# Supplementary material for: Immunosignature Analysis of Myalgic Encephalomyelitis/Chronic Fatigue Syndrome (ME/CFS)
Source: PubMed Central journal article supplement (PMC6505503; doi:10.1007/s12035-018-1354-8), 2018-10-08

Replicate densities (raw) for sample: 10848 (CFS)

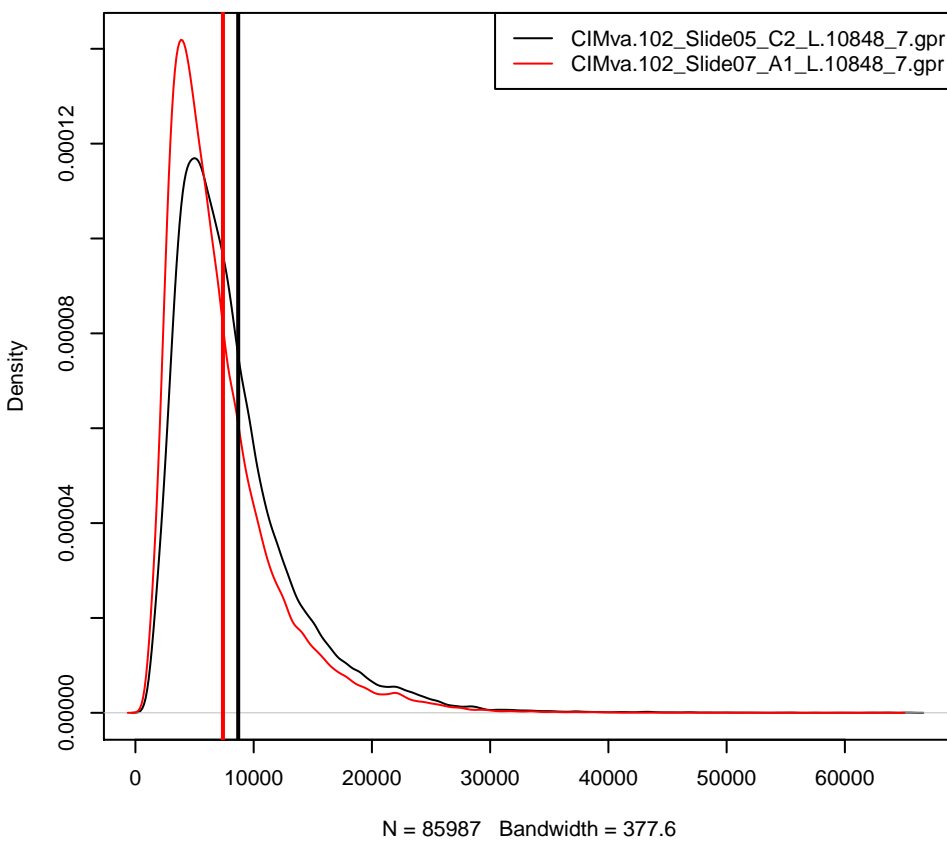

Replicate densities (raw; log2) for sample: 10848 (CFS)

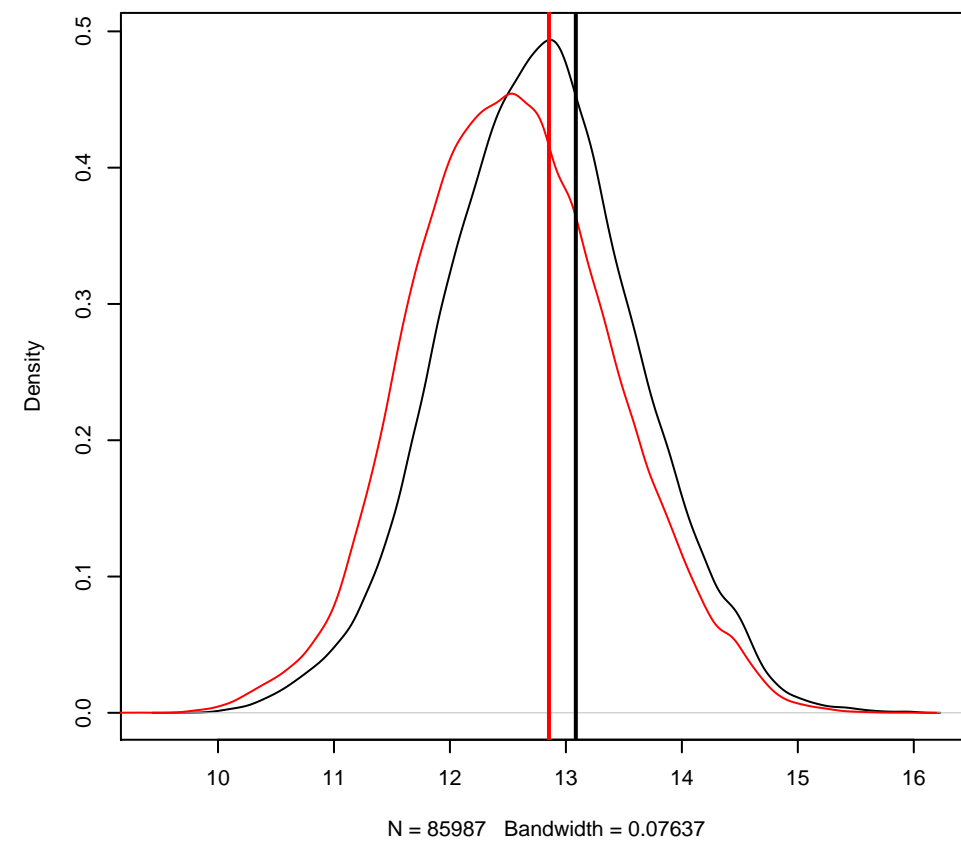

Replicate densities (normalized) for sample: 10848 (CFS)

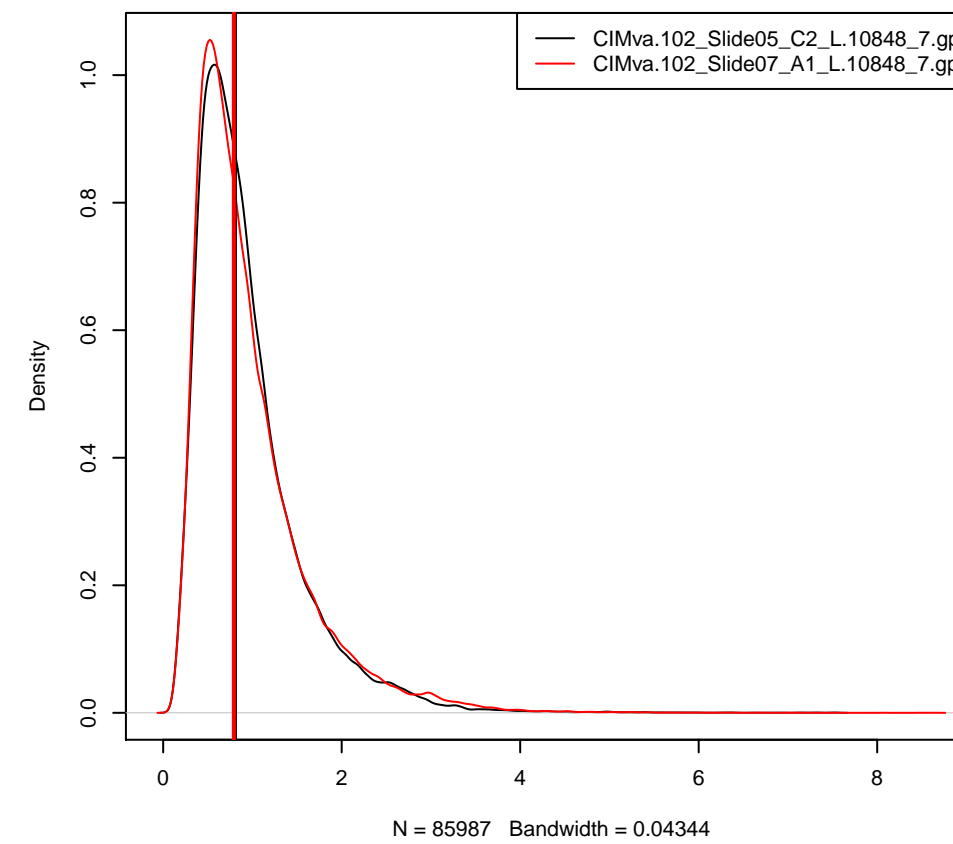

Replicate densities (normalized; log2) for sample: 10848 (CFS)

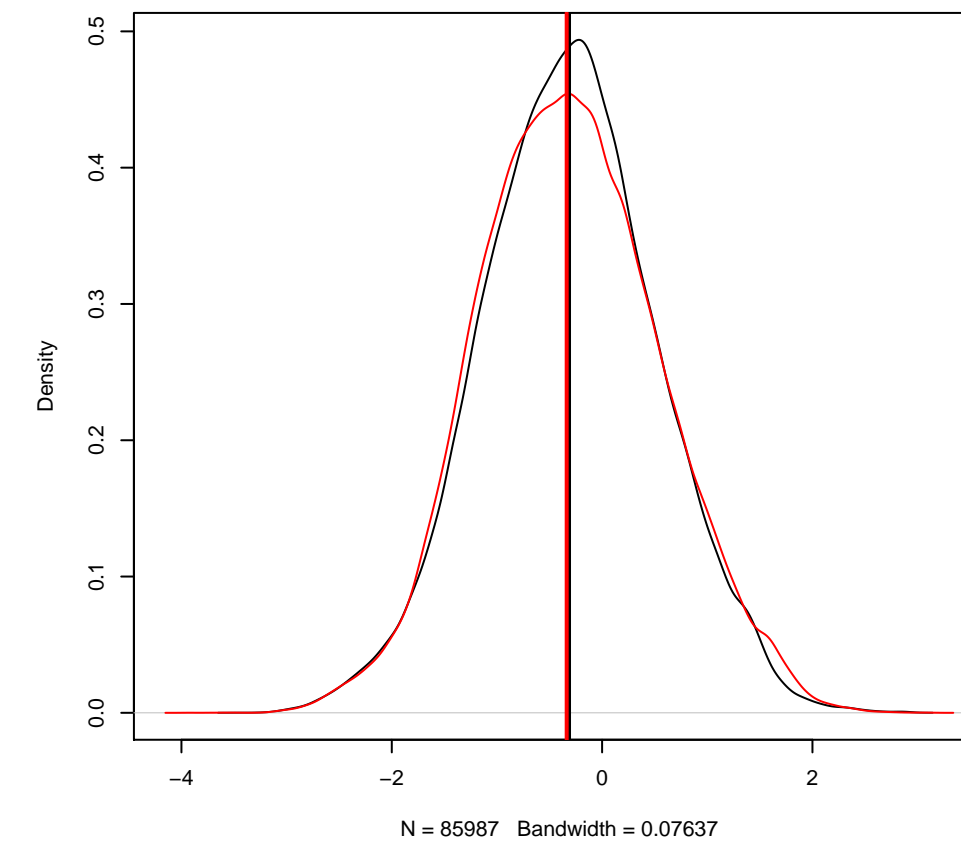

Replicate scatter (raw) for sample: 10848 (CFS)  
Correlation coefficient: 0.86 (Pearson); 0.91 (Spearman)

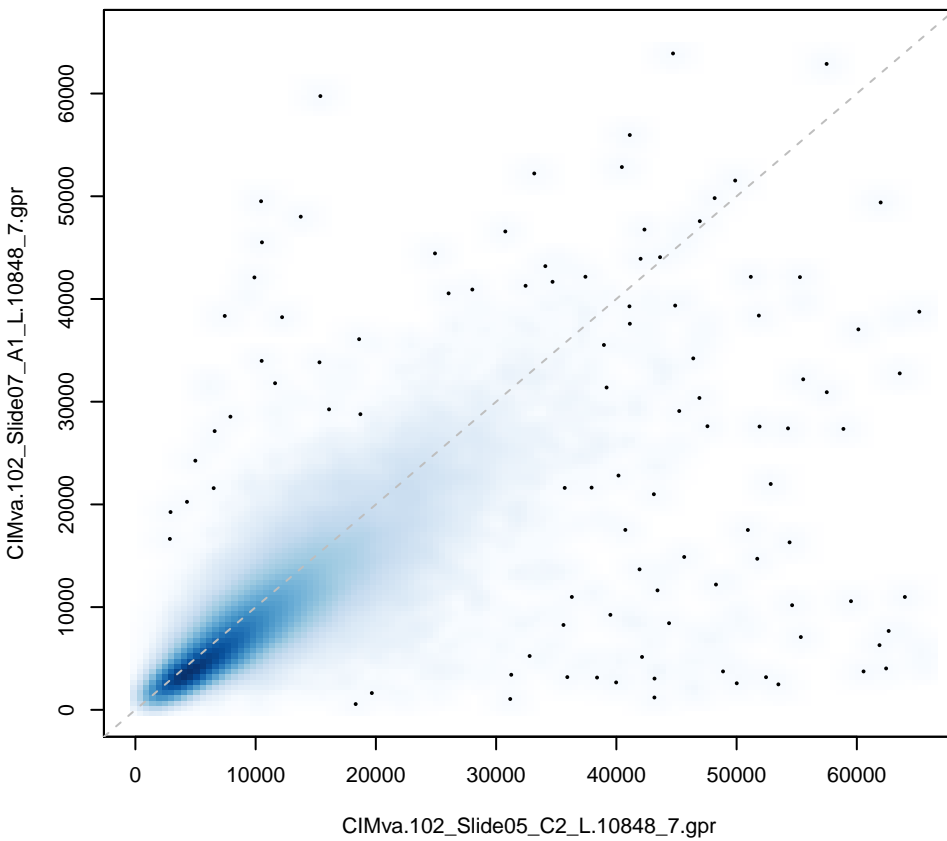

Replicate scatter (raw; log2) for sample: 10848 (CFS)  
Correlation coefficient: 0.91 (Pearson); 0.91 (Spearman)

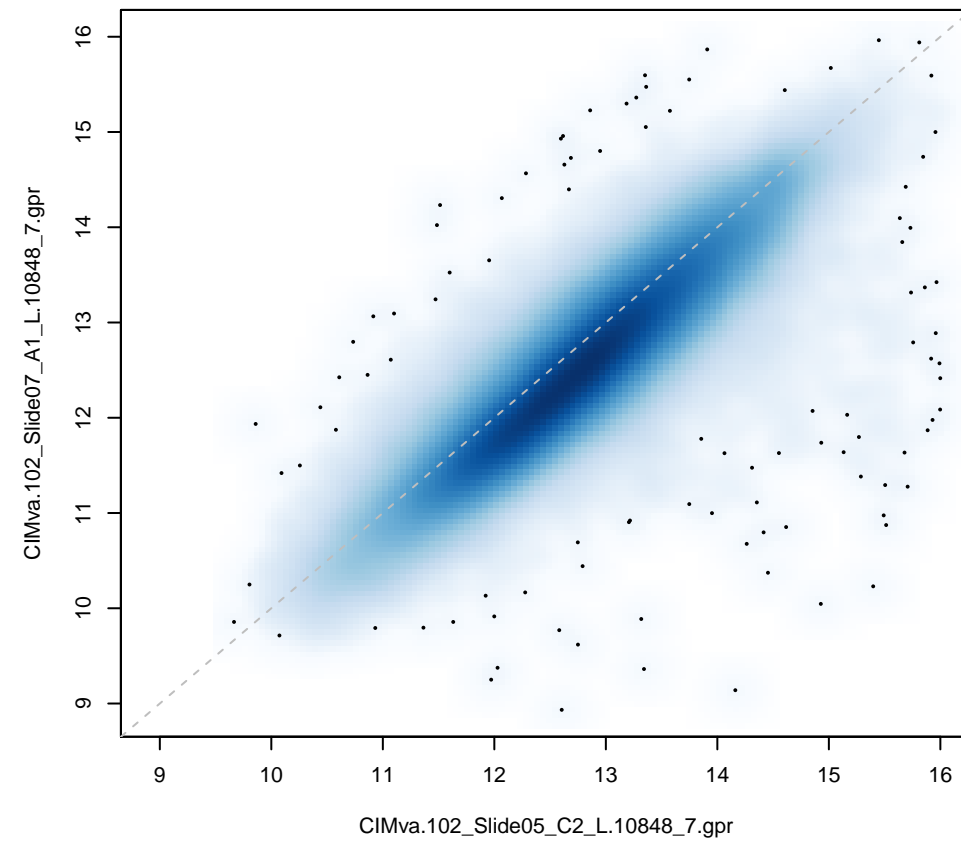

Replicate scatter (normalized) for sample: 10848 (CFS)  
Correlation coefficient: 0.86 (Pearson); 0.91 (Spearman)

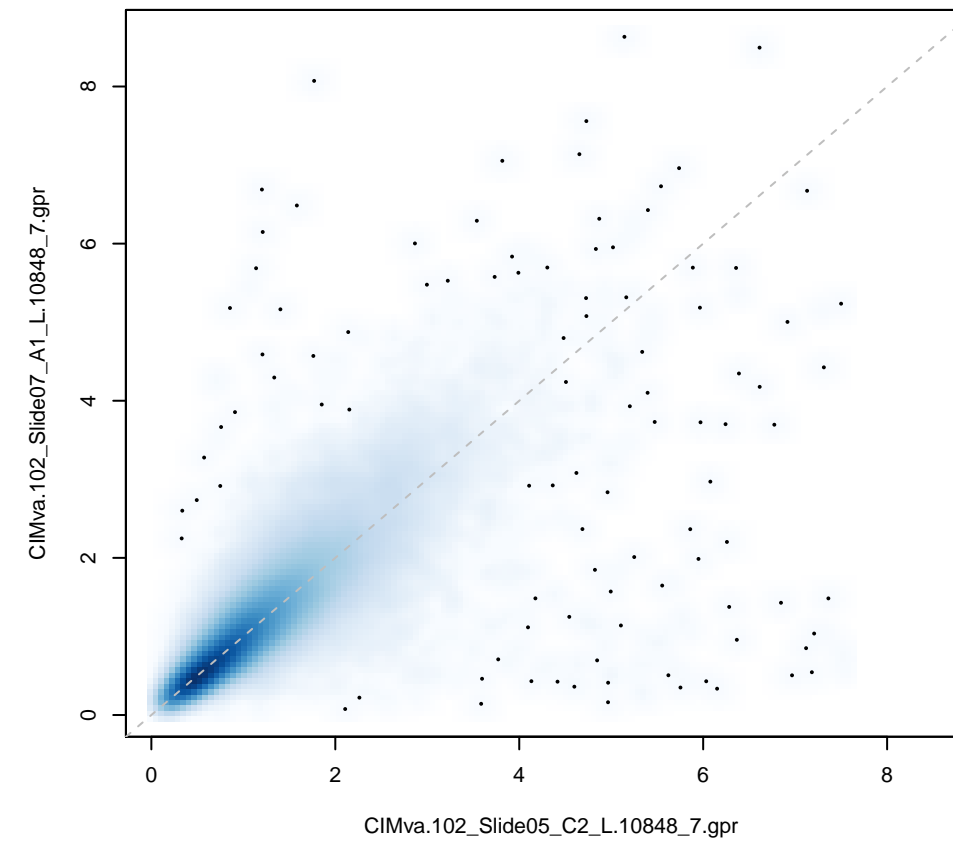

Replicate scatter (normalized; log2) for sample: 10848 (CFS)  
Correlation coefficient: 0.9 (Pearson); 0.91 (Spearman)

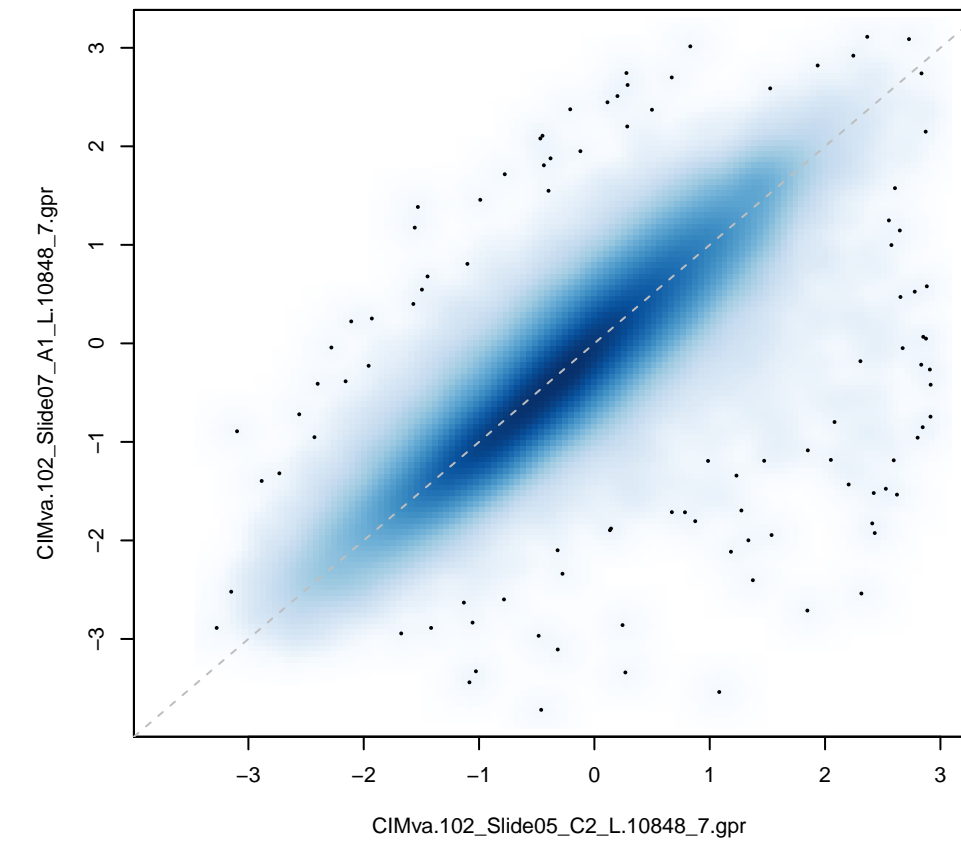

Replicate densities (raw) for sample: 10851 (CFS)

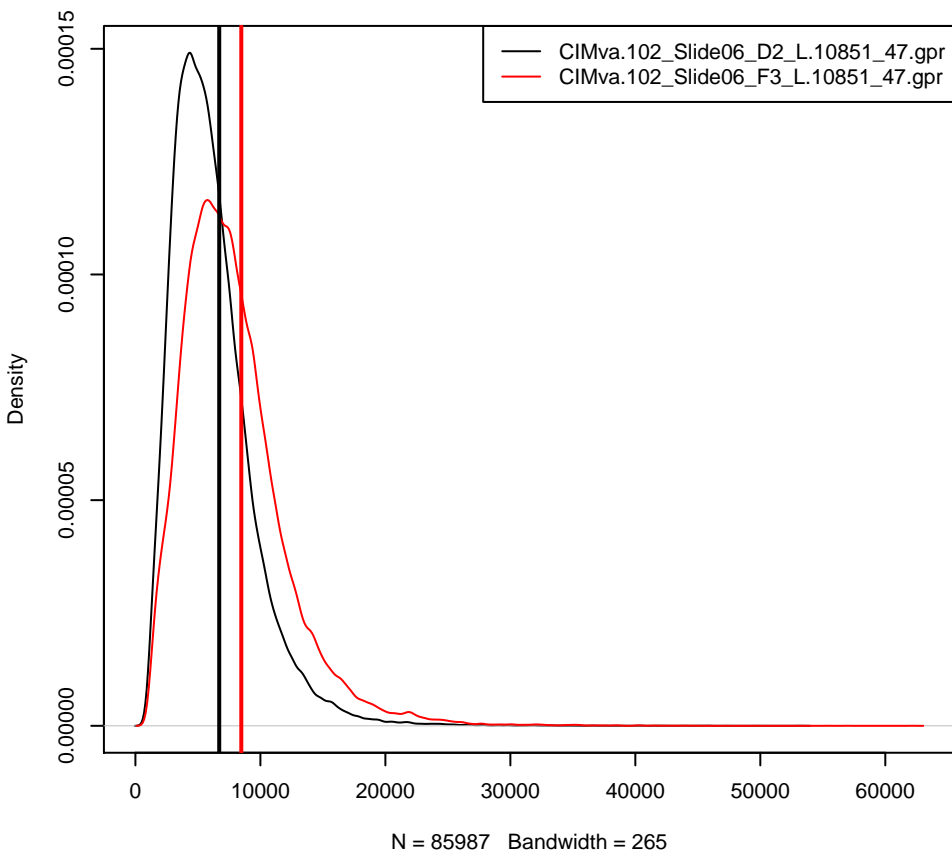

Replicate densities (raw; log2) for sample: 10851 (CFS)

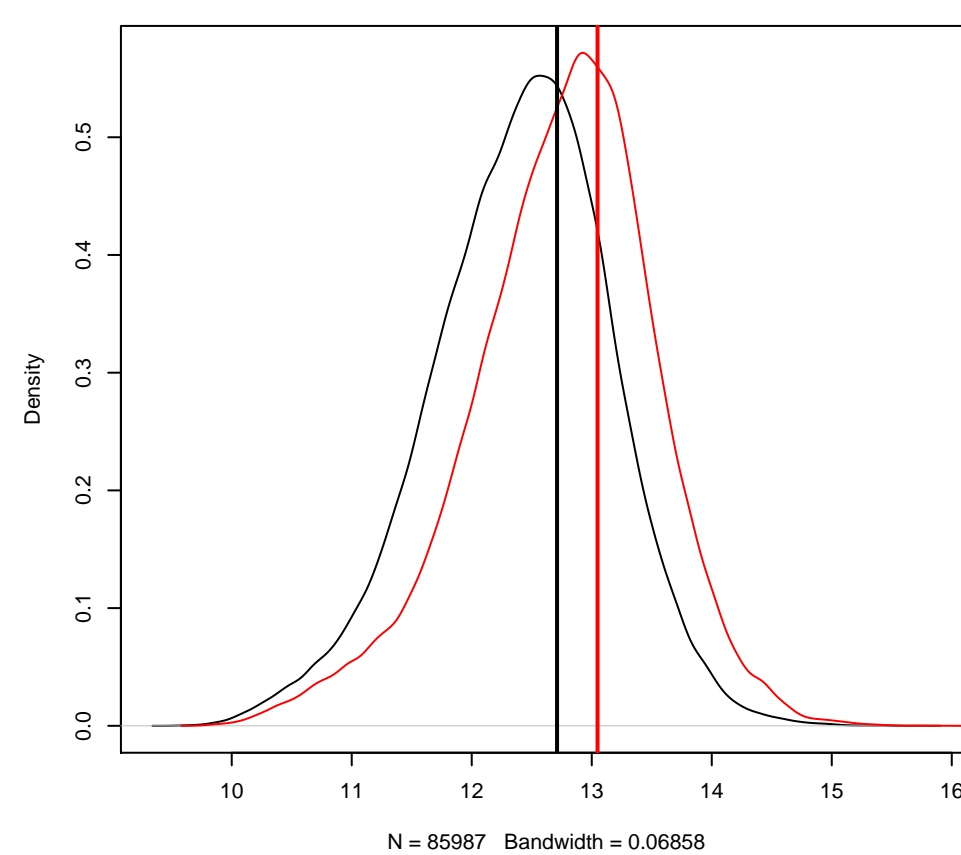

Replicate densities (normalized) for sample: 10851 (CFS)

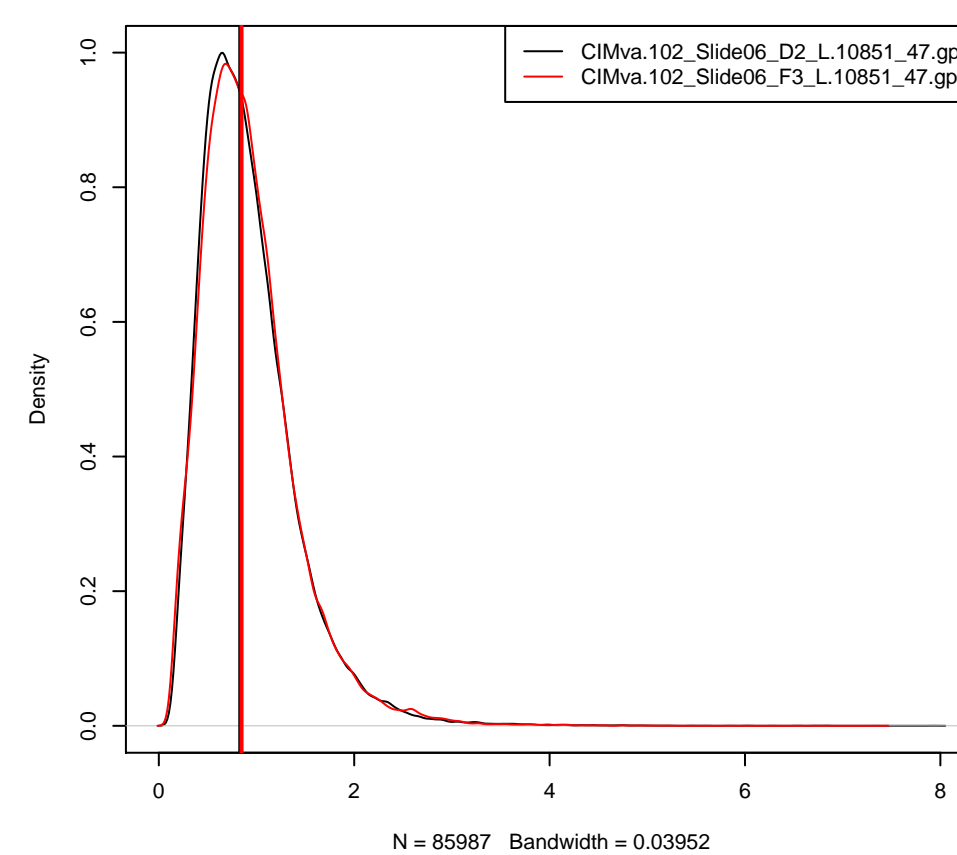

Replicate densities (normalized; log2) for sample: 10851 (CFS)

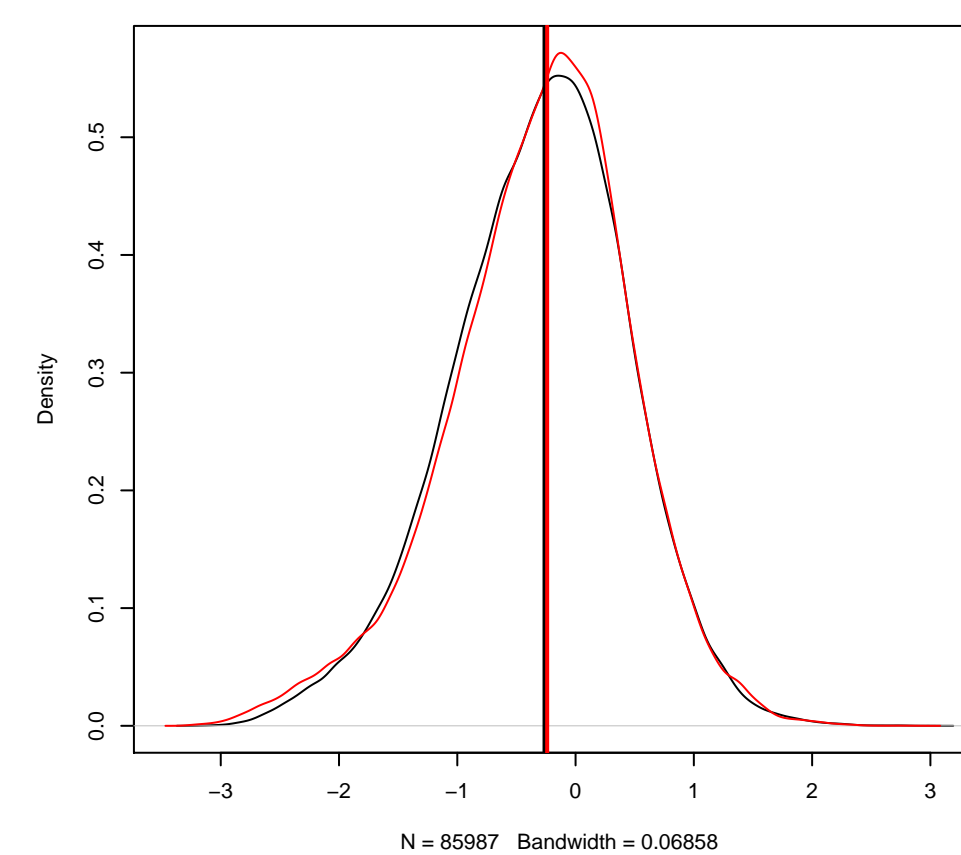

Replicate scatter (raw) for sample: 10851 (CFS)  
Correlation coefficient: 0.89 (Pearson); 0.91 (Spearman)

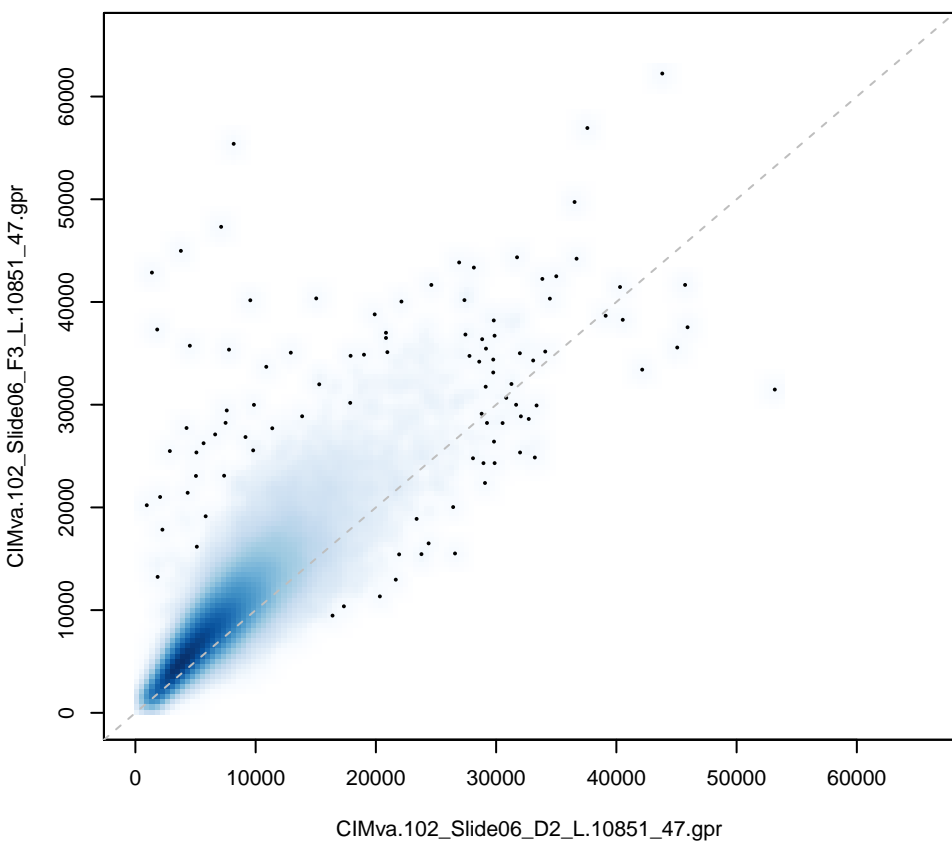

Replicate scatter (raw; log2) for sample: 10851 (CFS)  
Correlation coefficient: 0.92 (Pearson); 0.91 (Spearman)

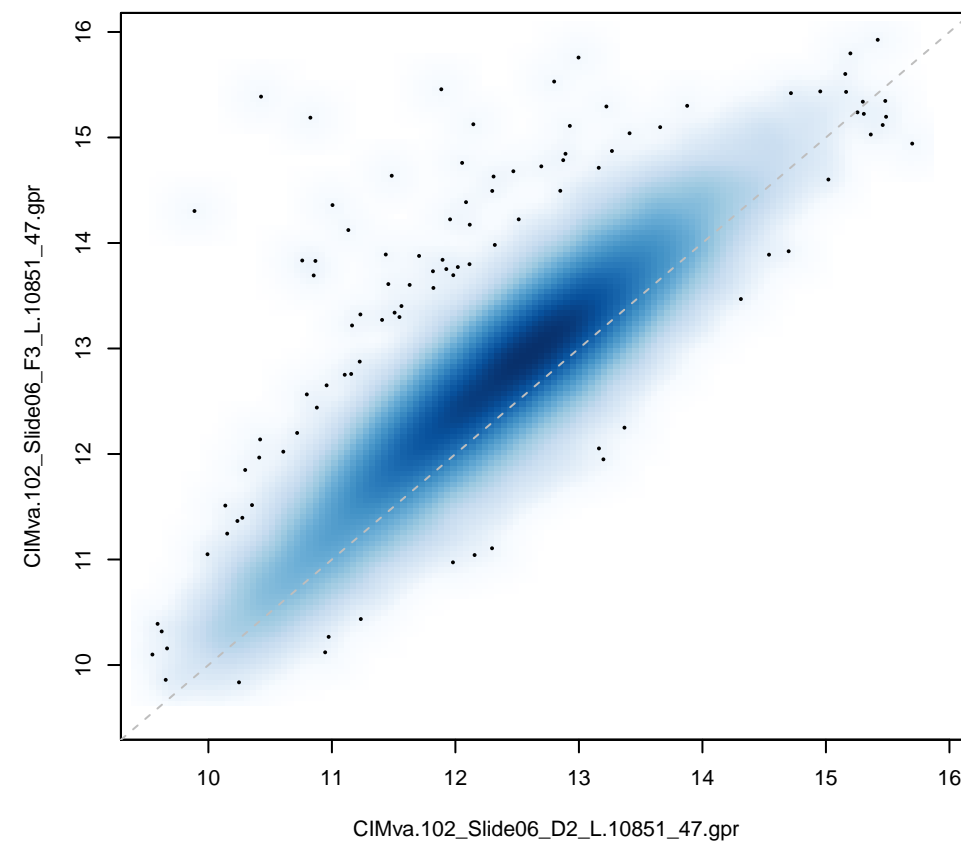

Replicate scatter (normalized) for sample: 10851 (CFS)  
Correlation coefficient: 0.89 (Pearson); 0.91 (Spearman)

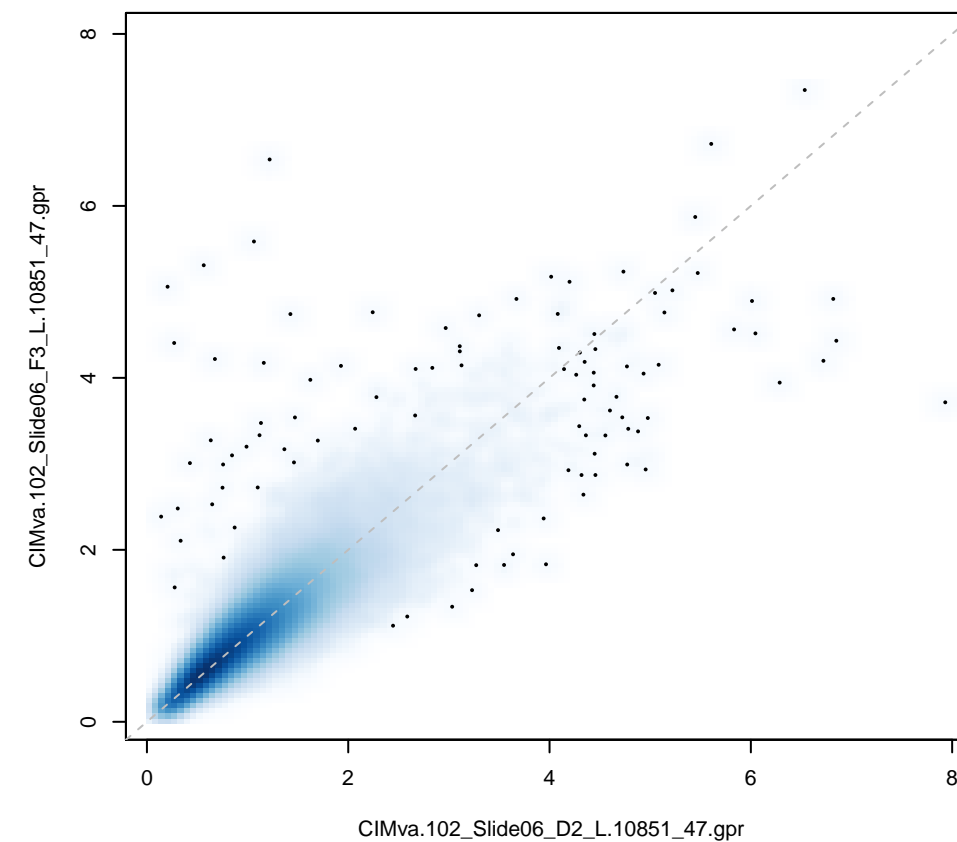

Replicate scatter (normalized; log2) for sample: 10851 (CFS)  
Correlation coefficient: 0.91 (Pearson); 0.91 (Spearman)

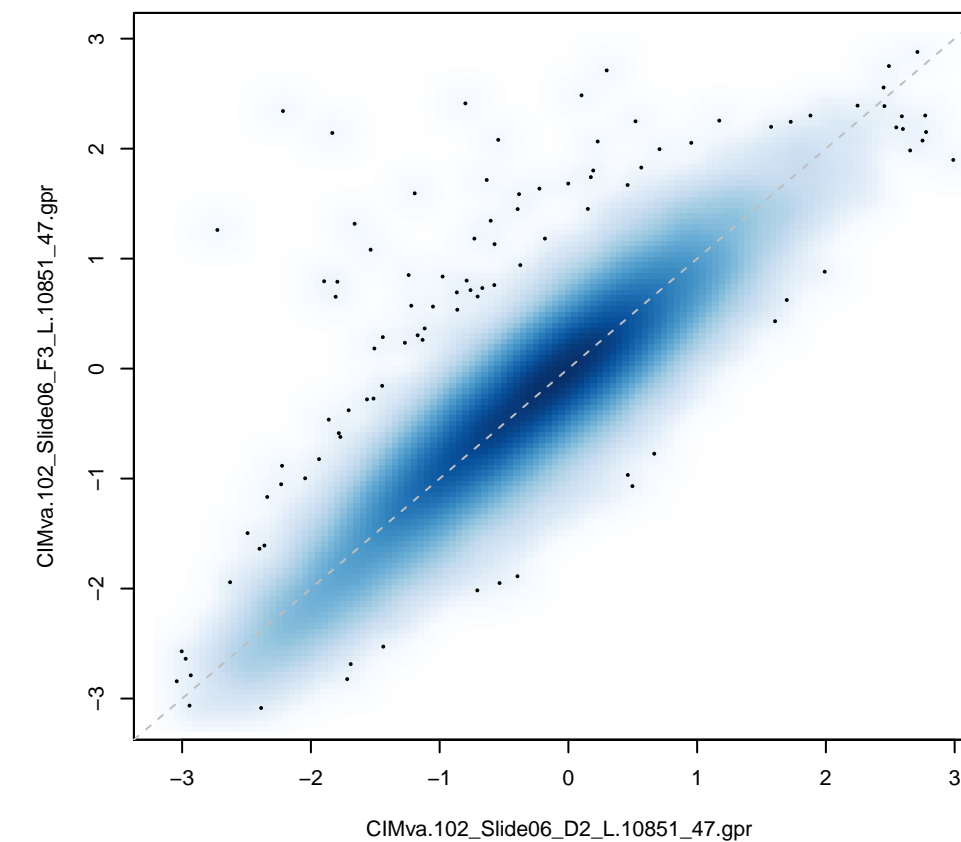

Replicate densities (raw) for sample: 11000 (CFS)

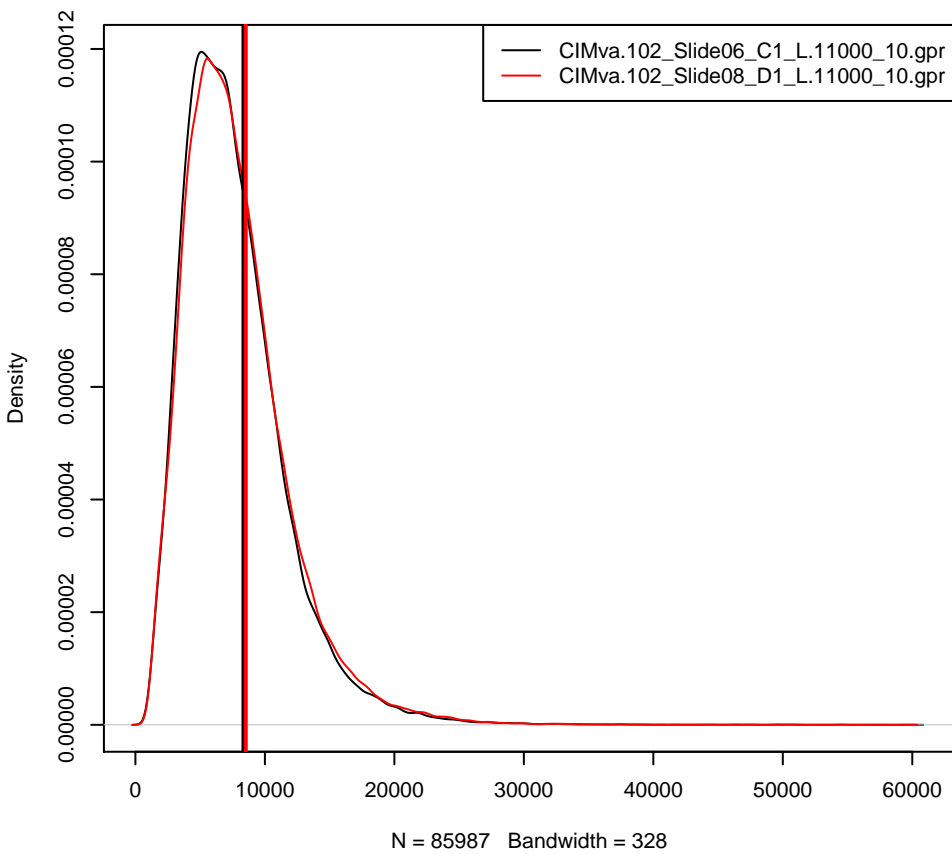

Replicate densities (raw; log2) for sample: 11000 (CFS)

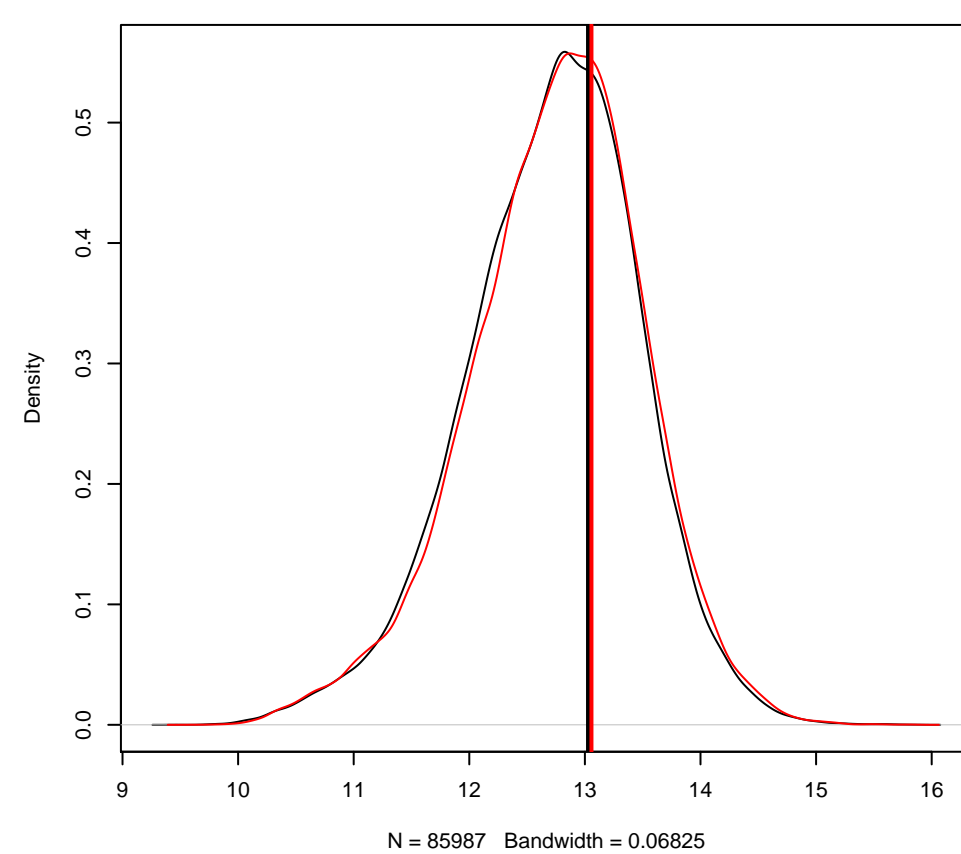

Replicate densities (normalized) for sample: 11000 (CFS)

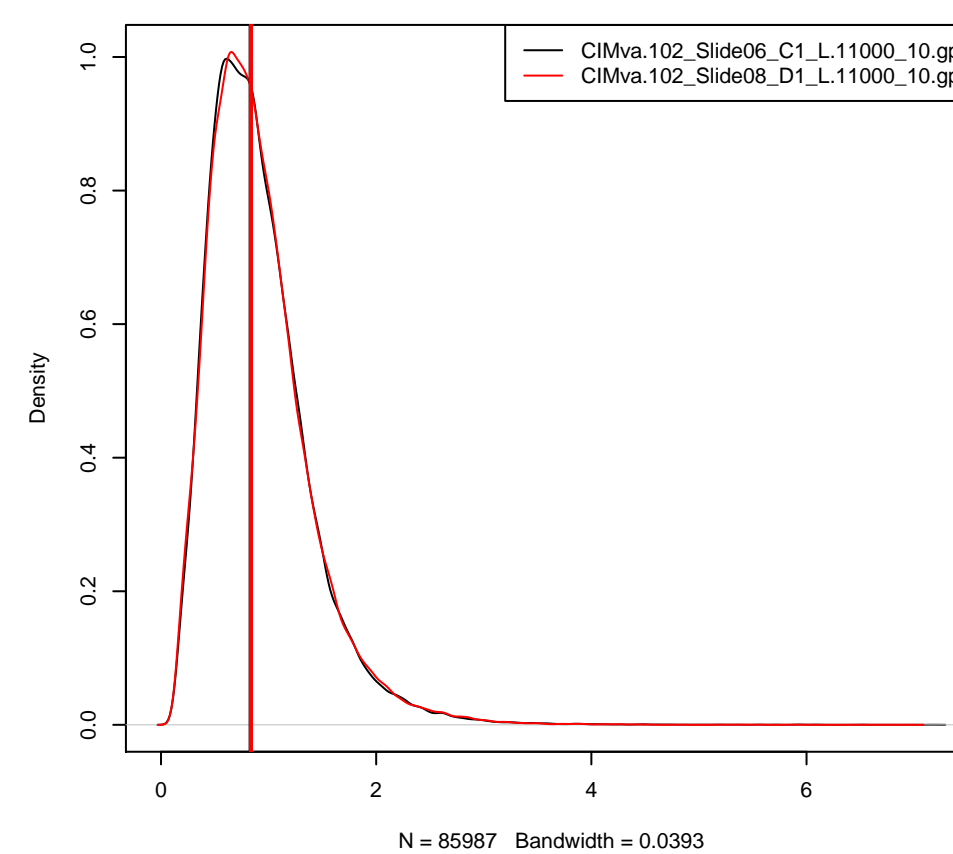

Replicate densities (normalized; log2) for sample: 11000 (CFS)

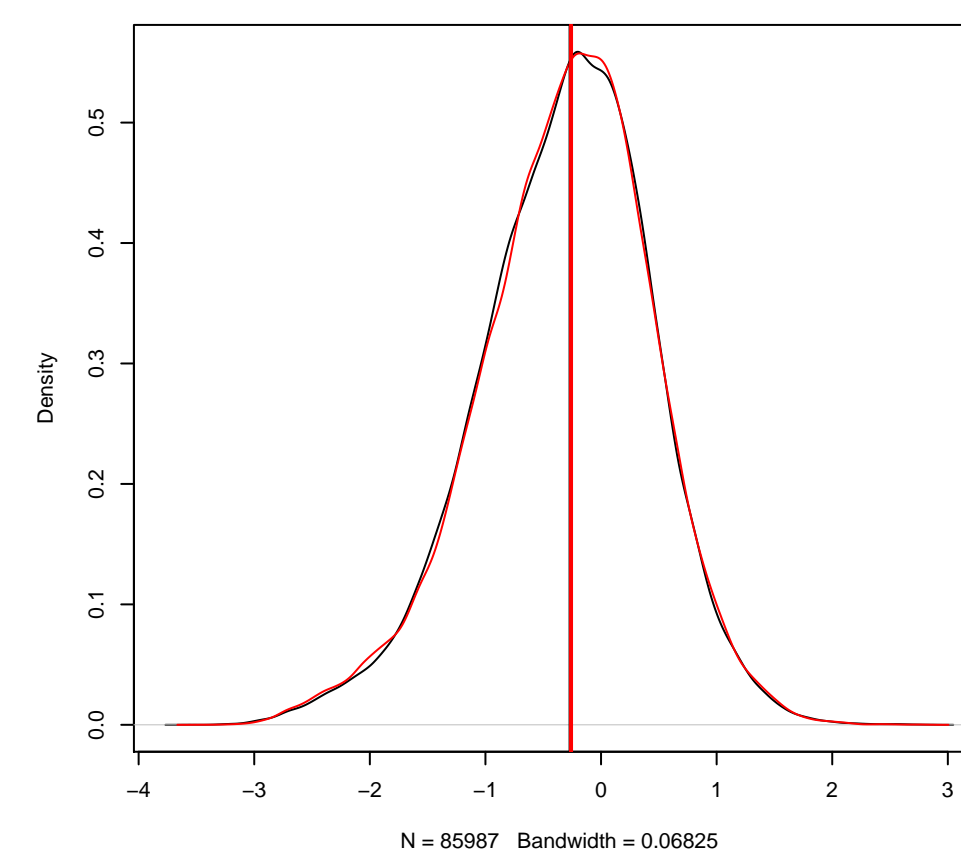

Replicate scatter (raw) for sample: 11000 (CFS)  
Correlation coefficient: 0.93 (Pearson); 0.94 (Spearman)

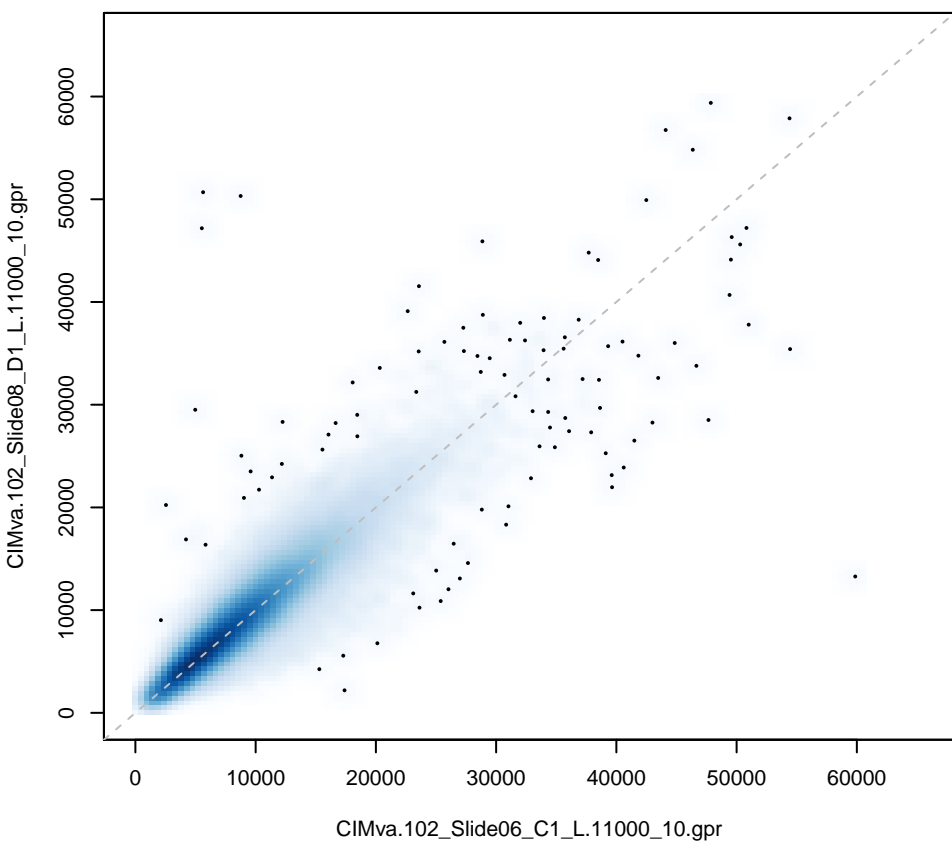

Replicate scatter (raw; log2) for sample: 11000 (CFS)  
Correlation coefficient: 0.94 (Pearson); 0.94 (Spearman)

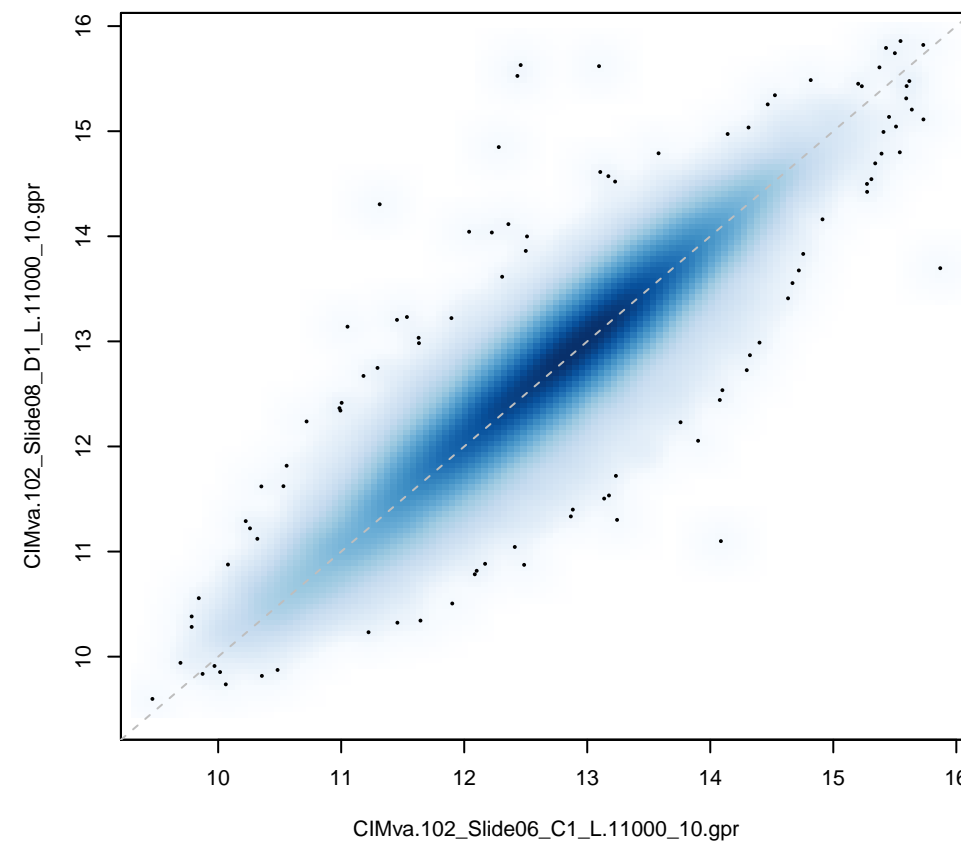

Replicate scatter (normalized) for sample: 11000 (CFS)  
Correlation coefficient: 0.93 (Pearson); 0.94 (Spearman)

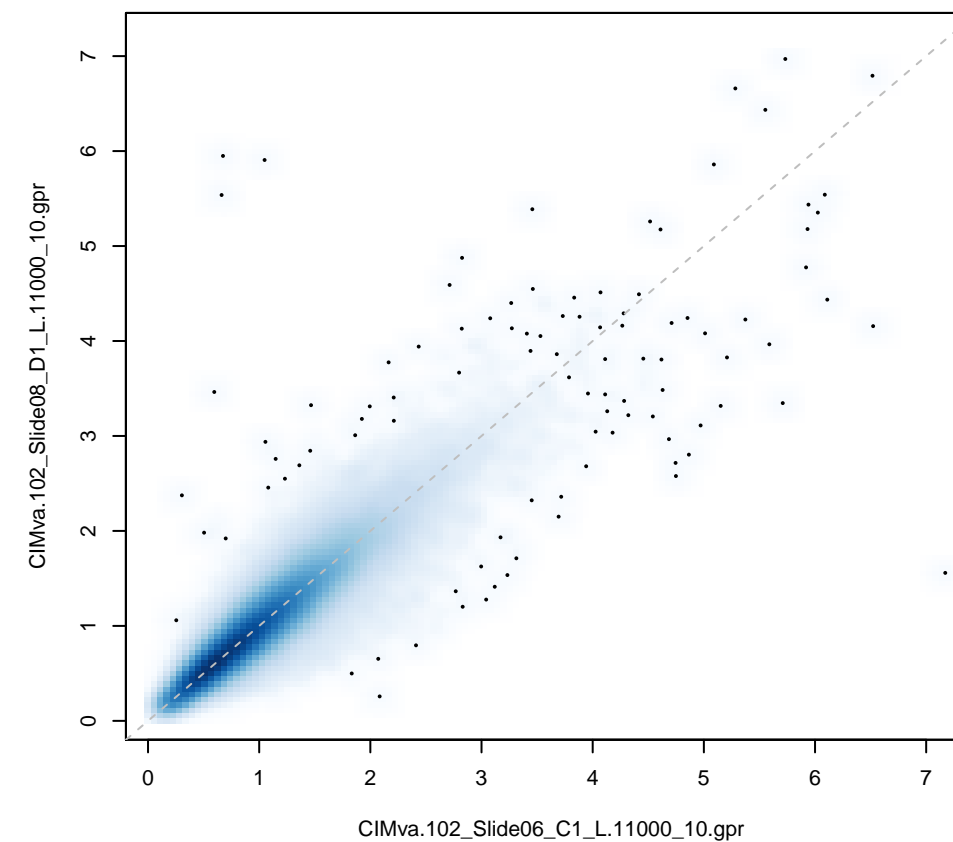

Replicate scatter (normalized; log2) for sample: 11000 (CFS)  
Correlation coefficient: 0.94 (Pearson); 0.94 (Spearman)

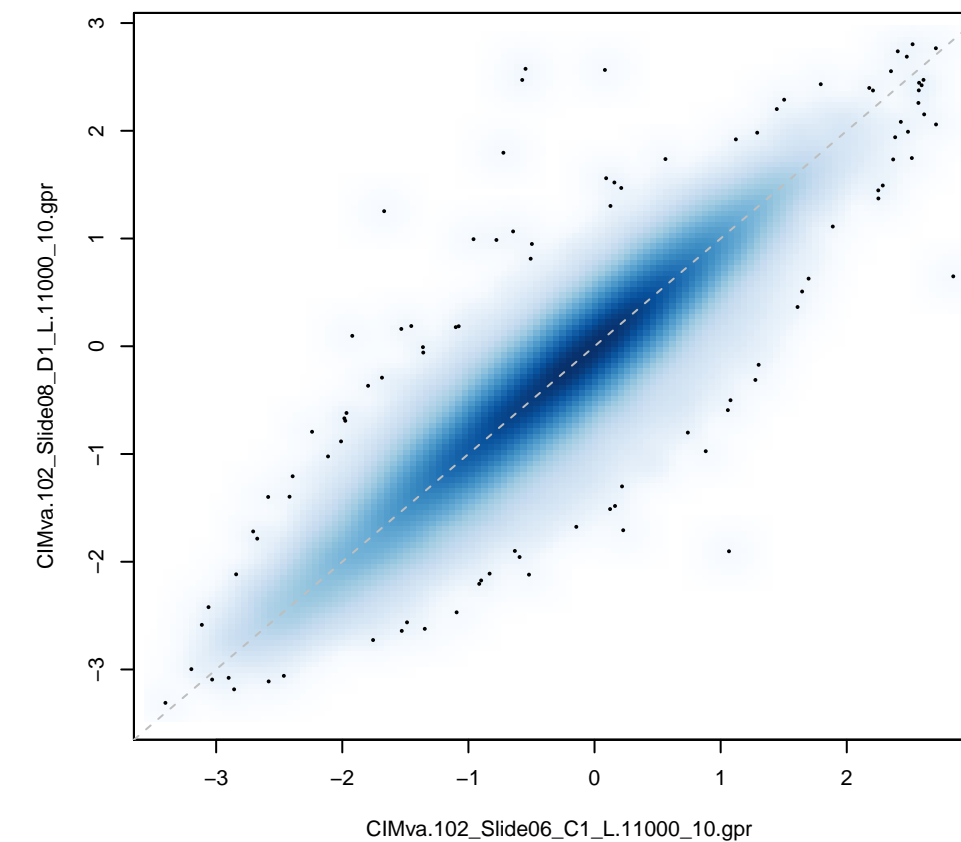

Replicate densities (raw) for sample: 11774 (CFS)

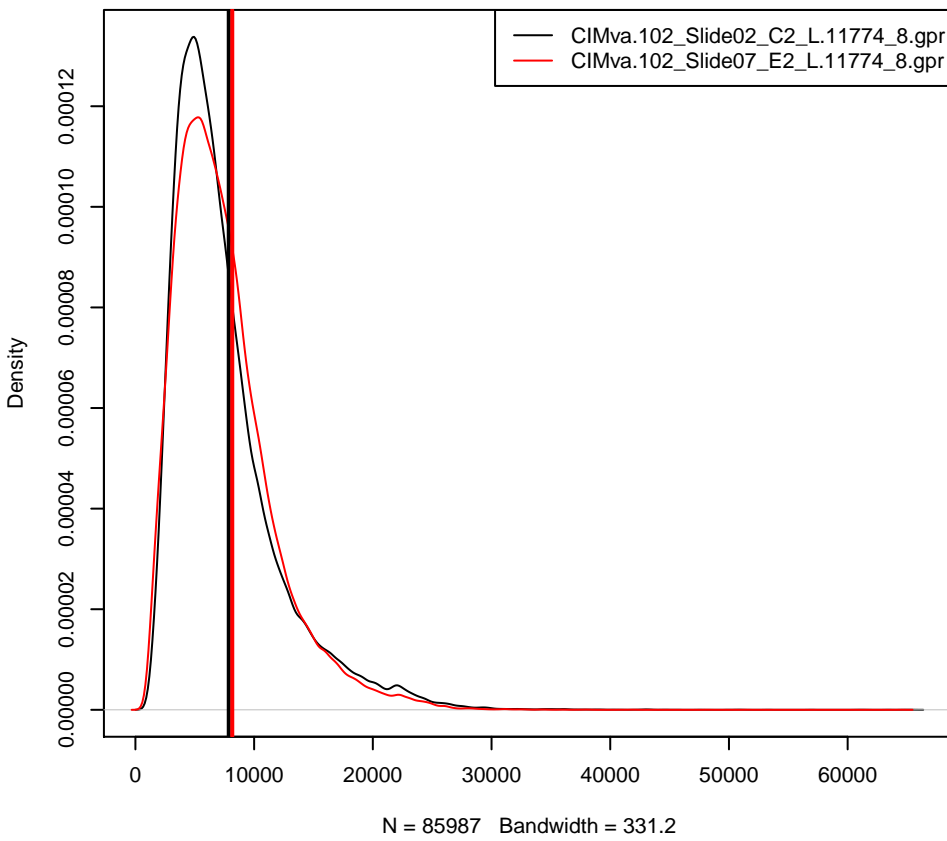

Replicate densities (raw; log2) for sample: 11774 (CFS)

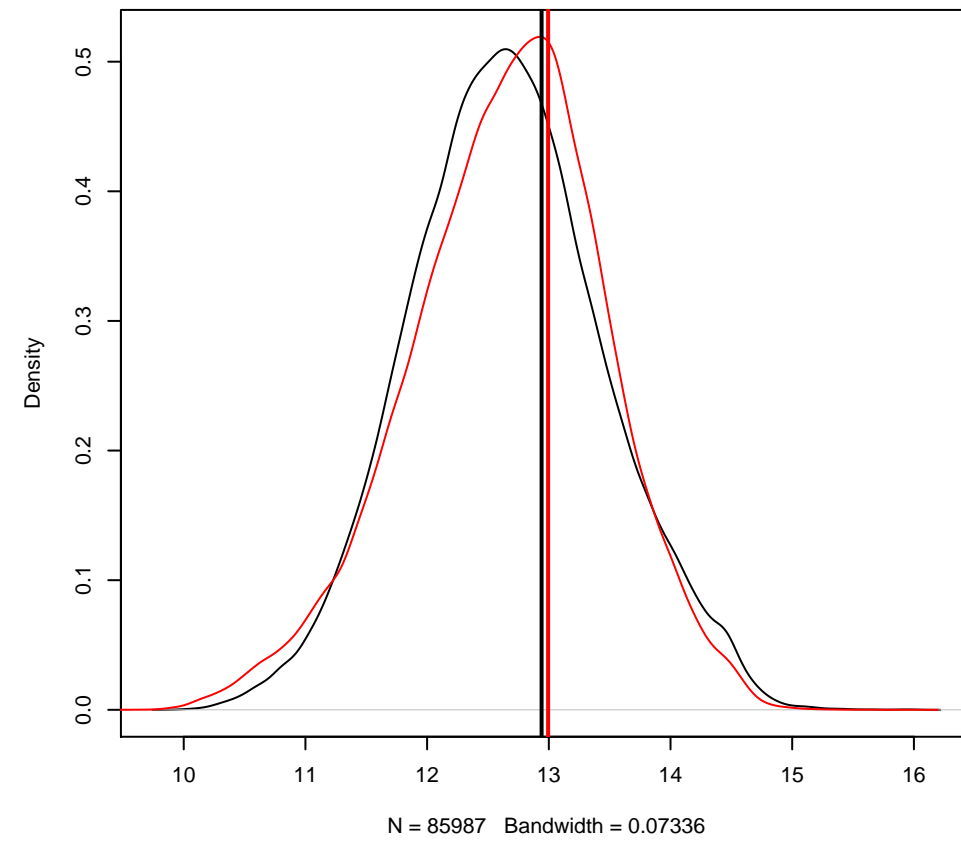

Replicate densities (normalized) for sample: 11774 (CFS)

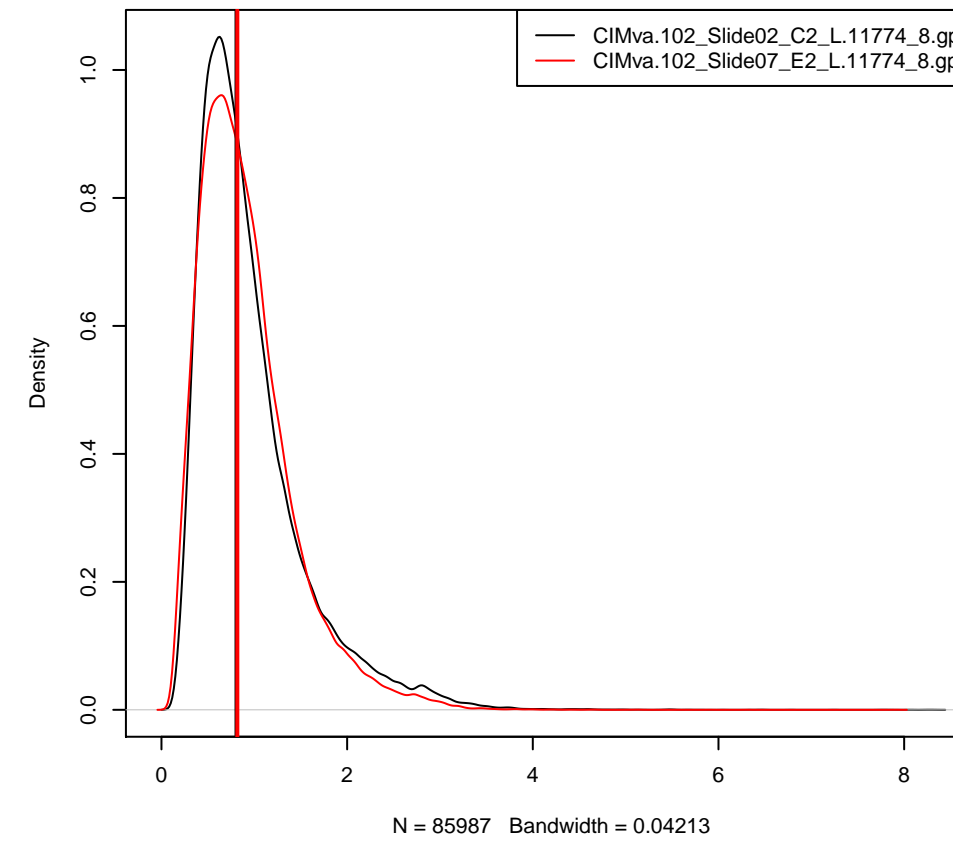

Replicate densities (normalized; log2) for sample: 11774 (CFS)

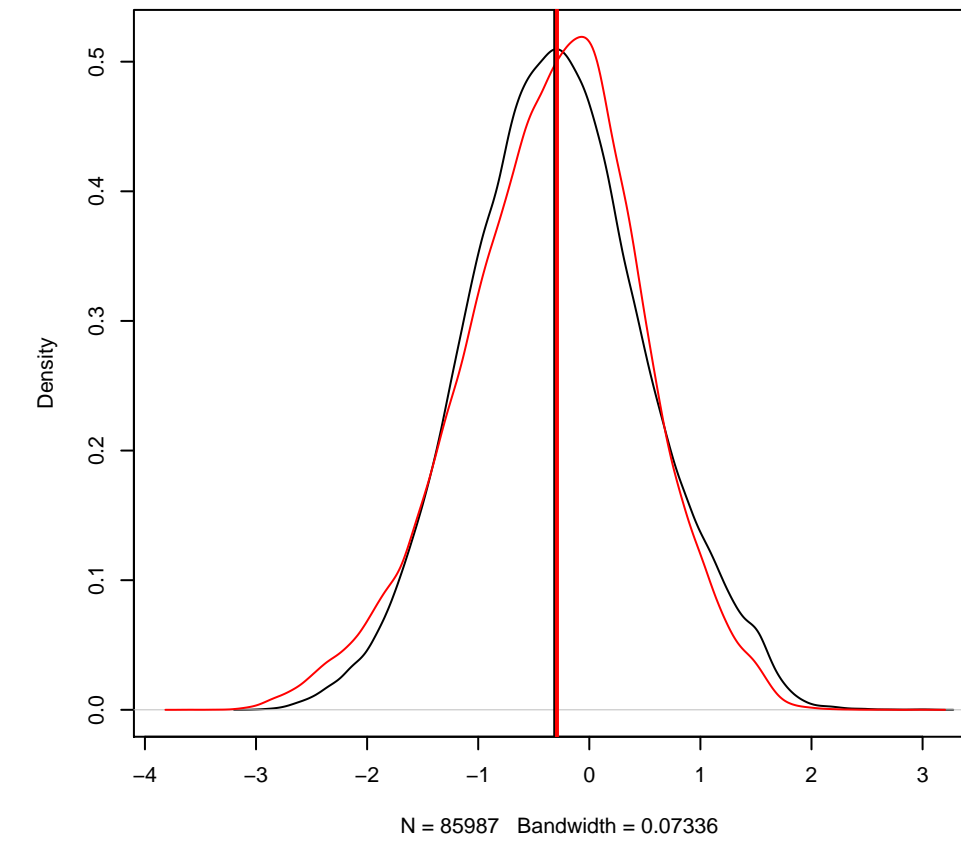

Replicate scatter (raw) for sample: 11774 (CFS)  
Correlation coefficient: 0.84 (Pearson); 0.87 (Spearman)

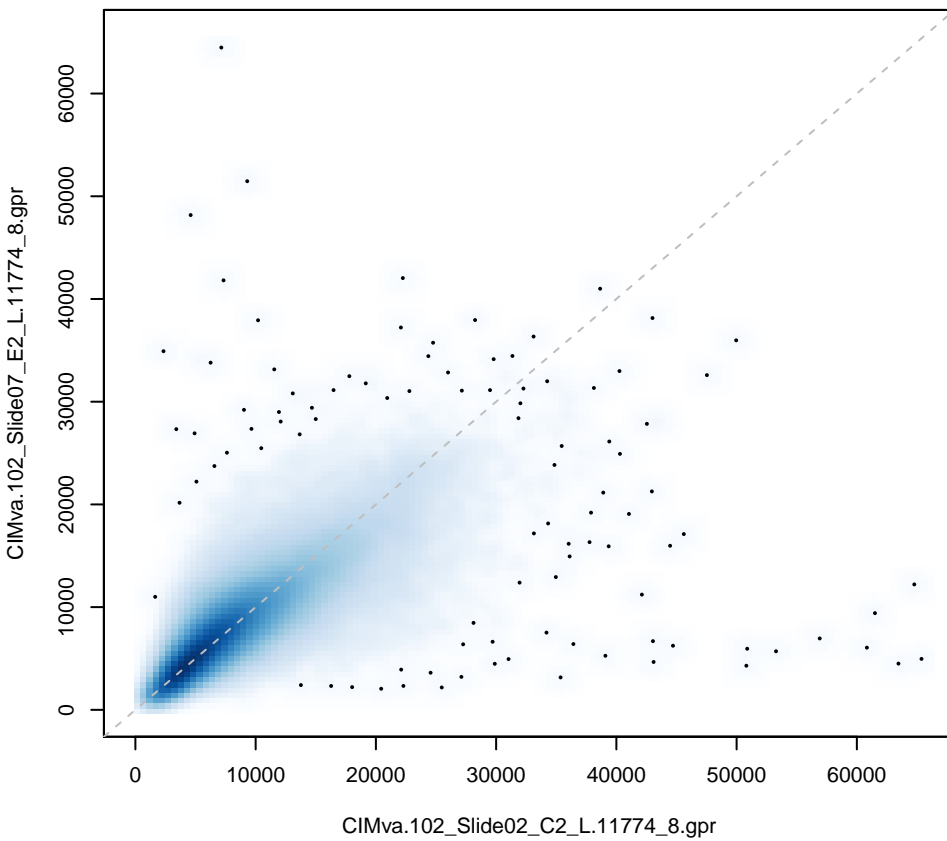

Replicate scatter (raw; log2) for sample: 11774 (CFS)  
Correlation coefficient: 0.88 (Pearson); 0.87 (Spearman)

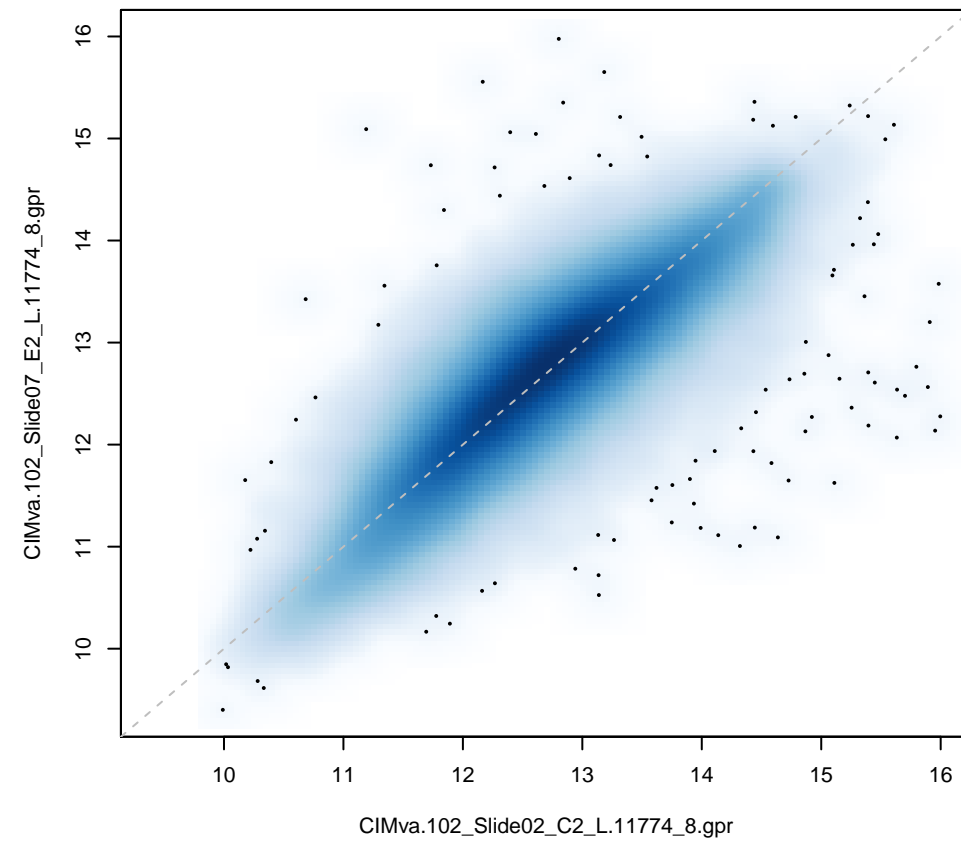

Replicate scatter (normalized) for sample: 11774 (CFS)  
Correlation coefficient: 0.84 (Pearson); 0.87 (Spearman)

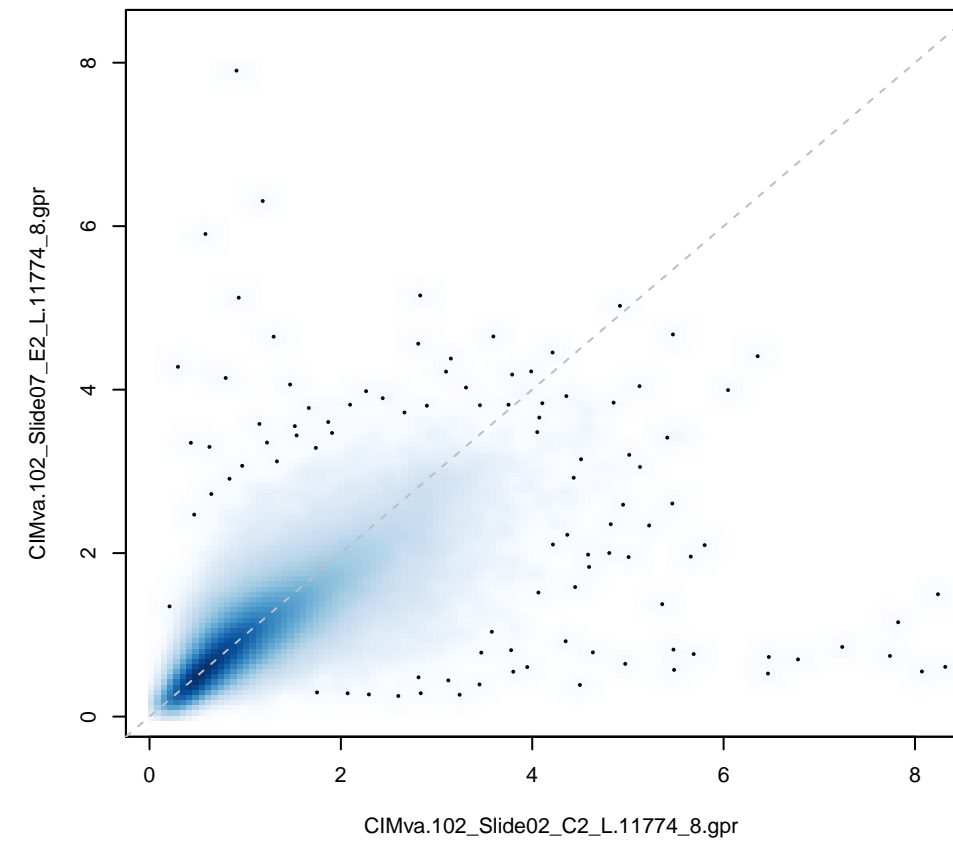

Replicate scatter (normalized; log2) for sample: 11774 (CFS)  
Correlation coefficient: 0.87 (Pearson); 0.87 (Spearman)

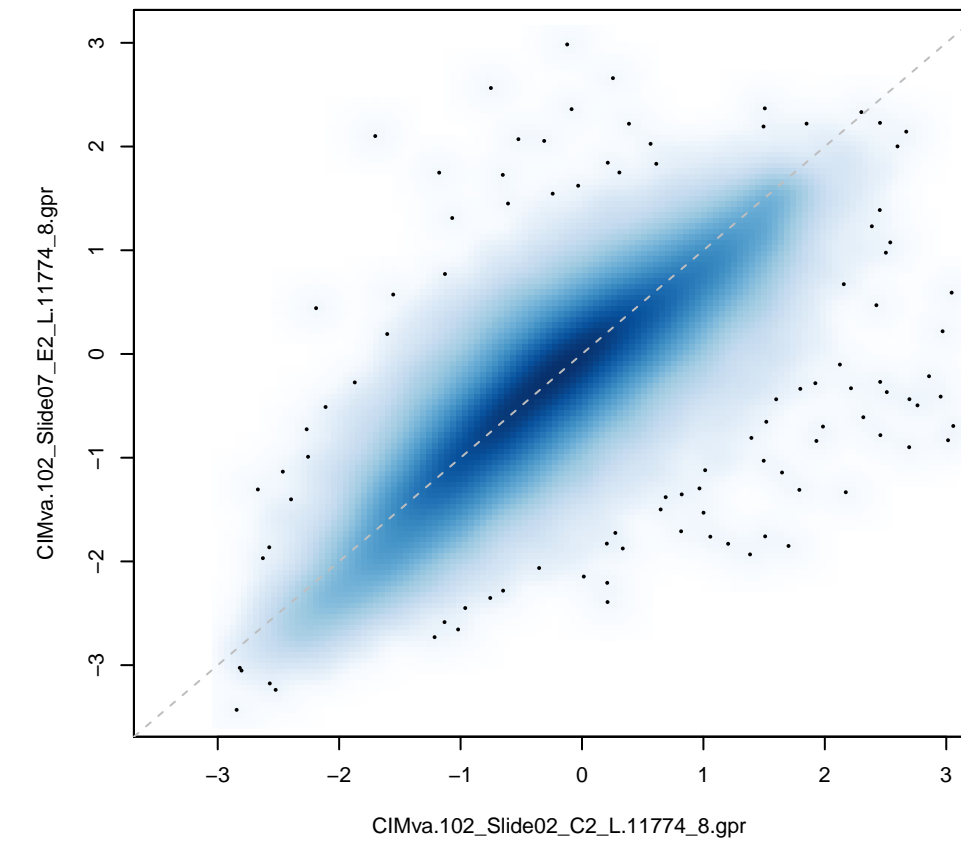

Replicate densities (raw) for sample: 12186 (Controls)

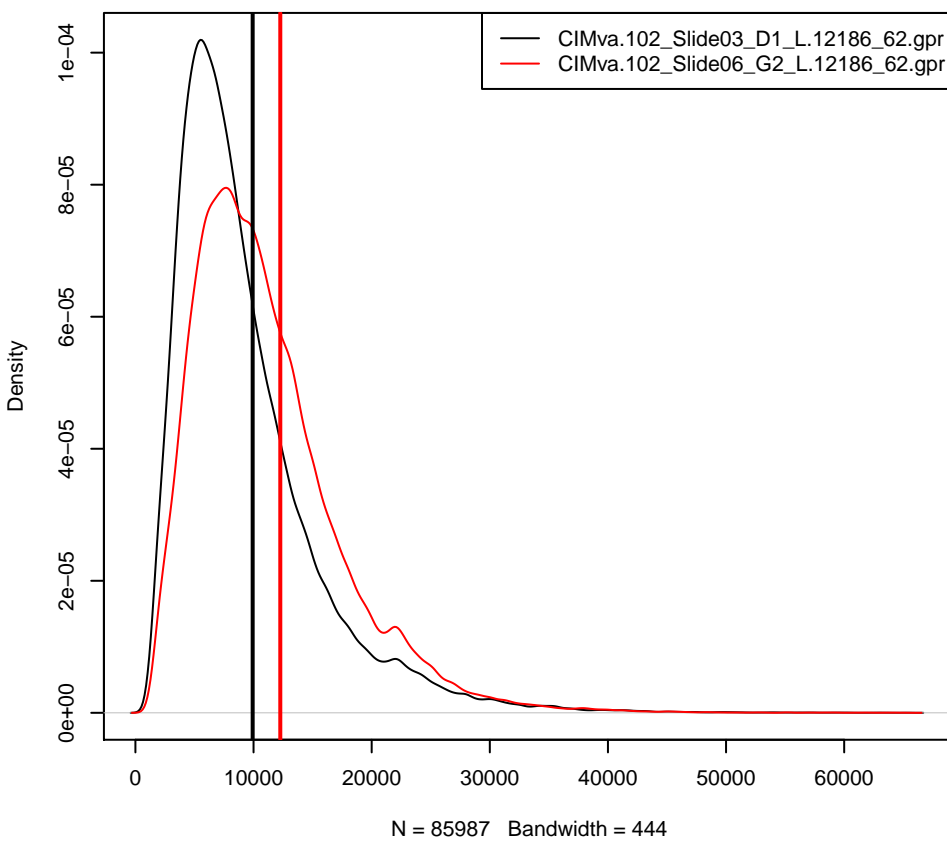

Replicate densities (raw; log2) for sample: 12186 (Controls)

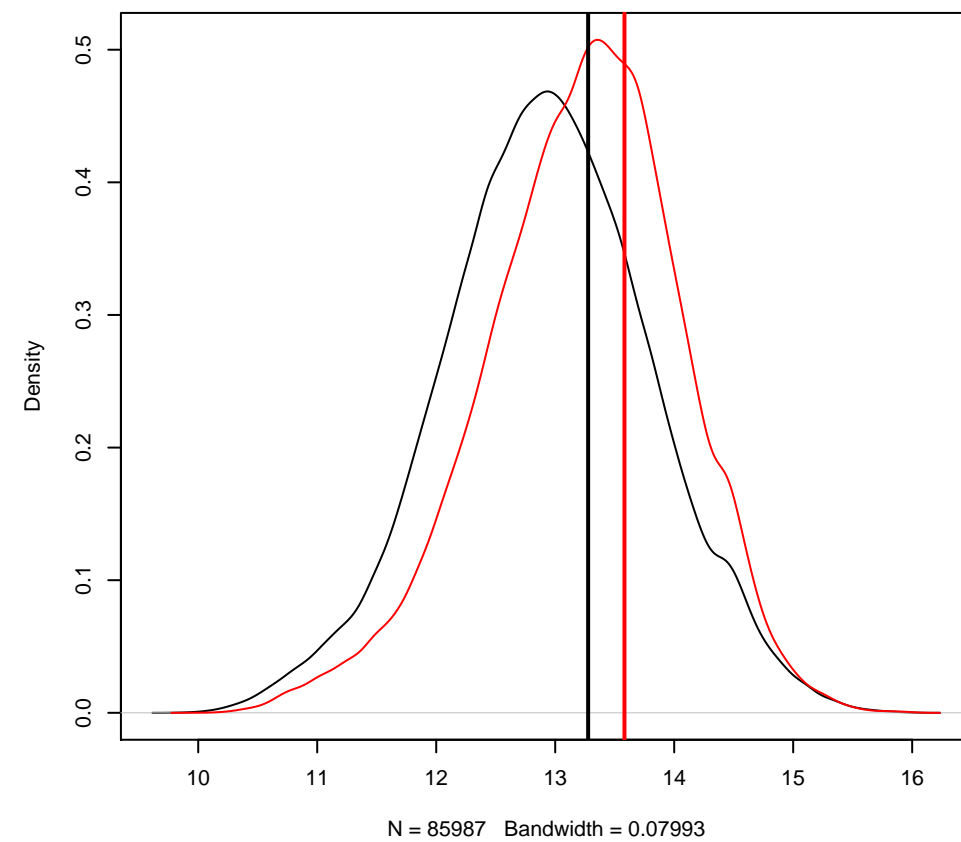

Replicate densities (normalized) for sample: 12186 (Controls)

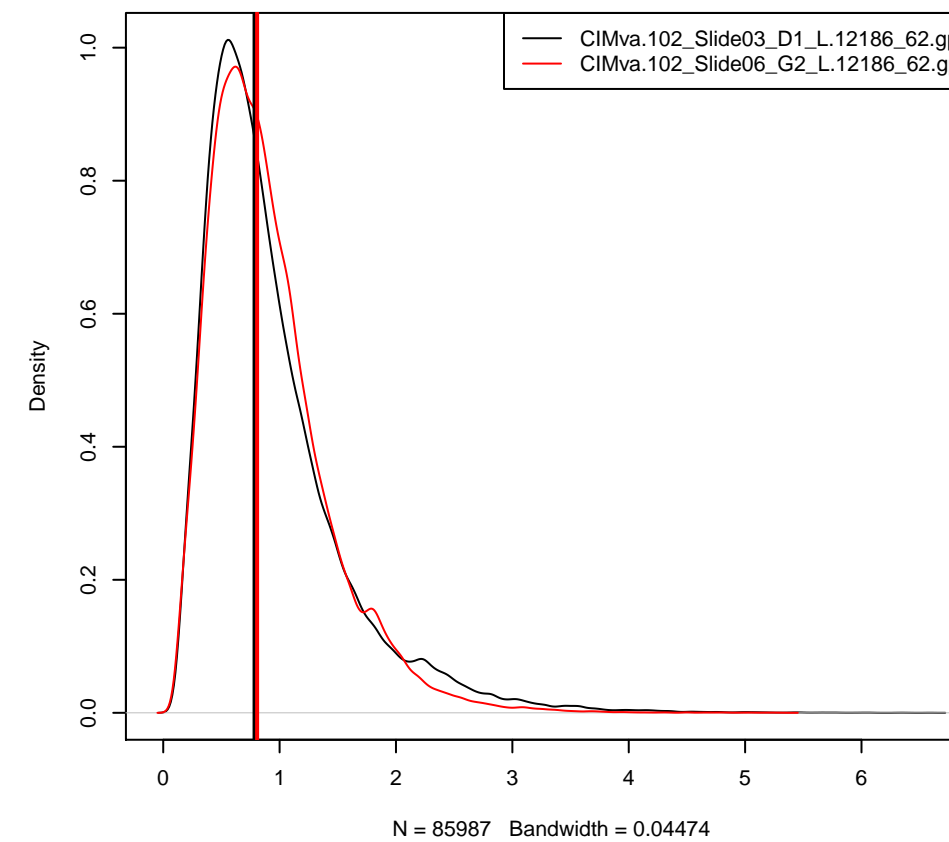

Replicate densities (normalized; log2) for sample: 12186 (Controls)

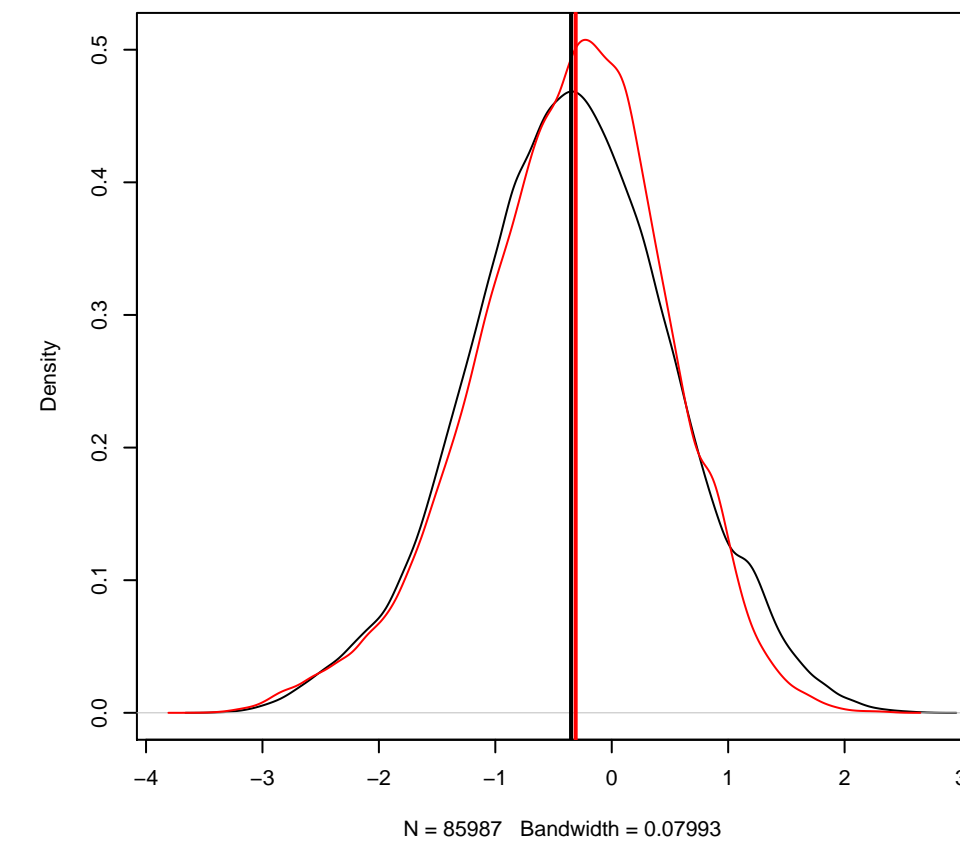

Replicate scatter (raw) for sample: 12186 (Controls)  
Correlation coefficient: 0.88 (Pearson); 0.91 (Spearman)

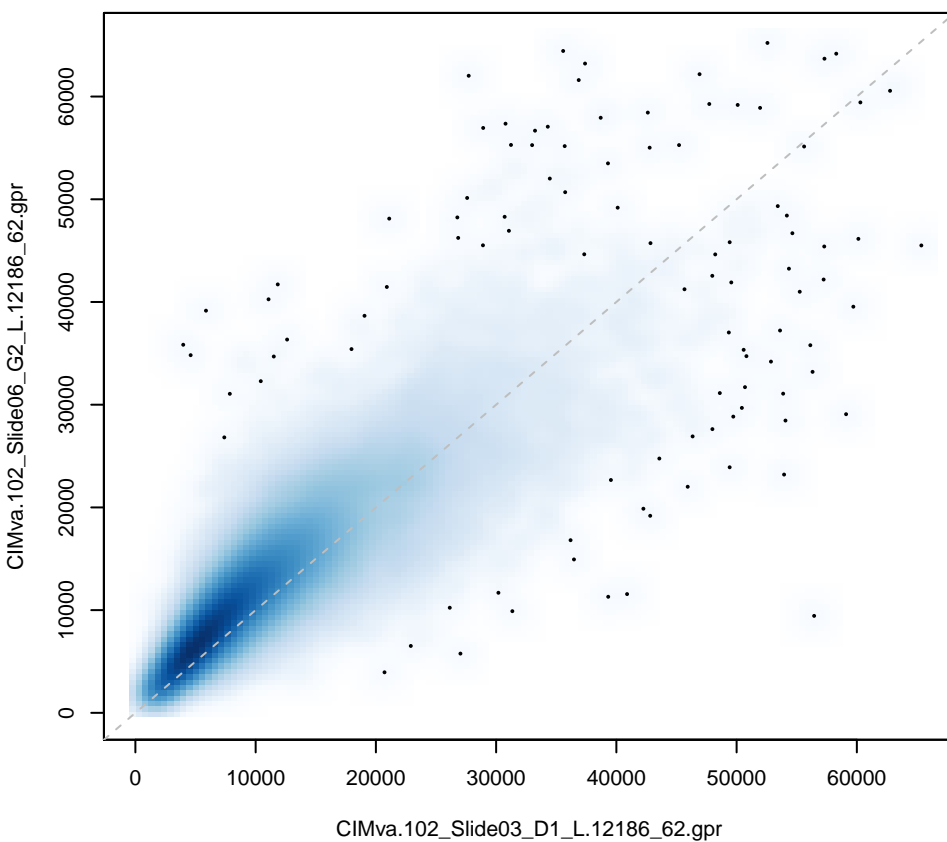

Replicate scatter (raw; log2) for sample: 12186 (Controls)  
Correlation coefficient: 0.91 (Pearson); 0.91 (Spearman)

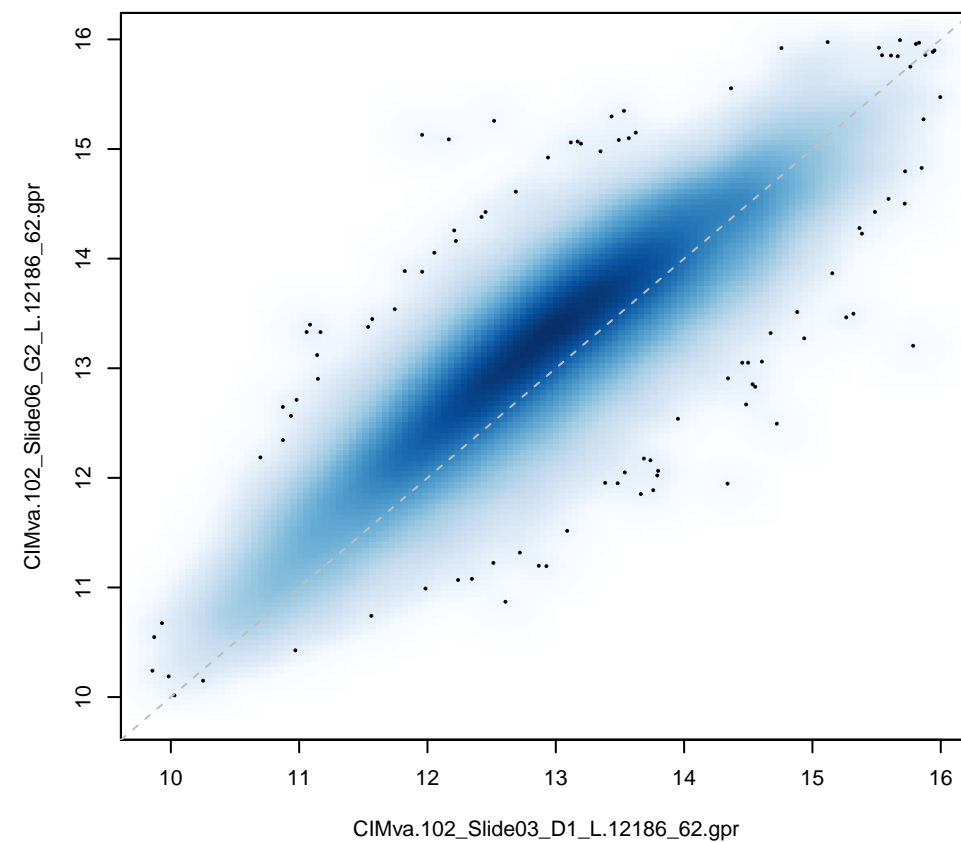

Replicate scatter (normalized) for sample: 12186 (Controls)  
Correlation coefficient: 0.88 (Pearson); 0.91 (Spearman)

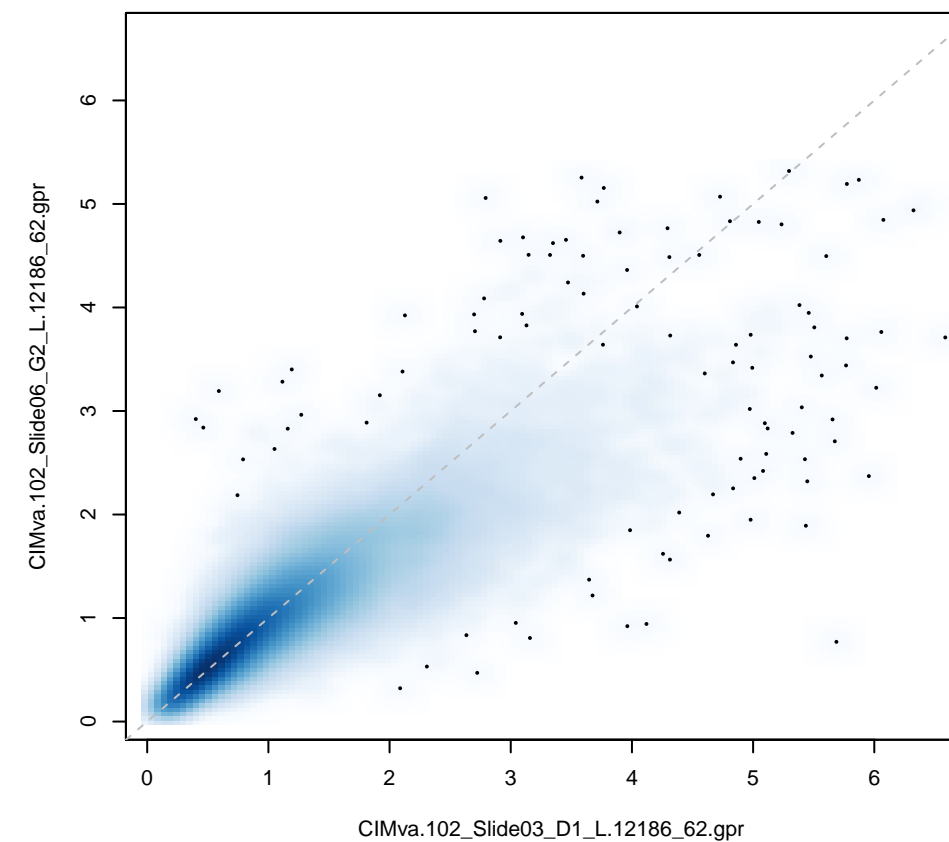

Replicate scatter (normalized; log2) for sample: 12186 (Controls)  
Correlation coefficient: 0.9 (Pearson); 0.91 (Spearman)

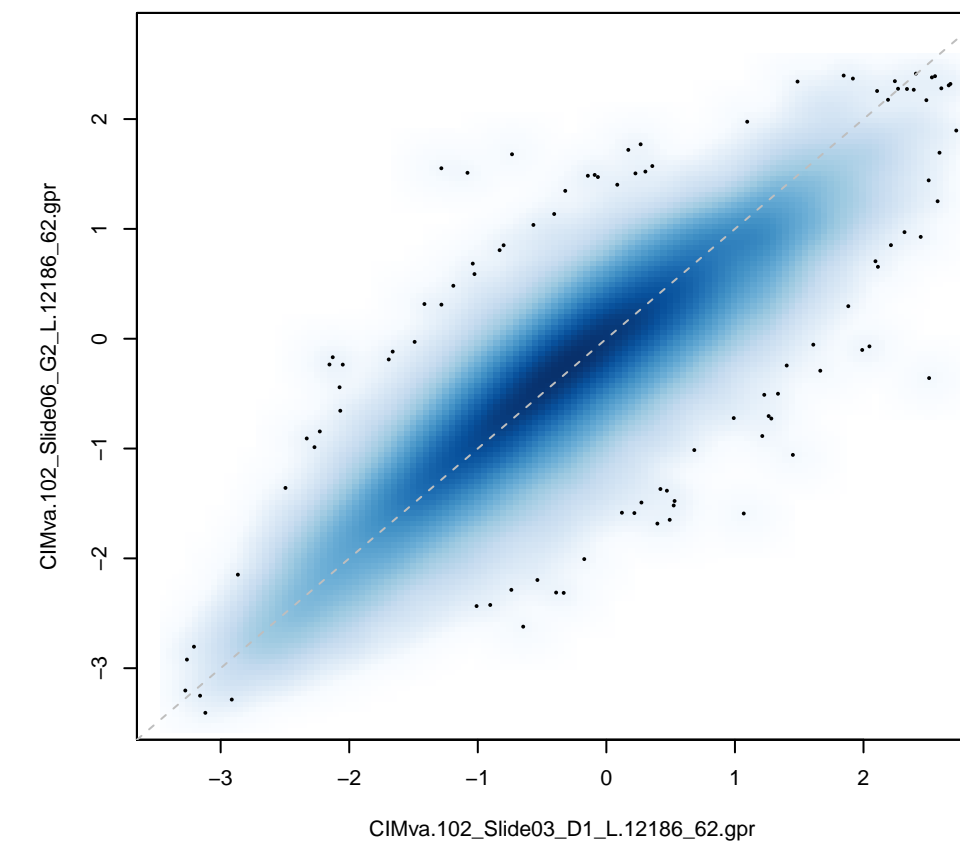

Replicate densities (raw) for sample: 12966 (CFS)

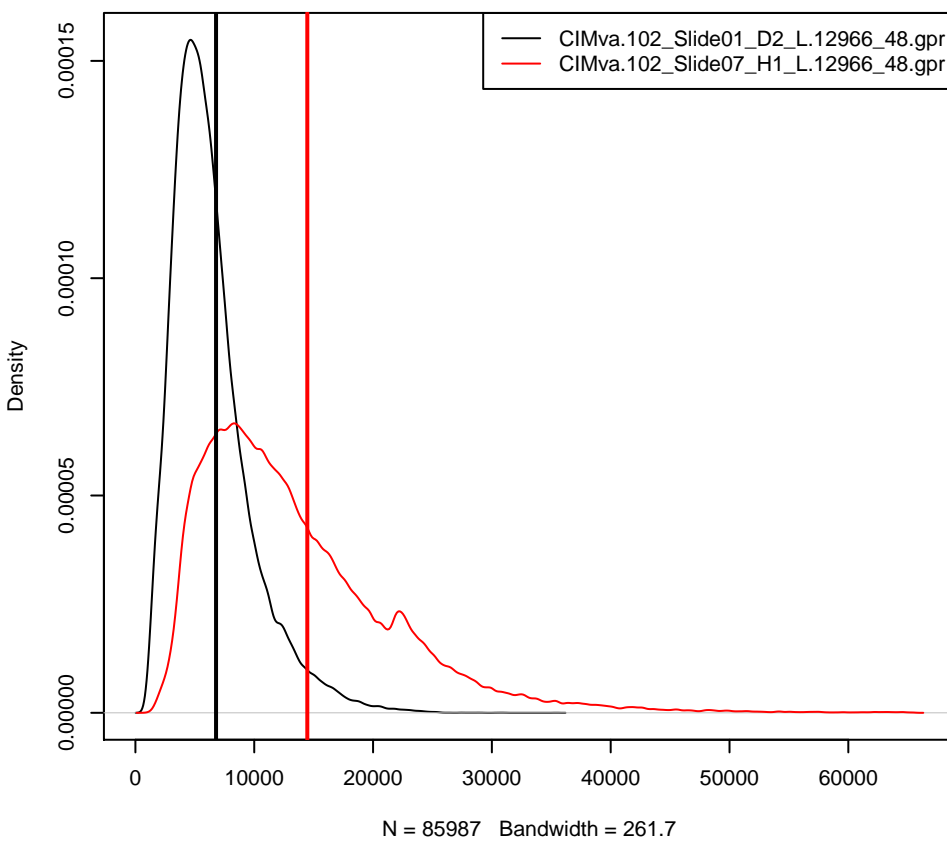

Replicate densities (raw; log2) for sample: 12966 (CFS)

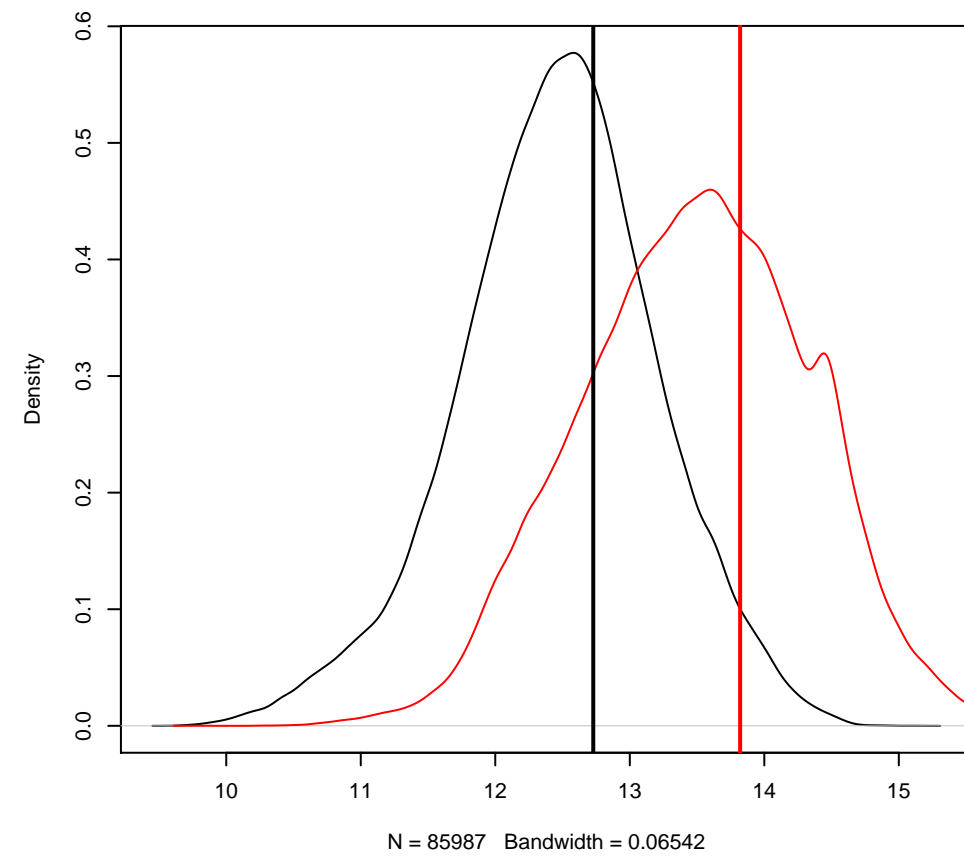

Replicate densities (normalized) for sample: 12966 (CFS)

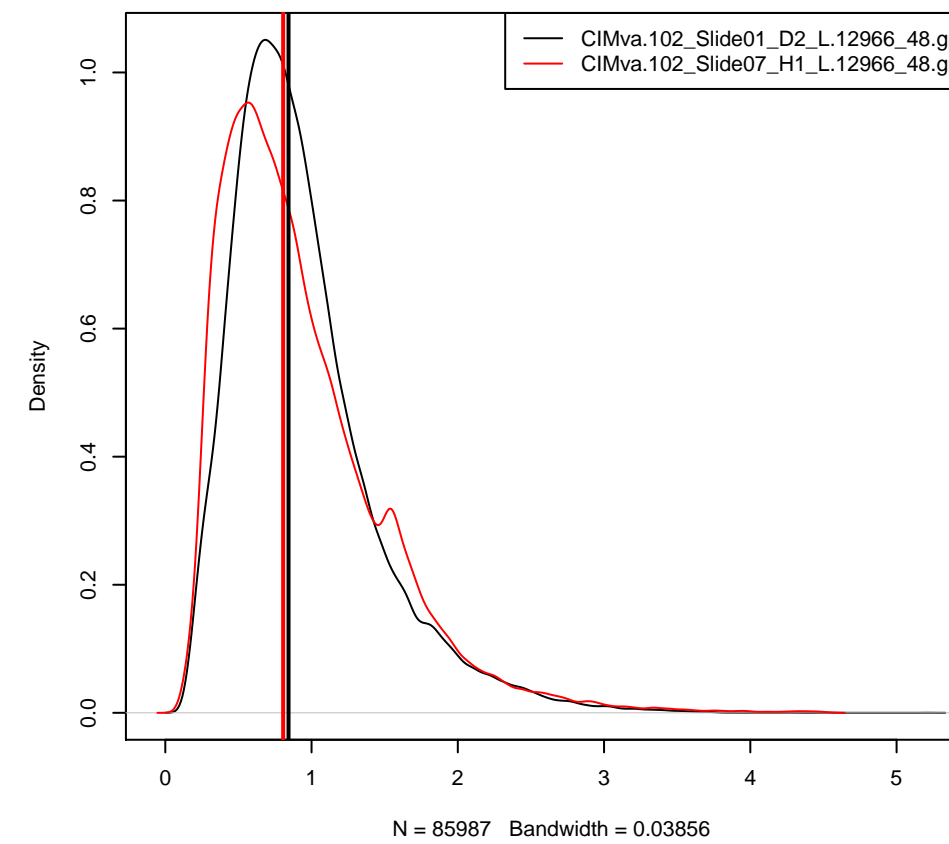

Replicate densities (normalized; log2) for sample: 12966 (CFS)

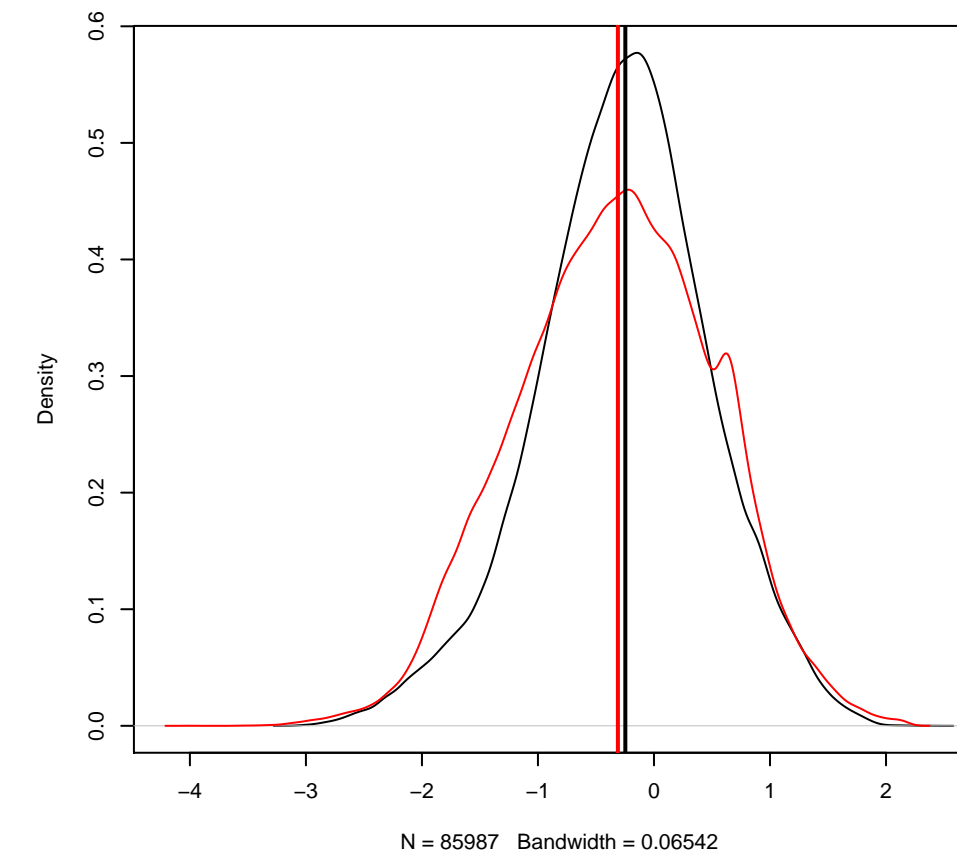

Replicate scatter (raw) for sample: 12966 (CFS)  
Correlation coefficient: 0.74 (Pearson); 0.78 (Spearman)

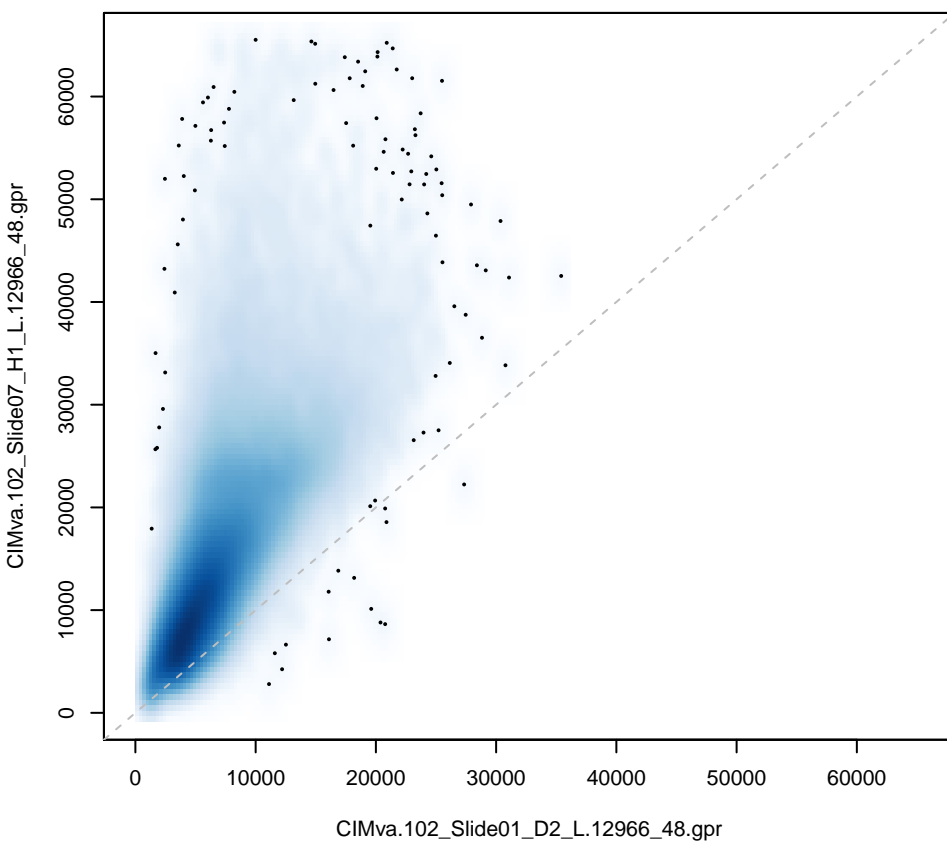

Replicate scatter (raw; log2) for sample: 12966 (CFS)  
Correlation coefficient: 0.78 (Pearson); 0.78 (Spearman)

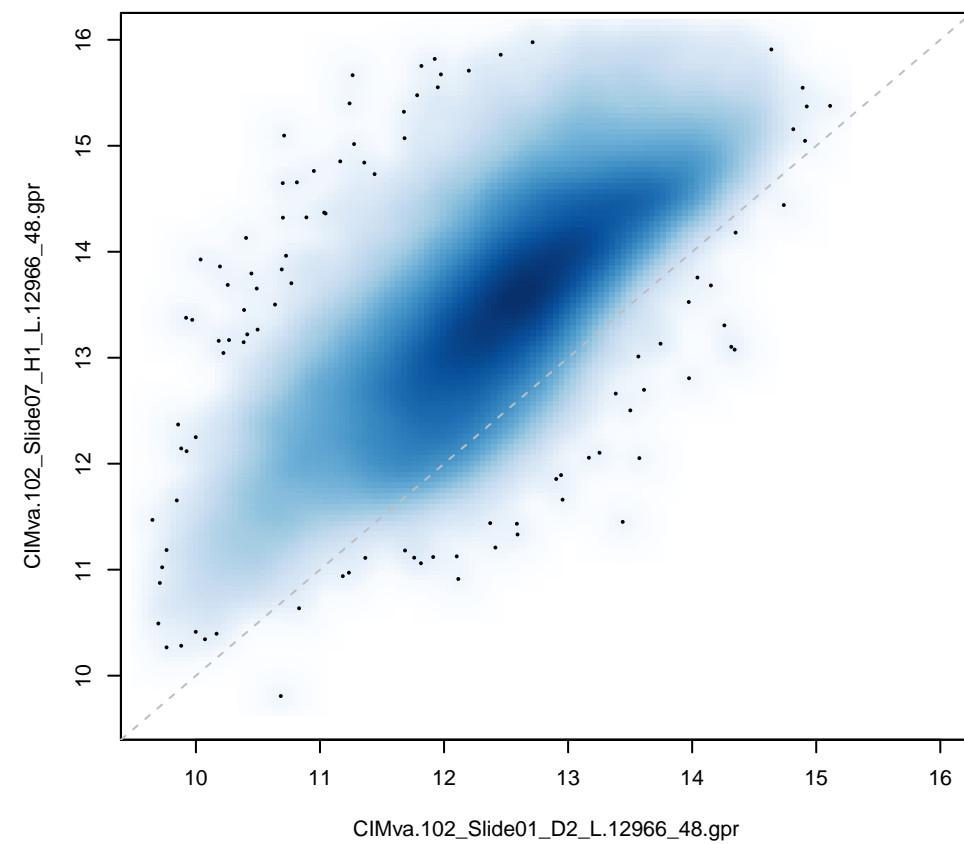

Replicate scatter (normalized) for sample: 12966 (CFS)  
Correlation coefficient: 0.74 (Pearson); 0.78 (Spearman)

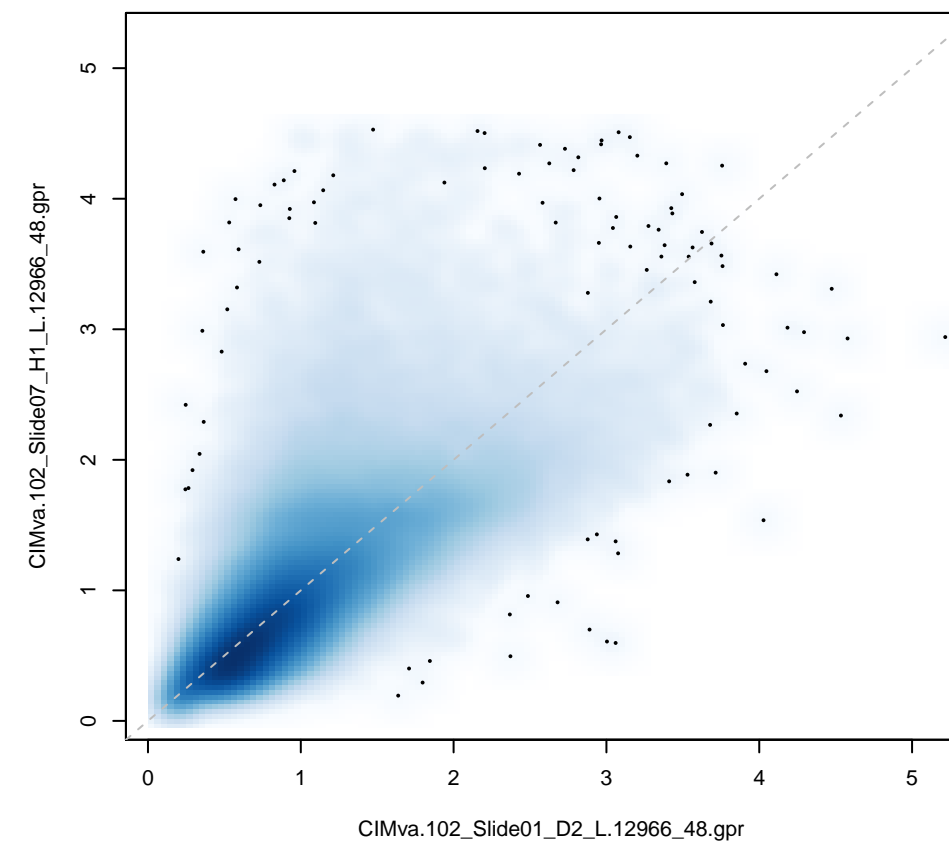

Replicate scatter (normalized; log2) for sample: 12966 (CFS)  
Correlation coefficient: 0.77 (Pearson); 0.78 (Spearman)

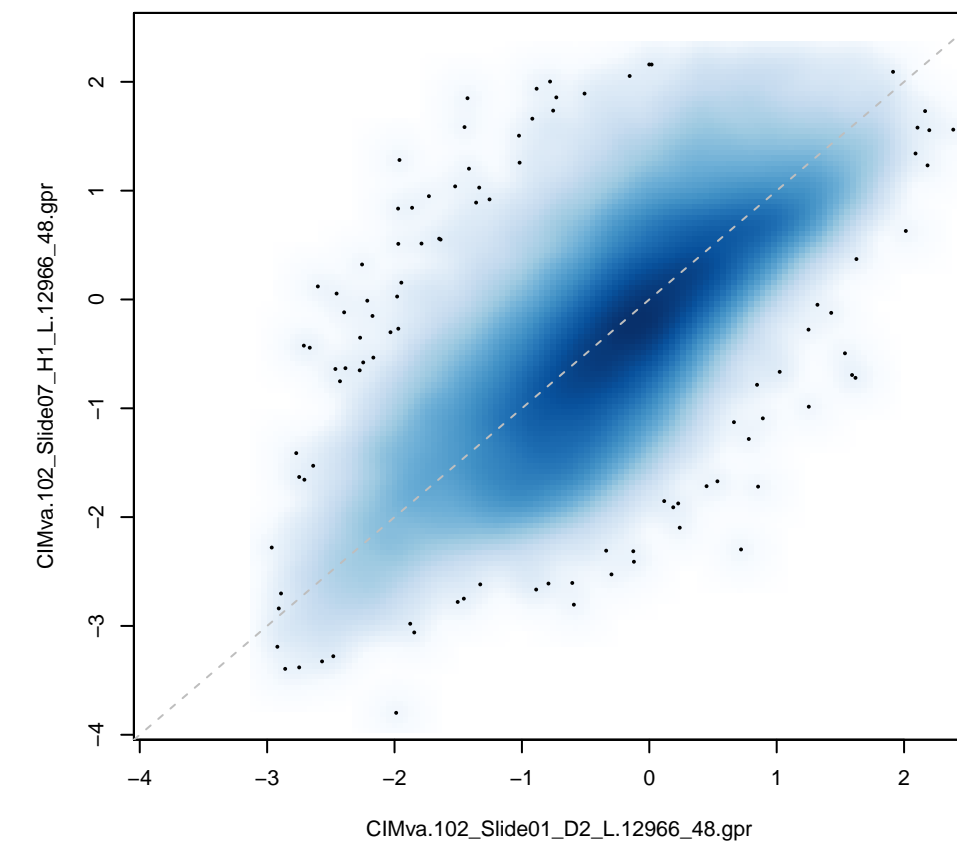

Replicate densities (raw) for sample: 14098 (CFS)

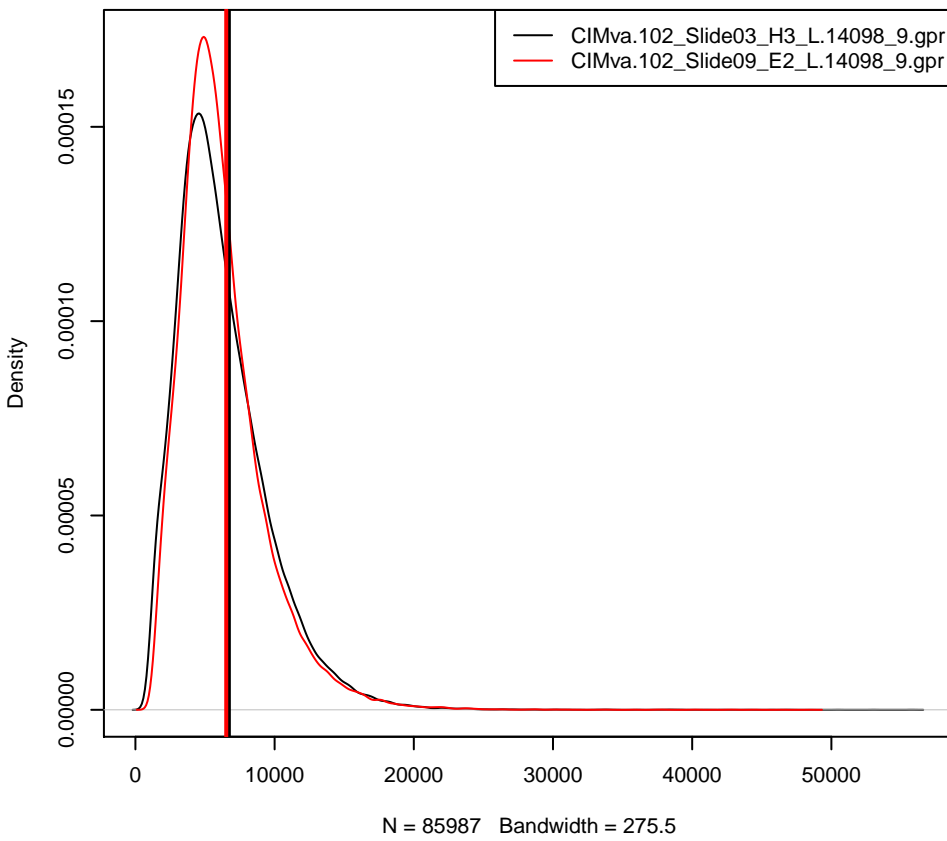

Replicate densities (raw; log2) for sample: 14098 (CFS)

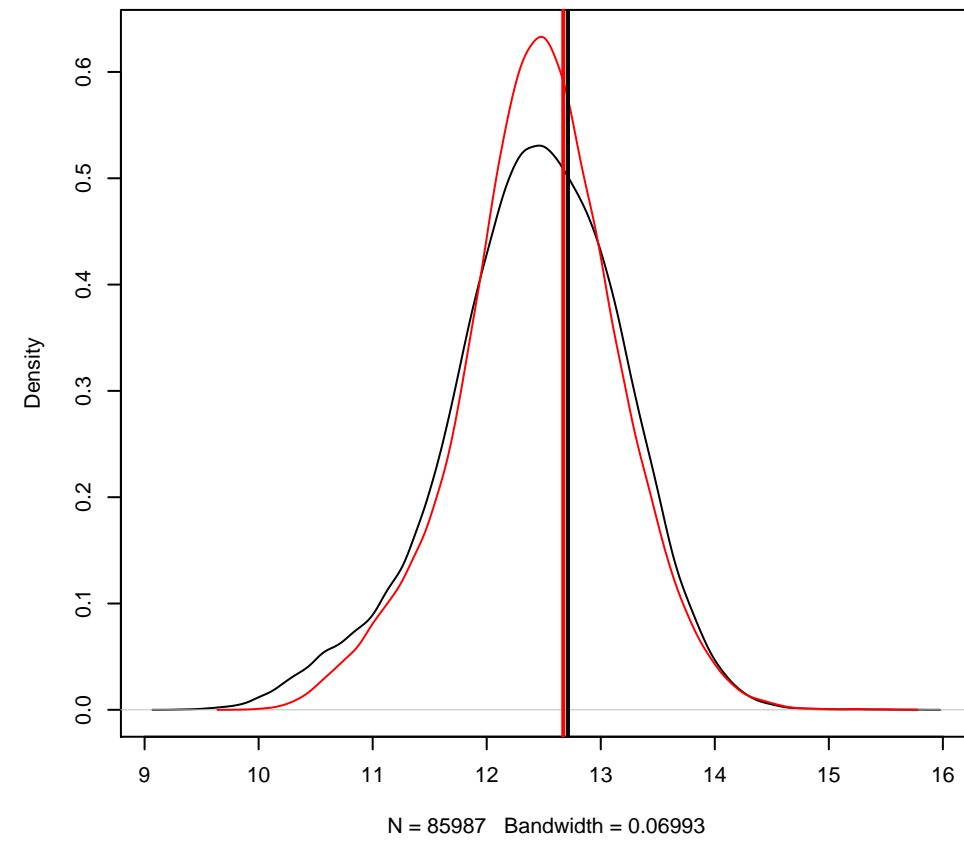

Replicate densities (normalized) for sample: 14098 (CFS)

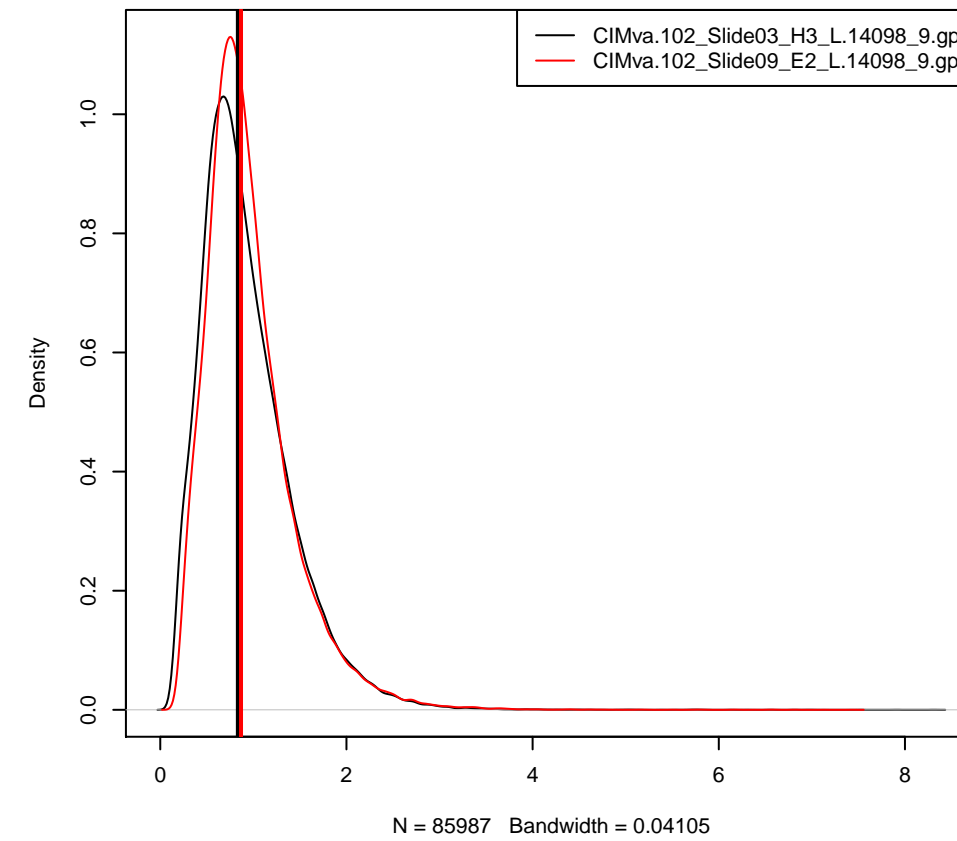

Replicate densities (normalized; log2) for sample: 14098 (CFS)

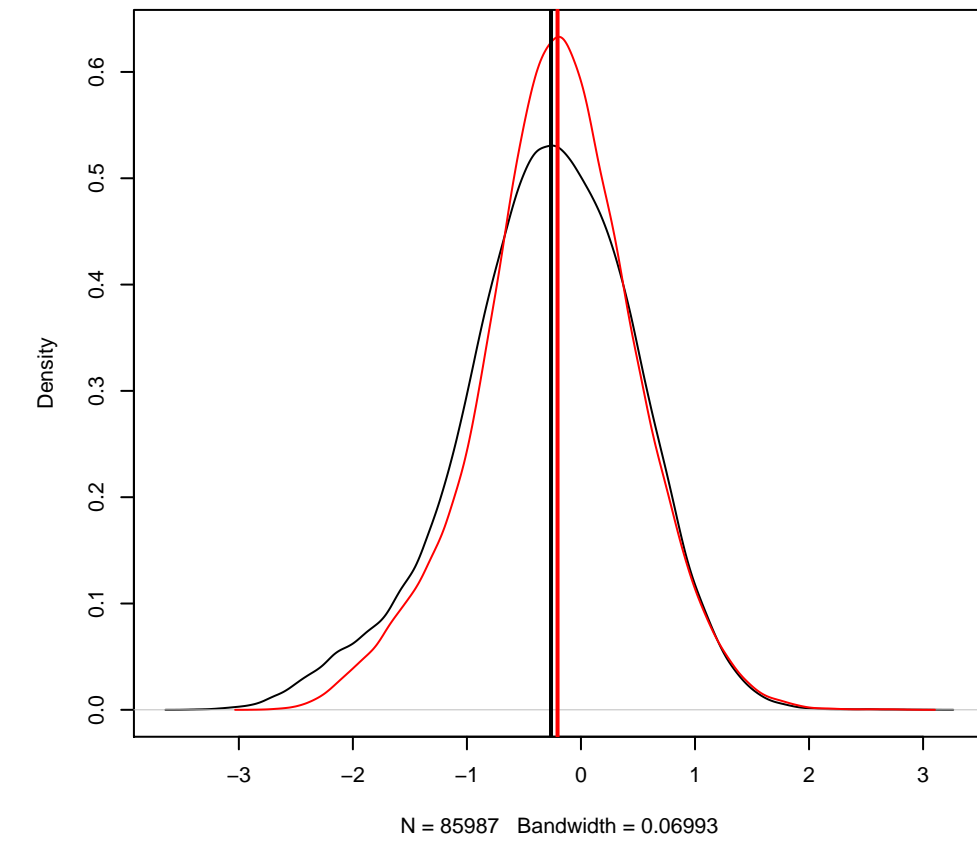

Replicate scatter (raw) for sample: 14098 (CFS)  
Correlation coefficient: 0.8 (Pearson); 0.83 (Spearman)

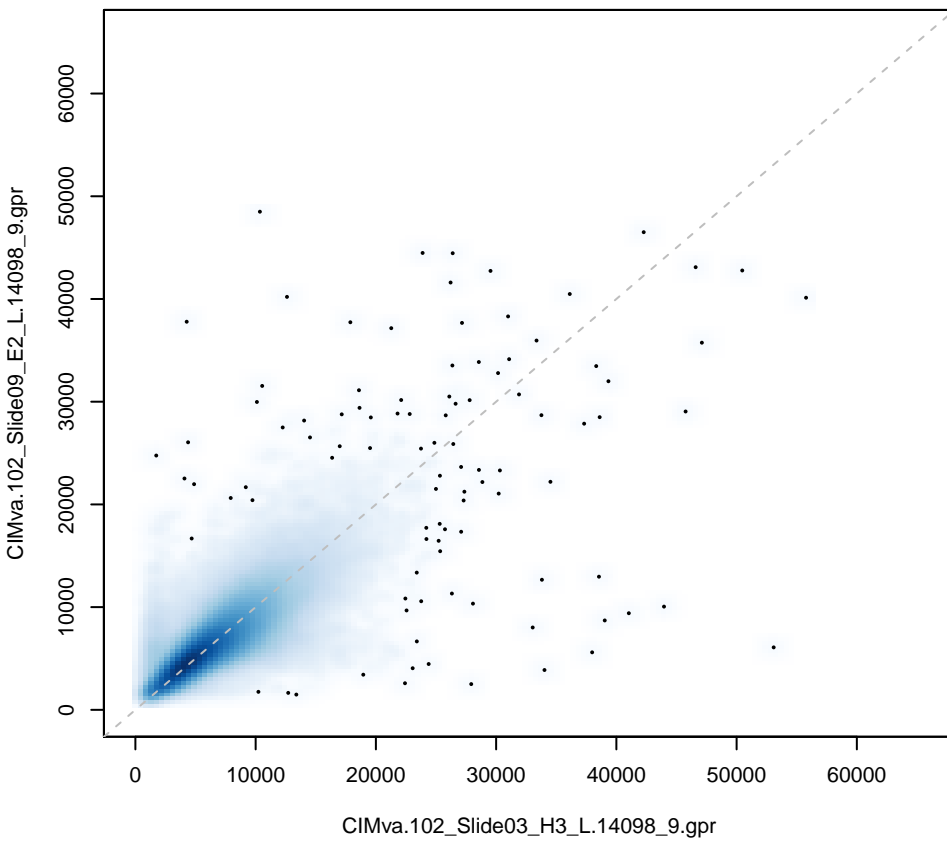

Replicate scatter (raw; log2) for sample: 14098 (CFS)  
Correlation coefficient: 0.82 (Pearson); 0.83 (Spearman)

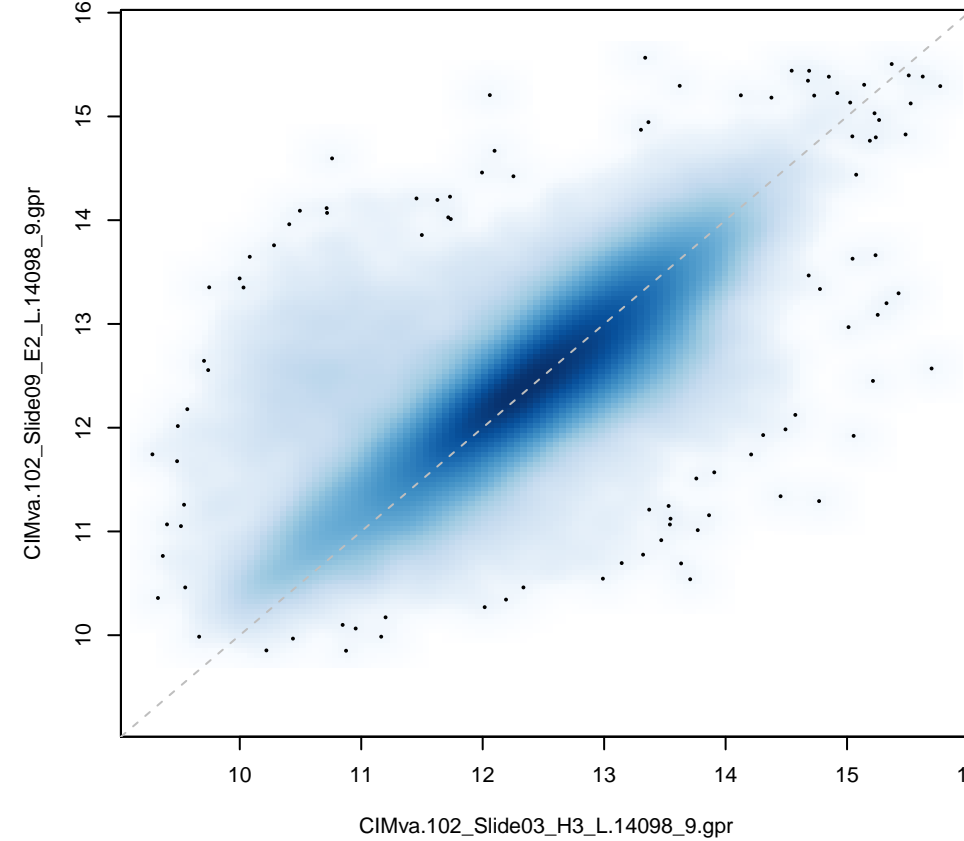

Replicate scatter (normalized) for sample: 14098 (CFS)  
Correlation coefficient: 0.8 (Pearson); 0.83 (Spearman)

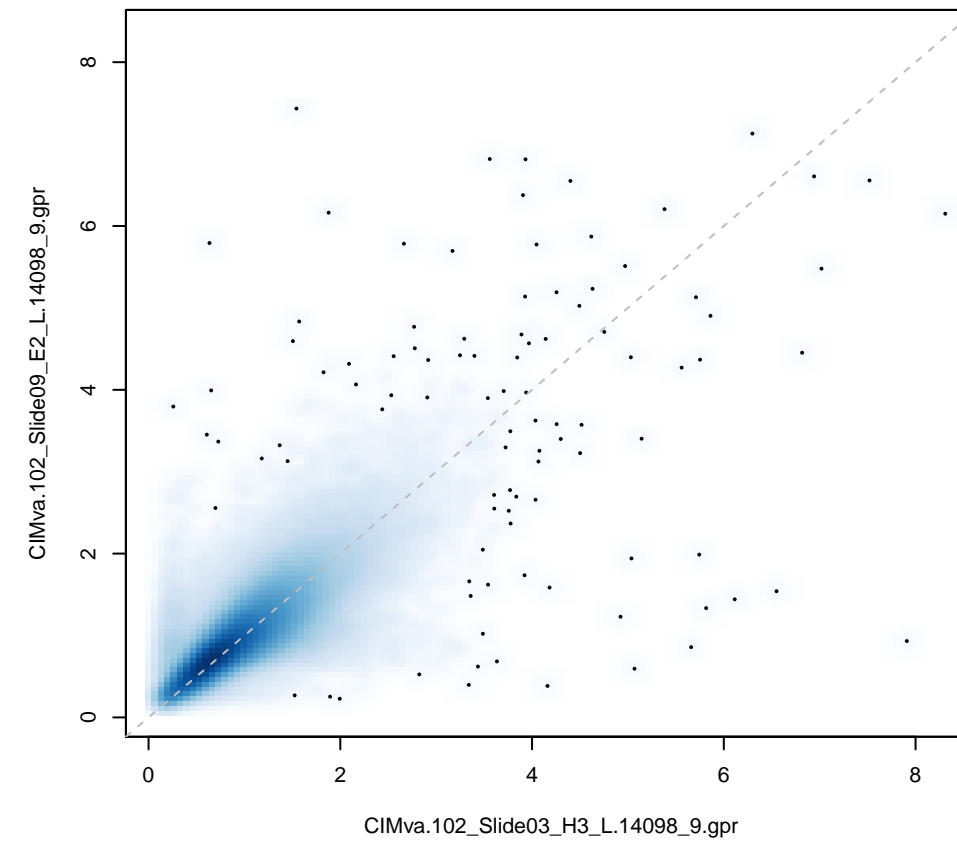

Replicate scatter (normalized; log2) for sample: 14098 (CFS)  
Correlation coefficient: 0.82 (Pearson); 0.83 (Spearman)

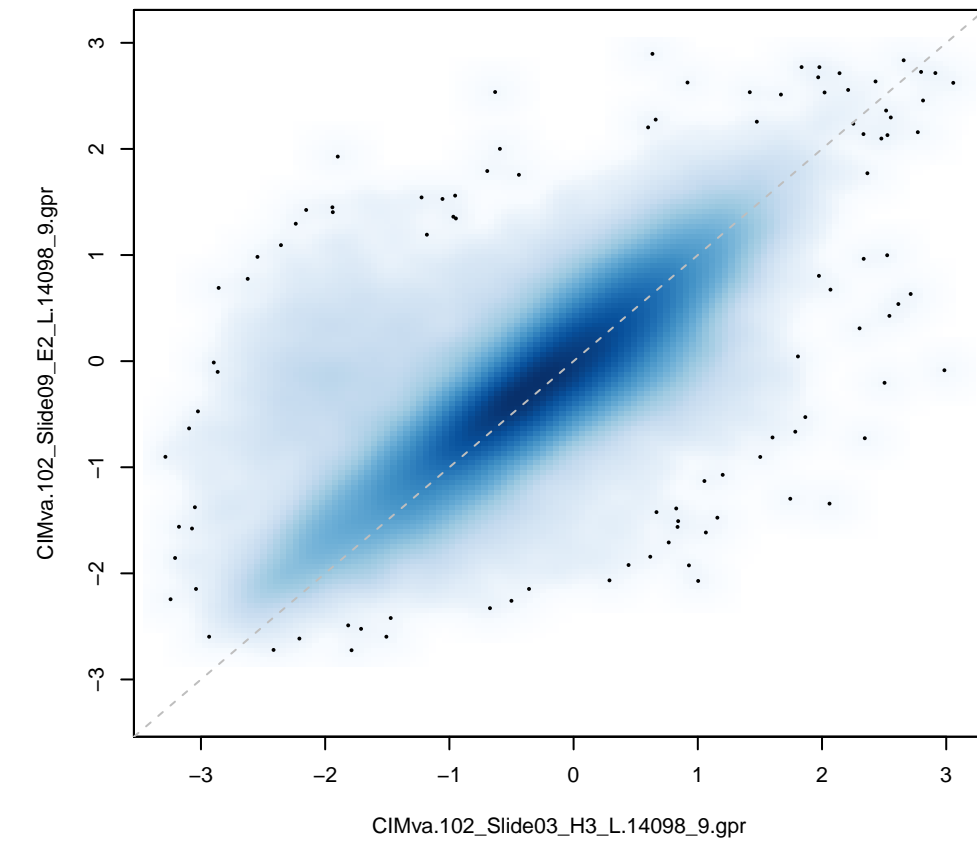

Replicate densities (raw) for sample: 14557 (Controls)

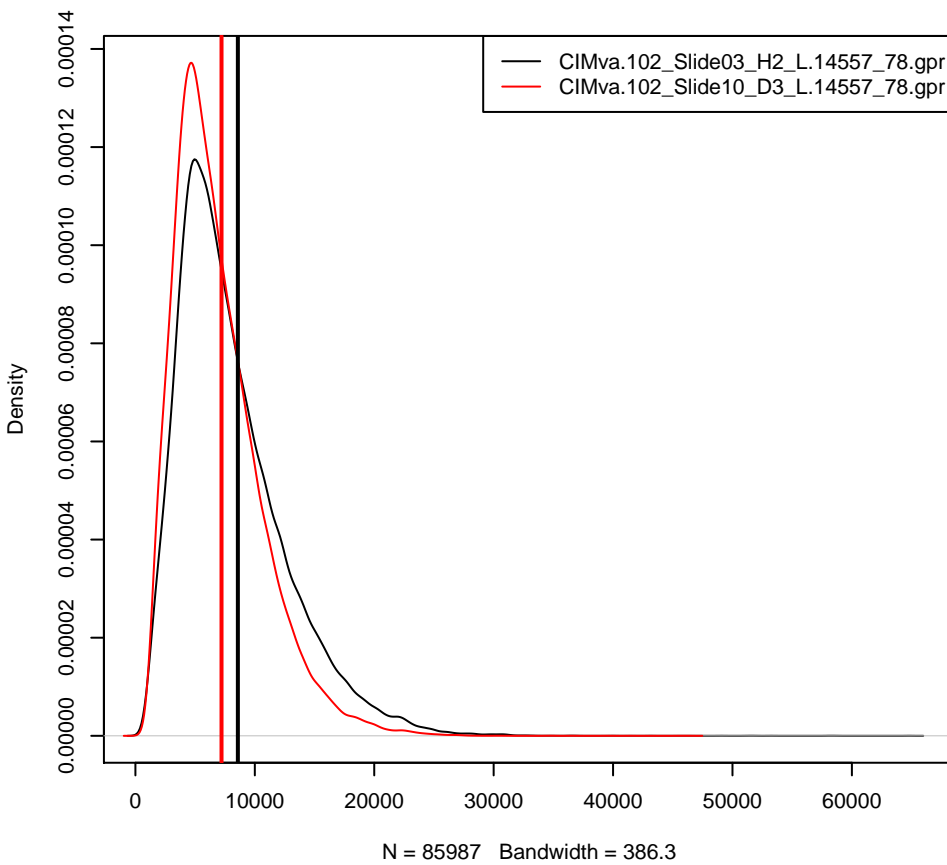

Replicate densities (raw; log2) for sample: 14557 (Controls)

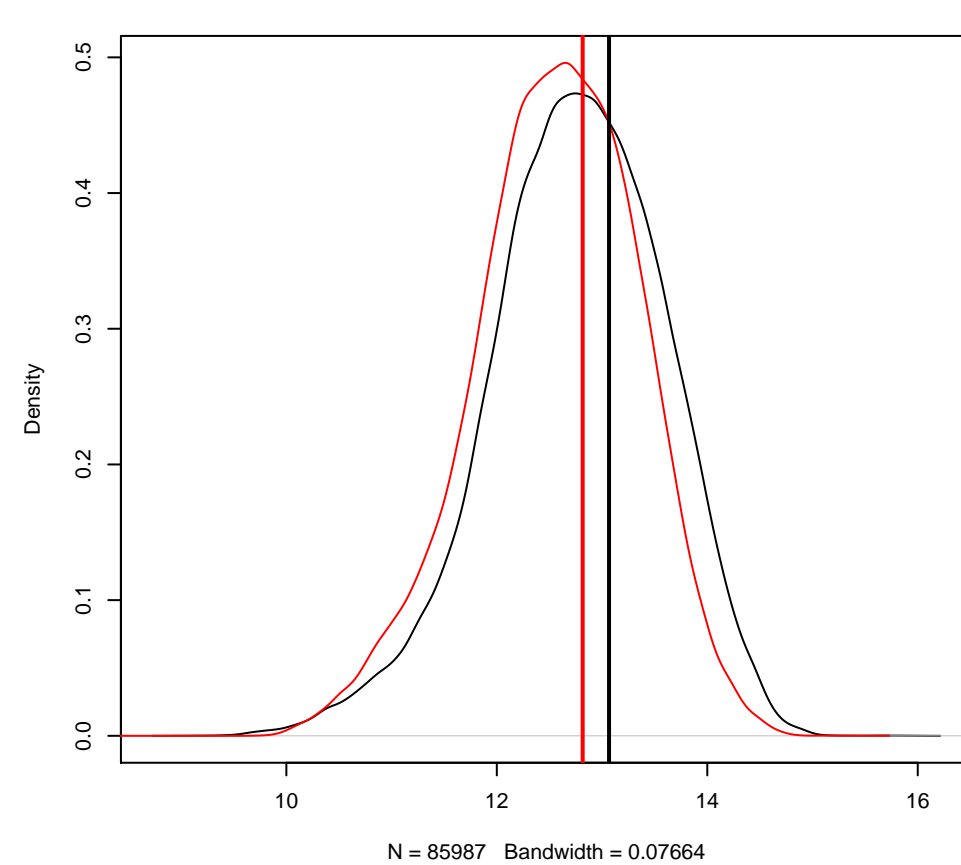

Replicate densities (normalized) for sample: 14557 (Controls)

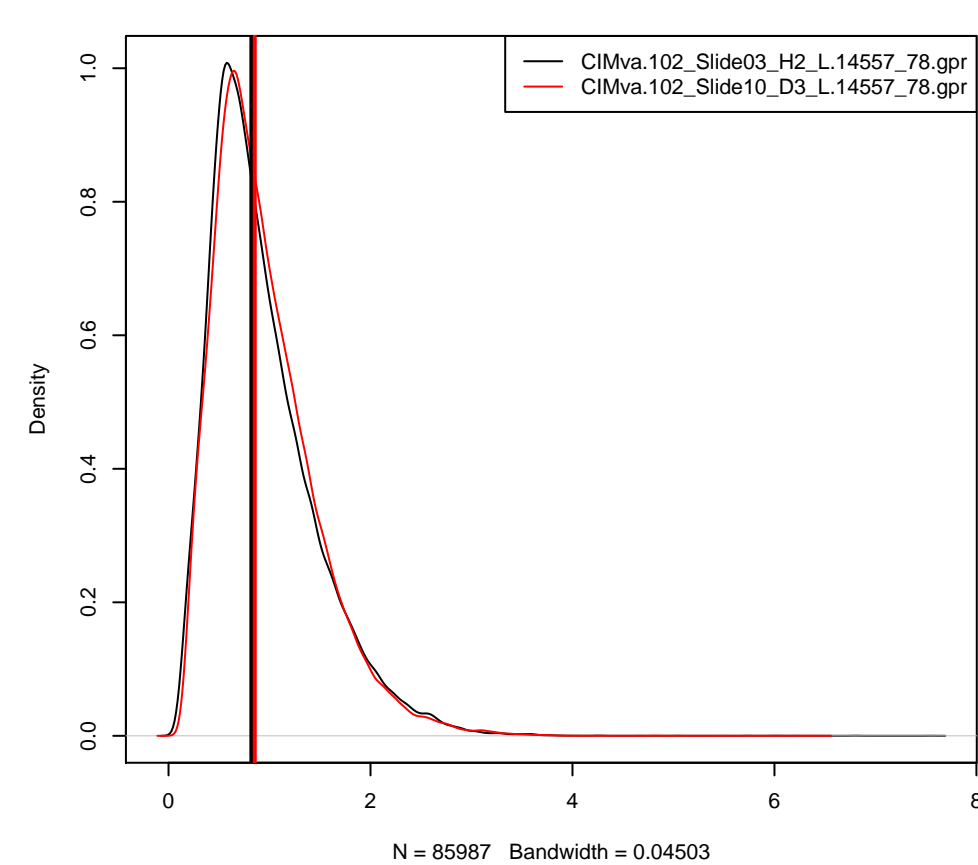

Replicate densities (normalized; log2) for sample: 14557 (Controls)

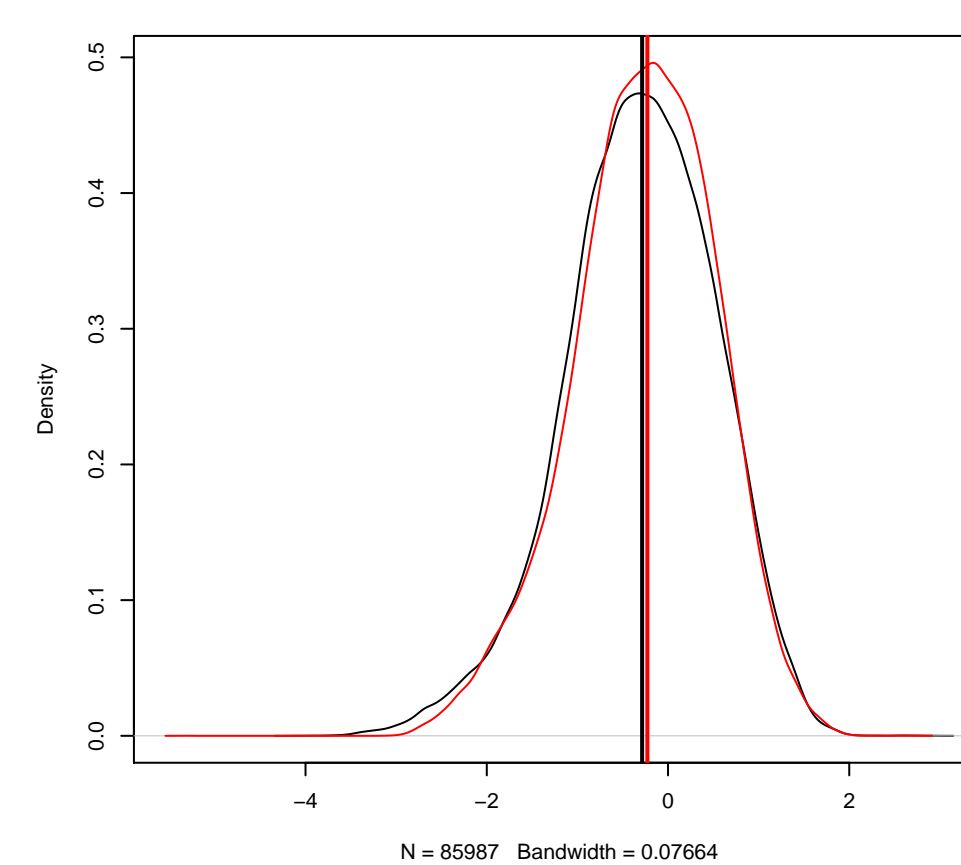

Replicate scatter (raw) for sample: 14557 (Controls)  
Correlation coefficient: 0.85 (Pearson); 0.85 (Spearman)

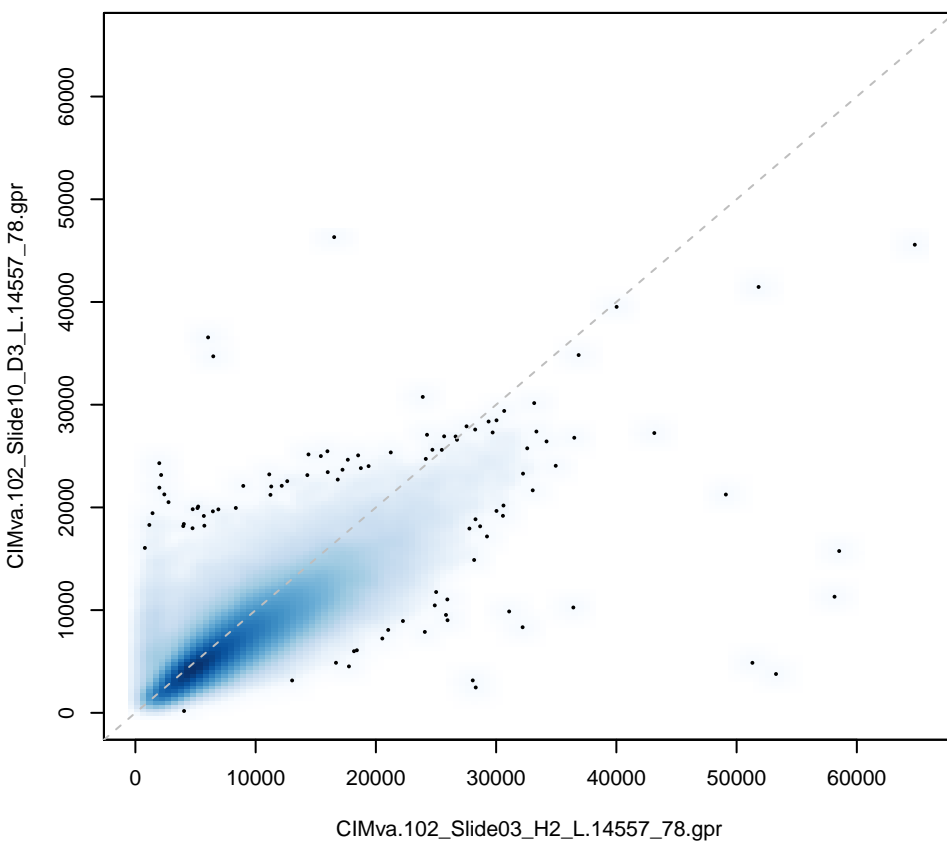

Replicate scatter (raw; log2) for sample: 14557 (Controls)  
Correlation coefficient: 0.83 (Pearson); 0.85 (Spearman)

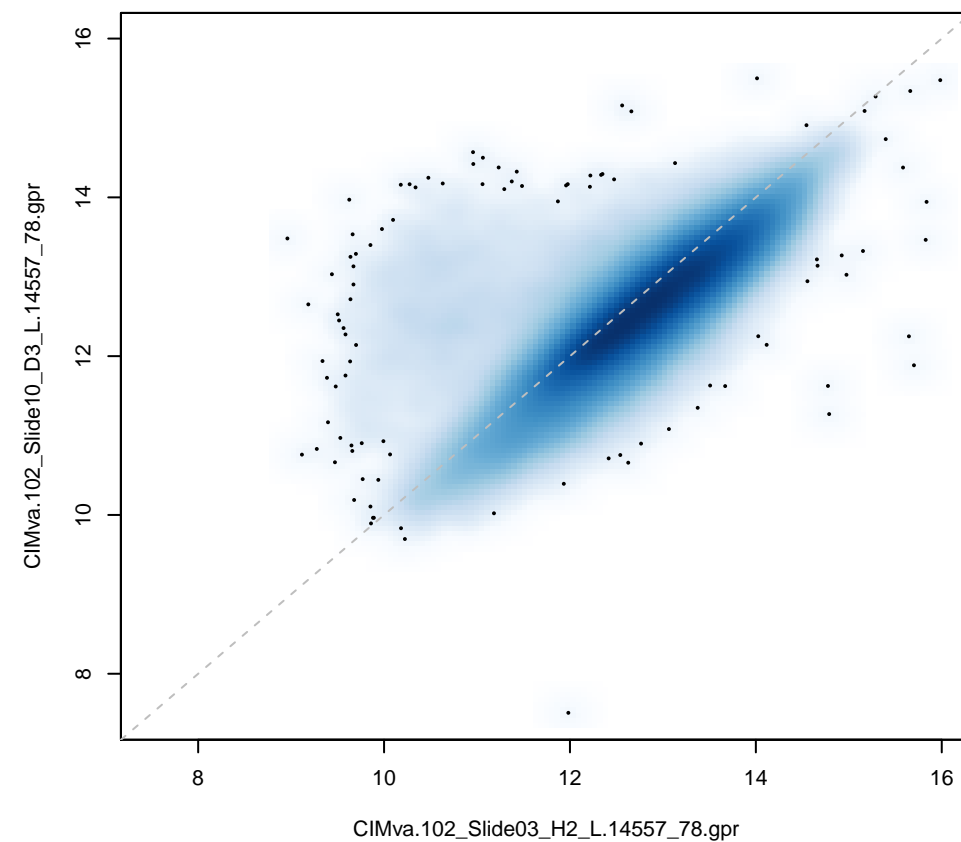

Replicate scatter (normalized) for sample: 14557 (Controls)  
Correlation coefficient: 0.85 (Pearson); 0.85 (Spearman)

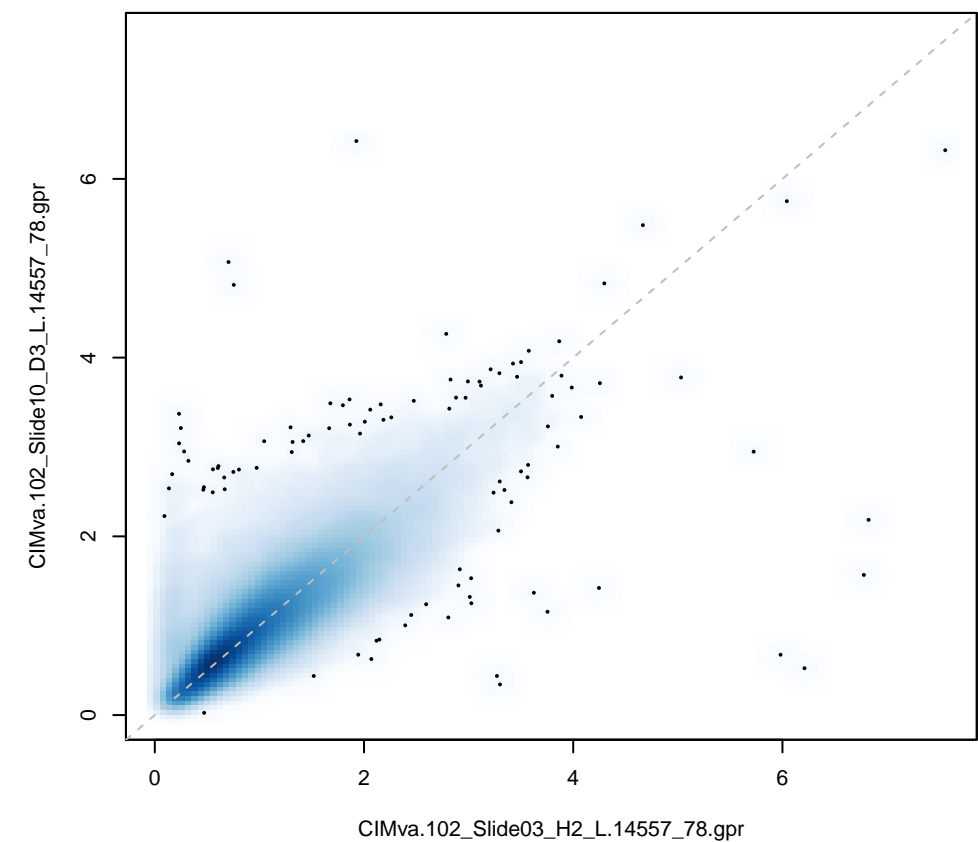

Replicate scatter (normalized; log2) for sample: 14557 (Controls)  
Correlation coefficient: 0.85 (Pearson); 0.85 (Spearman)

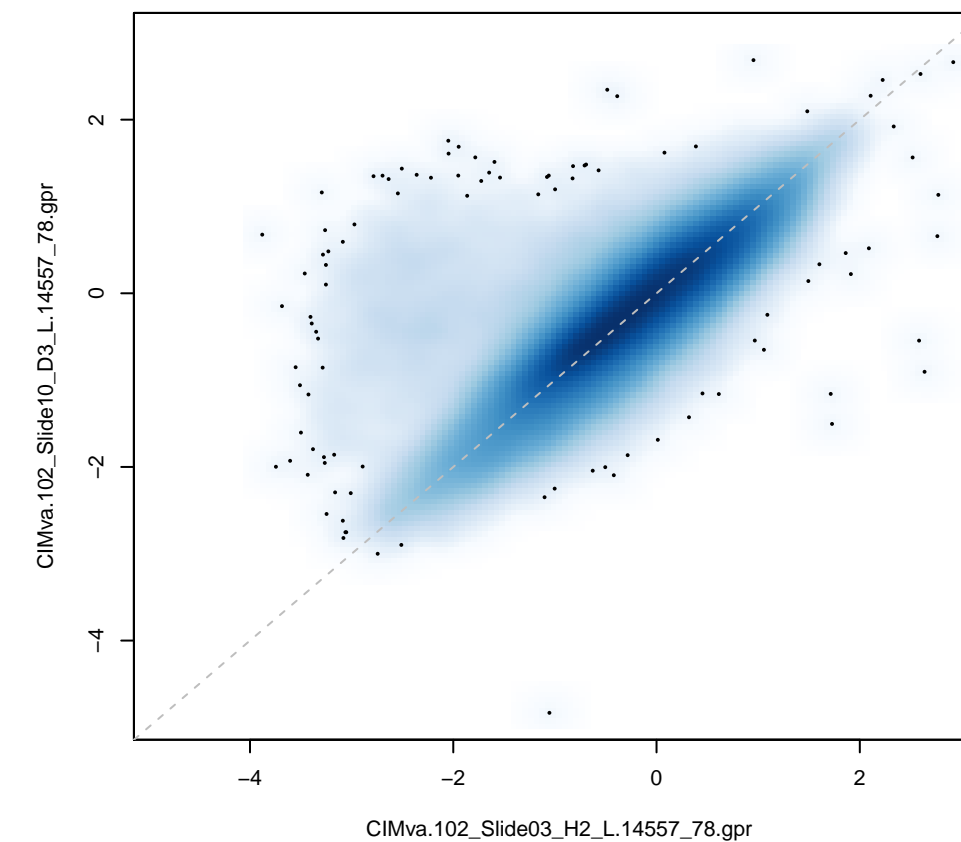



Replicate densities (raw) for sample: 14706 (CFS)

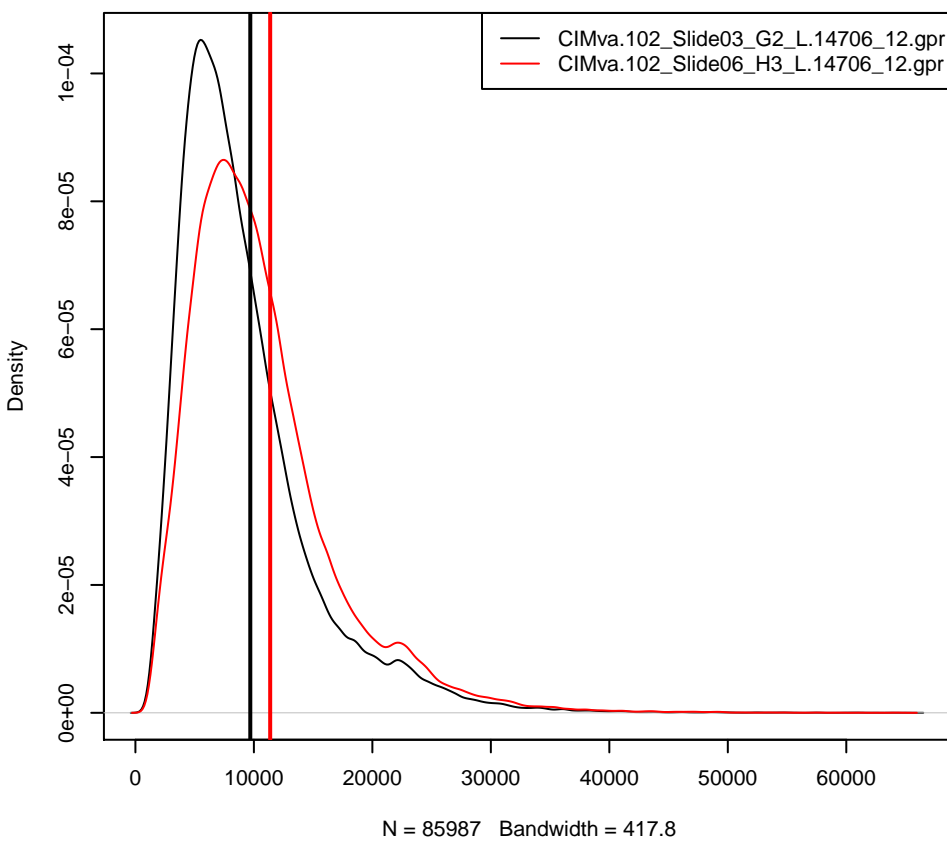

Replicate densities (raw; log2) for sample: 14706 (CFS)

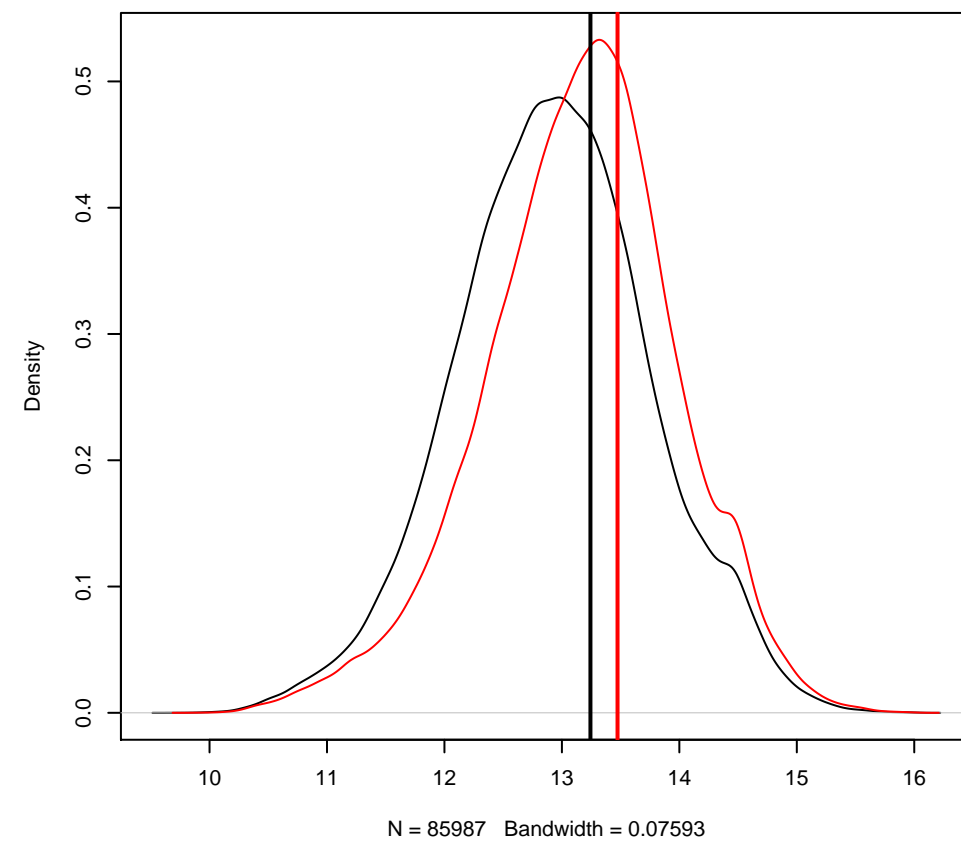

Replicate densities (normalized) for sample: 14706 (CFS)

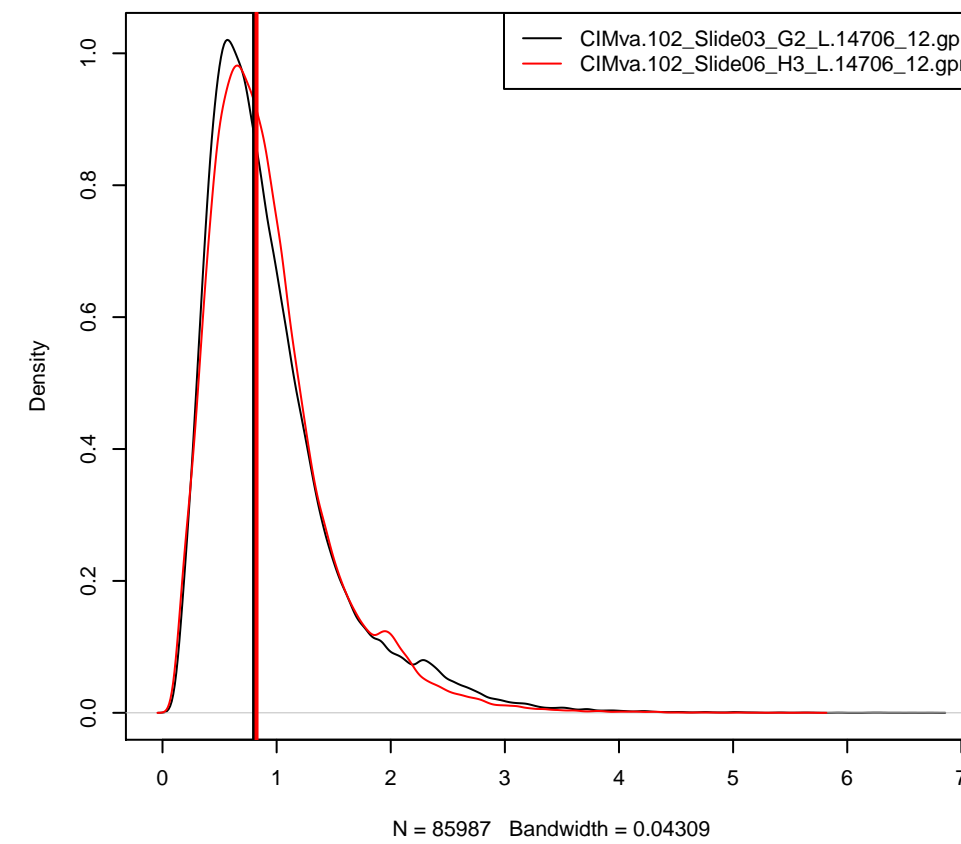

Replicate densities (normalized; log2) for sample: 14706 (CFS)

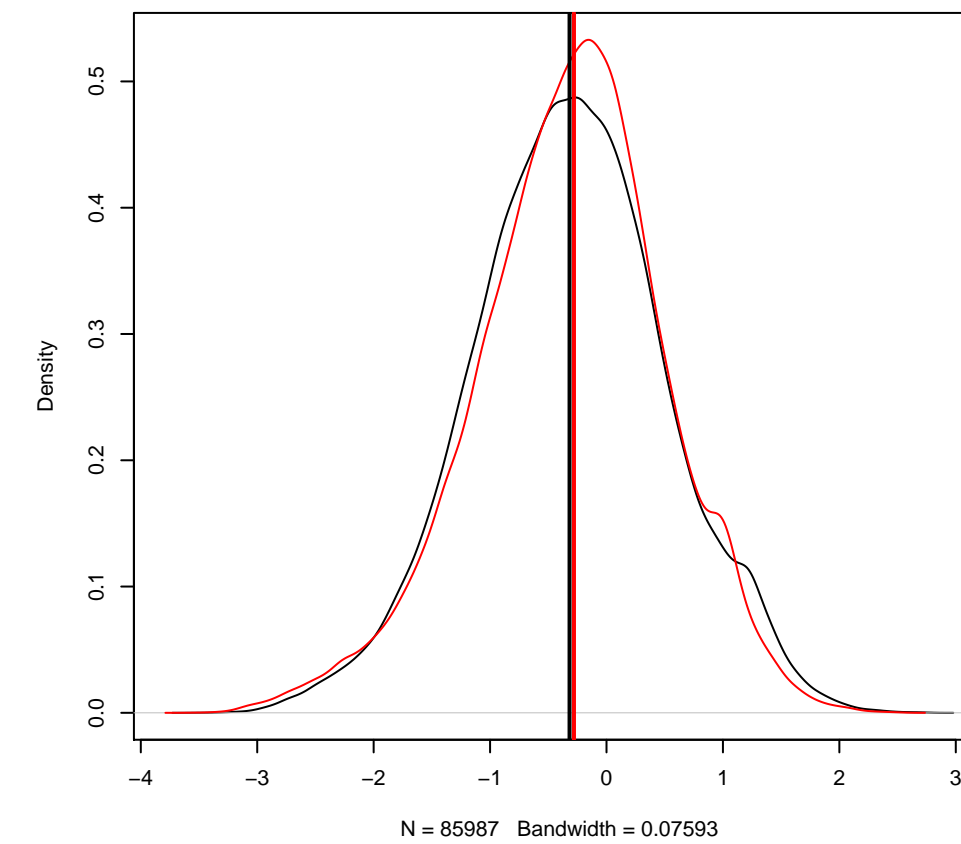

Replicate scatter (raw) for sample: 14706 (CFS)  
Correlation coefficient: 0.87 (Pearson); 0.89 (Spearman)

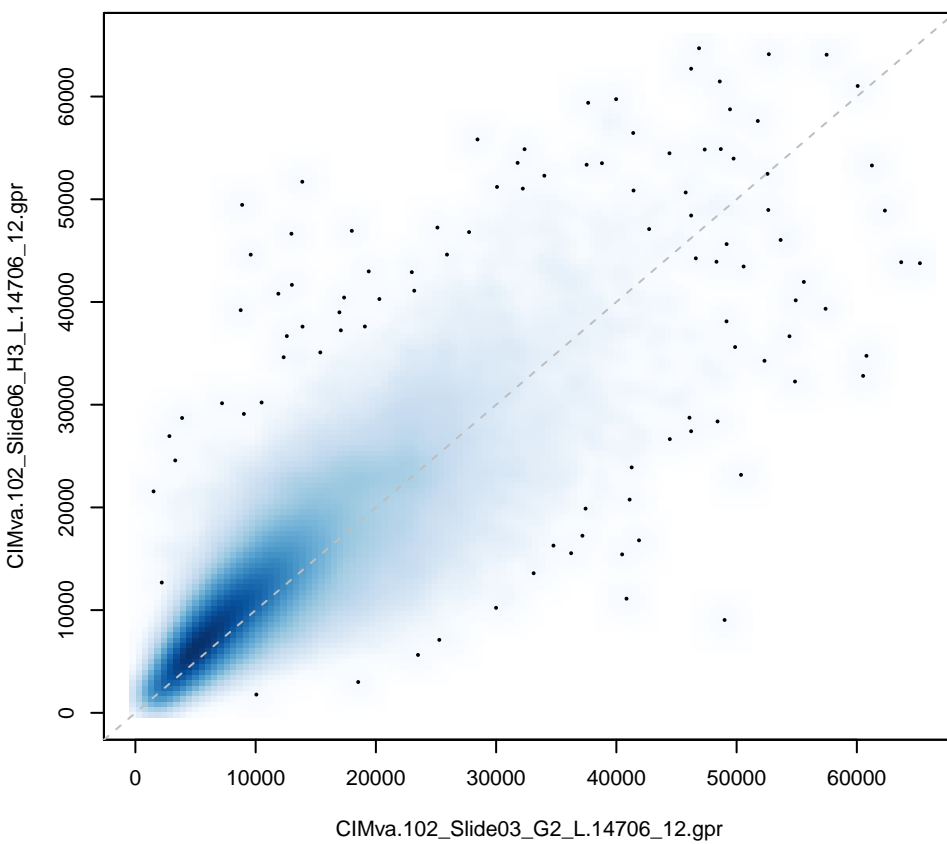

Replicate scatter (raw; log2) for sample: 14706 (CFS)  
Correlation coefficient: 0.89 (Pearson); 0.89 (Spearman)

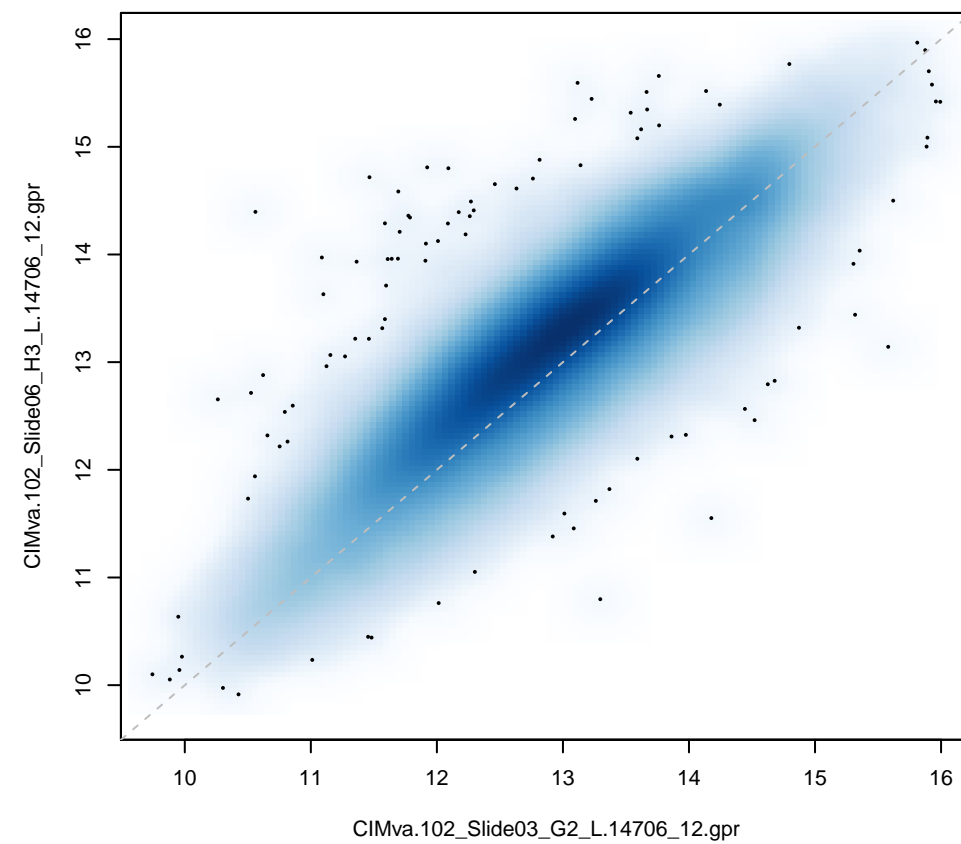

Replicate scatter (normalized) for sample: 14706 (CFS)  
Correlation coefficient: 0.87 (Pearson); 0.89 (Spearman)

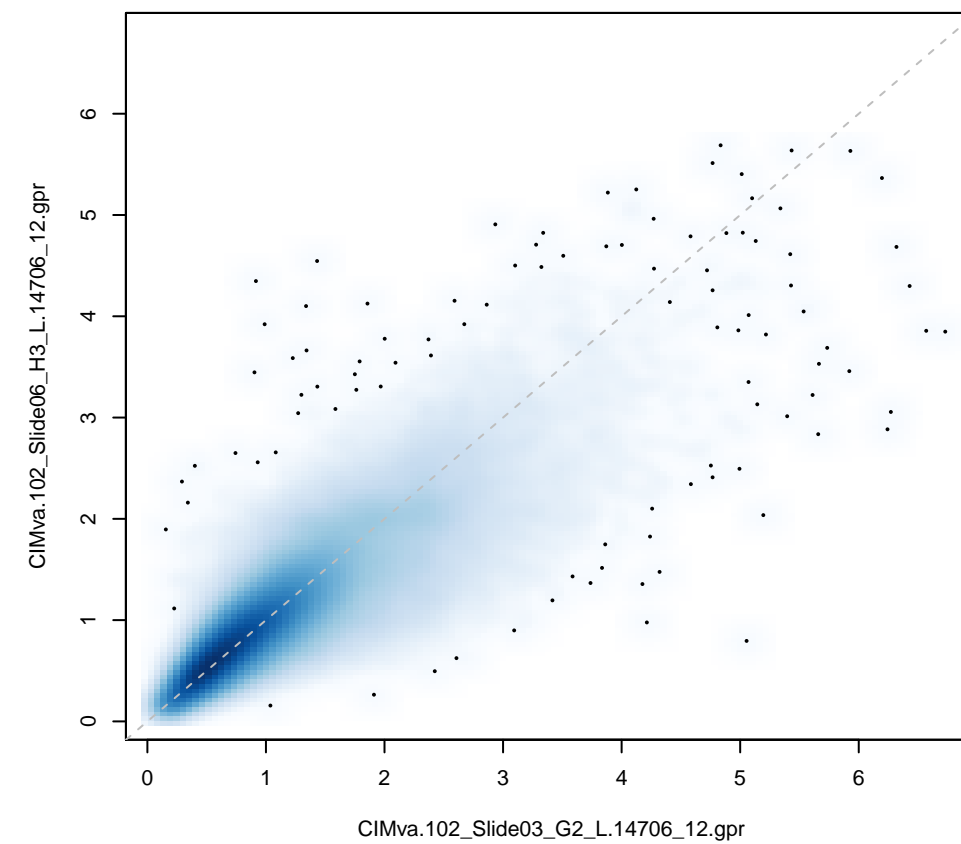

Replicate scatter (normalized; log2) for sample: 14706 (CFS)  
Correlation coefficient: 0.88 (Pearson); 0.89 (Spearman)

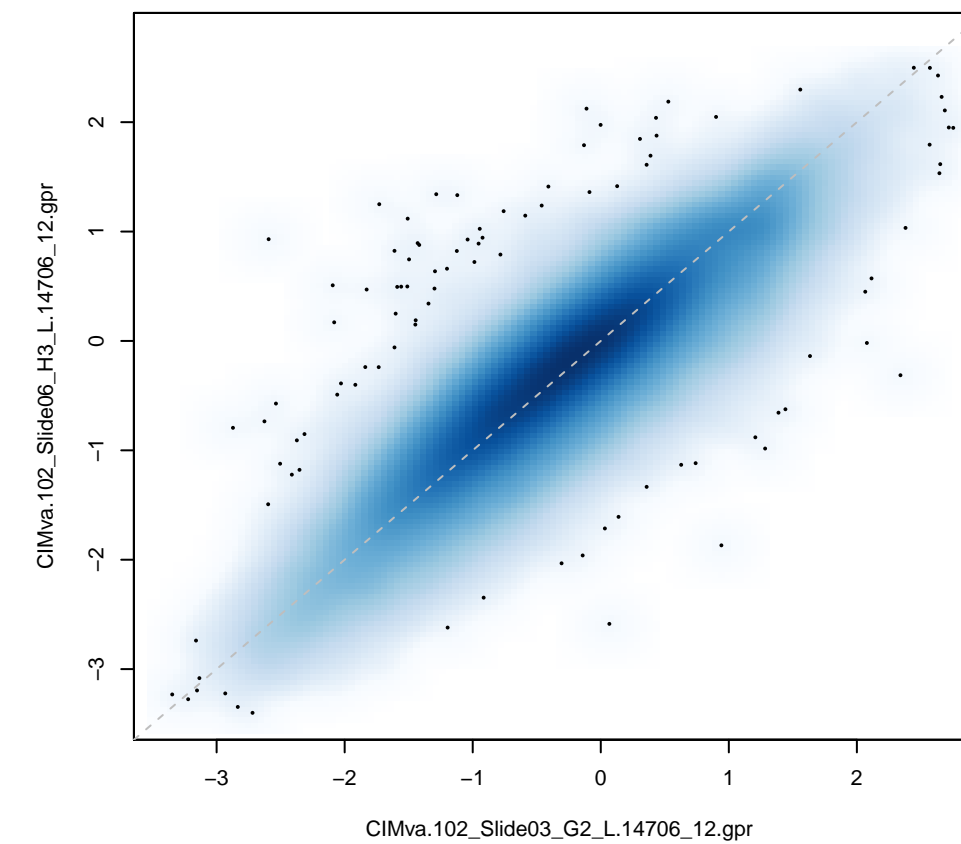

Replicate densities (raw) for sample: 1555 (CFS)

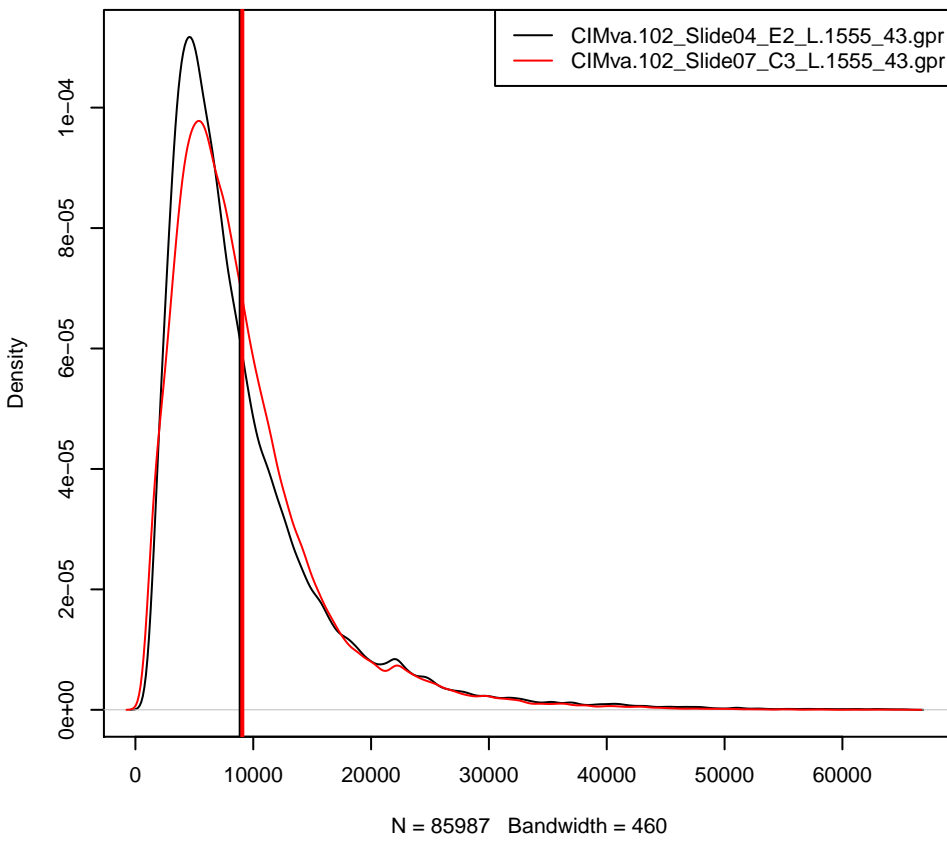

Replicate densities (raw; log2) for sample: 1555 (CFS)

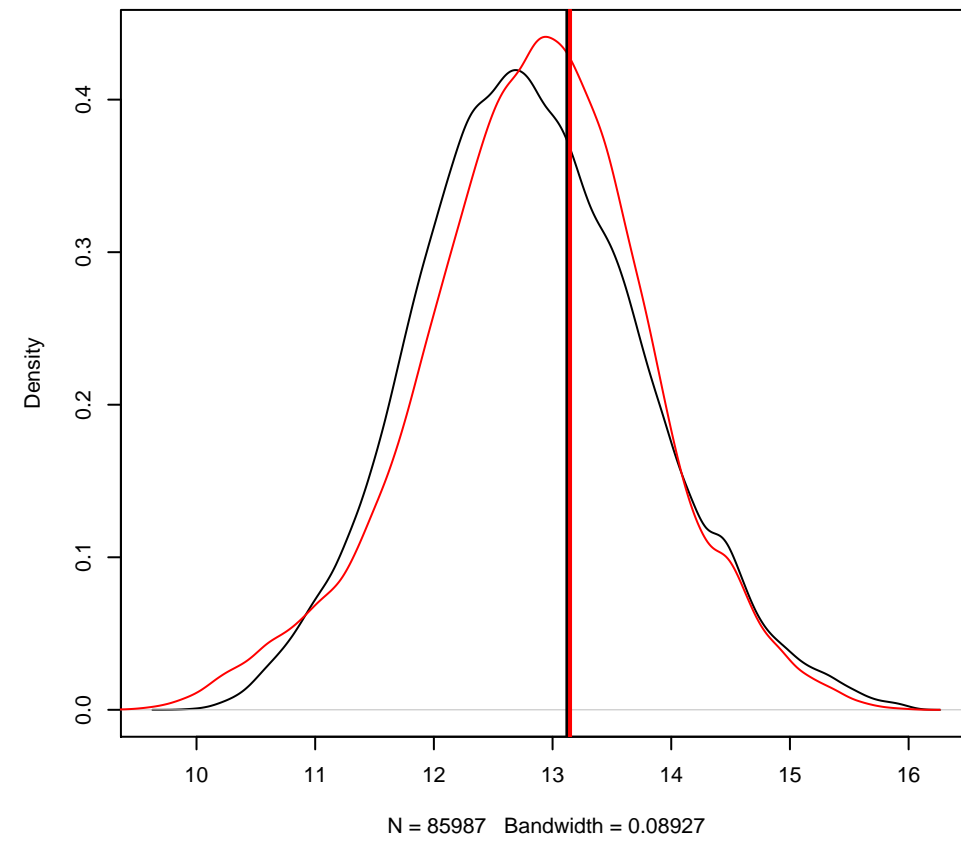

Replicate densities (normalized) for sample: 1555 (CFS)

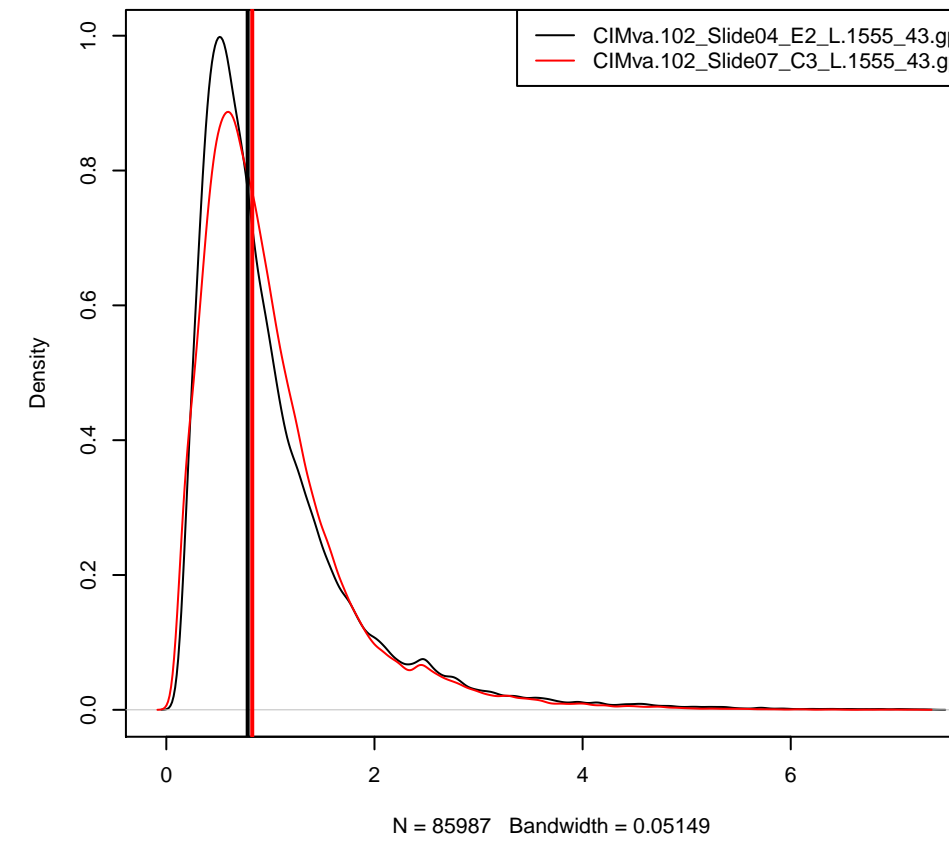

Replicate densities (normalized; log2) for sample: 1555 (CFS)

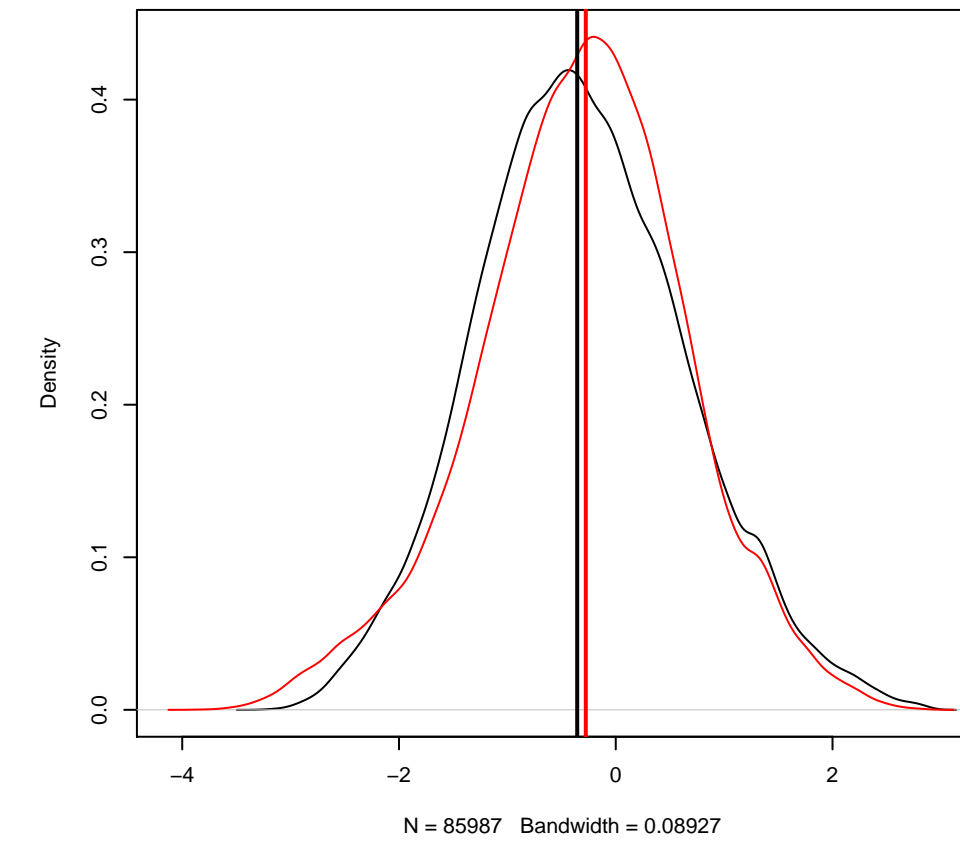

Replicate scatter (raw) for sample: 1555 (CFS)  
Correlation coefficient: 0.88 (Pearson); 0.9 (Spearman)

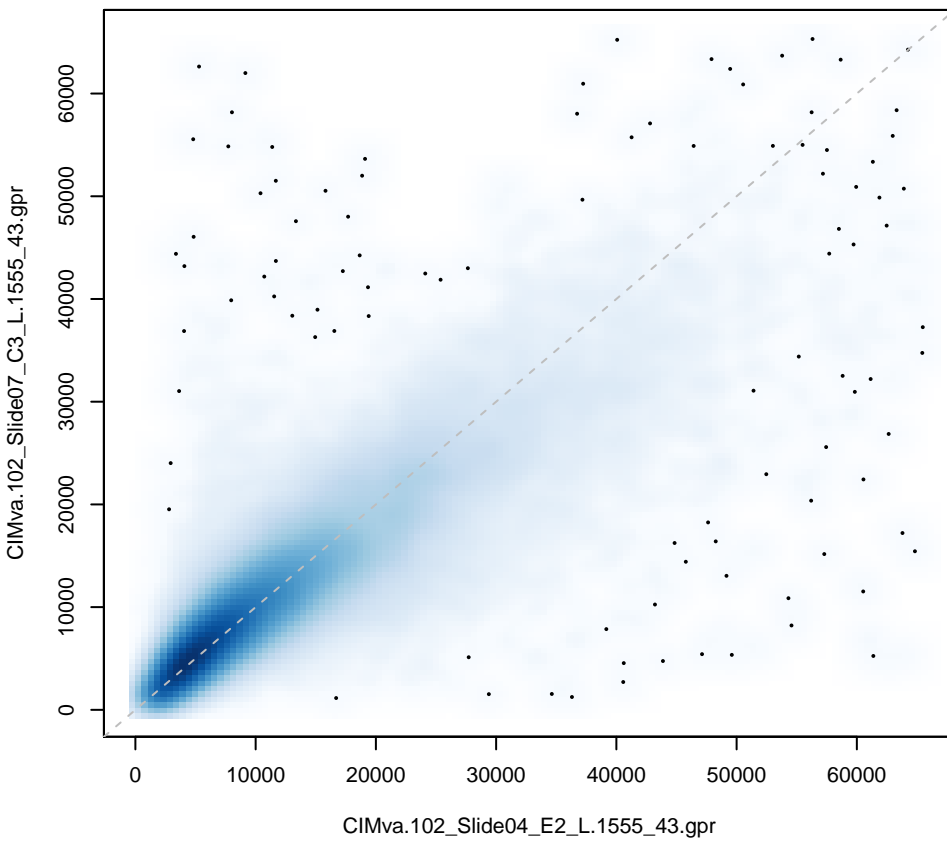

Replicate scatter (raw; log2) for sample: 1555 (CFS)  
Correlation coefficient: 0.9 (Pearson); 0.9 (Spearman)

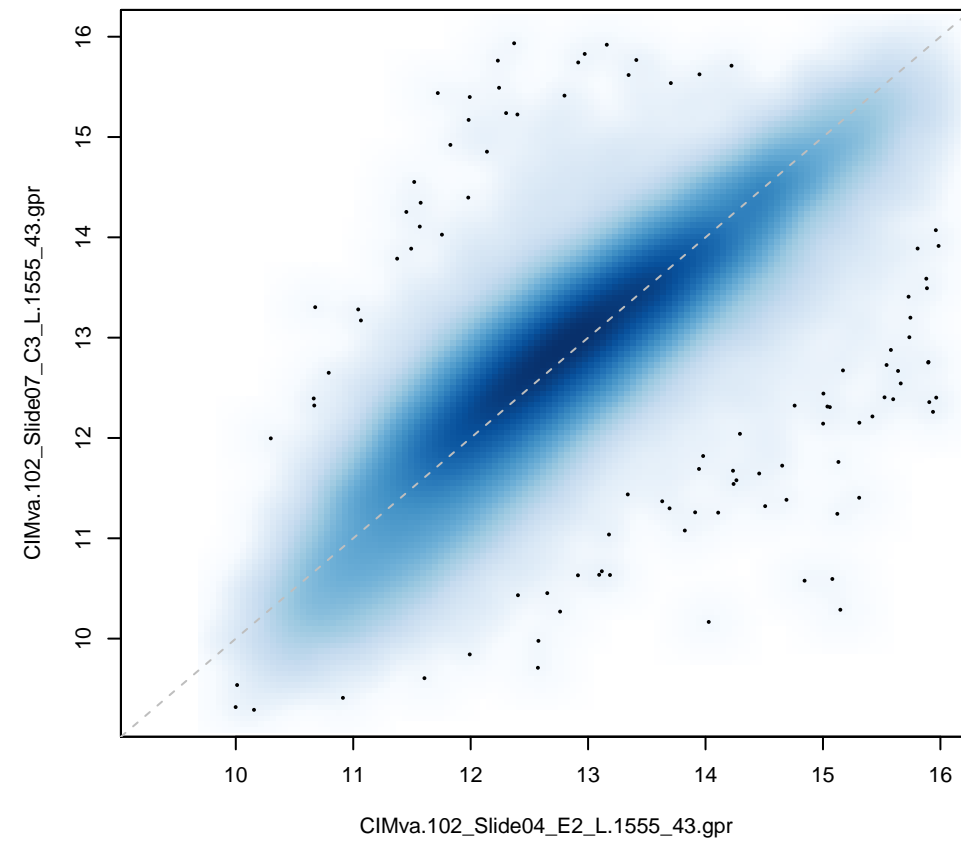

Replicate scatter (normalized) for sample: 1555 (CFS)  
Correlation coefficient: 0.88 (Pearson); 0.9 (Spearman)

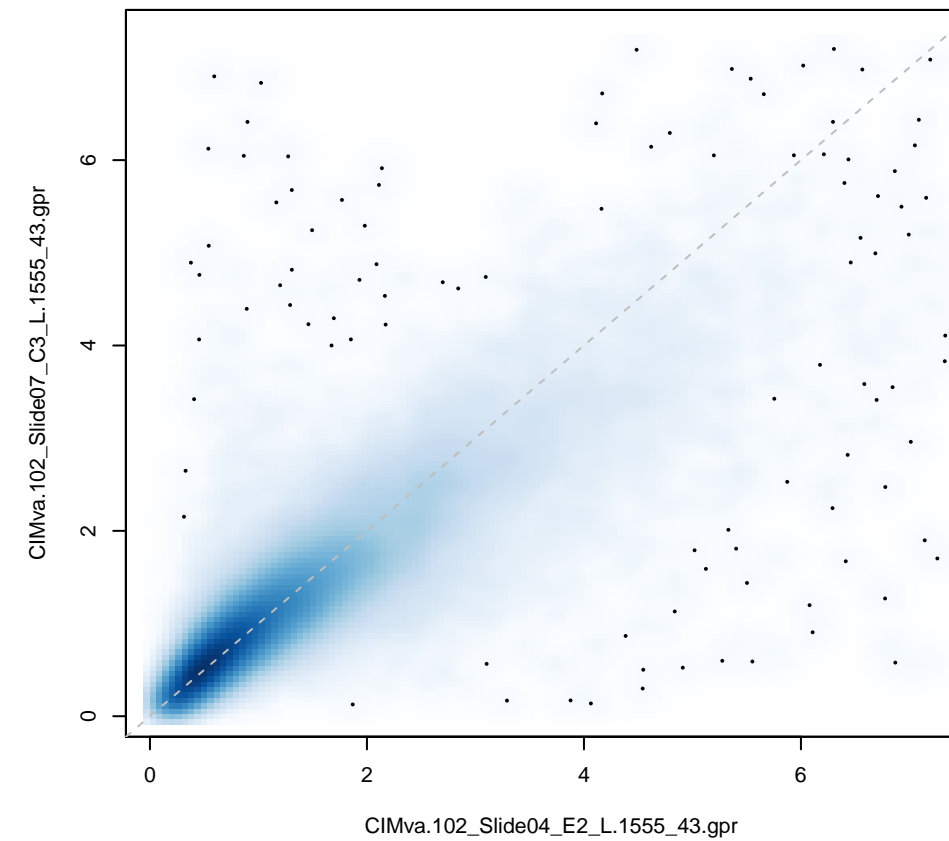

Replicate scatter (normalized; log2) for sample: 1555 (CFS)  
Correlation coefficient: 0.9 (Pearson); 0.9 (Spearman)

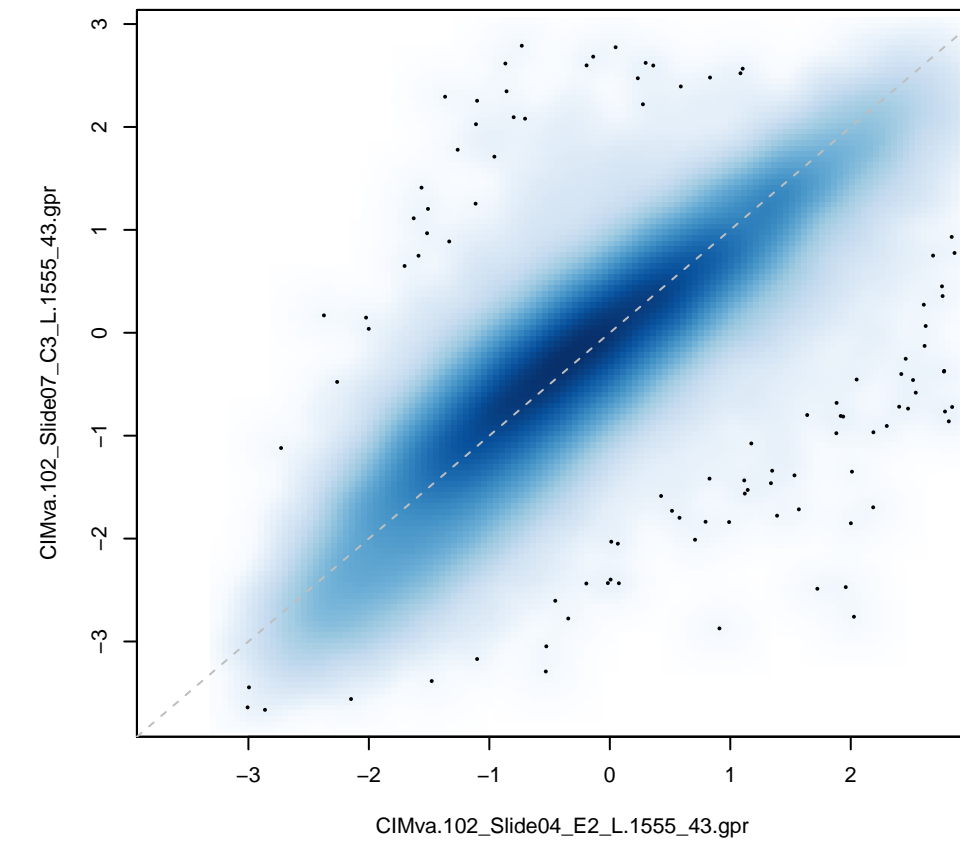

Replicate densities (raw) for sample: 1556 (CFS)

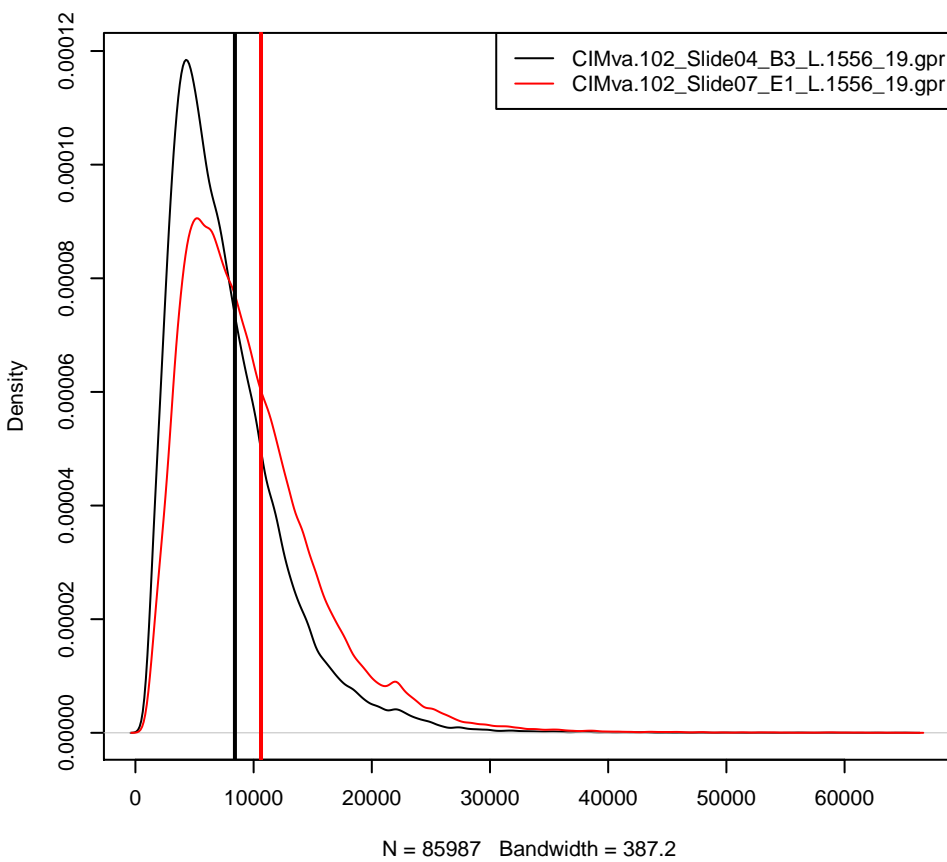

Replicate densities (raw; log2) for sample: 1556 (CFS)

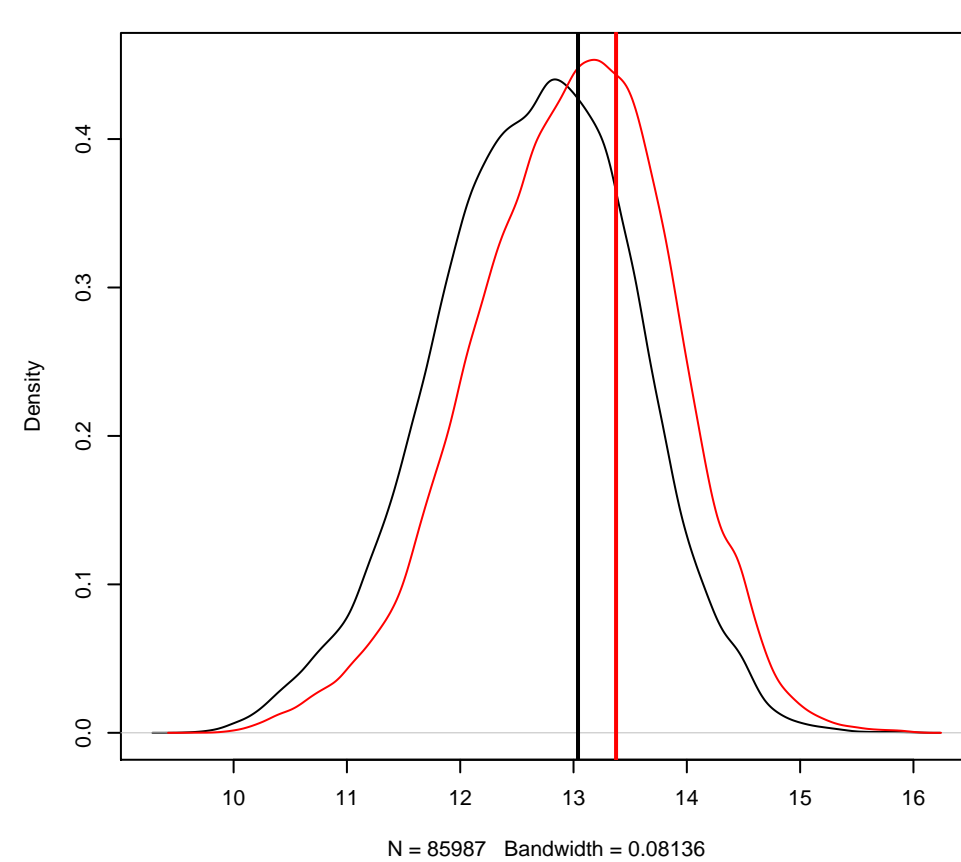

Replicate densities (normalized) for sample: 1556 (CFS)

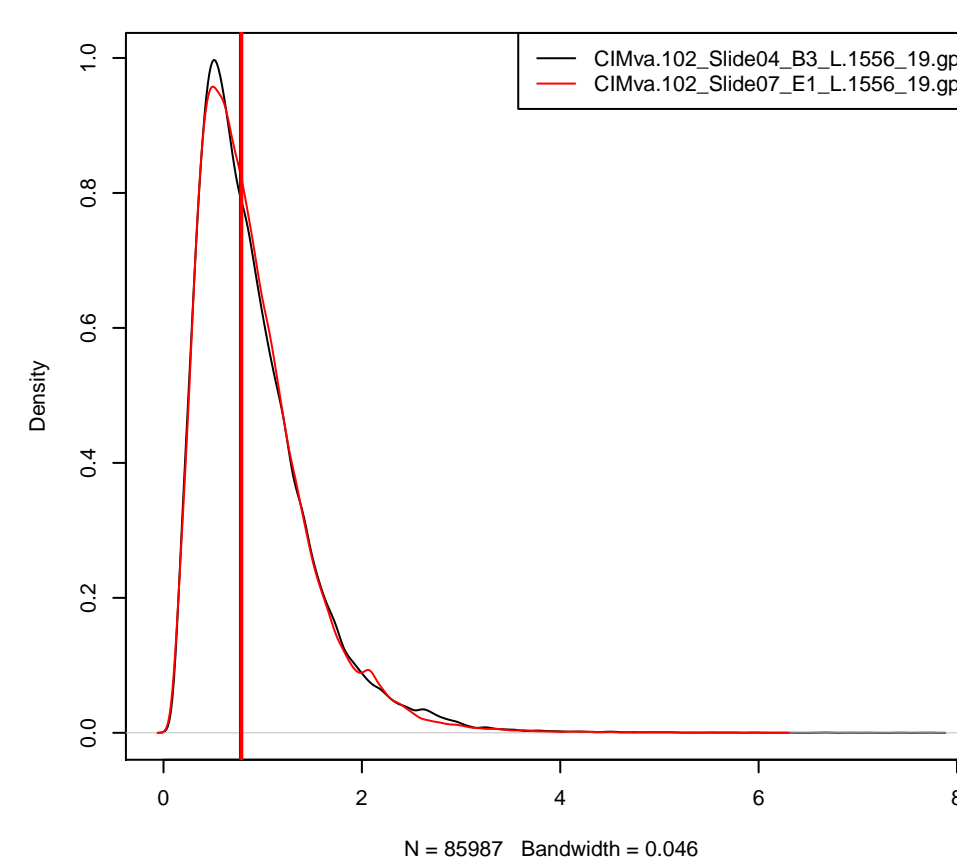

Replicate densities (normalized; log2) for sample: 1556 (CFS)

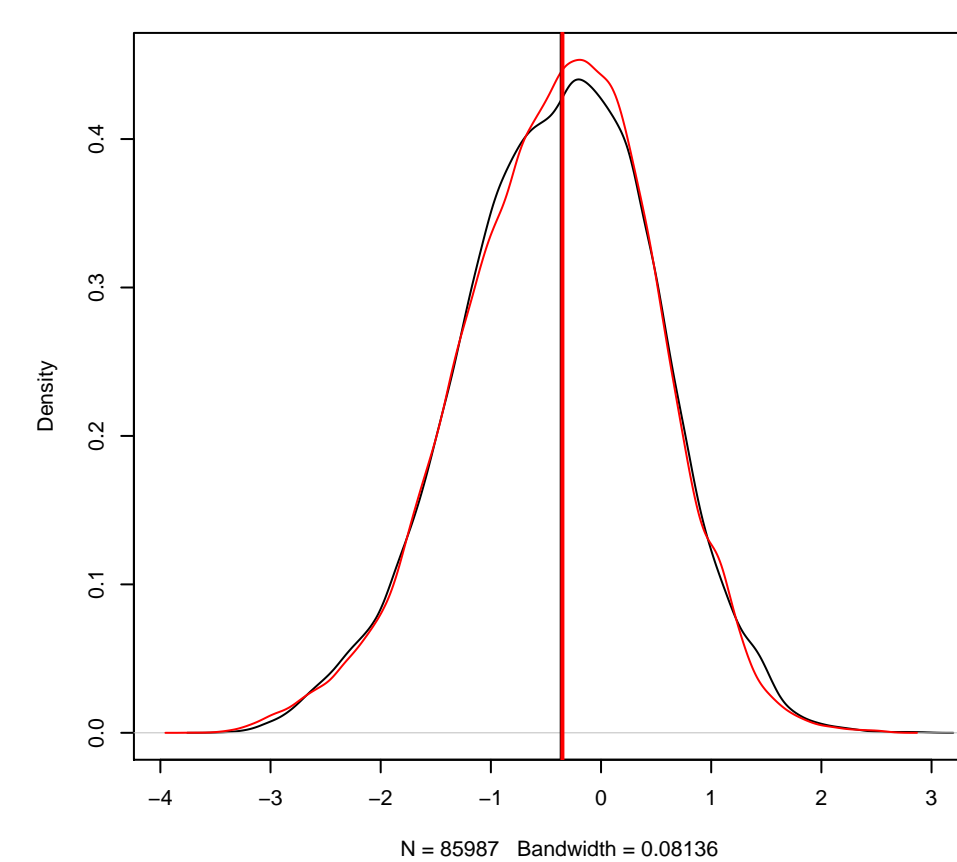

Replicate scatter (raw) for sample: 1556 (CFS)  
Correlation coefficient: 0.84 (Pearson); 0.91 (Spearman)

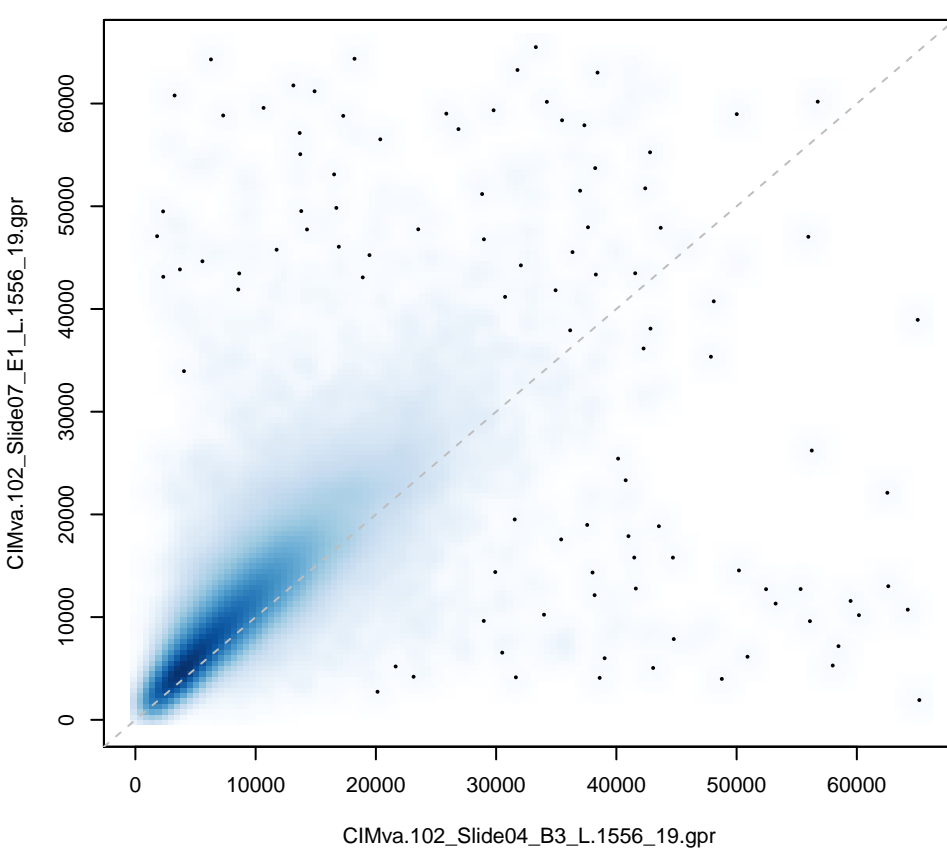

Replicate scatter (raw; log2) for sample: 1556 (CFS)  
Correlation coefficient: 0.91 (Pearson); 0.91 (Spearman)

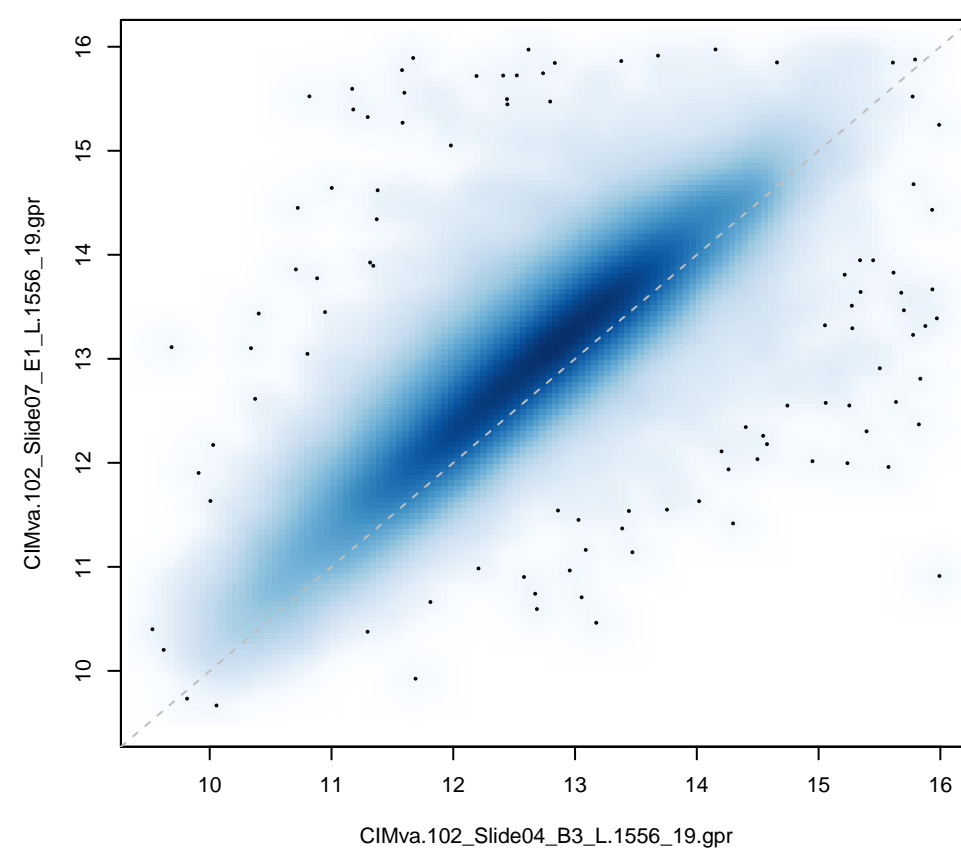

Replicate scatter (normalized) for sample: 1556 (CFS)  
Correlation coefficient: 0.84 (Pearson); 0.91 (Spearman)

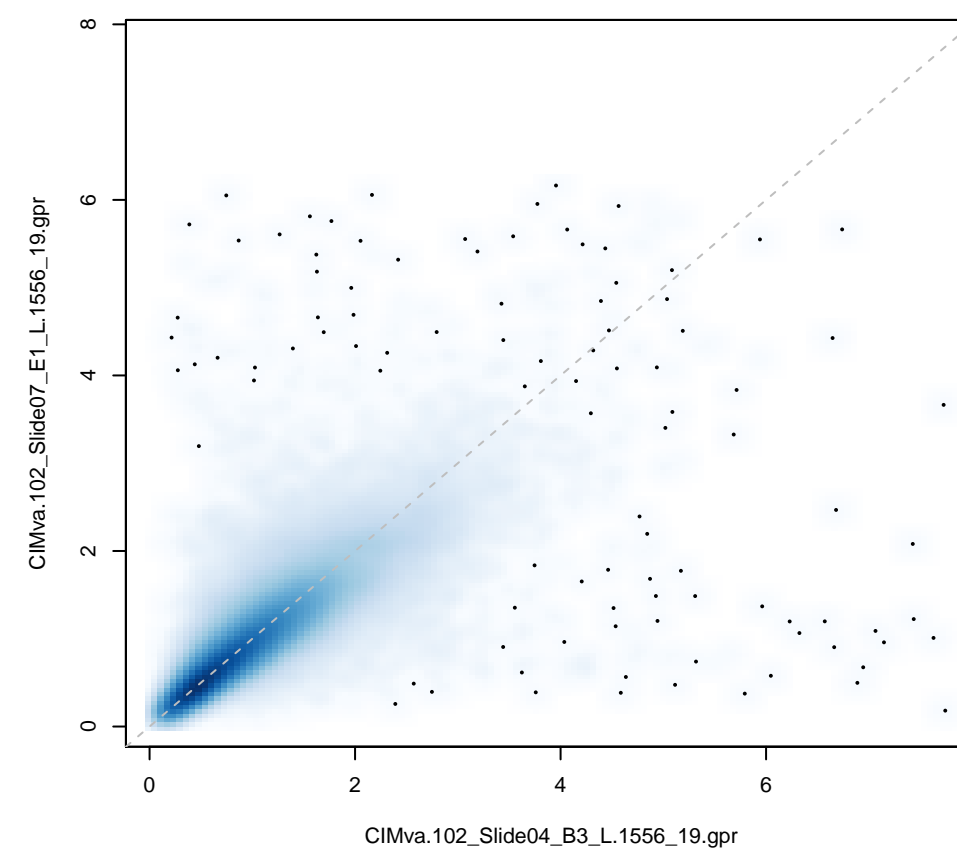

Replicate scatter (normalized; log2) for sample: 1556 (CFS)  
Correlation coefficient: 0.89 (Pearson); 0.91 (Spearman)

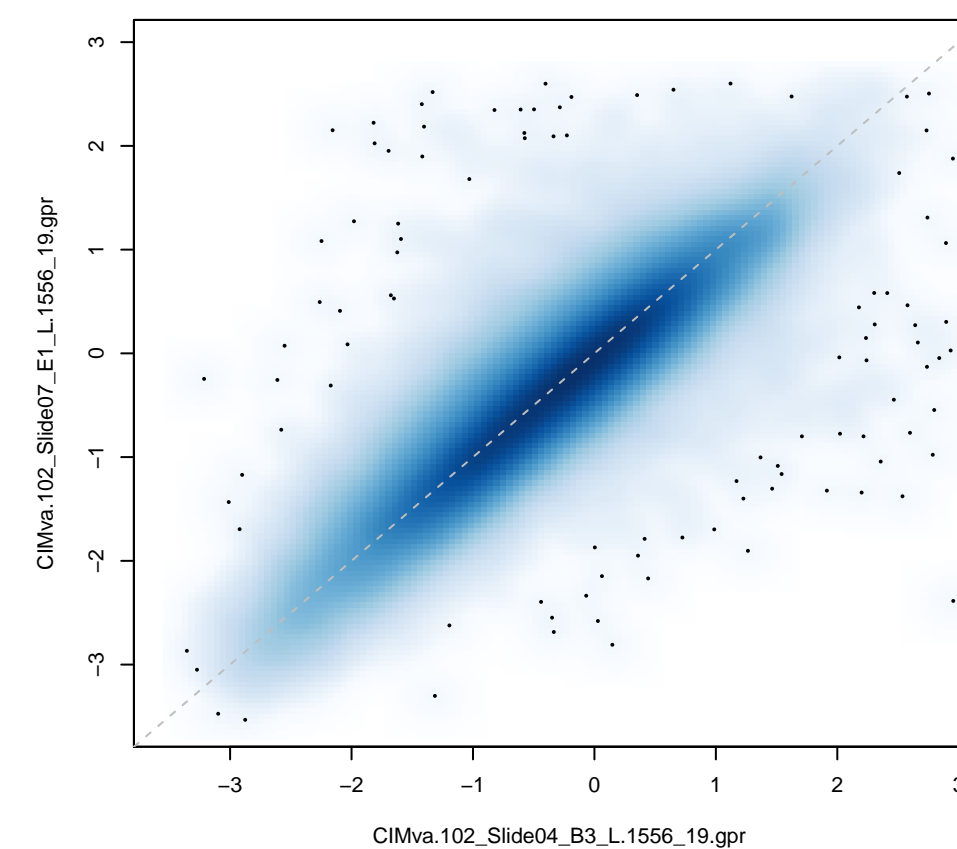

Replicate densities (raw) for sample: 1606 (Controls)

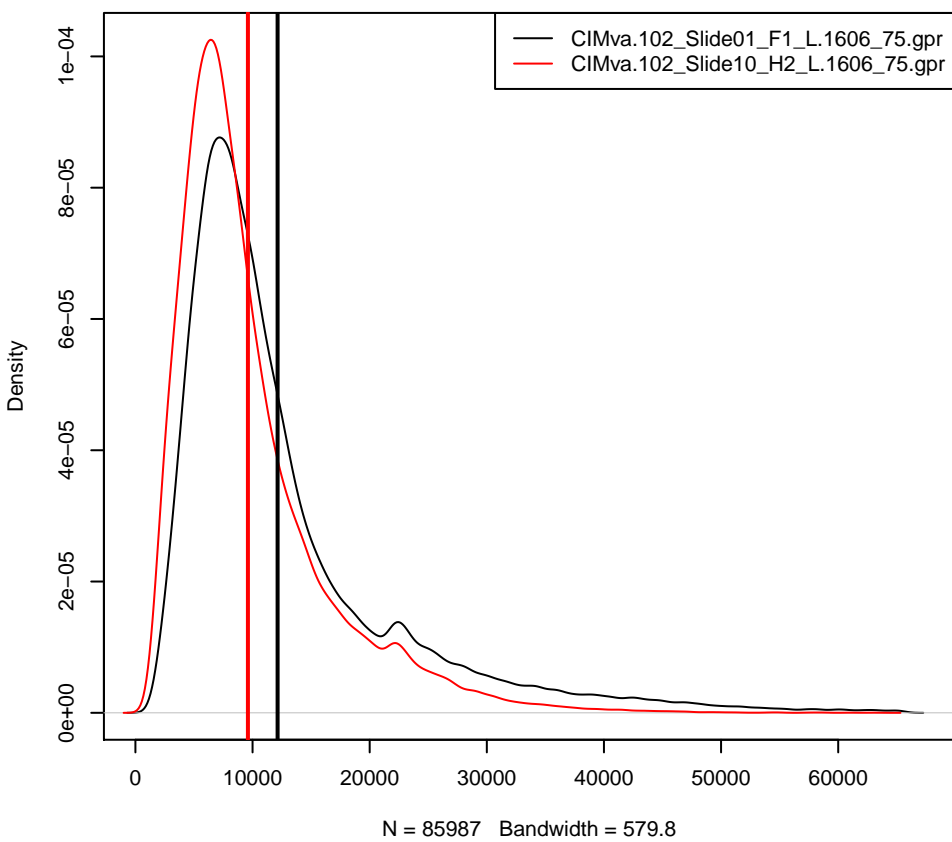

Replicate densities (raw; log2) for sample: 1606 (Controls)

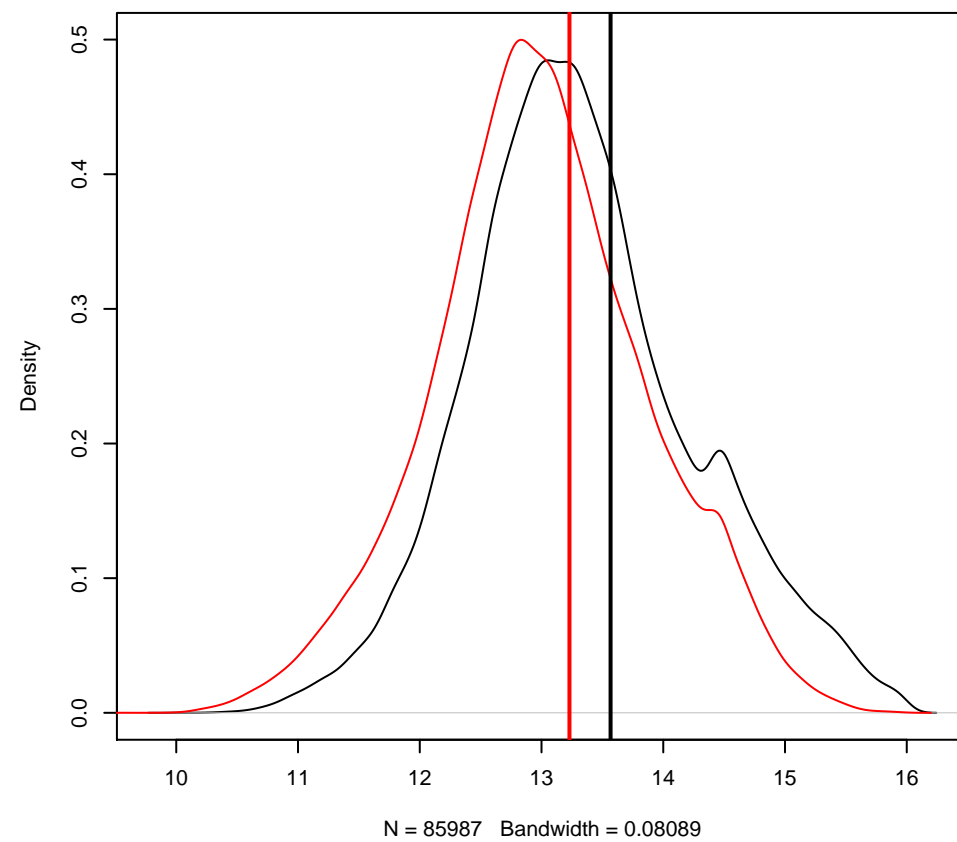

Replicate densities (normalized) for sample: 1606 (Controls)

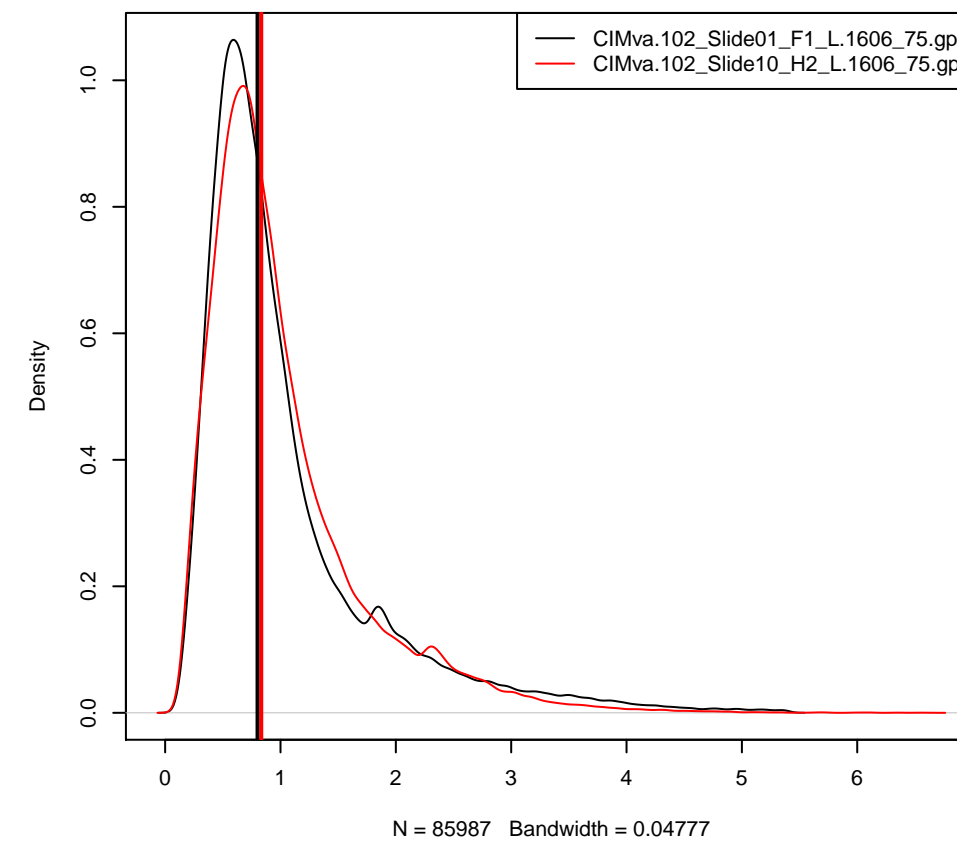

Replicate densities (normalized; log2) for sample: 1606 (Controls)

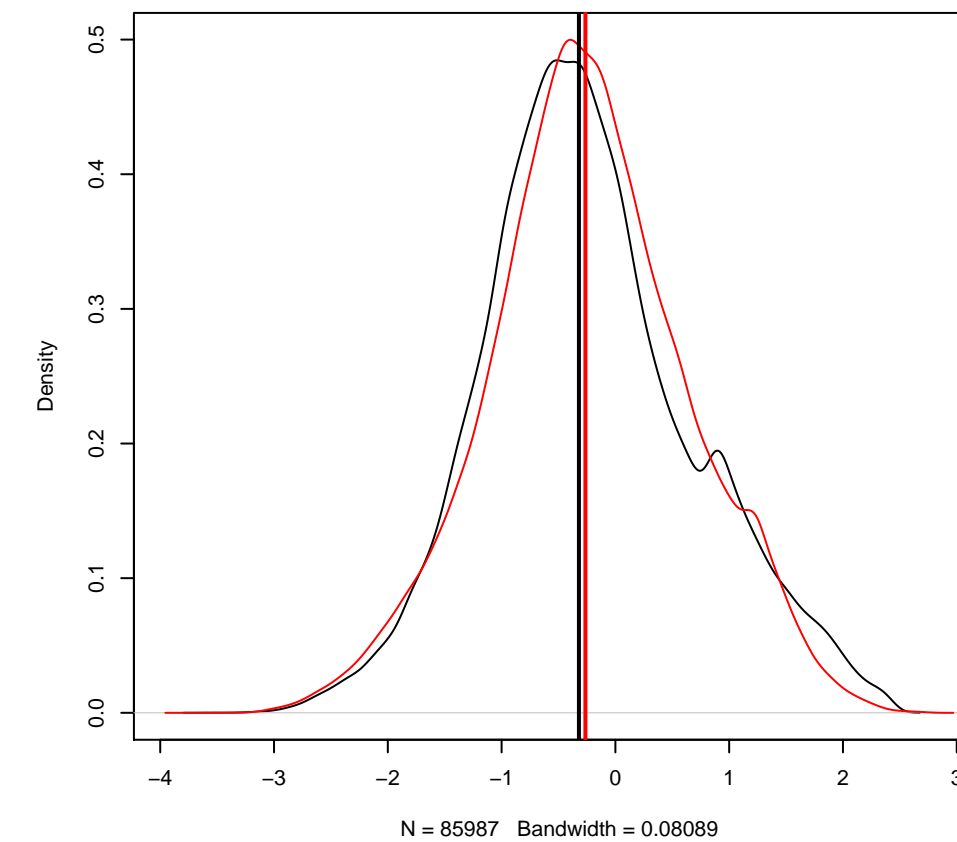

Replicate scatter (raw) for sample: 1606 (Controls)  
Correlation coefficient: 0.87 (Pearson); 0.85 (Spearman)

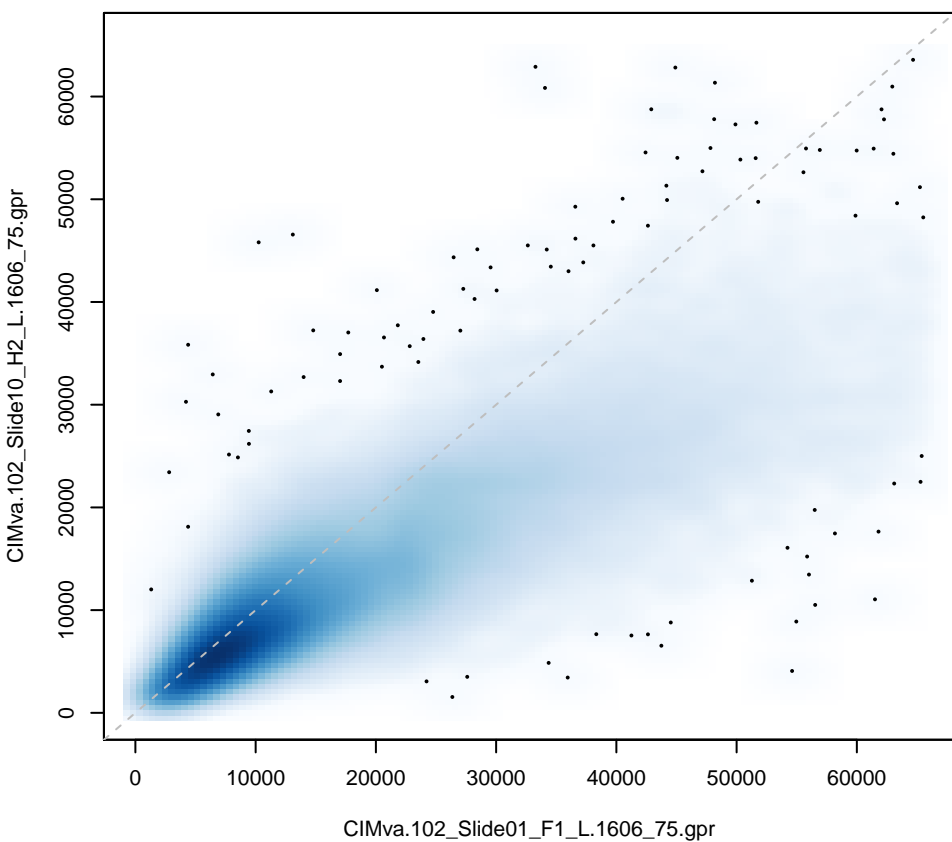

Replicate scatter (raw; log2) for sample: 1606 (Controls)  
Correlation coefficient: 0.87 (Pearson); 0.85 (Spearman)

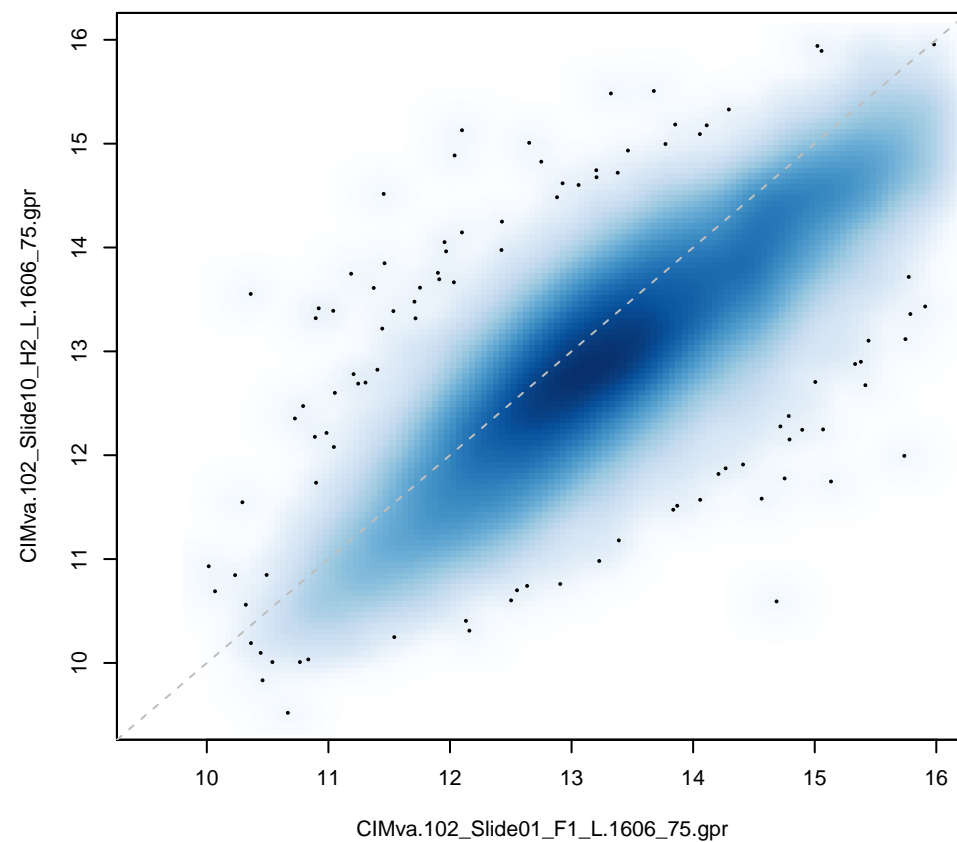

Replicate scatter (normalized) for sample: 1606 (Controls)  
Correlation coefficient: 0.87 (Pearson); 0.85 (Spearman)

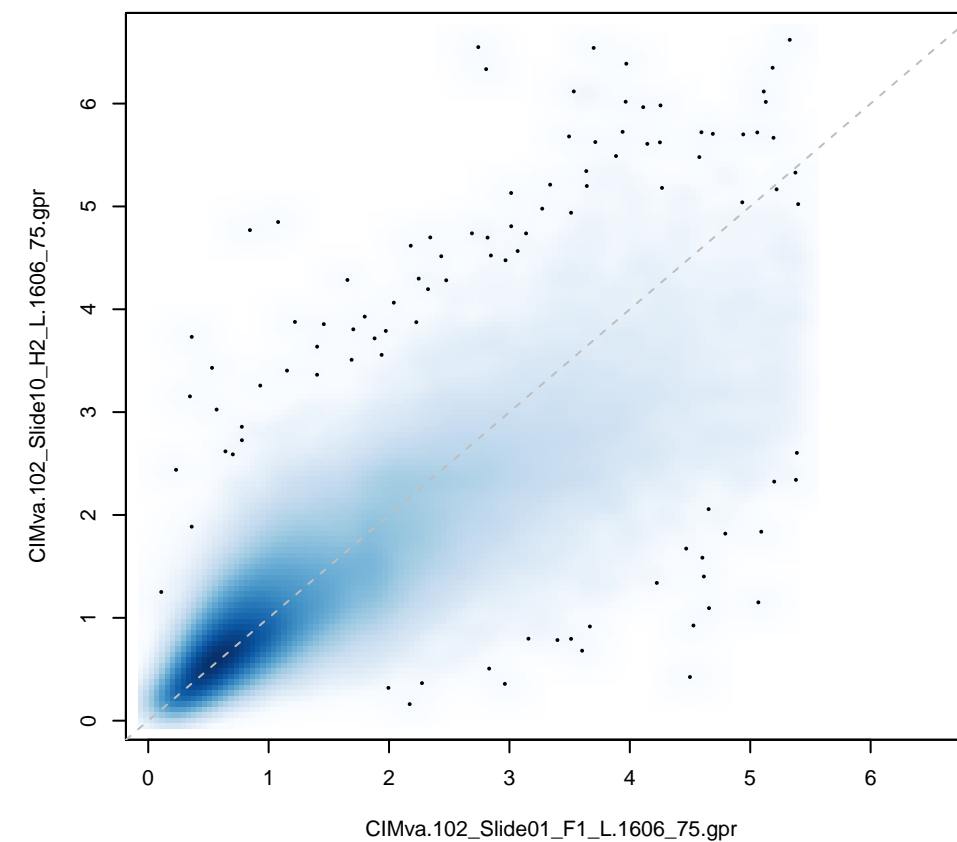

Replicate scatter (normalized; log2) for sample: 1606 (Controls)  
Correlation coefficient: 0.87 (Pearson); 0.85 (Spearman)

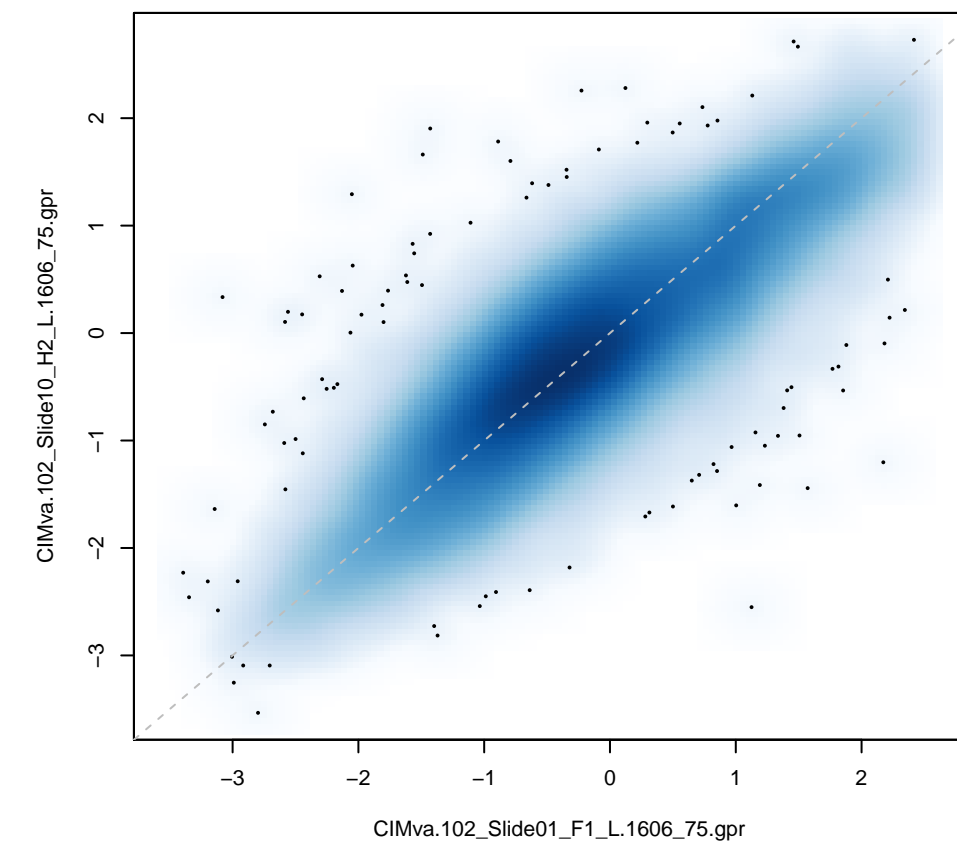

Replicate densities (raw) for sample: 2092 (Controls)

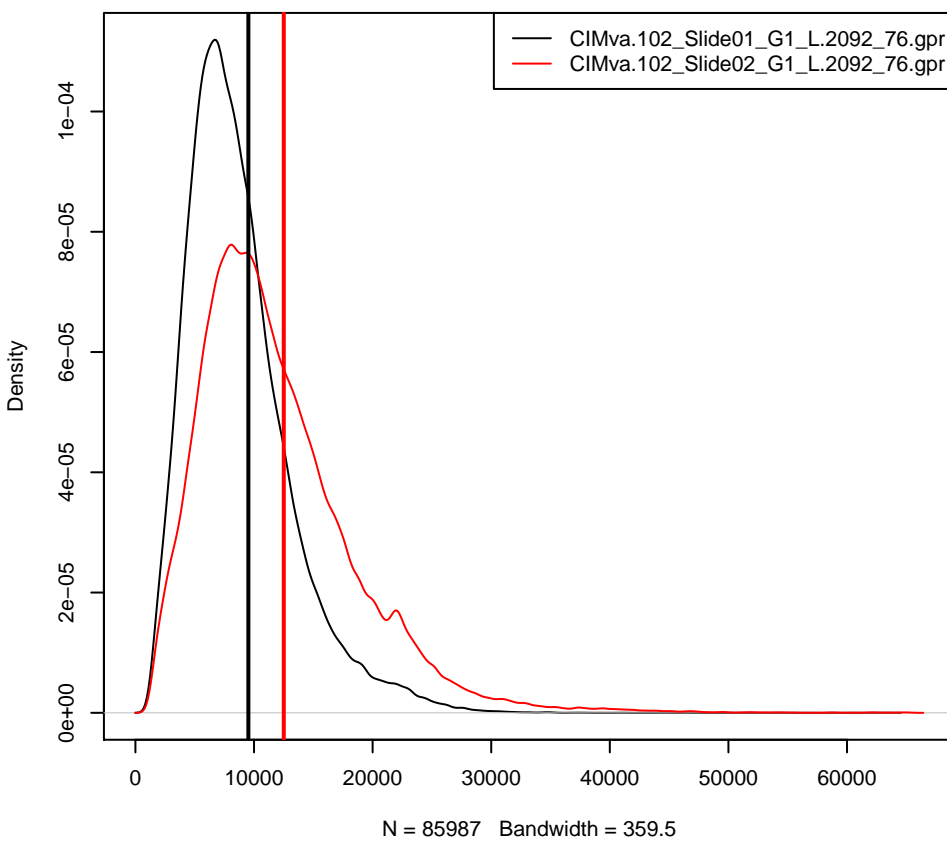

Replicate densities (raw; log2) for sample: 2092 (Controls)

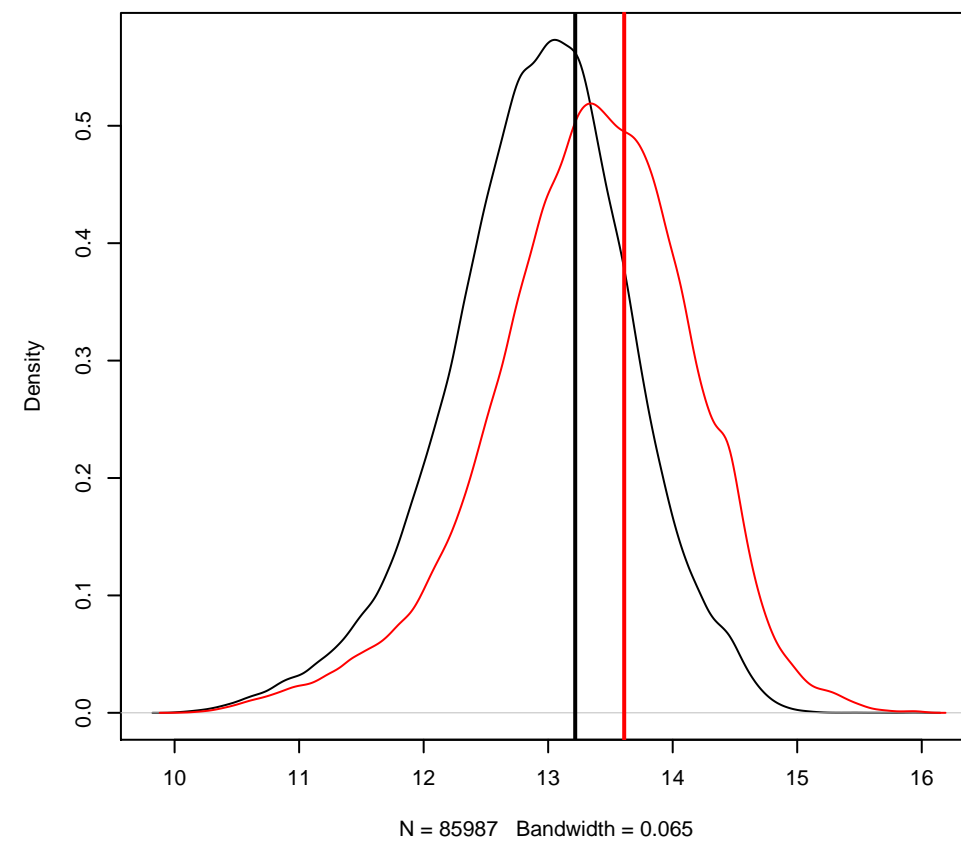

Replicate densities (normalized) for sample: 2092 (Controls)

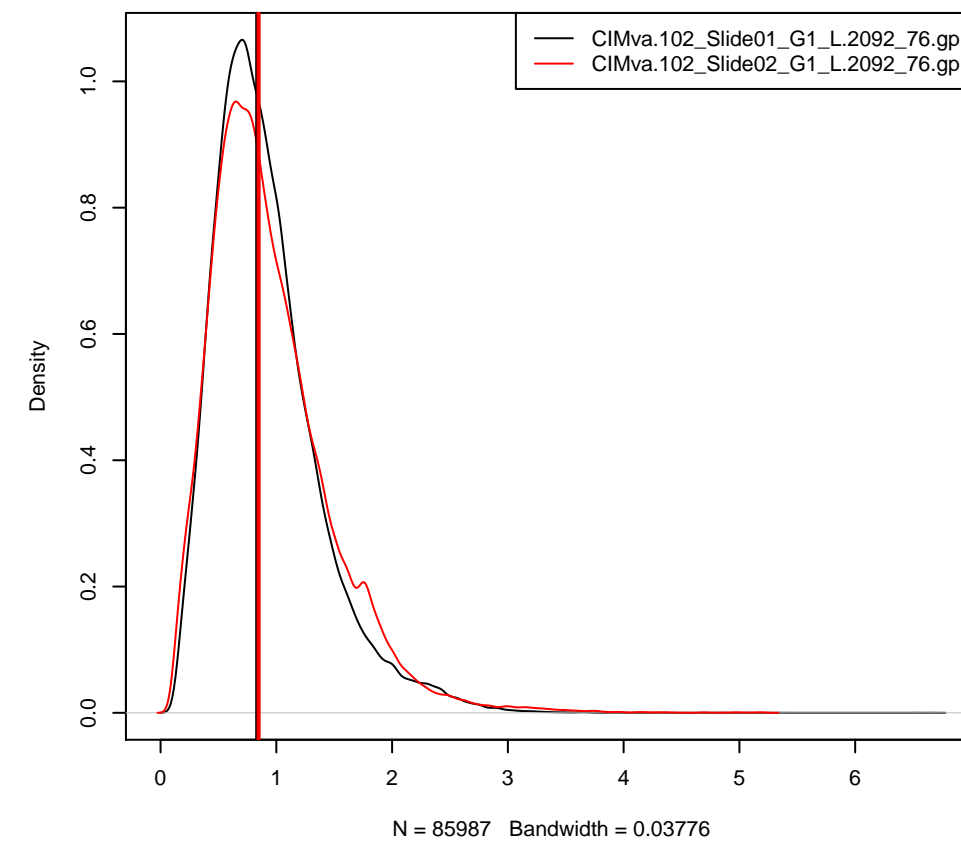

Replicate densities (normalized; log2) for sample: 2092 (Controls)

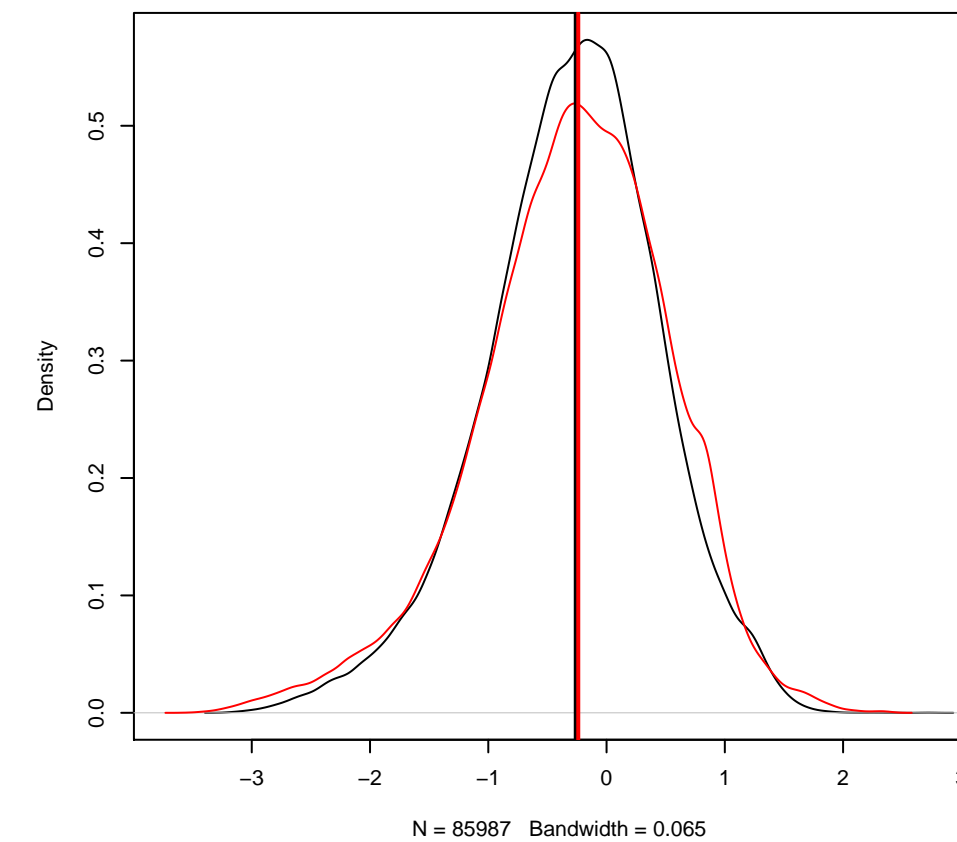

Replicate scatter (raw) for sample: 2092 (Controls)  
Correlation coefficient: 0.84 (Pearson); 0.87 (Spearman)

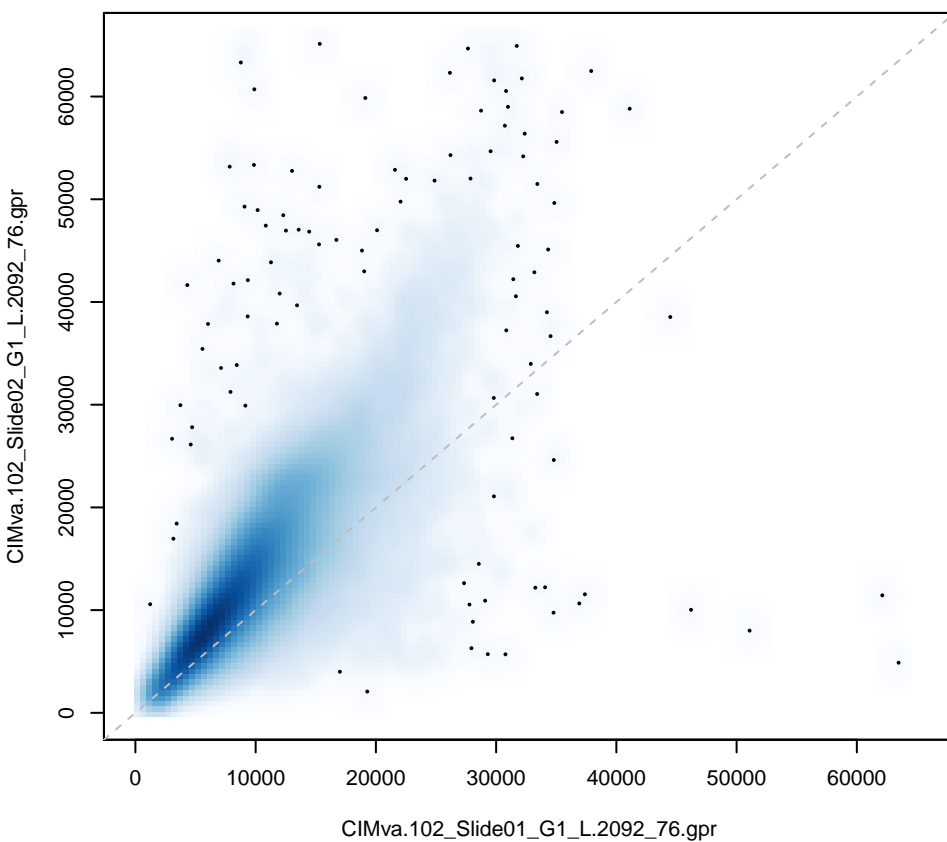

Replicate scatter (raw; log2) for sample: 2092 (Controls)  
Correlation coefficient: 0.88 (Pearson); 0.87 (Spearman)

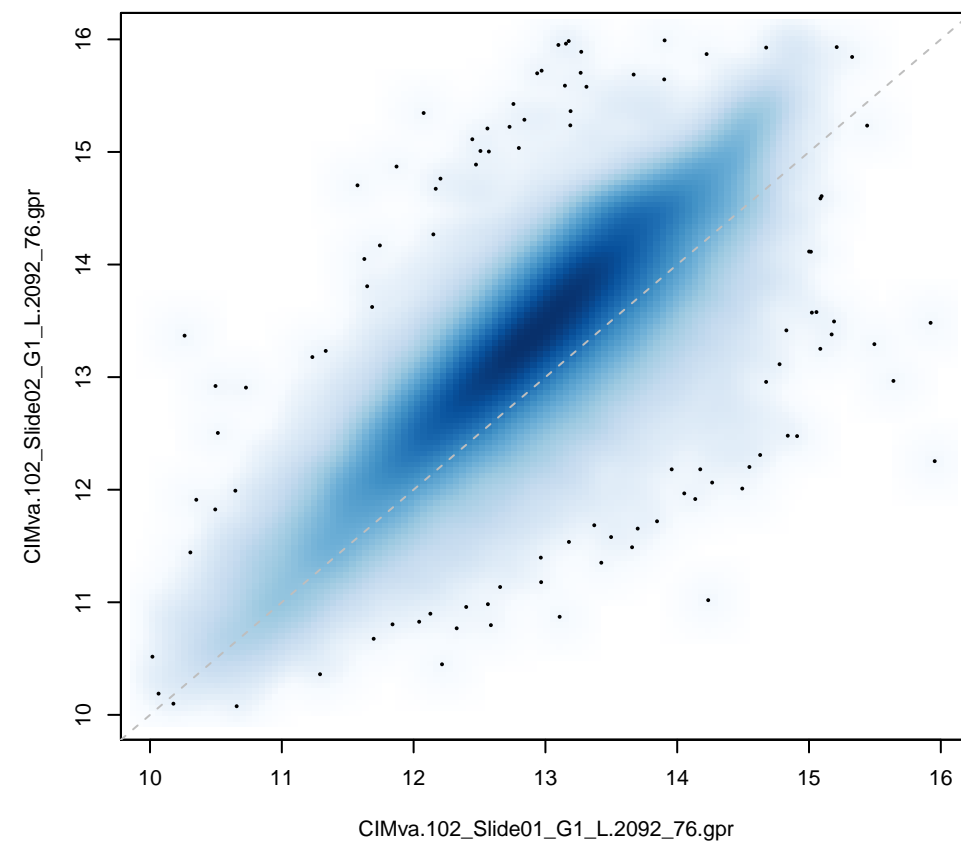

Replicate scatter (normalized) for sample: 2092 (Controls)  
Correlation coefficient: 0.84 (Pearson); 0.87 (Spearman)

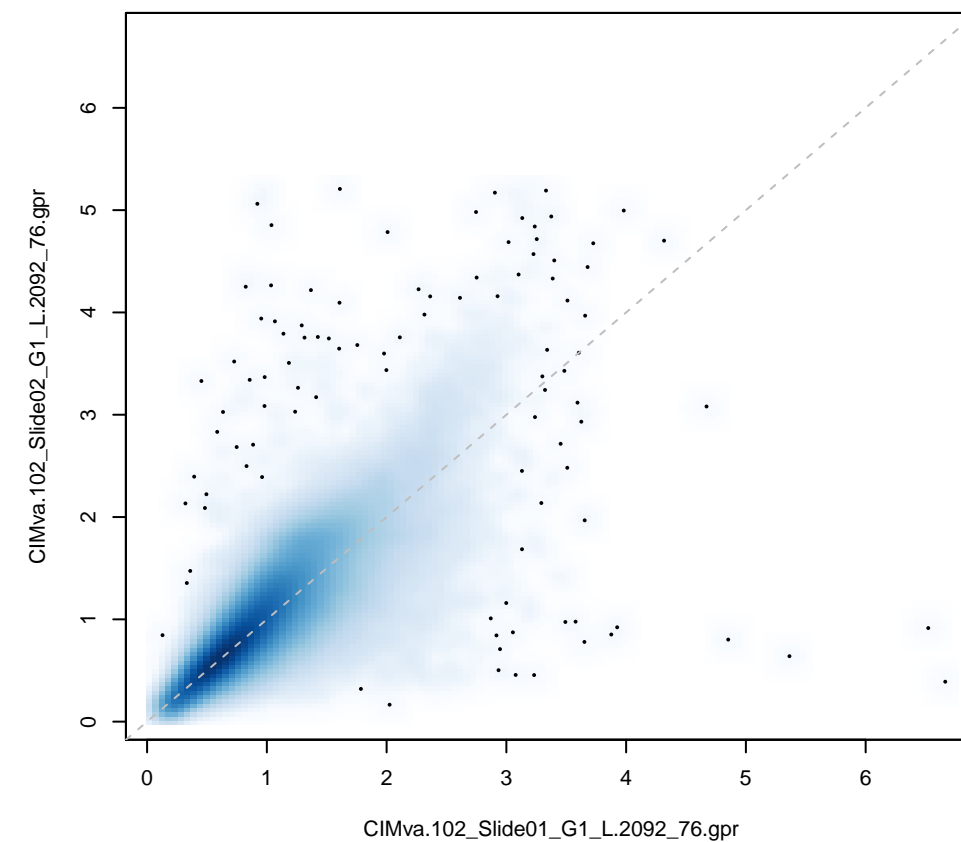

Replicate scatter (normalized; log2) for sample: 2092 (Controls)  
Correlation coefficient: 0.86 (Pearson); 0.87 (Spearman)

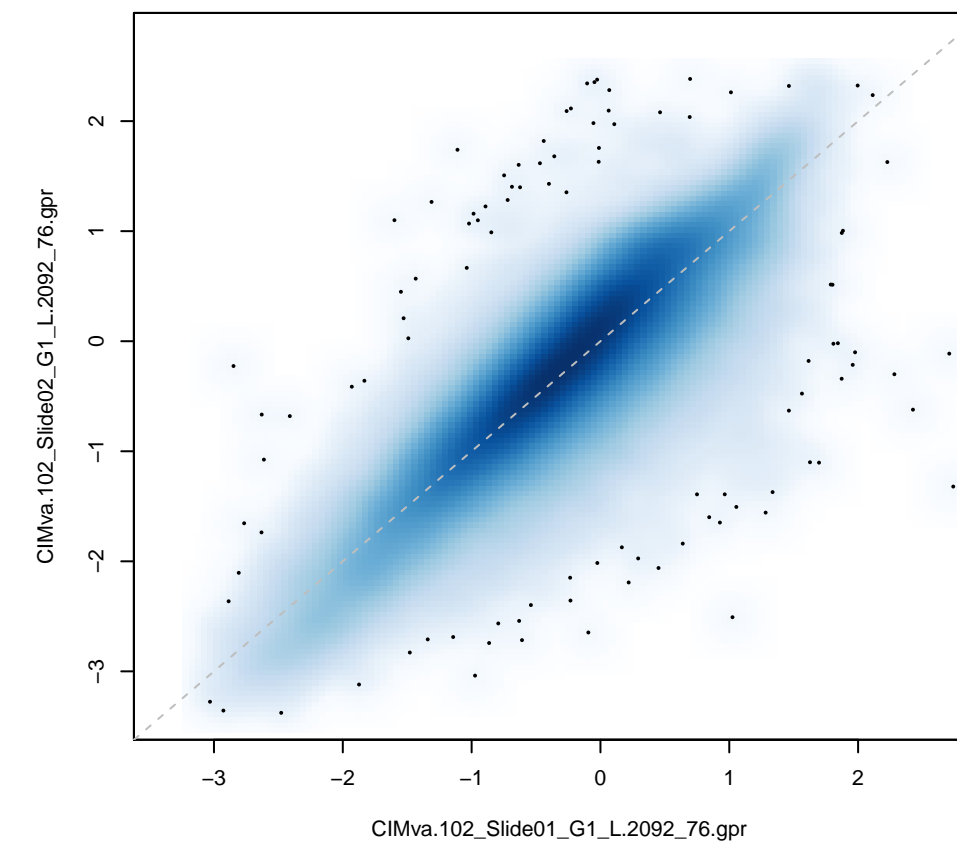

Replicate densities (raw) for sample: 2095 (Controls)

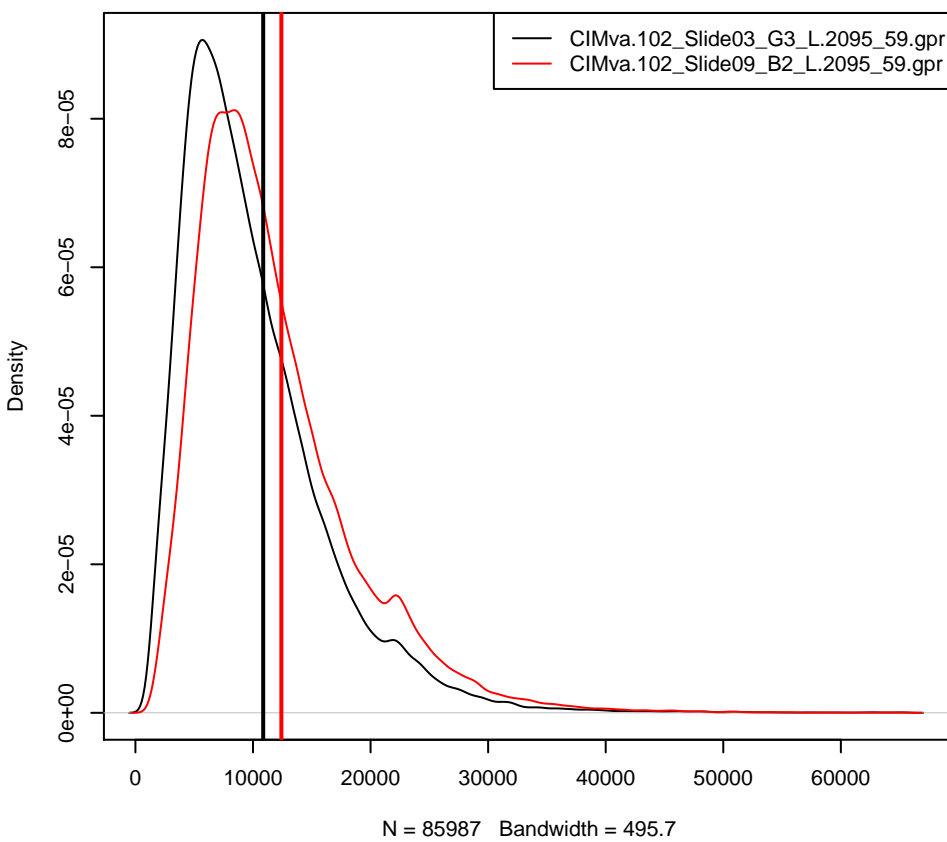

Replicate densities (raw; log2) for sample: 2095 (Controls)

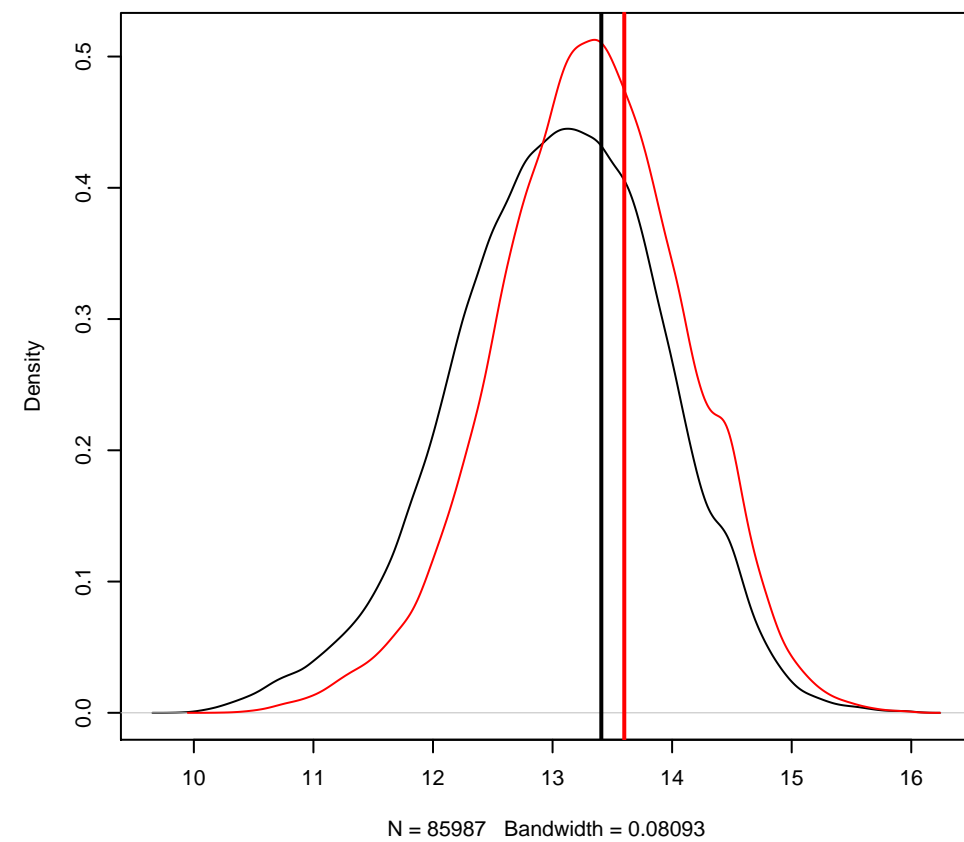

Replicate densities (normalized) for sample: 2095 (Controls)

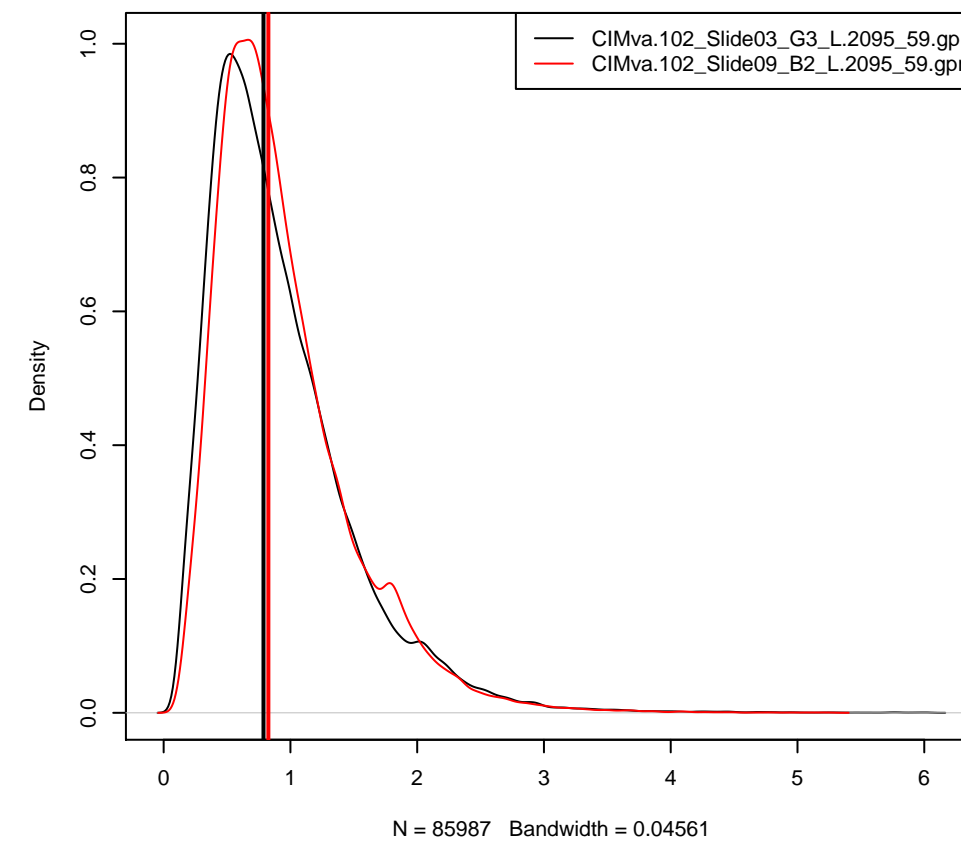

Replicate densities (normalized; log2) for sample: 2095 (Controls)

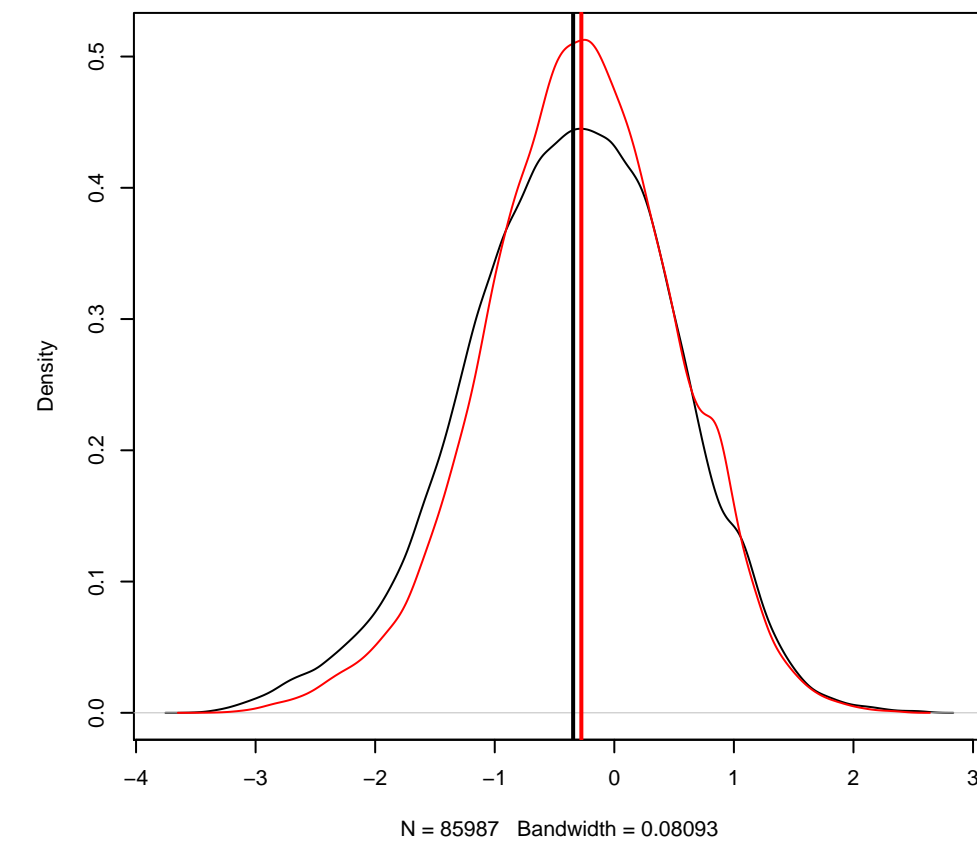

Replicate scatter (raw) for sample: 2095 (Controls)  
Correlation coefficient: 0.76 (Pearson); 0.82 (Spearman)

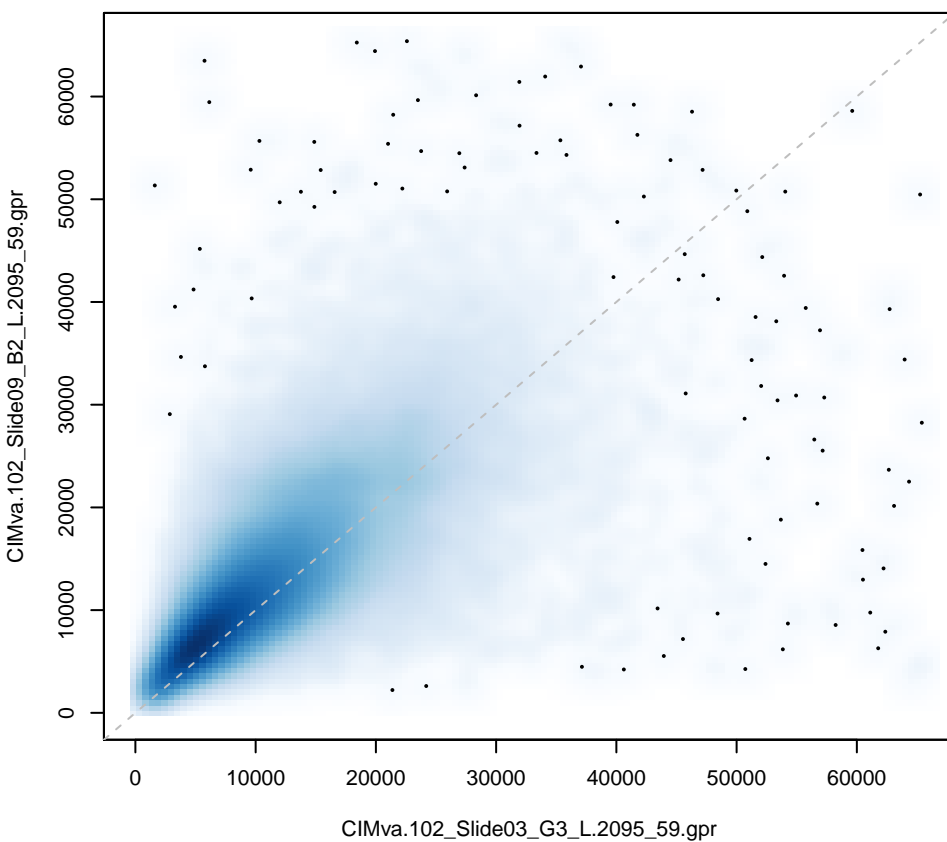

Replicate scatter (raw; log2) for sample: 2095 (Controls)  
Correlation coefficient: 0.83 (Pearson); 0.82 (Spearman)

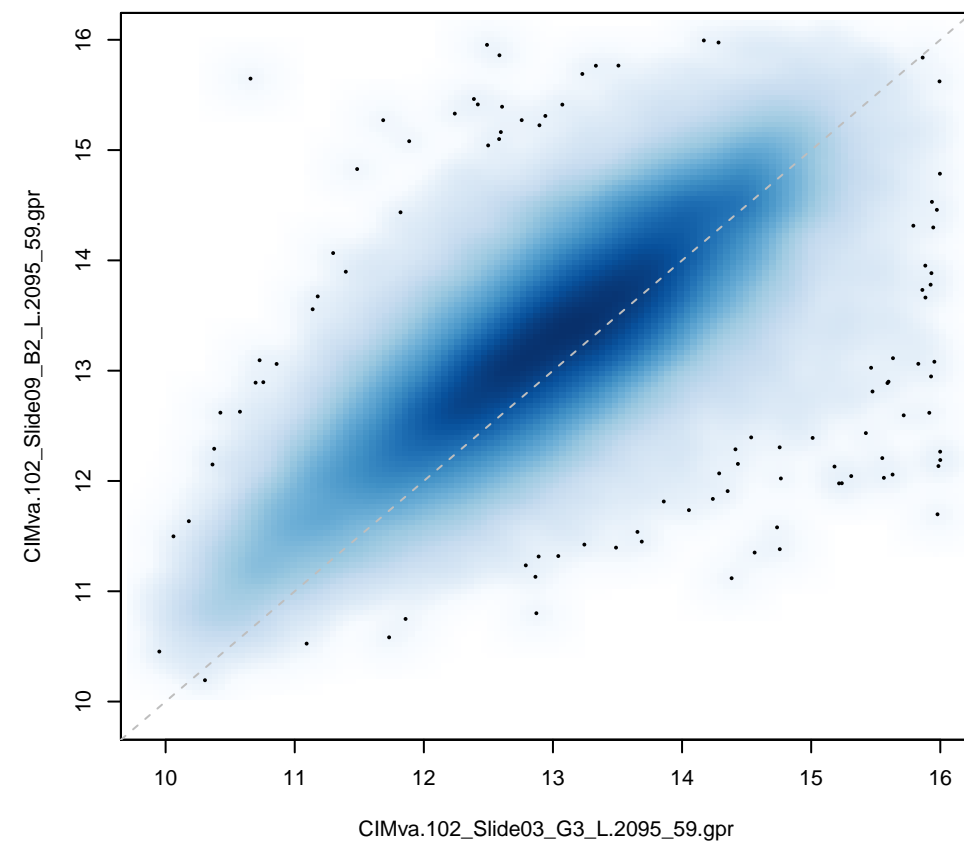

Replicate scatter (normalized) for sample: 2095 (Controls)  
Correlation coefficient: 0.76 (Pearson); 0.82 (Spearman)

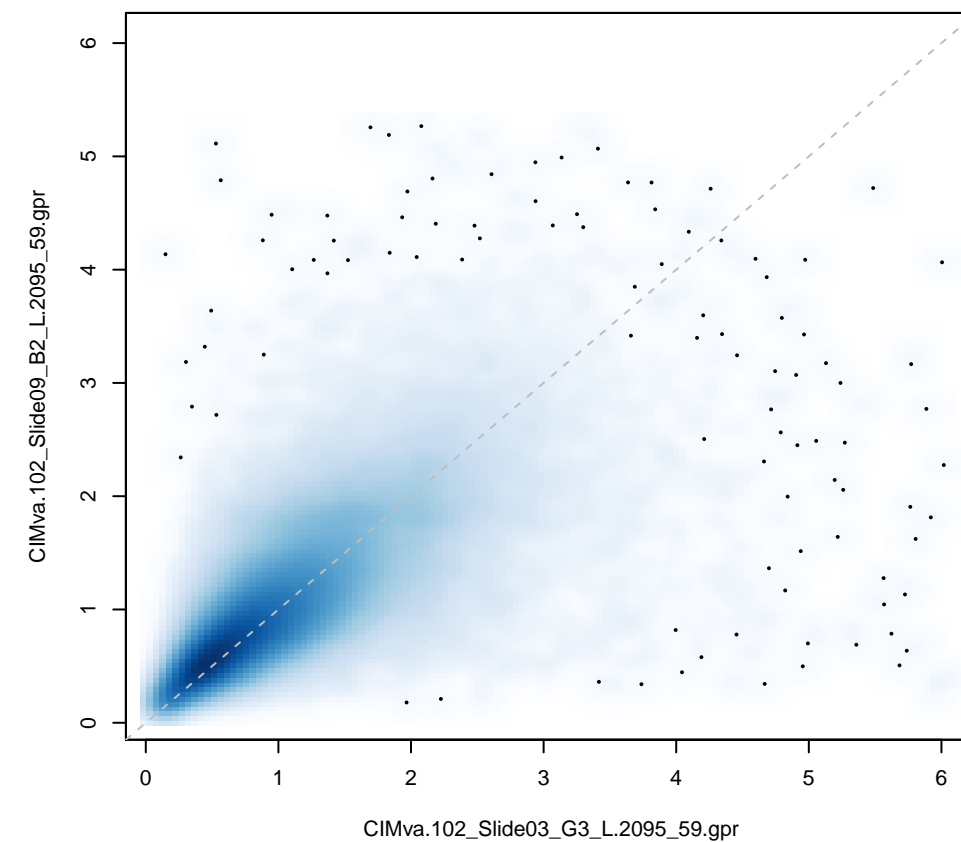

Replicate scatter (normalized; log2) for sample: 2095 (Controls)  
Correlation coefficient: 0.81 (Pearson); 0.82 (Spearman)

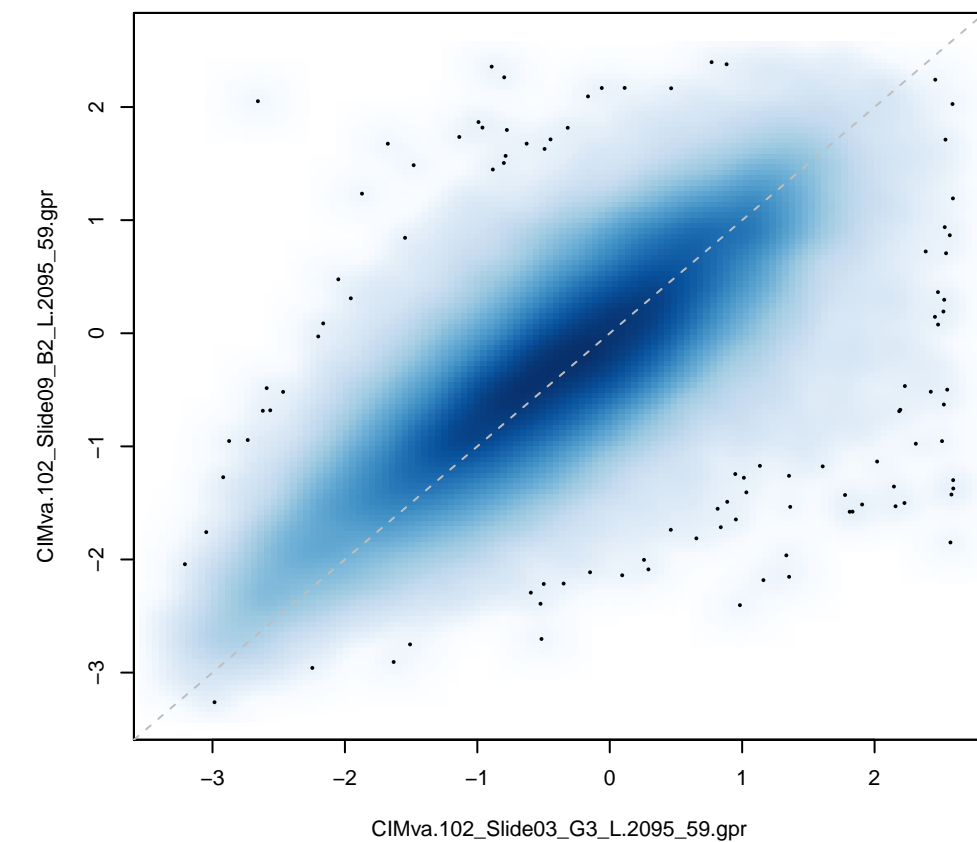

Replicate densities (raw) for sample: 2096 (CFS)

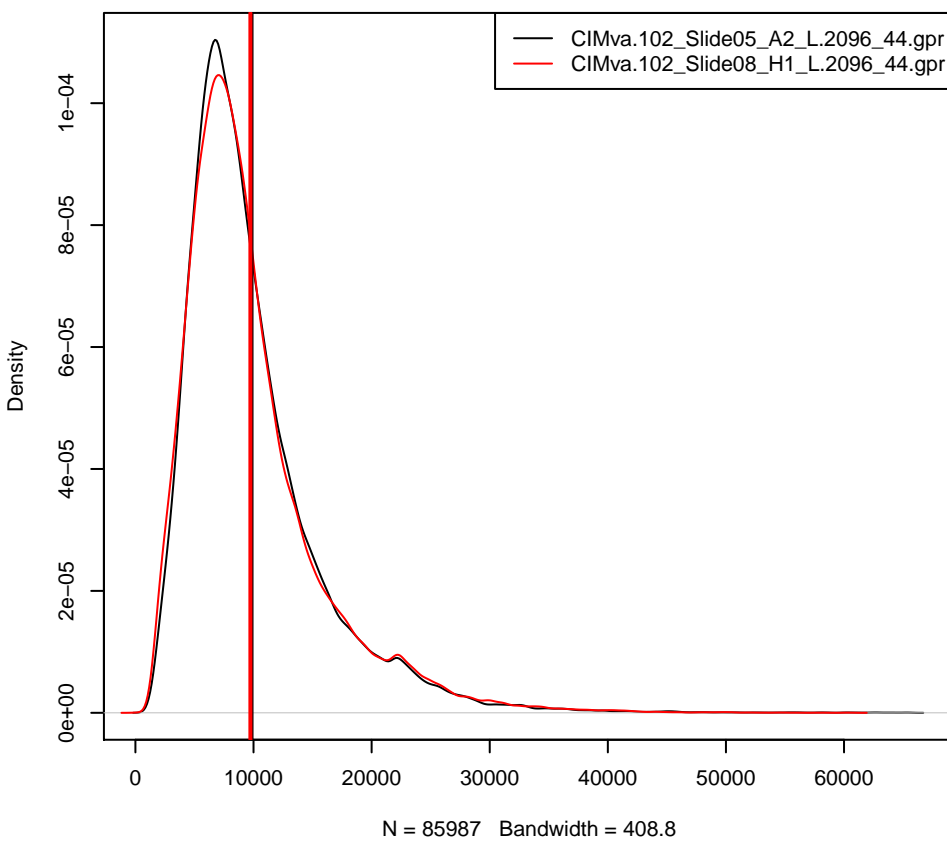

Replicate densities (raw; log2) for sample: 2096 (CFS)

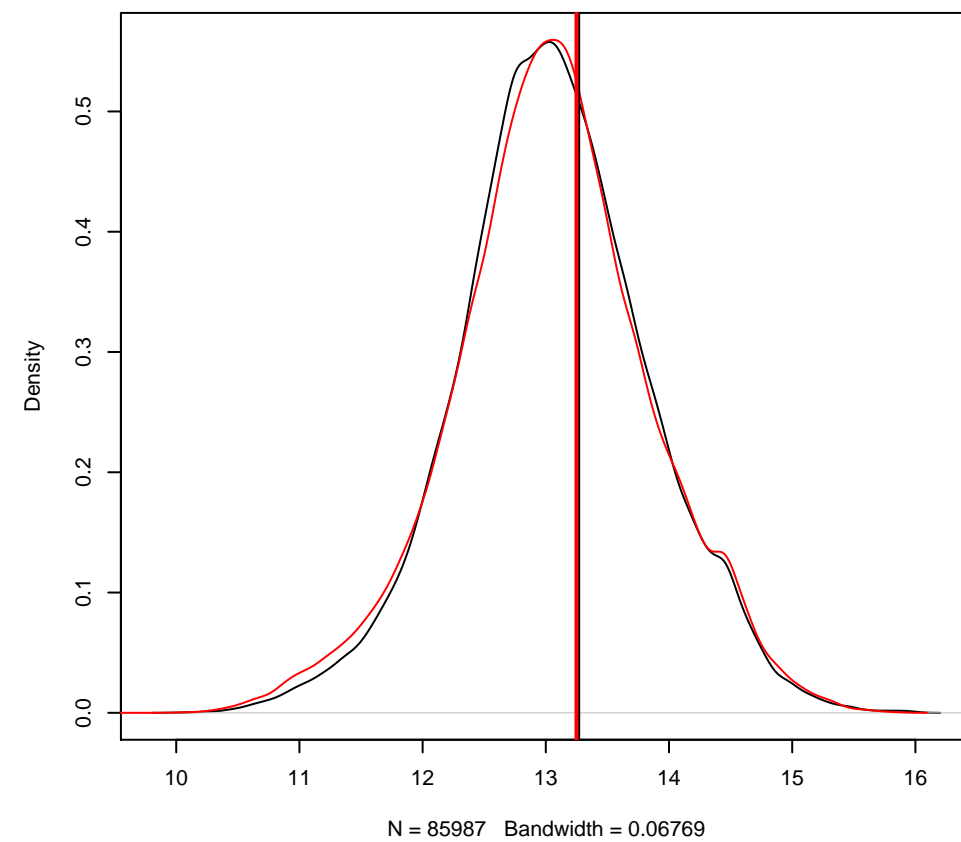

Replicate densities (normalized) for sample: 2096 (CFS)

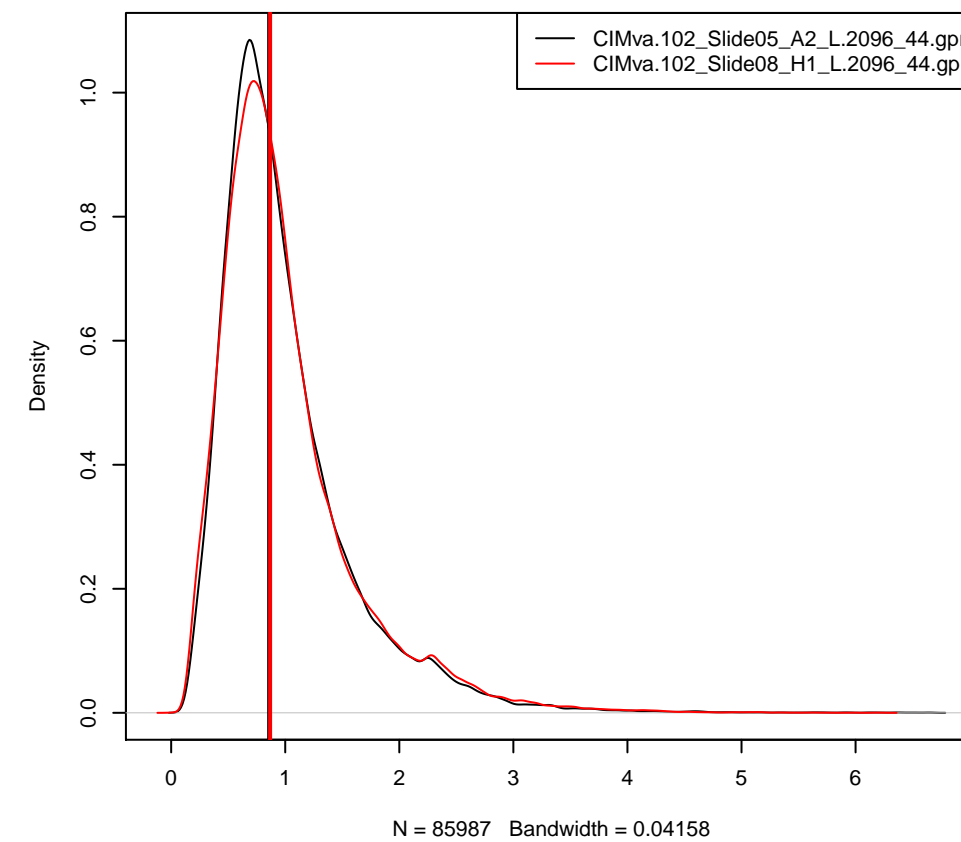

Replicate densities (normalized; log2) for sample: 2096 (CFS)

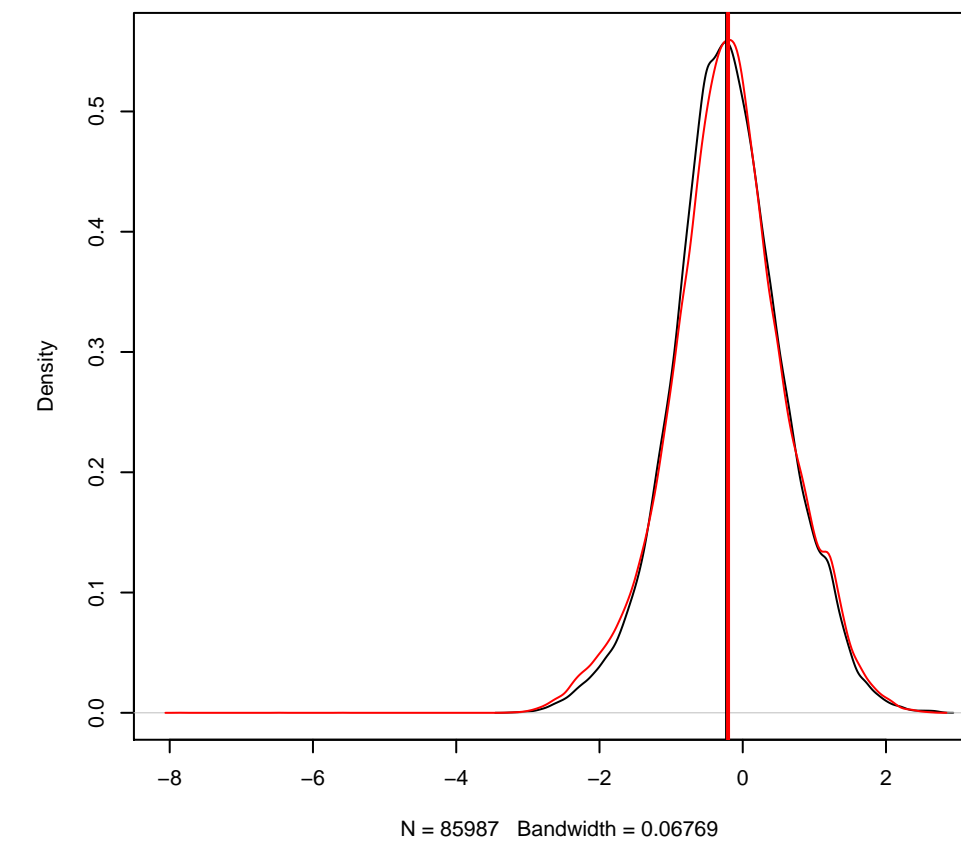

Replicate scatter (raw) for sample: 2096 (CFS)  
Correlation coefficient: 0.77 (Pearson); 0.79 (Spearman)

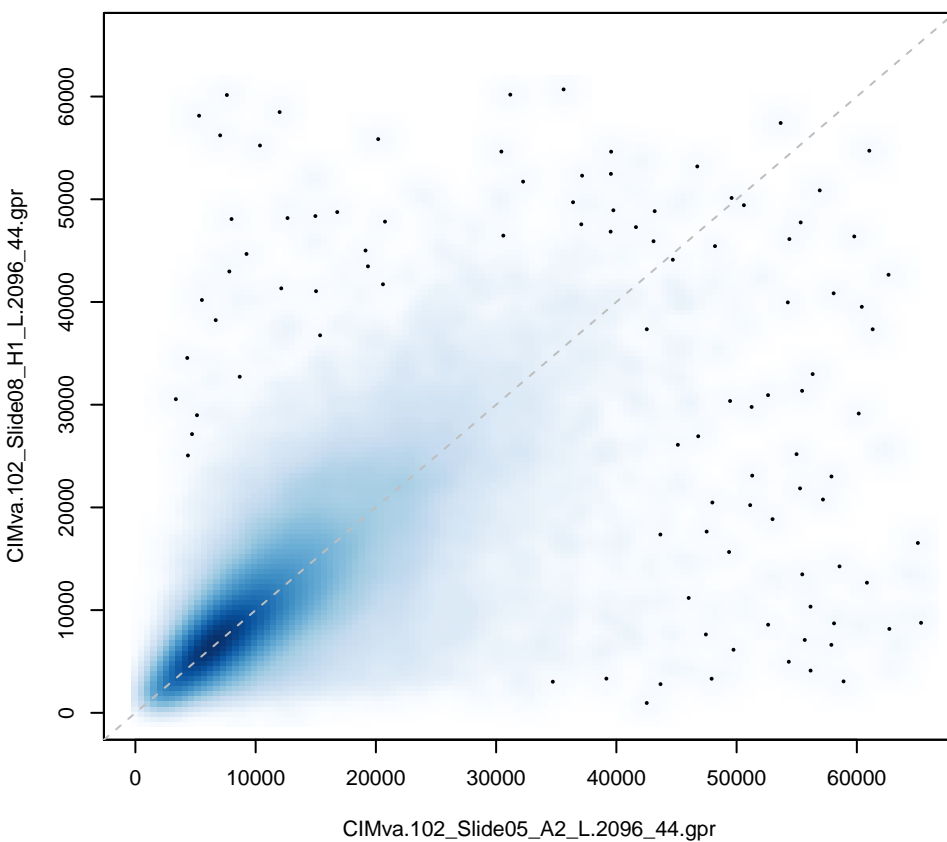

Replicate scatter (raw; log2) for sample: 2096 (CFS)  
Correlation coefficient: 0.8 (Pearson); 0.79 (Spearman)

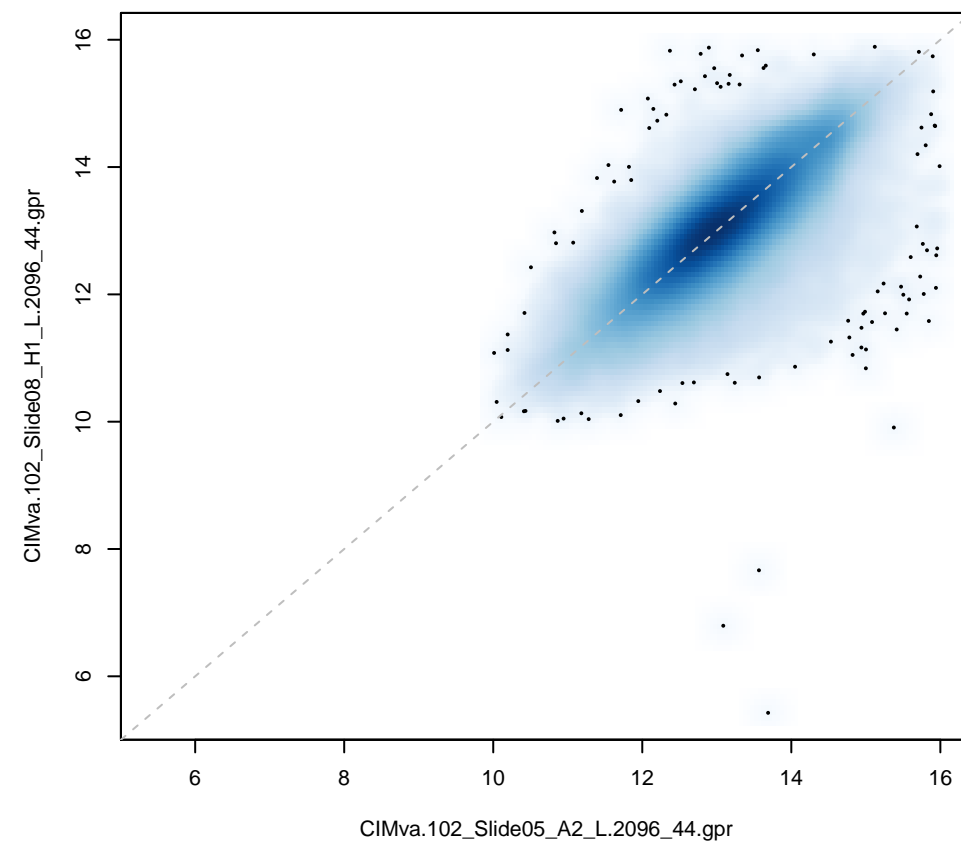

Replicate scatter (normalized) for sample: 2096 (CFS)  
Correlation coefficient: 0.77 (Pearson); 0.79 (Spearman)

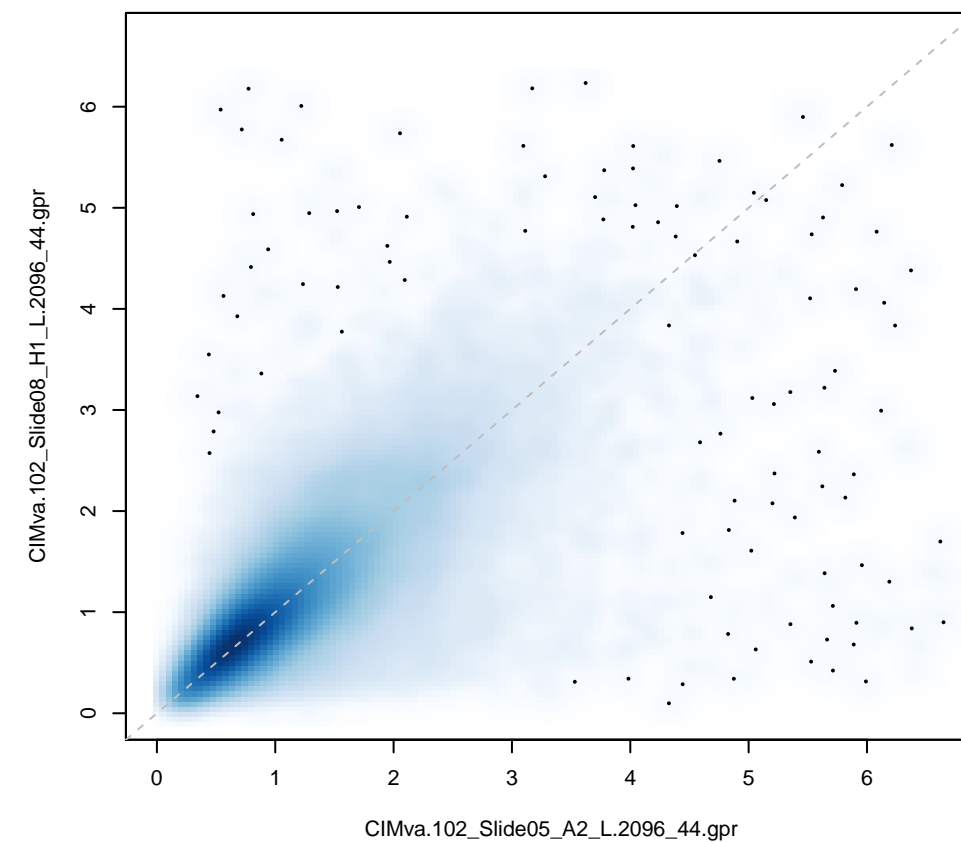

Replicate scatter (normalized; log2) for sample: 2096 (CFS)  
Correlation coefficient: 0.79 (Pearson); 0.79 (Spearman)

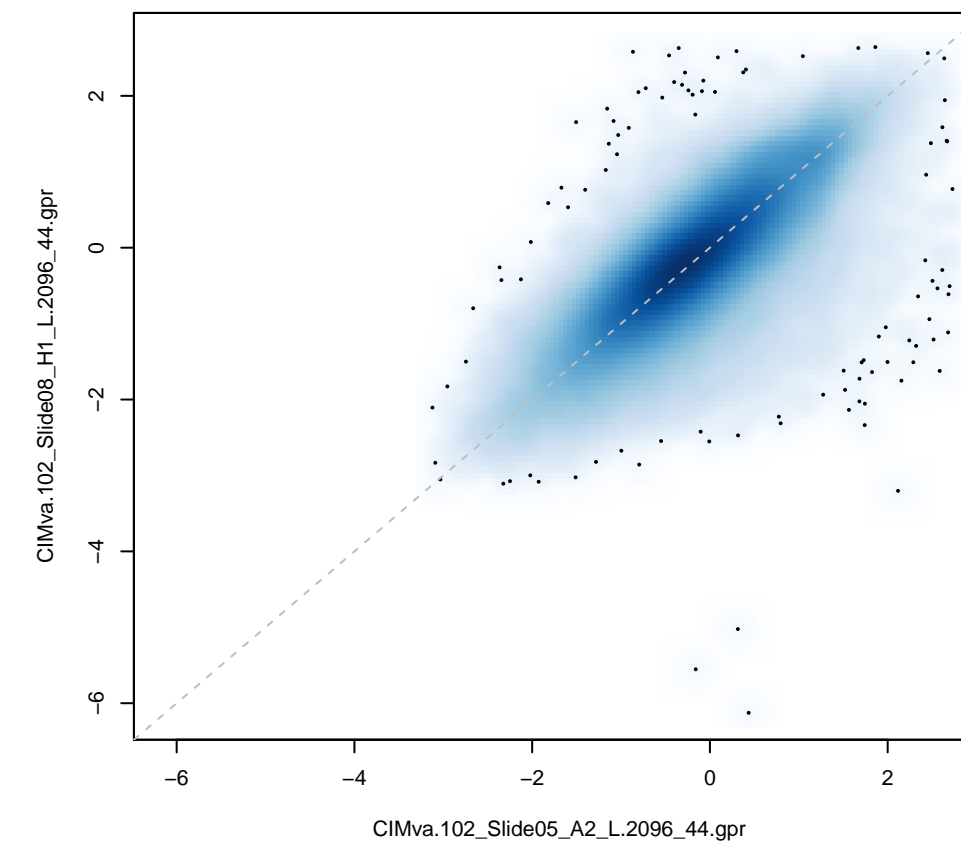

Replicate densities (raw) for sample: 2097 (CFS)

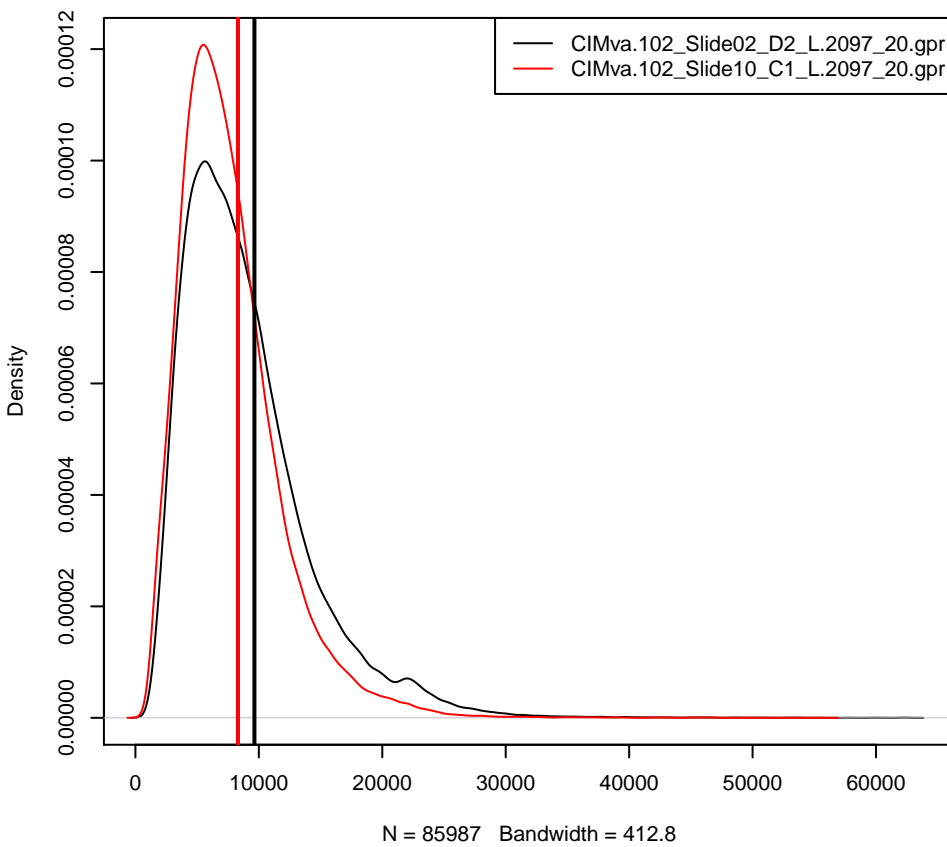

Replicate densities (raw; log2) for sample: 2097 (CFS)

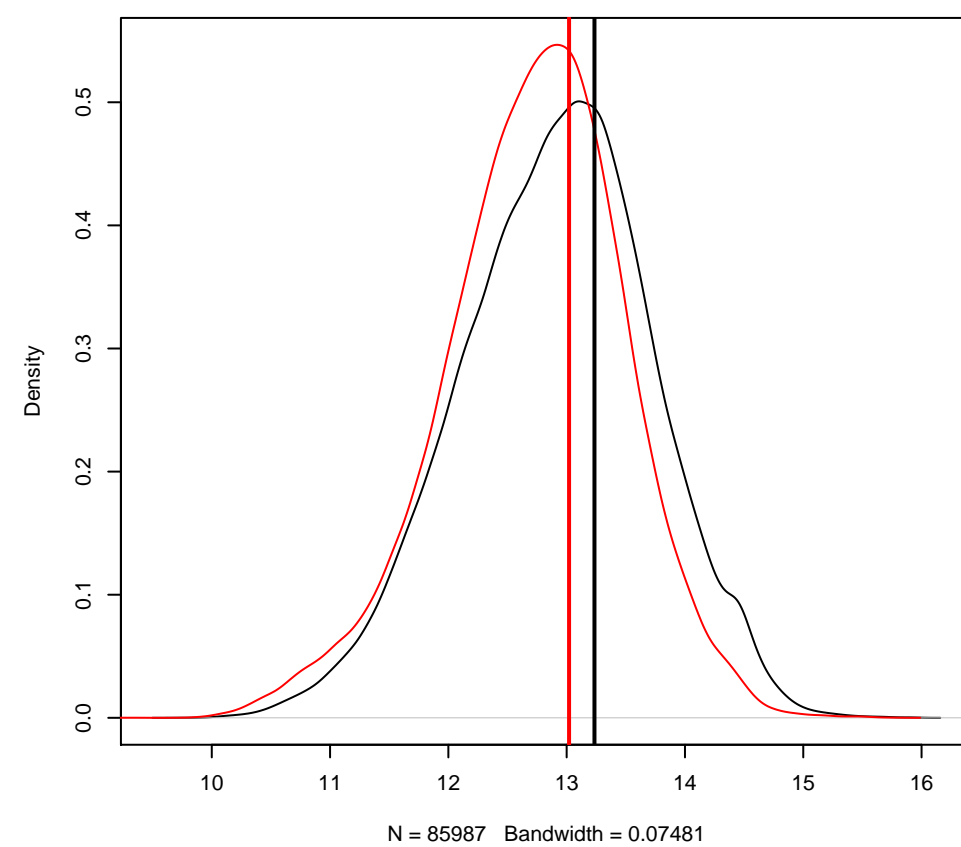

Replicate densities (normalized) for sample: 2097 (CFS)

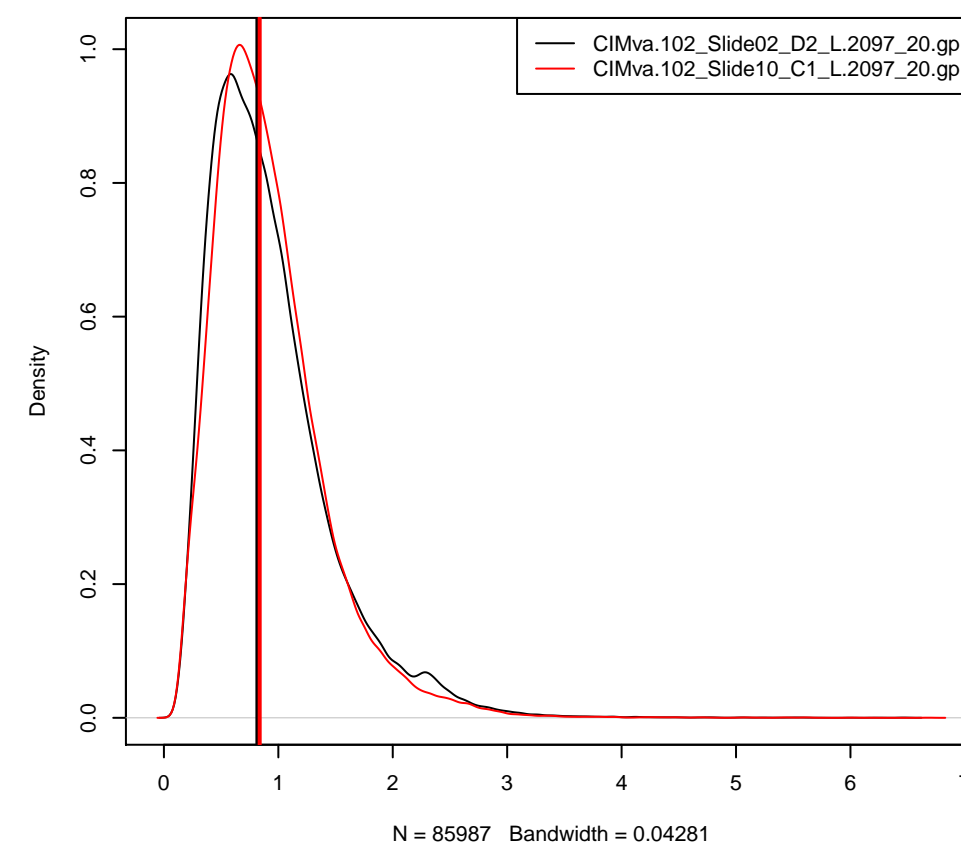

Replicate densities (normalized; log2) for sample: 2097 (CFS)

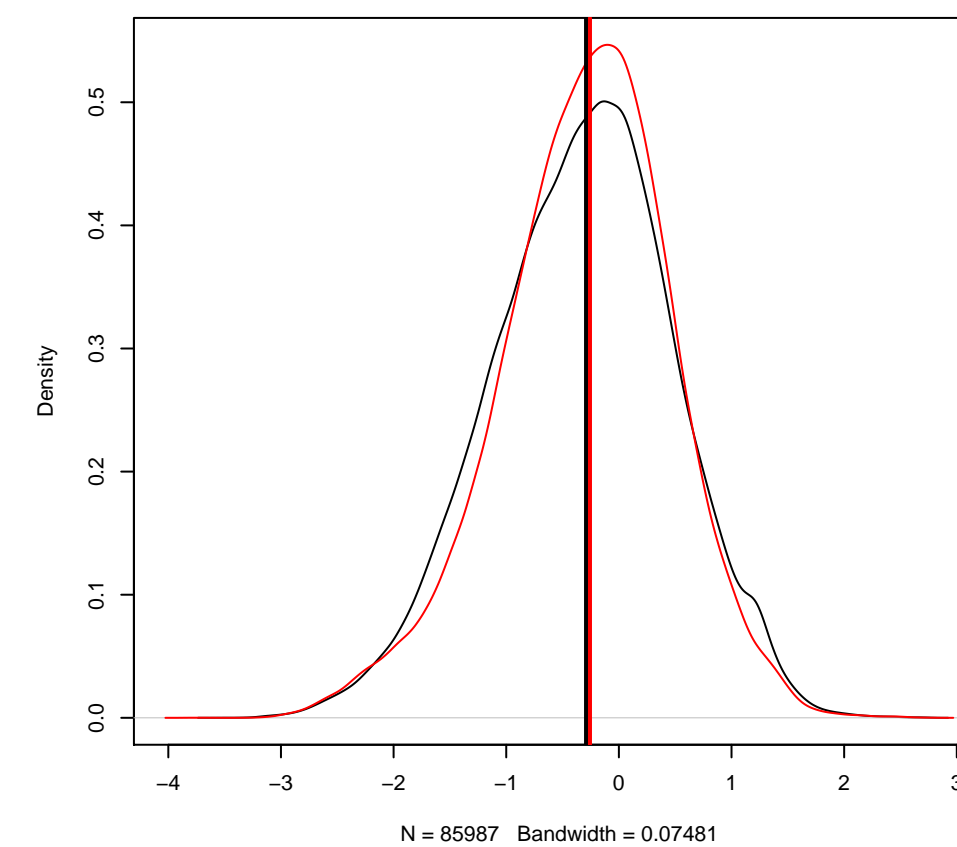

Replicate scatter (raw) for sample: 2097 (CFS)  
Correlation coefficient: 0.88 (Pearson); 0.89 (Spearman)

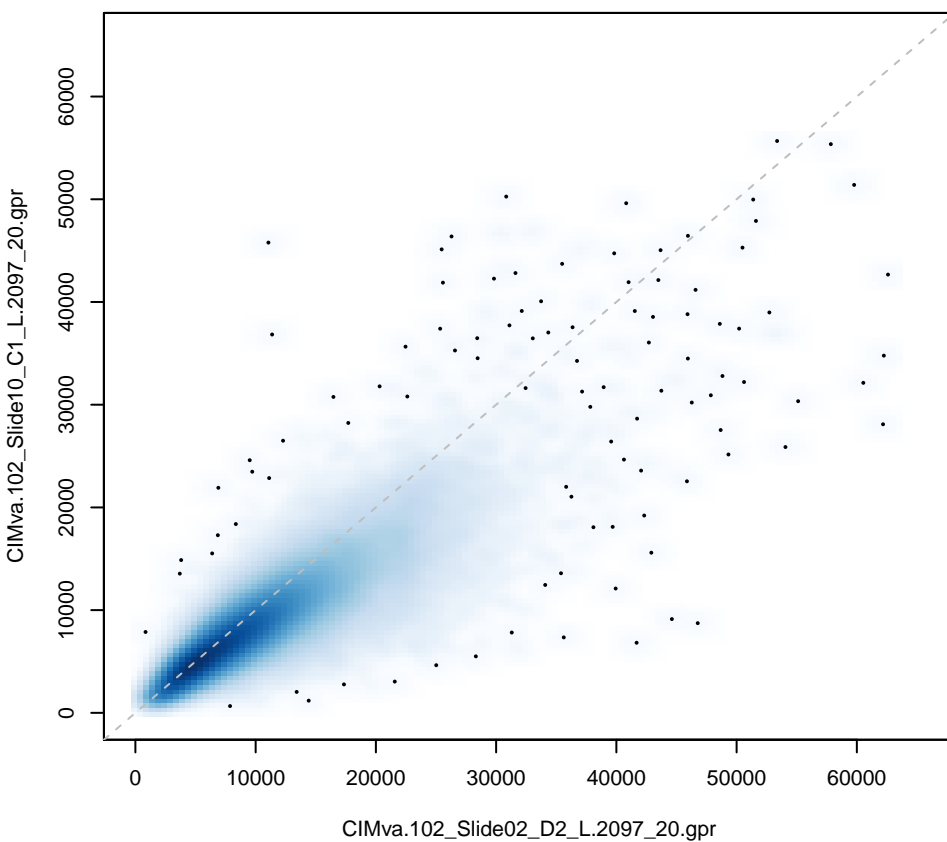

Replicate scatter (raw; log2) for sample: 2097 (CFS)  
Correlation coefficient: 0.9 (Pearson); 0.89 (Spearman)

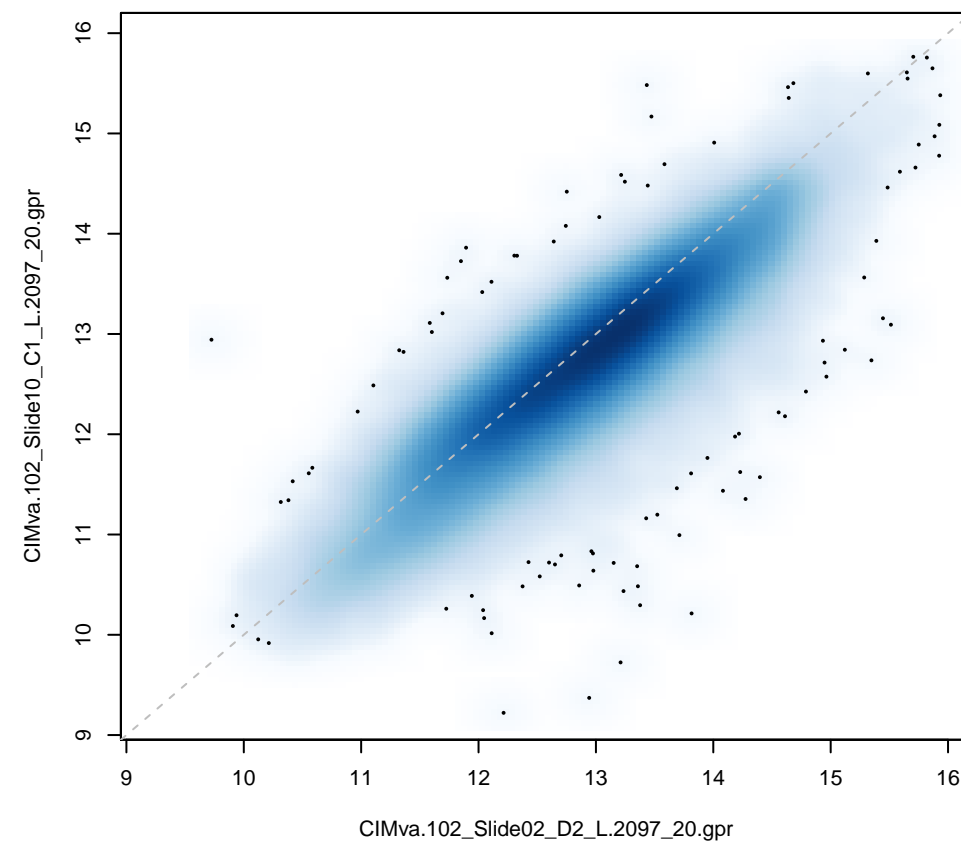

Replicate scatter (normalized) for sample: 2097 (CFS)  
Correlation coefficient: 0.88 (Pearson); 0.89 (Spearman)

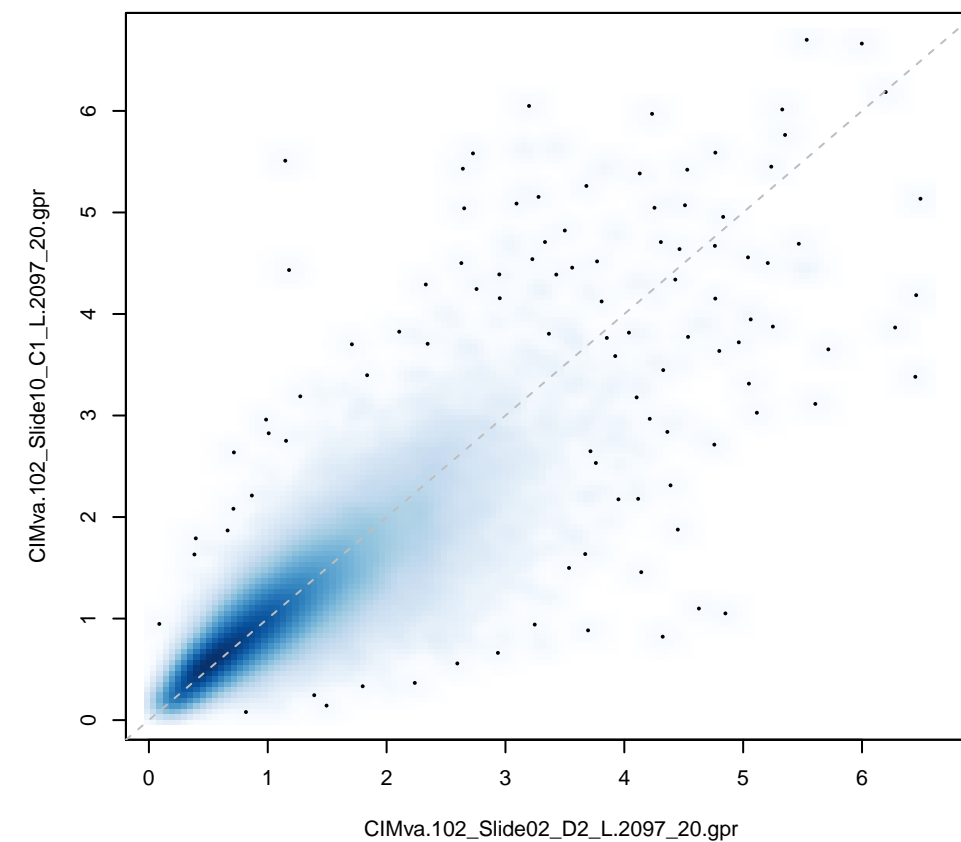

Replicate scatter (normalized; log2) for sample: 2097 (CFS)  
Correlation coefficient: 0.89 (Pearson); 0.89 (Spearman)

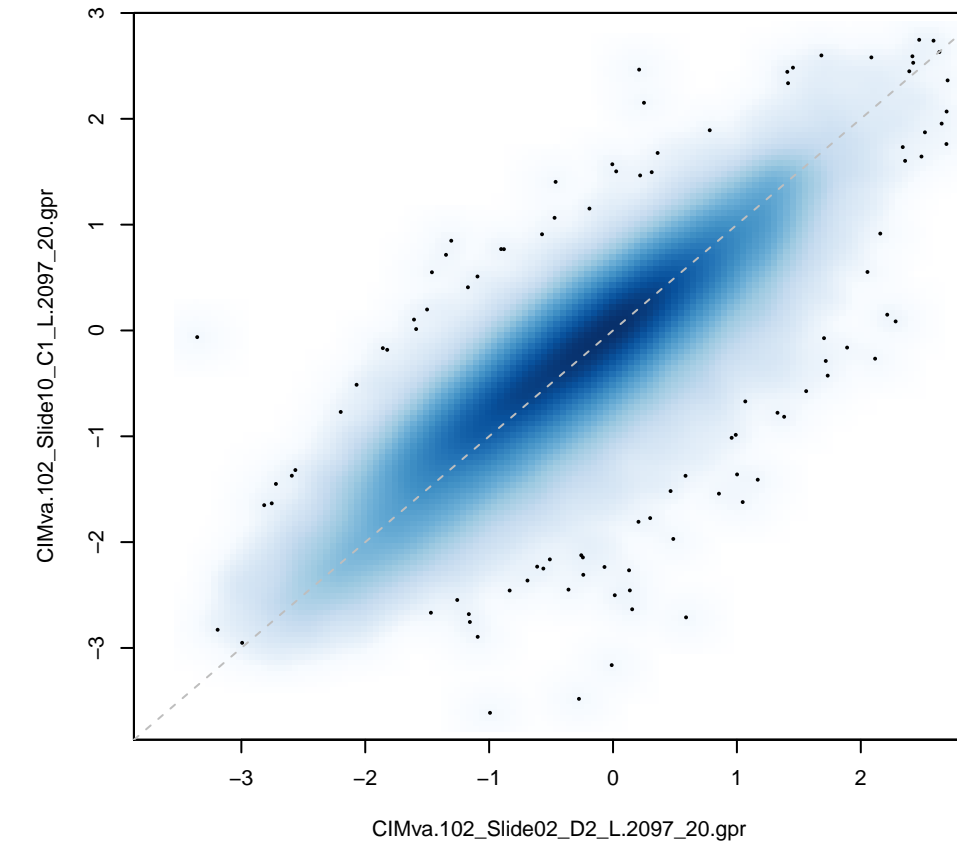



Replicate densities (raw) for sample: 3925 (Controls)

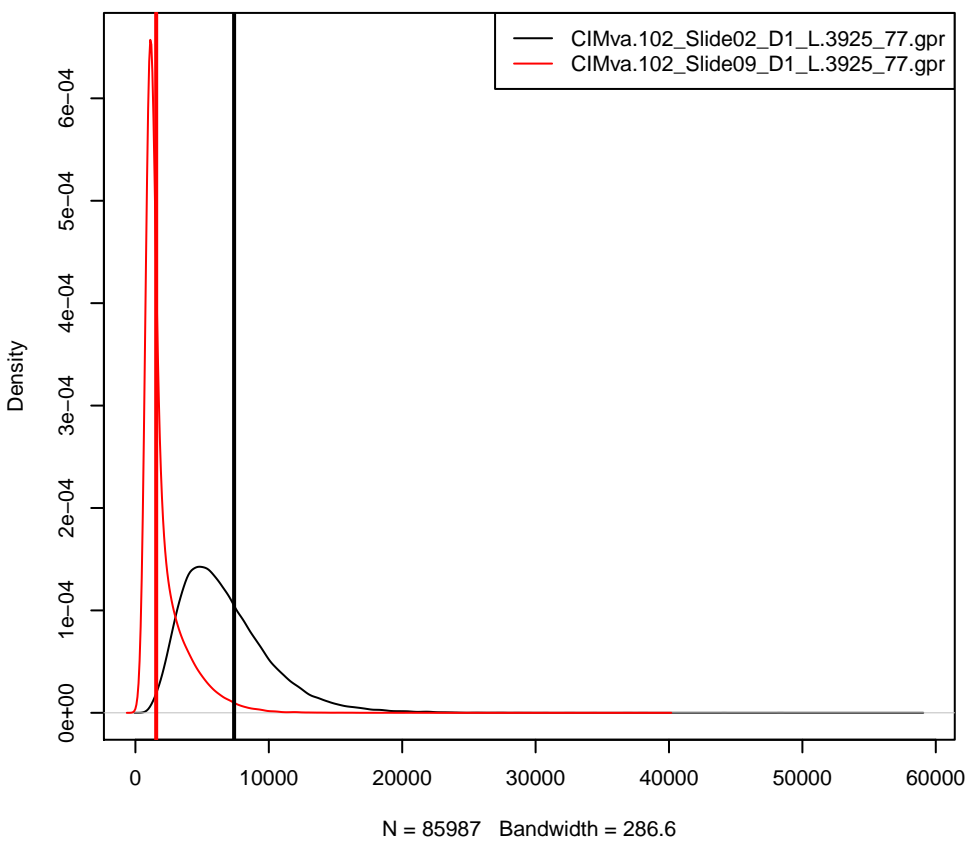

Replicate densities (raw; log2) for sample: 3925 (Controls)

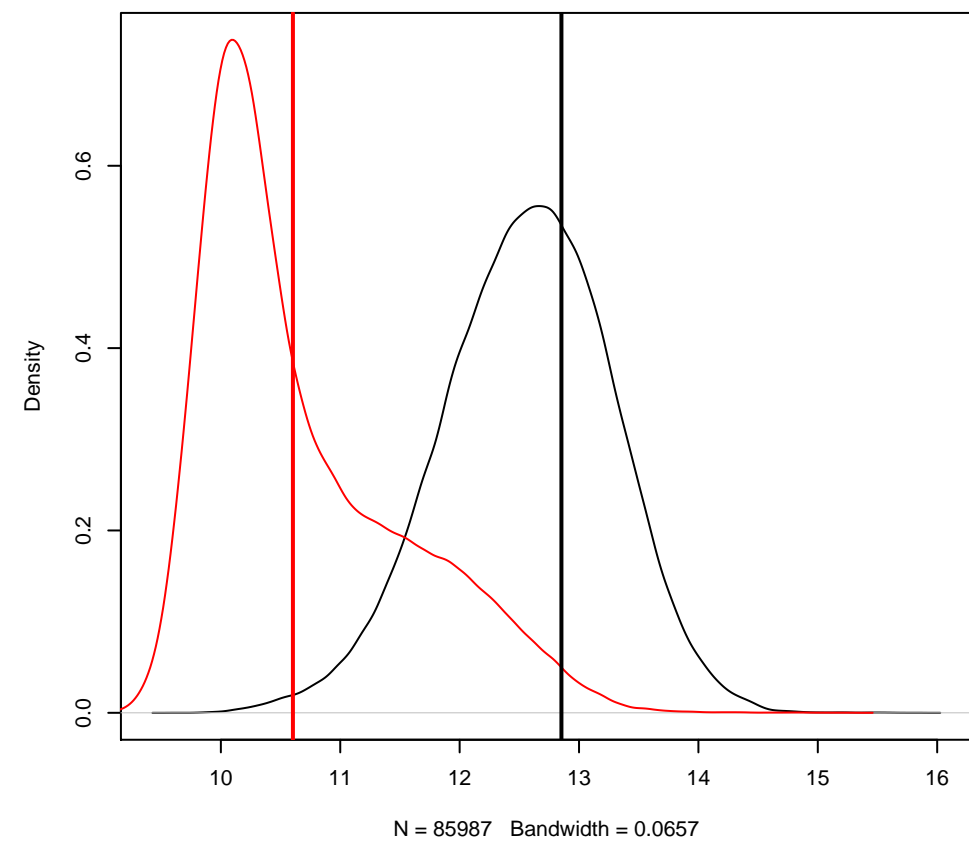

Replicate densities (normalized) for sample: 3925 (Controls)

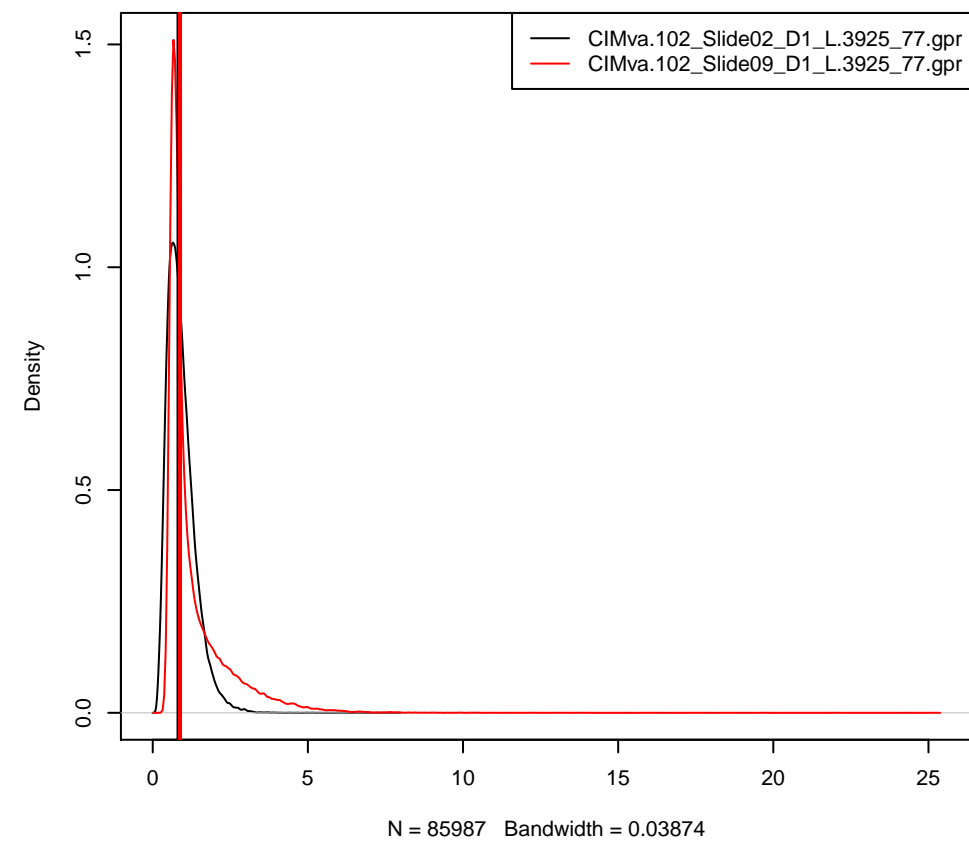

Replicate densities (normalized; log2) for sample: 3925 (Controls)

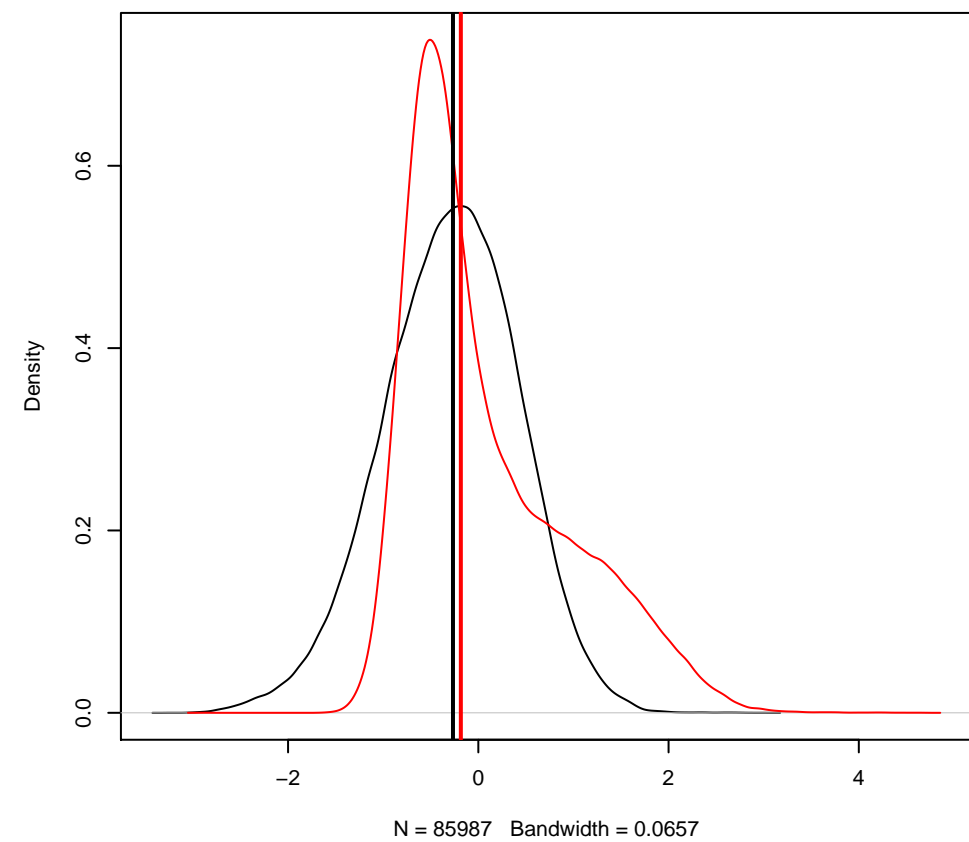

Replicate scatter (raw) for sample: 3925 (Controls)  
Correlation coefficient: 0.42 (Pearson); 0.41 (Spearman)

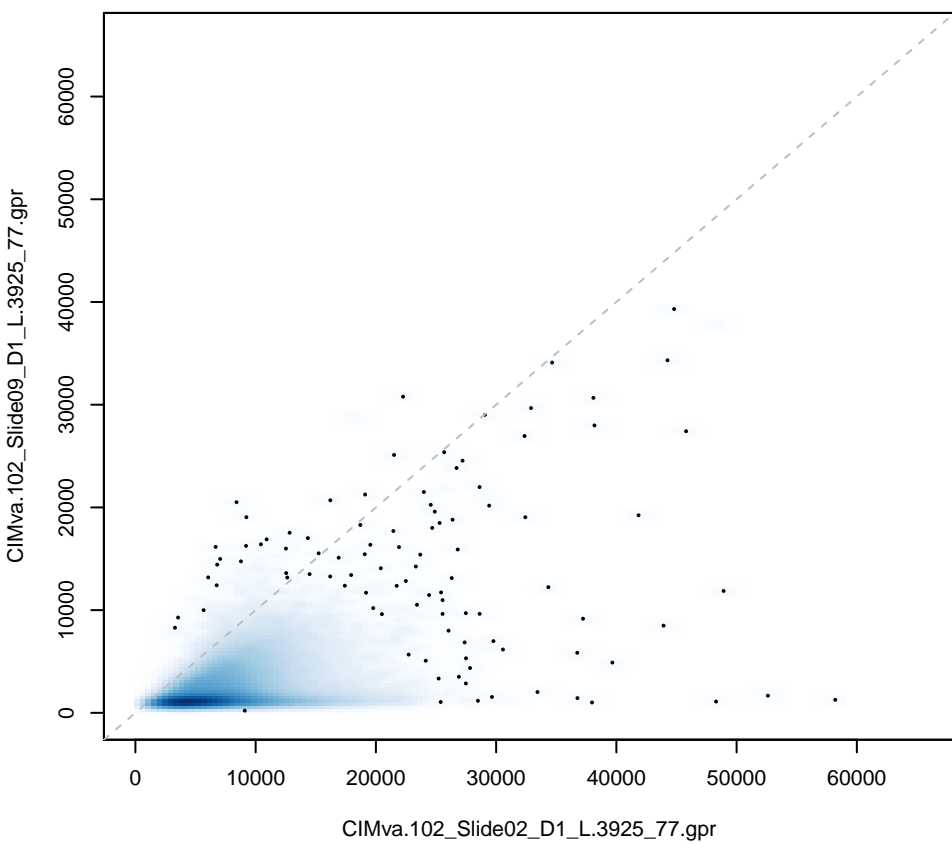

Replicate scatter (raw; log2) for sample: 3925 (Controls)  
Correlation coefficient: 0.43 (Pearson); 0.41 (Spearman)

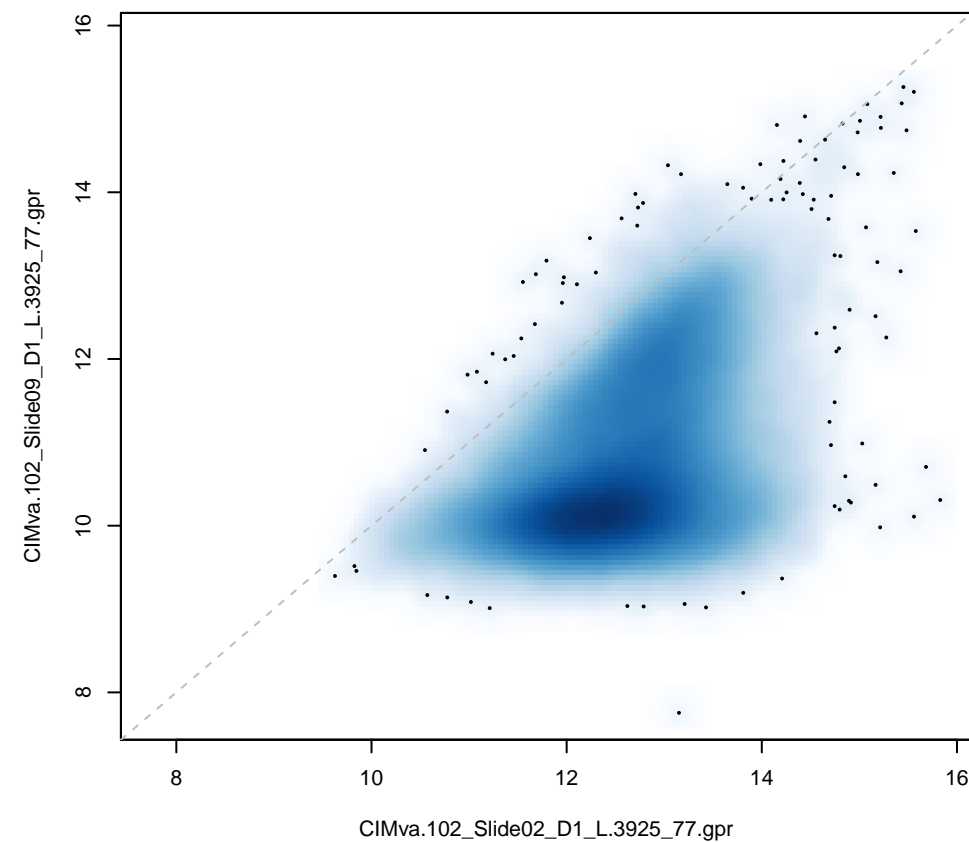

Replicate scatter (normalized) for sample: 3925 (Controls)  
Correlation coefficient: 0.42 (Pearson); 0.41 (Spearman)

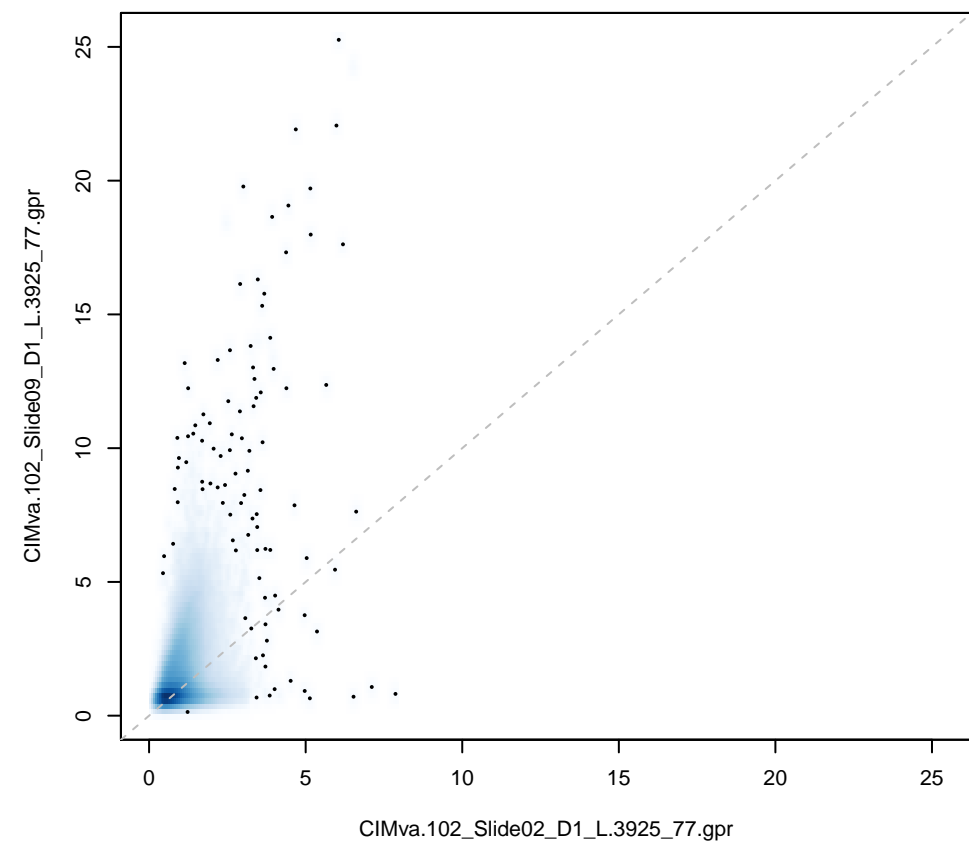

Replicate scatter (normalized; log2) for sample: 3925 (Controls)  
Correlation coefficient: 0.43 (Pearson); 0.41 (Spearman)

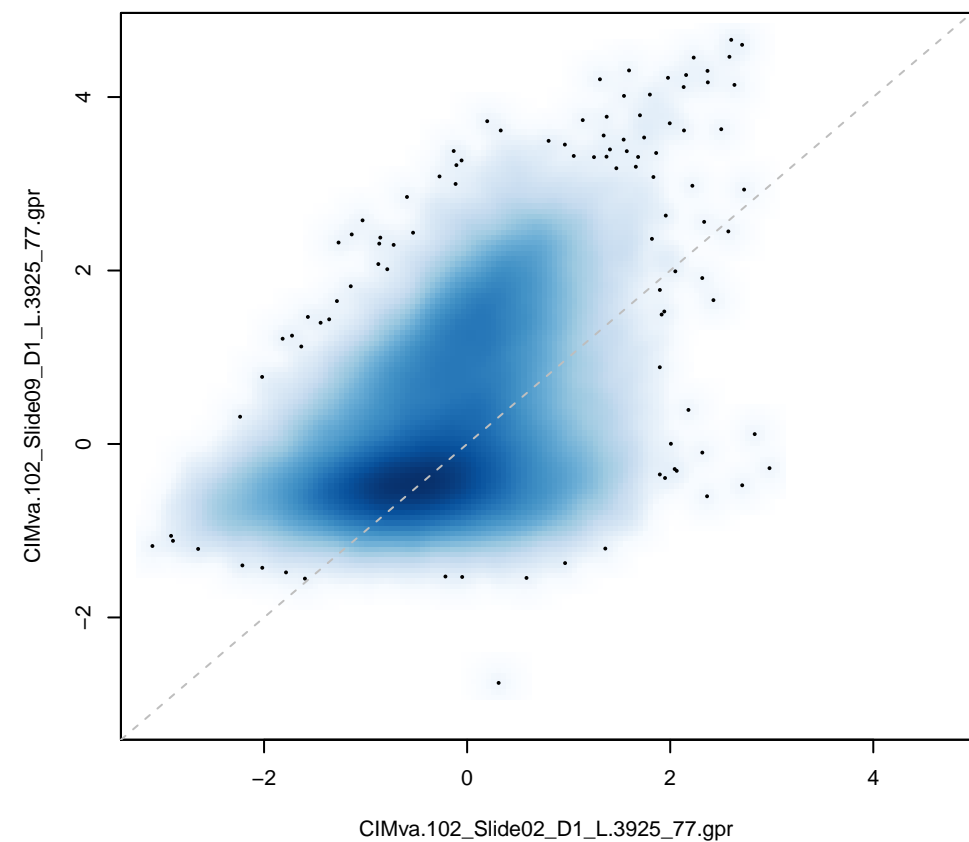

Replicate densities (raw) for sample: 4049 (CFS)

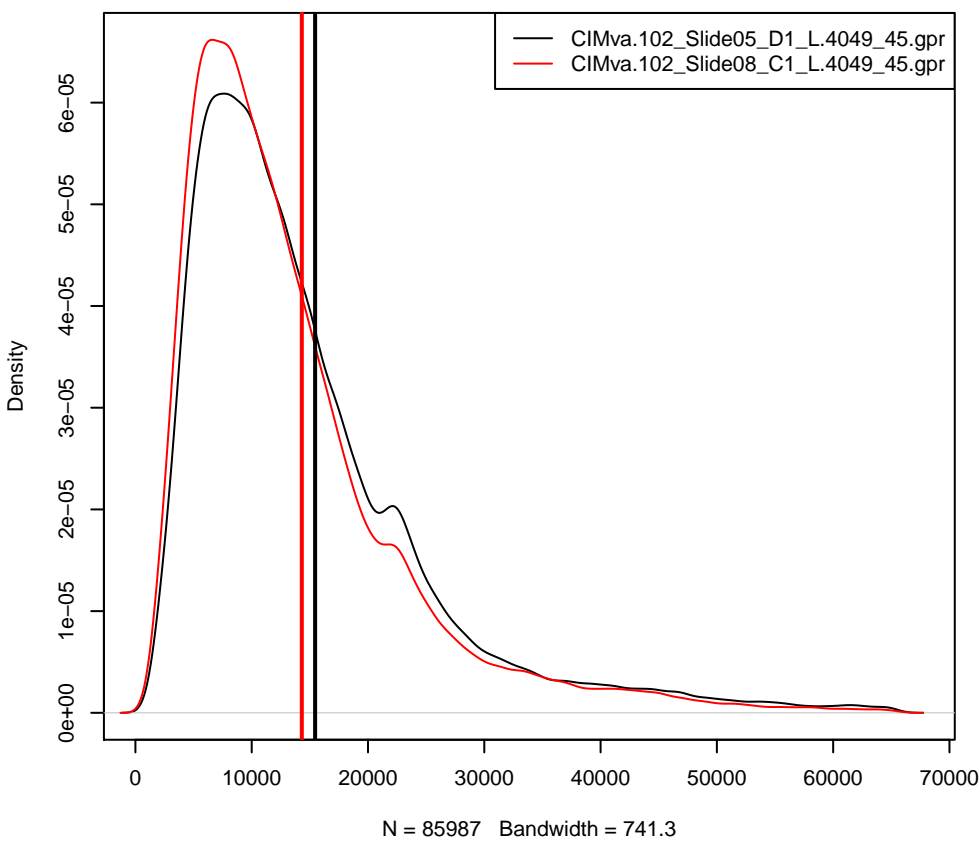

Replicate densities (raw; log2) for sample: 4049 (CFS)

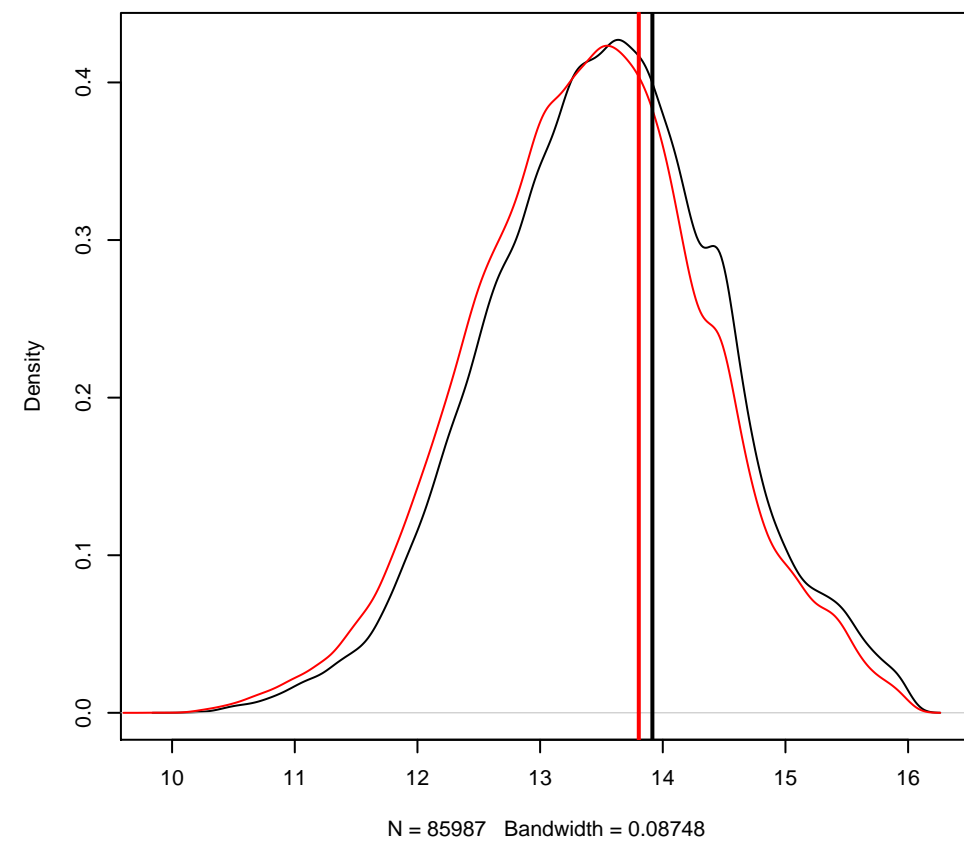

Replicate densities (normalized) for sample: 4049 (CFS)

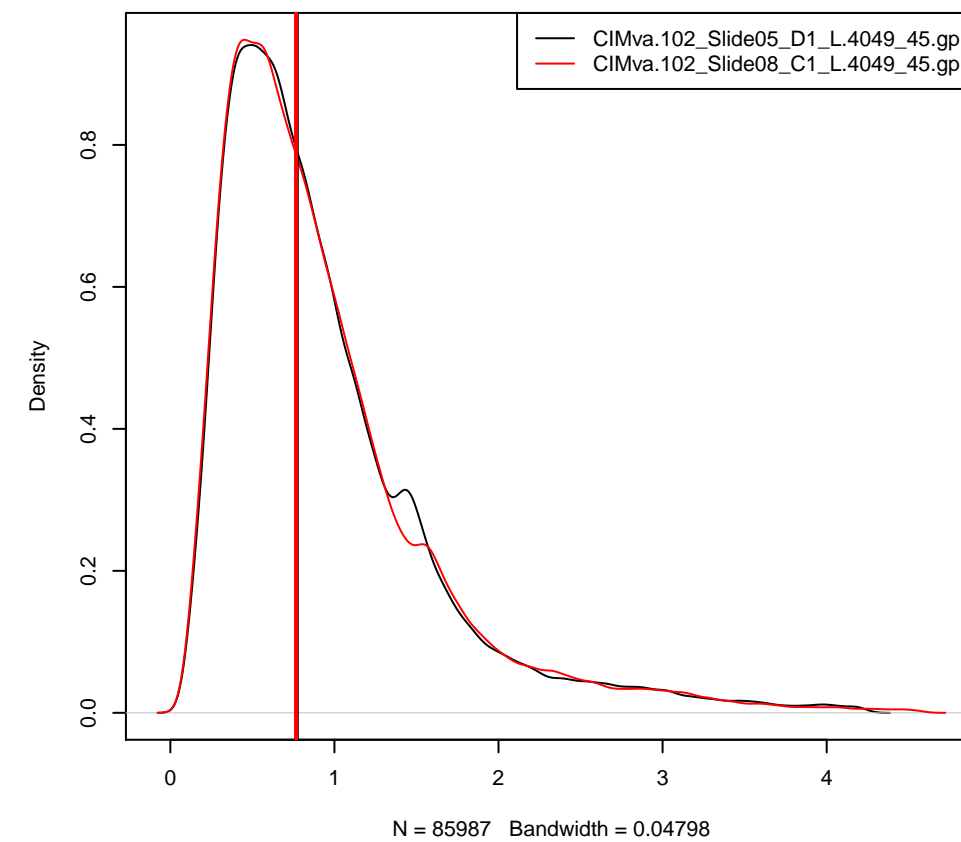

Replicate densities (normalized; log2) for sample: 4049 (CFS)

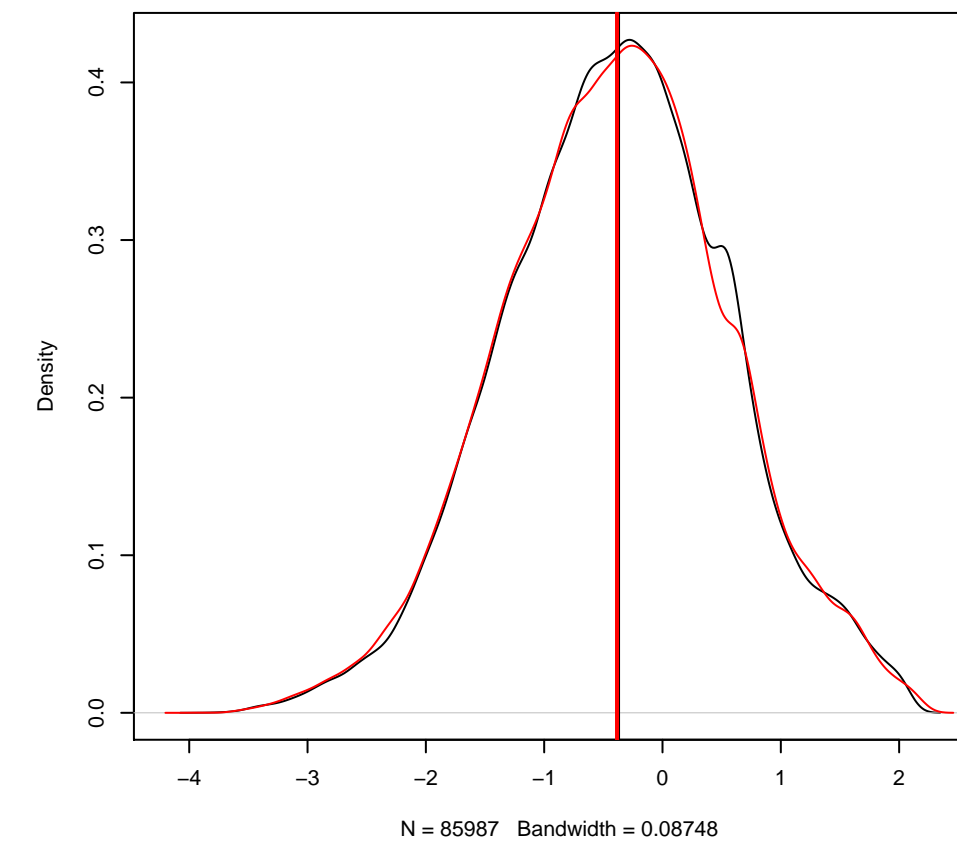

Replicate scatter (raw) for sample: 4049 (CFS)  
Correlation coefficient: 0.86 (Pearson); 0.91 (Spearman)

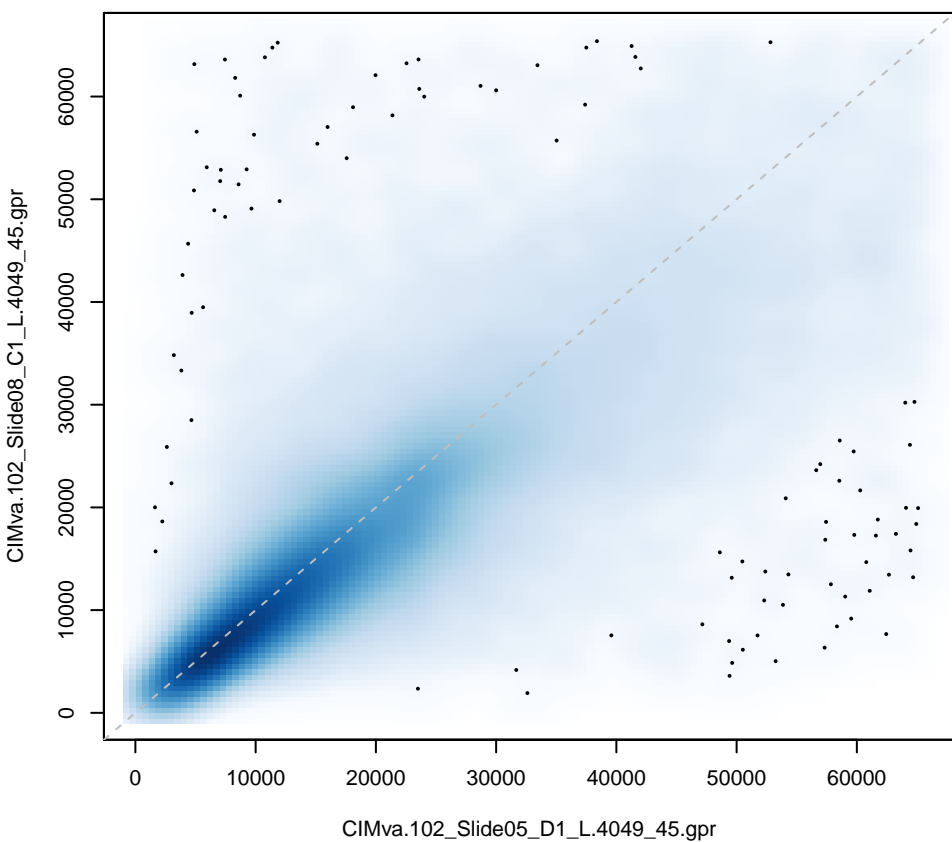

Replicate scatter (raw; log2) for sample: 4049 (CFS)  
Correlation coefficient: 0.92 (Pearson); 0.91 (Spearman)

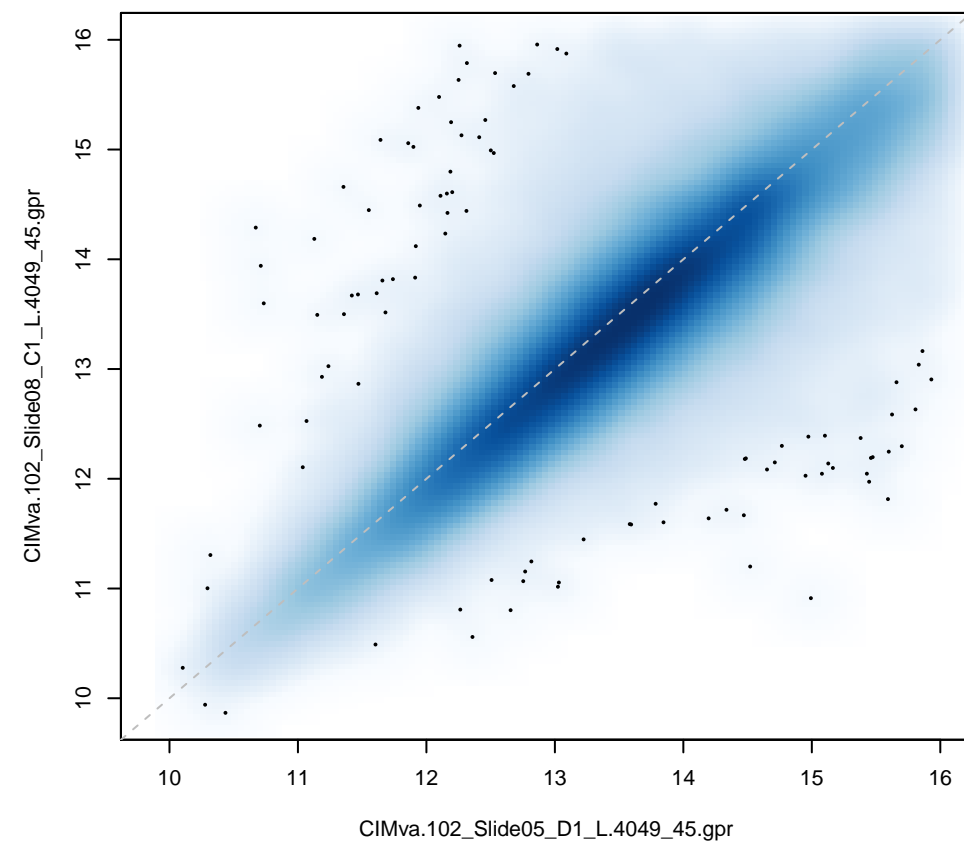

Replicate scatter (normalized) for sample: 4049 (CFS)  
Correlation coefficient: 0.86 (Pearson); 0.91 (Spearman)

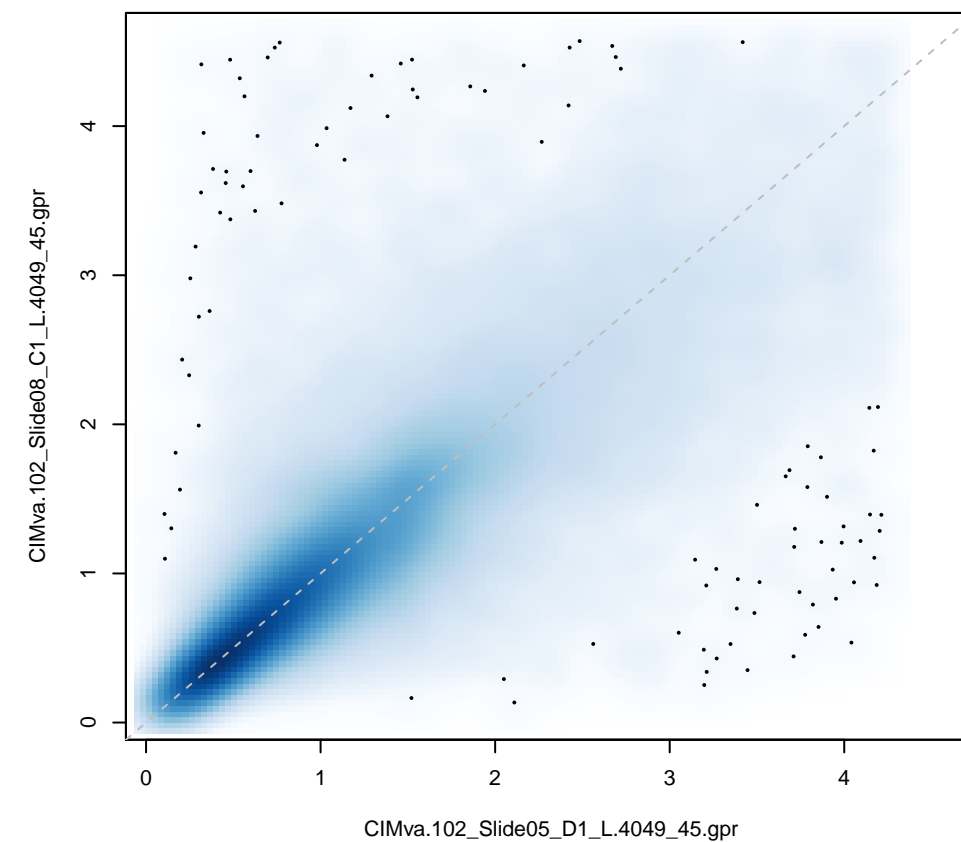

Replicate scatter (normalized; log2) for sample: 4049 (CFS)  
Correlation coefficient: 0.9 (Pearson); 0.91 (Spearman)

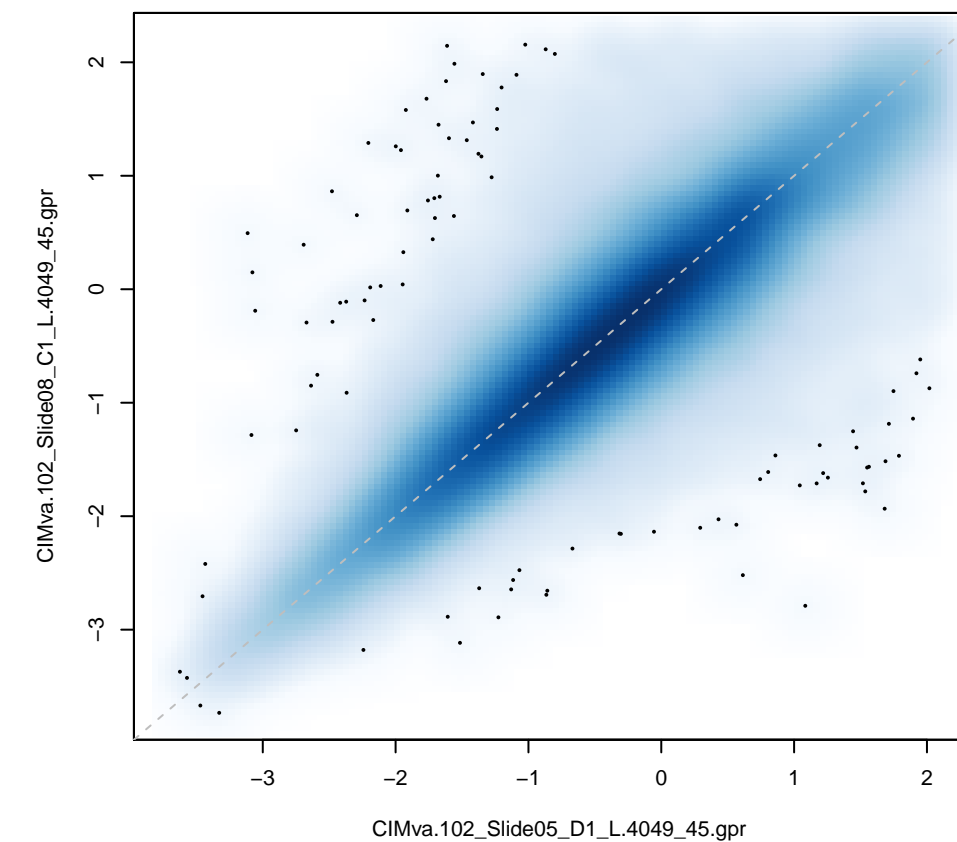

Replicate densities (raw) for sample: 521128 (CFS)

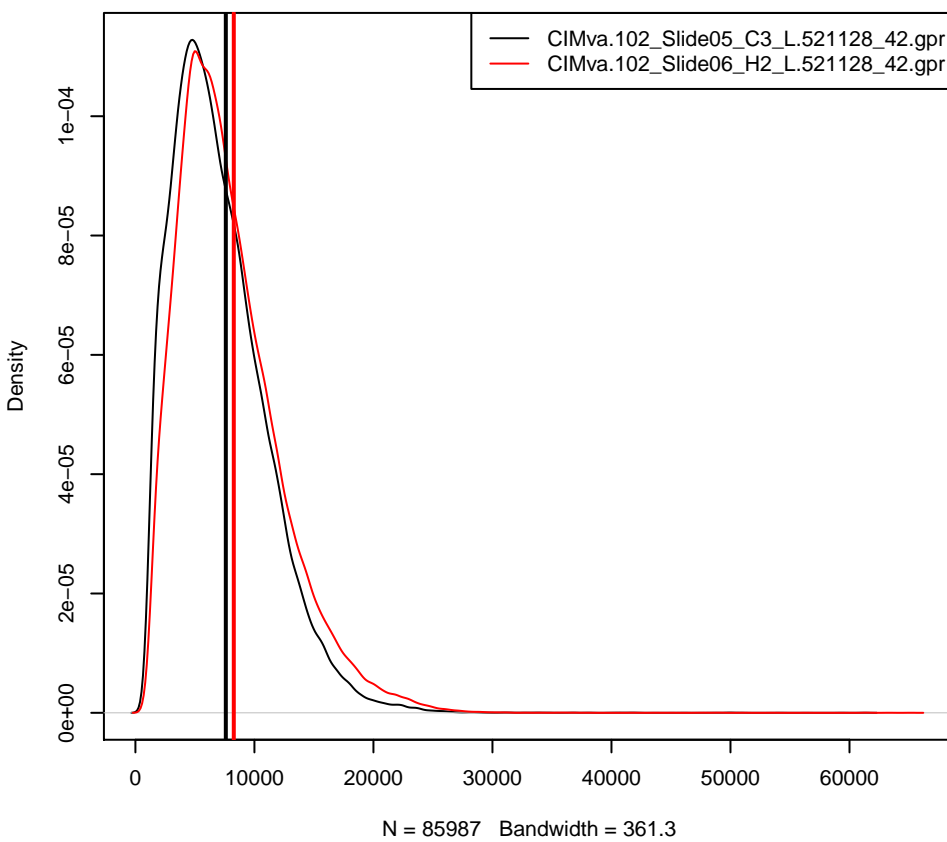

Replicate densities (raw; log2) for sample: 521128 (CFS)

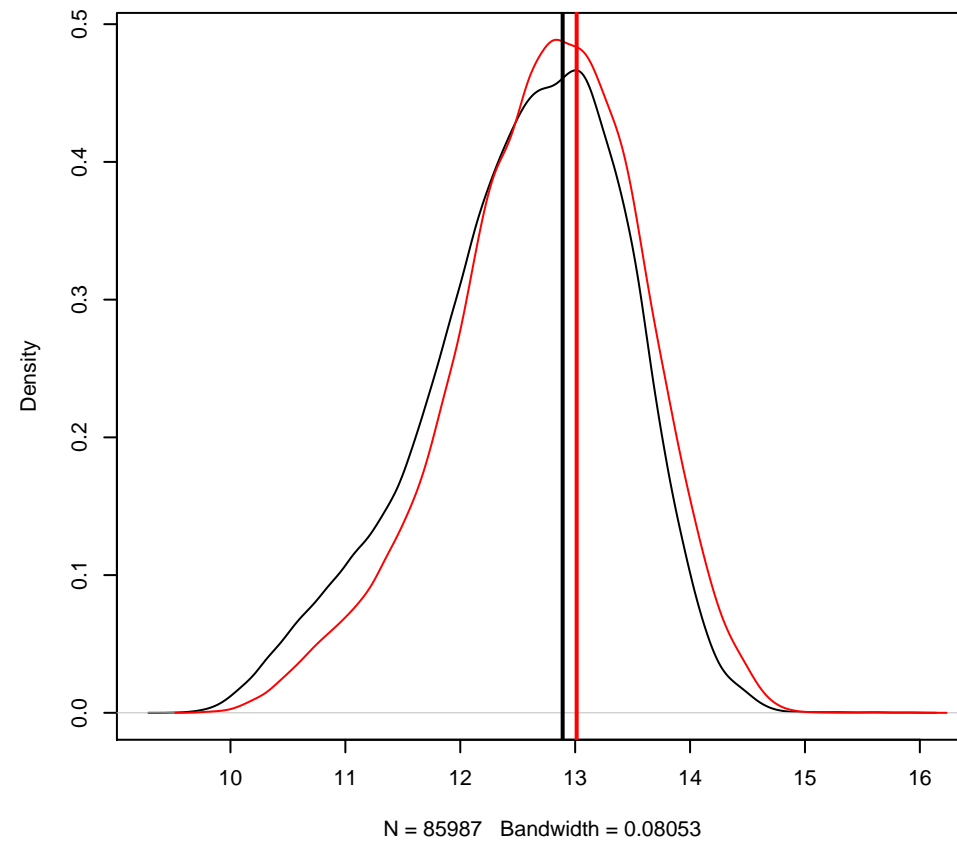

Replicate densities (normalized) for sample: 521128 (CFS)

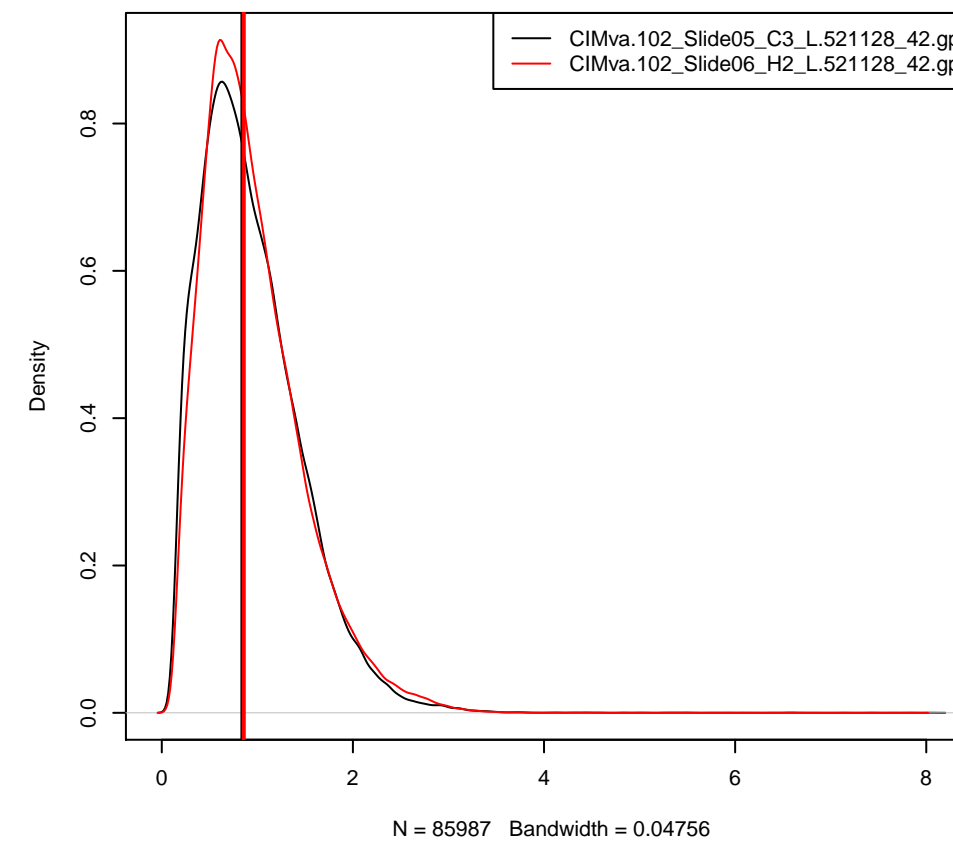

Replicate densities (normalized; log2) for sample: 521128 (CFS)

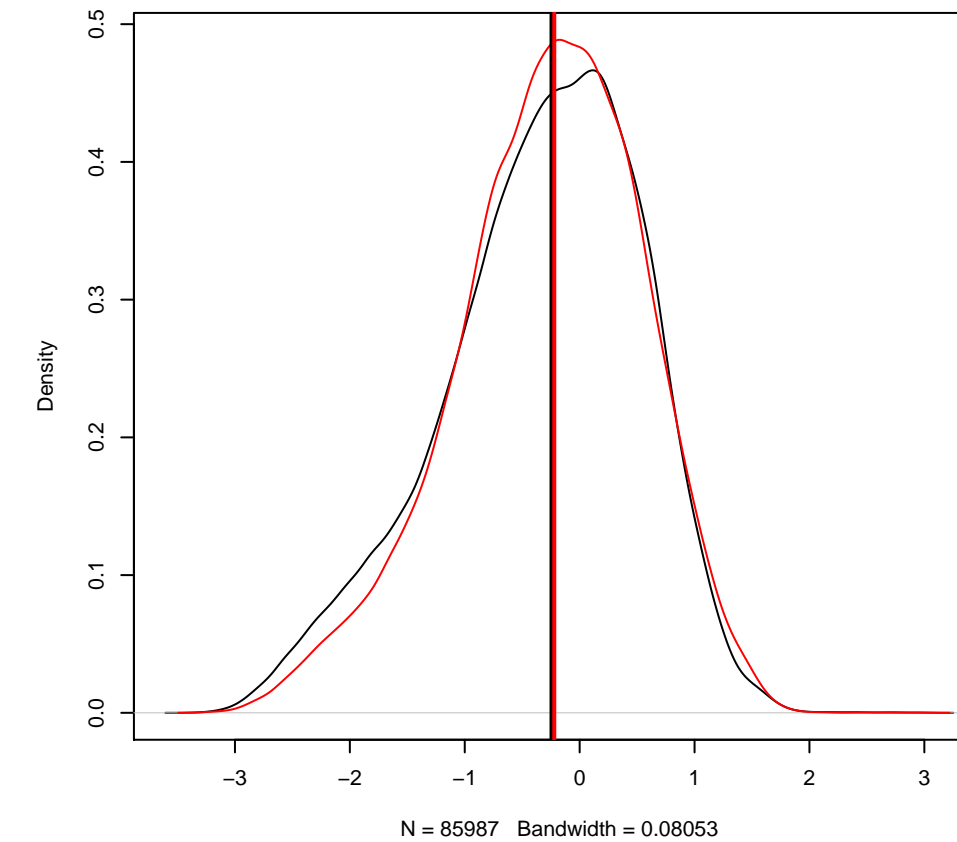

Replicate scatter (raw) for sample: 521128 (CFS)  
Correlation coefficient: 0.86 (Pearson); 0.88 (Spearman)

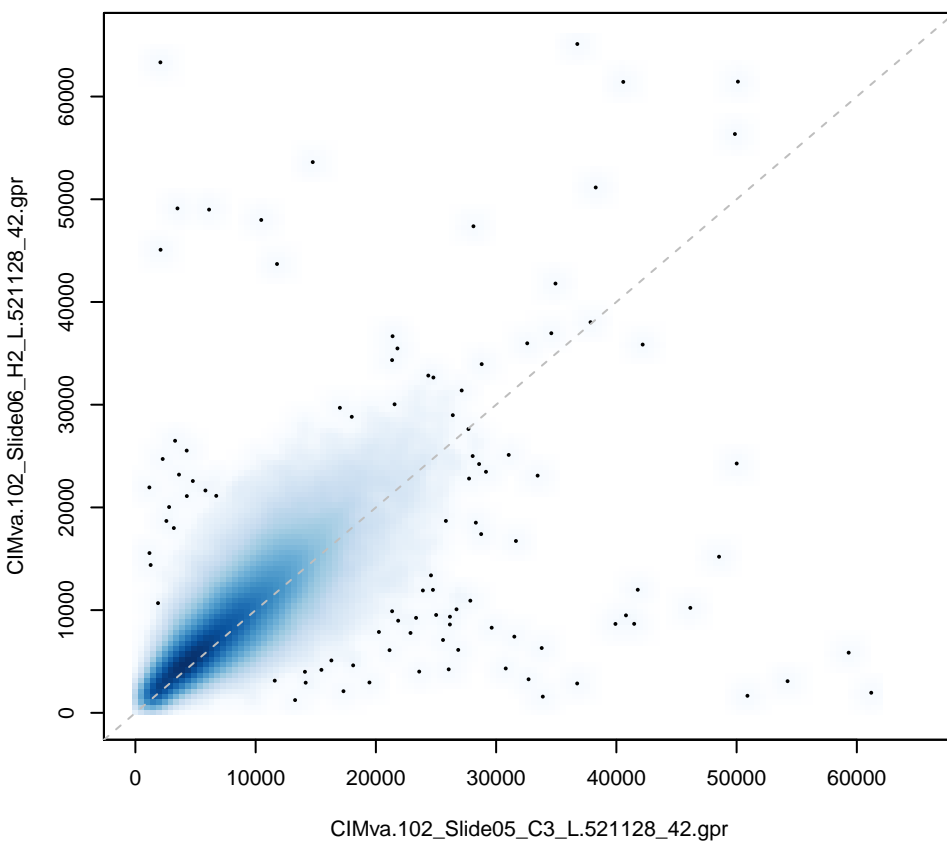

Replicate scatter (raw; log2) for sample: 521128 (CFS)  
Correlation coefficient: 0.89 (Pearson); 0.88 (Spearman)

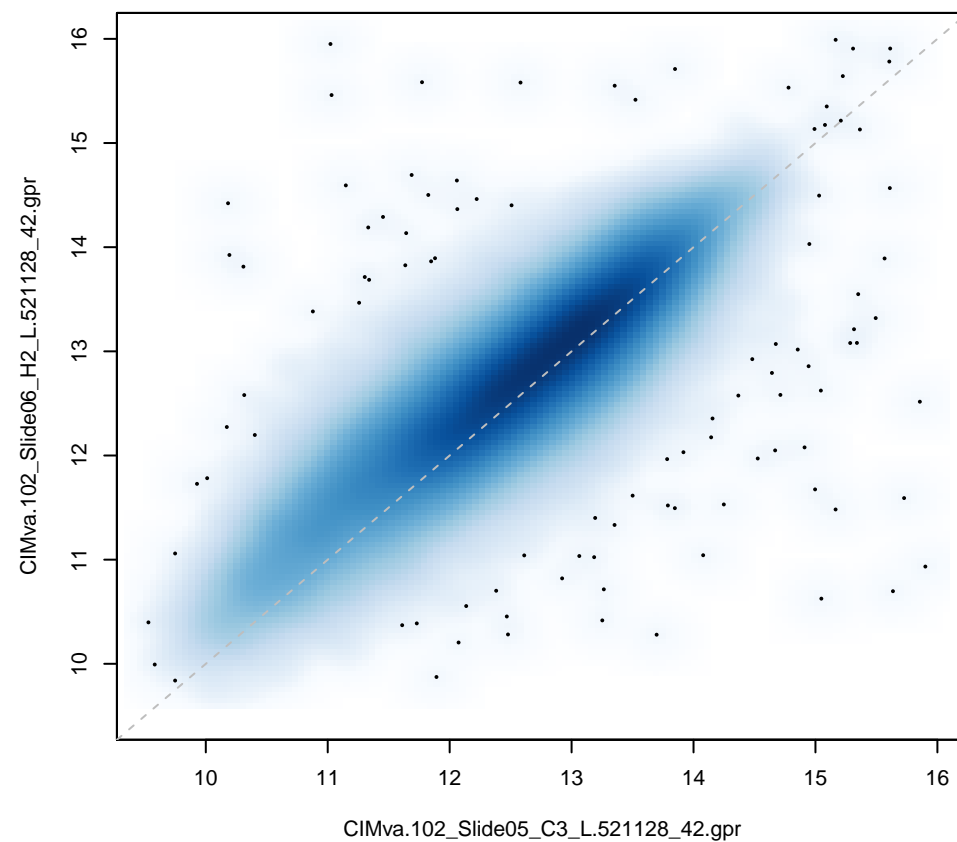

Replicate scatter (normalized) for sample: 521128 (CFS)  
Correlation coefficient: 0.86 (Pearson); 0.88 (Spearman)

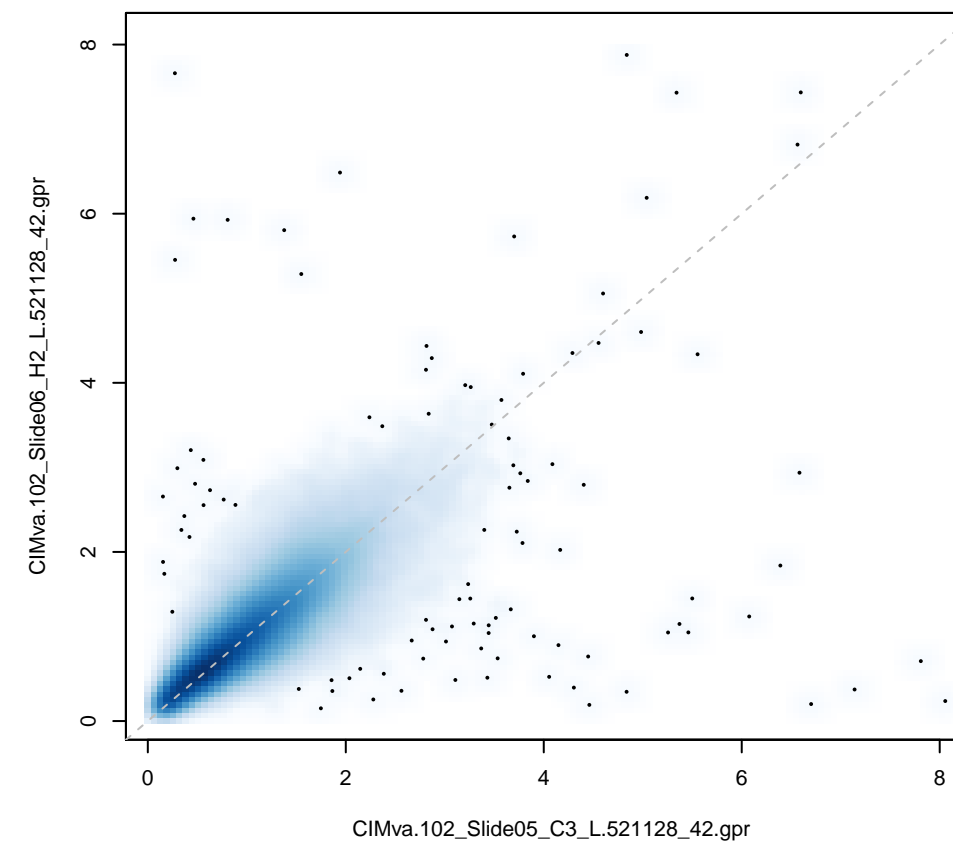

Replicate scatter (normalized; log2) for sample: 521128 (CFS)  
Correlation coefficient: 0.88 (Pearson); 0.88 (Spearman)

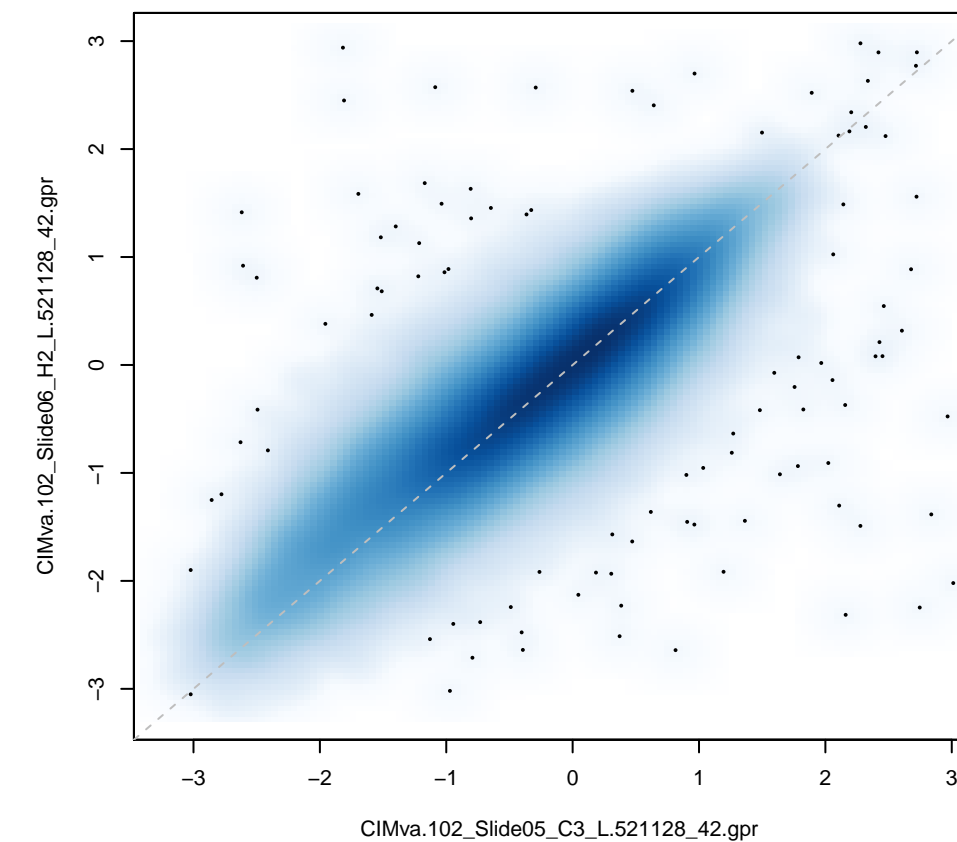

Replicate densities (raw) for sample: 523991 (Controls)

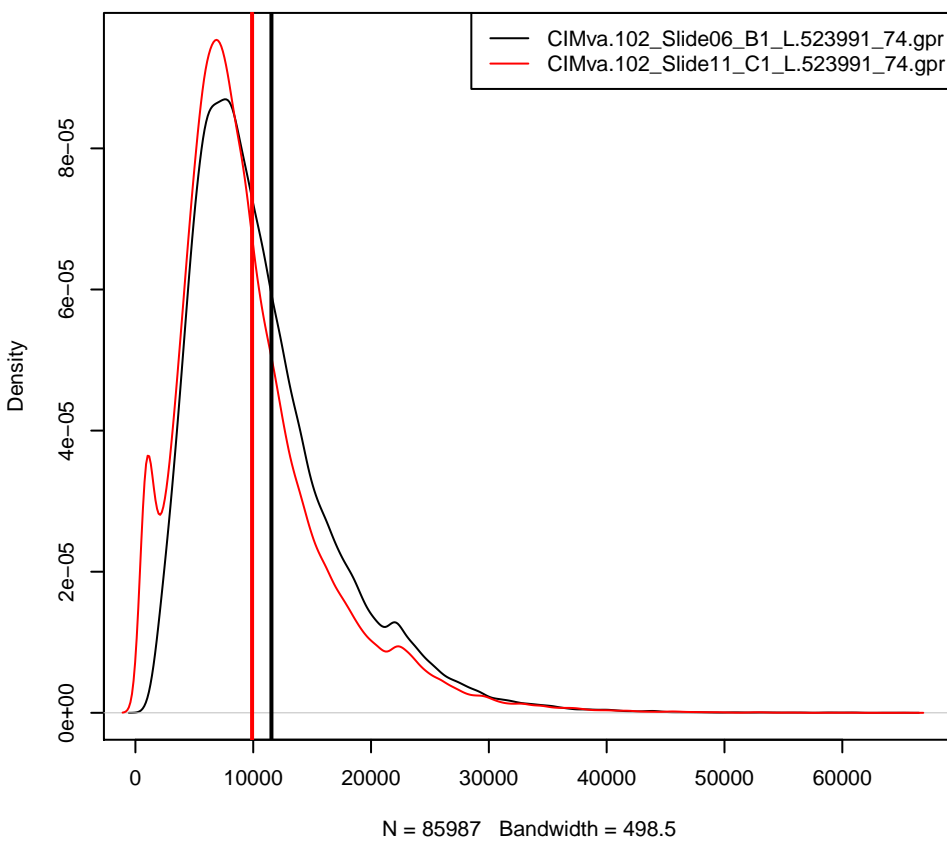

Replicate densities (raw; log2) for sample: 523991 (Controls)

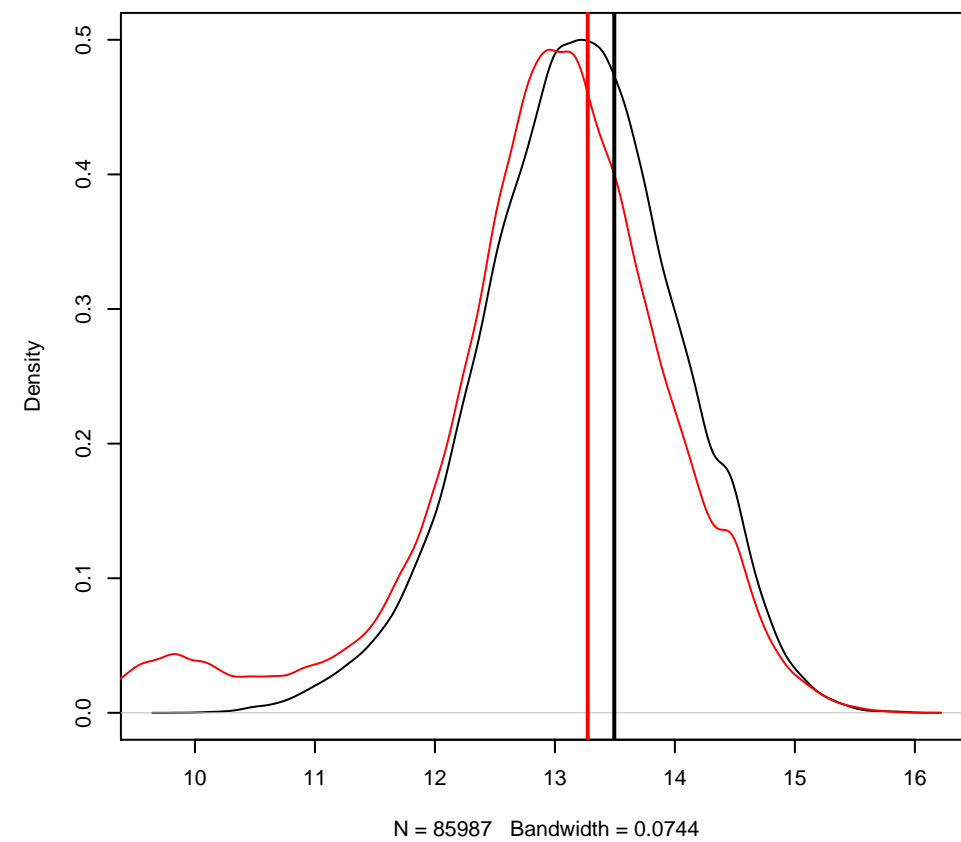

Replicate densities (normalized) for sample: 523991 (Controls)

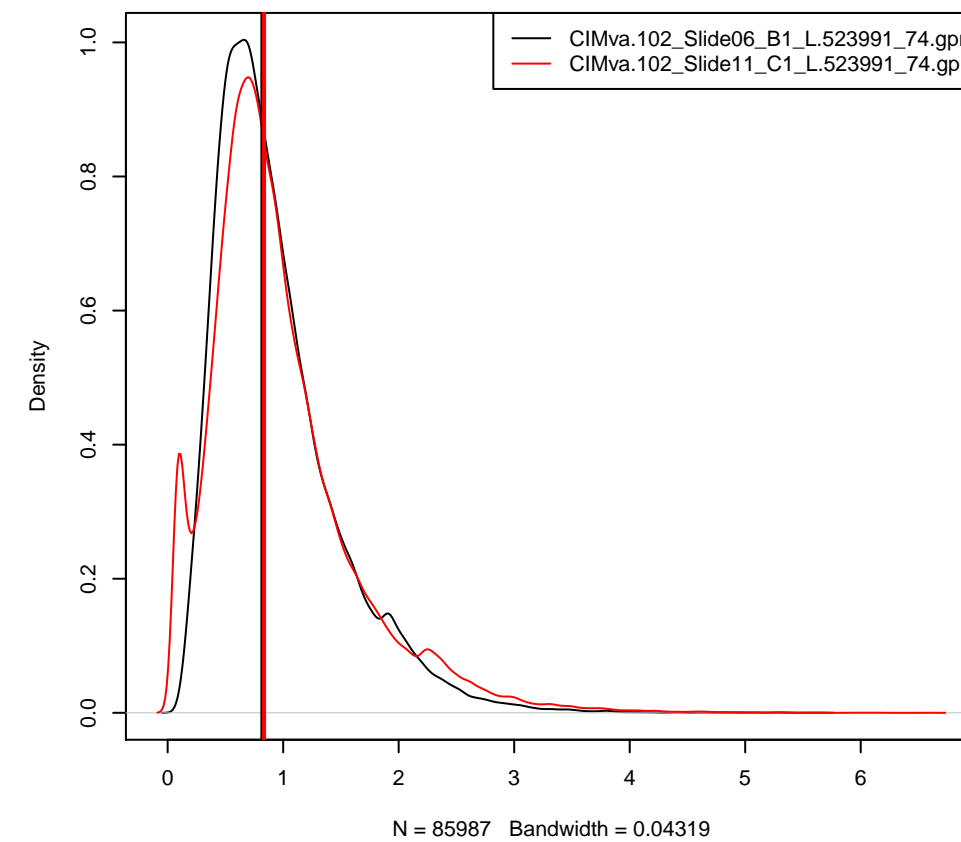

Replicate densities (normalized; log2) for sample: 523991 (Controls)

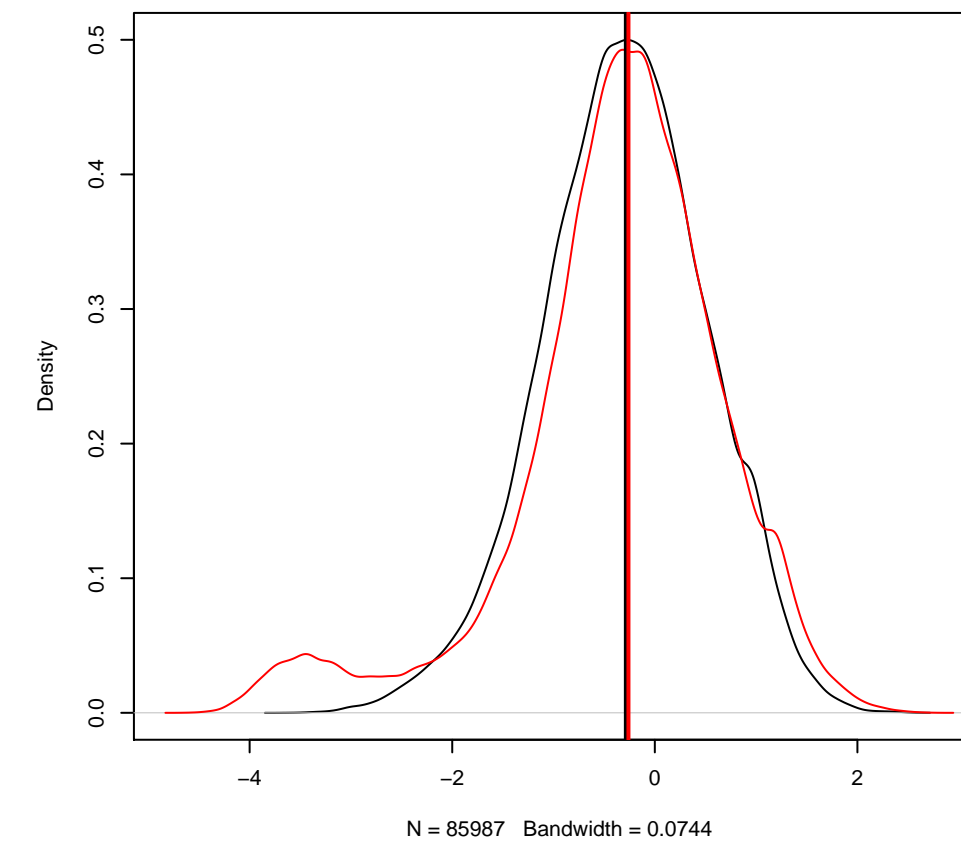

Replicate scatter (raw) for sample: 523991 (Controls)  
Correlation coefficient: 0.85 (Pearson); 0.82 (Spearman)

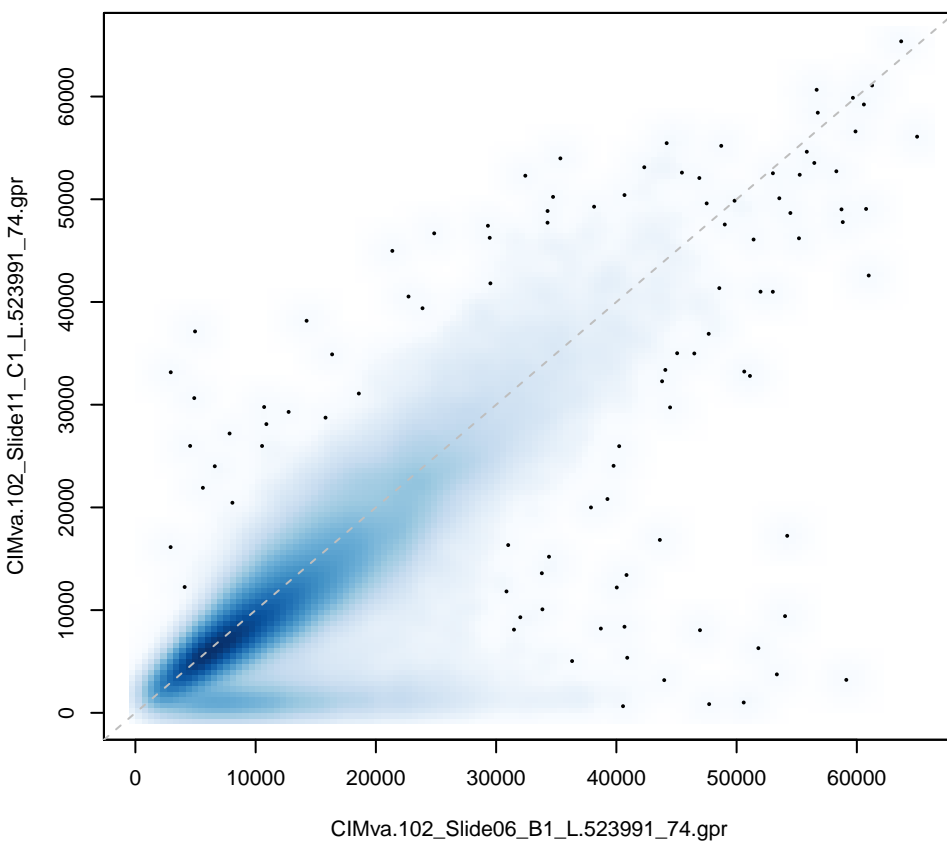

Replicate scatter (raw; log2) for sample: 523991 (Controls)  
Correlation coefficient: 0.68 (Pearson); 0.82 (Spearman)

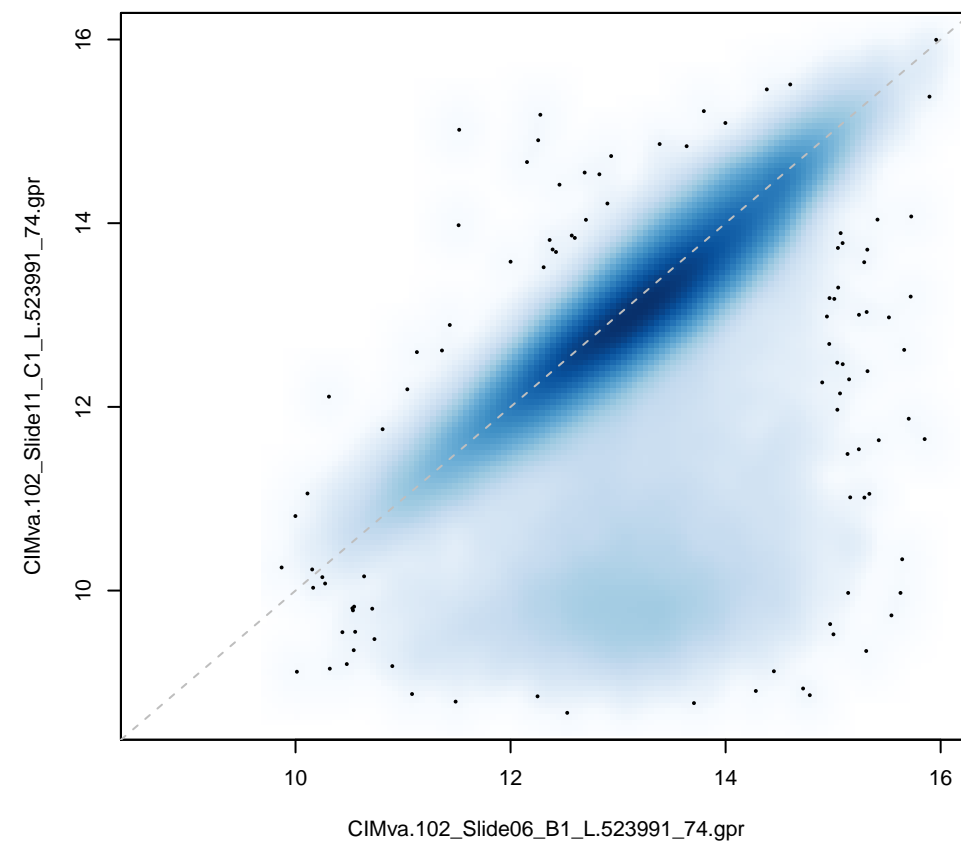

Replicate scatter (normalized) for sample: 523991 (Controls)  
Correlation coefficient: 0.85 (Pearson); 0.82 (Spearman)

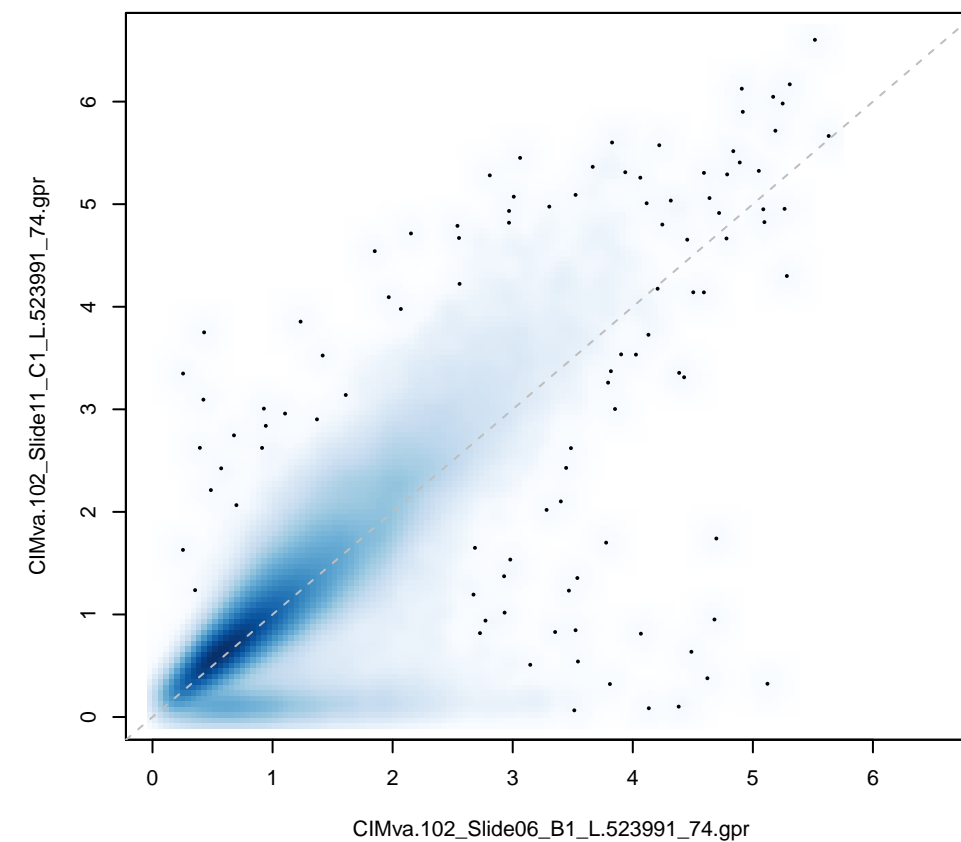

Replicate scatter (normalized; log2) for sample: 523991 (Controls)  
Correlation coefficient: 0.81 (Pearson); 0.82 (Spearman)

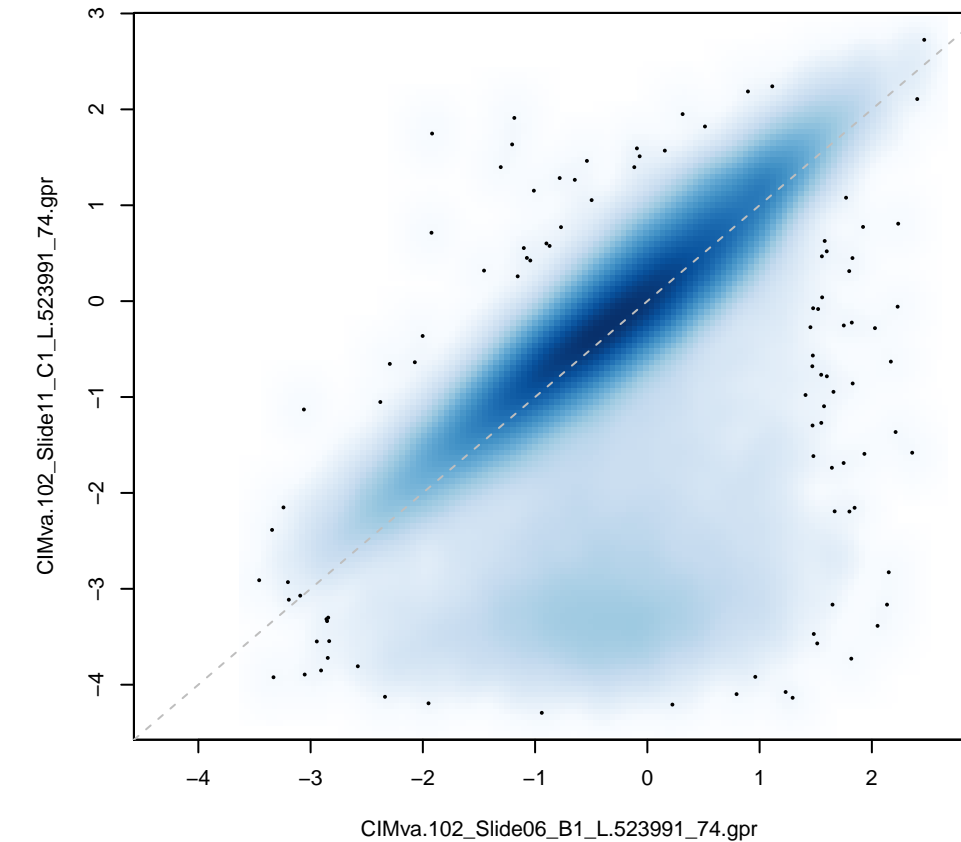

Replicate densities (raw) for sample: 524618 (CFS)

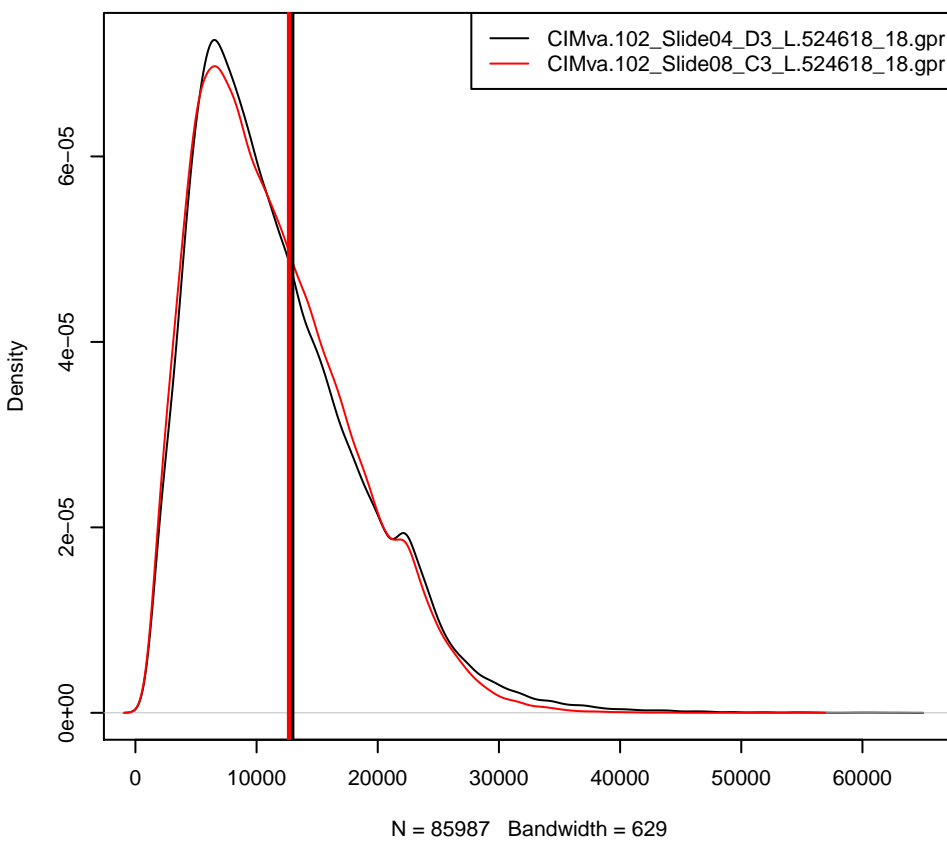

Replicate densities (raw; log2) for sample: 524618 (CFS)

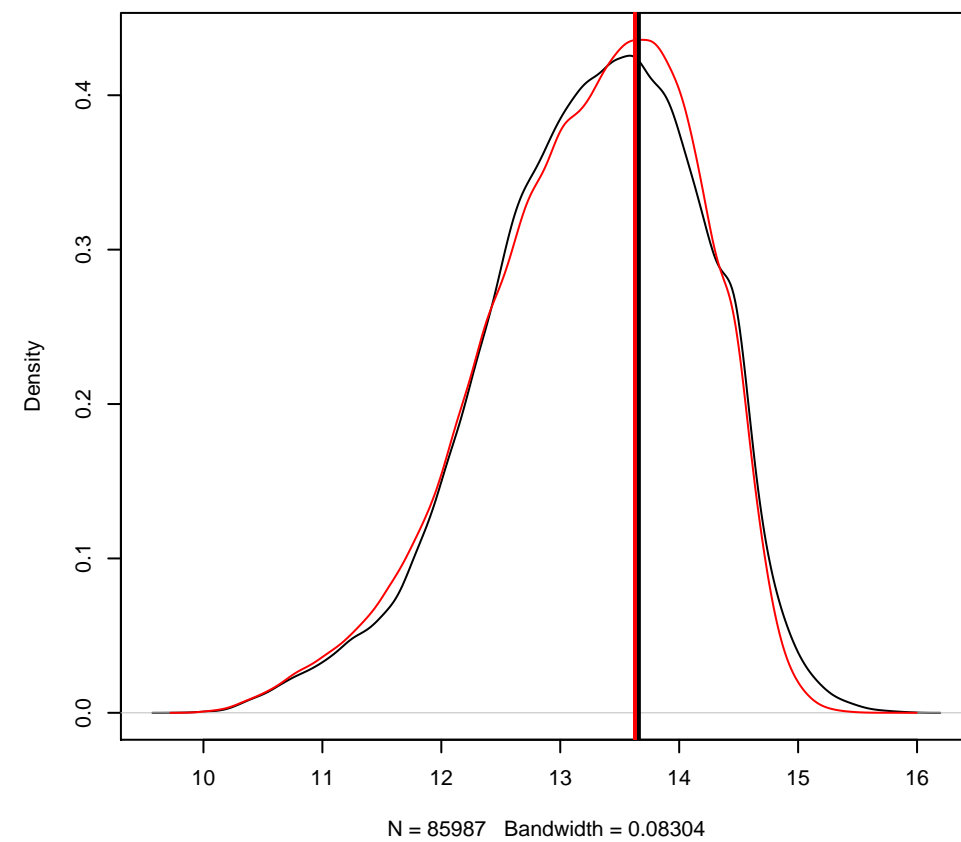

Replicate densities (normalized) for sample: 524618 (CFS)

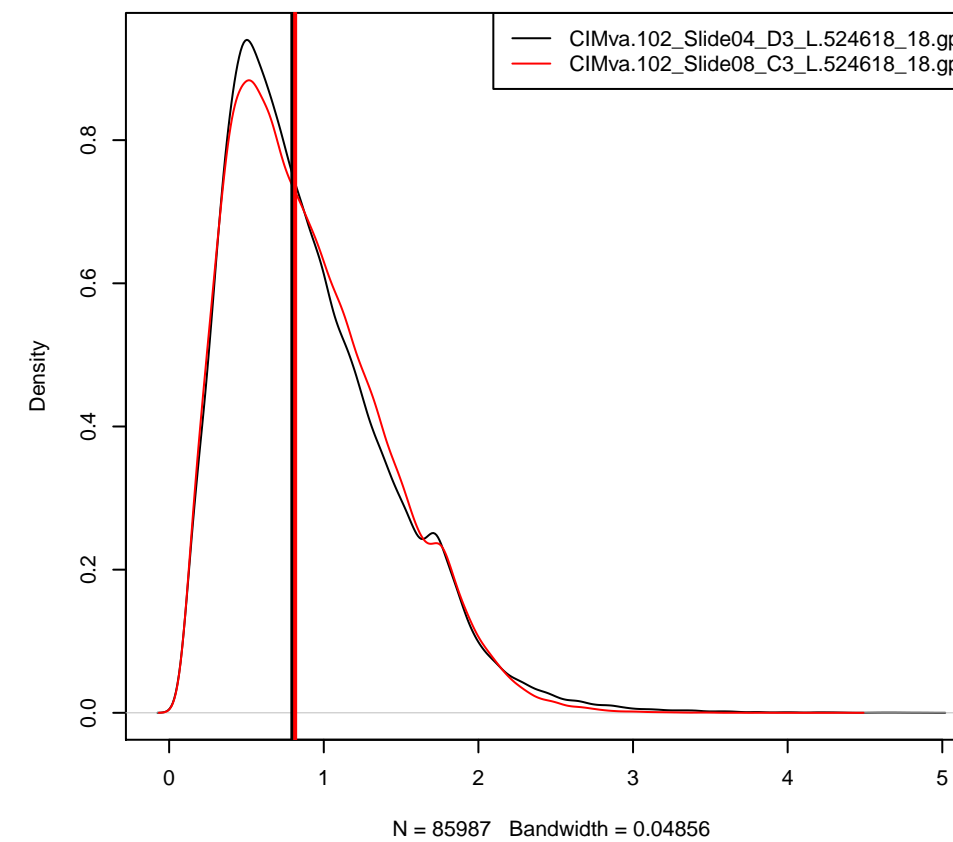

Replicate densities (normalized; log2) for sample: 524618 (CFS)

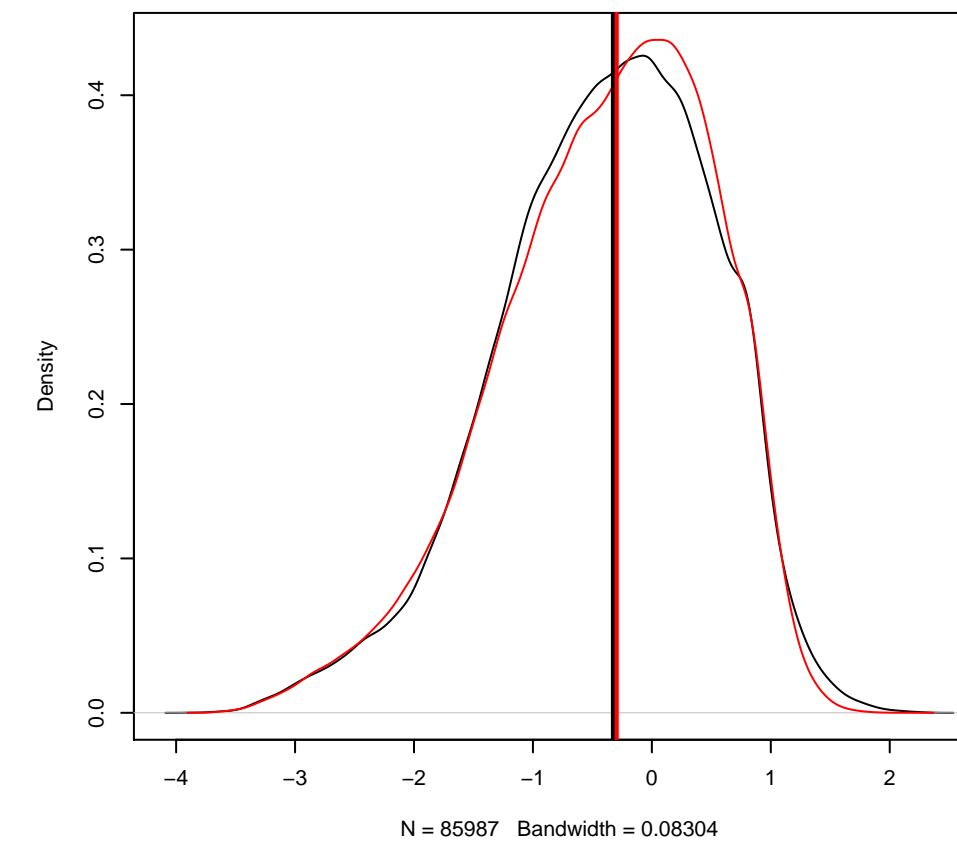

Replicate scatter (raw) for sample: 524618 (CFS)  
Correlation coefficient: 0.87 (Pearson); 0.9 (Spearman)

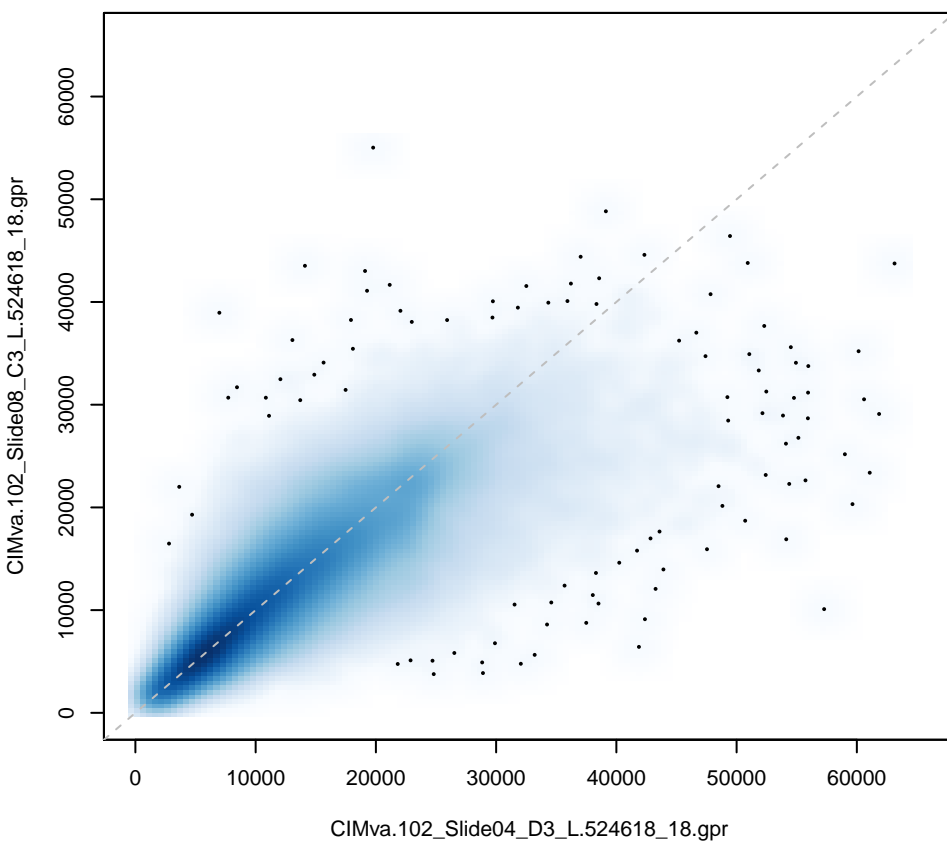

Replicate scatter (raw; log2) for sample: 524618 (CFS)  
Correlation coefficient: 0.9 (Pearson); 0.9 (Spearman)

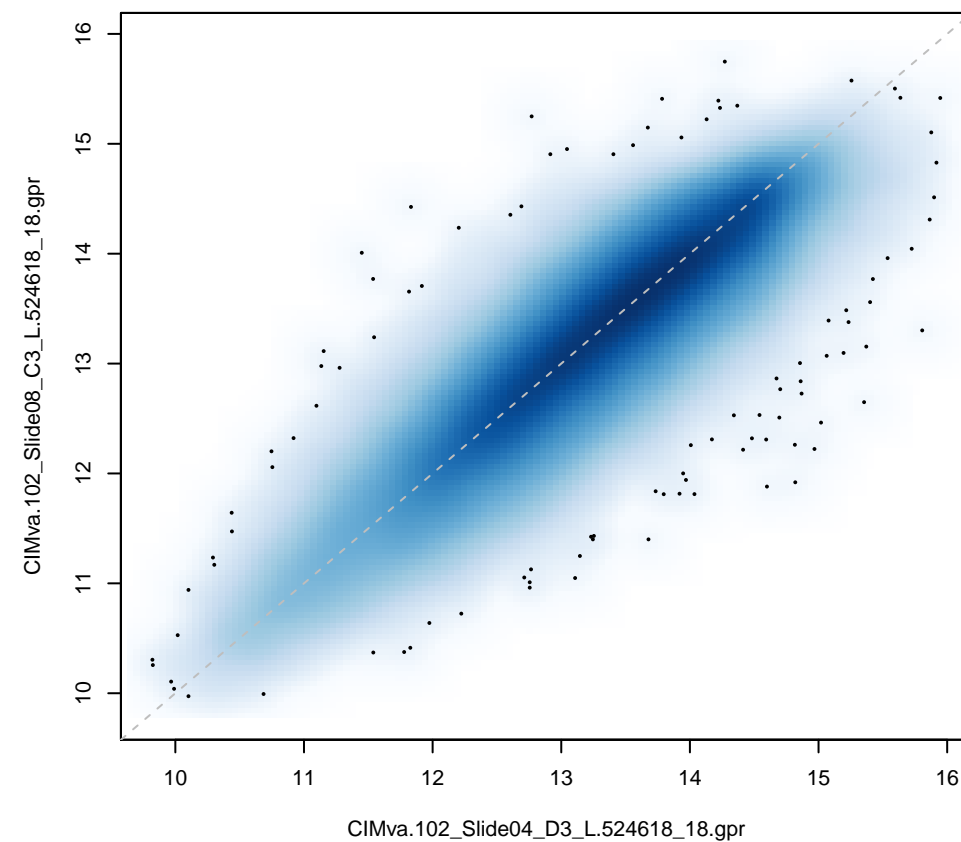

Replicate scatter (normalized) for sample: 524618 (CFS)  
Correlation coefficient: 0.87 (Pearson); 0.9 (Spearman)

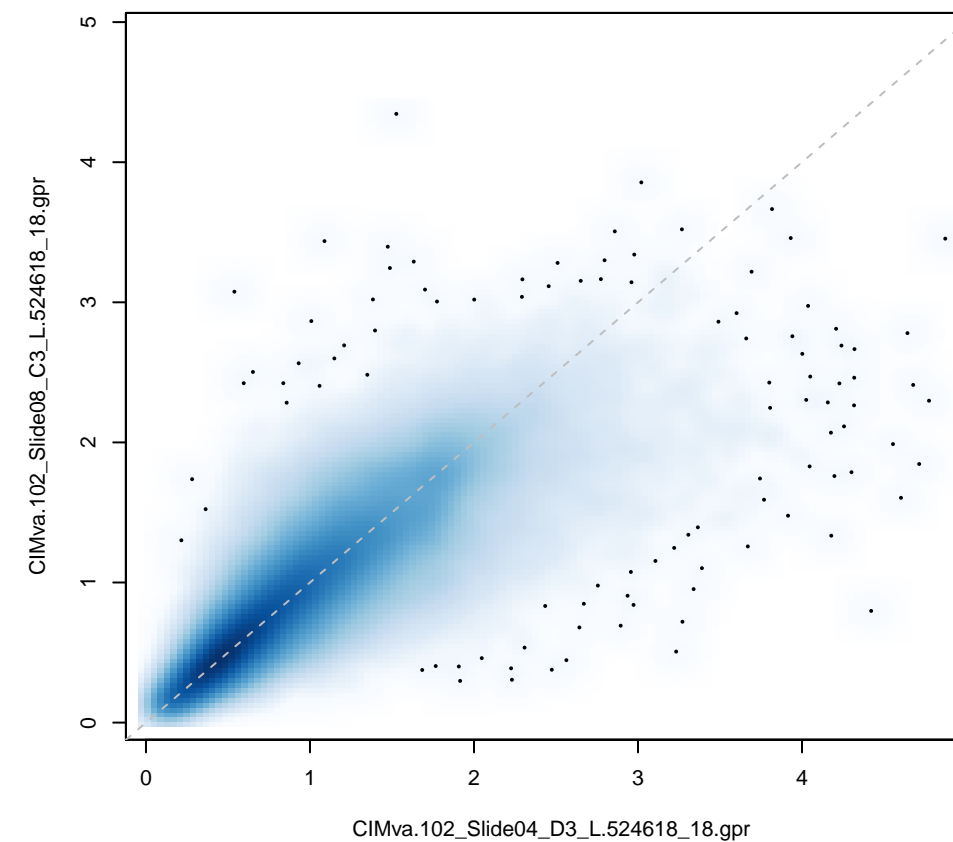

Replicate scatter (normalized; log2) for sample: 524618 (CFS)  
Correlation coefficient: 0.89 (Pearson); 0.9 (Spearman)

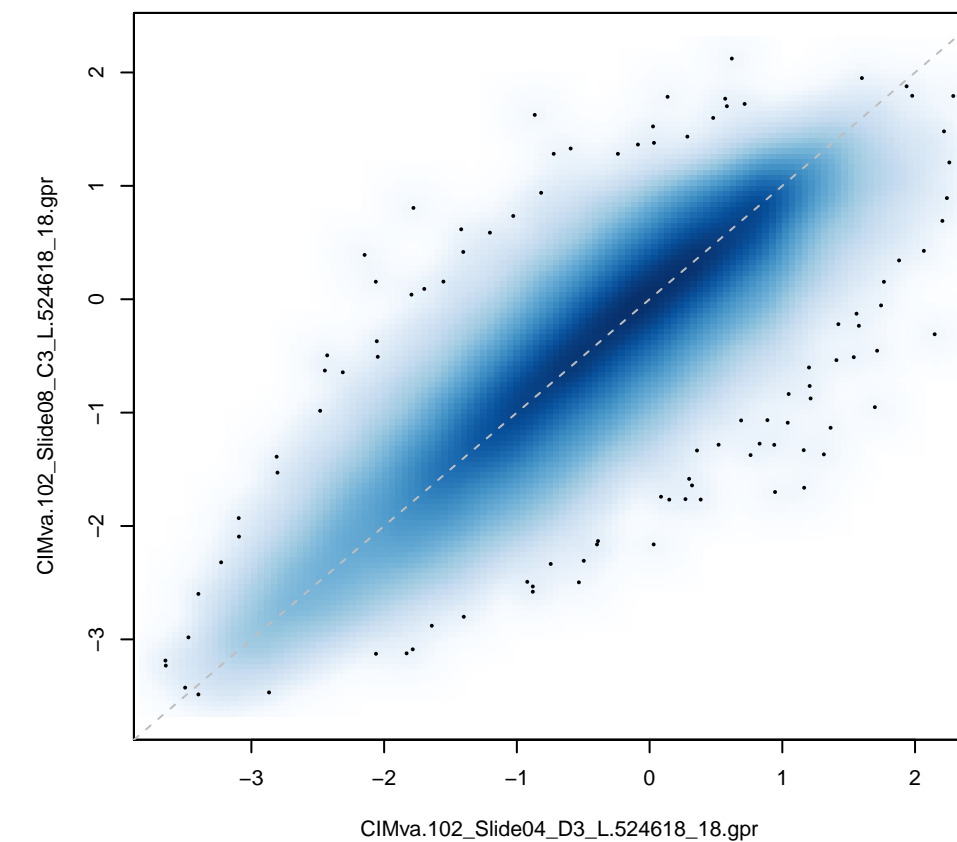

Replicate densities (raw) for sample: 532181 (Controls)

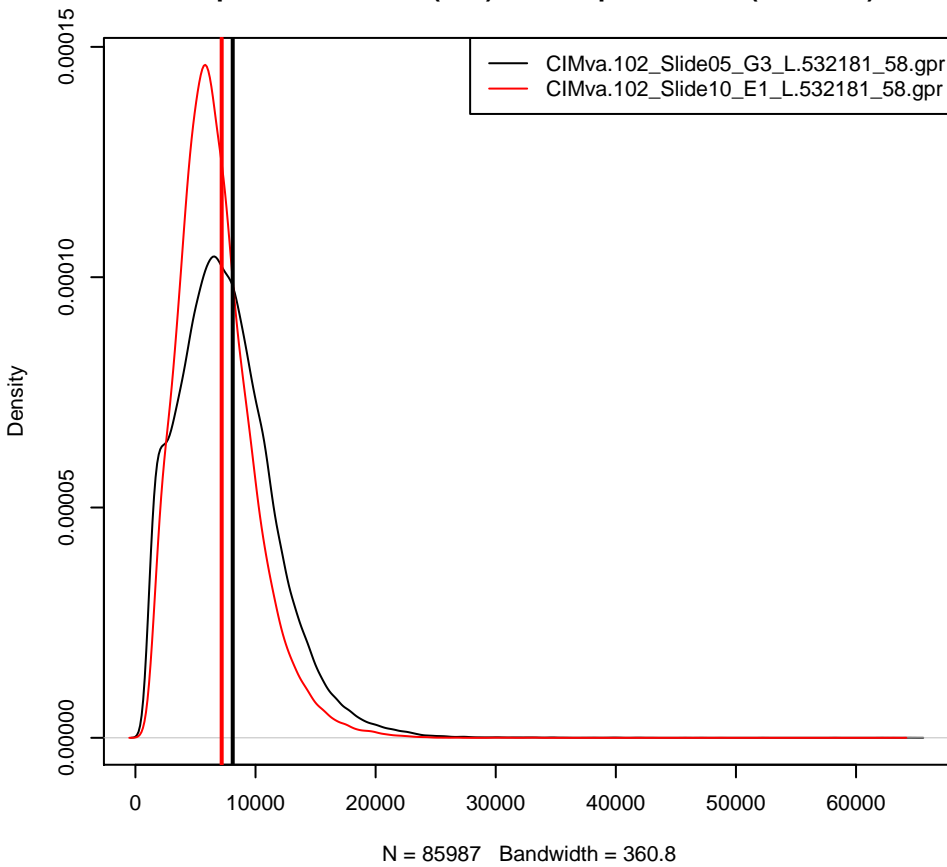

Replicate densities (raw; log2) for sample: 532181 (Controls)

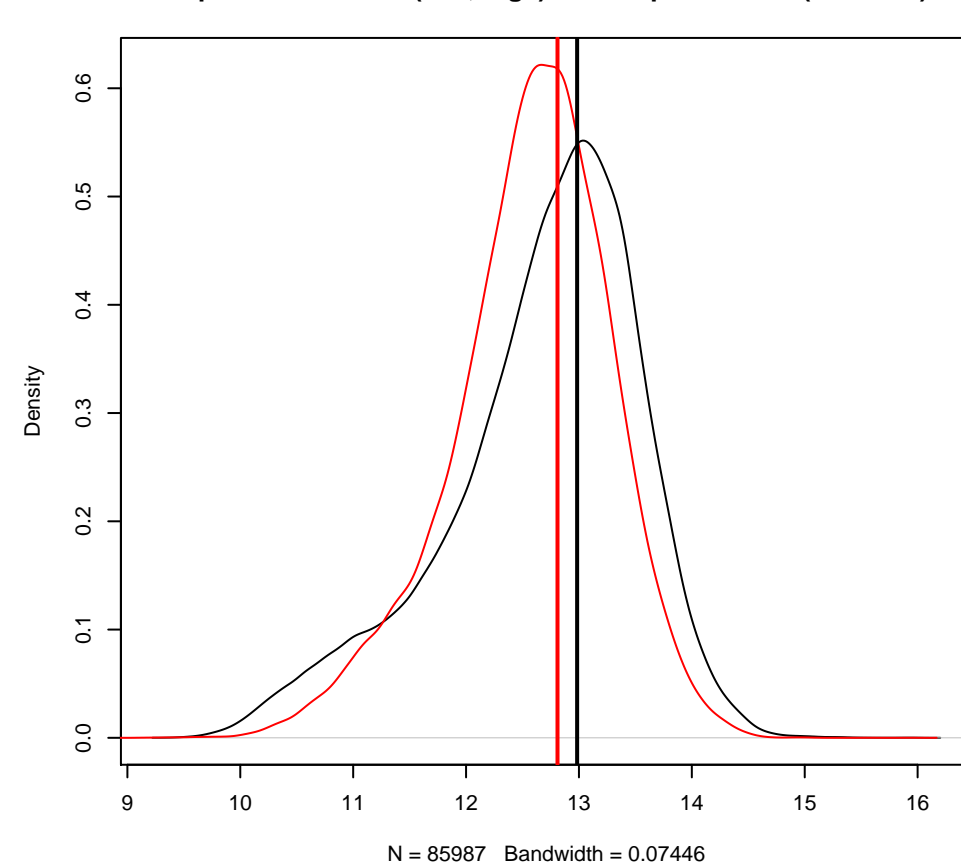

Replicate densities (normalized) for sample: 532181 (Controls)

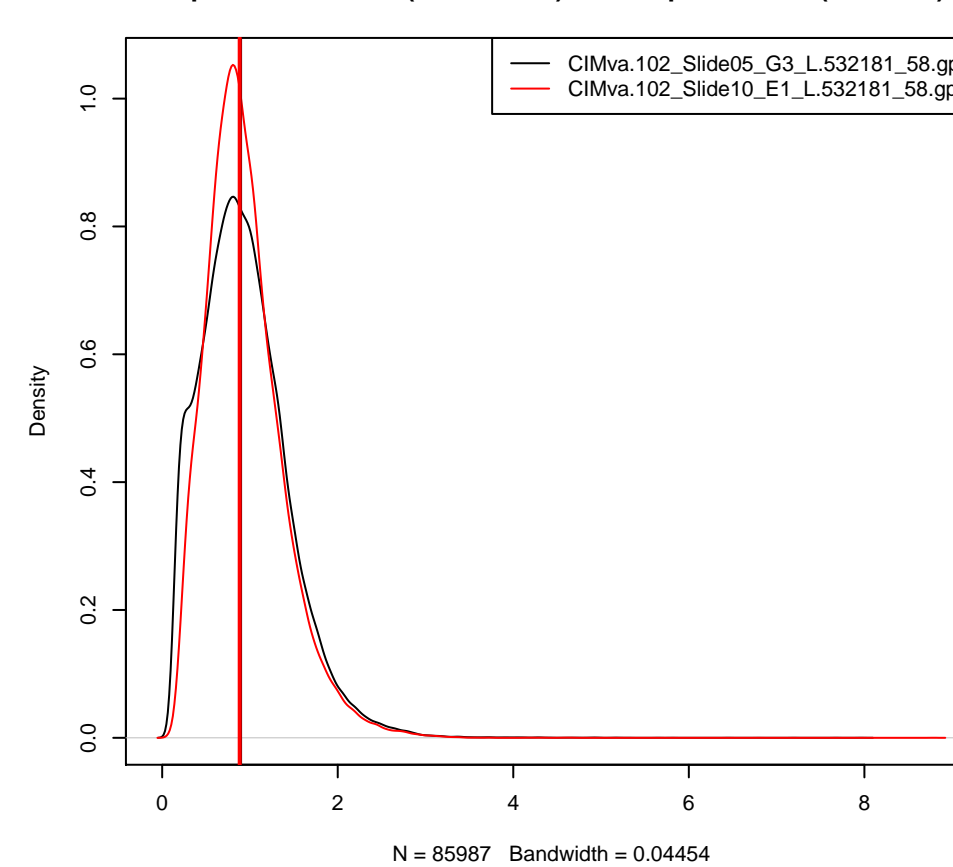

Replicate densities (normalized; log2) for sample: 532181 (Controls)

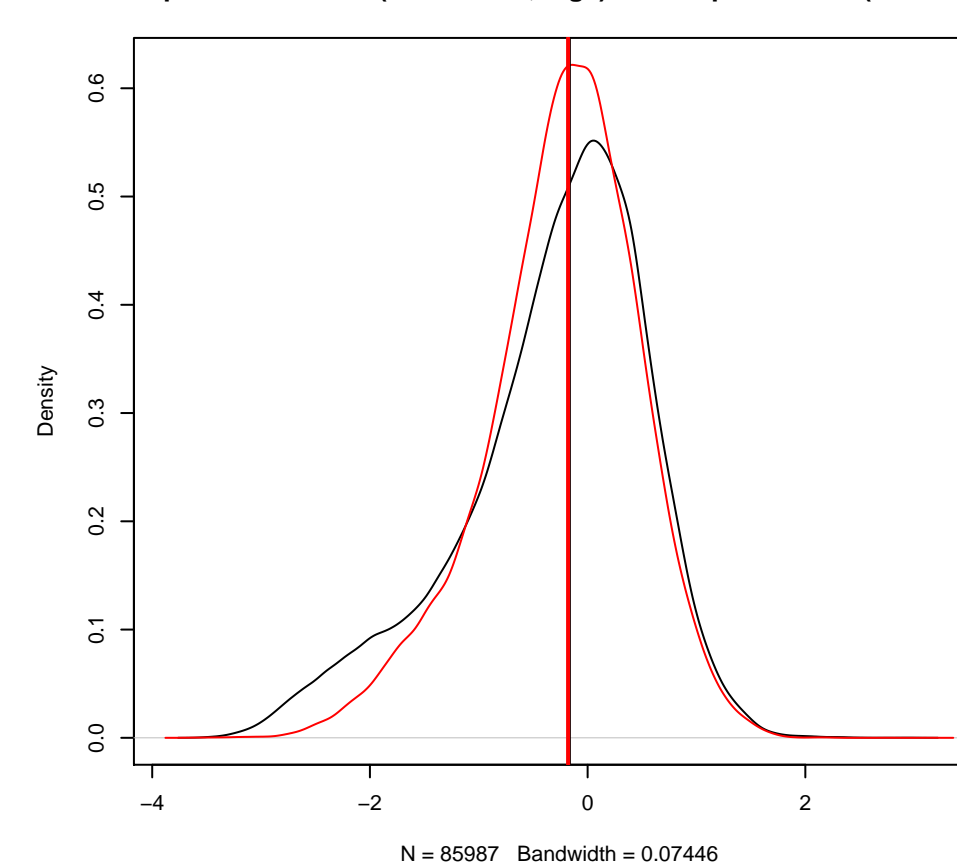

Replicate scatter (raw) for sample: 532181 (Controls)  
Correlation coefficient: 0.85 (Pearson); 0.88 (Spearman)

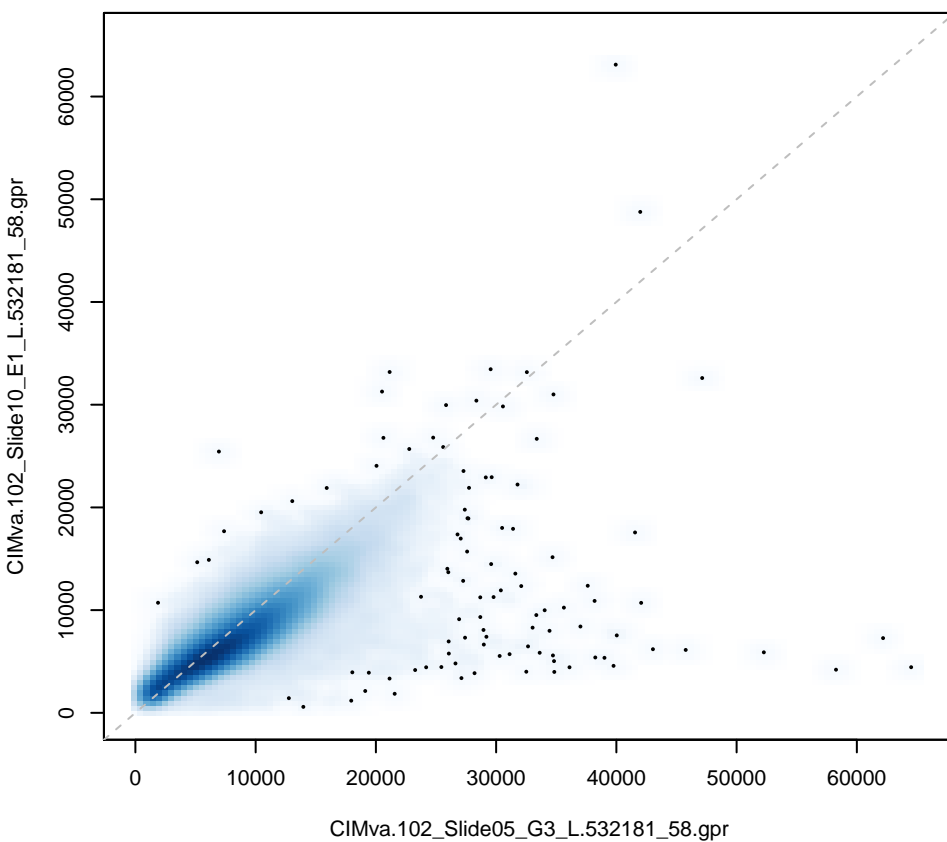

Replicate scatter (raw; log2) for sample: 532181 (Controls)  
Correlation coefficient: 0.88 (Pearson); 0.88 (Spearman)

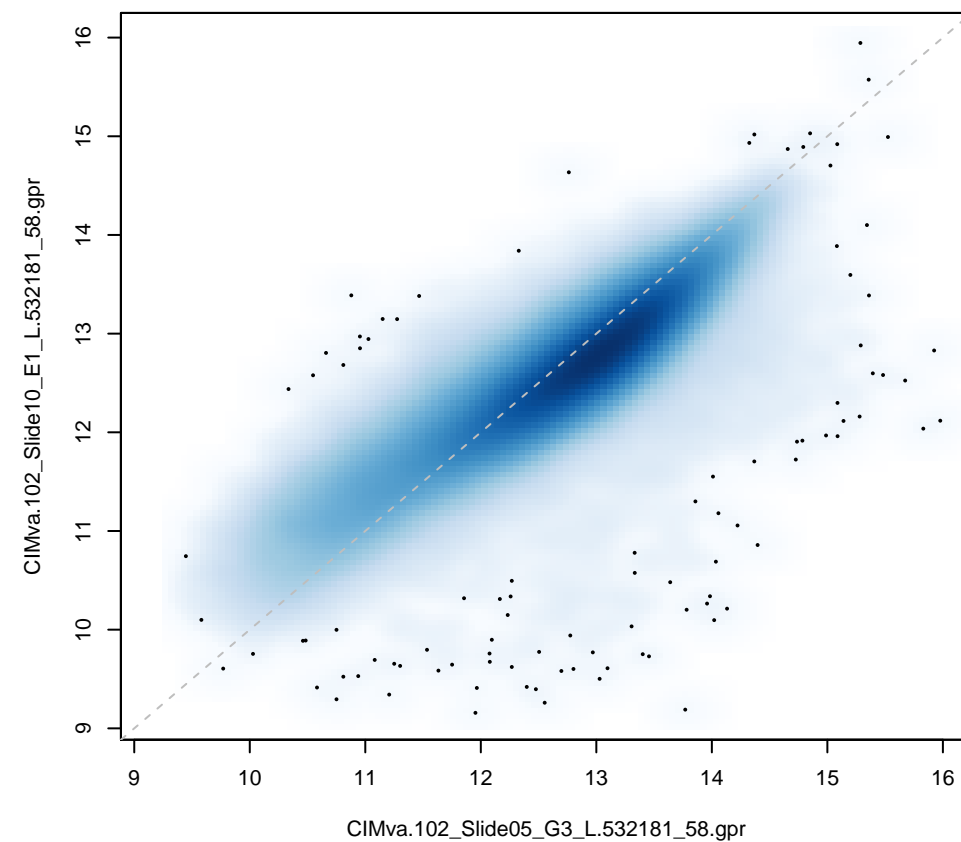

Replicate scatter (normalized) for sample: 532181 (Controls)  
Correlation coefficient: 0.85 (Pearson); 0.88 (Spearman)

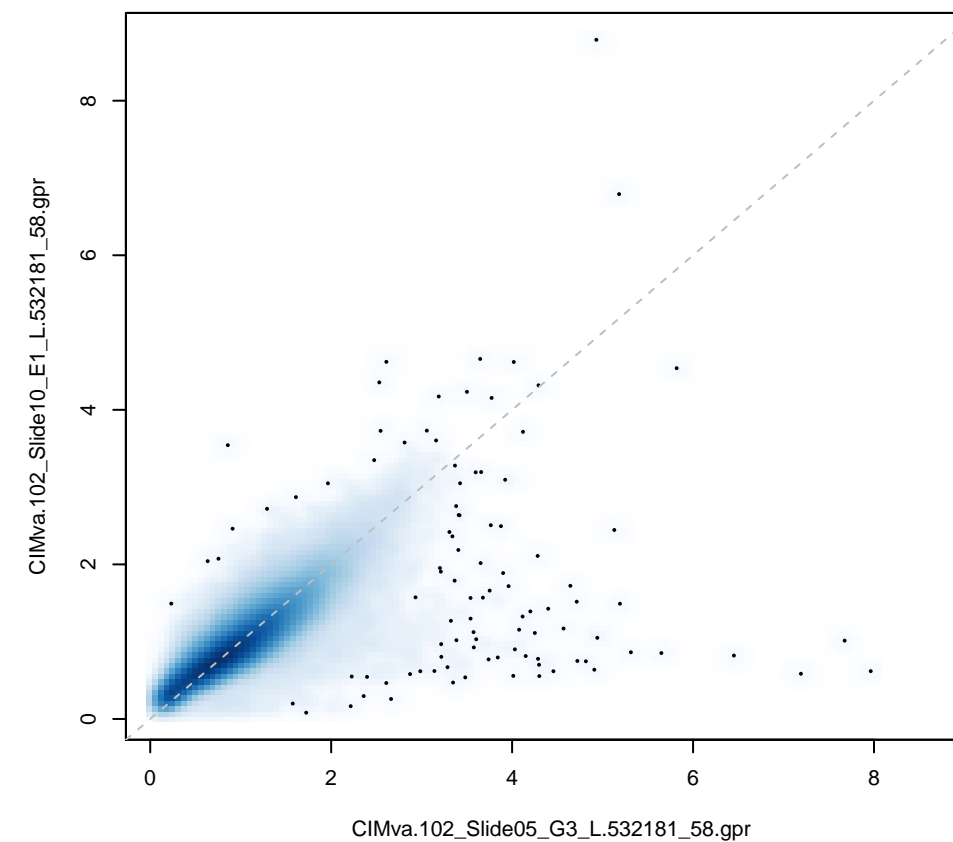

Replicate scatter (normalized; log2) for sample: 532181 (Controls)  
Correlation coefficient: 0.88 (Pearson); 0.88 (Spearman)

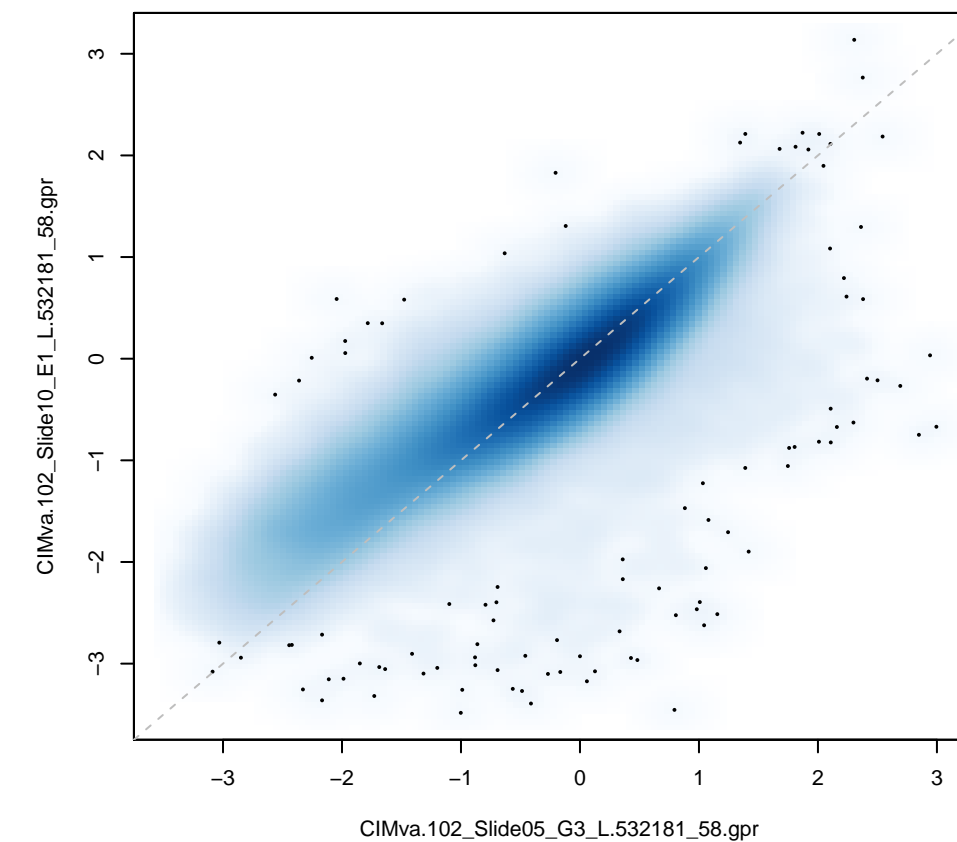

Replicate densities (raw) for sample: 544160 (CFS)

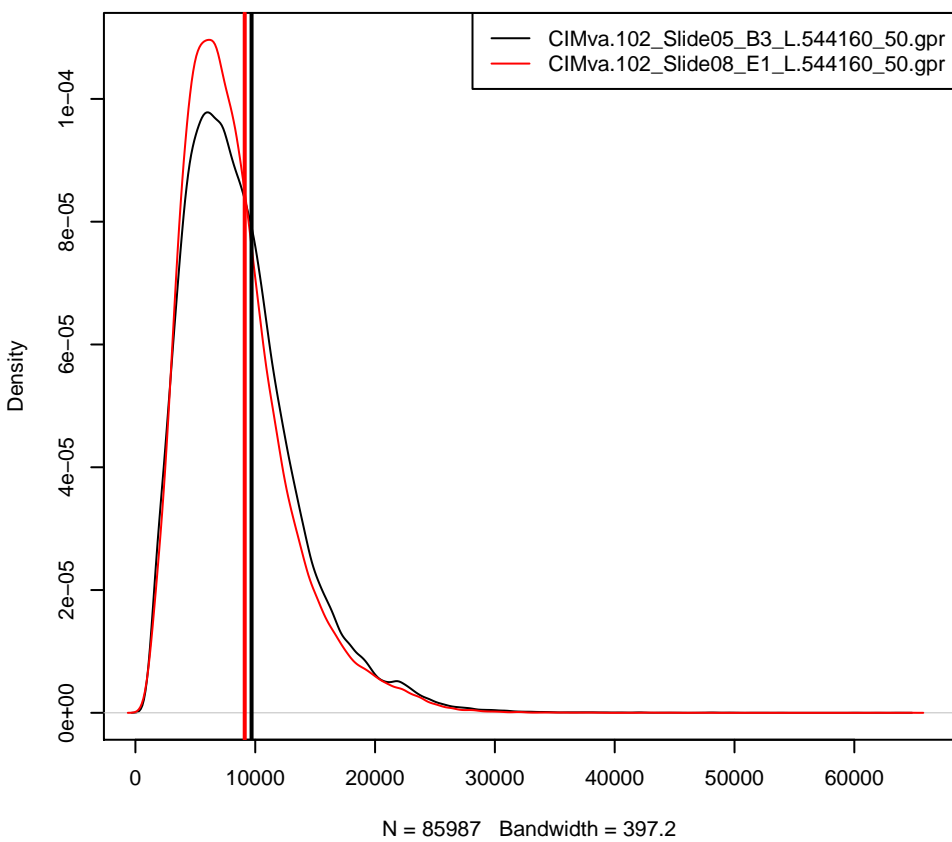

Replicate densities (raw; log2) for sample: 544160 (CFS)

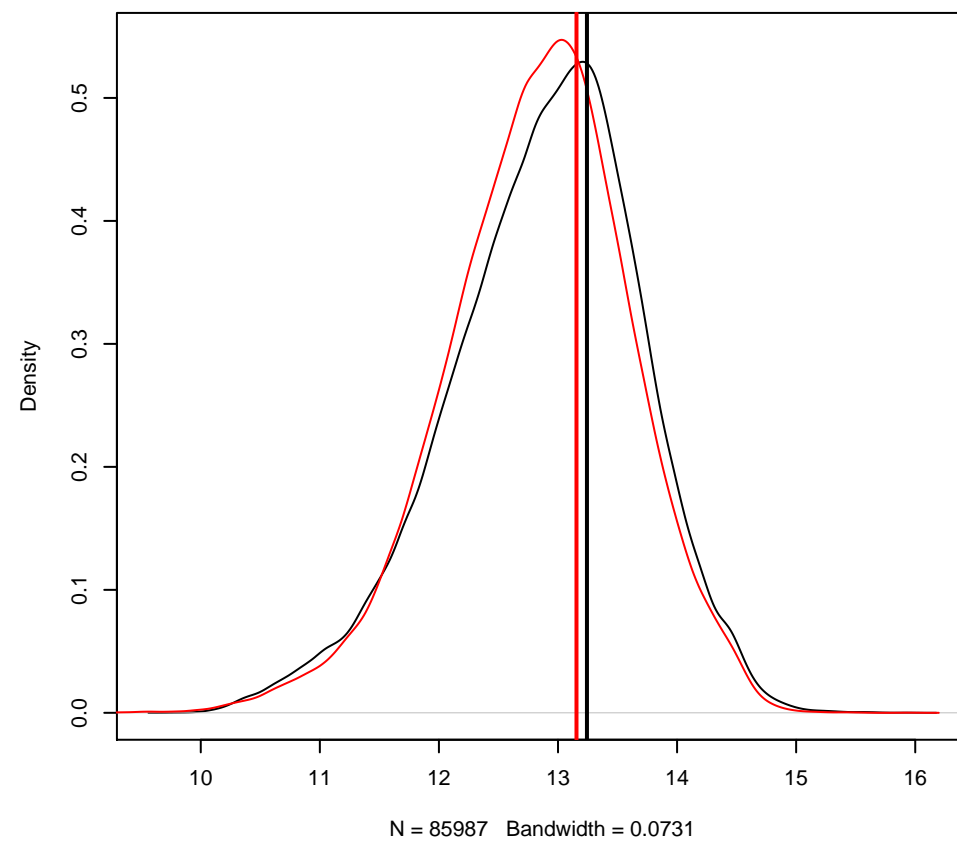

Replicate densities (normalized) for sample: 544160 (CFS)

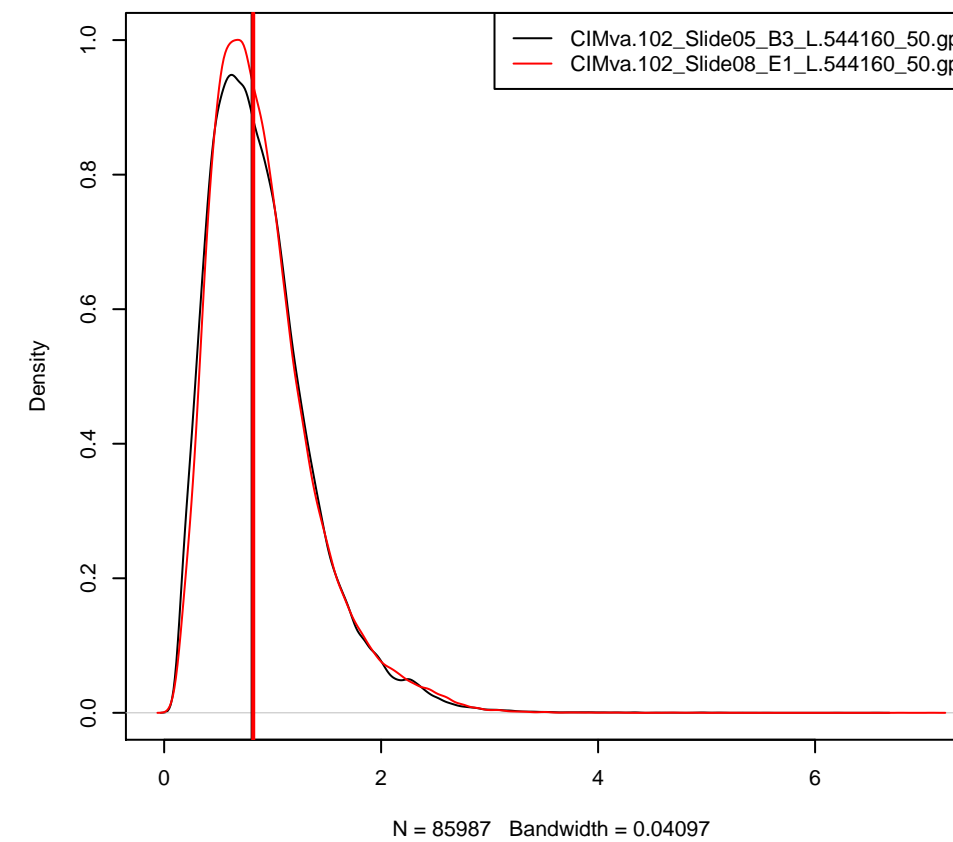

Replicate densities (normalized; log2) for sample: 544160 (CFS)

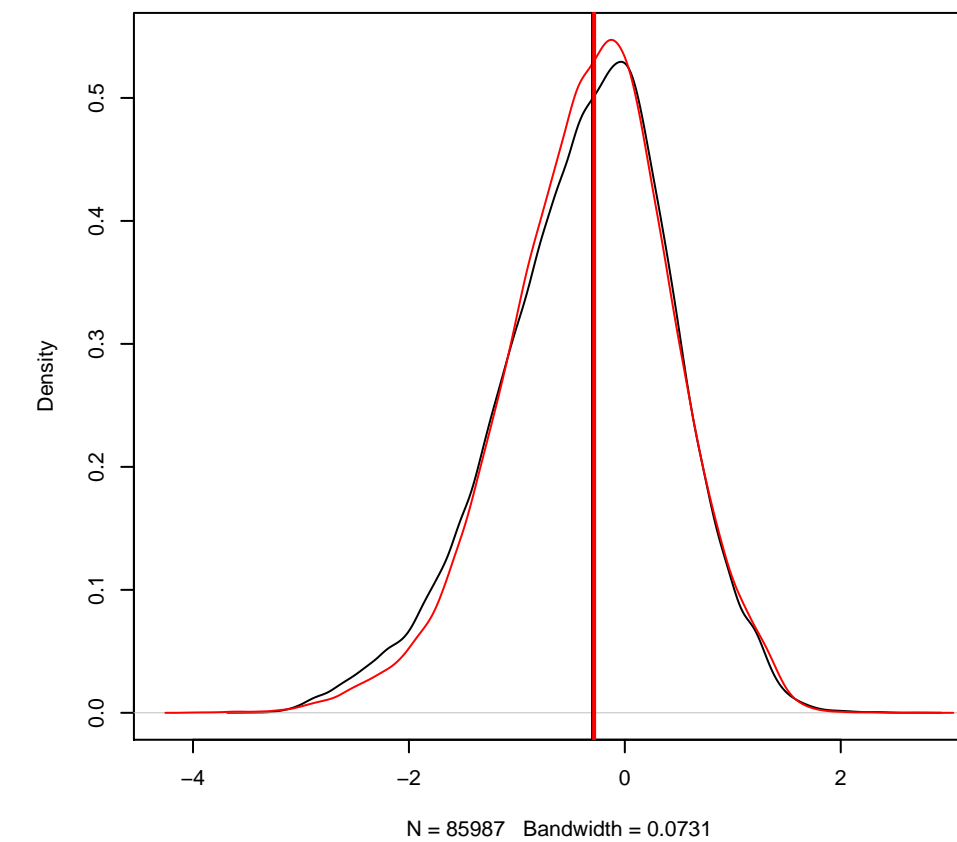

Replicate scatter (raw) for sample: 544160 (CFS)  
Correlation coefficient: 0.87 (Pearson); 0.89 (Spearman)

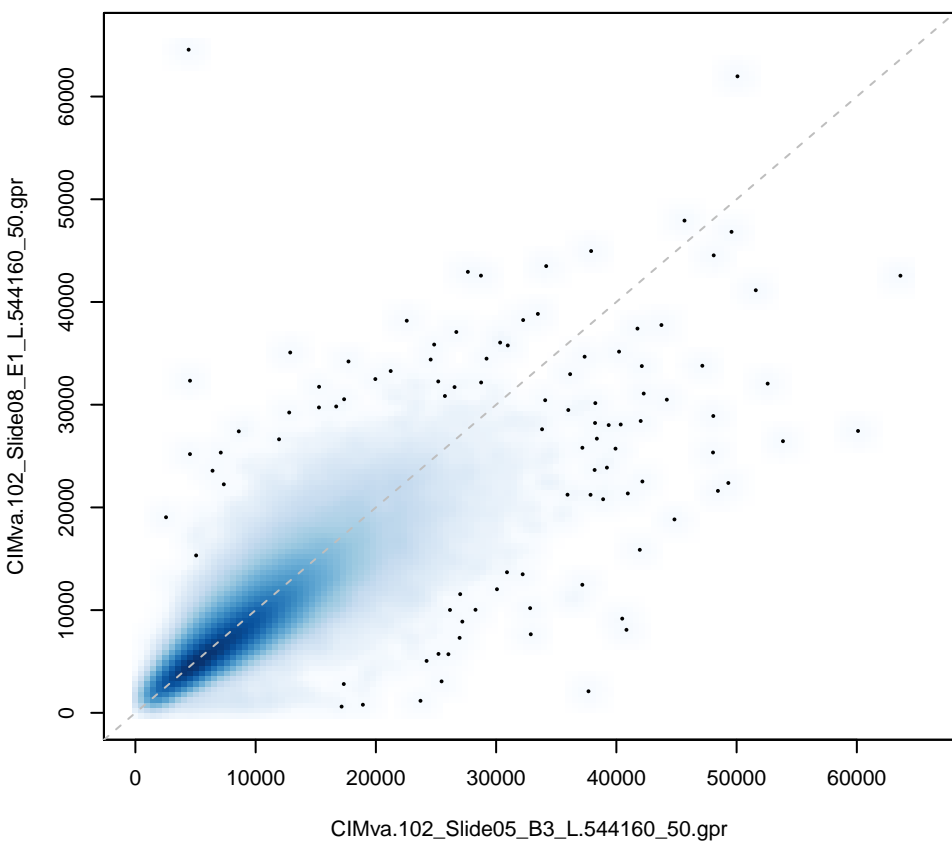

Replicate scatter (raw; log2) for sample: 544160 (CFS)  
Correlation coefficient: 0.89 (Pearson); 0.89 (Spearman)

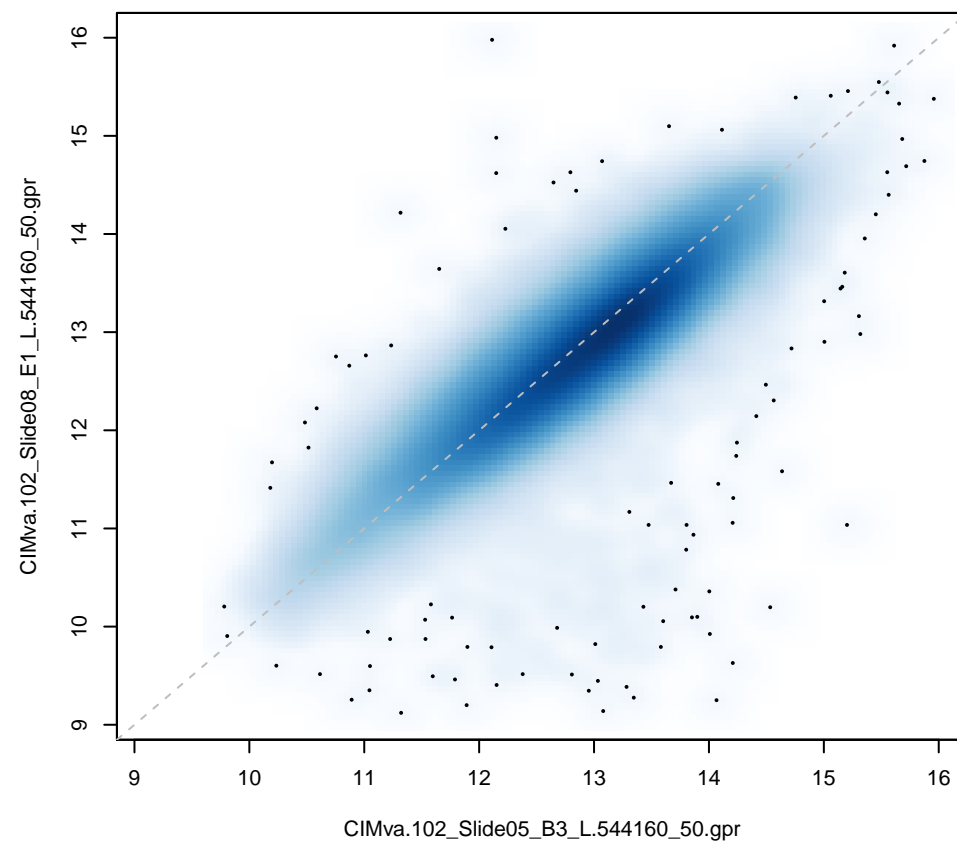

Replicate scatter (normalized) for sample: 544160 (CFS)  
Correlation coefficient: 0.87 (Pearson); 0.89 (Spearman)

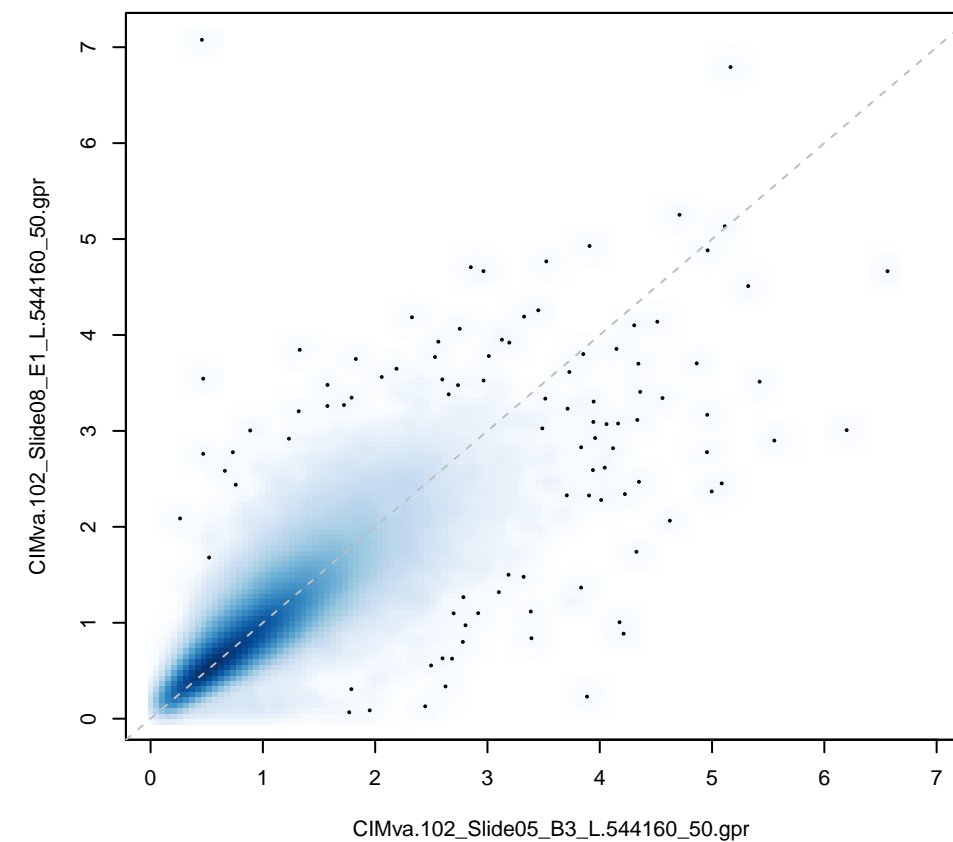

Replicate scatter (normalized; log2) for sample: 544160 (CFS)  
Correlation coefficient: 0.88 (Pearson); 0.89 (Spearman)

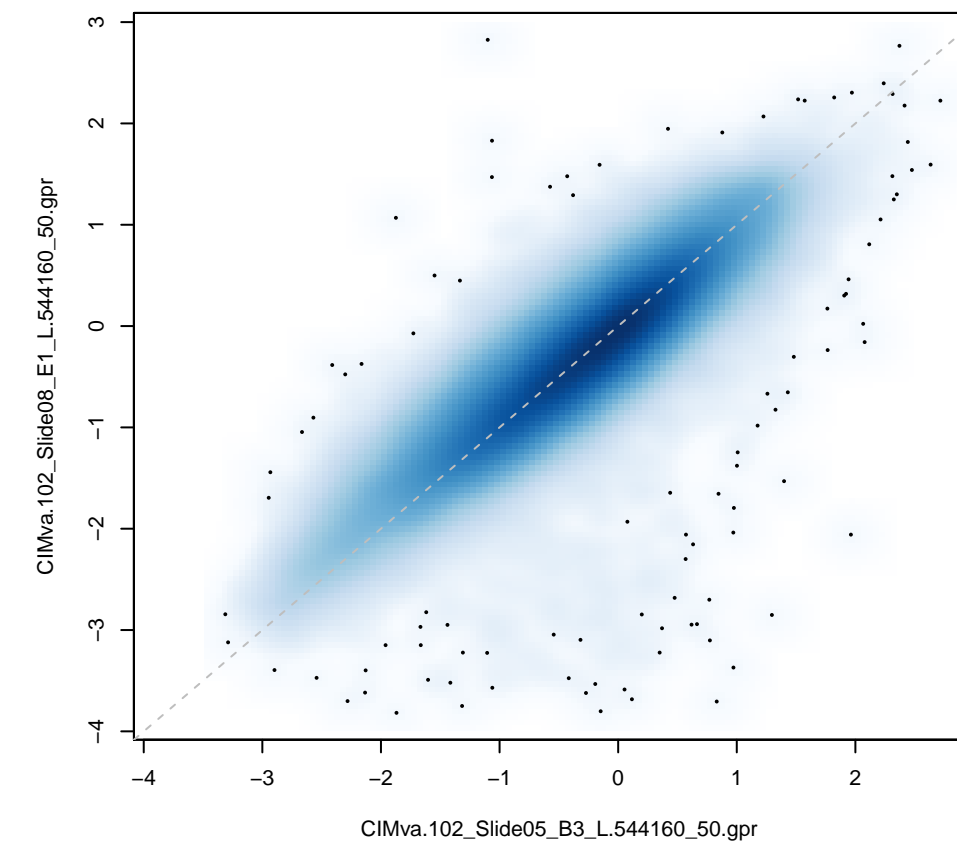

Replicate densities (raw) for sample: 546336 (CFS)

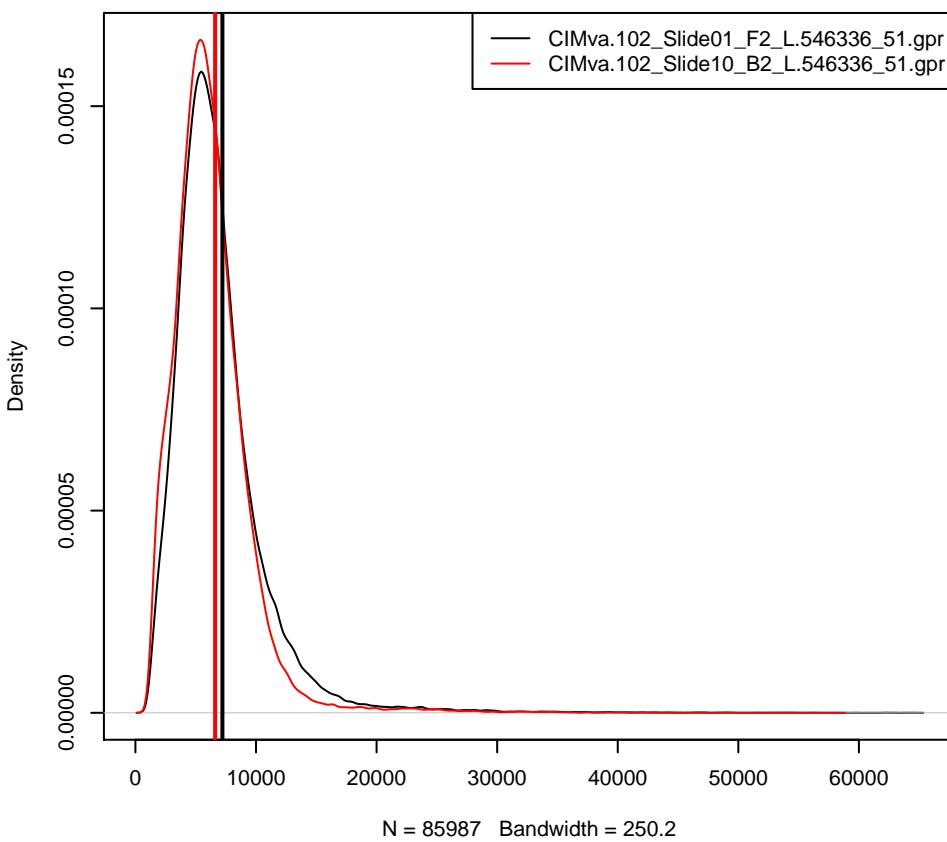

Replicate densities (raw; log2) for sample: 546336 (CFS)

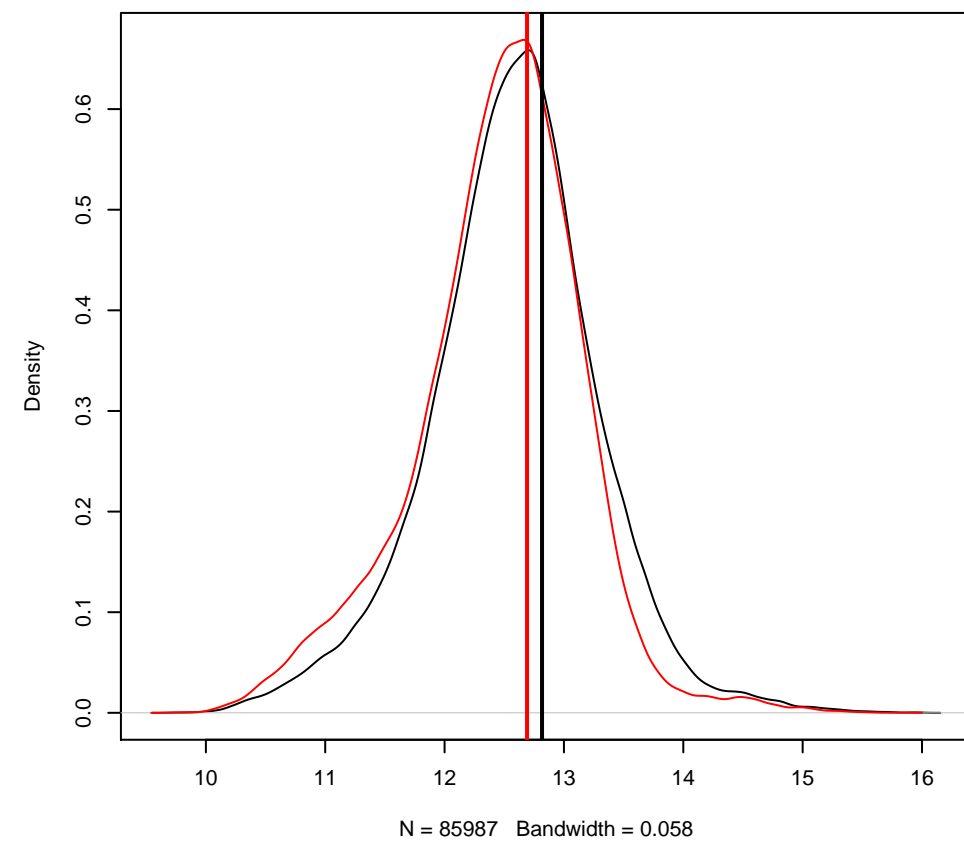

Replicate densities (normalized) for sample: 546336 (CFS)

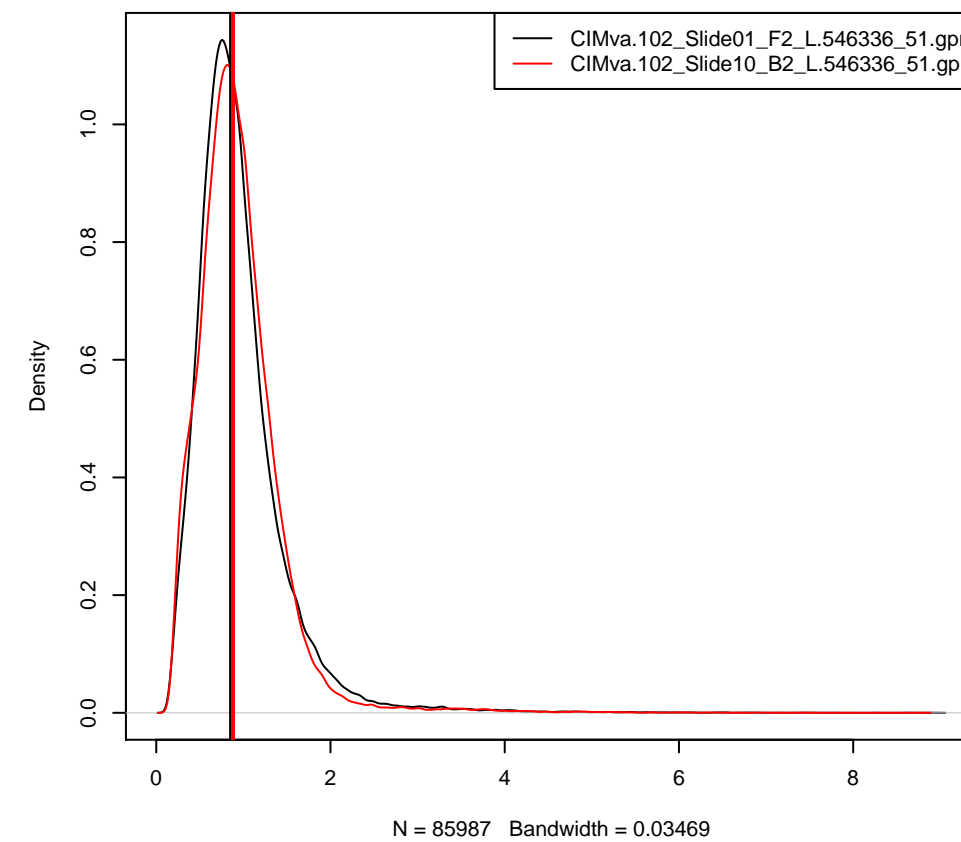

Replicate densities (normalized; log2) for sample: 546336 (CFS)

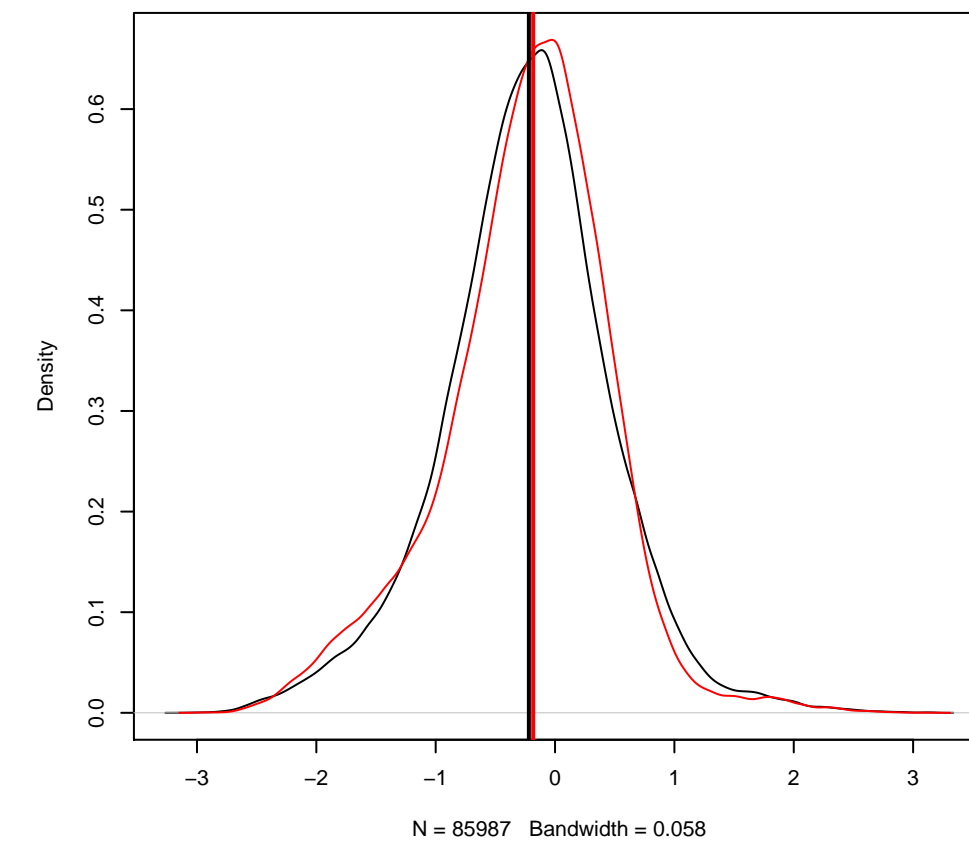

Replicate scatter (raw) for sample: 546336 (CFS)  
Correlation coefficient: 0.86 (Pearson); 0.83 (Spearman)

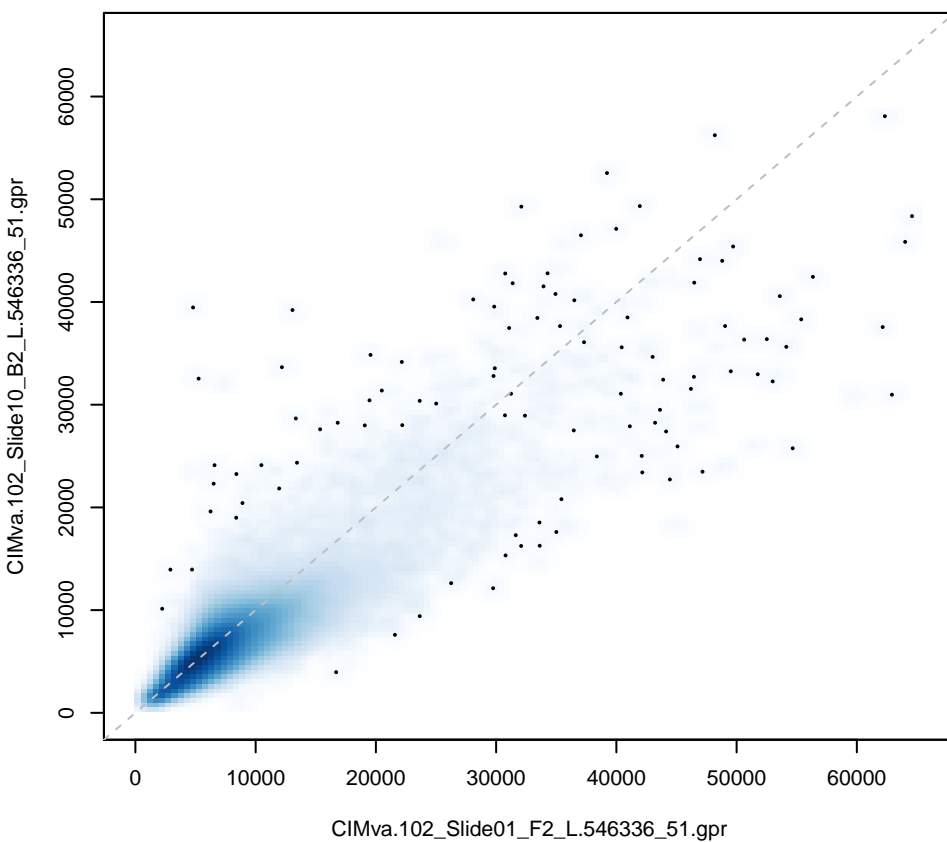

Replicate scatter (raw; log2) for sample: 546336 (CFS)  
Correlation coefficient: 0.86 (Pearson); 0.83 (Spearman)

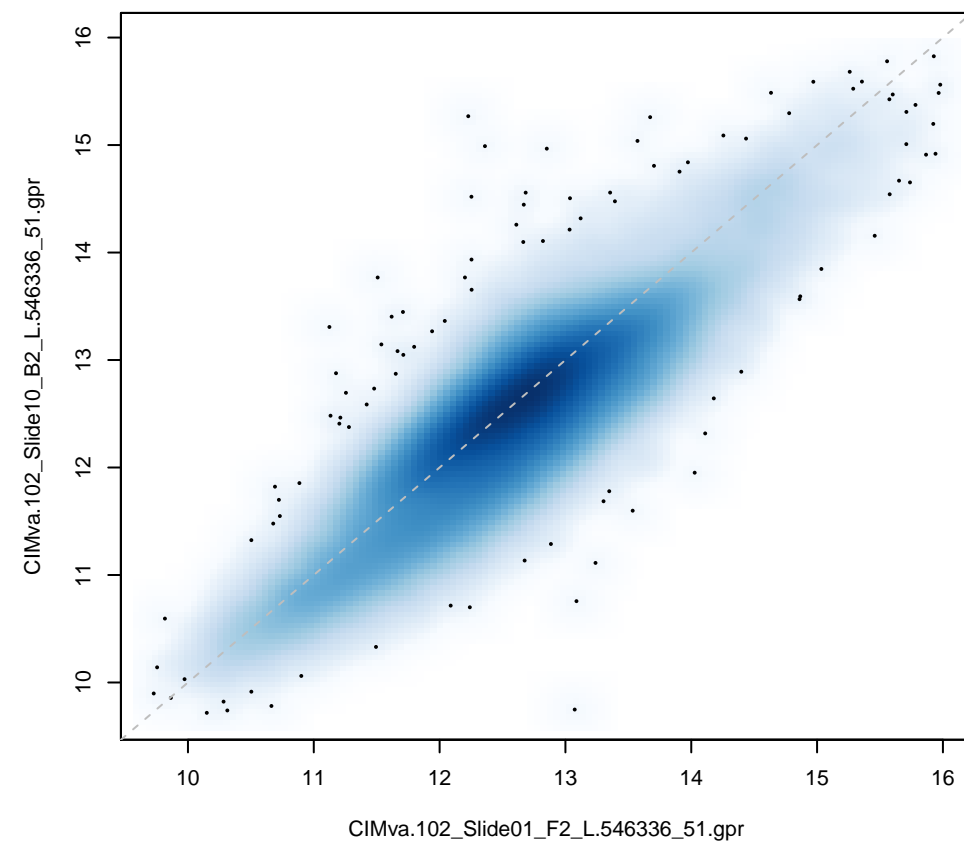

Replicate scatter (normalized) for sample: 546336 (CFS)  
Correlation coefficient: 0.86 (Pearson); 0.83 (Spearman)

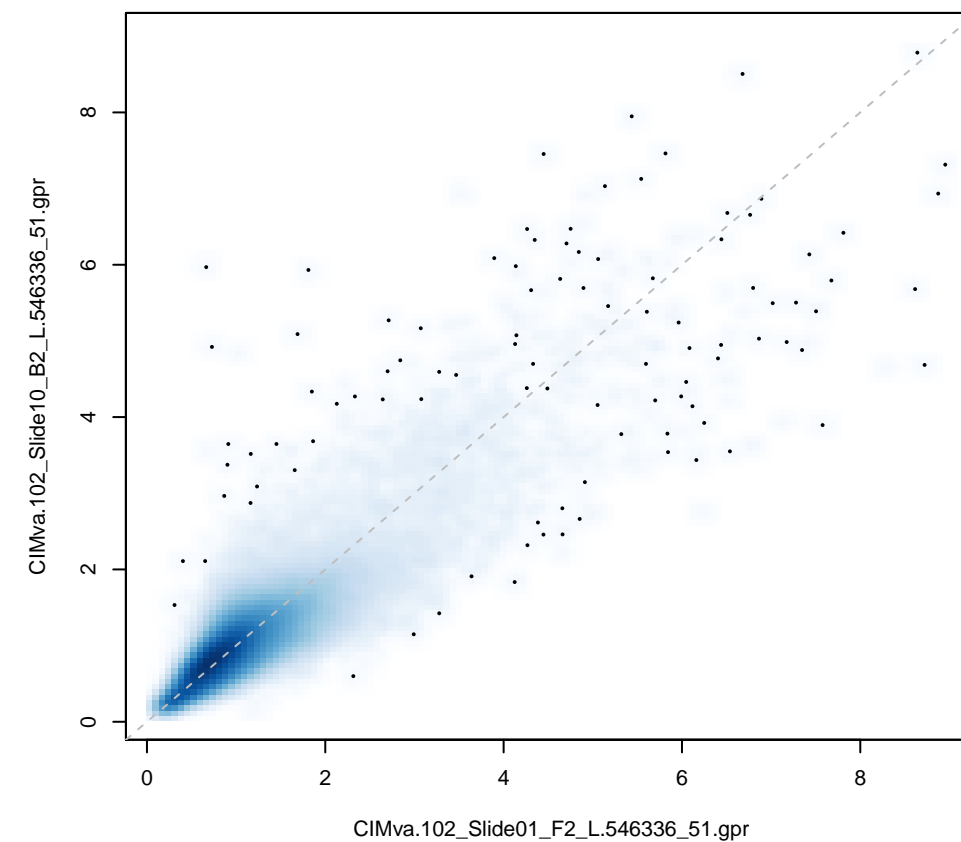

Replicate scatter (normalized; log2) for sample: 546336 (CFS)  
Correlation coefficient: 0.85 (Pearson); 0.83 (Spearman)

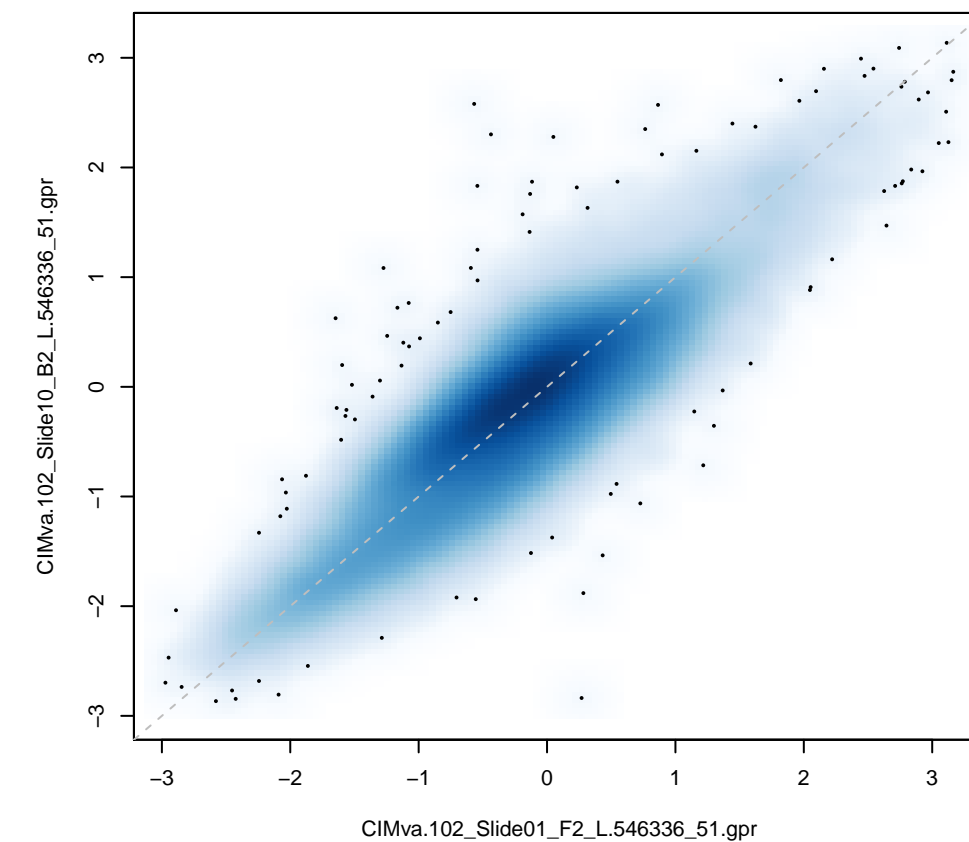



Replicate densities (raw) for sample: 546432 (Controls)

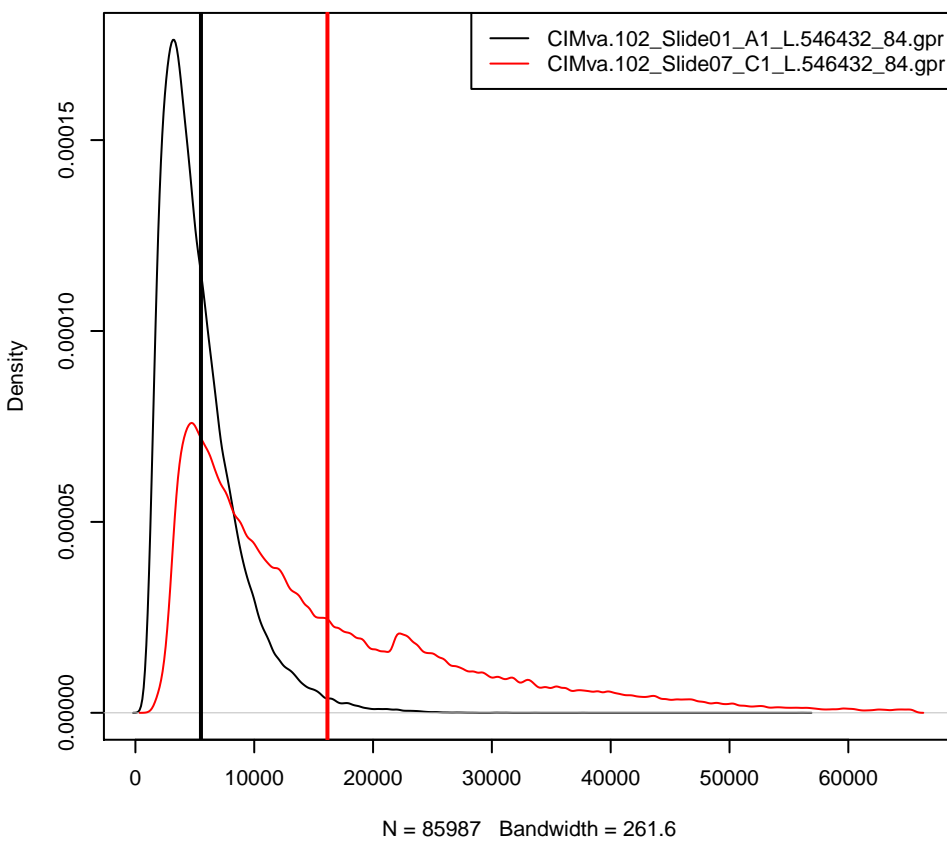

Replicate densities (raw; log2) for sample: 546432 (Controls)

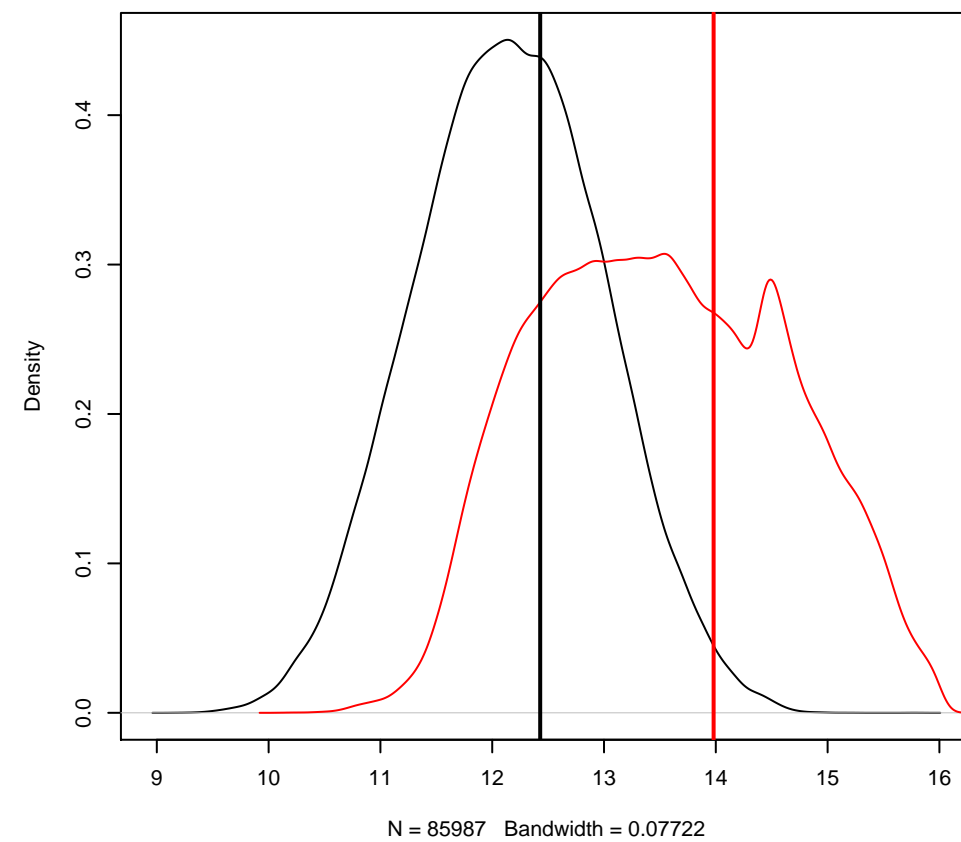

Replicate densities (normalized) for sample: 546432 (Controls)

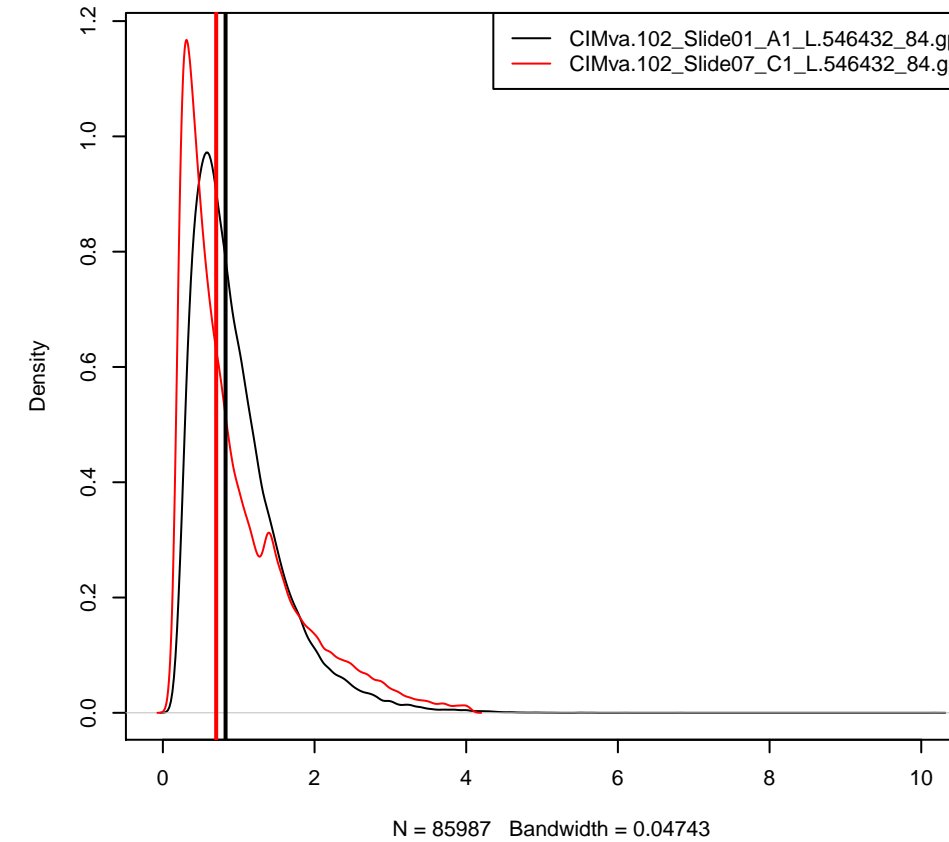

Replicate densities (normalized; log2) for sample: 546432 (Controls)

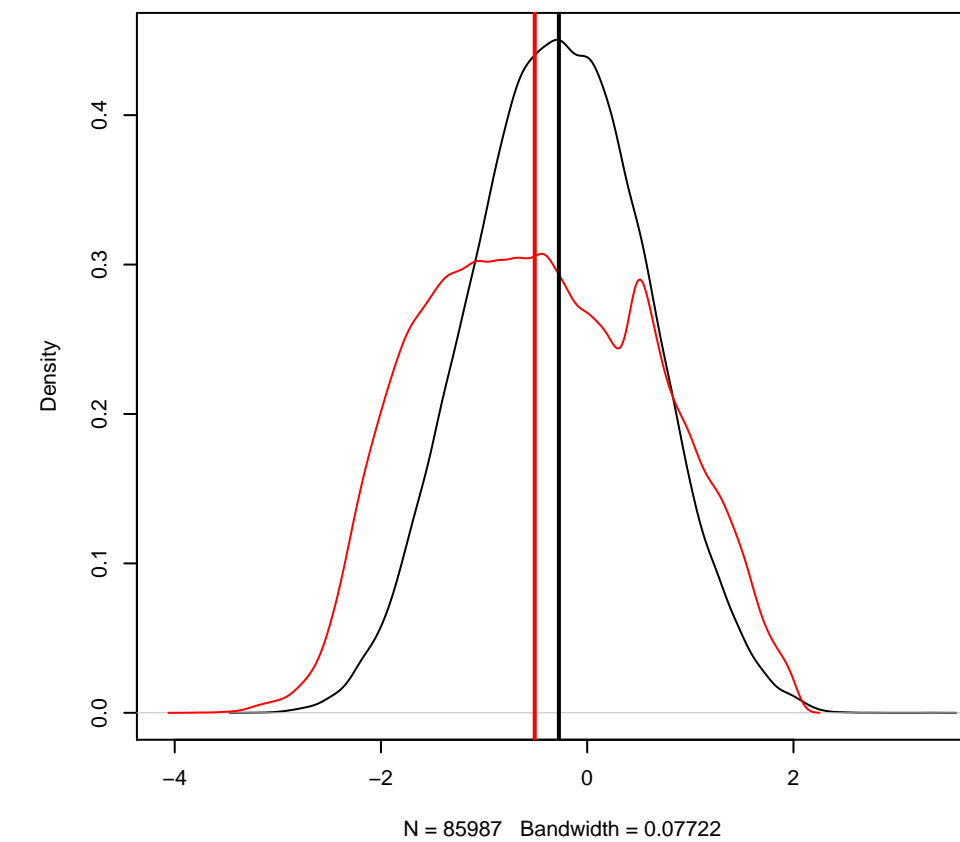

Replicate scatter (raw) for sample: 546432 (Controls)  
Correlation coefficient: 0.58 (Pearson); 0.6 (Spearman)

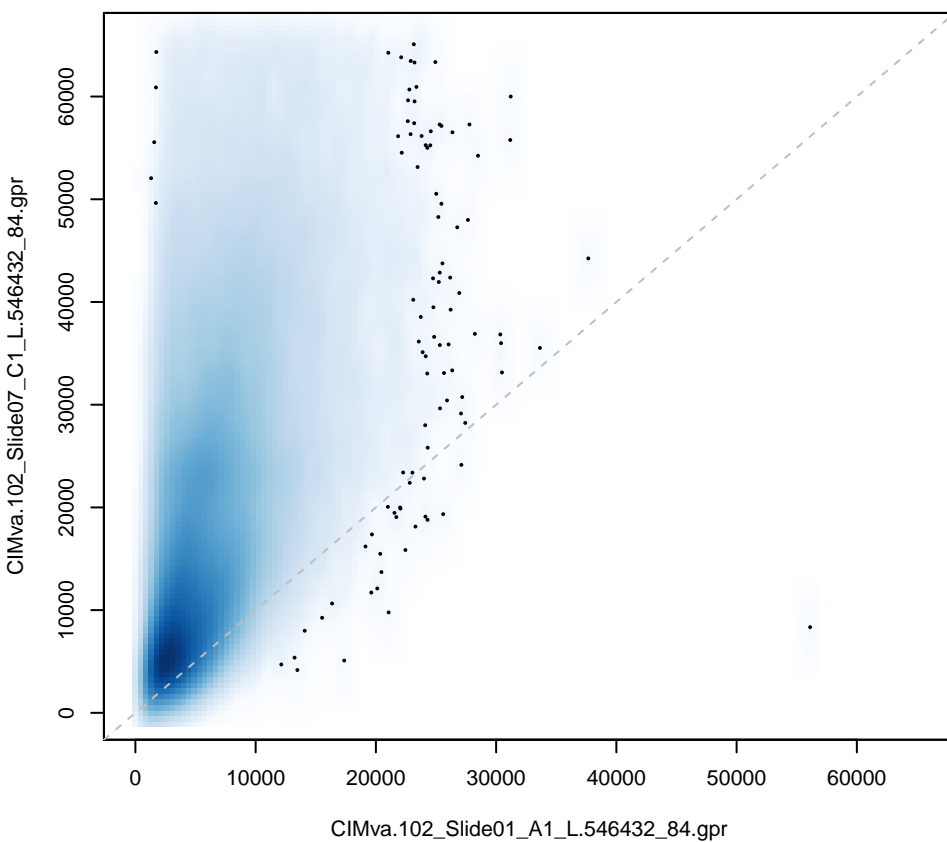

Replicate scatter (raw; log2) for sample: 546432 (Controls)  
Correlation coefficient: 0.62 (Pearson); 0.6 (Spearman)

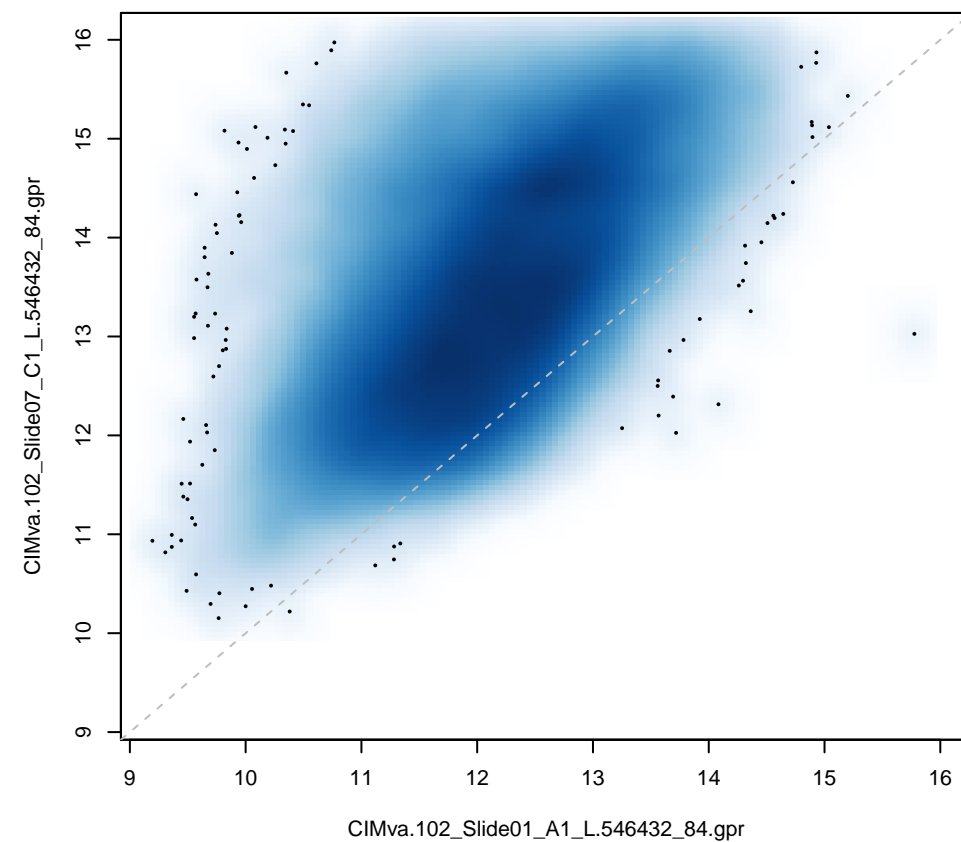

Replicate scatter (normalized) for sample: 546432 (Controls)  
Correlation coefficient: 0.58 (Pearson); 0.6 (Spearman)

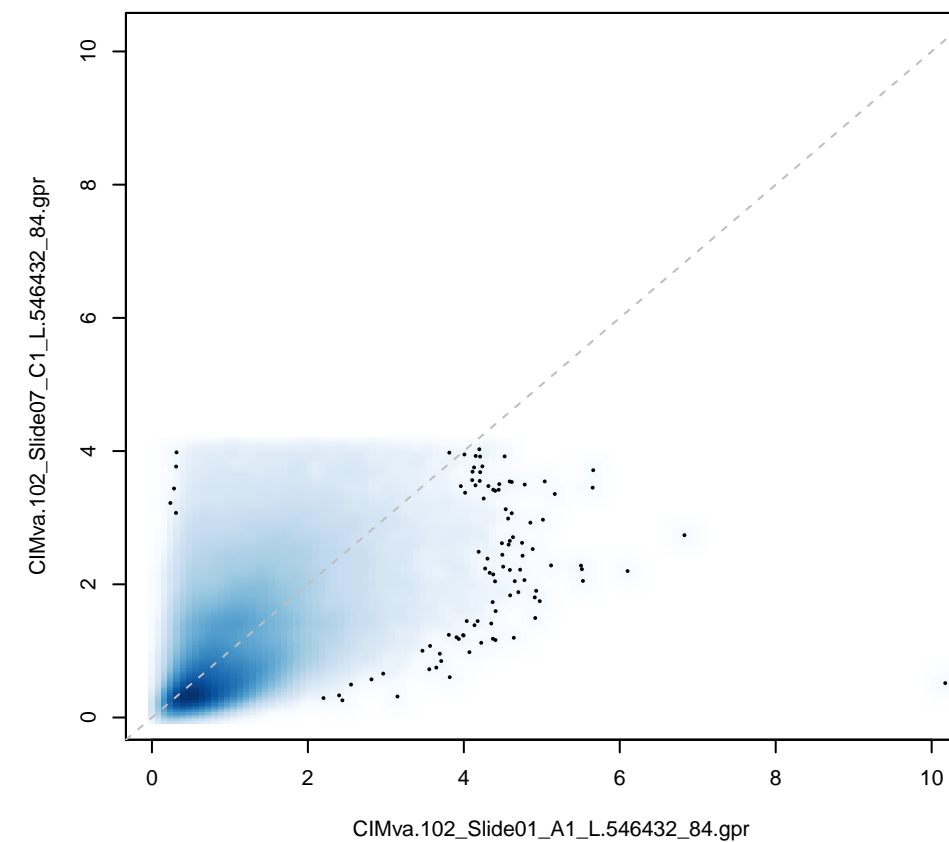

Replicate scatter (normalized; log2) for sample: 546432 (Controls)  
Correlation coefficient: 0.61 (Pearson); 0.6 (Spearman)

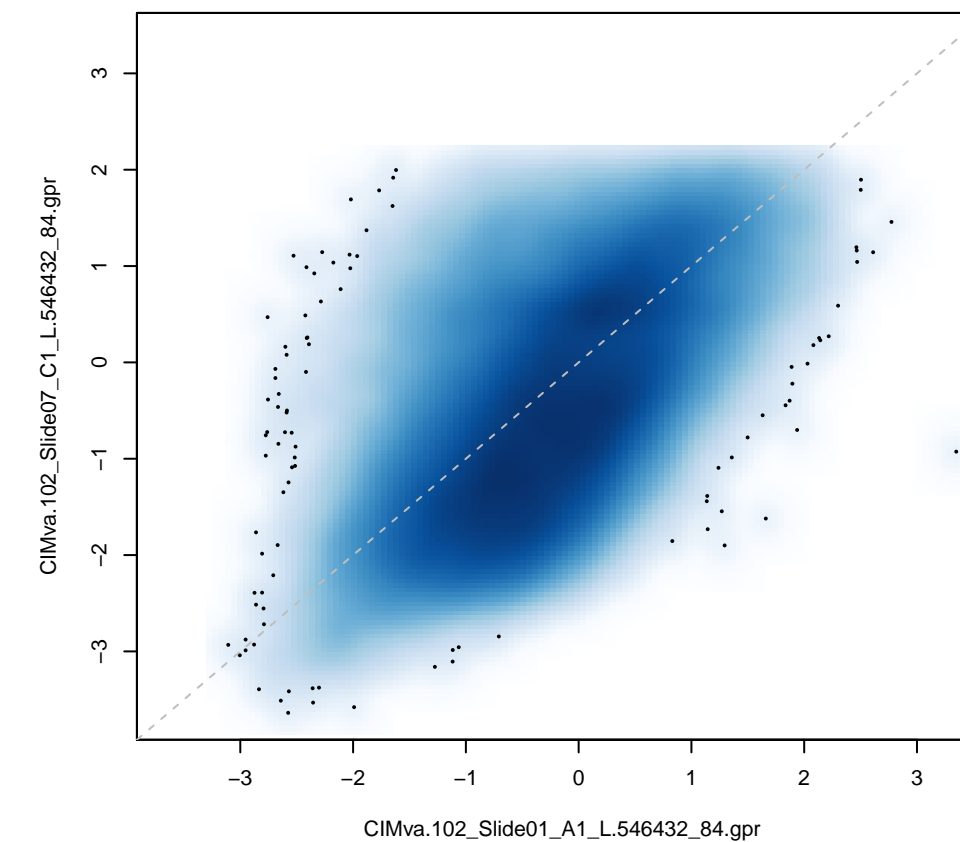

Replicate densities (raw) for sample: 554162 (Controls)

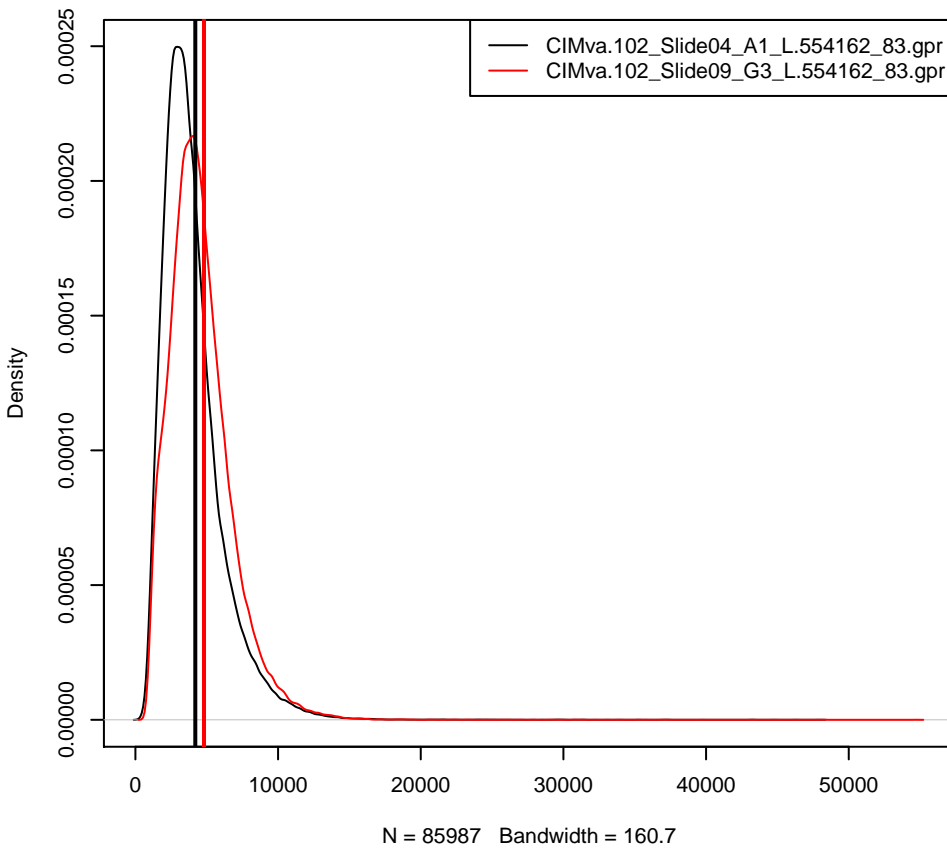

Replicate densities (raw; log2) for sample: 554162 (Controls)

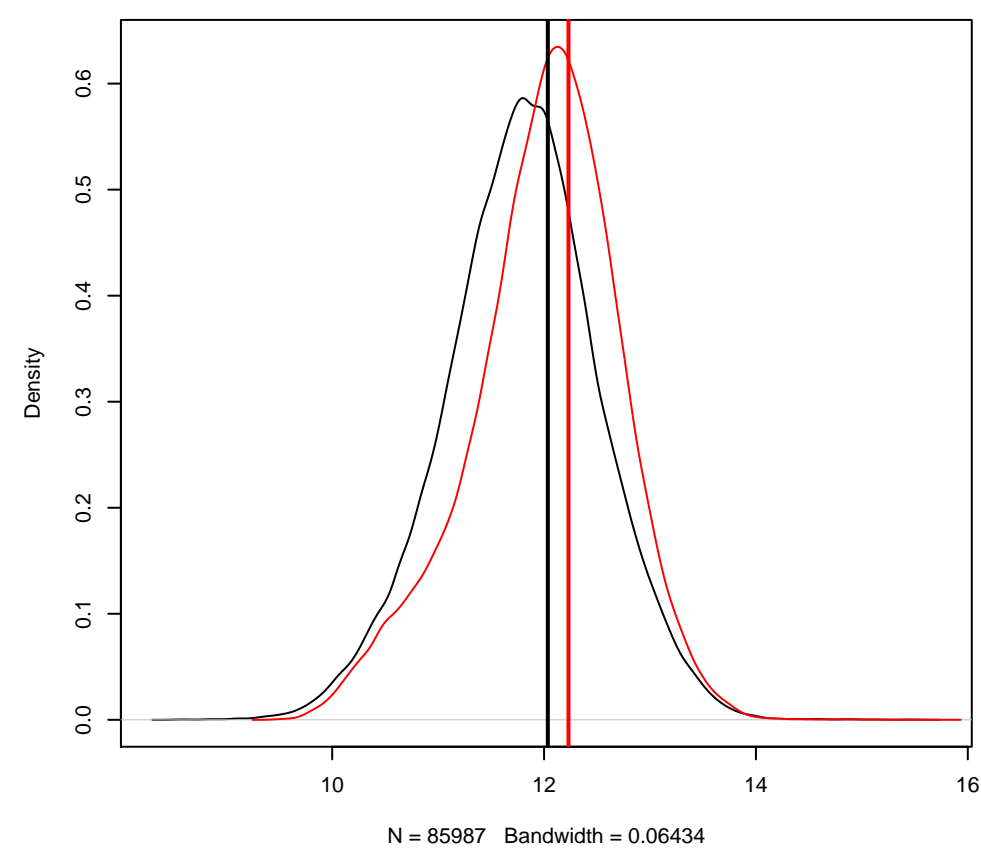

Replicate densities (normalized) for sample: 554162 (Controls)

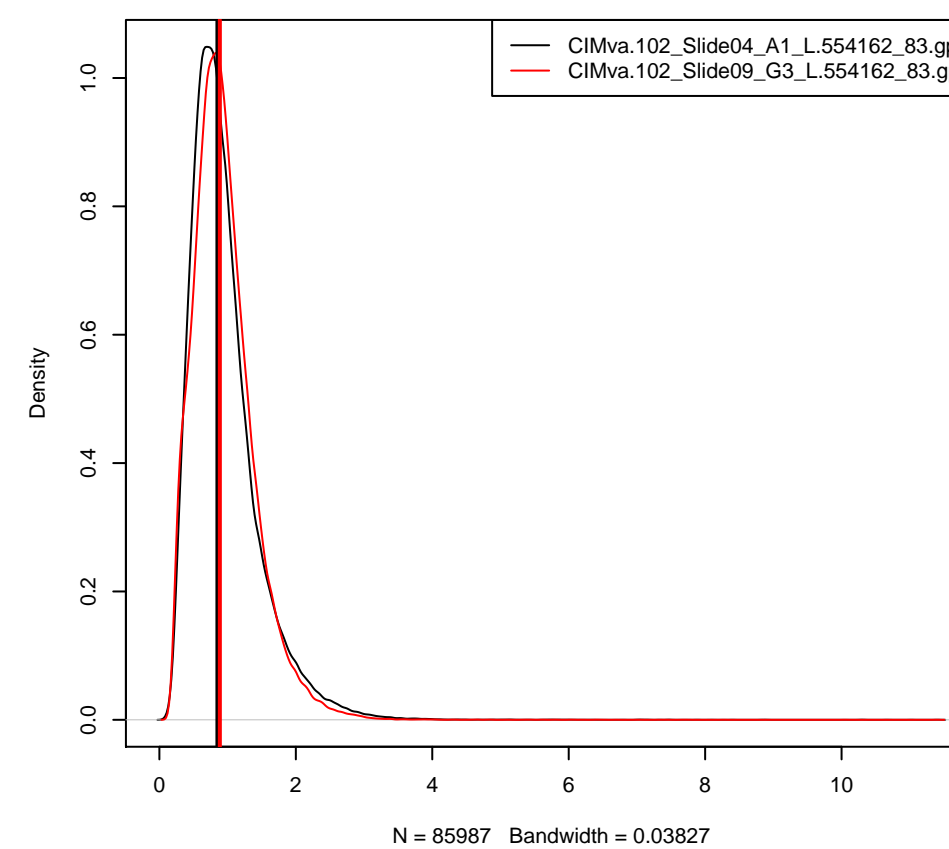

Replicate densities (normalized; log2) for sample: 554162 (Controls)

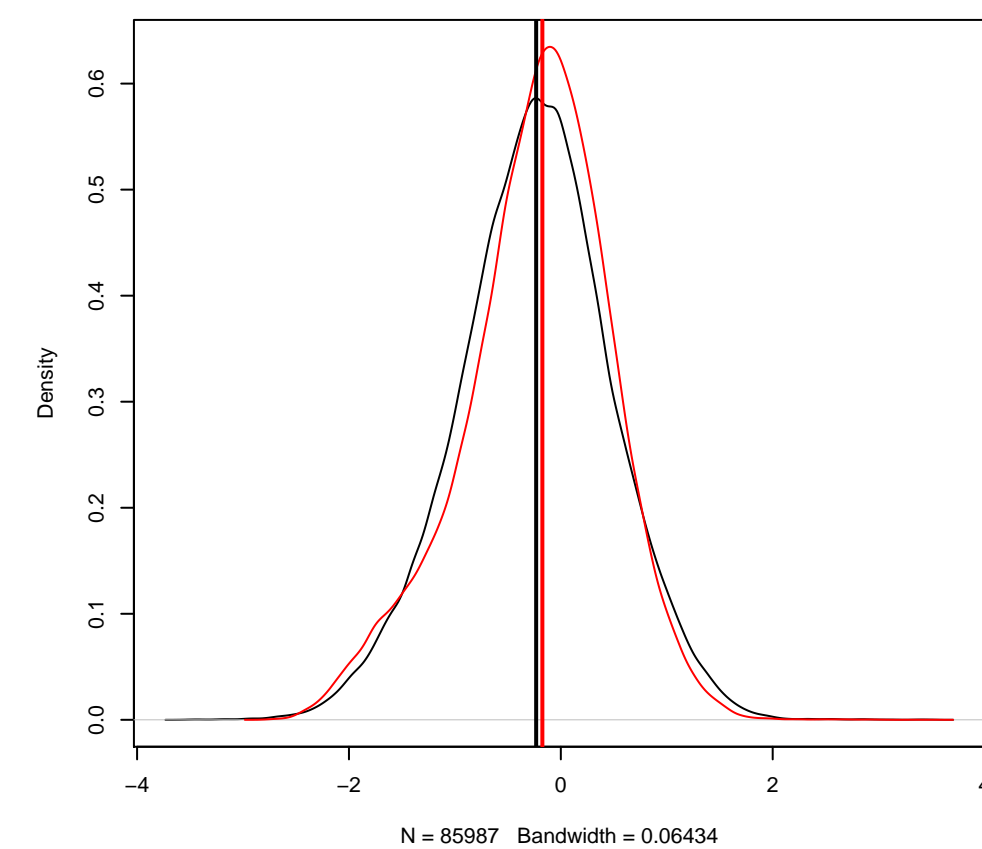

Replicate scatter (raw) for sample: 554162 (Controls)  
Correlation coefficient: 0.83 (Pearson); 0.85 (Spearman)

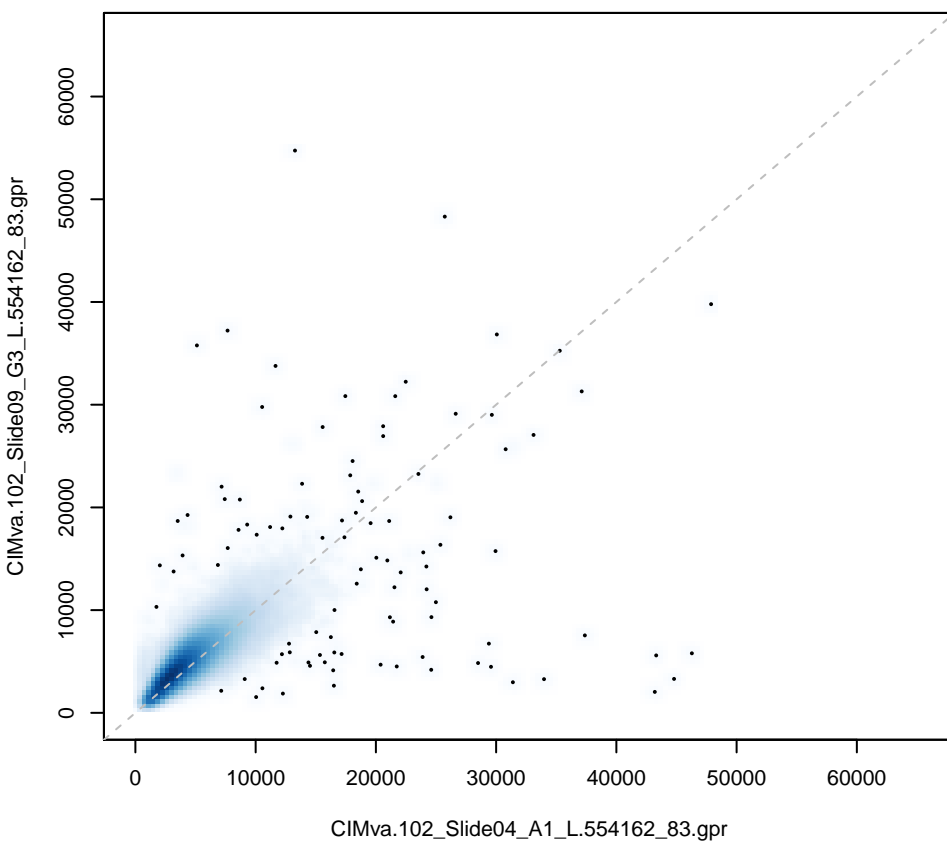

Replicate scatter (raw; log2) for sample: 554162 (Controls)  
Correlation coefficient: 0.86 (Pearson); 0.85 (Spearman)

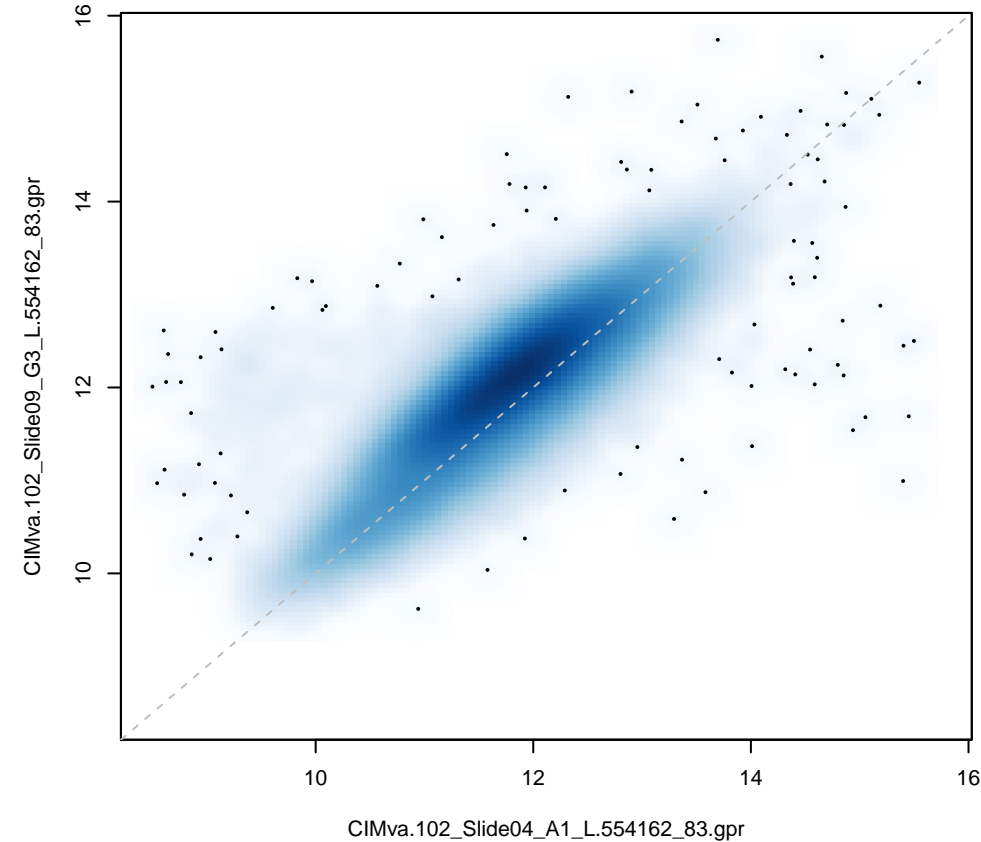

Replicate scatter (normalized) for sample: 554162 (Controls)  
Correlation coefficient: 0.83 (Pearson); 0.85 (Spearman)

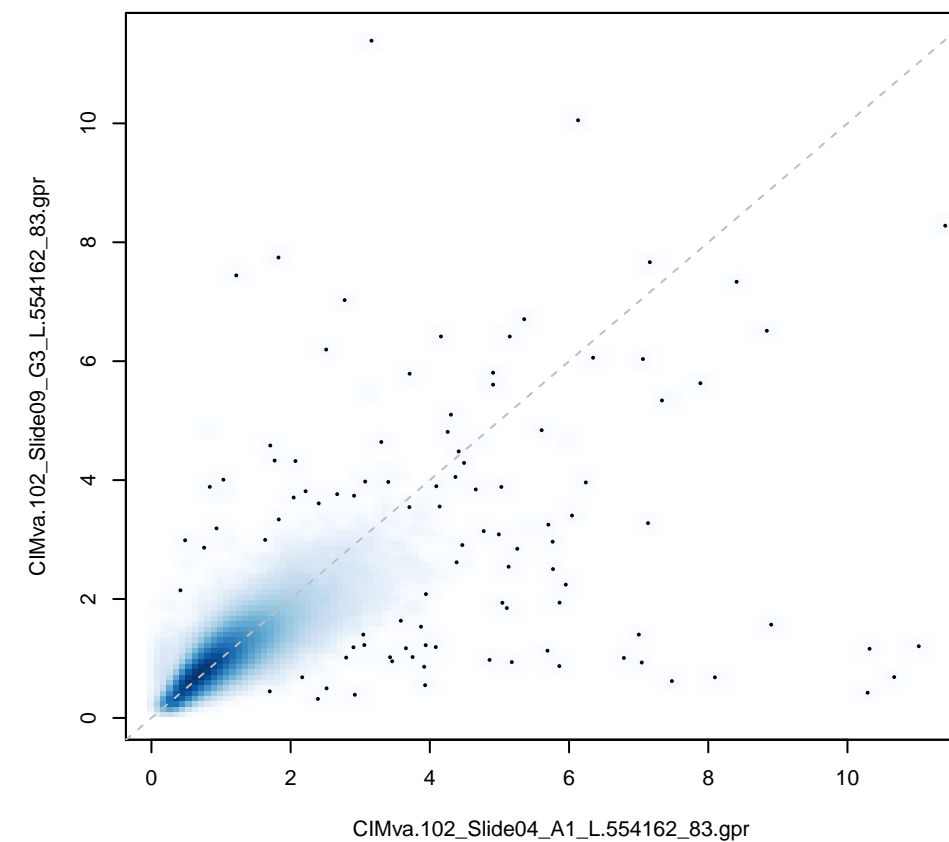

Replicate scatter (normalized; log2) for sample: 554162 (Controls)  
Correlation coefficient: 0.86 (Pearson); 0.85 (Spearman)

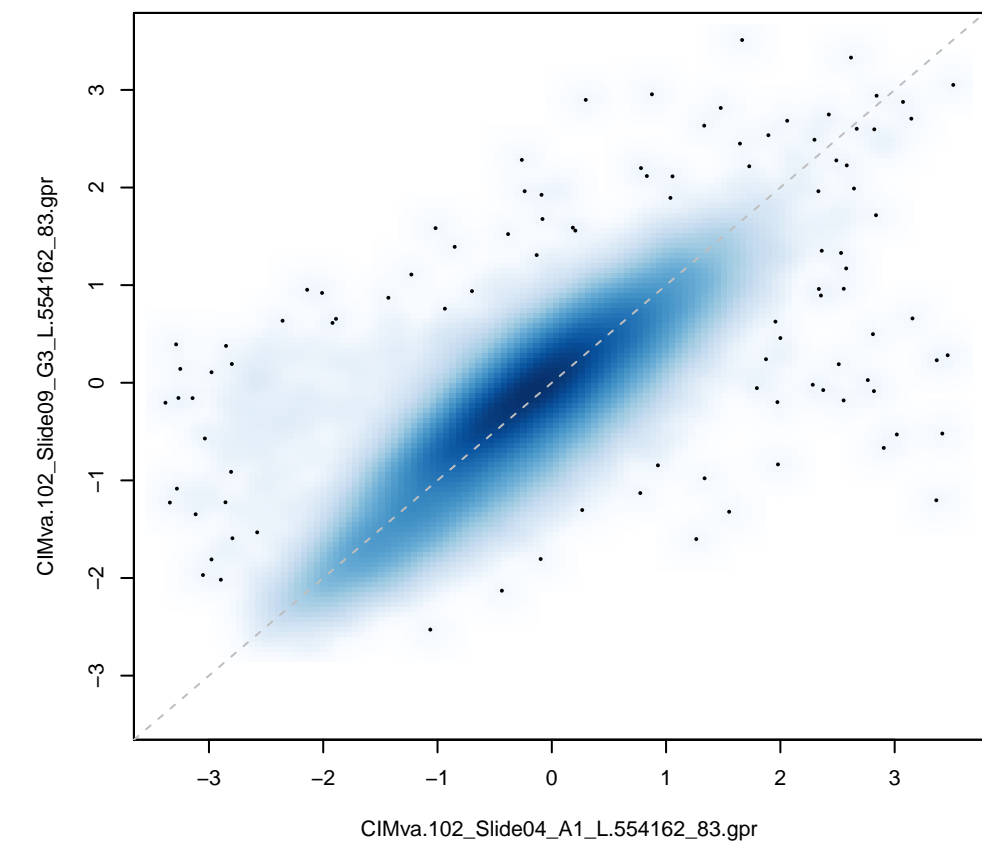

Replicate densities (raw) for sample: 554551 (CFS)

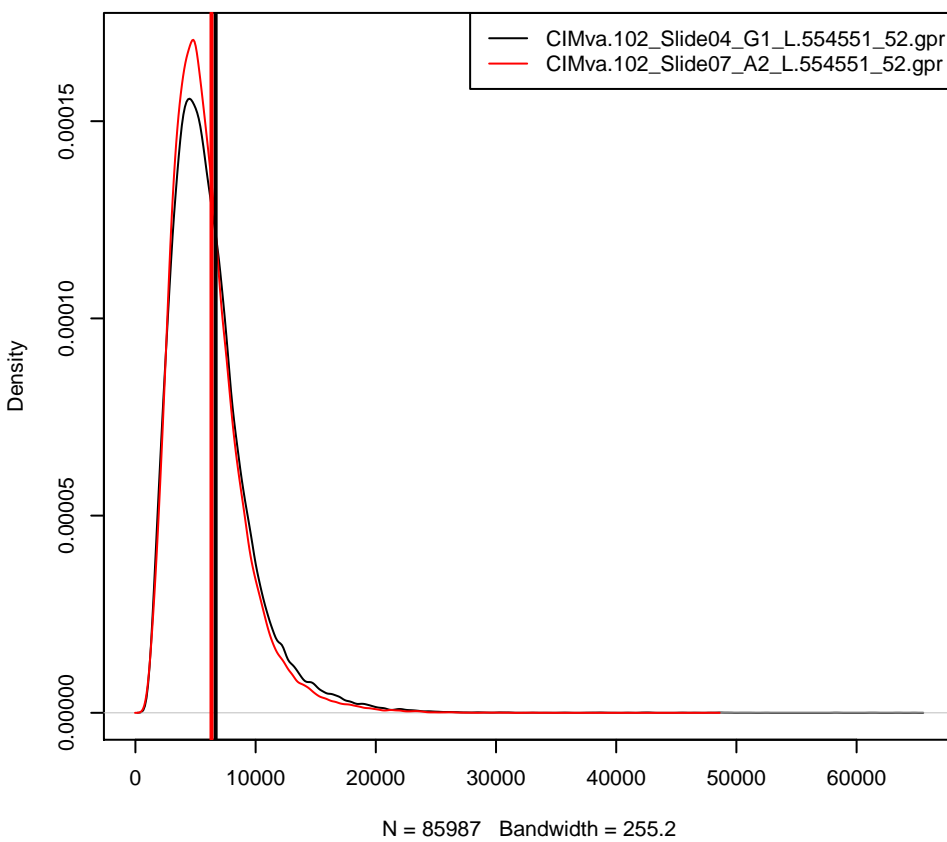

Replicate densities (raw; log2) for sample: 554551 (CFS)

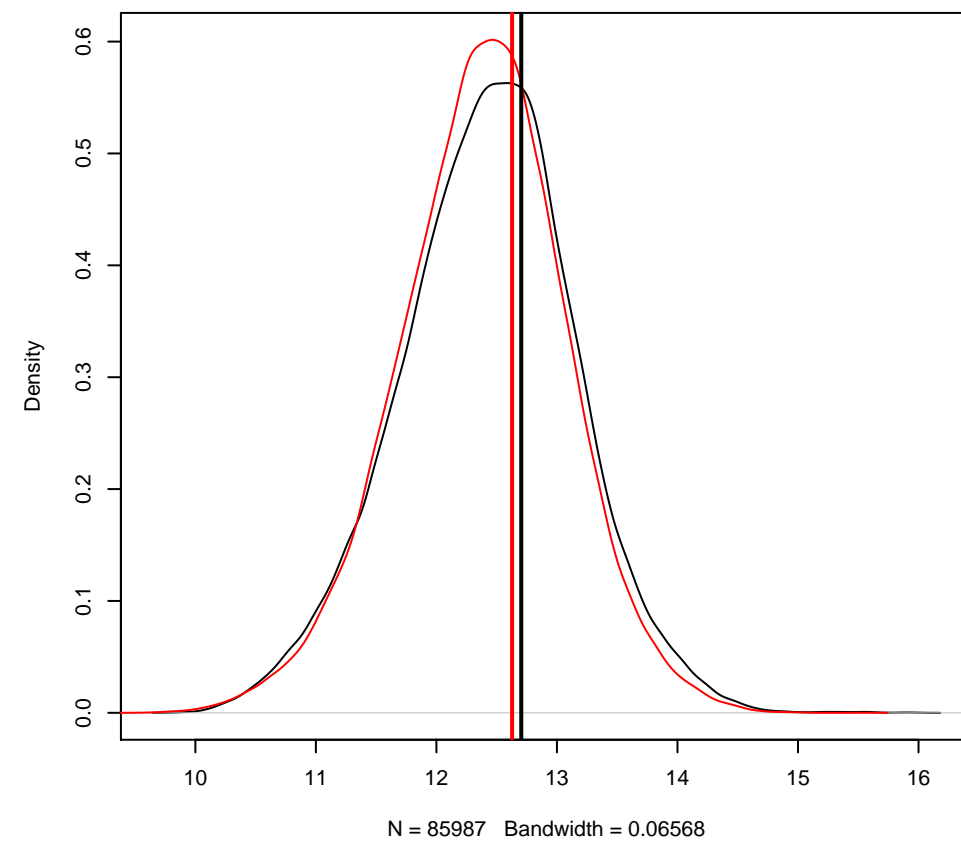

Replicate densities (normalized) for sample: 554551 (CFS)

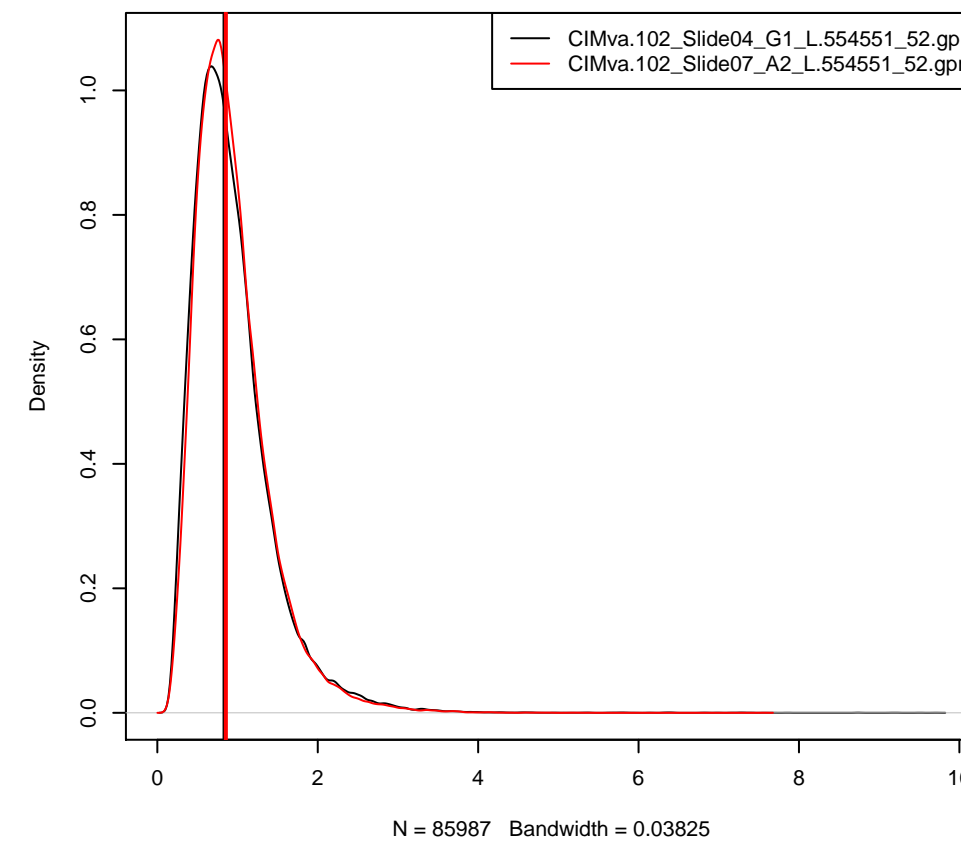

Replicate densities (normalized; log2) for sample: 554551 (CFS)

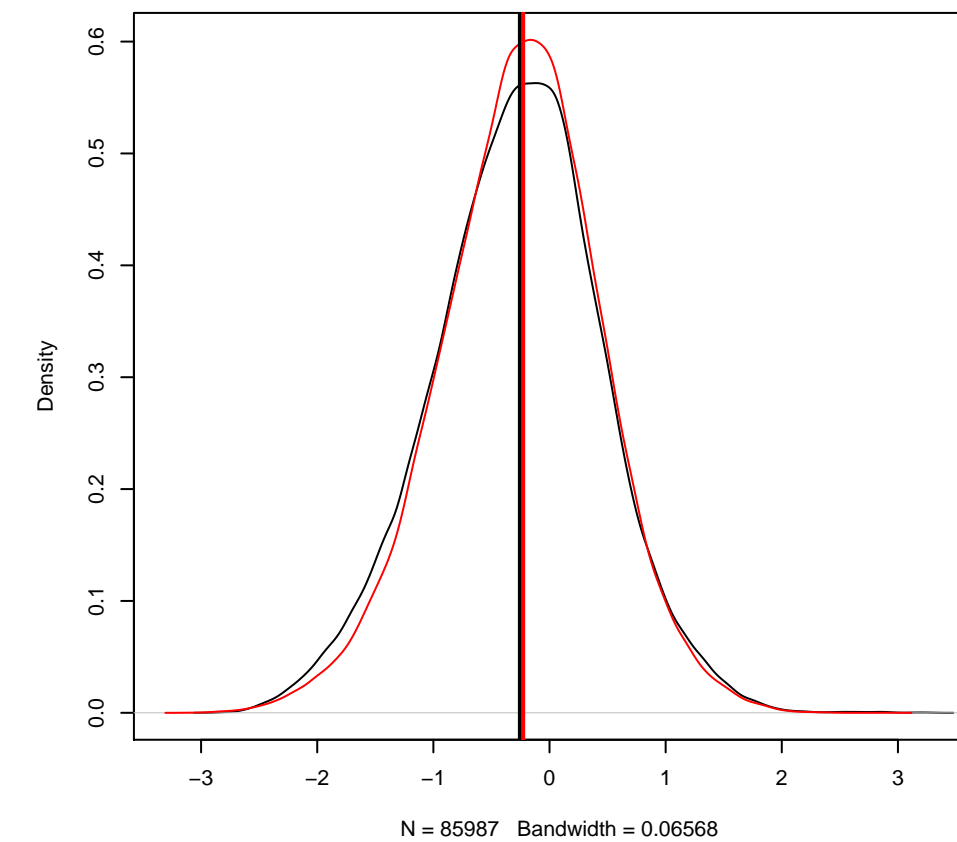

Replicate scatter (raw) for sample: 554551 (CFS)  
Correlation coefficient: 0.79 (Pearson); 0.83 (Spearman)

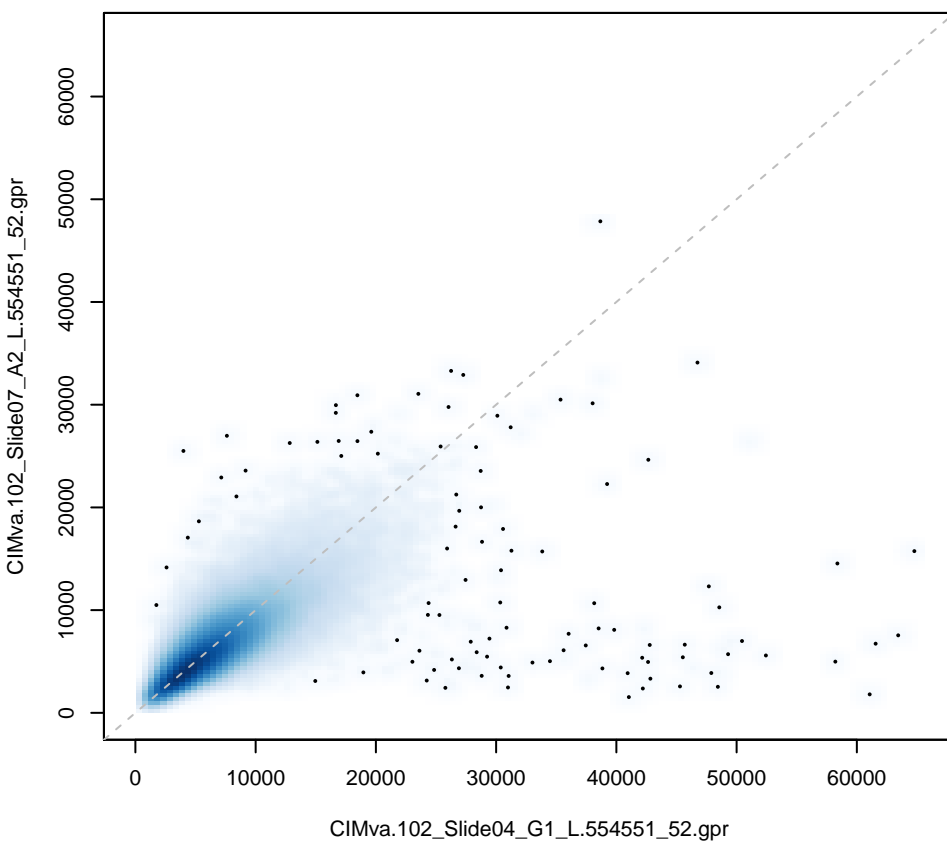

Replicate scatter (raw; log2) for sample: 554551 (CFS)  
Correlation coefficient: 0.84 (Pearson); 0.83 (Spearman)

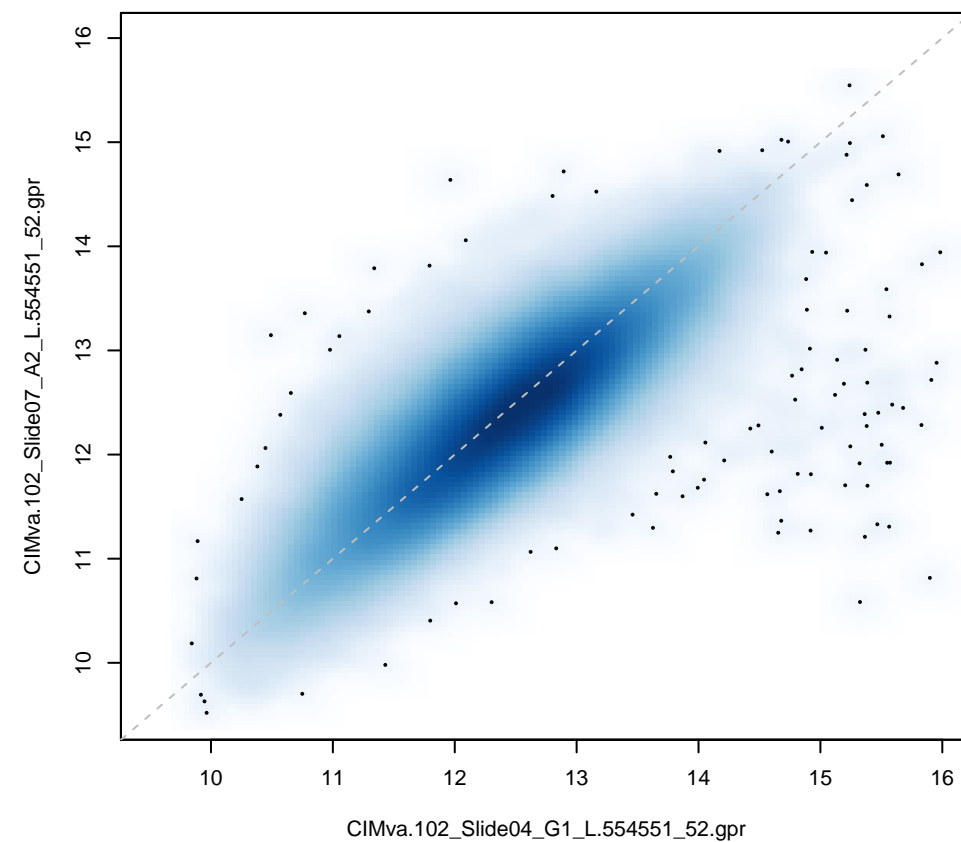

Replicate scatter (normalized) for sample: 554551 (CFS)  
Correlation coefficient: 0.79 (Pearson); 0.83 (Spearman)

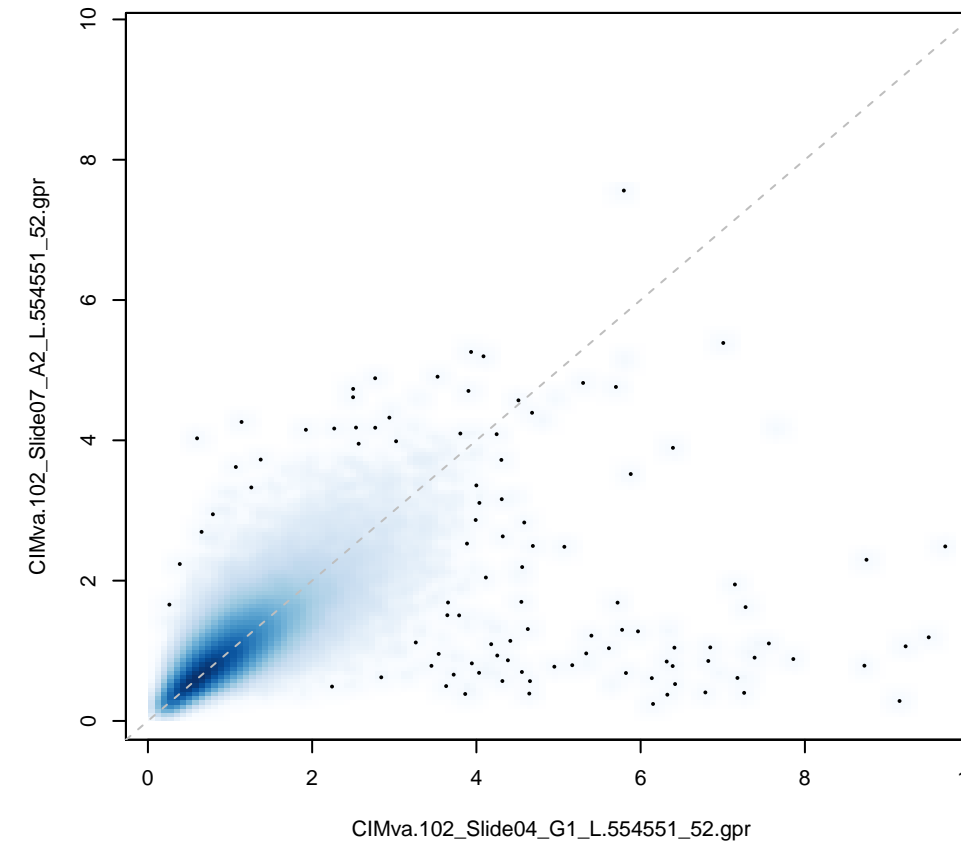

Replicate scatter (normalized; log2) for sample: 554551 (CFS)  
Correlation coefficient: 0.82 (Pearson); 0.83 (Spearman)

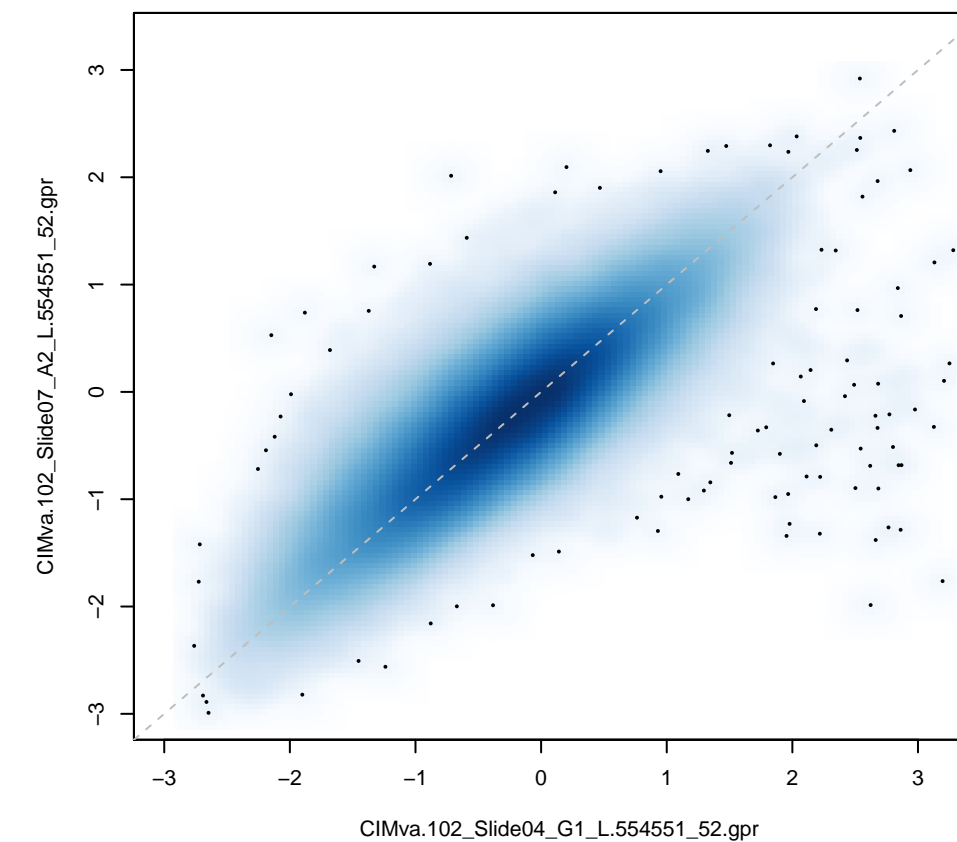

Replicate densities (raw) for sample: 554816 (Controls)

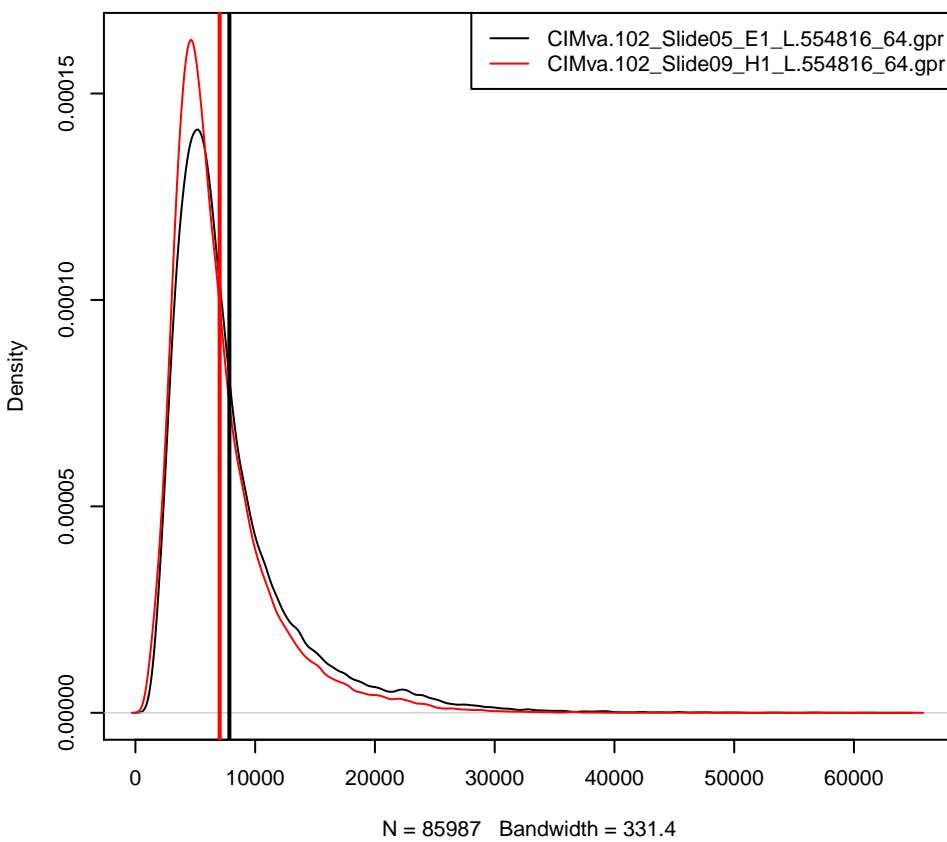

Replicate densities (raw; log2) for sample: 554816 (Controls)

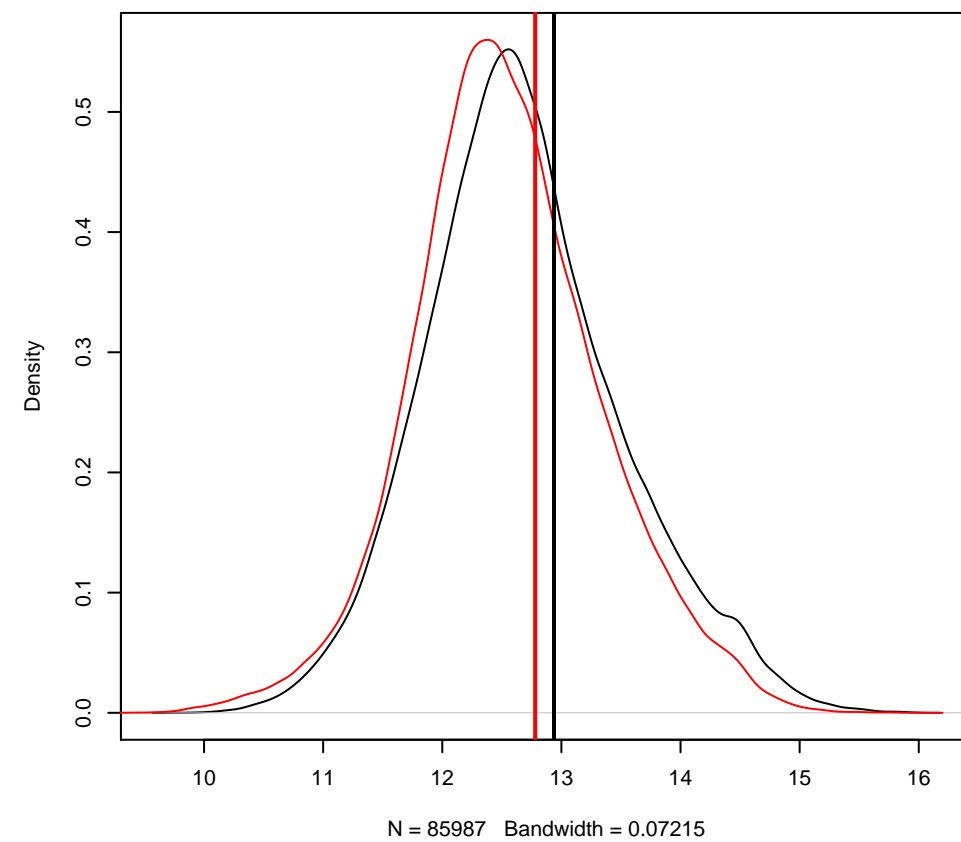

Replicate densities (normalized) for sample: 554816 (Controls)

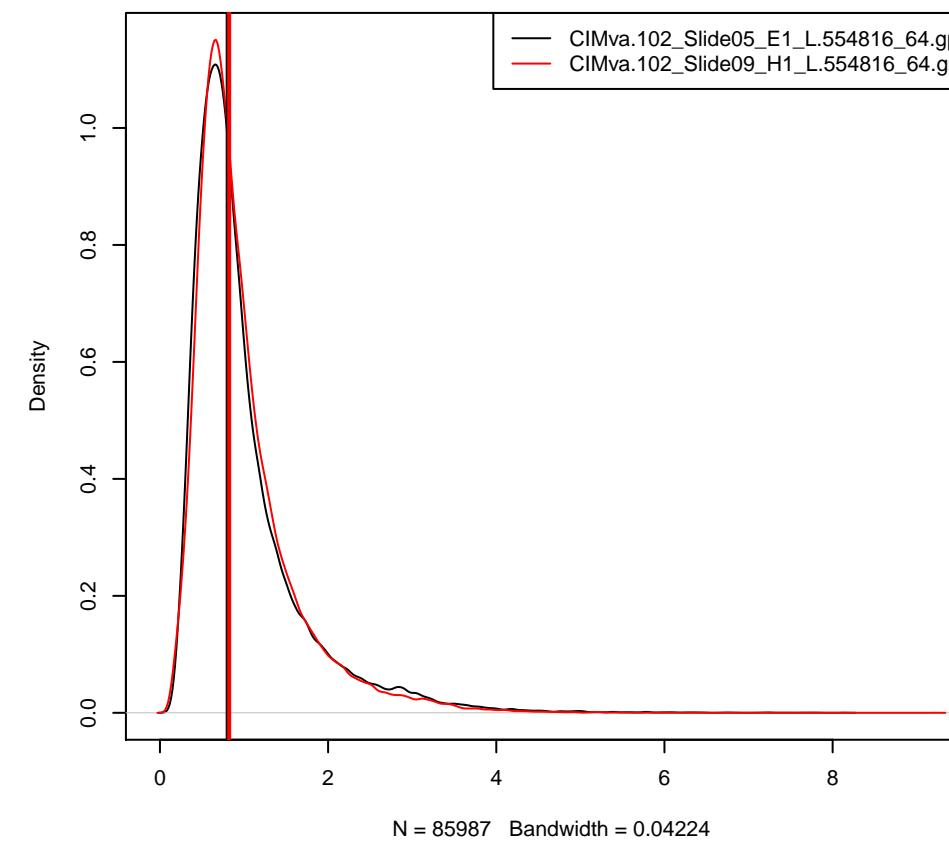

Replicate densities (normalized; log2) for sample: 554816 (Controls)

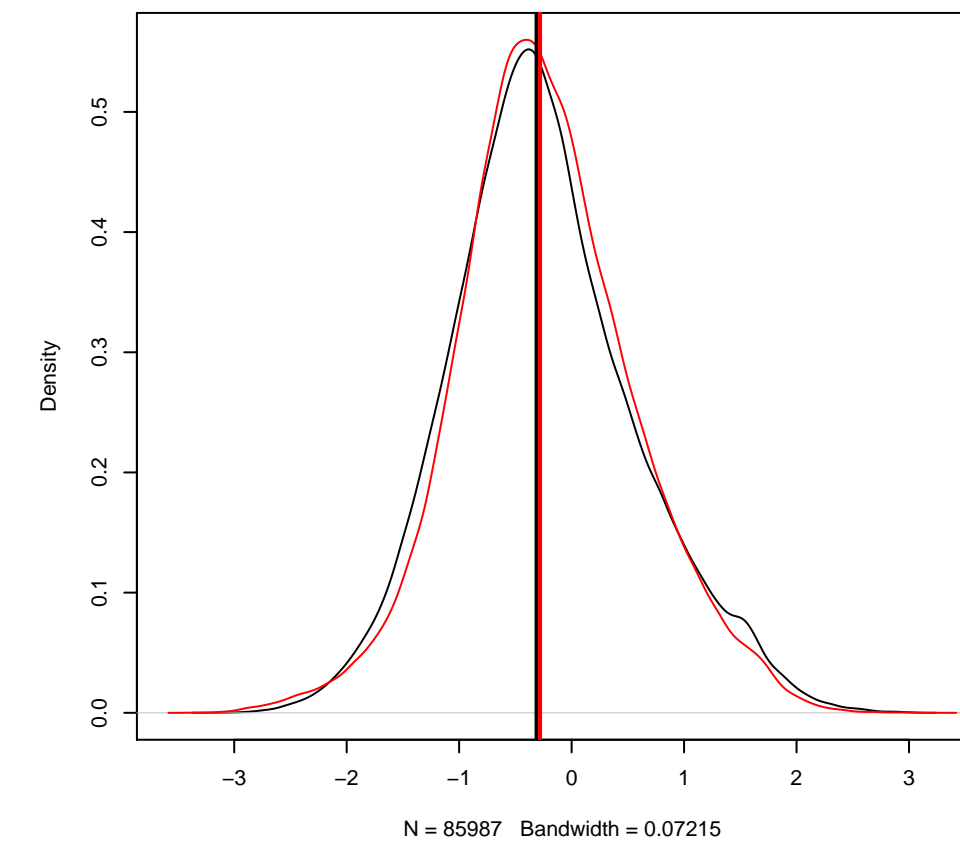

Replicate scatter (raw) for sample: 554816 (Controls)  
Correlation coefficient: 0.85 (Pearson); 0.87 (Spearman)

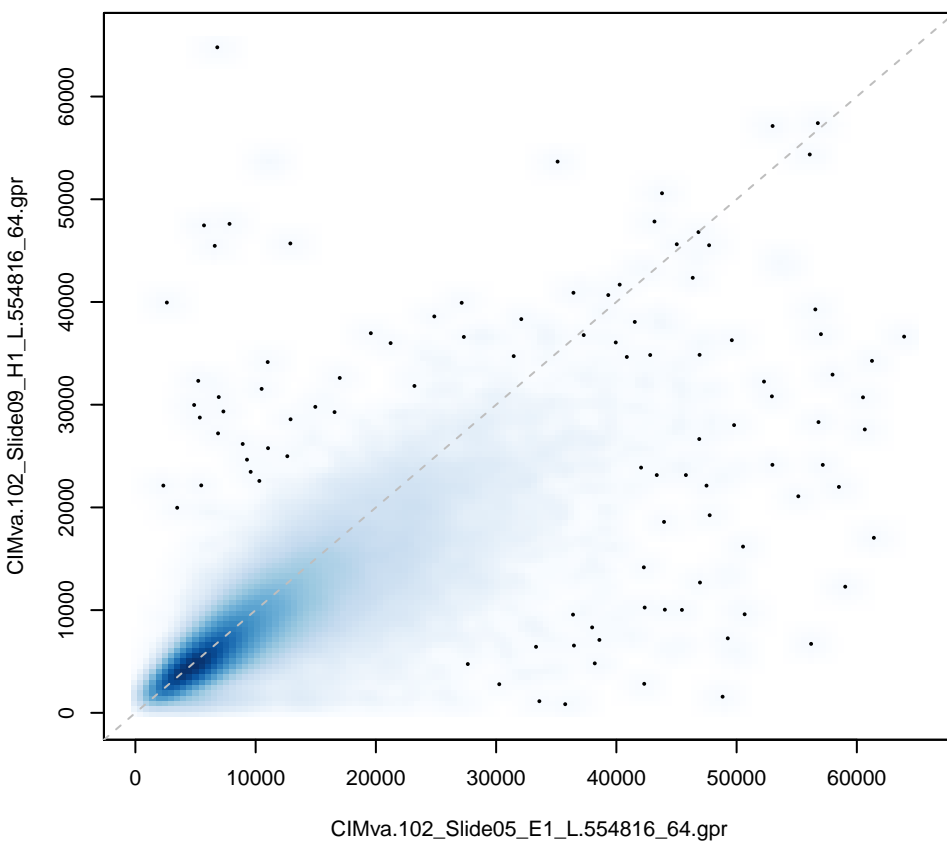

Replicate scatter (raw; log2) for sample: 554816 (Controls)  
Correlation coefficient: 0.86 (Pearson); 0.87 (Spearman)

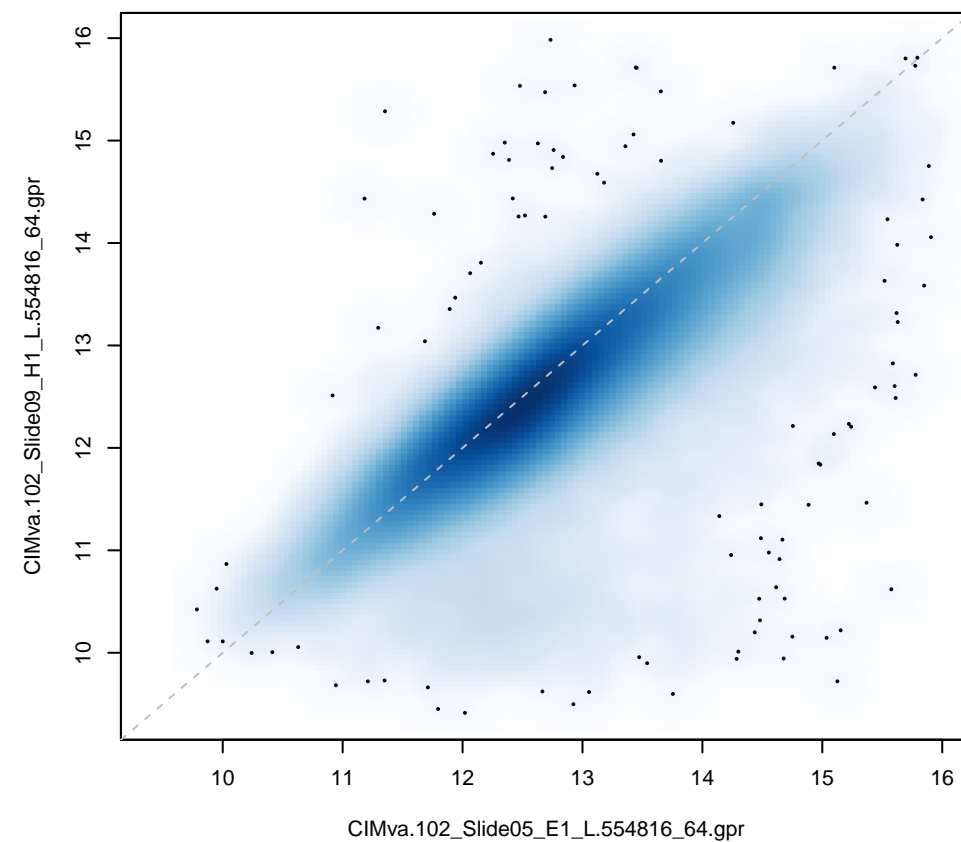

Replicate scatter (normalized) for sample: 554816 (Controls)  
Correlation coefficient: 0.85 (Pearson); 0.87 (Spearman)

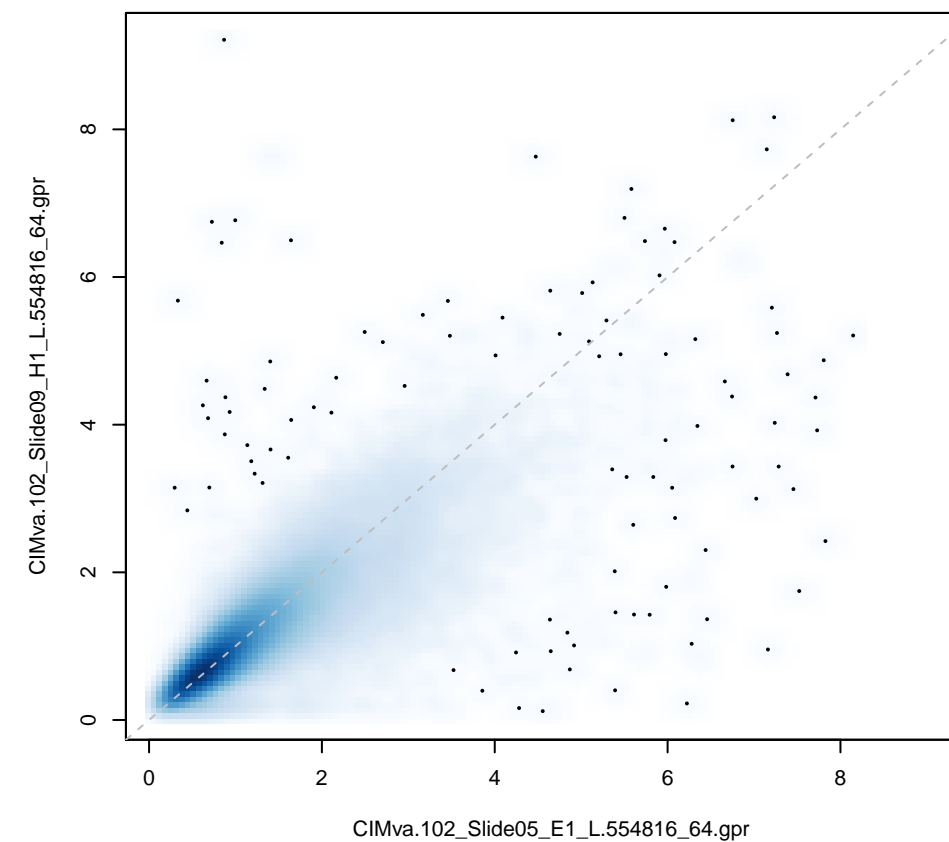

Replicate scatter (normalized; log2) for sample: 554816 (Controls)  
Correlation coefficient: 0.87 (Pearson); 0.87 (Spearman)

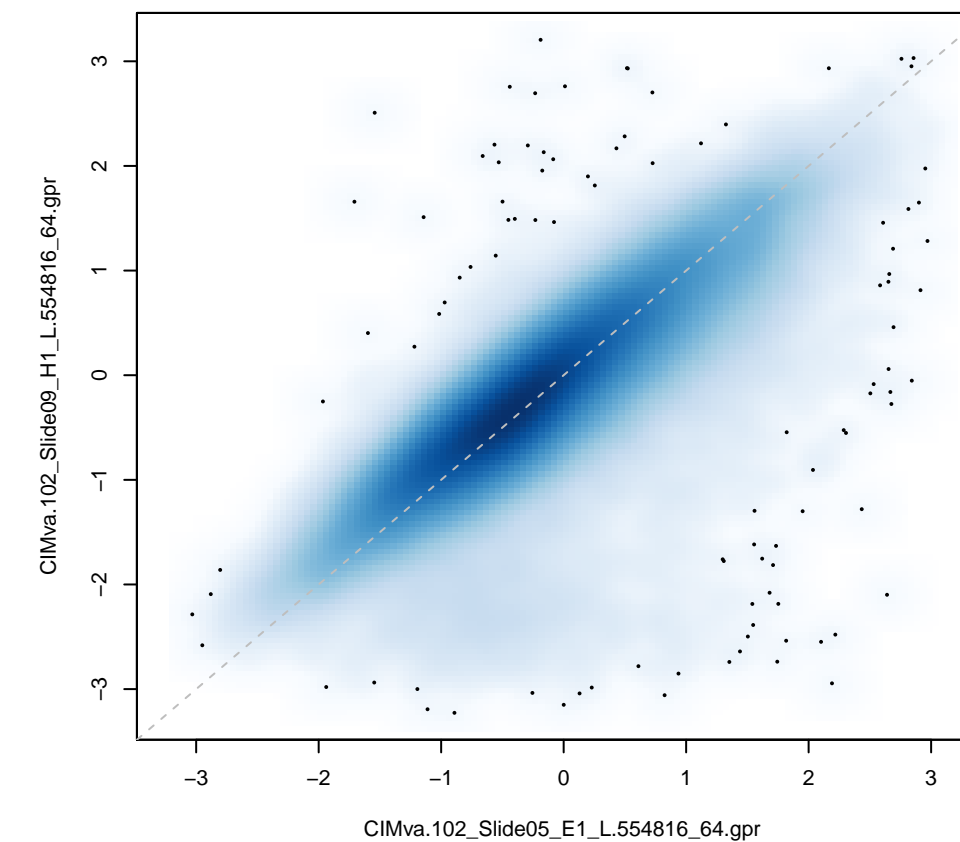

Replicate densities (raw) for sample: 555926 (CFS)

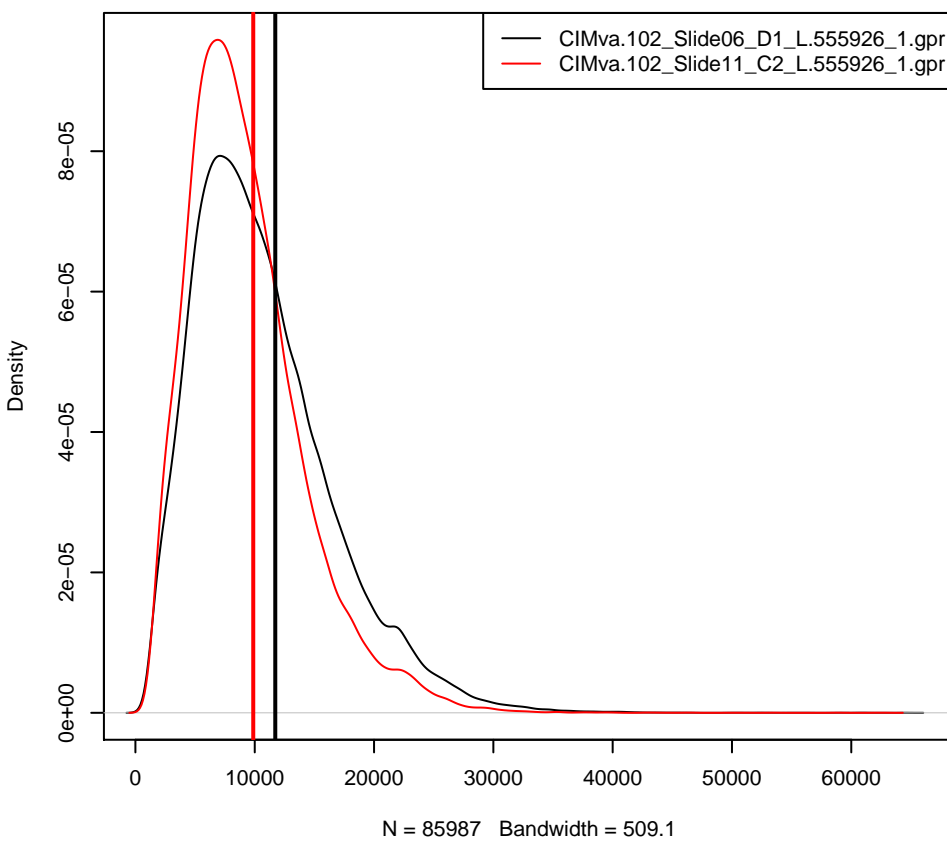

Replicate densities (raw; log2) for sample: 555926 (CFS)

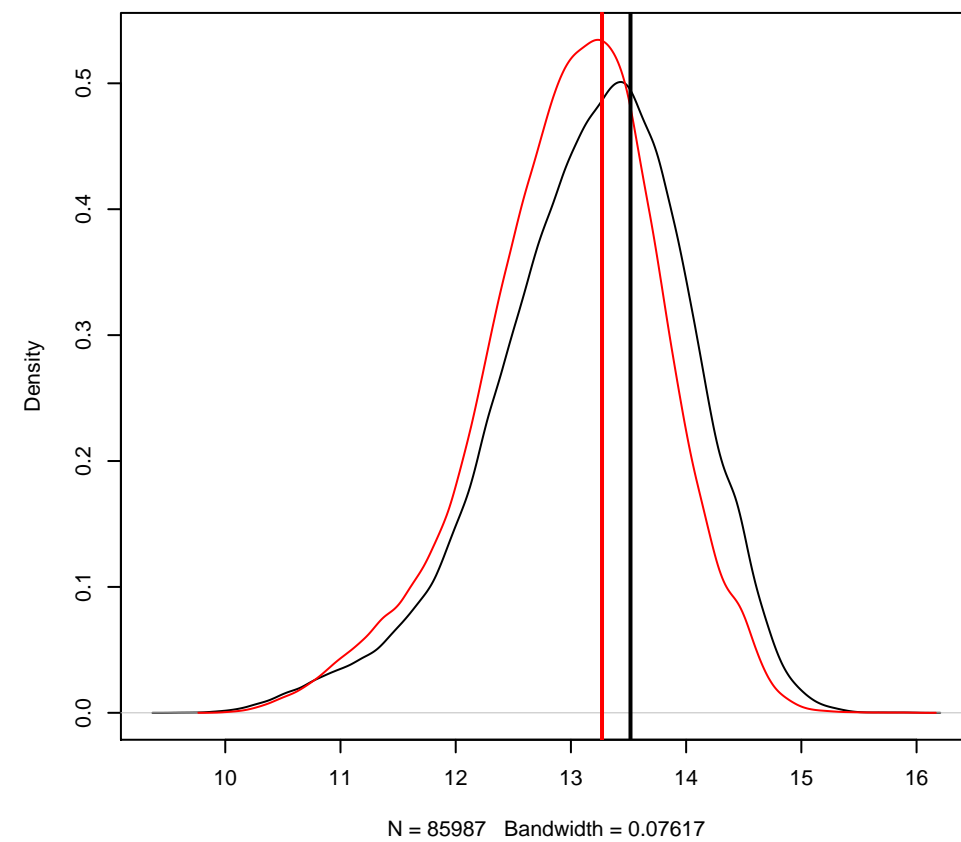

Replicate densities (normalized) for sample: 555926 (CFS)

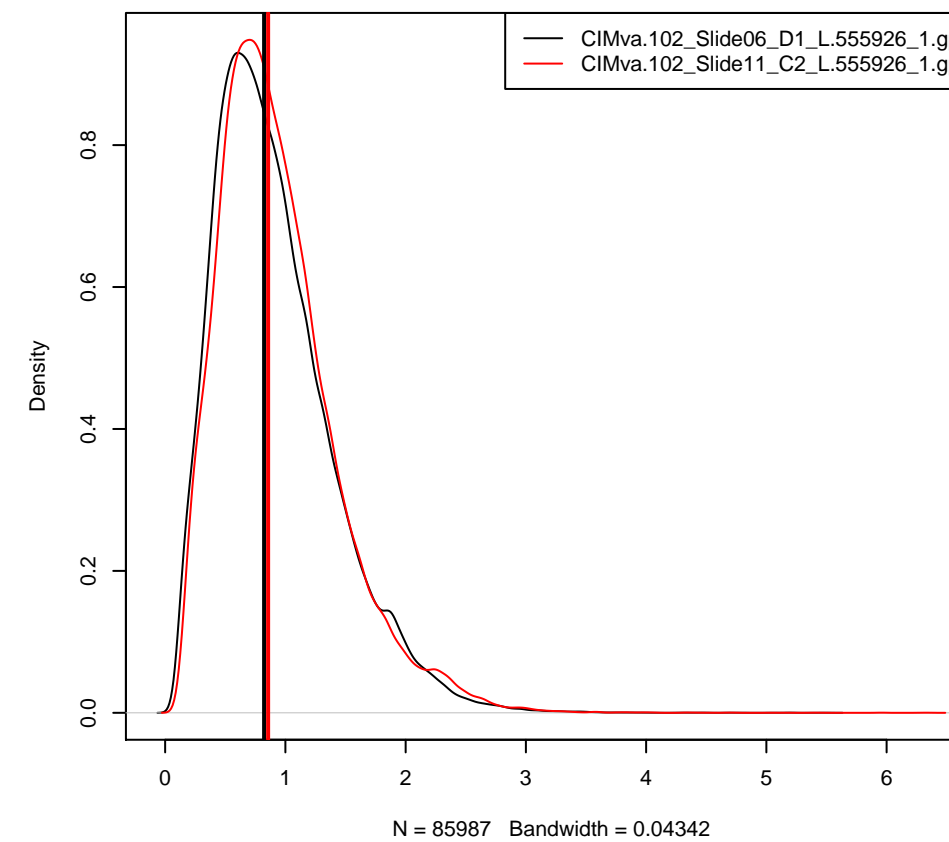

Replicate densities (normalized; log2) for sample: 555926 (CFS)

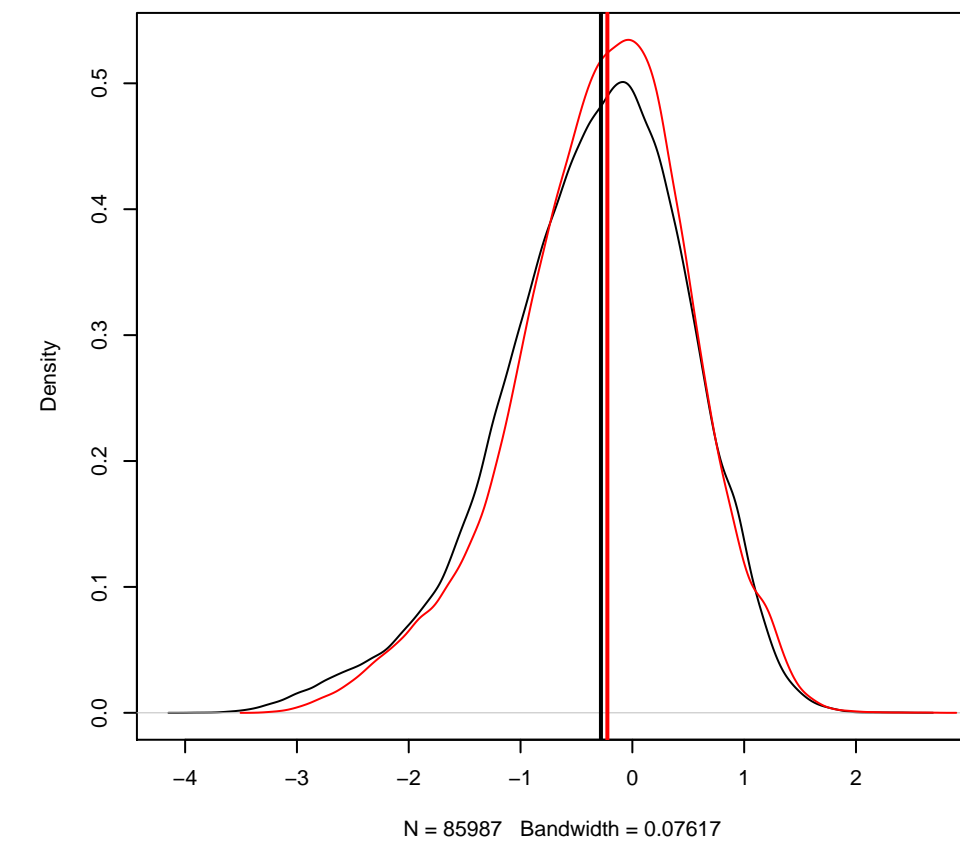

Replicate scatter (raw) for sample: 555926 (CFS)  
Correlation coefficient: 0.86 (Pearson); 0.86 (Spearman)

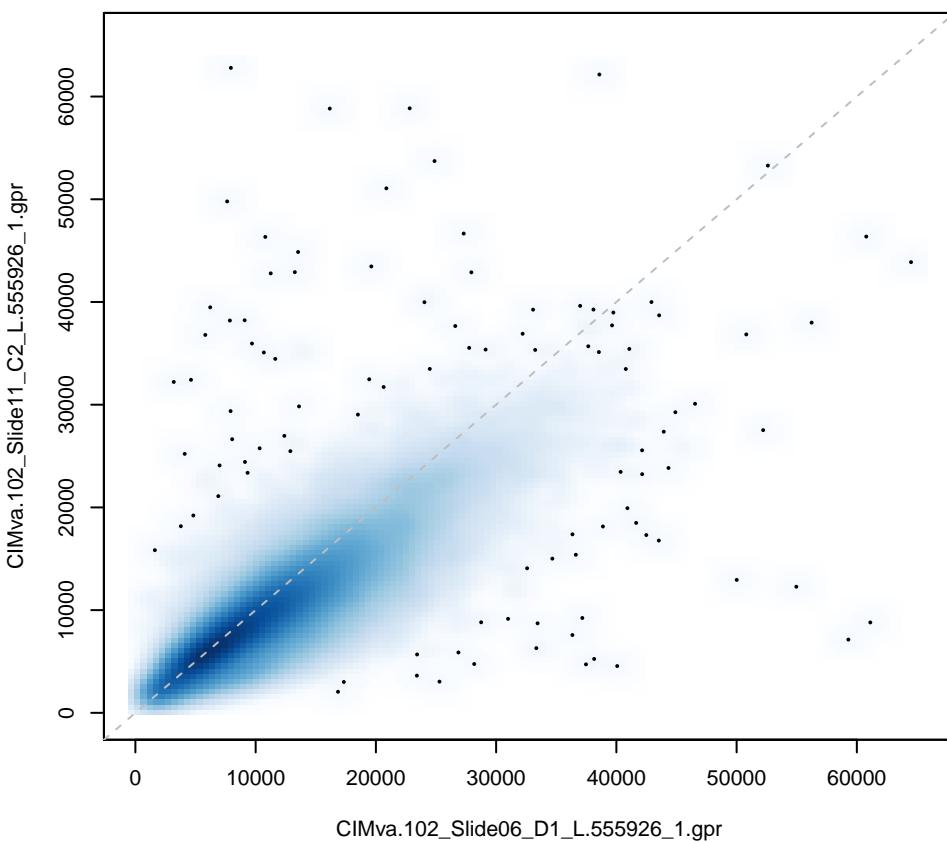

Replicate scatter (raw; log2) for sample: 555926 (CFS)  
Correlation coefficient: 0.87 (Pearson); 0.86 (Spearman)

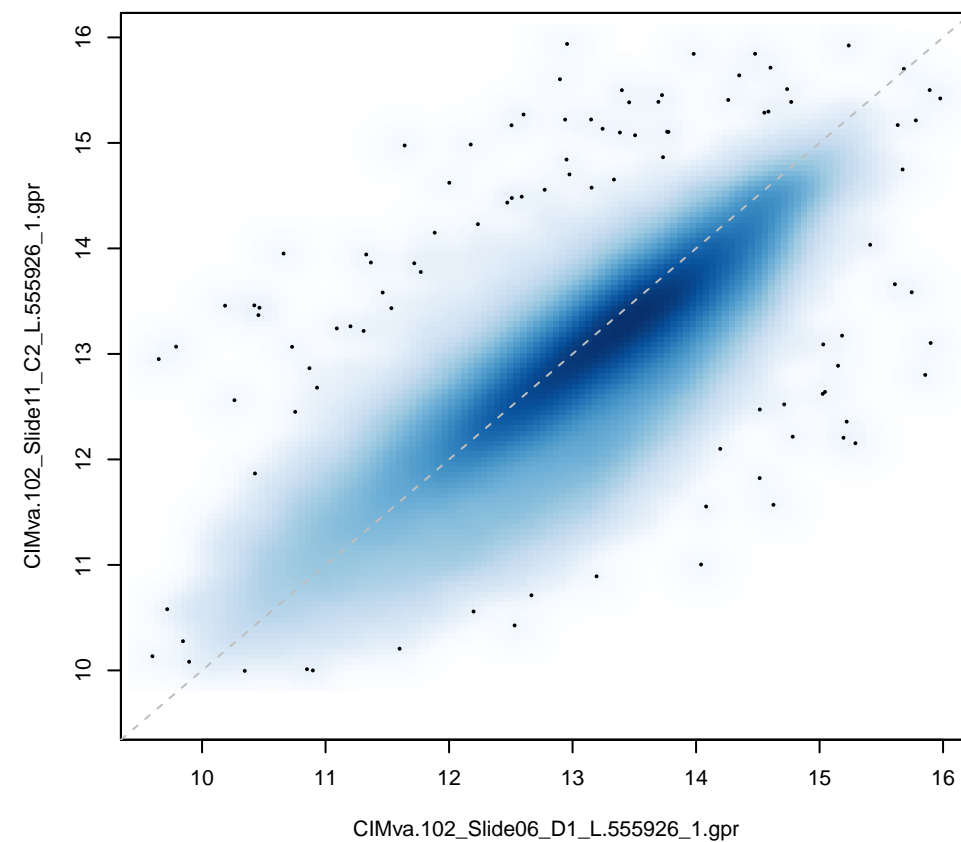

Replicate scatter (normalized) for sample: 555926 (CFS)  
Correlation coefficient: 0.86 (Pearson); 0.86 (Spearman)

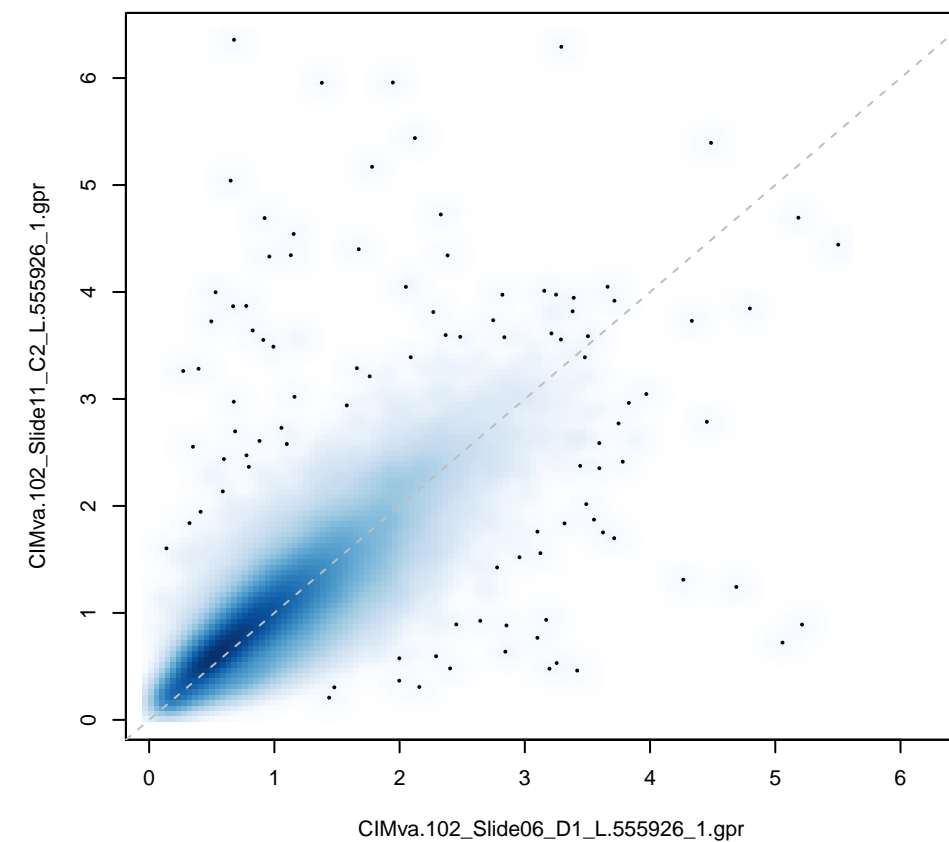

Replicate scatter (normalized; log2) for sample: 555926 (CFS)  
Correlation coefficient: 0.87 (Pearson); 0.86 (Spearman)

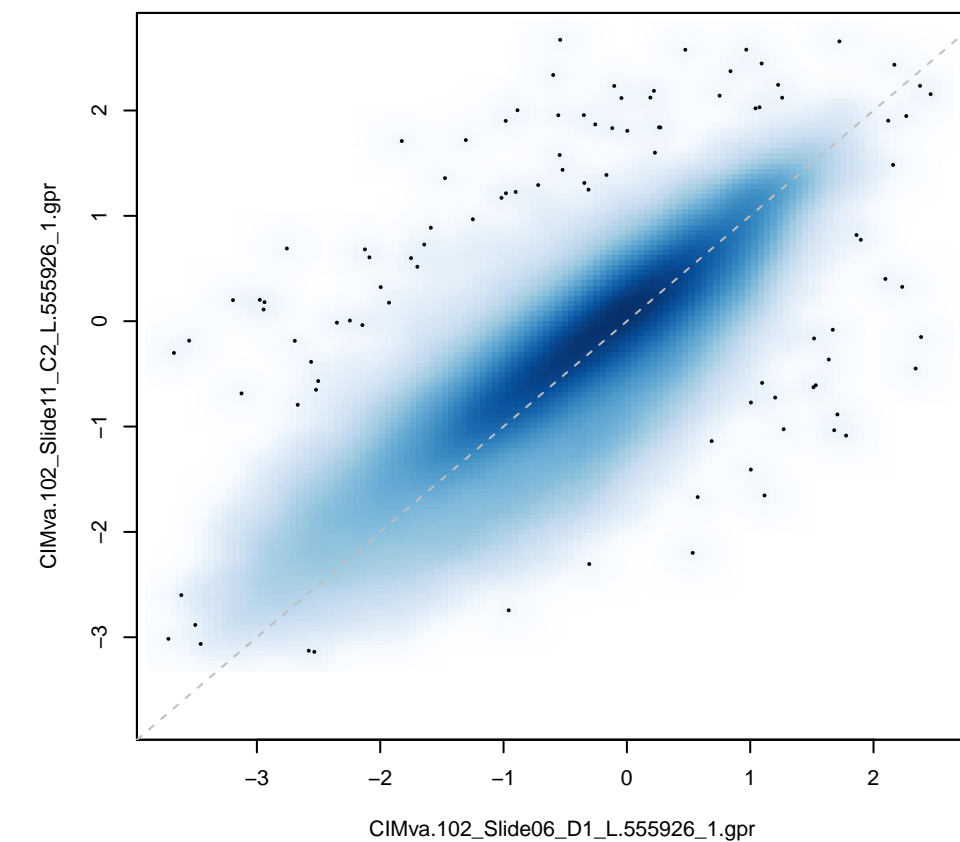

Replicate densities (raw) for sample: 556015 (Controls)

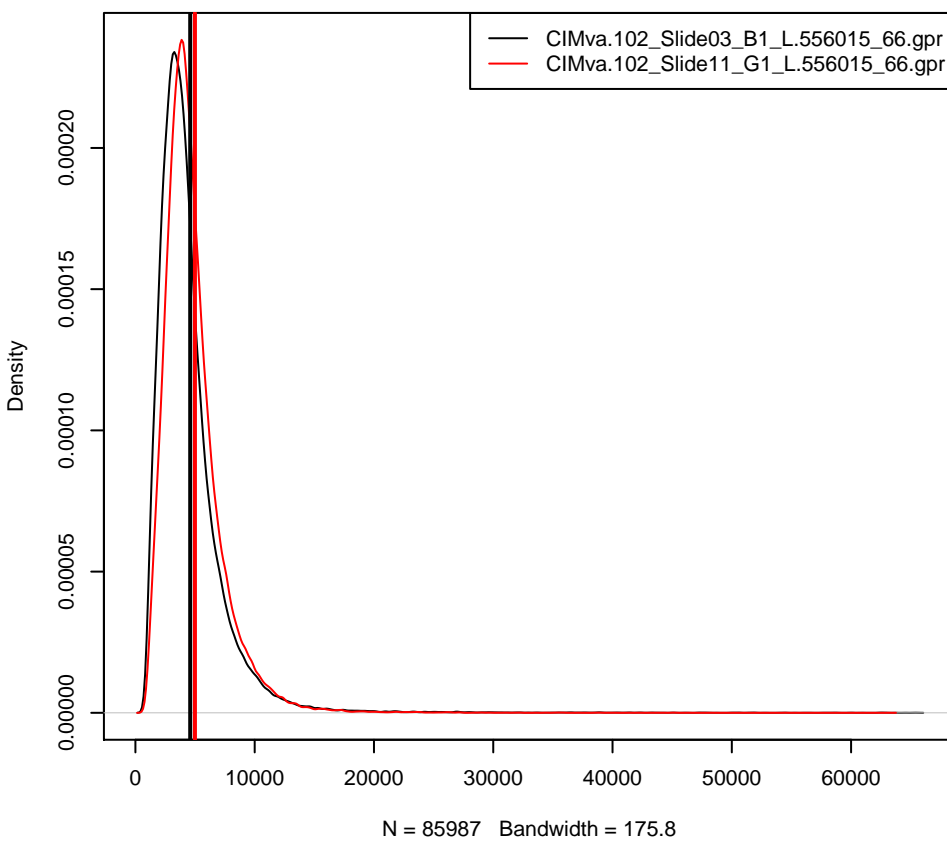

Replicate densities (raw; log2) for sample: 556015 (Controls)

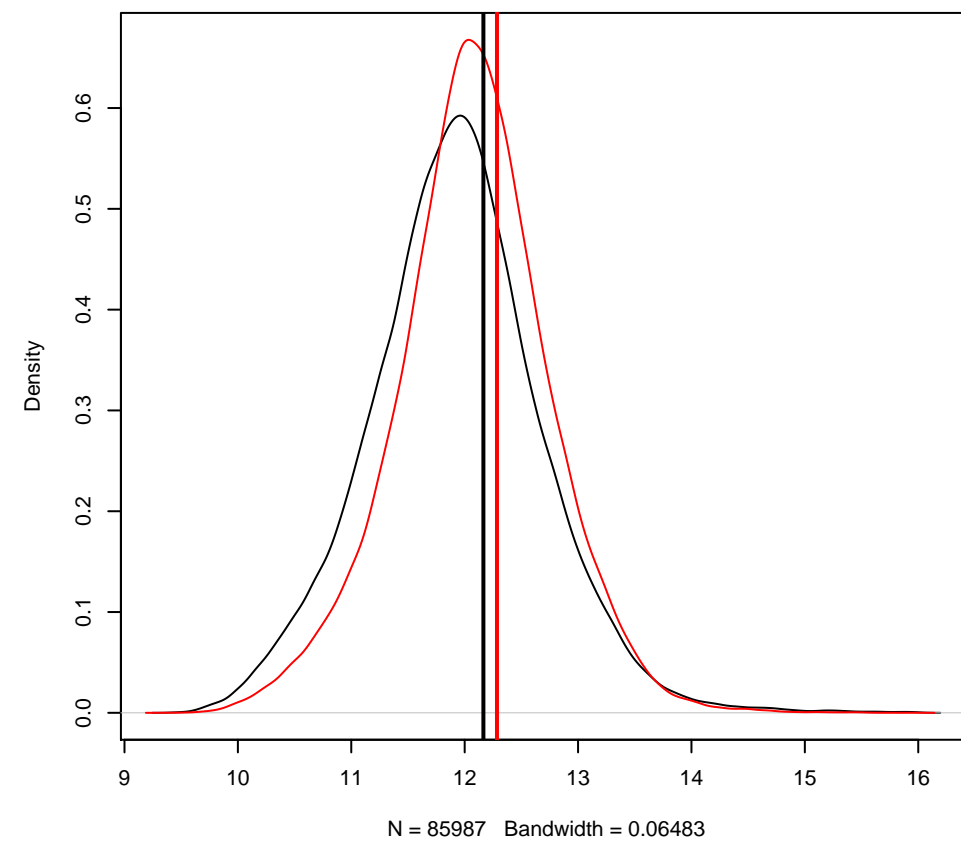

Replicate densities (normalized) for sample: 556015 (Controls)

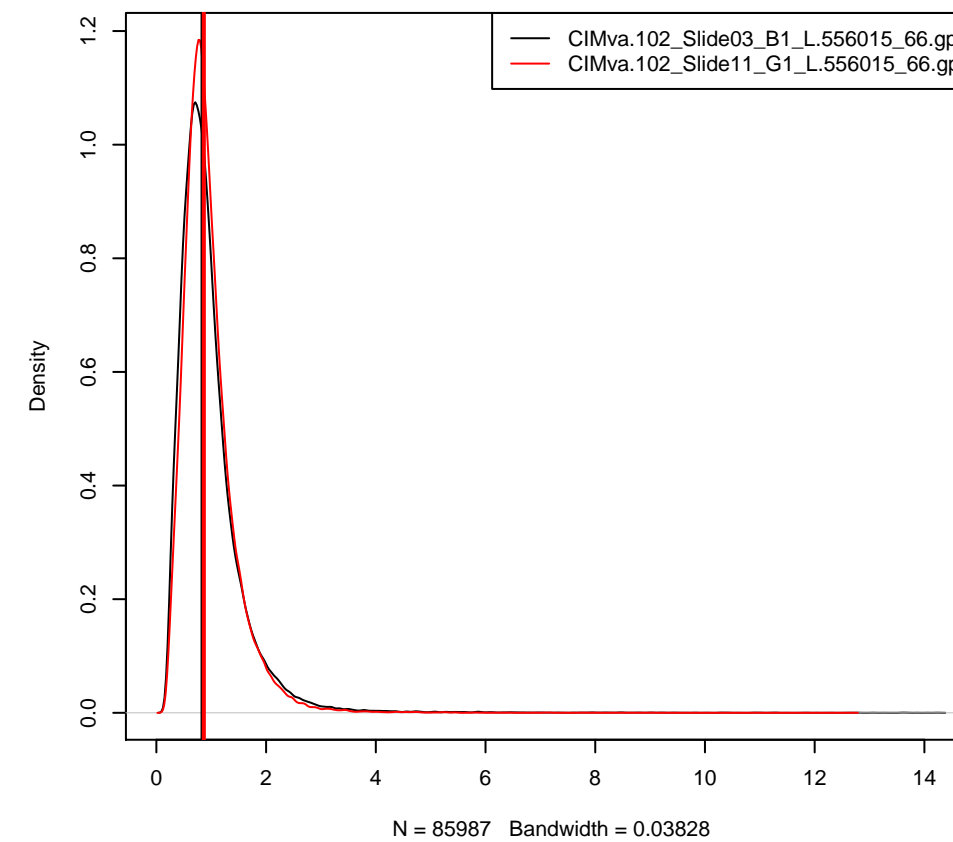

Replicate densities (normalized; log2) for sample: 556015 (Controls)

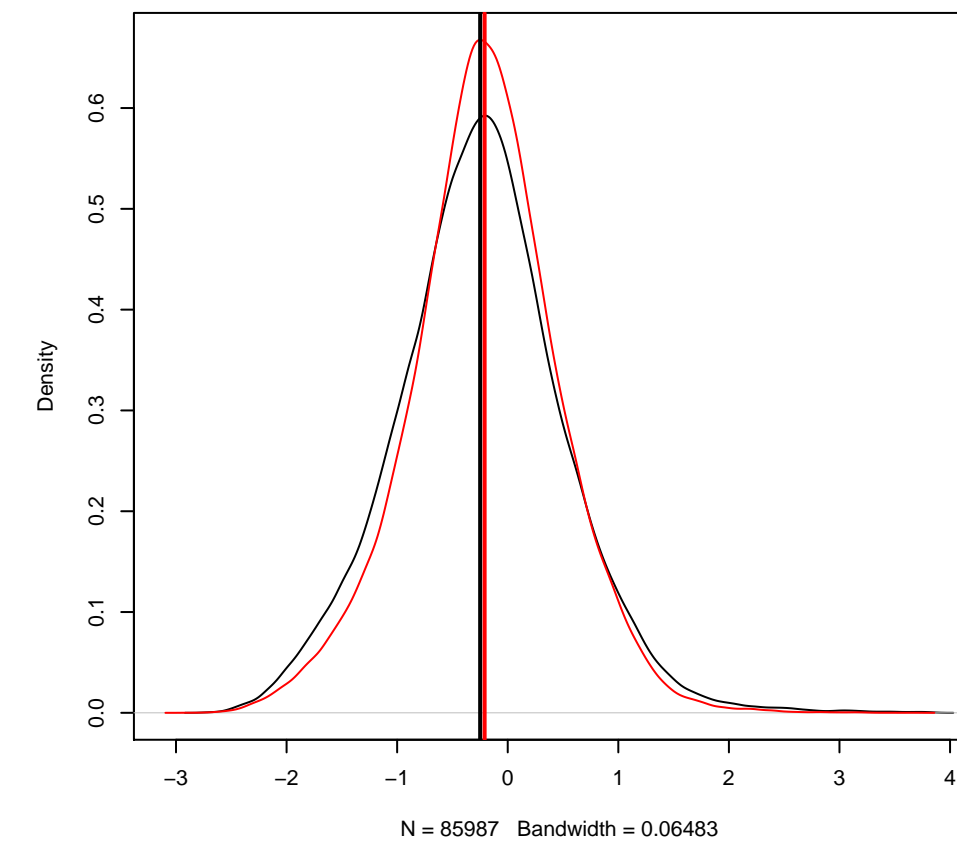

Replicate scatter (raw) for sample: 556015 (Controls)  
Correlation coefficient: 0.76 (Pearson); 0.88 (Spearman)

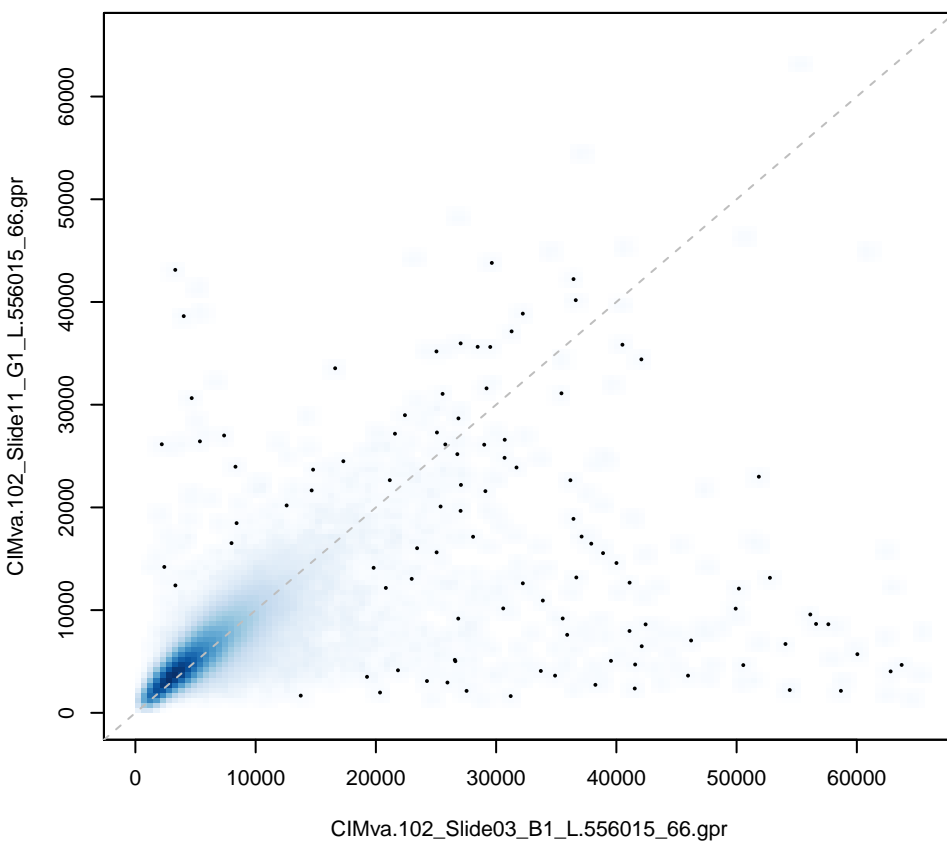

Replicate scatter (raw; log2) for sample: 556015 (Controls)  
Correlation coefficient: 0.88 (Pearson); 0.88 (Spearman)

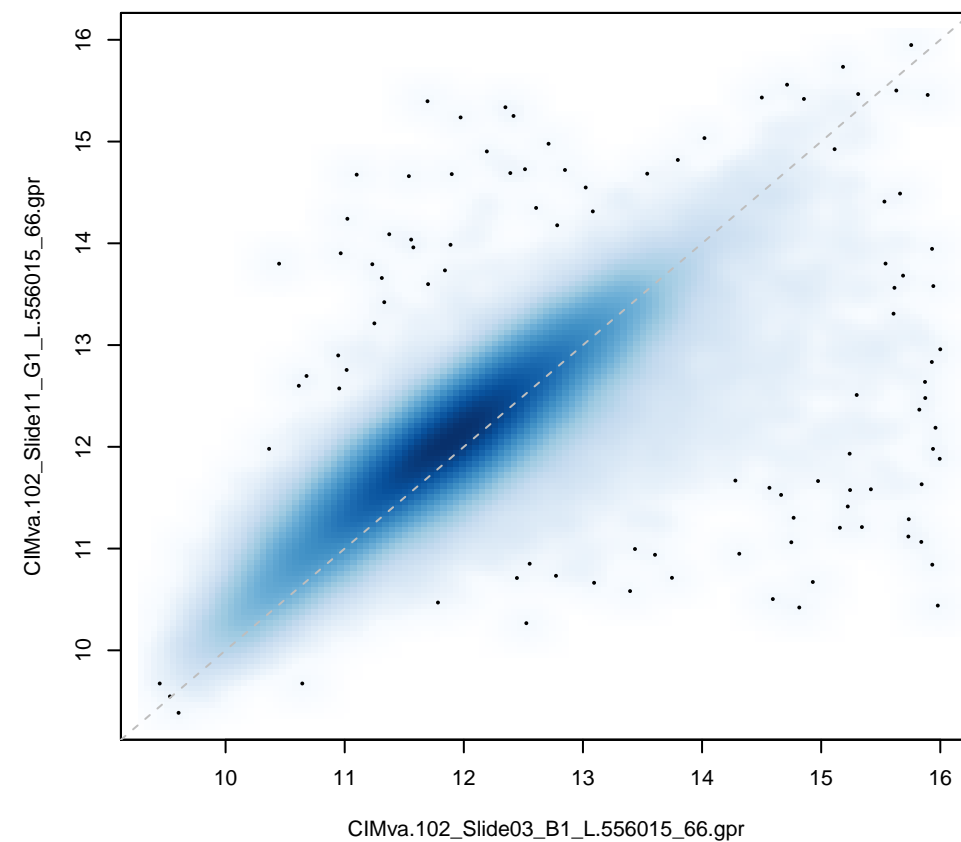

Replicate scatter (normalized) for sample: 556015 (Controls)  
Correlation coefficient: 0.76 (Pearson); 0.88 (Spearman)

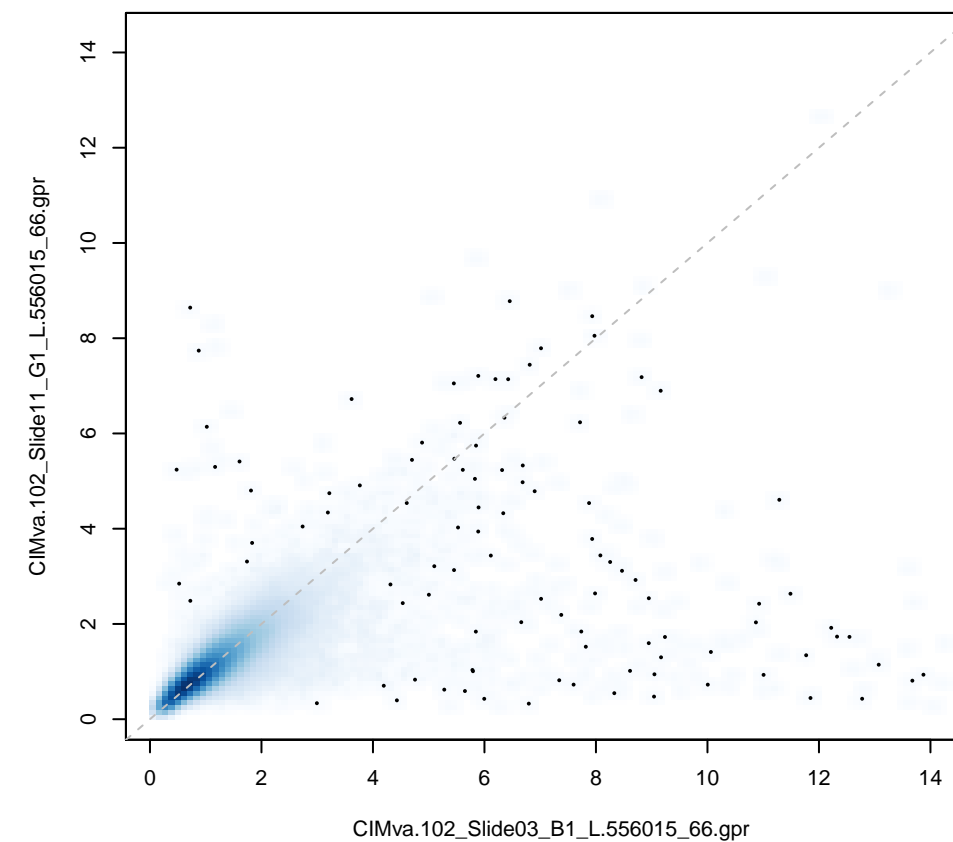

Replicate scatter (normalized; log2) for sample: 556015 (Controls)  
Correlation coefficient: 0.86 (Pearson); 0.88 (Spearman)

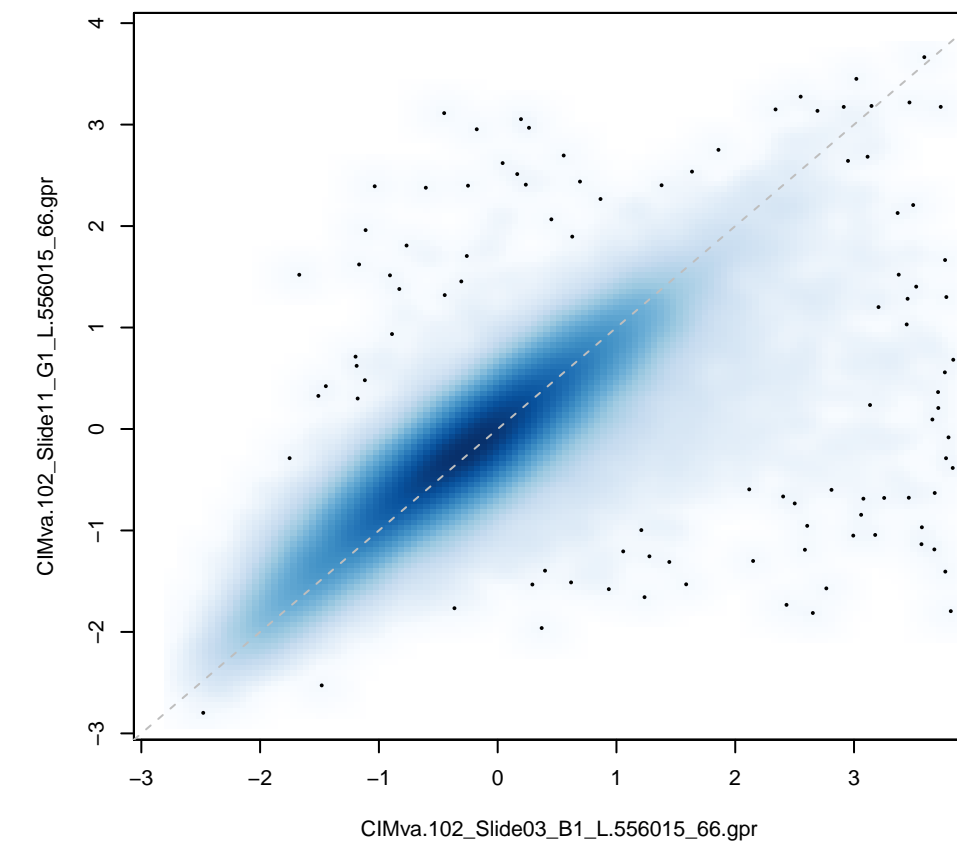

Replicate densities (raw) for sample: 556404 (Controls)

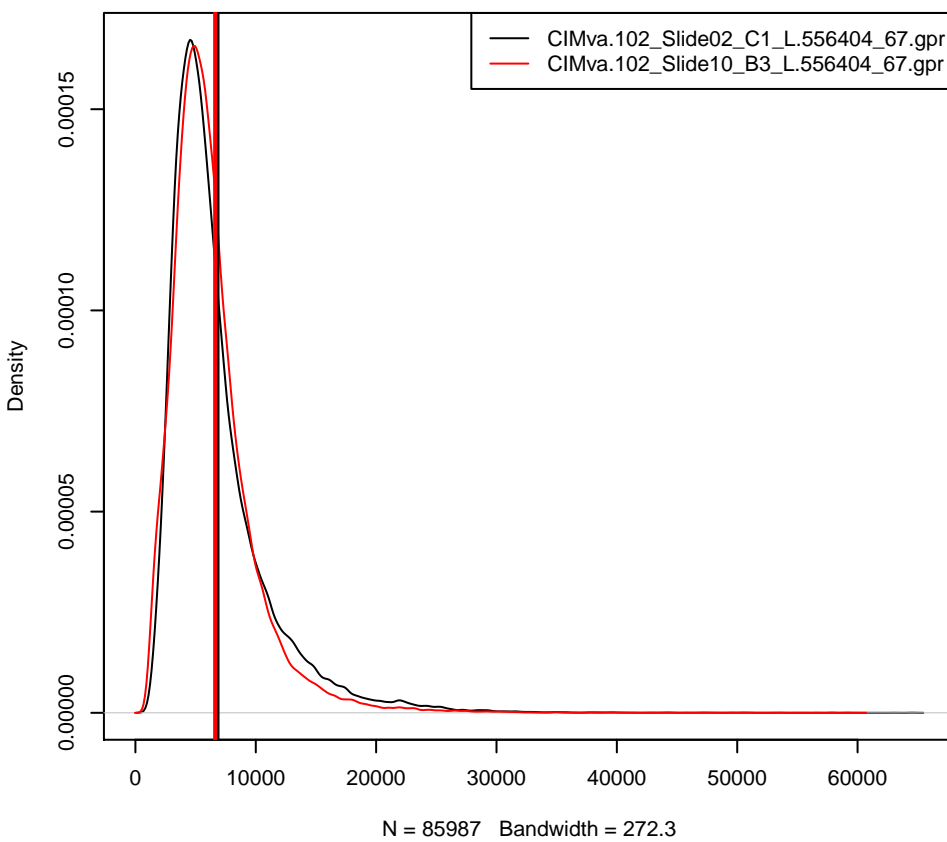

Replicate densities (raw; log2) for sample: 556404 (Controls)

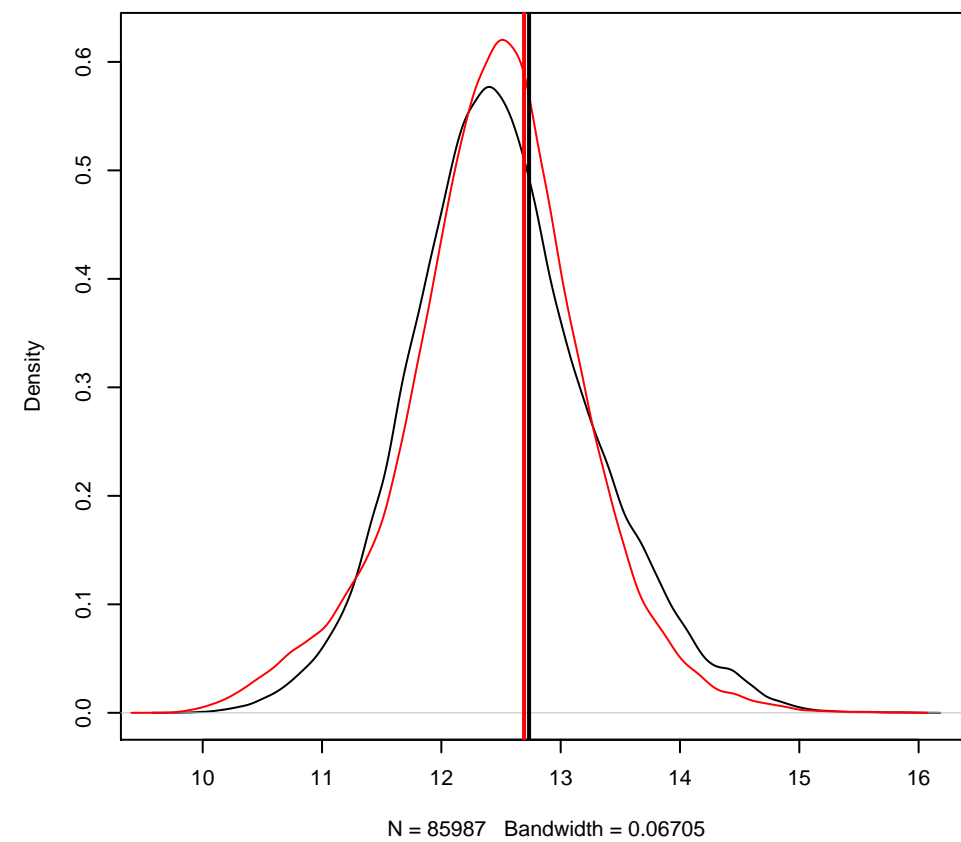

Replicate densities (normalized) for sample: 556404 (Controls)

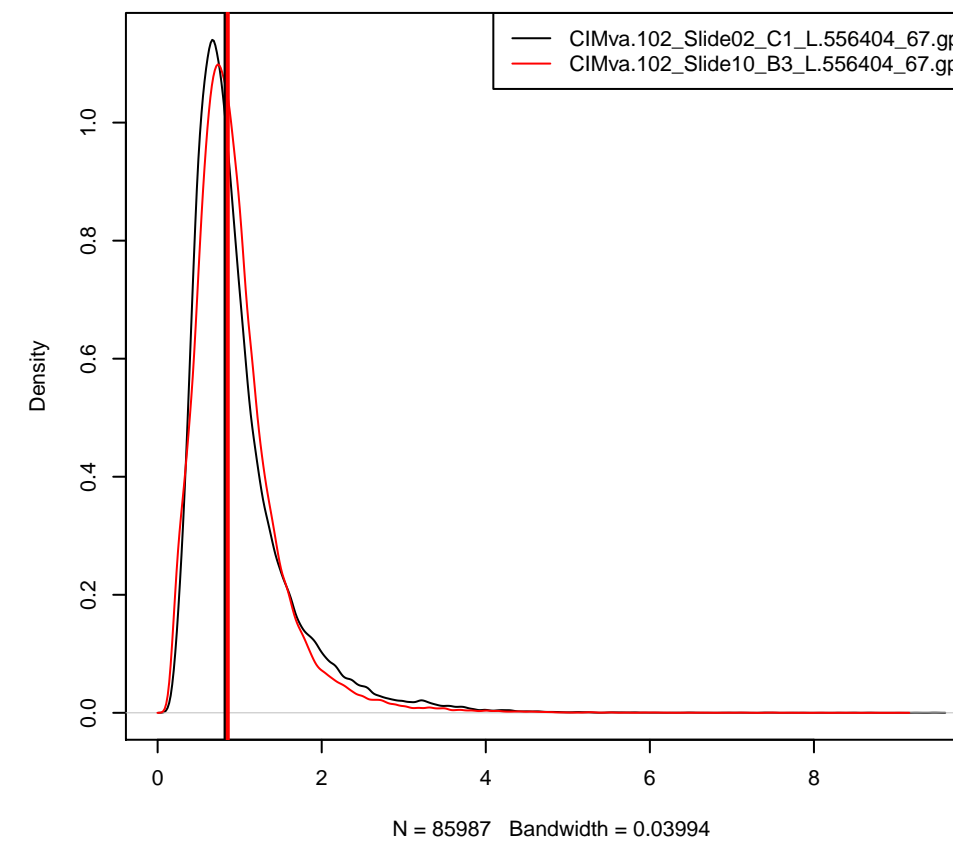

Replicate densities (normalized; log2) for sample: 556404 (Controls)

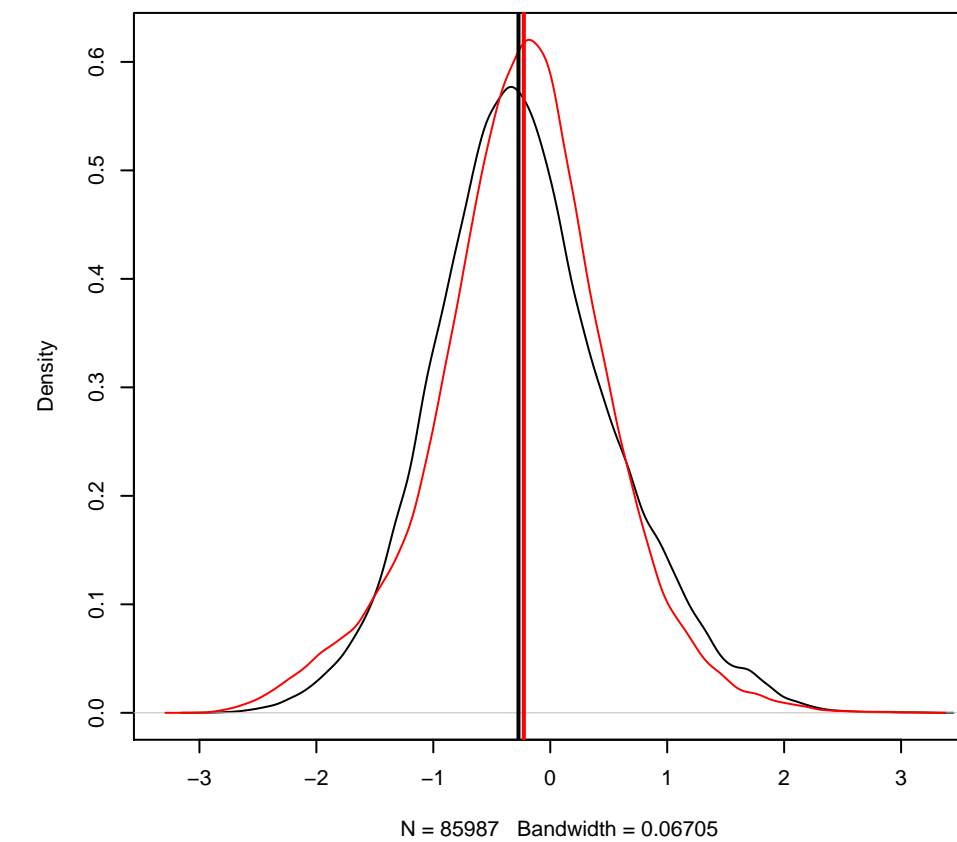

Replicate scatter (raw) for sample: 556404 (Controls)  
Correlation coefficient: 0.79 (Pearson); 0.82 (Spearman)

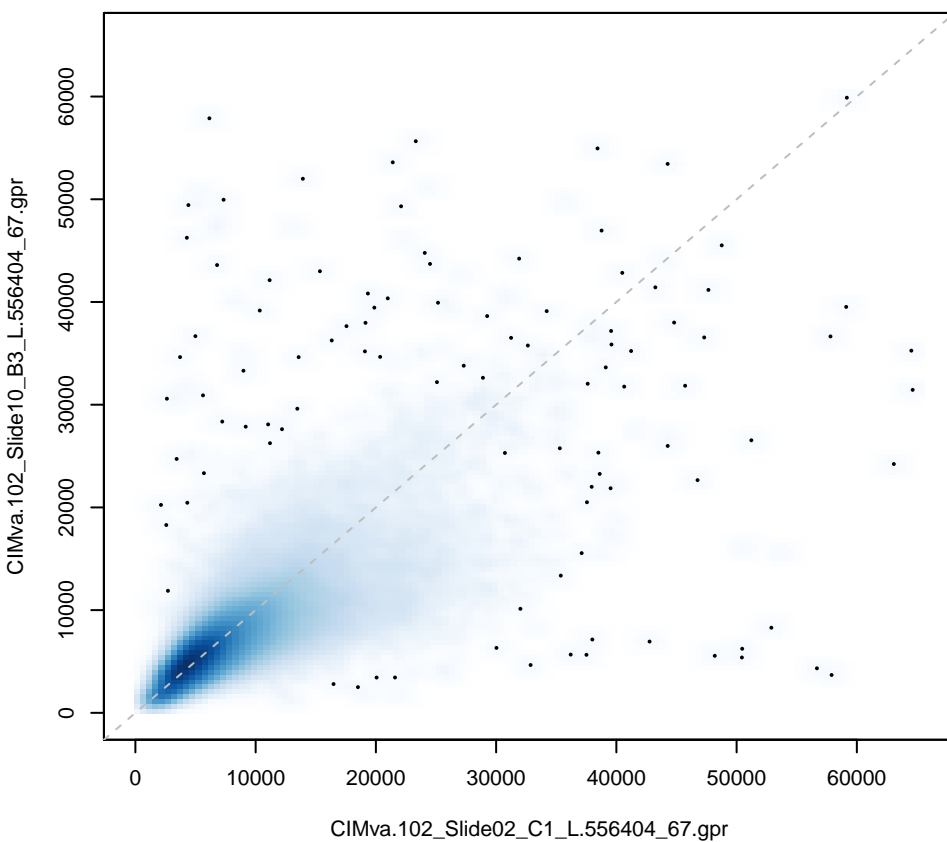

Replicate scatter (raw; log2) for sample: 556404 (Controls)  
Correlation coefficient: 0.83 (Pearson); 0.82 (Spearman)

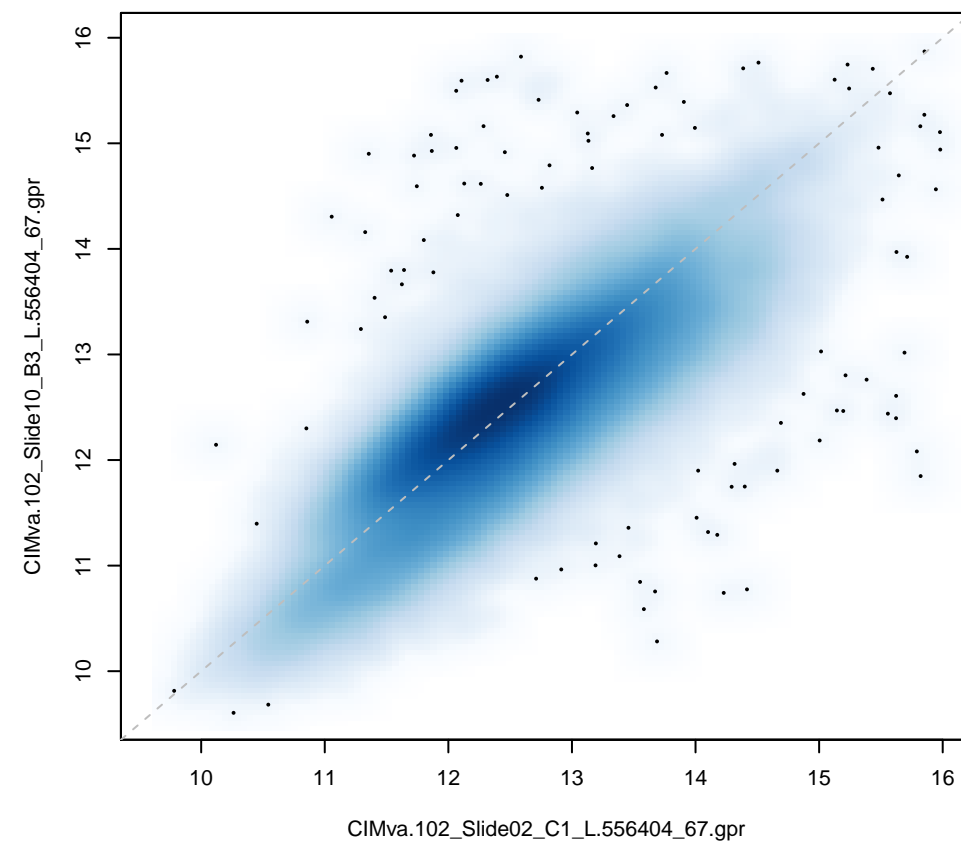

Replicate scatter (normalized) for sample: 556404 (Controls)  
Correlation coefficient: 0.79 (Pearson); 0.82 (Spearman)

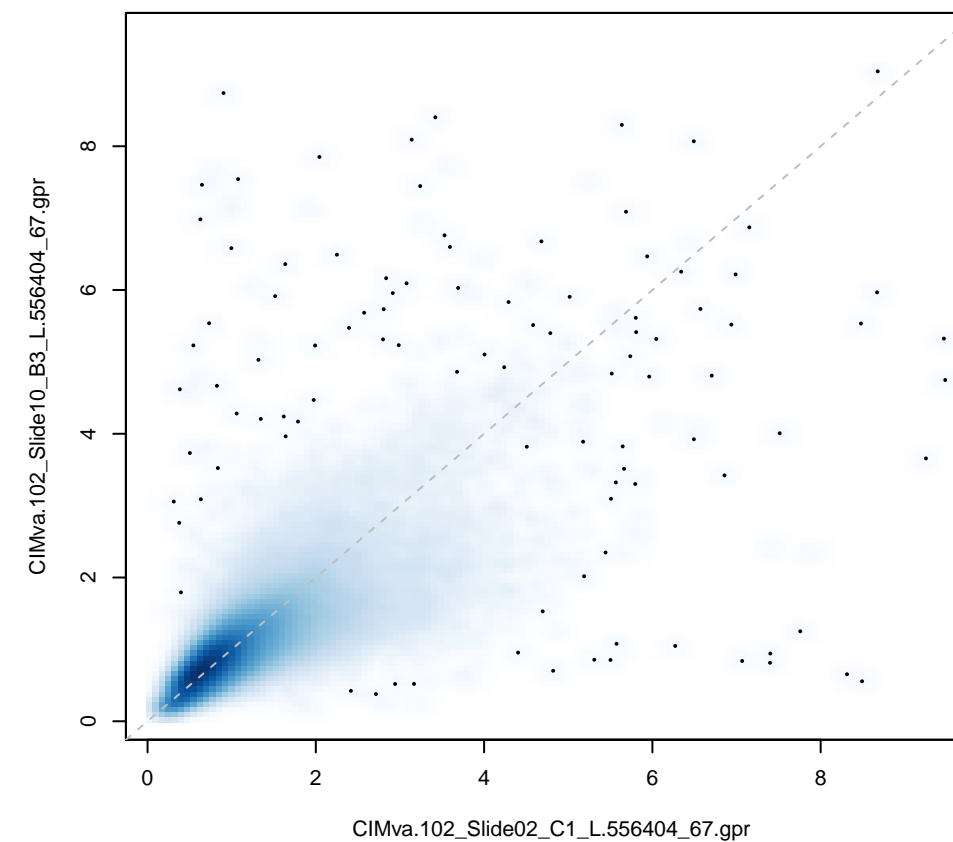

Replicate scatter (normalized; log2) for sample: 556404 (Controls)  
Correlation coefficient: 0.82 (Pearson); 0.82 (Spearman)

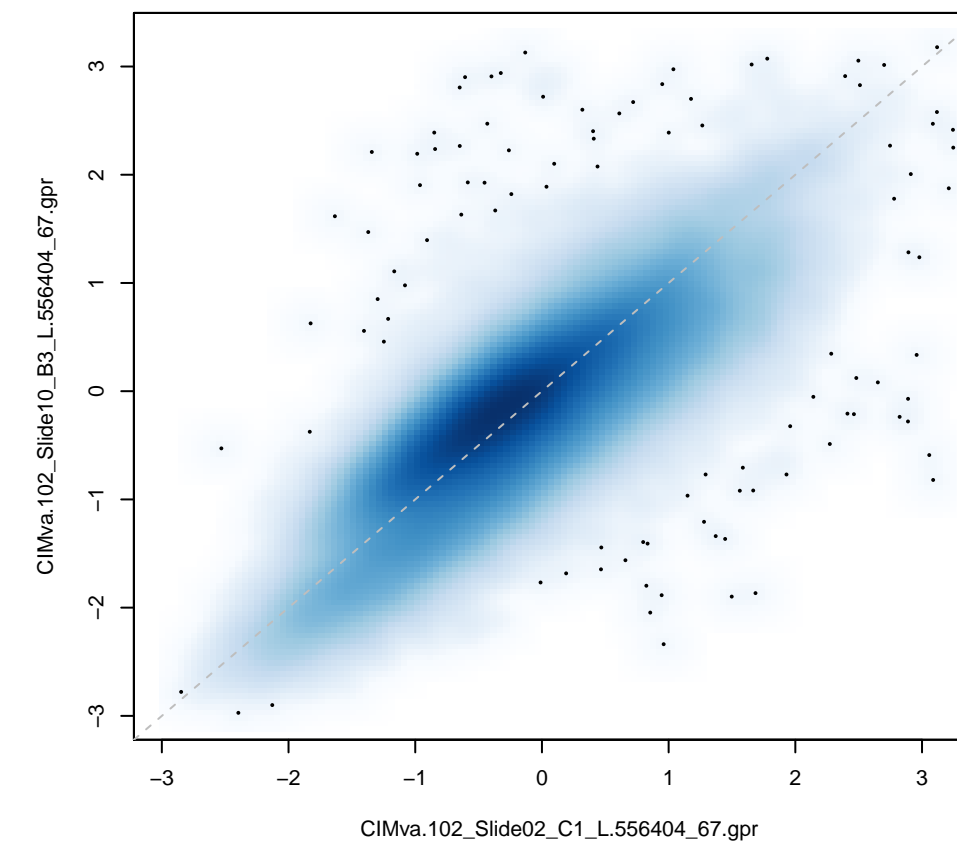

Replicate densities (raw) for sample: 556984 (CFS)

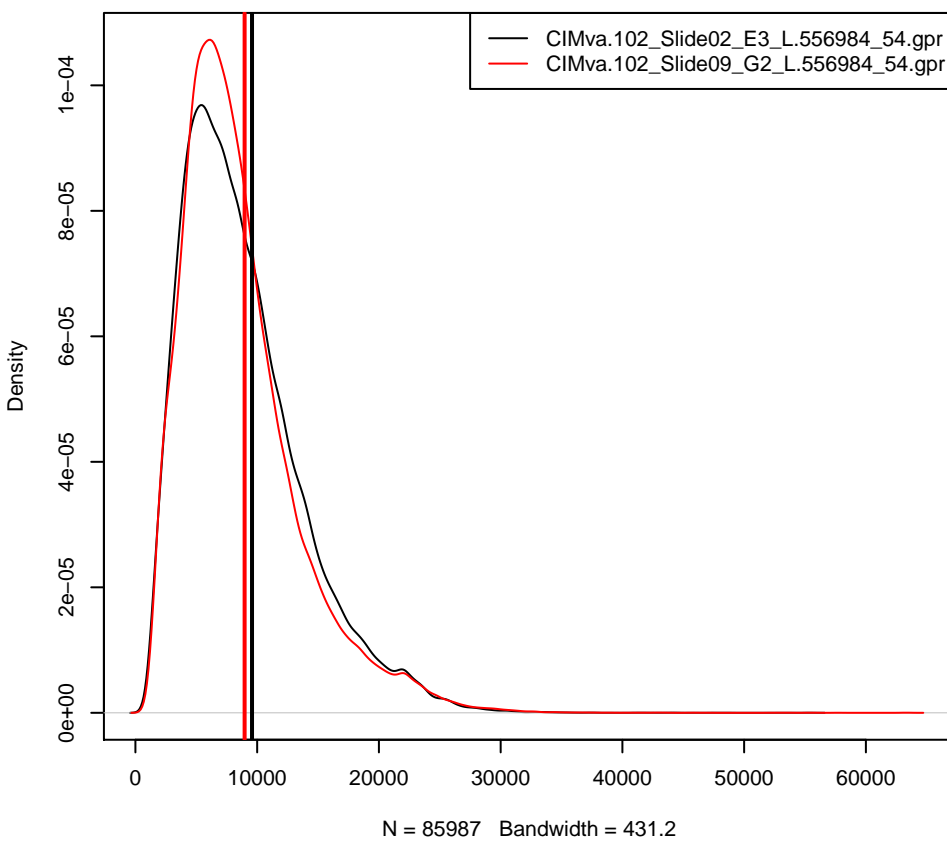

Replicate densities (raw; log2) for sample: 556984 (CFS)

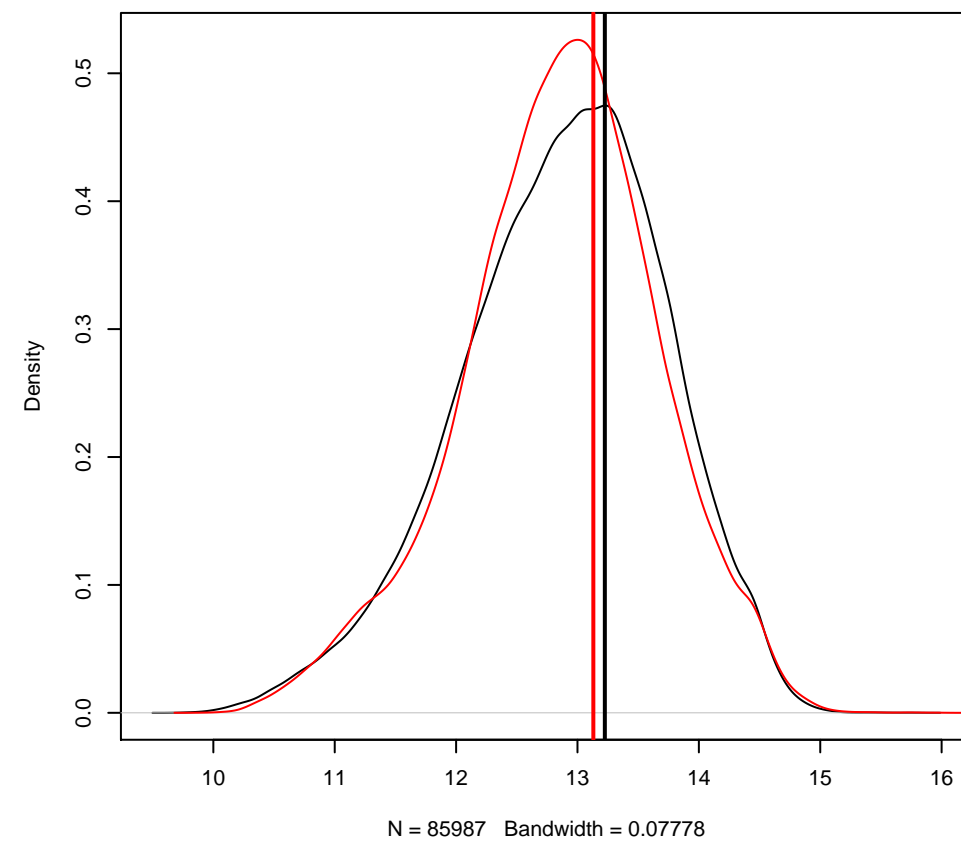

Replicate densities (normalized) for sample: 556984 (CFS)

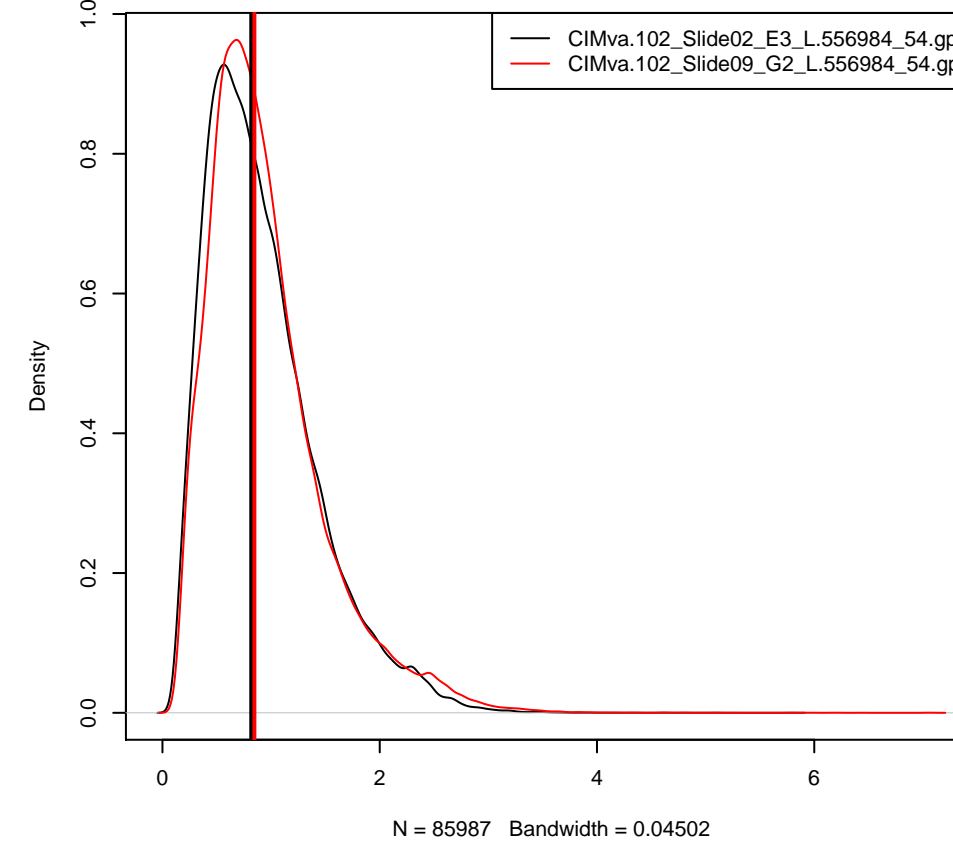

Replicate densities (normalized; log2) for sample: 556984 (CFS)

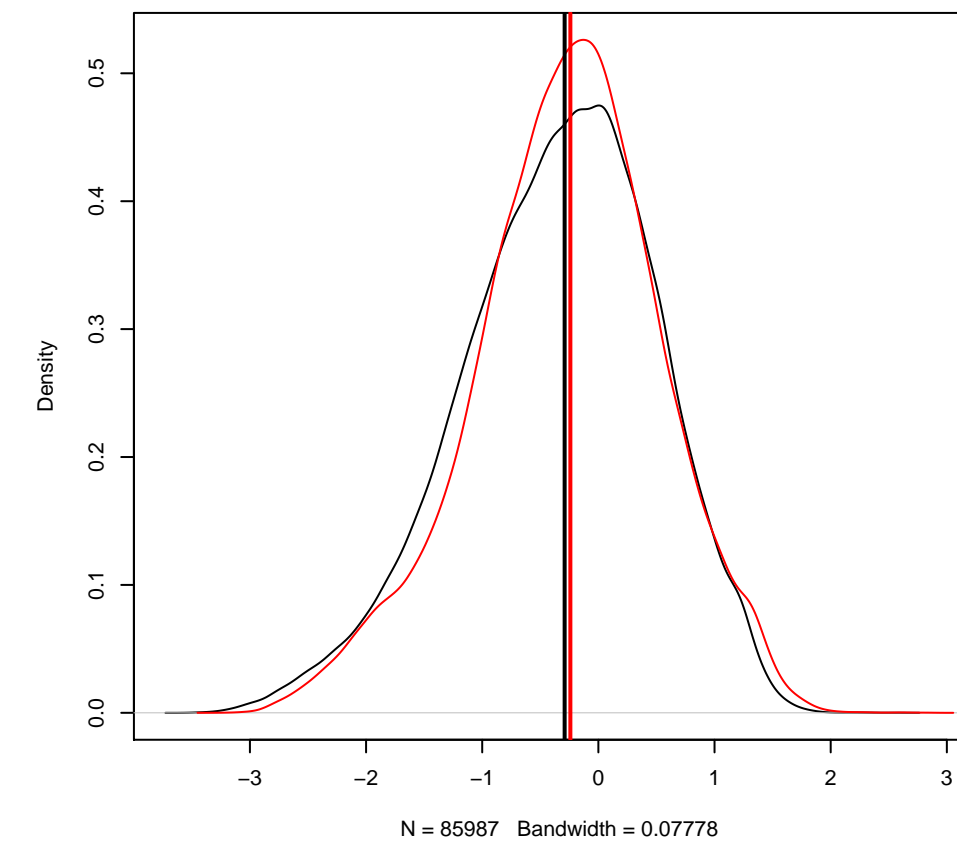

Replicate scatter (raw) for sample: 556984 (CFS)  
Correlation coefficient: 0.9 (Pearson); 0.92 (Spearman)

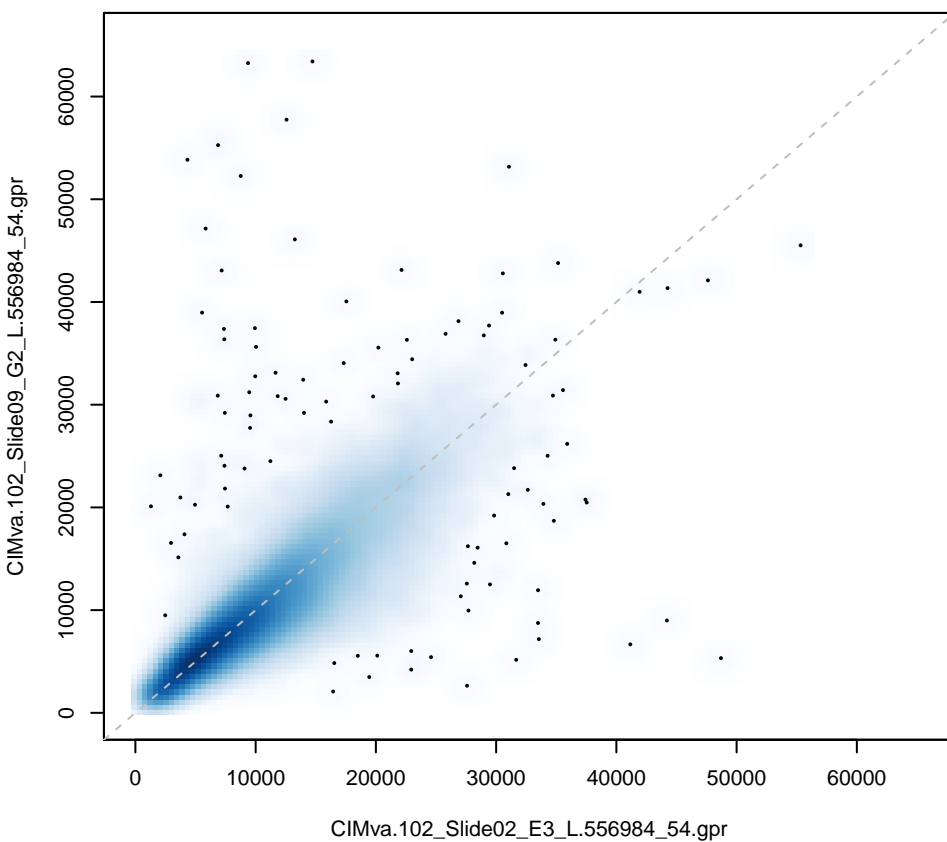

Replicate scatter (raw; log2) for sample: 556984 (CFS)  
Correlation coefficient: 0.92 (Pearson); 0.92 (Spearman)

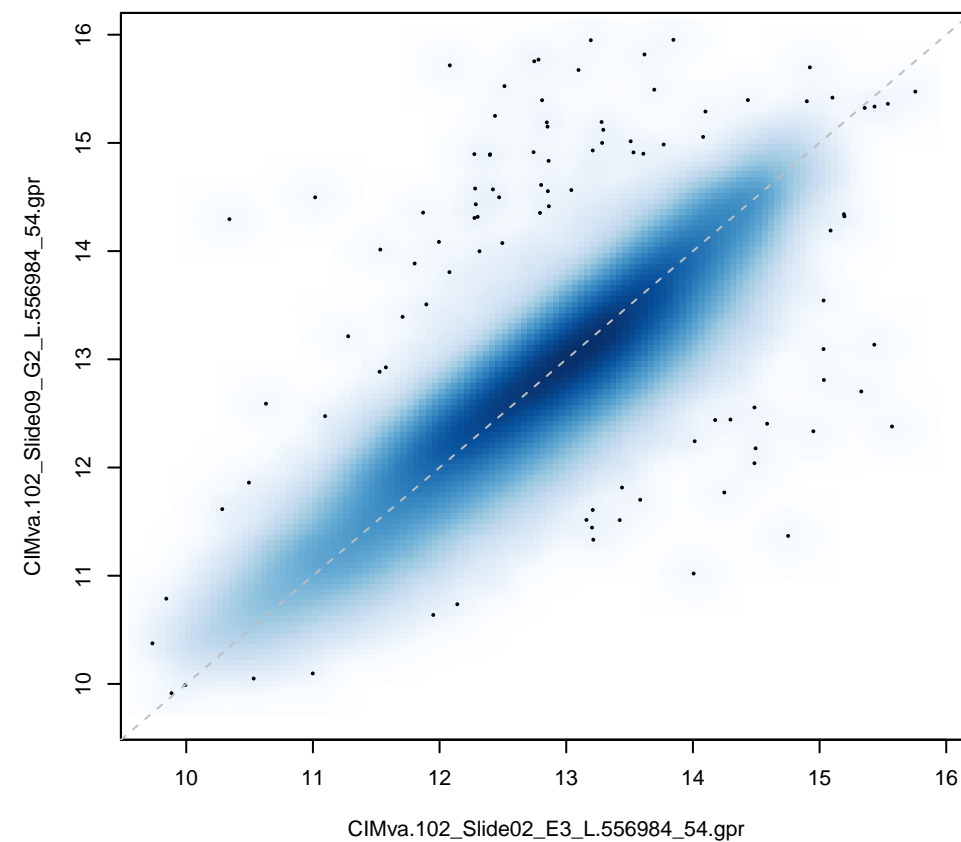

Replicate scatter (normalized) for sample: 556984 (CFS)  
Correlation coefficient: 0.9 (Pearson); 0.92 (Spearman)

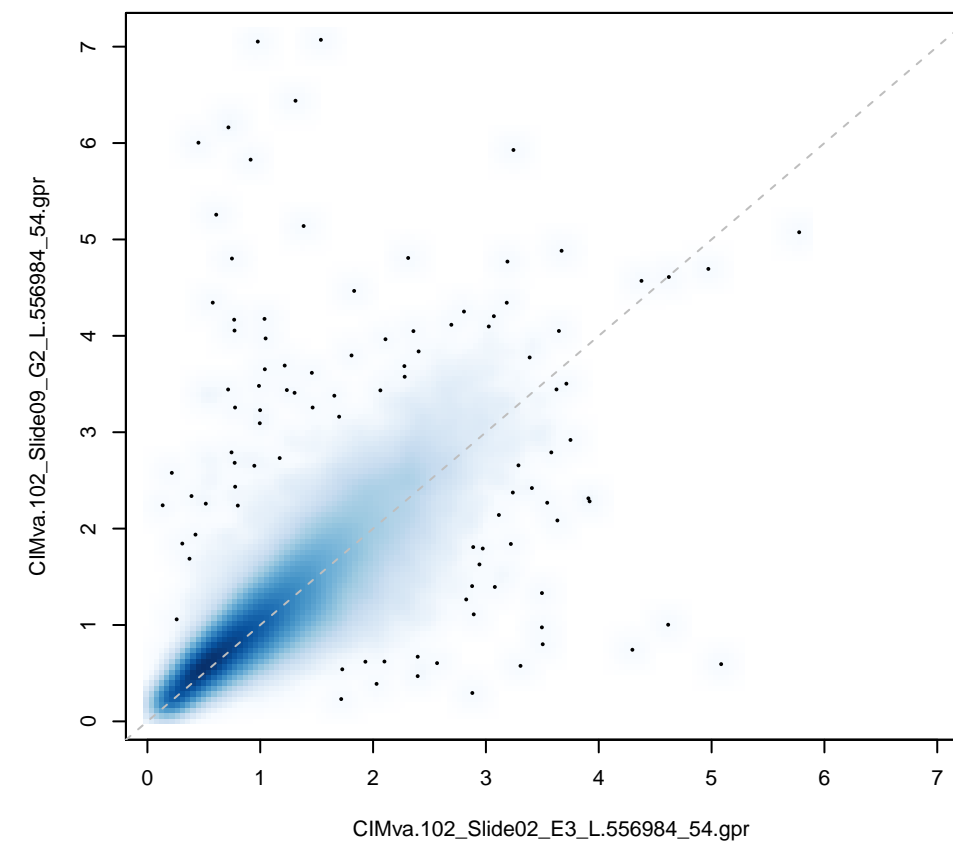

Replicate scatter (normalized; log2) for sample: 556984 (CFS)  
Correlation coefficient: 0.91 (Pearson); 0.92 (Spearman)

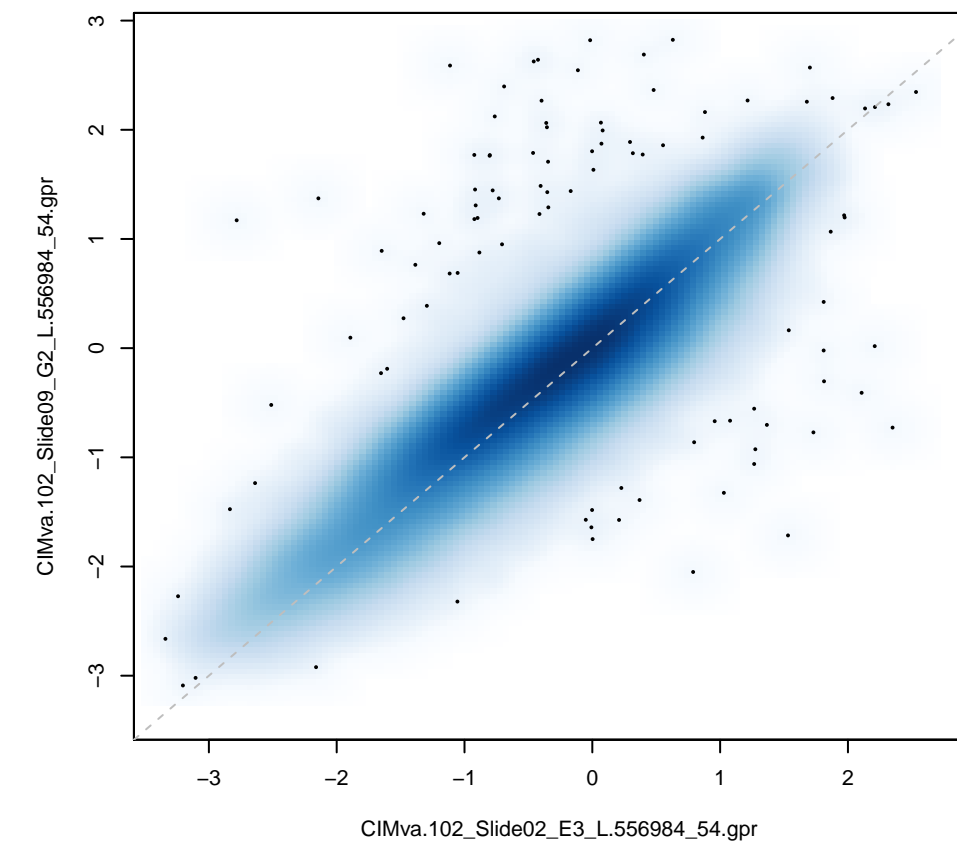



Replicate densities (raw) for sample: 557455 (CFS)

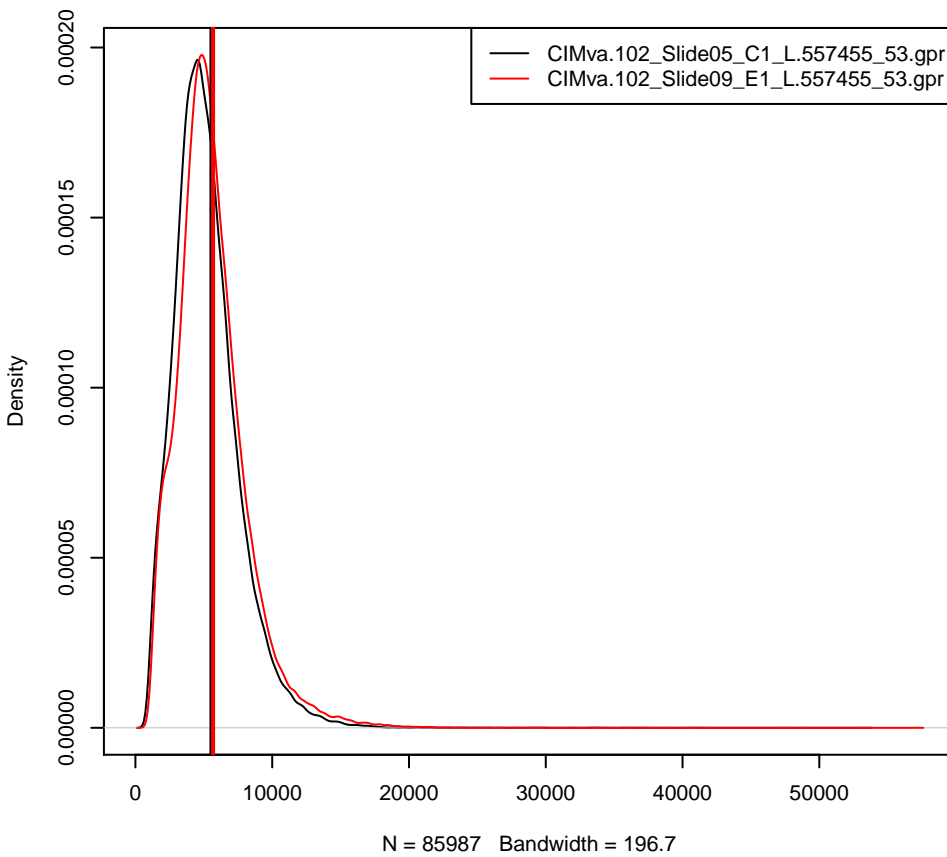

Replicate densities (raw; log2) for sample: 557455 (CFS)

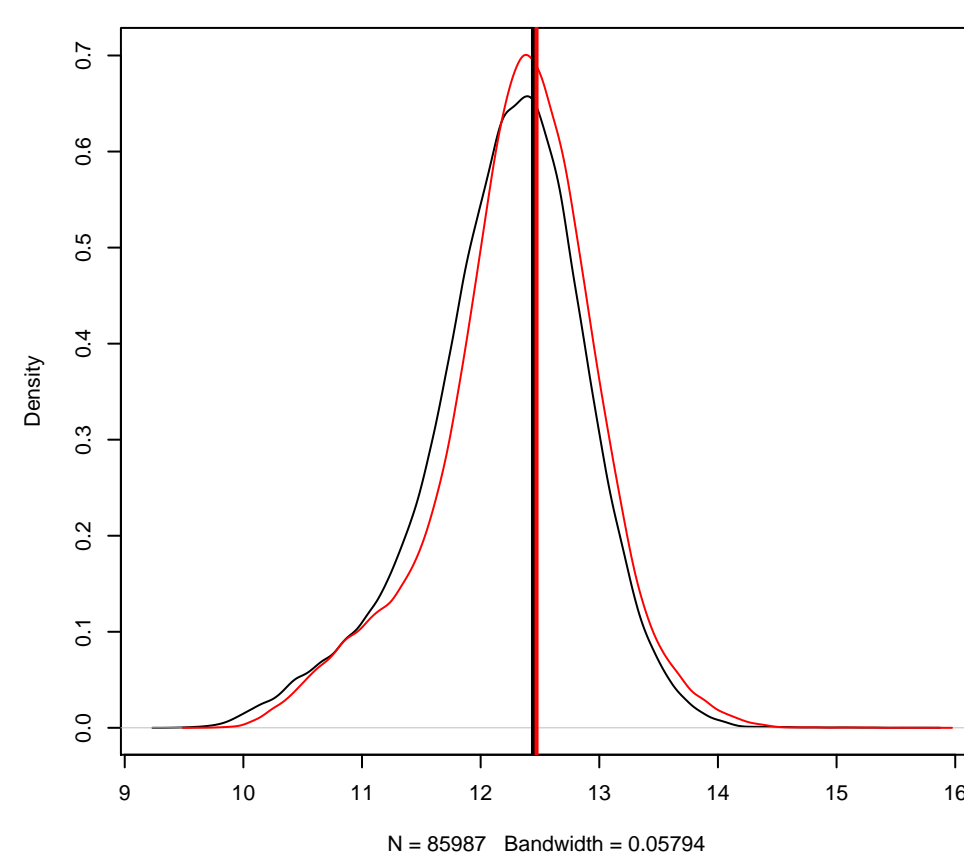

Replicate densities (normalized) for sample: 557455 (CFS)

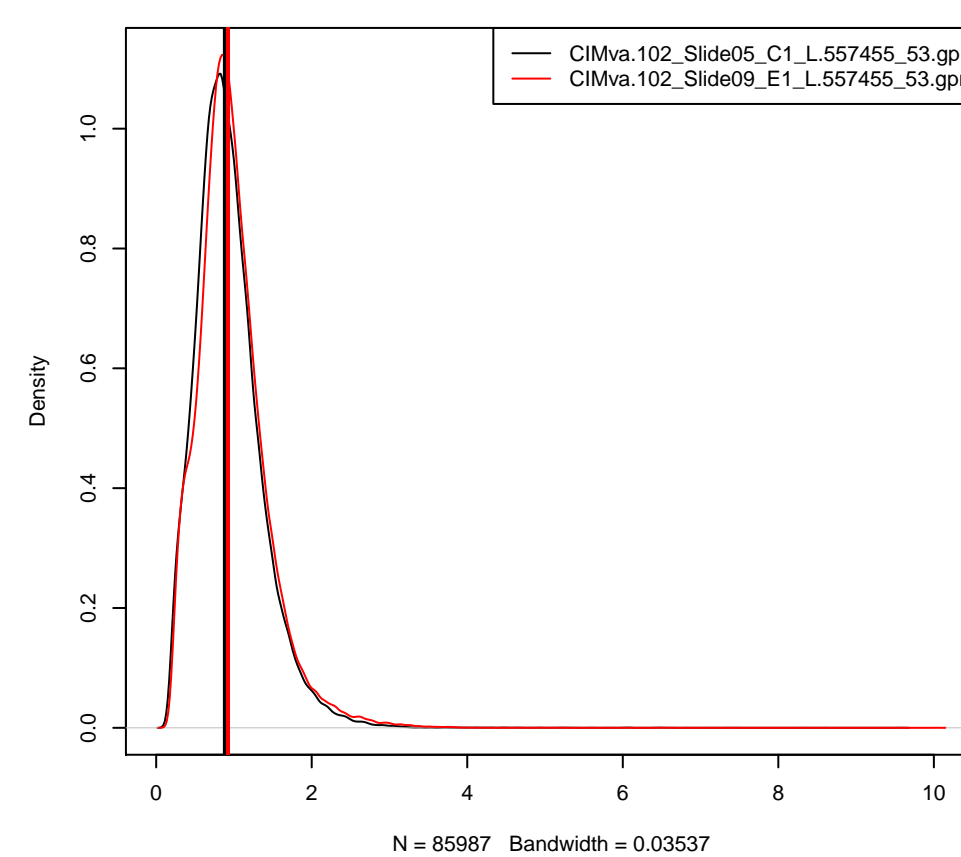

Replicate densities (normalized; log2) for sample: 557455 (CFS)

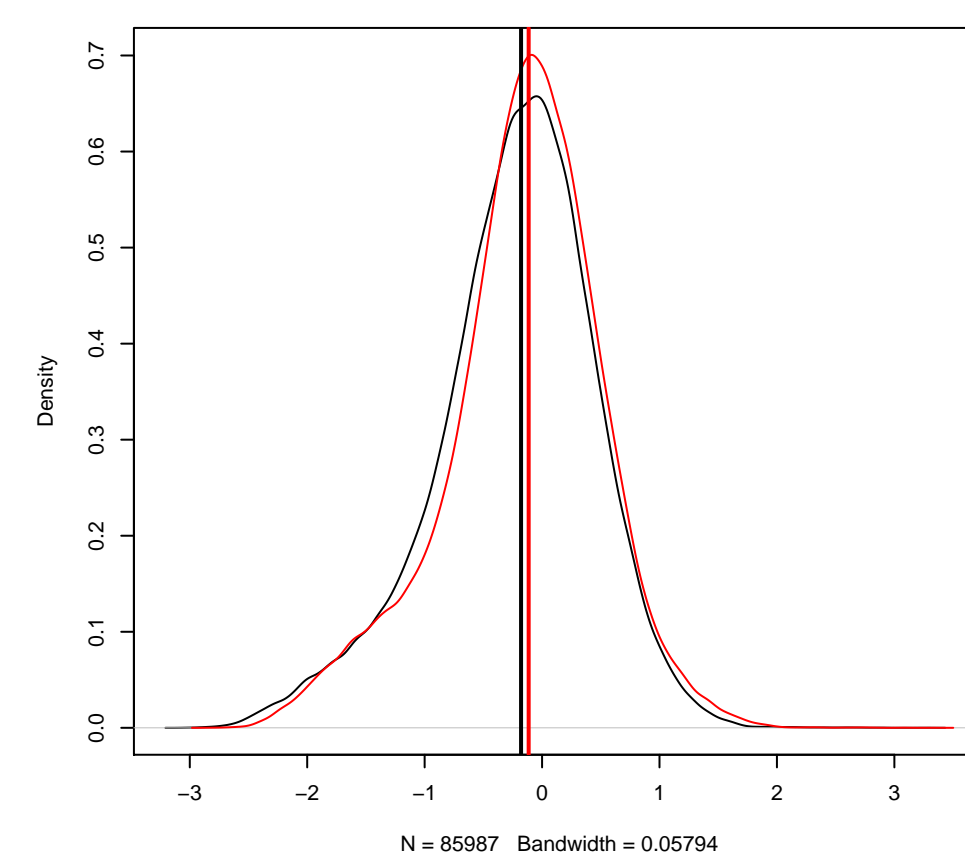

Replicate scatter (raw) for sample: 557455 (CFS)  
Correlation coefficient: 0.88 (Pearson); 0.88 (Spearman)

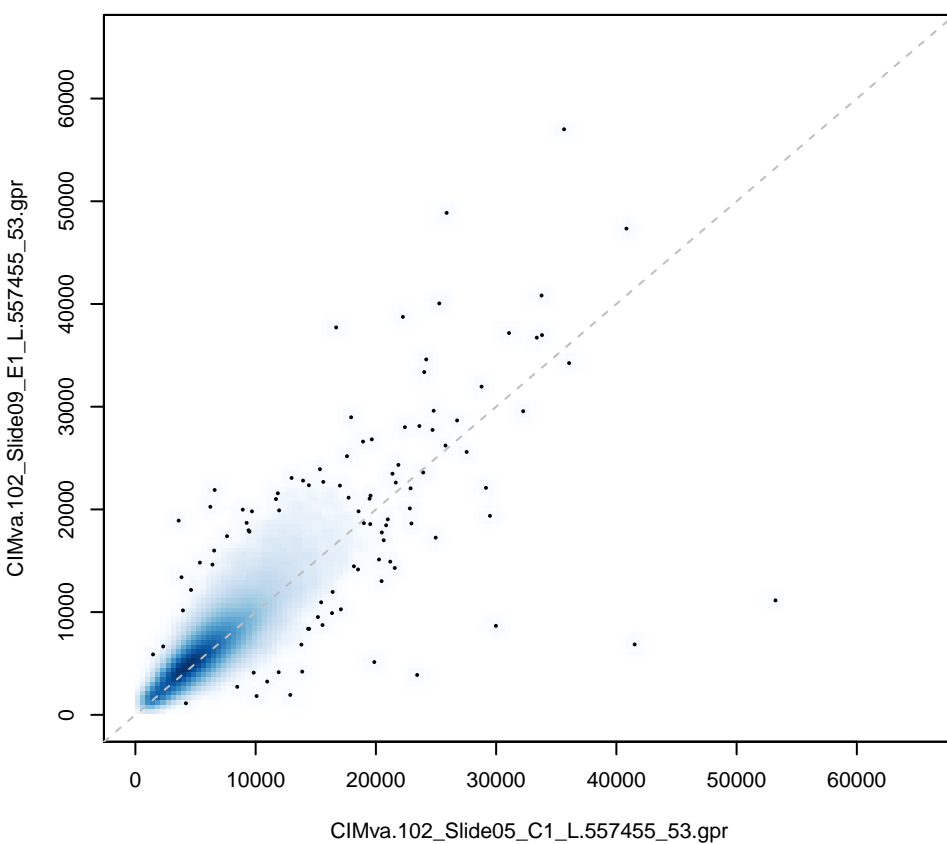

Replicate scatter (raw; log2) for sample: 557455 (CFS)  
Correlation coefficient: 0.9 (Pearson); 0.88 (Spearman)

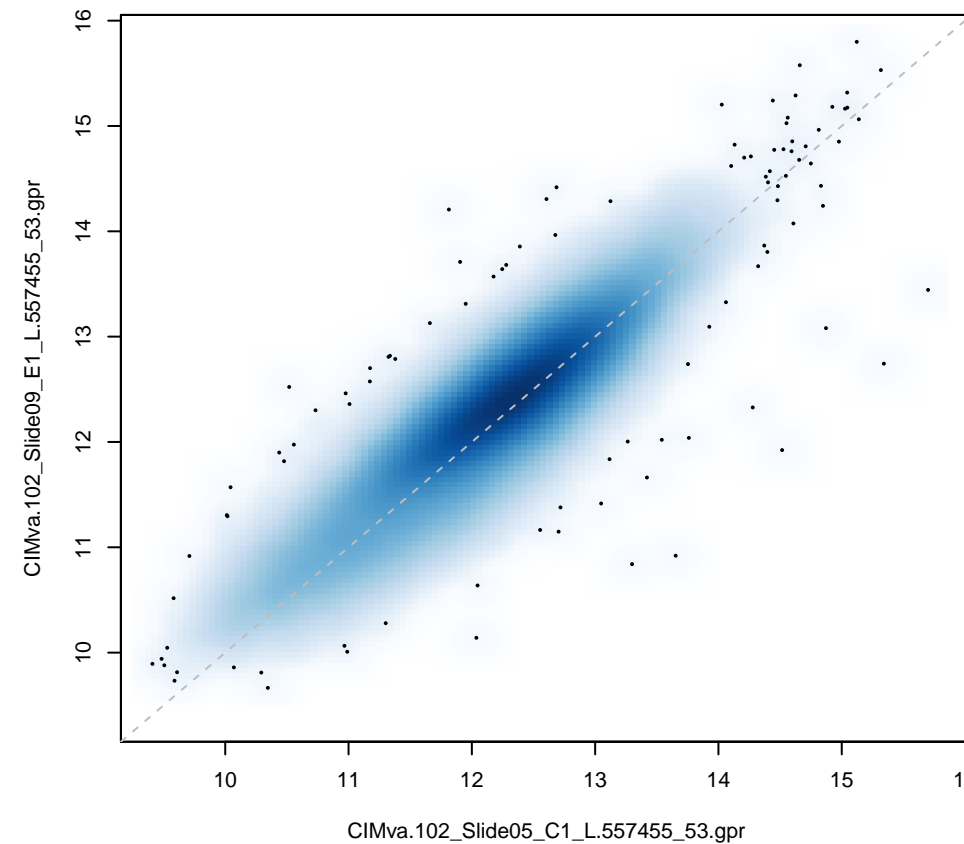

Replicate scatter (normalized) for sample: 557455 (CFS)  
Correlation coefficient: 0.88 (Pearson); 0.88 (Spearman)

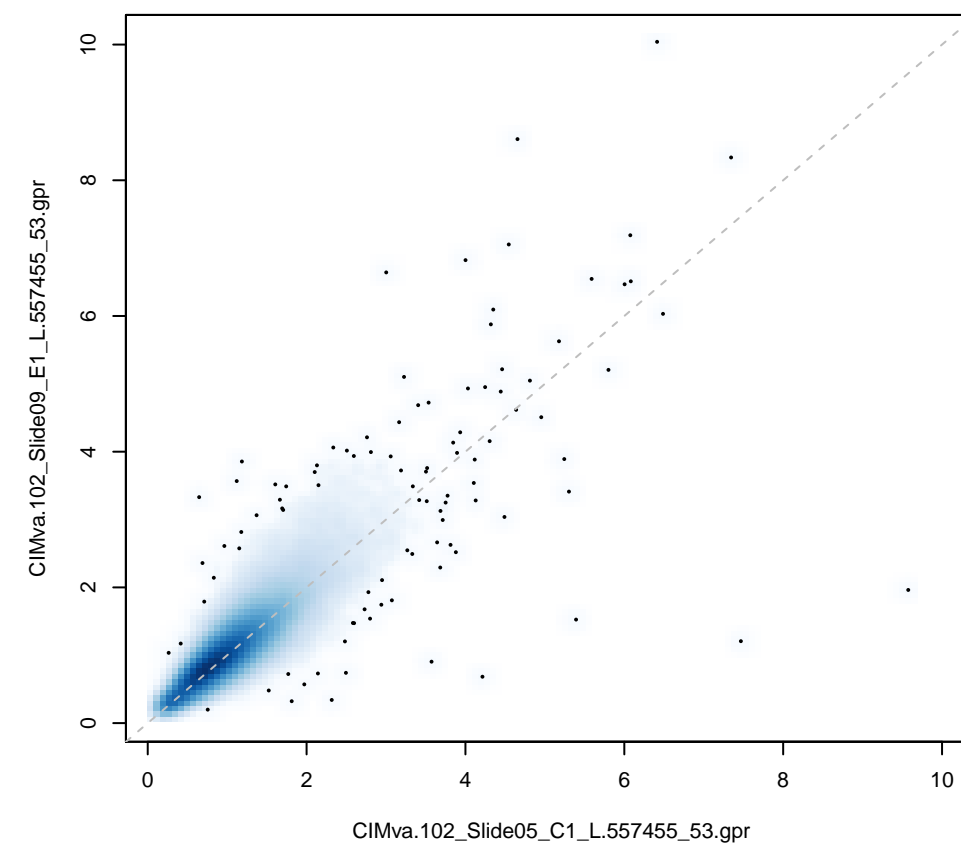

Replicate scatter (normalized; log2) for sample: 557455 (CFS)  
Correlation coefficient: 0.89 (Pearson); 0.88 (Spearman)

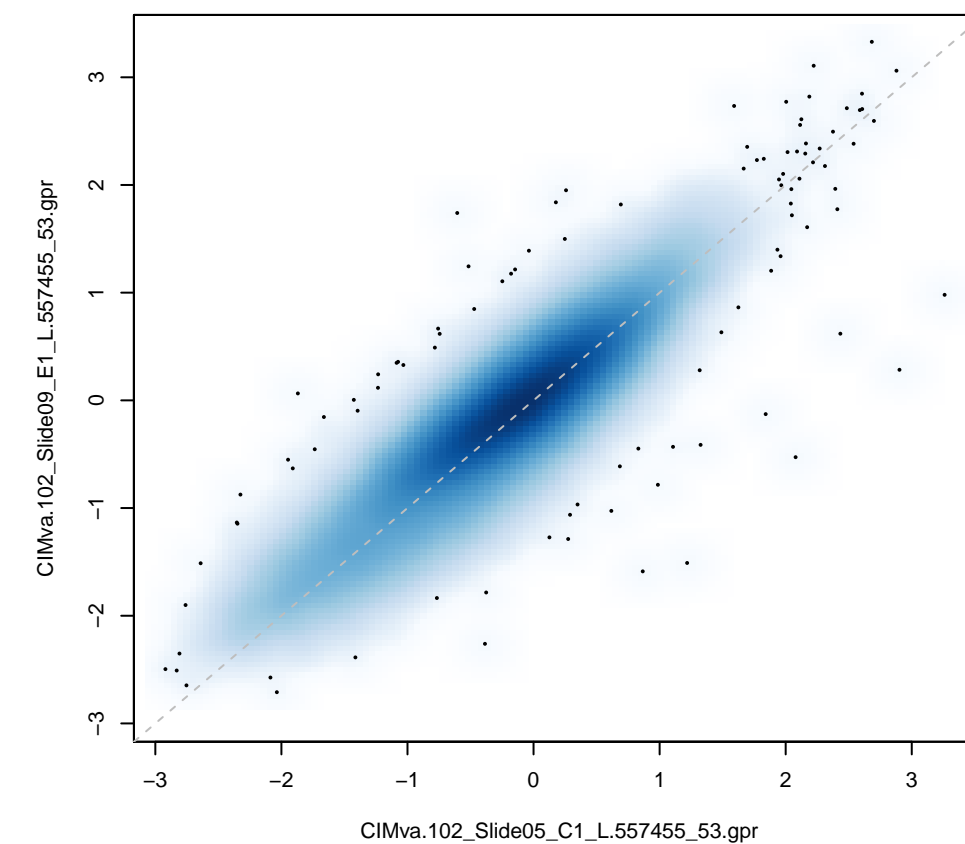

Replicate densities (raw) for sample: 557625 (Controls)

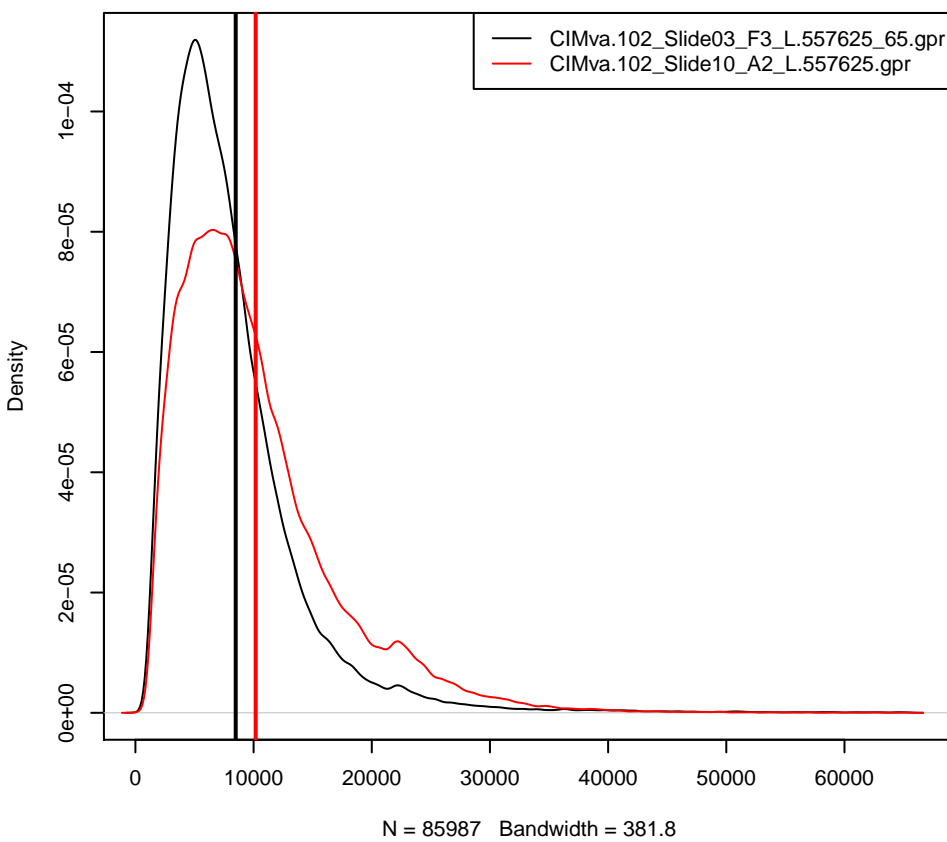

Replicate densities (raw; log2) for sample: 557625 (Controls)

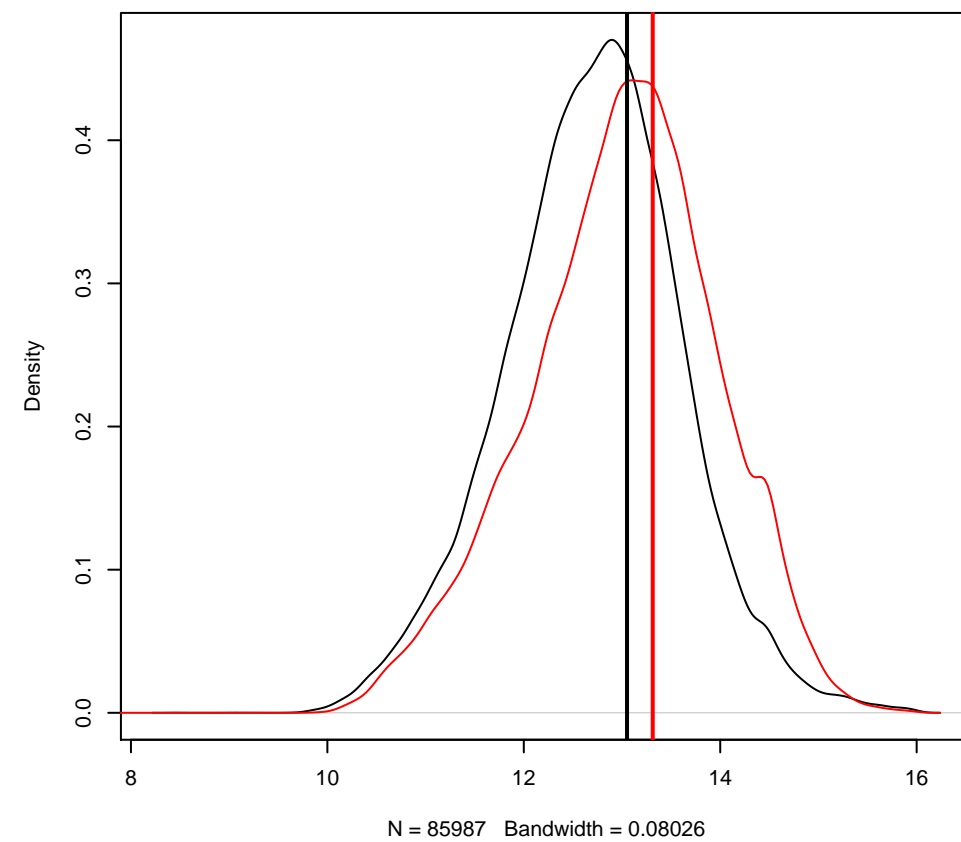

Replicate densities (normalized) for sample: 557625 (Controls)

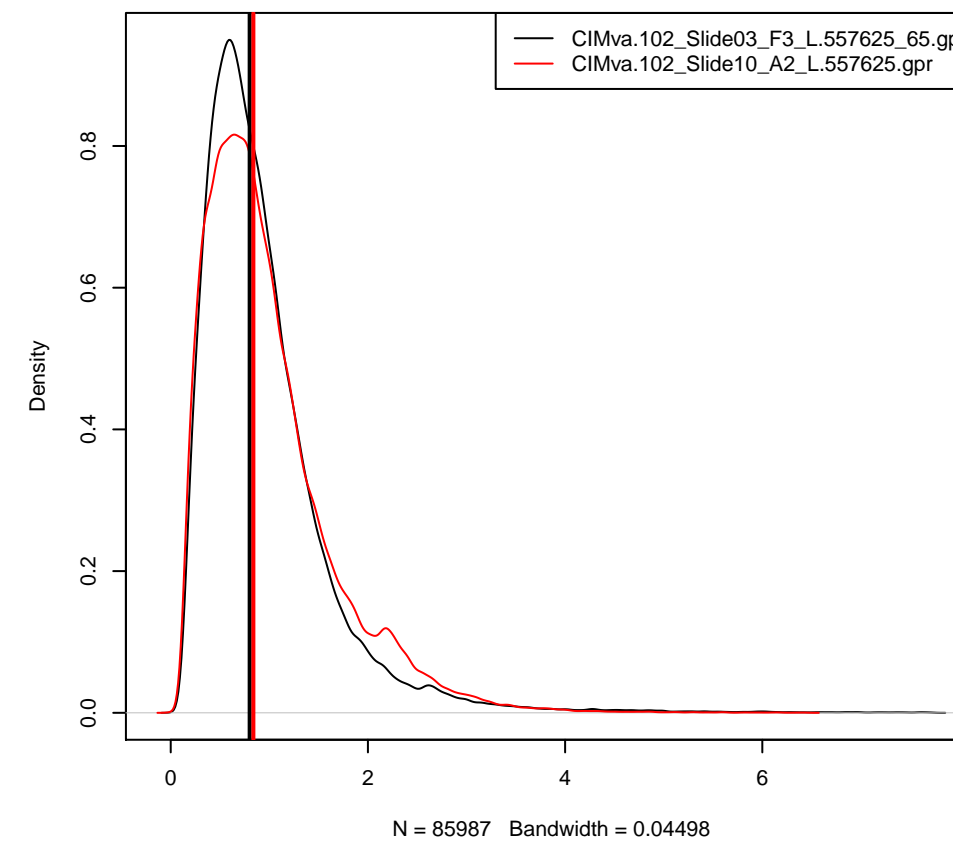

Replicate densities (normalized; log2) for sample: 557625 (Controls)

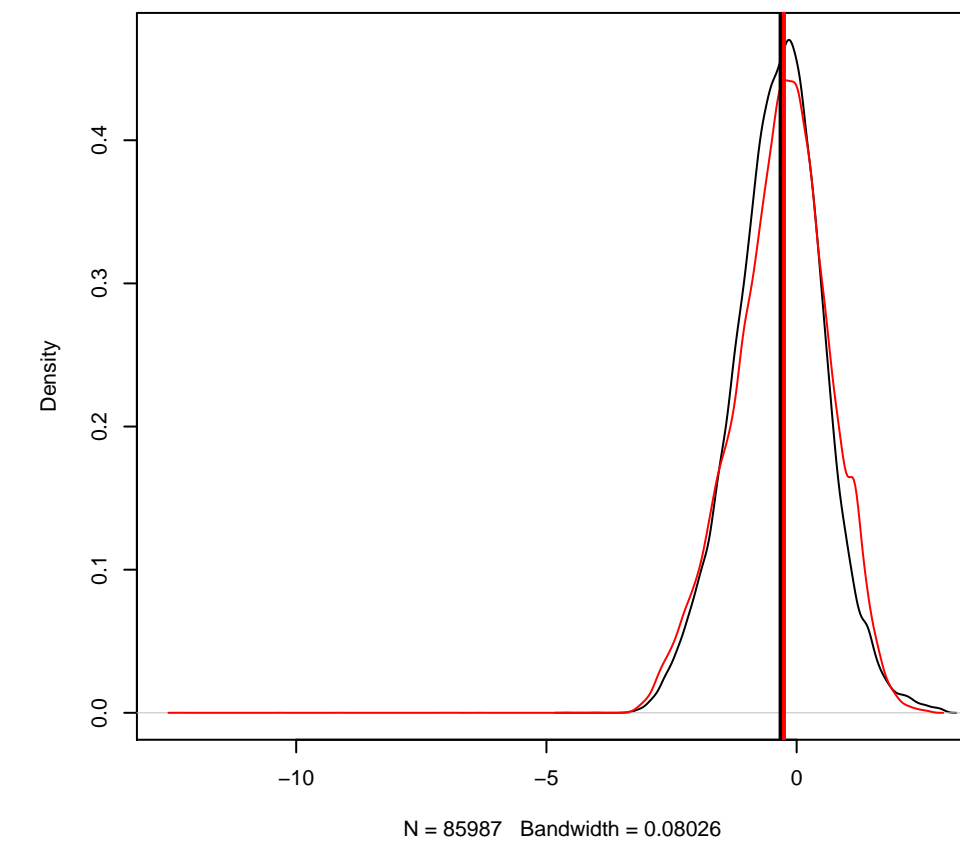

Replicate scatter (raw) for sample: 557625 (Controls)  
Correlation coefficient: 0.43 (Pearson); 0.64 (Spearman)

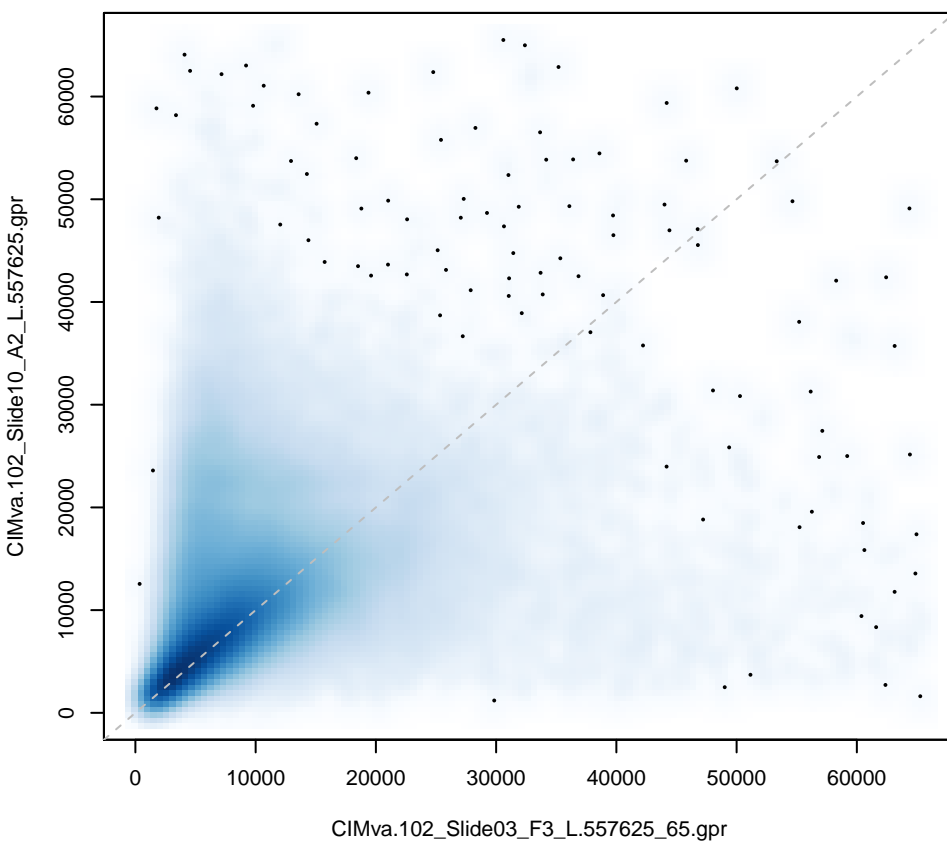

Replicate scatter (raw; log2) for sample: 557625 (Controls)  
Correlation coefficient: 0.66 (Pearson); 0.64 (Spearman)

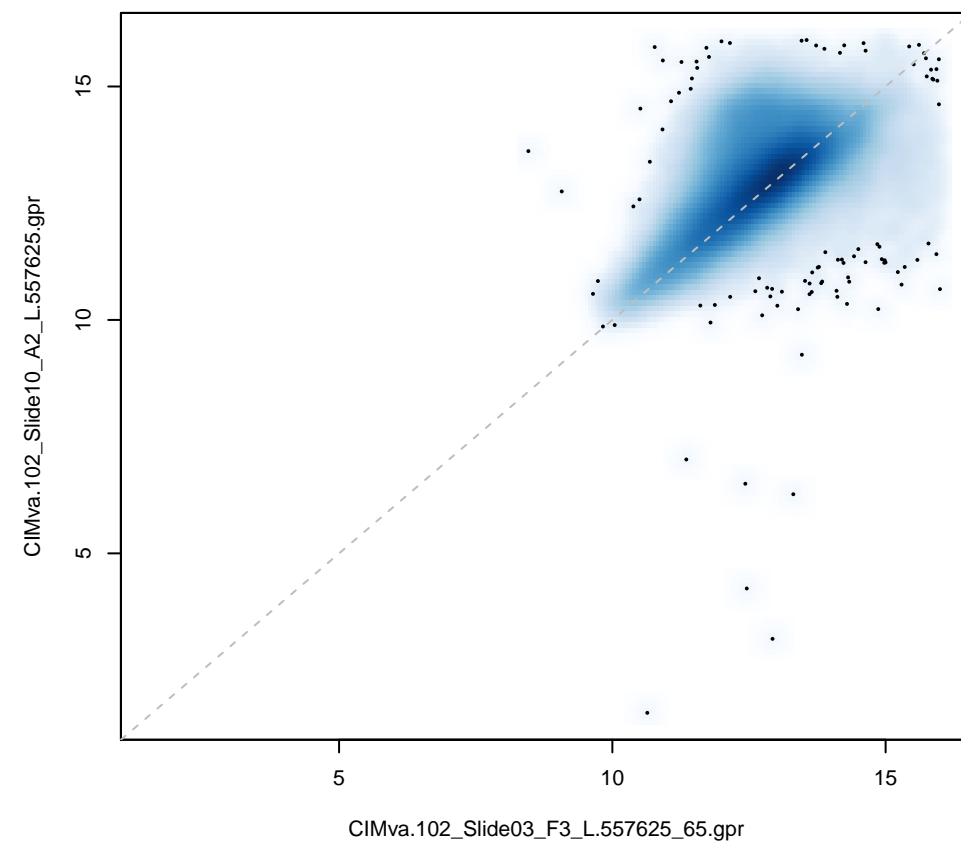

Replicate scatter (normalized) for sample: 557625 (Controls)  
Correlation coefficient: 0.43 (Pearson); 0.64 (Spearman)

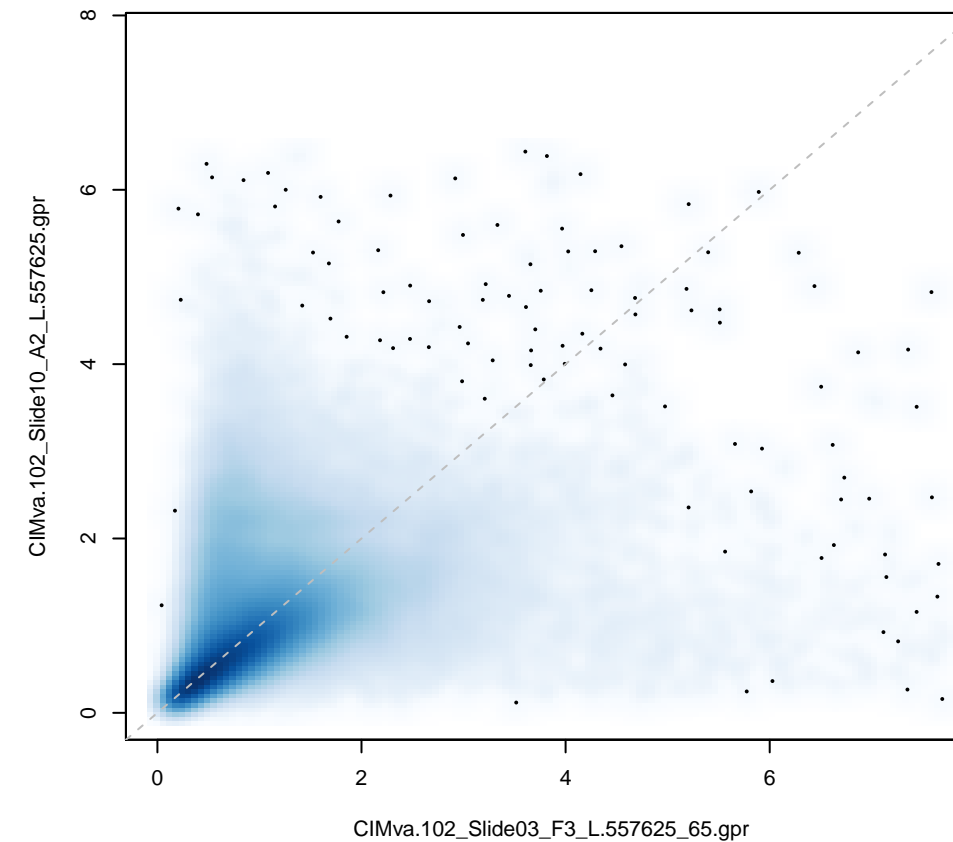

Replicate scatter (normalized; log2) for sample: 557625 (Controls)  
Correlation coefficient: 0.55 (Pearson); 0.64 (Spearman)

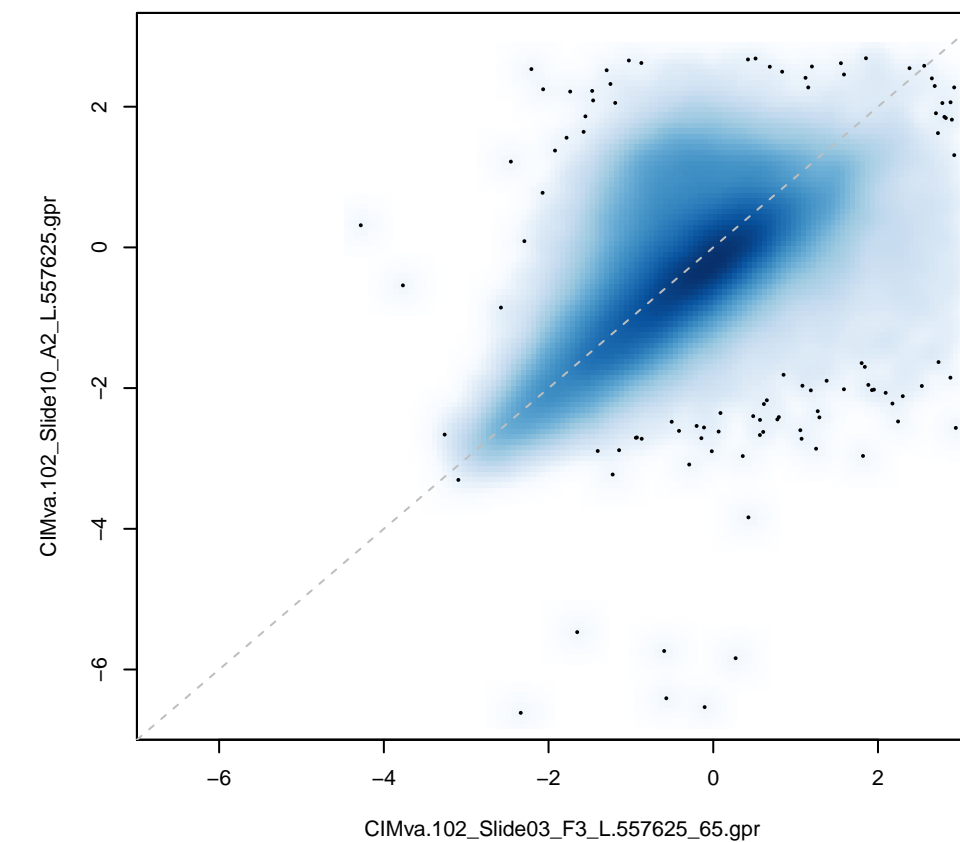

Replicate densities (raw) for sample: 558285 (Controls)

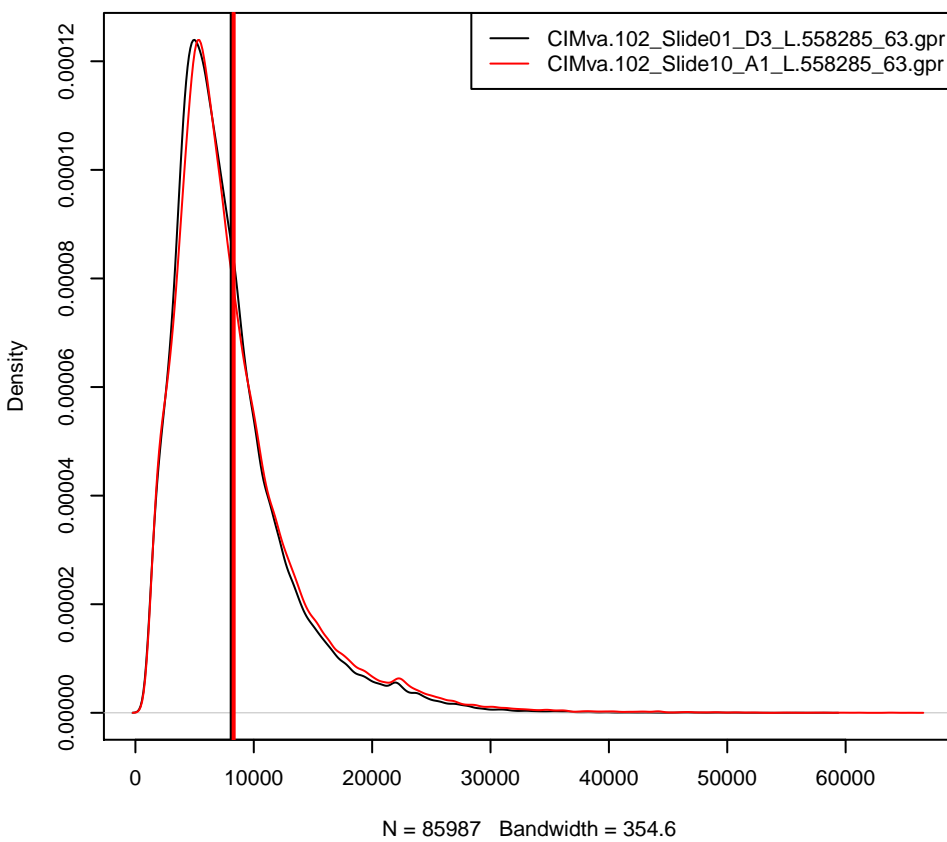

Replicate densities (raw; log2) for sample: 558285 (Controls)

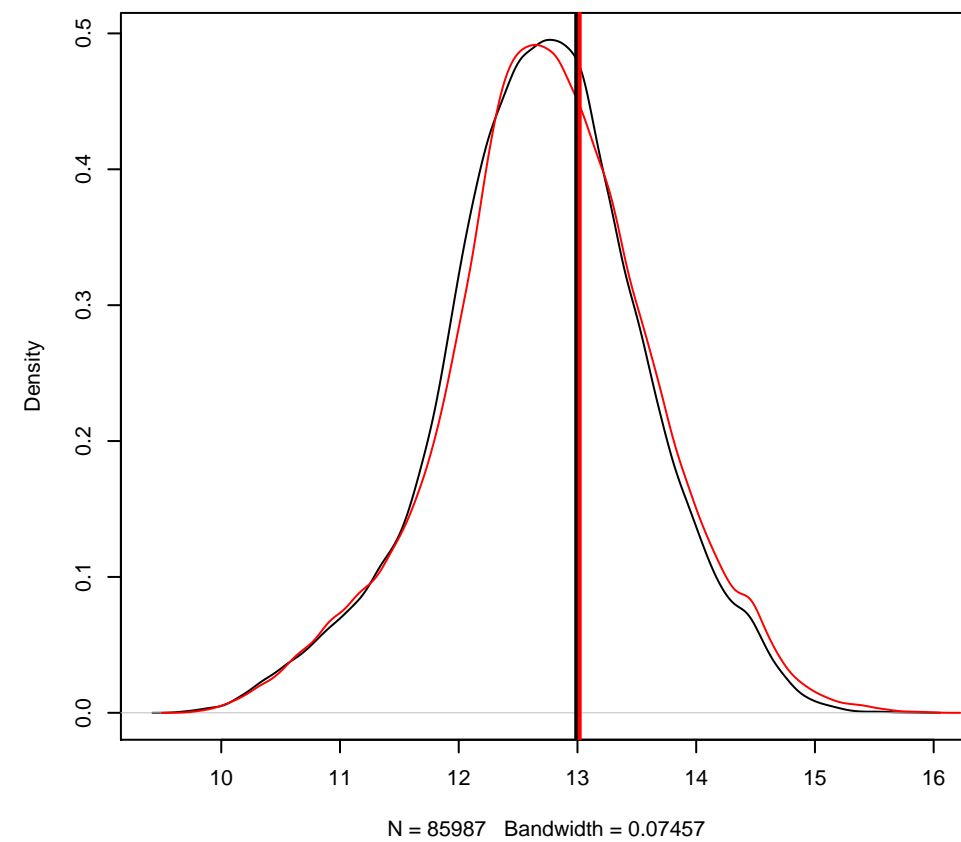

Replicate densities (normalized) for sample: 558285 (Controls)

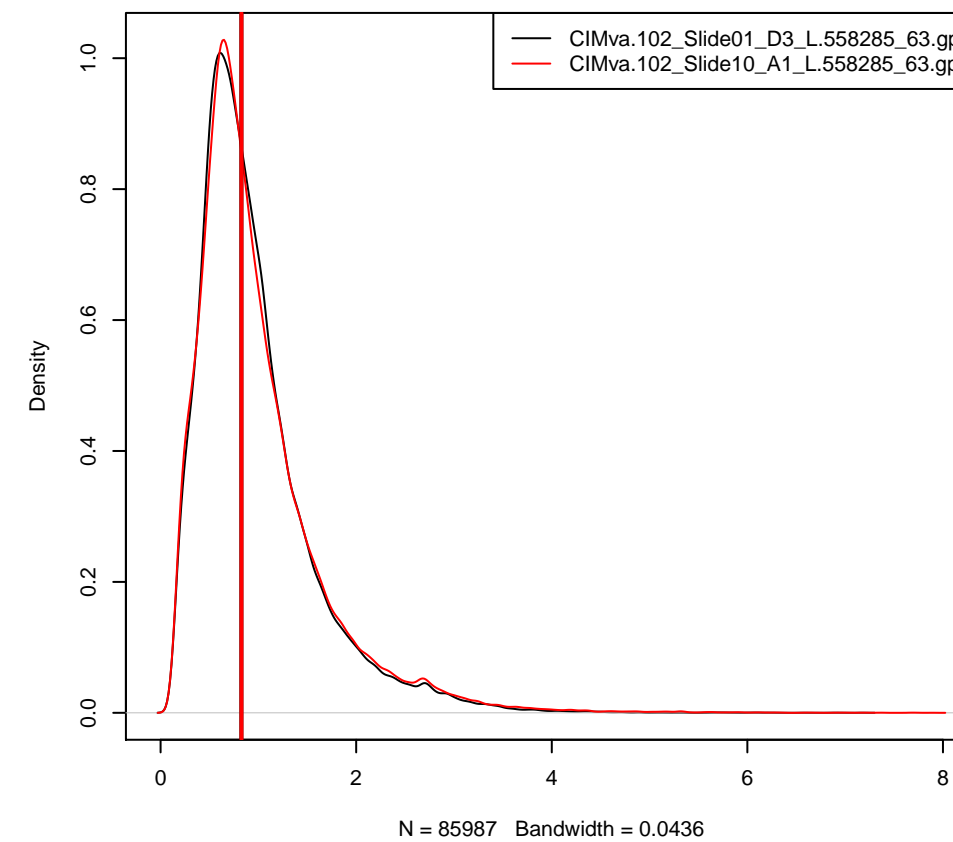

Replicate densities (normalized; log2) for sample: 558285 (Controls)

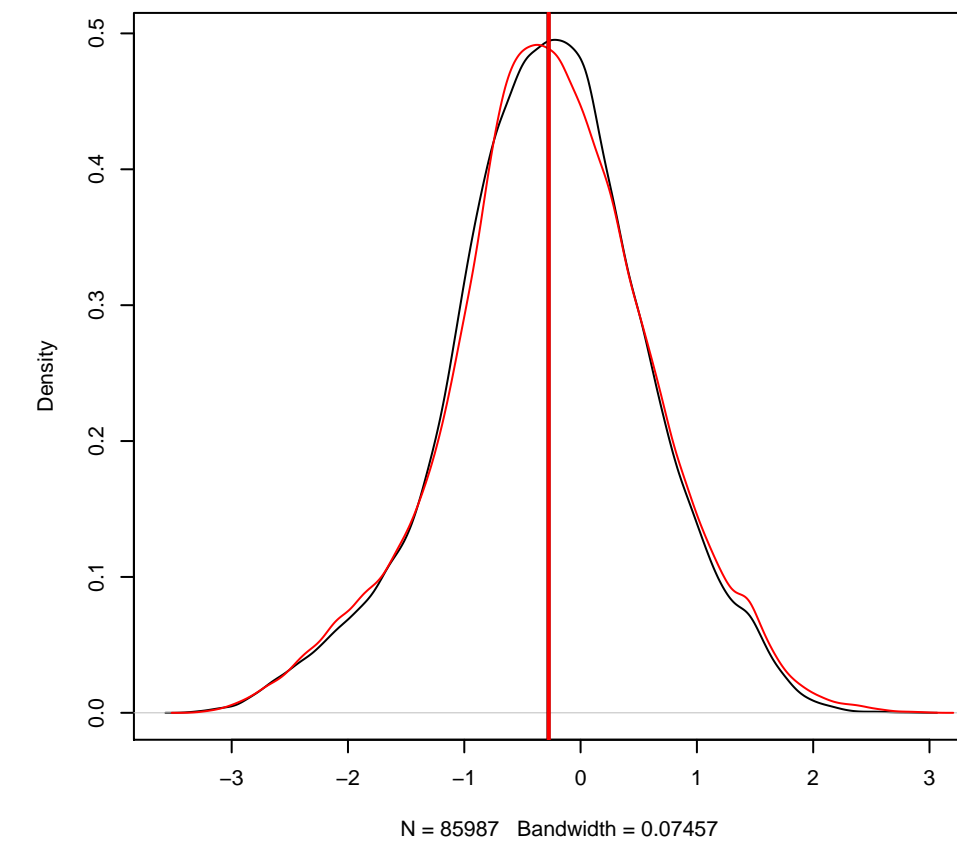

Replicate scatter (raw) for sample: 558285 (Controls)  
Correlation coefficient: 0.84 (Pearson); 0.88 (Spearman)

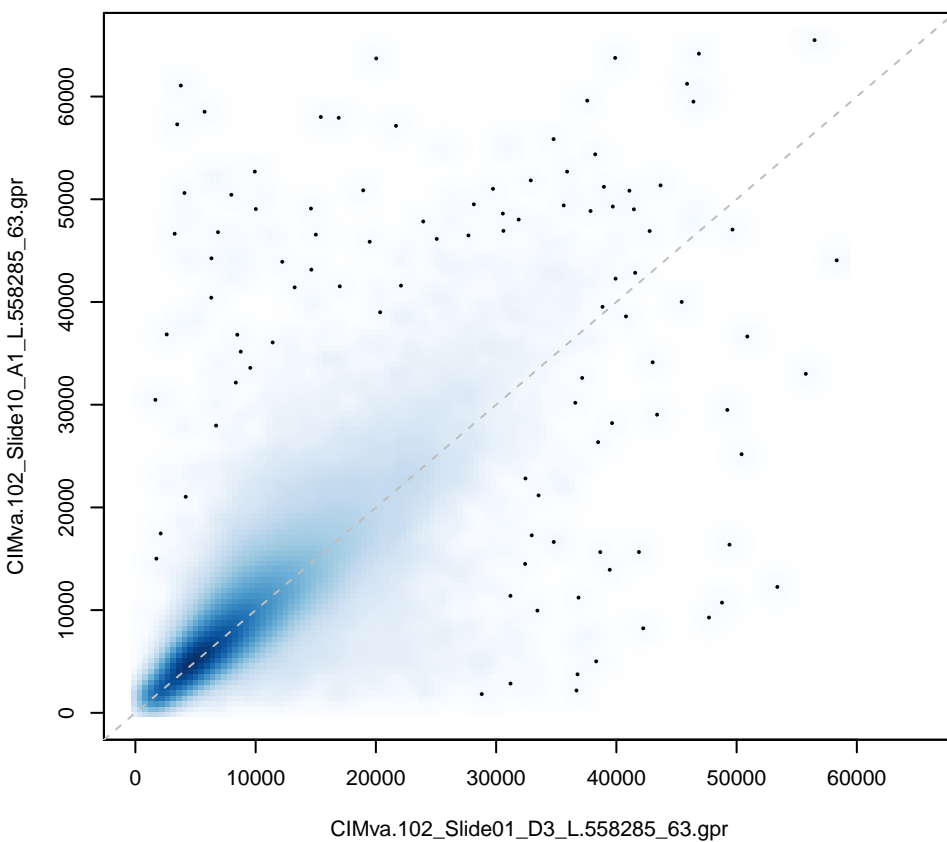

Replicate scatter (raw; log2) for sample: 558285 (Controls)  
Correlation coefficient: 0.89 (Pearson); 0.88 (Spearman)

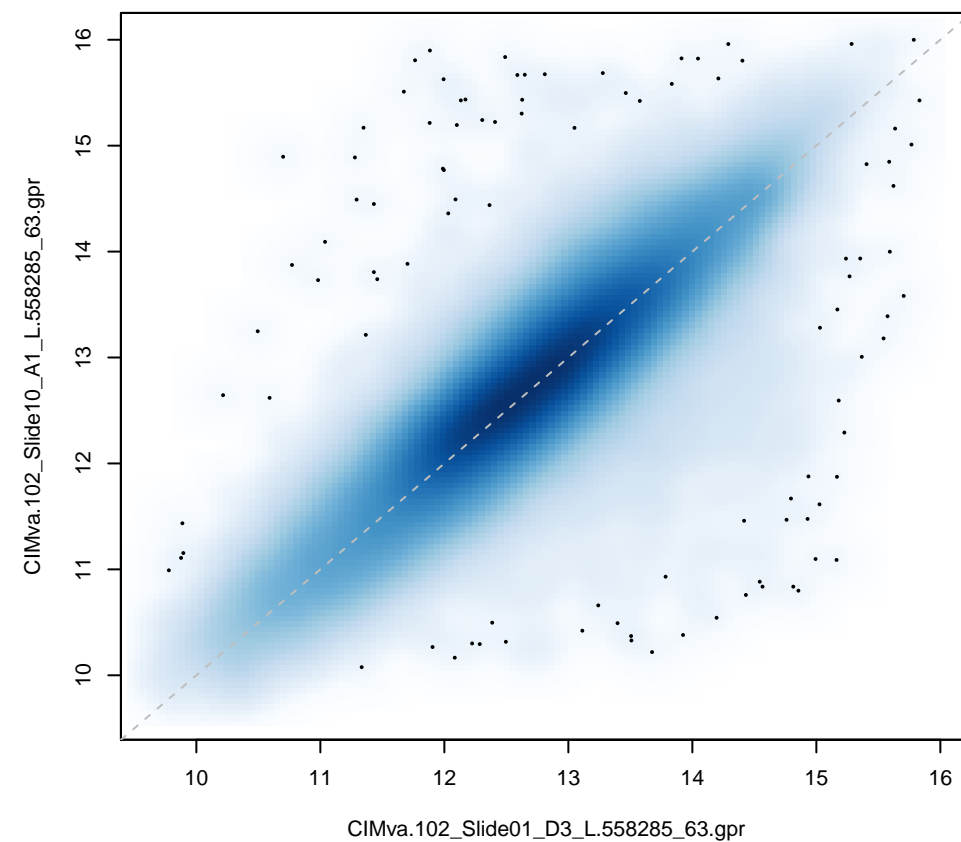

Replicate scatter (normalized) for sample: 558285 (Controls)  
Correlation coefficient: 0.84 (Pearson); 0.88 (Spearman)

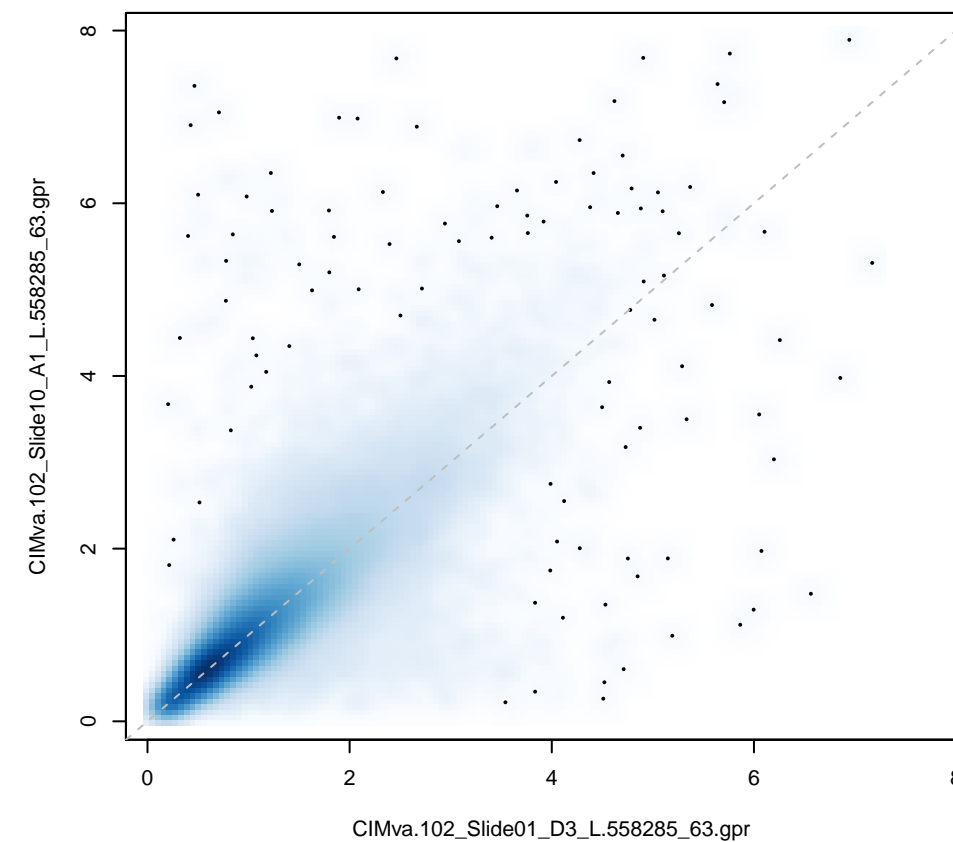

Replicate scatter (normalized; log2) for sample: 558285 (Controls)  
Correlation coefficient: 0.87 (Pearson); 0.88 (Spearman)

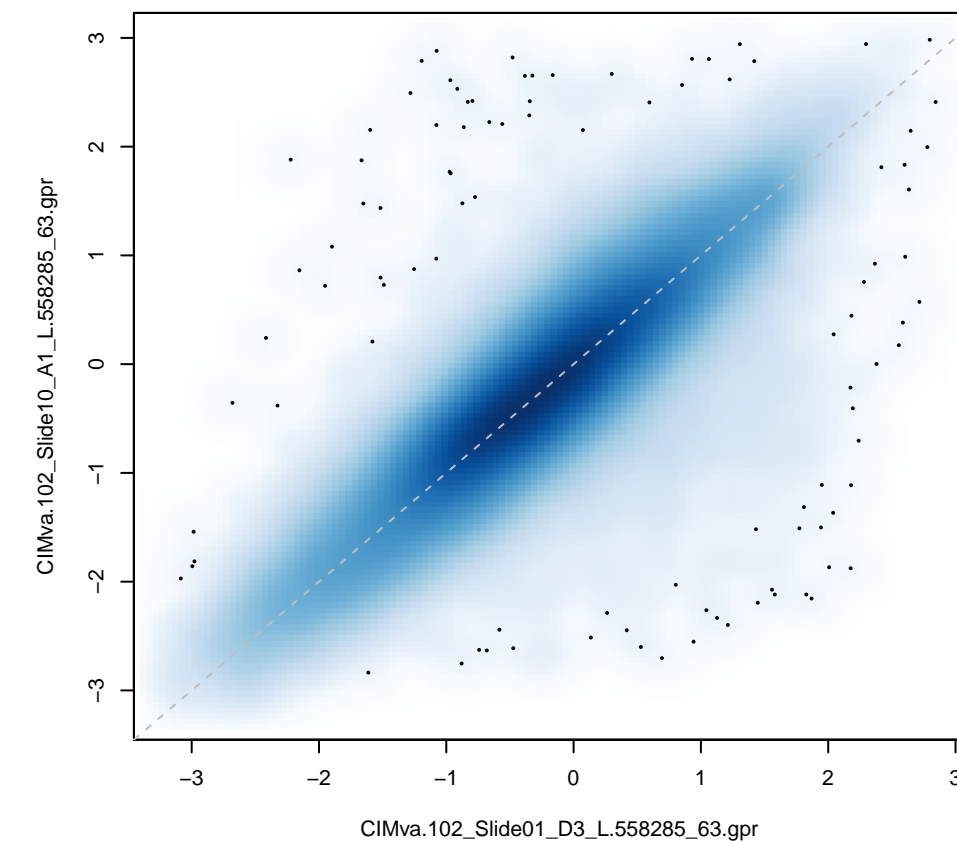

Replicate densities (raw) for sample: 559701 (CFS)

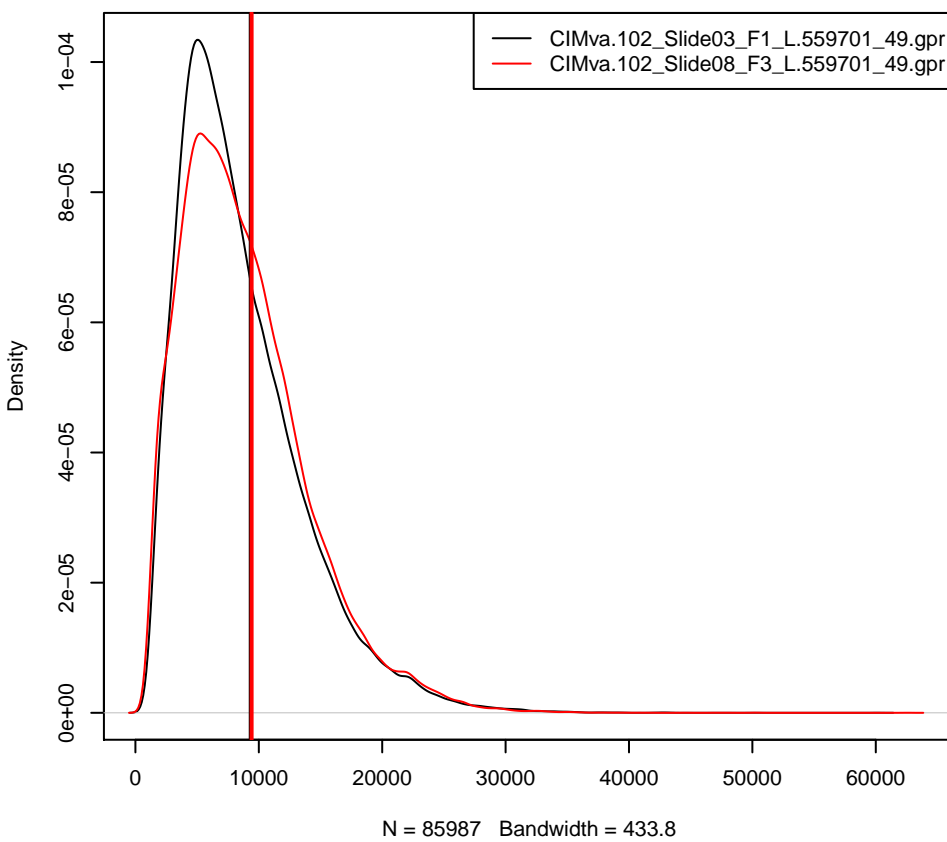

Replicate densities (raw; log2) for sample: 559701 (CFS)

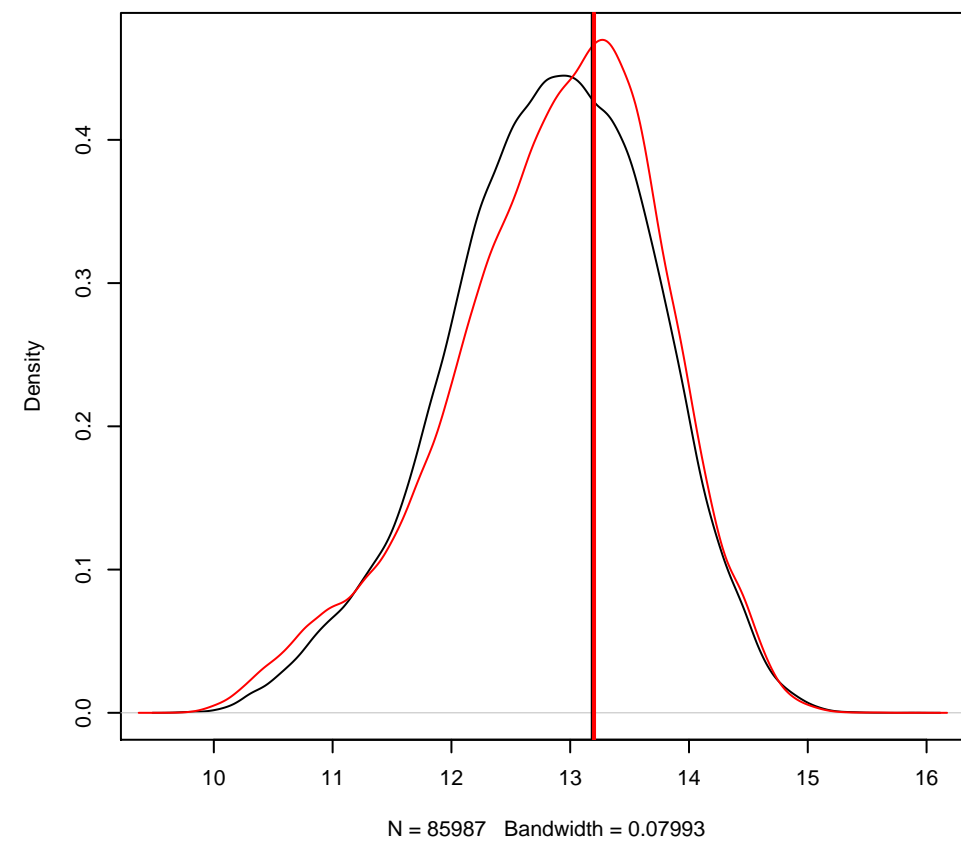

Replicate densities (normalized) for sample: 559701 (CFS)

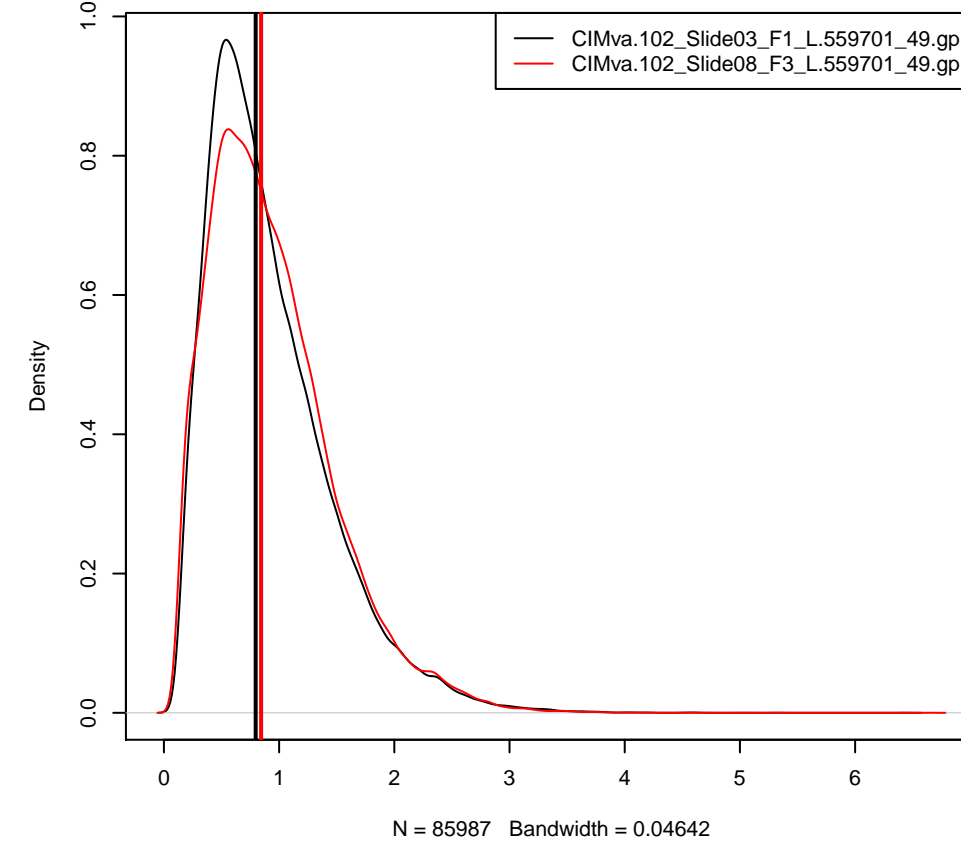

Replicate densities (normalized; log2) for sample: 559701 (CFS)

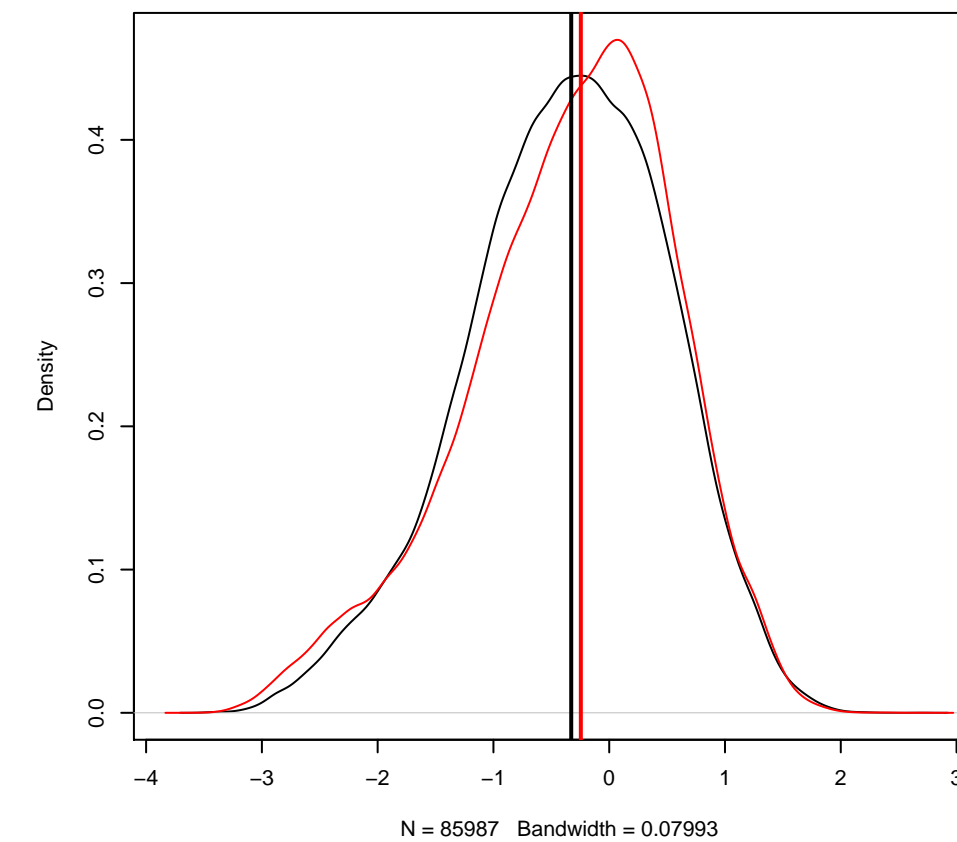

Replicate scatter (raw) for sample: 559701 (CFS)  
Correlation coefficient: 0.87 (Pearson); 0.89 (Spearman)

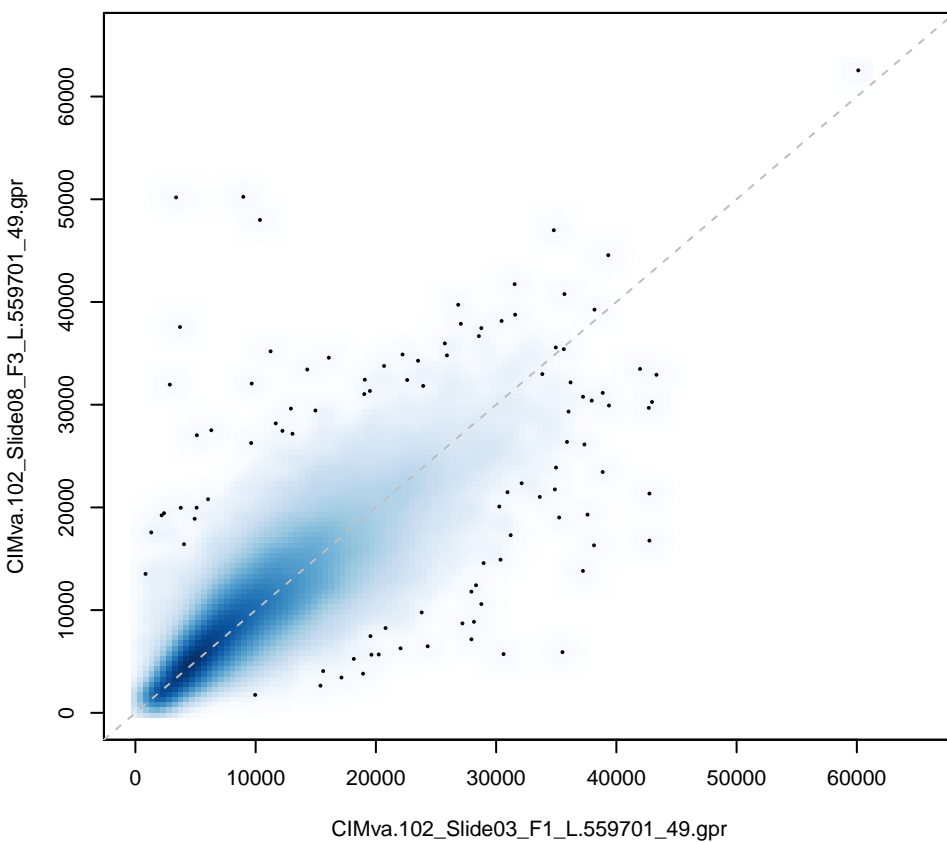

Replicate scatter (raw; log2) for sample: 559701 (CFS)  
Correlation coefficient: 0.9 (Pearson); 0.89 (Spearman)

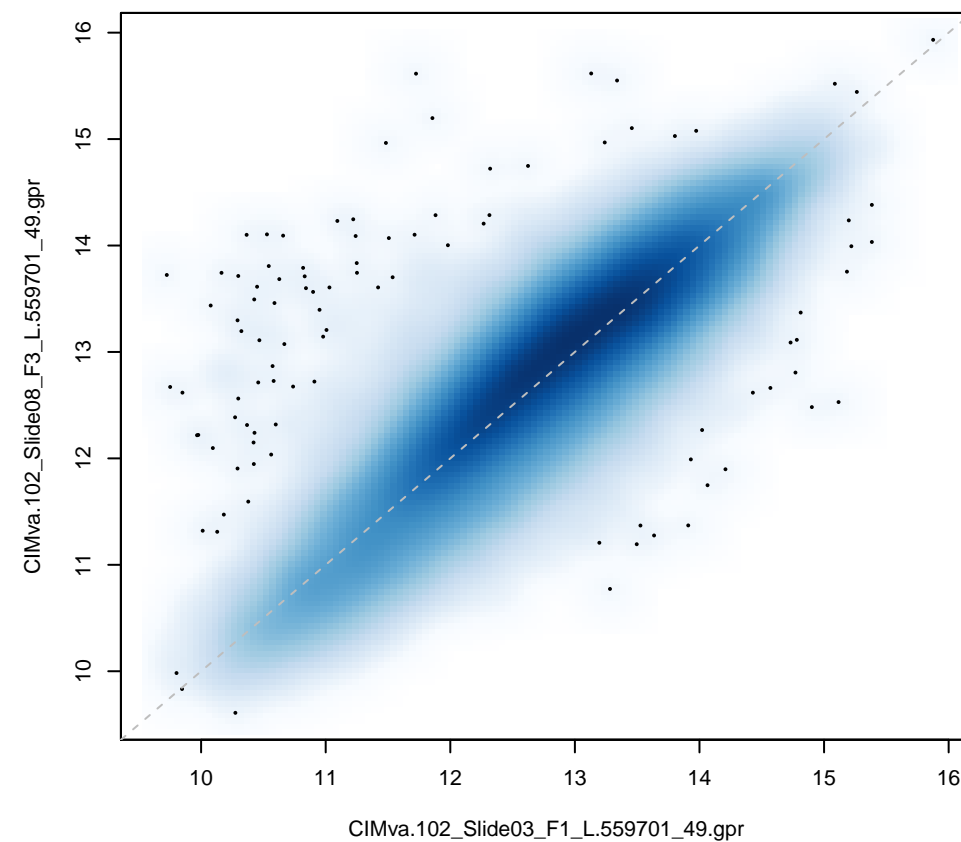

Replicate scatter (normalized) for sample: 559701 (CFS)  
Correlation coefficient: 0.87 (Pearson); 0.89 (Spearman)

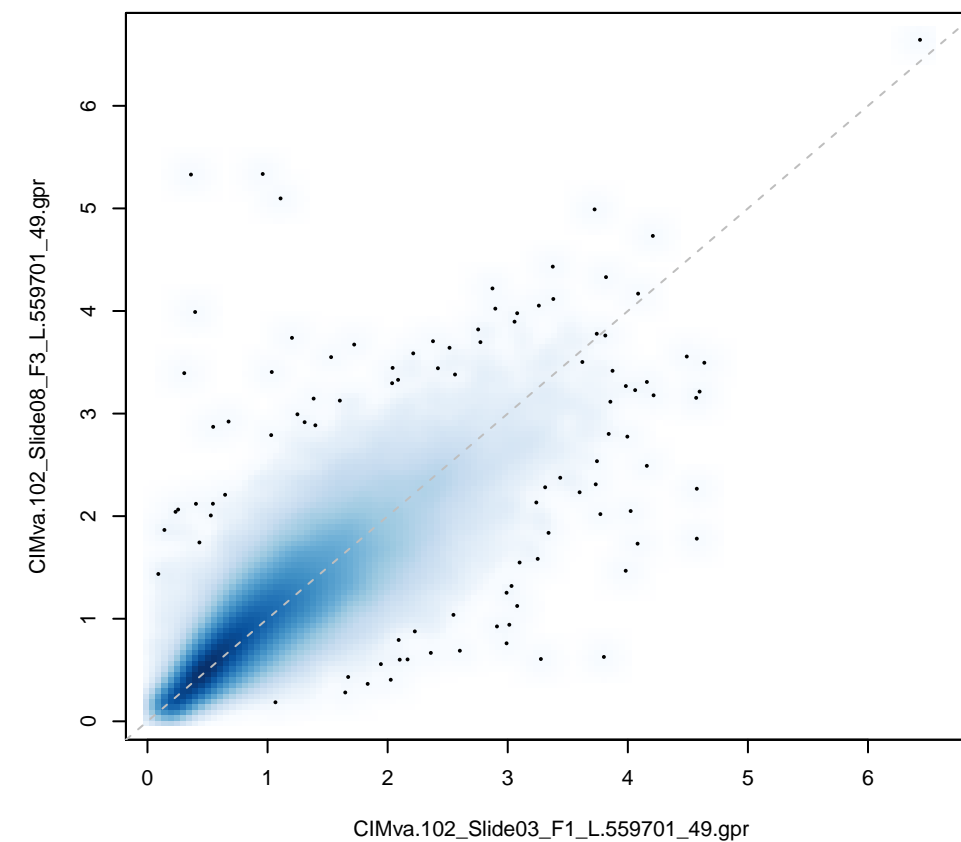

Replicate scatter (normalized; log2) for sample: 559701 (CFS)  
Correlation coefficient: 0.89 (Pearson); 0.89 (Spearman)

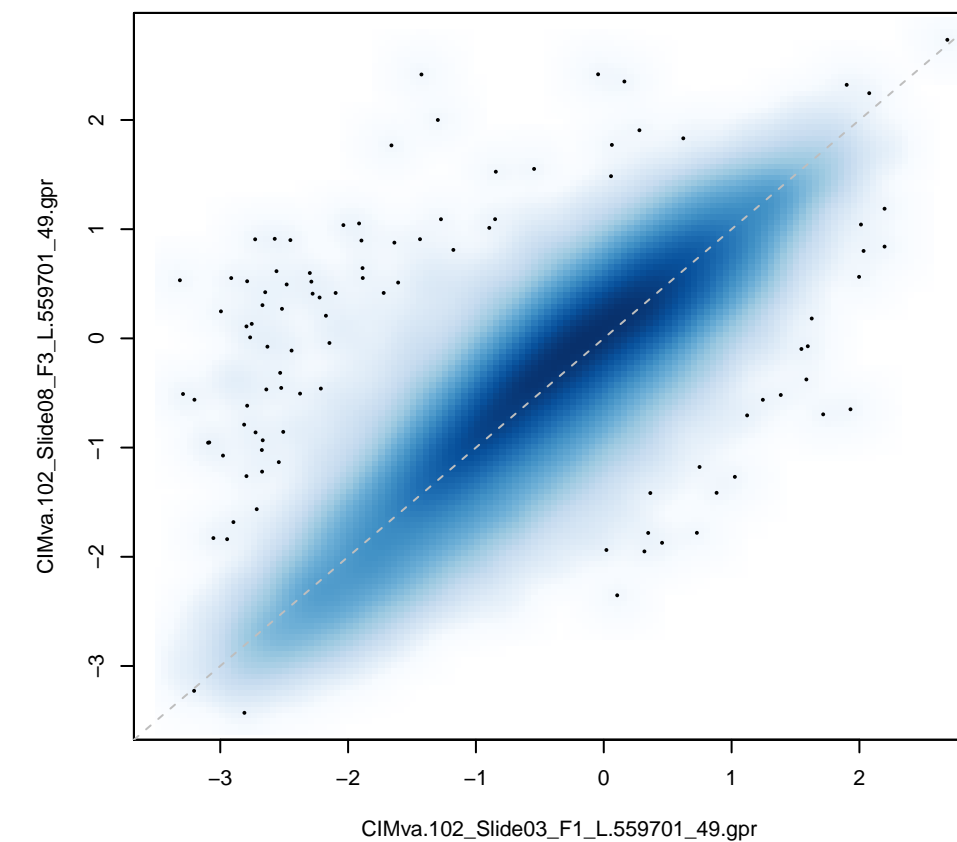

Replicate densities (raw) for sample: 559705 (Controls)

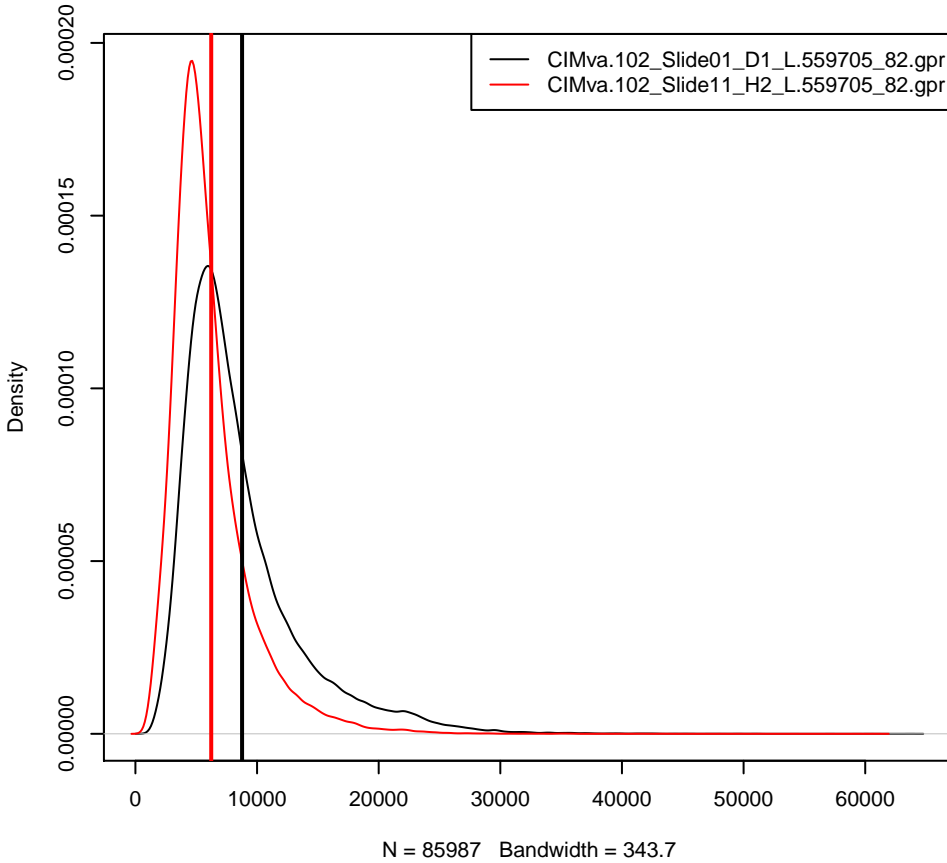

Replicate densities (raw; log2) for sample: 559705 (Controls)

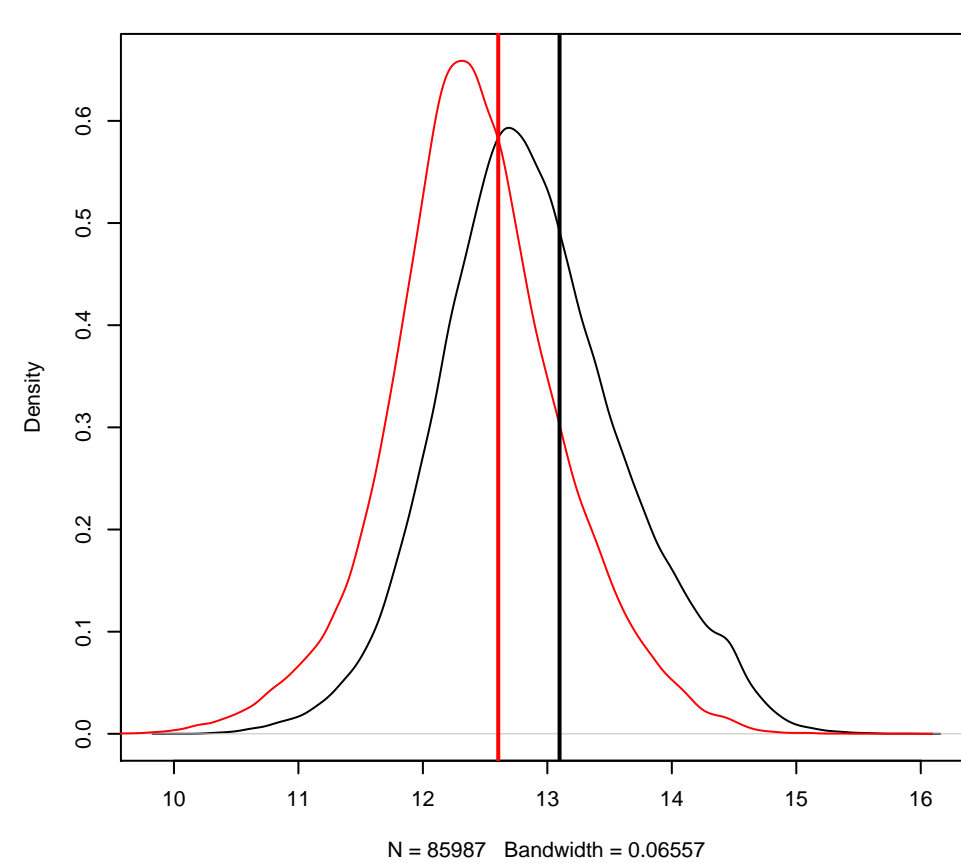

Replicate densities (normalized) for sample: 559705 (Controls)

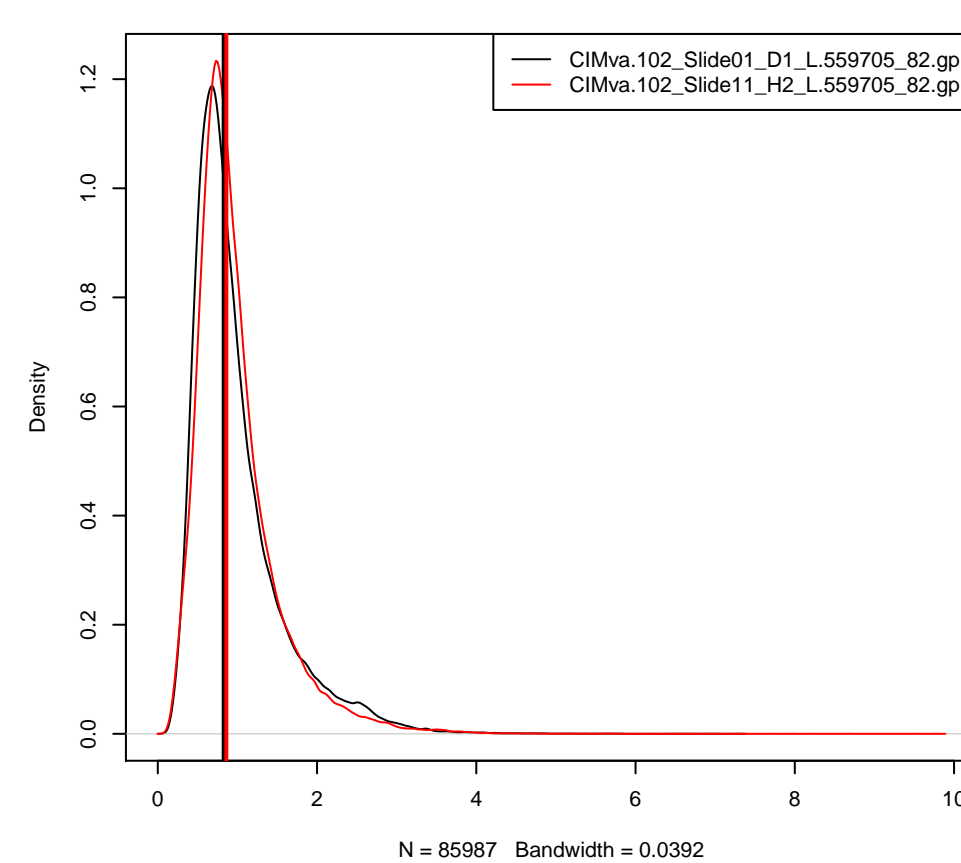

Replicate densities (normalized; log2) for sample: 559705 (Controls)

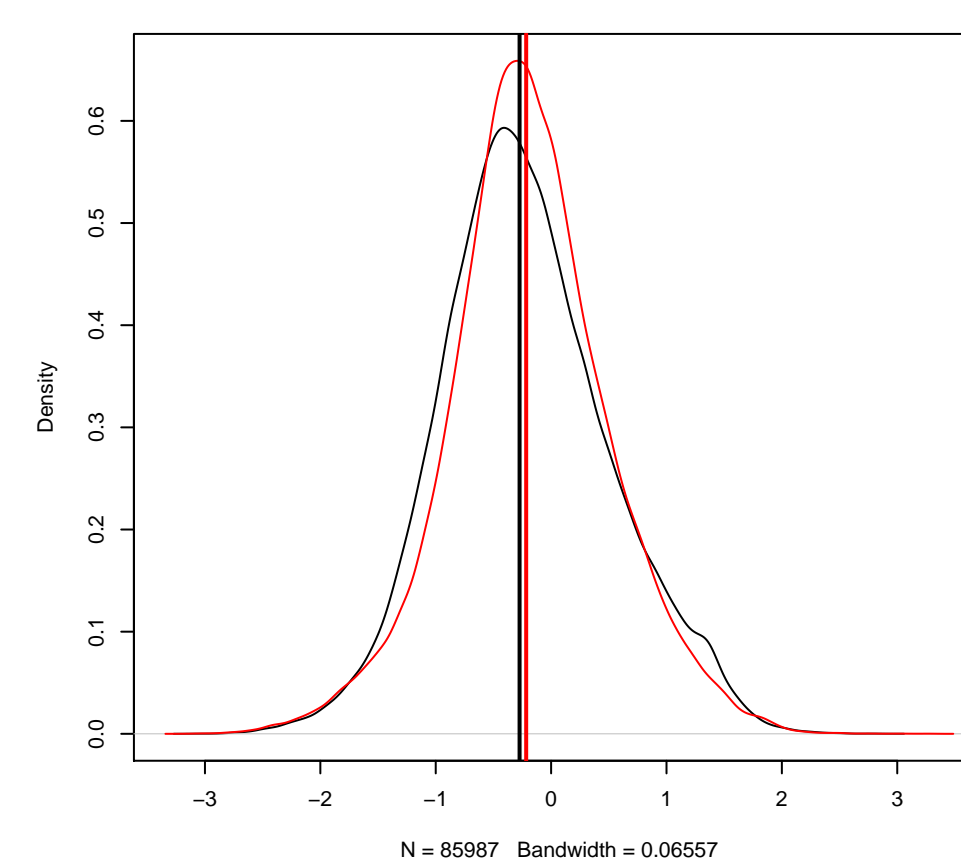

Replicate scatter (raw) for sample: 559705 (Controls)  
Correlation coefficient: 0.82 (Pearson); 0.82 (Spearman)

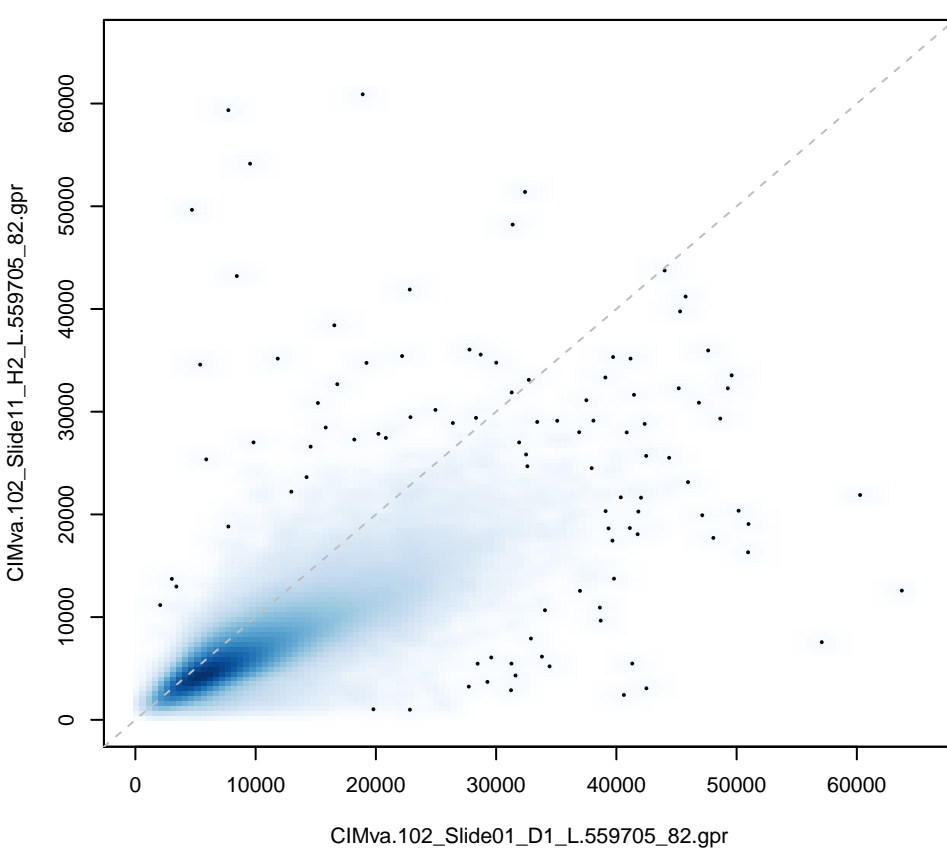

Replicate scatter (raw; log2) for sample: 559705 (Controls)  
Correlation coefficient: 0.82 (Pearson); 0.82 (Spearman)

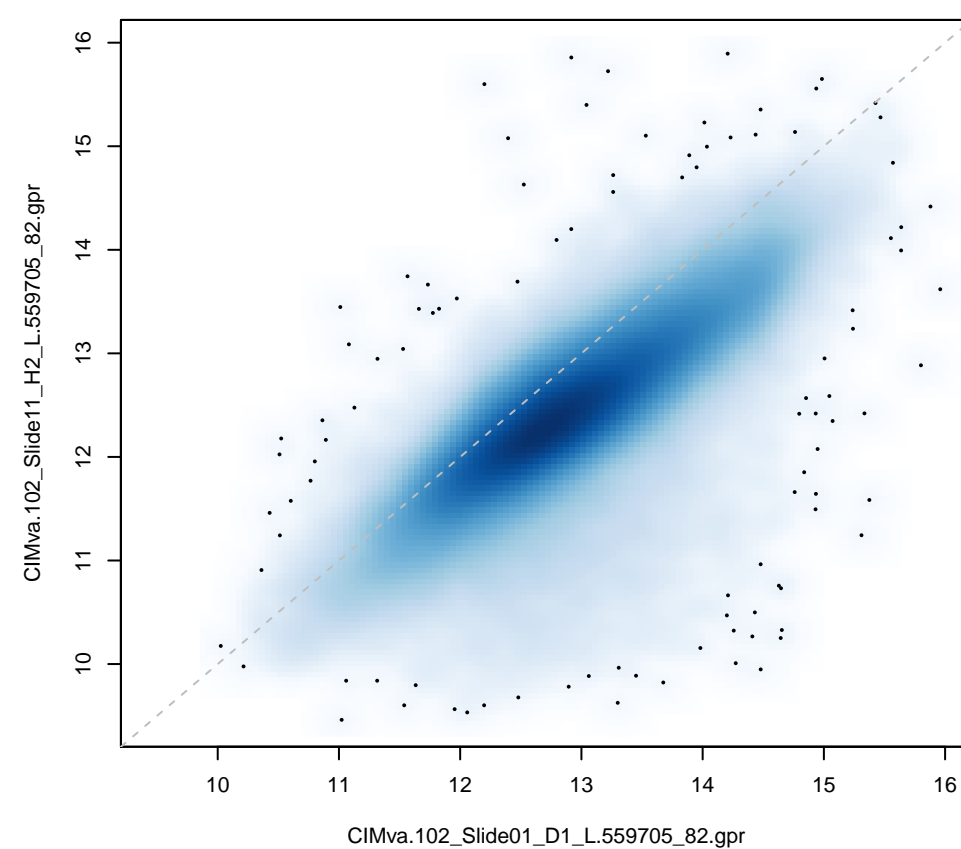

Replicate scatter (normalized) for sample: 559705 (Controls)  
Correlation coefficient: 0.82 (Pearson); 0.82 (Spearman)

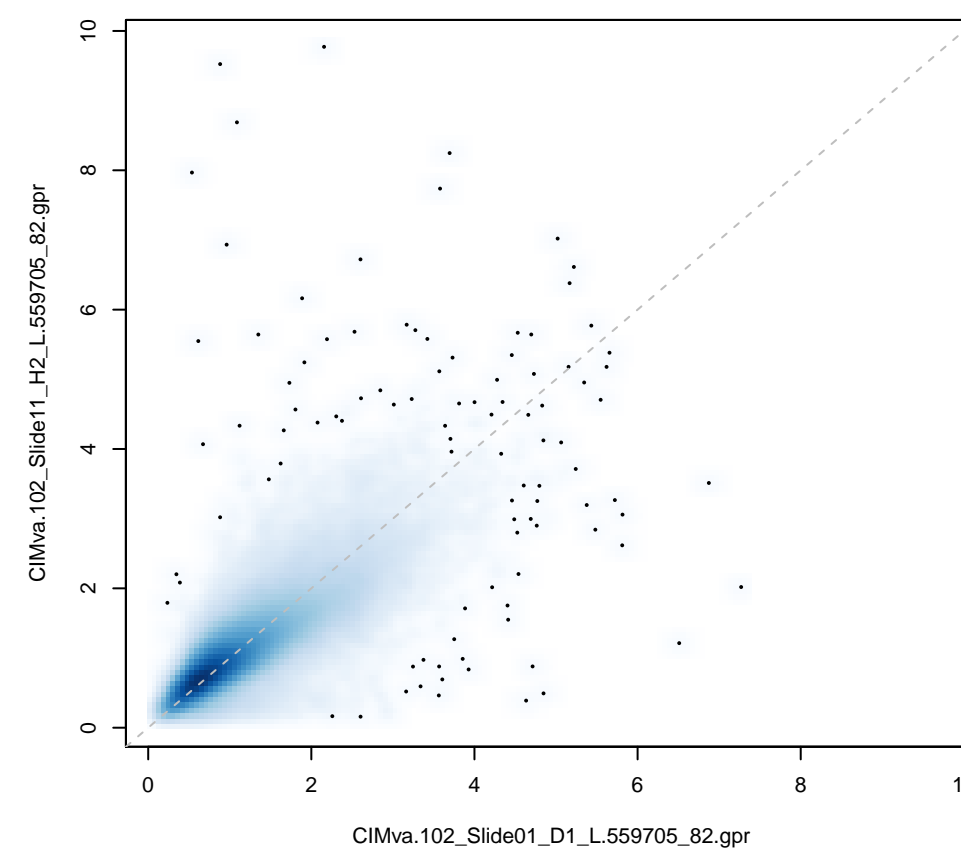

Replicate scatter (normalized; log2) for sample: 559705 (Controls)  
Correlation coefficient: 0.83 (Pearson); 0.82 (Spearman)

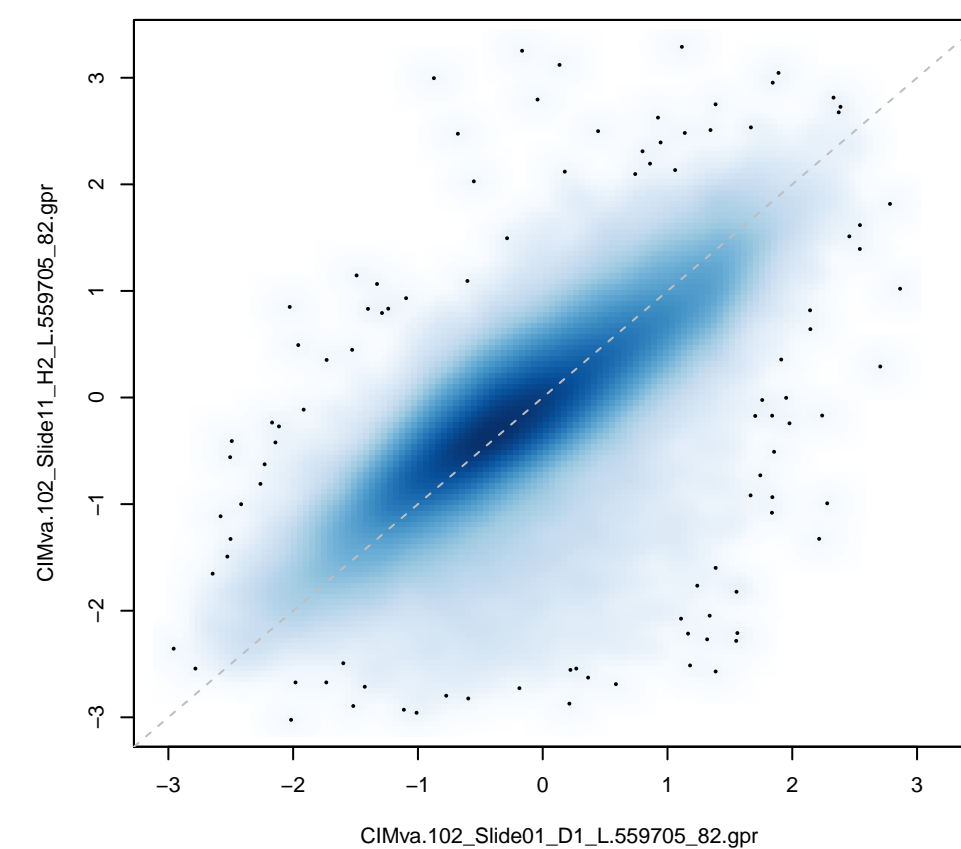

Replicate densities (raw) for sample: 560677 (CFS)

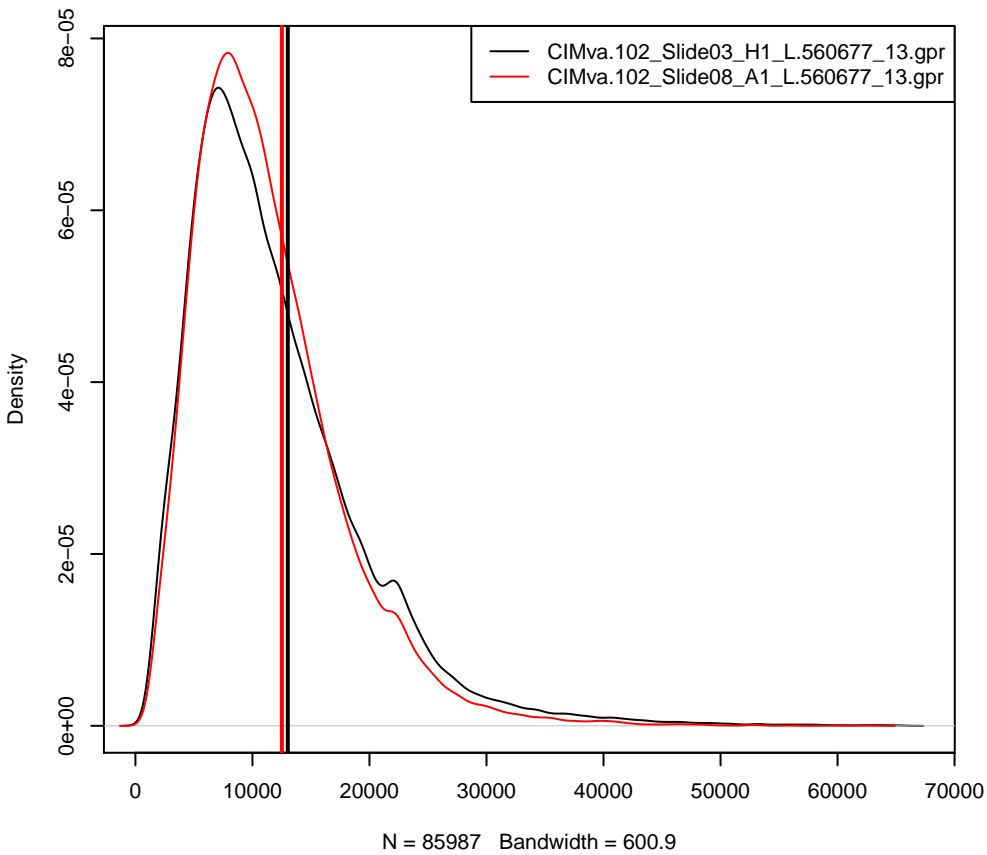

Replicate densities (raw; log2) for sample: 560677 (CFS)

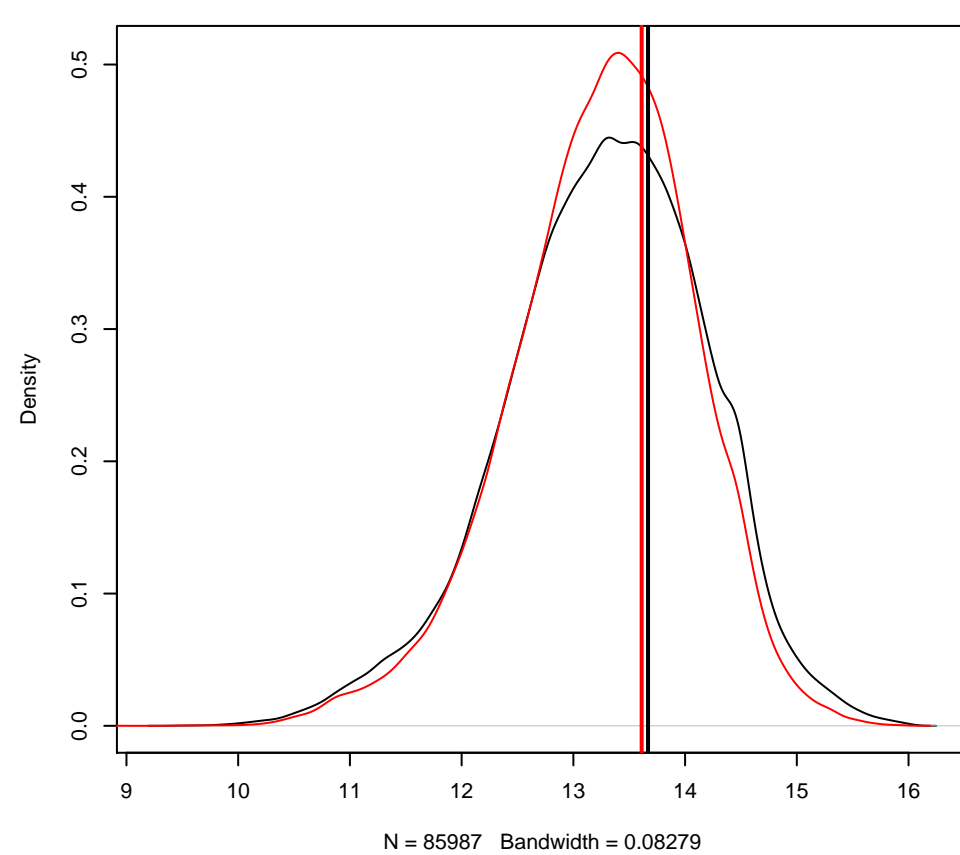

Replicate densities (normalized) for sample: 560677 (CFS)

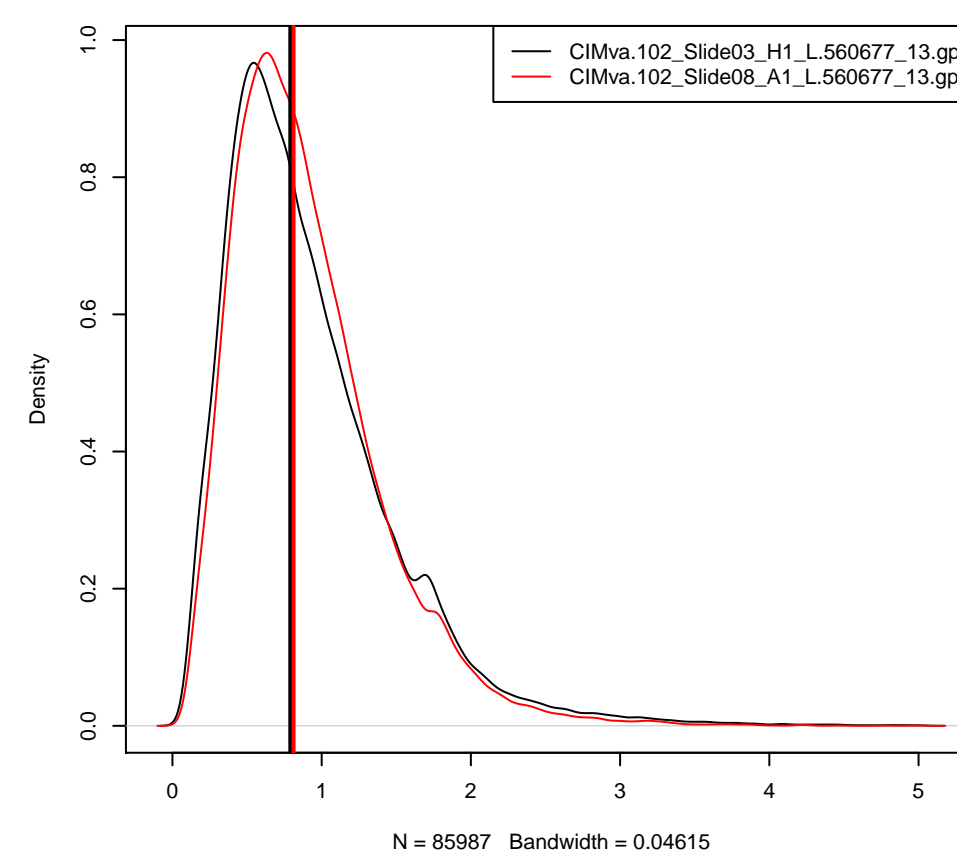

Replicate densities (normalized; log2) for sample: 560677 (CFS)

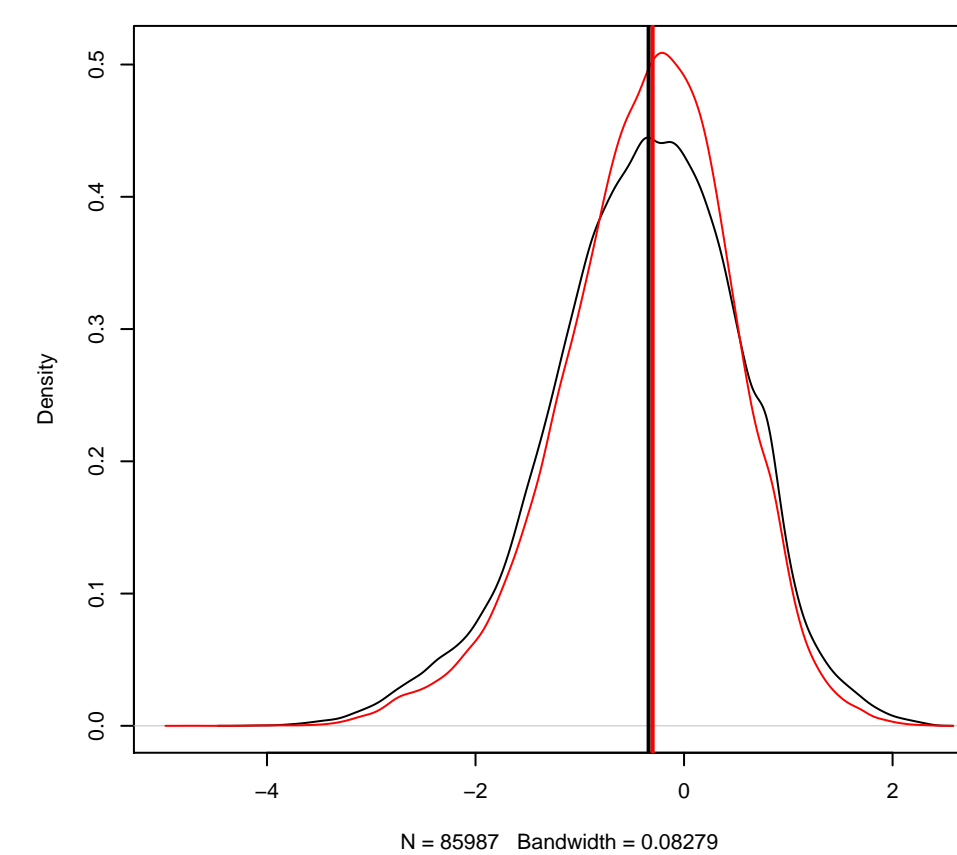

Replicate scatter (raw) for sample: 560677 (CFS)  
Correlation coefficient: 0.88 (Pearson); 0.88 (Spearman)

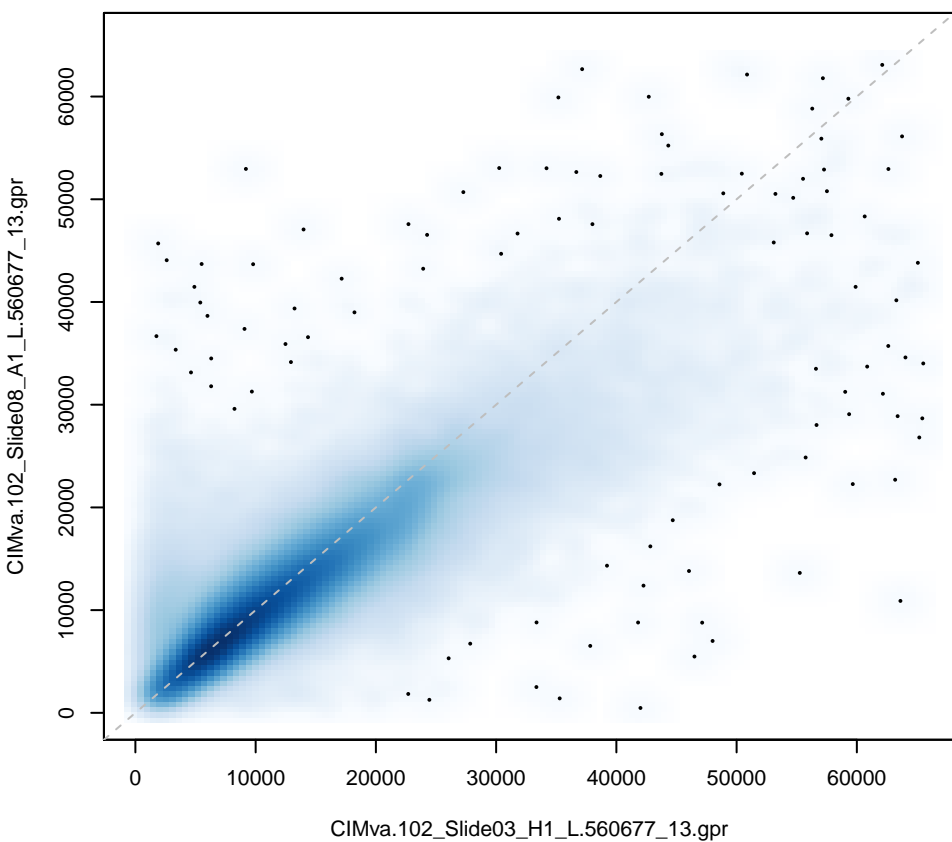

Replicate scatter (raw; log2) for sample: 560677 (CFS)  
Correlation coefficient: 0.85 (Pearson); 0.88 (Spearman)

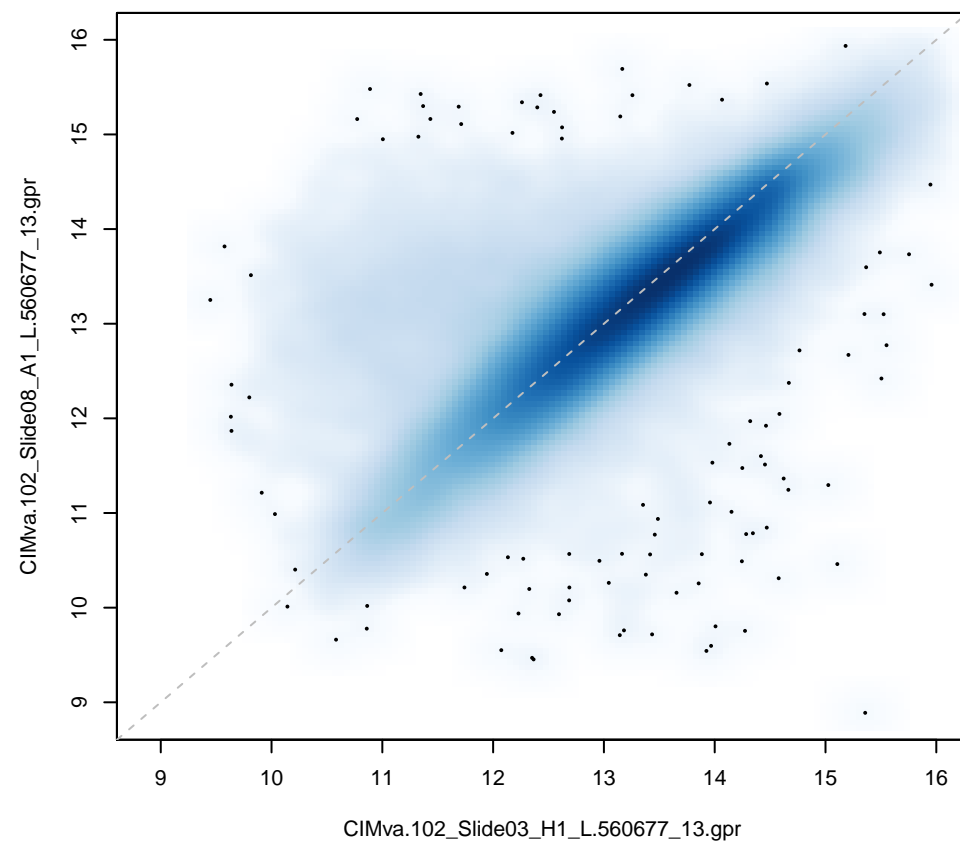

Replicate scatter (normalized) for sample: 560677 (CFS)  
Correlation coefficient: 0.88 (Pearson); 0.88 (Spearman)

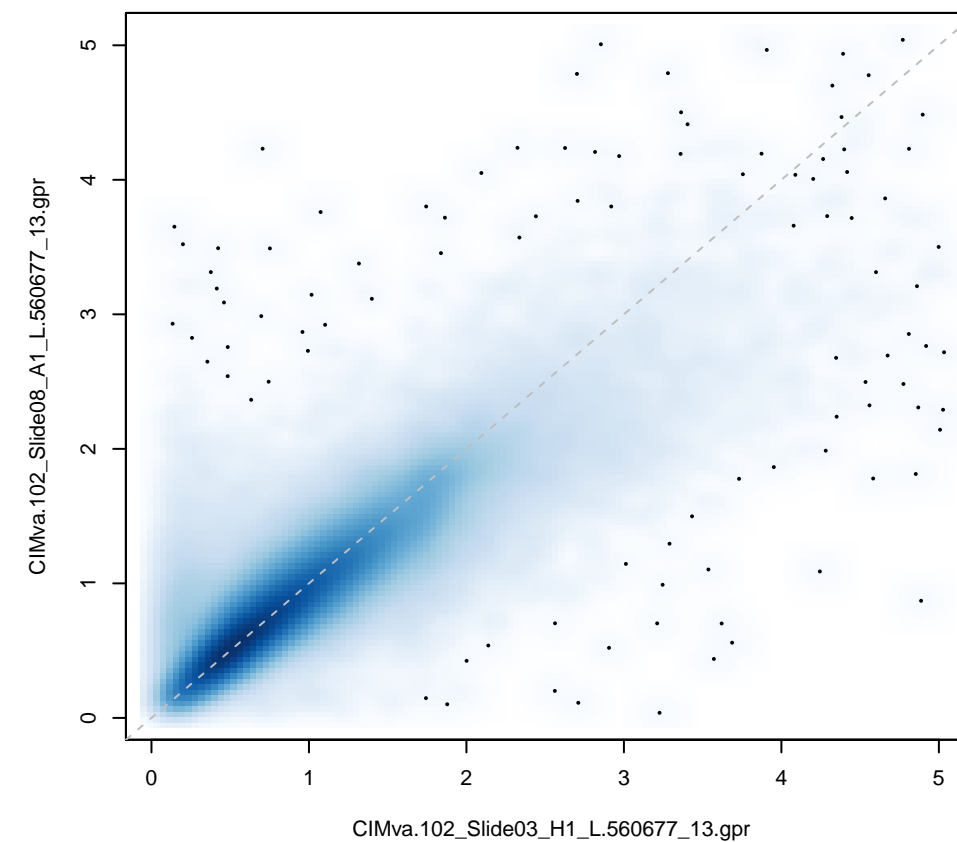

Replicate scatter (normalized; log2) for sample: 560677 (CFS)  
Correlation coefficient: 0.88 (Pearson); 0.88 (Spearman)

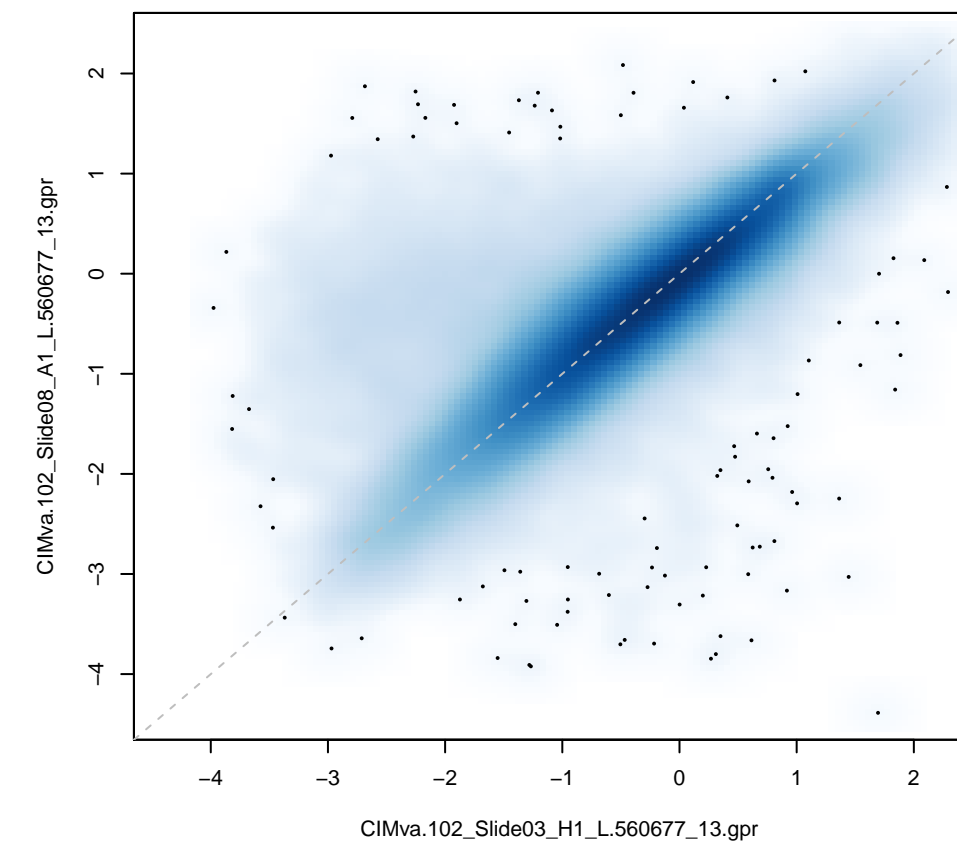

Replicate densities (raw) for sample: 566693 (Controls)

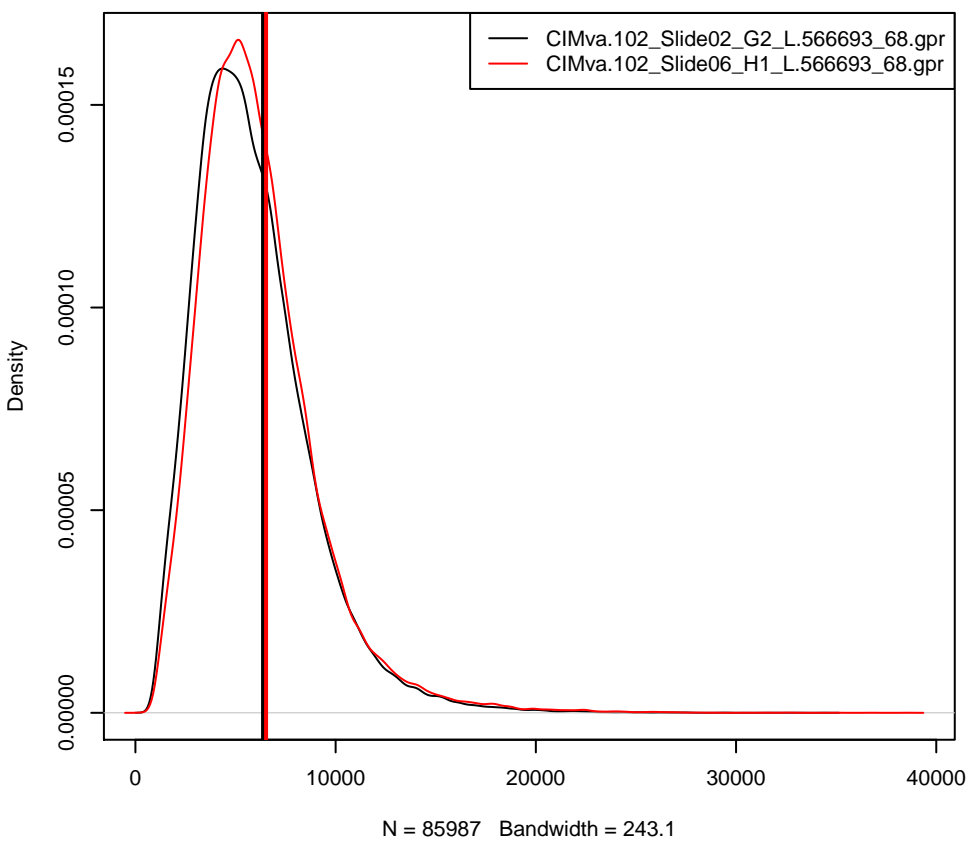

Replicate densities (raw; log2) for sample: 566693 (Controls)

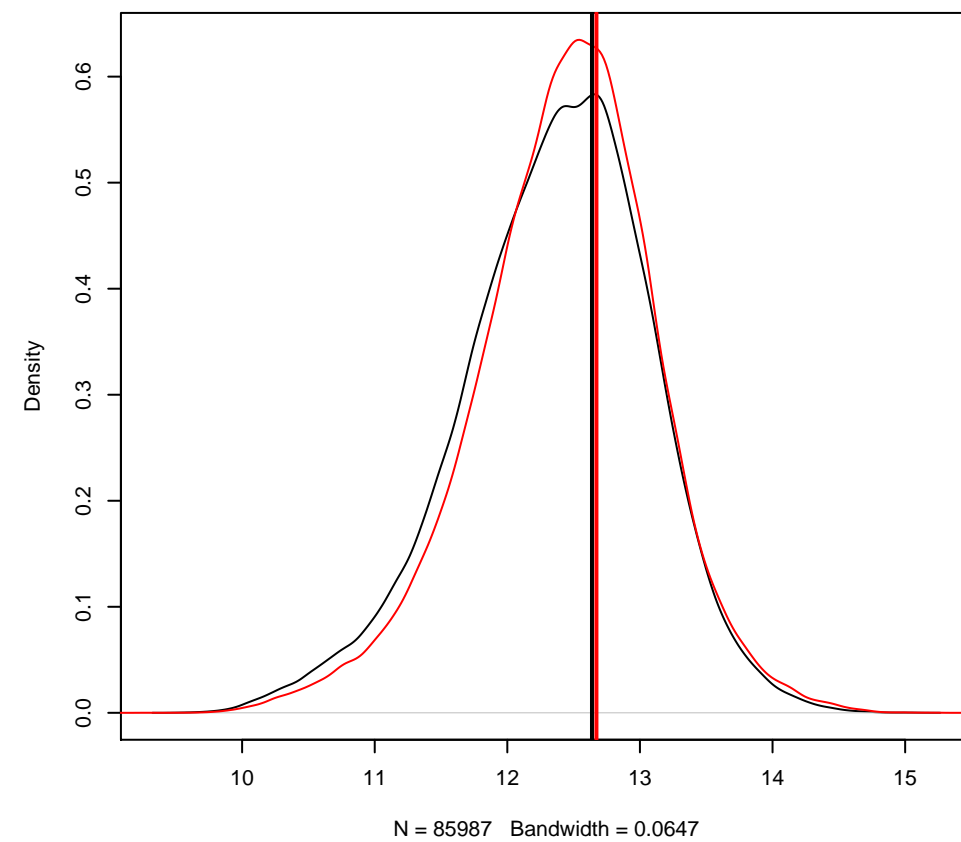

Replicate densities (normalized) for sample: 566693 (Controls)

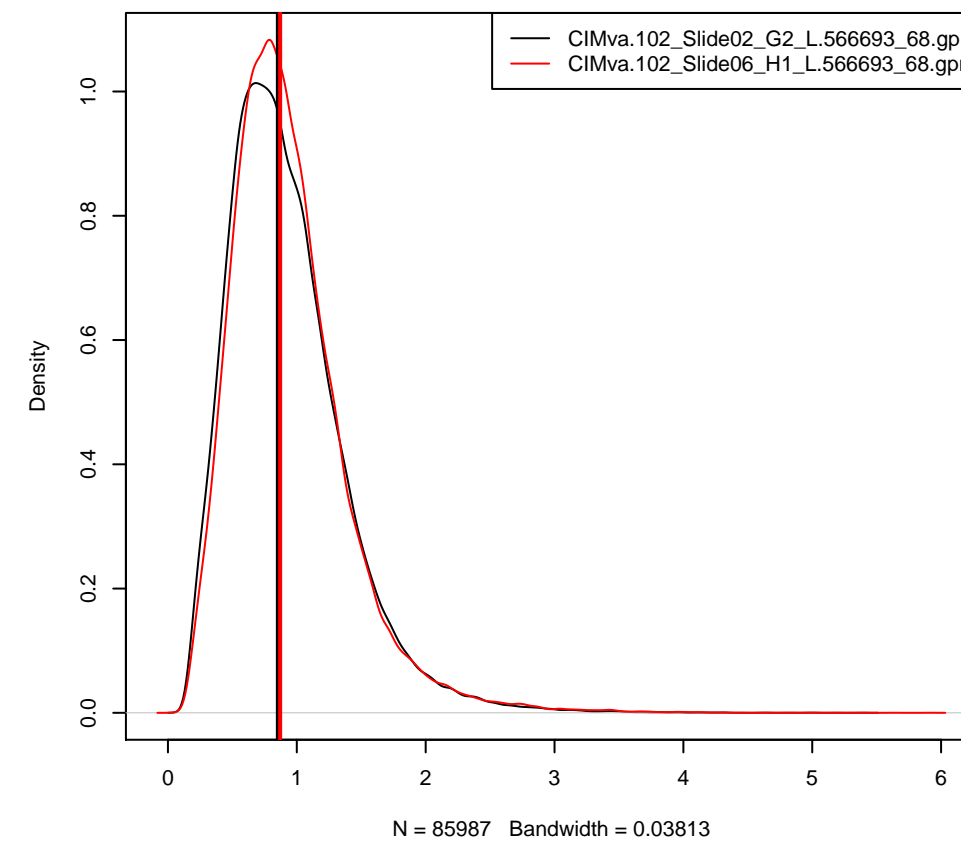

Replicate densities (normalized; log2) for sample: 566693 (Controls)

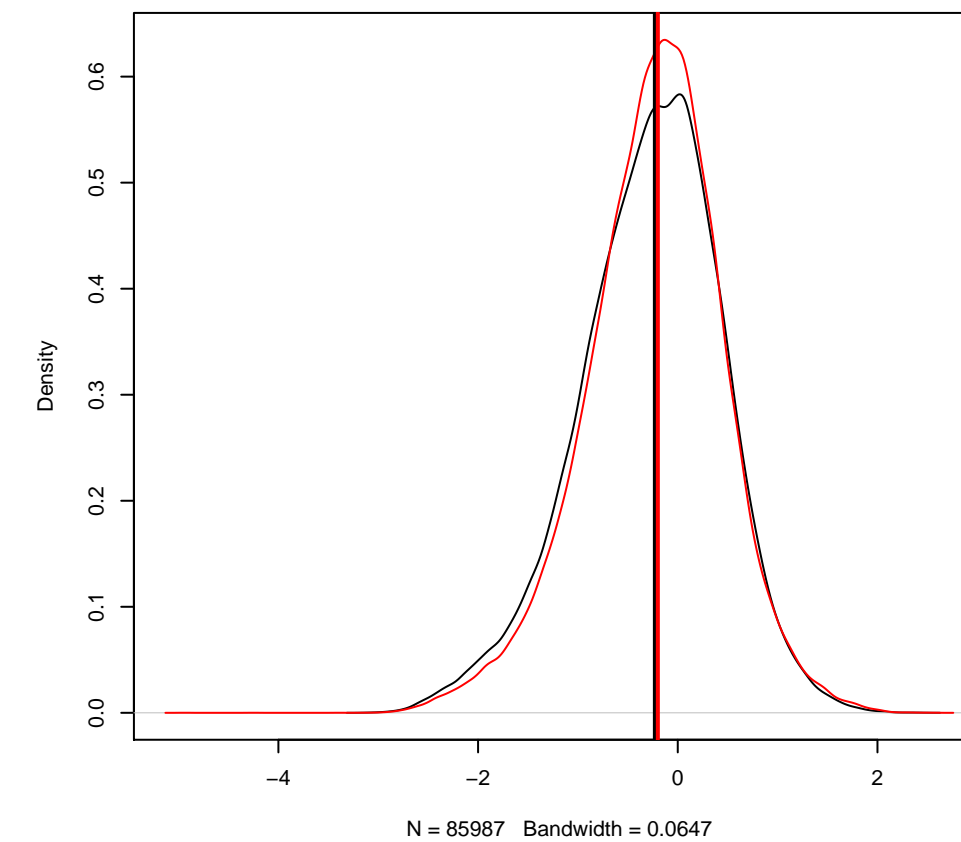

Replicate scatter (raw) for sample: 566693 (Controls)  
Correlation coefficient: 0.91 (Pearson); 0.91 (Spearman)

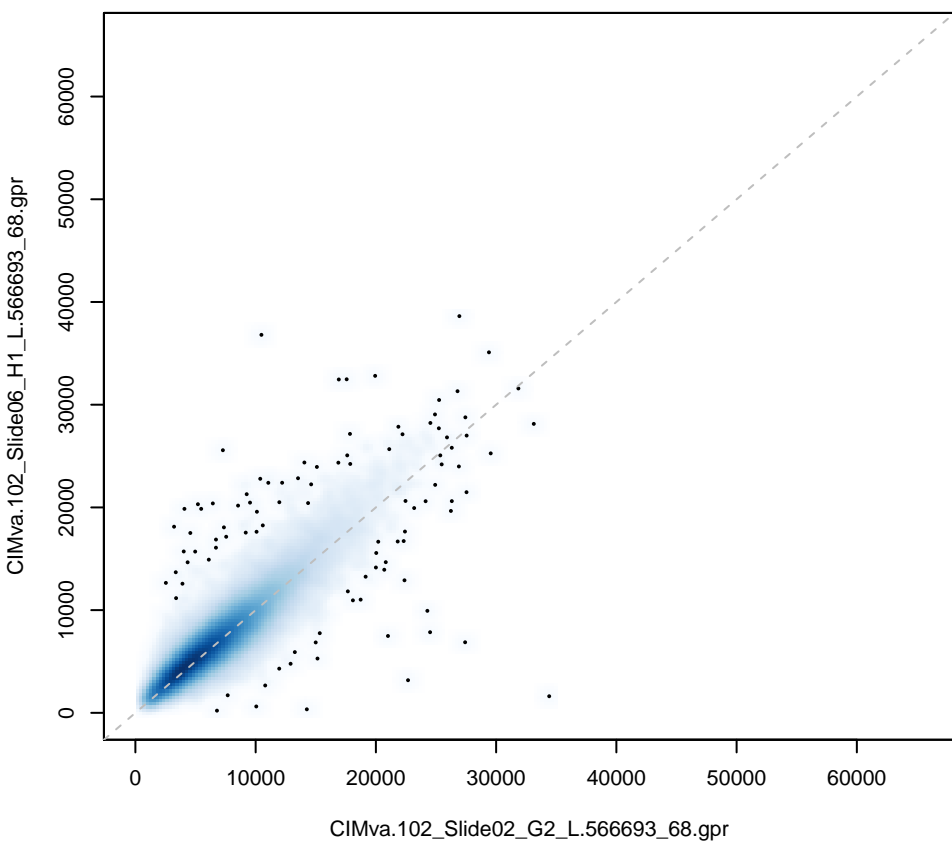

Replicate scatter (raw; log2) for sample: 566693 (Controls)  
Correlation coefficient: 0.91 (Pearson); 0.91 (Spearman)

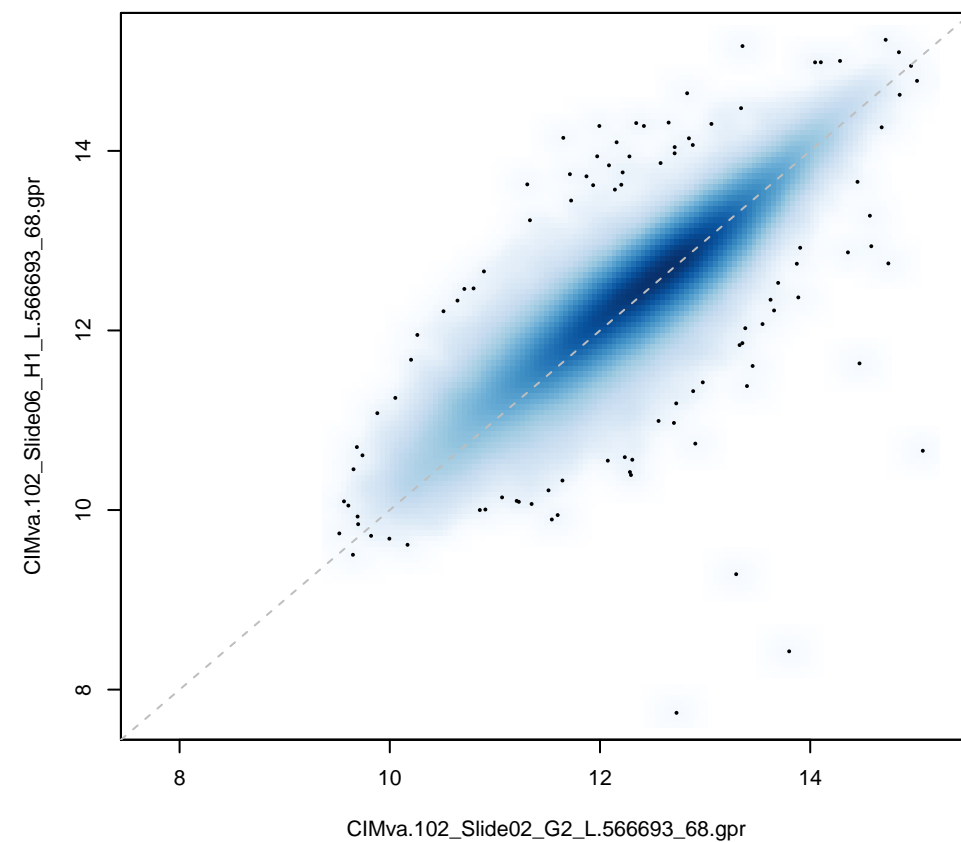

Replicate scatter (normalized) for sample: 566693 (Controls)  
Correlation coefficient: 0.91 (Pearson); 0.91 (Spearman)

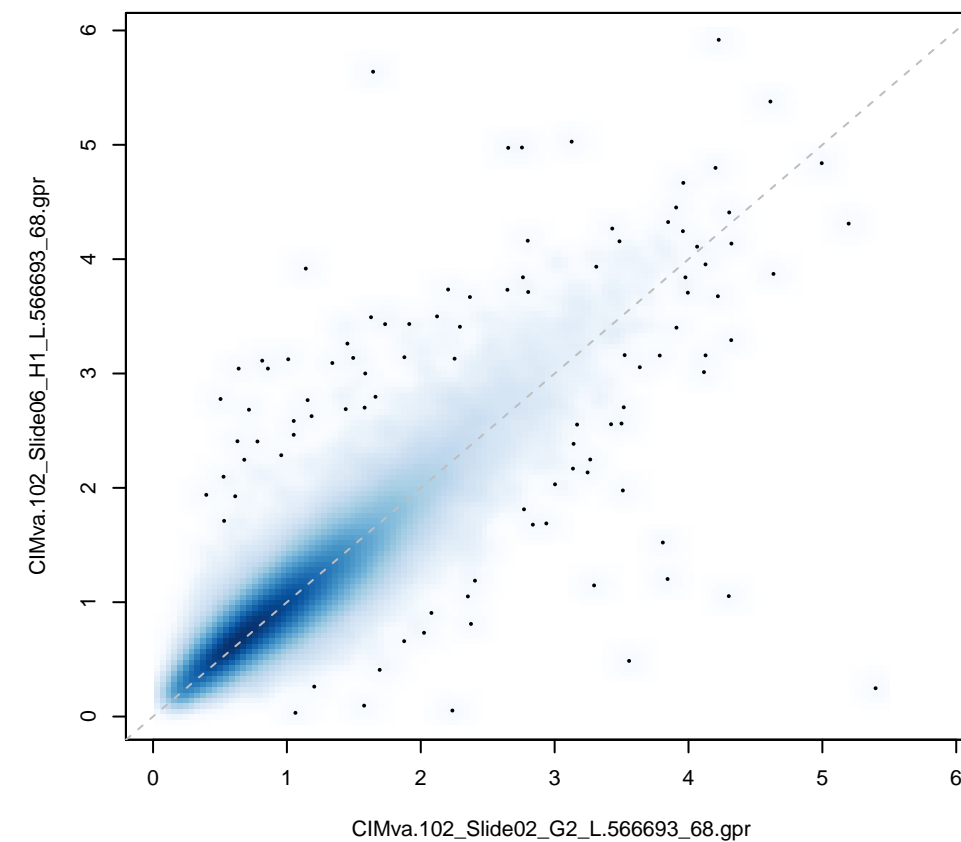

Replicate scatter (normalized; log2) for sample: 566693 (Controls)  
Correlation coefficient: 0.92 (Pearson); 0.91 (Spearman)

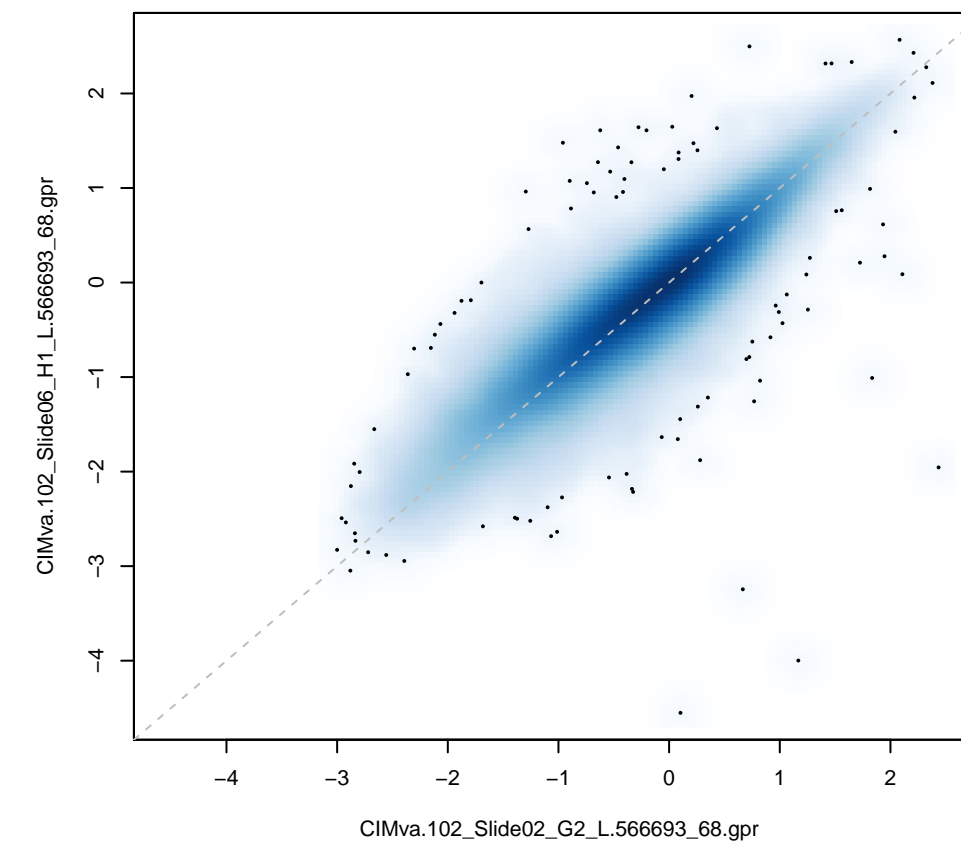

Replicate densities (raw) for sample: 567362 (CFS)

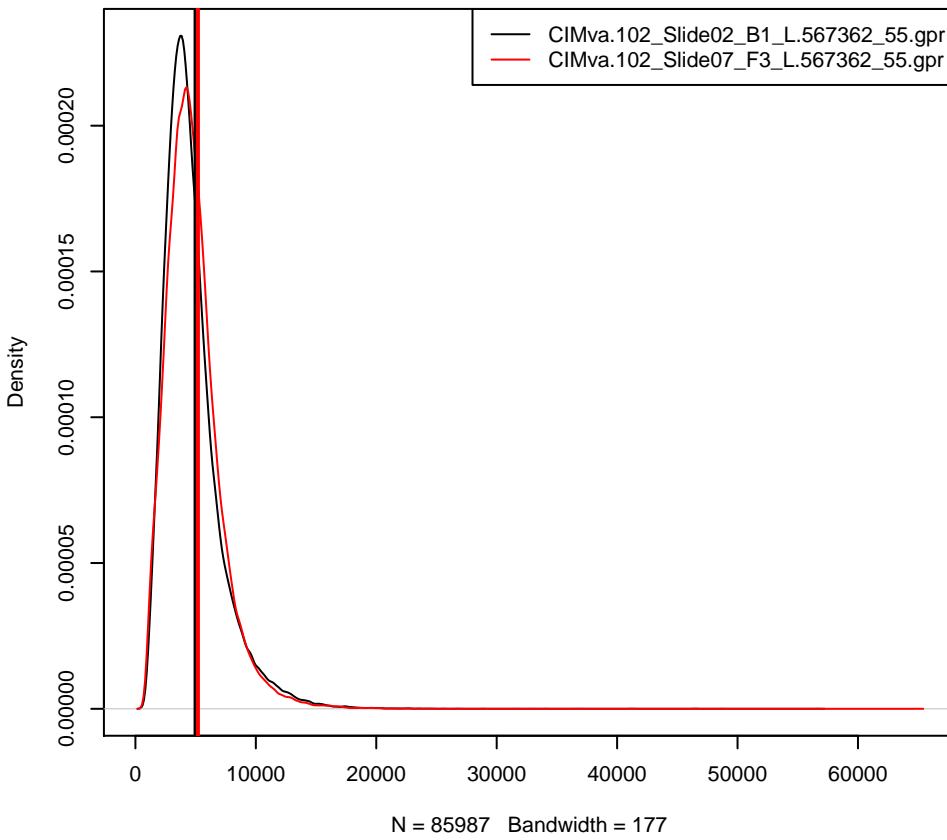

Replicate densities (raw; log2) for sample: 567362 (CFS)

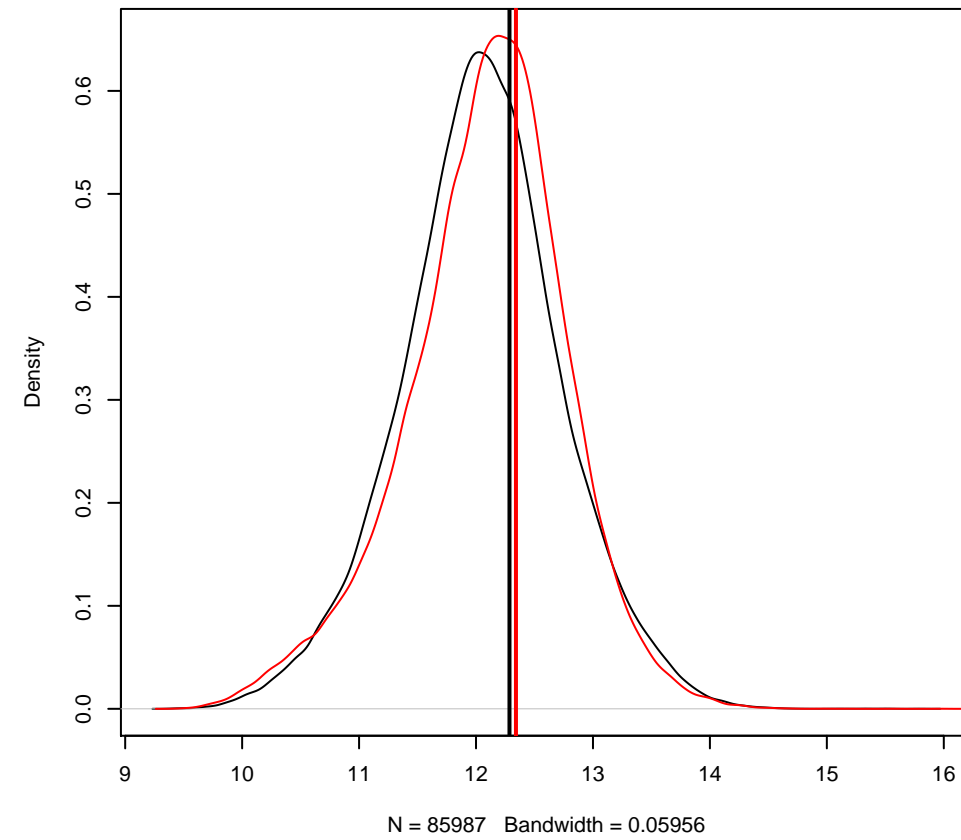

Replicate densities (normalized) for sample: 567362 (CFS)

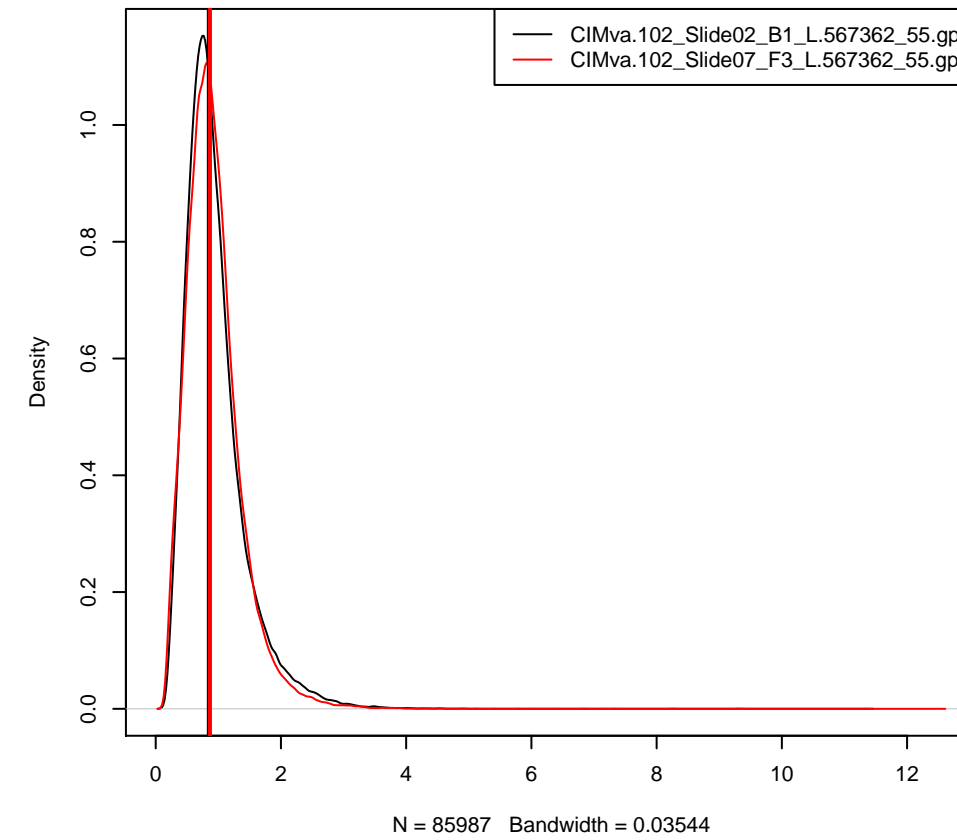

Replicate densities (normalized; log2) for sample: 567362 (CFS)

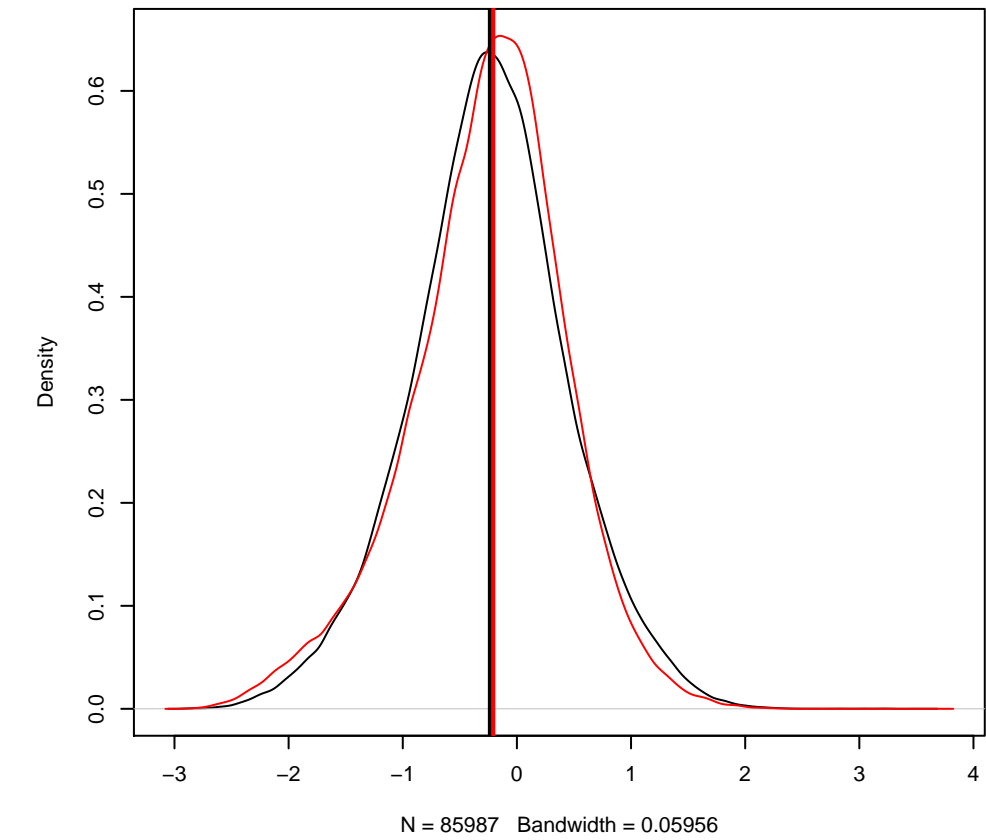

Replicate scatter (raw) for sample: 567362 (CFS)  
Correlation coefficient: 0.84 (Pearson); 0.87 (Spearman)

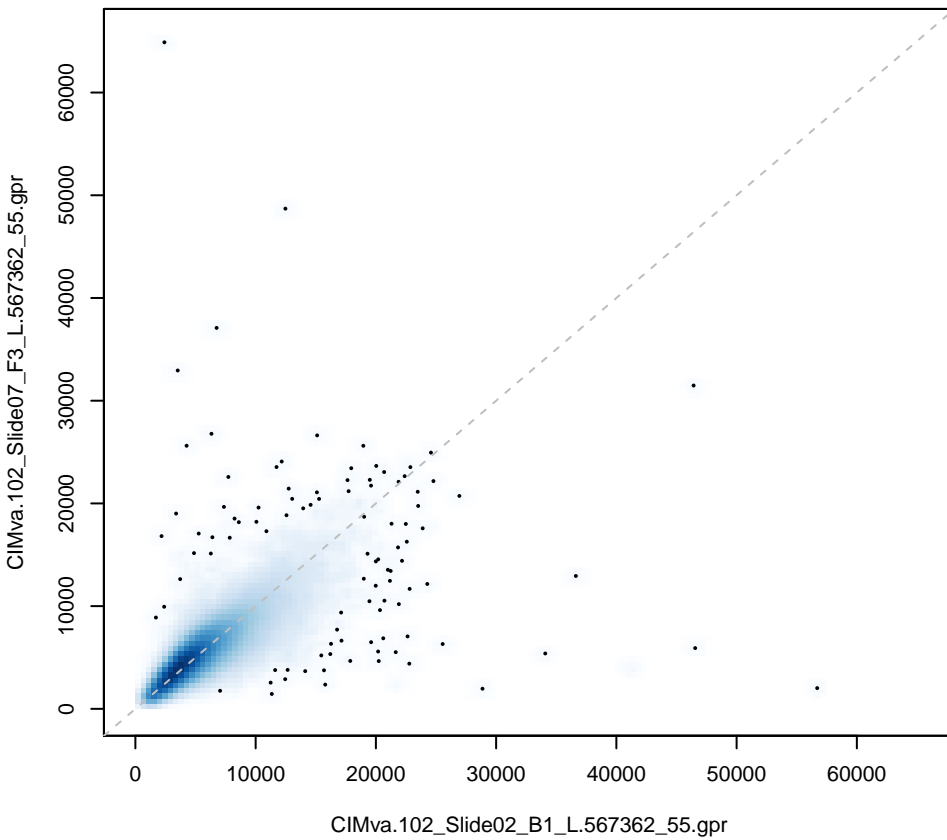

Replicate scatter (raw; log2) for sample: 567362 (CFS)  
Correlation coefficient: 0.88 (Pearson); 0.87 (Spearman)

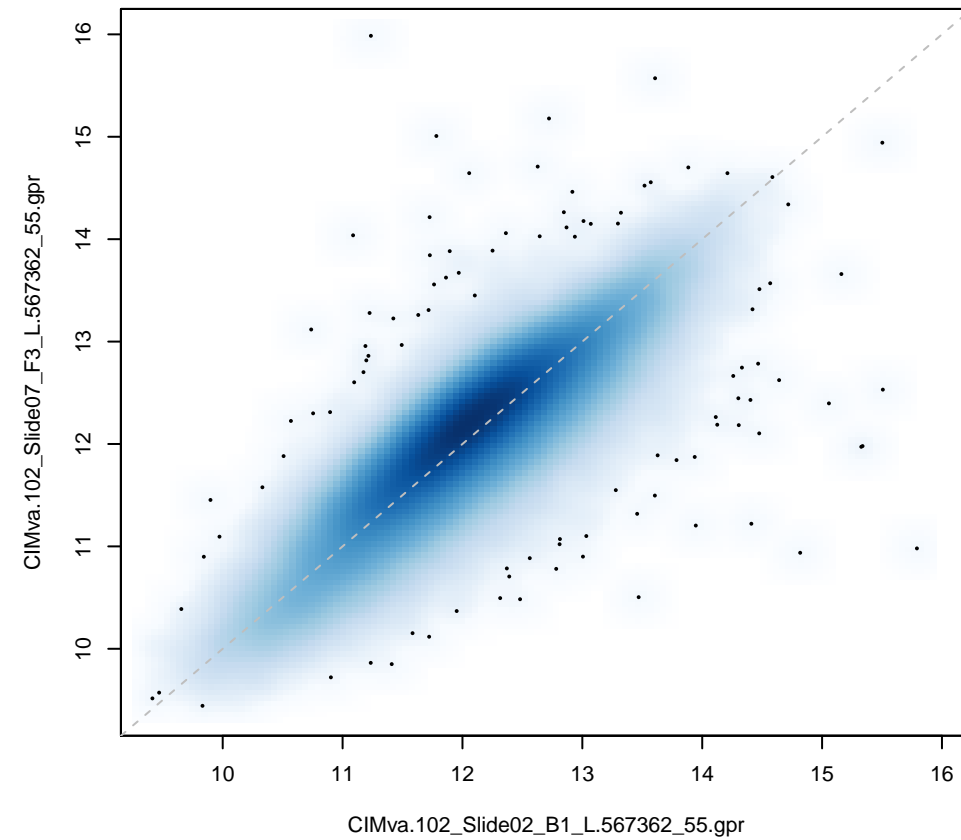

Replicate scatter (normalized) for sample: 567362 (CFS)  
Correlation coefficient: 0.84 (Pearson); 0.87 (Spearman)

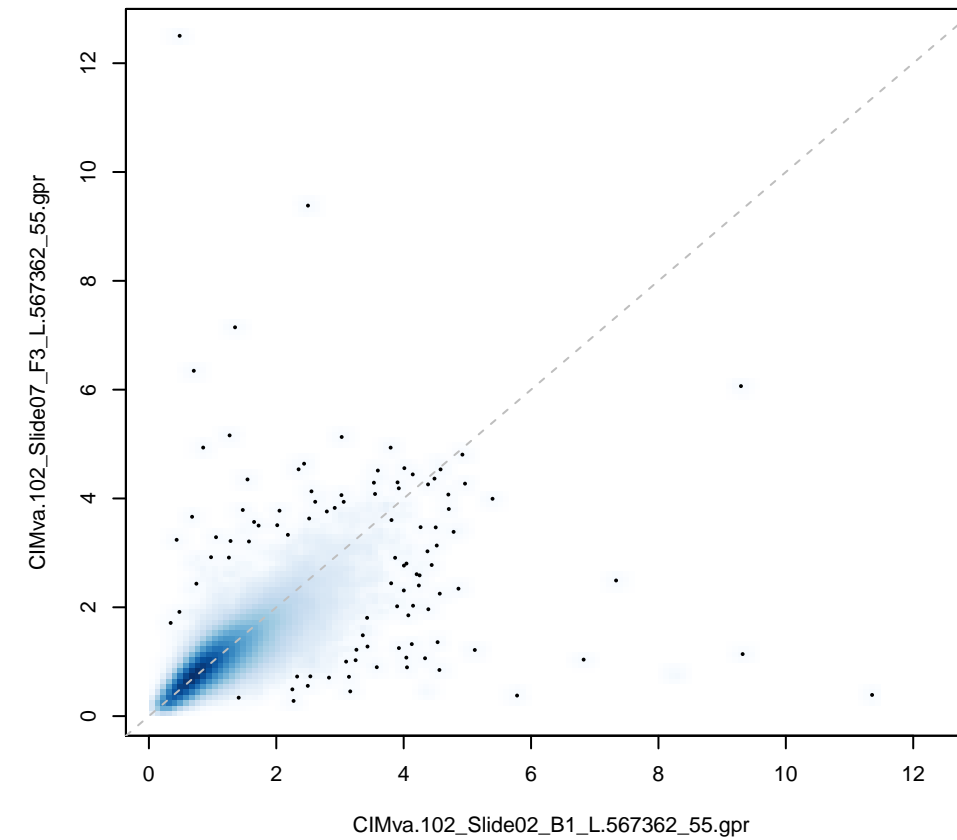

Replicate scatter (normalized; log2) for sample: 567362 (CFS)  
Correlation coefficient: 0.87 (Pearson); 0.87 (Spearman)

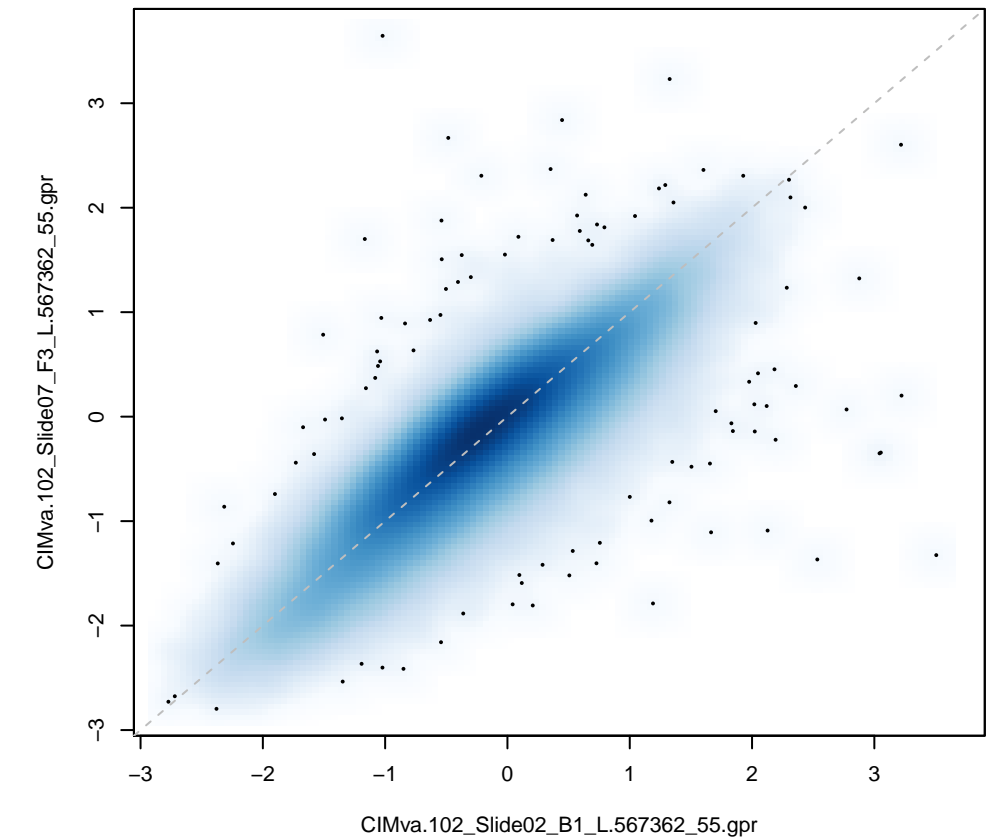



Replicate densities (raw) for sample: 570811 (Controls)

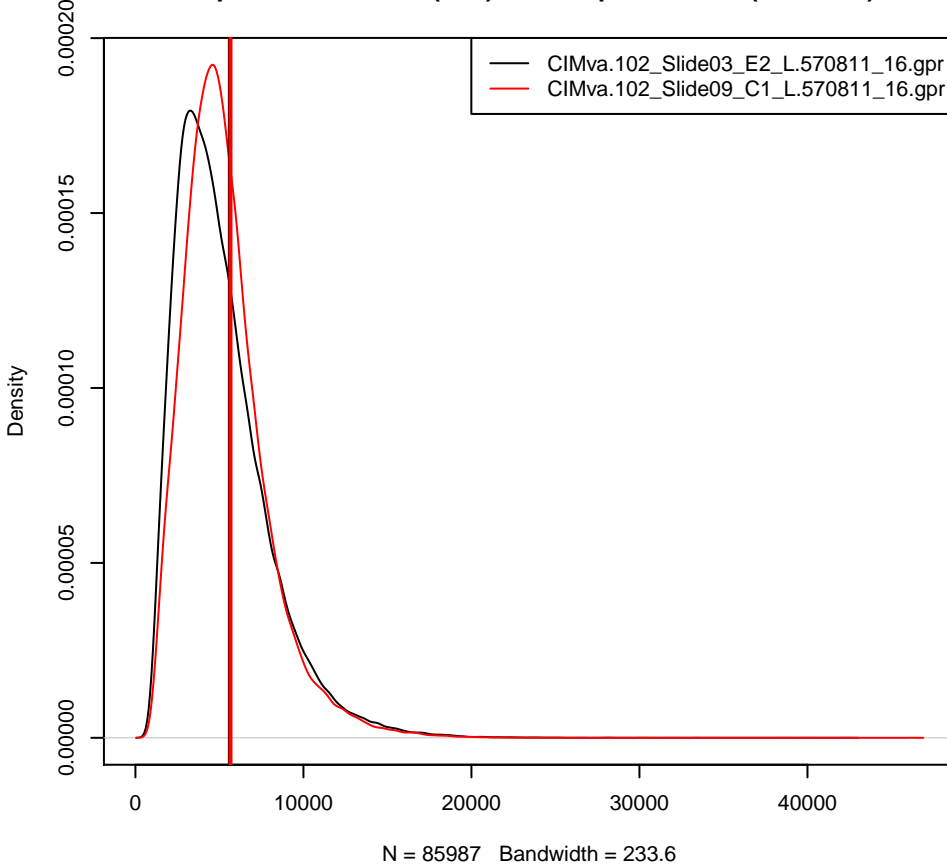

Replicate densities (raw; log2) for sample: 570811 (Controls)

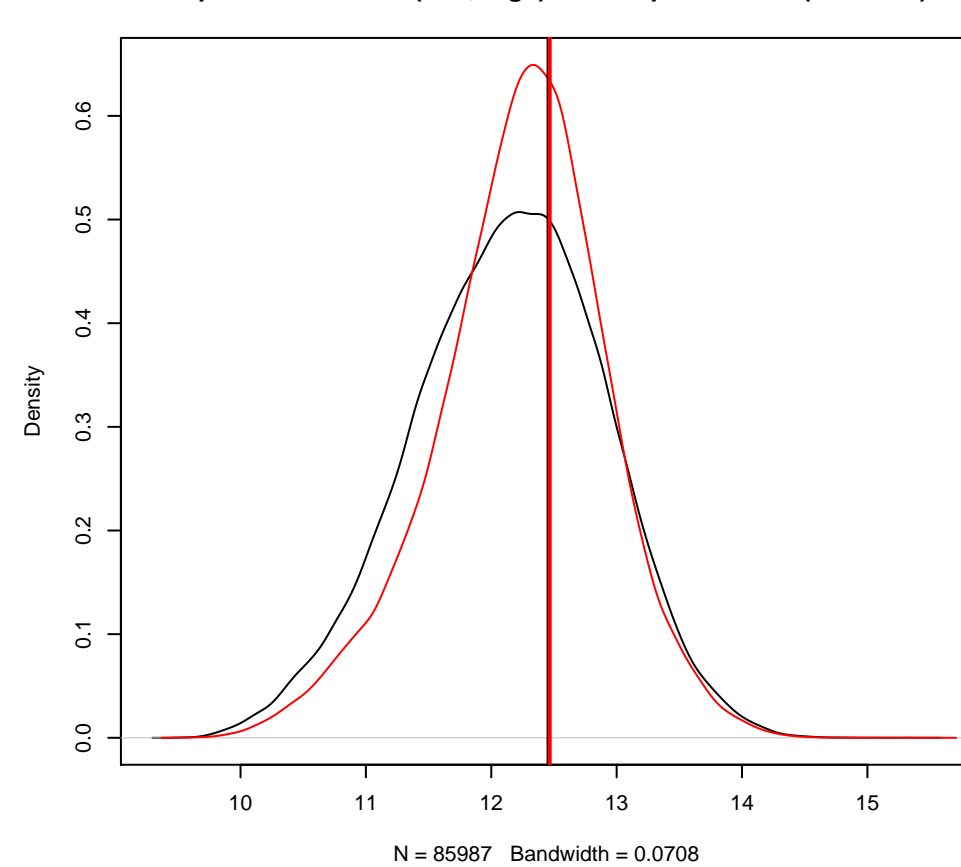

Replicate densities (normalized) for sample: 570811 (Controls)

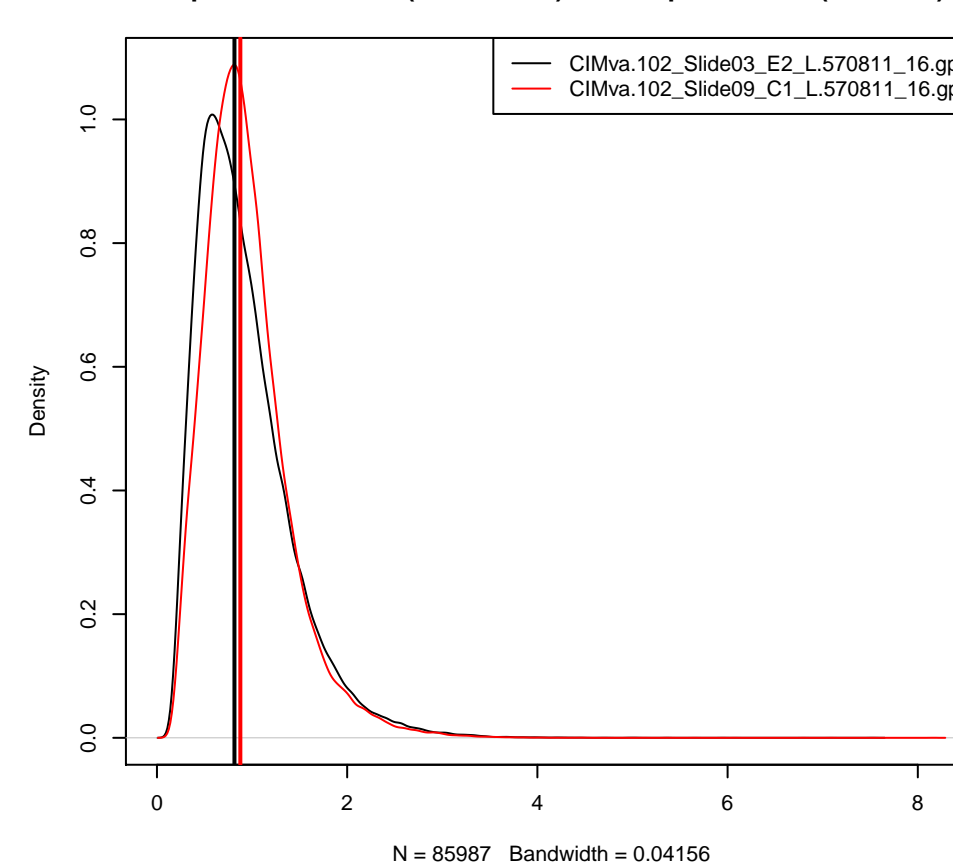

Replicate densities (normalized; log2) for sample: 570811 (Controls)

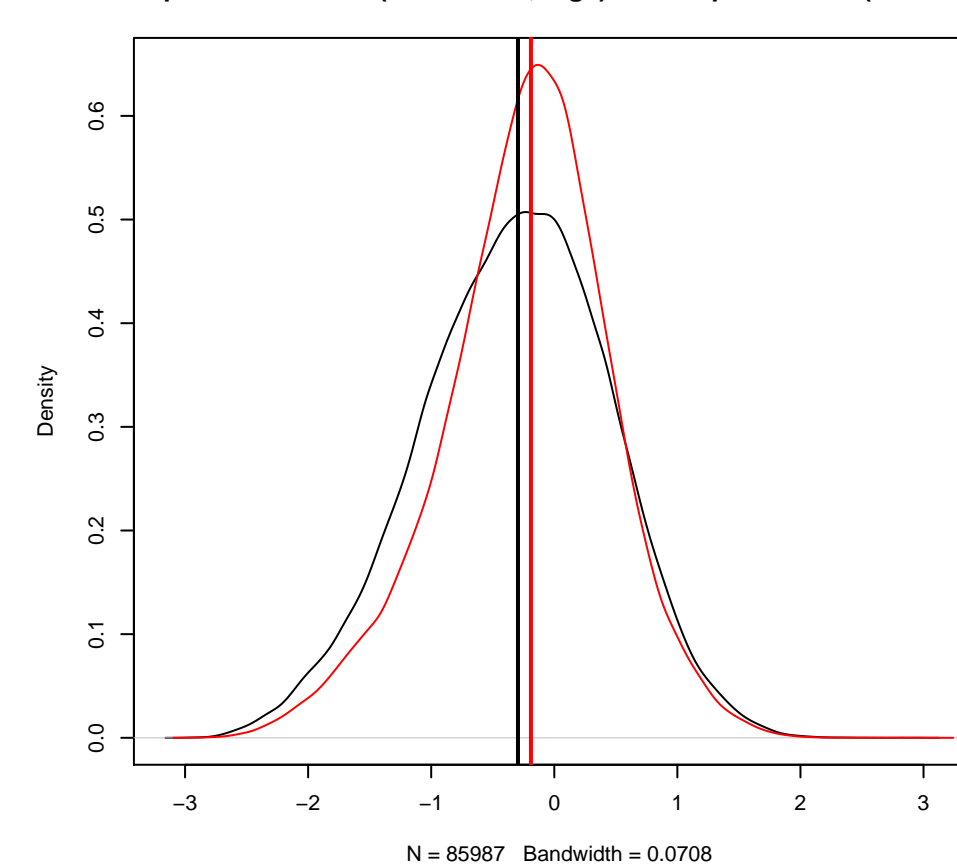

Replicate scatter (raw) for sample: 570811 (Controls)  
Correlation coefficient: 0.79 (Pearson); 0.81 (Spearman)

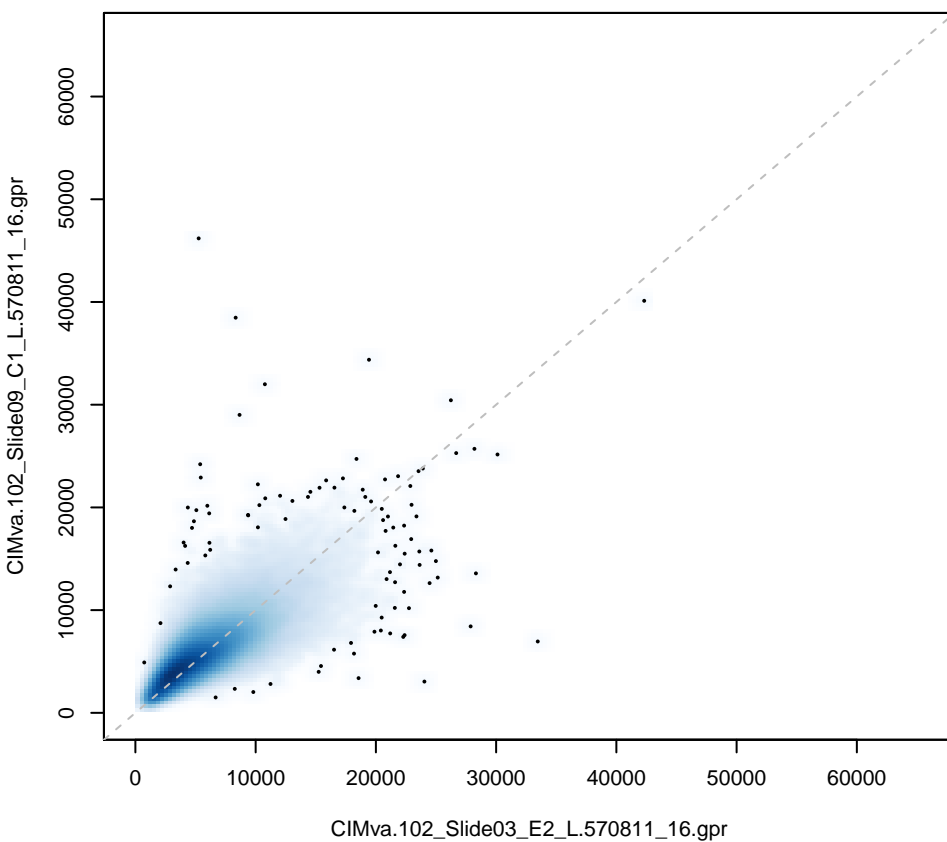

Replicate scatter (raw; log2) for sample: 570811 (Controls)  
Correlation coefficient: 0.83 (Pearson); 0.81 (Spearman)

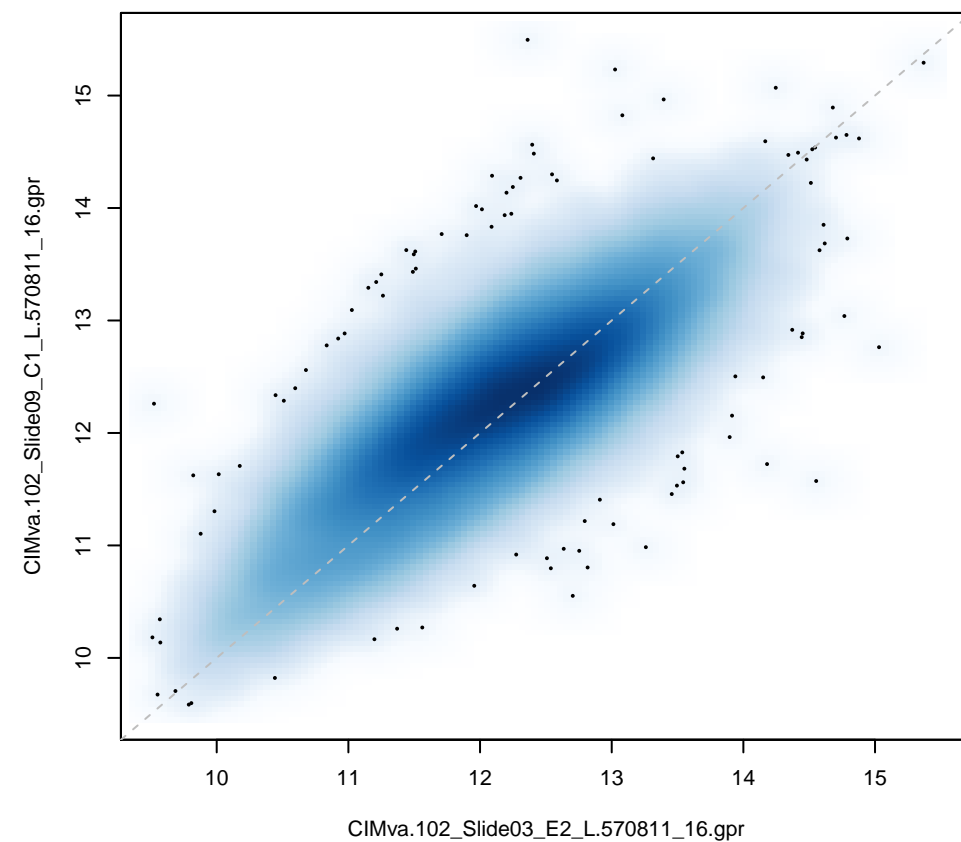

Replicate scatter (normalized) for sample: 570811 (Controls)  
Correlation coefficient: 0.79 (Pearson); 0.81 (Spearman)

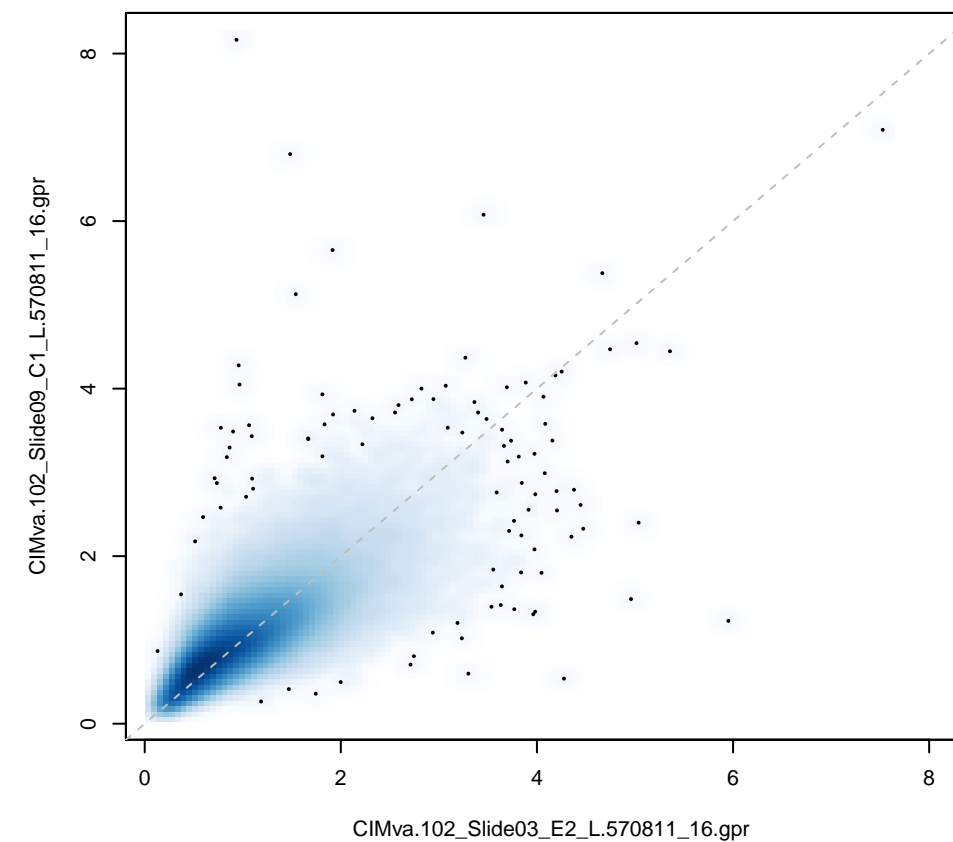

Replicate scatter (normalized; log2) for sample: 570811 (Controls)  
Correlation coefficient: 0.81 (Pearson); 0.81 (Spearman)

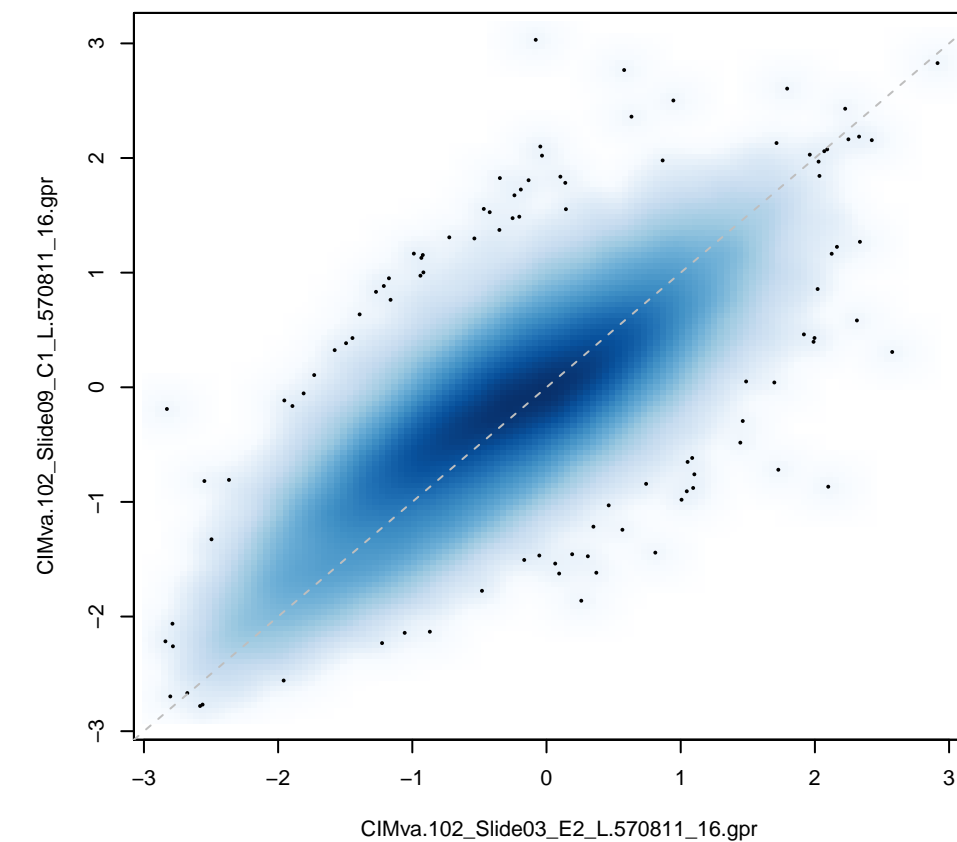

Replicate densities (raw) for sample: 571239 (CFS)

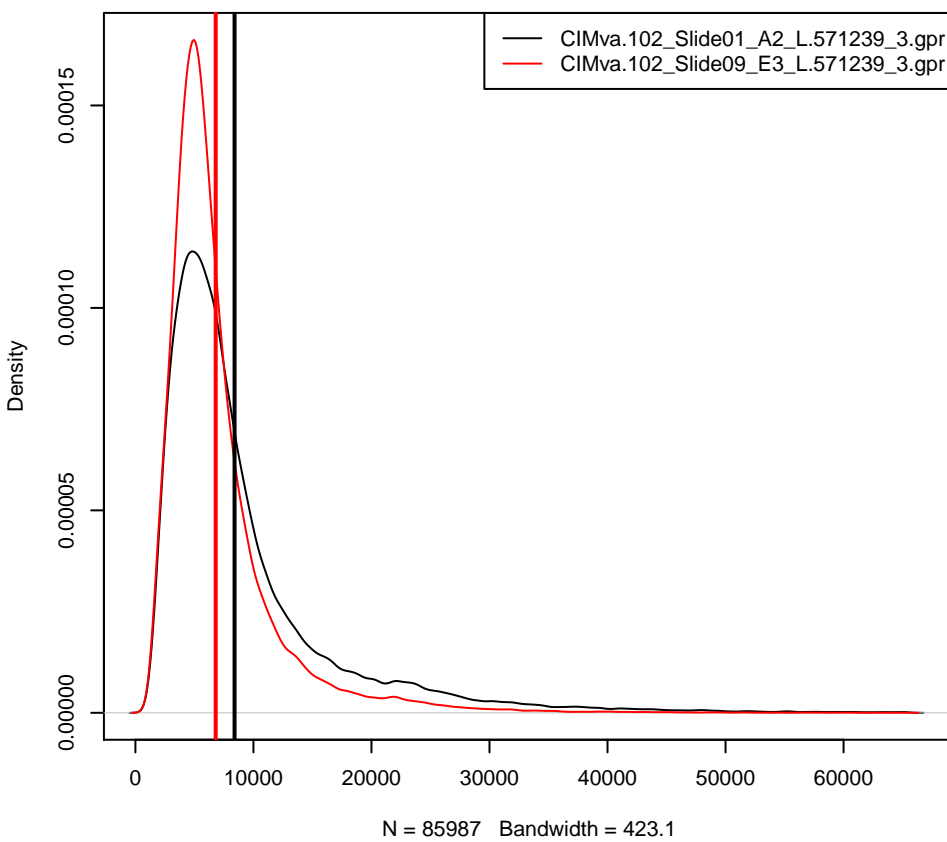

Replicate densities (raw; log2) for sample: 571239 (CFS)

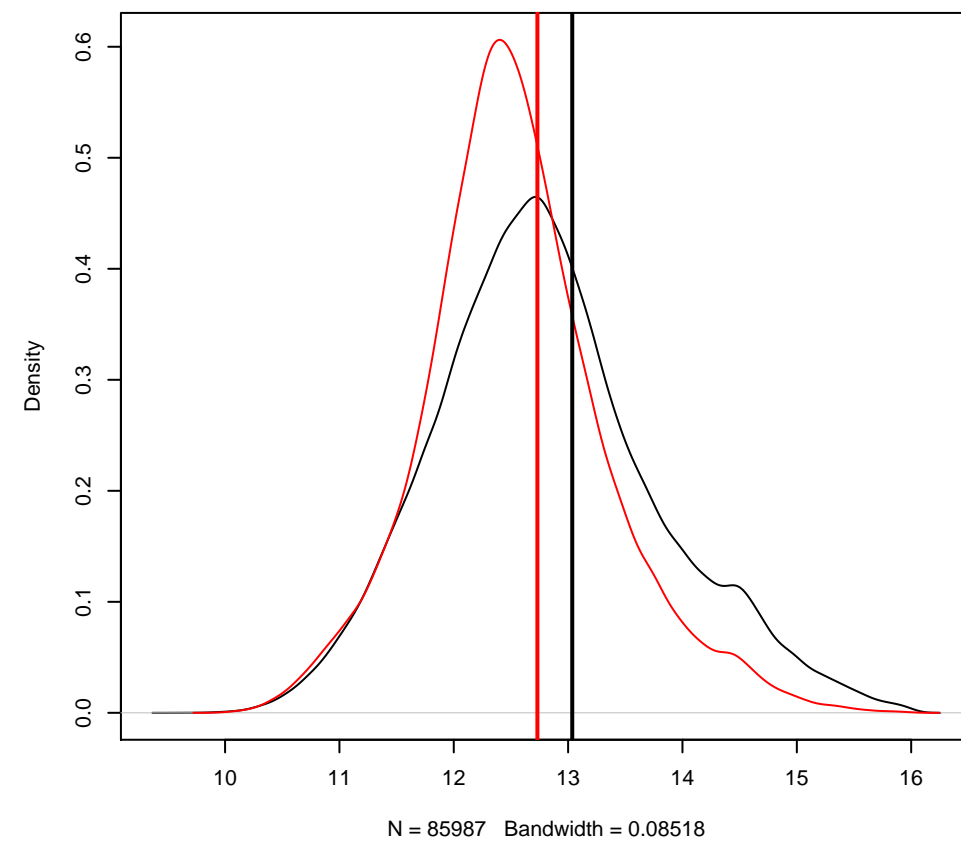

Replicate densities (normalized) for sample: 571239 (CFS)

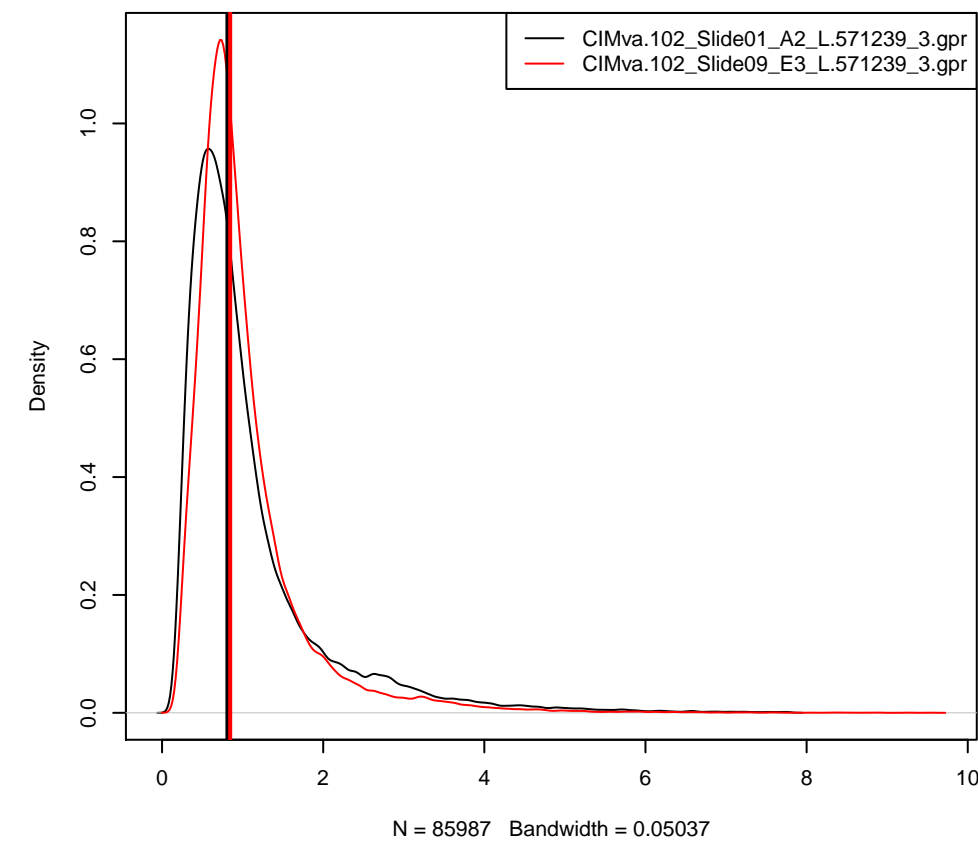

Replicate densities (normalized; log2) for sample: 571239 (CFS)

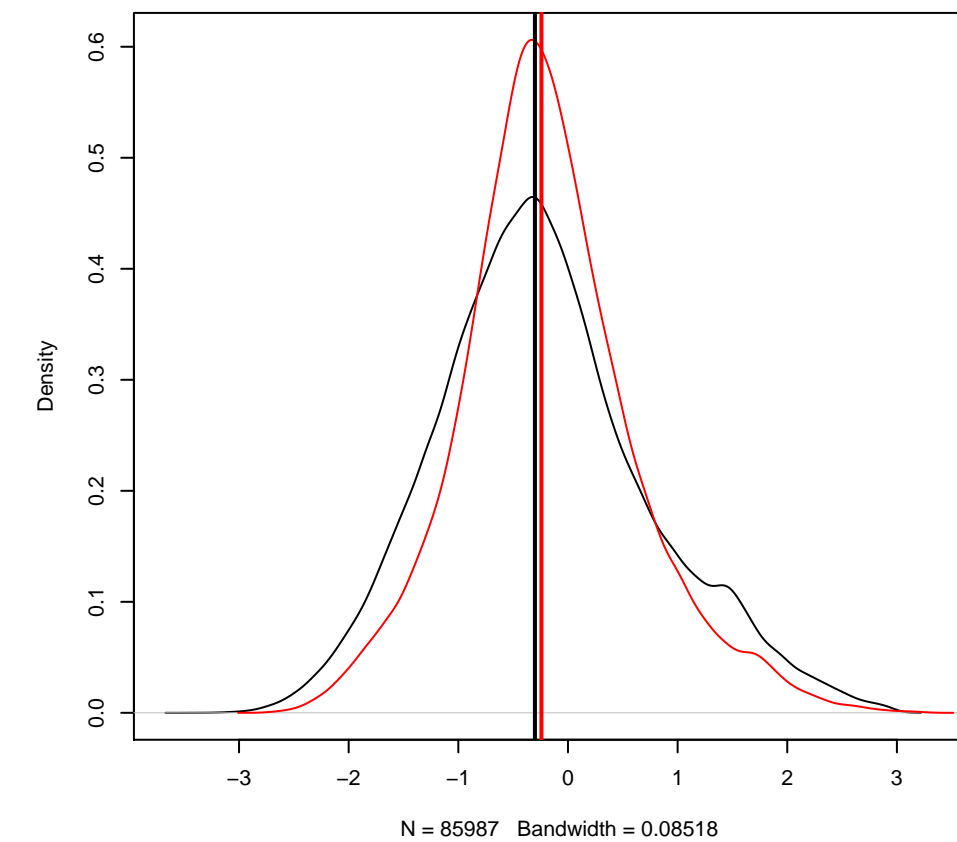

Replicate scatter (raw) for sample: 571239 (CFS)  
Correlation coefficient: 0.48 (Pearson); 0.57 (Spearman)

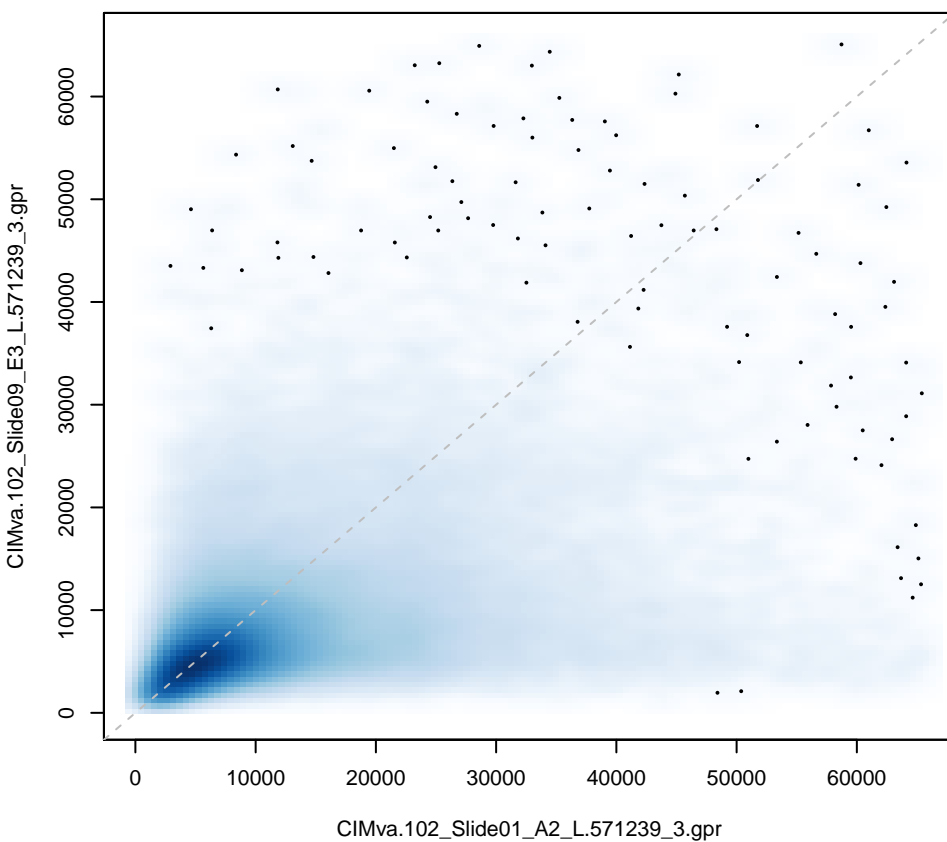

Replicate scatter (raw; log2) for sample: 571239 (CFS)  
Correlation coefficient: 0.58 (Pearson); 0.57 (Spearman)

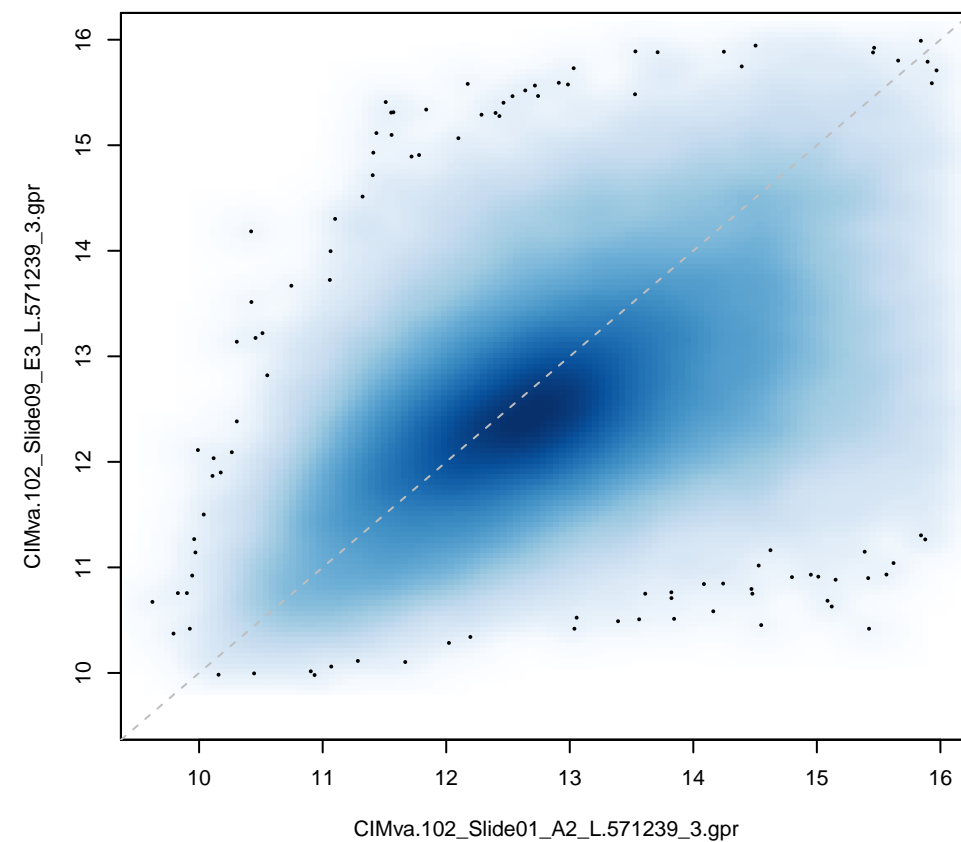

Replicate scatter (normalized) for sample: 571239 (CFS)  
Correlation coefficient: 0.48 (Pearson); 0.57 (Spearman)

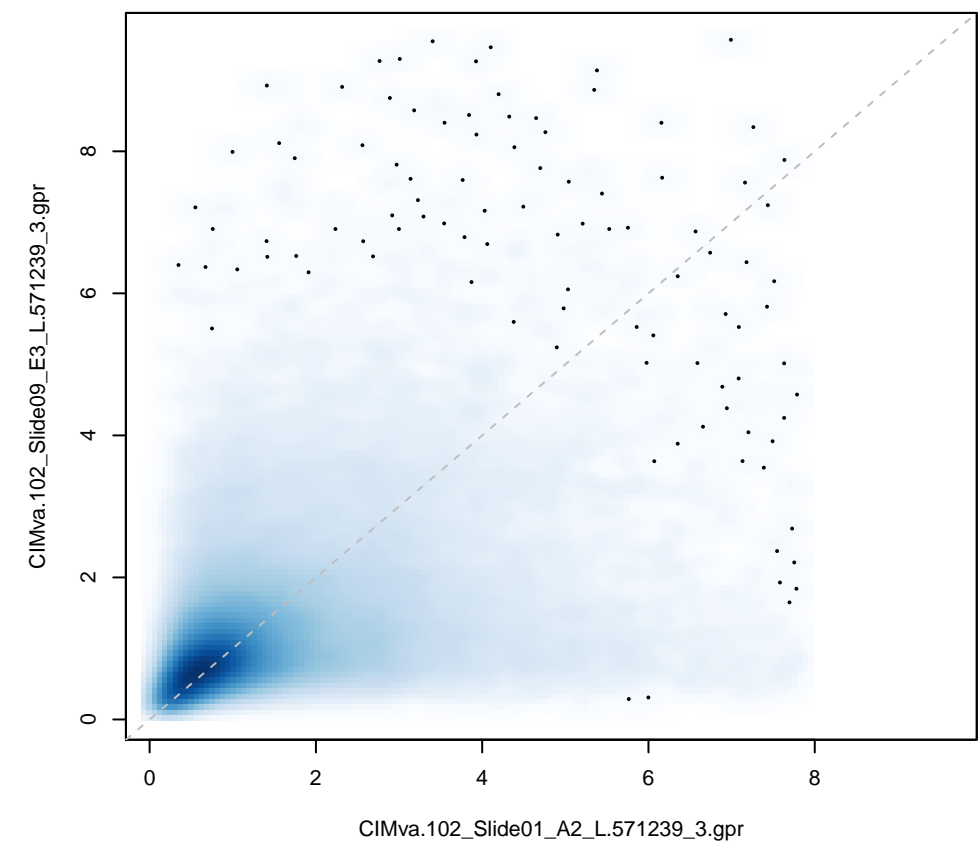

Replicate scatter (normalized; log2) for sample: 571239 (CFS)  
Correlation coefficient: 0.55 (Pearson); 0.57 (Spearman)

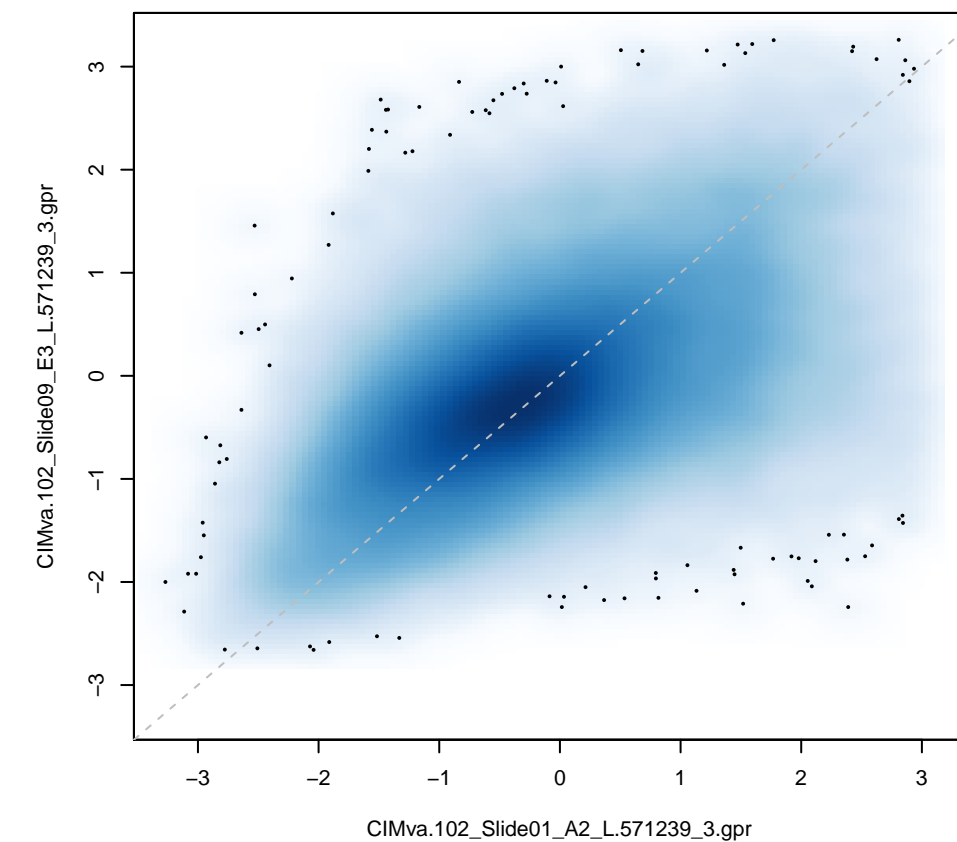

Replicate densities (raw) for sample: 575466 (Controls)

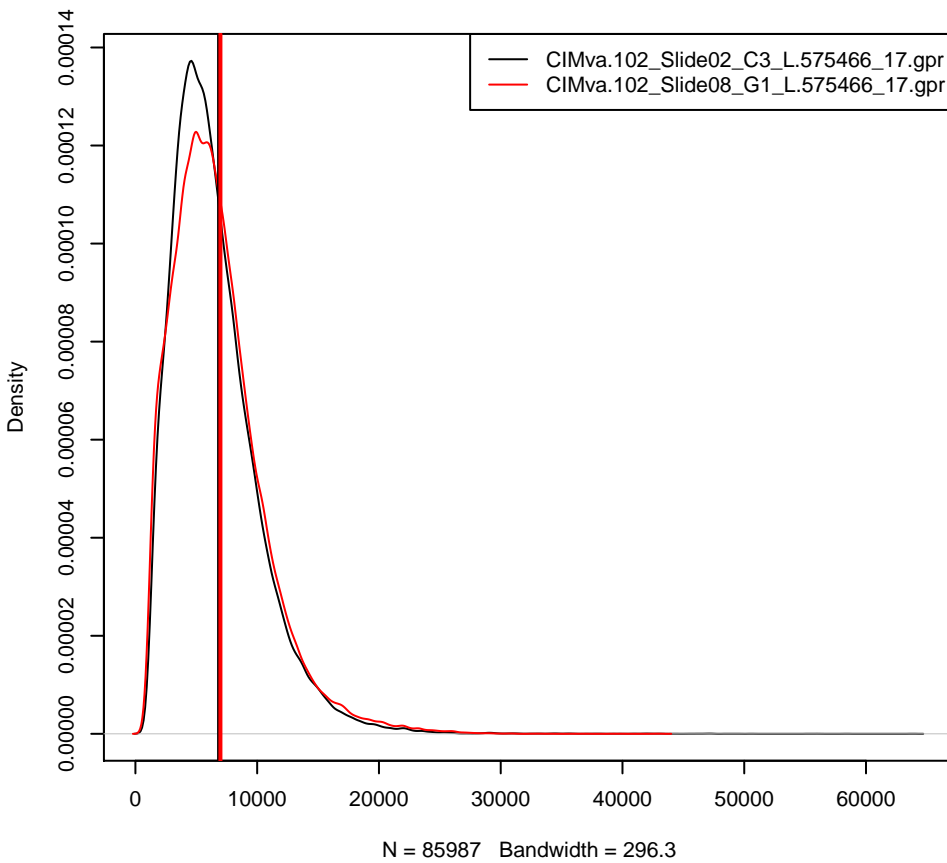

Replicate densities (raw; log2) for sample: 575466 (Controls)

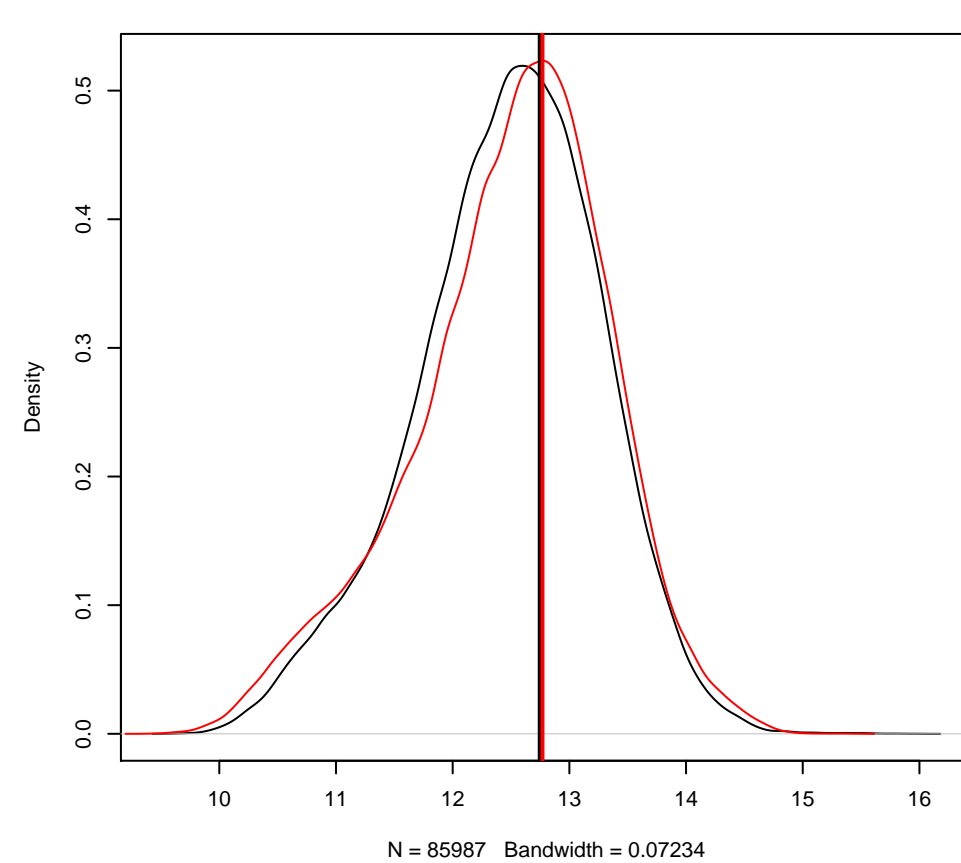

Replicate densities (normalized) for sample: 575466 (Controls)

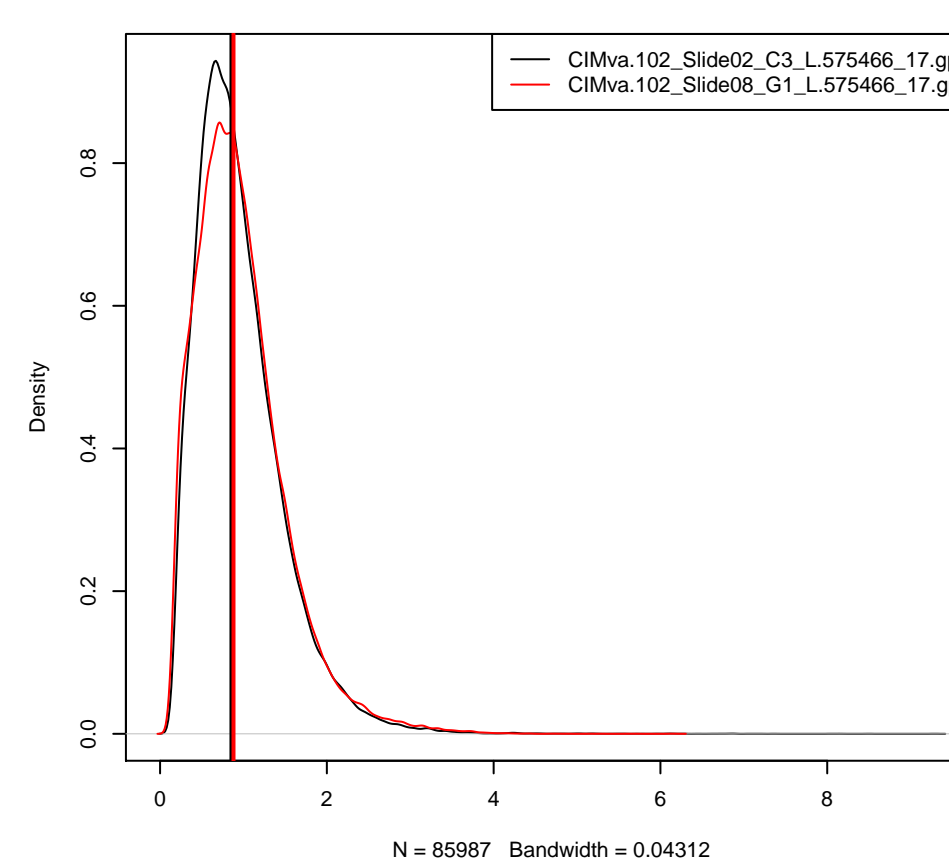

Replicate densities (normalized; log2) for sample: 575466 (Controls)

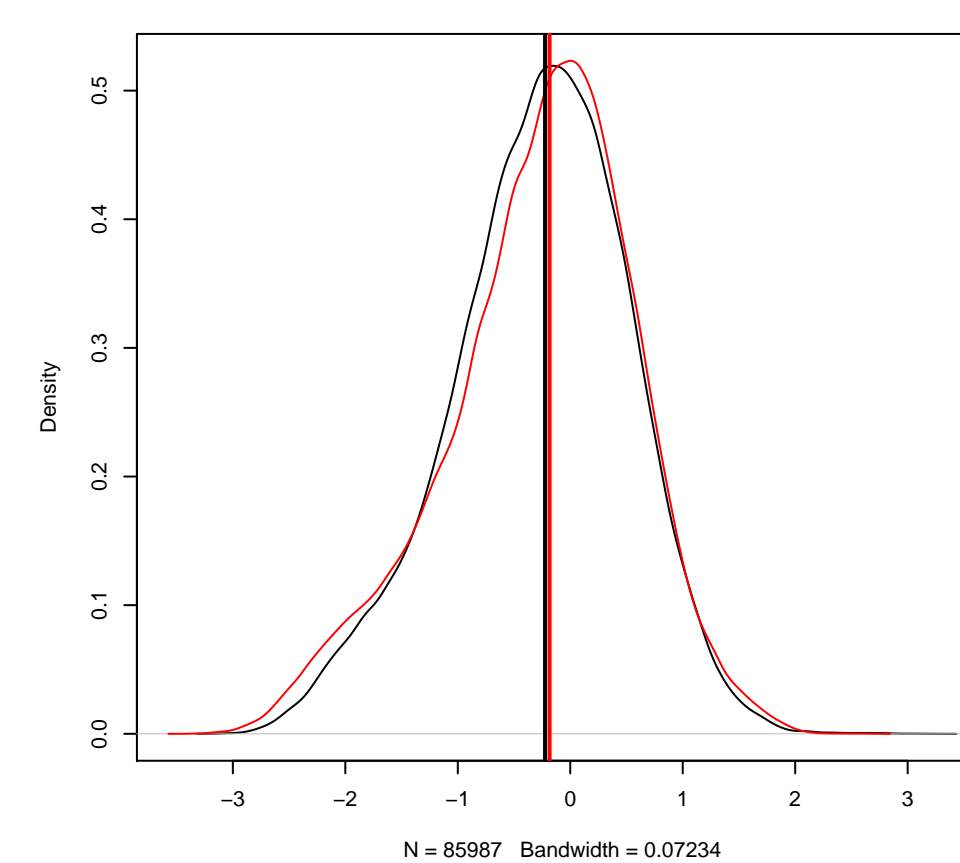

Replicate scatter (raw) for sample: 575466 (Controls)  
Correlation coefficient: 0.73 (Pearson); 0.79 (Spearman)

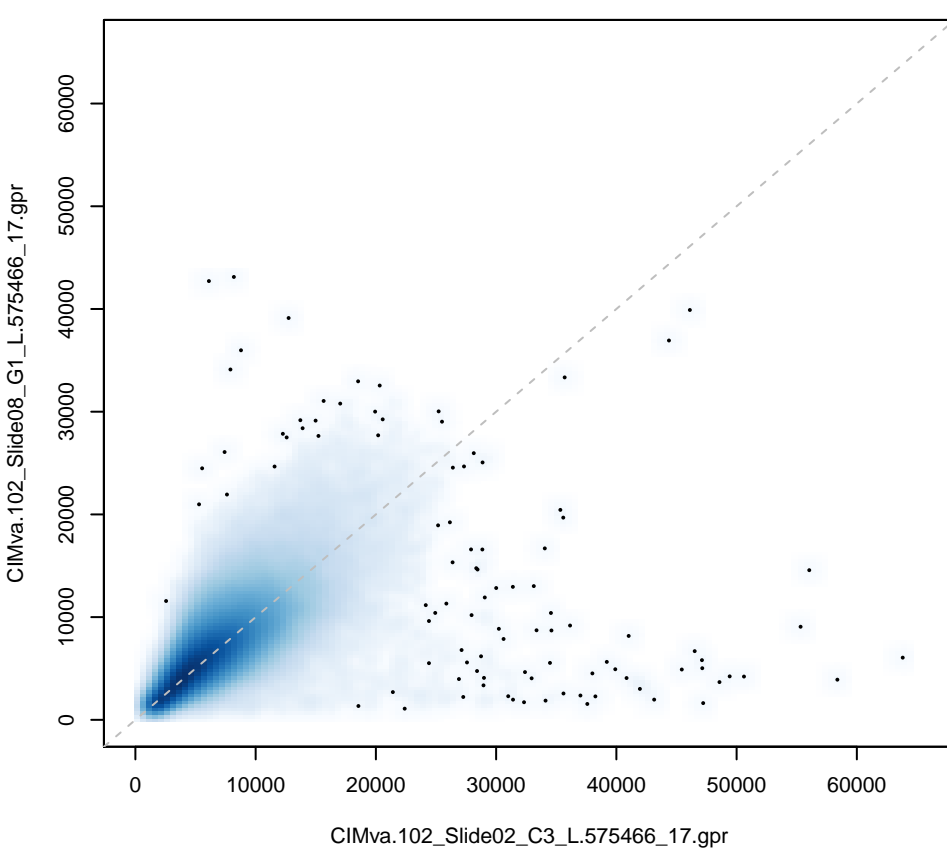

Replicate scatter (raw; log2) for sample: 575466 (Controls)  
Correlation coefficient: 0.8 (Pearson); 0.79 (Spearman)

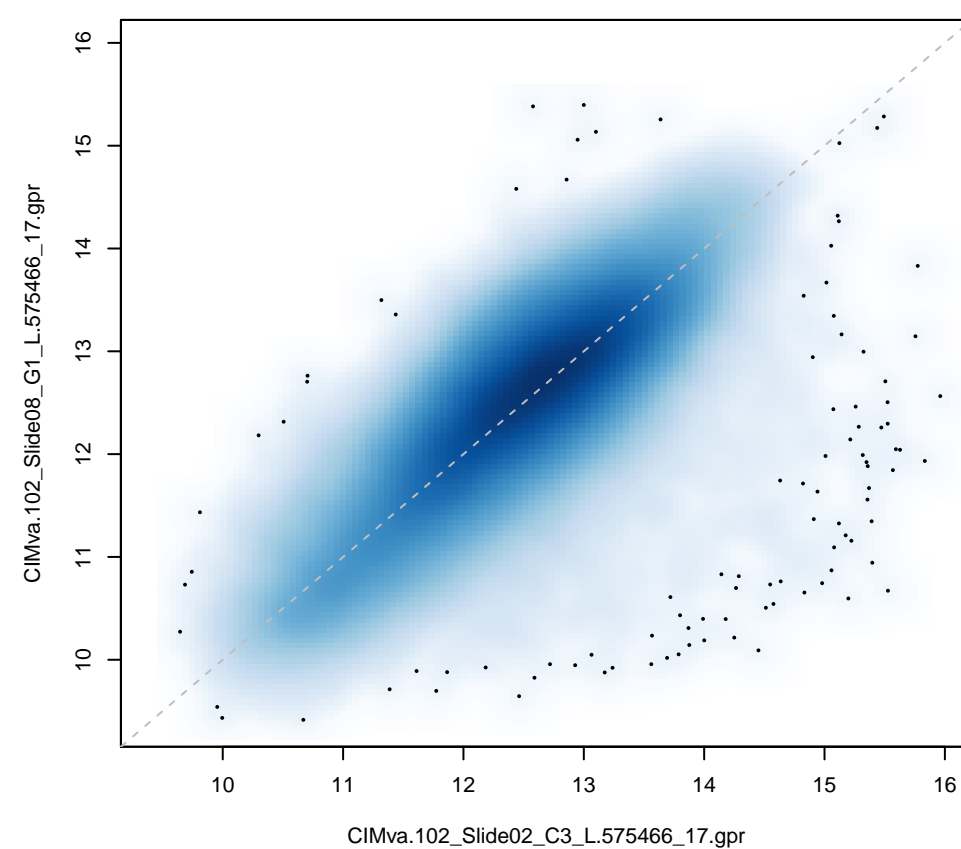

Replicate scatter (normalized) for sample: 575466 (Controls)  
Correlation coefficient: 0.73 (Pearson); 0.79 (Spearman)

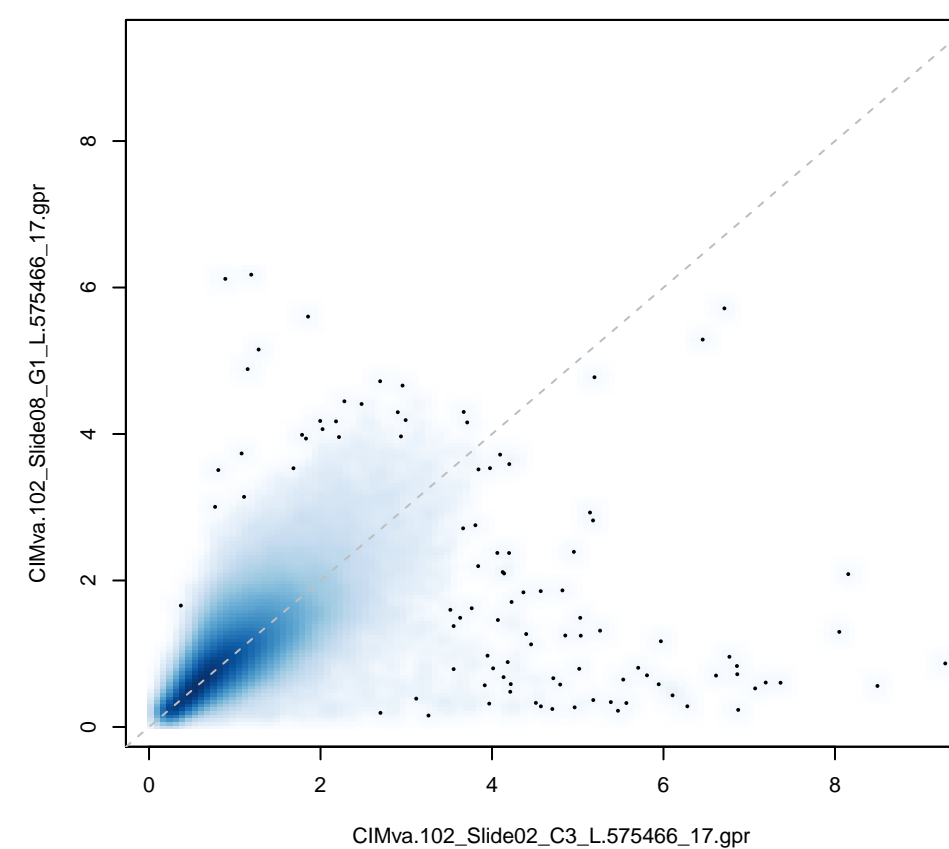

Replicate scatter (normalized; log2) for sample: 575466 (Controls)  
Correlation coefficient: 0.78 (Pearson); 0.79 (Spearman)

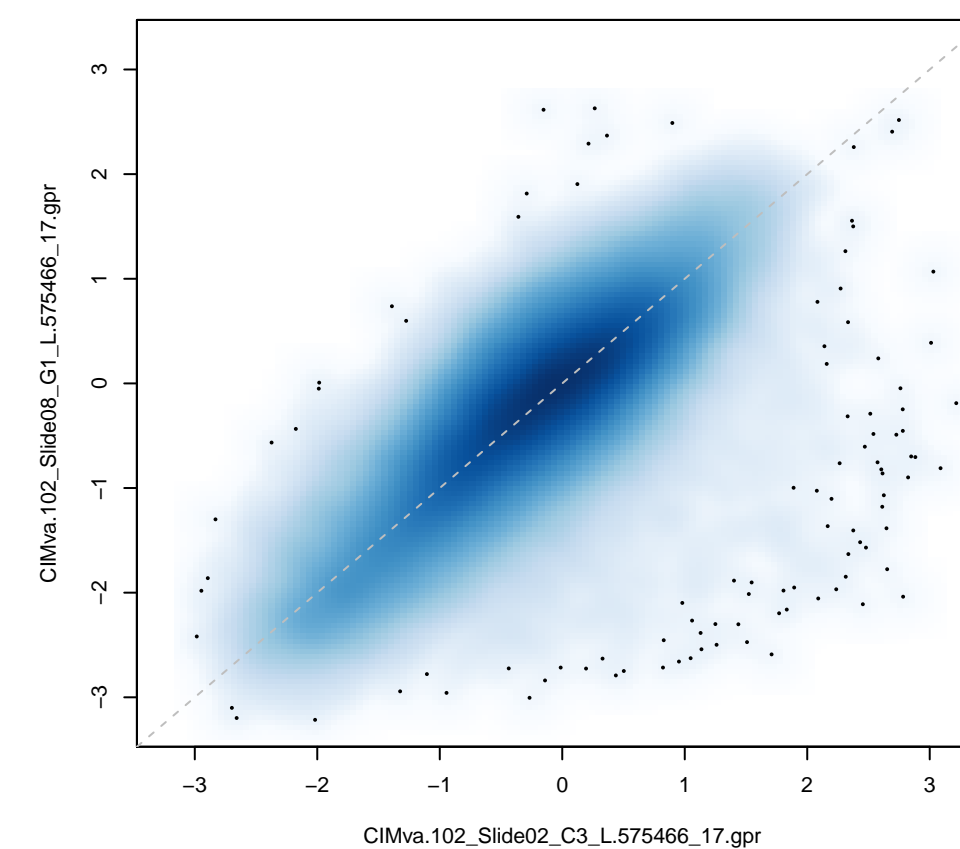

Replicate densities (raw) for sample: 5940 (Controls)

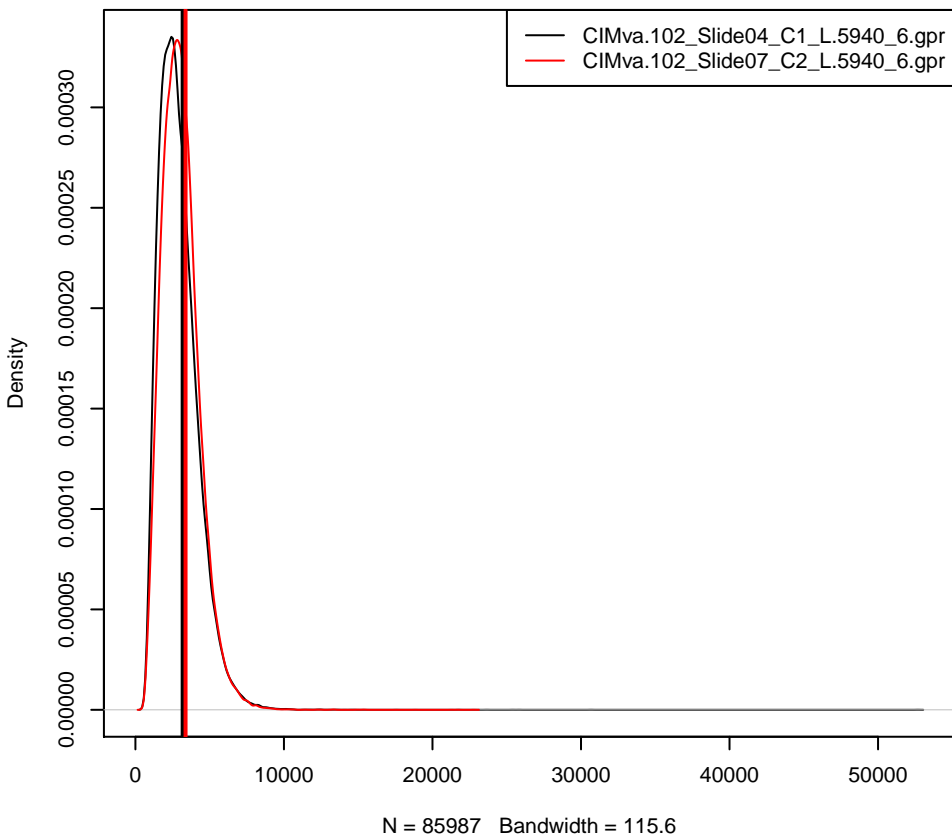

Replicate densities (raw; log2) for sample: 5940 (Controls)

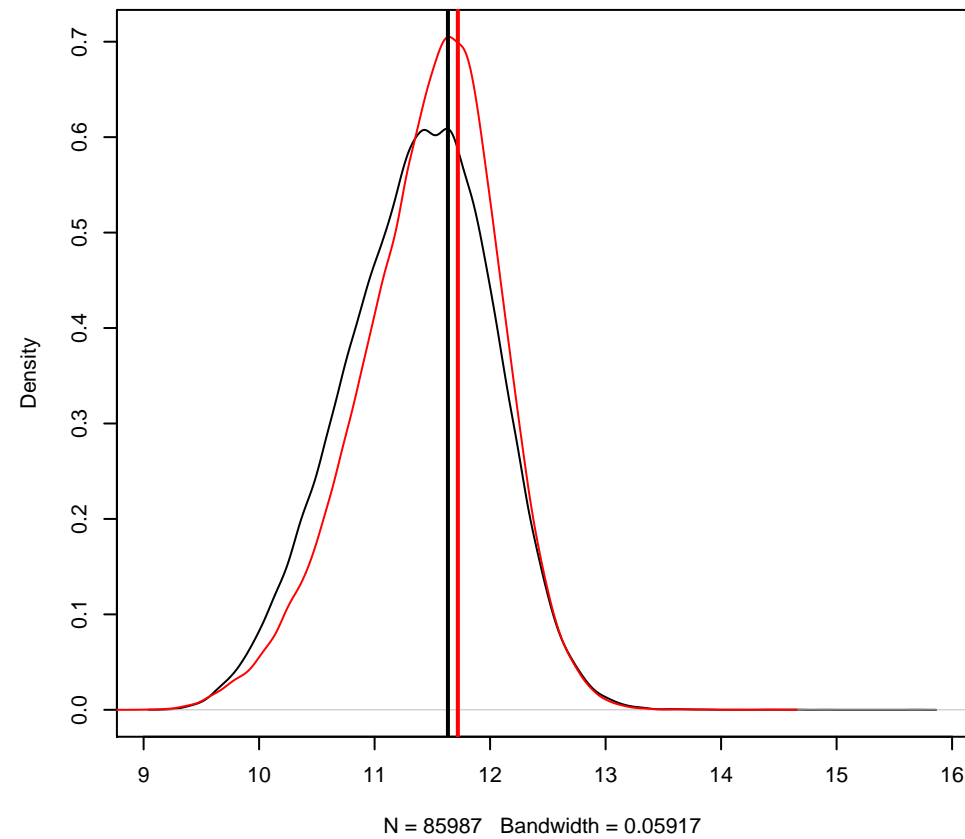

Replicate densities (normalized) for sample: 5940 (Controls)

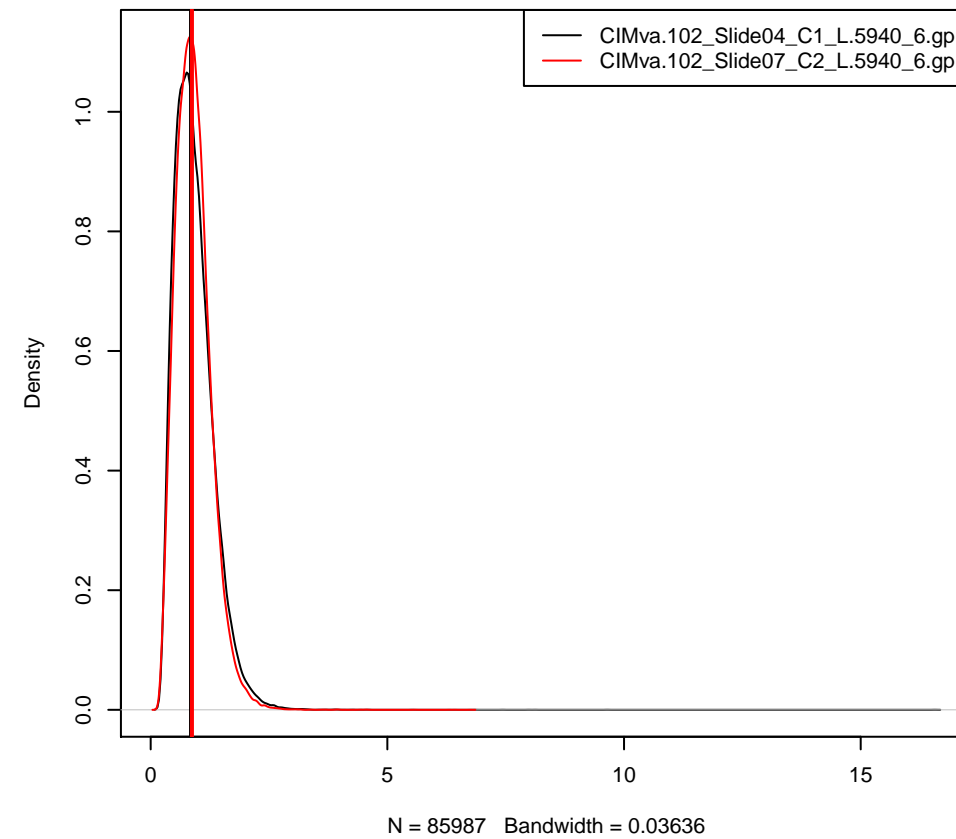

Replicate densities (normalized; log2) for sample: 5940 (Controls)

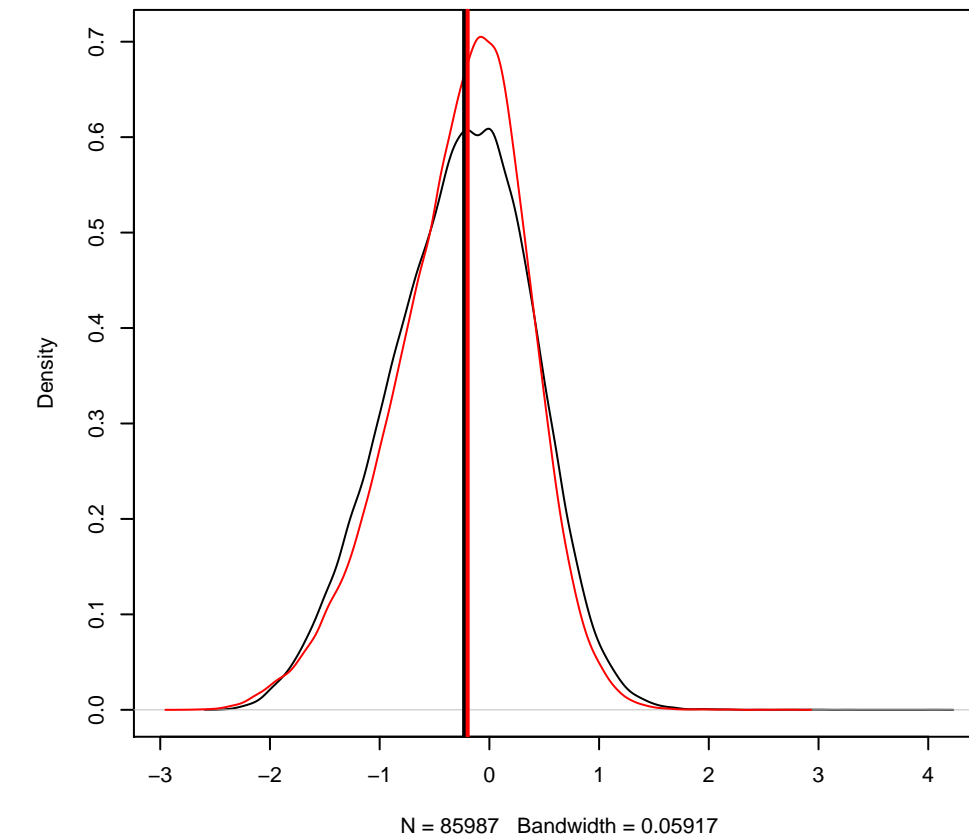

Replicate scatter (raw) for sample: 5940 (Controls)  
Correlation coefficient: 0.78 (Pearson); 0.83 (Spearman)

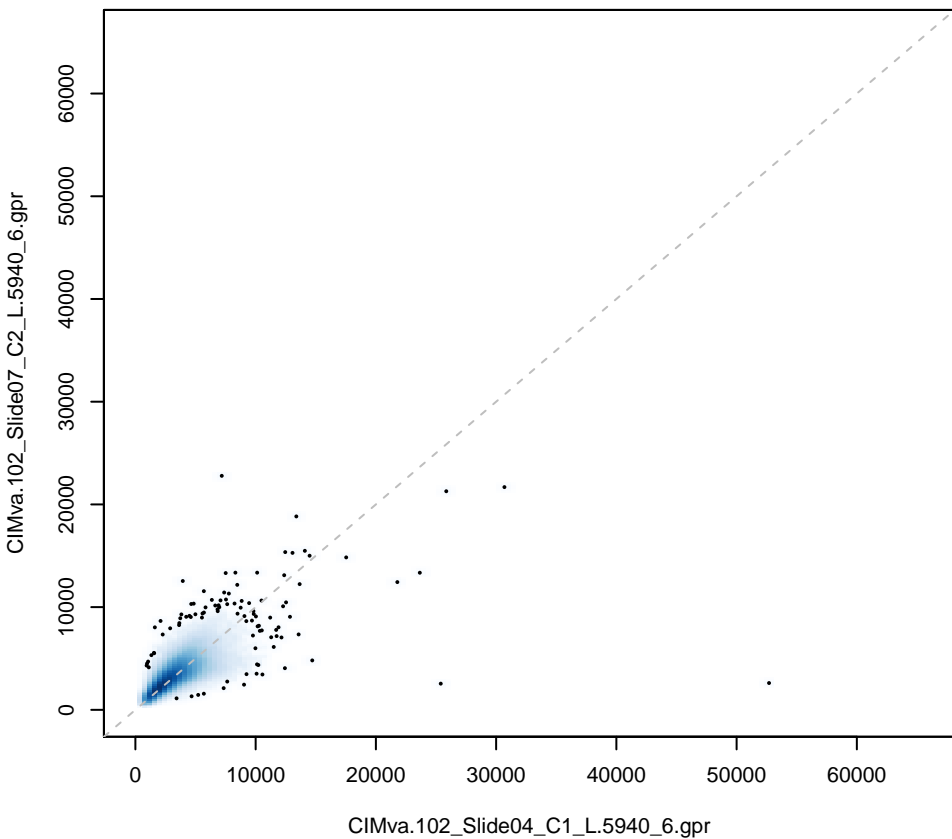

Replicate scatter (raw; log2) for sample: 5940 (Controls)  
Correlation coefficient: 0.84 (Pearson); 0.83 (Spearman)

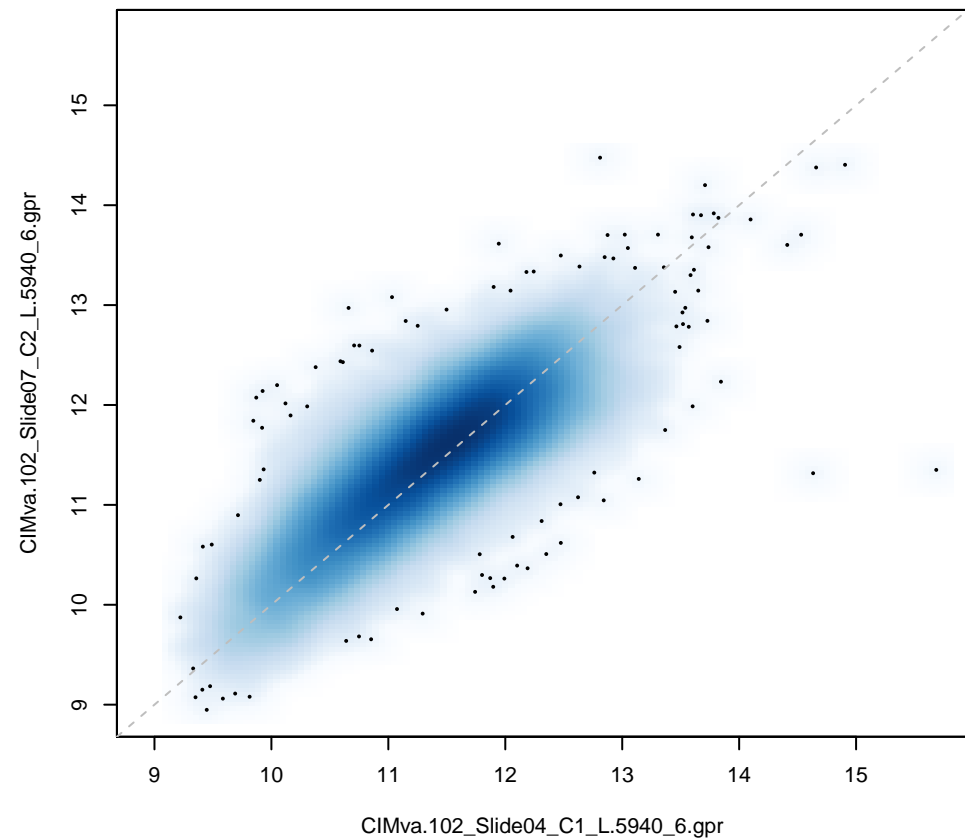

Replicate scatter (normalized) for sample: 5940 (Controls)  
Correlation coefficient: 0.78 (Pearson); 0.83 (Spearman)

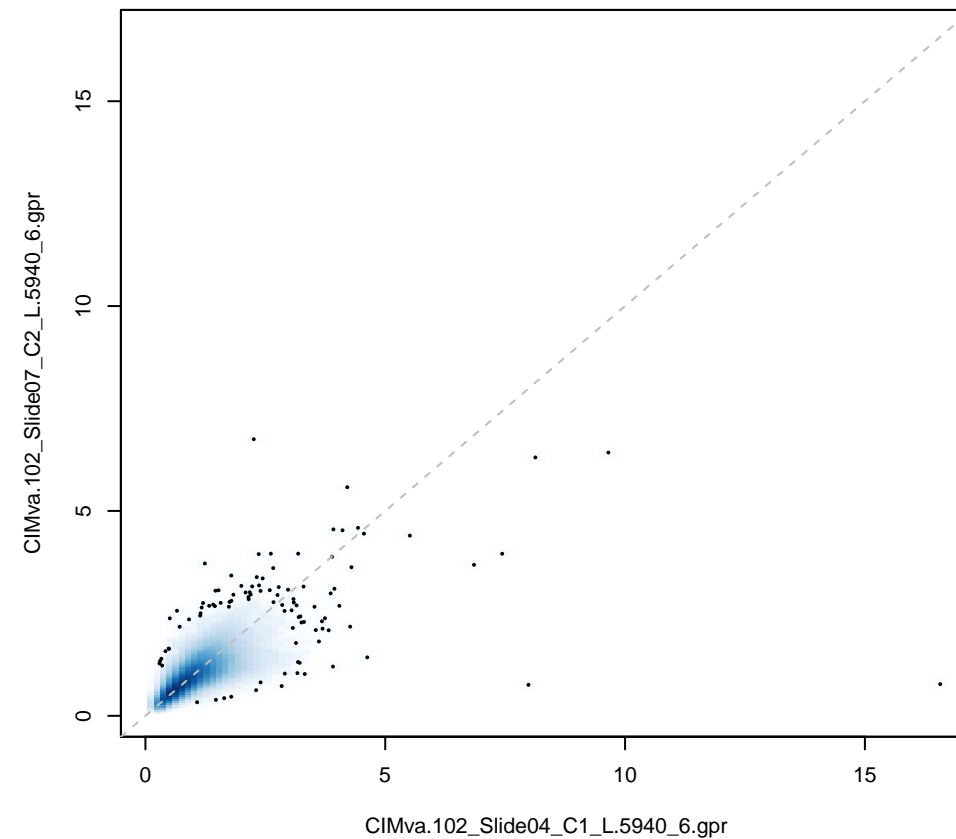

Replicate scatter (normalized; log2) for sample: 5940 (Controls)  
Correlation coefficient: 0.82 (Pearson); 0.83 (Spearman)

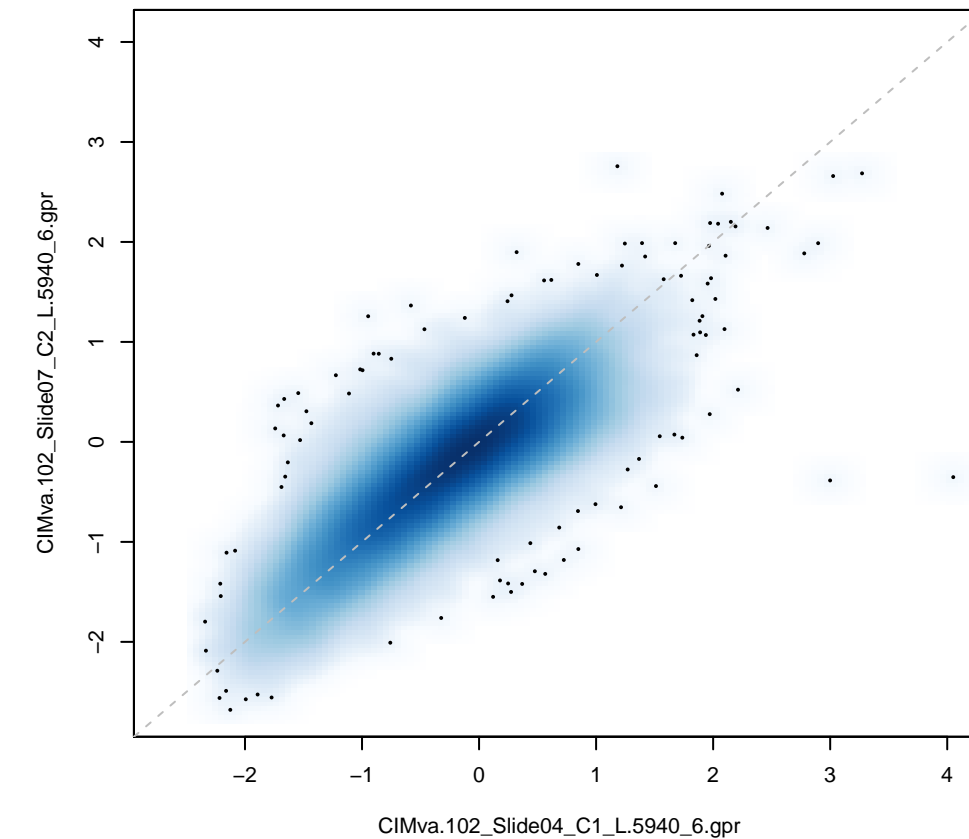

Replicate densities (raw) for sample: 7224 (Controls)

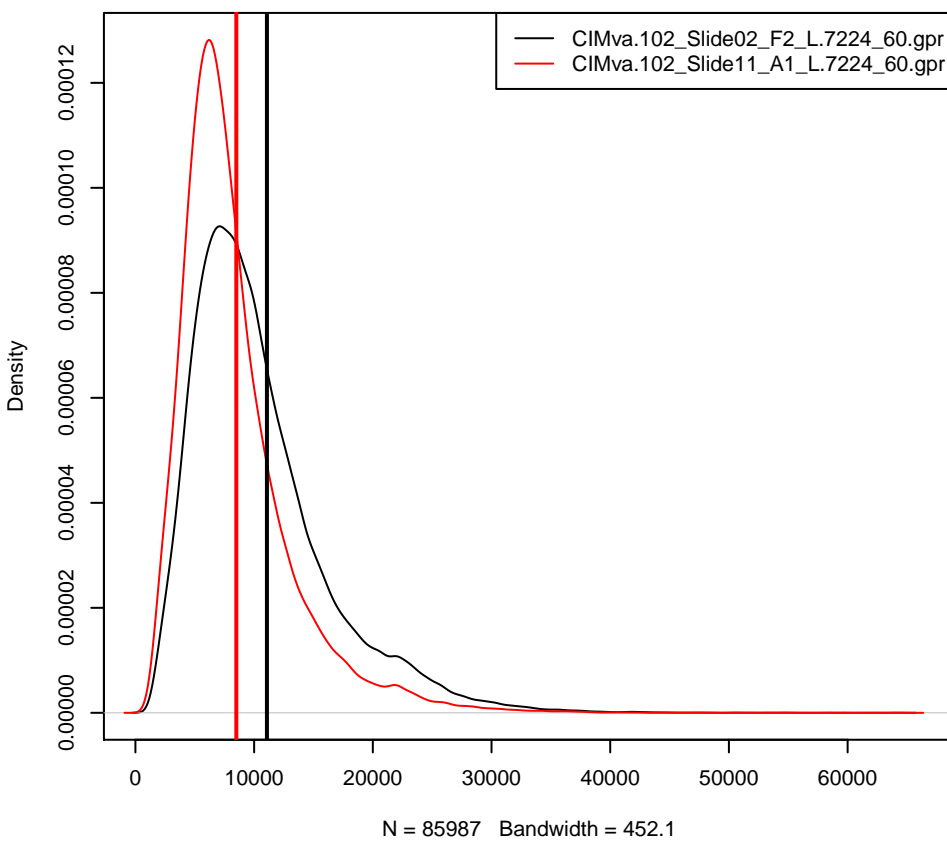

Replicate densities (raw; log2) for sample: 7224 (Controls)

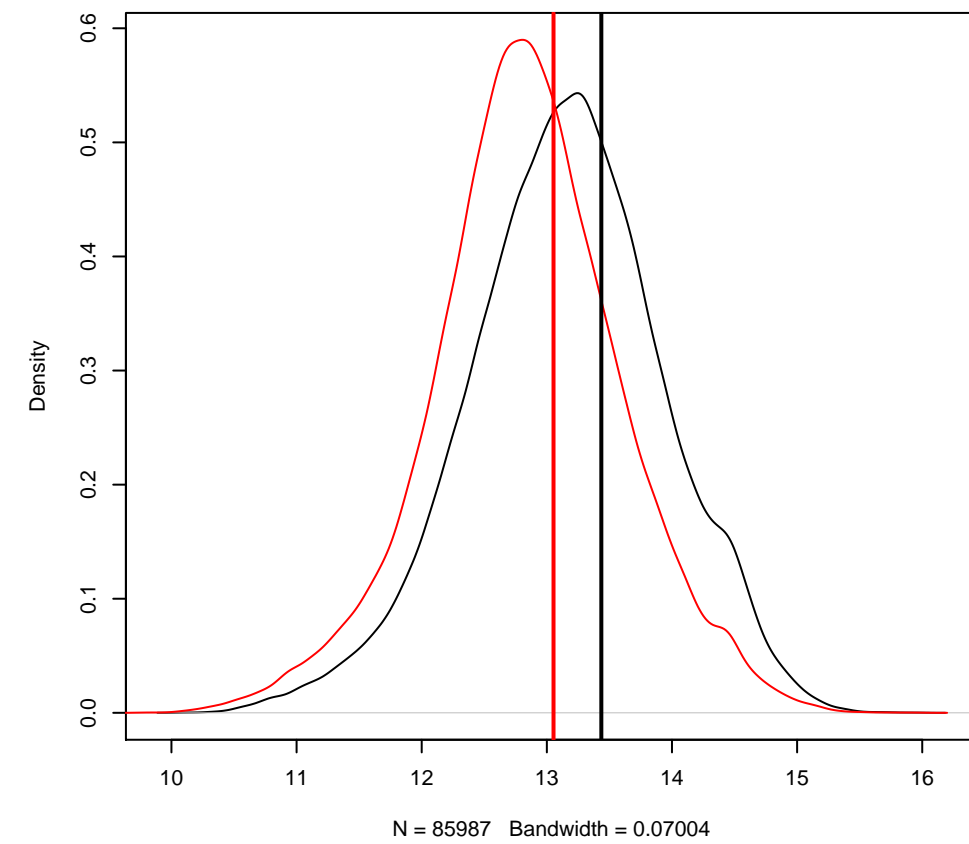

Replicate densities (normalized) for sample: 7224 (Controls)

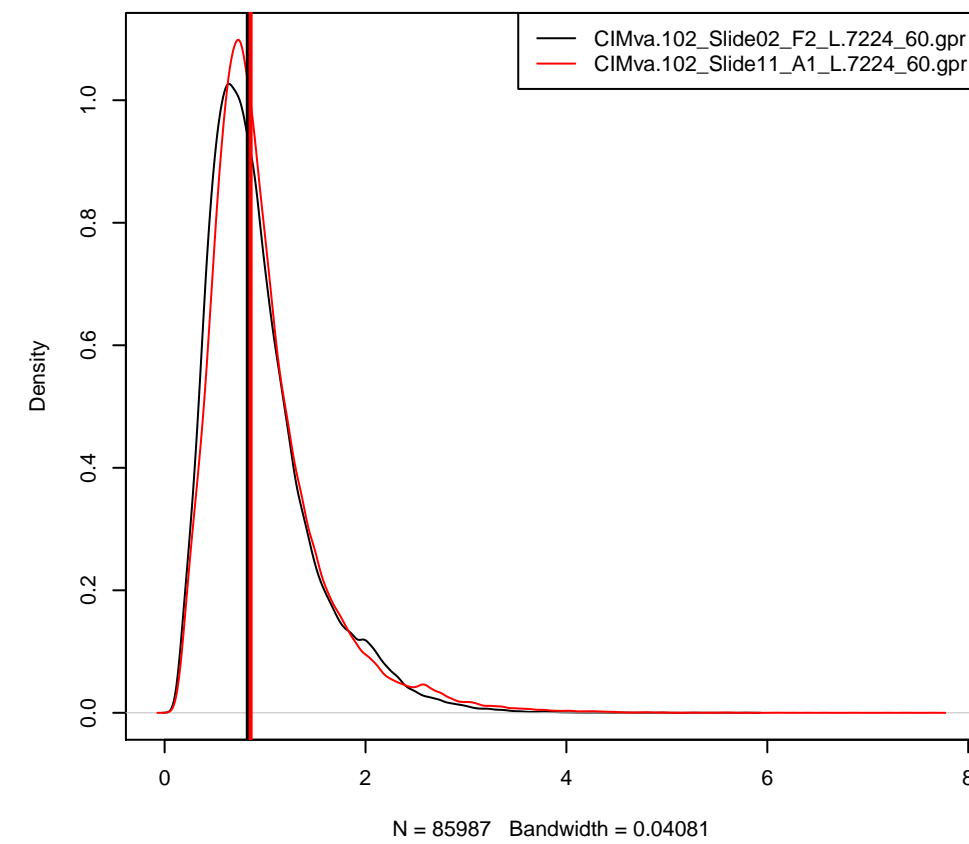

Replicate densities (normalized; log2) for sample: 7224 (Controls)

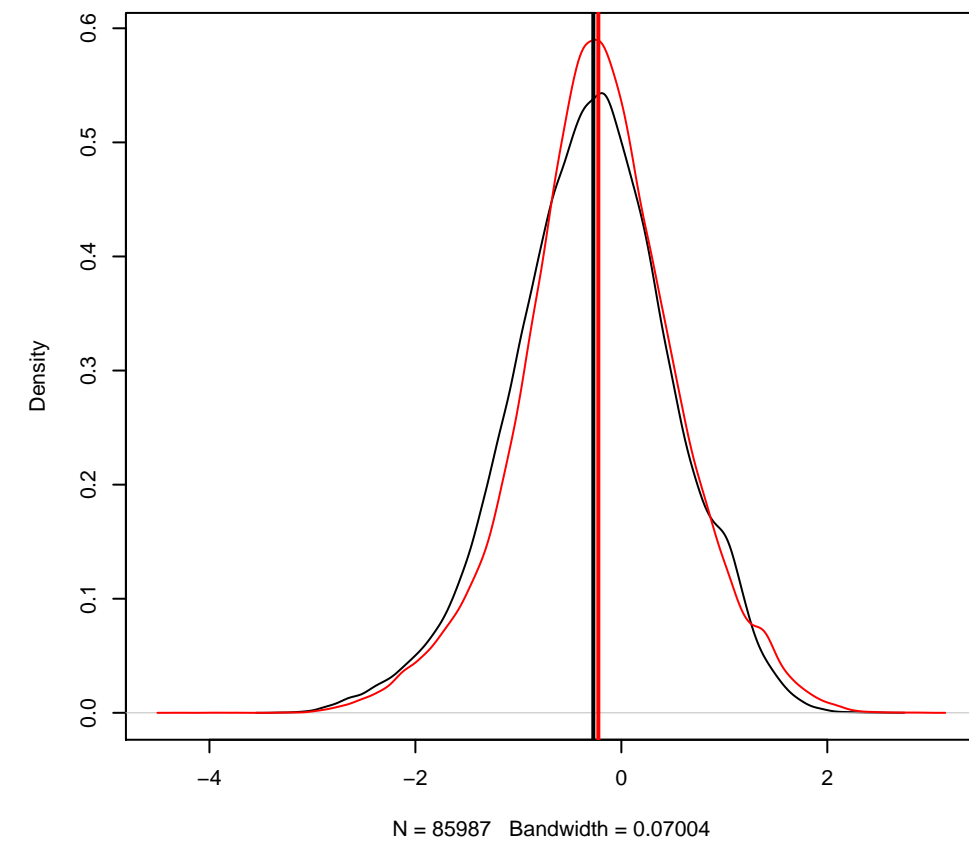

Replicate scatter (raw) for sample: 7224 (Controls)  
Correlation coefficient: 0.8 (Pearson); 0.81 (Spearman)

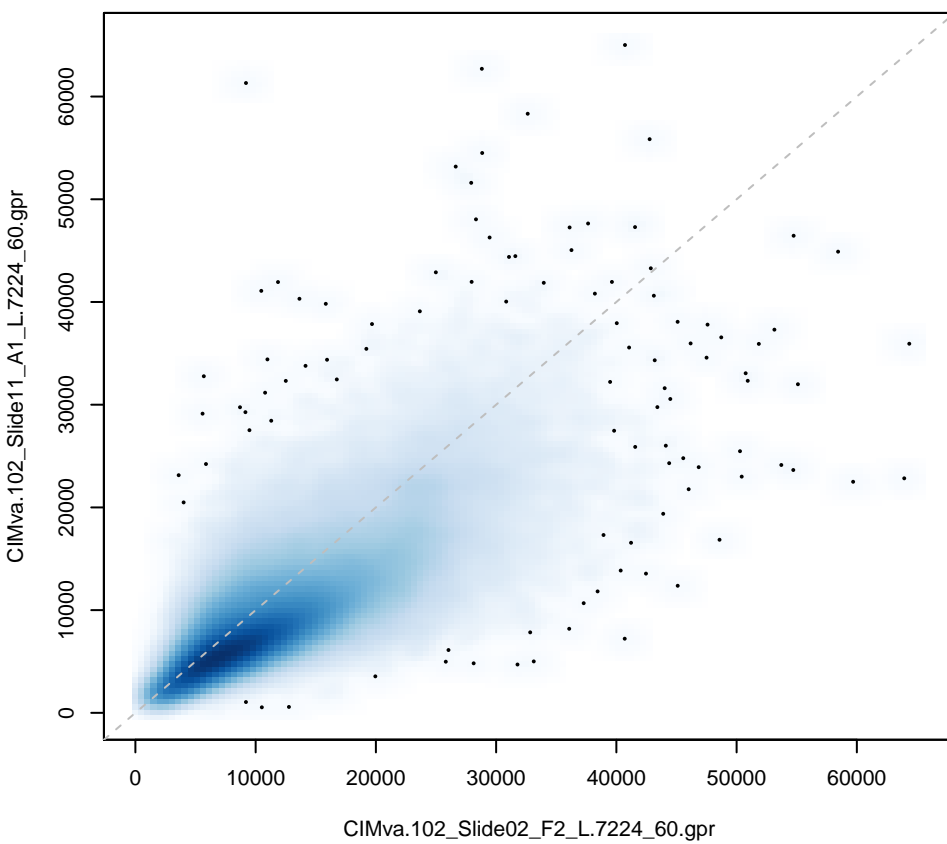

Replicate scatter (raw; log2) for sample: 7224 (Controls)  
Correlation coefficient: 0.83 (Pearson); 0.81 (Spearman)

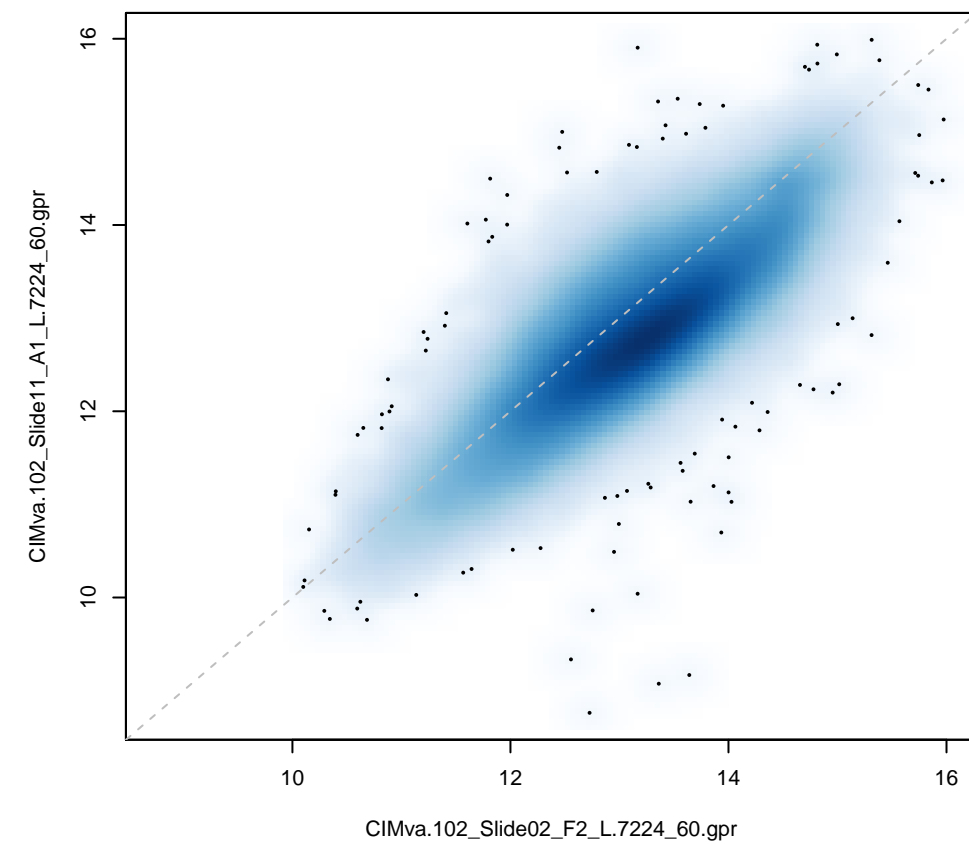

Replicate scatter (normalized) for sample: 7224 (Controls)  
Correlation coefficient: 0.8 (Pearson); 0.81 (Spearman)

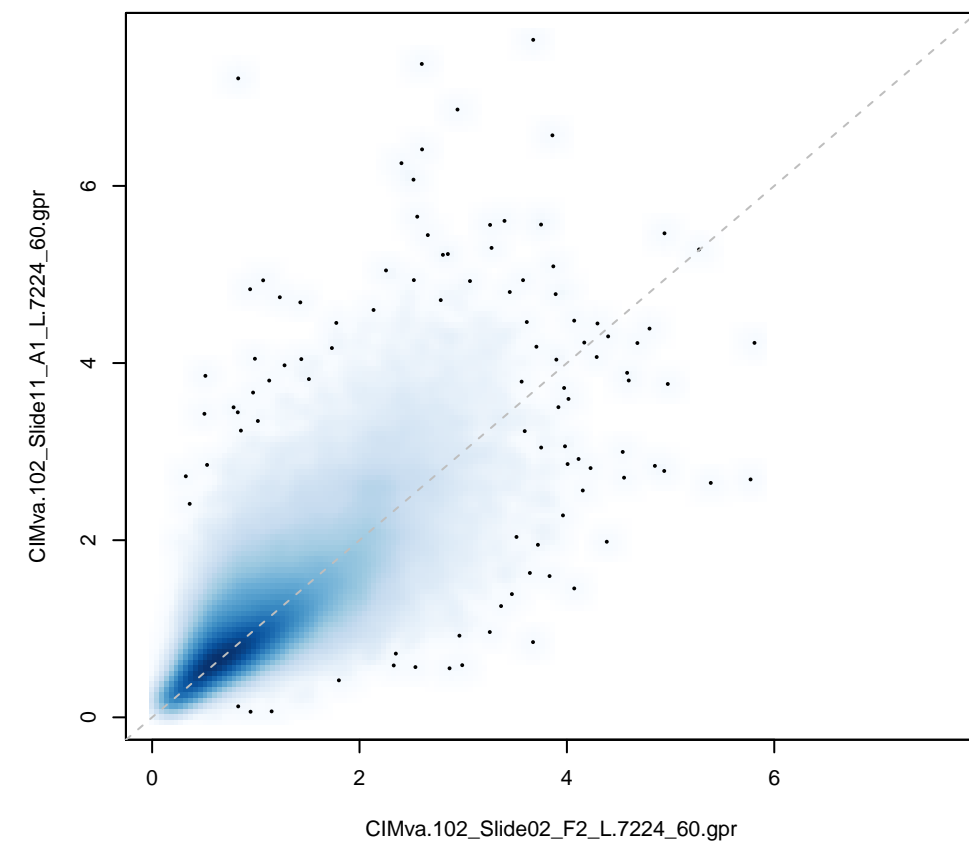

Replicate scatter (normalized; log2) for sample: 7224 (Controls)  
Correlation coefficient: 0.82 (Pearson); 0.81 (Spearman)

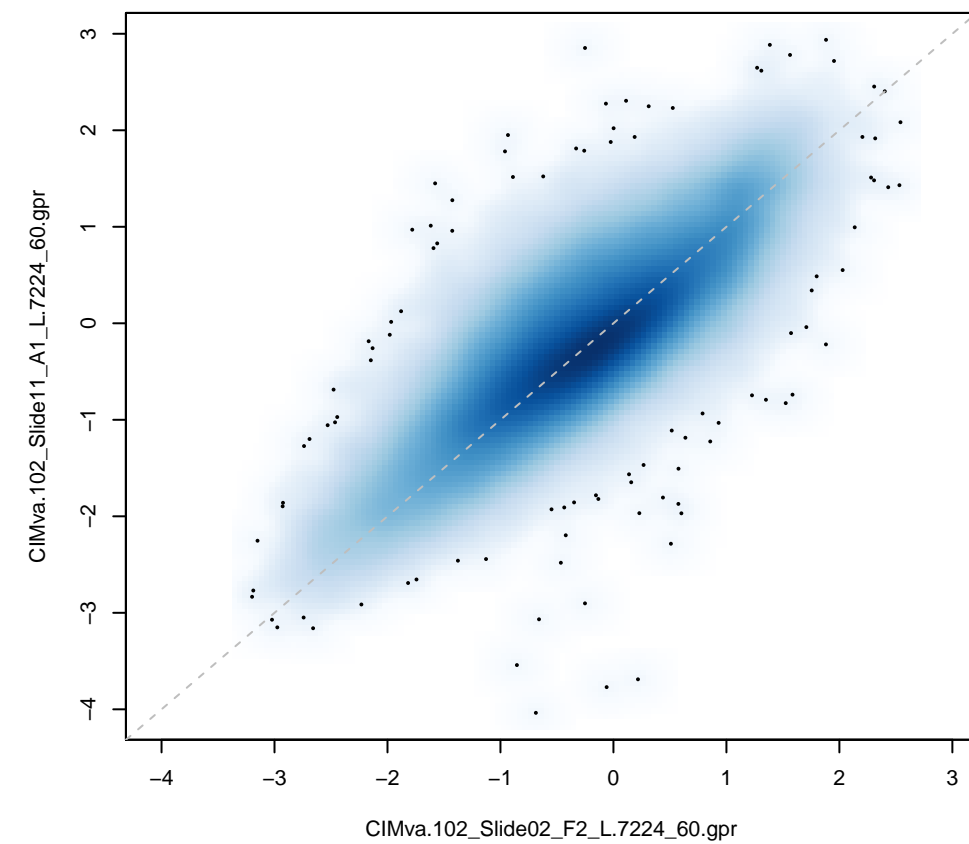

Replicate densities (raw) for sample: 7505 (Controls)

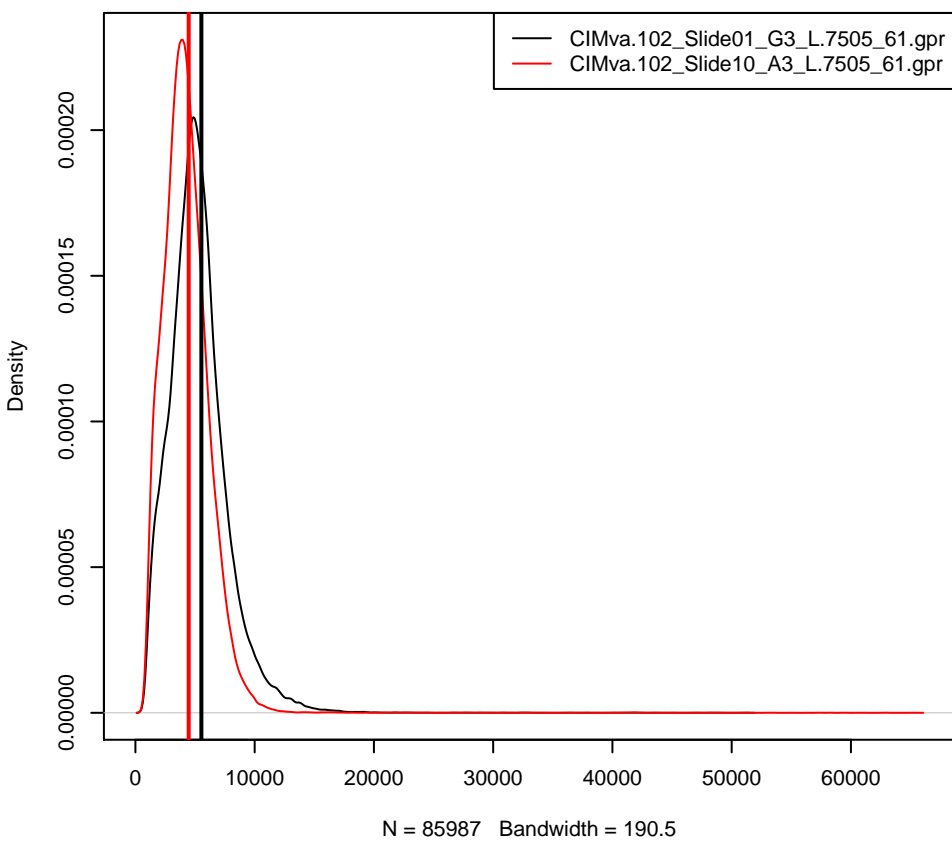

Replicate densities (raw; log2) for sample: 7505 (Controls)

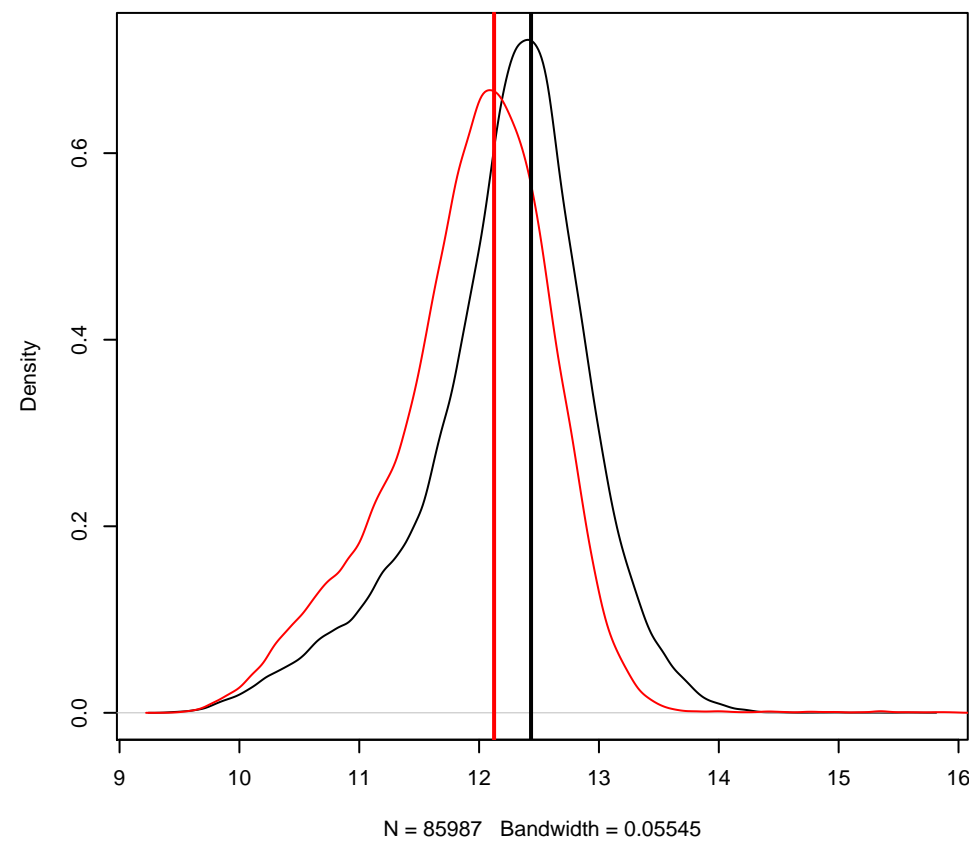

Replicate densities (normalized) for sample: 7505 (Controls)

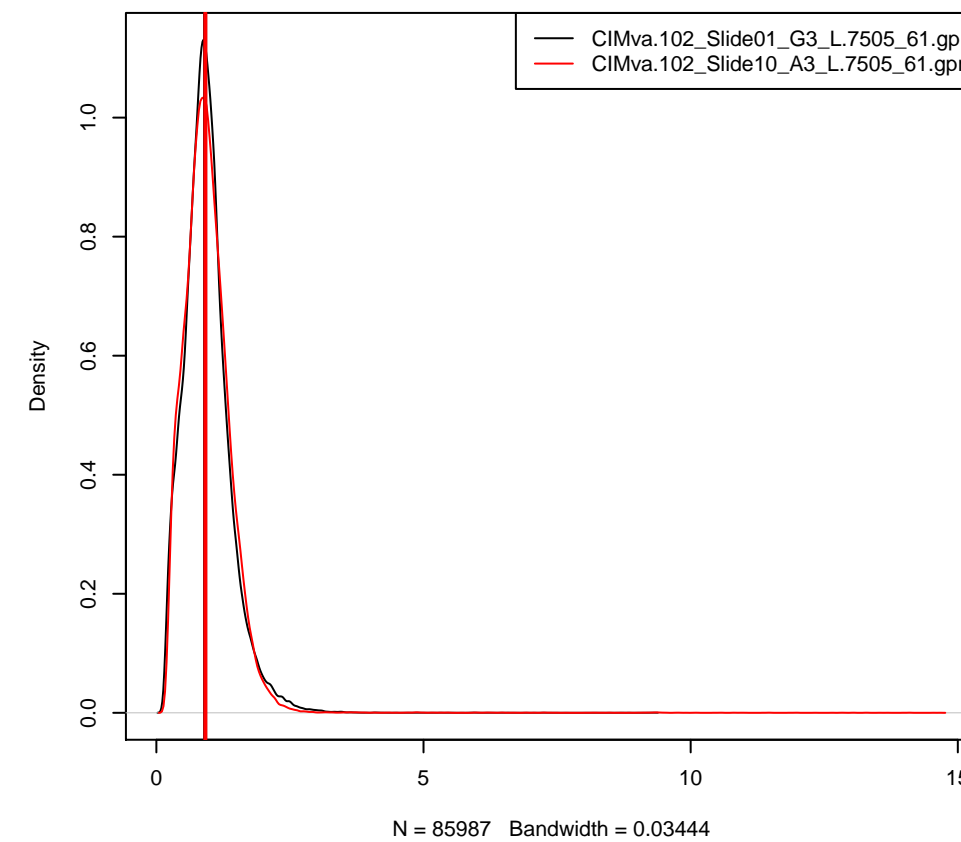

Replicate densities (normalized; log2) for sample: 7505 (Controls)

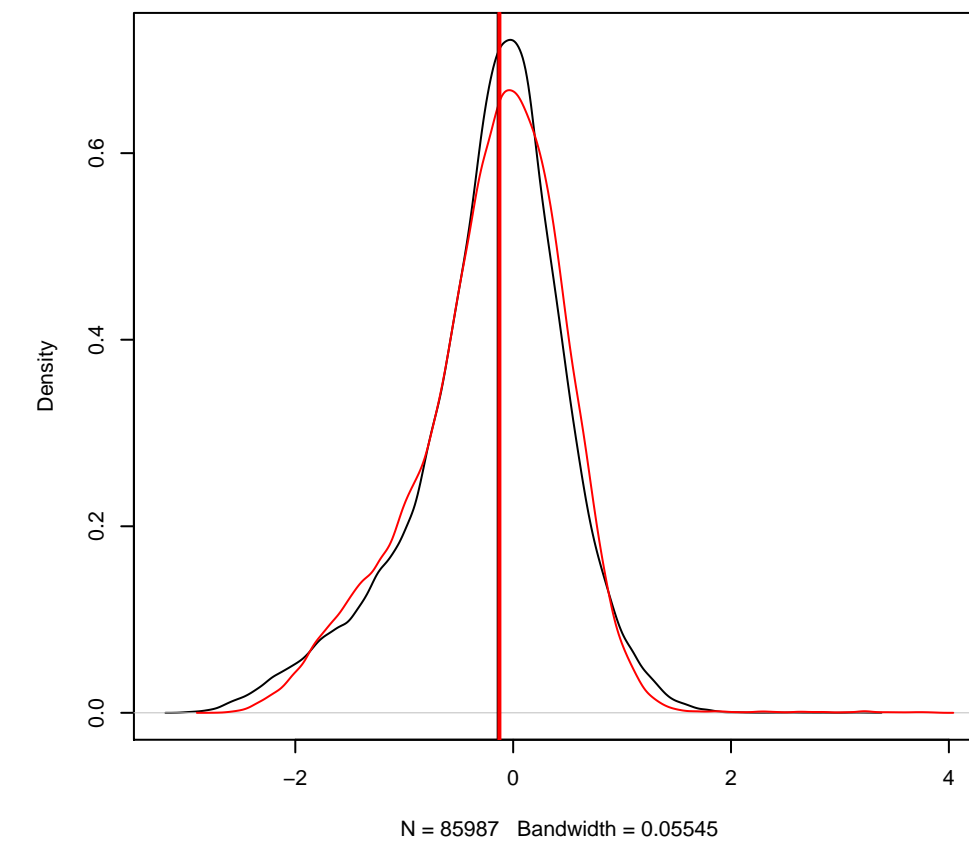

Replicate scatter (raw) for sample: 7505 (Controls)  
Correlation coefficient: 0.66 (Pearson); 0.85 (Spearman)

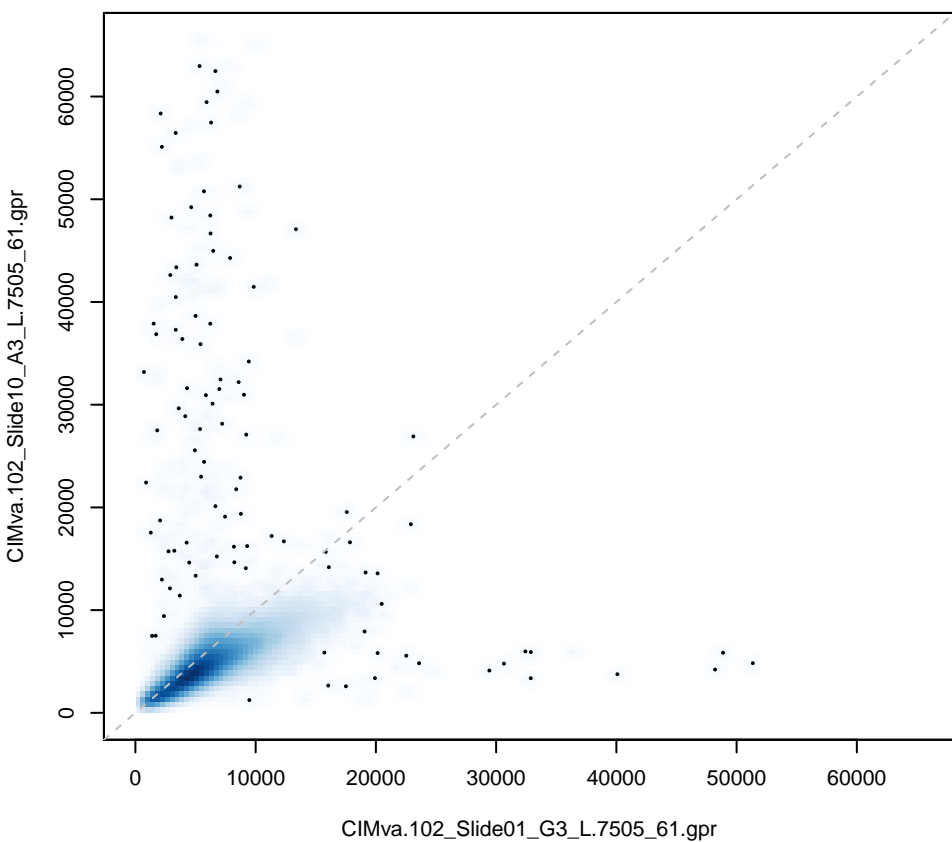

Replicate scatter (raw; log2) for sample: 7505 (Controls)  
Correlation coefficient: 0.86 (Pearson); 0.85 (Spearman)

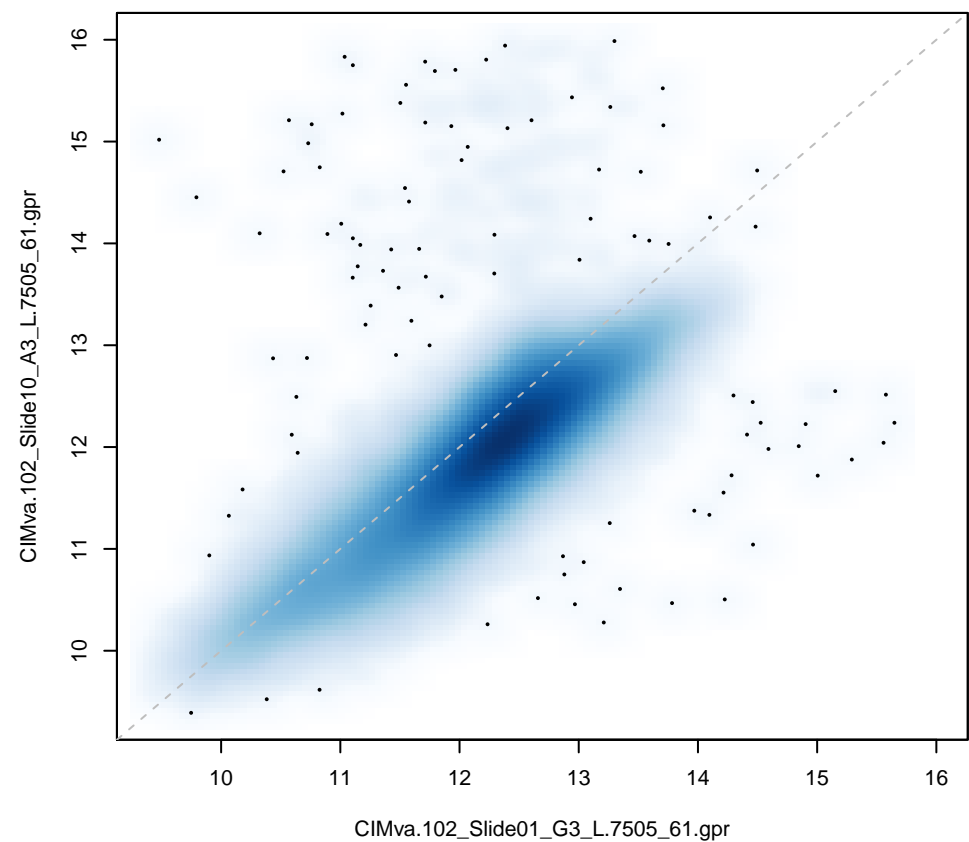

Replicate scatter (normalized) for sample: 7505 (Controls)  
Correlation coefficient: 0.66 (Pearson); 0.85 (Spearman)

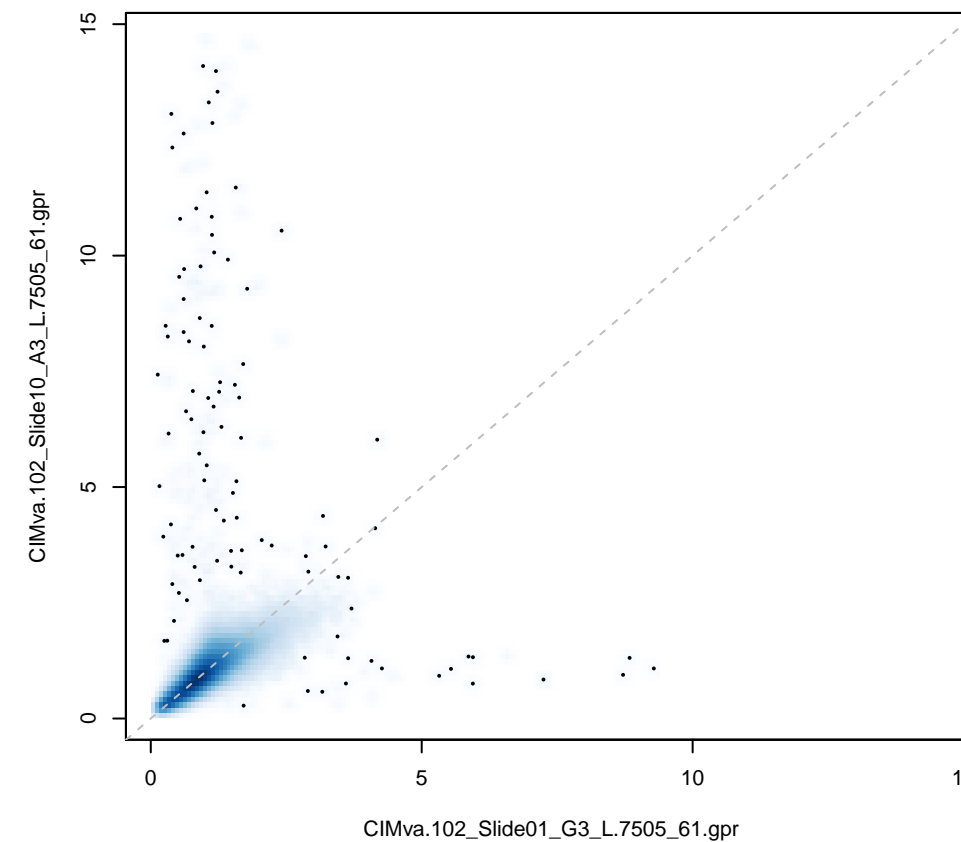

Replicate scatter (normalized; log2) for sample: 7505 (Controls)  
Correlation coefficient: 0.82 (Pearson); 0.85 (Spearman)

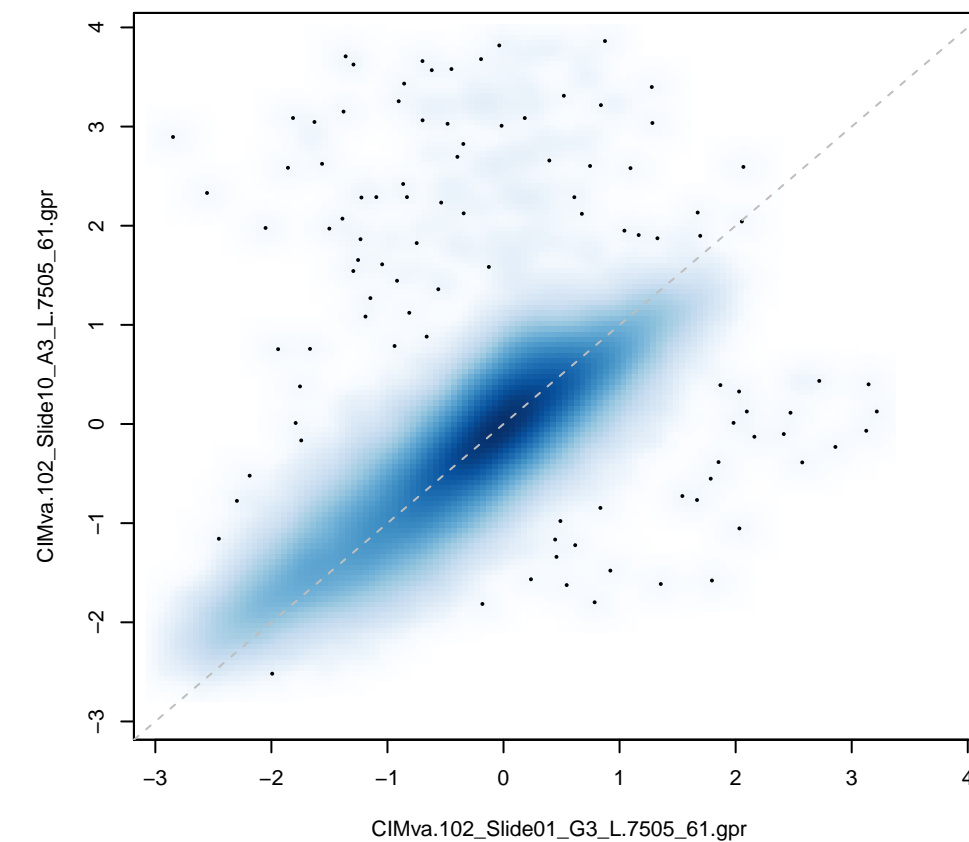

Replicate densities (raw) for sample: 8793 (Controls)

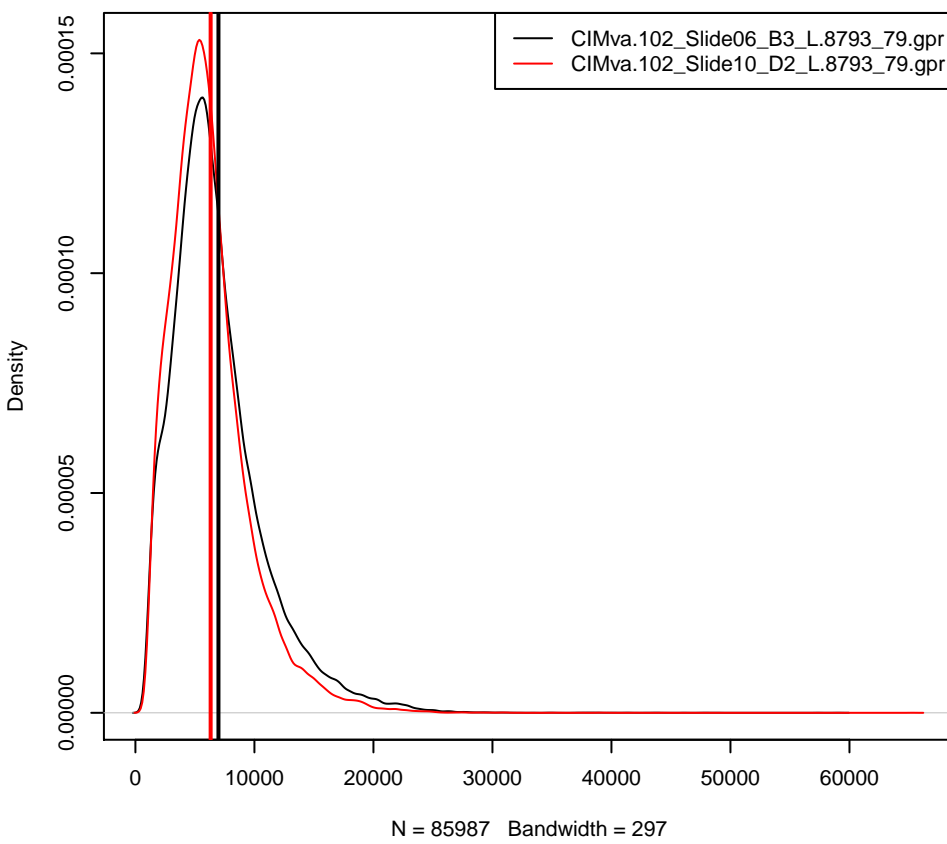

Replicate densities (raw; log2) for sample: 8793 (Controls)

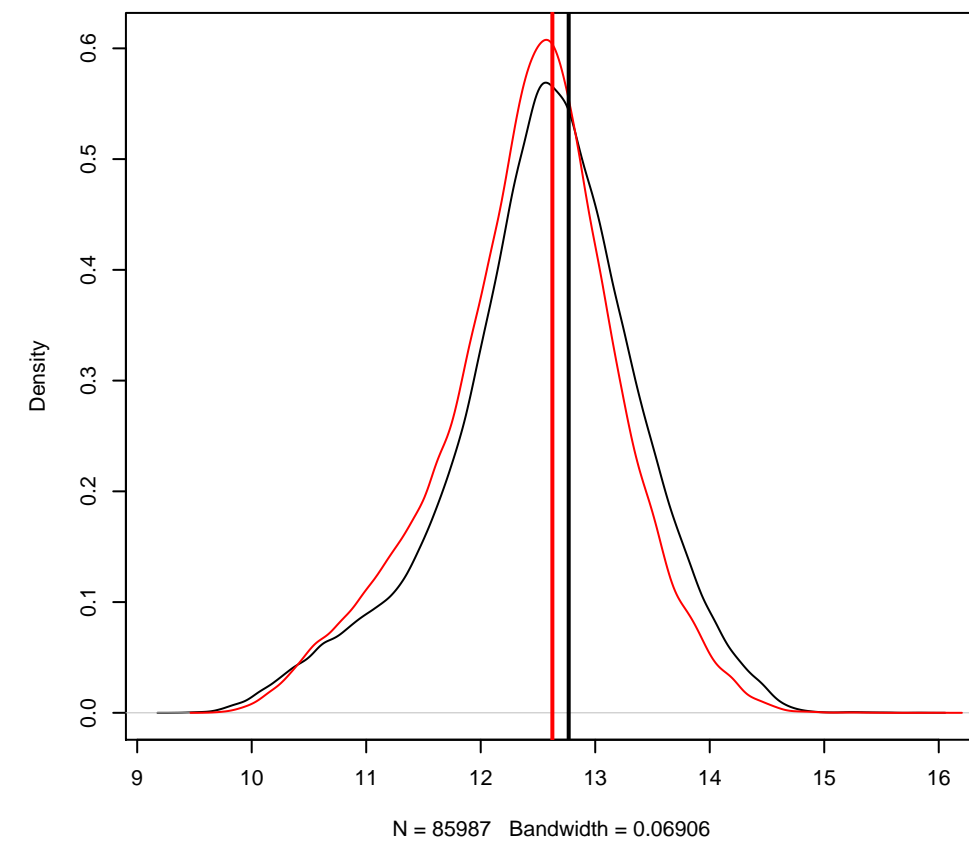

Replicate densities (normalized) for sample: 8793 (Controls)

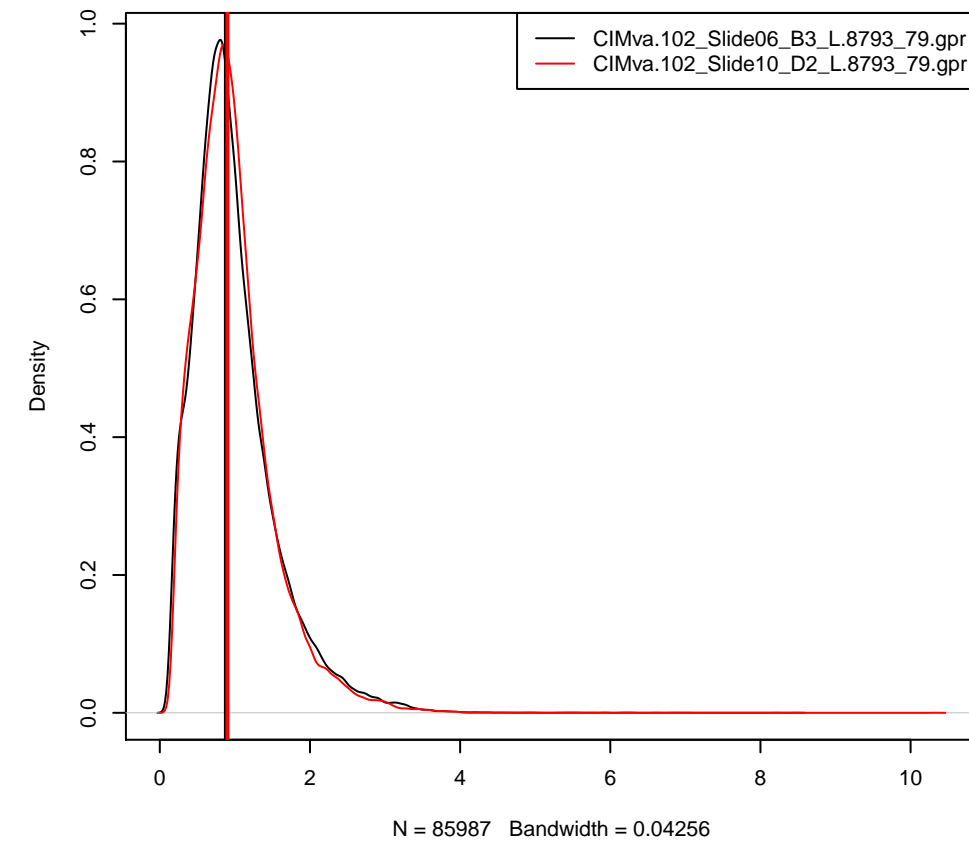

Replicate densities (normalized; log2) for sample: 8793 (Controls)

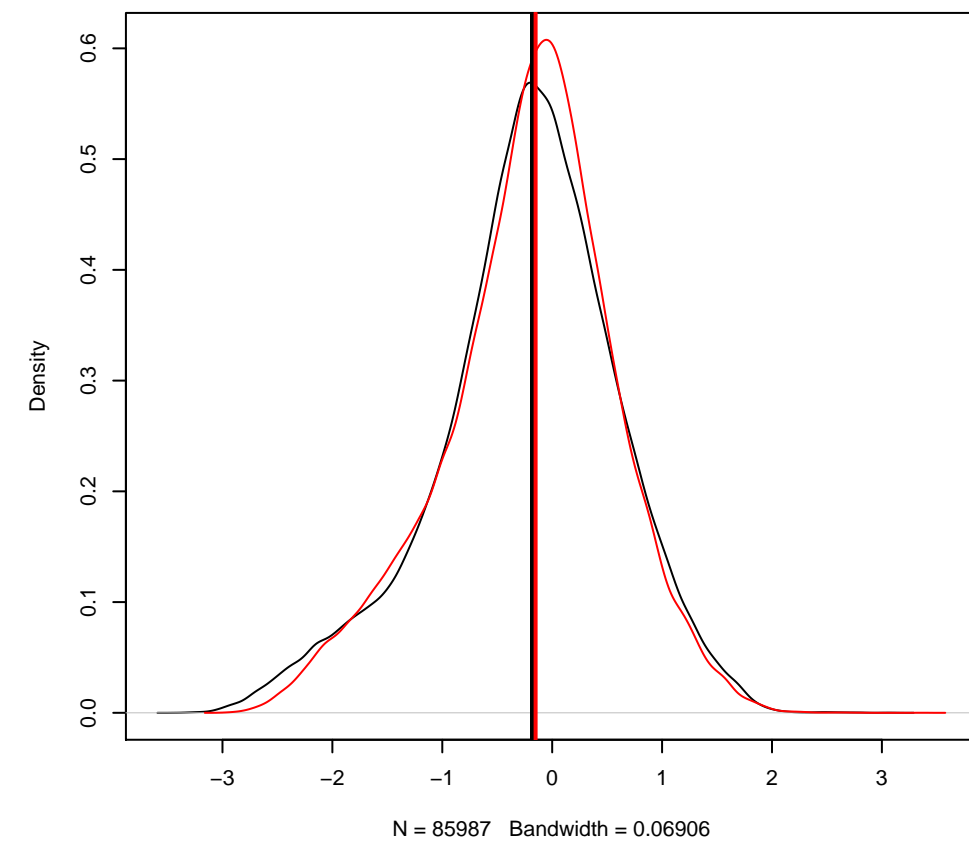

Replicate scatter (raw) for sample: 8793 (Controls)  
Correlation coefficient: 0.89 (Pearson); 0.9 (Spearman)

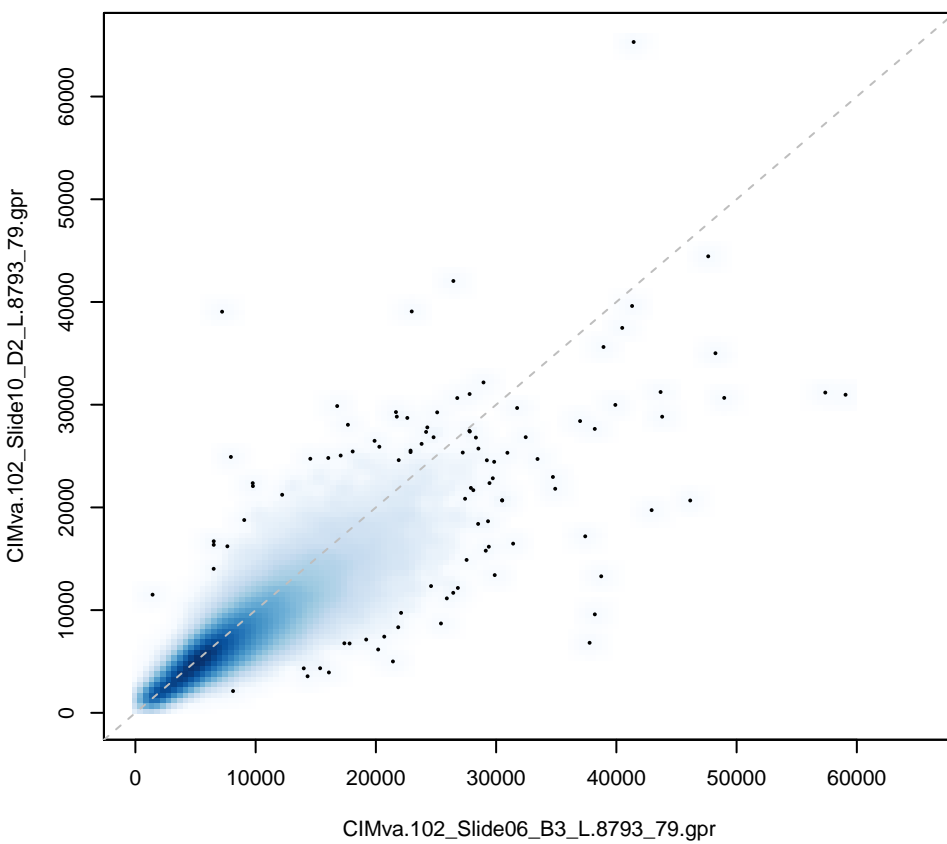

Replicate scatter (raw; log2) for sample: 8793 (Controls)  
Correlation coefficient: 0.92 (Pearson); 0.9 (Spearman)

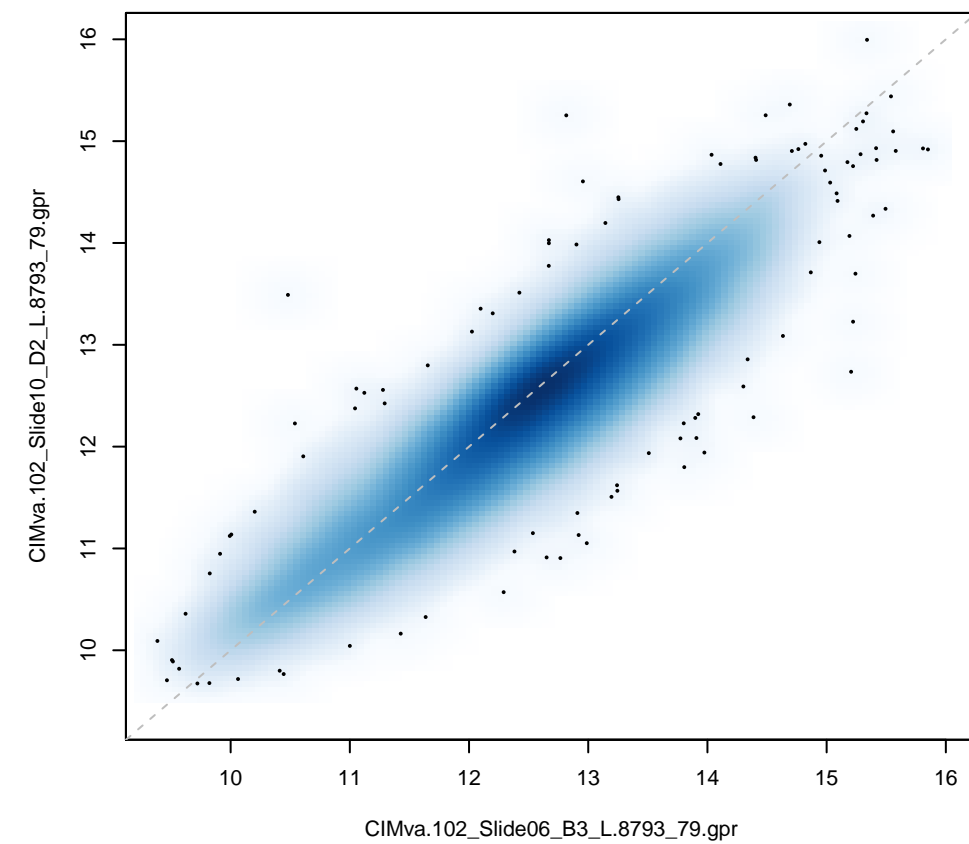

Replicate scatter (normalized) for sample: 8793 (Controls)  
Correlation coefficient: 0.89 (Pearson); 0.9 (Spearman)

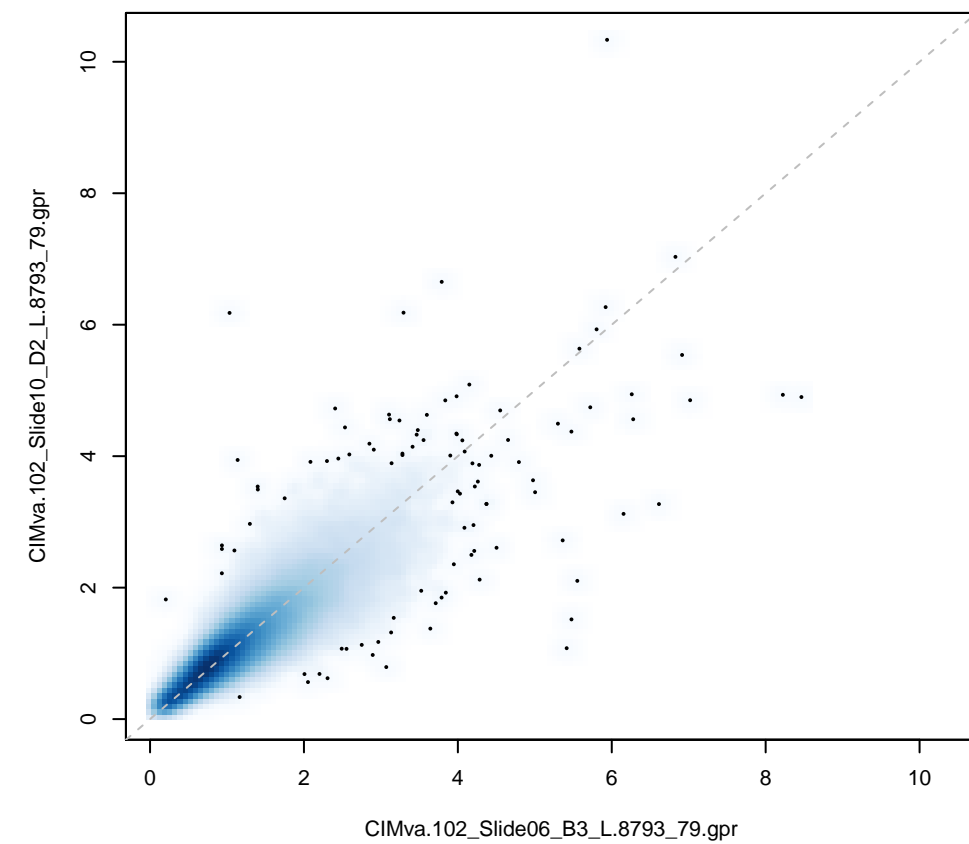

Replicate scatter (normalized; log2) for sample: 8793 (Controls)  
Correlation coefficient: 0.91 (Pearson); 0.9 (Spearman)

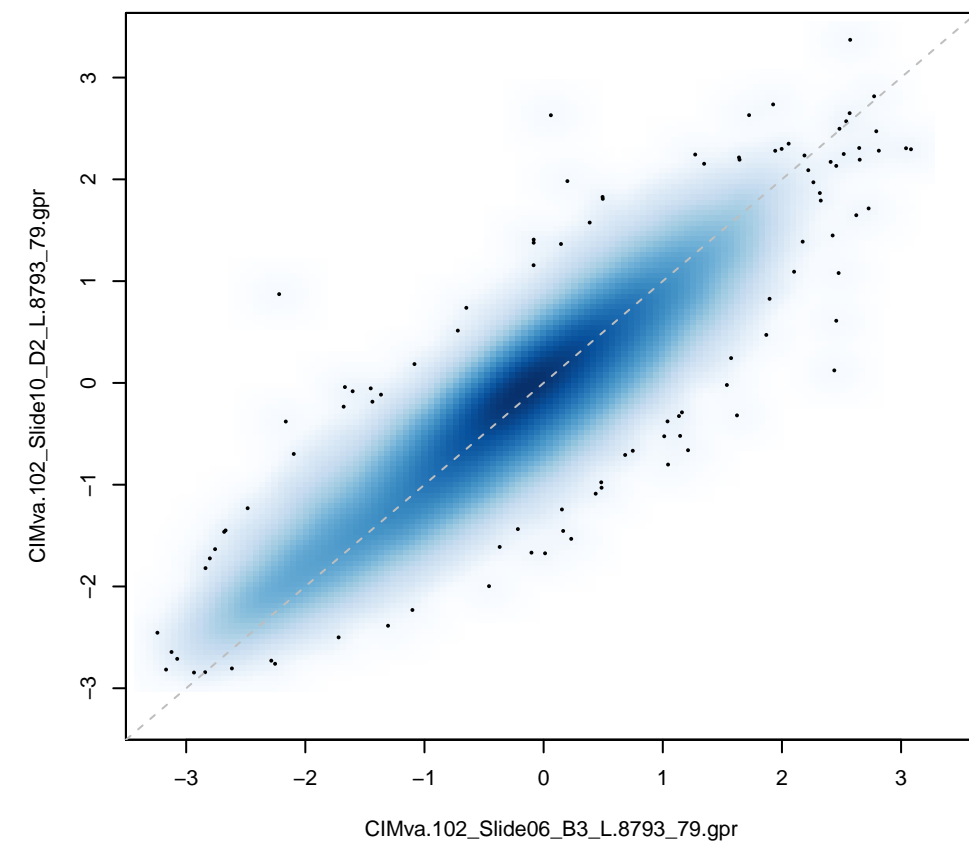

Replicate densities (raw) for sample: 8795 (Controls)

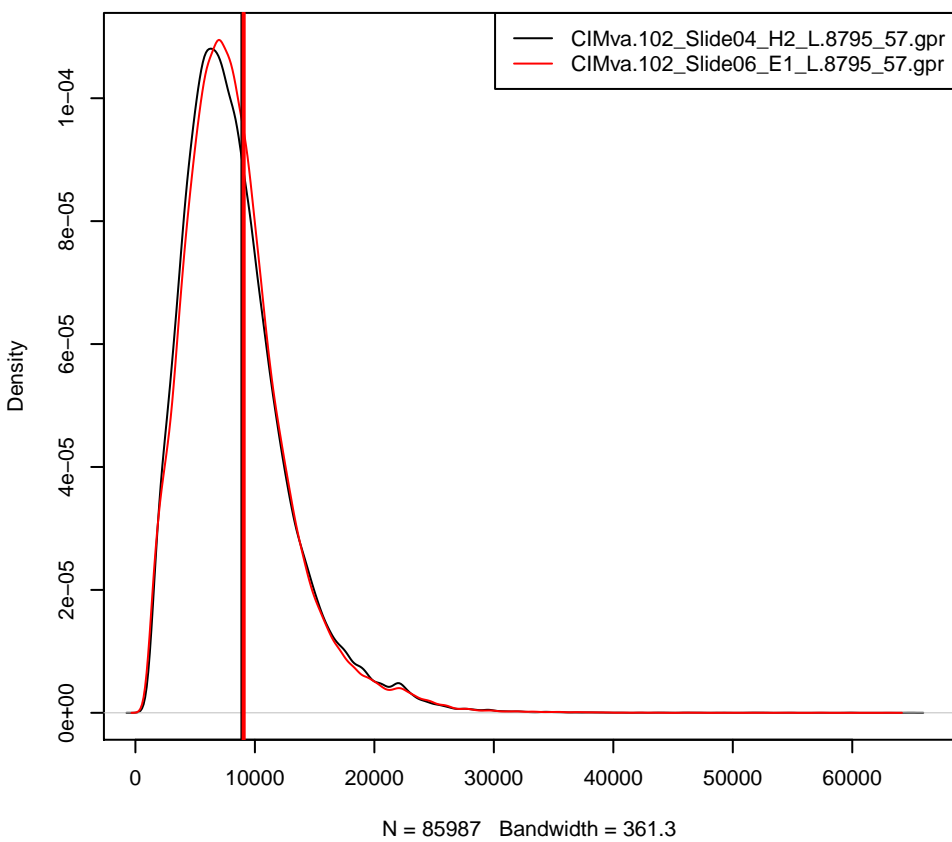

Replicate densities (raw; log2) for sample: 8795 (Controls)

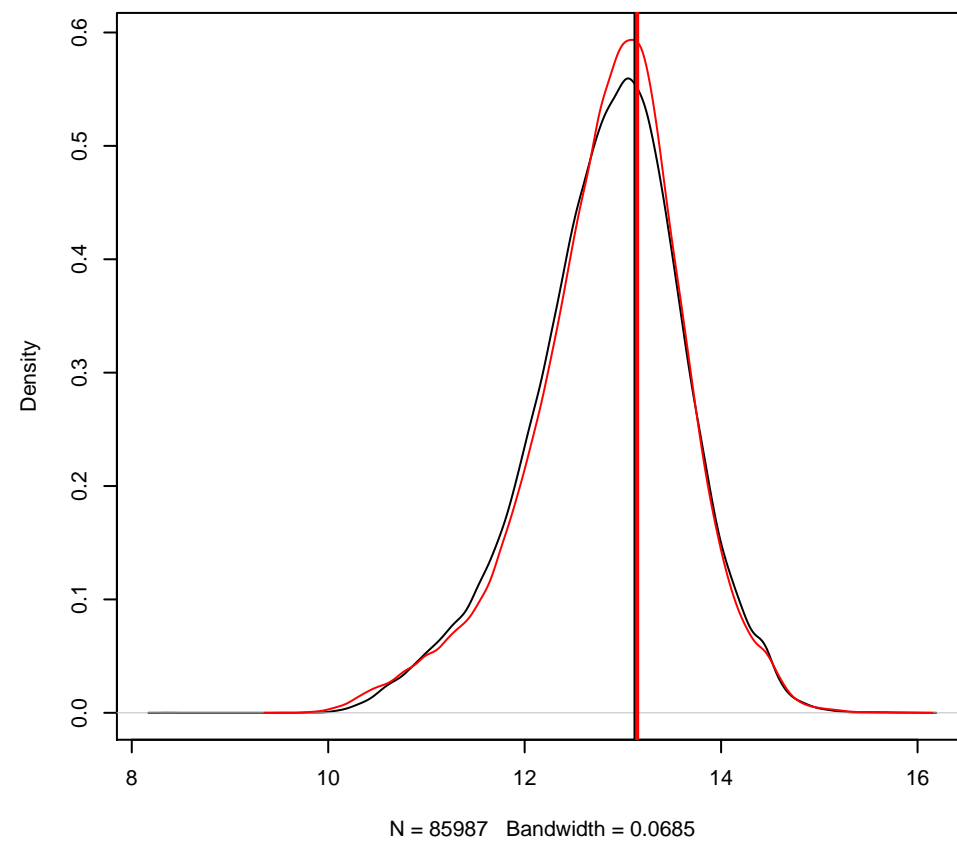

Replicate densities (normalized) for sample: 8795 (Controls)

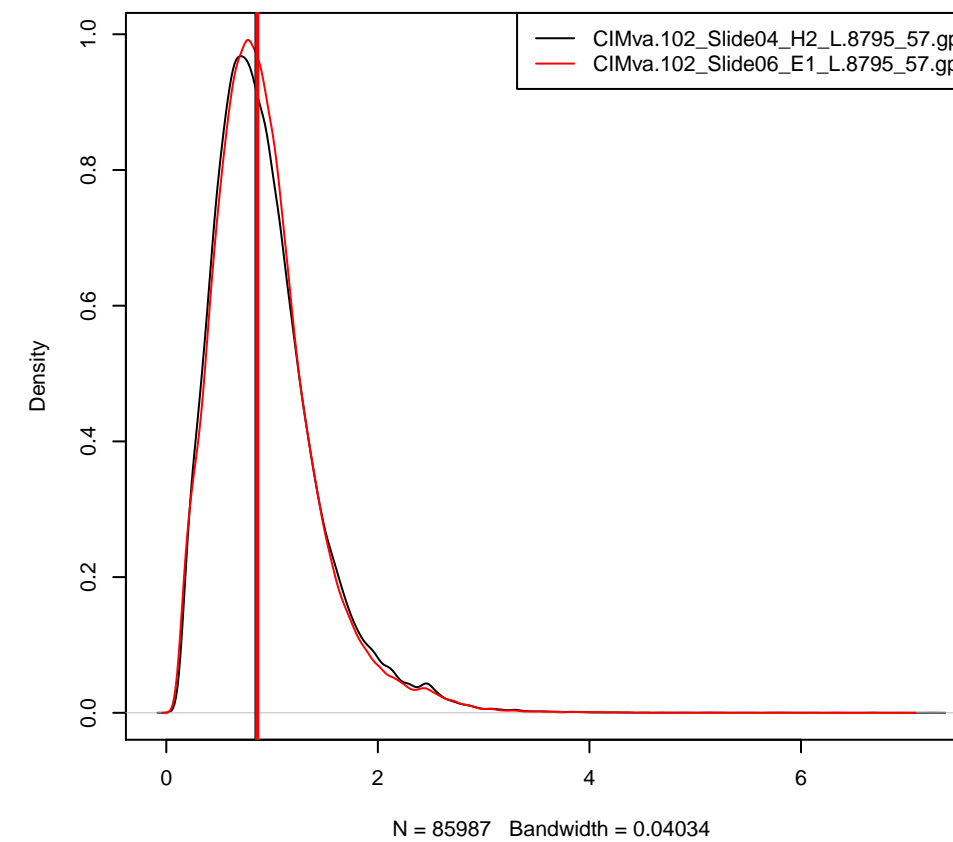

Replicate densities (normalized; log2) for sample: 8795 (Controls)

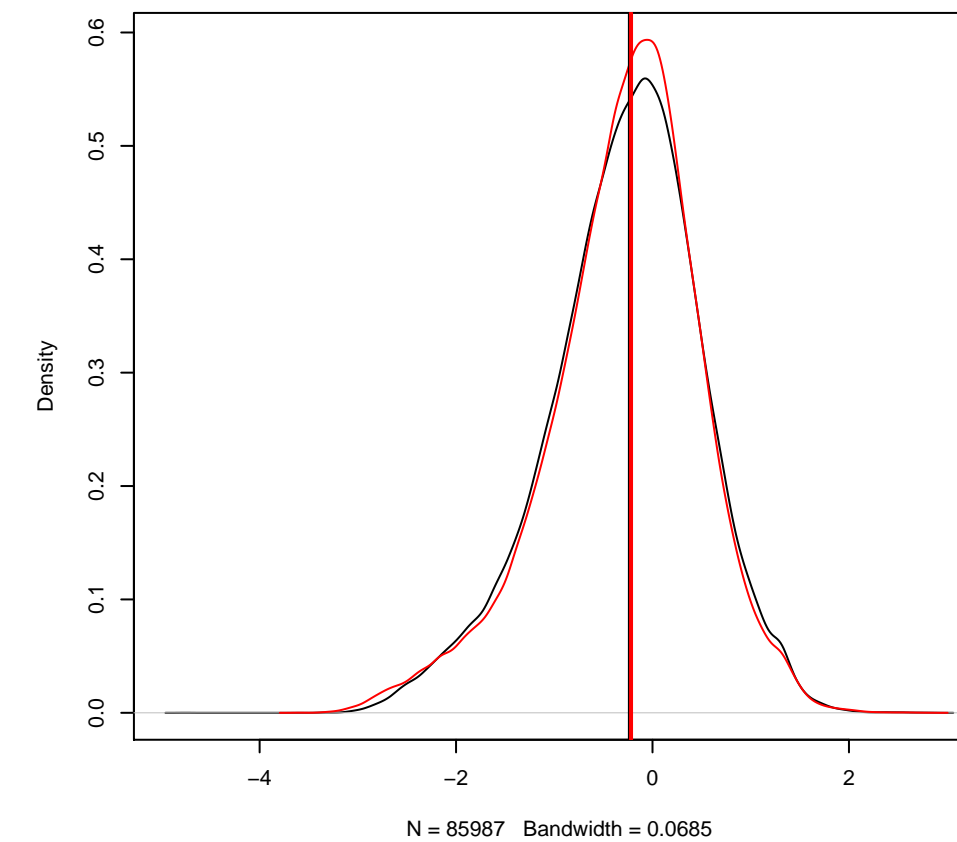

Replicate scatter (raw) for sample: 8795 (Controls)  
Correlation coefficient: 0.92 (Pearson); 0.93 (Spearman)

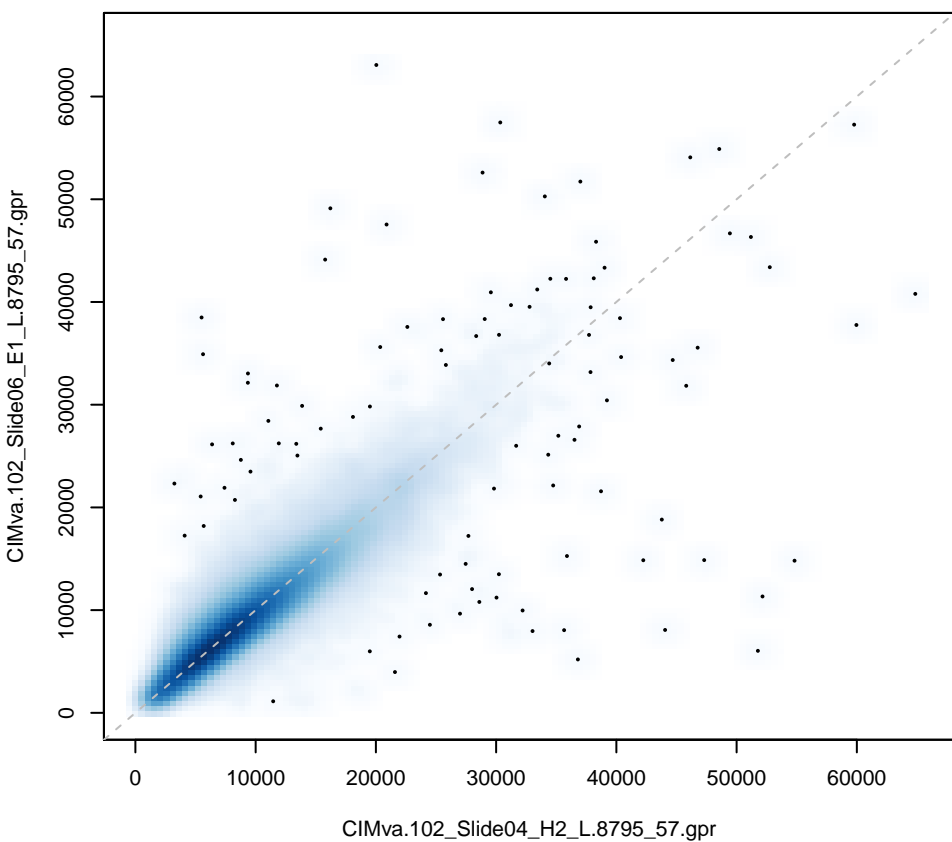

Replicate scatter (raw; log2) for sample: 8795 (Controls)  
Correlation coefficient: 0.93 (Pearson); 0.93 (Spearman)

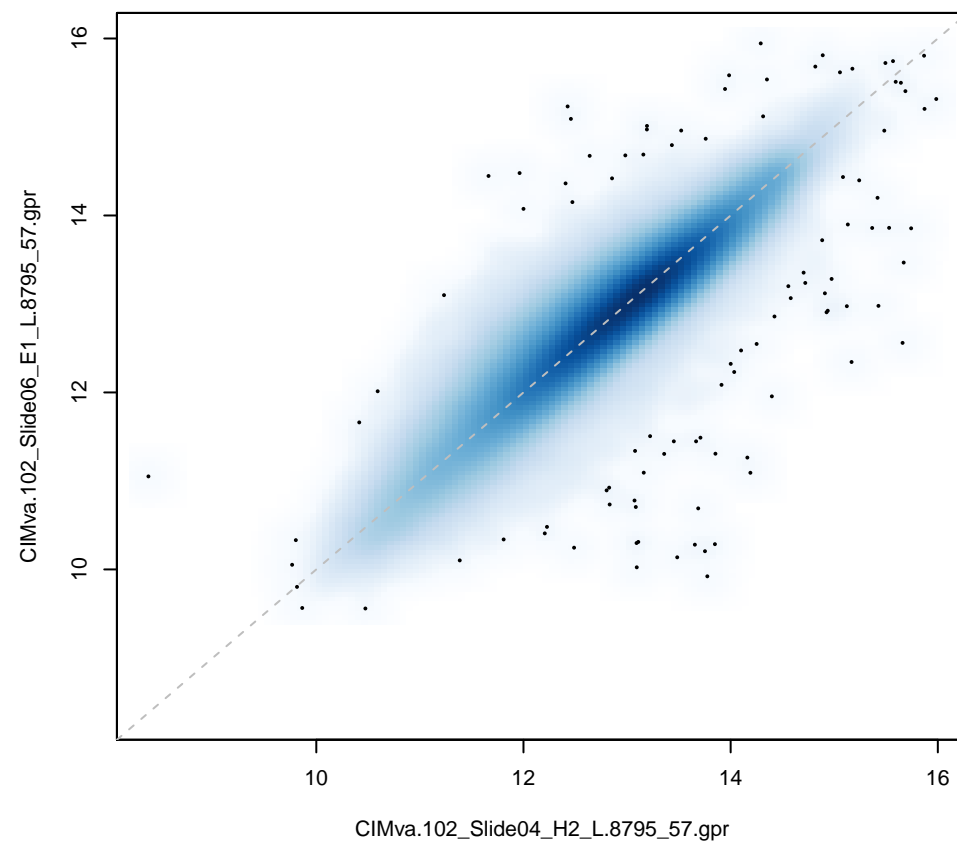

Replicate scatter (normalized) for sample: 8795 (Controls)  
Correlation coefficient: 0.92 (Pearson); 0.93 (Spearman)

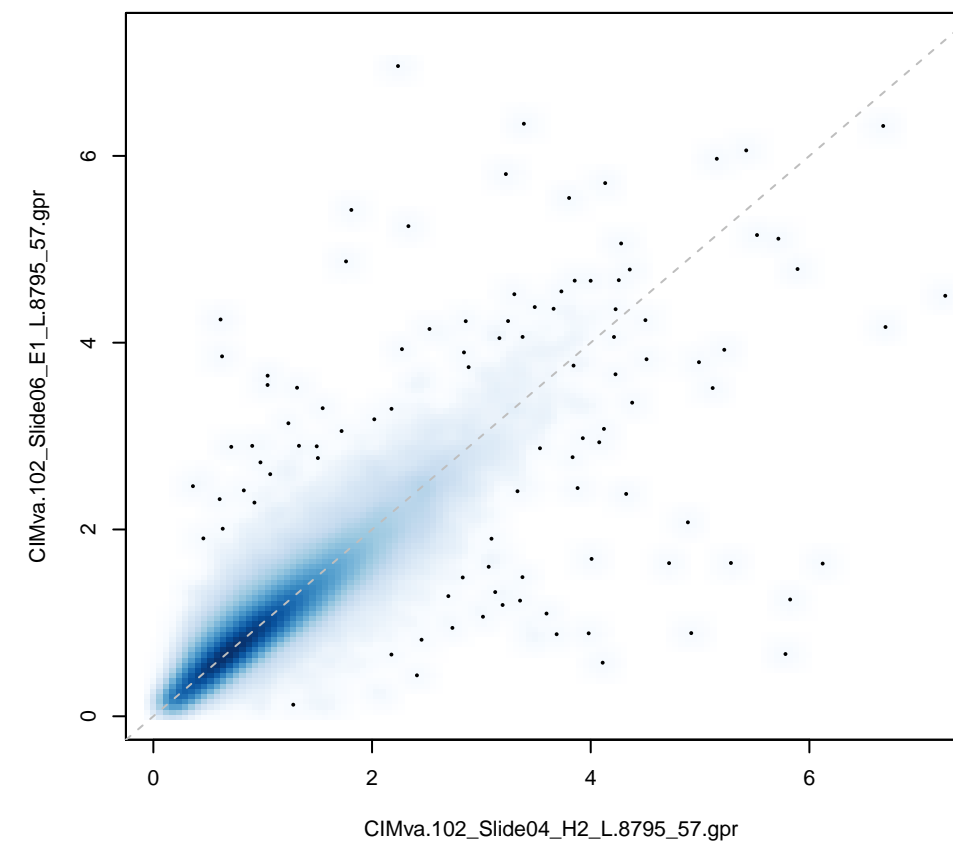

Replicate scatter (normalized; log2) for sample: 8795 (Controls)  
Correlation coefficient: 0.93 (Pearson); 0.93 (Spearman)

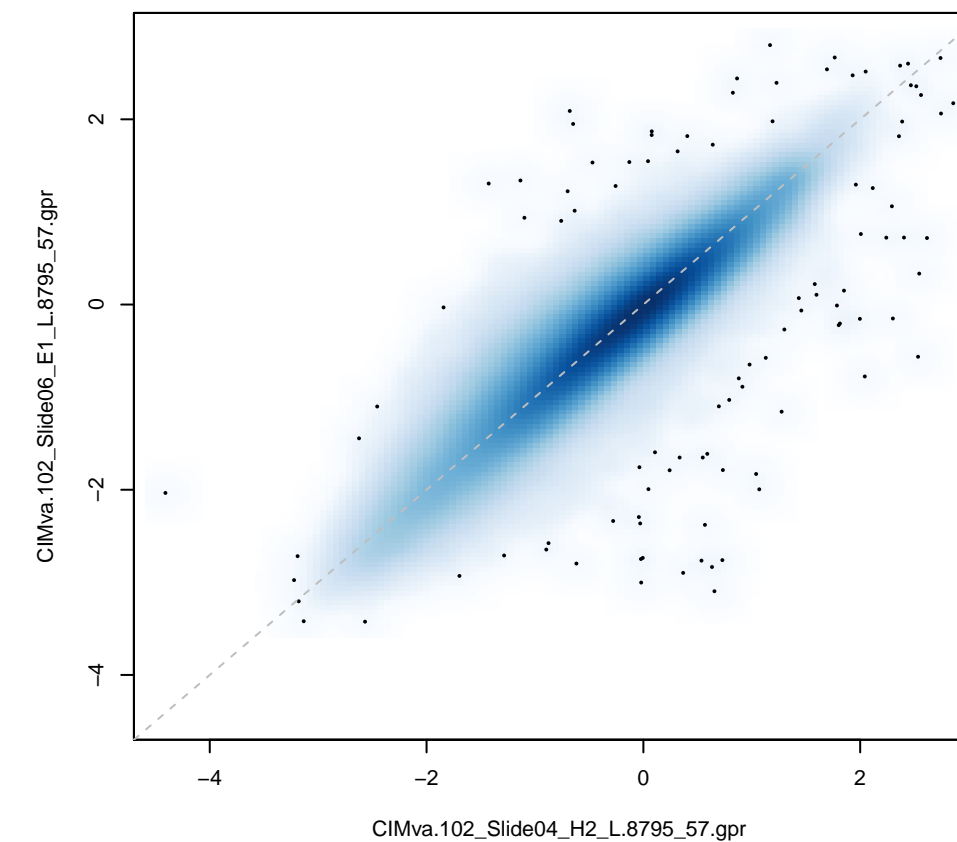

Supplement: 12035_2018_1354_MOESM9_ESM.pdf [file 12035_2018_1354_MOESM9_ESM.pdf]
