# Supplementary material for: Immunosignature Analysis of Myalgic Encephalomyelitis/Chronic Fatigue Syndrome (ME/CFS)
Source: PubMed Central journal article supplement (PMC6505503; doi:10.1007/s12035-018-1354-8), 2018-10-08

# AFFLQRLGVLSG

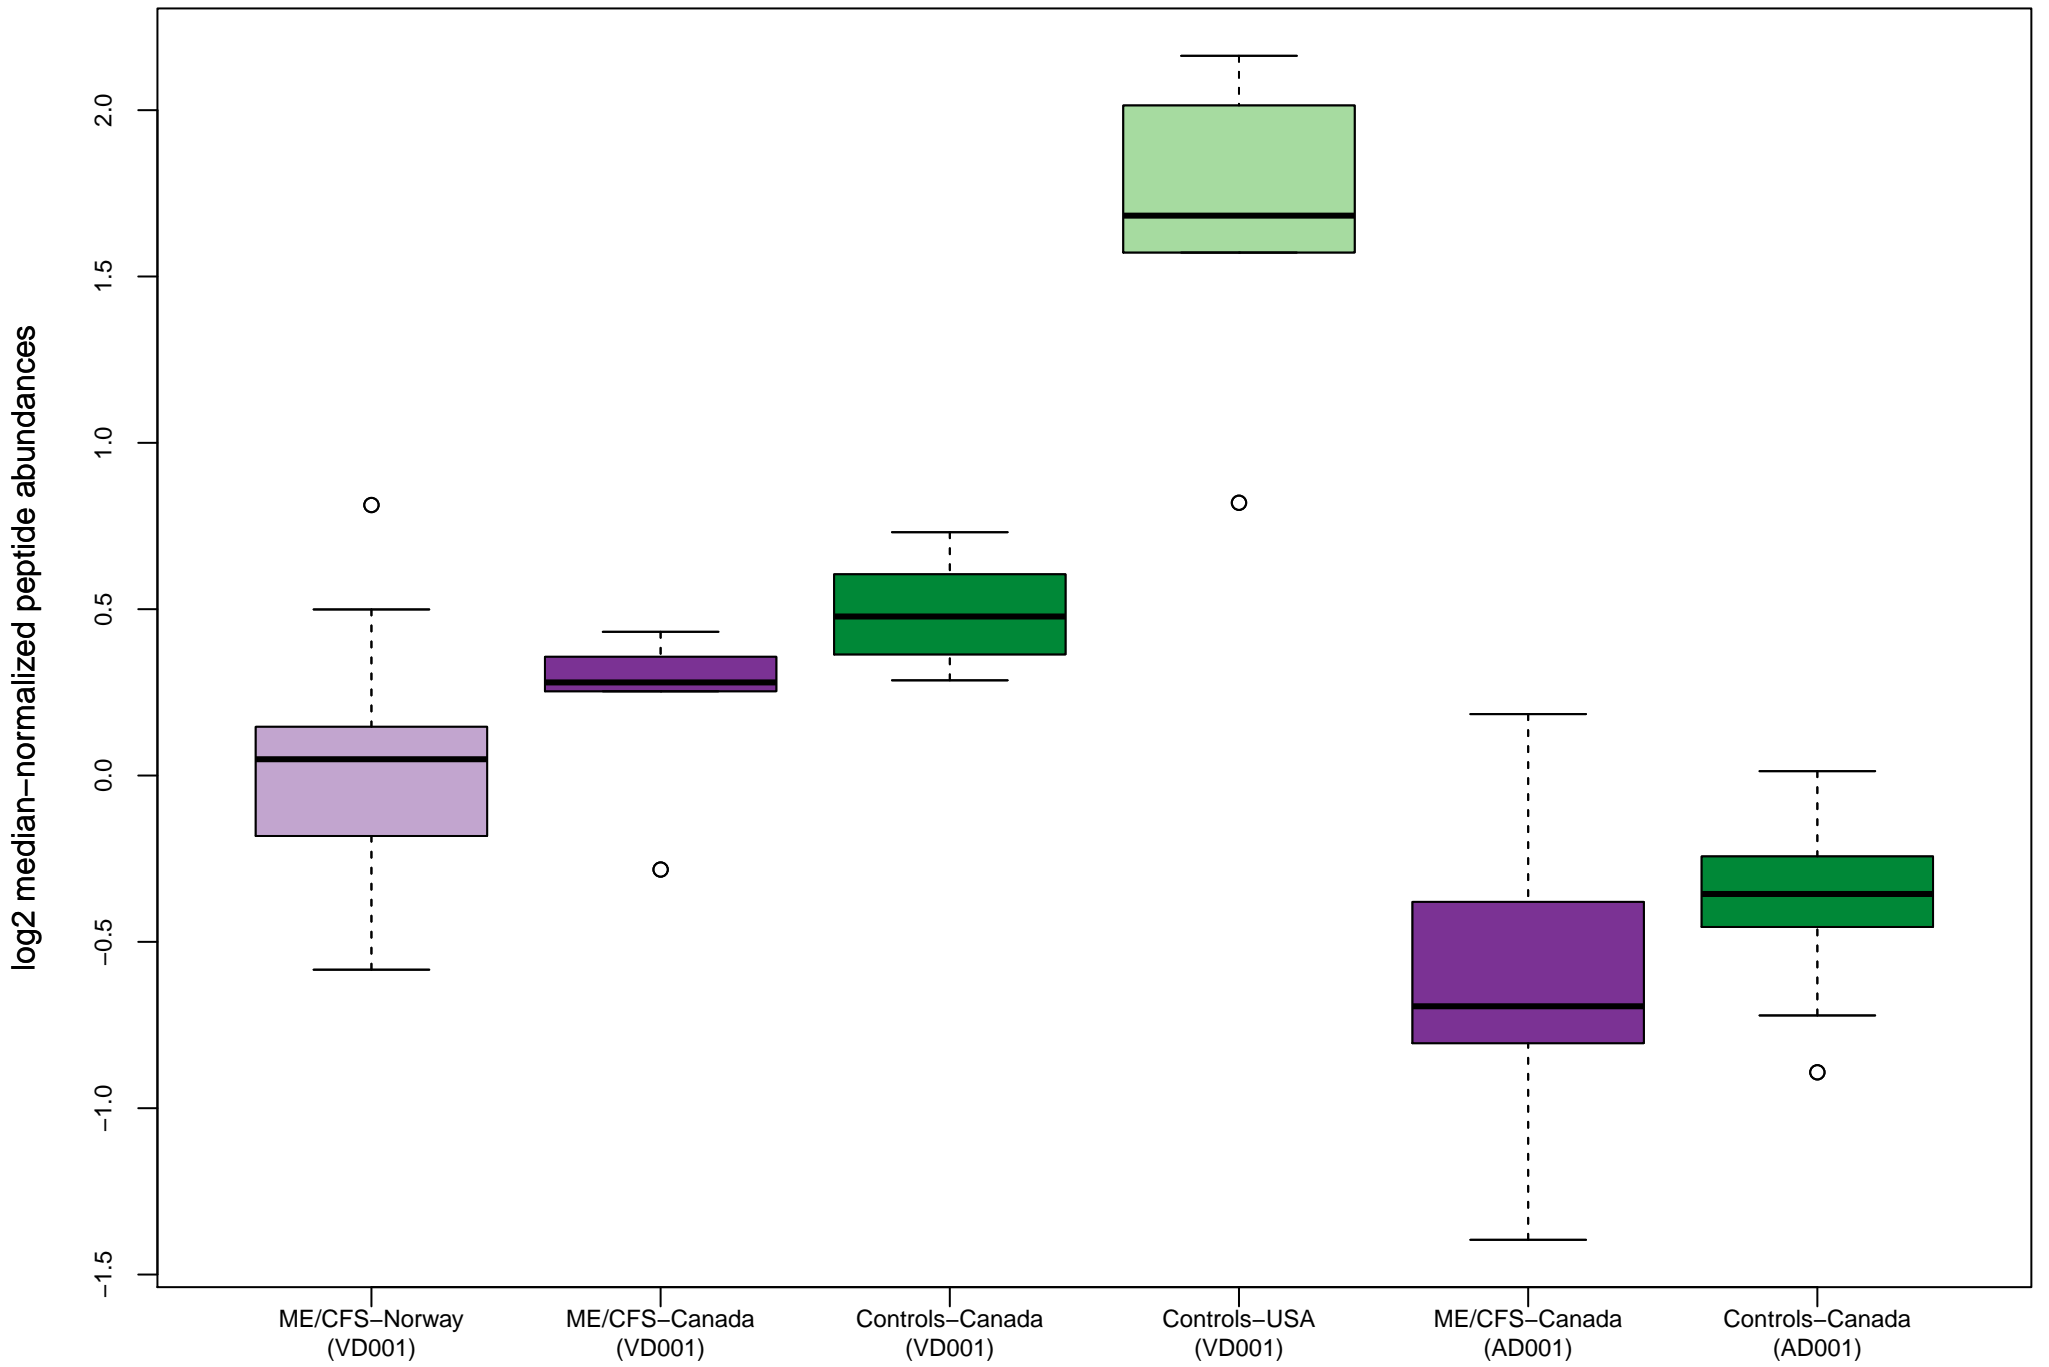

# AFQKHRLSVALS

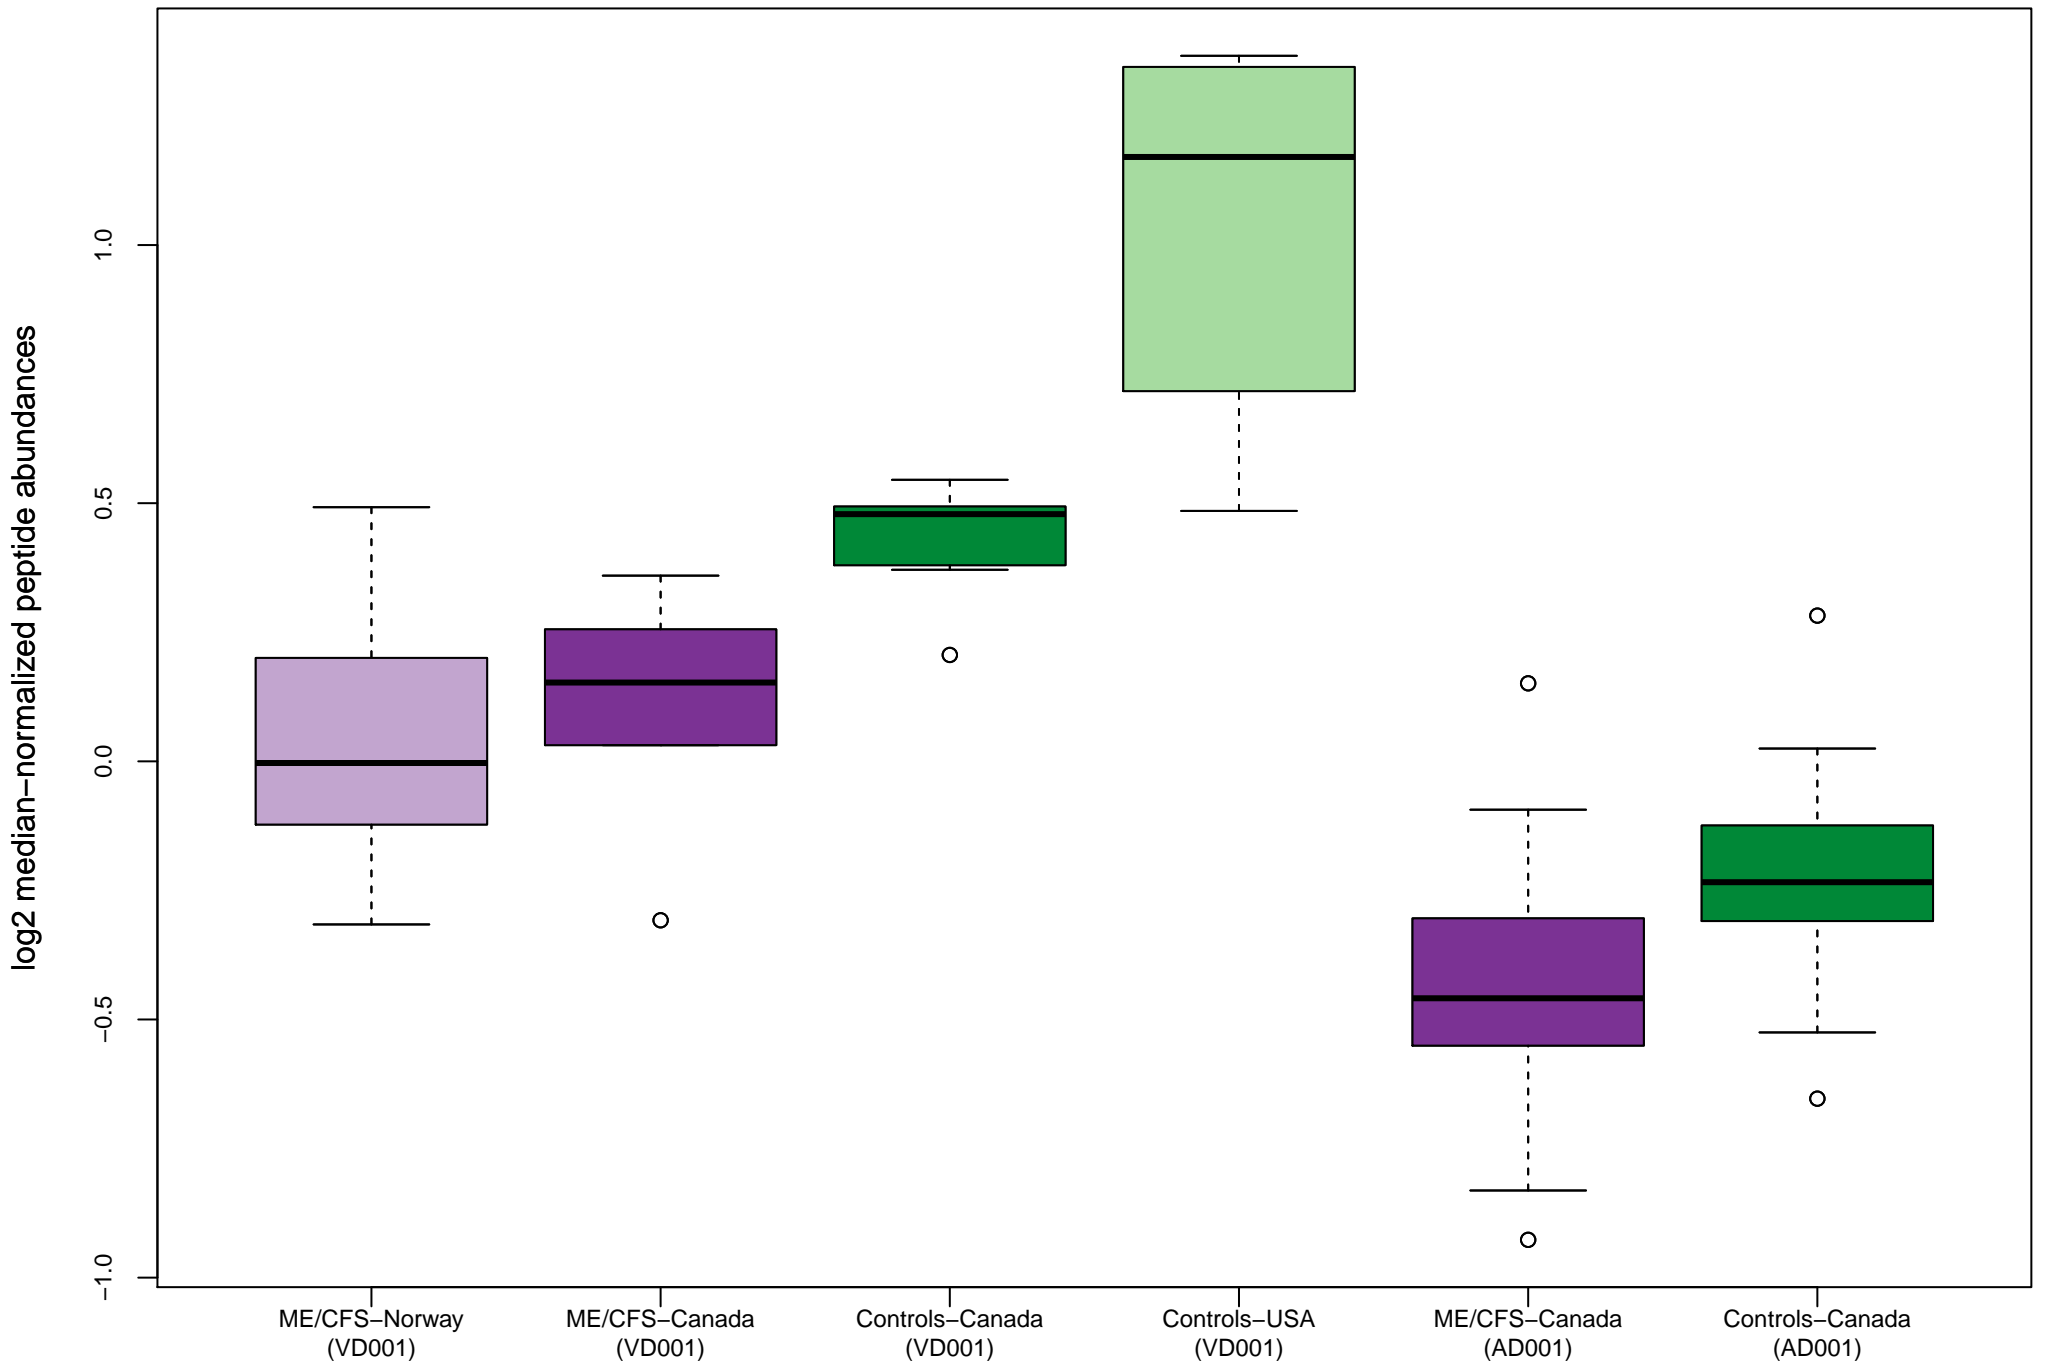

# AFRSWQPLSGVL

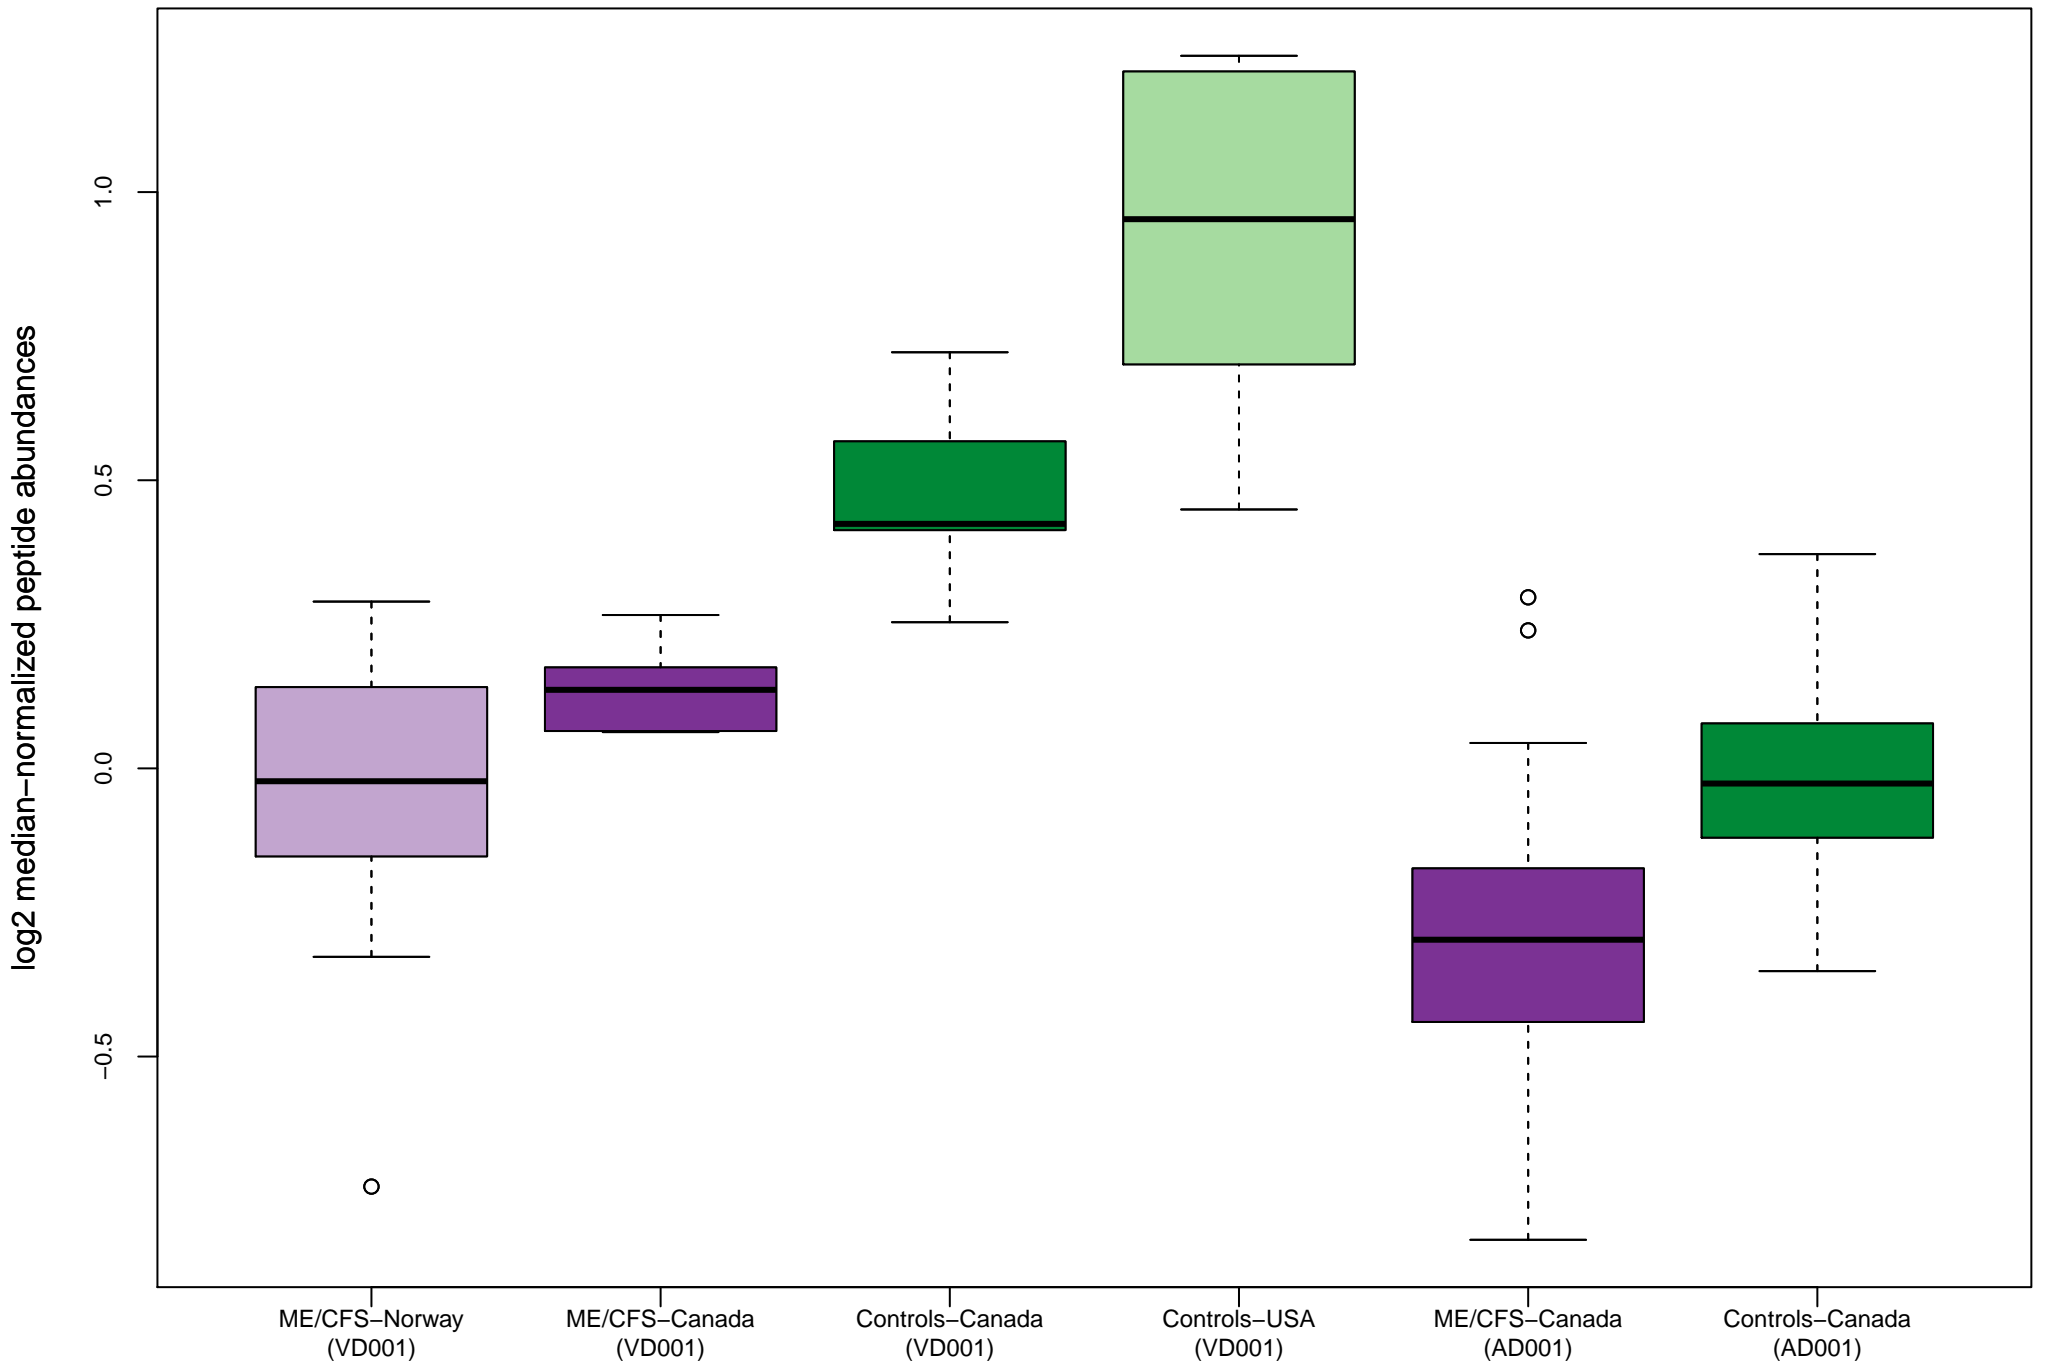

# AFYRWGFYKVLS

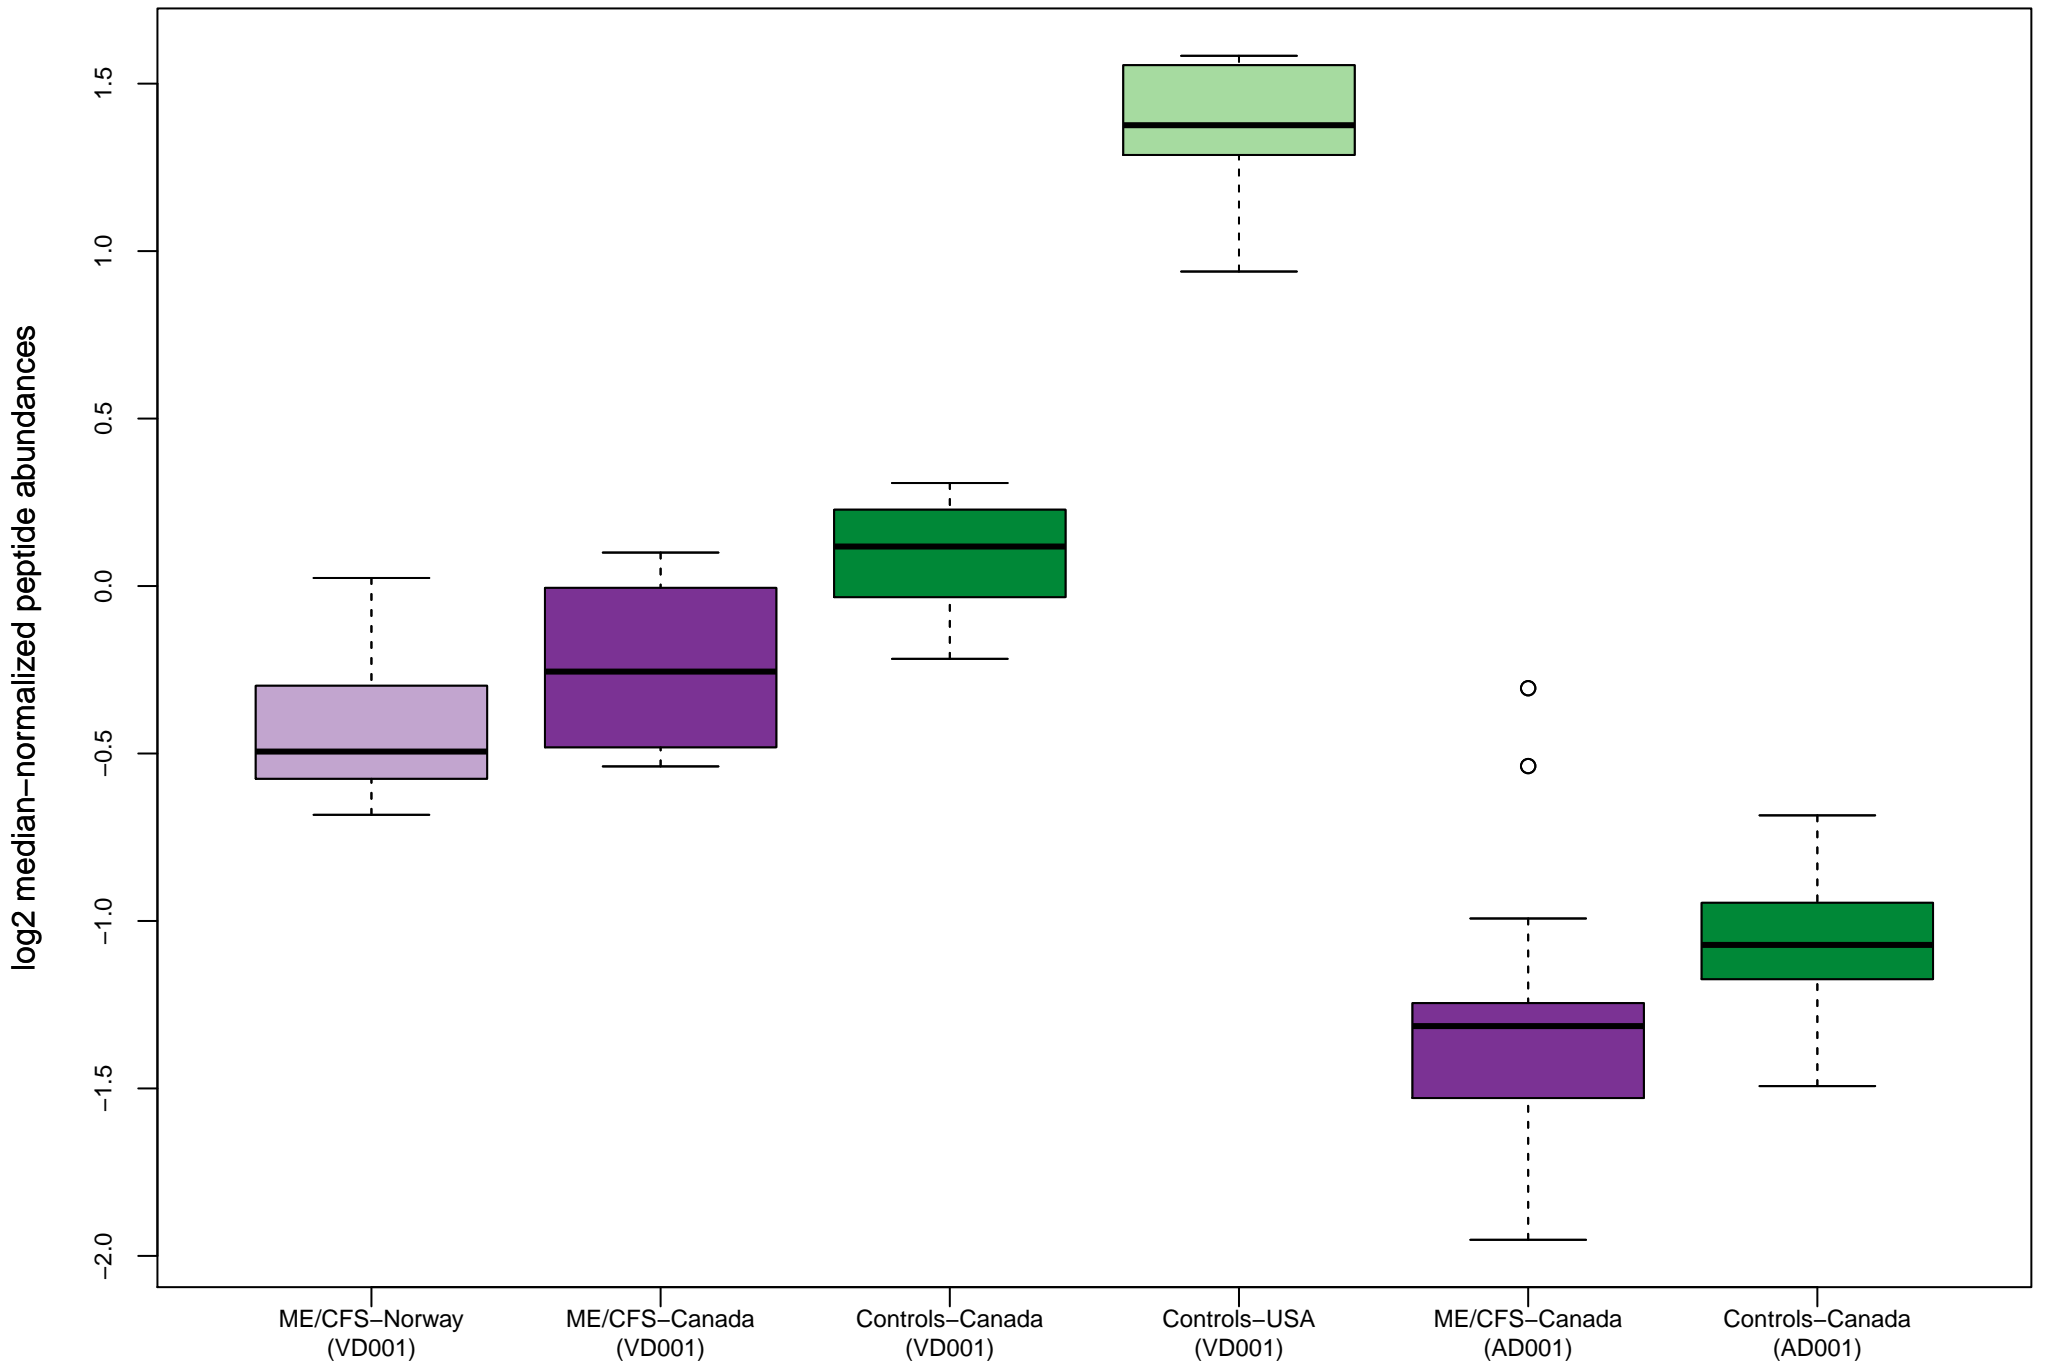

# AGFFPQFRWVAG

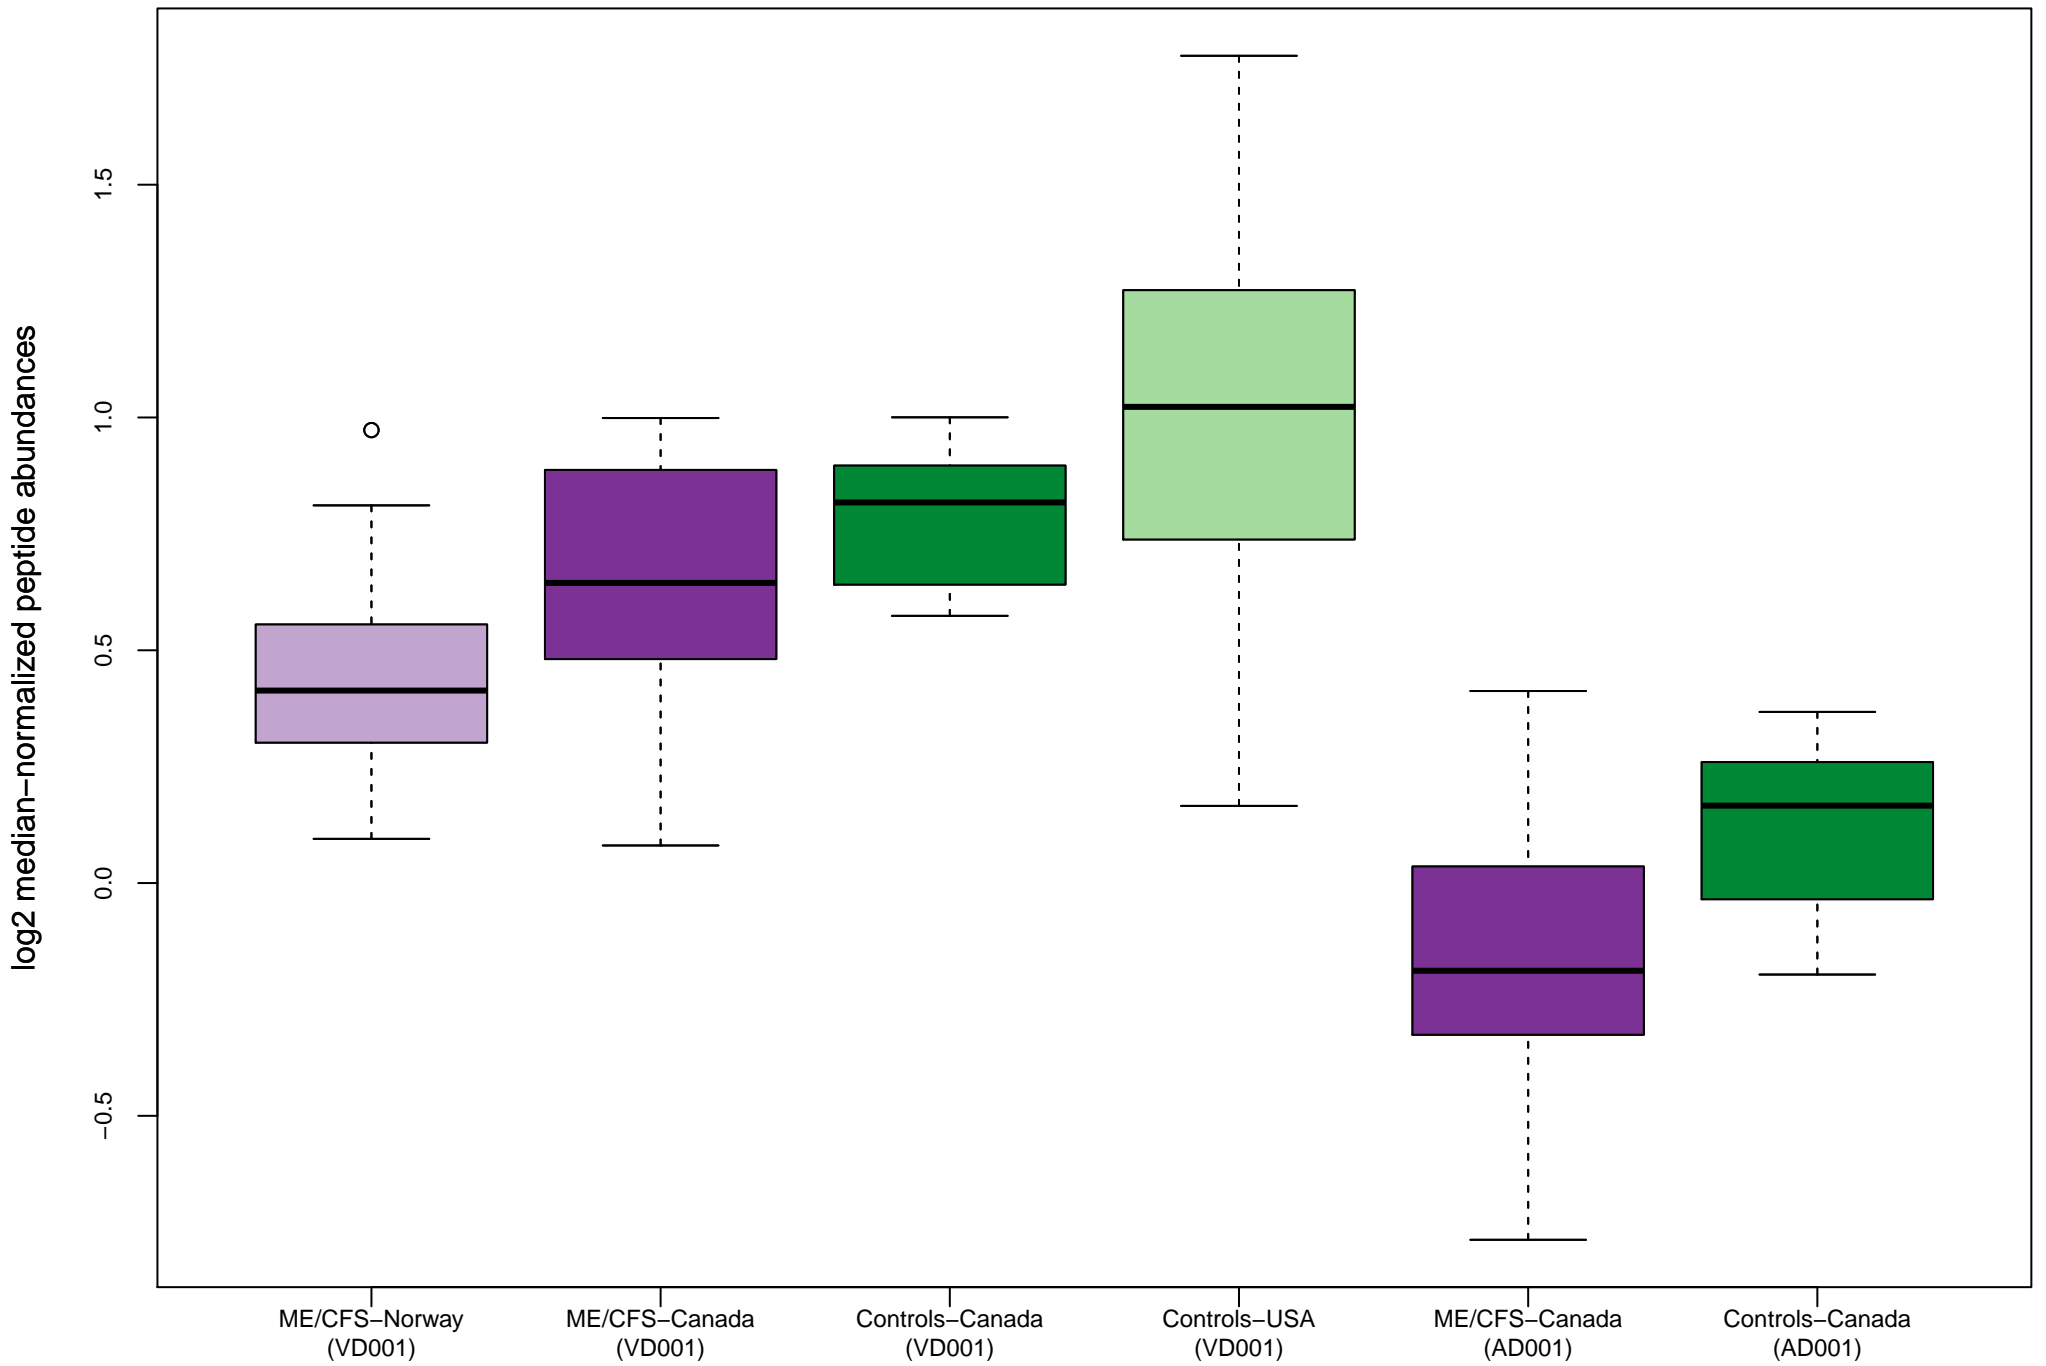

# AGLRWVLGALVG

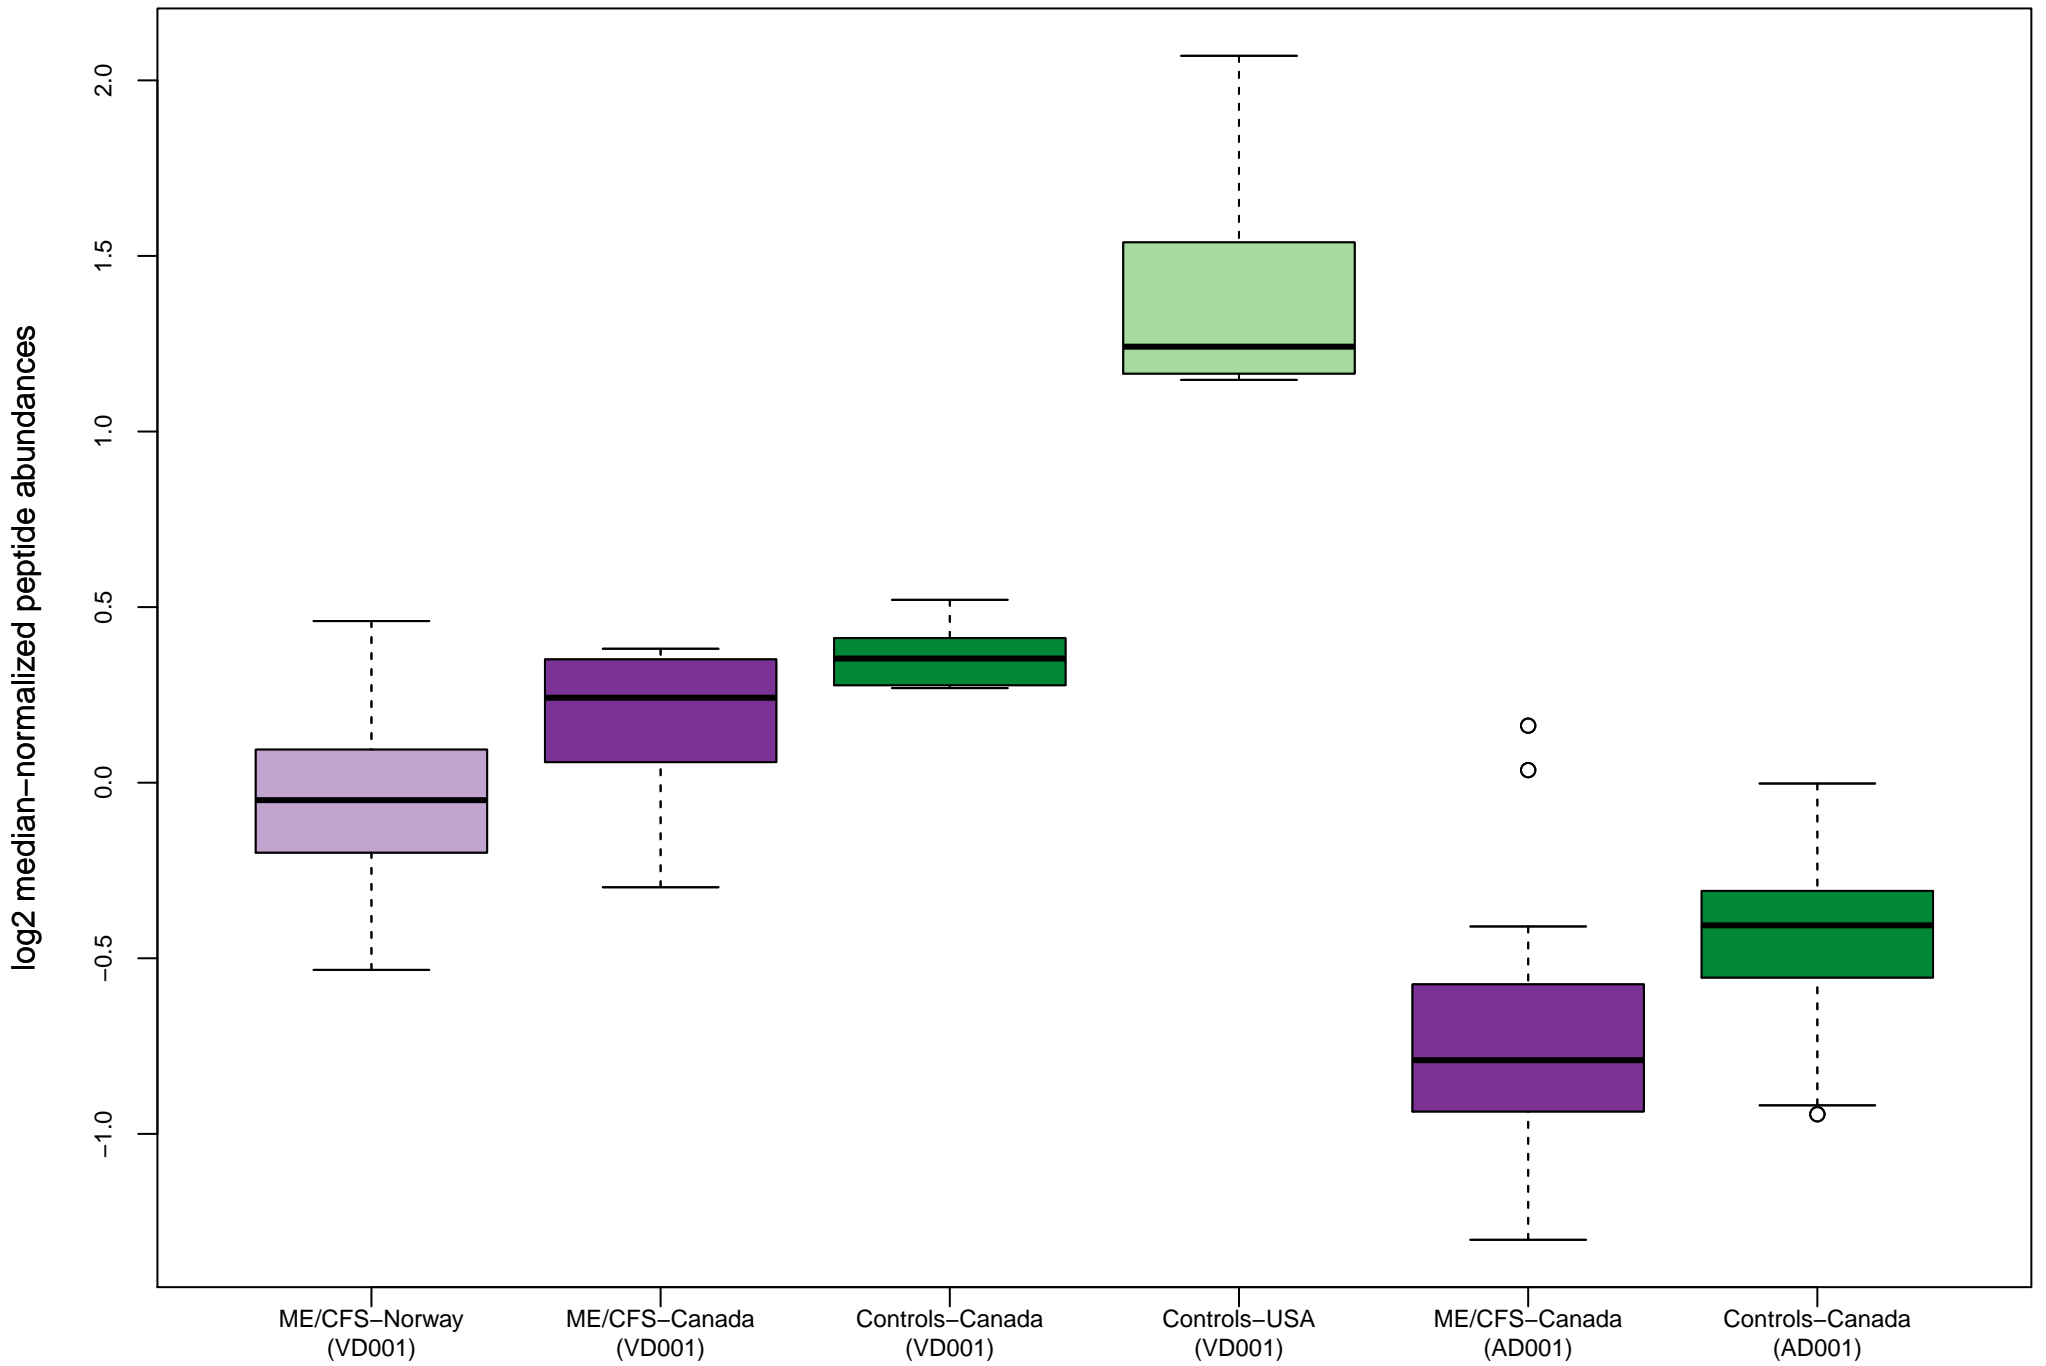

# AGRLVAWALSSG

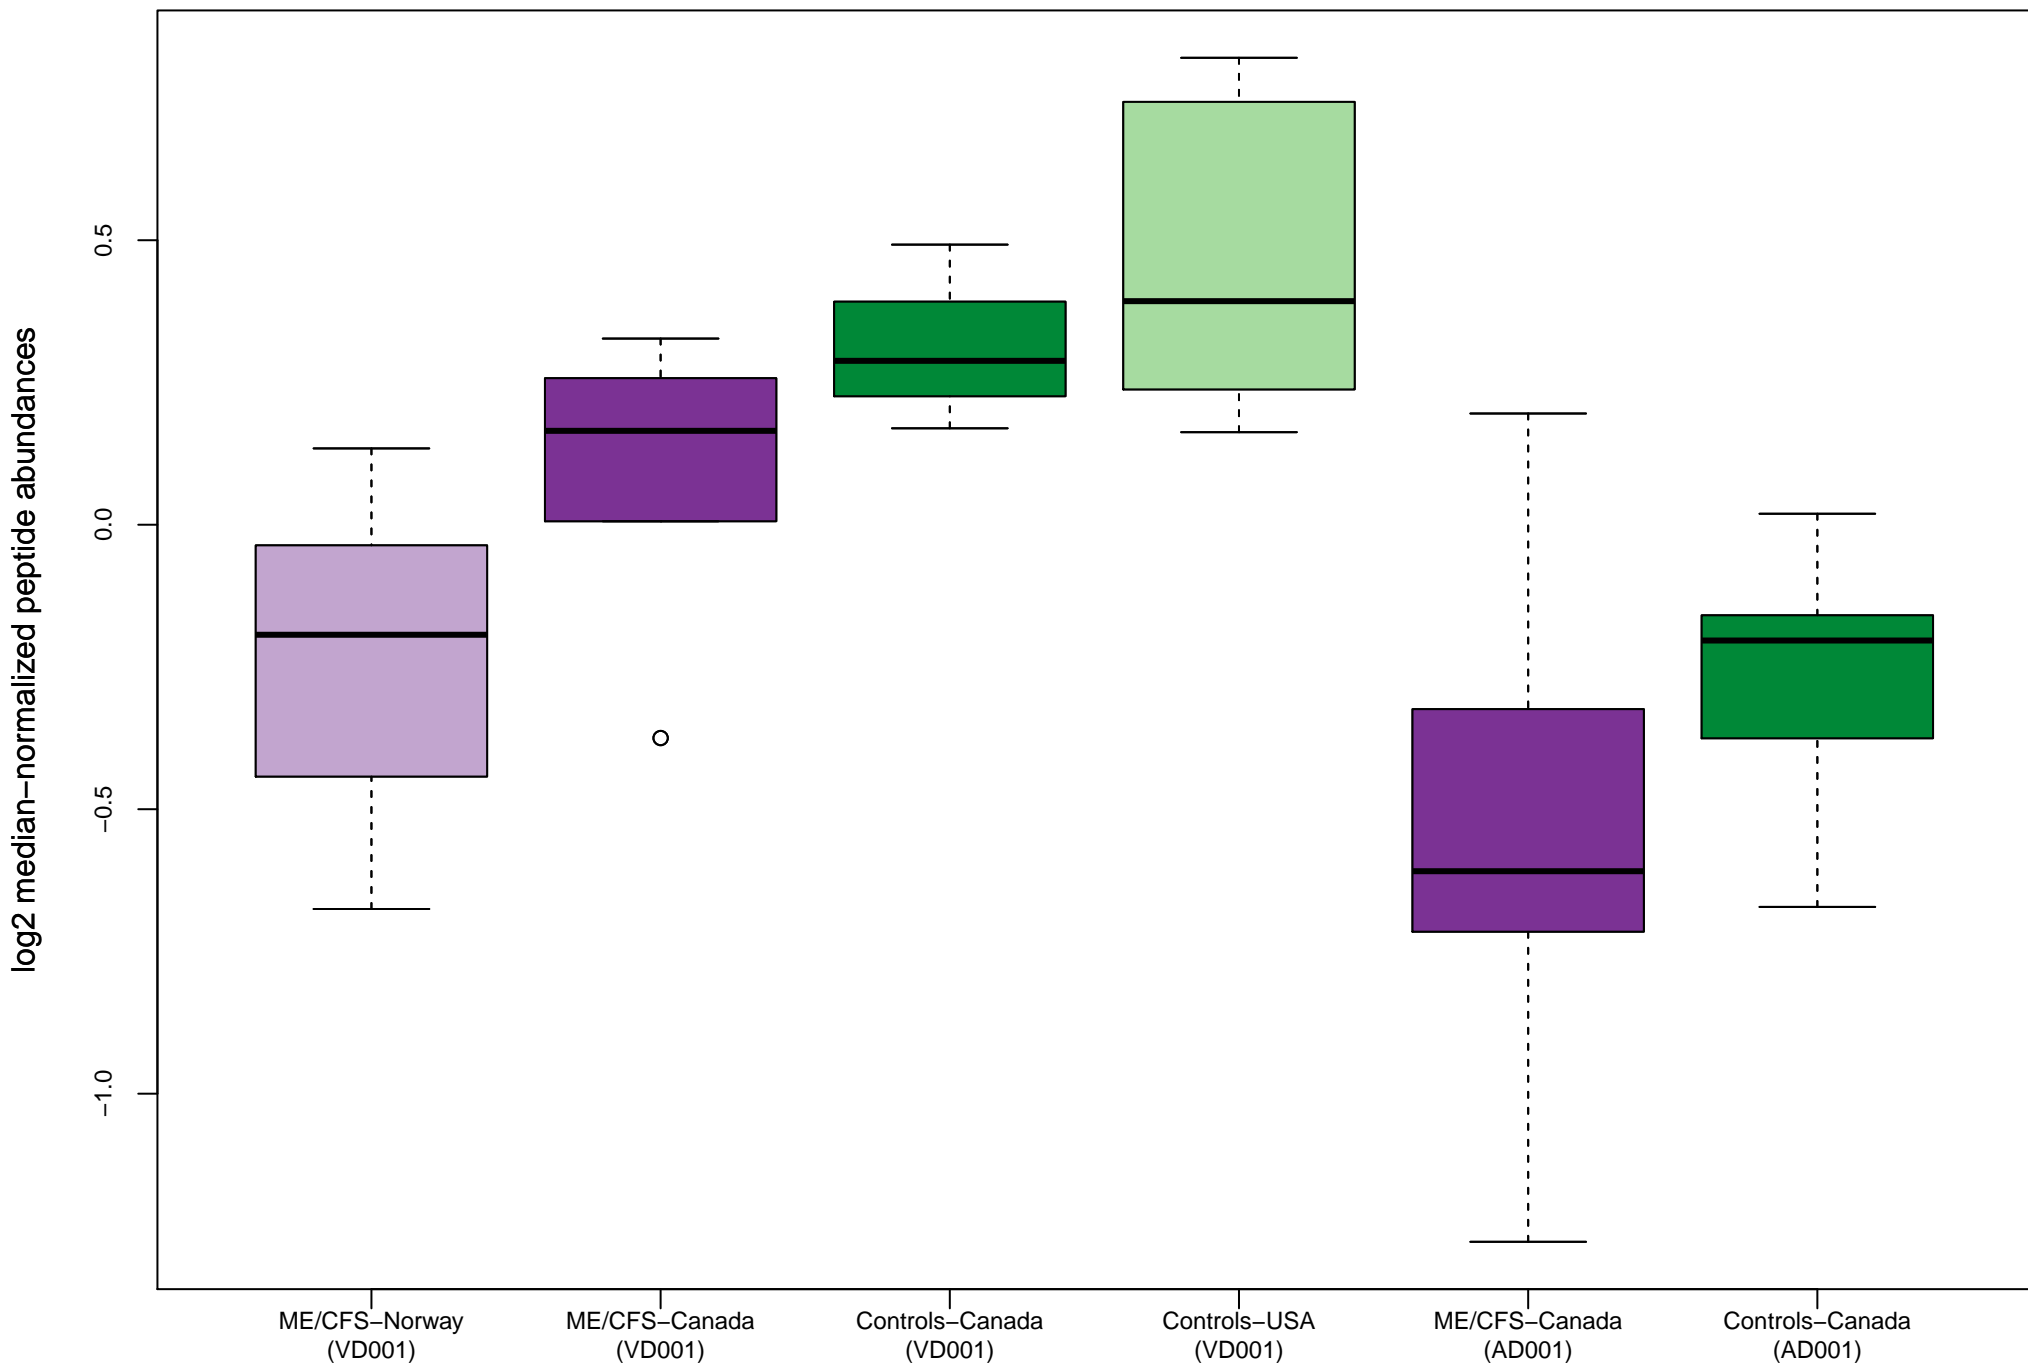

# AKFWLPVSALSG

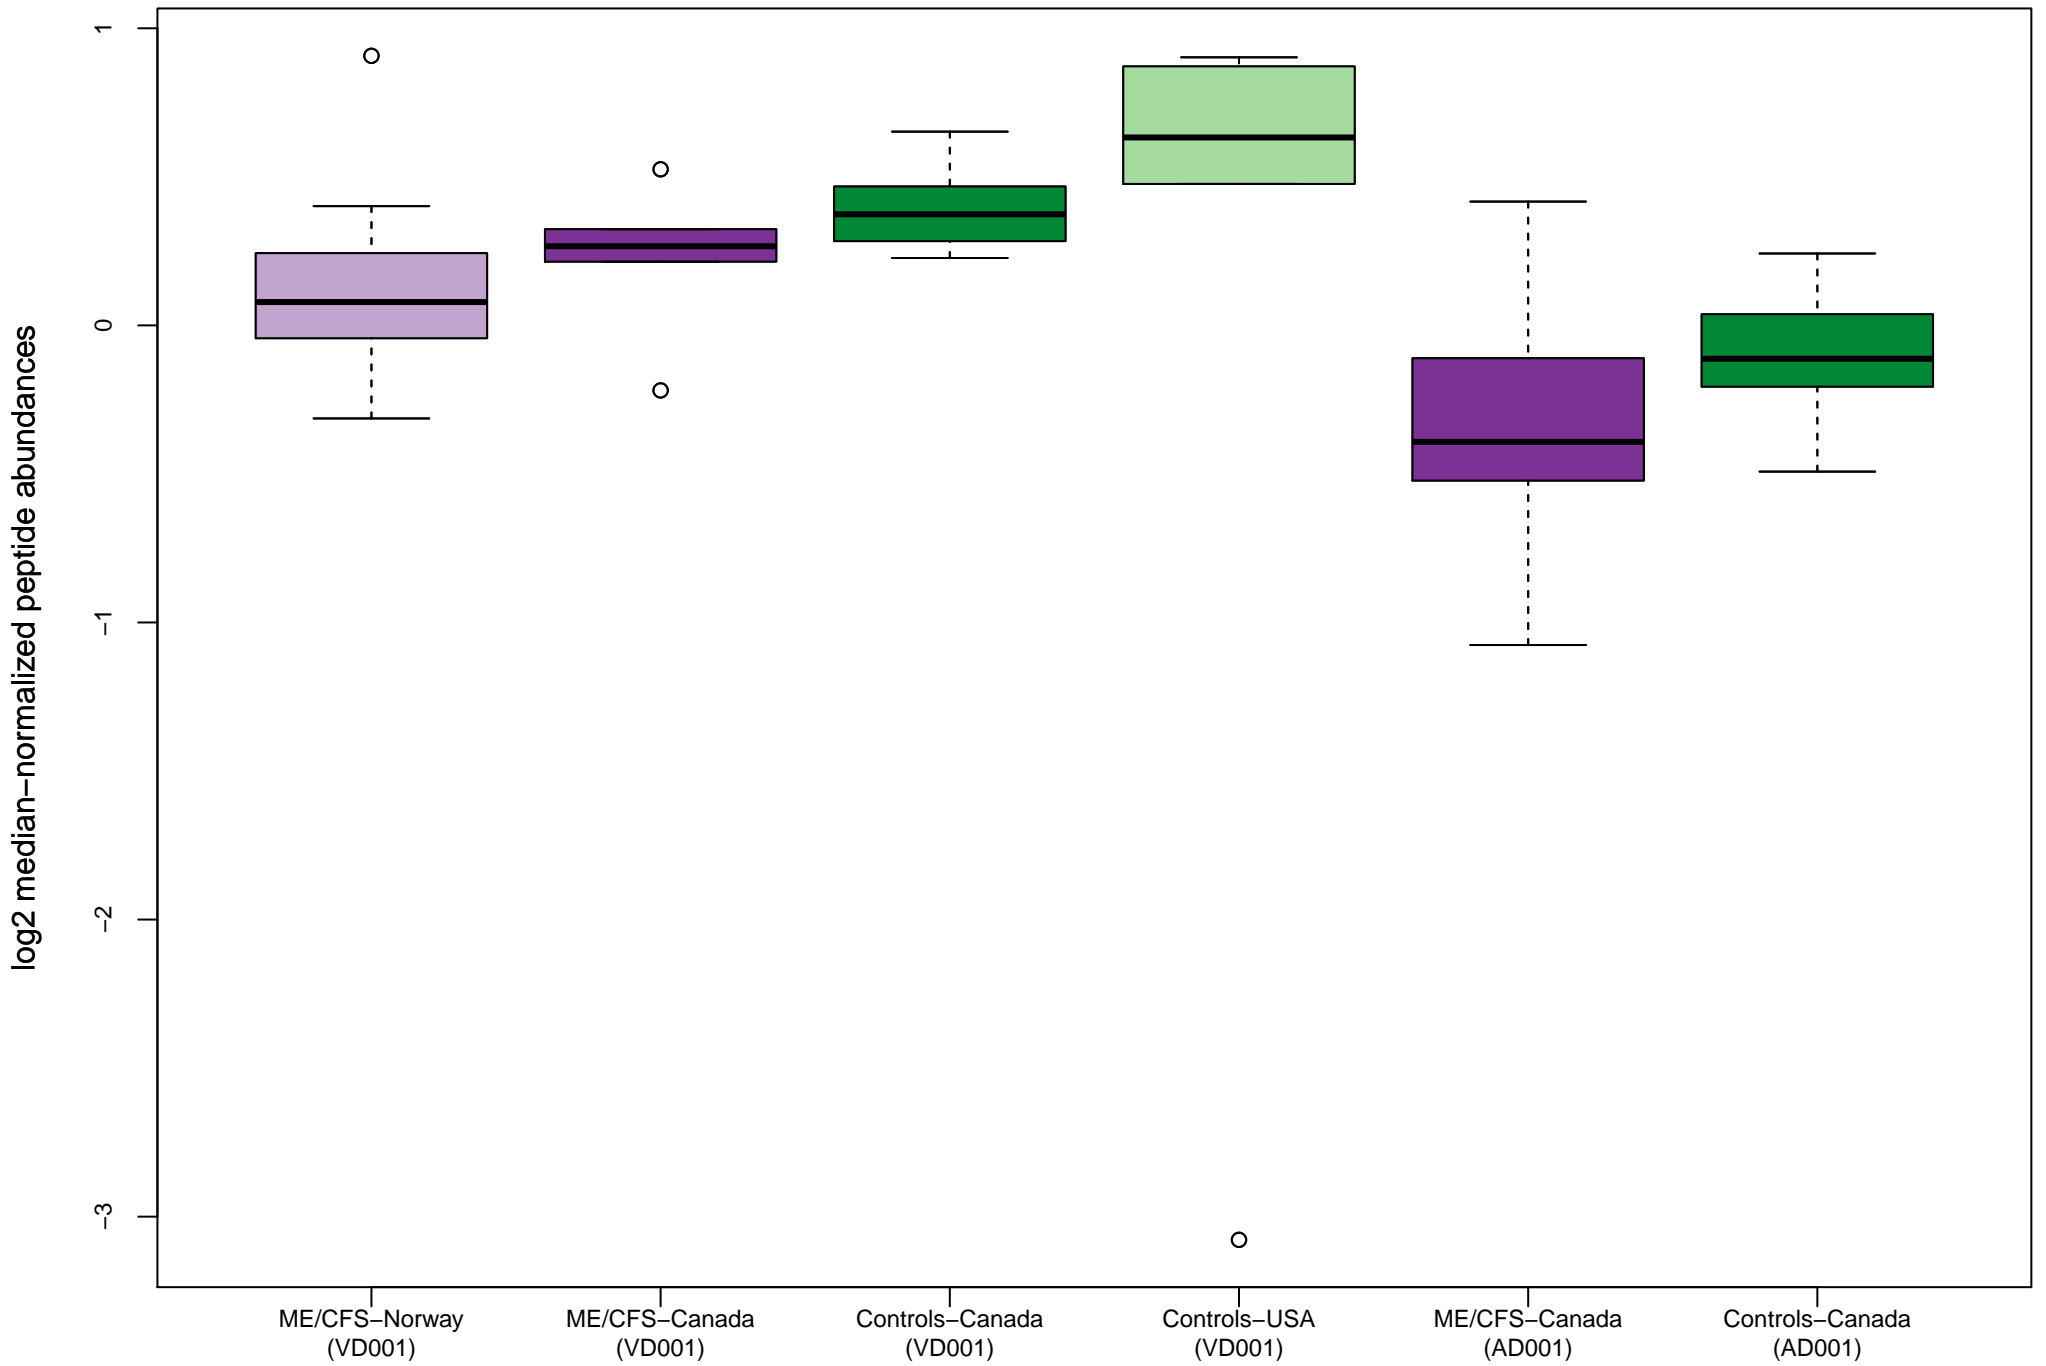



# ALHVLRFPYKLG

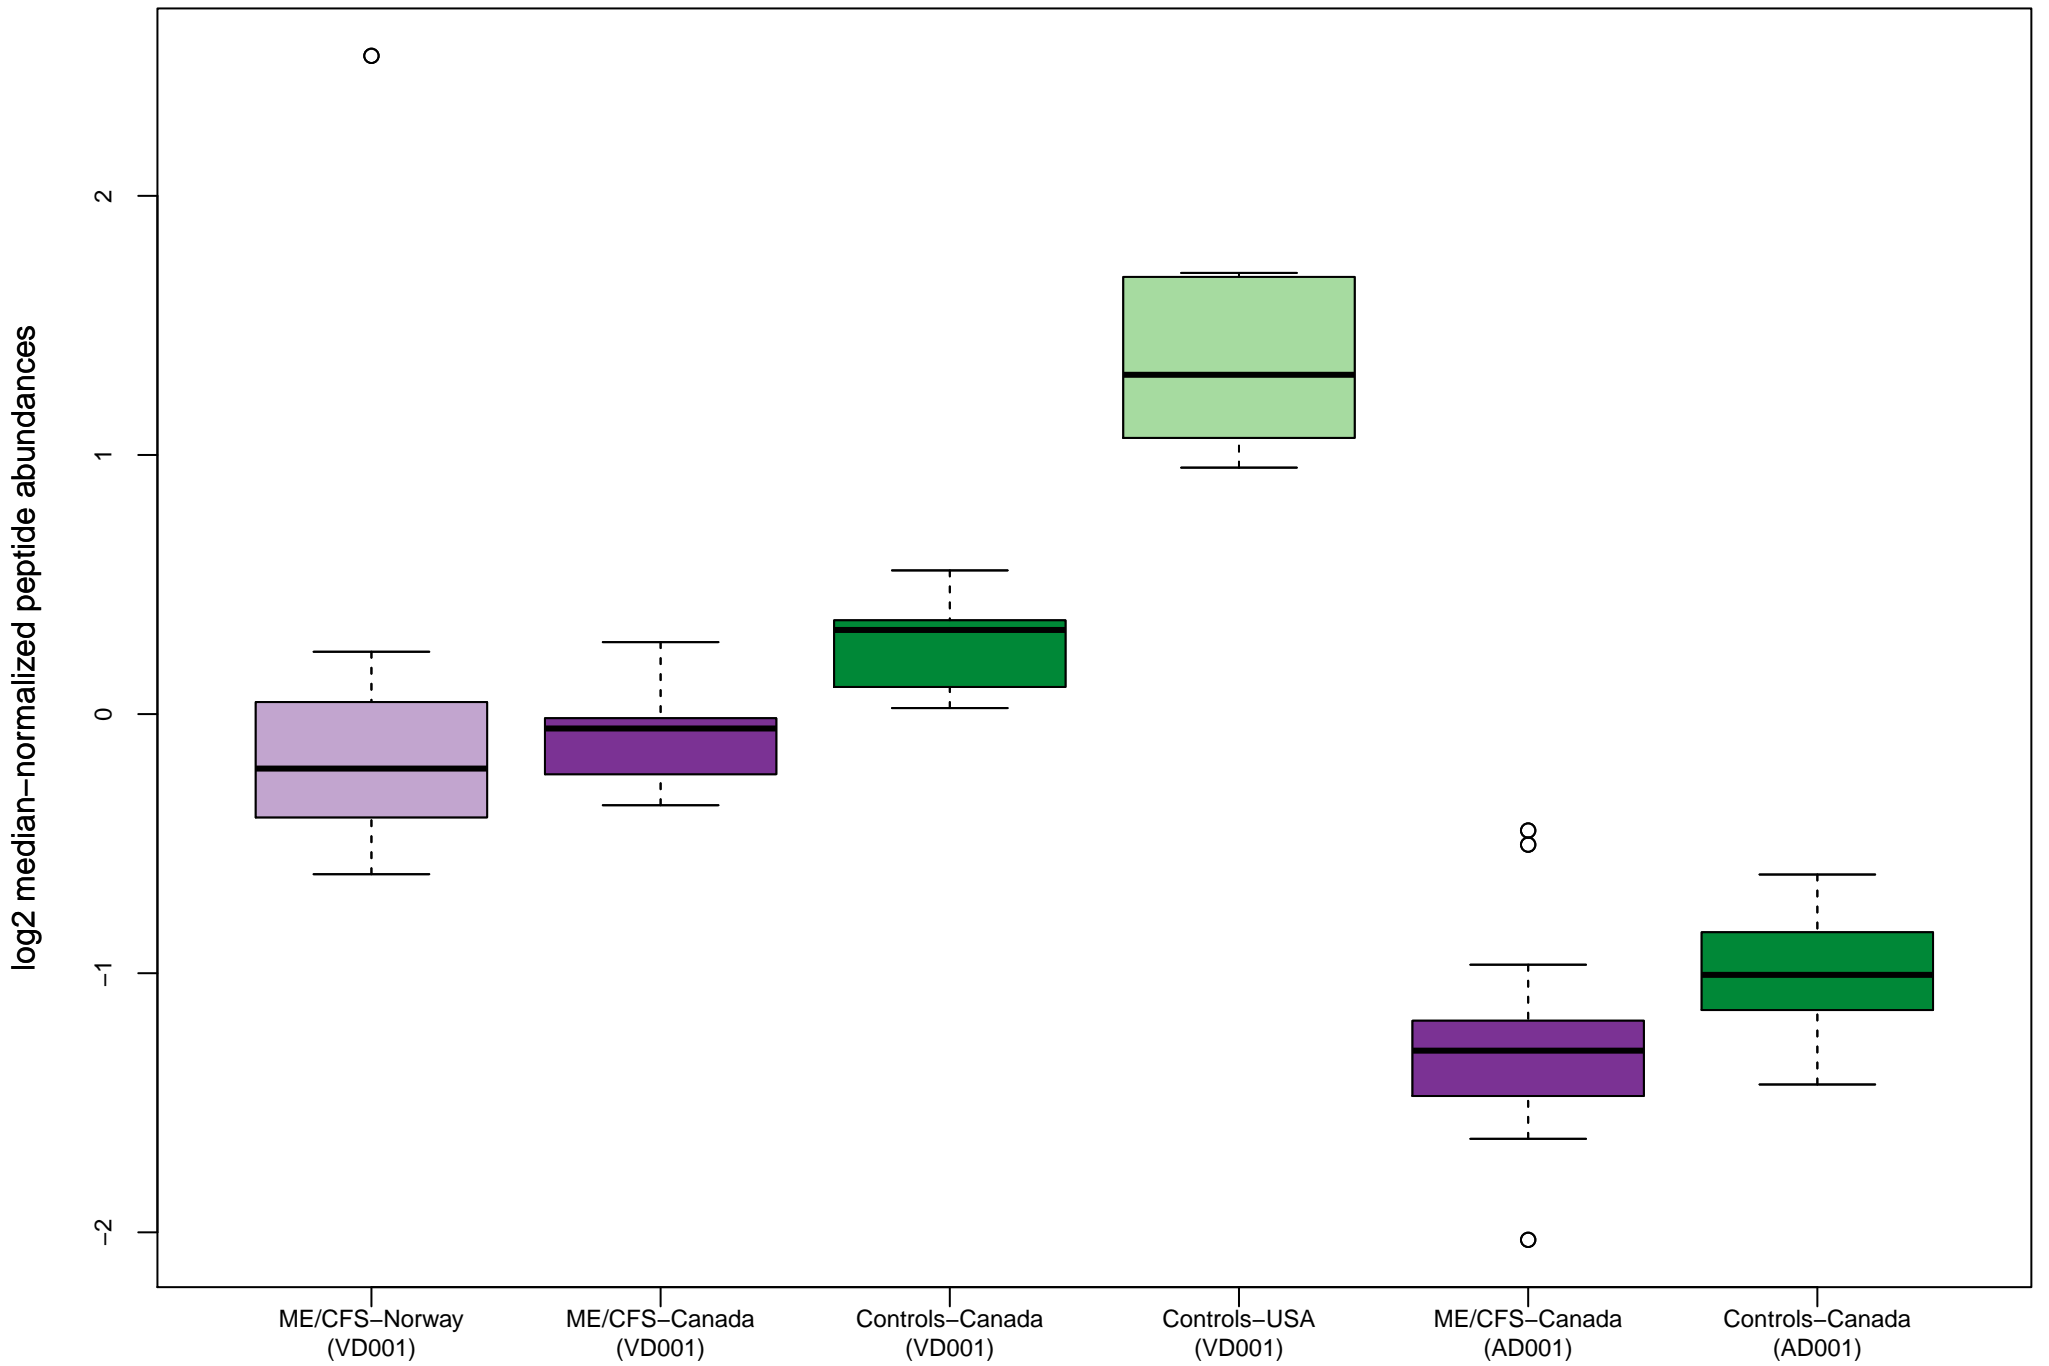

# ALLKYWGVALSG

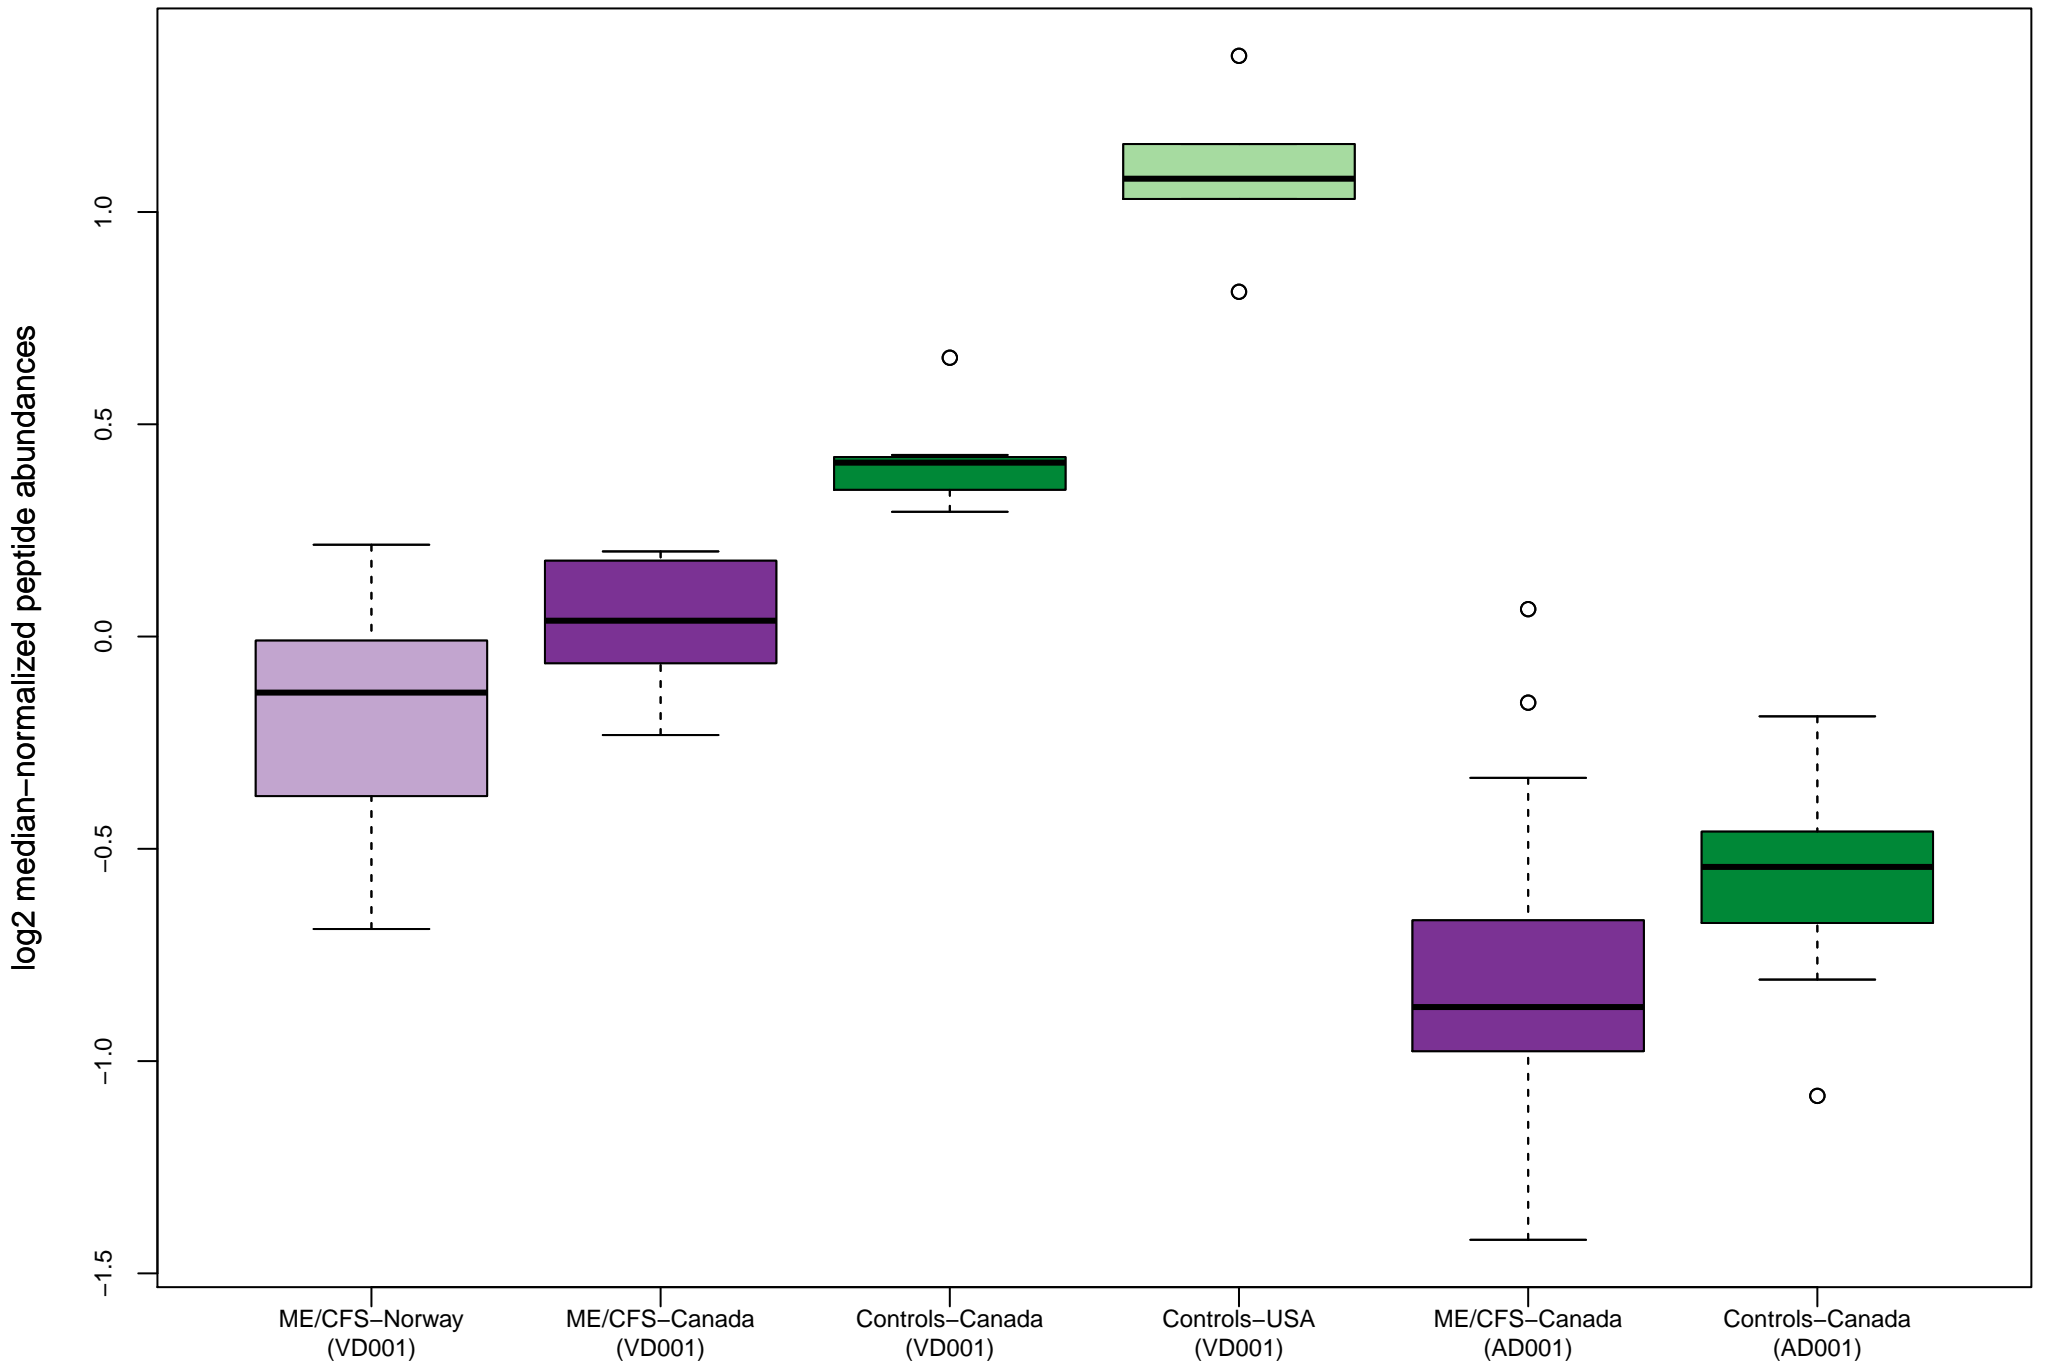

# ALLNRWSGVALG

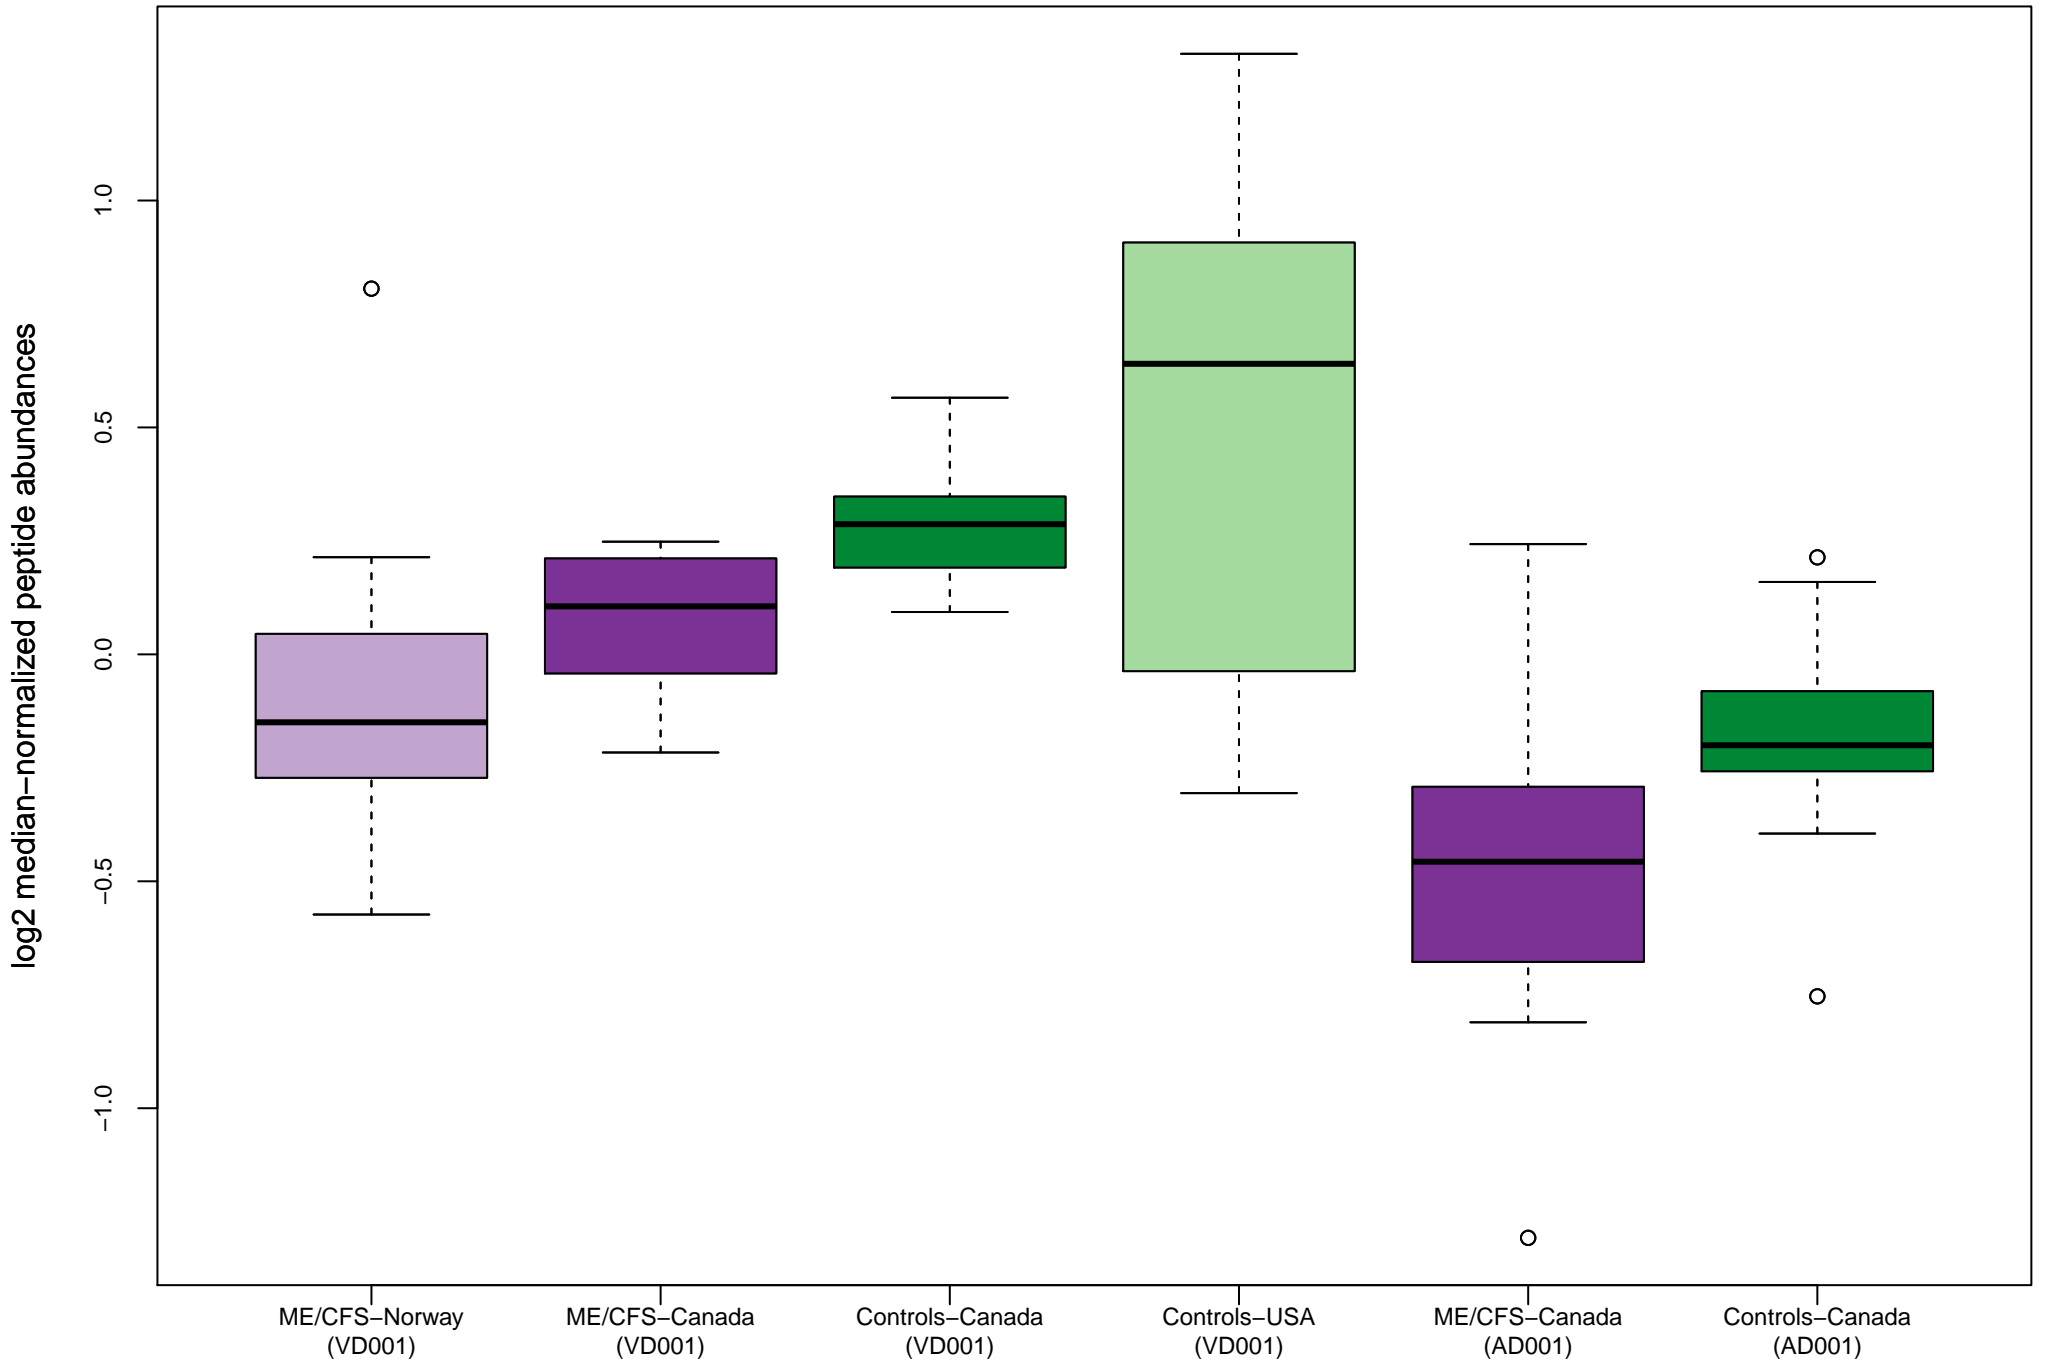

# ALNNVLFYWSL

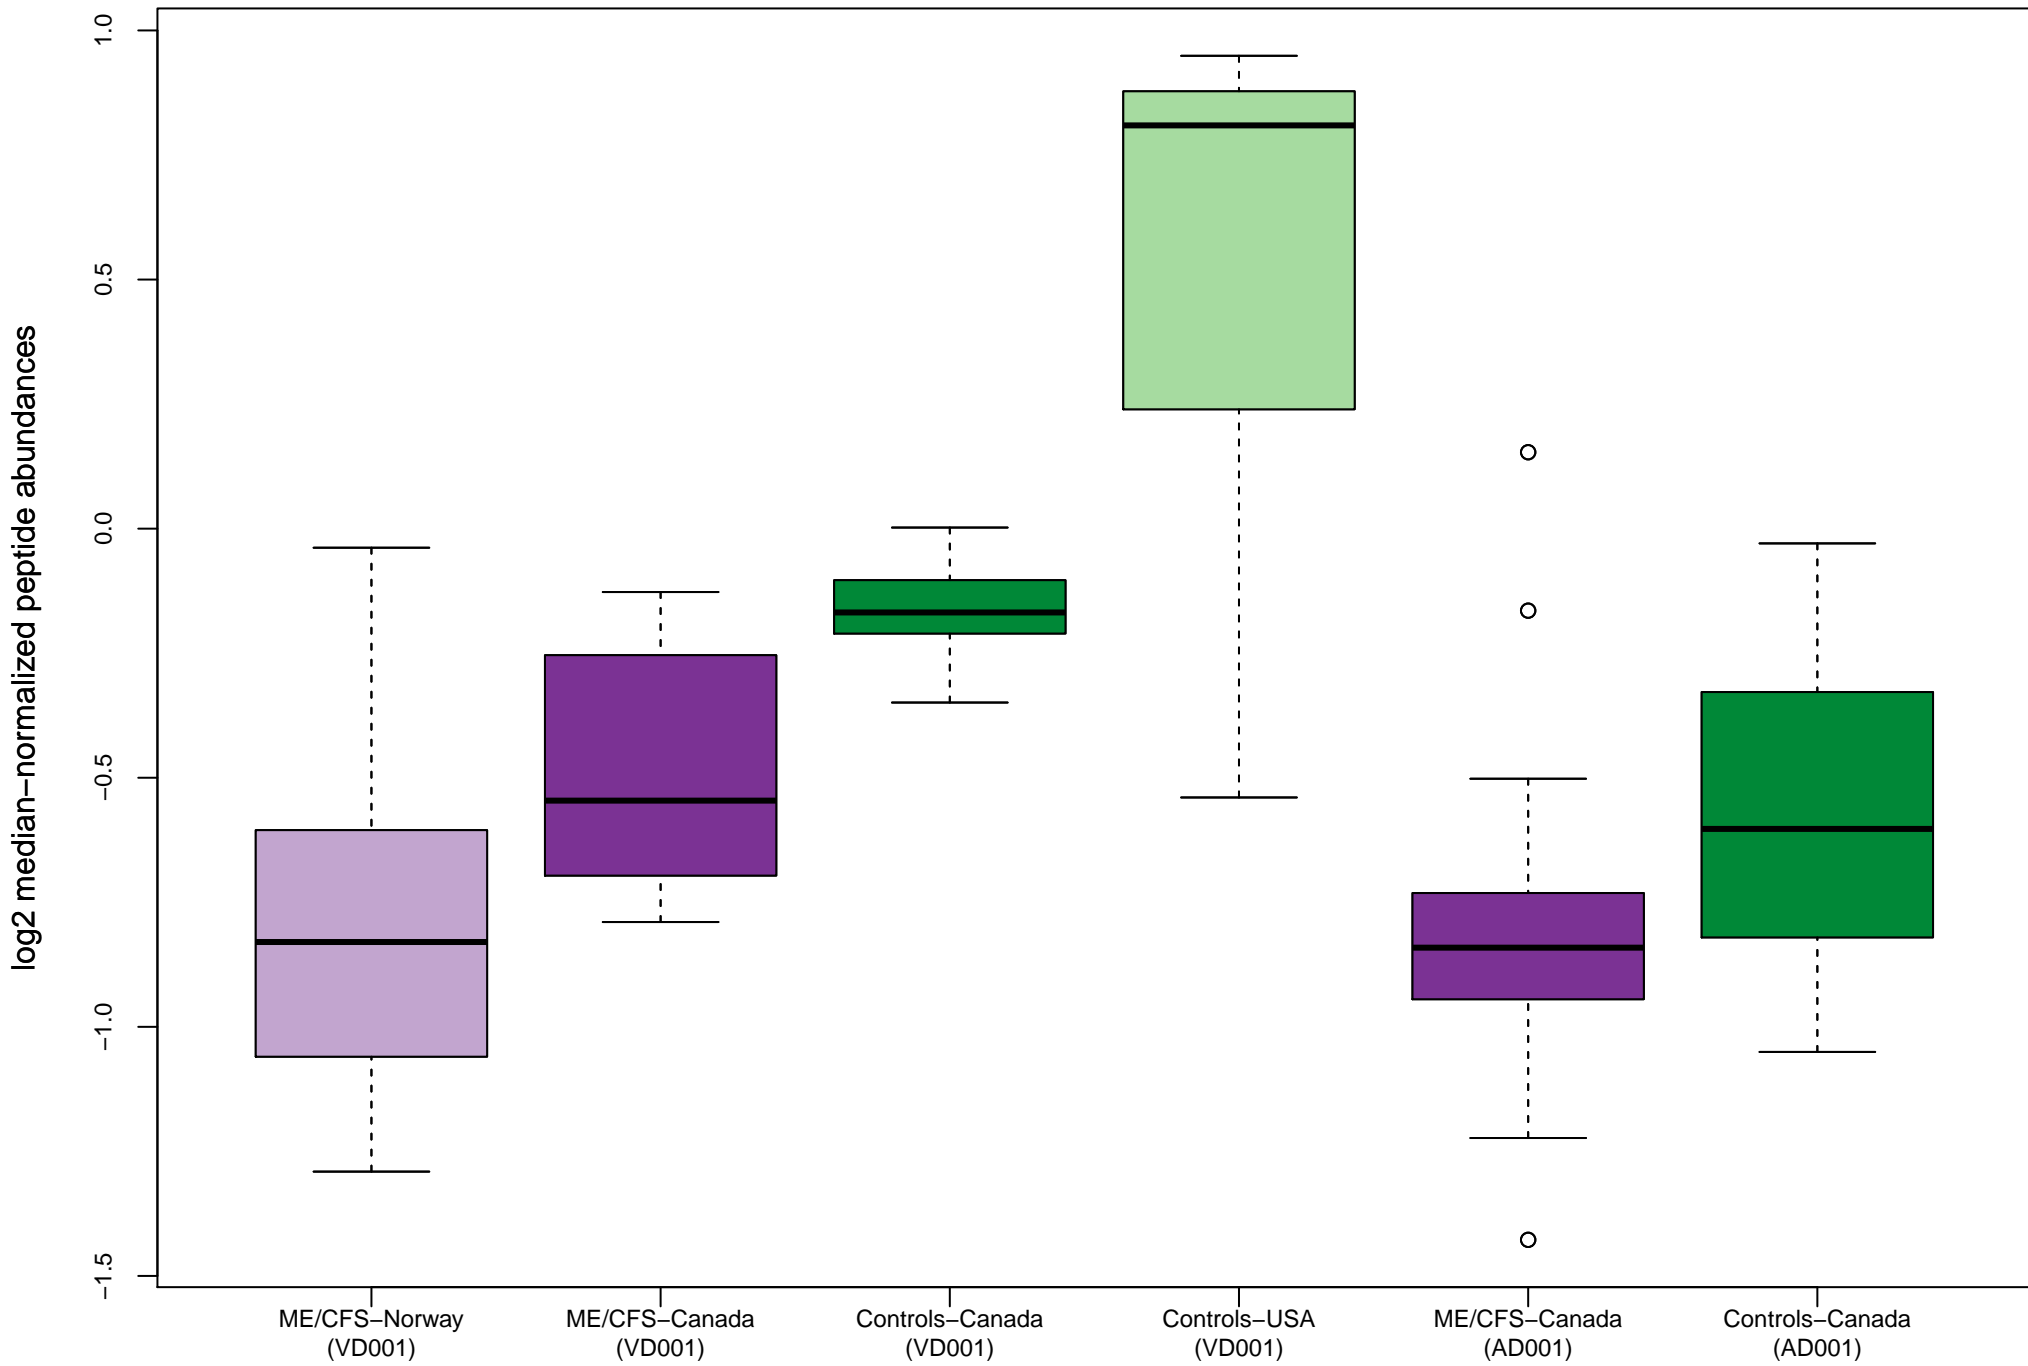

# ALRGPVPYWVGL

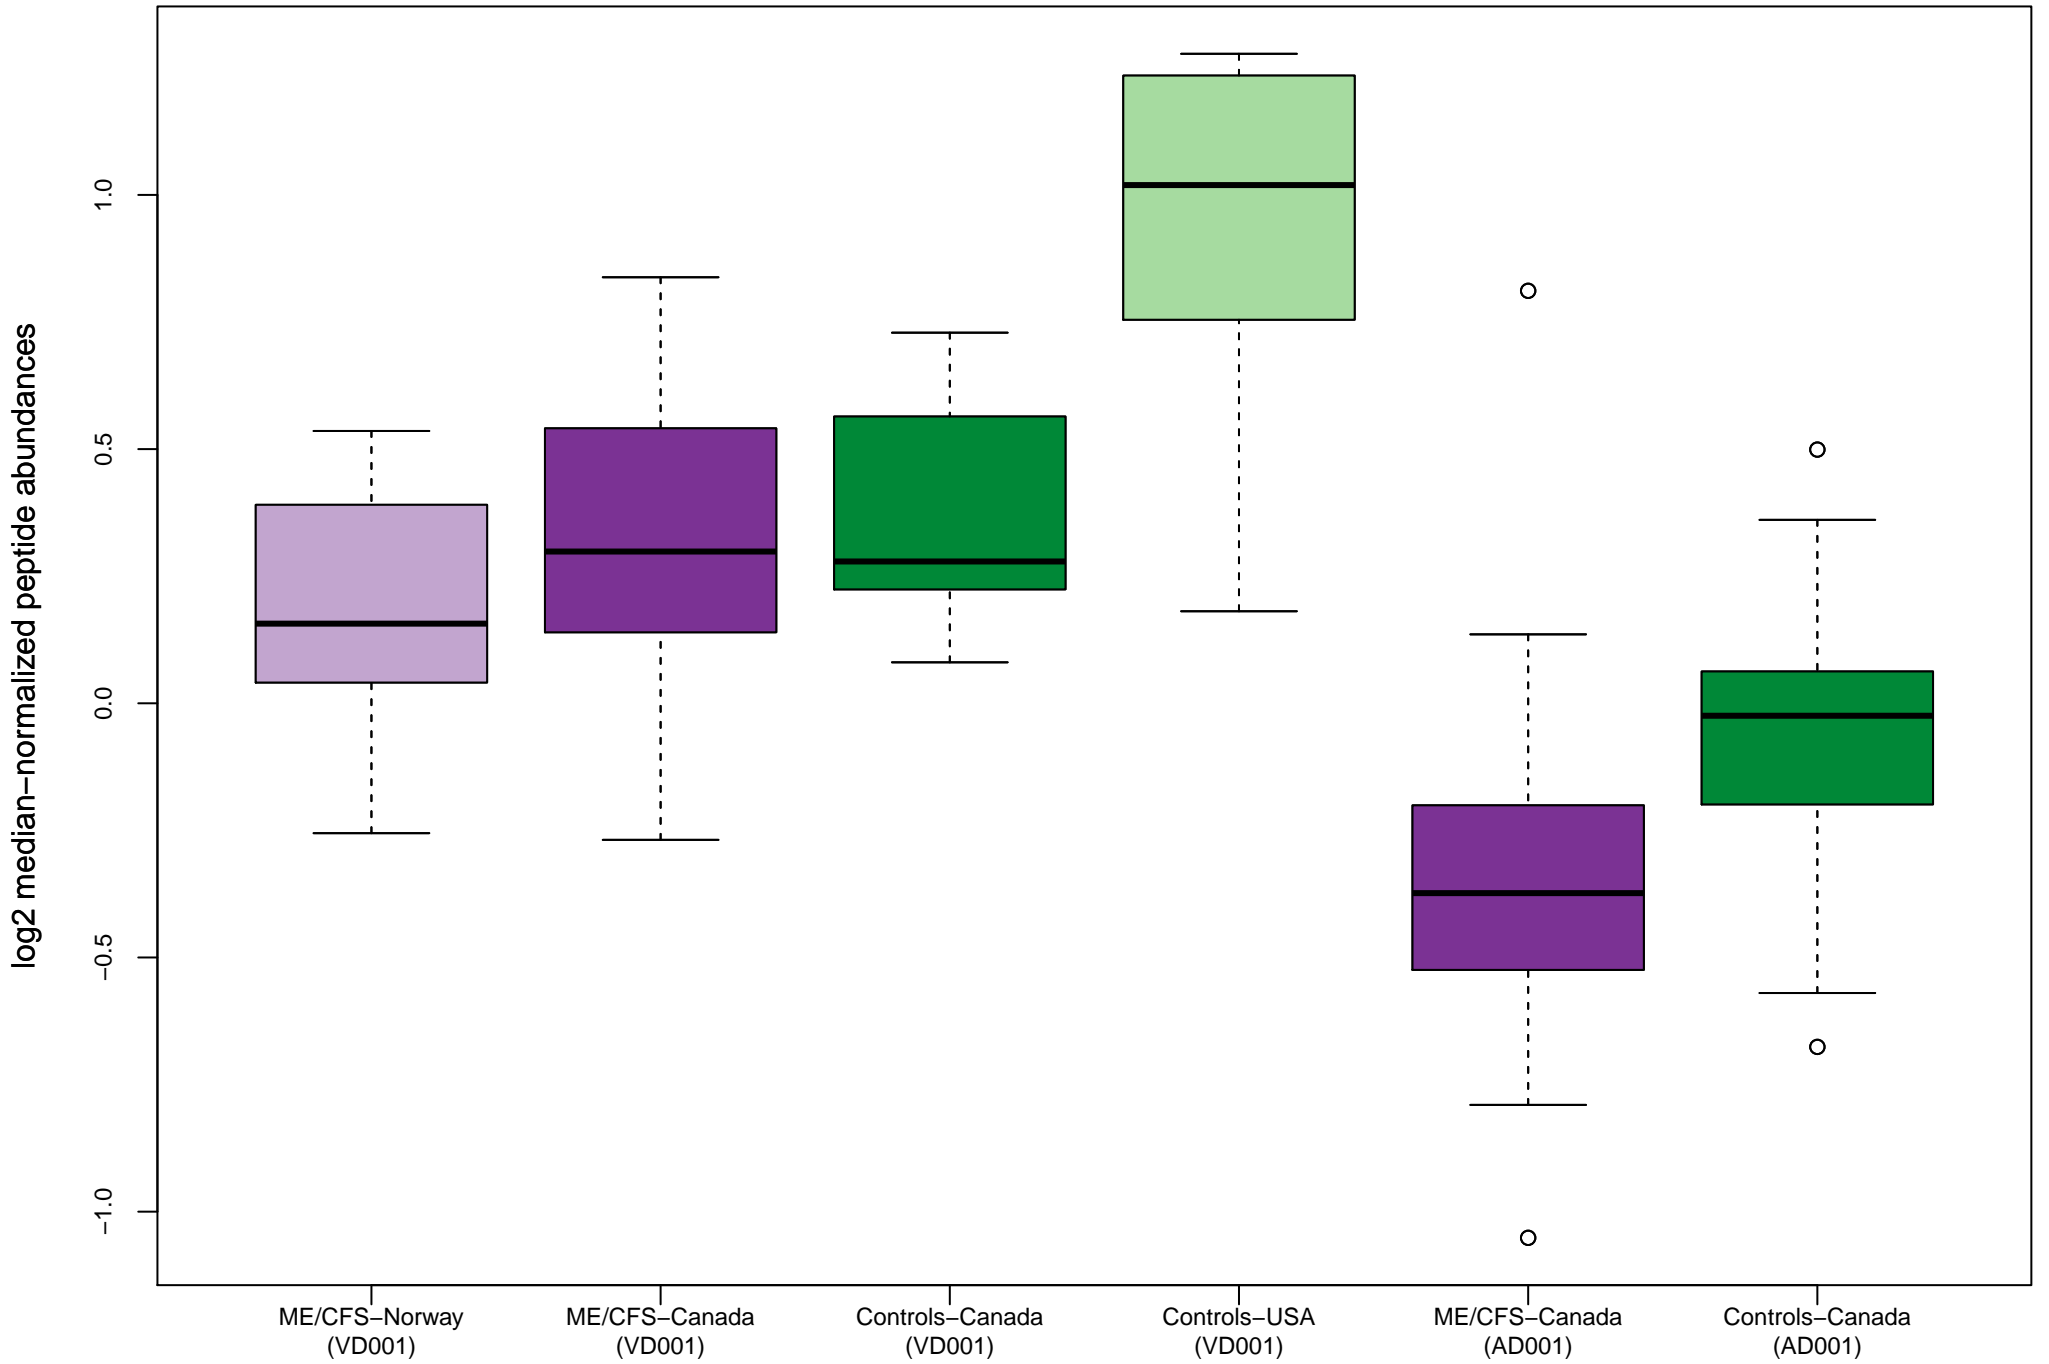

# ALSRFNVFPVAG

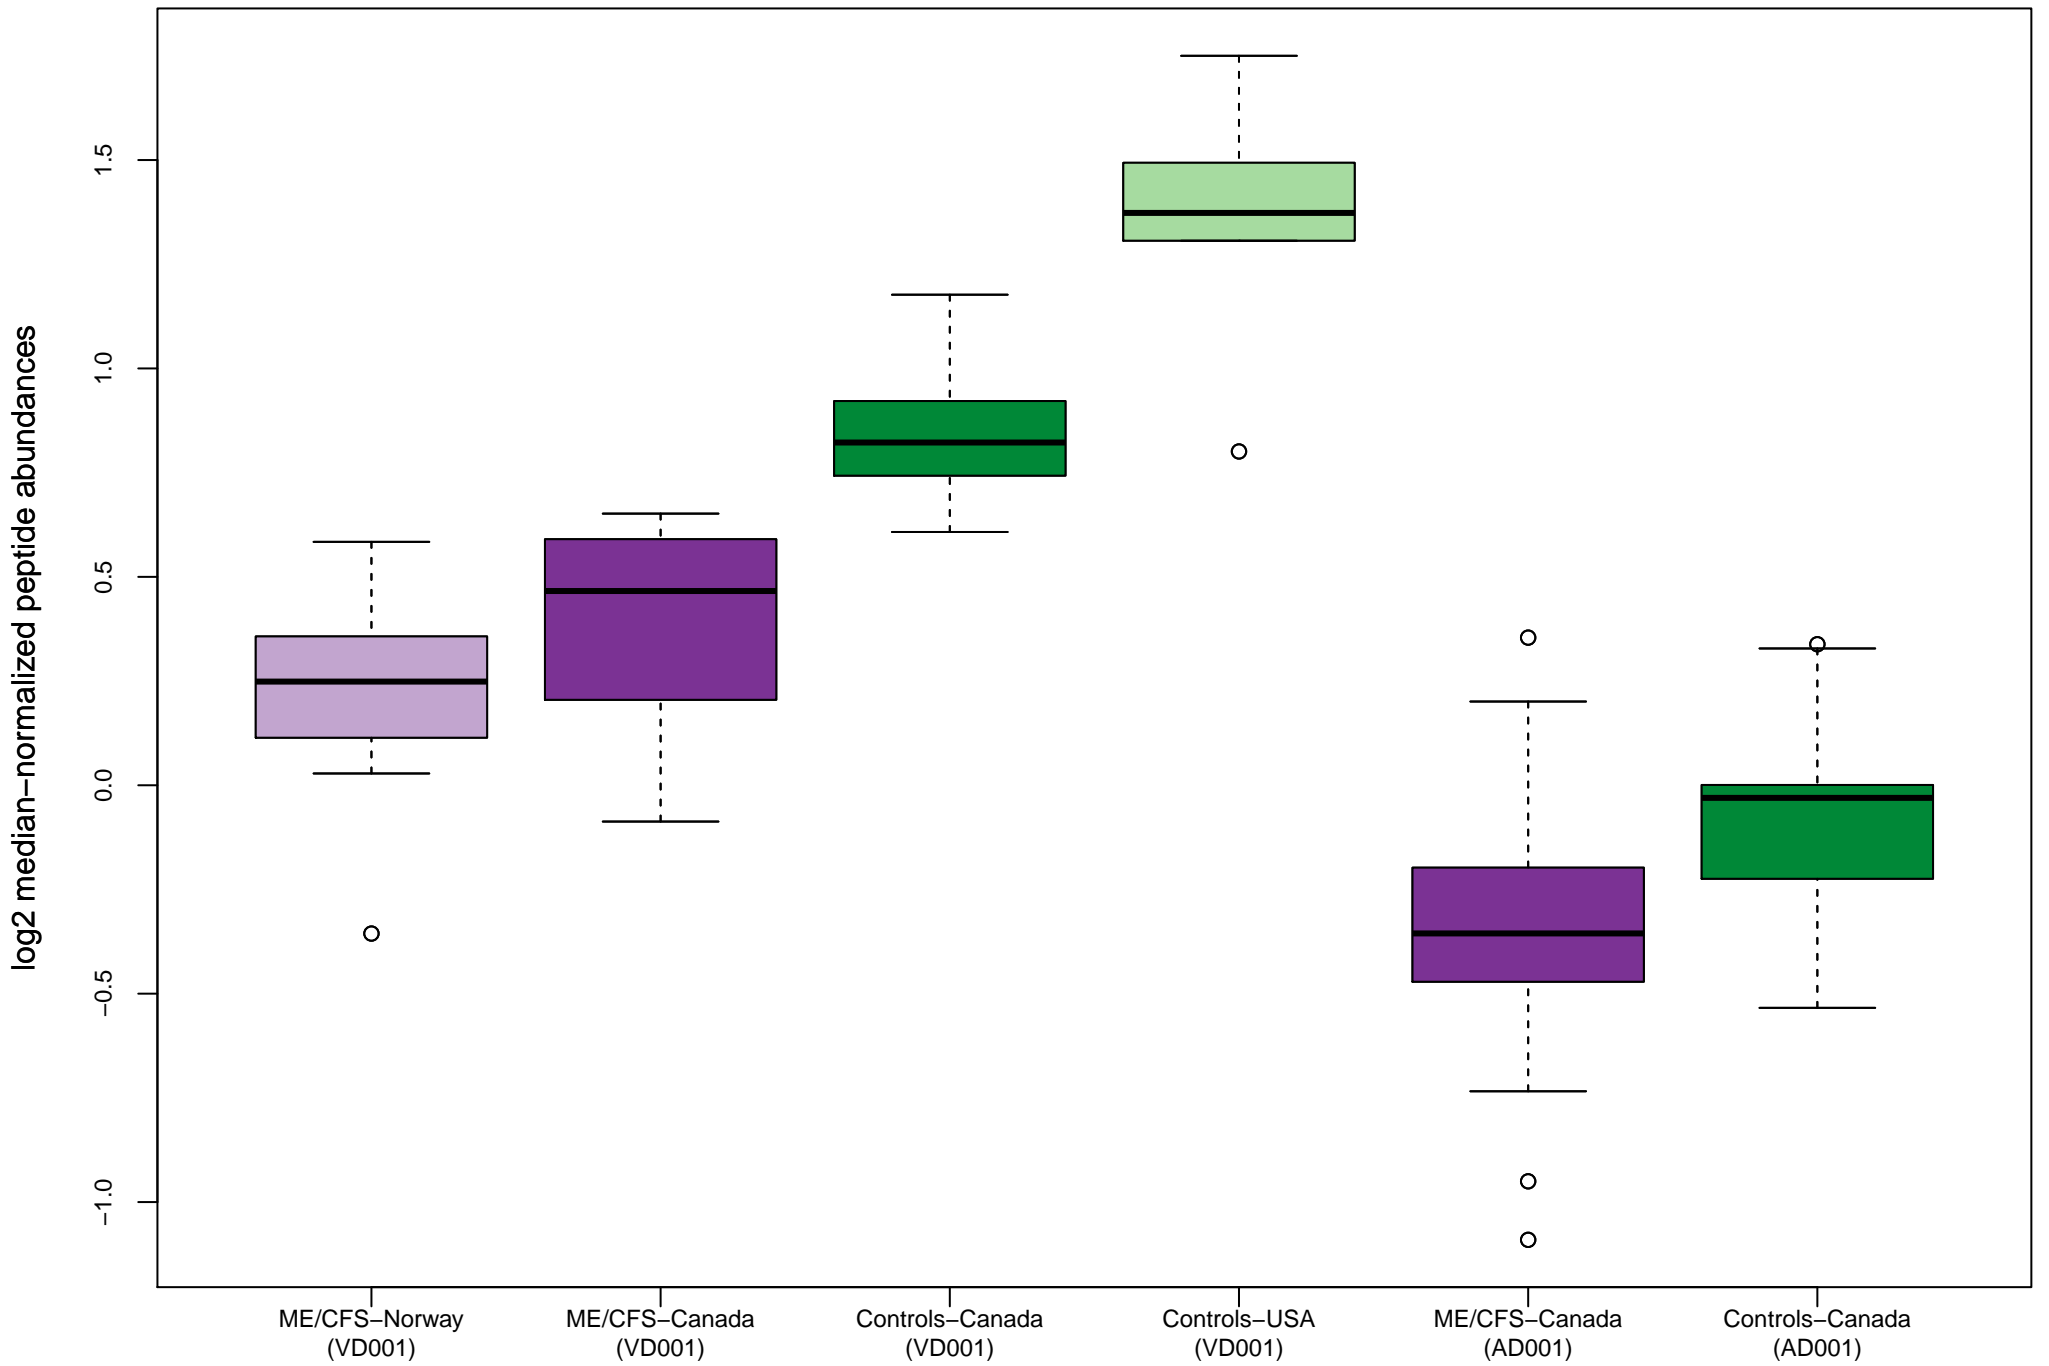

# ANHVLRYRWVSV

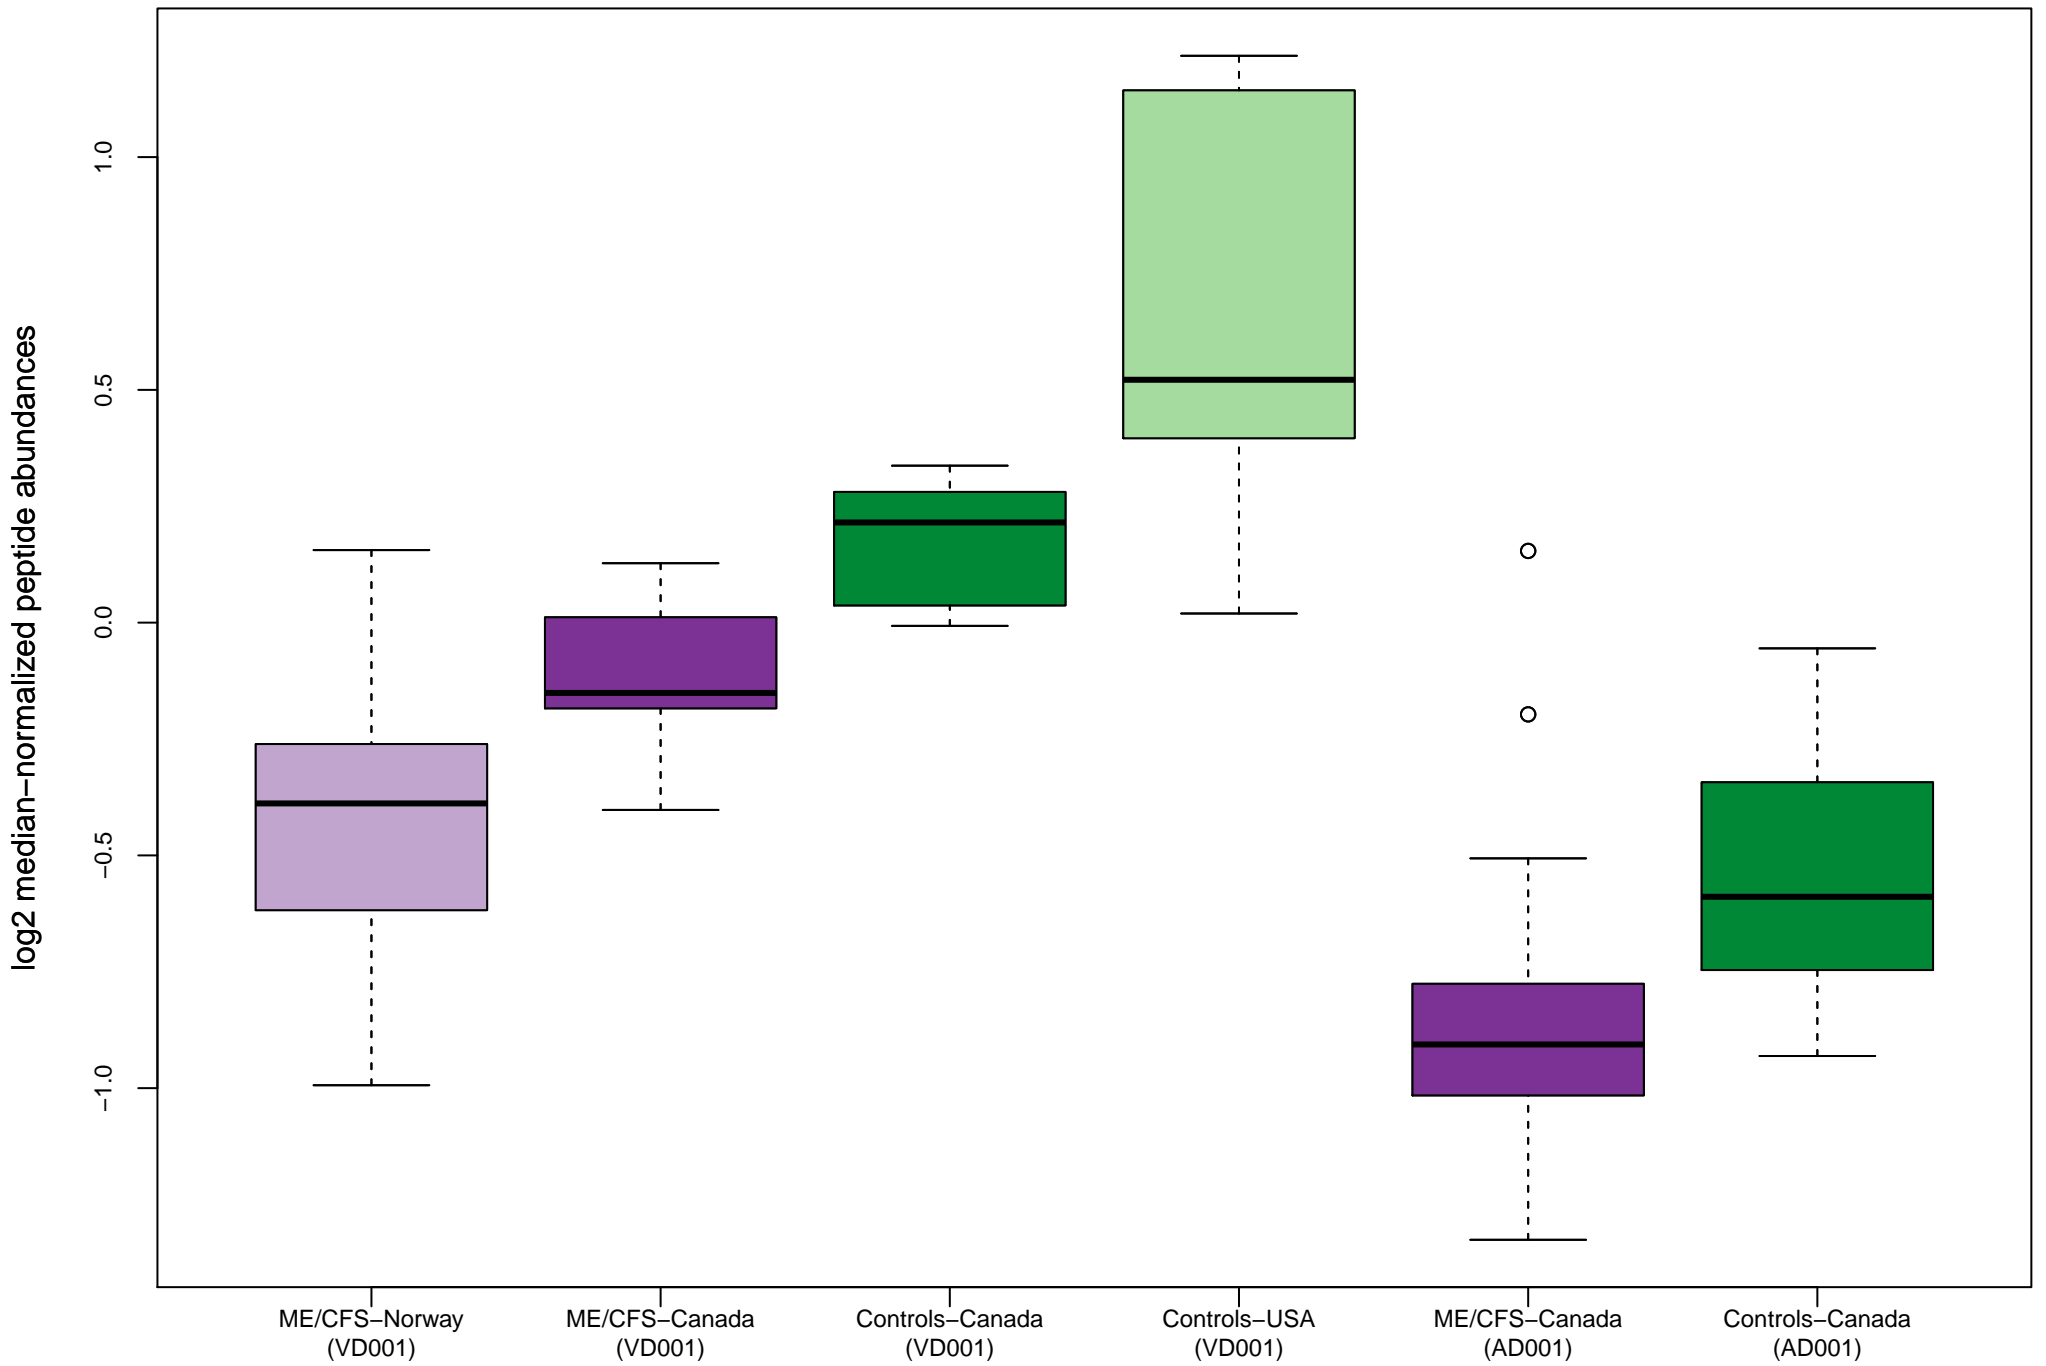

# ANRAWLGVALSG

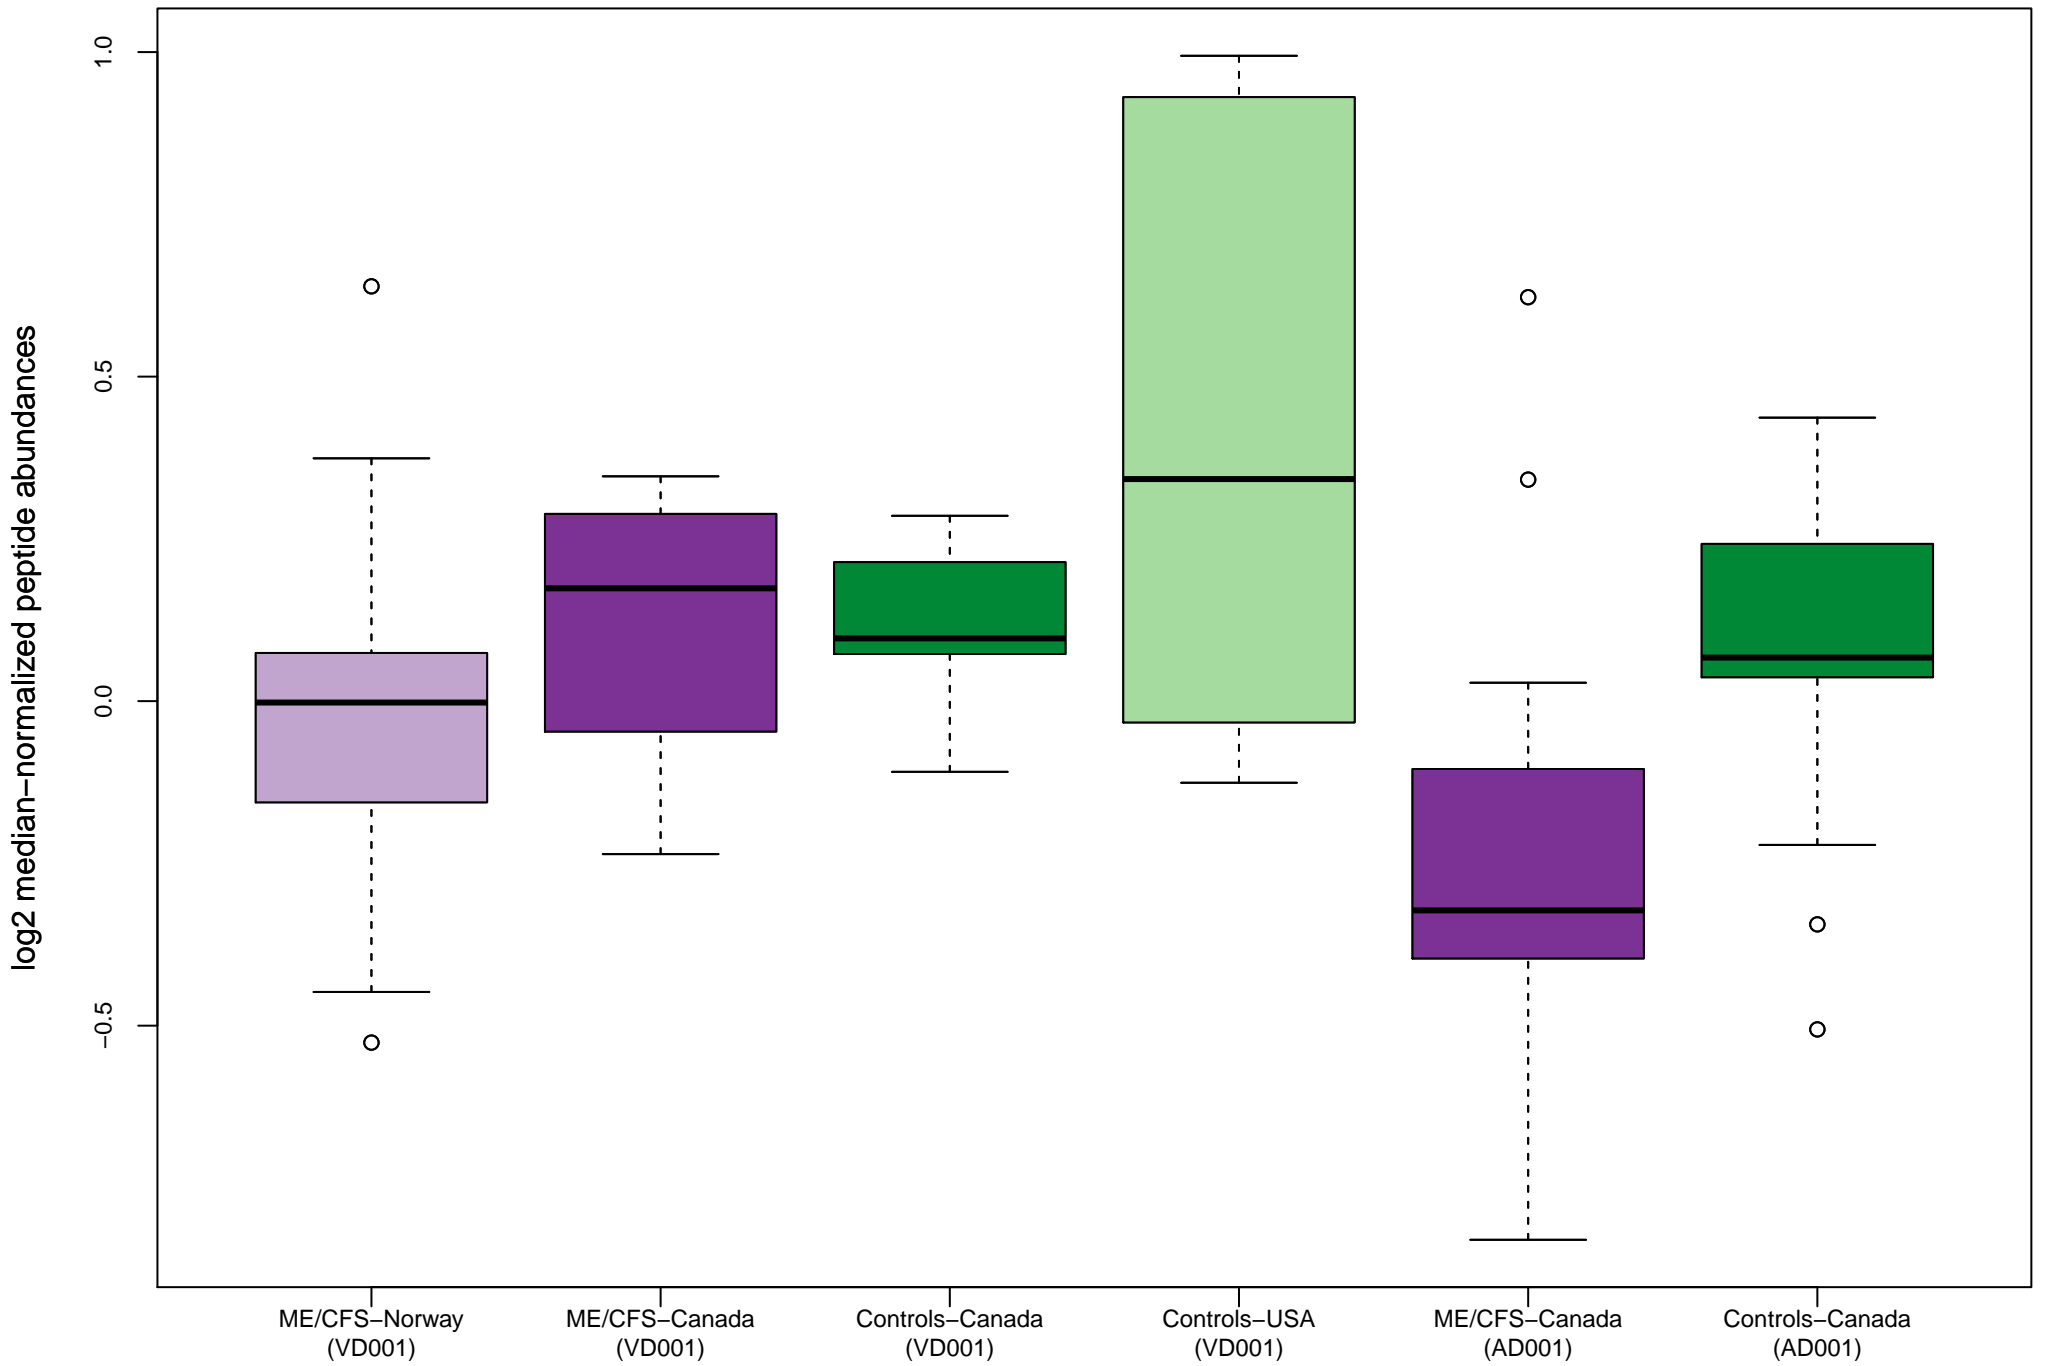



# APFFRLGVALSG

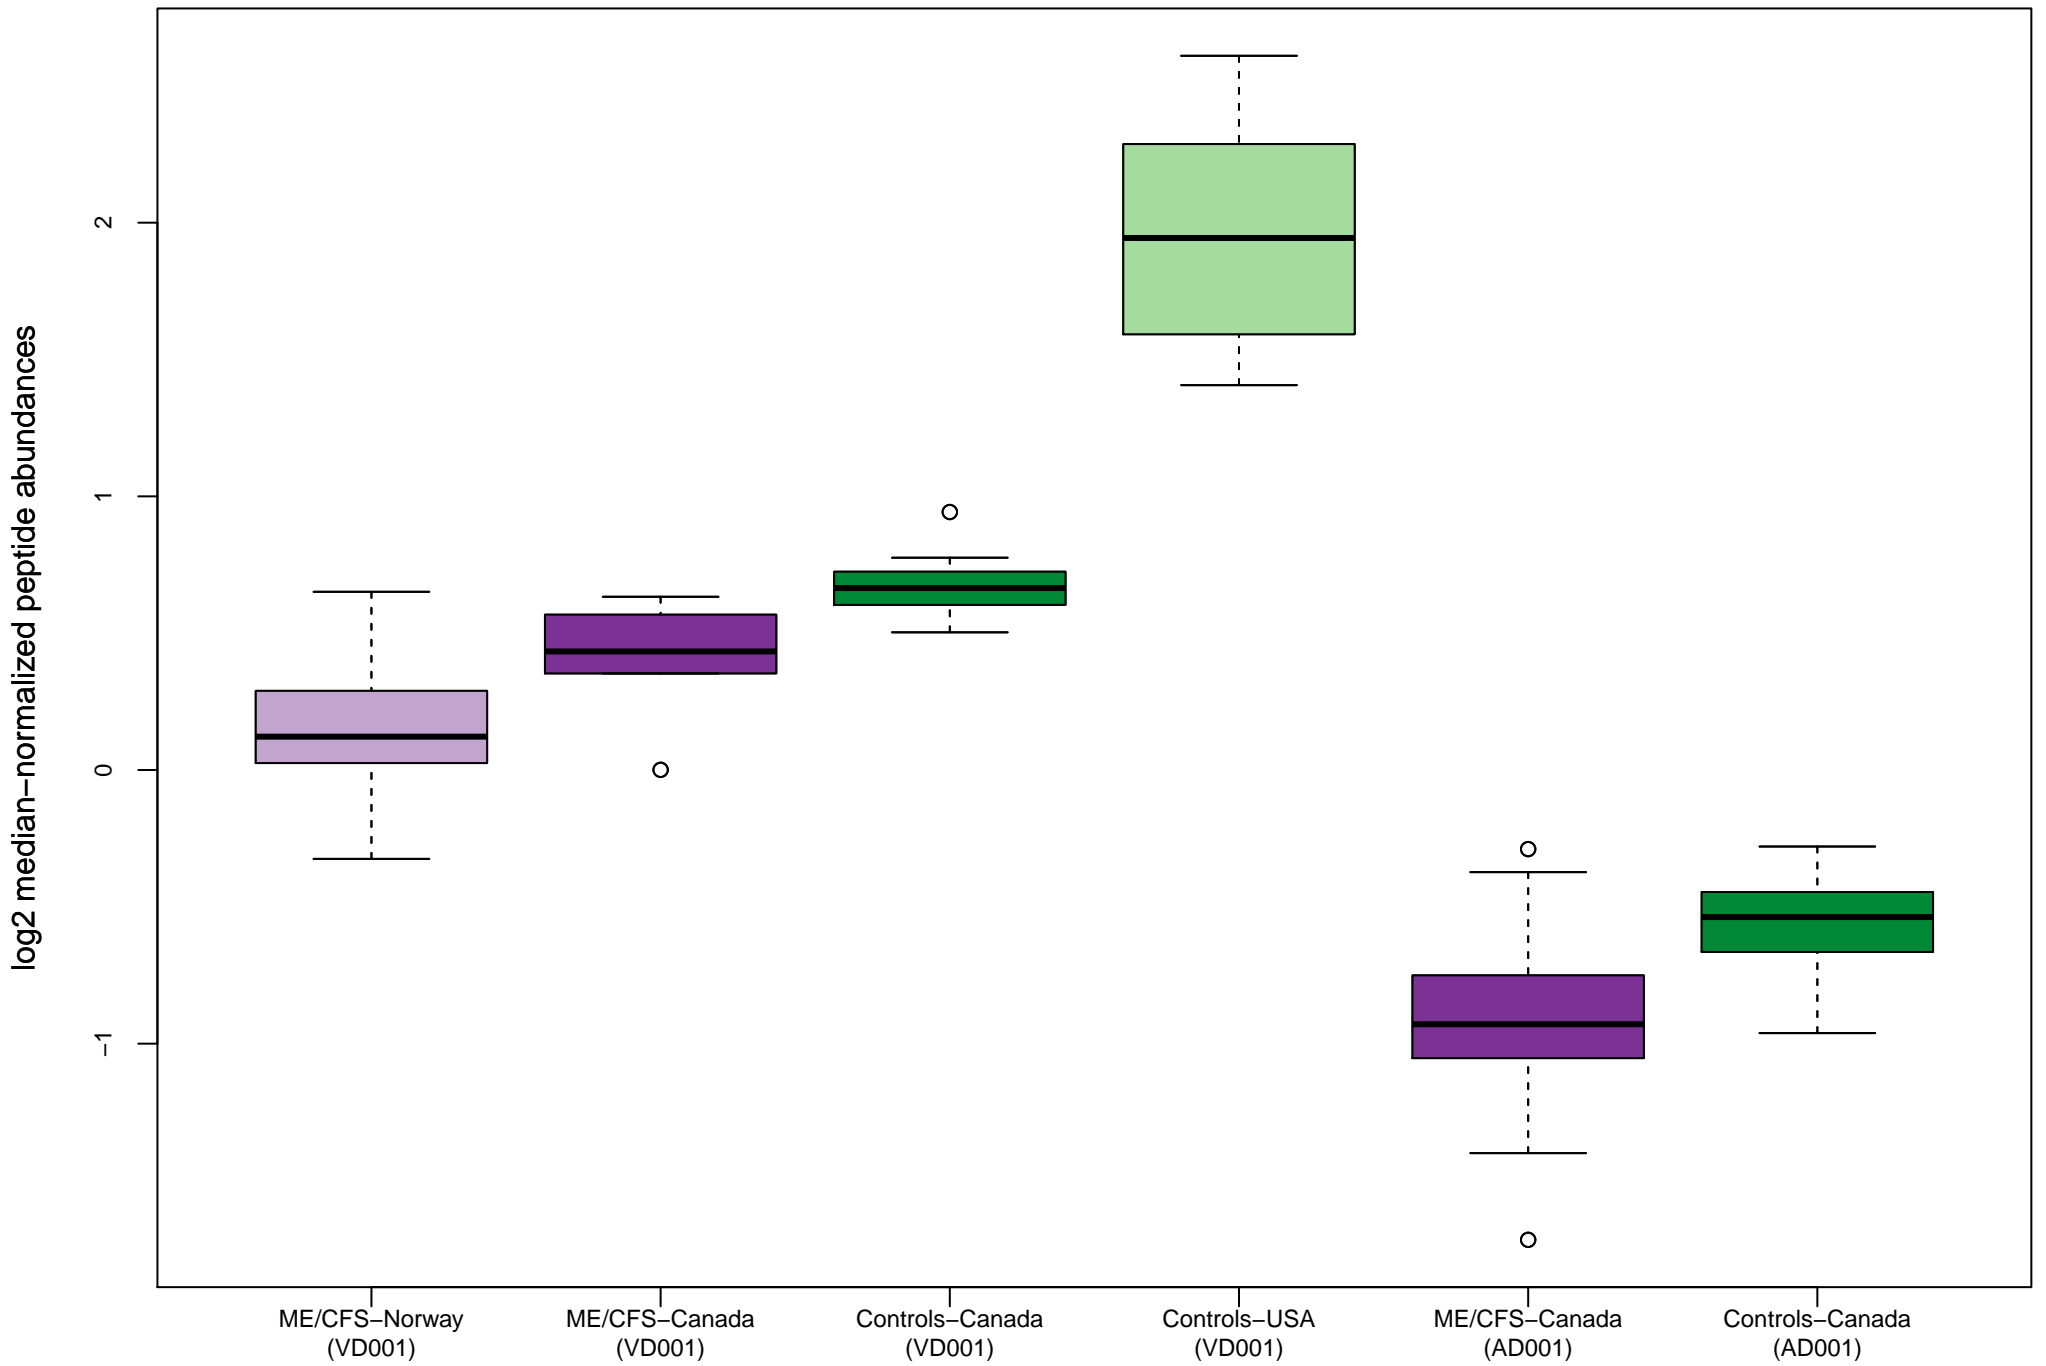

# AQALQNRVWVGL

log2 median-normalized peptide abundances

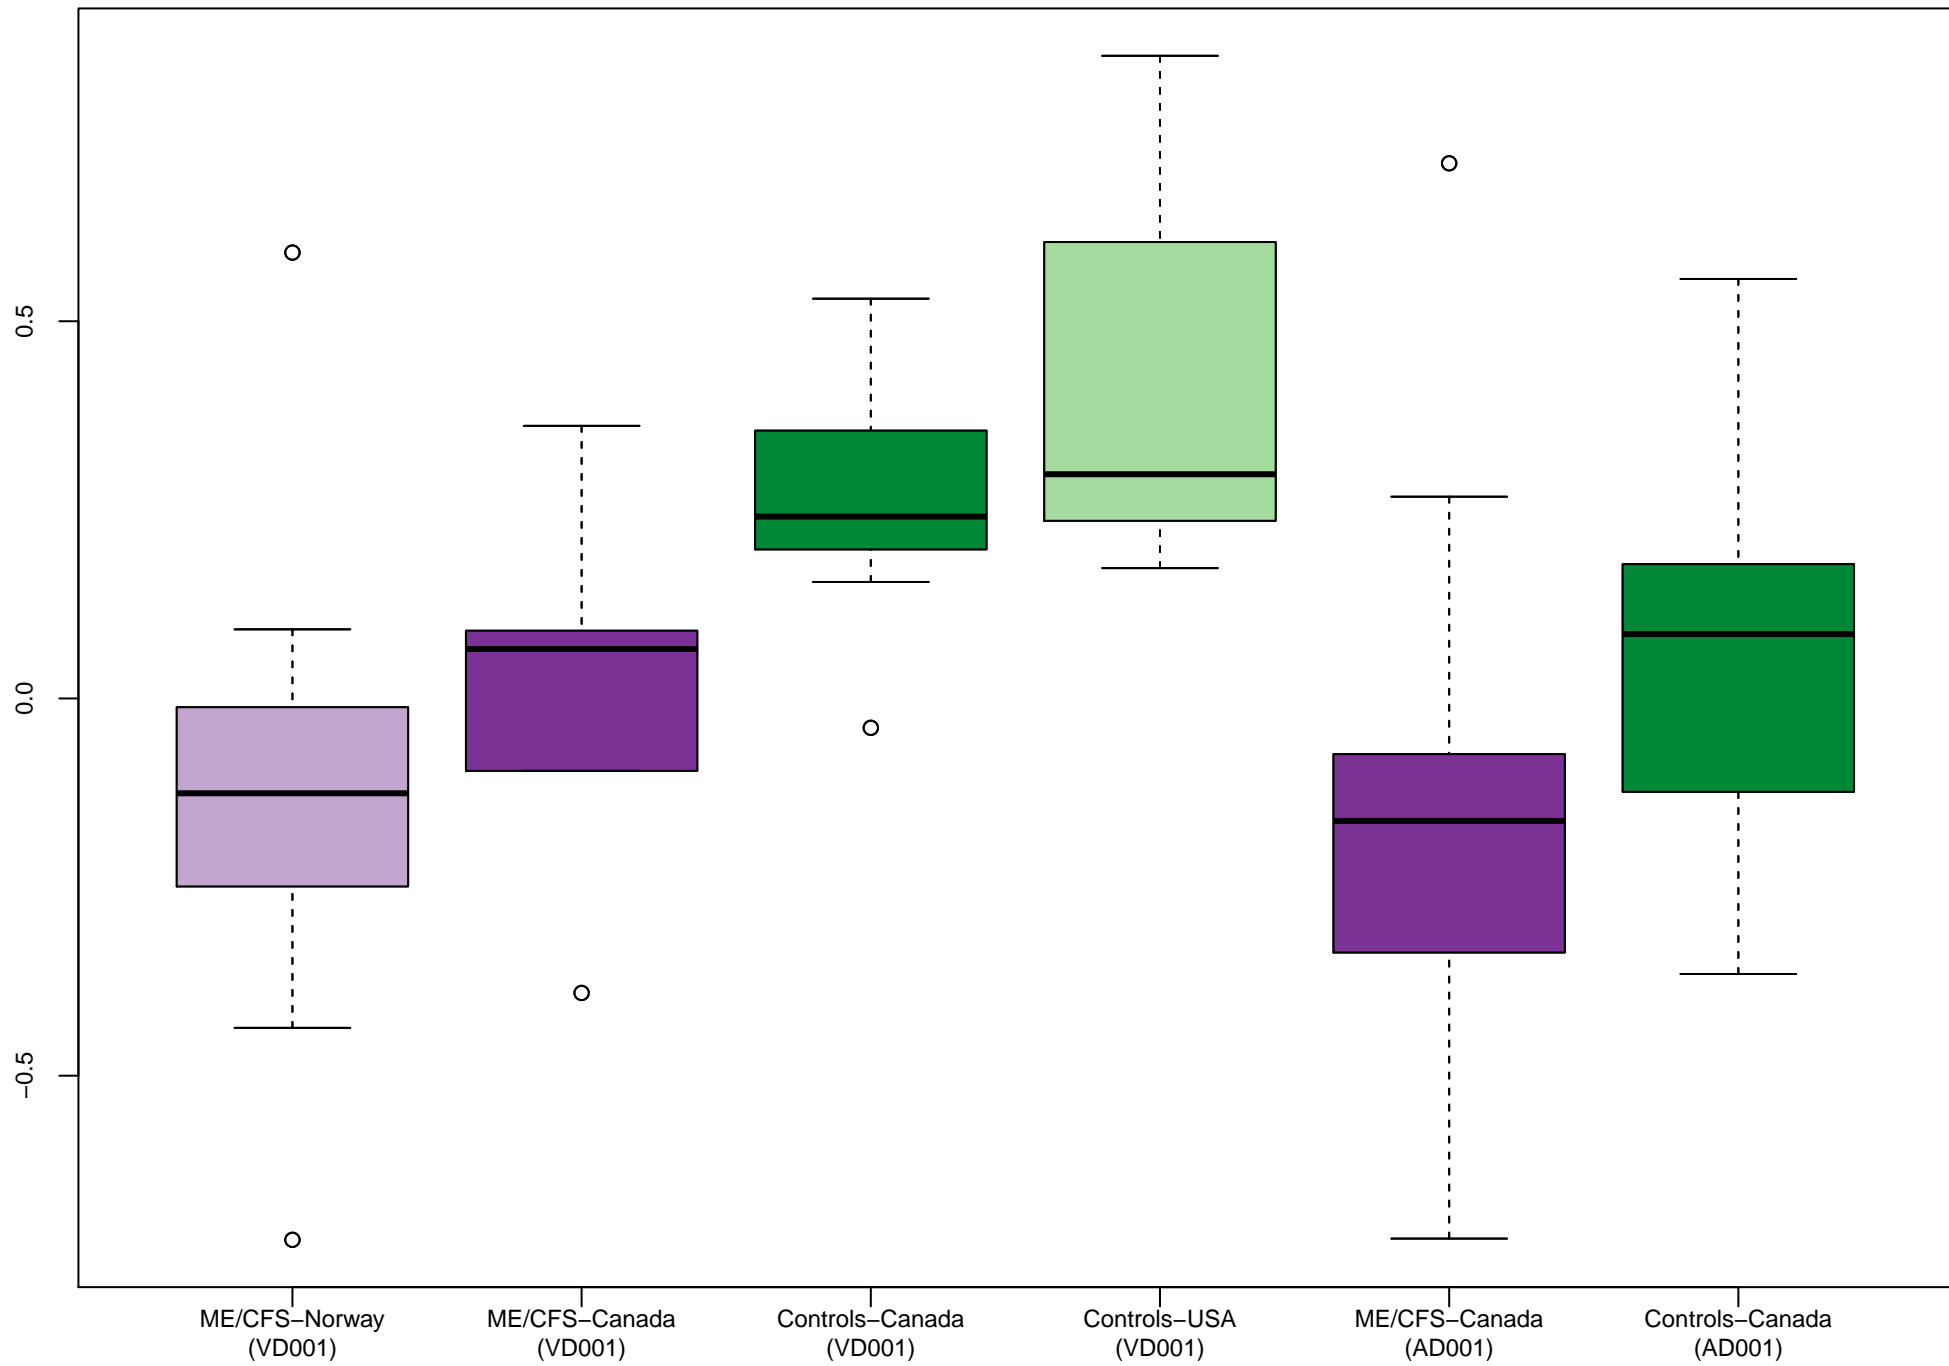

# ARALYFRSALG

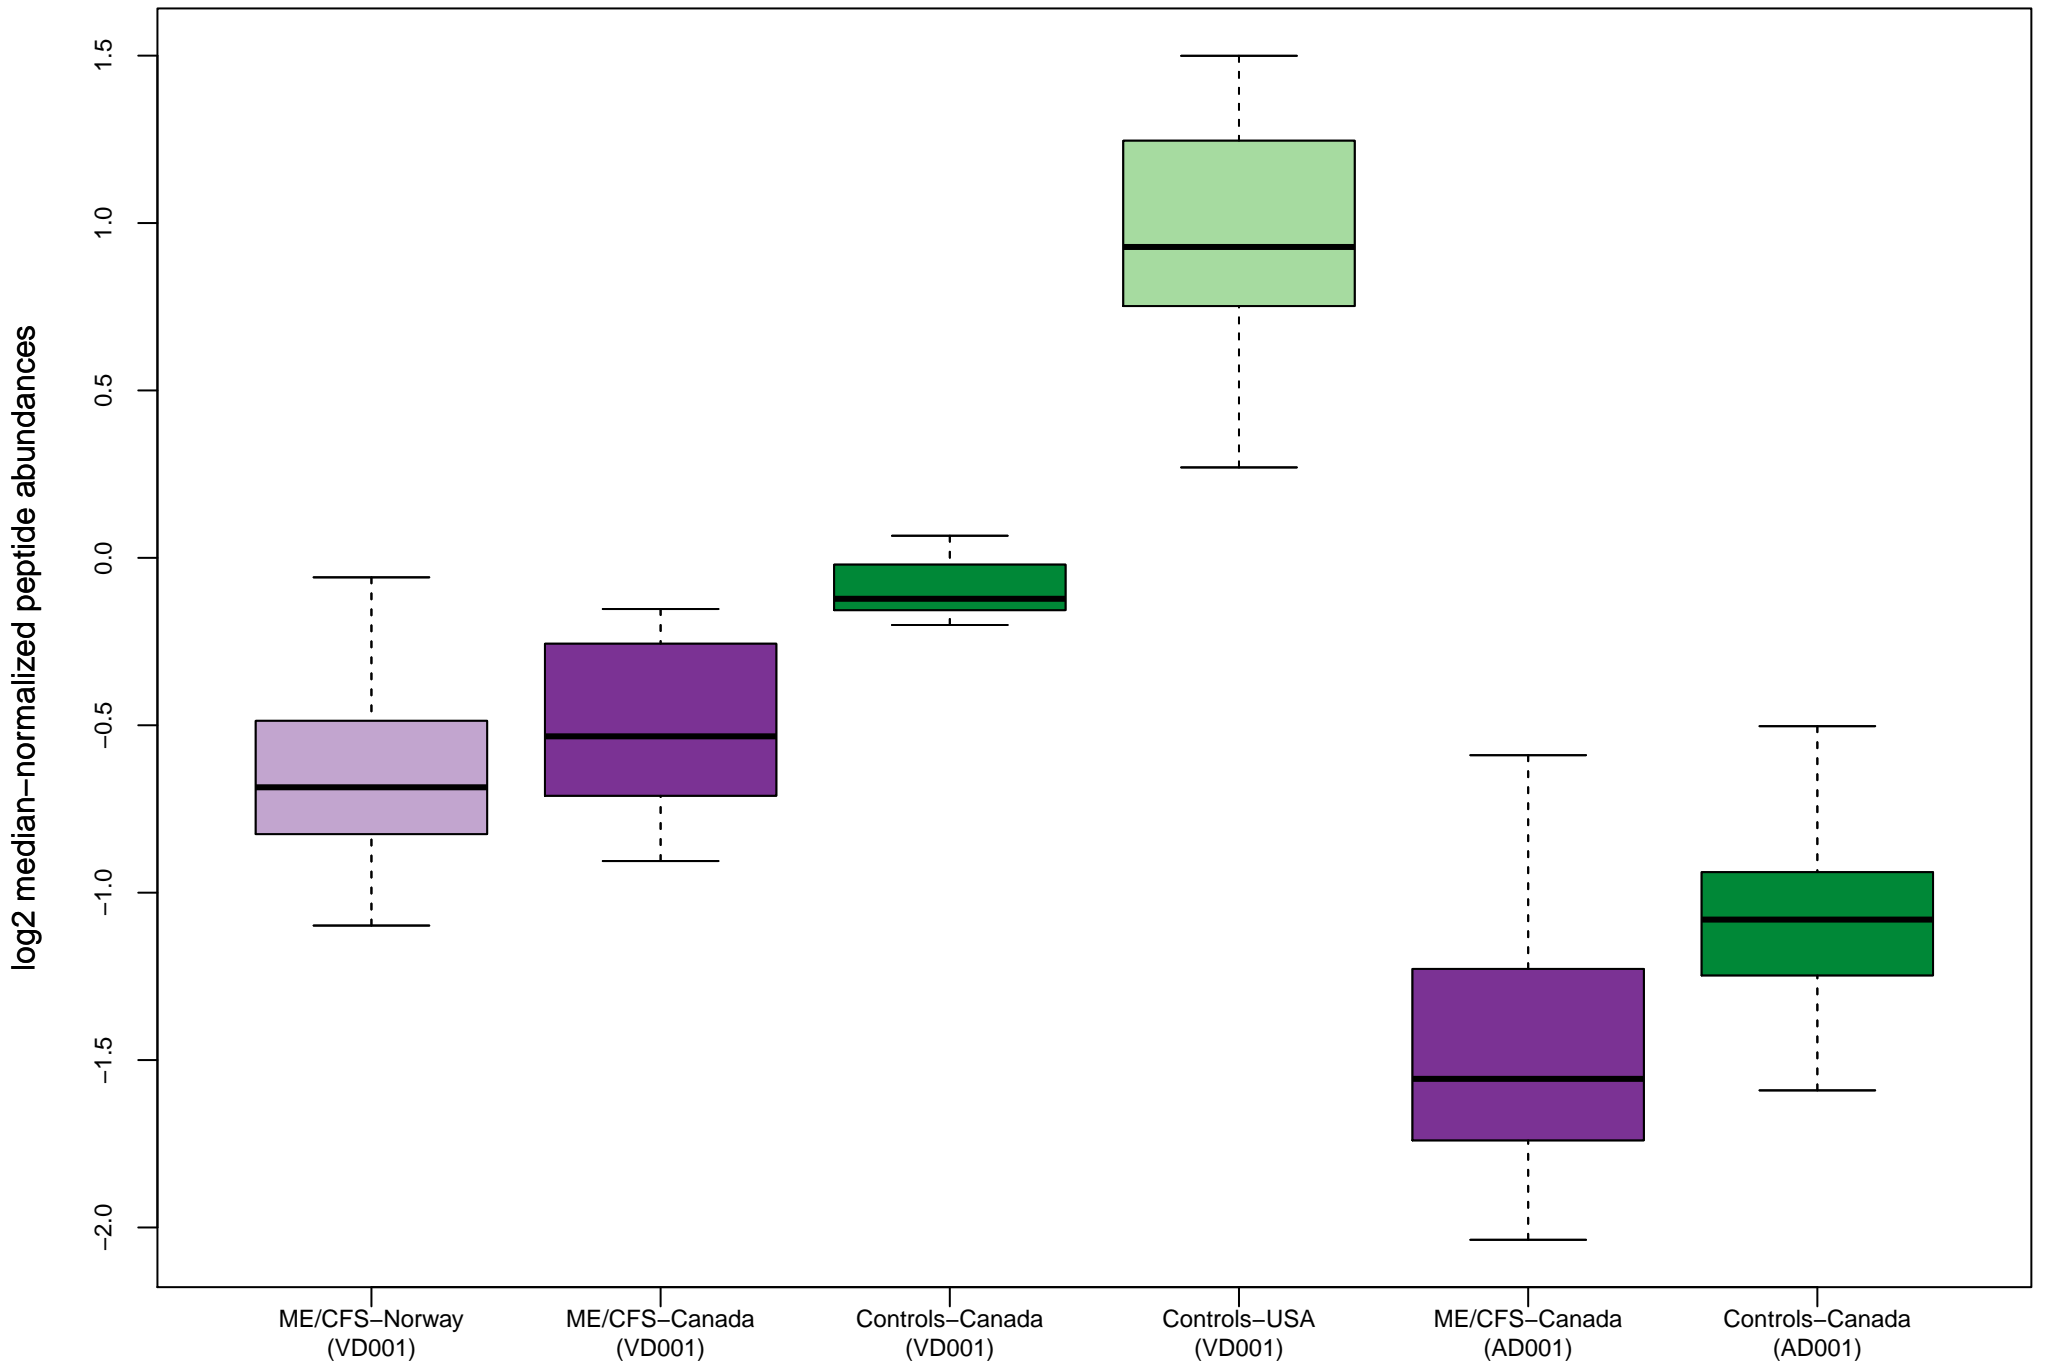

# ARAVLNALSVLS

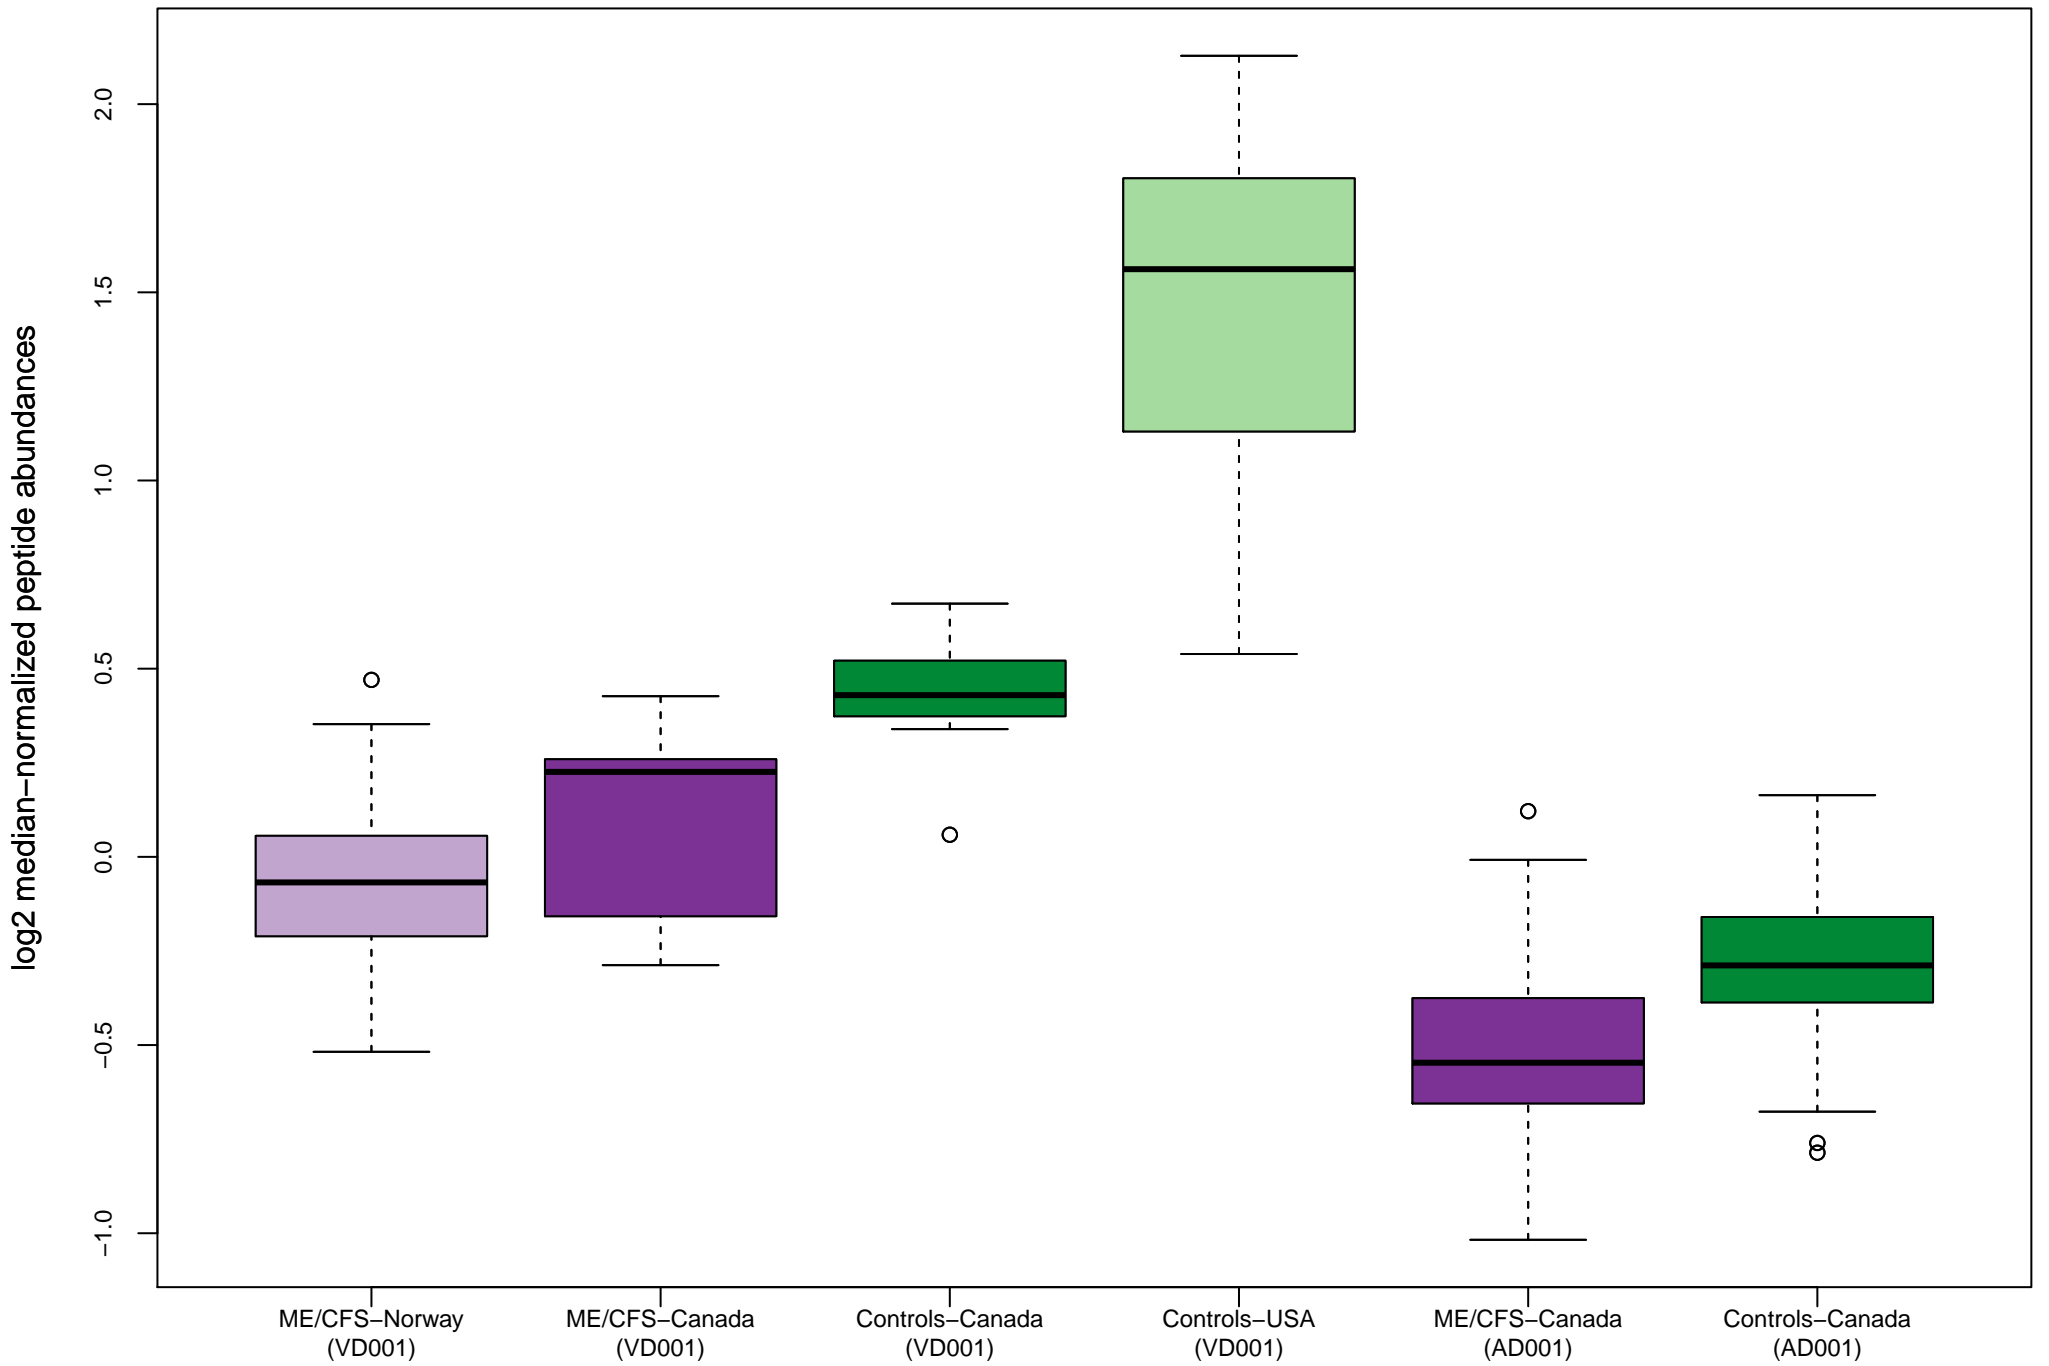

# ARFGALGVALSG

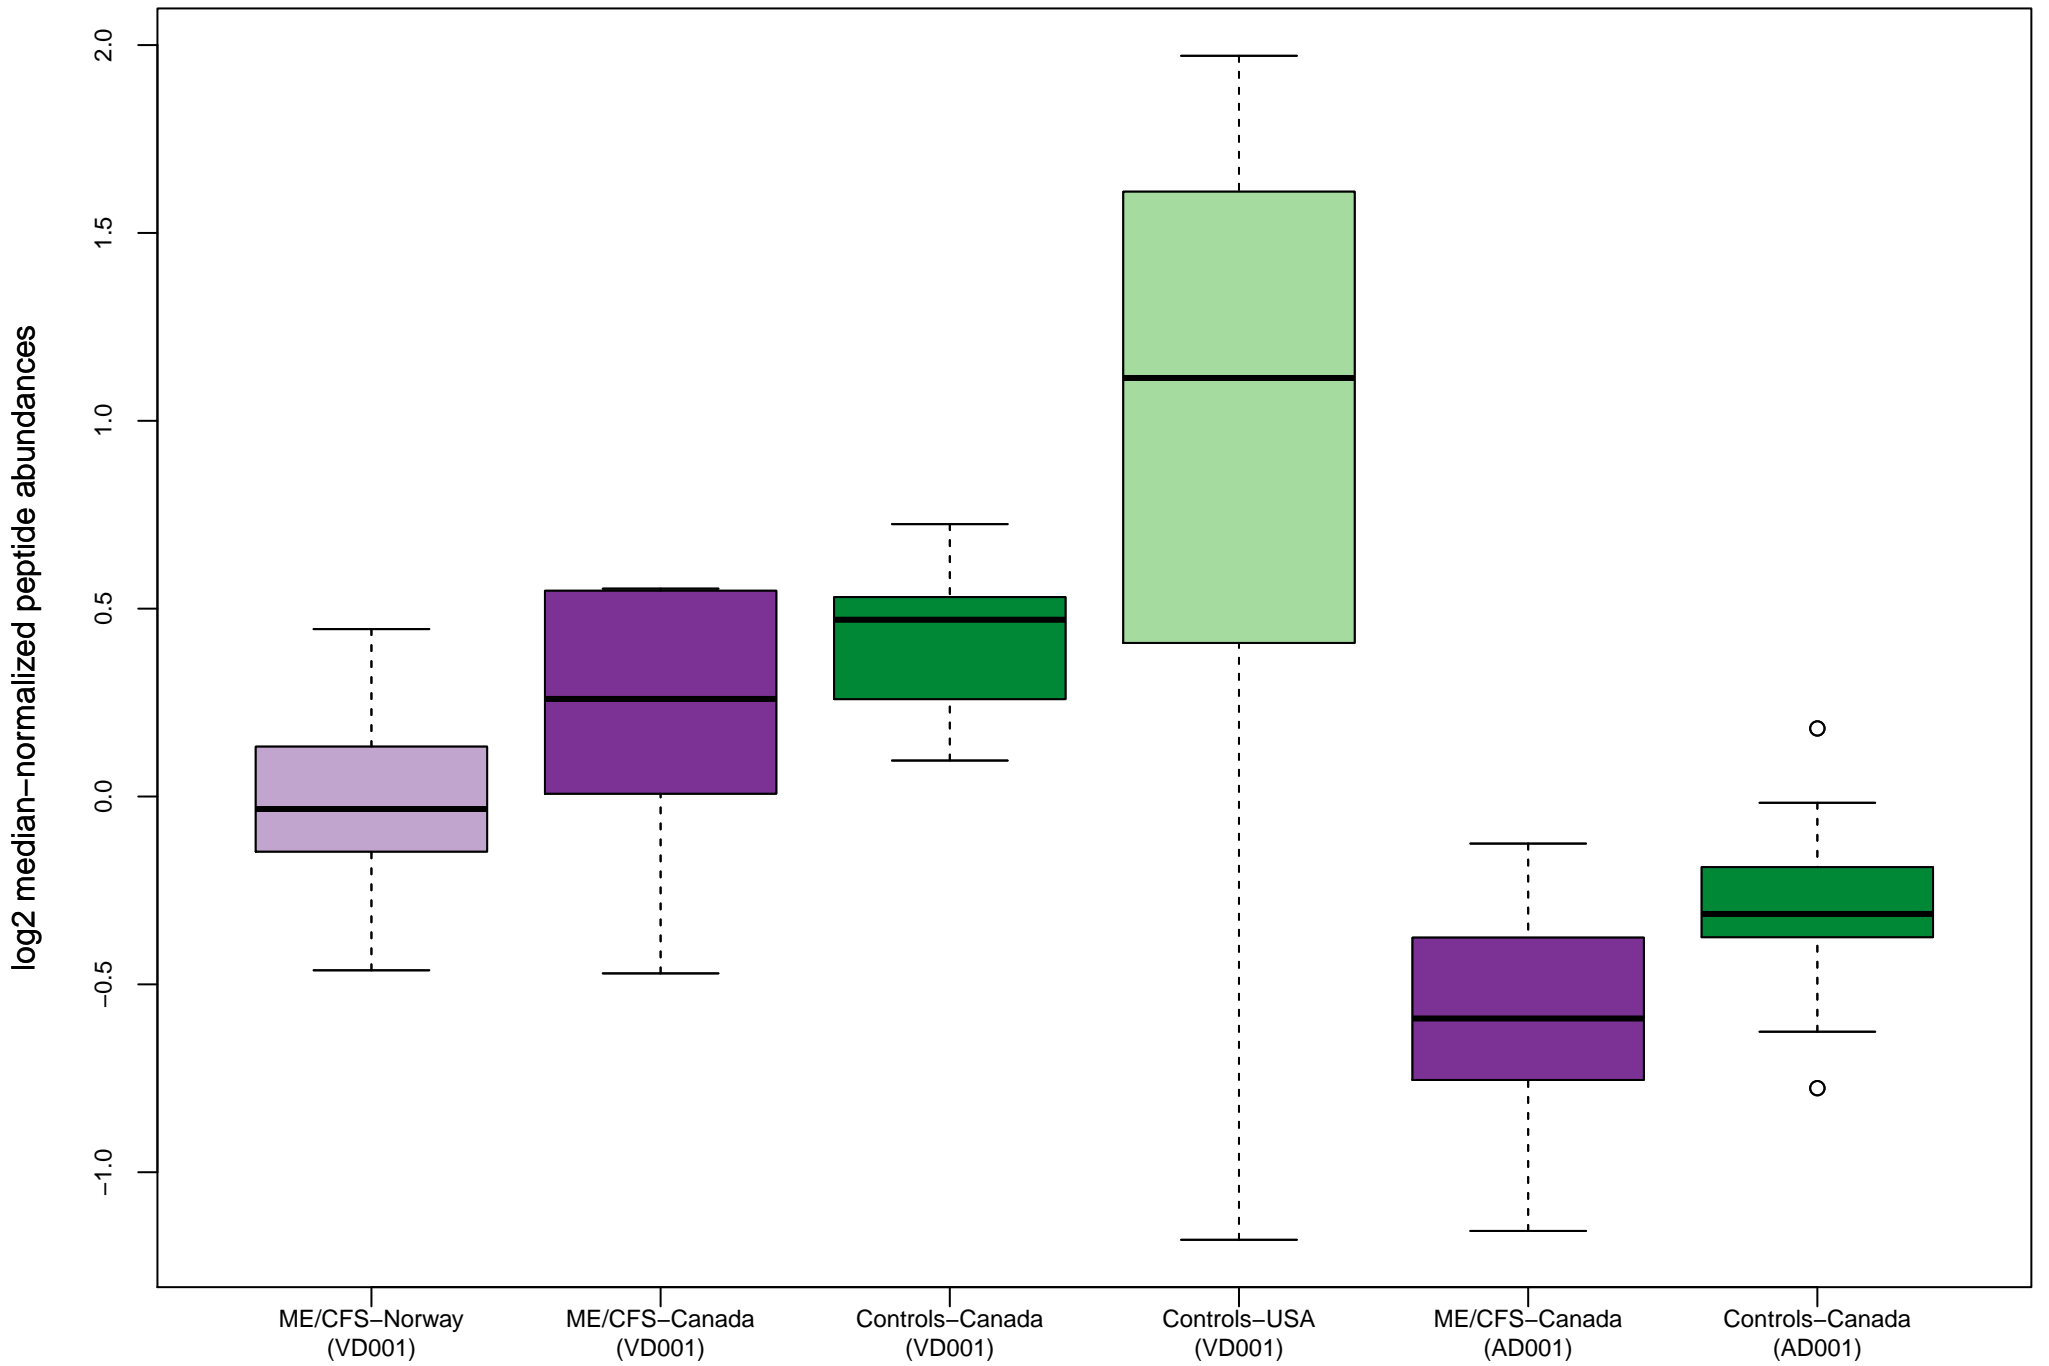

# ARFYQRLGVALG

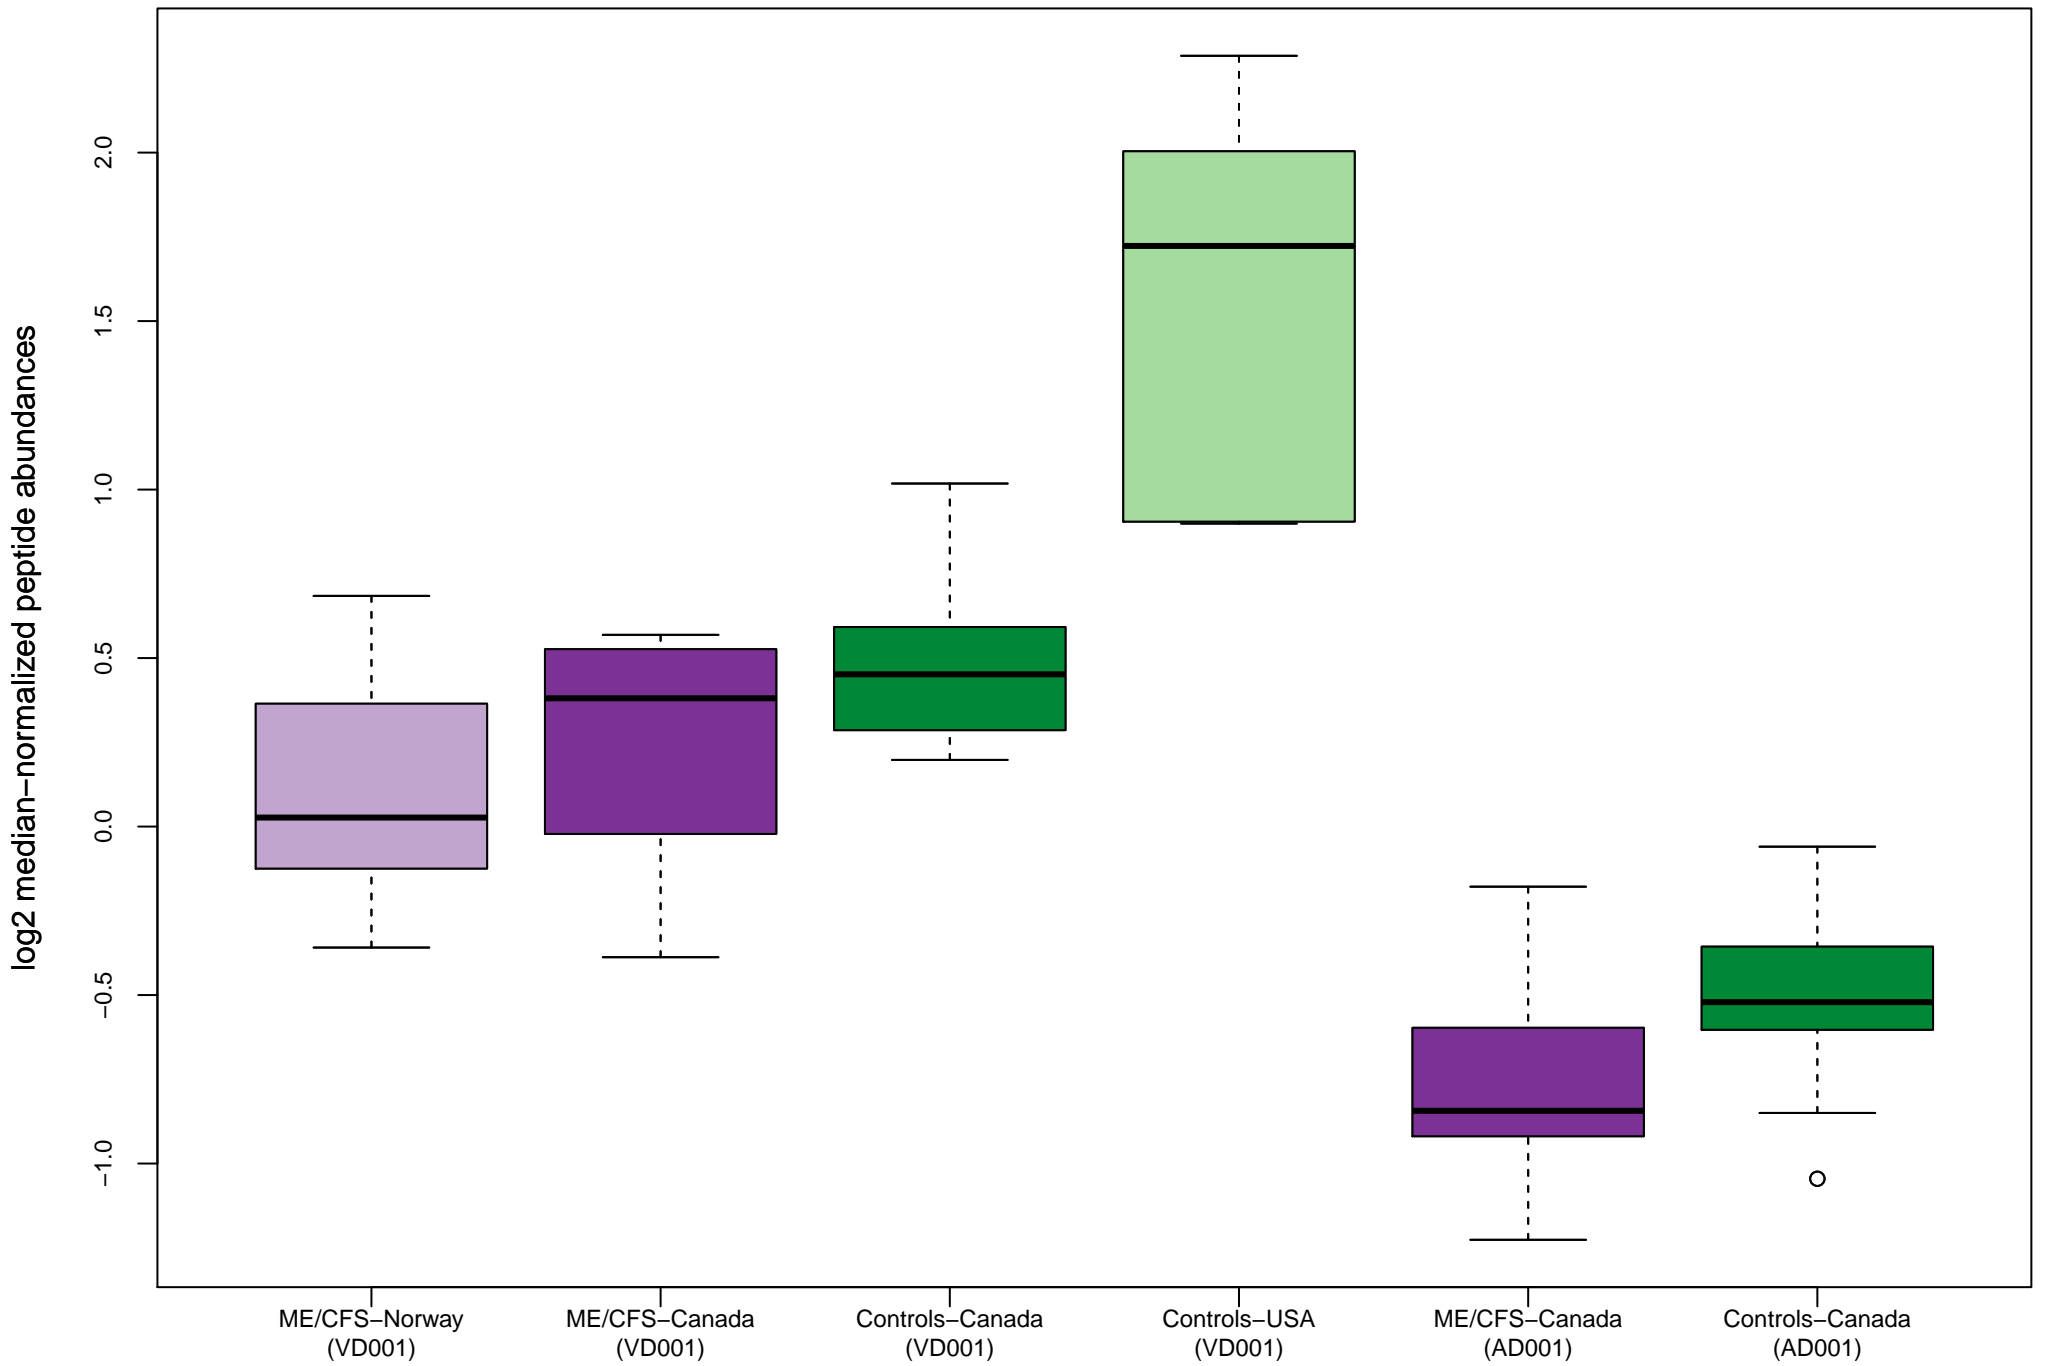

# ARGYKFWASVLS

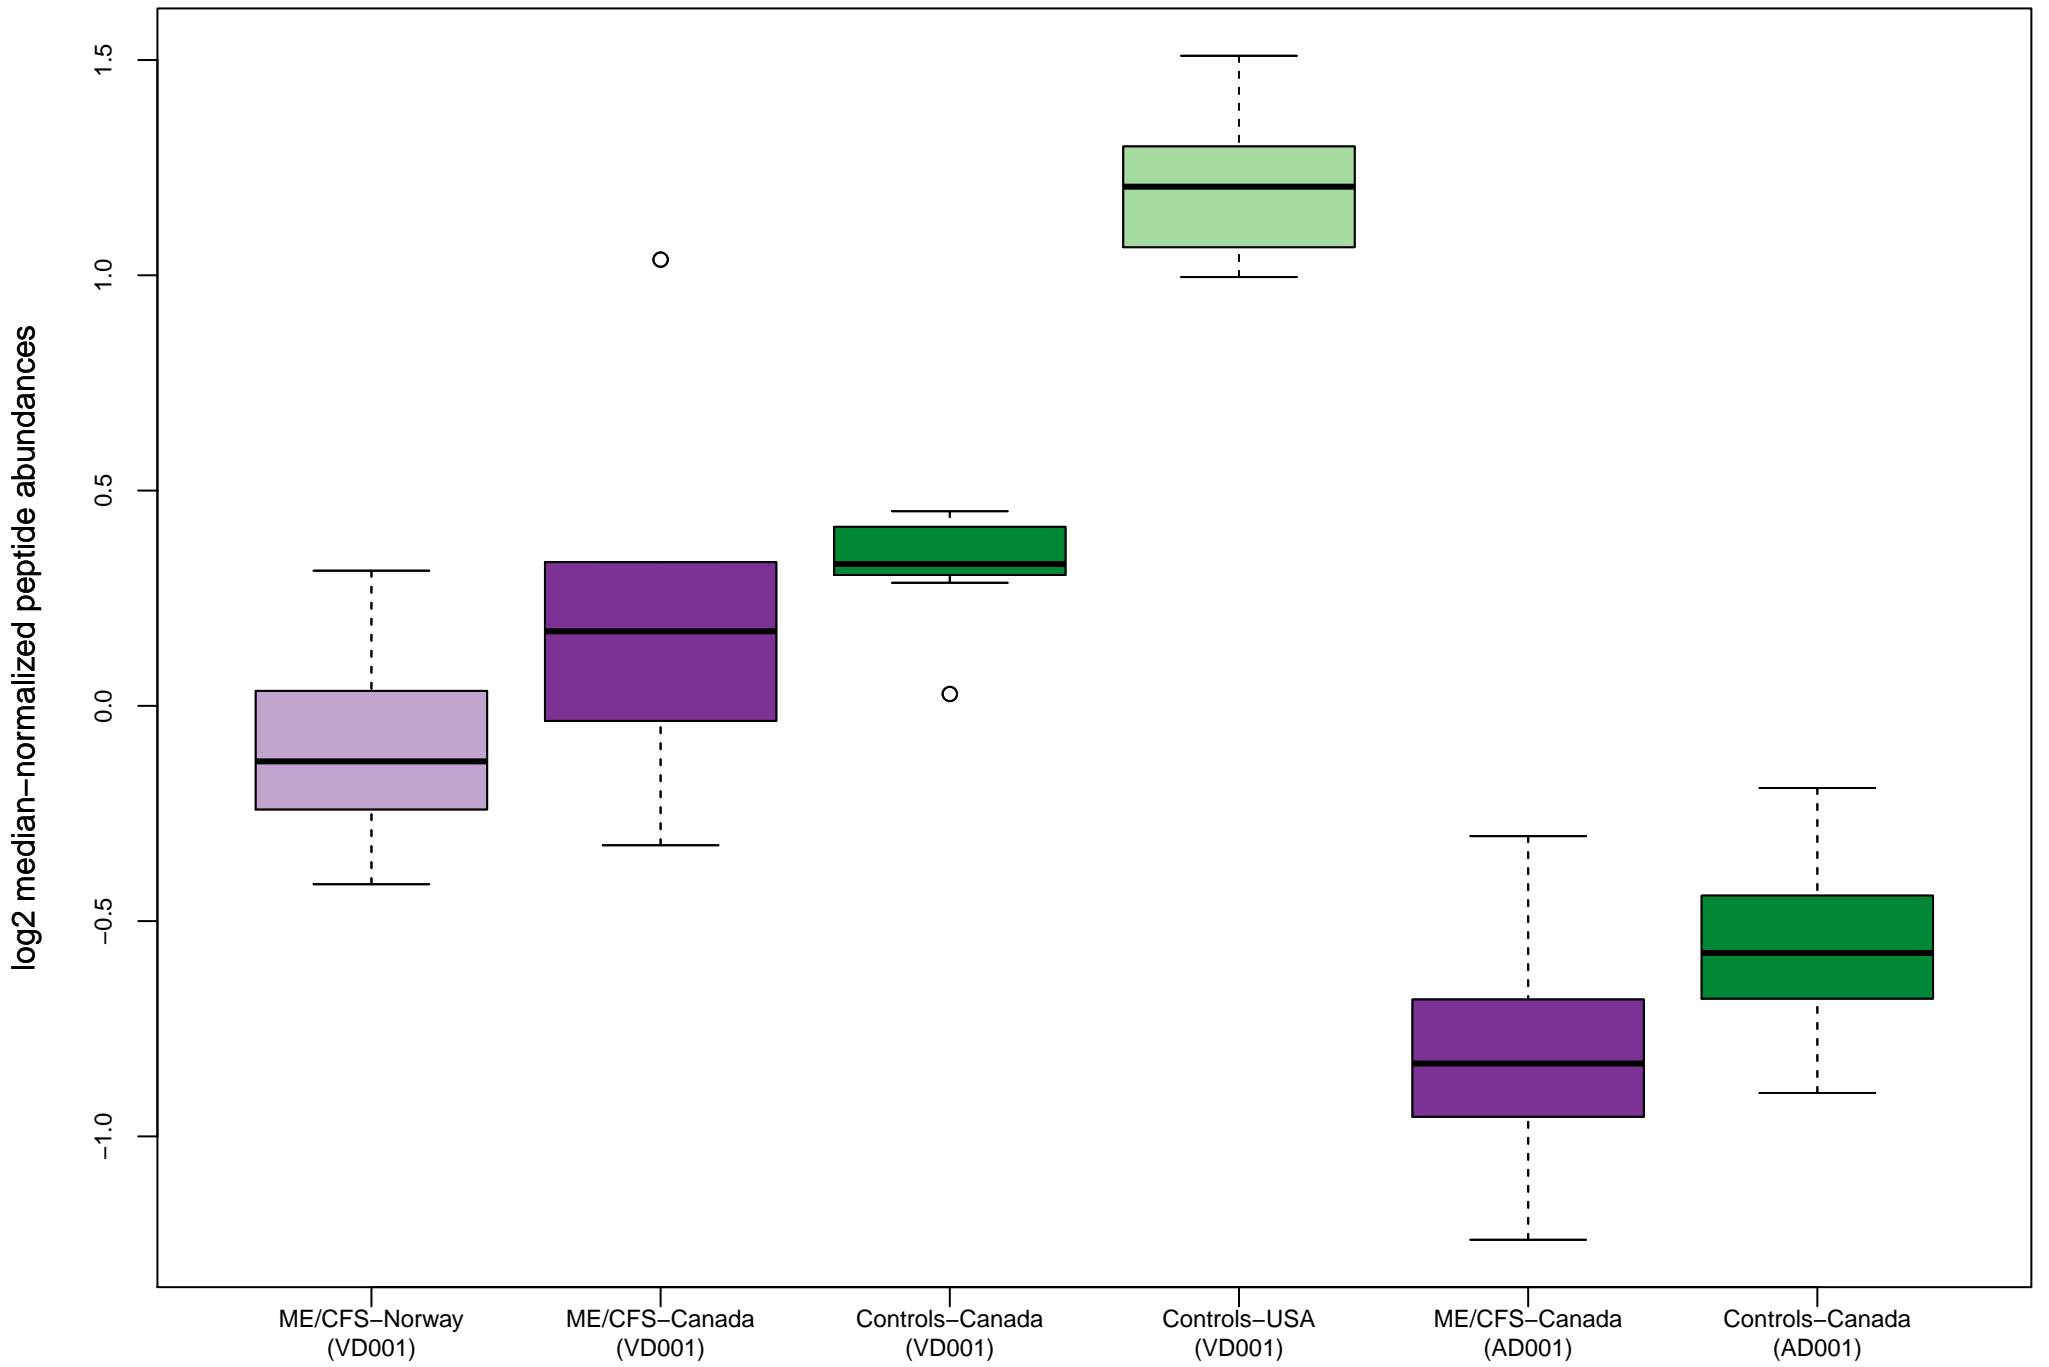

# ARGYVWASGVLS

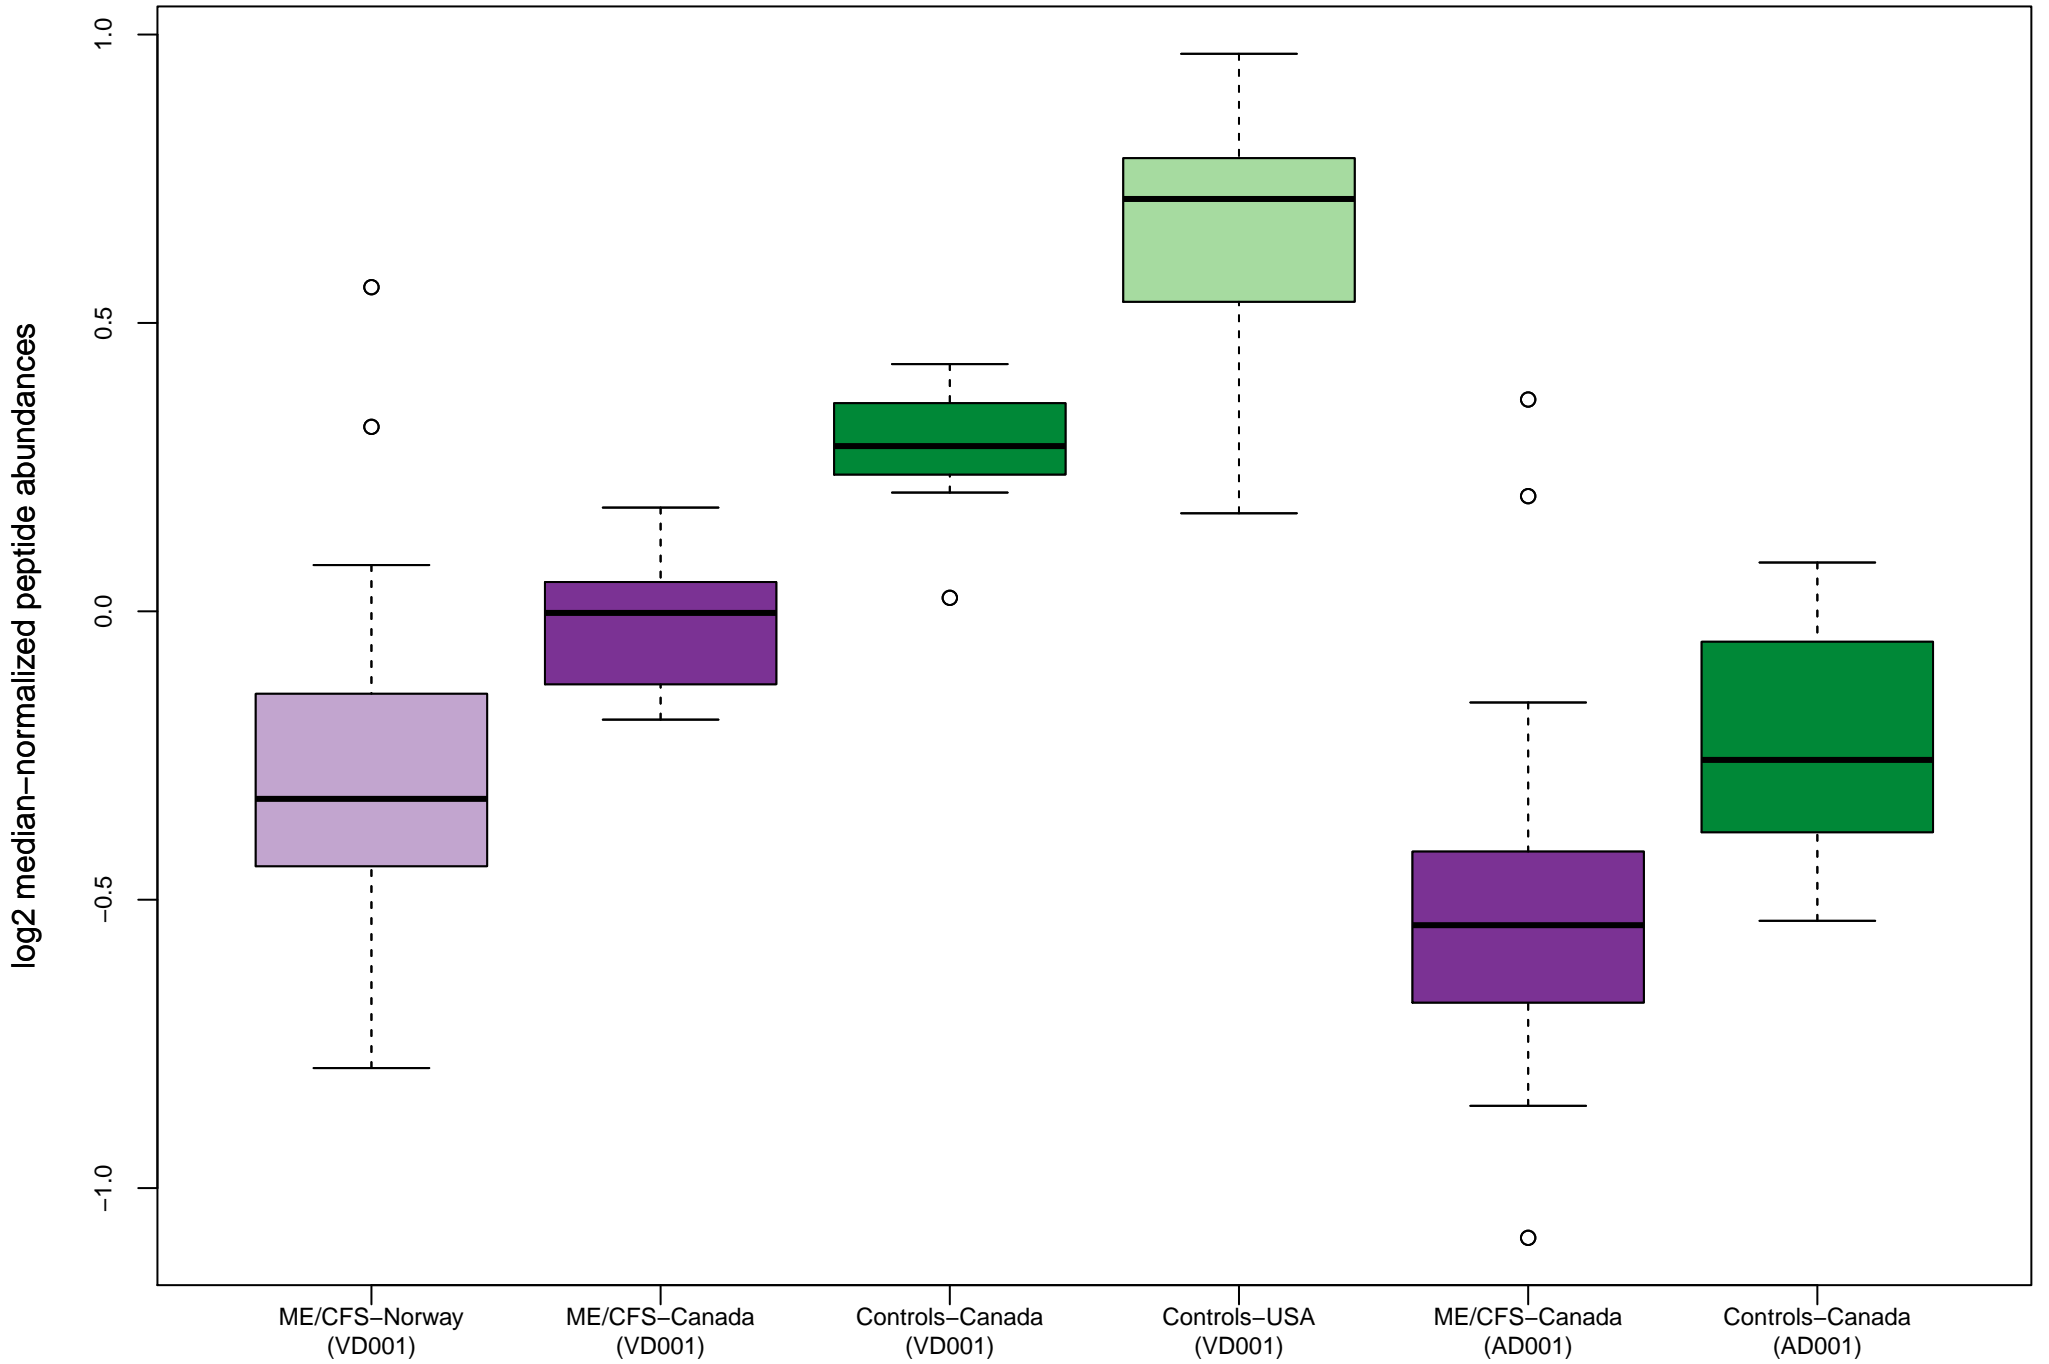



# ARNQLWAGVALS

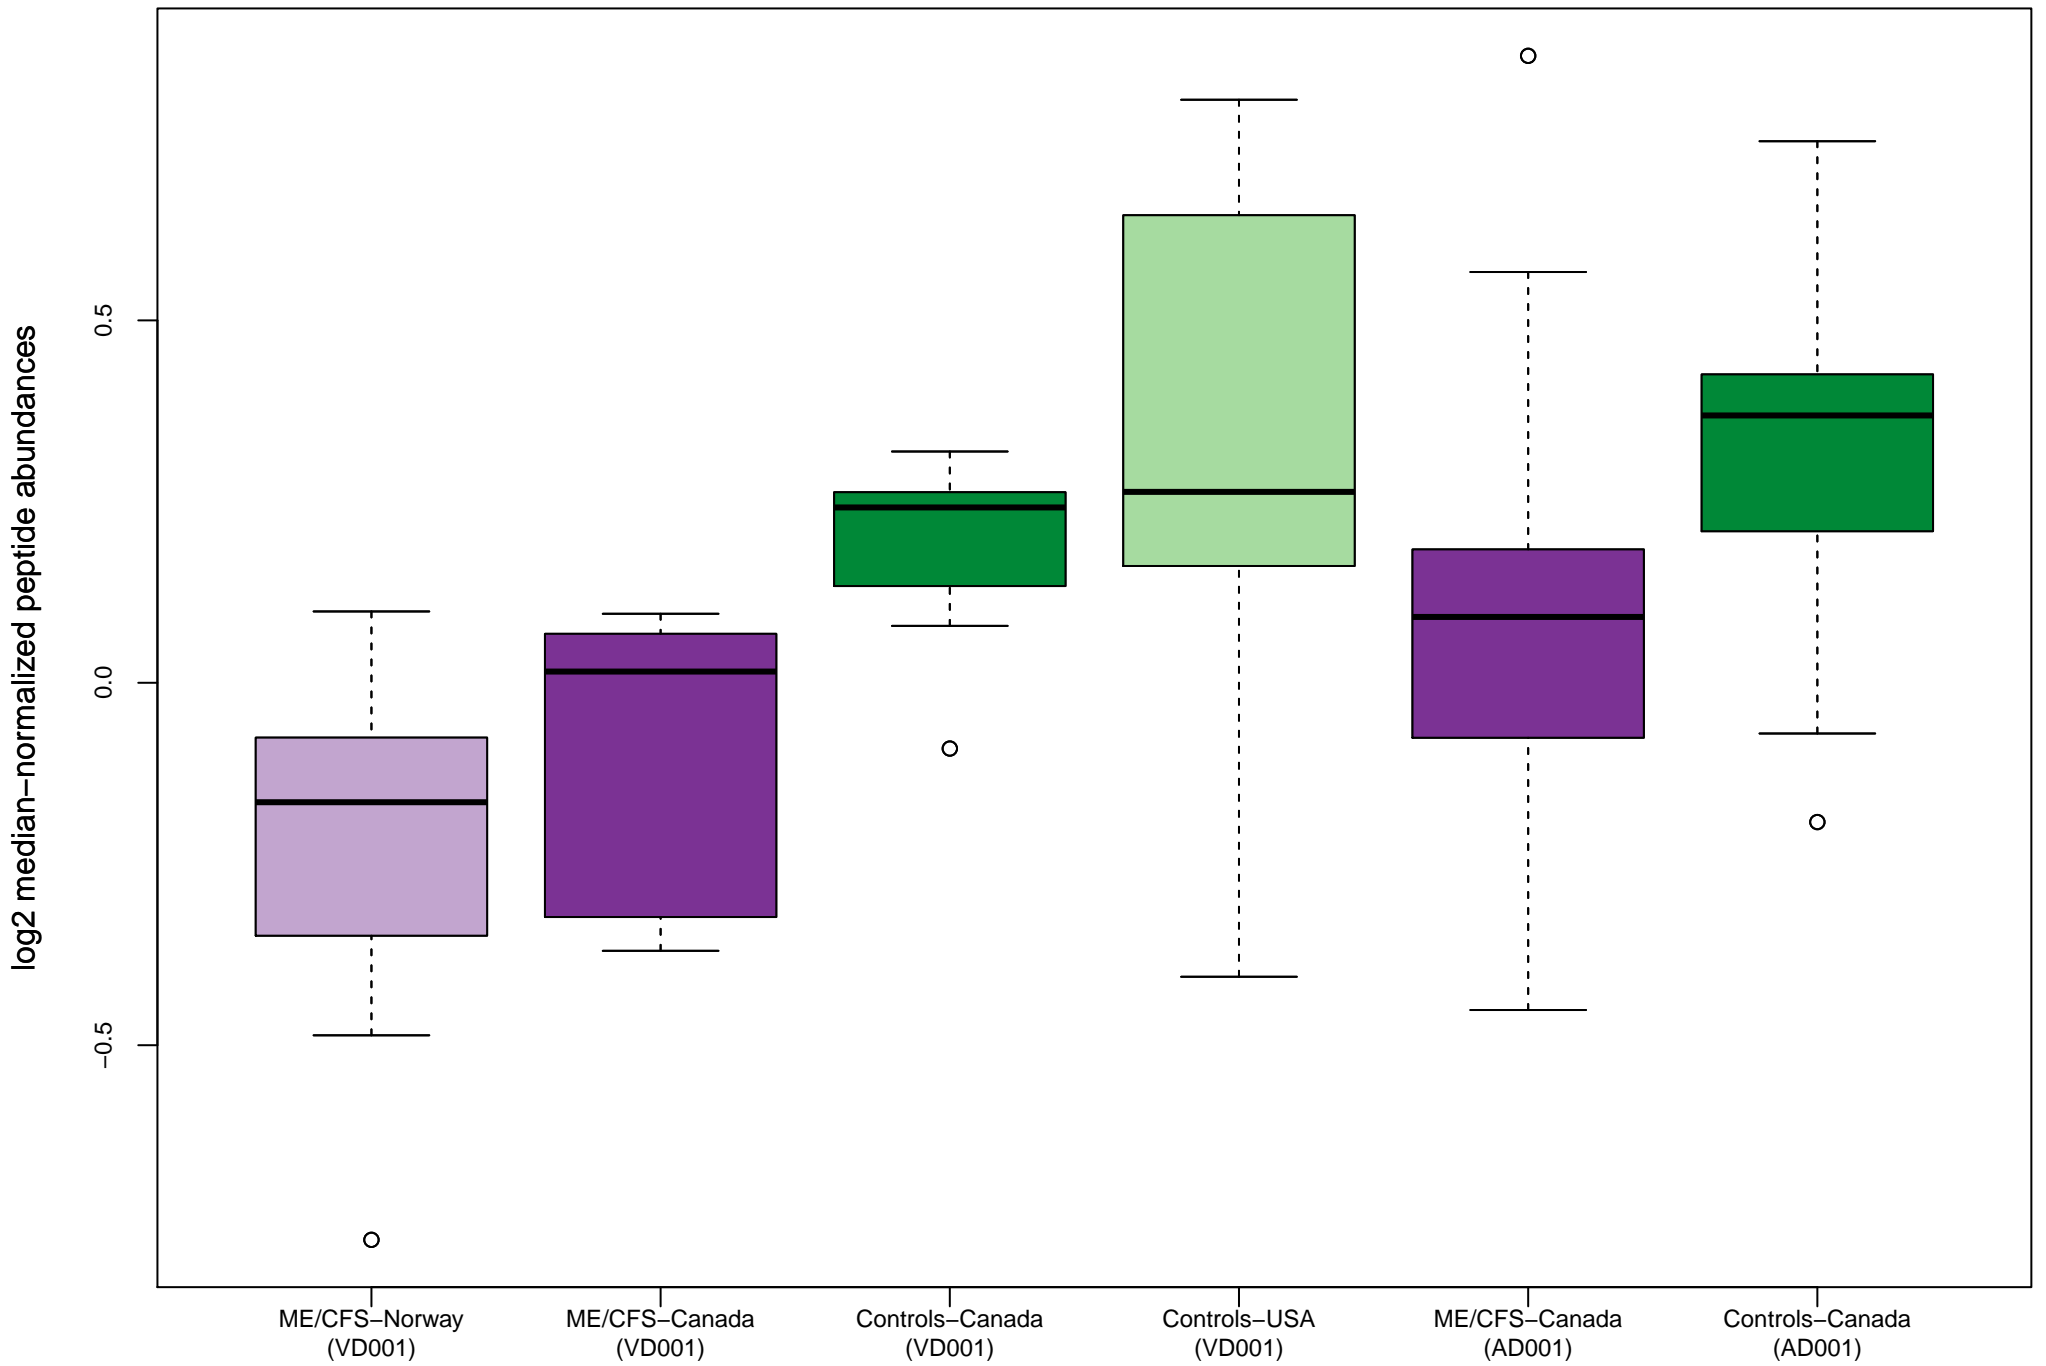

# ASRVFRLSYWKD

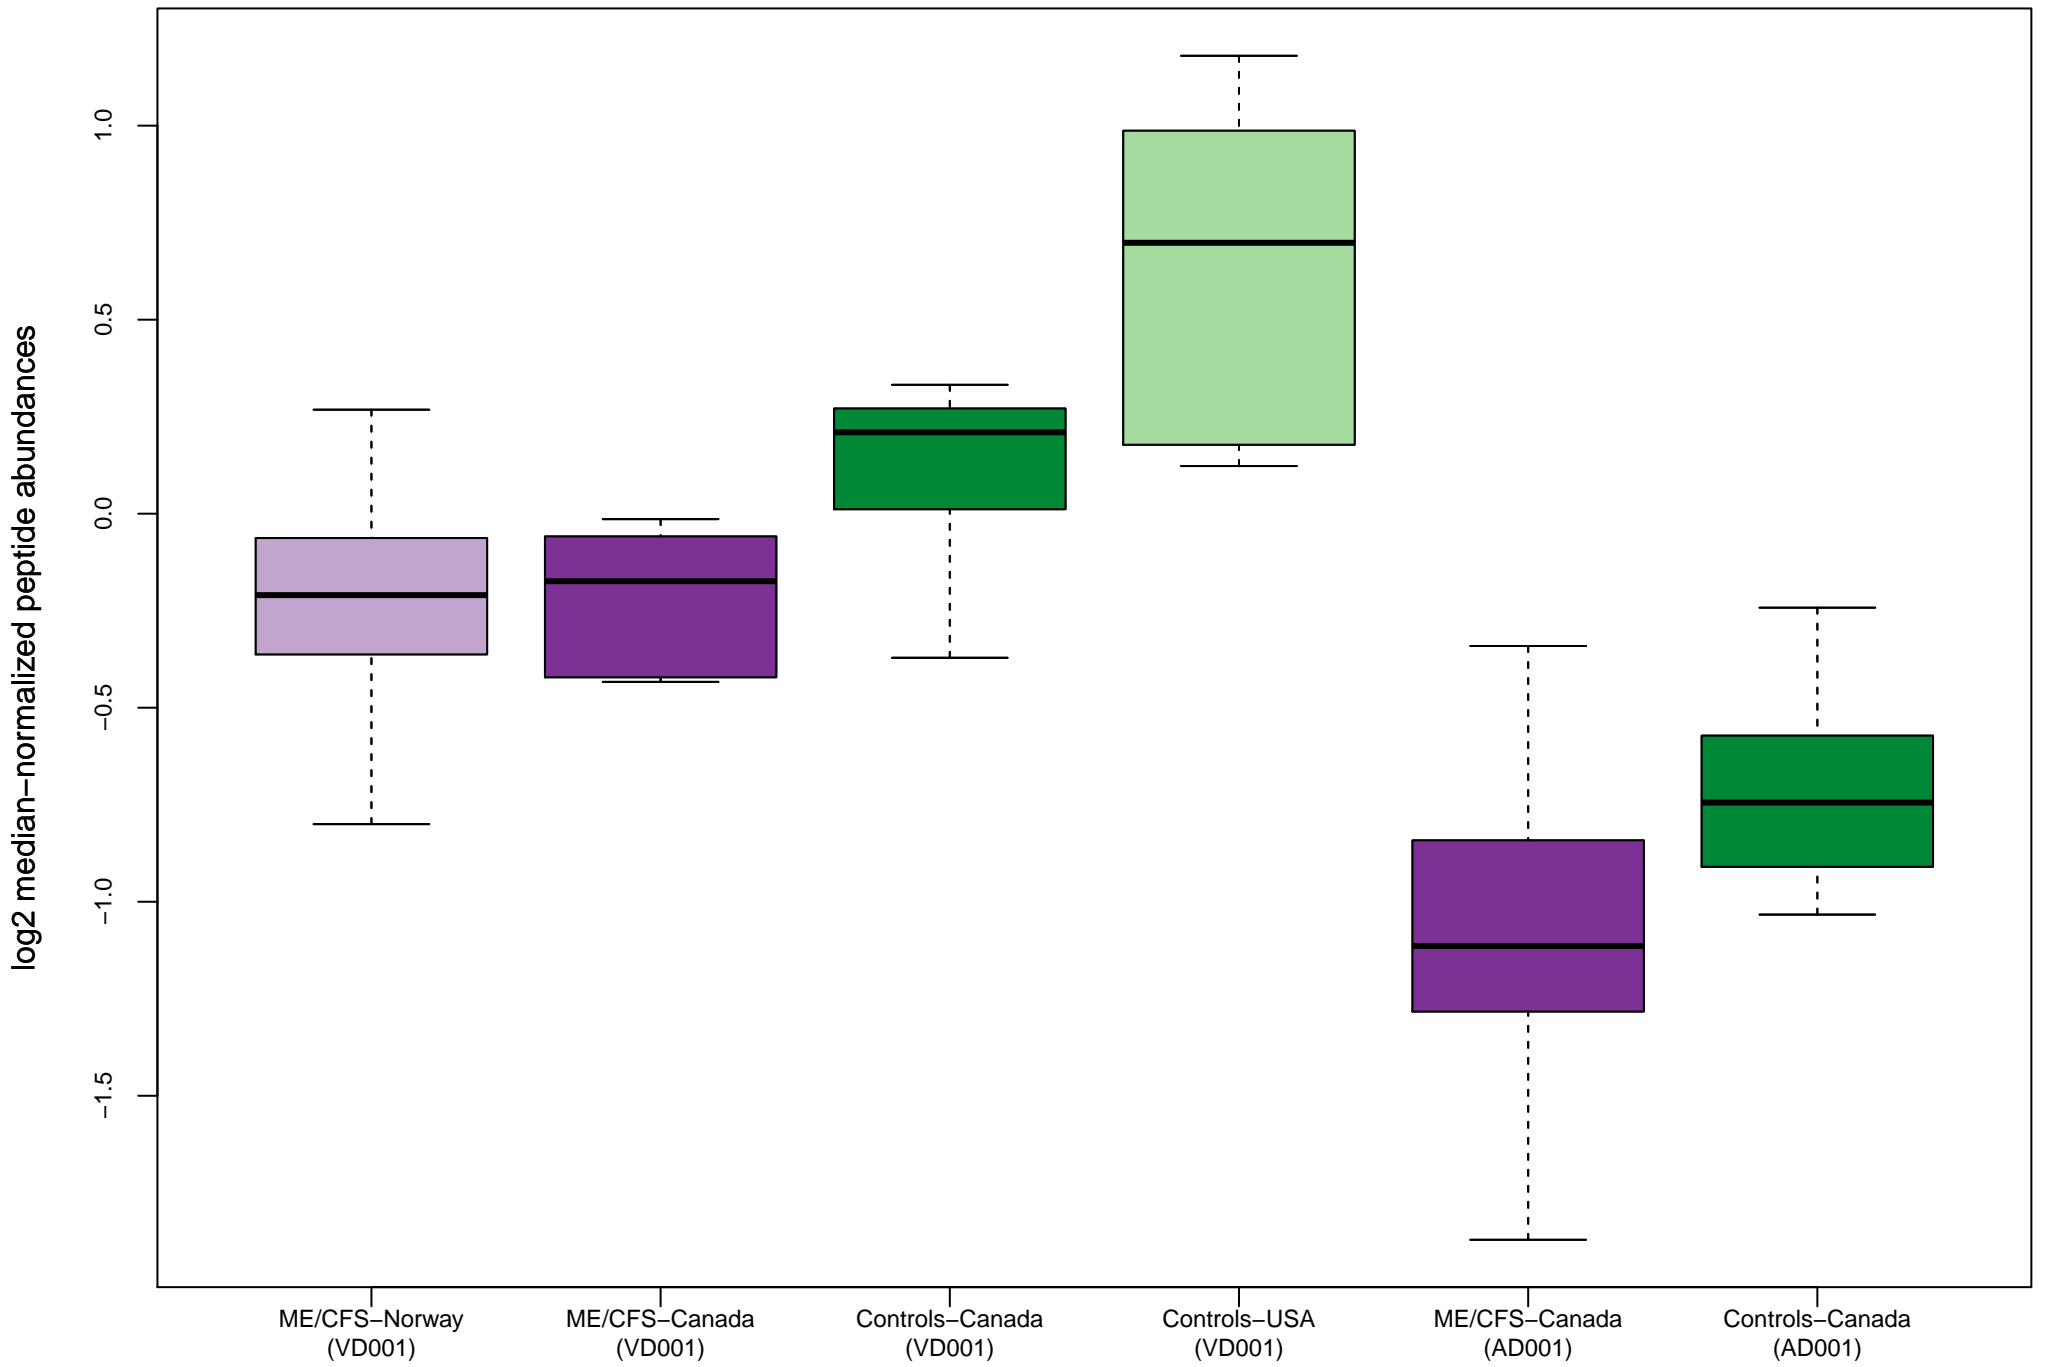

# AVFPWRVGVALG

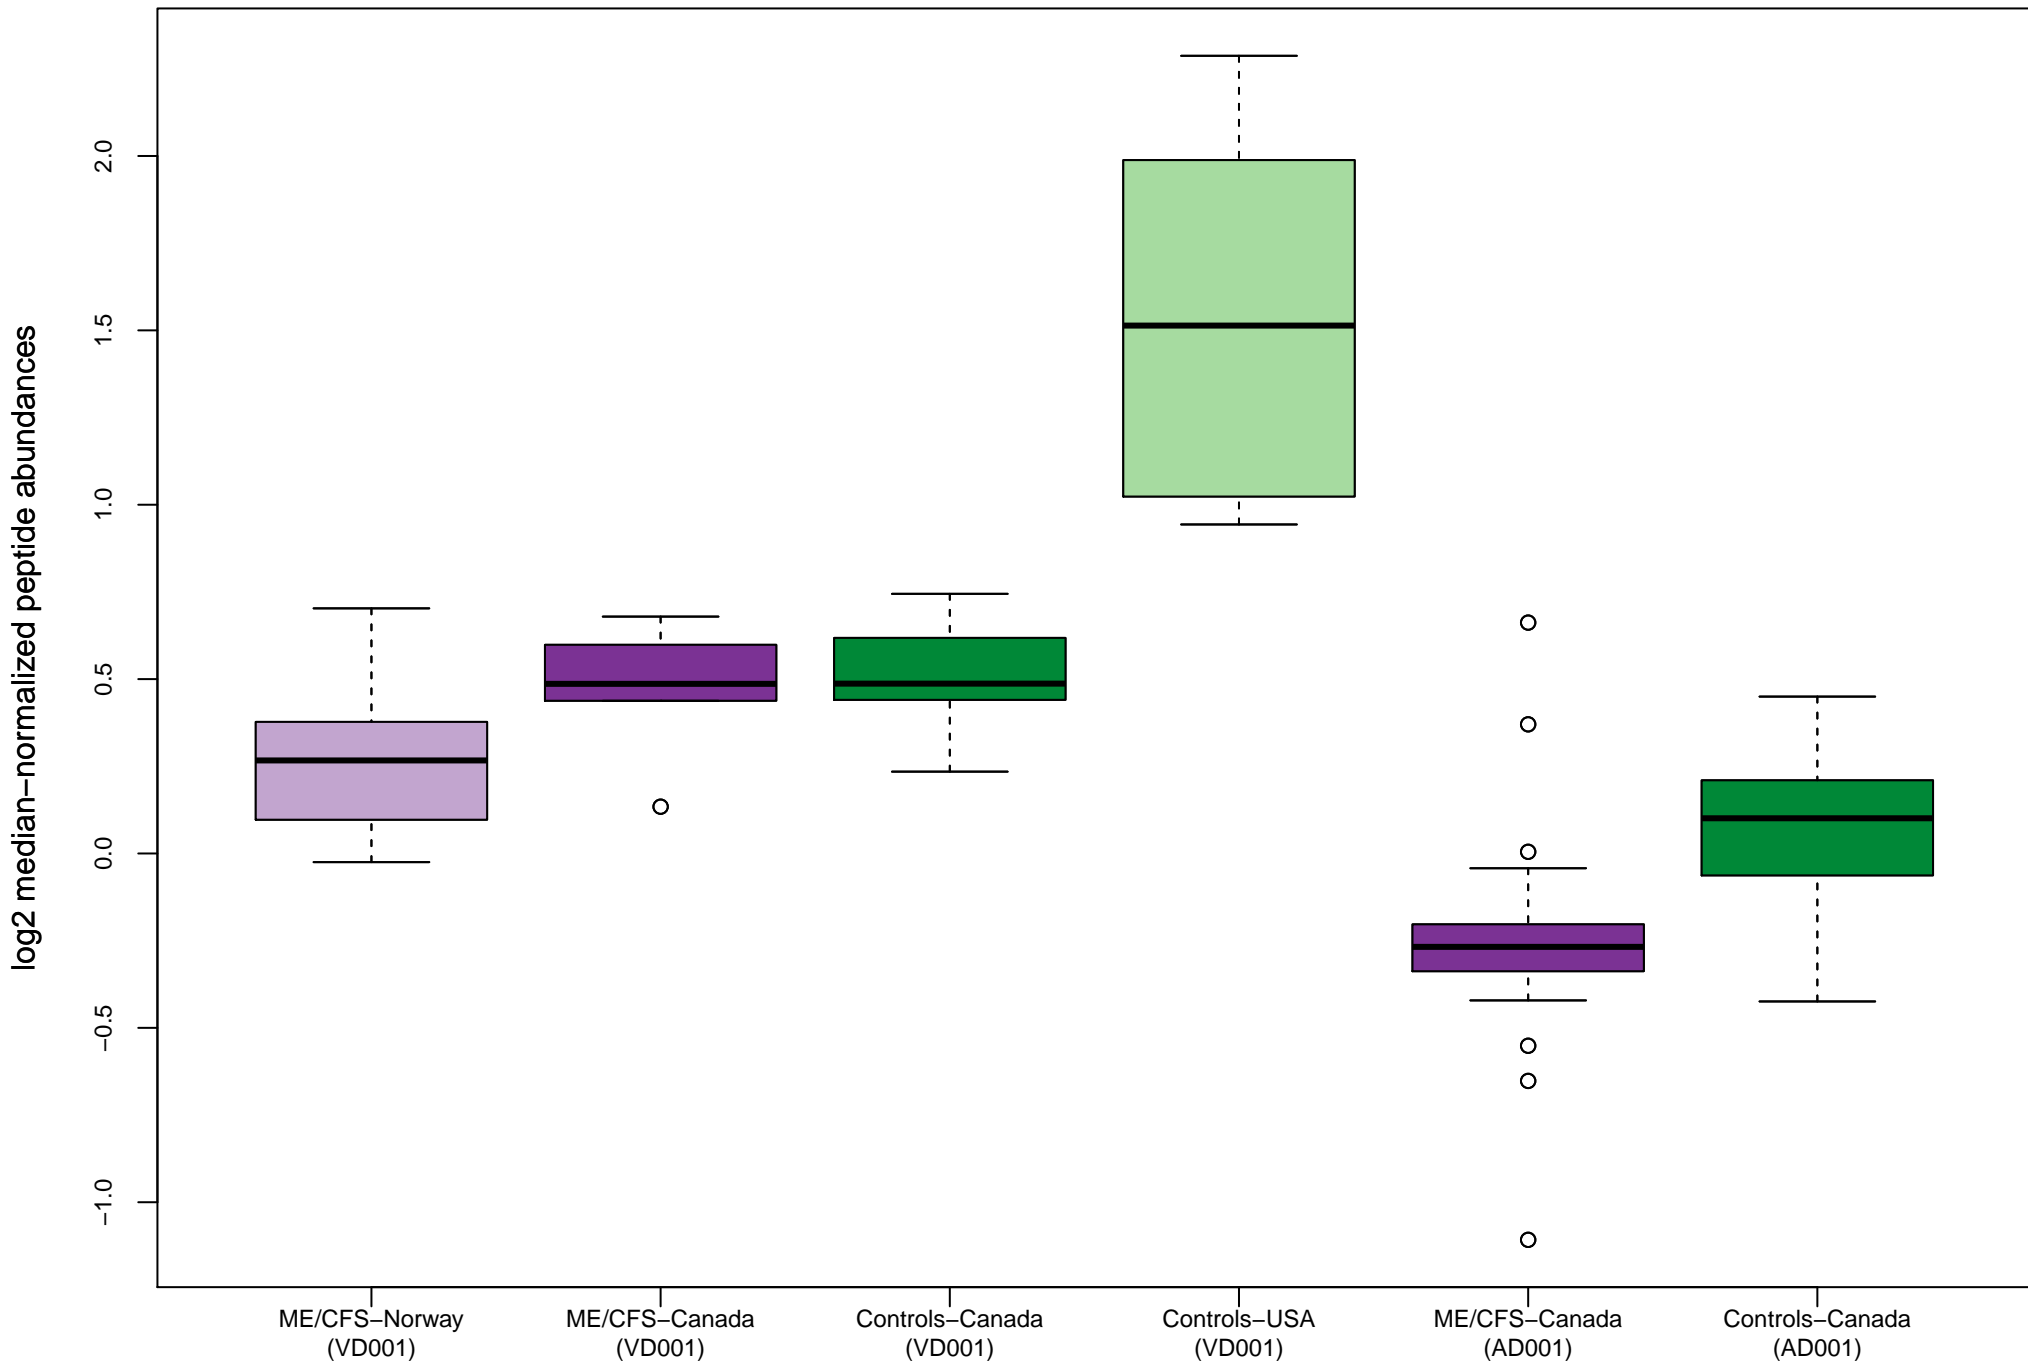

# AVLSLKLGVASG

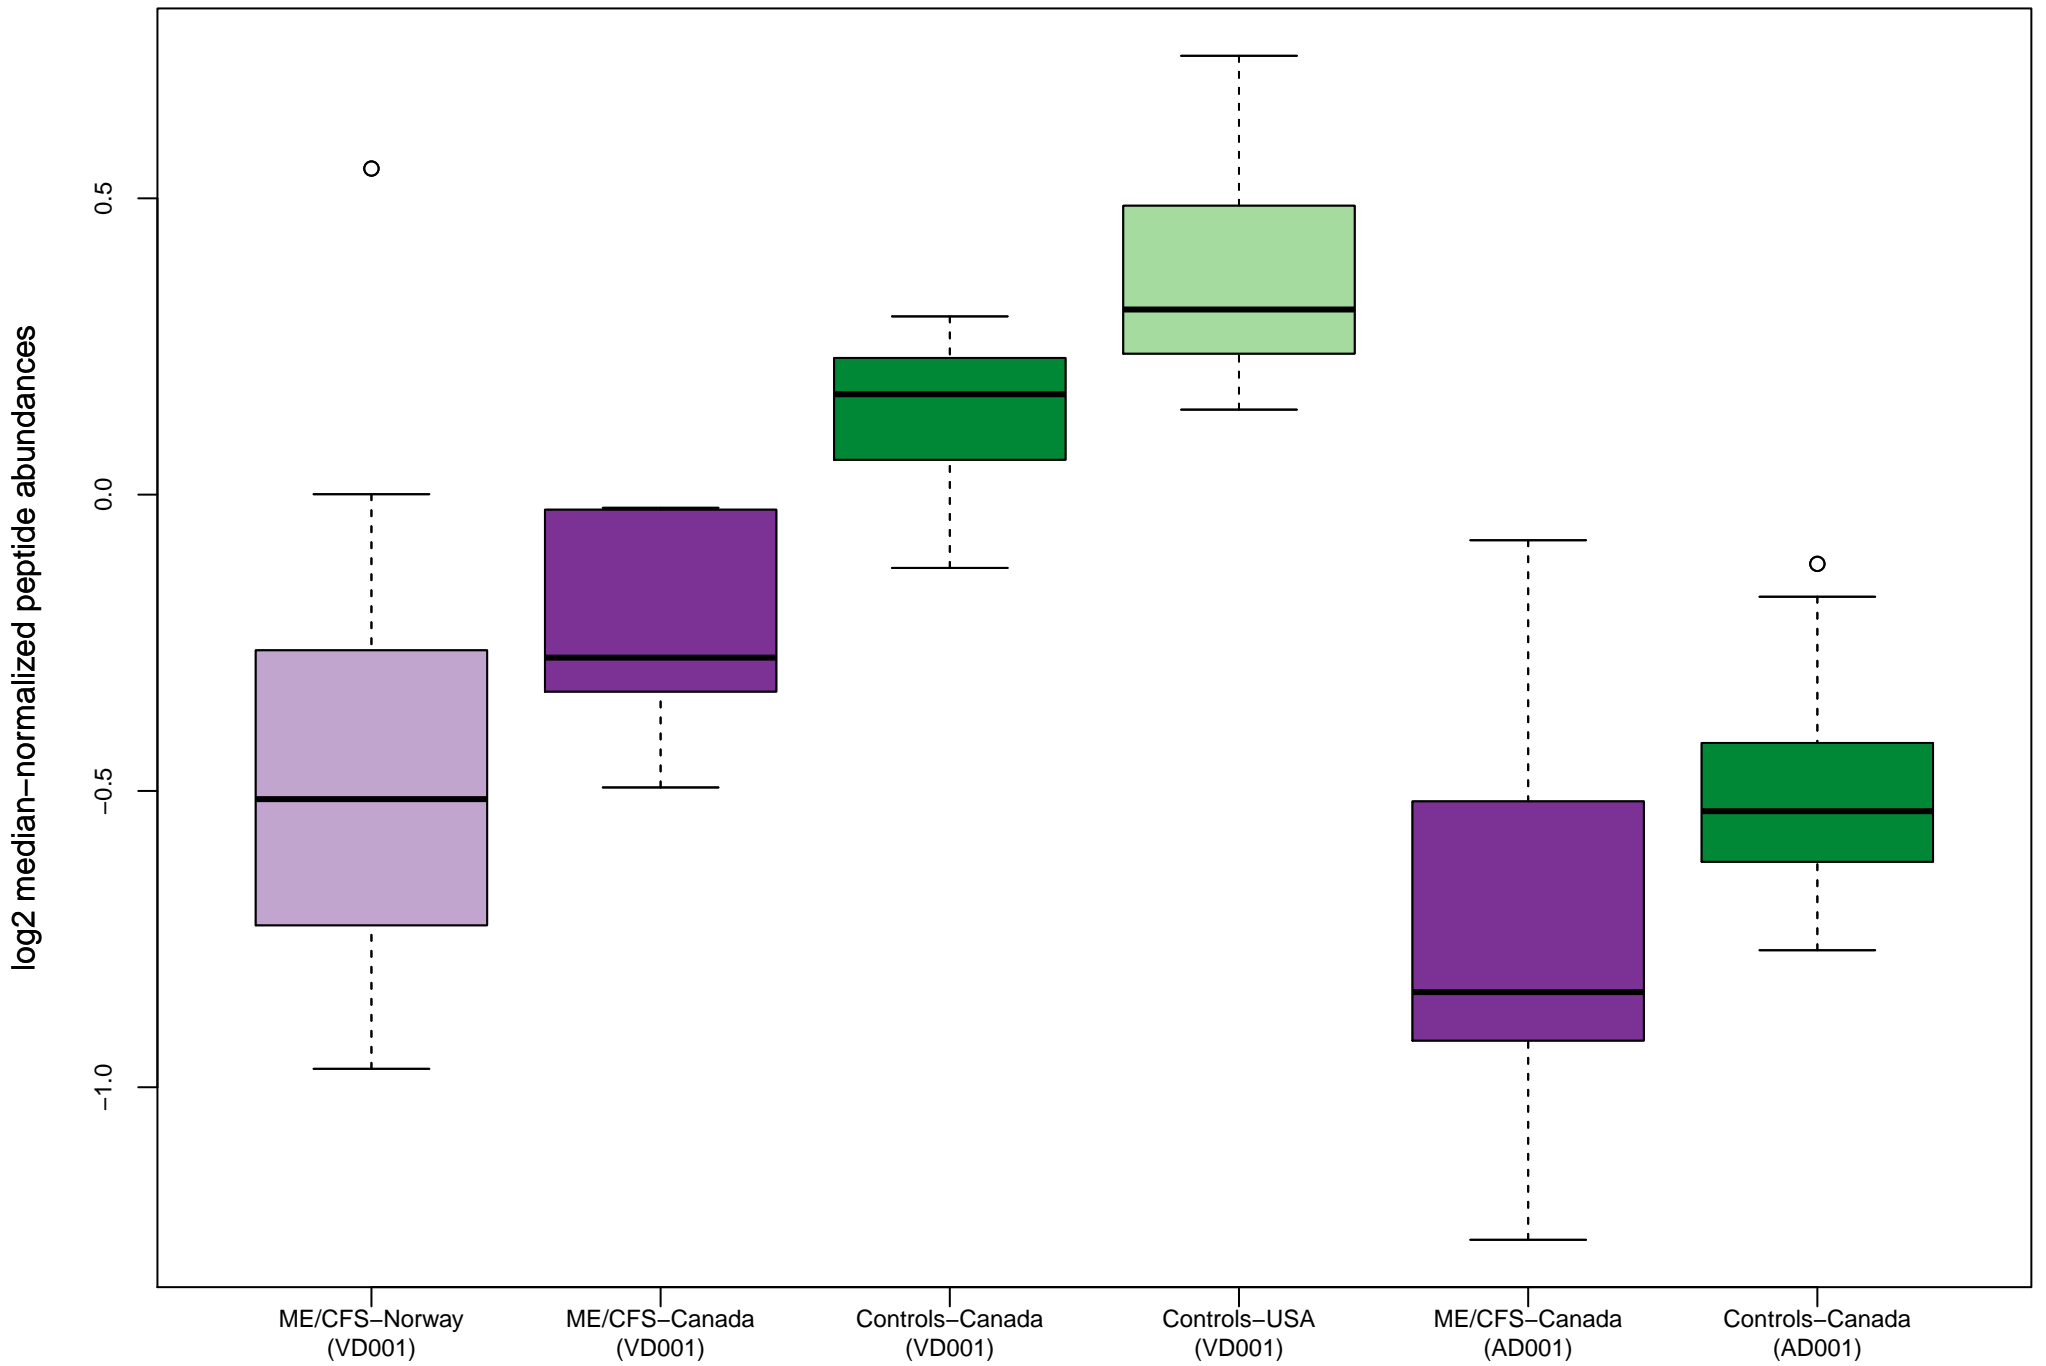

# AVRFWSGVALSG

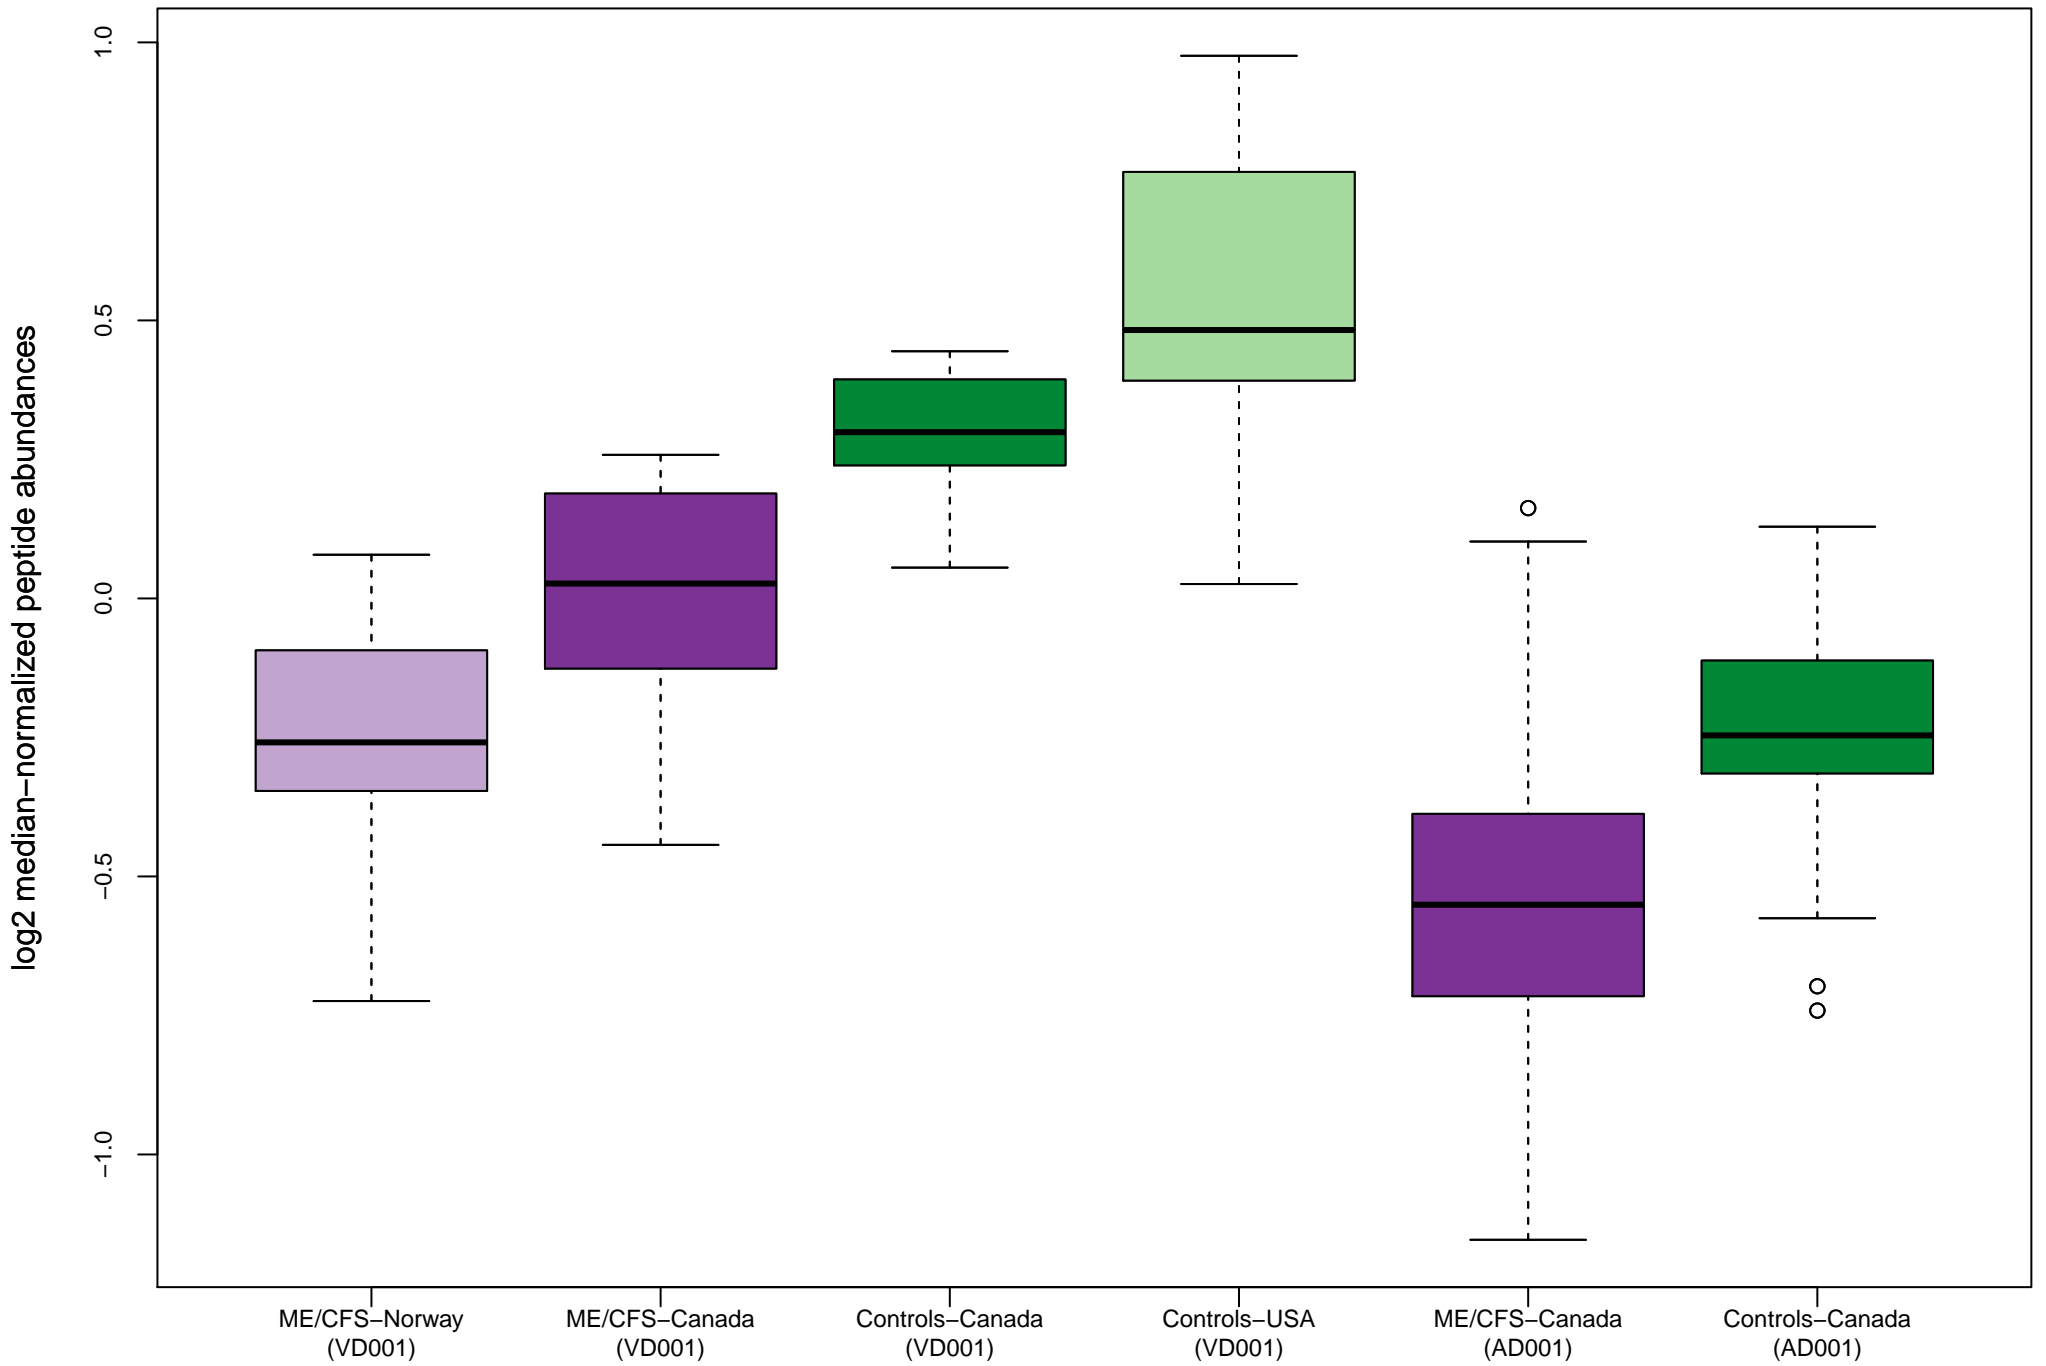

# AVSRWLSNLSAL

log2 median-normalized peptide abundances

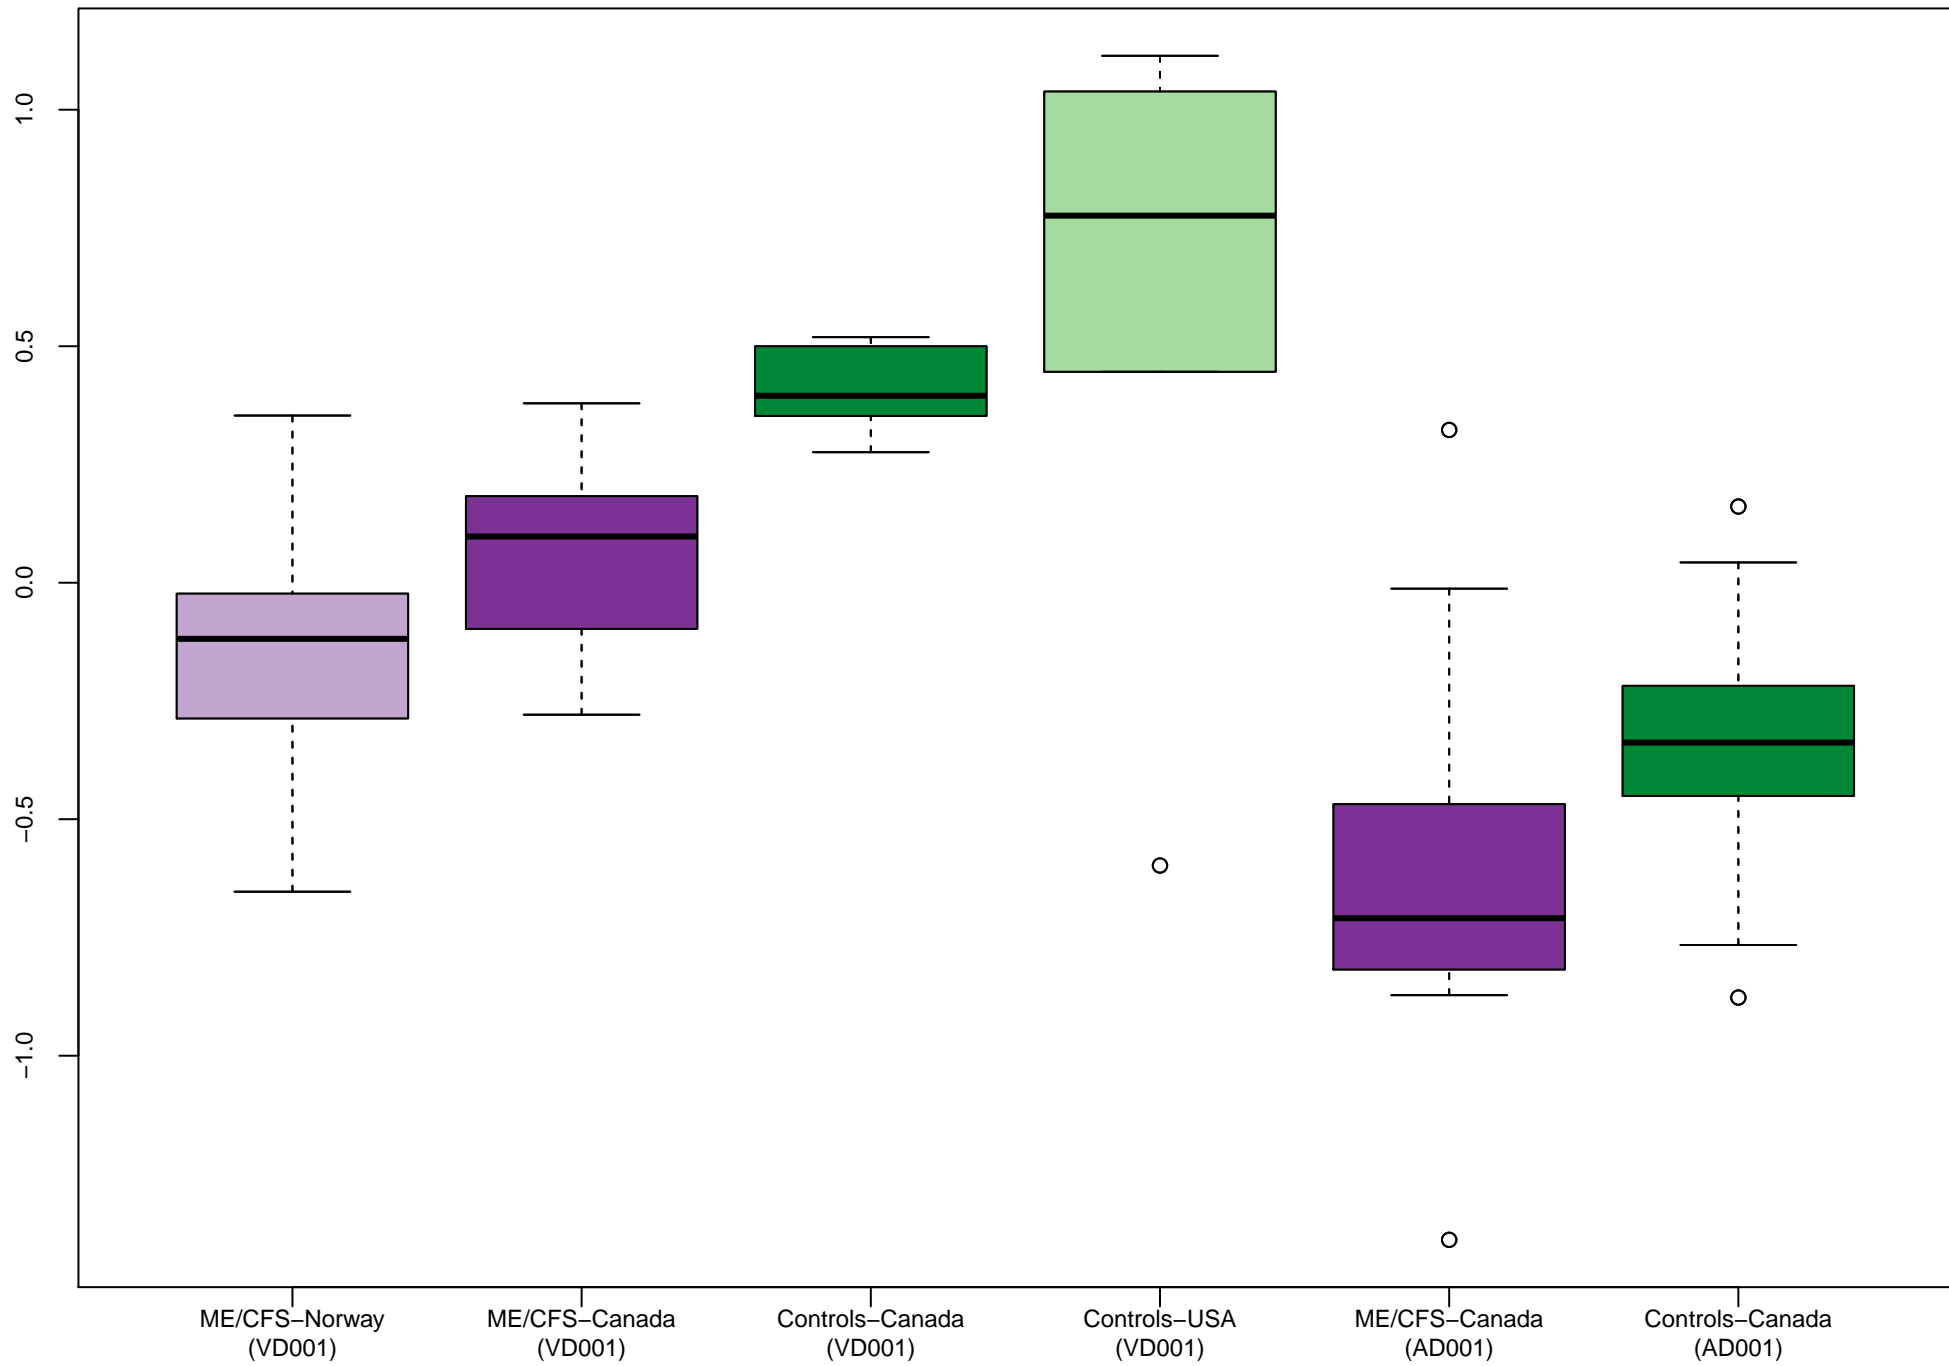

# AVYNSKLSVALS

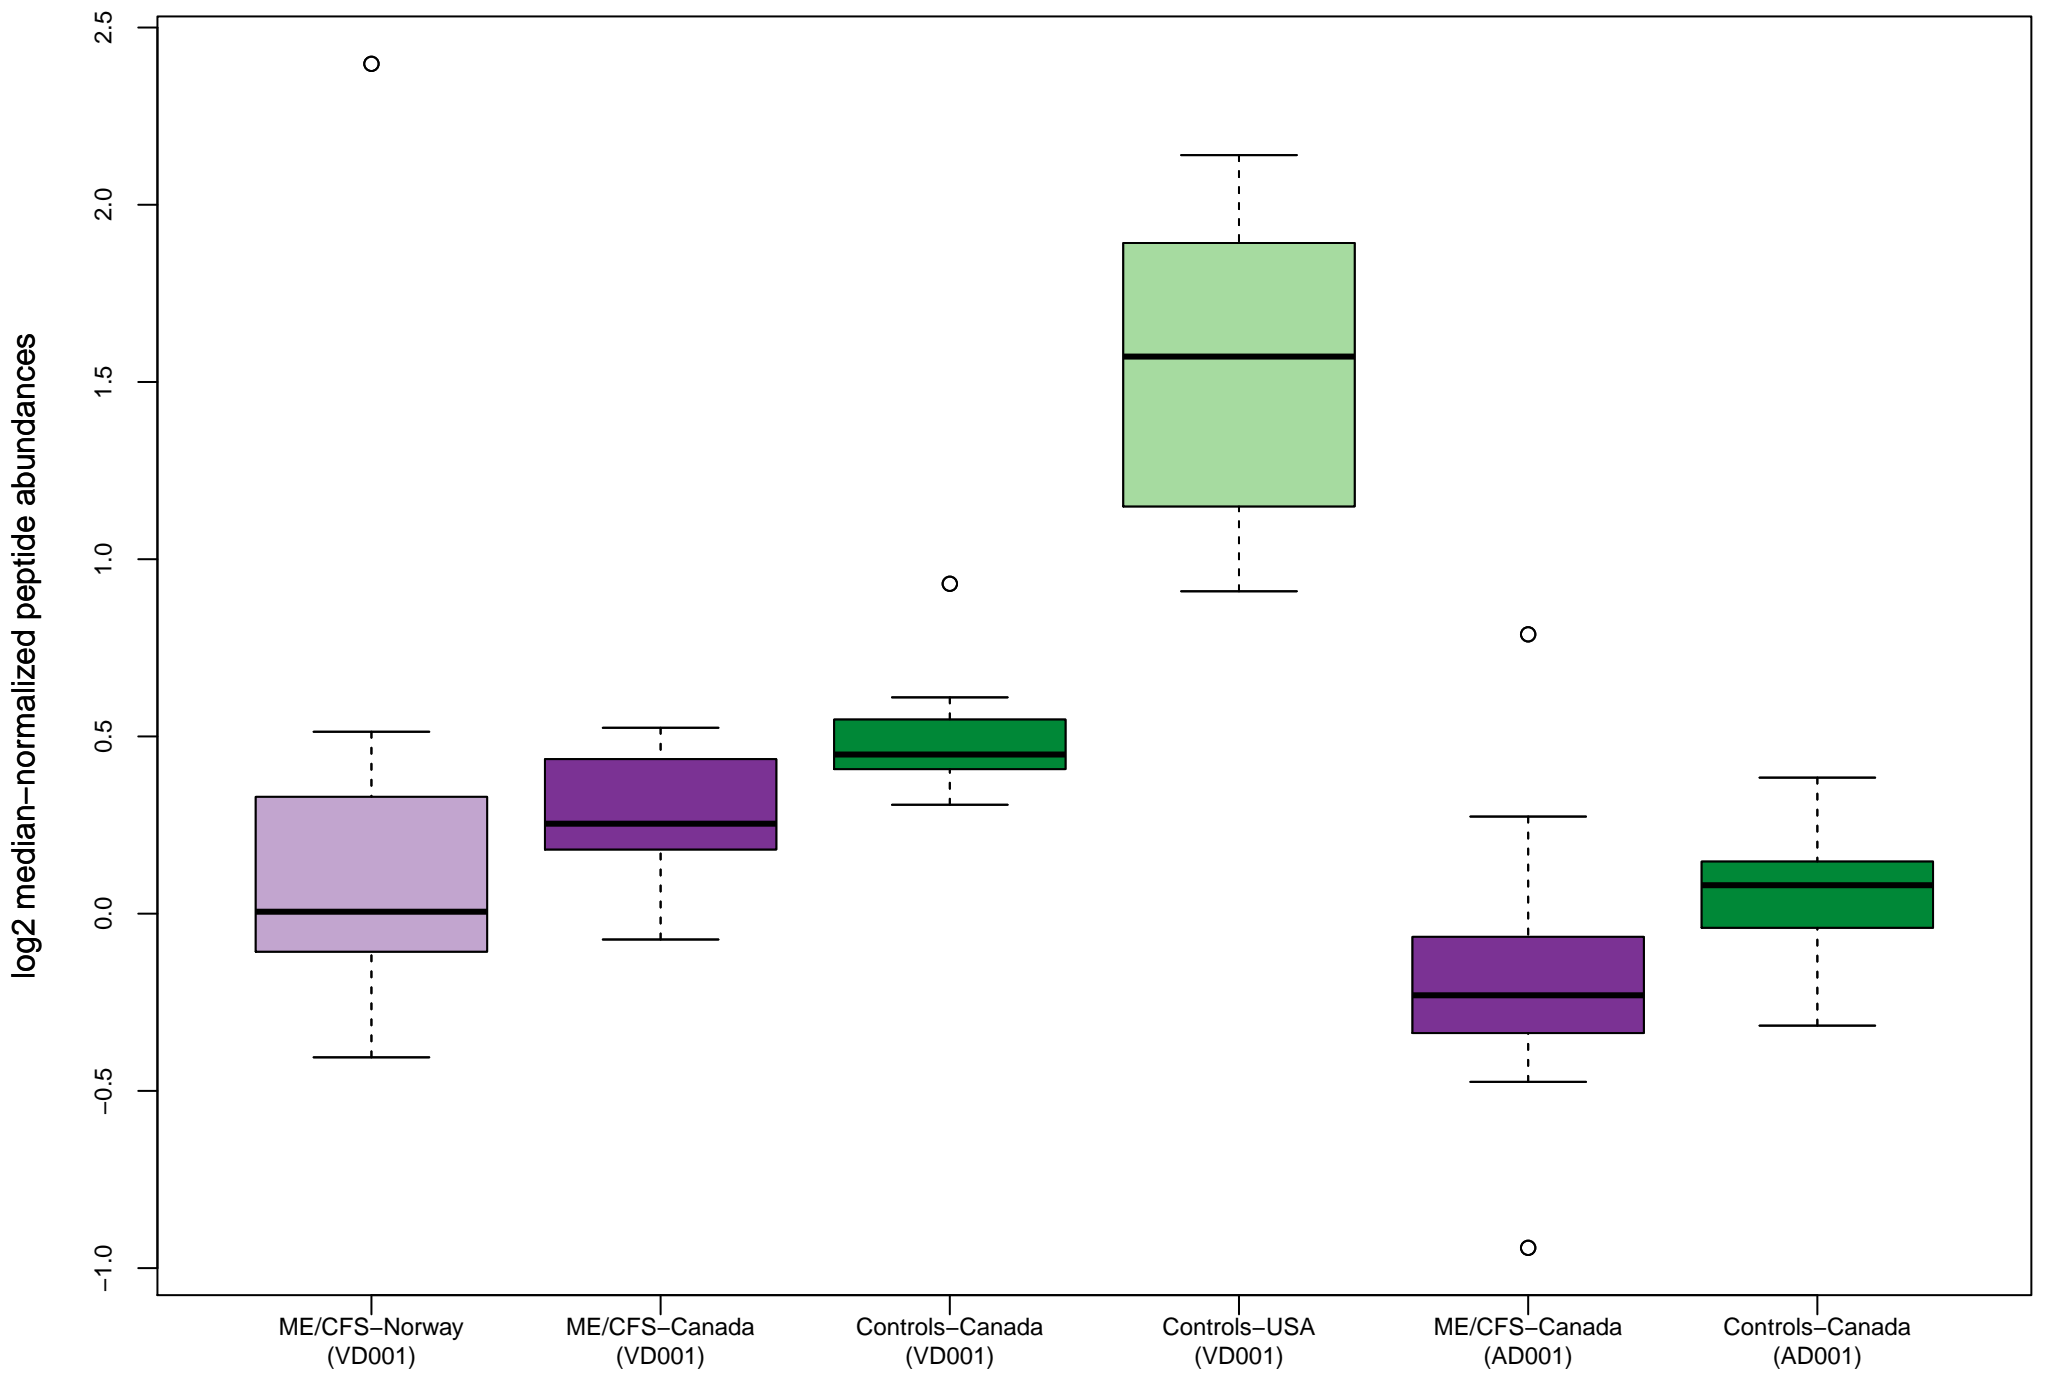

# AWFRQFYALSAL

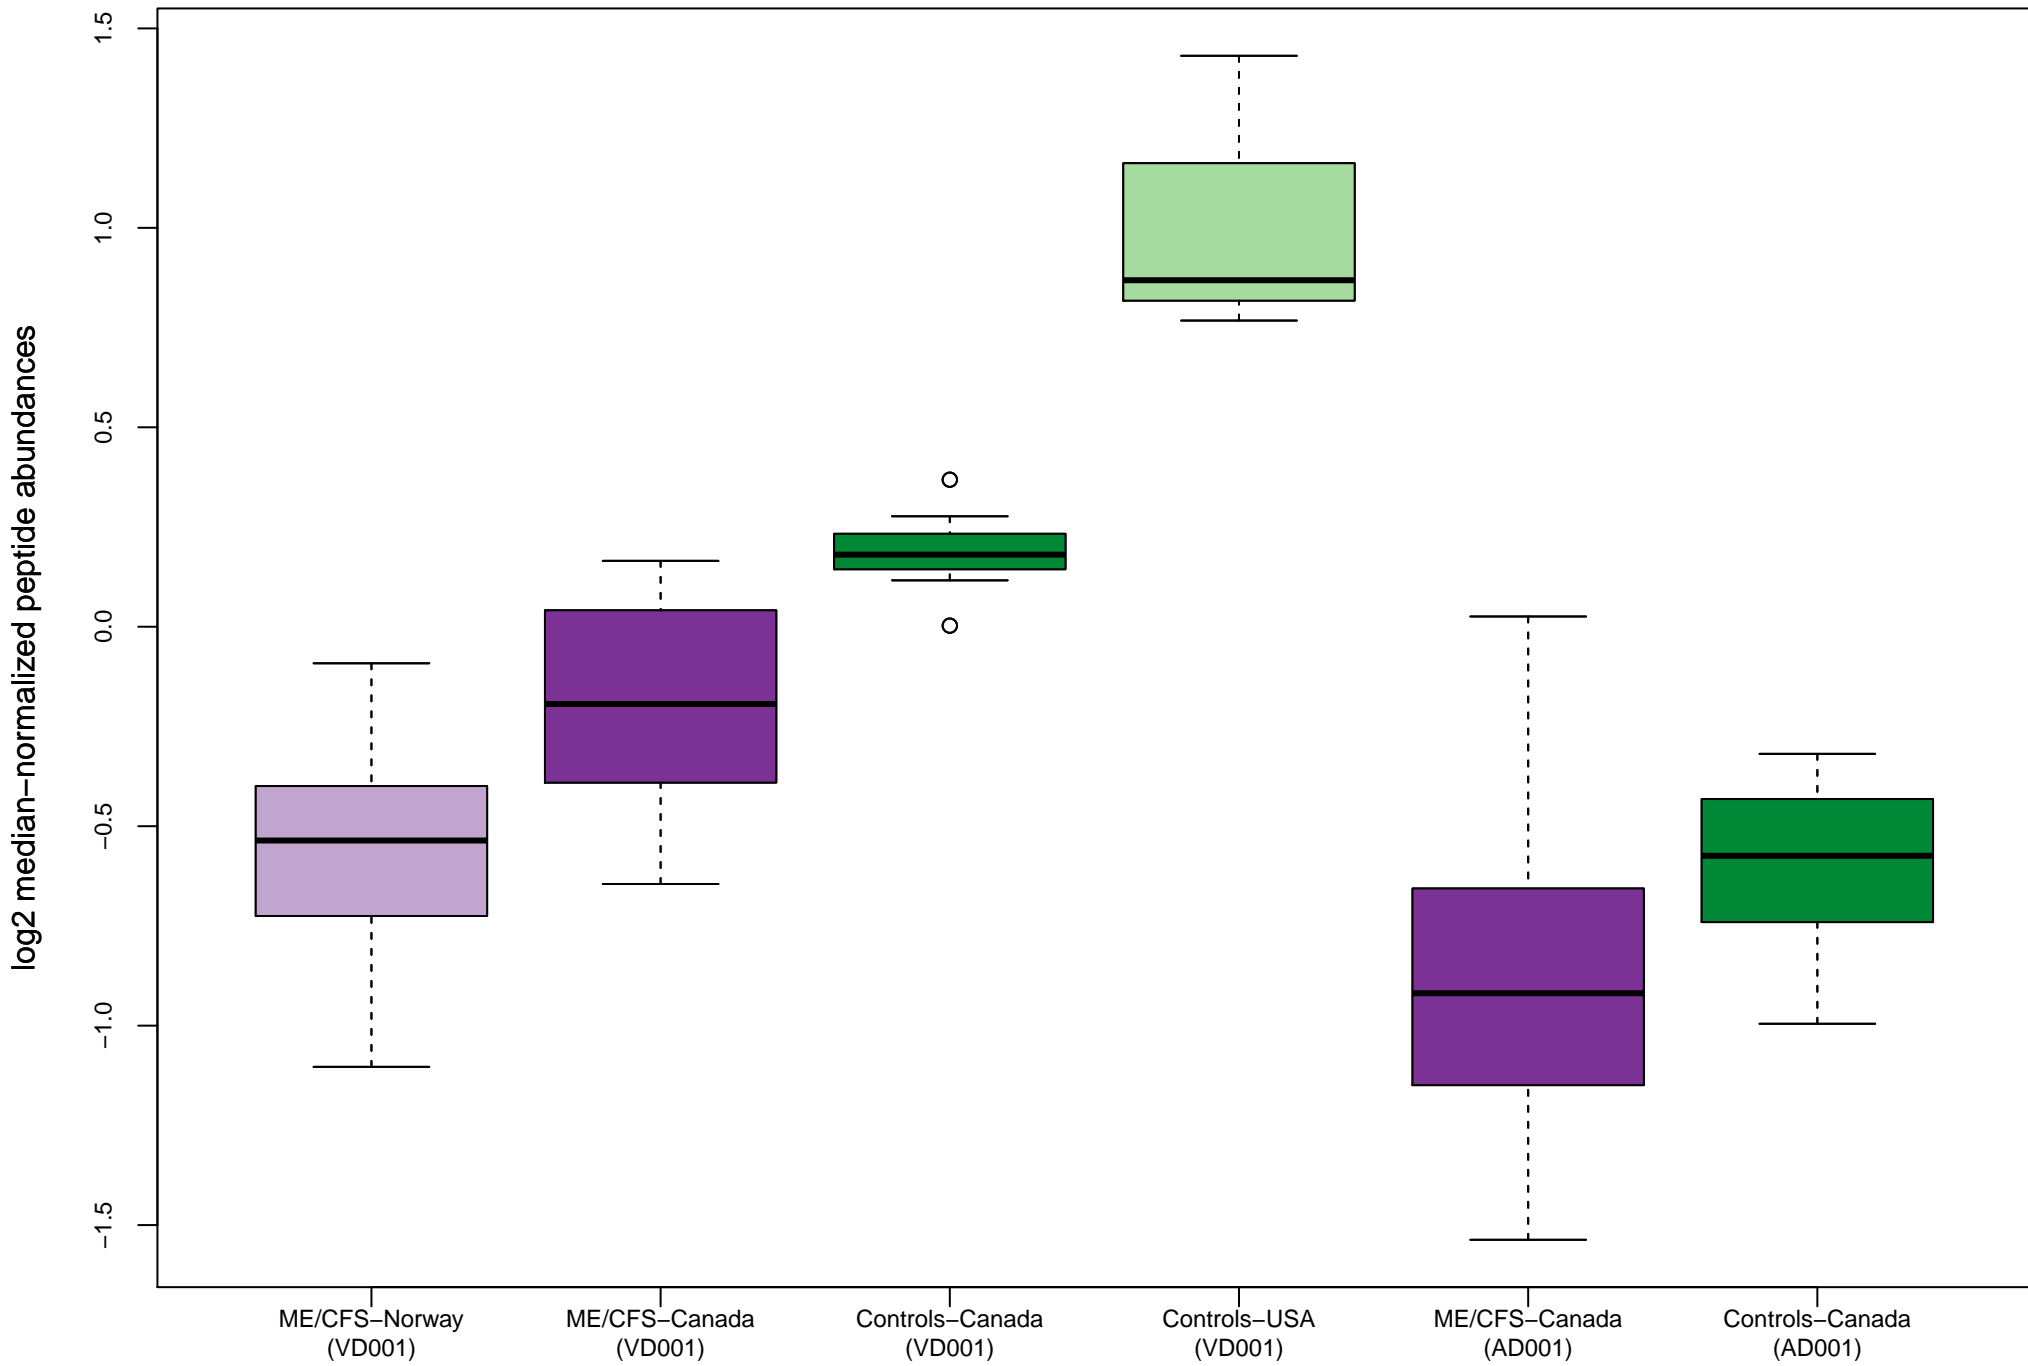



# AWKYVFREYWGV

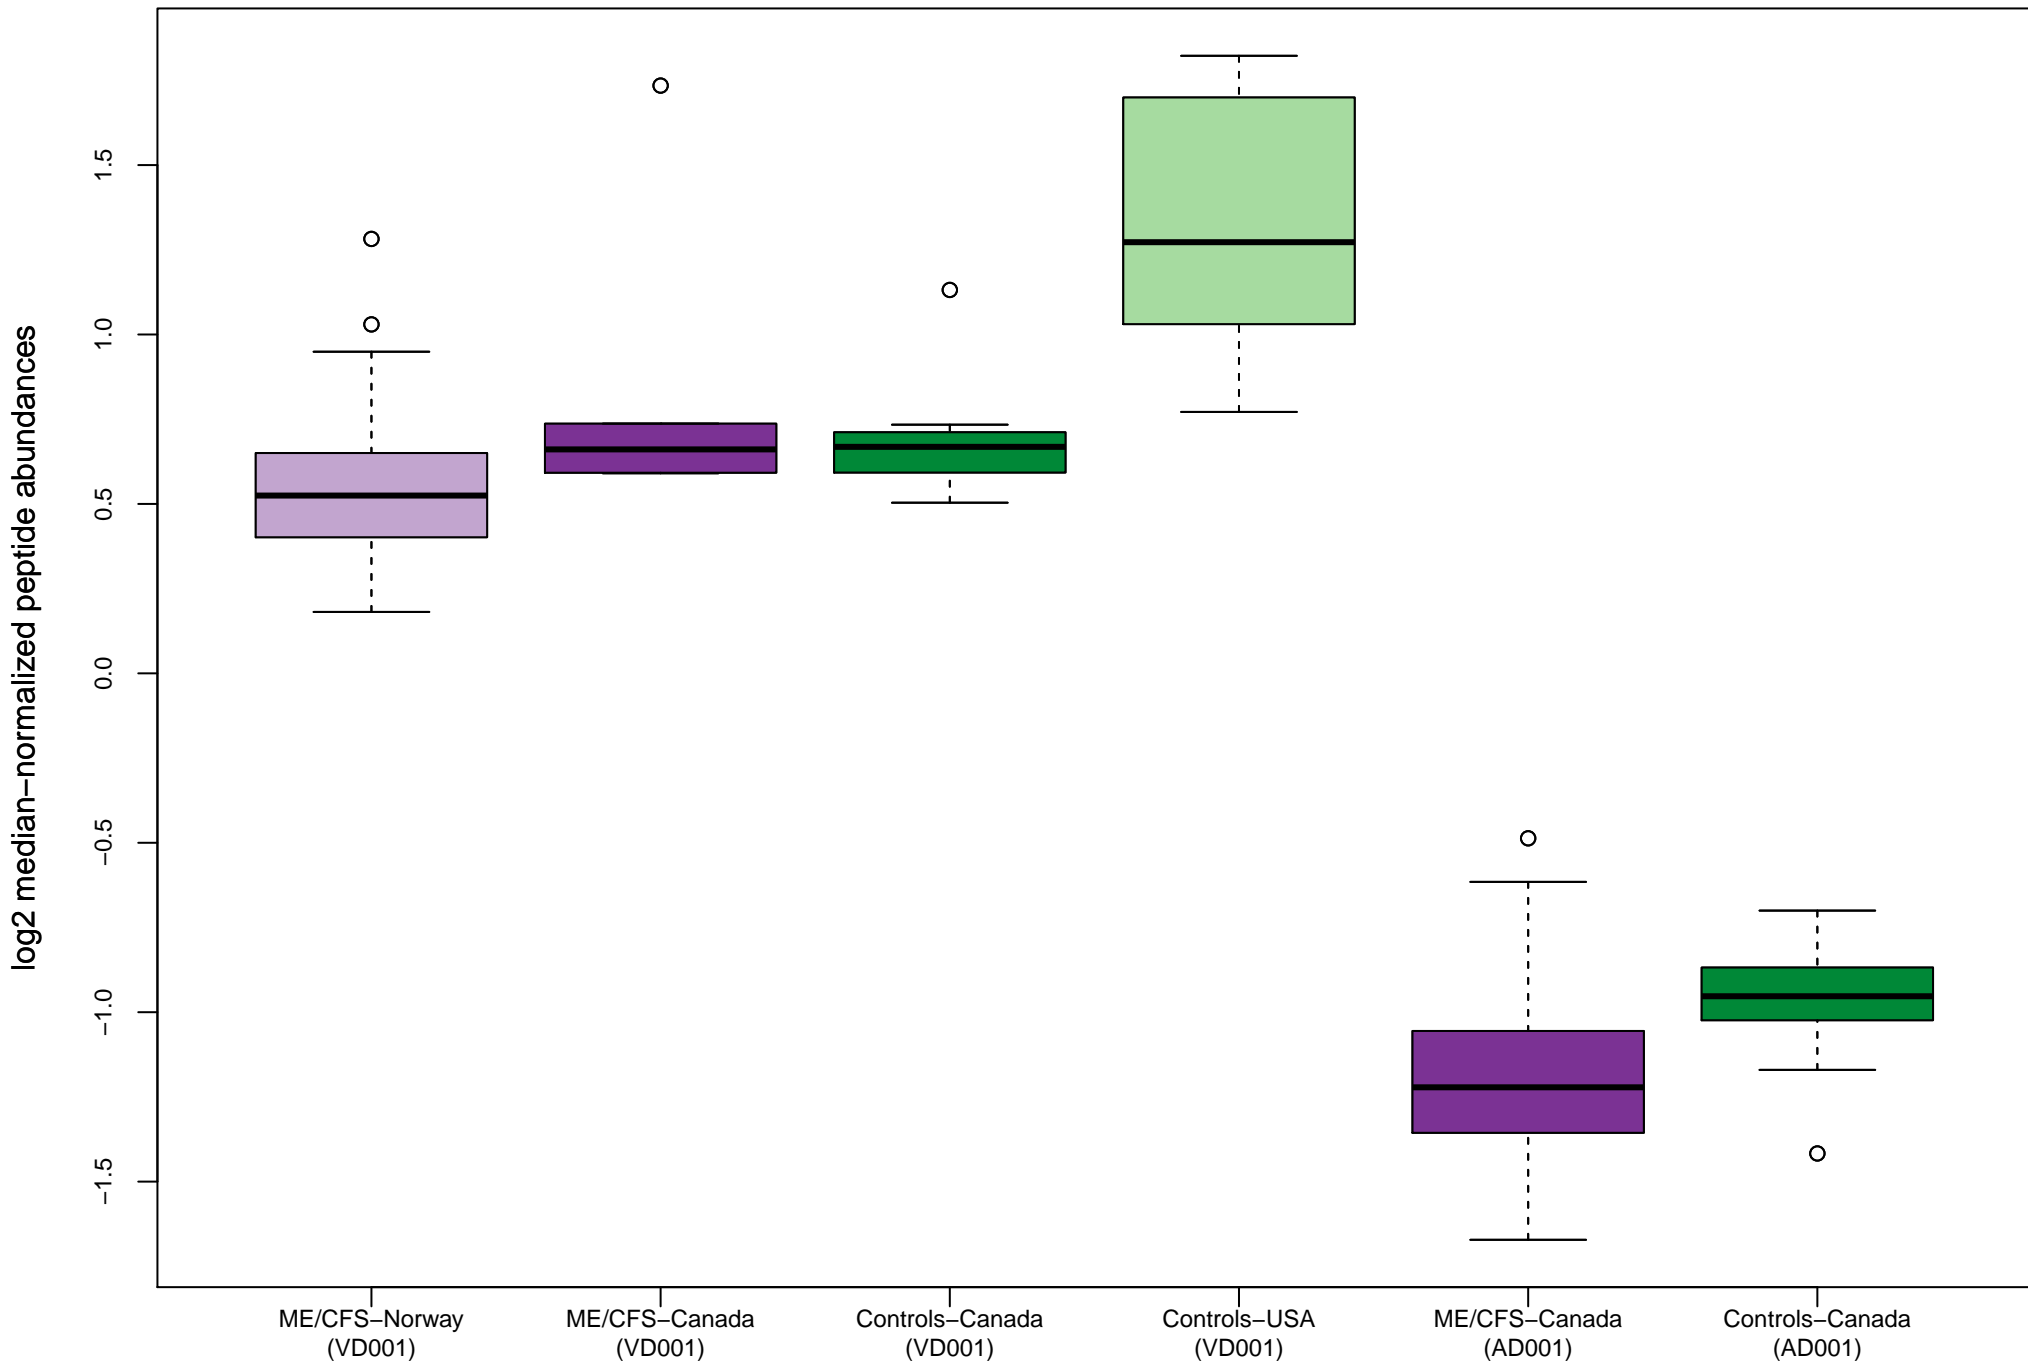

# AWLRLGAGVLSG

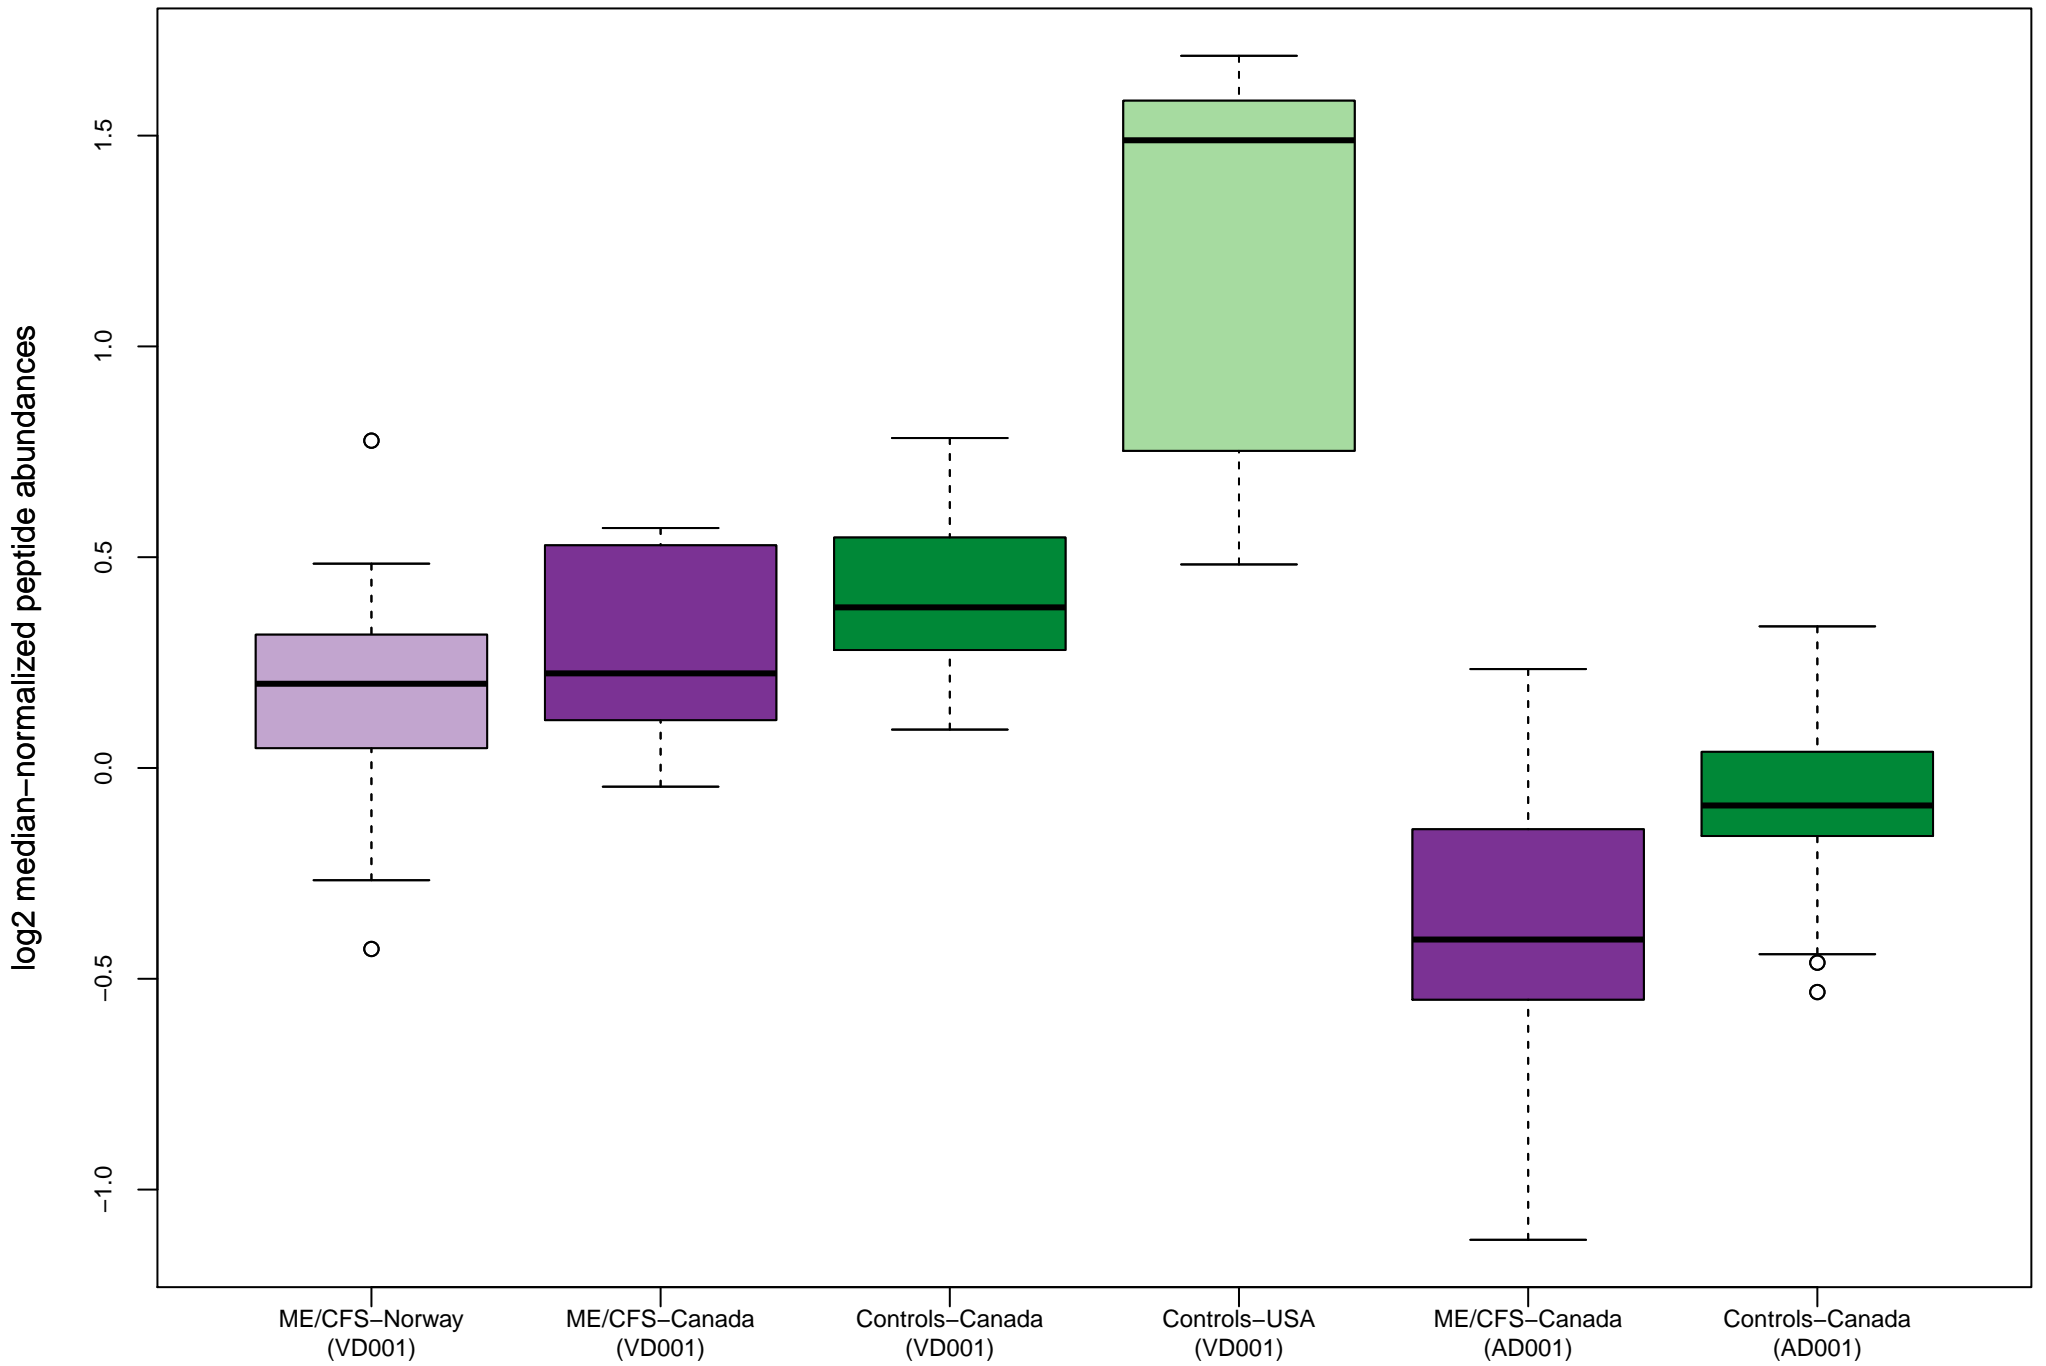

# AWRASVLSGVAL

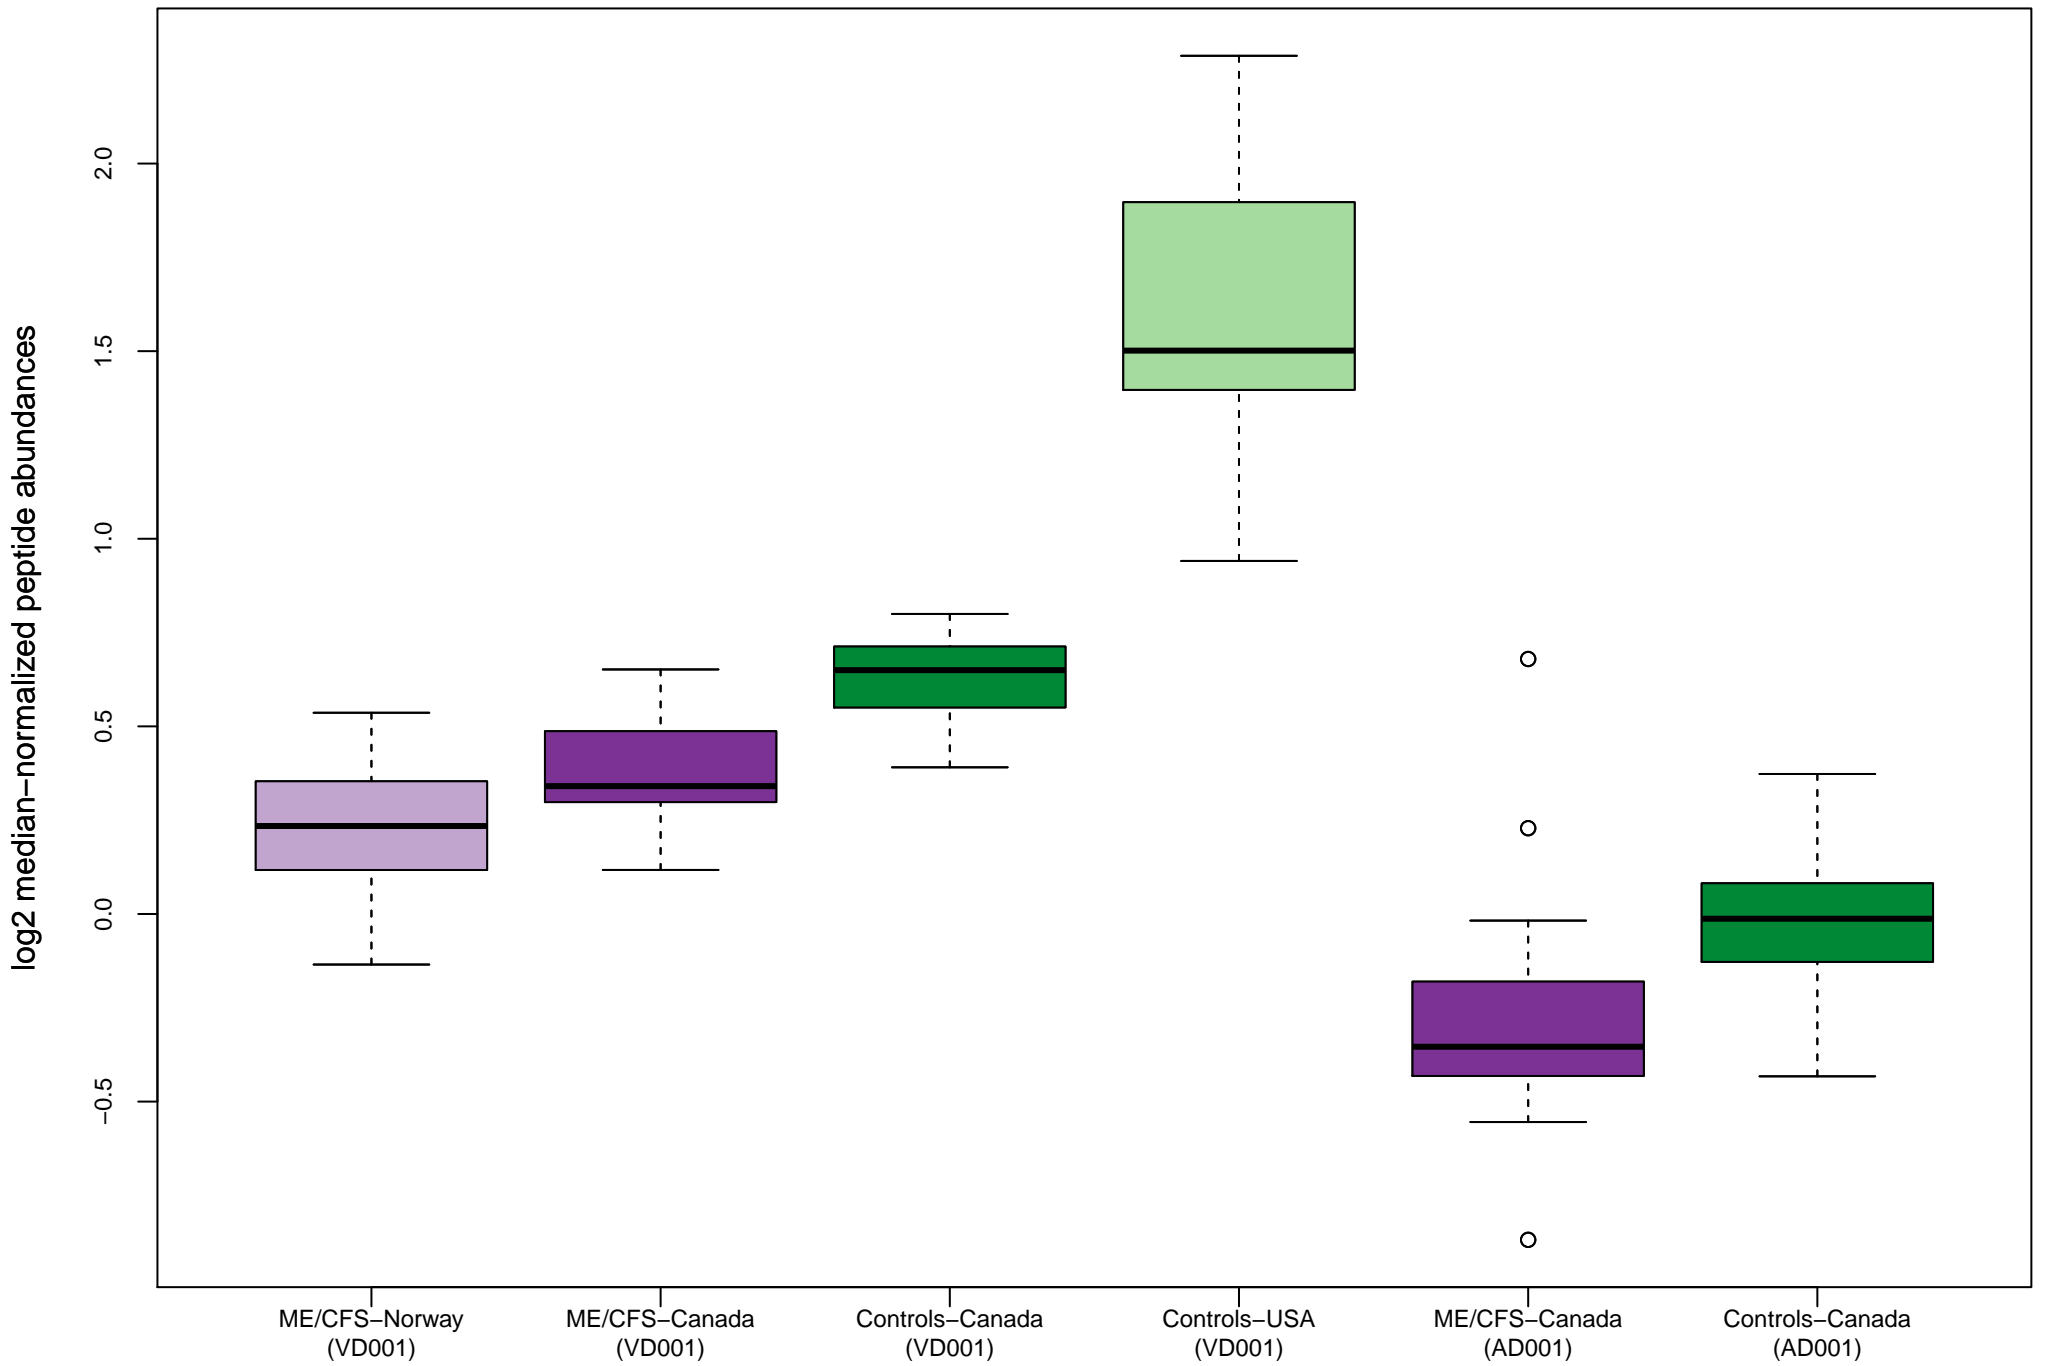

# AWSYRWSGVALG

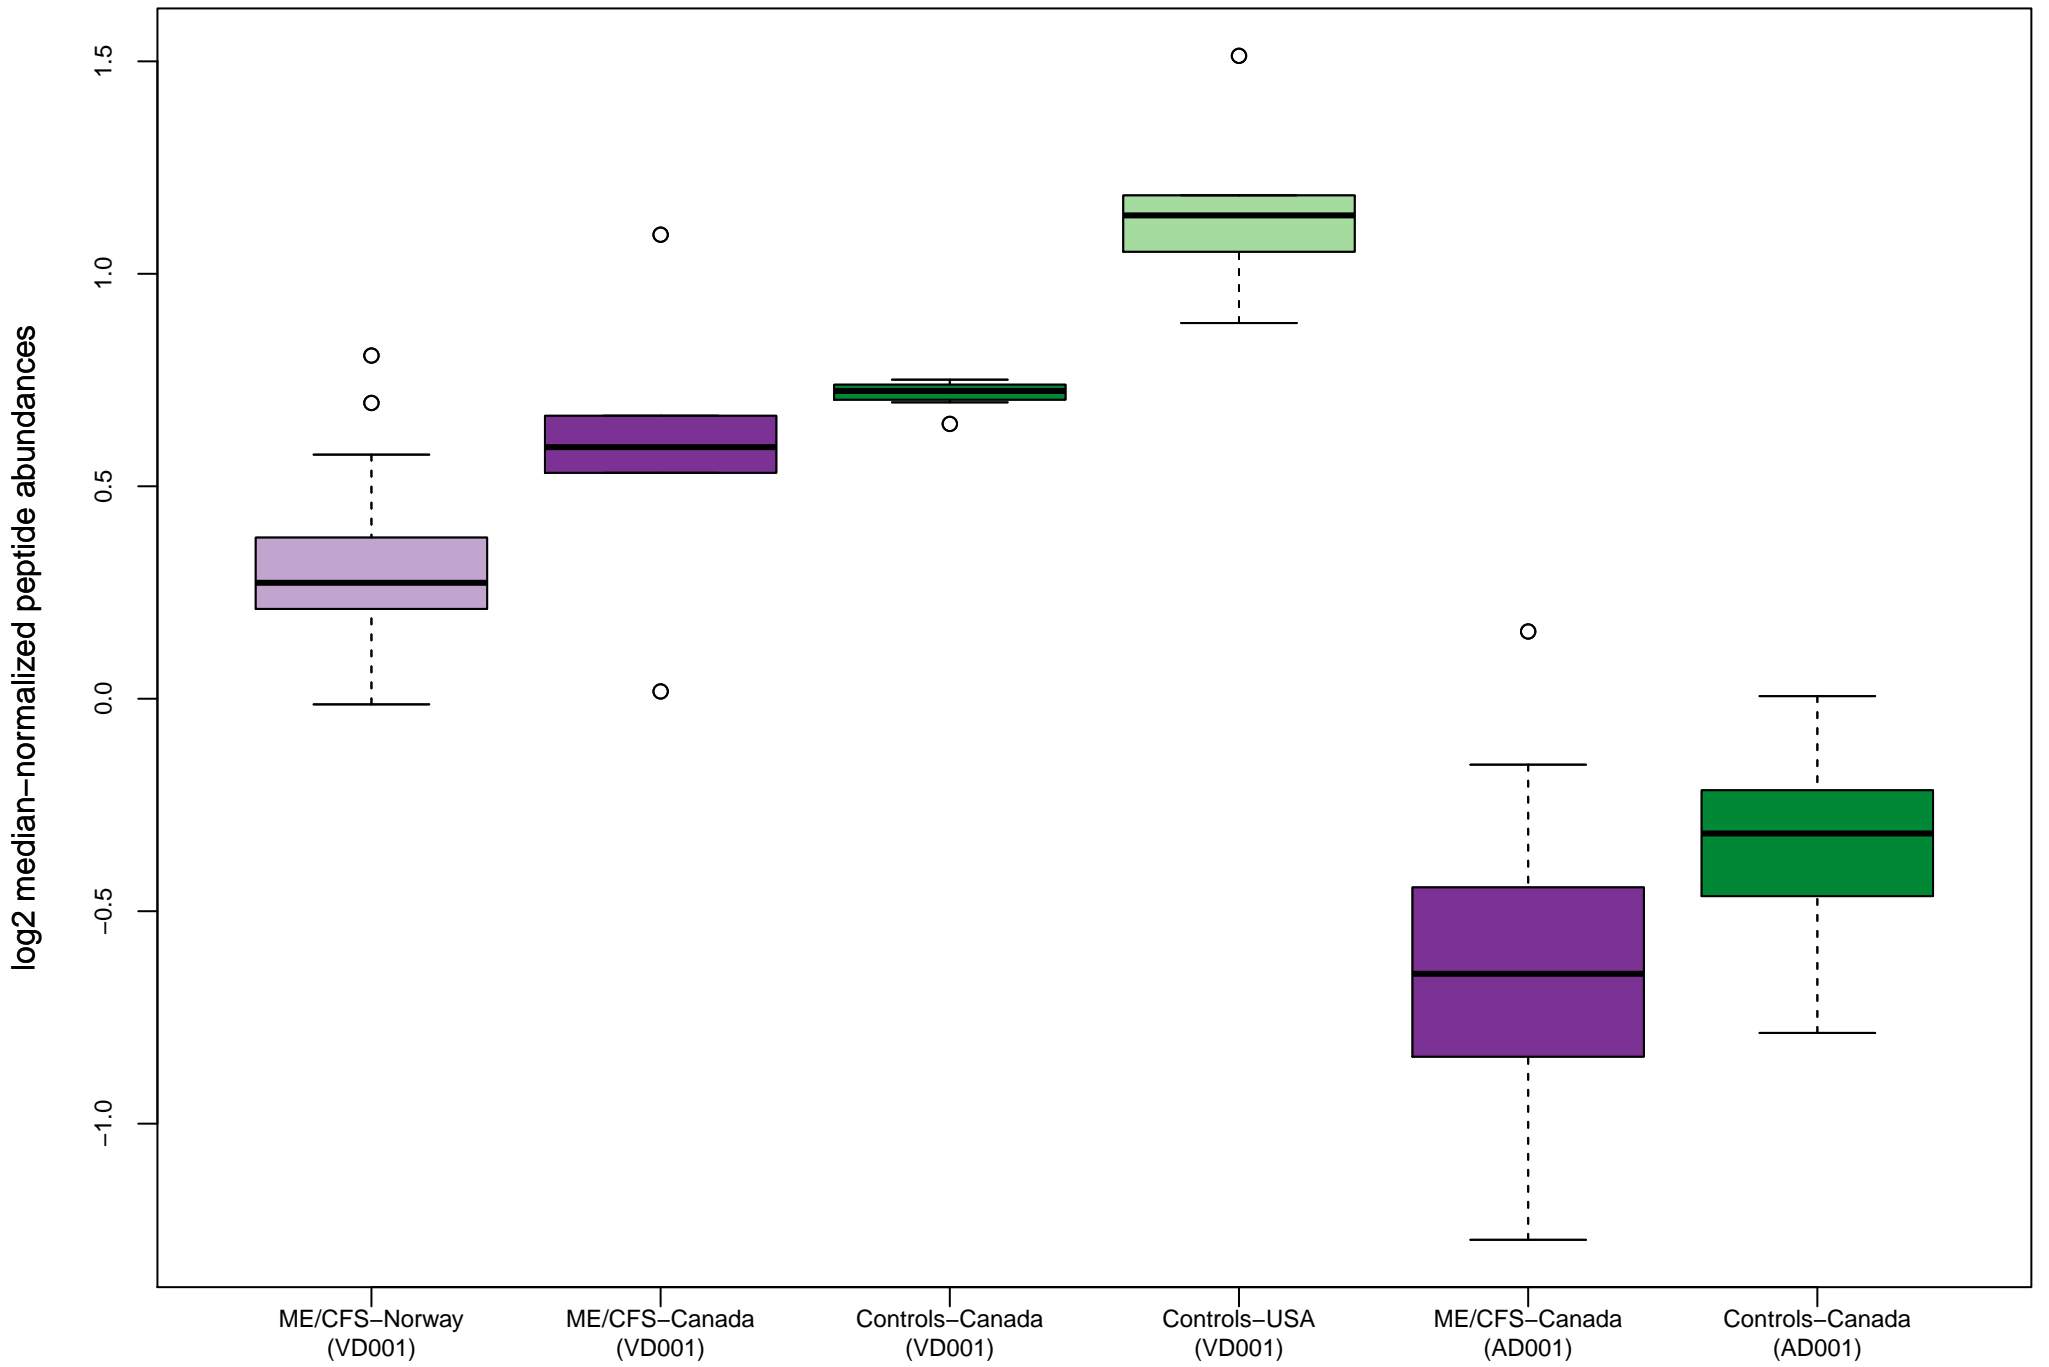

# AYWWNWNKVSVL

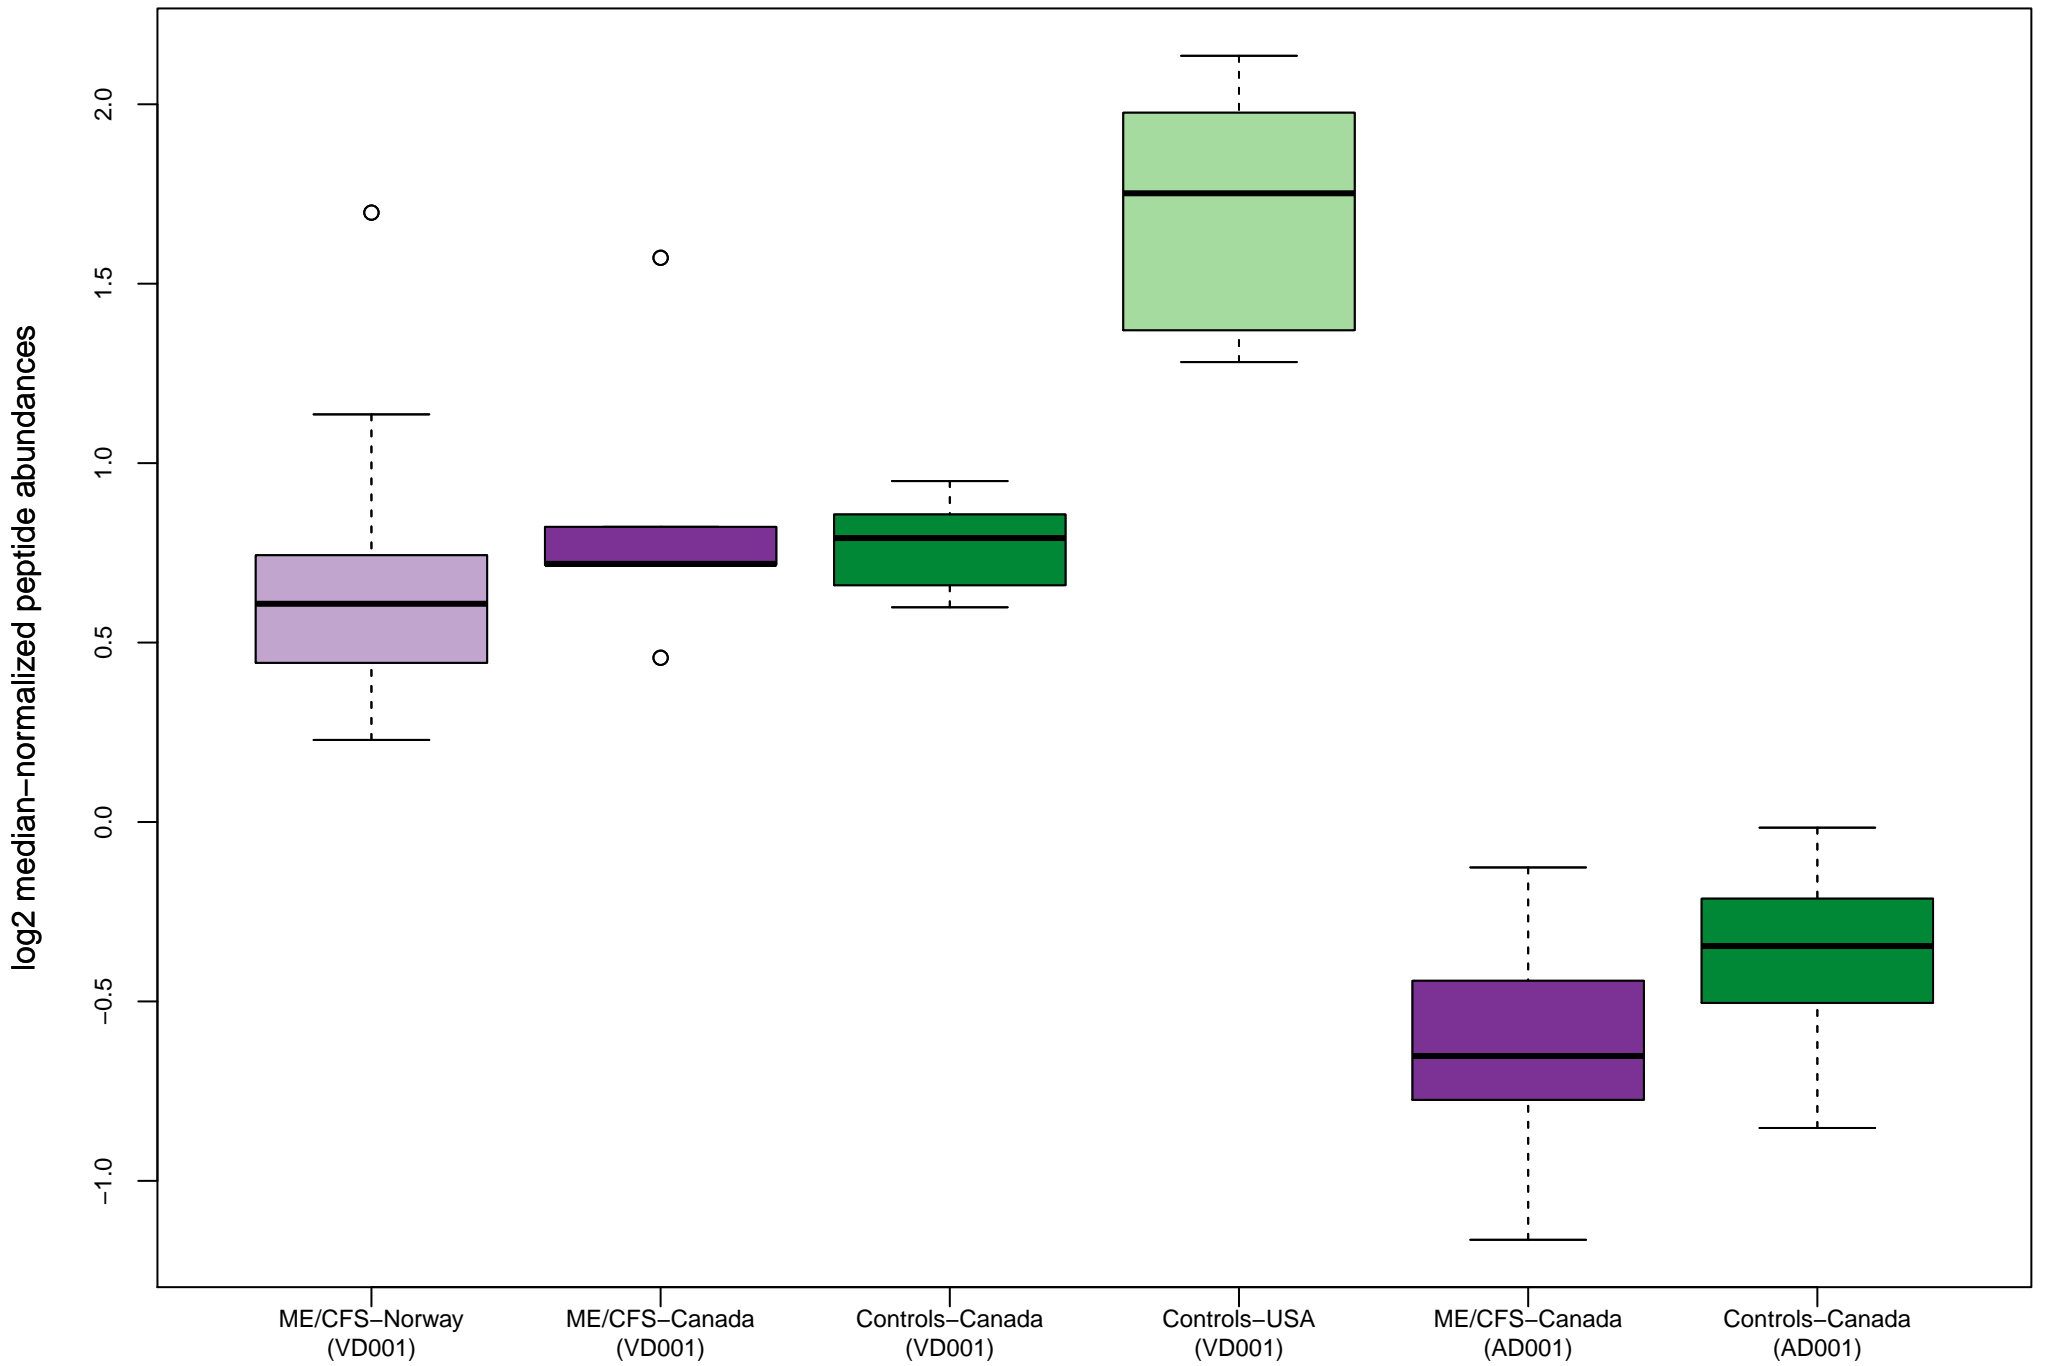

# DFLYLRKVL SLS

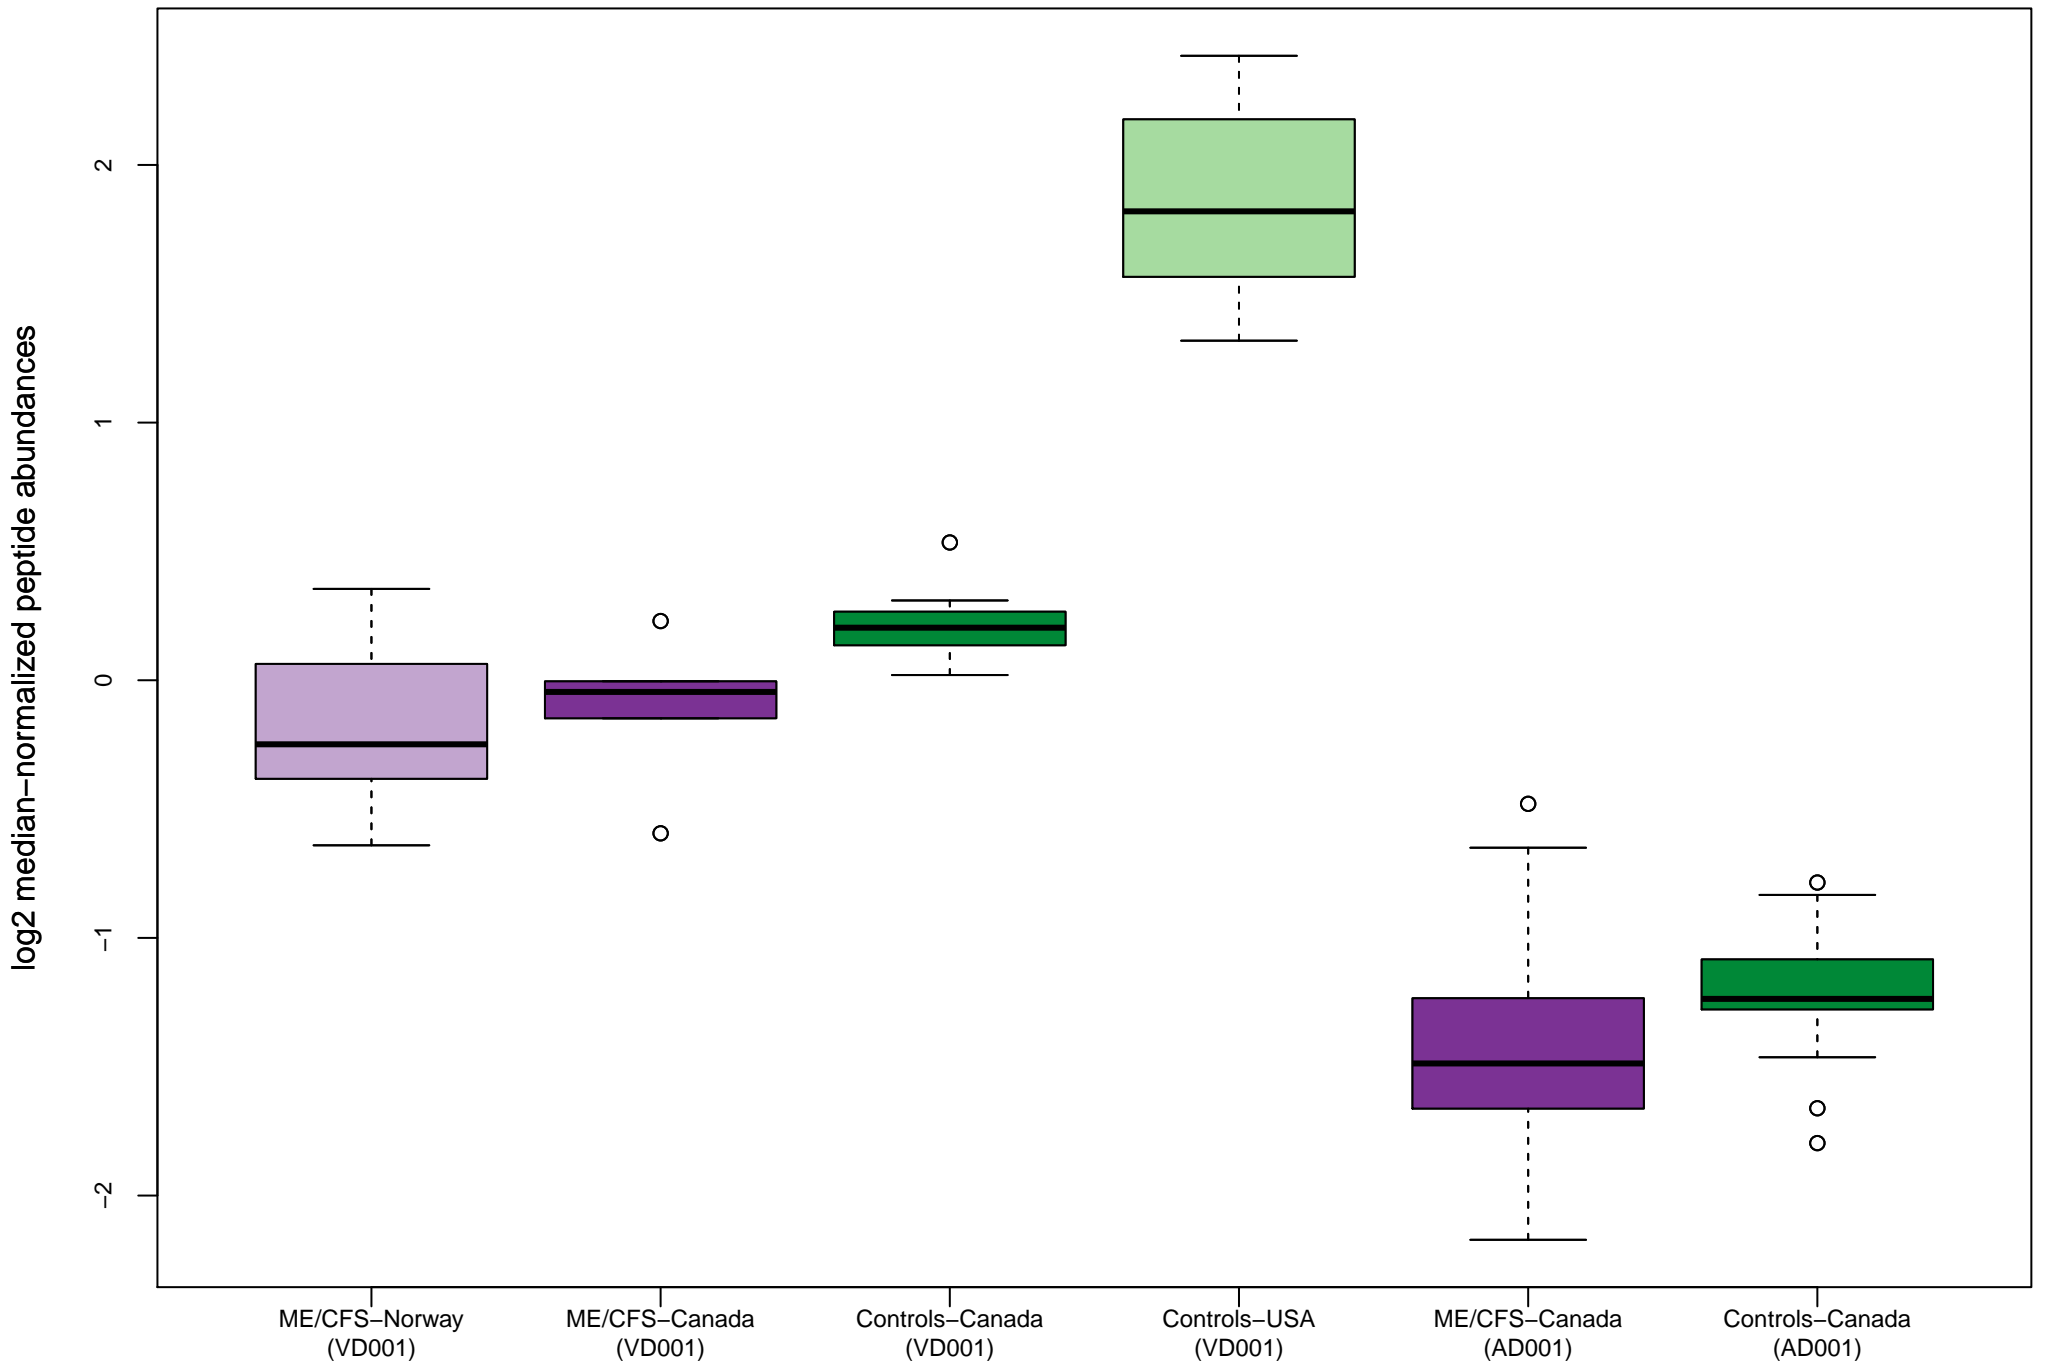

# DLWHRVFRYALS

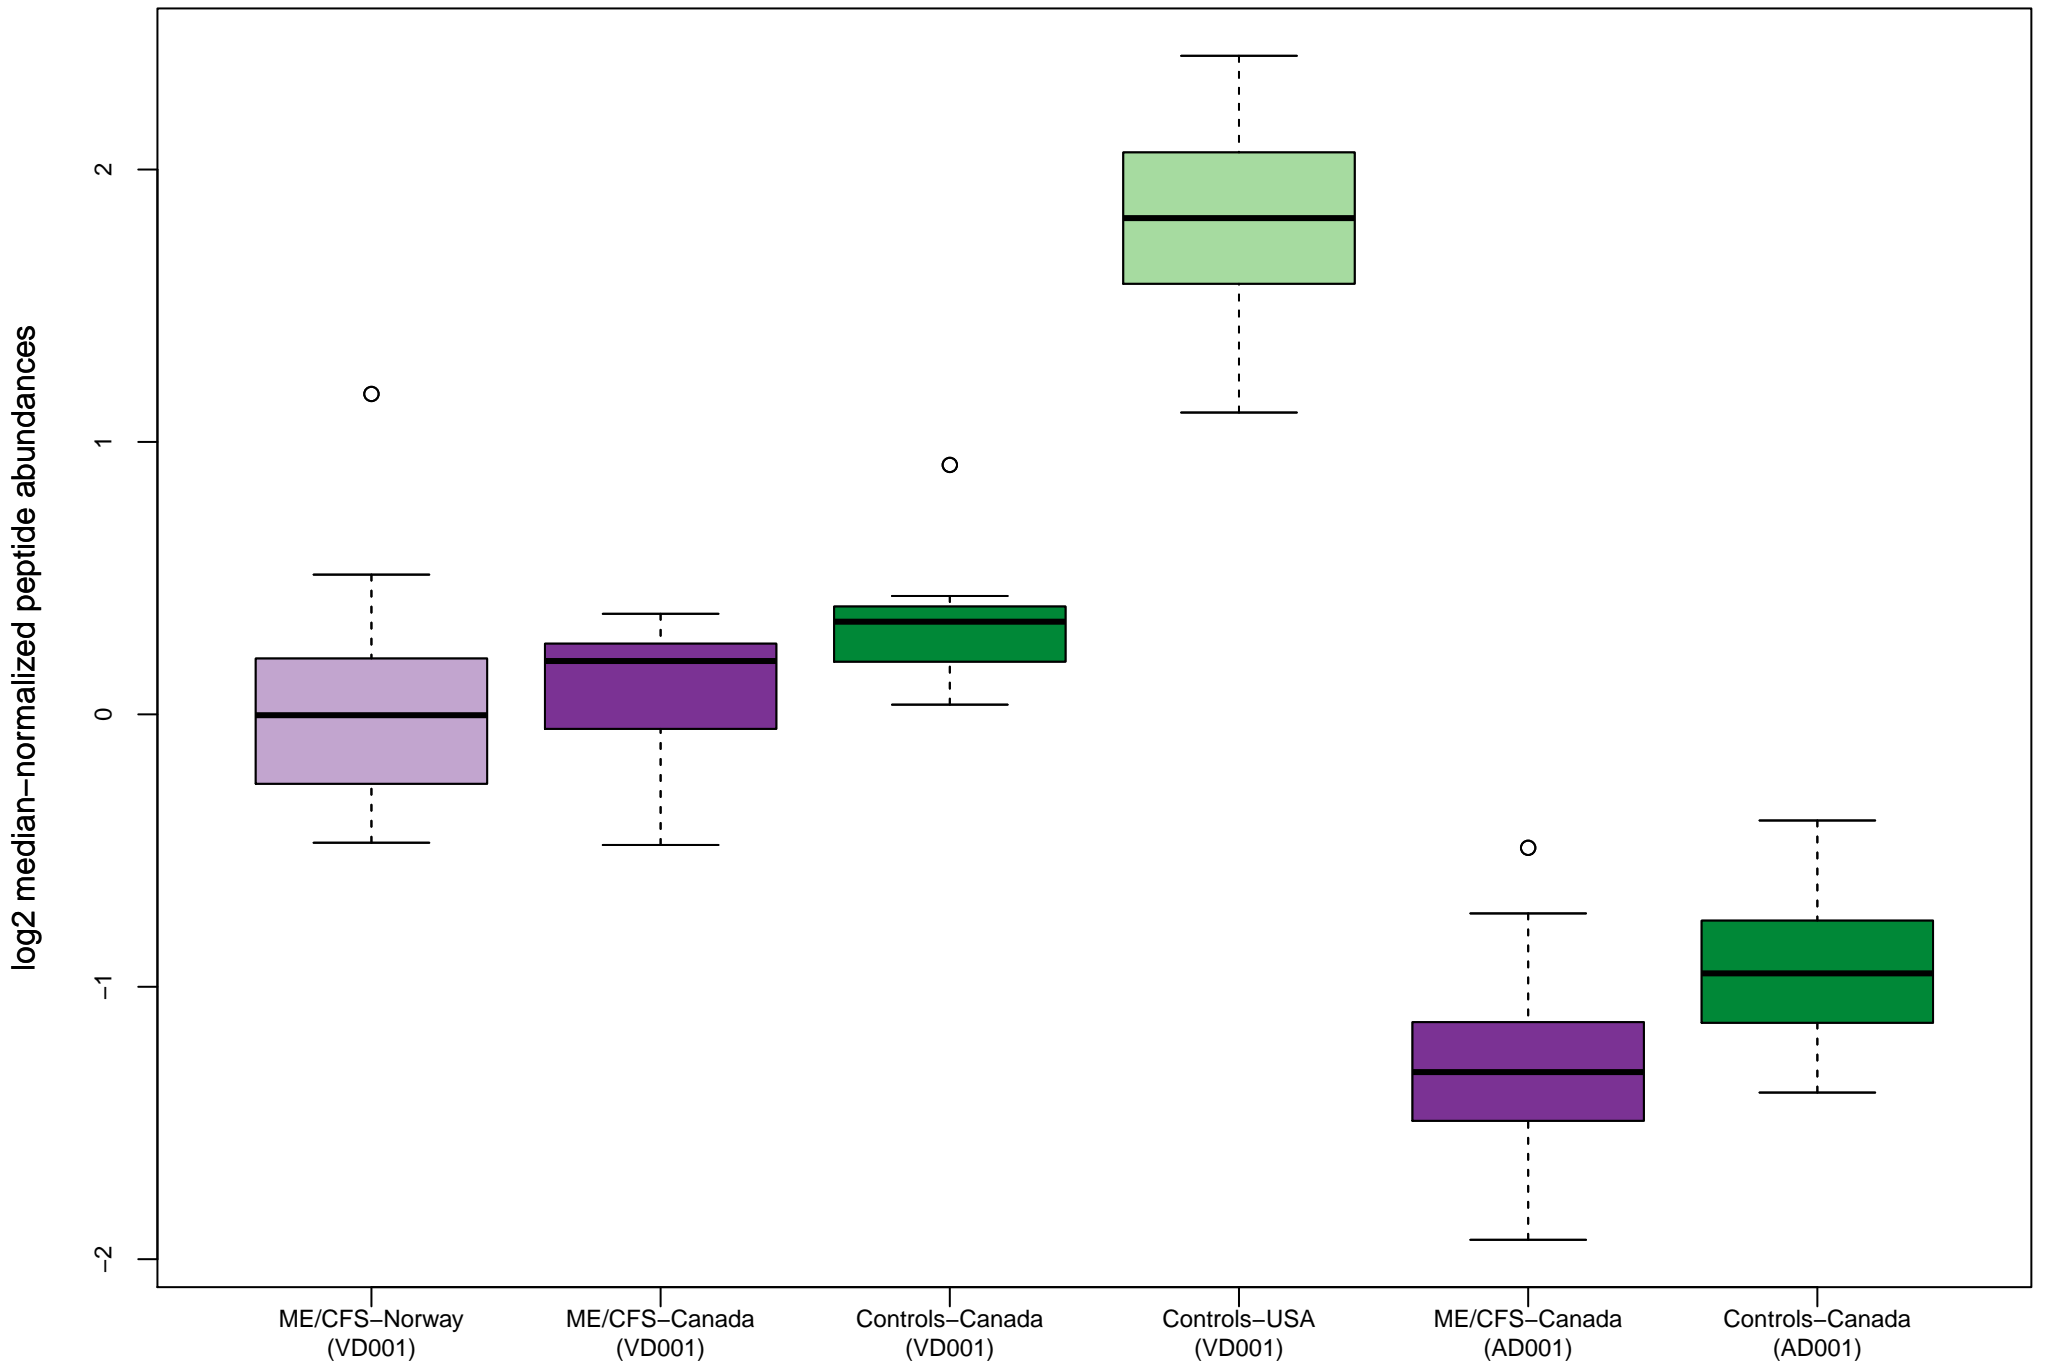

# DRGYWFRALSVL

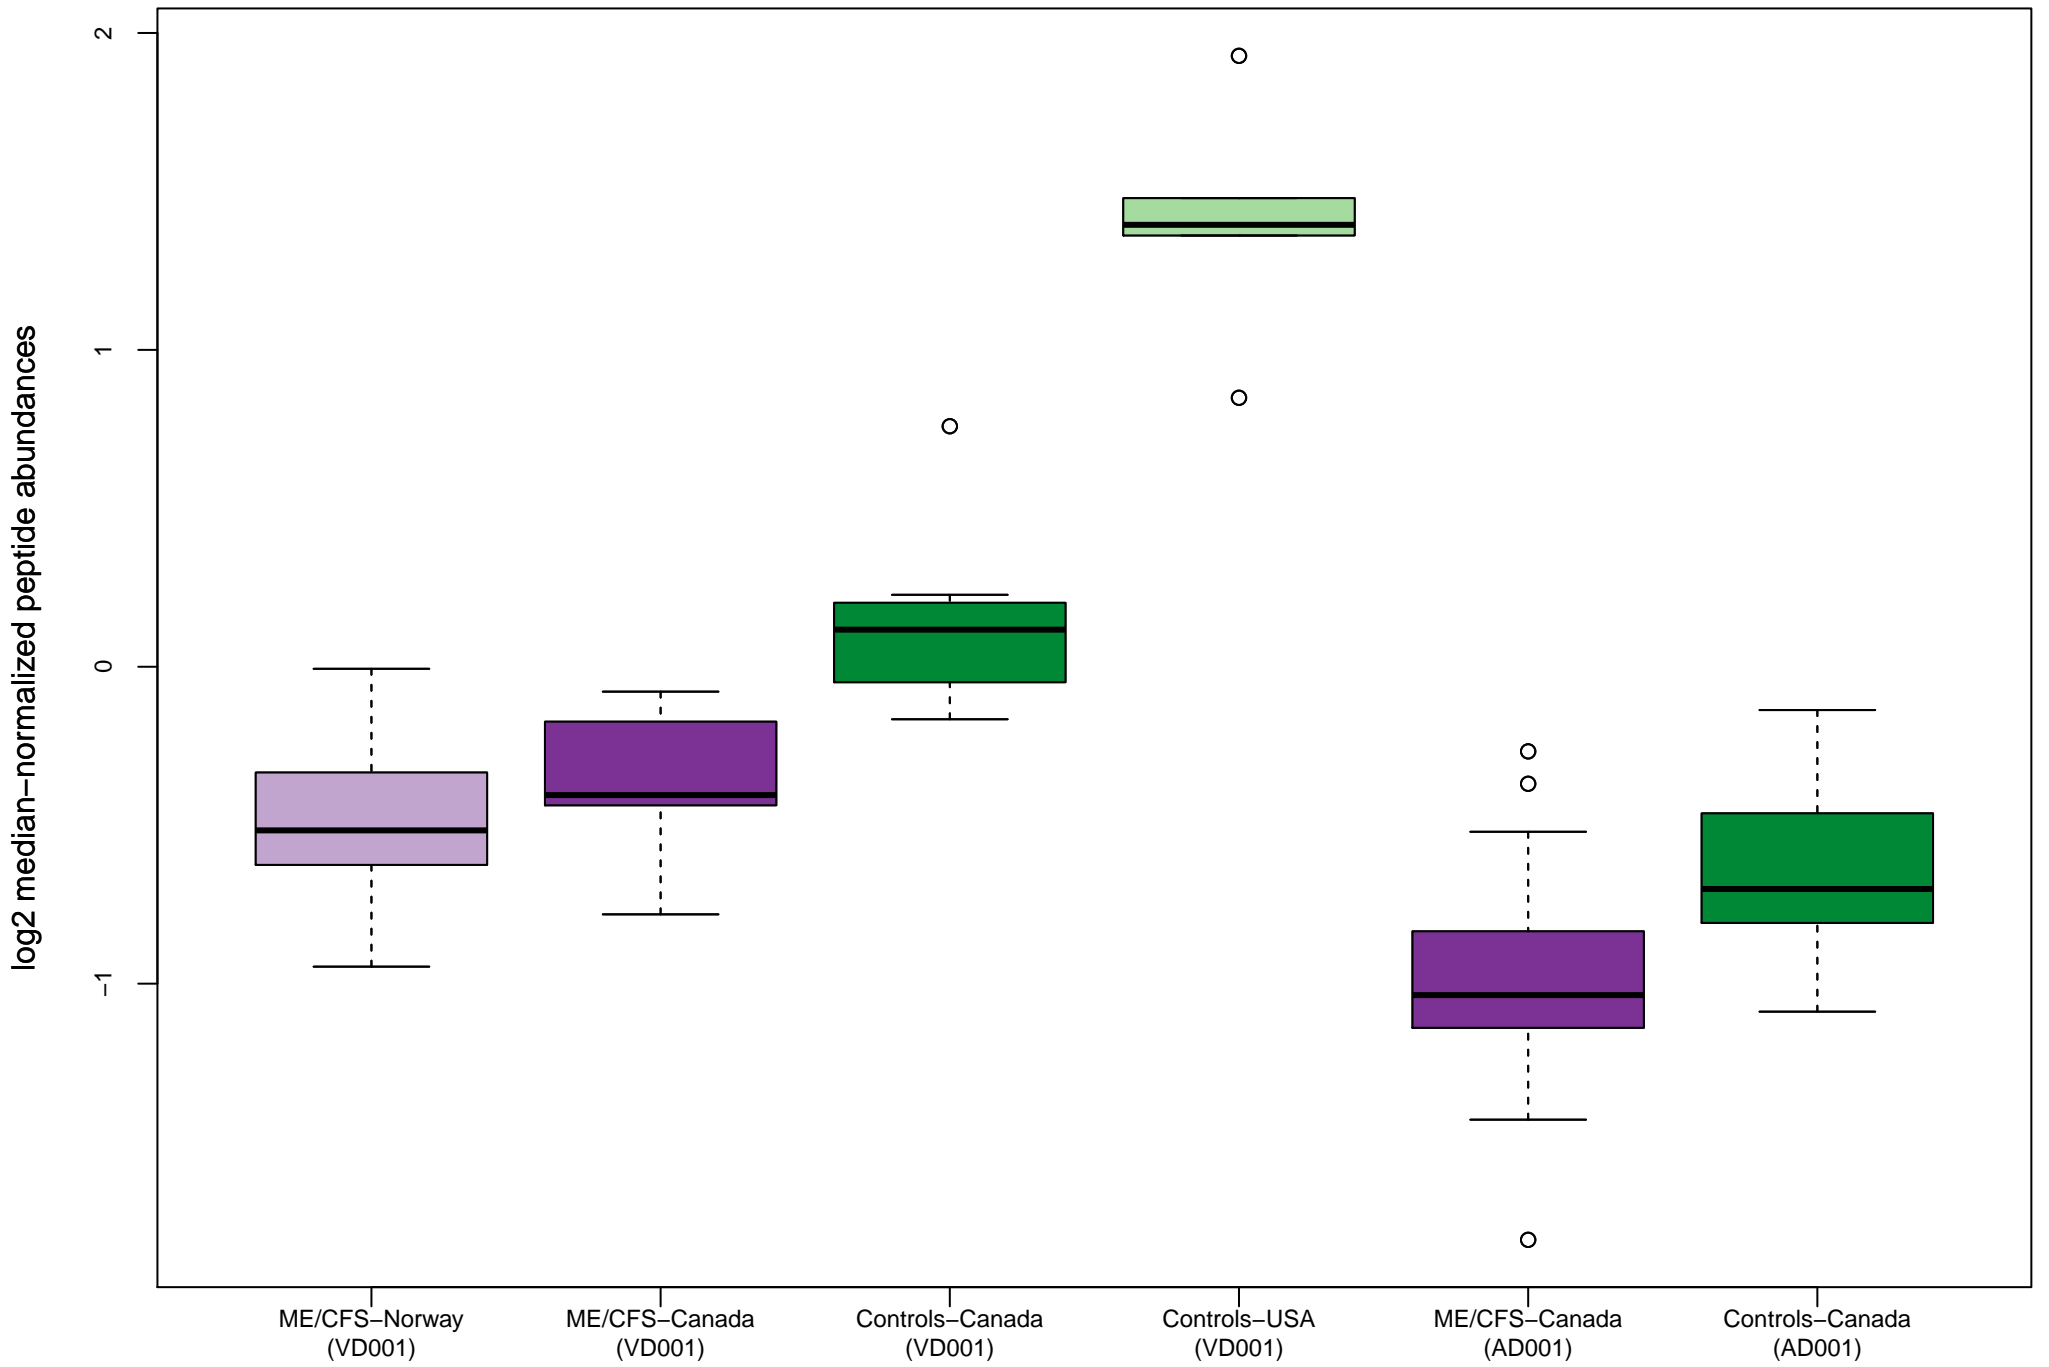



# DRSFFRALSGLS

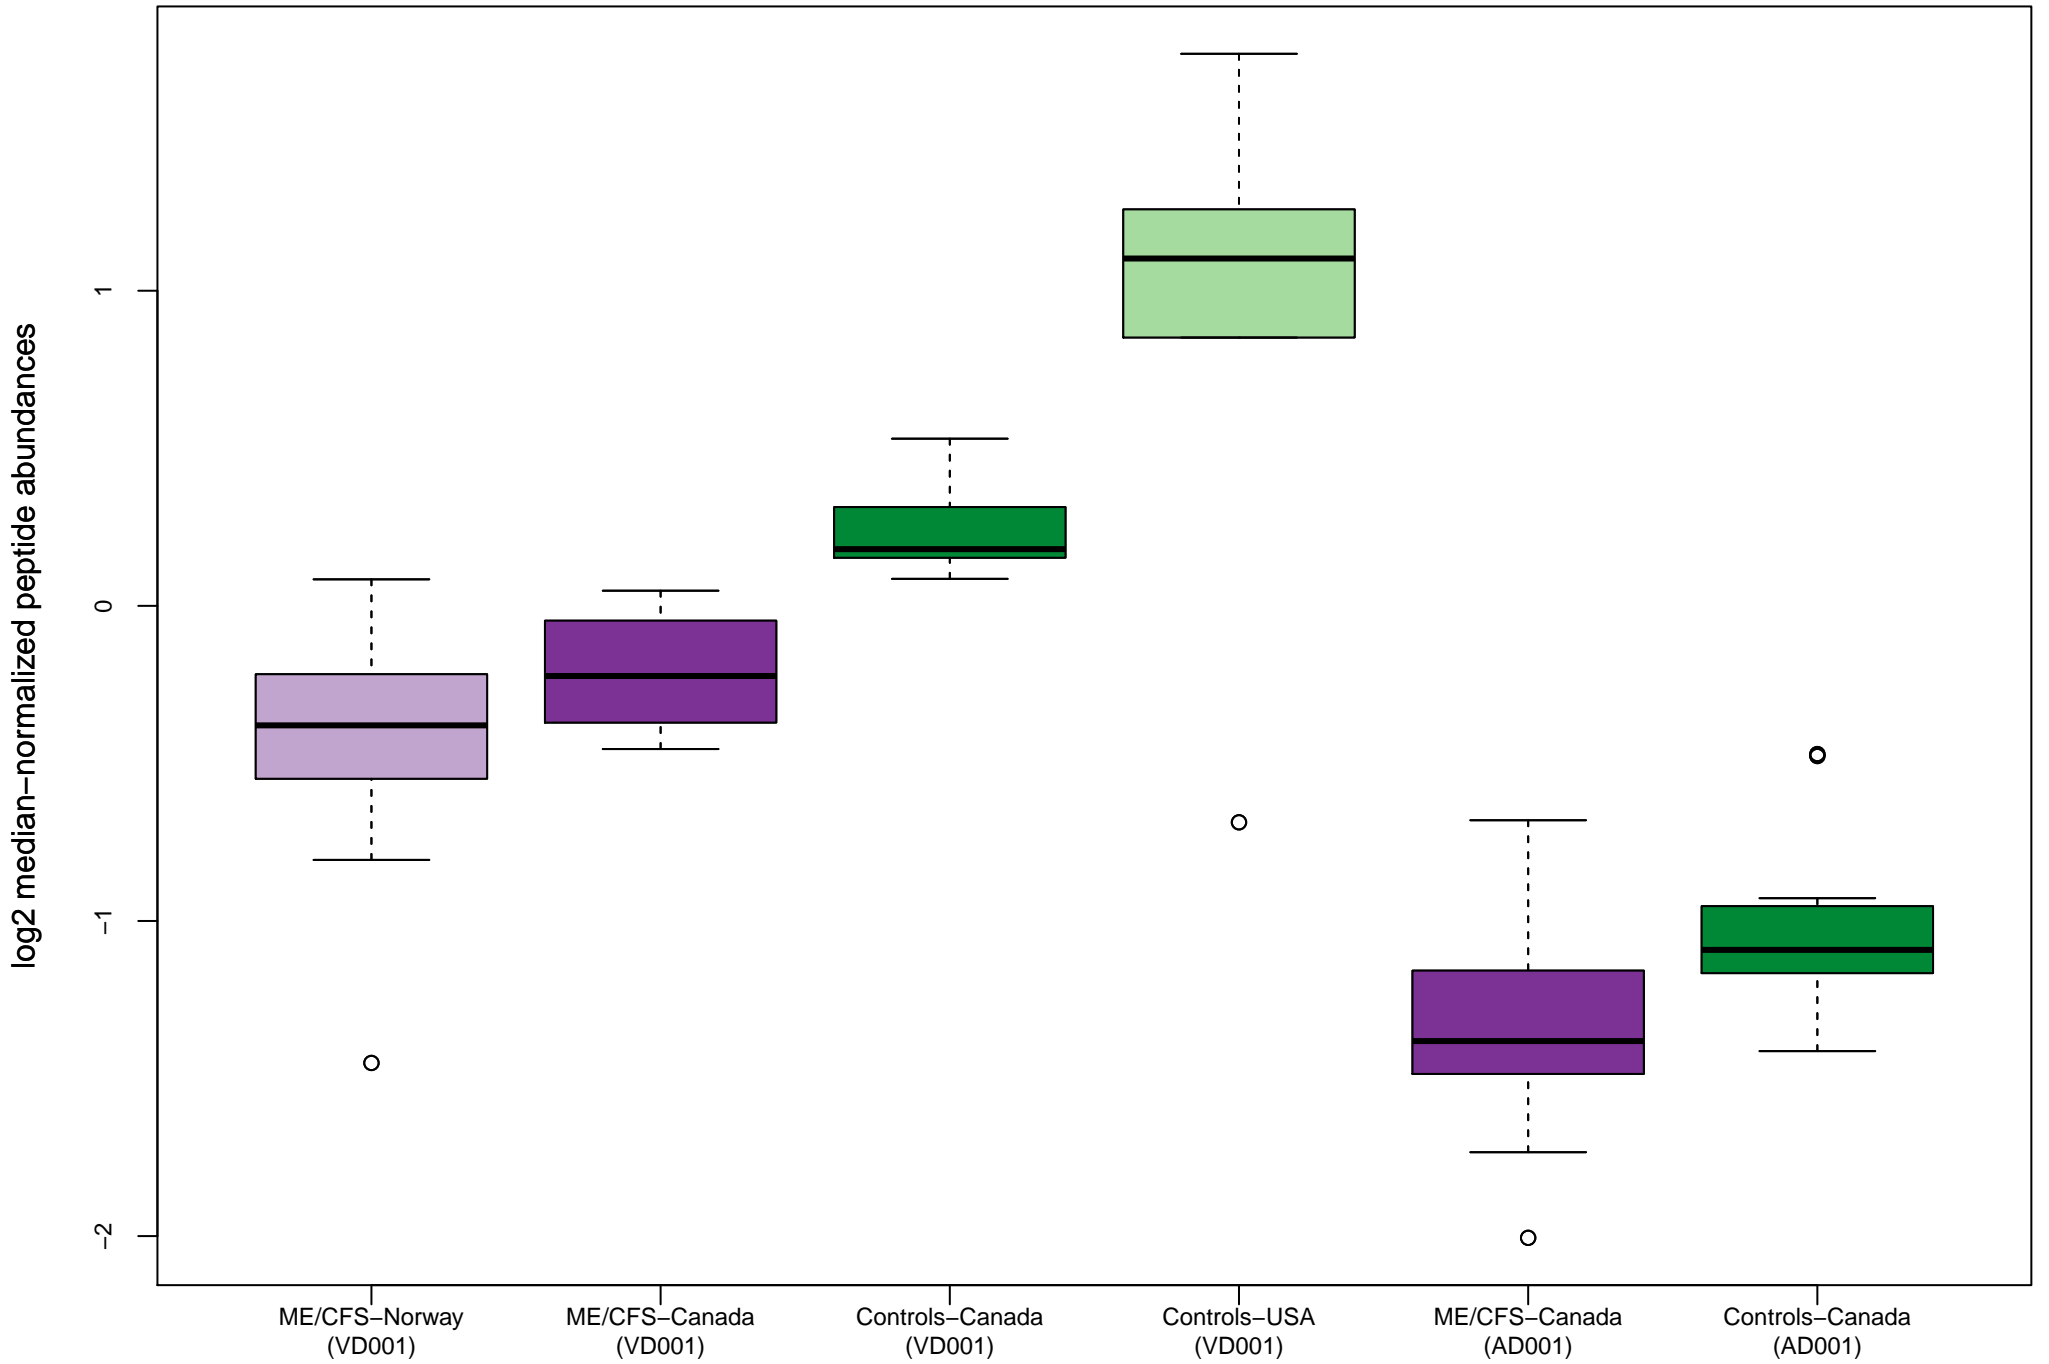

# DSQRLAFRVLSA

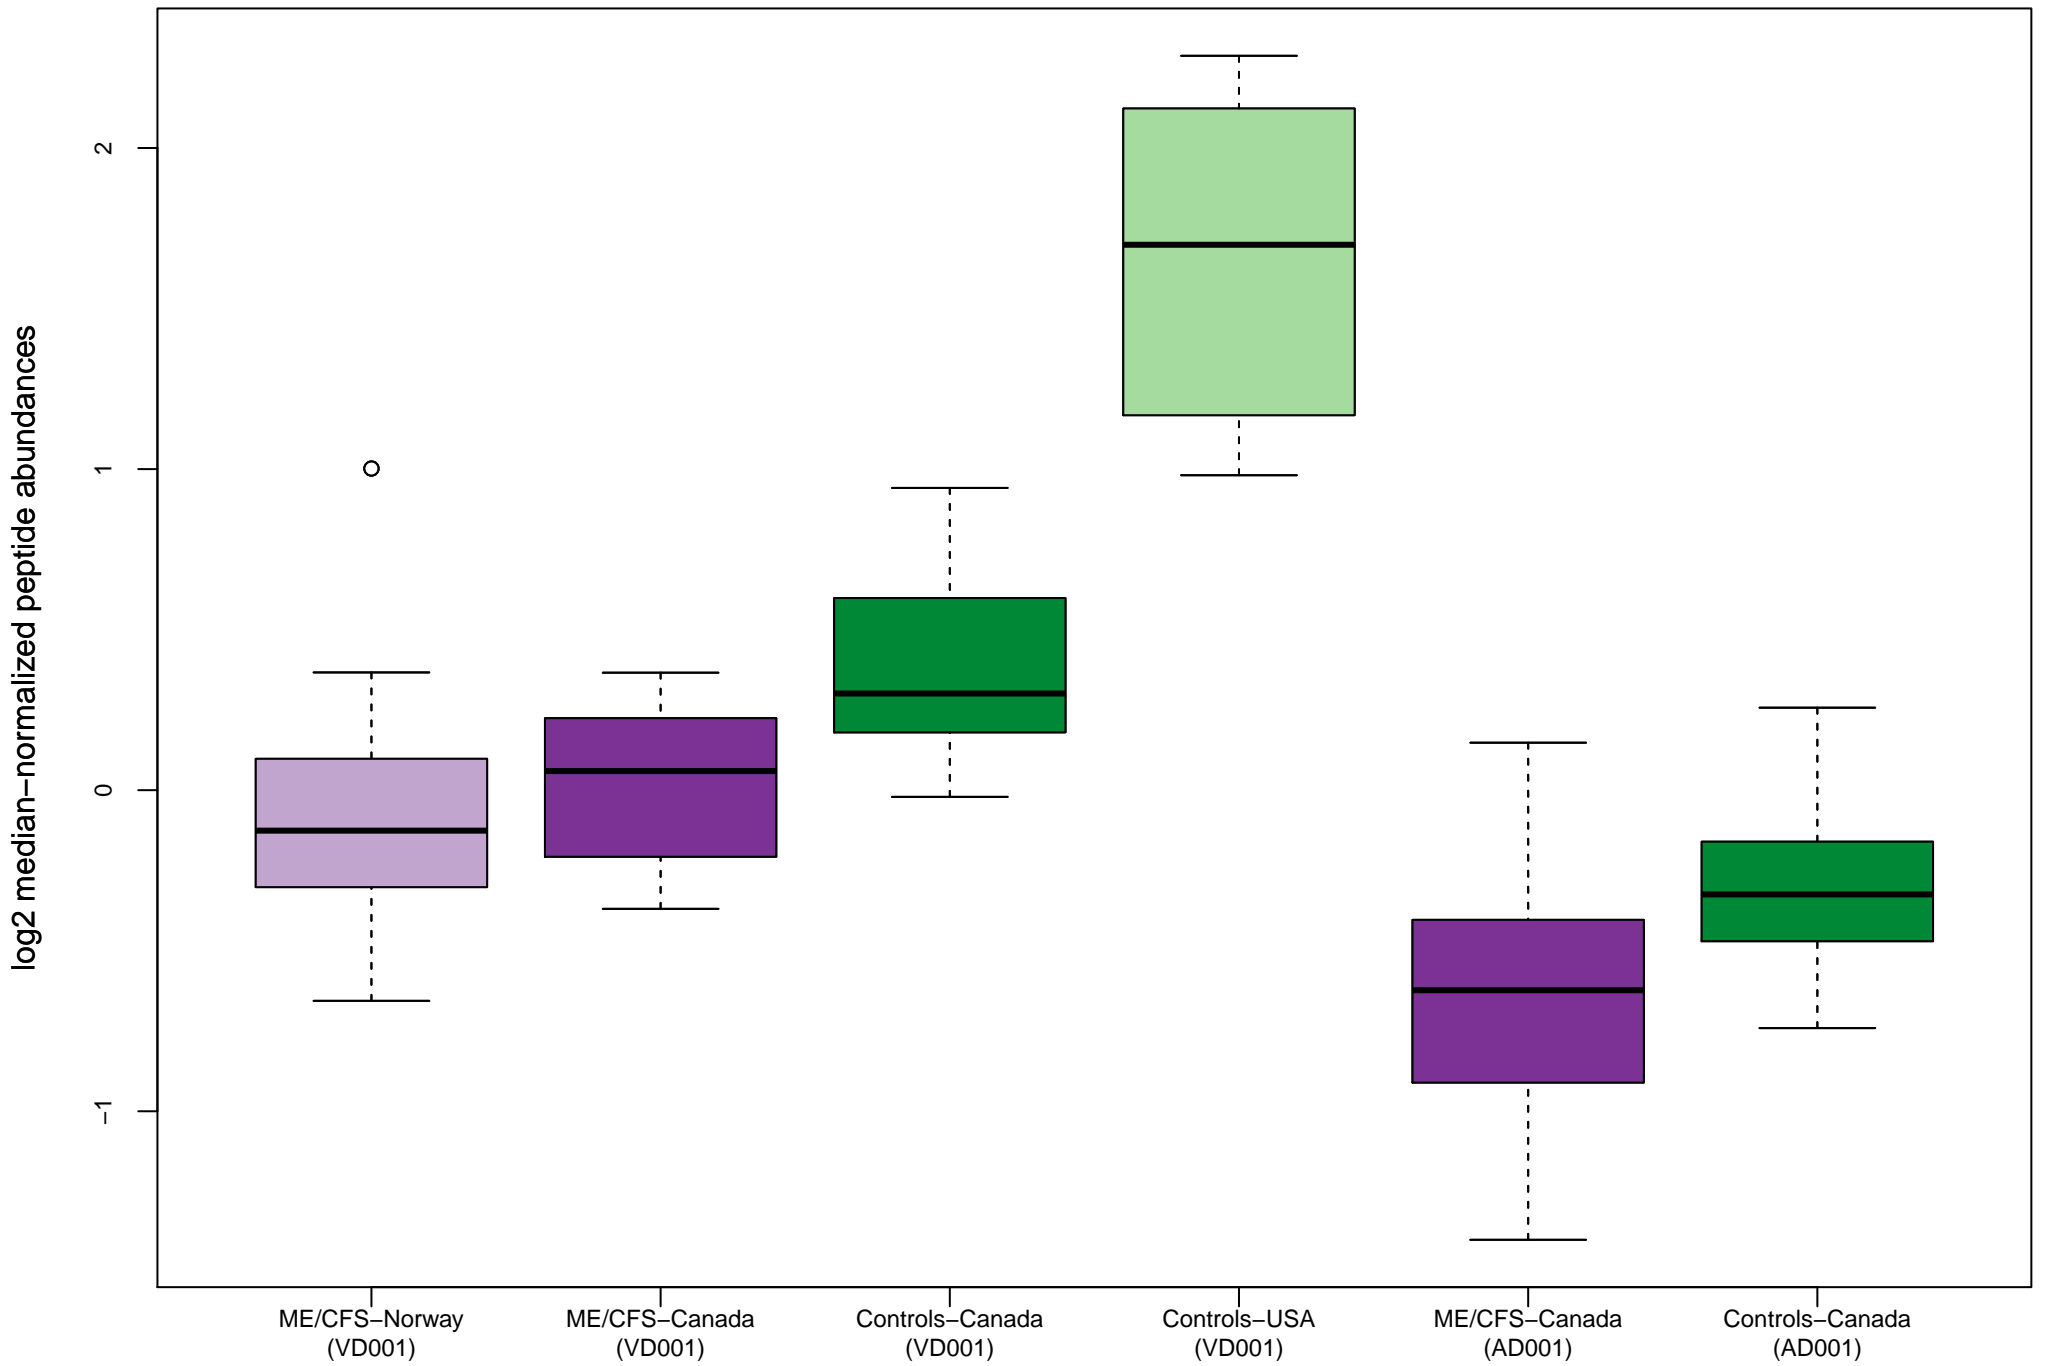

# EAPFRWLRVLSS

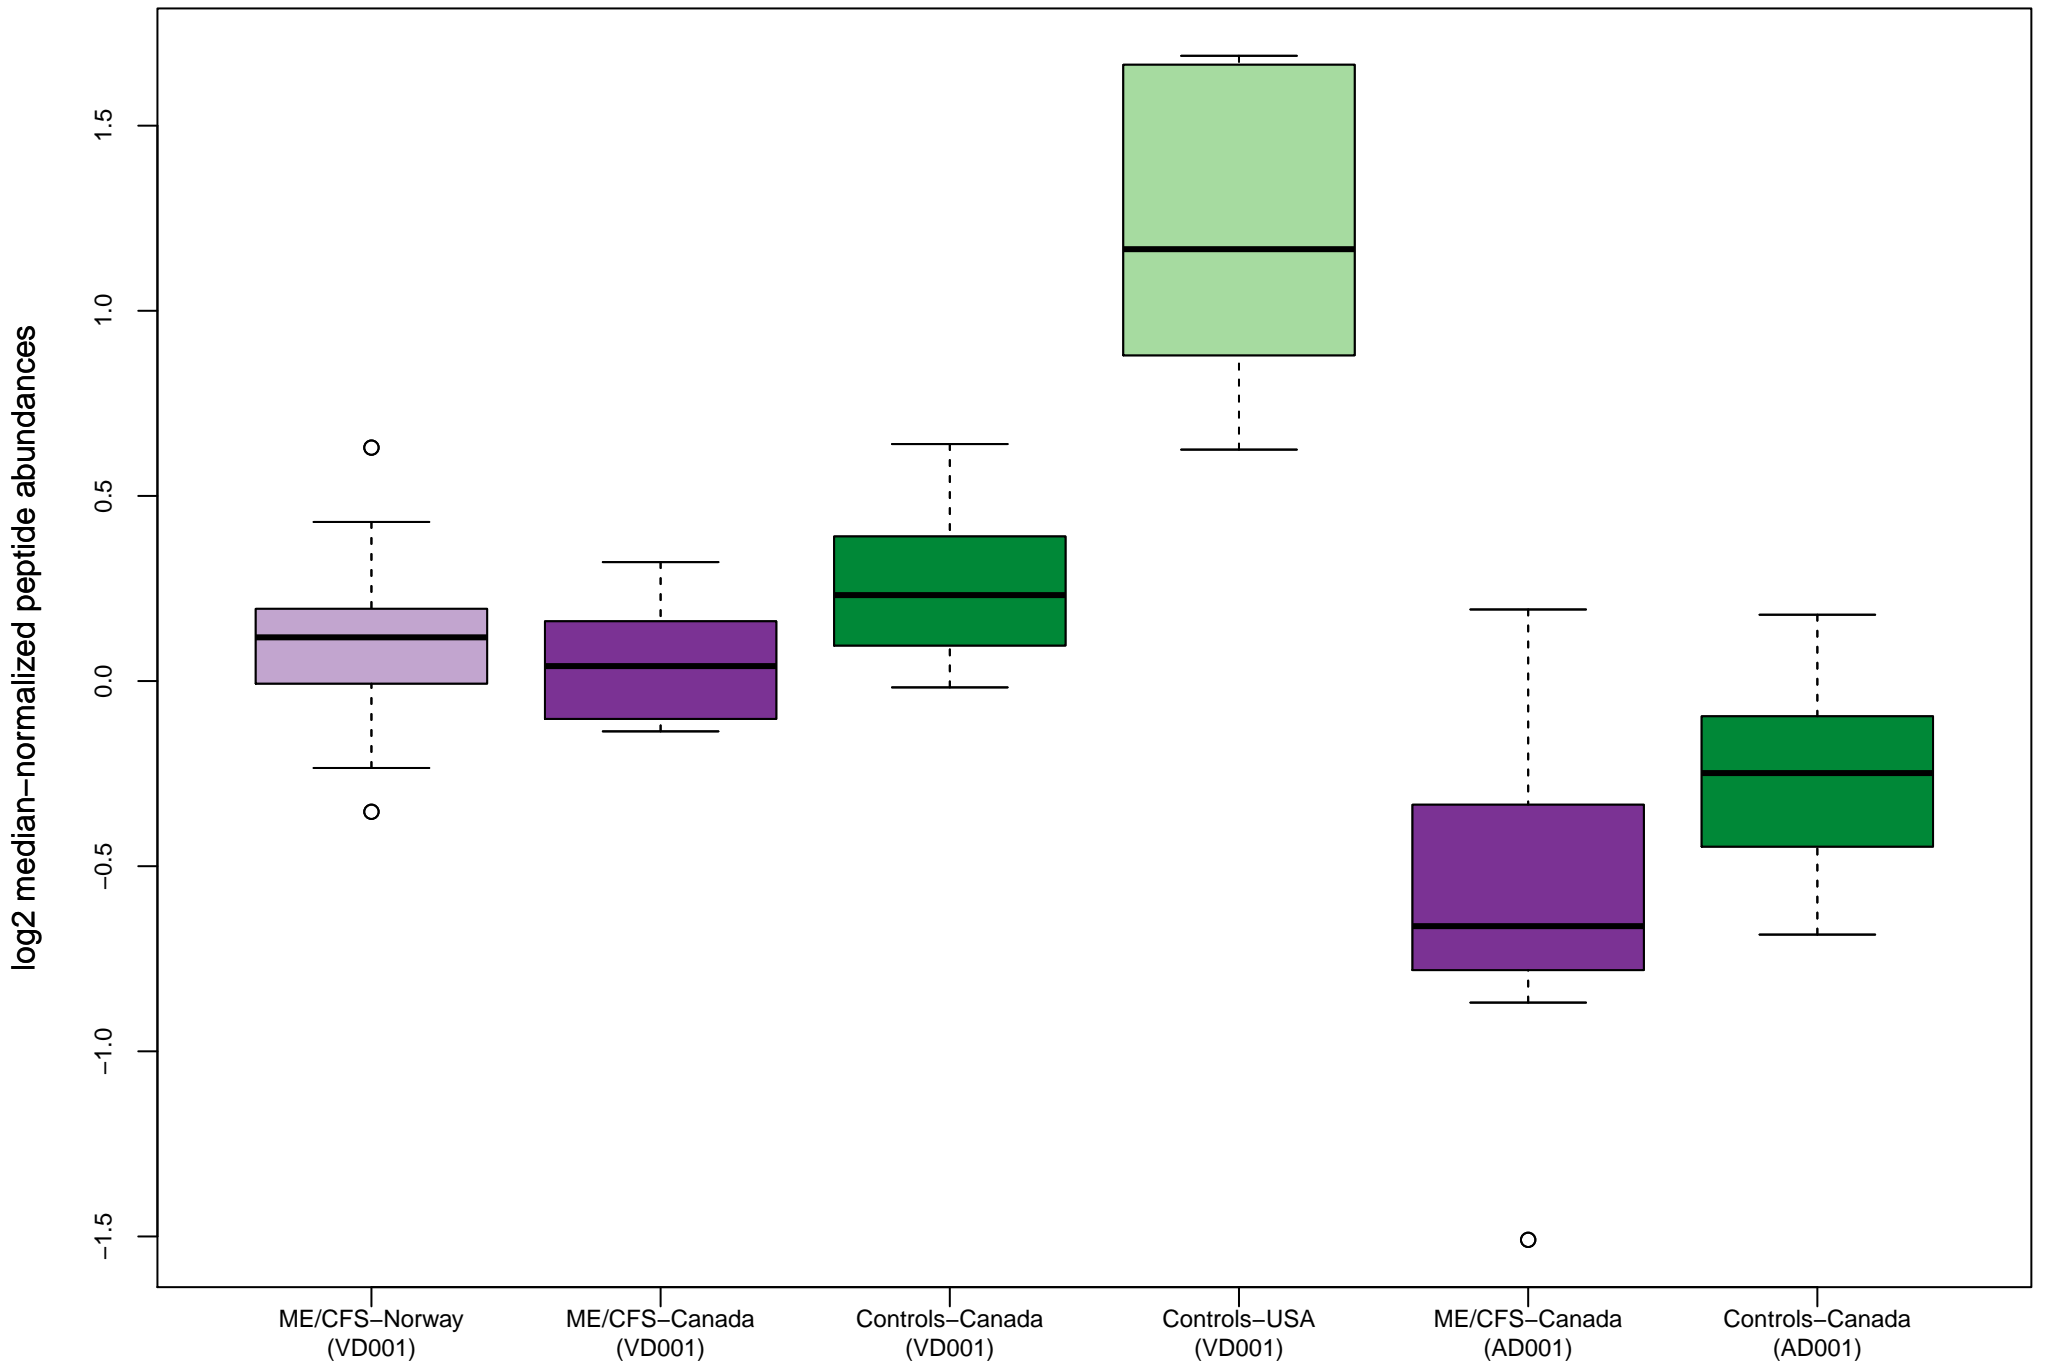

# EFAFPLRYKAVL

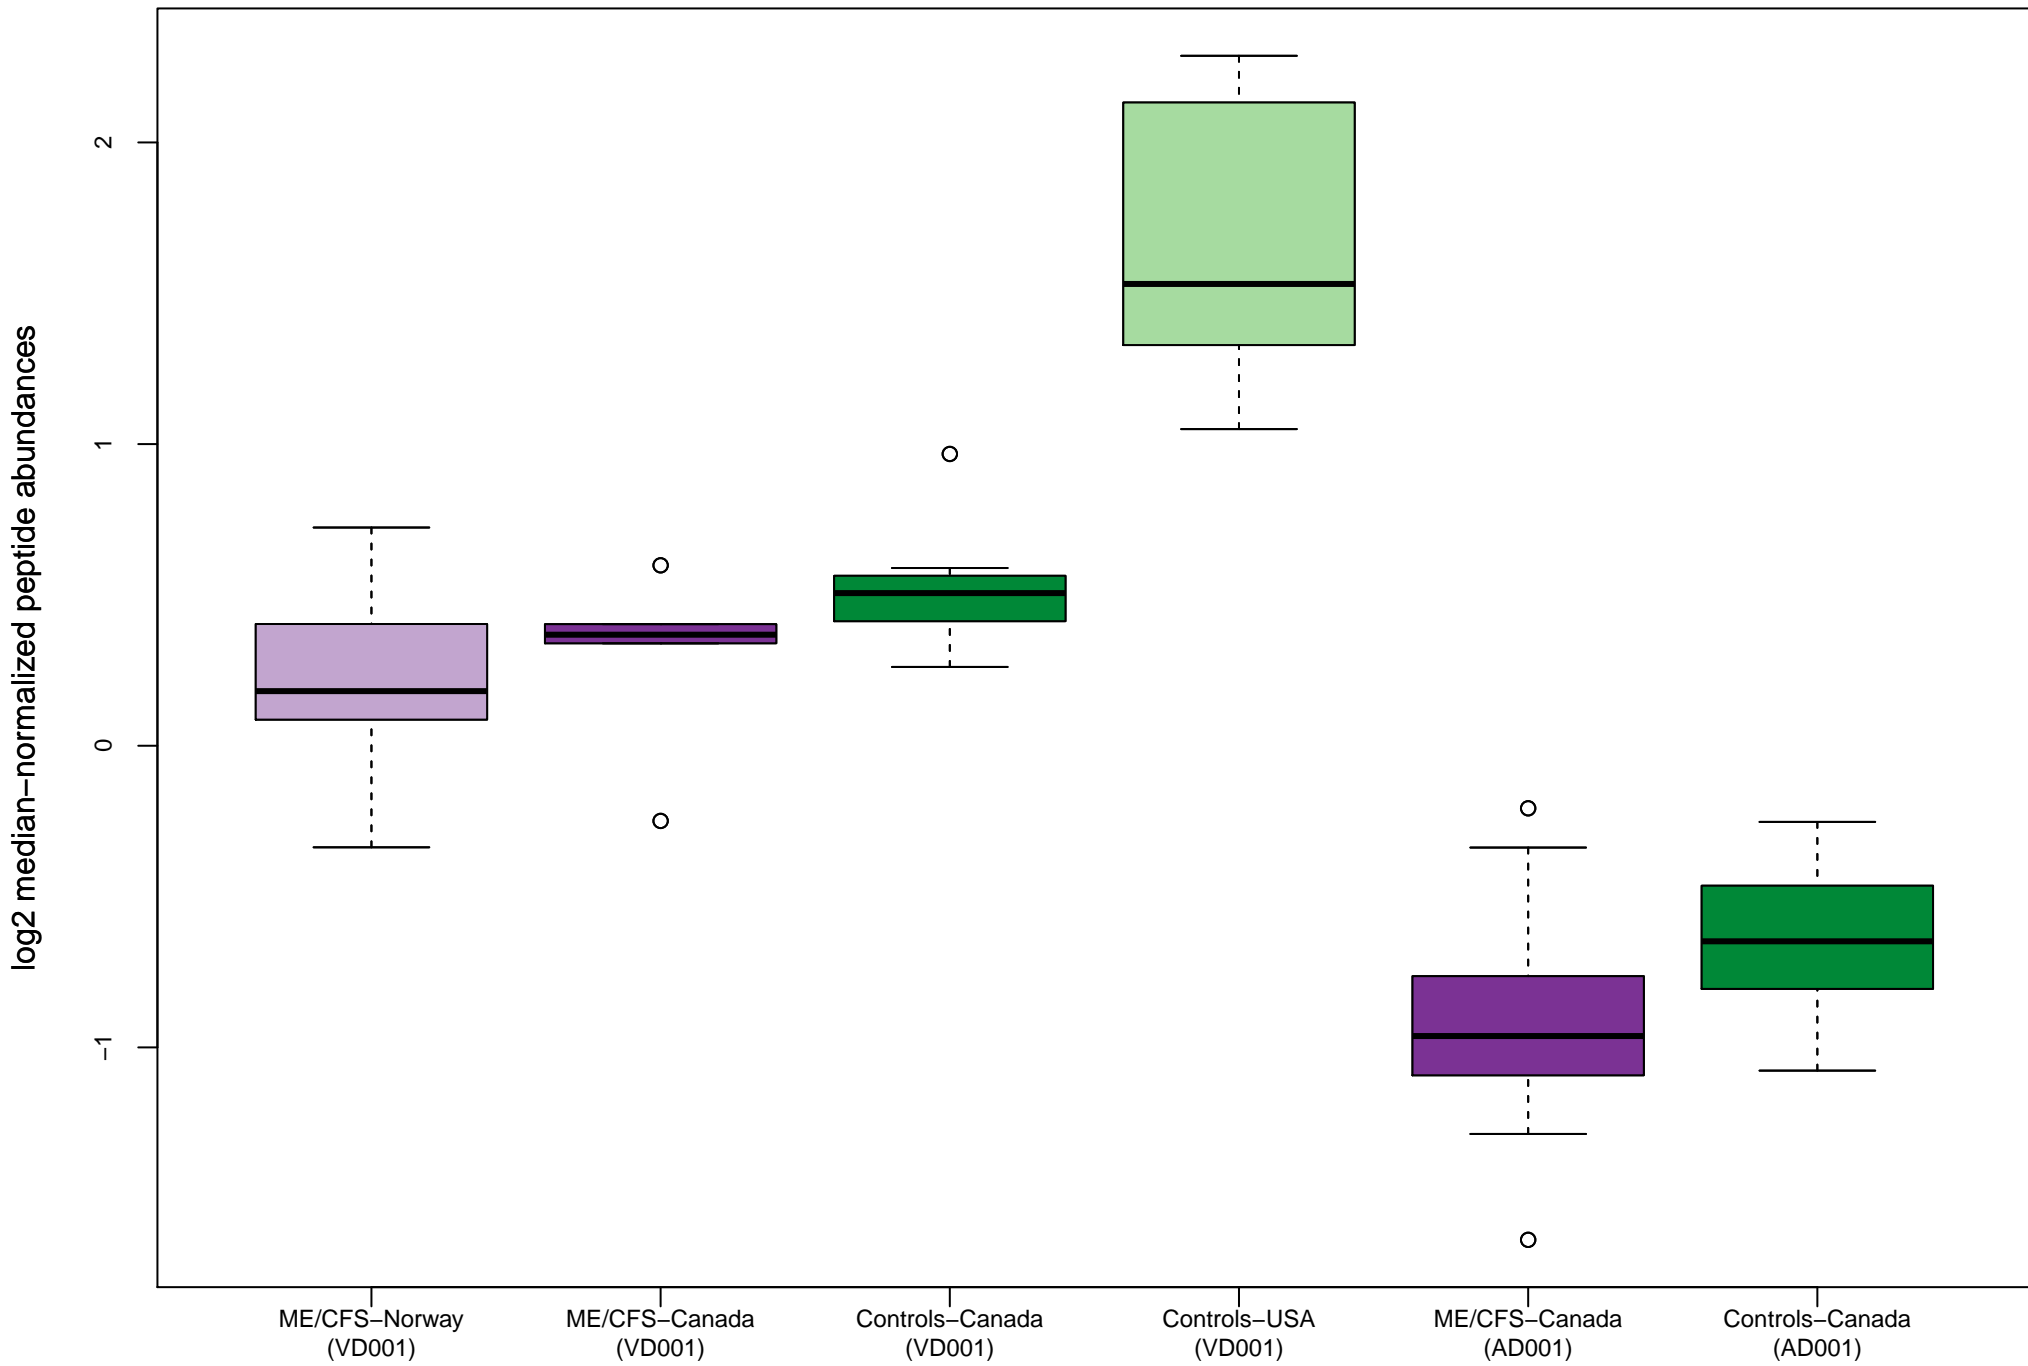

# EFKLFALRWALS

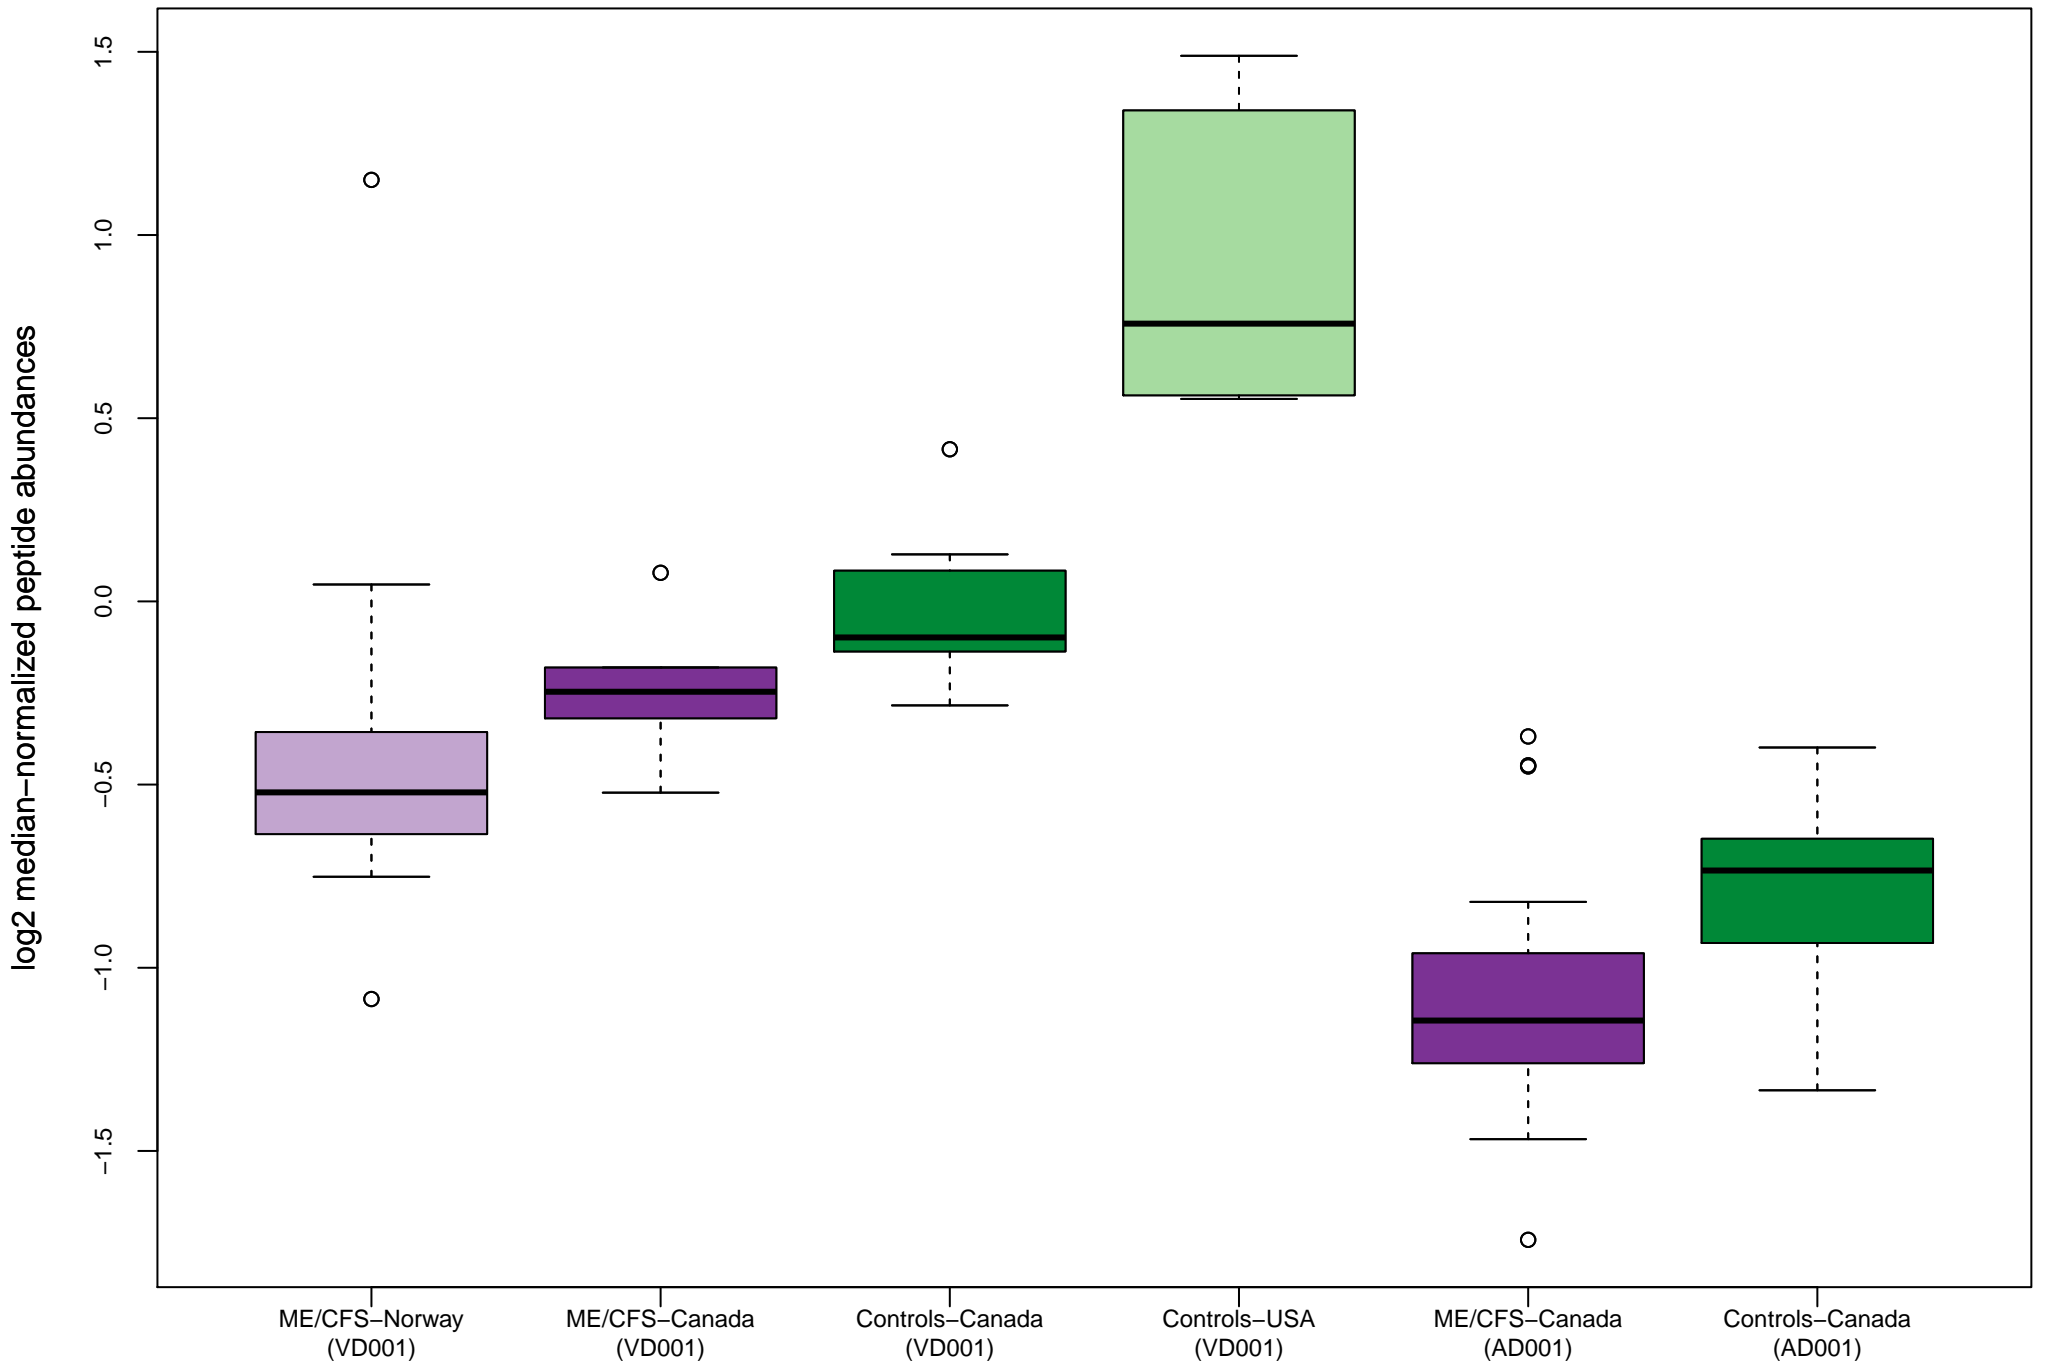

# EQFRFPRWLGVA

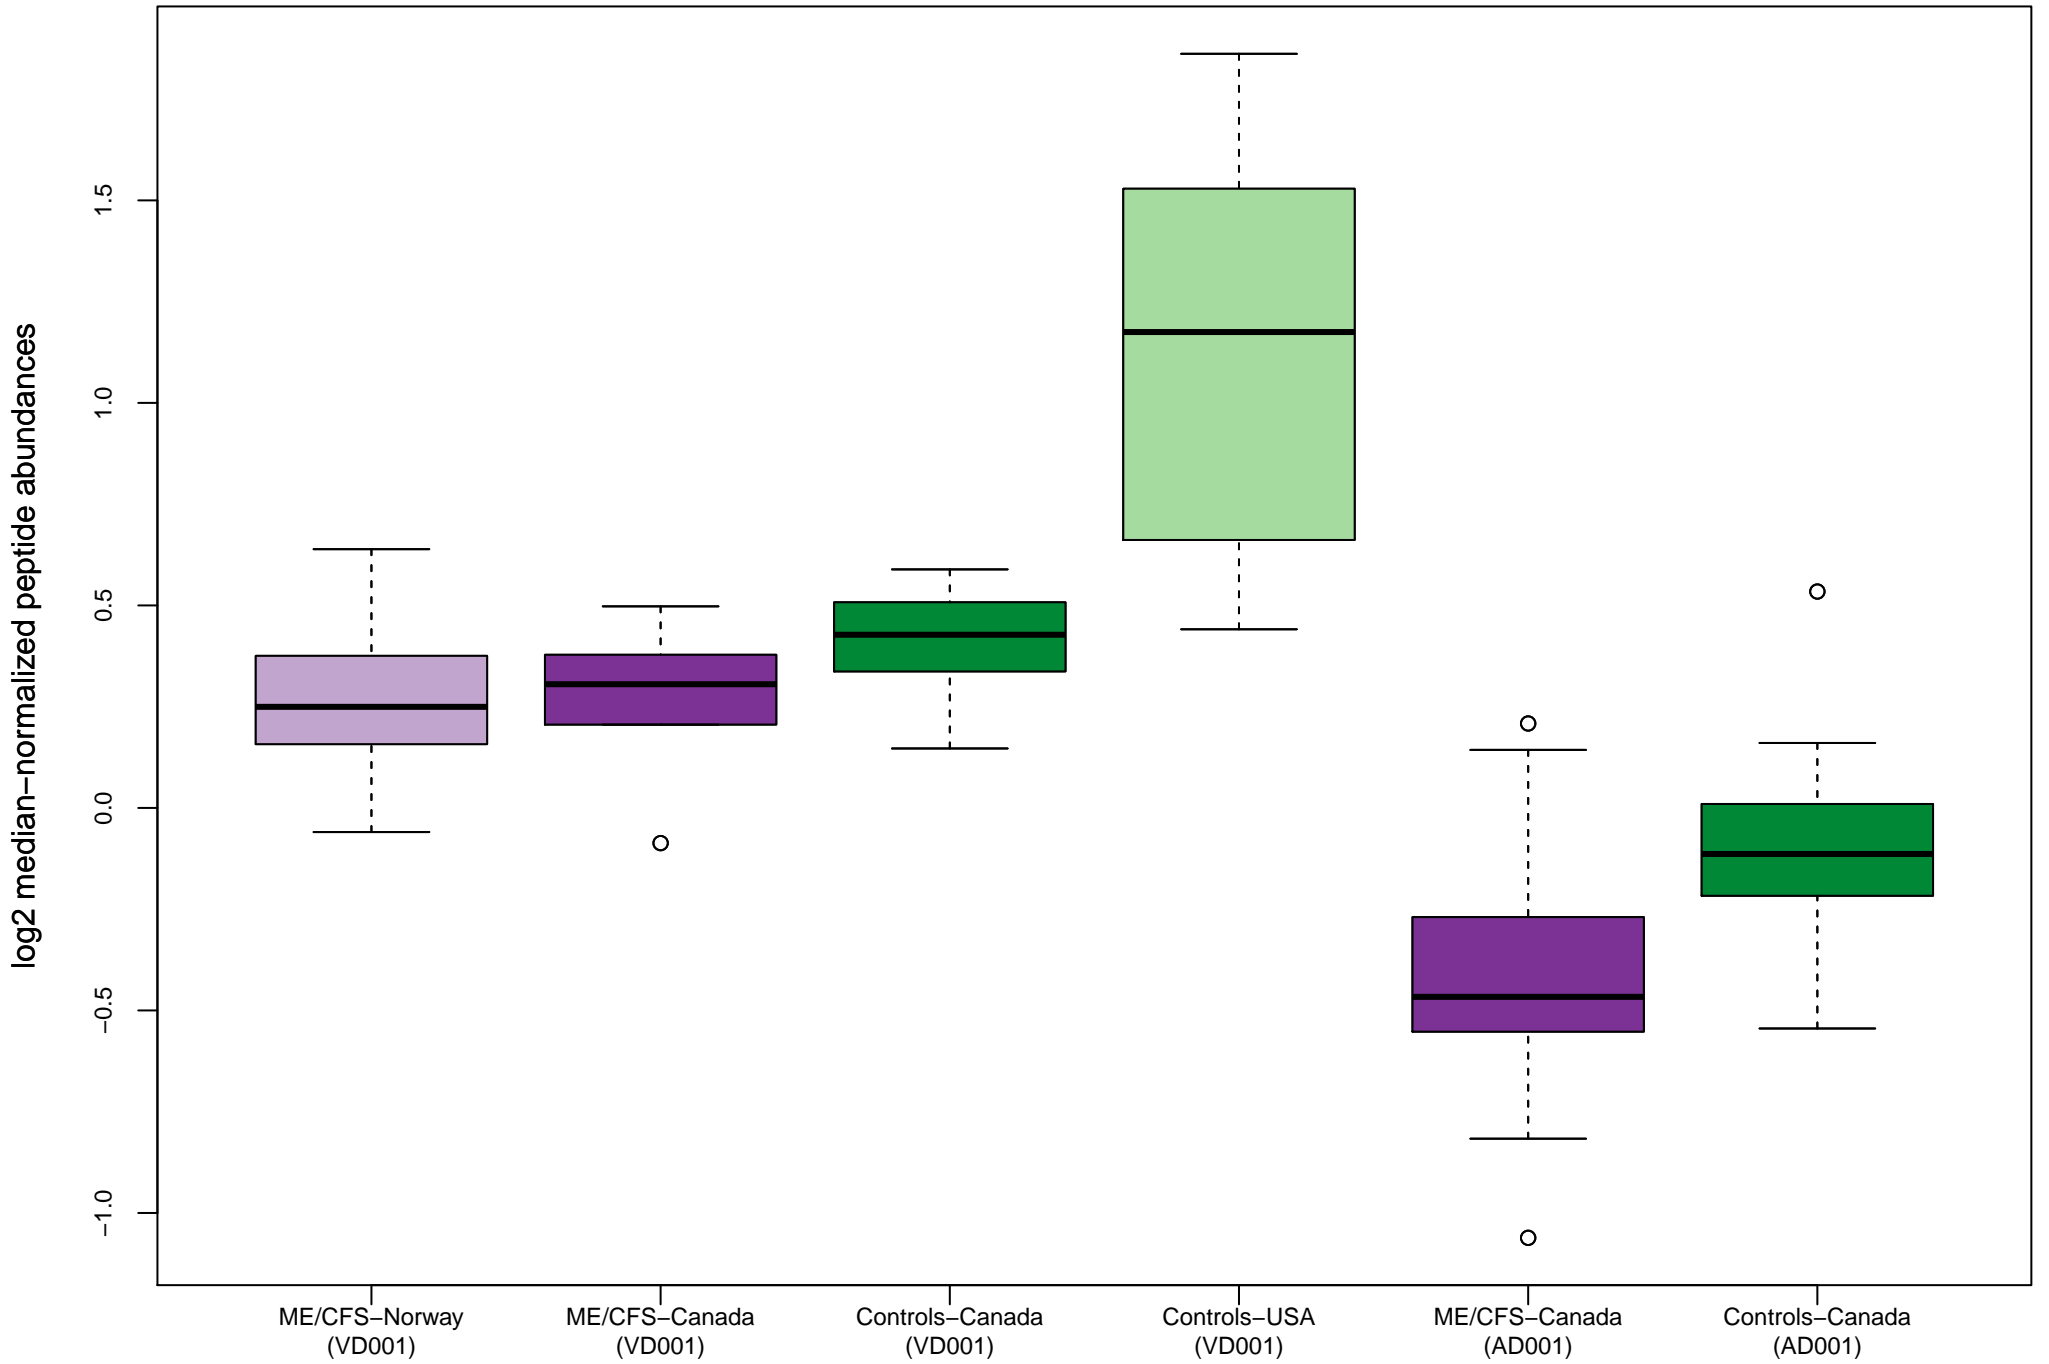

# EQWRRYLSGVLS

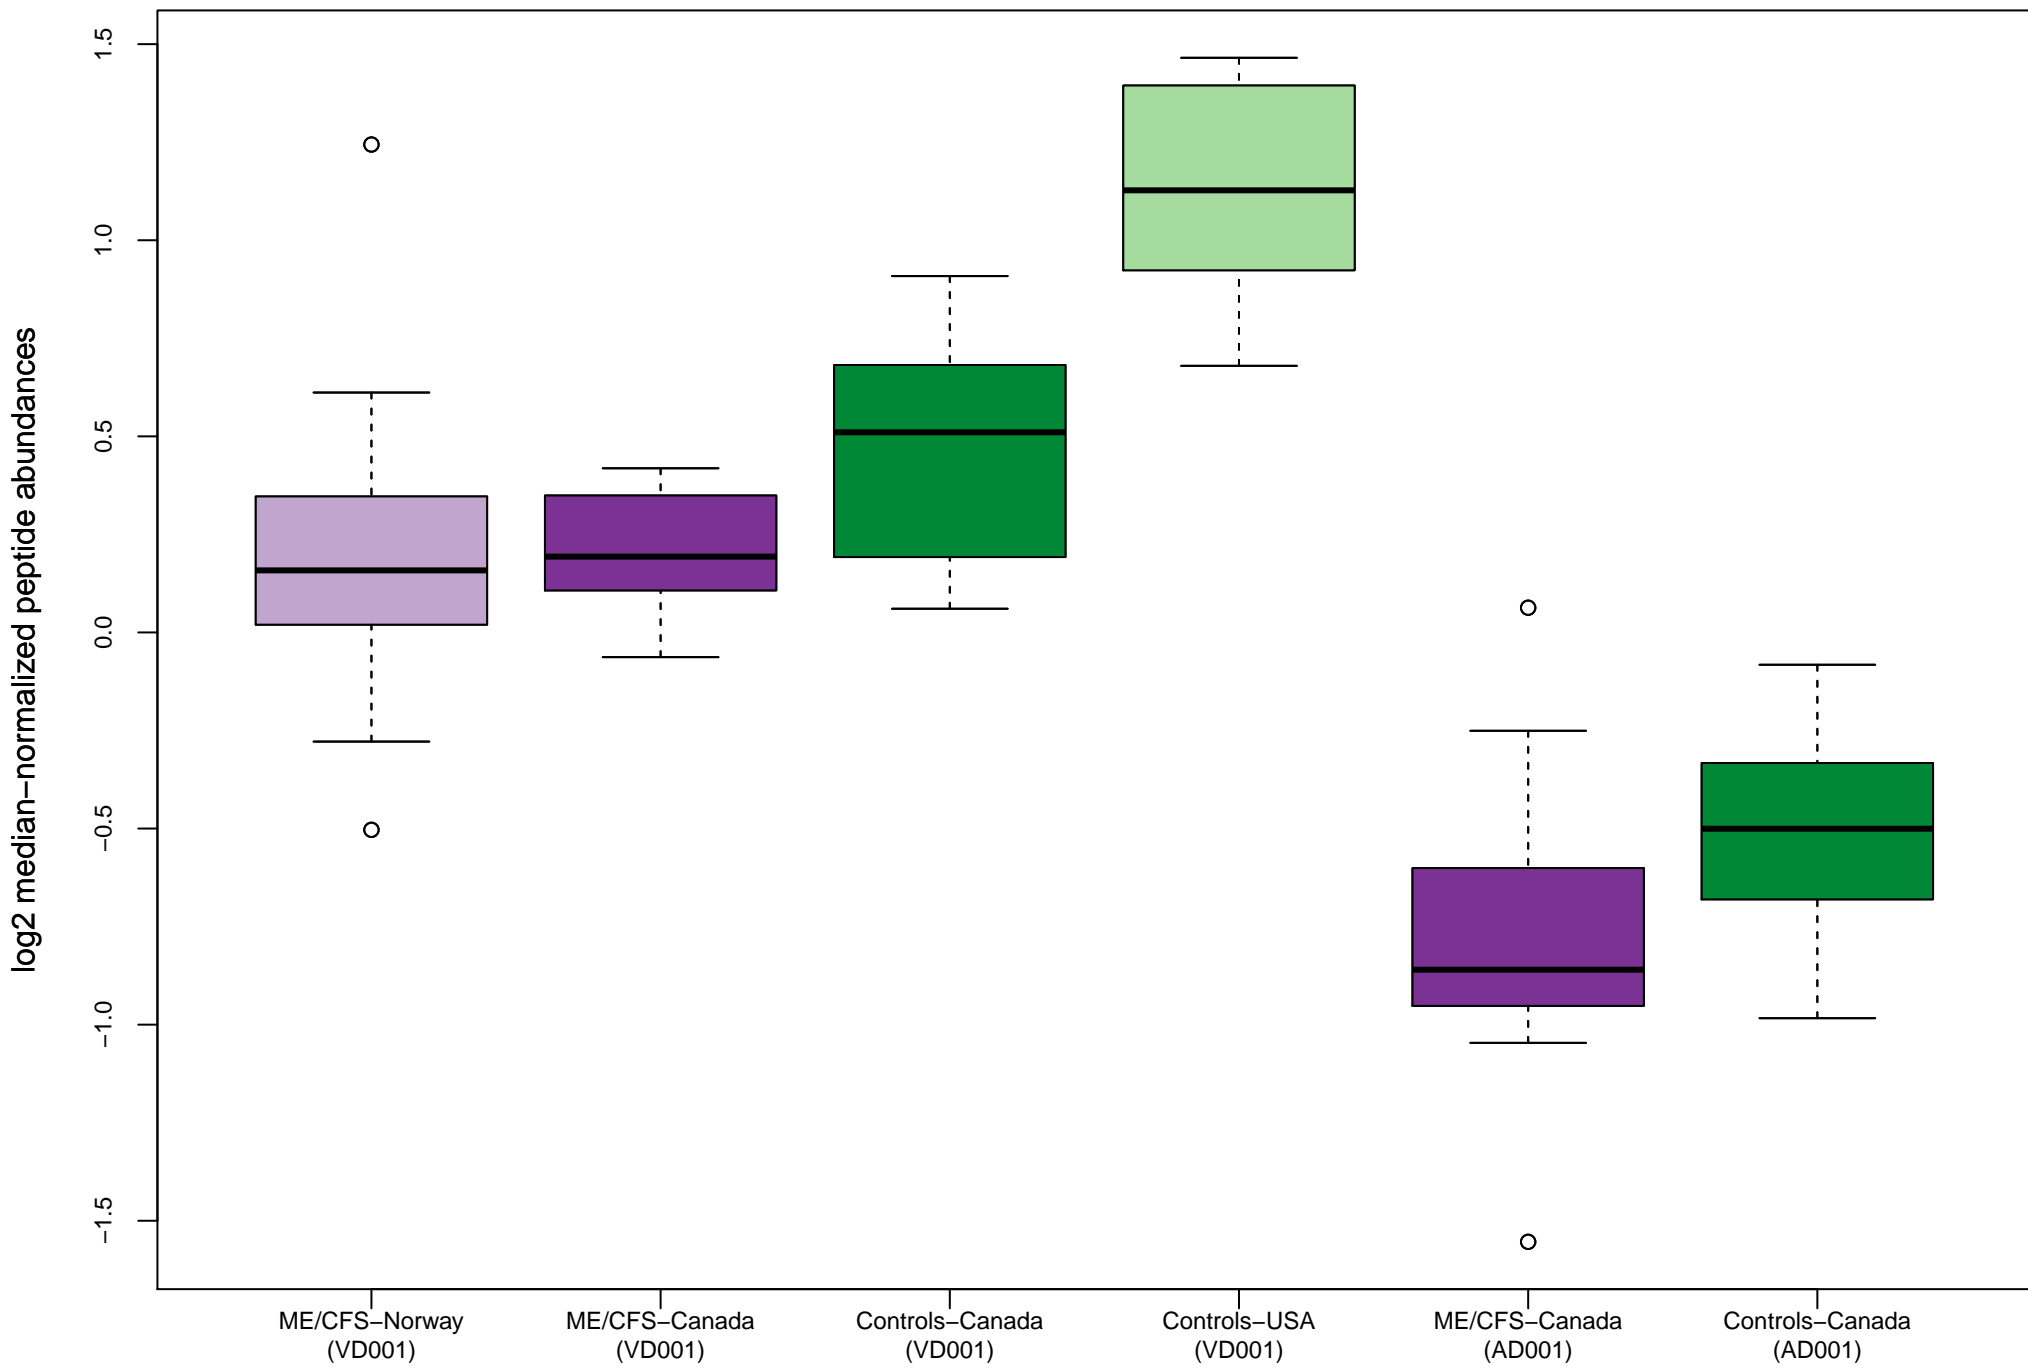

# EWLLVLRPYNKG

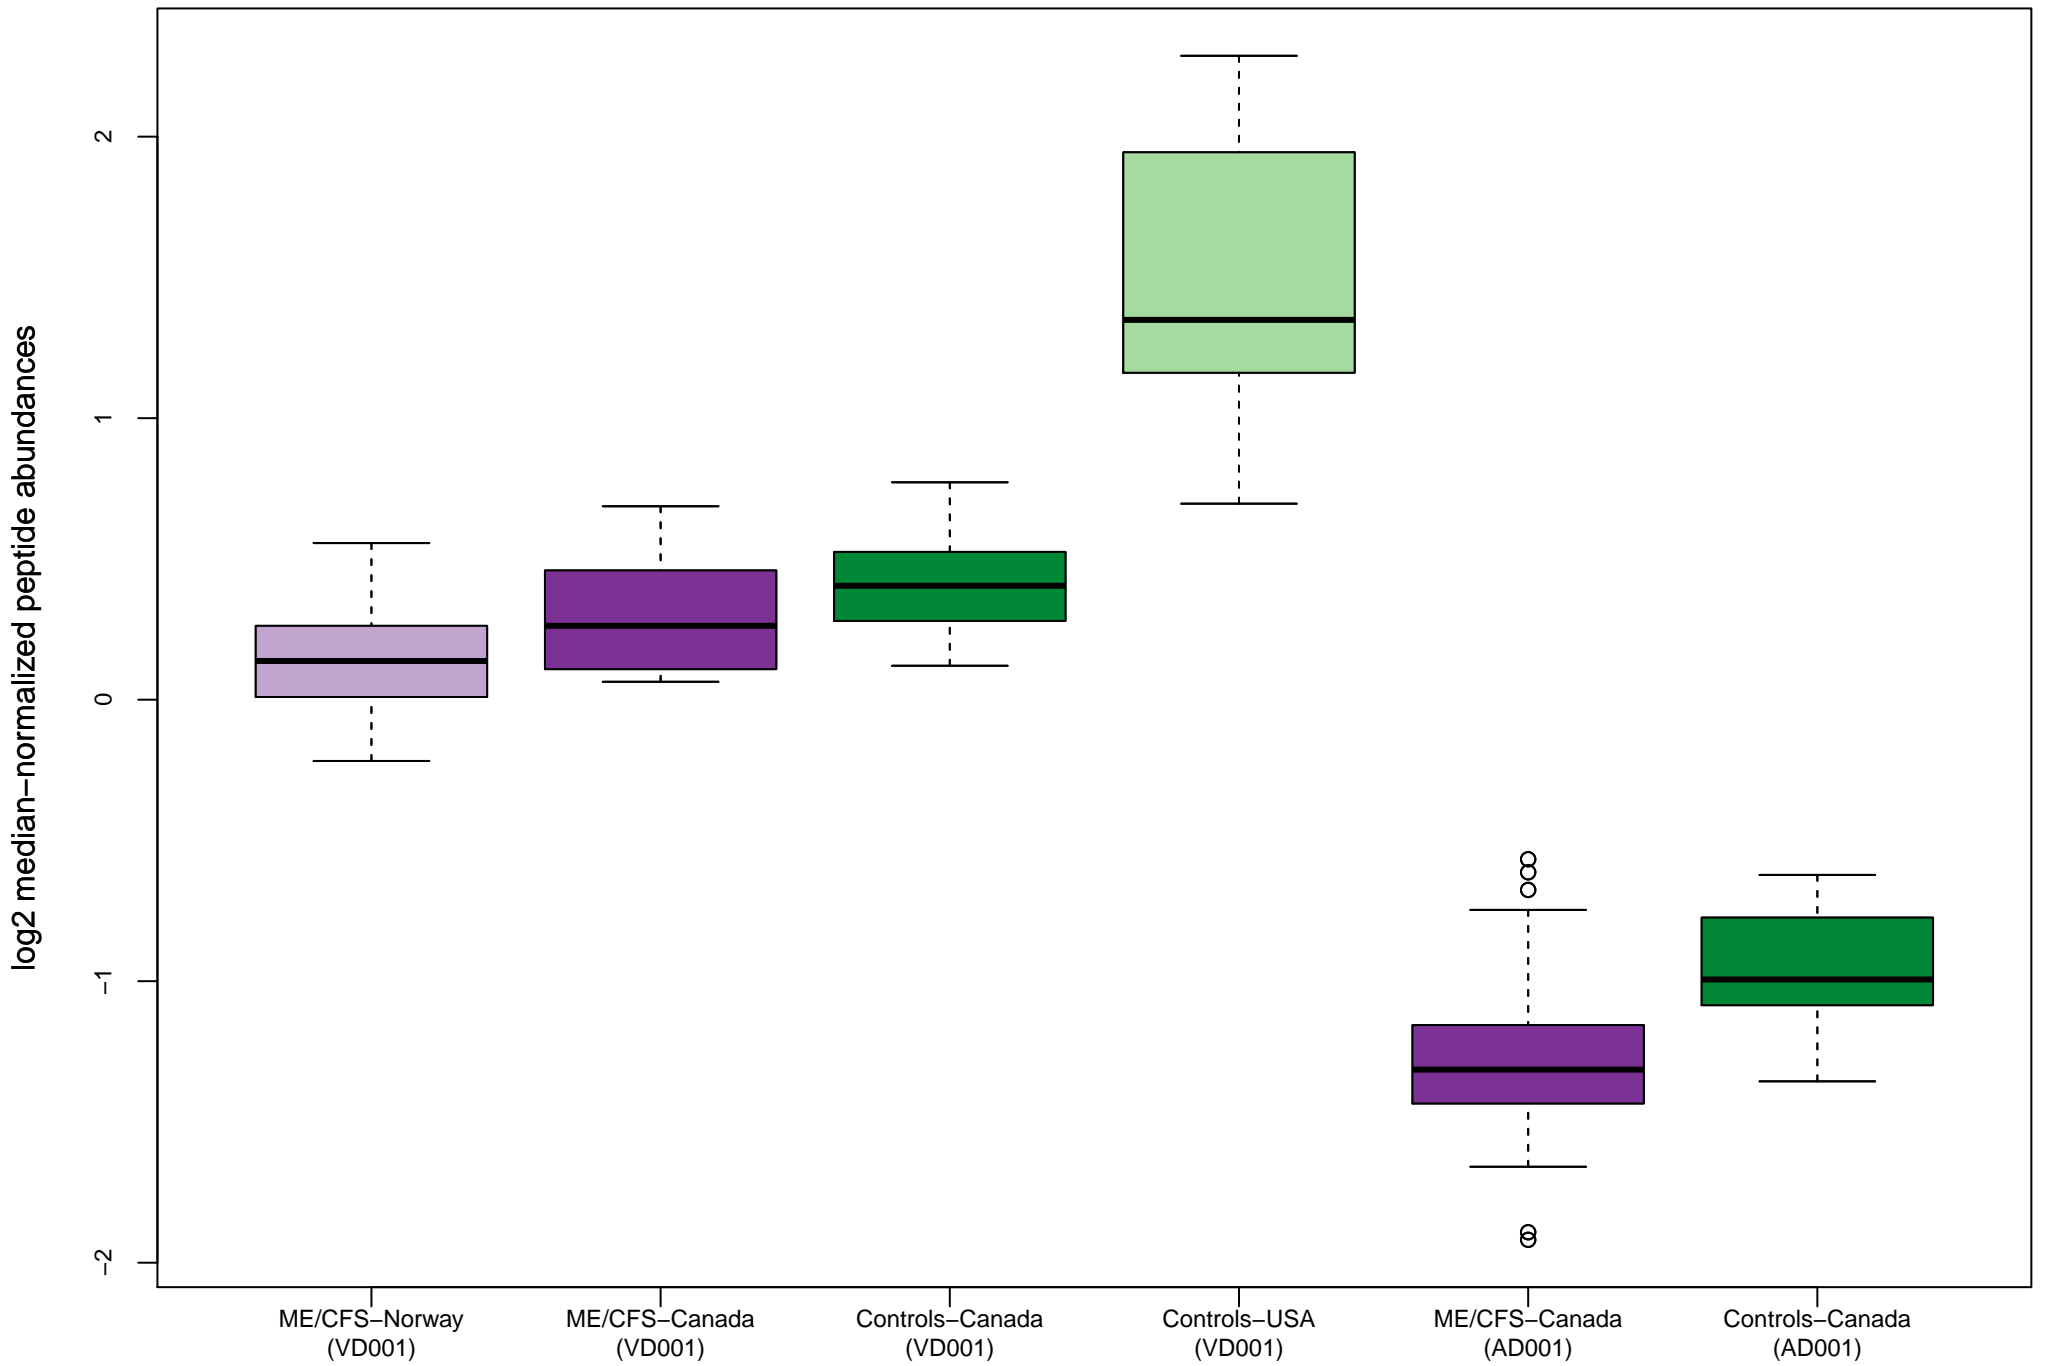



# EWPYWLRSVAL

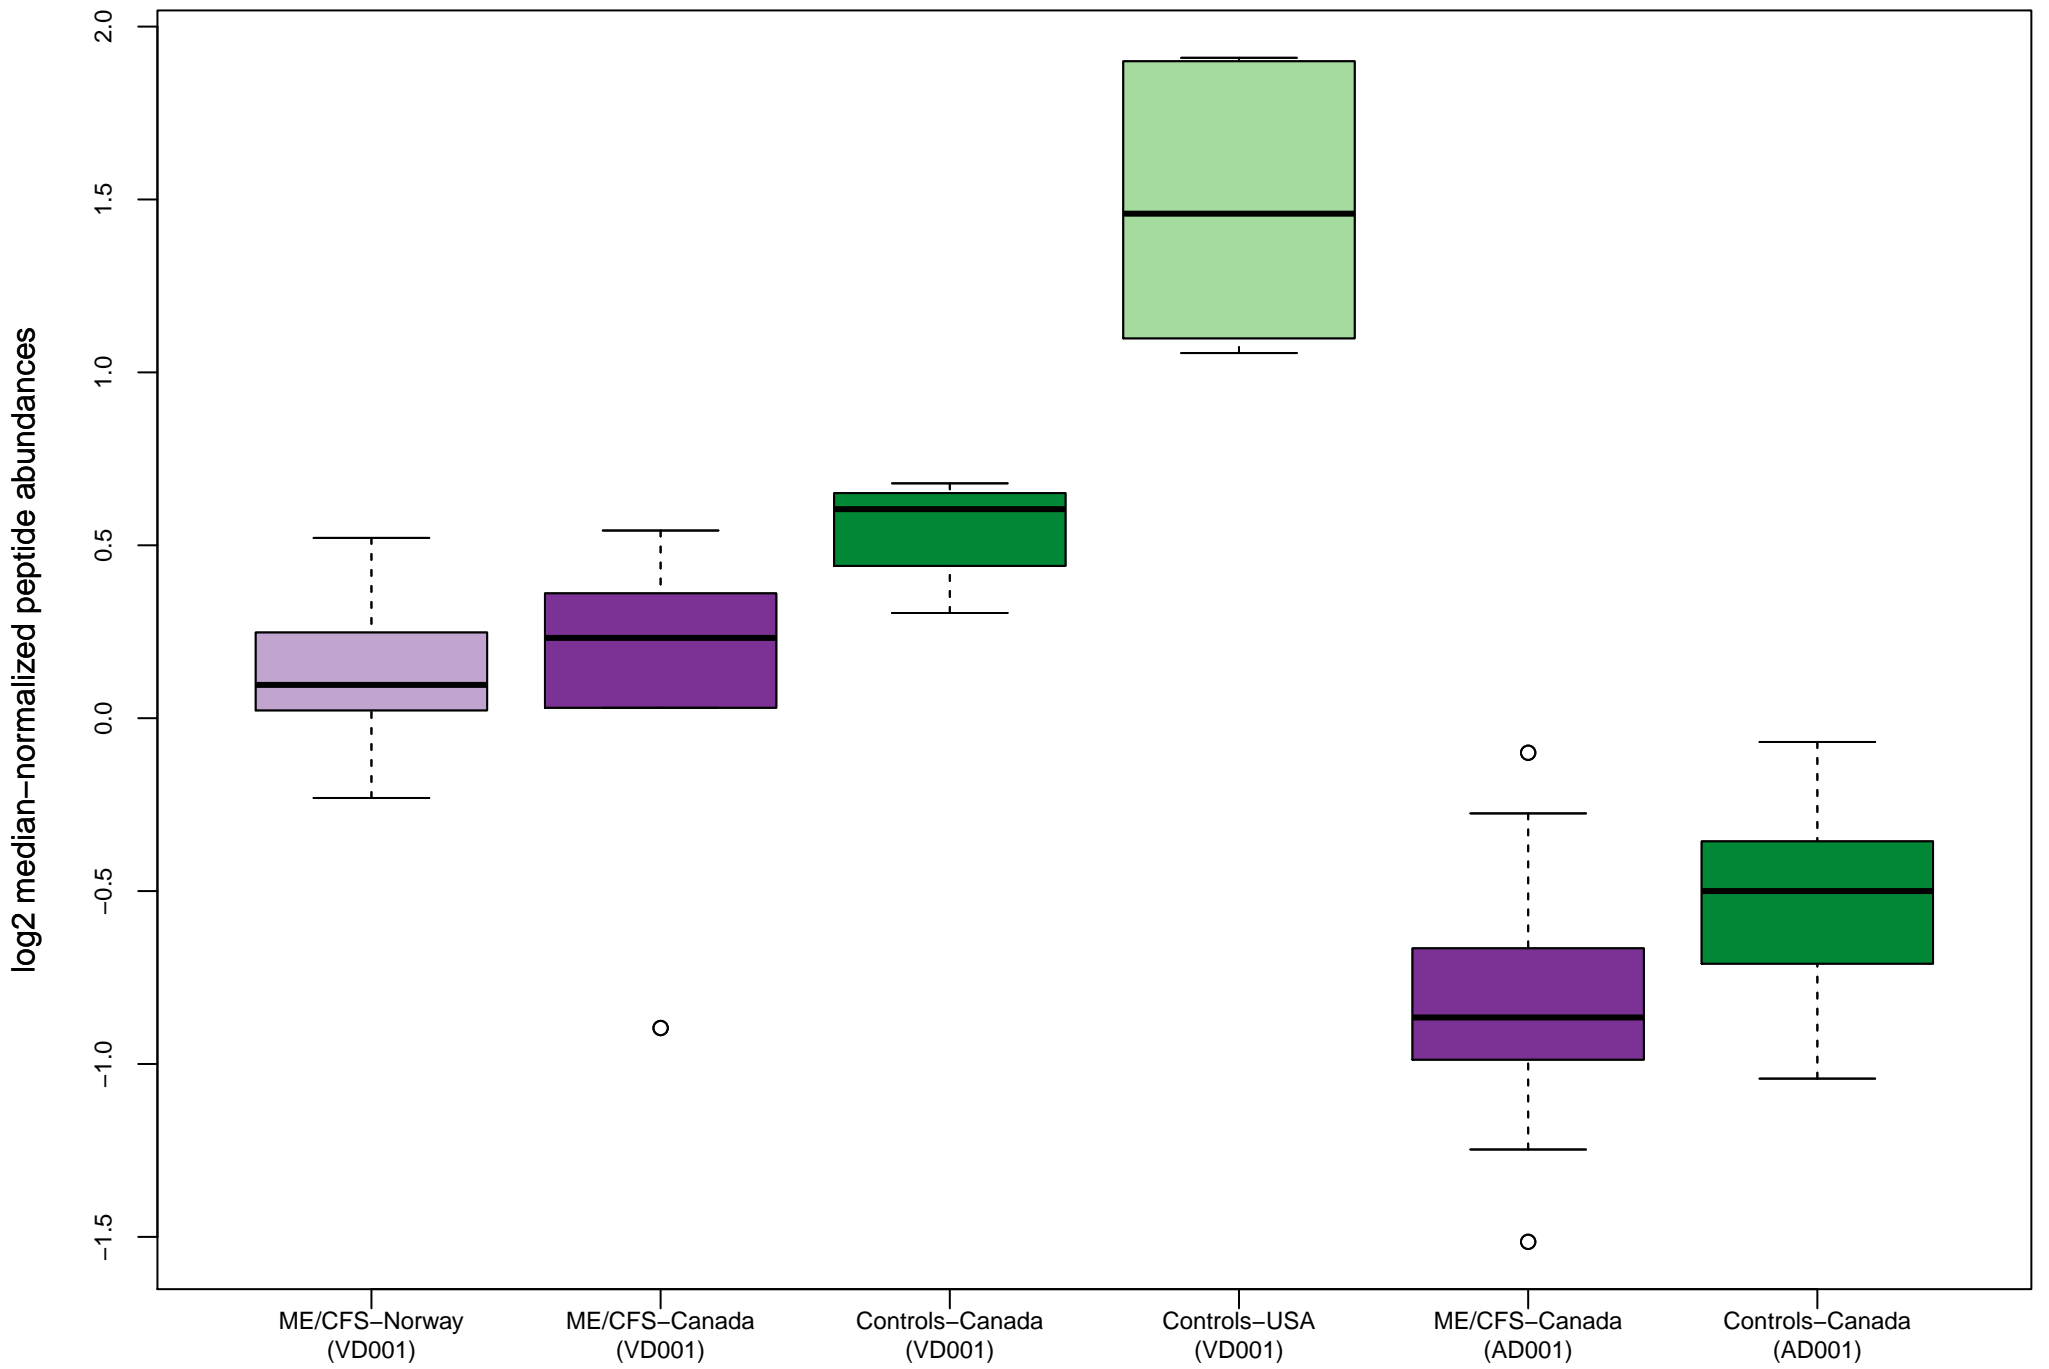

# EYPNLRVFWKVL

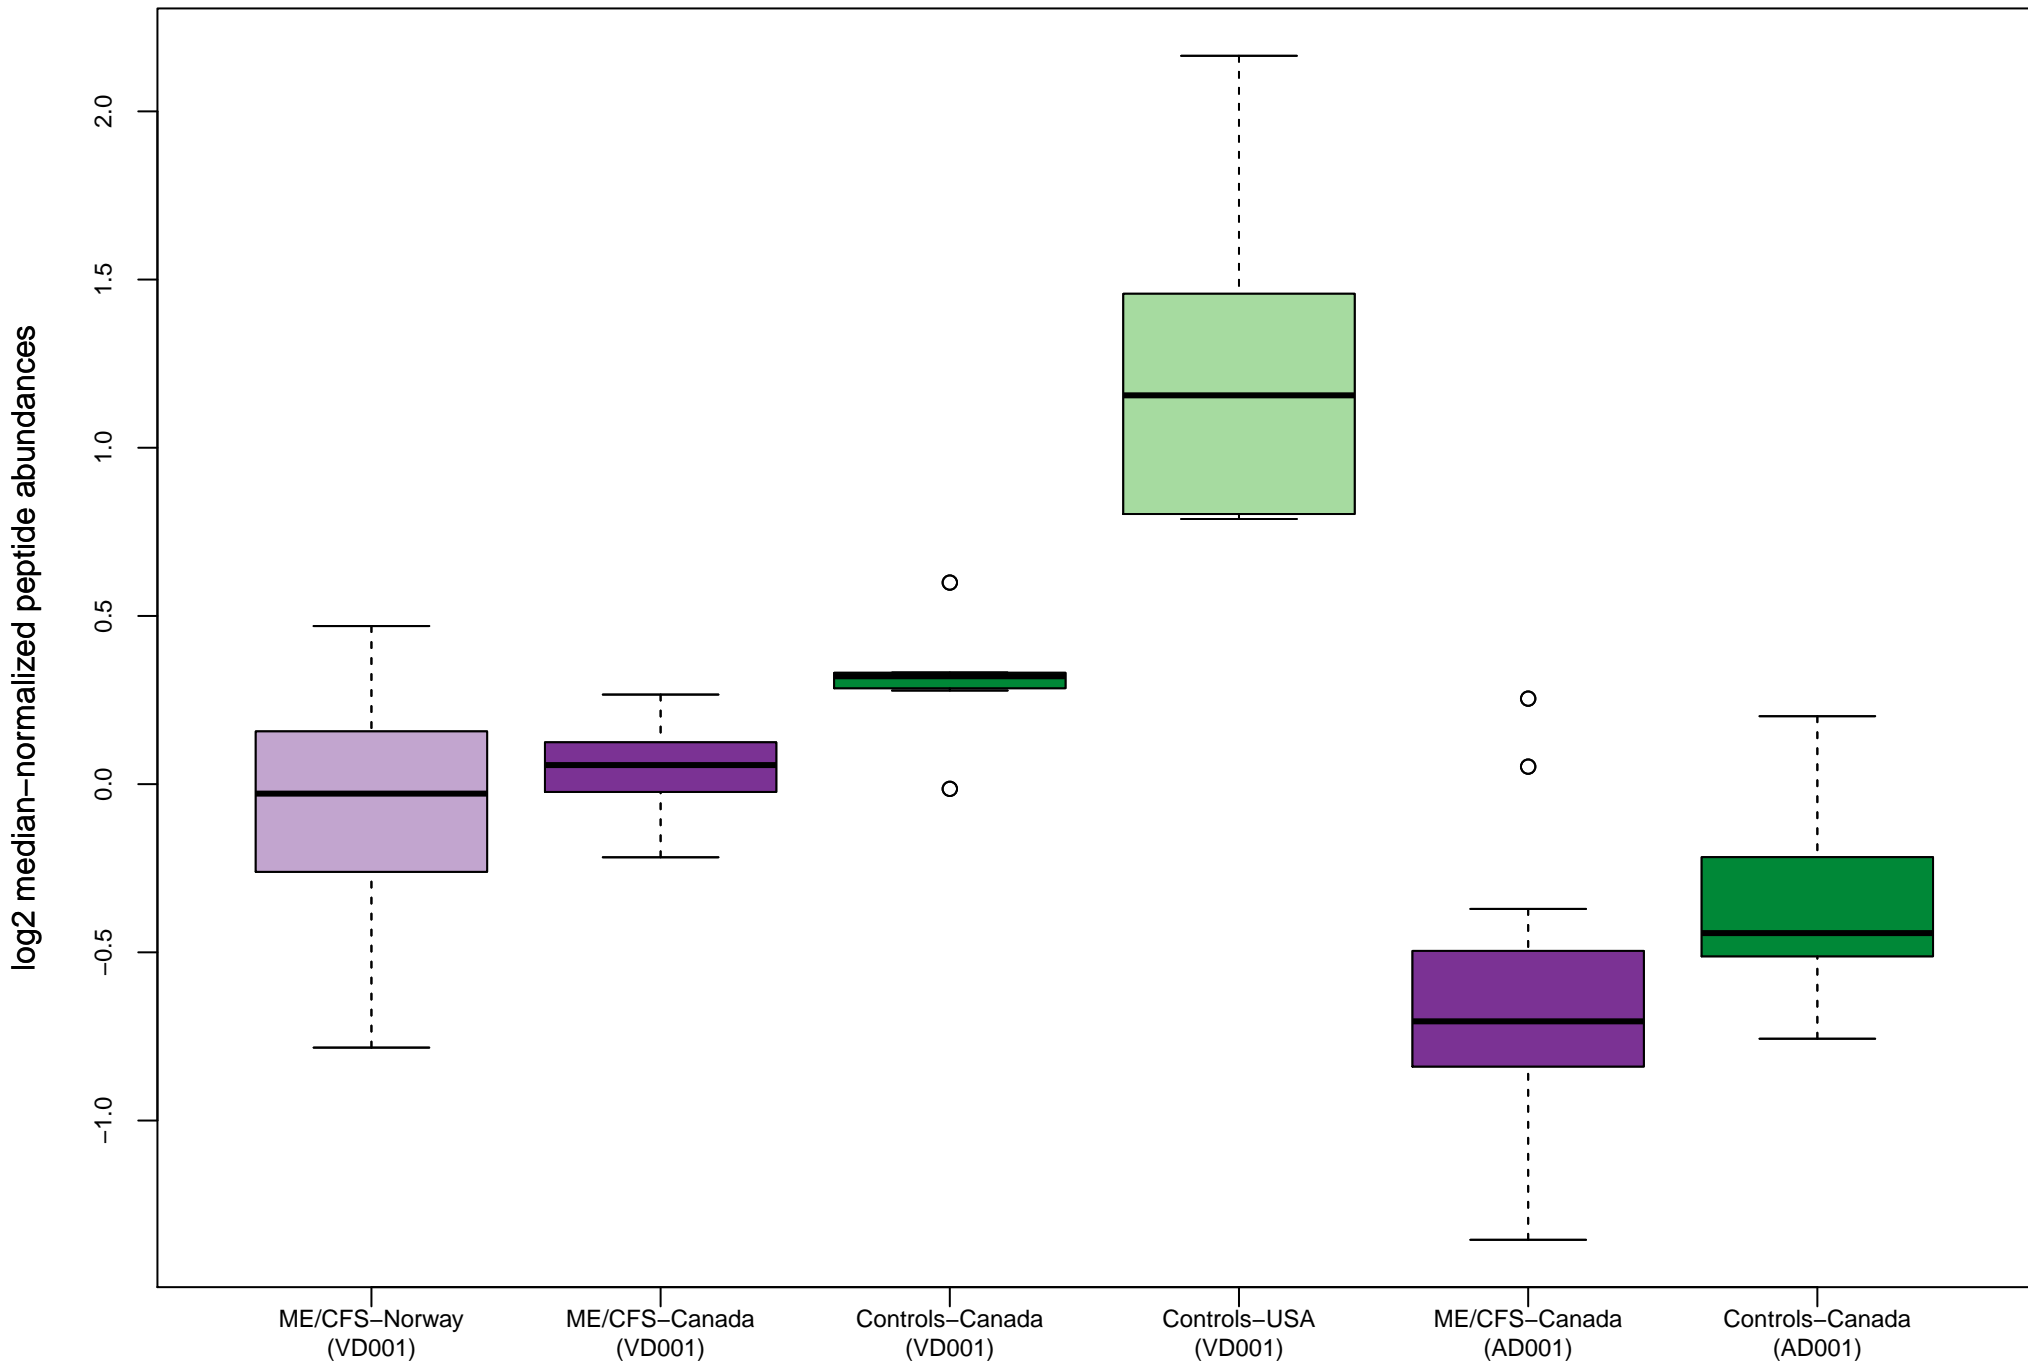

# FAKLEVAFYKGV

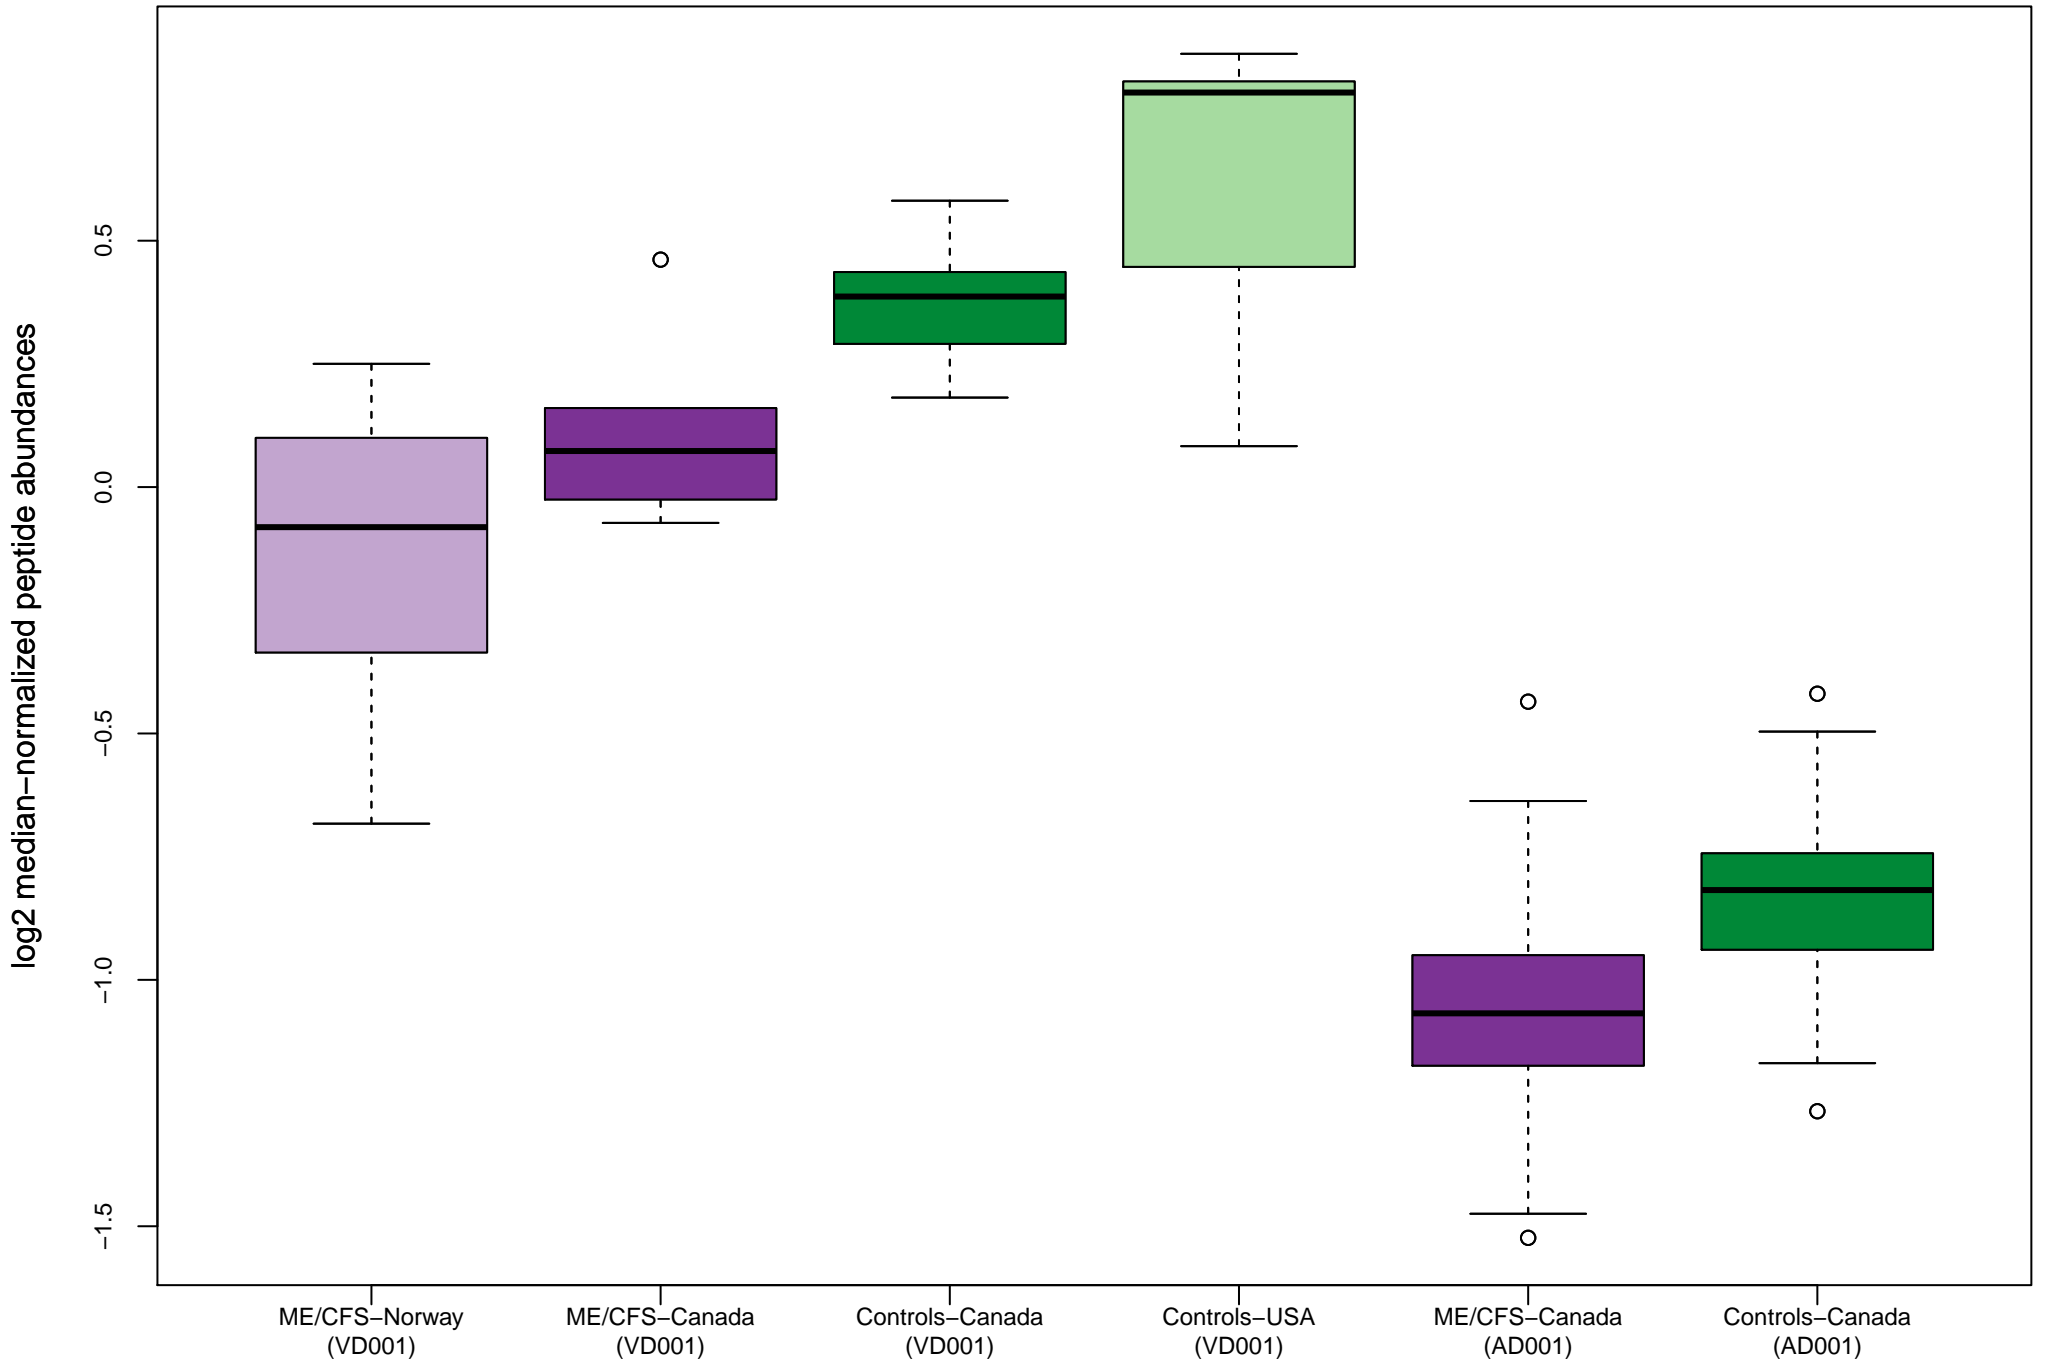

# FALWPWLSKHLA

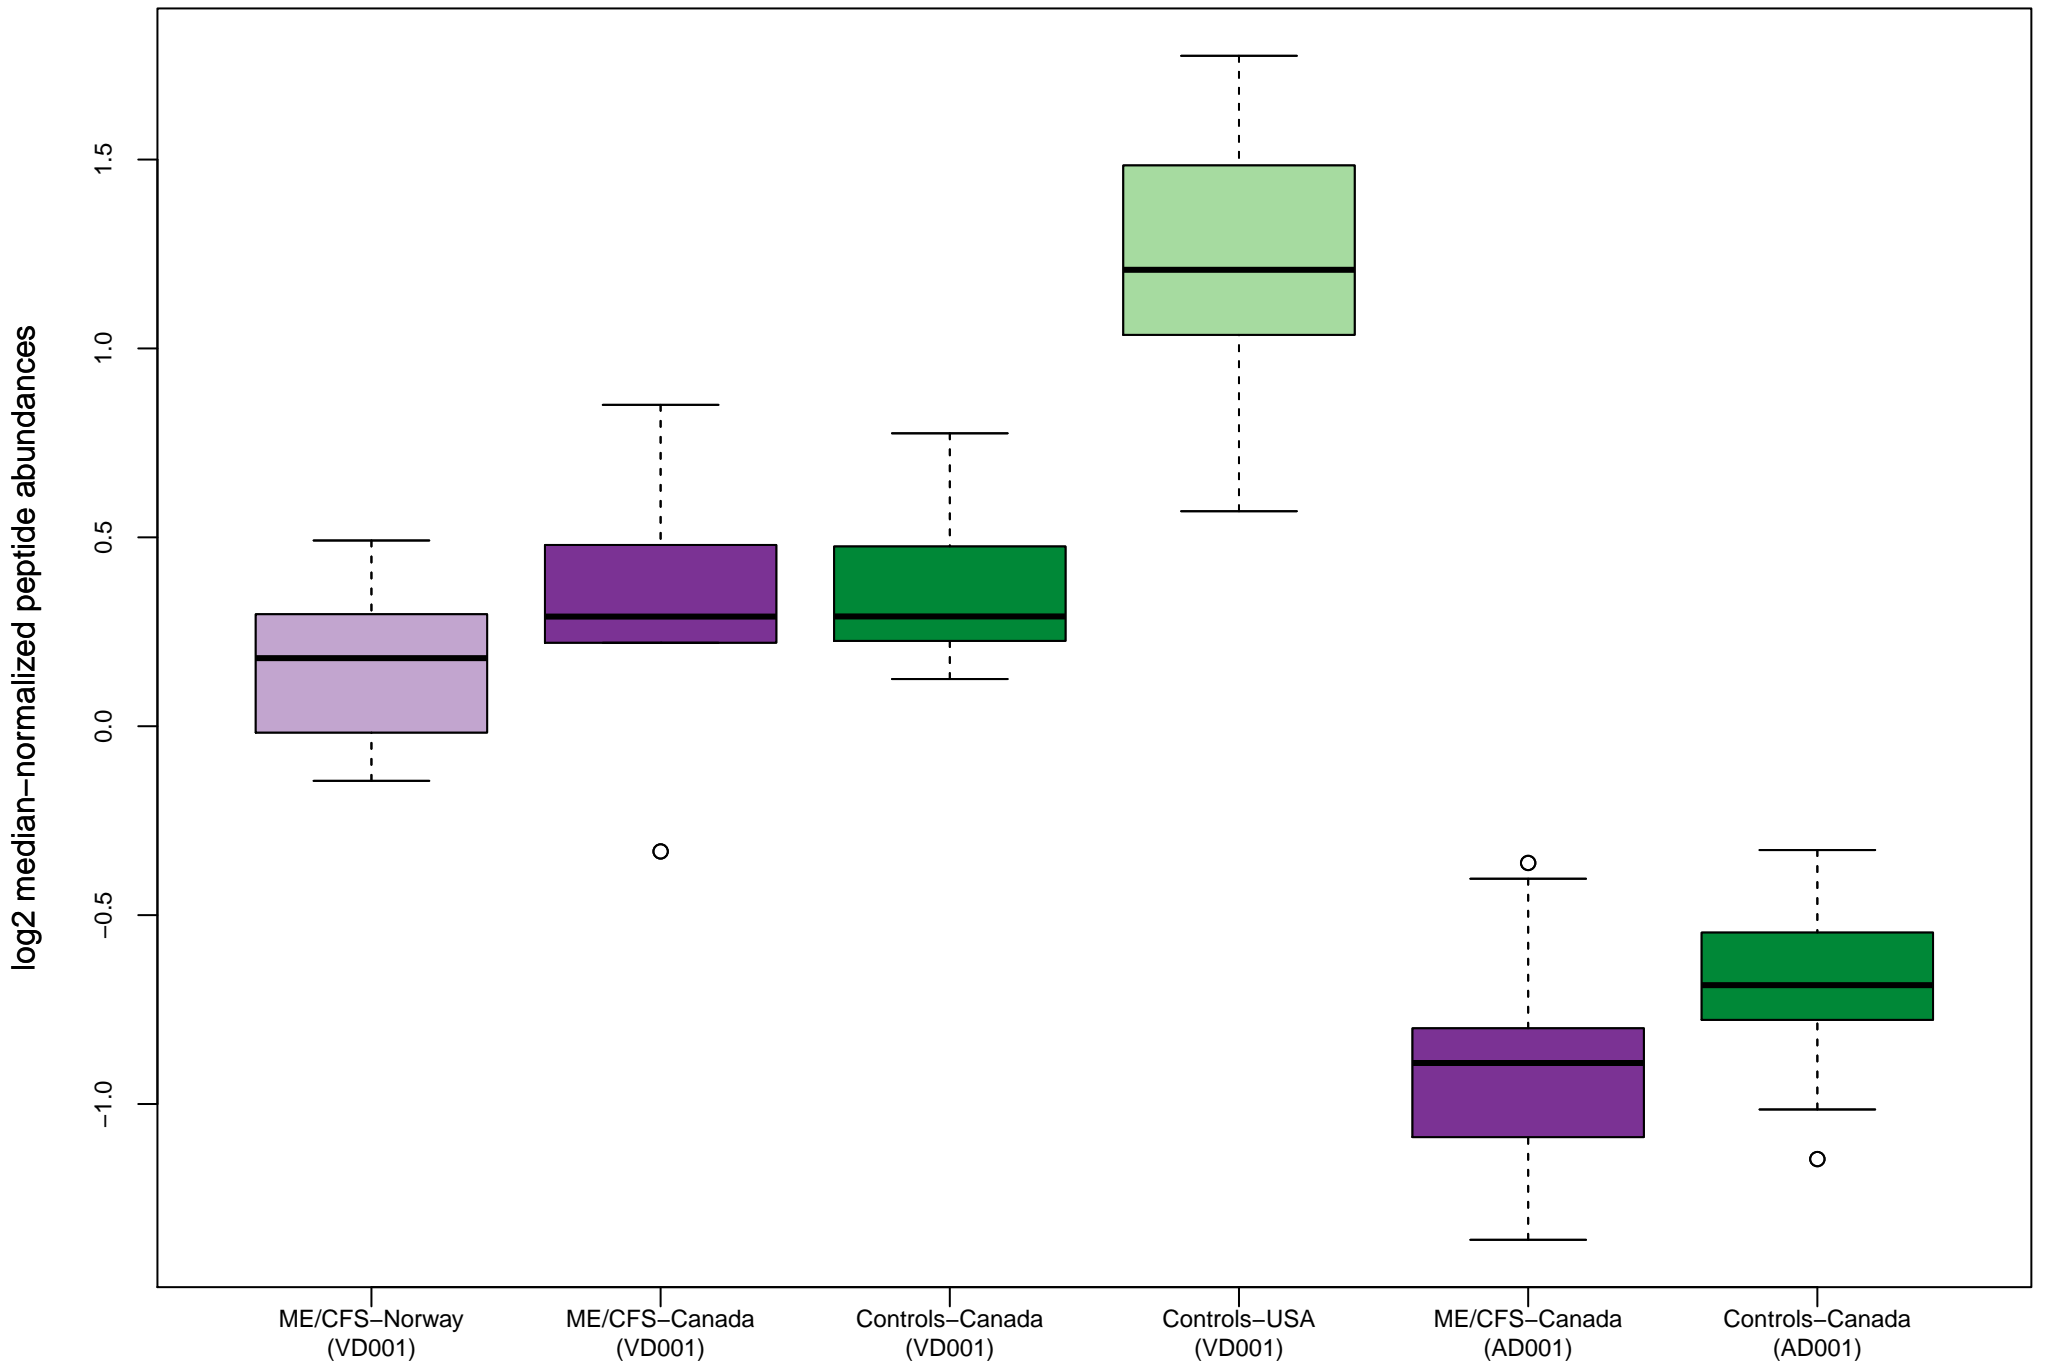

# FARFQRYSGVAL

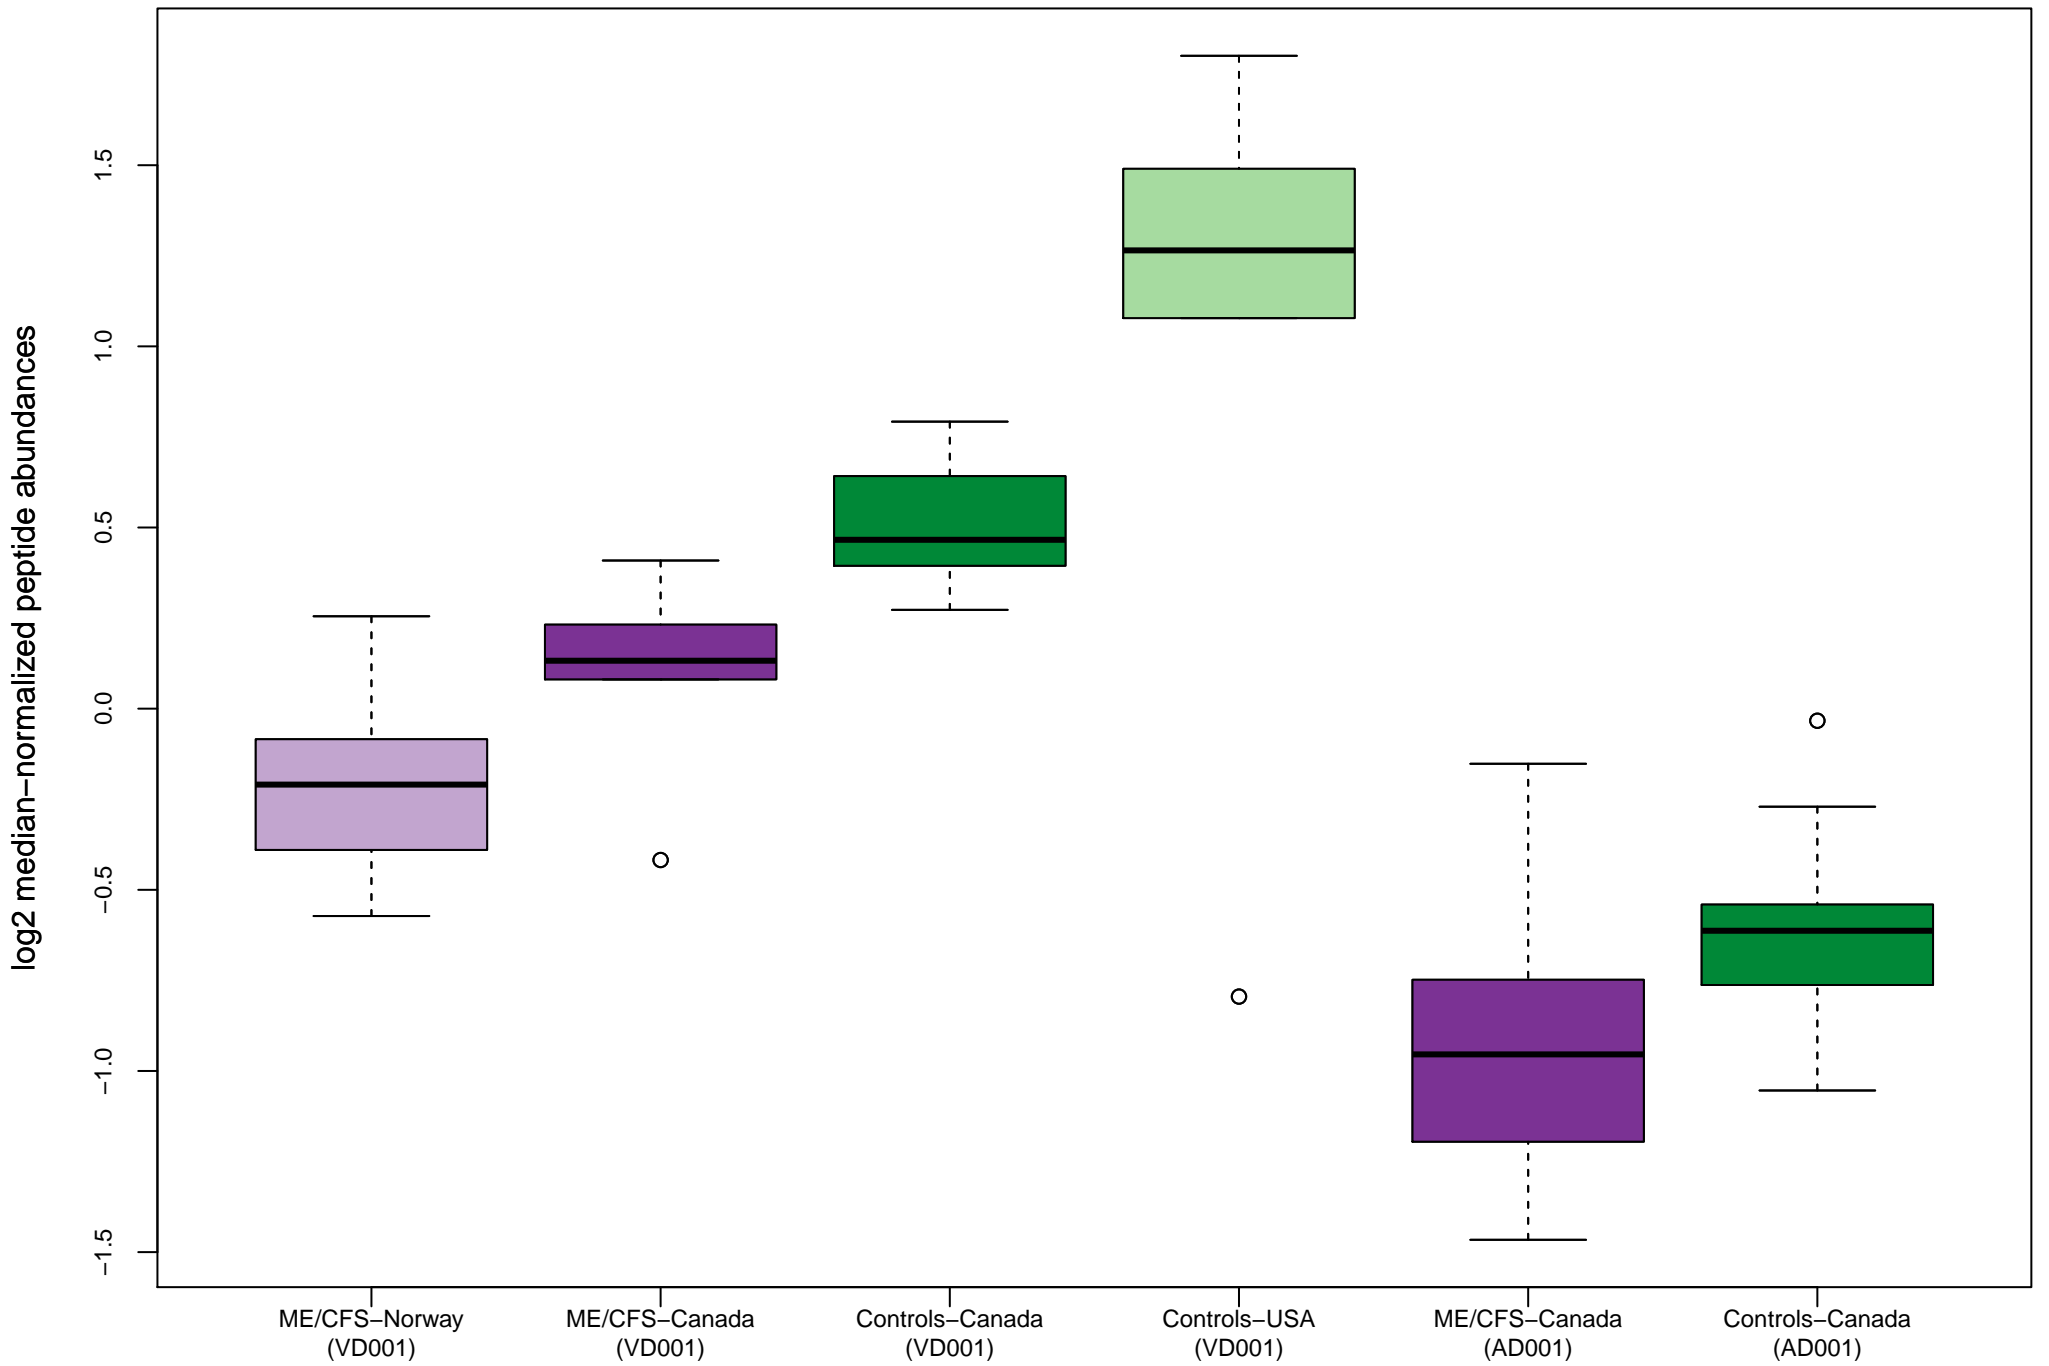

# FARLERWLSVAG

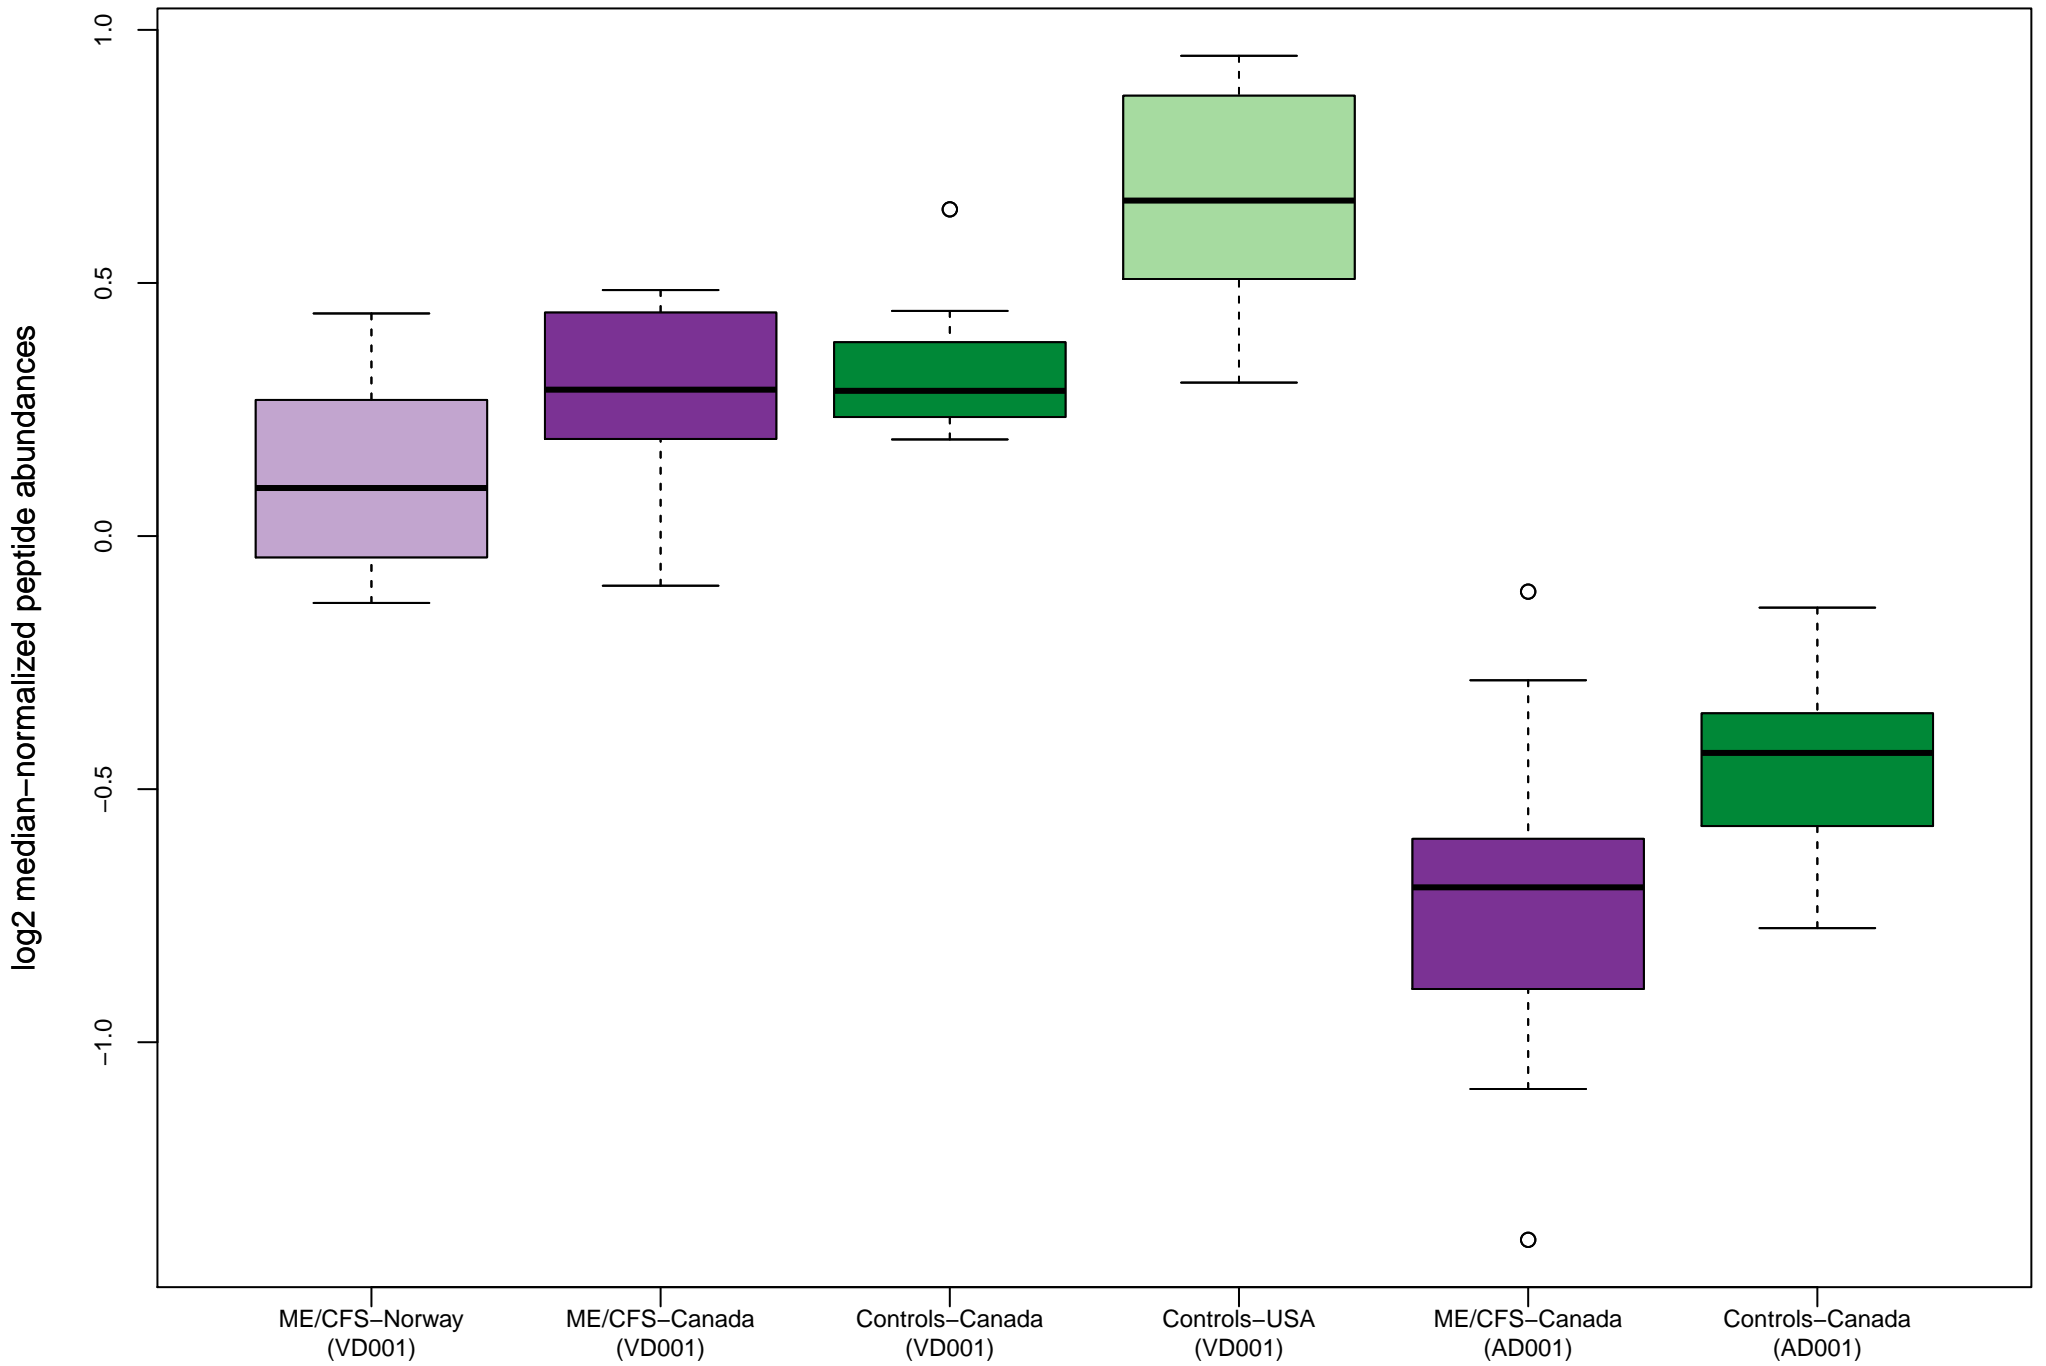

# FARPQRYSWVGL

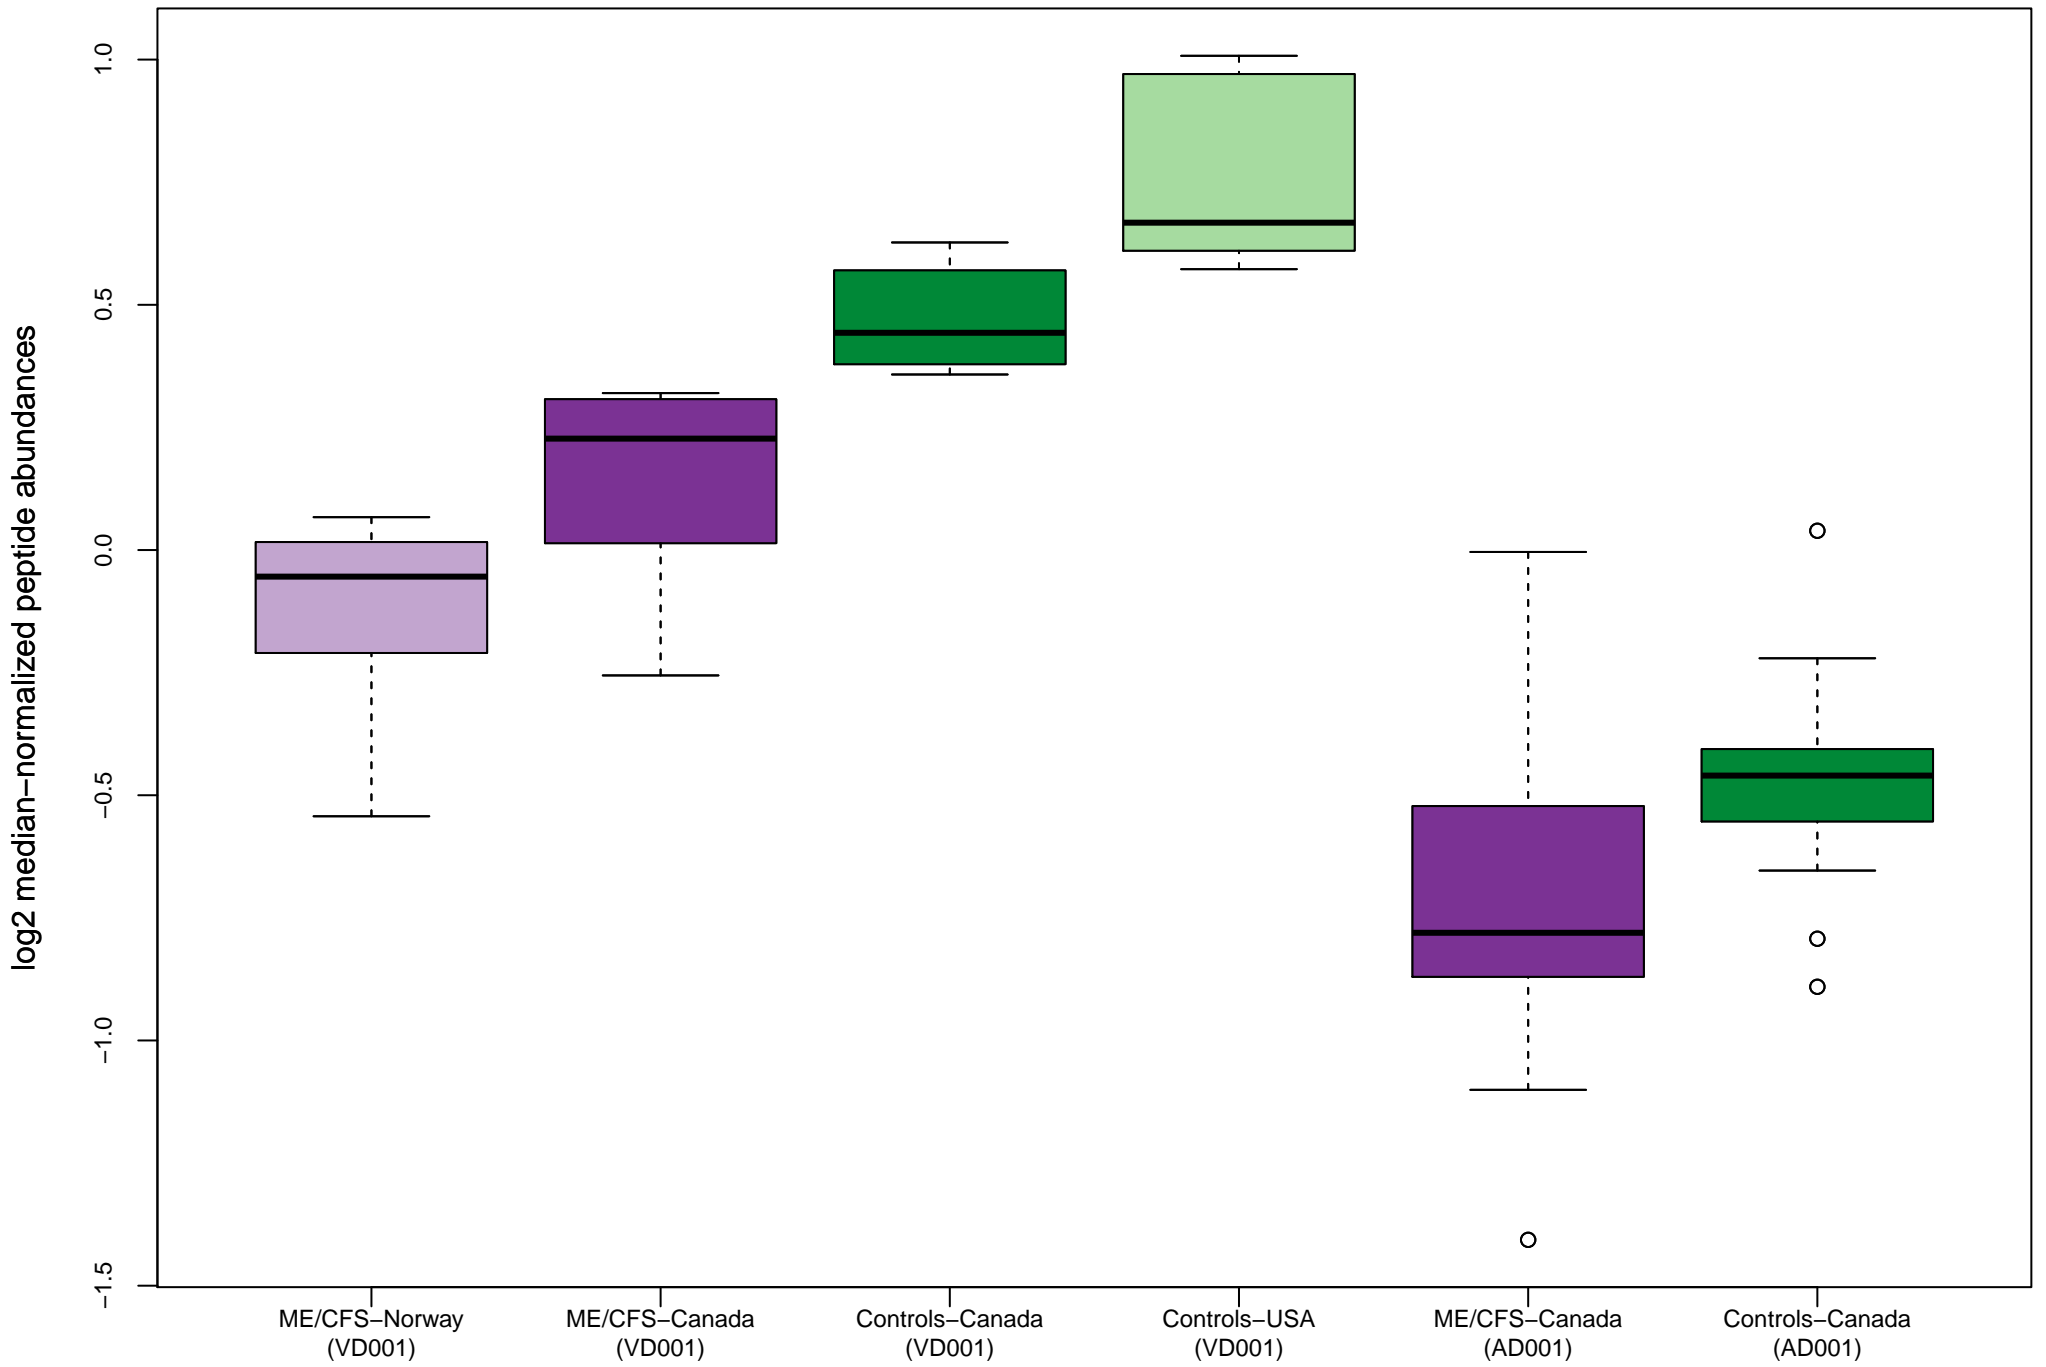

# FEPRYVALRRYA

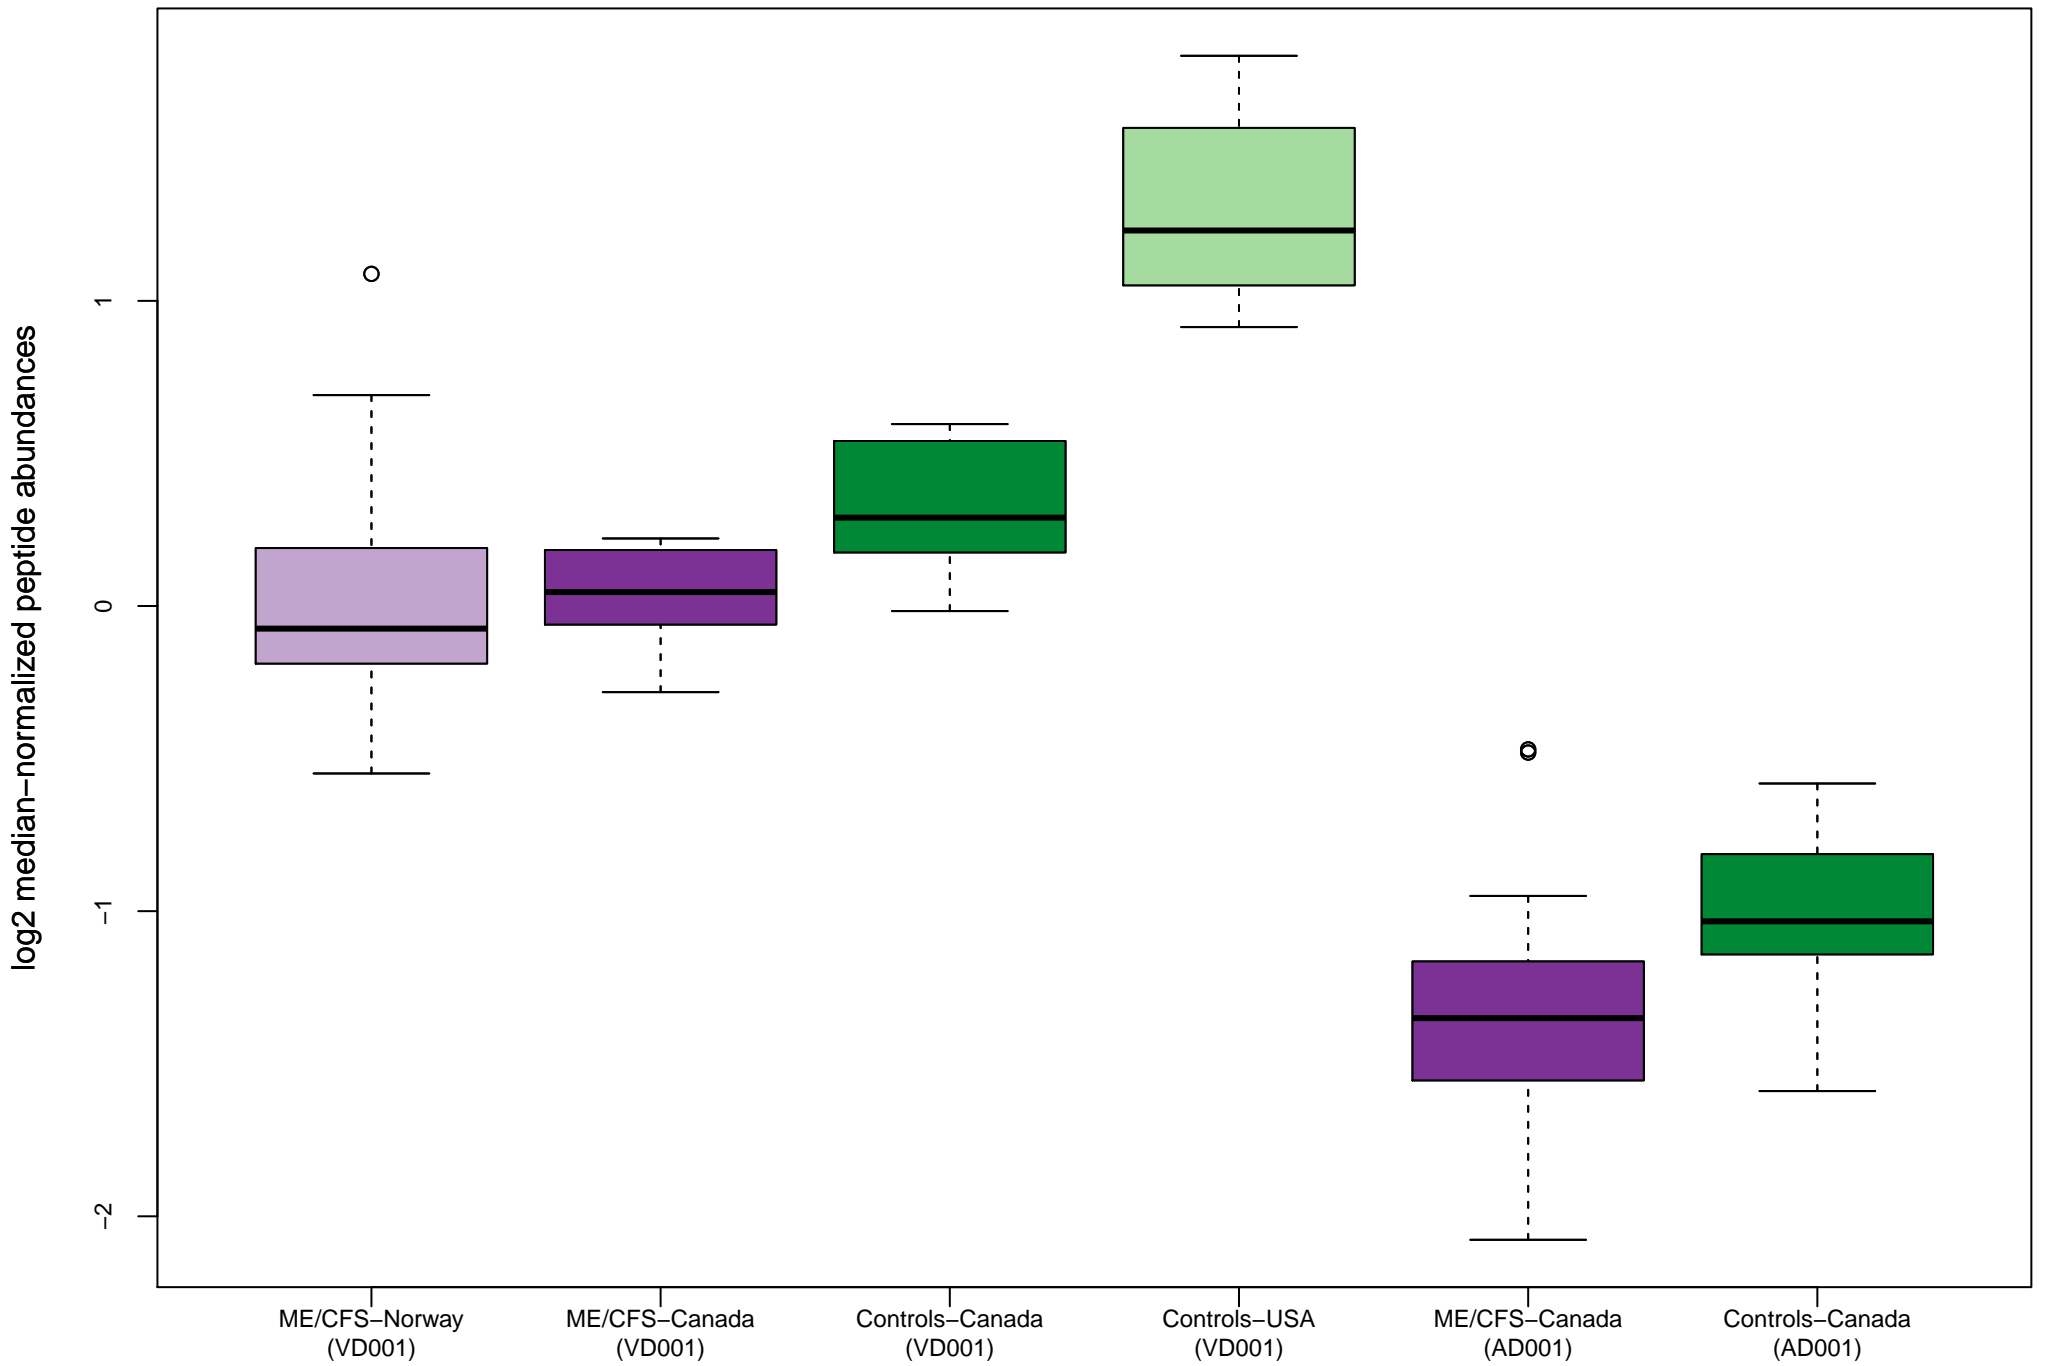



# FFQVRWLGALSG

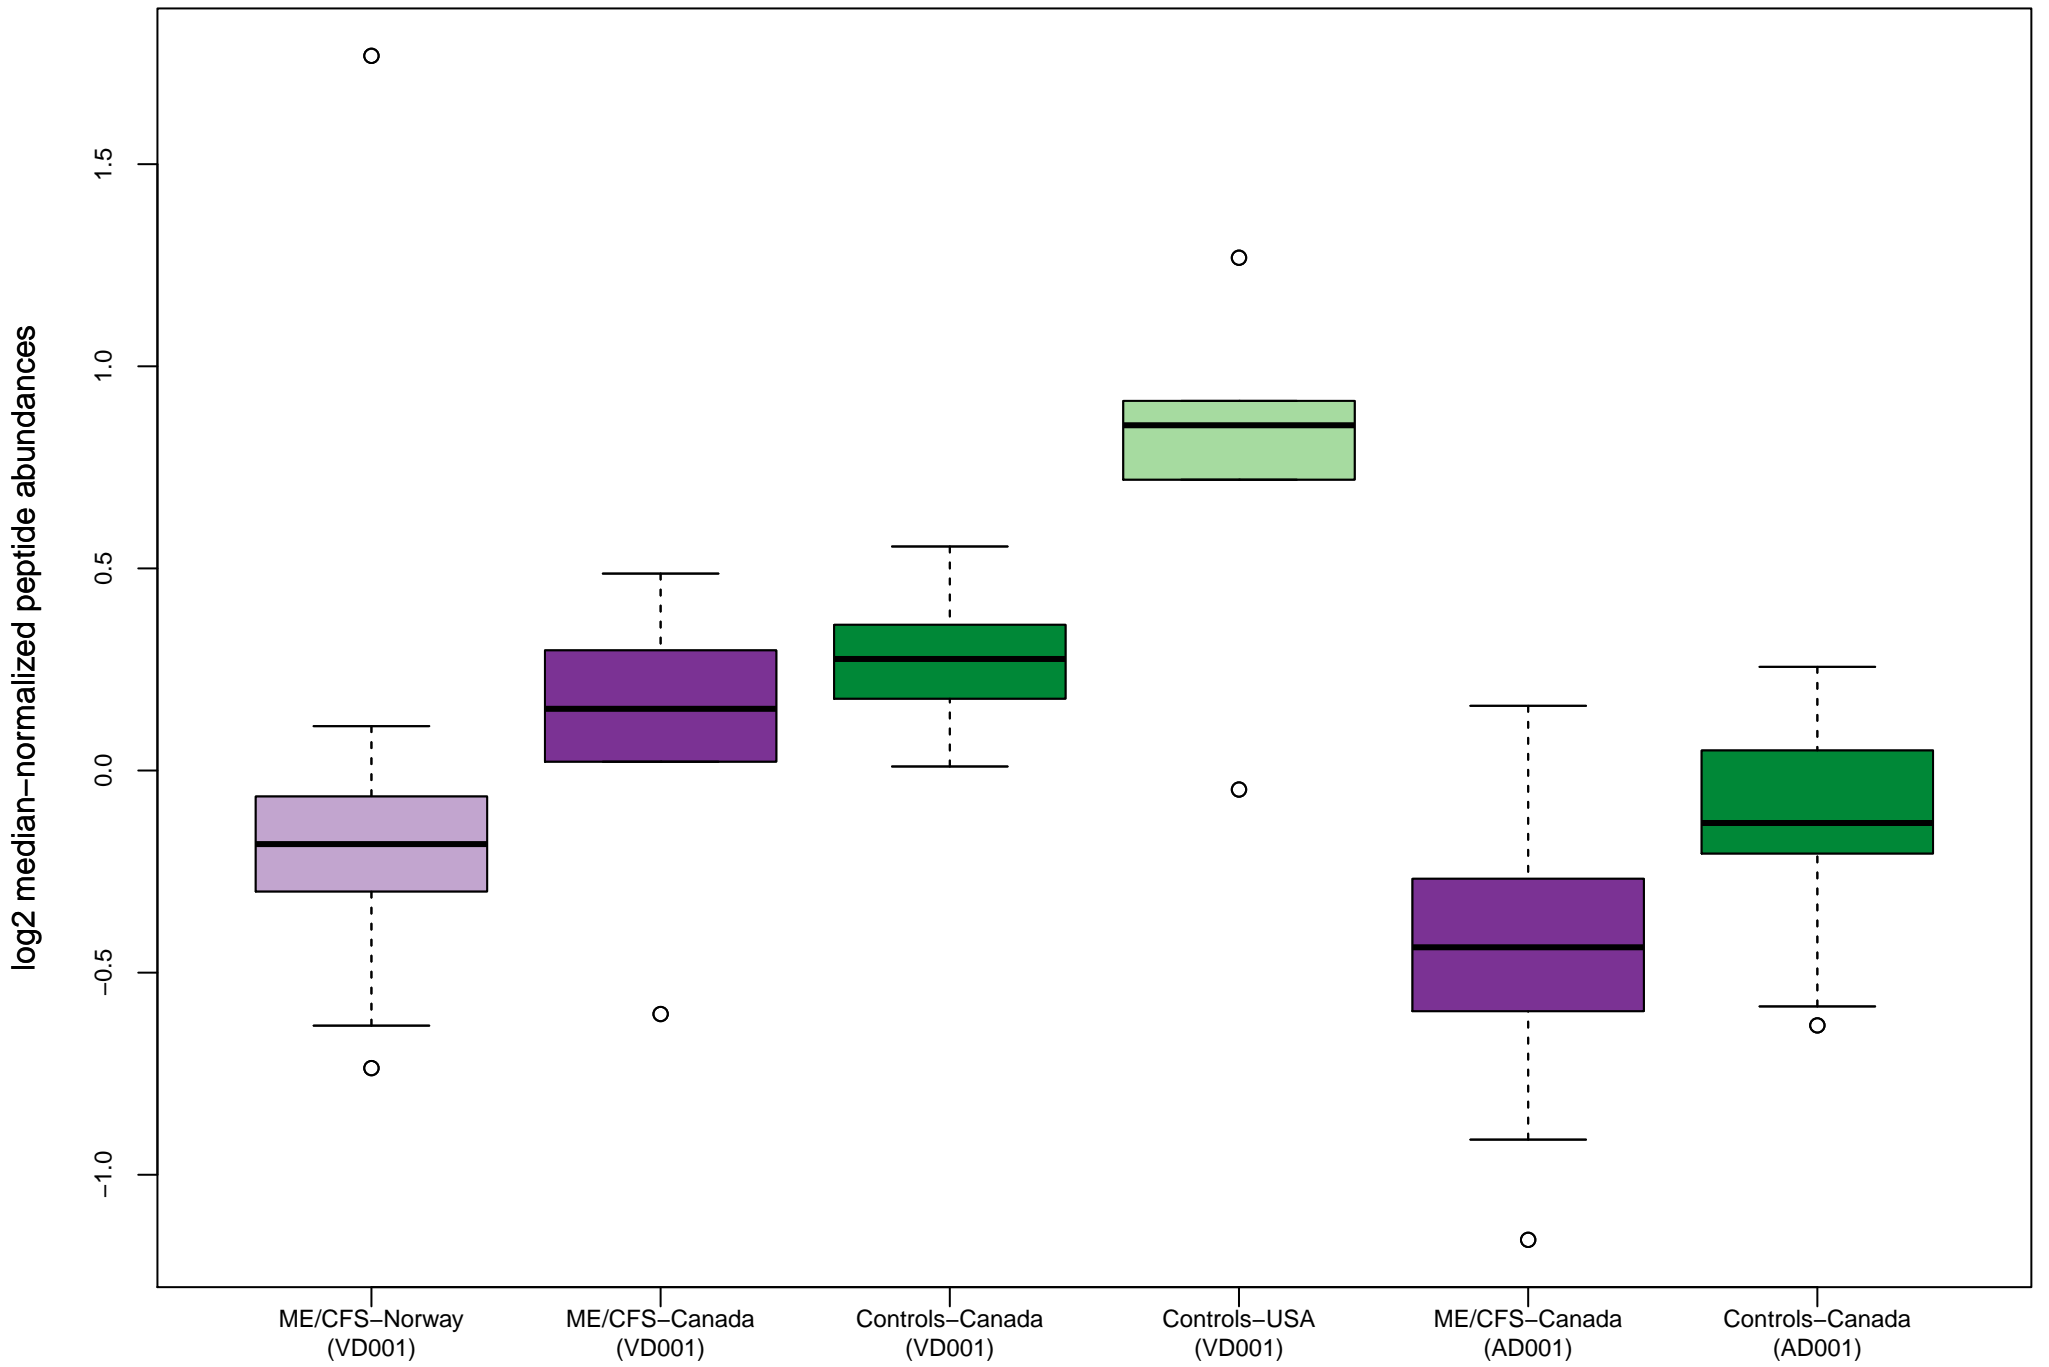

# FFRAVAYWKHVL

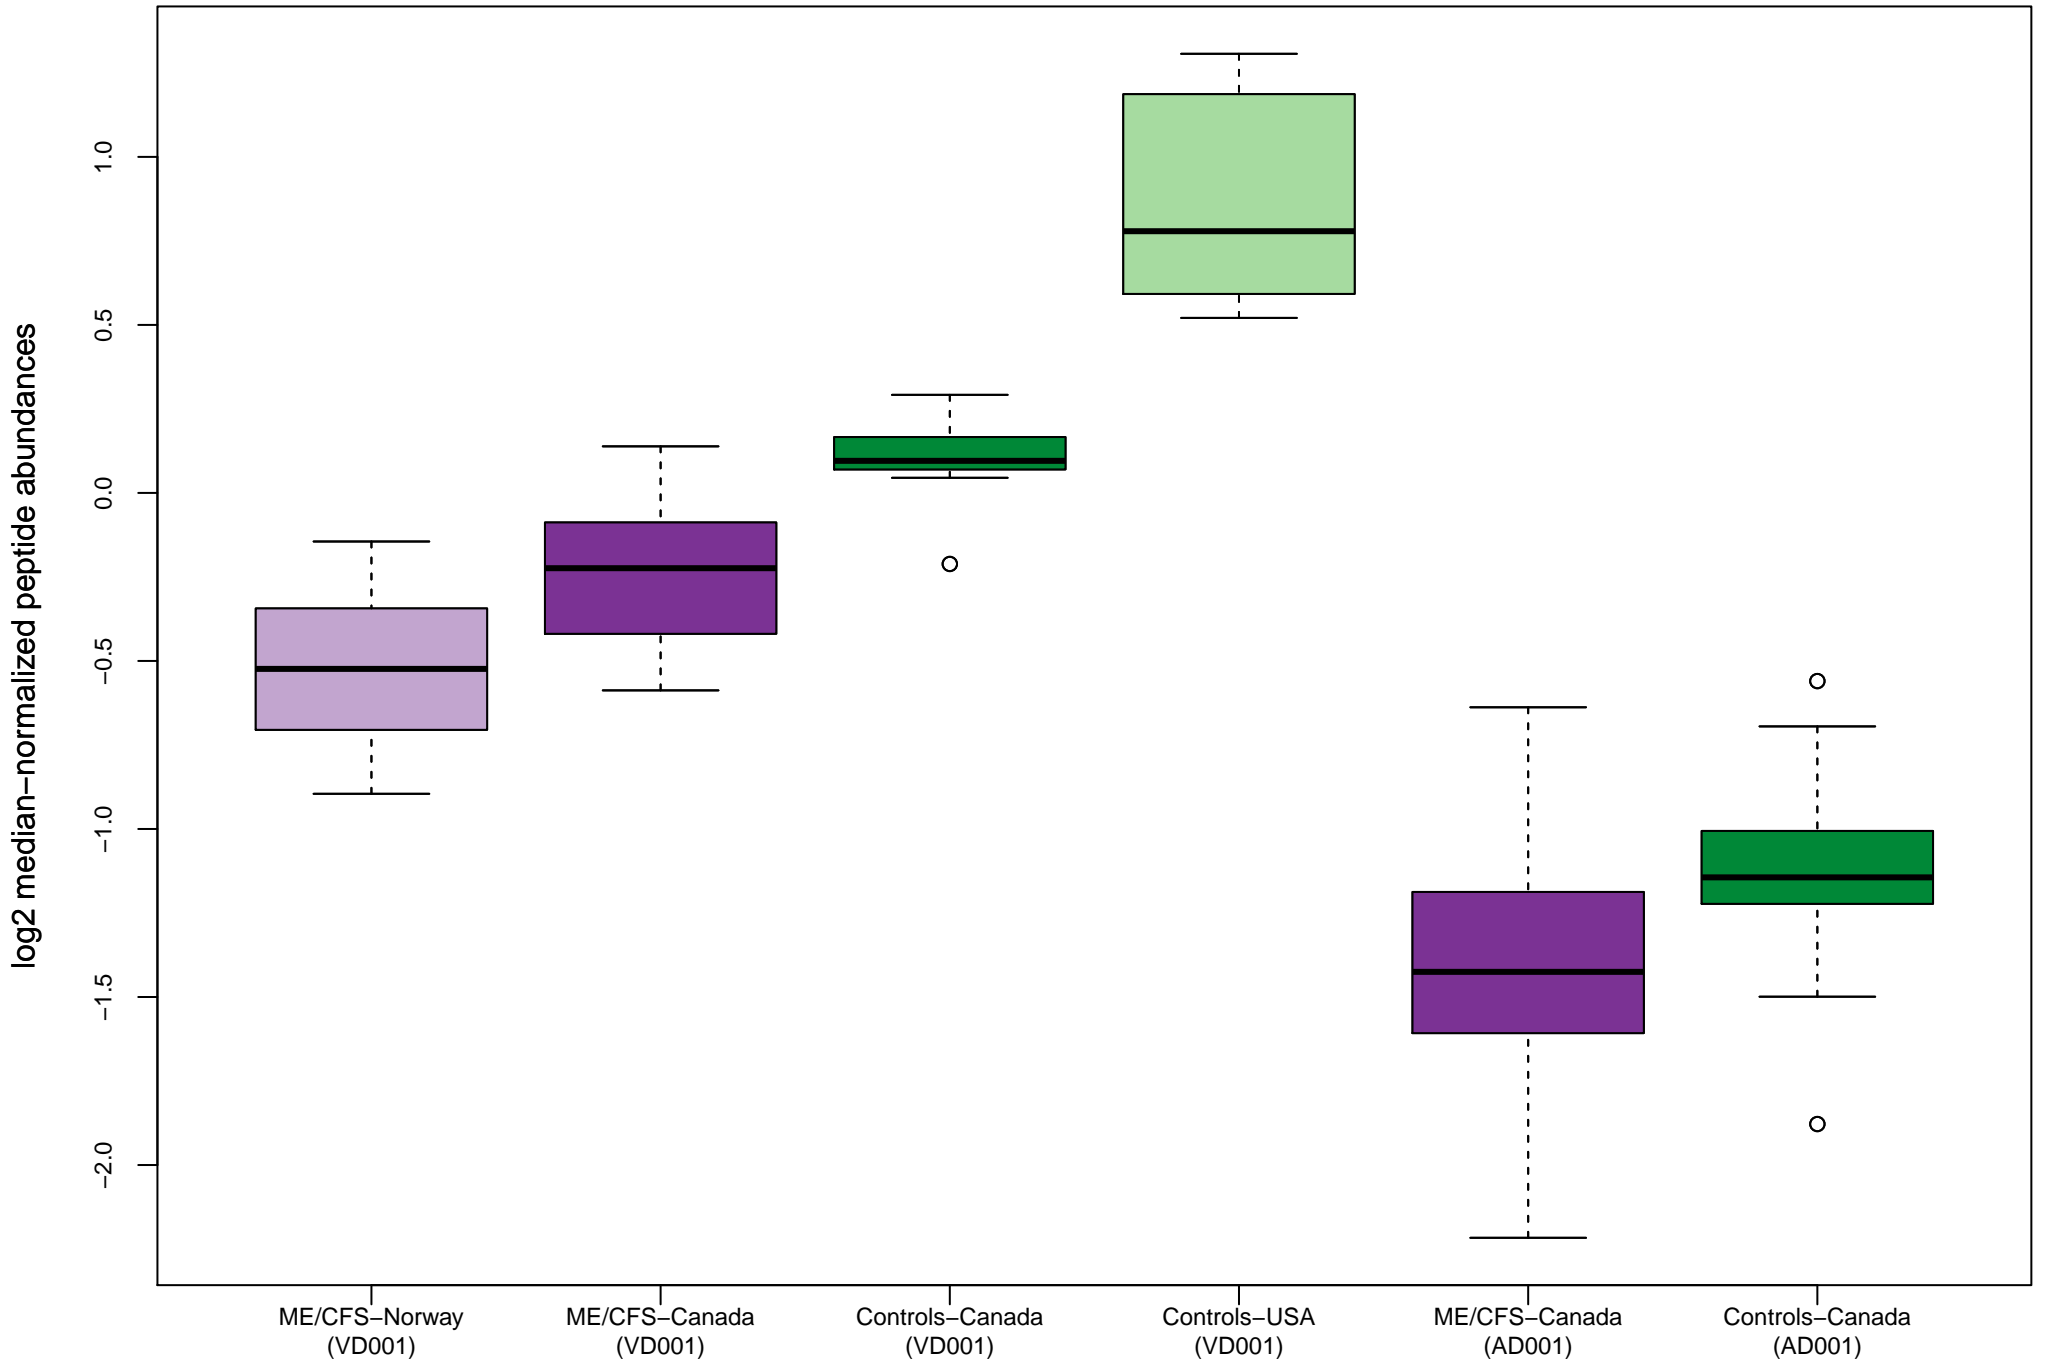

# FGQKNAYWVALS

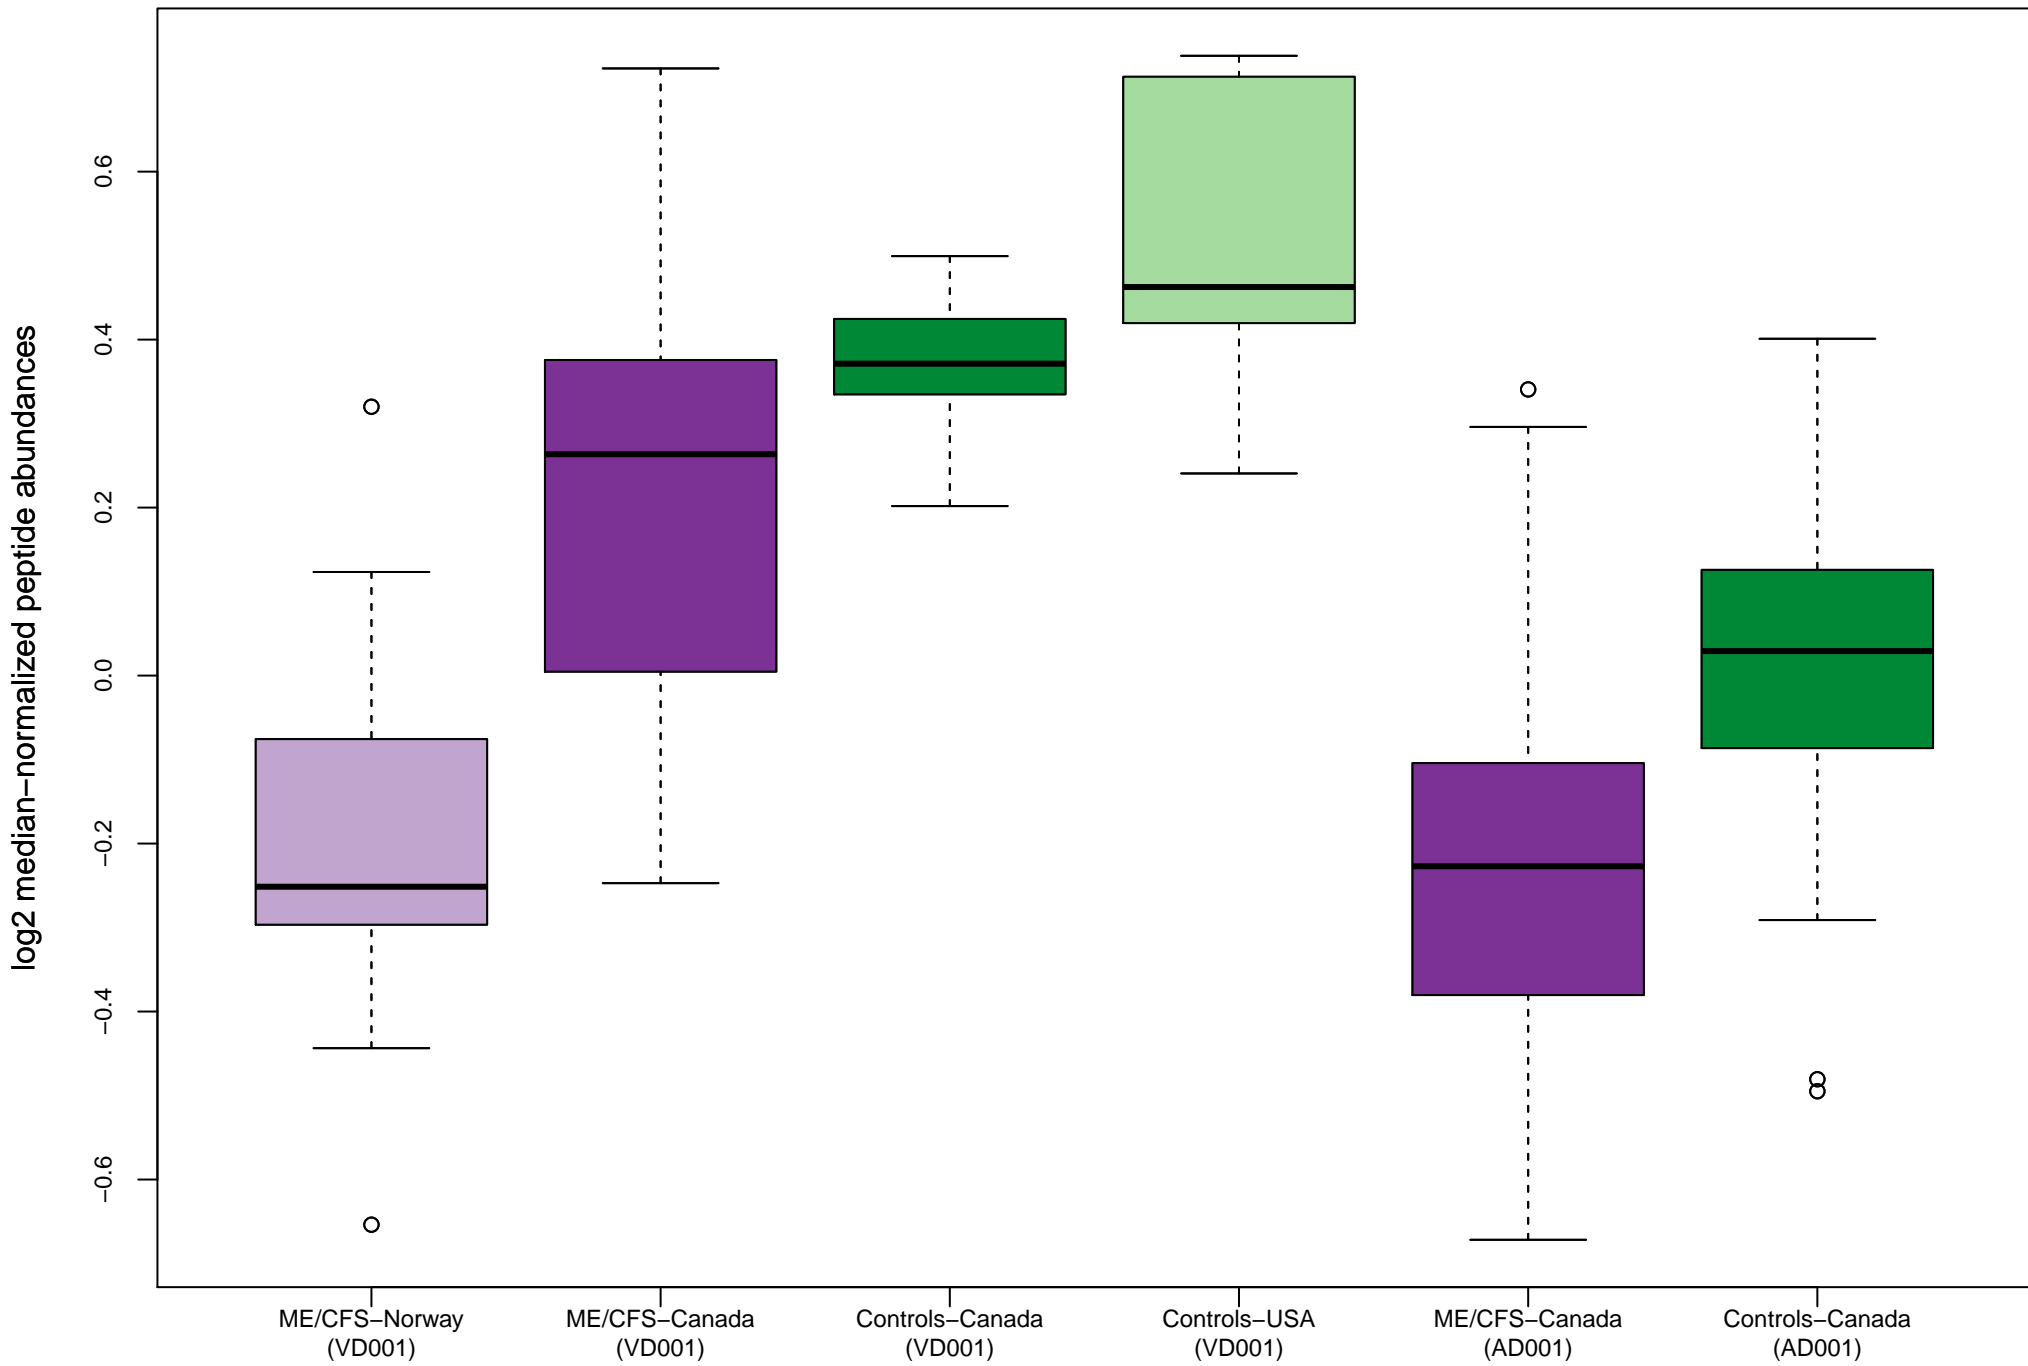

# FGRYWWNLRLVS

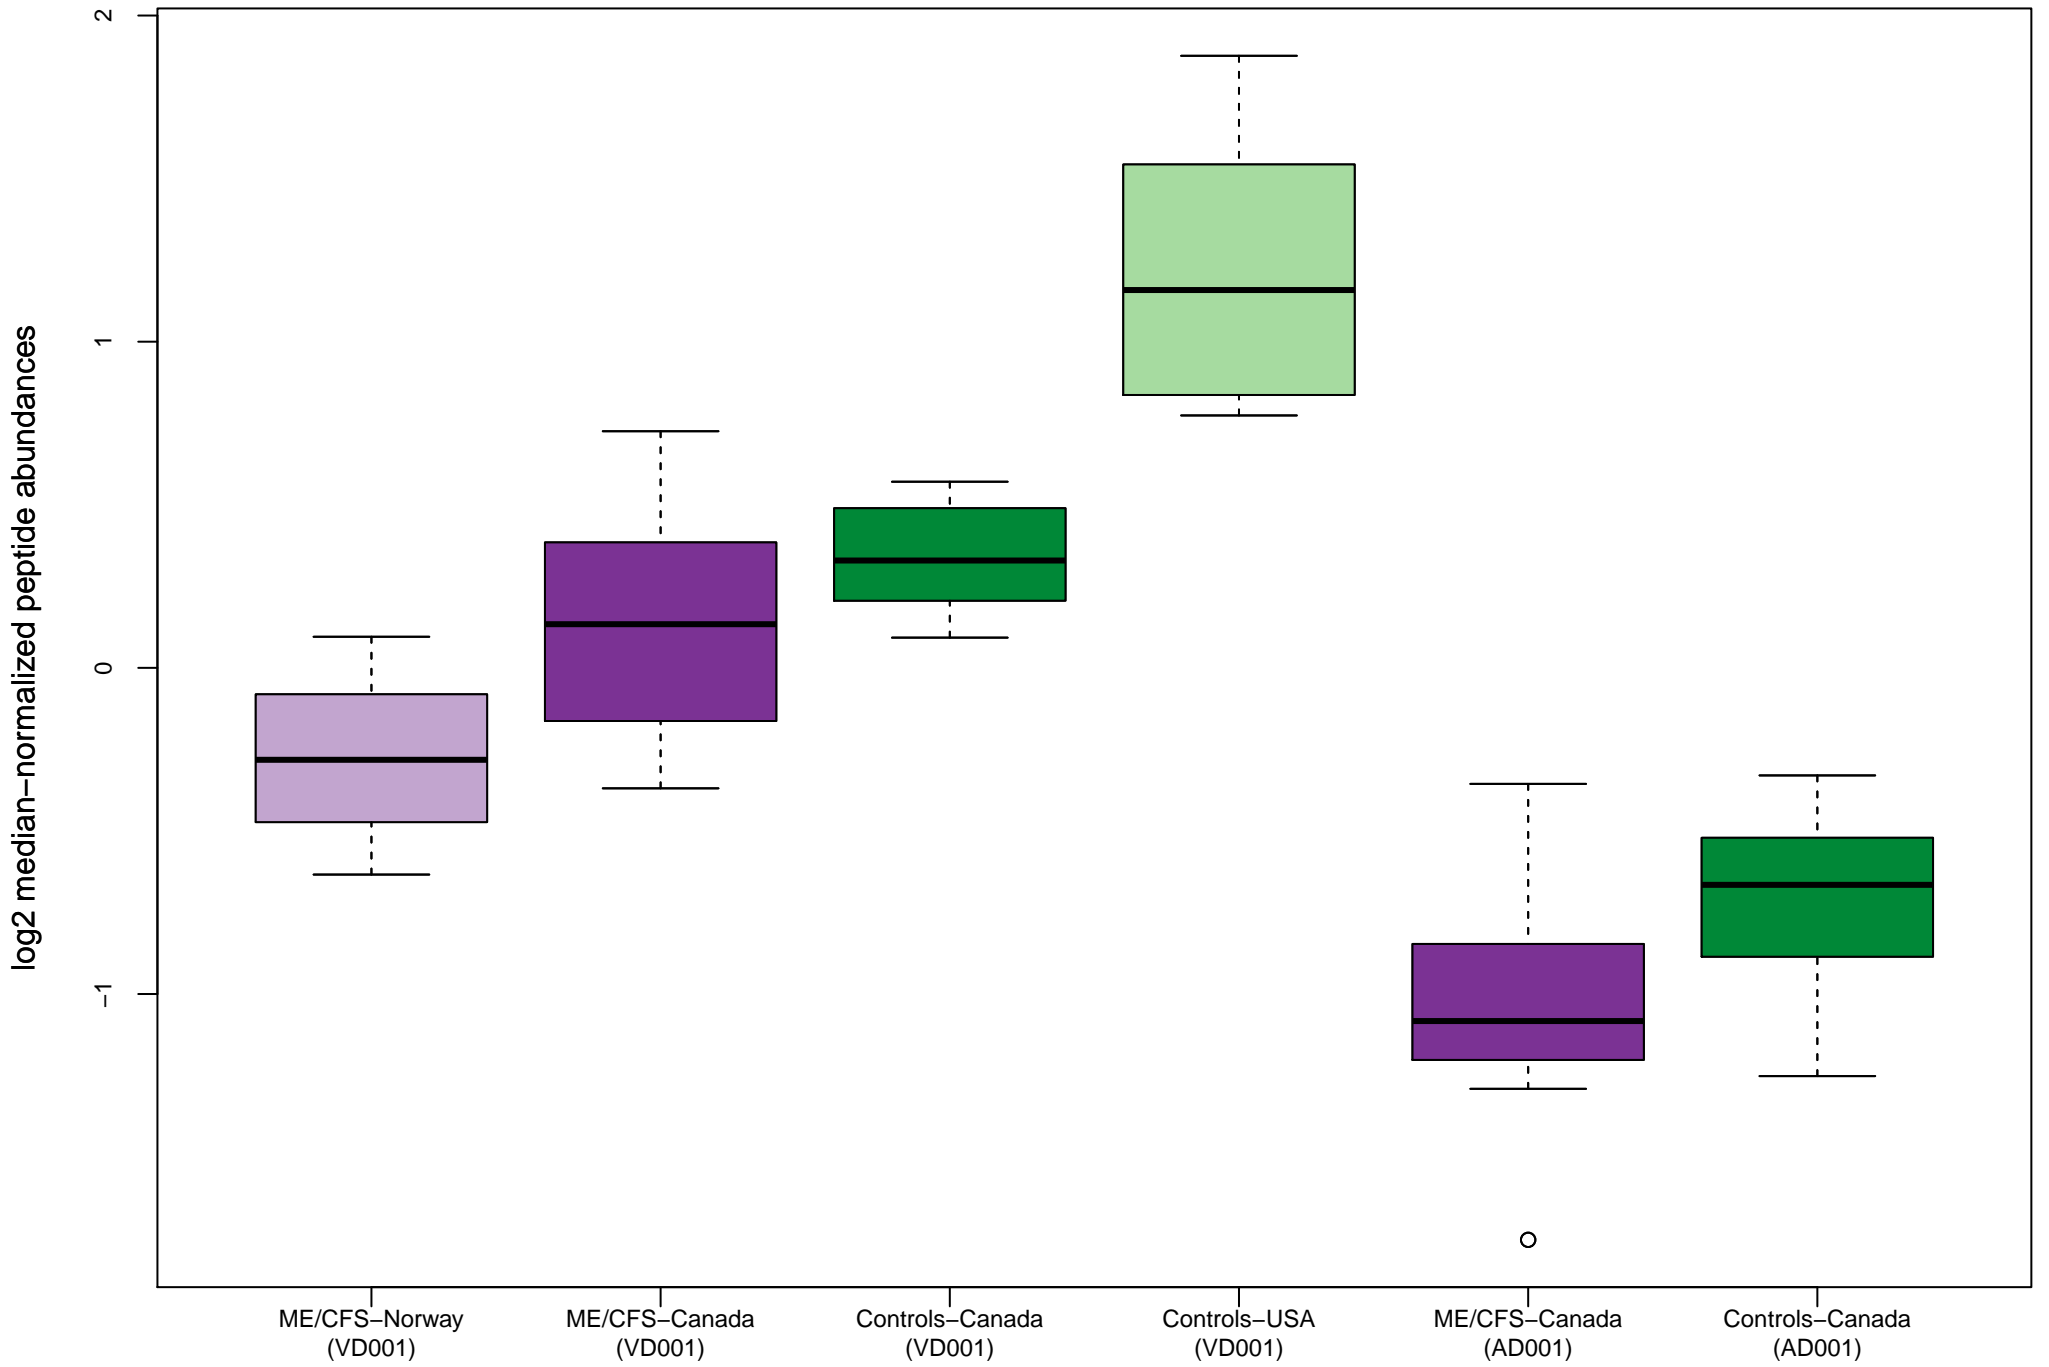

# FHGNLFYLRKLL

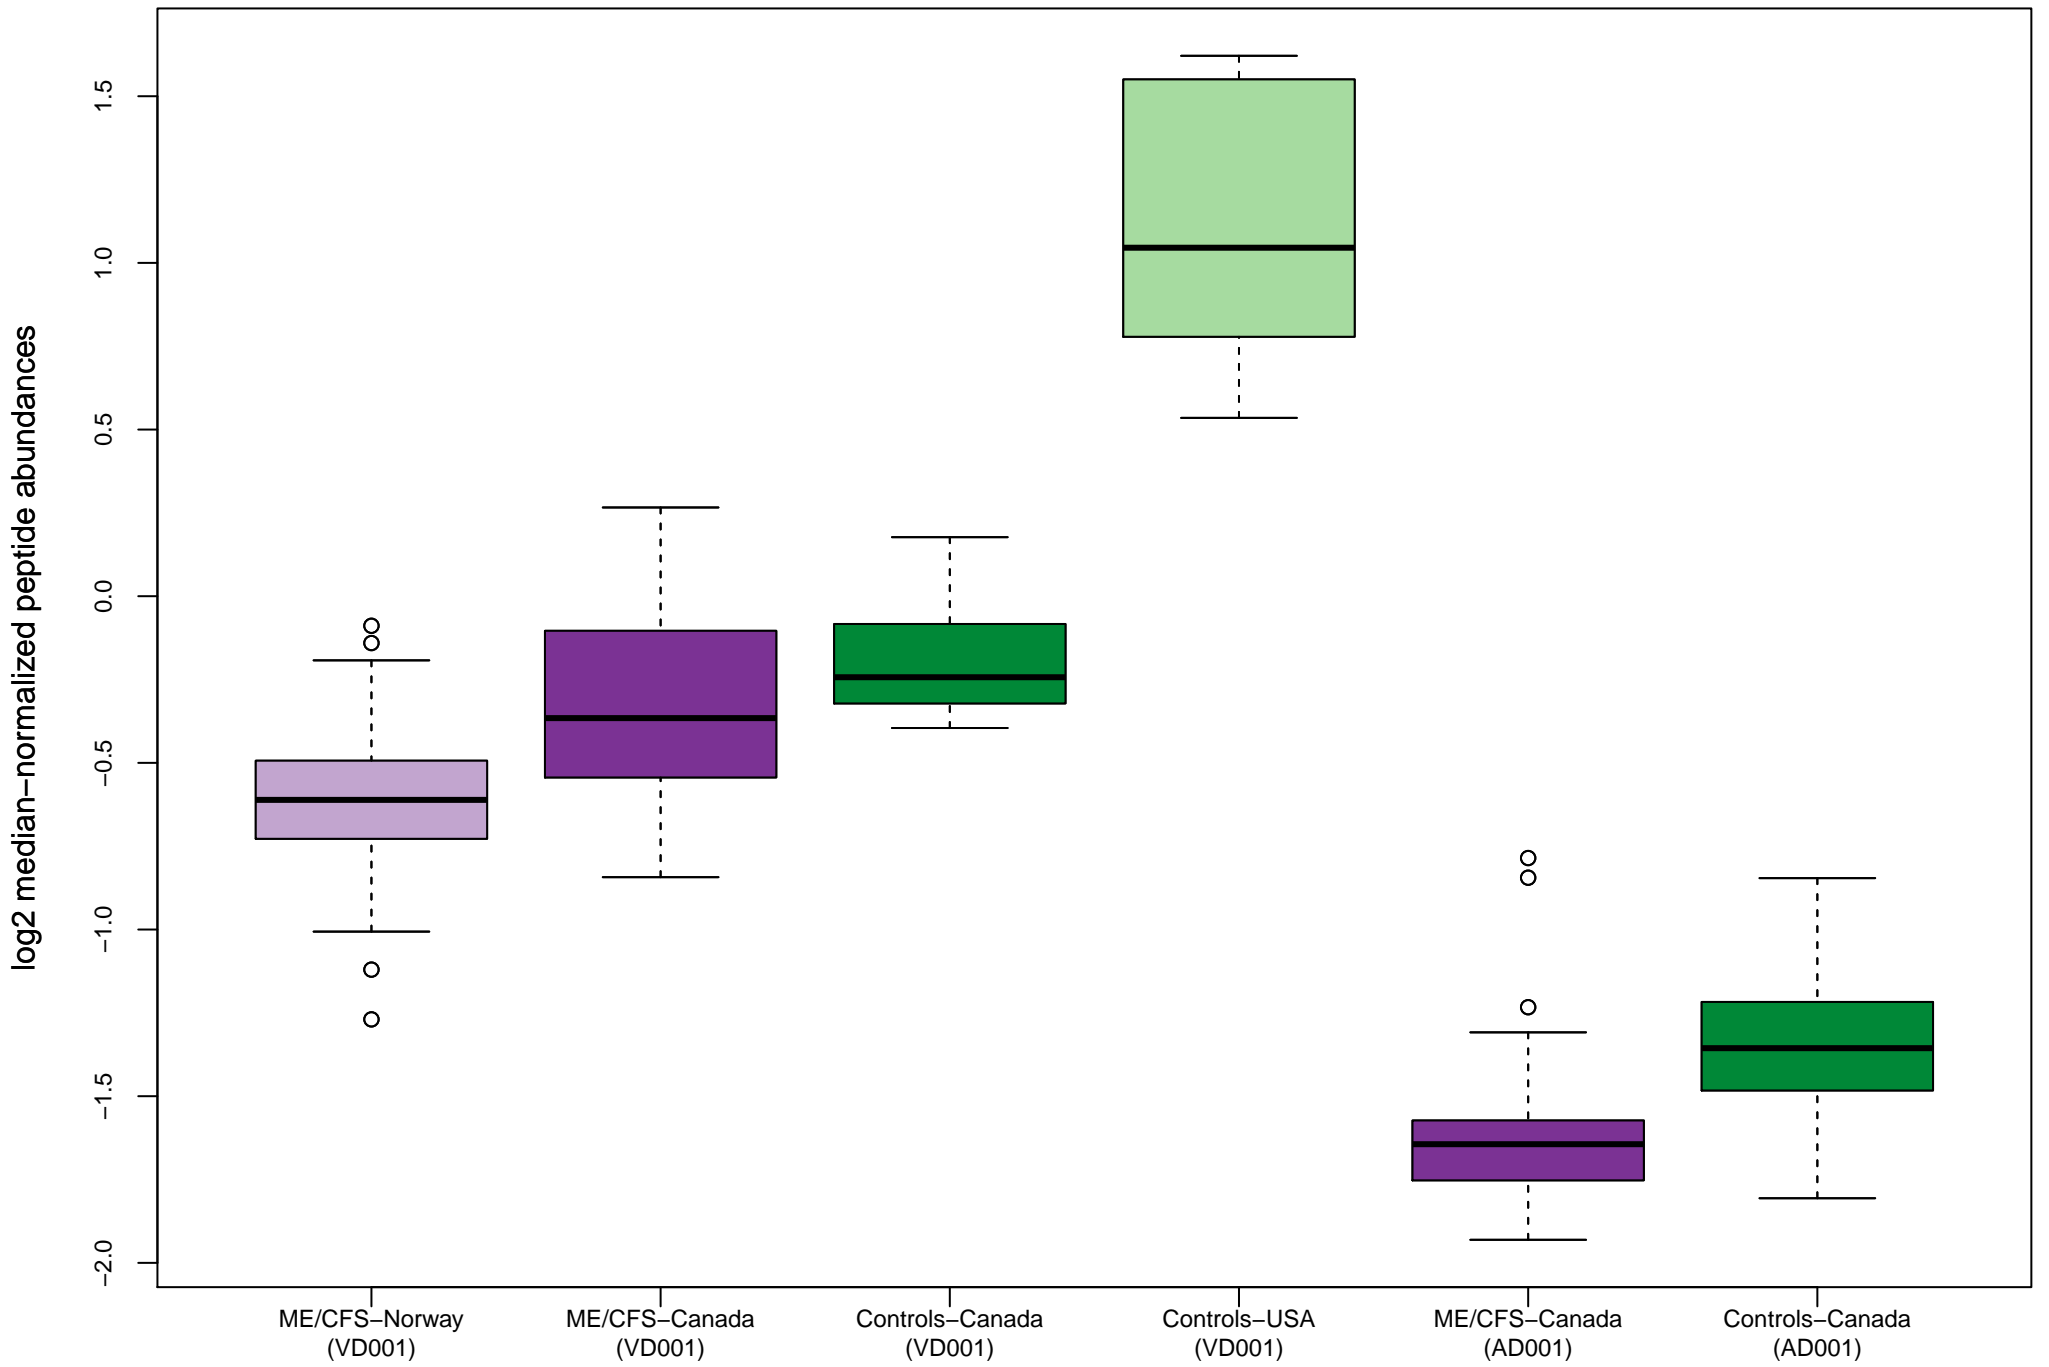

# FHLYSRKSFVAL

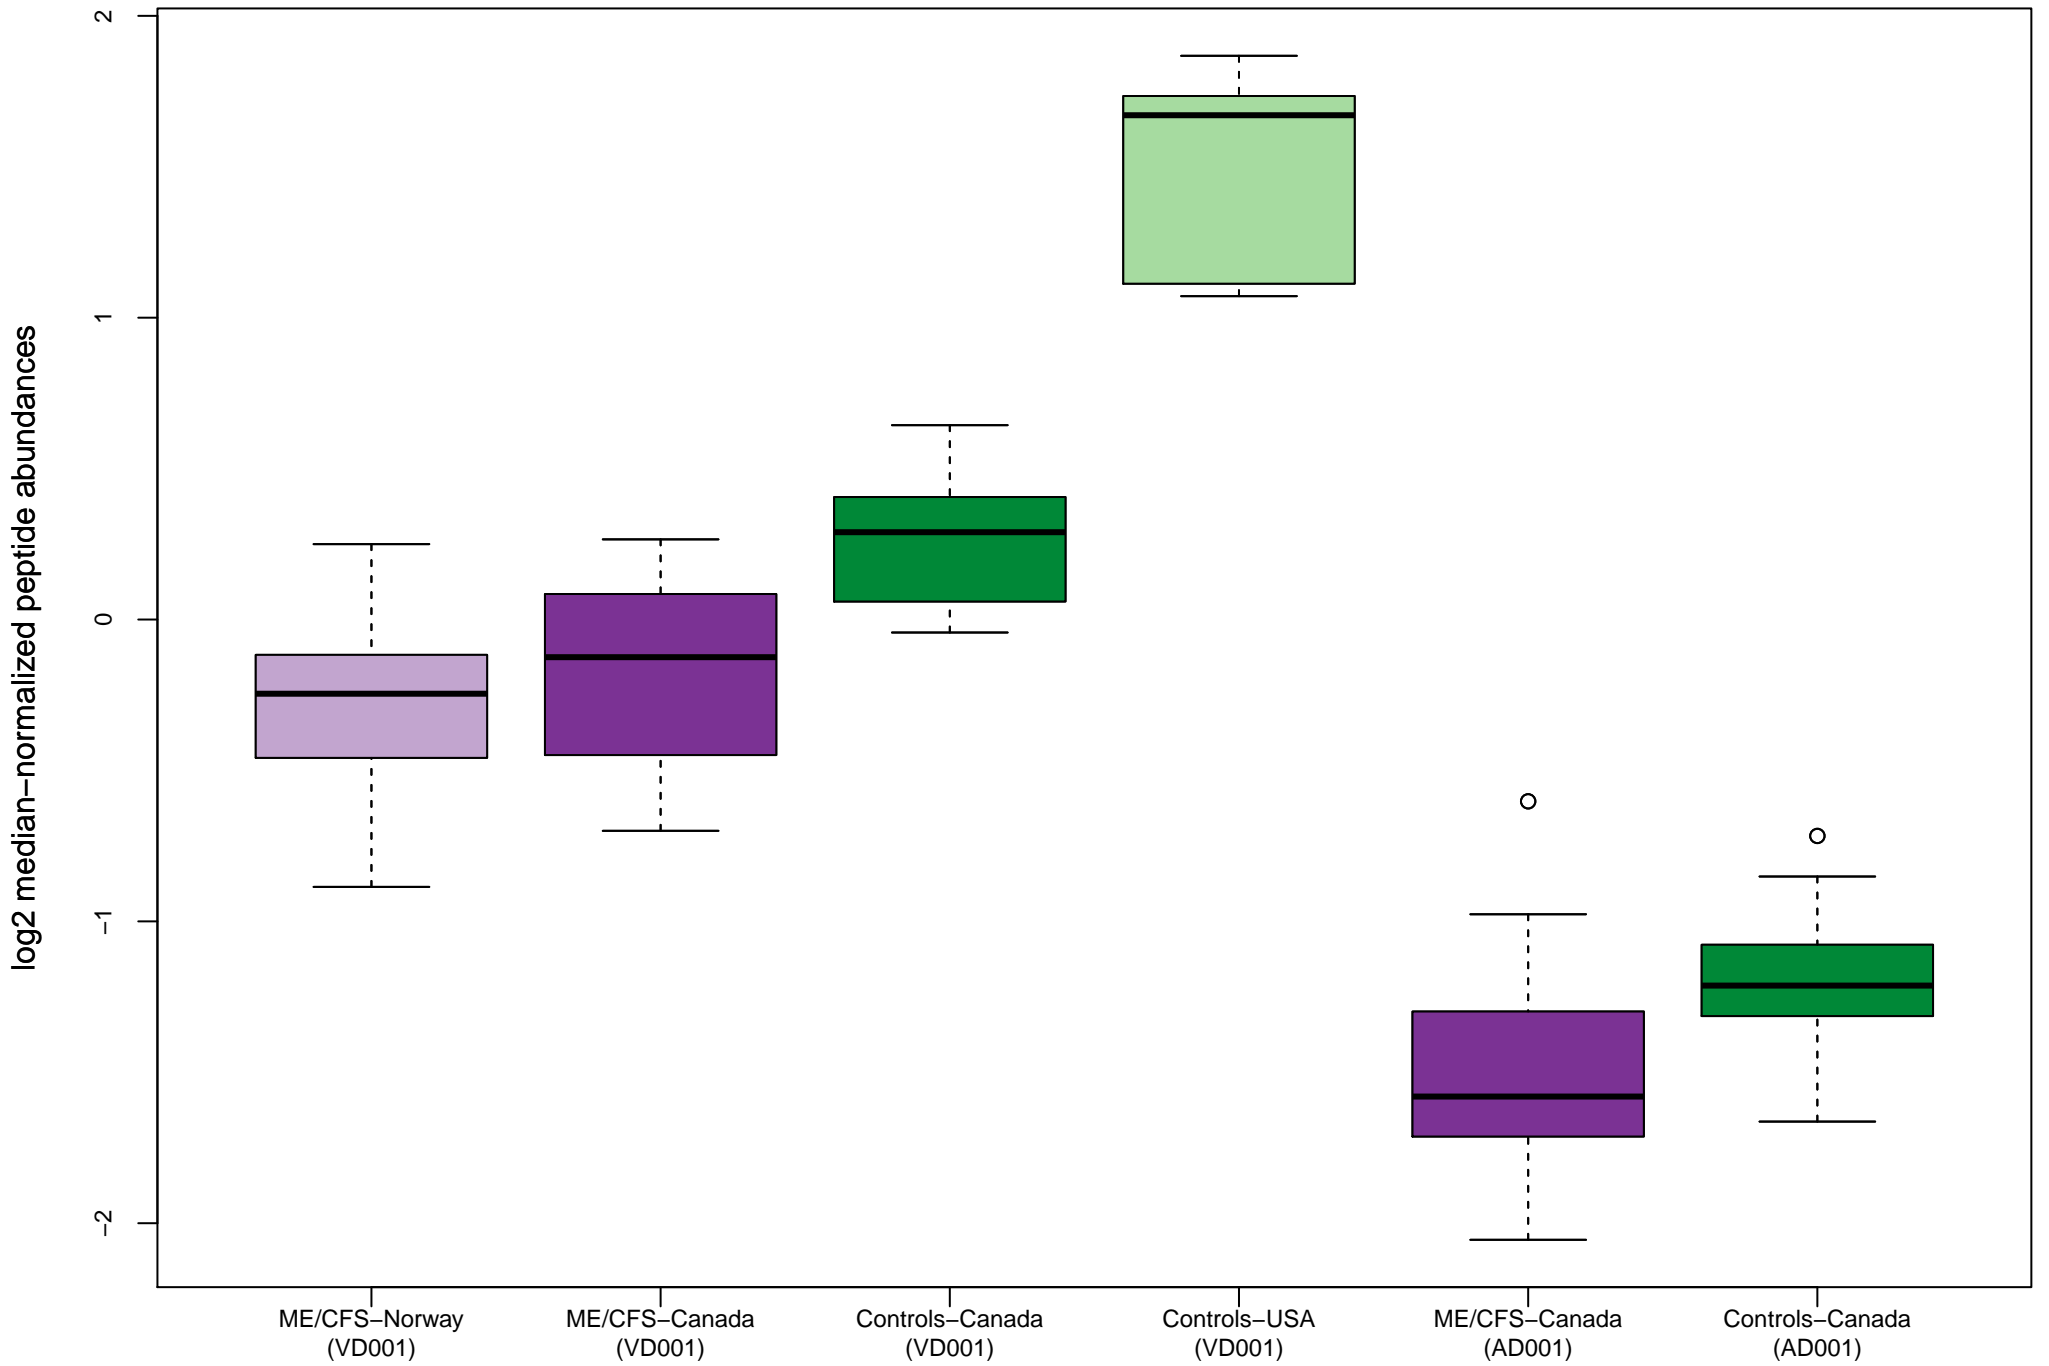

# FKVEYSRSFYKV

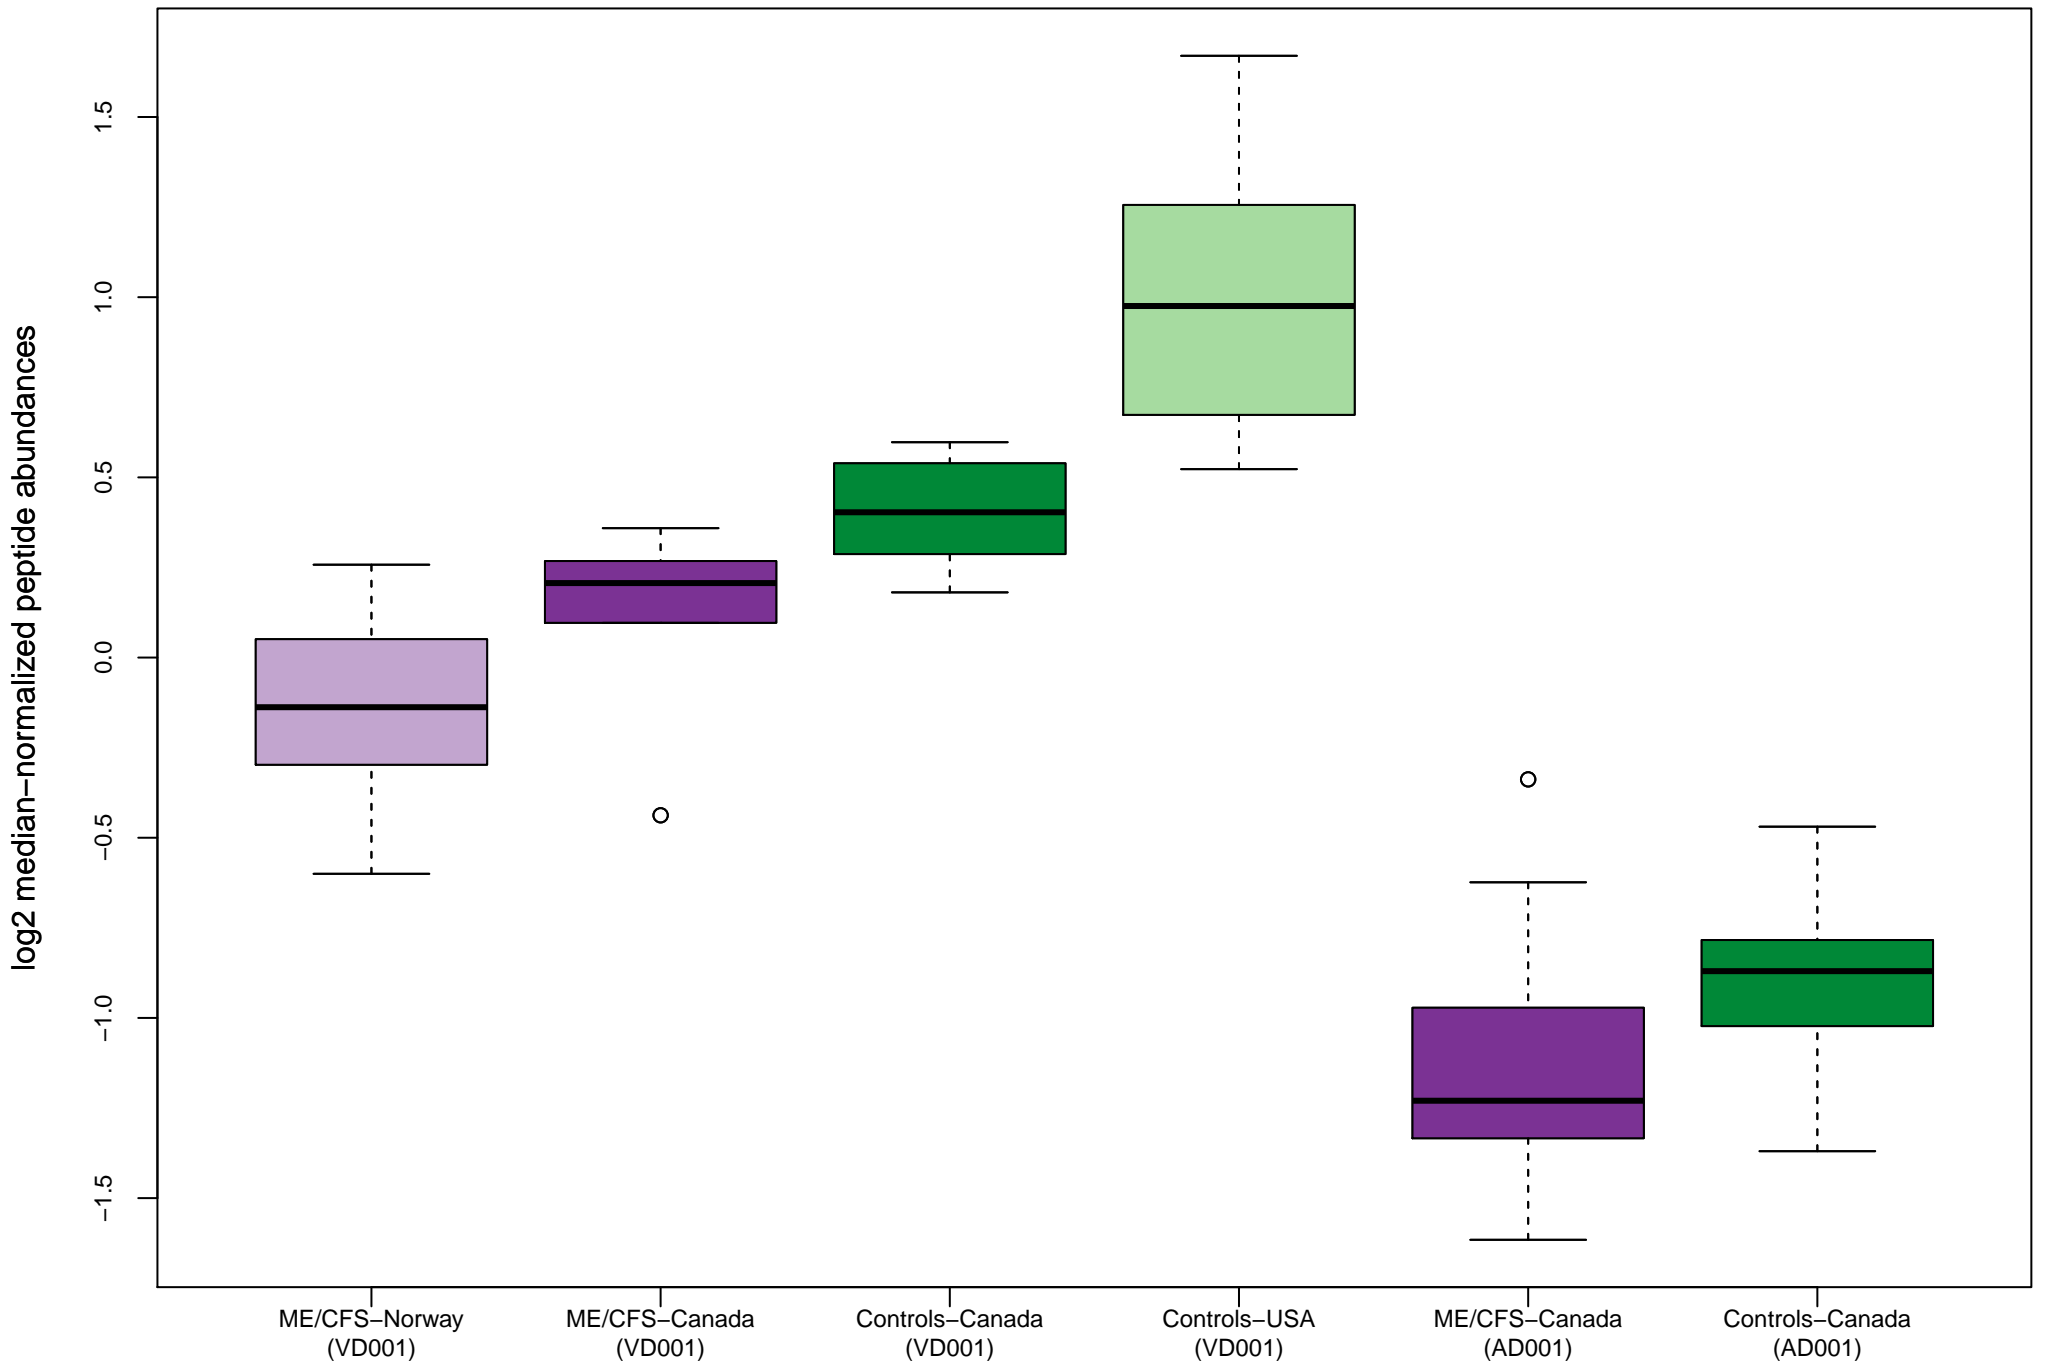

**FKWSPYSVLSLG**

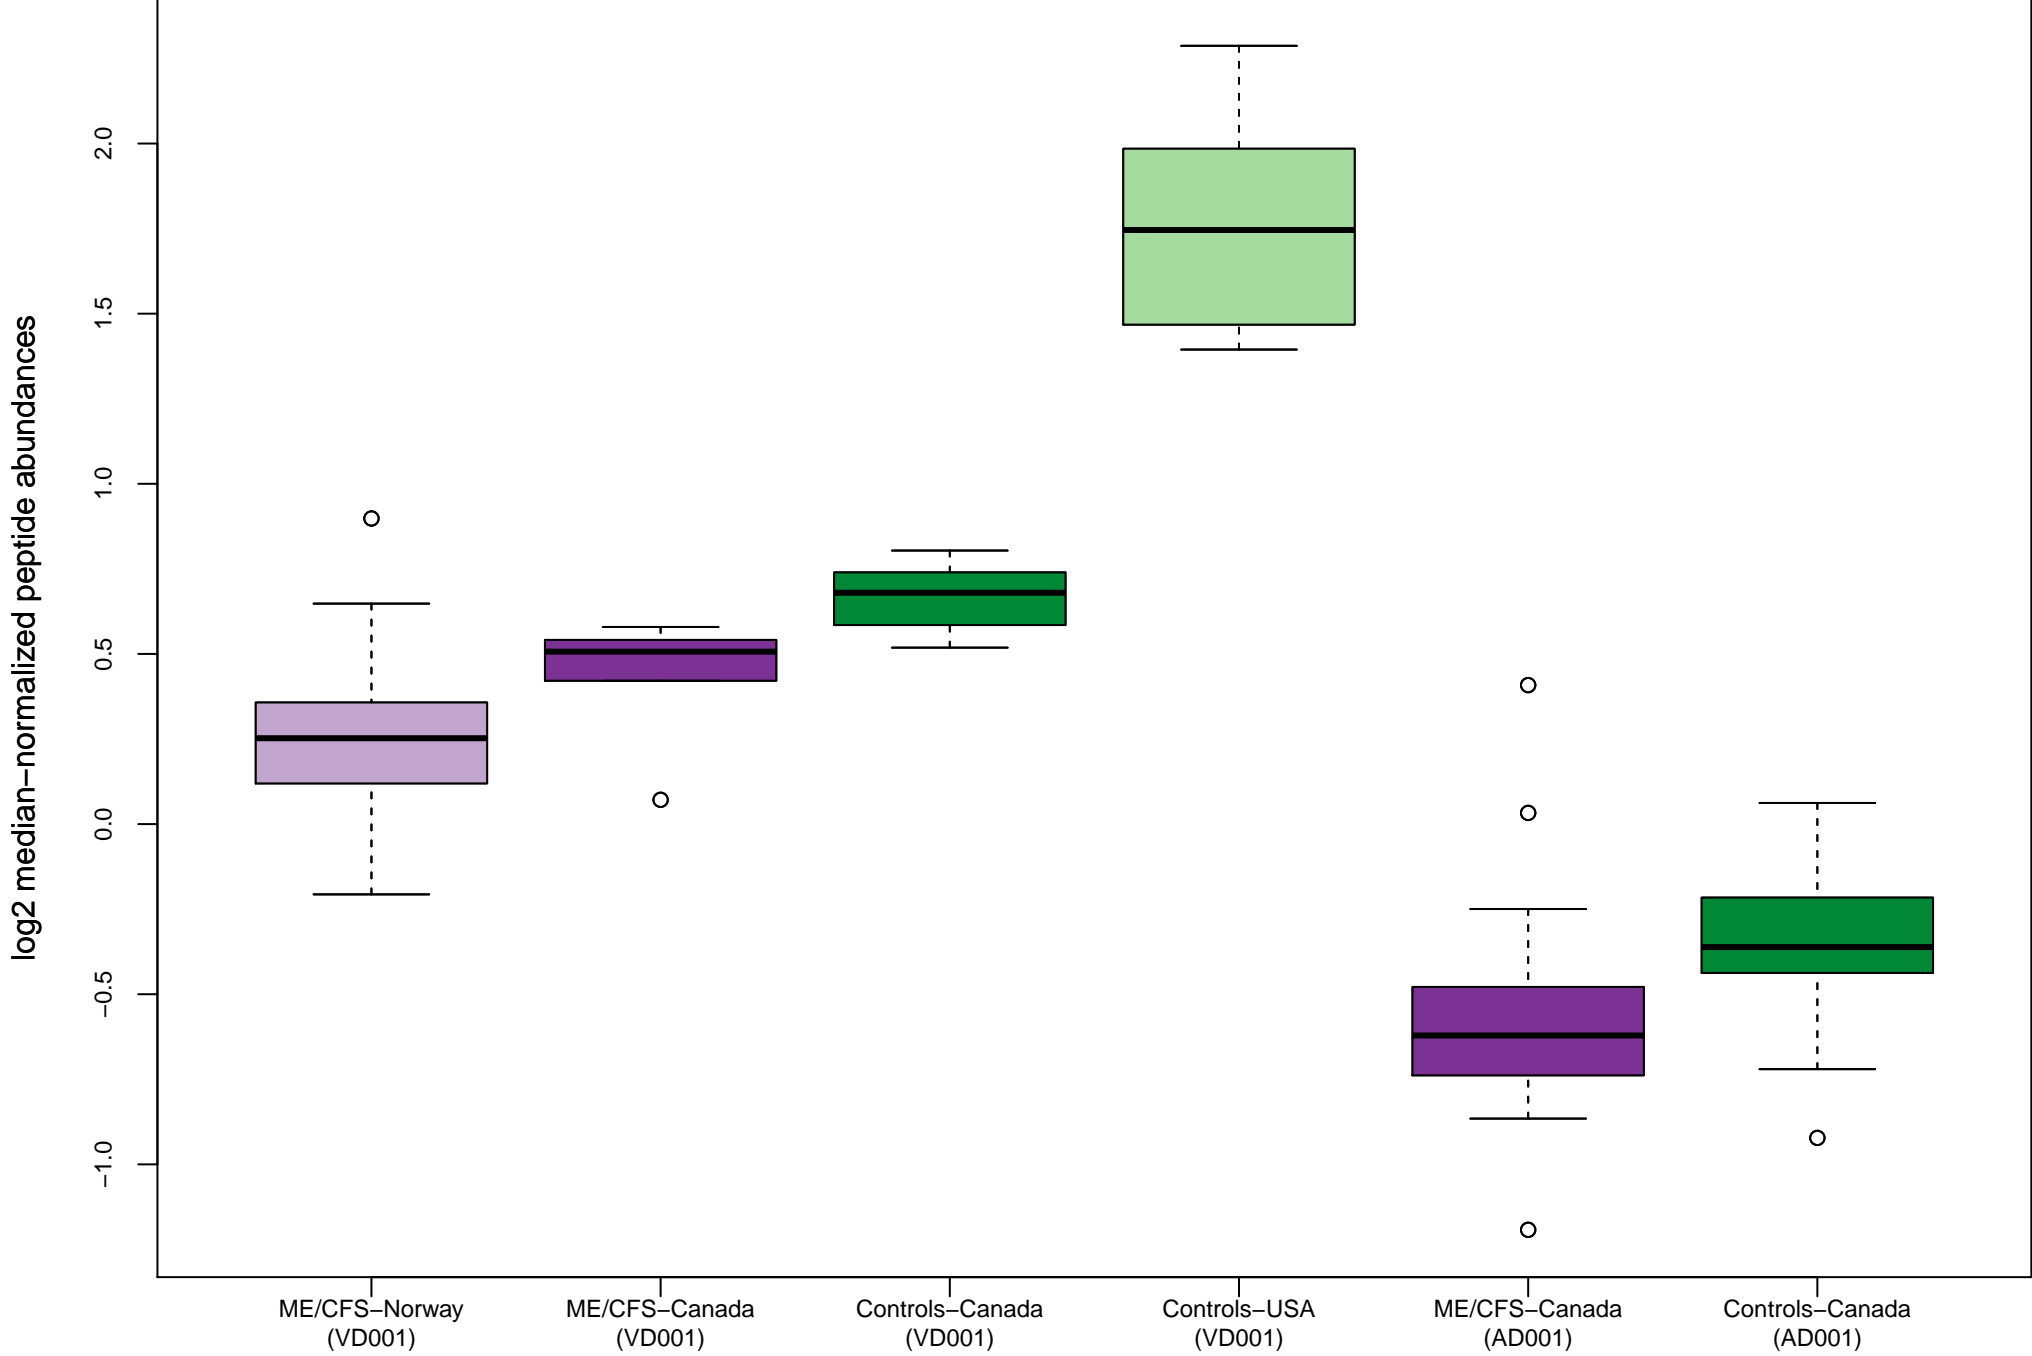



# FLNSRFYVGALG

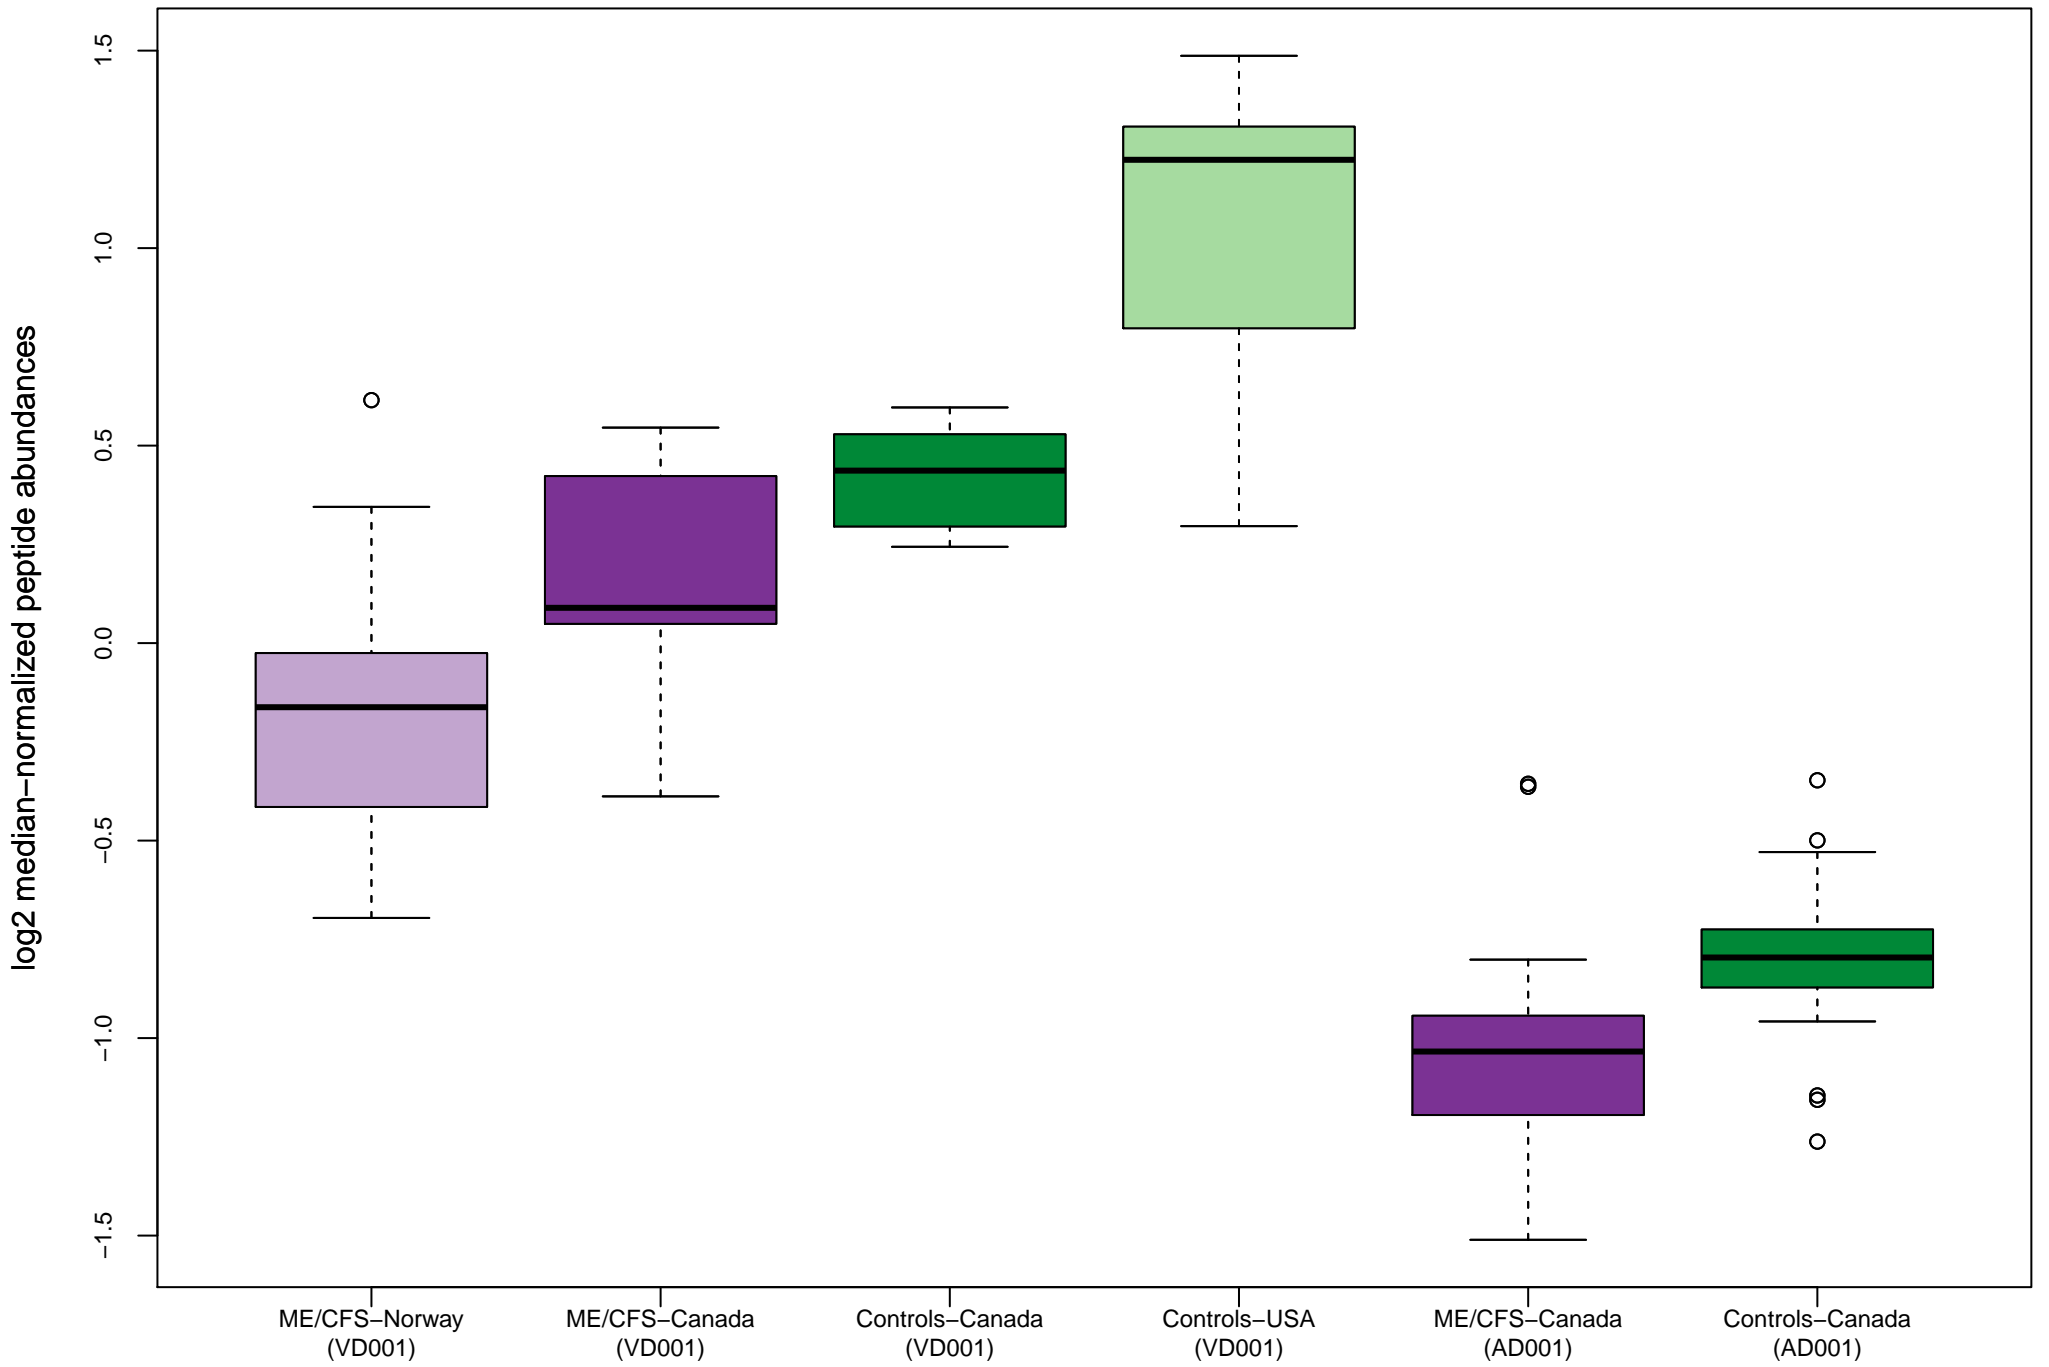

# FLPYWQLYWKLV

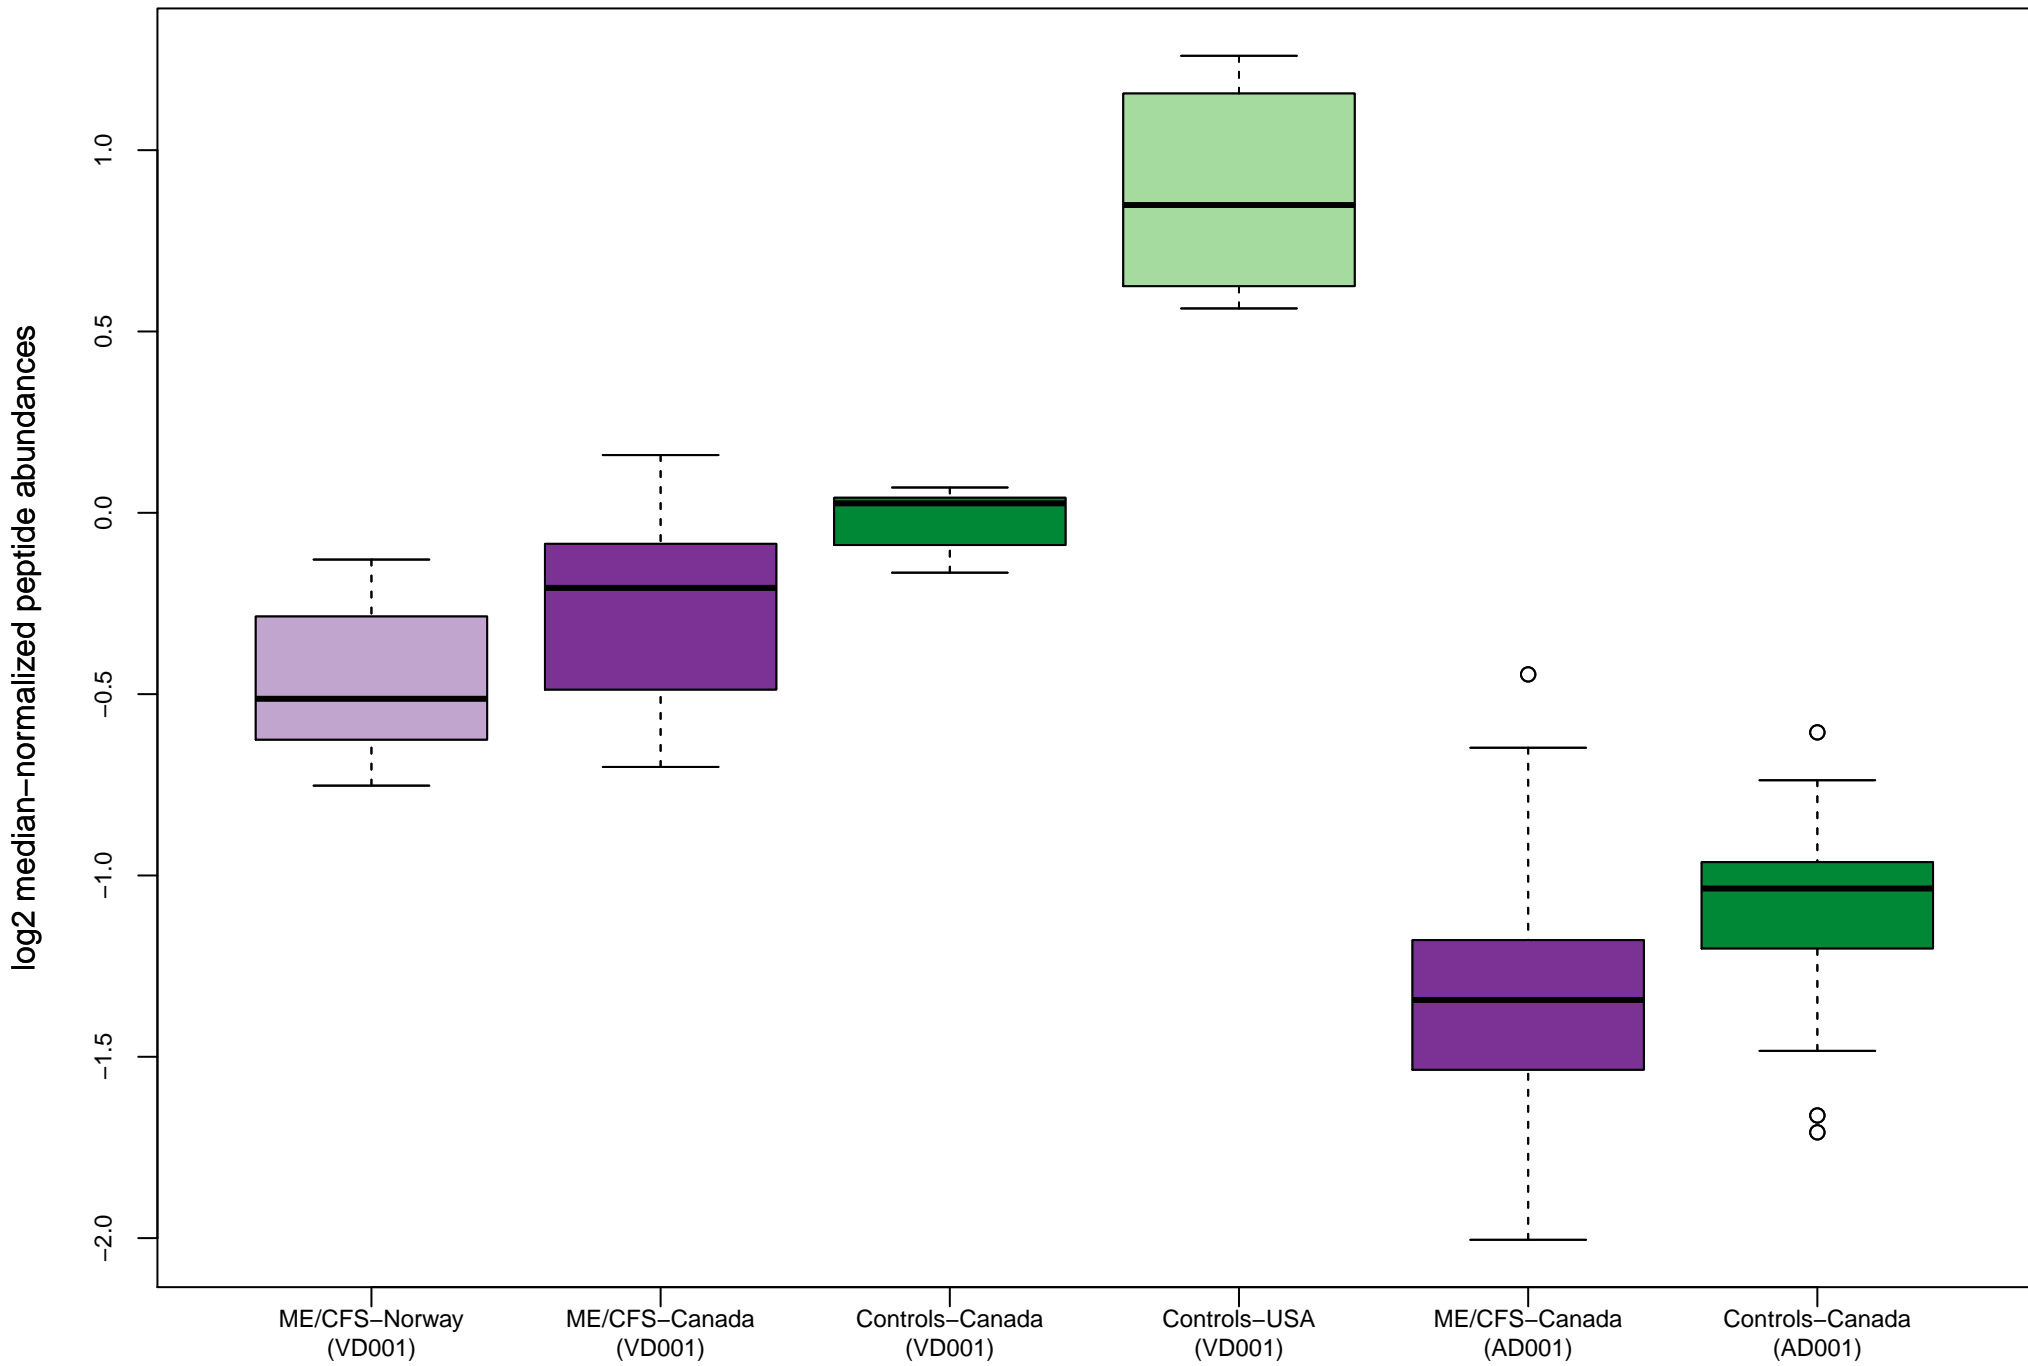

# FLVSSRYGVLSG

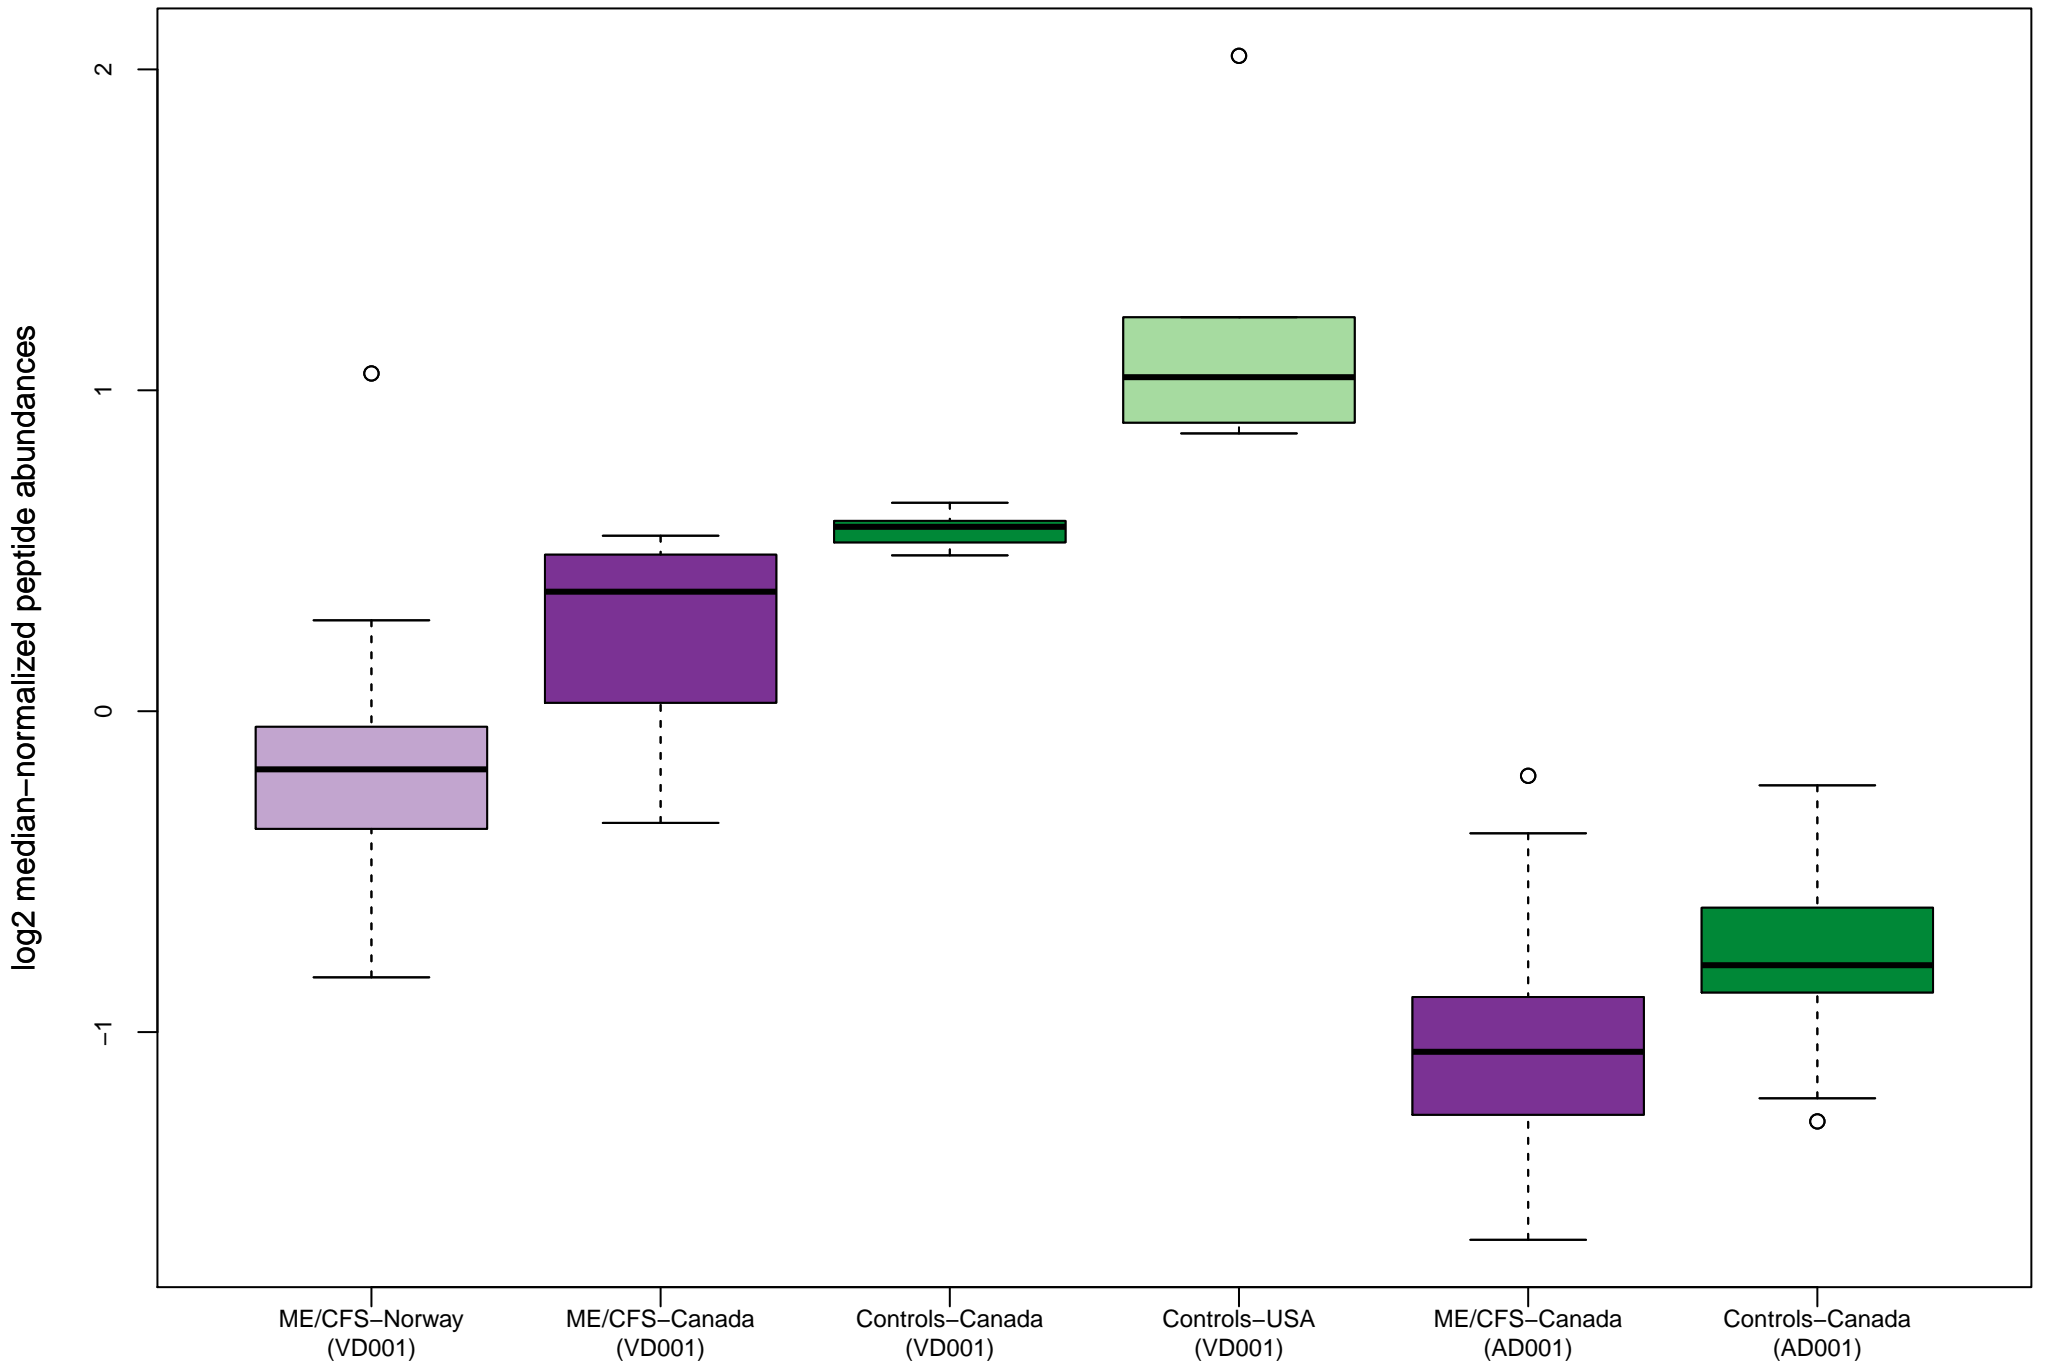

# FLYFRPGRVALS

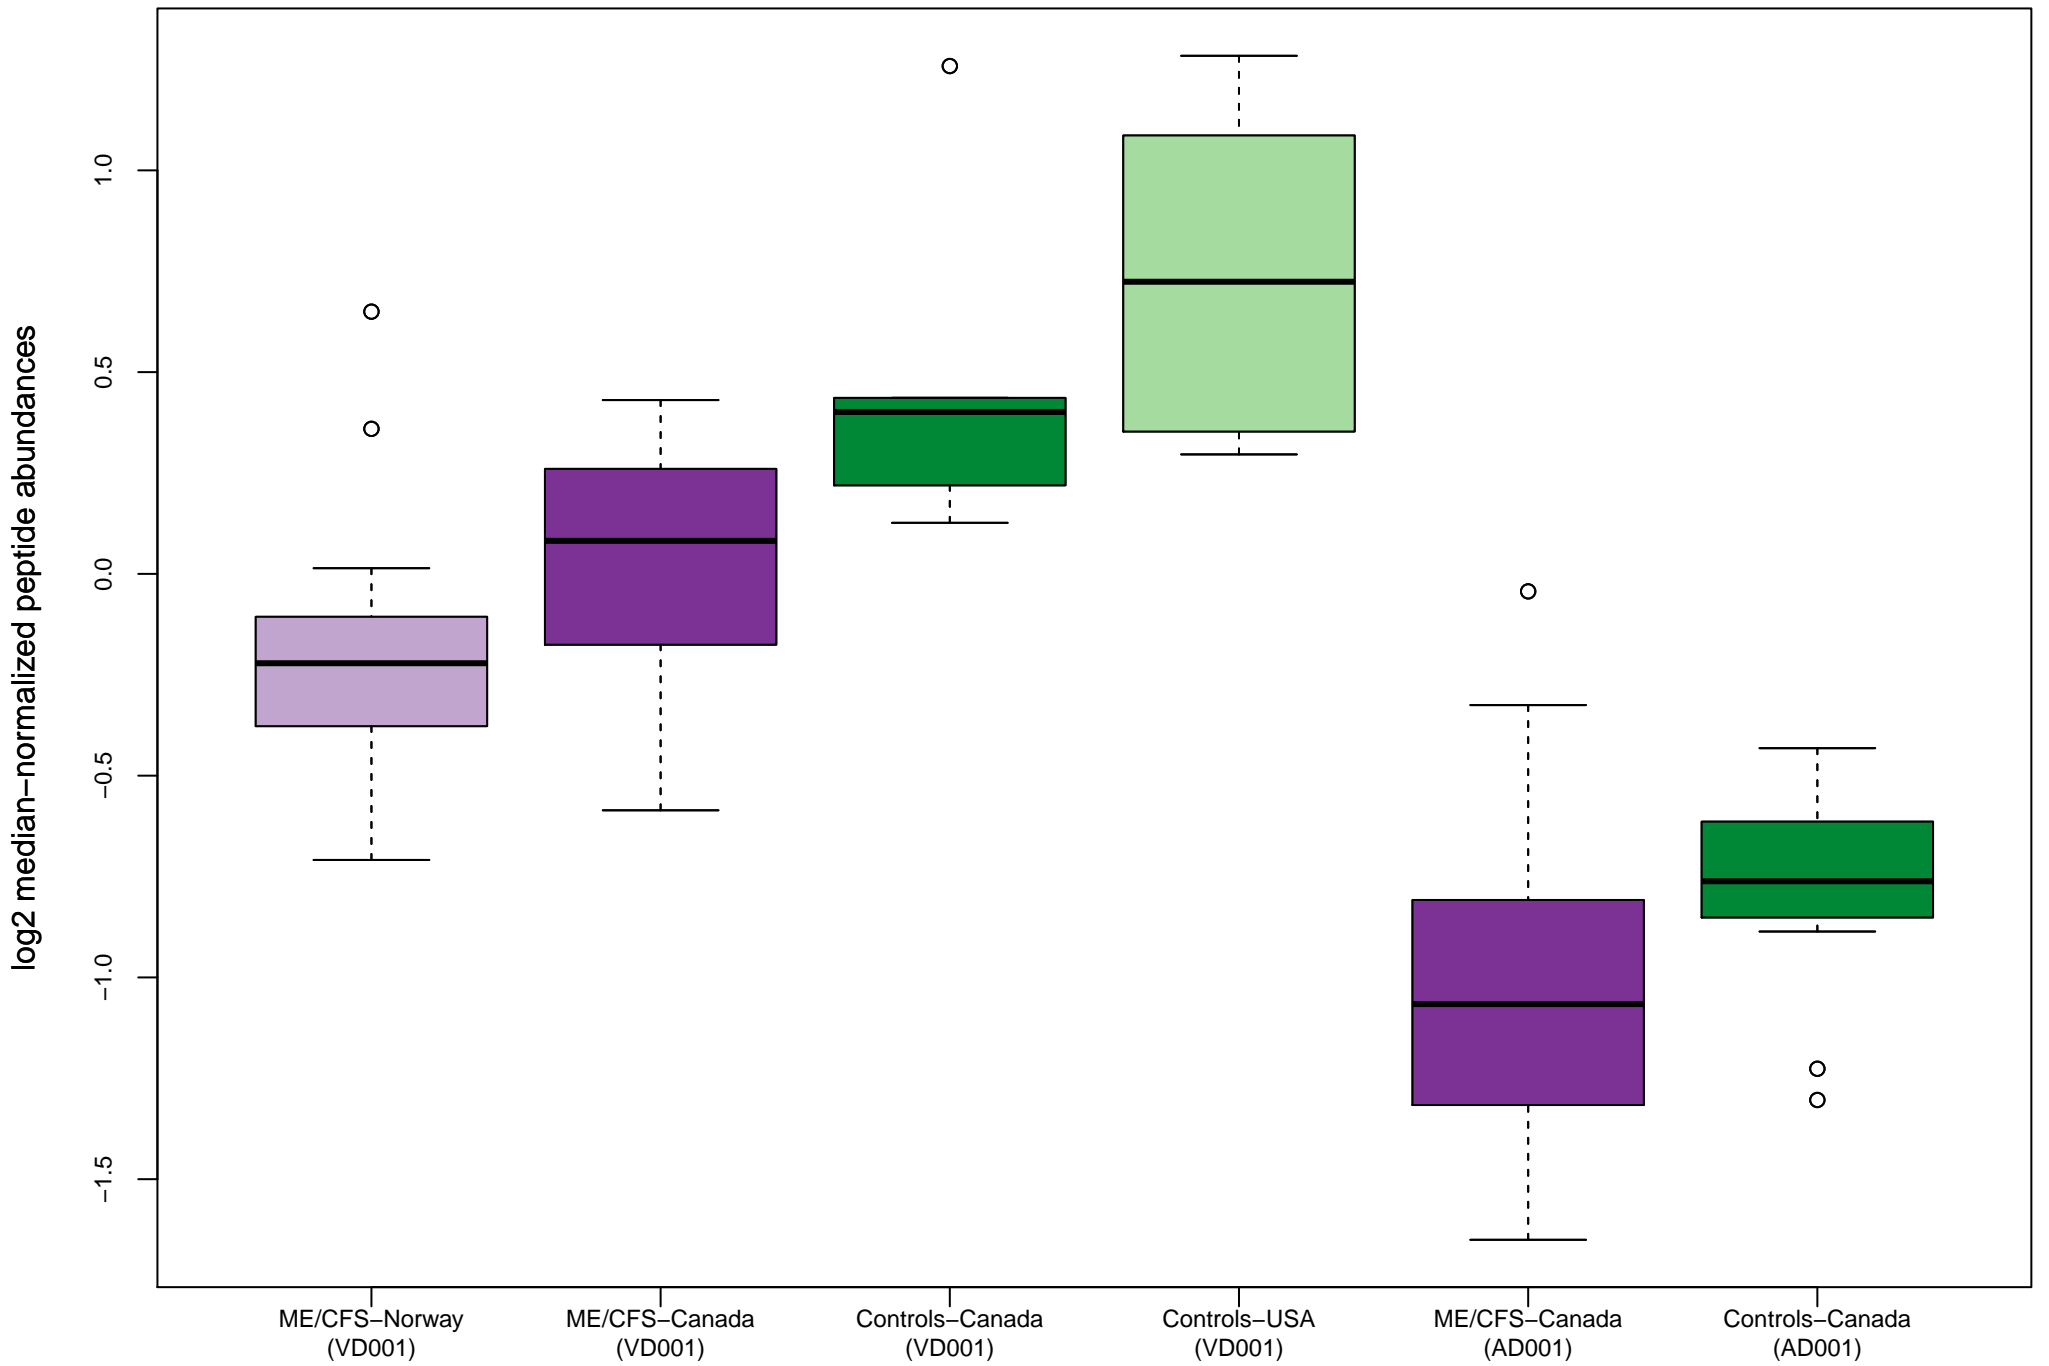

# FNKFRYVFYFNS

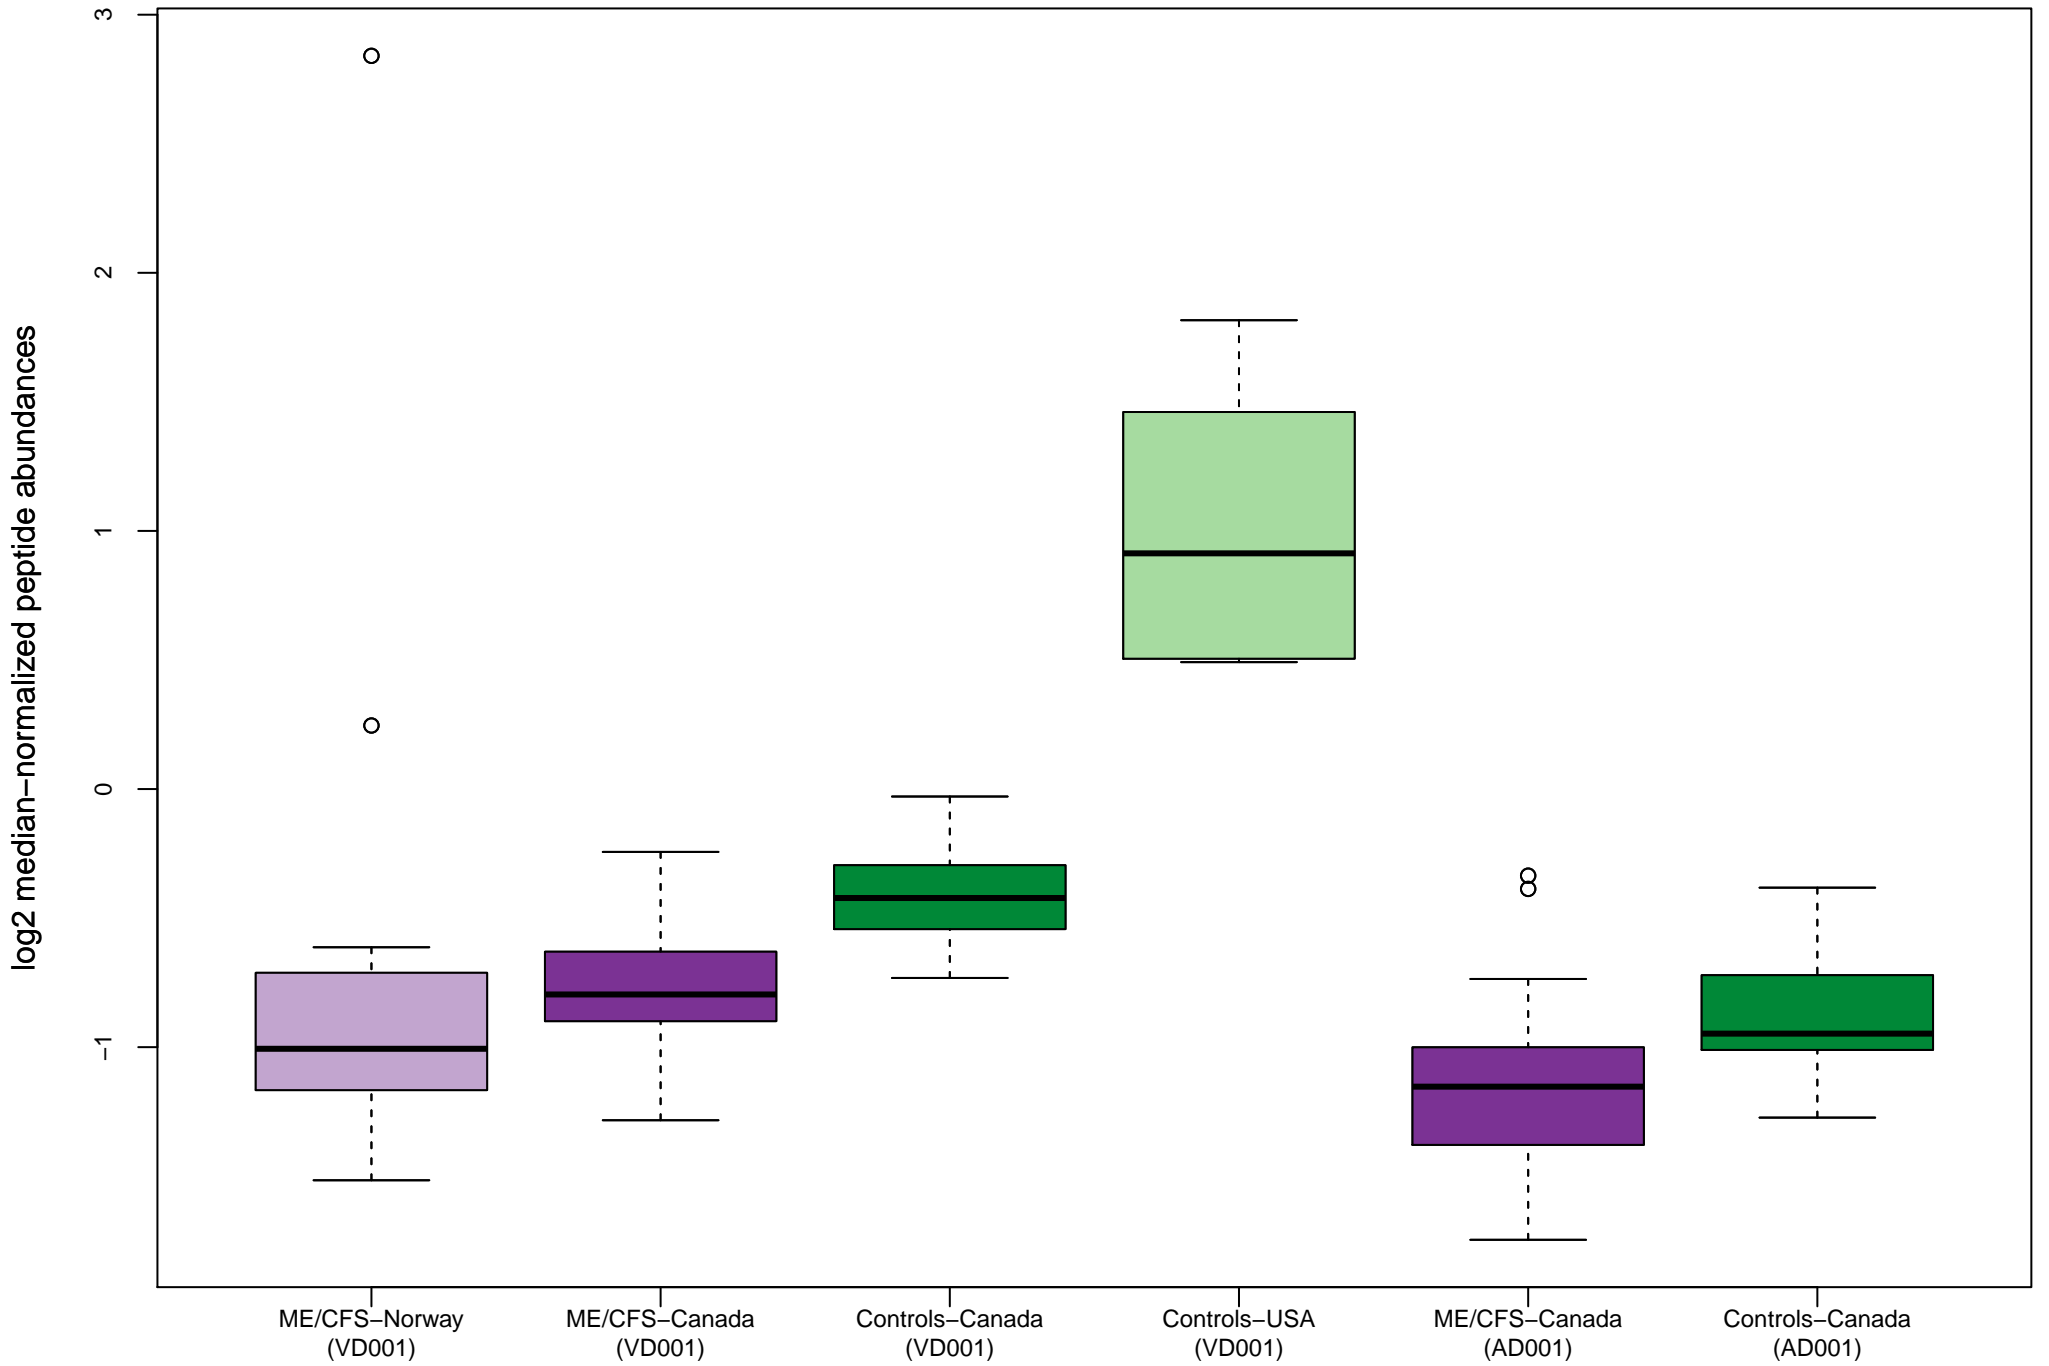

# FNWSYLRKVALS

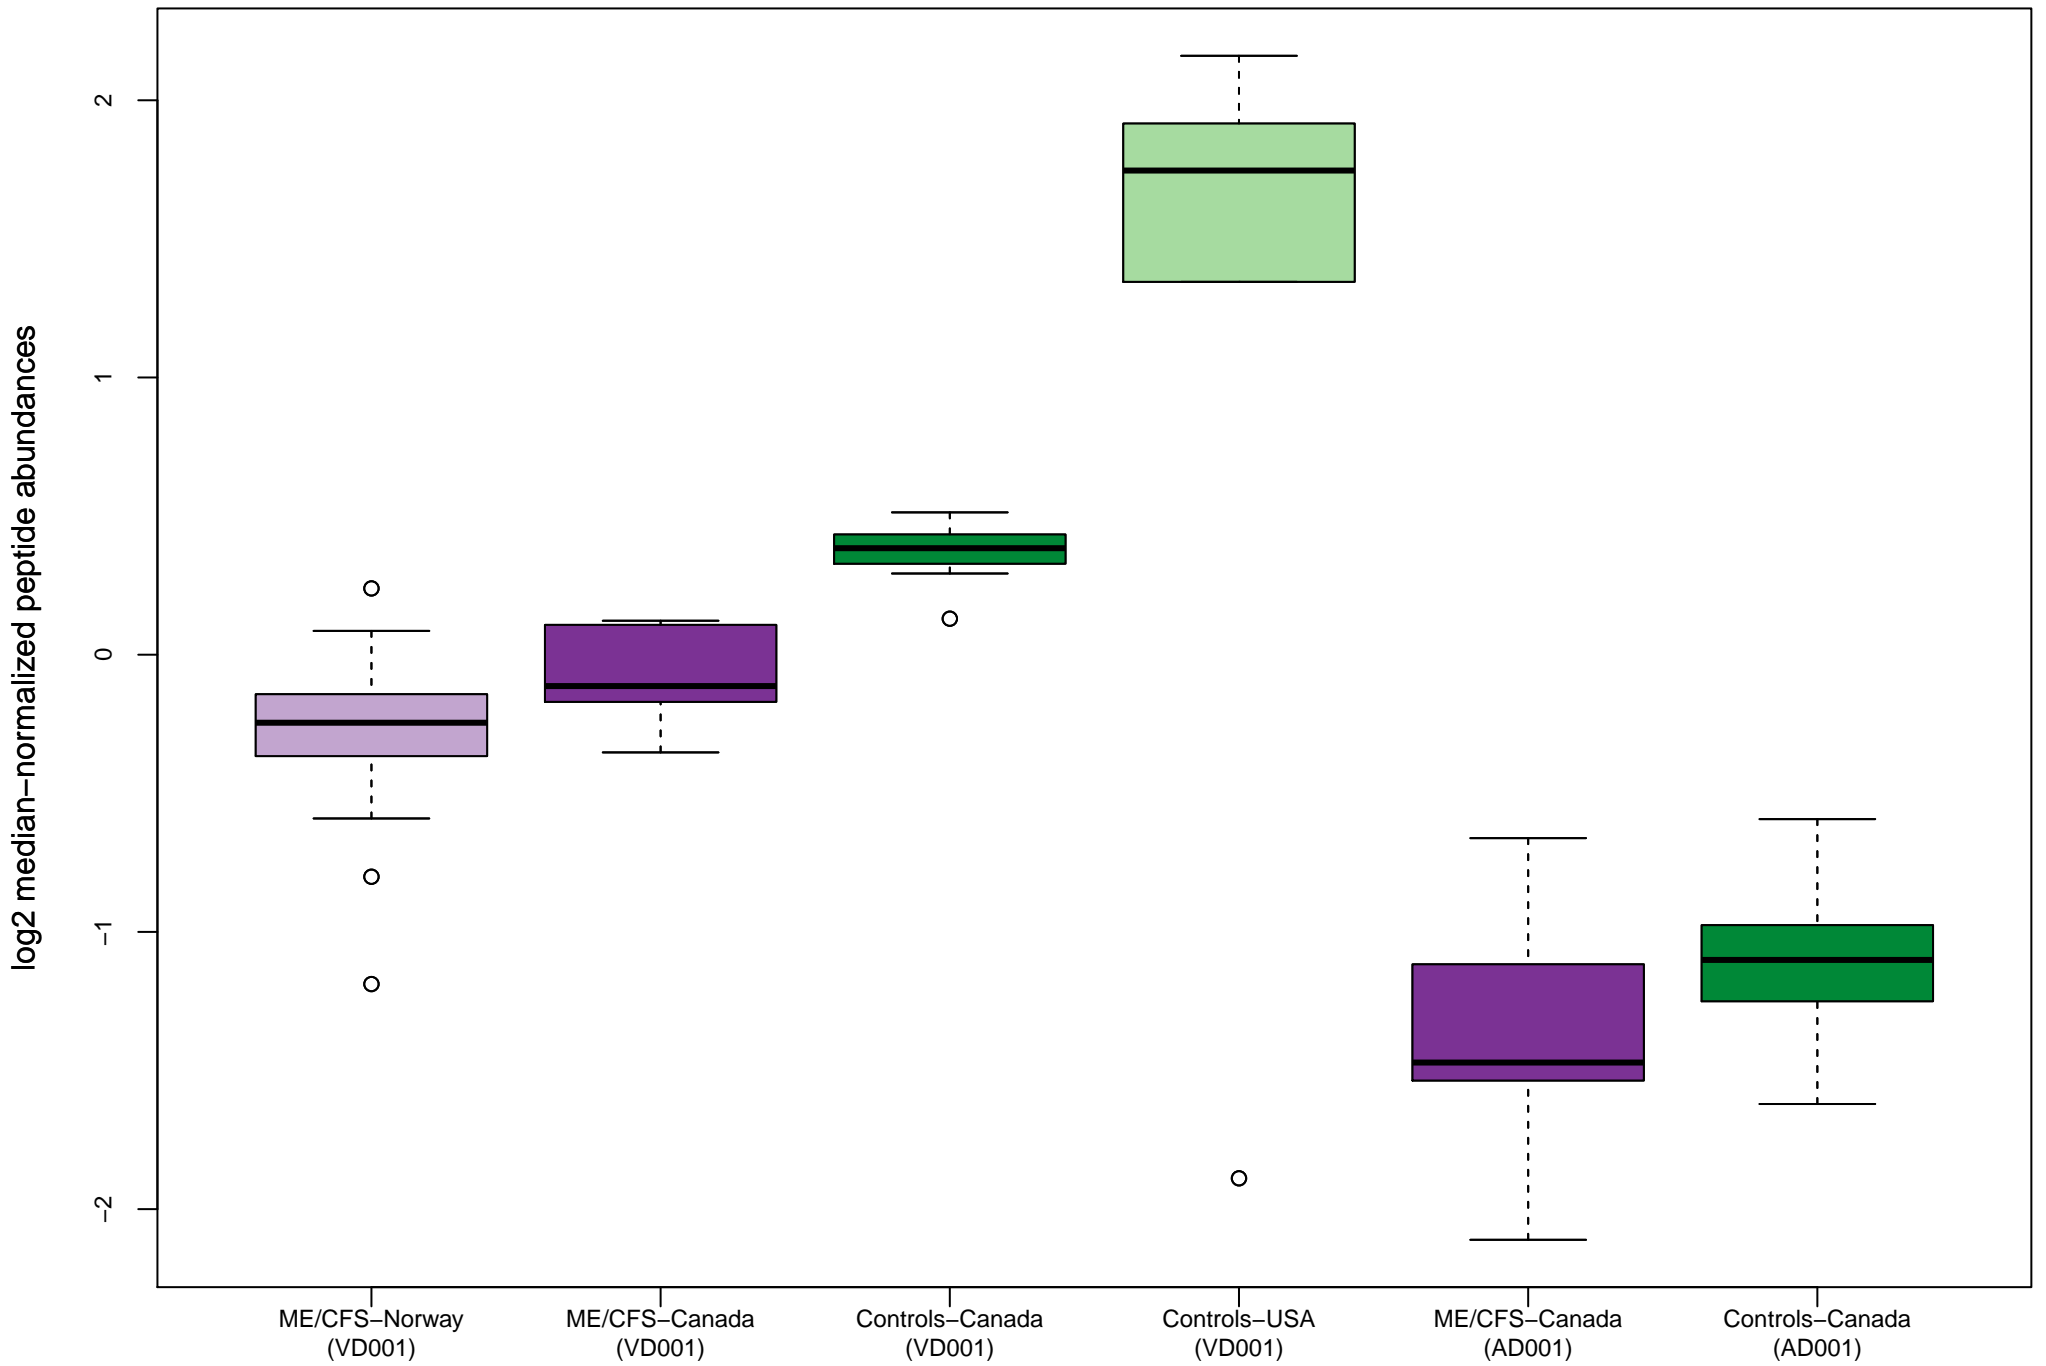

# FPLYYVGRKHSL

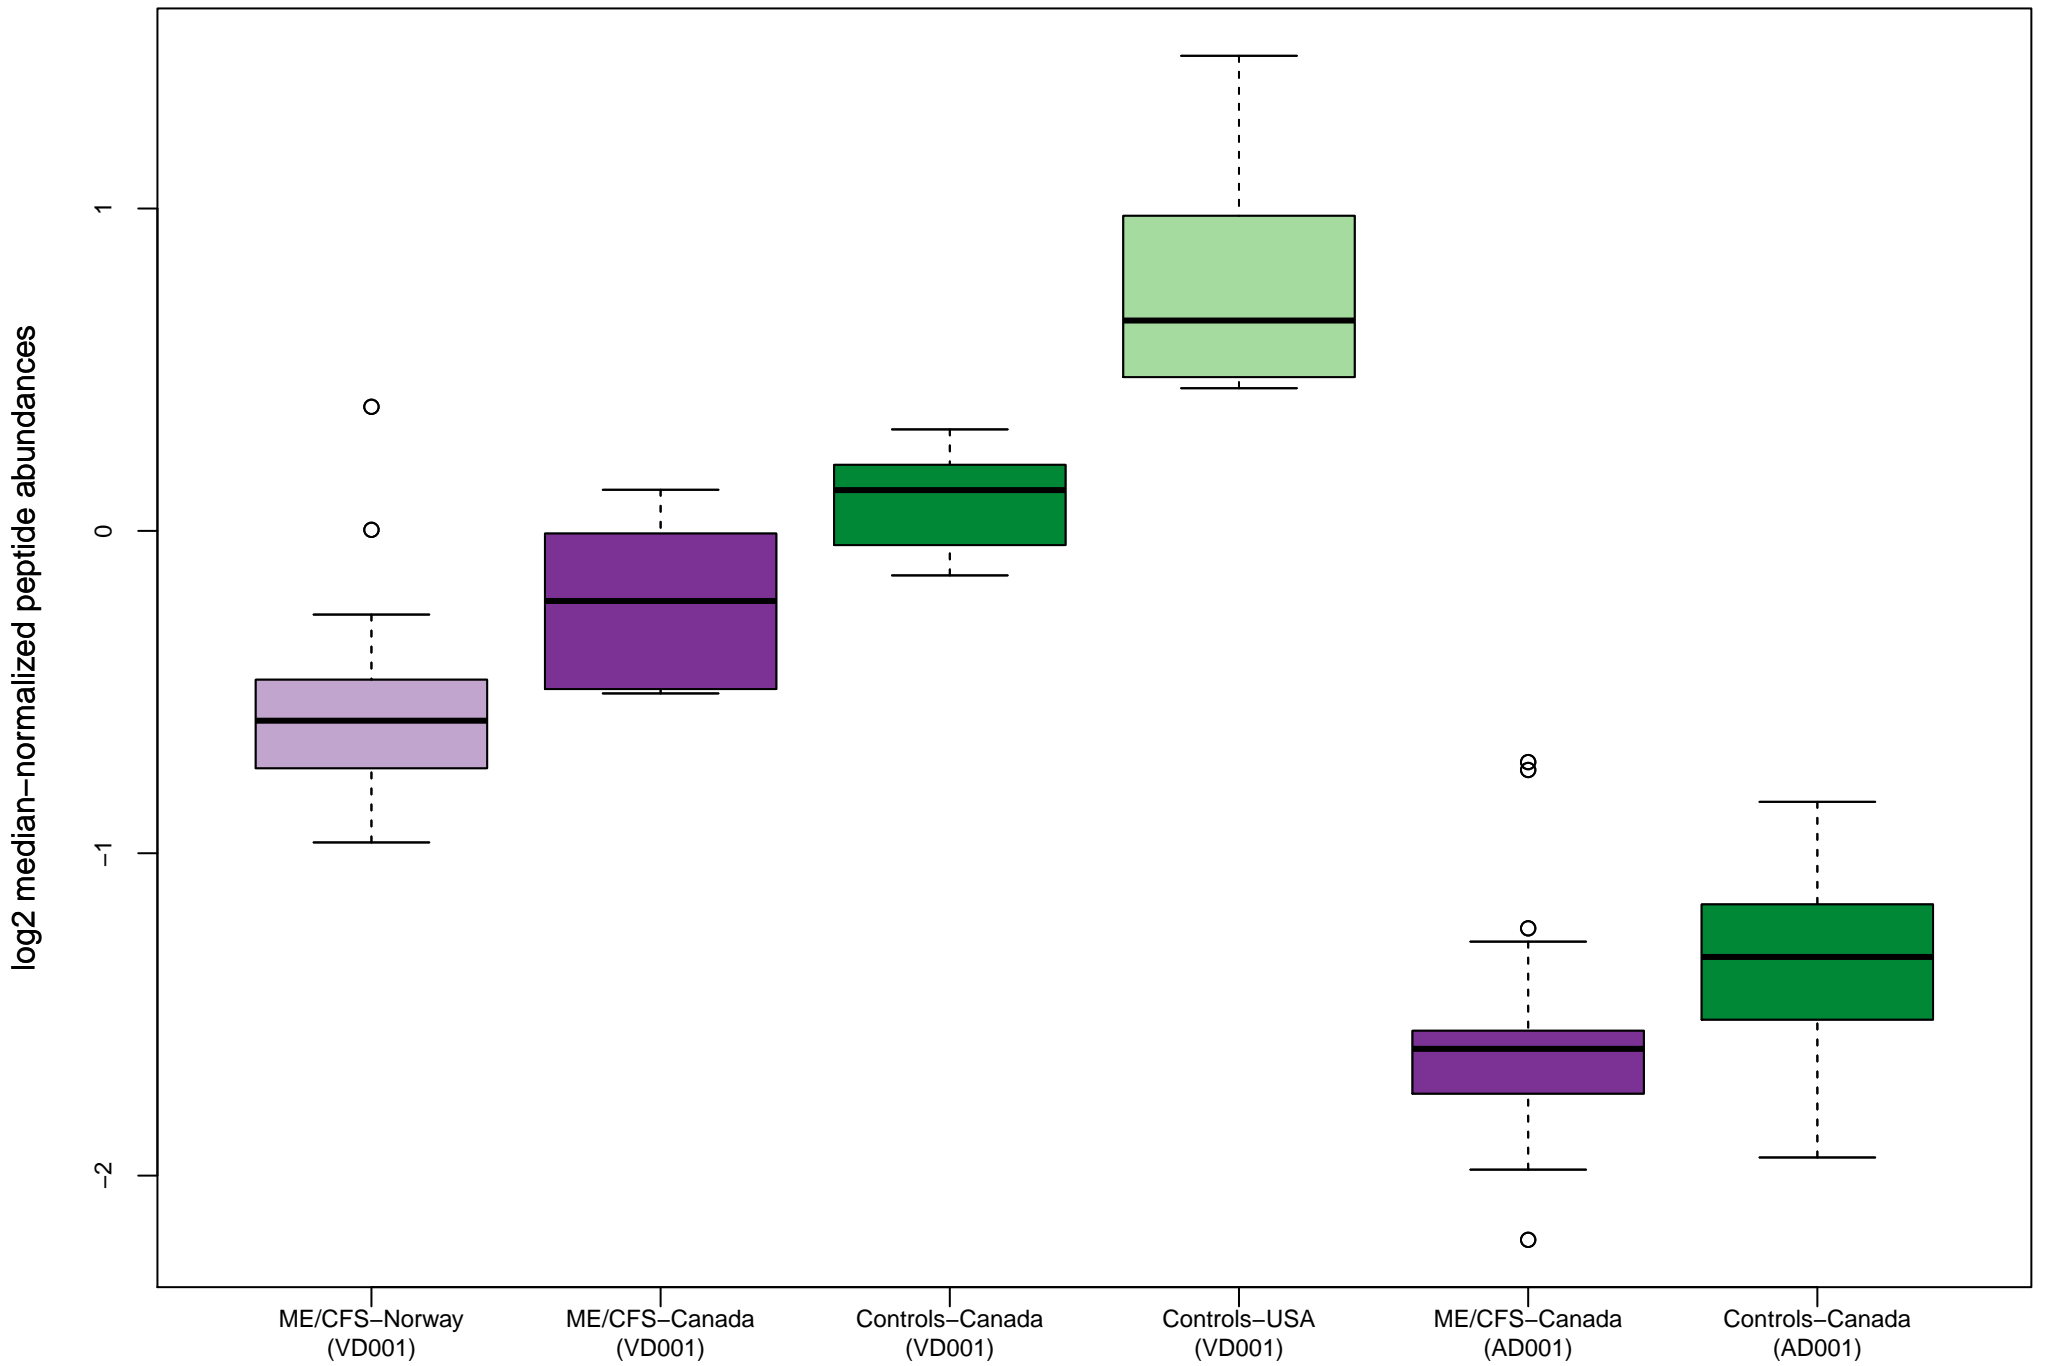

# FPPYFRWSNLGL

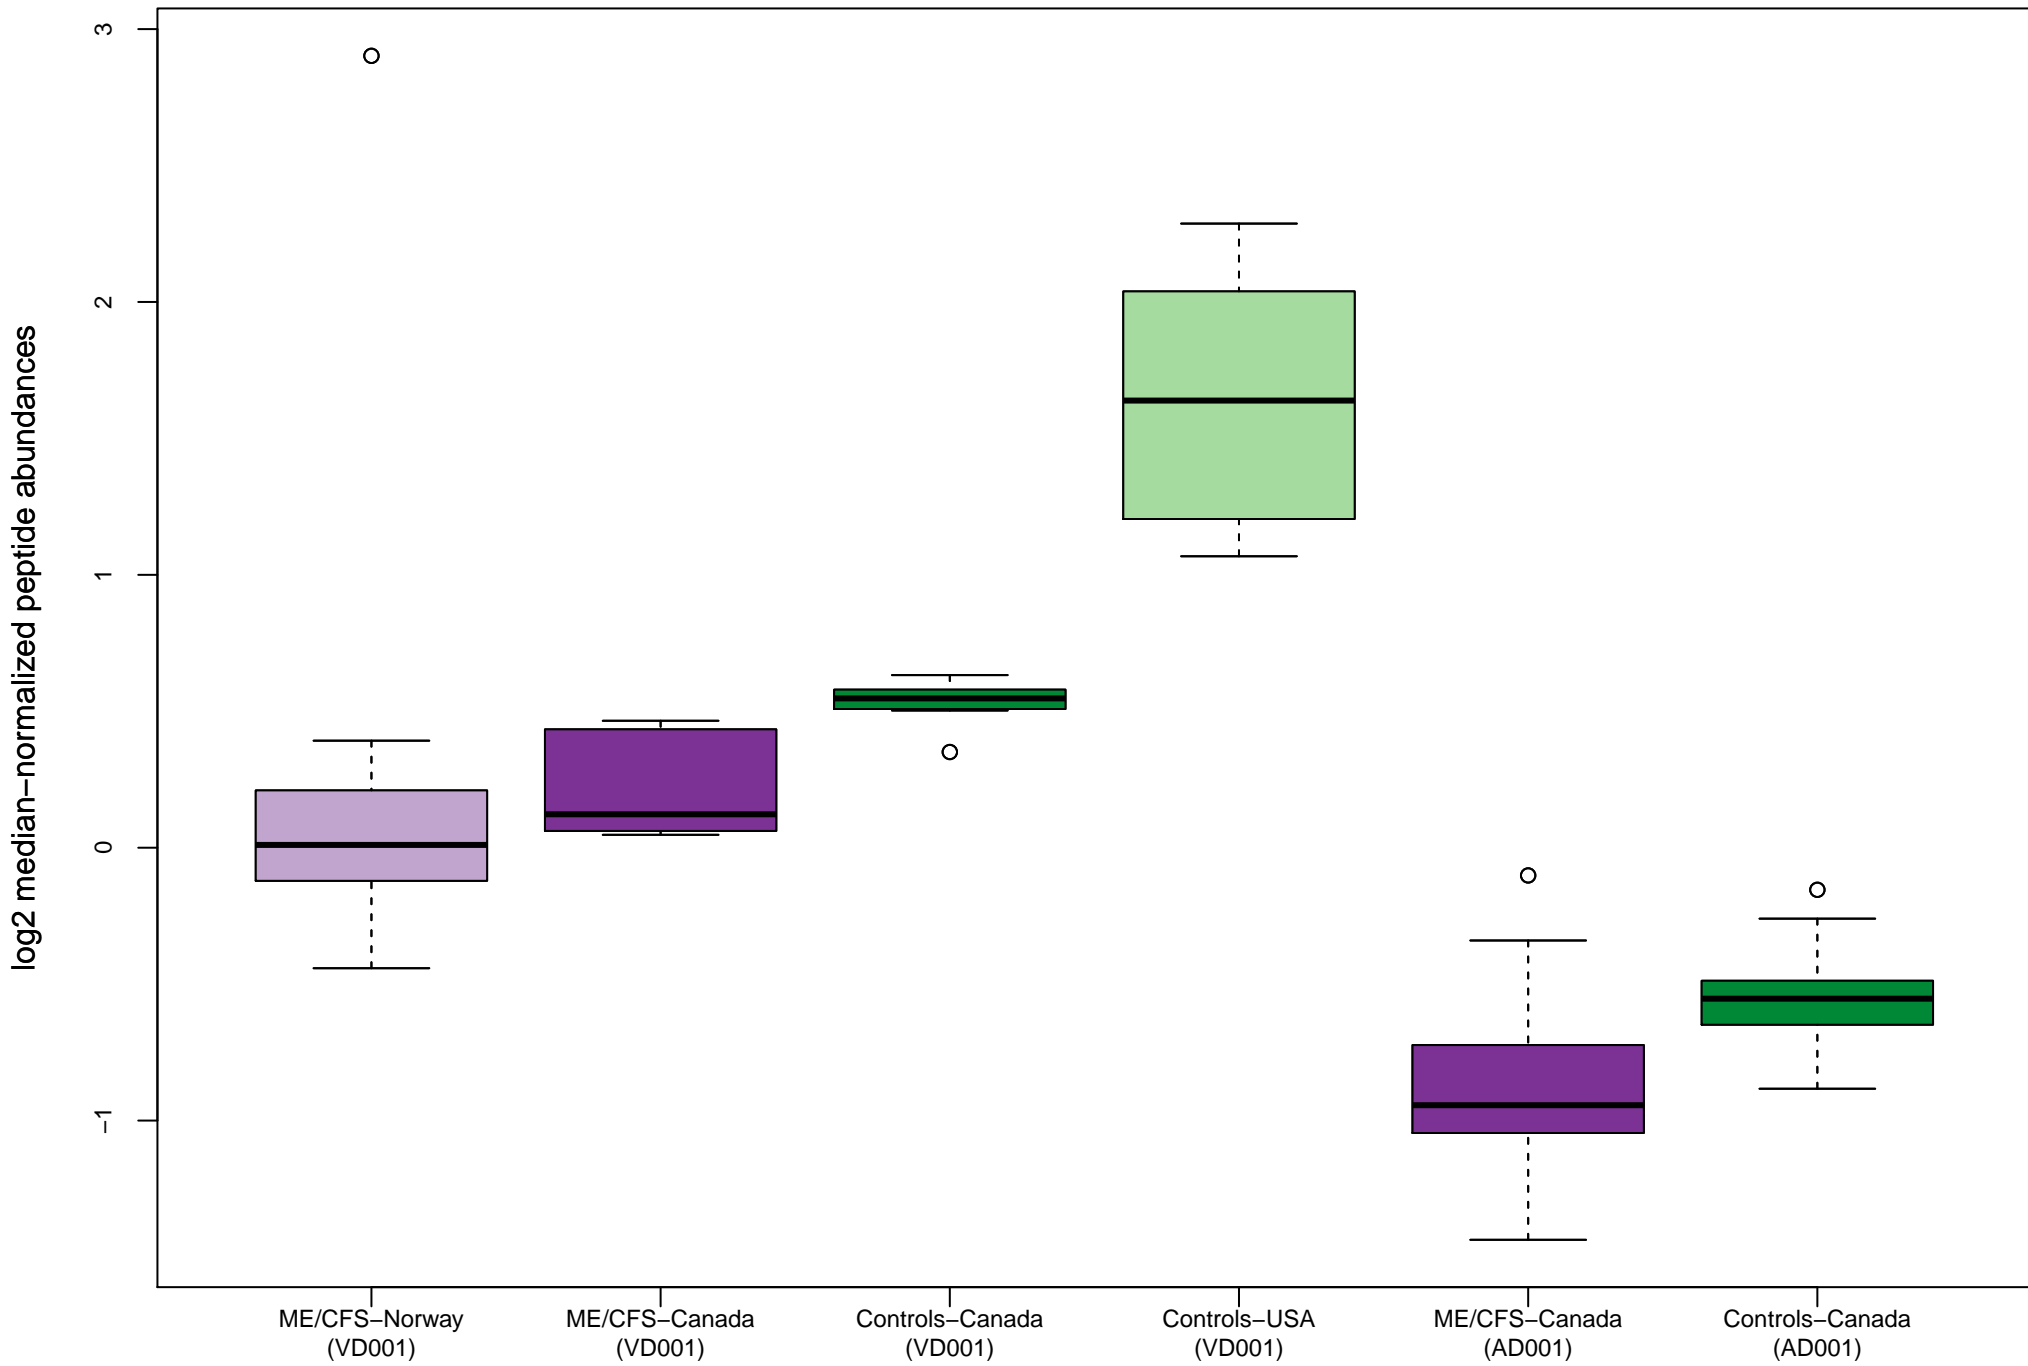



# FPRFLSFRYNVL

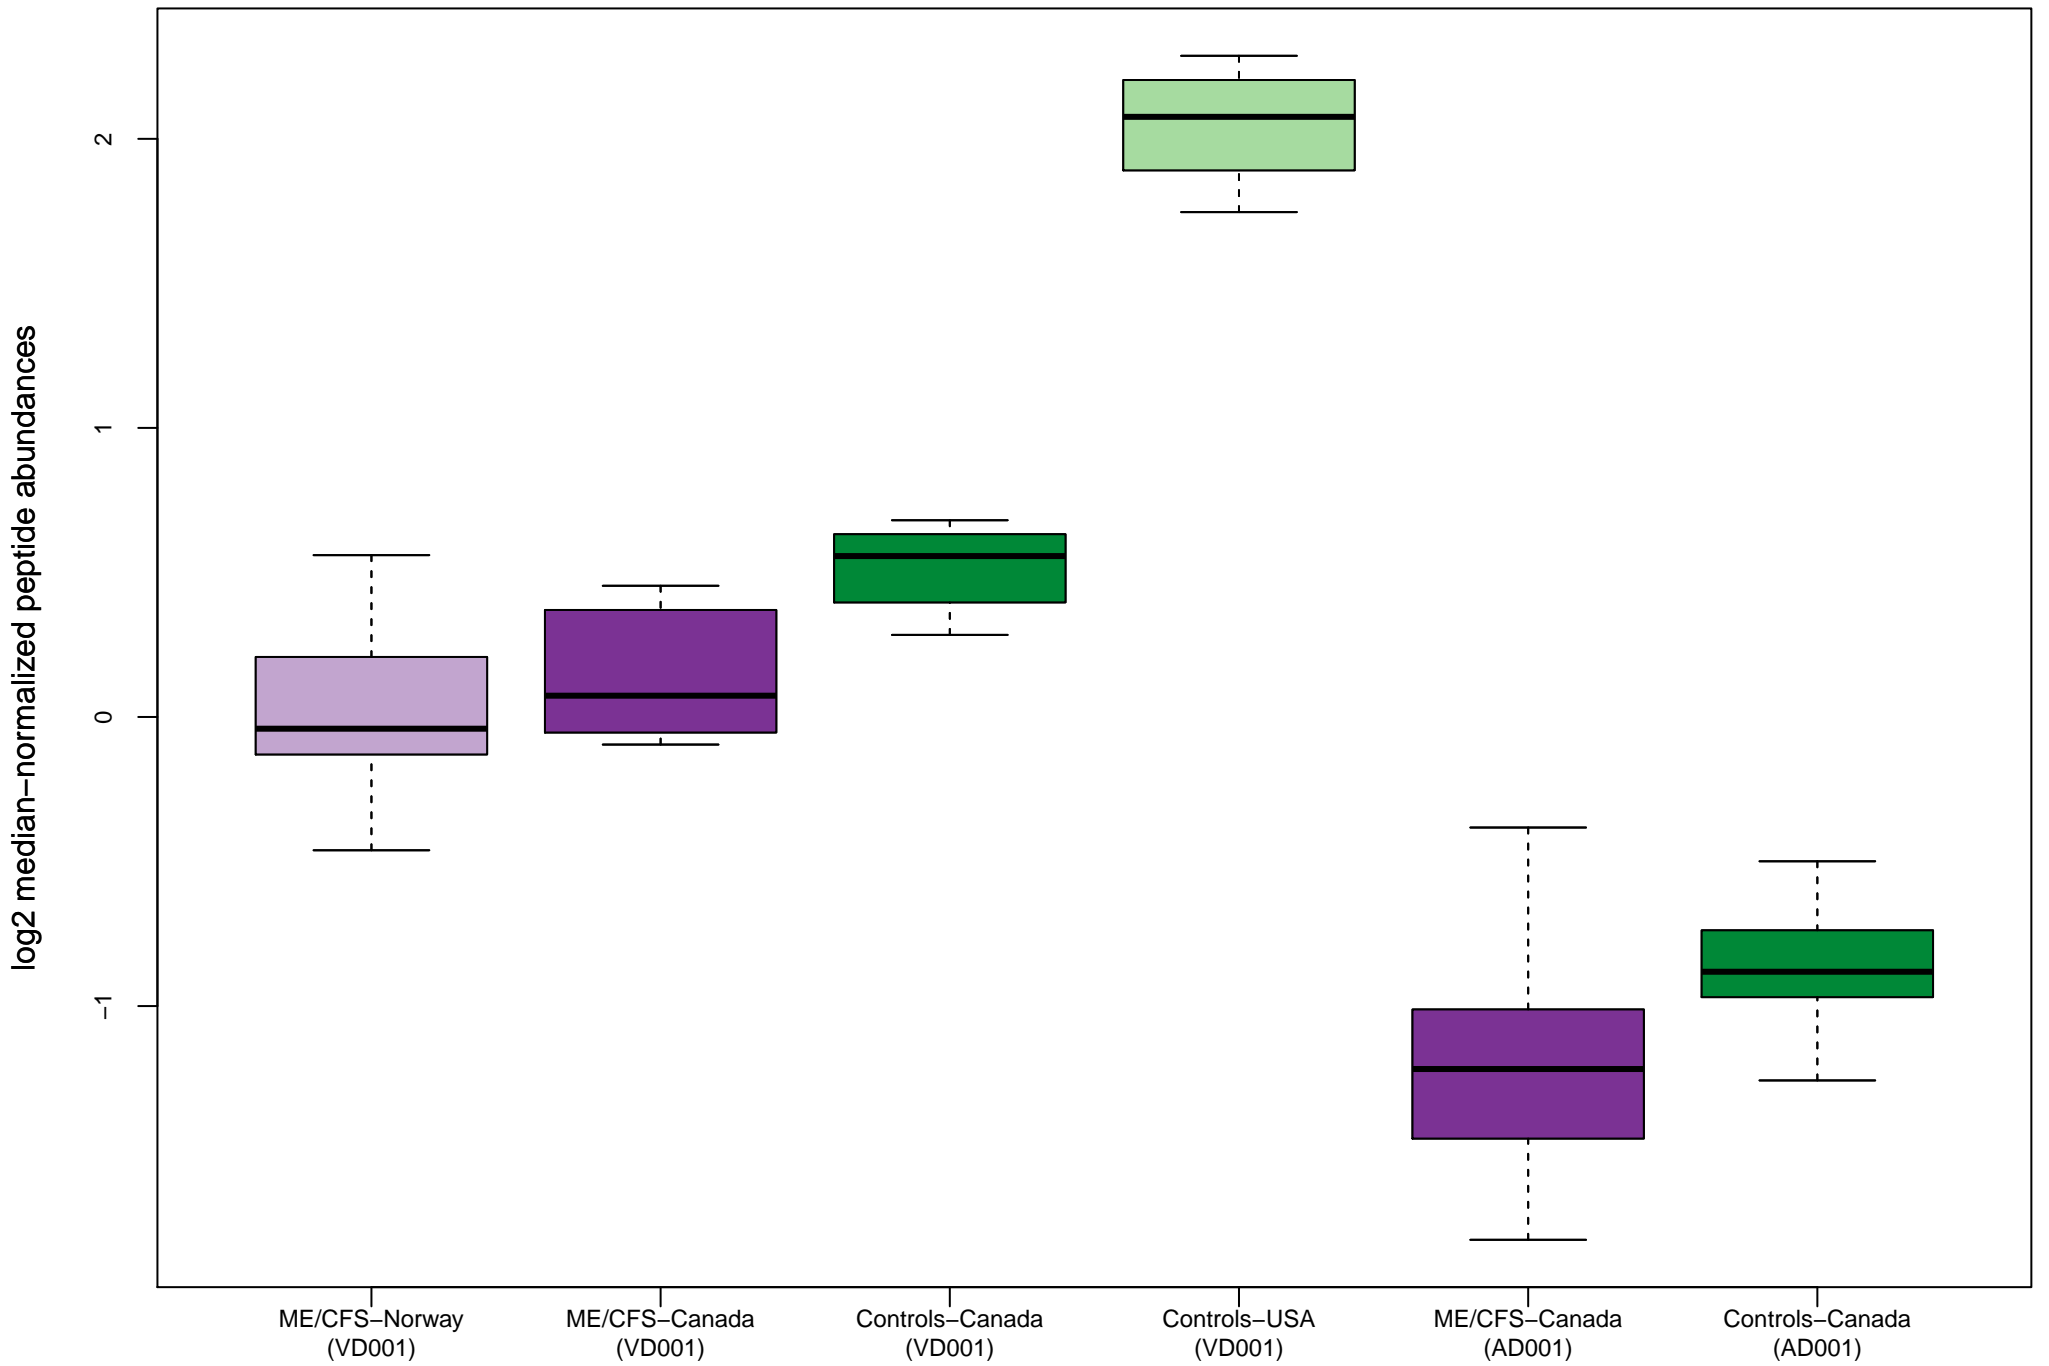

FPRGLGPYVSAG

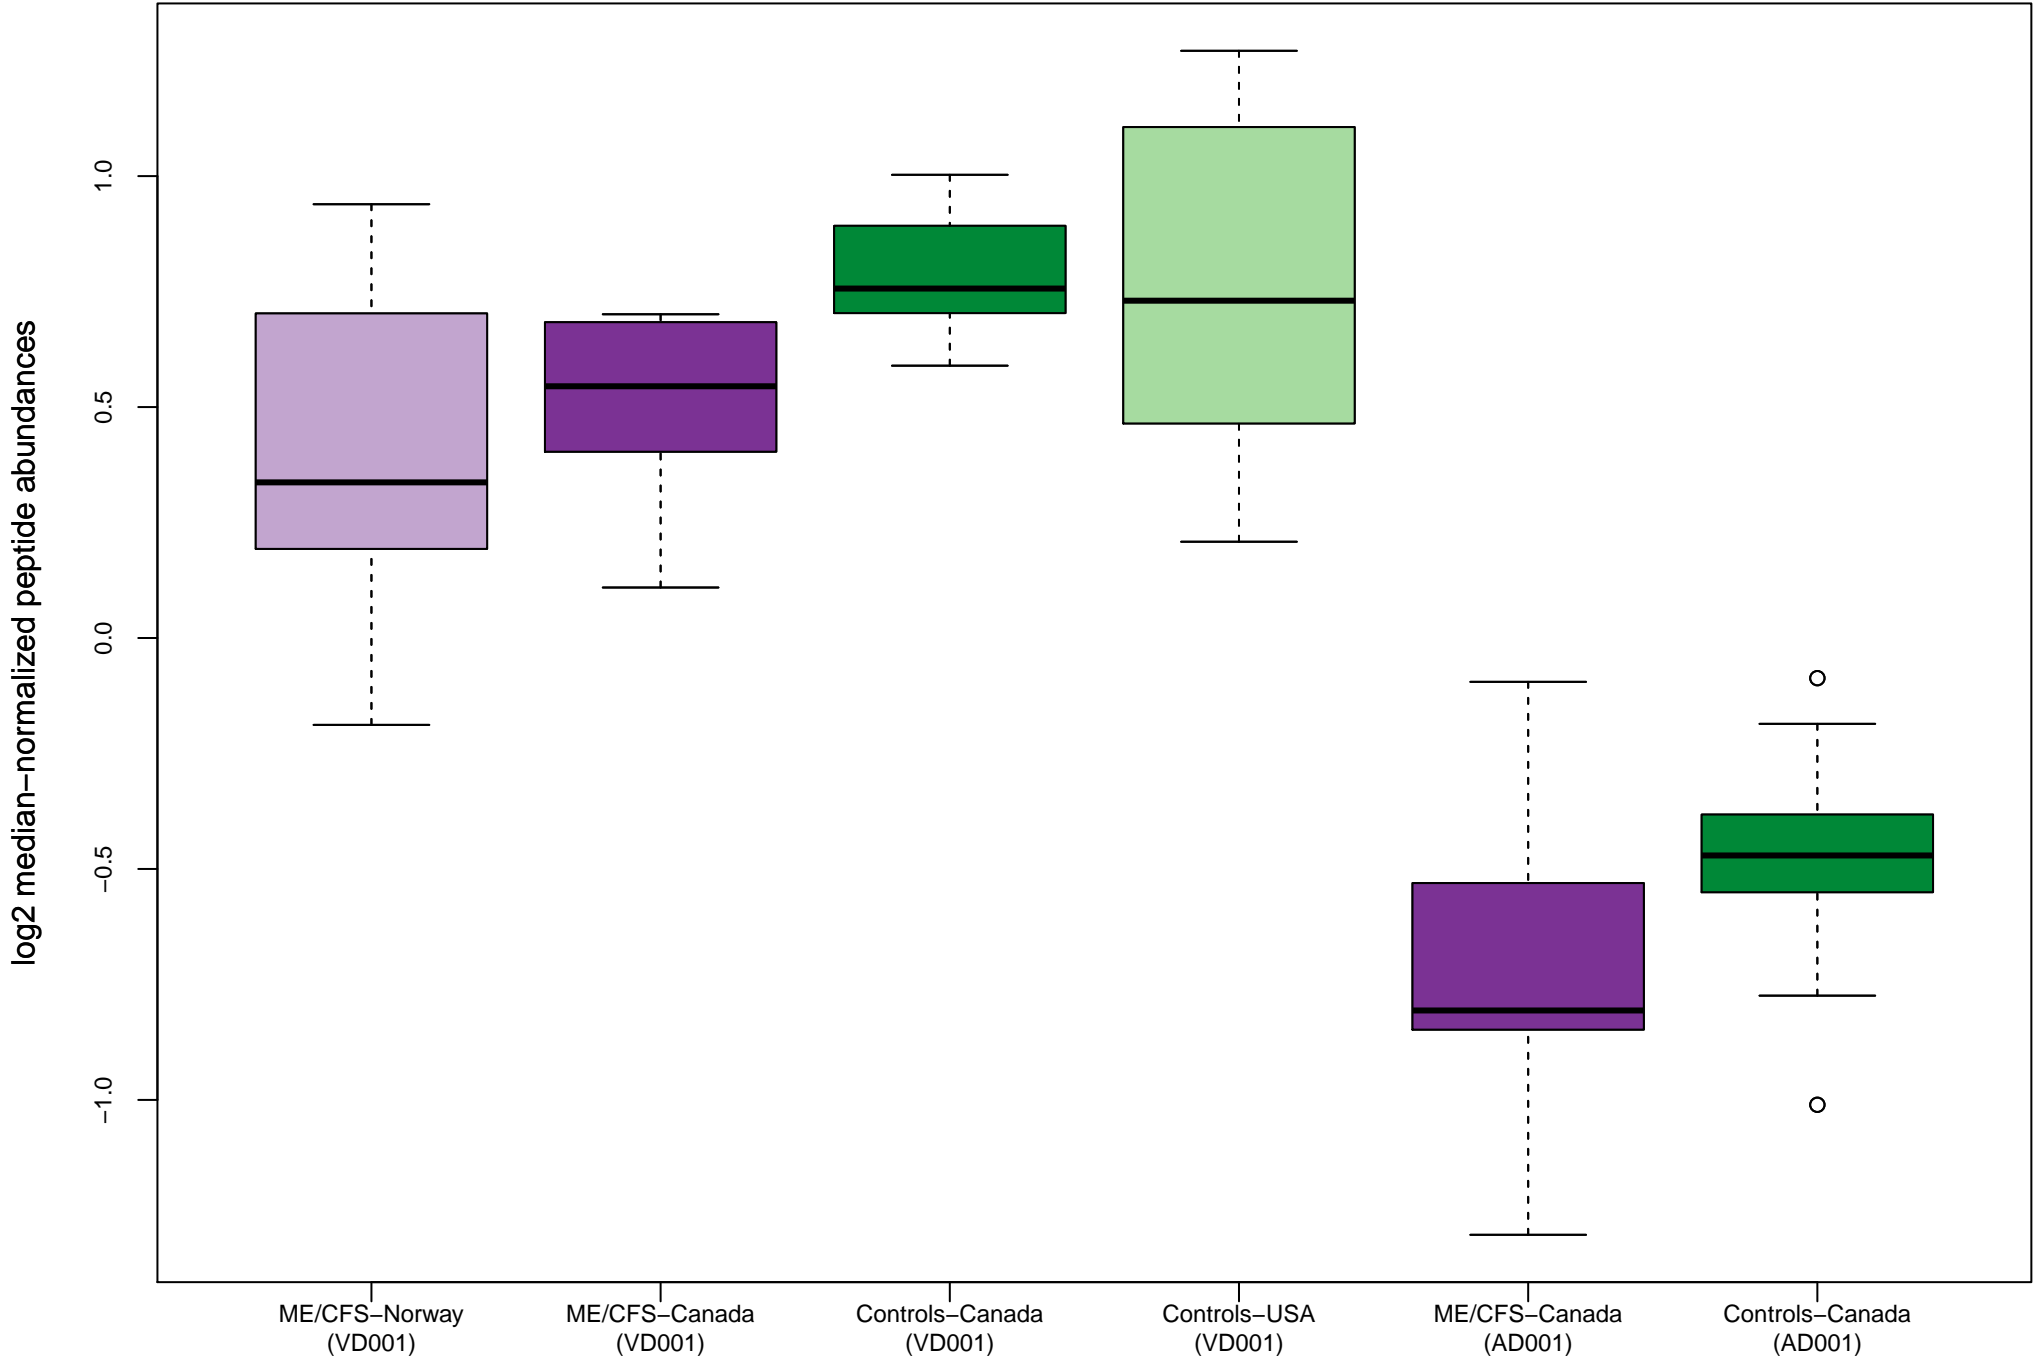

# FRRRPNFVAG

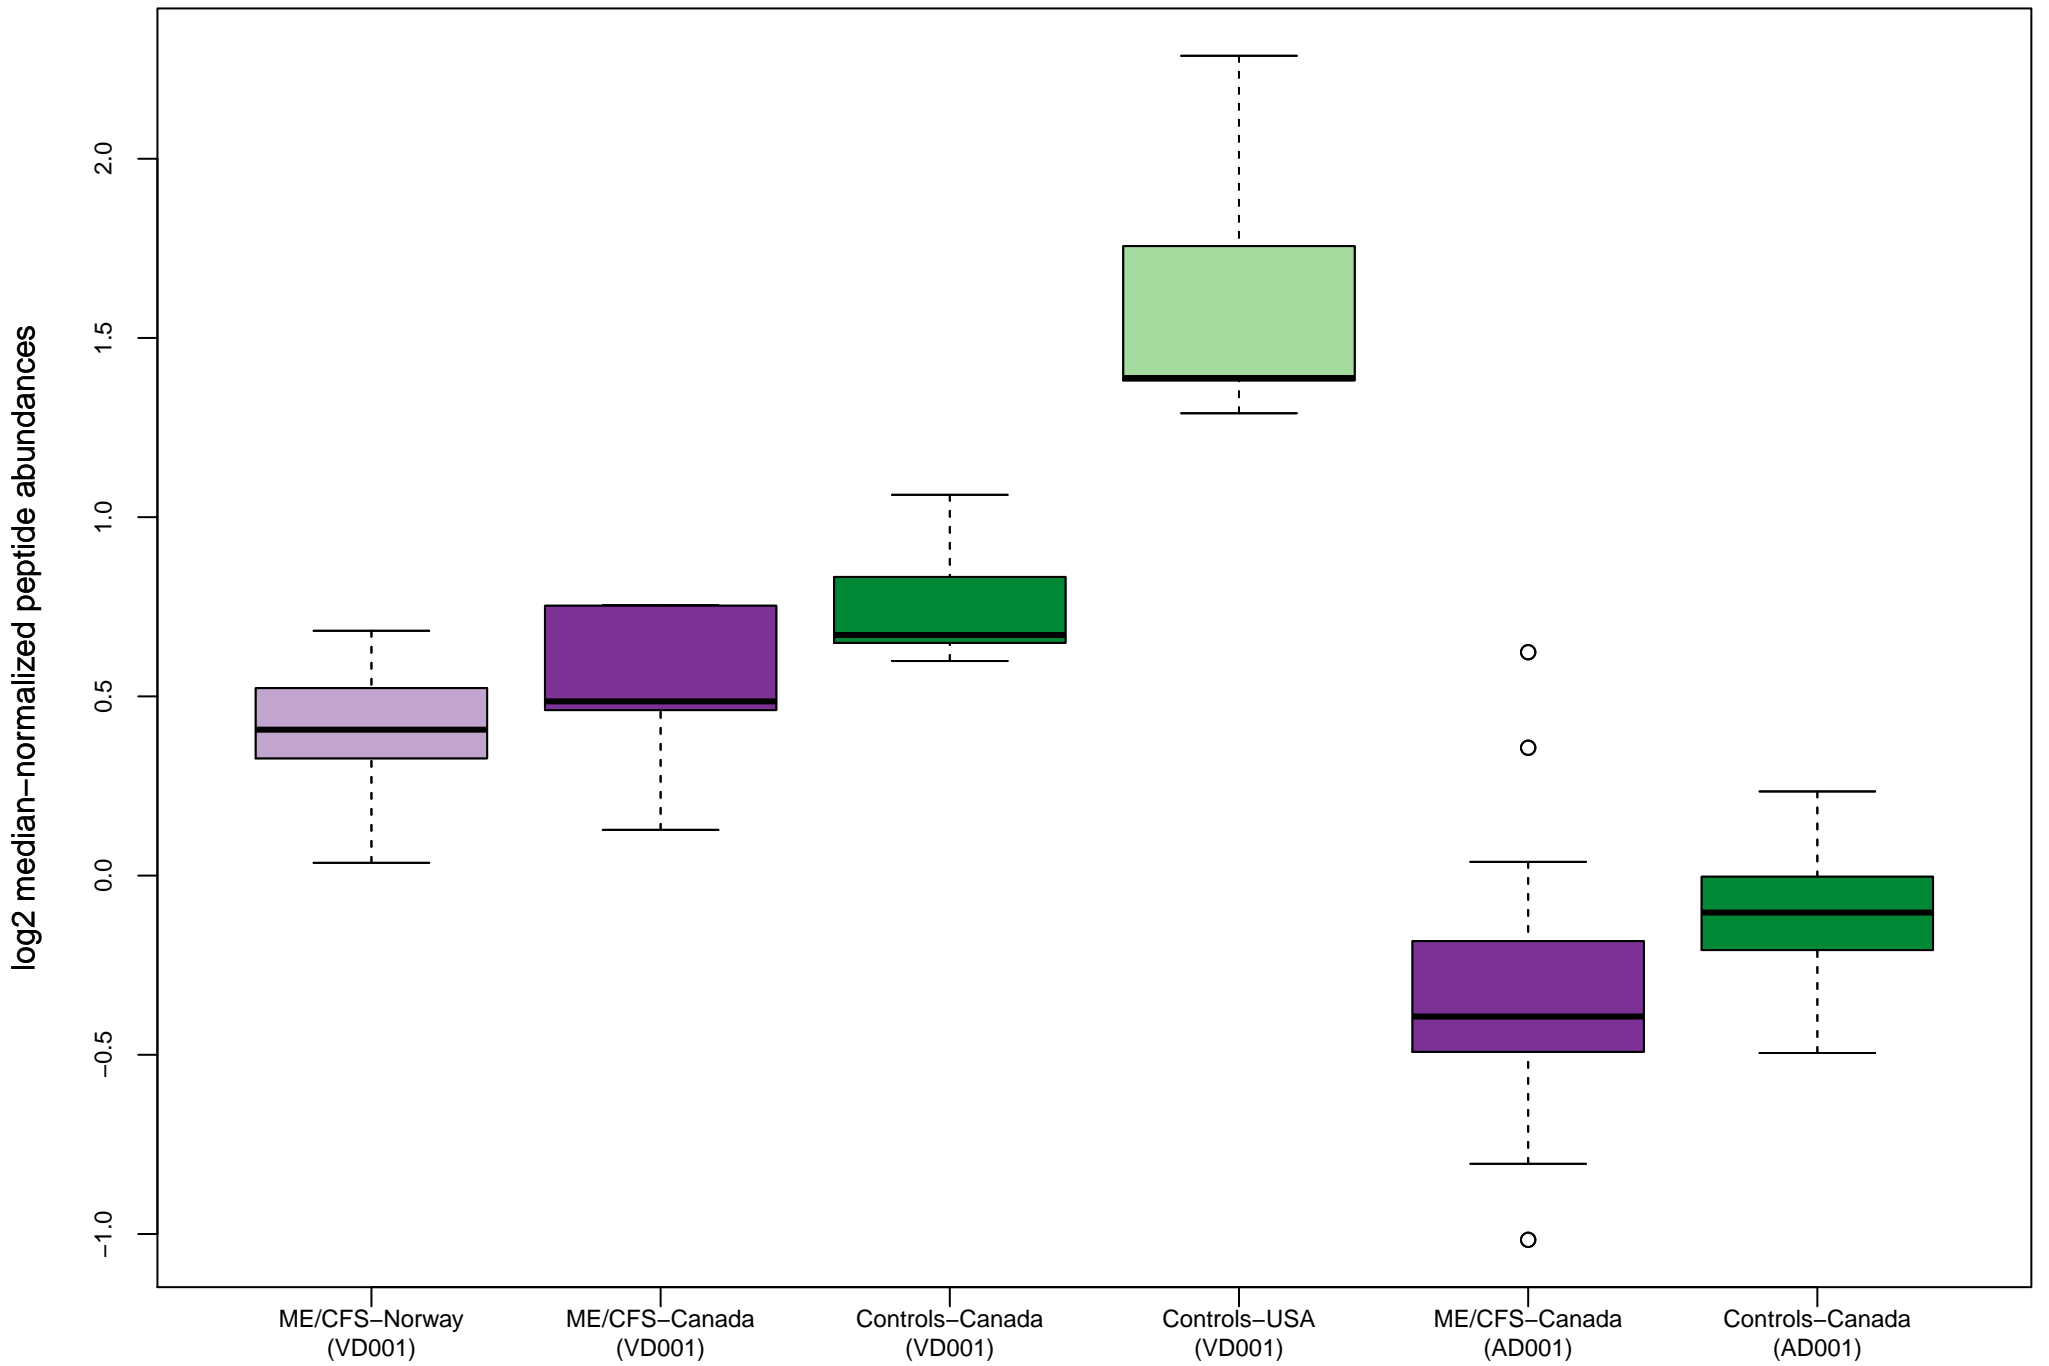

# FQGWKLGFRWHL

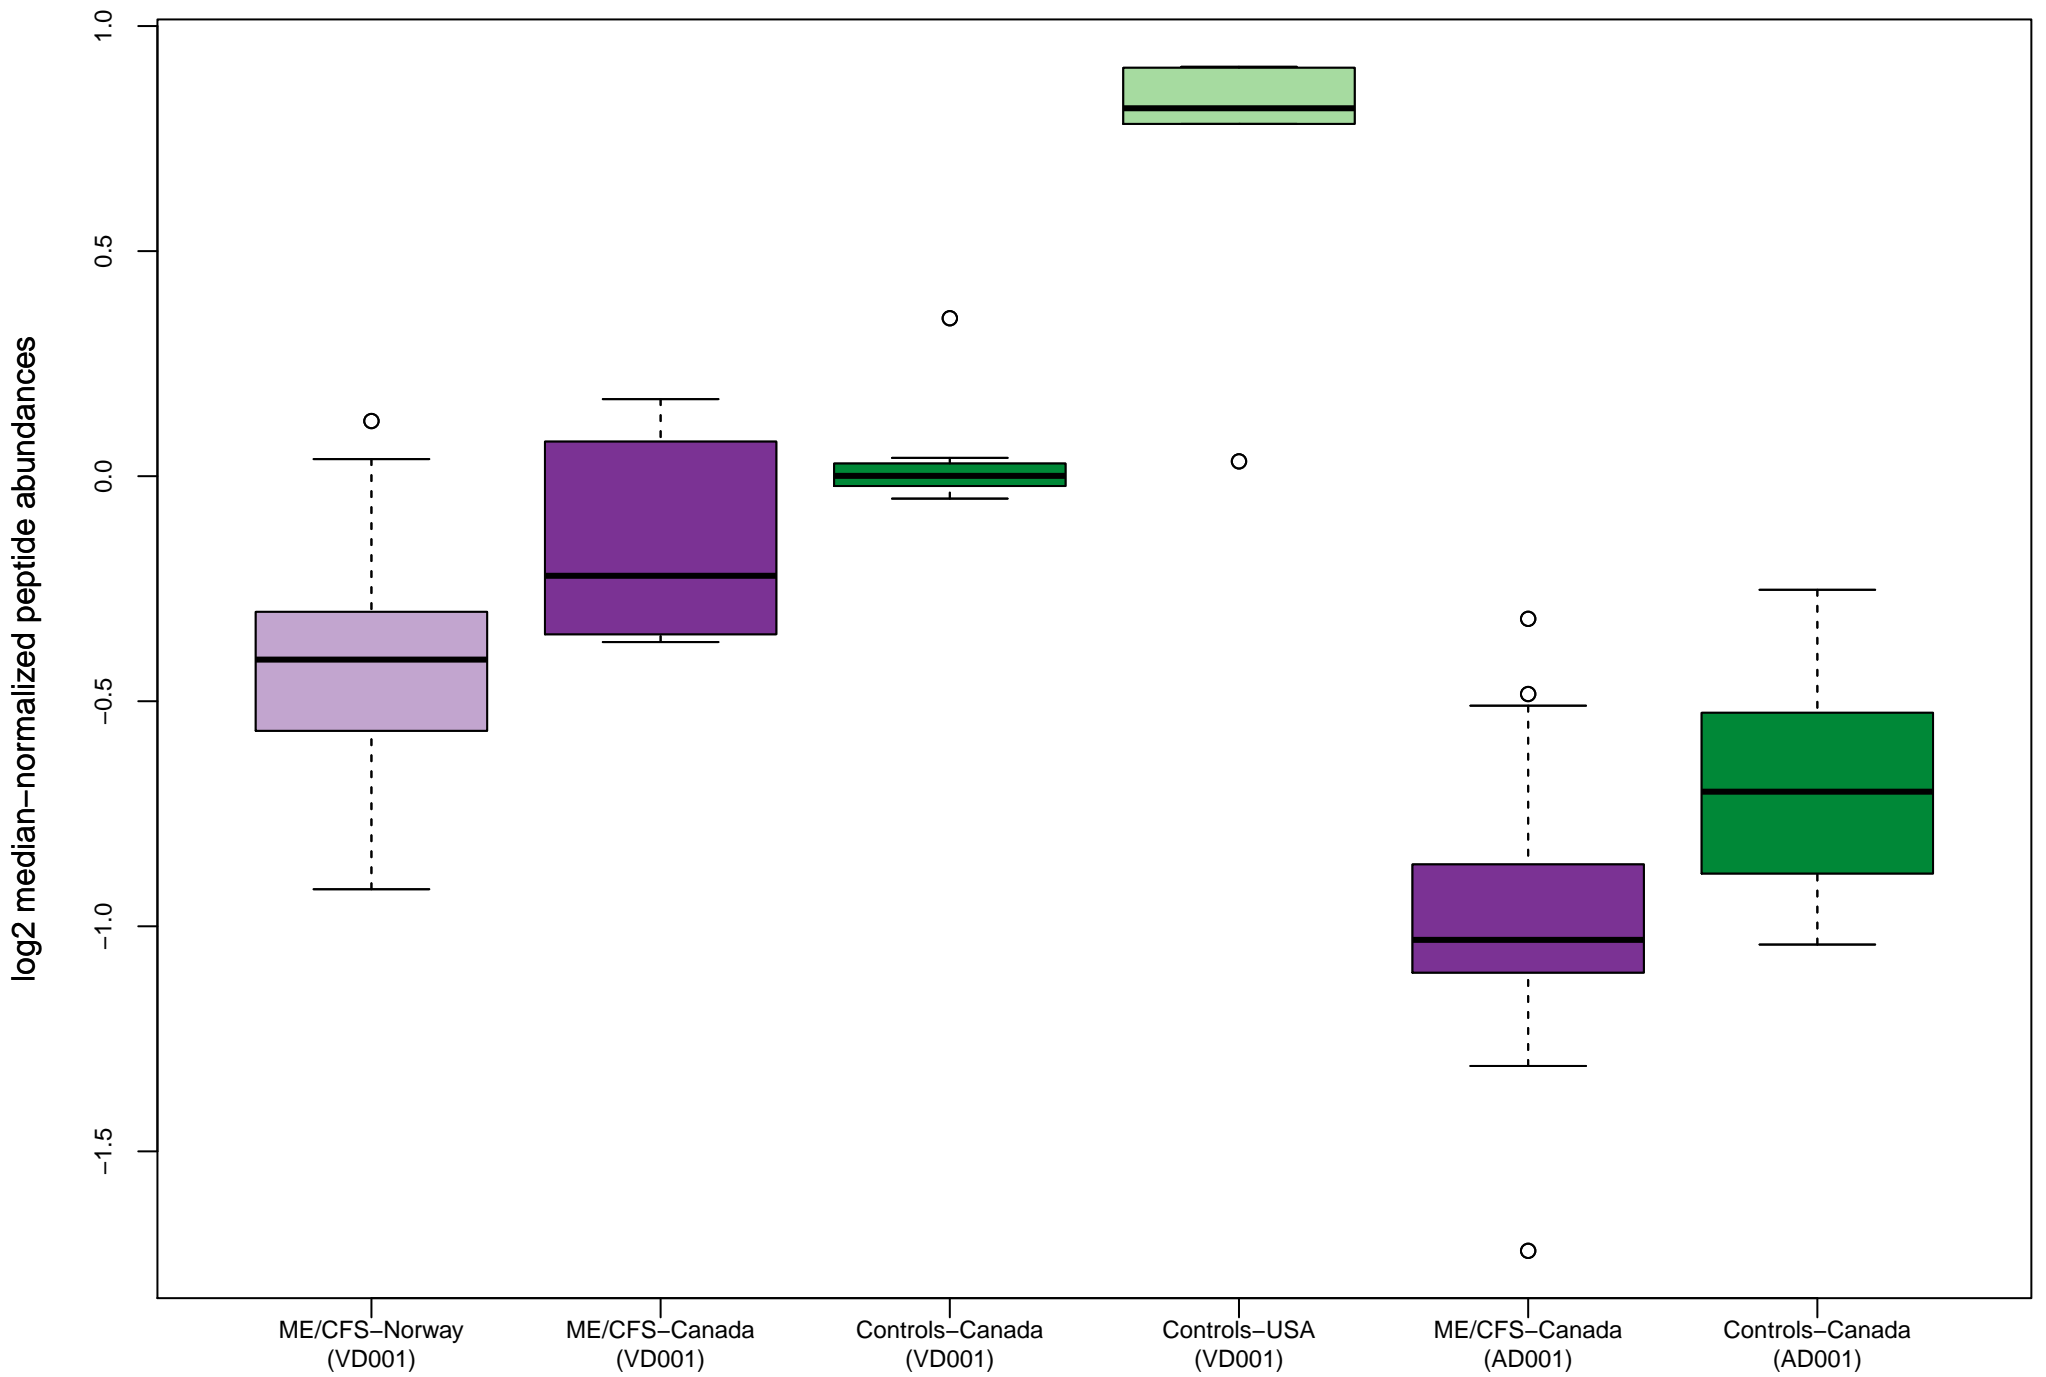

# FQPYFARYALSG

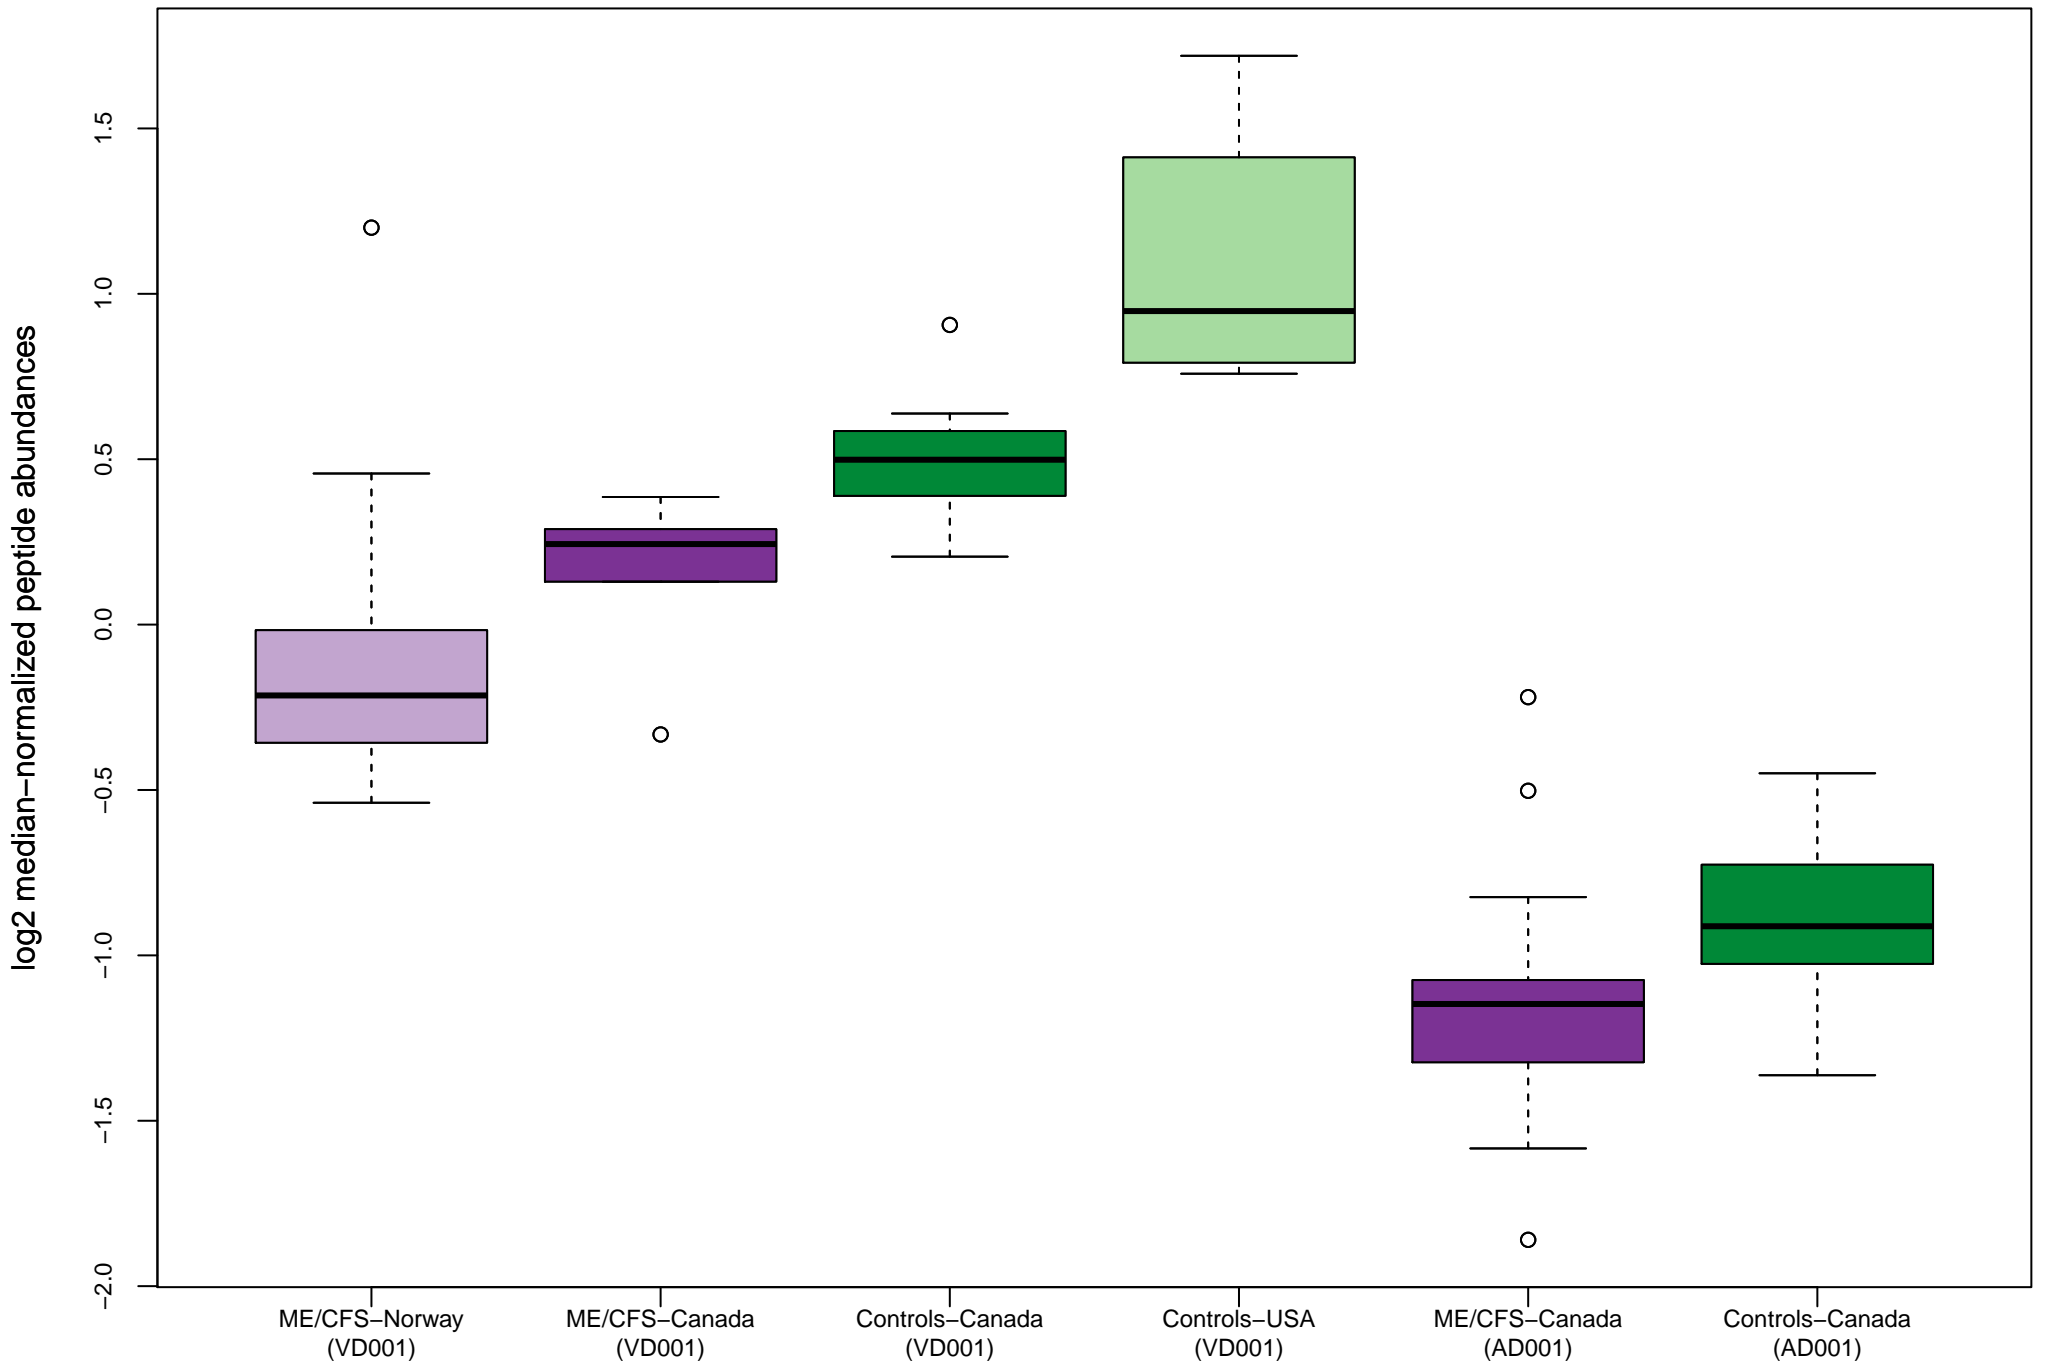

# FQRLWQFYWLSG

log2 median-normalized peptide abundances

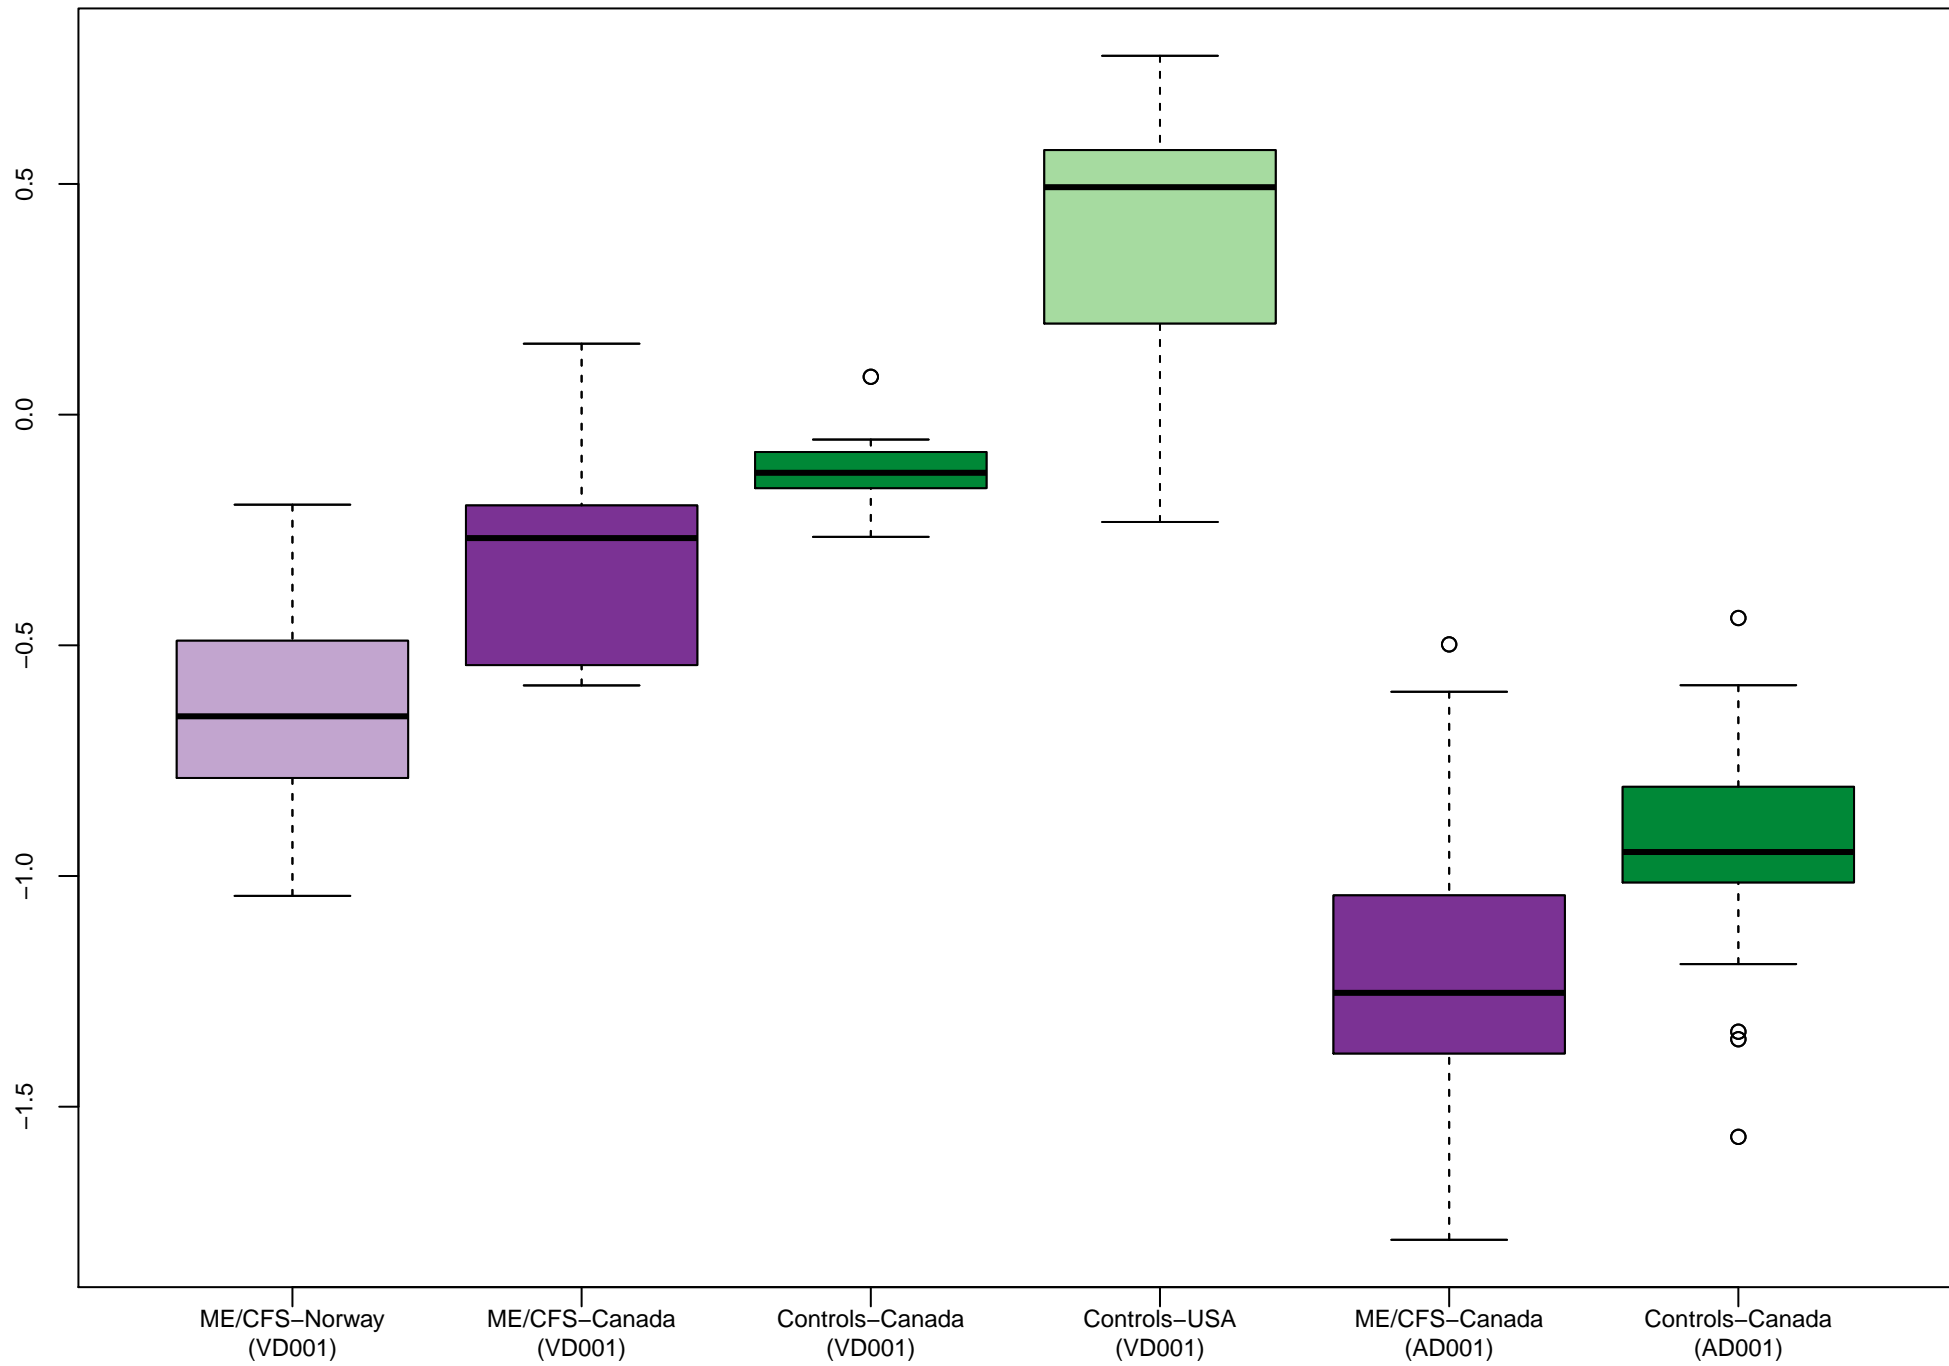

# FQVRGWVLGVSG

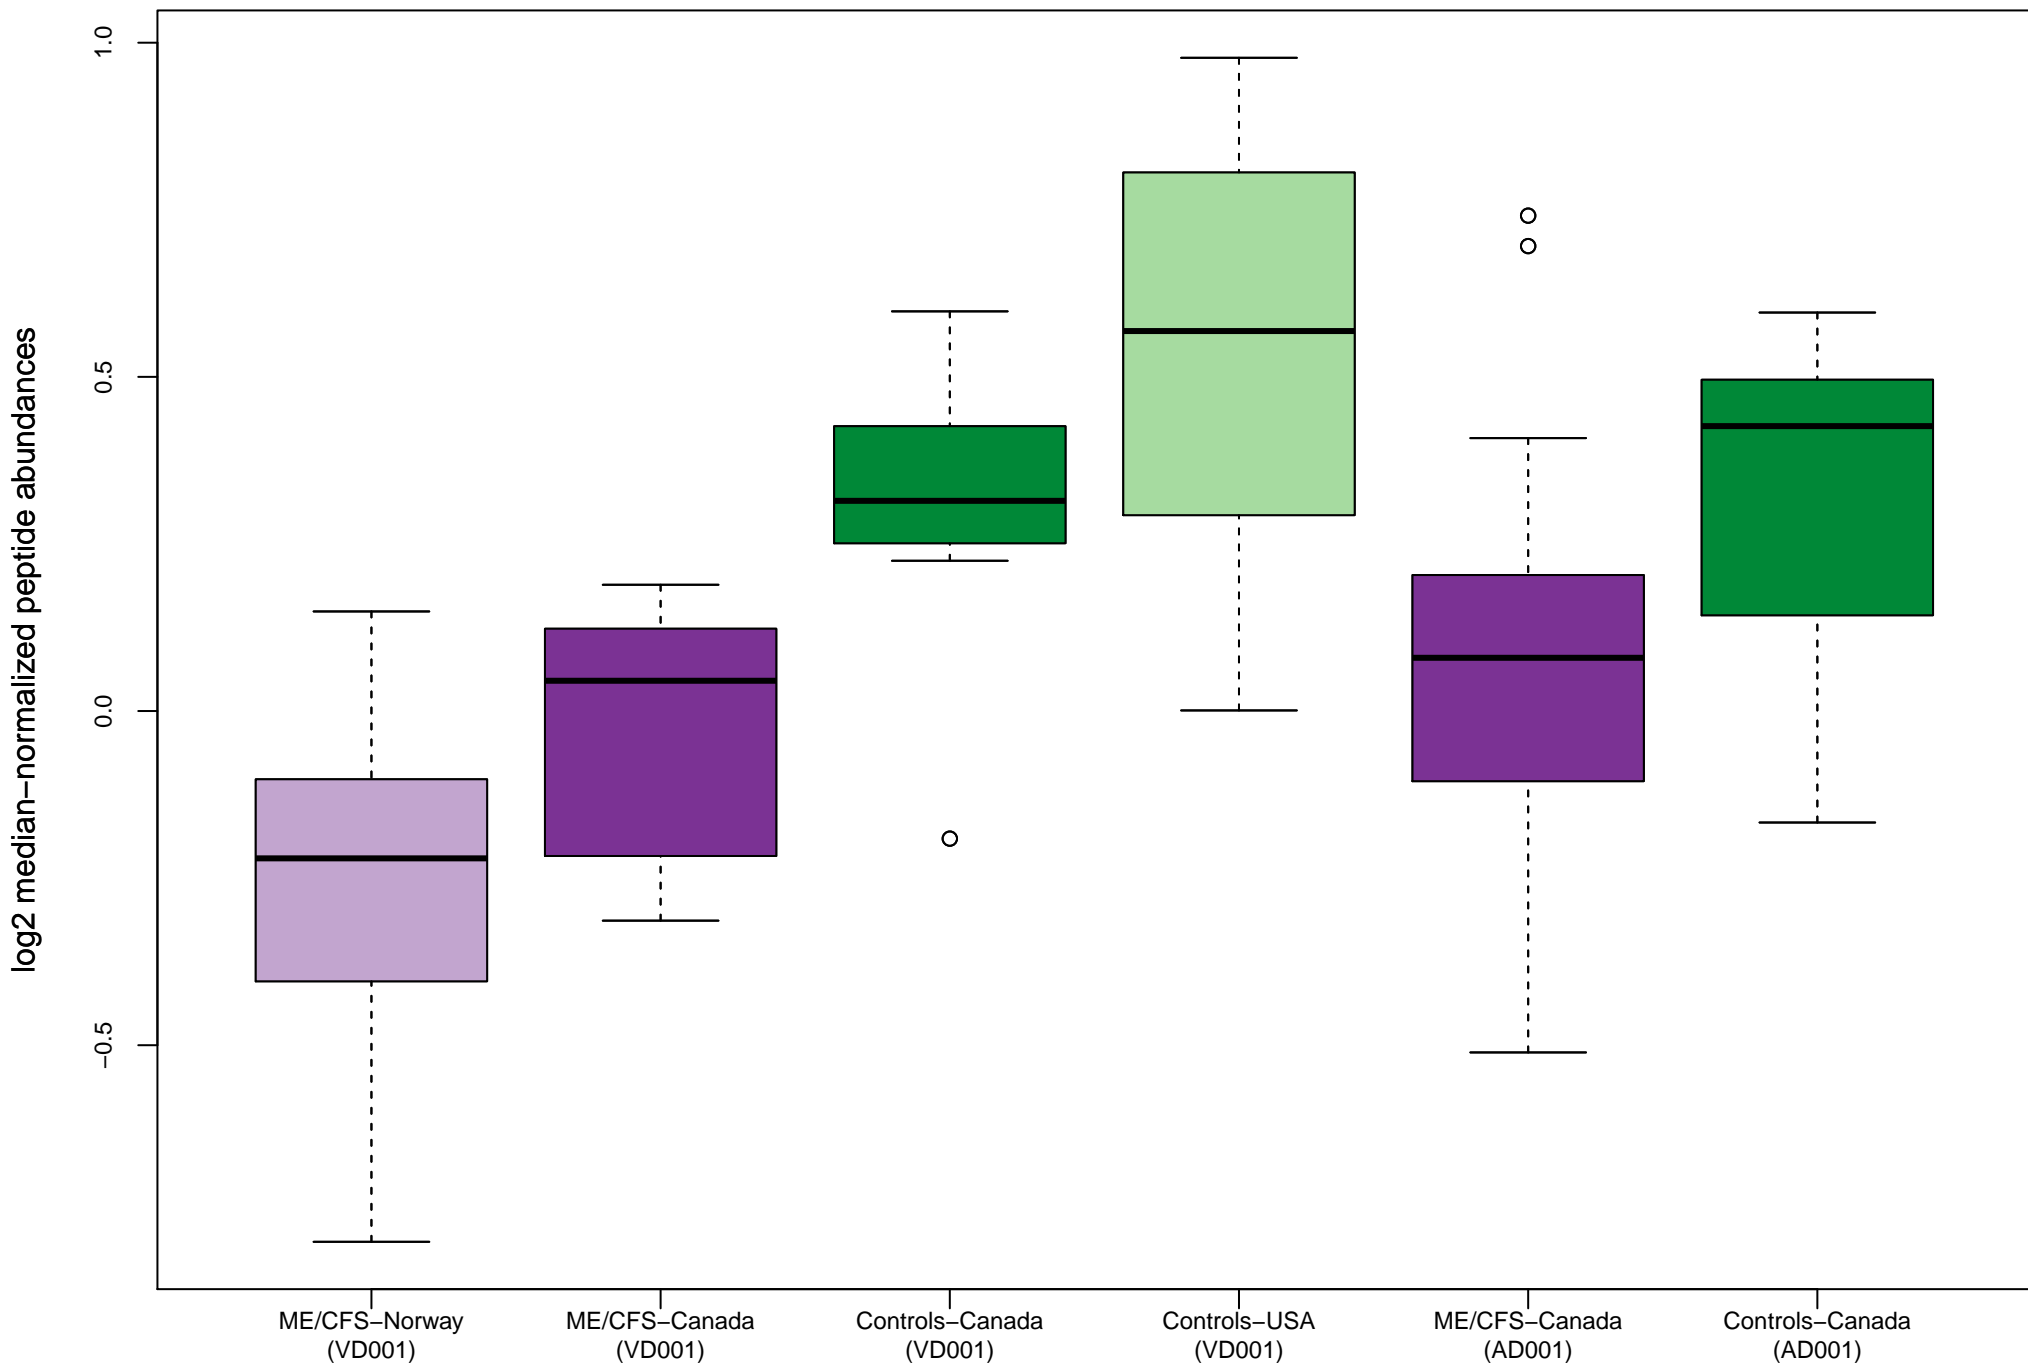

# FQYKFLSYWNKS

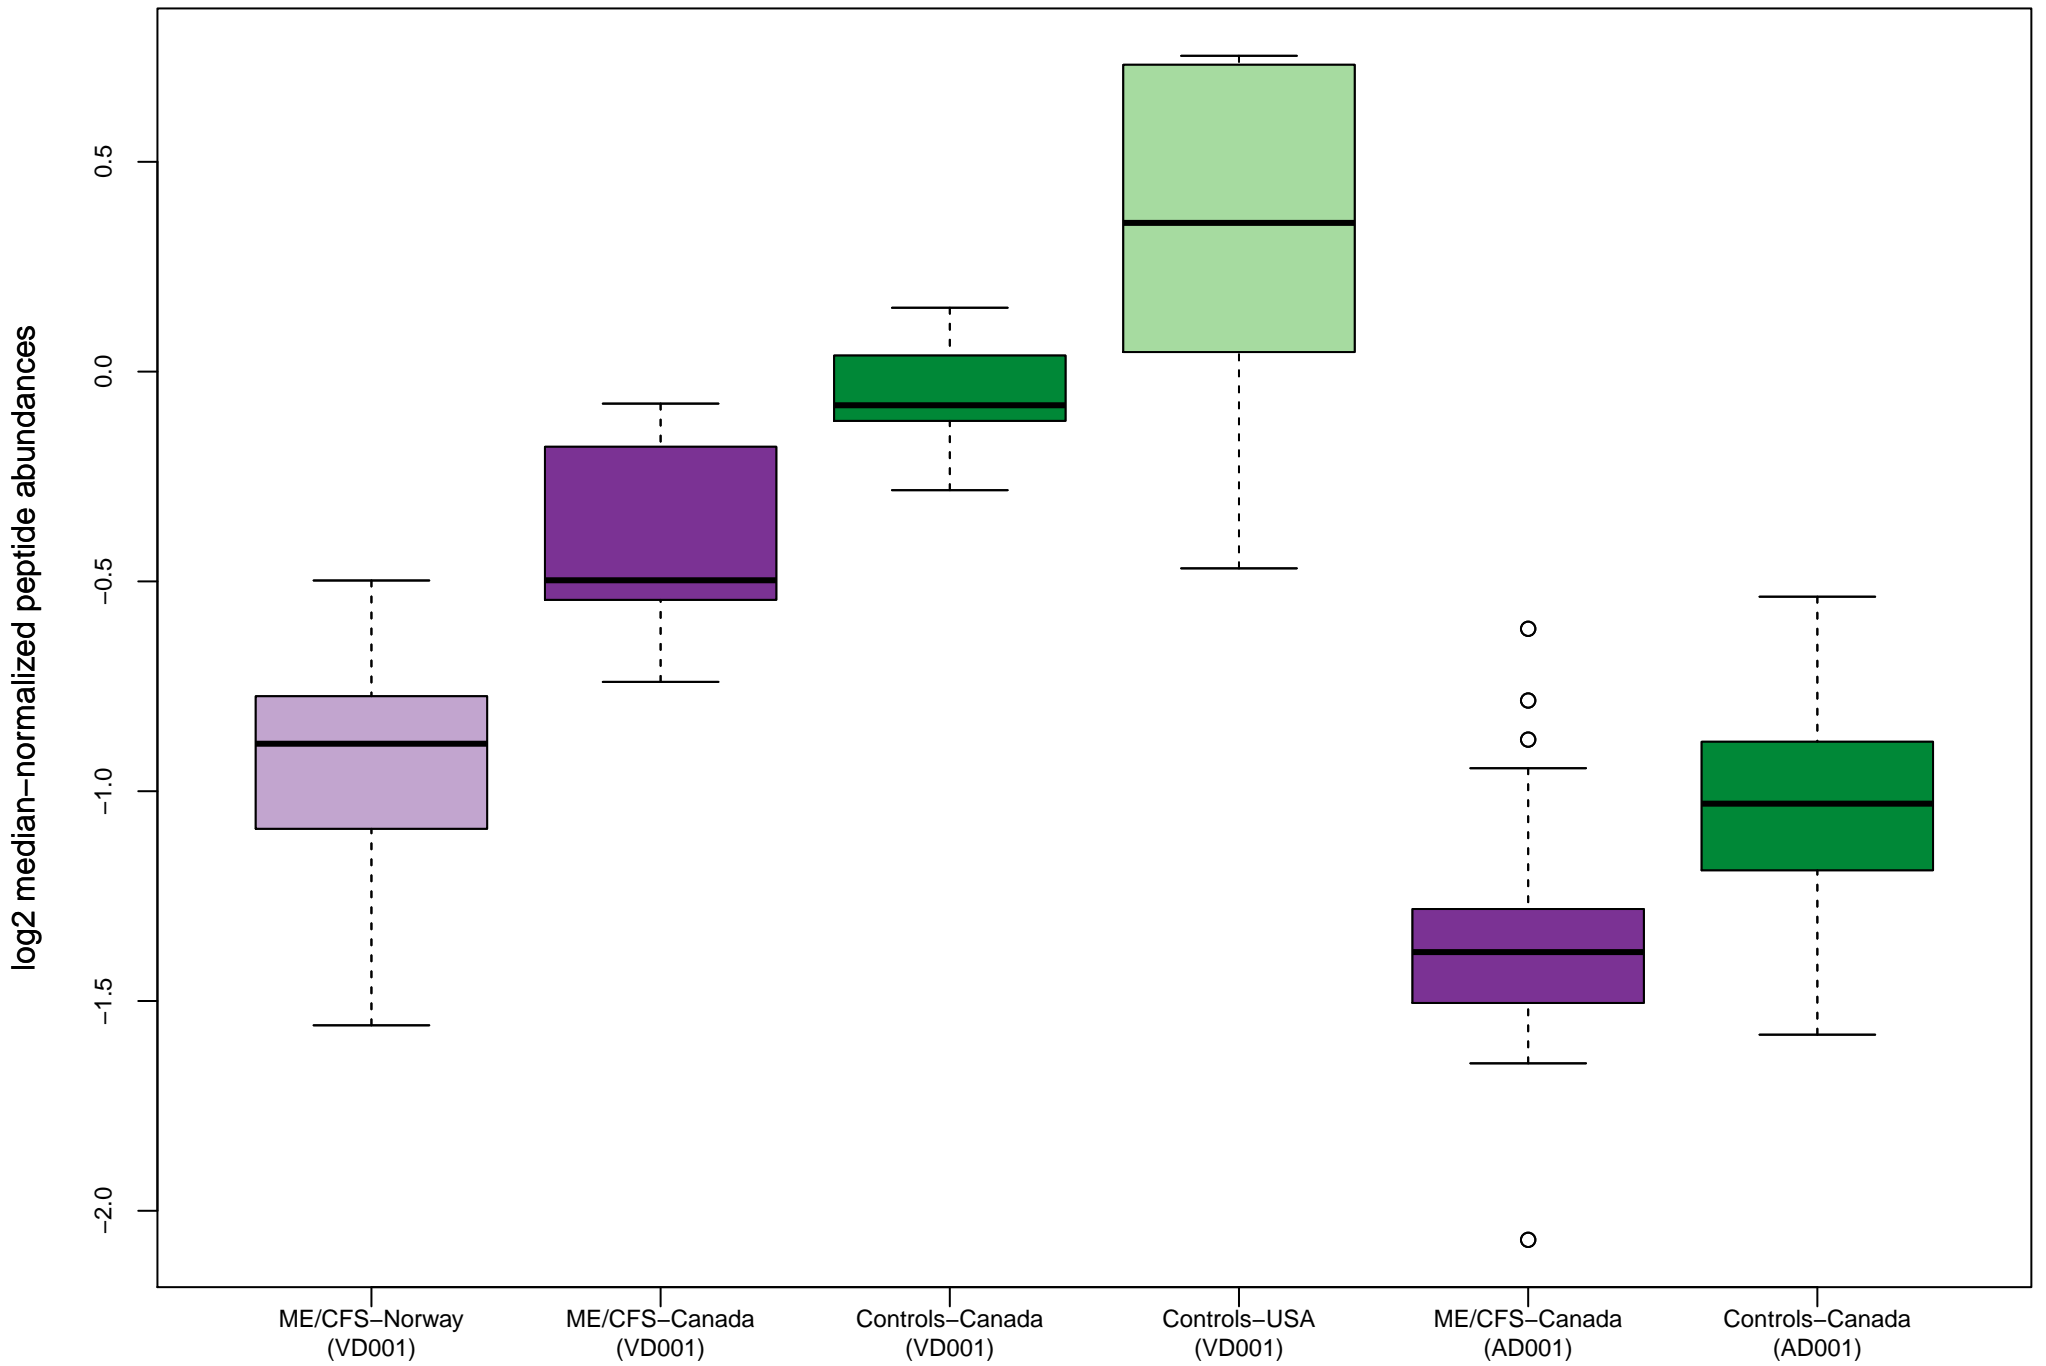



# FRLYAFRSGFYG

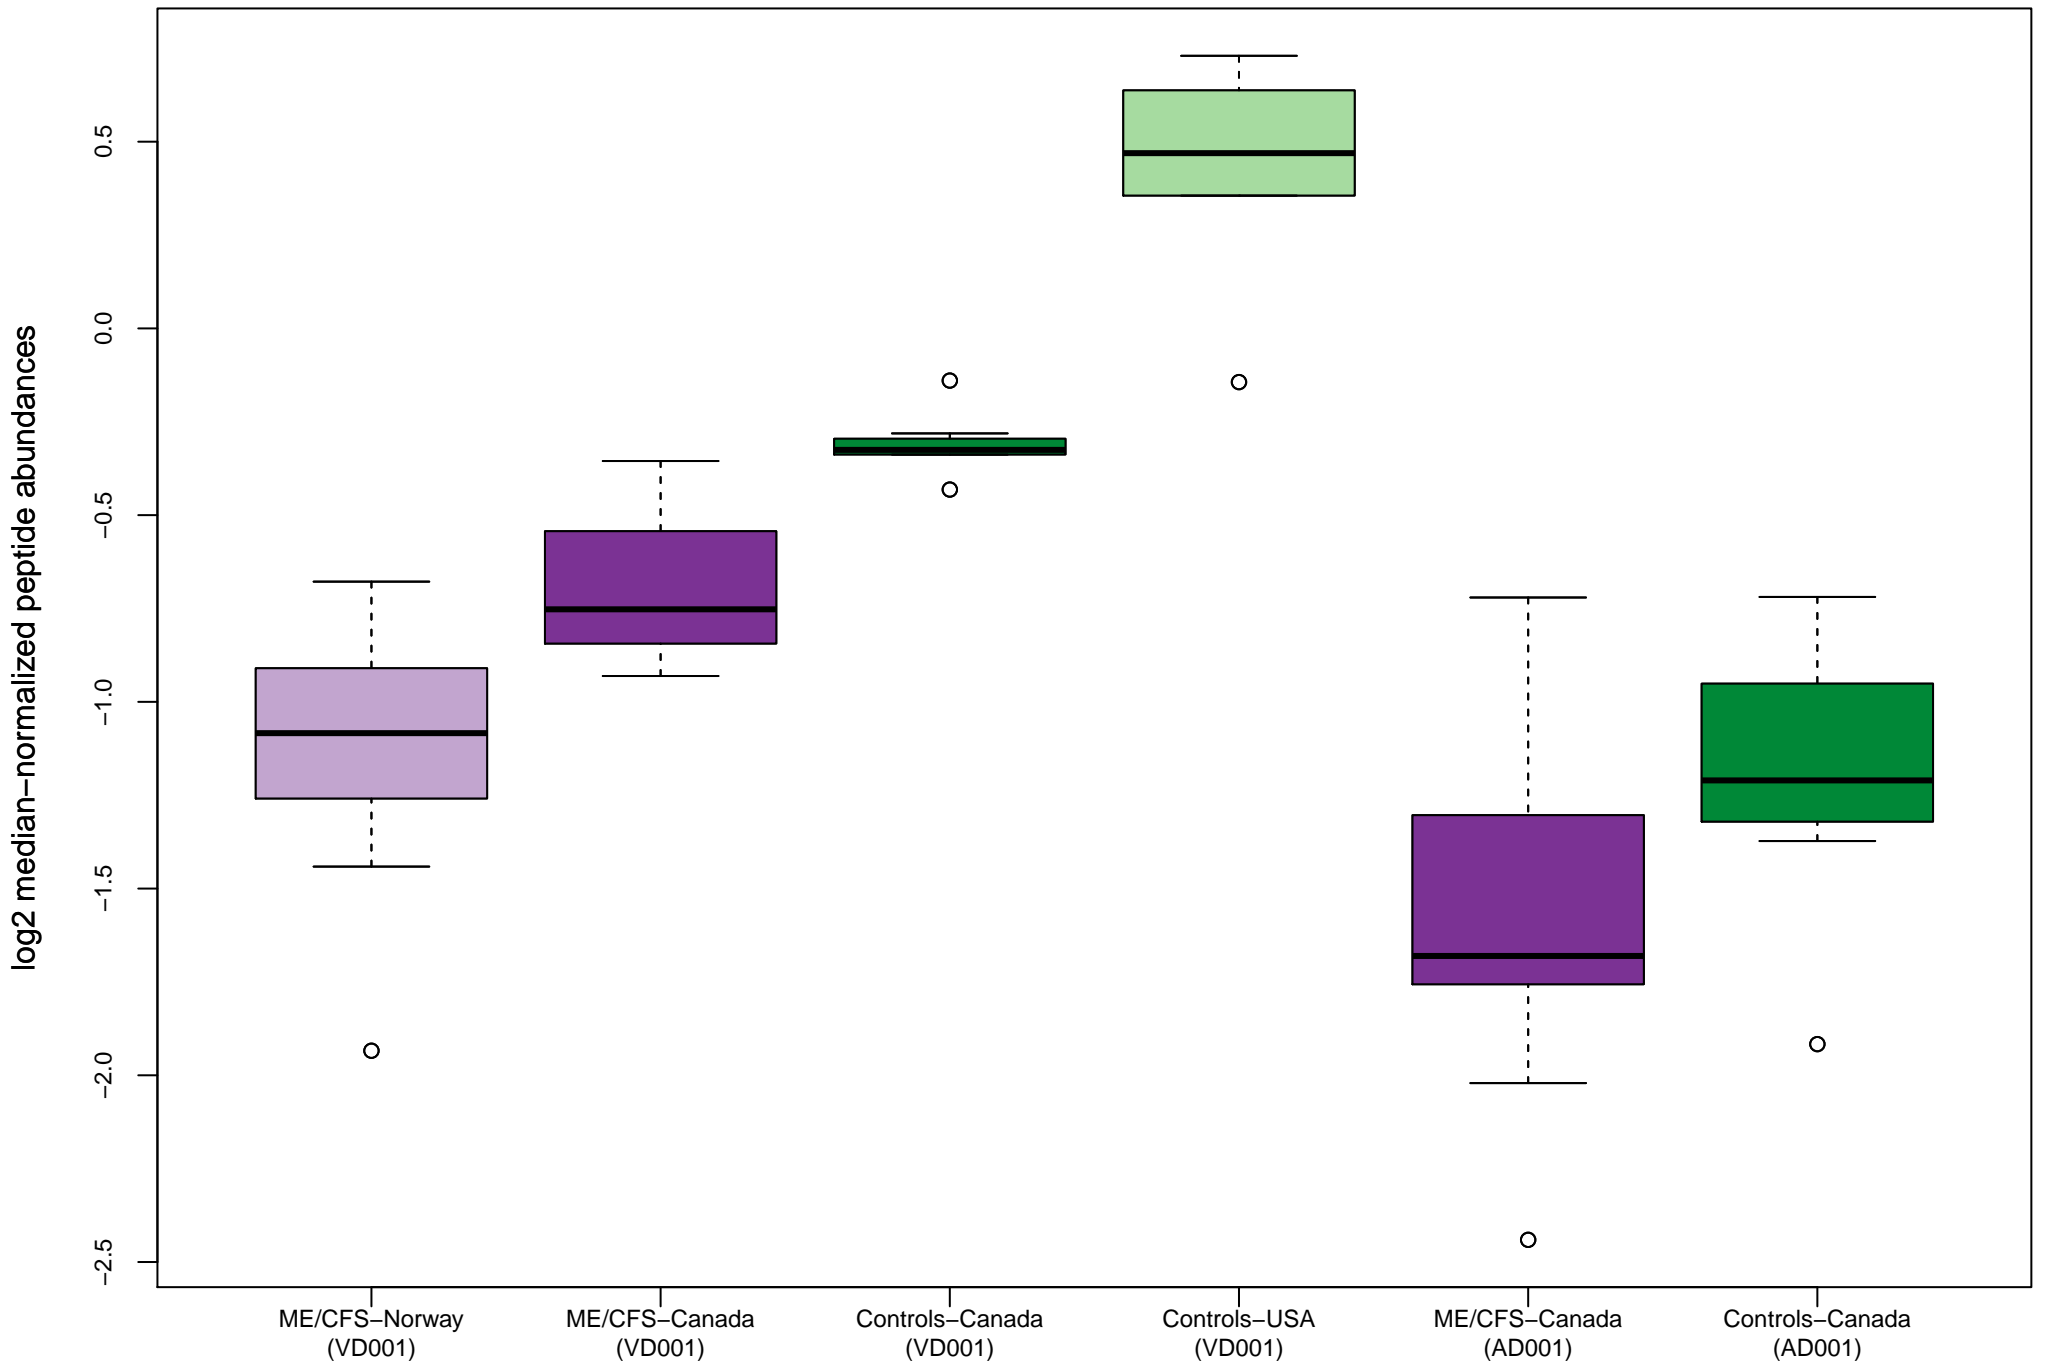

# FRPQFPLFHRA

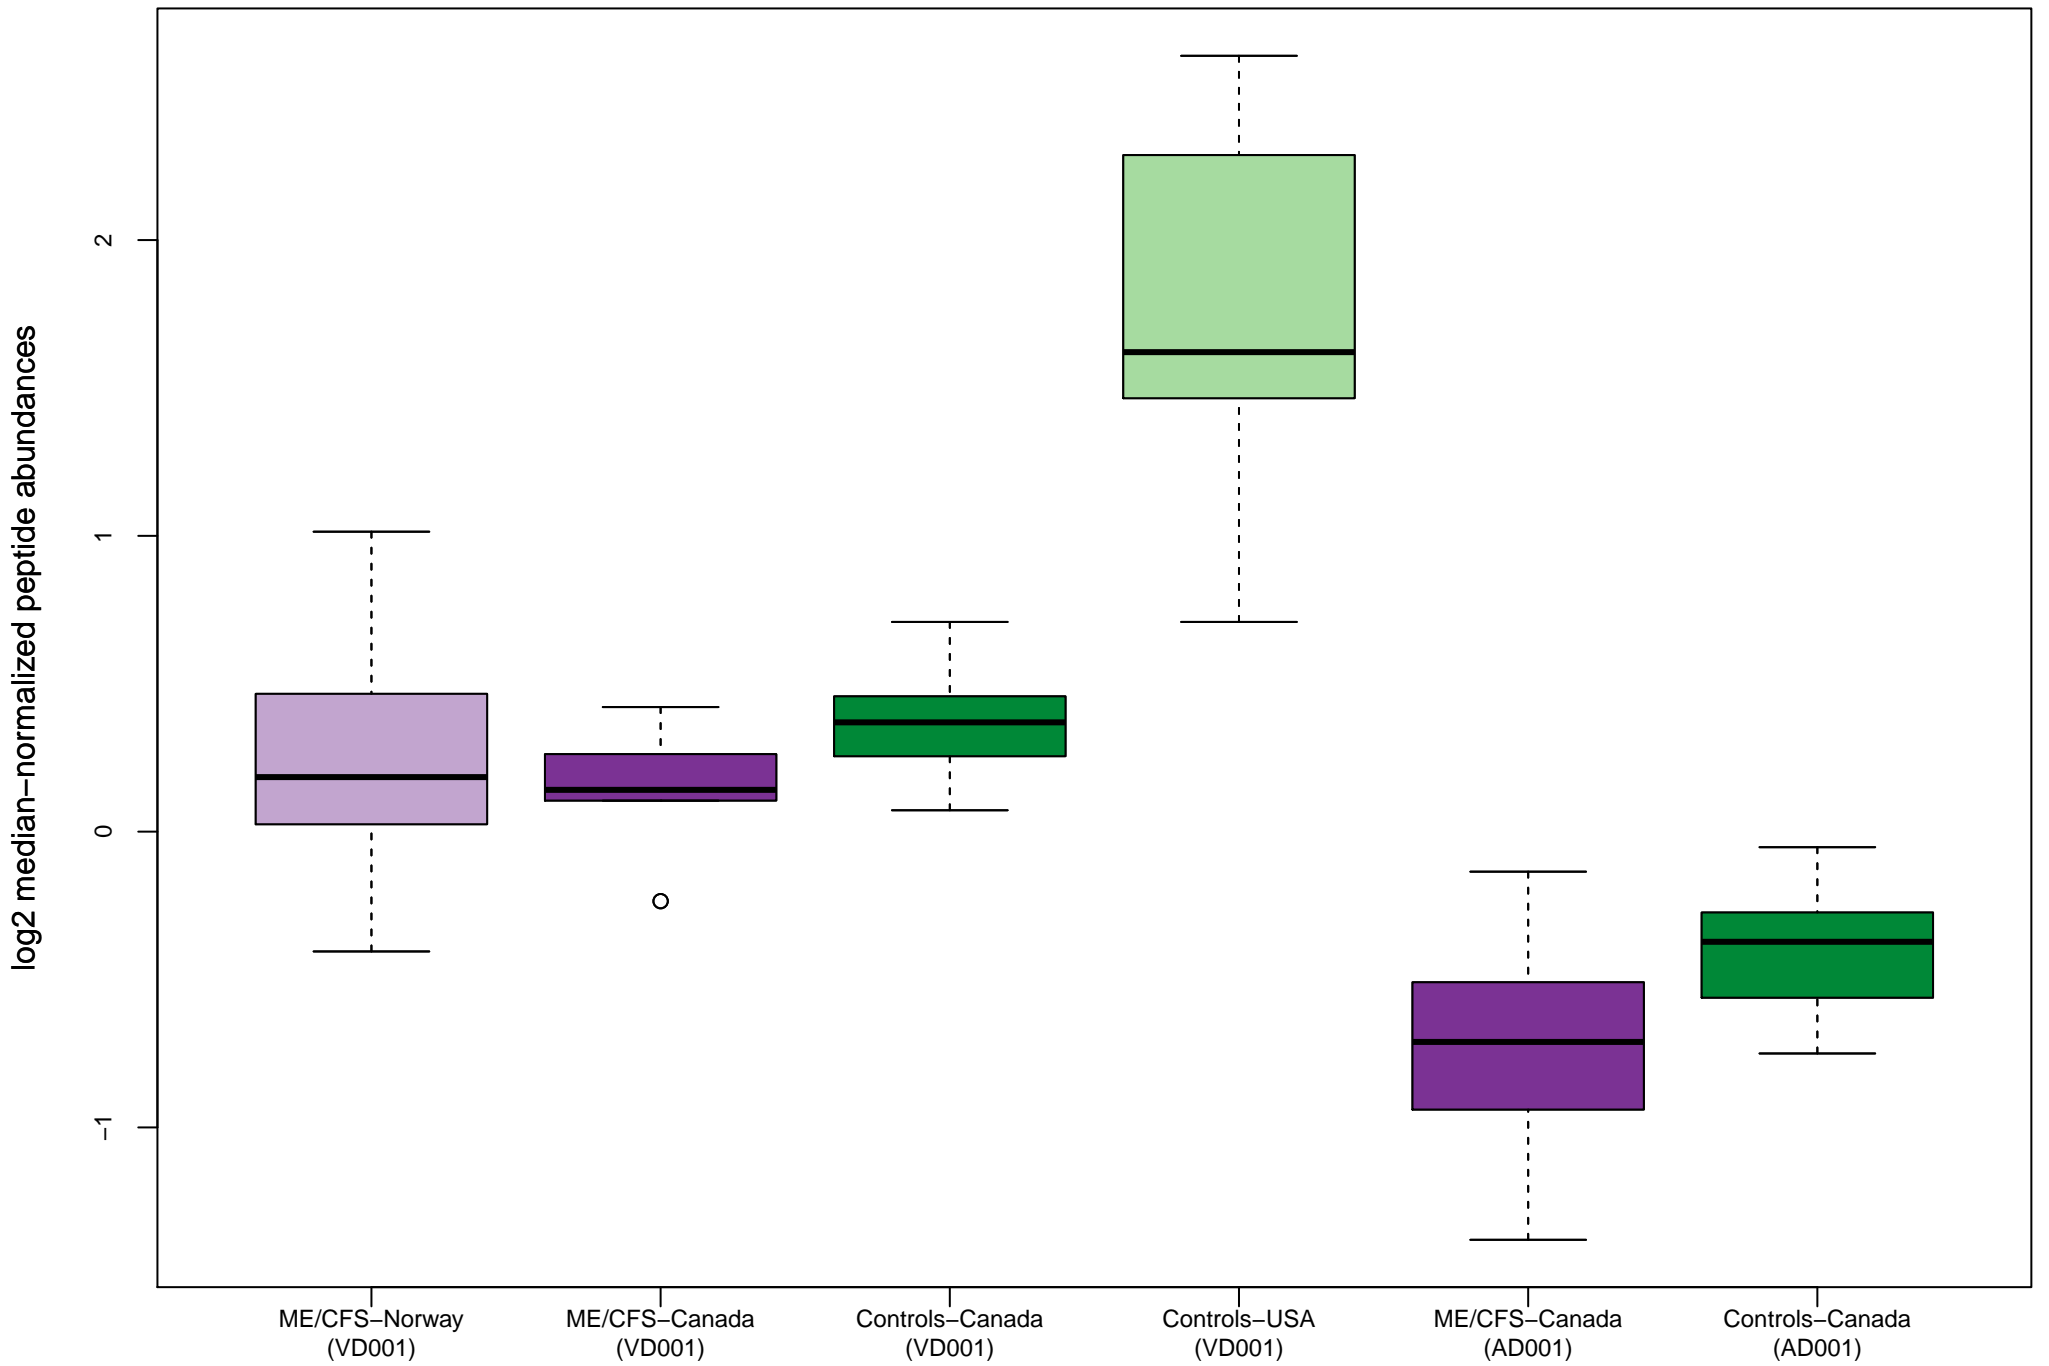

# FRRHVSNYVALG

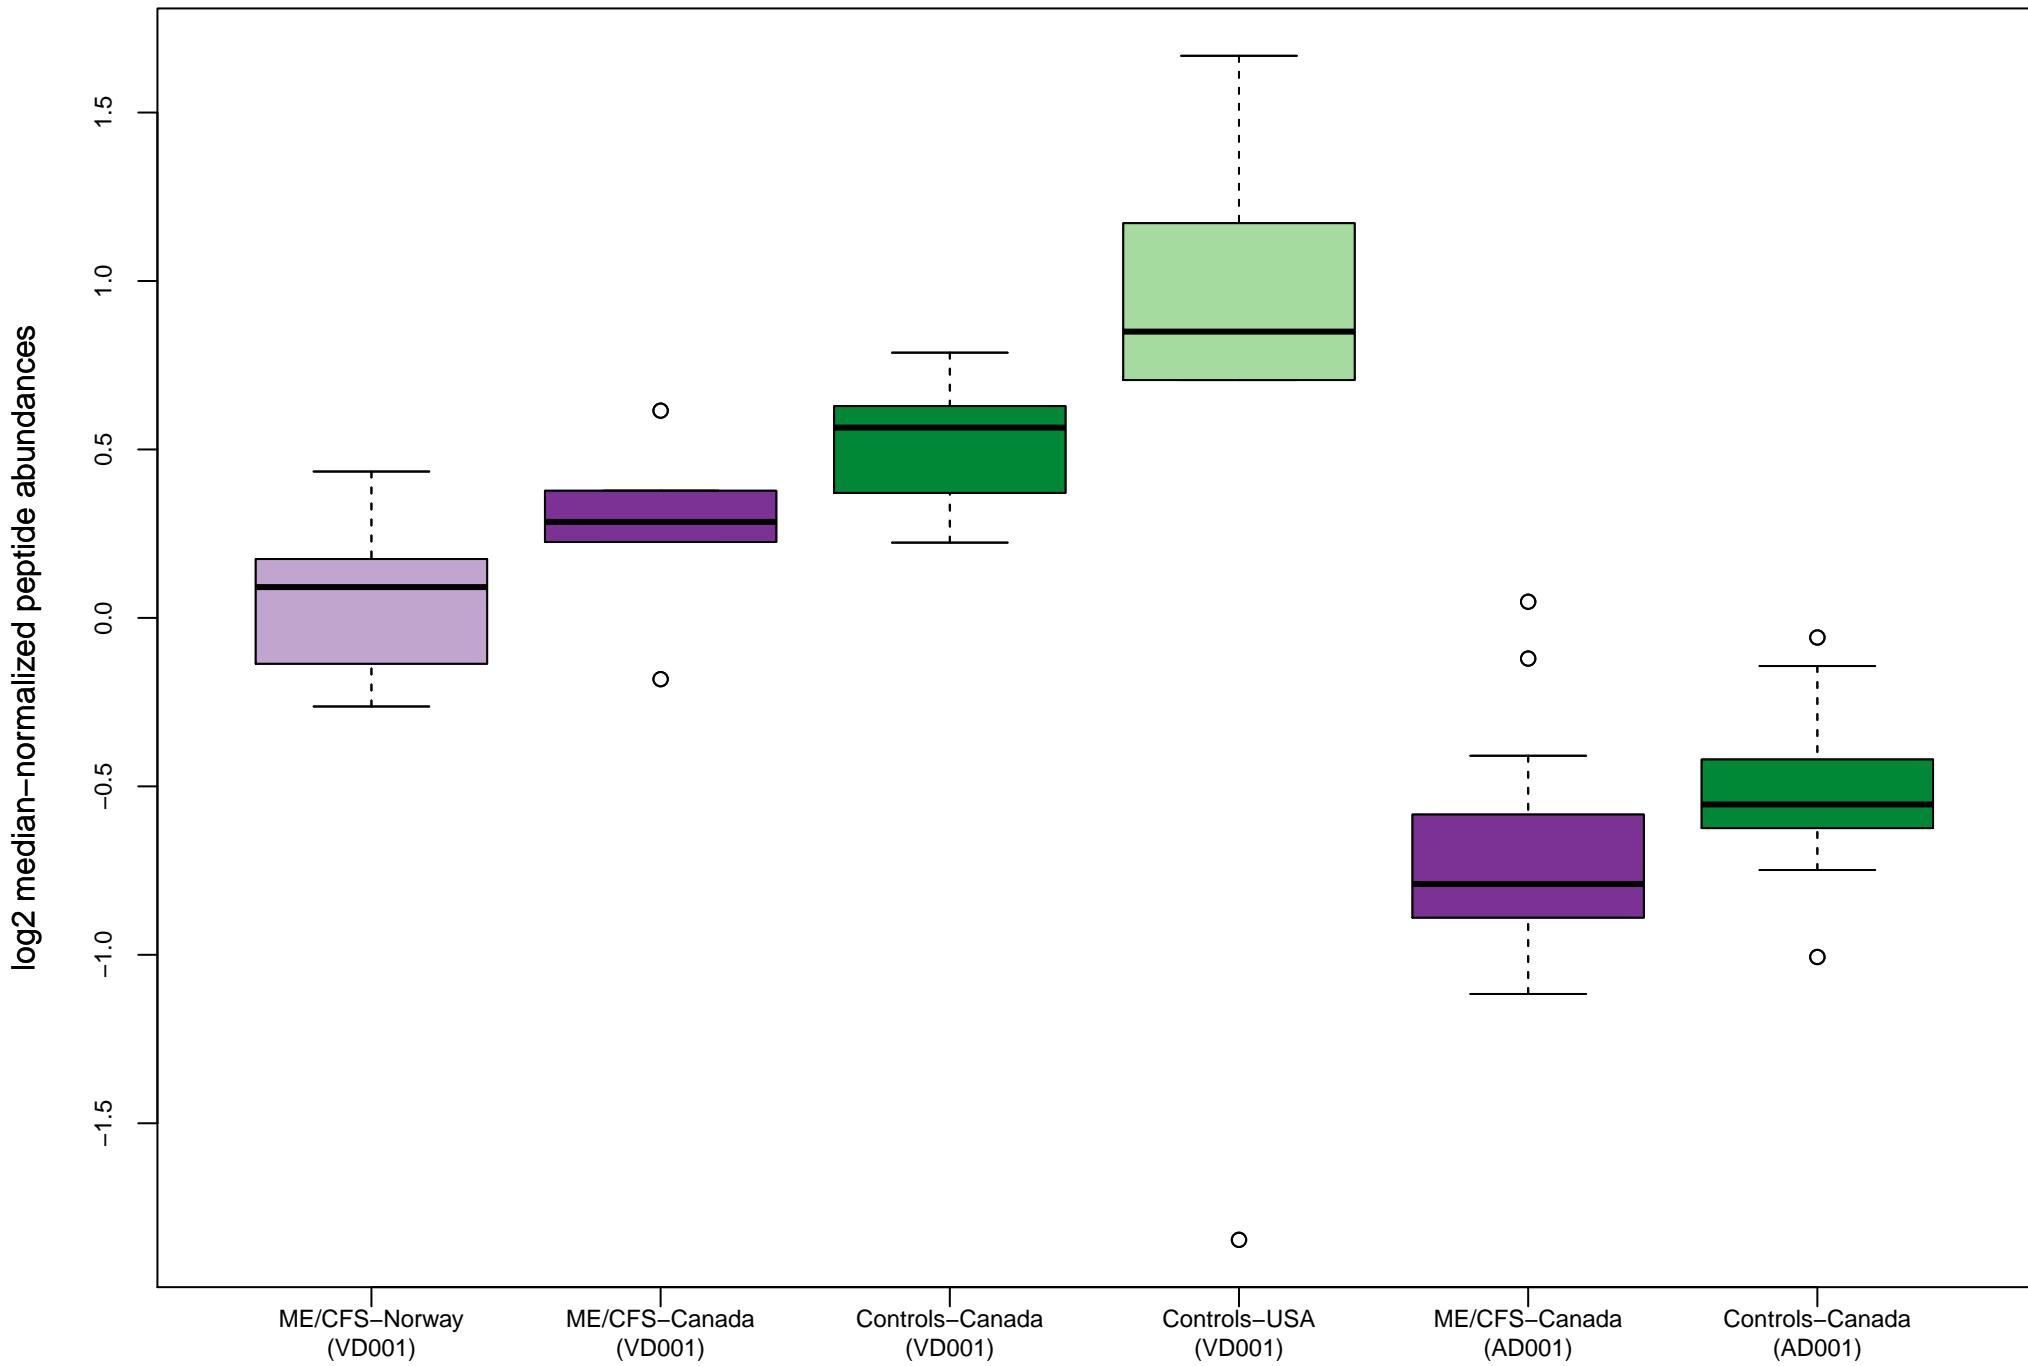

# FSLQGRVLSVSG

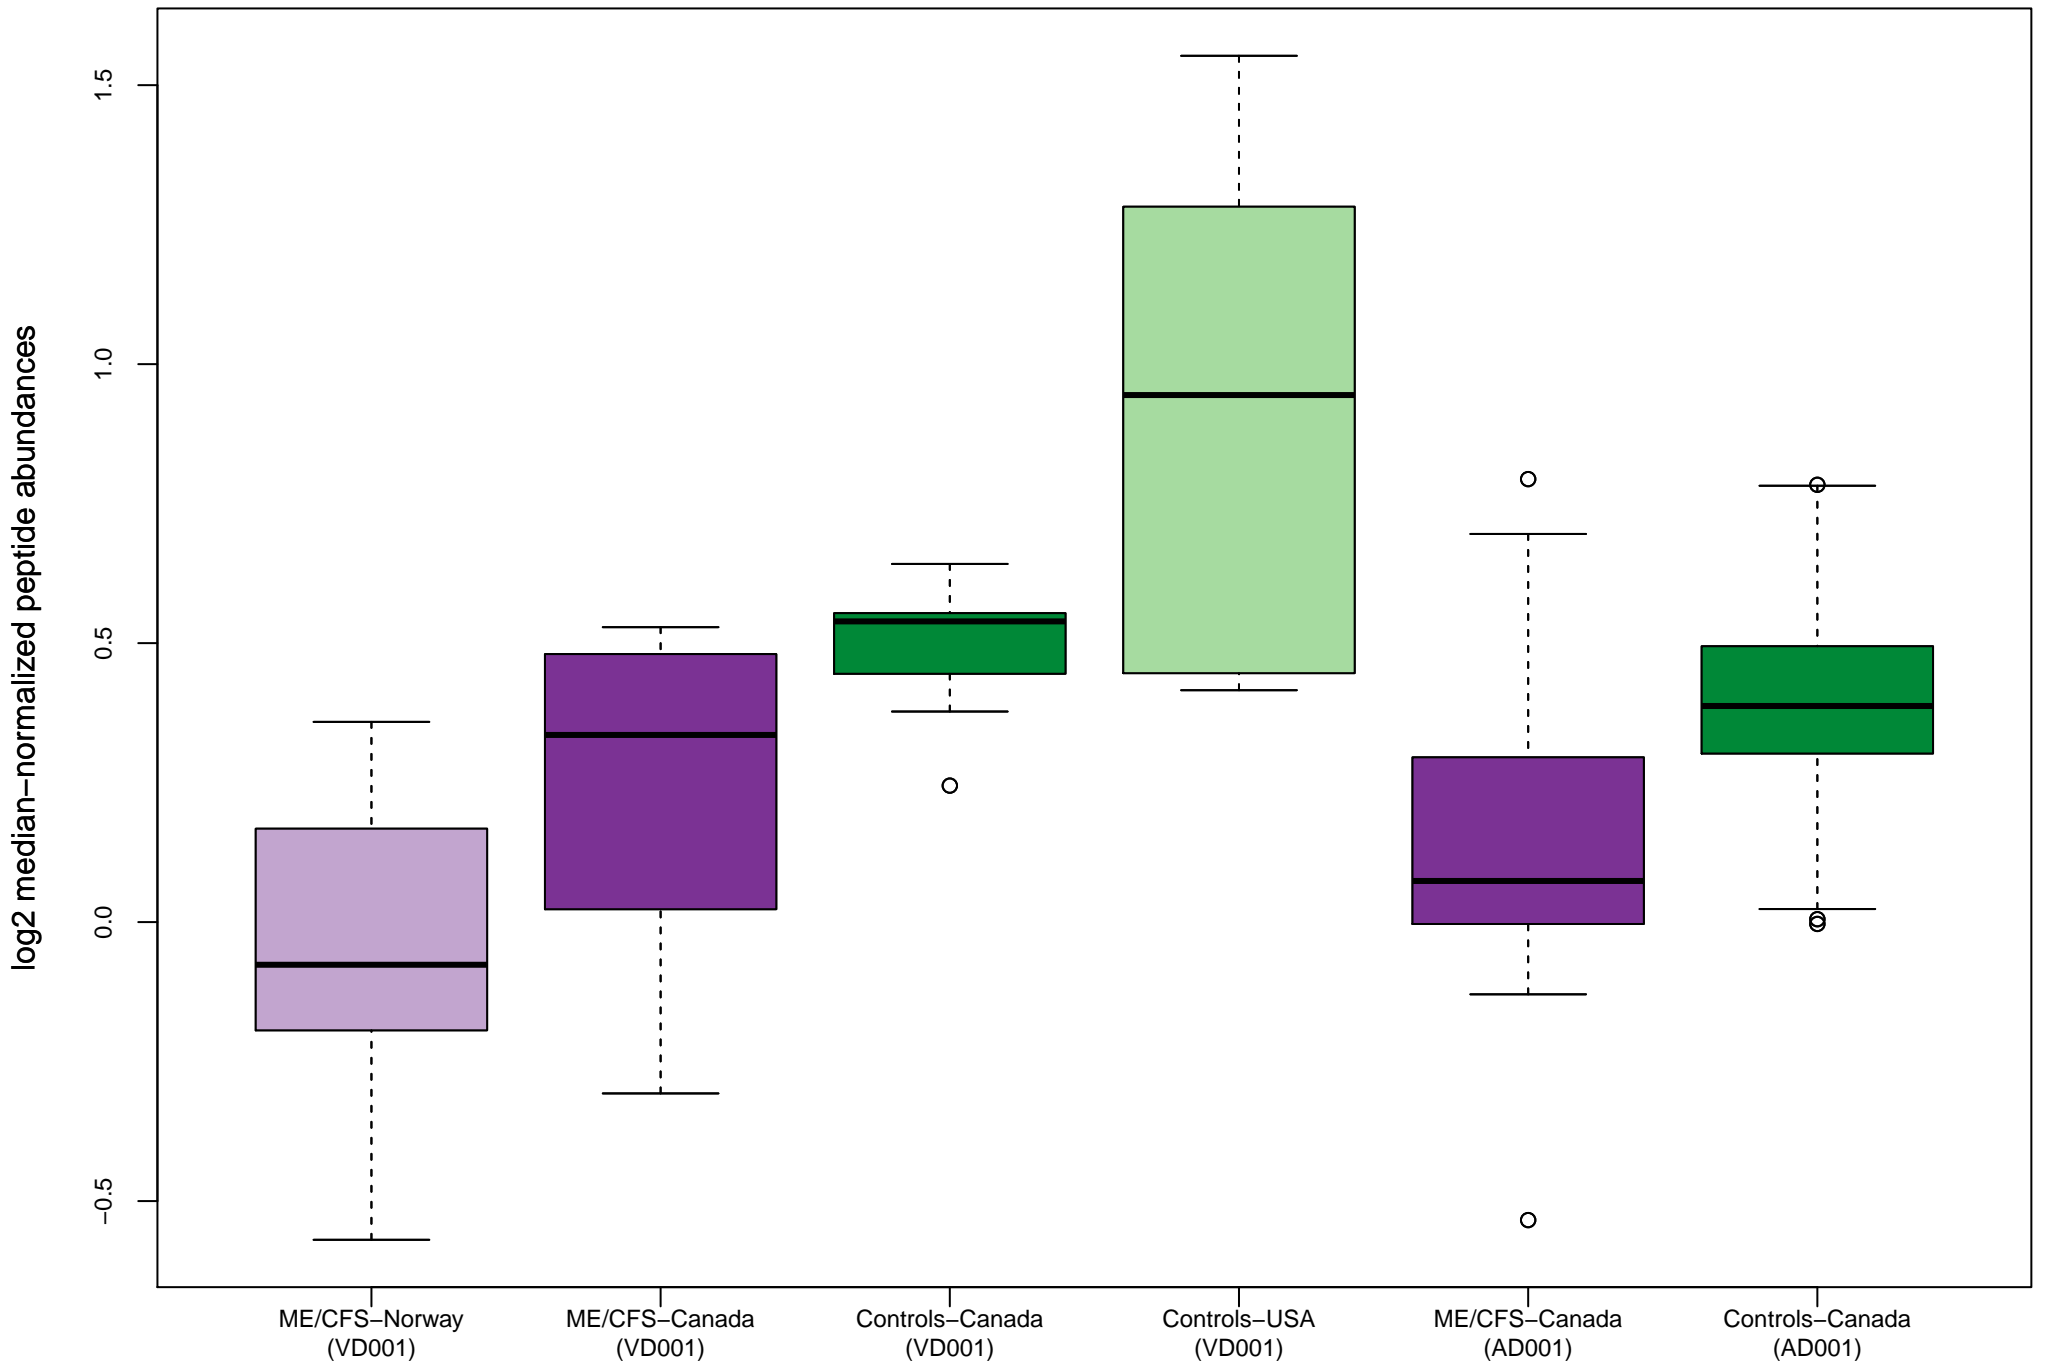

# FSNRFPLSVLSG

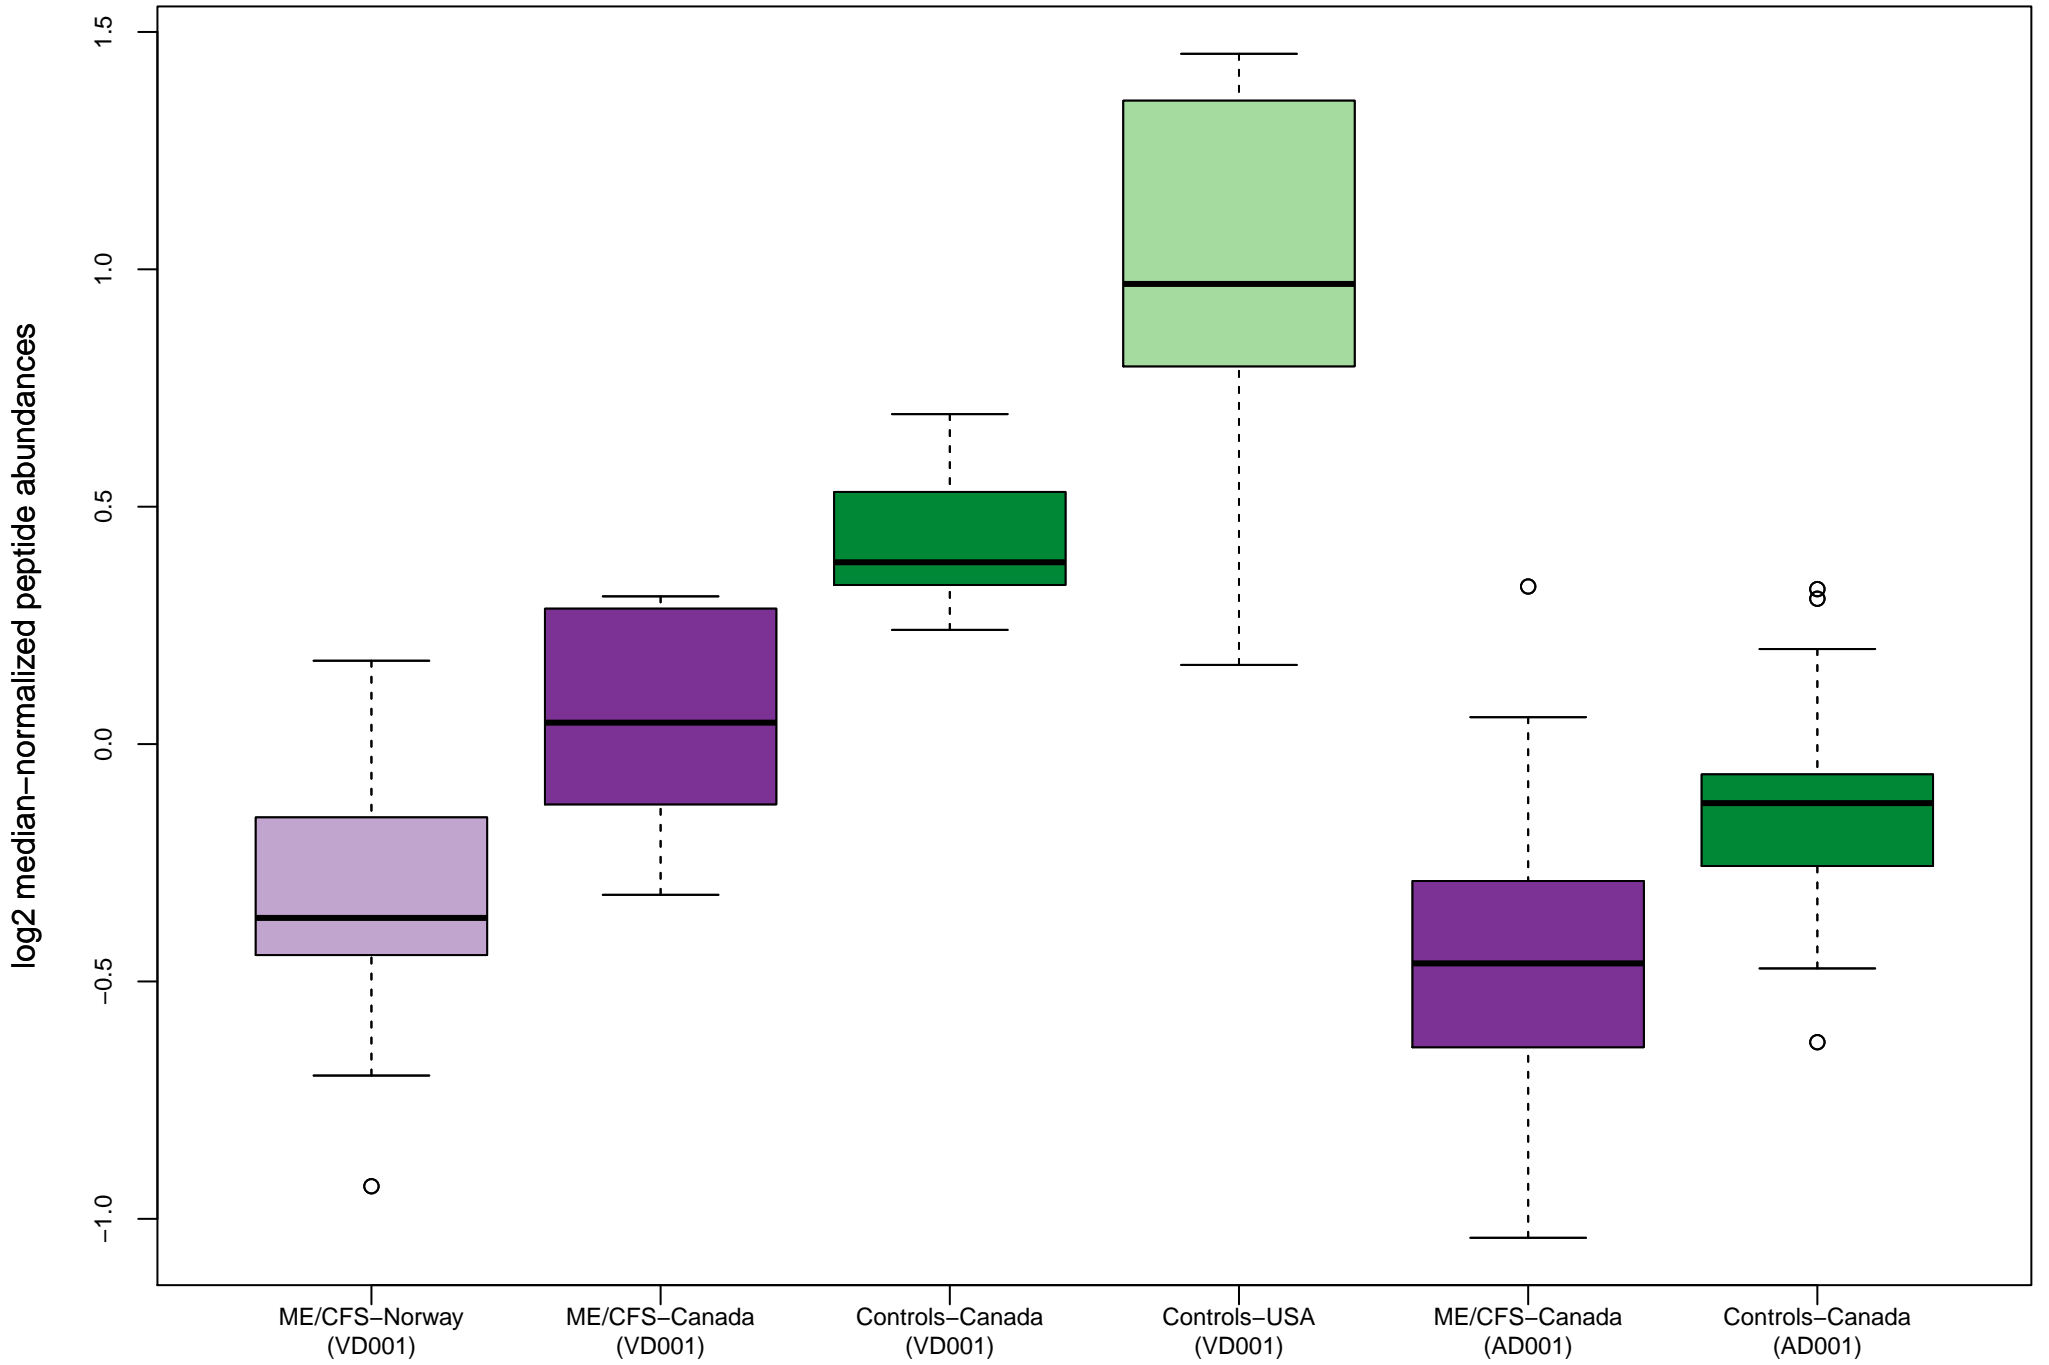

# FVRLVLRNAGAS

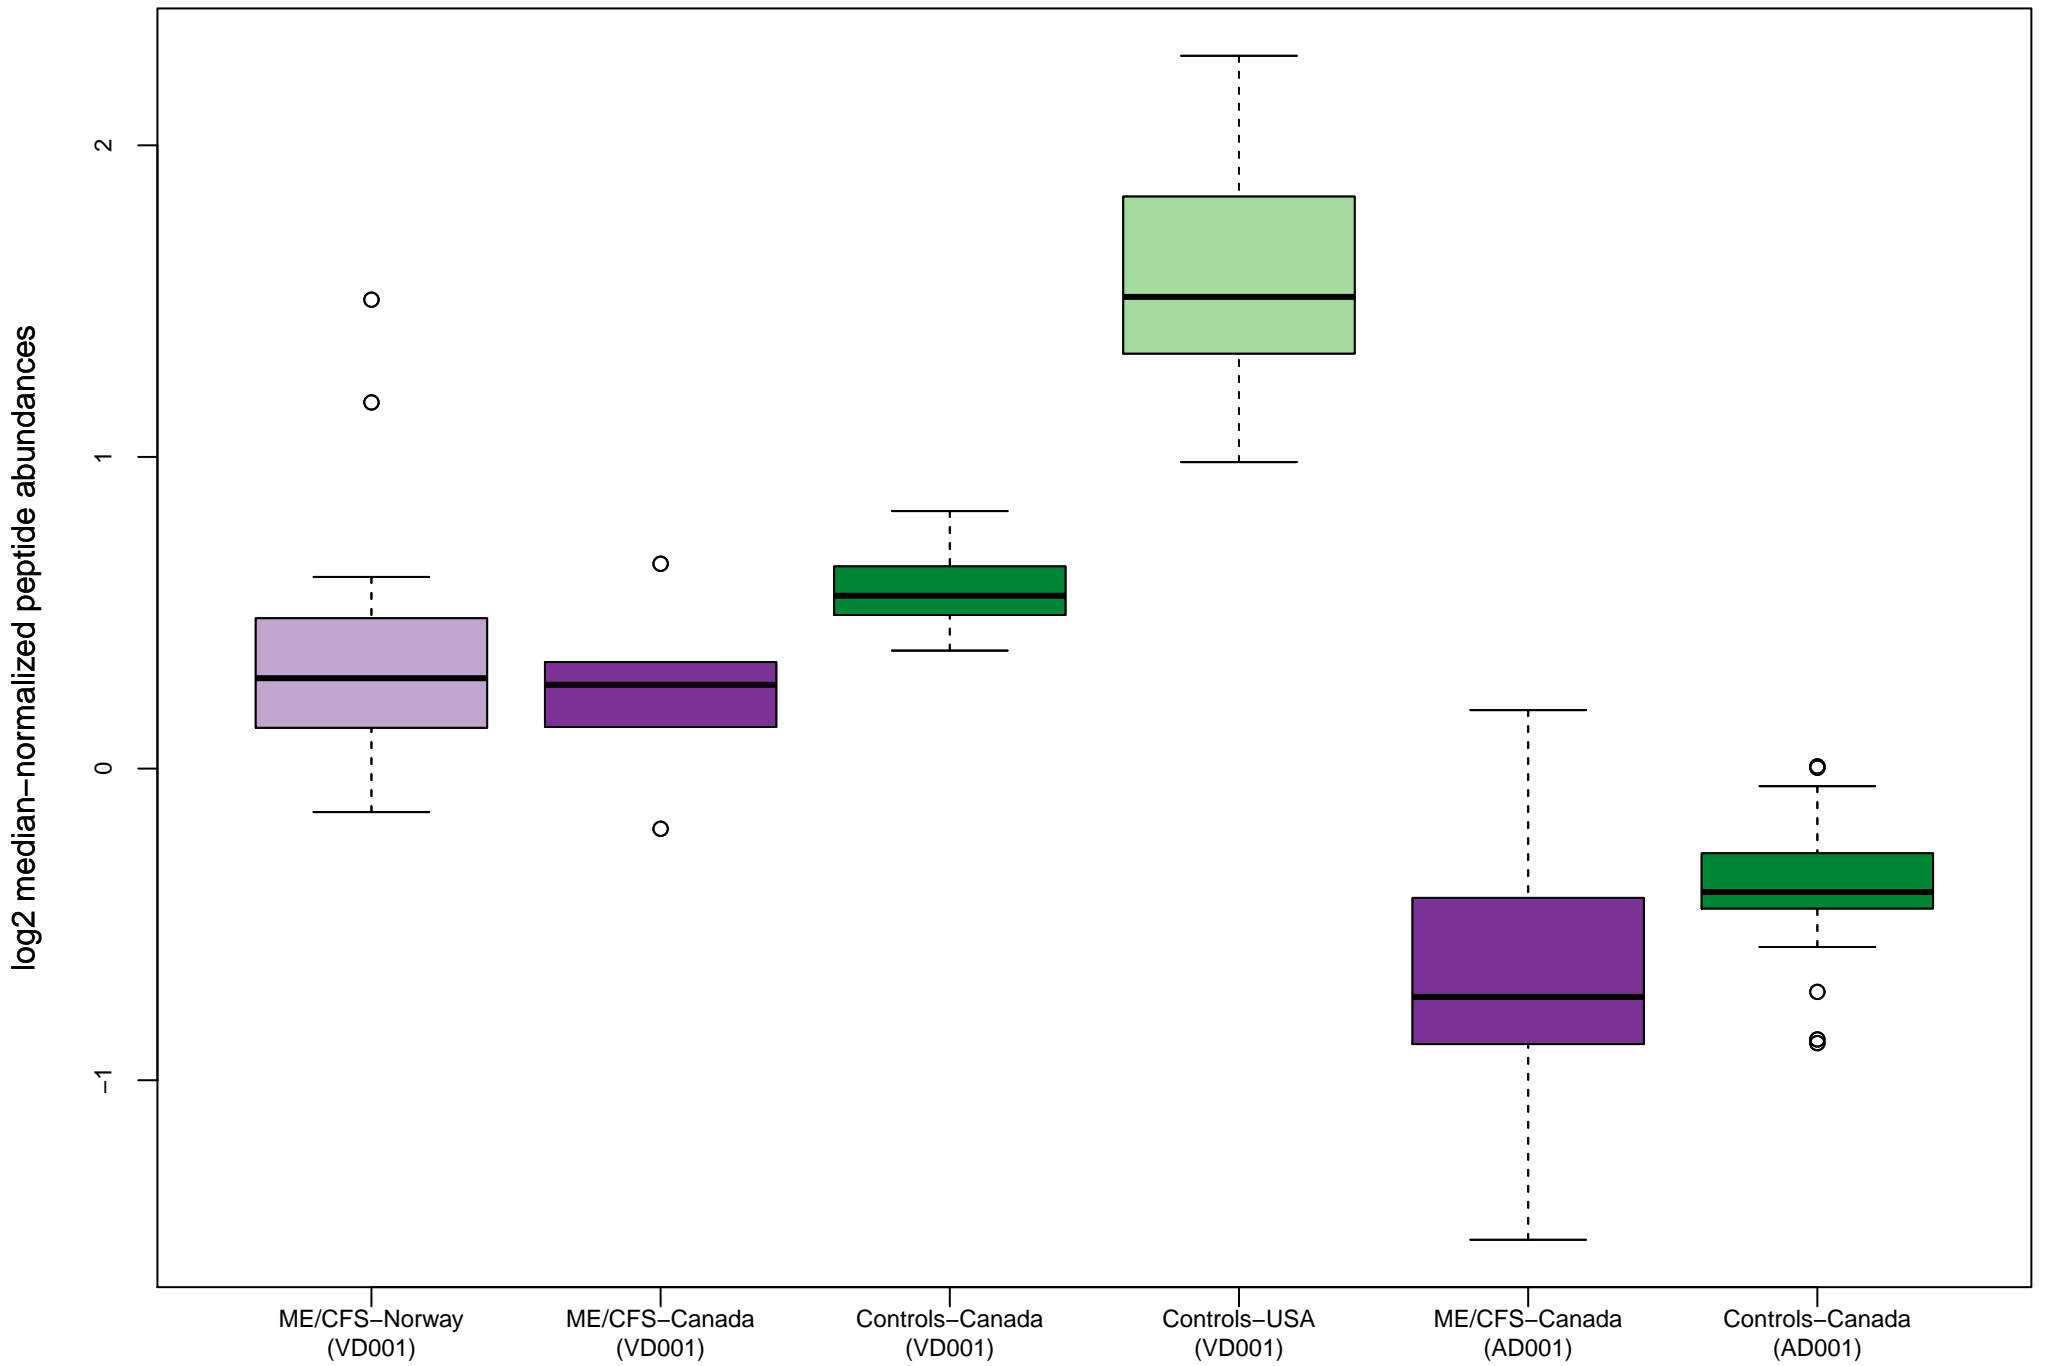

# FVYLSRLYKHAL

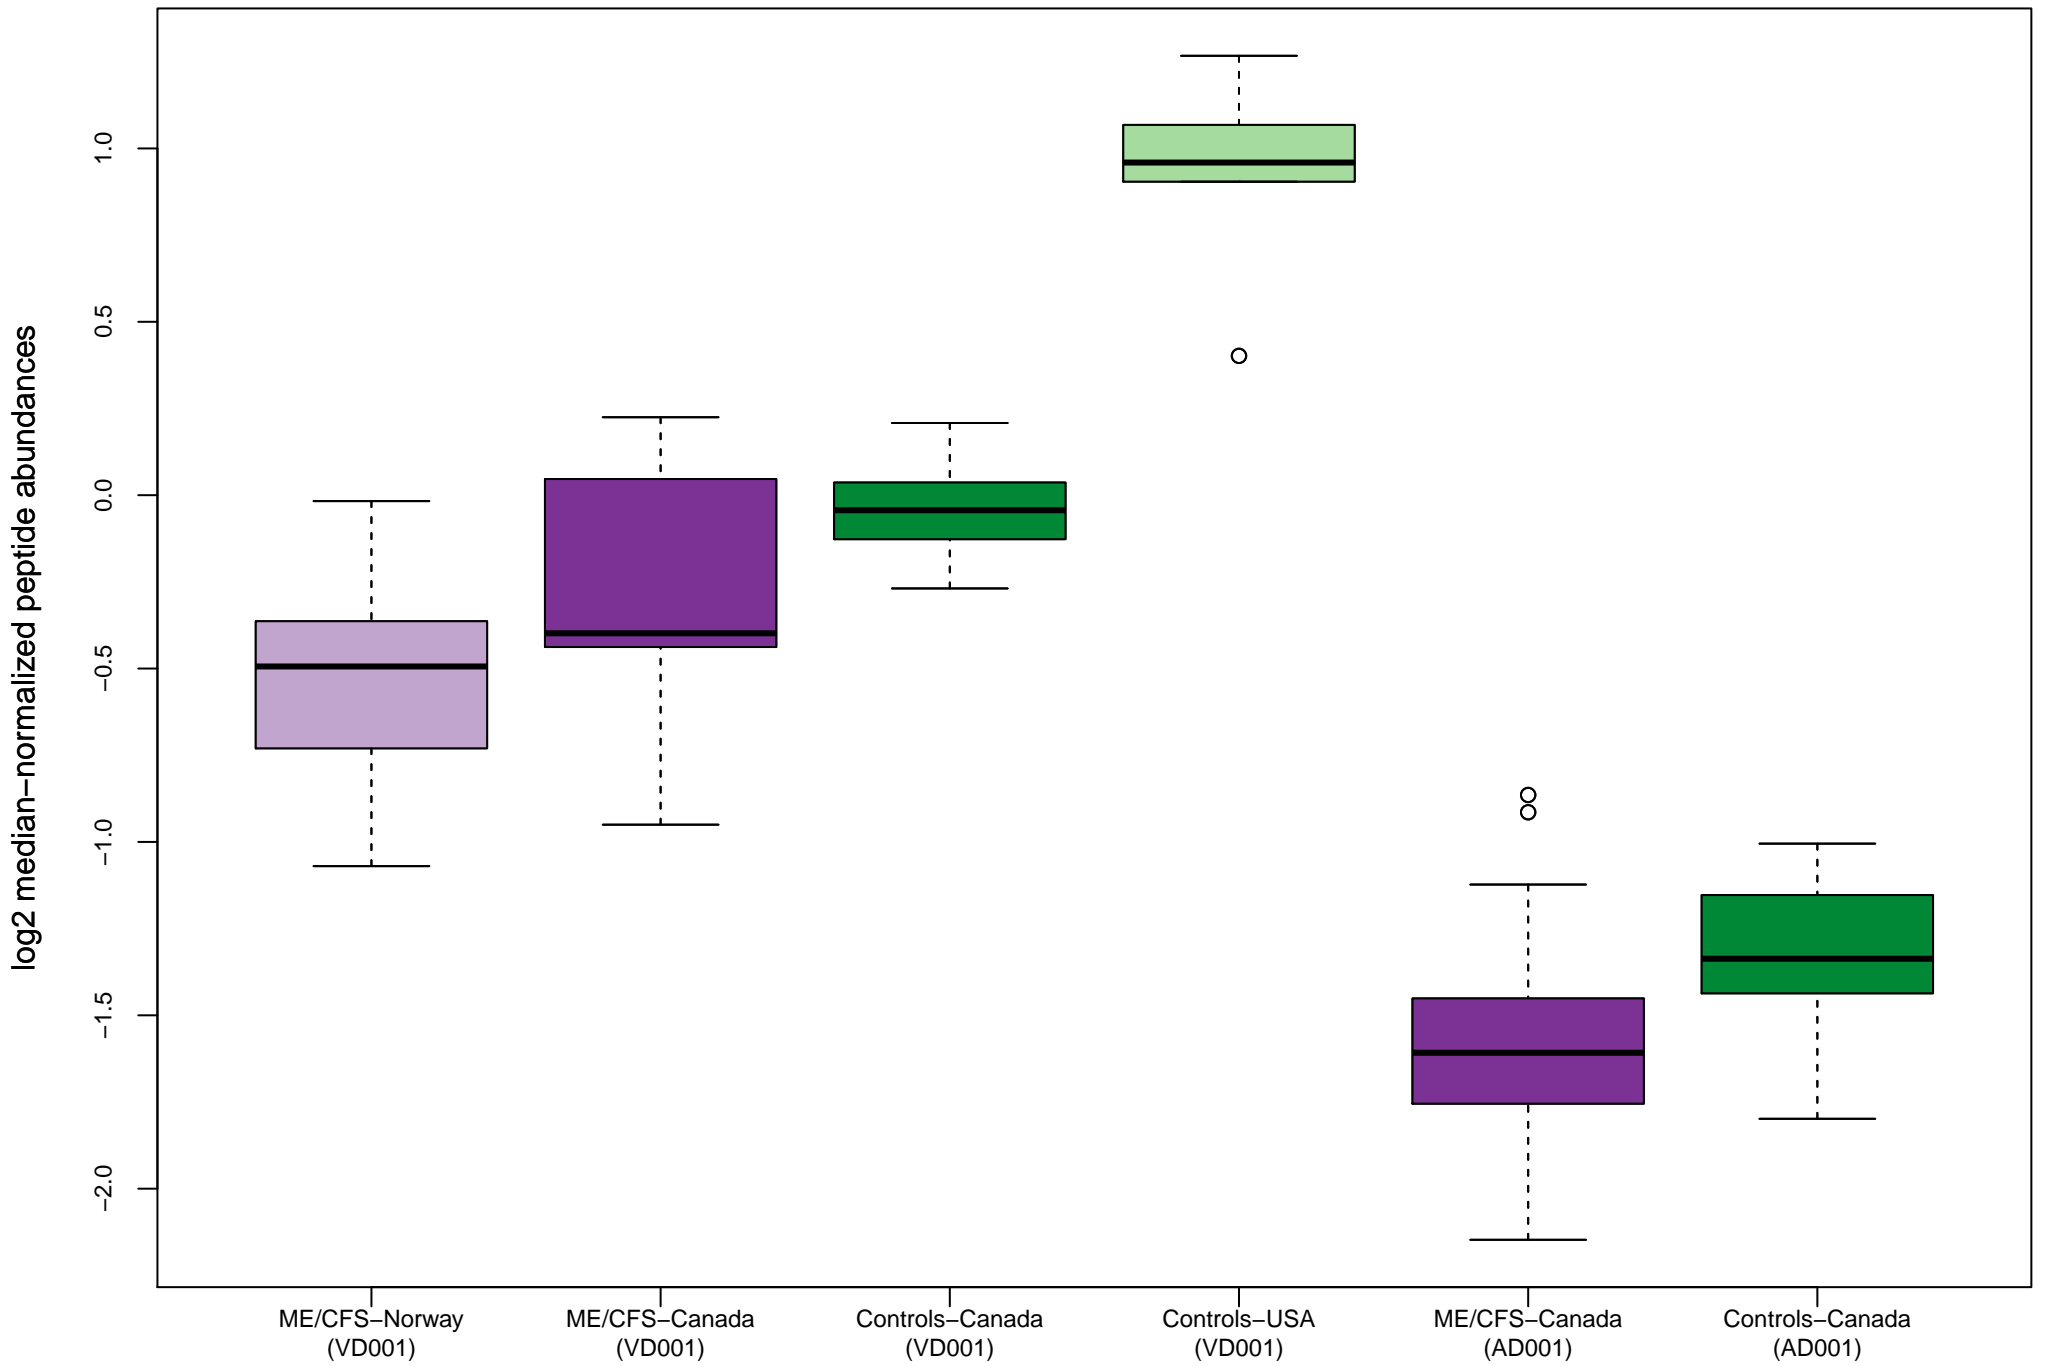

FWRKYLGRVVL

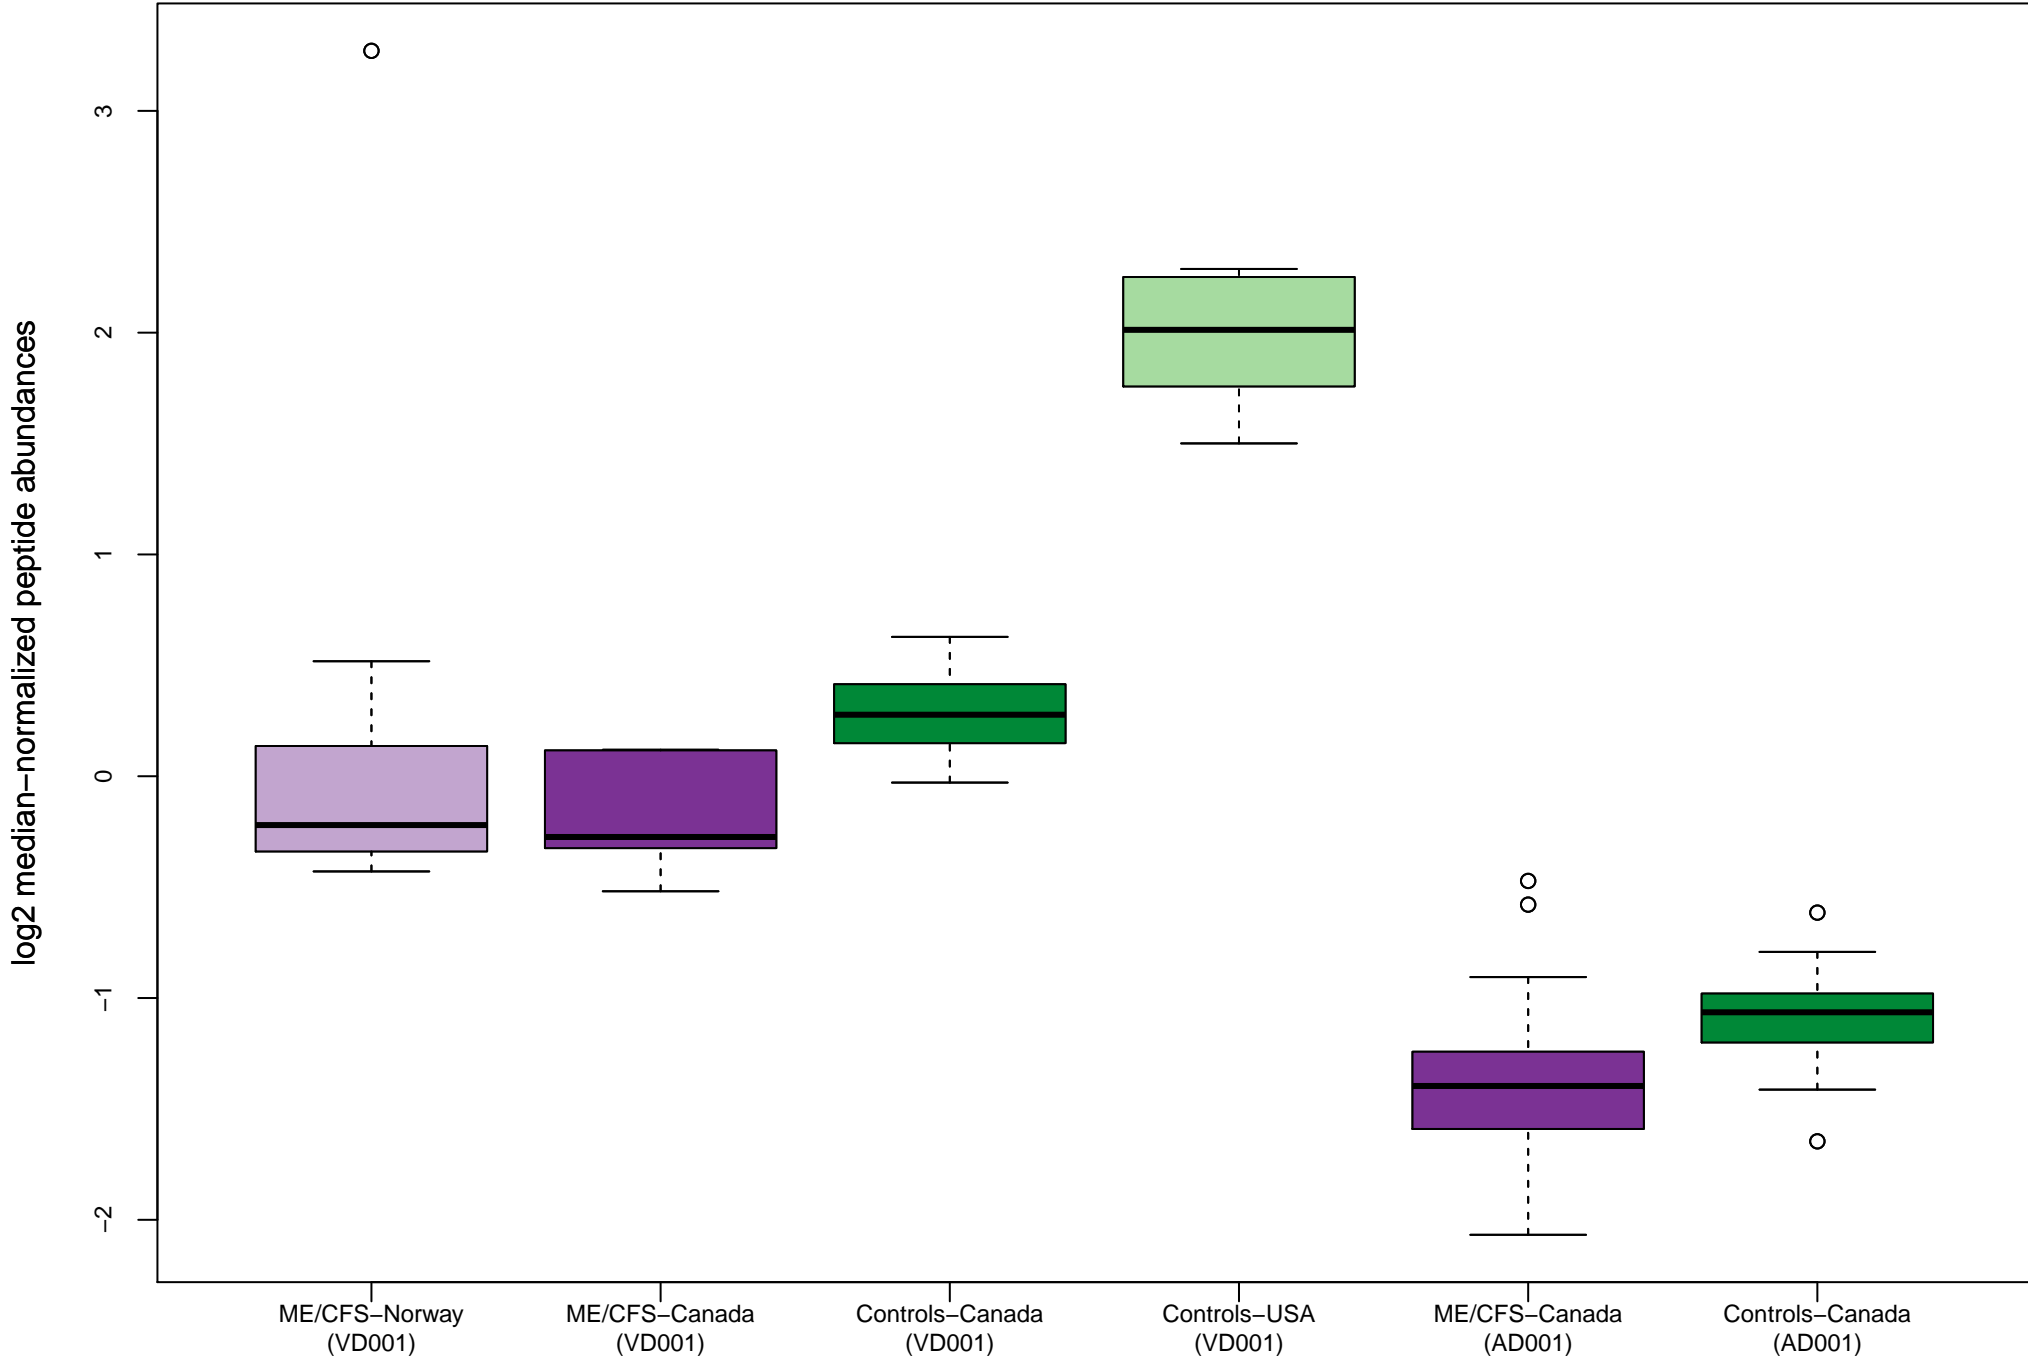



# FWWRSFVASLSG

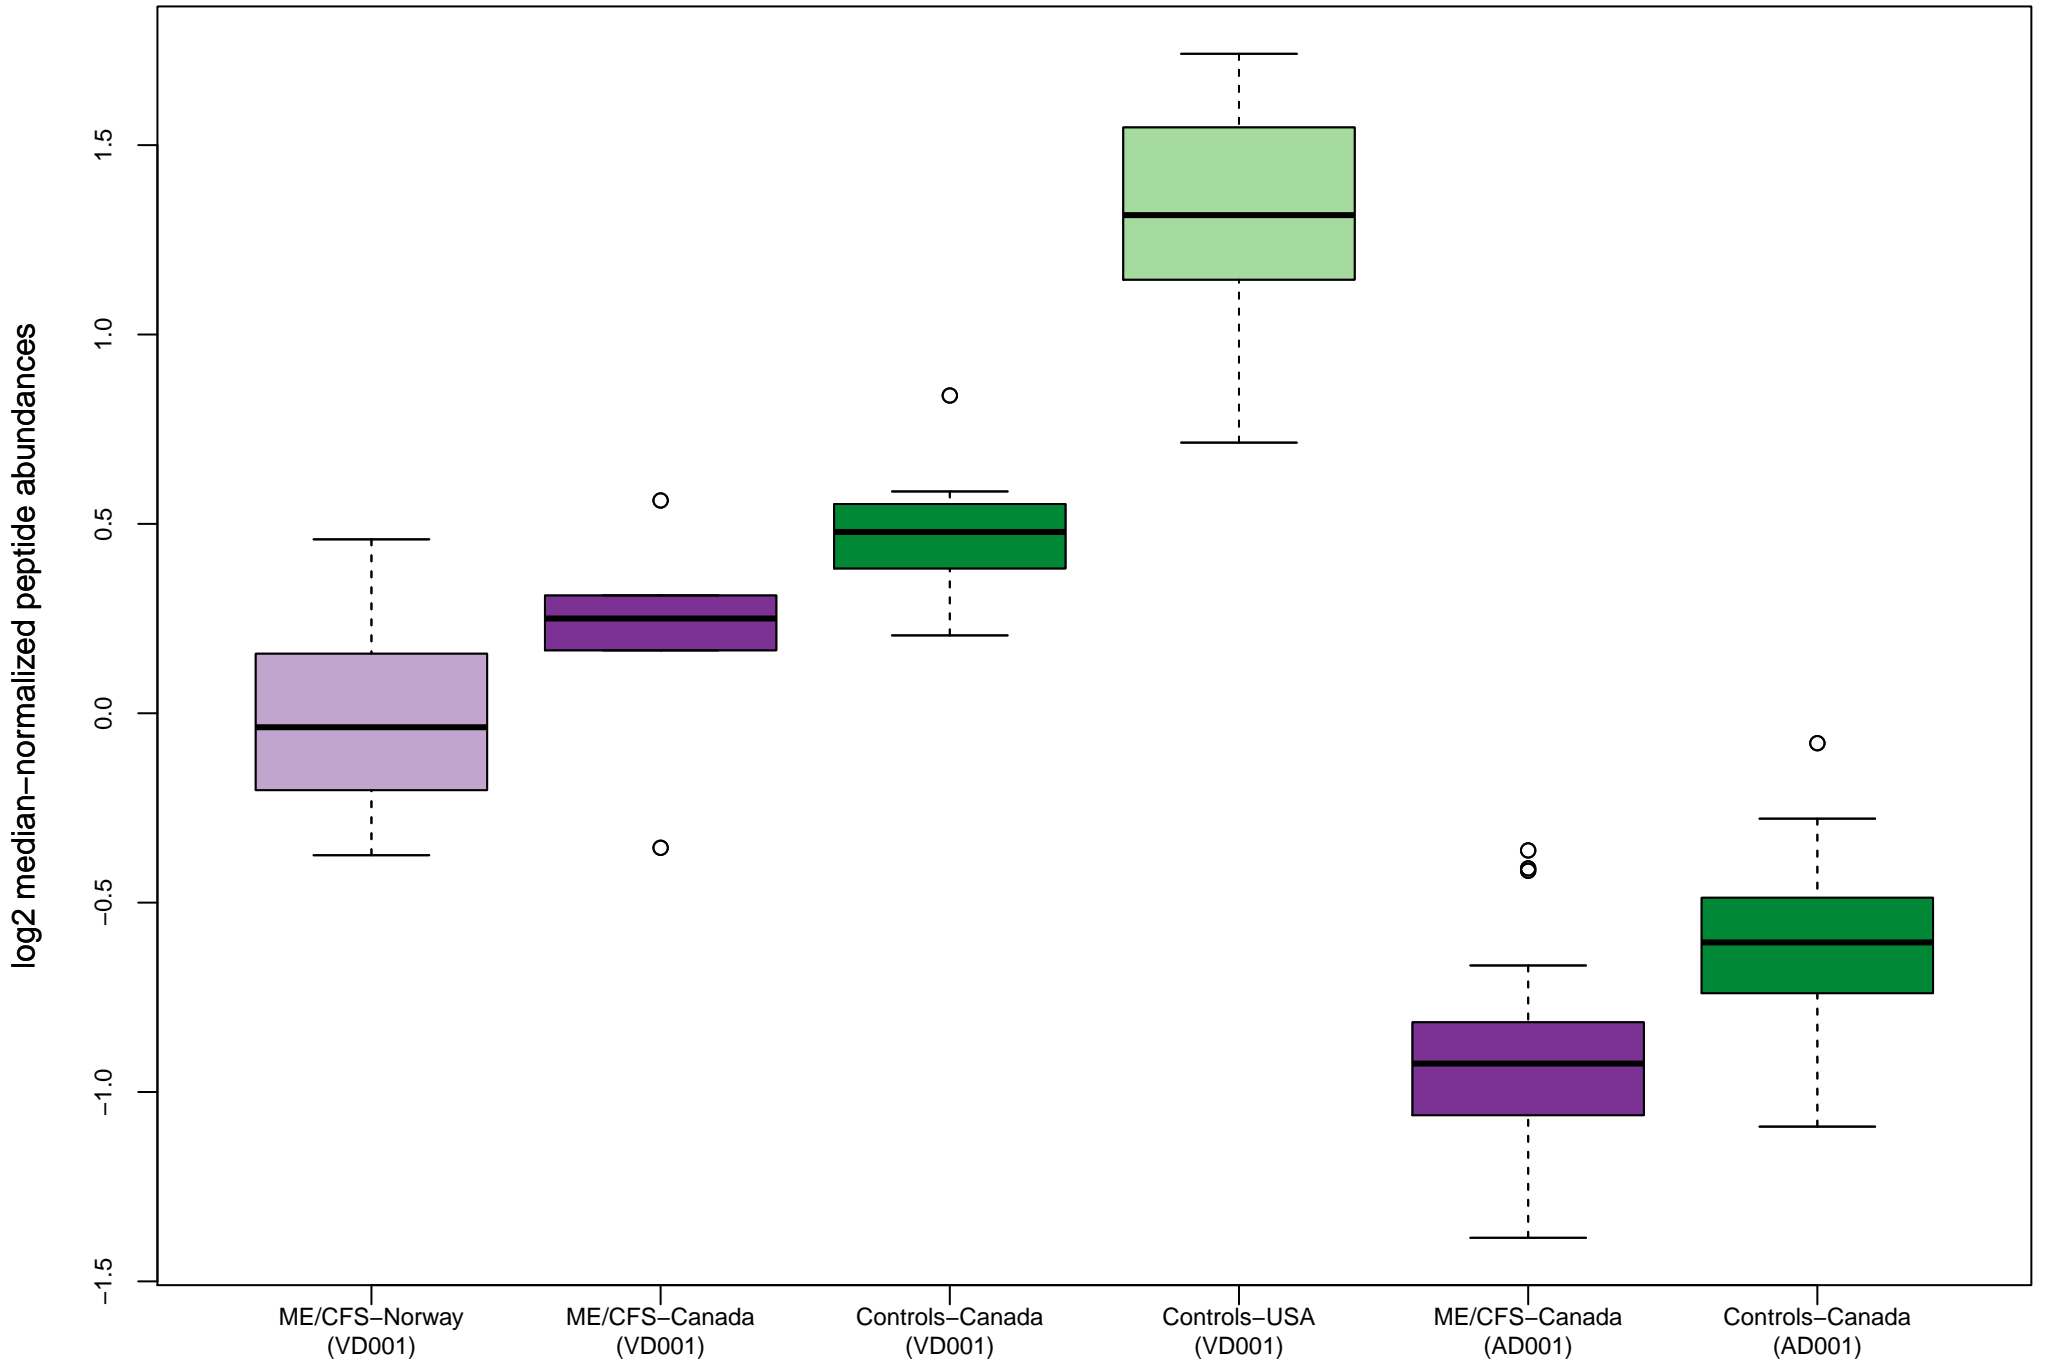

# FYRGSRVLSVLG

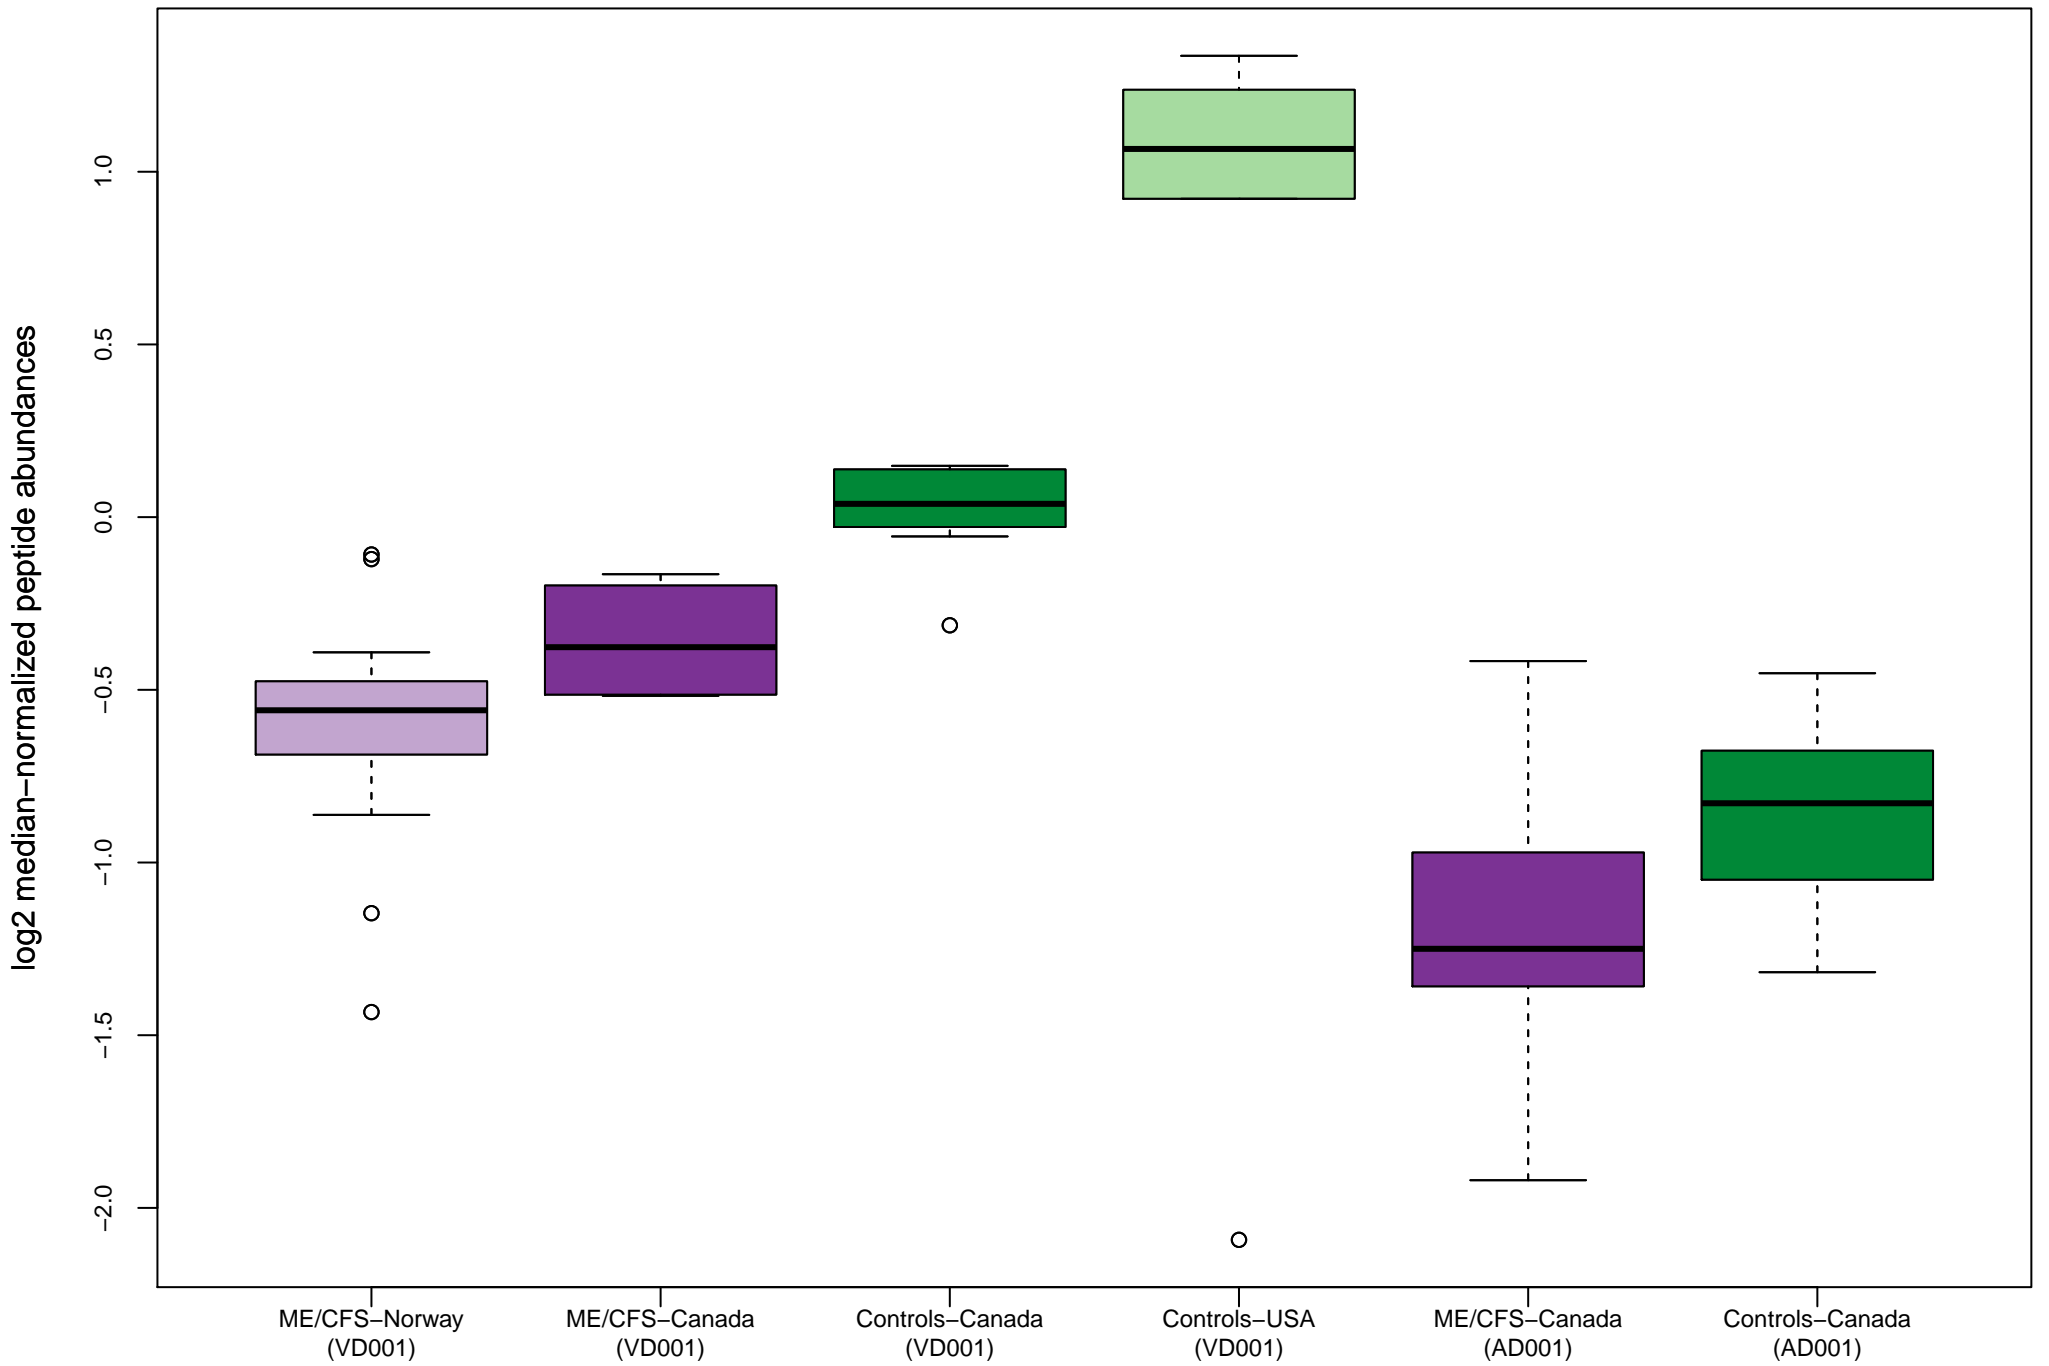

# GALSRYWFHVAS

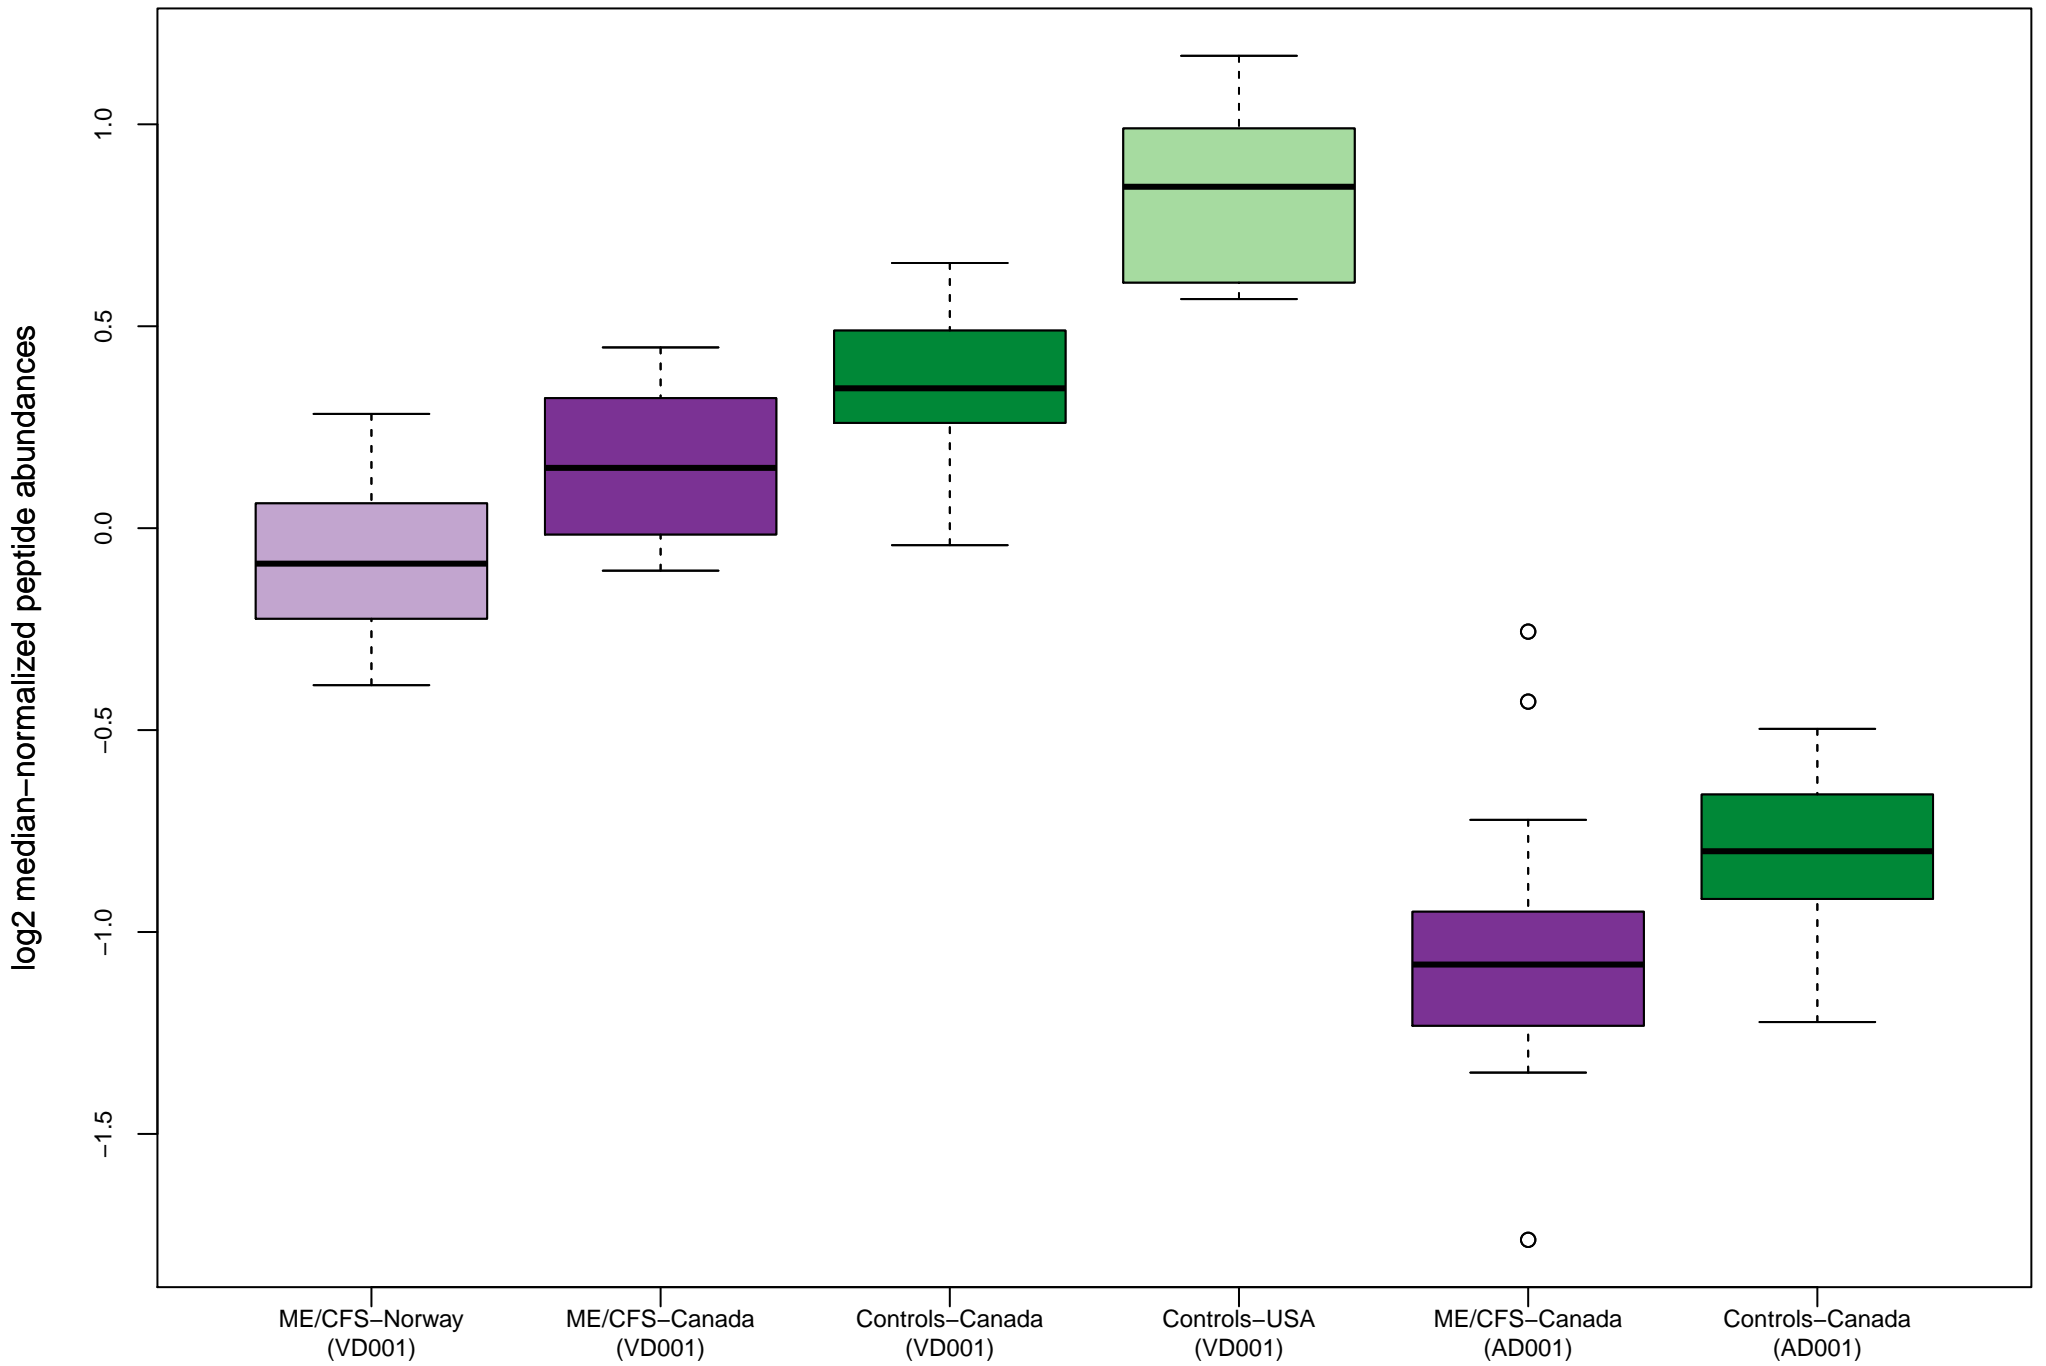

# GFGFSRLSGVLG

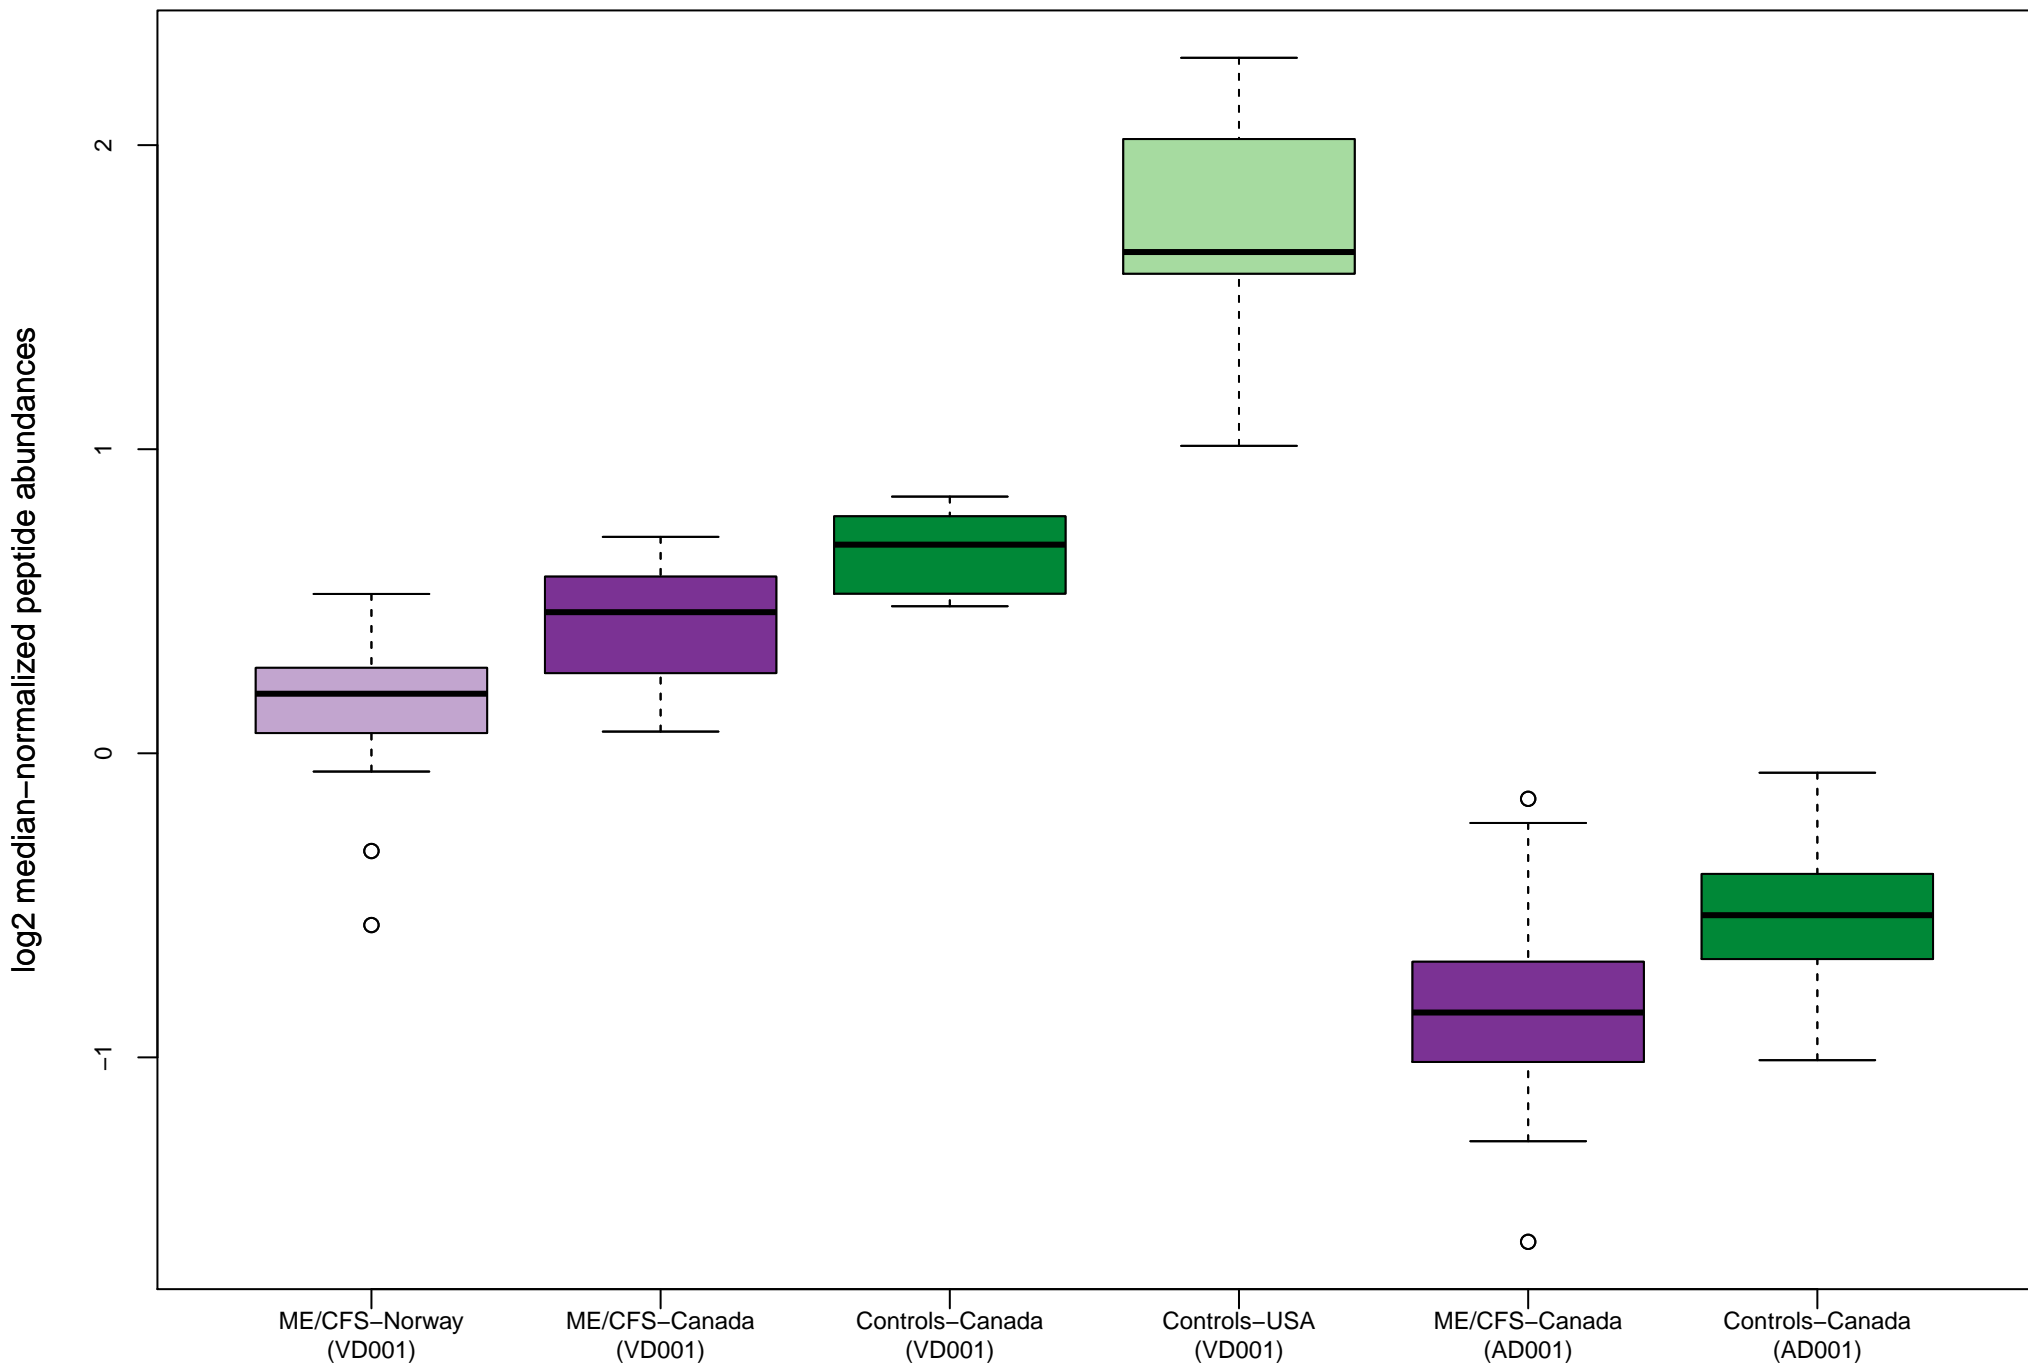

# GFRQHLFRWVG

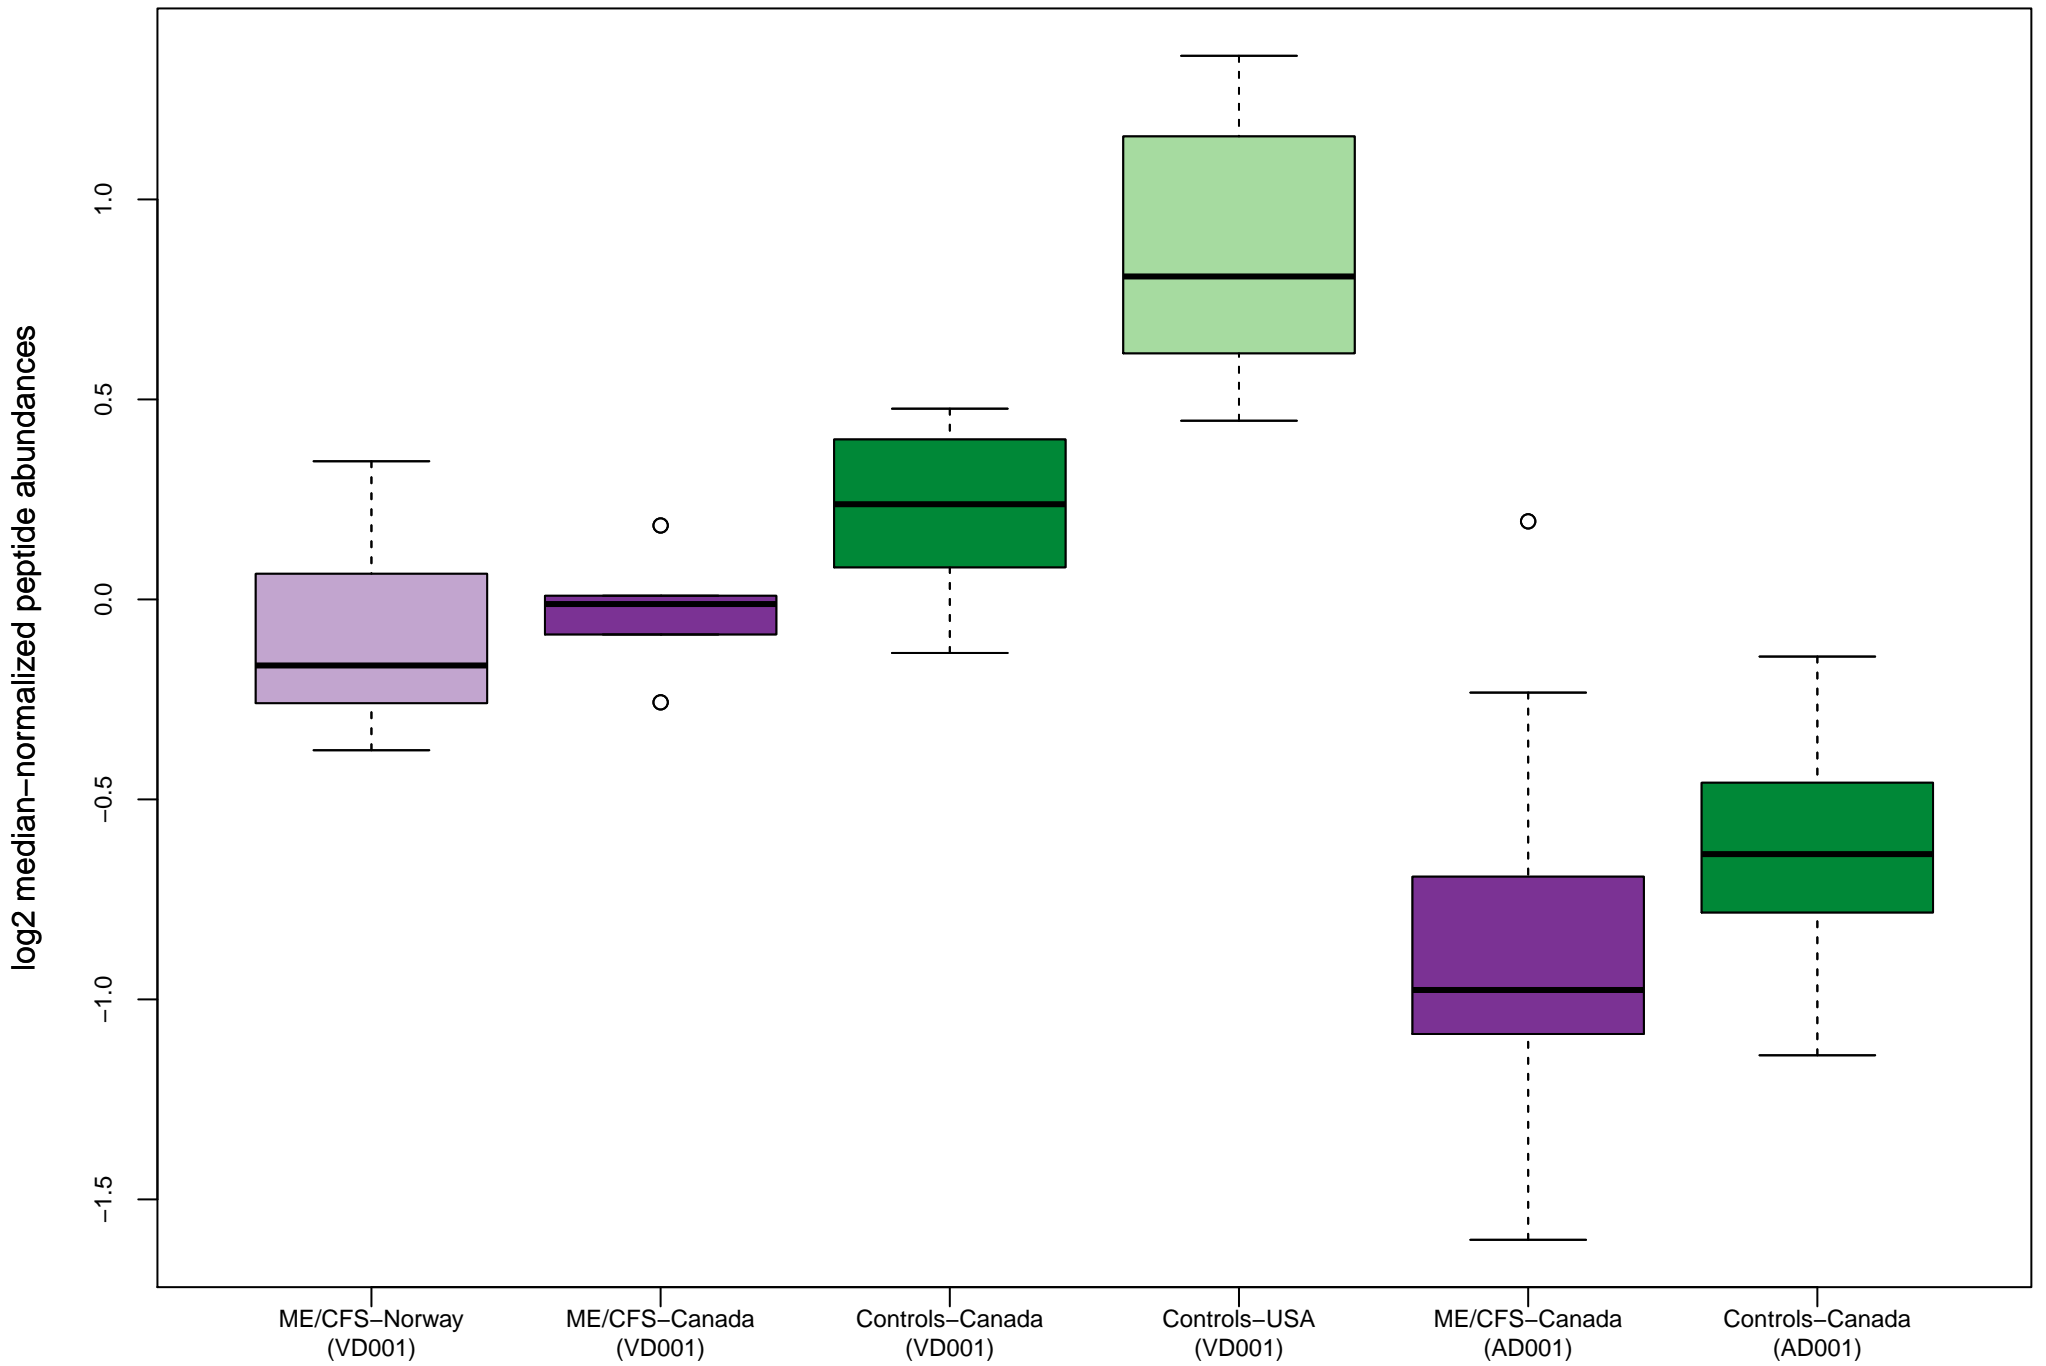

# GFRWARVSKGS

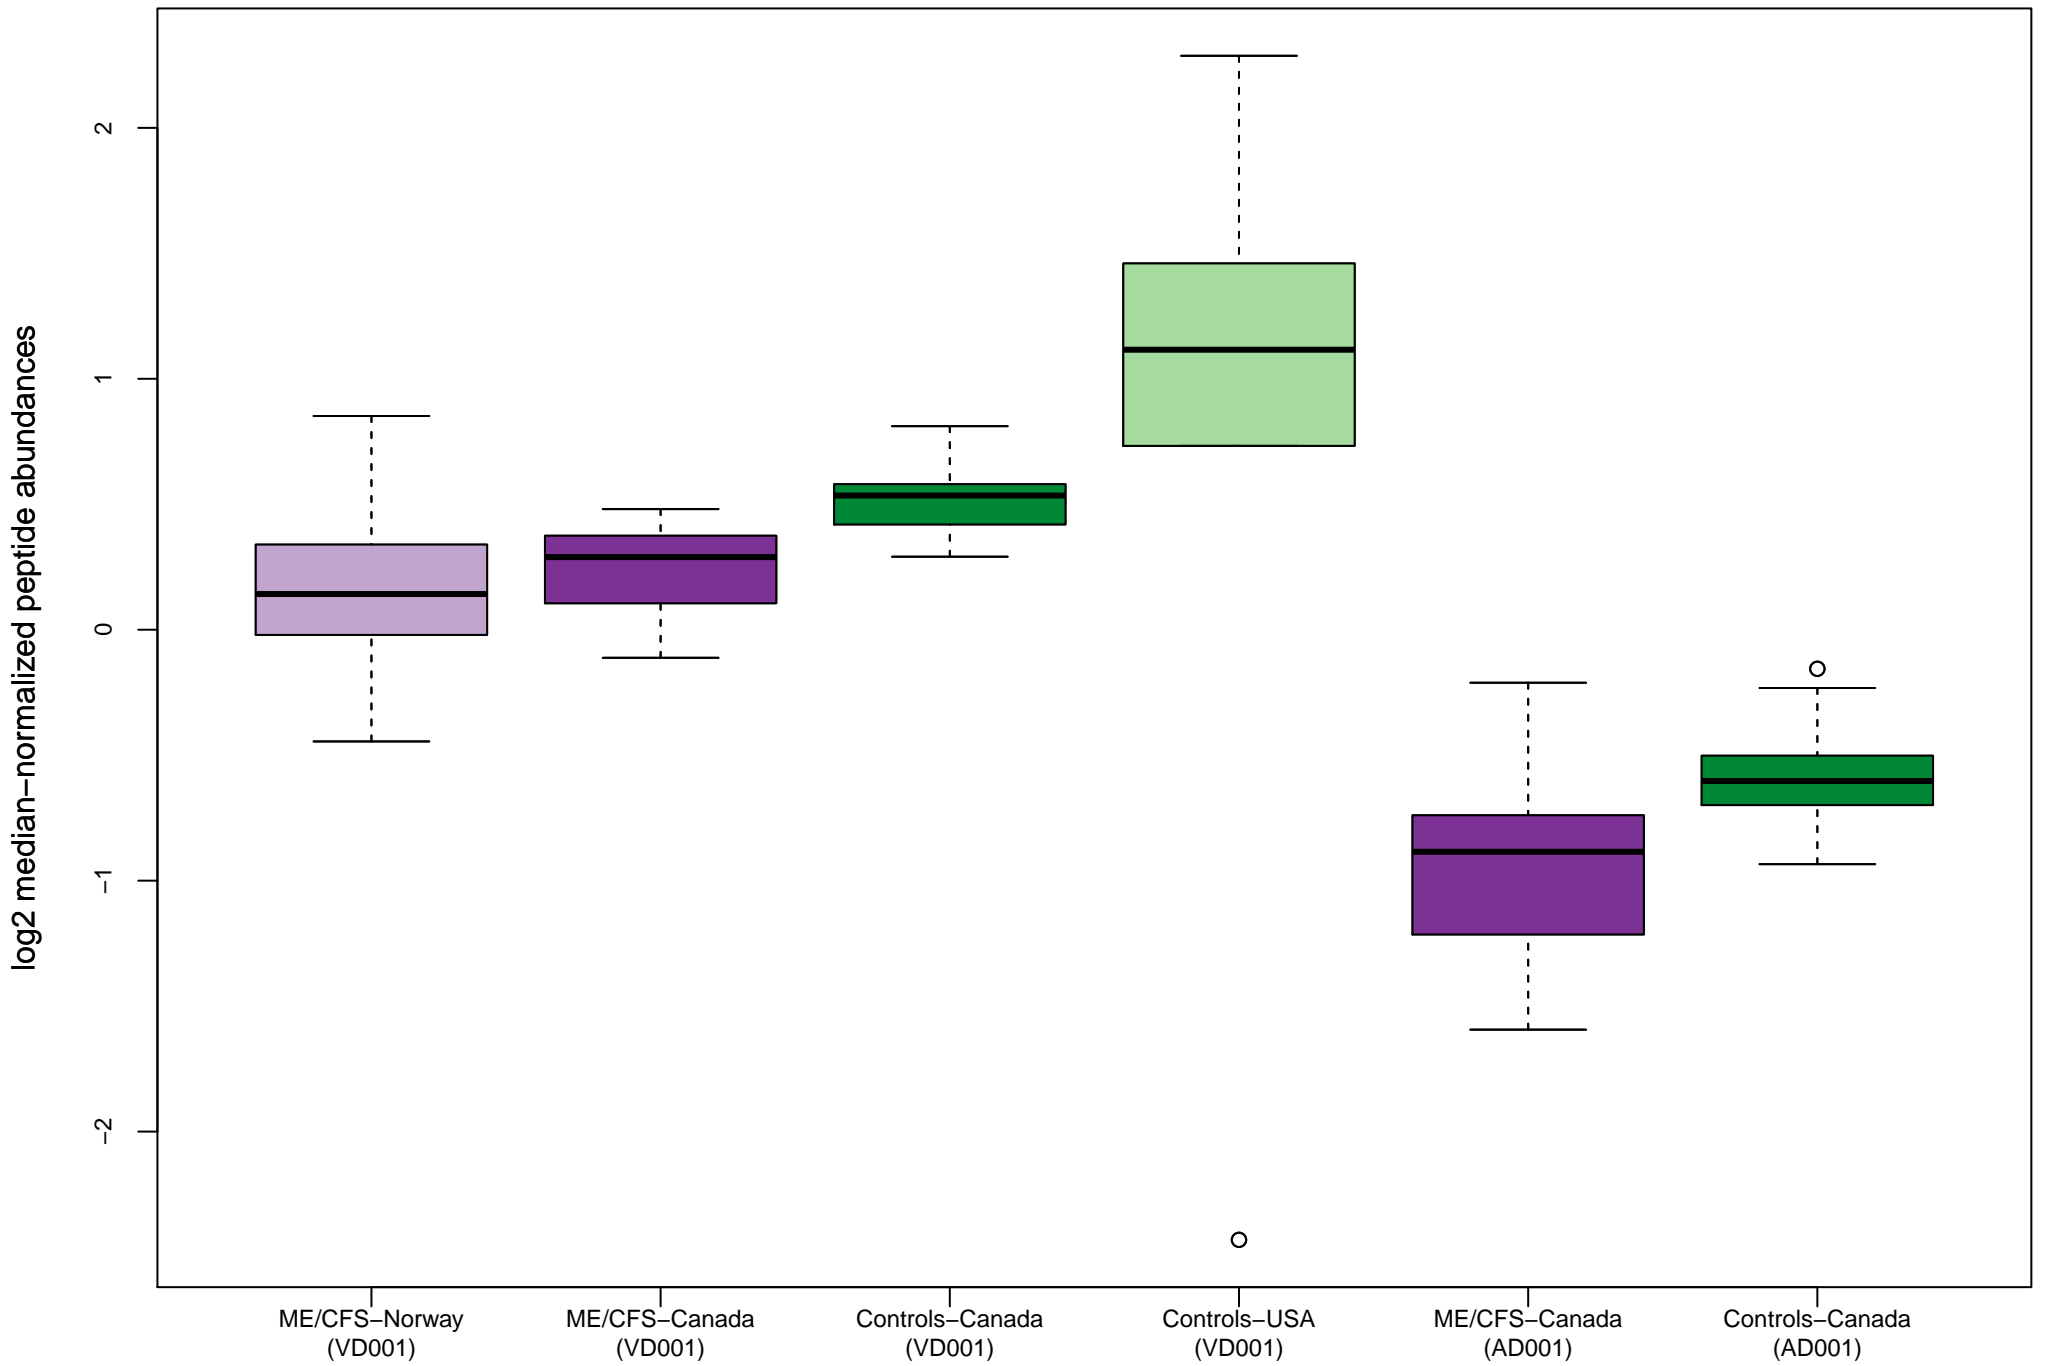

# GFVKLLSGVLSG

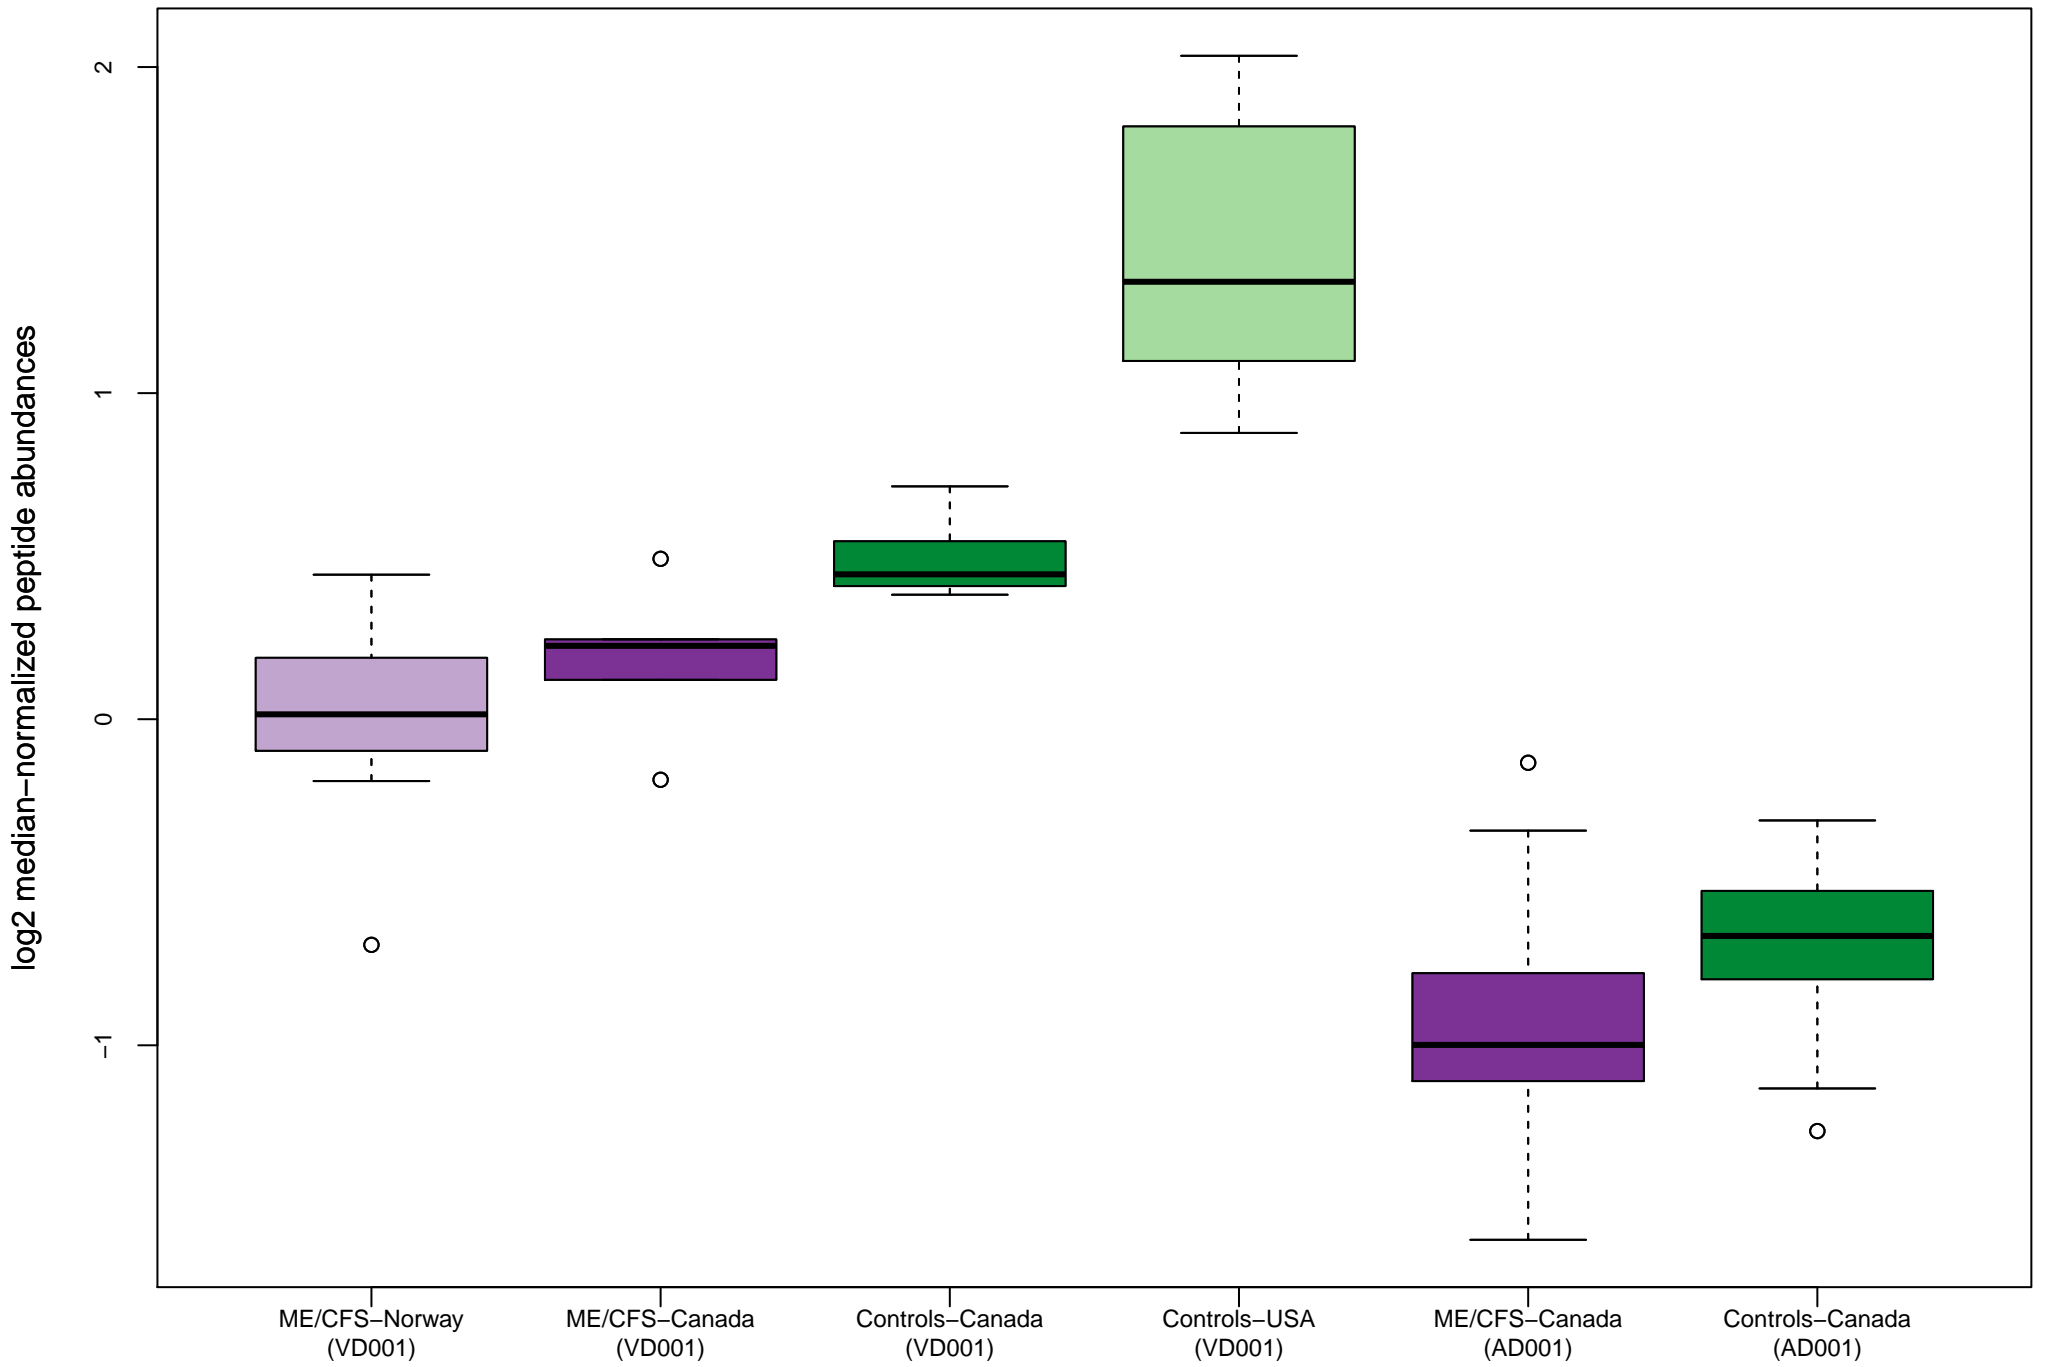

# GGRWGVLGALSG

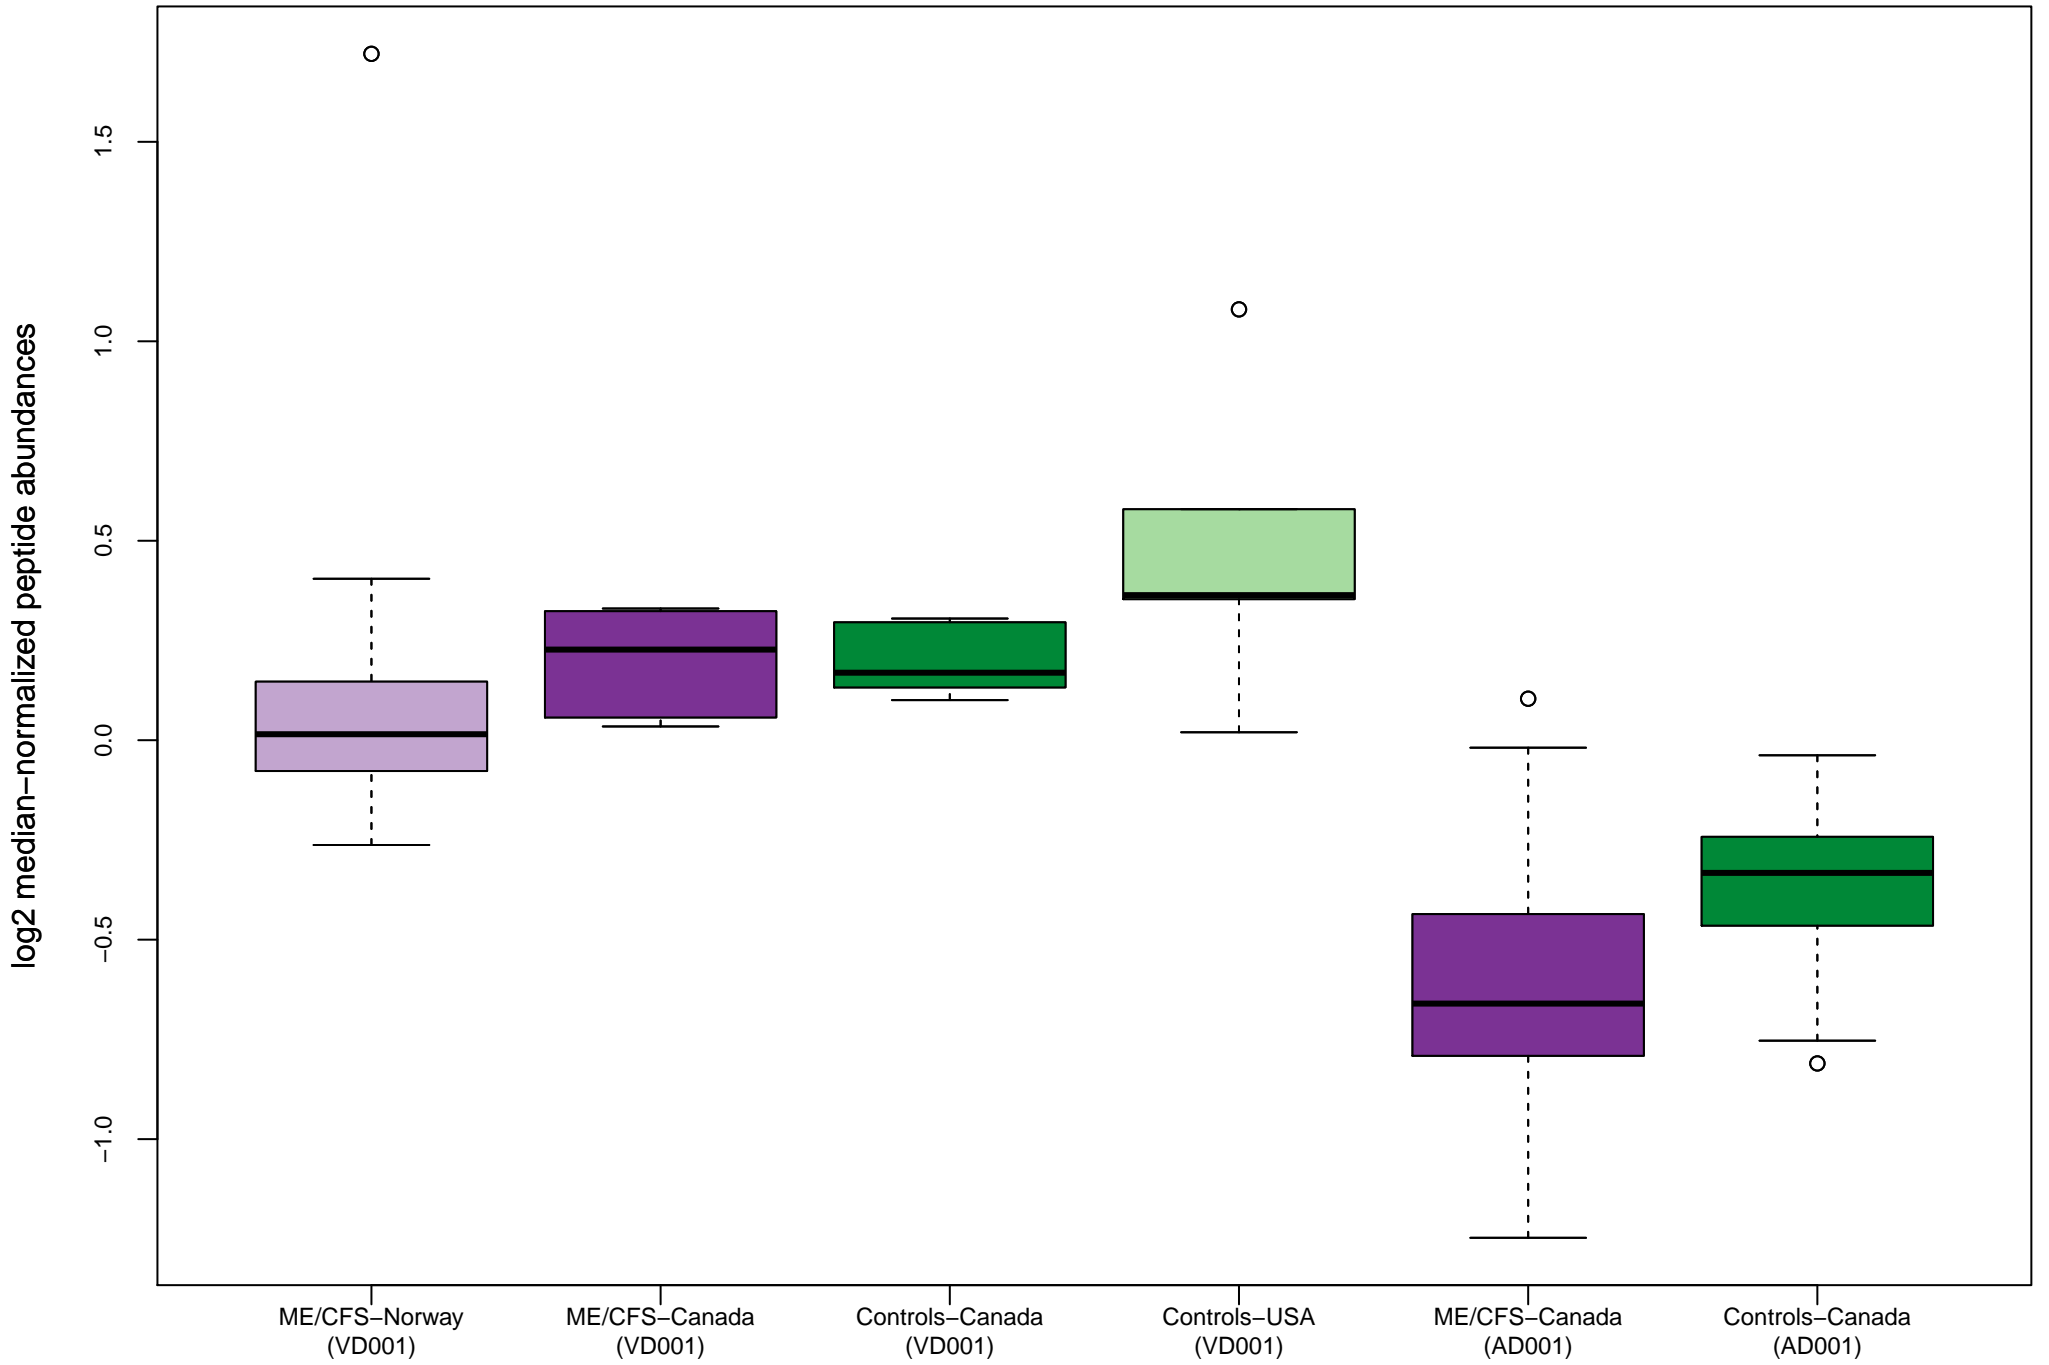



# GHSWRLGVALSG

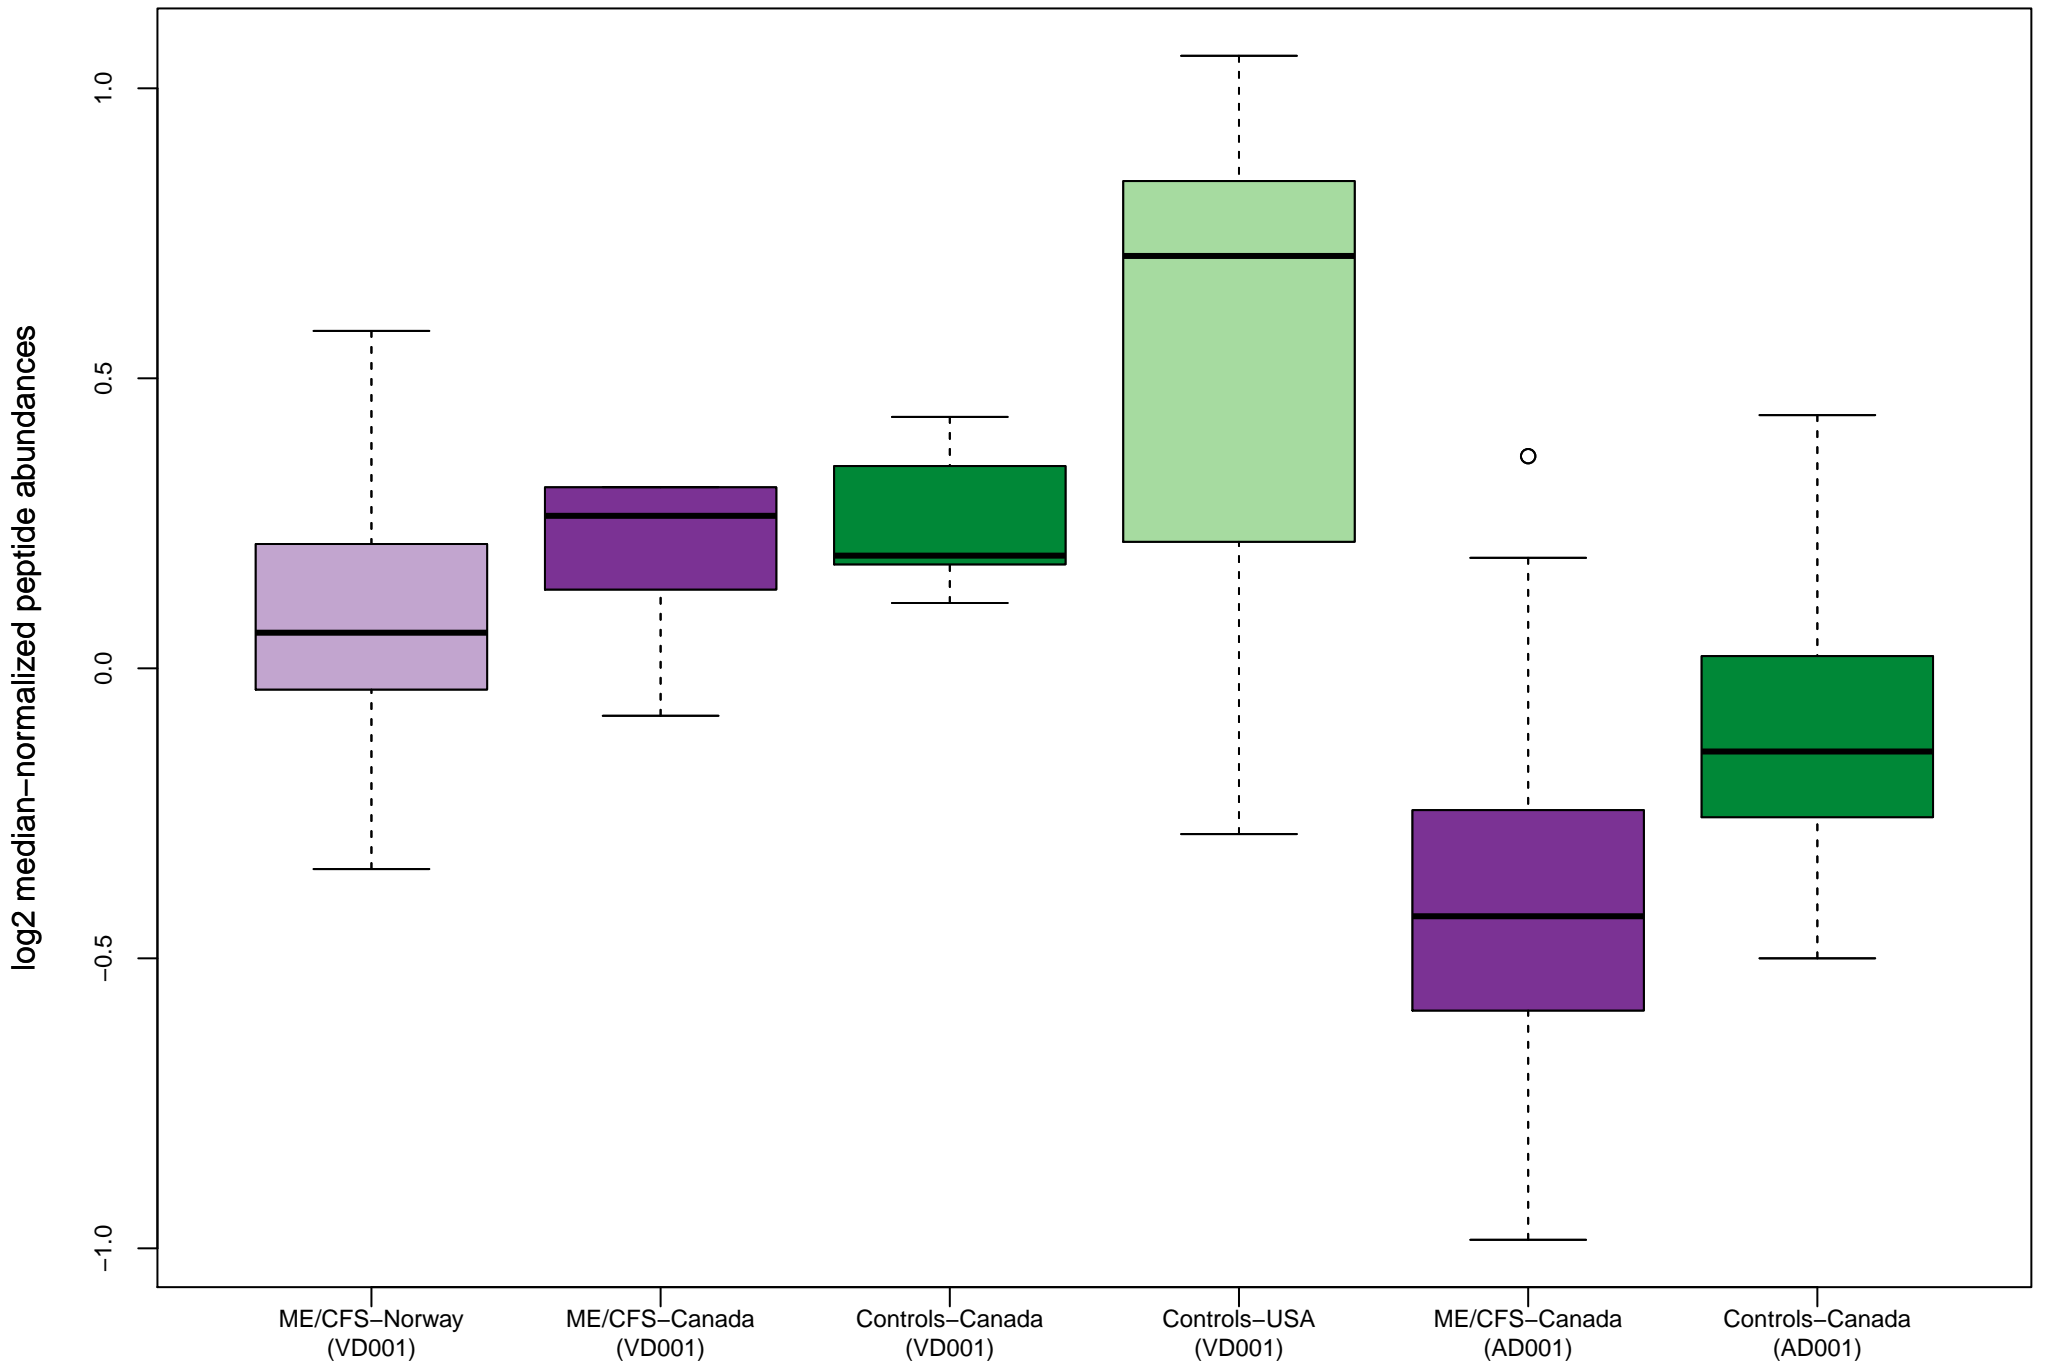

# GKAFWLREYLLG

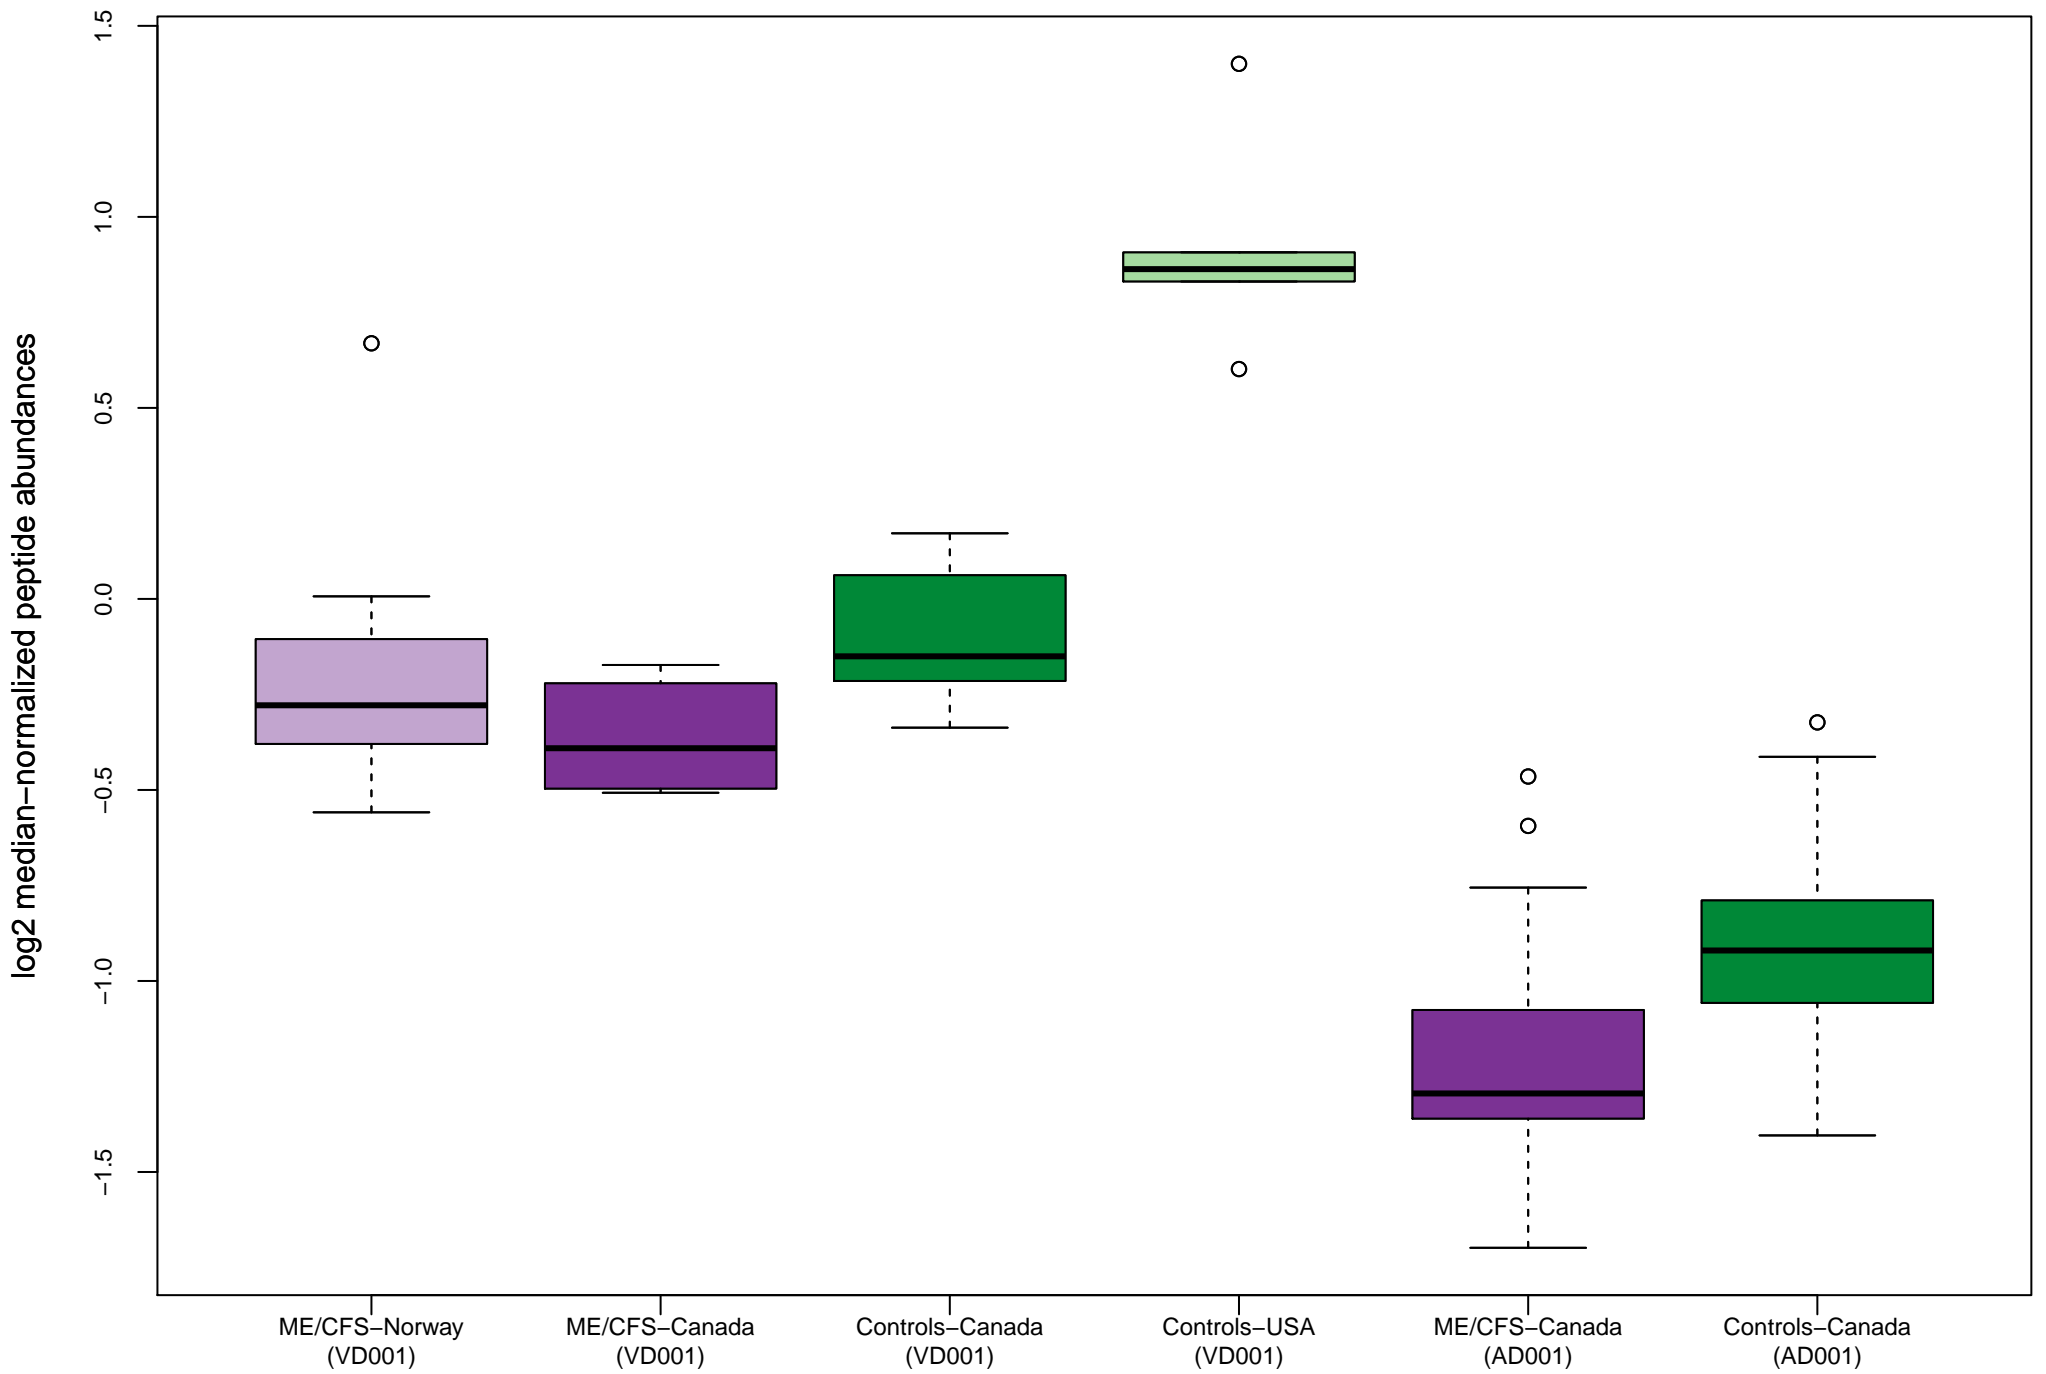

# GNVWRWALGVAS

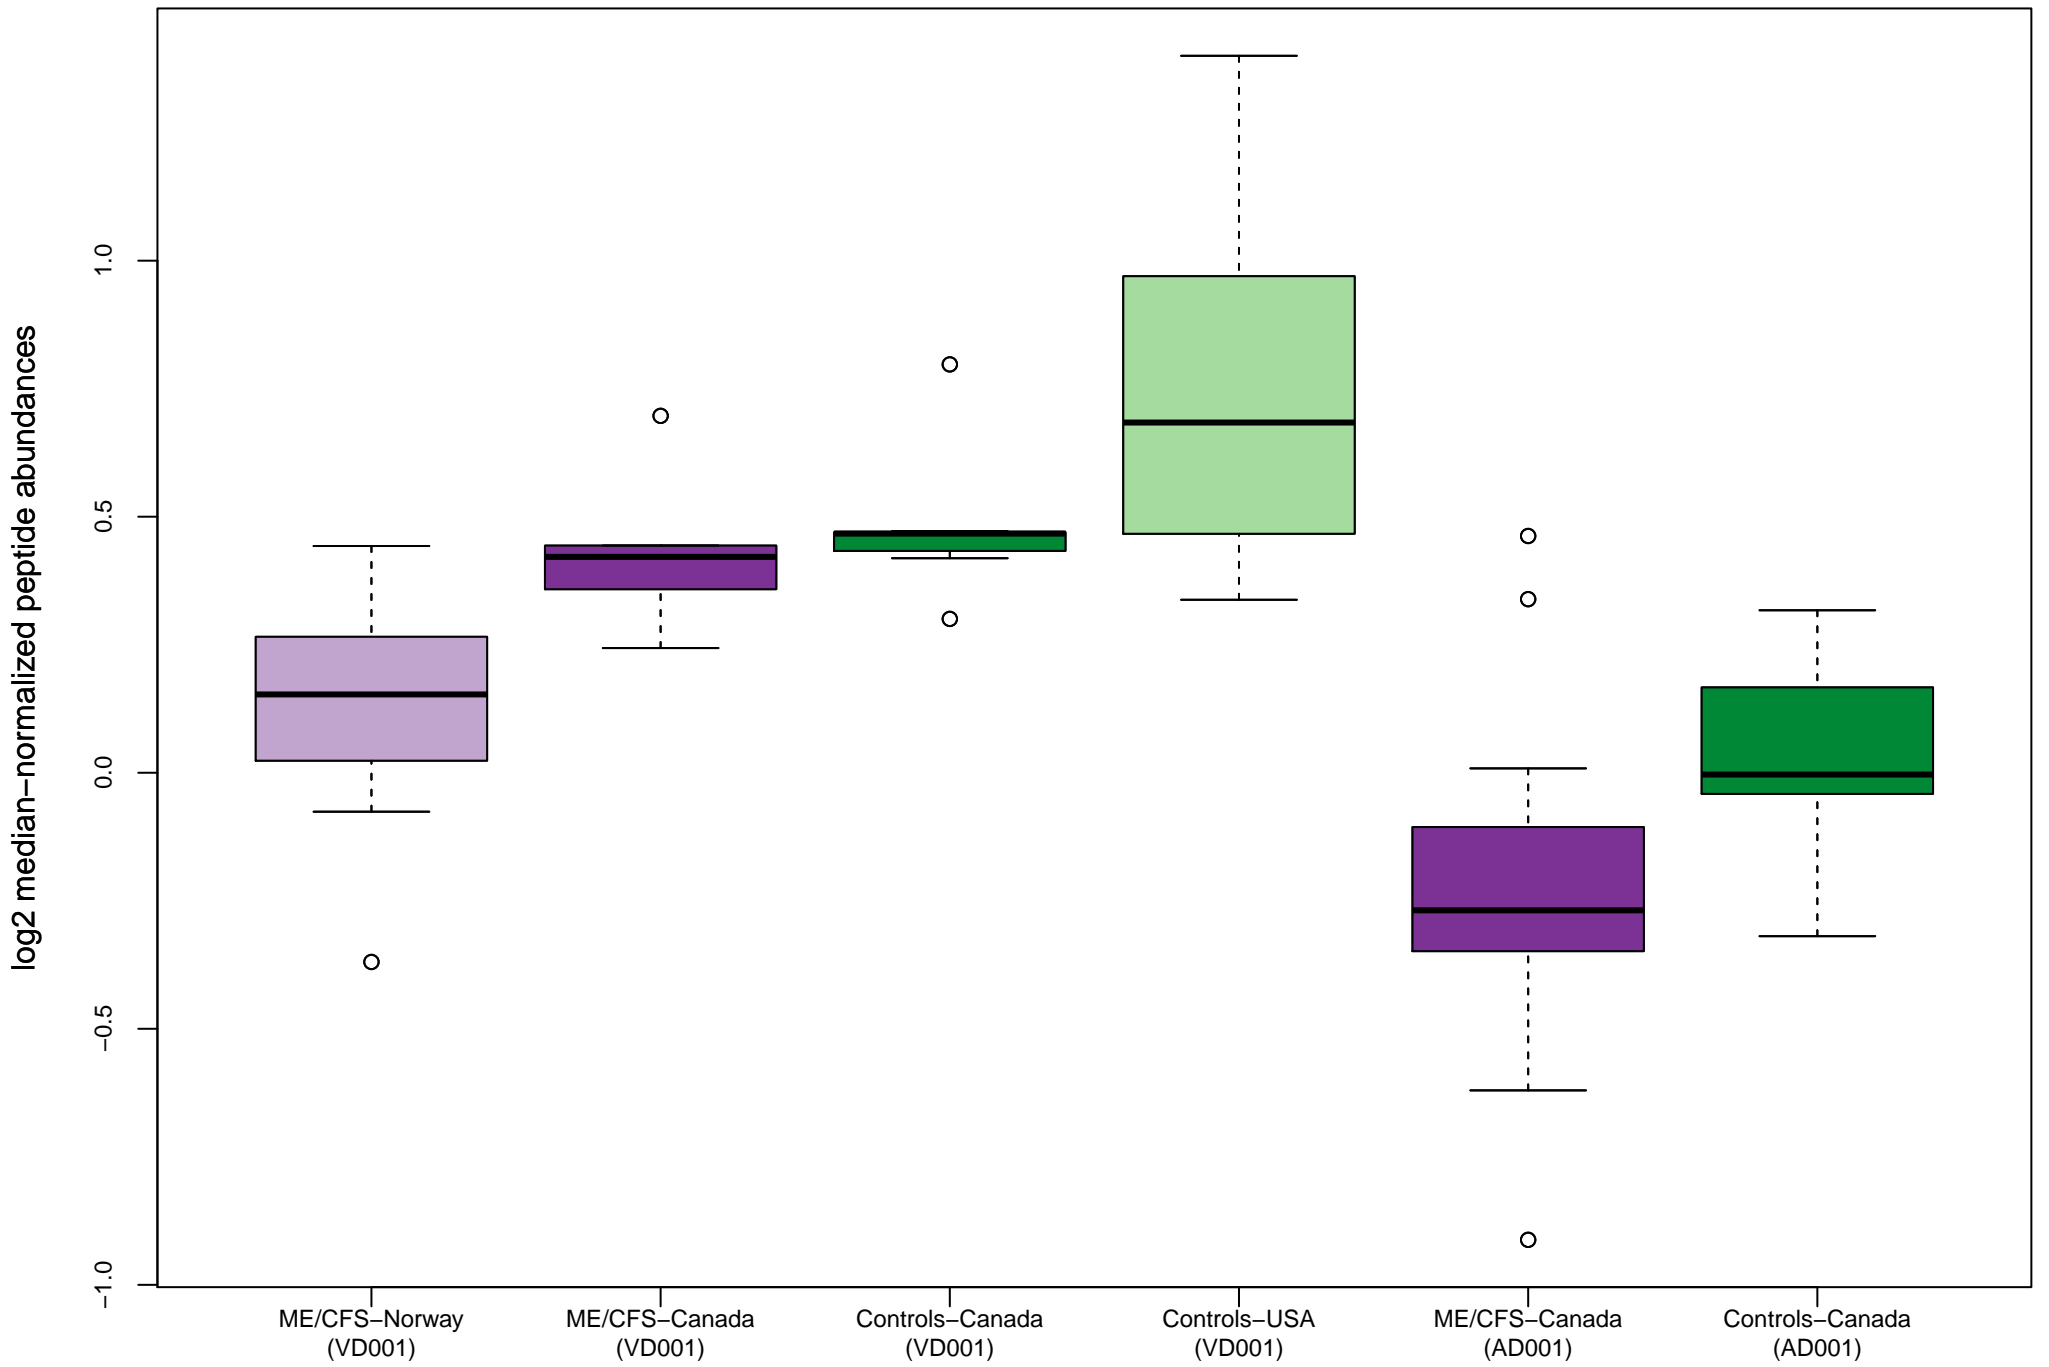

# GRFLYNLSVLSG

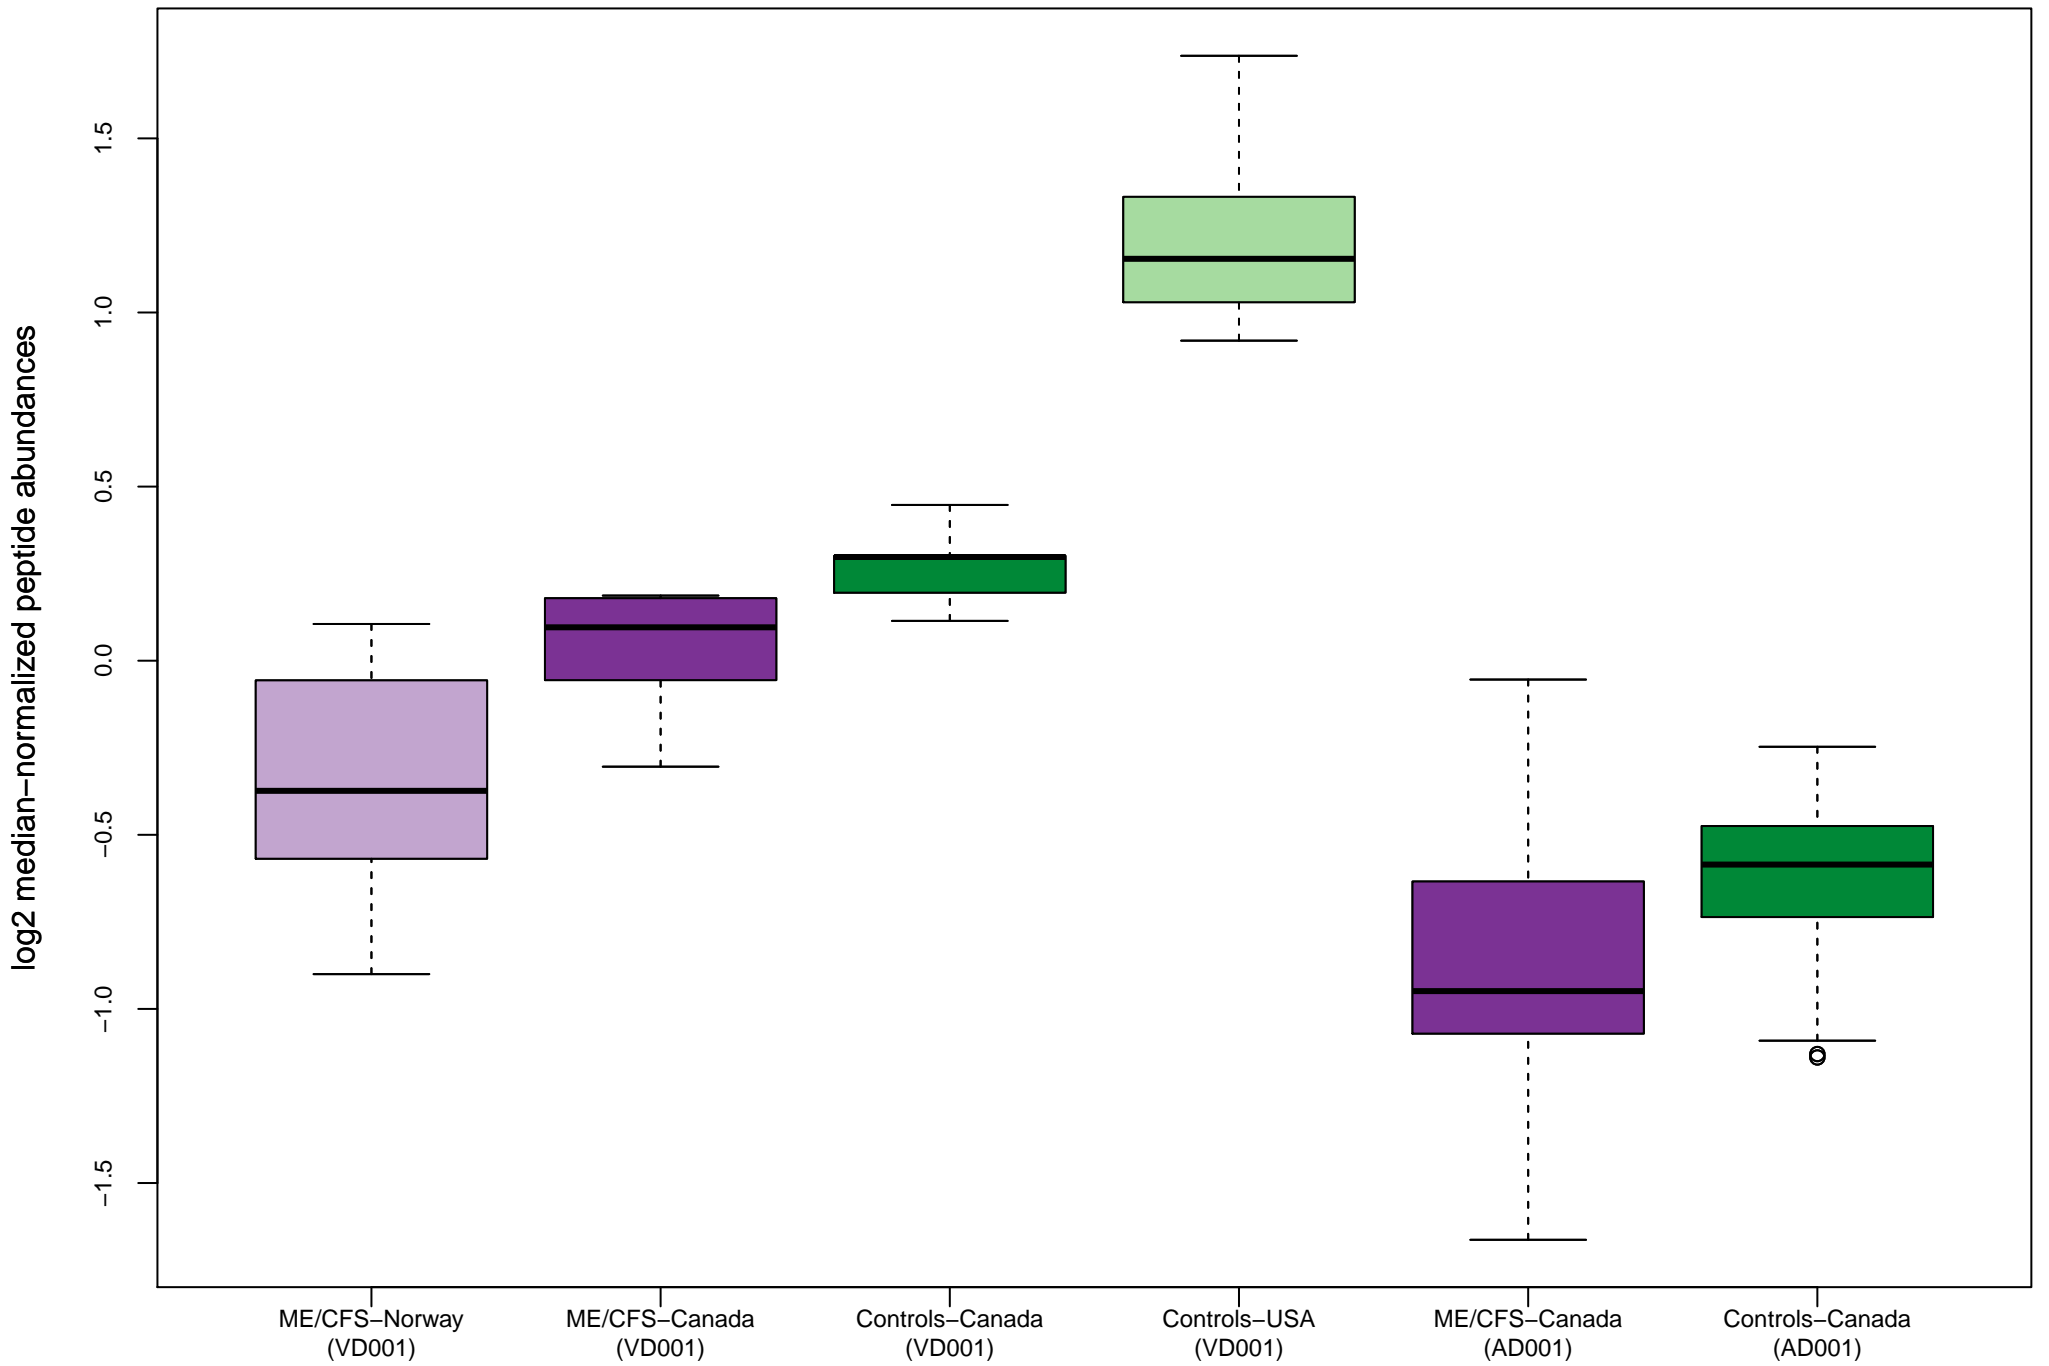

# GRFRNYVALSGL

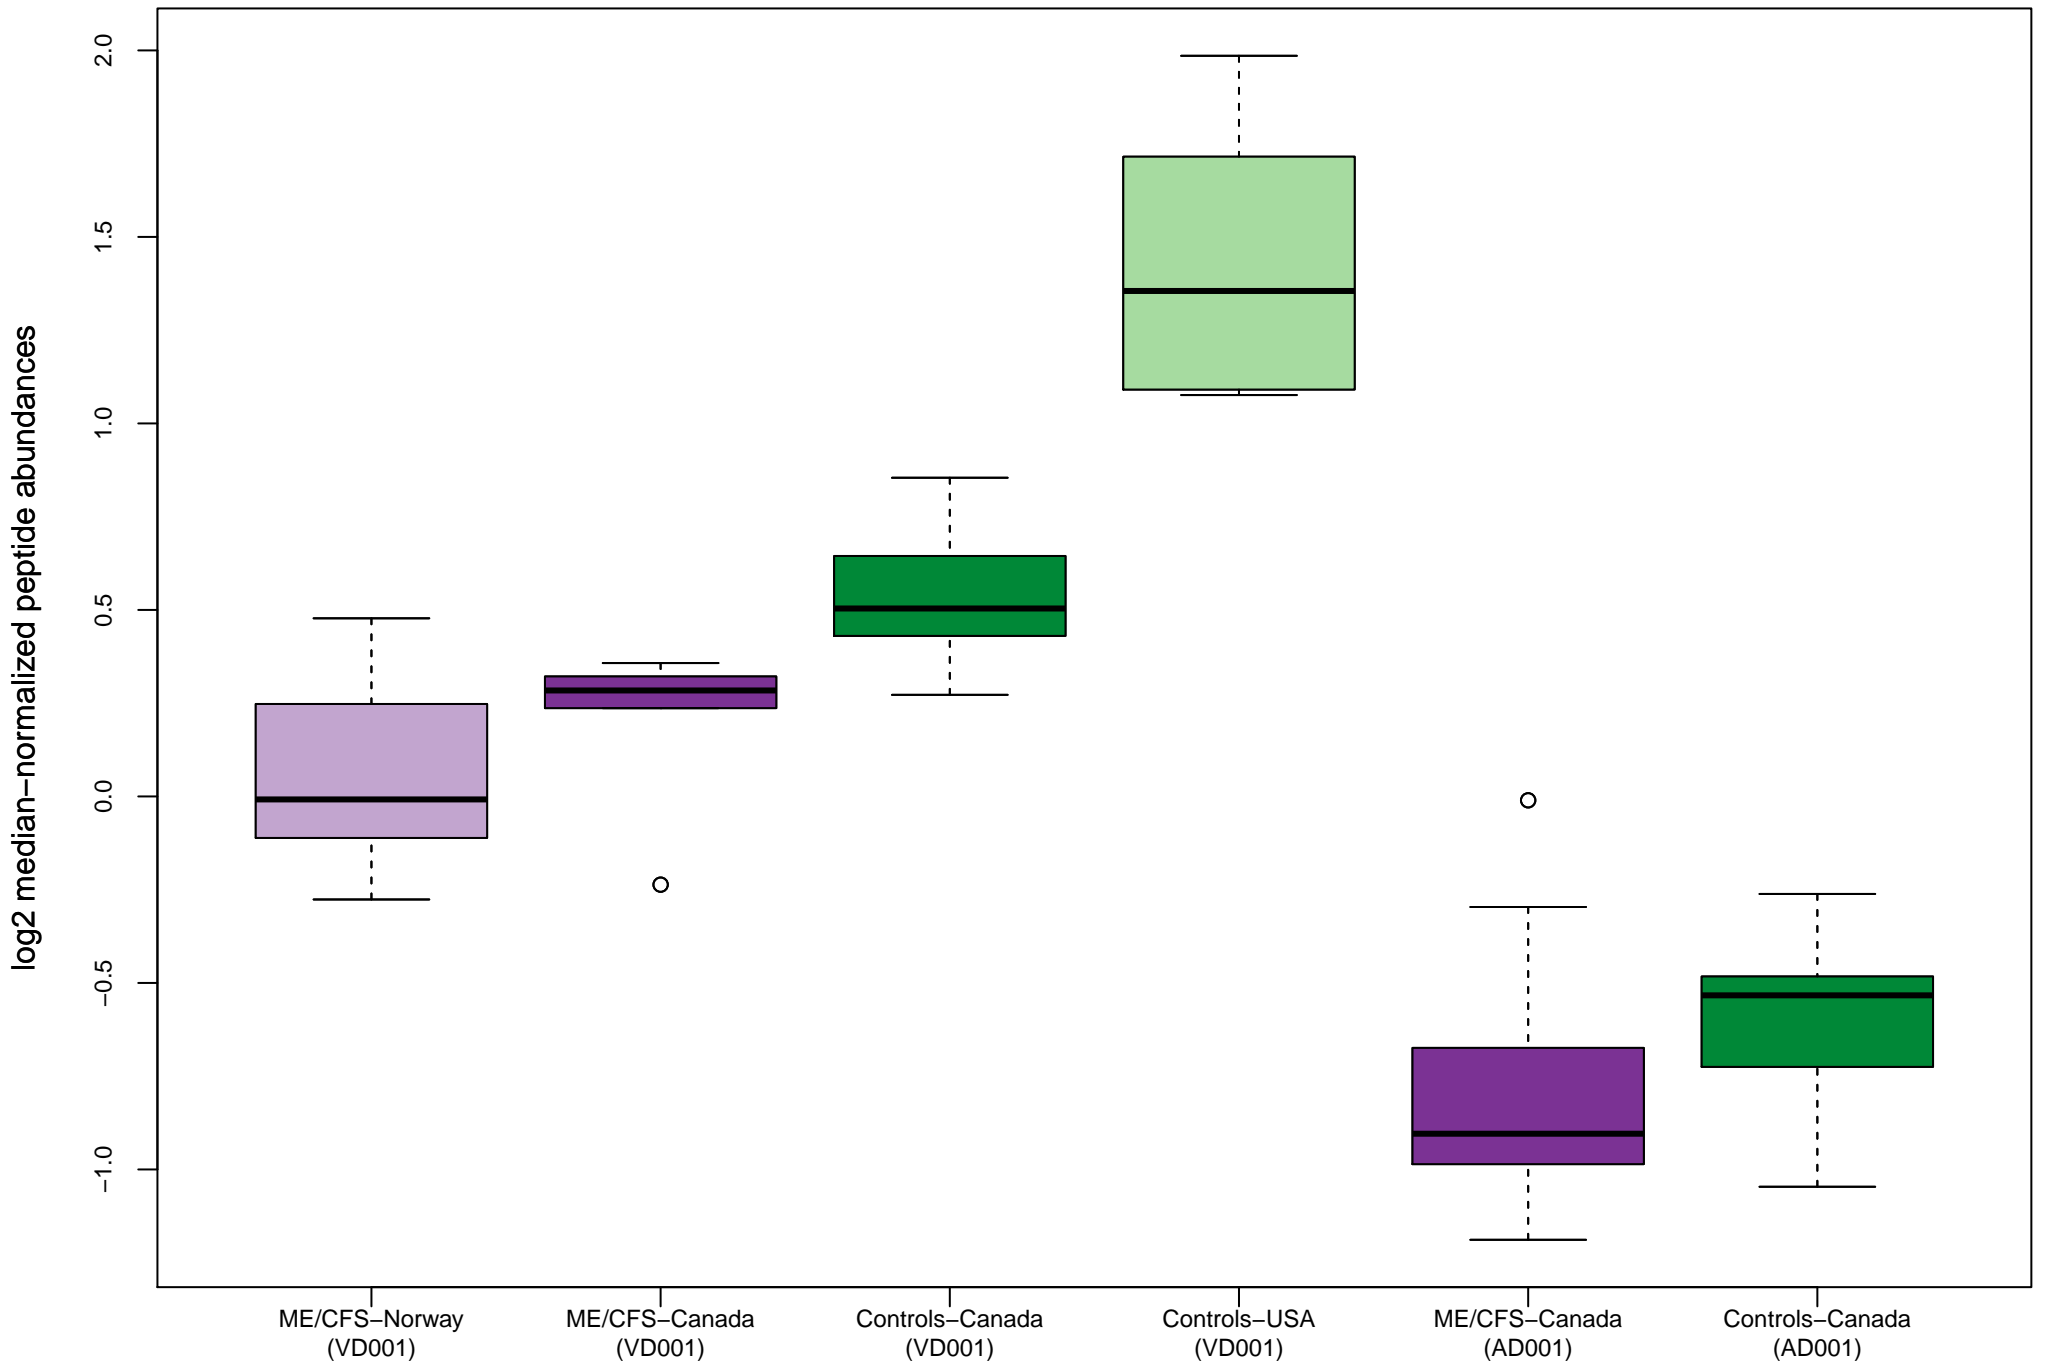

# GRFVYNLGVALS

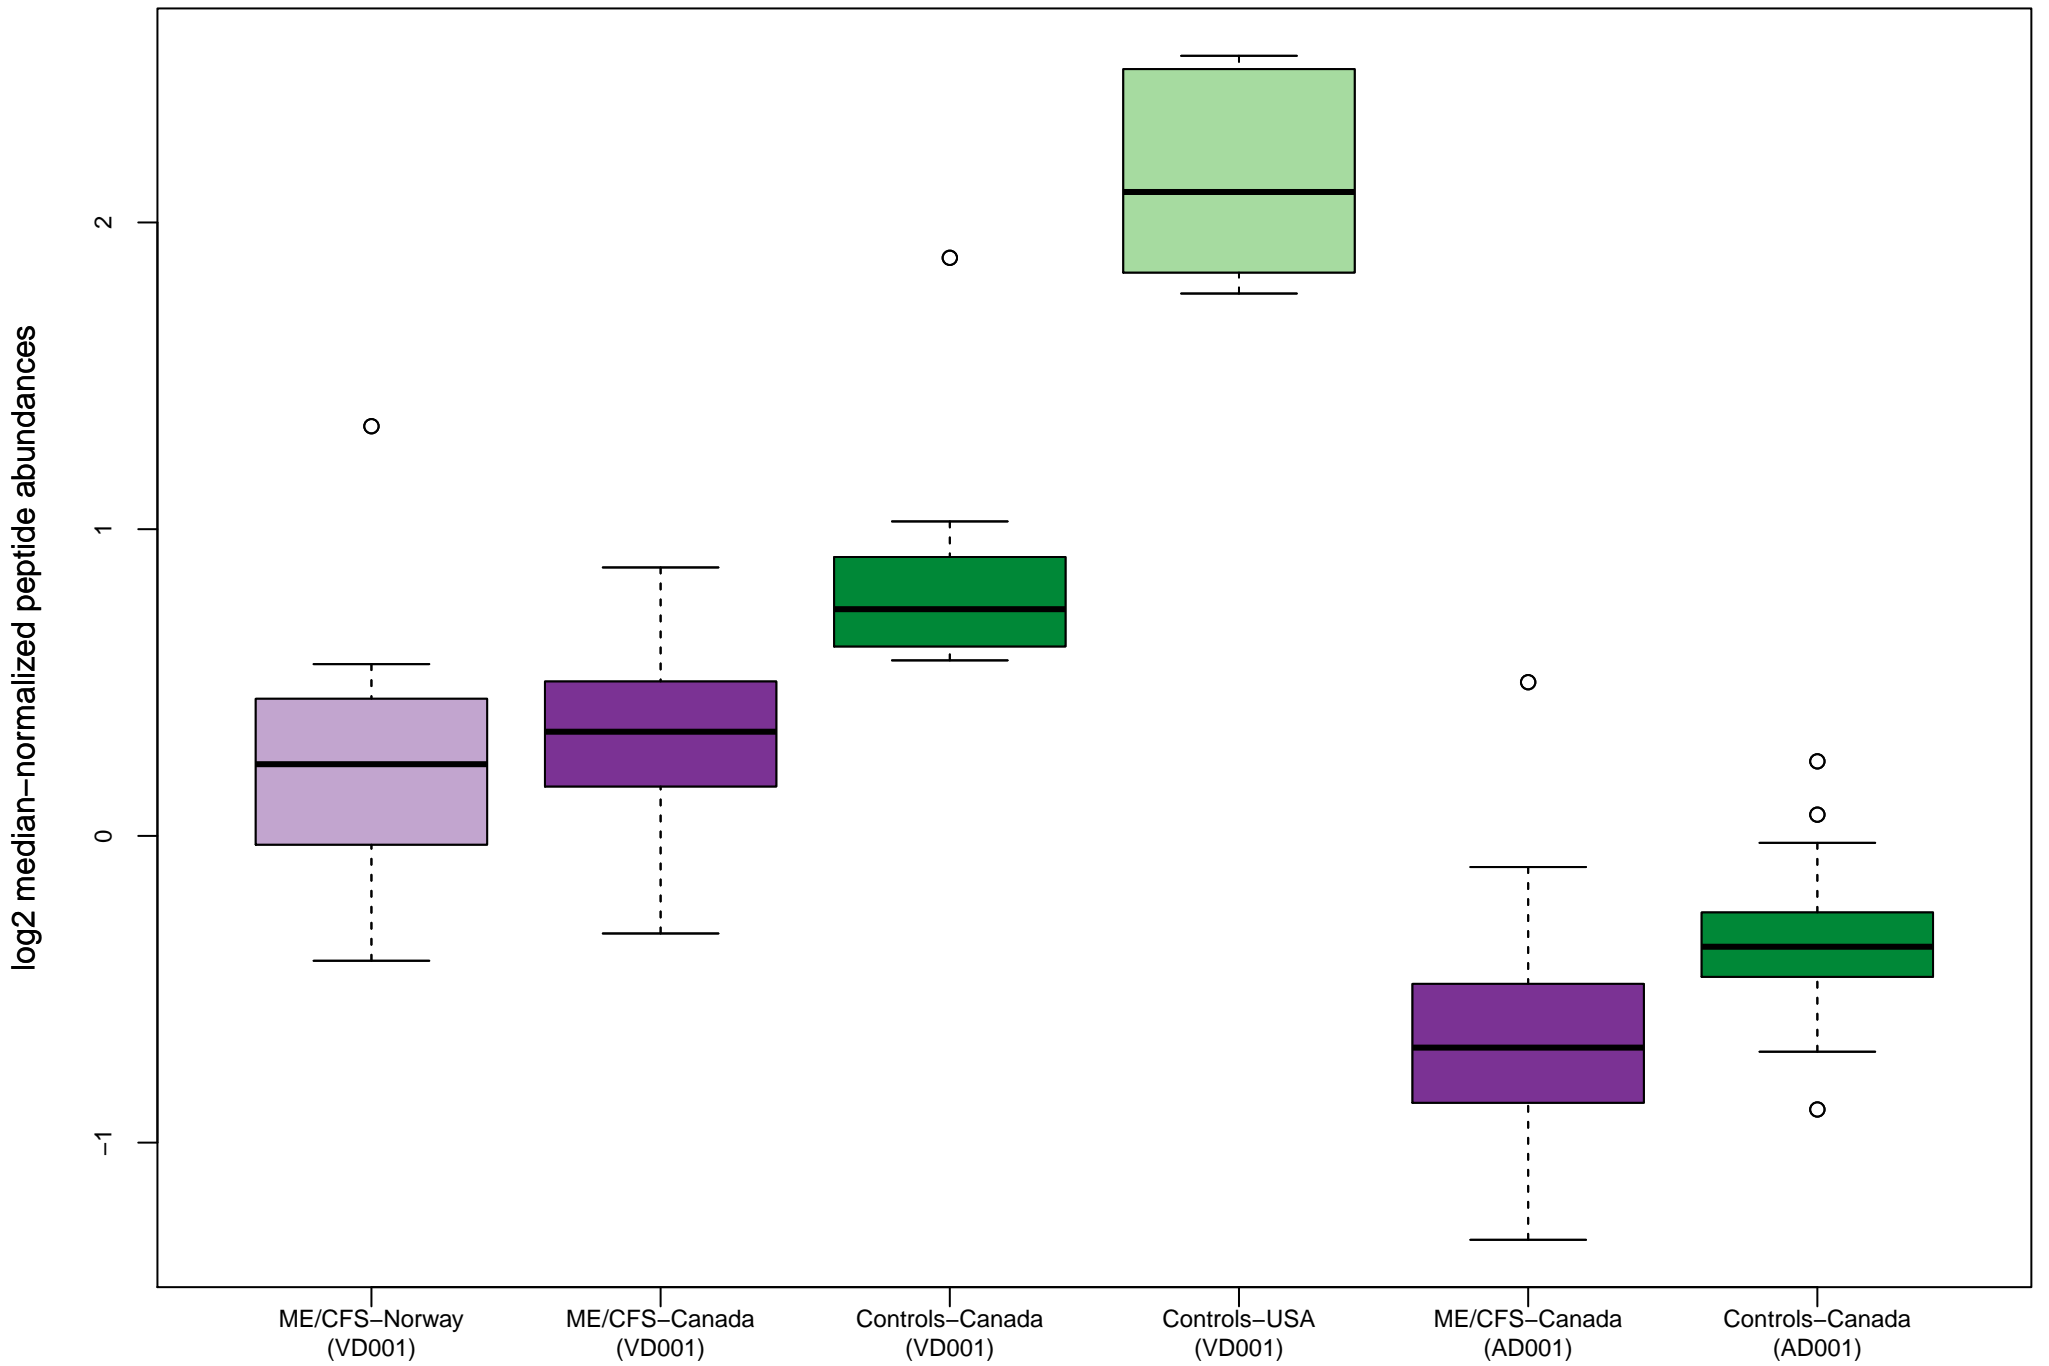

# GRFWANLGVALS

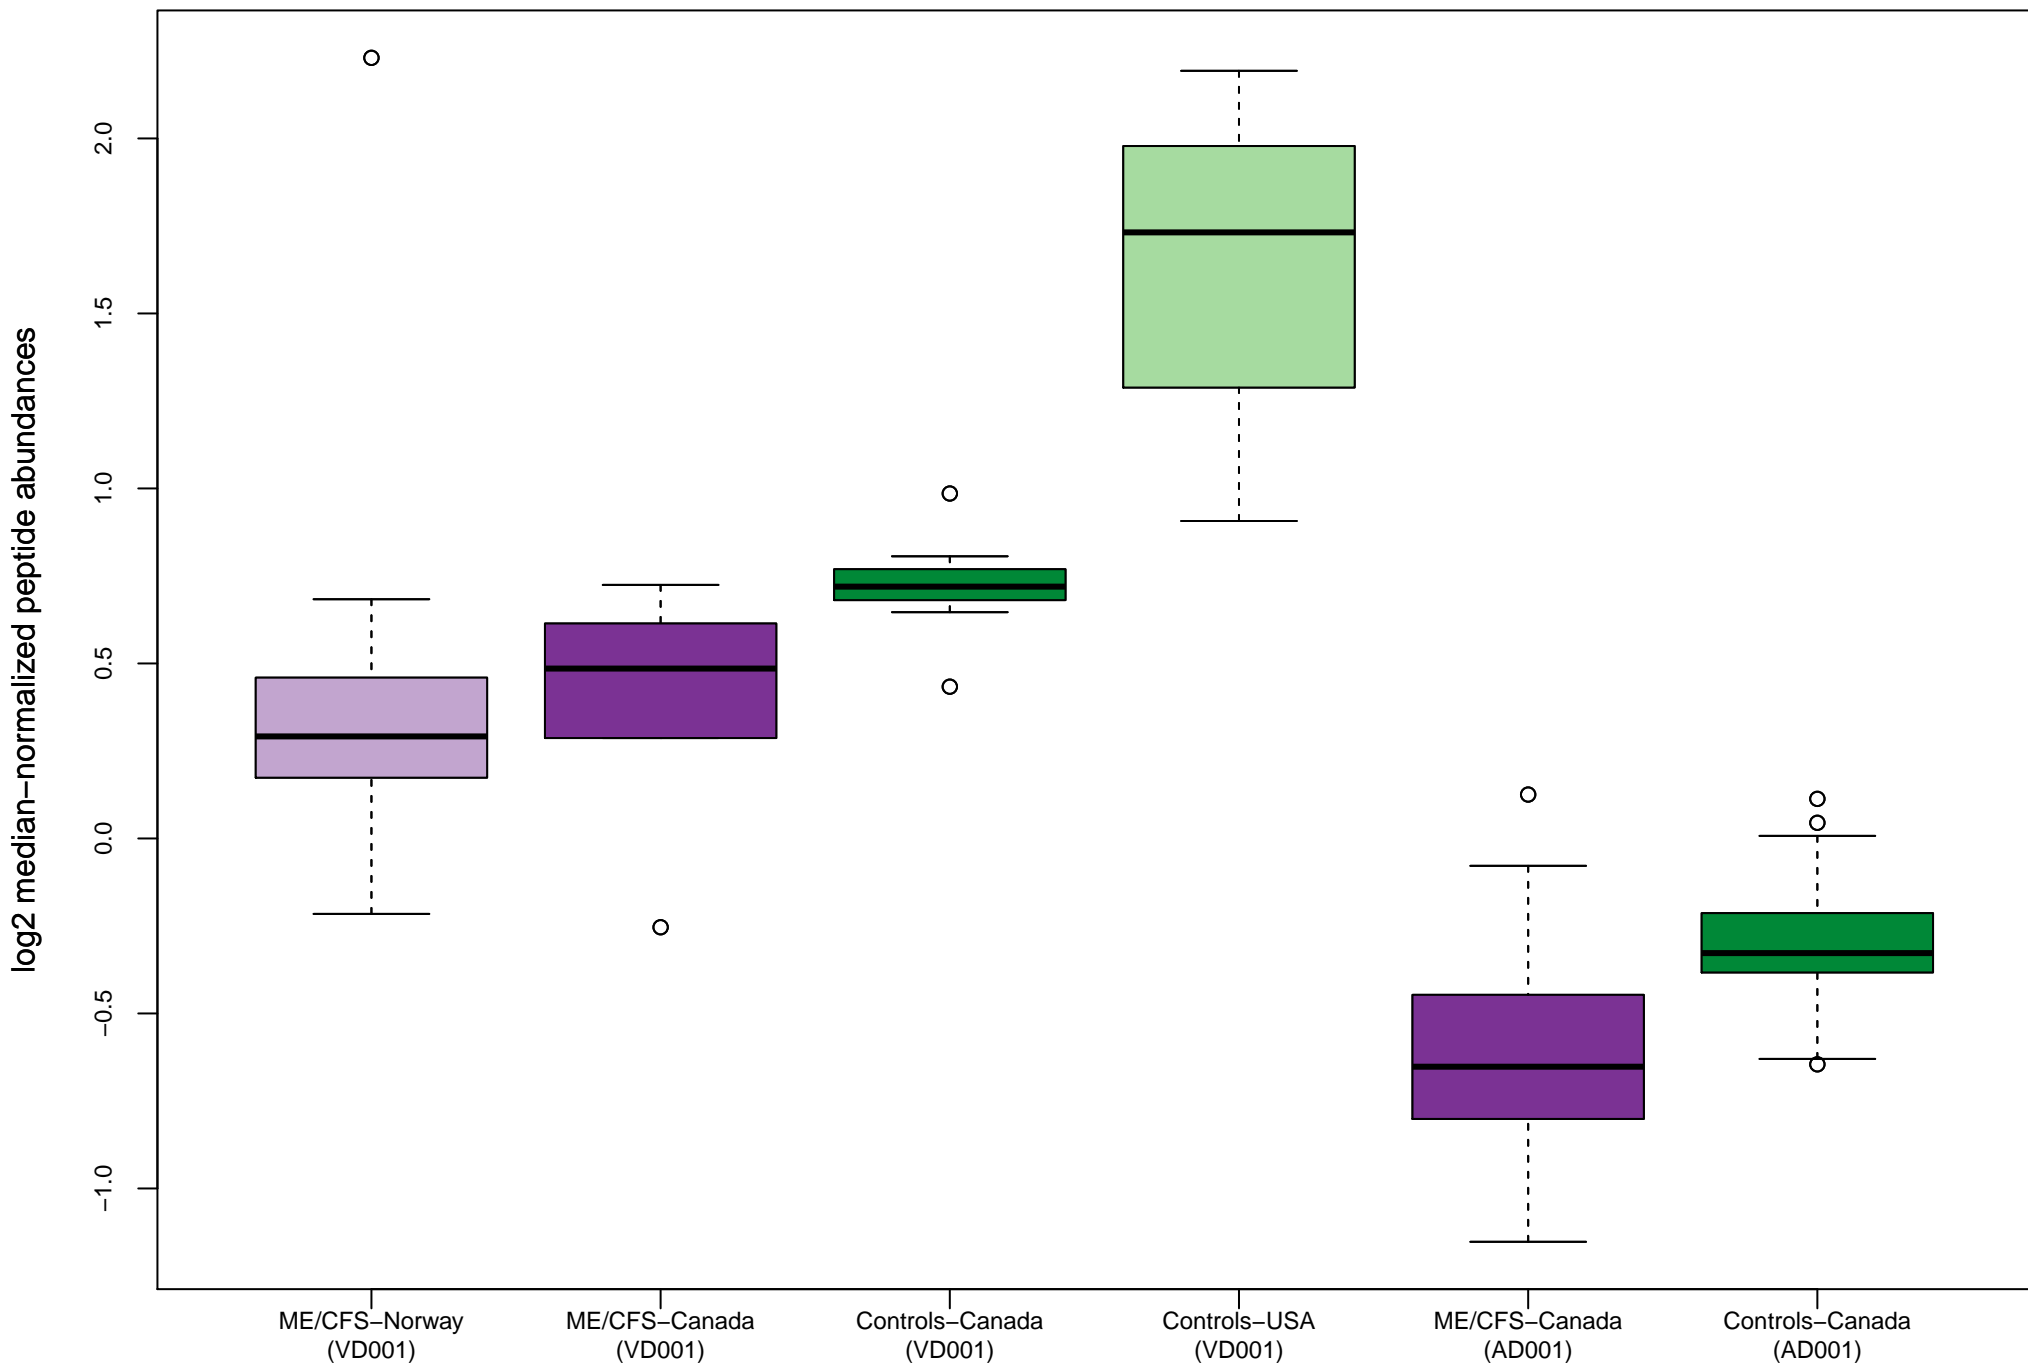

# GRLWYNALSVLS

log2 median-normalized peptide abundances

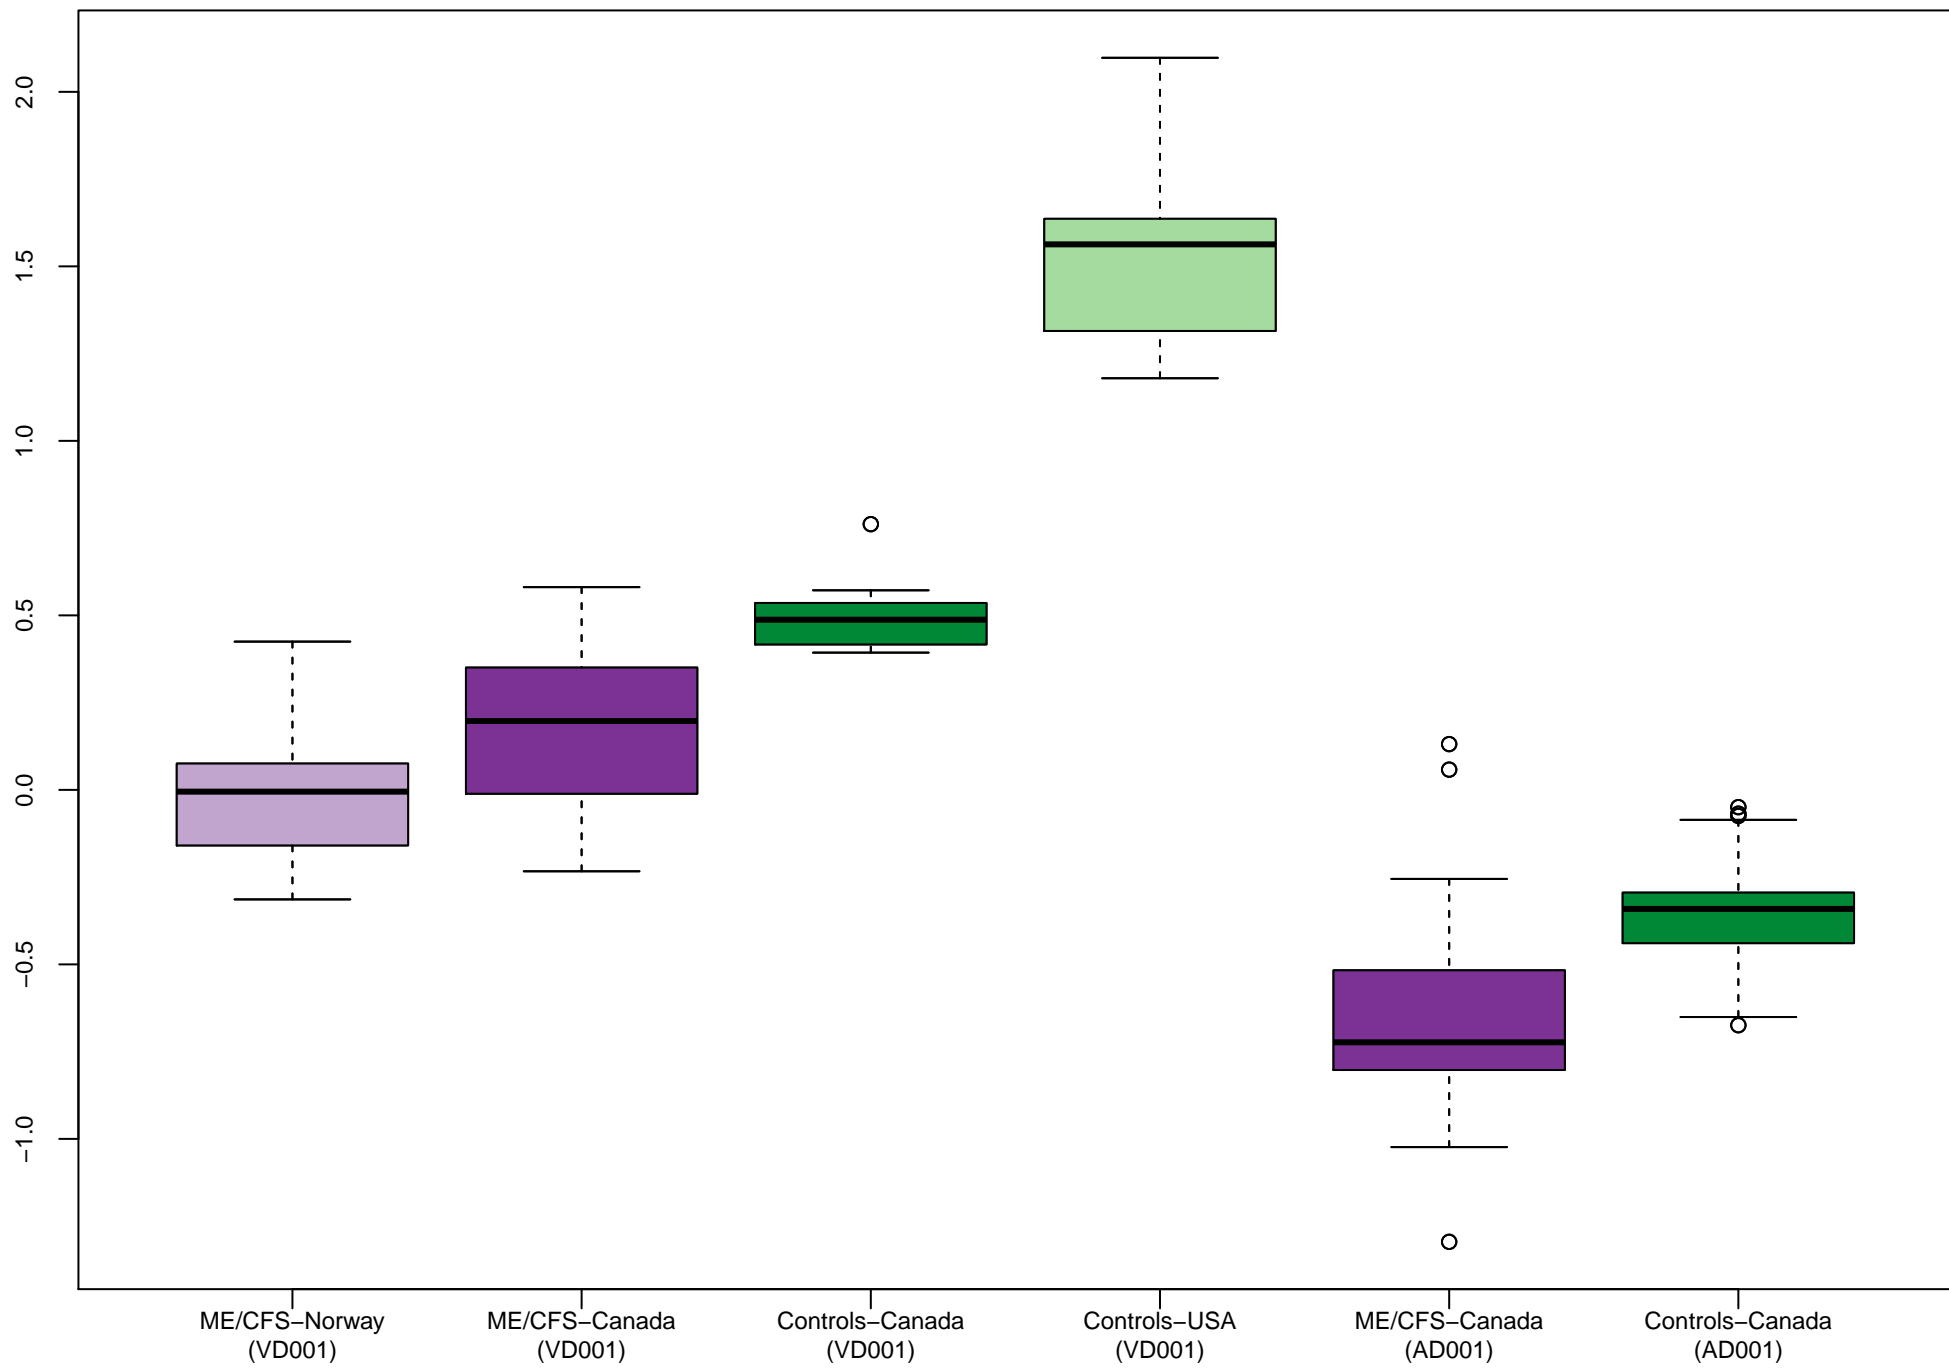



# GRYSRWWVLGVL

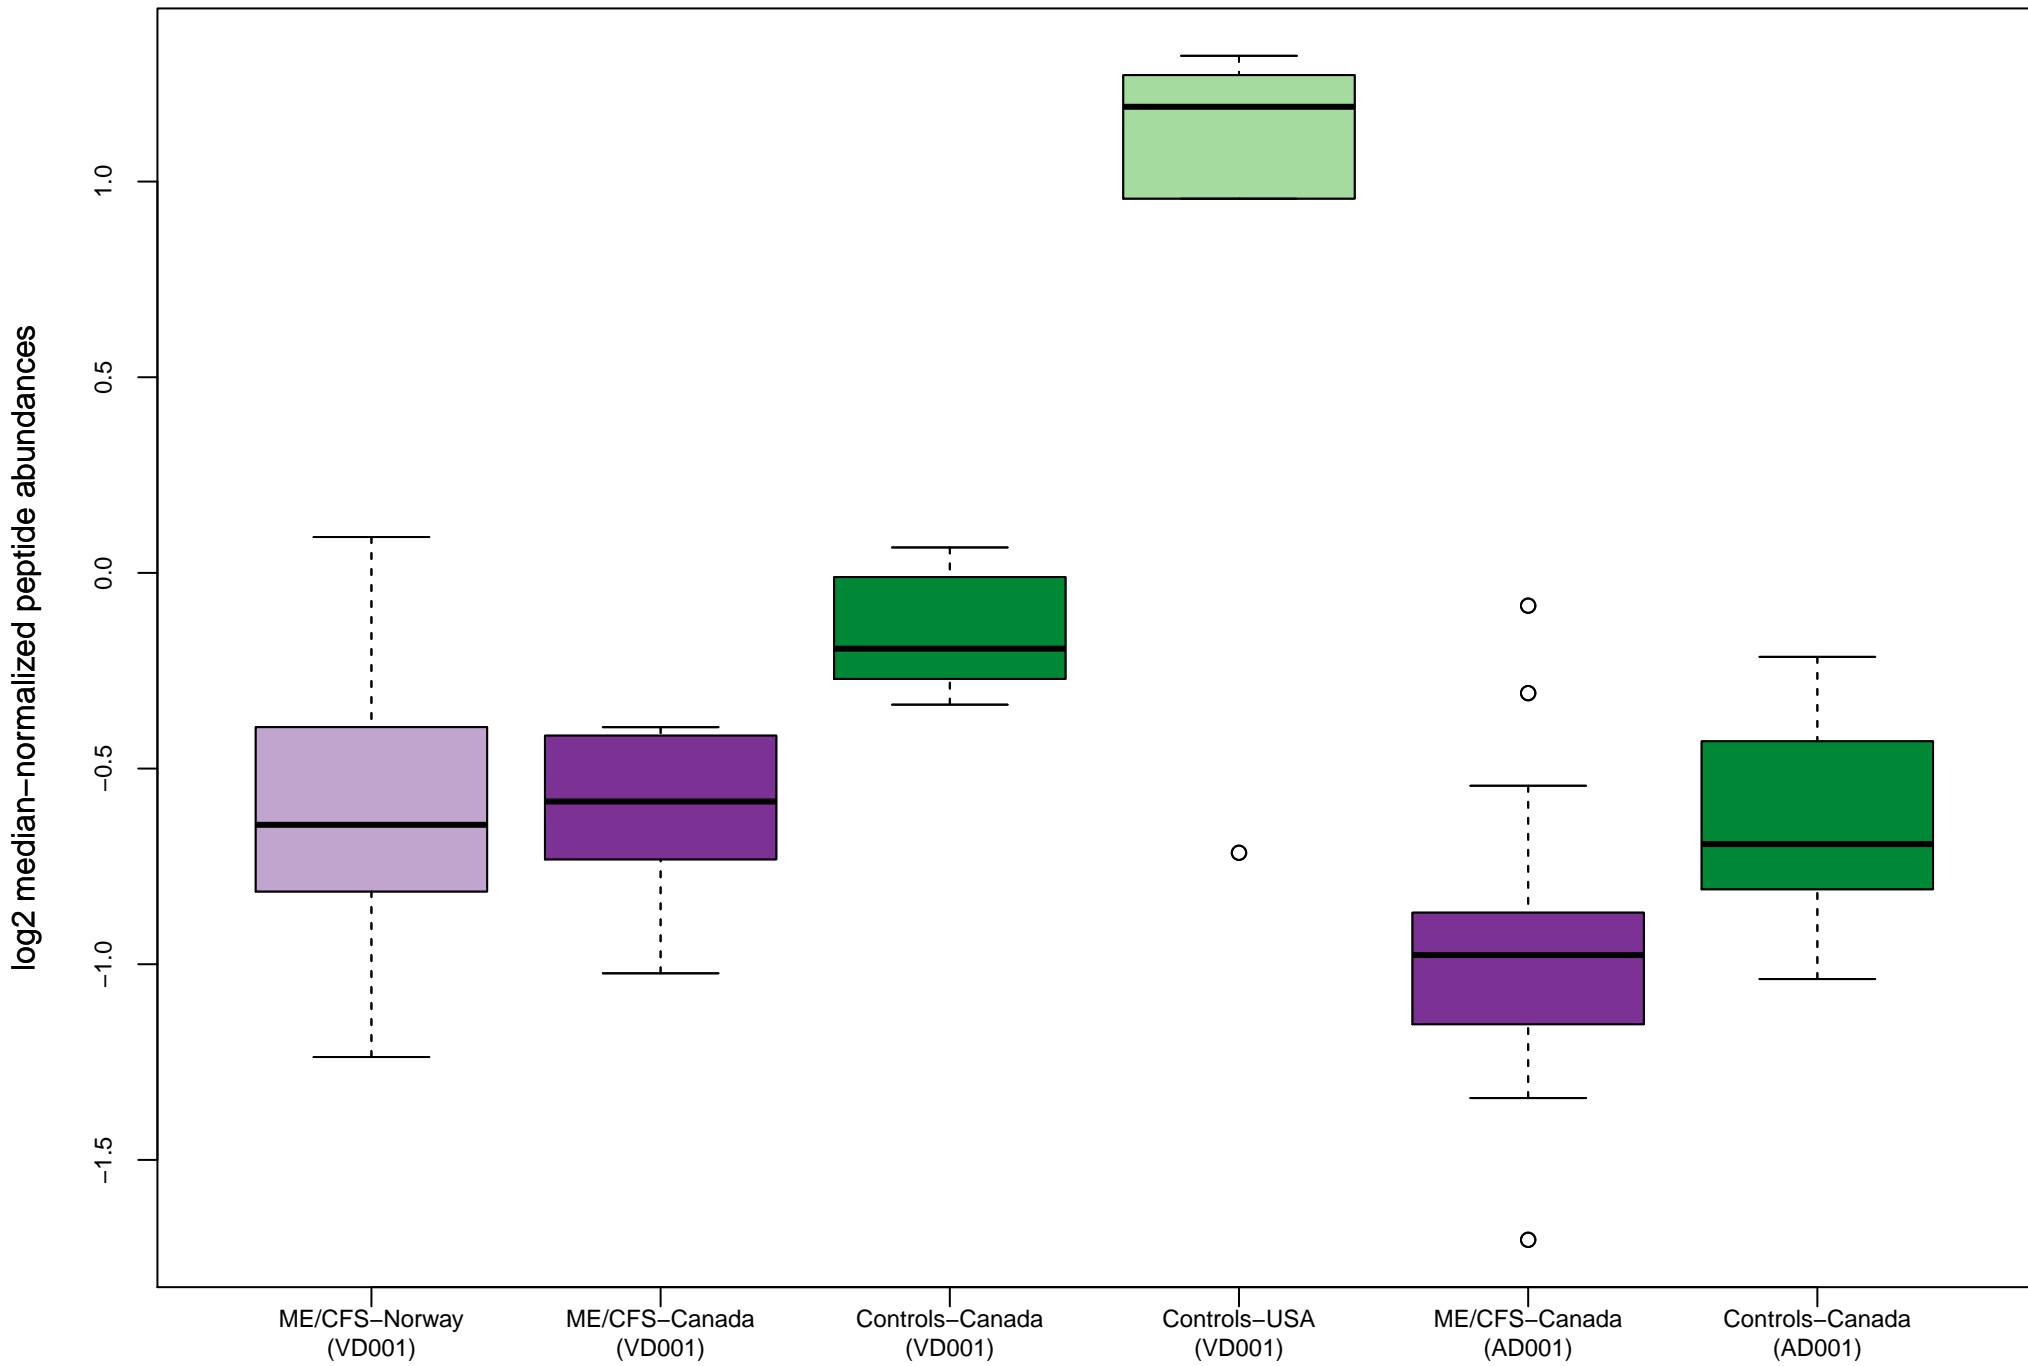

# GSFAFRPYVALS

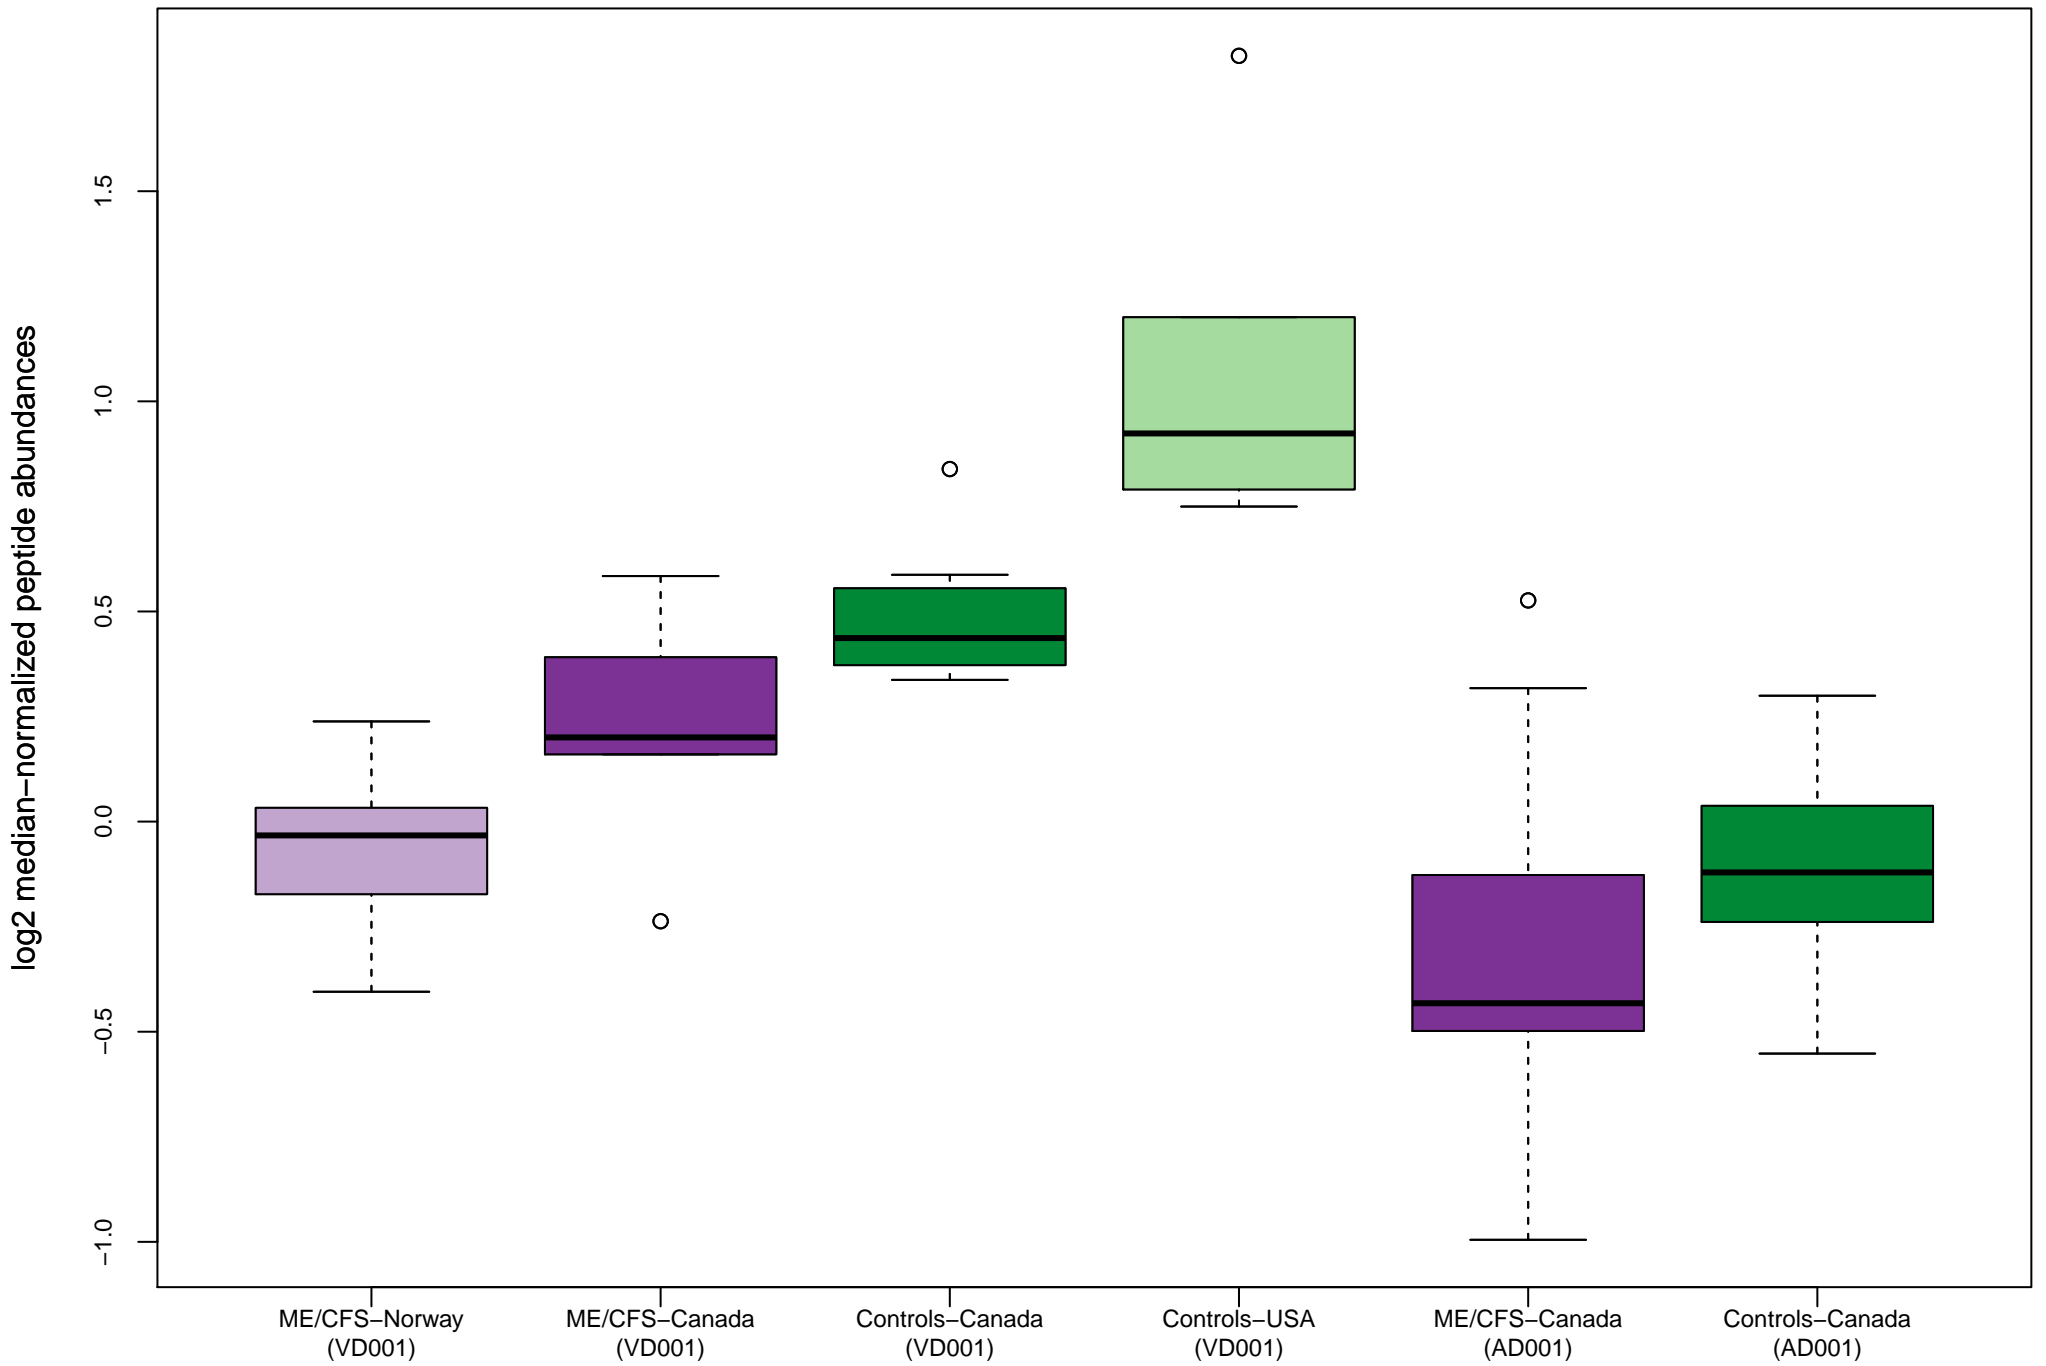

# GSYLRLSGVLSG

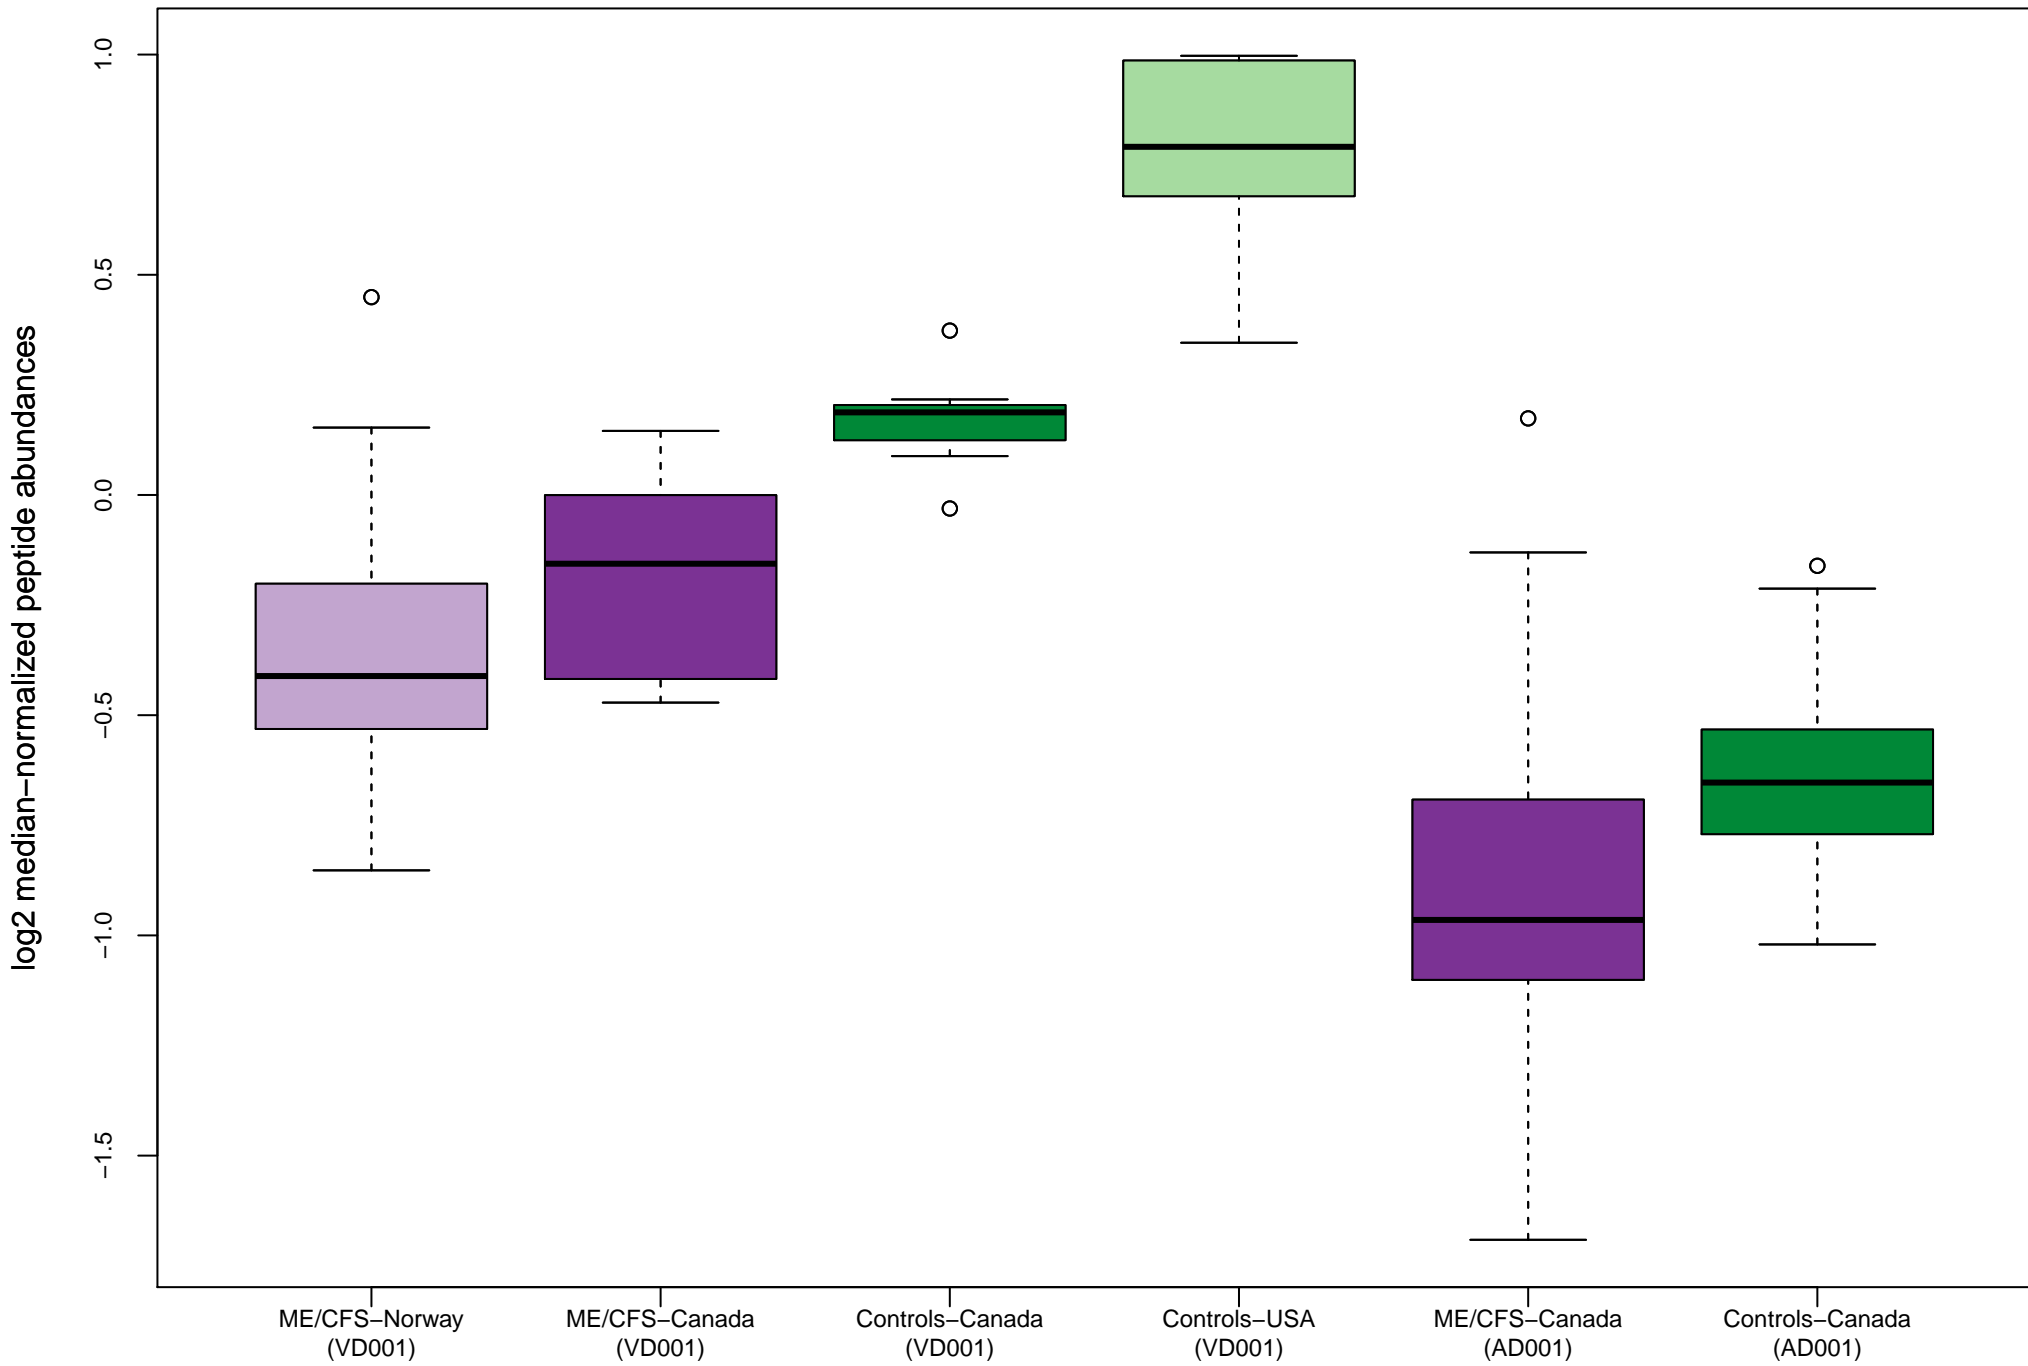

# GSYQFRPWSAL

log2 median-normalized peptide abundances

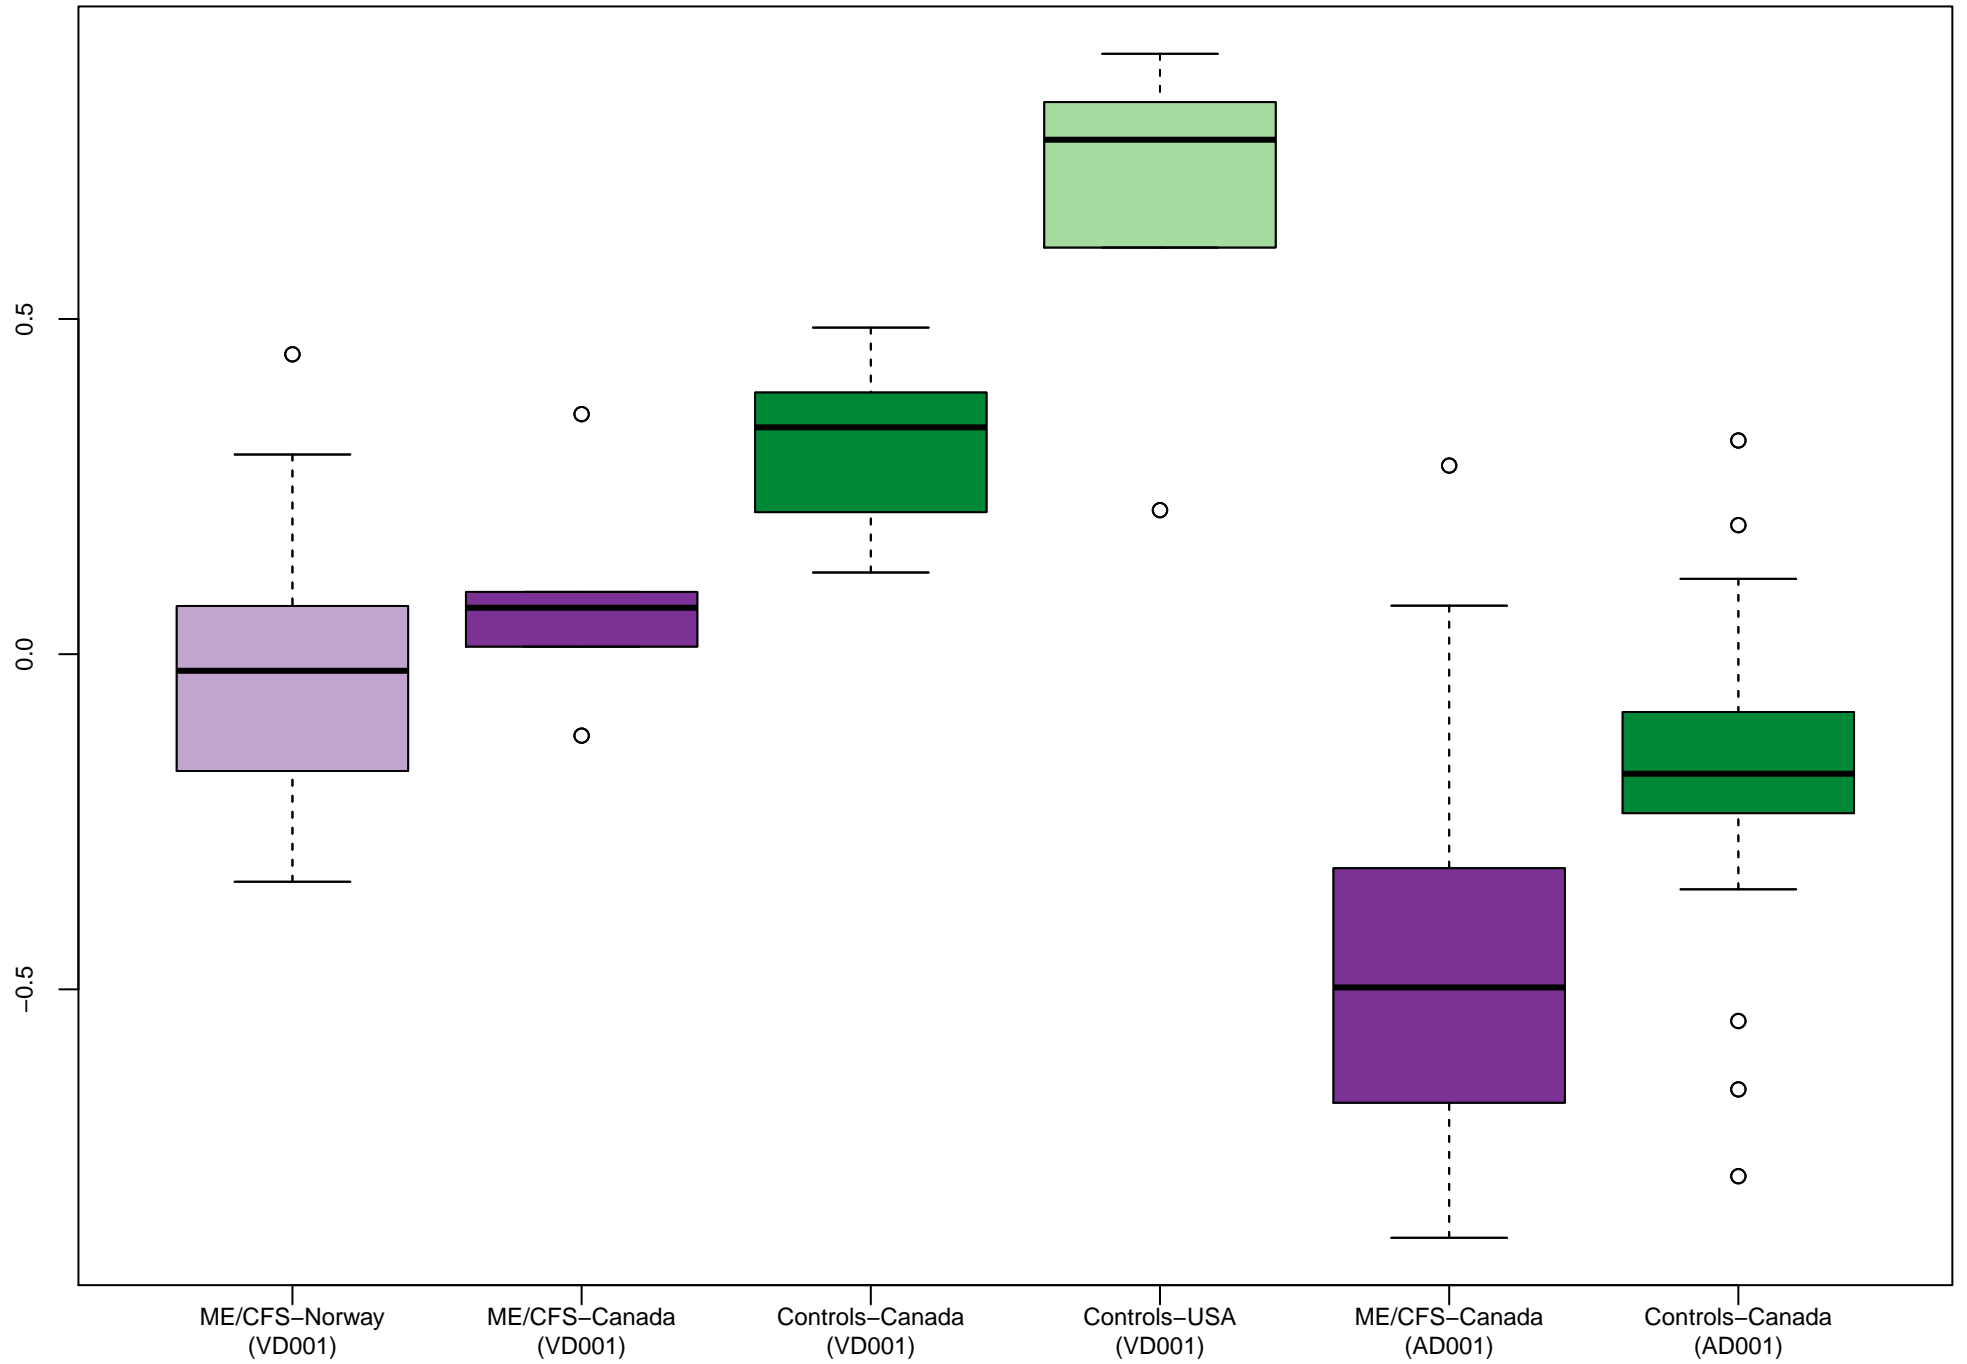

# GVFRWPYGVALG

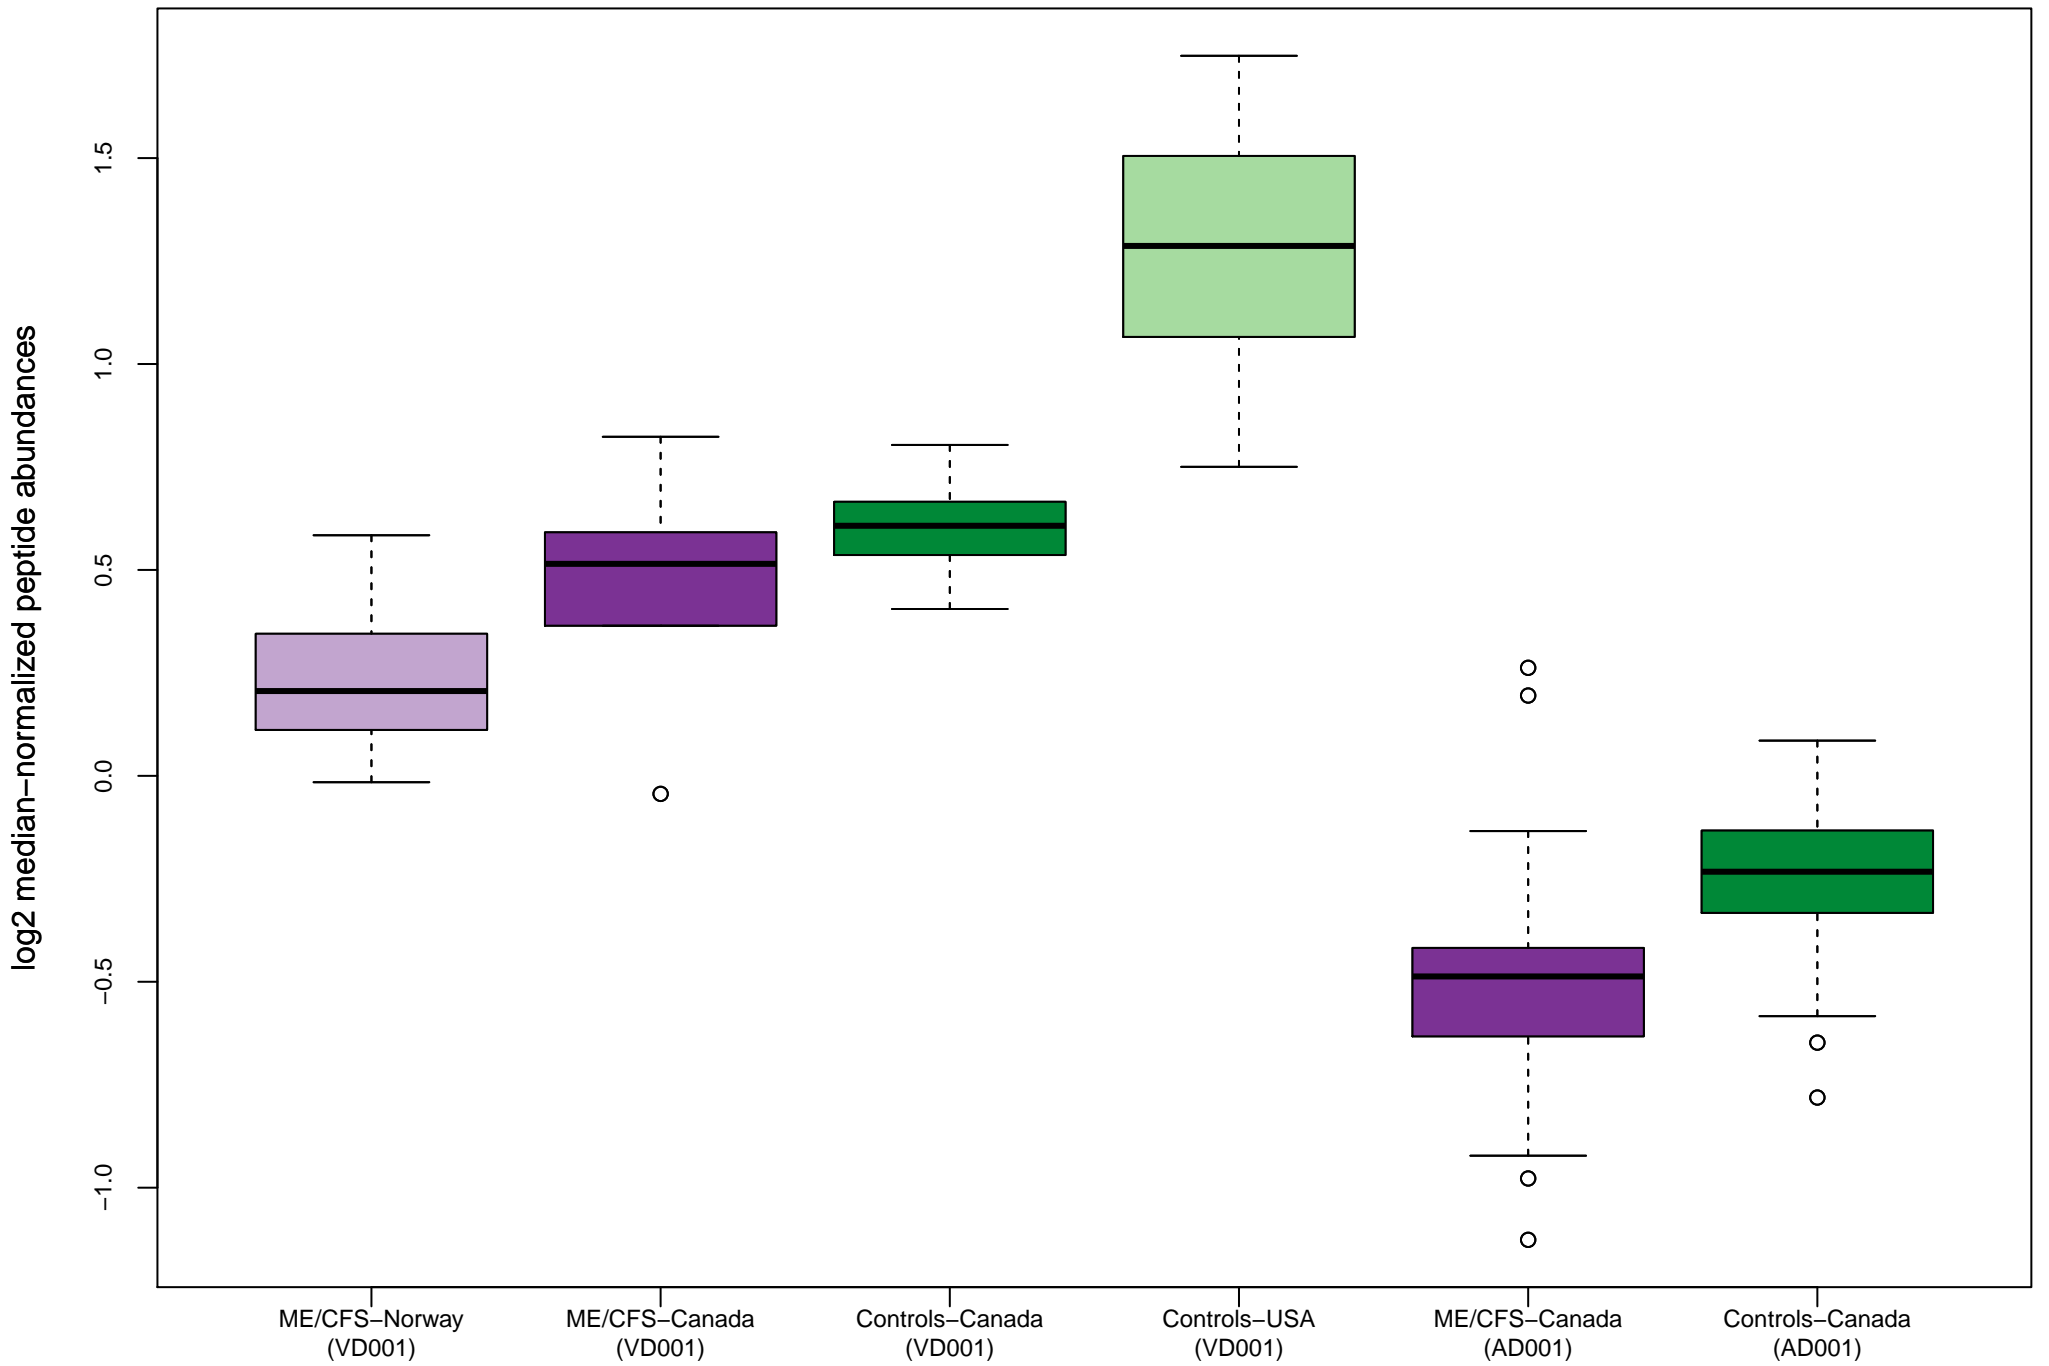

# GVLRRWWLSGVSG

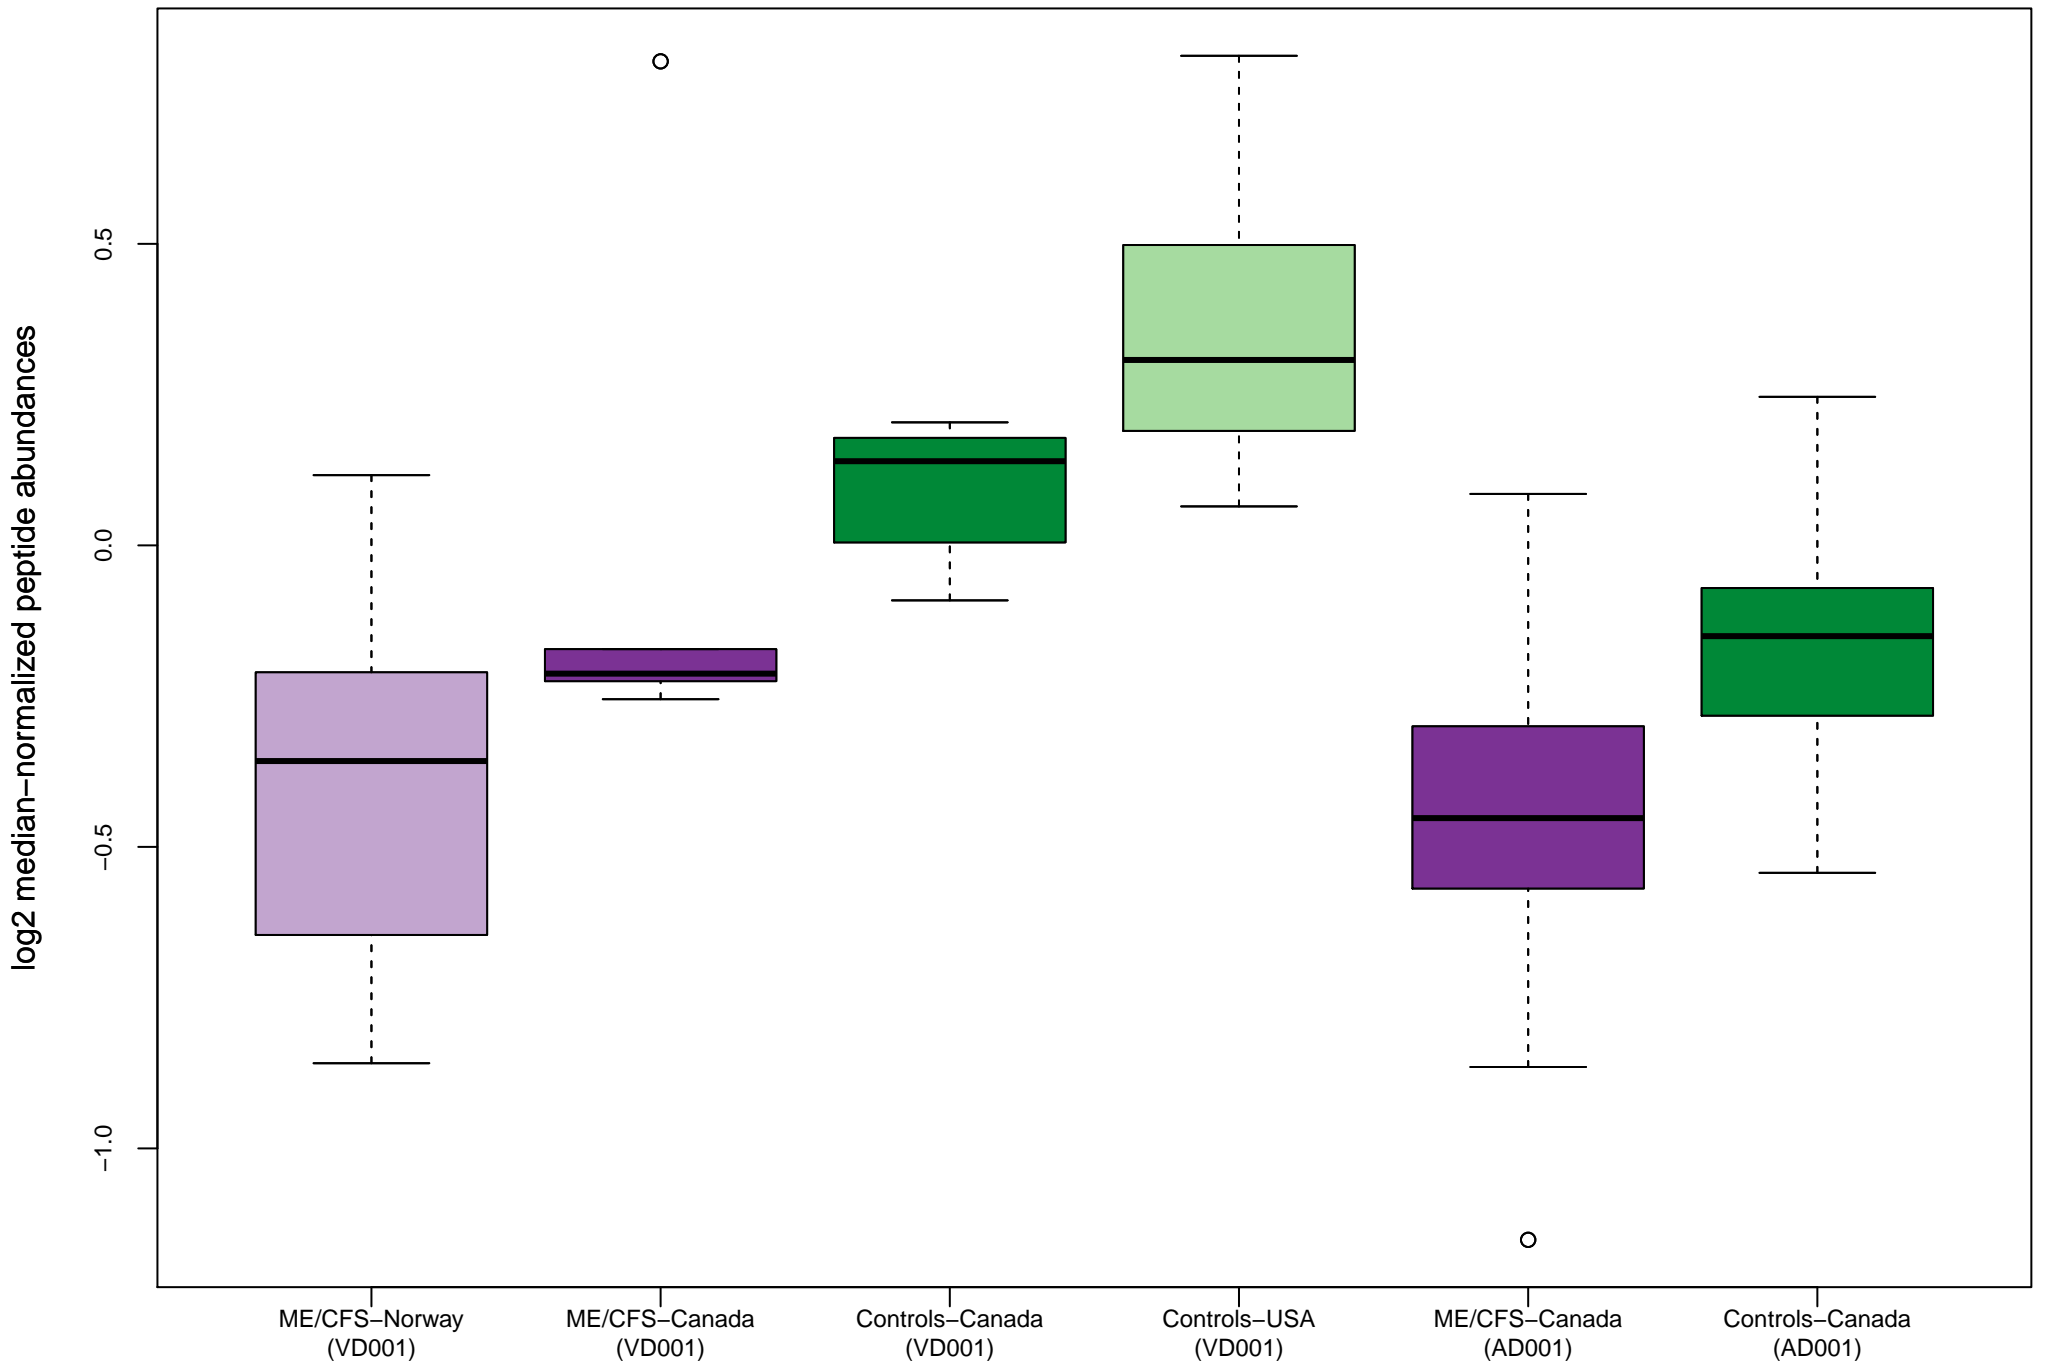

# GVLSRFWSVASG

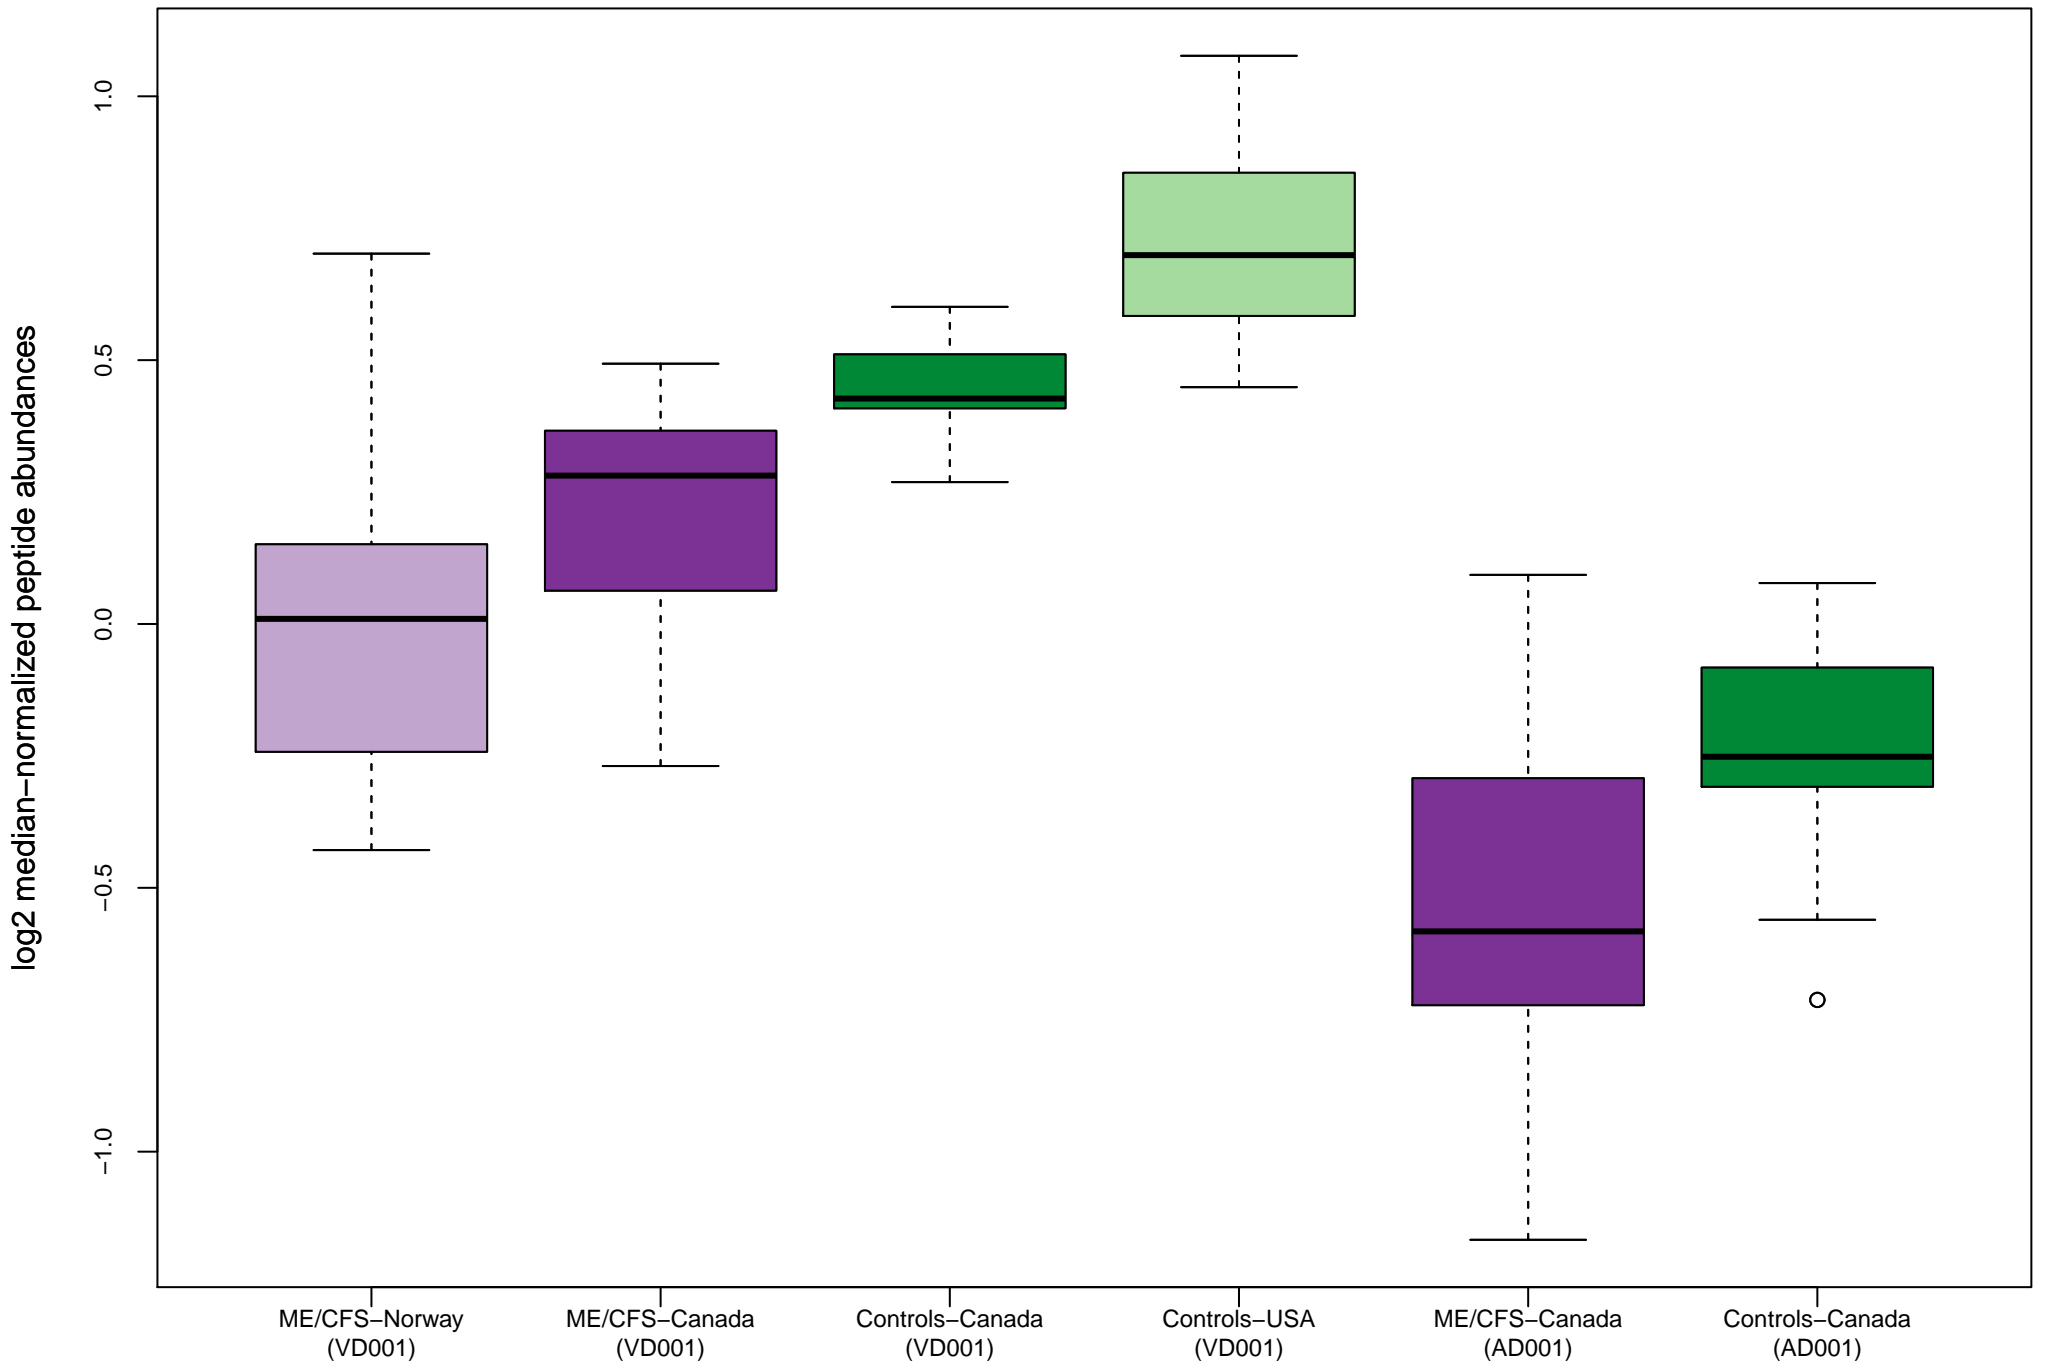

# GVQRPFLGVLSG

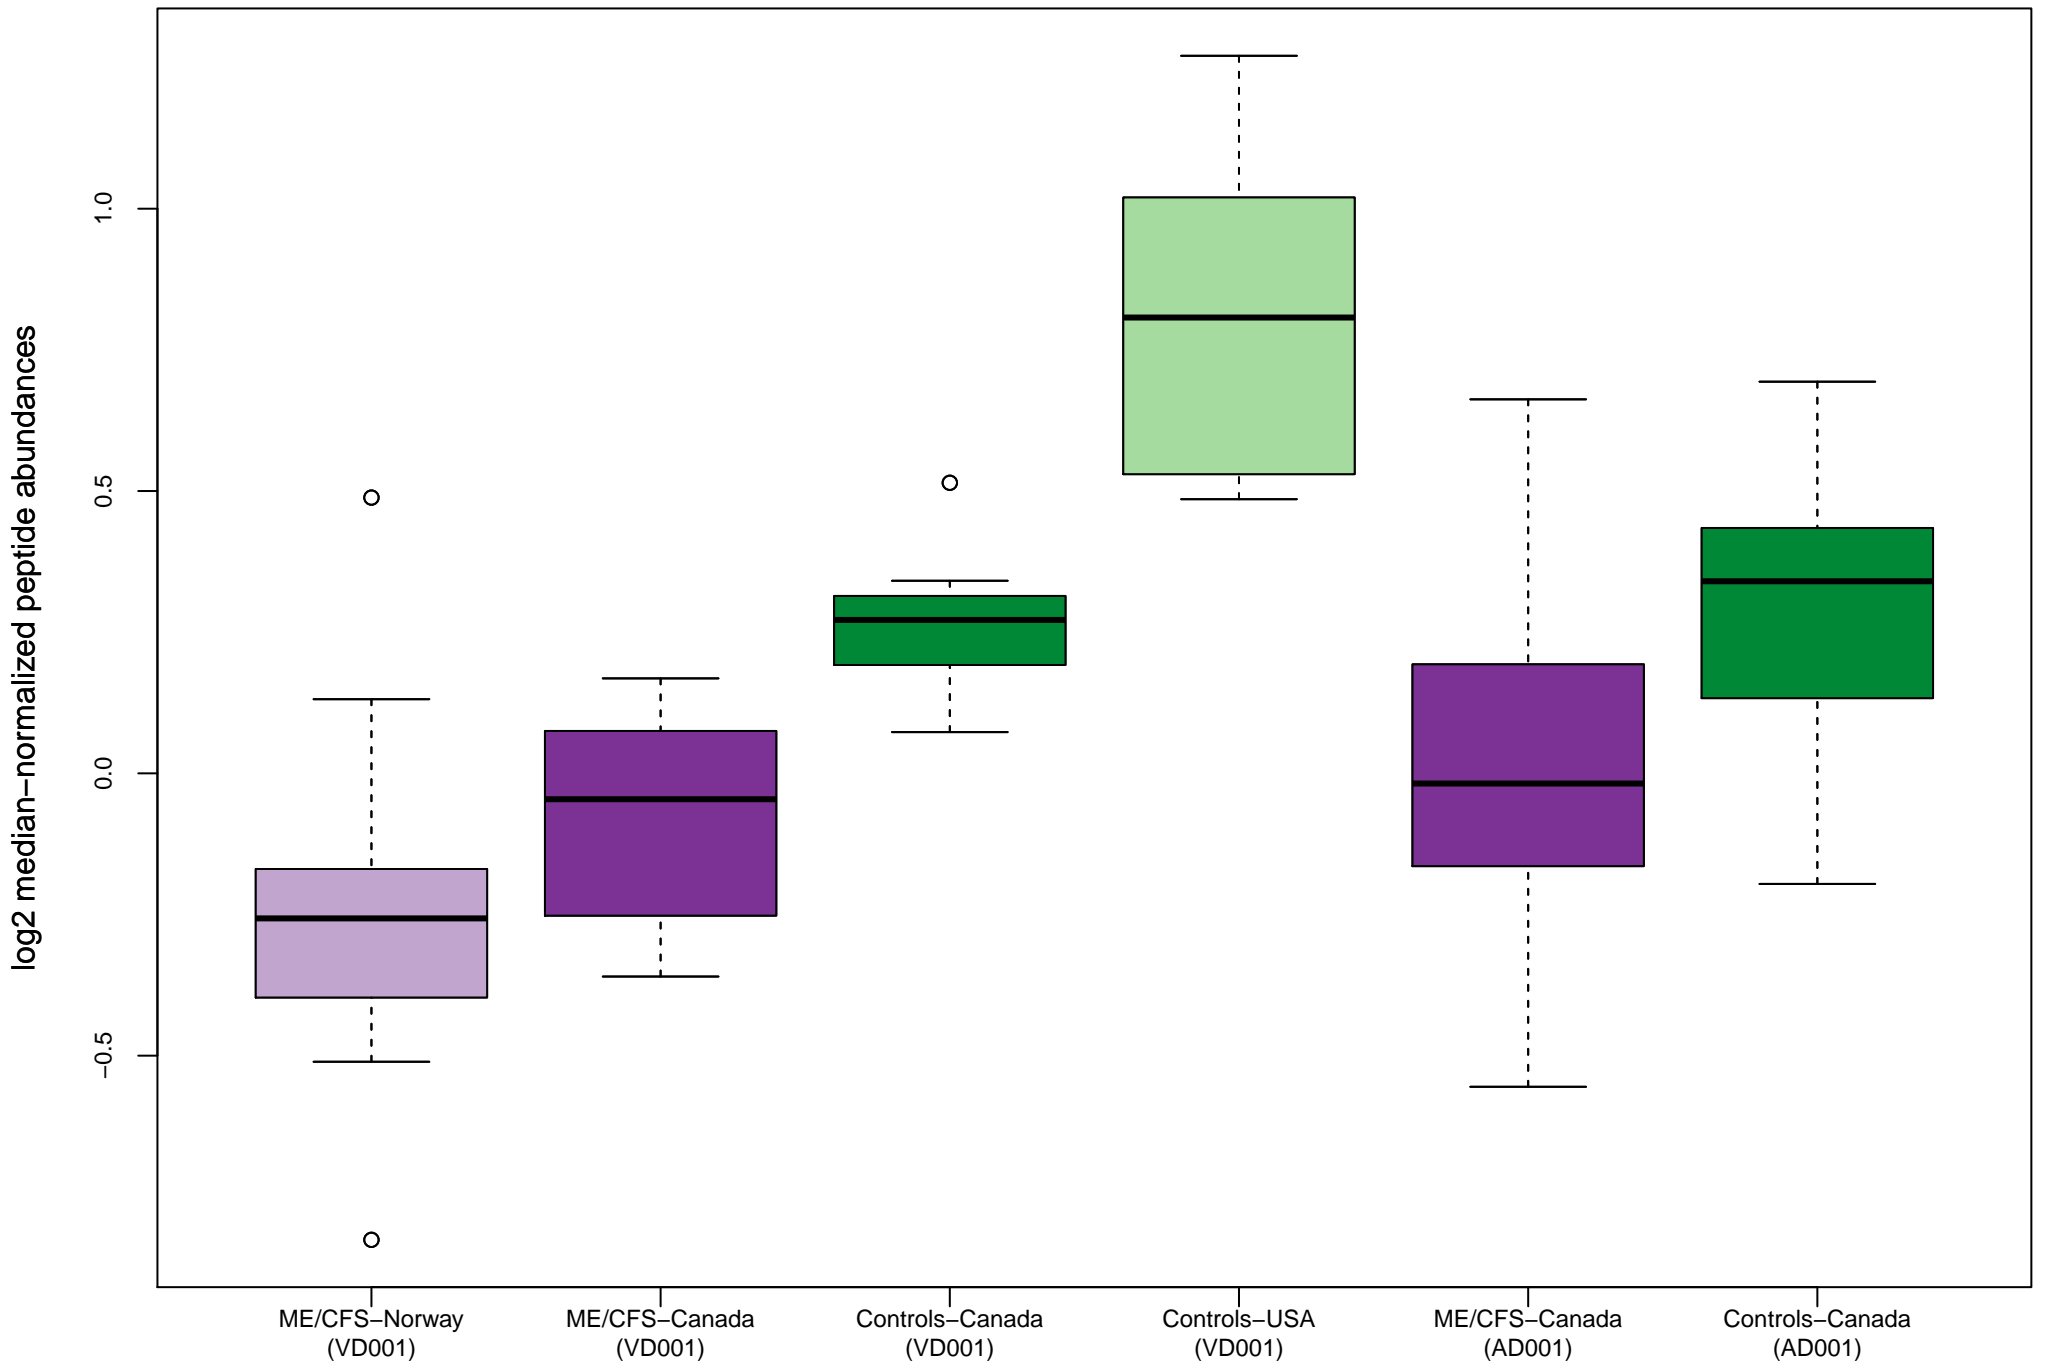



# GVRLASGVALSG

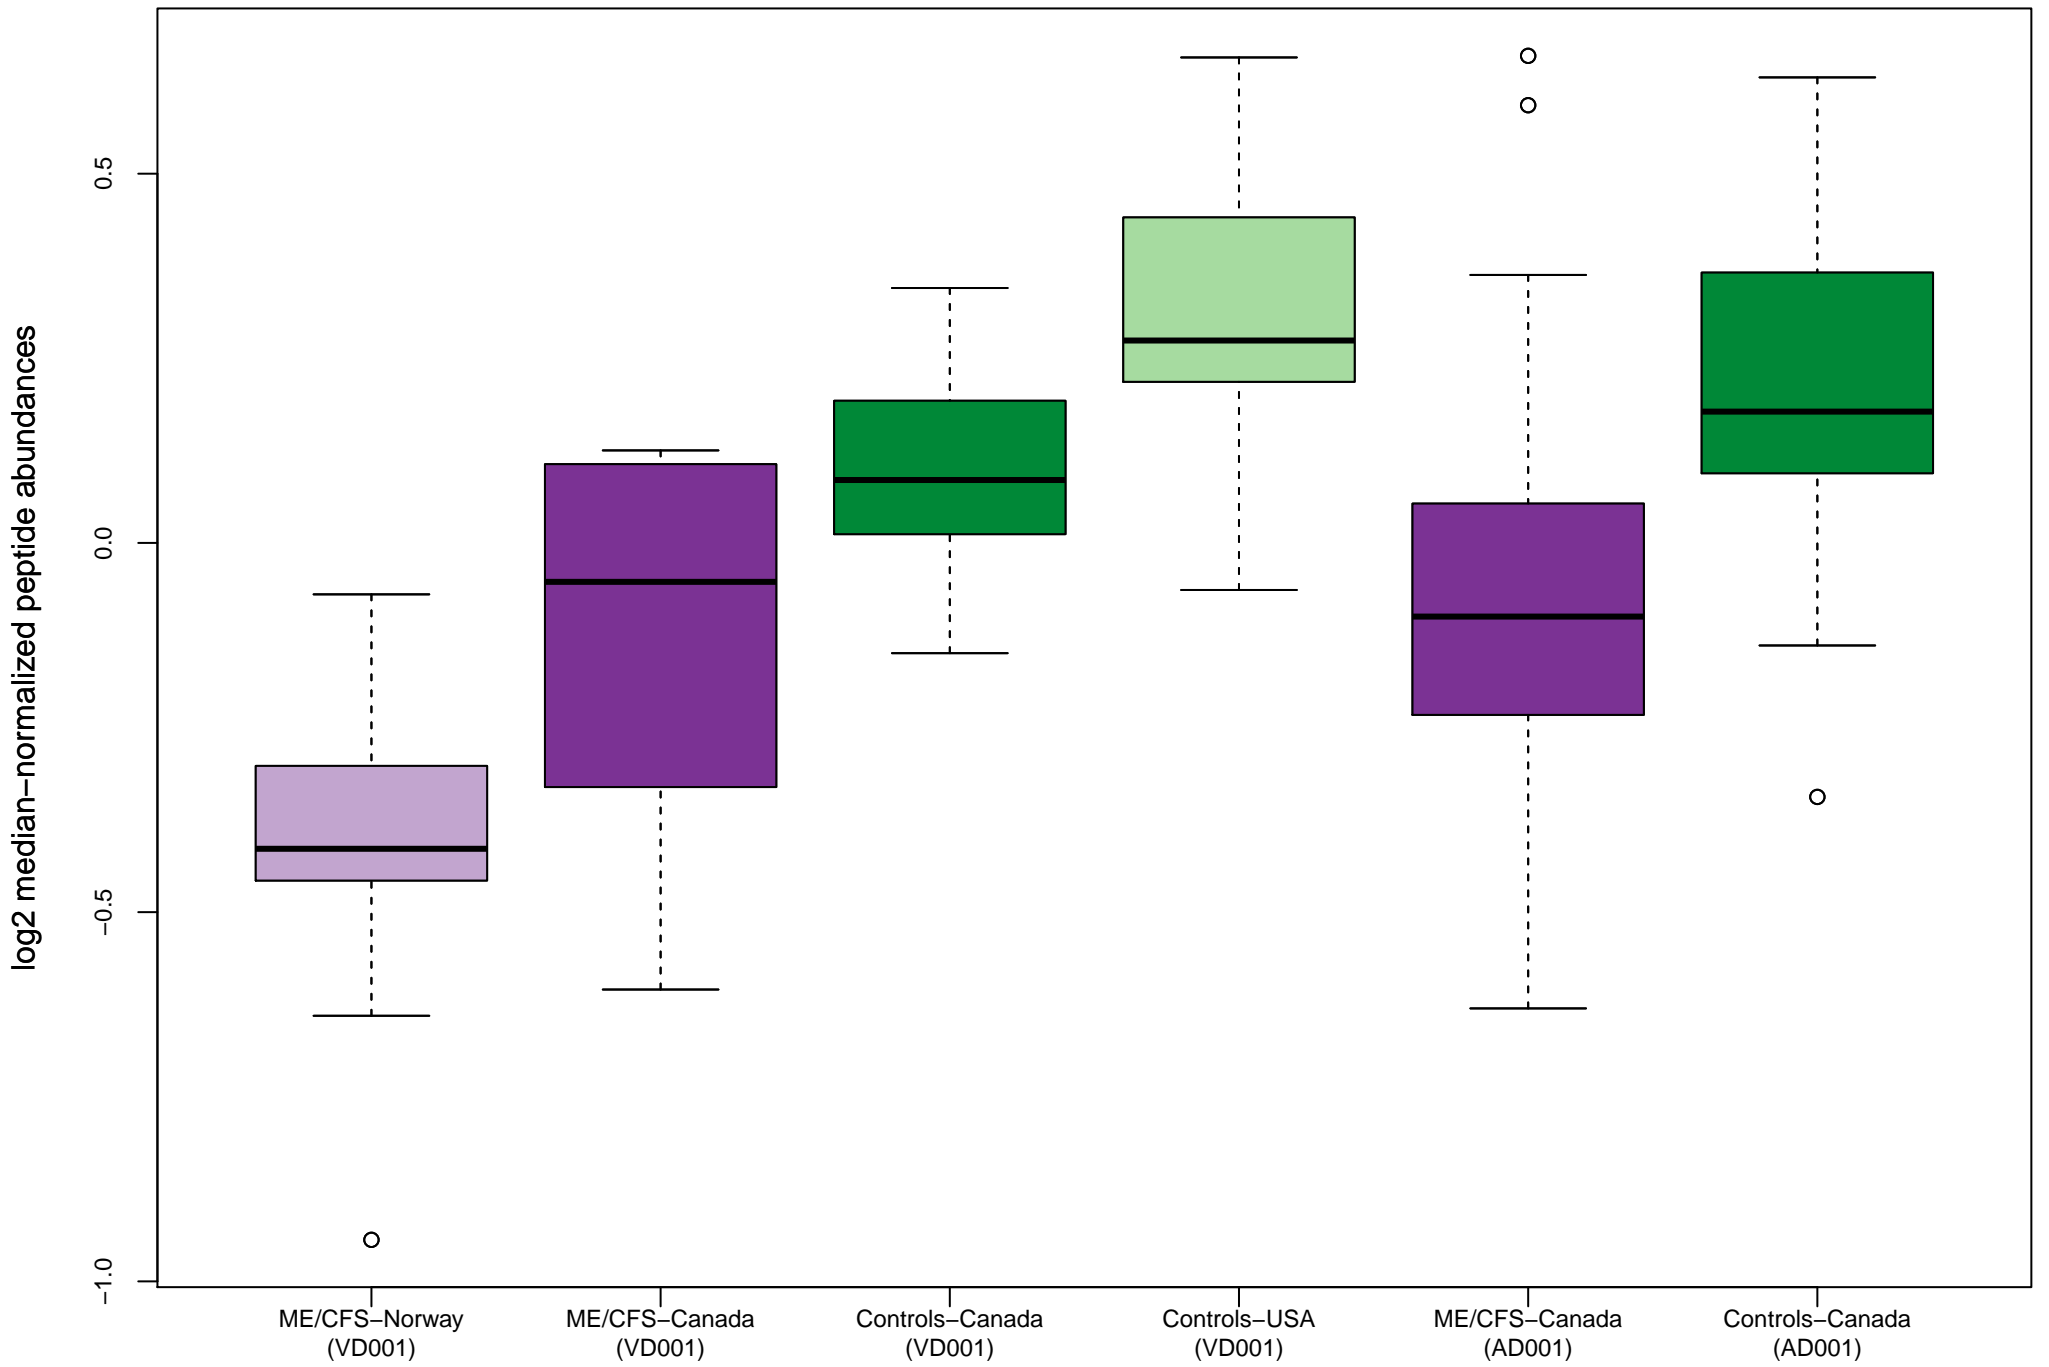

# GVMRYSGVALSG

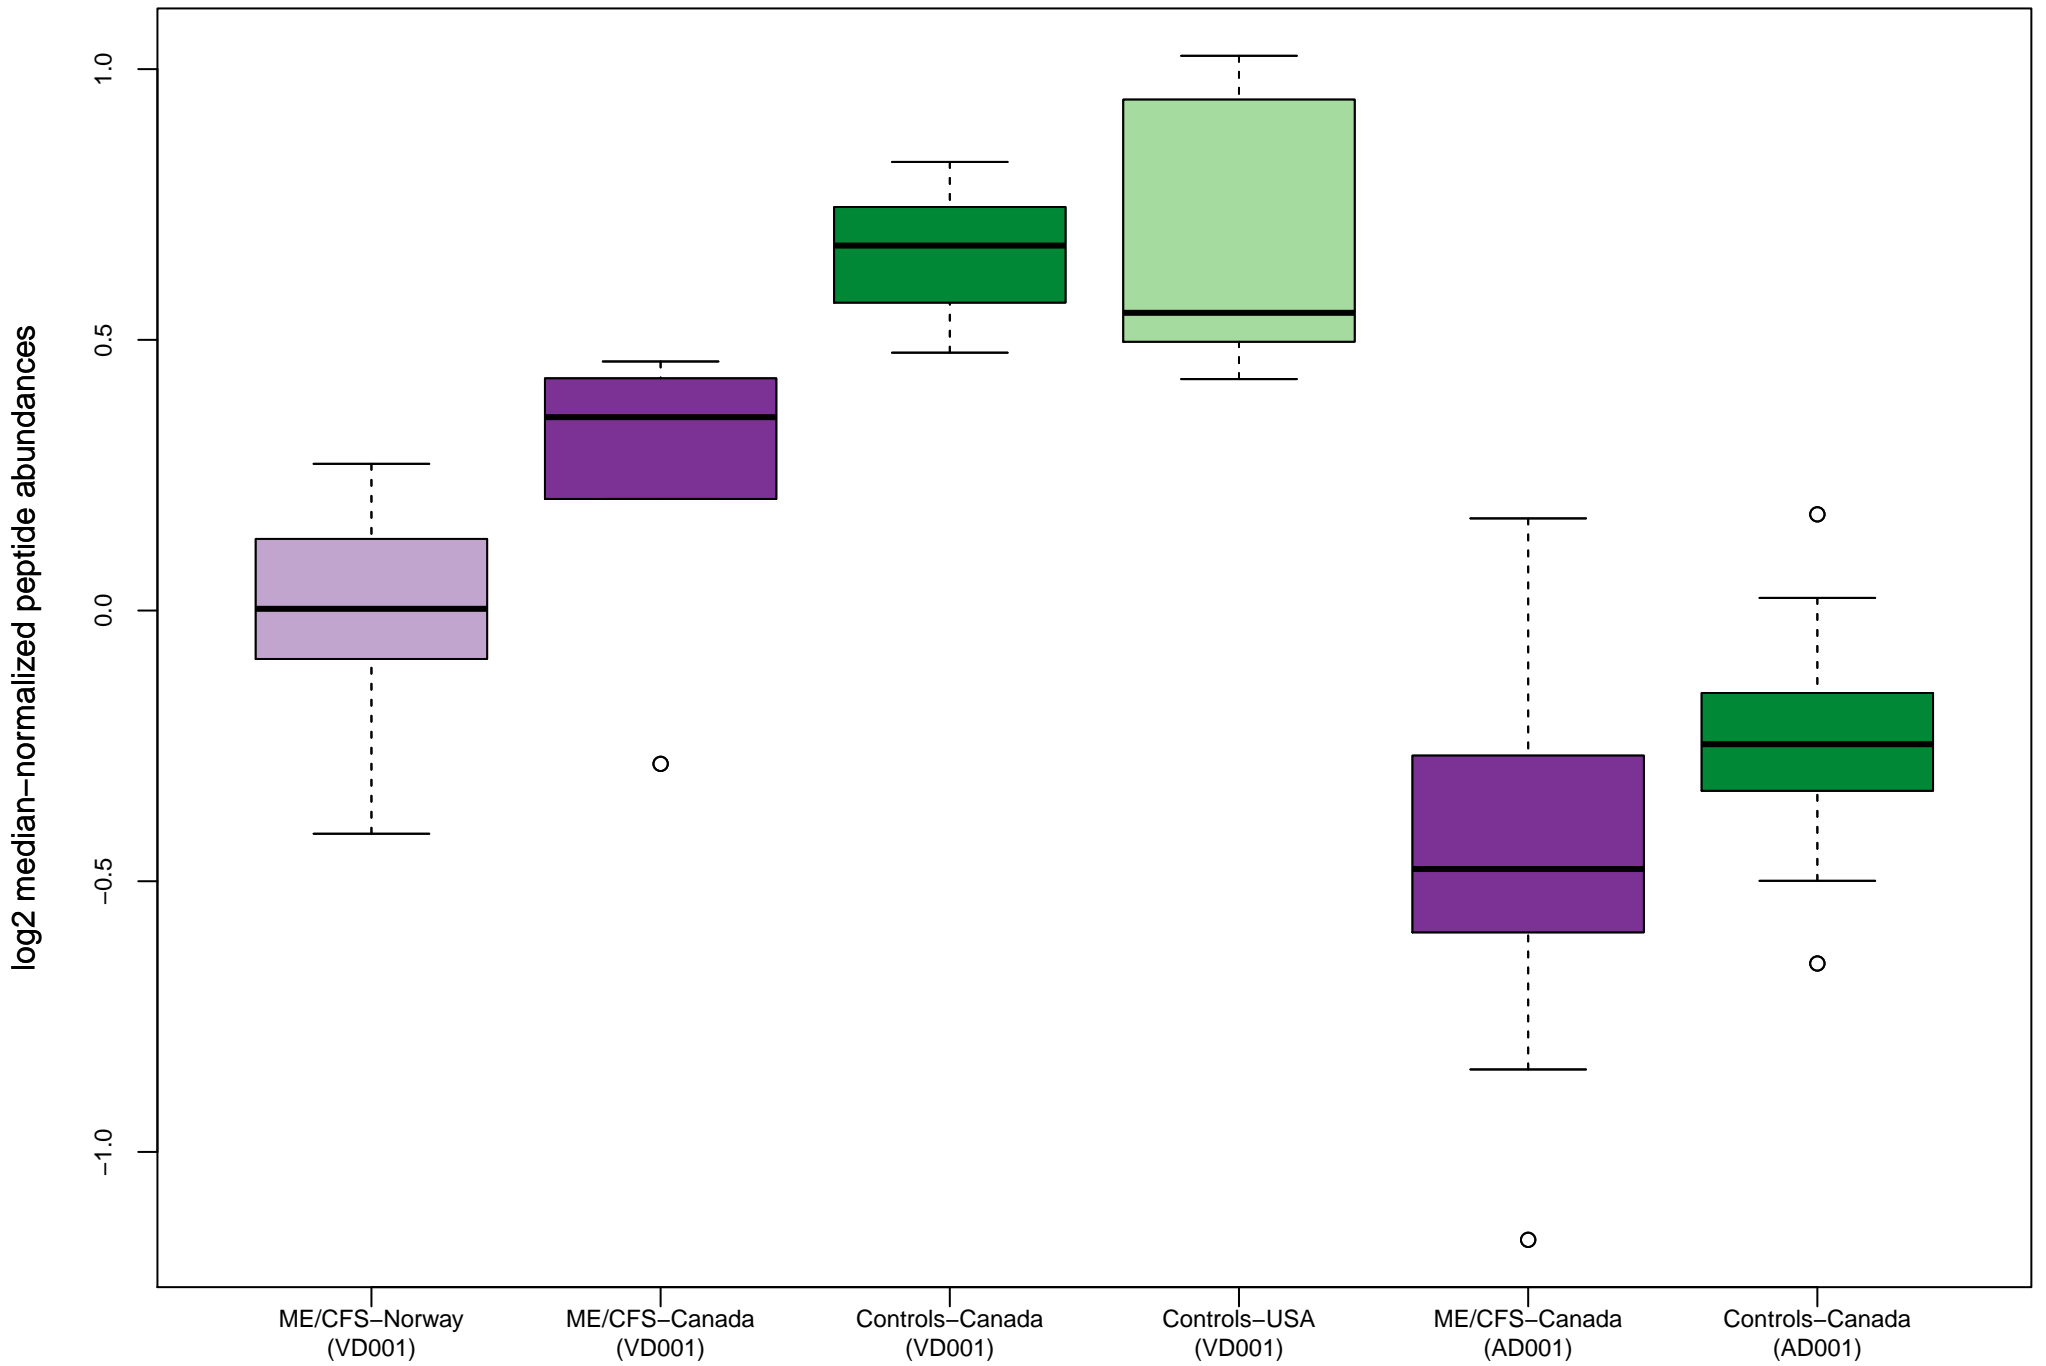

# GWLLKSGVALSG

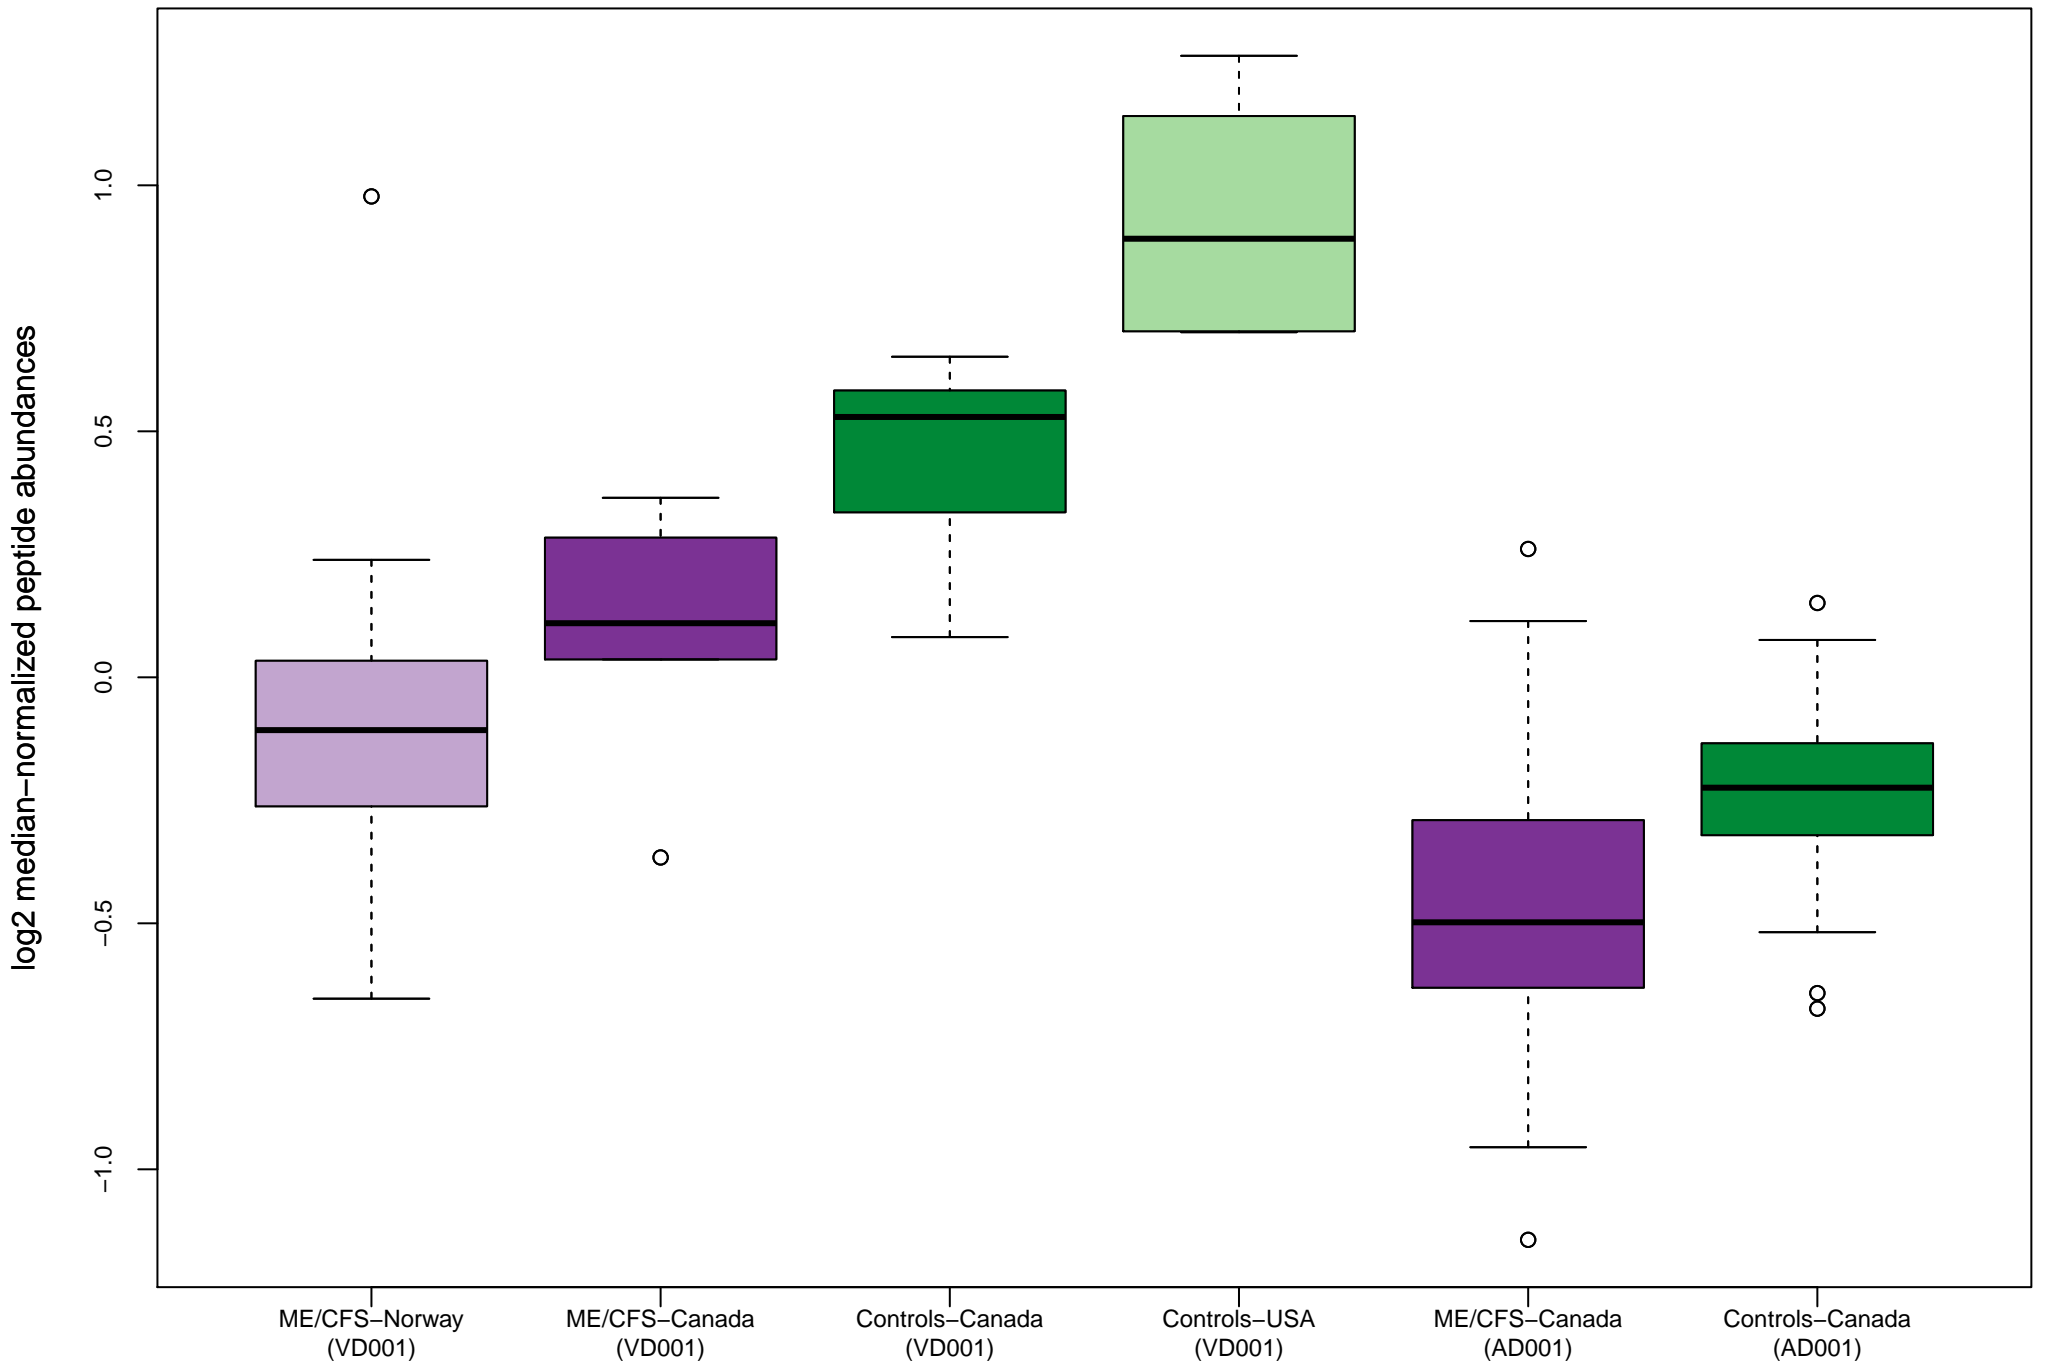

# GWRWYKLGVLSG

log<sub>2</sub> median-normalized peptide abundances

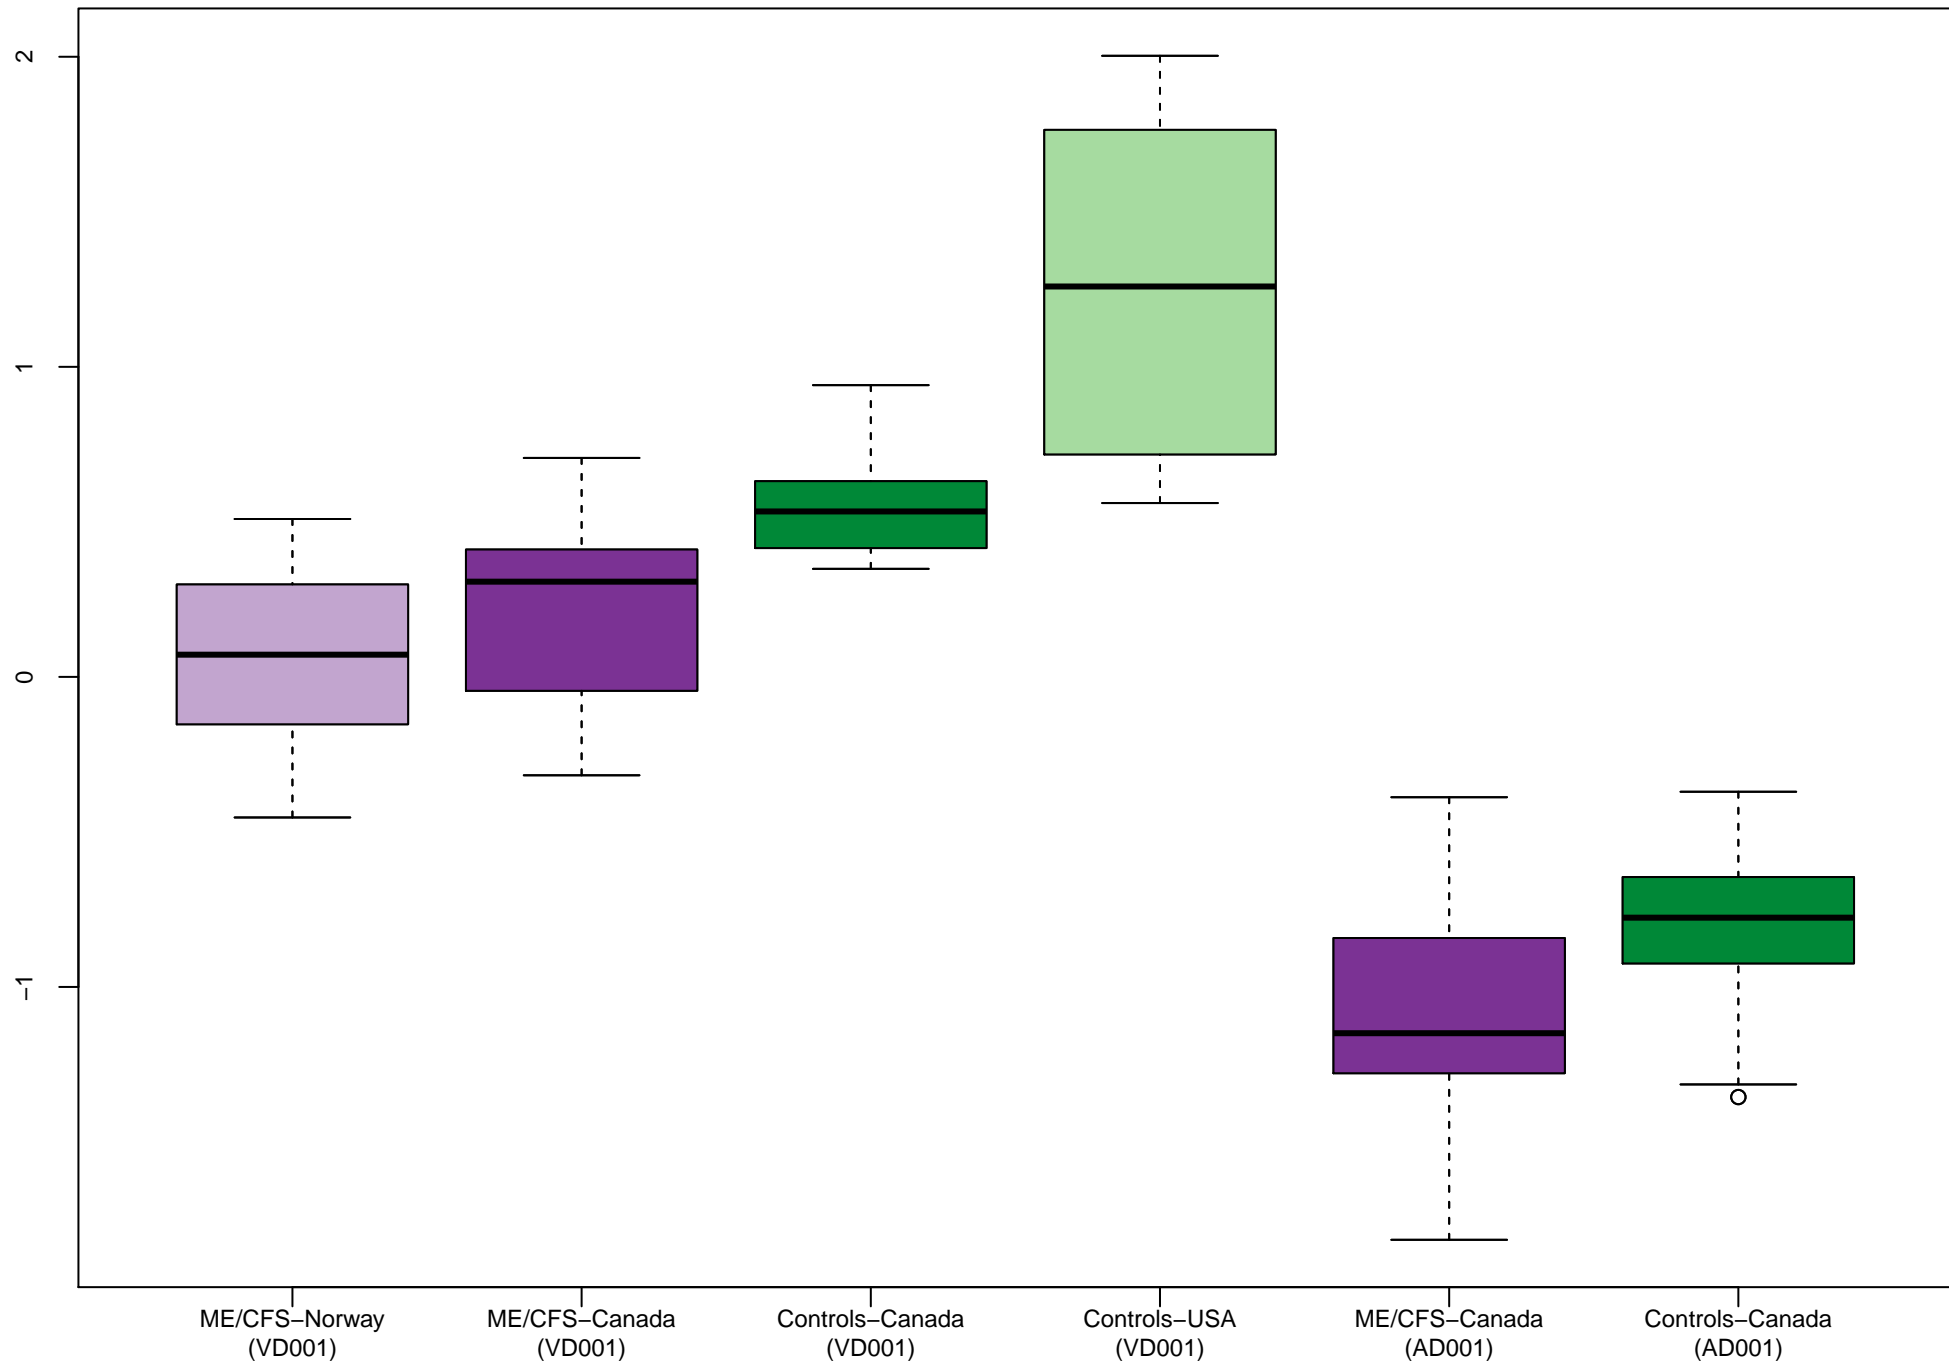

# GWVKLNVALSAS

log2 median-normalized peptide abundances

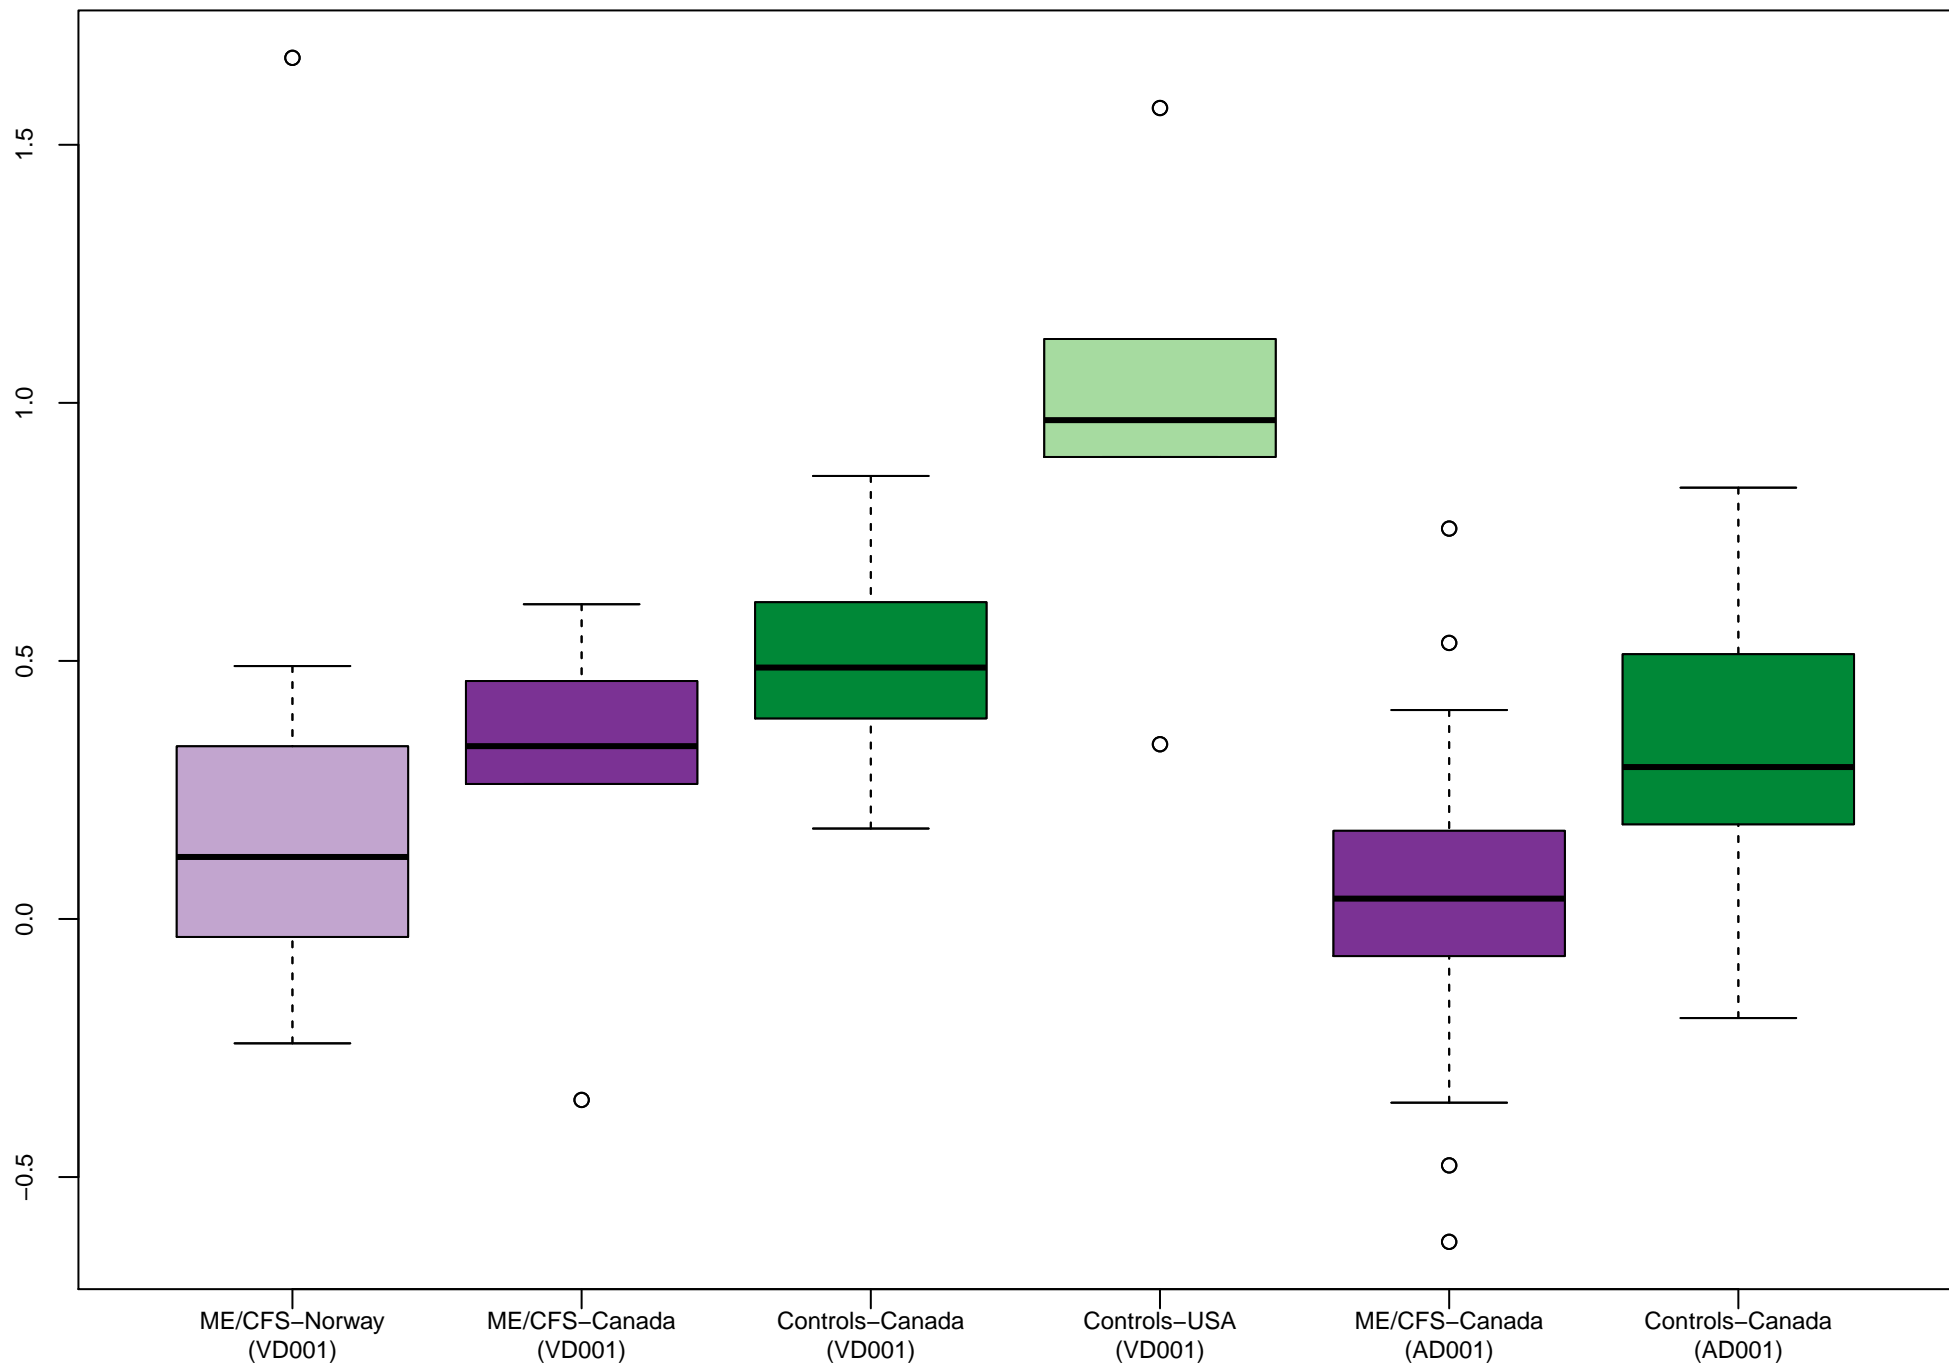

# GWVQWARLSVSG

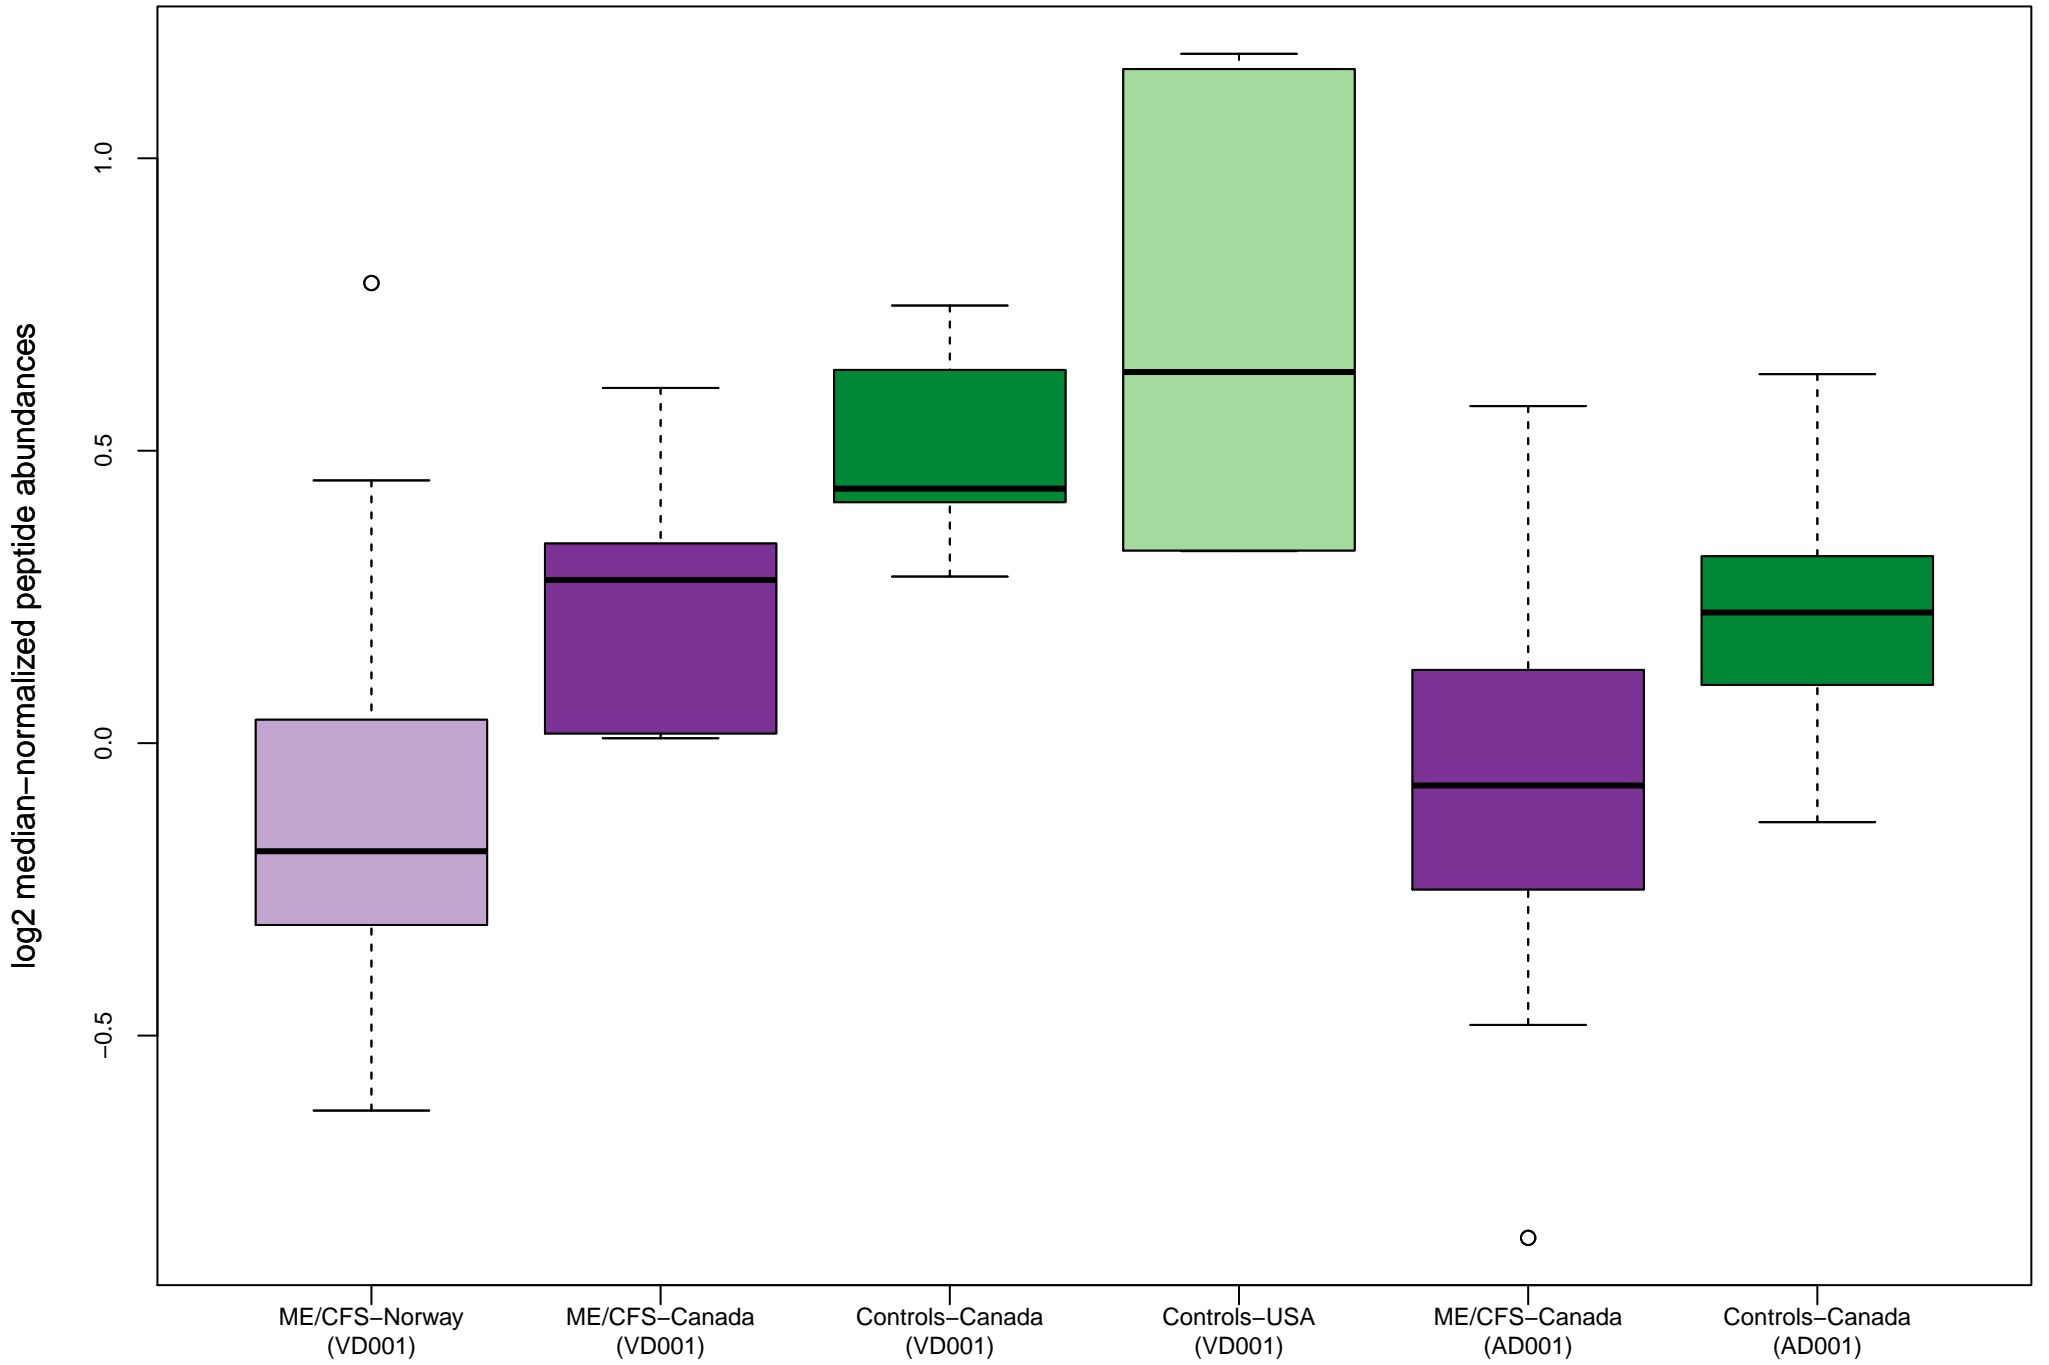

# GYARVFNLSVLS

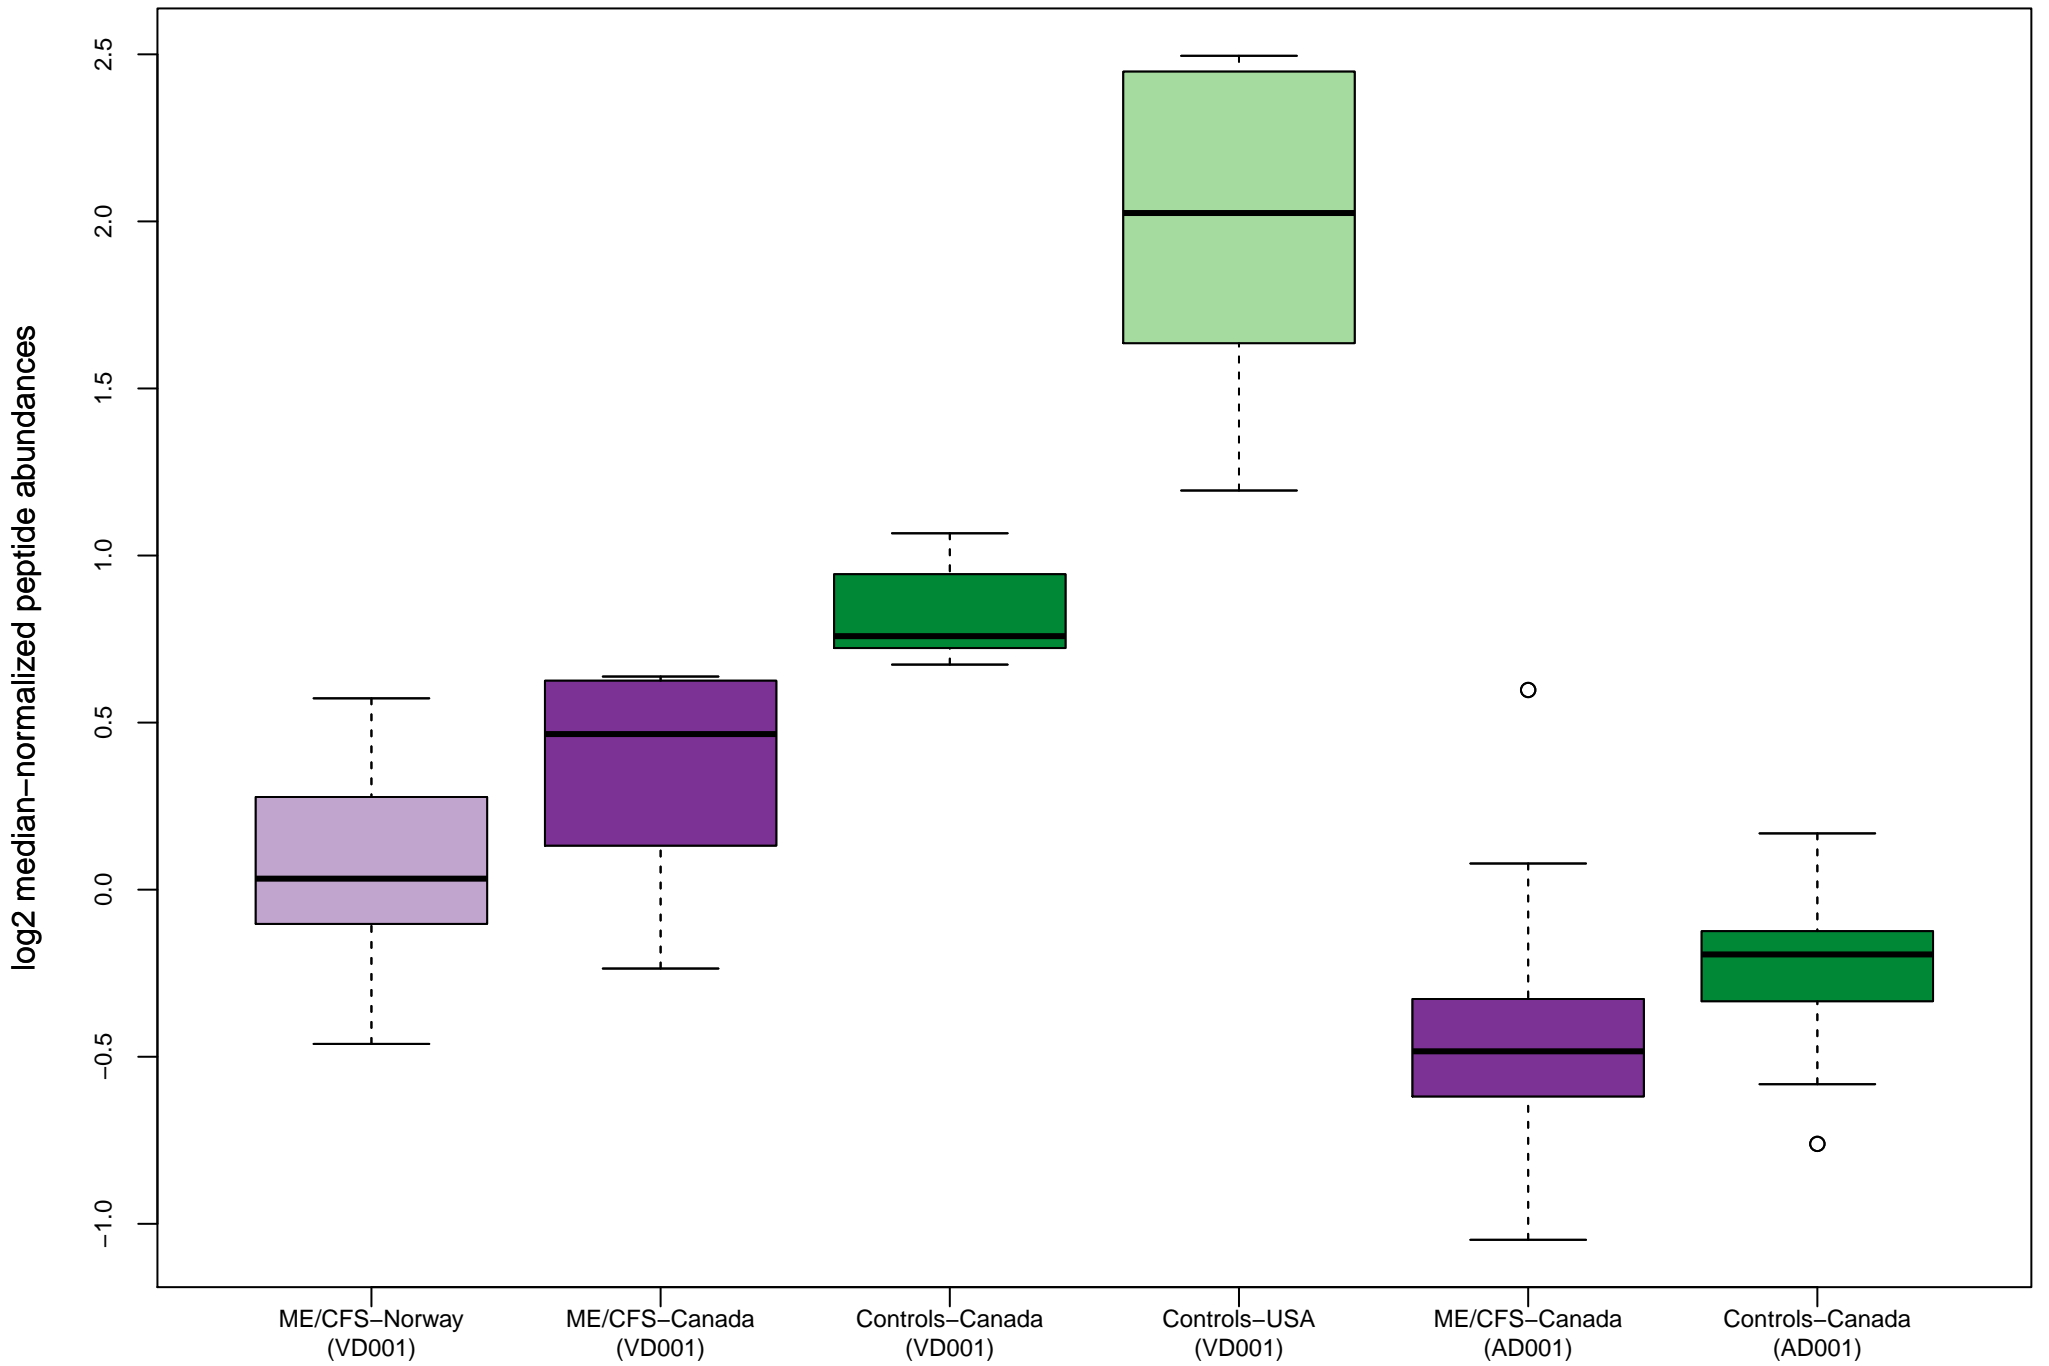

# HDGFARSFRVAV

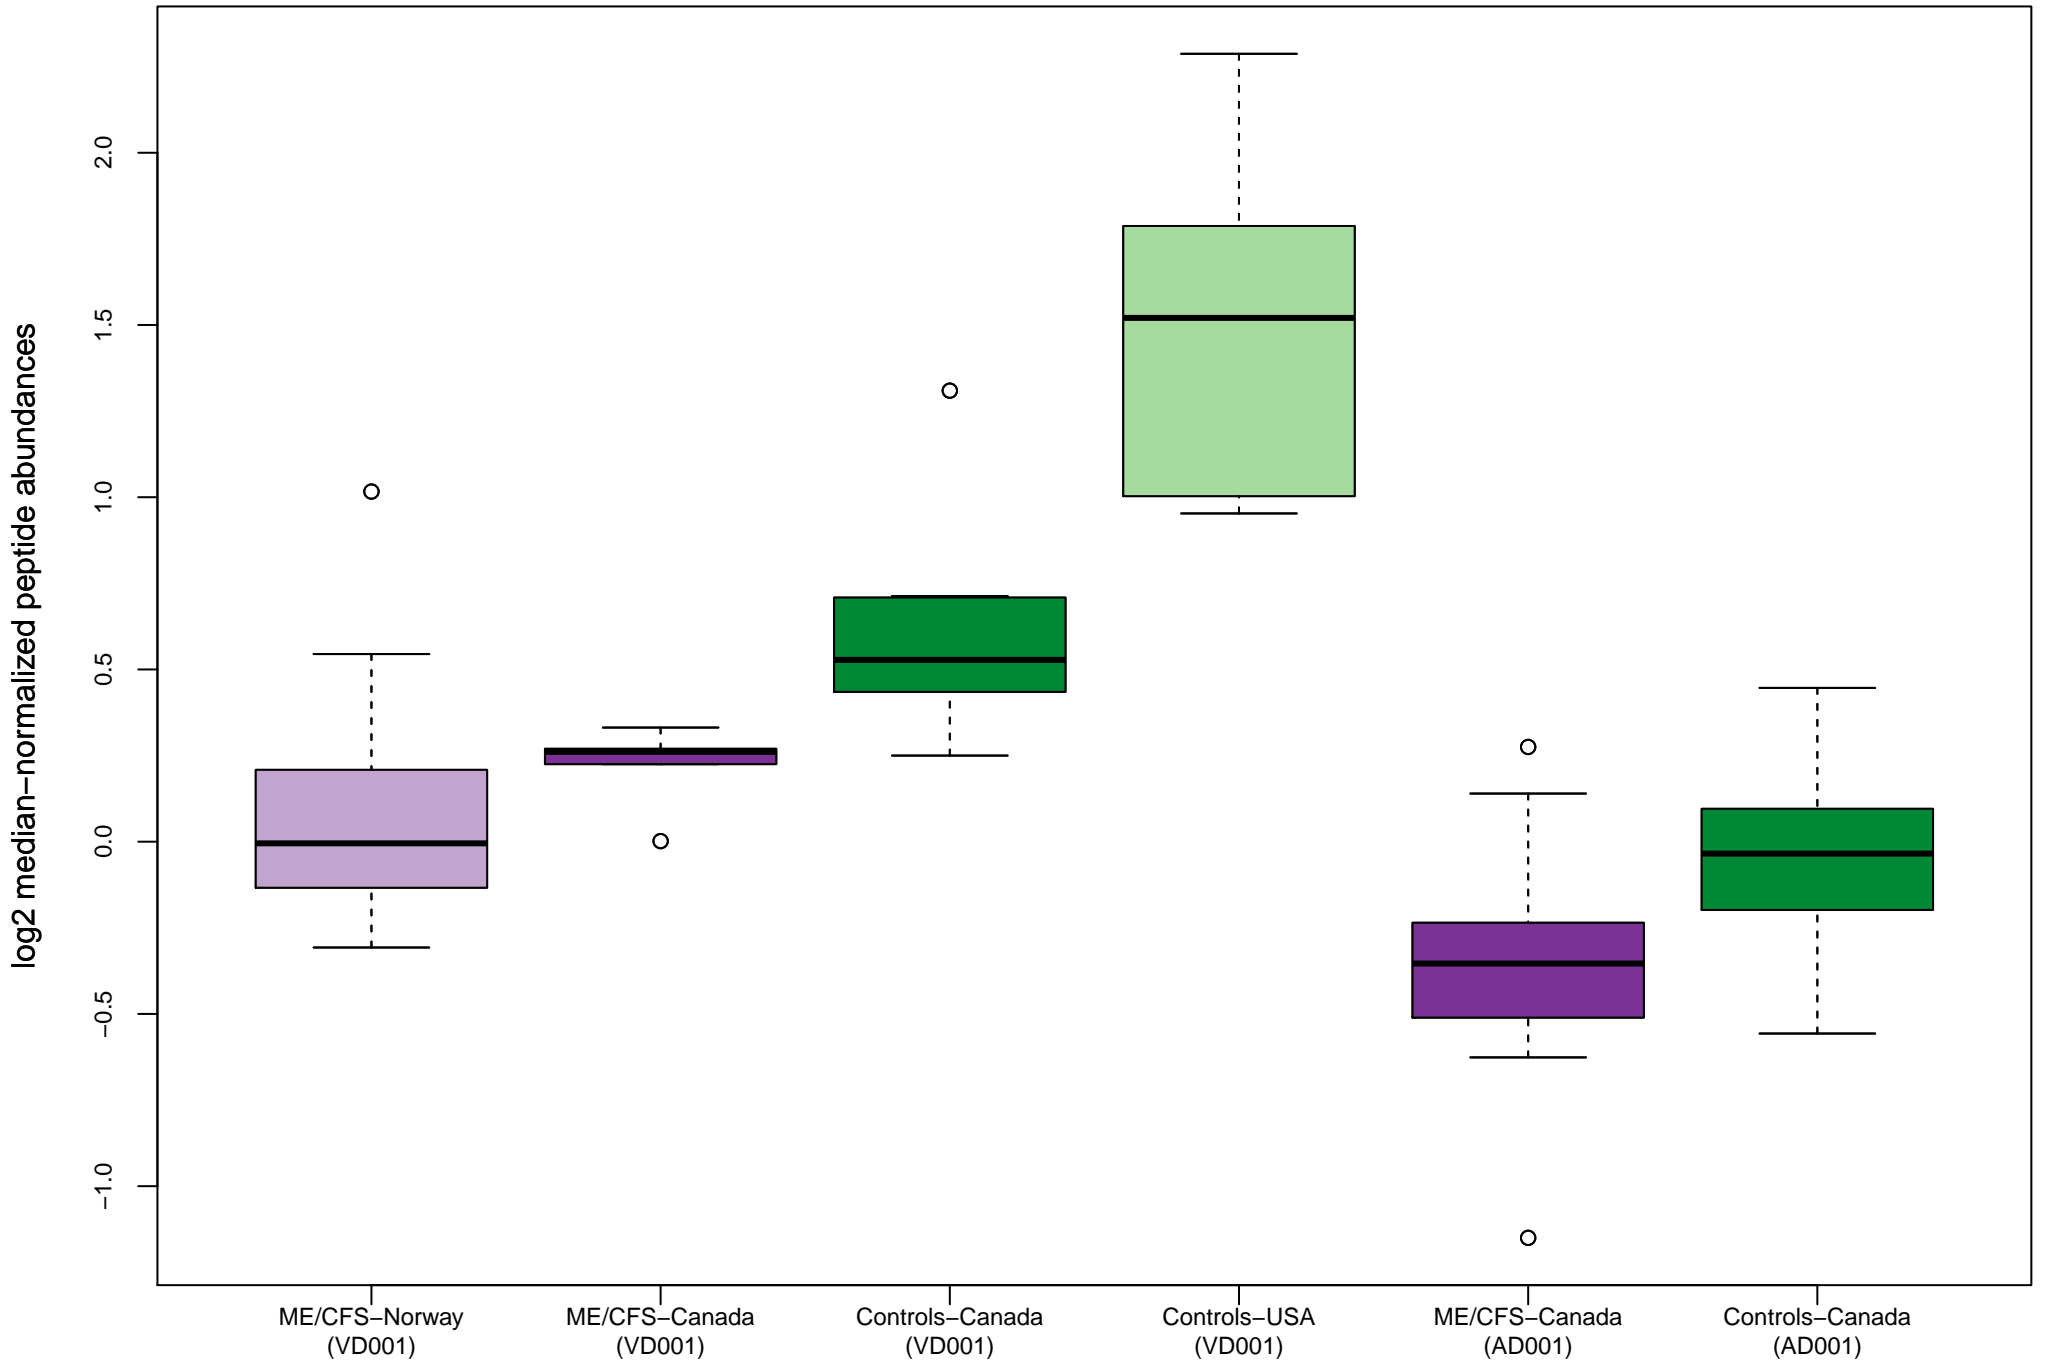



# HKWLWSGVALSG

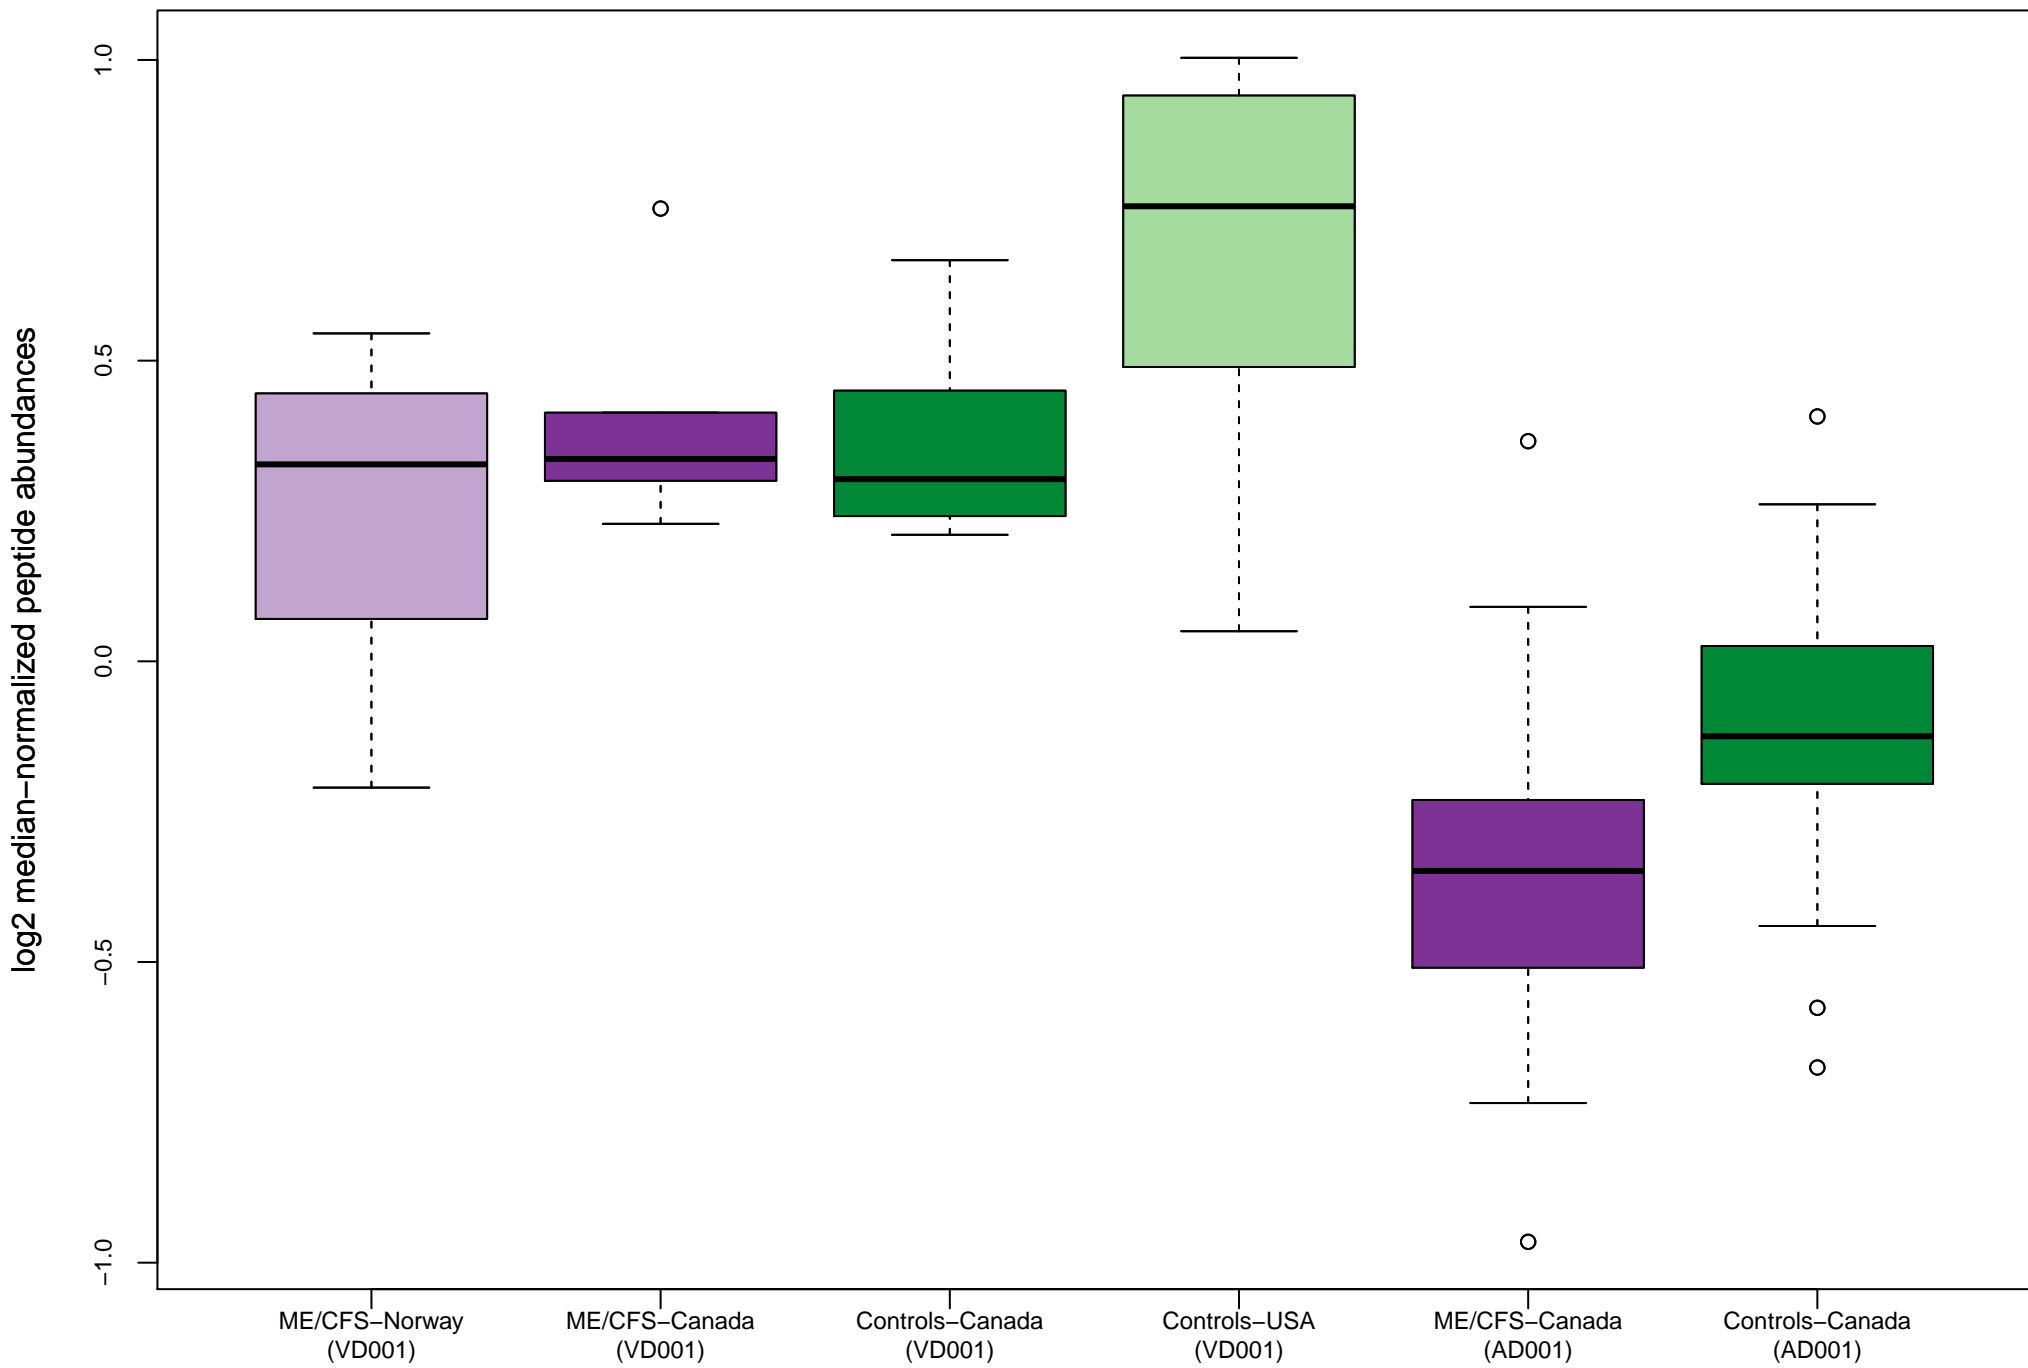

# HLPWVLRALSG

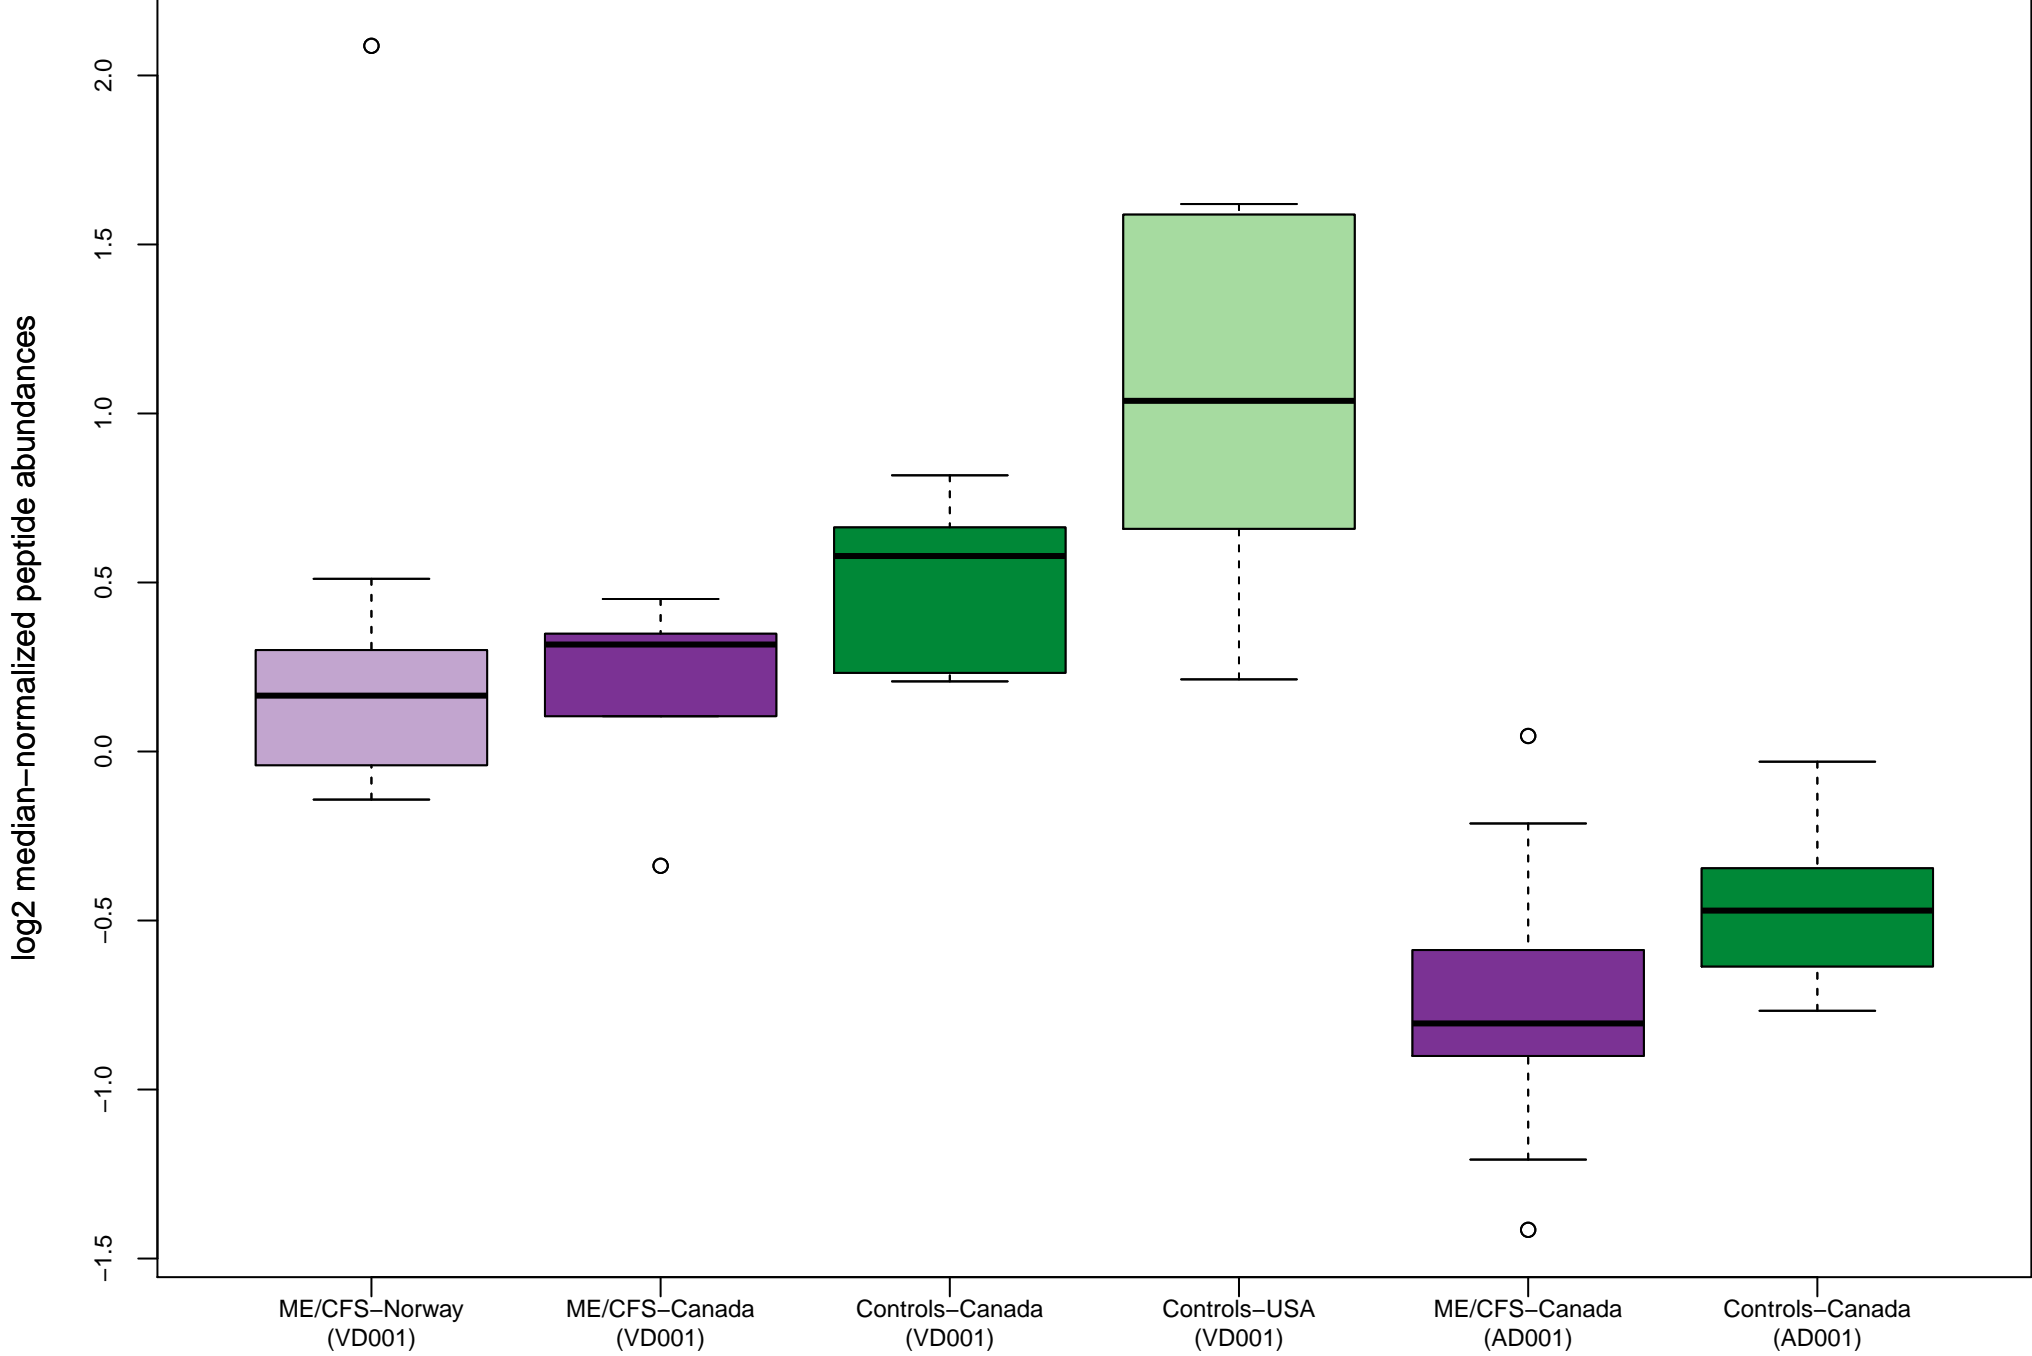

# HLYKALFGRVAL

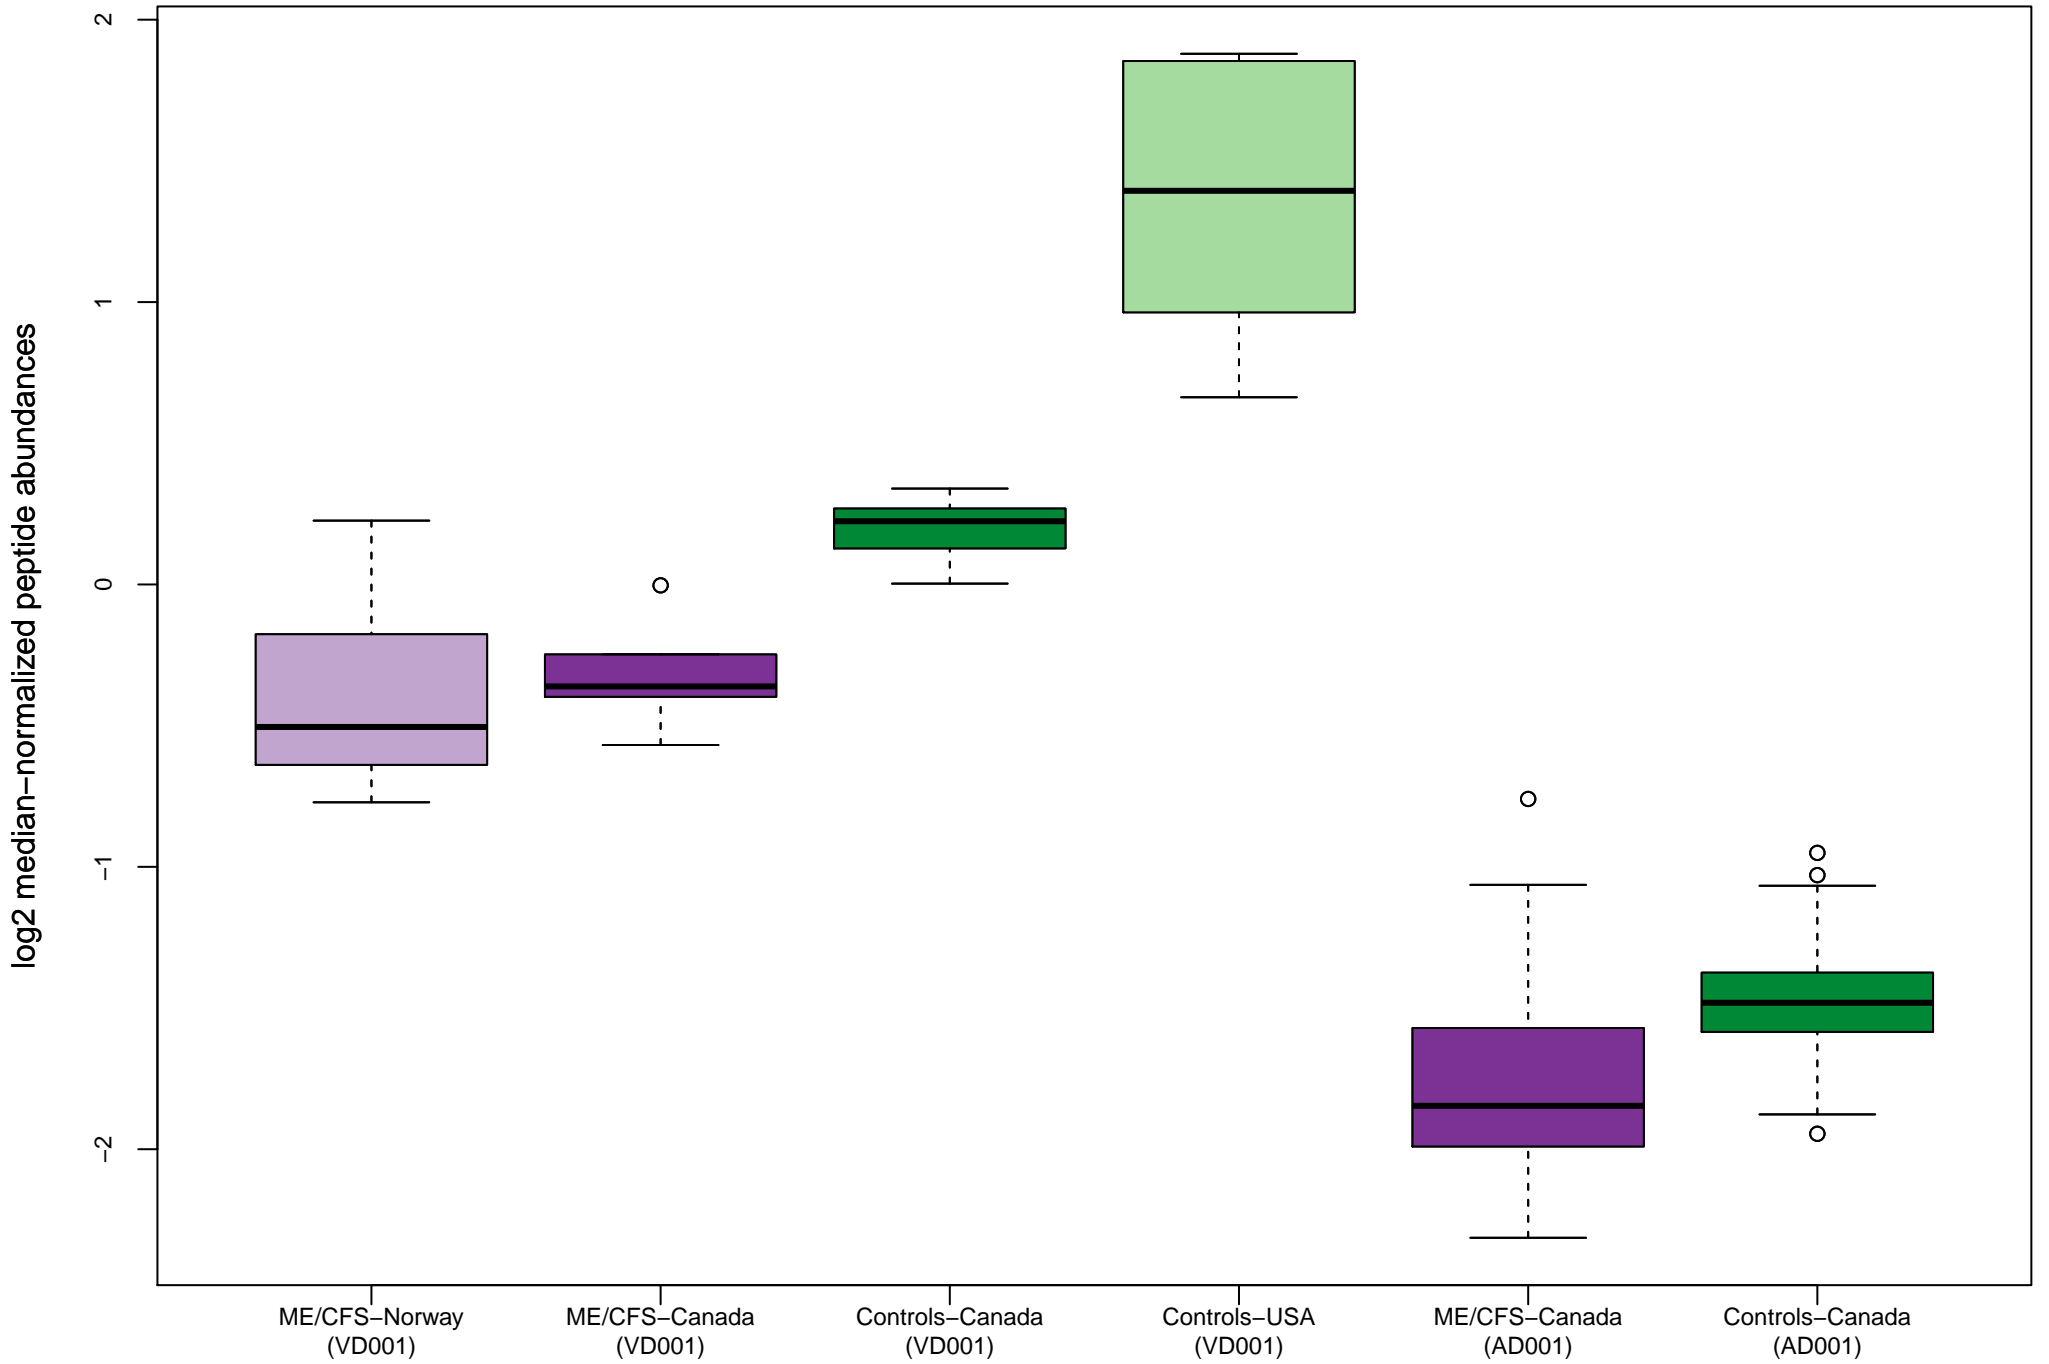

# HPFFRASGVALG

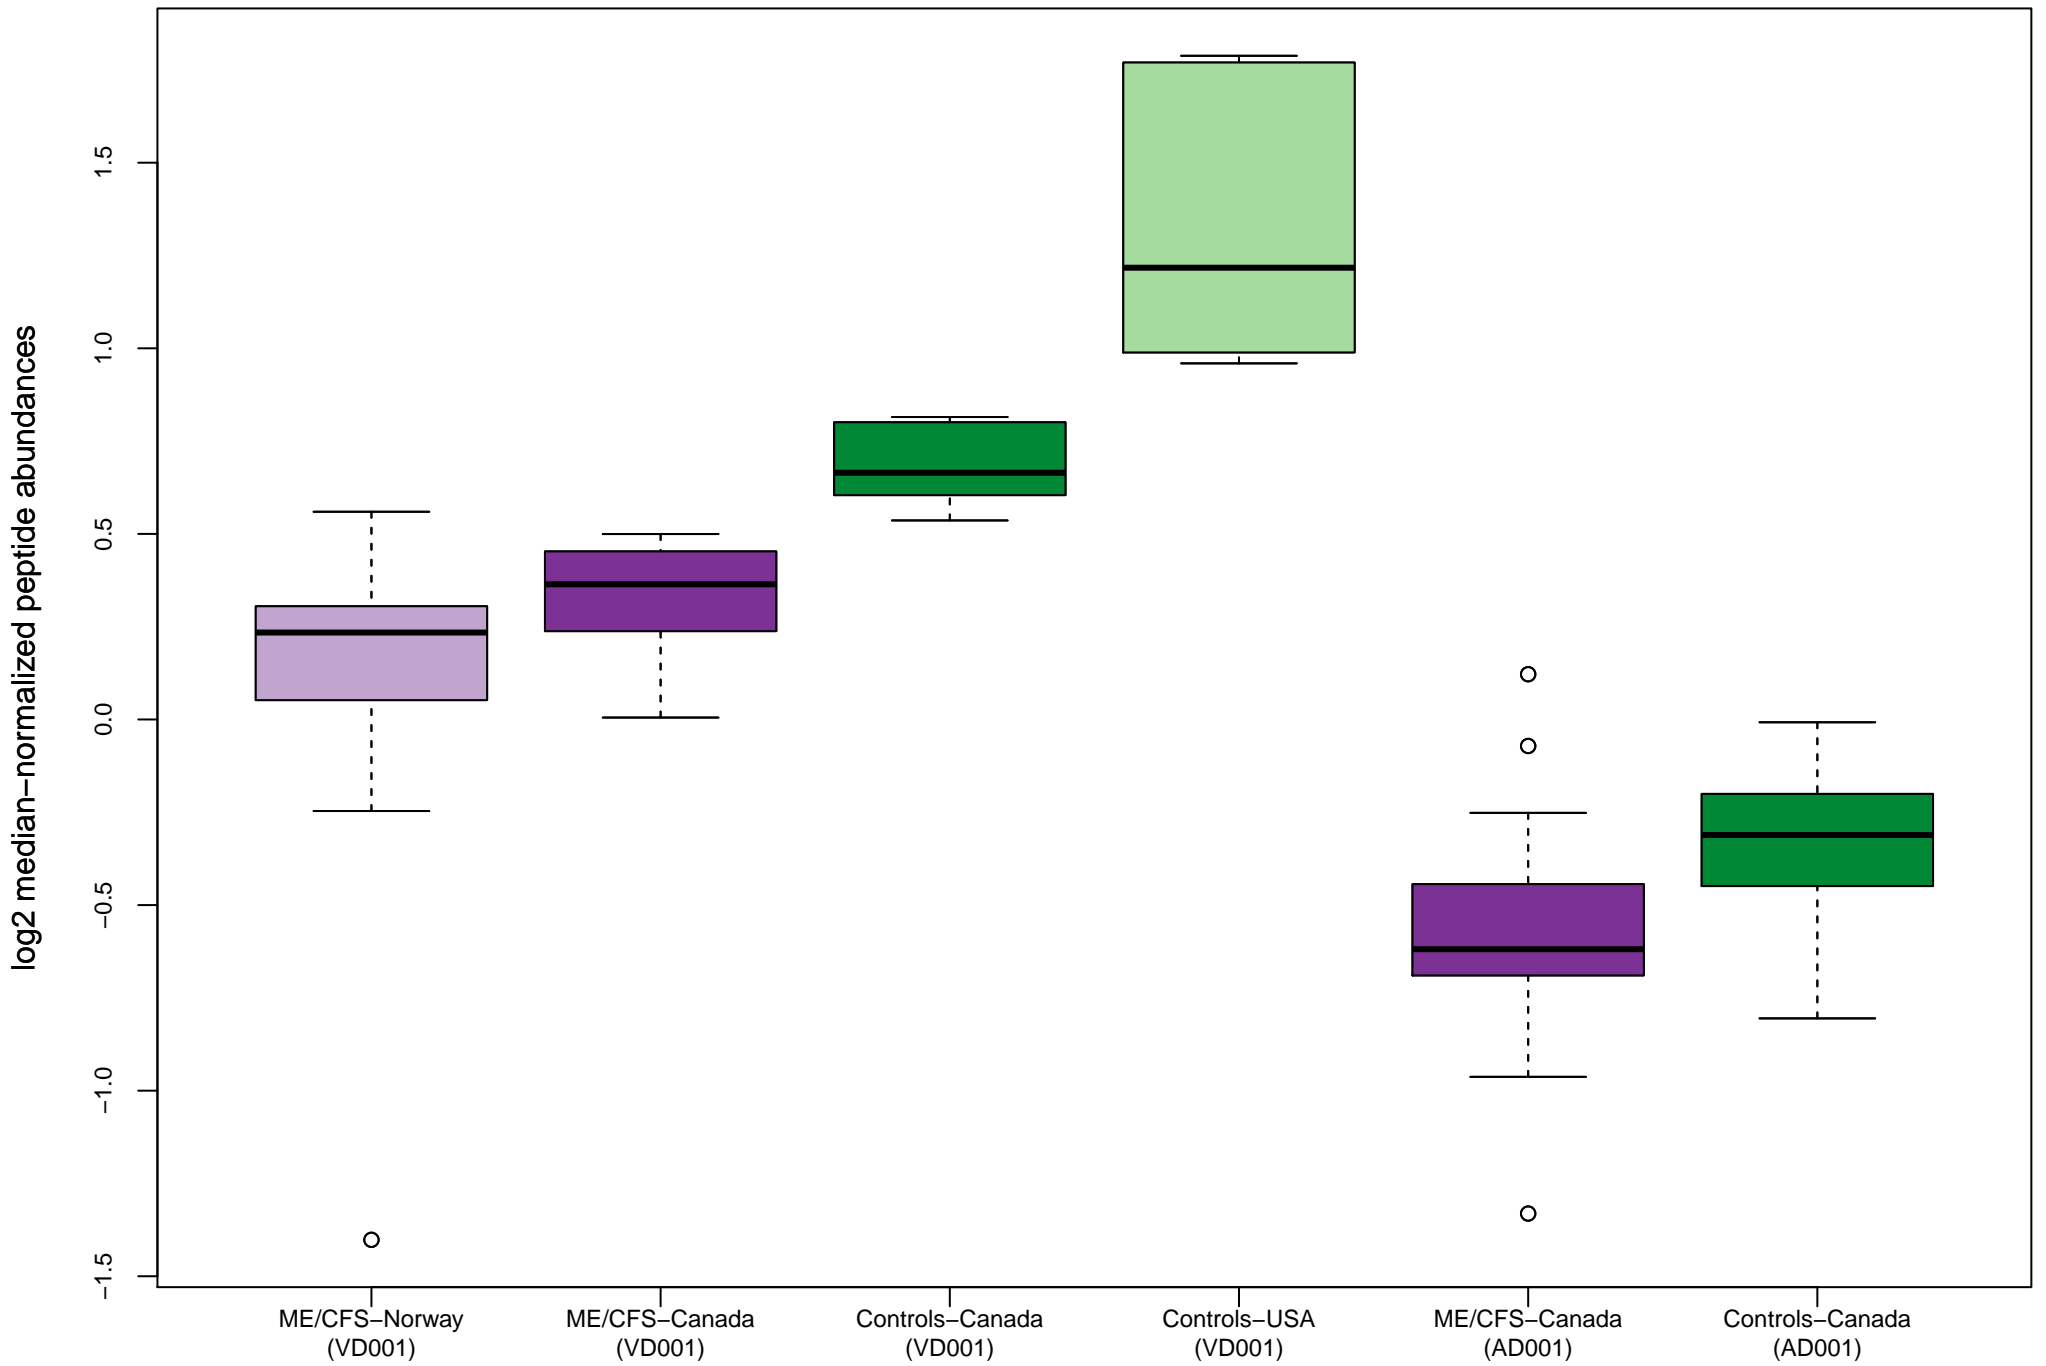

# HRVLLRASGASG

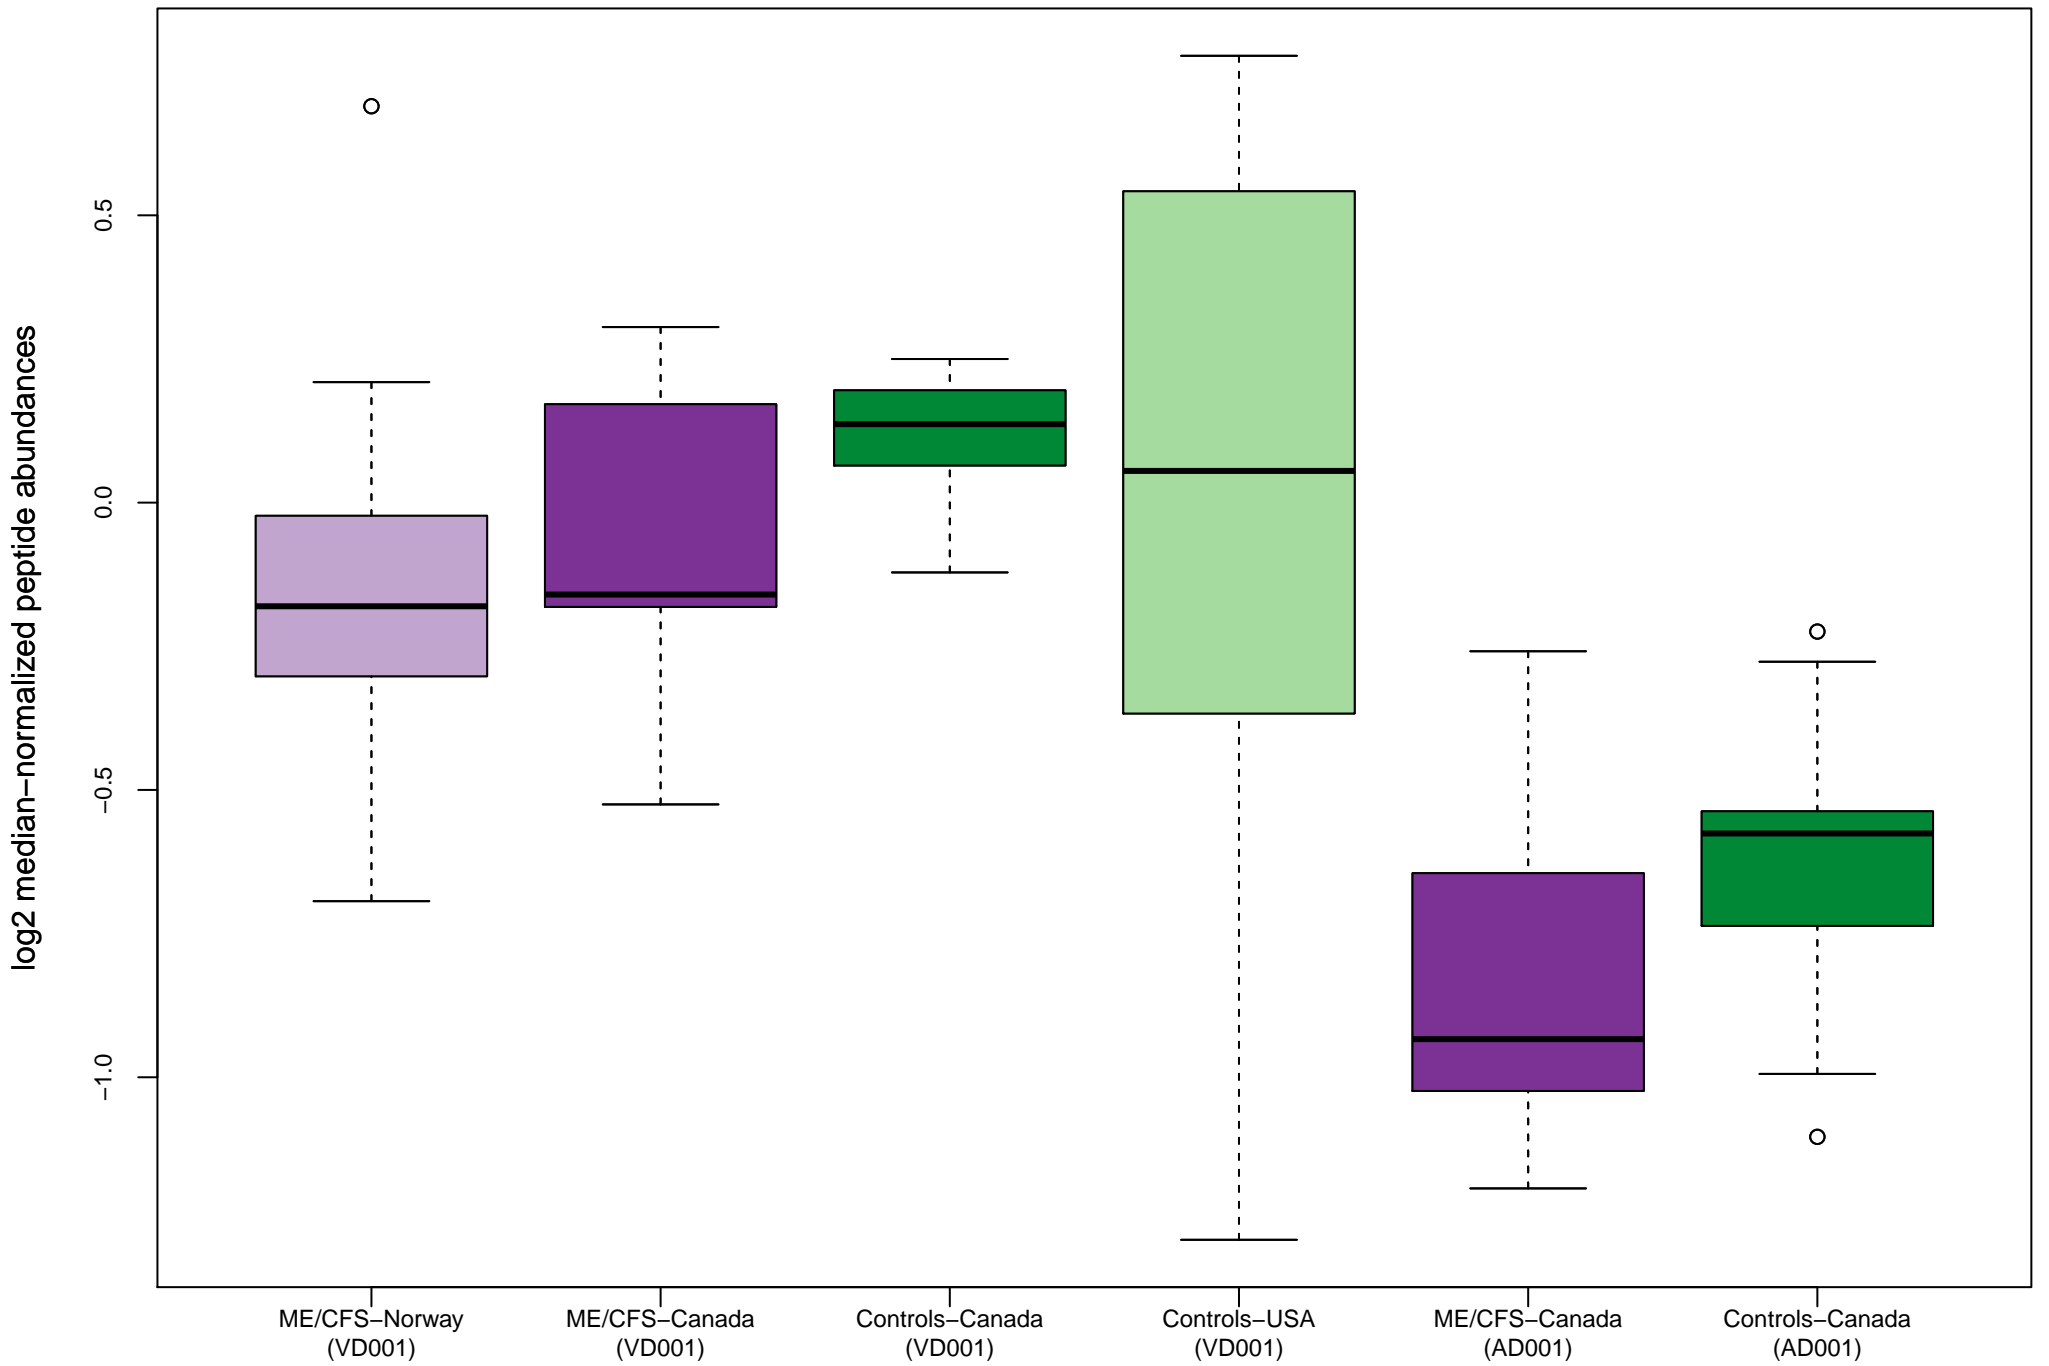

# HVARFRLWSGAG

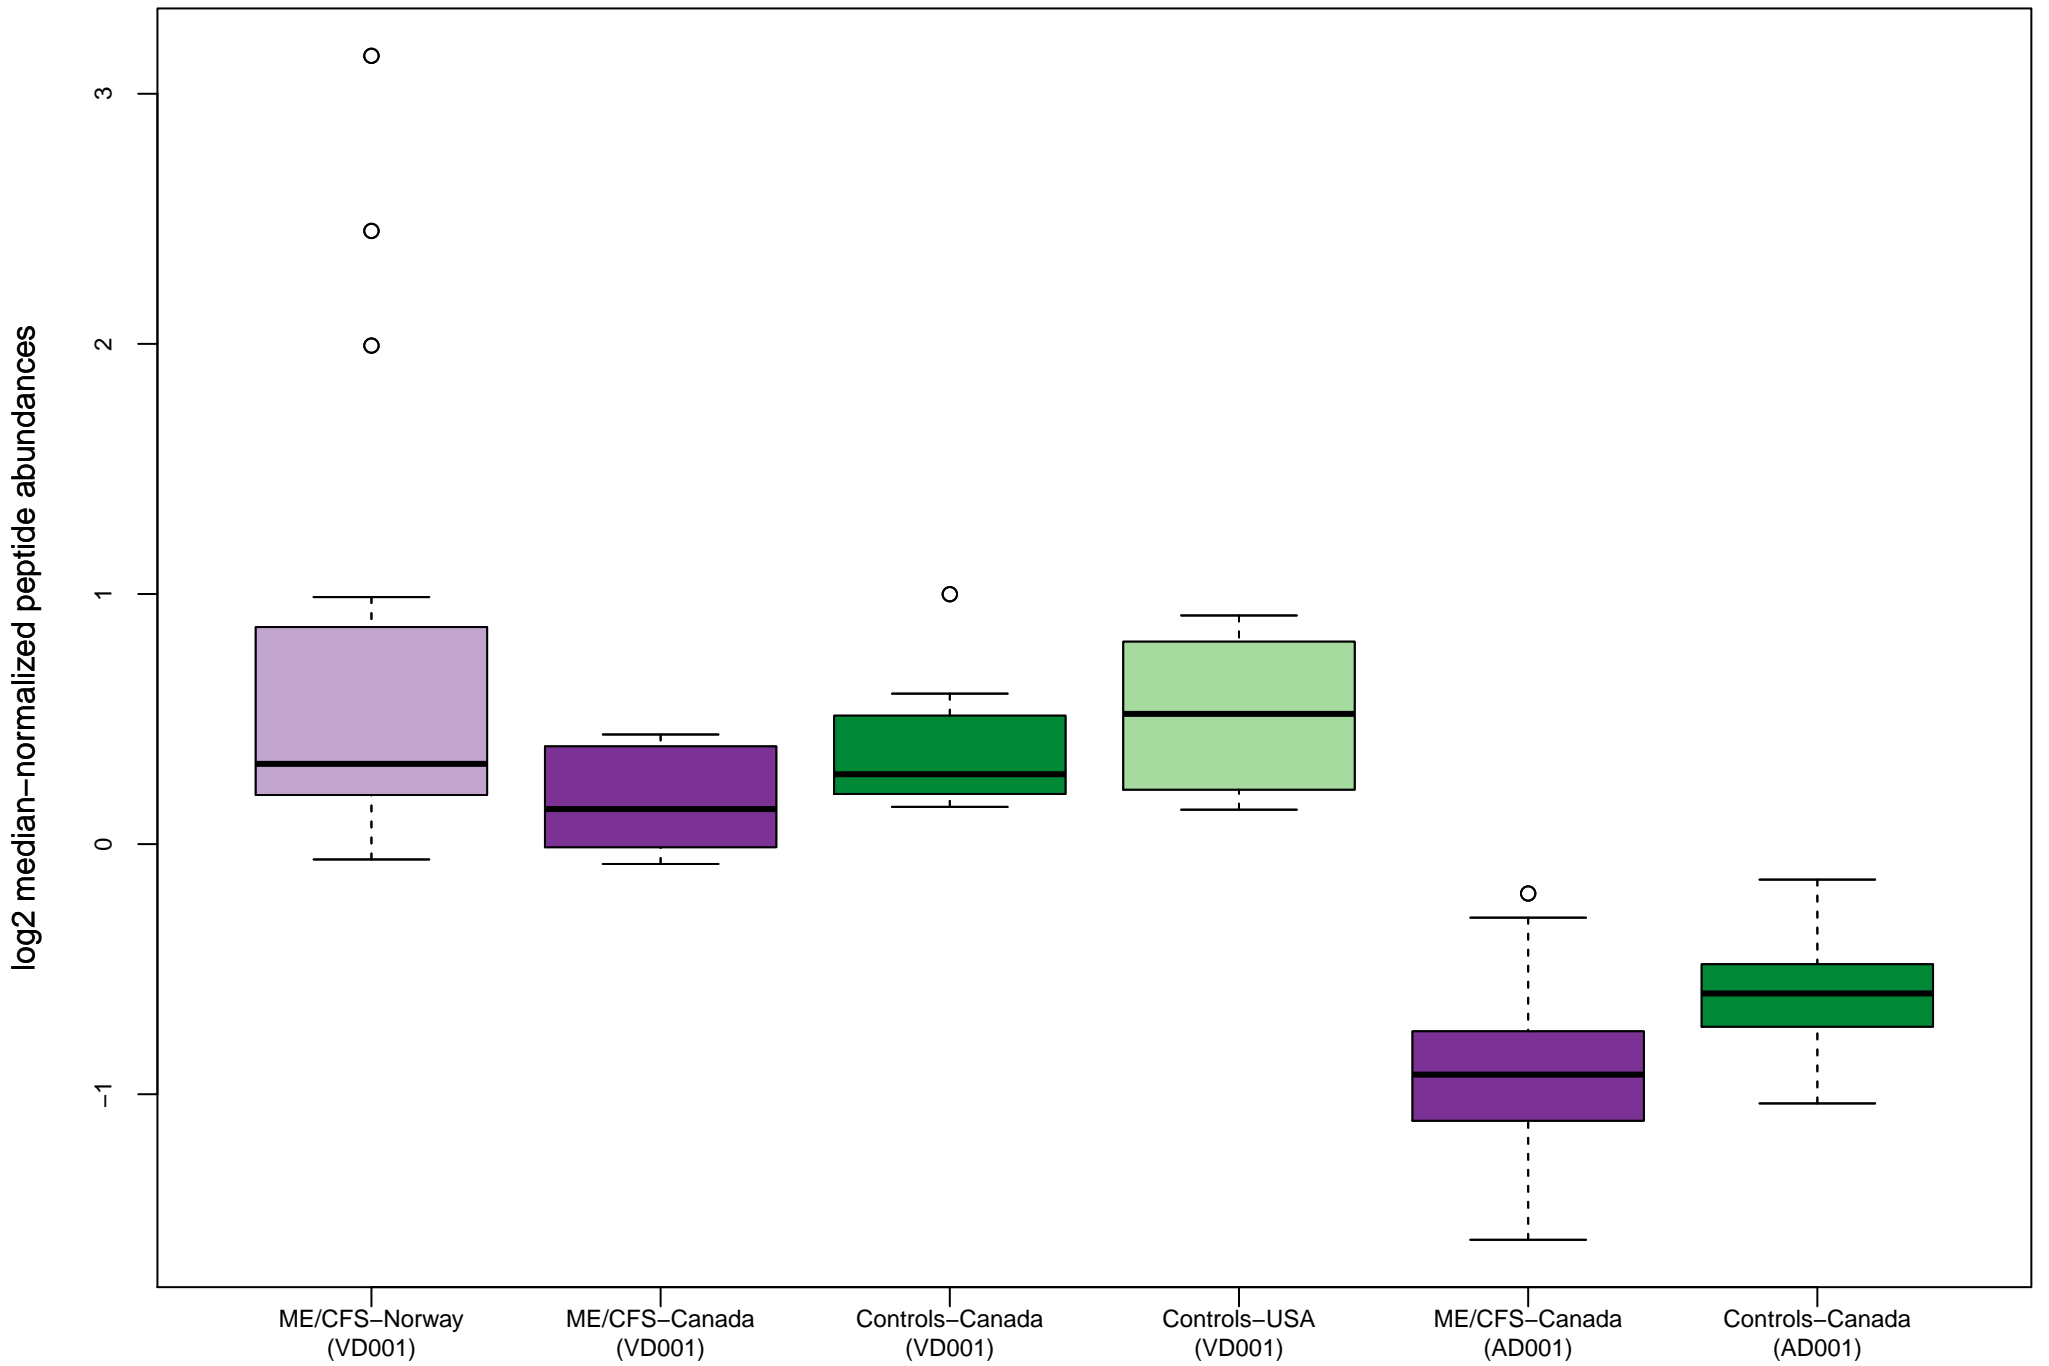

# HWPWVRGVALSG

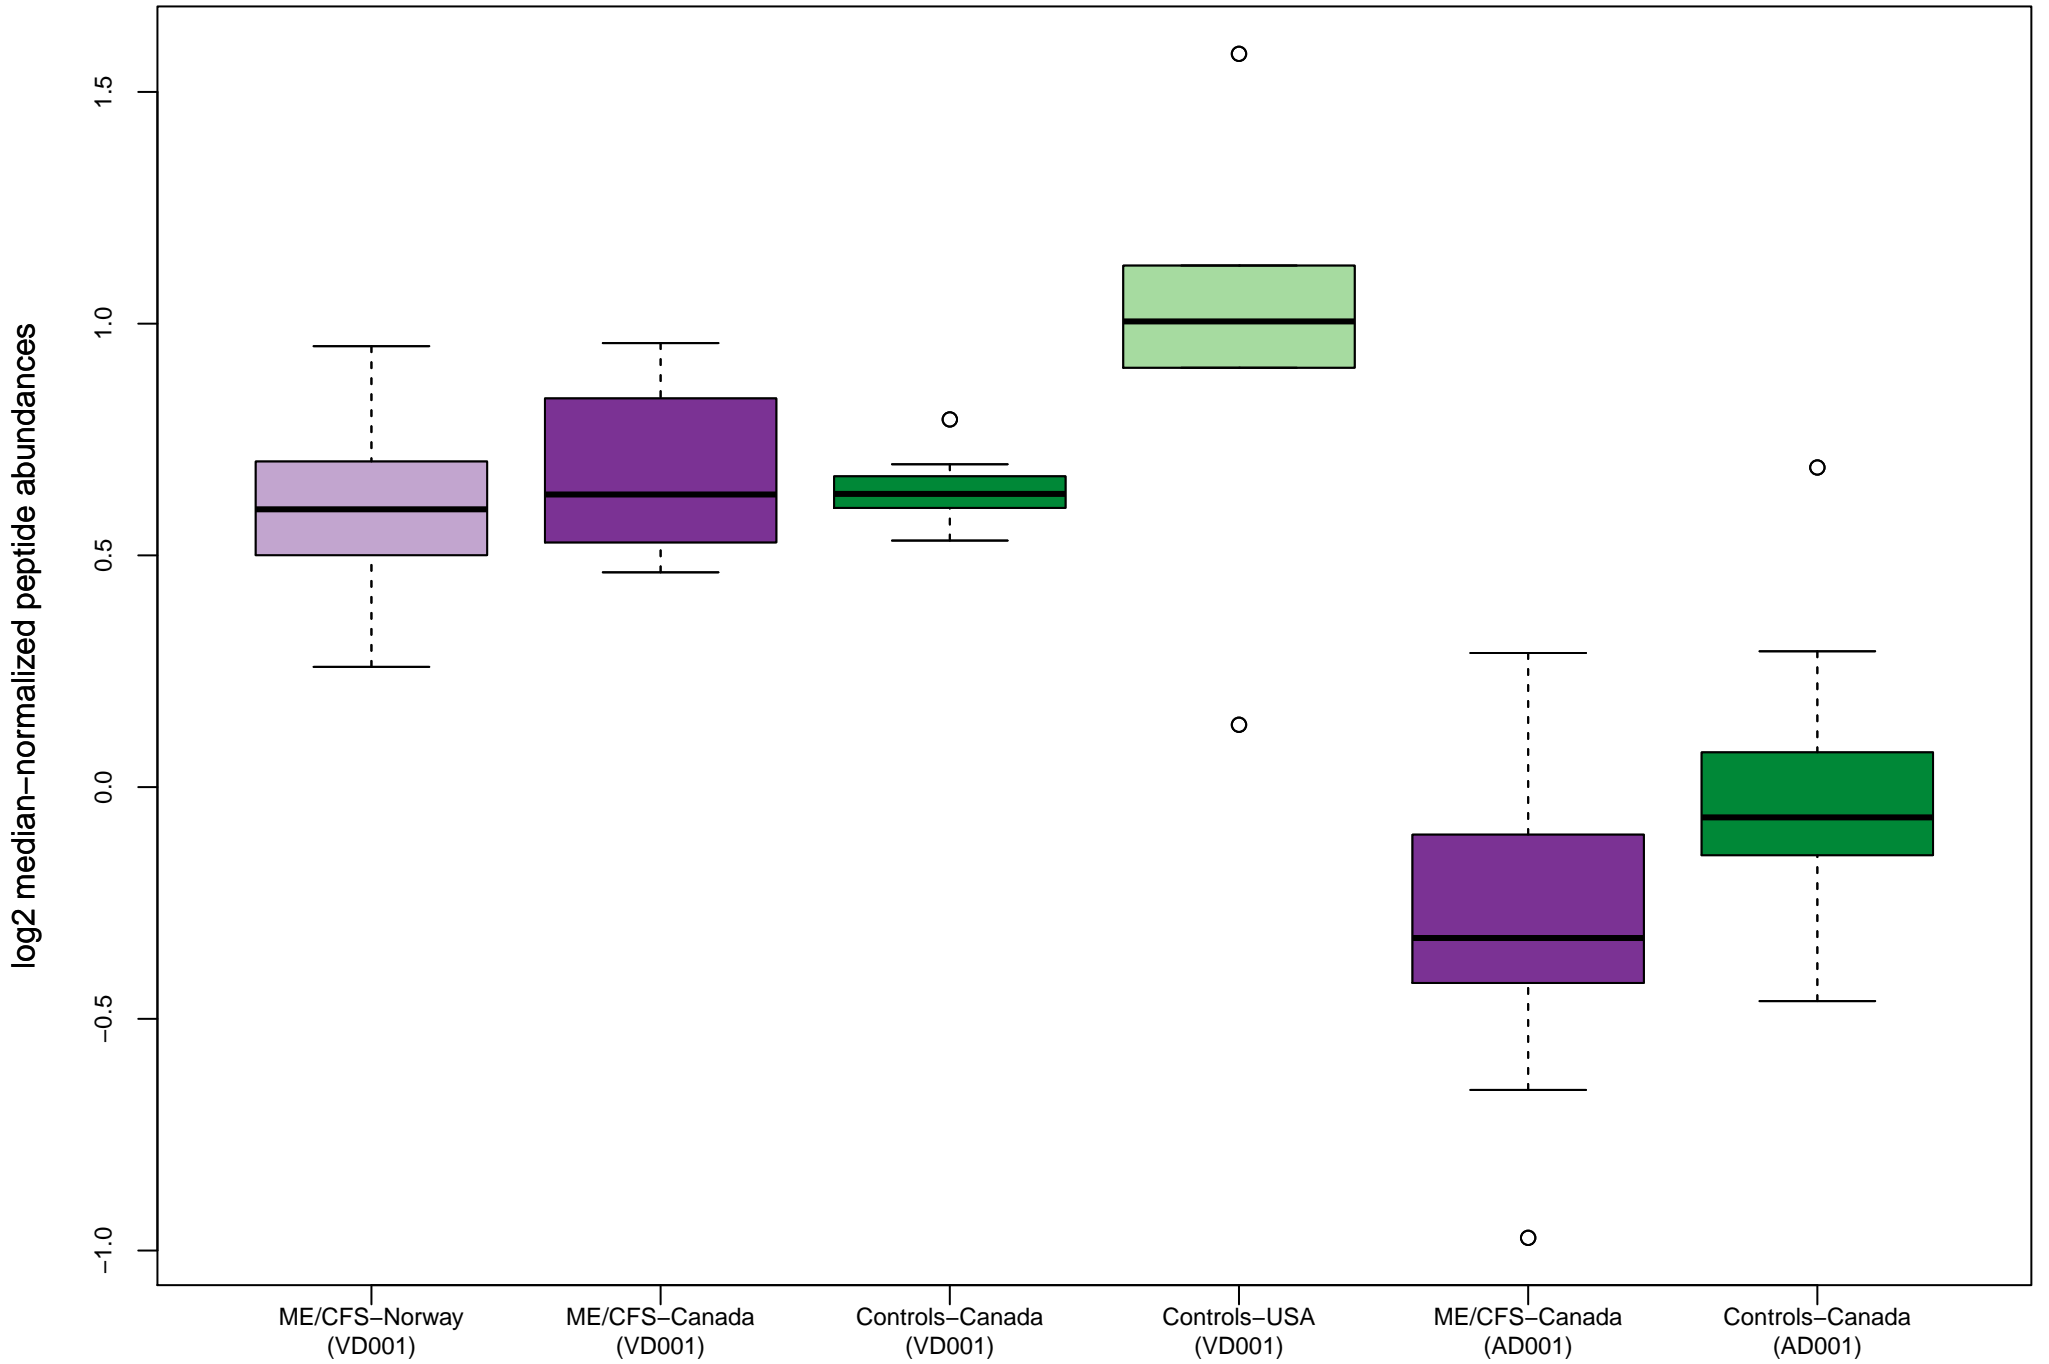

# HWRYQRLGVALS

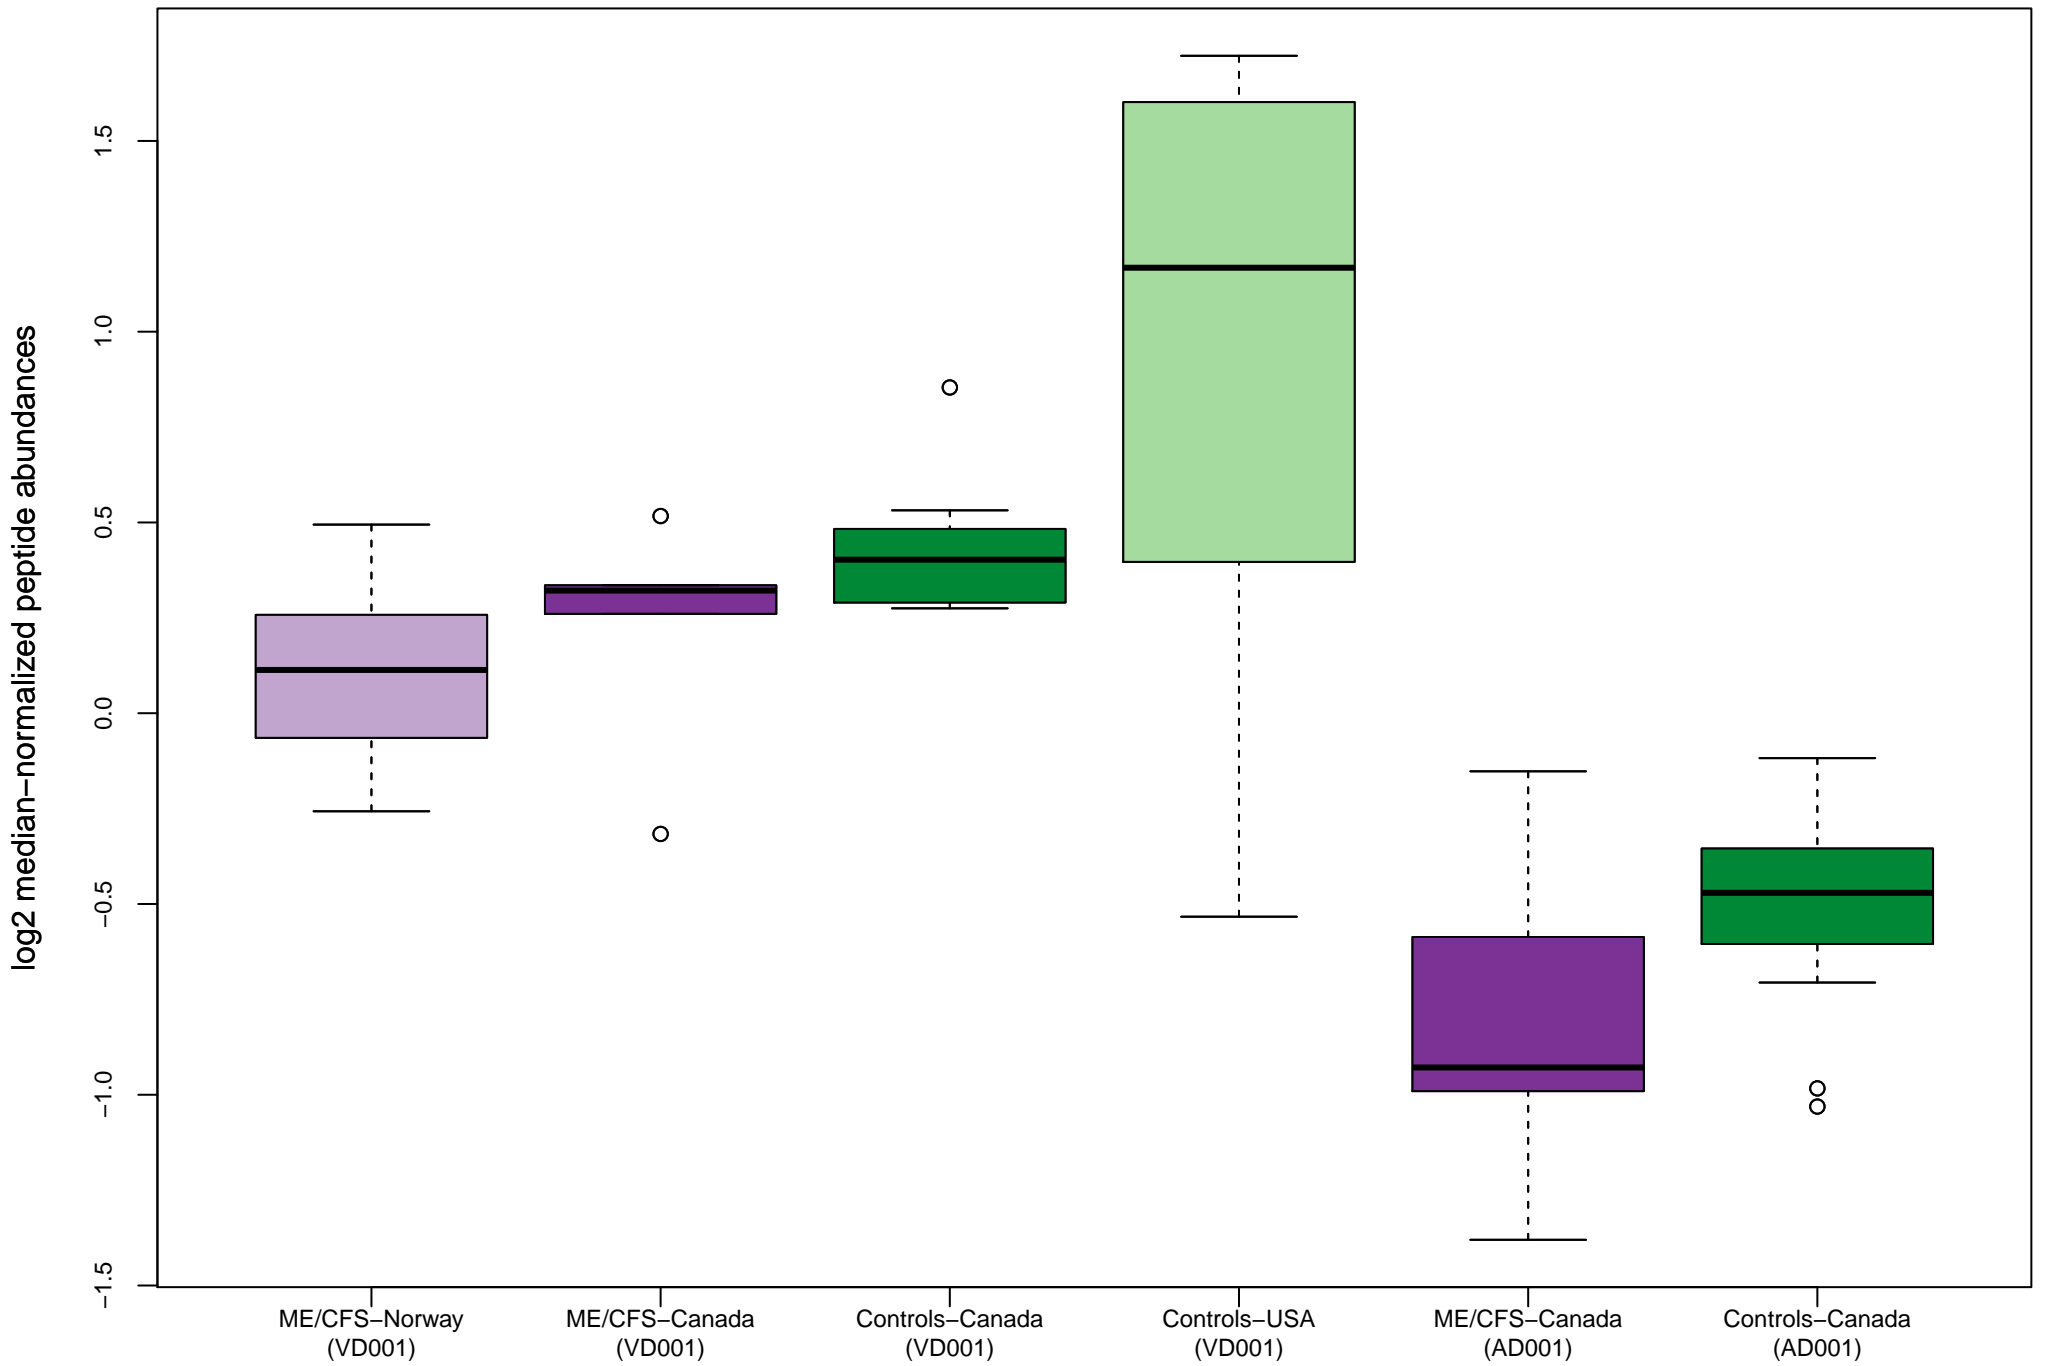



# KAWWAFPYKVLS

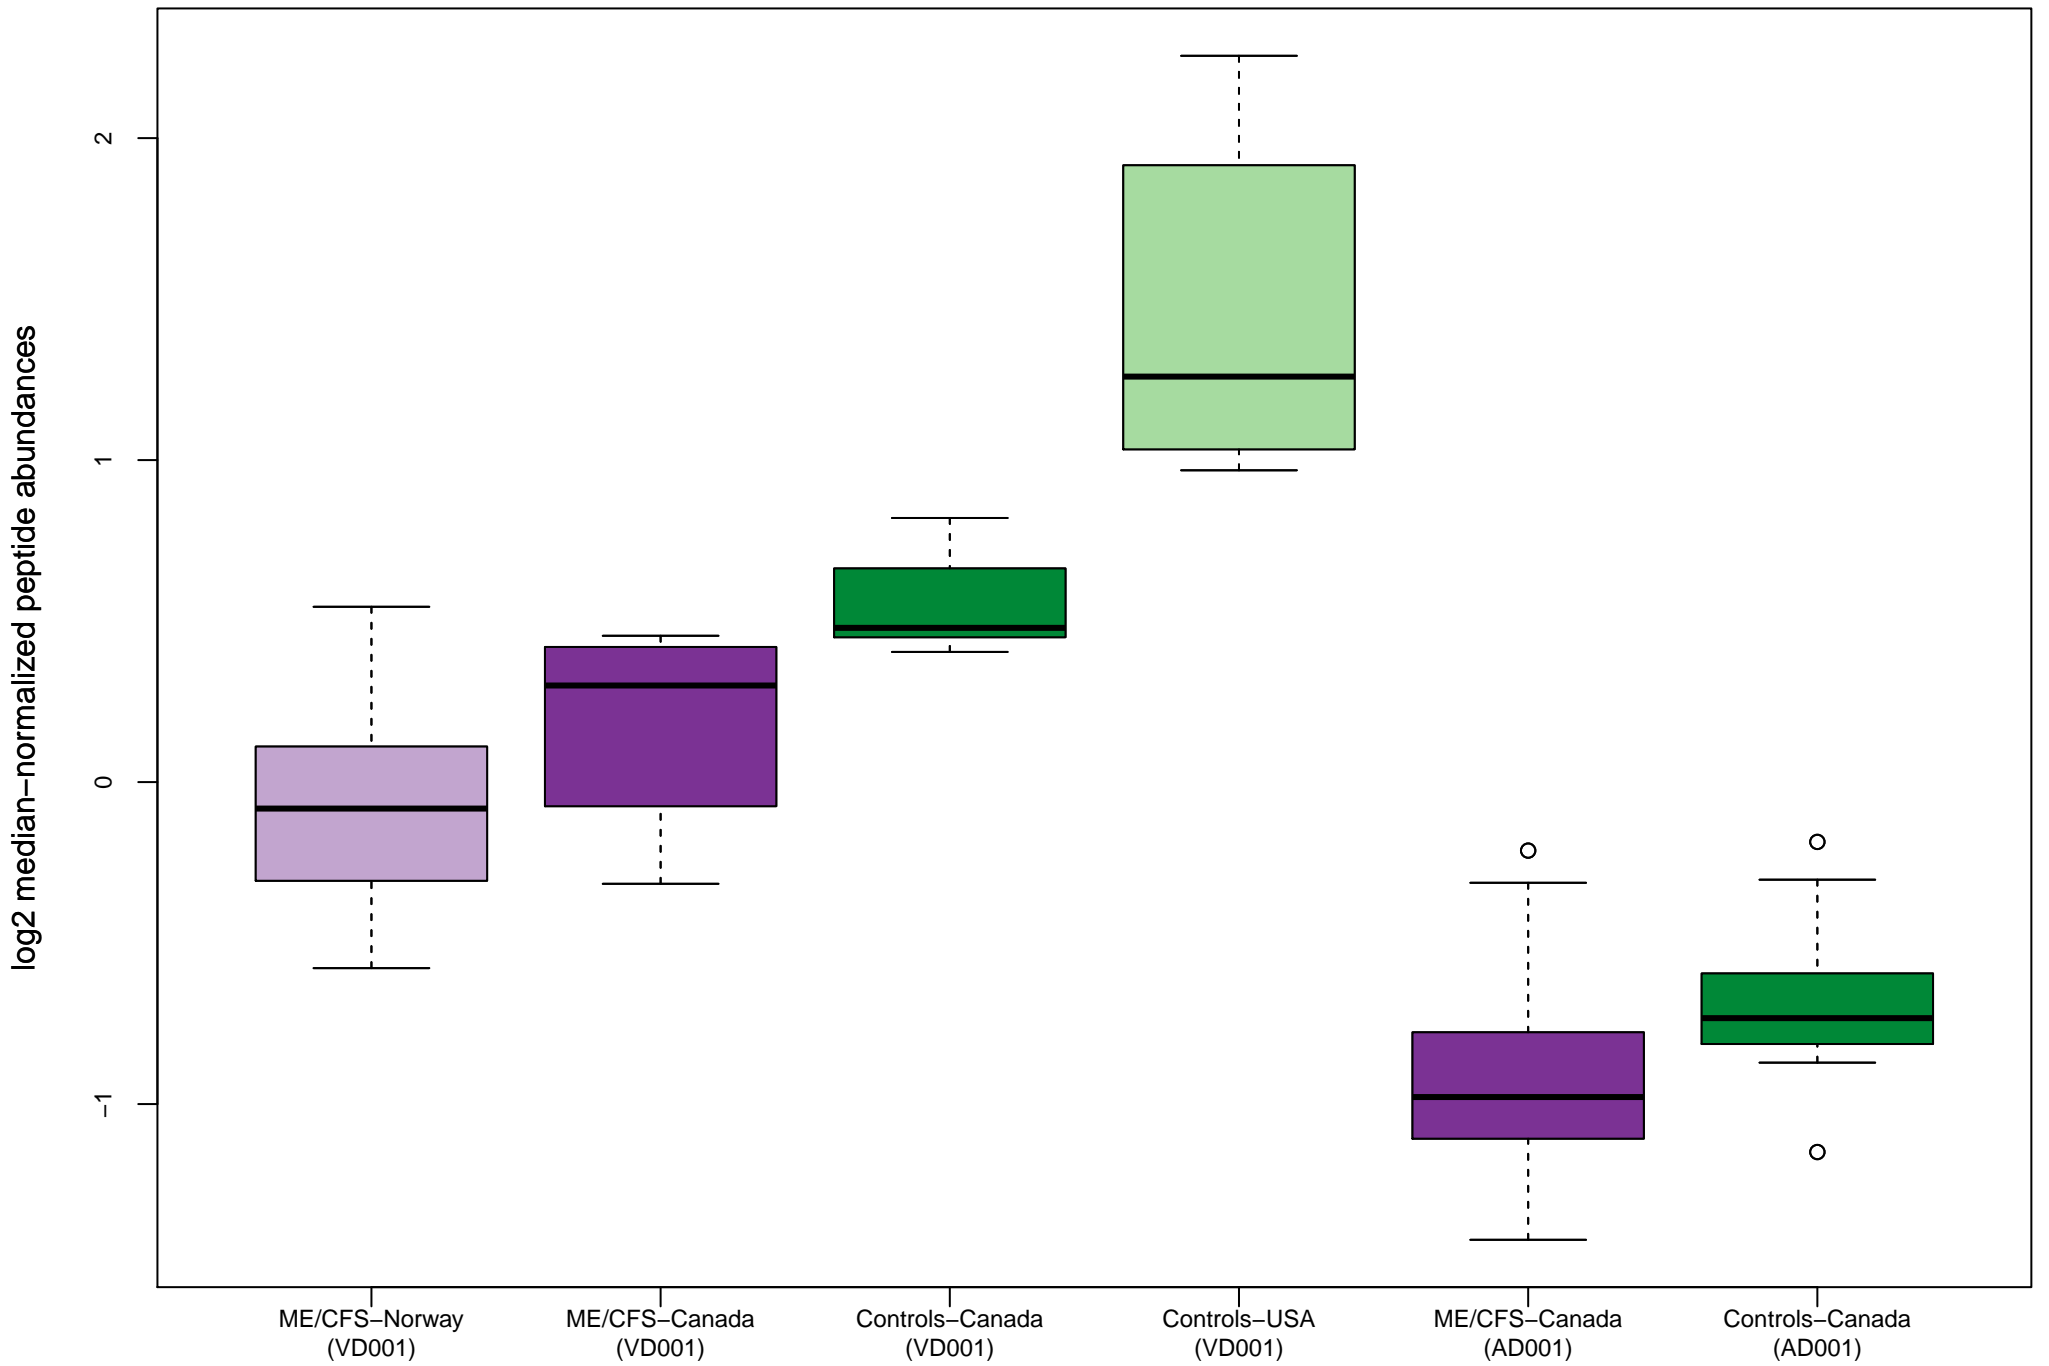

# KFARFYSGVLSG

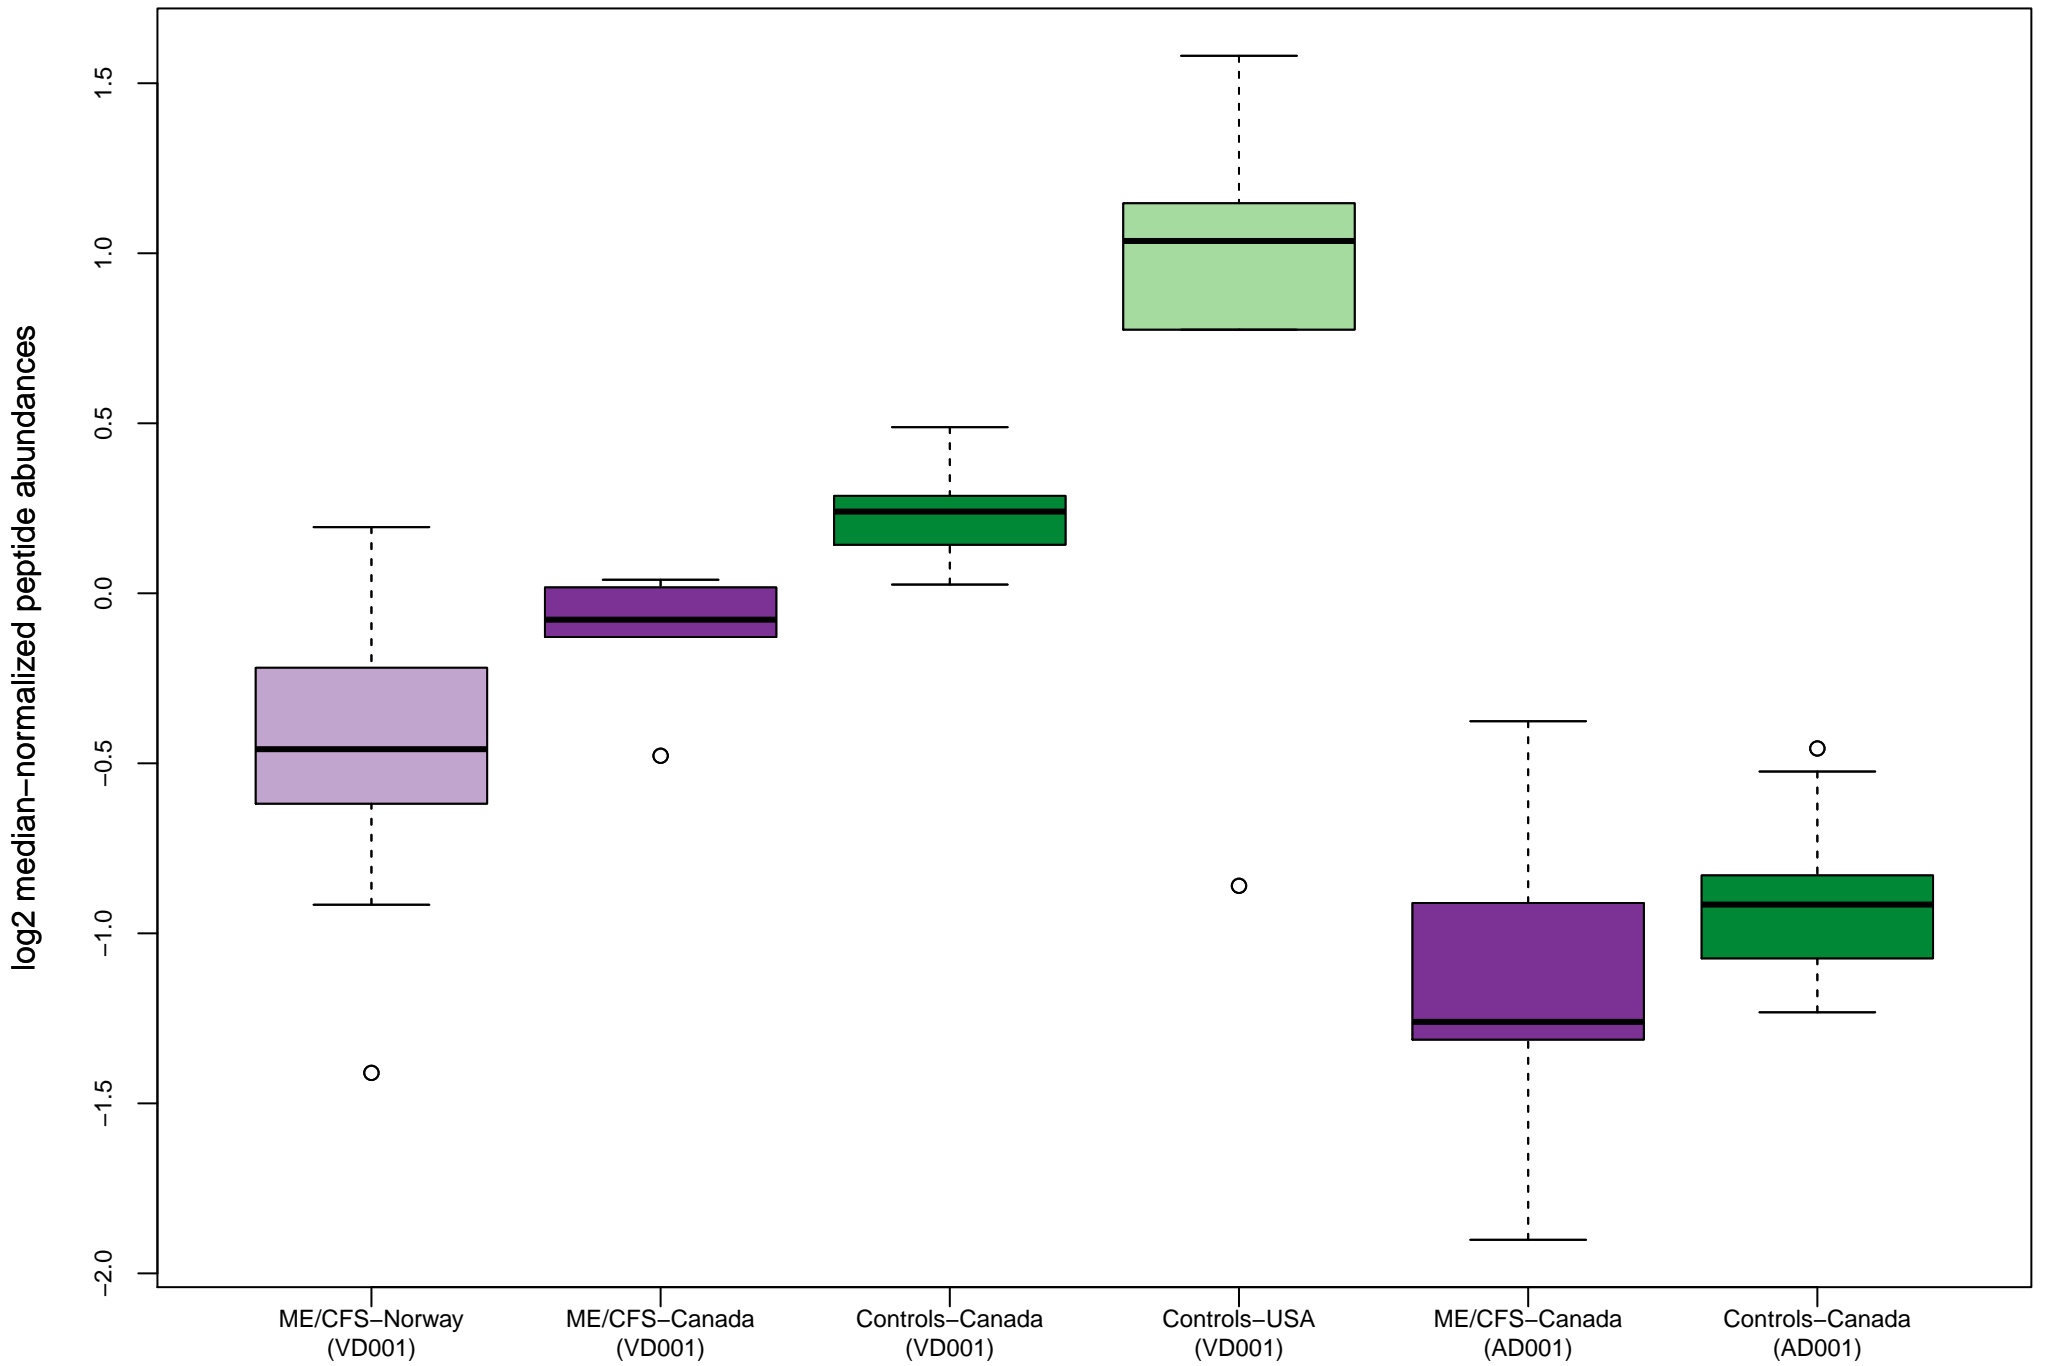

# KFFKWVGVALSG

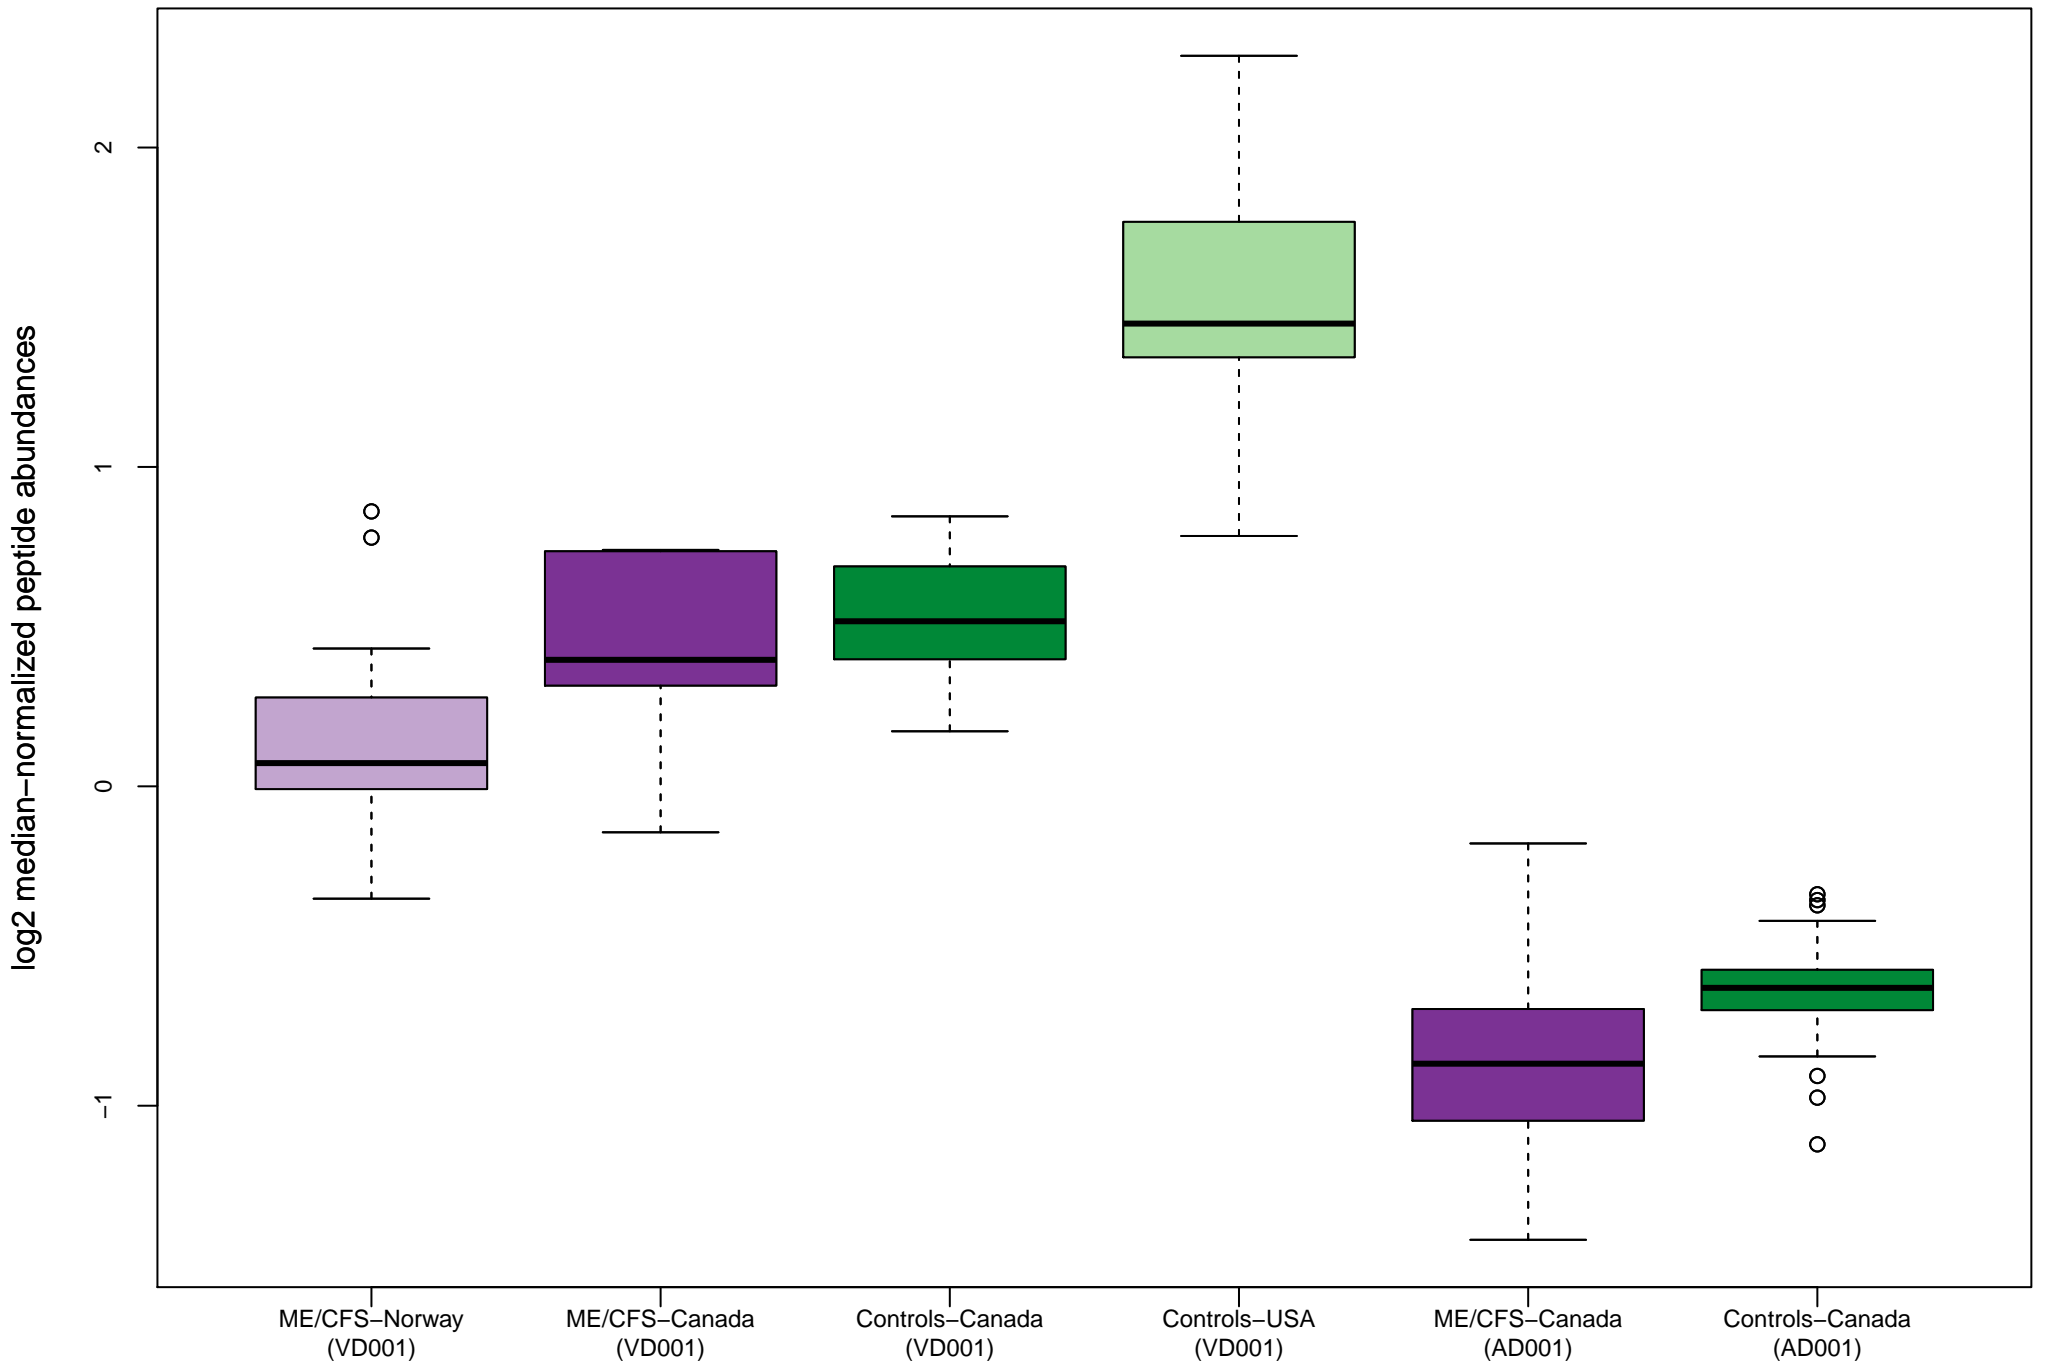

# KFQFYRVSALSG

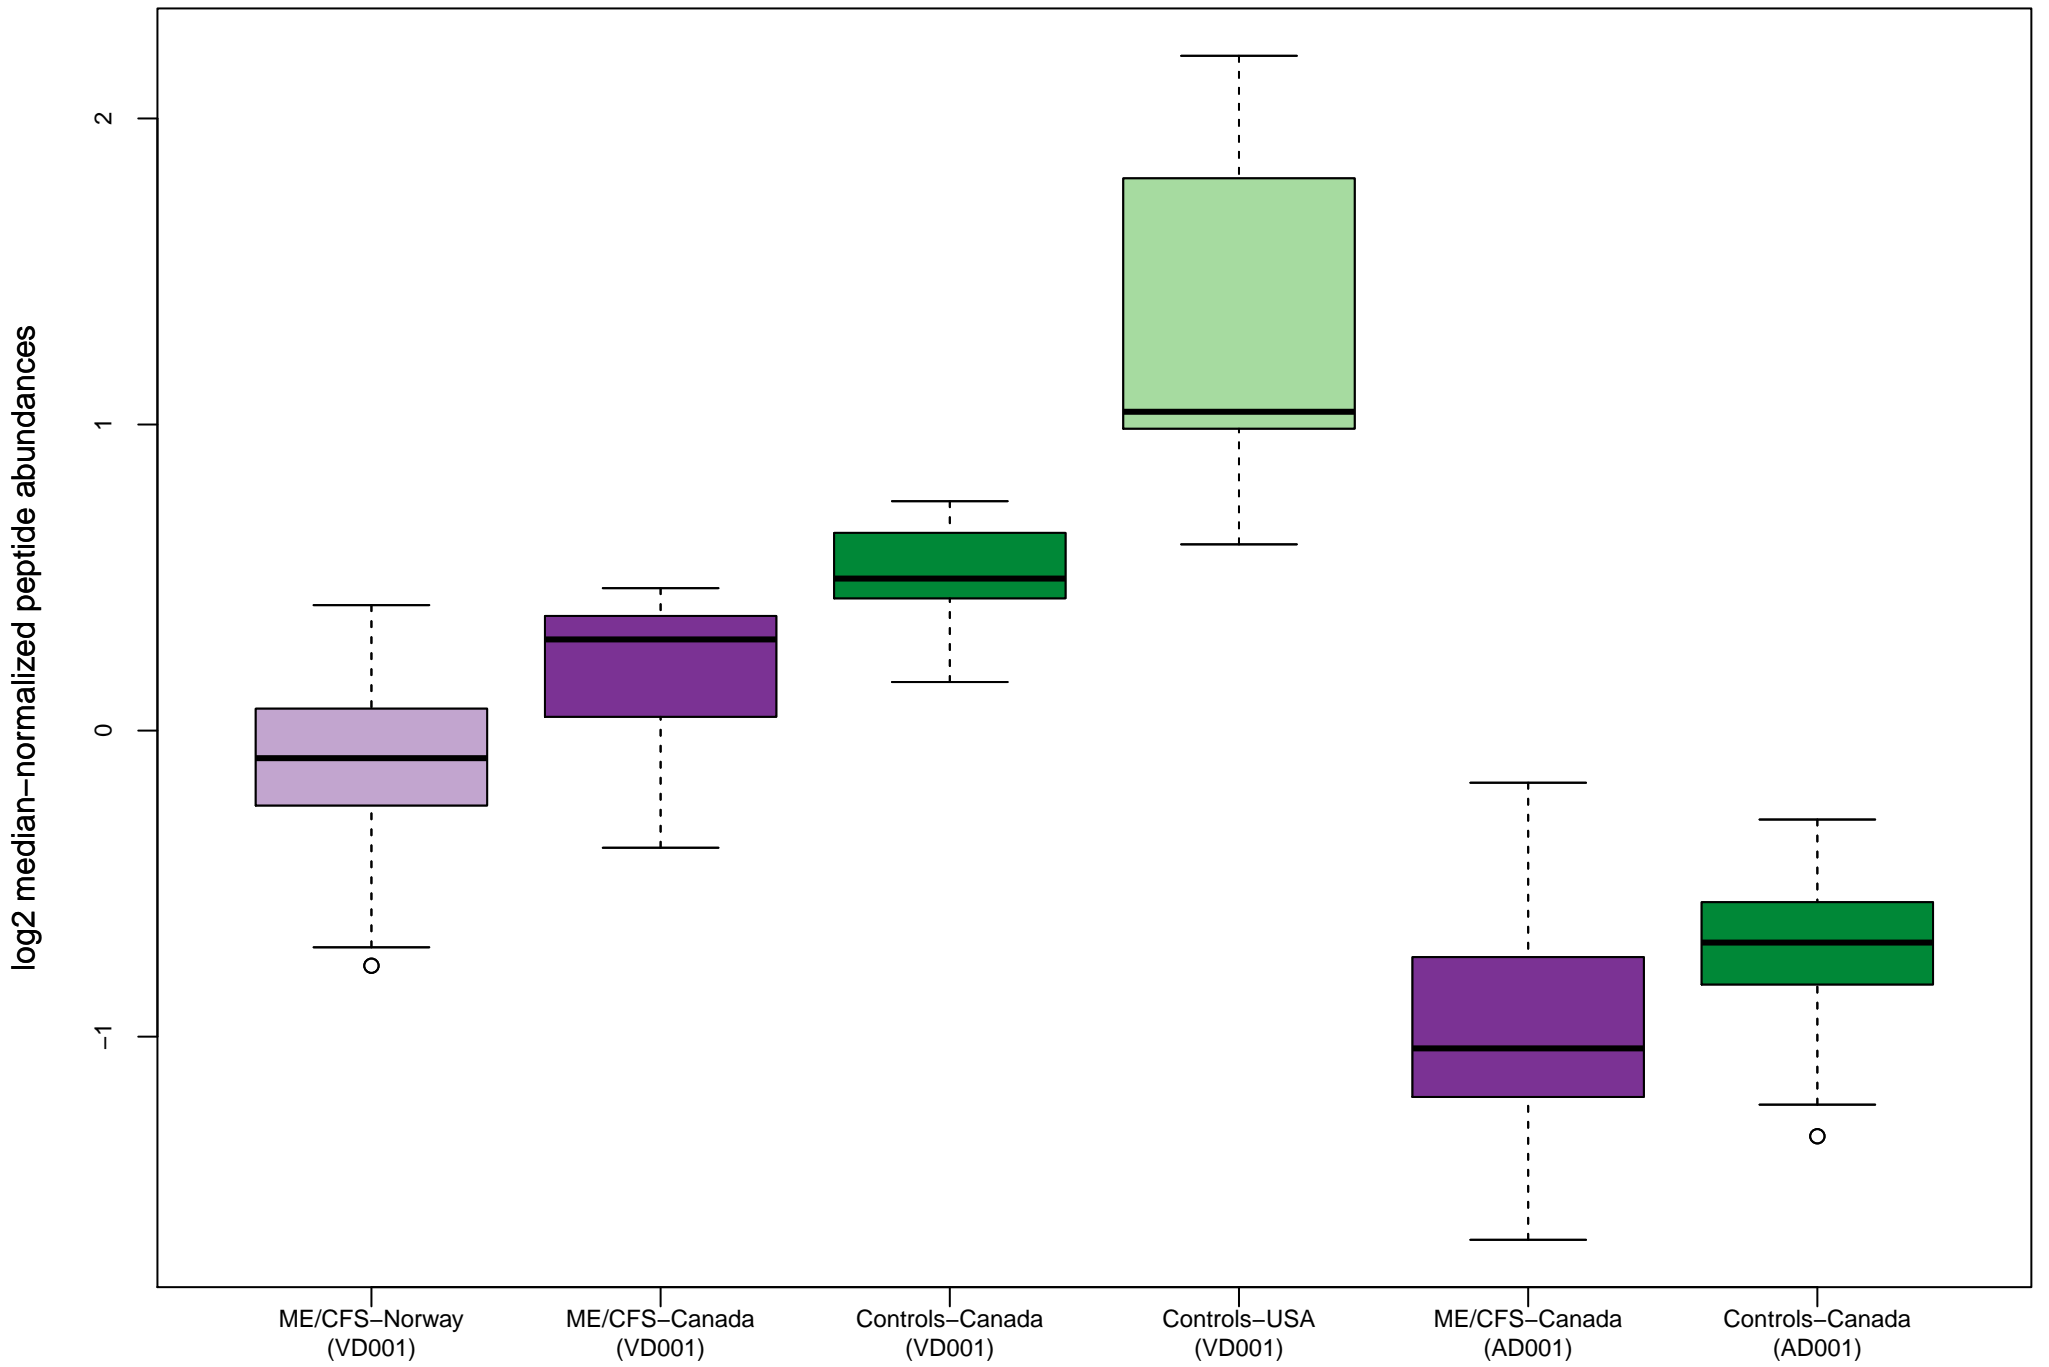

# KFSVYKVGVASG

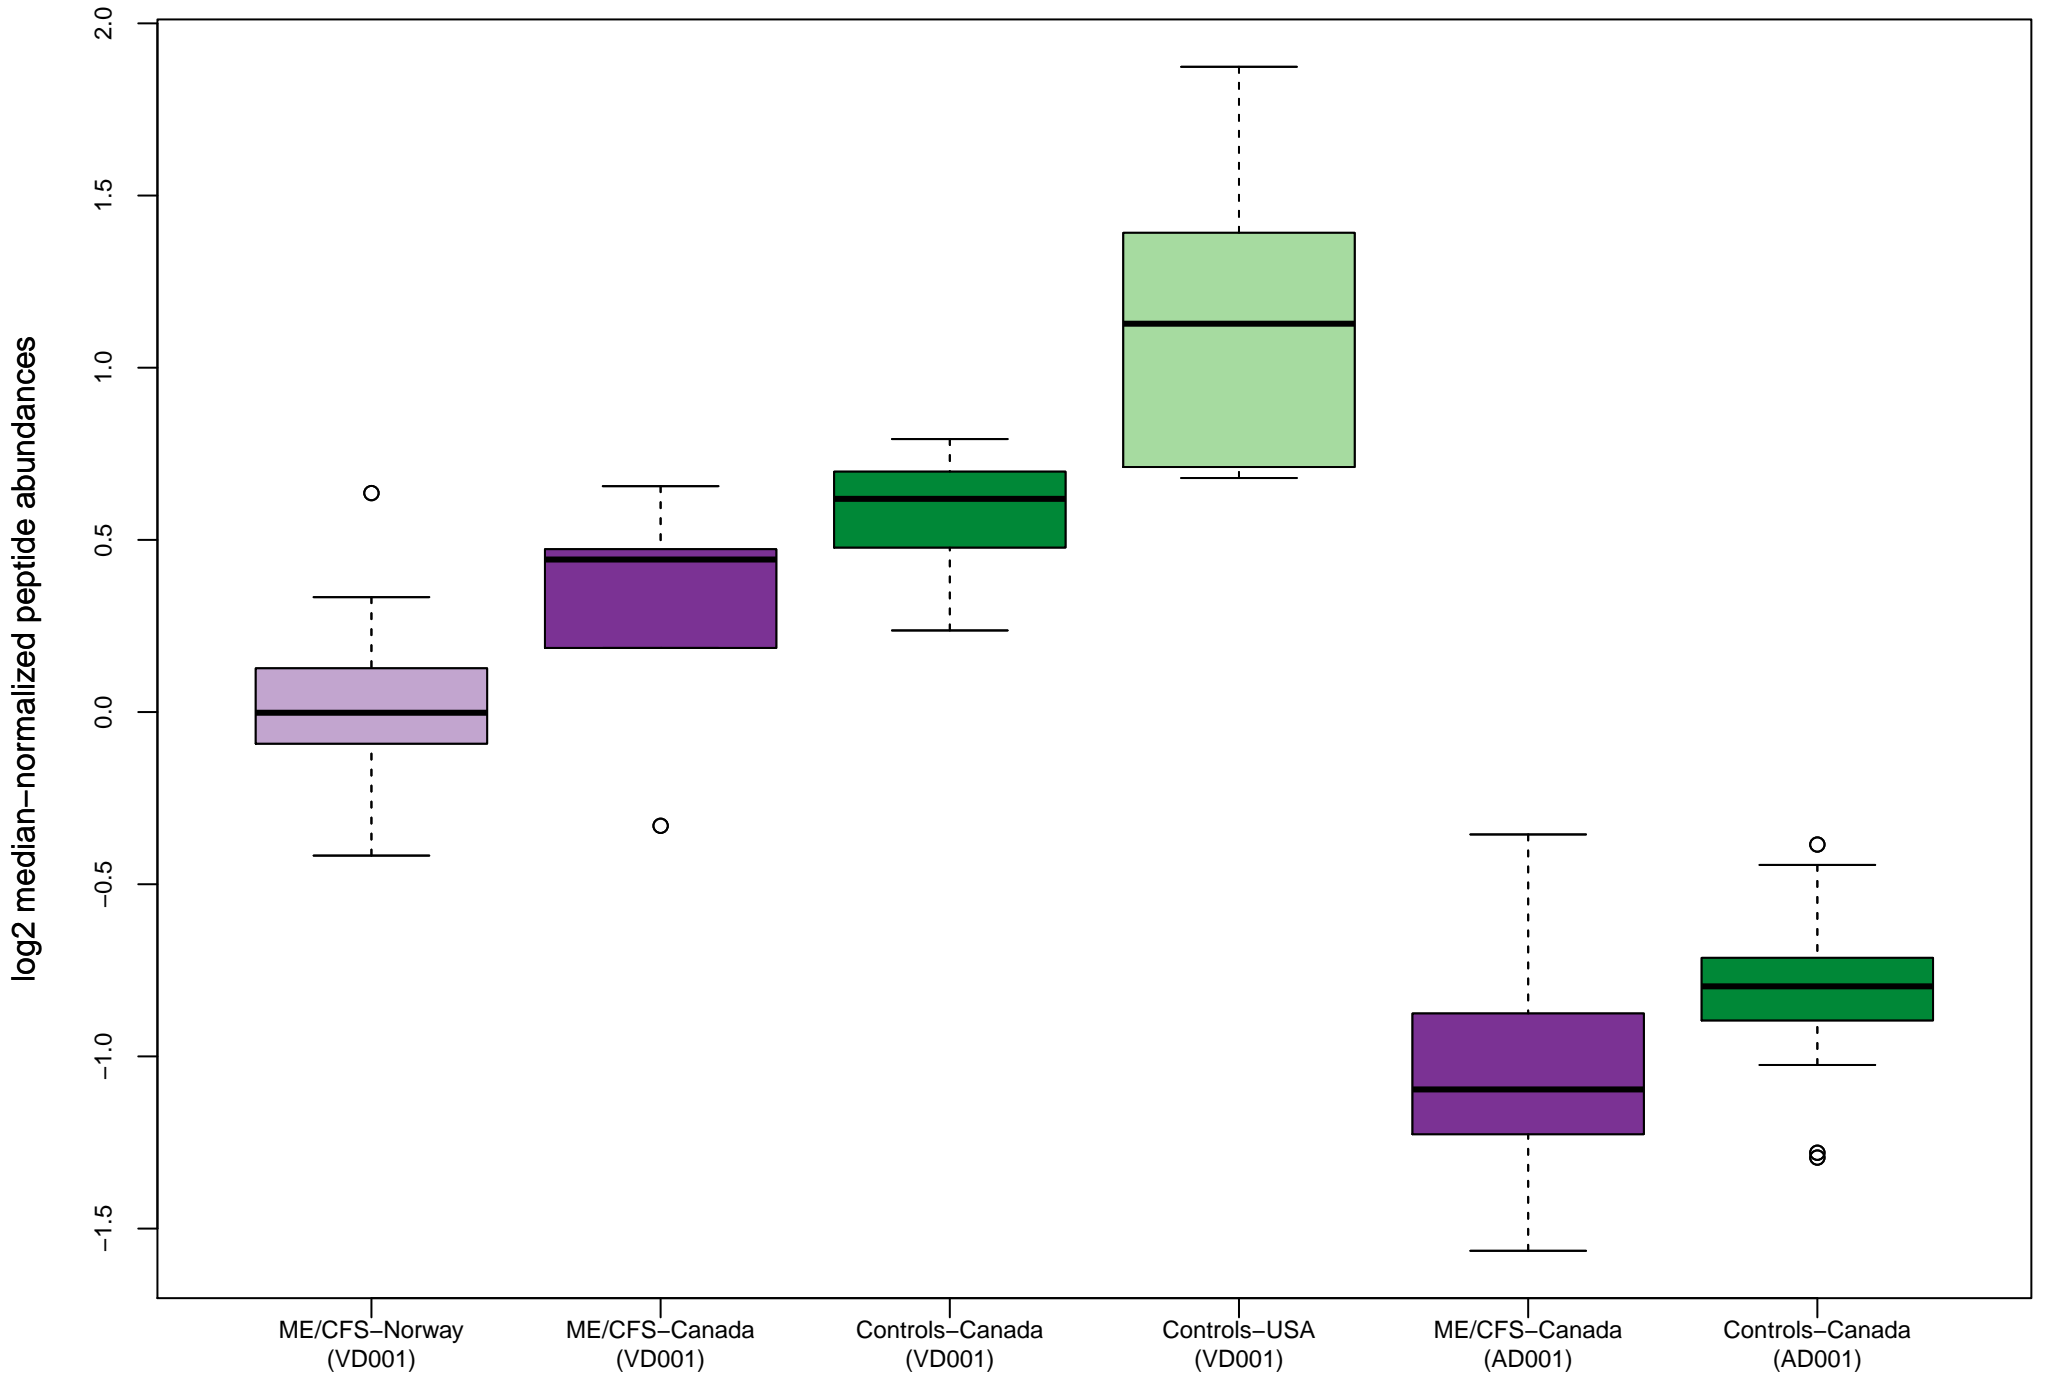

# KFWGRLFPVALG

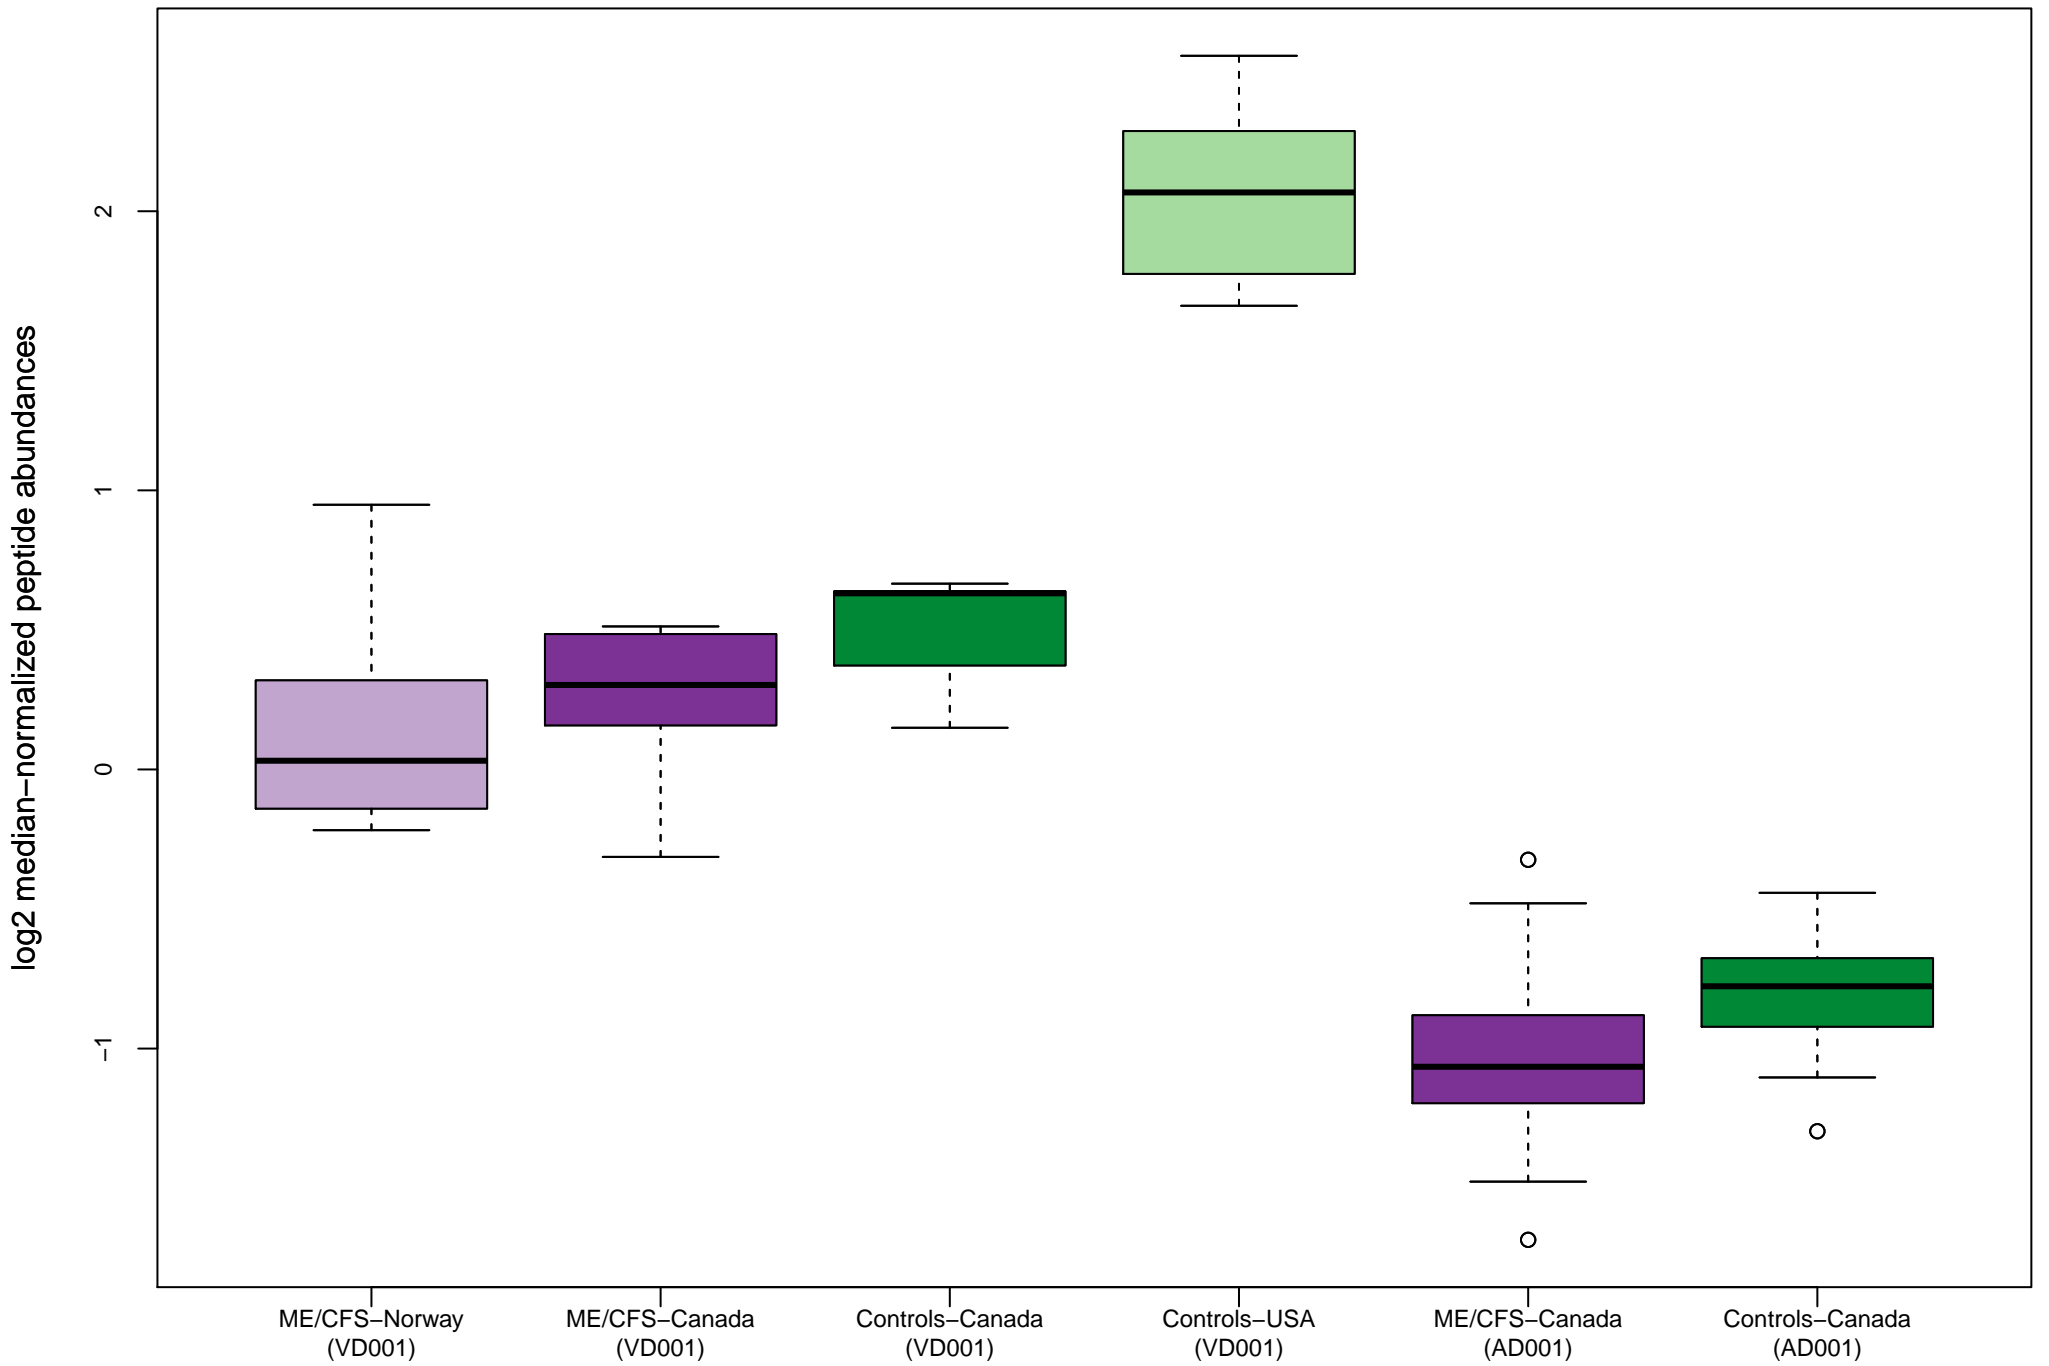

# KLAVWSGVALSG

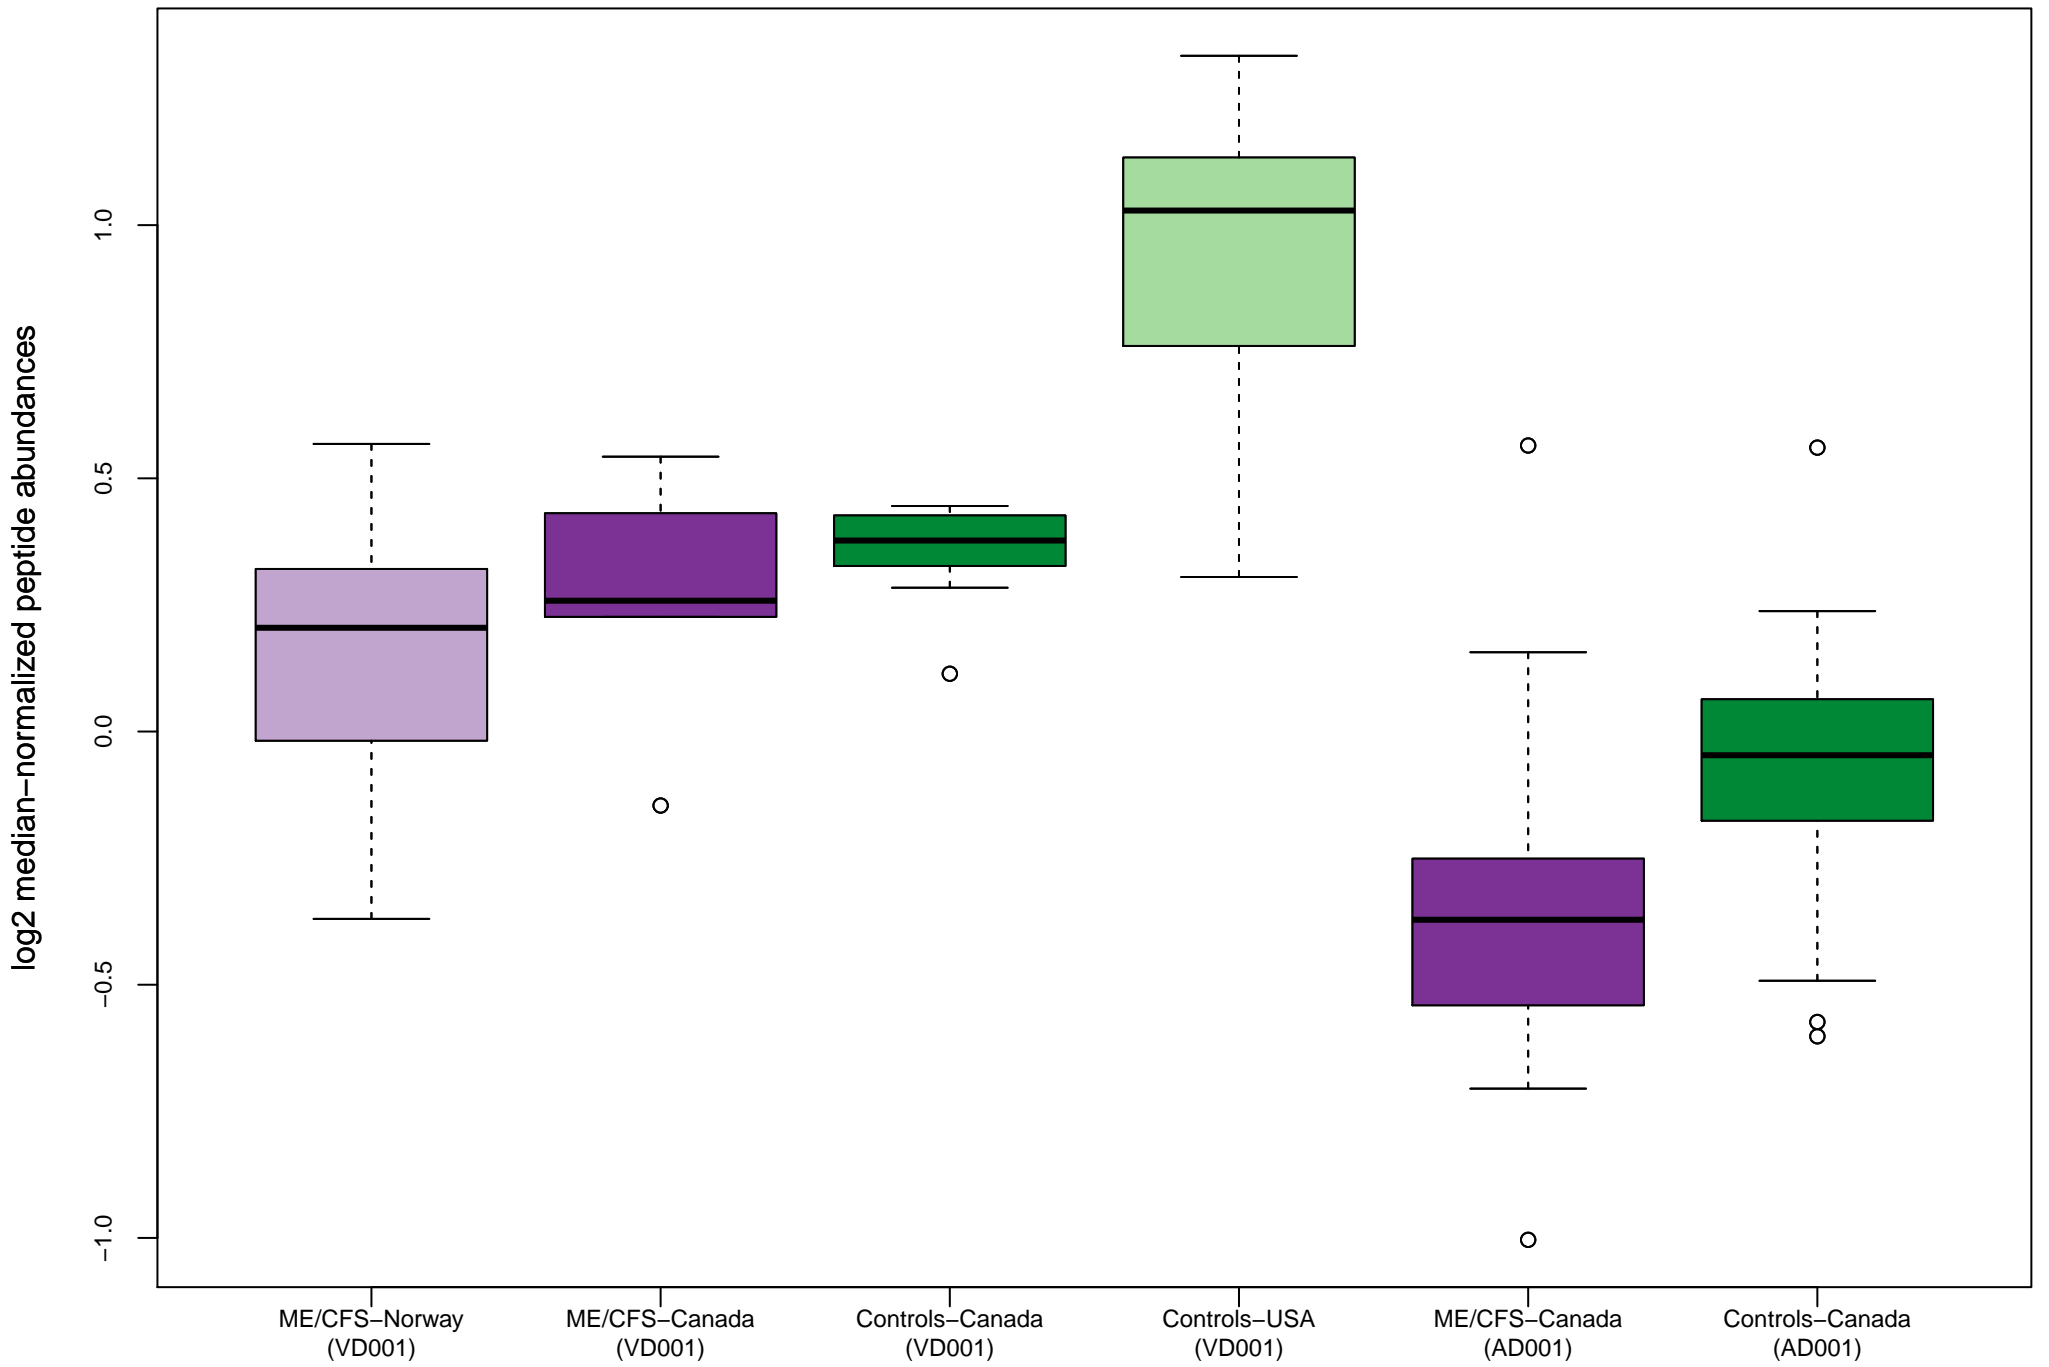

# KLWLPRYWASVL

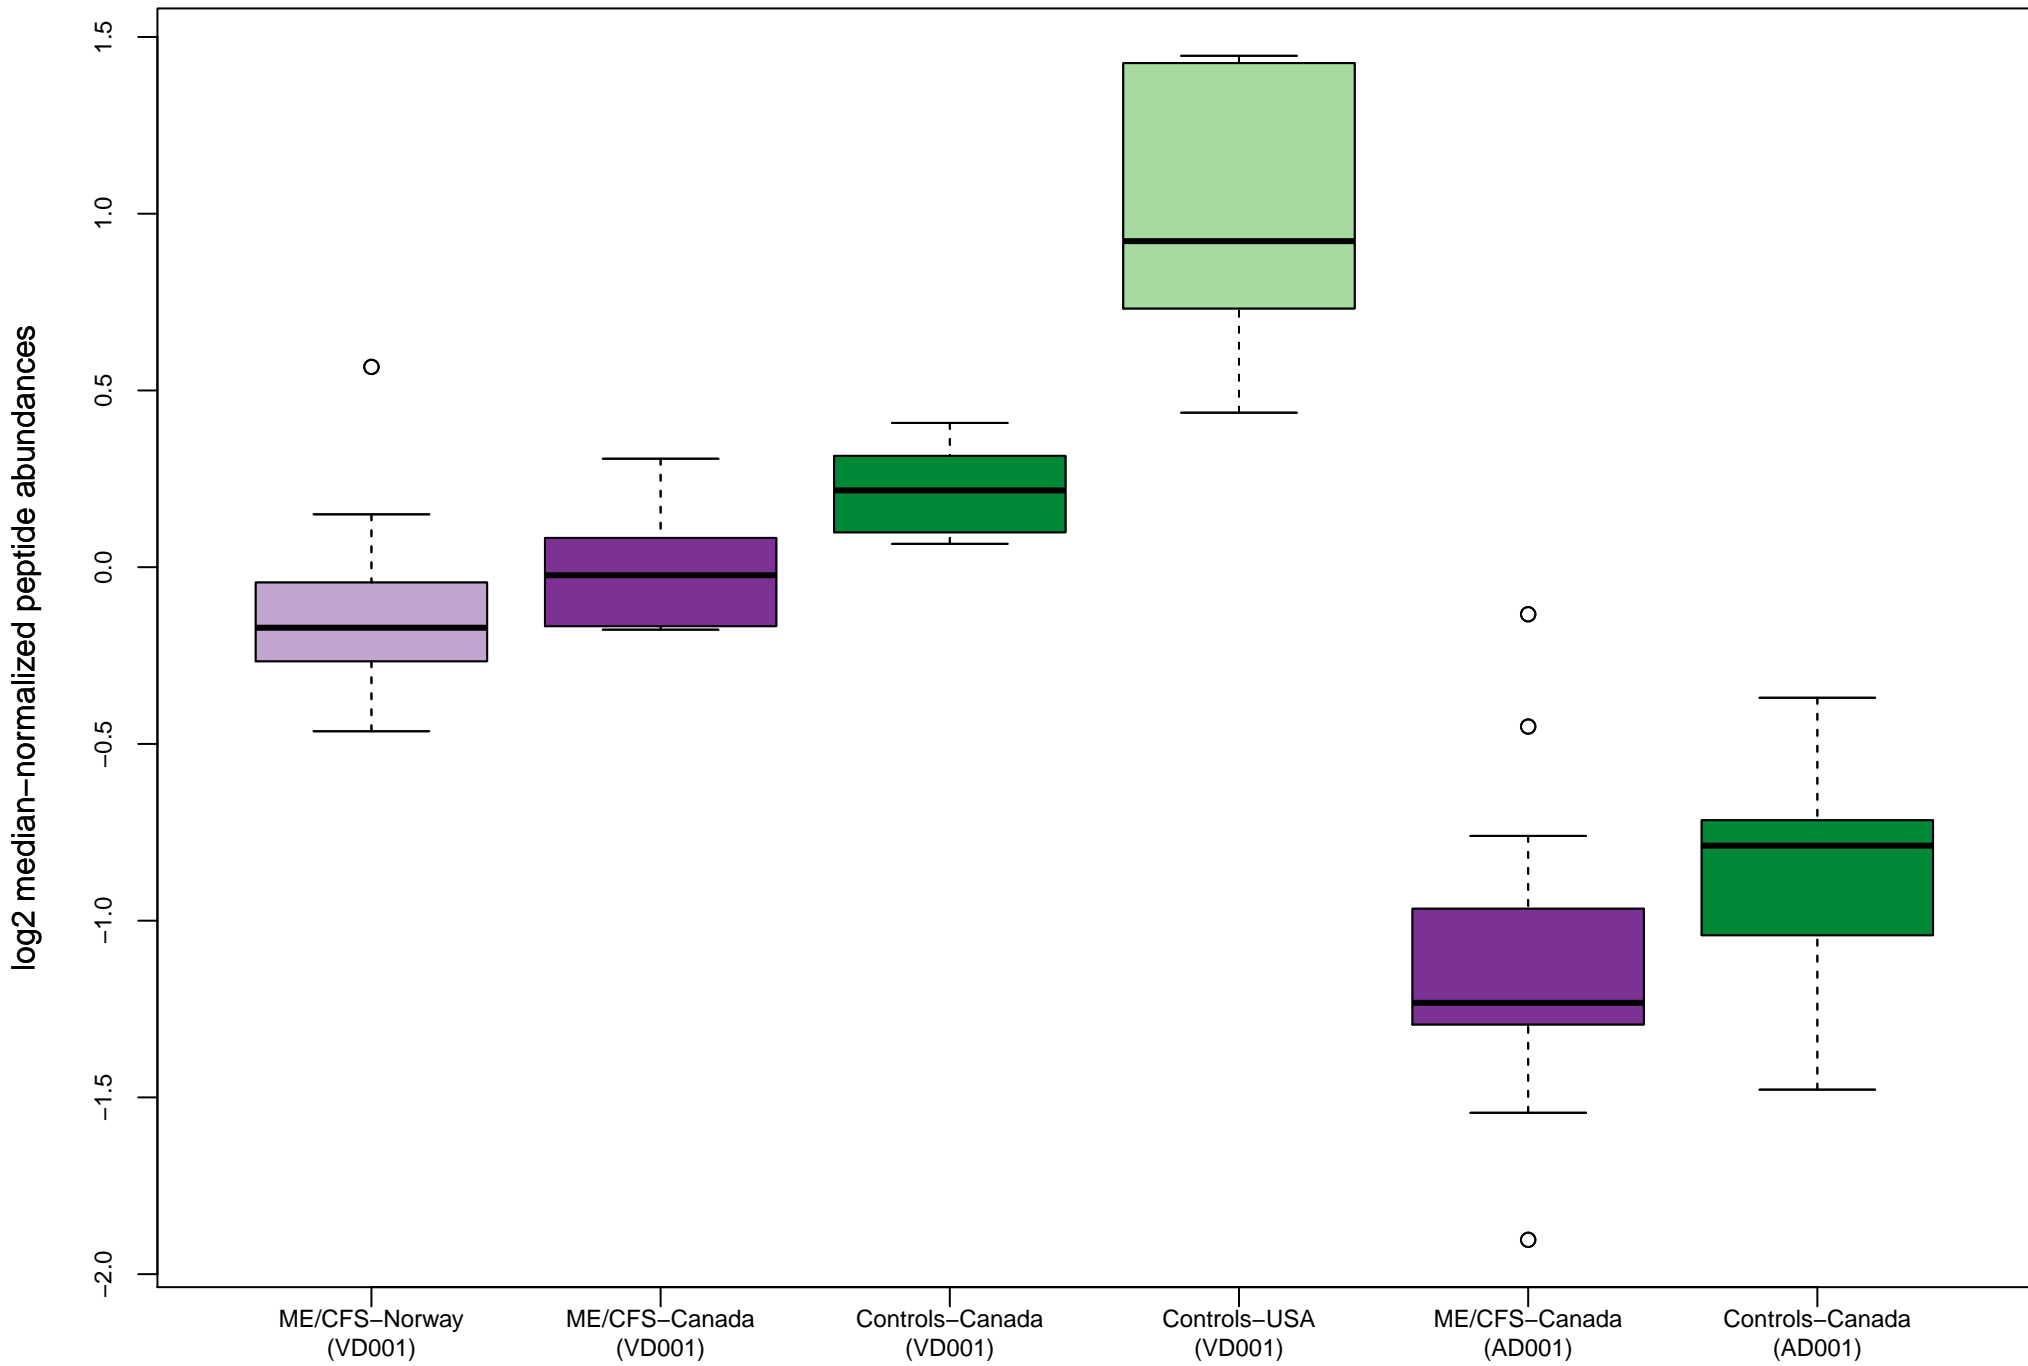



# KPALQSFRWVAL

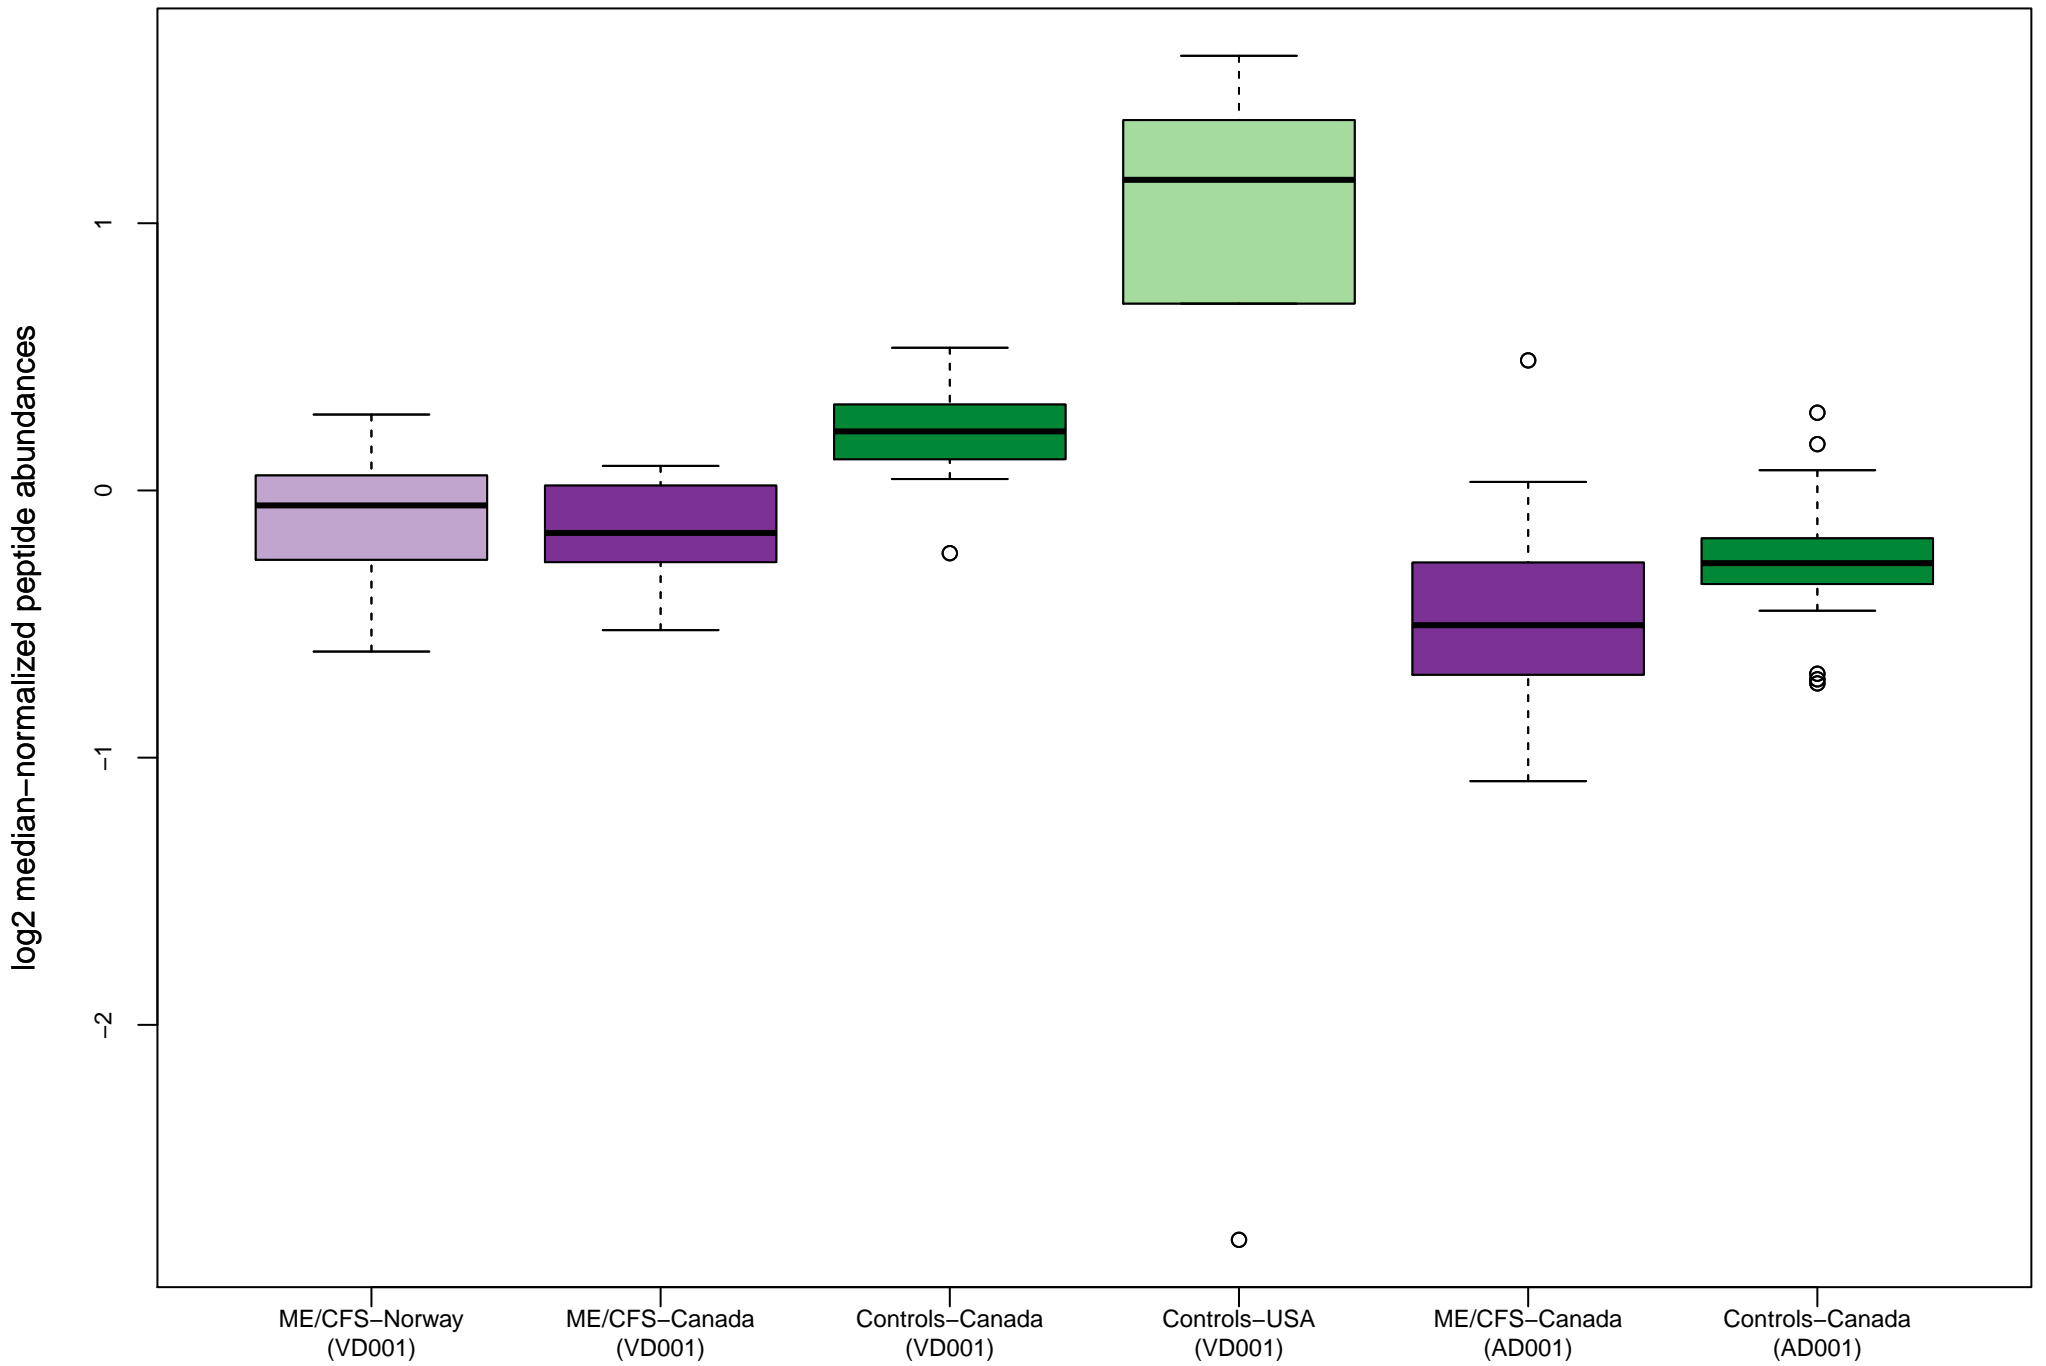

# KPYEWVRLSALS

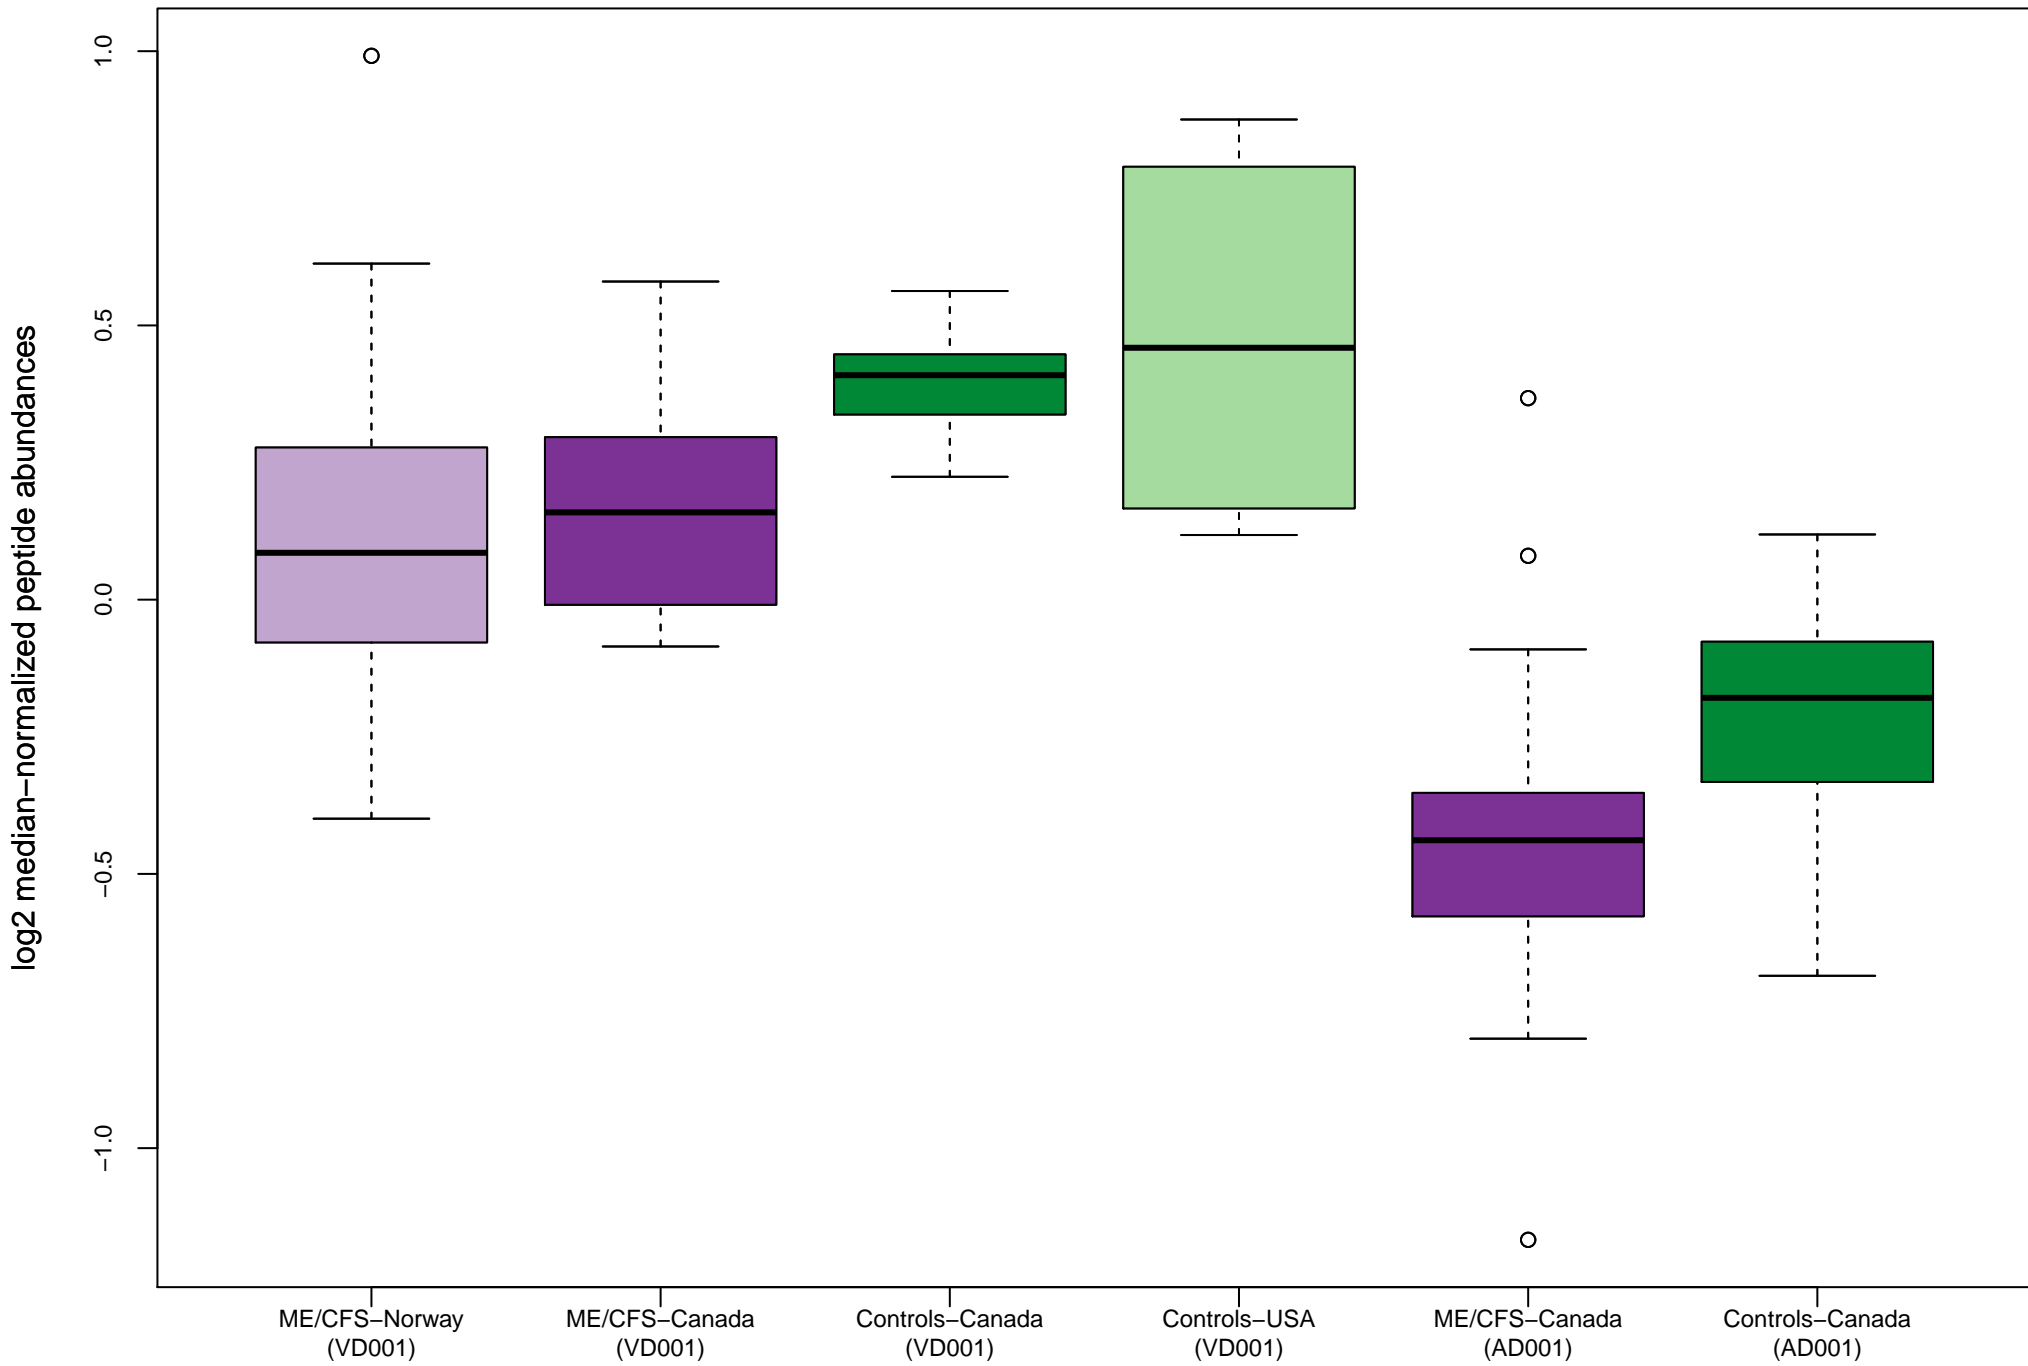

# KVFLGRYFWKDA

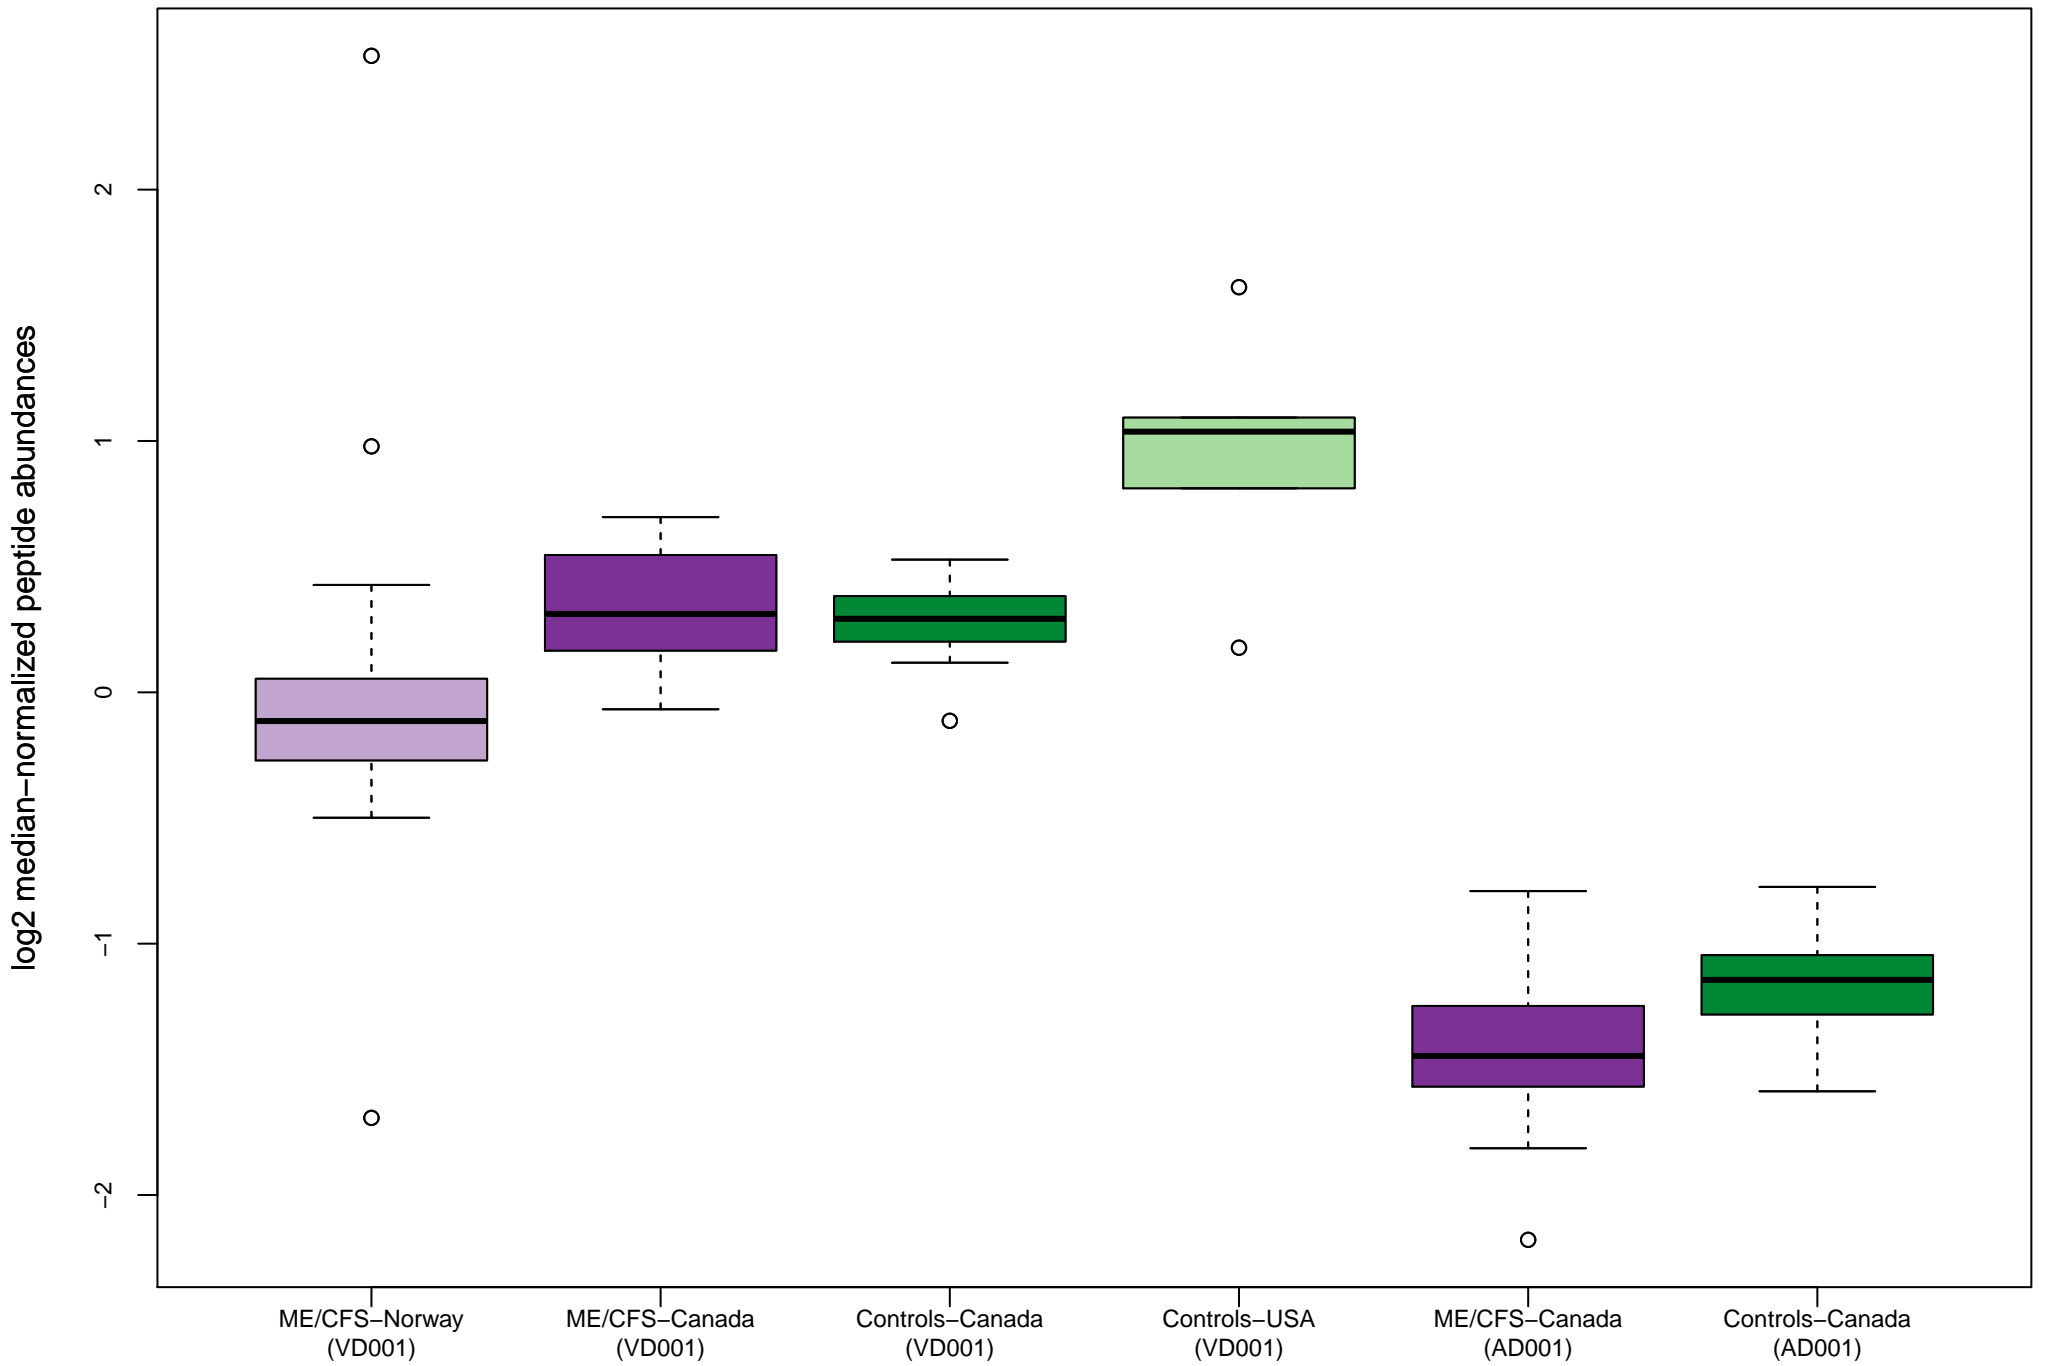

# KVFNPWLRVGVS

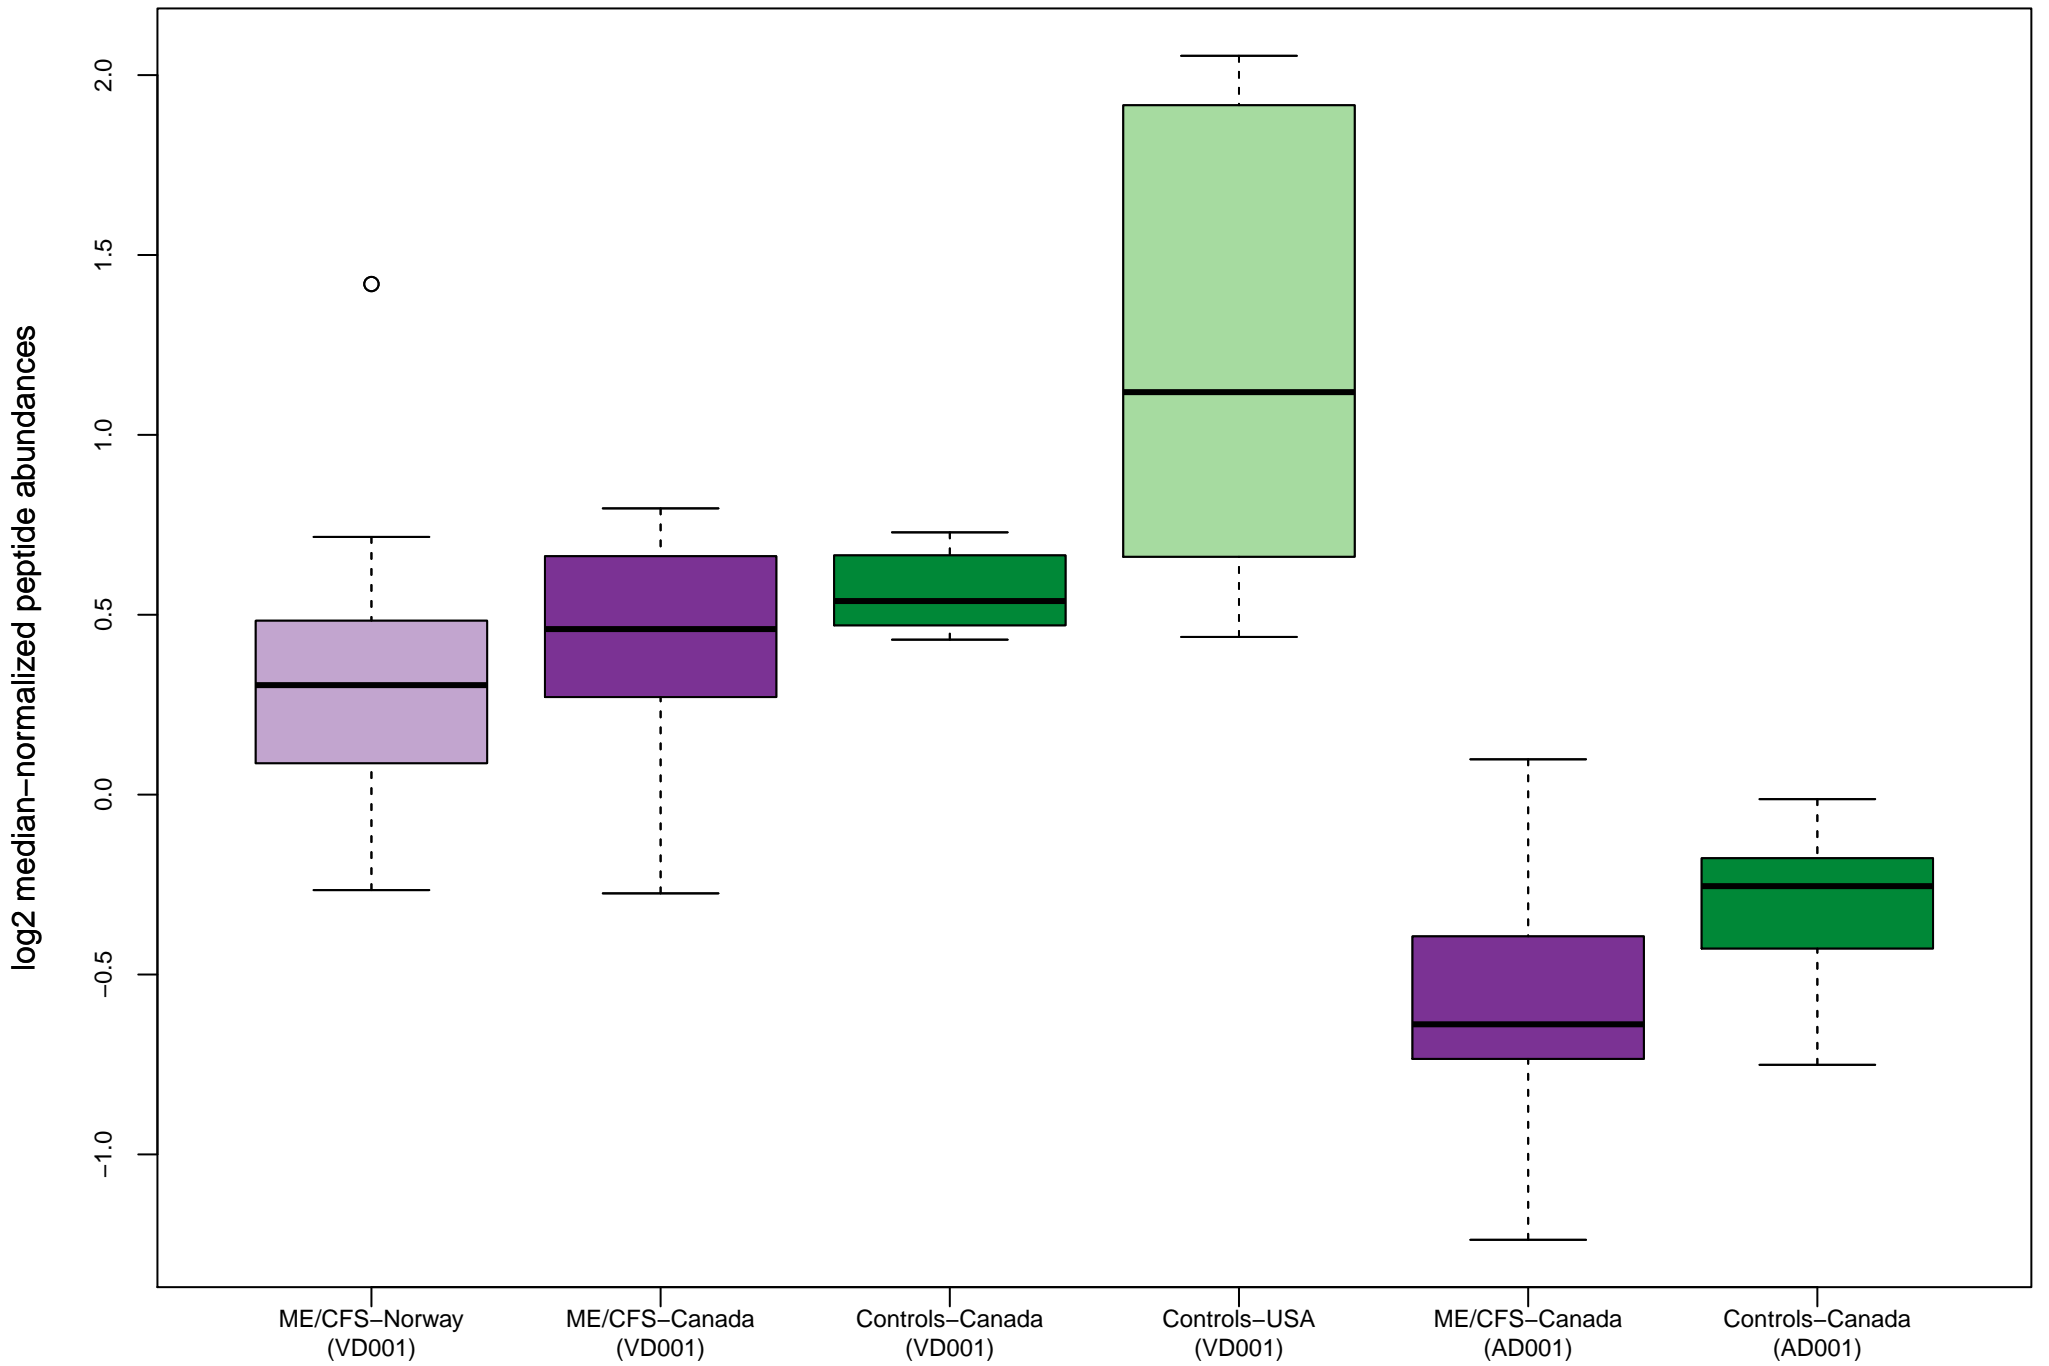

# KVYVGFLGKHAS

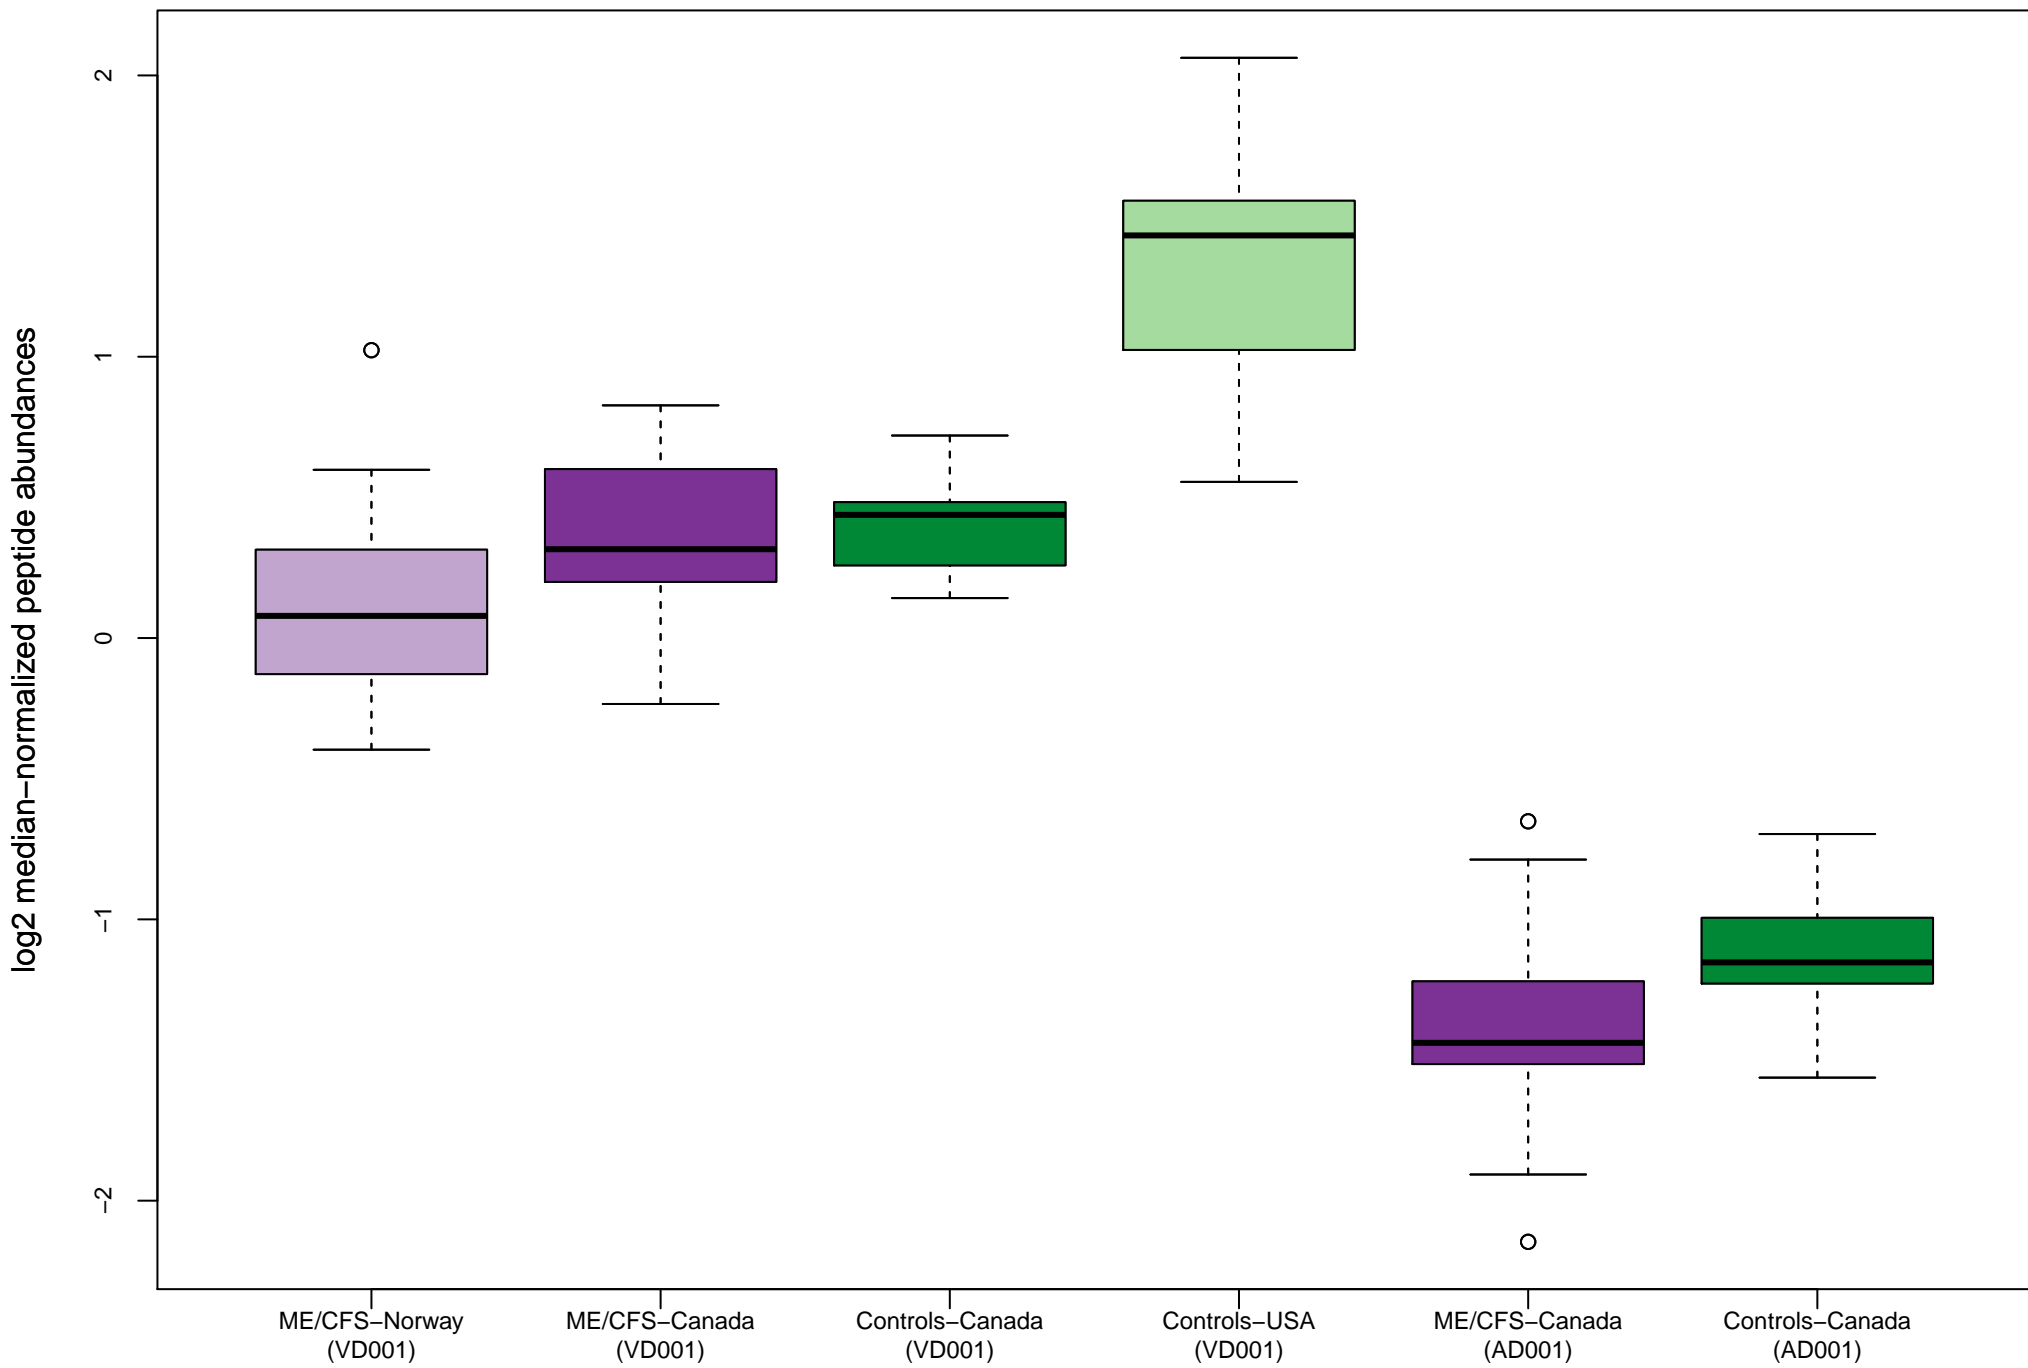

# KWLKSWLGVALS

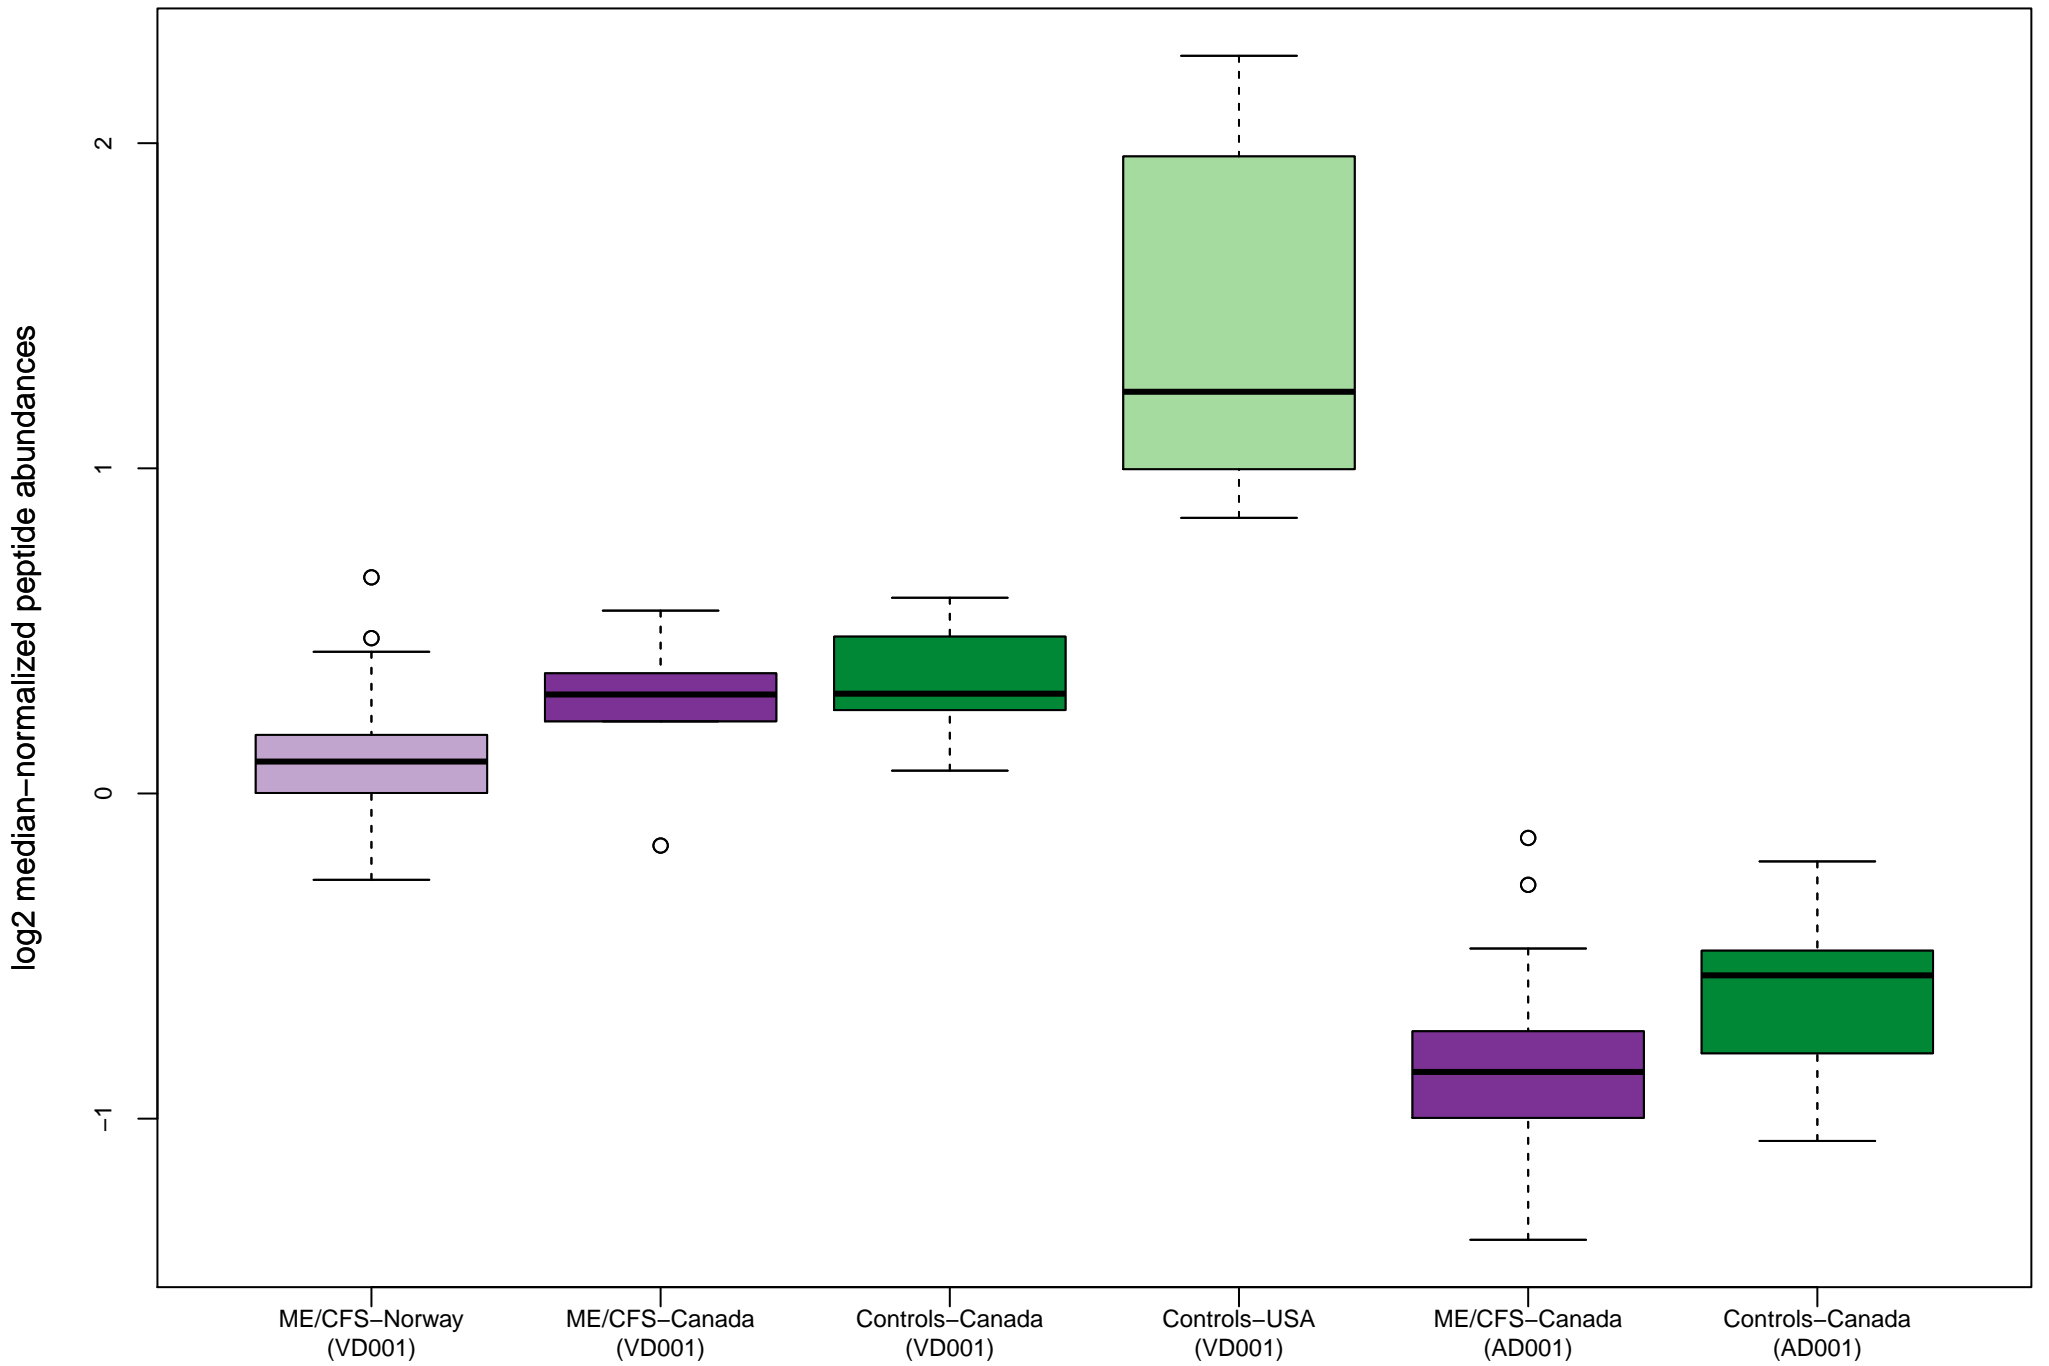

# KWLRPVPLGALS

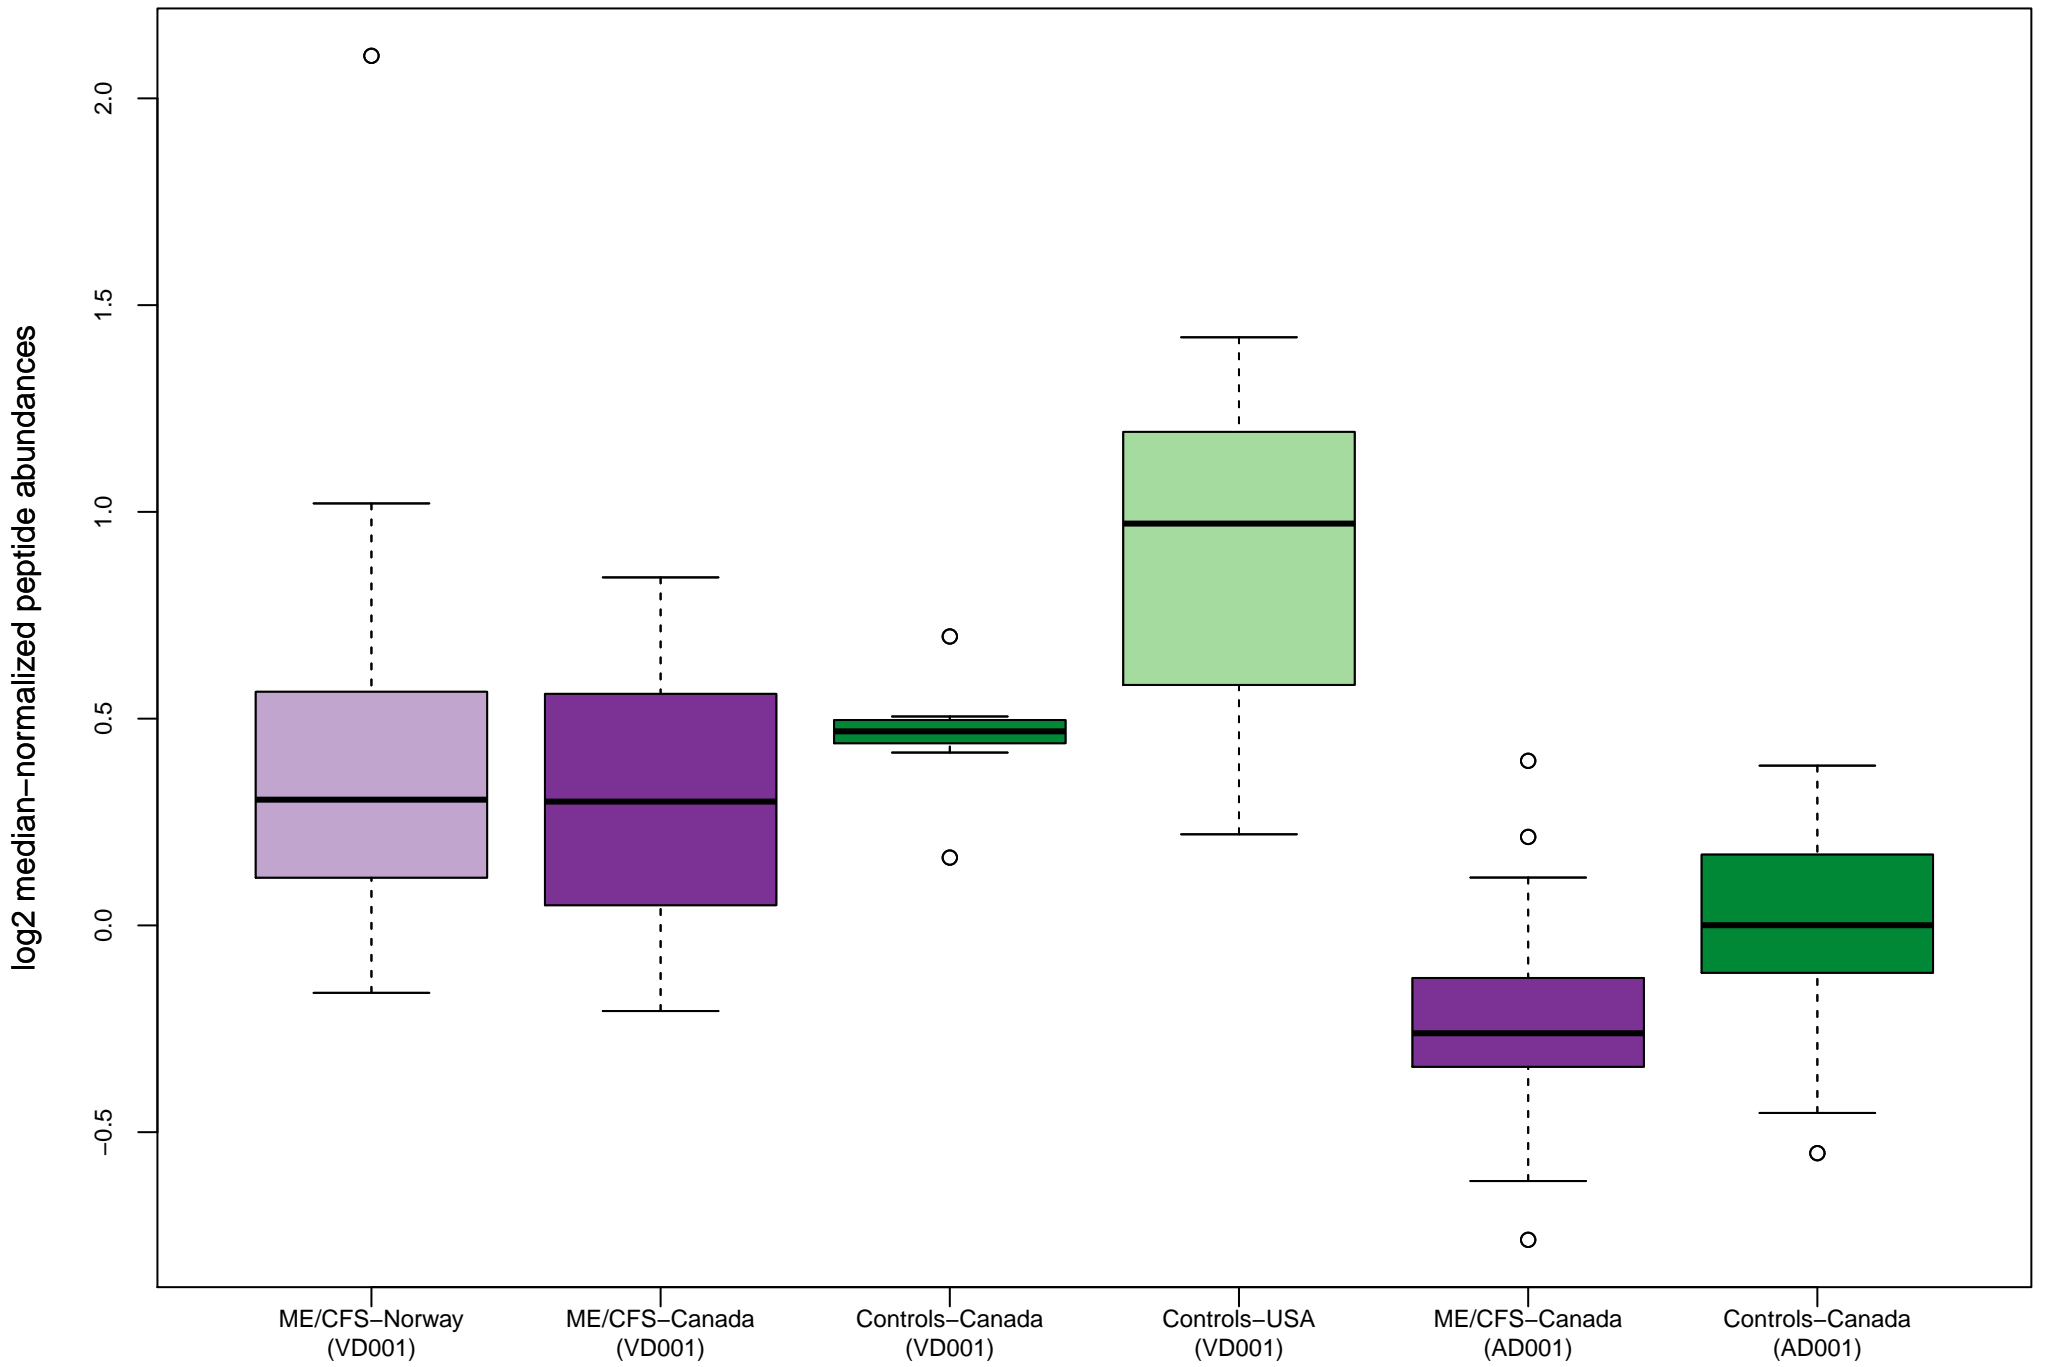

# KWLFWL SGLSG

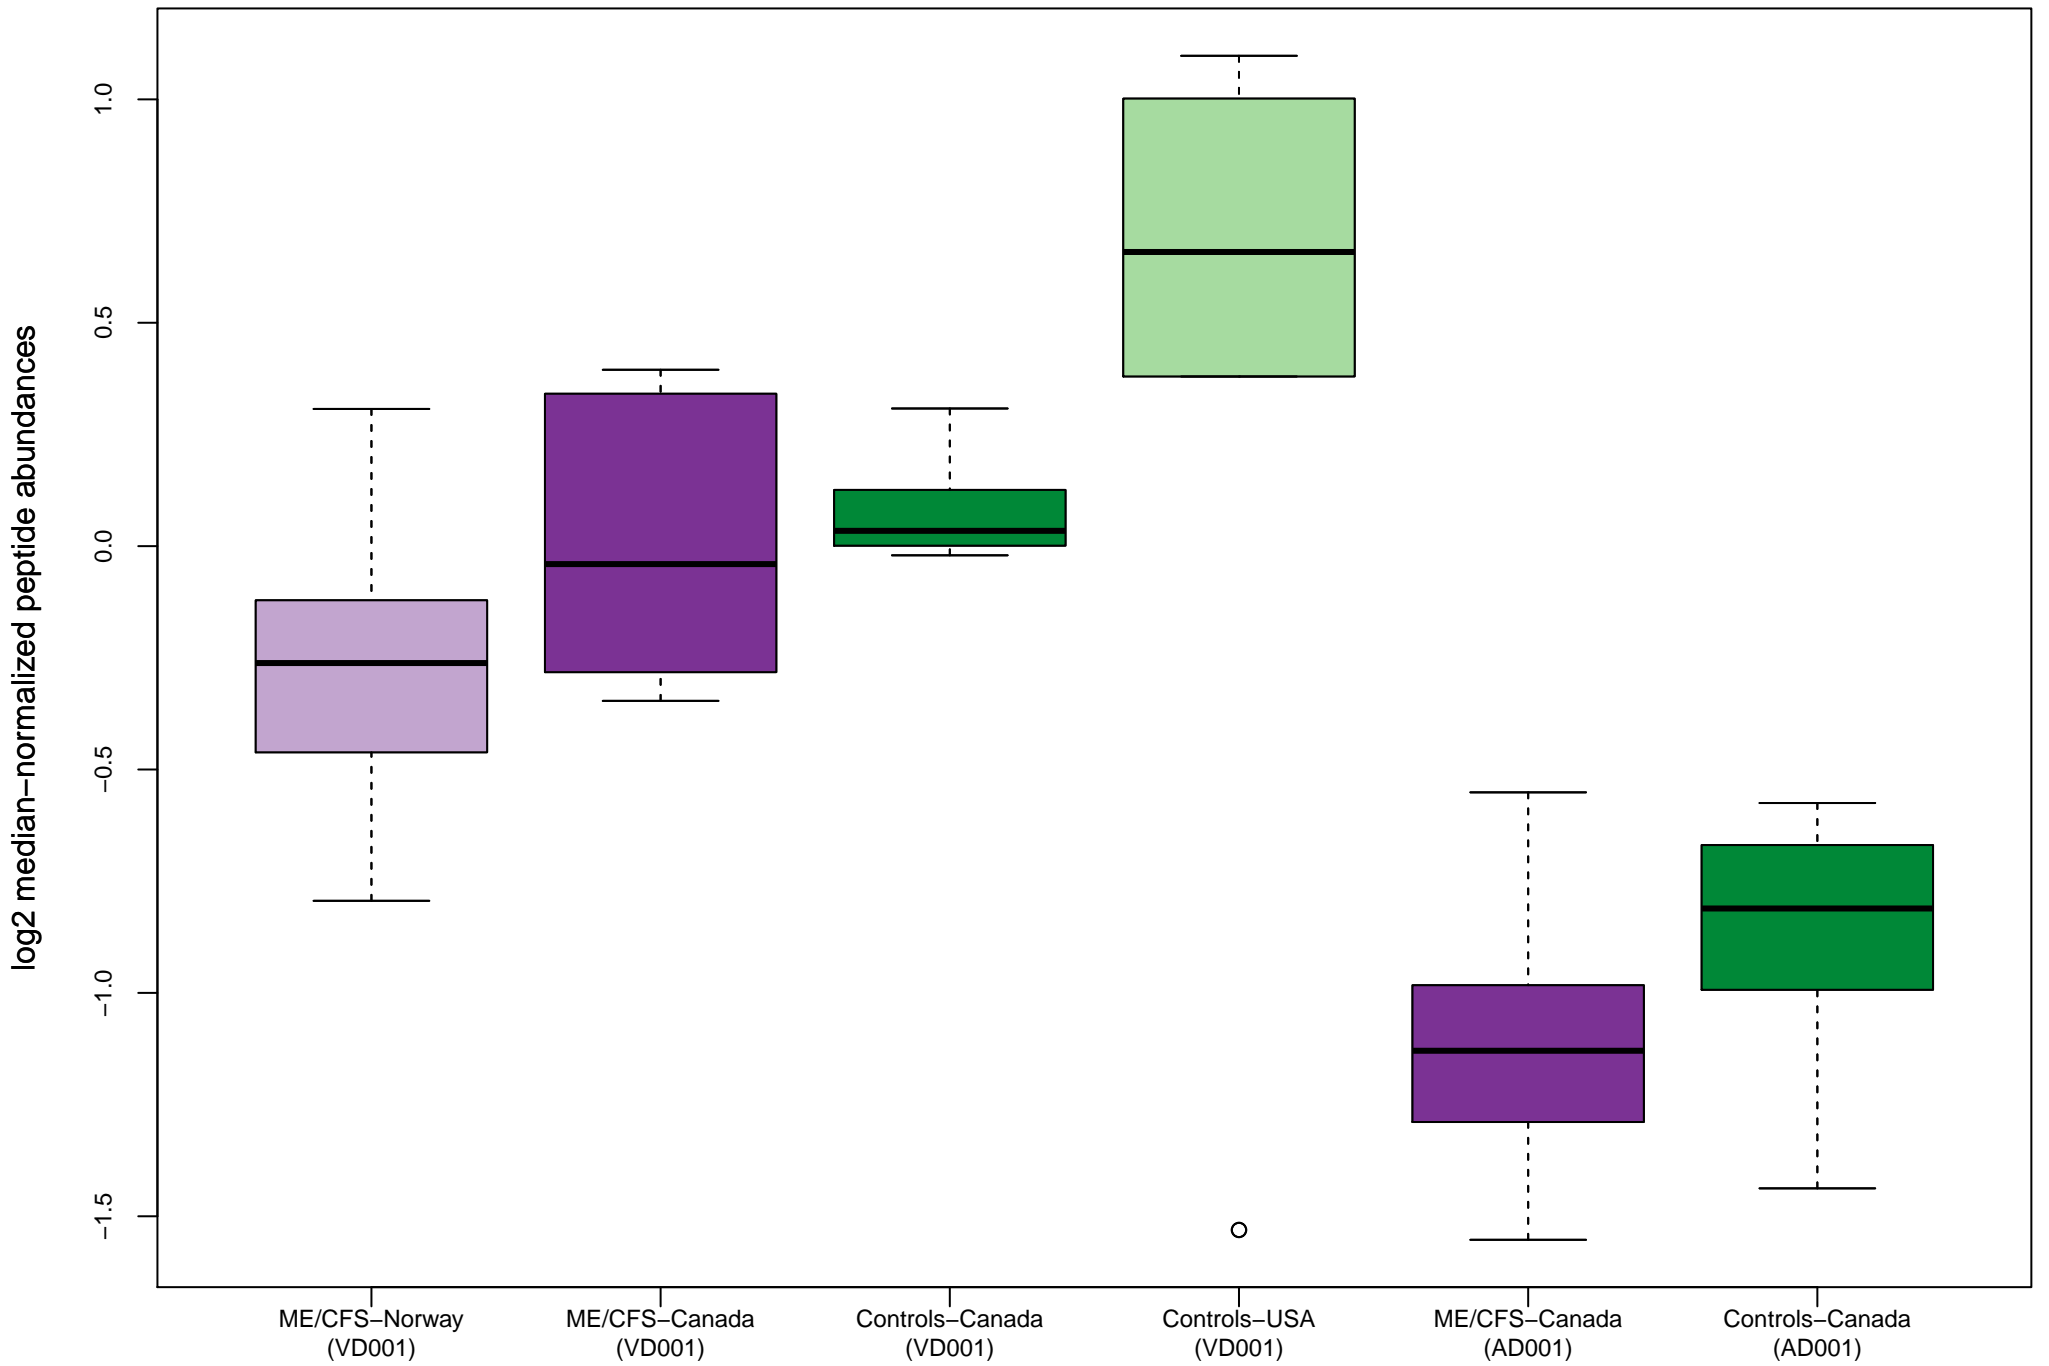



# KWRFWLSGVLSG

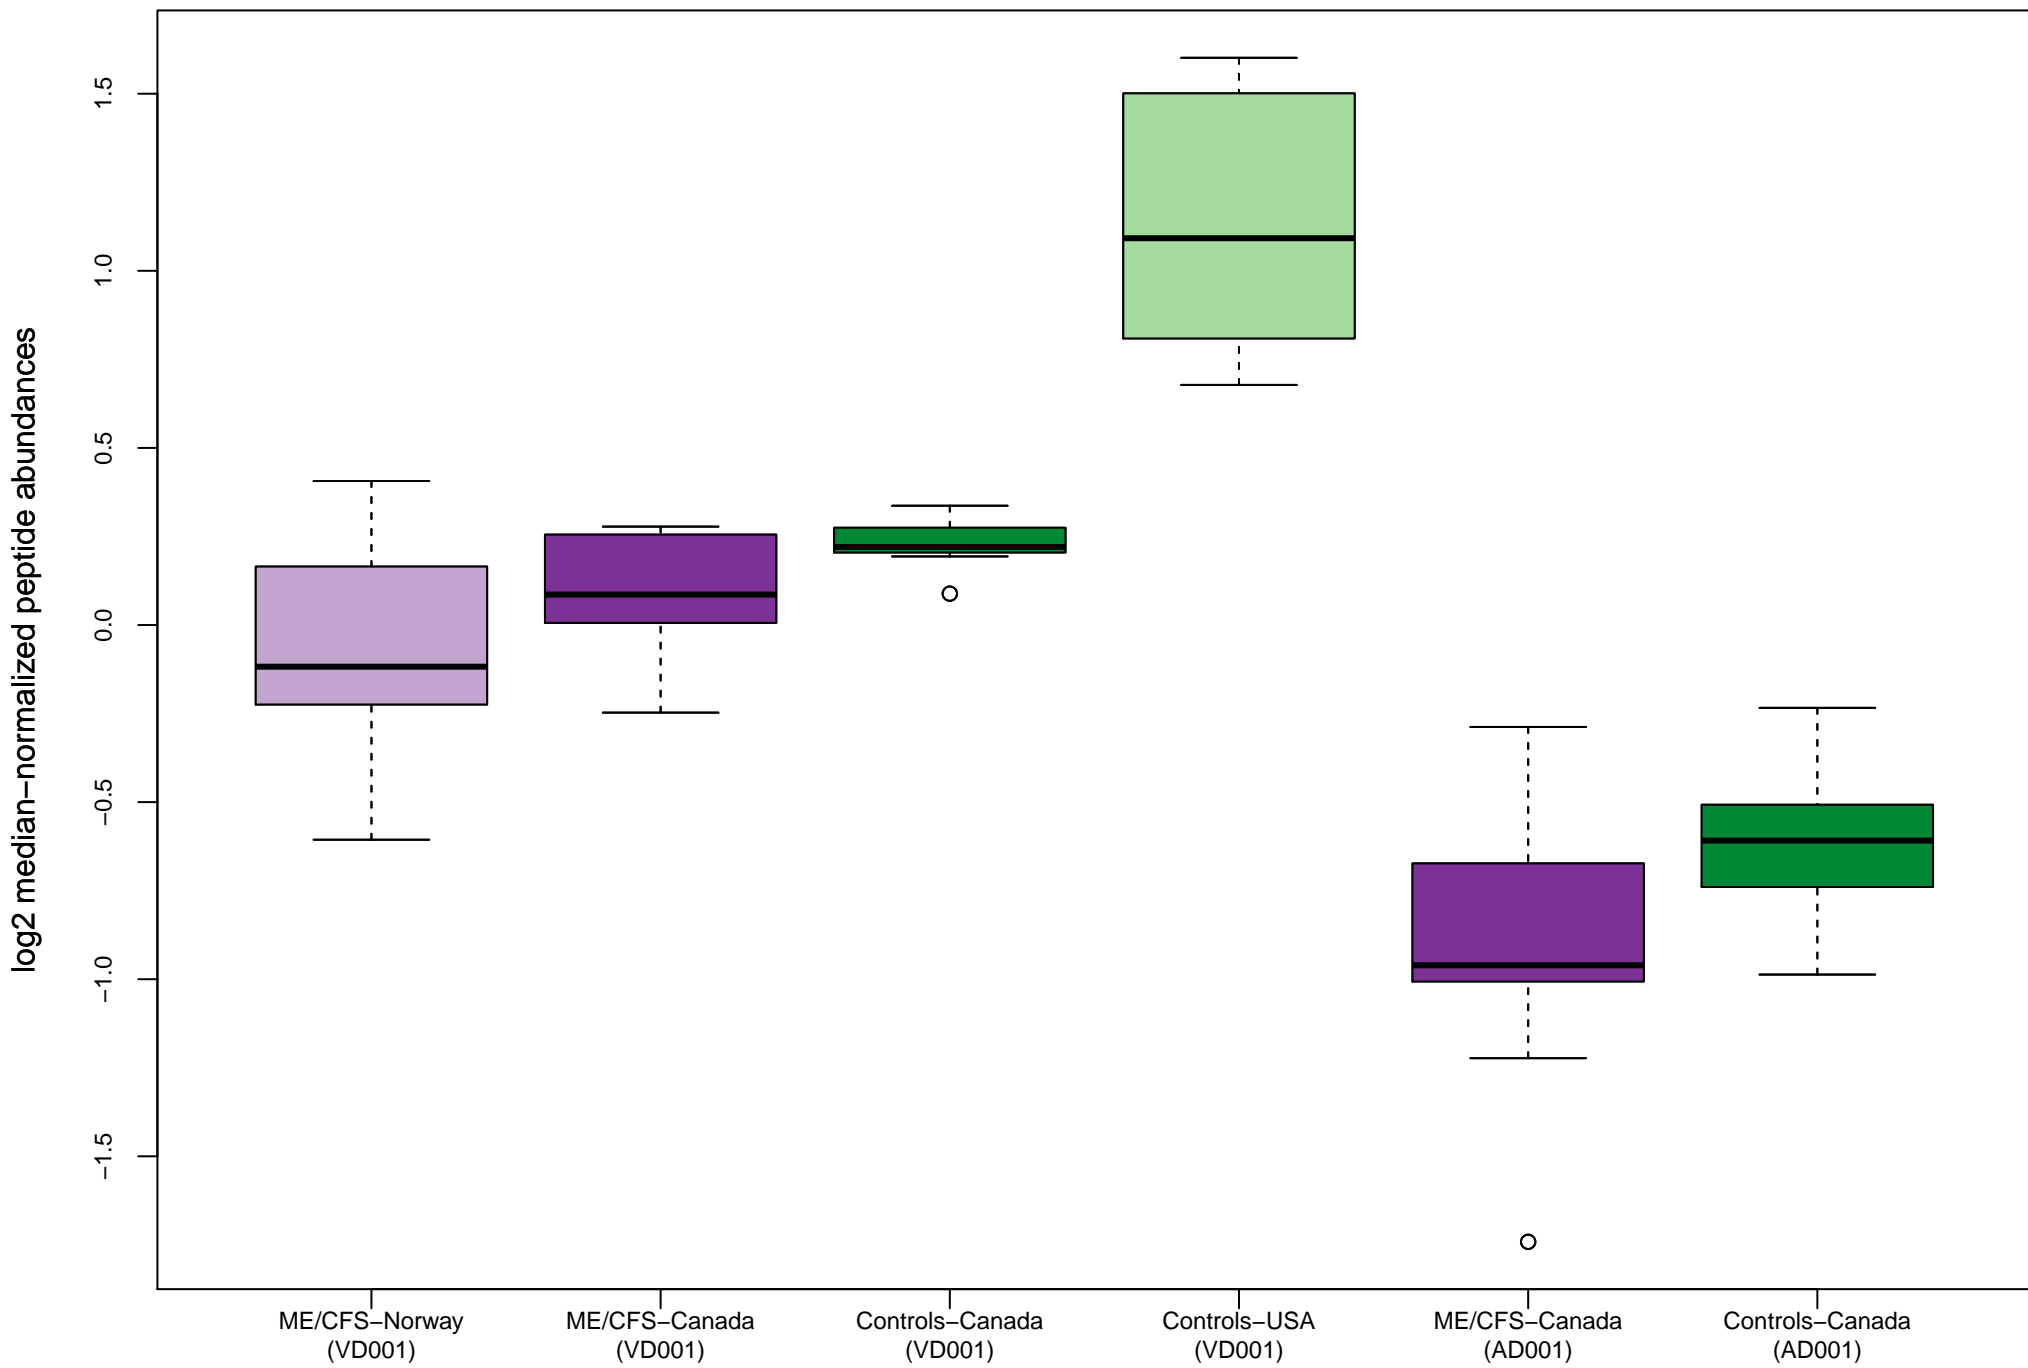

# KWRVSGVALSG

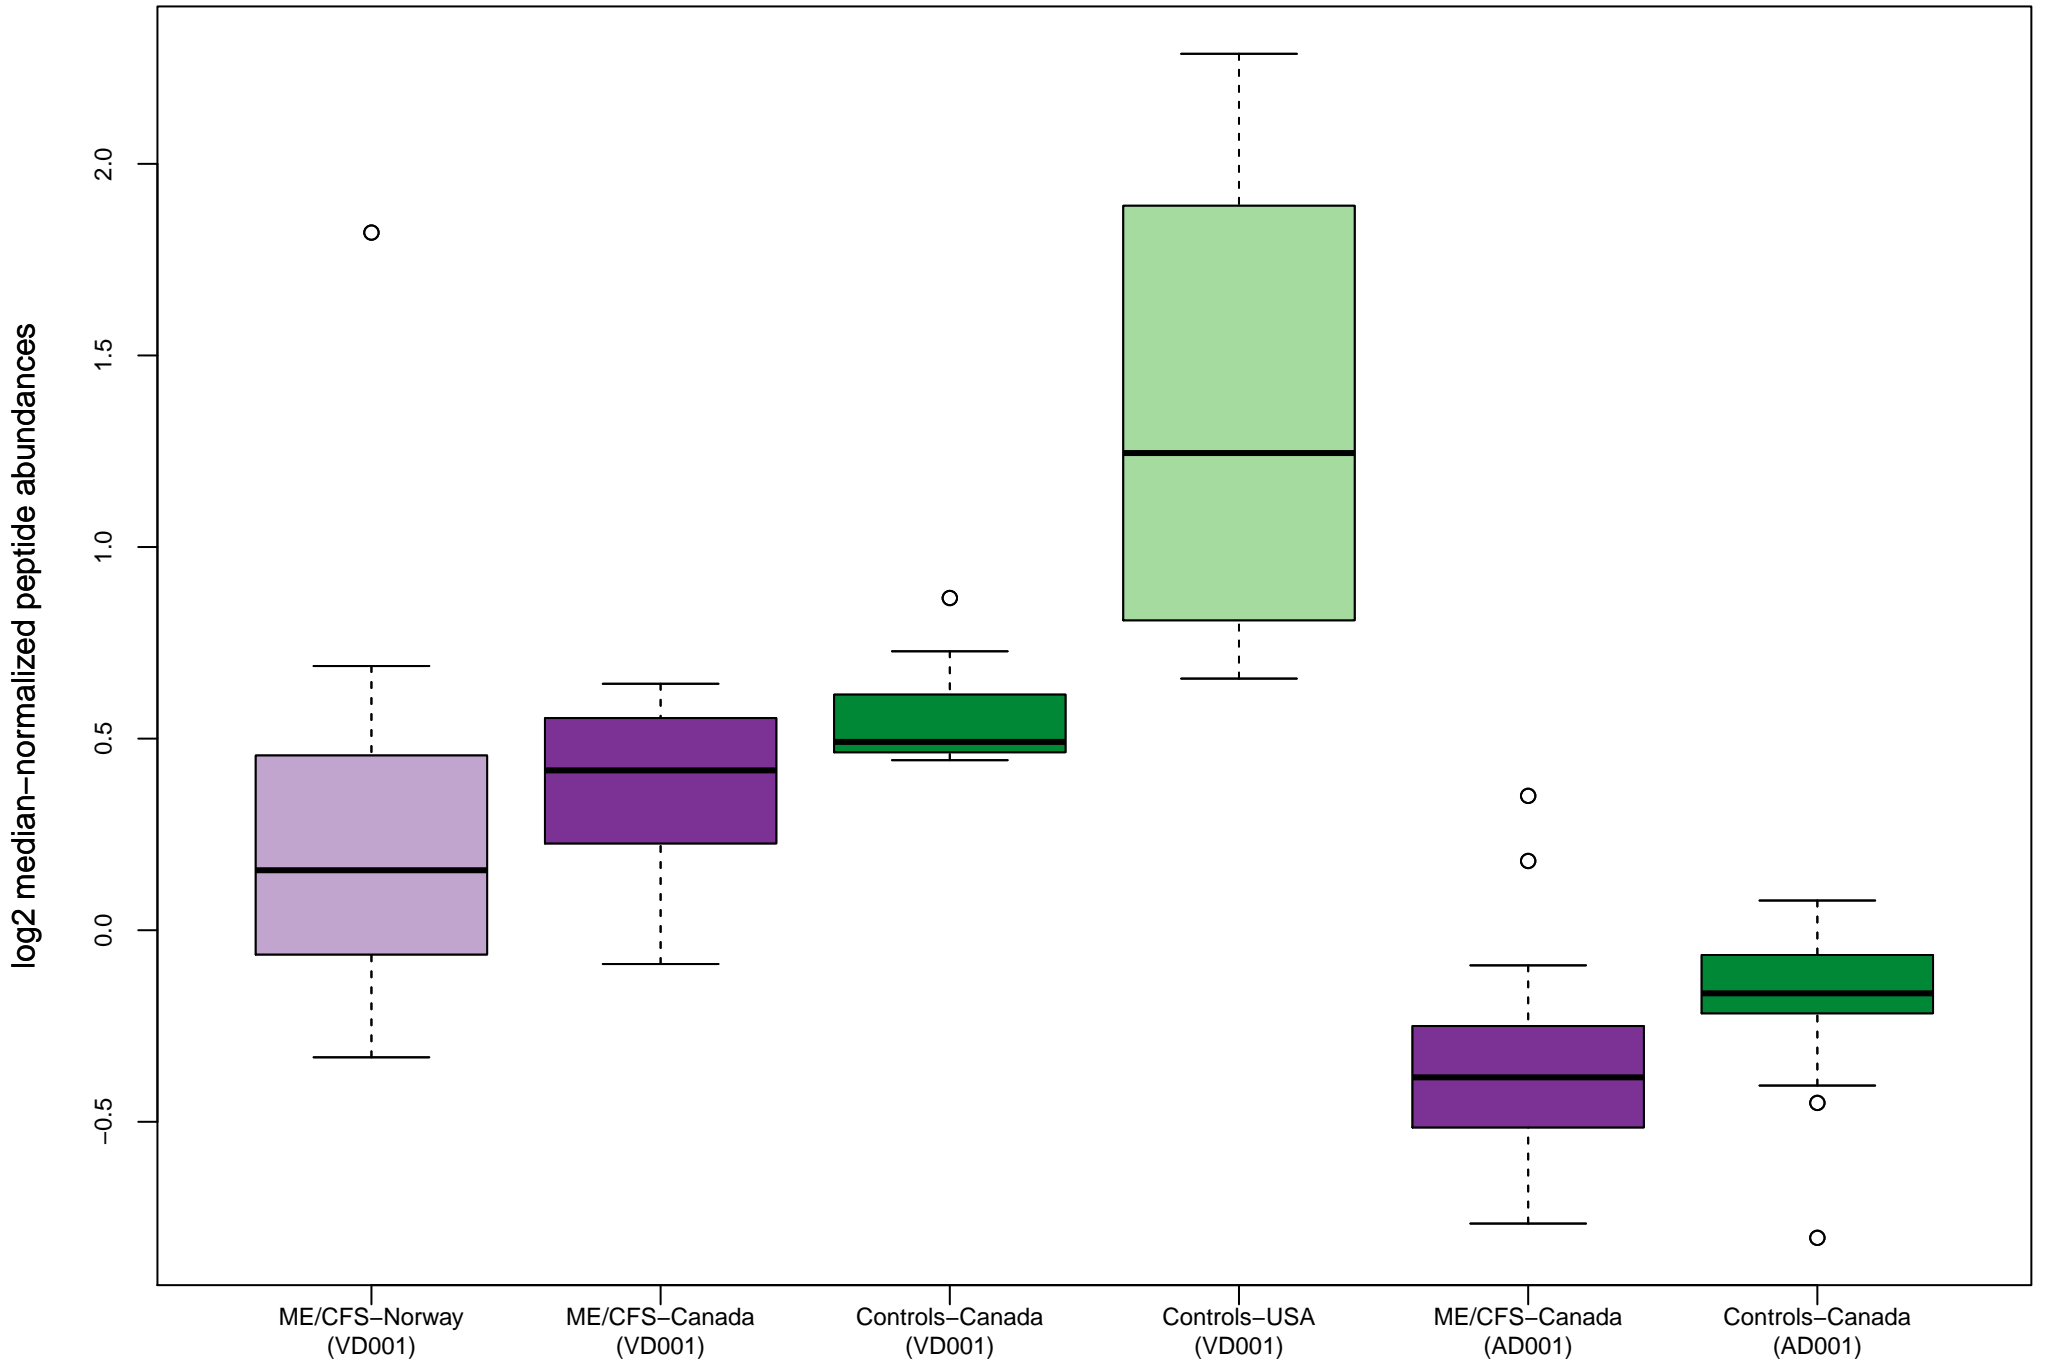

# KYALWVRVLSGL

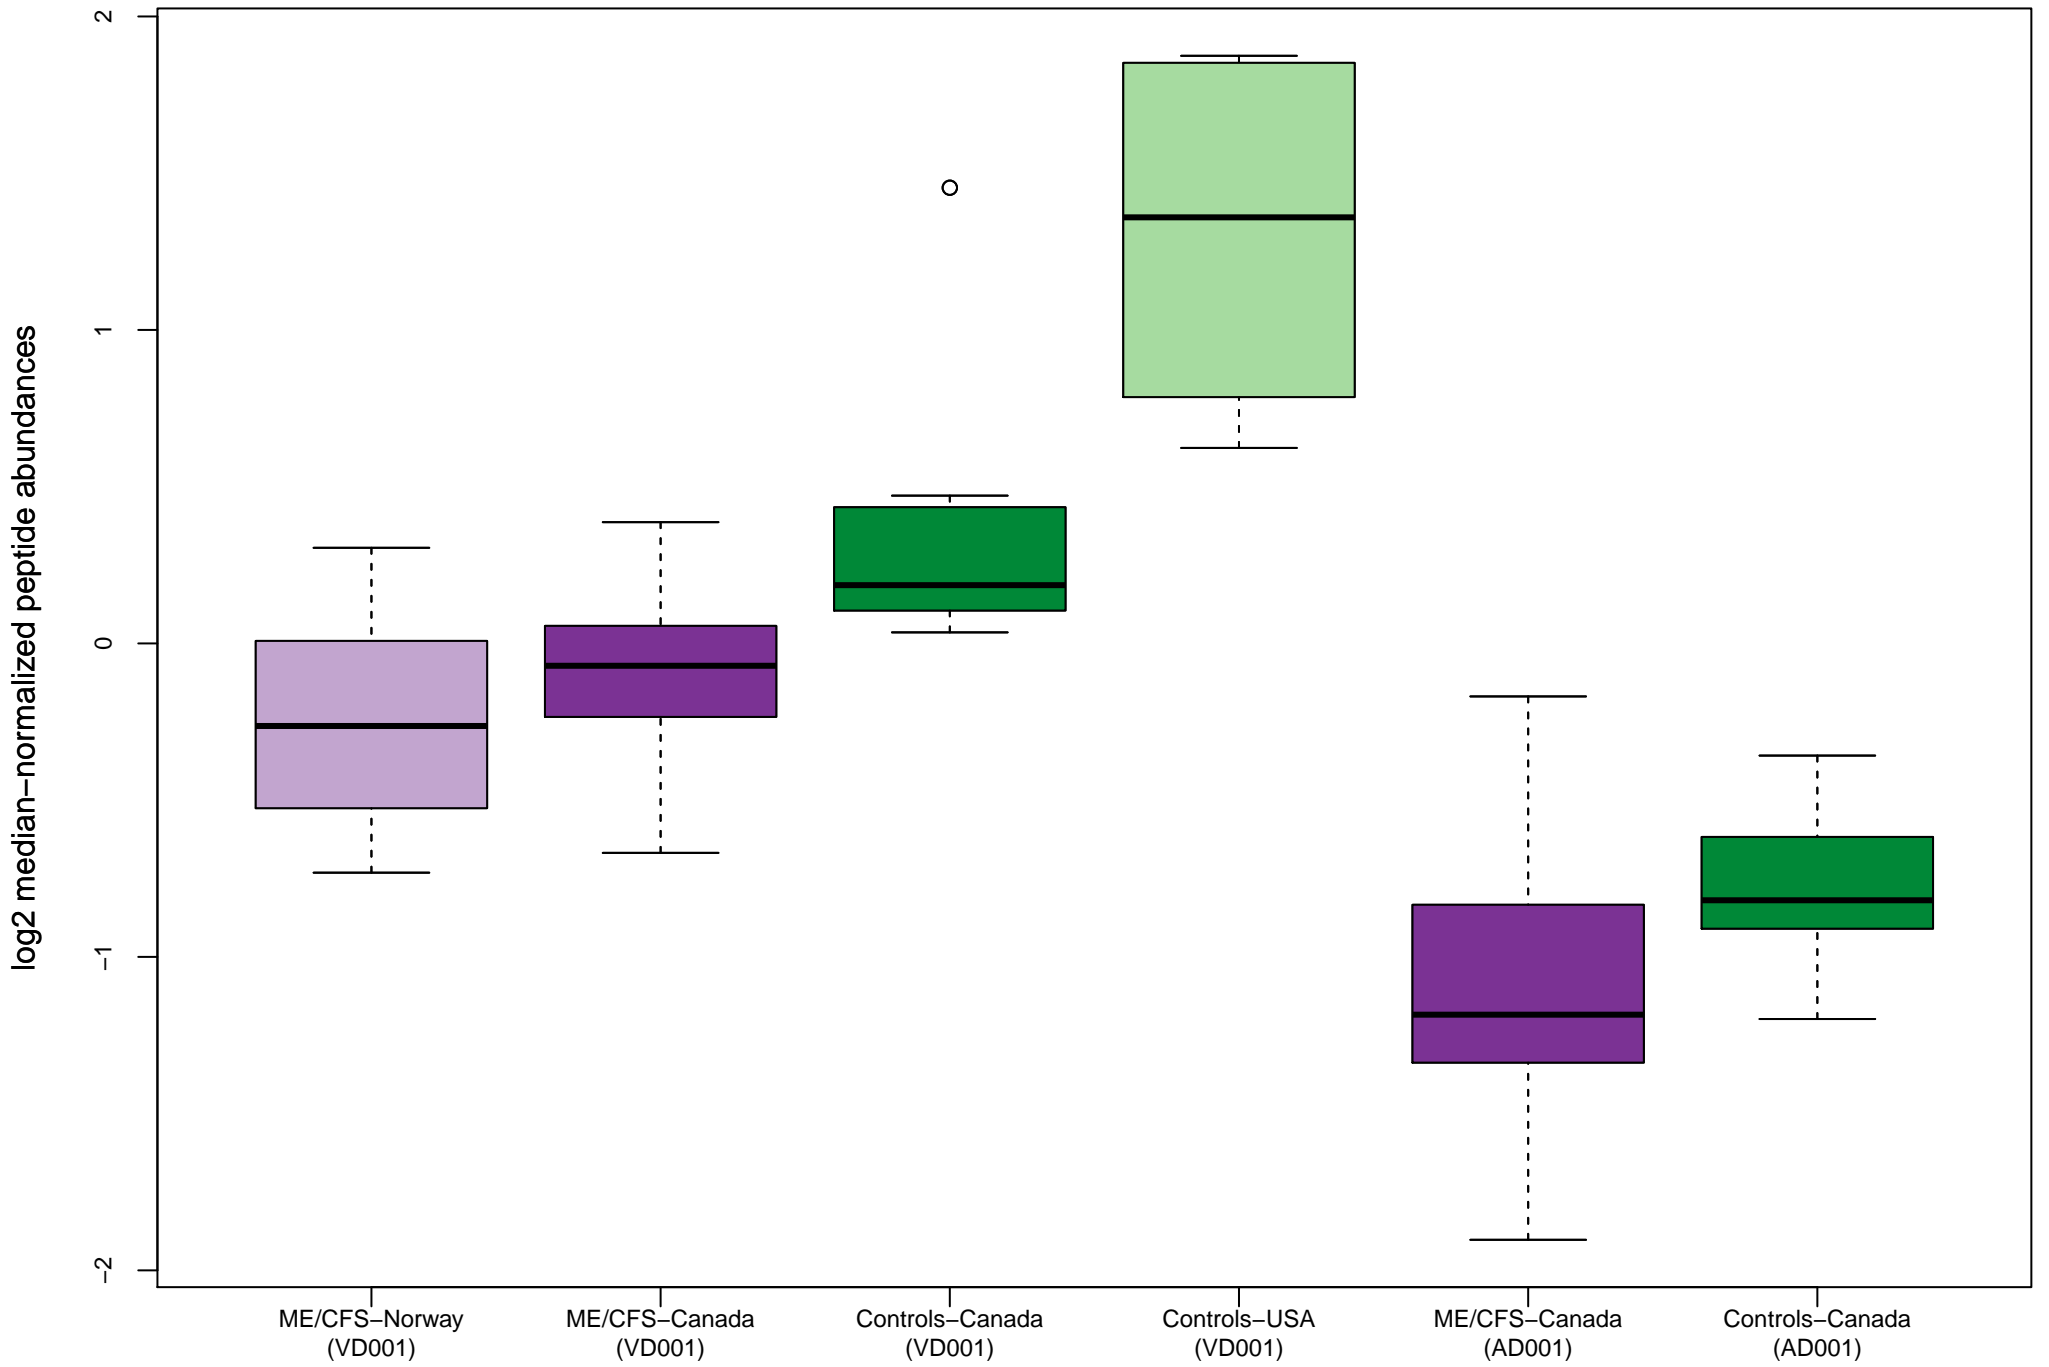

# KYSSWLGVLSG

log2 median-normalized peptide abundances

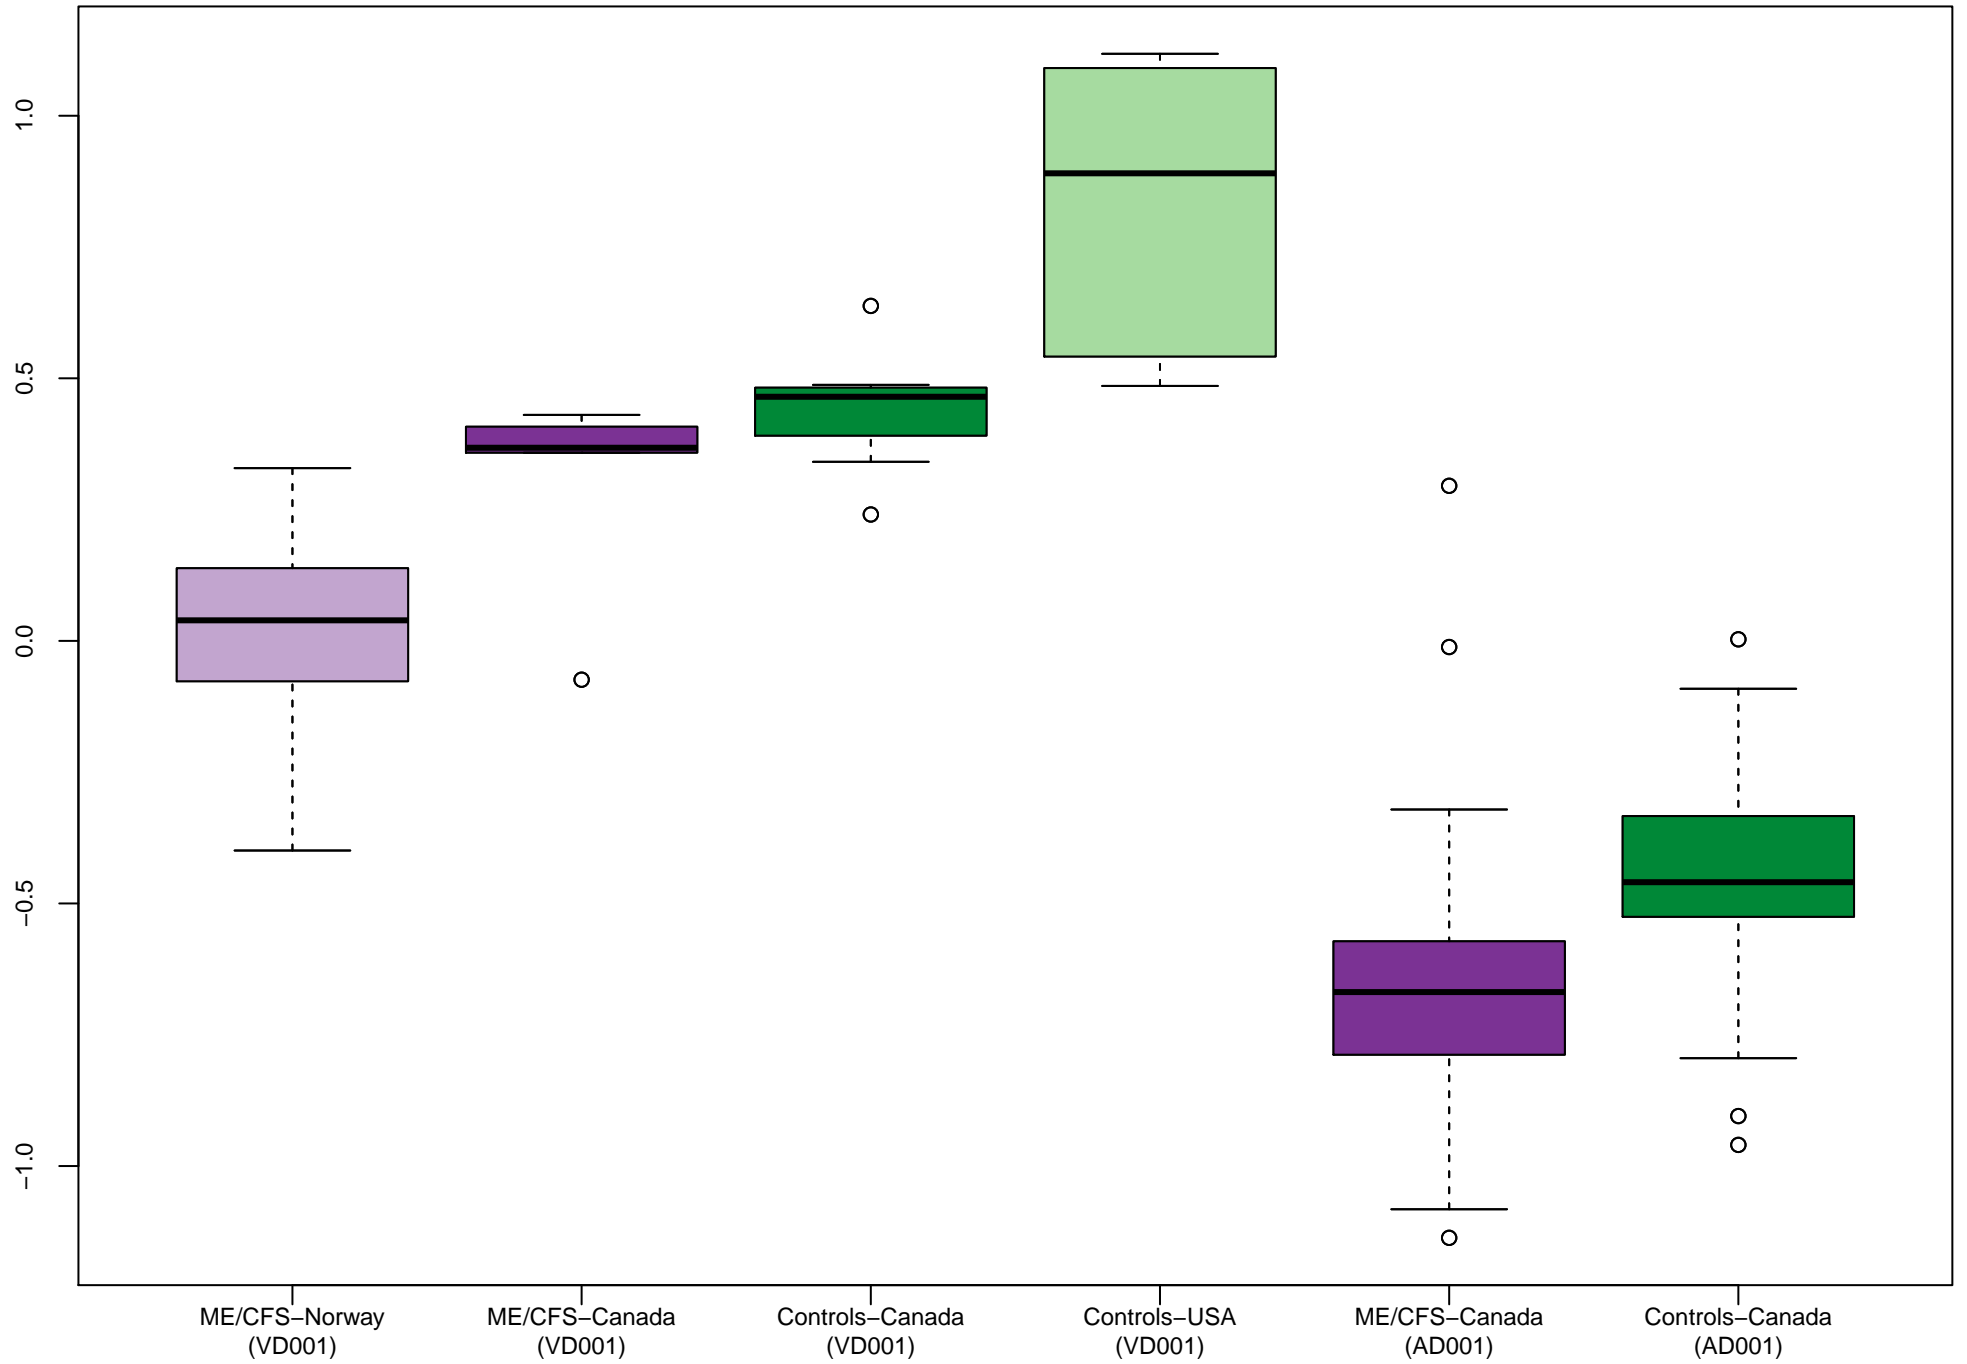

# KYVWRPLGVLSG

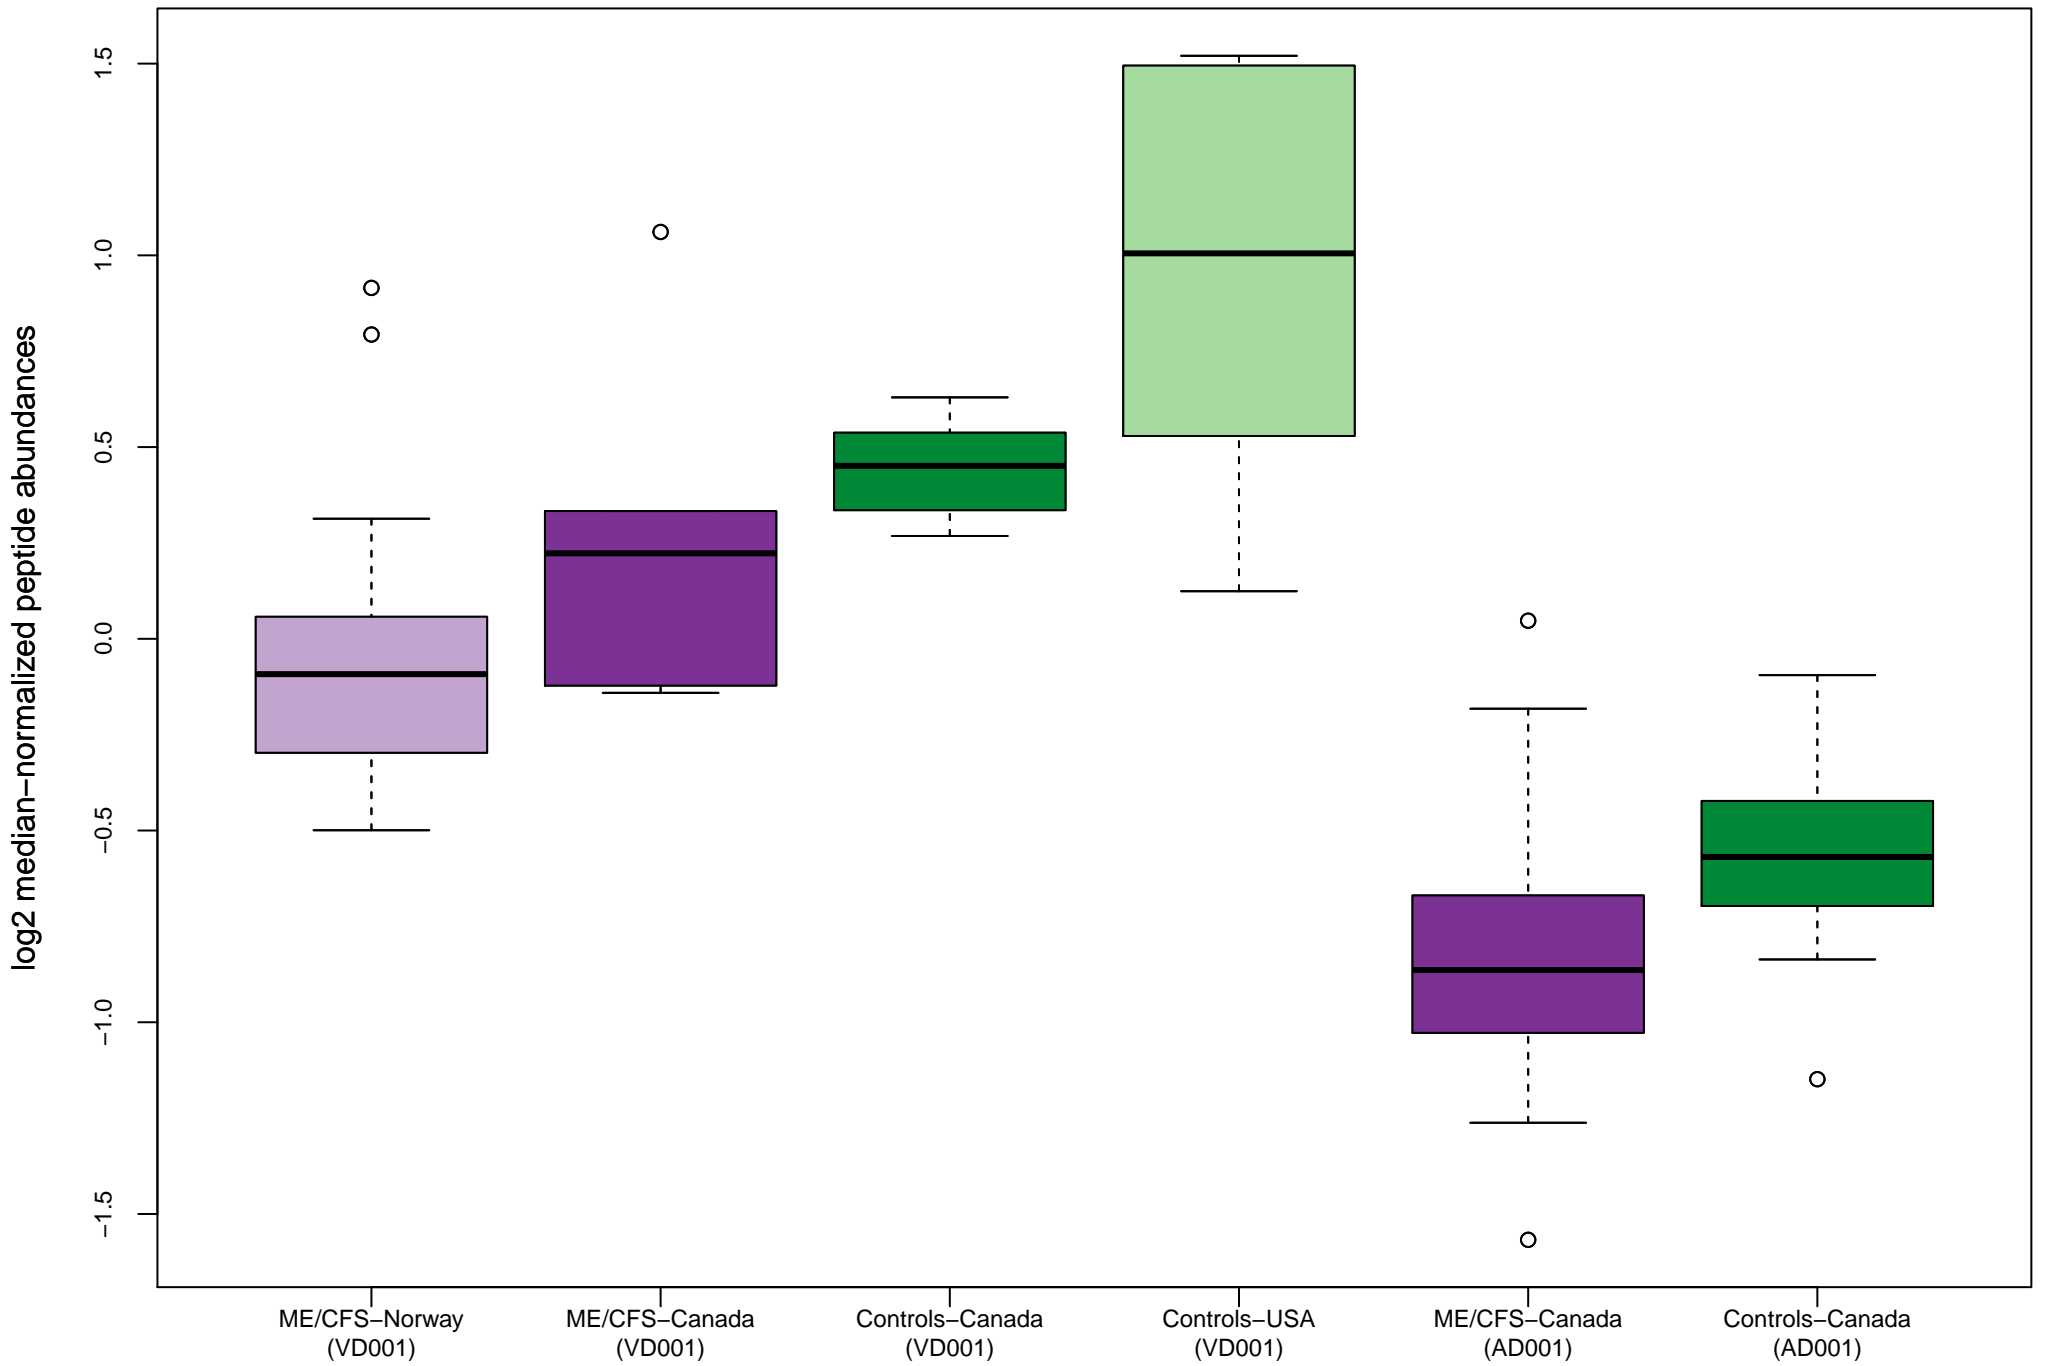

# LAQRYFASGVLS

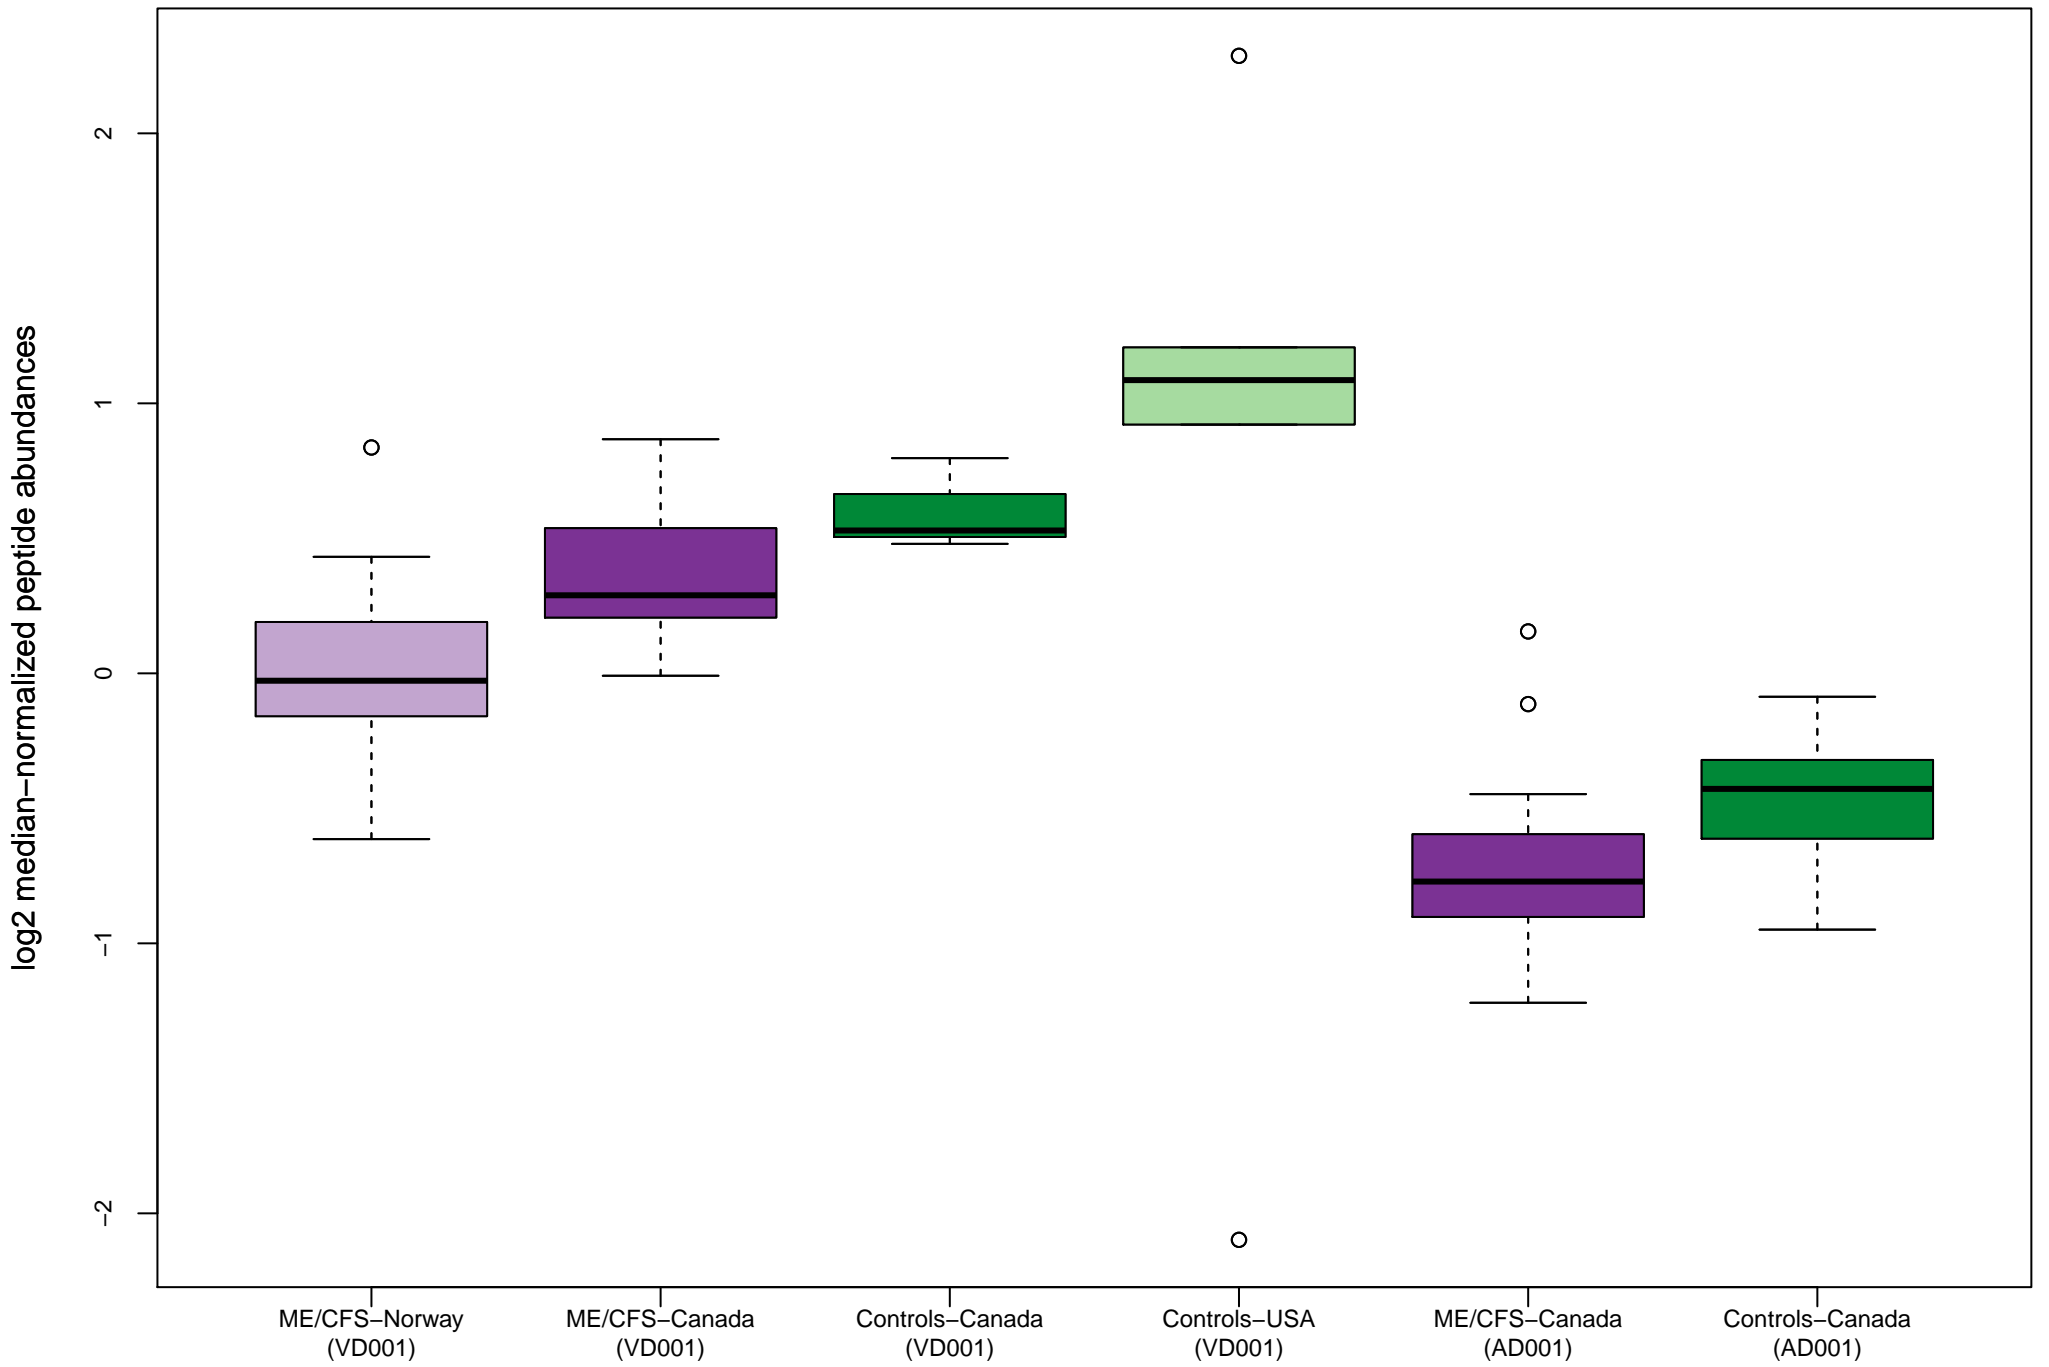

# LARLPLGVALSG

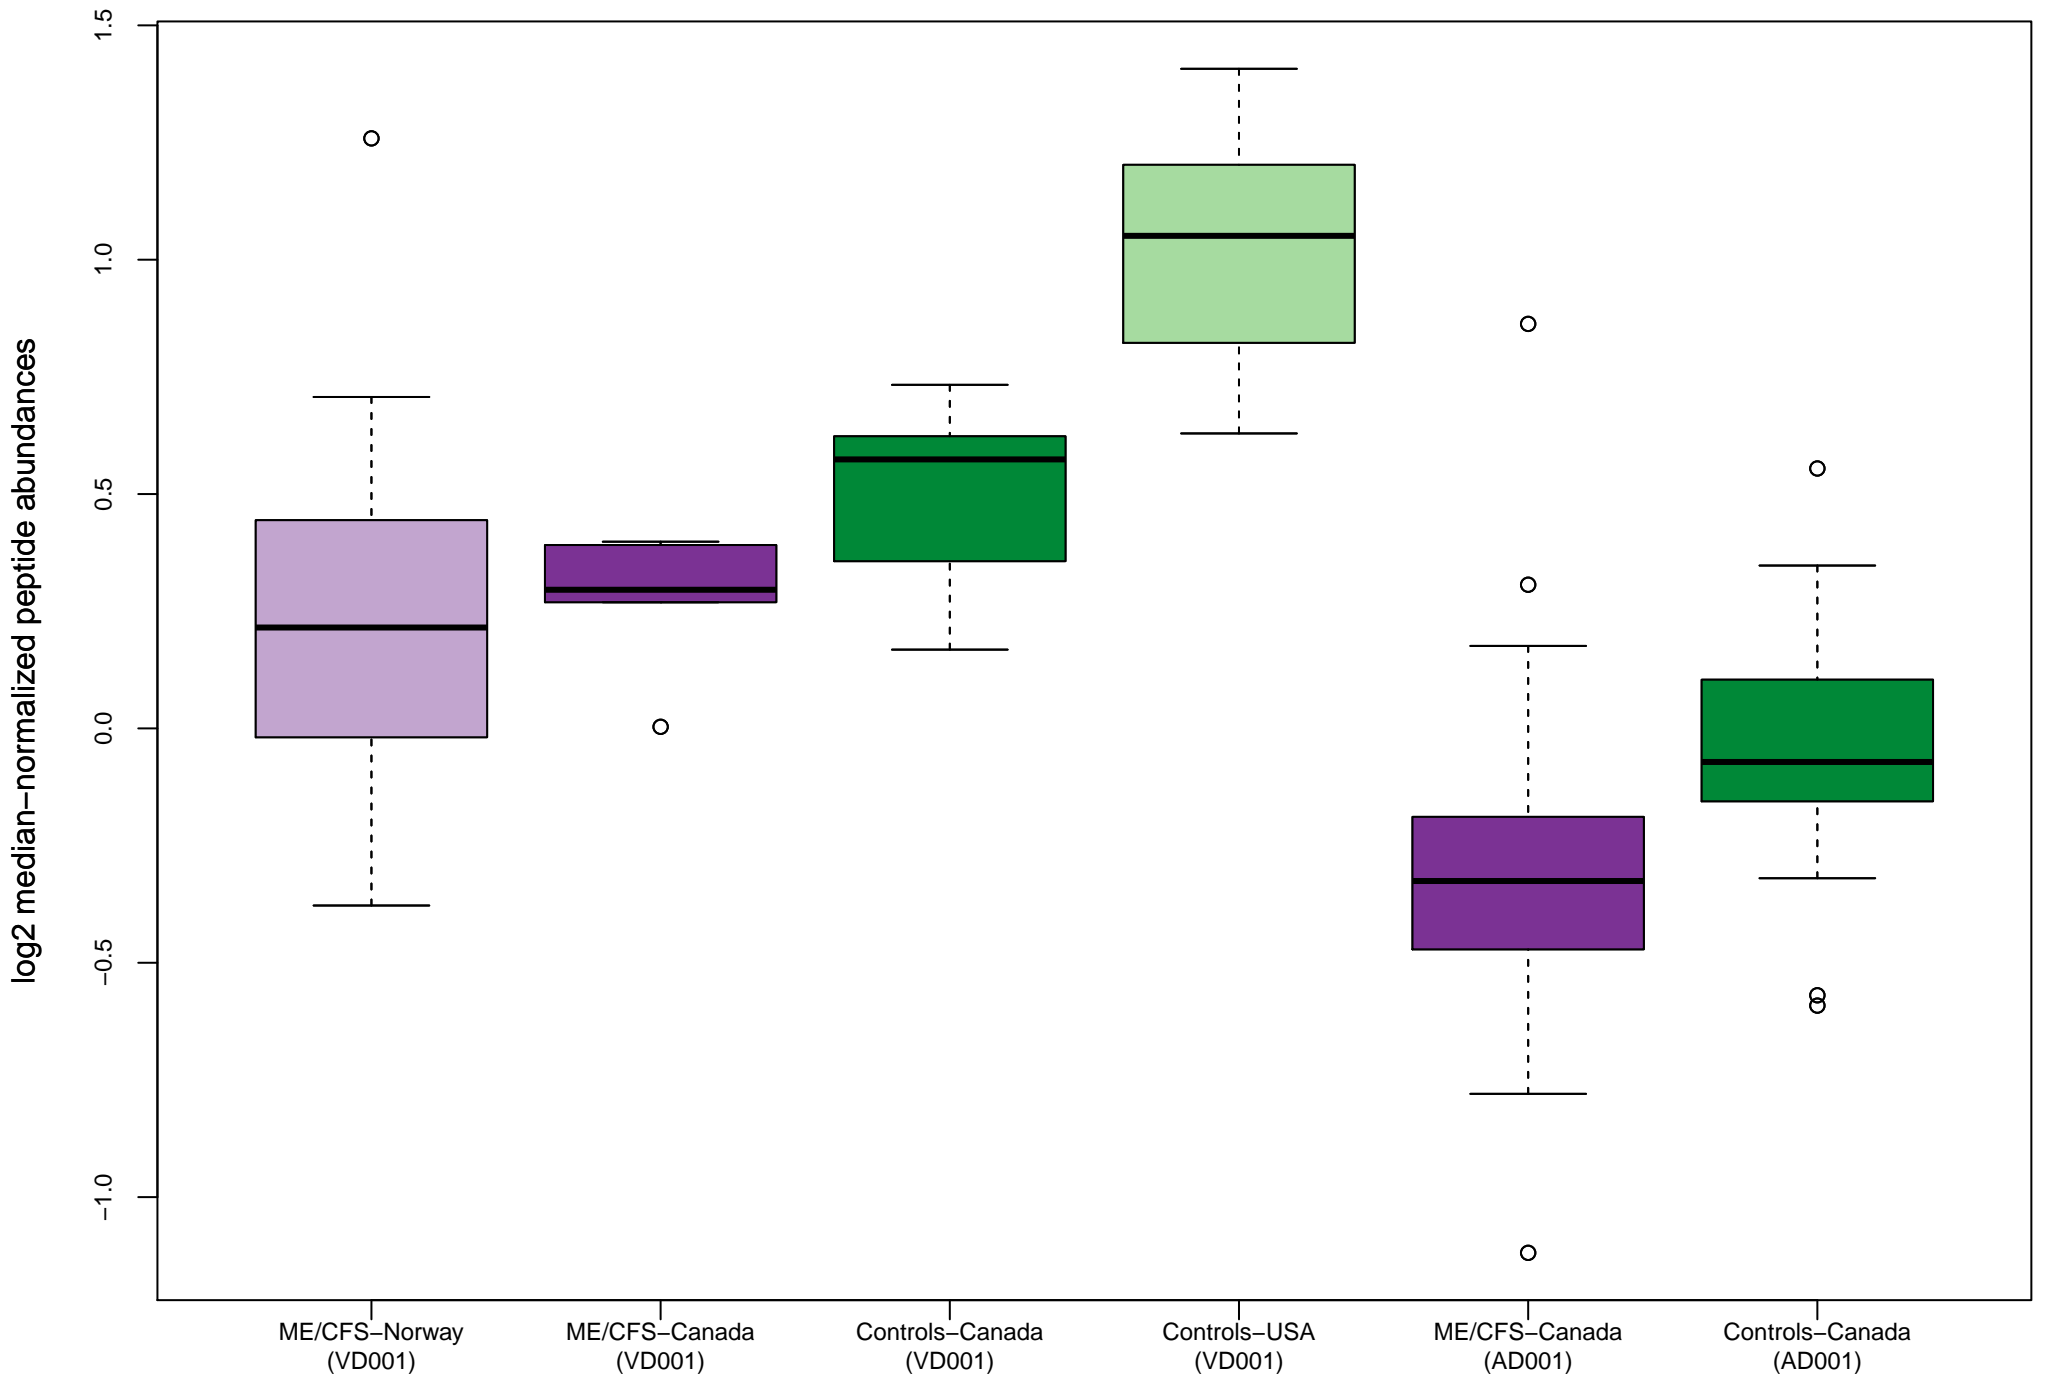

# LFAWSRVSGVLS

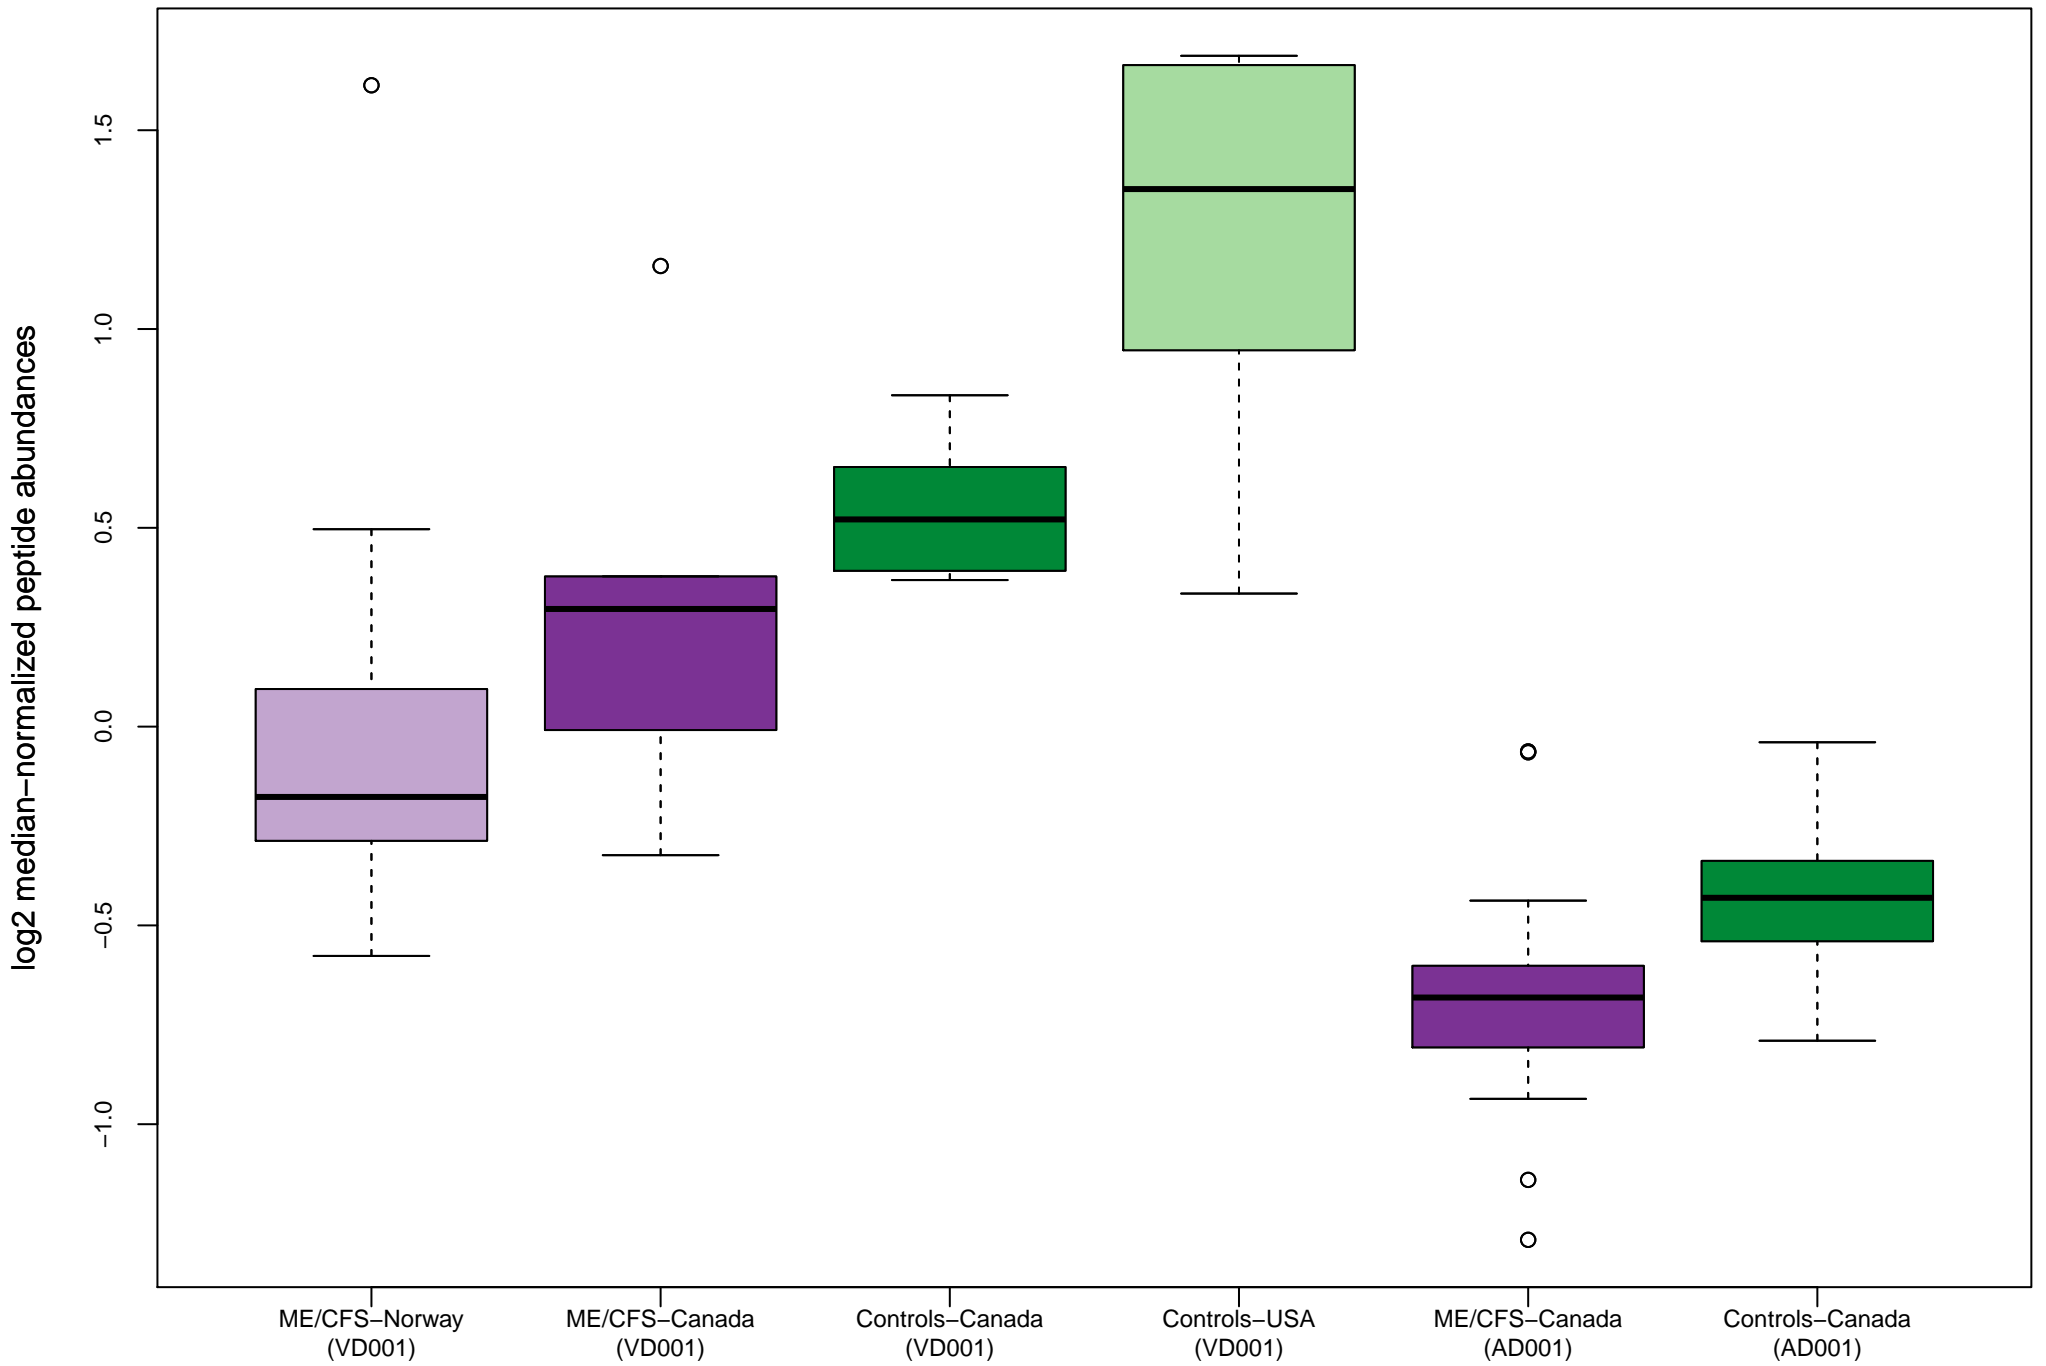



# LFLRRWALSVSG

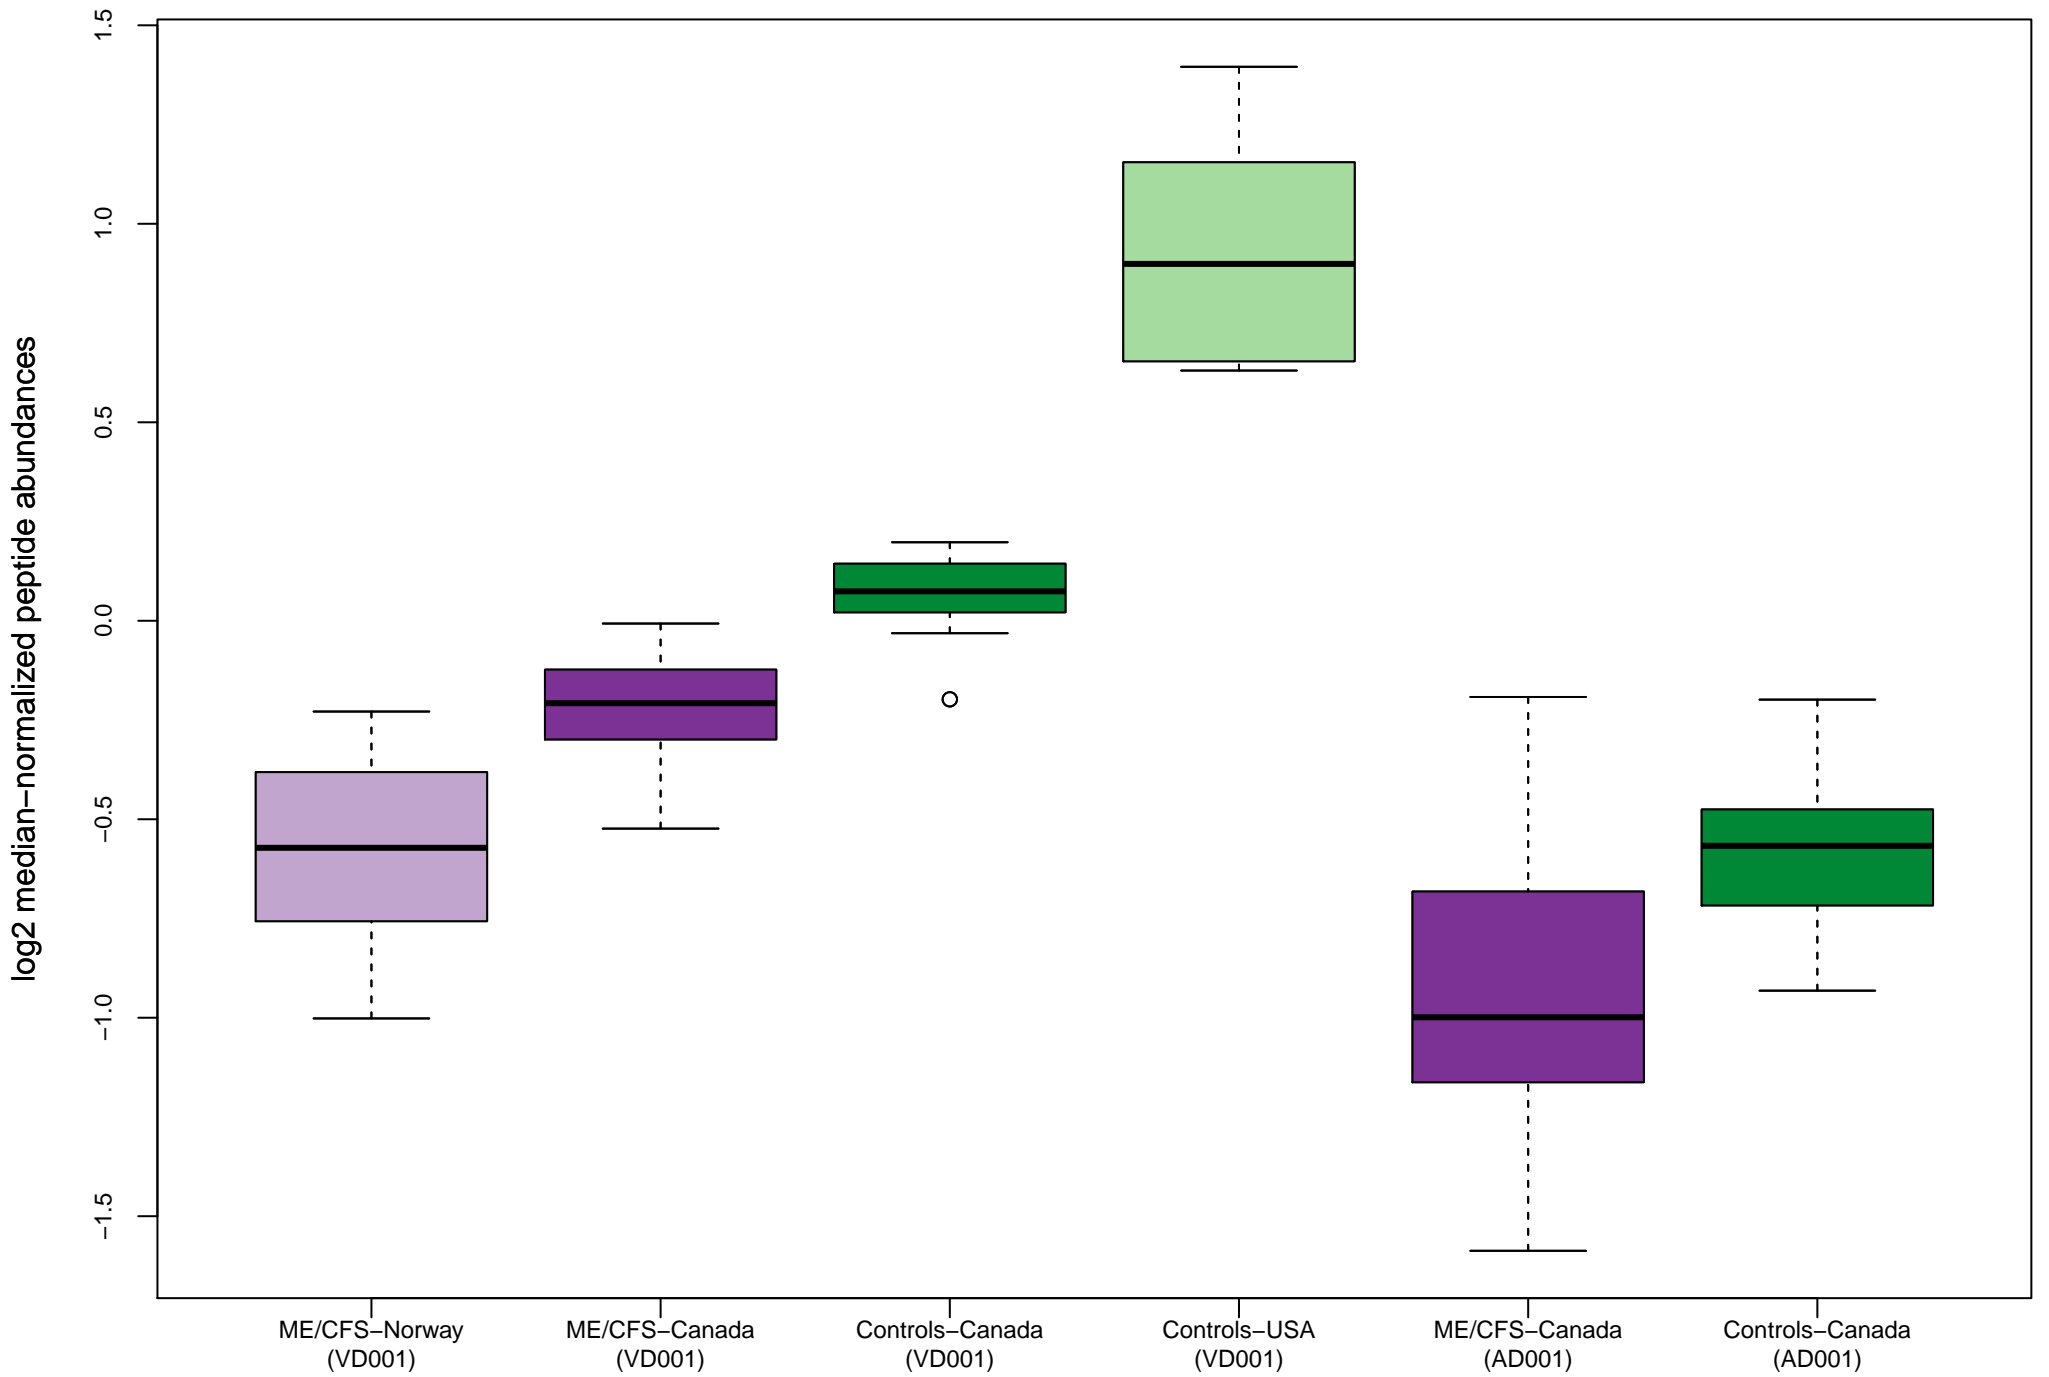

# LFWLFRQRNVAL

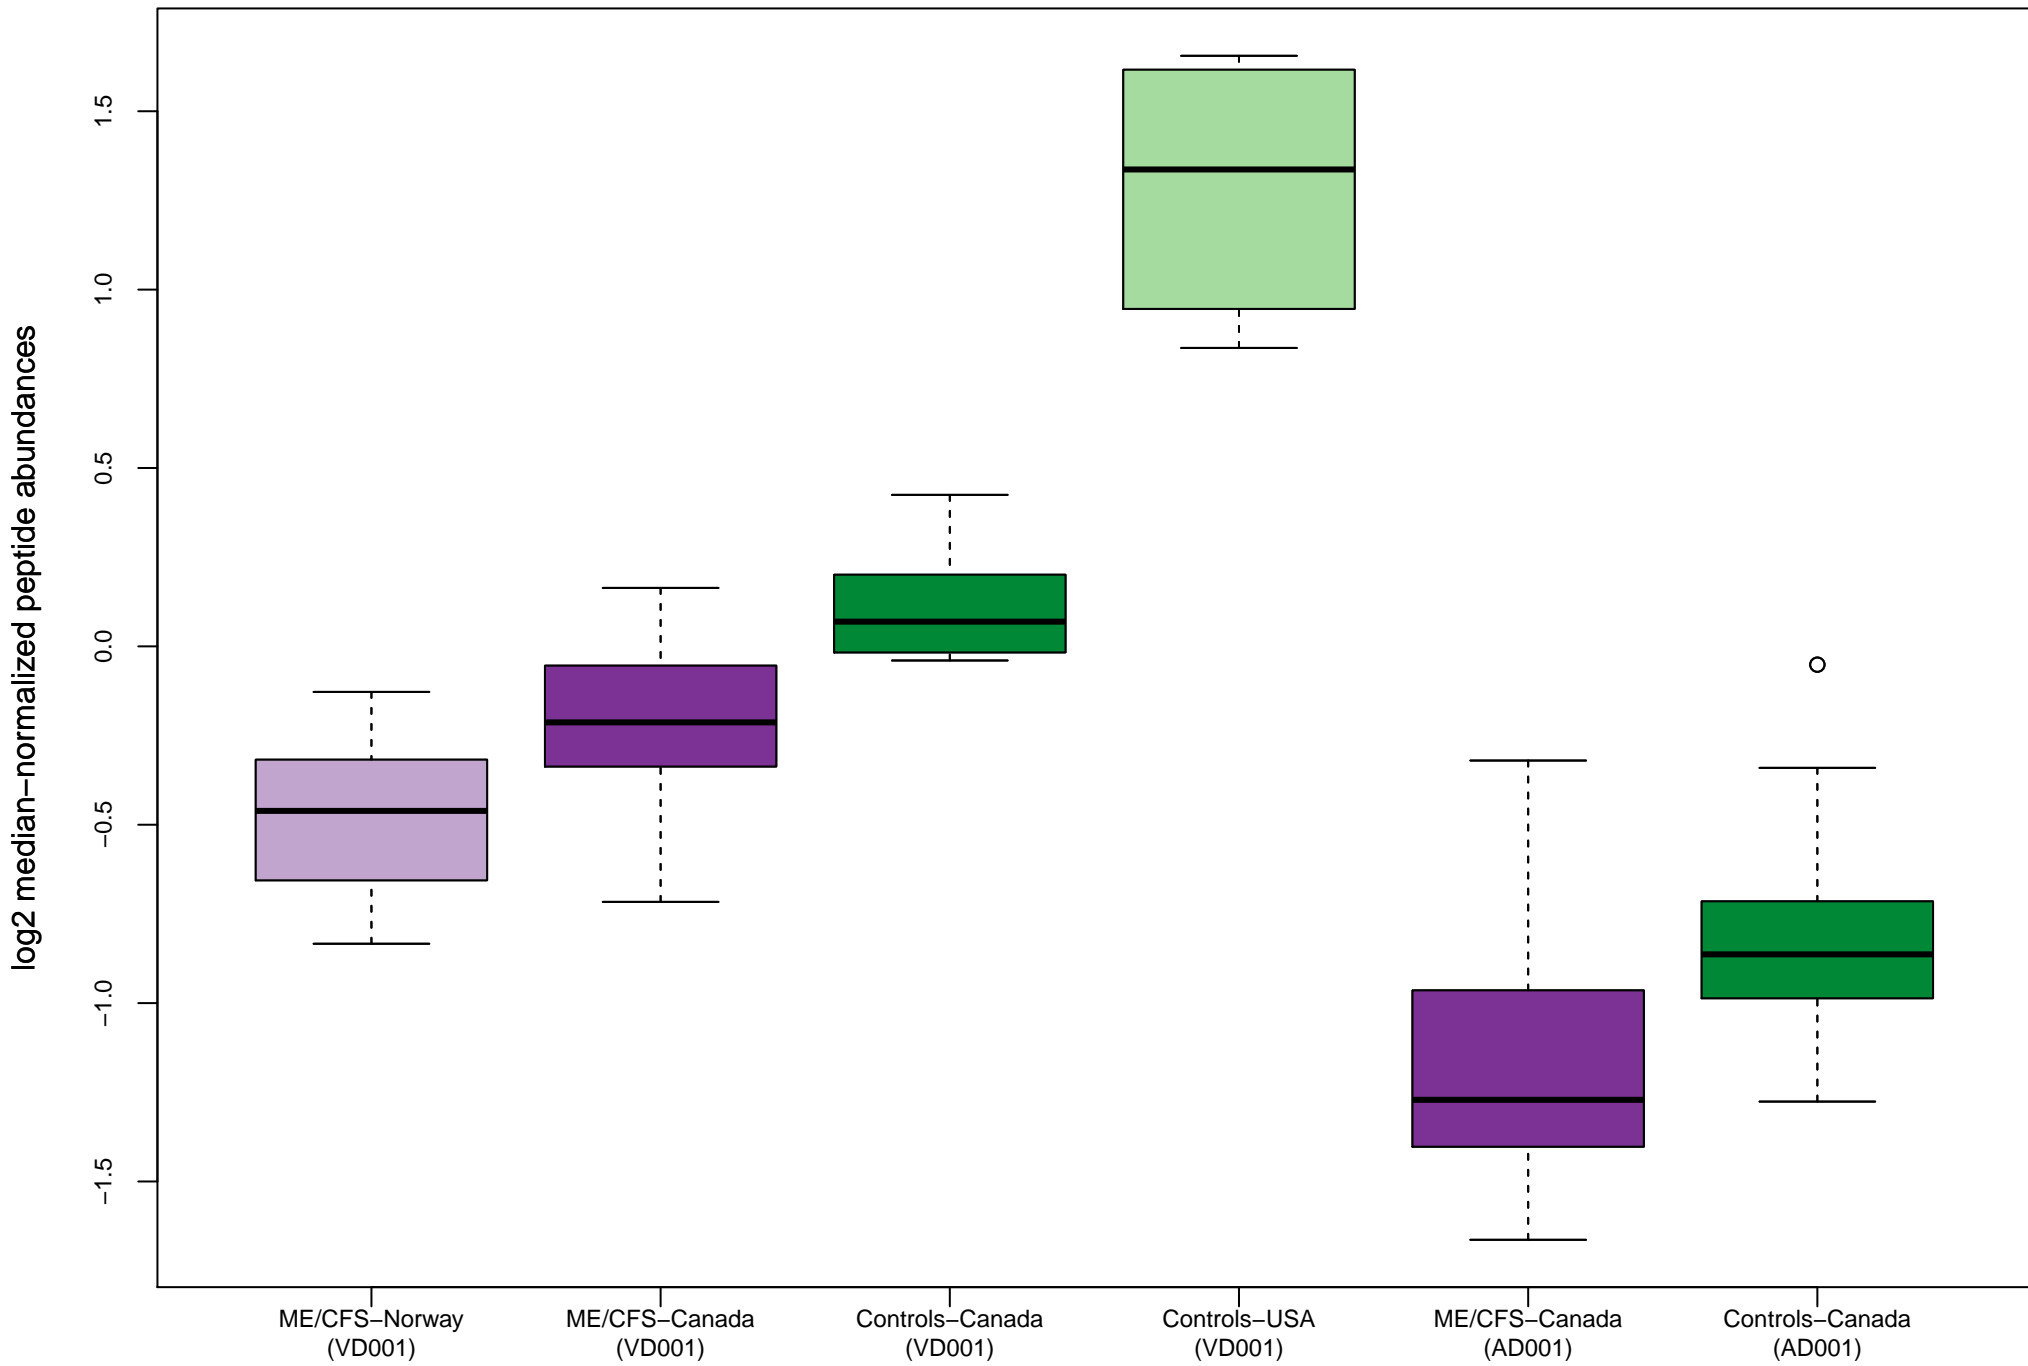

# LGAKWALSALS

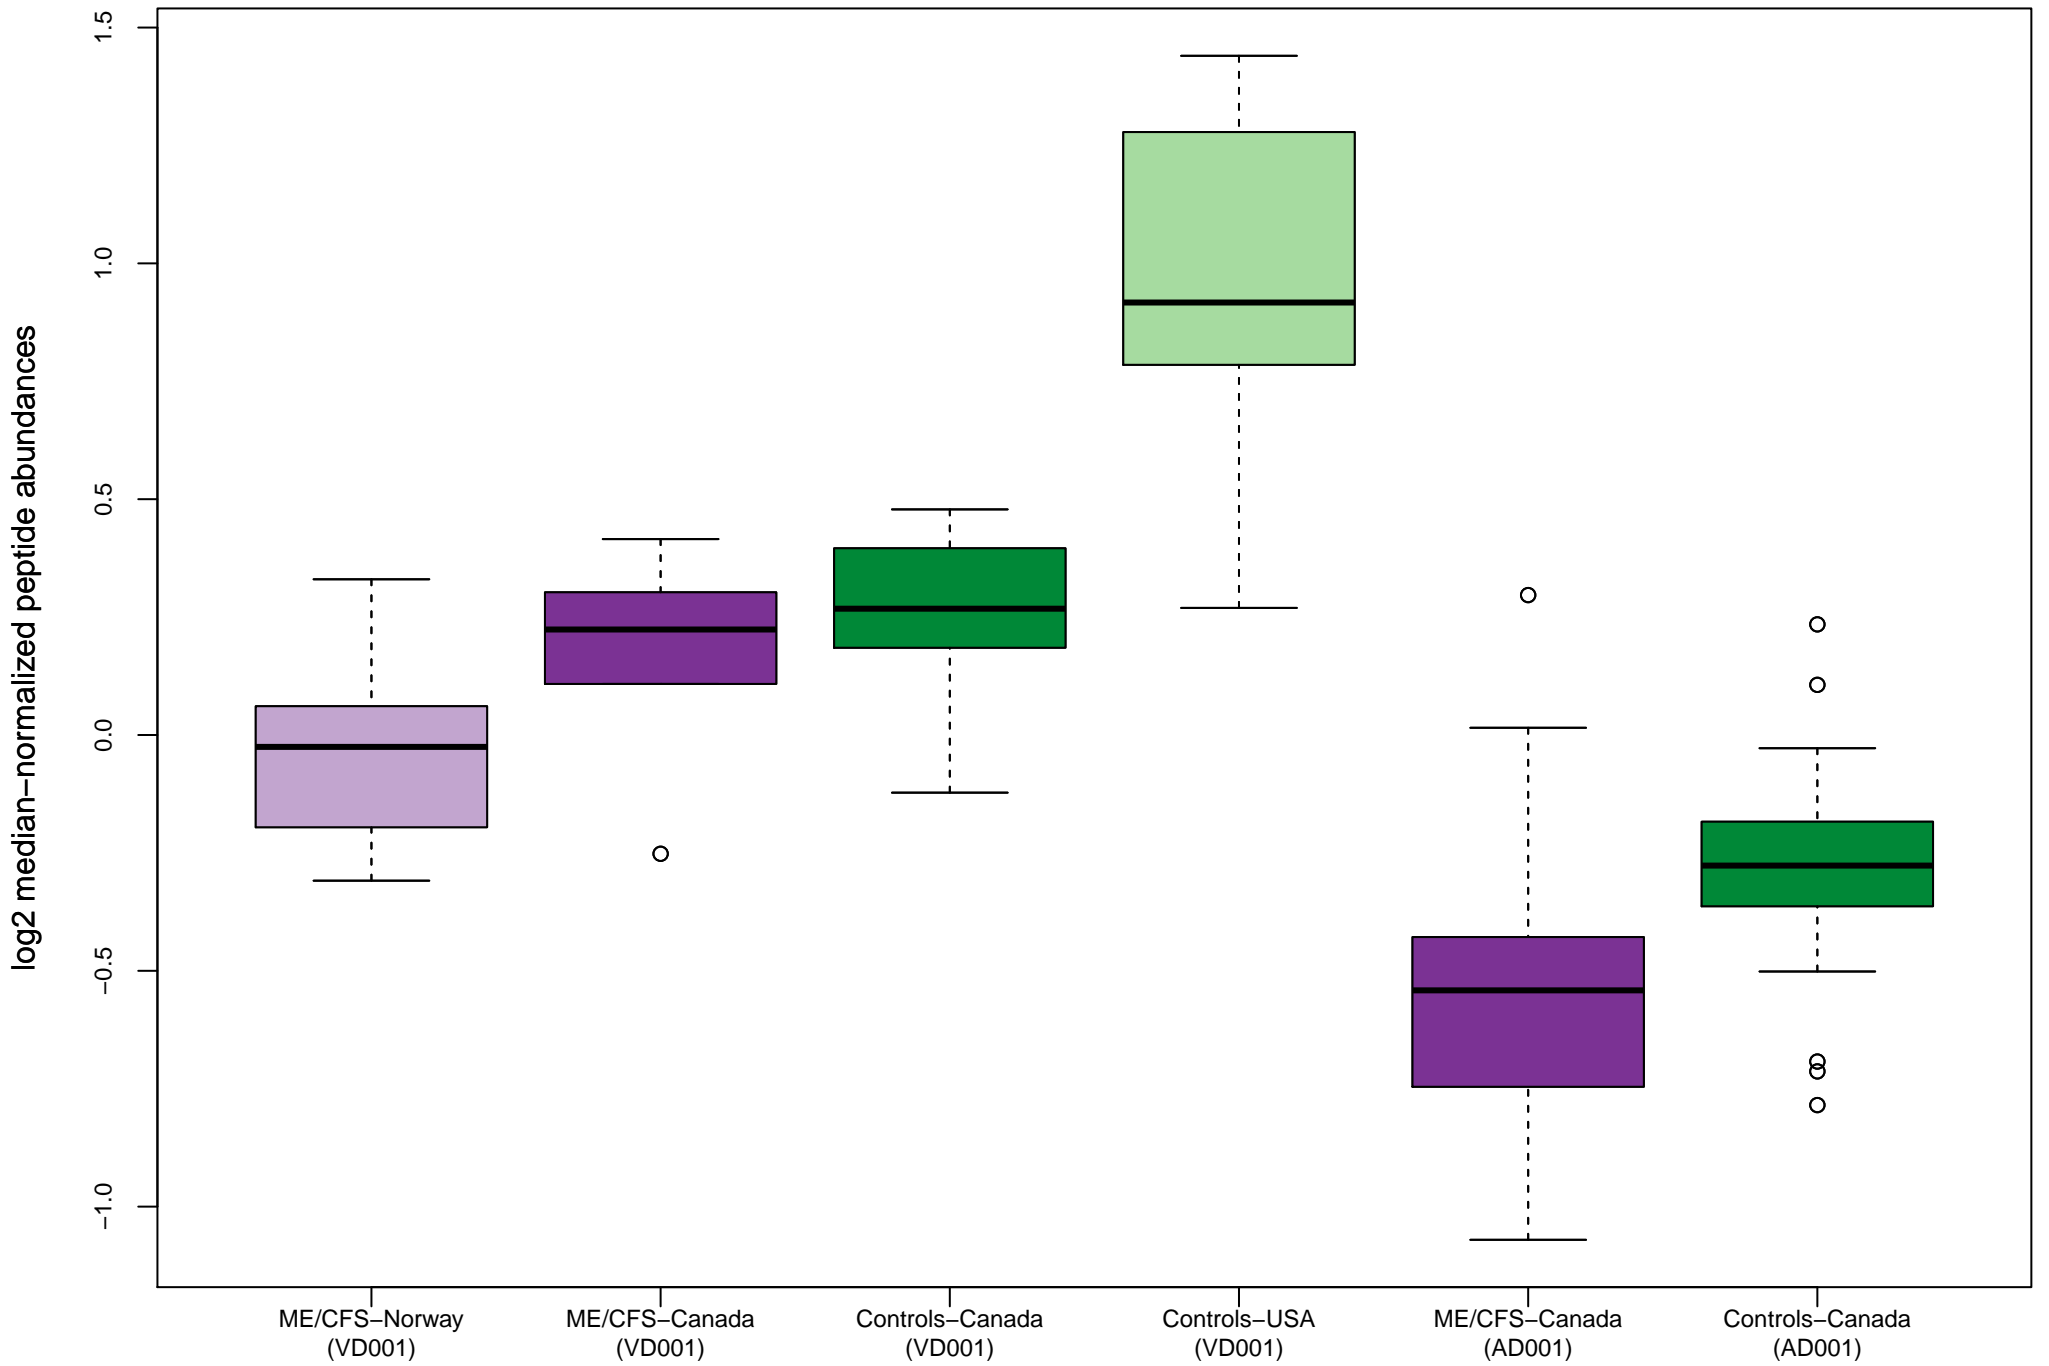

# LGHQRVFSVAG

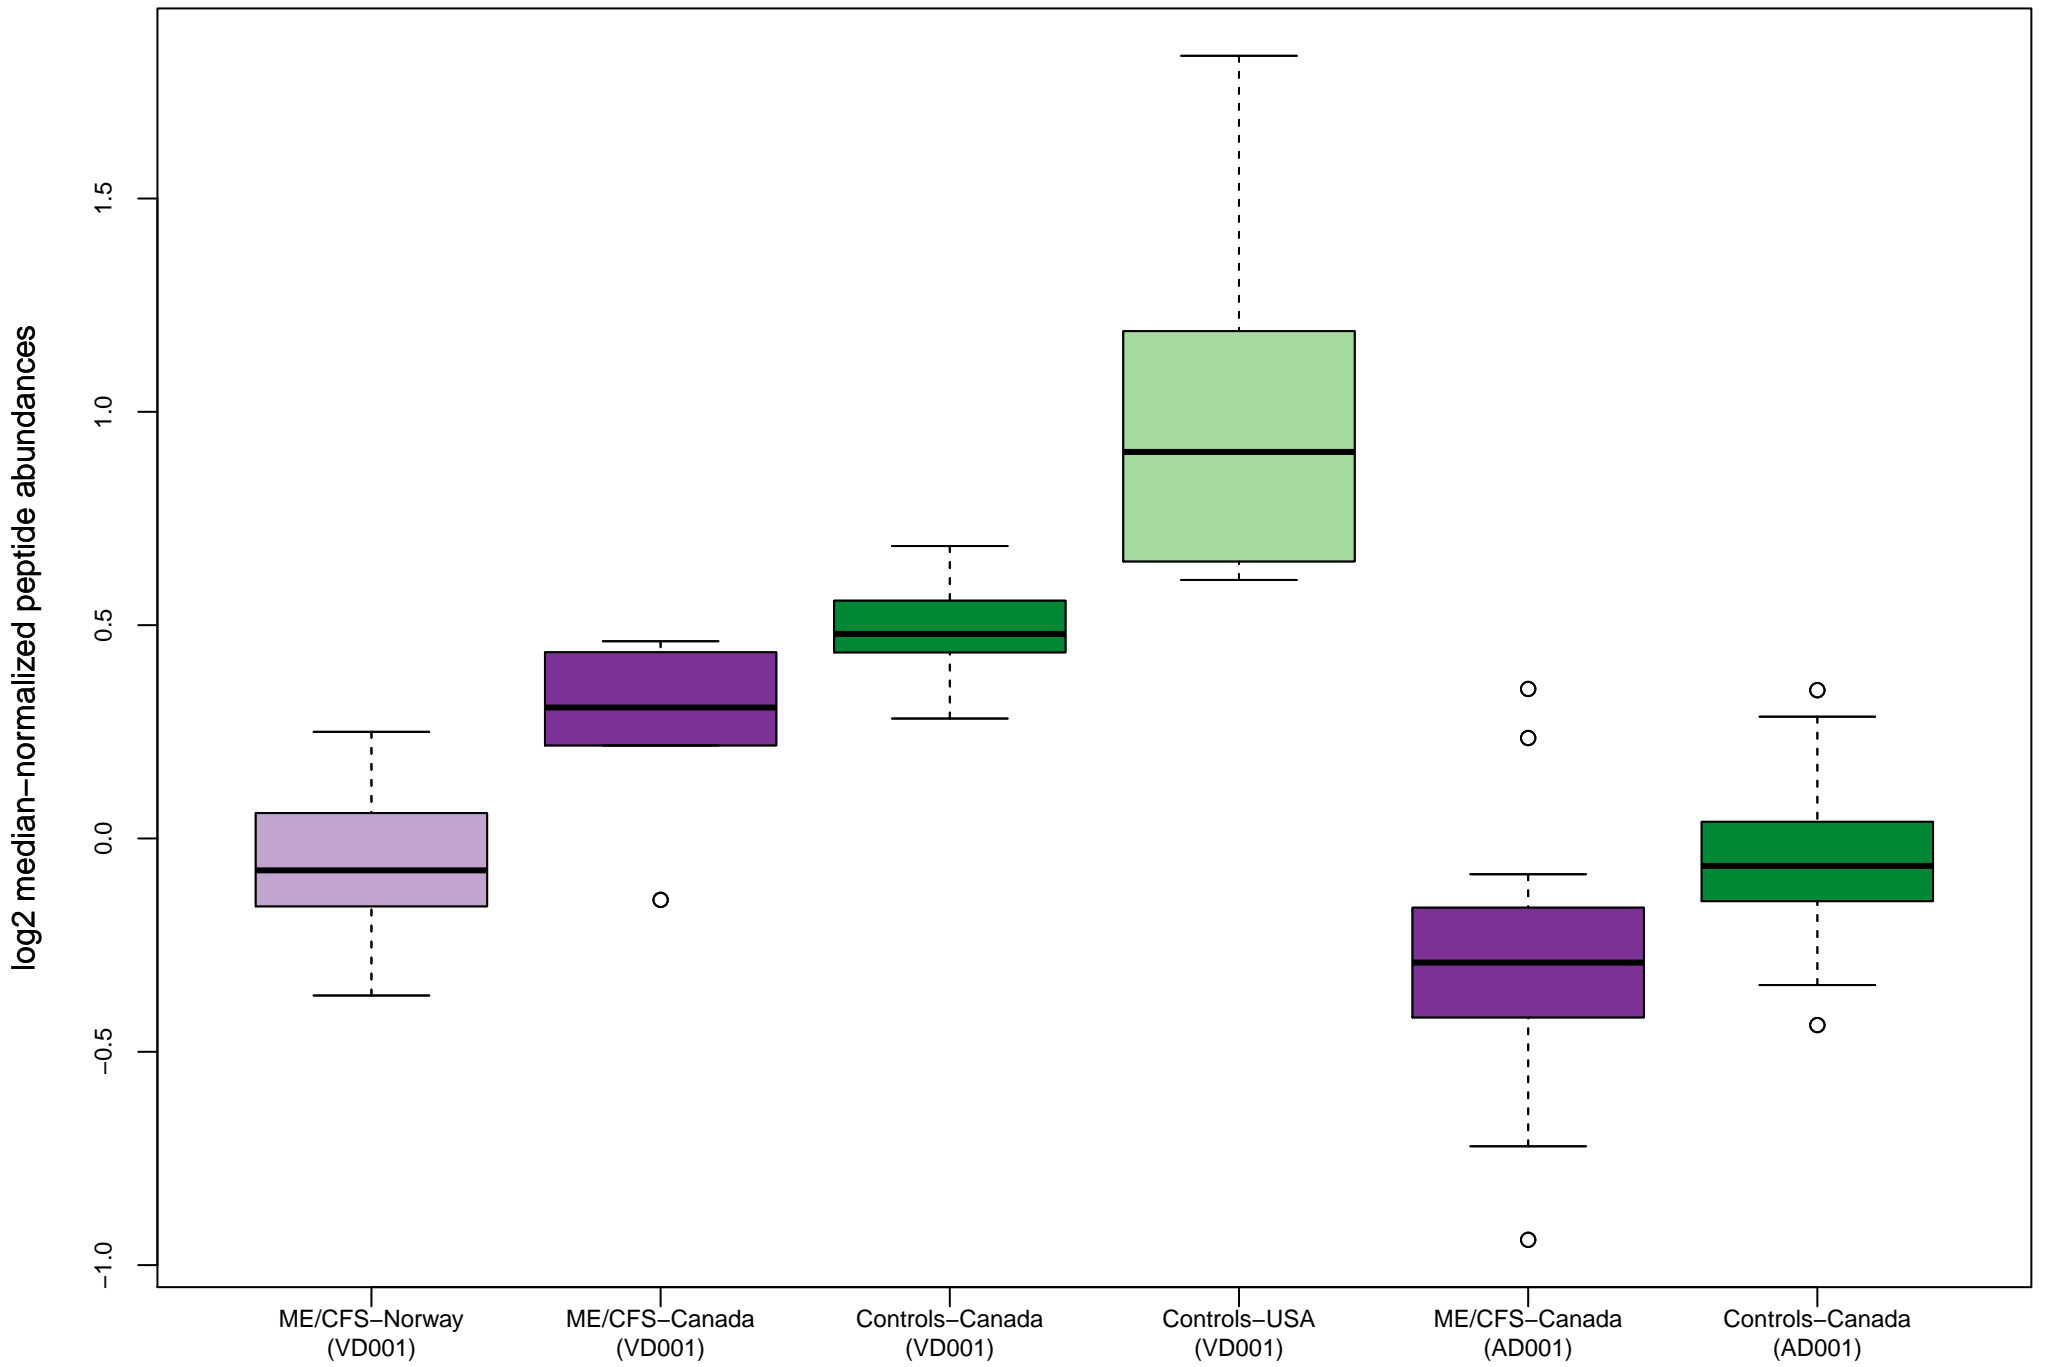

# LLFRYQRALSSG

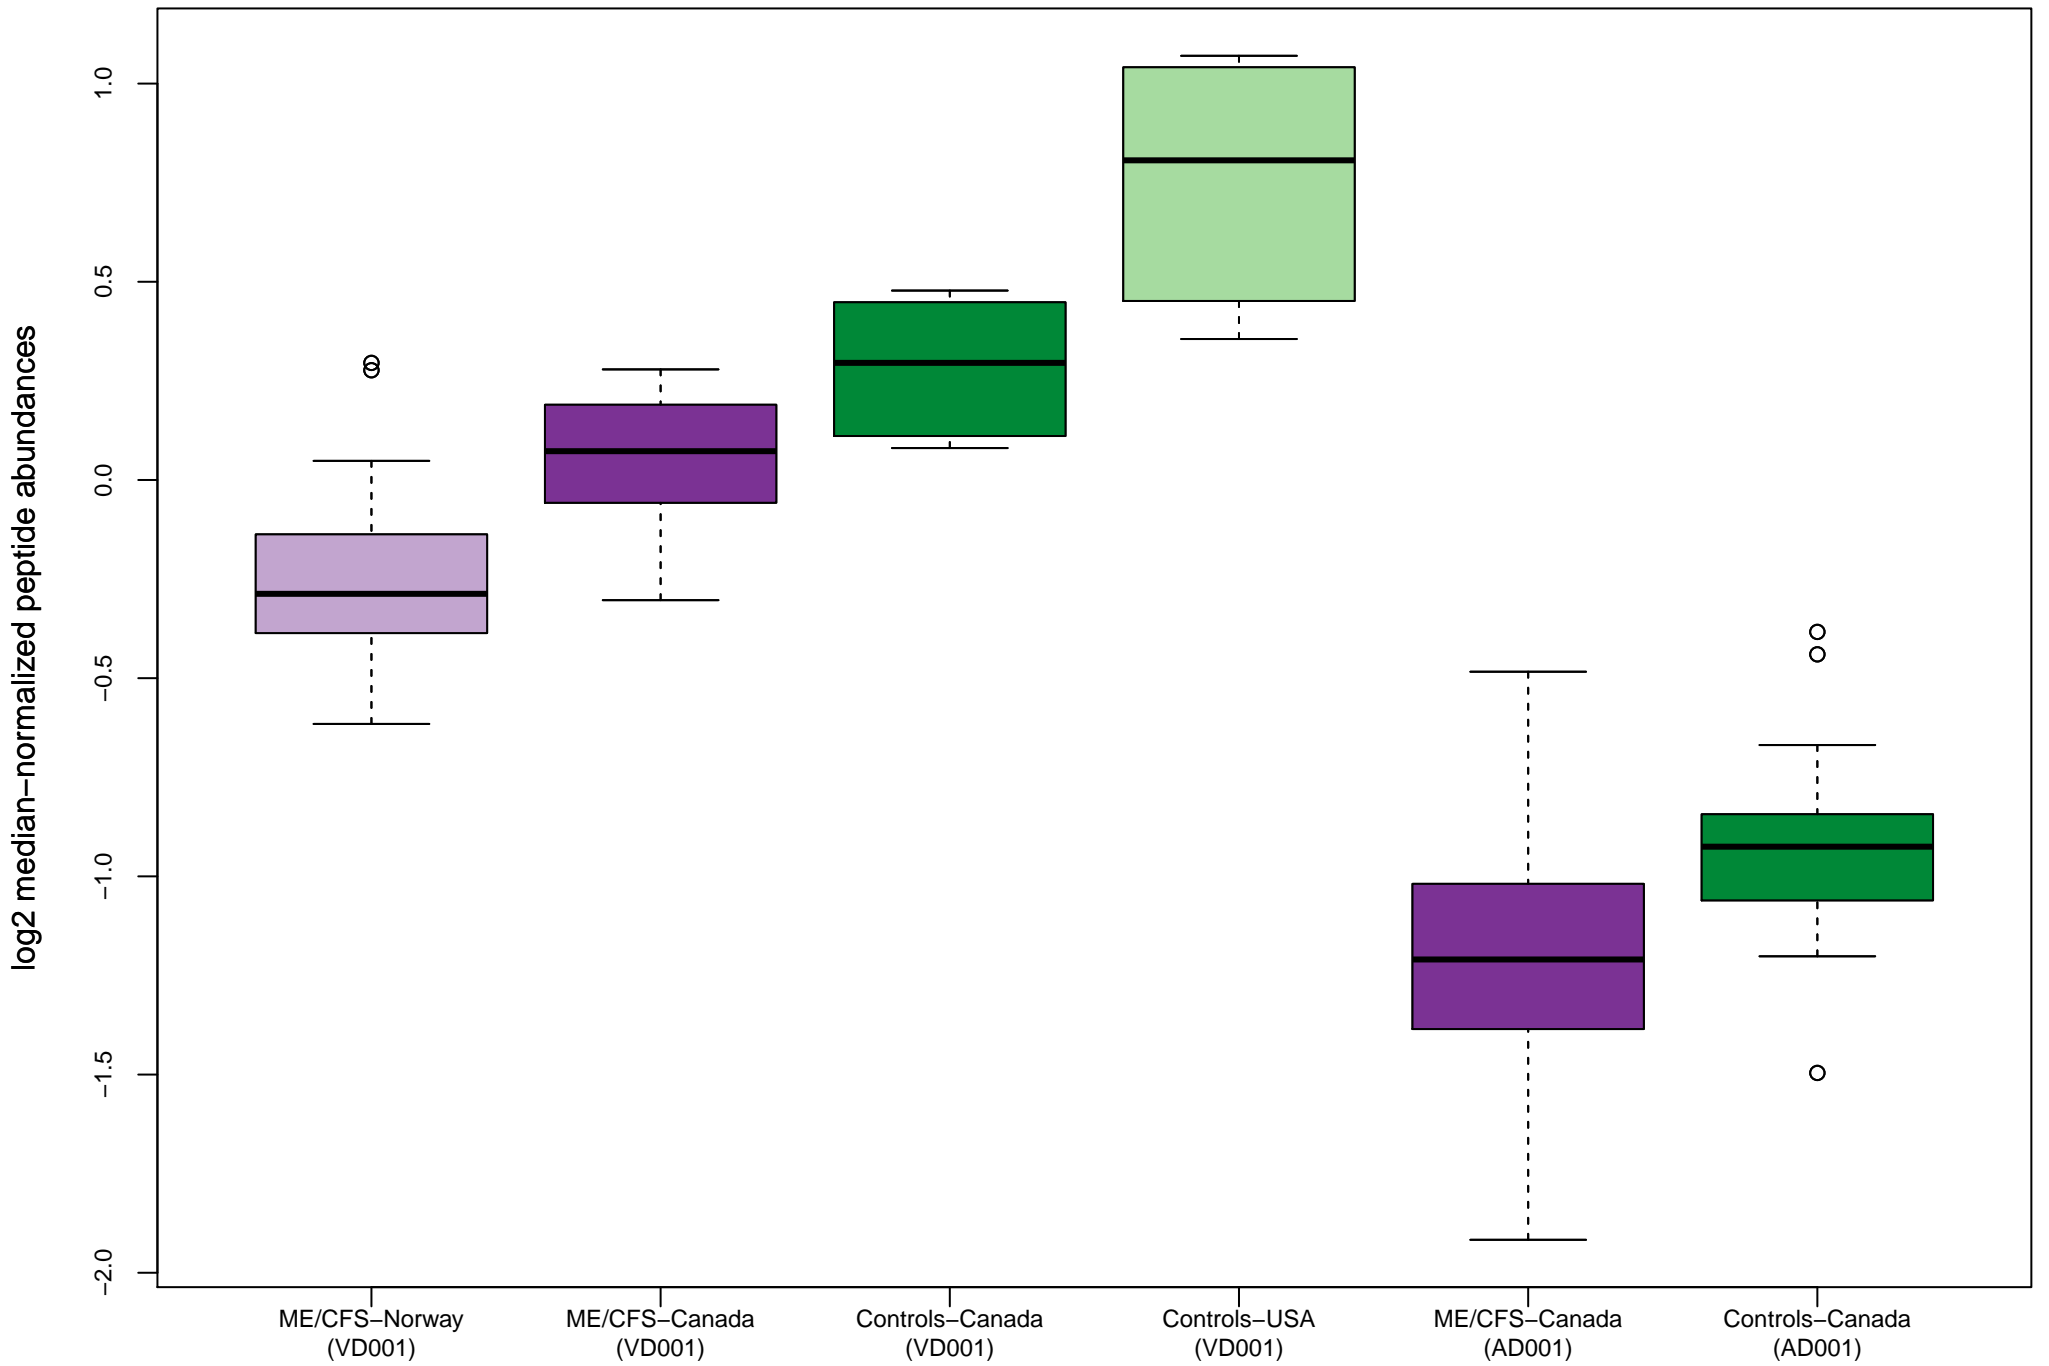

# LLRWNWAGVALS

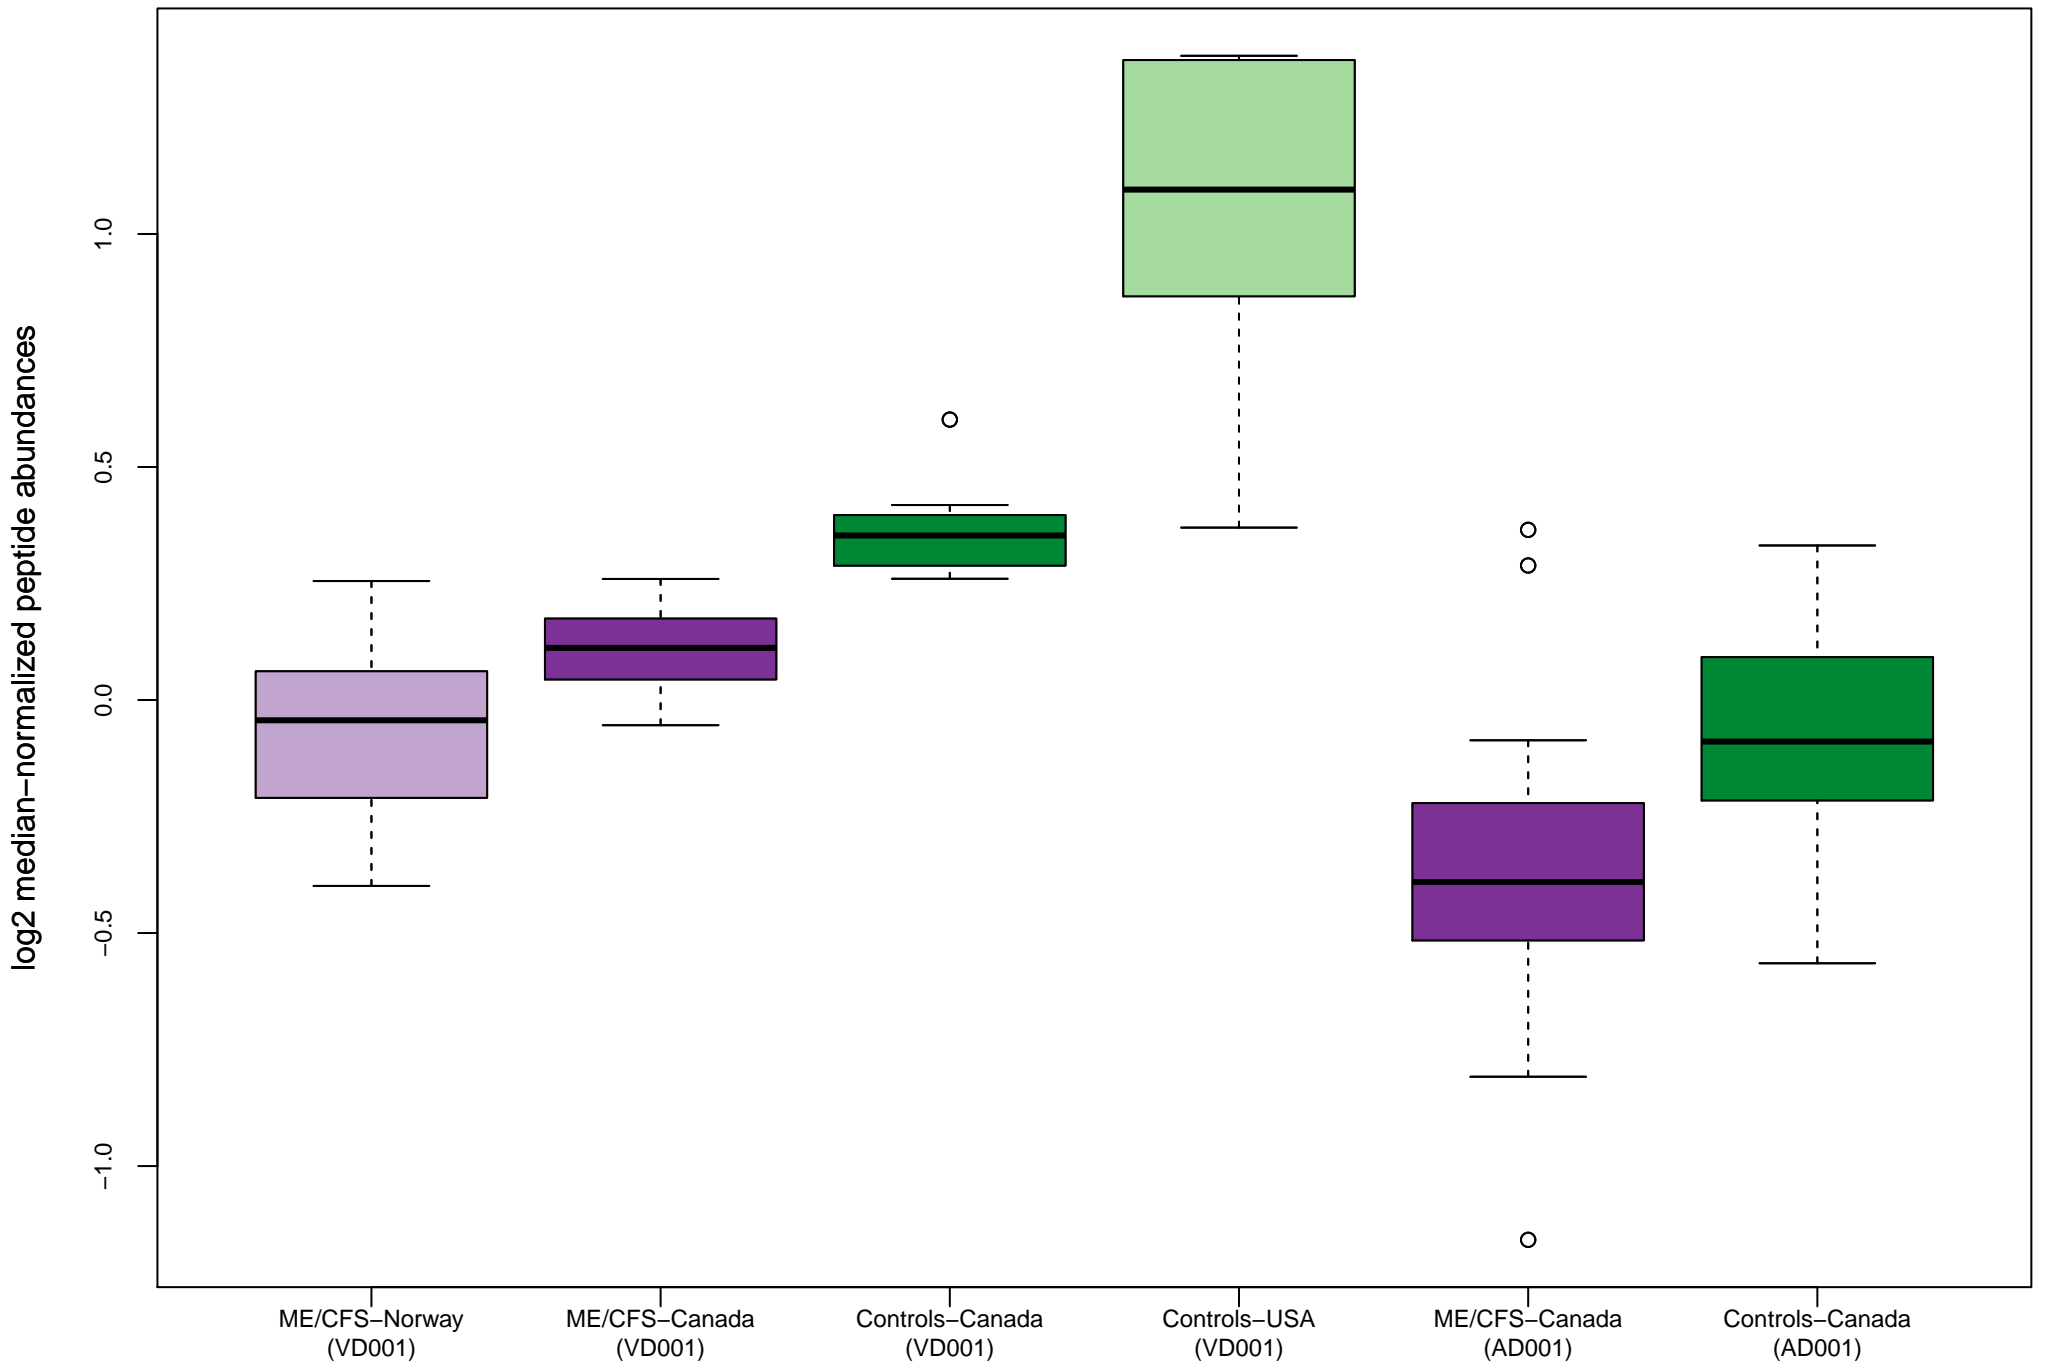

# LNGKYLGVLSG

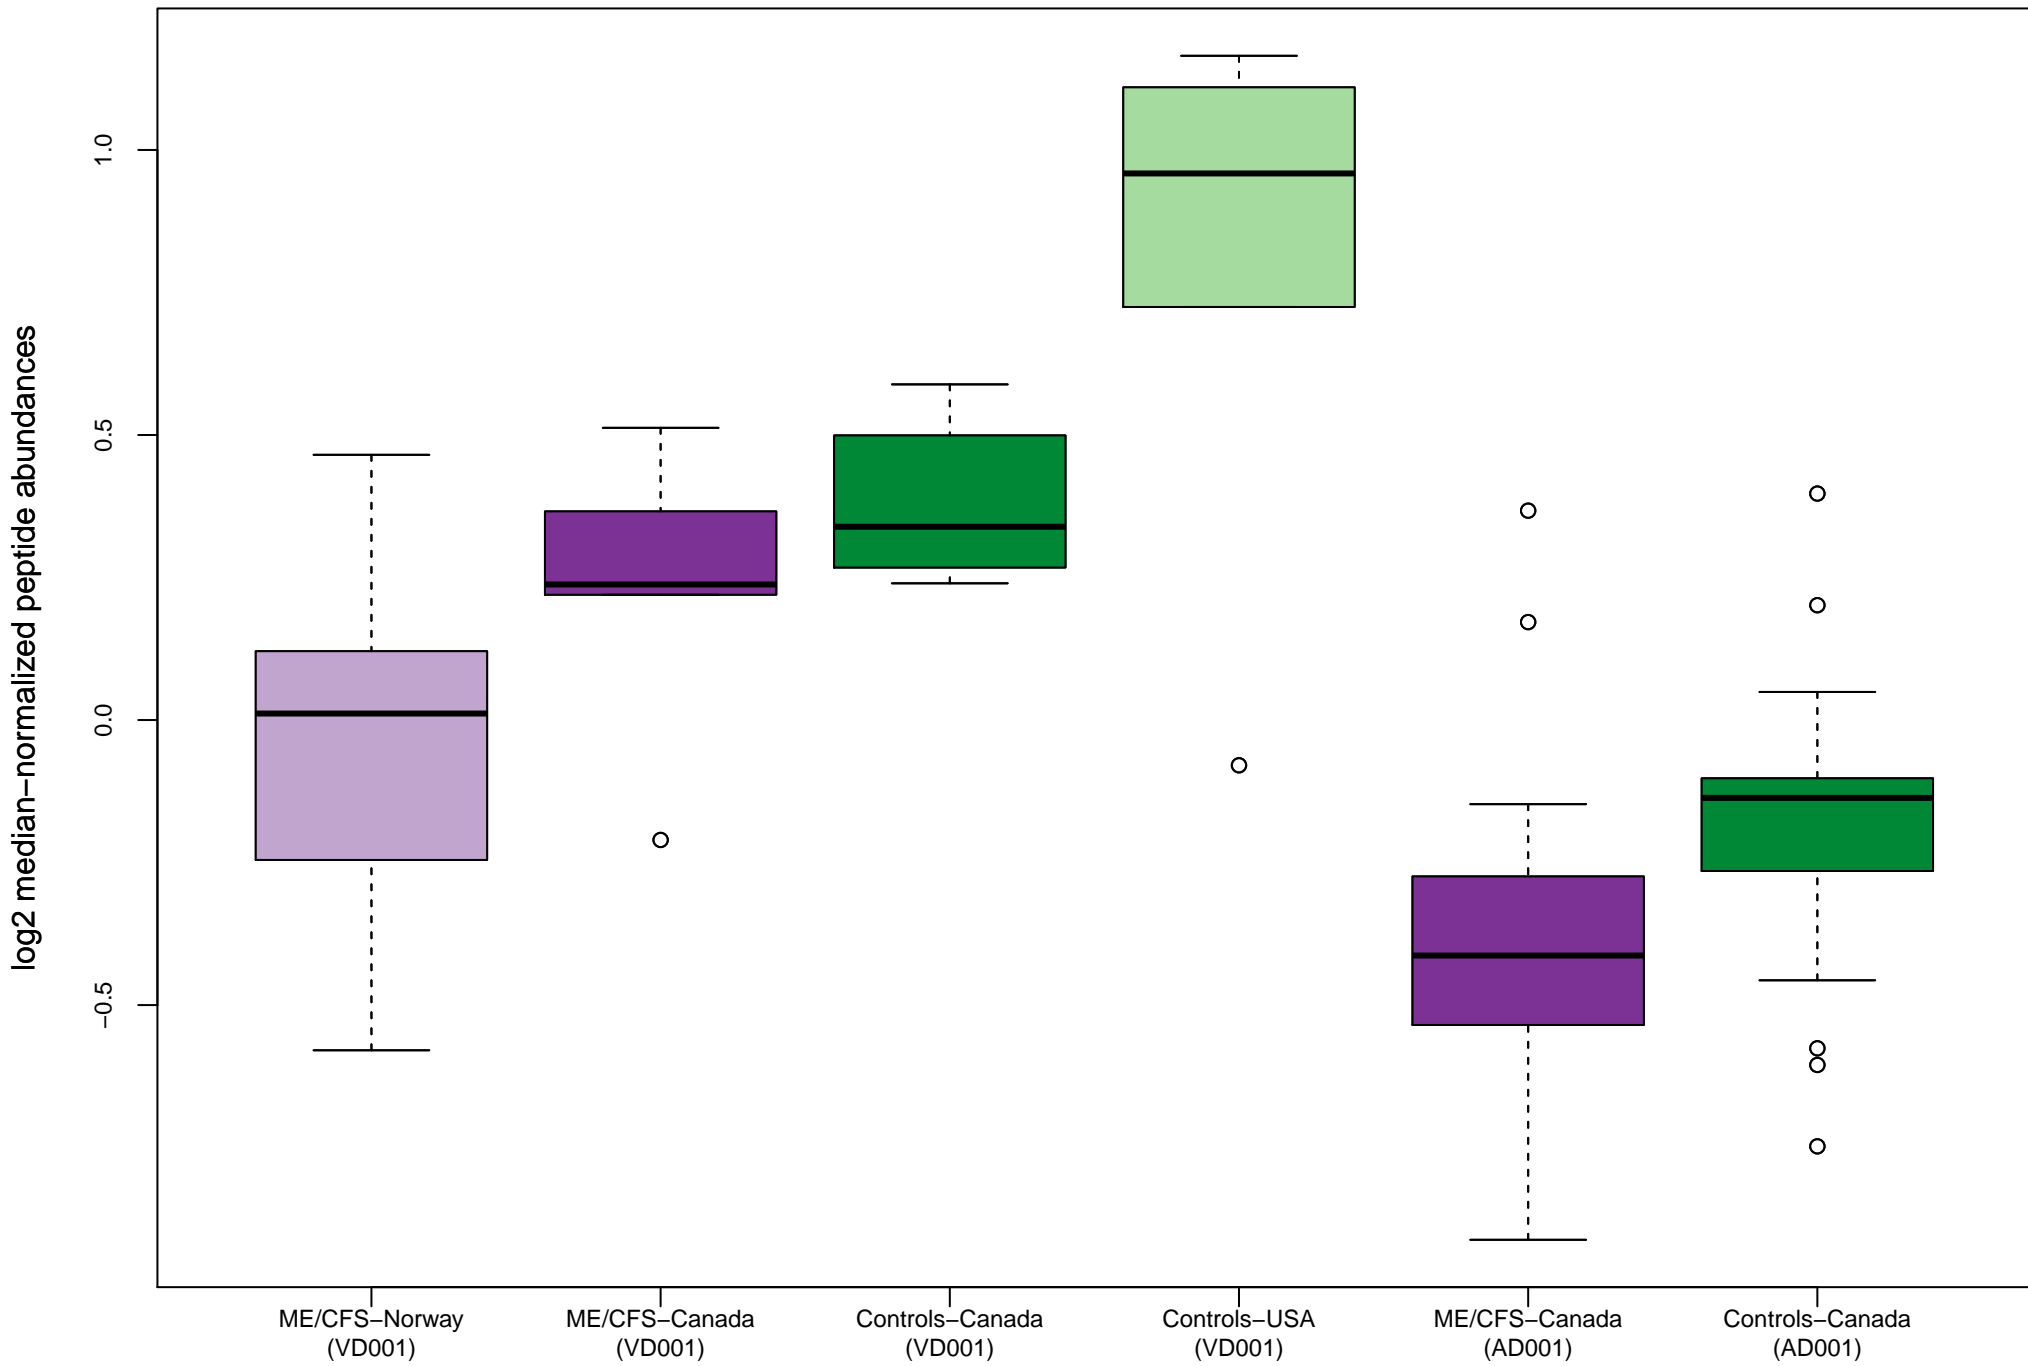

# LNKFQYALGLSG

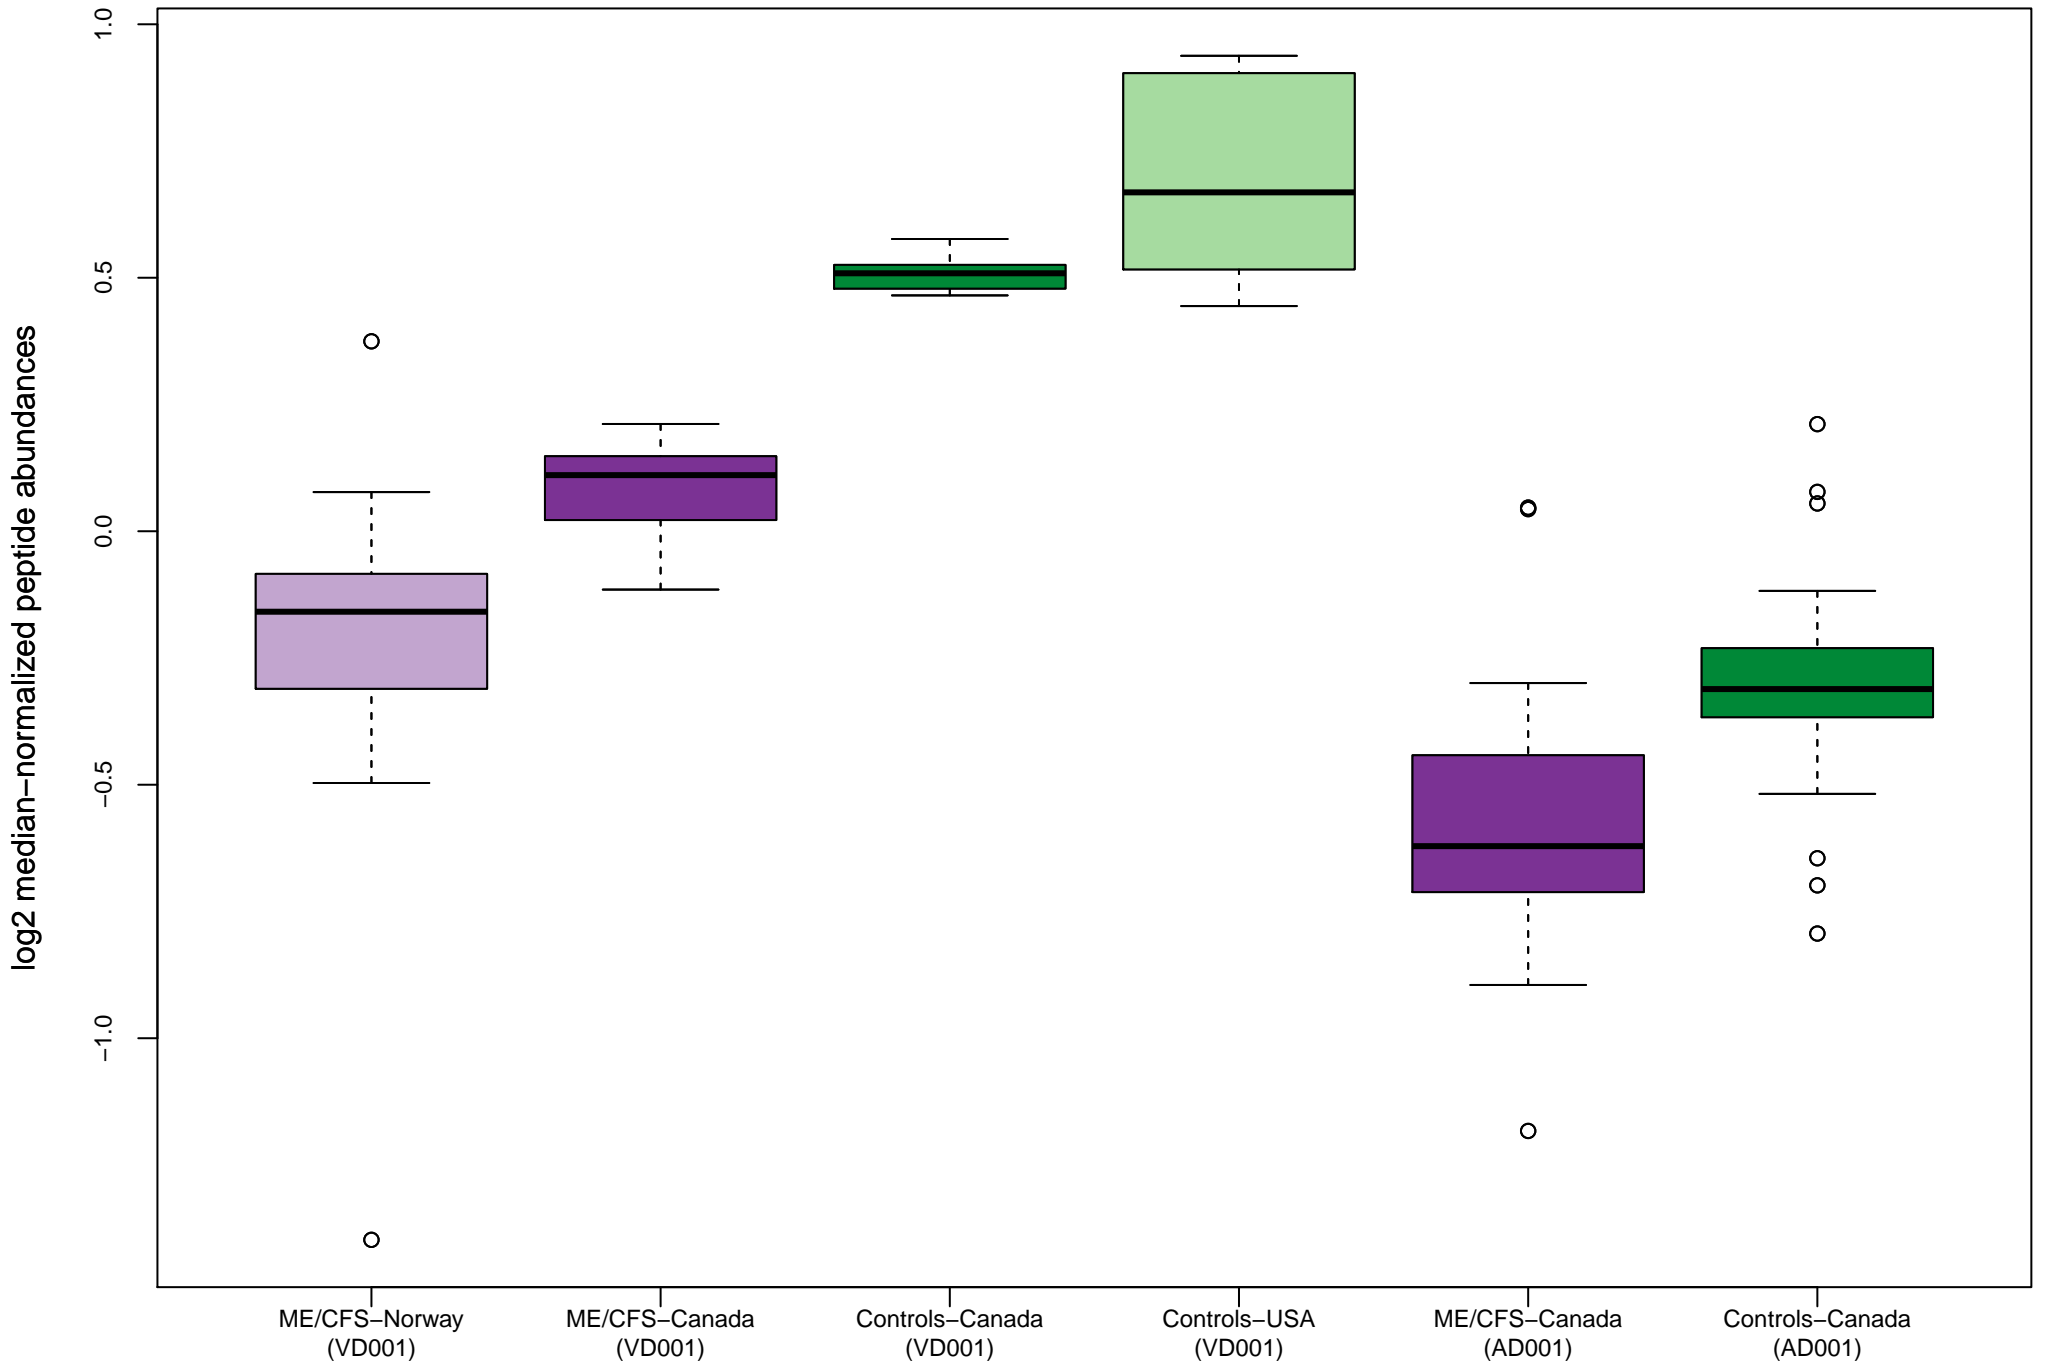



# LNRLYHALGVLS

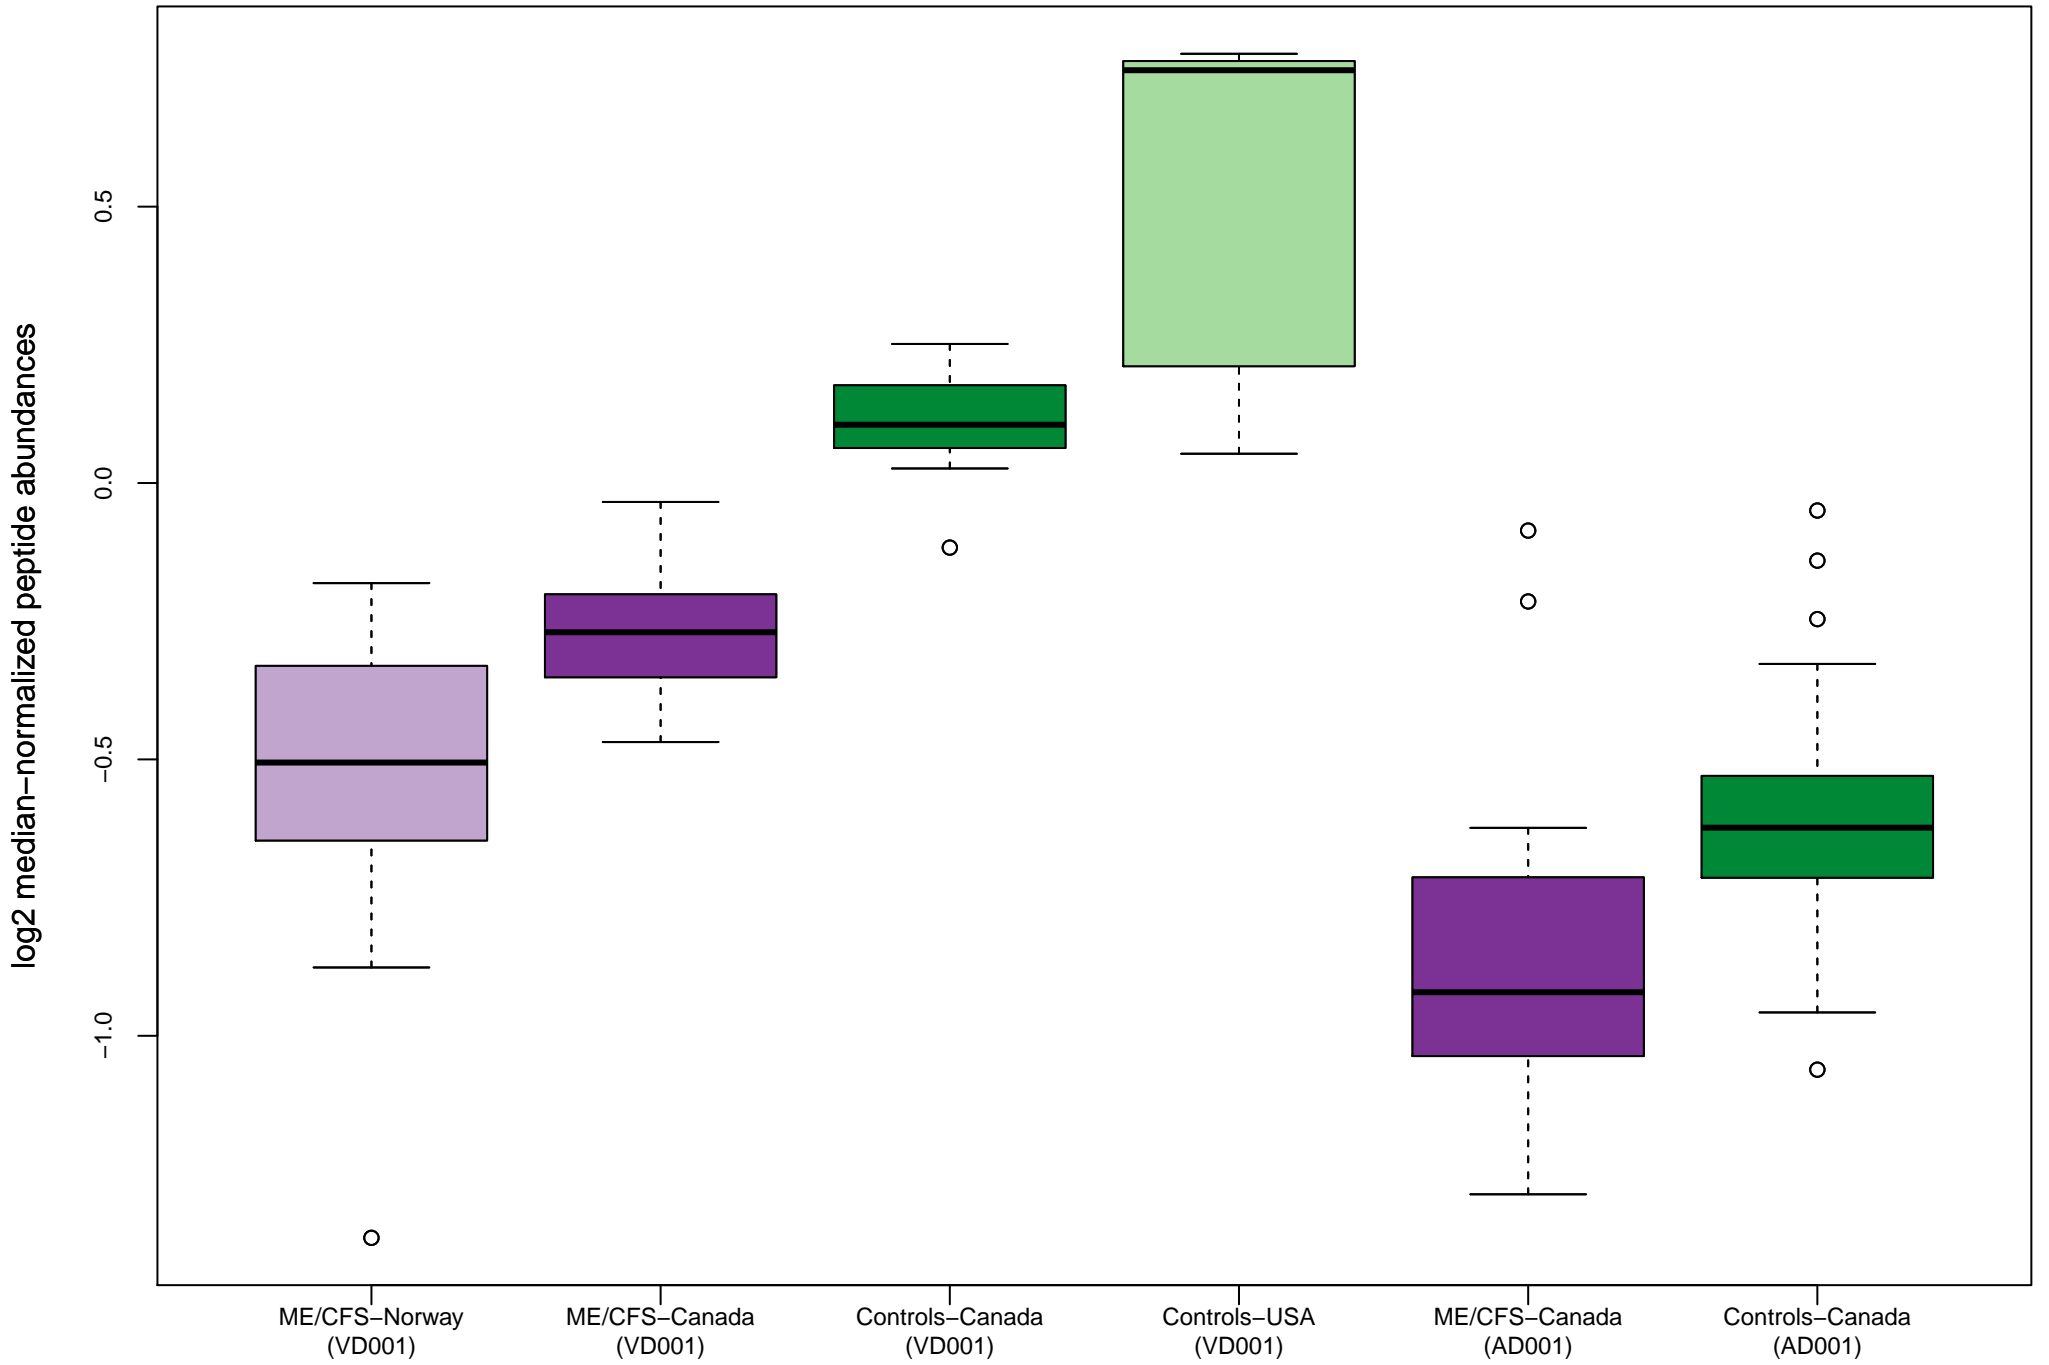

# LNYLRLSGVLSG

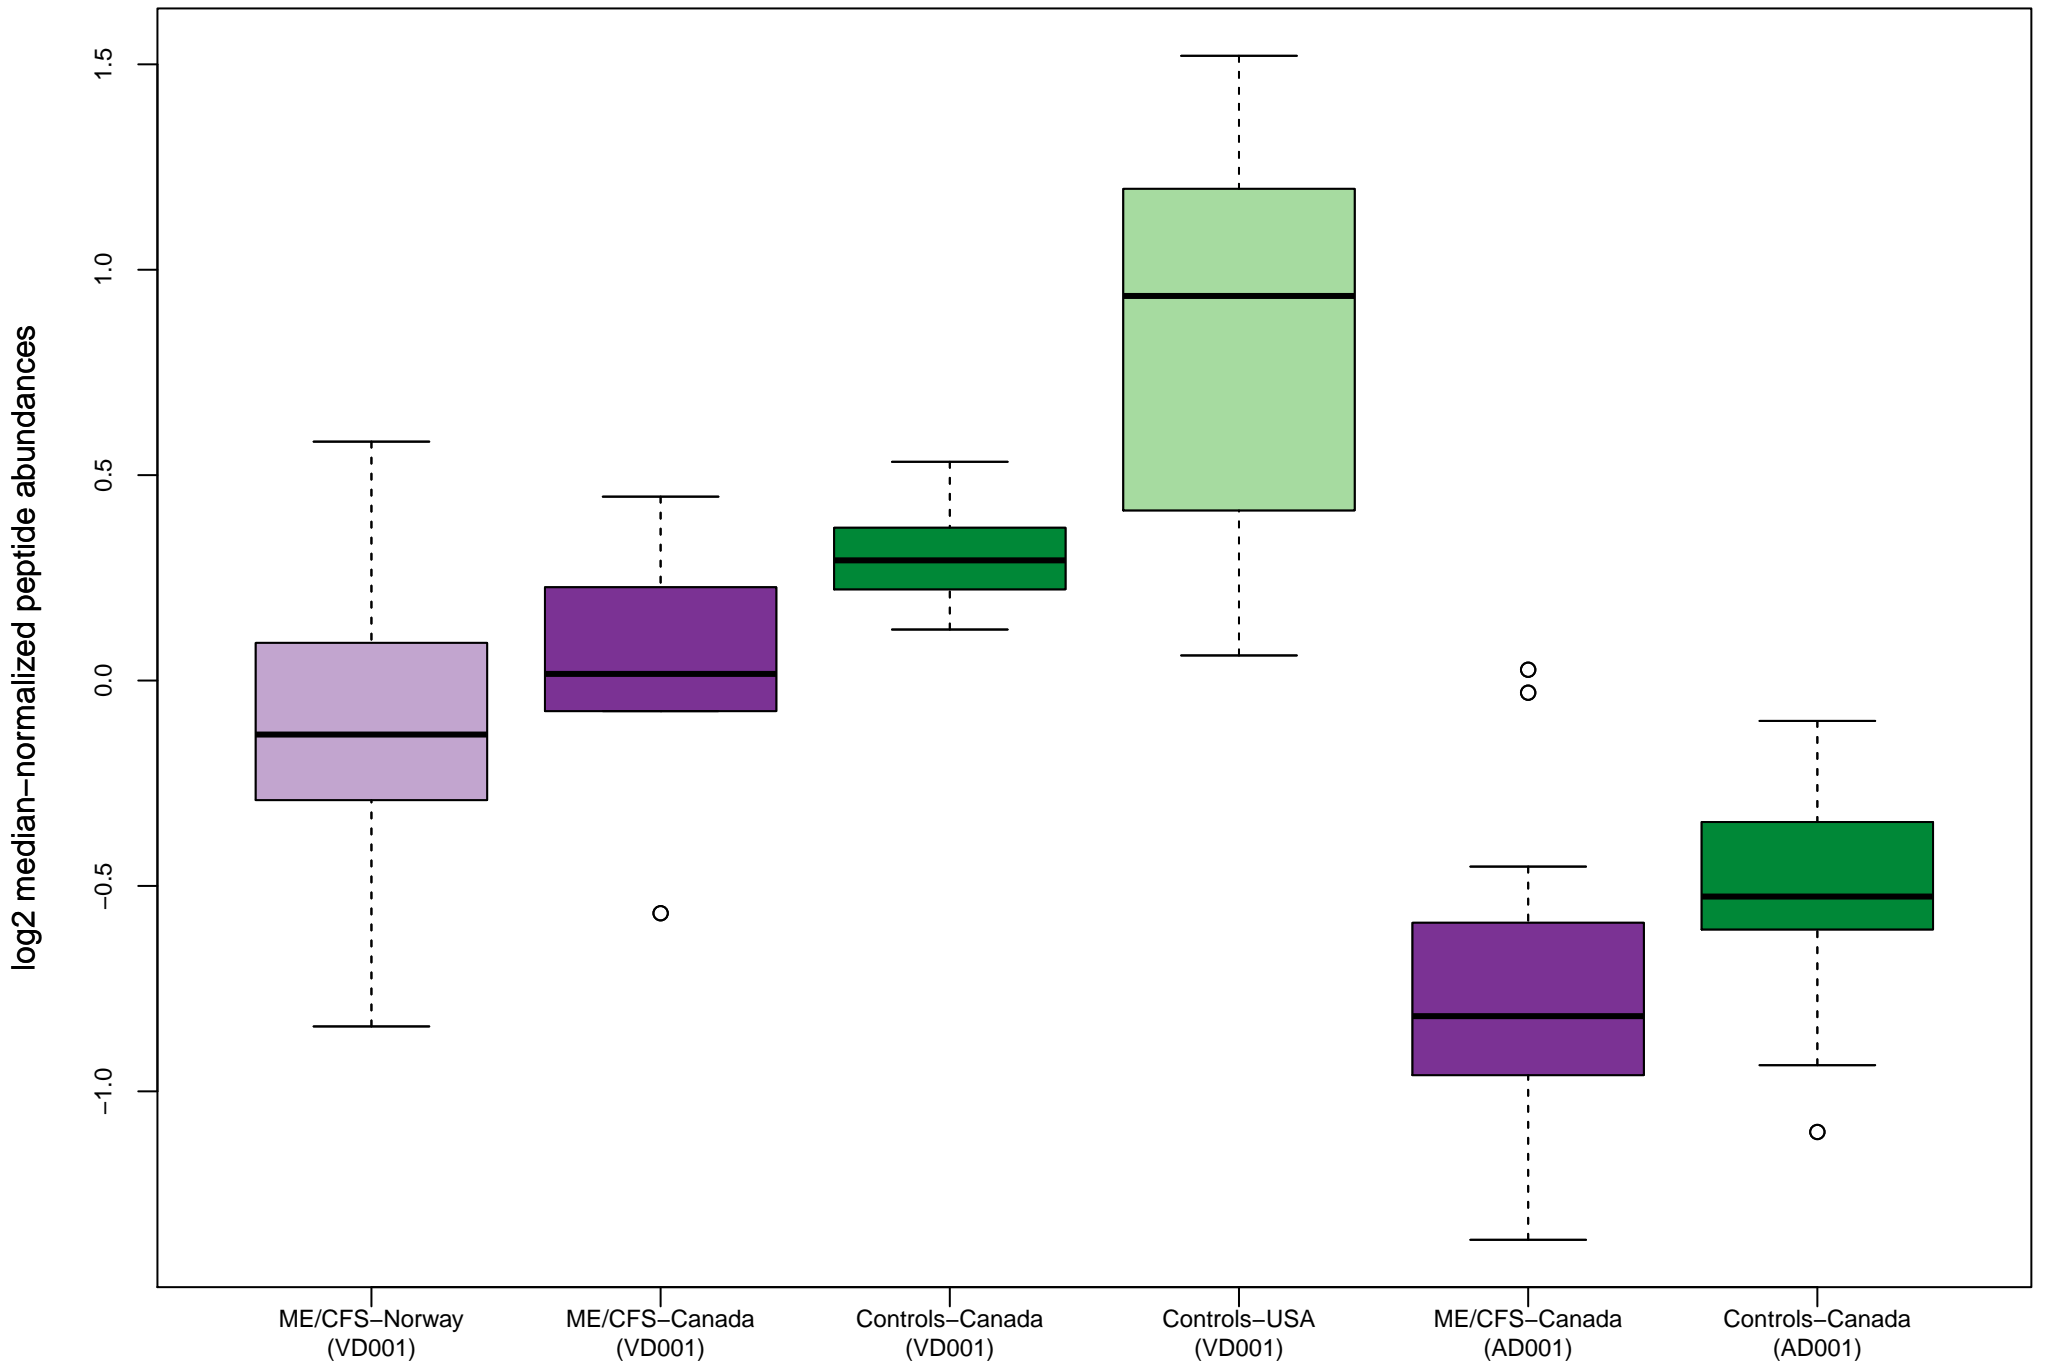

# LQLRLQFAGVLG

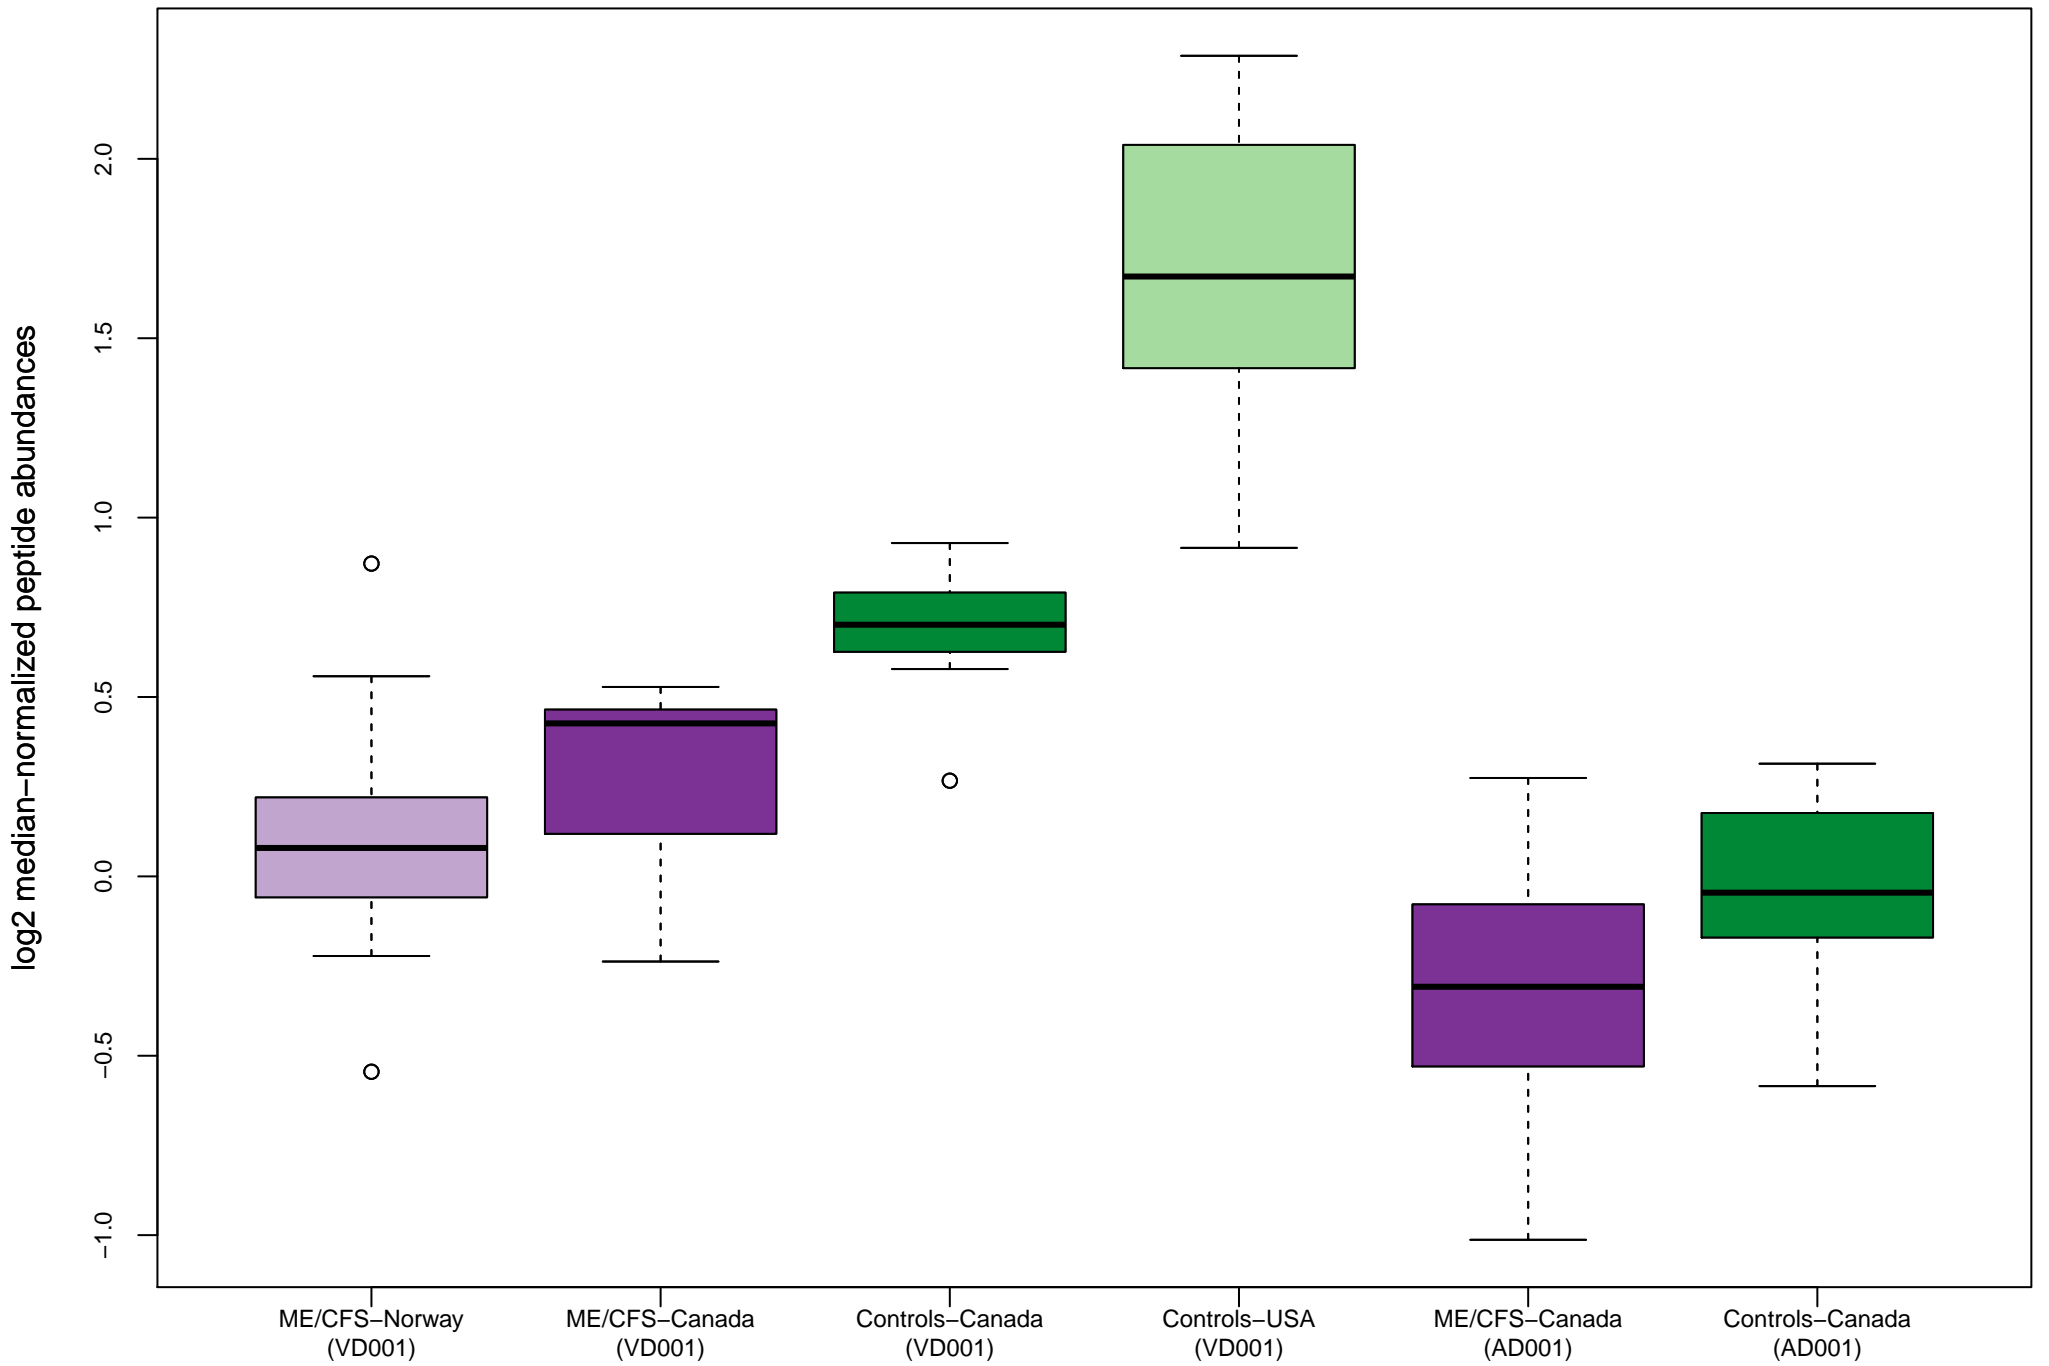

# LQLRVSYWKDVG

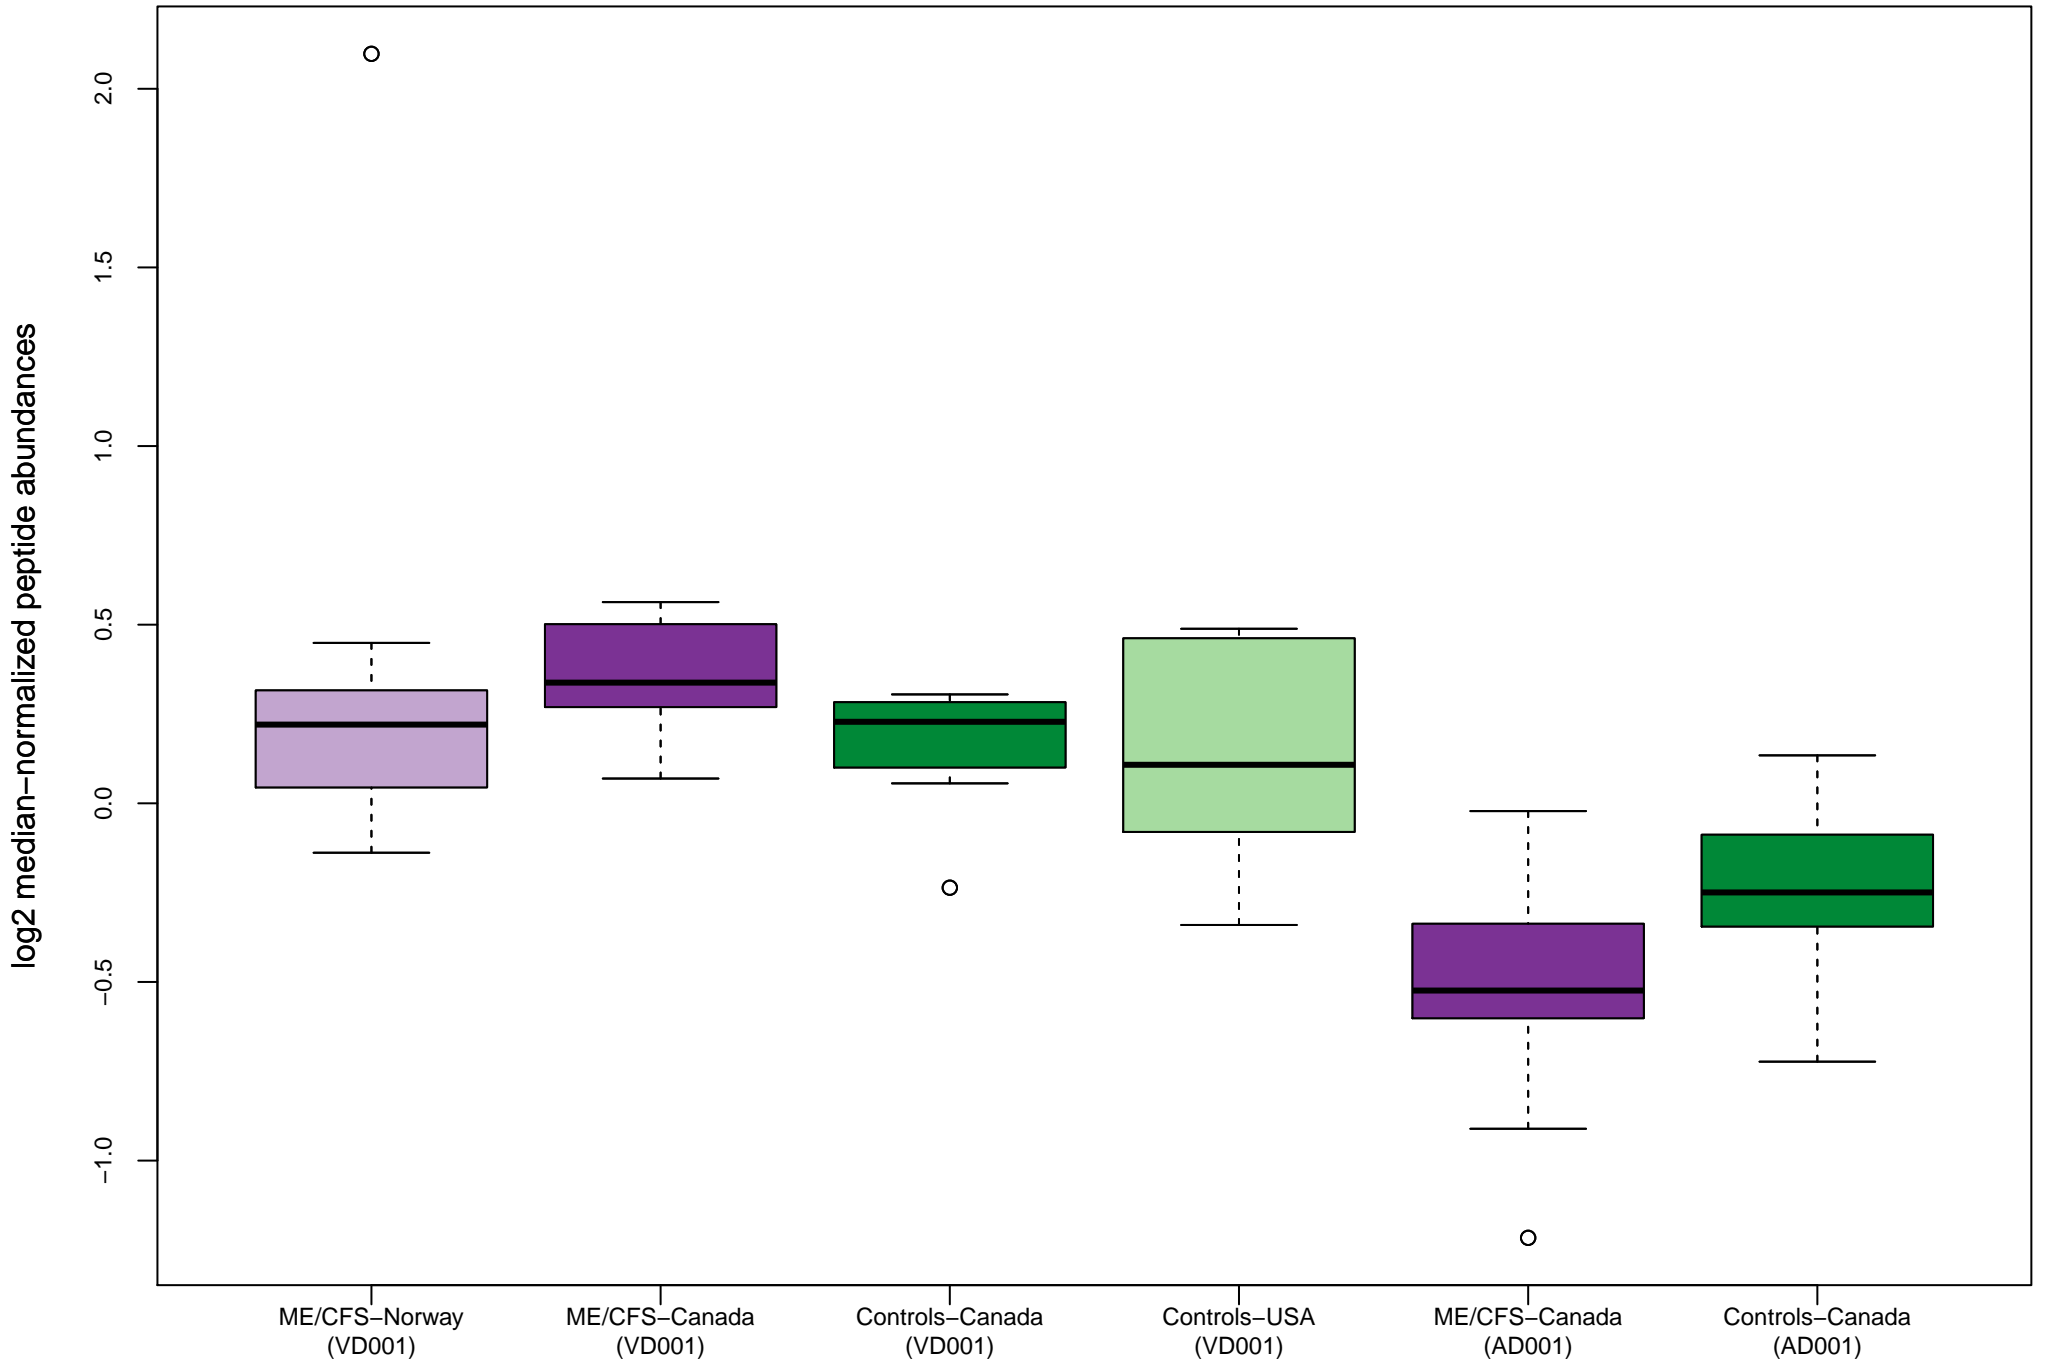

# LQSVRWALSLSG

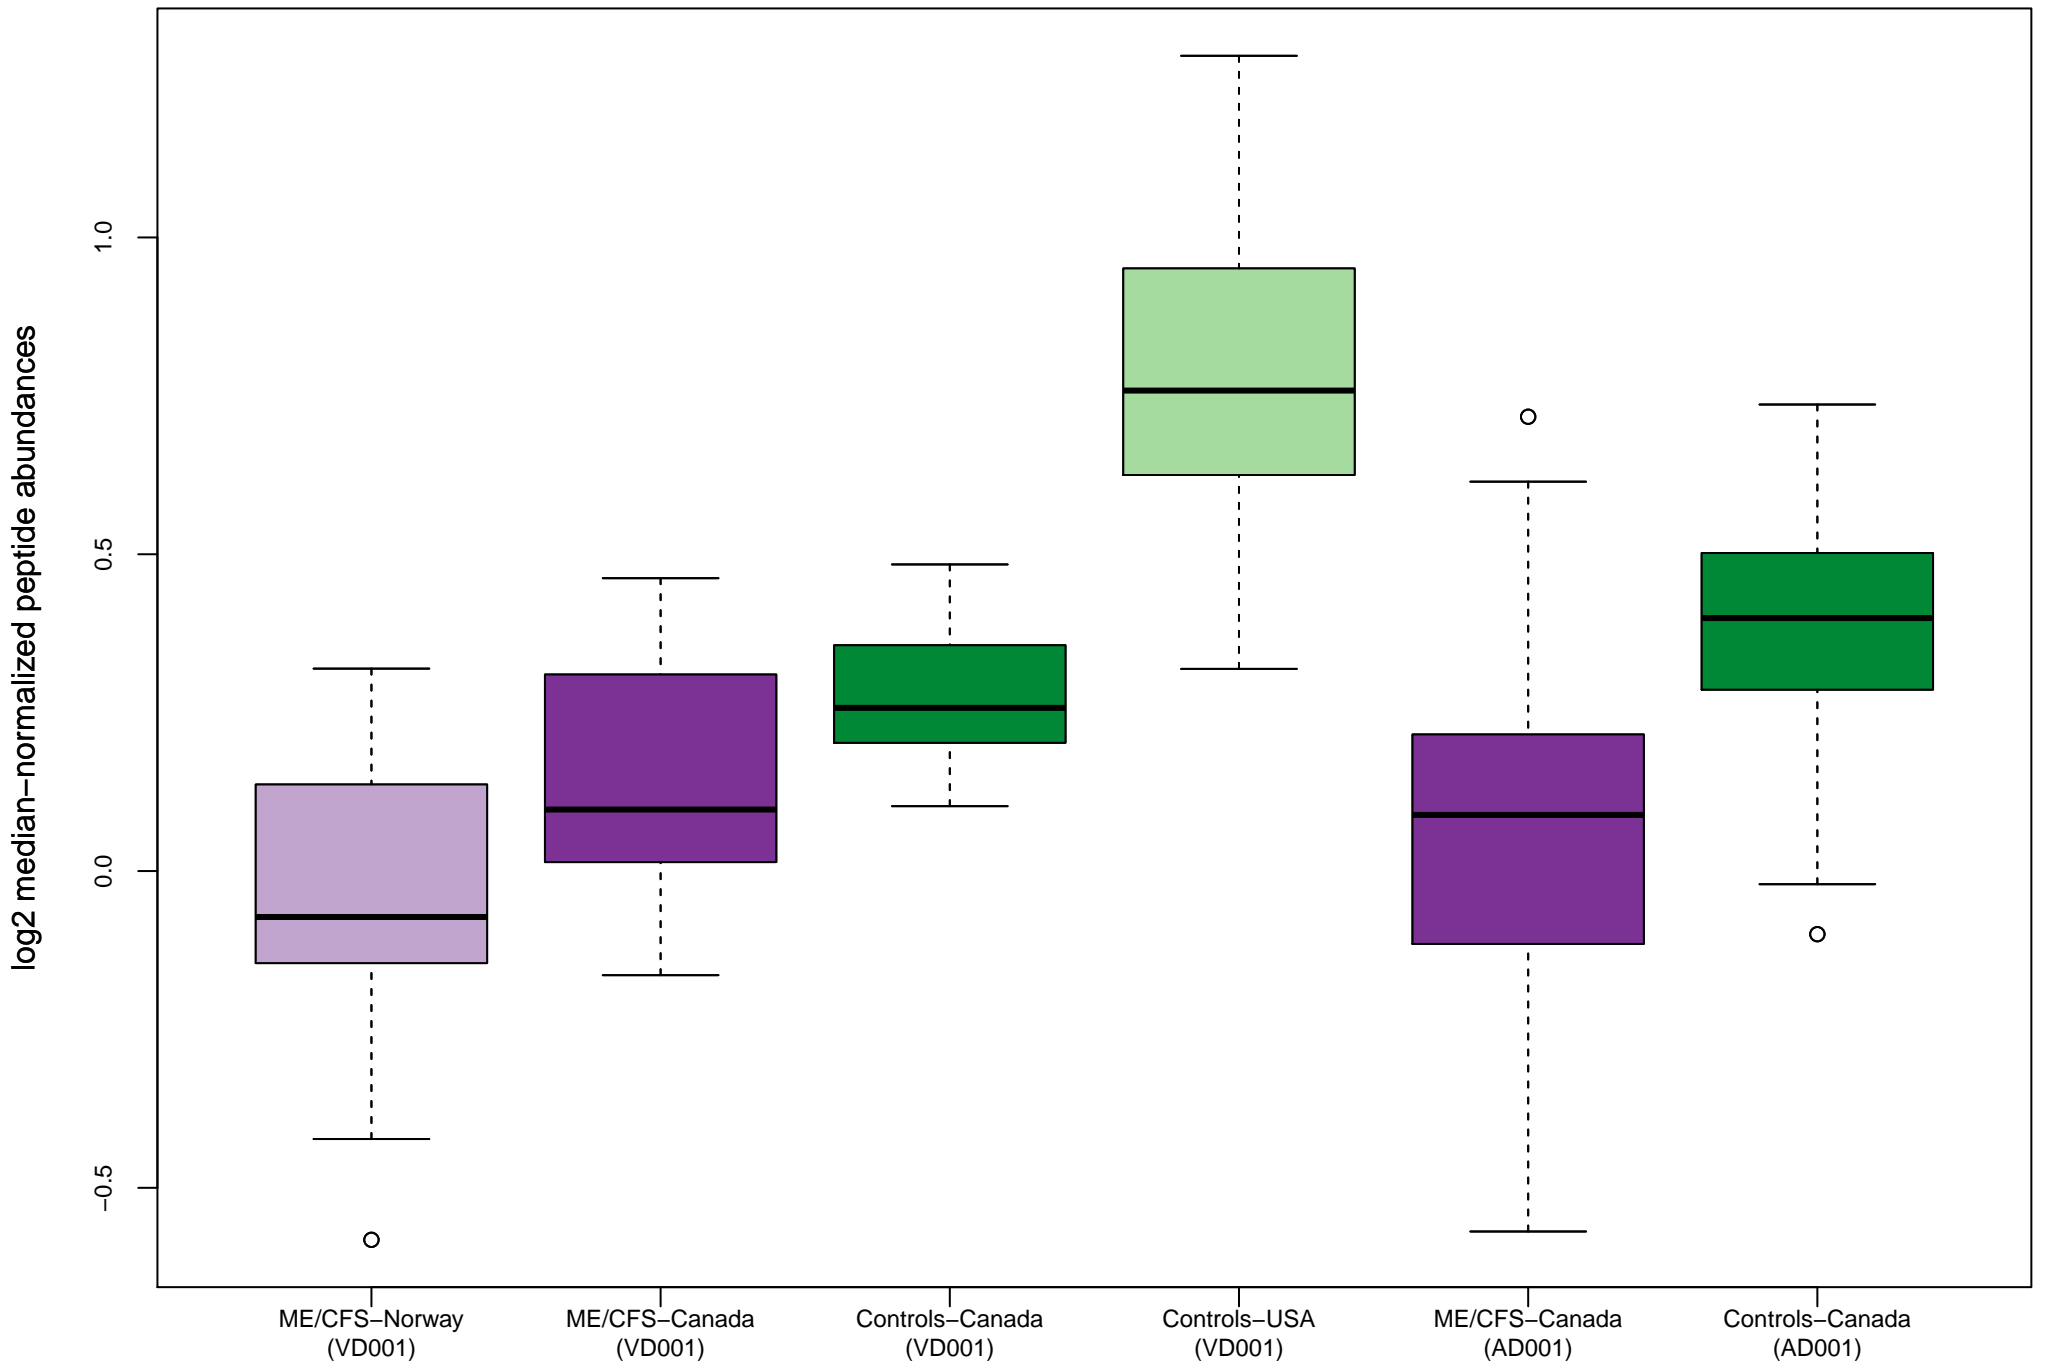

# LQVHLRVALVAG

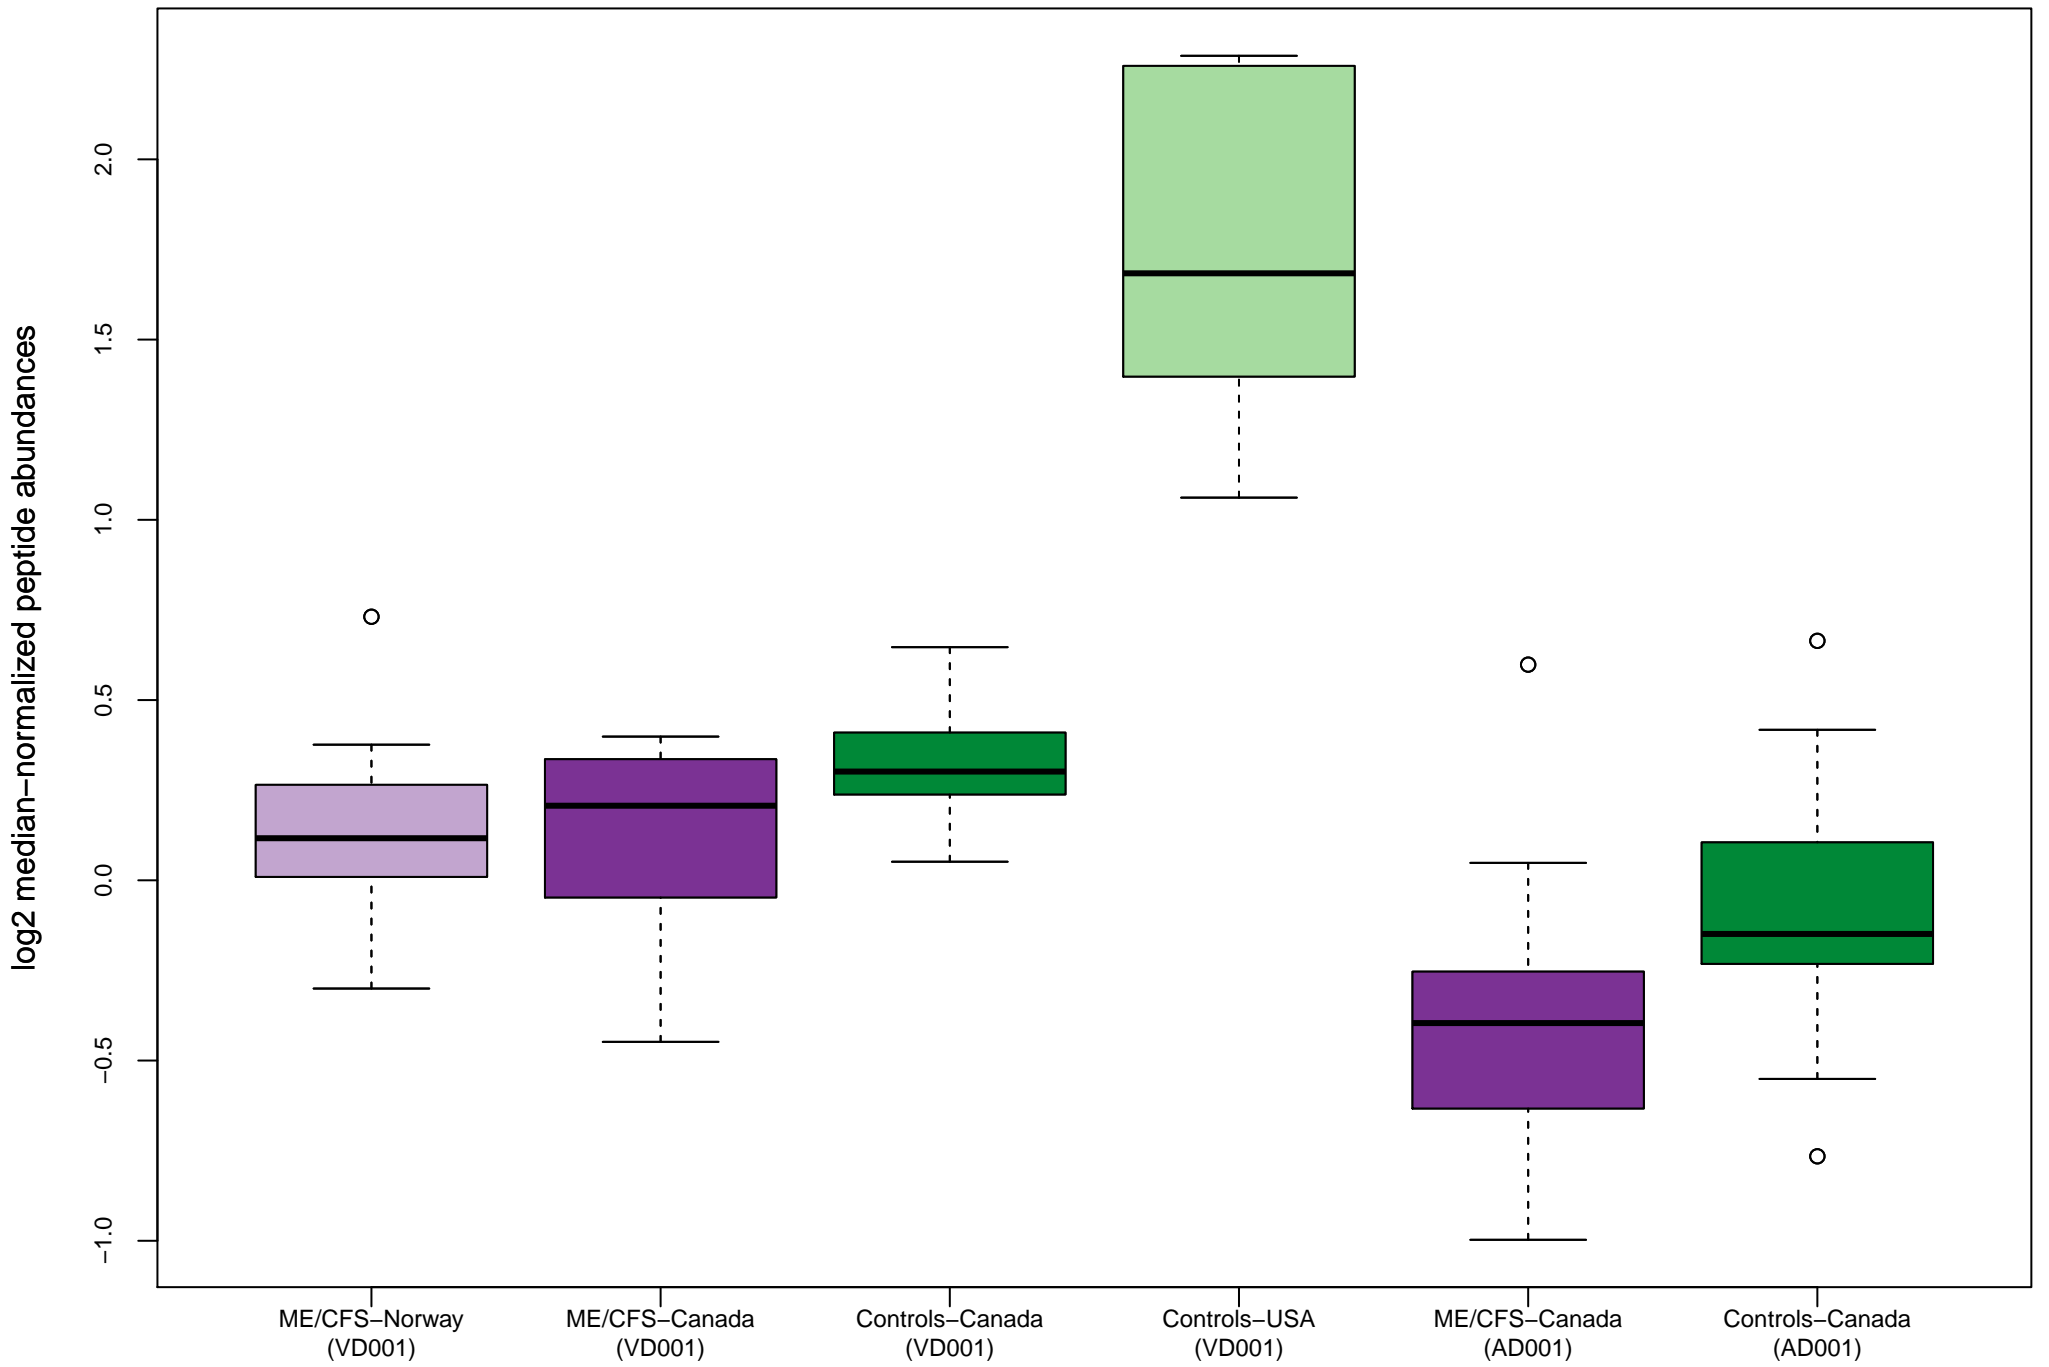

# LQWSRVVASVAS

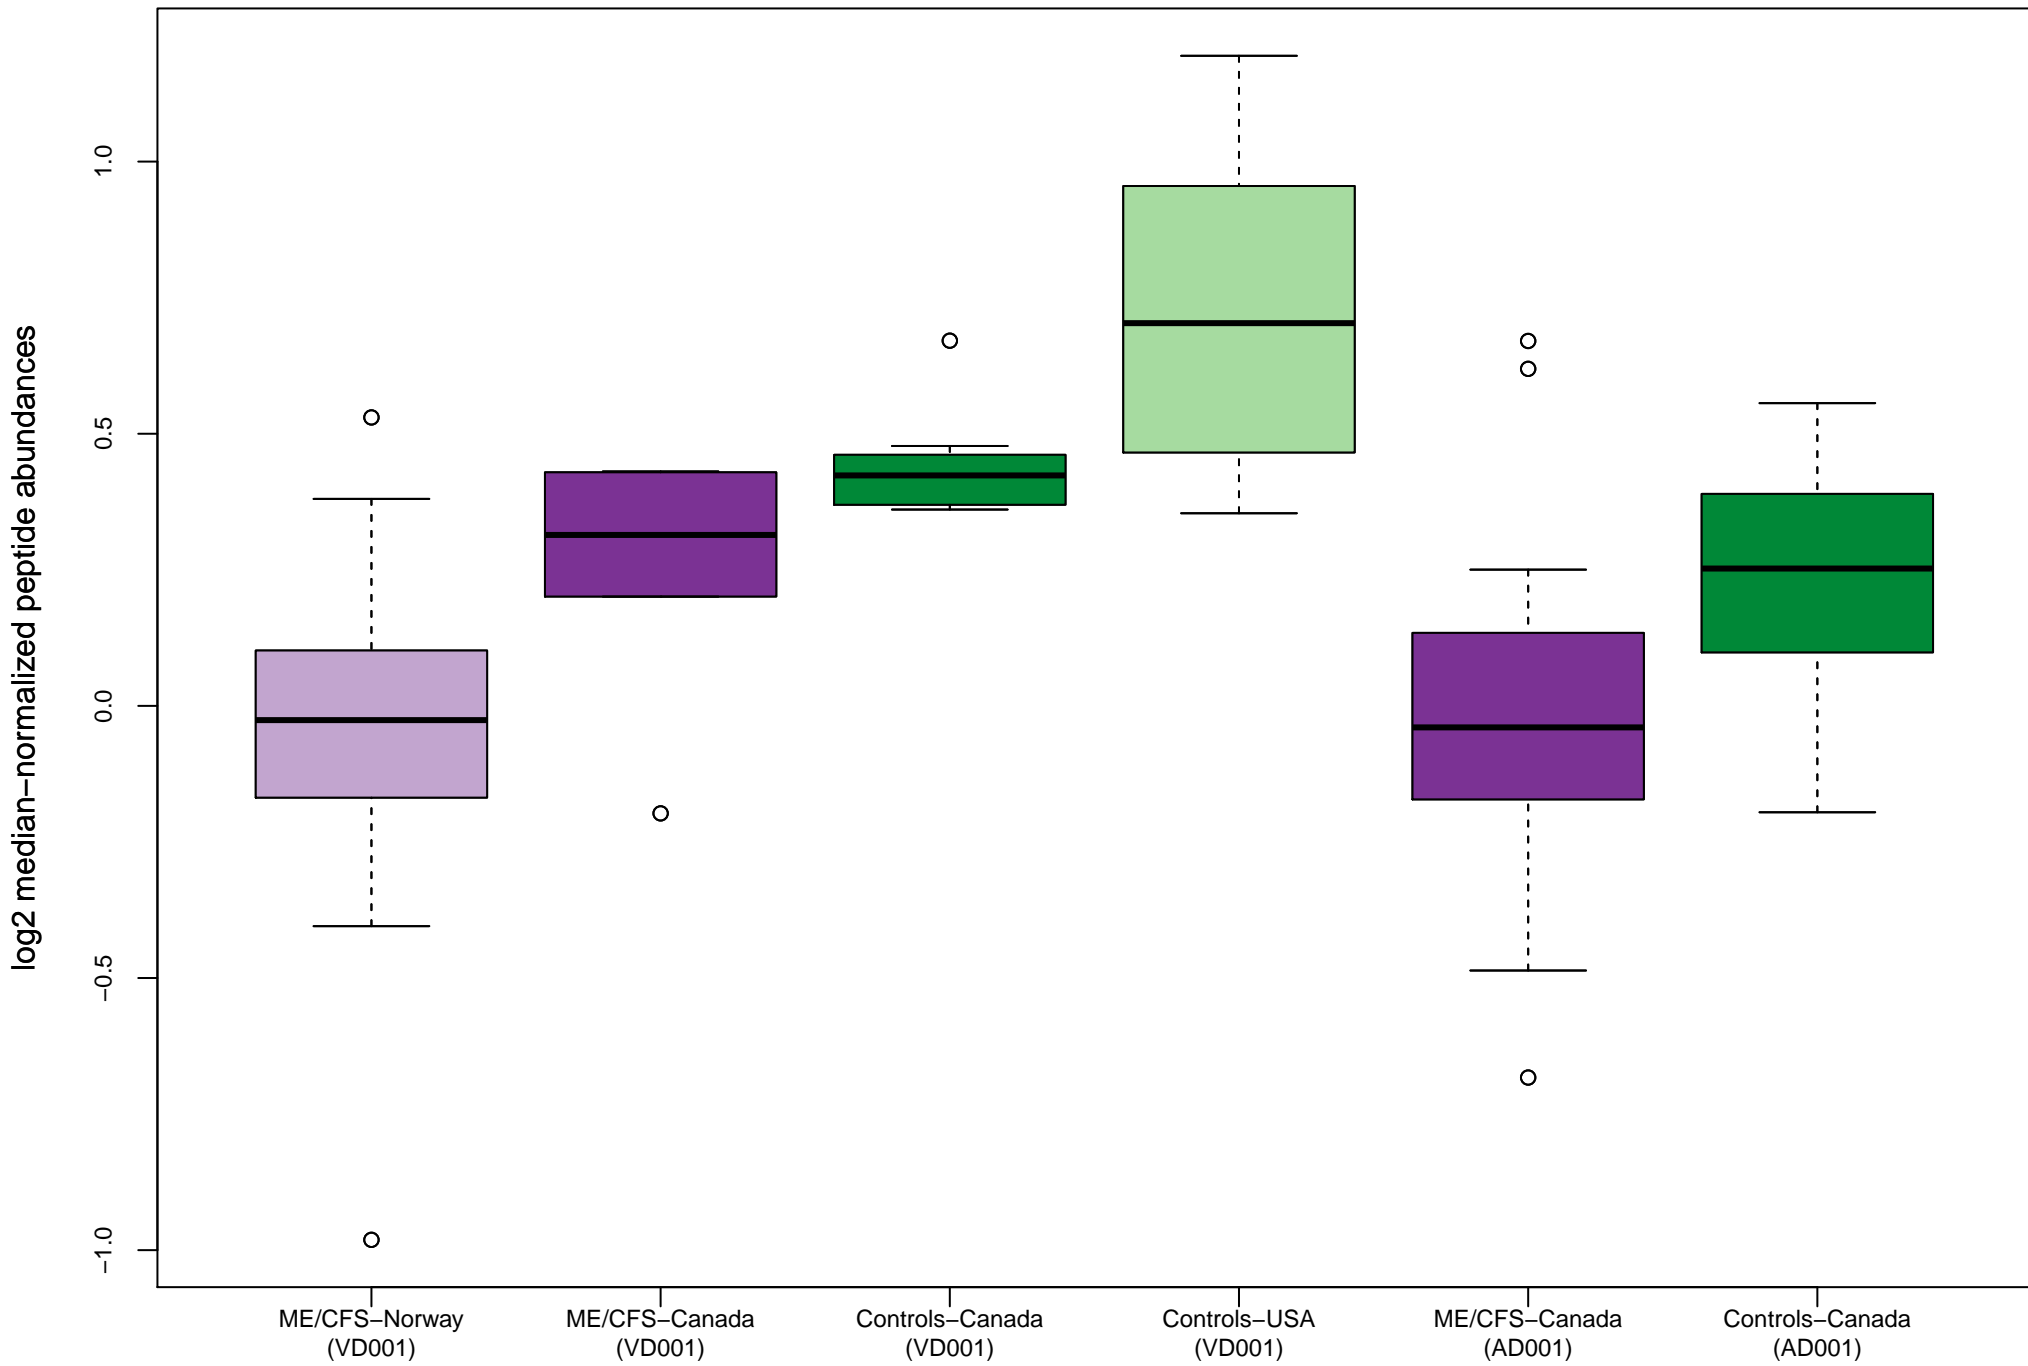

# LRAFYQRYWVLS

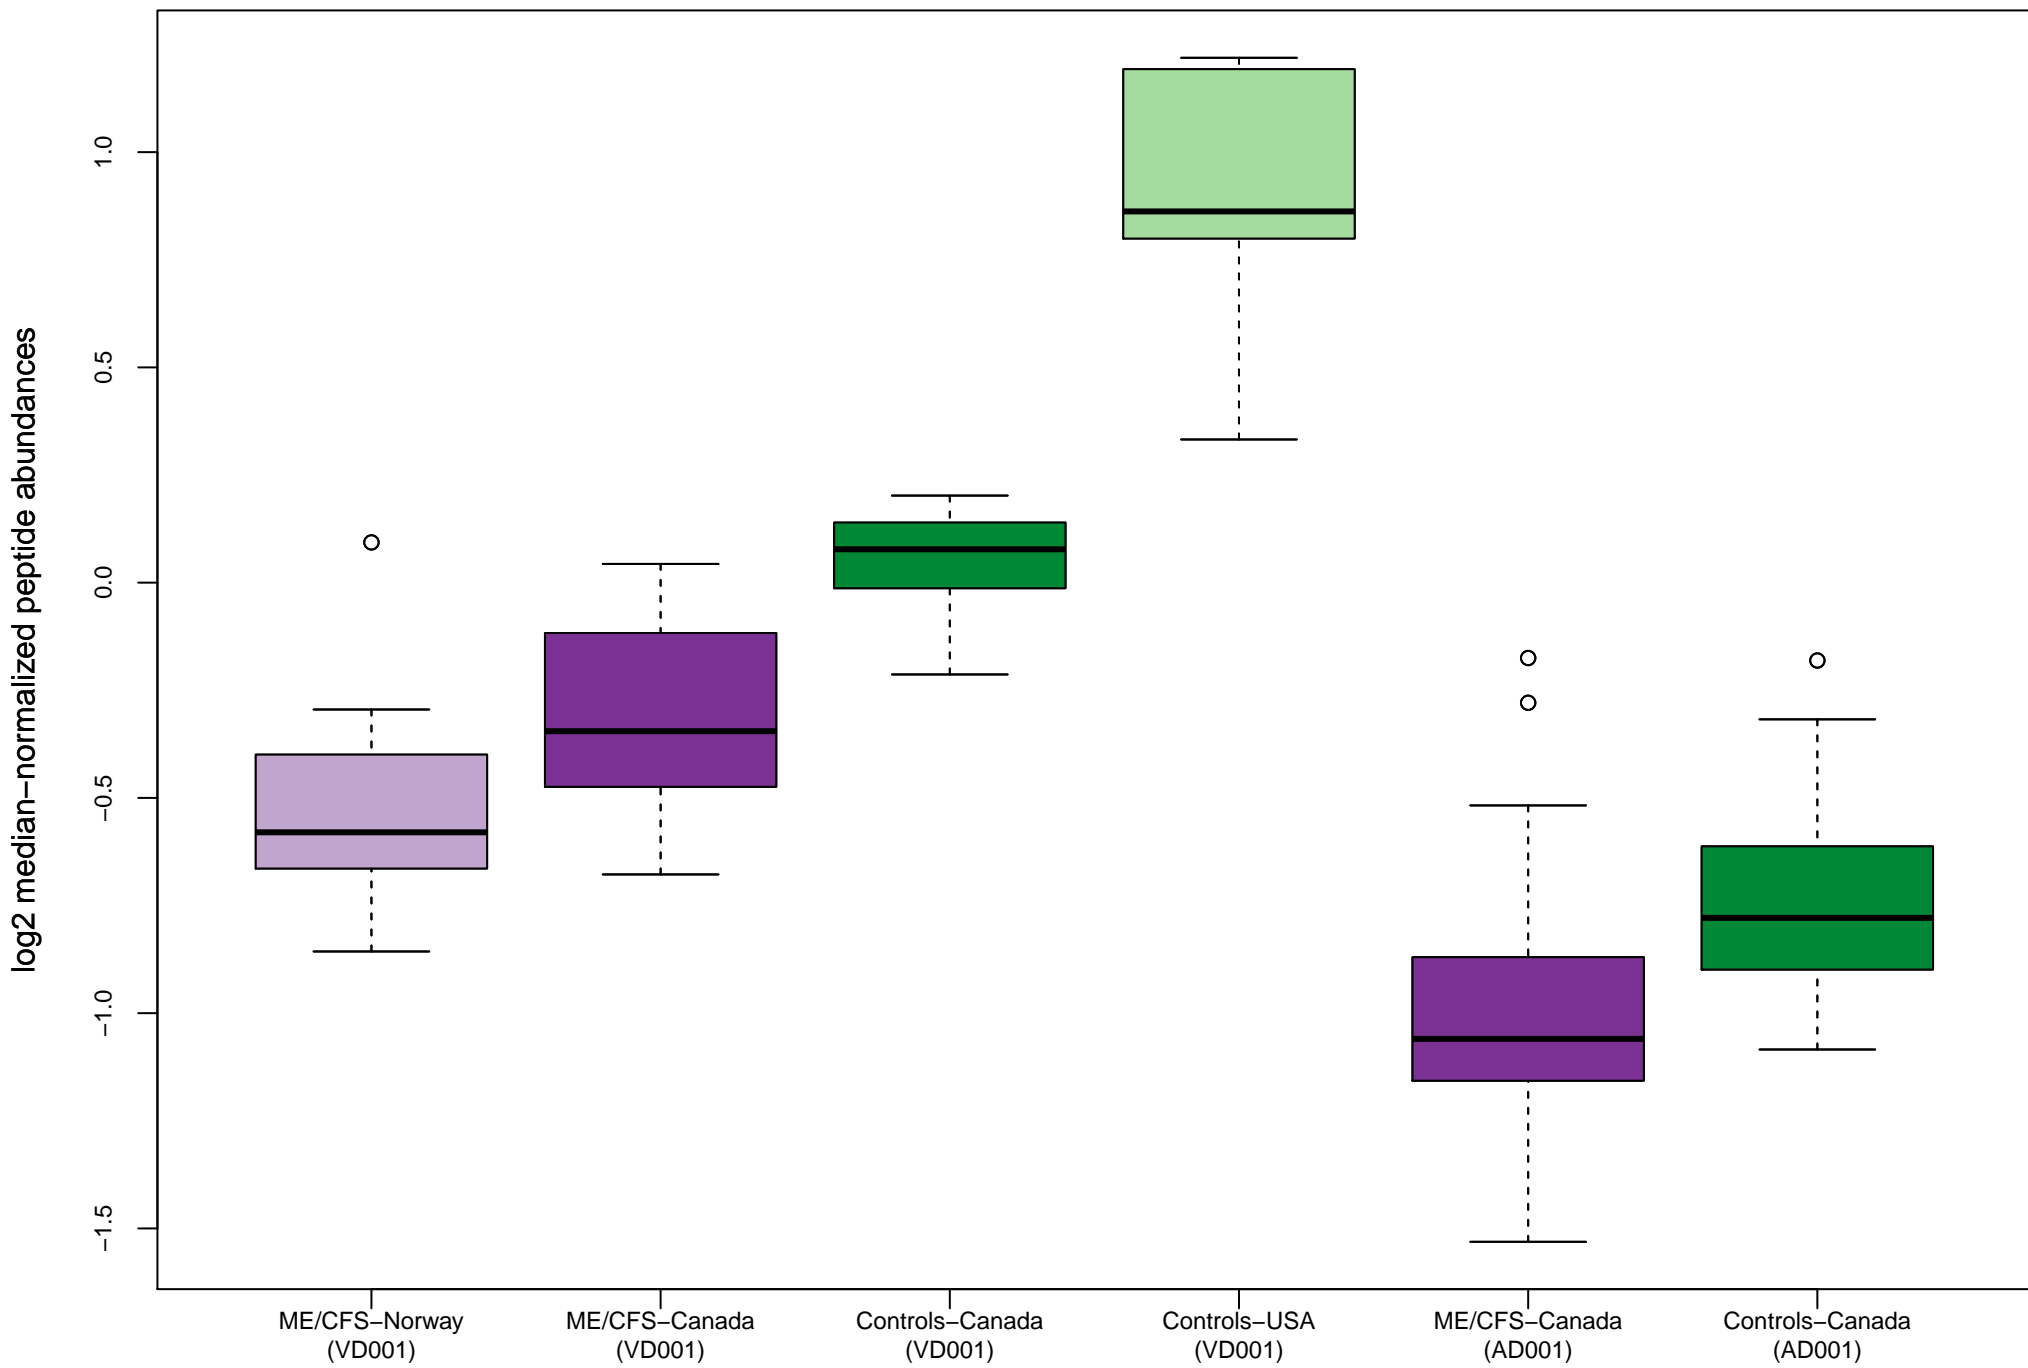



# LRAGYALWKLVL

log2 median-normalized peptide abundances

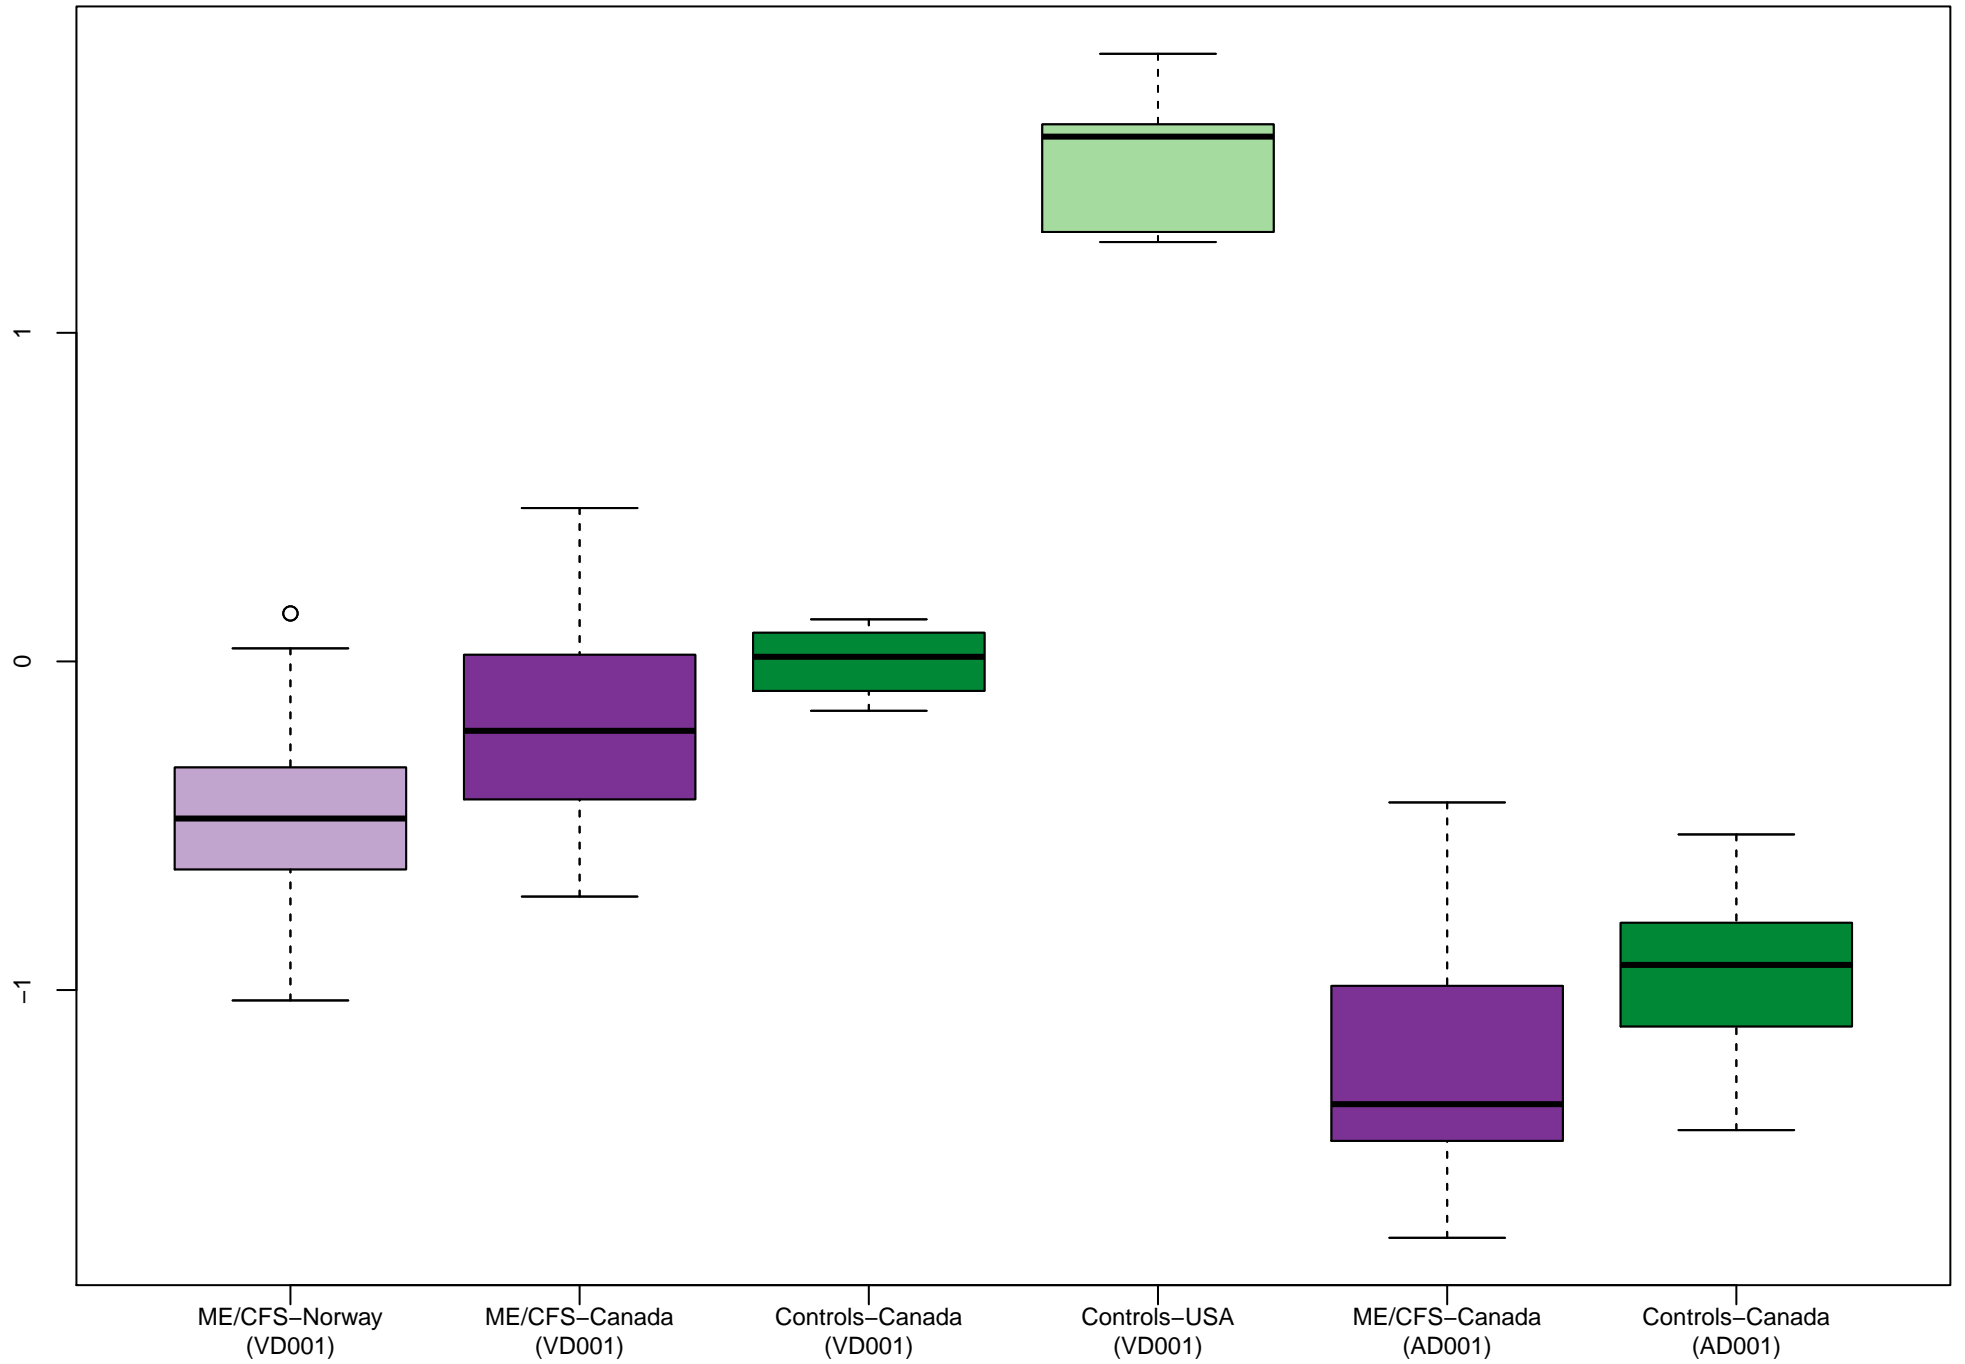

# LRFGFKVASVAS

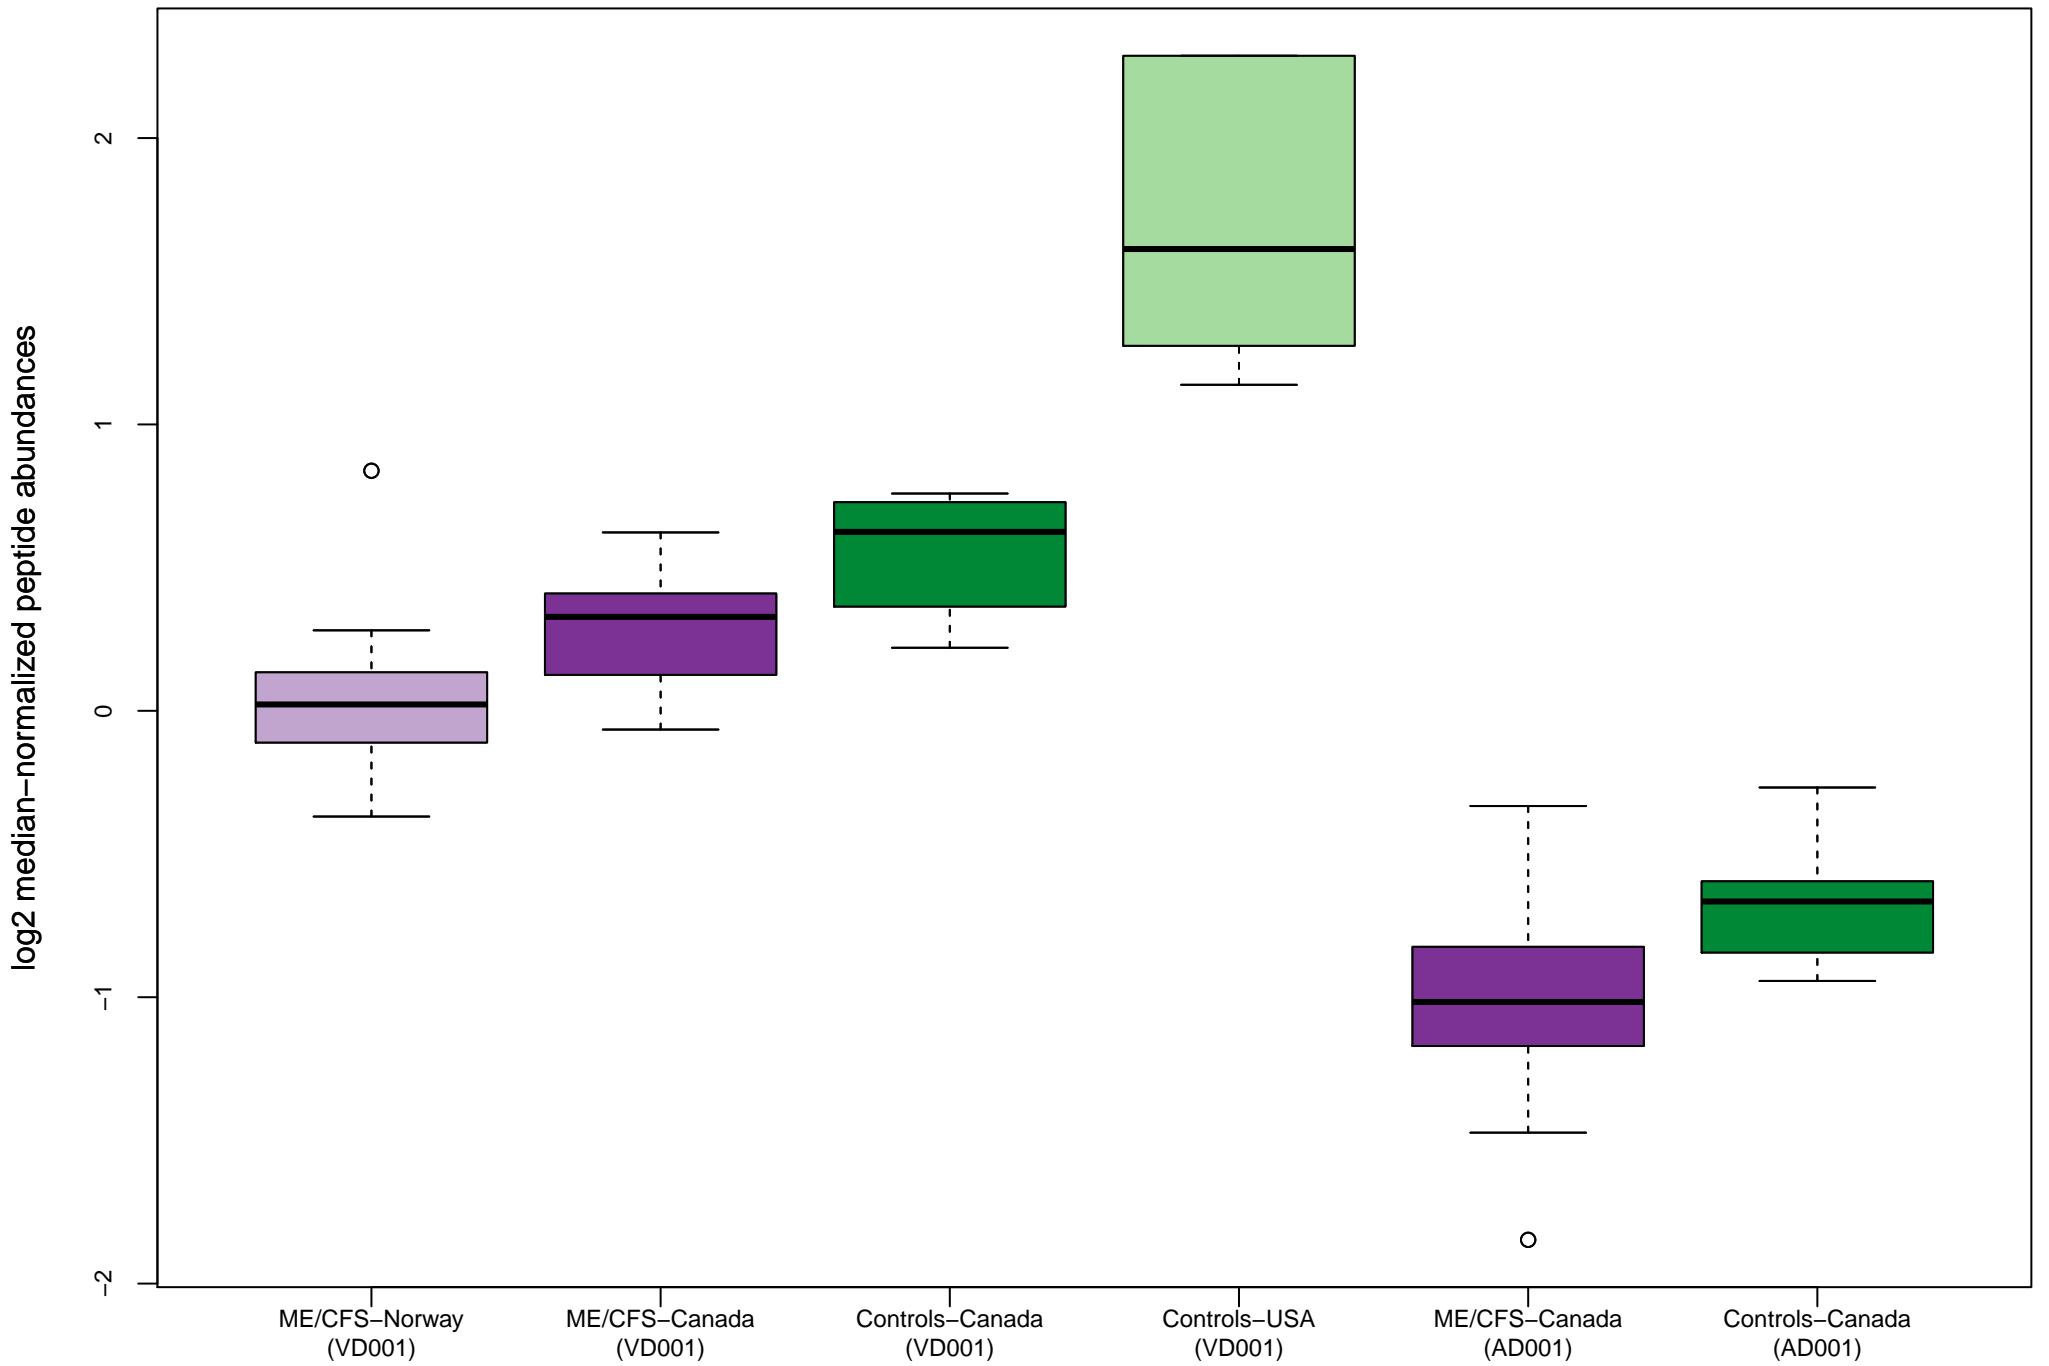

# LRFGWVASGVAL

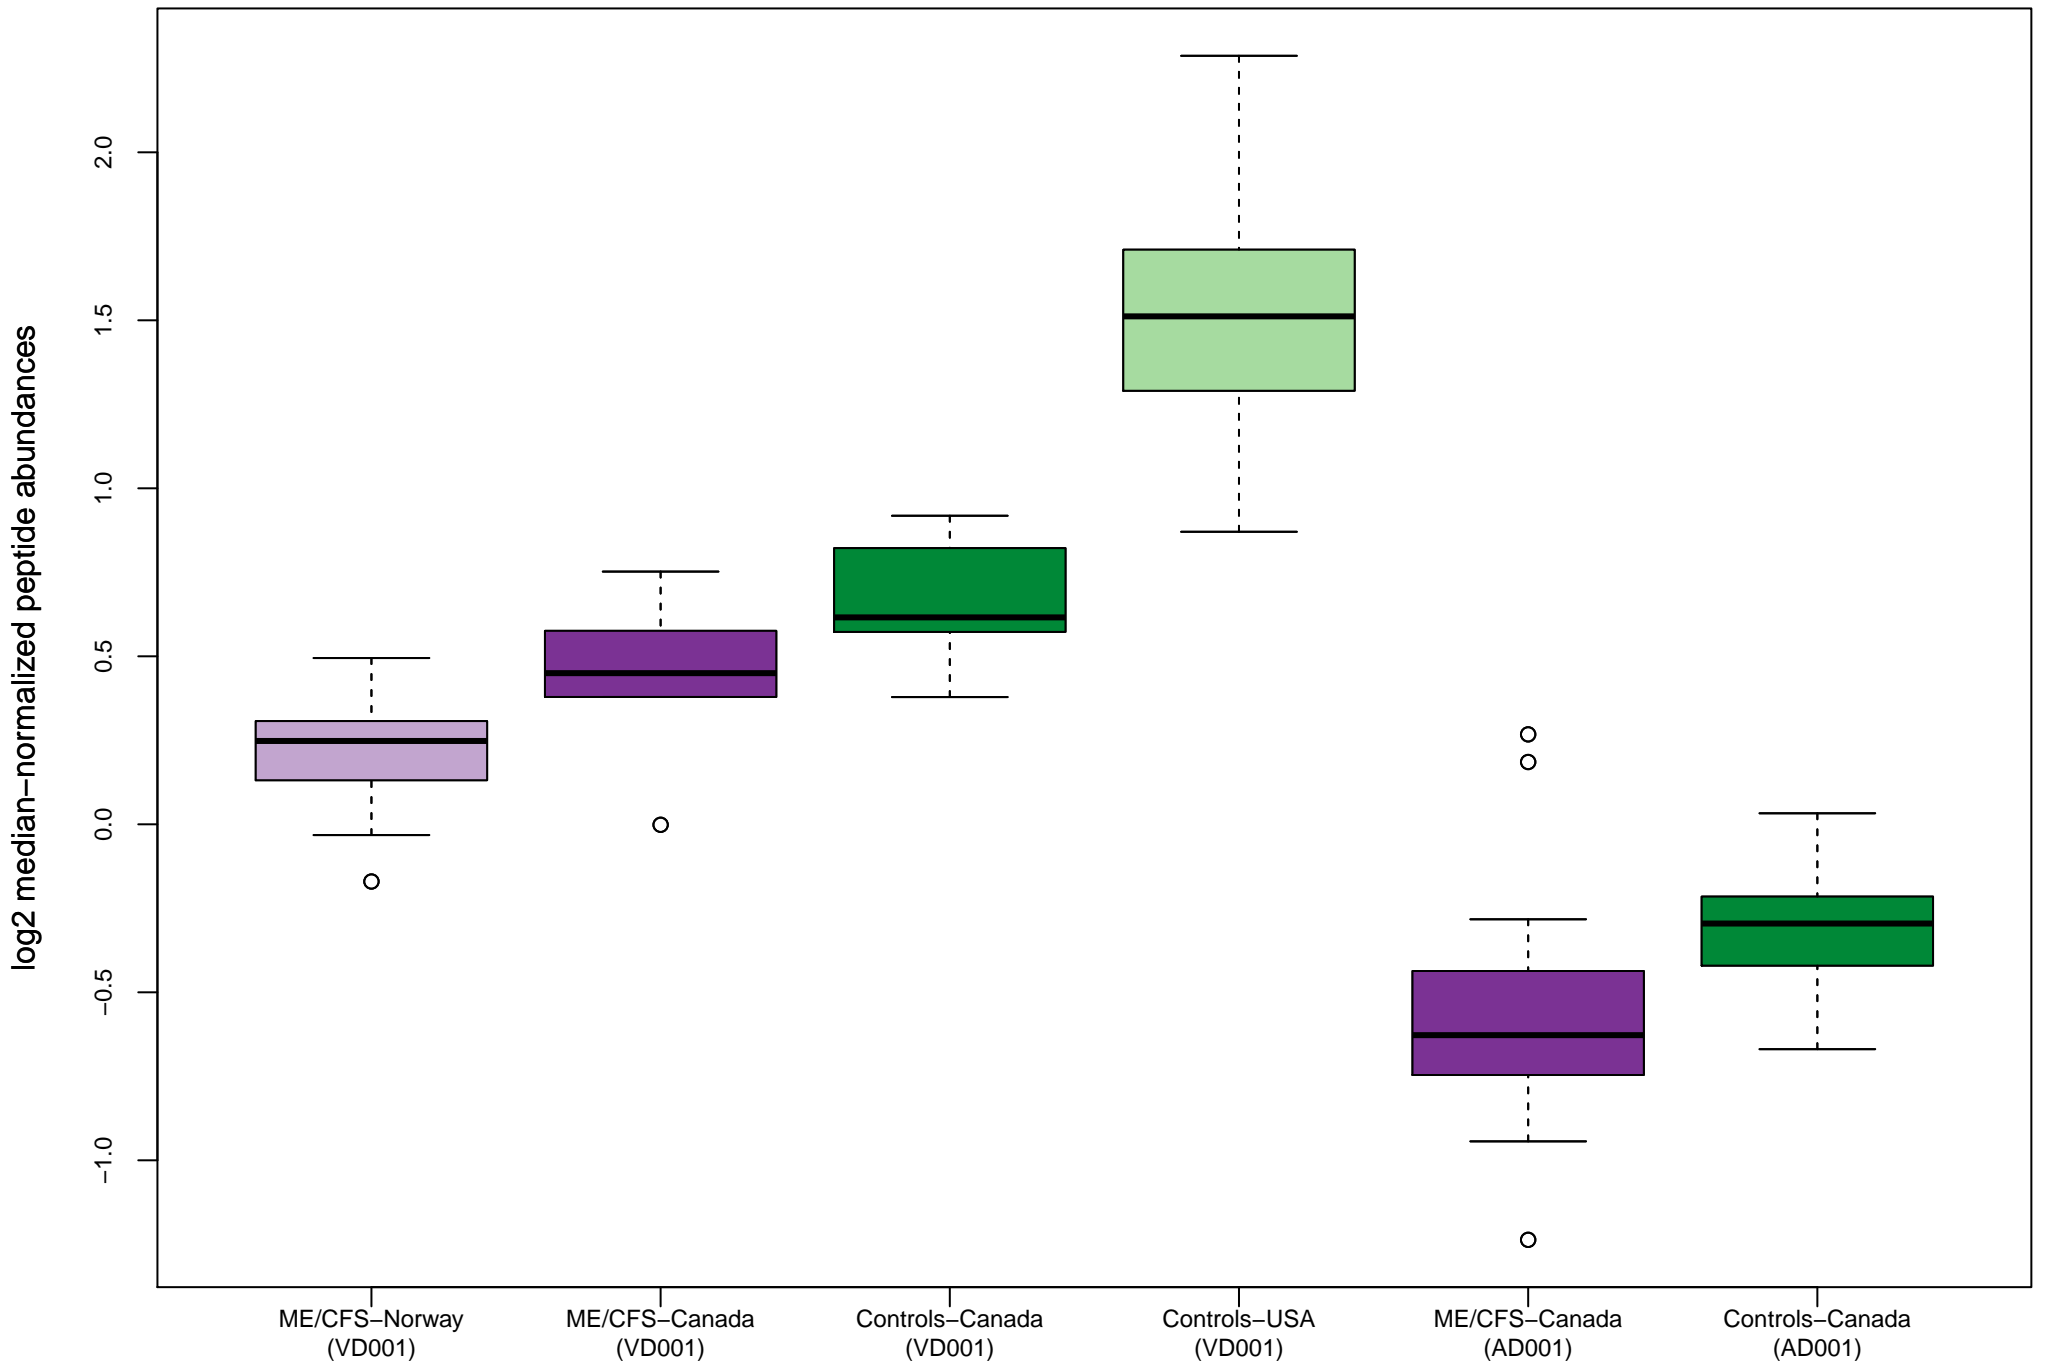

# LRFKYVALSGSG

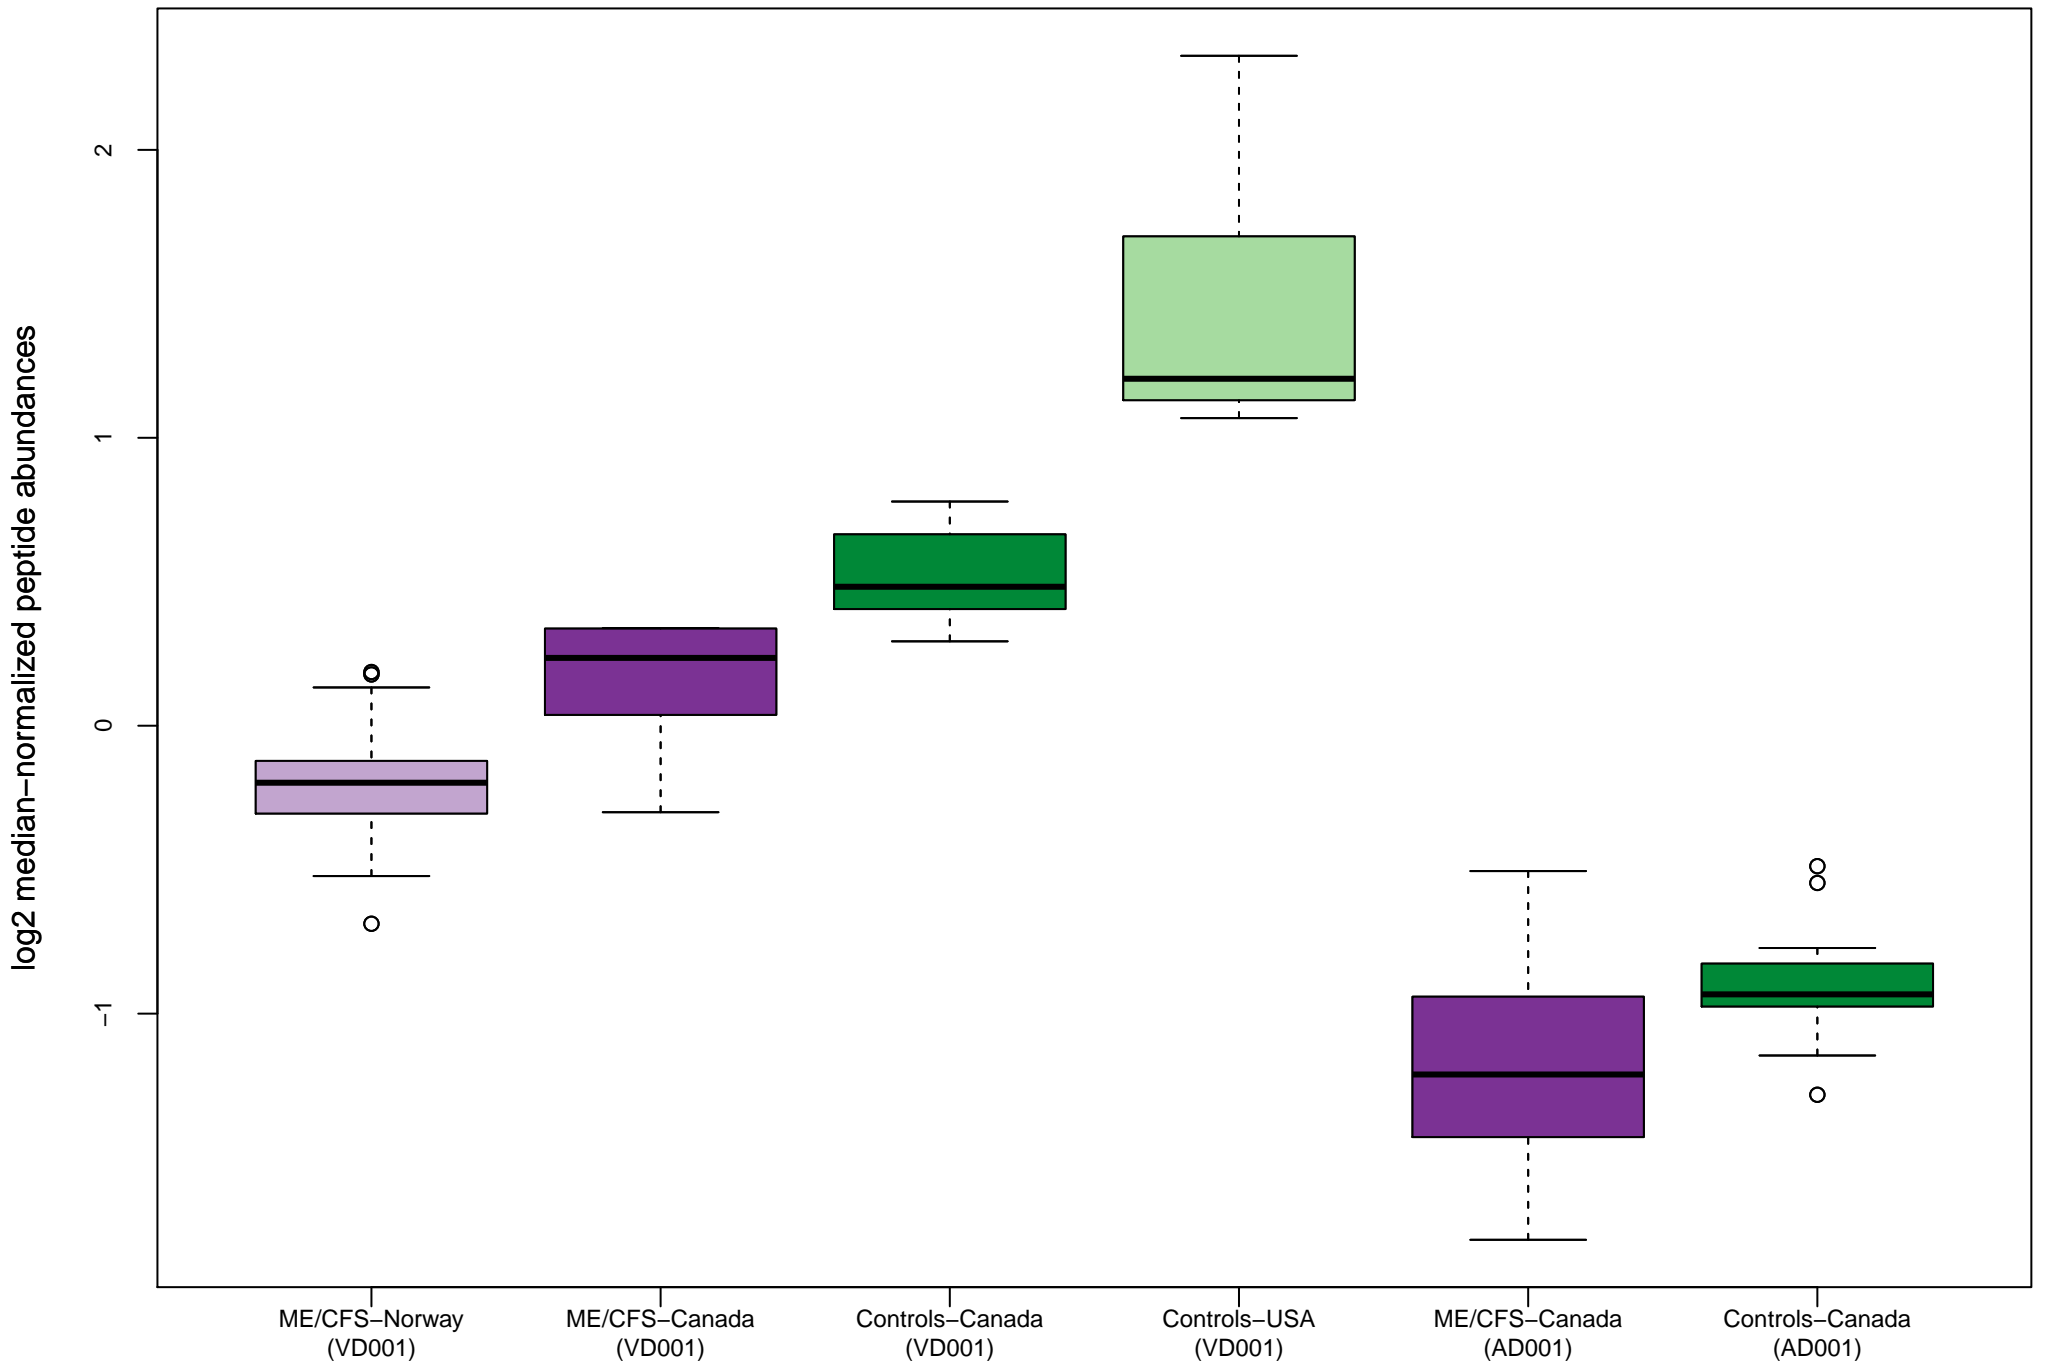

# LRFPFPLGALSG

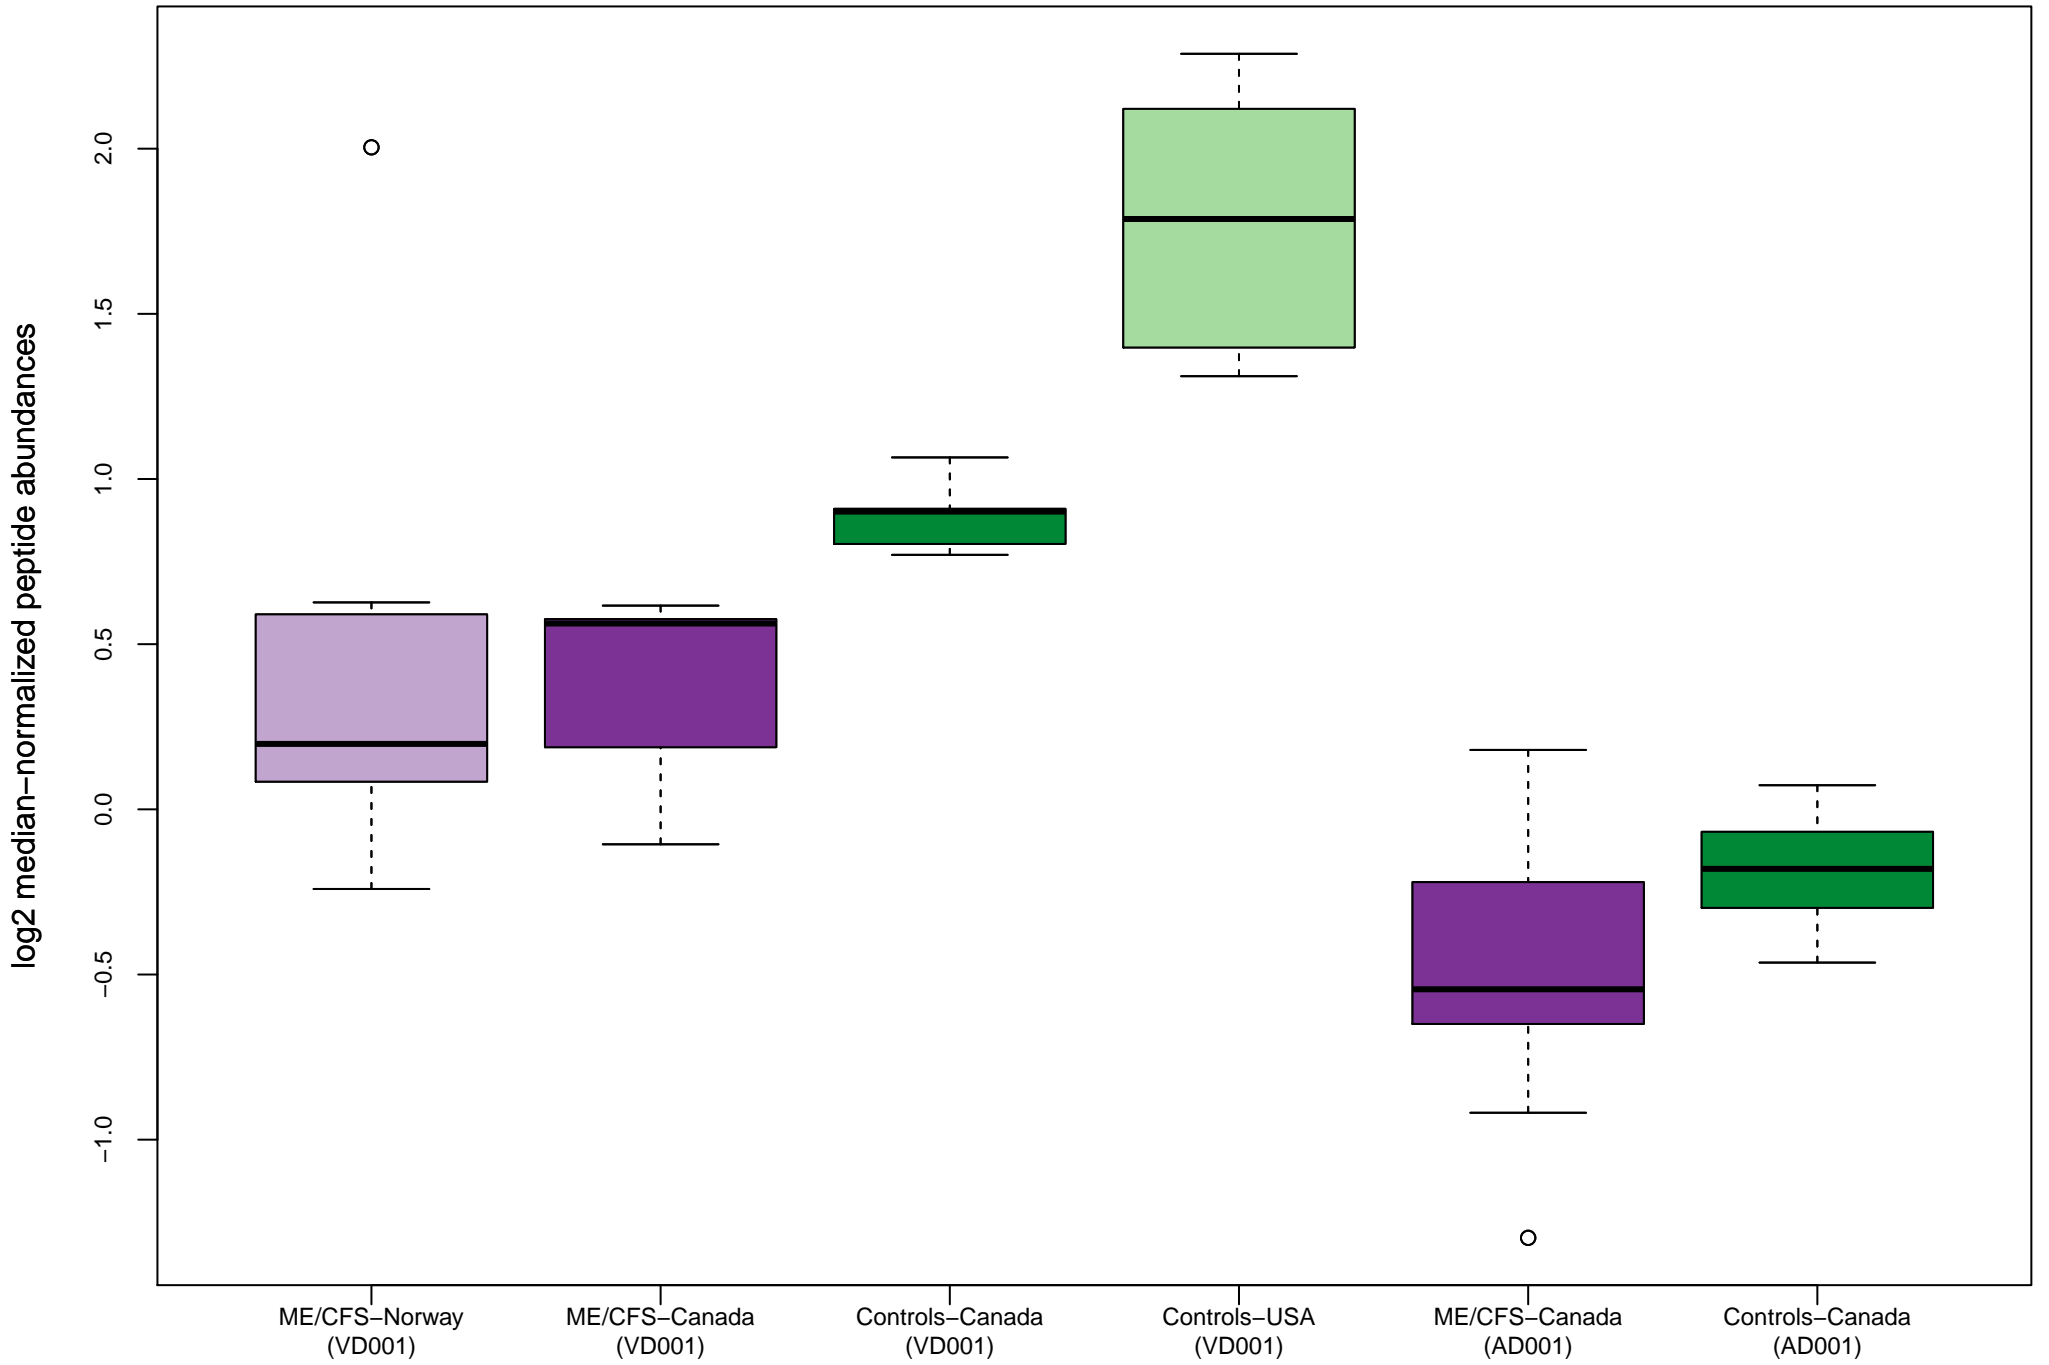

# LRLFAPWVASAG

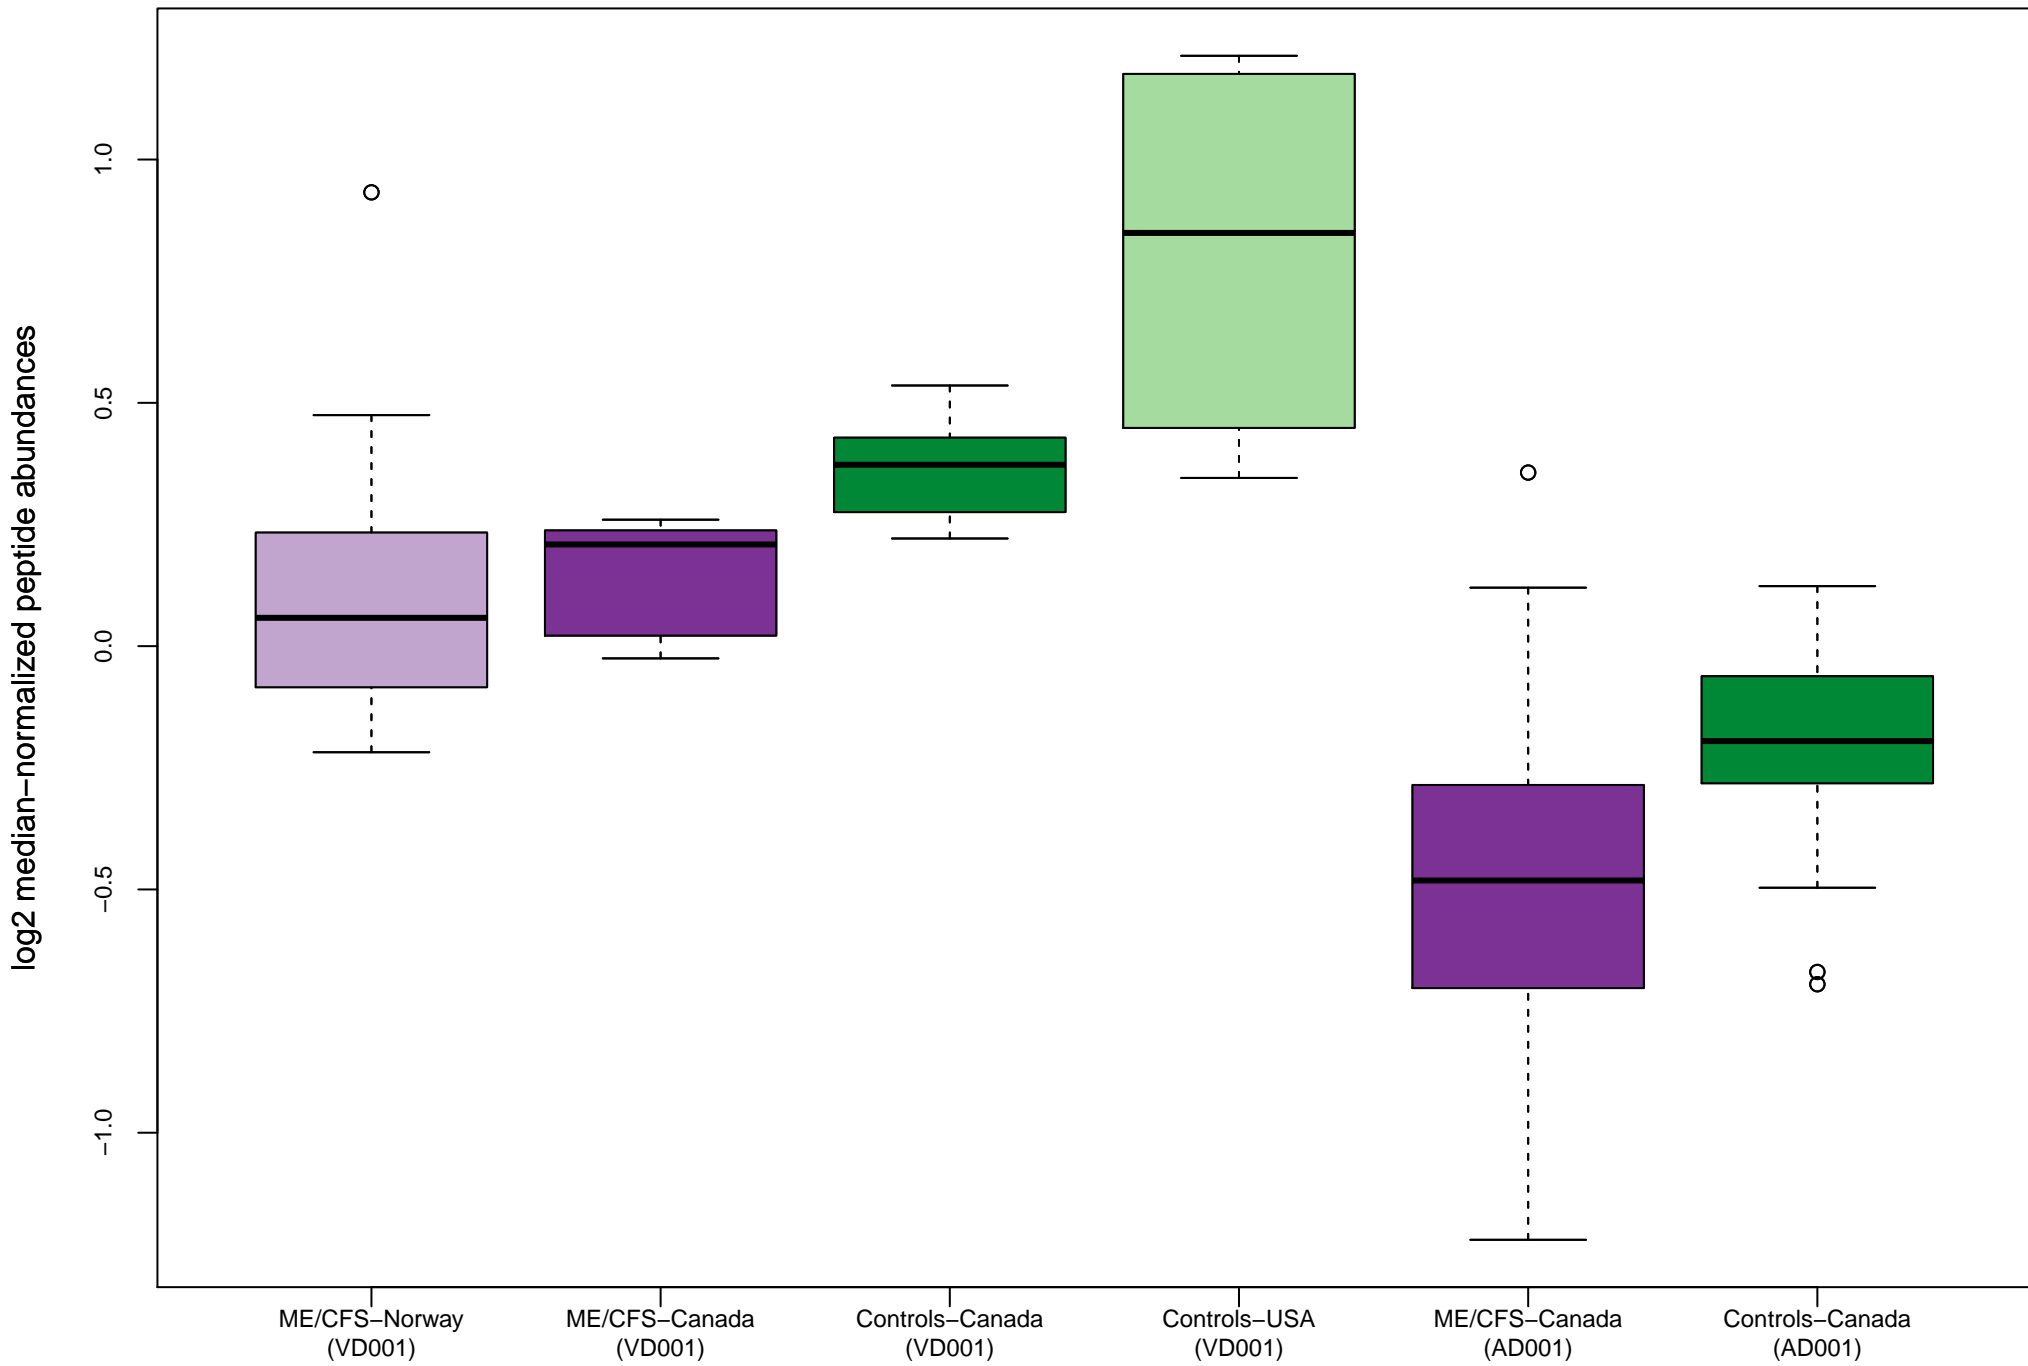

# LRLGLRYLSVLG

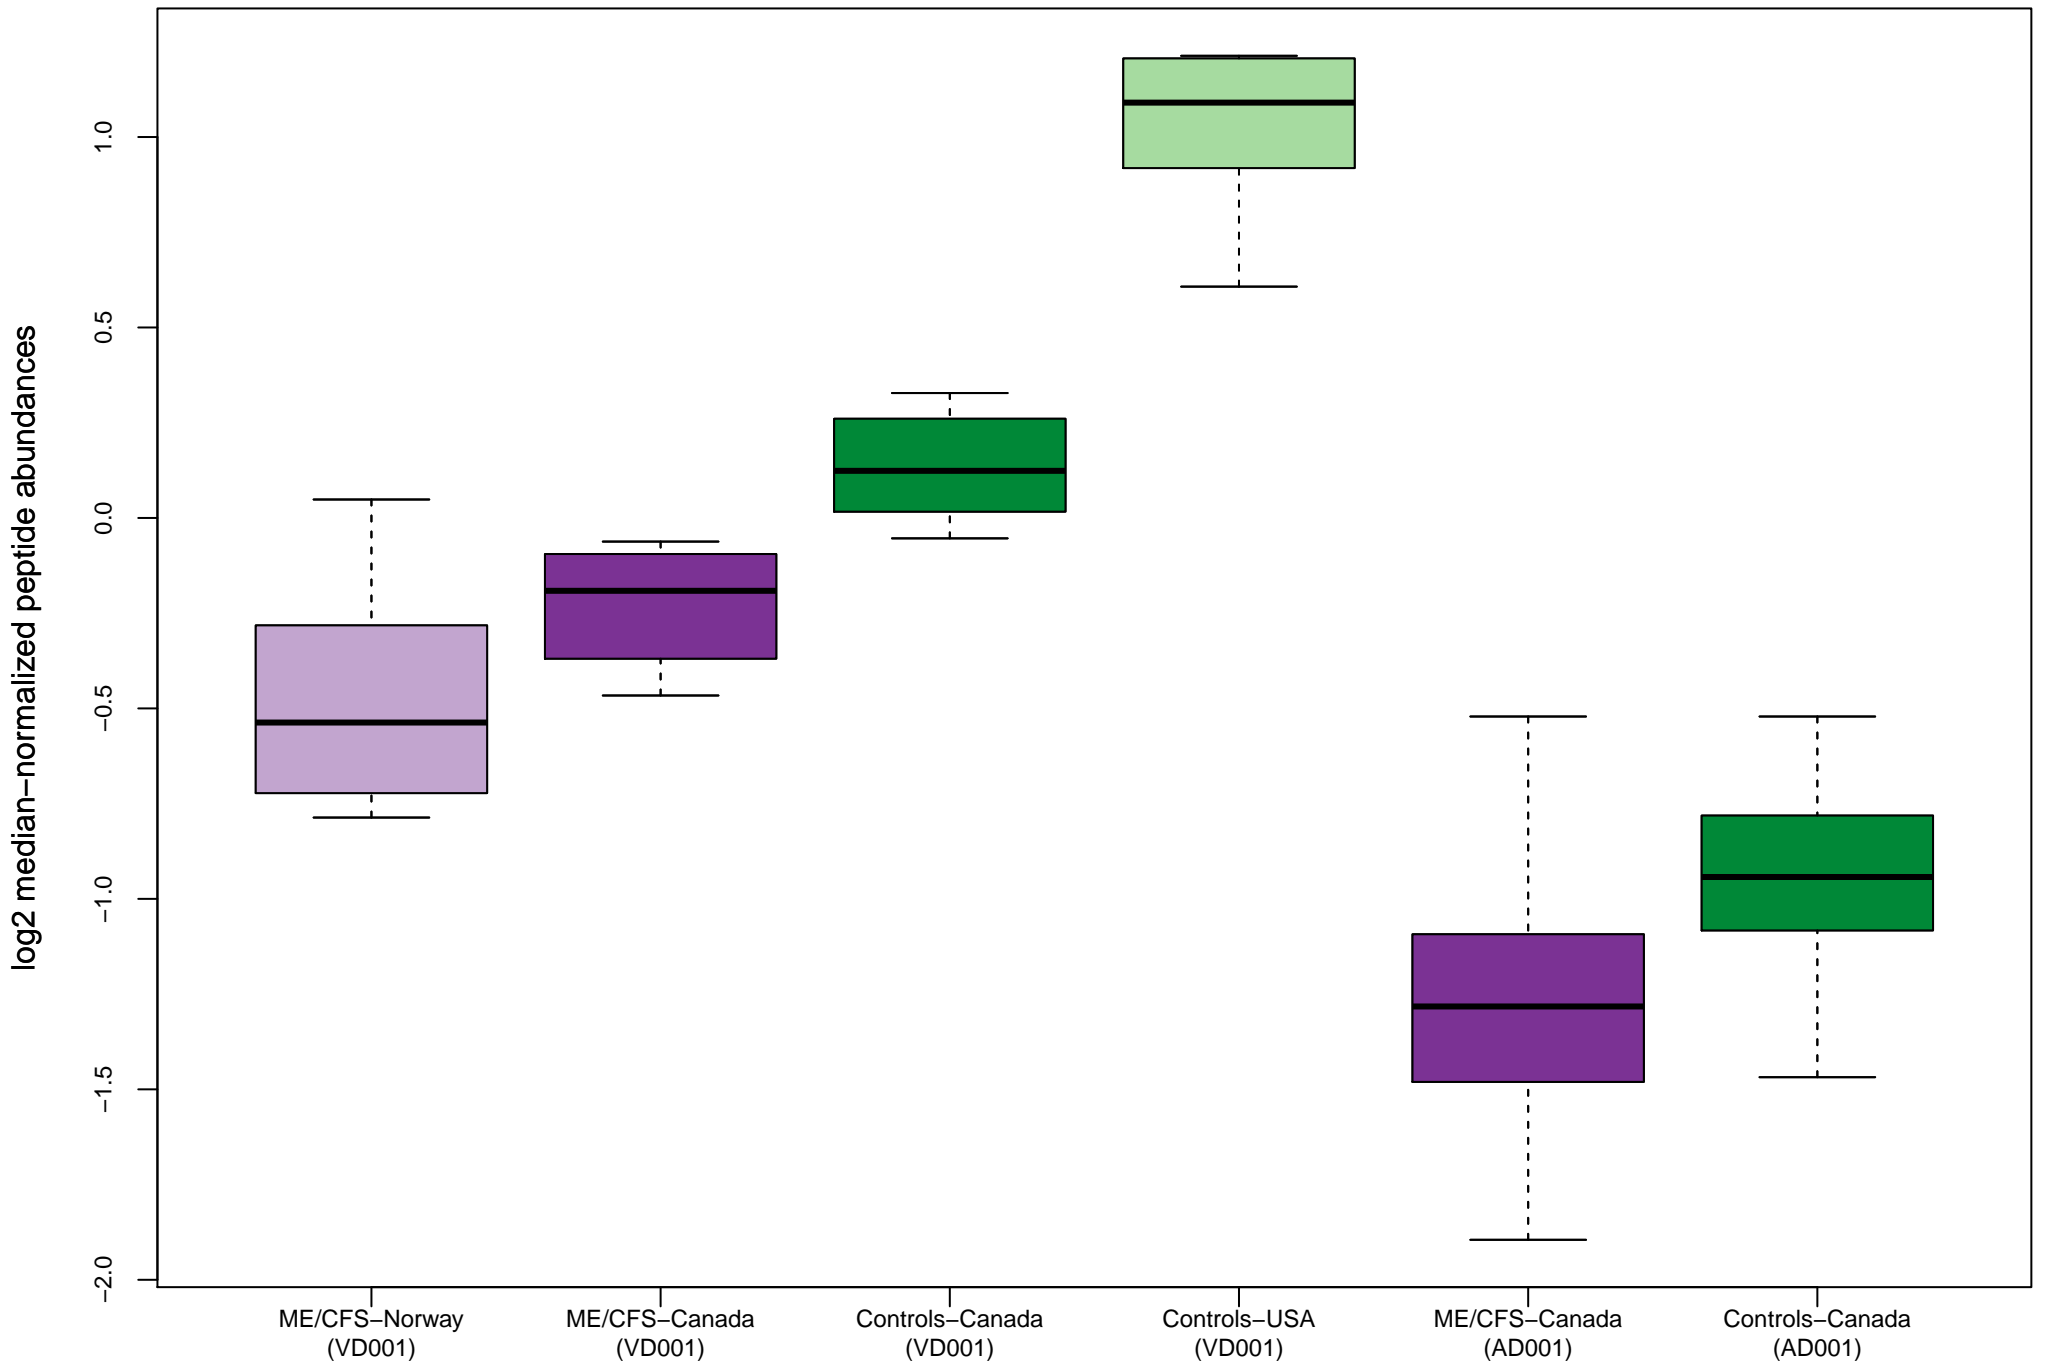

# LRLWRPAGVALS

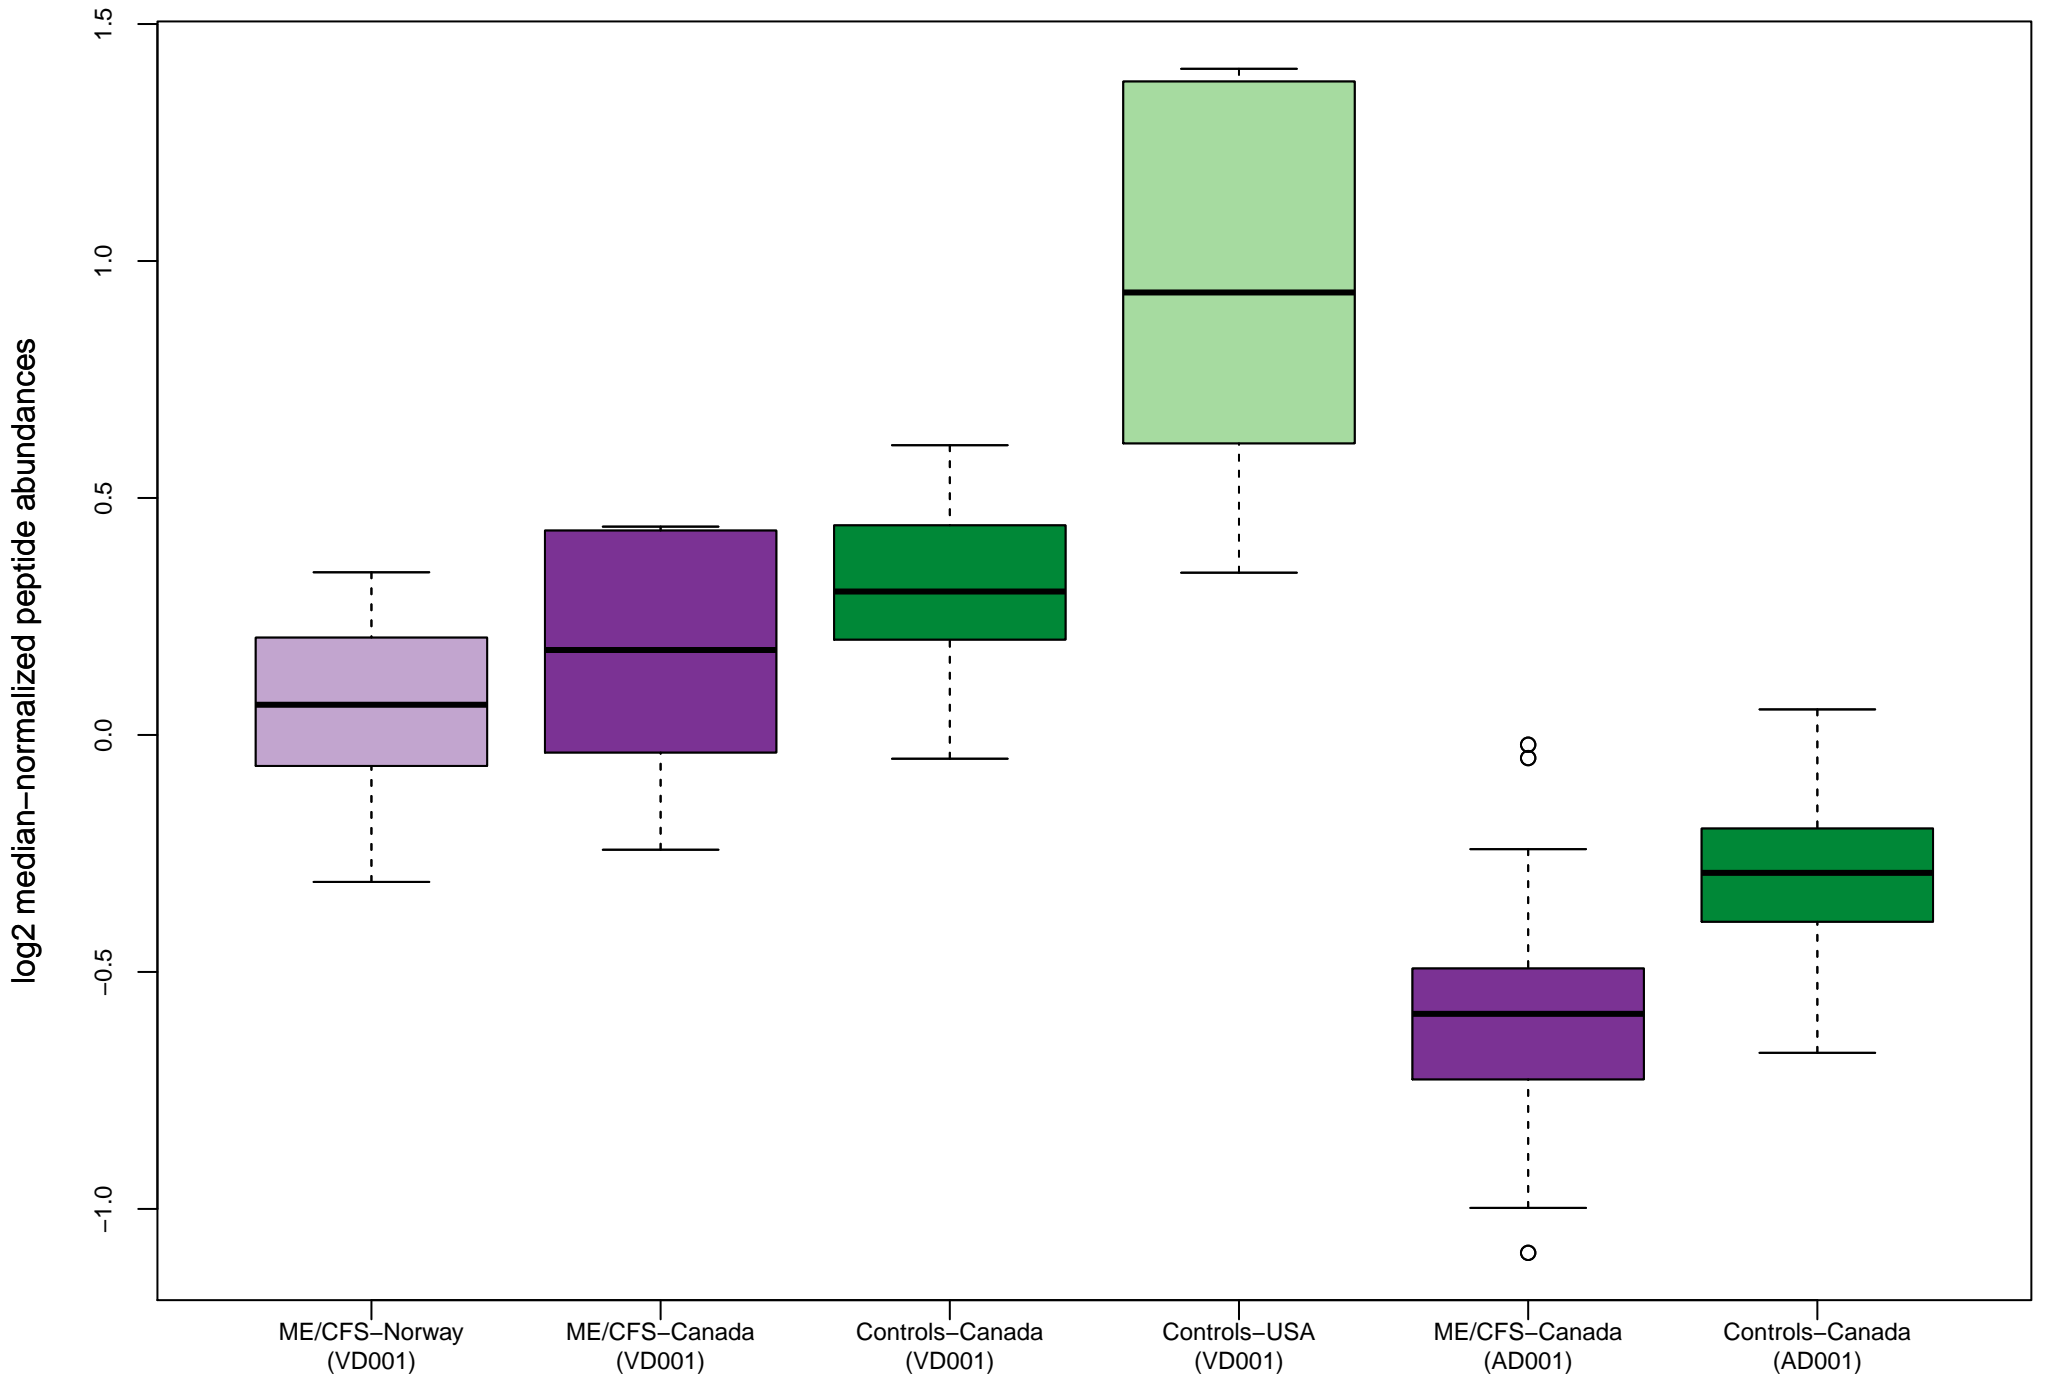



# LRNFAQRPYWL

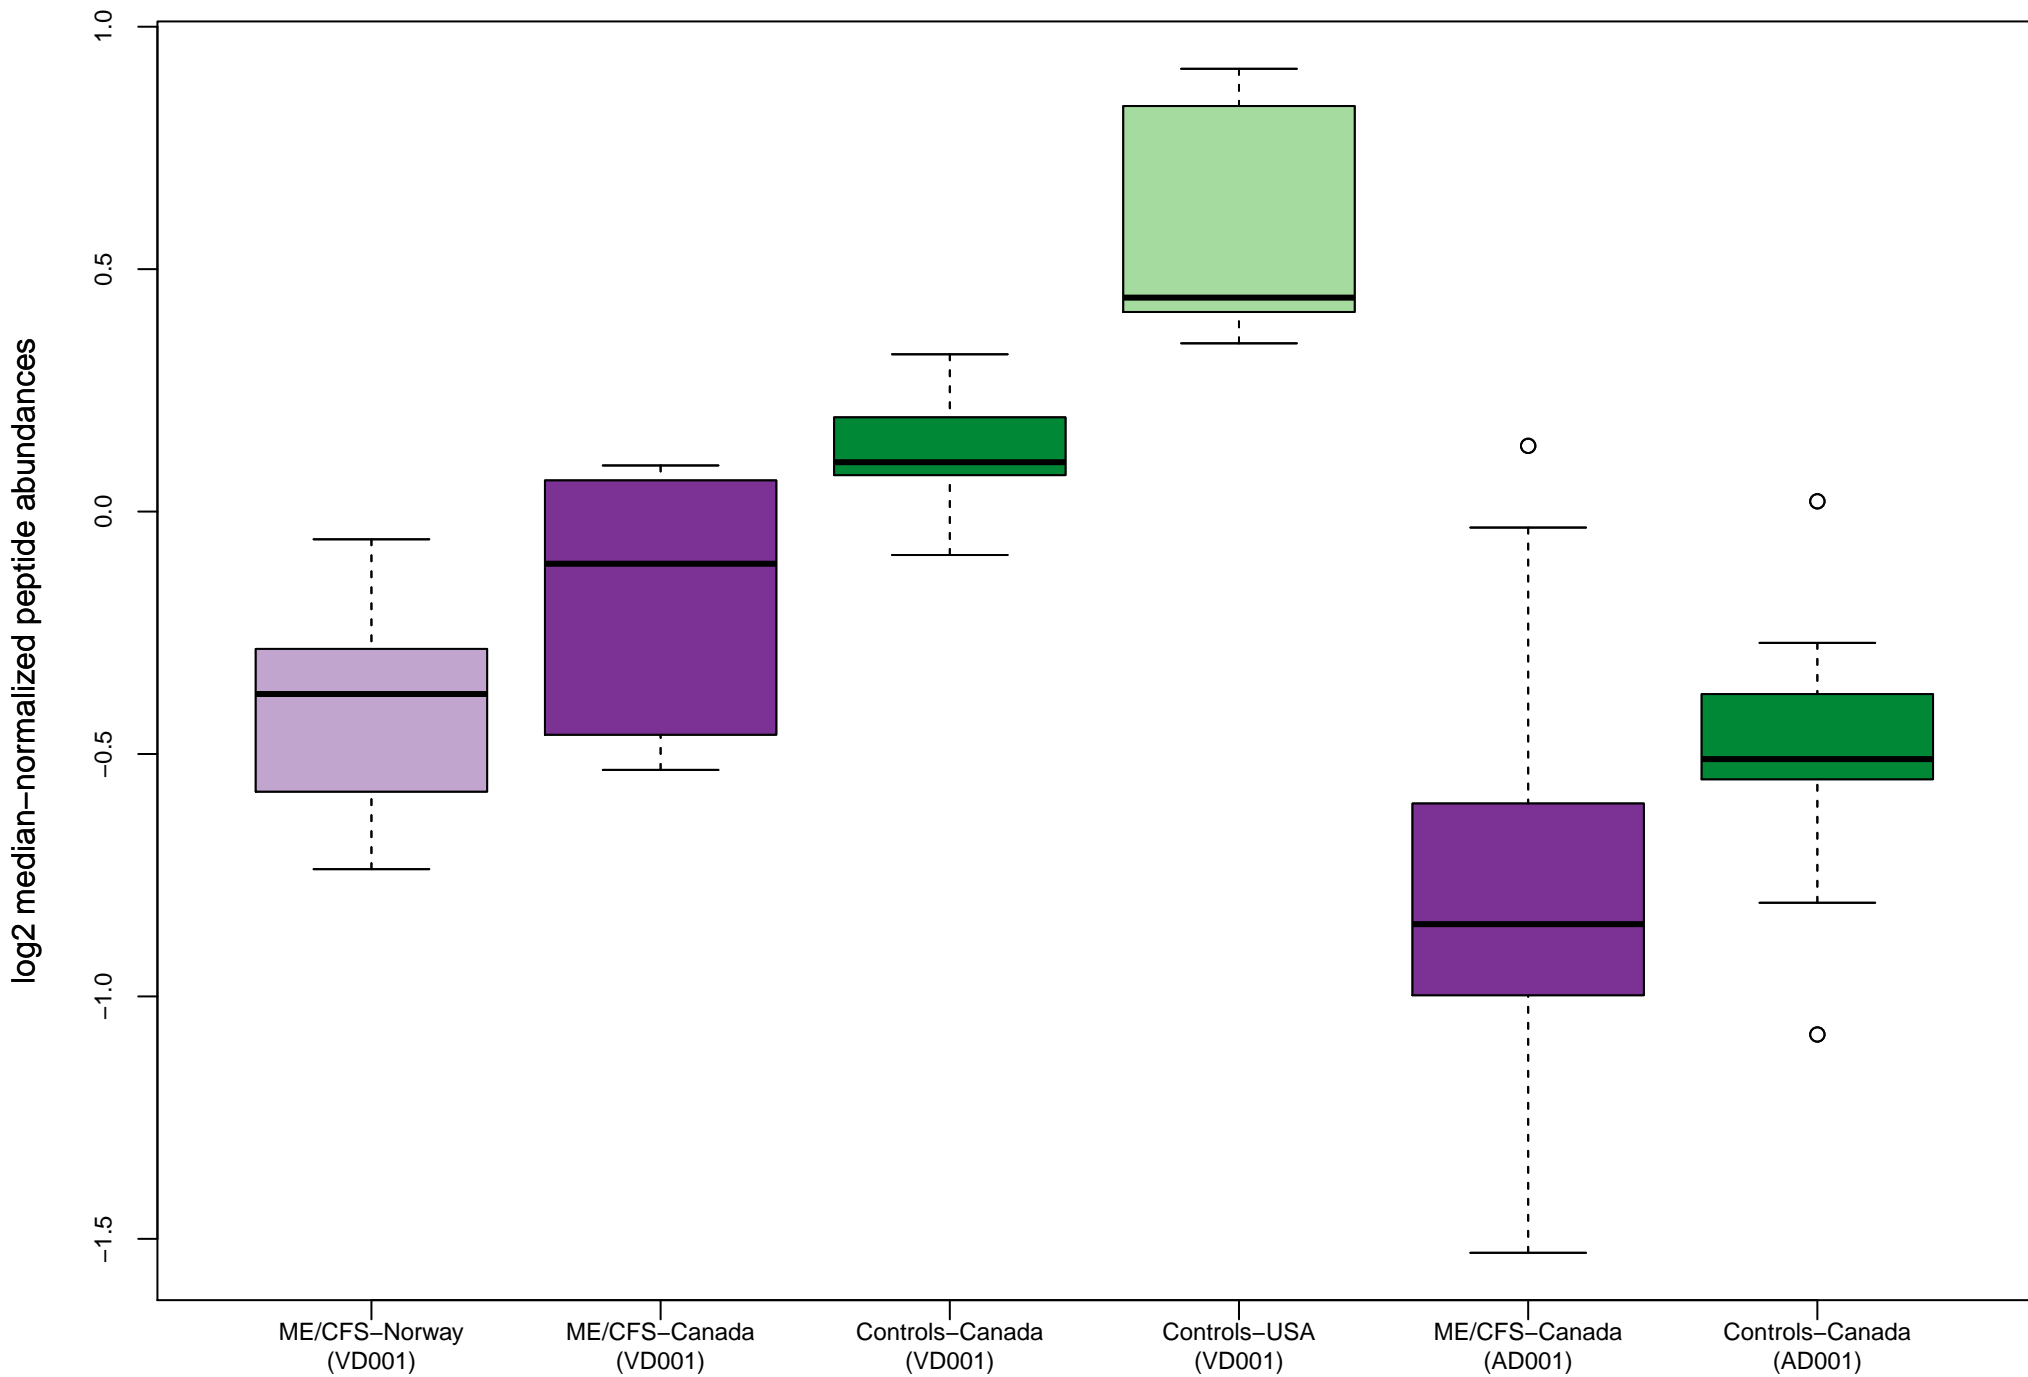

# LRQNLFHVSVLG

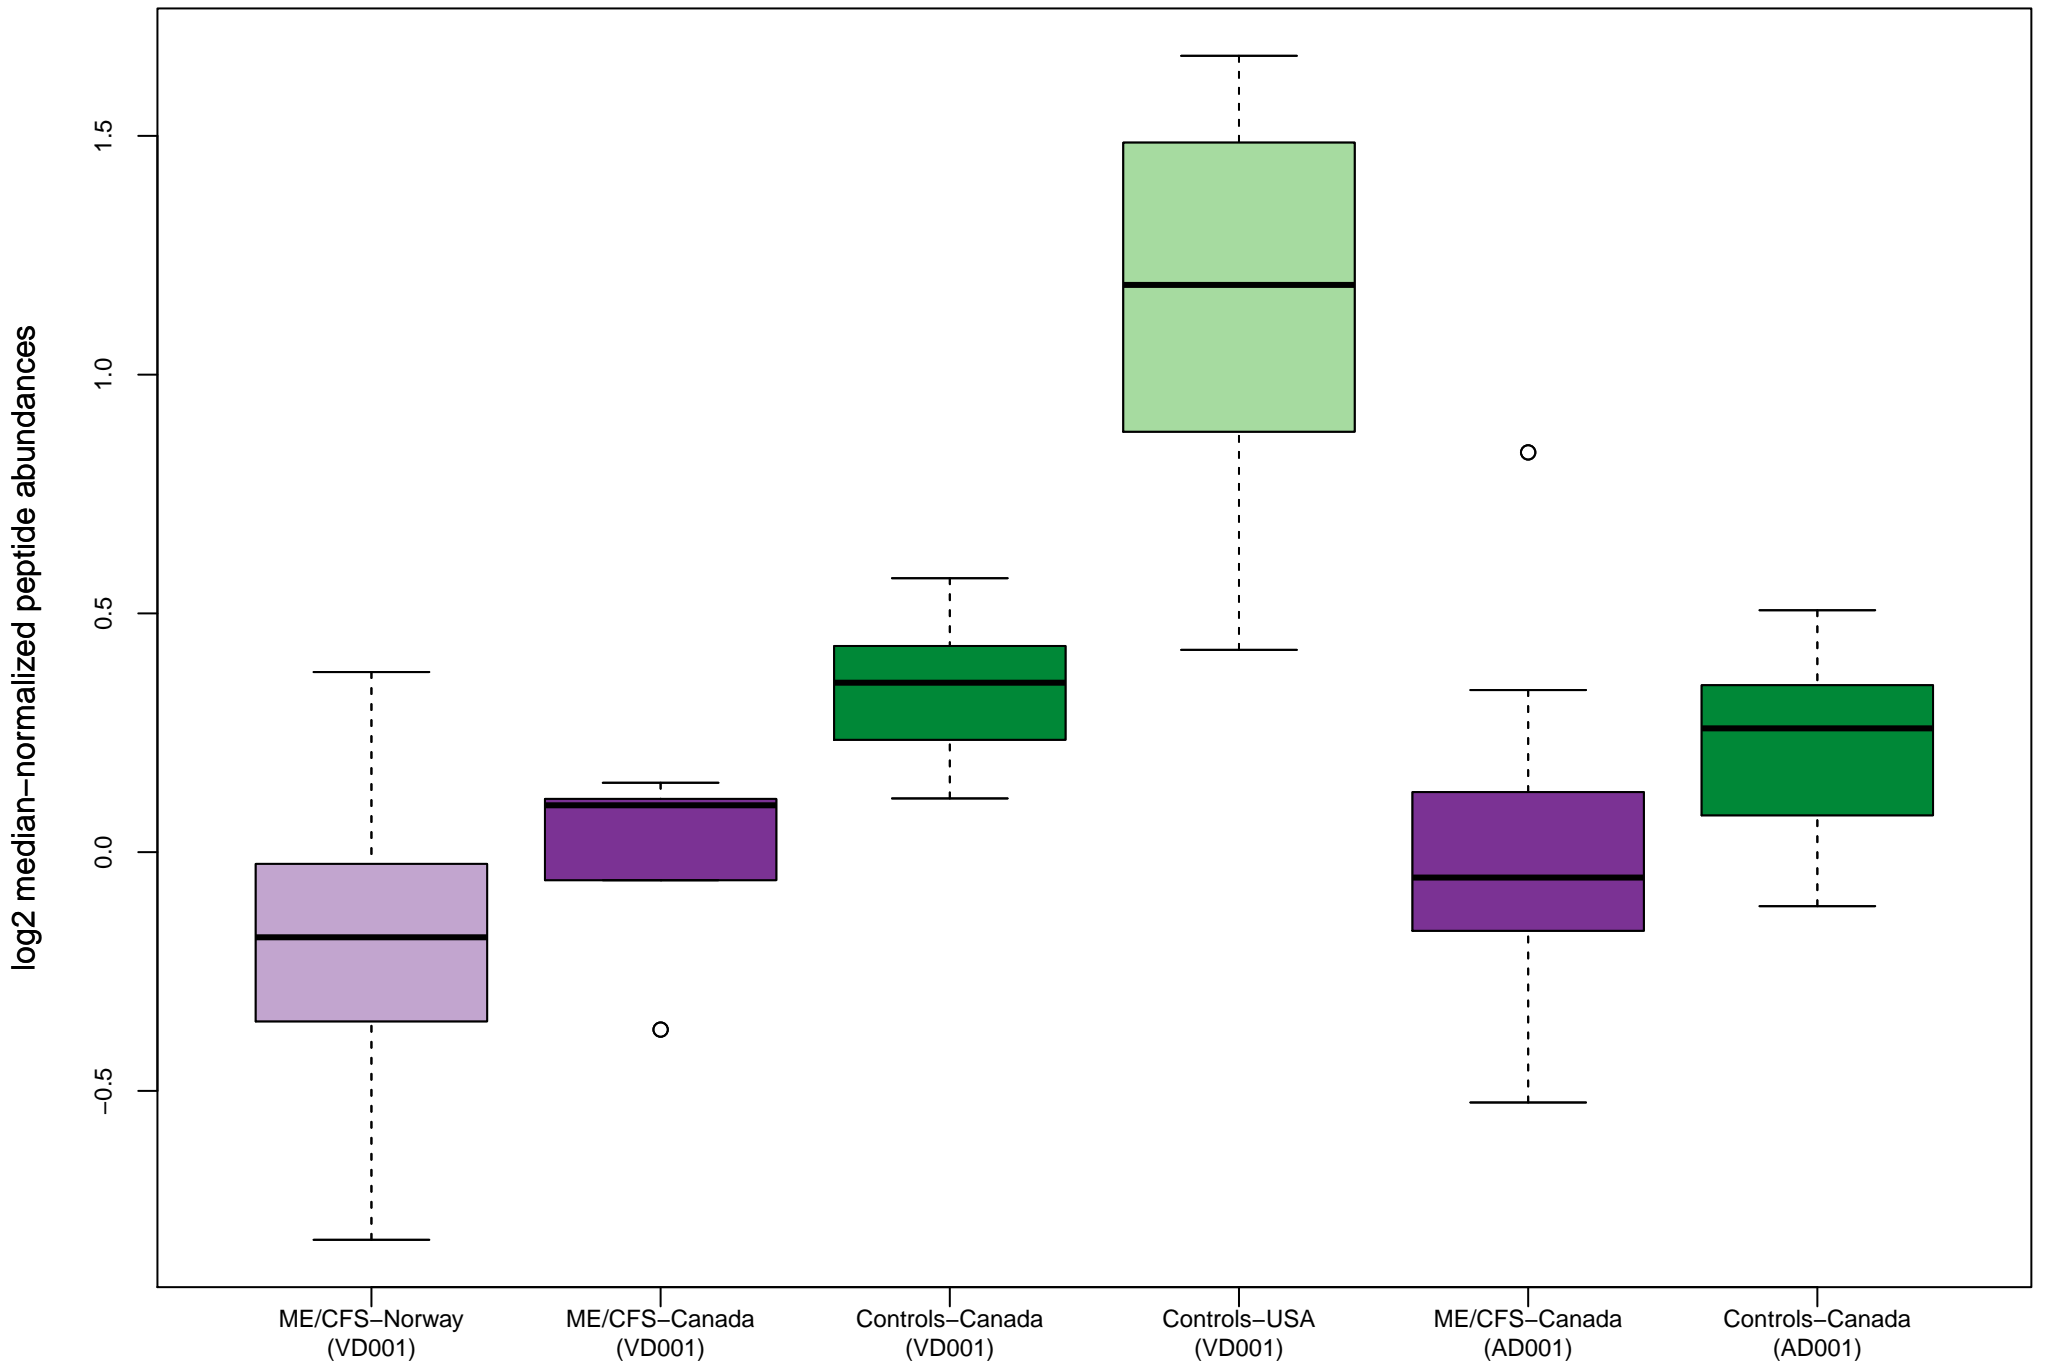

# LRRHVRLGVALS

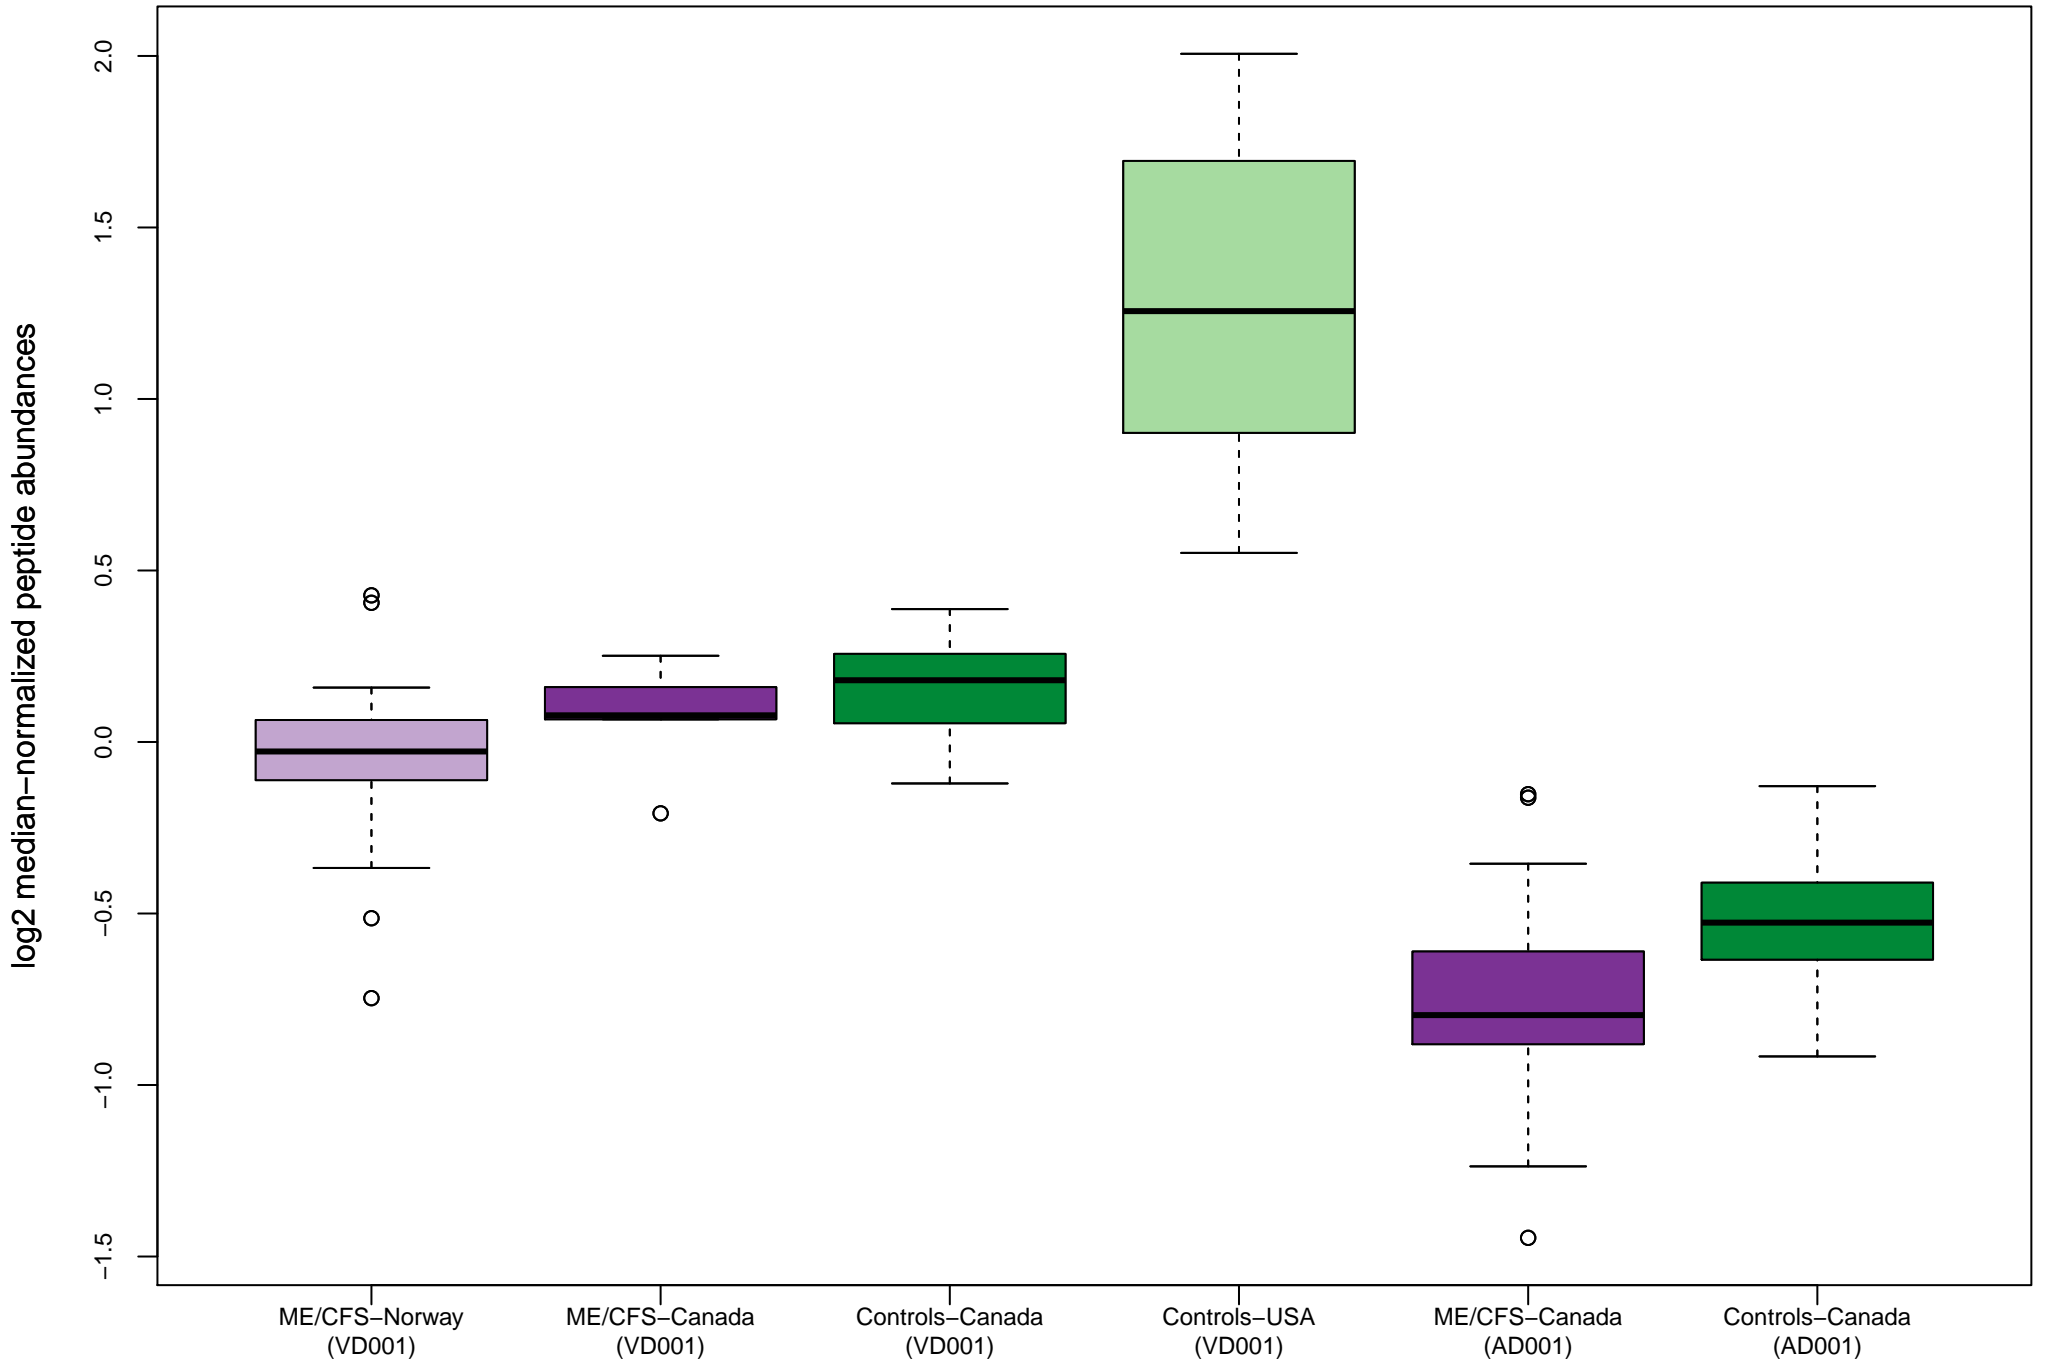

# LRVWLSGVASG

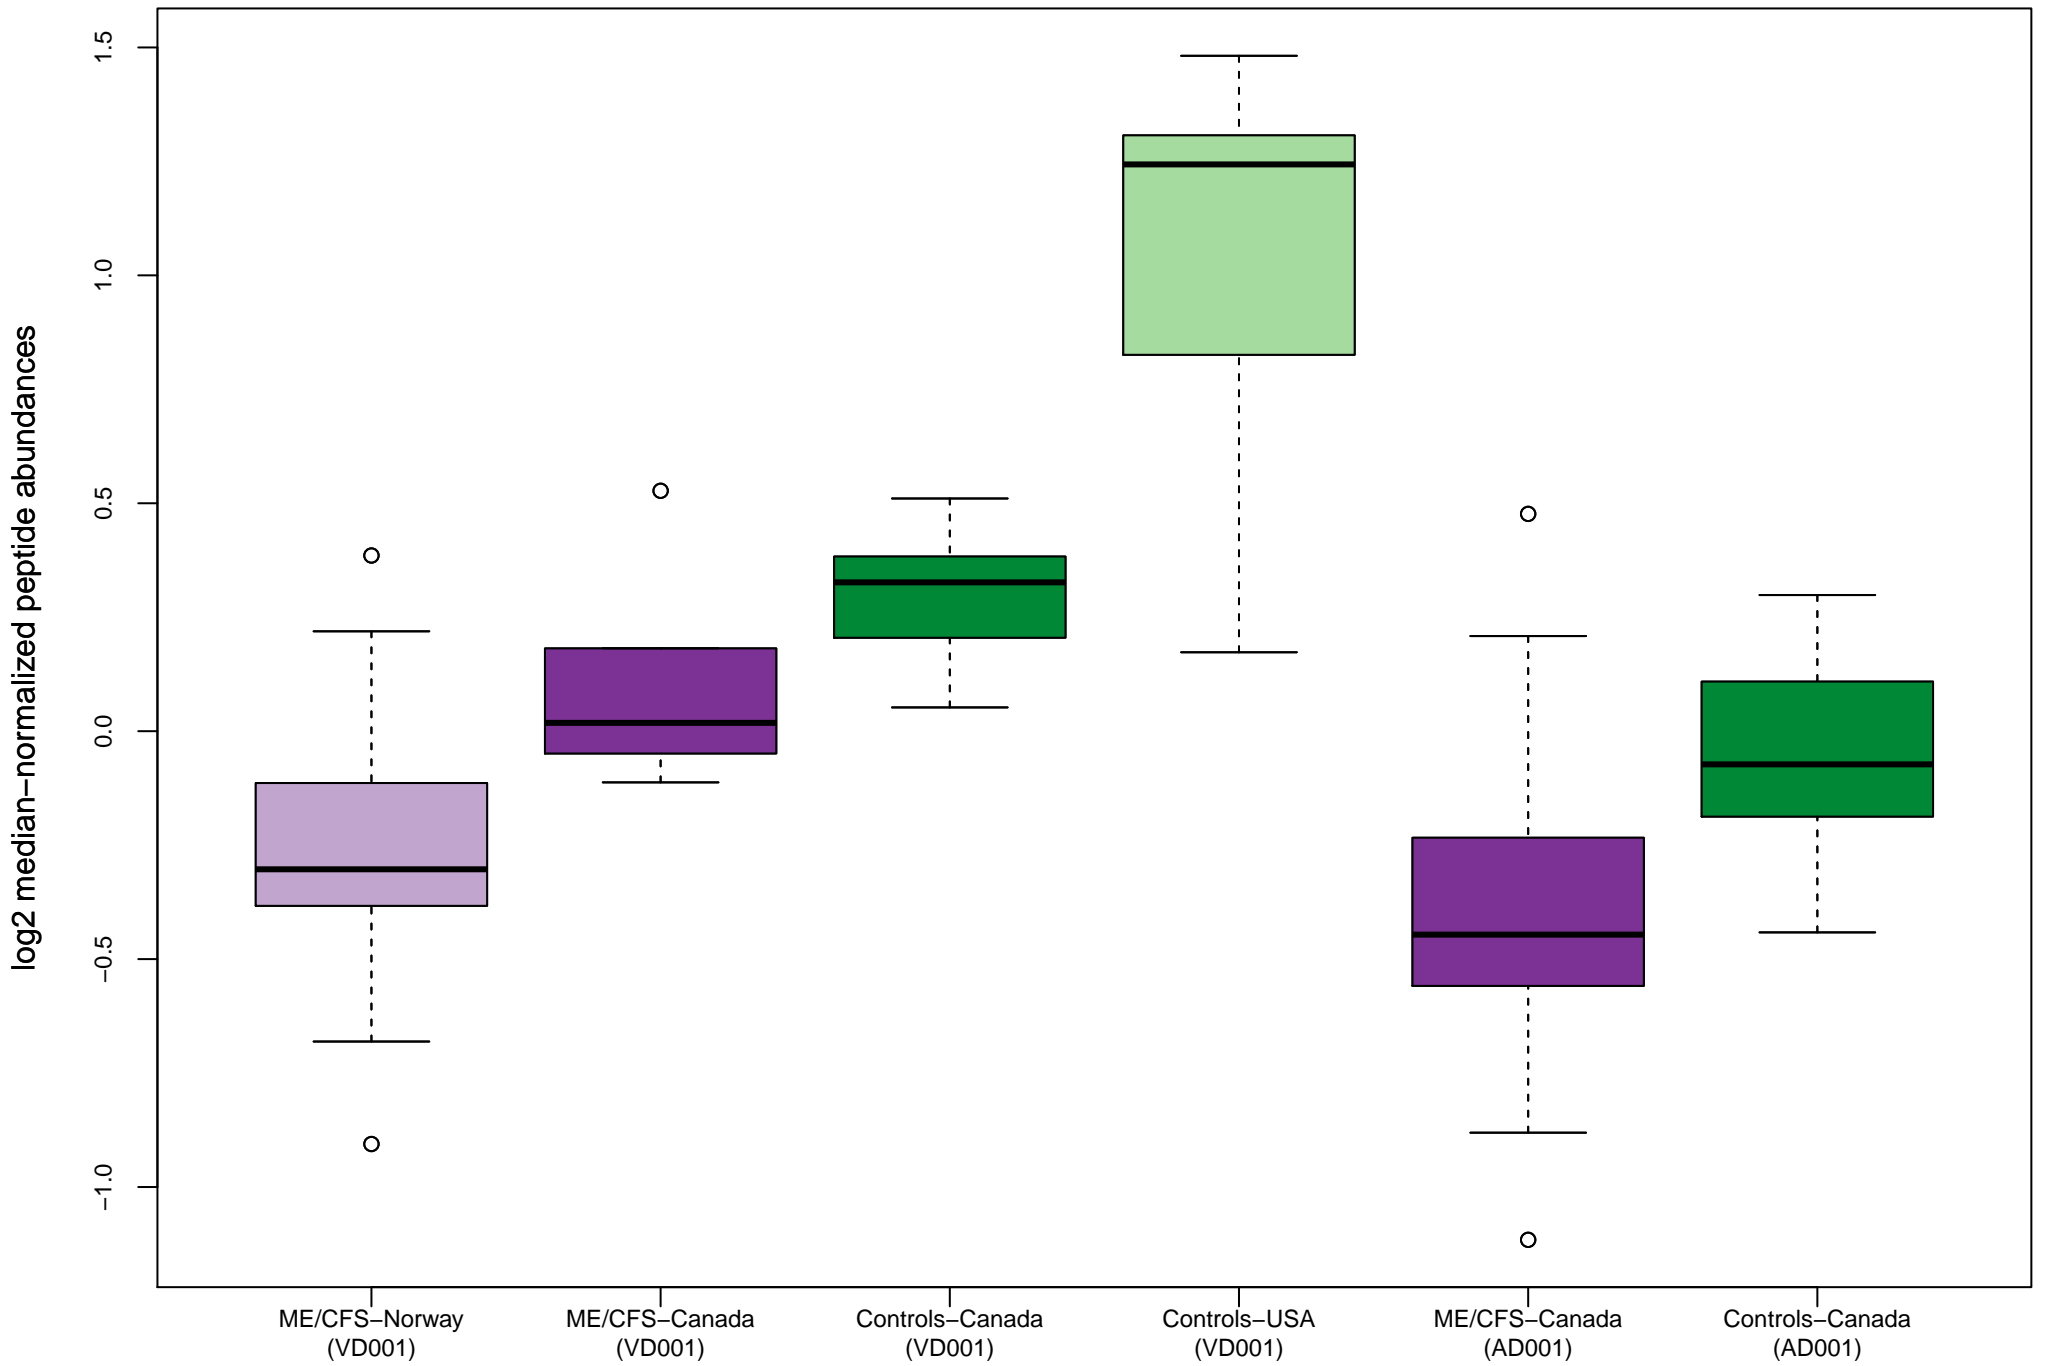

# LRVYRWVLGALS

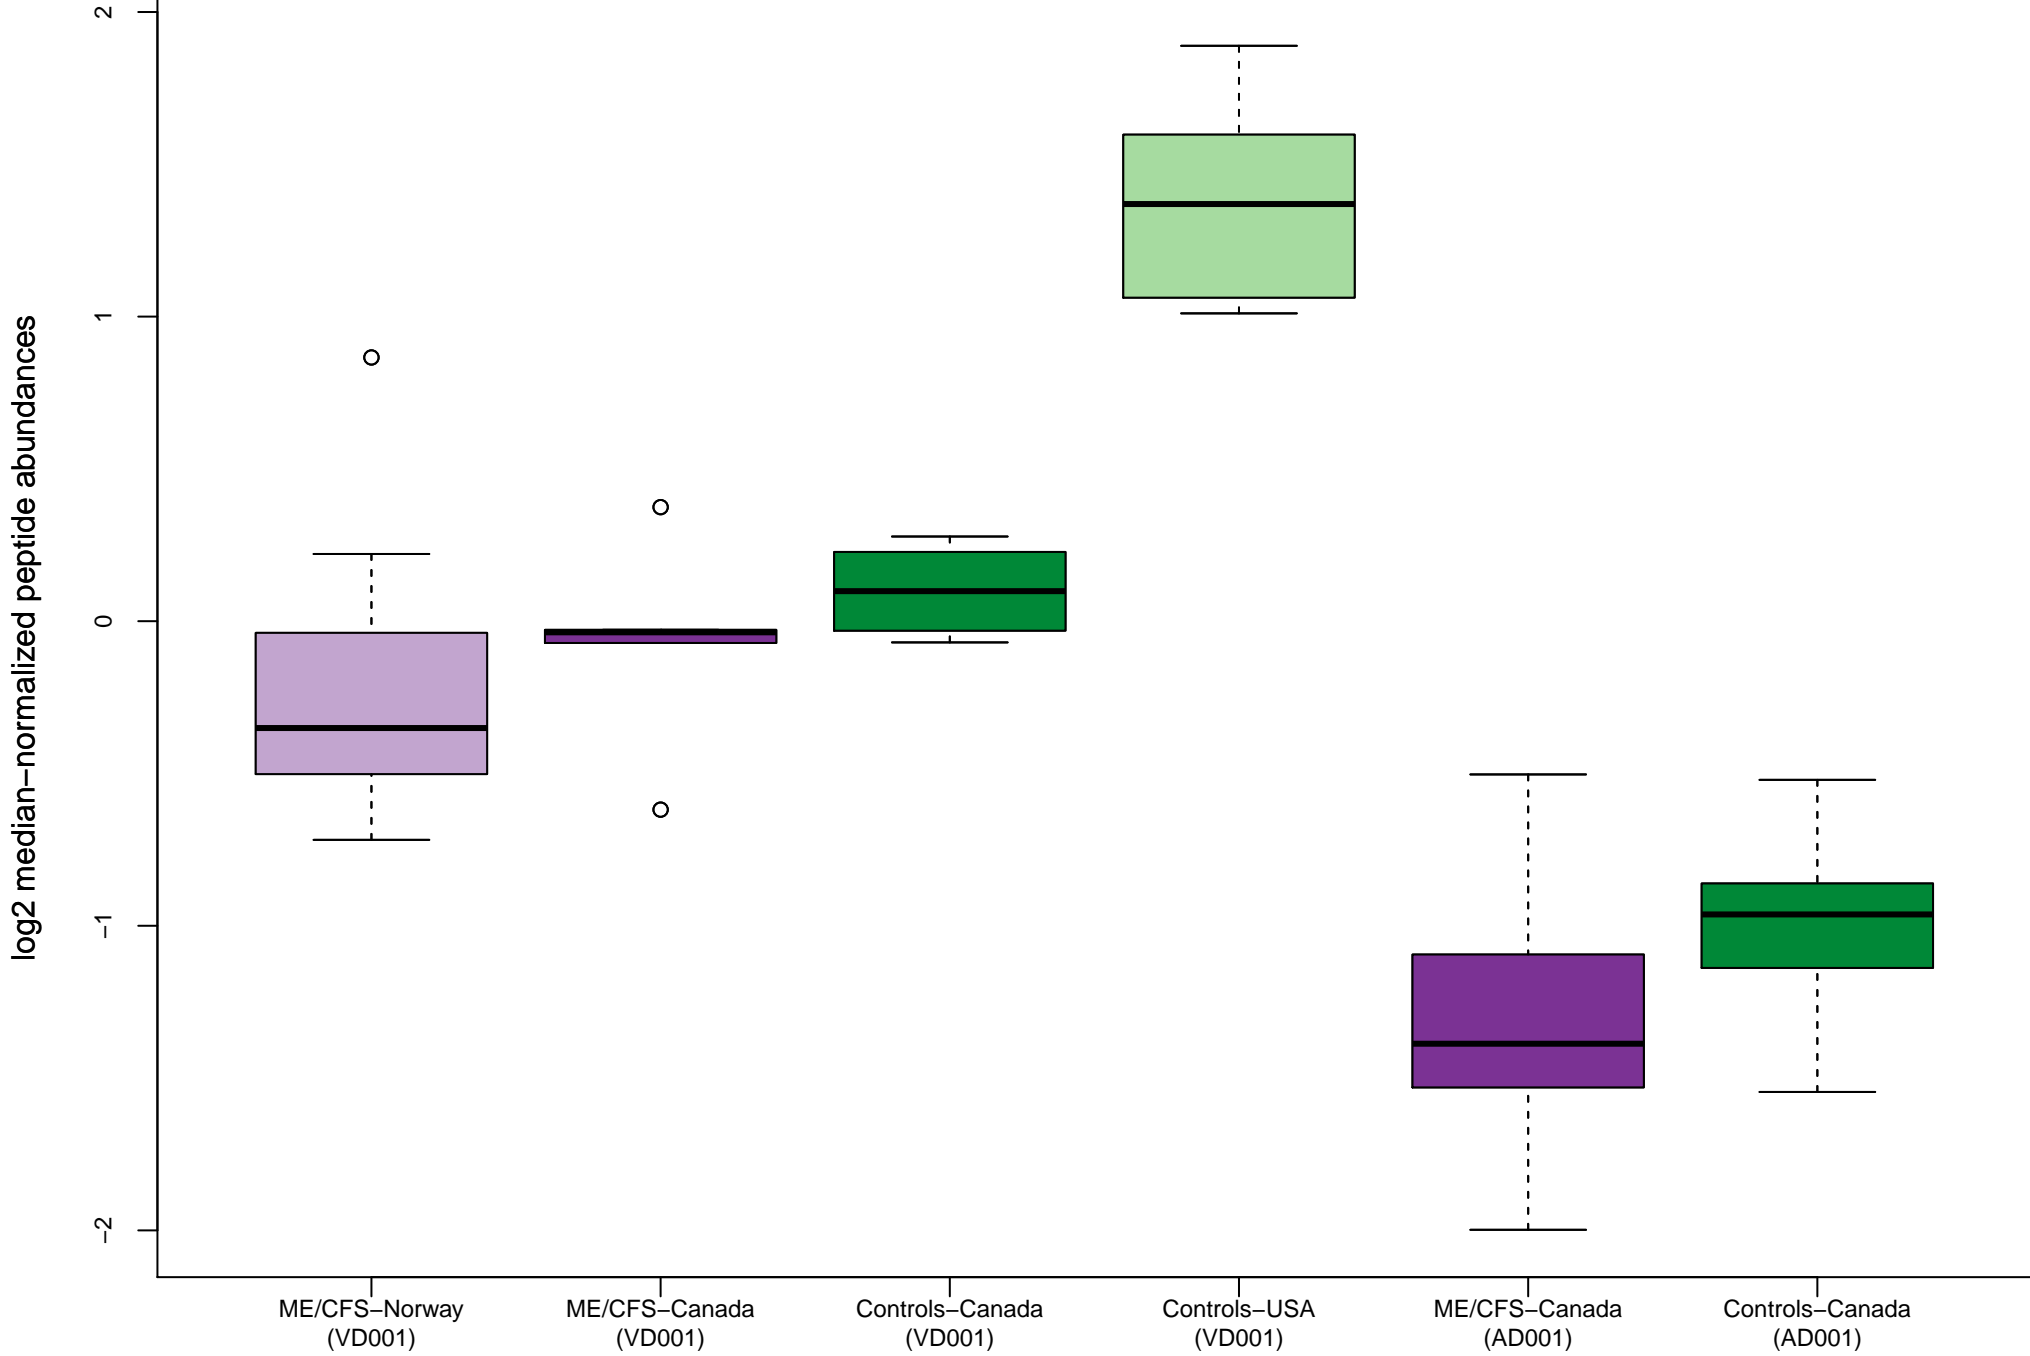

# LRYFYQFKAGVG

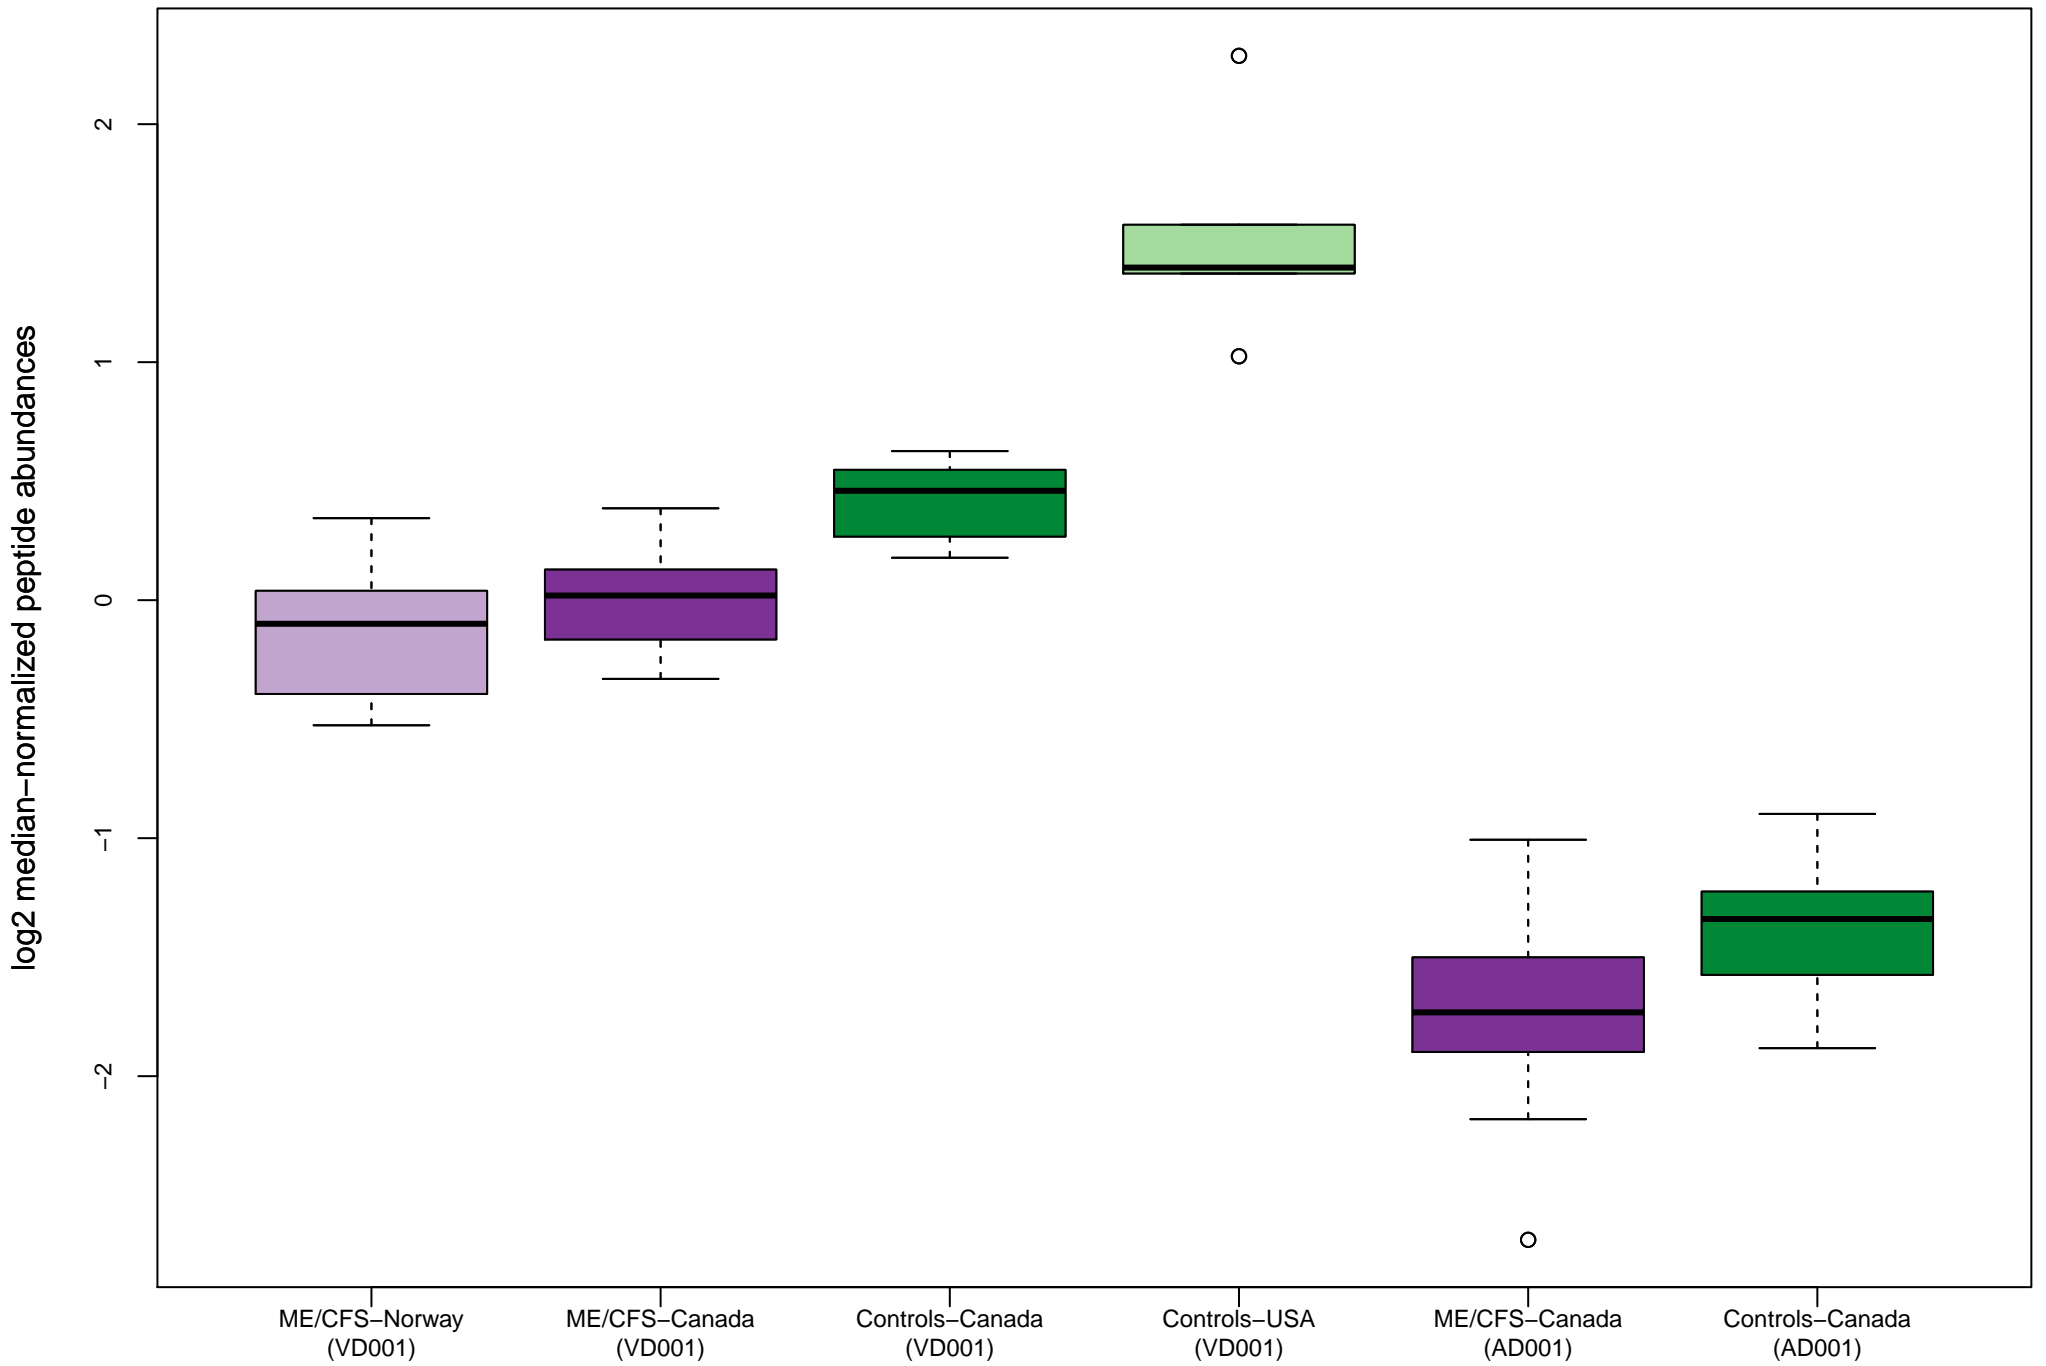

# LSAKVWLSGALG

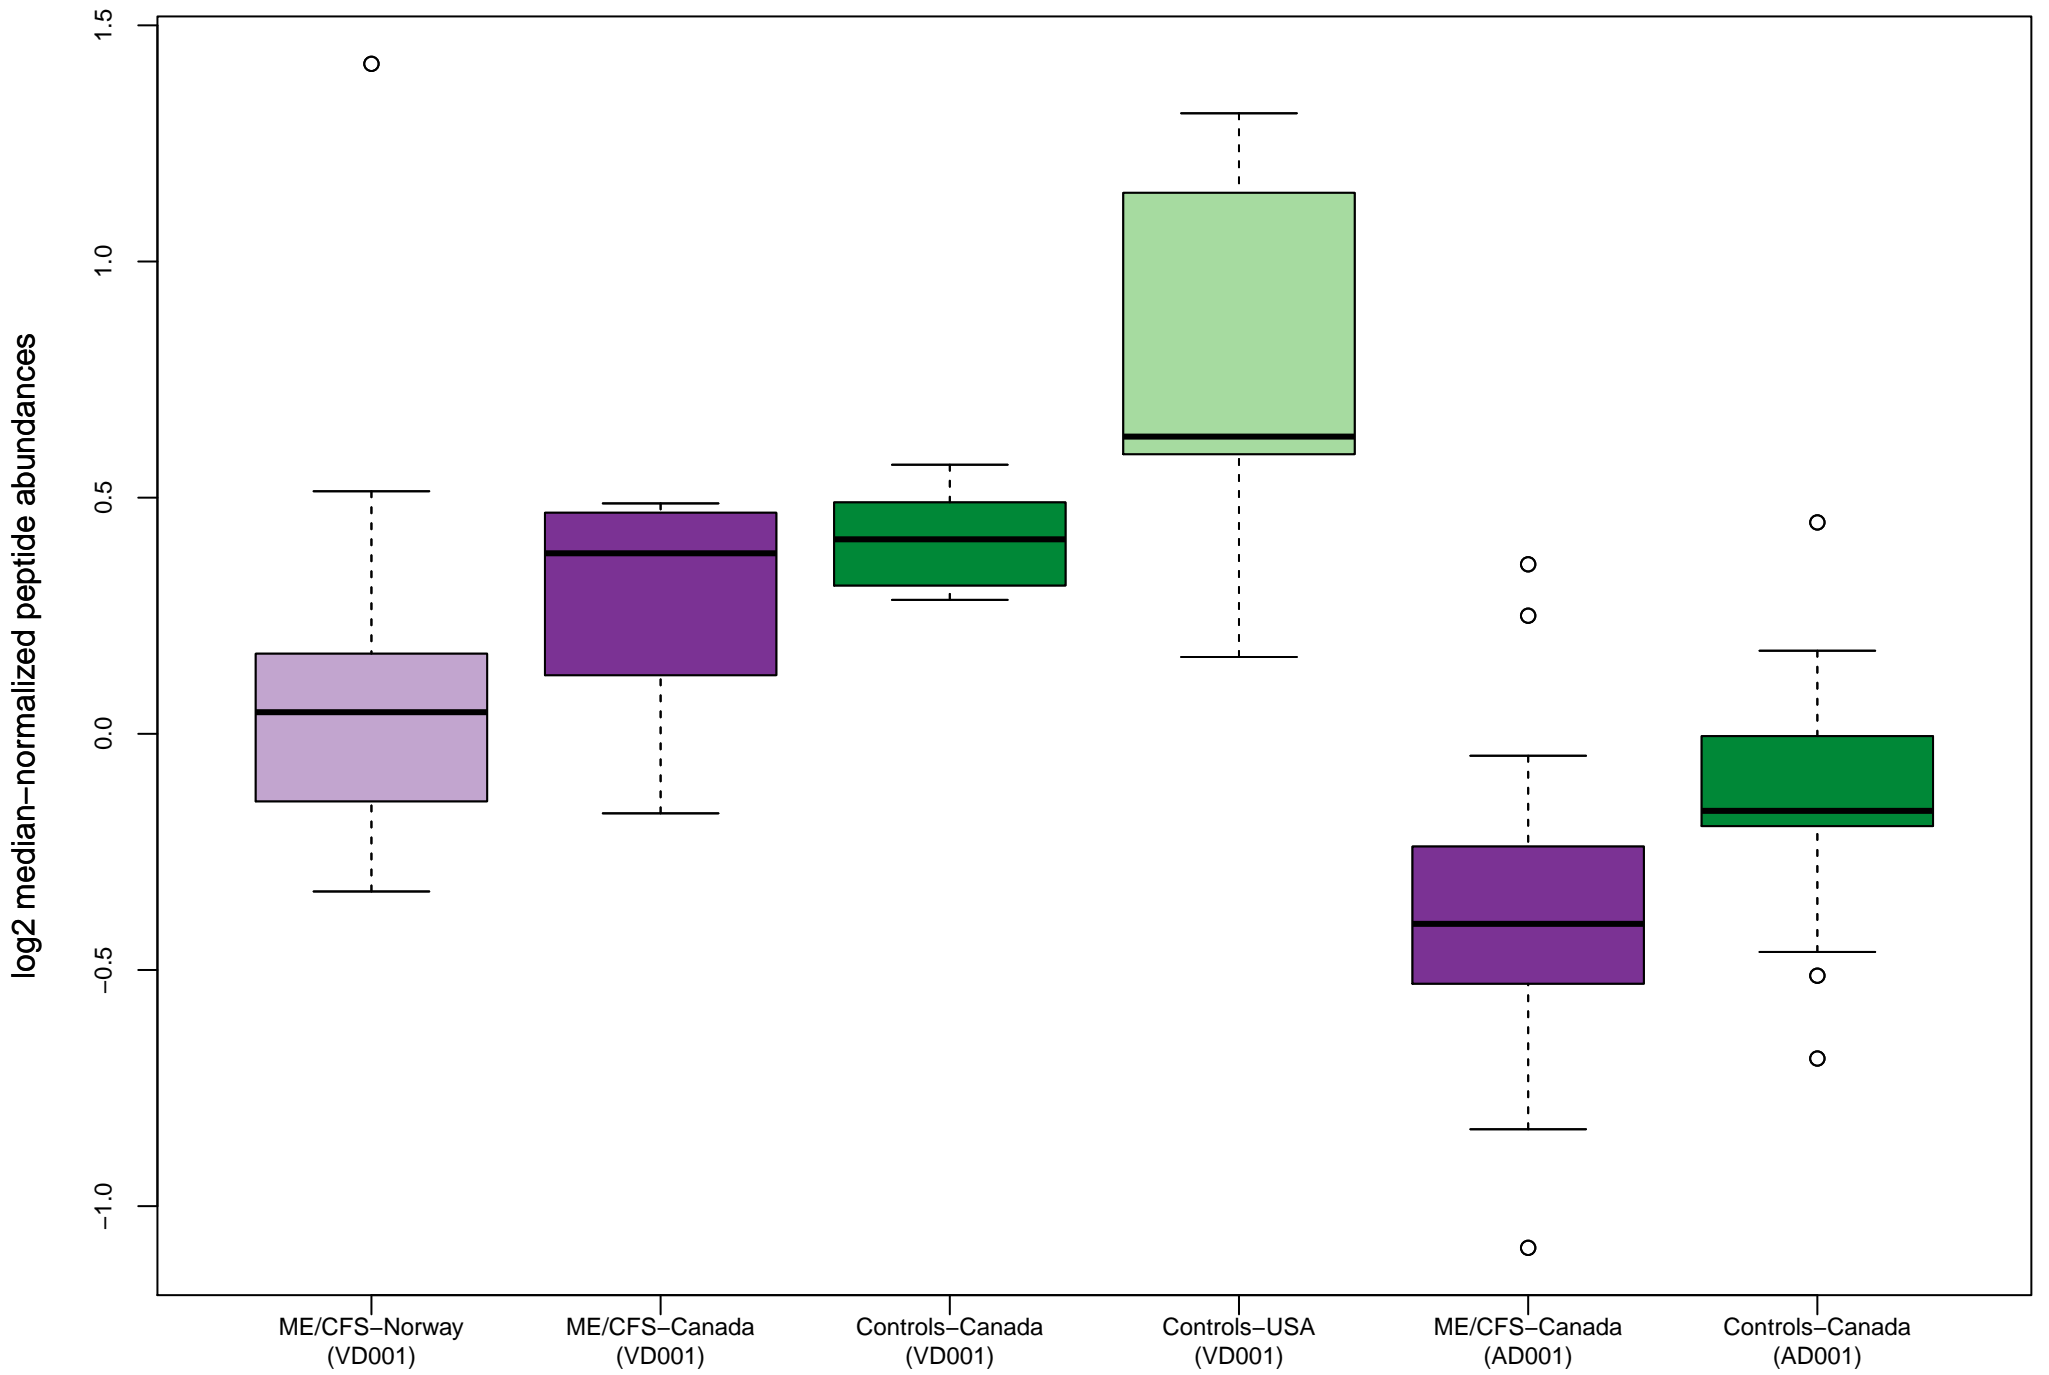

# LVAVRSGVALSG

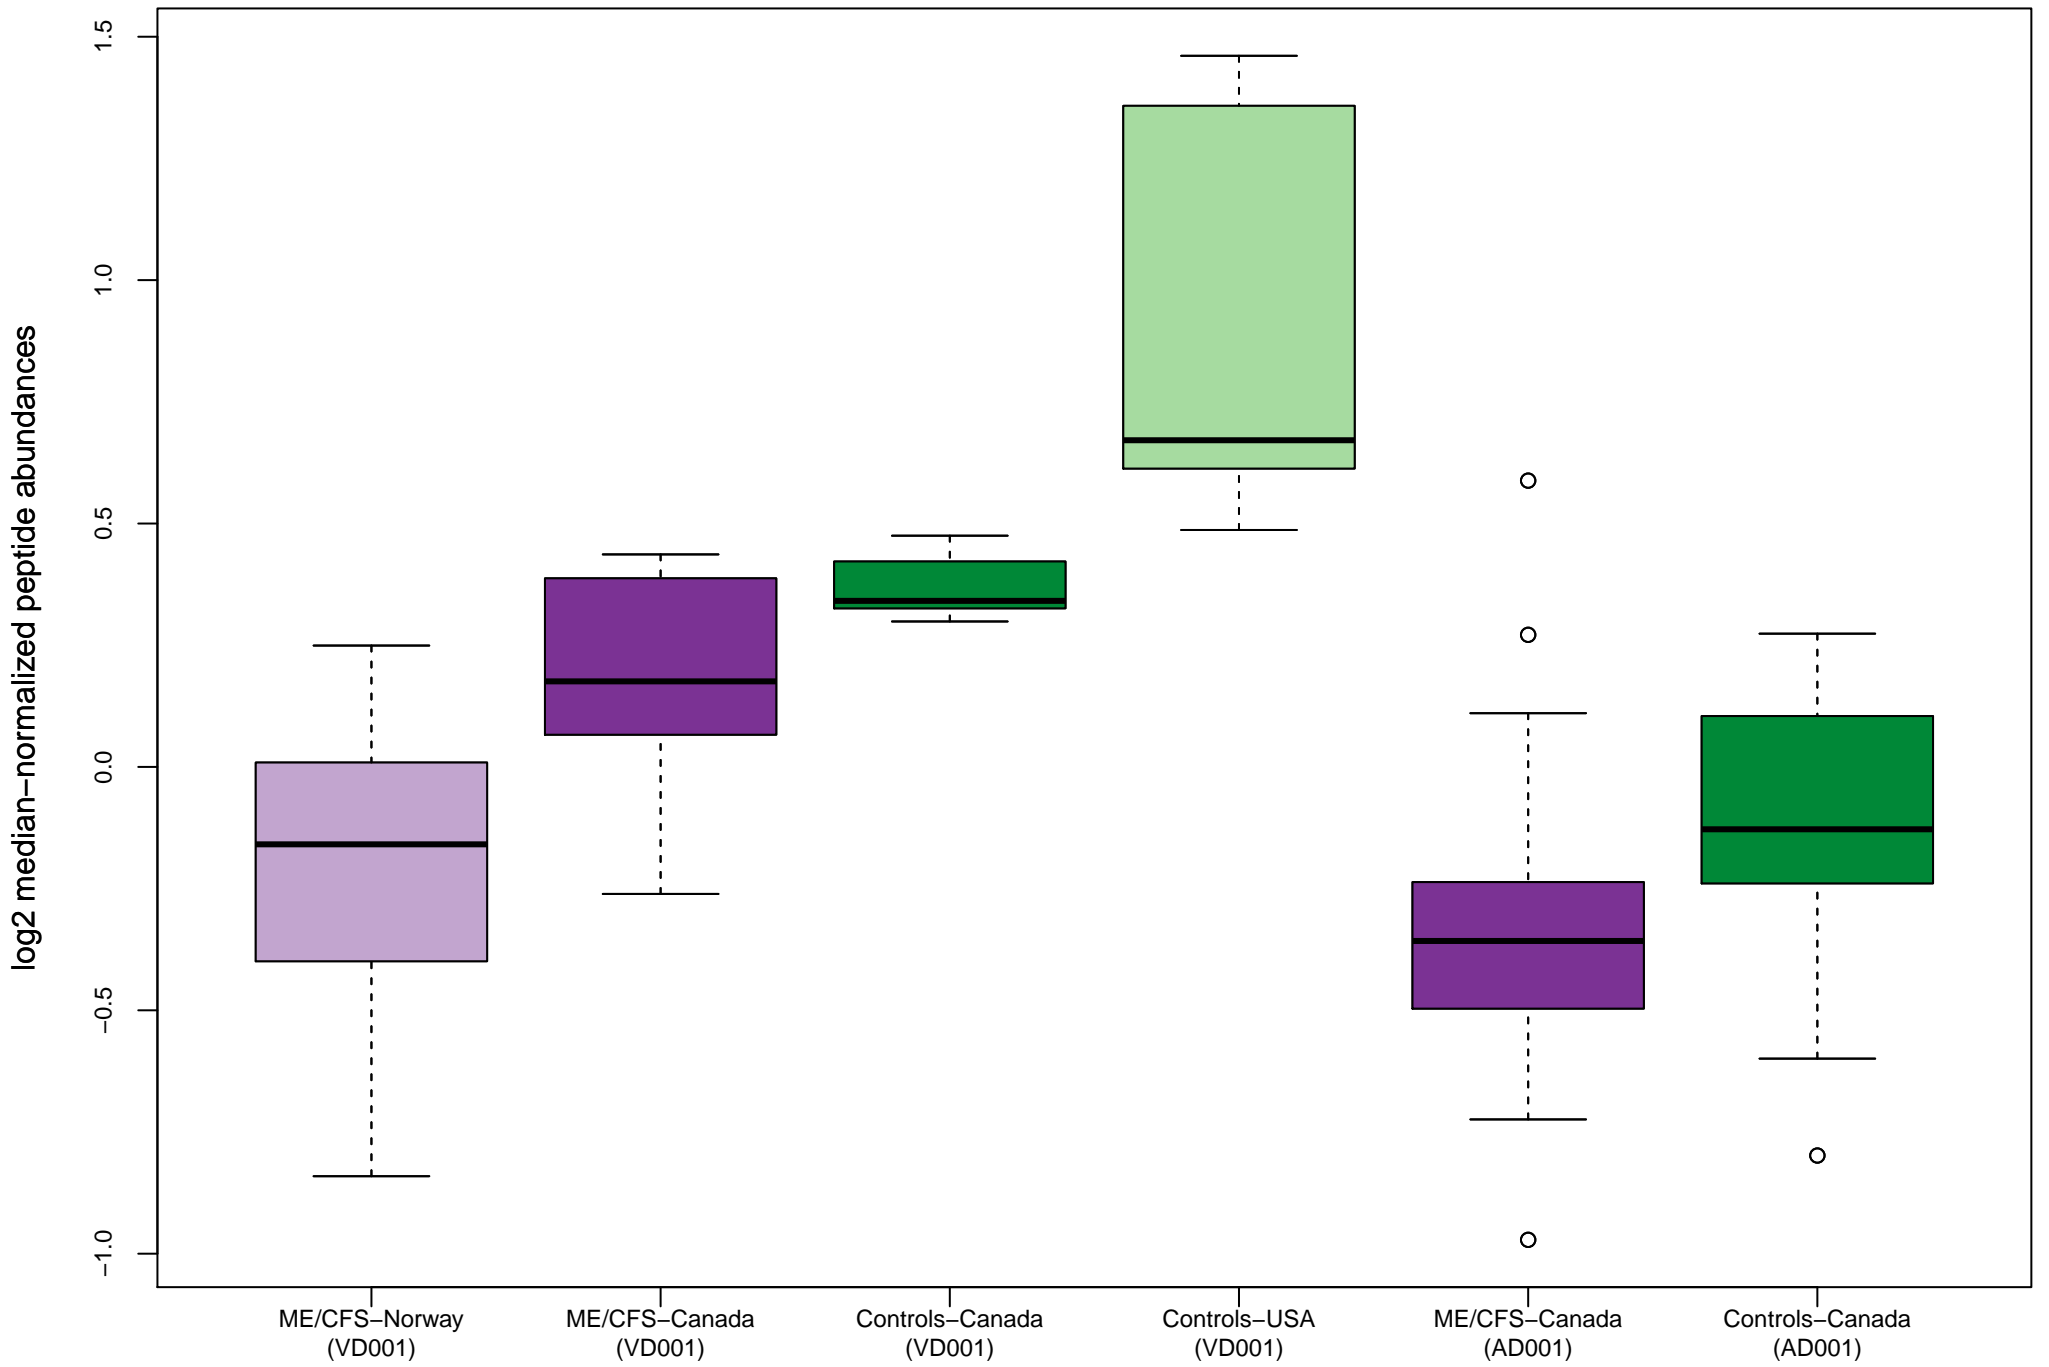



# LVAWRAGVALSG

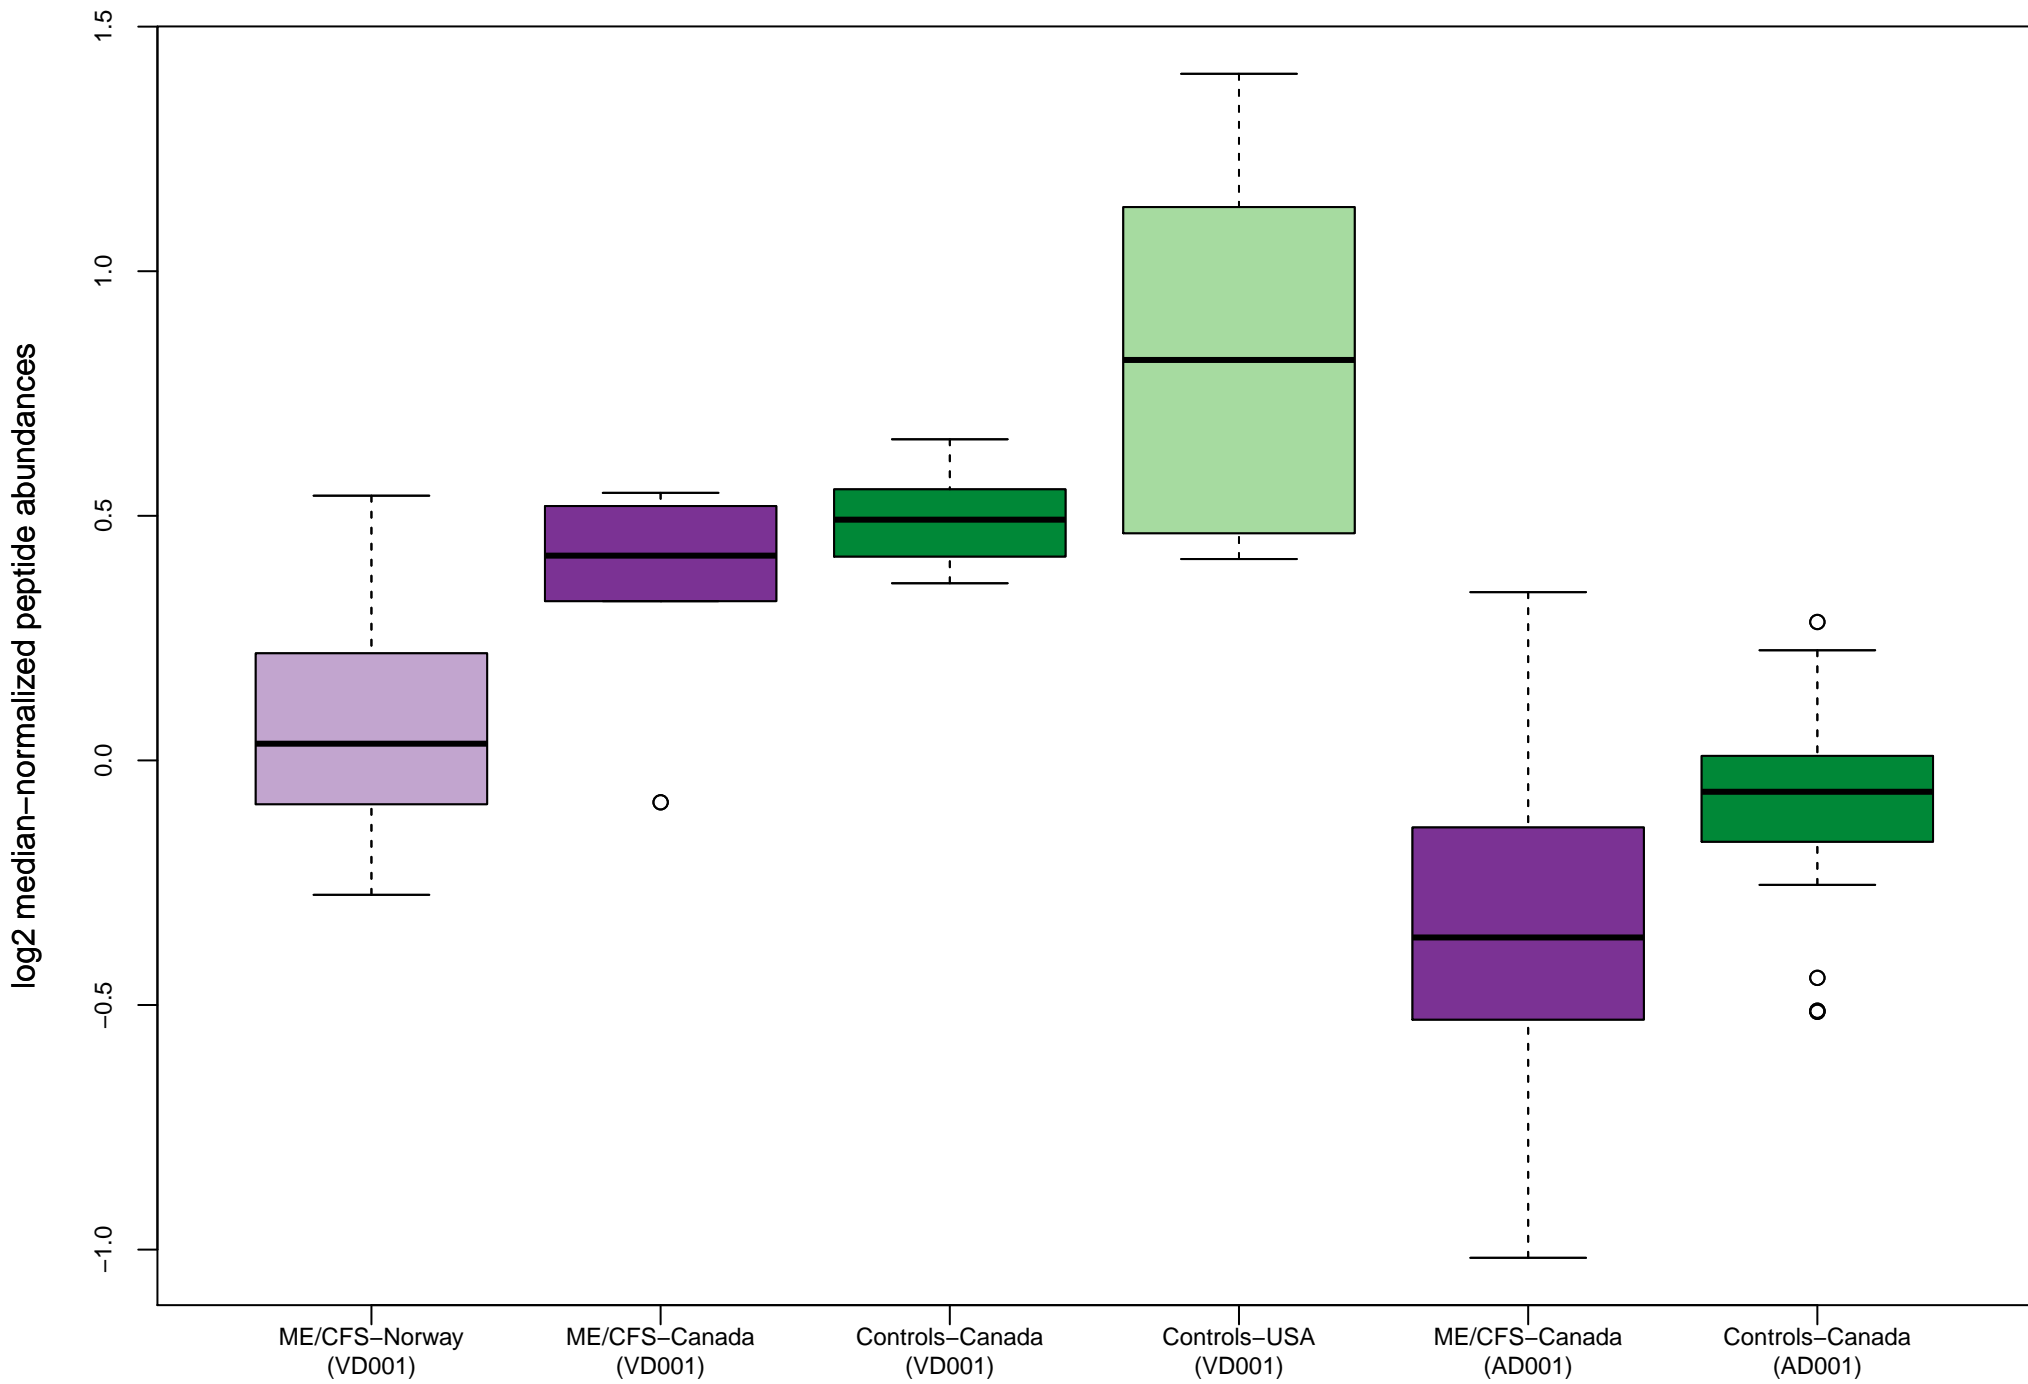

# LVRNYKALVALS

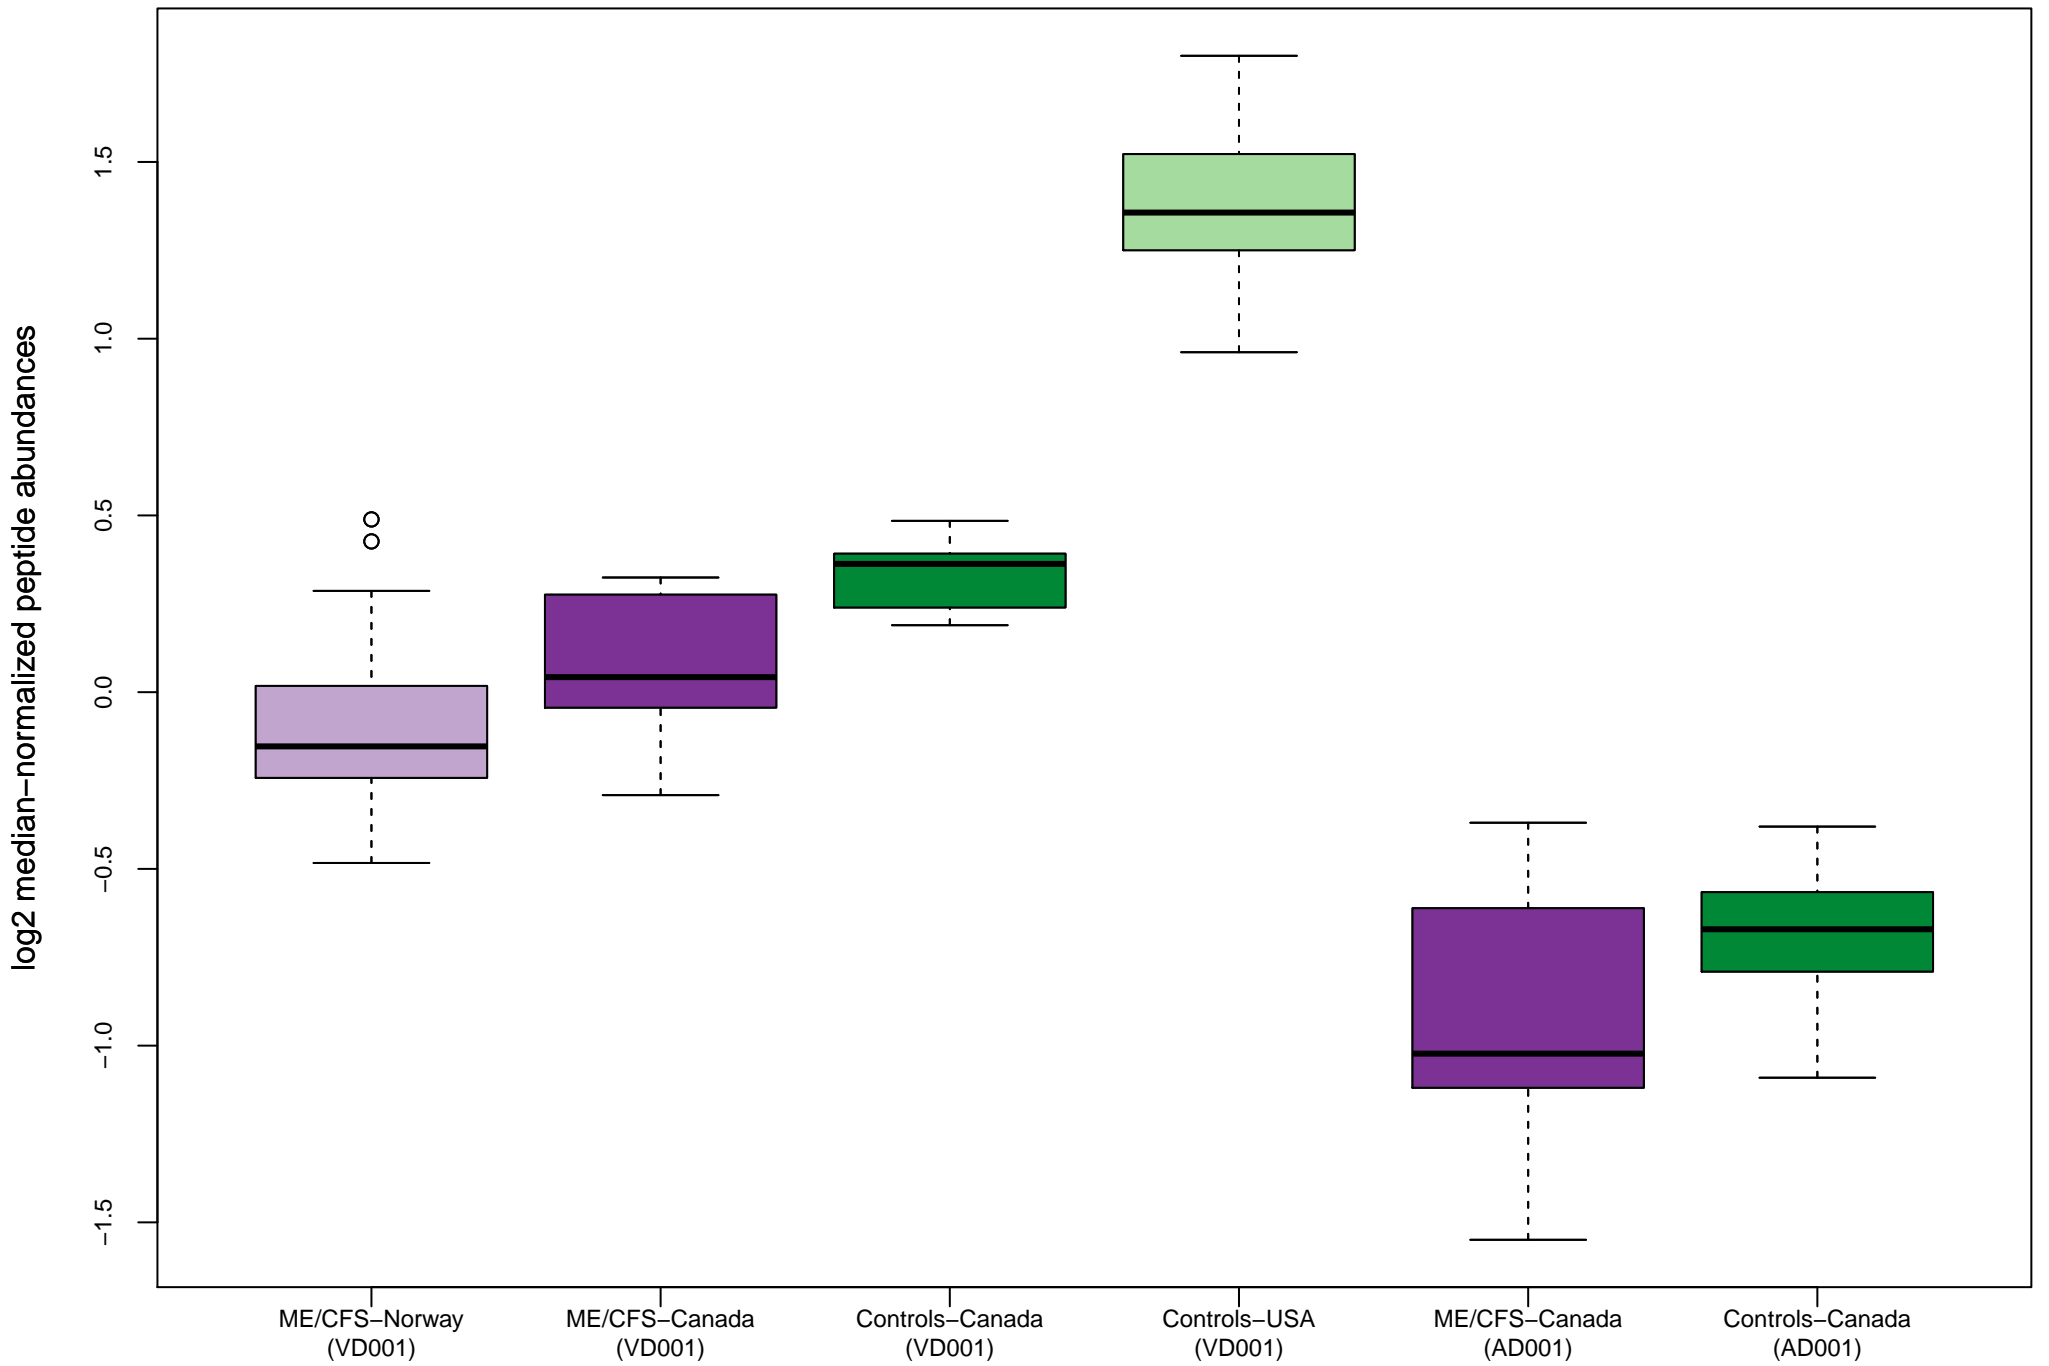

# LVRWGNLGVALG

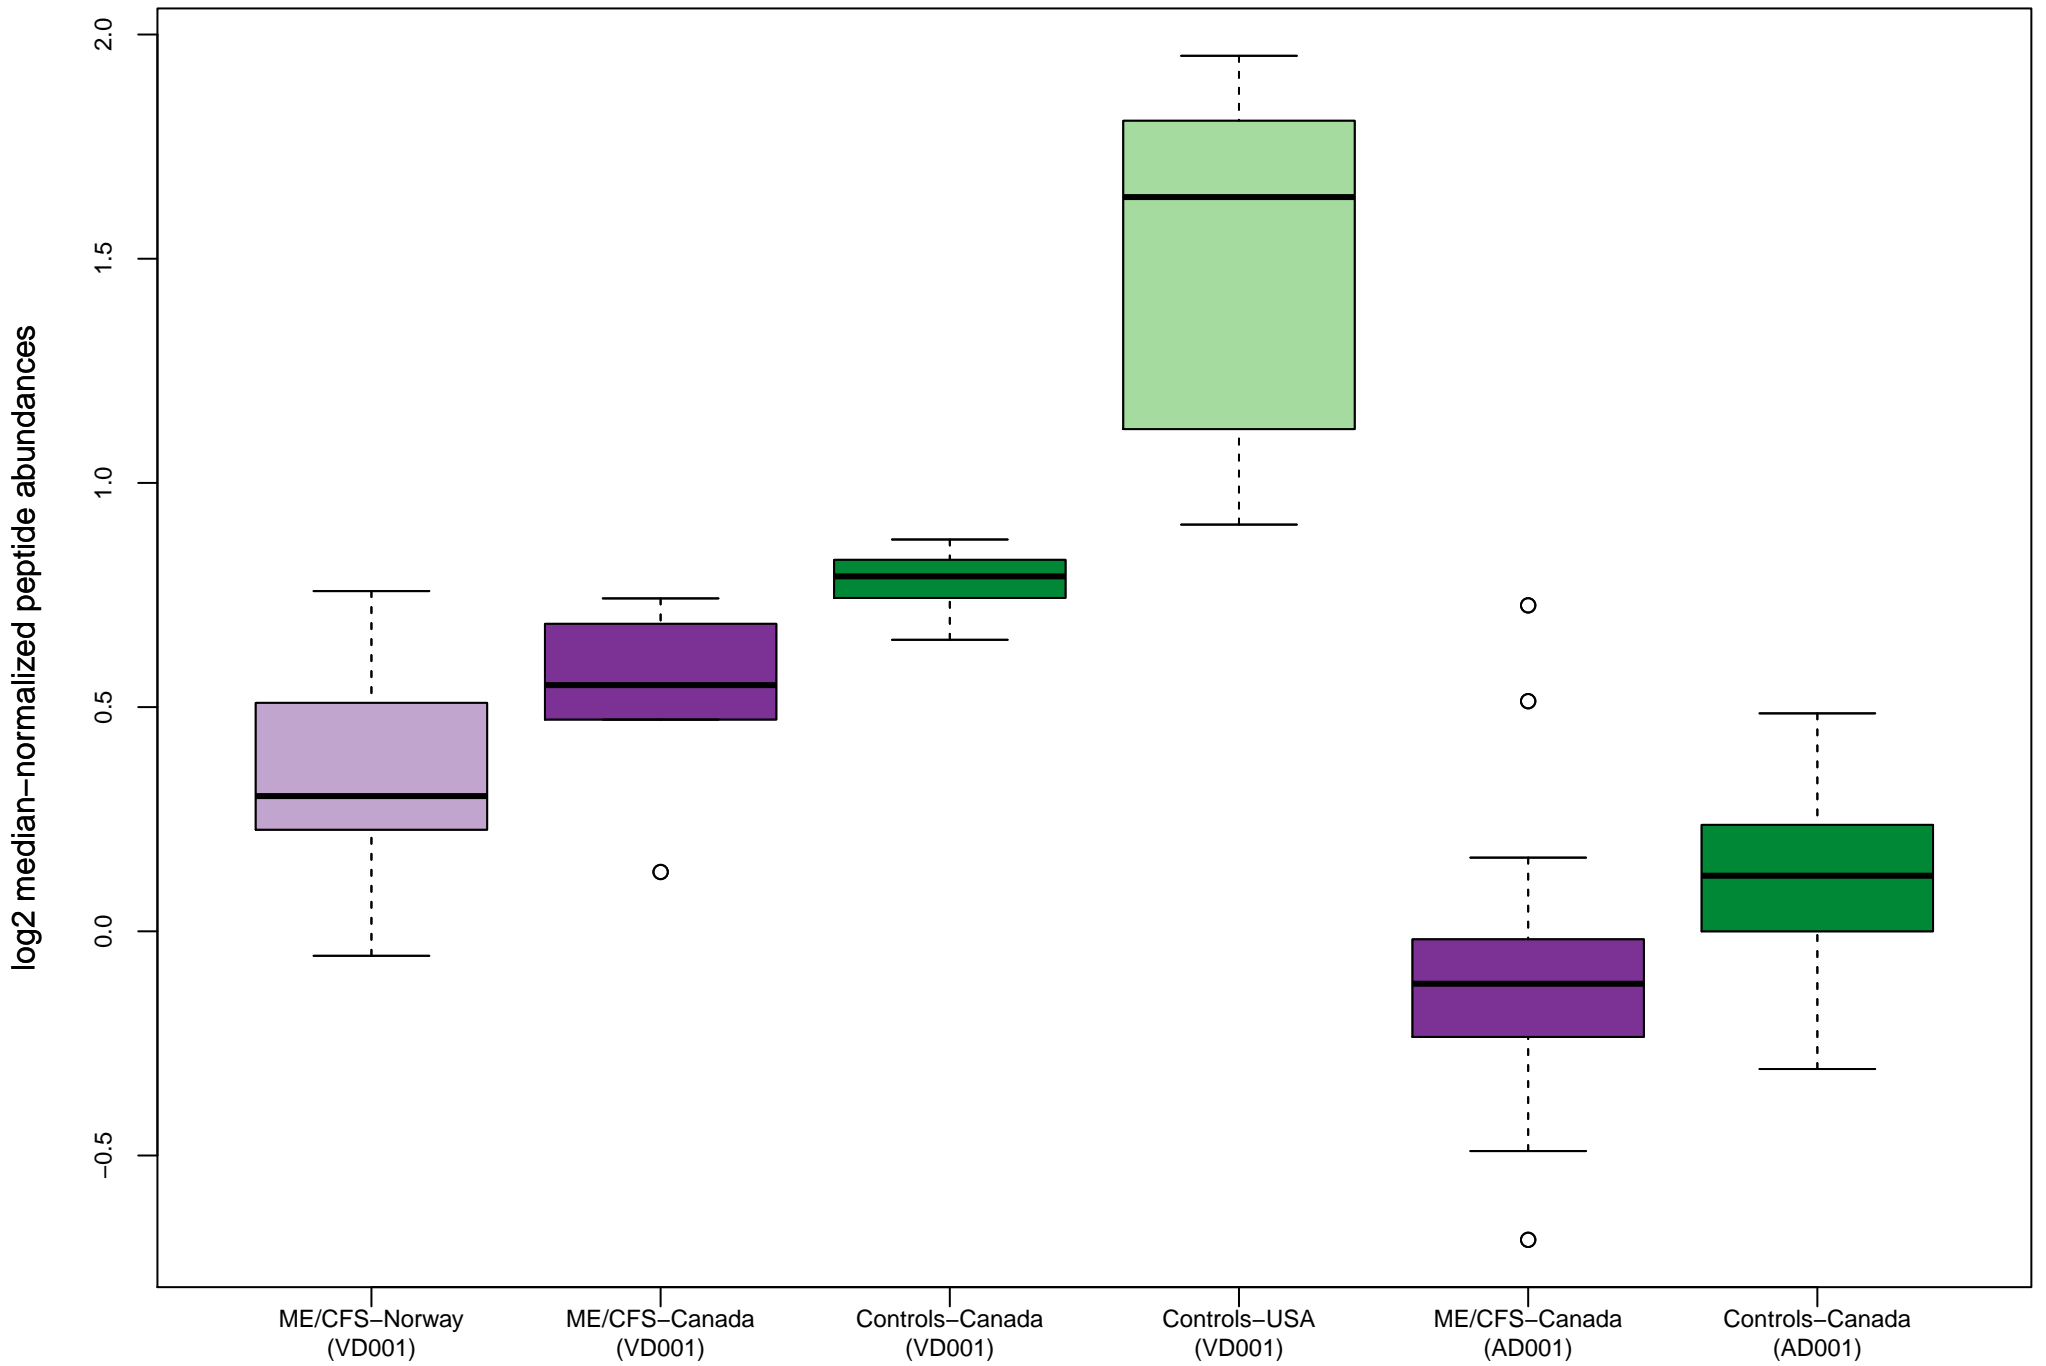

# LWGPWRAGVLSG

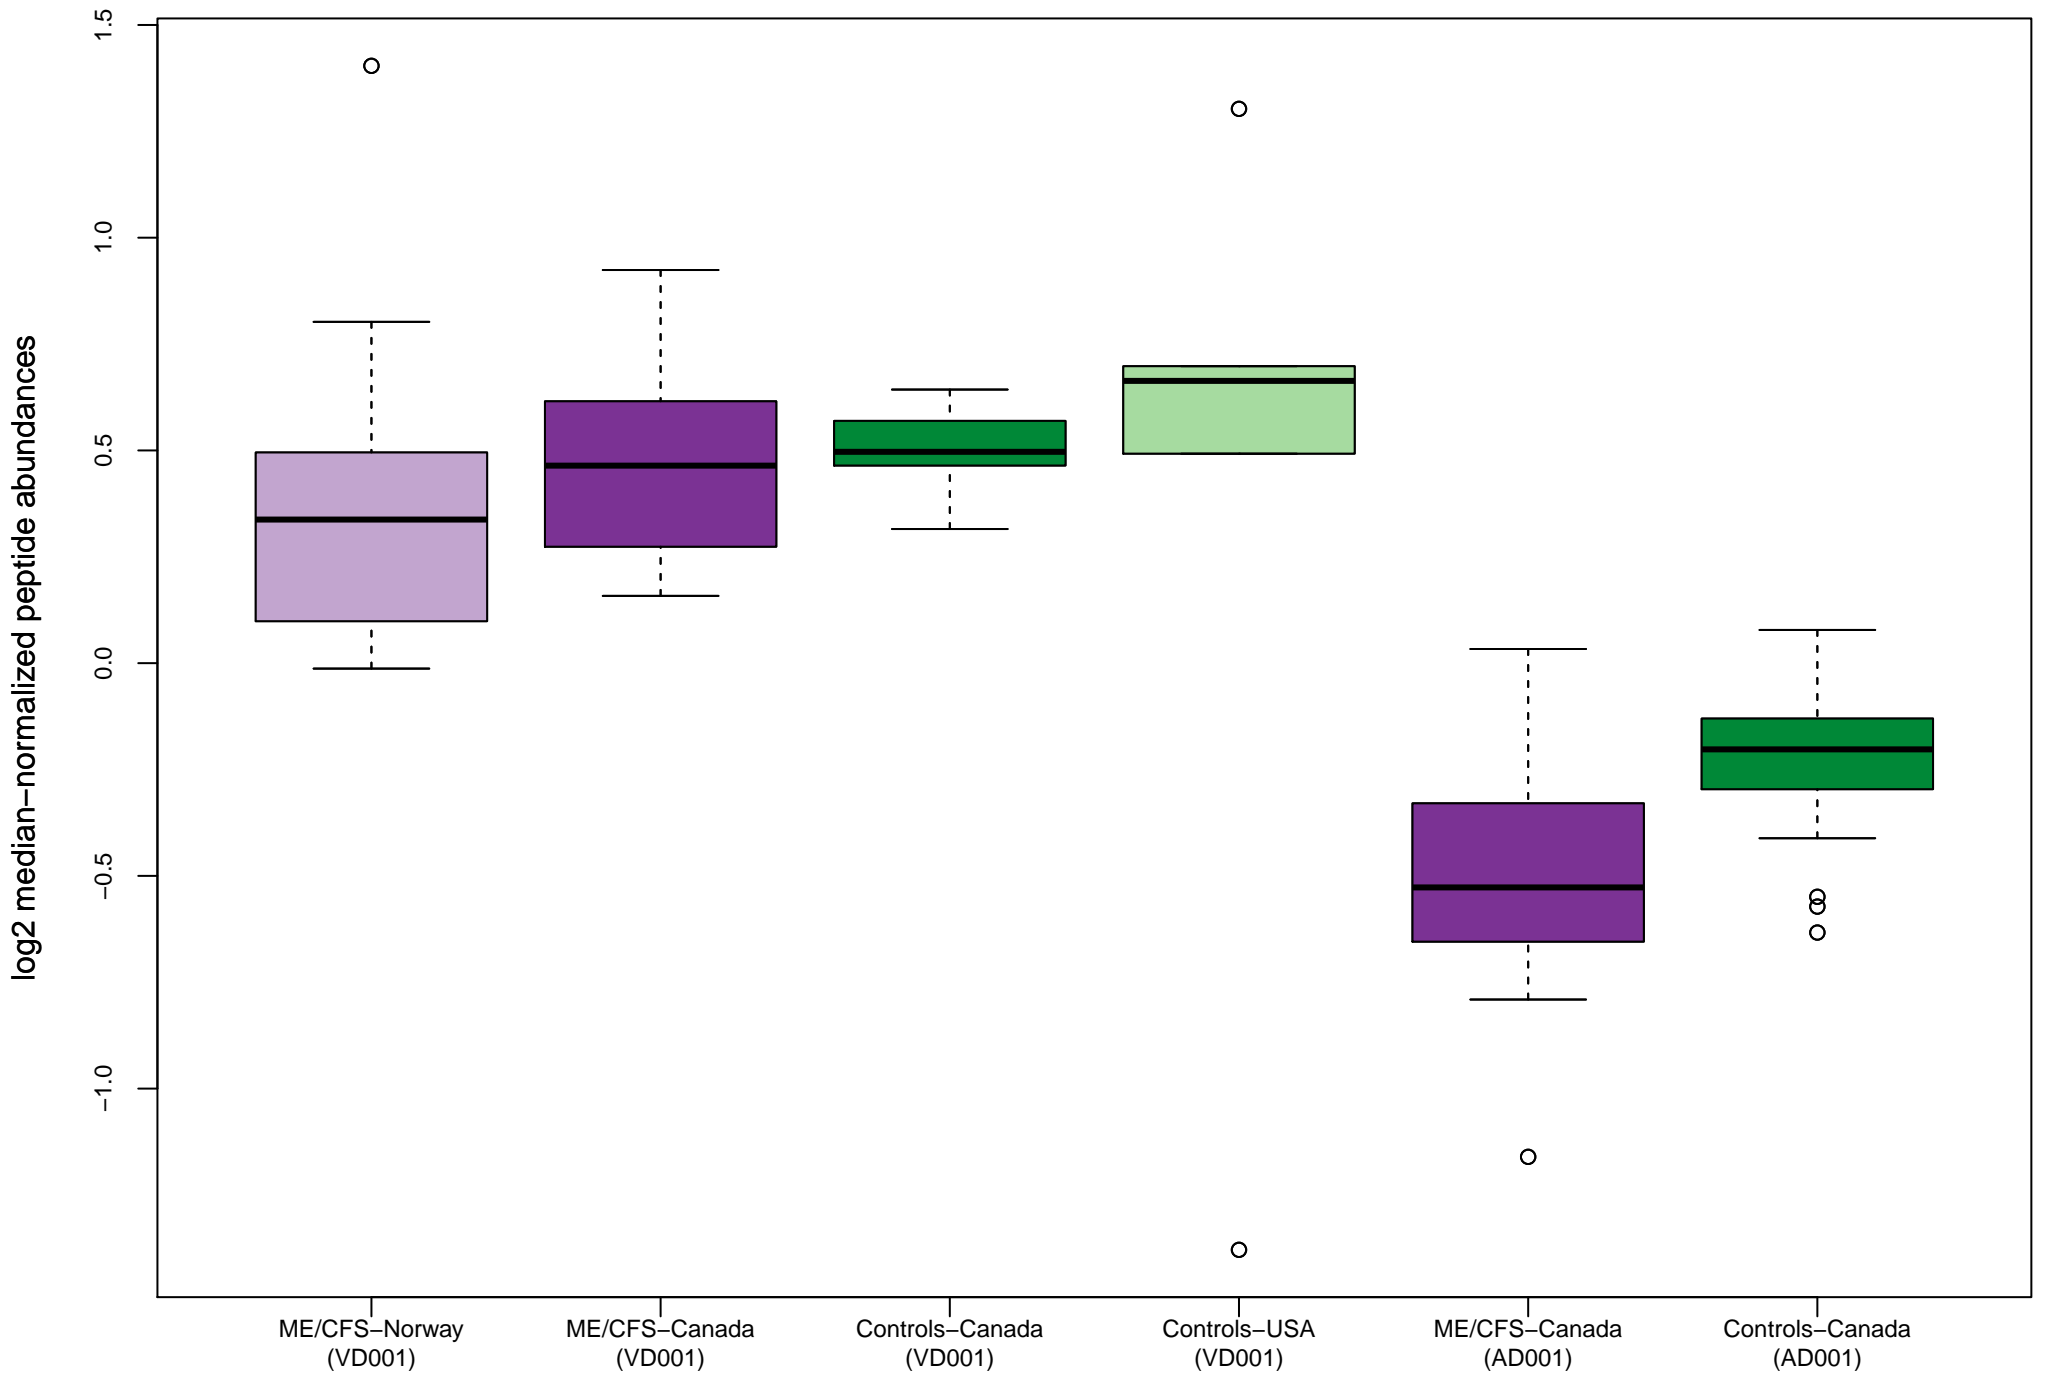

# LWRNYALSVLSG

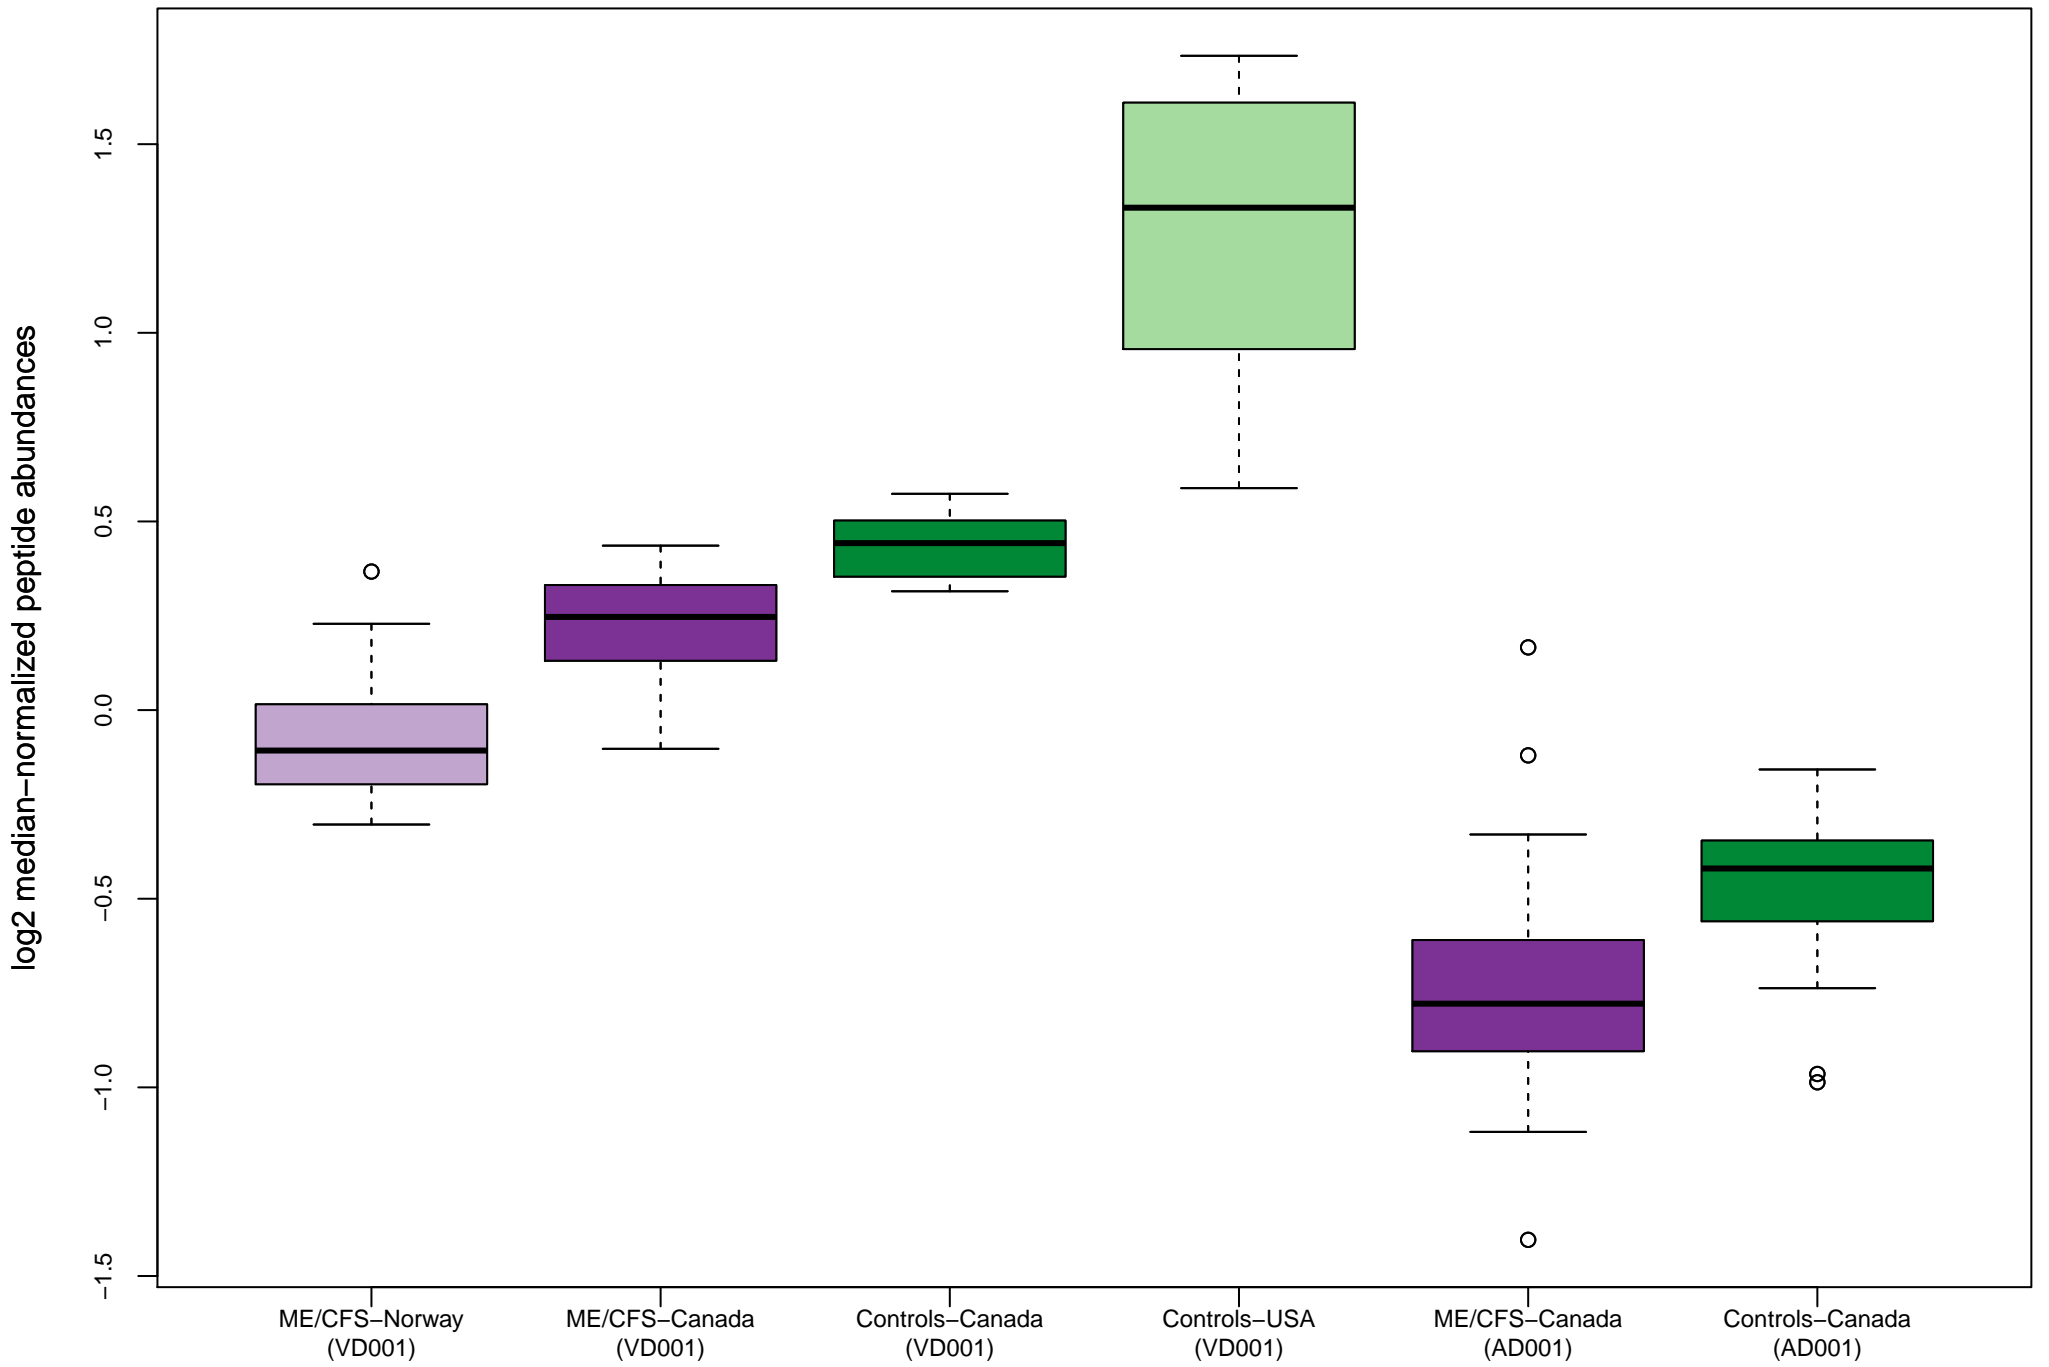

# LWSNRALGVALG

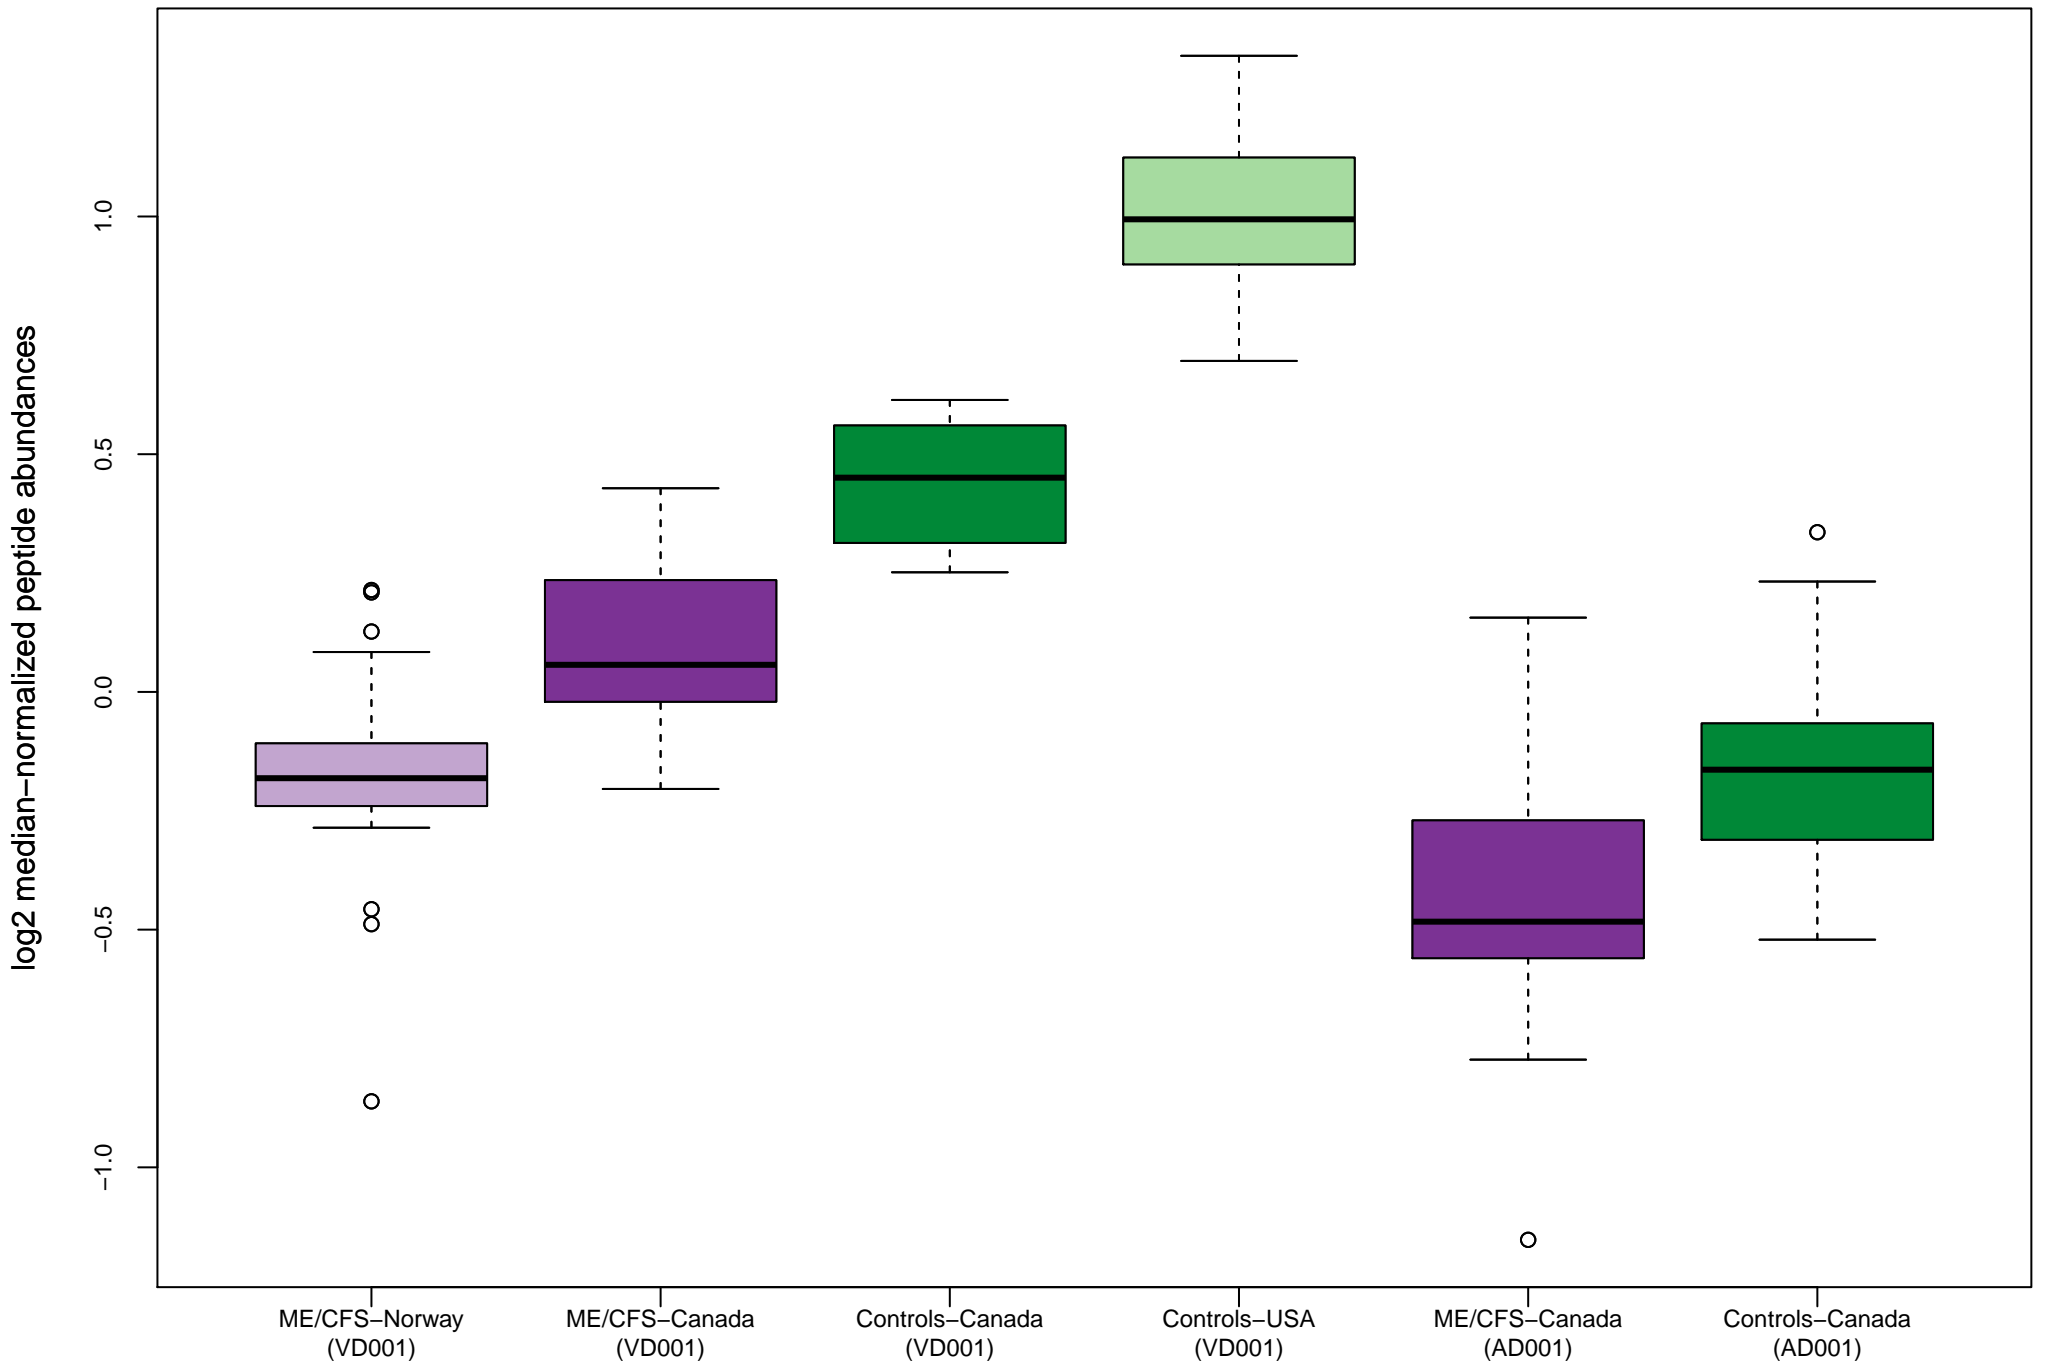

# LWWNRLGVALSG

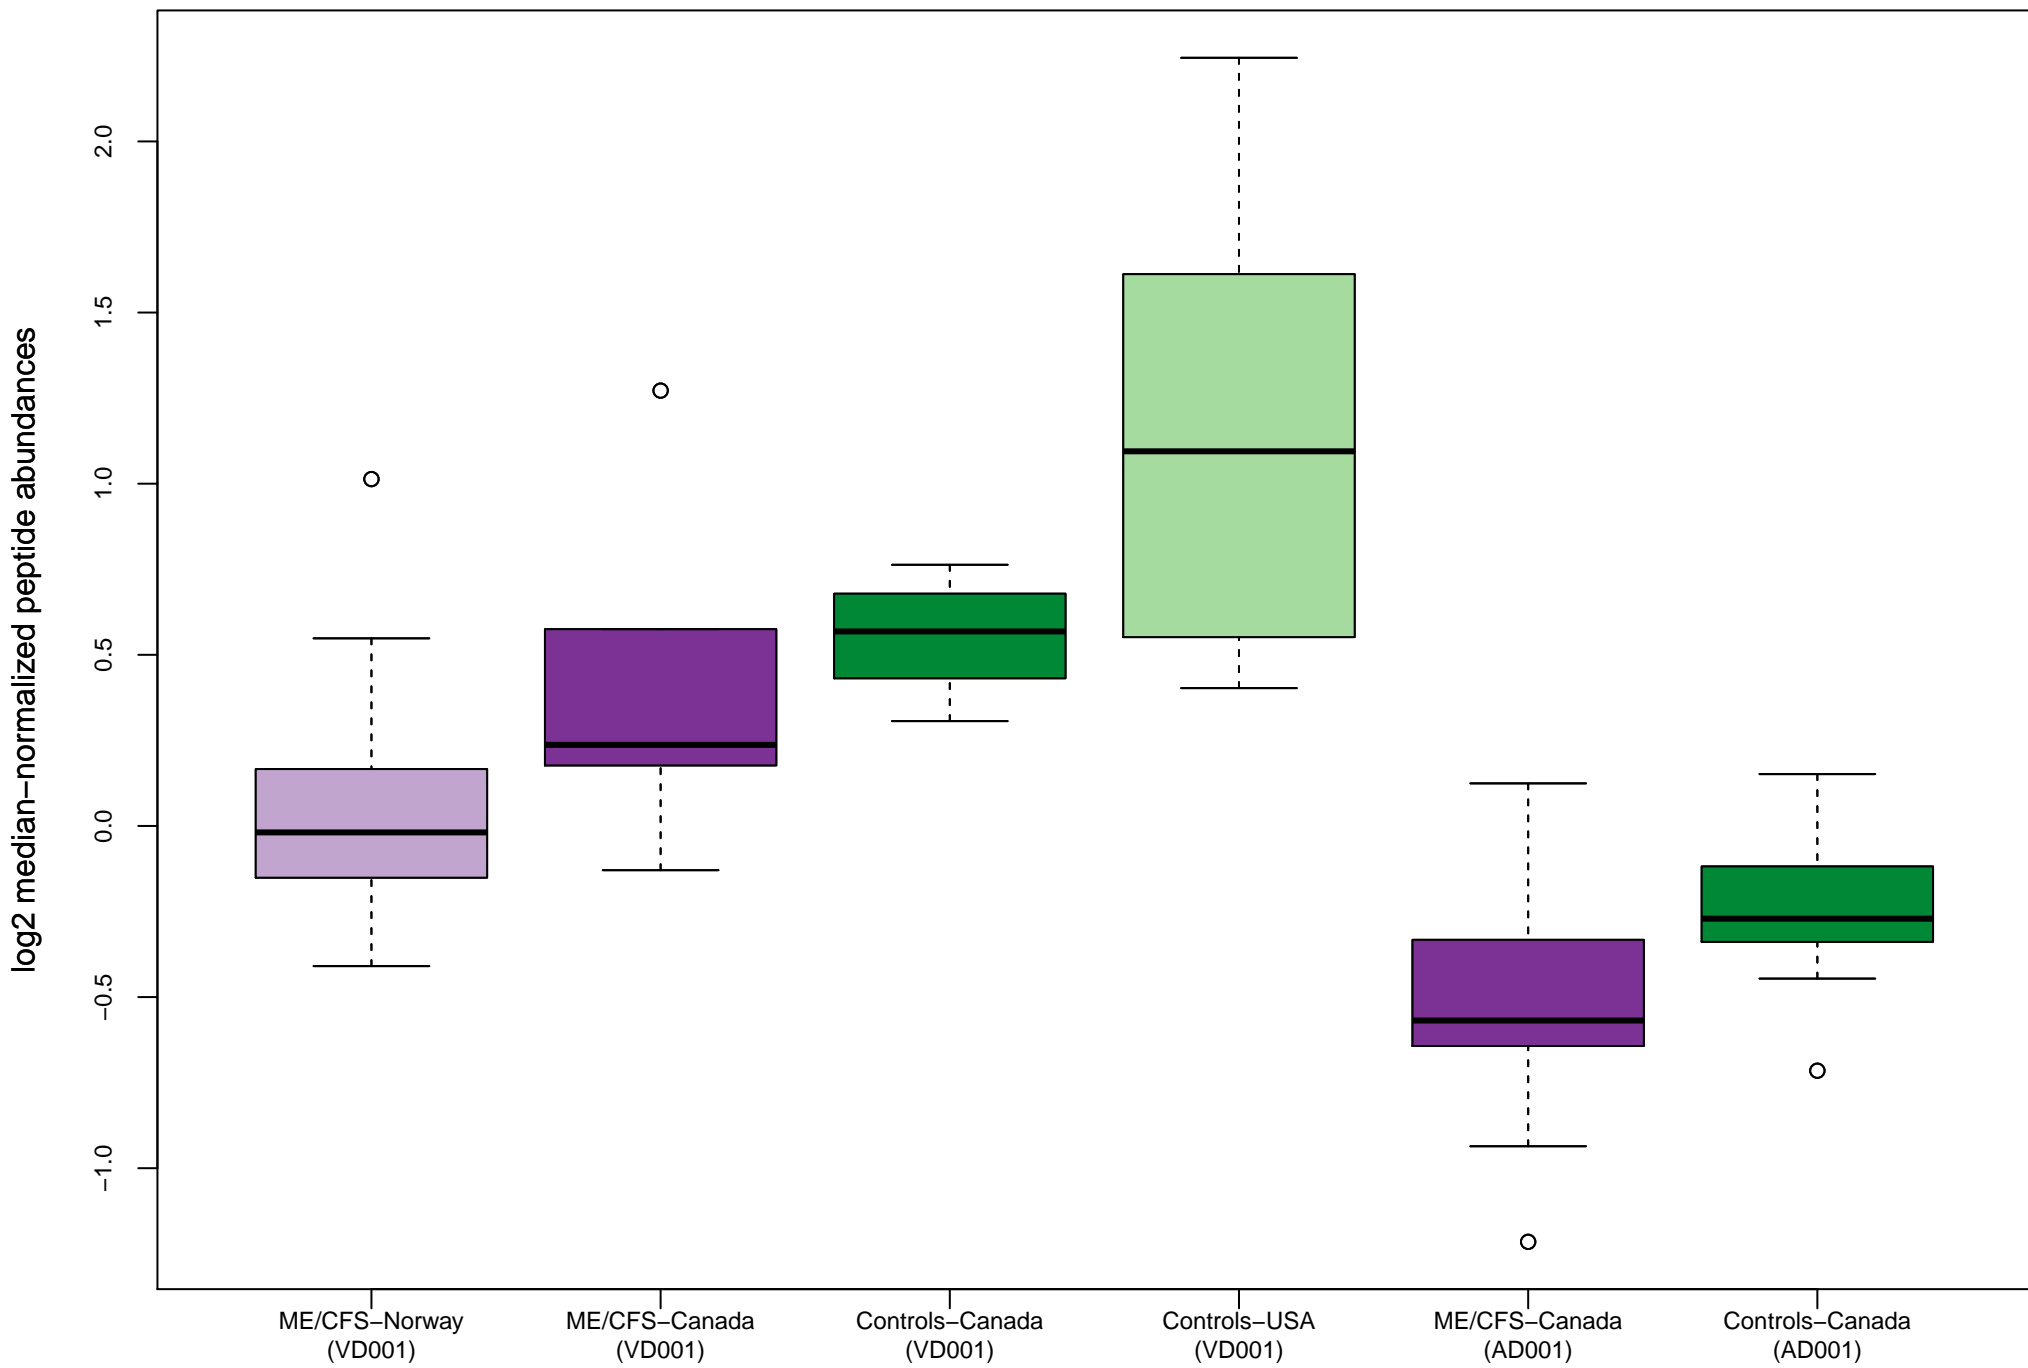

# LYFRSWLSVASG

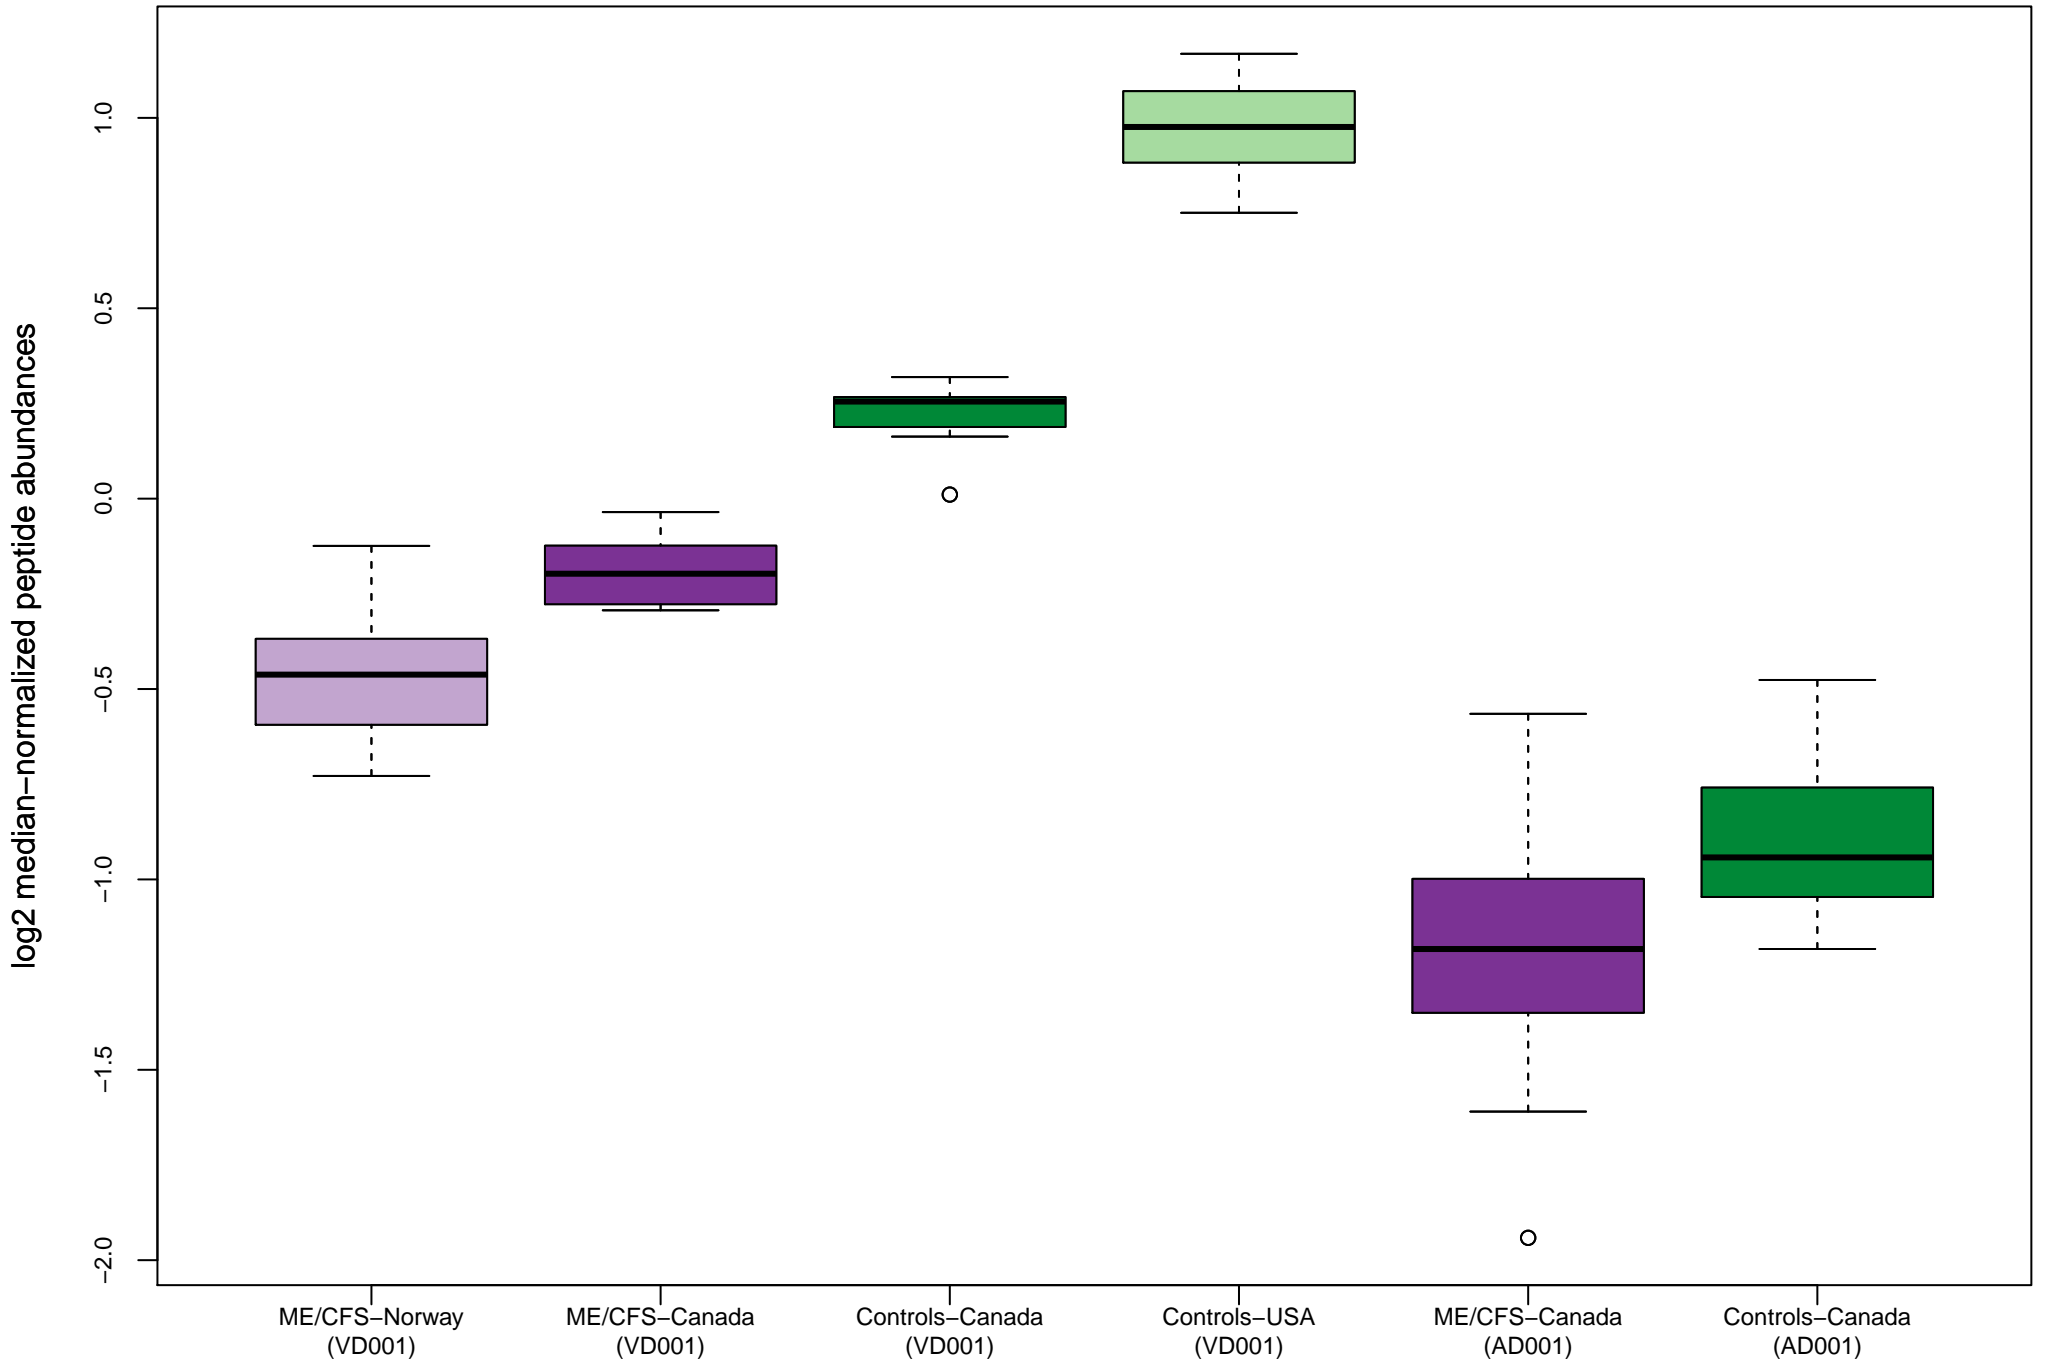



# LYKWKYL SVALG

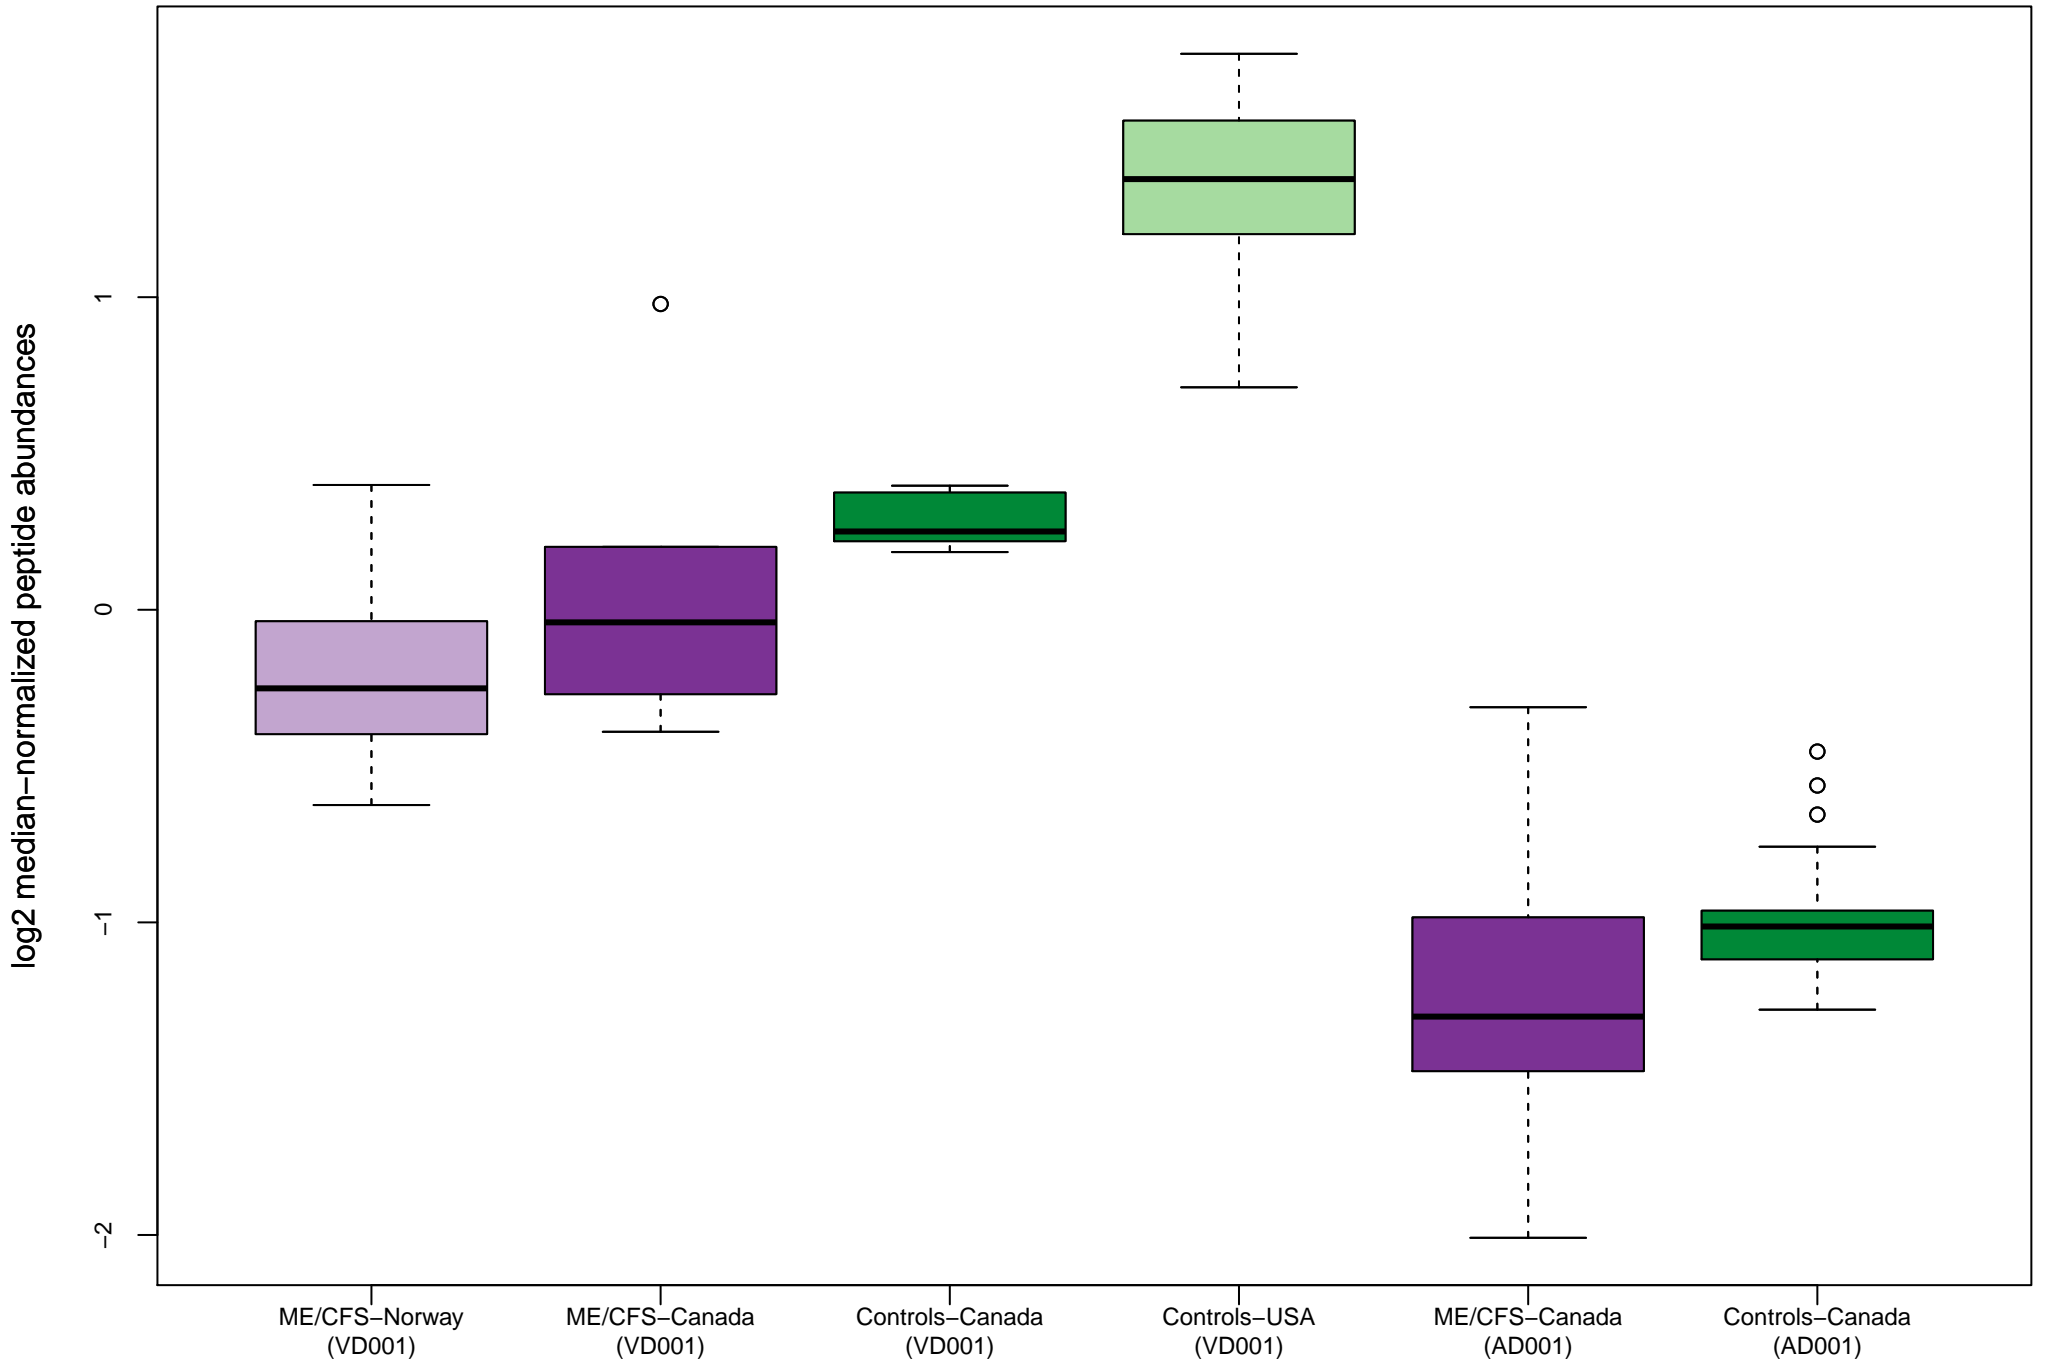

# LYLGHRVGVALS

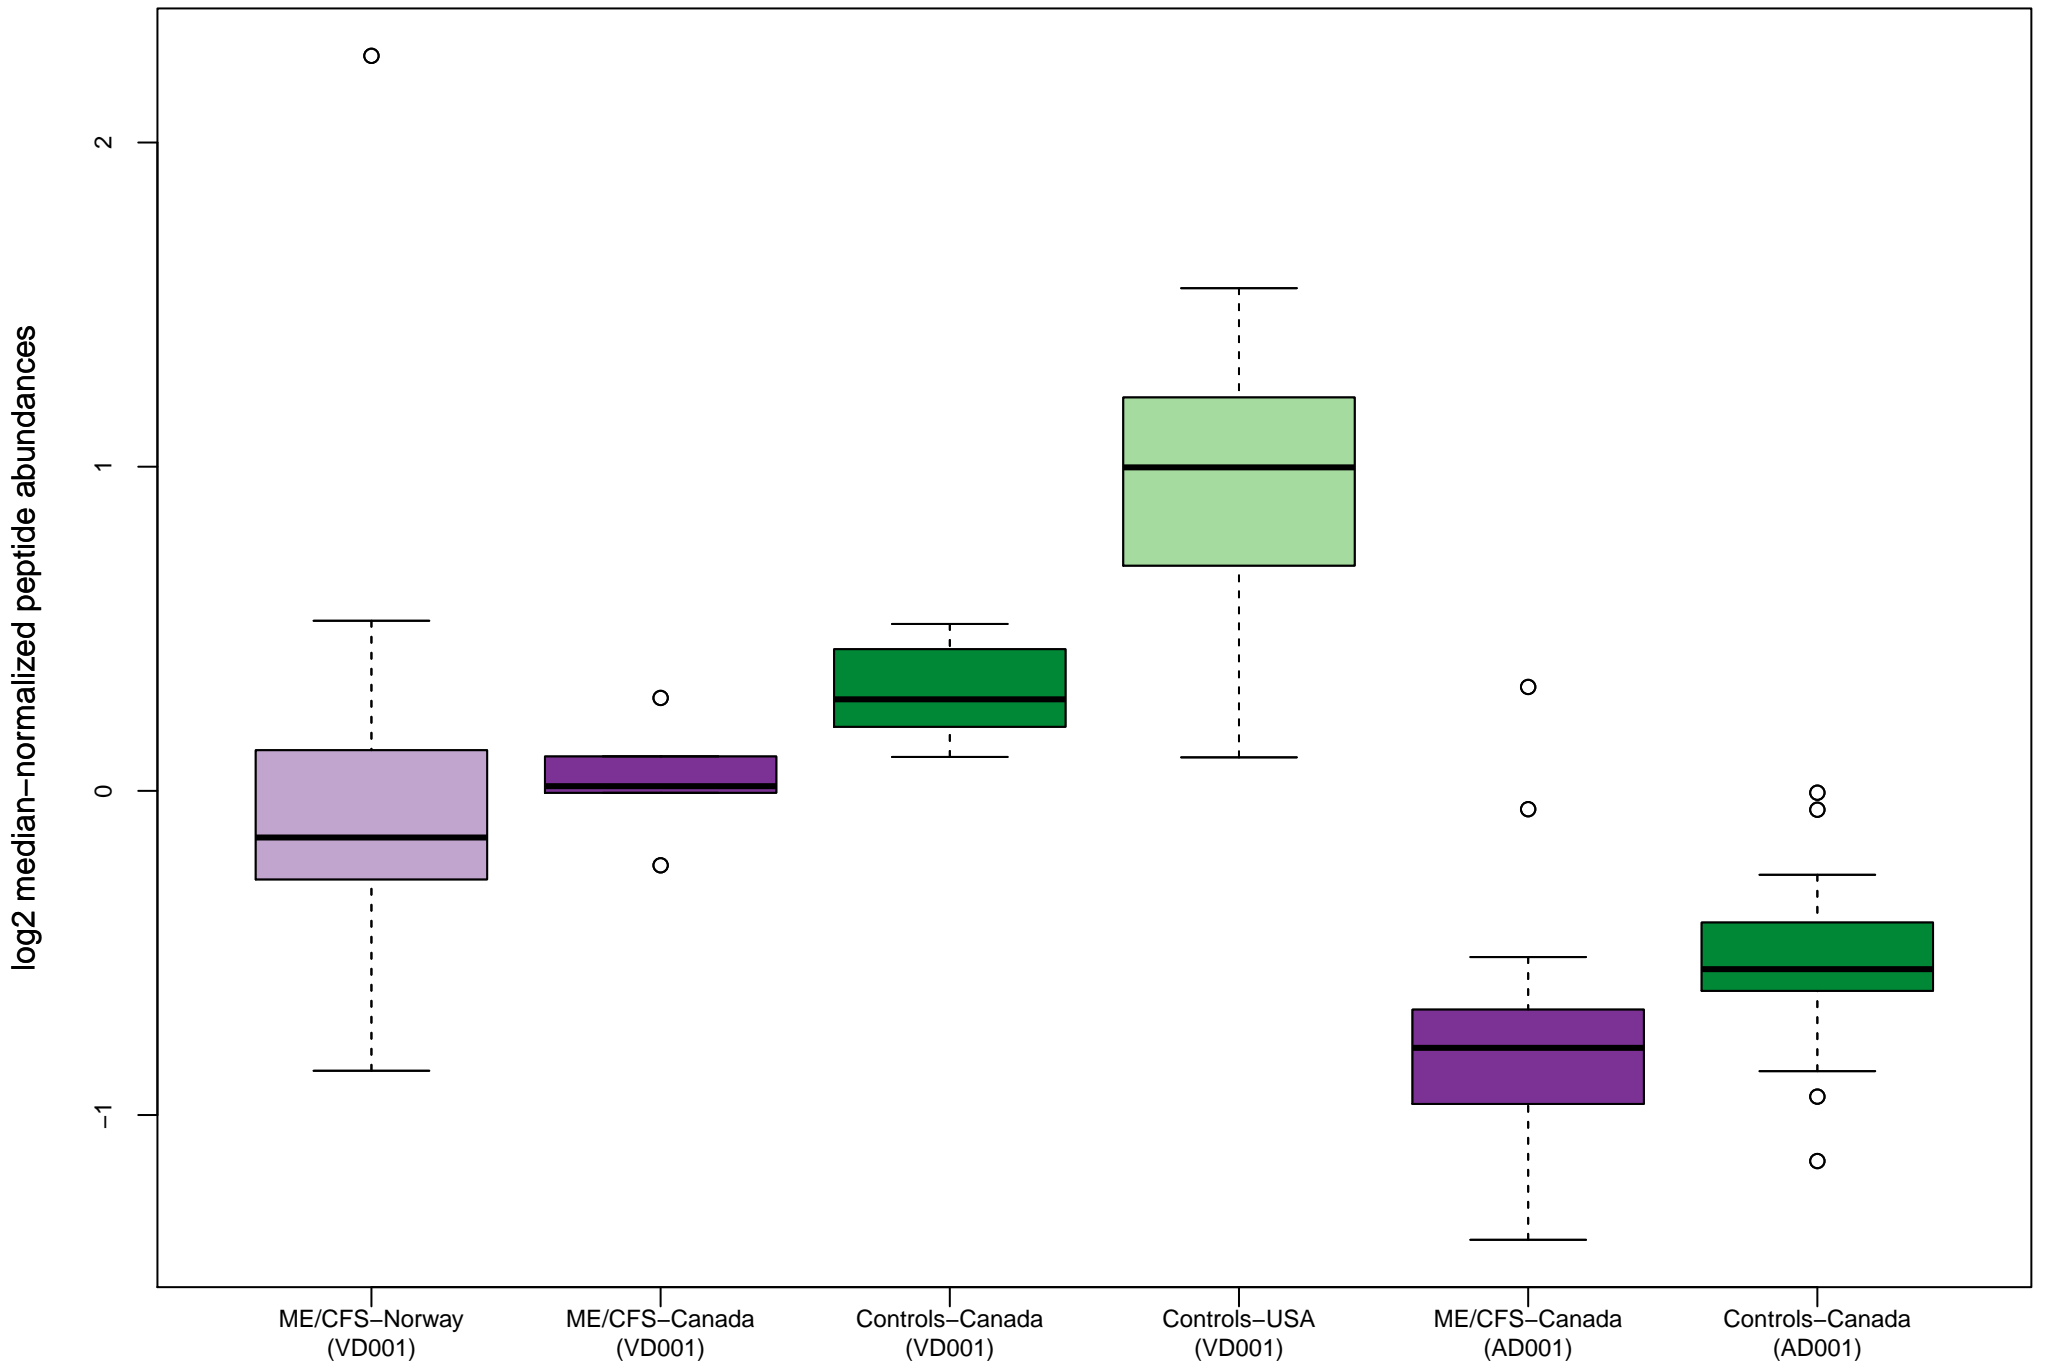

# LYLGWRWAGVLG

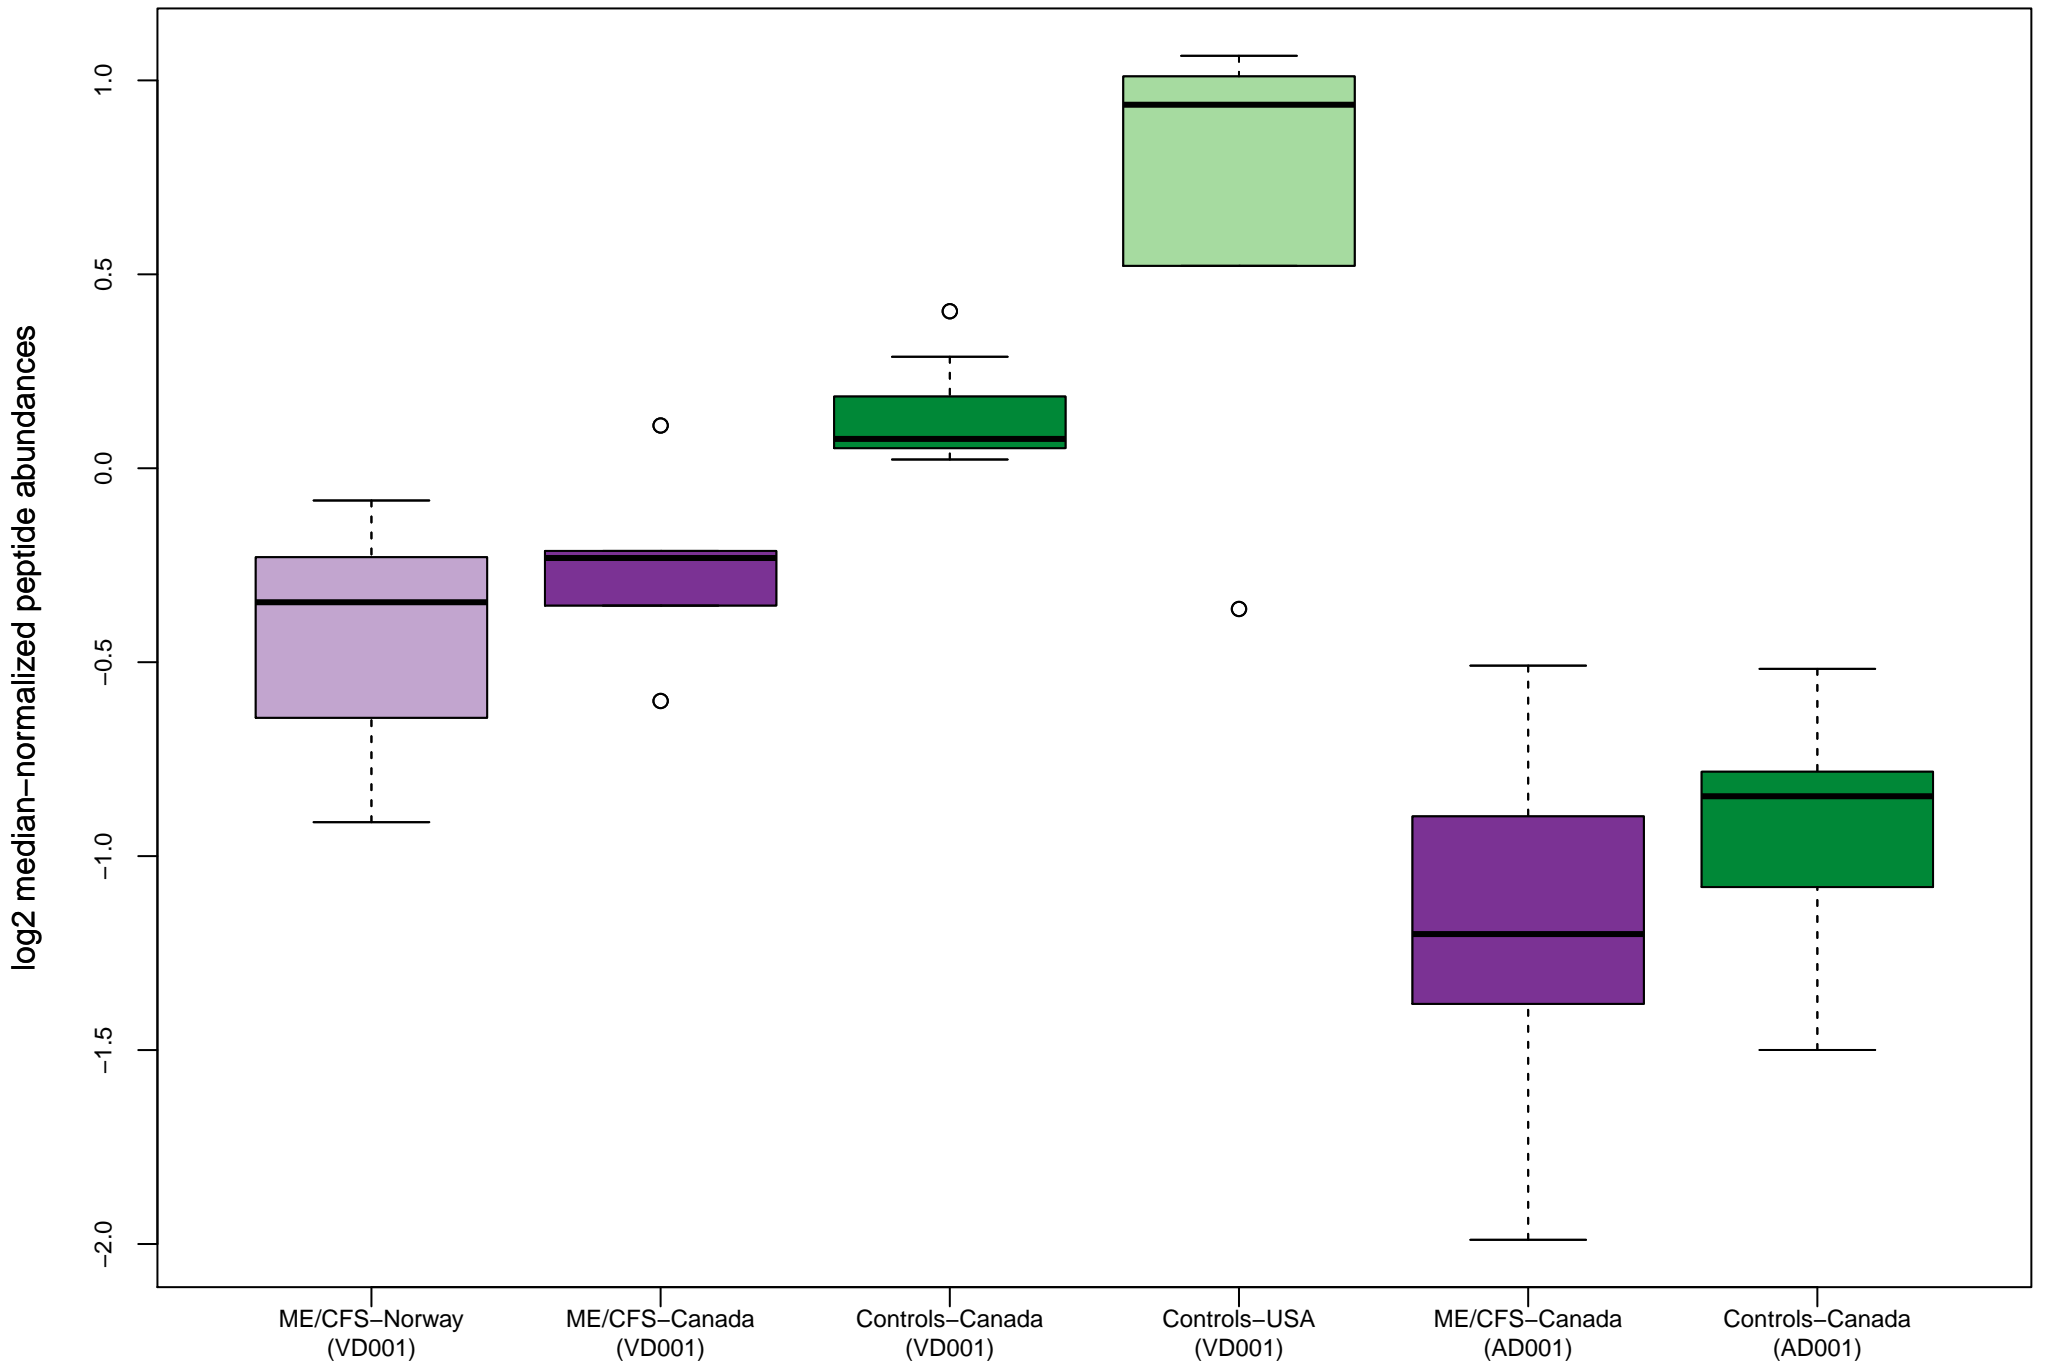

# LYNGRFYGVLSG

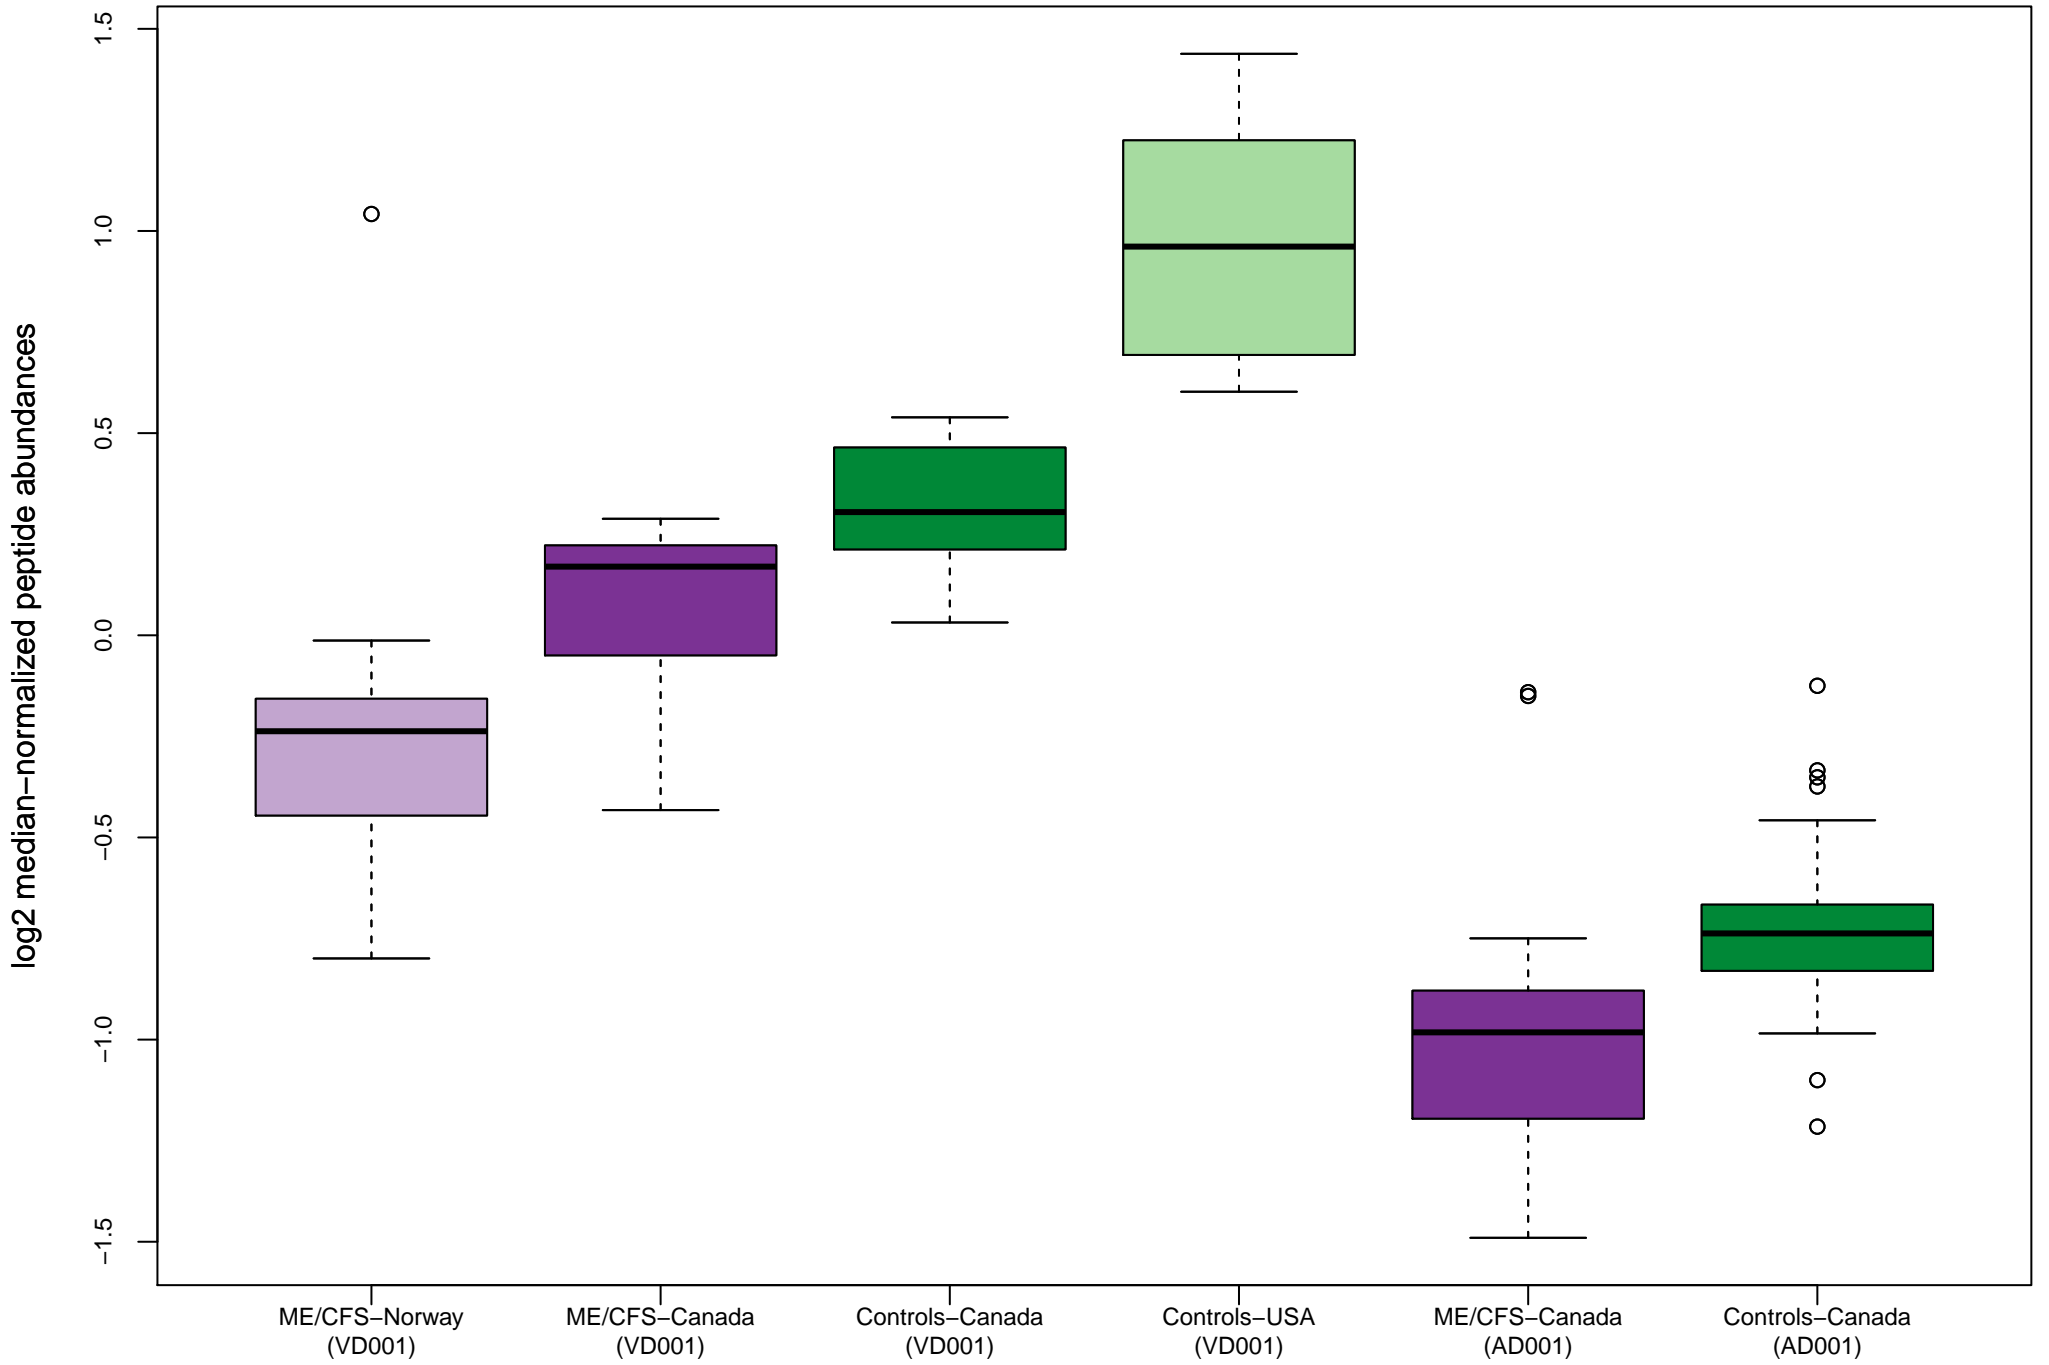

# LYSKPVLSVLSG

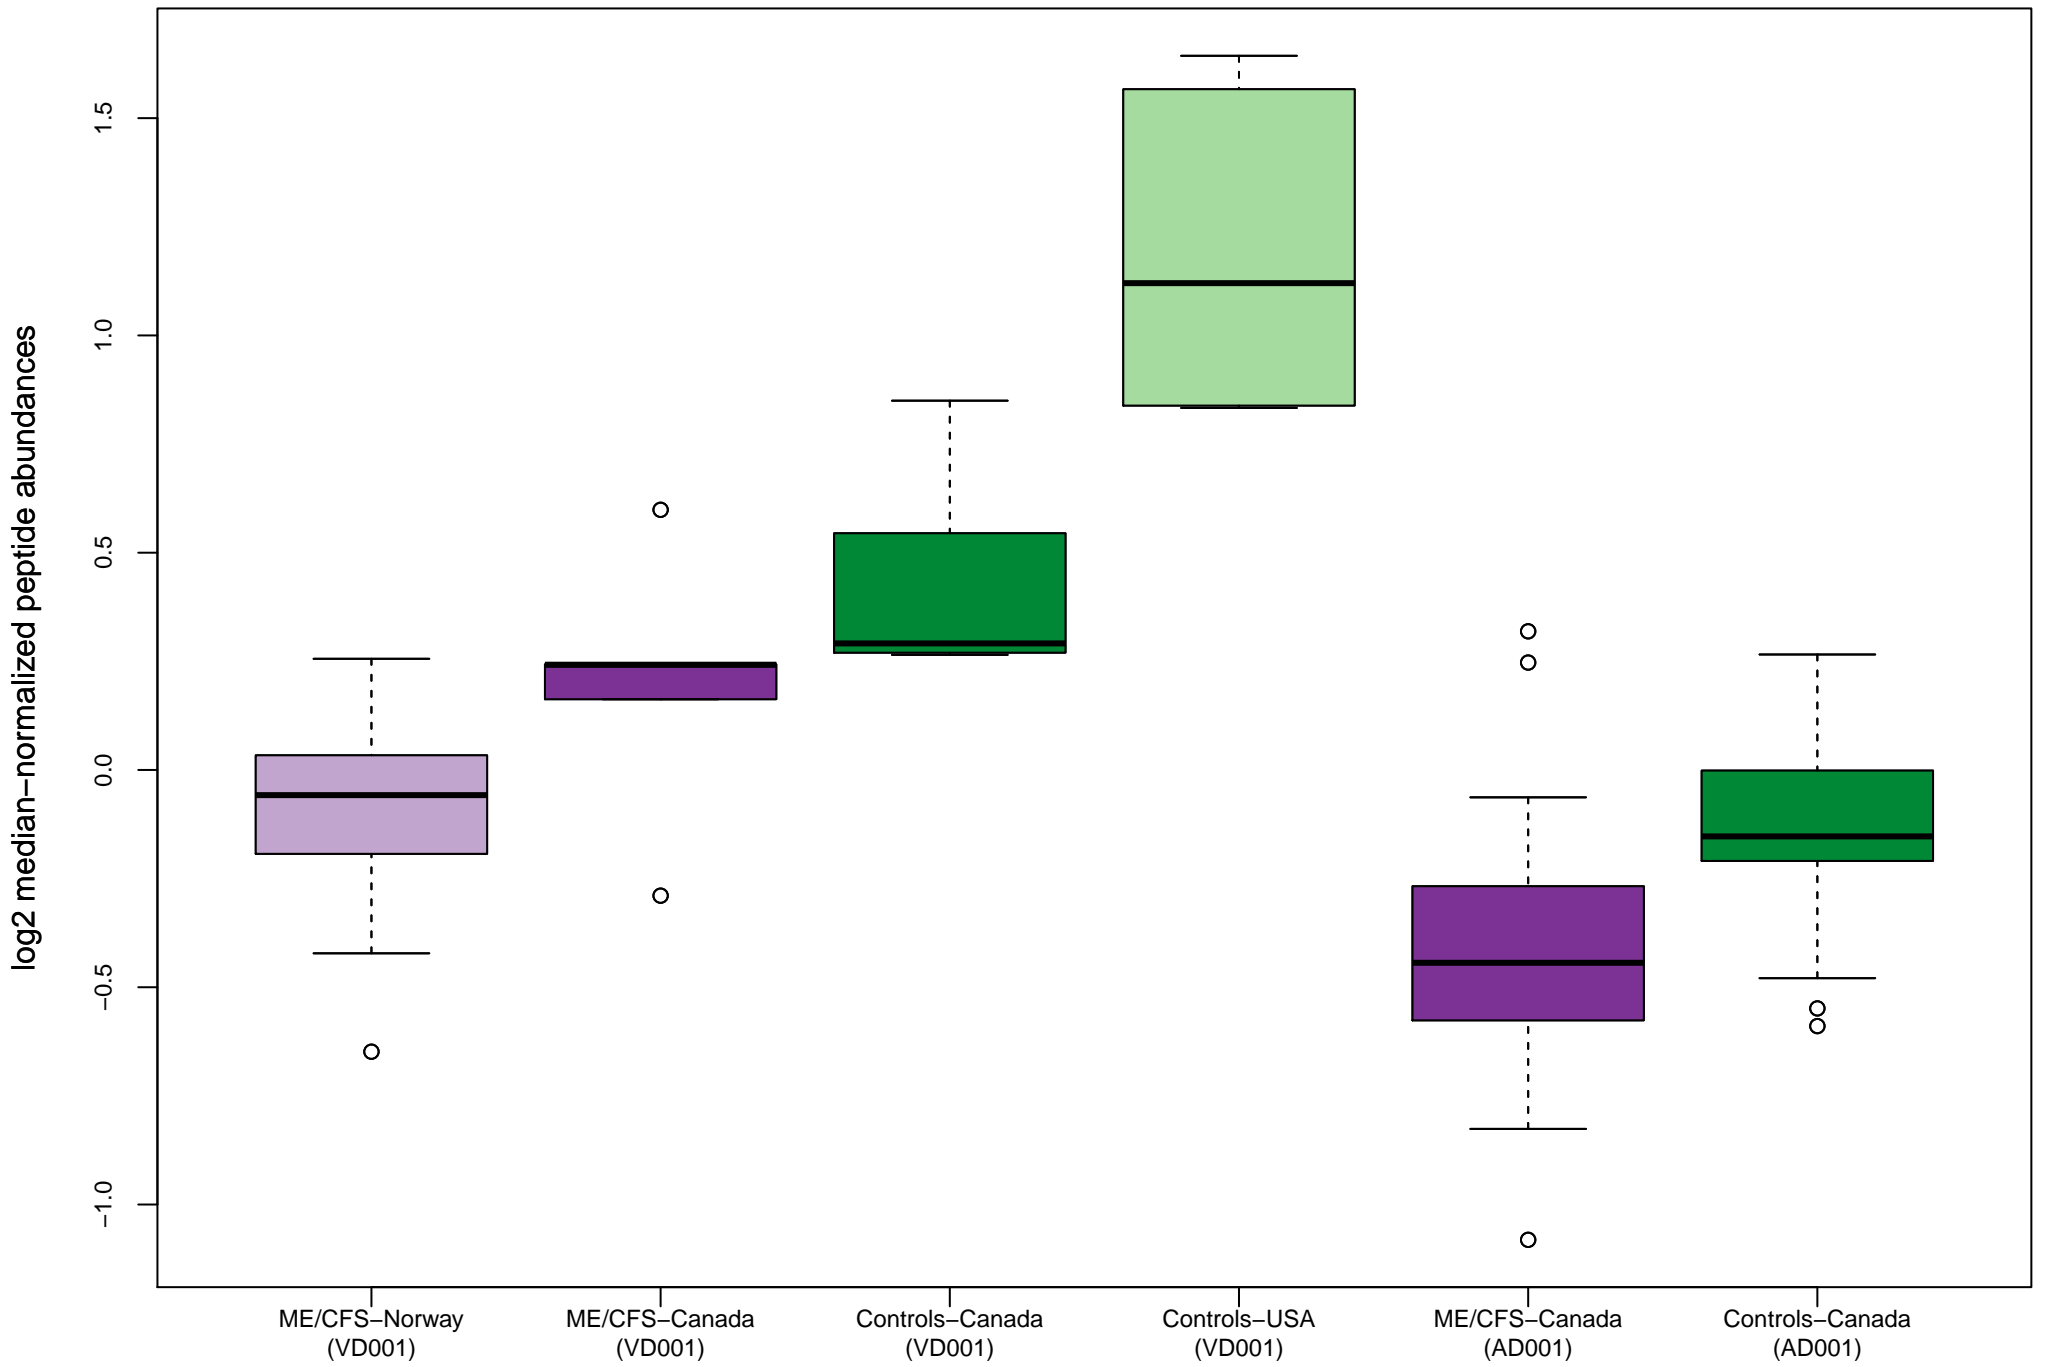

# LYSRSRVLVAG

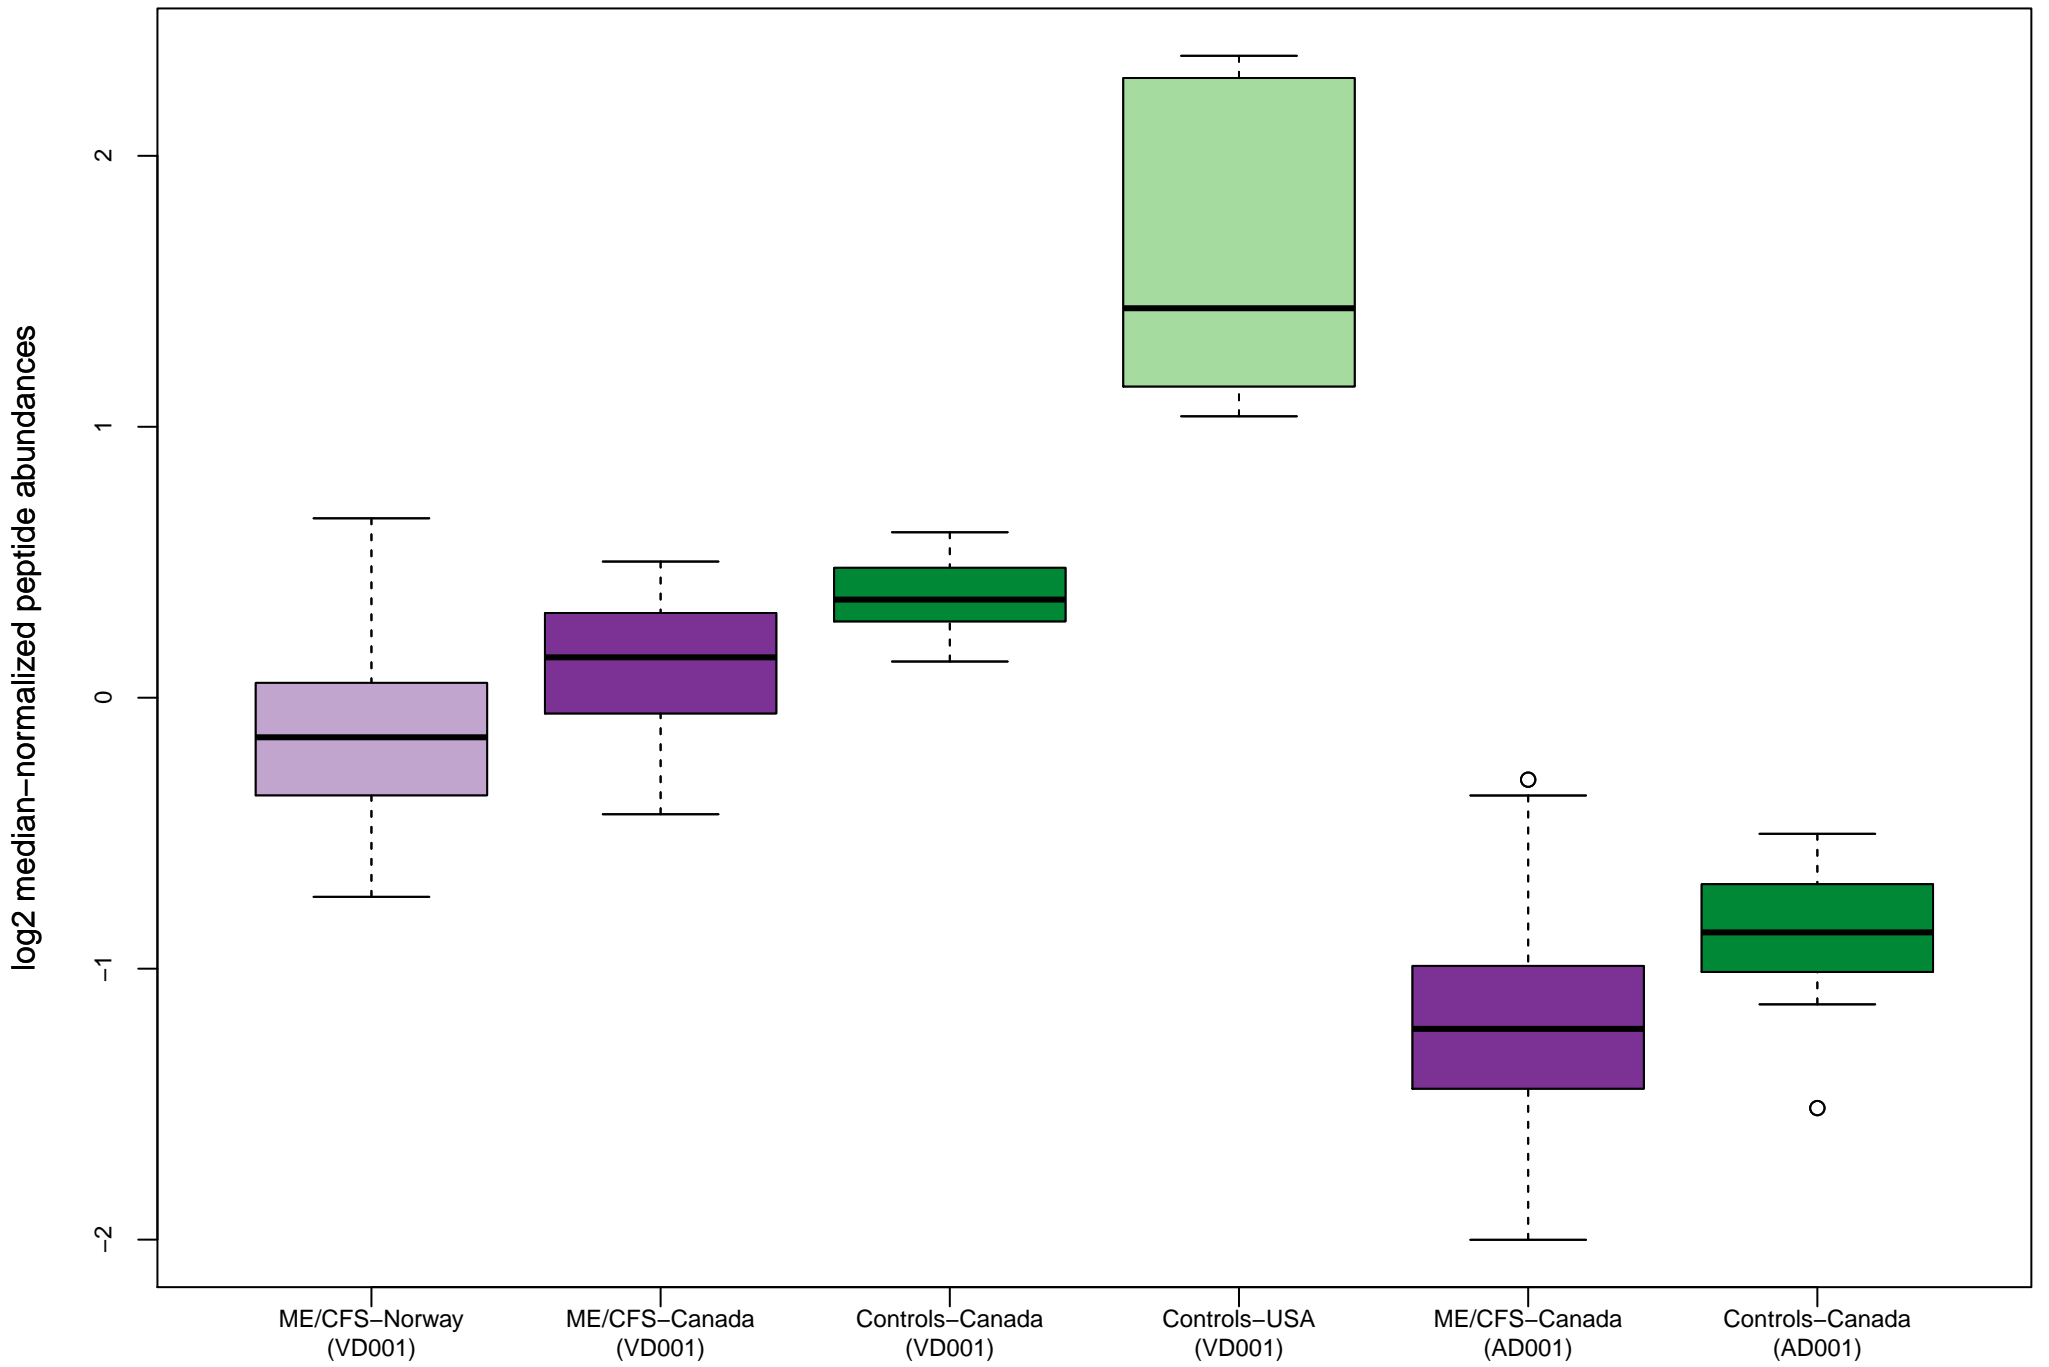

# NAFWQVQFRHVL

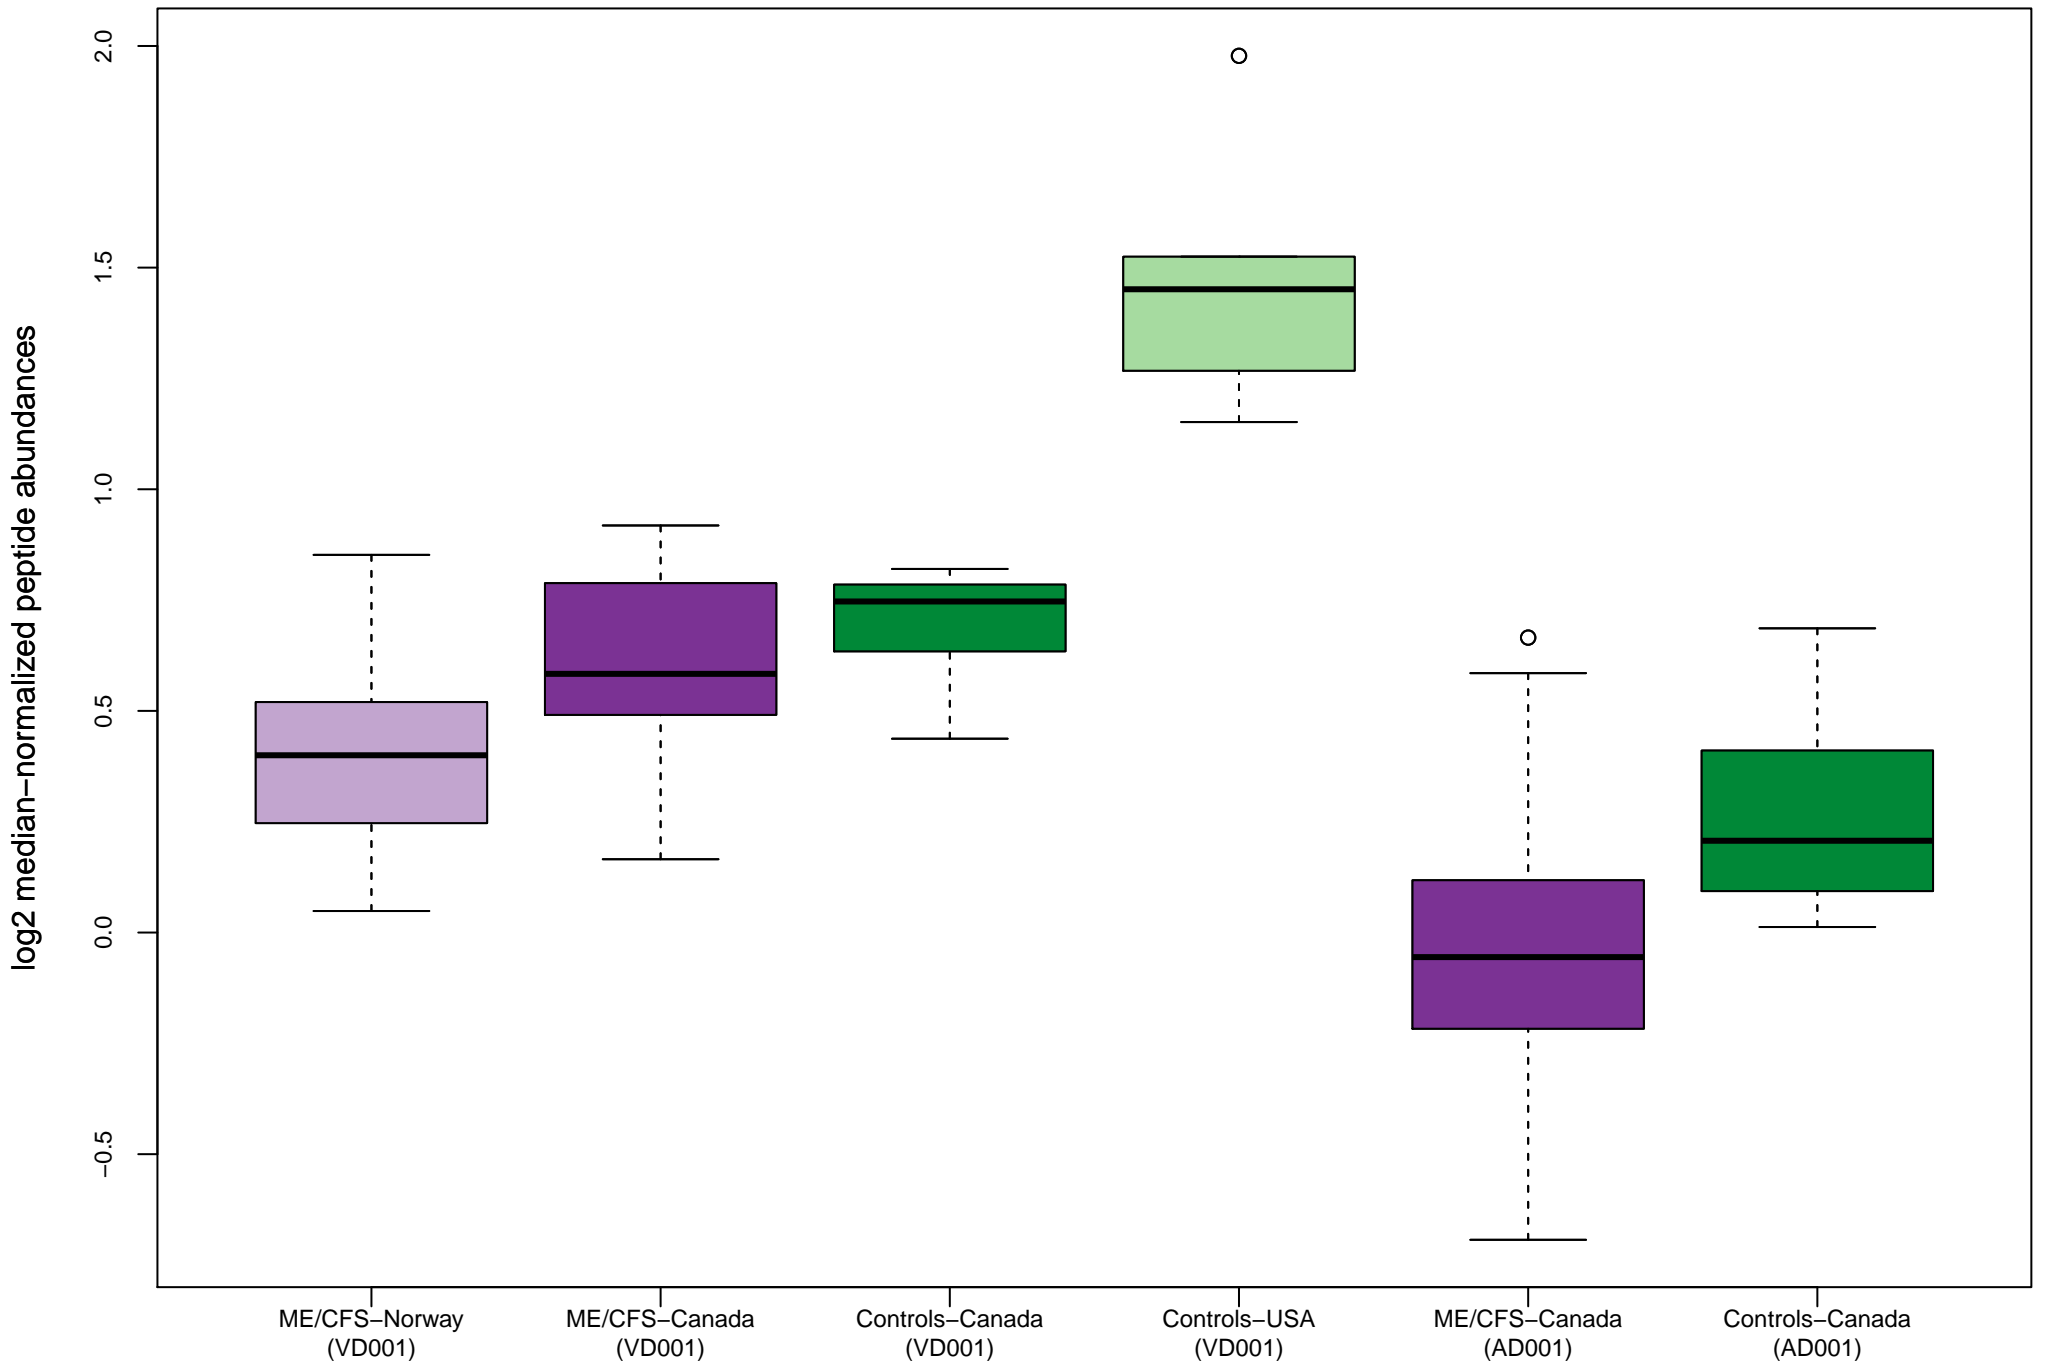

# NAWFRYRHLVAS

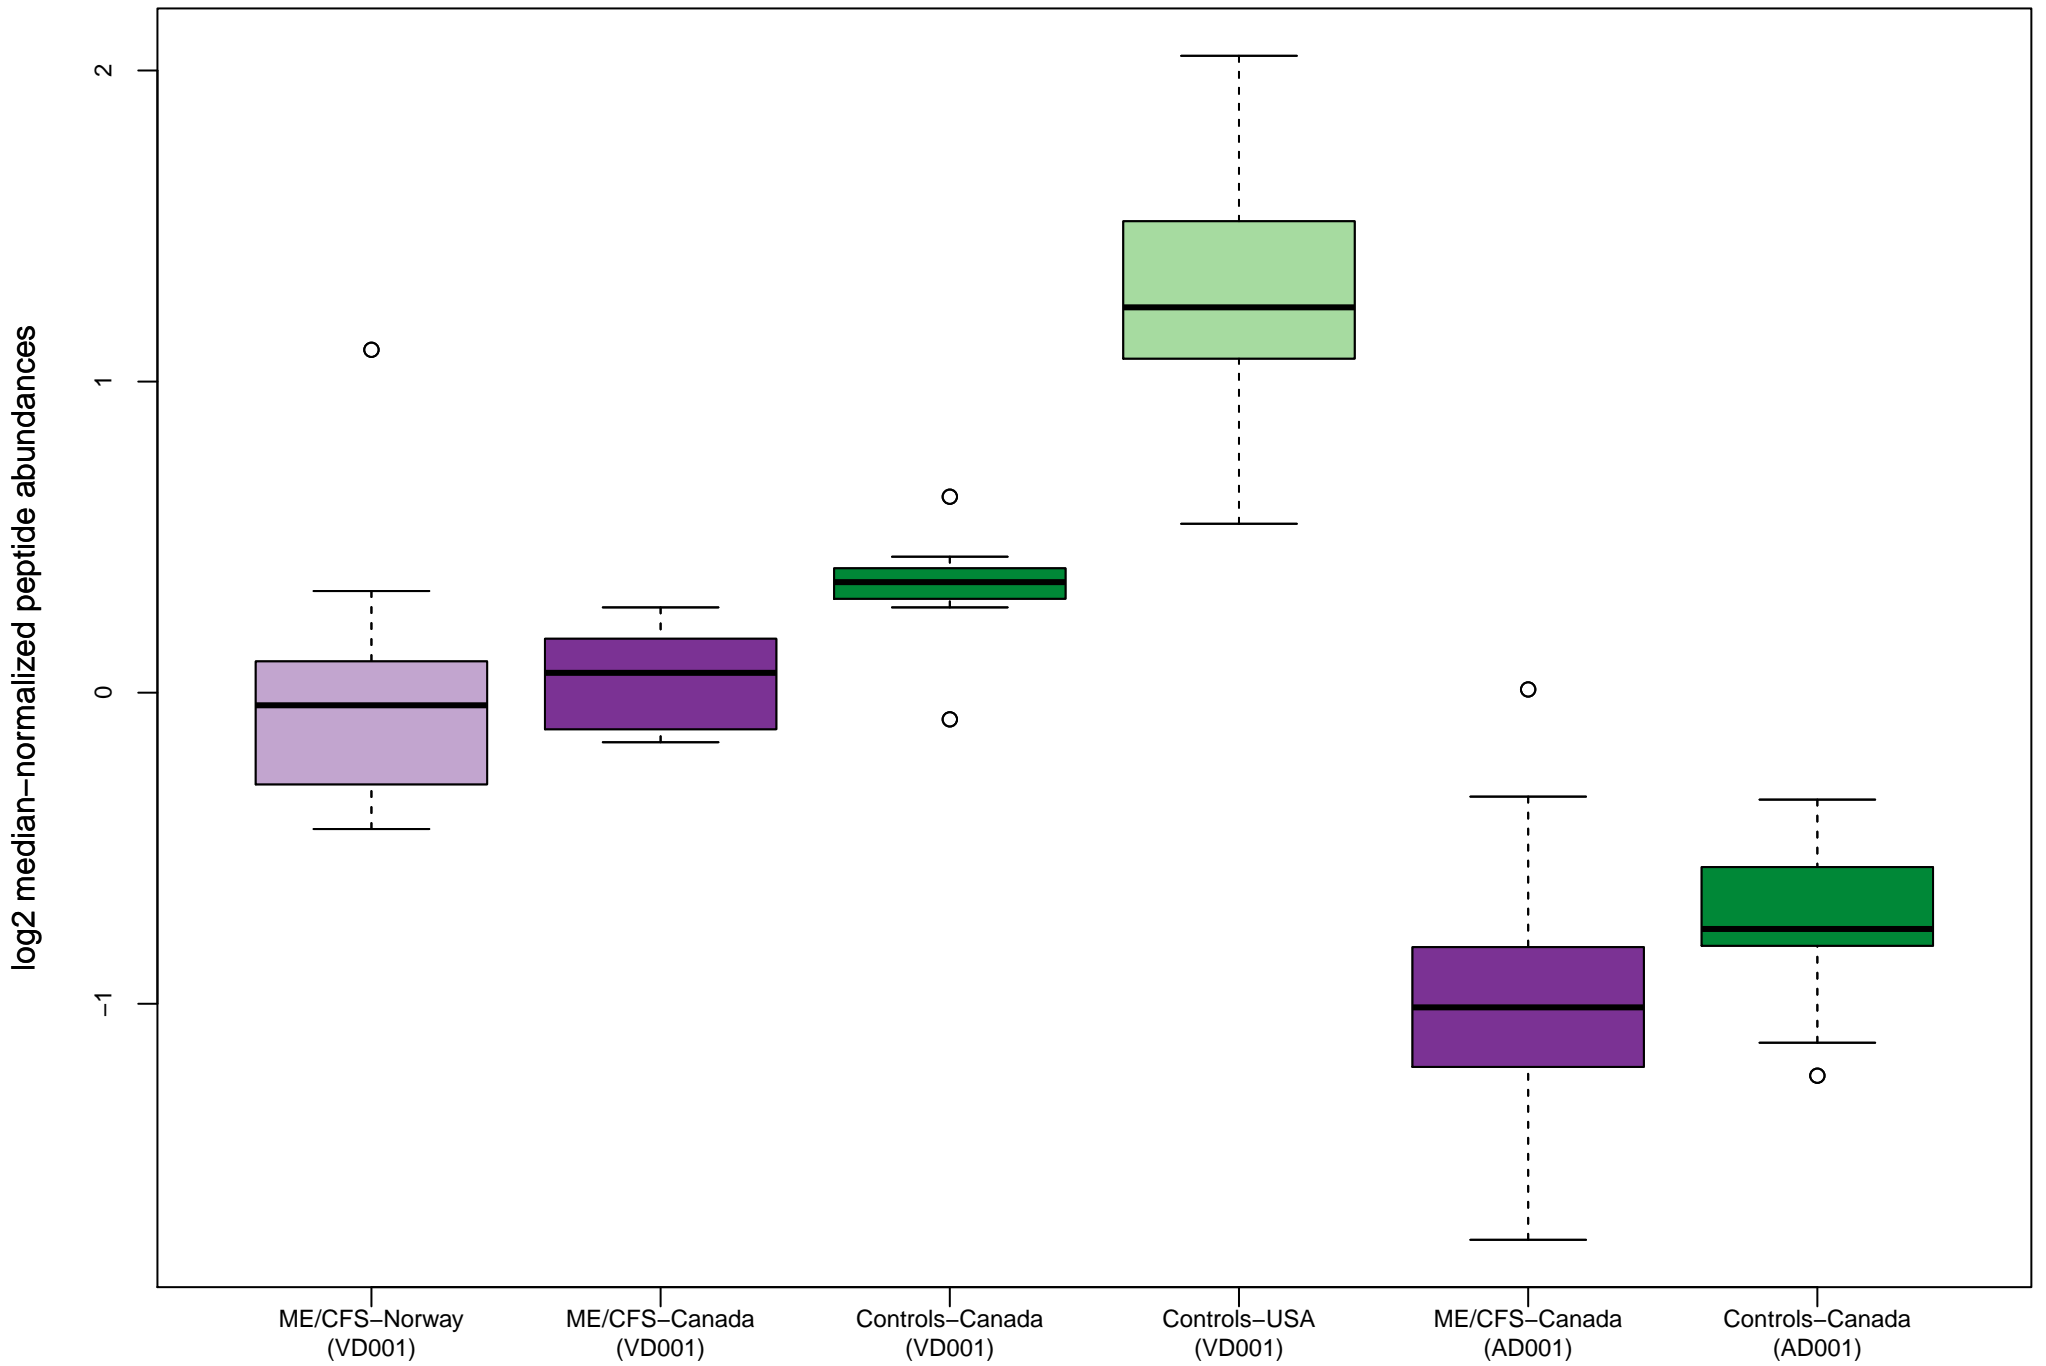



# NAYWGWLQRVLL

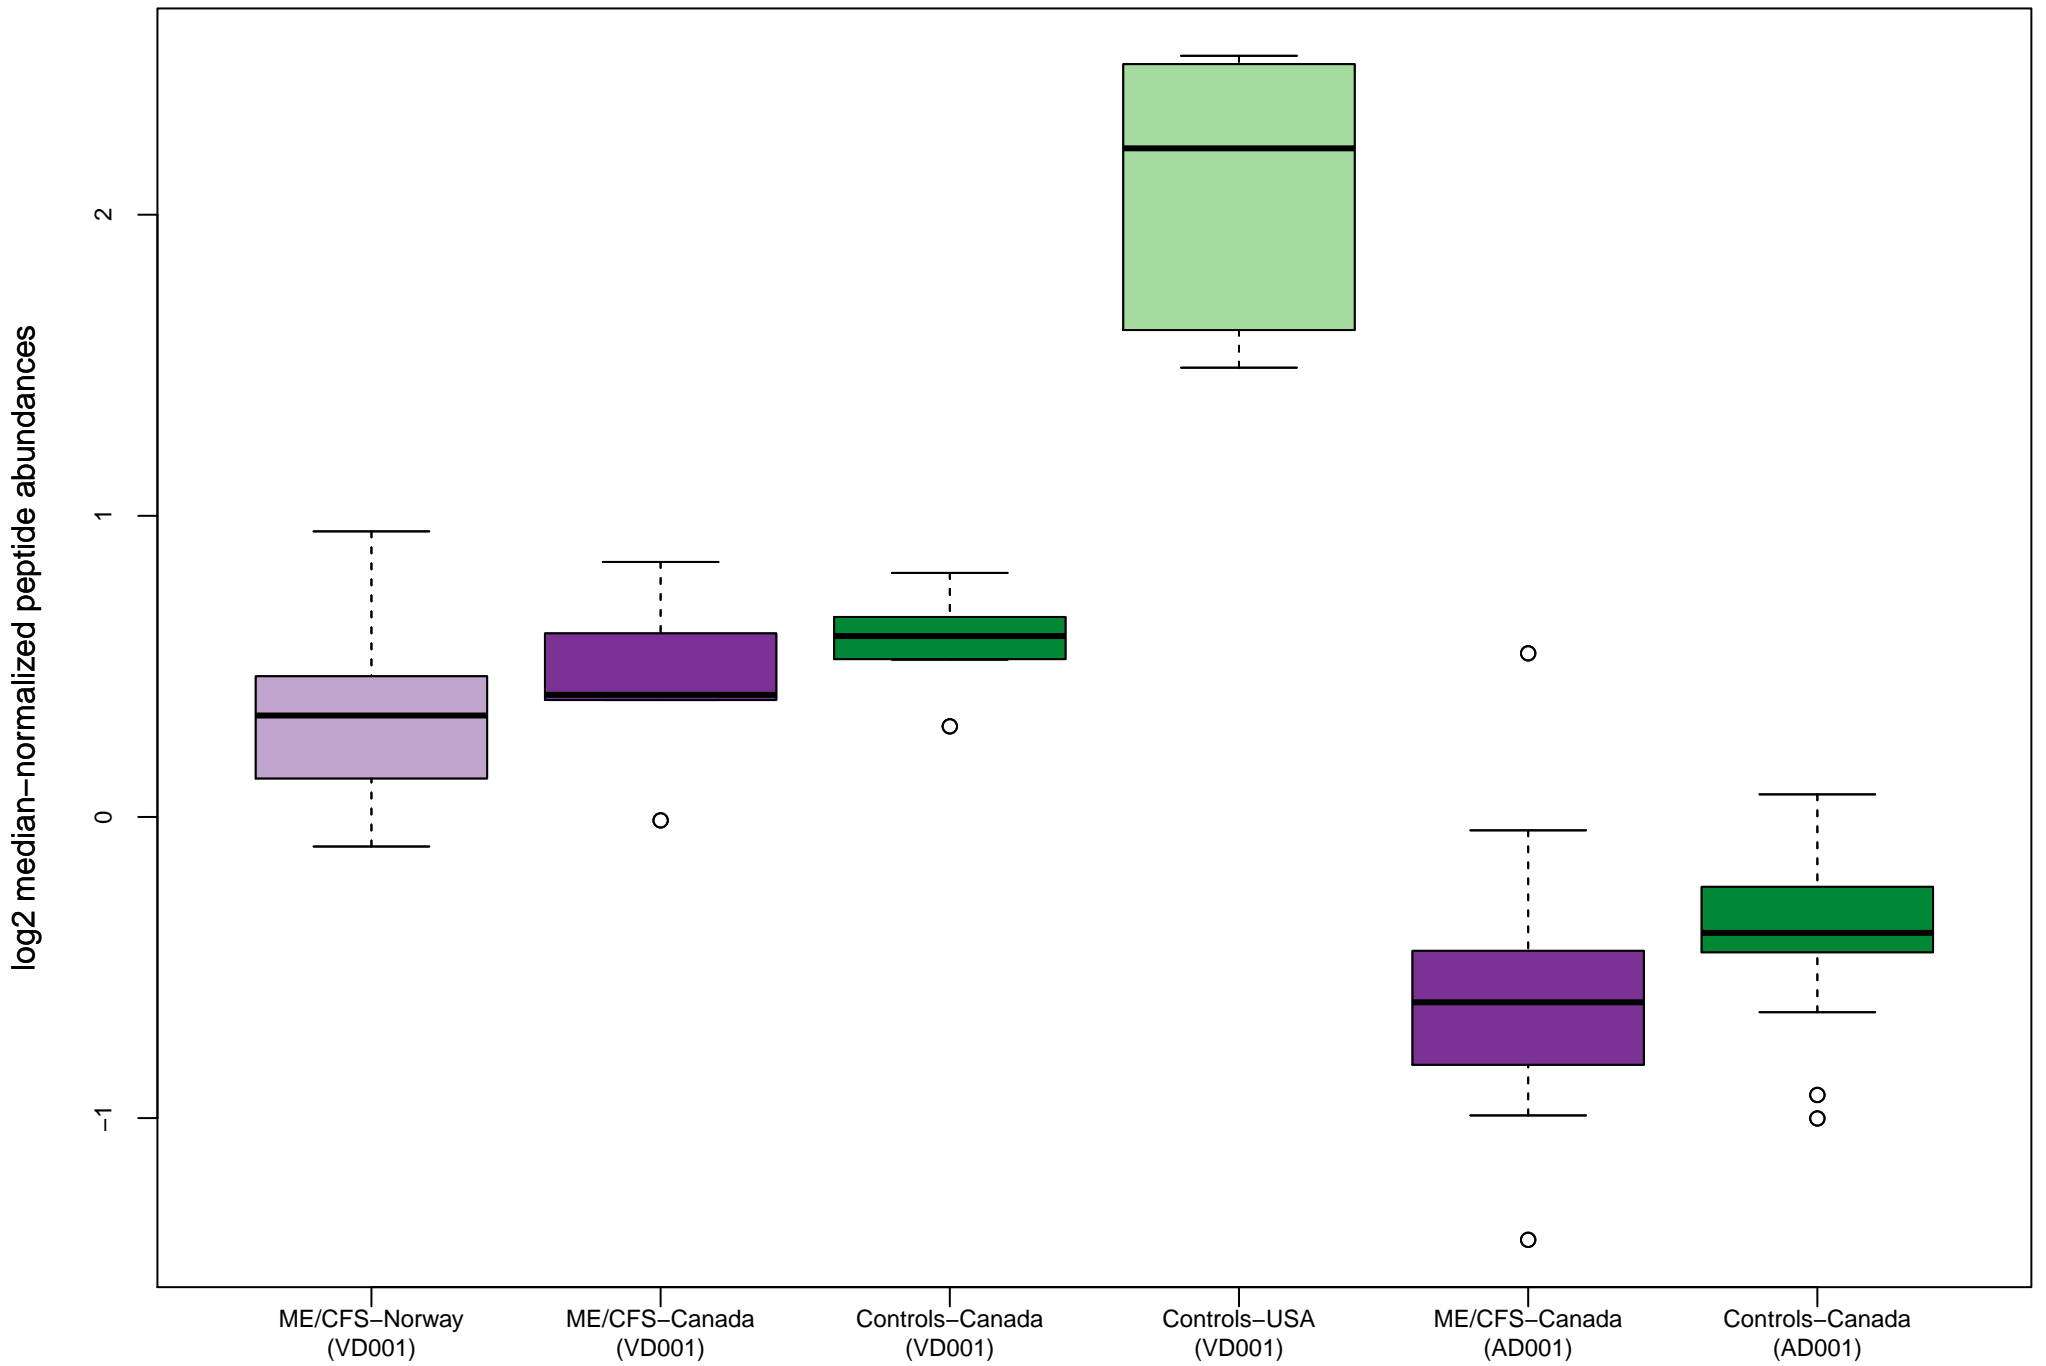

# NFQFRSVASLSG

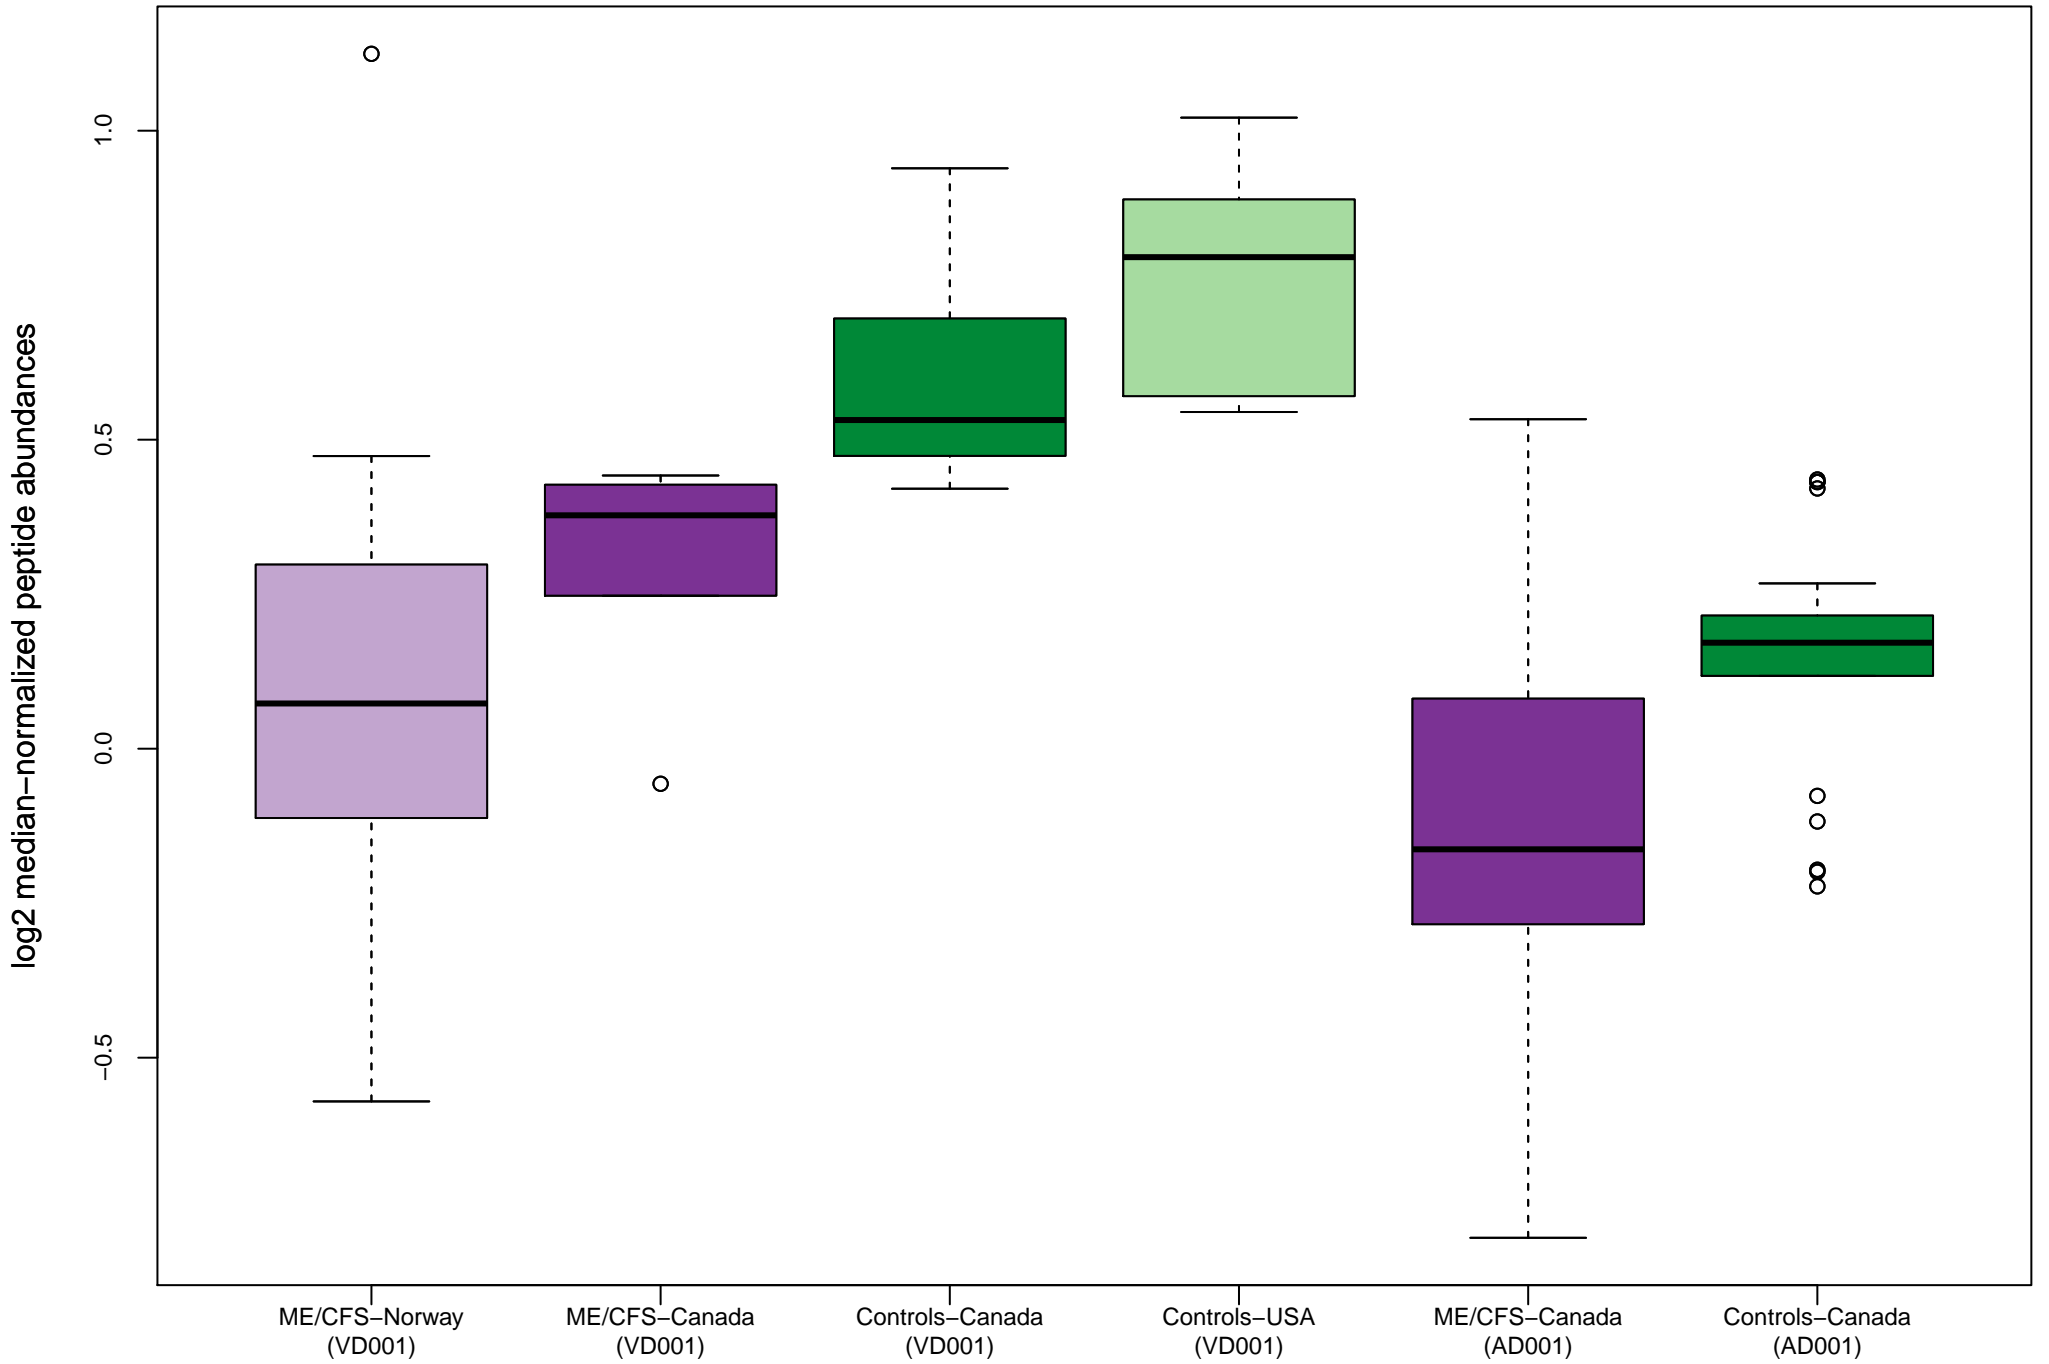

# NFYVGFVPWKGL

log2 median-normalized peptide abundances

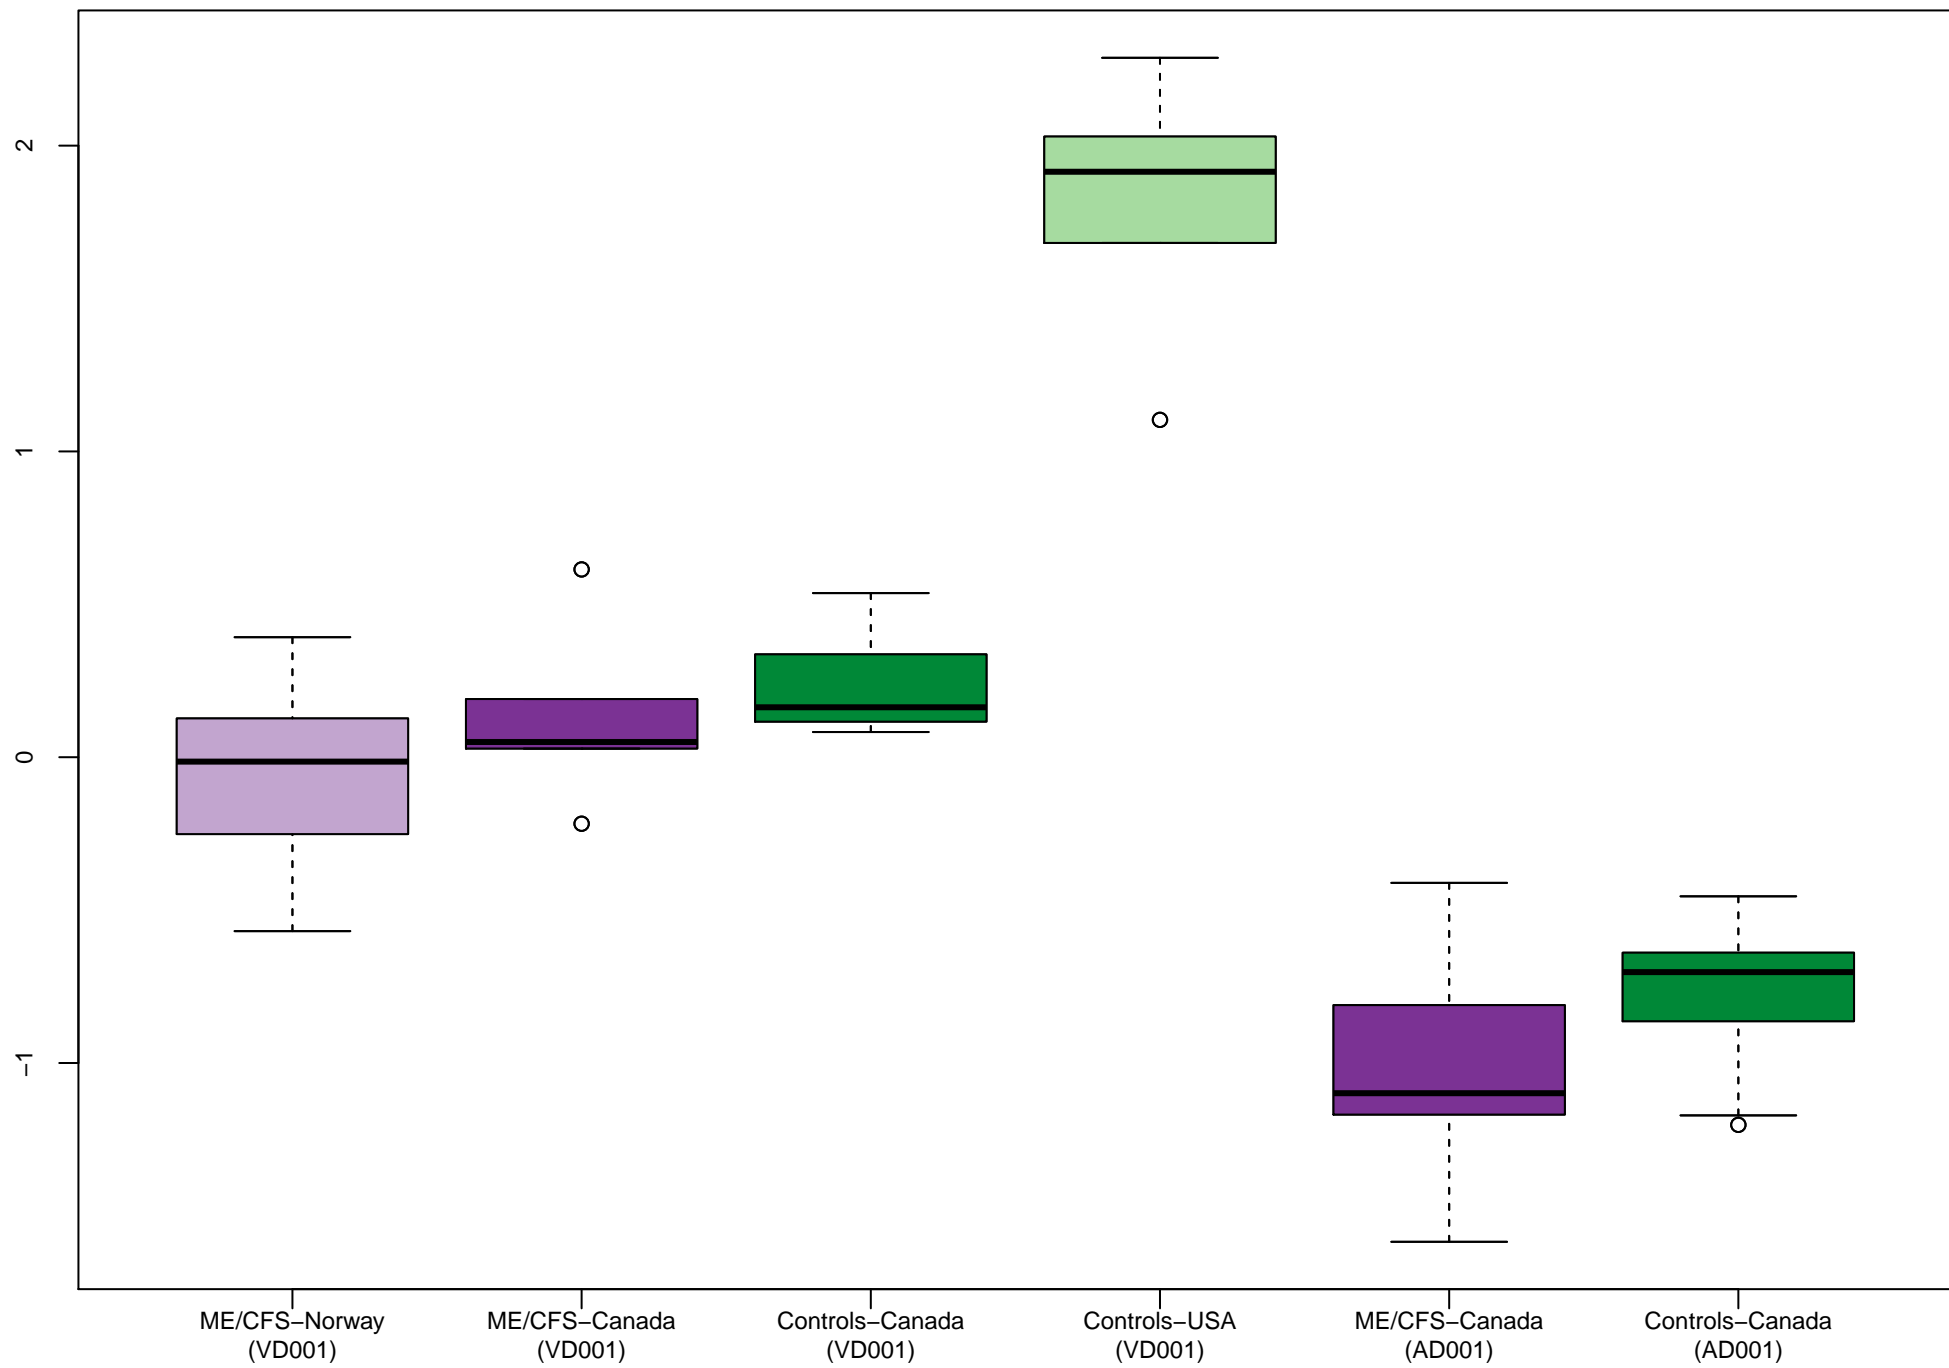

# NPNRRAPYVLSS

log2 median-normalized peptide abundances

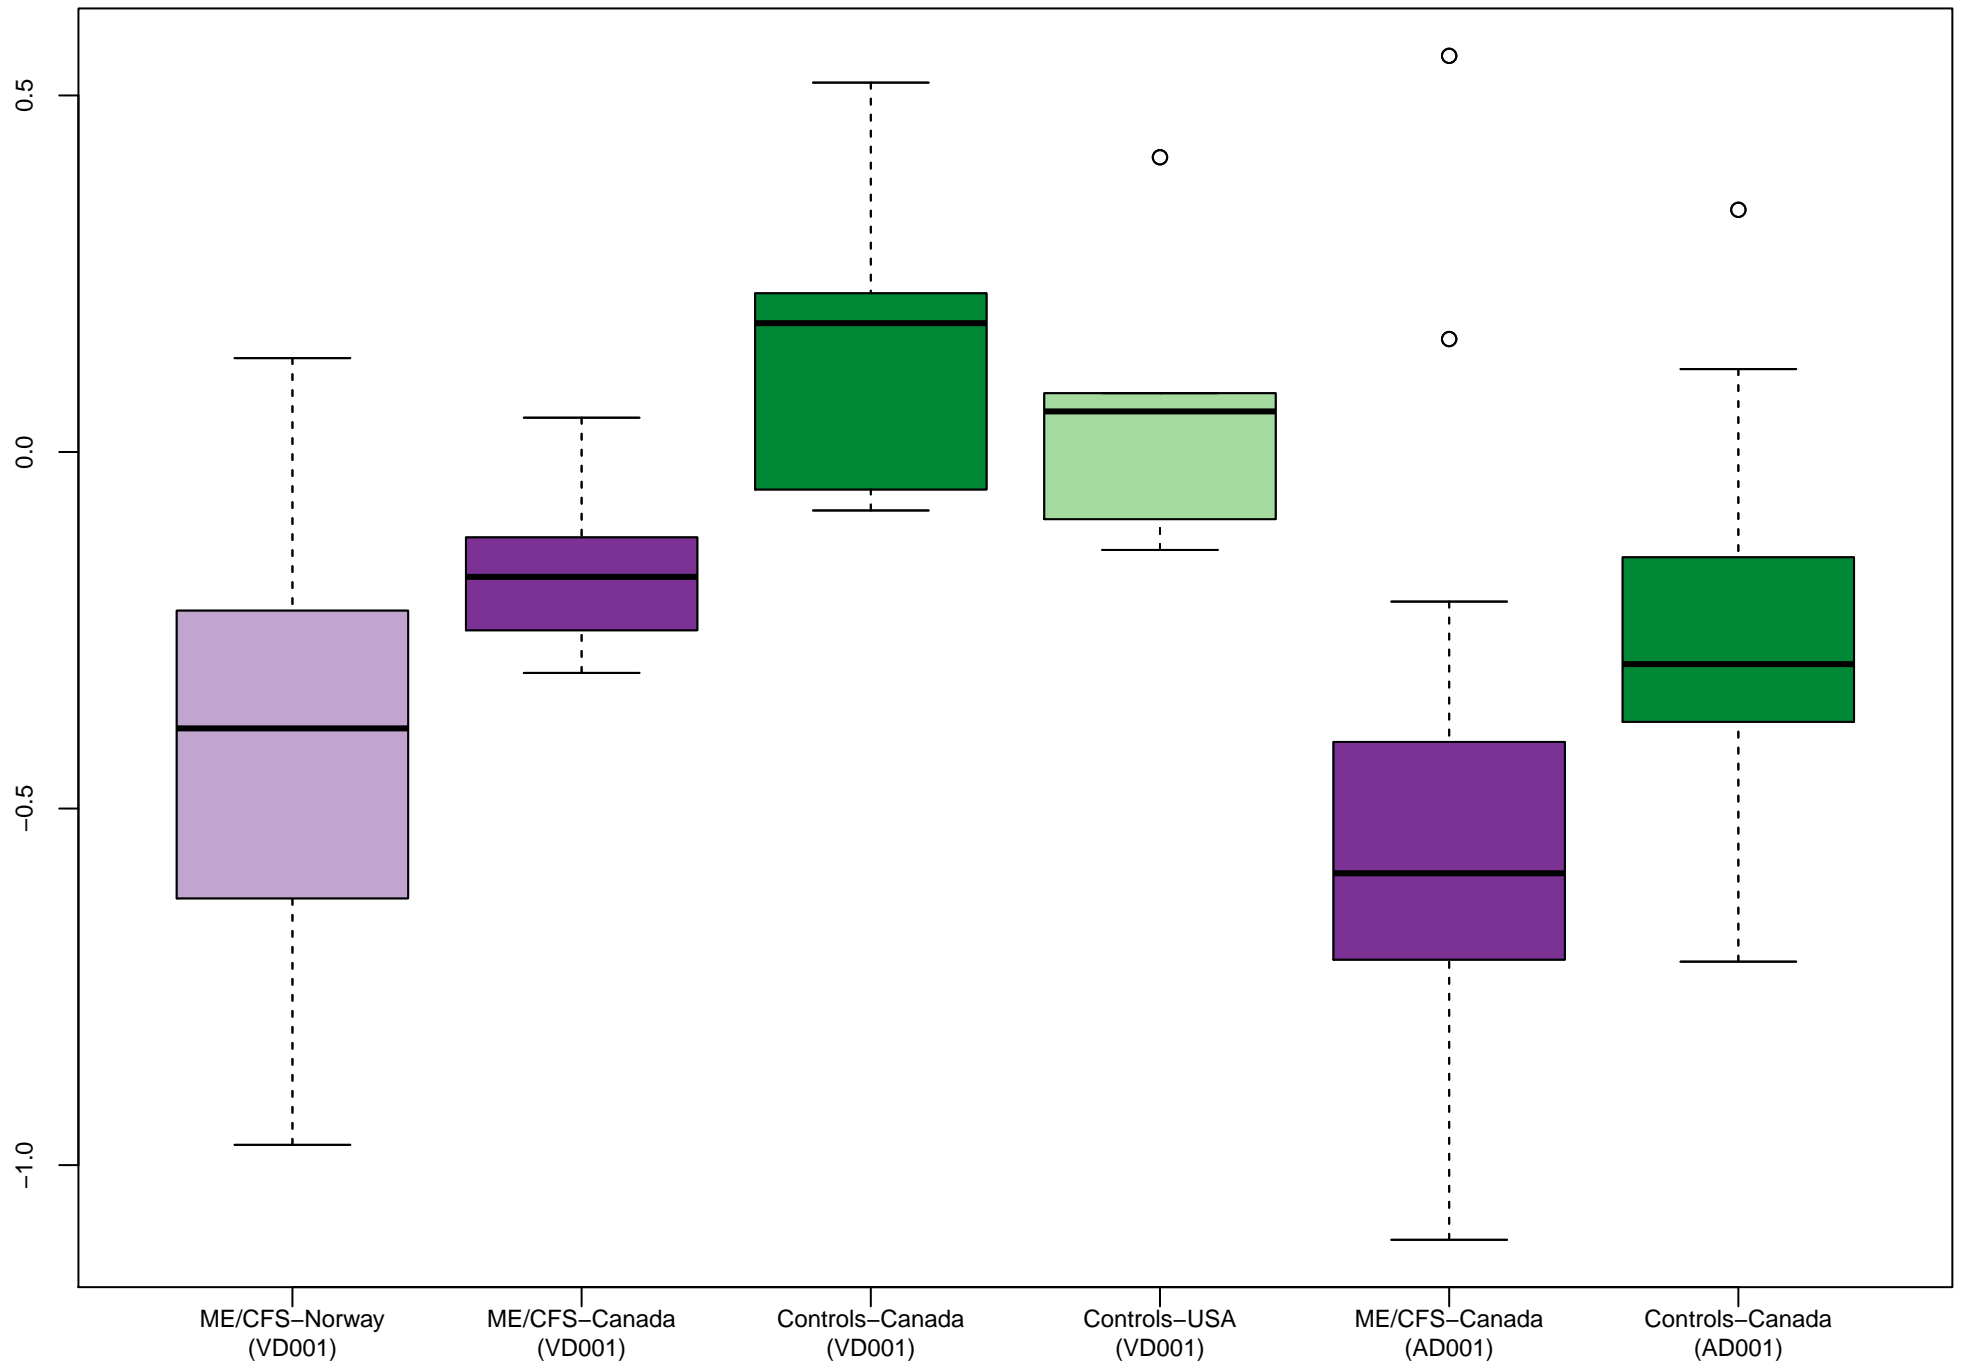

# NPRAYWHVASAS

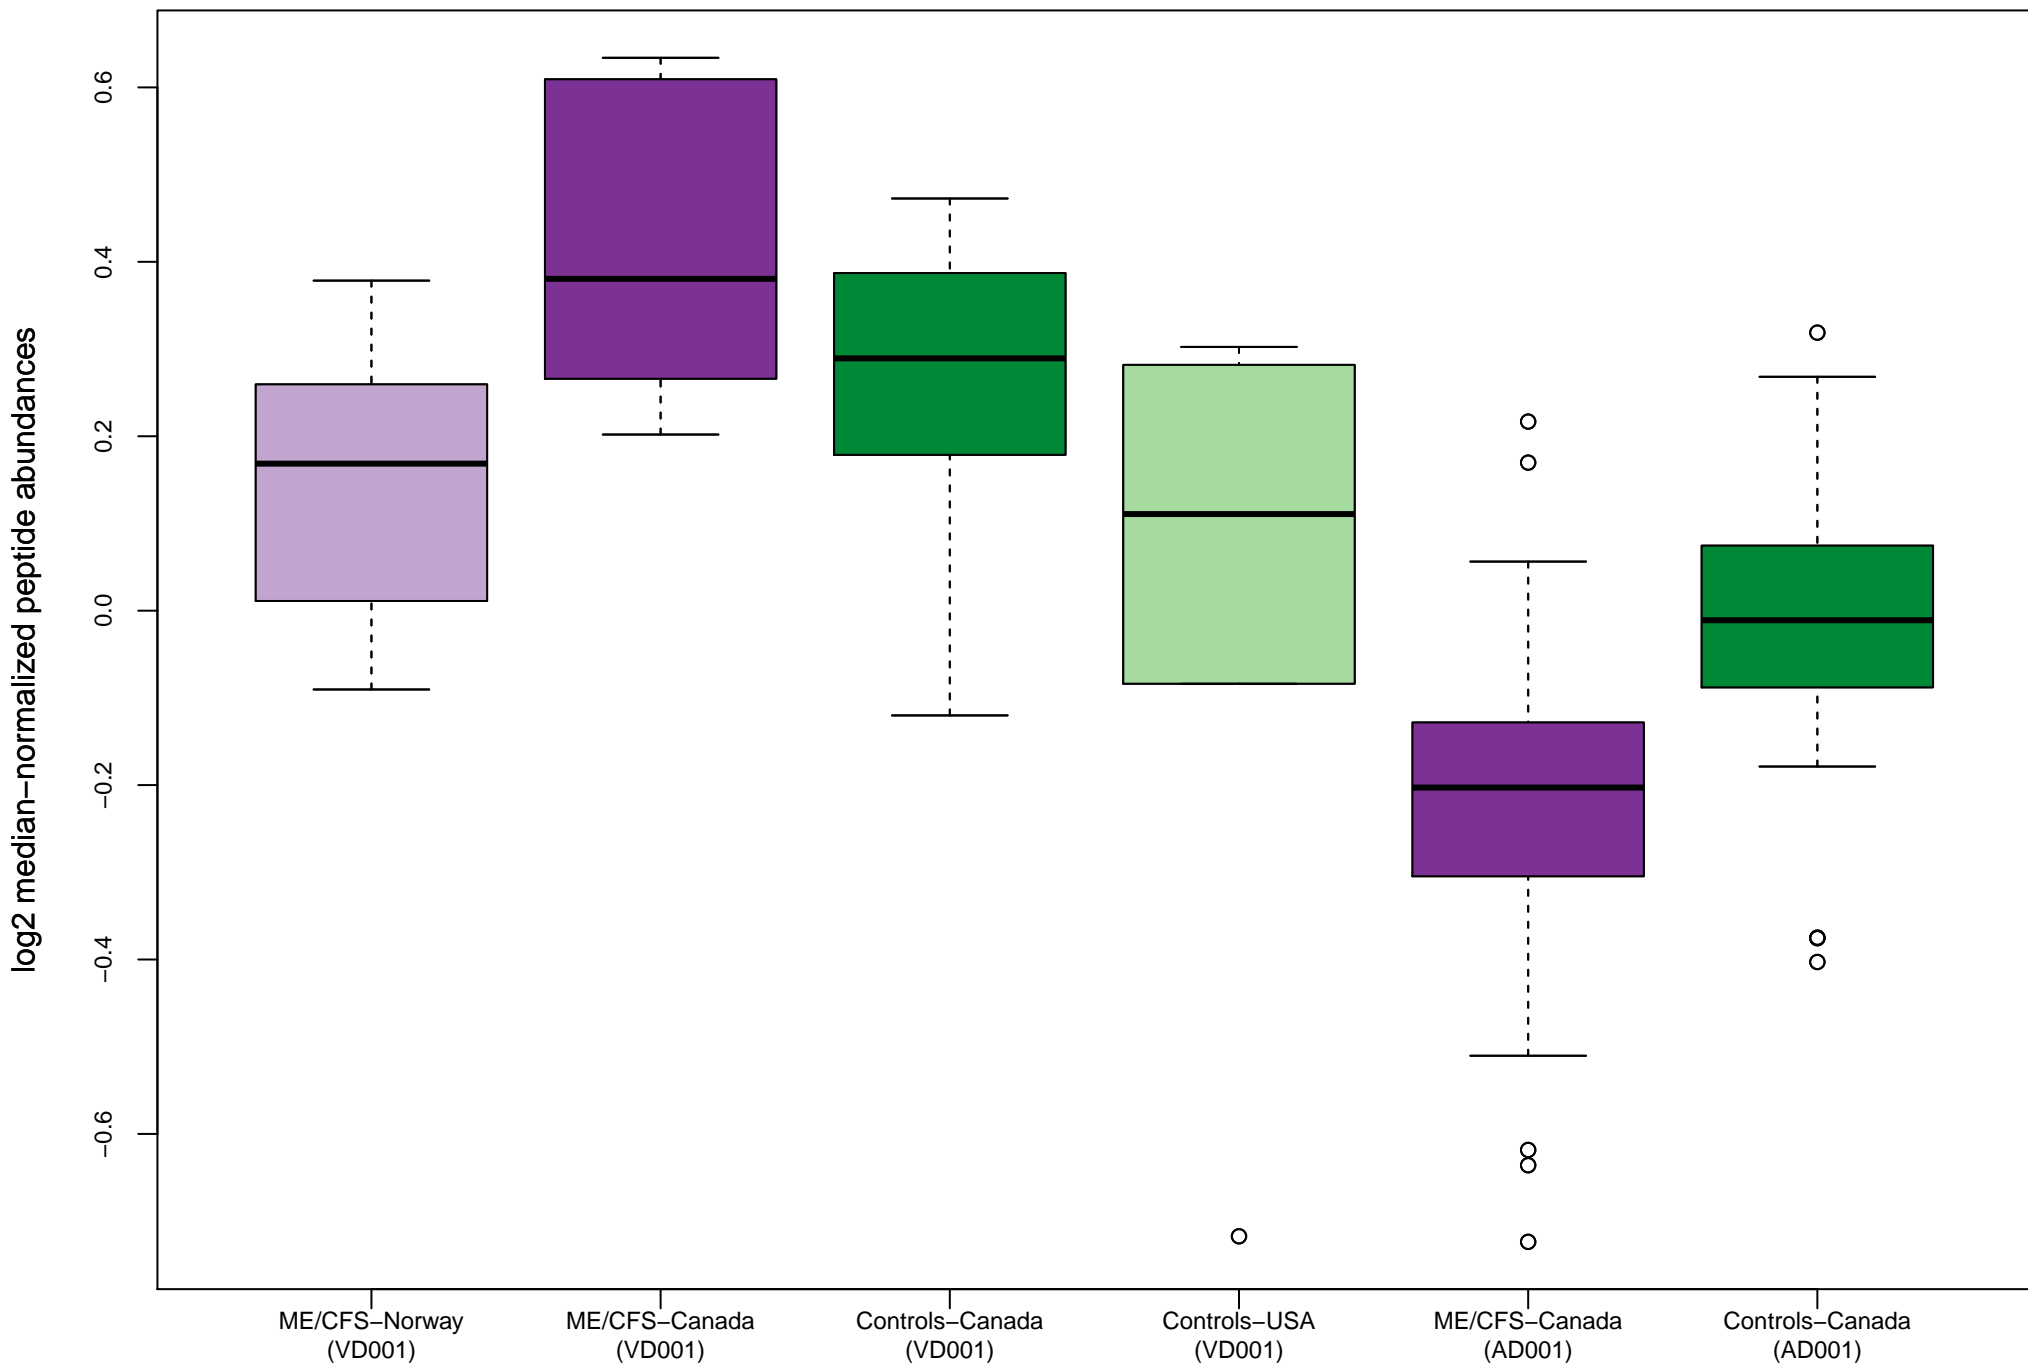

# NQLNLRWLGVLG

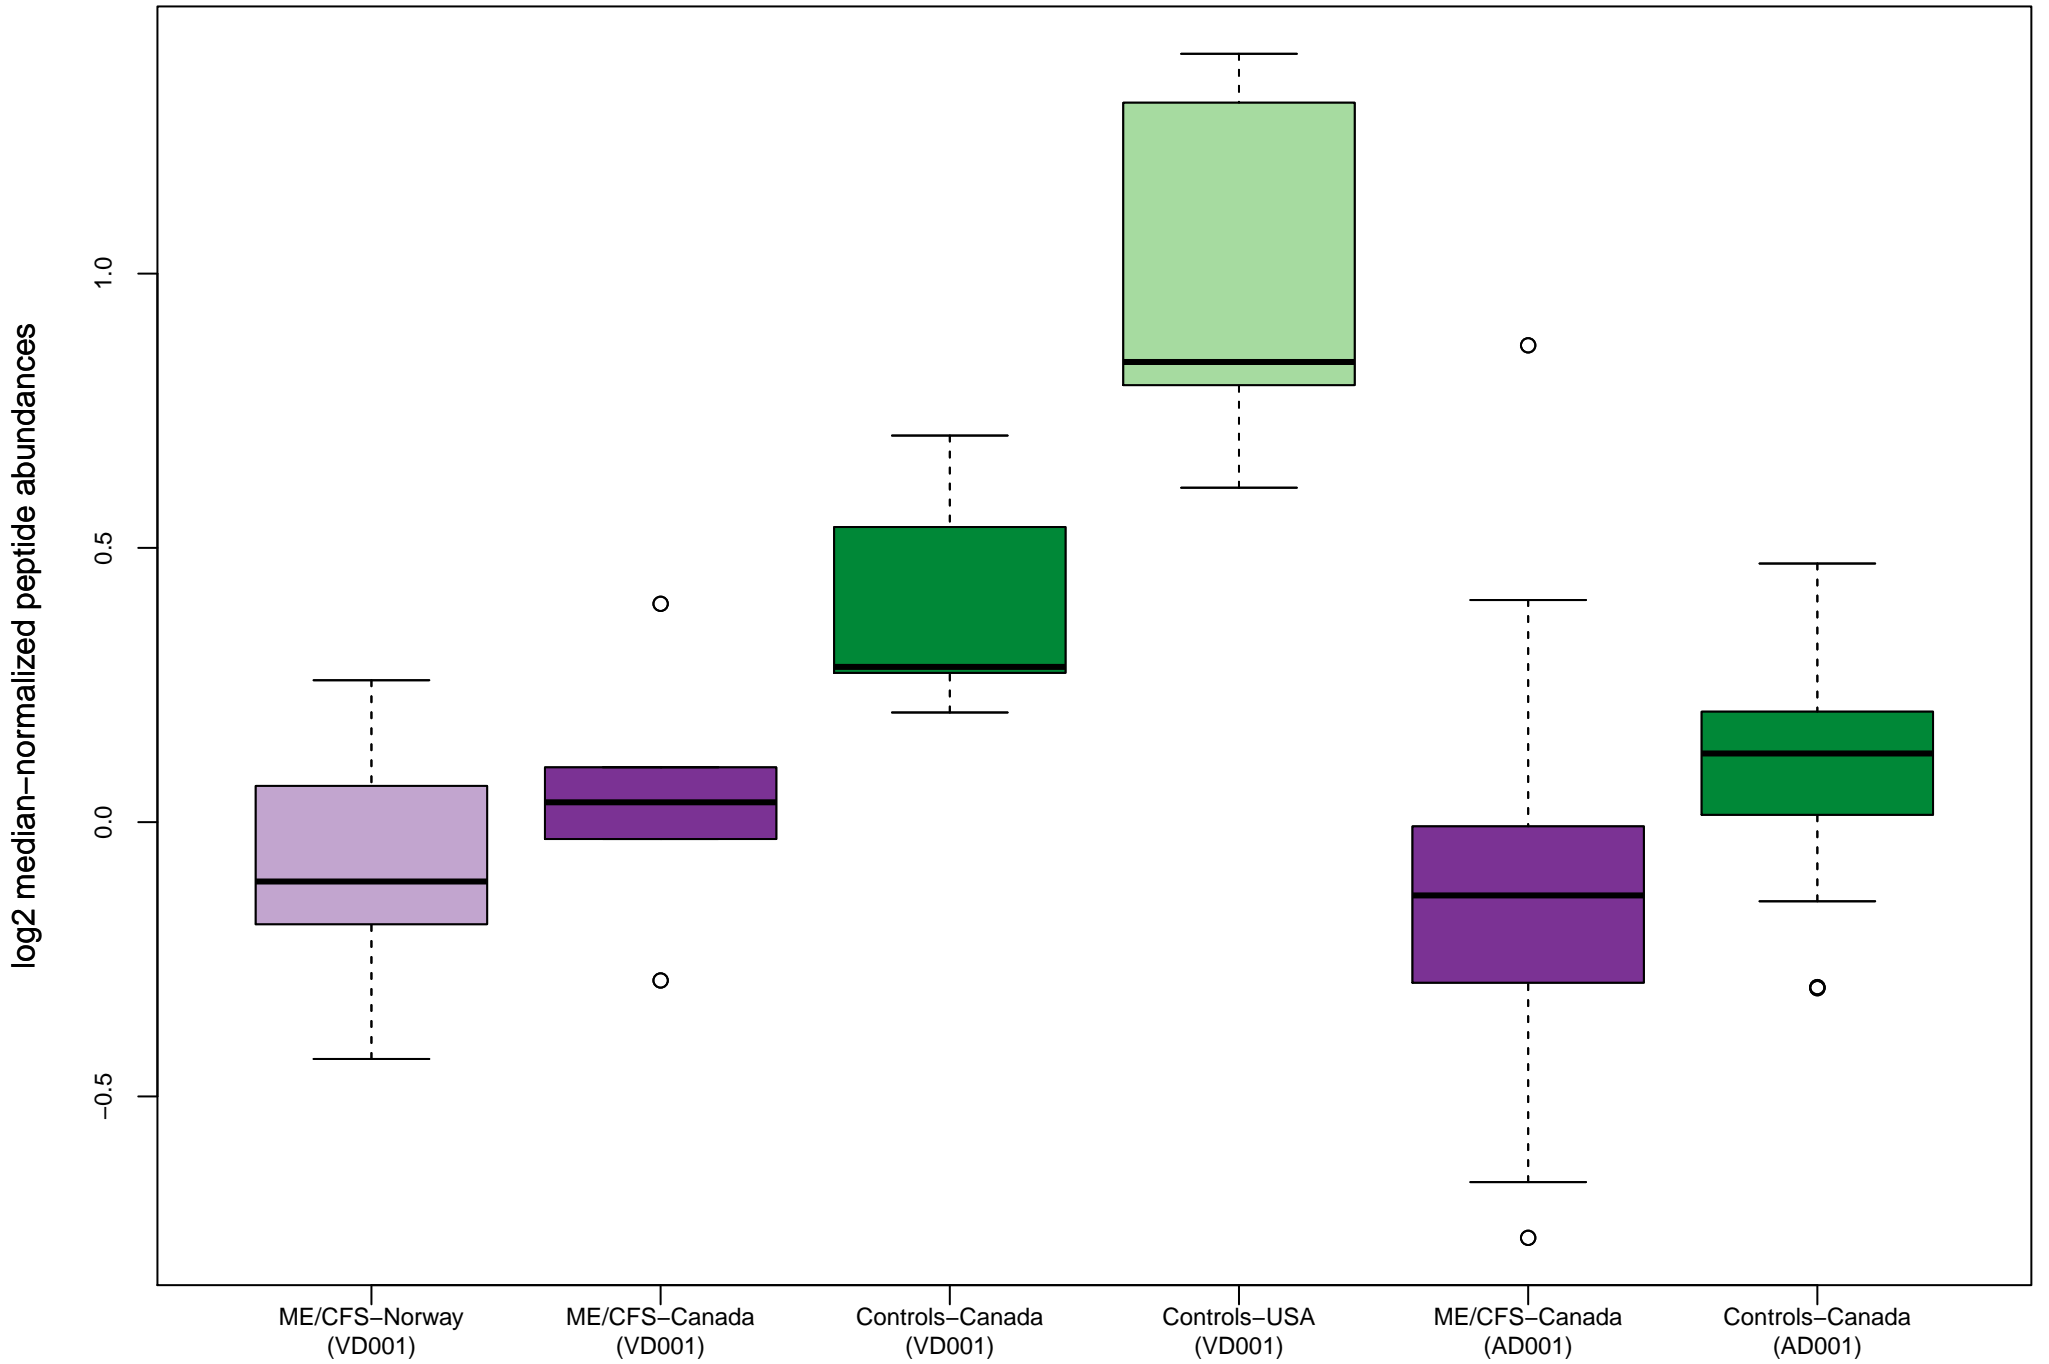

# NQQYFRALGALG

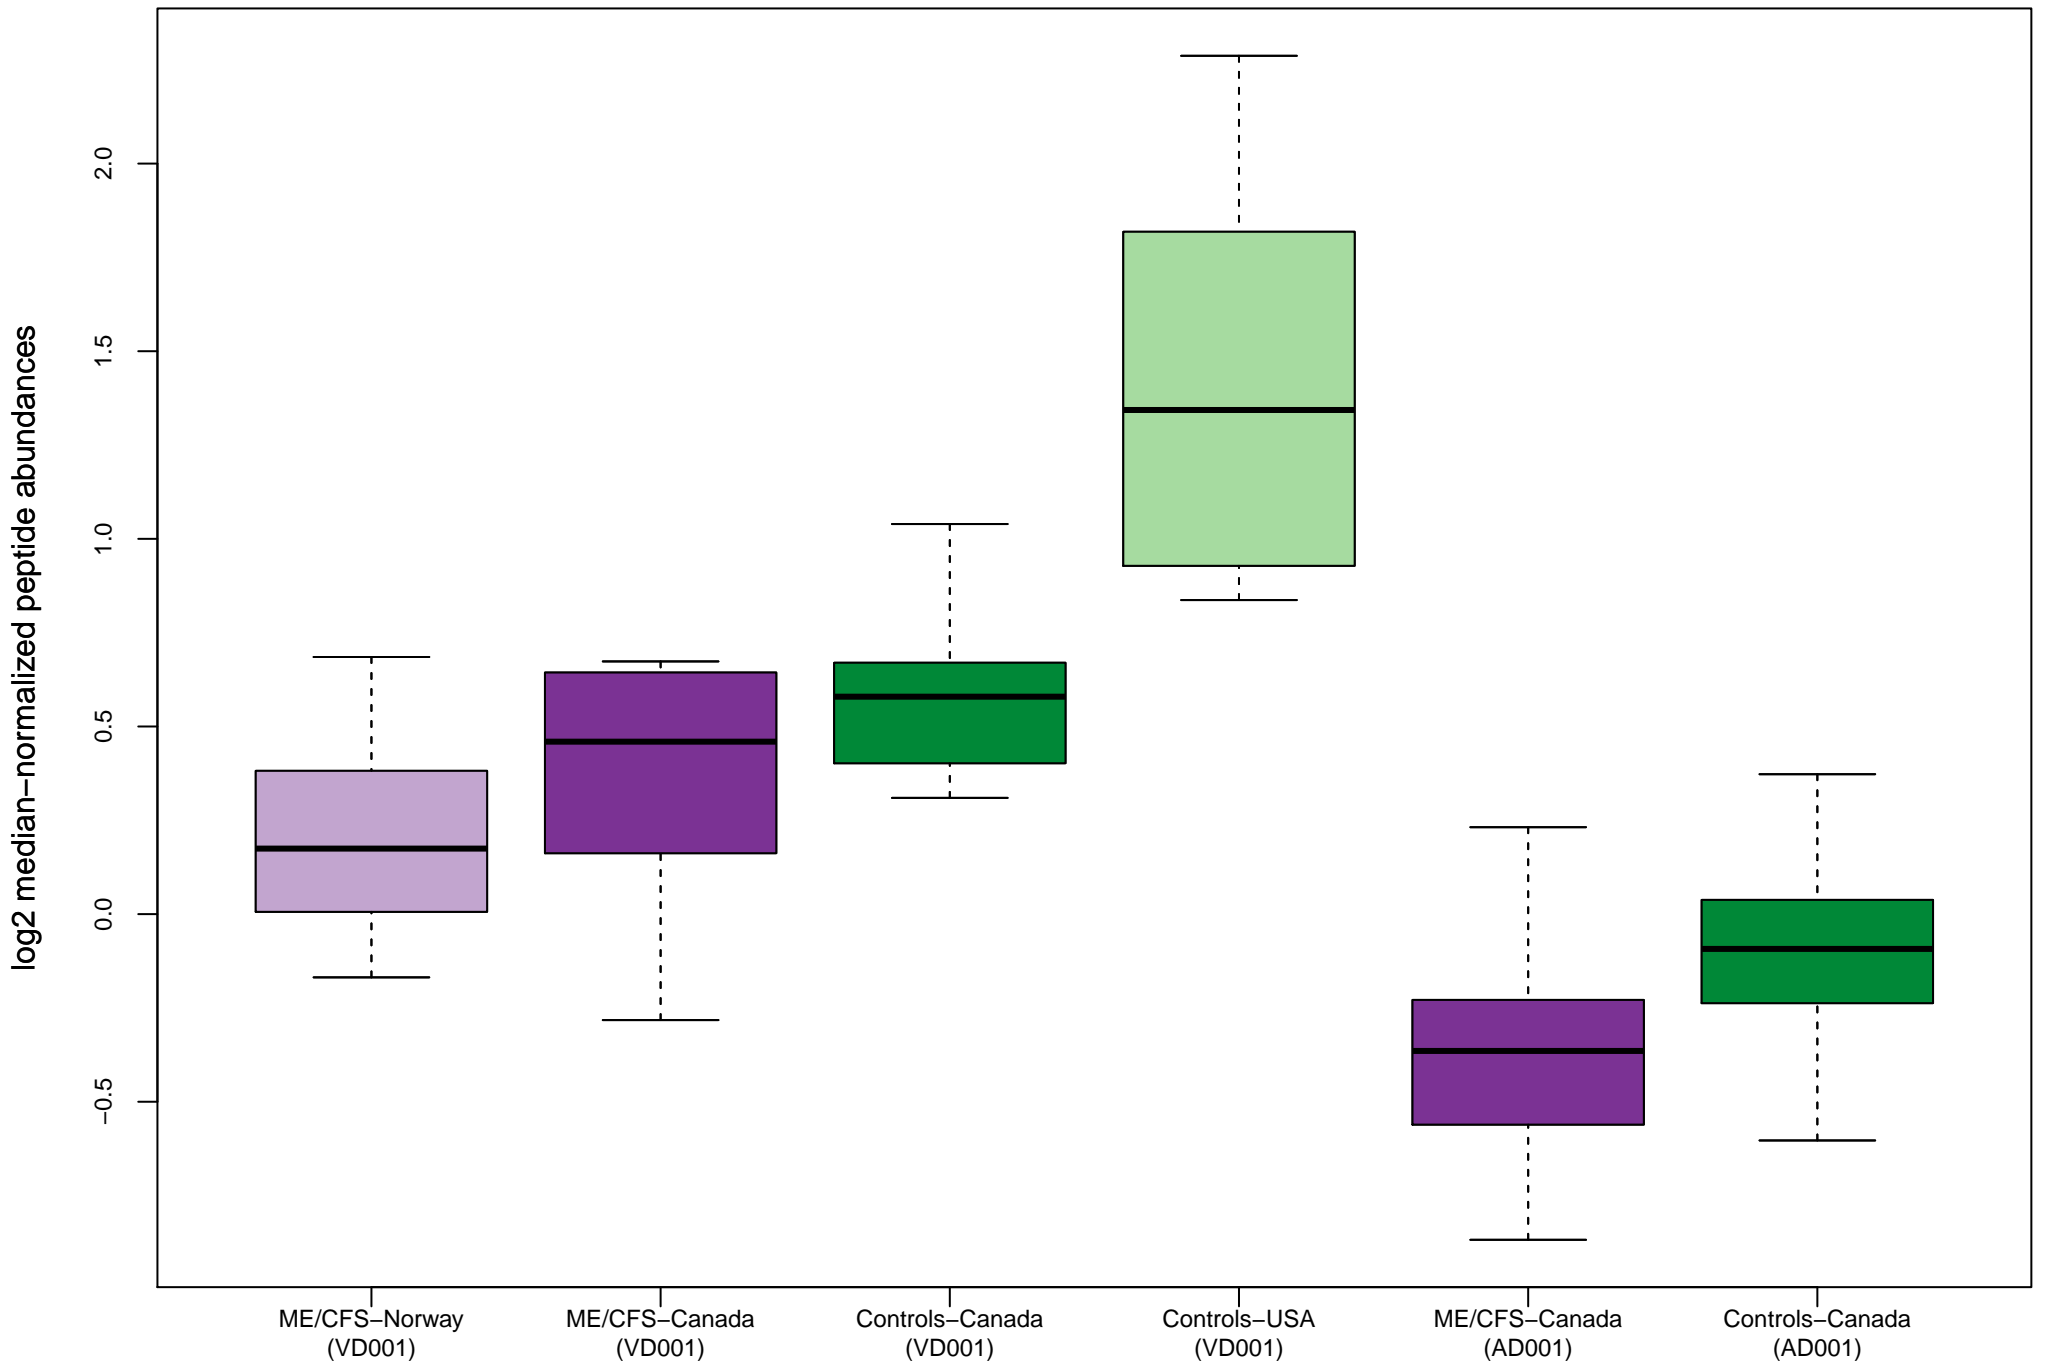

# NRDGPVFRWVSA

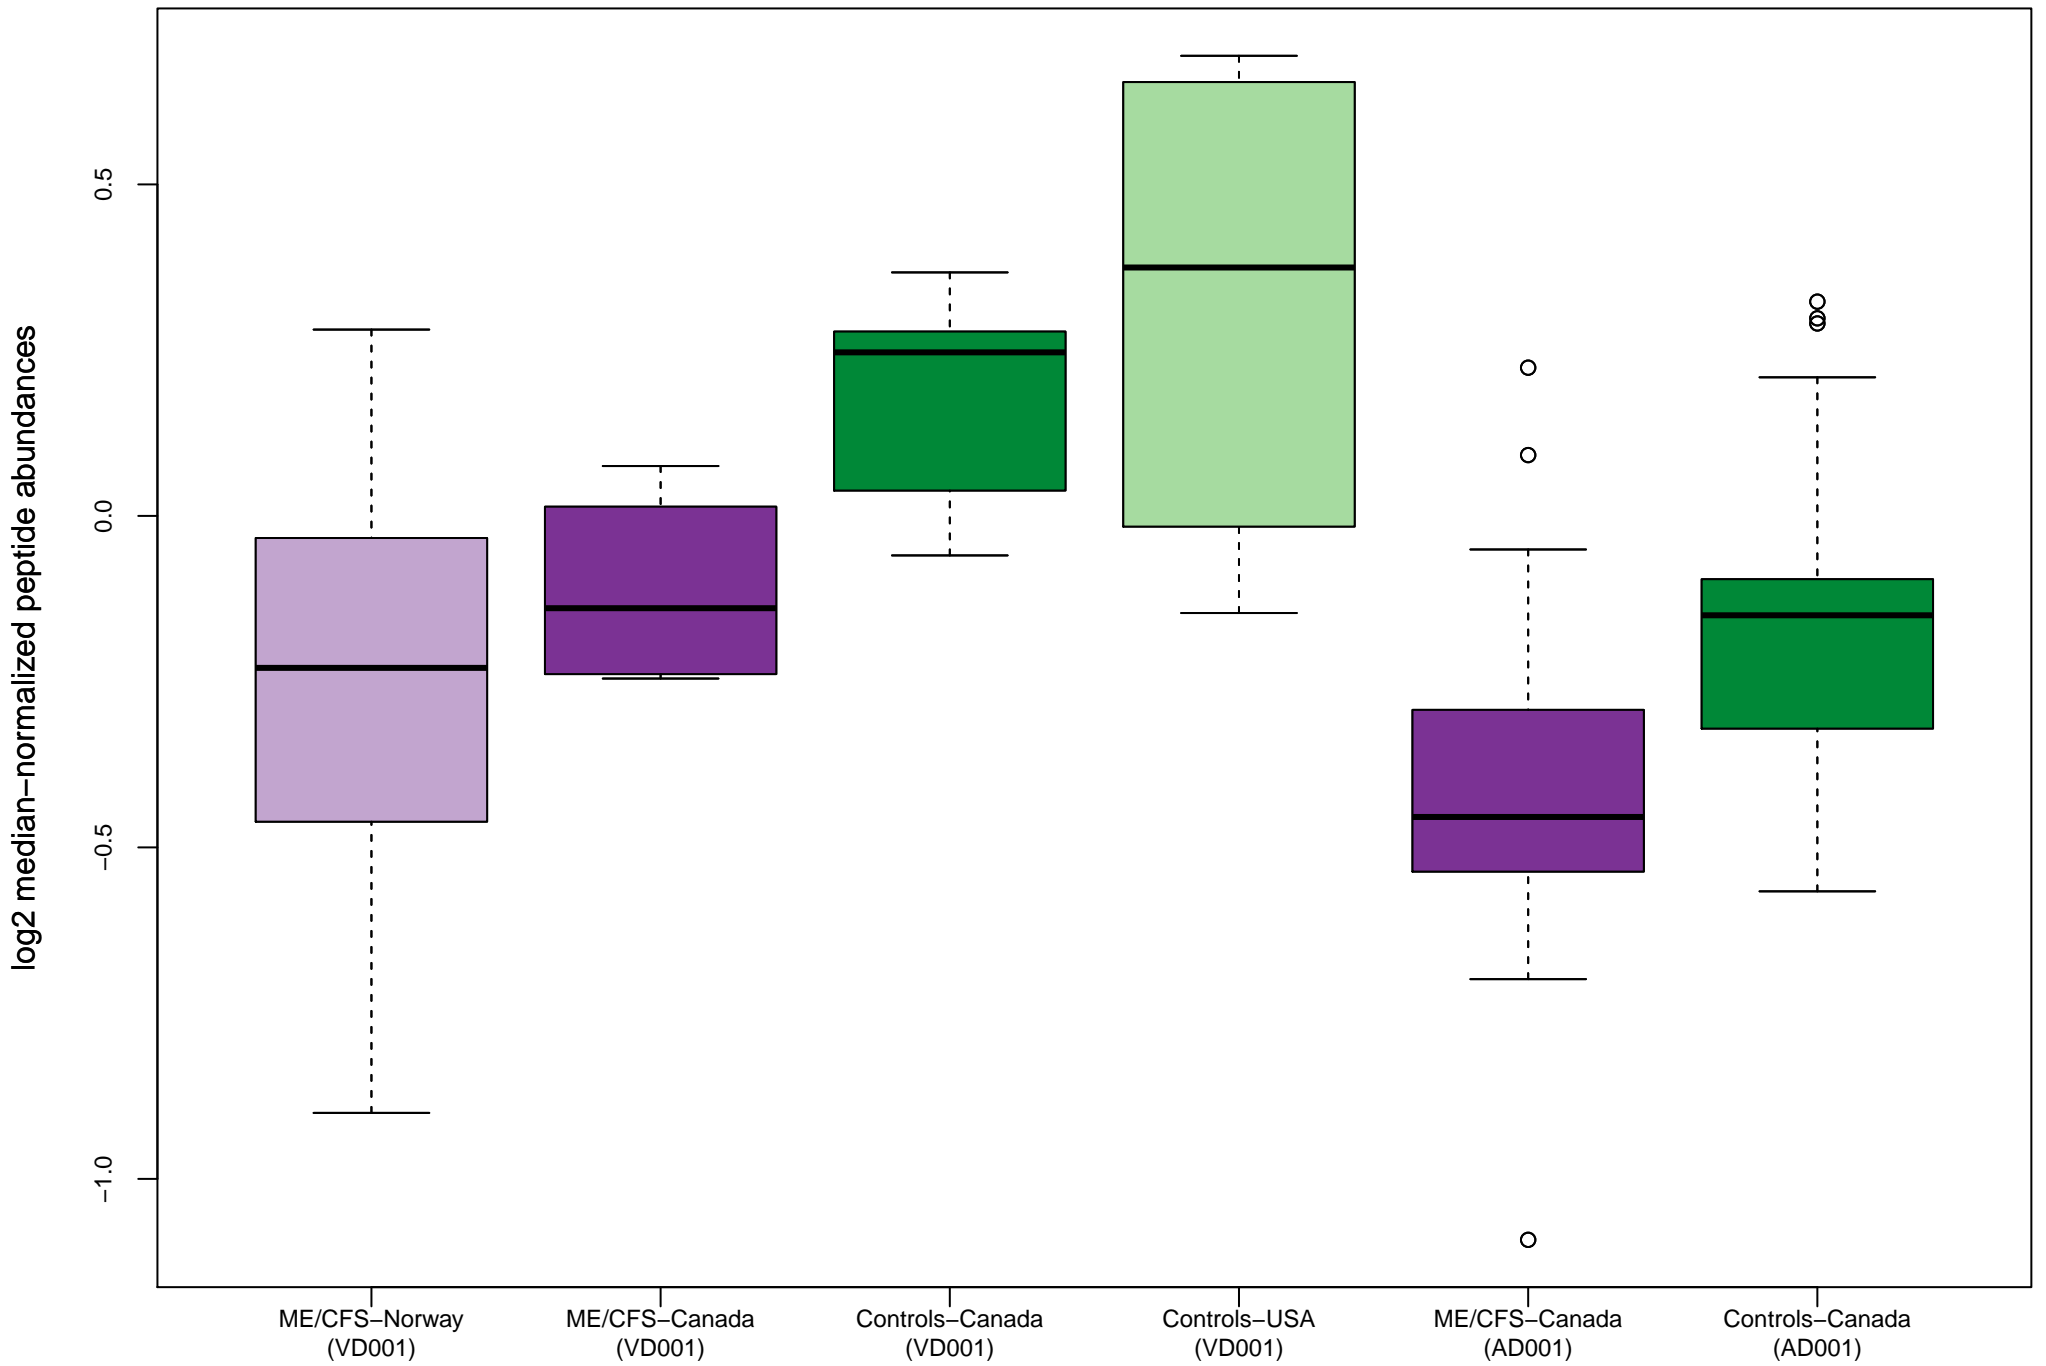



# NRHRSWLSGVLS

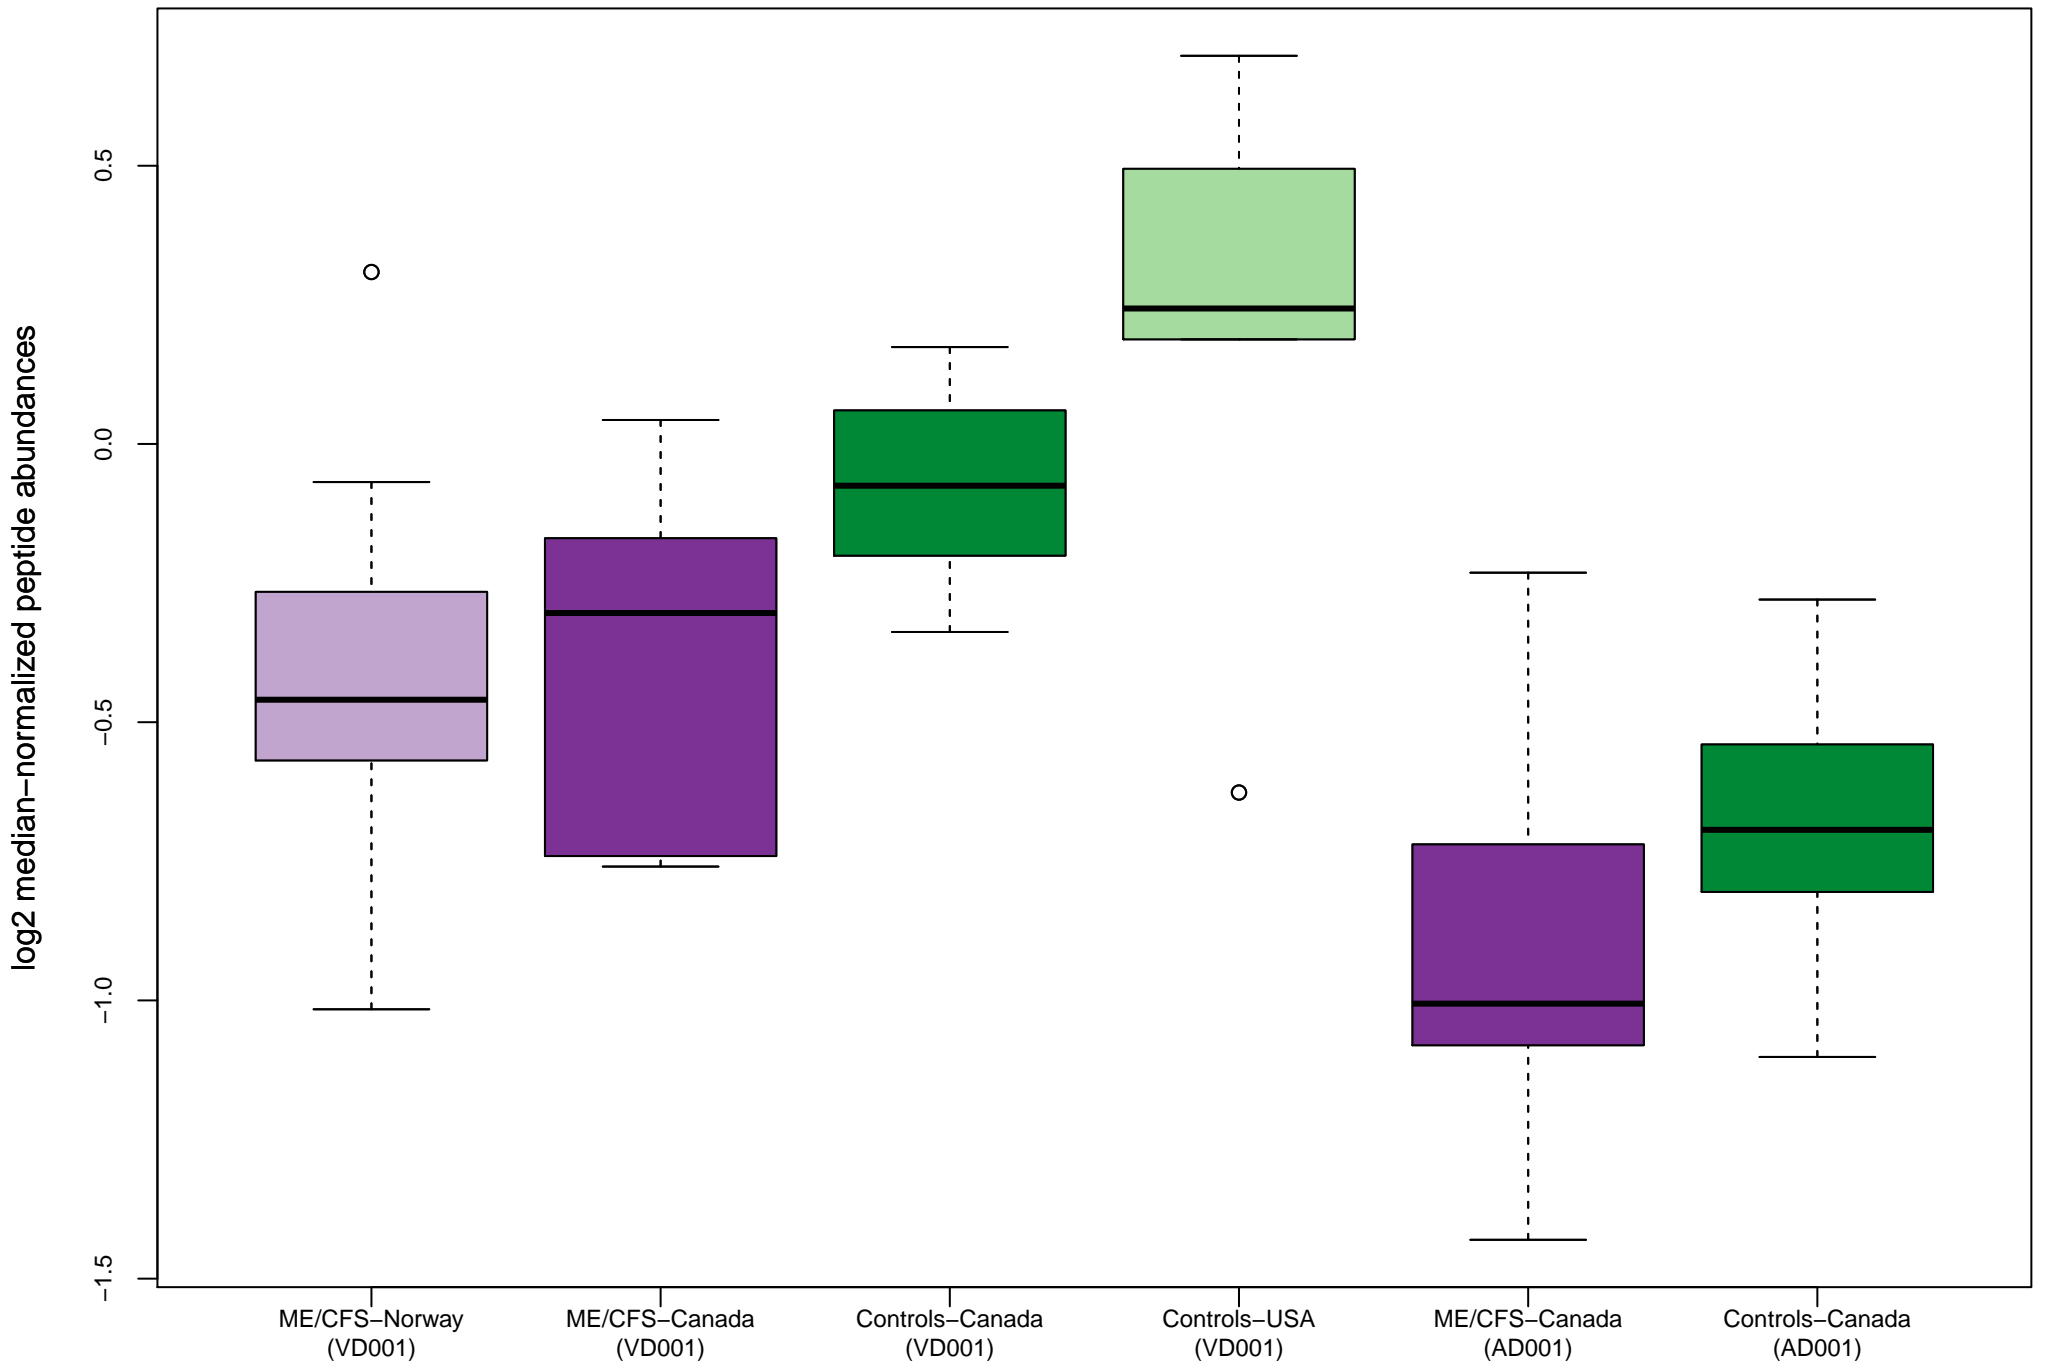

# NRYYLPWALVSG

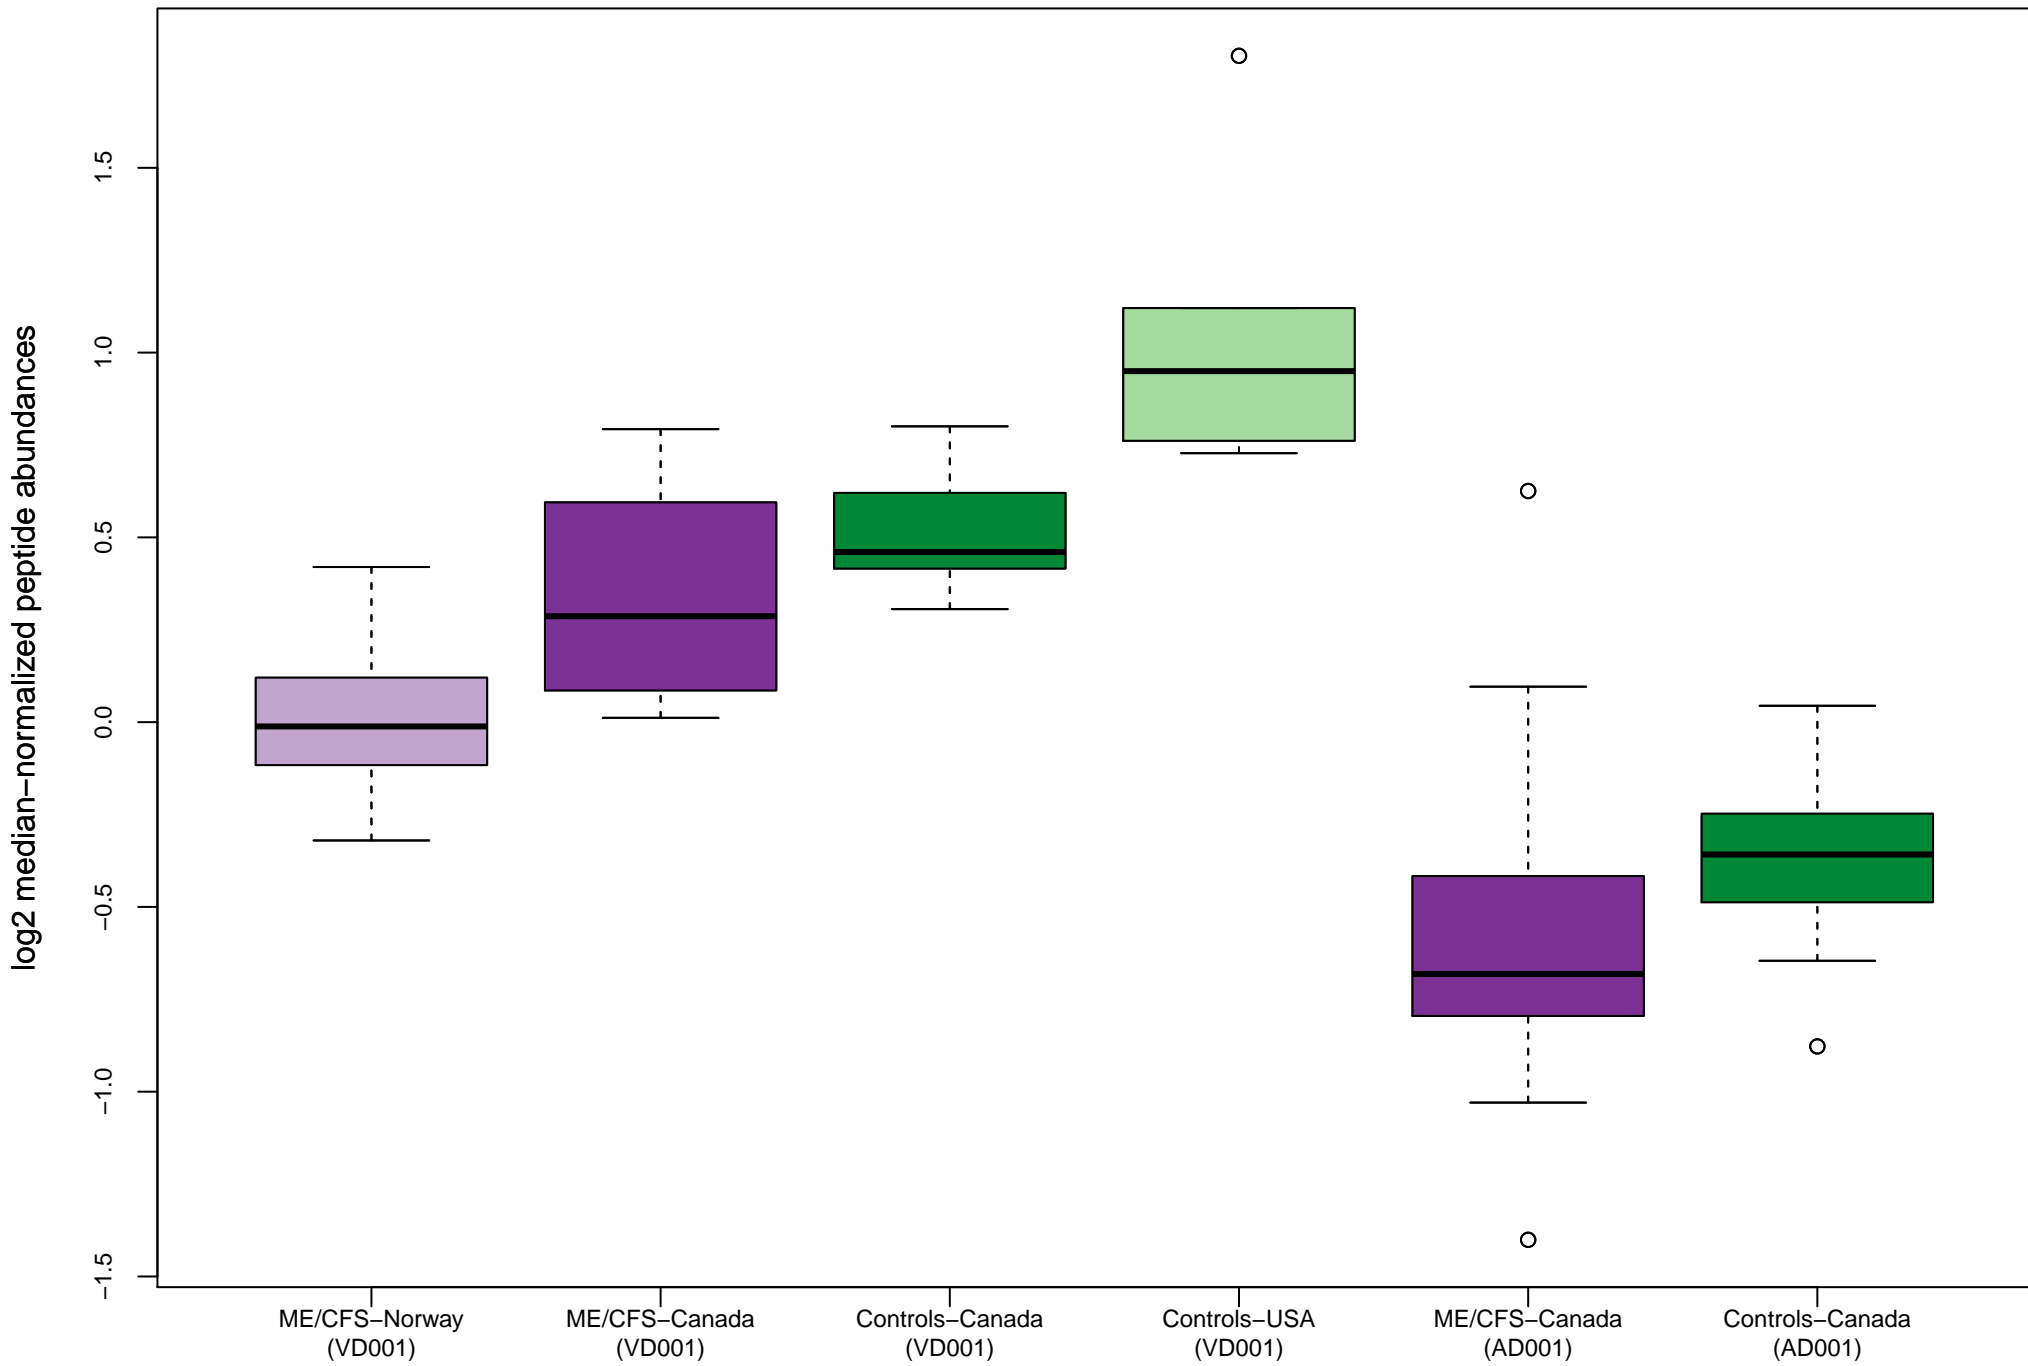

# NSKQRLFLSVSG

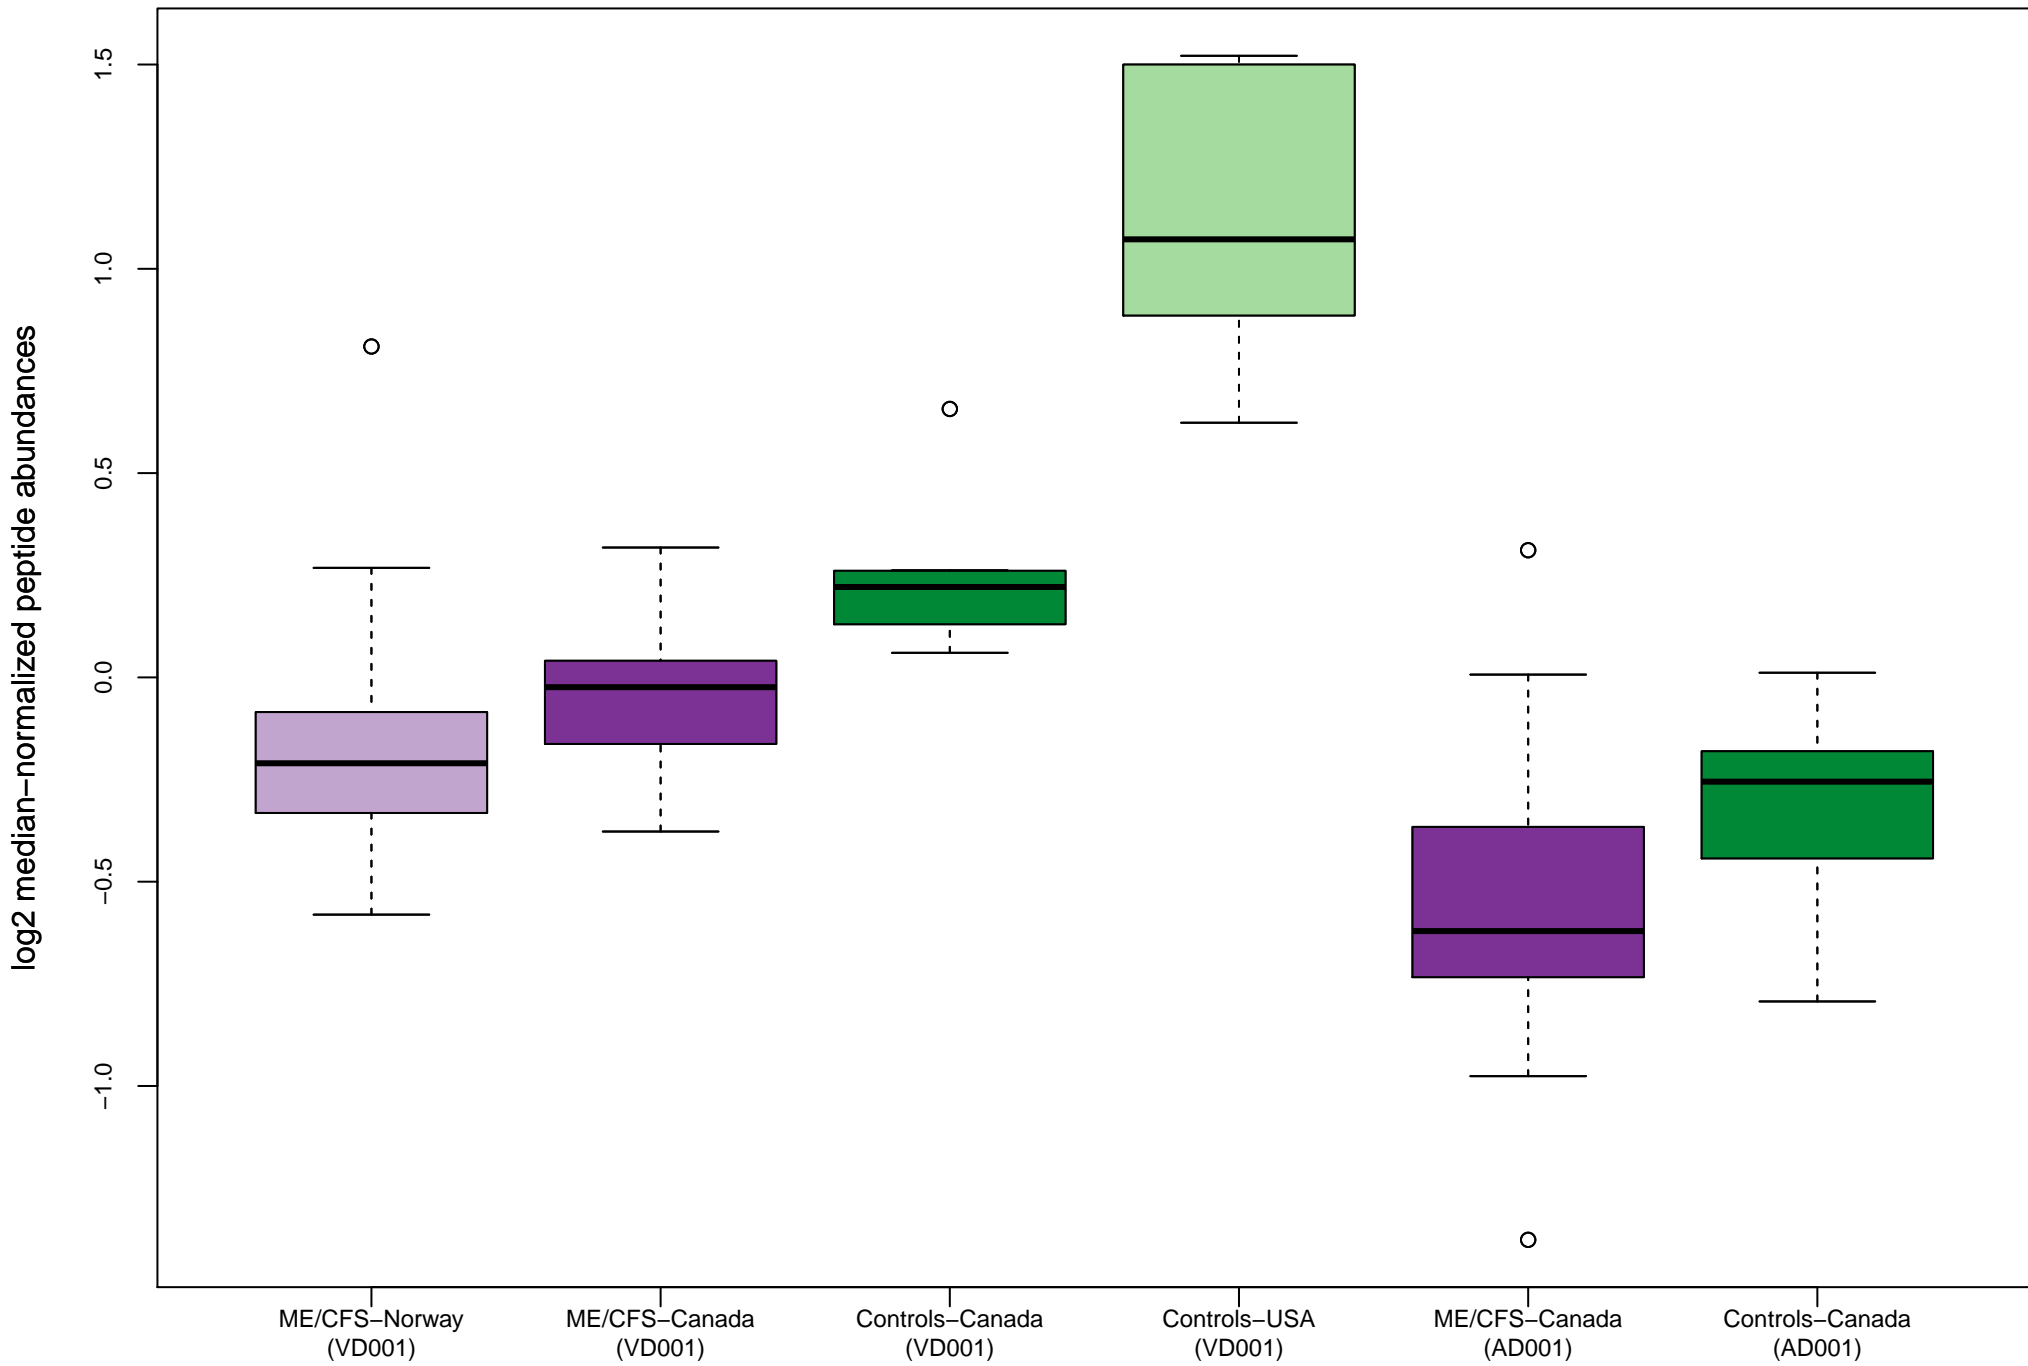

# NSRRWFYWNHLS

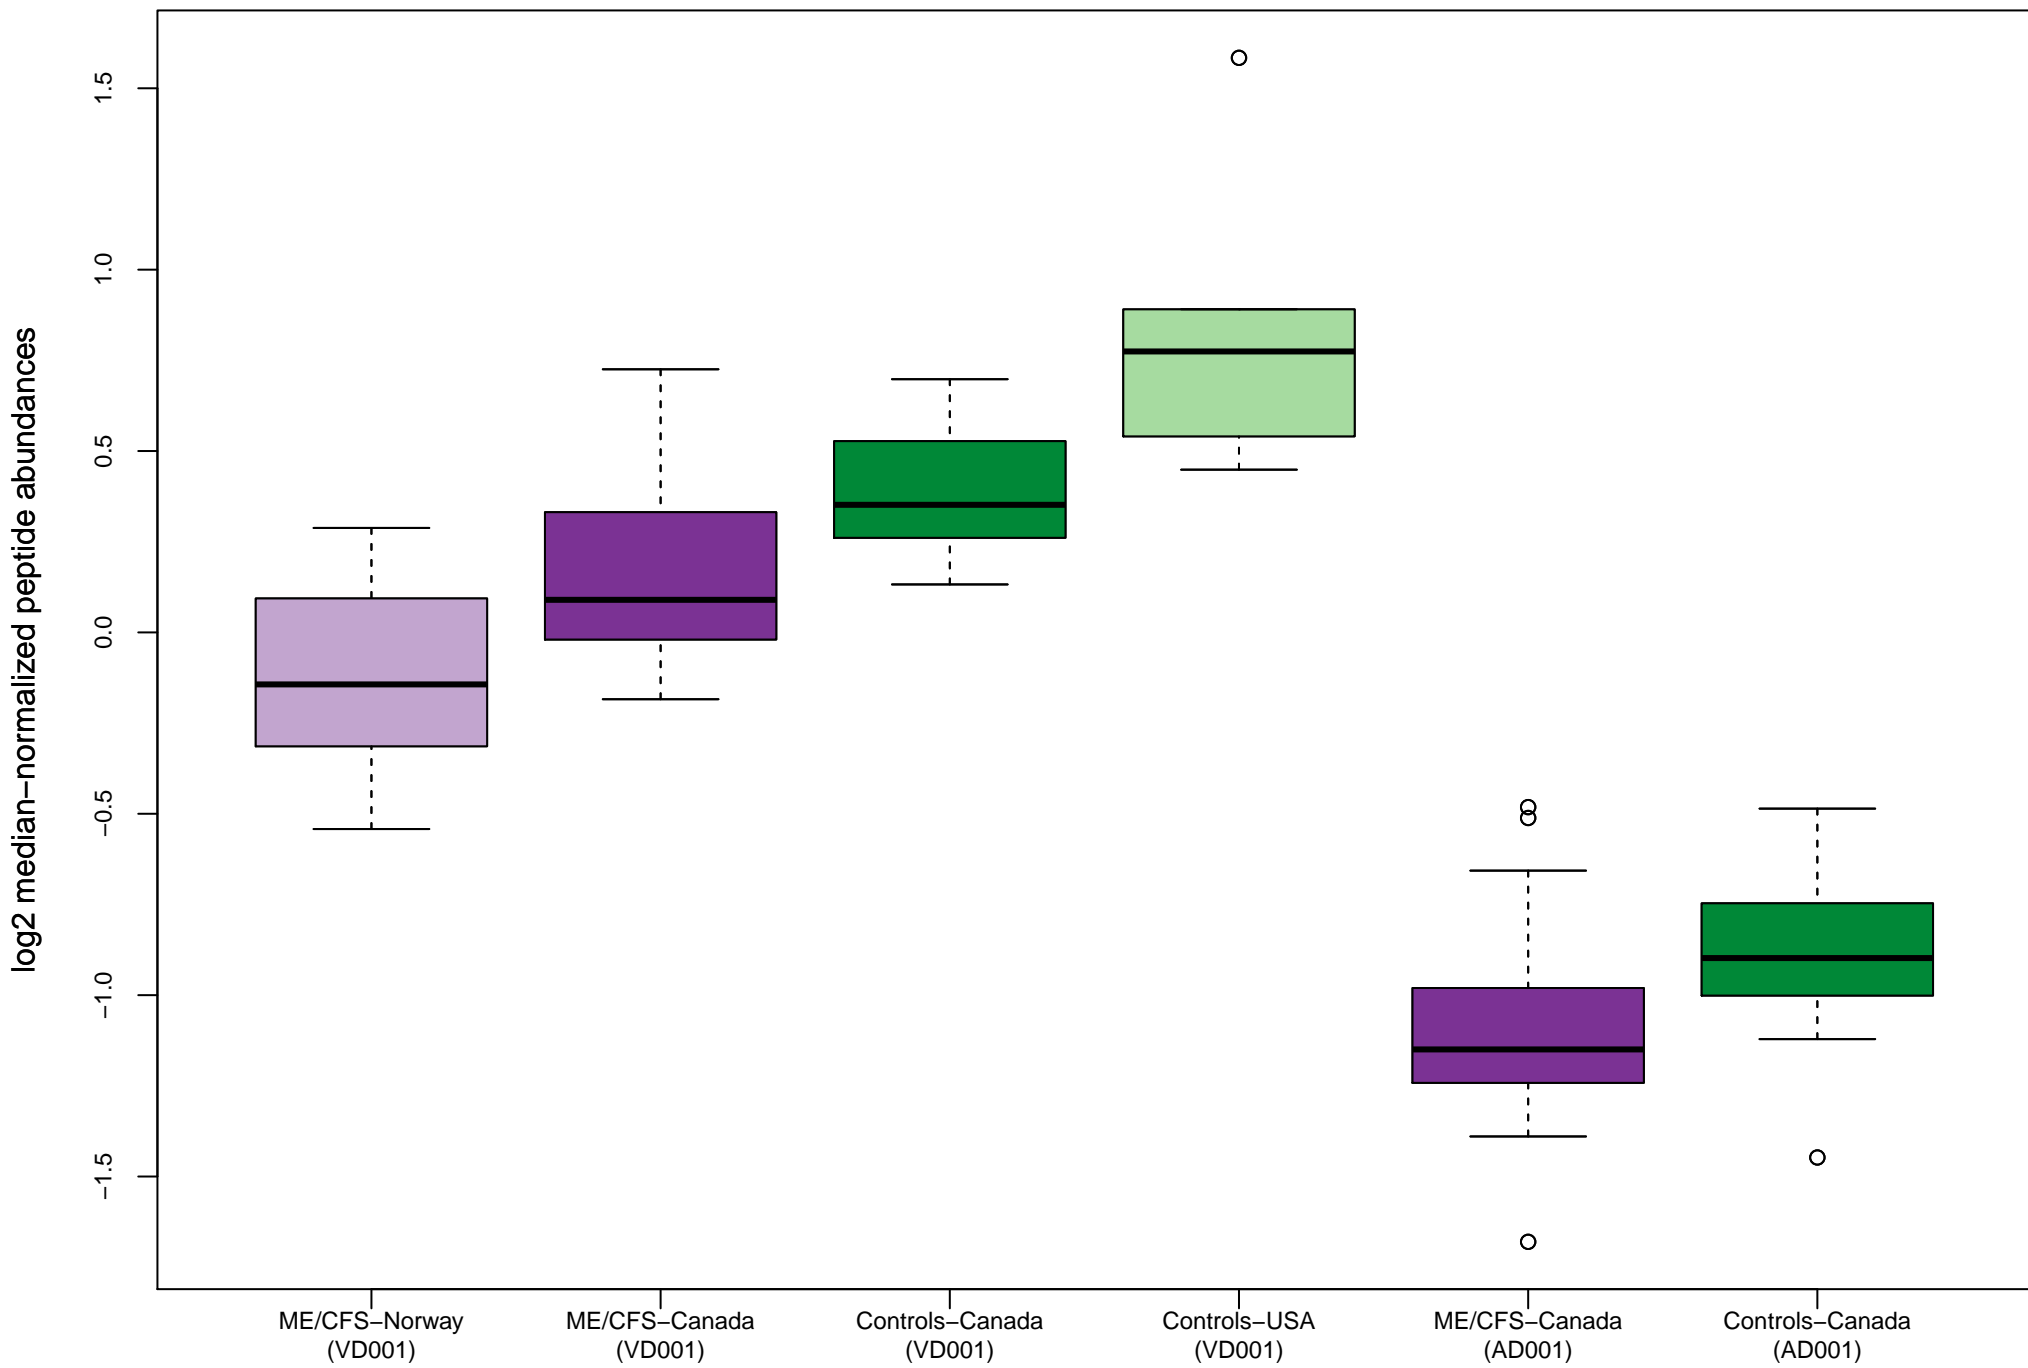

# NSWALNSRYWVL

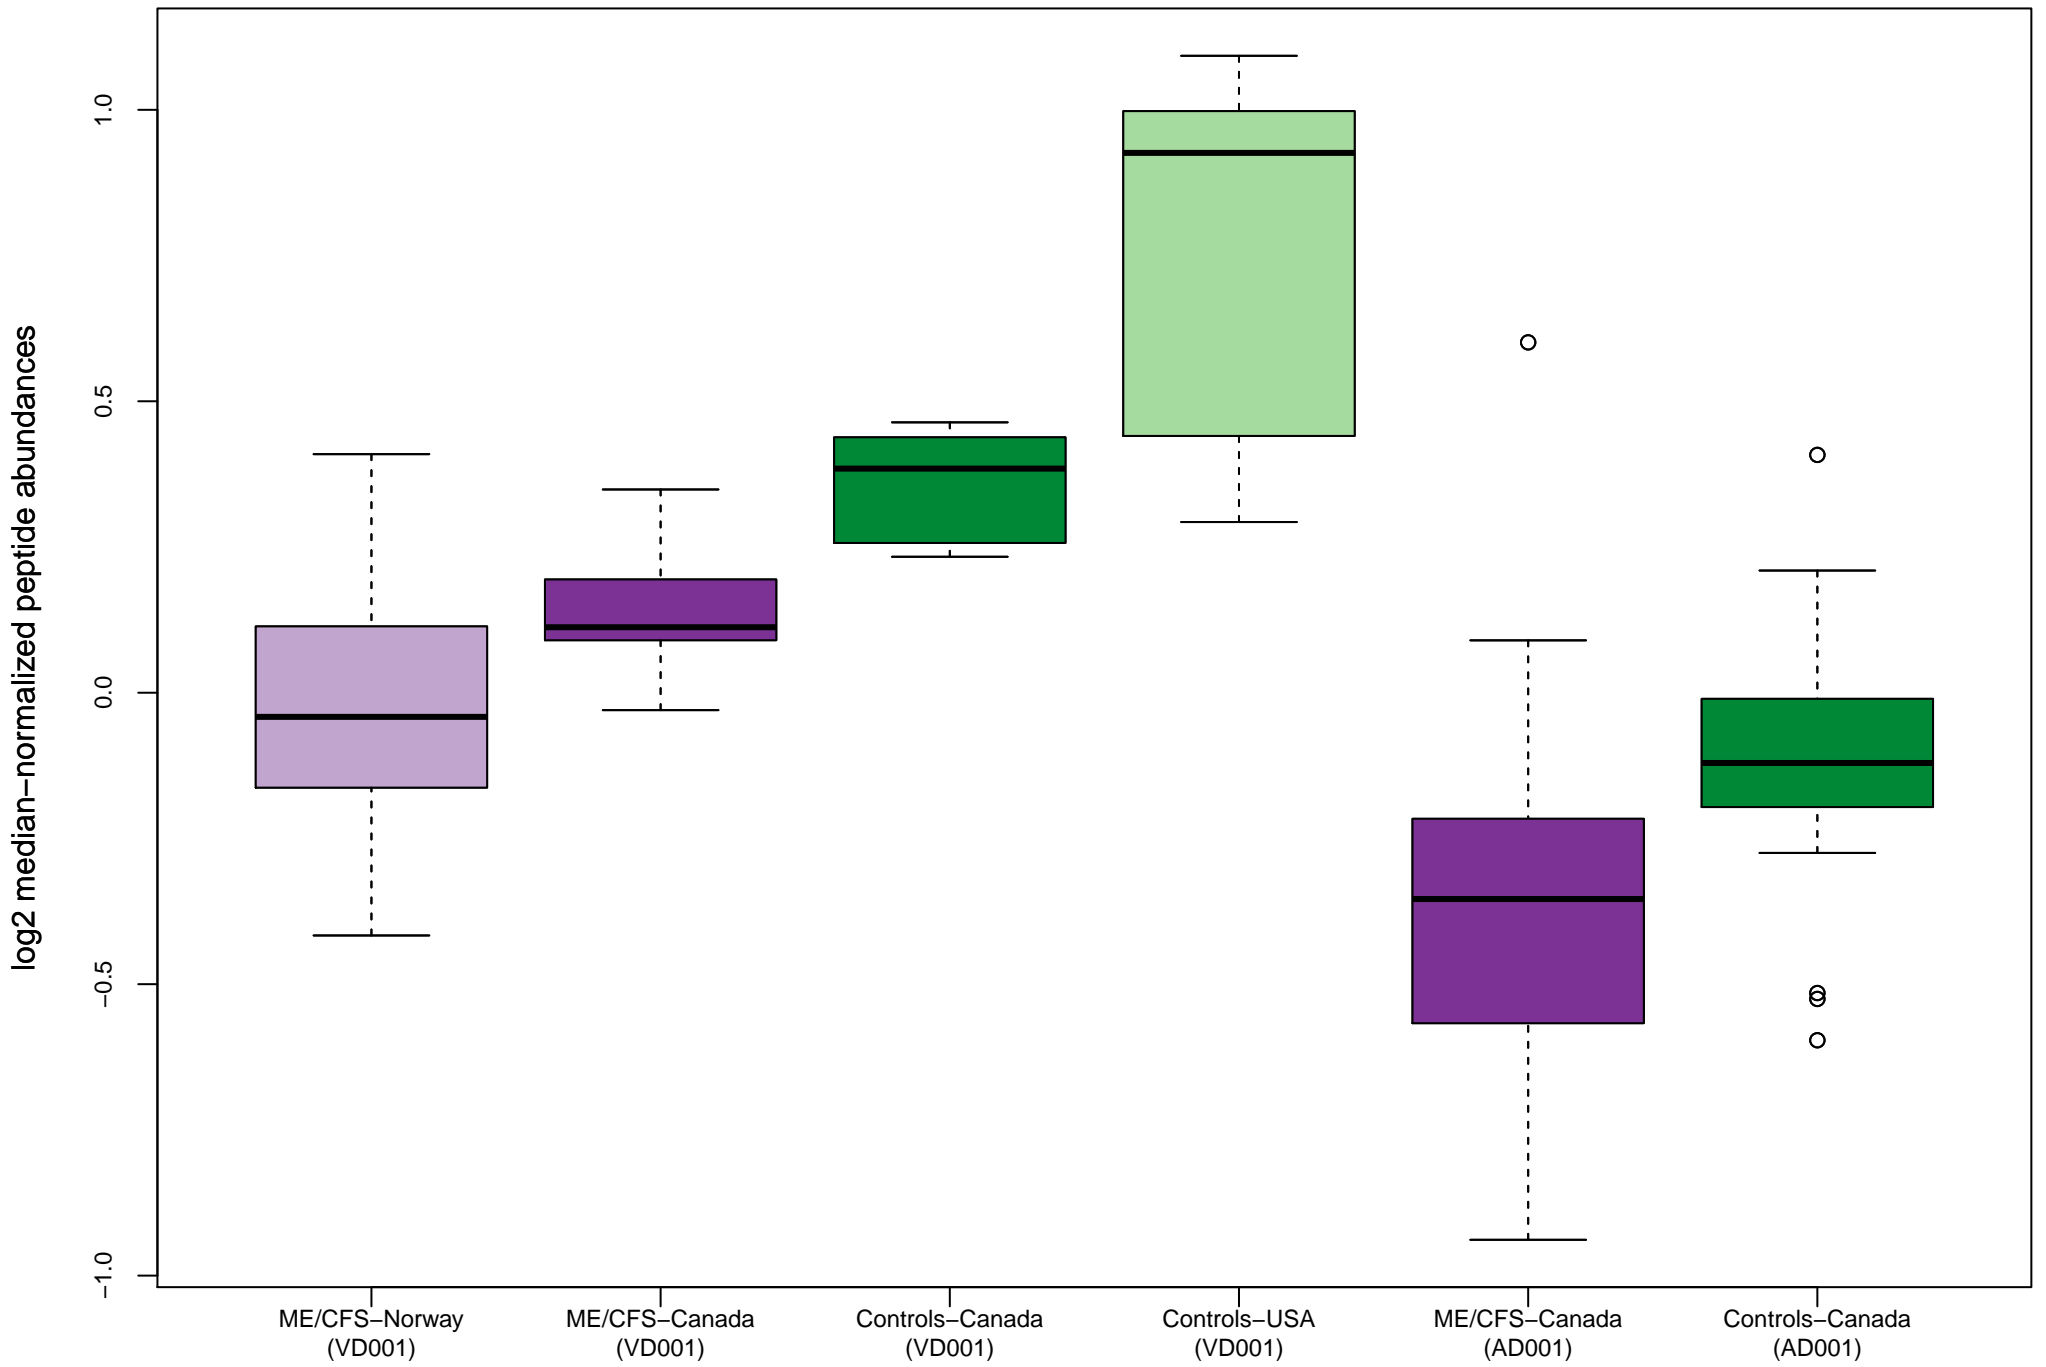

# NVLLGVRNAVLS

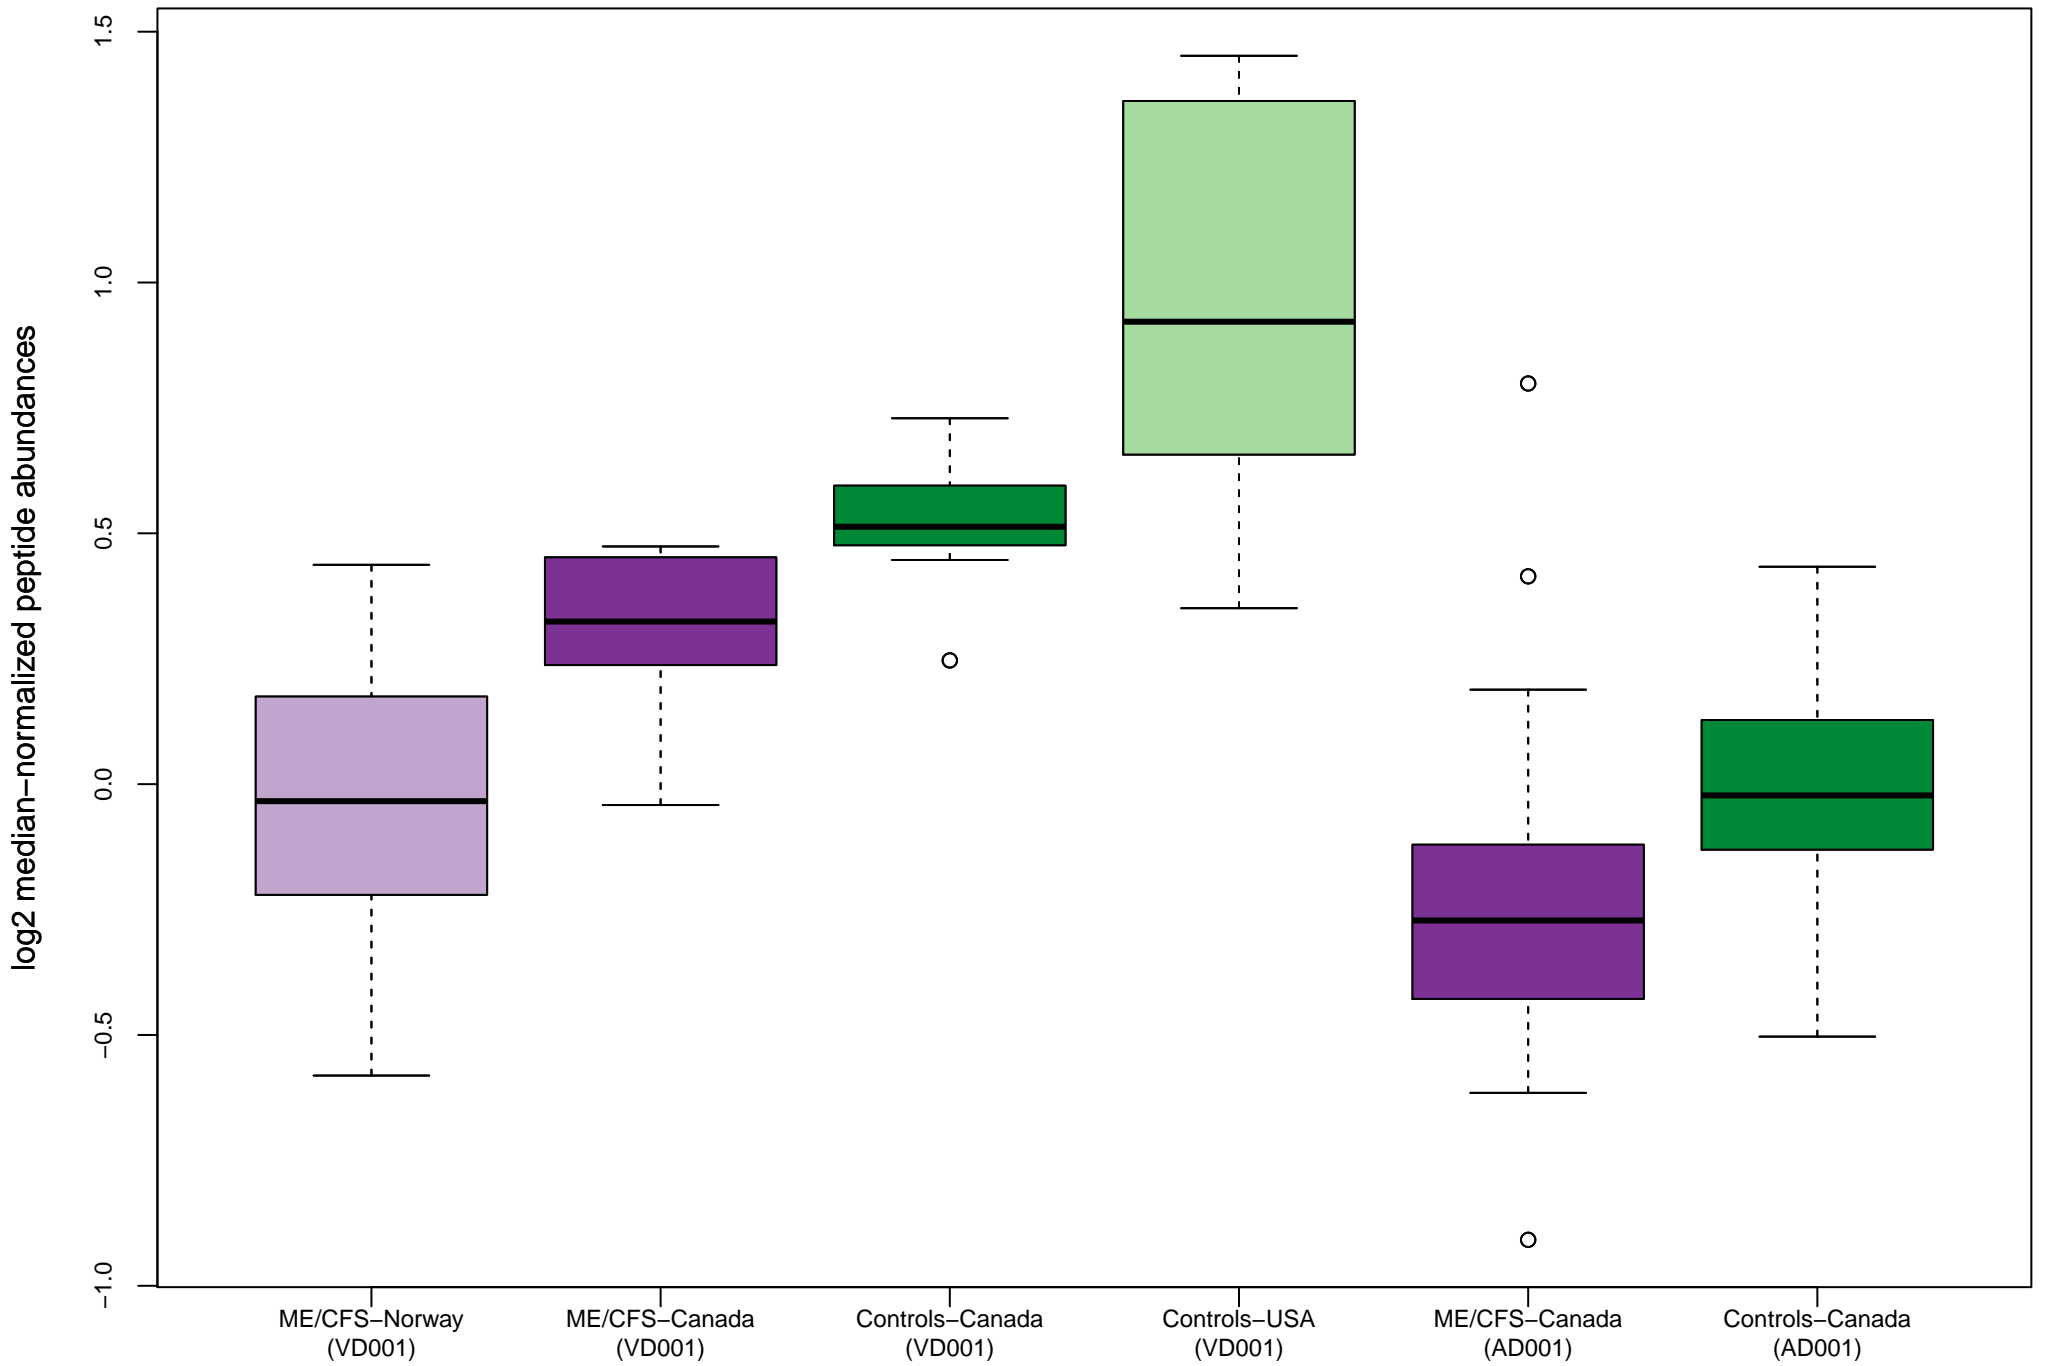

# NVRYVSALWKGG

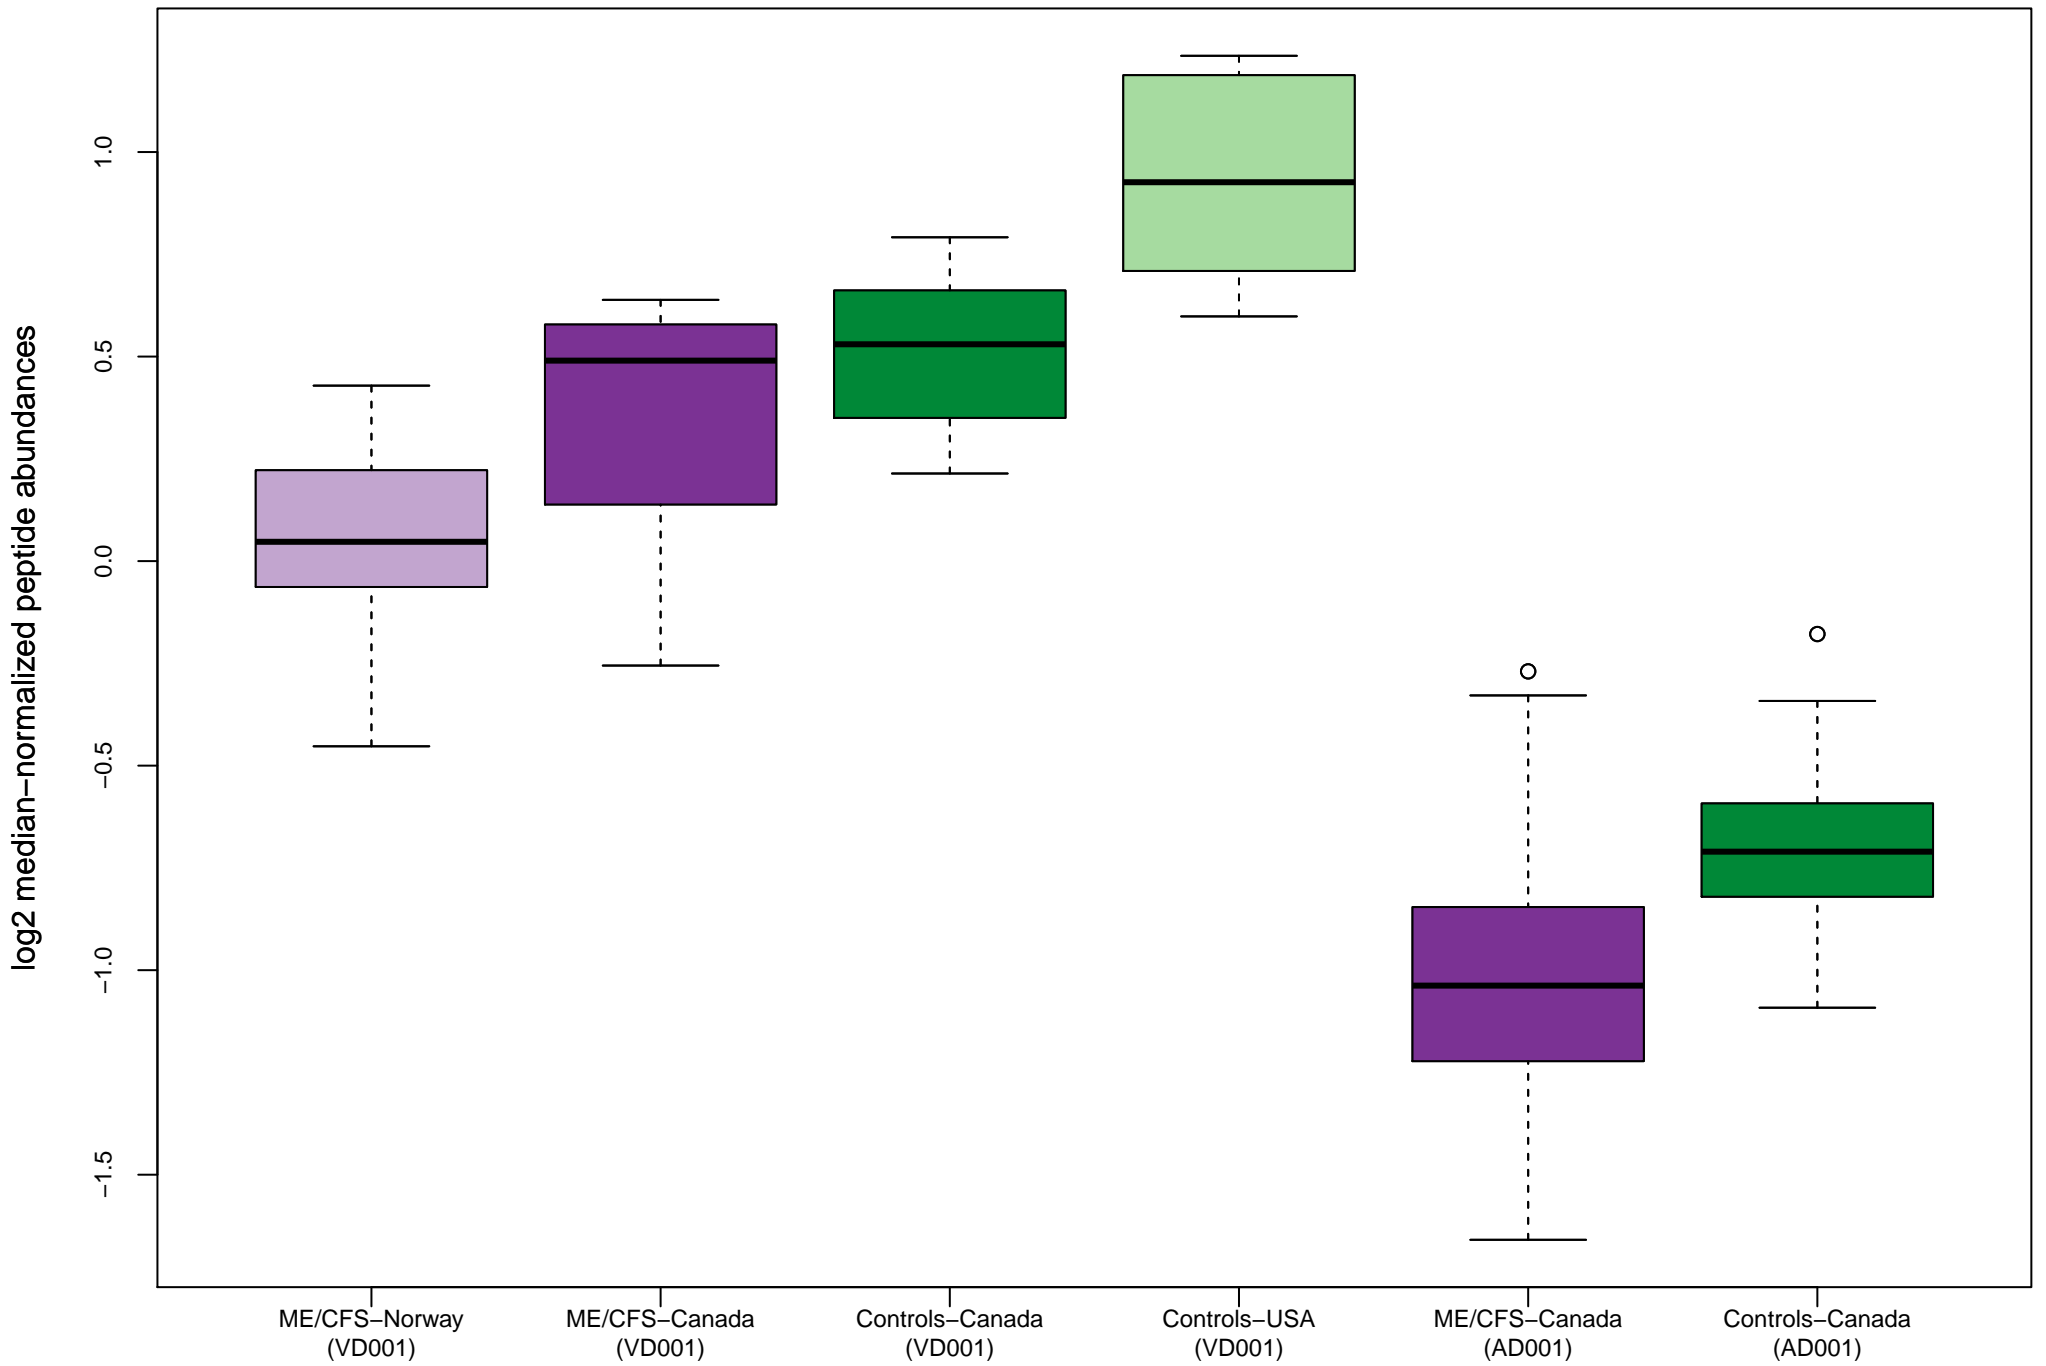

# NWLYRWLGALSG

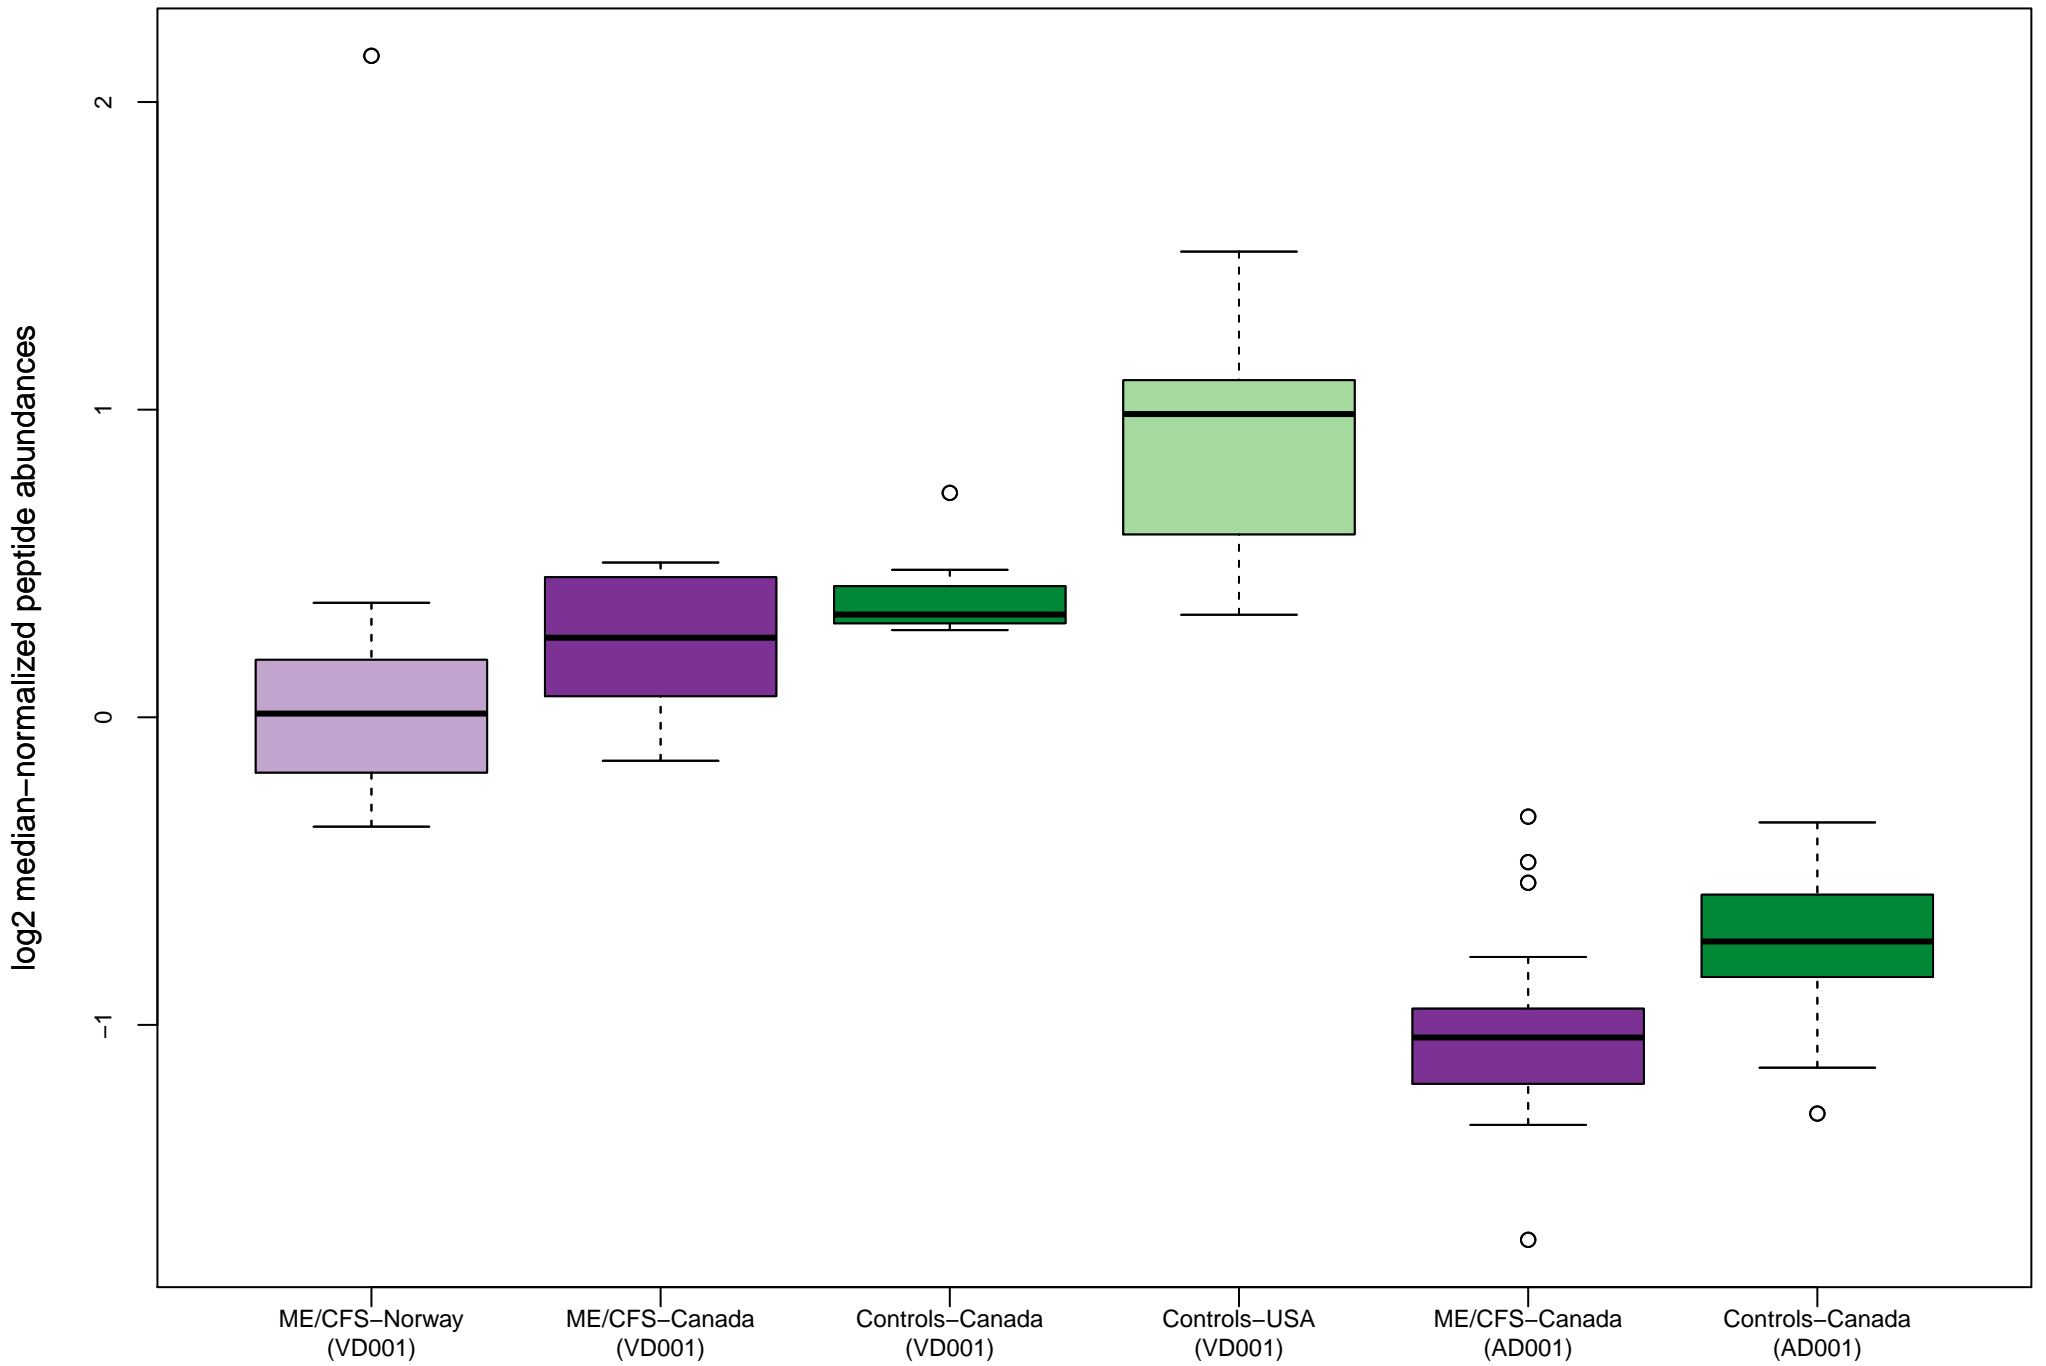



# NWRSWVSGVALG

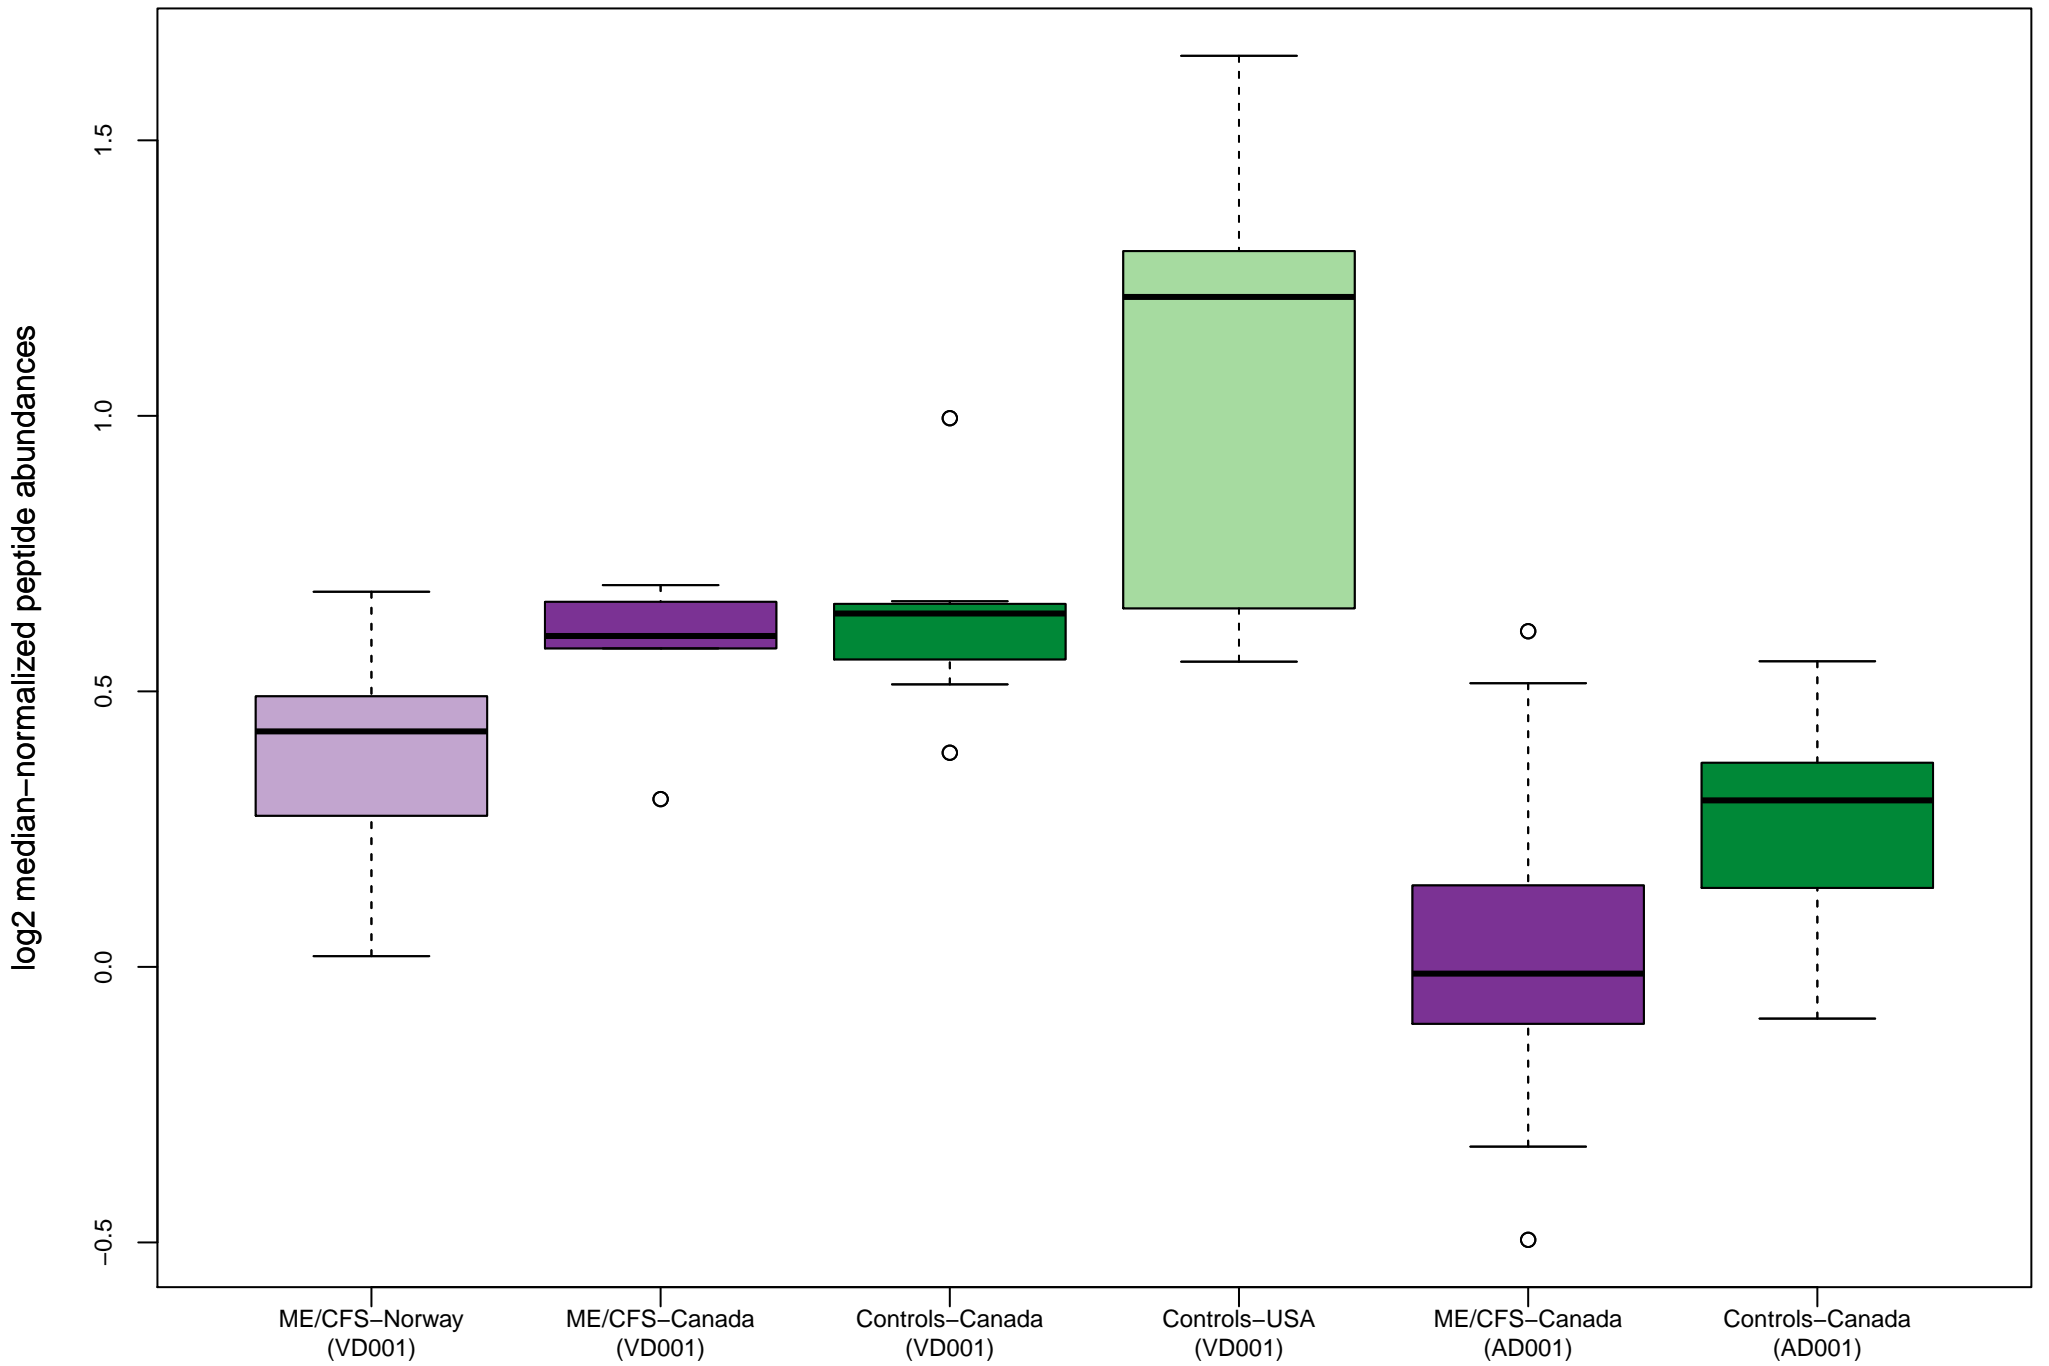

# NWSLRYLGVLSG

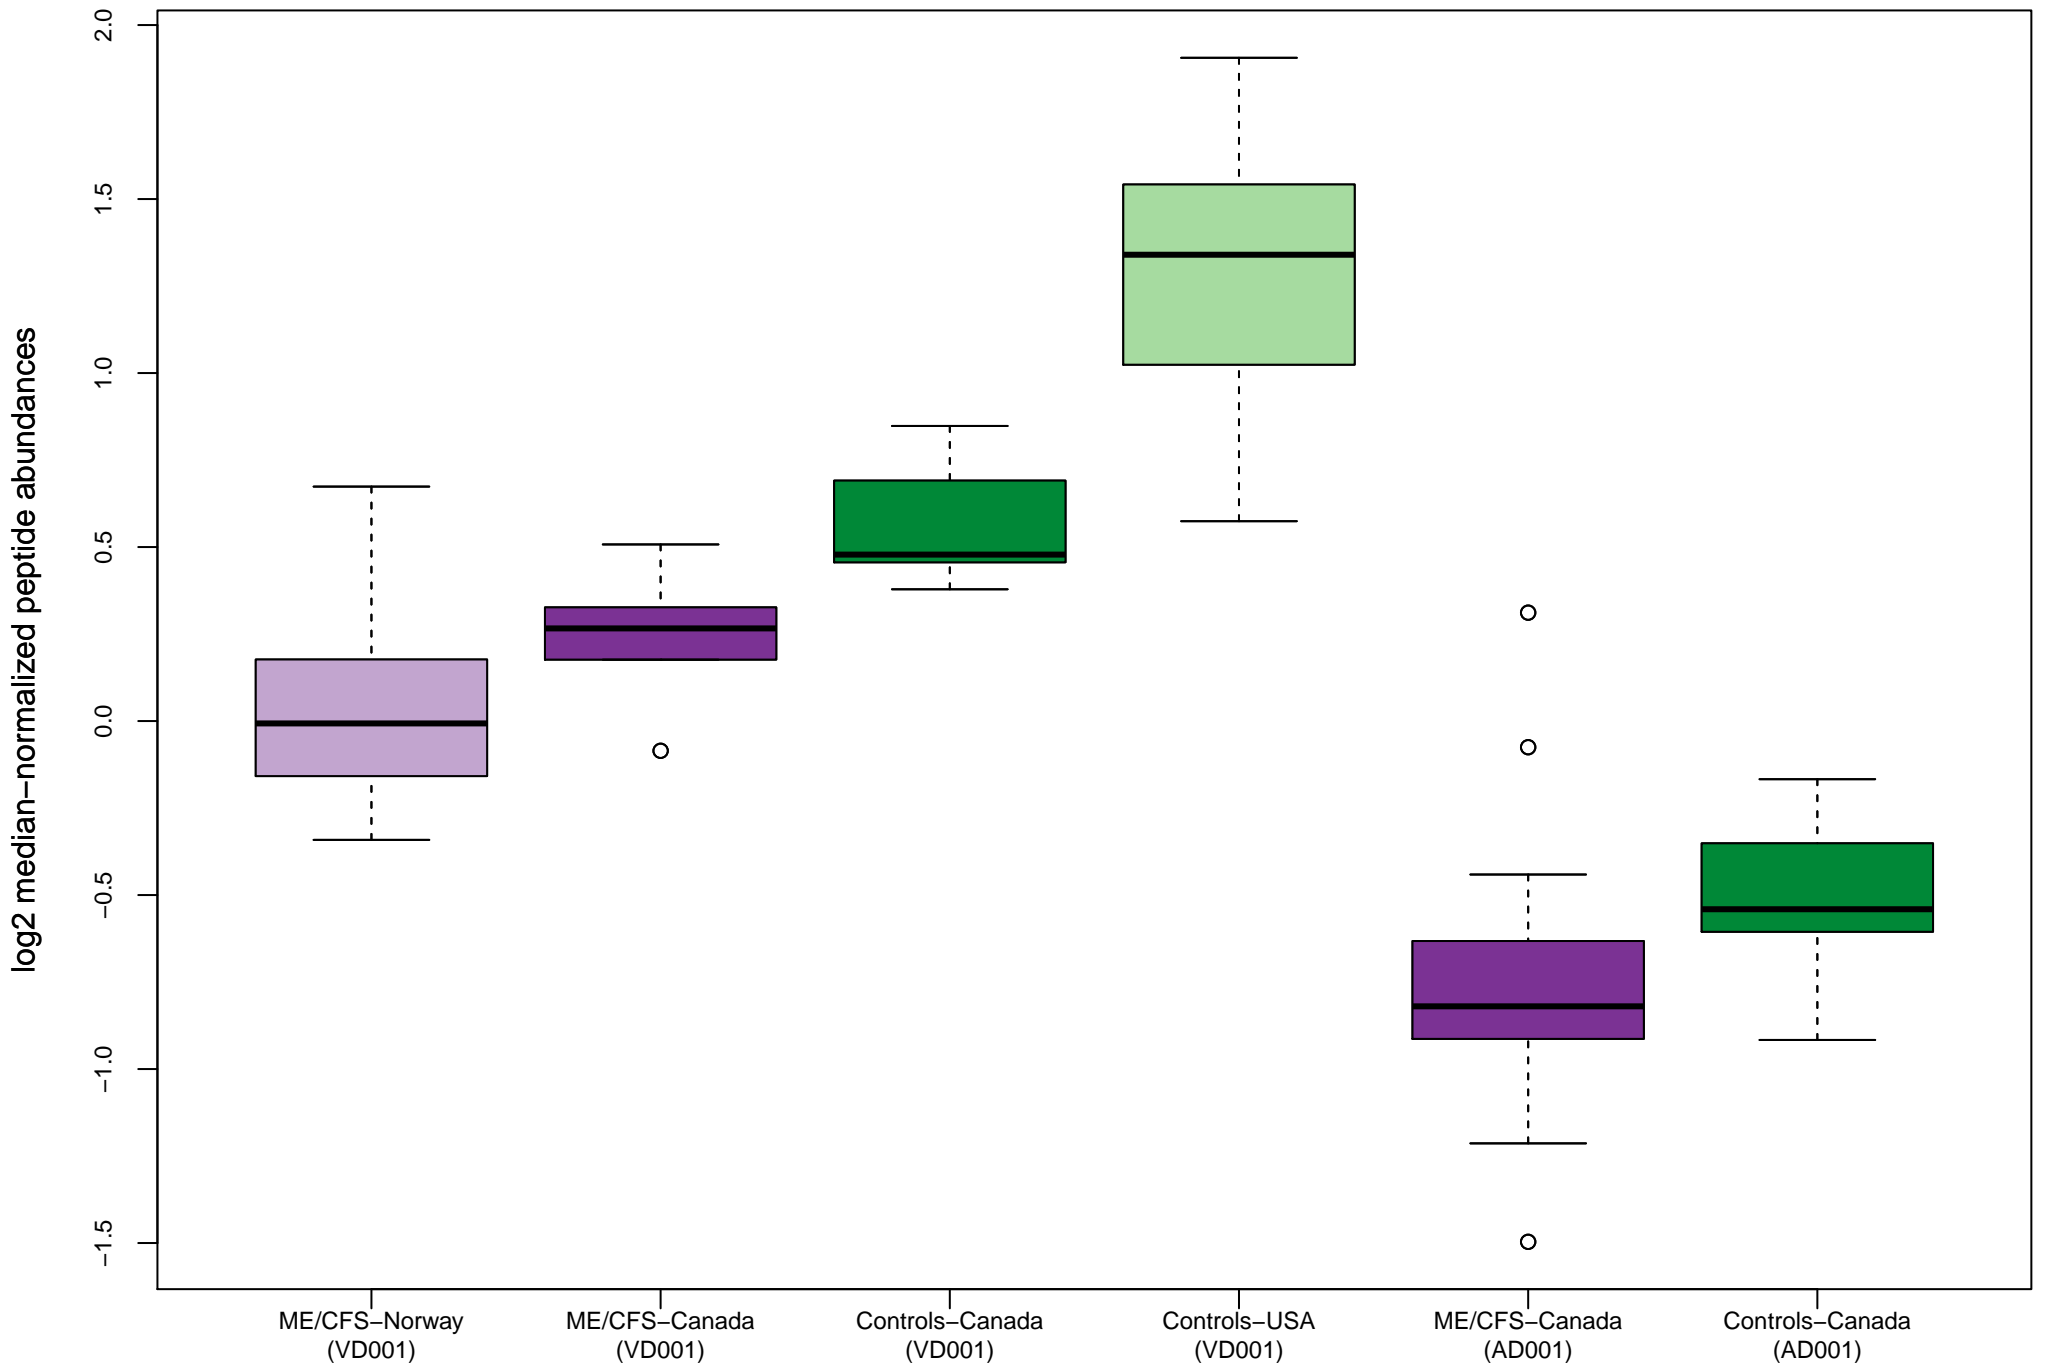

# PAQVLRYPWASG

log2 median-normalized peptide abundances

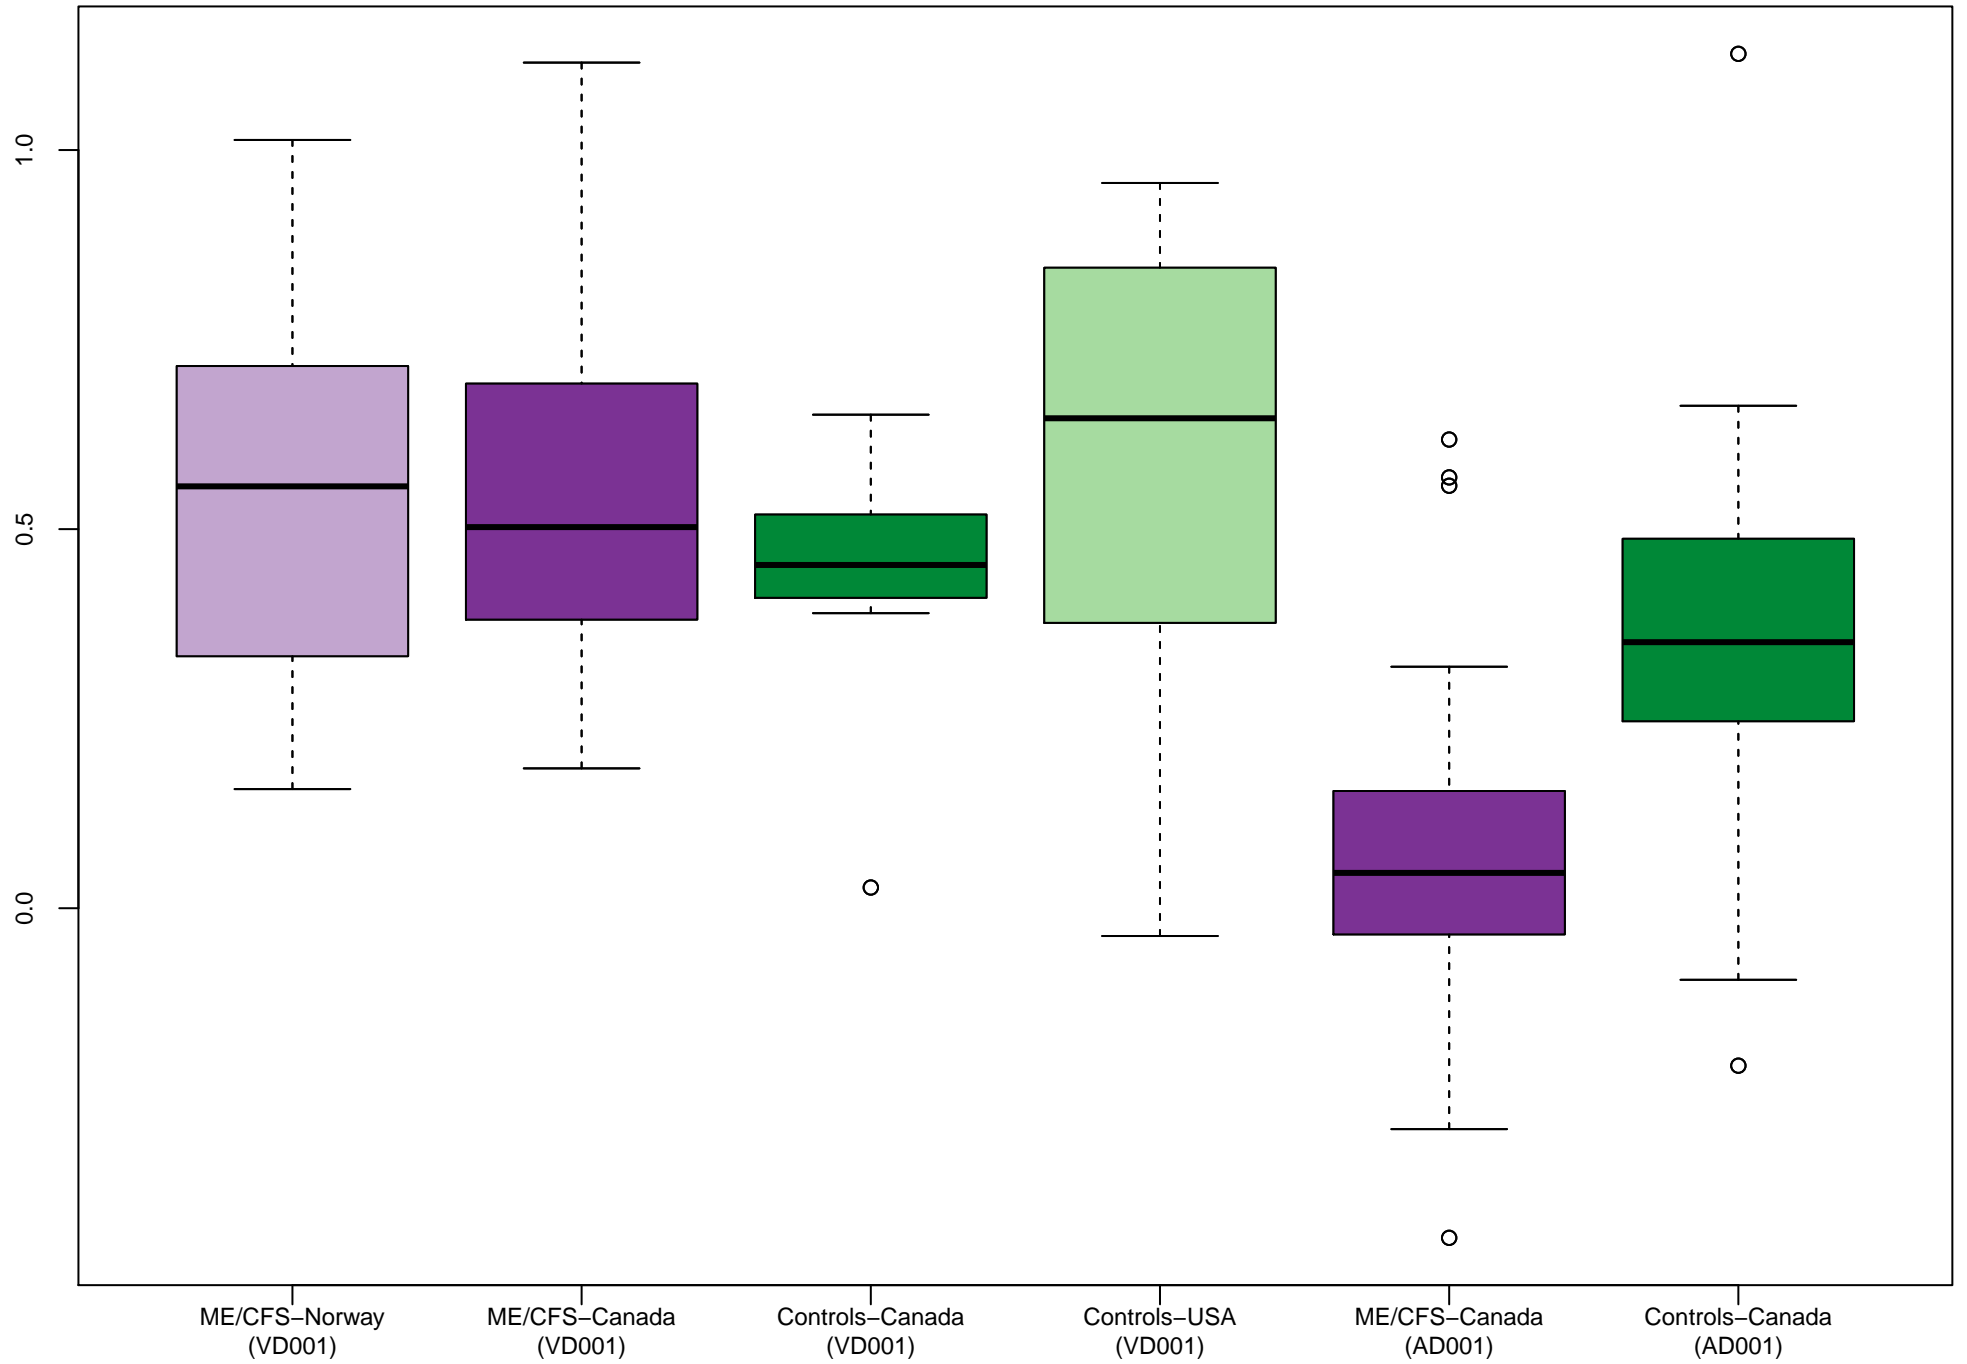

# PARFFRVALSGG

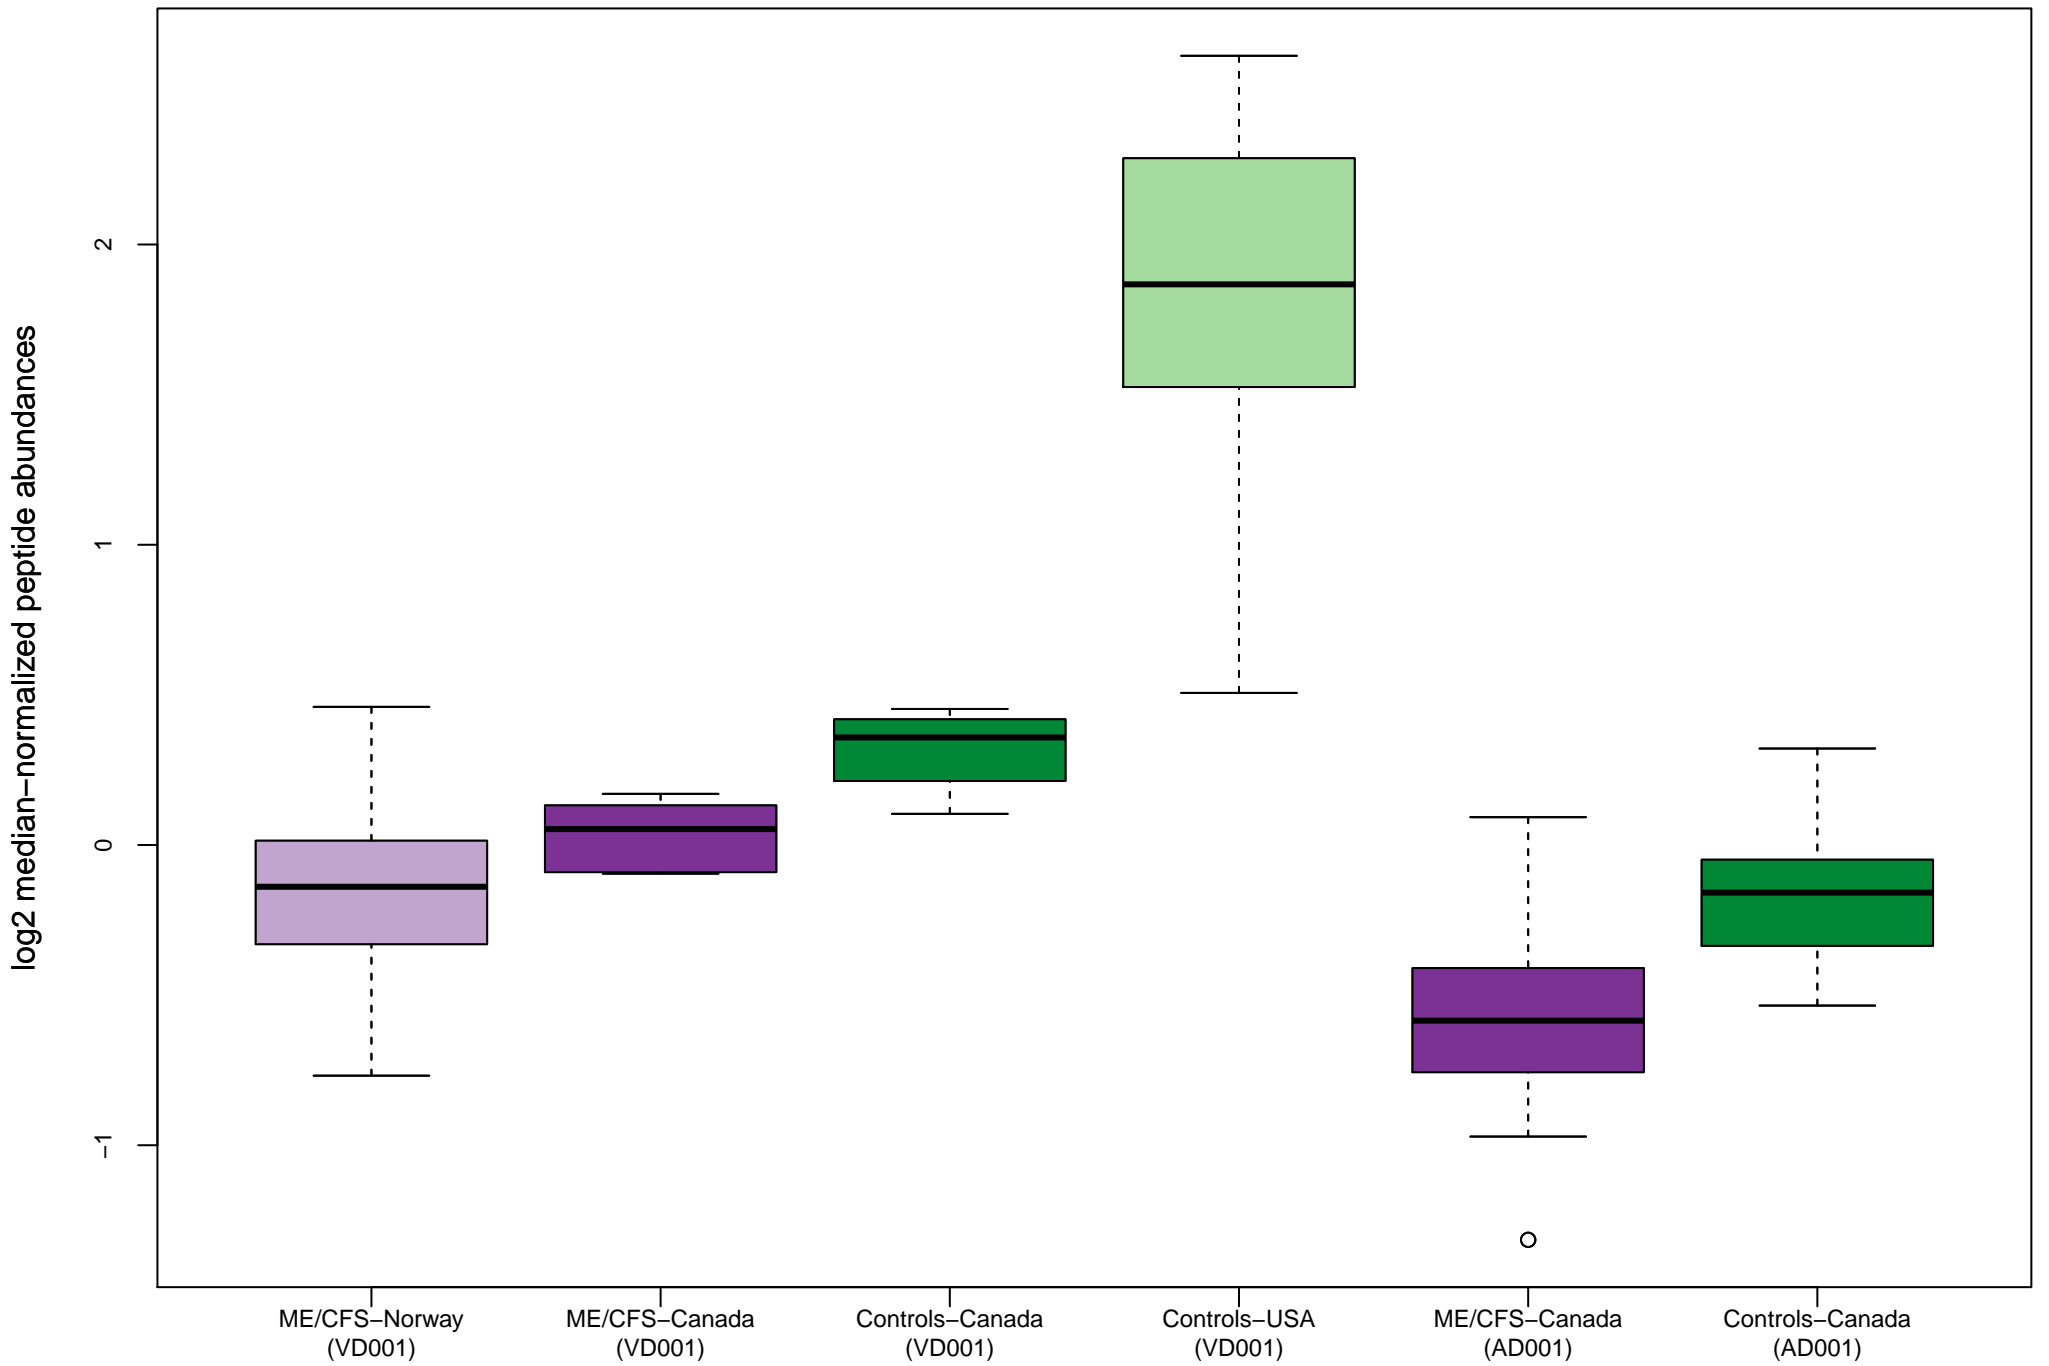

# PARLYLQYKVLS

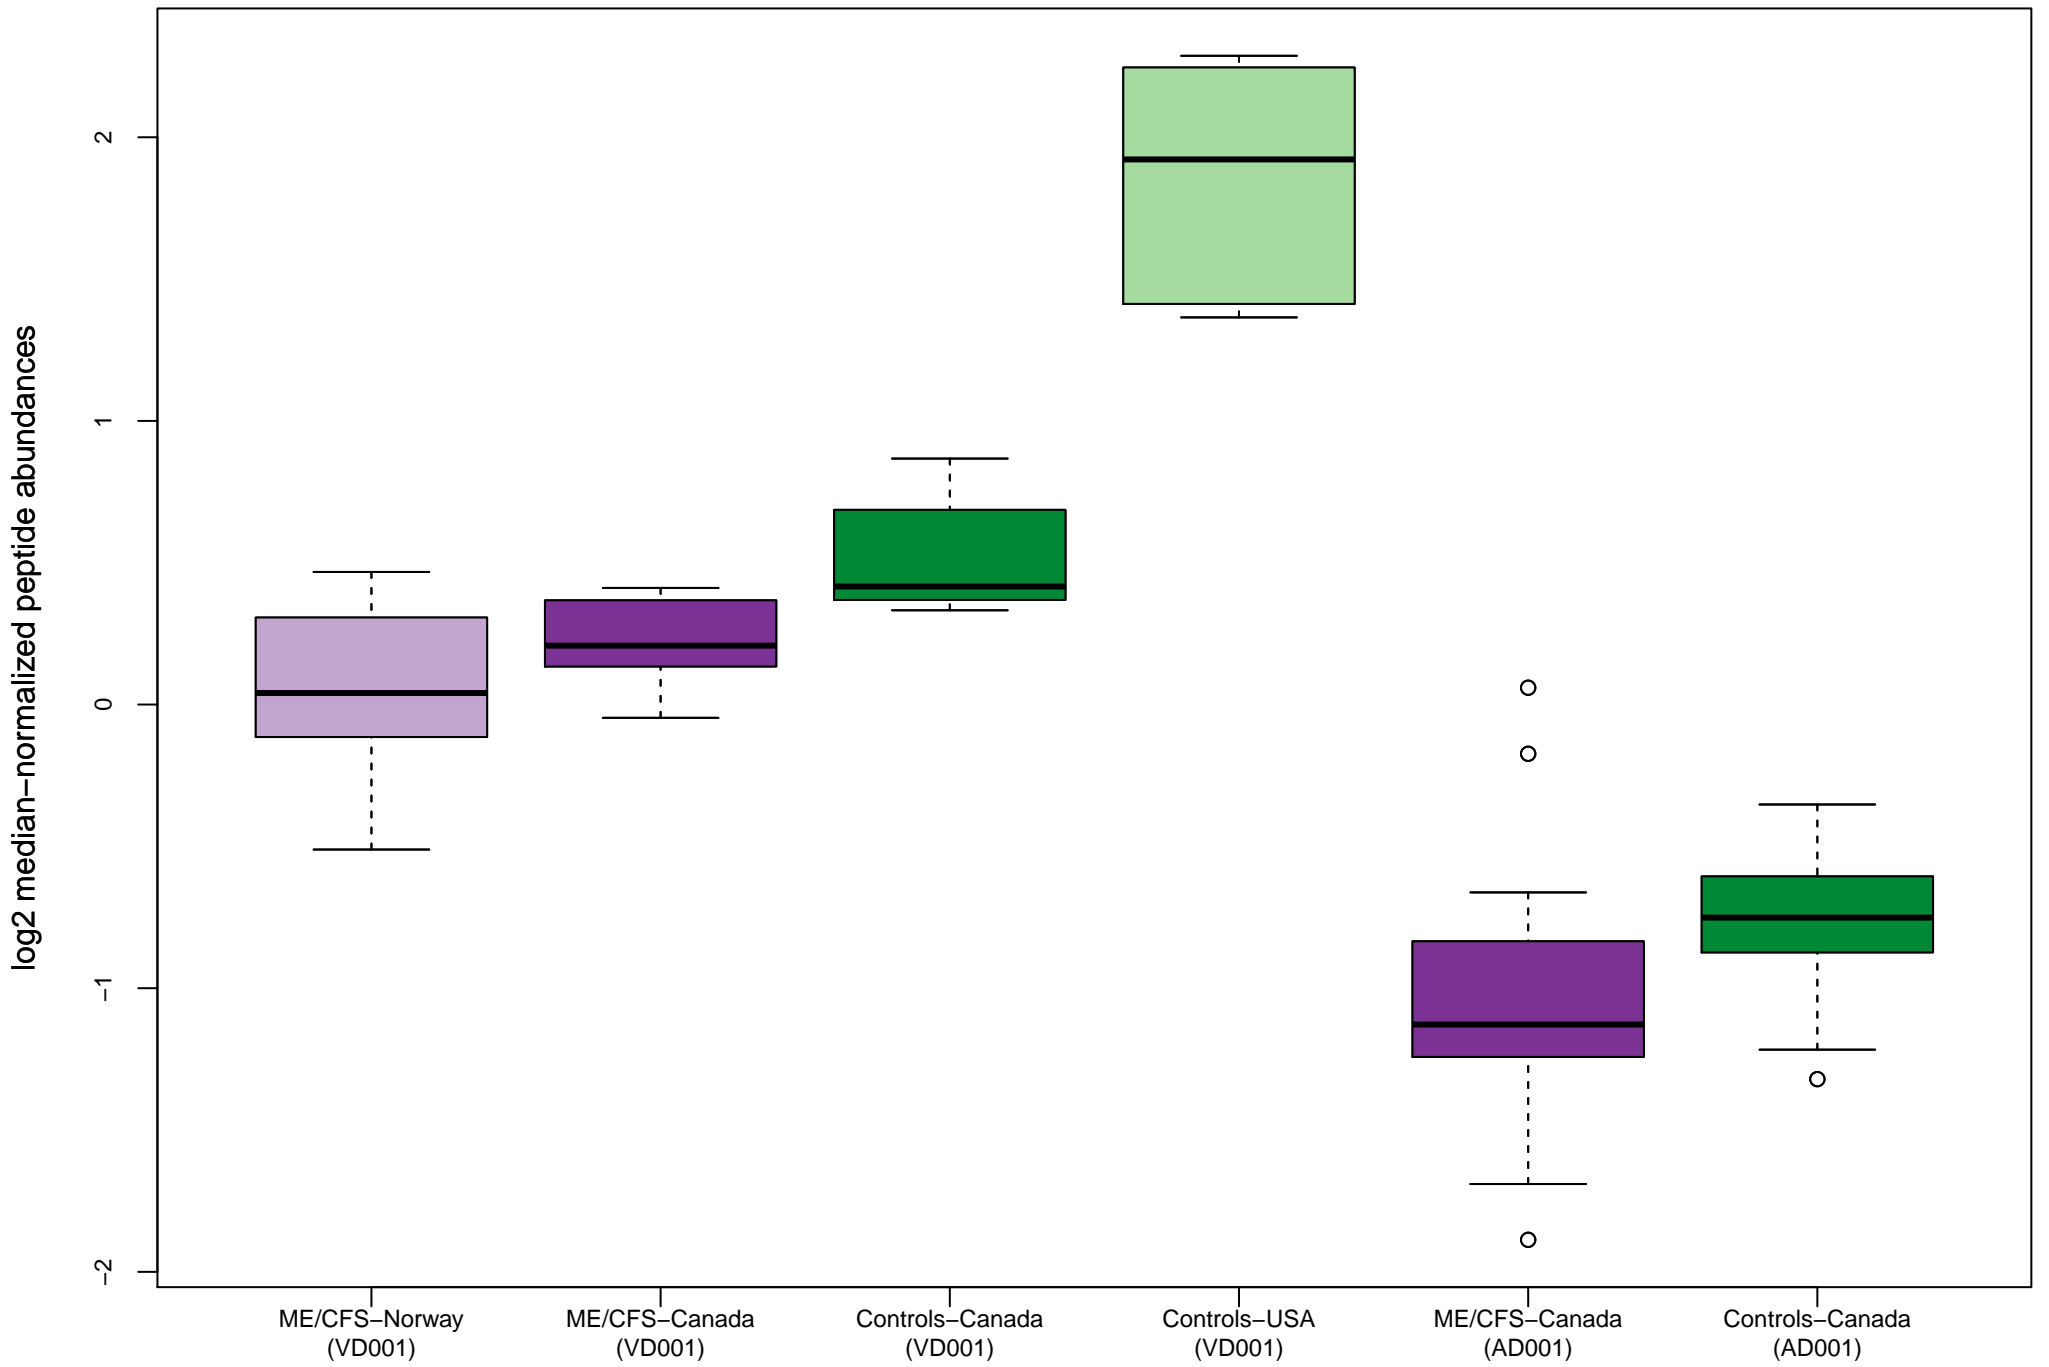

# PFLKAFALGVSG

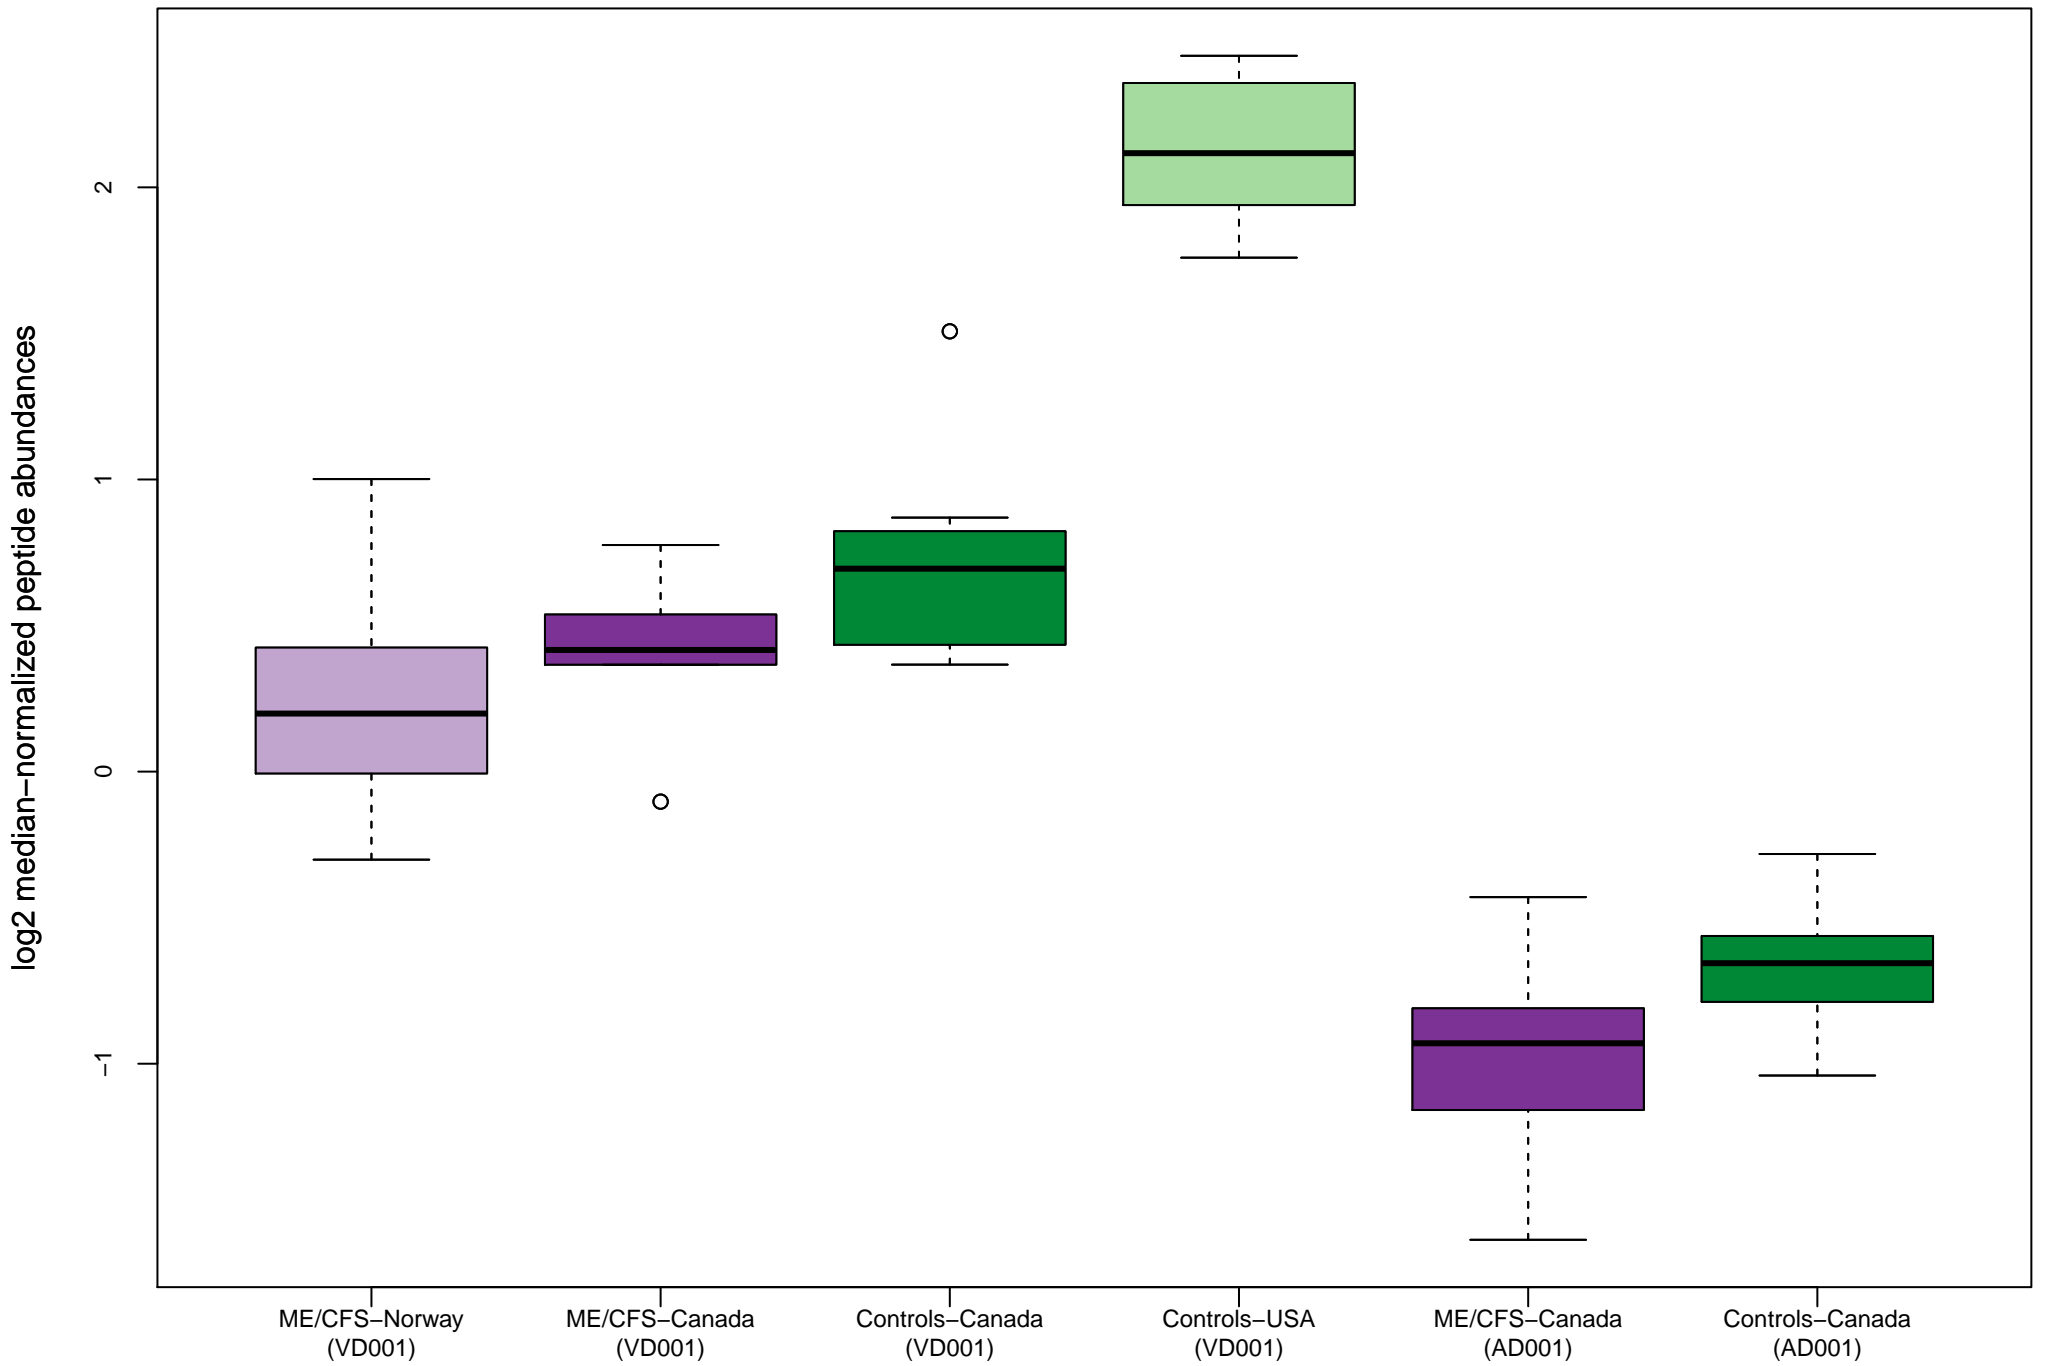

# PFLLRYSGVALS

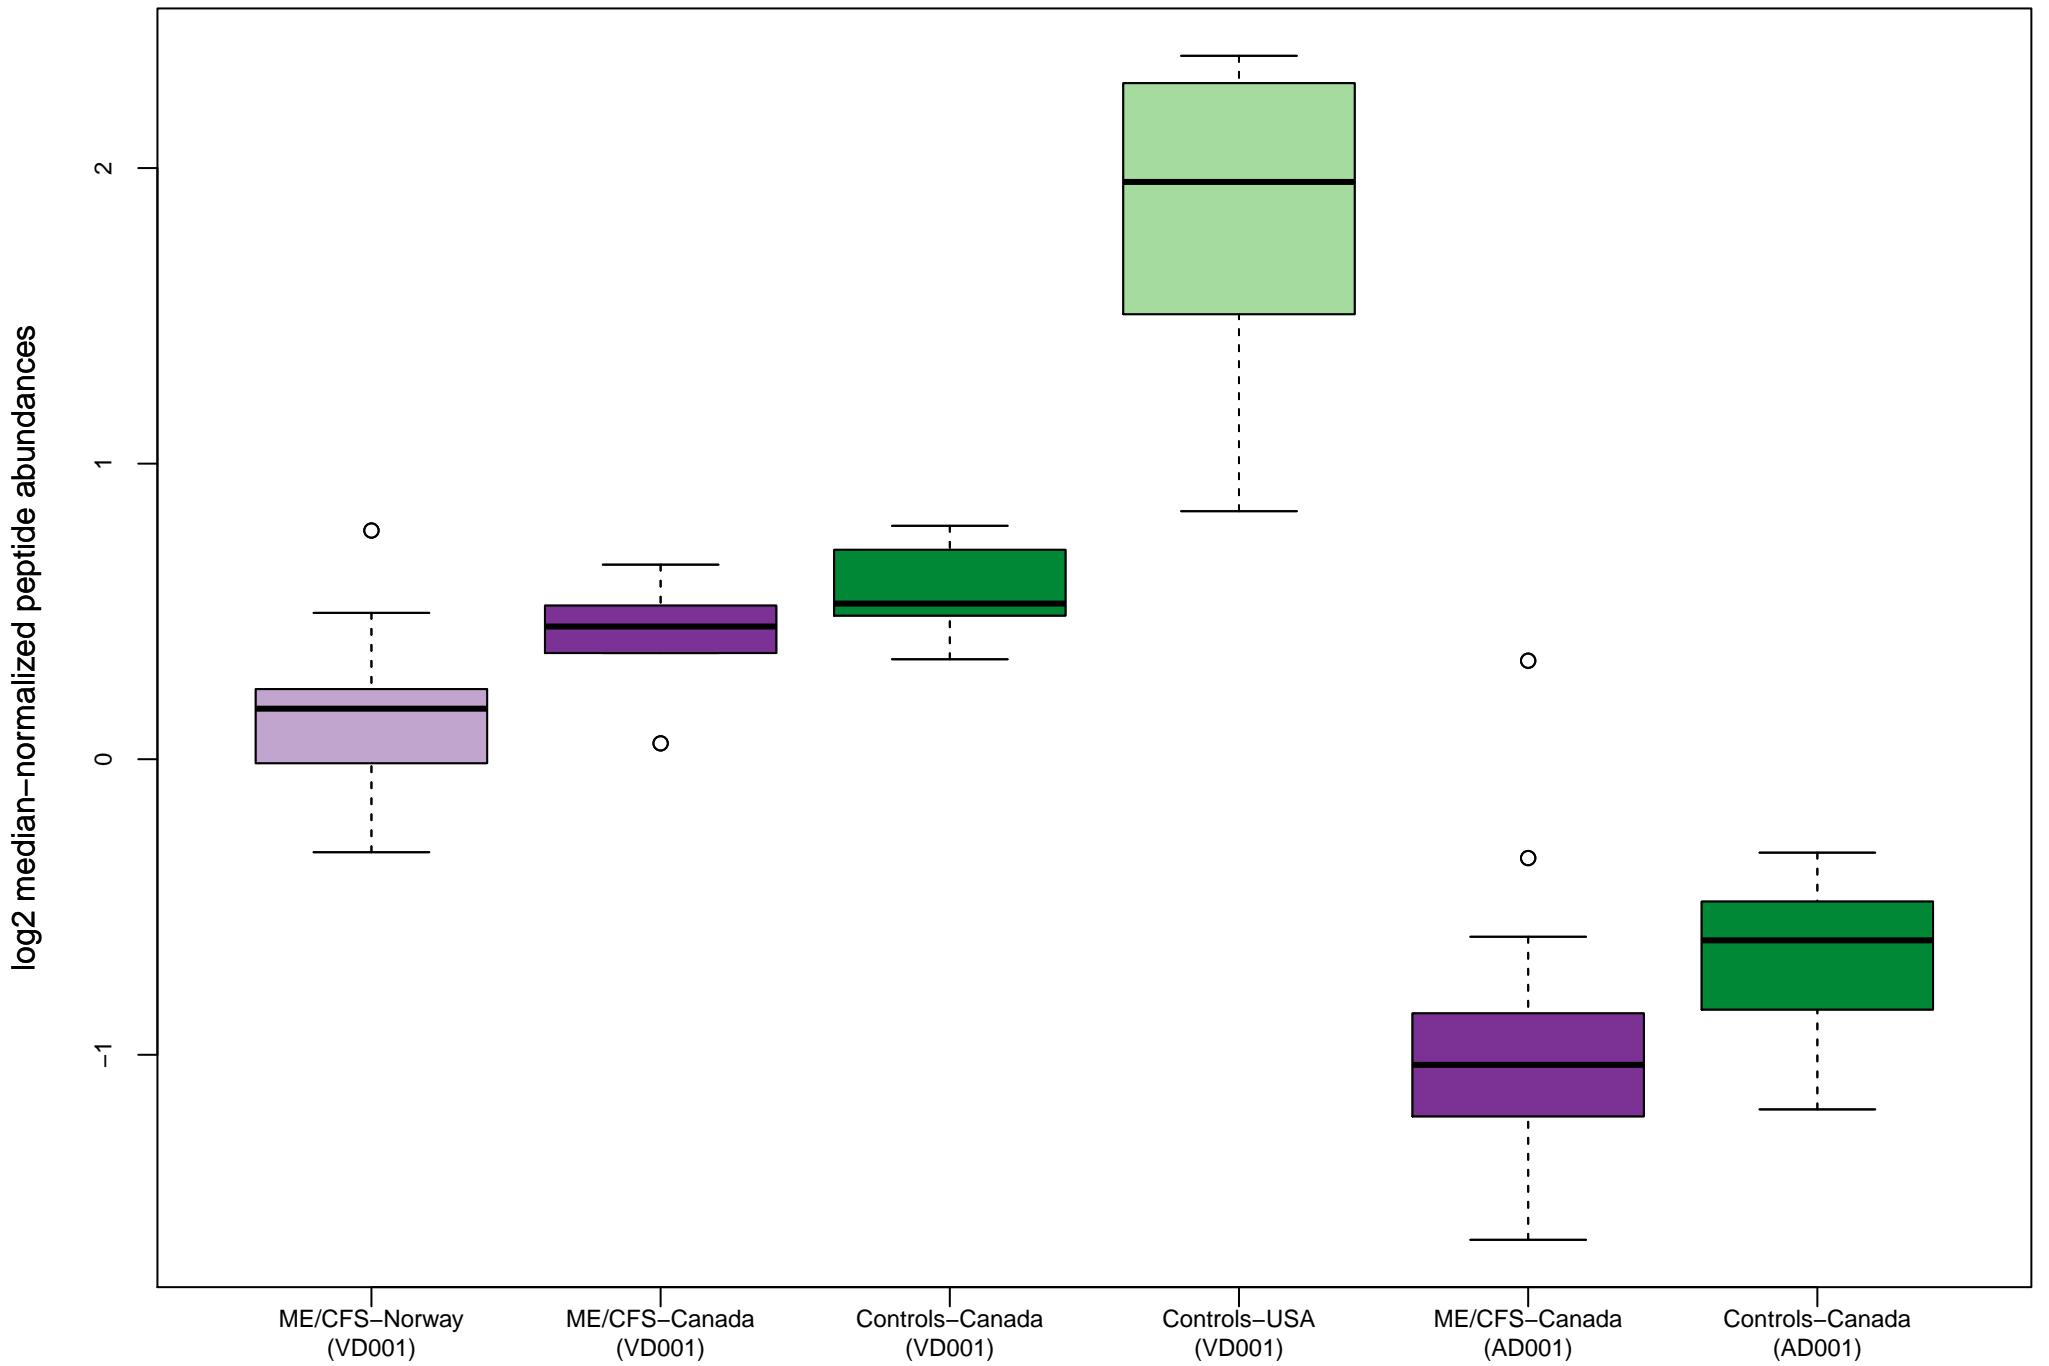

# PFYYLRPYKLGV

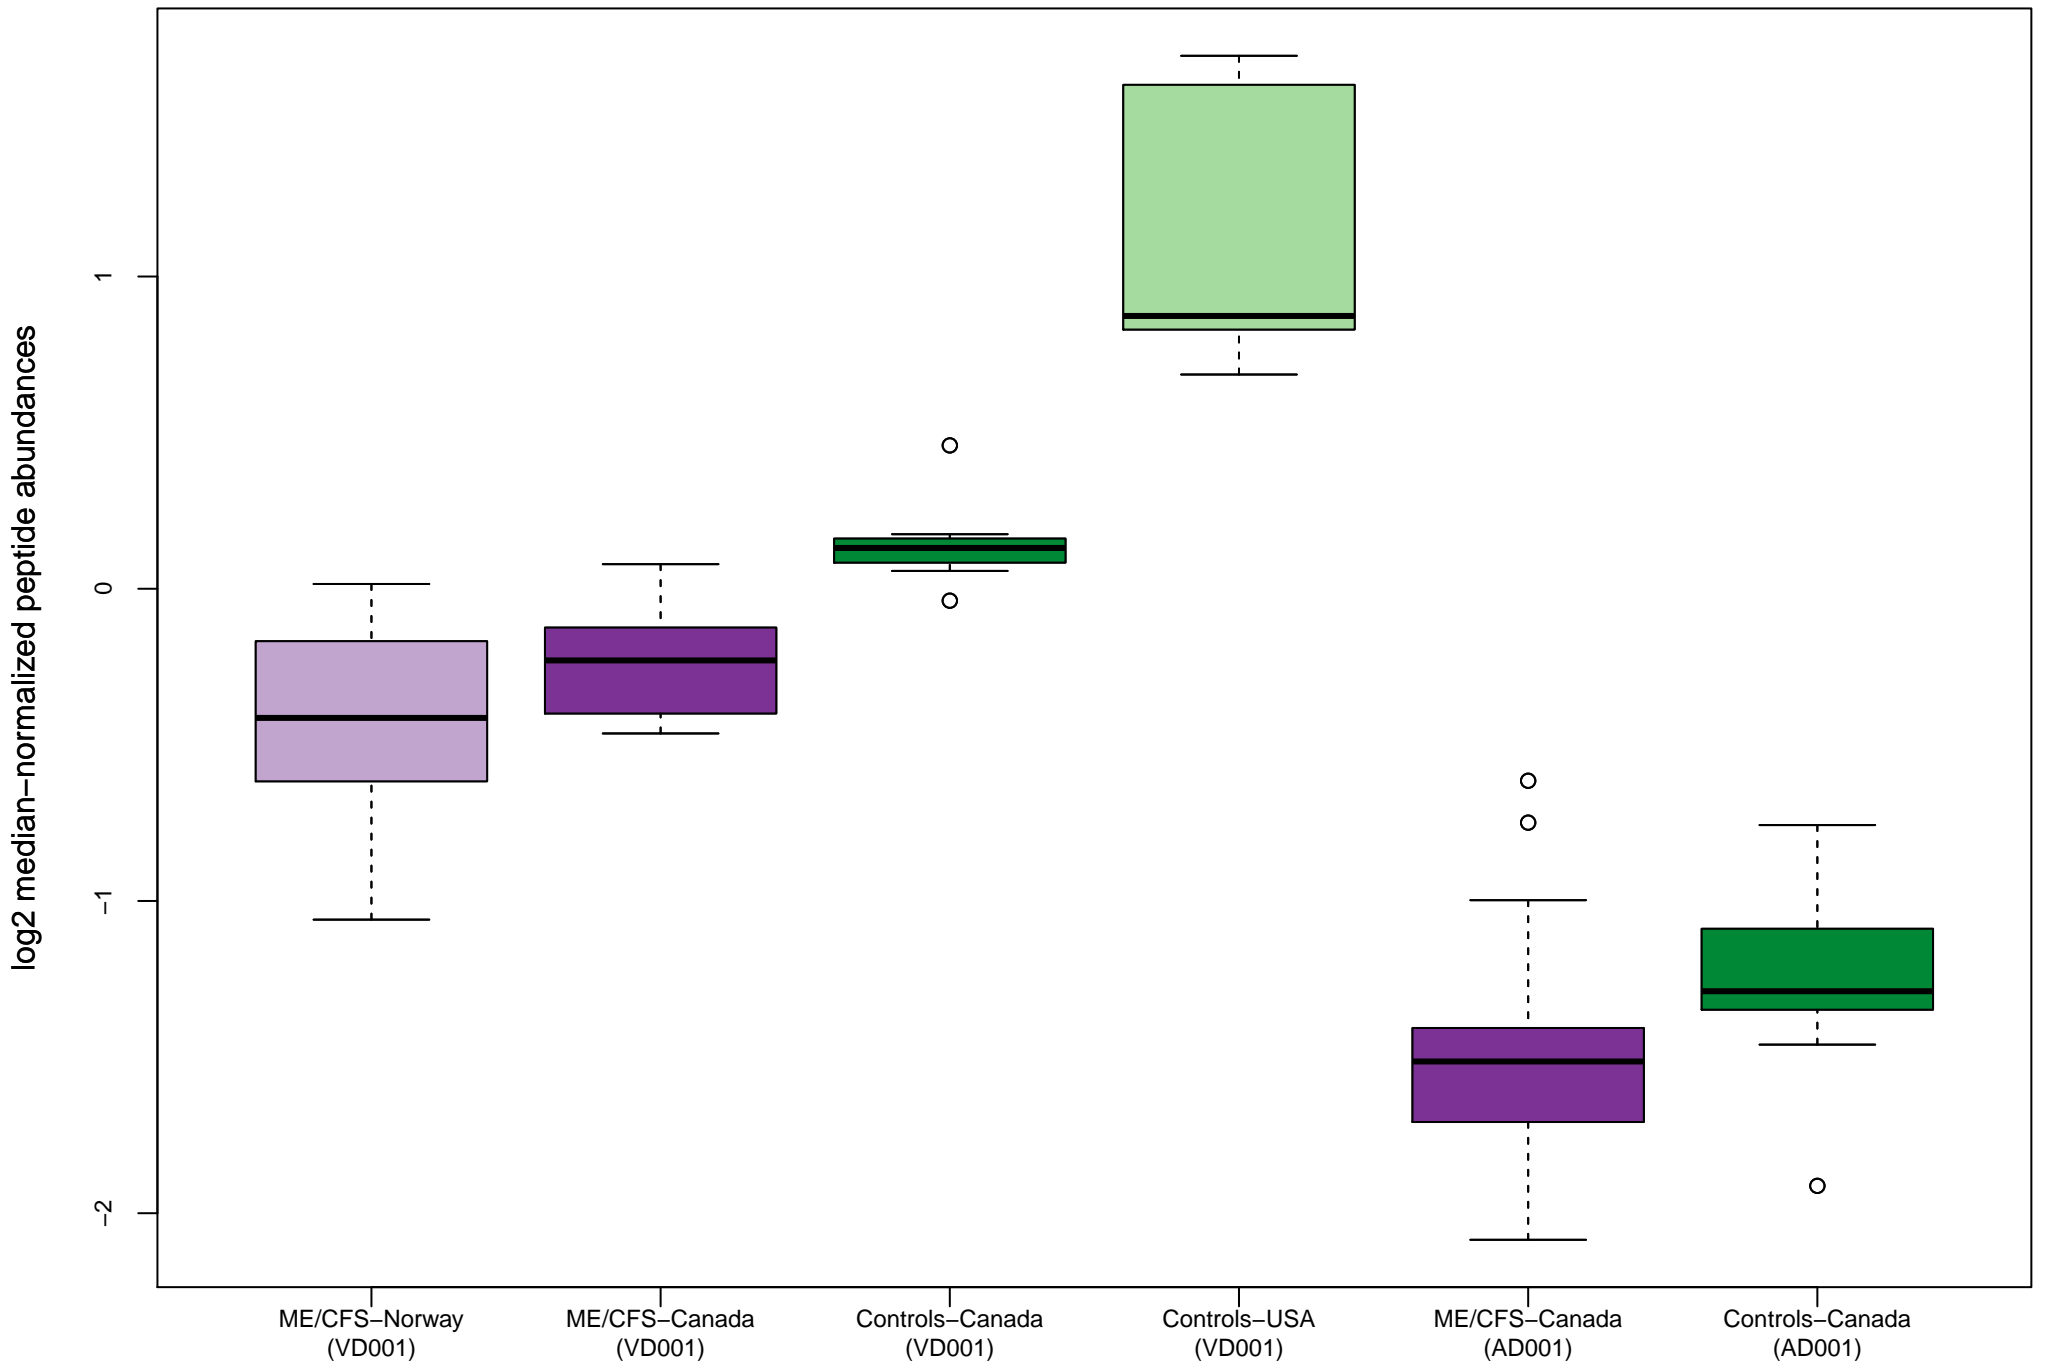



# PGA VFRAGVLSG

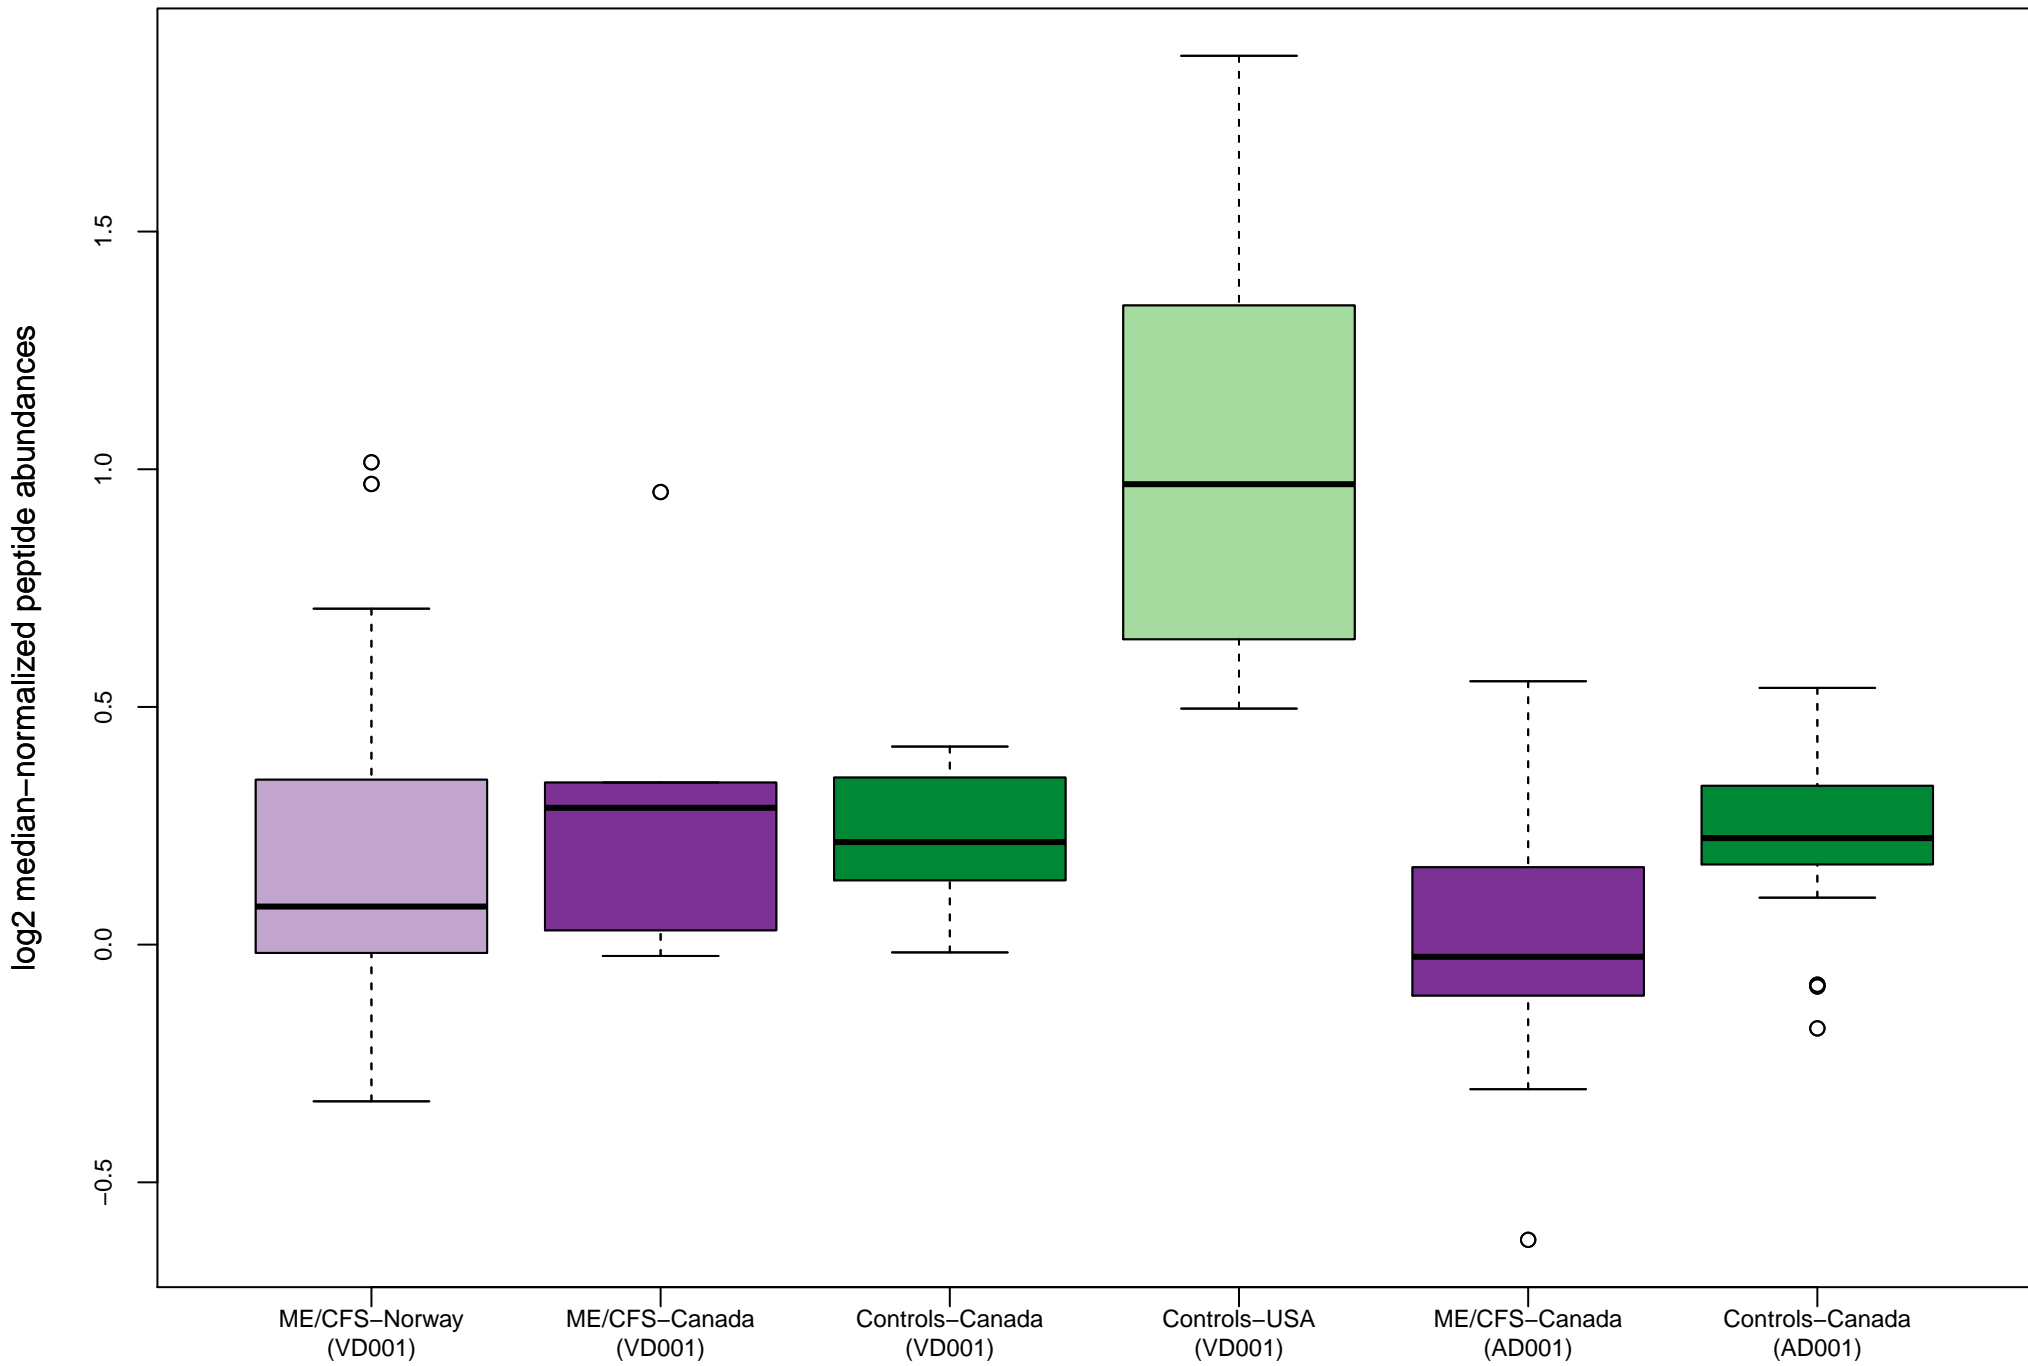

# PGGYVRLSGVAS

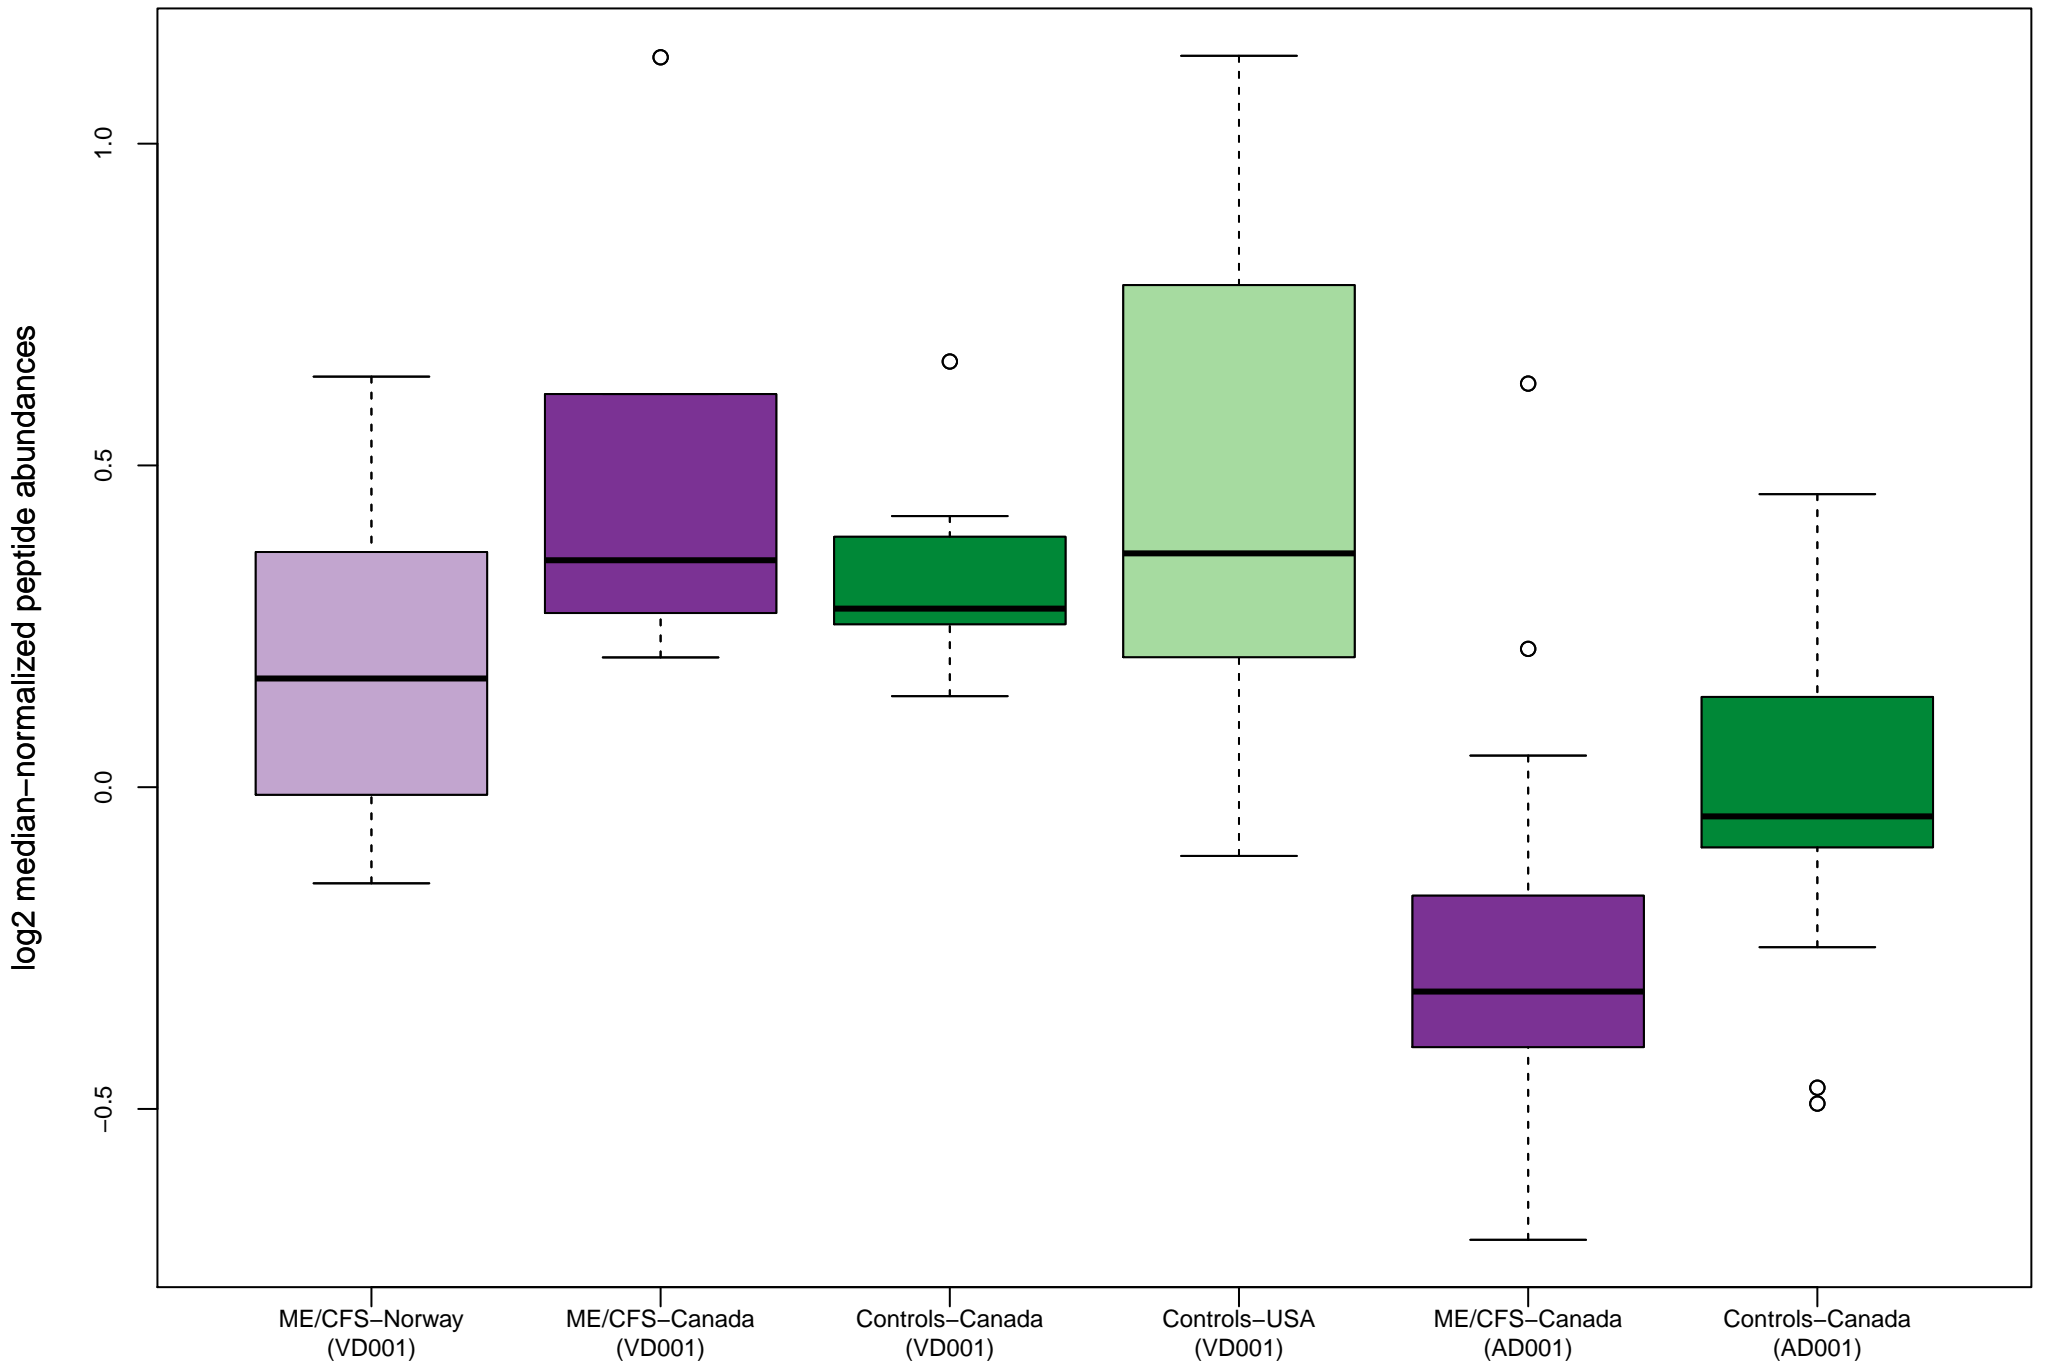

# PGSFVLNKAVLS

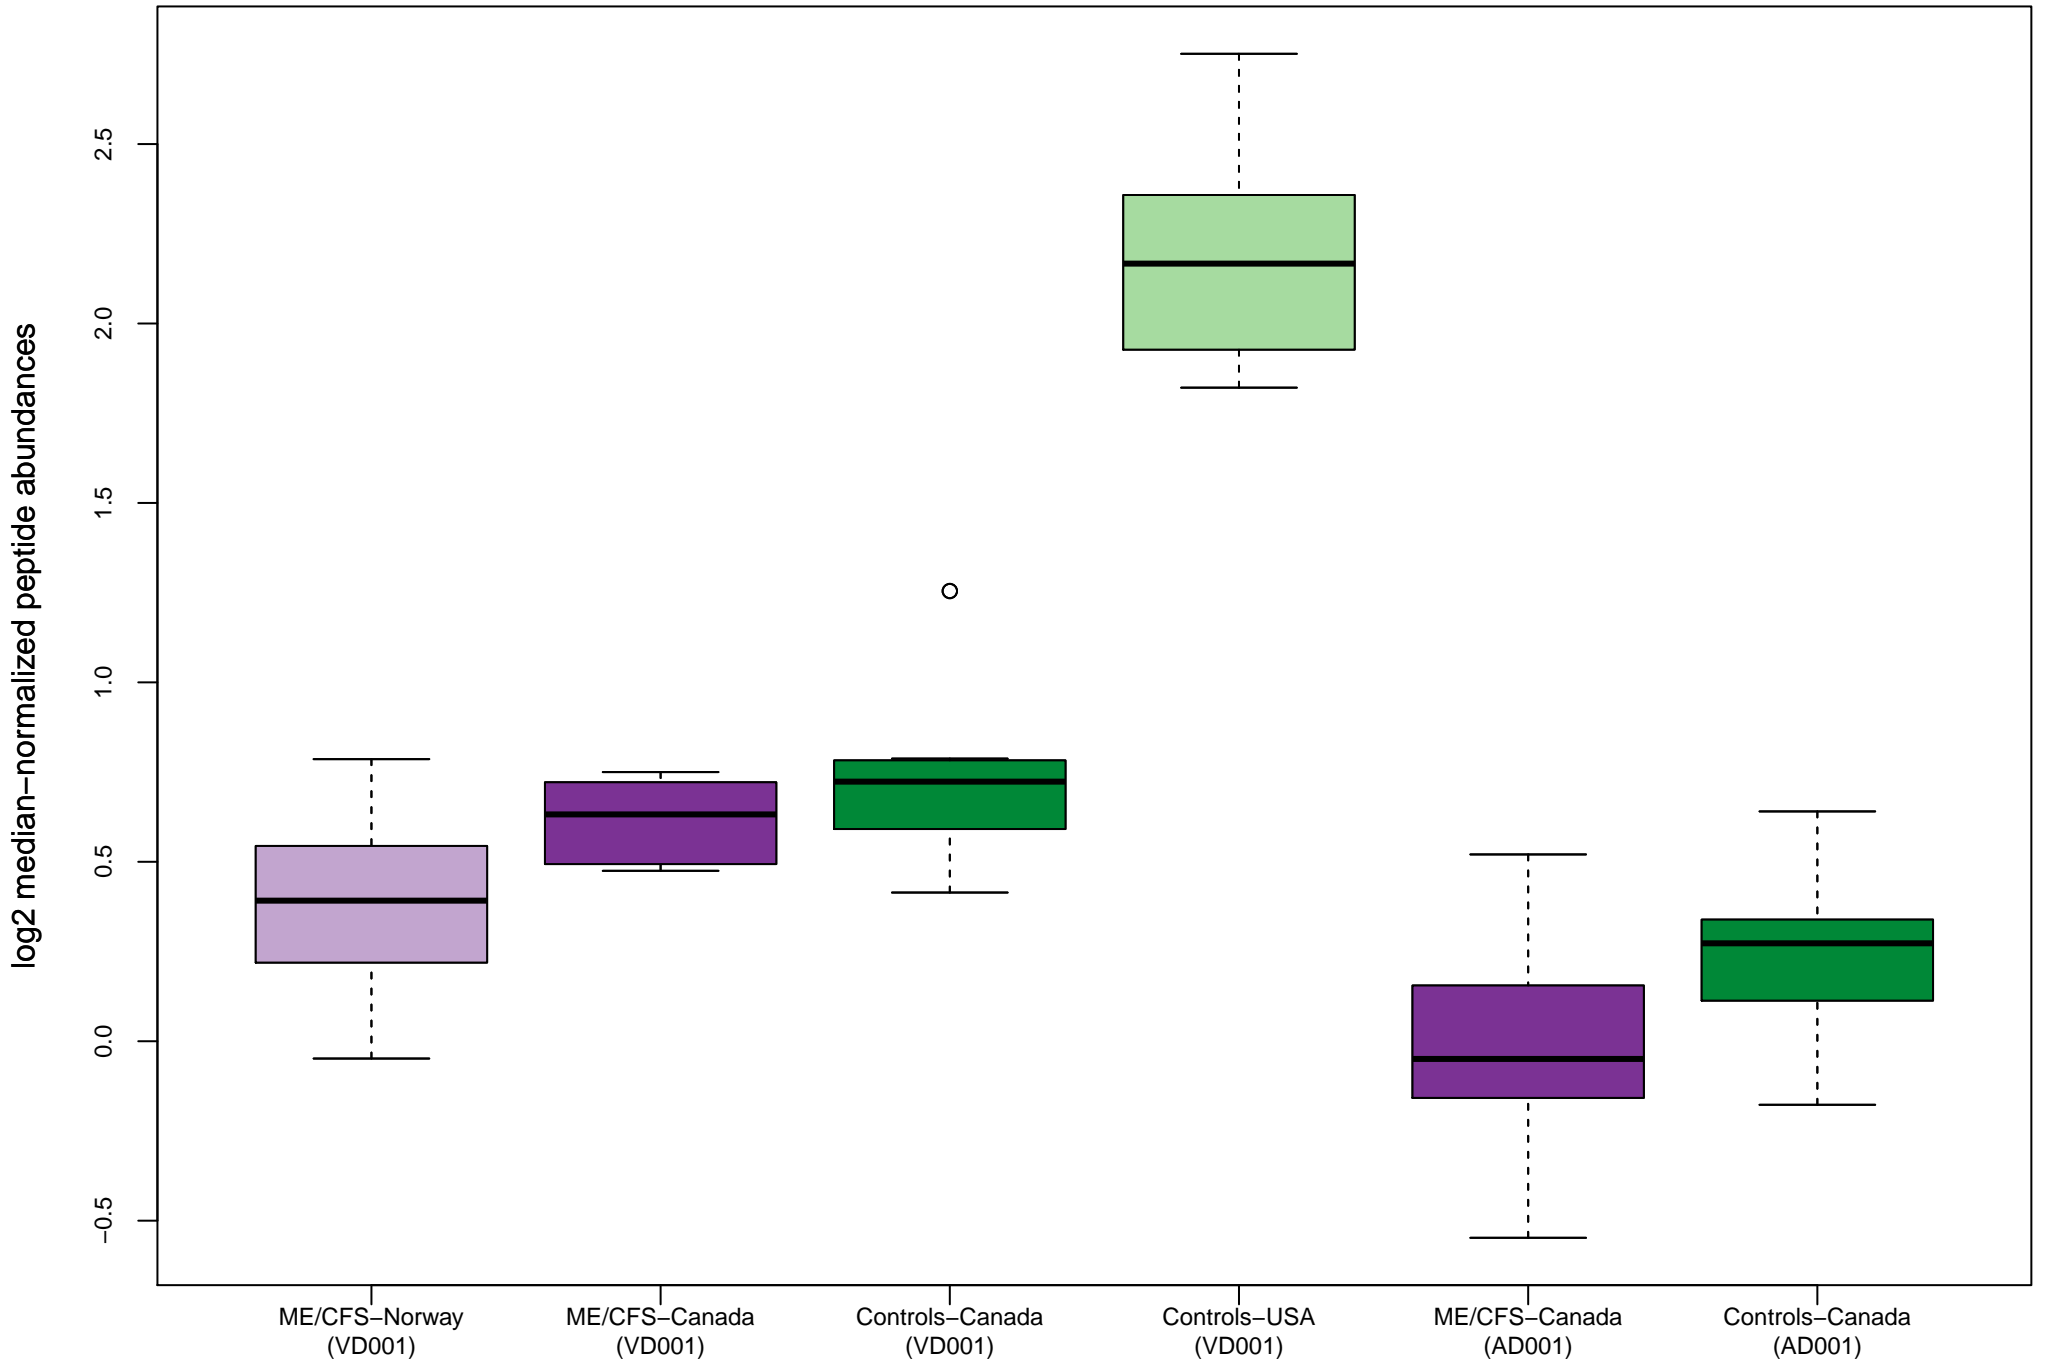

# PGVFRLLFNLPGA

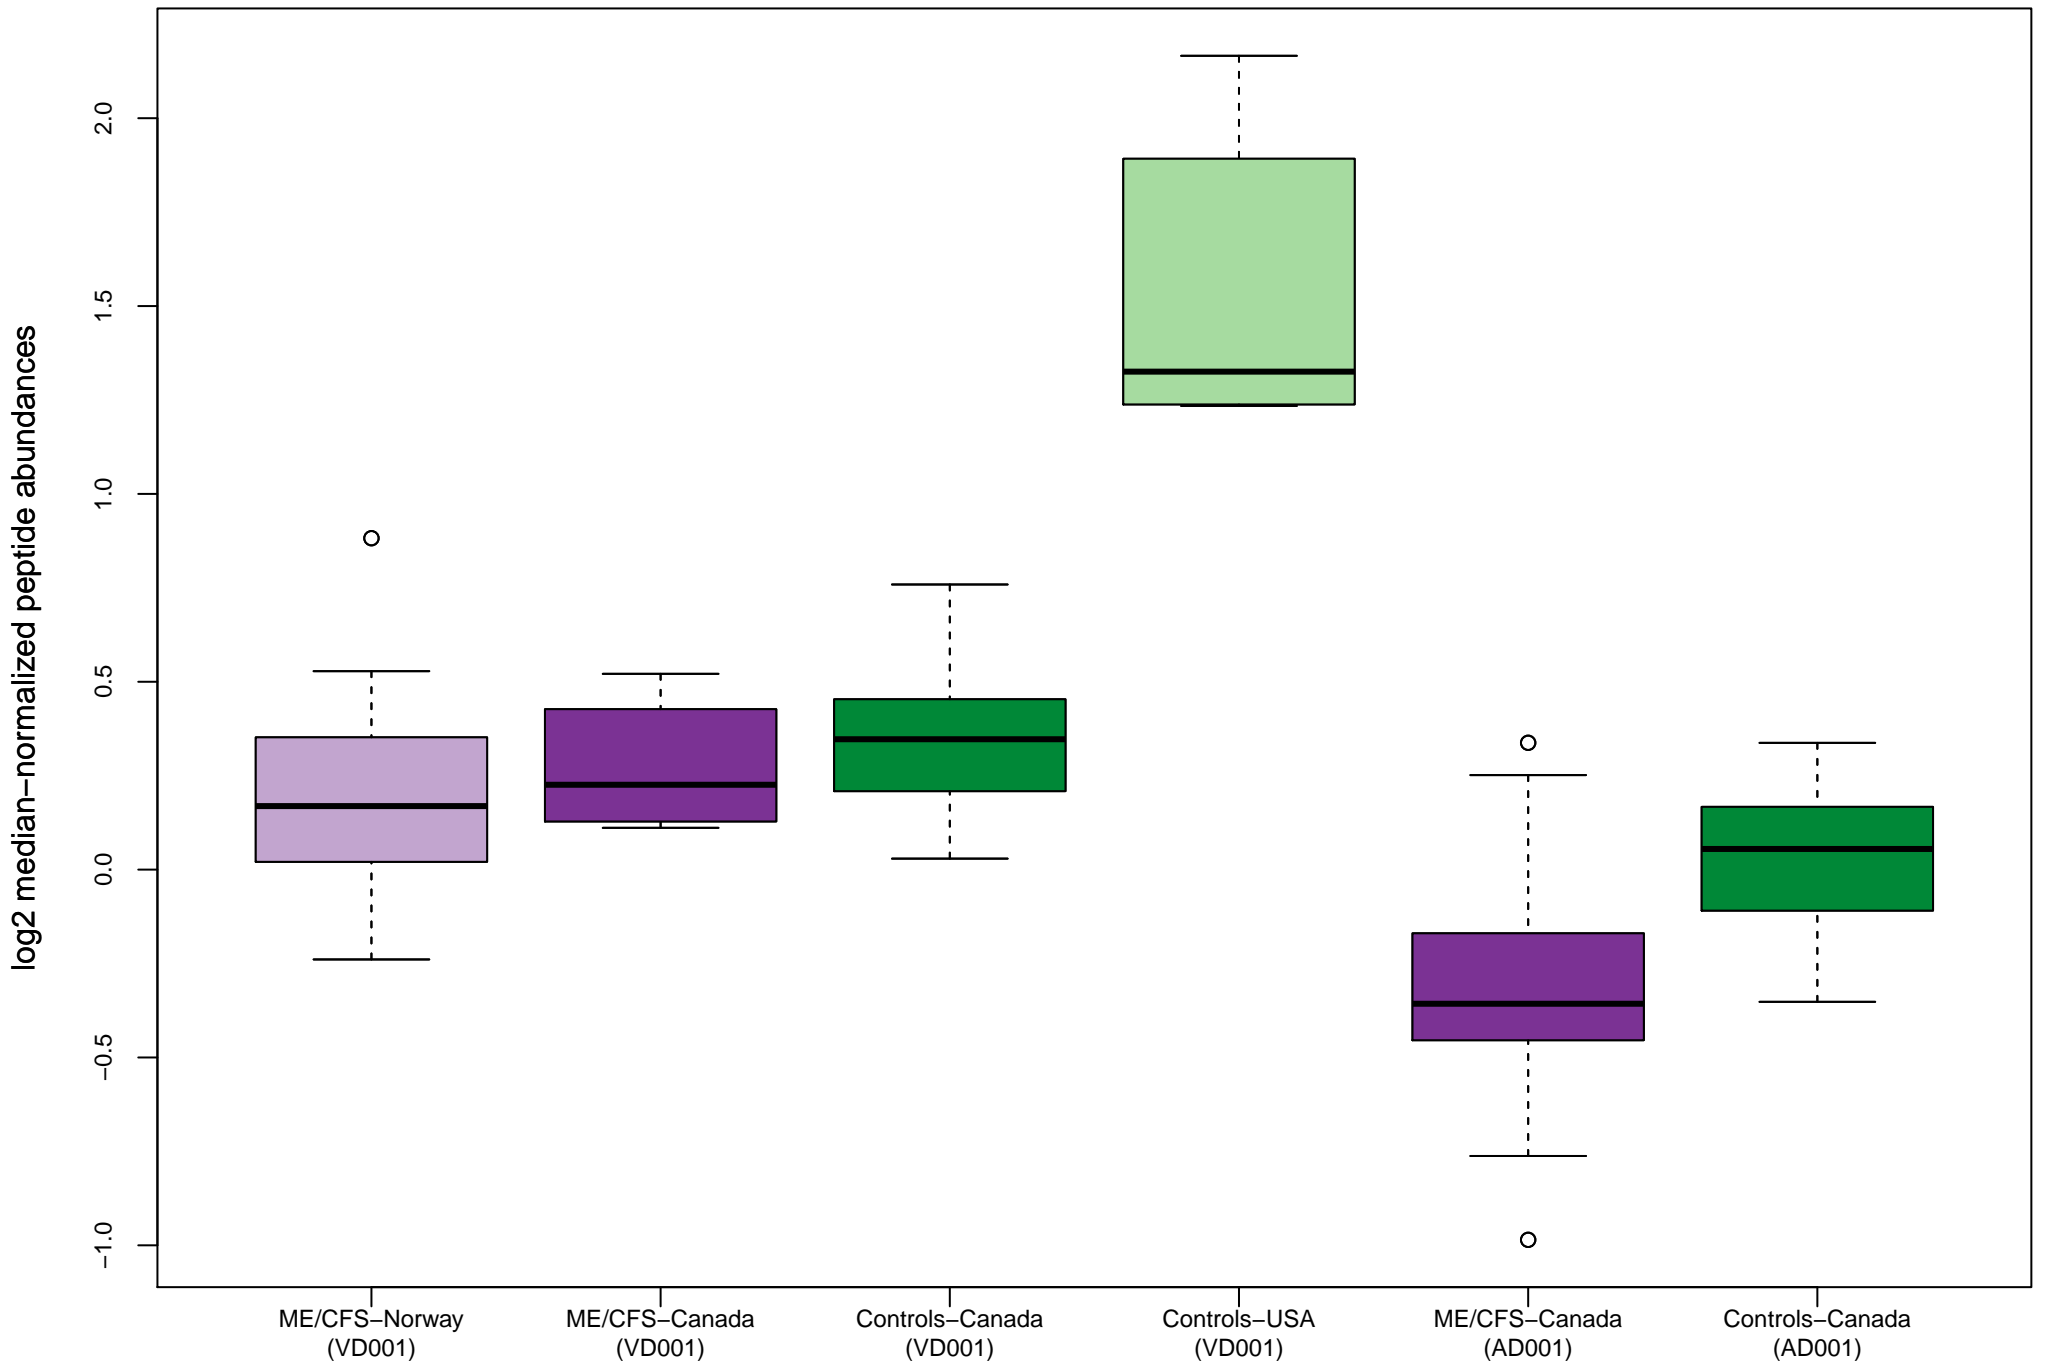

# PGVRFYHSGALS

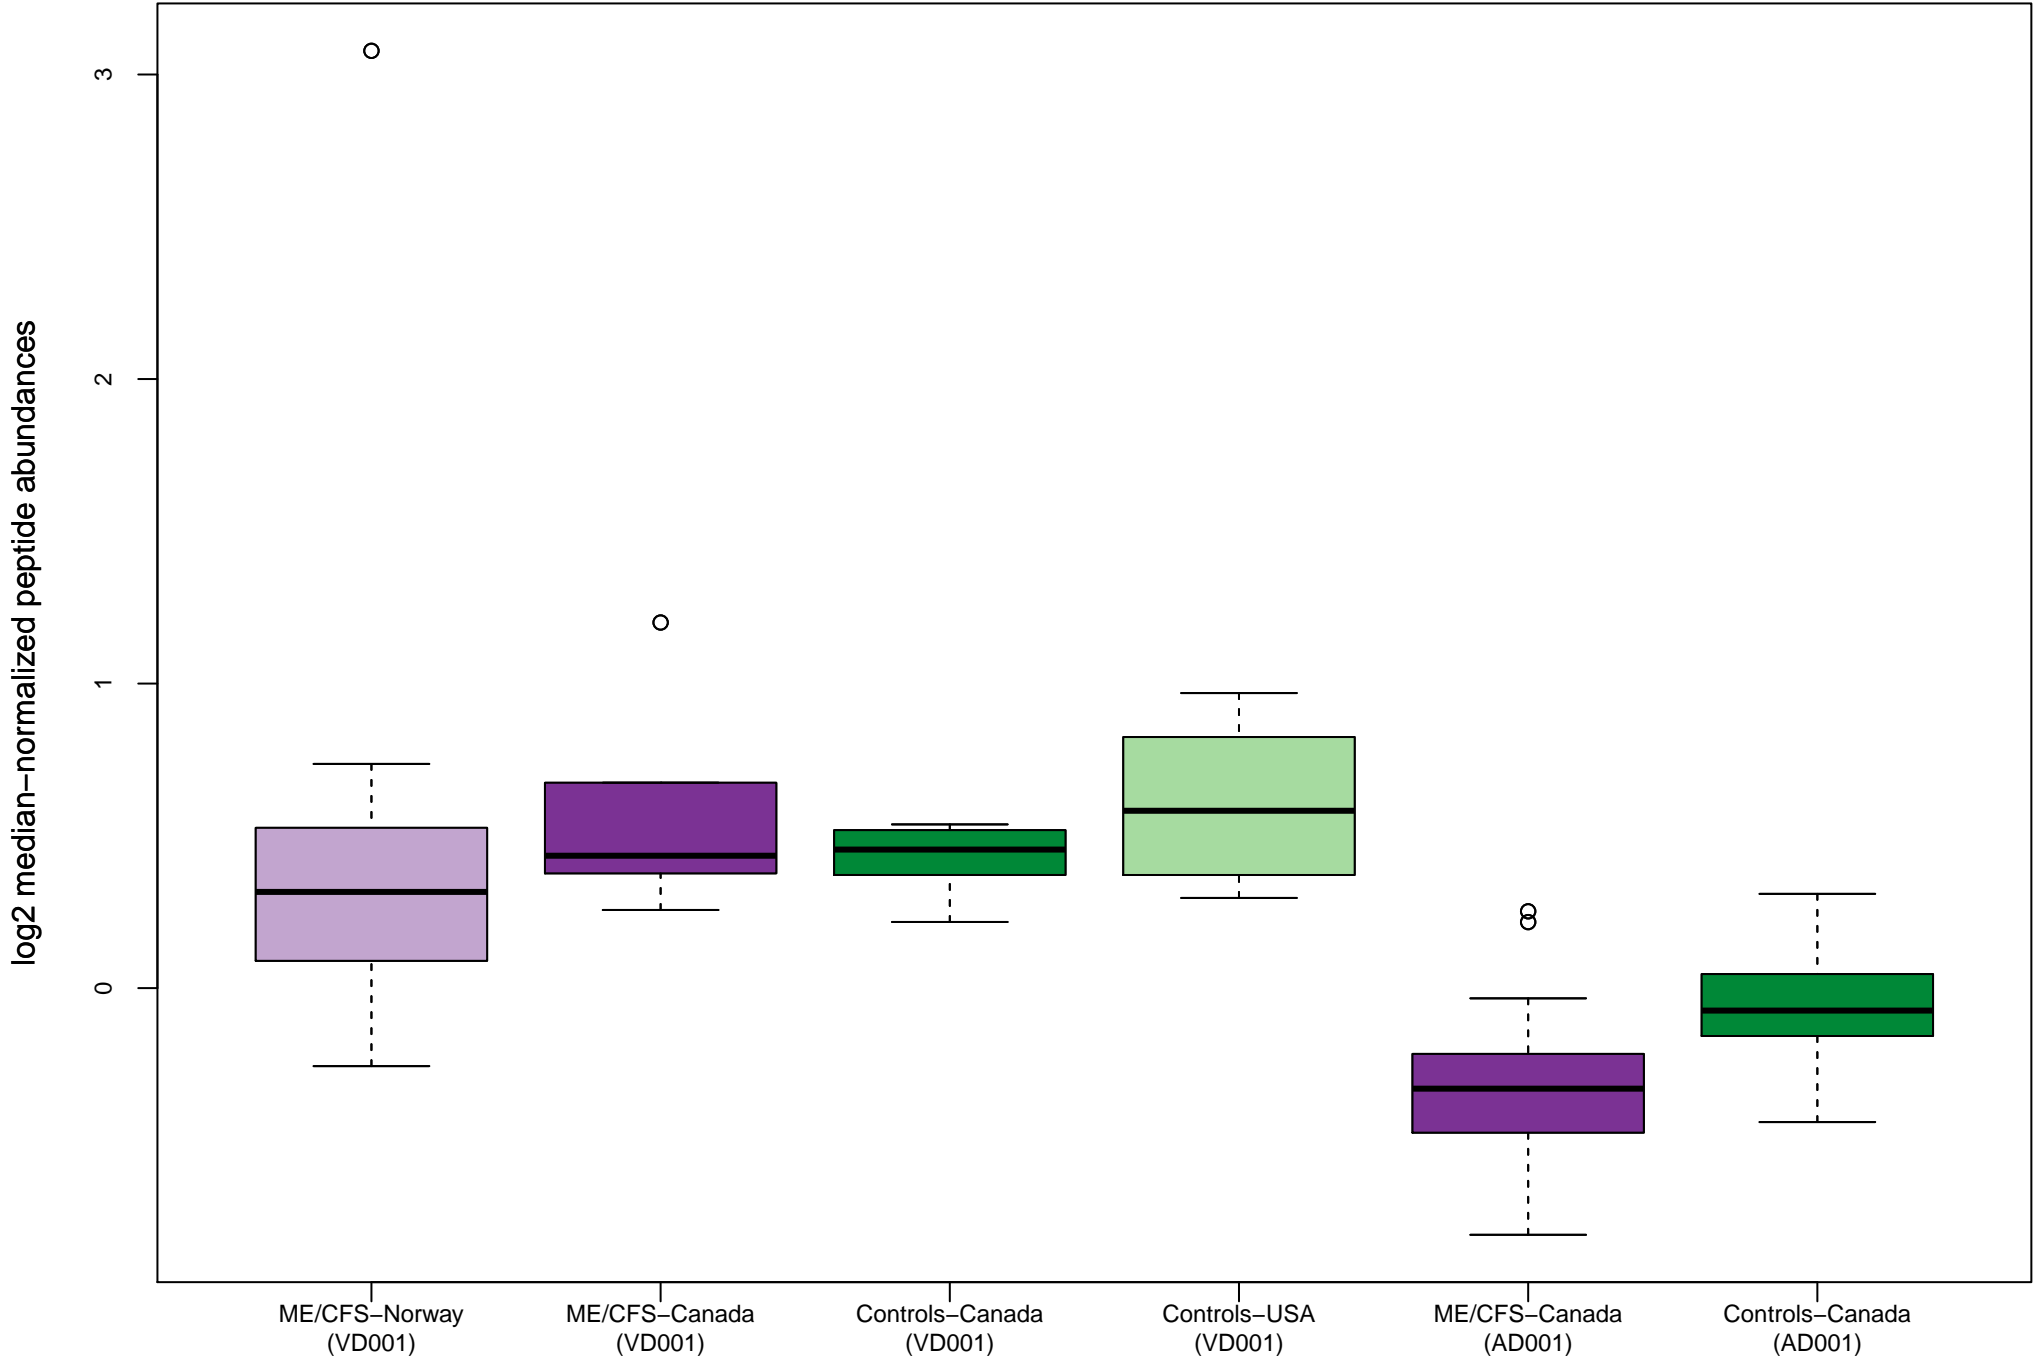

# PHWWLRYWNGVS

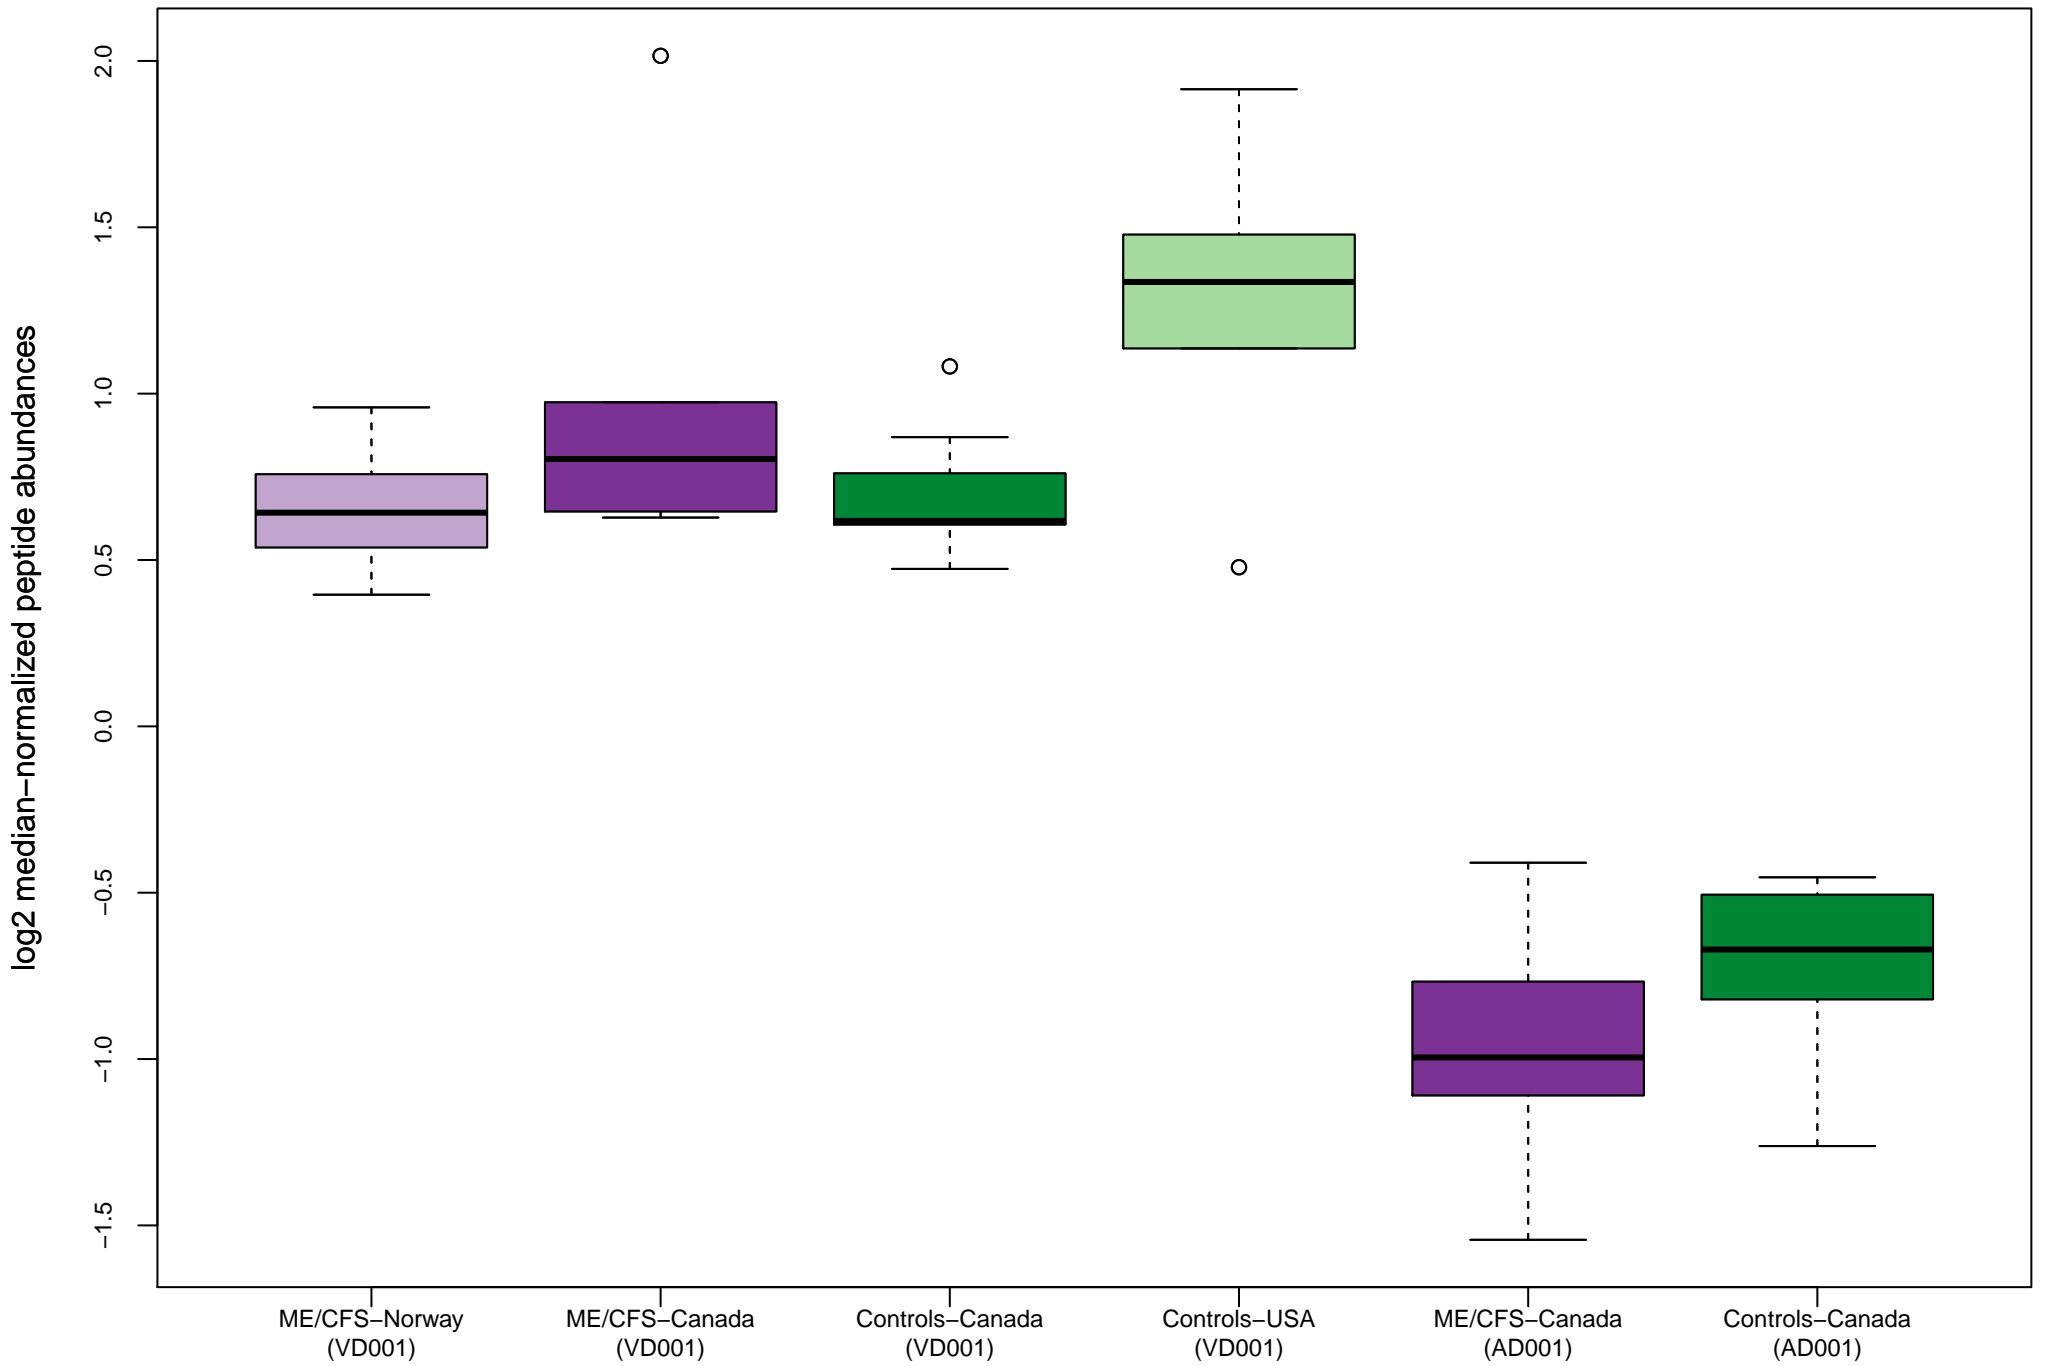

# PKFFFRYKVLGG

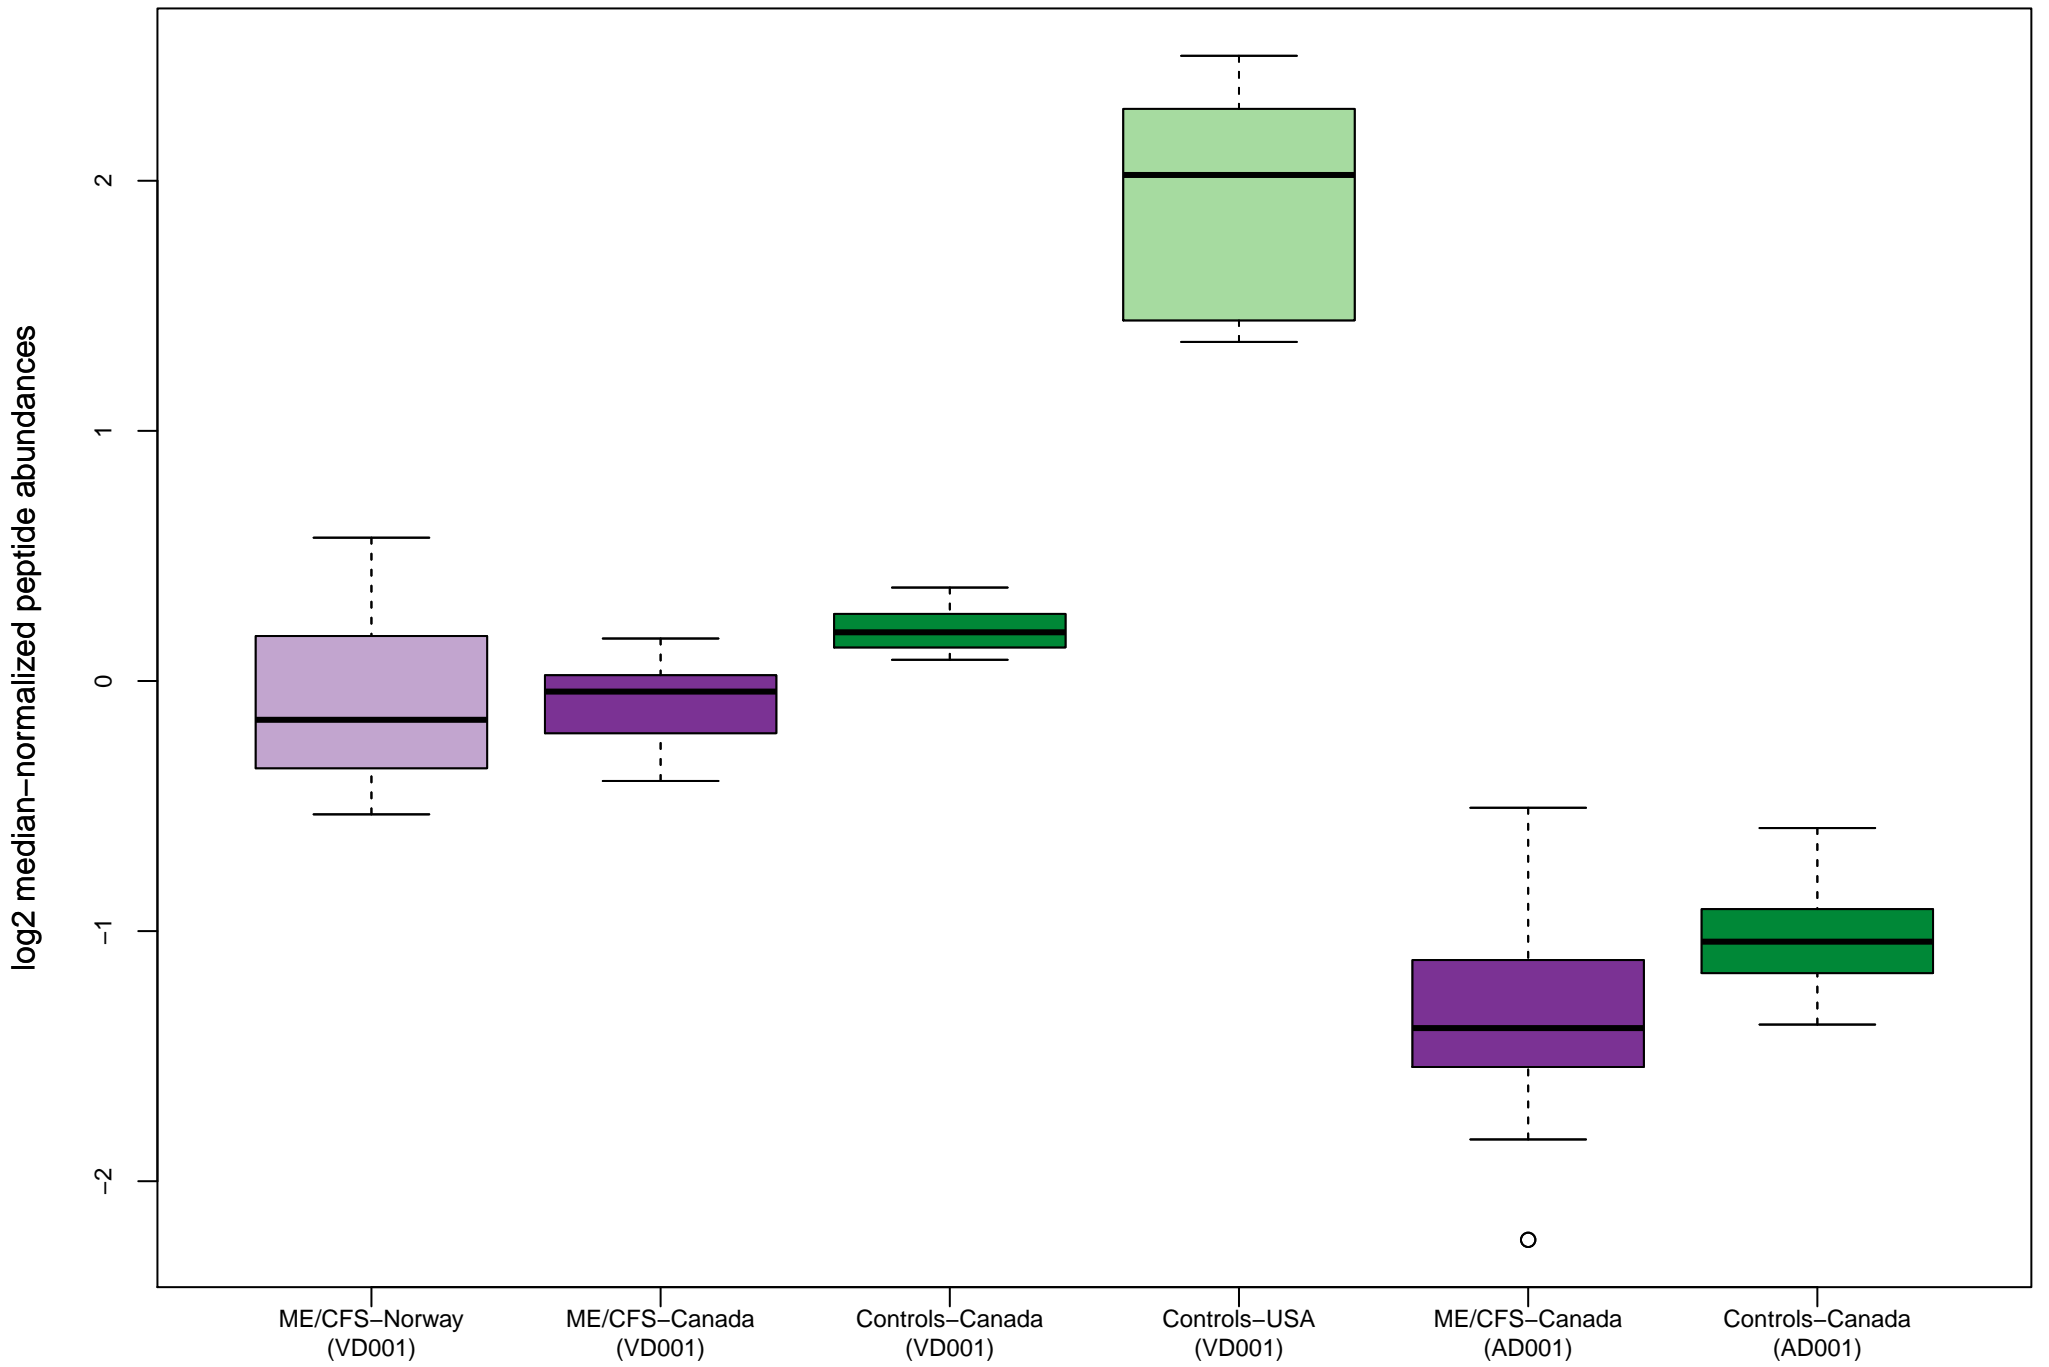

# PKYQLYKLSALS

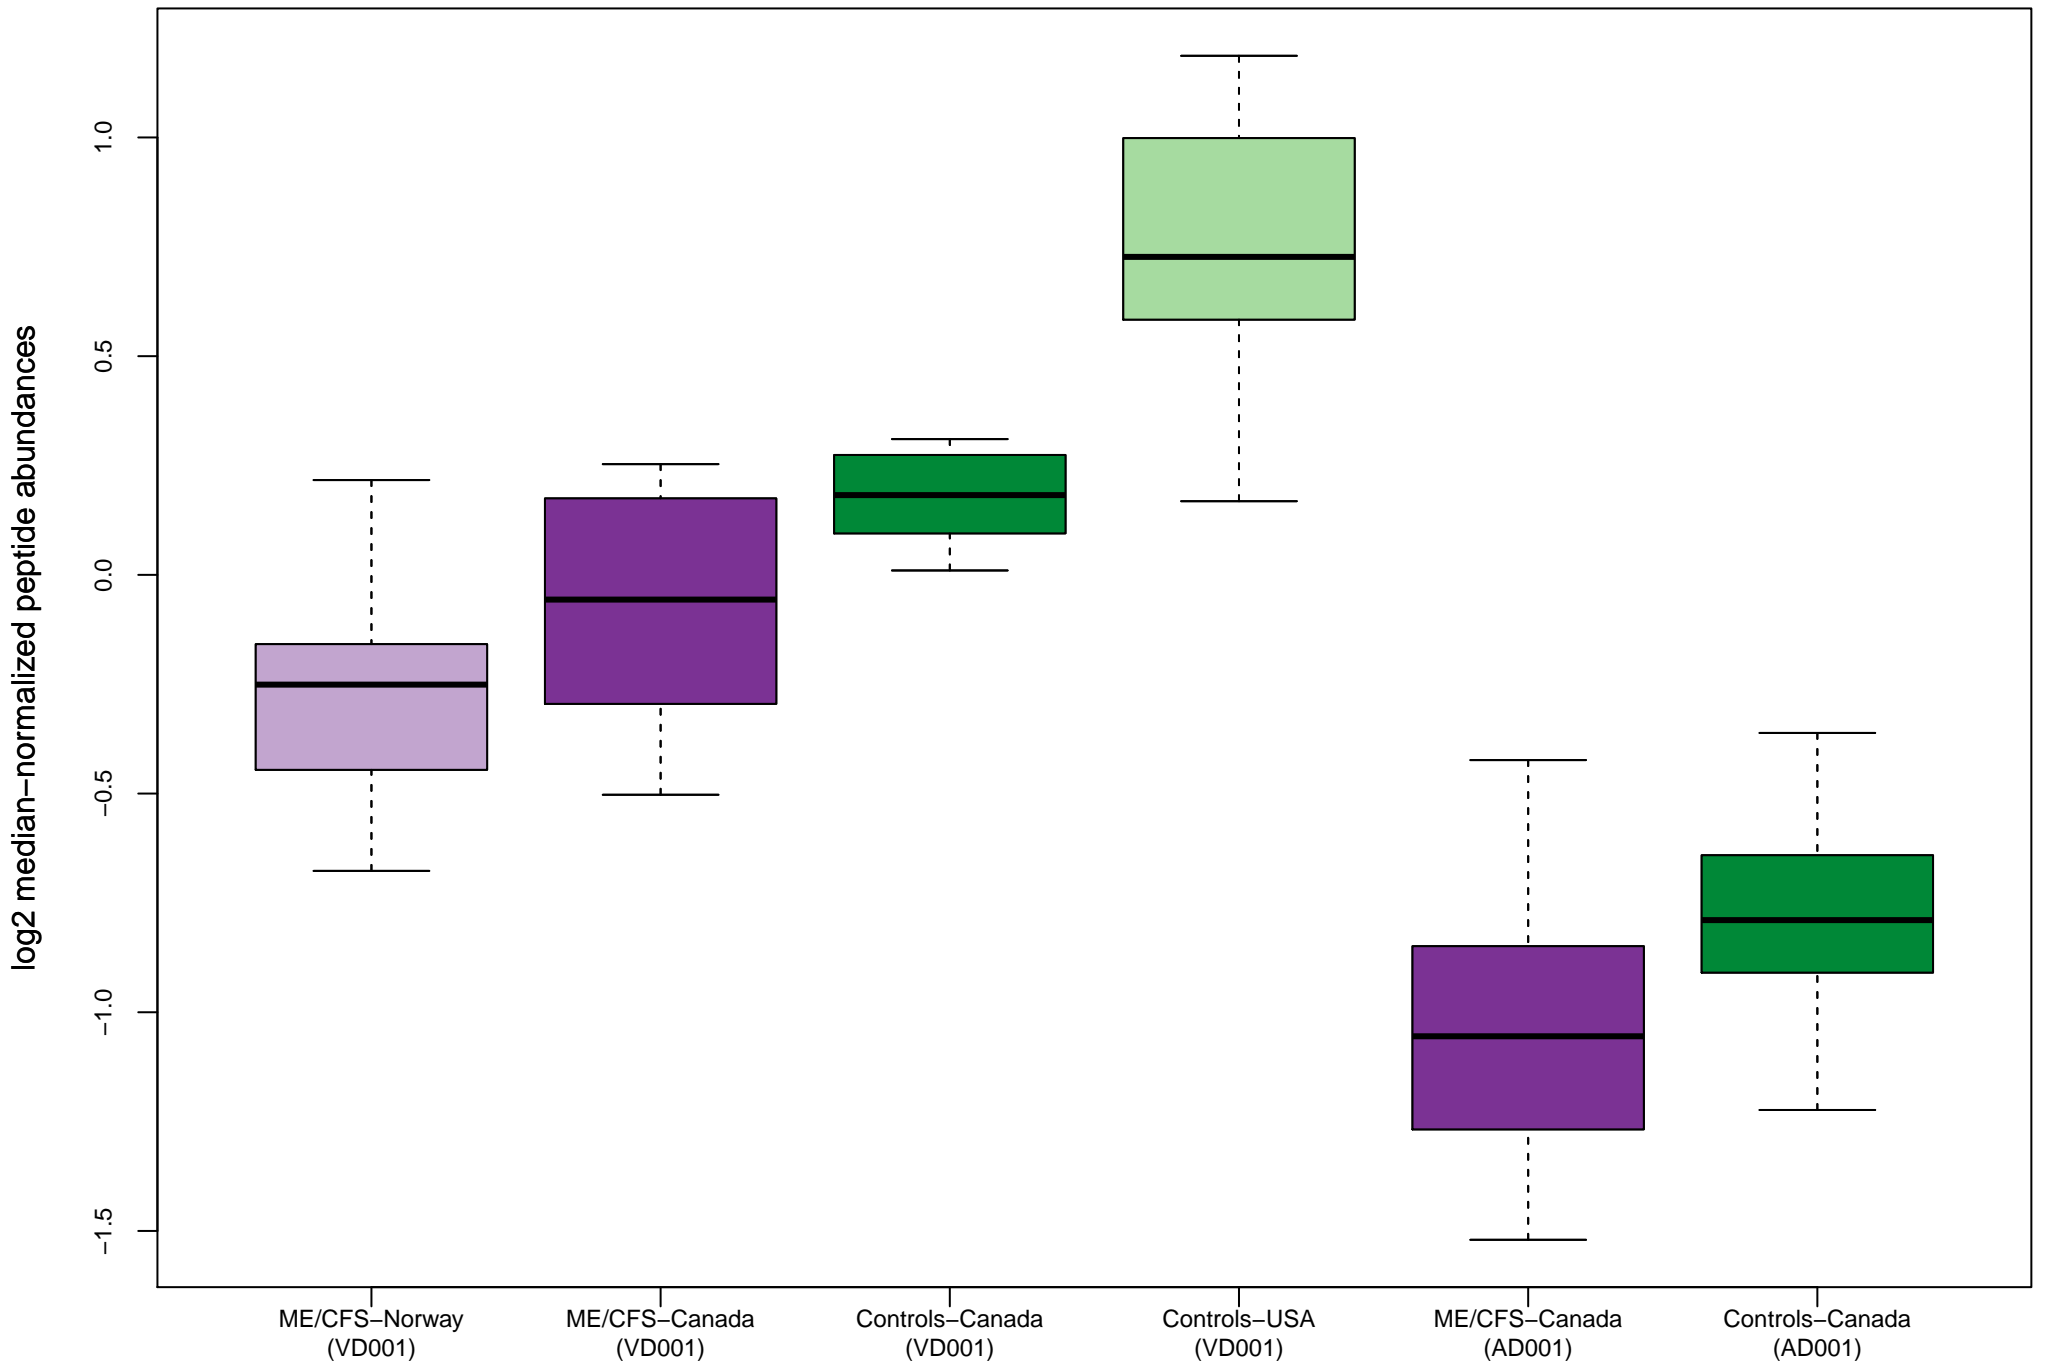



# PLKVRYWALWKV

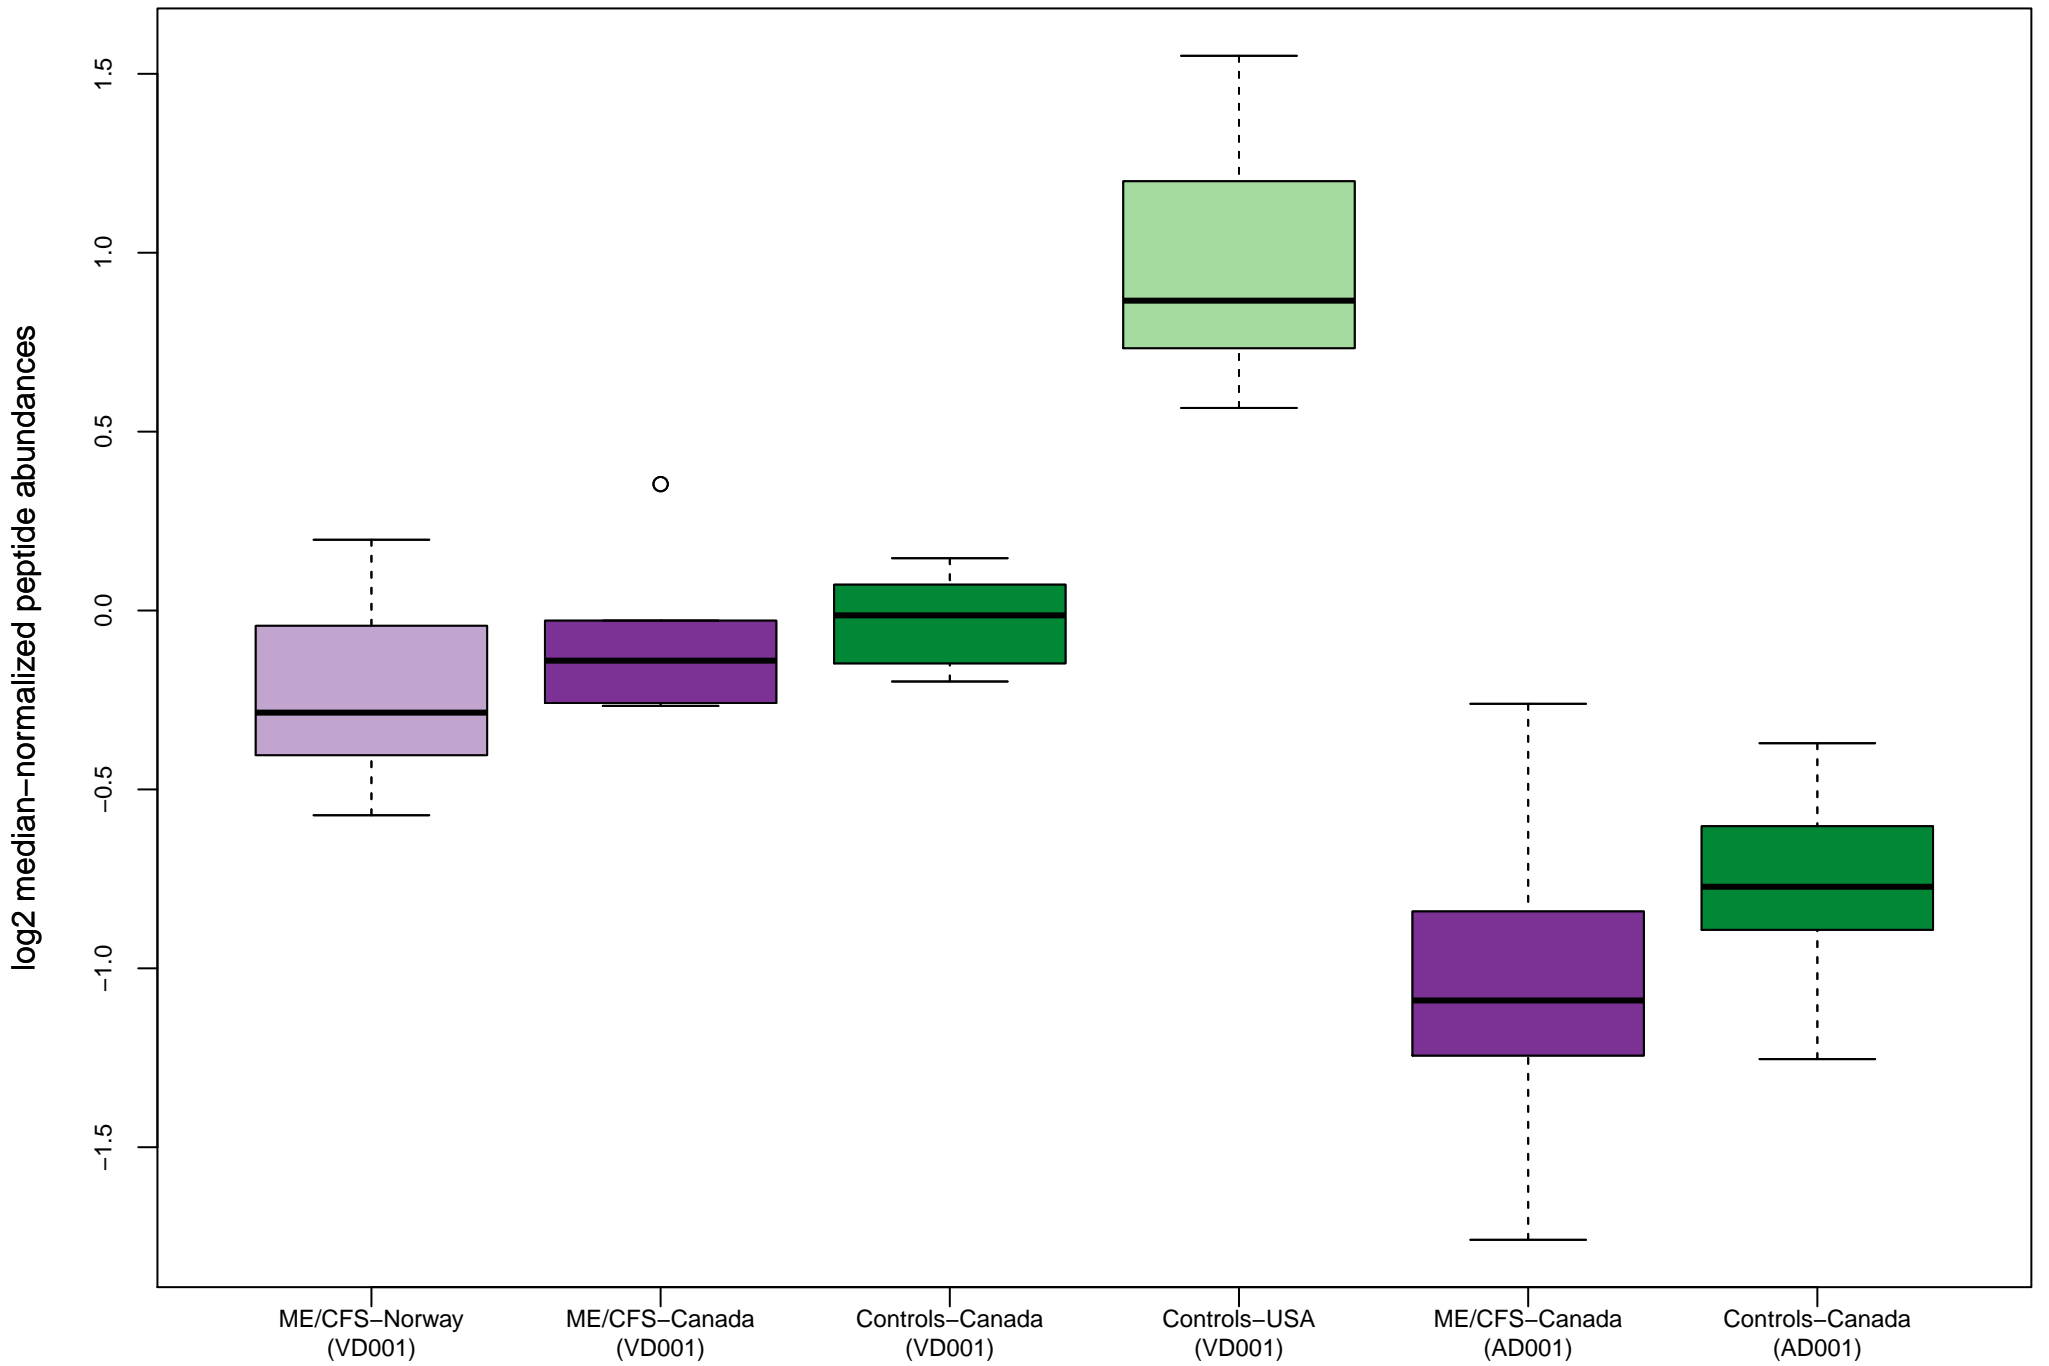

# PLLLRKVALSGS

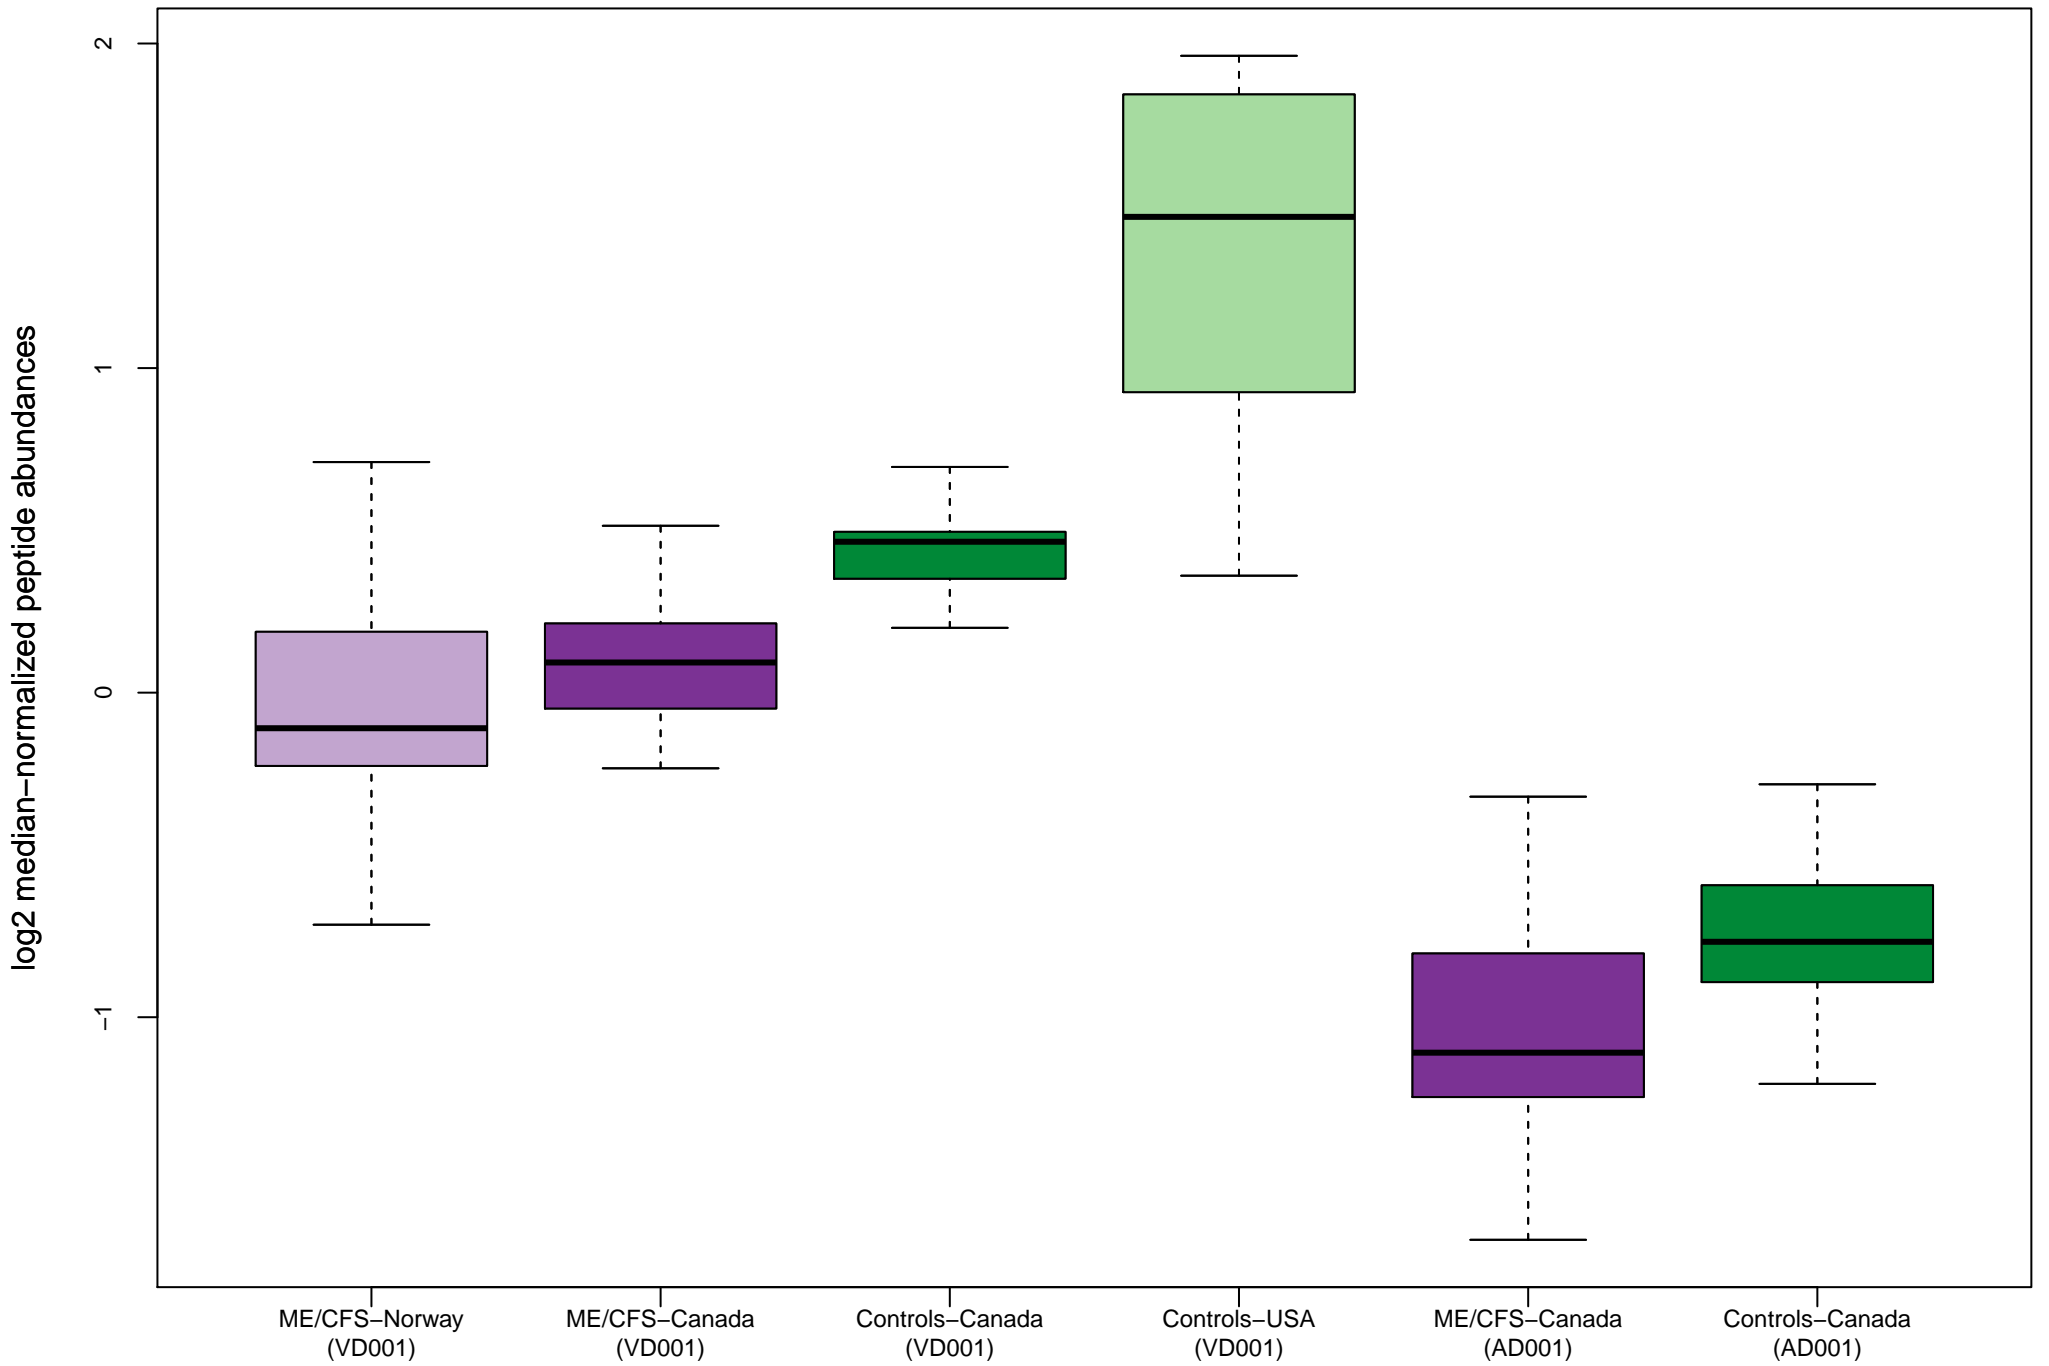

# PLSPGFYKWKAL

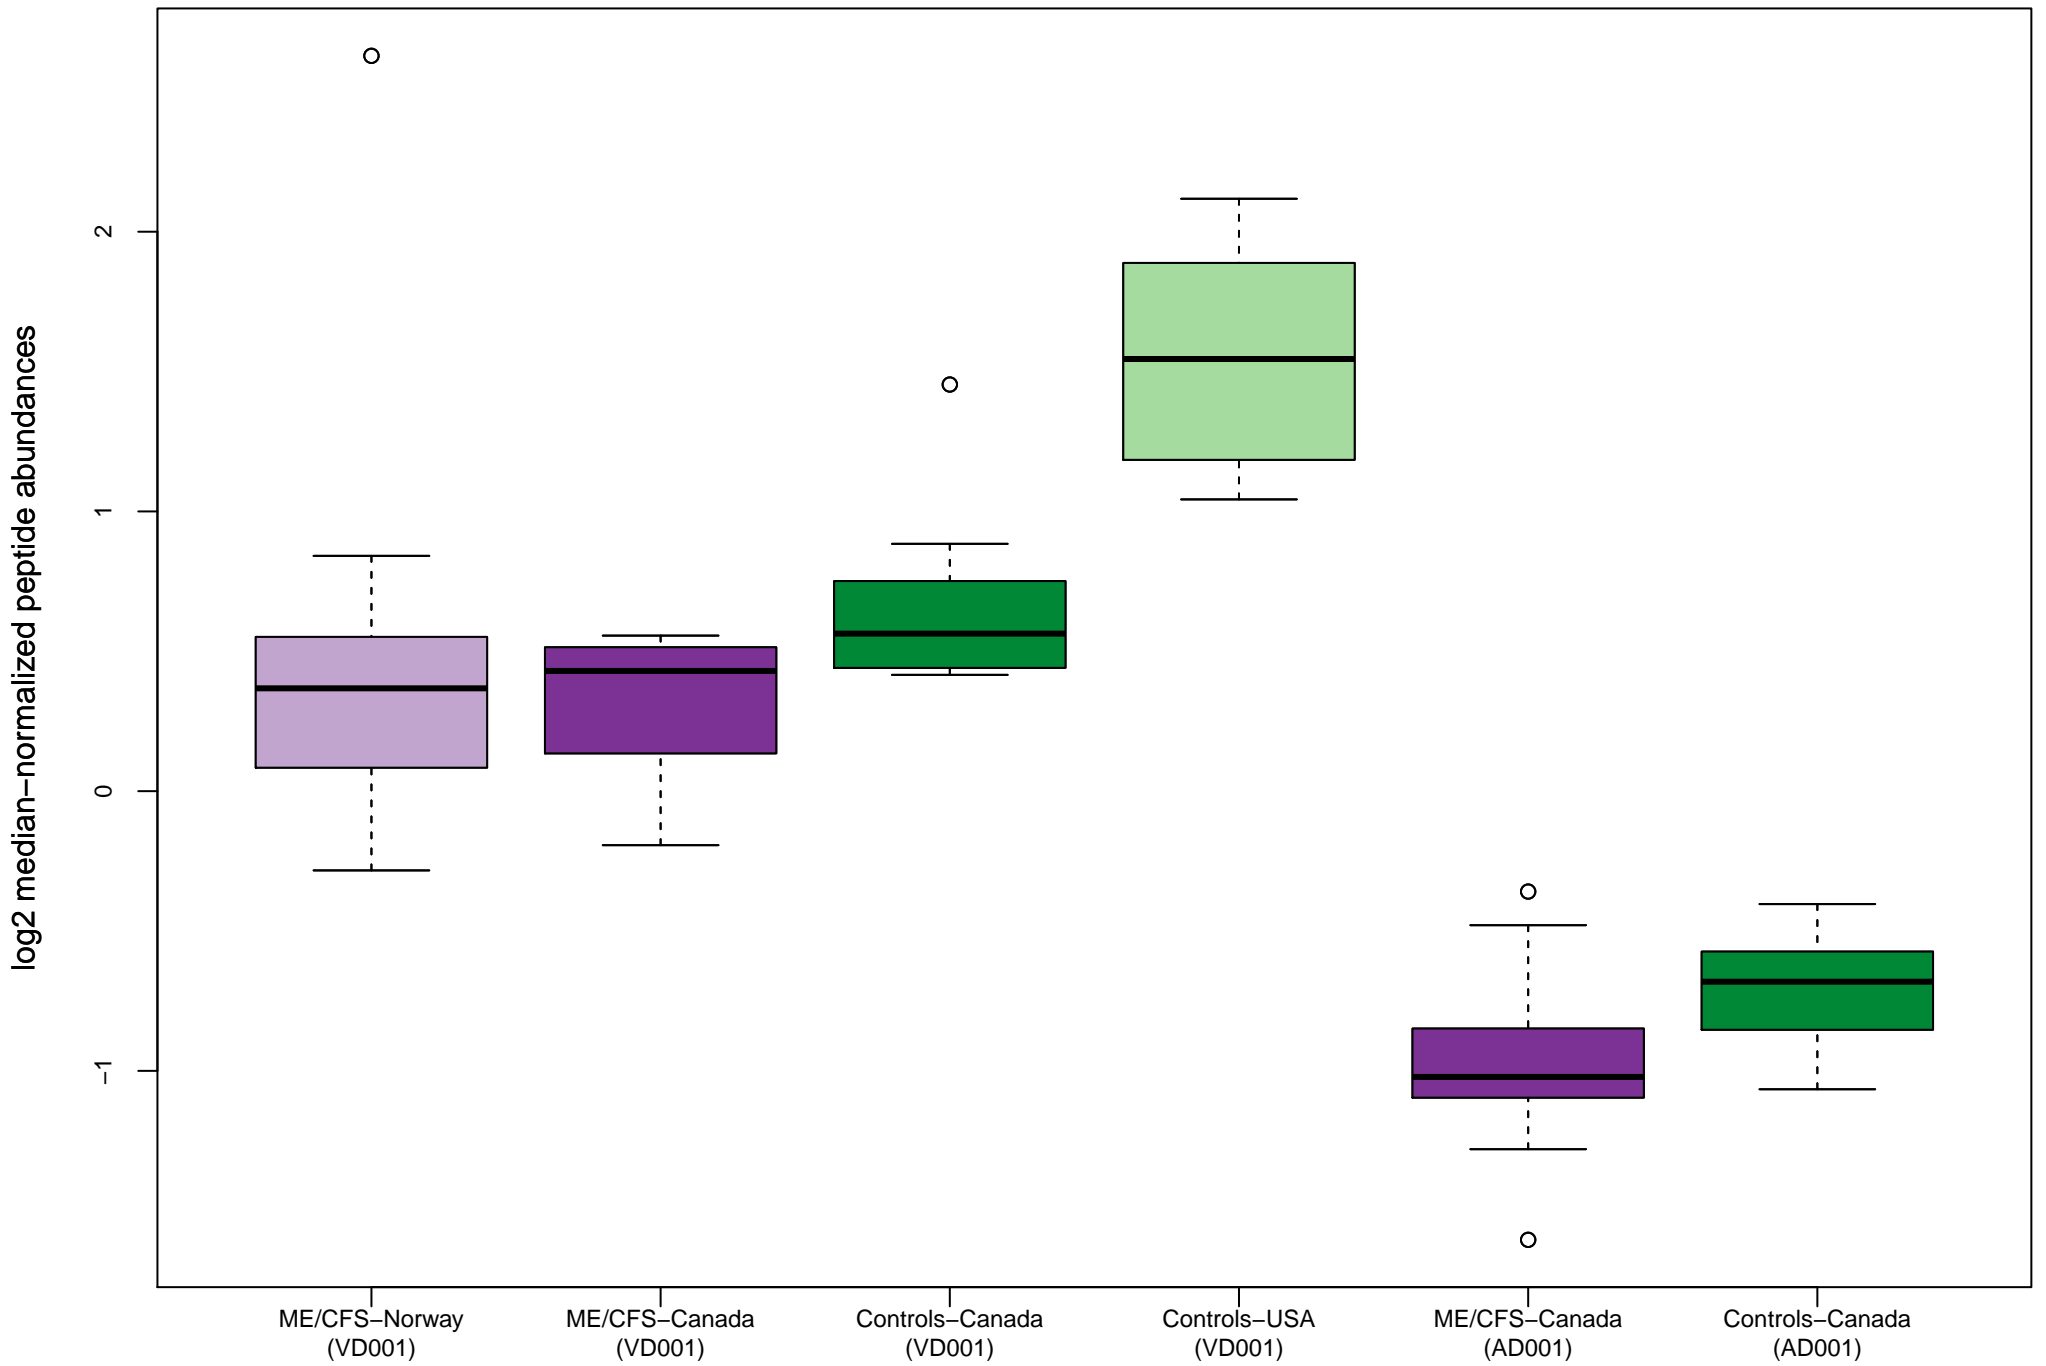

# PLVPFYKGVALS

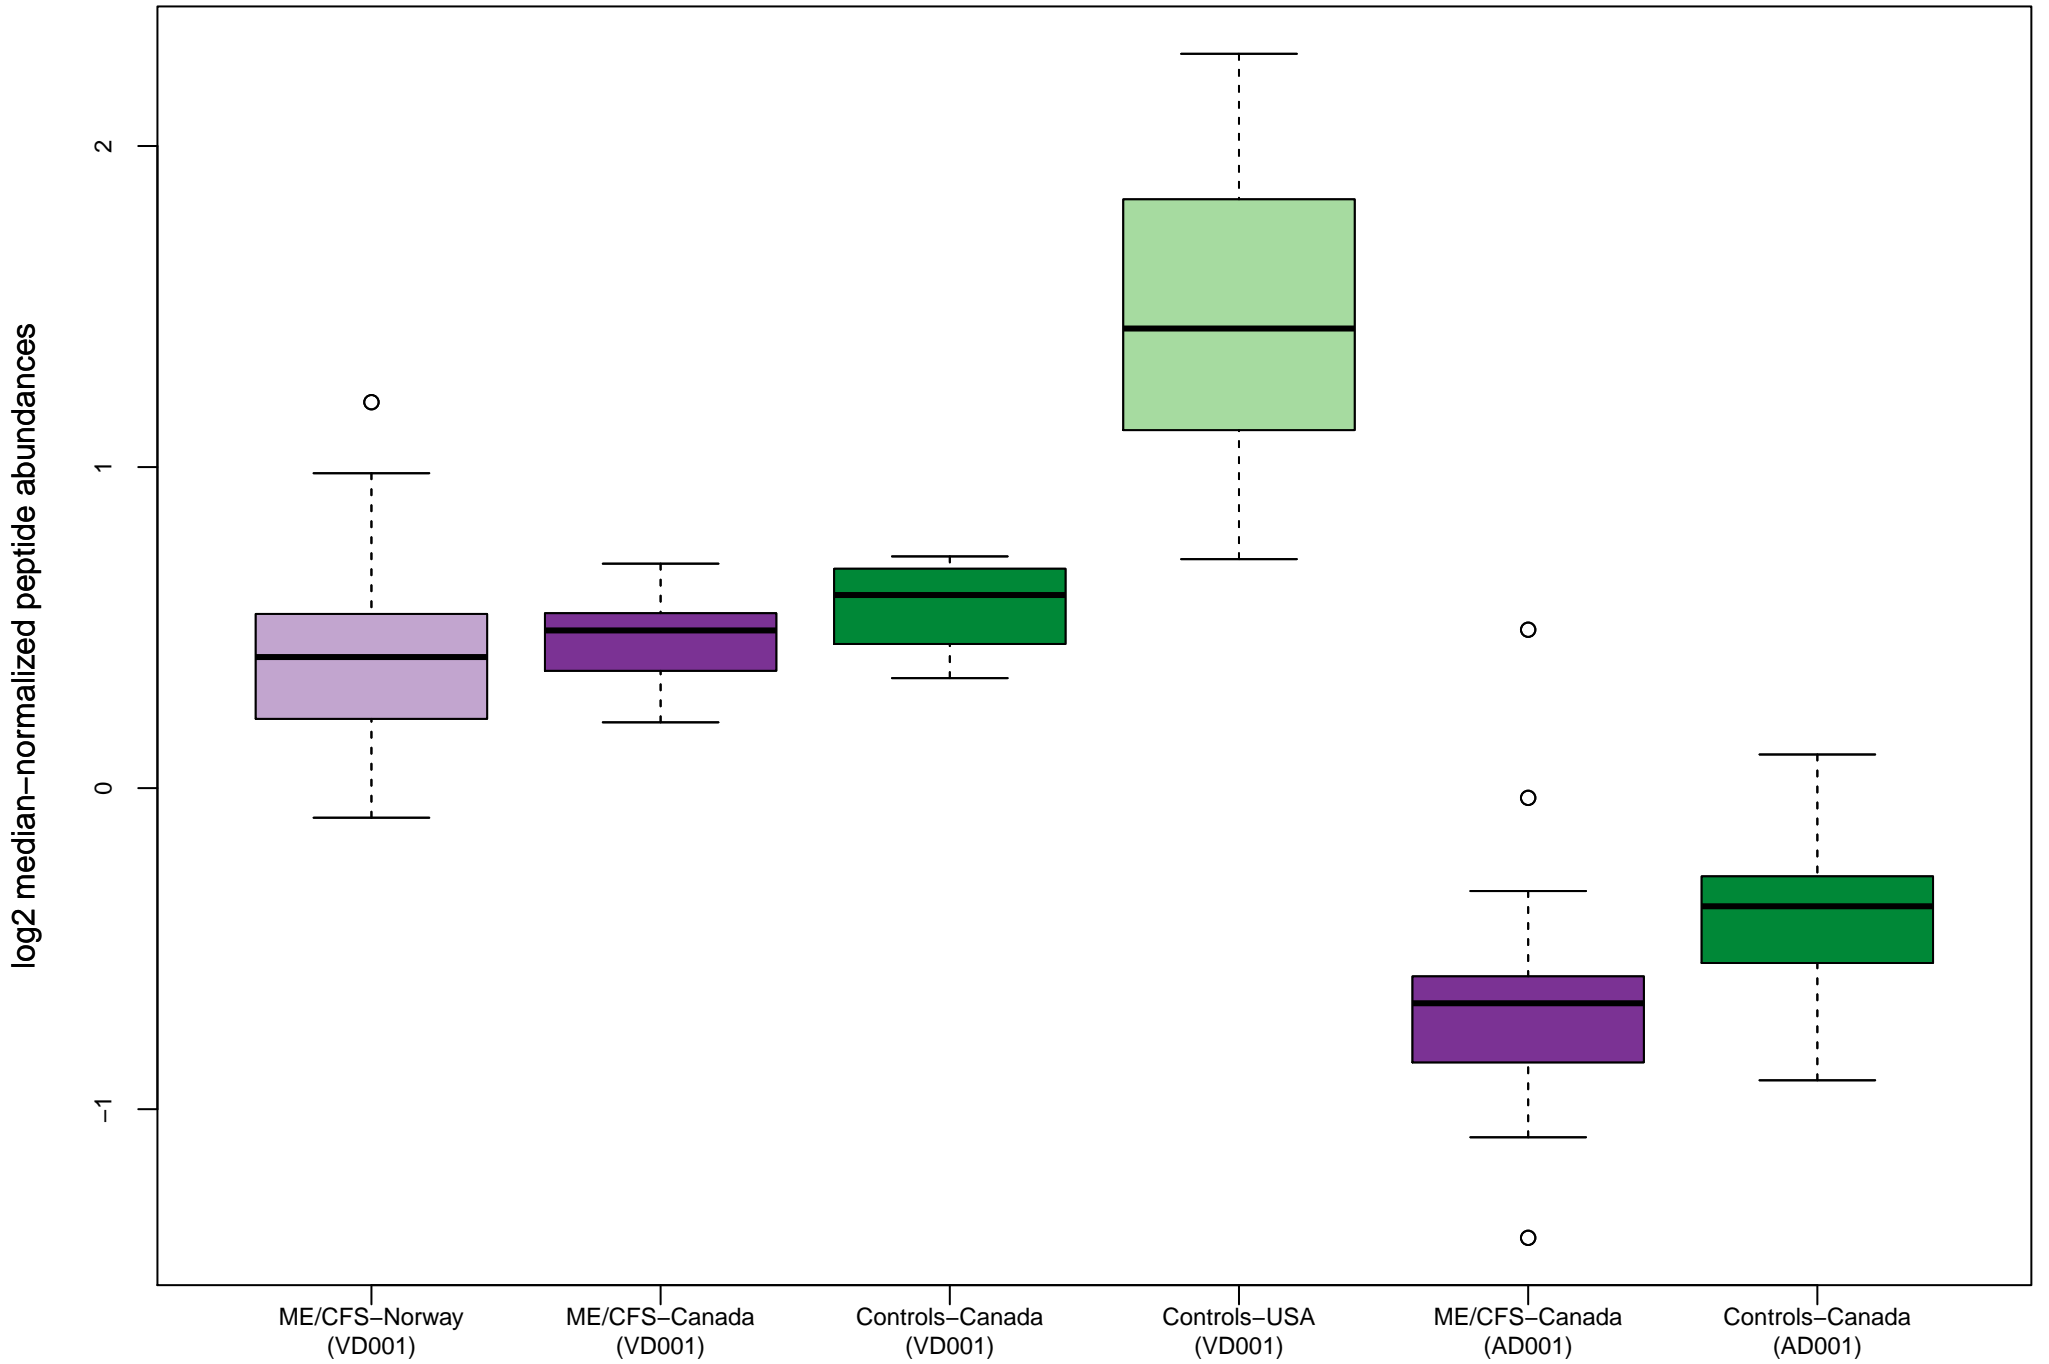

# PLVRFPPVASVAG

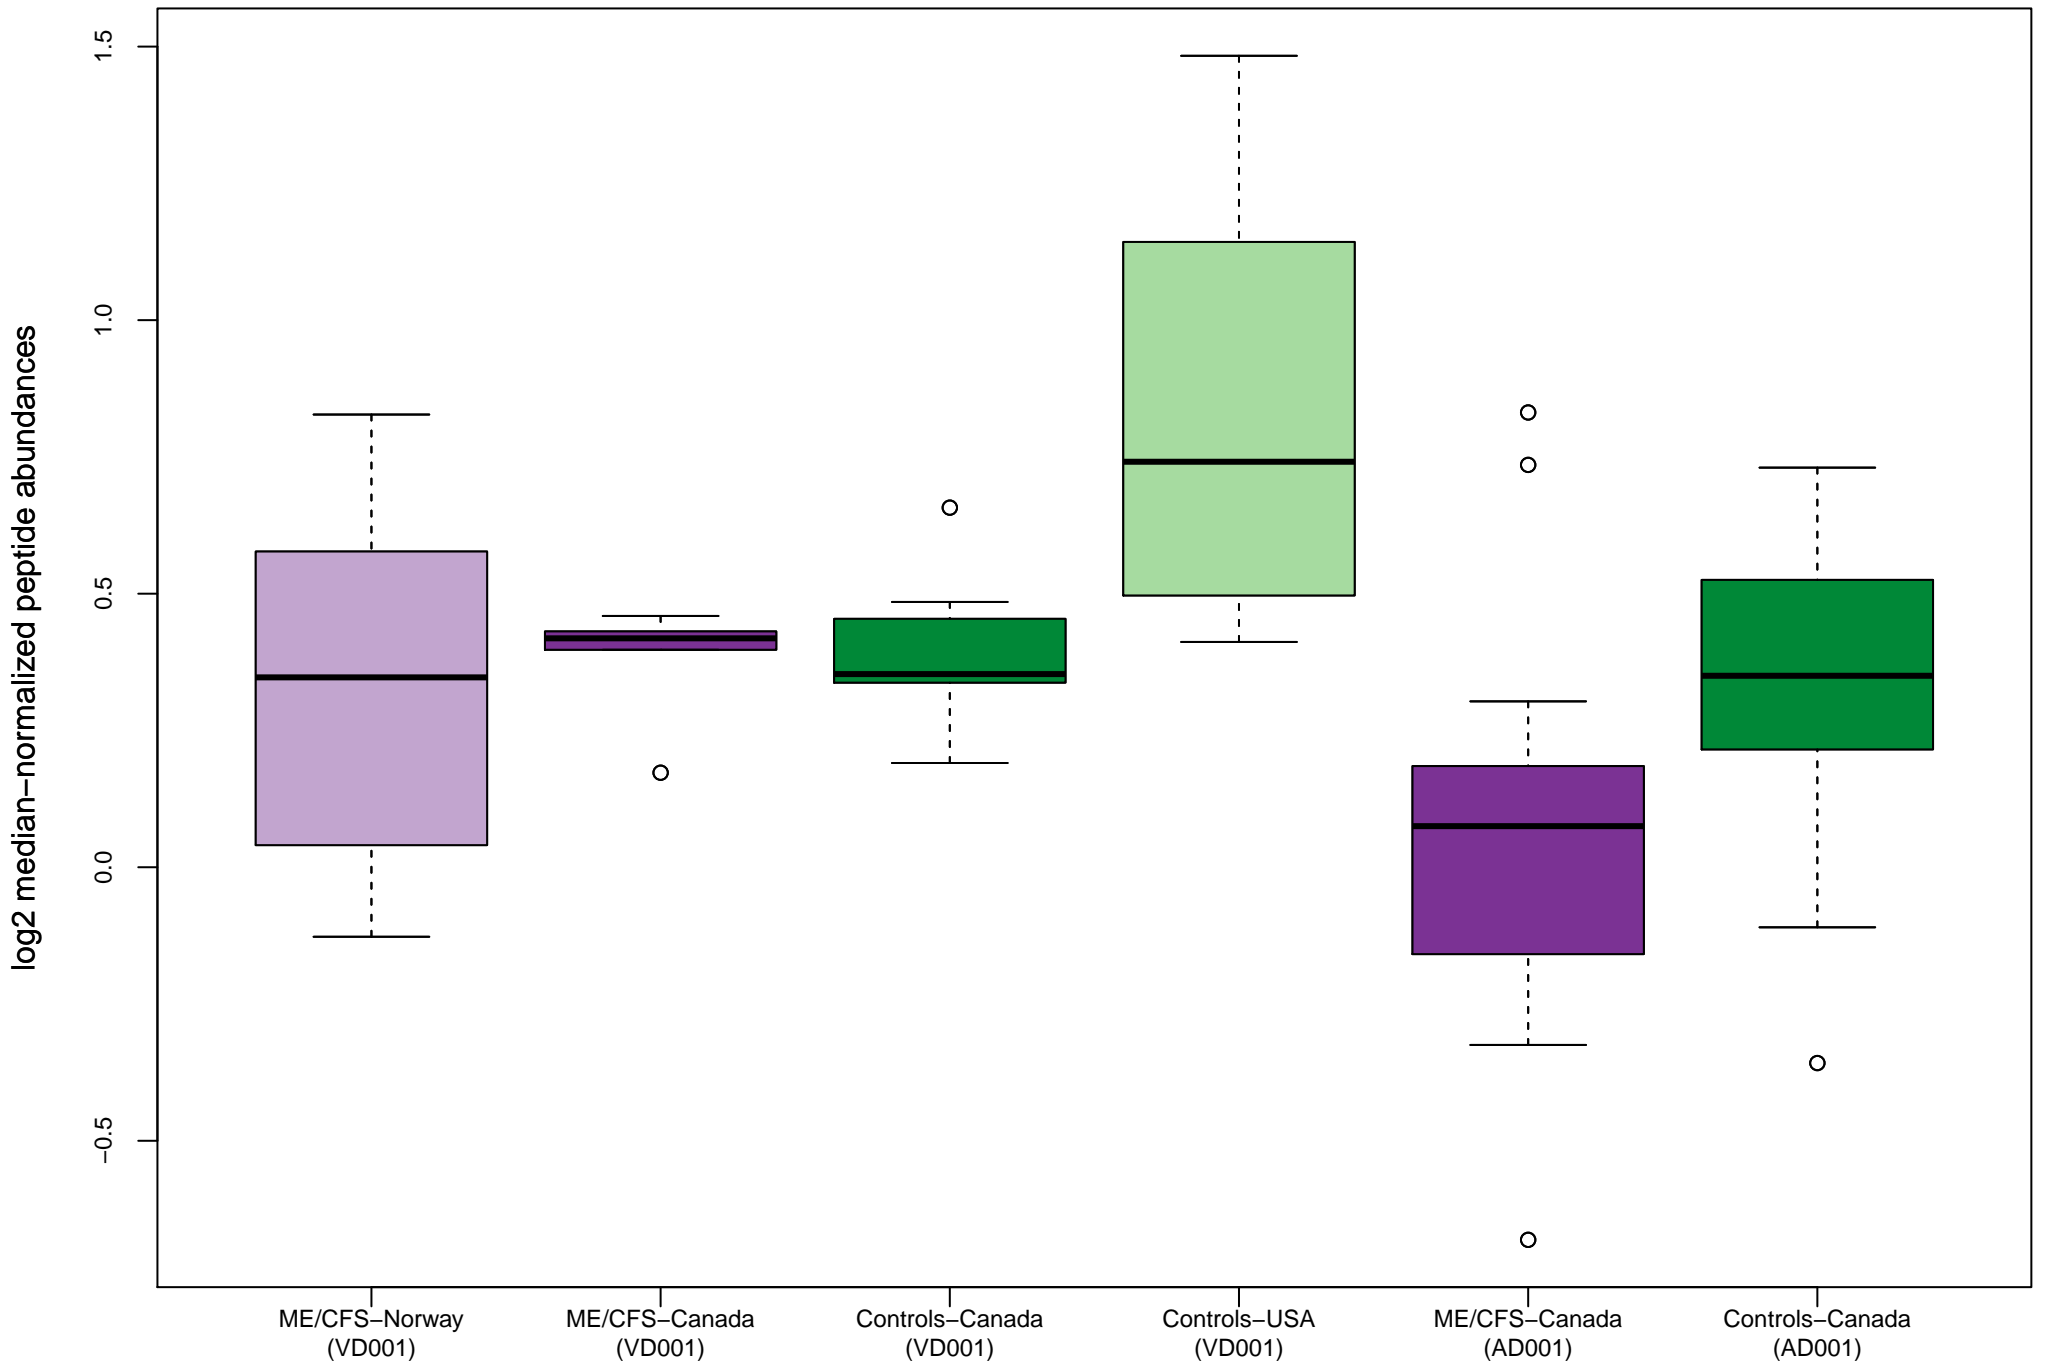

# PLYVGSFRPNLL

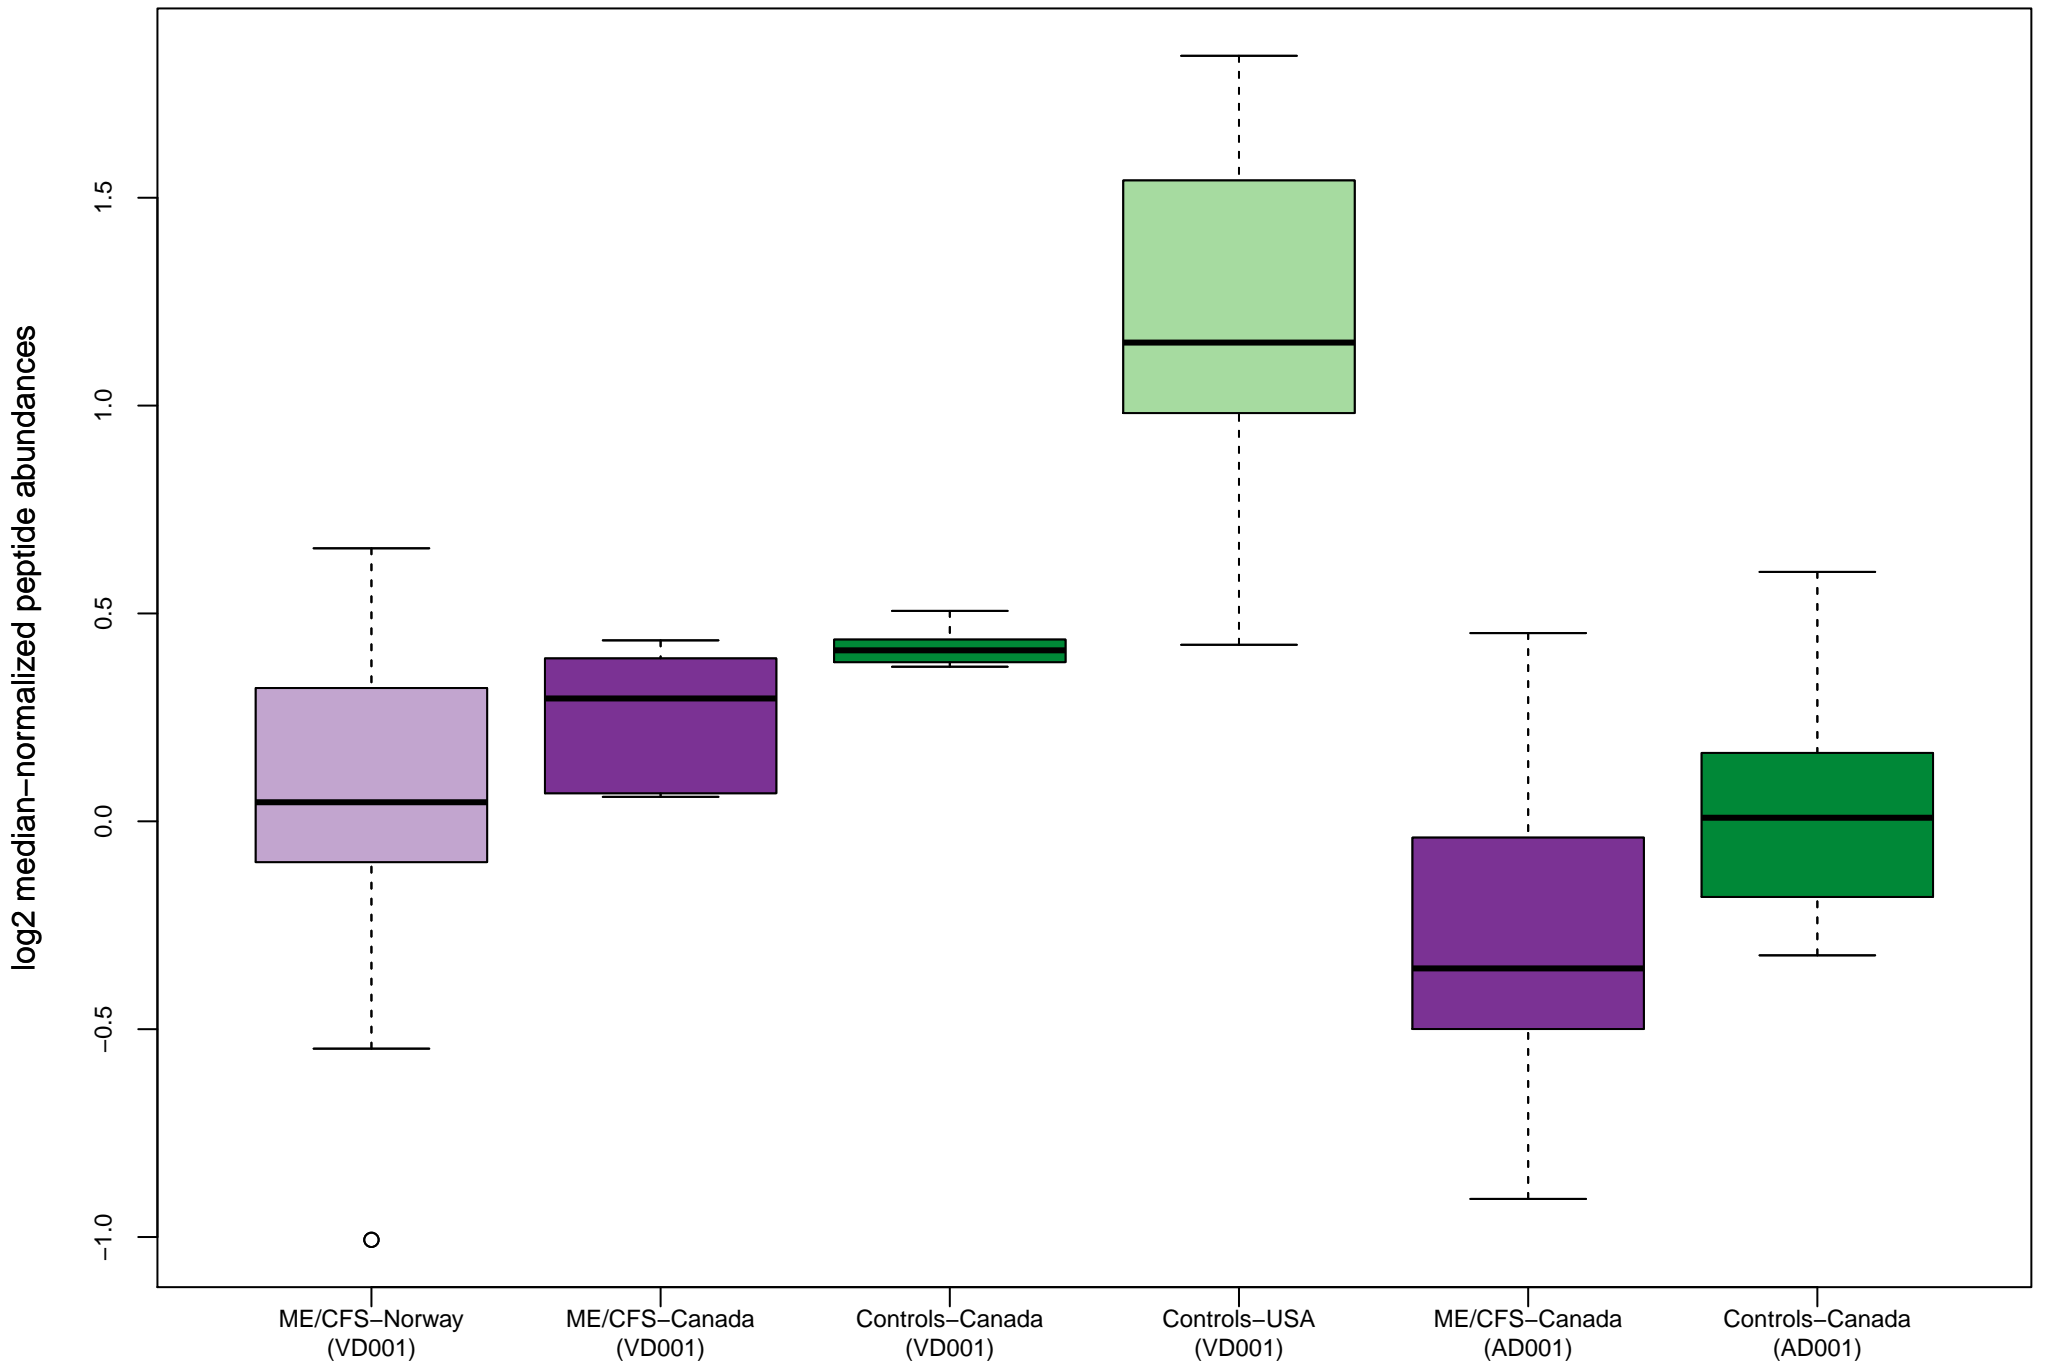

# PNFLWASRALAL

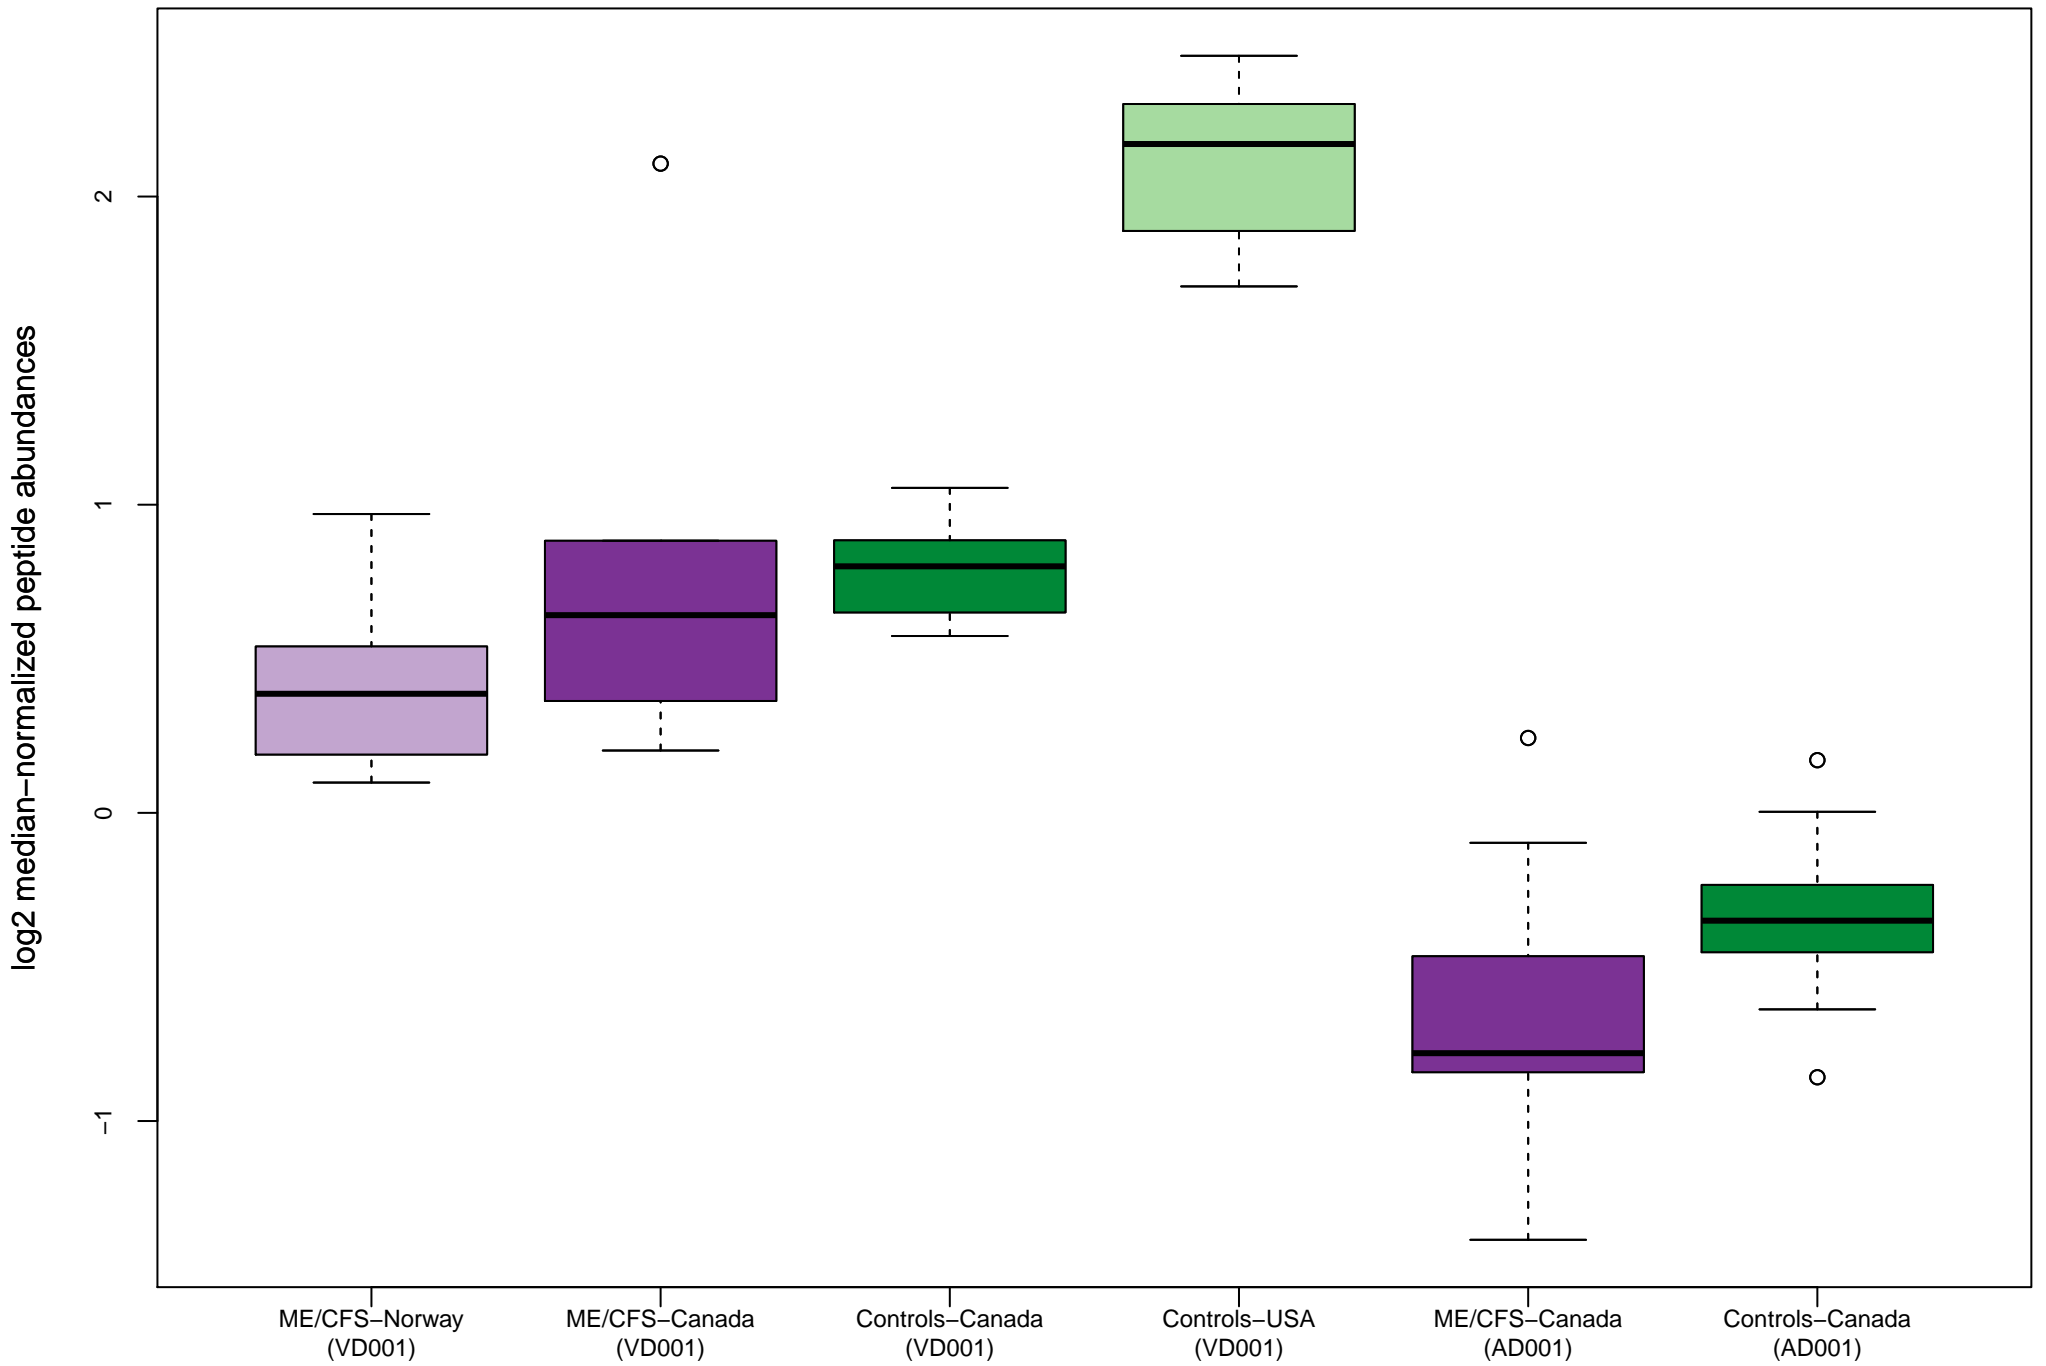

# PPFSYKVLASG

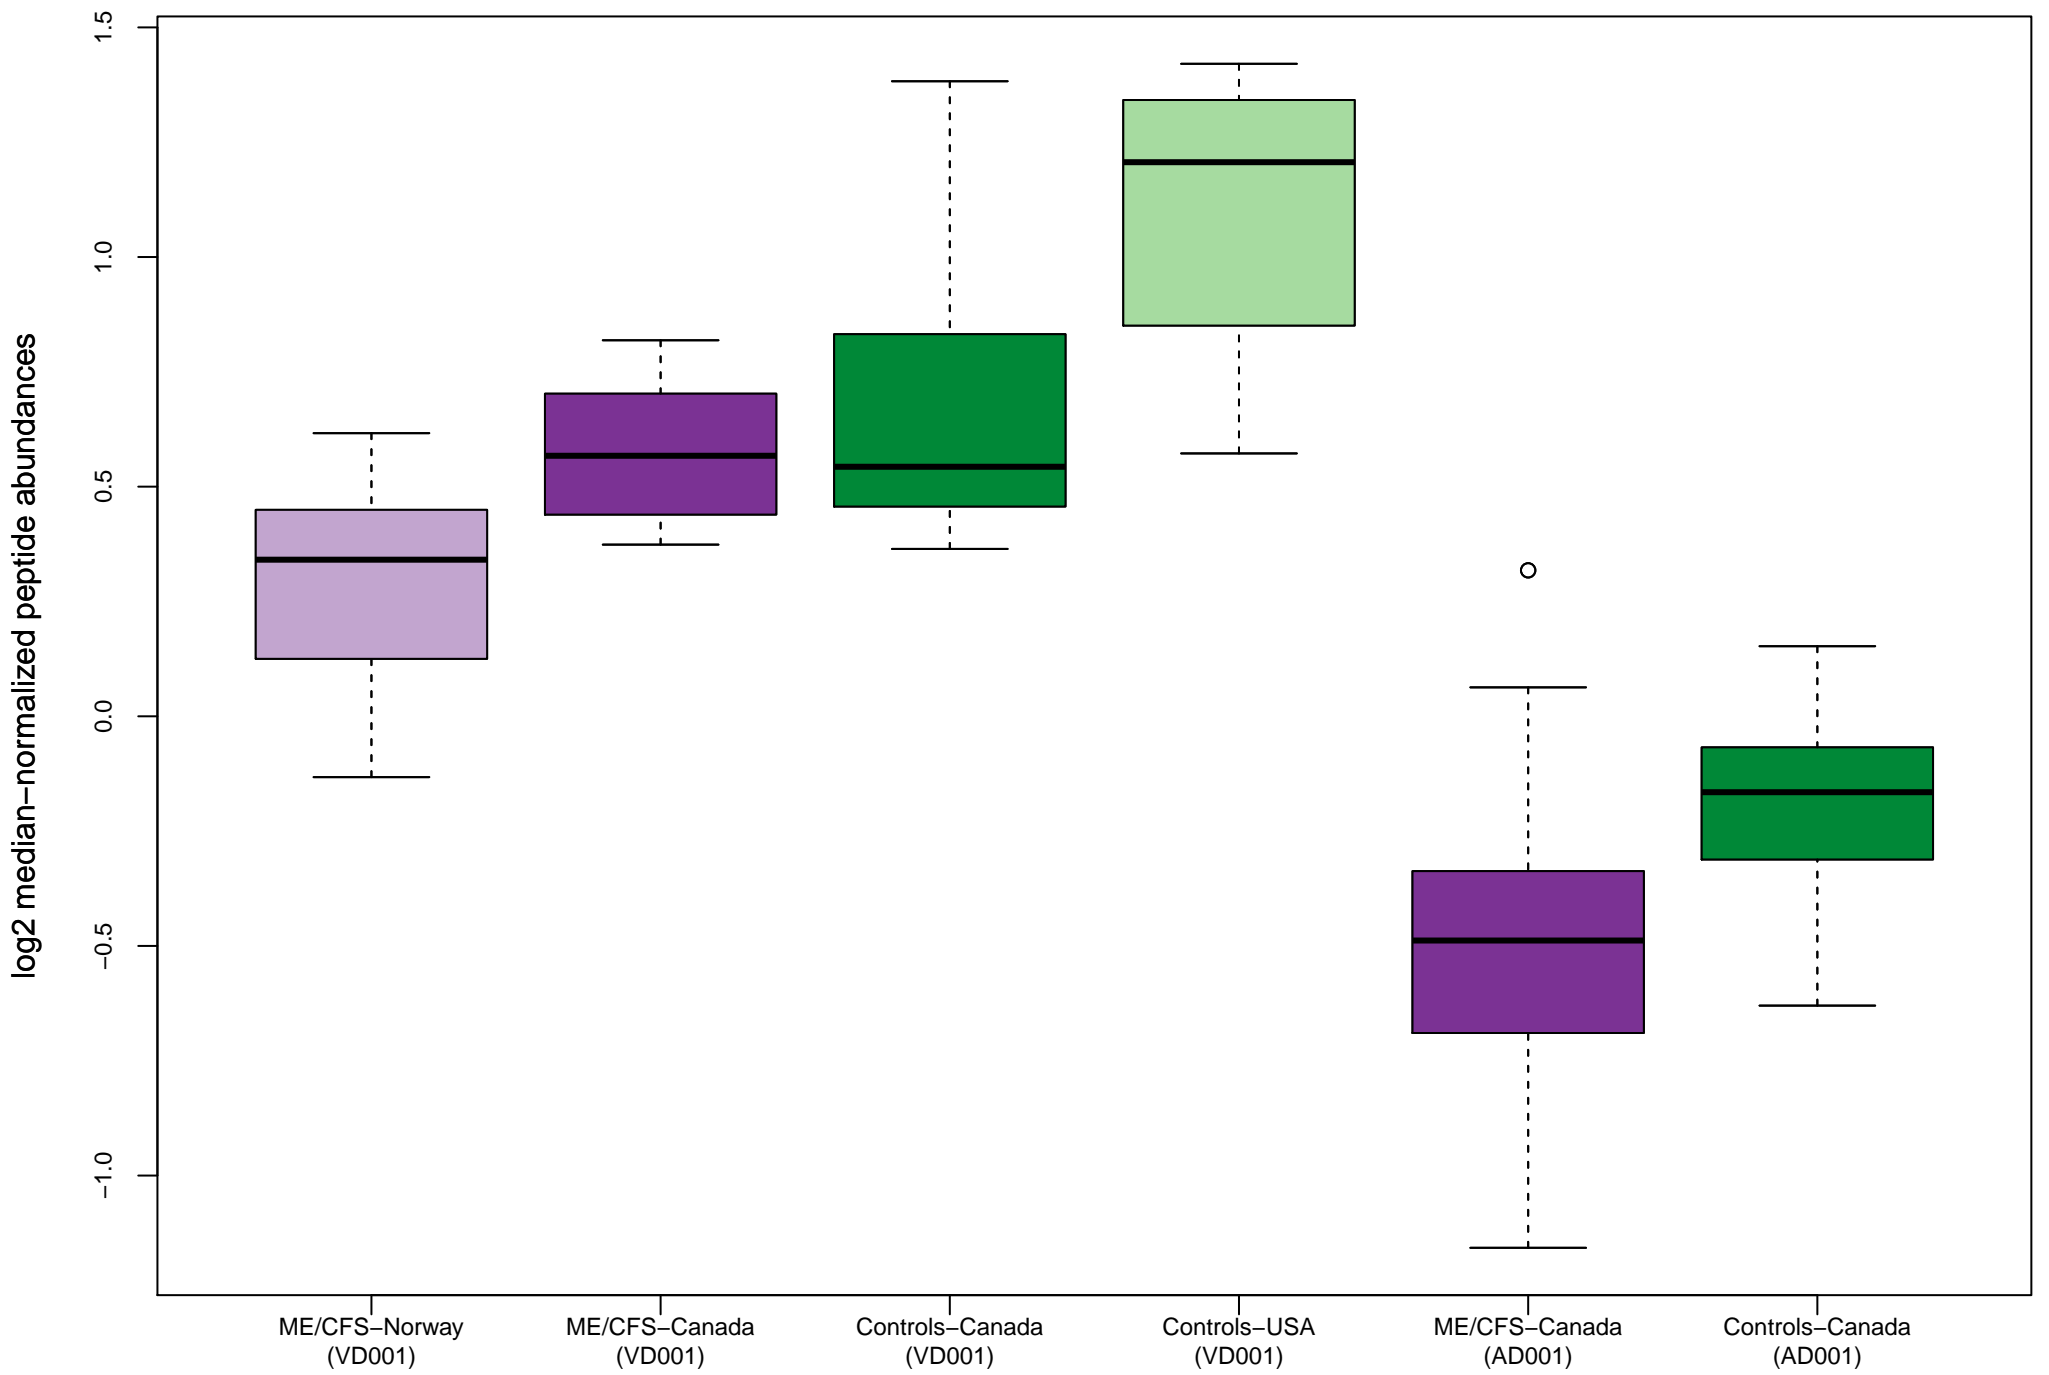



# PPRQFALSGVLS

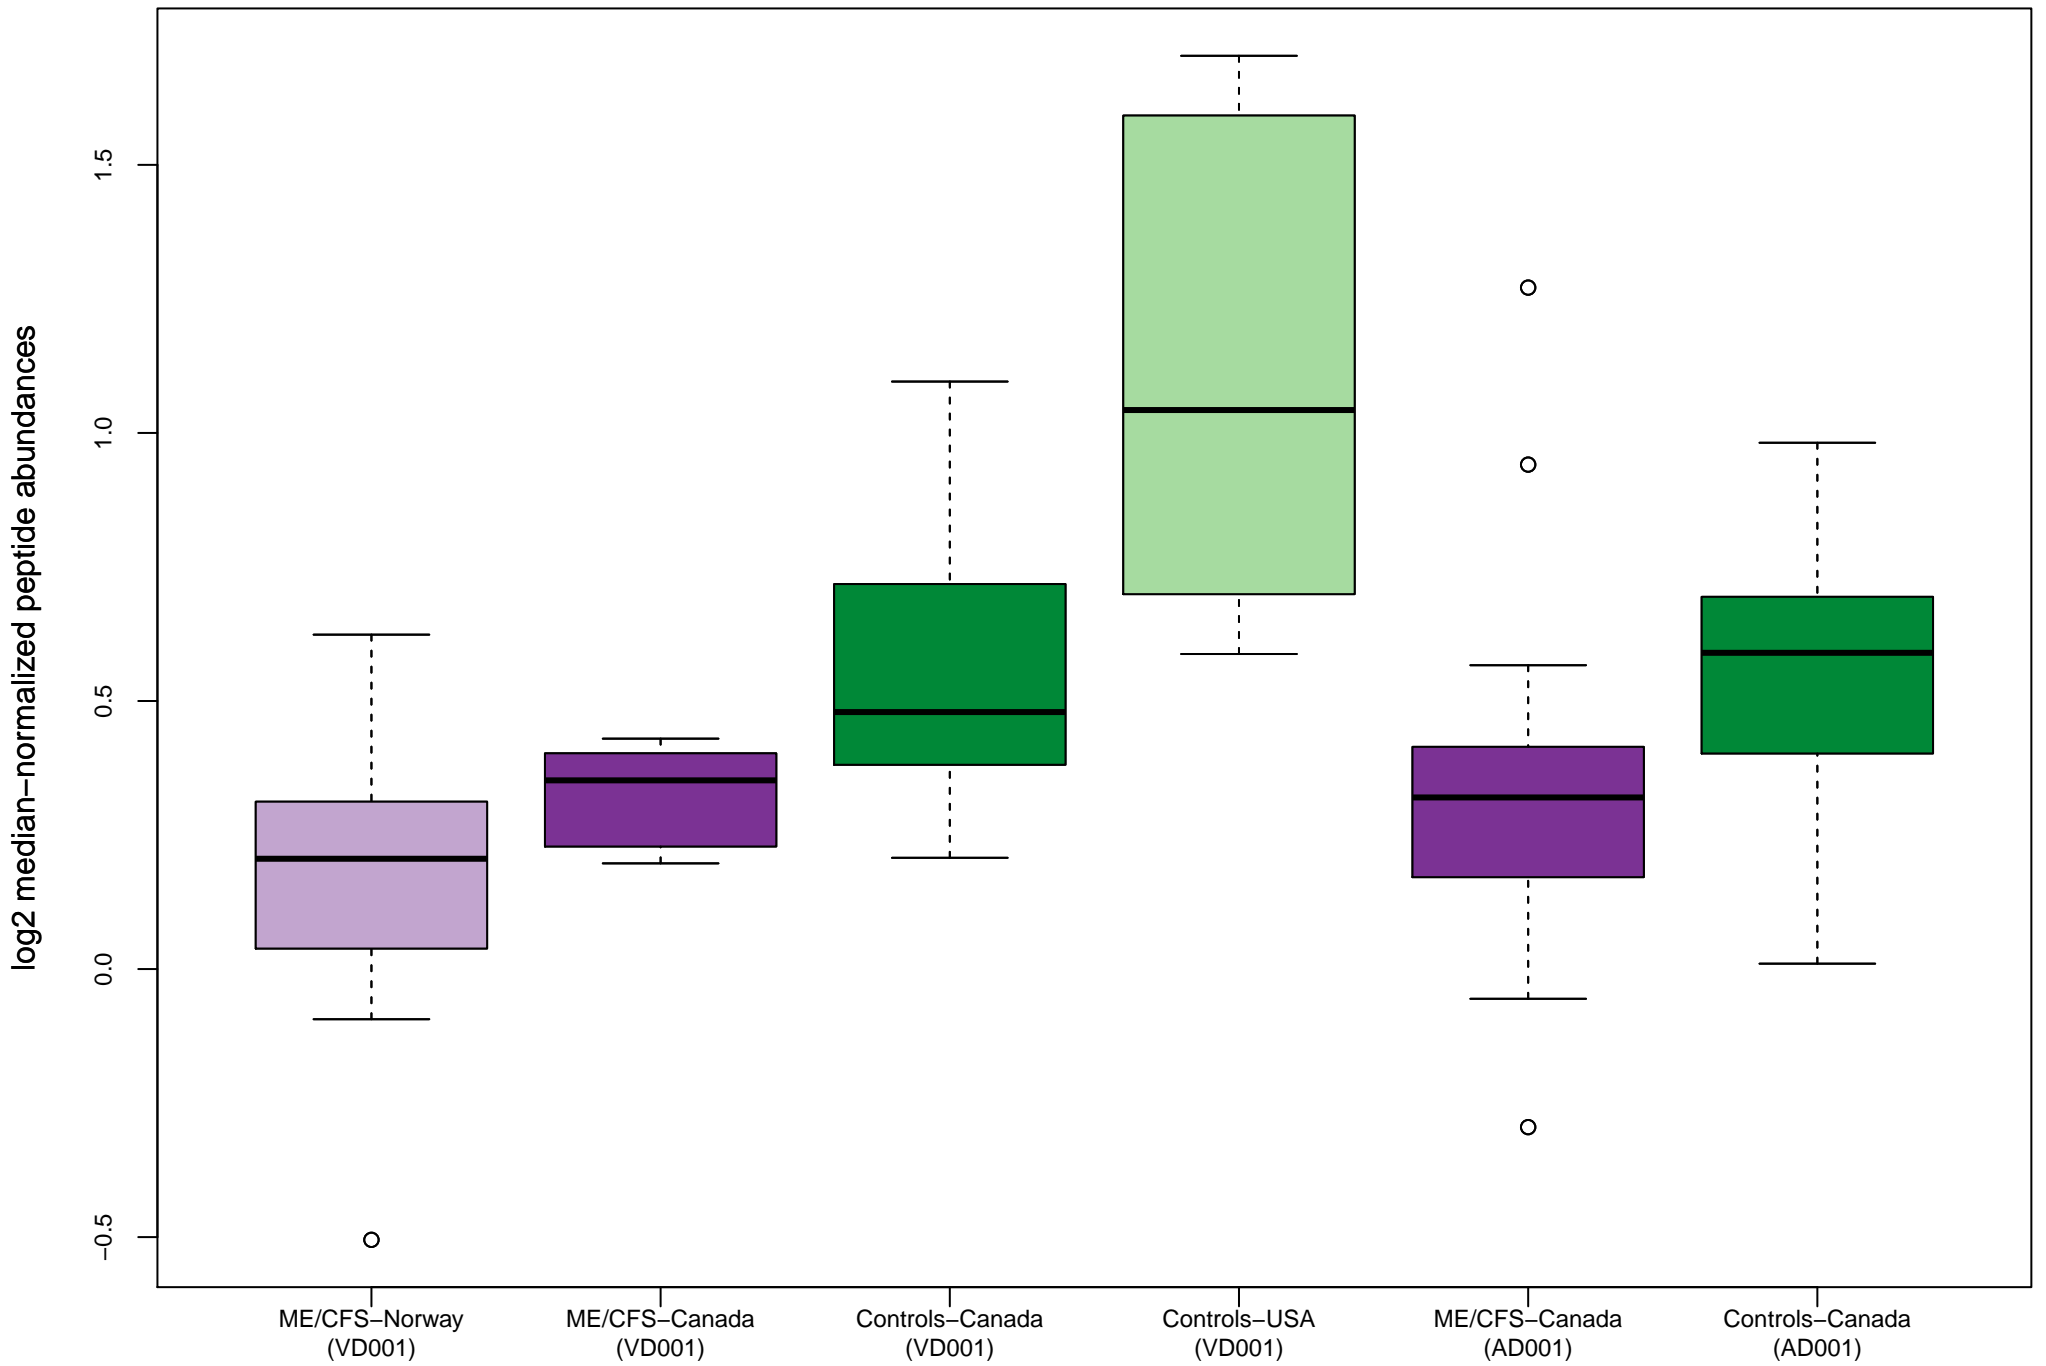

# PQAYFRGVALSG

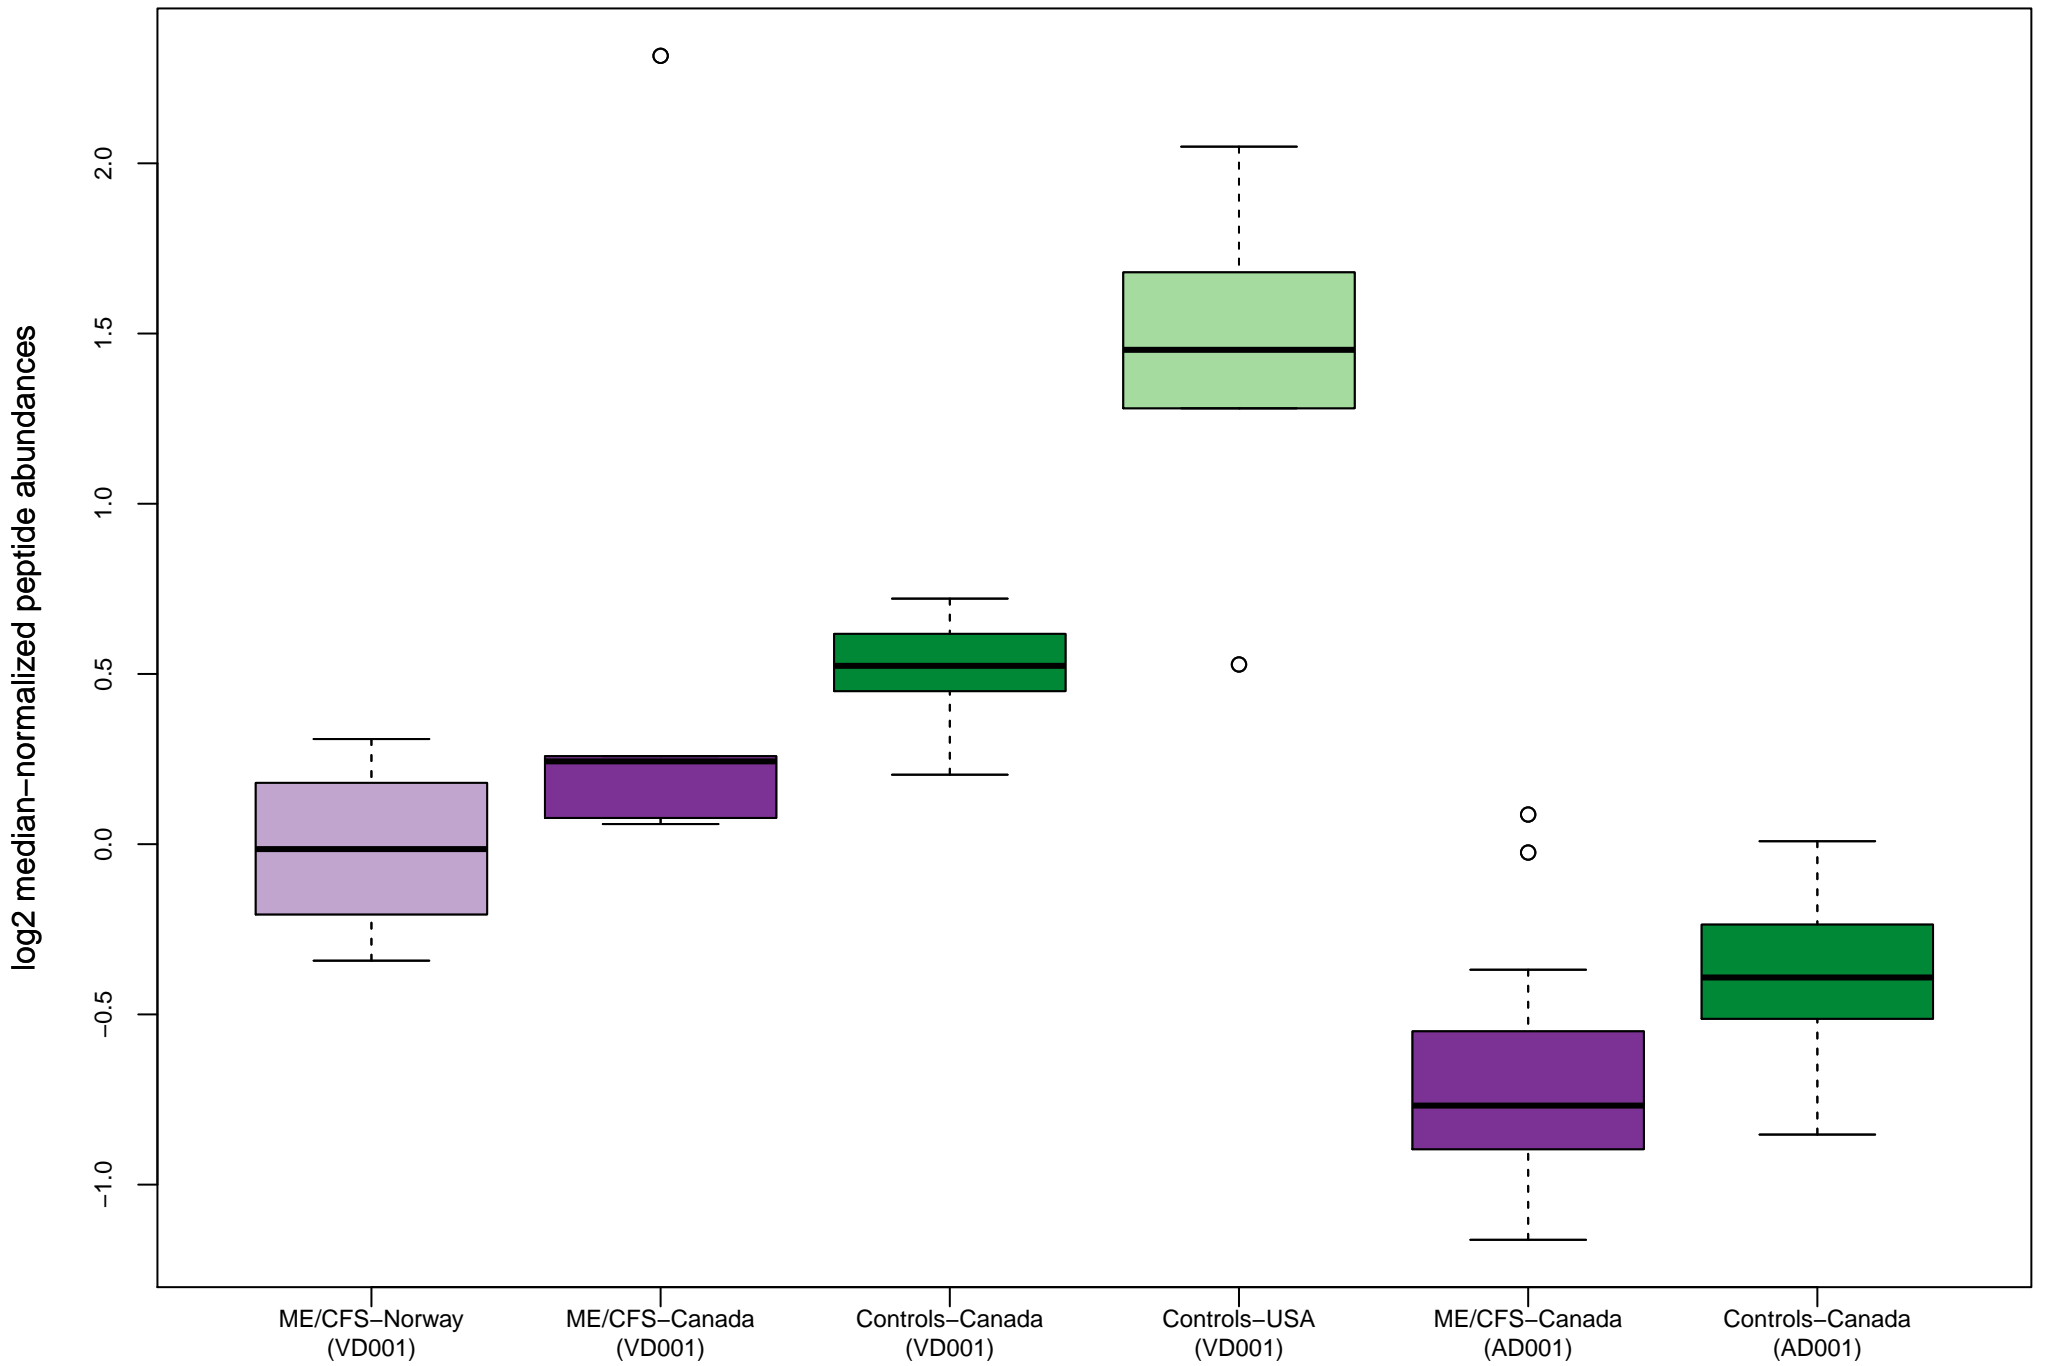

# PQFARVLQPVVA

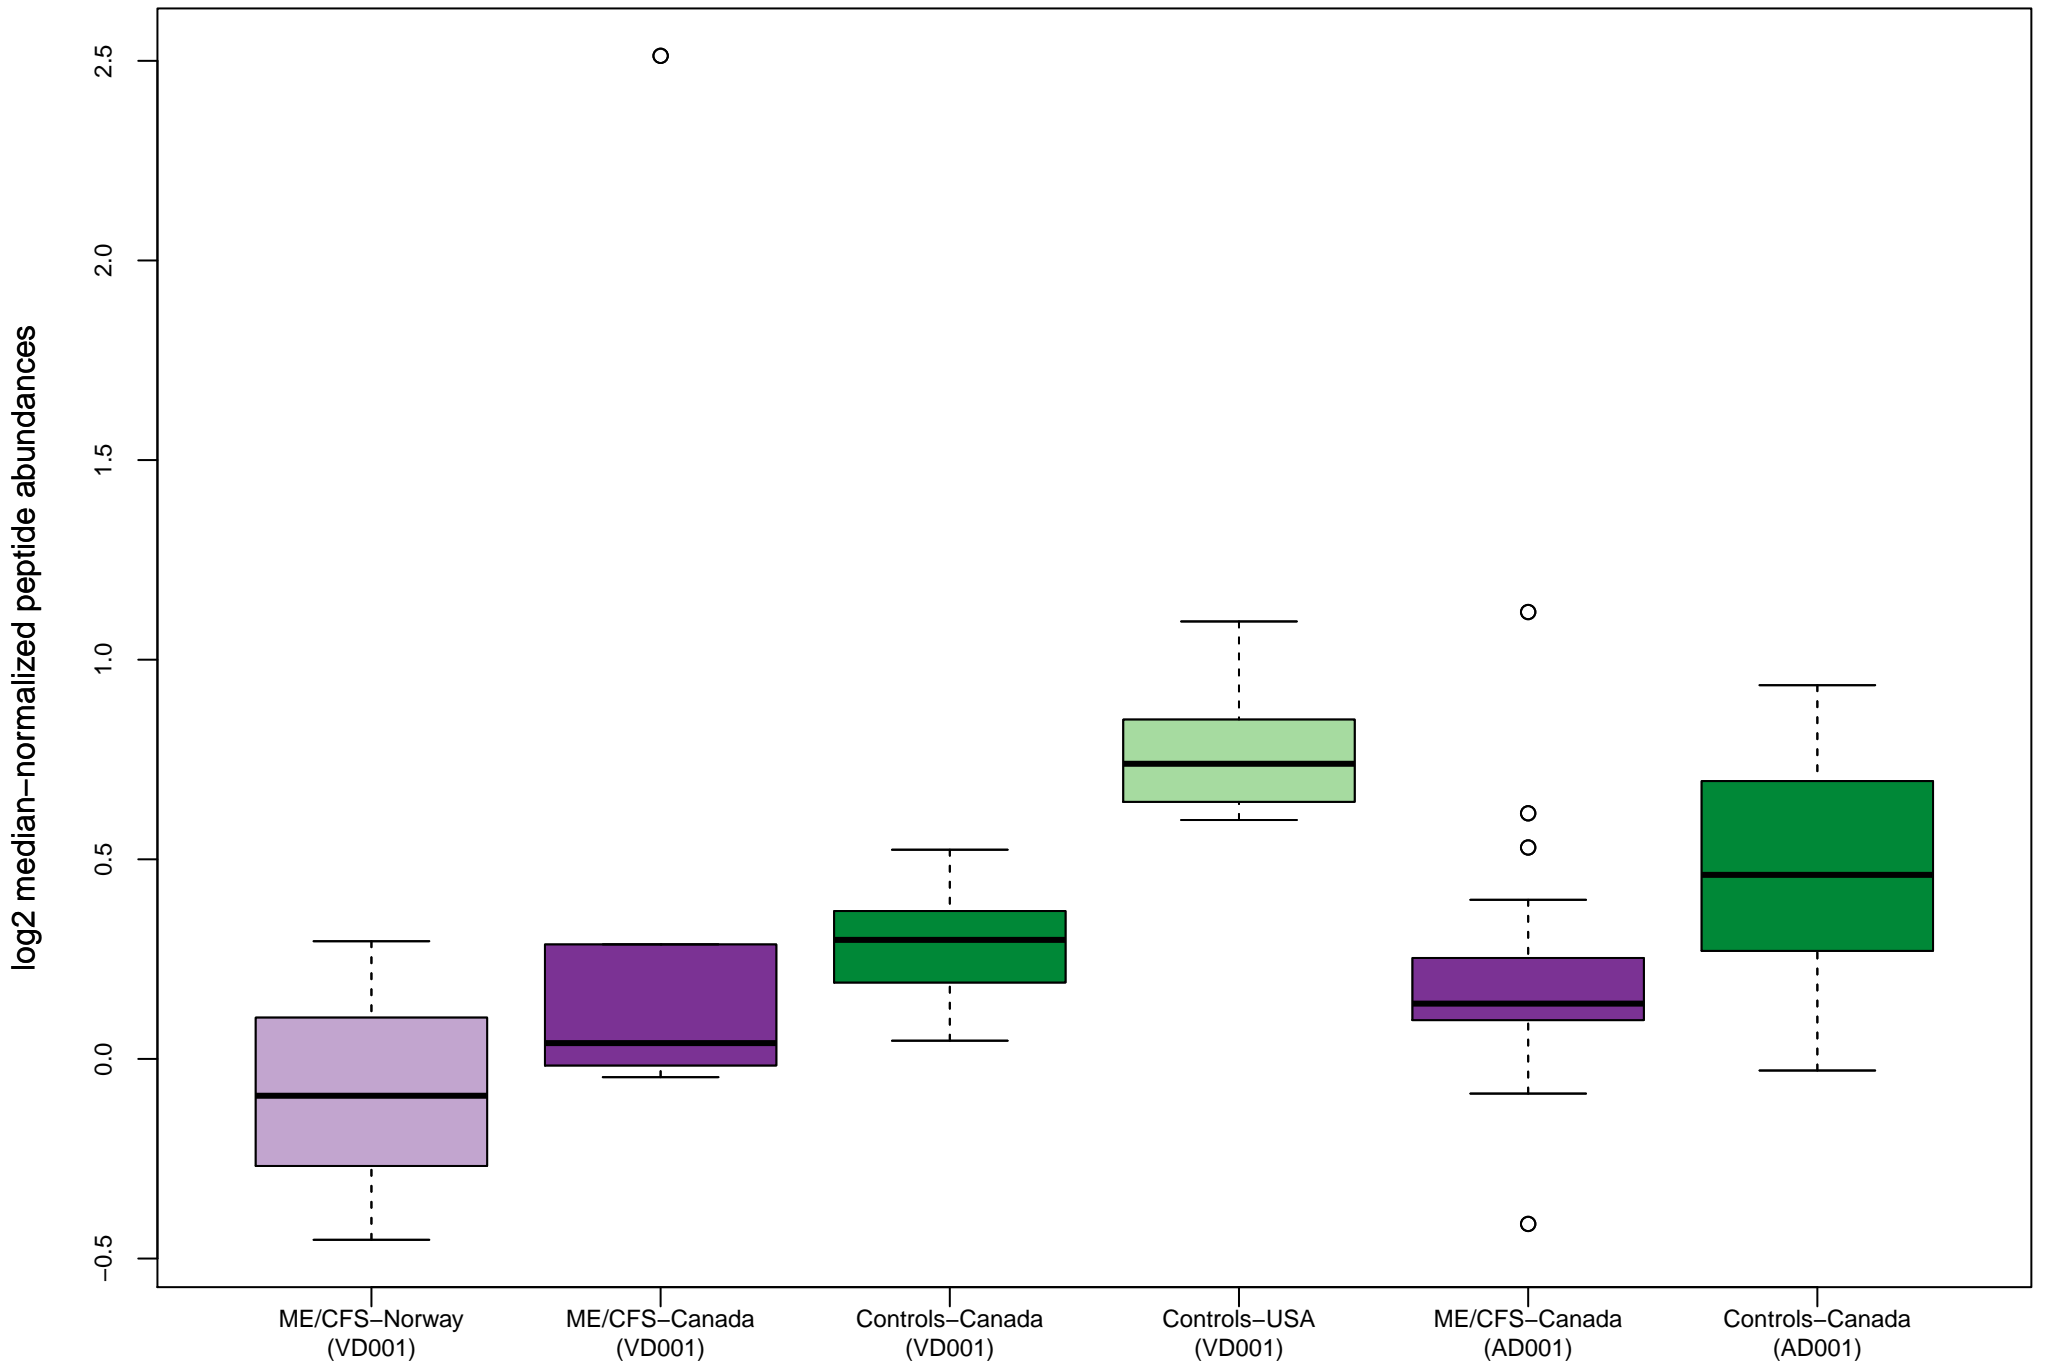

# PQRFHLFRWAVG

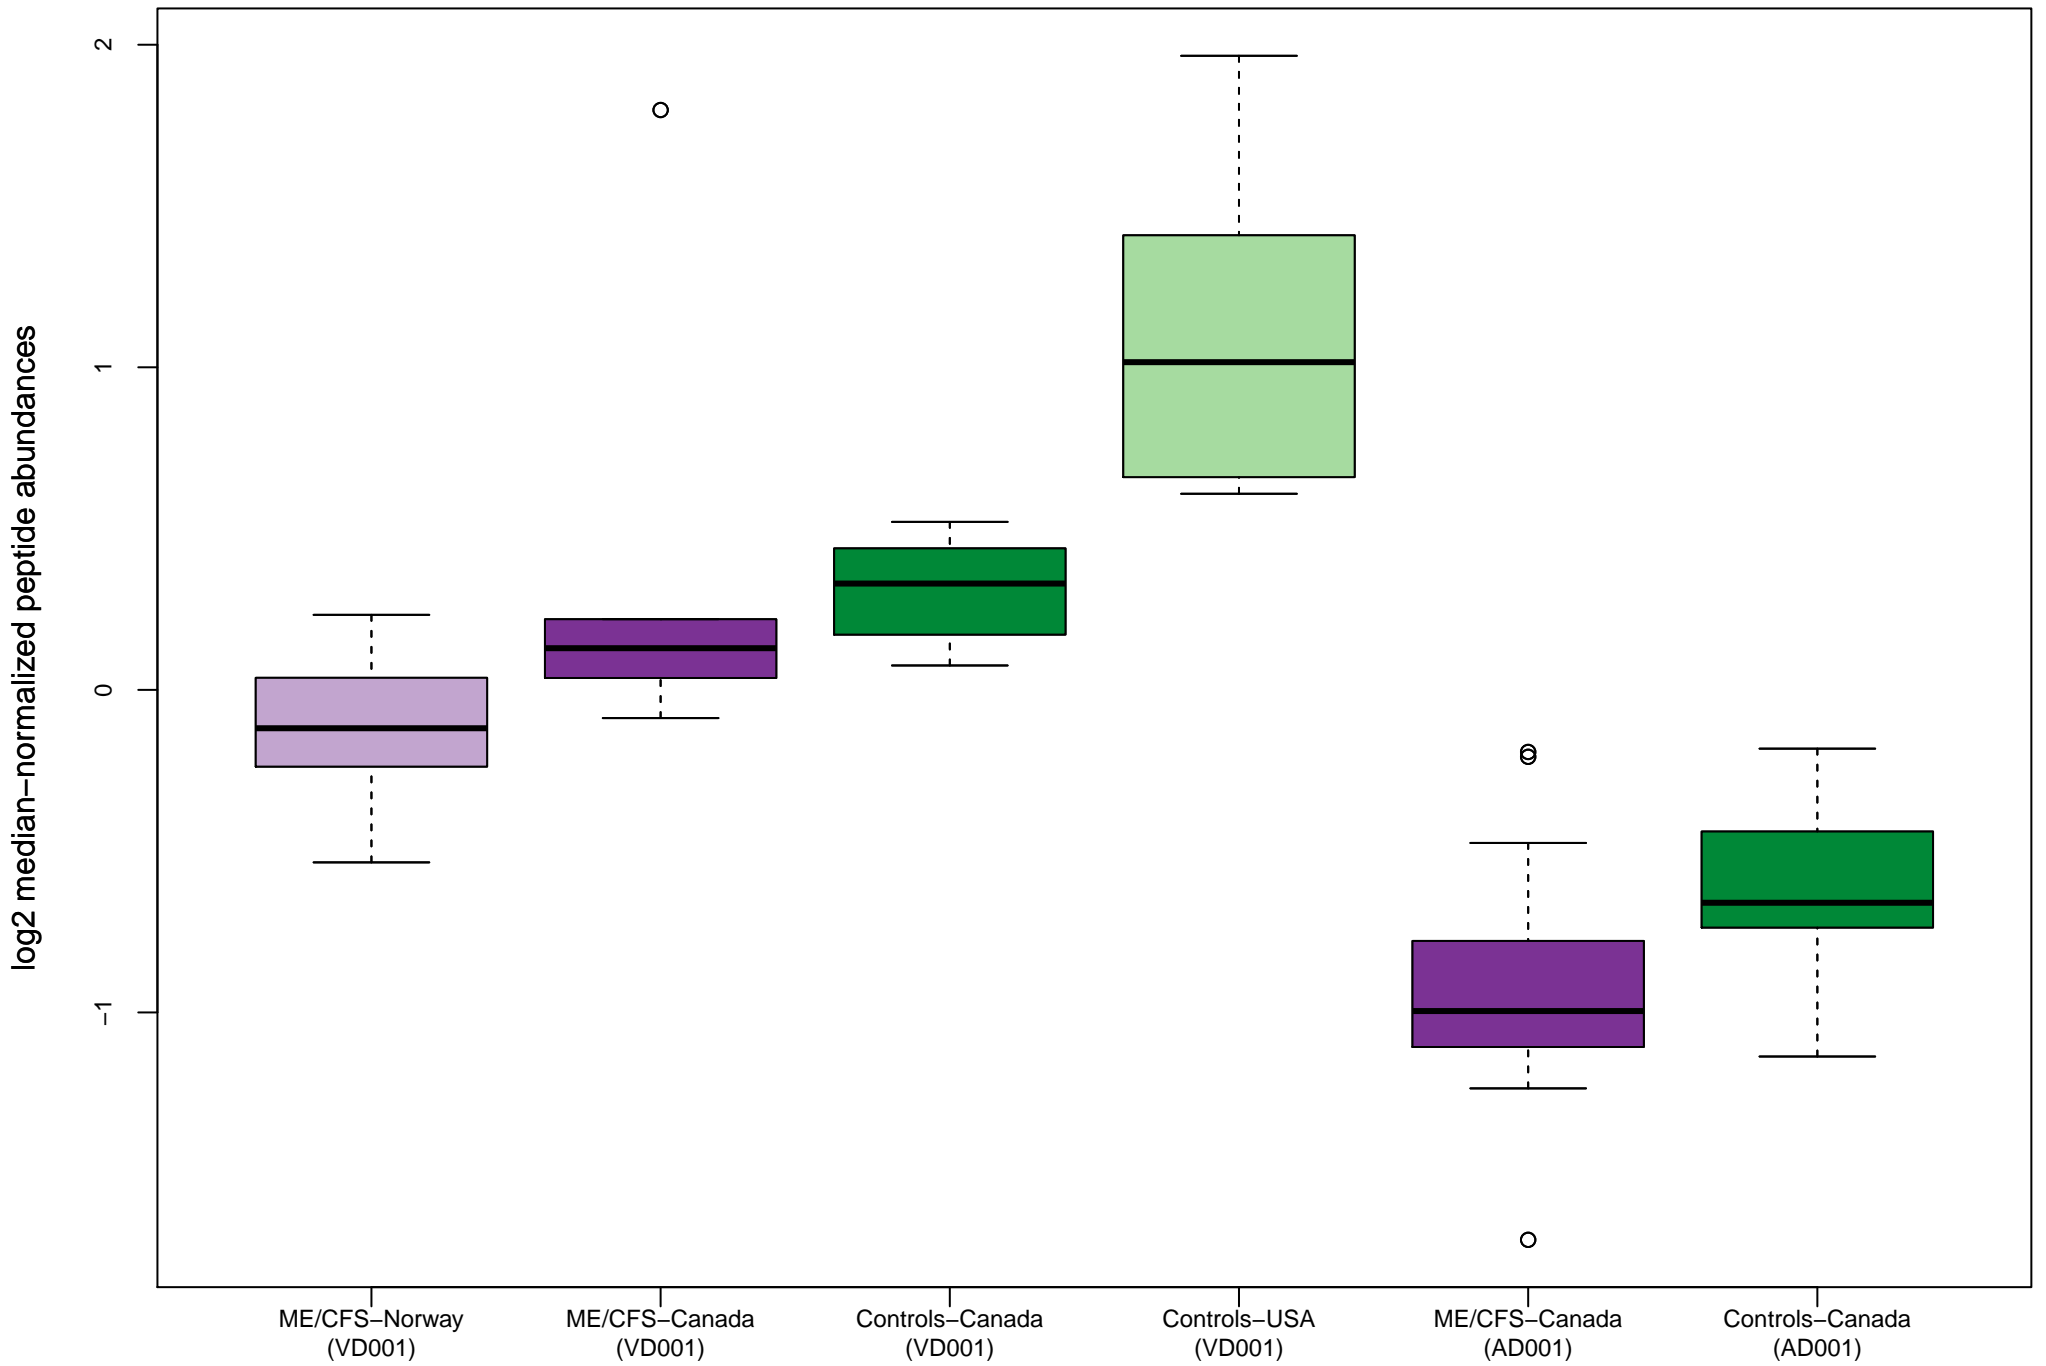

# PRFYSNGVALSG

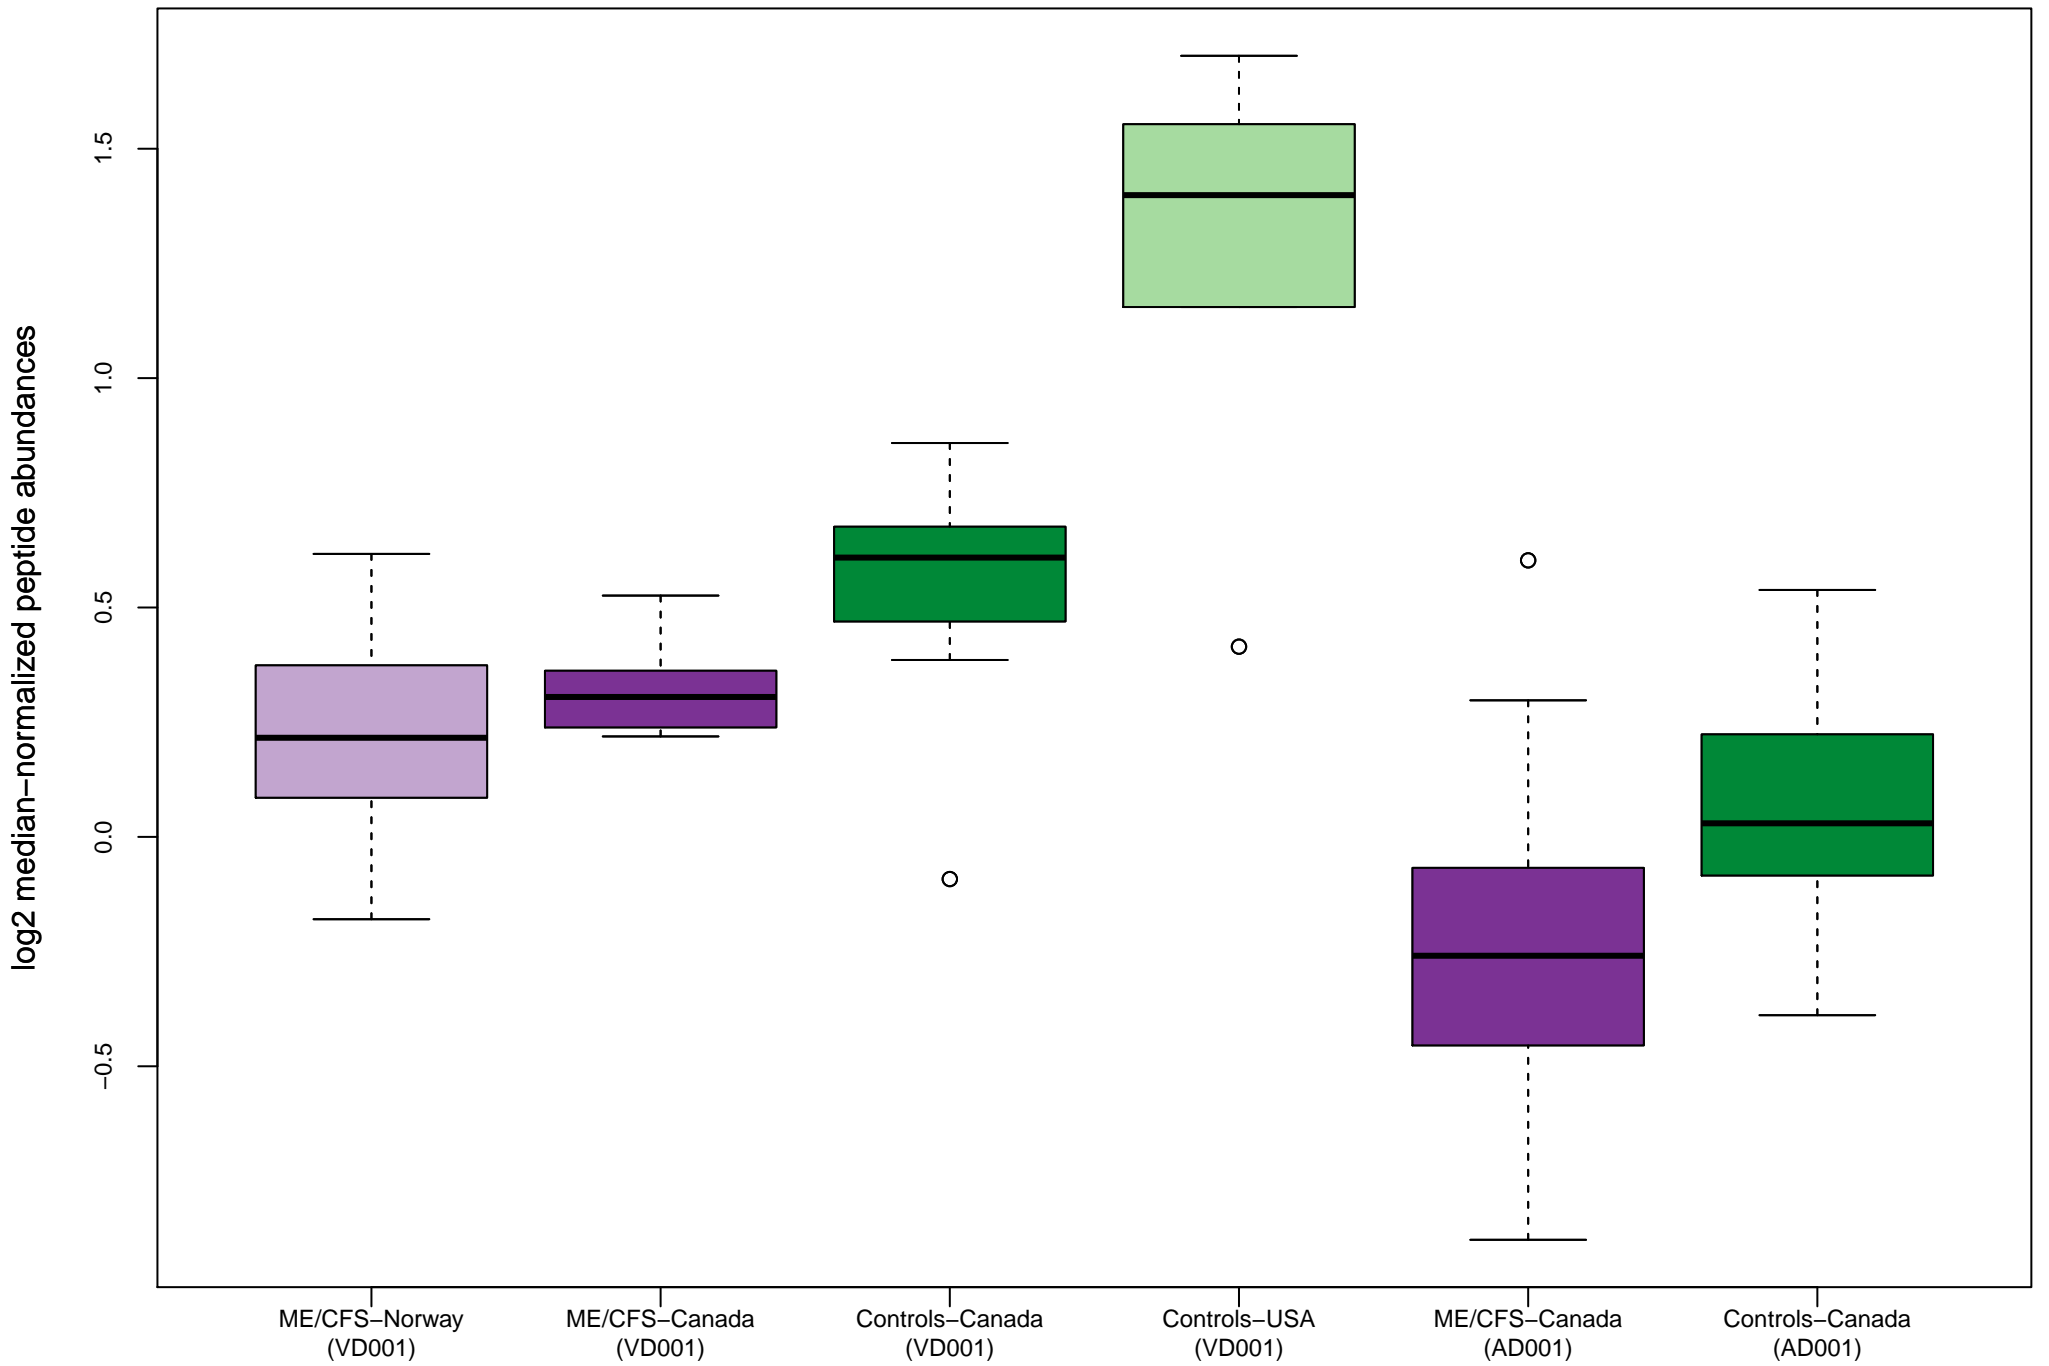

# PRLSLHLGVALG

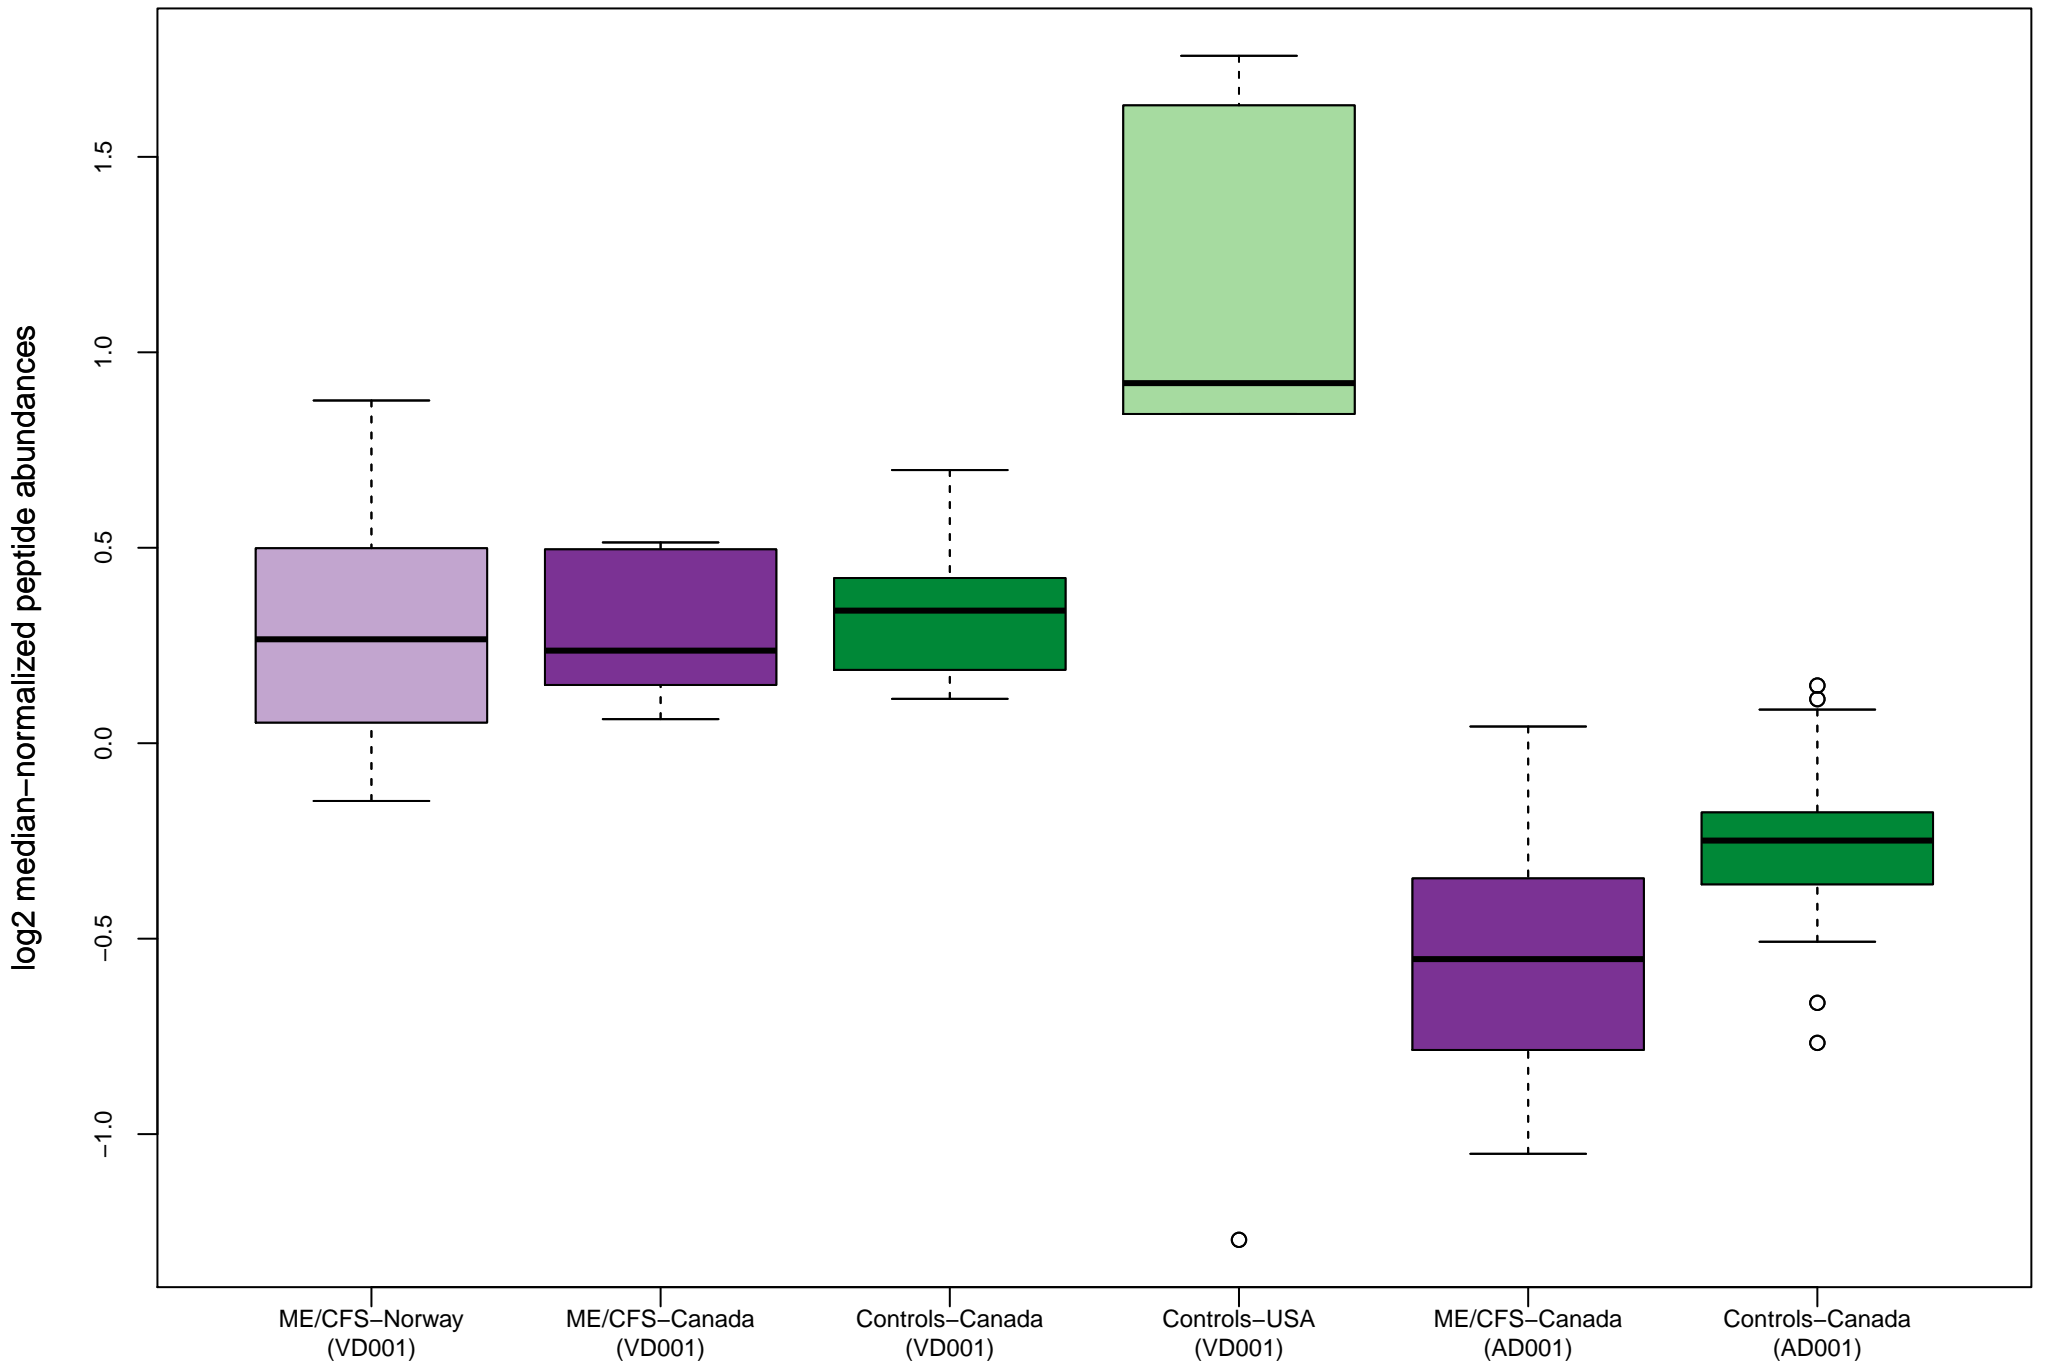

# PRLVSWGVSAG

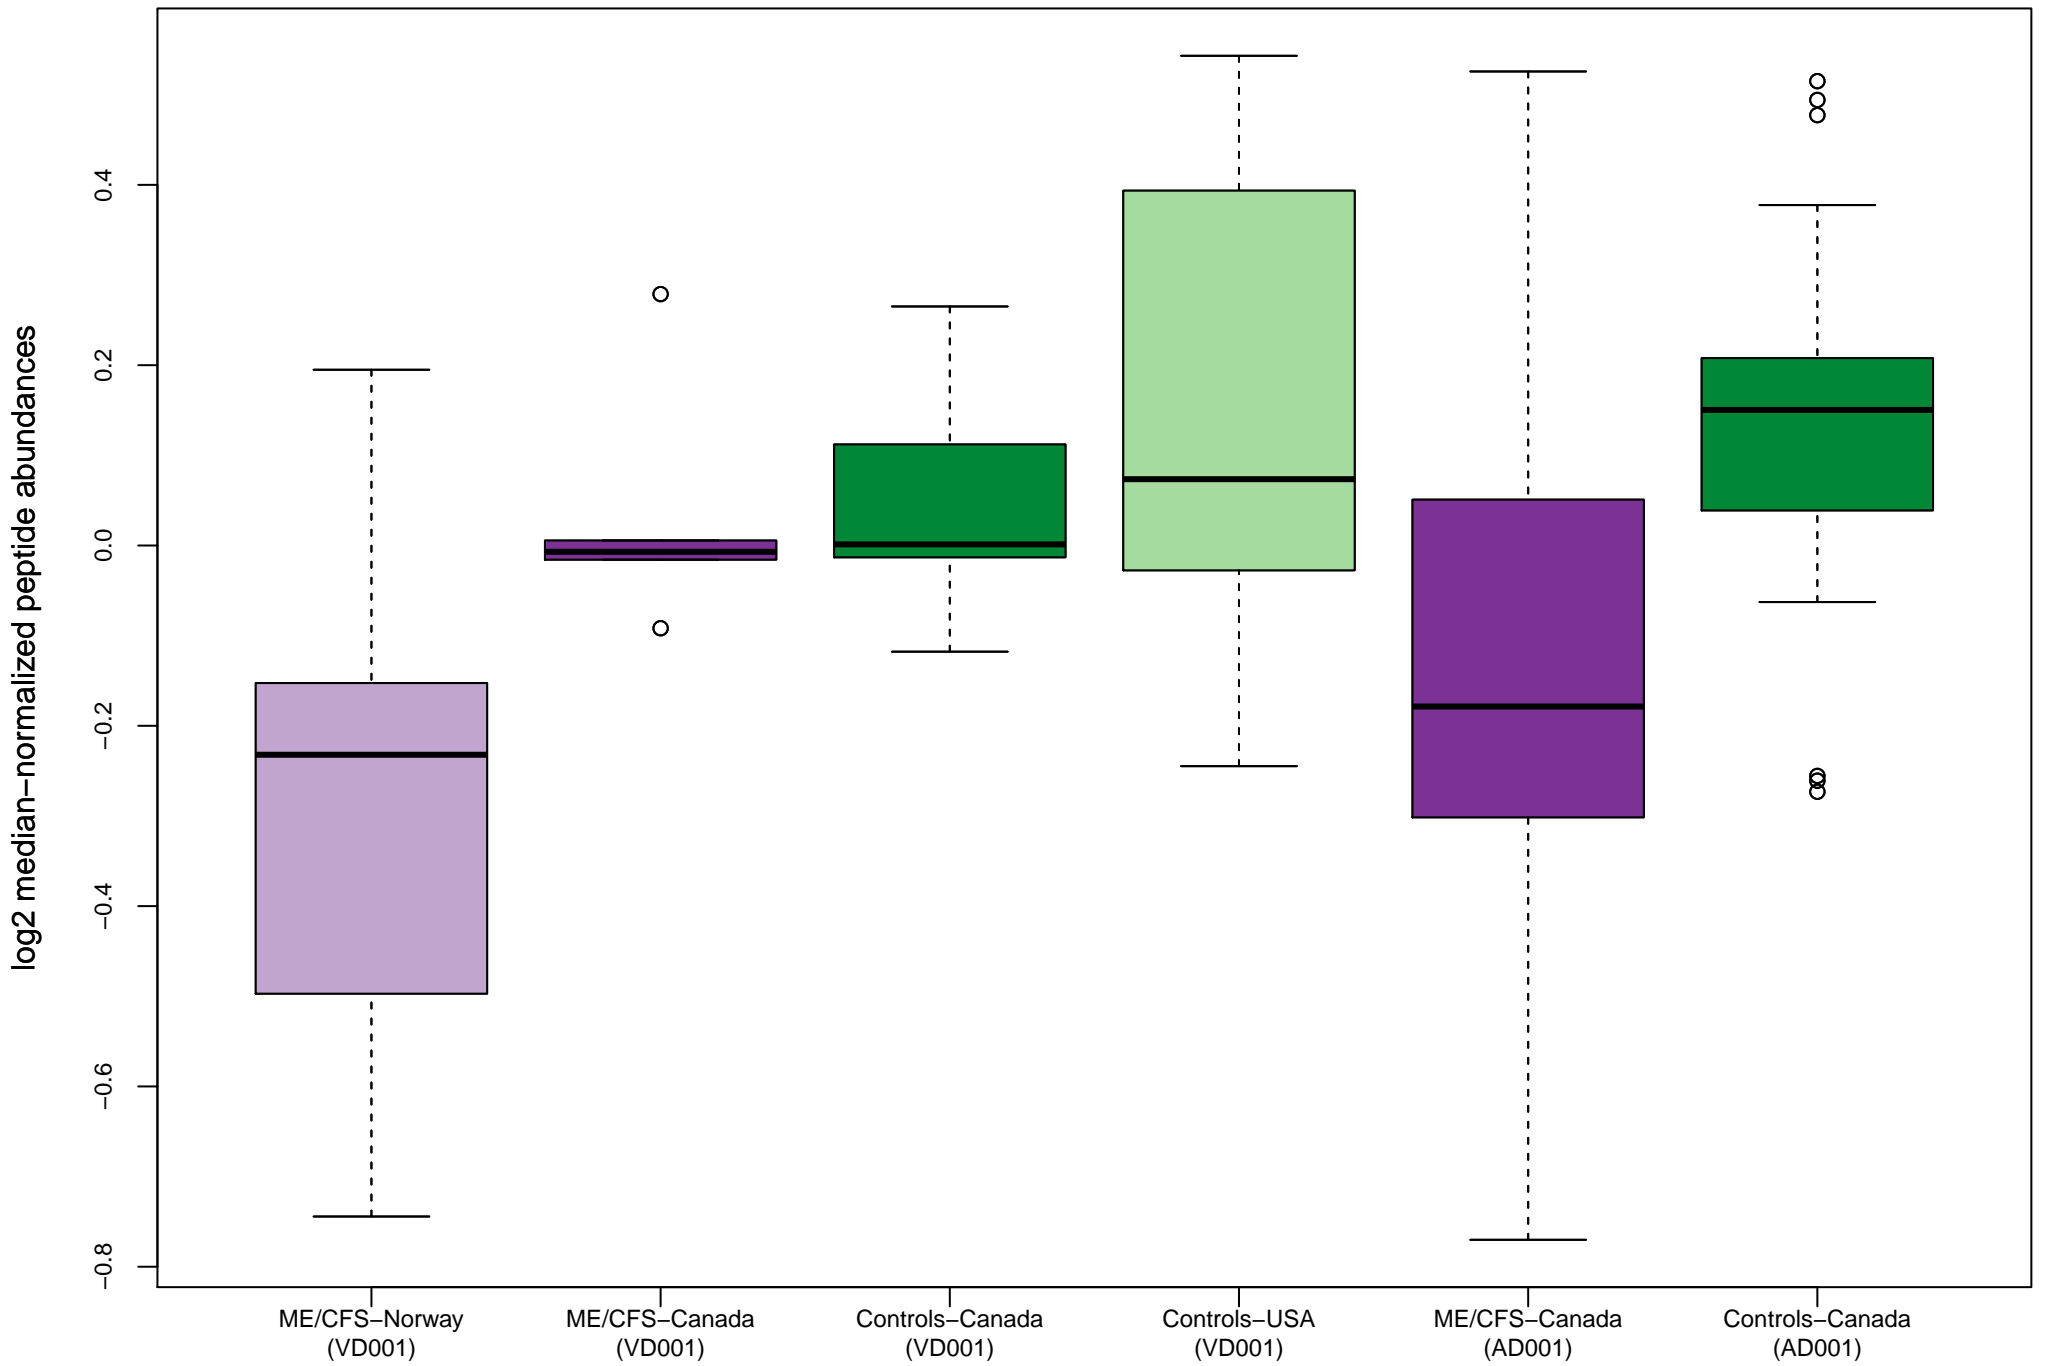

# PRVRWLLSGVSG

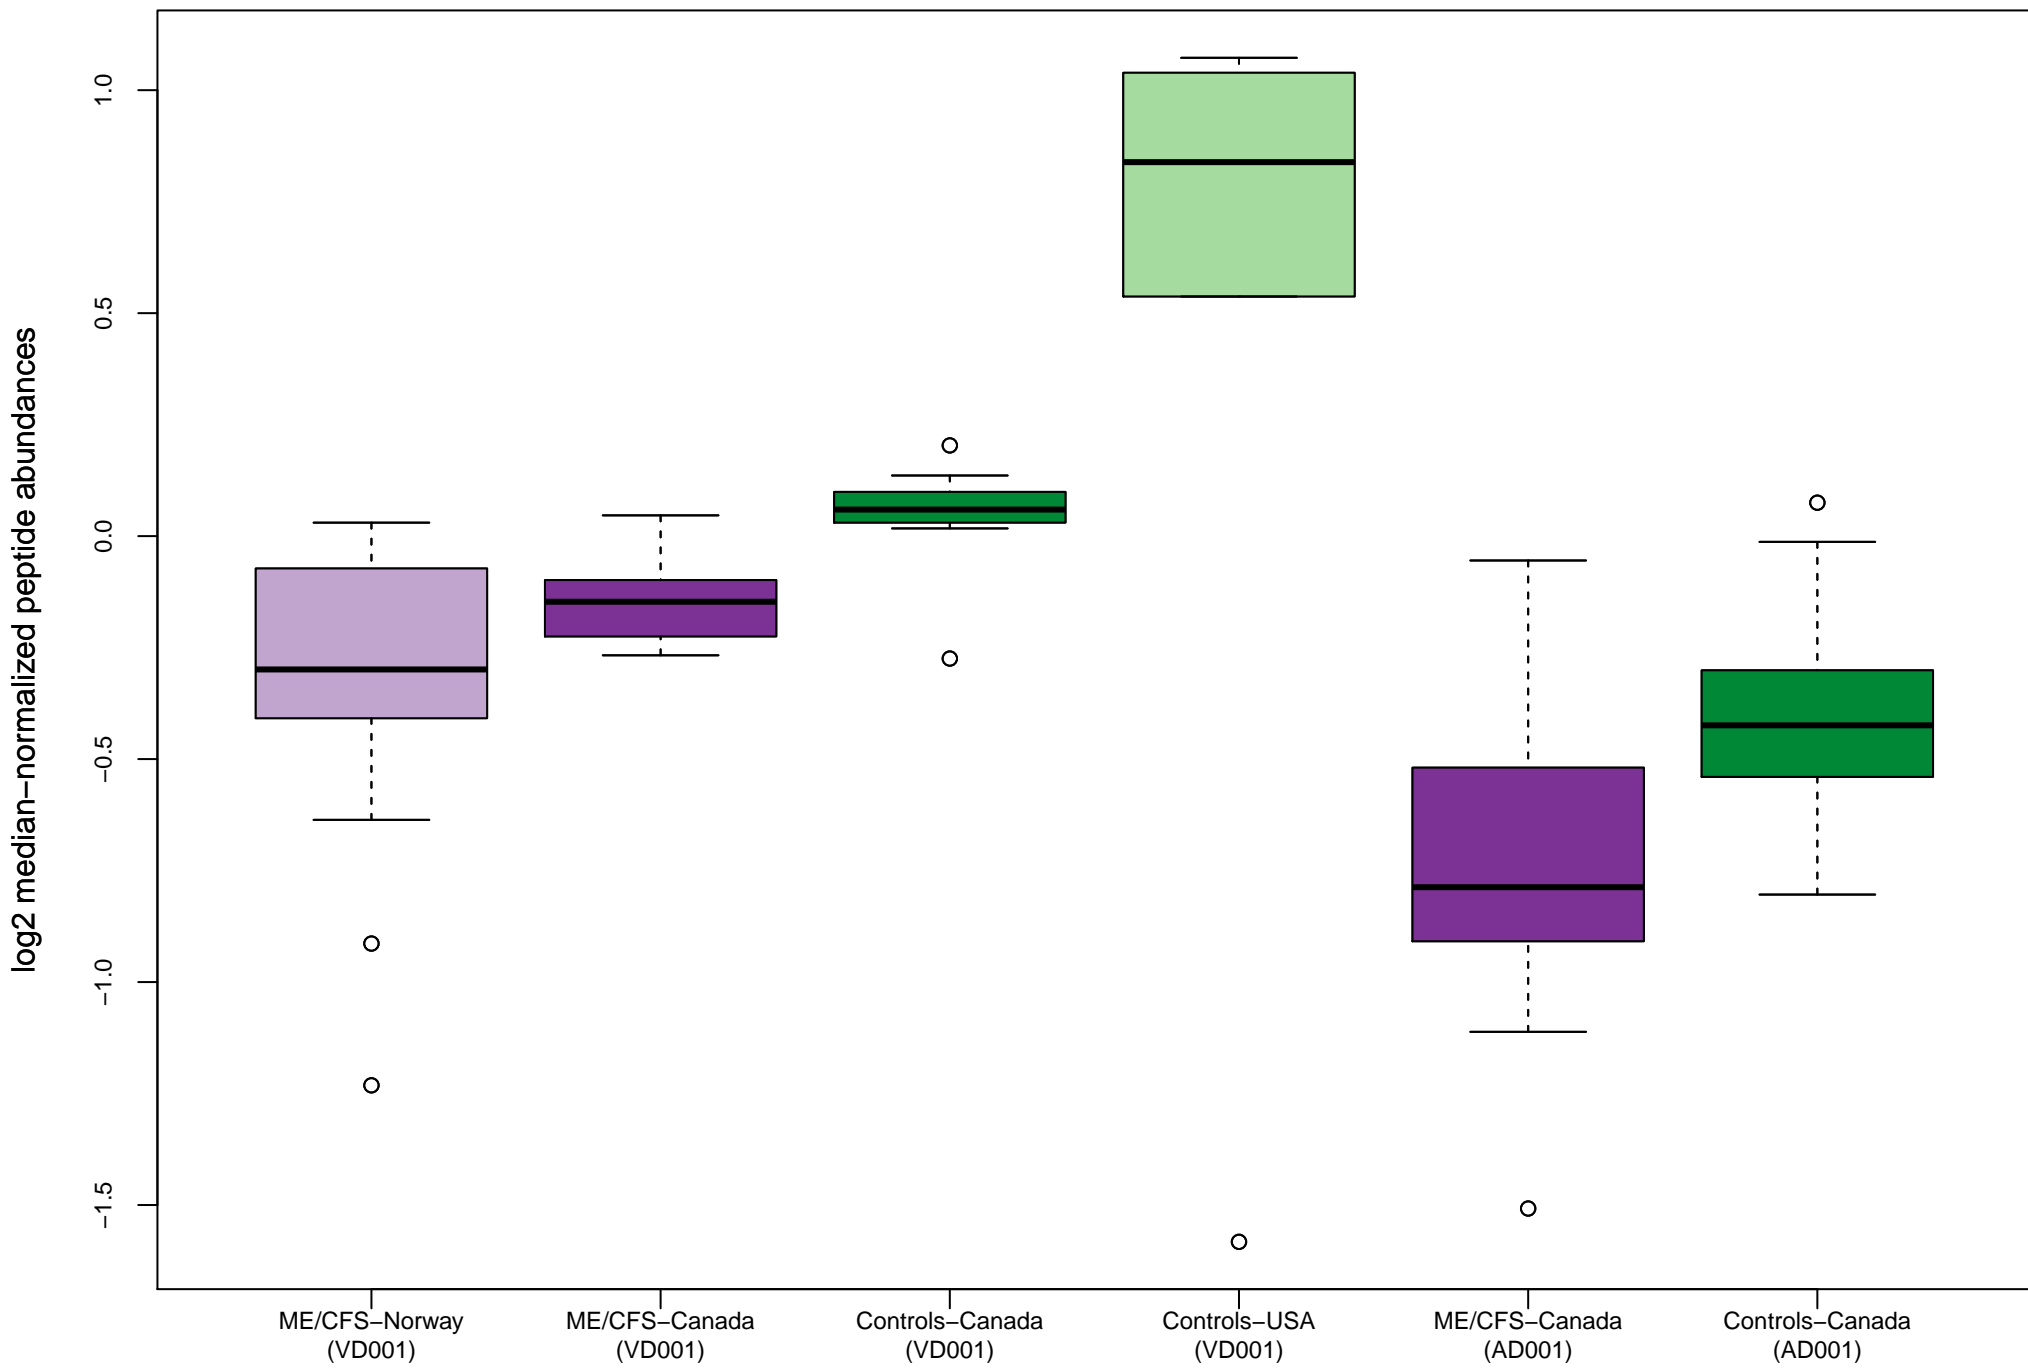



# PRWQFQWVGVLG

log2 median-normalized peptide abundances

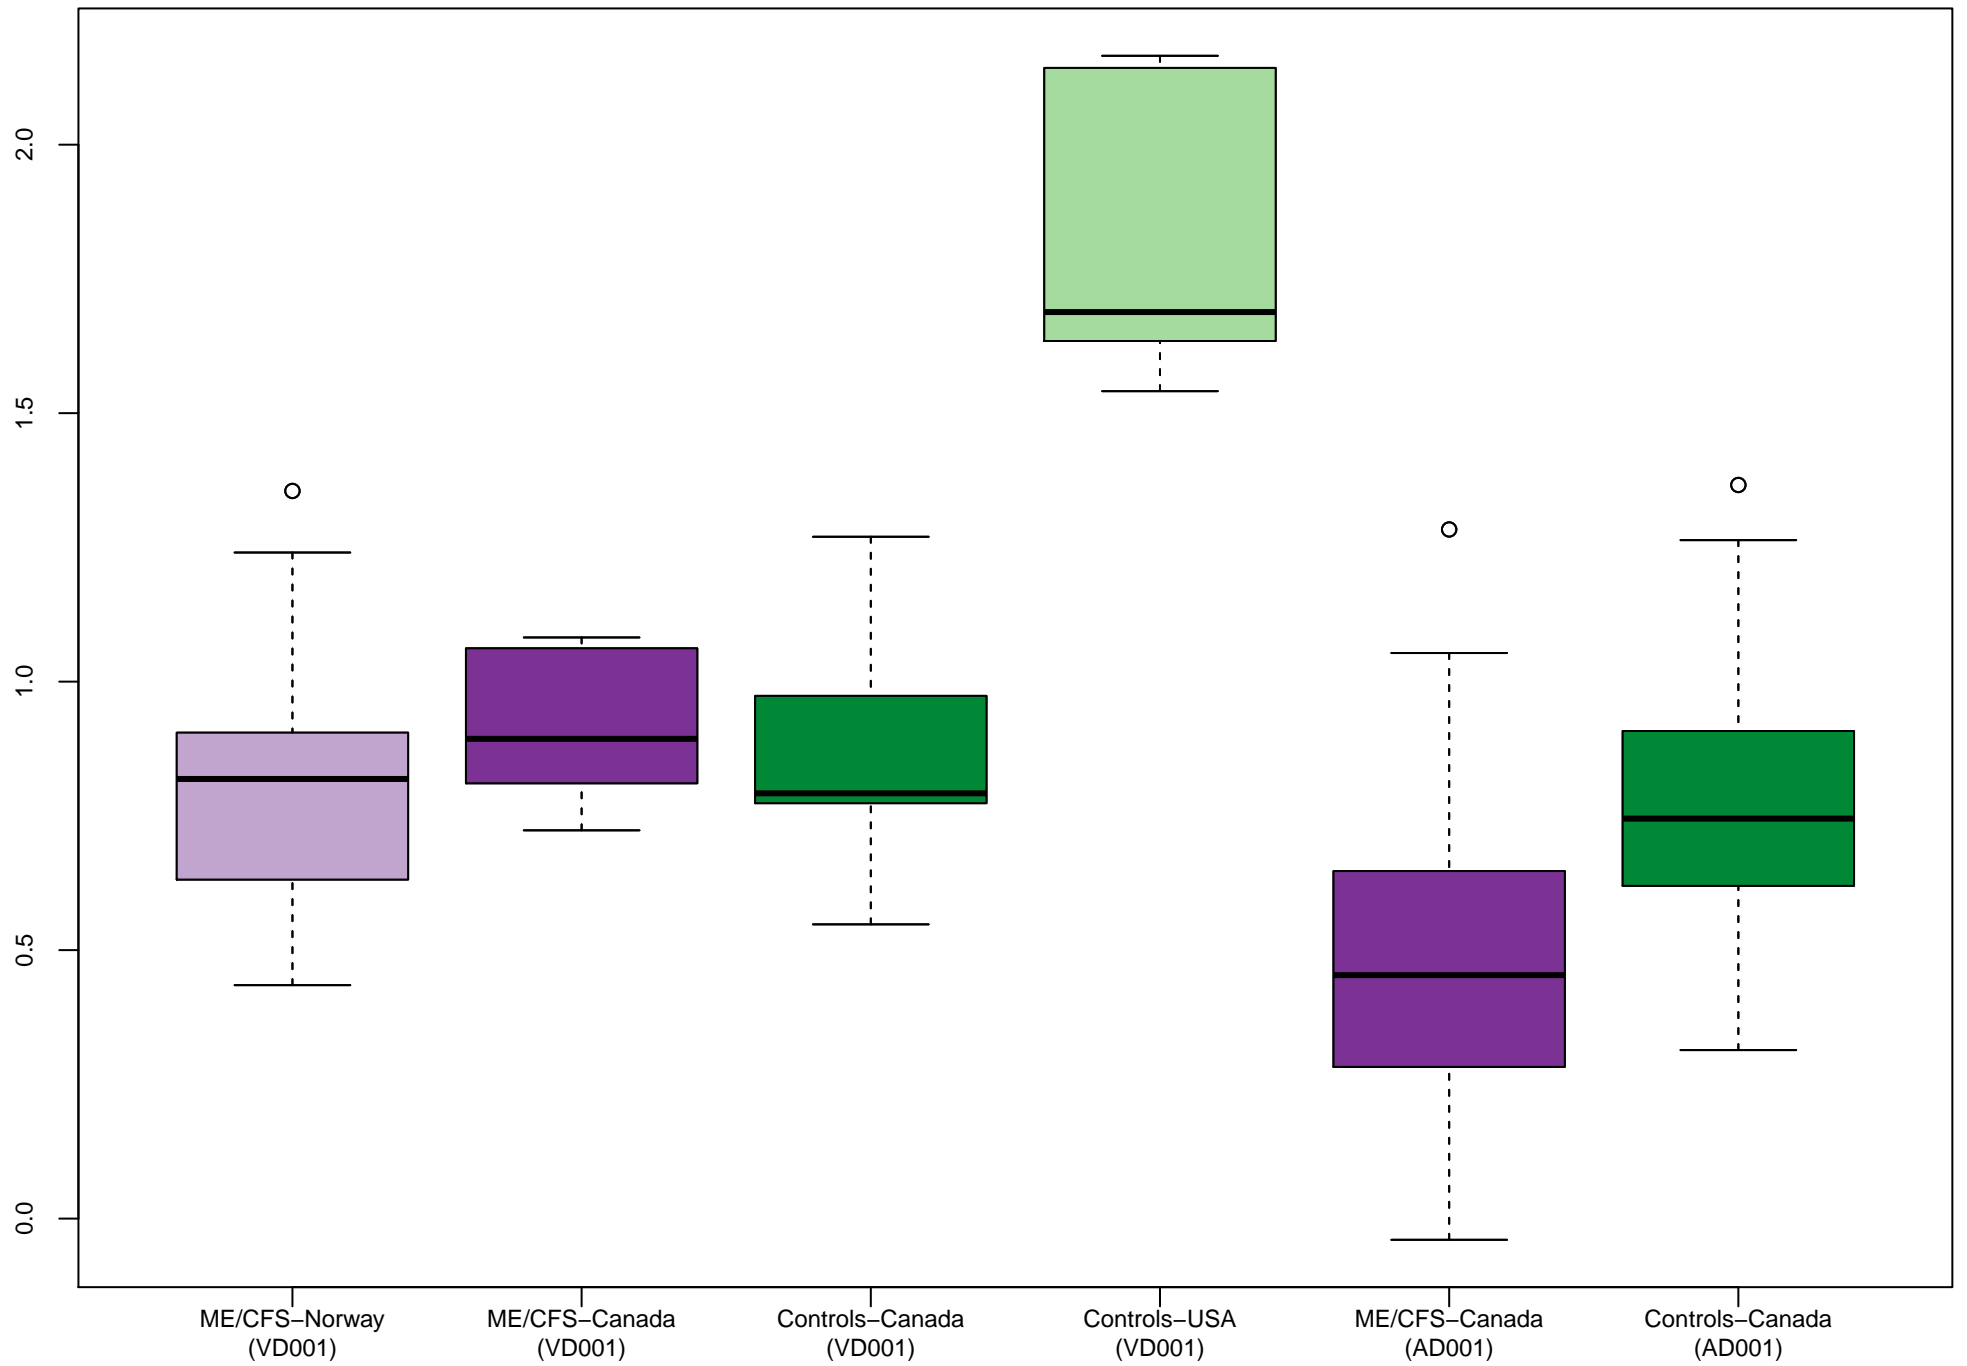

# PRWWPNLSVLSG

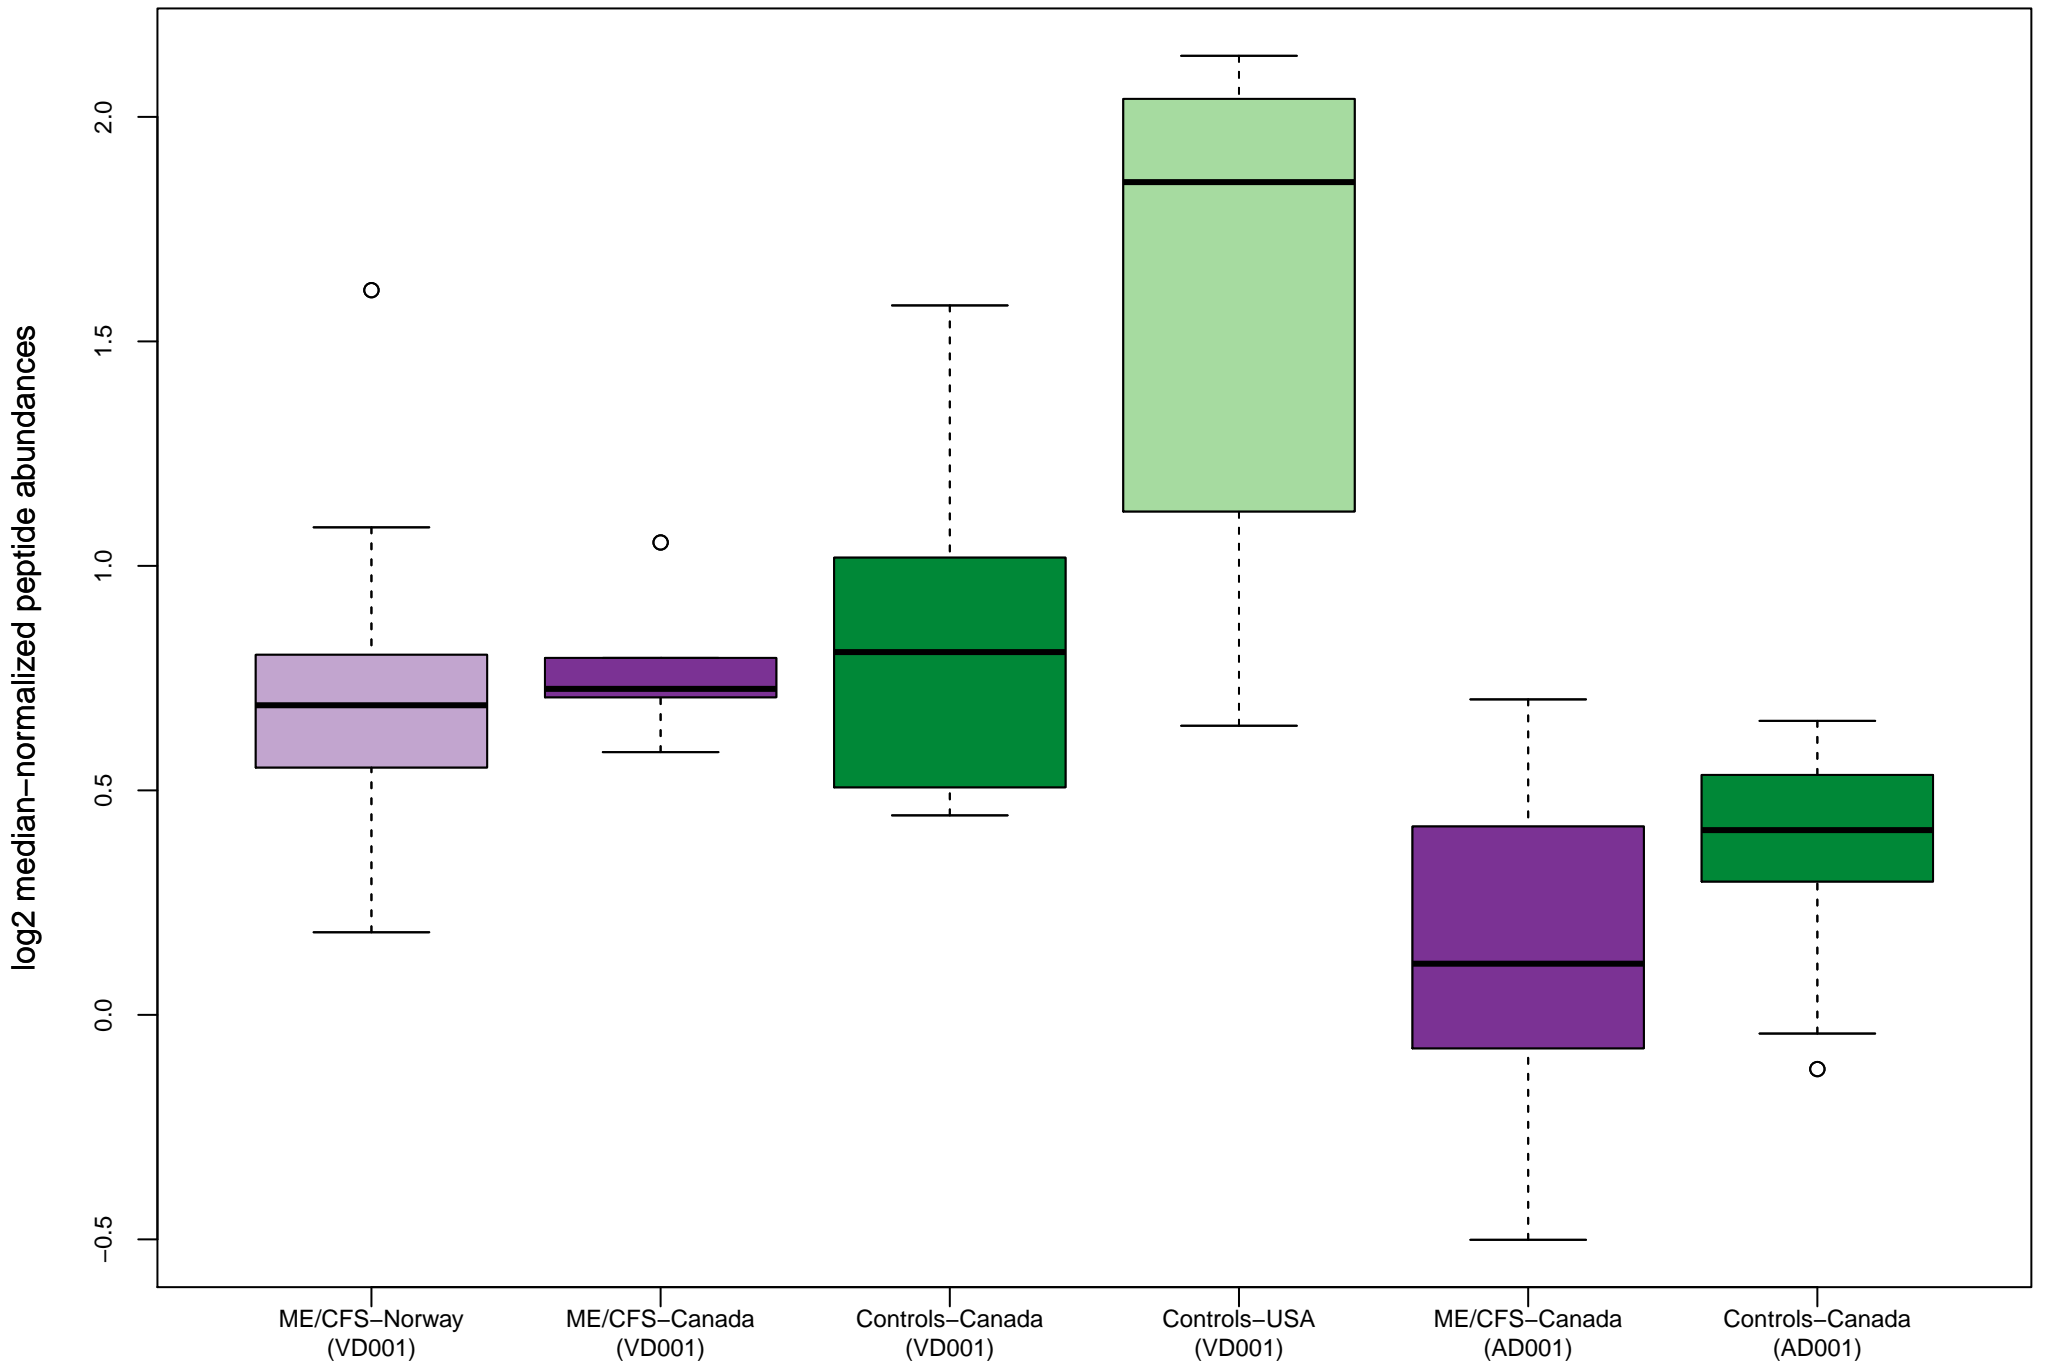

# PSPRFYWNVGVG

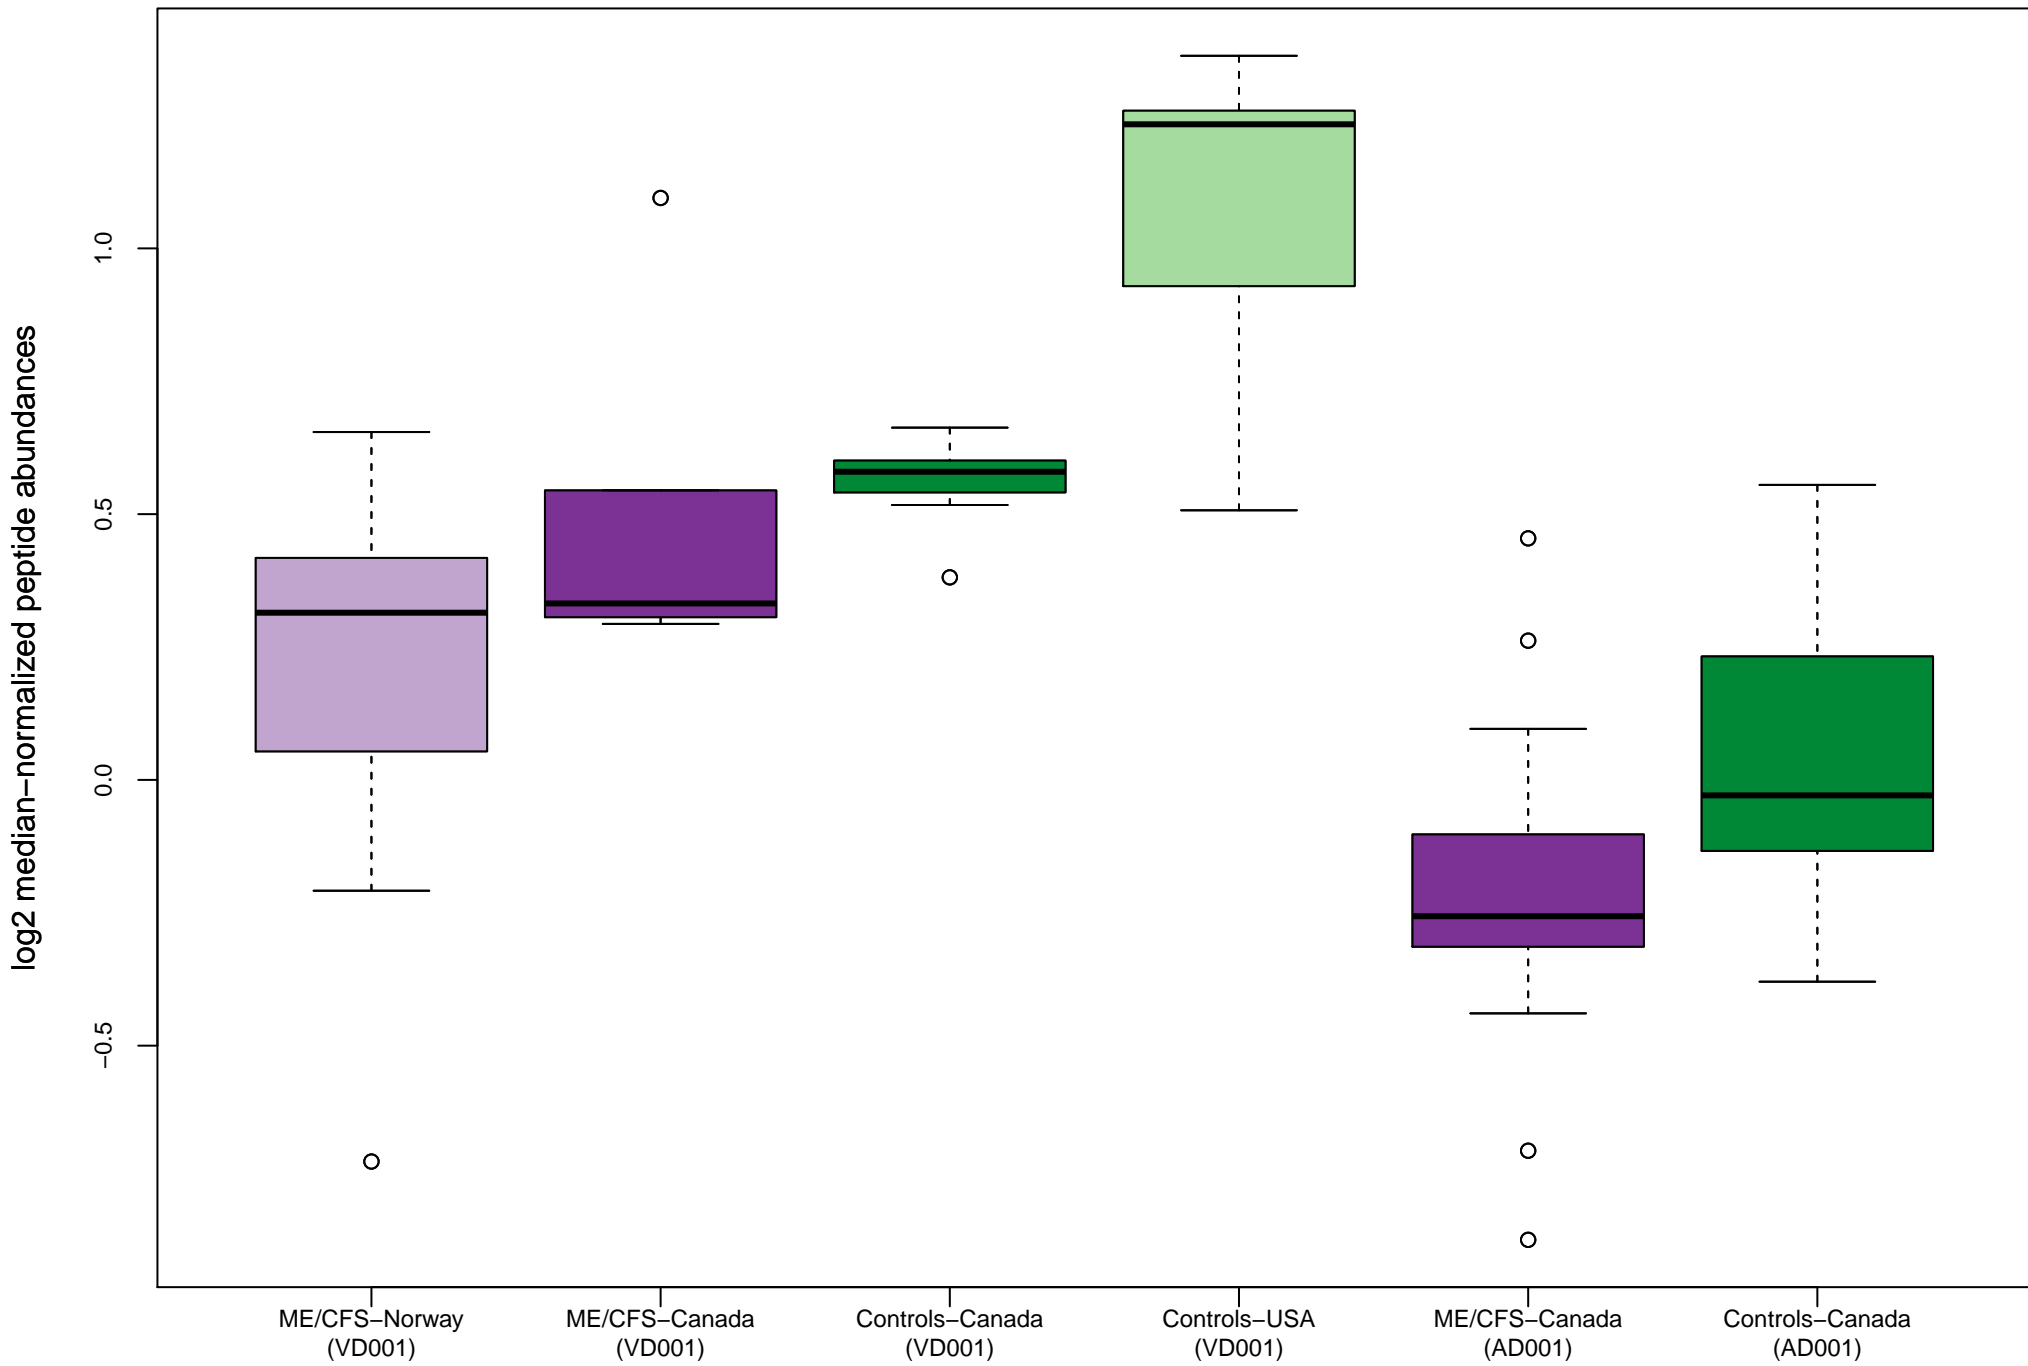

# PVNLGWGFRALL

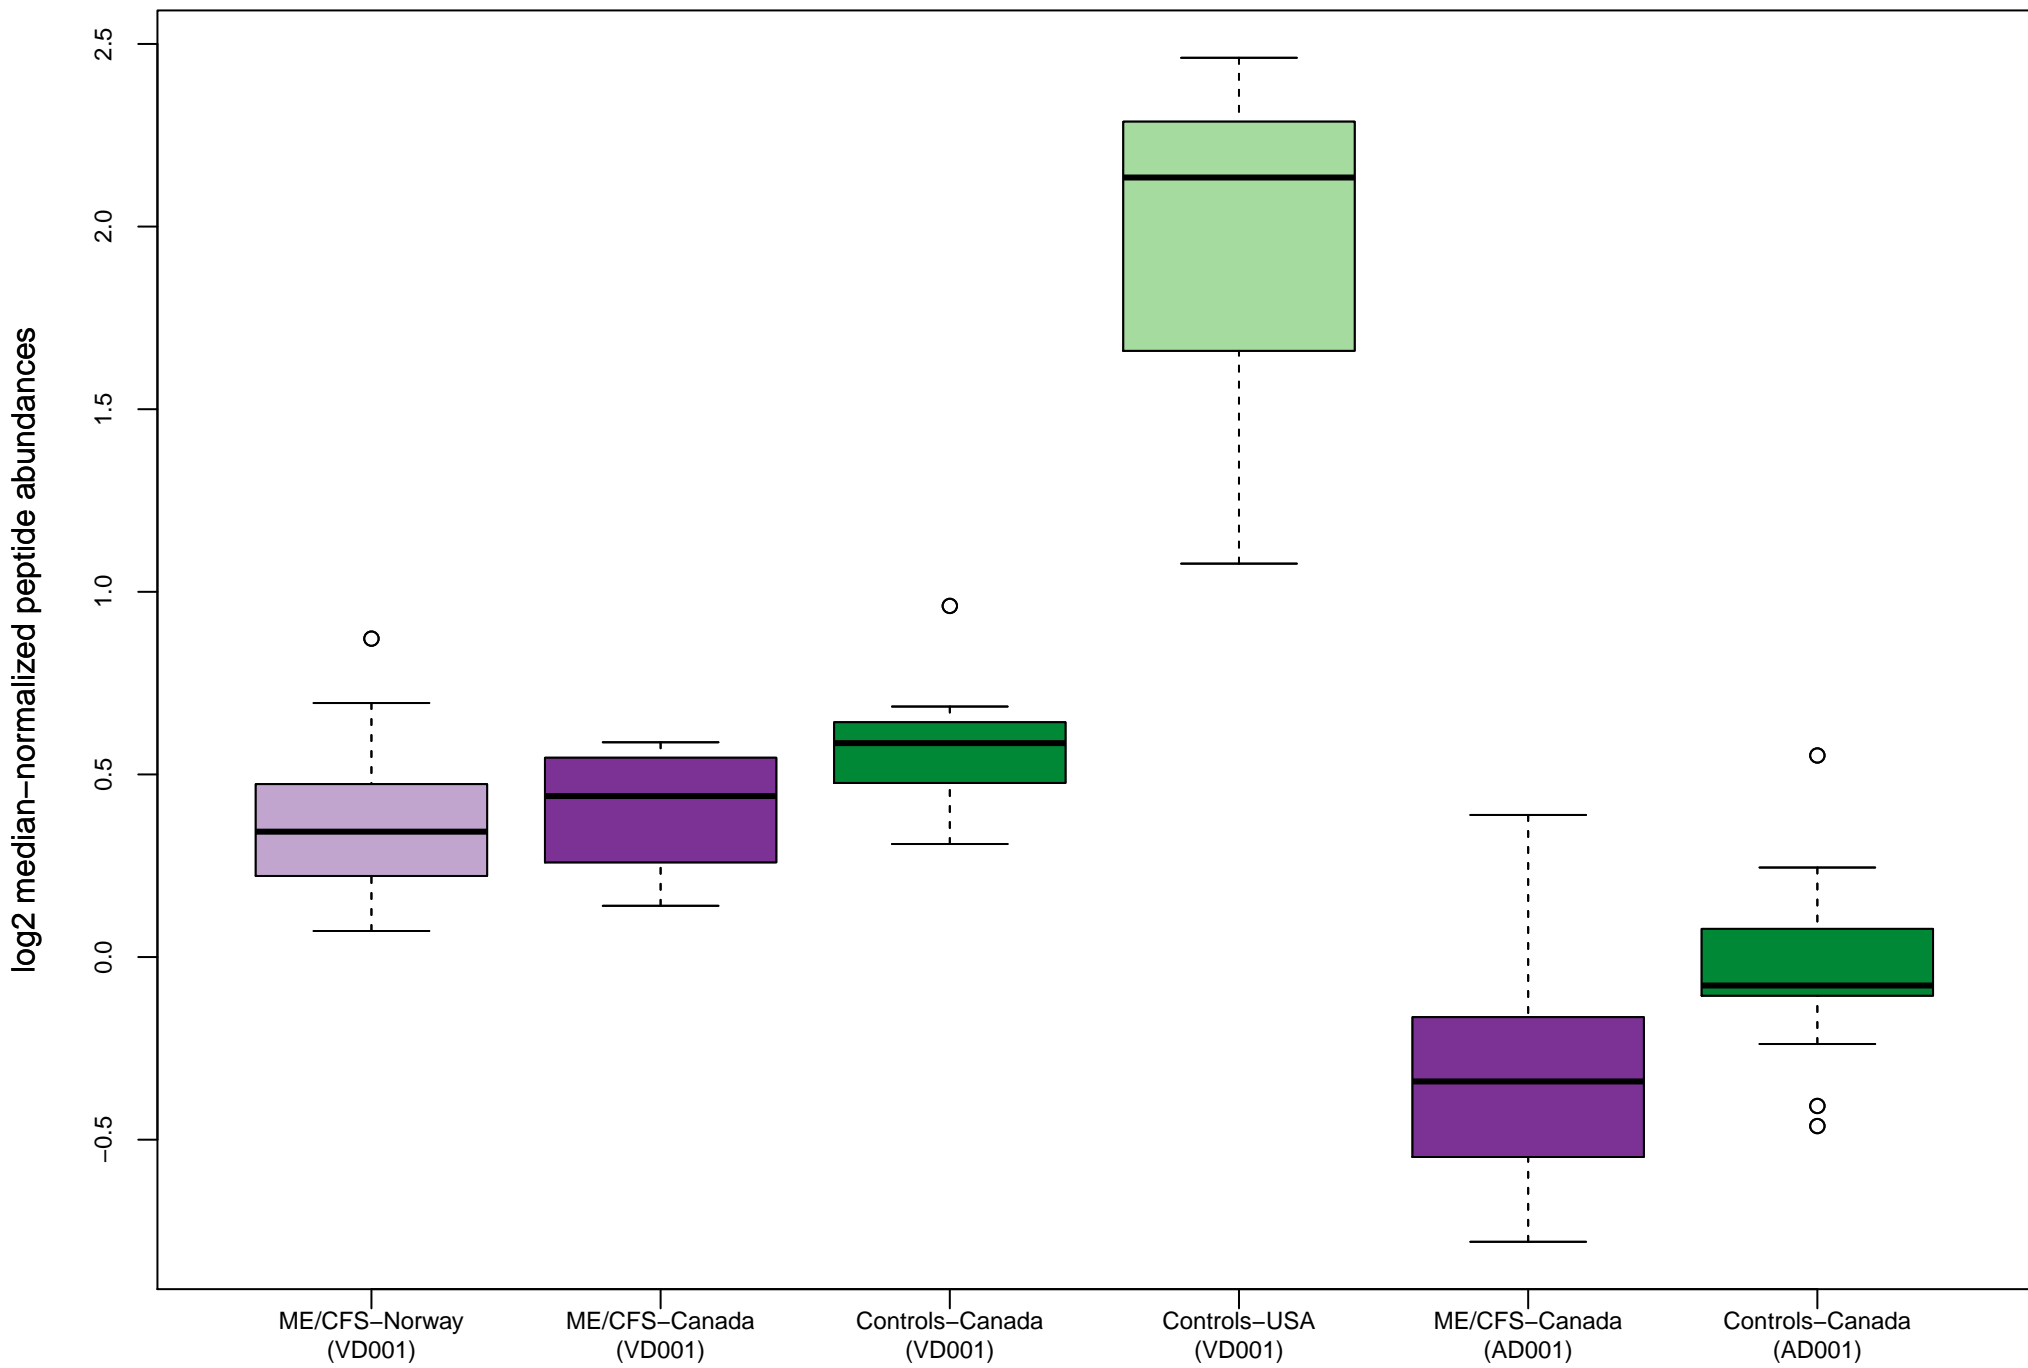

# PVYKRVFRVLS

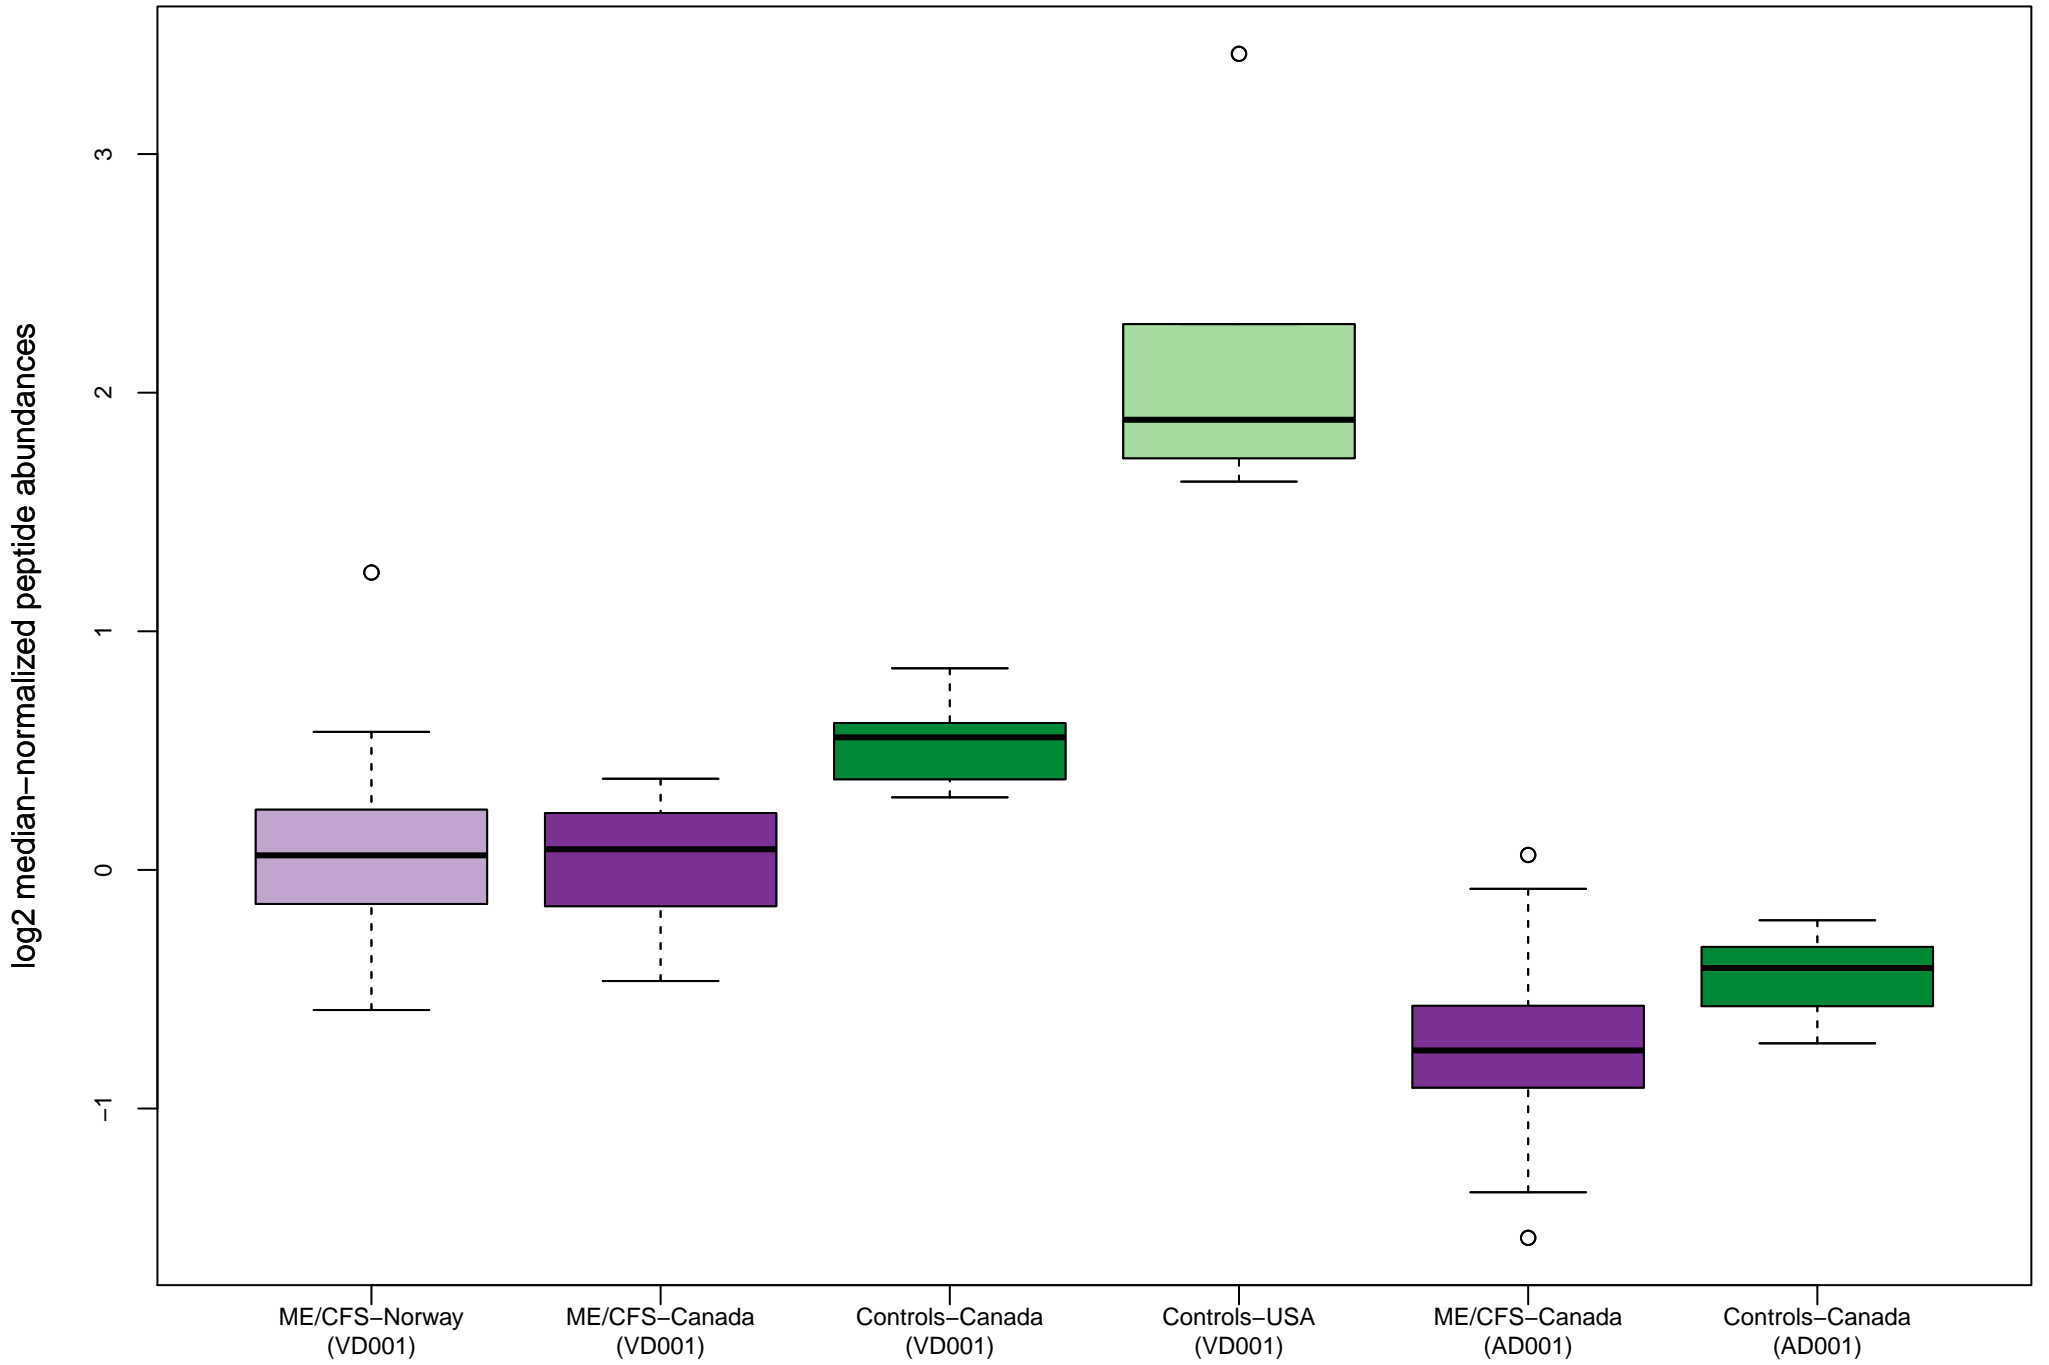

# PWFLRWRPWLLS

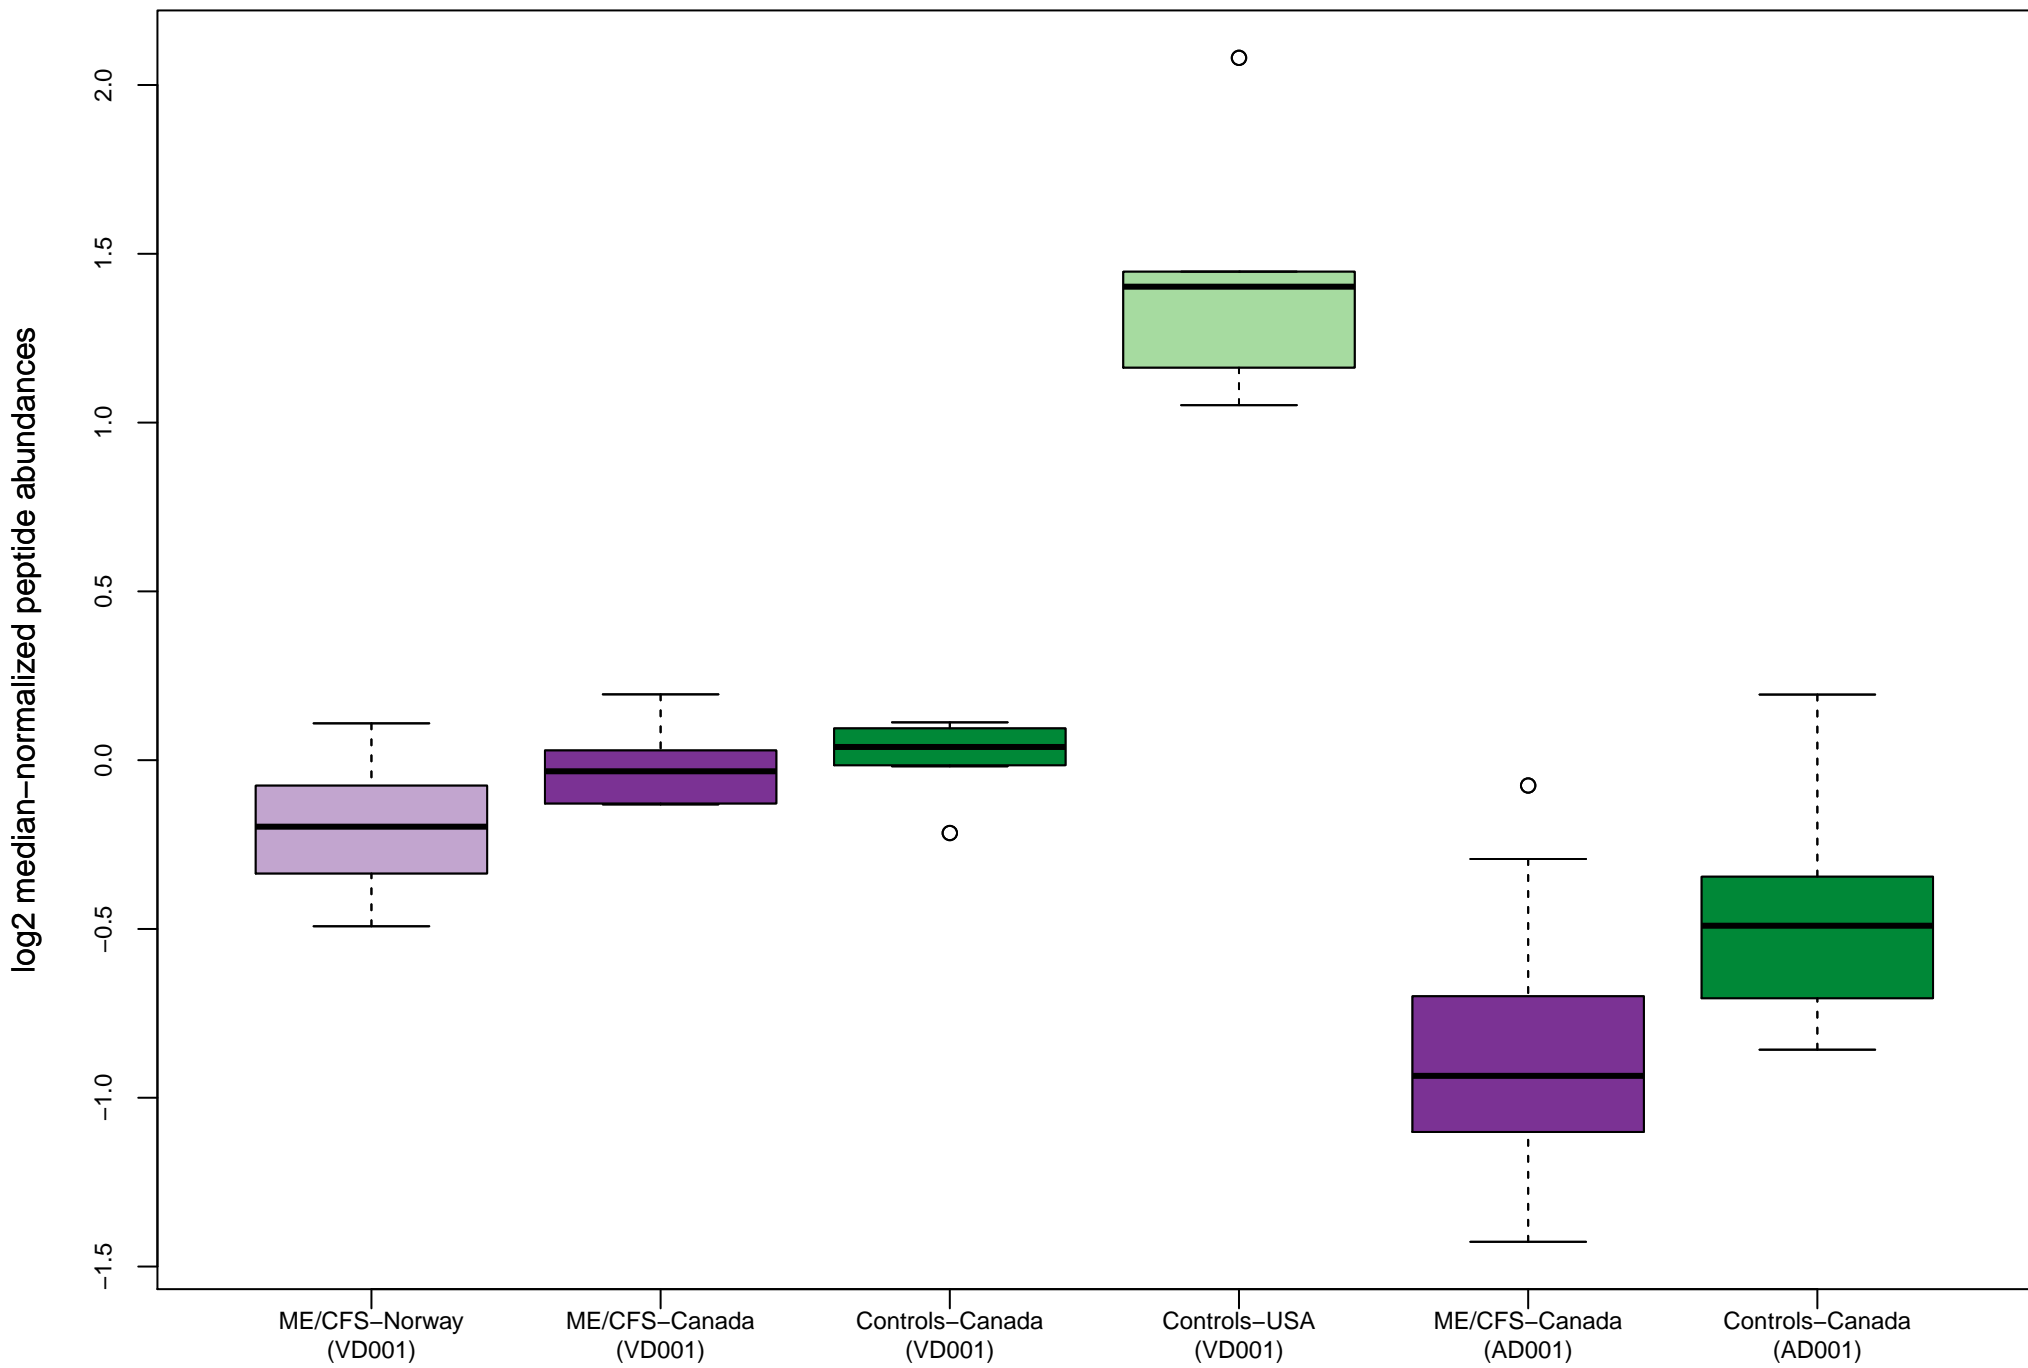

PWGFLSFQRYVL

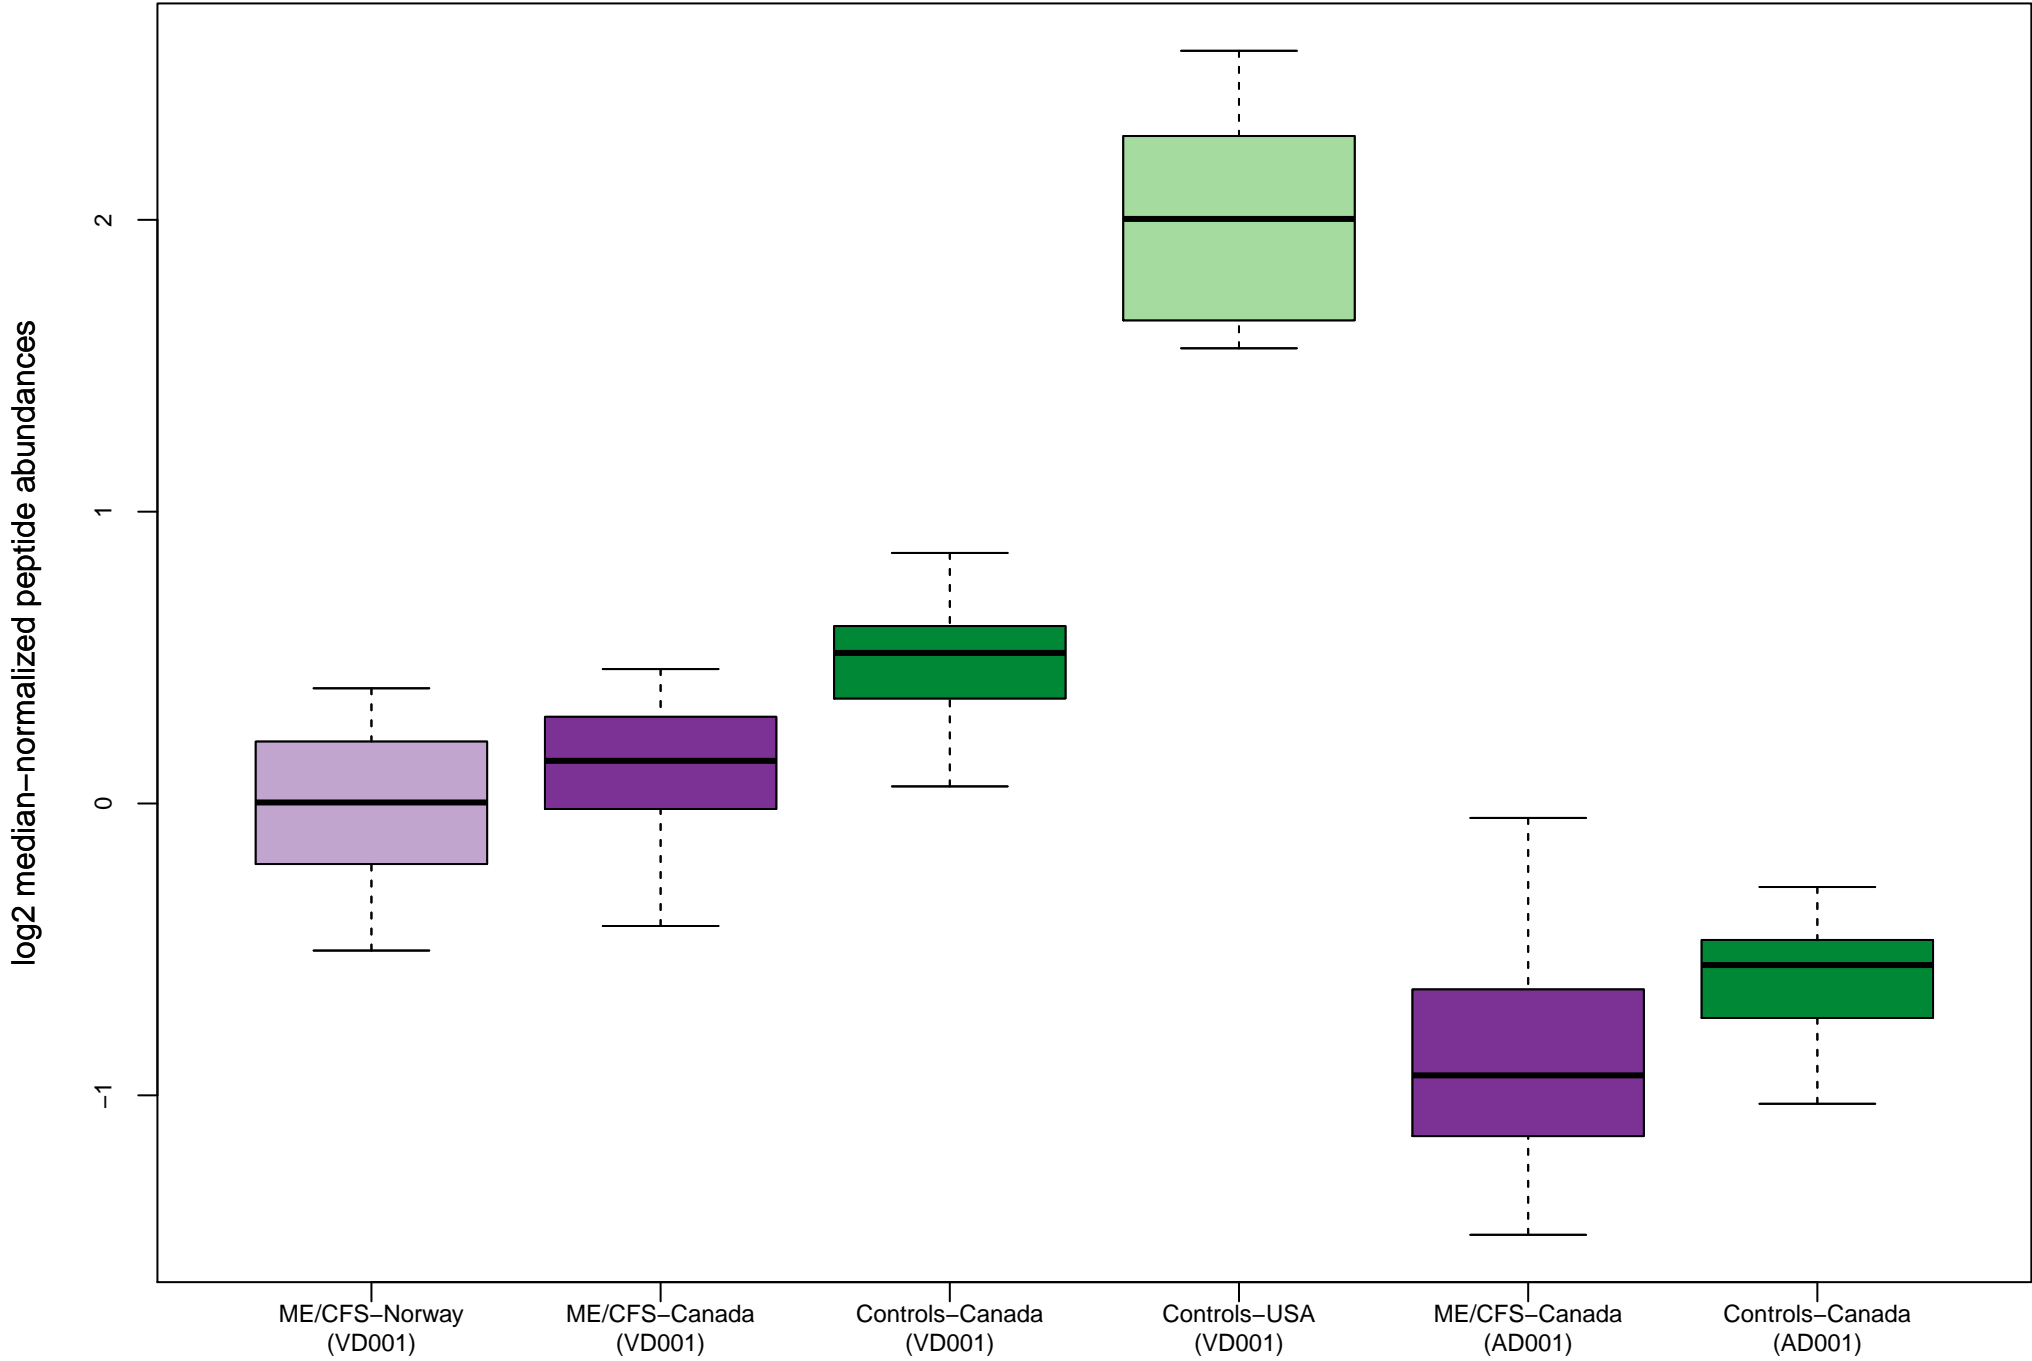

# PWYRSFHLSGLG

log2 median-normalized peptide abundances

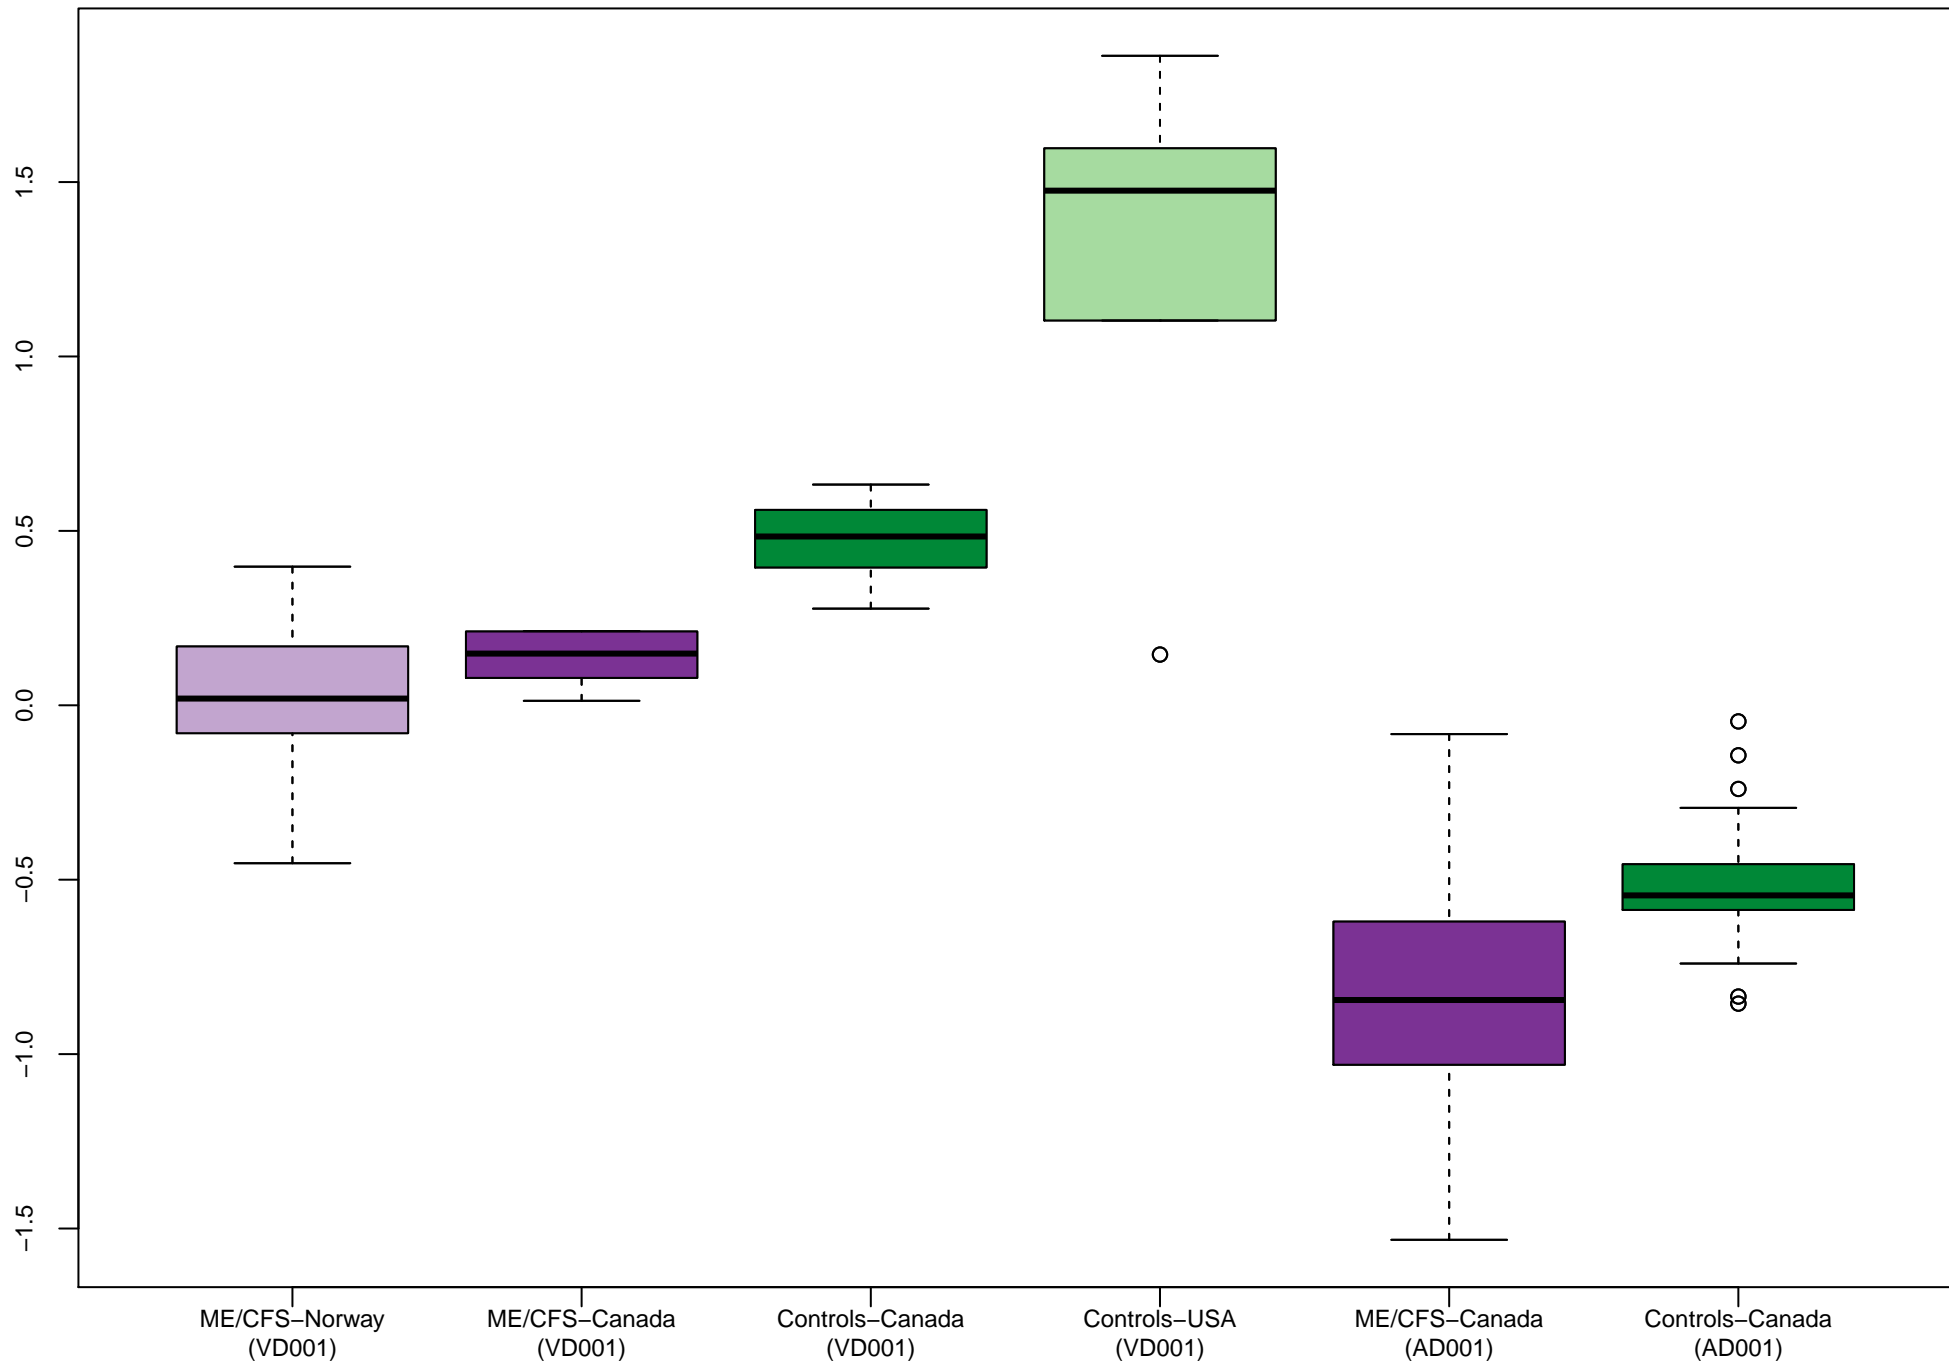



# PYAVVLGRPLSS

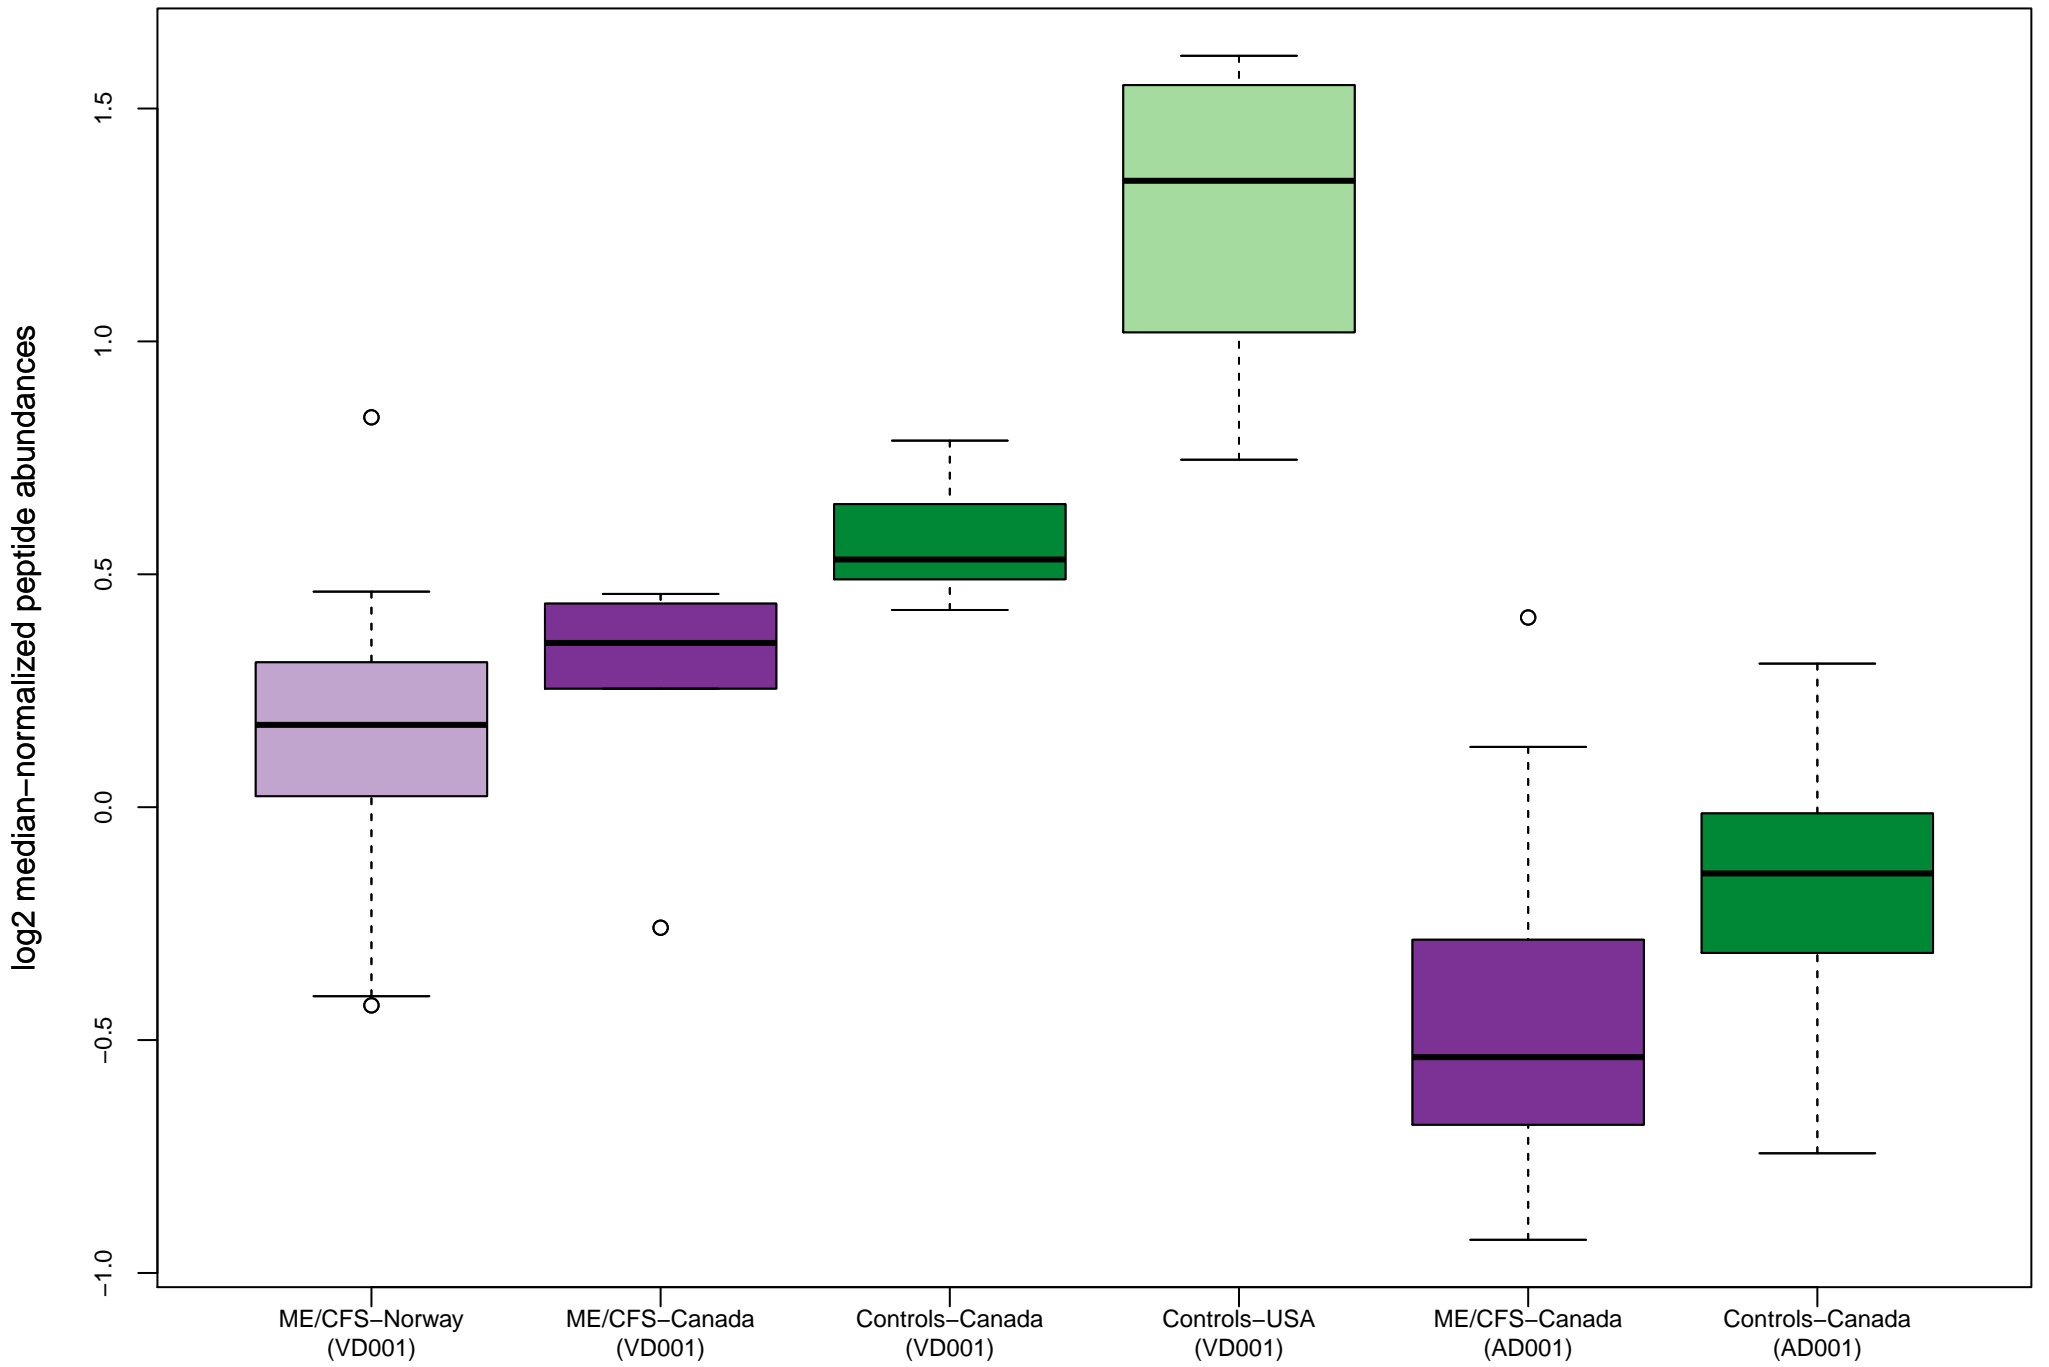

# PYGGRVLHLGSG

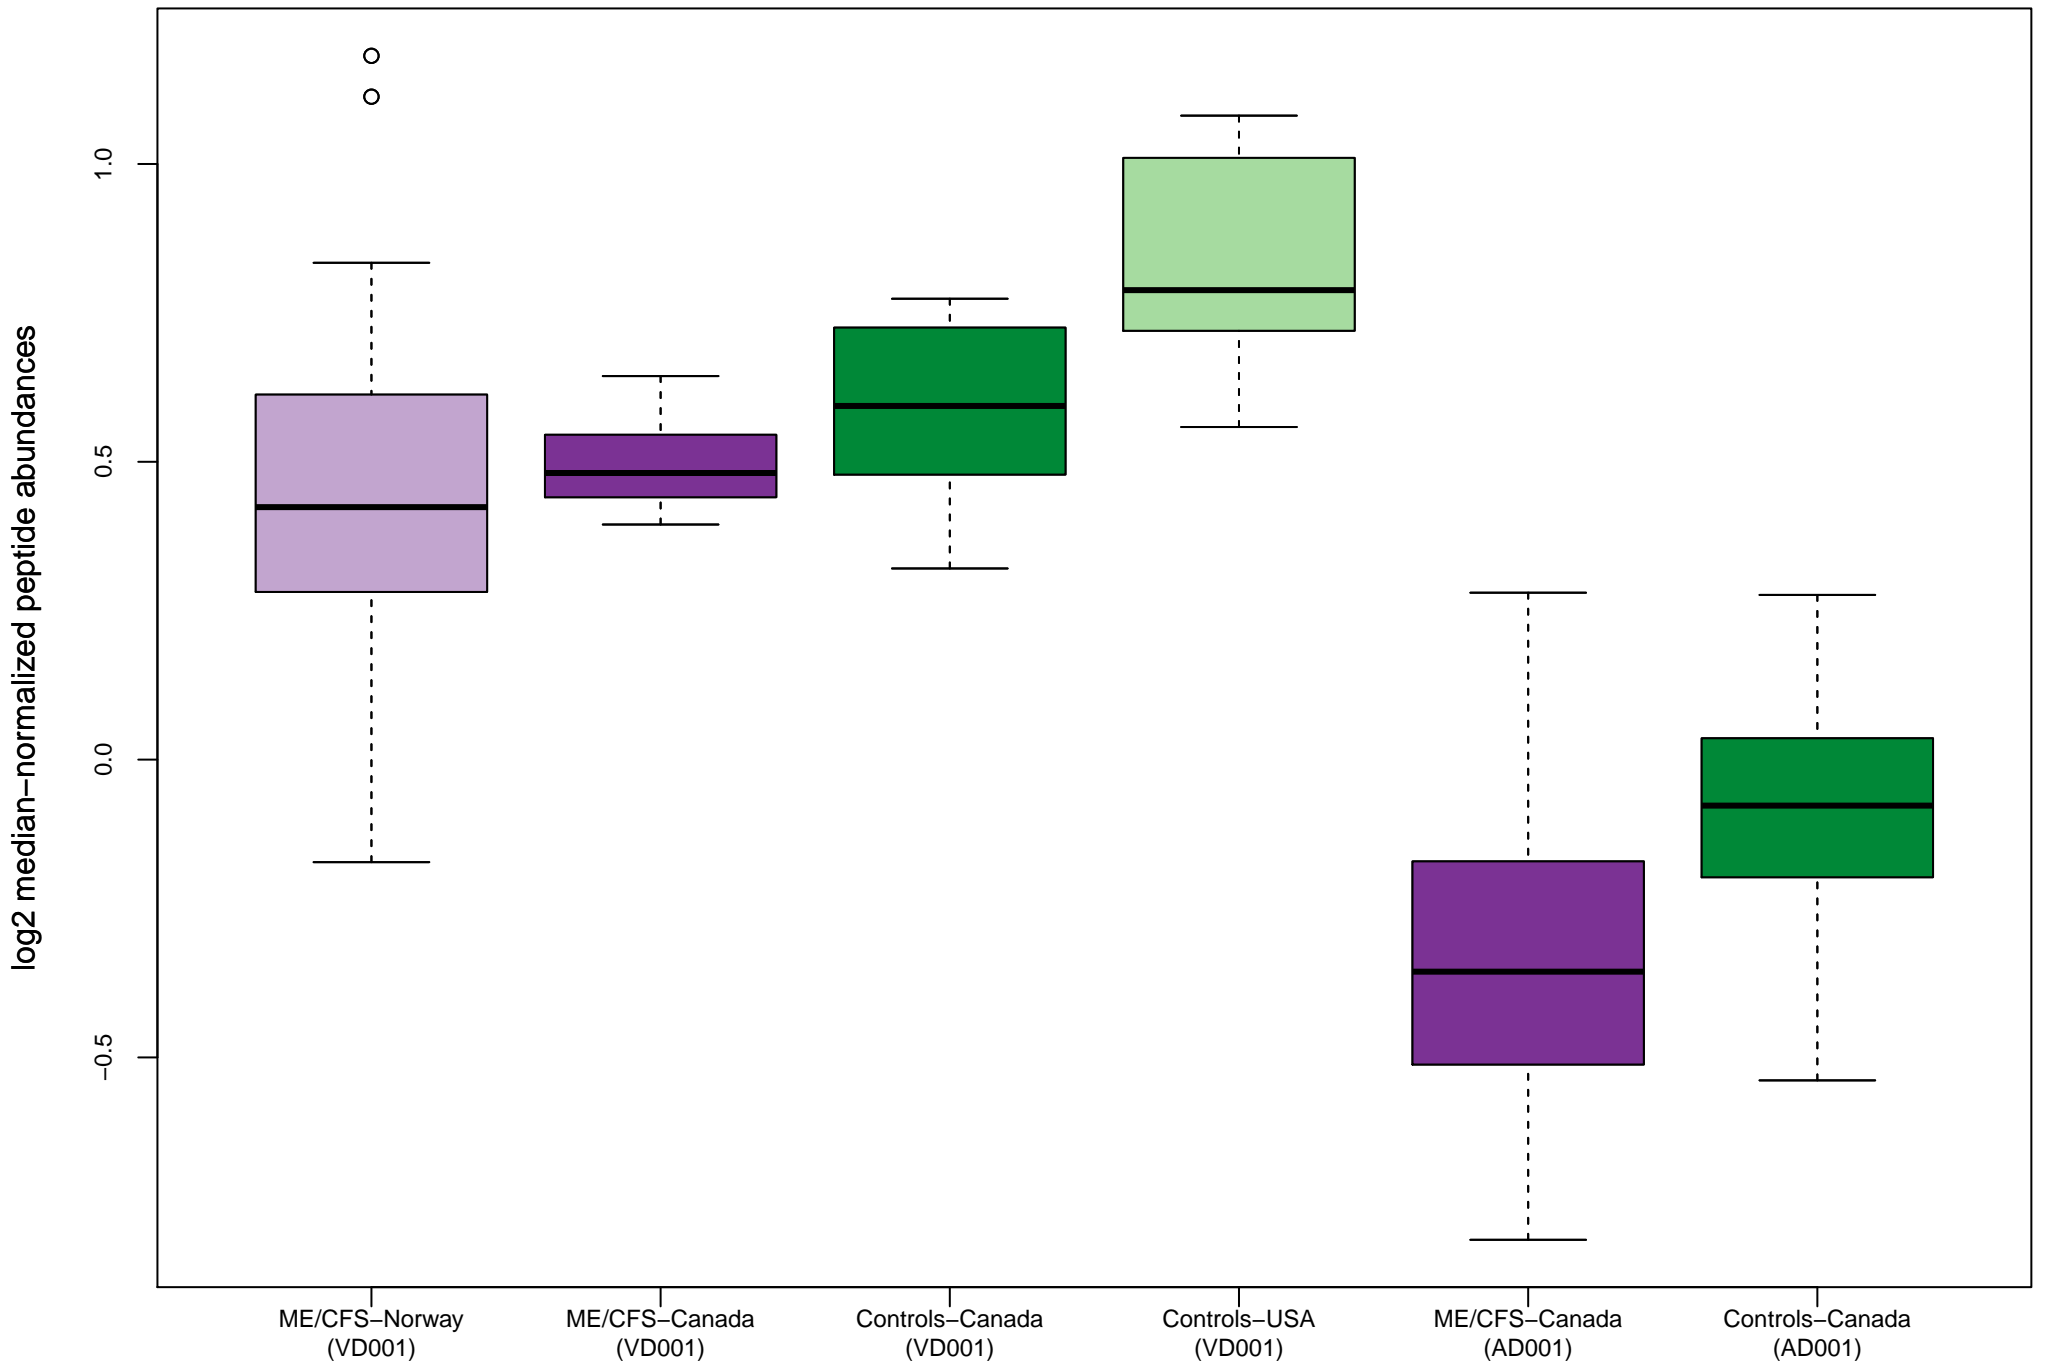

# PYLFVRNLRPAL

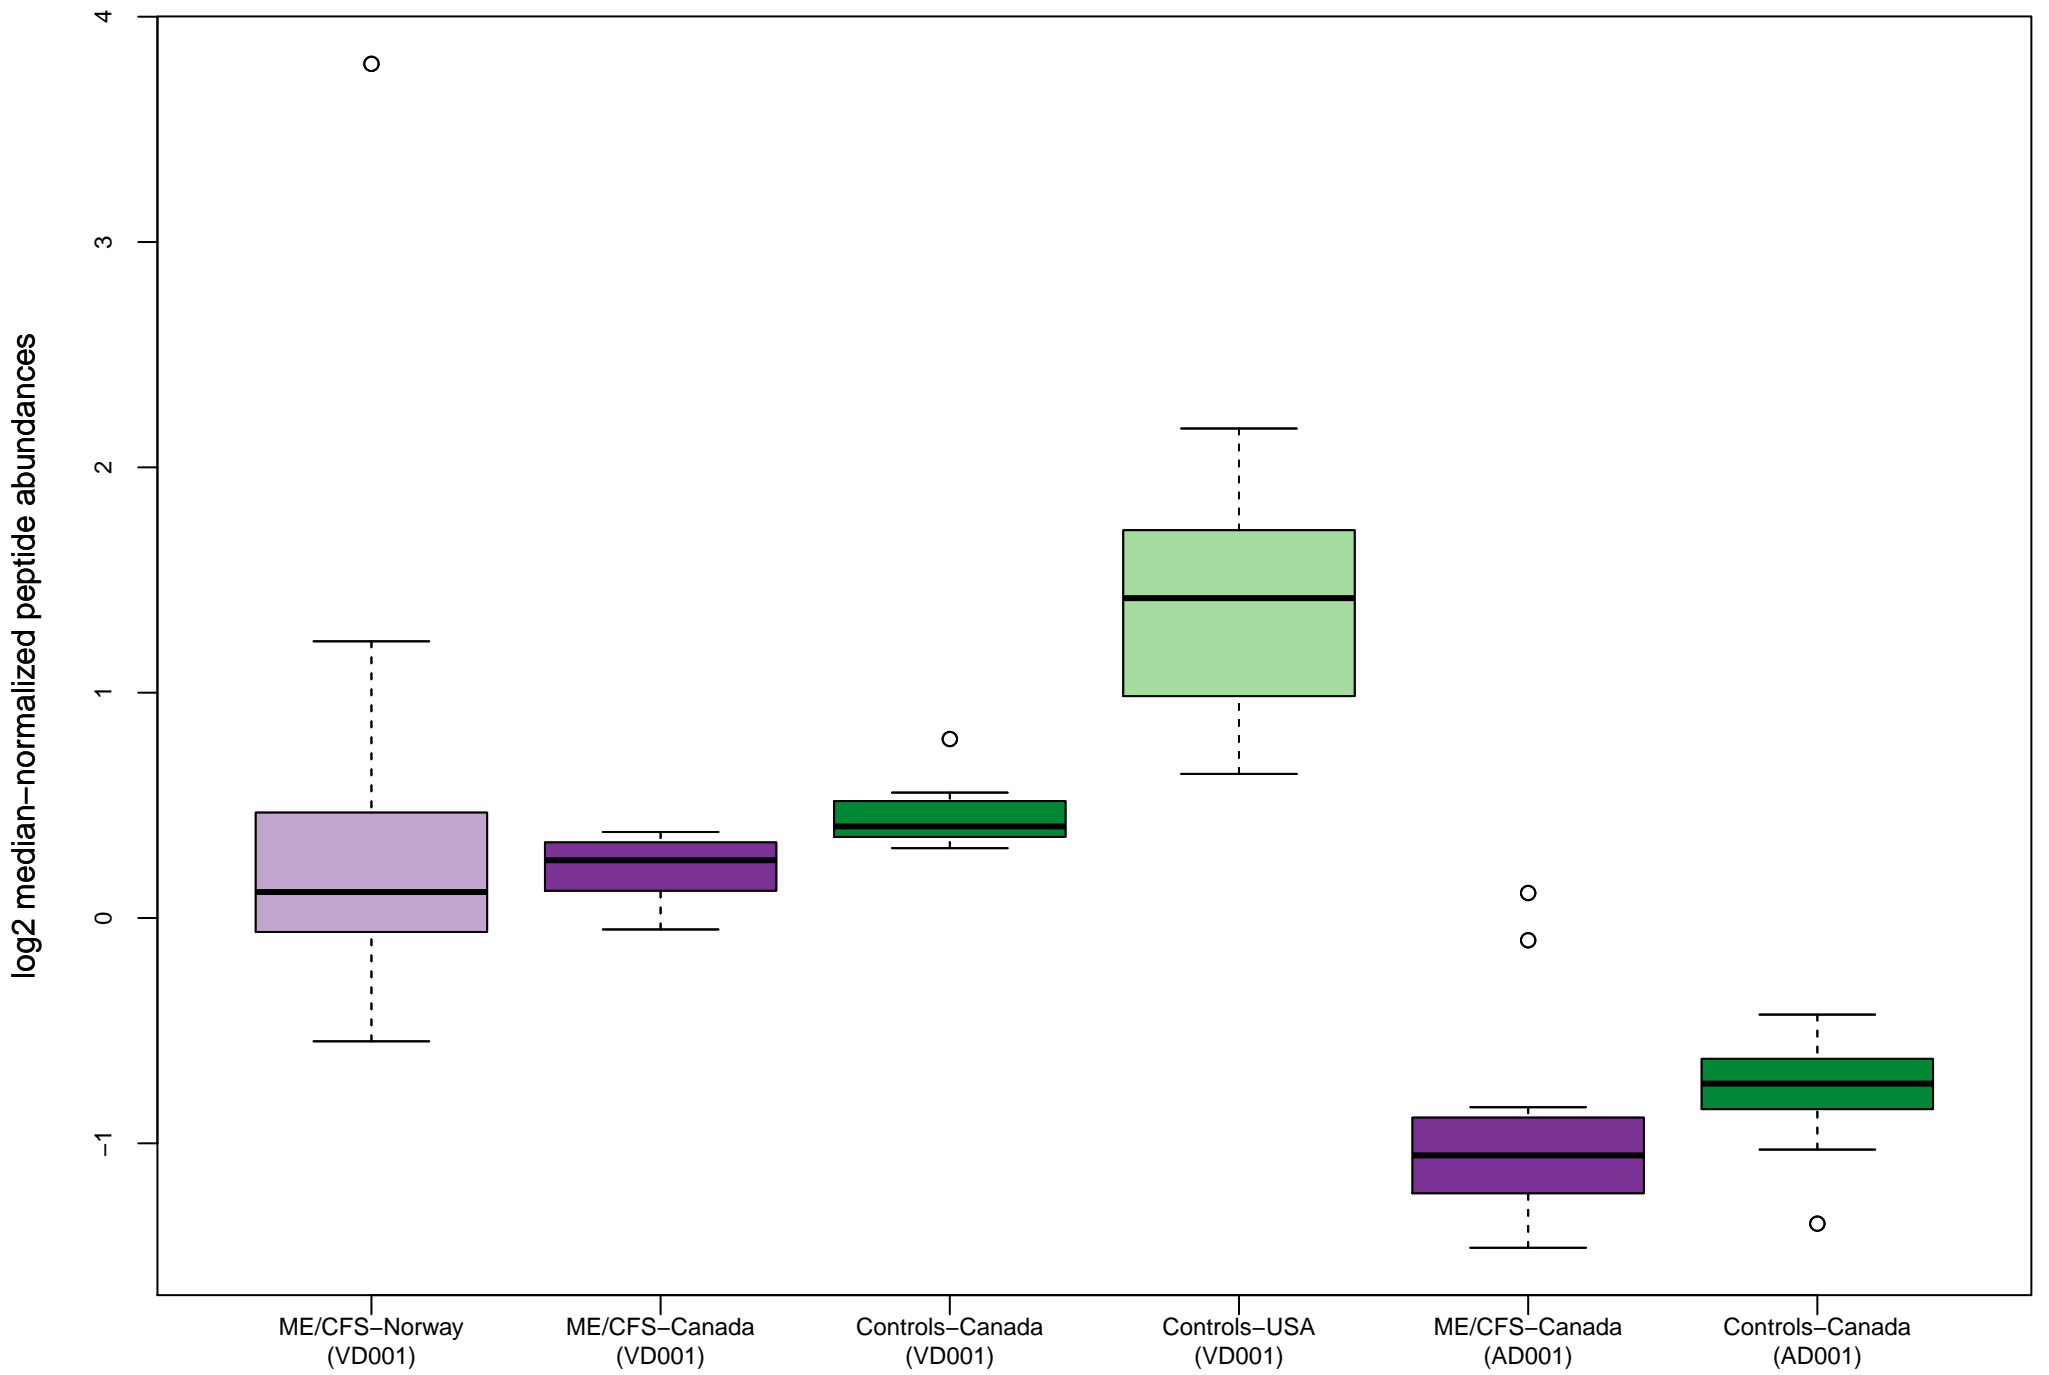

# PYLNFYKFRKVA

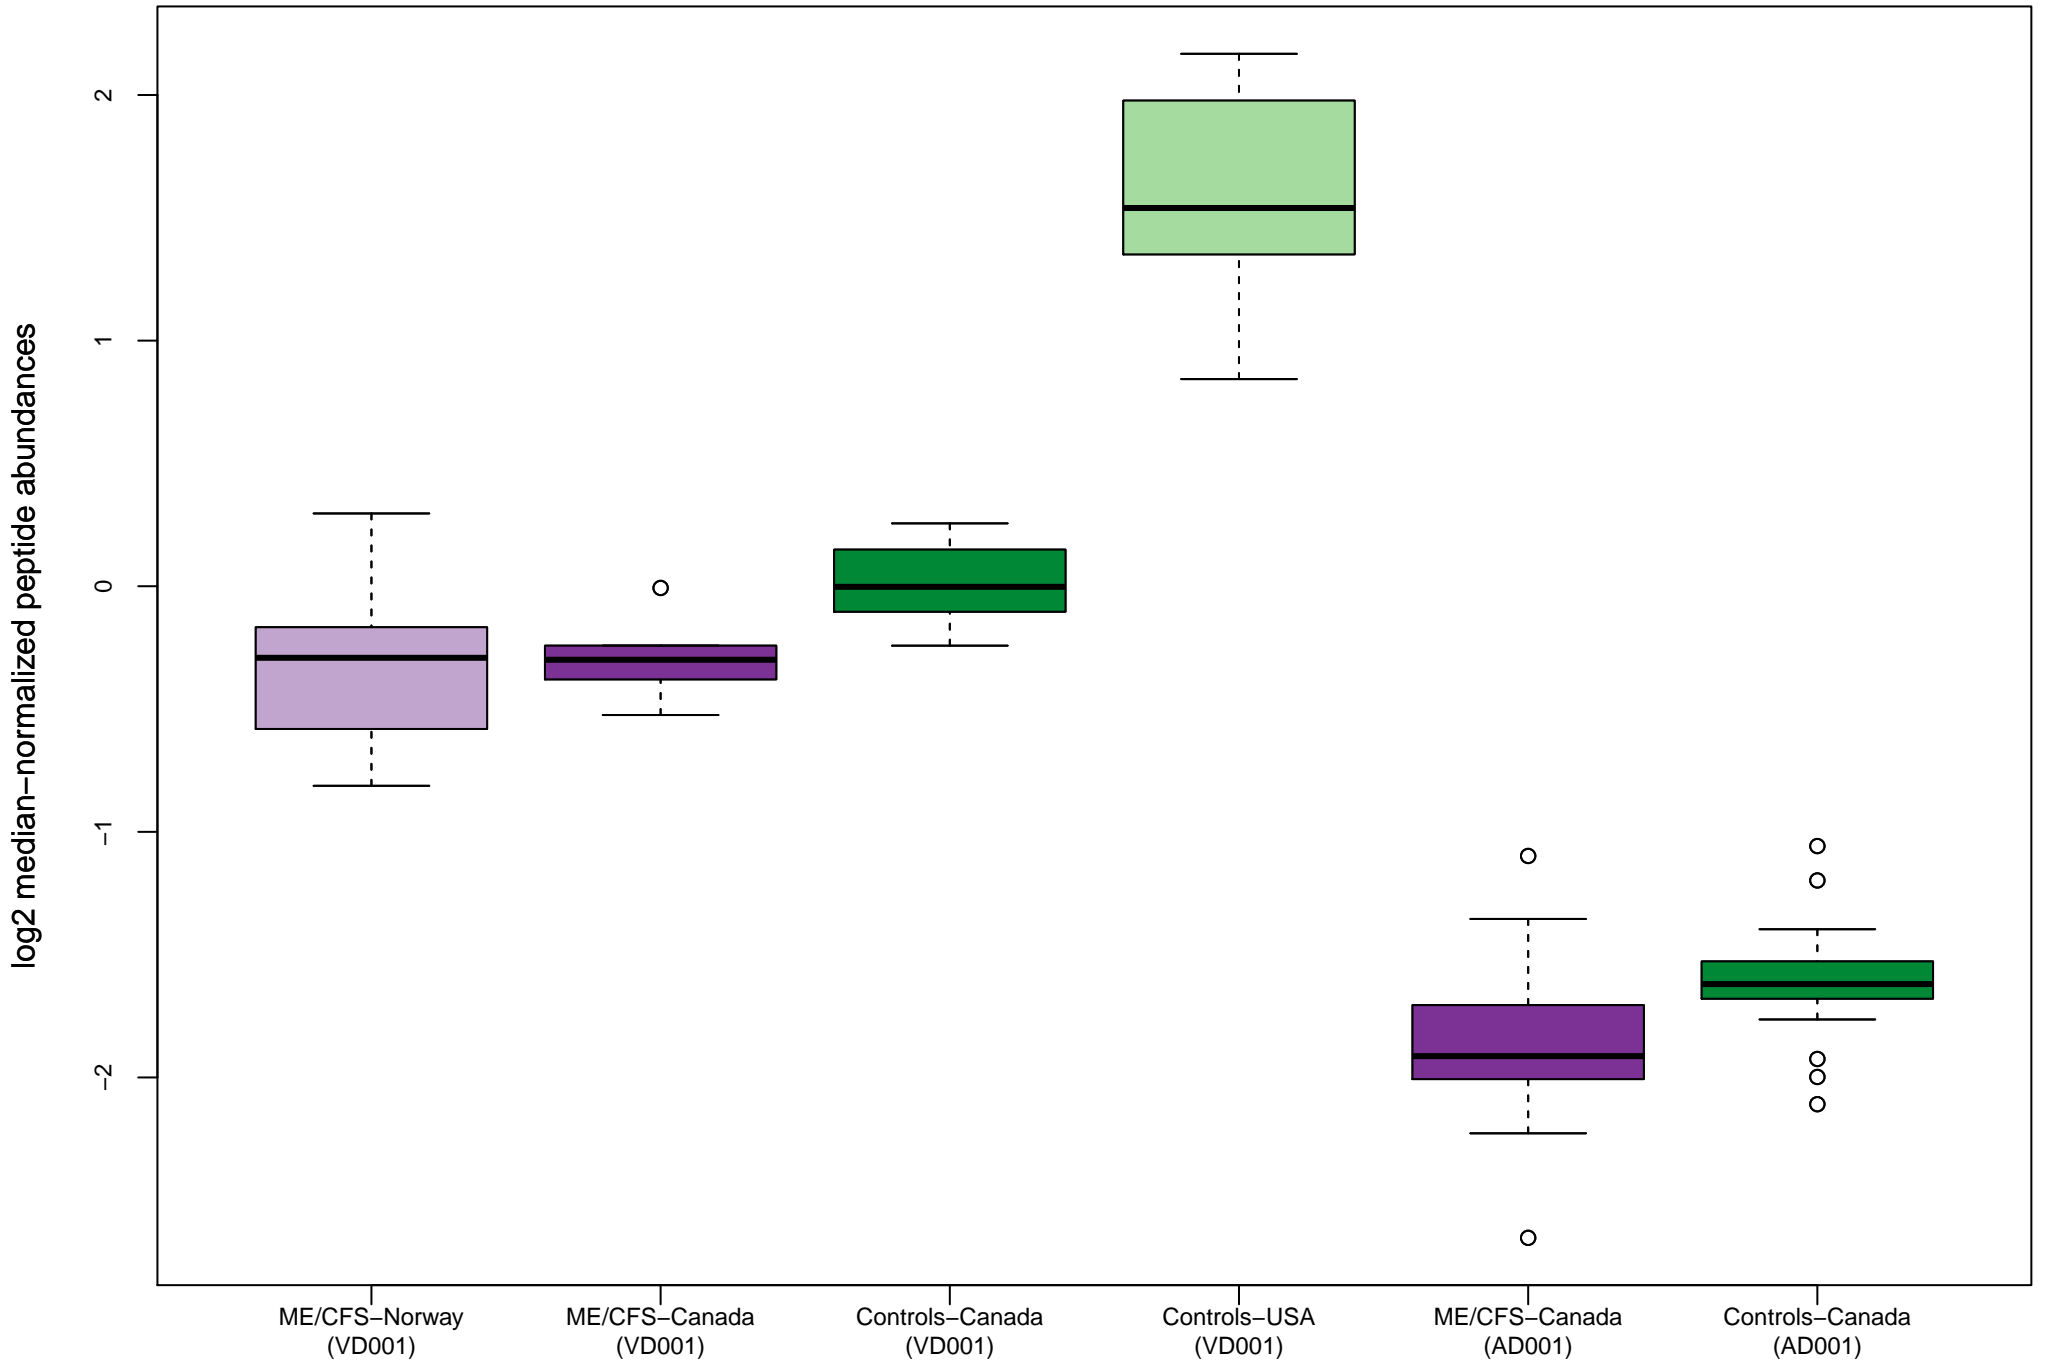

# PYPLWKGYVALS

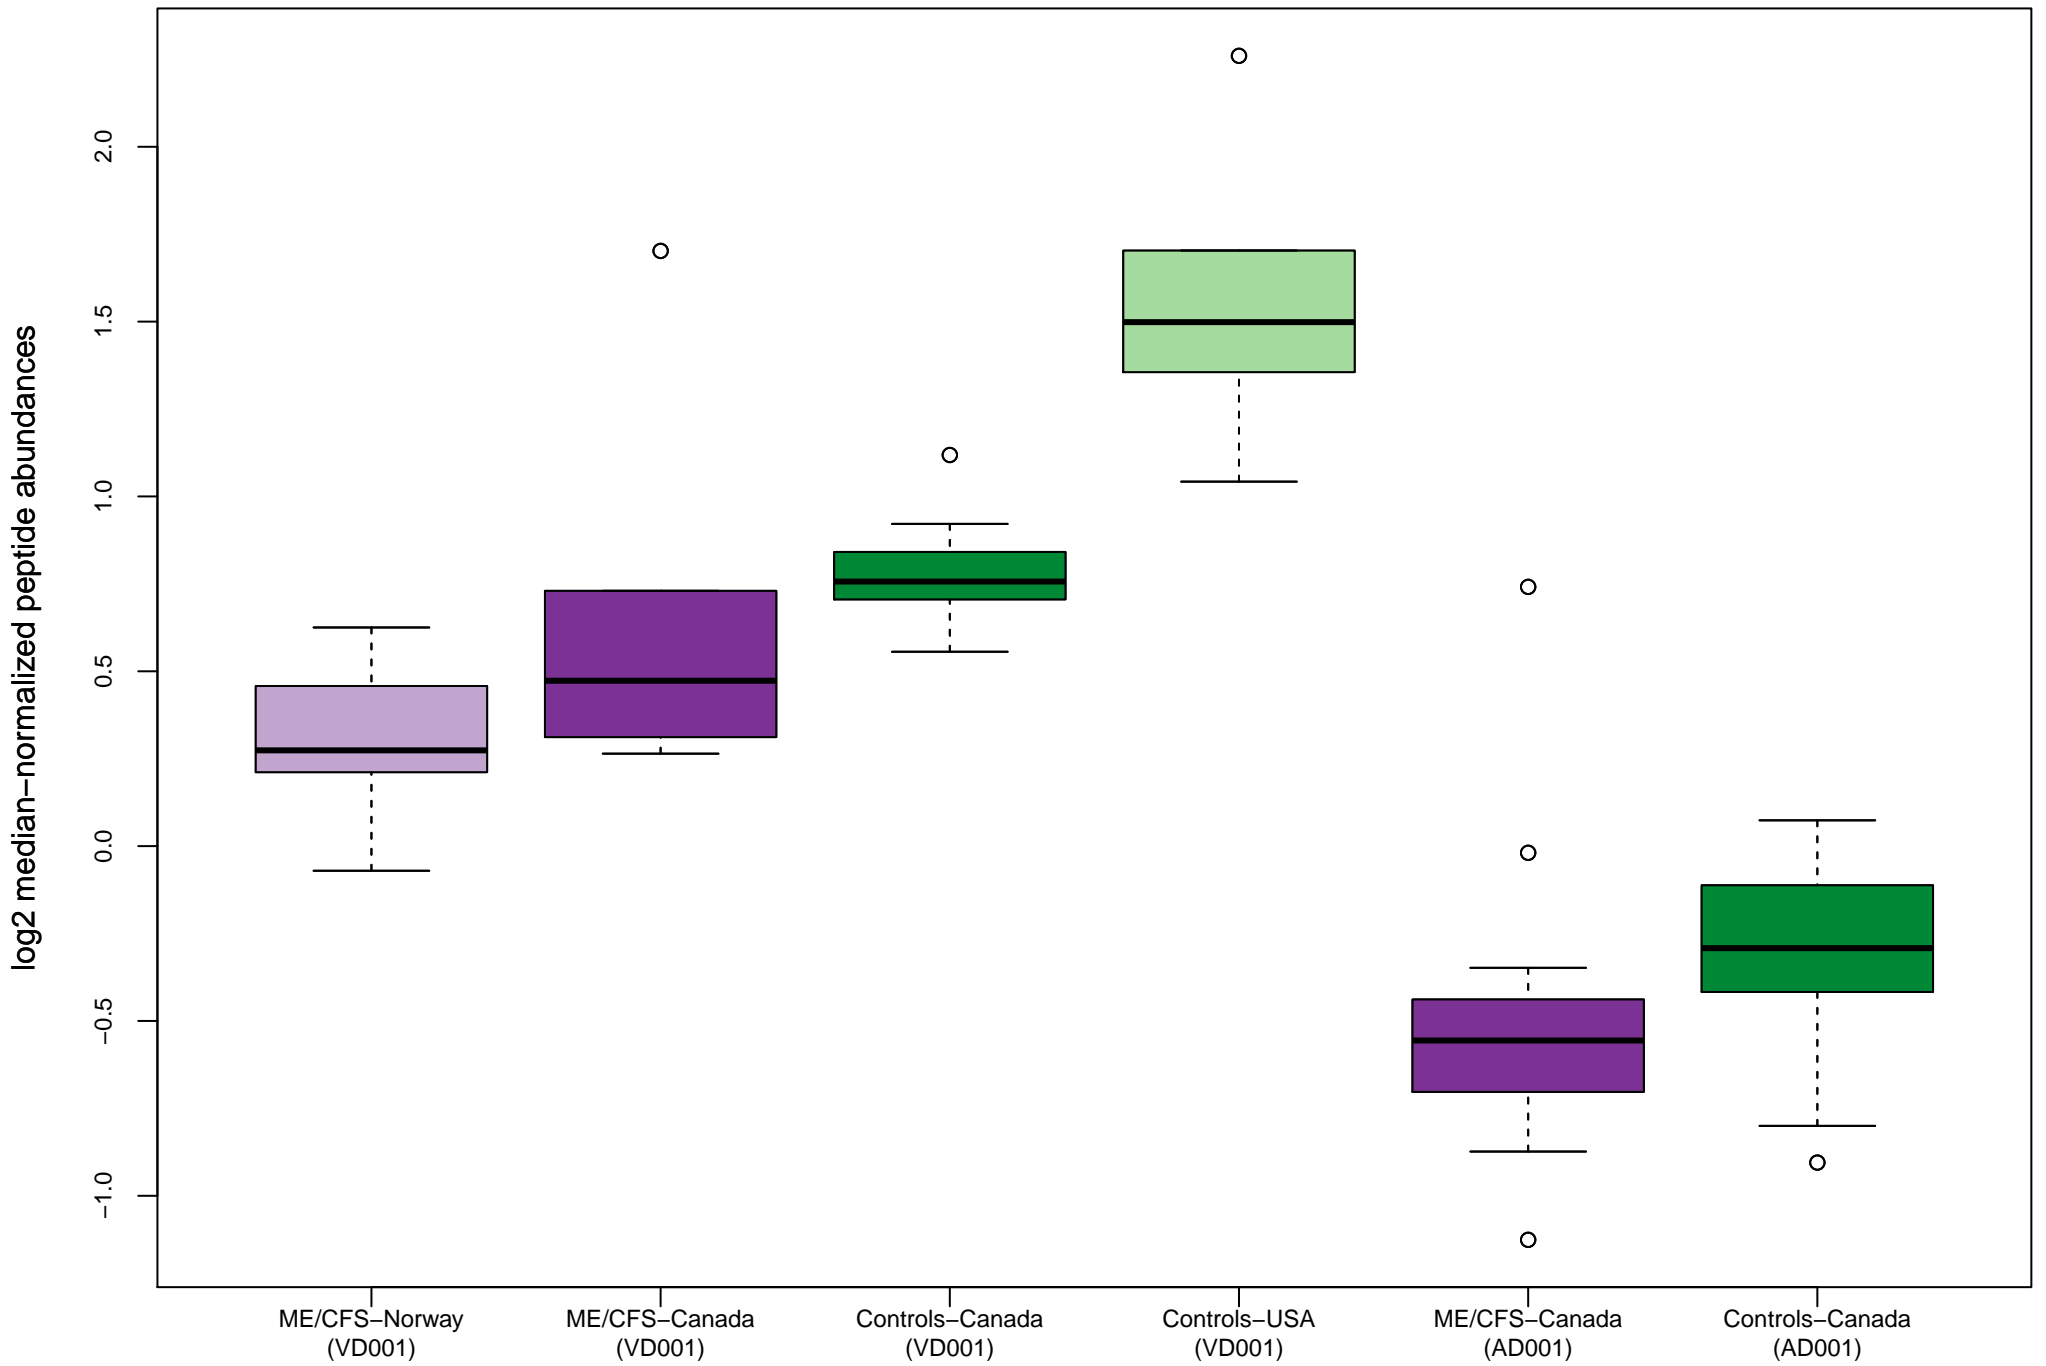

# PYRSRGWHALLG

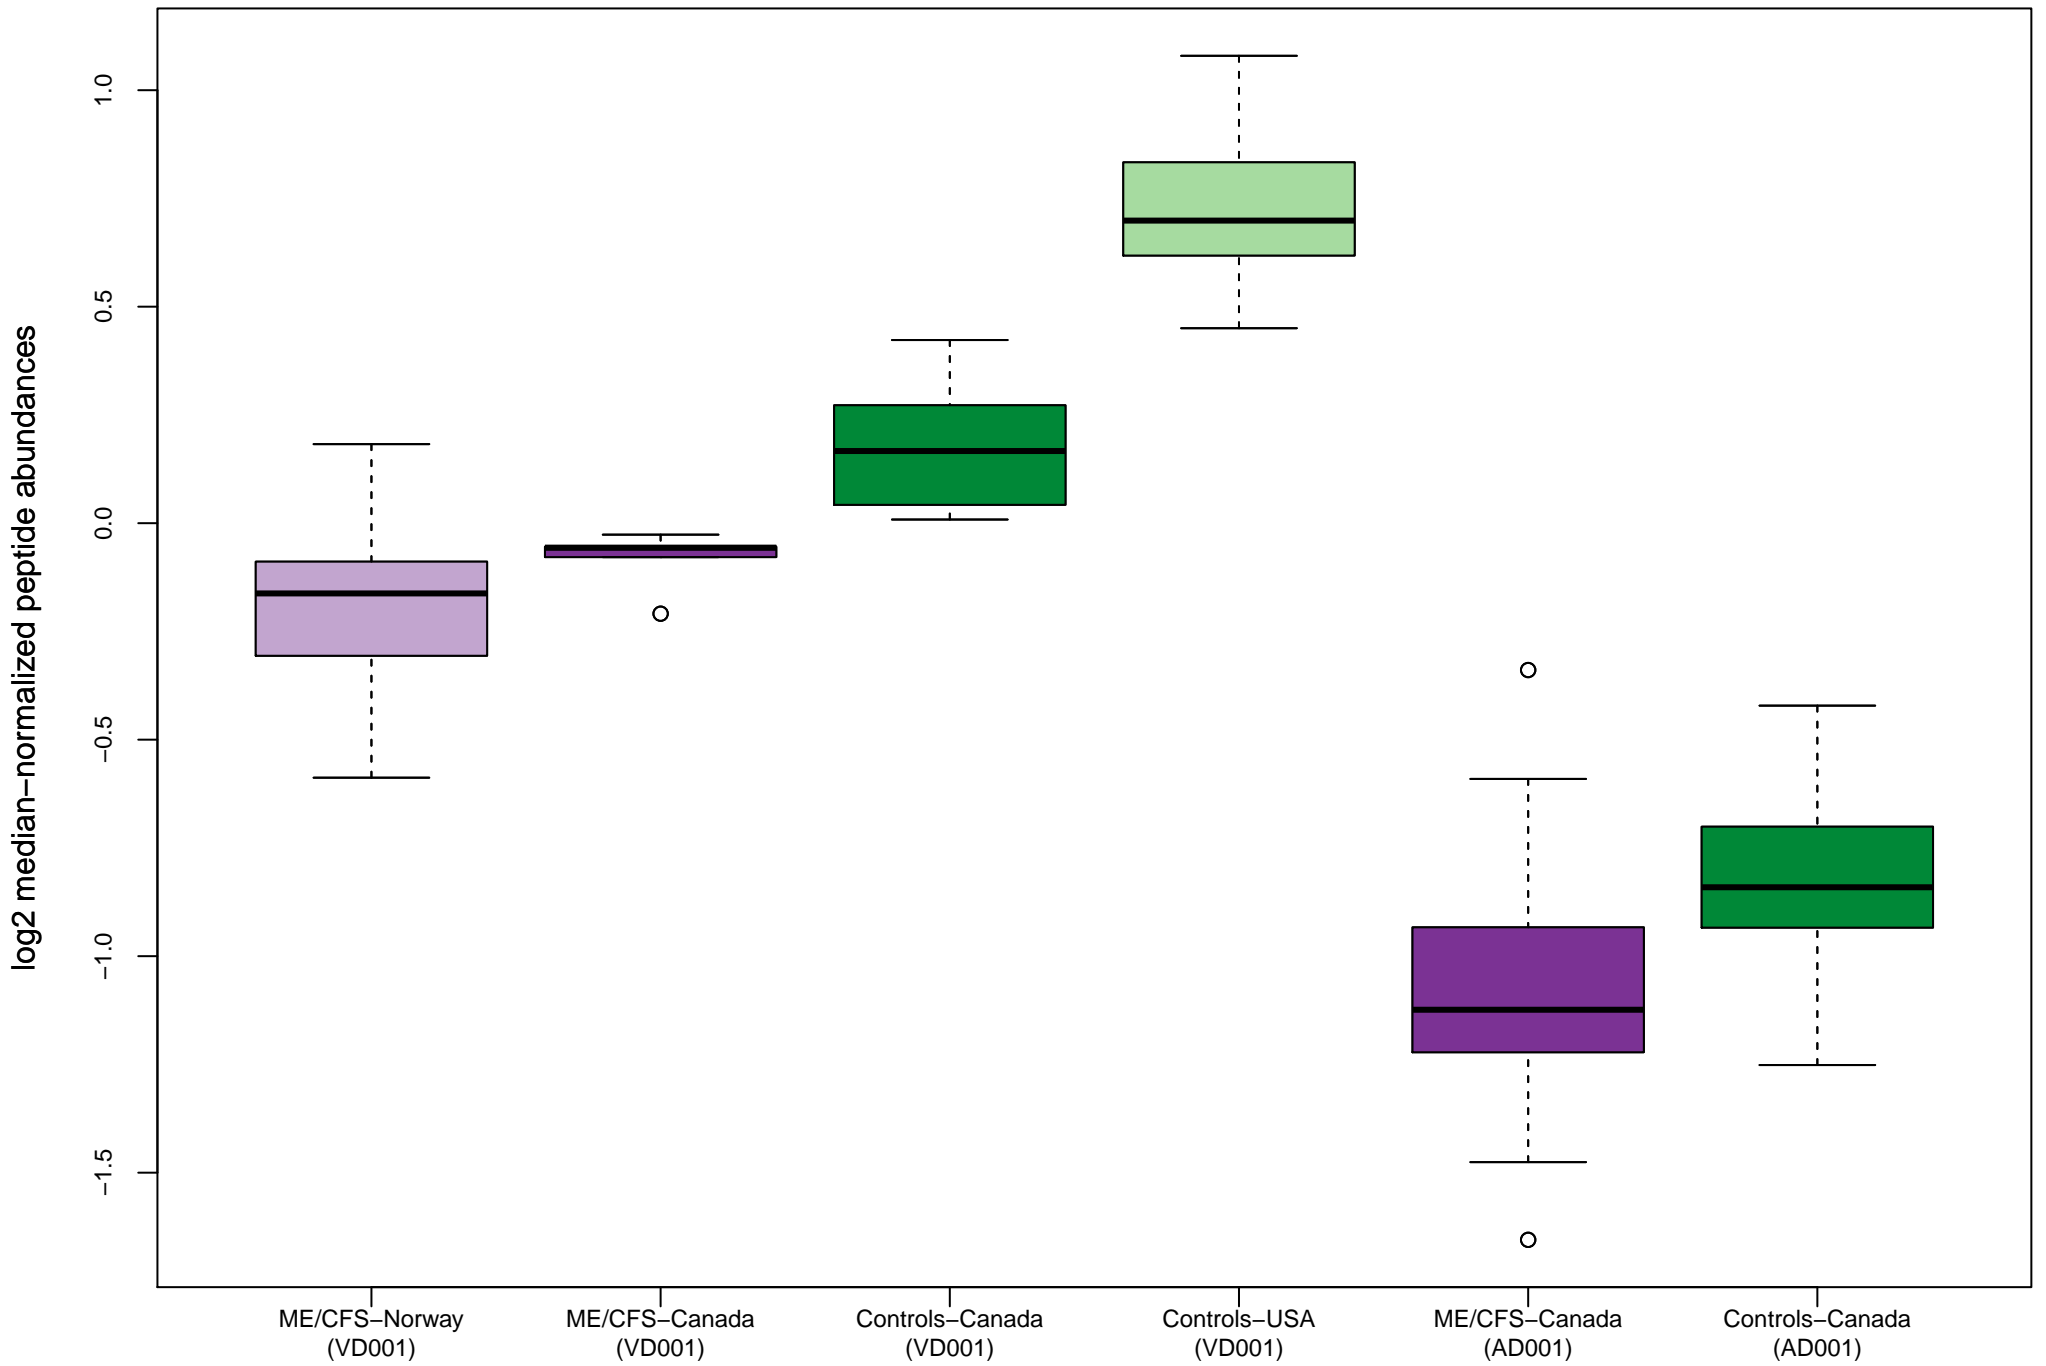

# PYVLVRYNQWLL

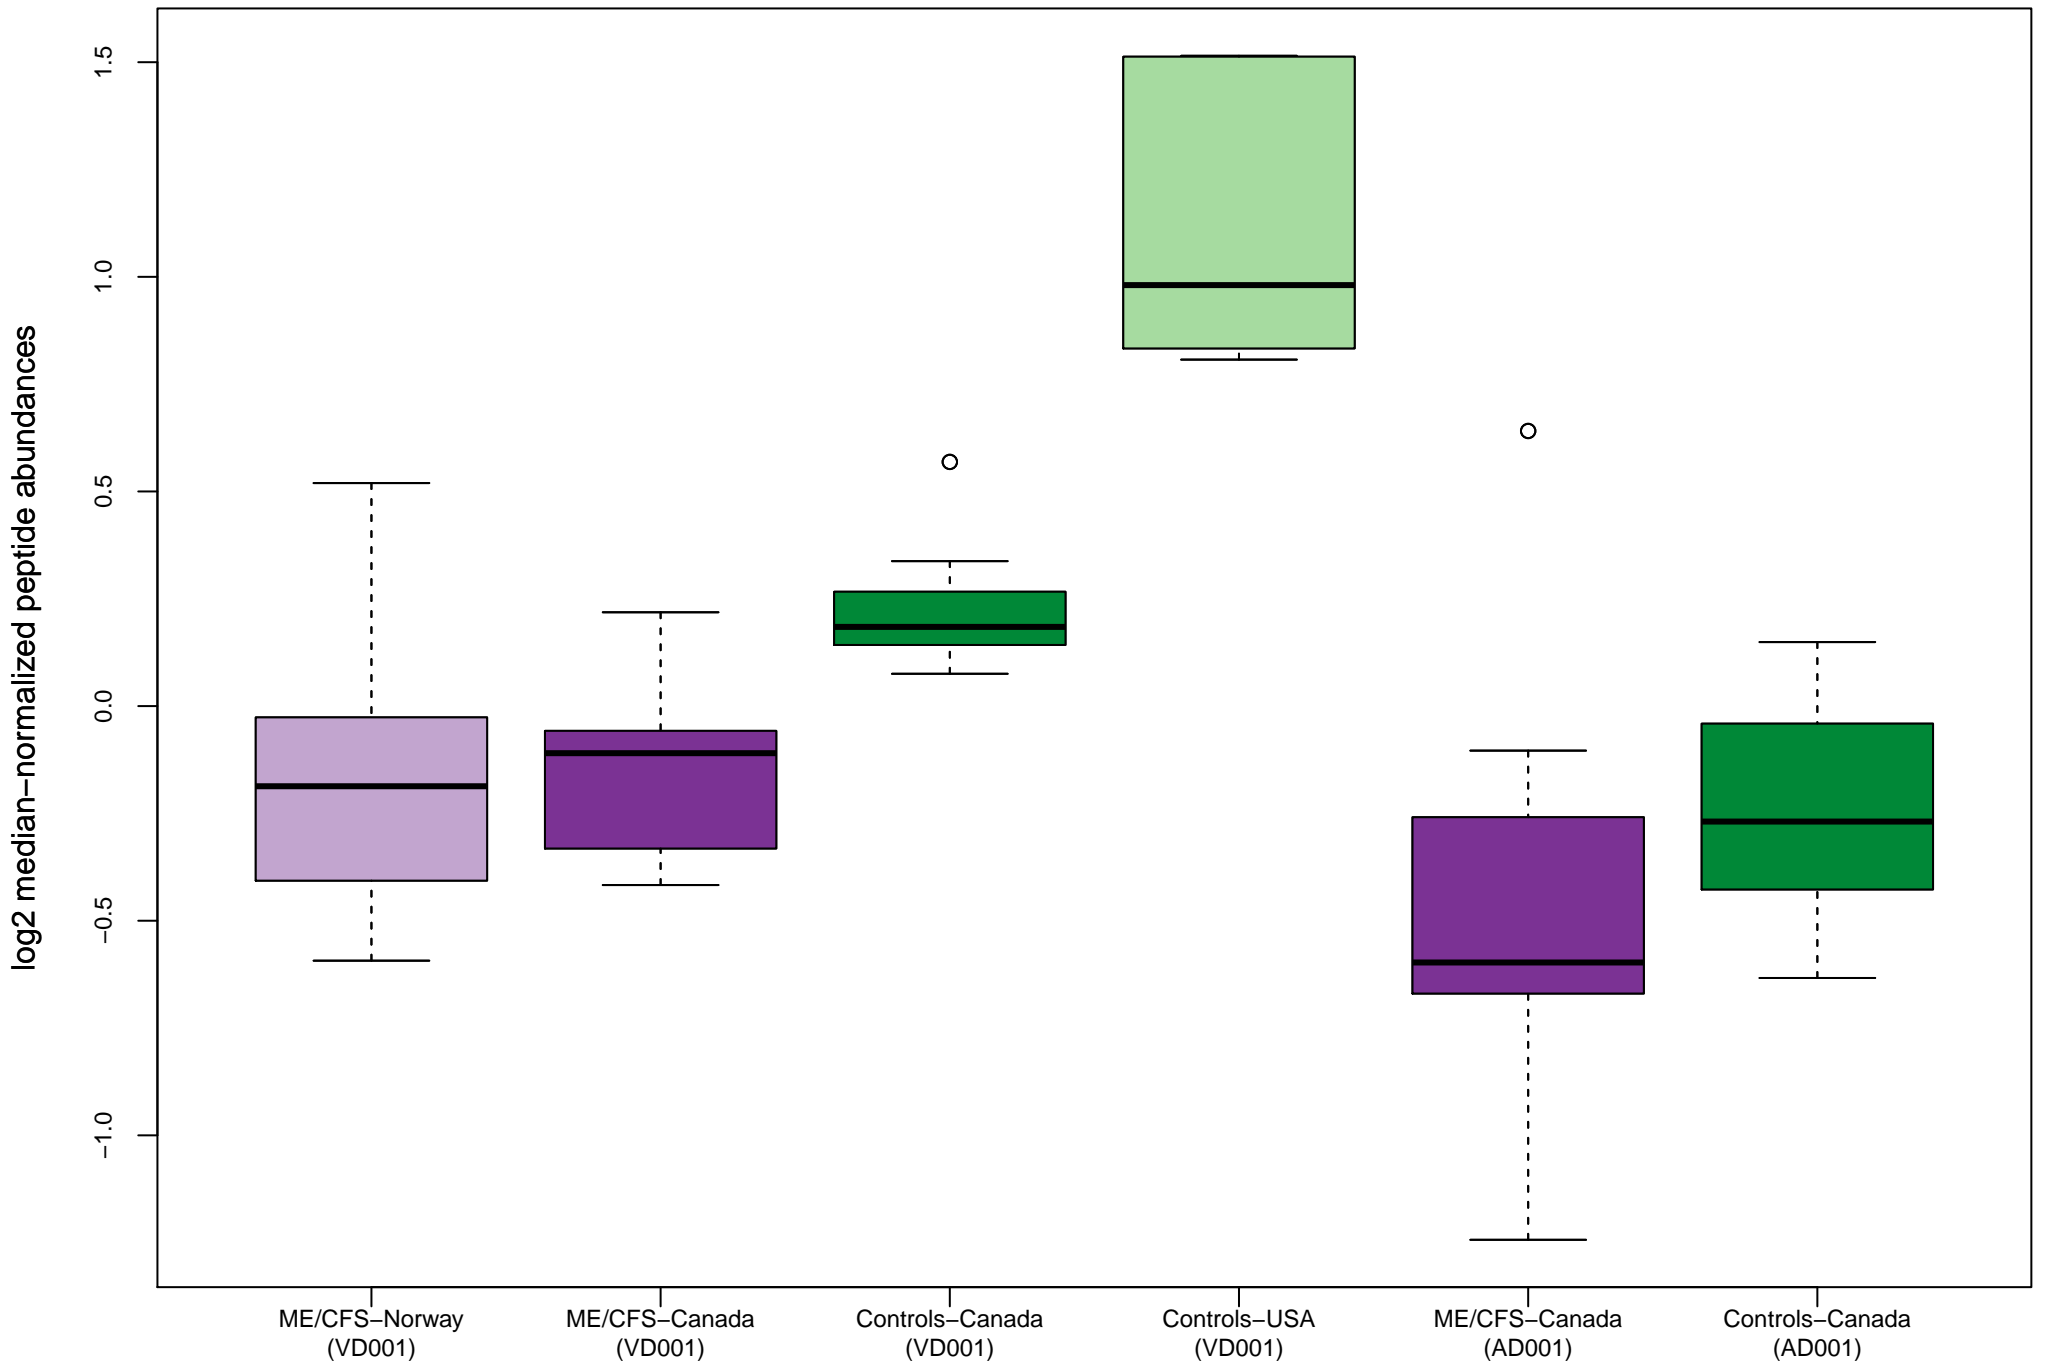

# PYWAAFWKAYNA

log2 median-normalized peptide abundances

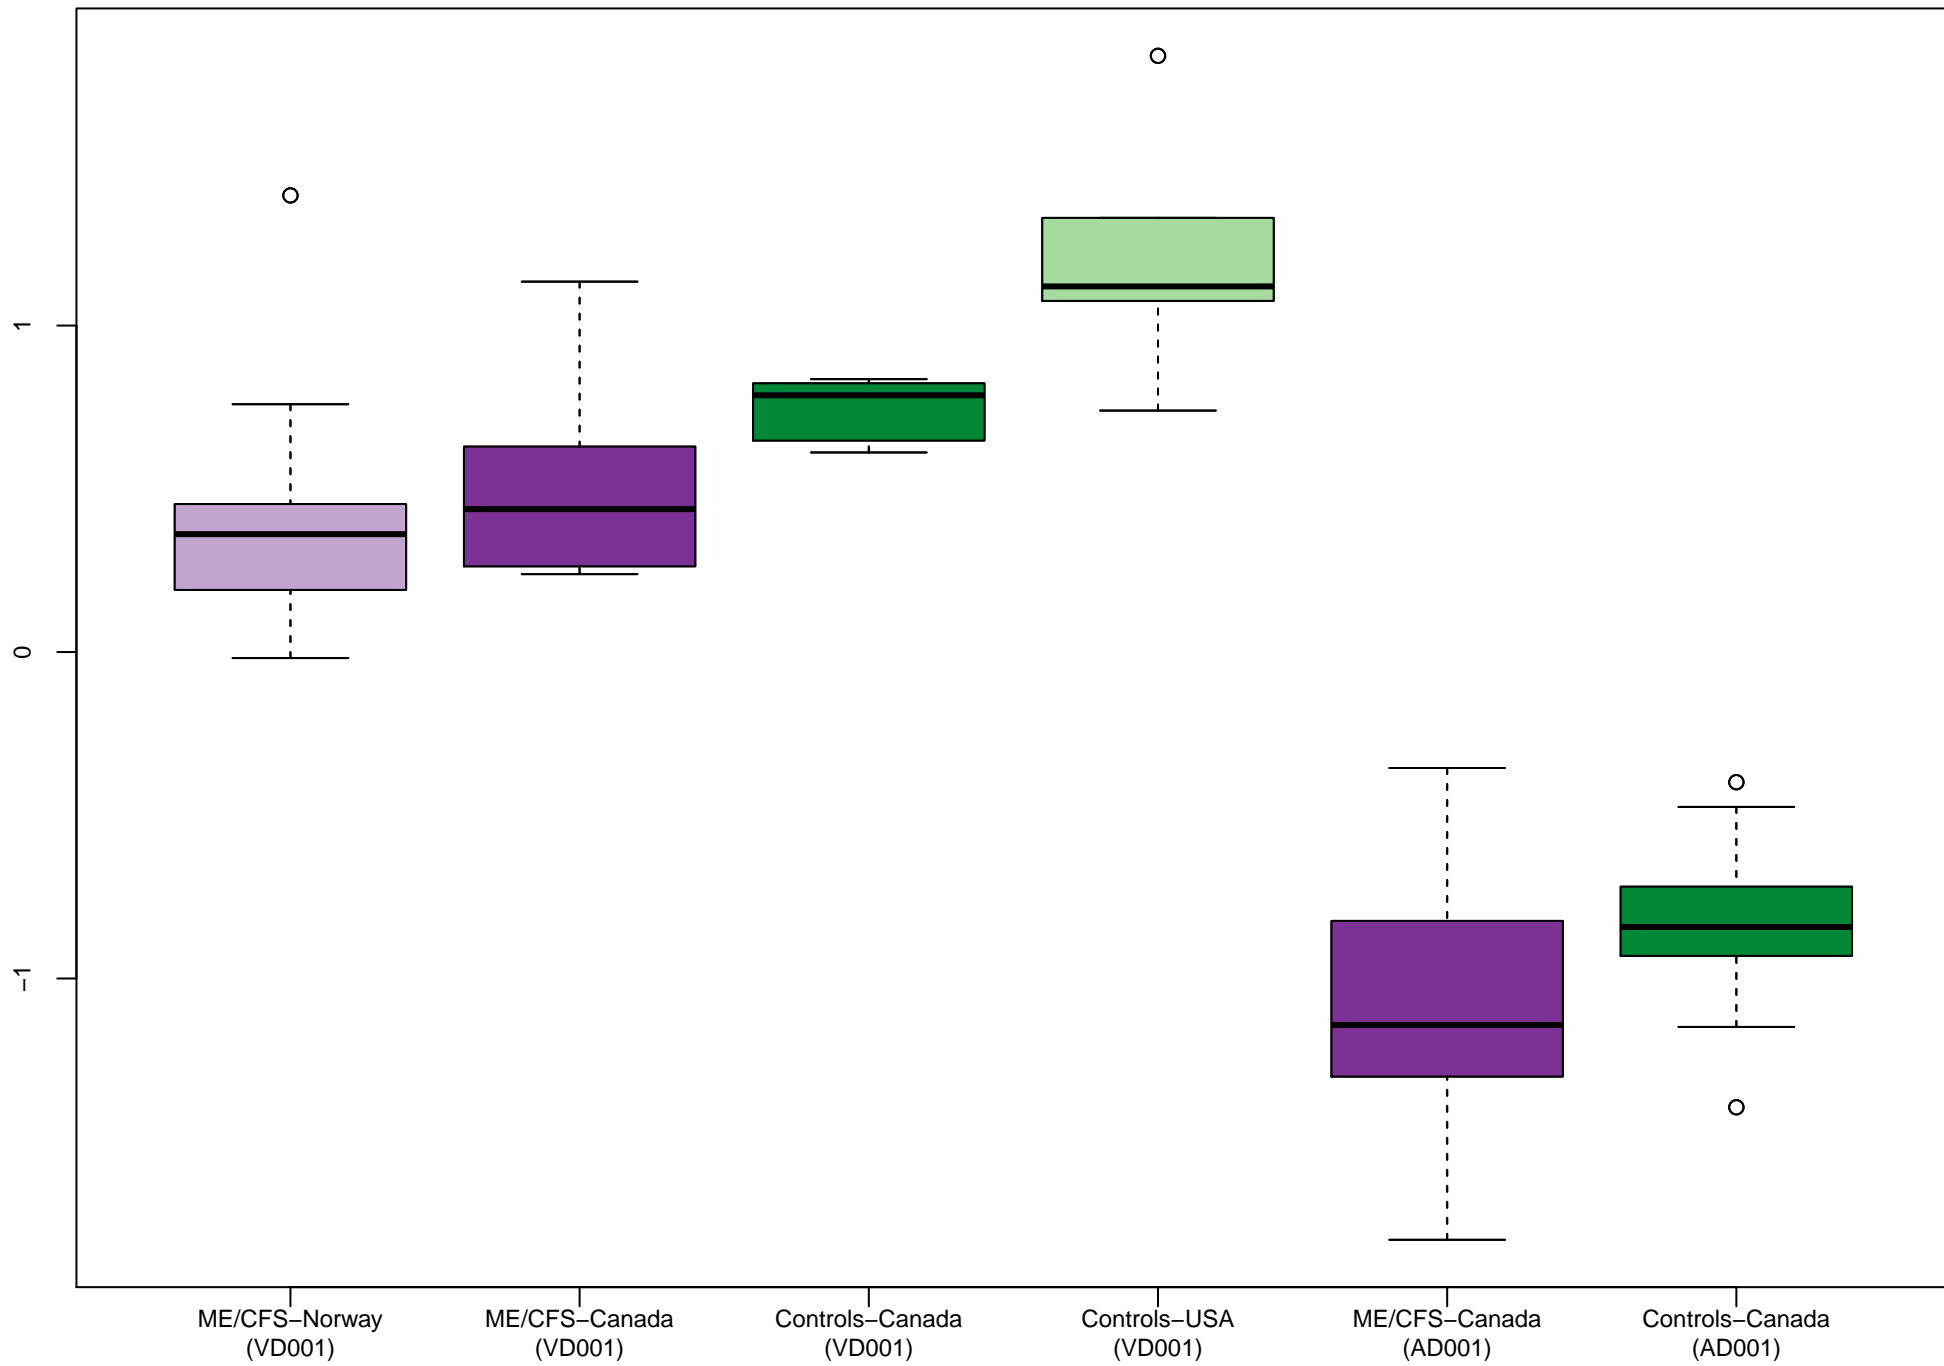



# PYYVGVFRWALS

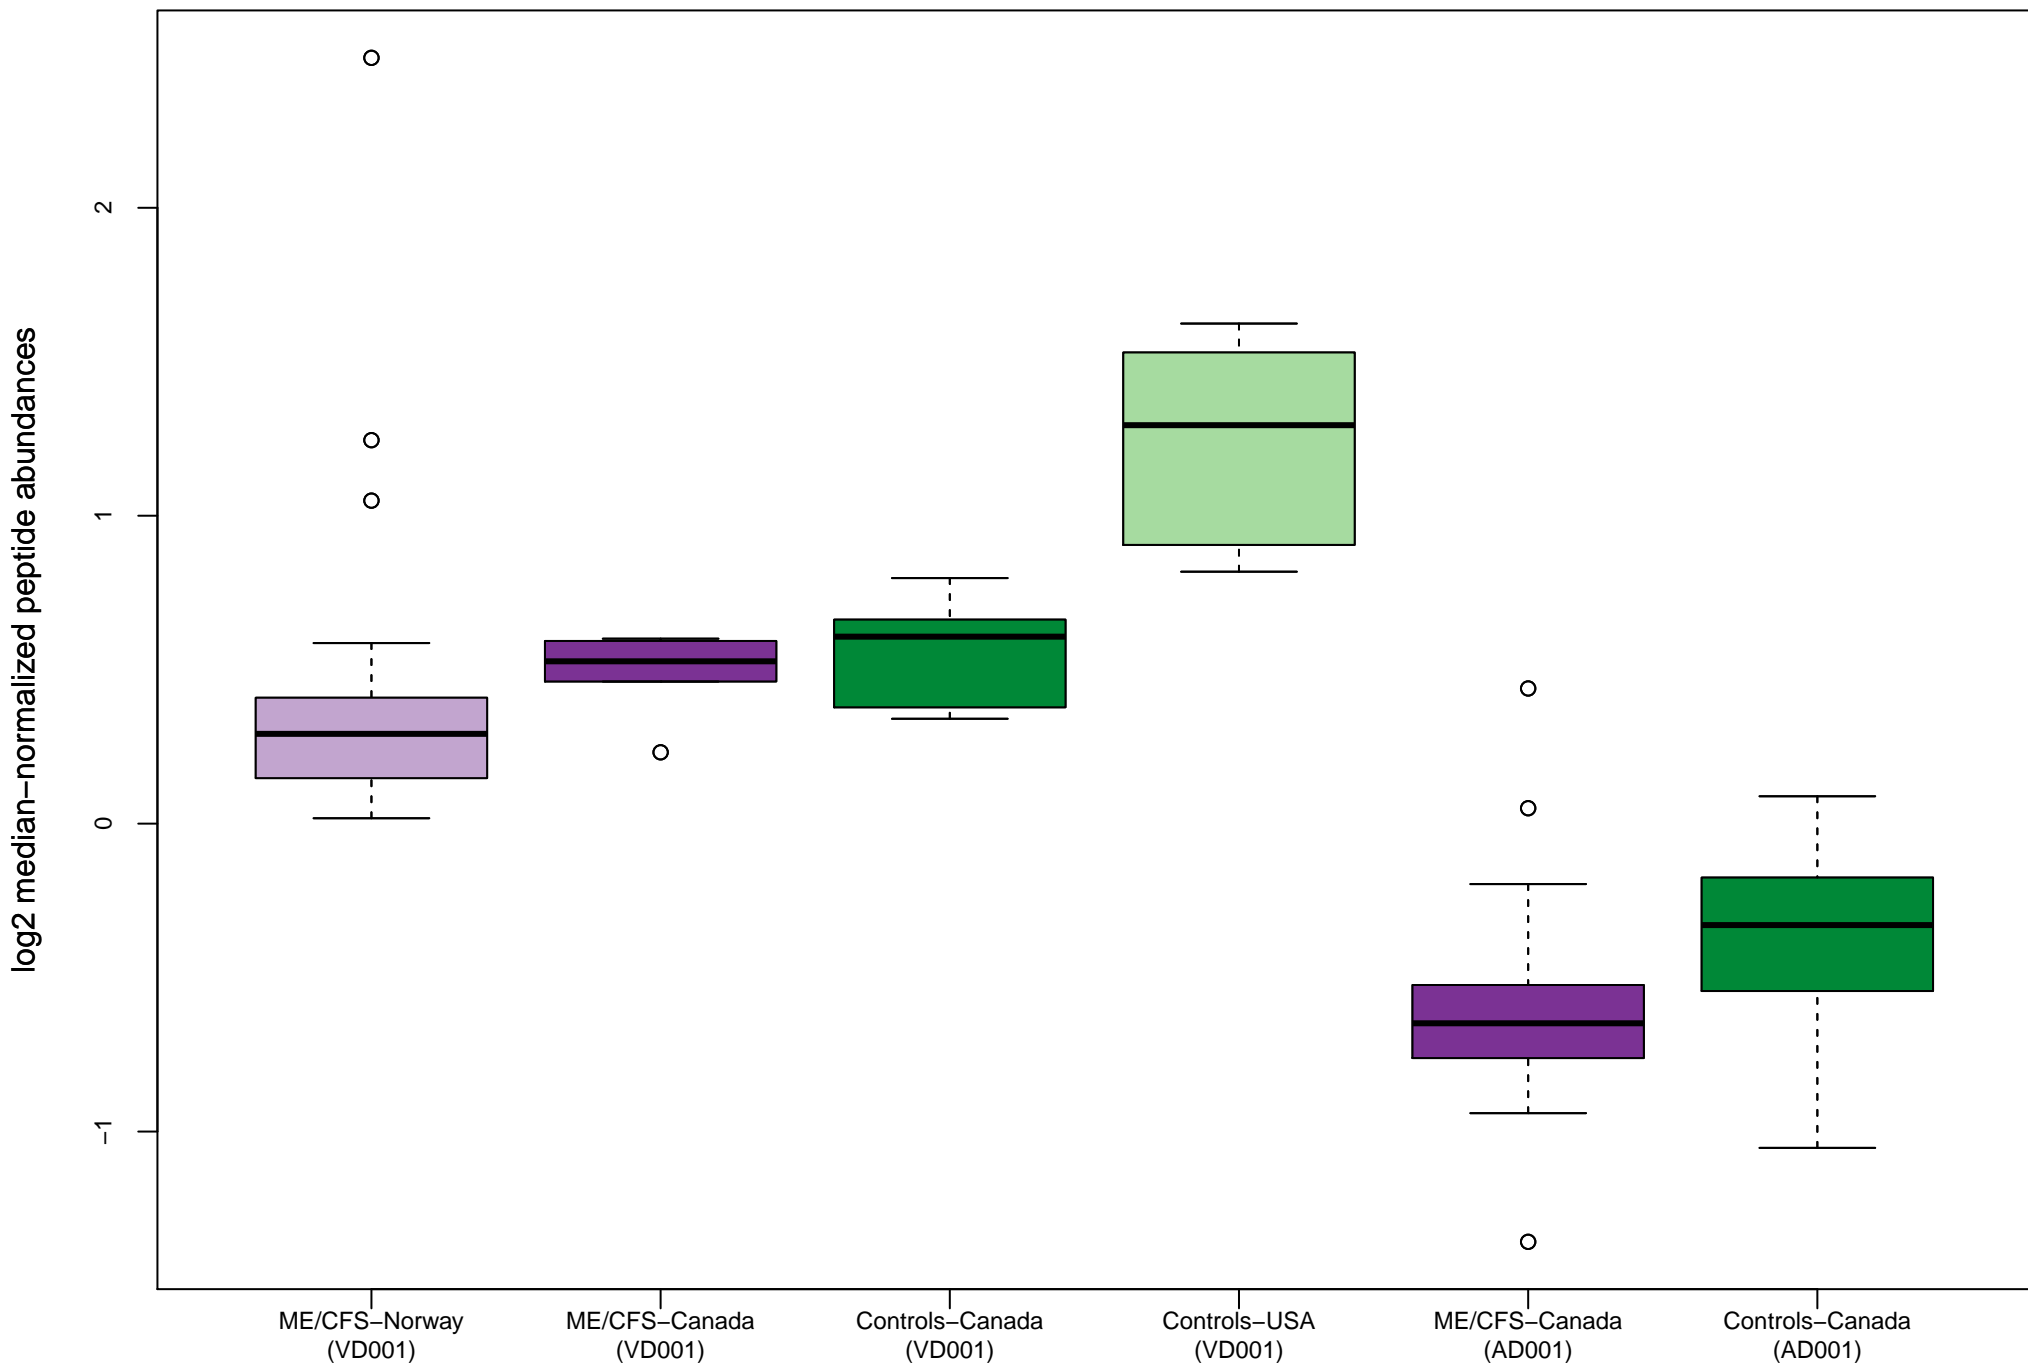

# QAFPWVPRYWAS

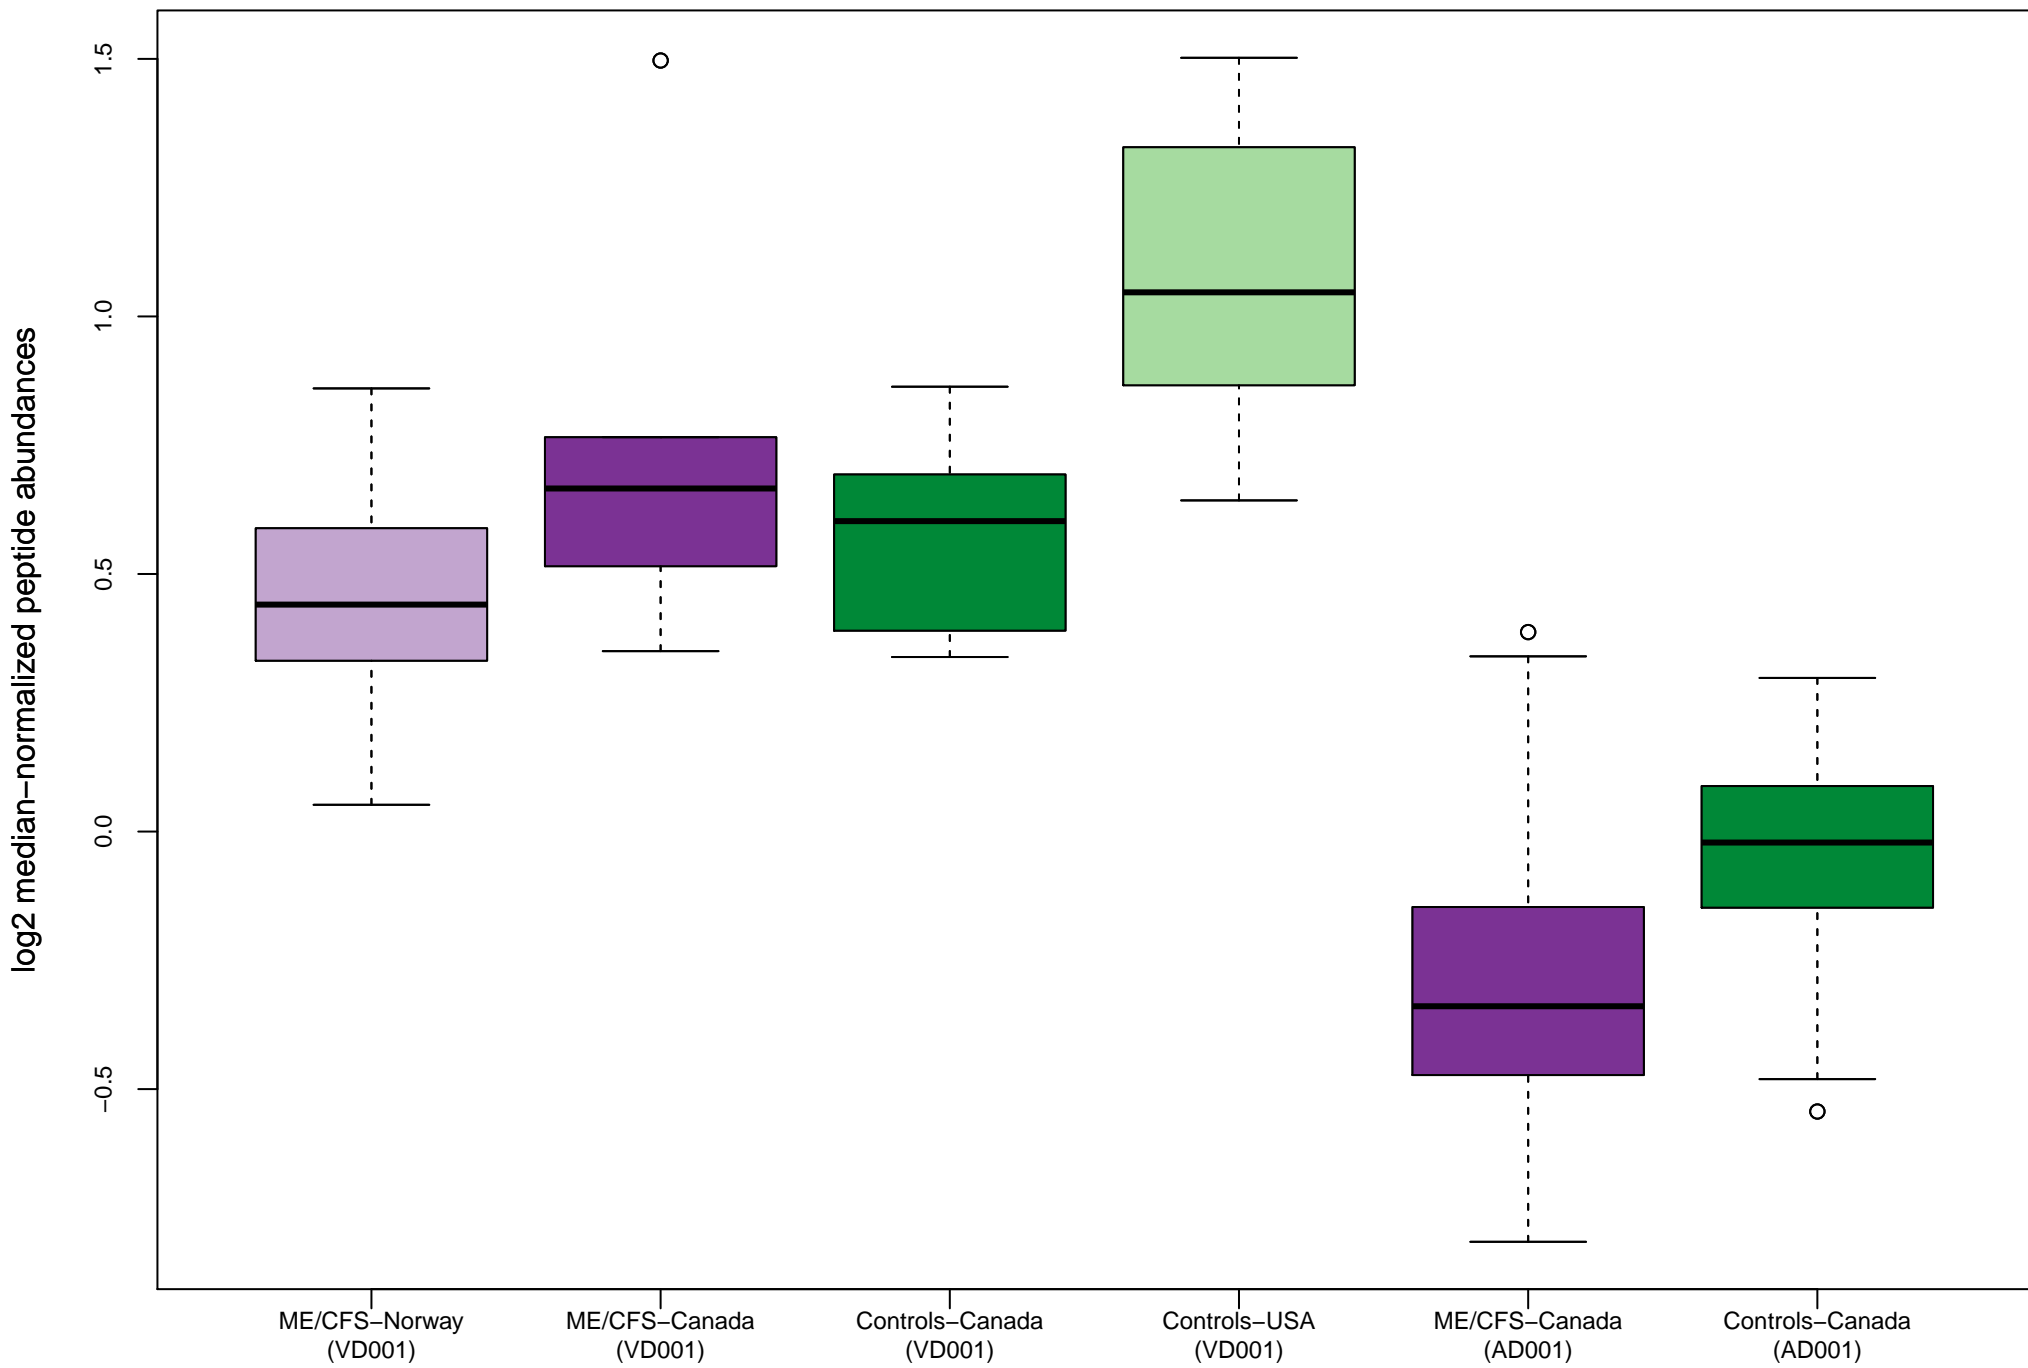

# QALRFVARYNVG

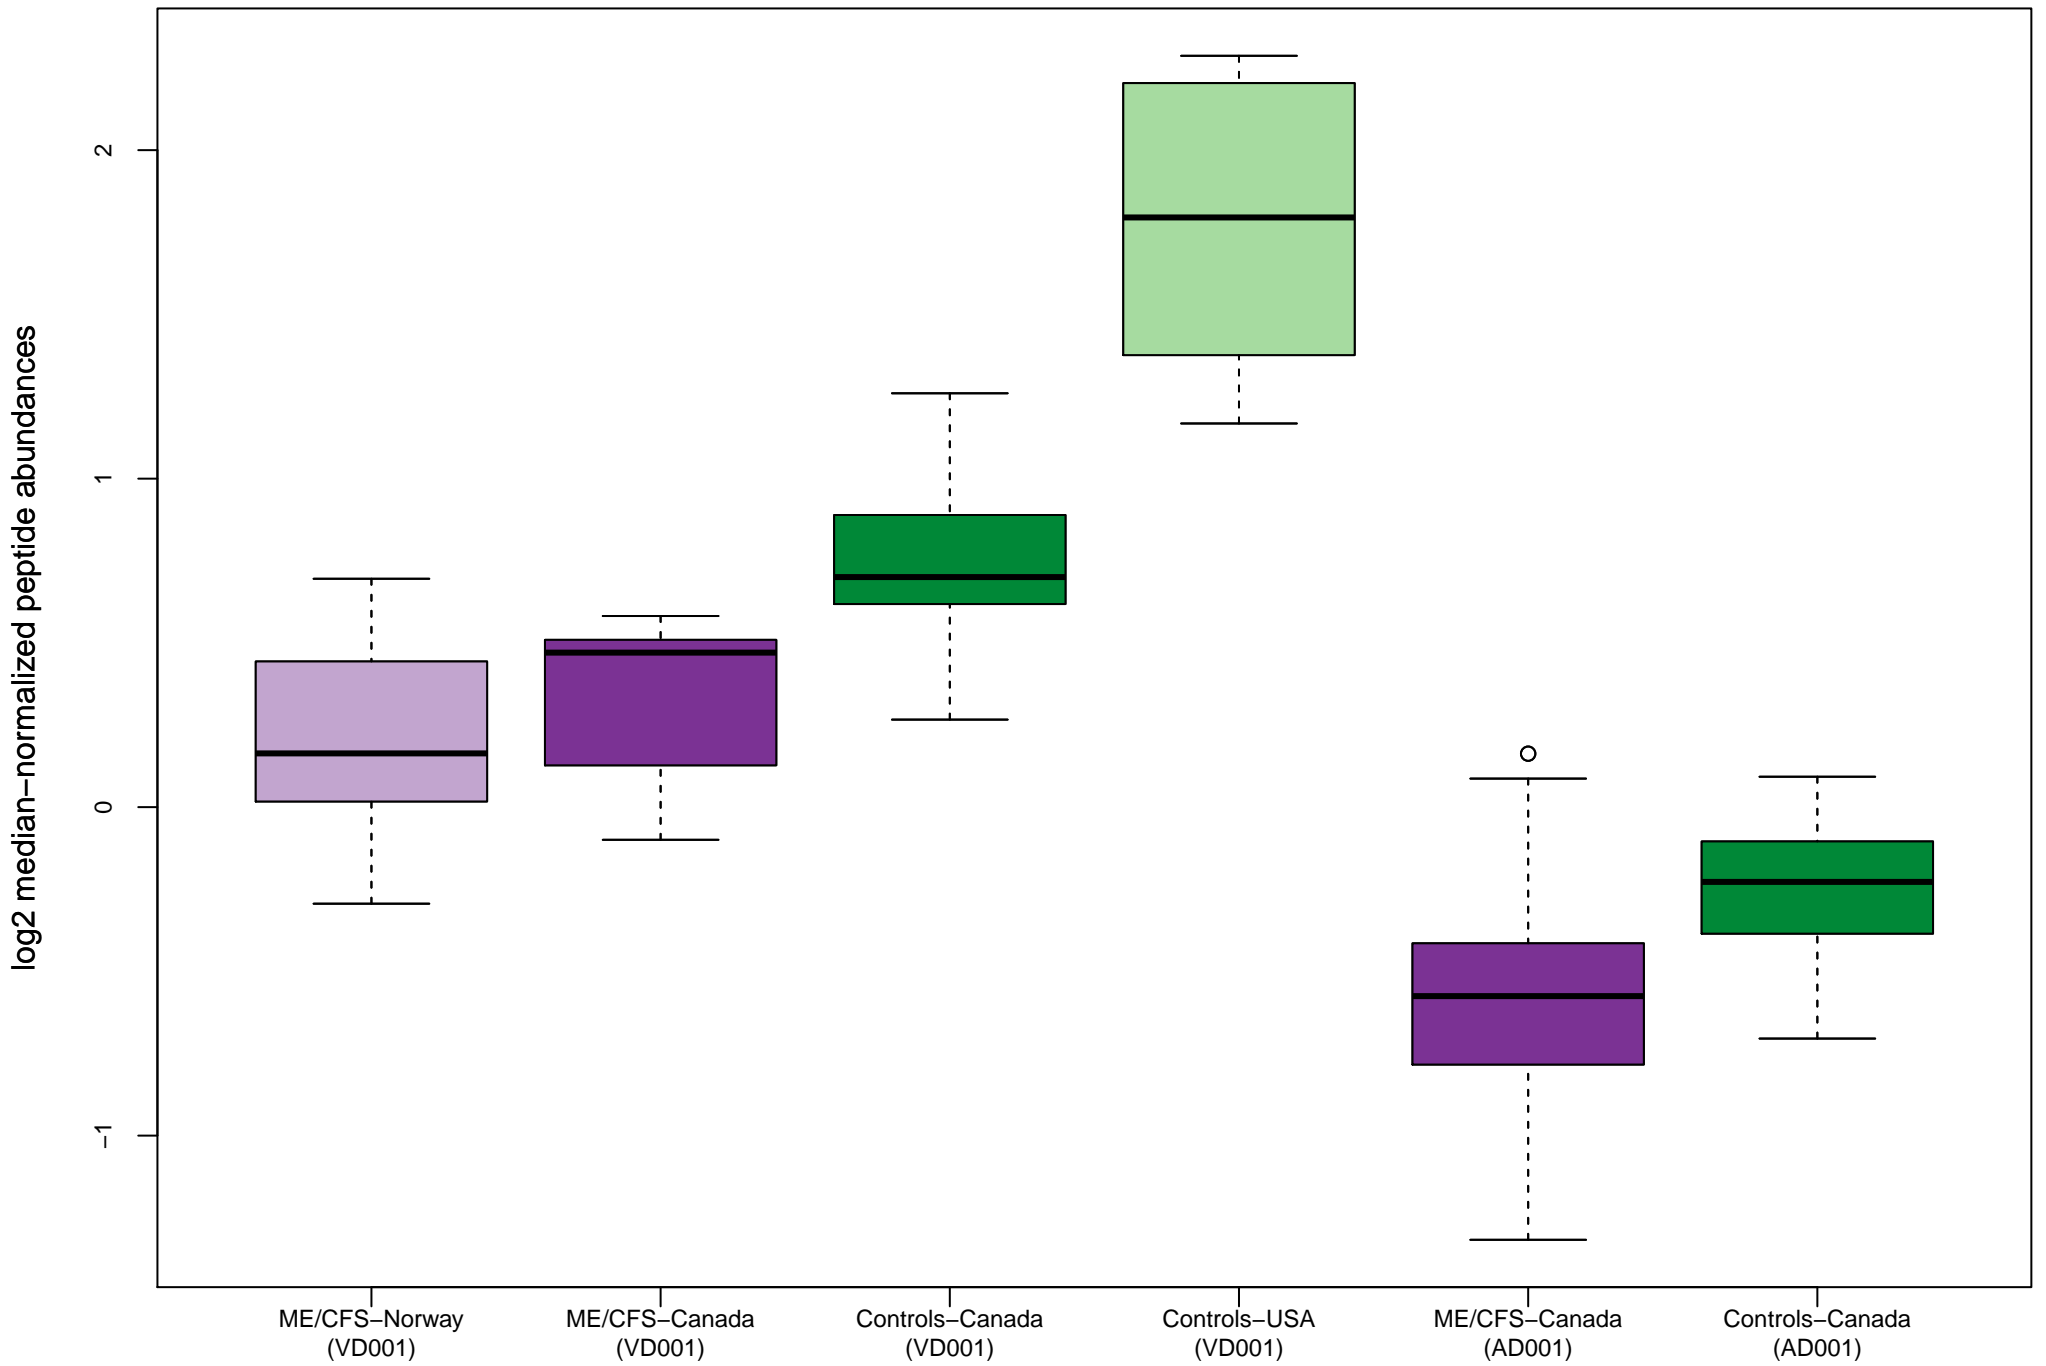

# QAVWGFRGVLSG

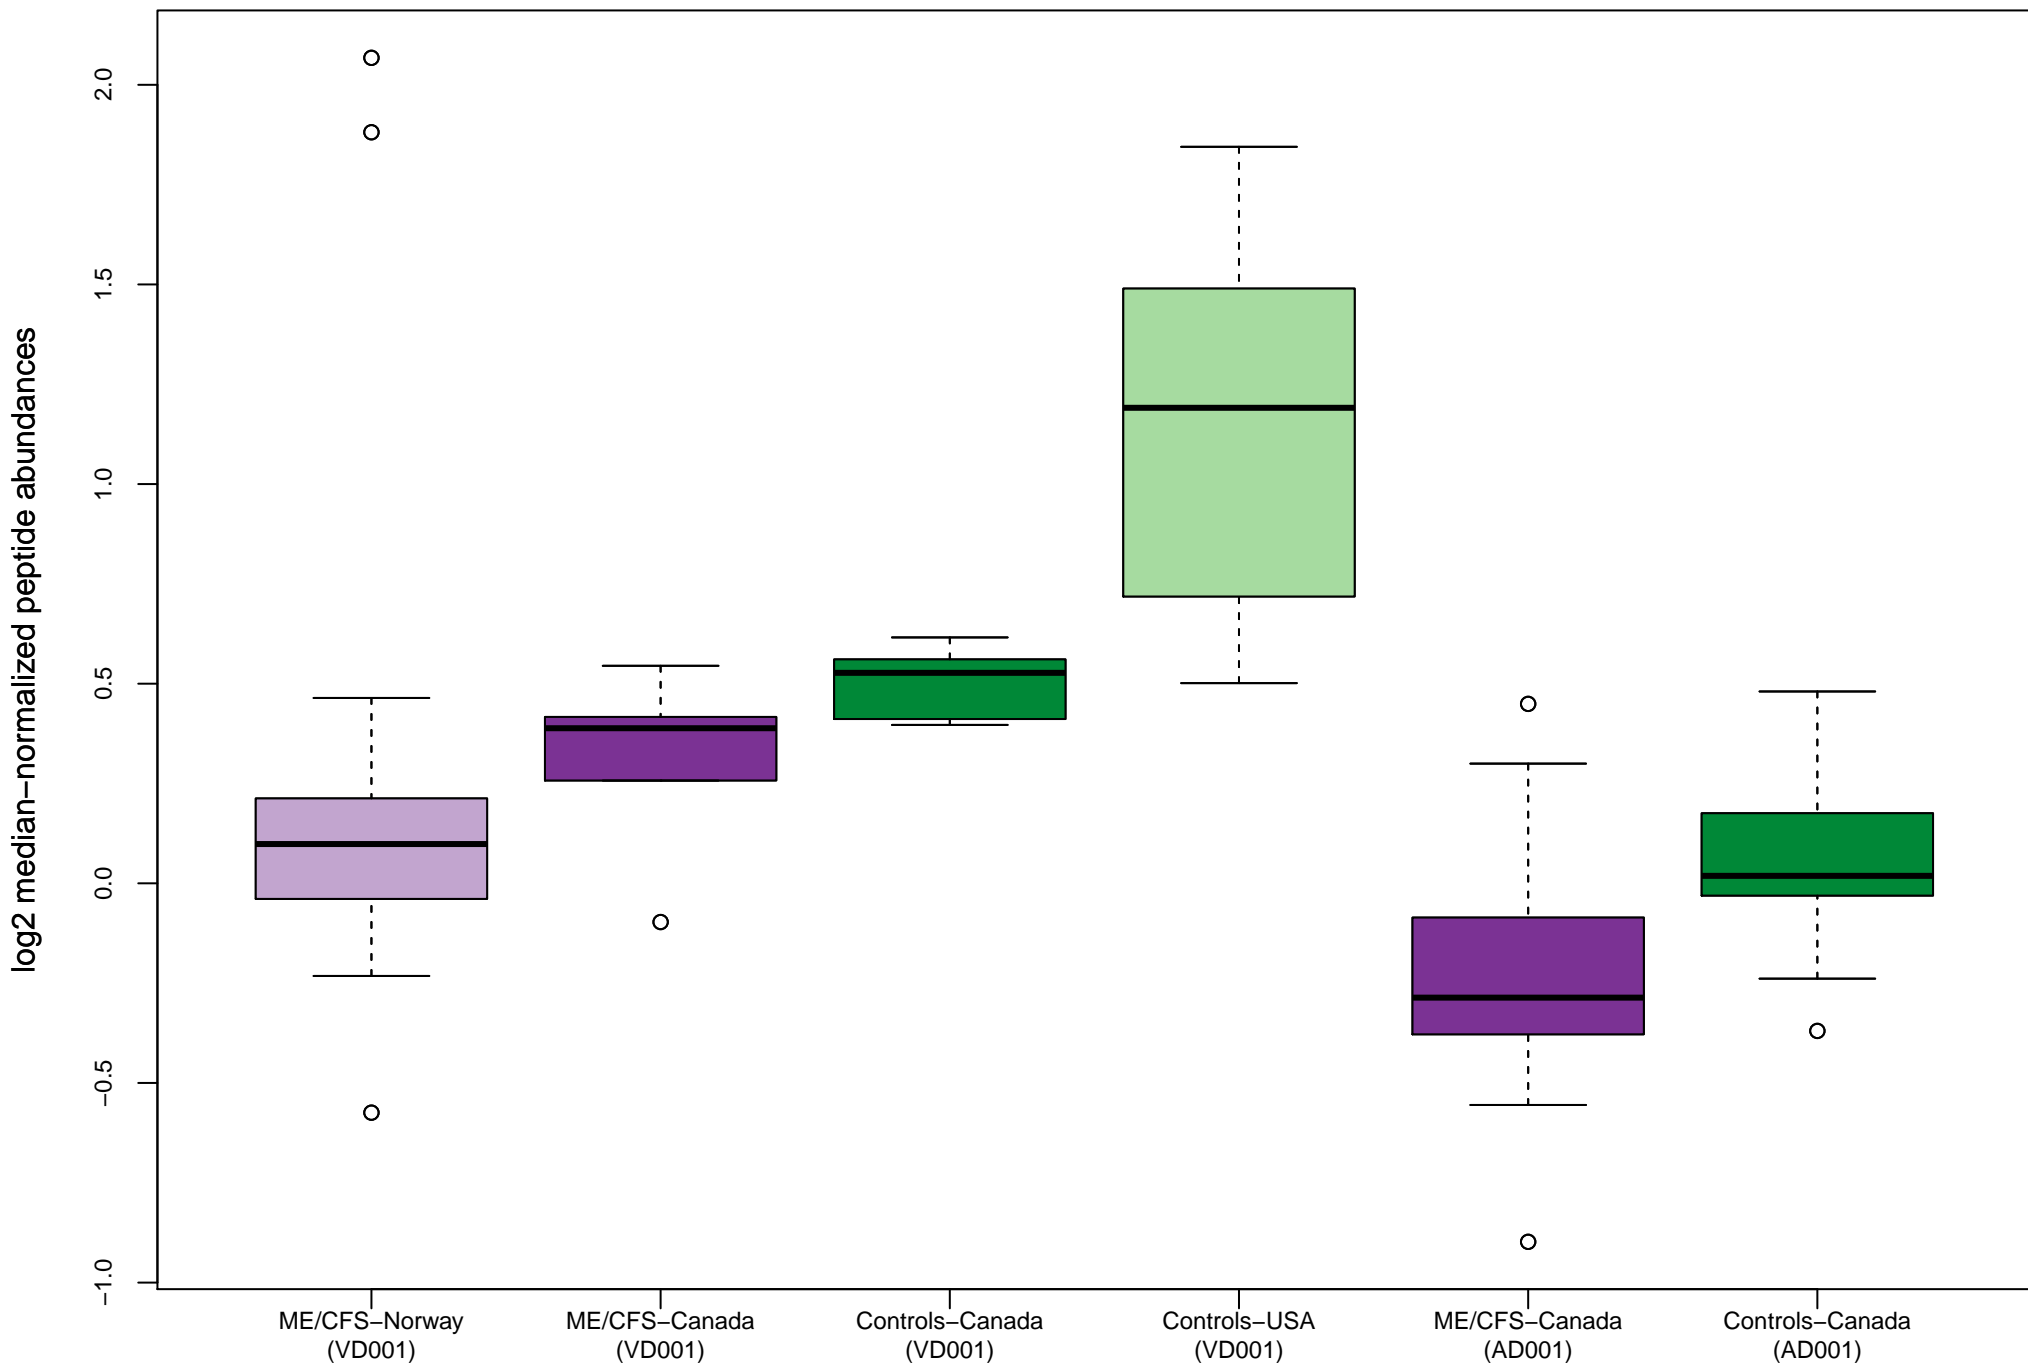

# QFARYHFLPWNV

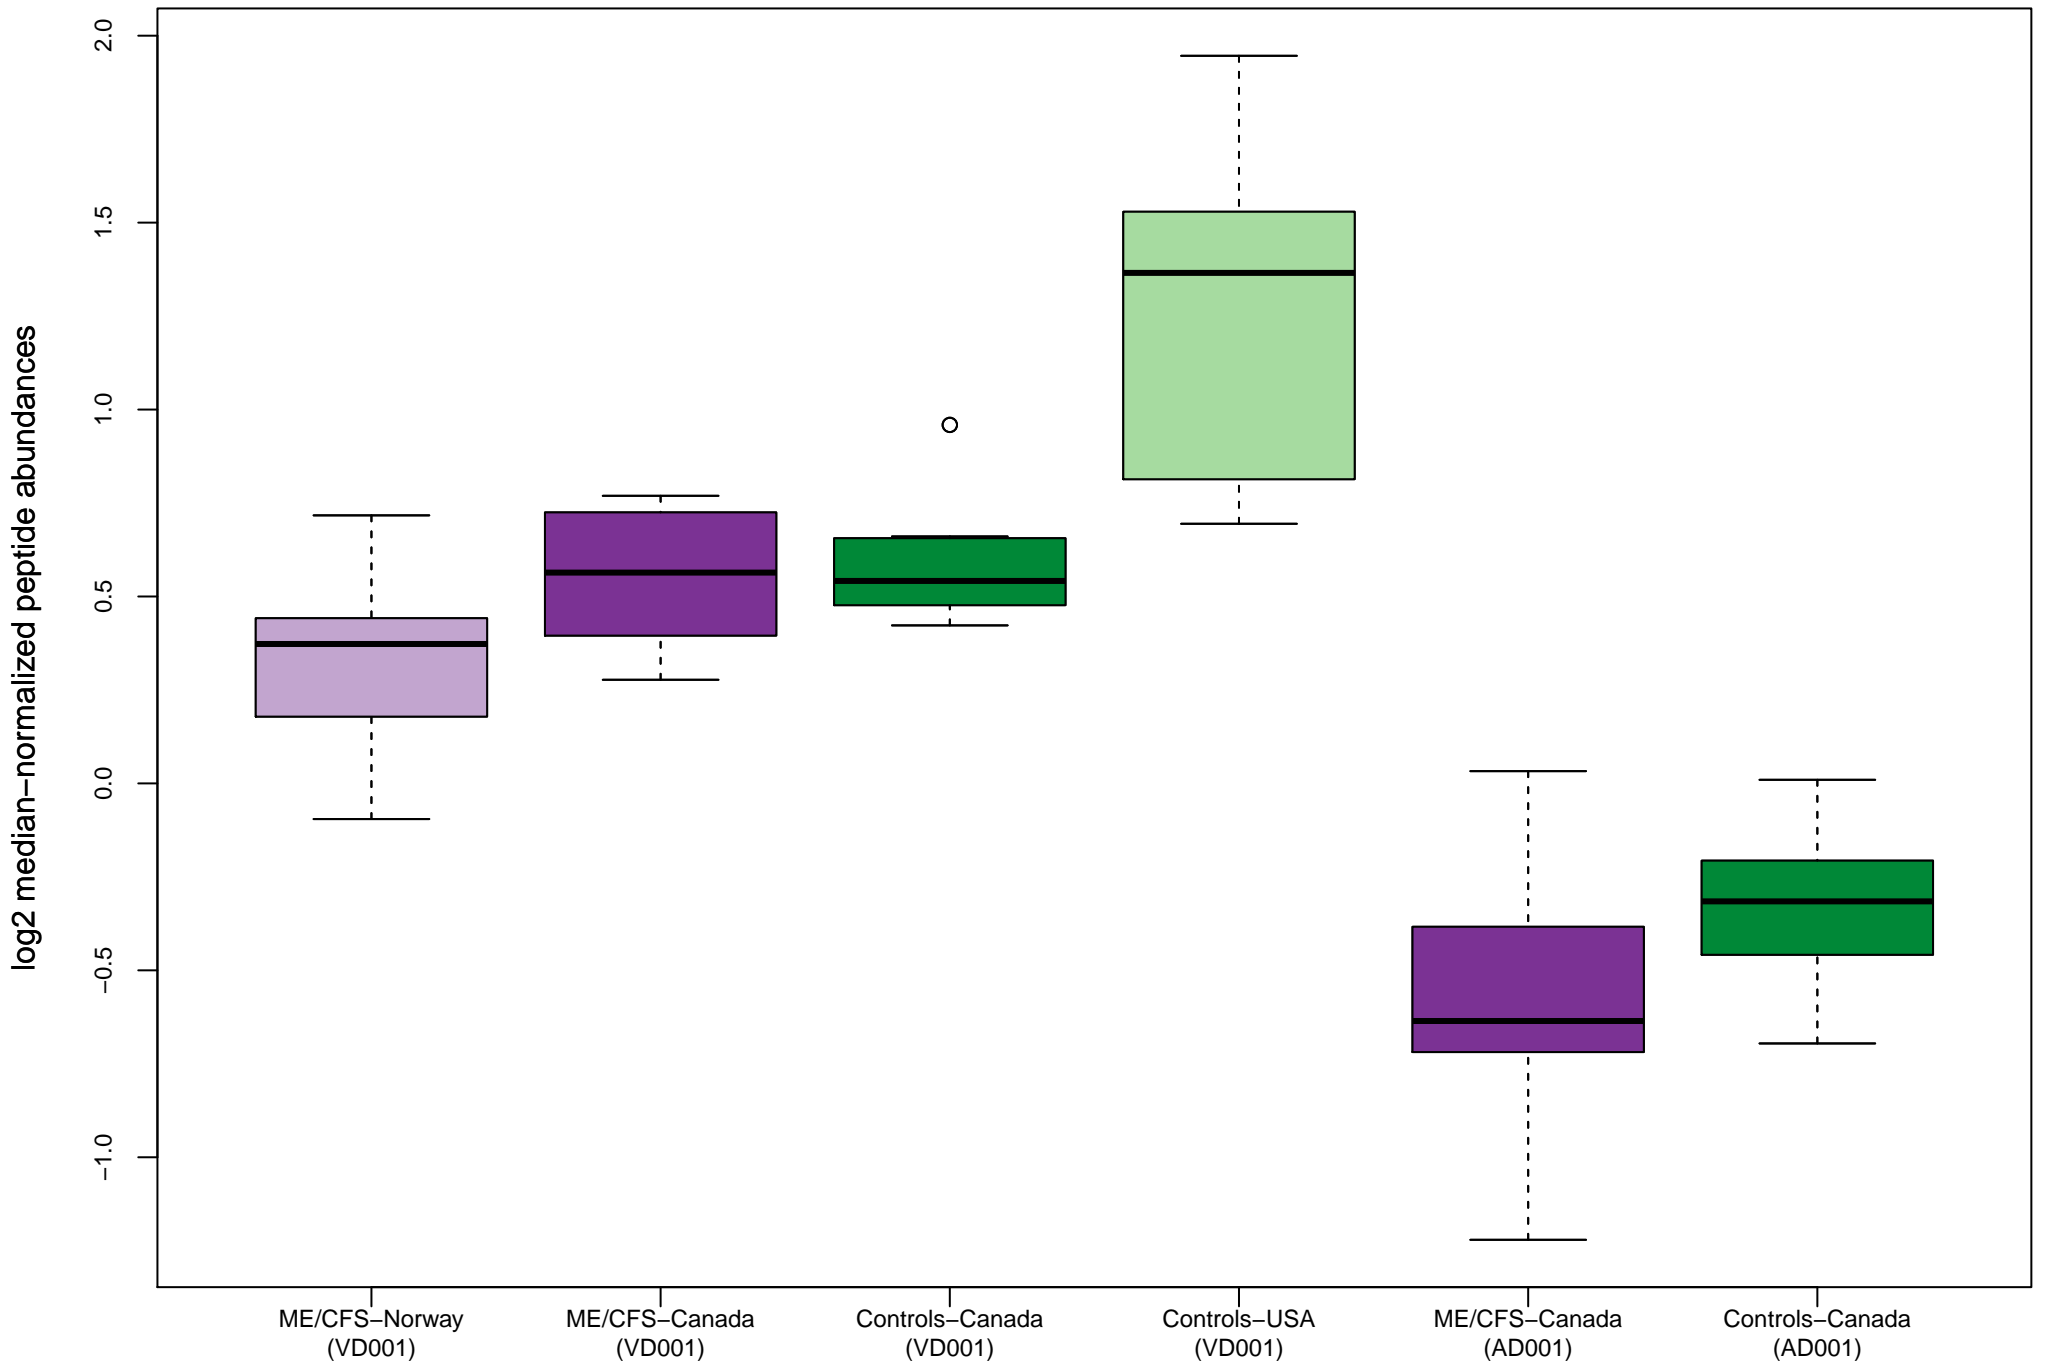

# QFLWHQPWGFRL

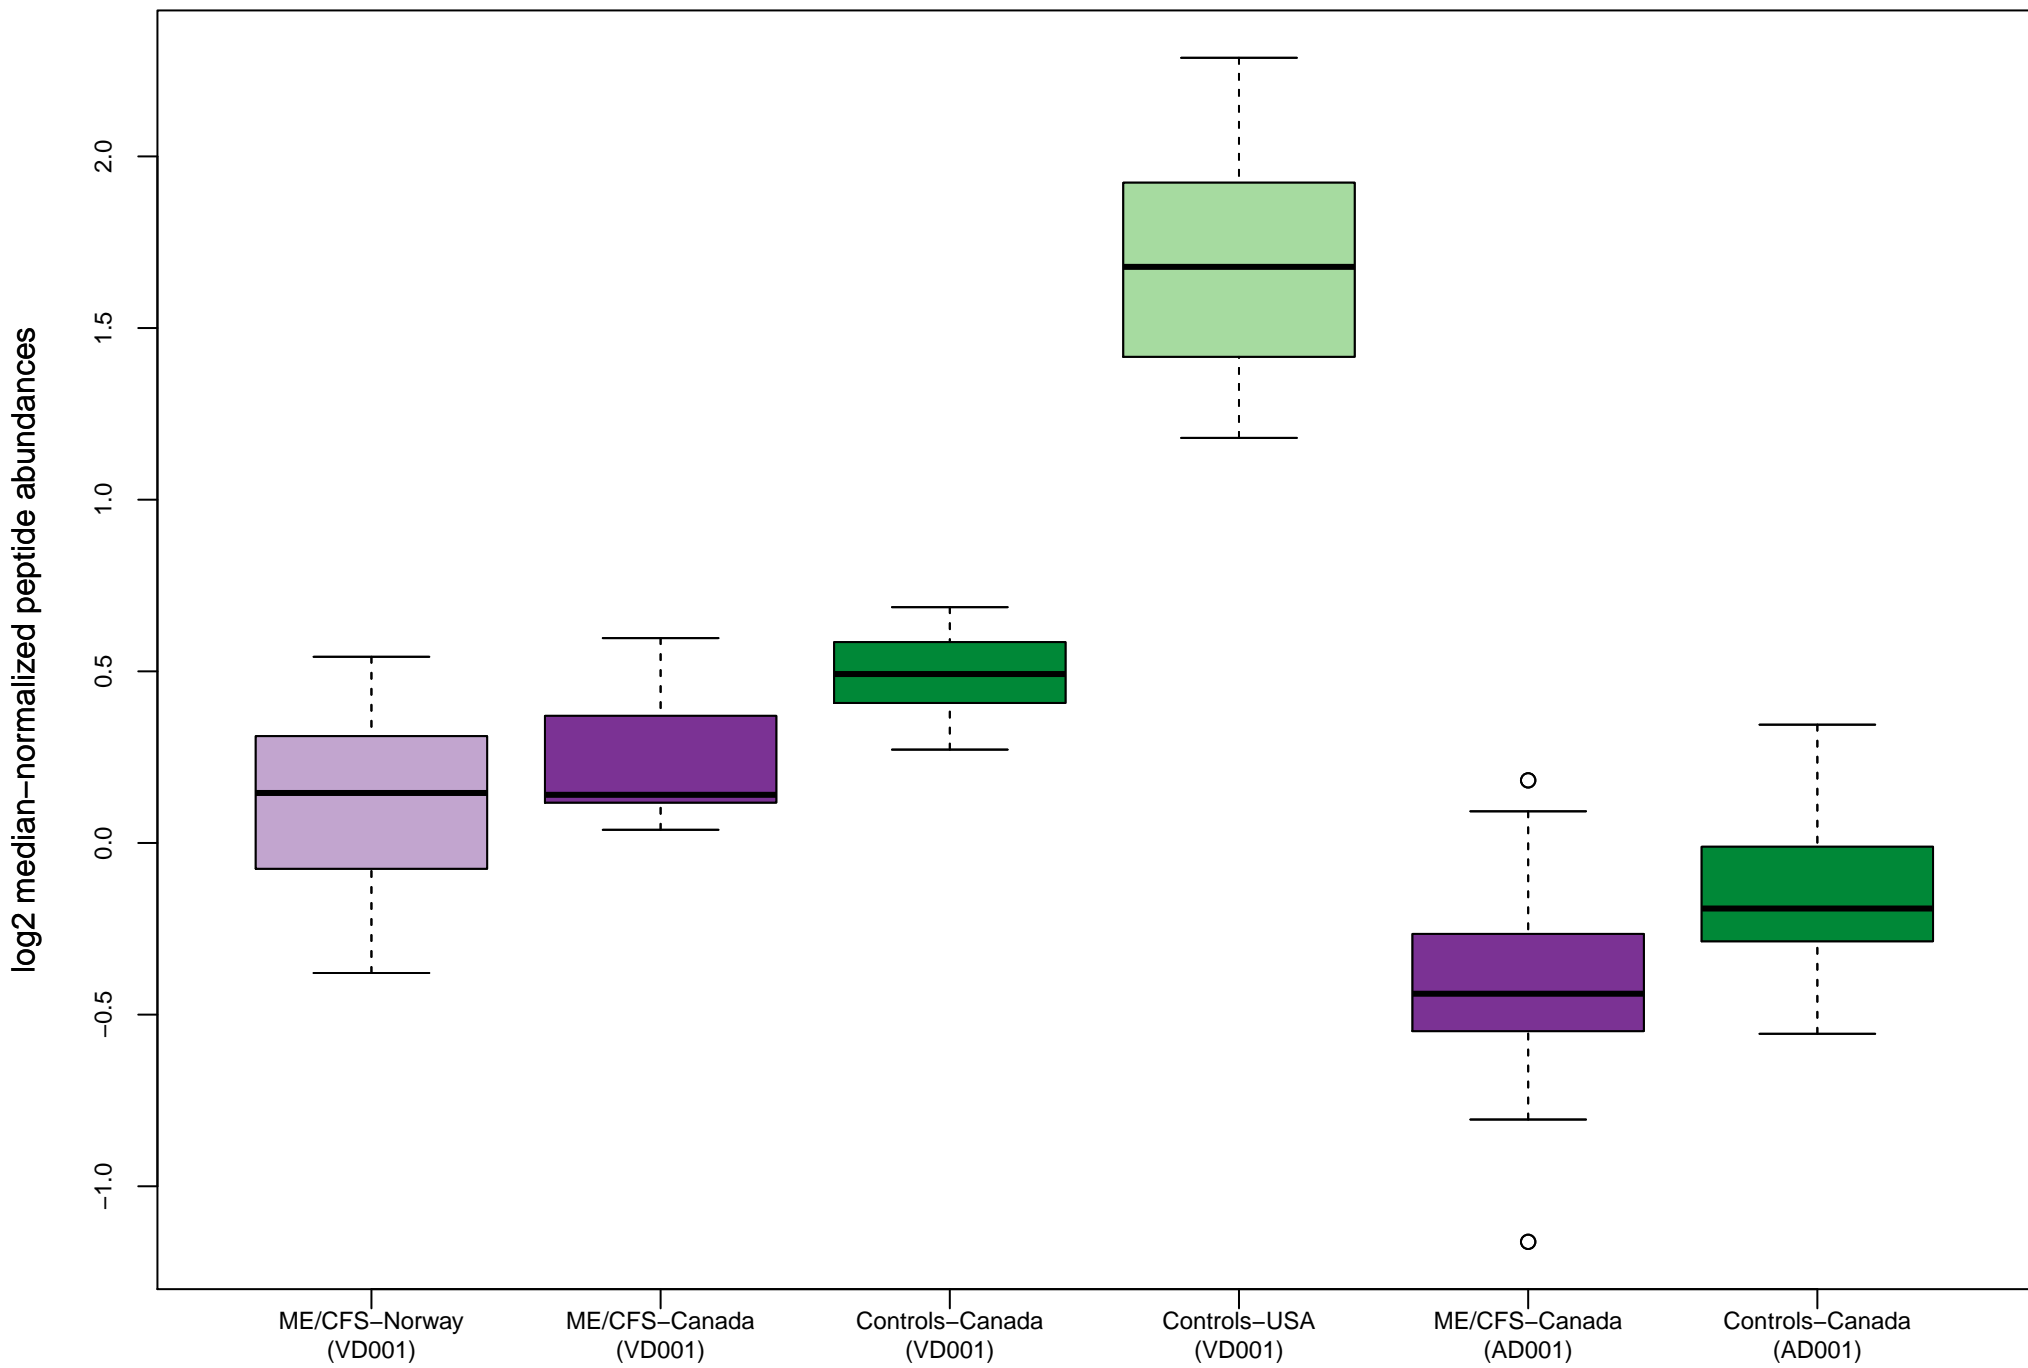

# QFLYPWFKLSGV

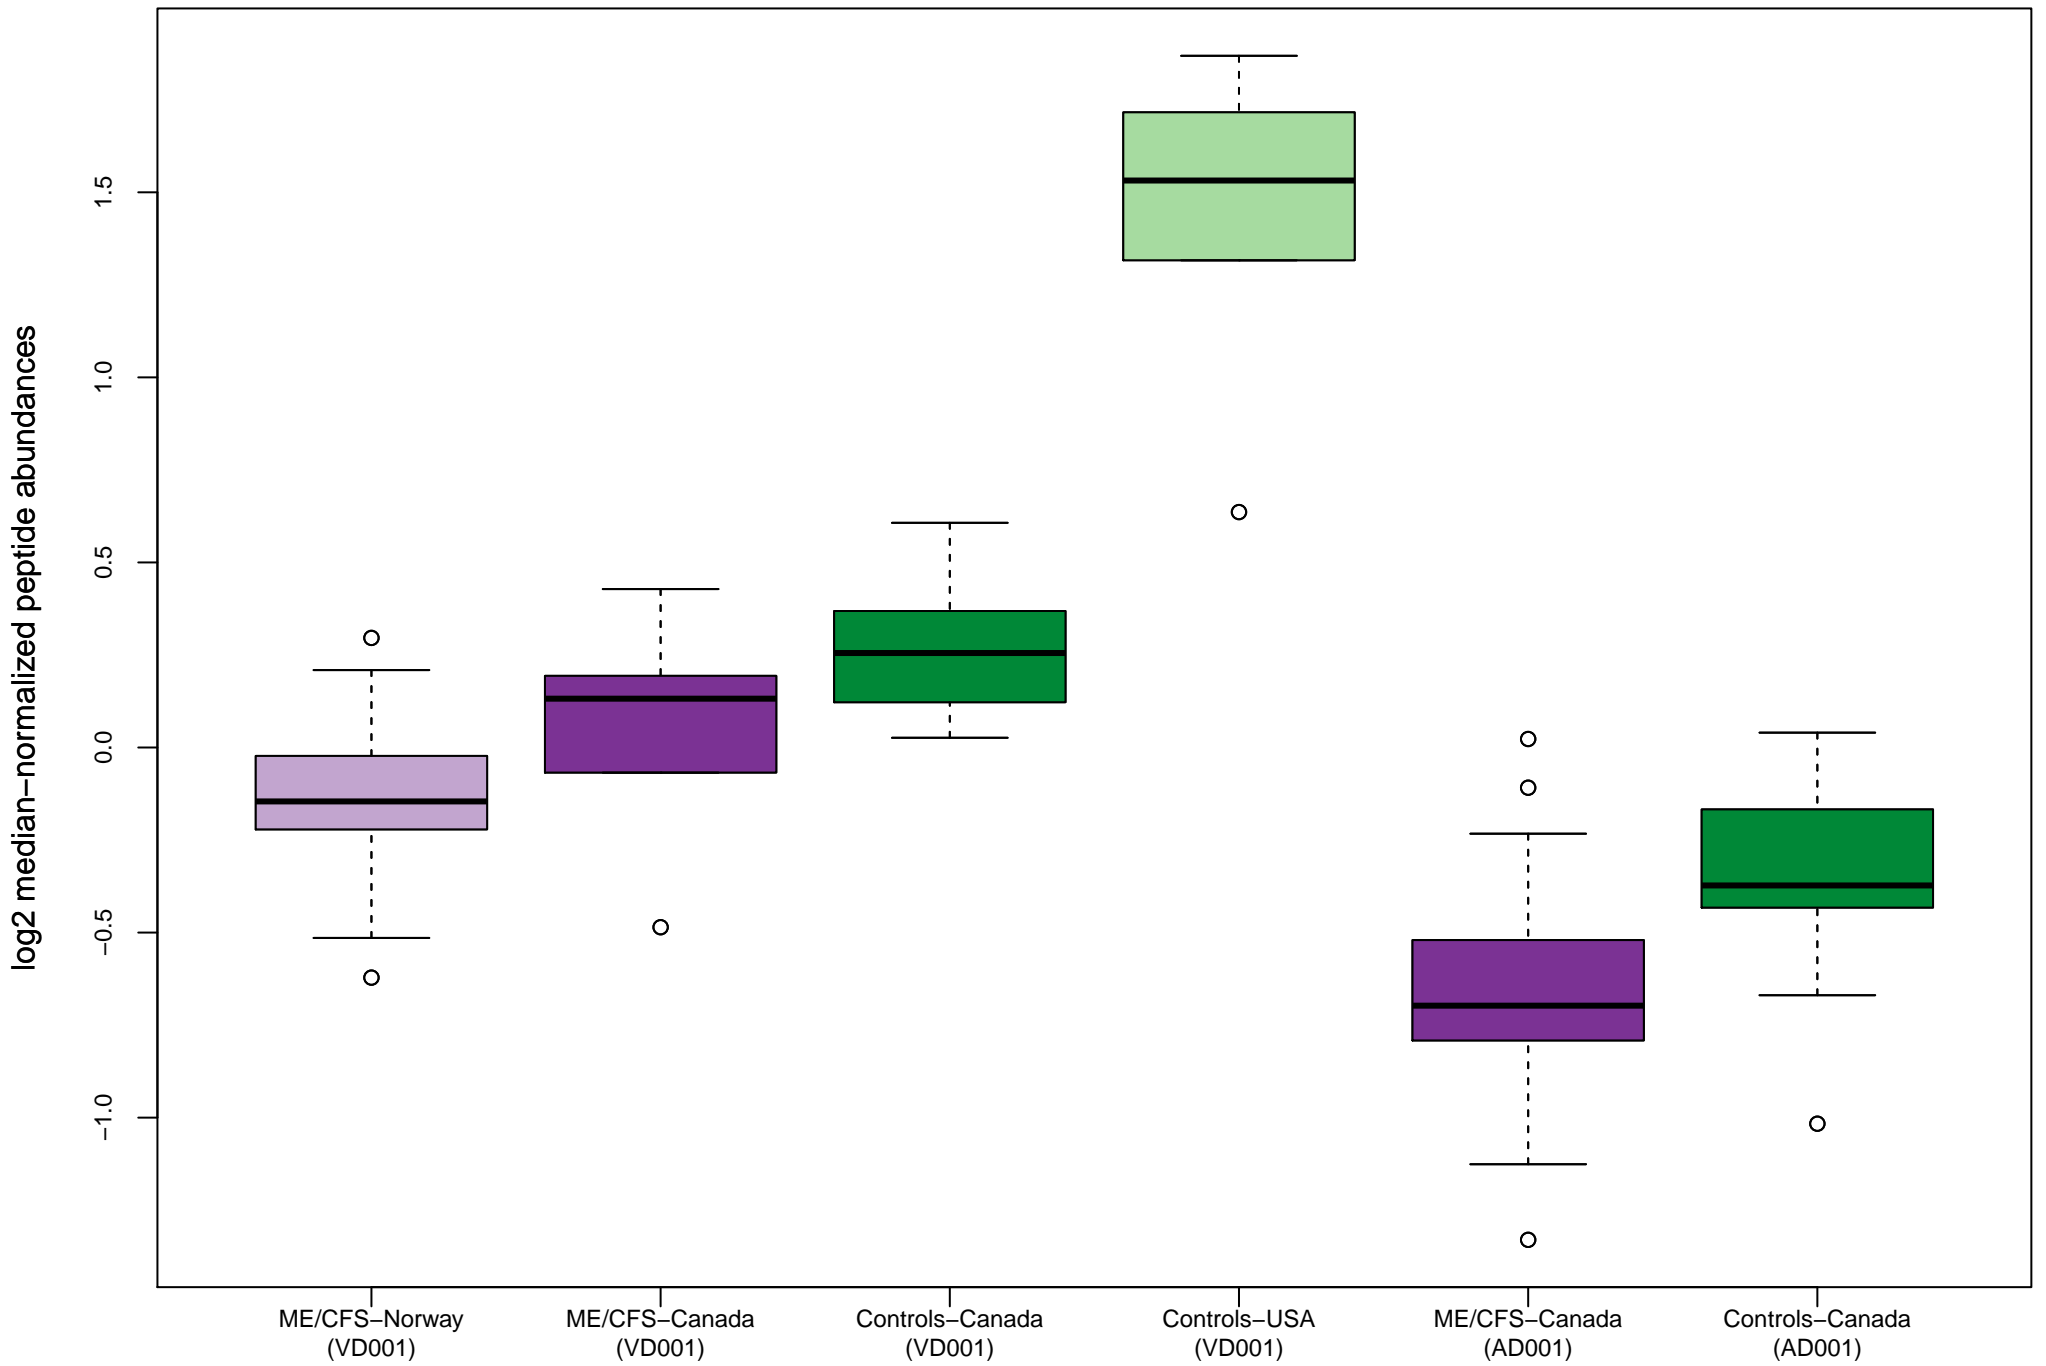

# QFSRNVLWKFYW

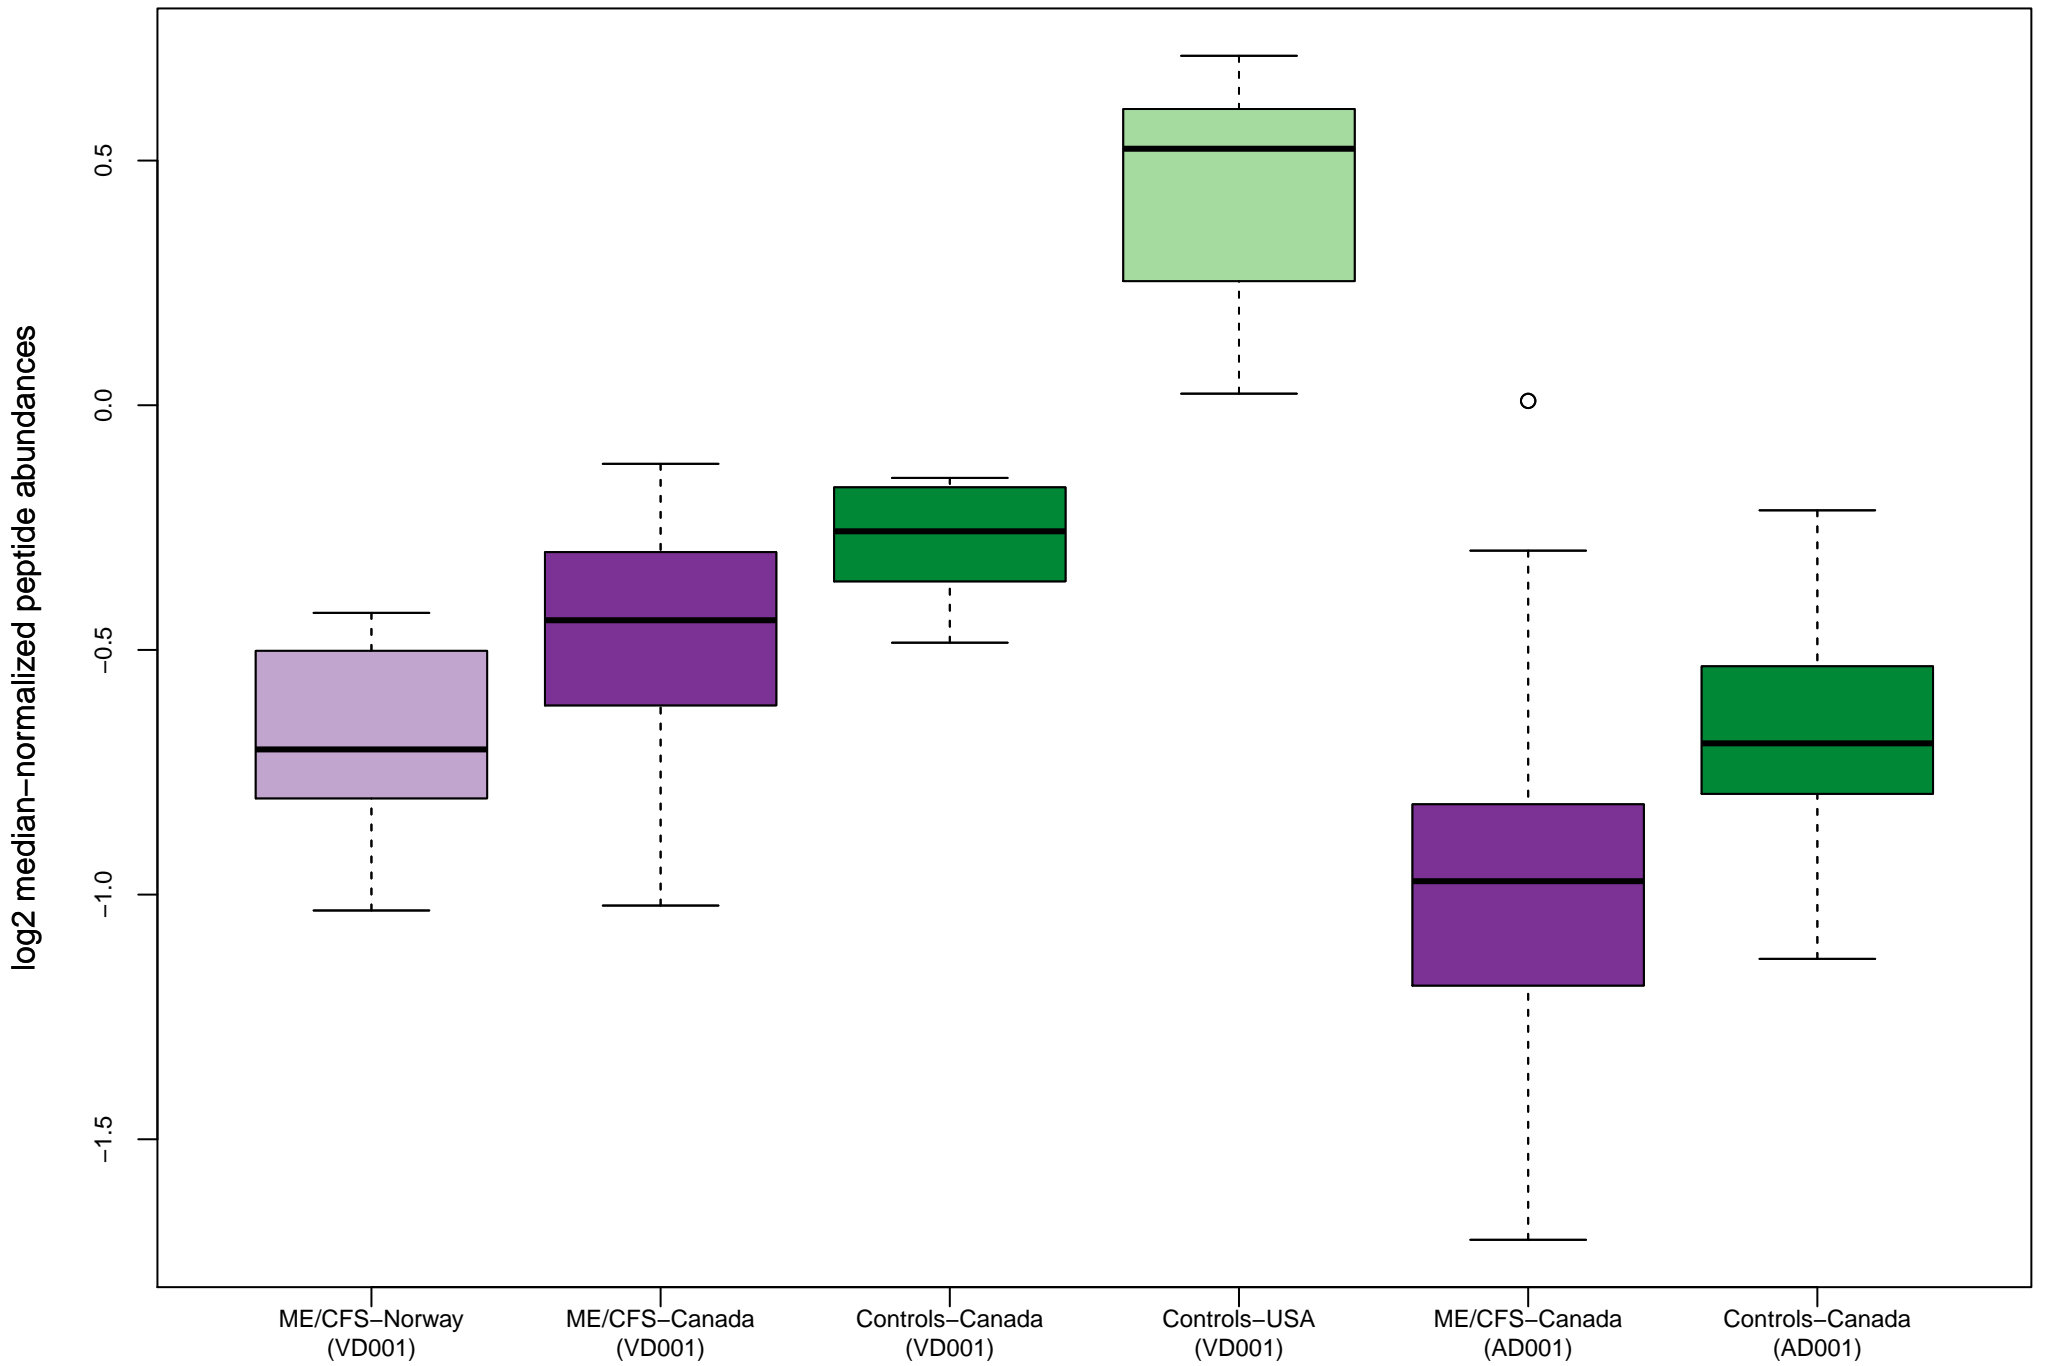



# QGQFRLWNAFPL

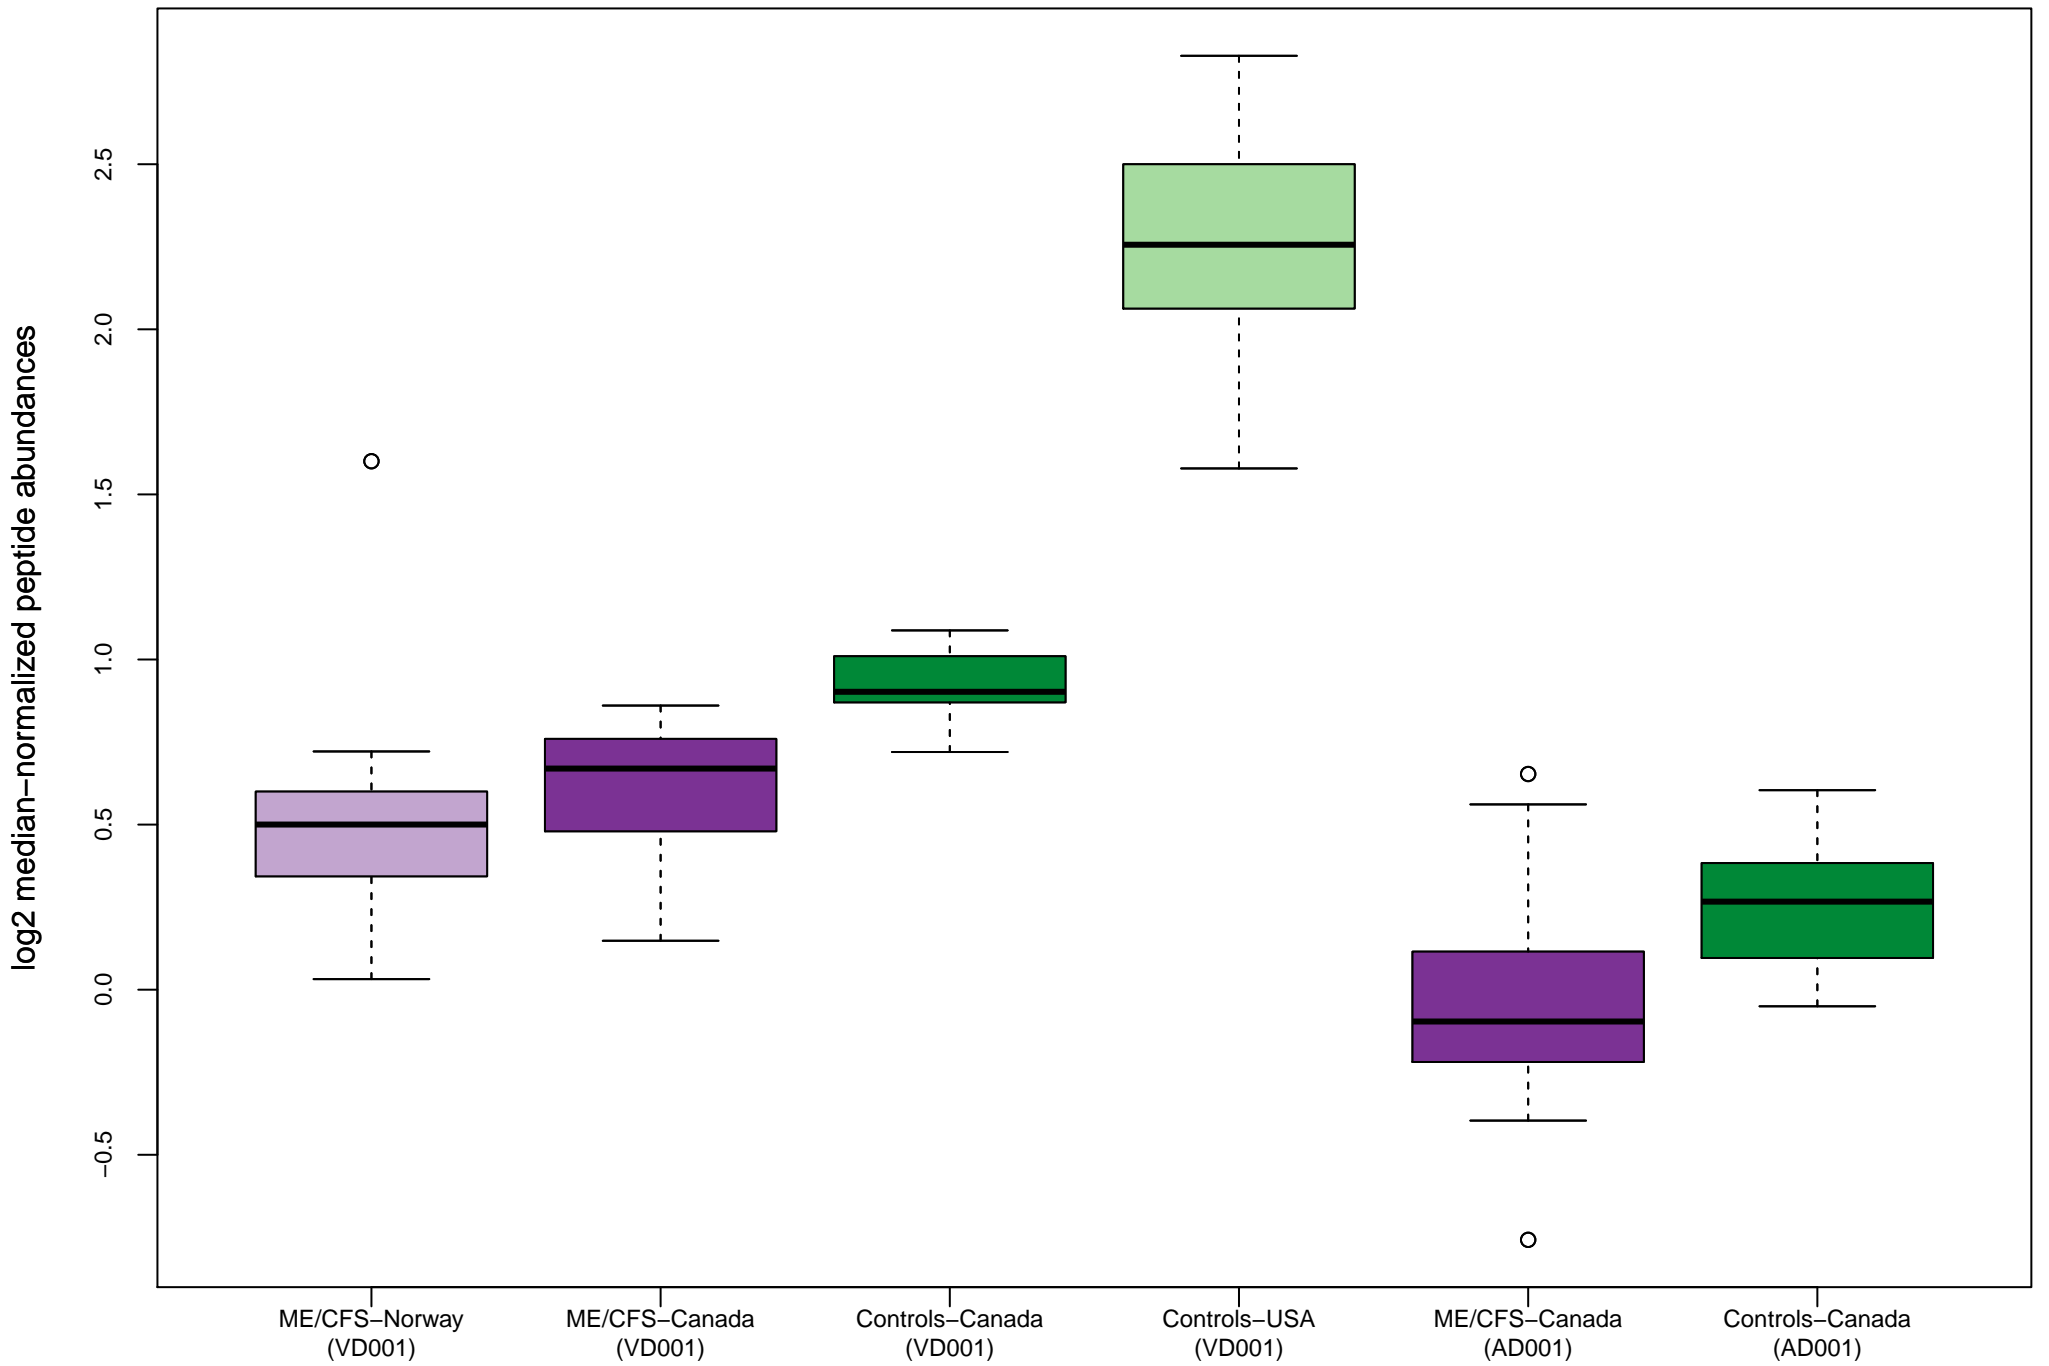

# QGWRLFALSGAL

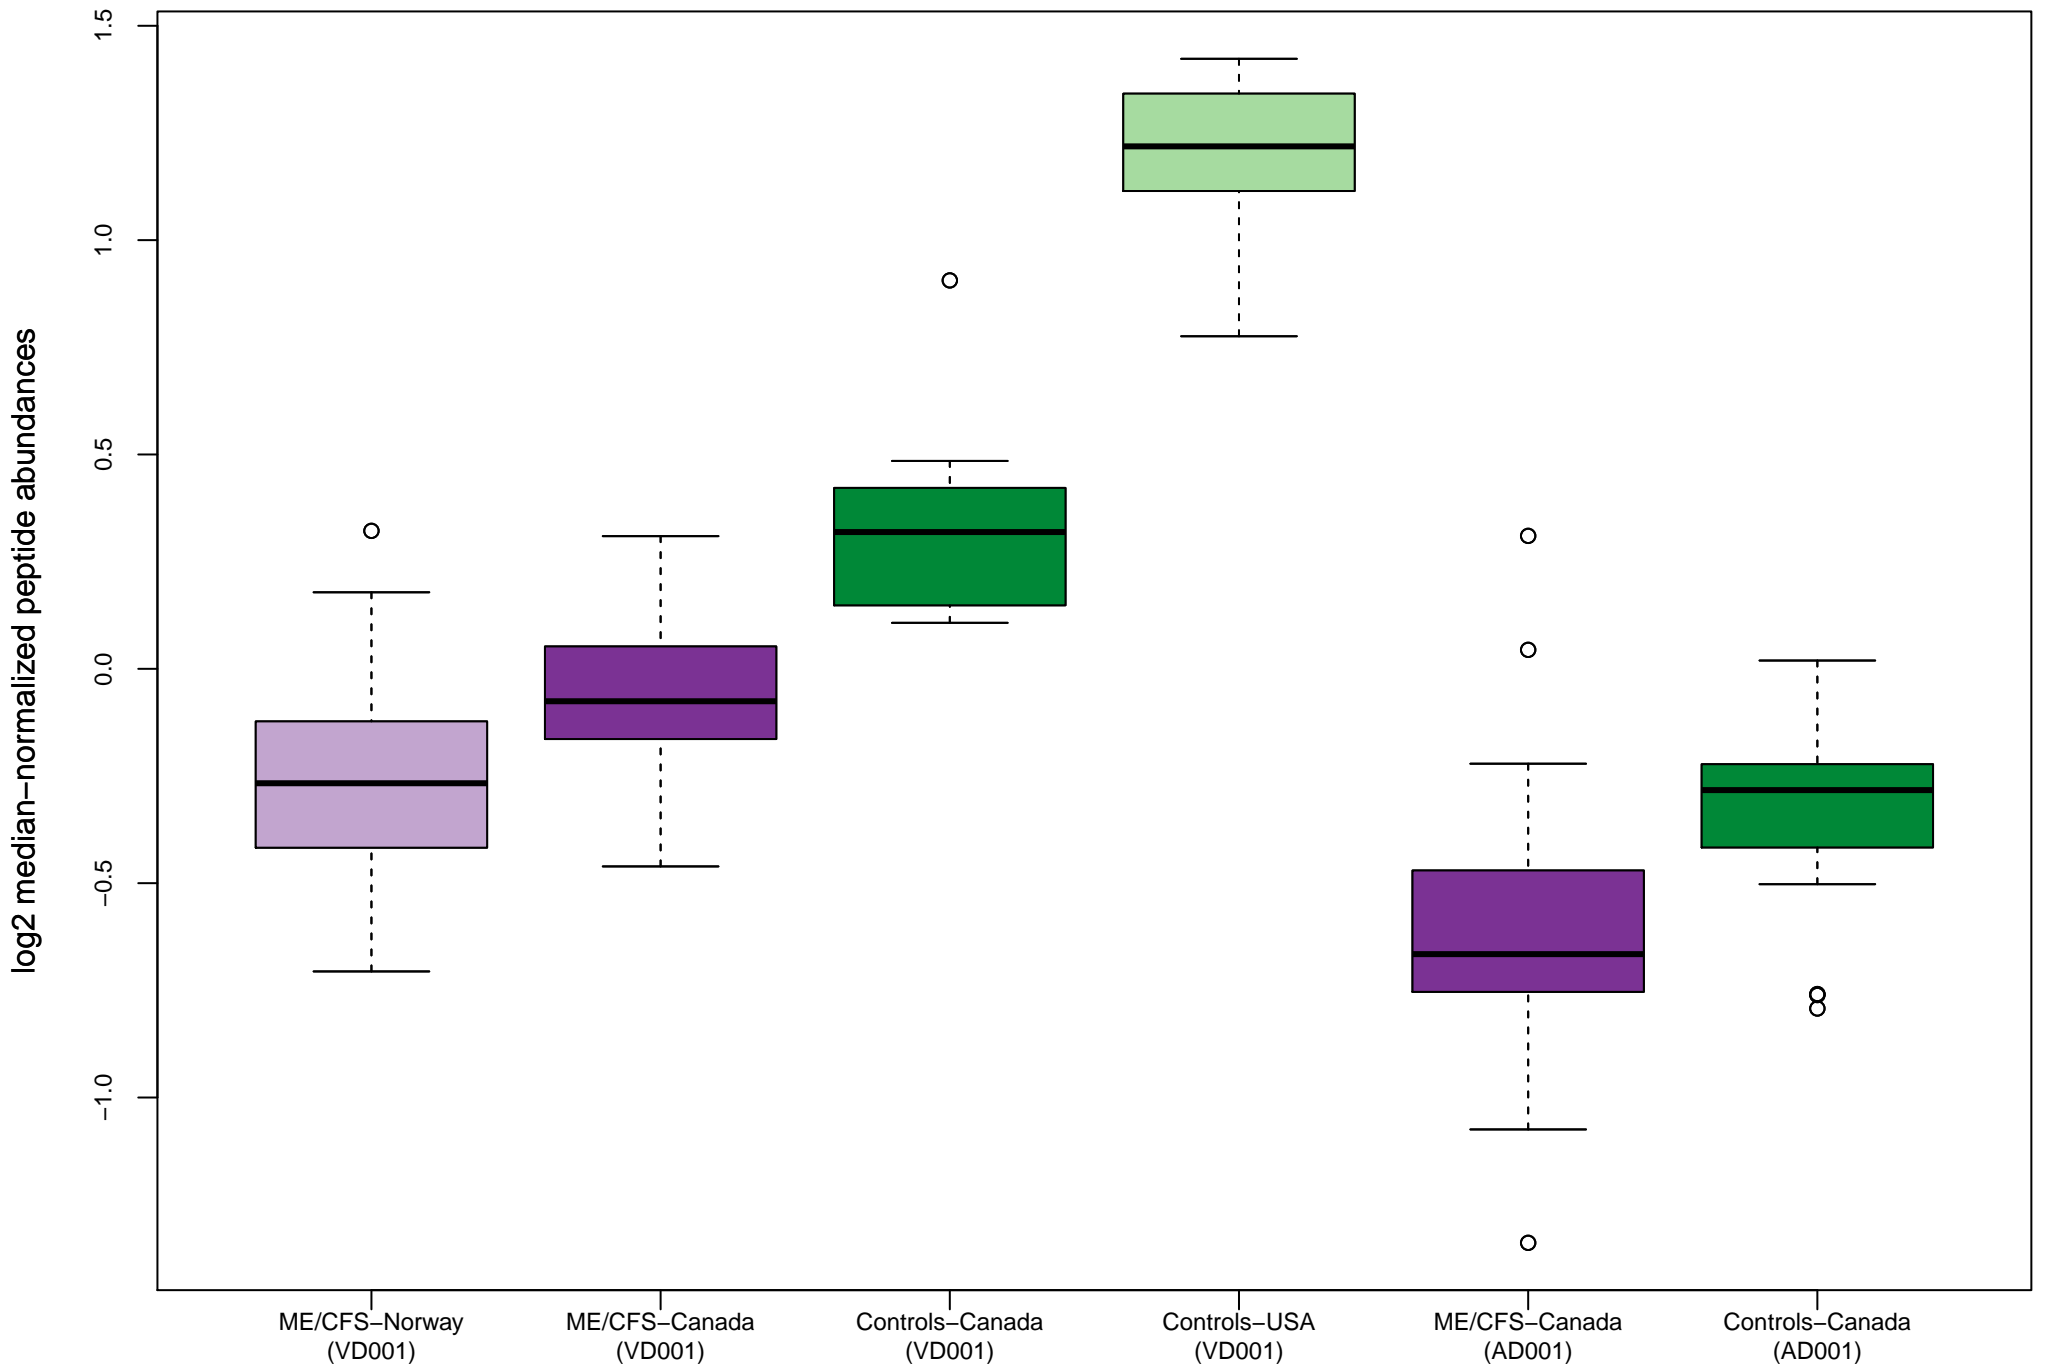

# QHHFVSFRKVAL

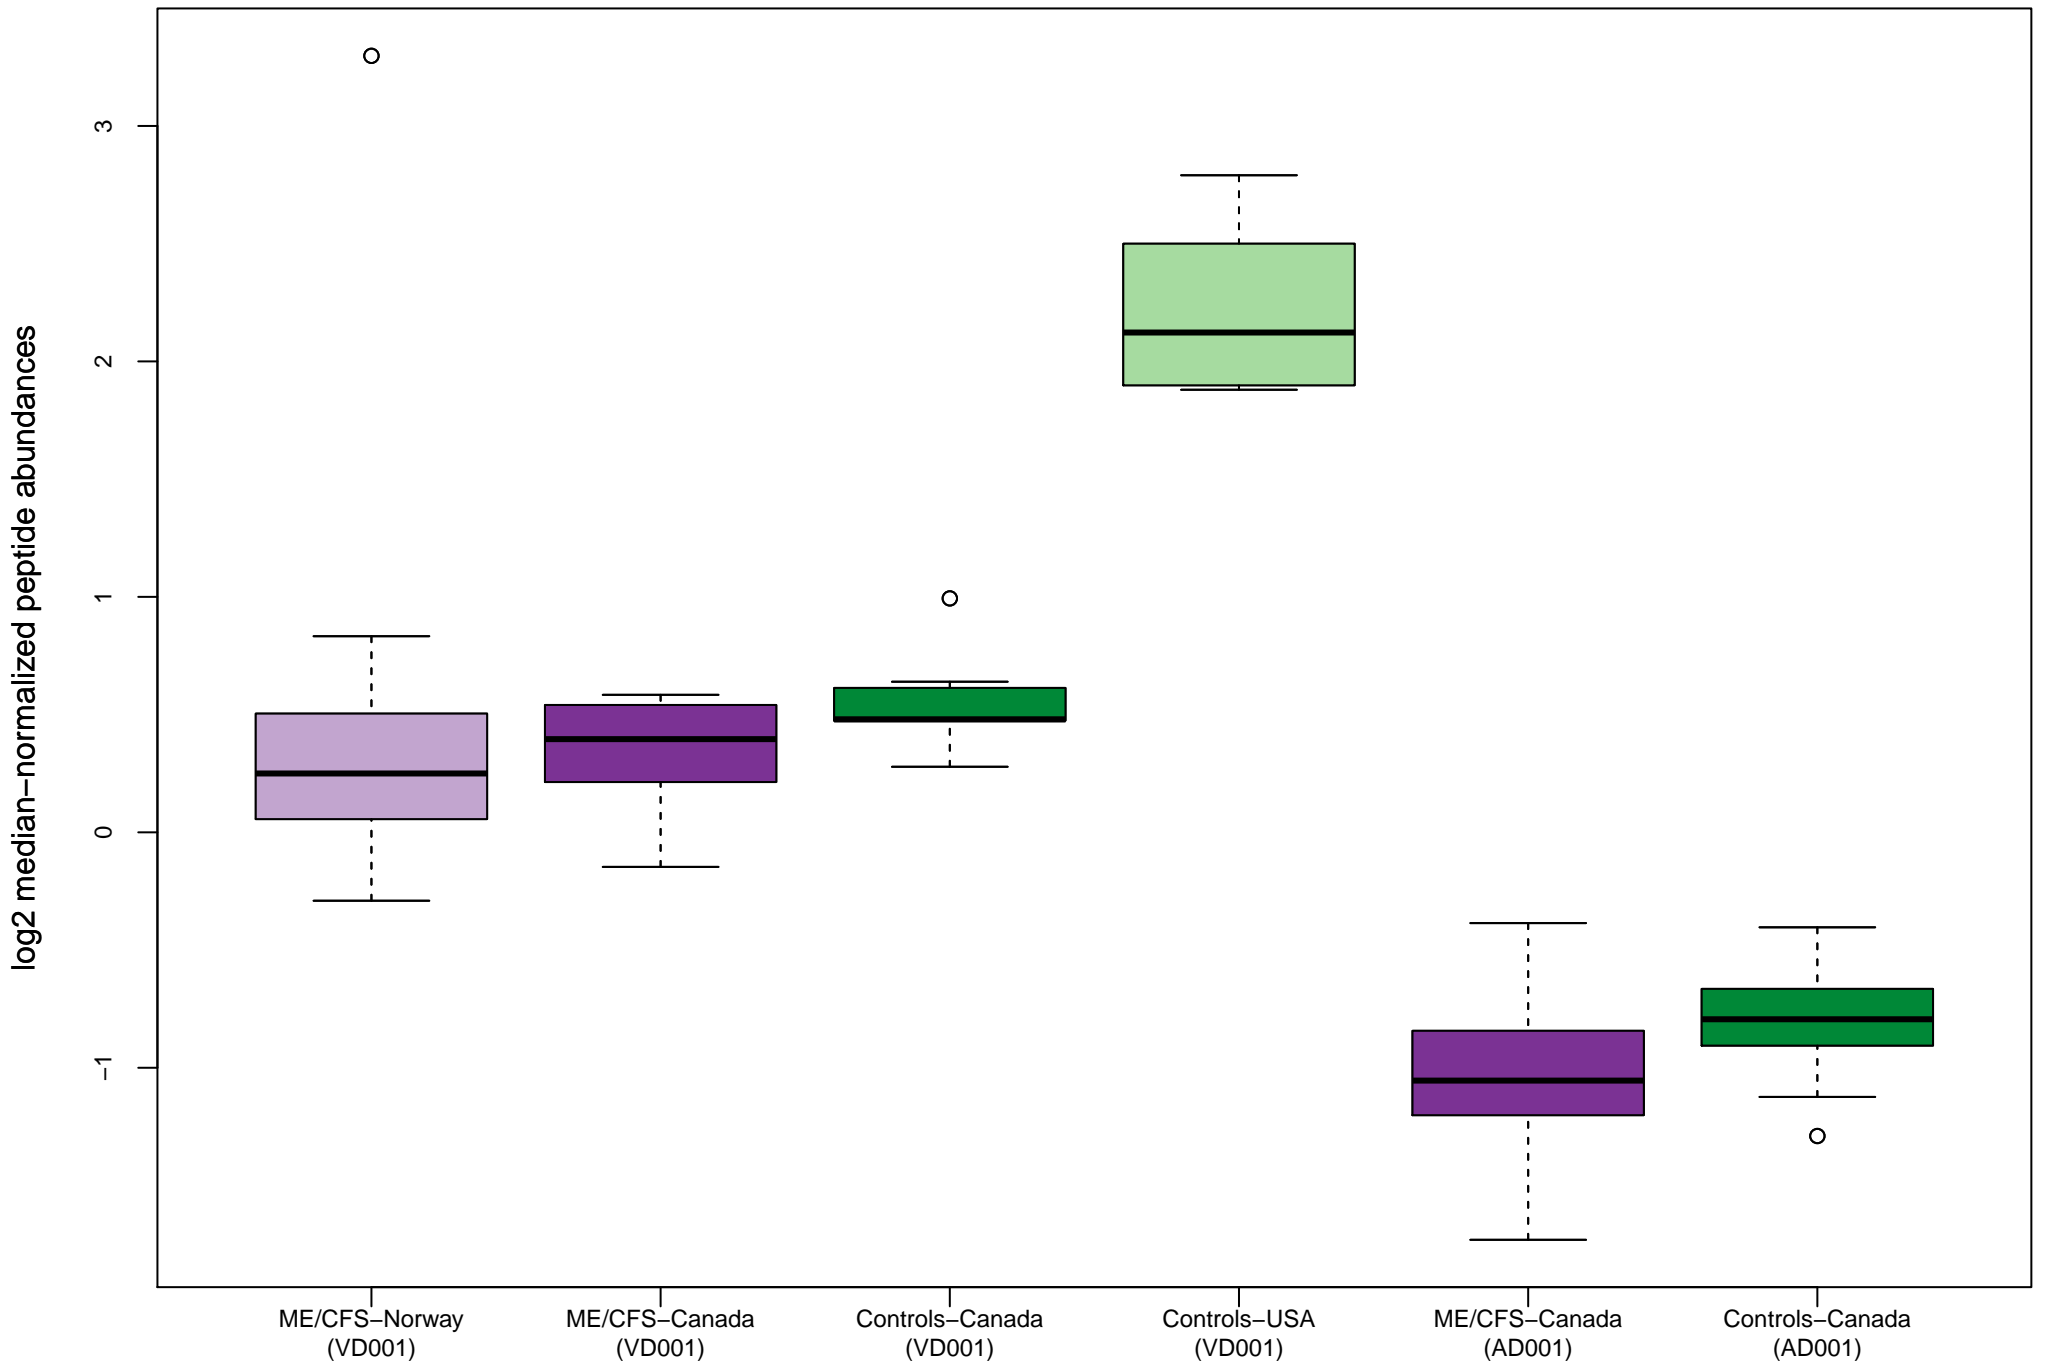

# QLFWRVFPWKVL

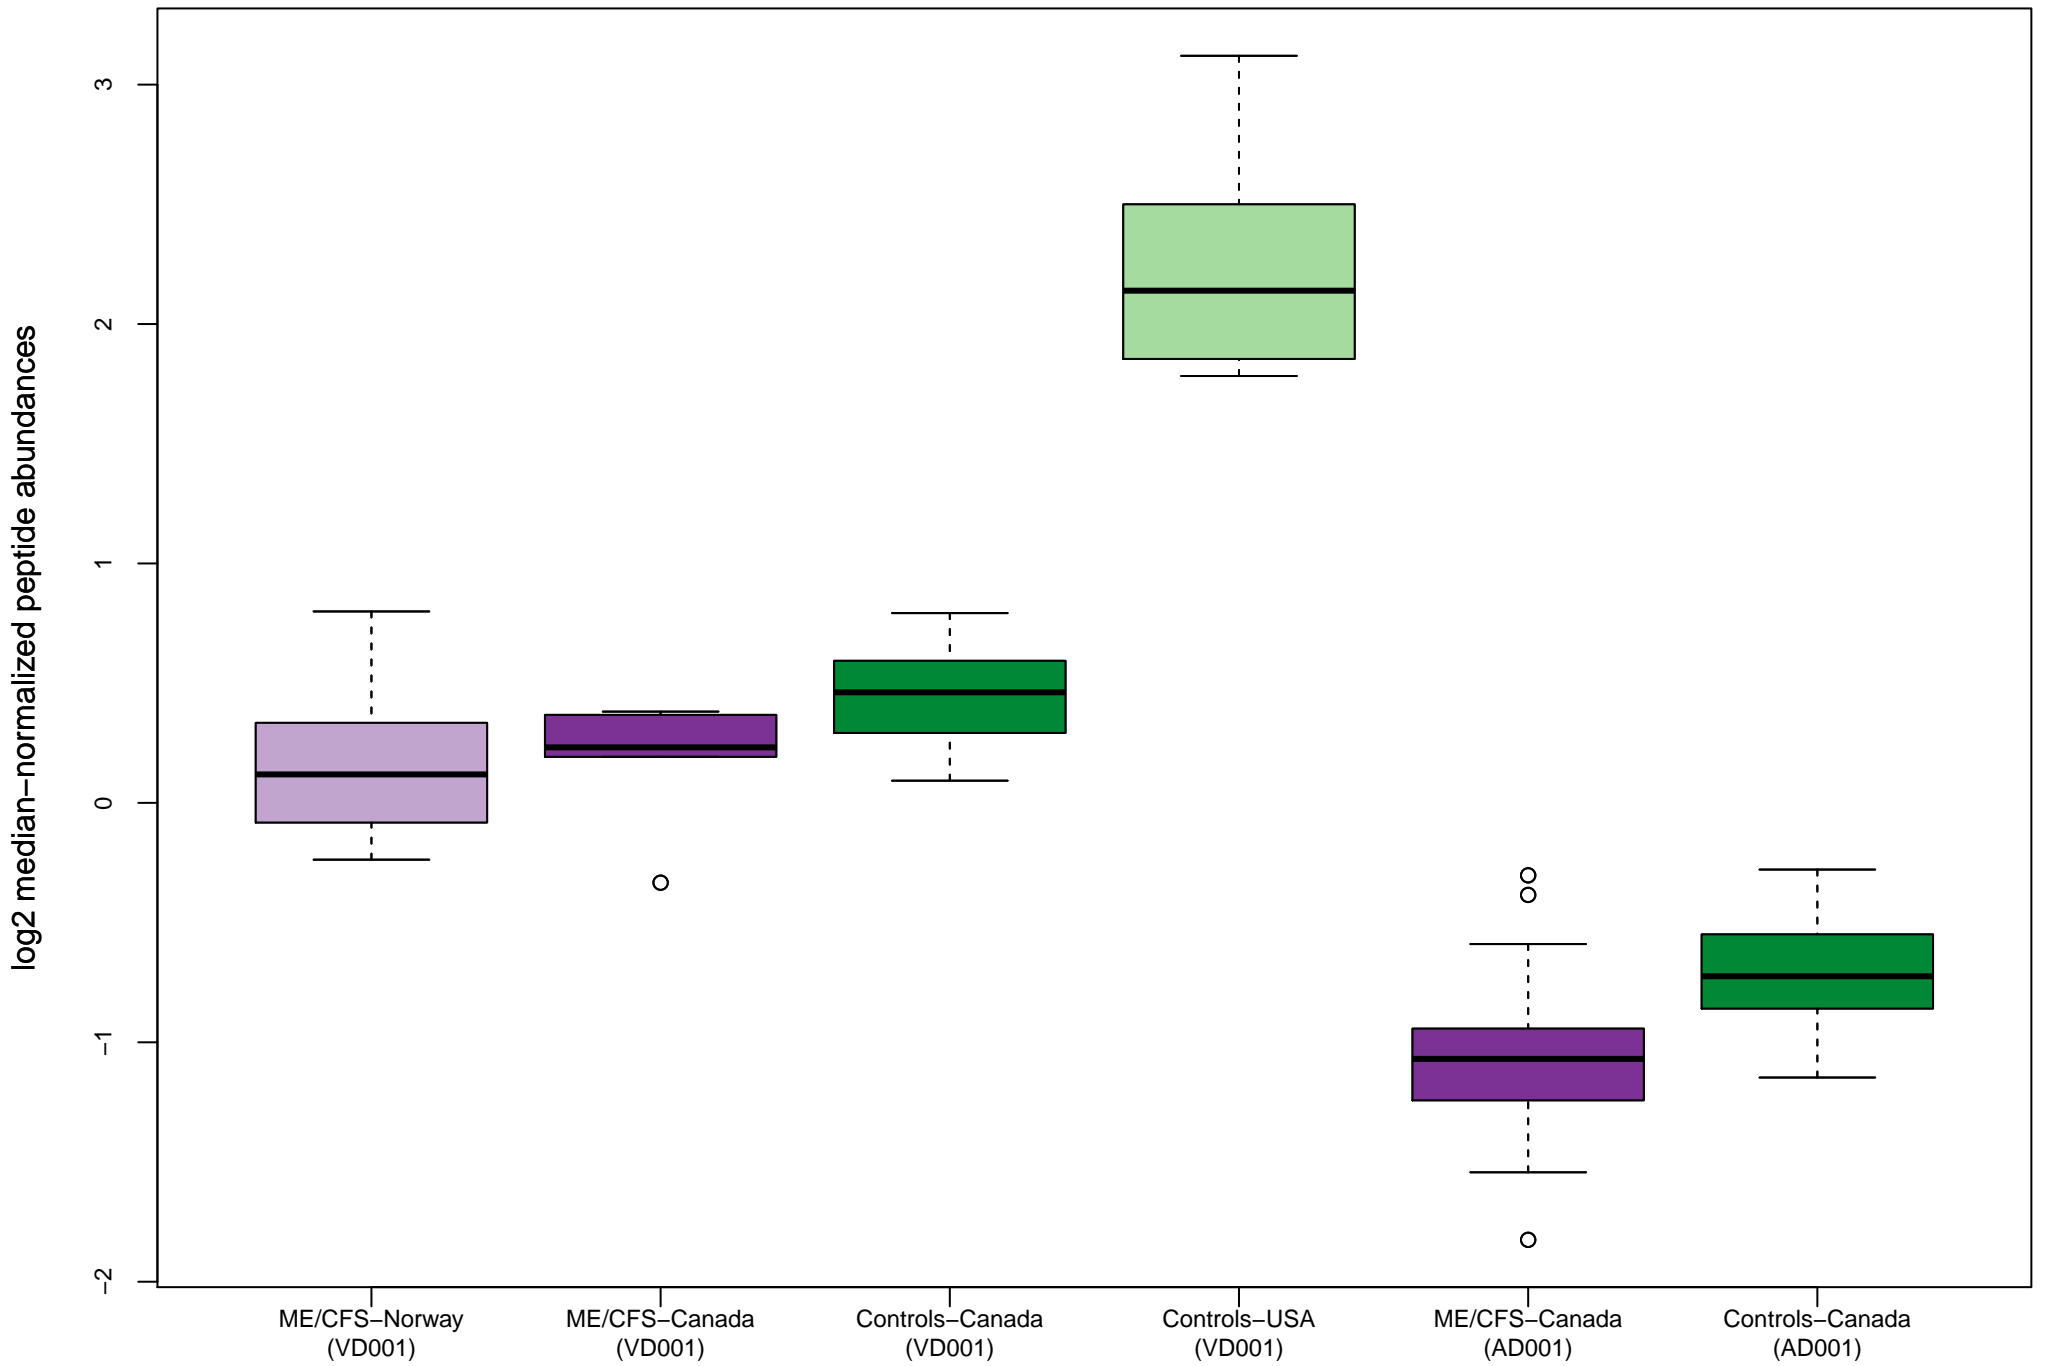

# QLKYHVQFRLLS

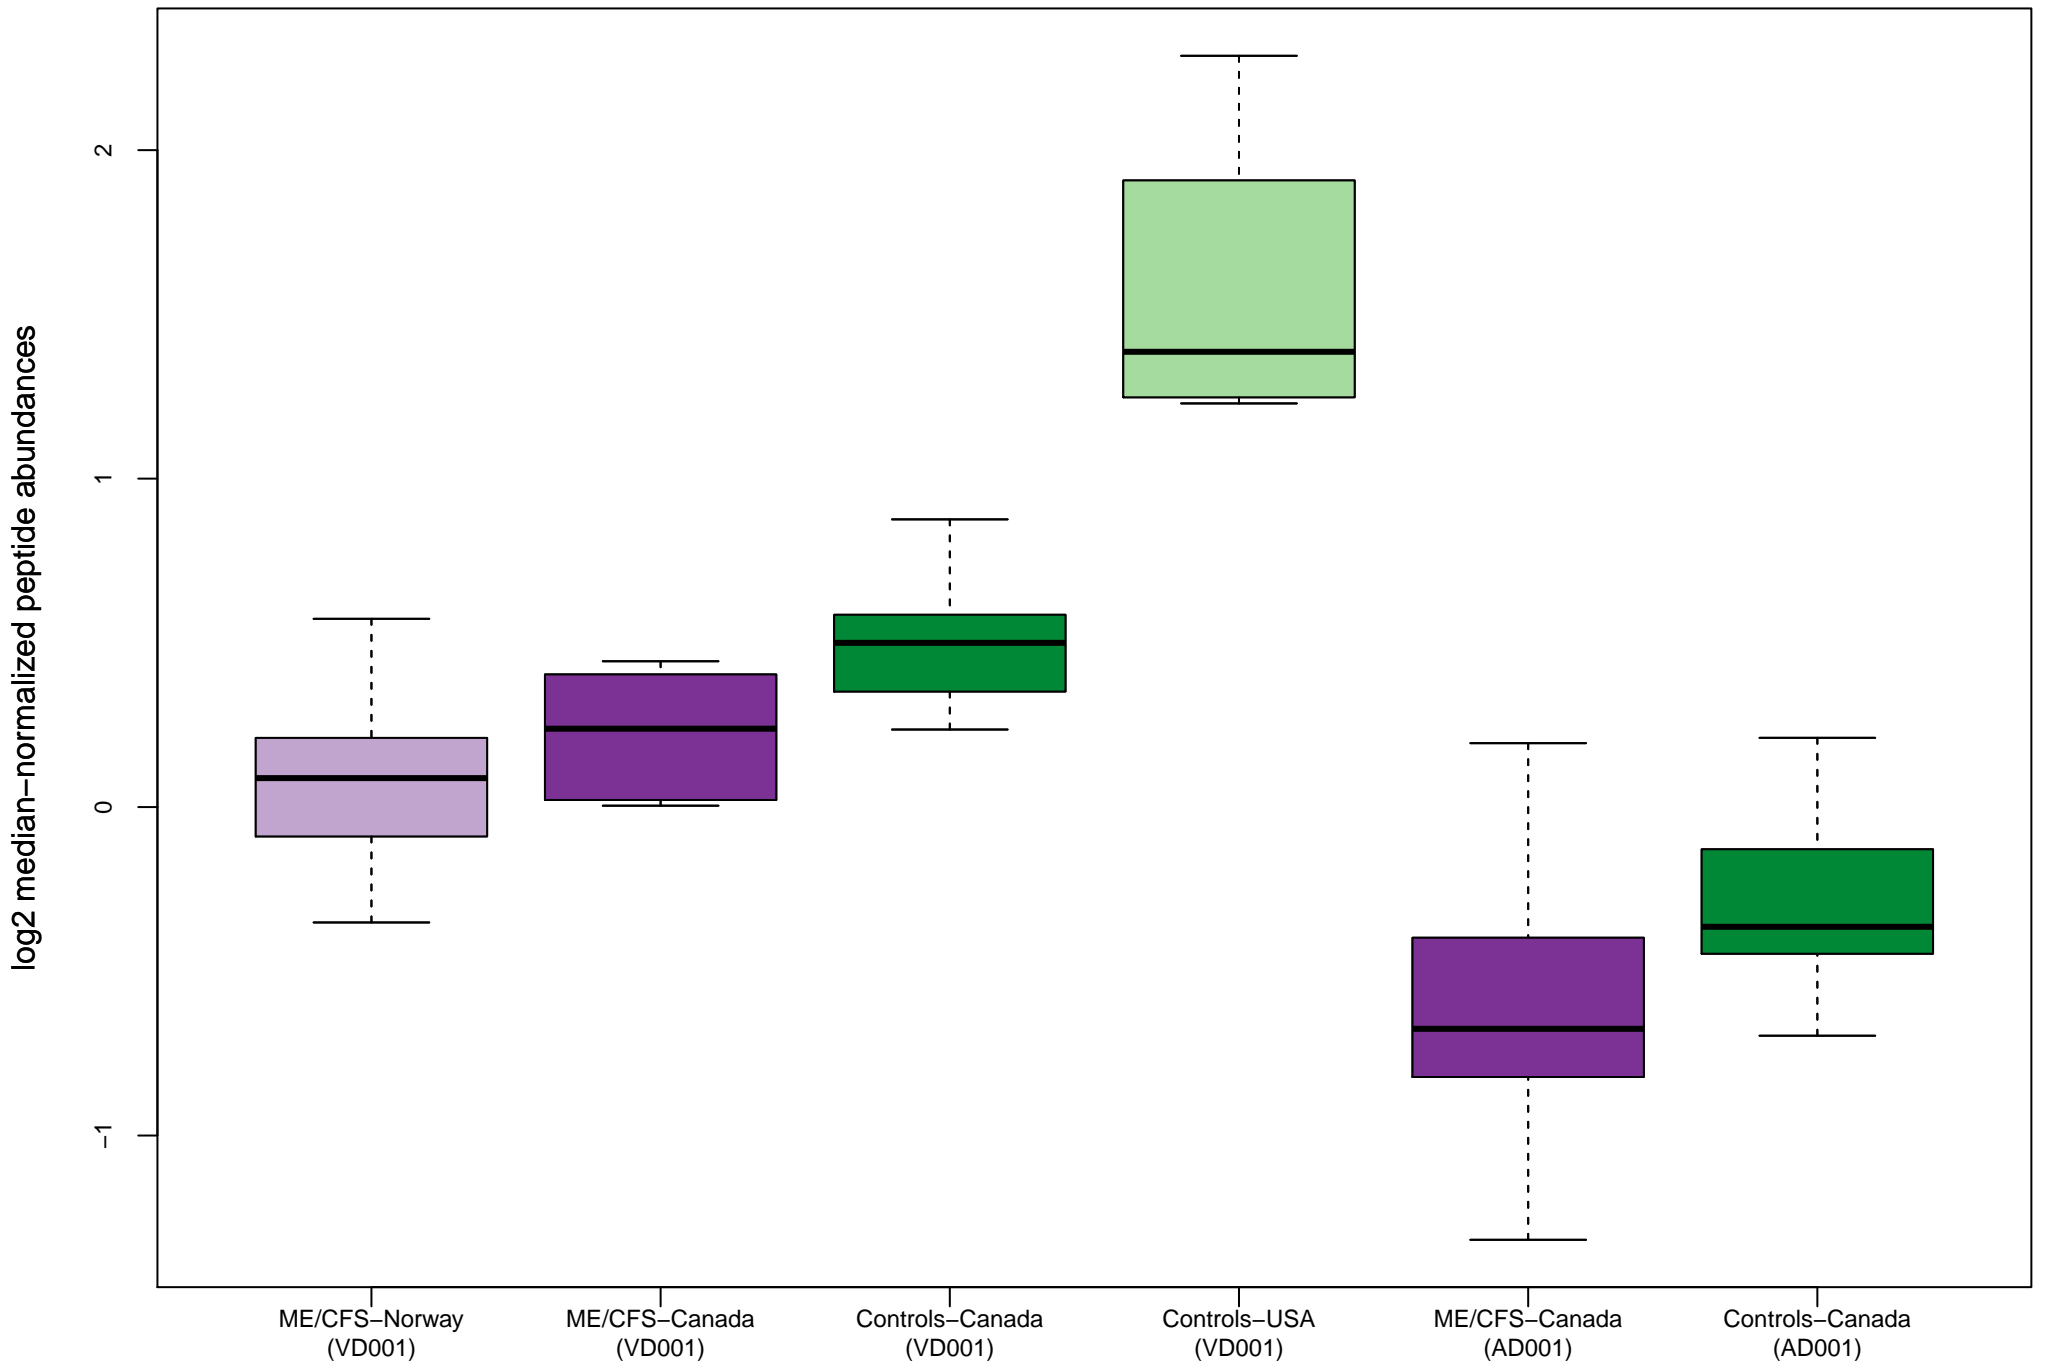

# QLLHLRSGVALS

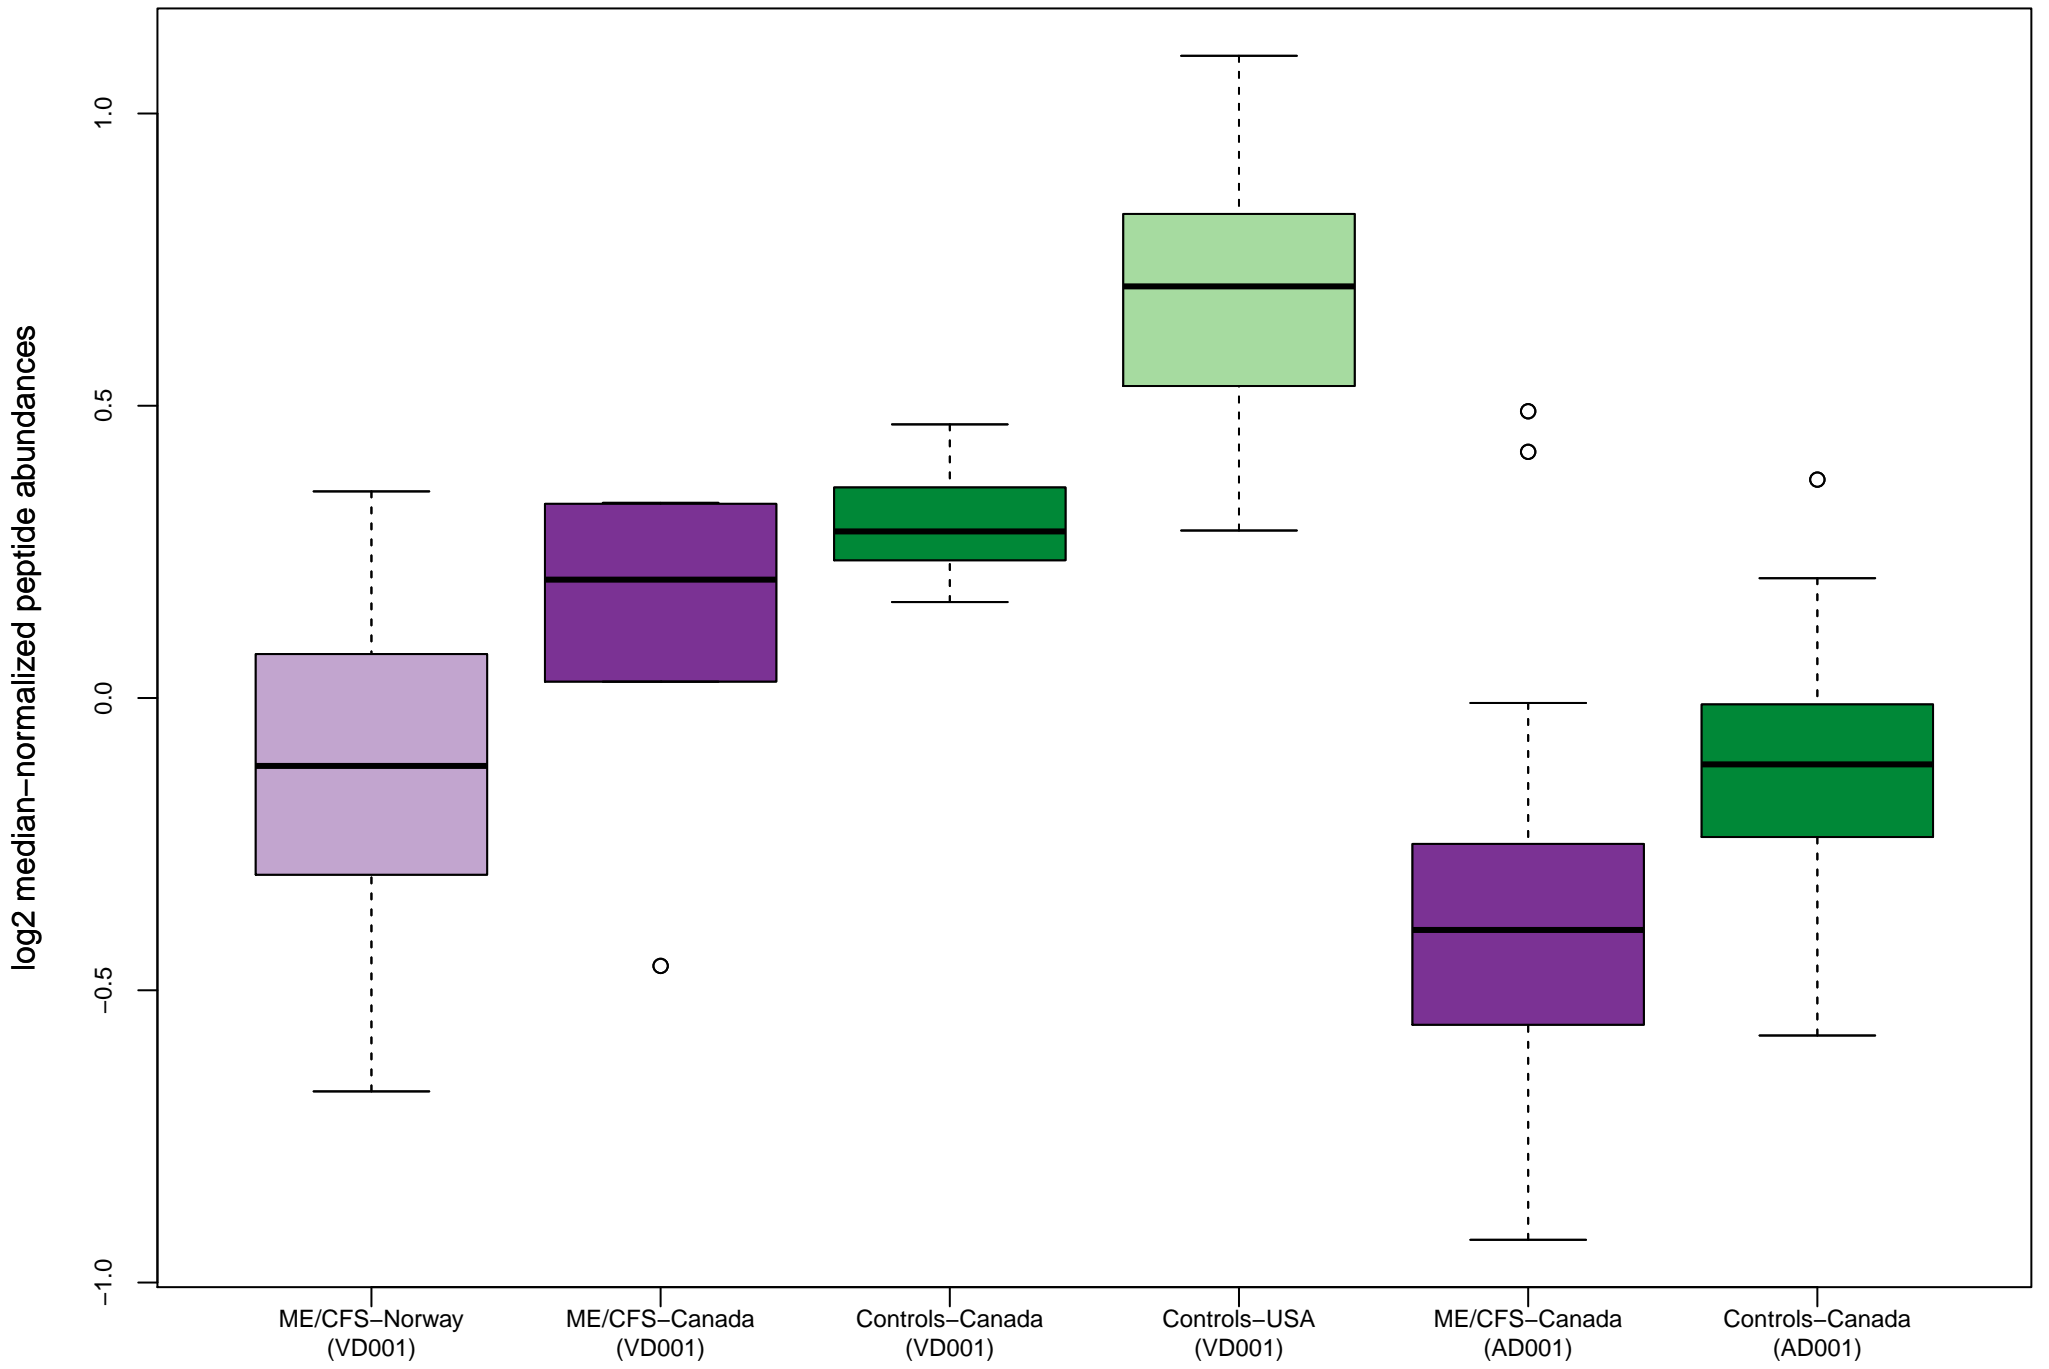

# QLSRSFPVKVLL

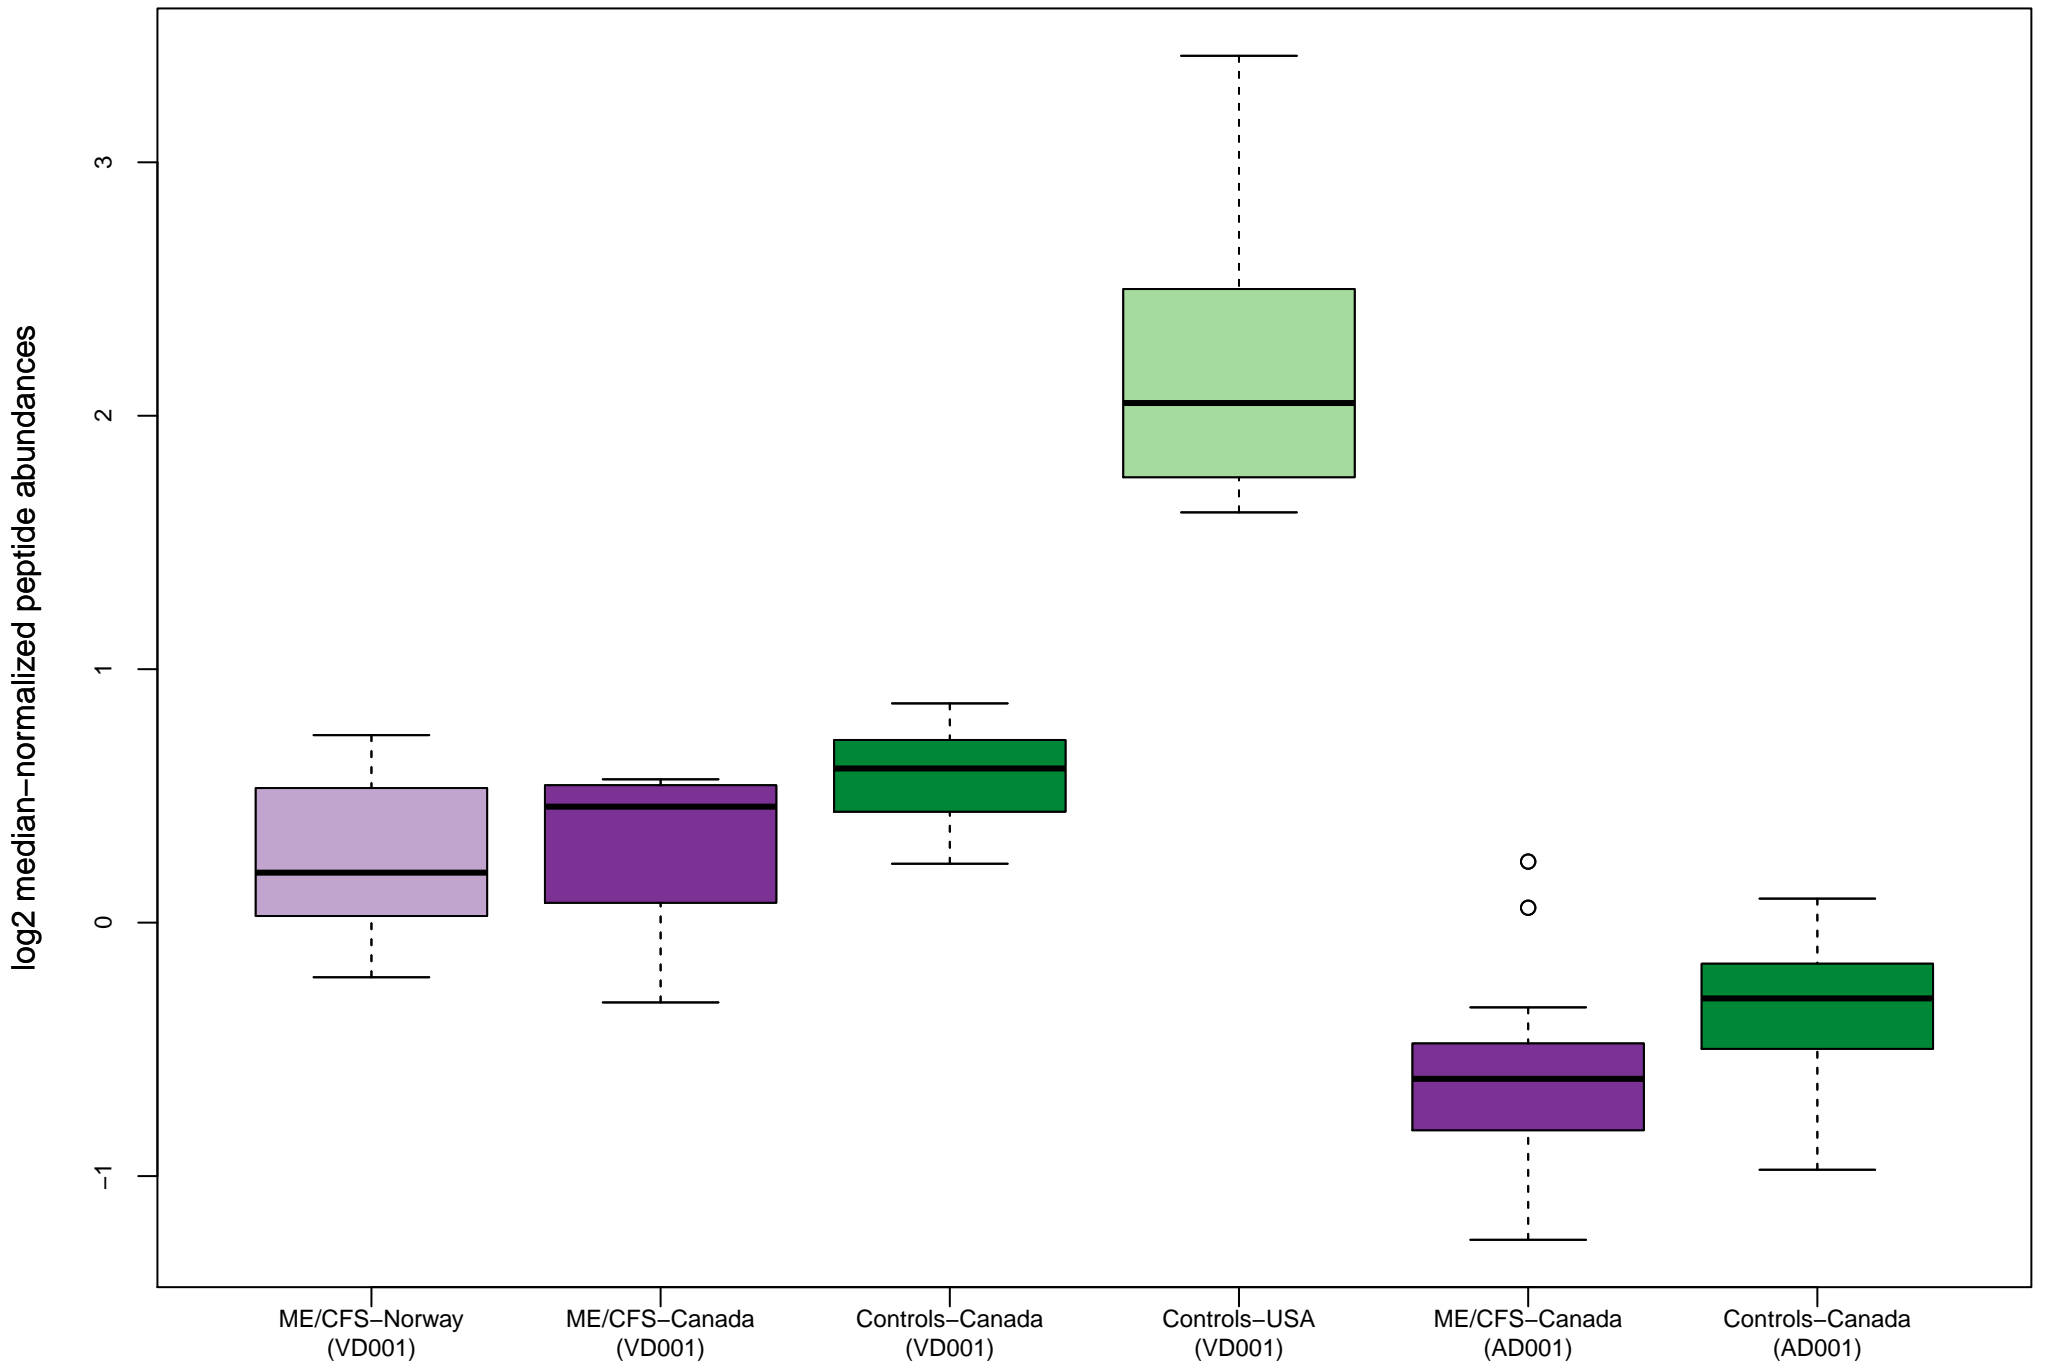

# QLVRRWLSGVAS

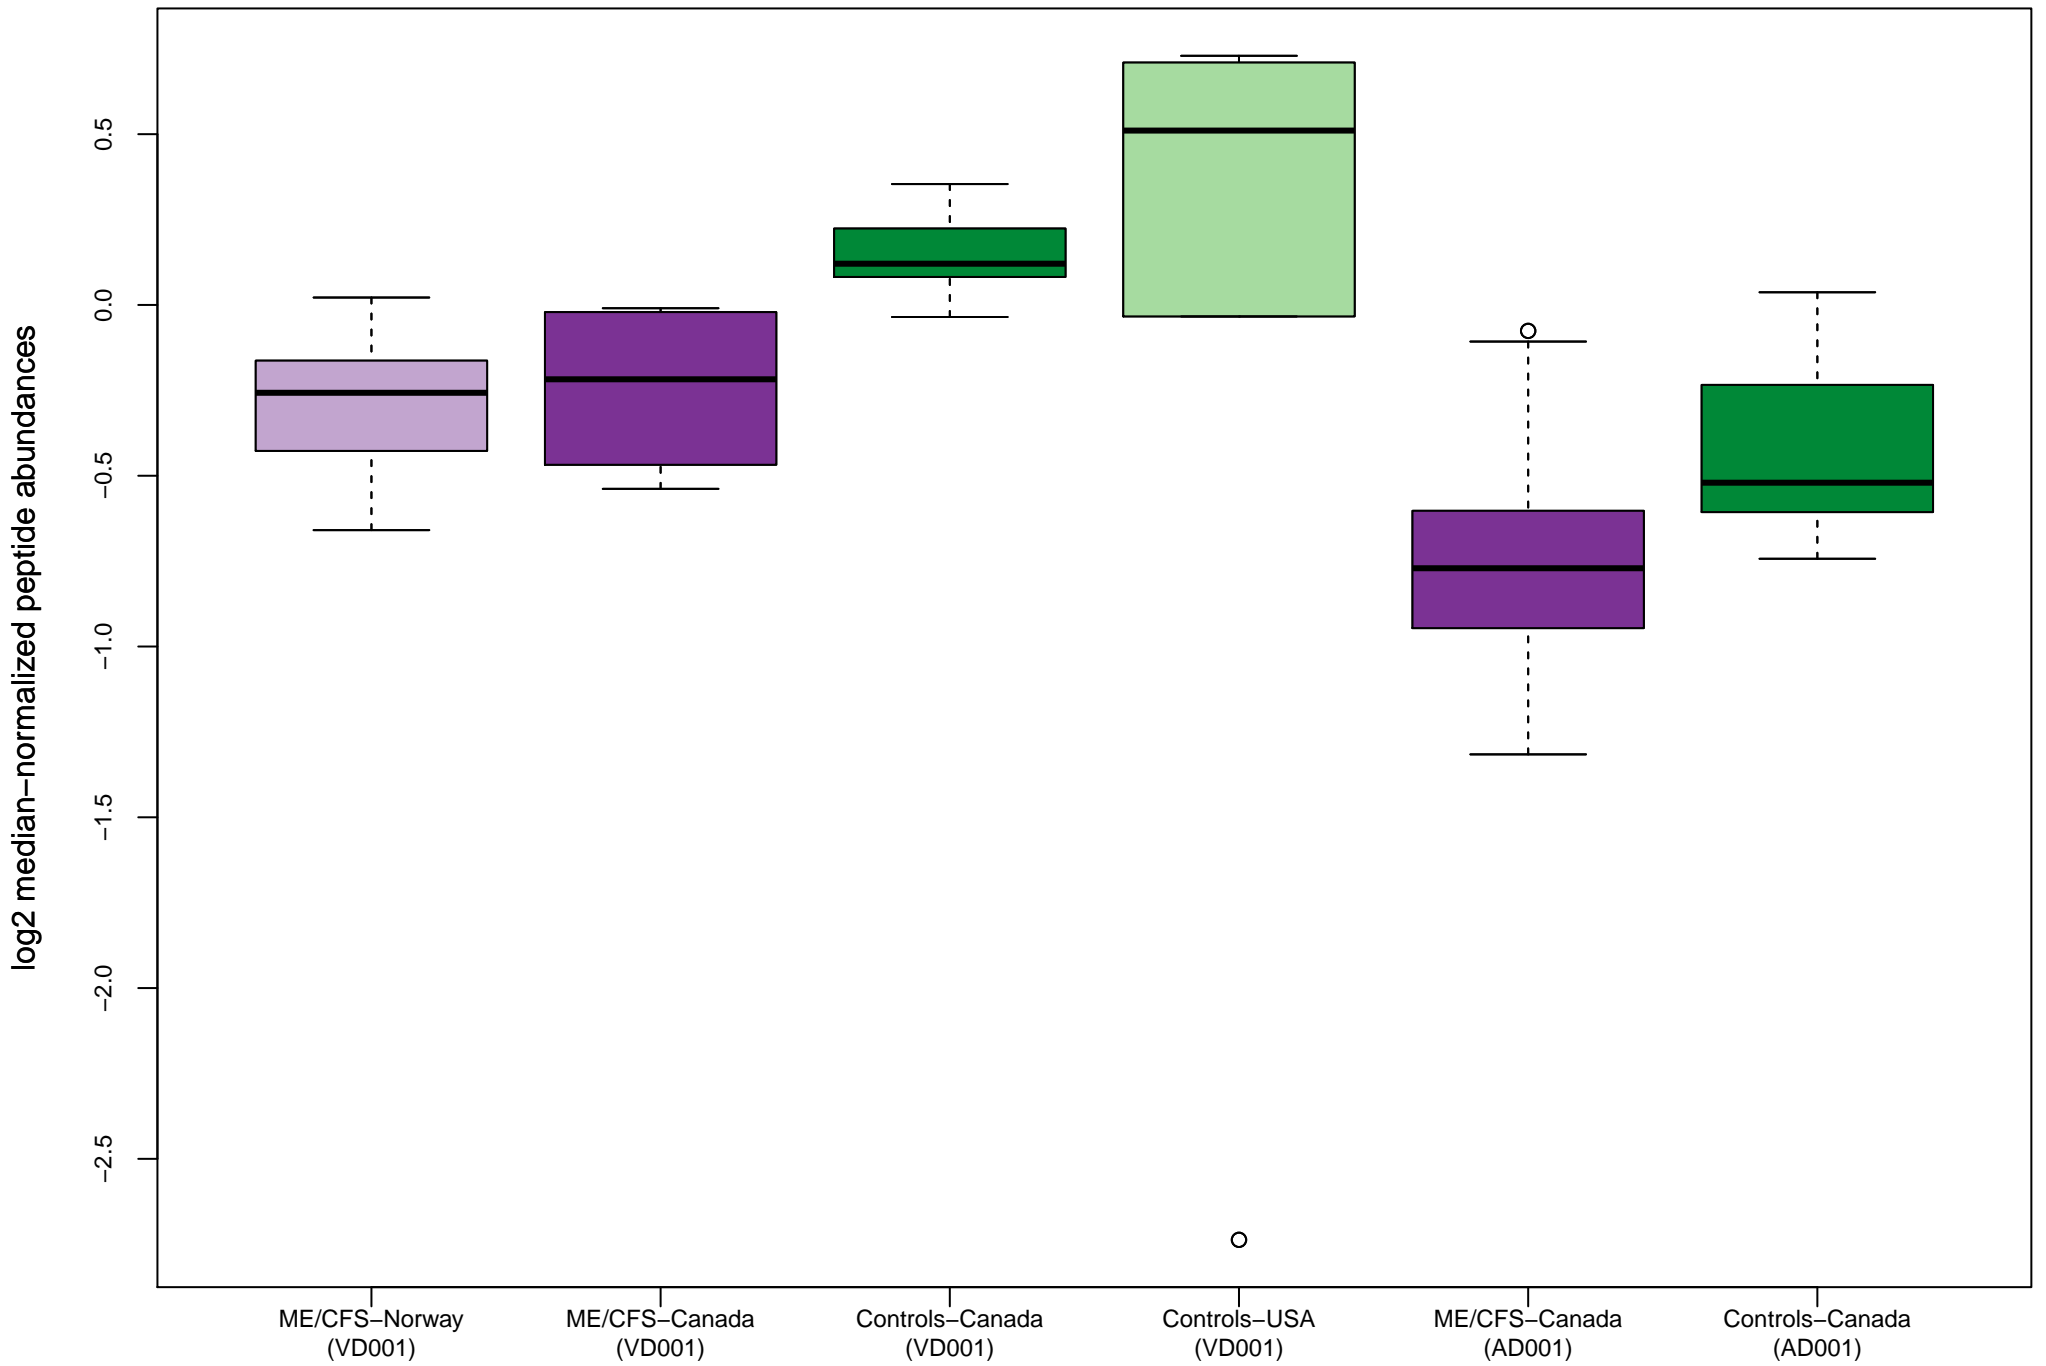



# QLYKWVGPLSAS

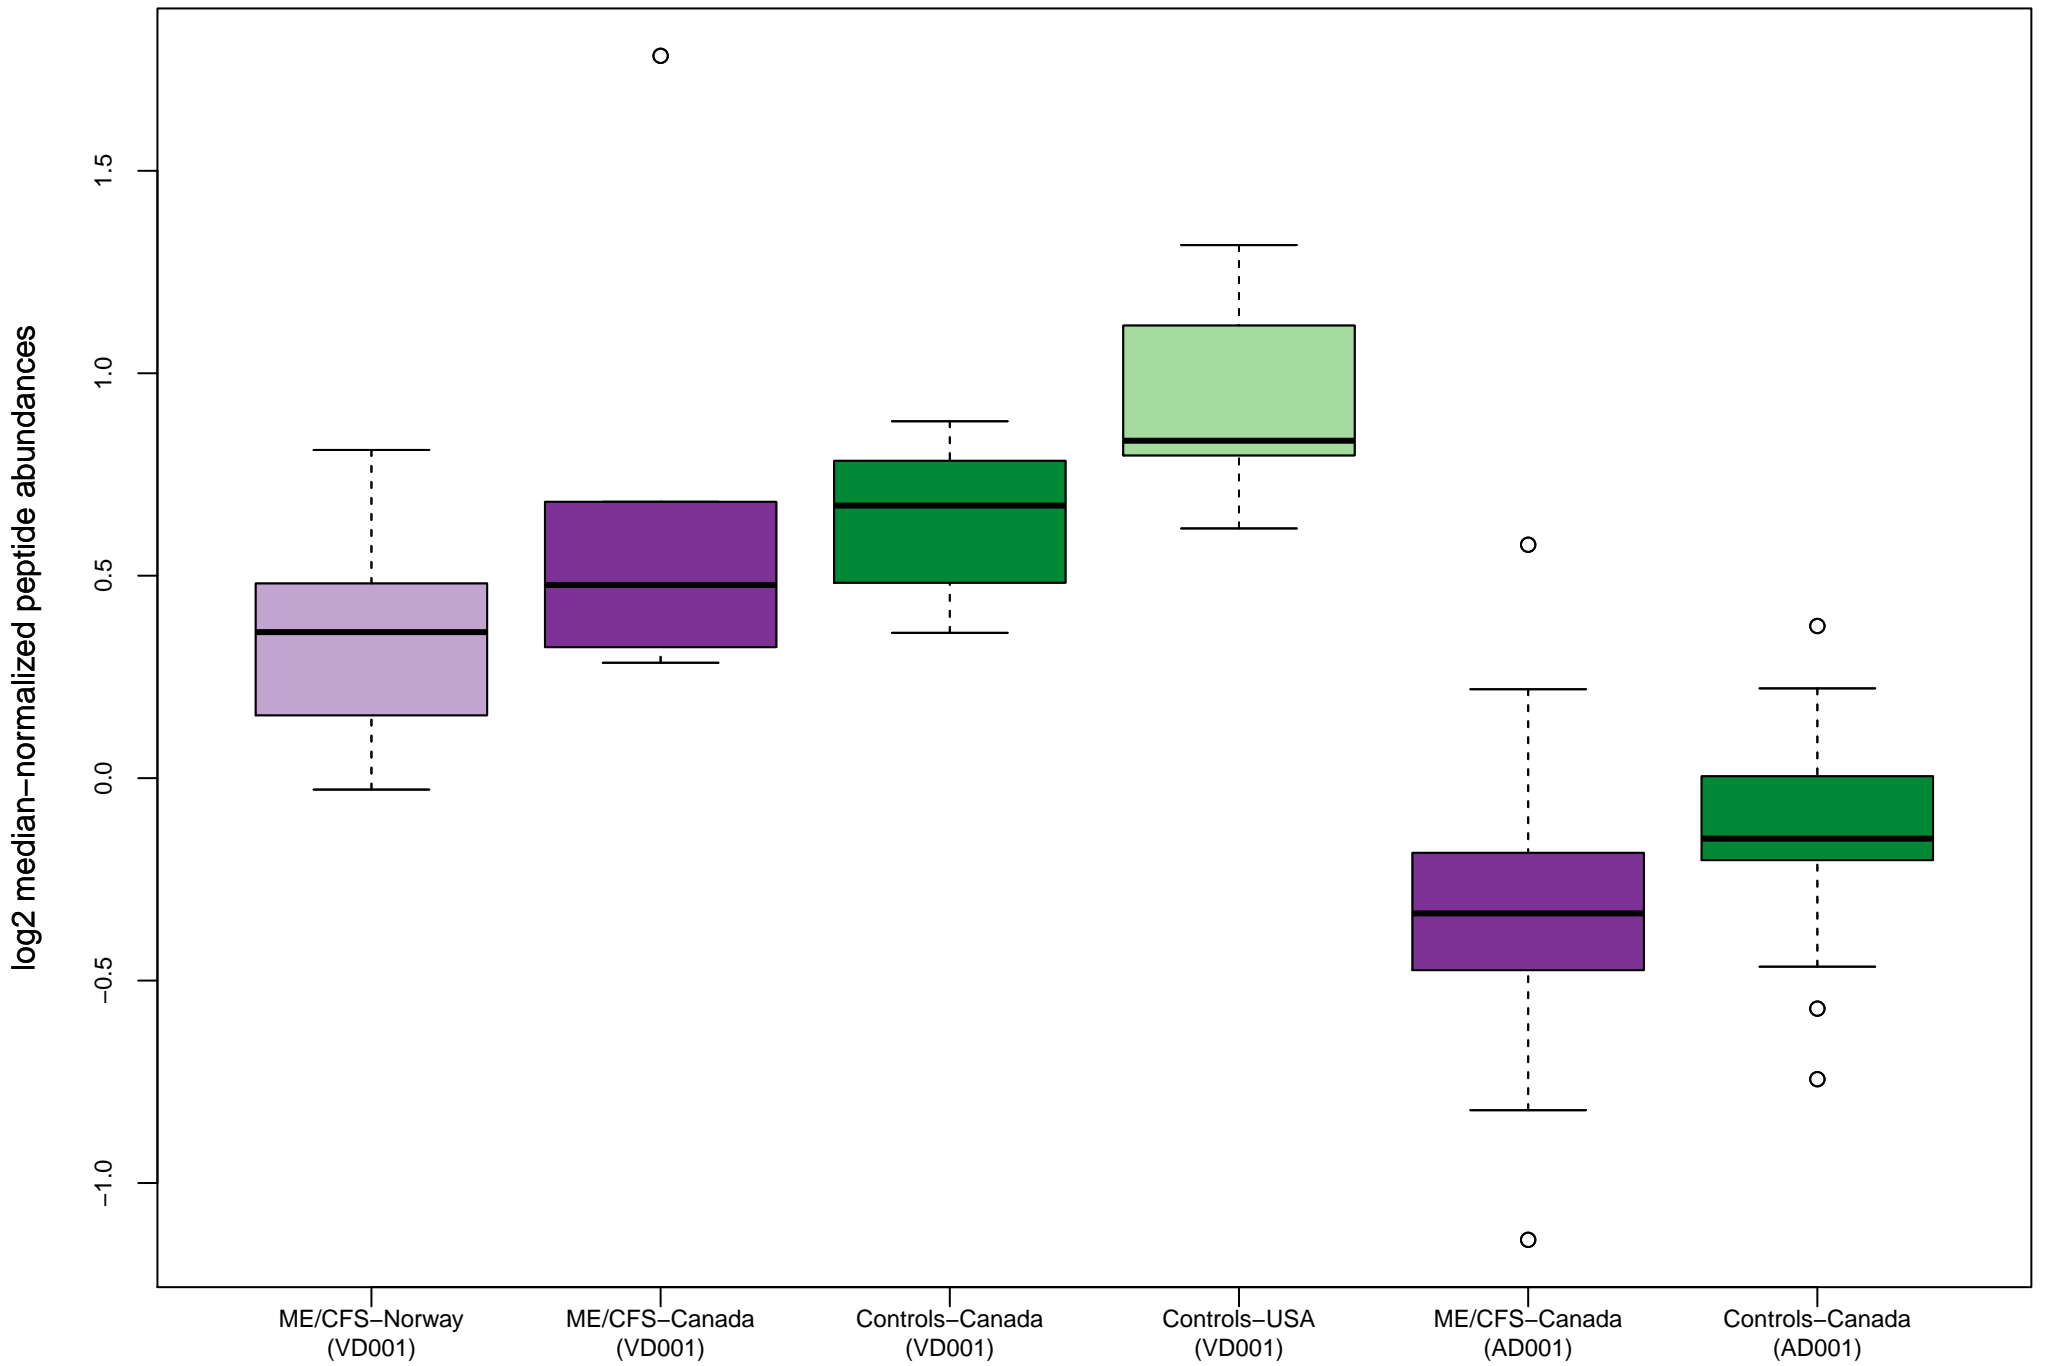

# QNVNVSRYWSG

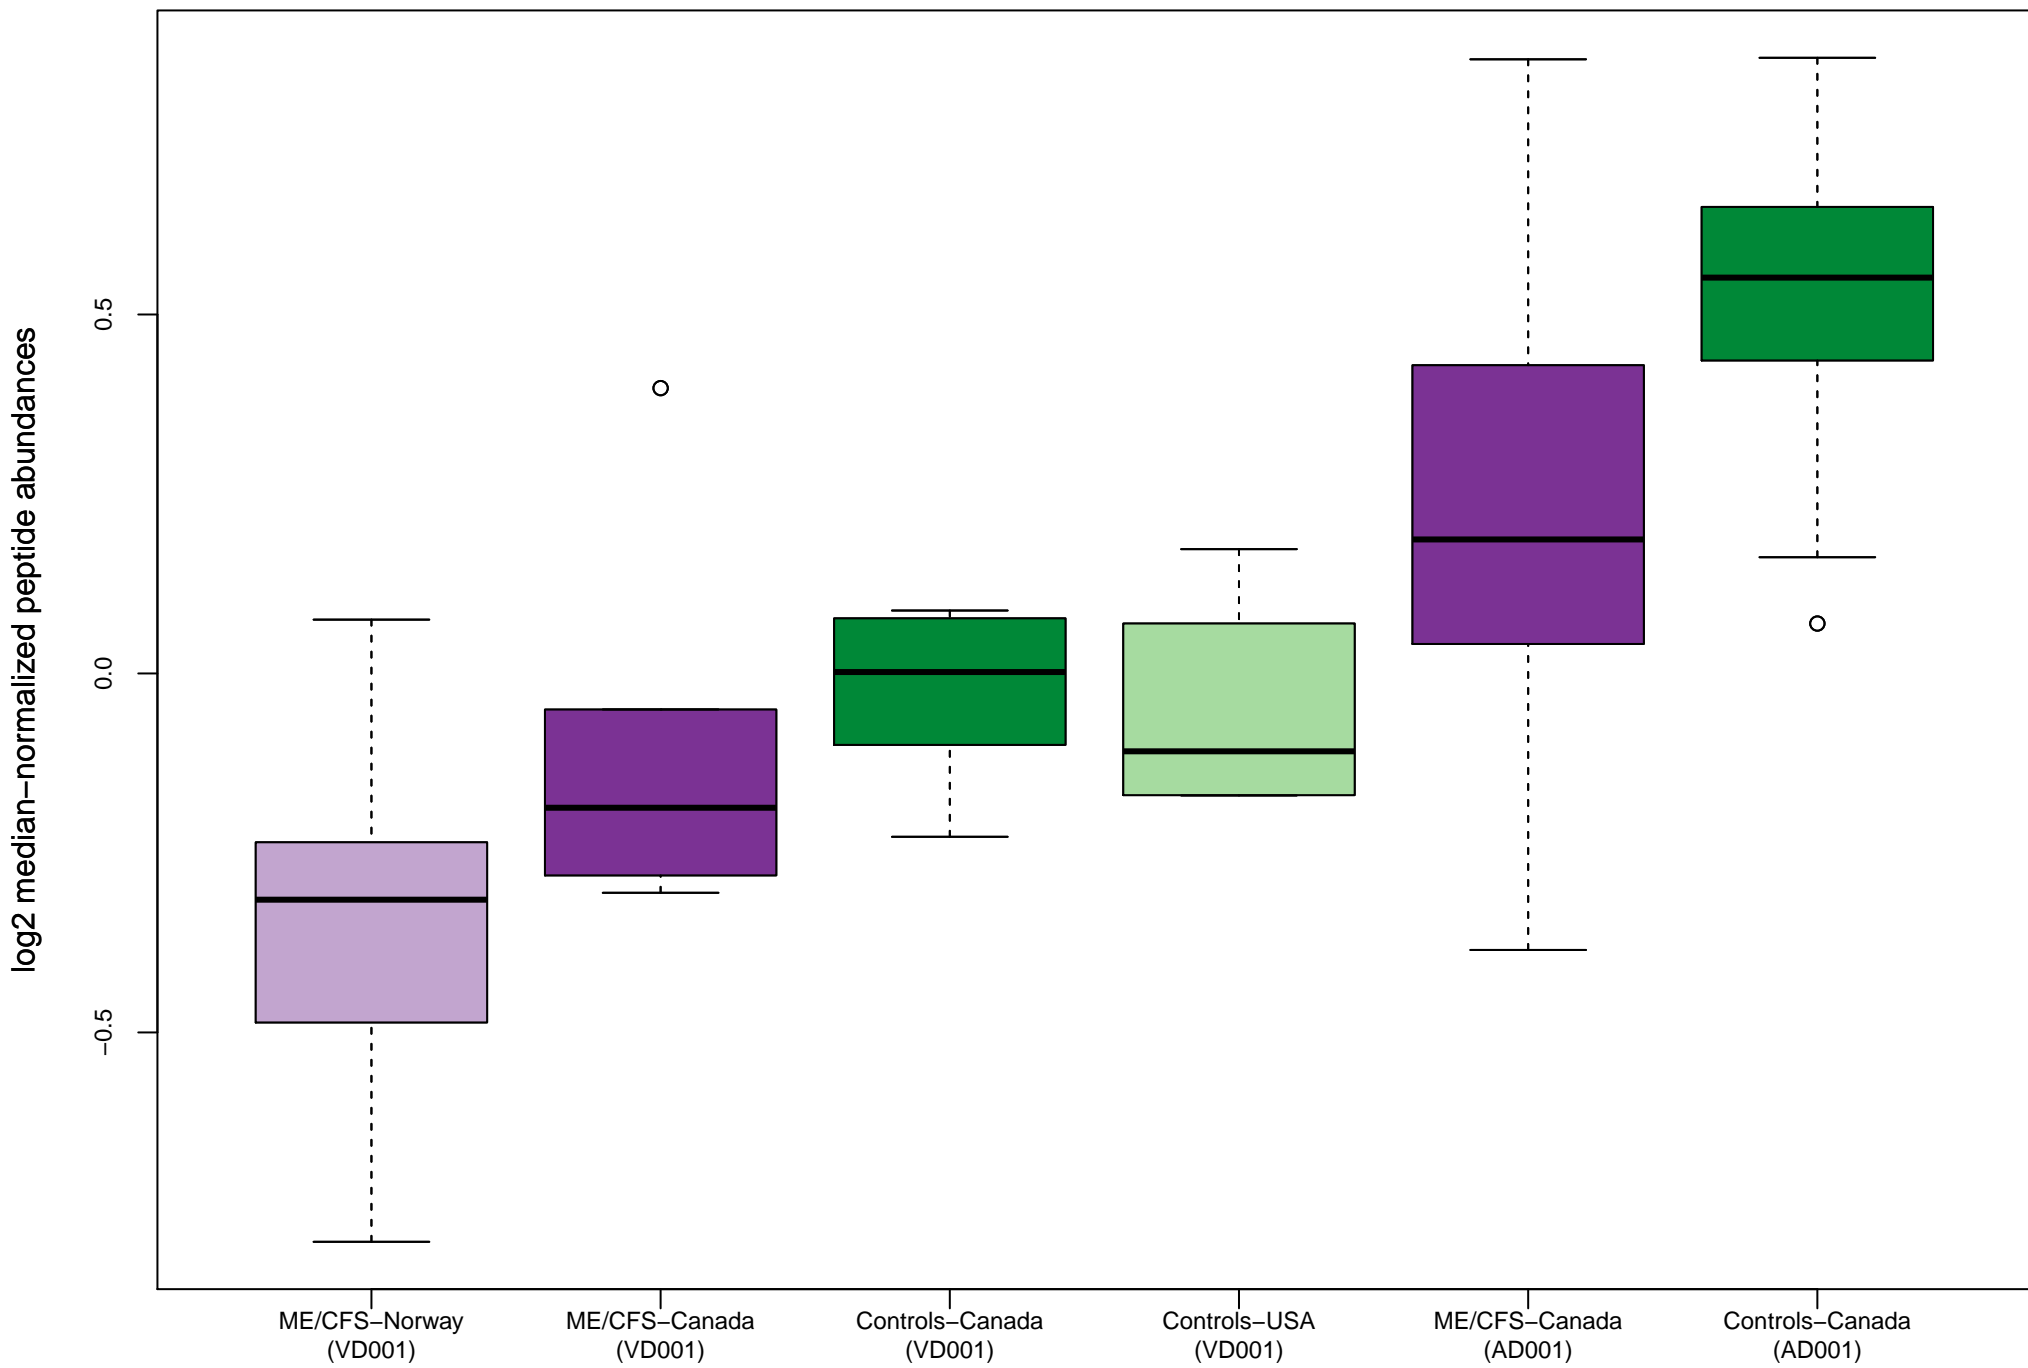

# QNWWRWLGVALS

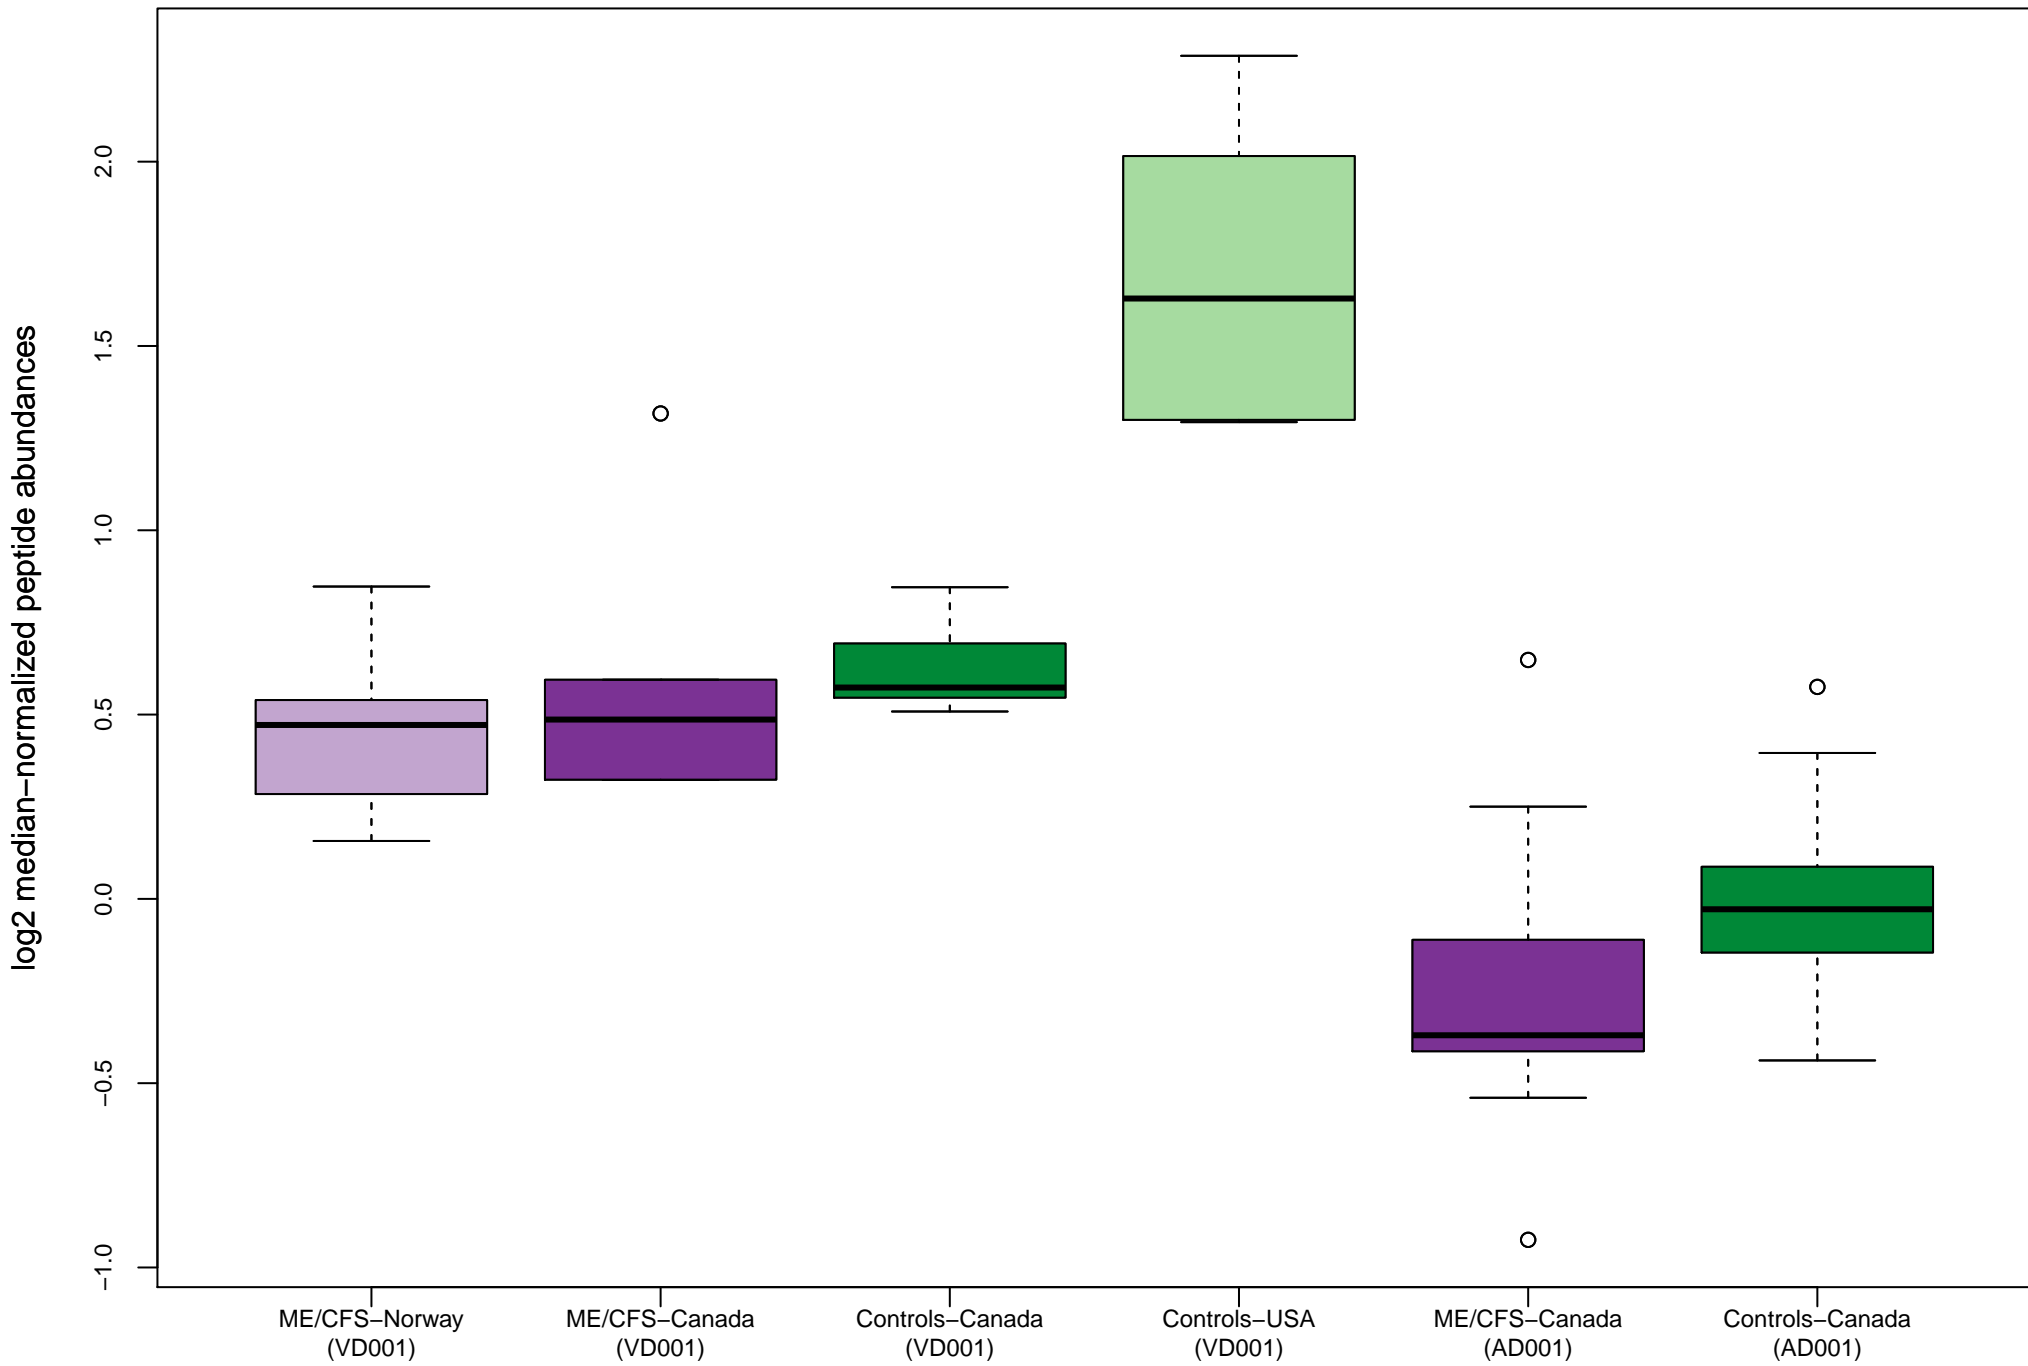

QPALGVRHVYKV

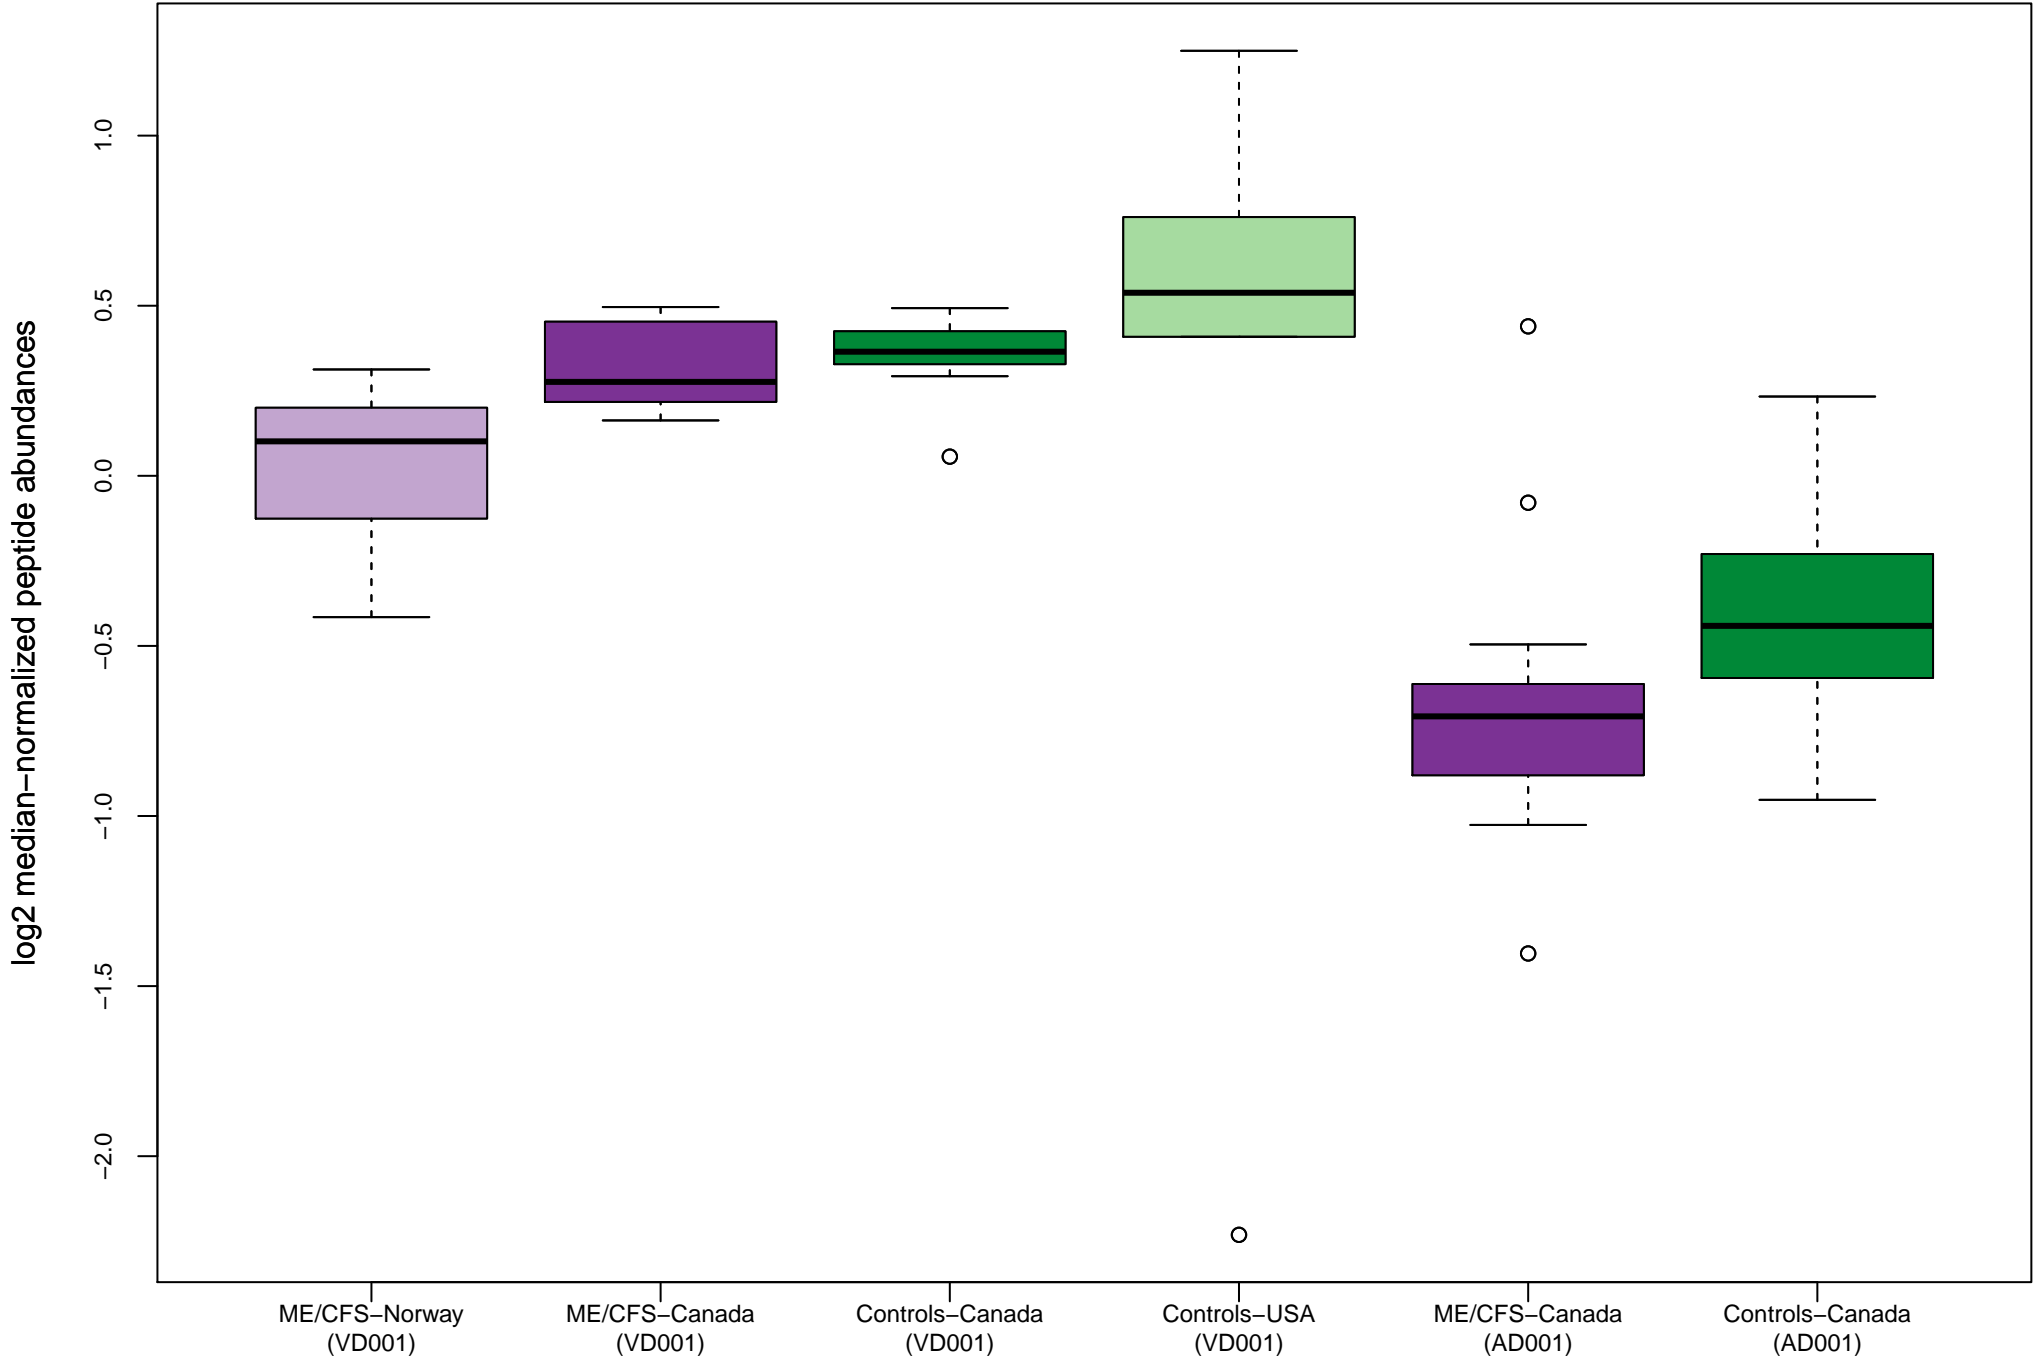

# QPRVFALSQRYL

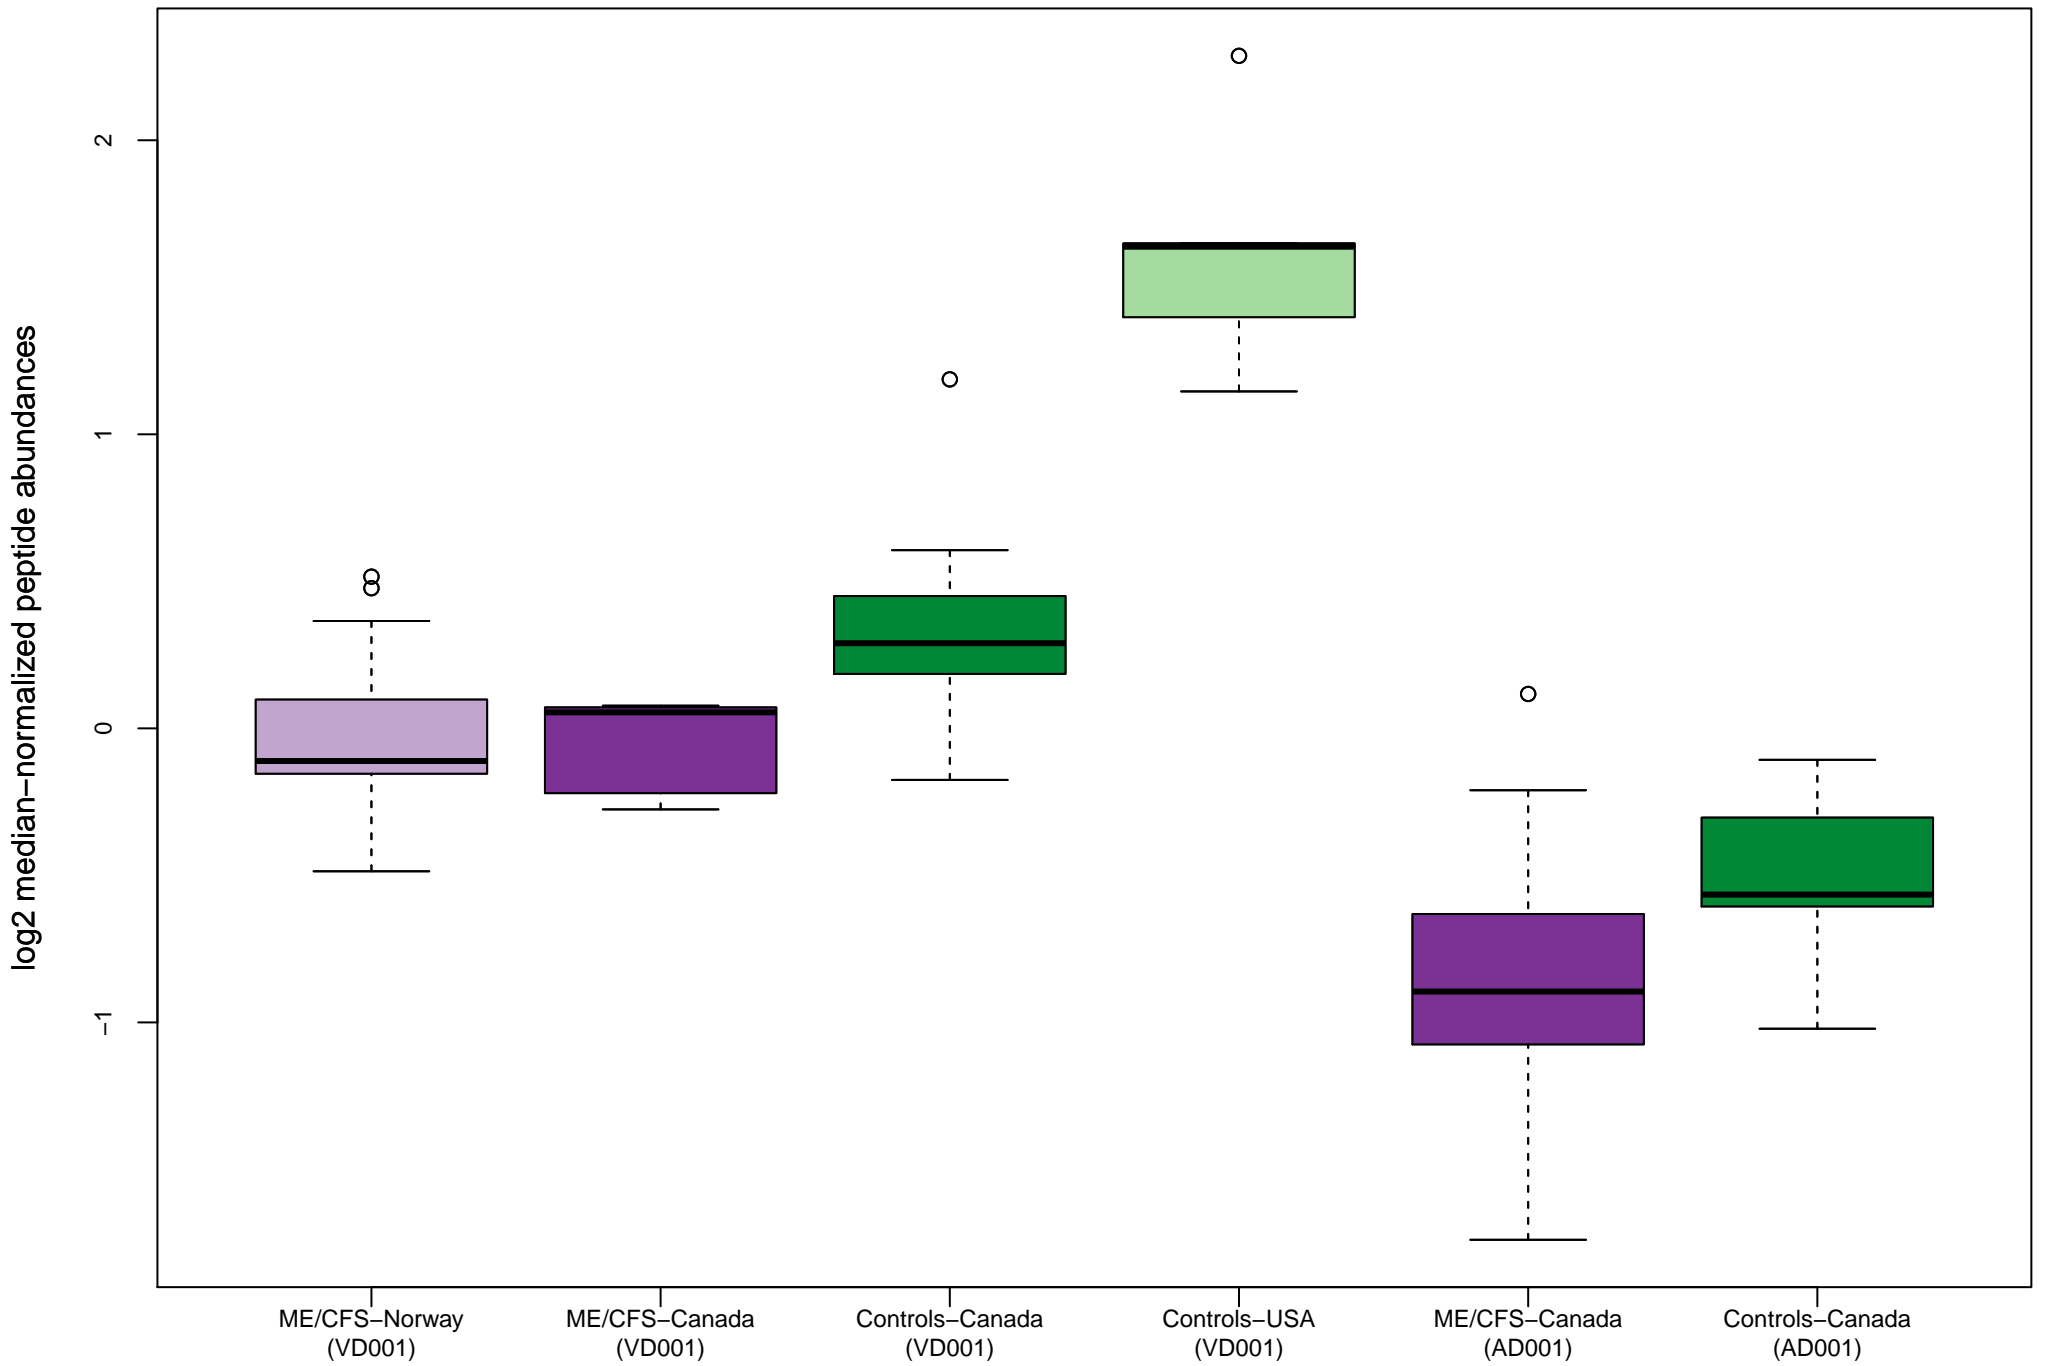

# QPYKLRLSRYLS

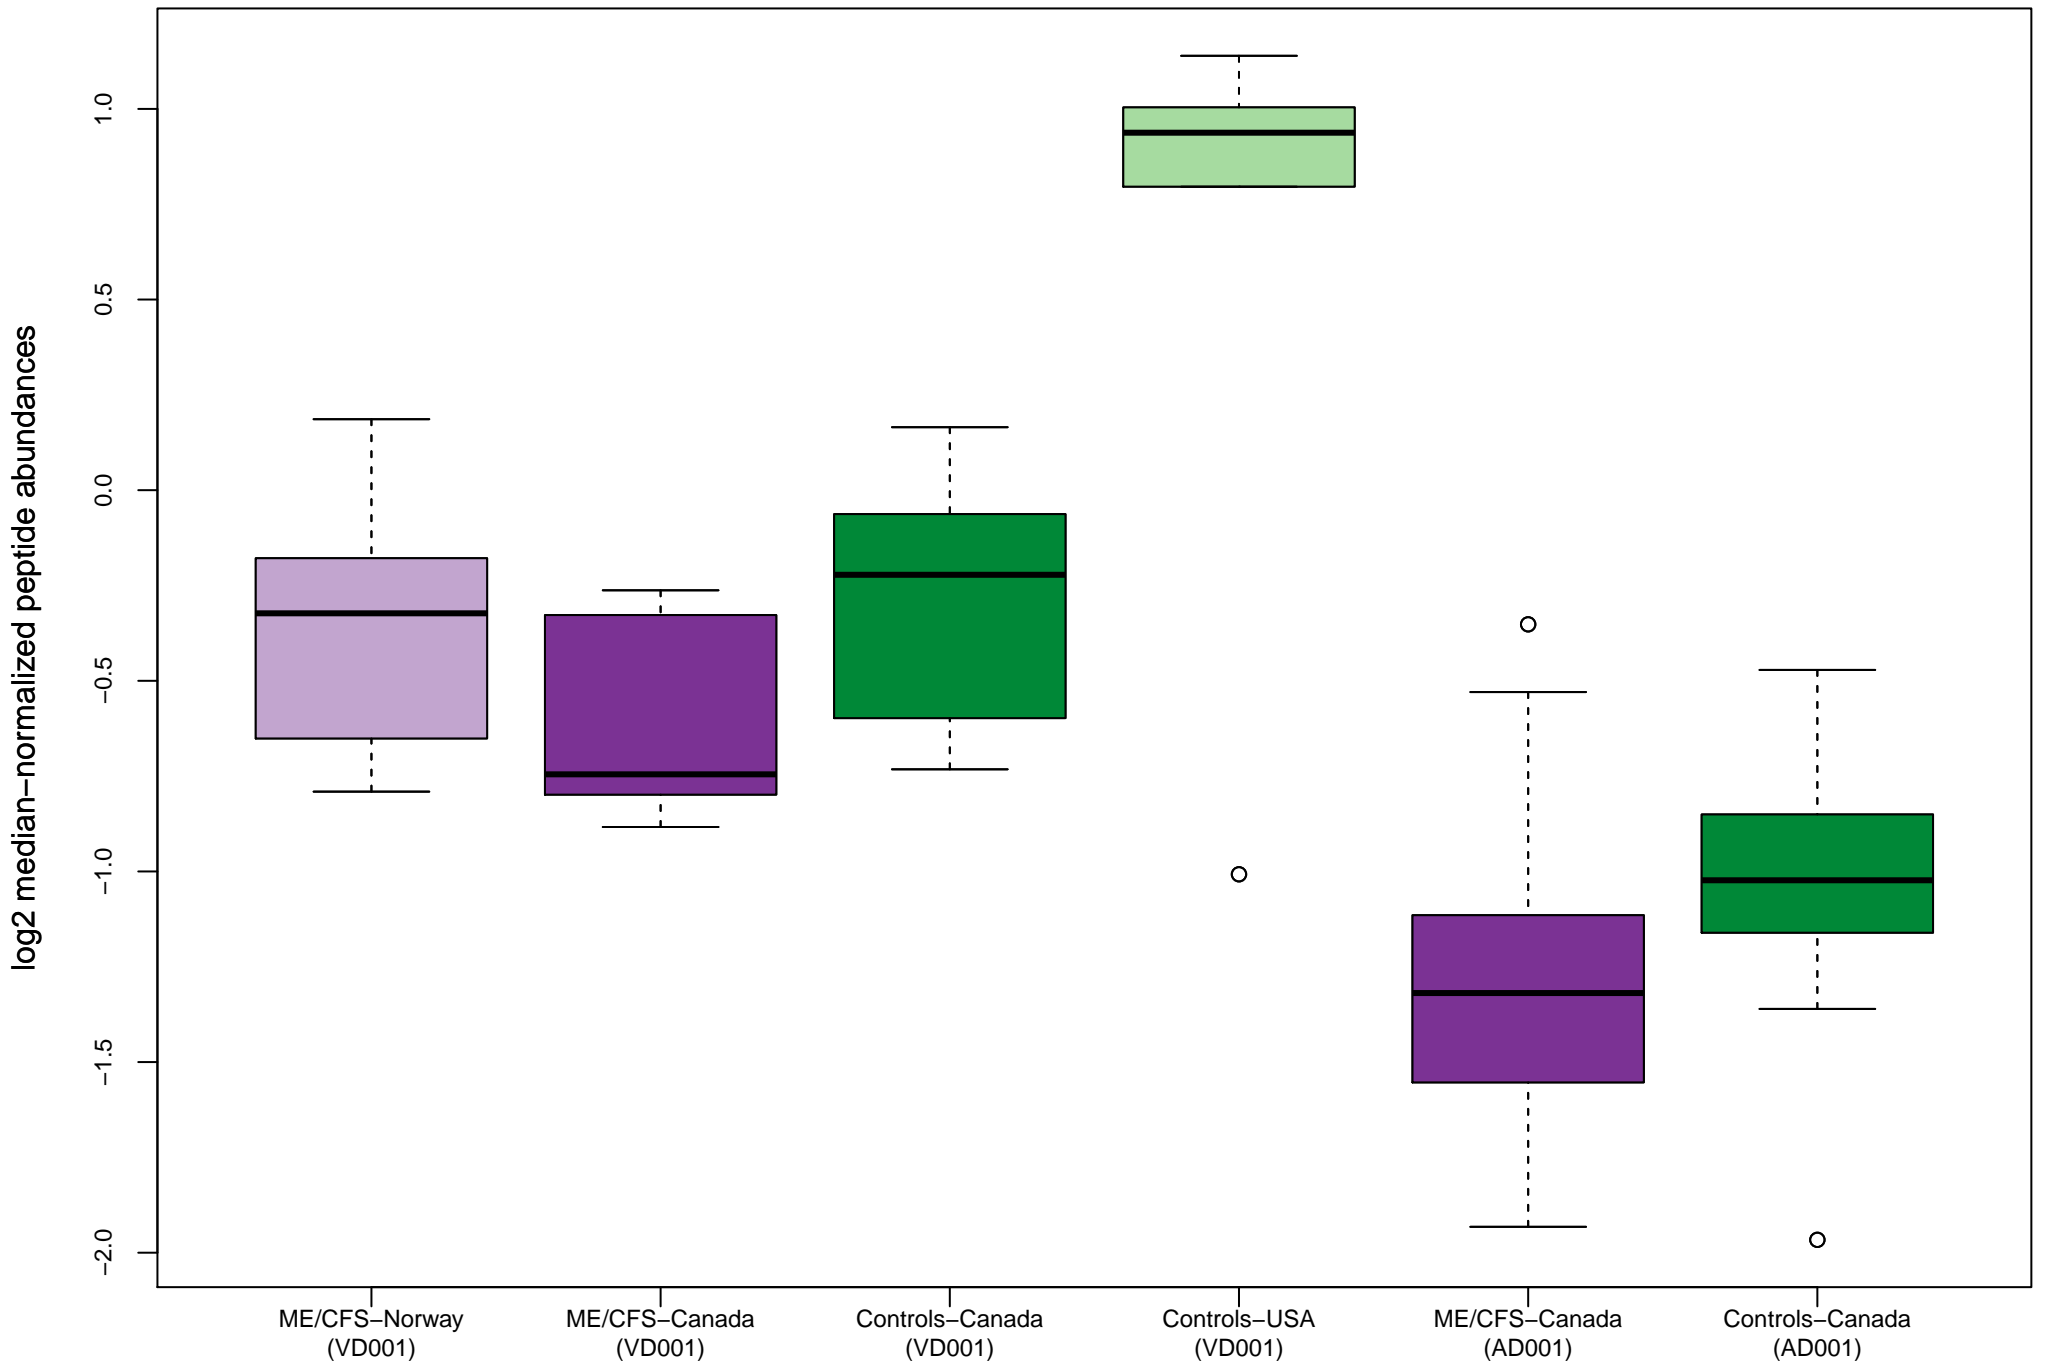

# QPYPWLFYVRW

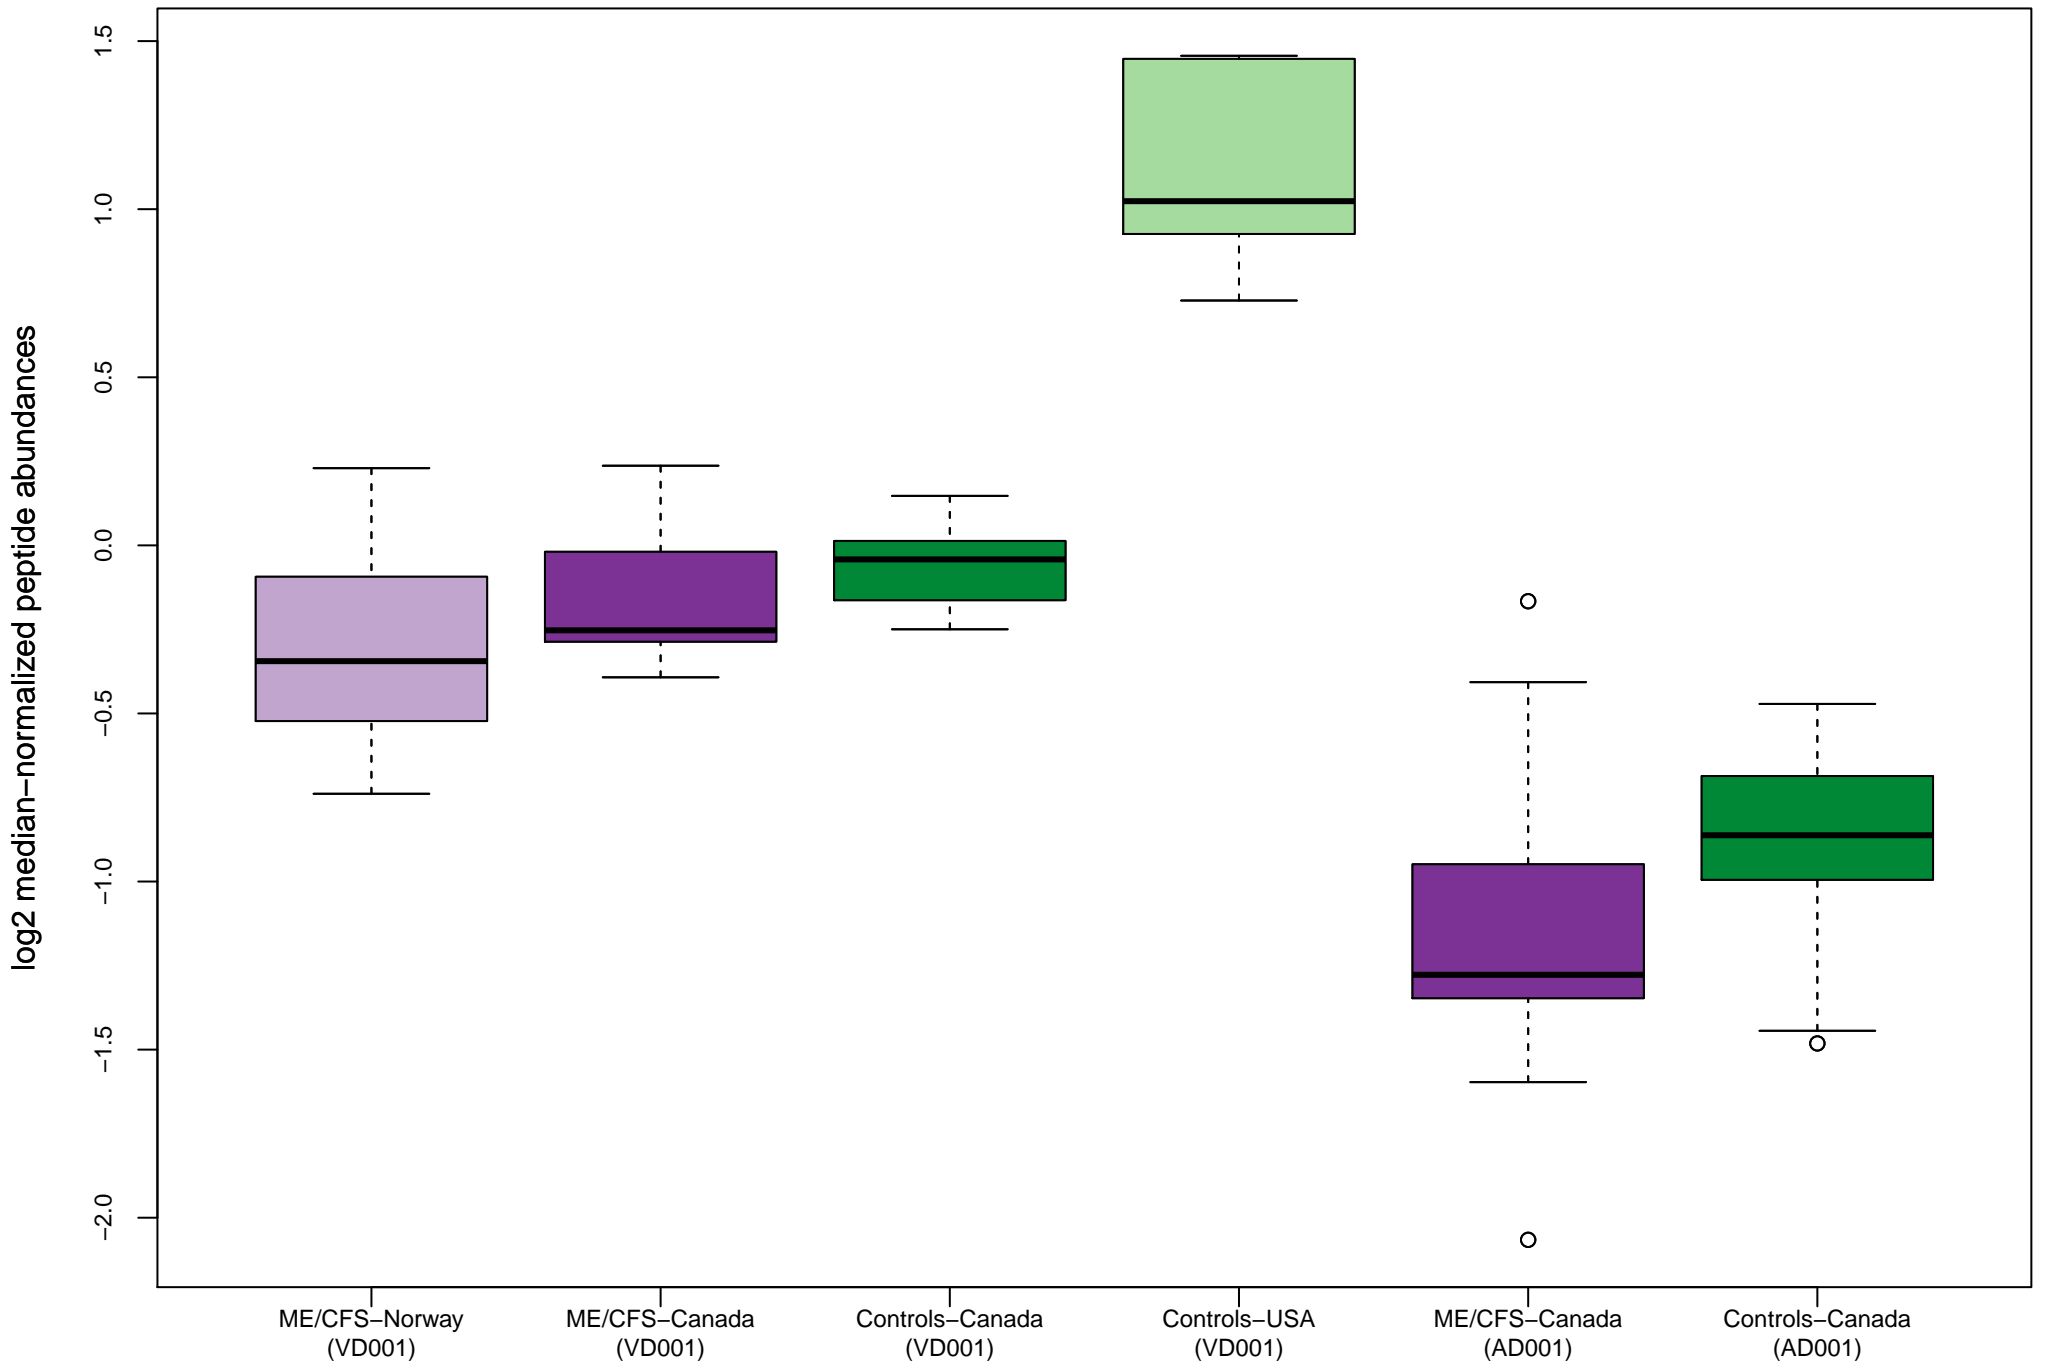

# QQYRVSWALSAL

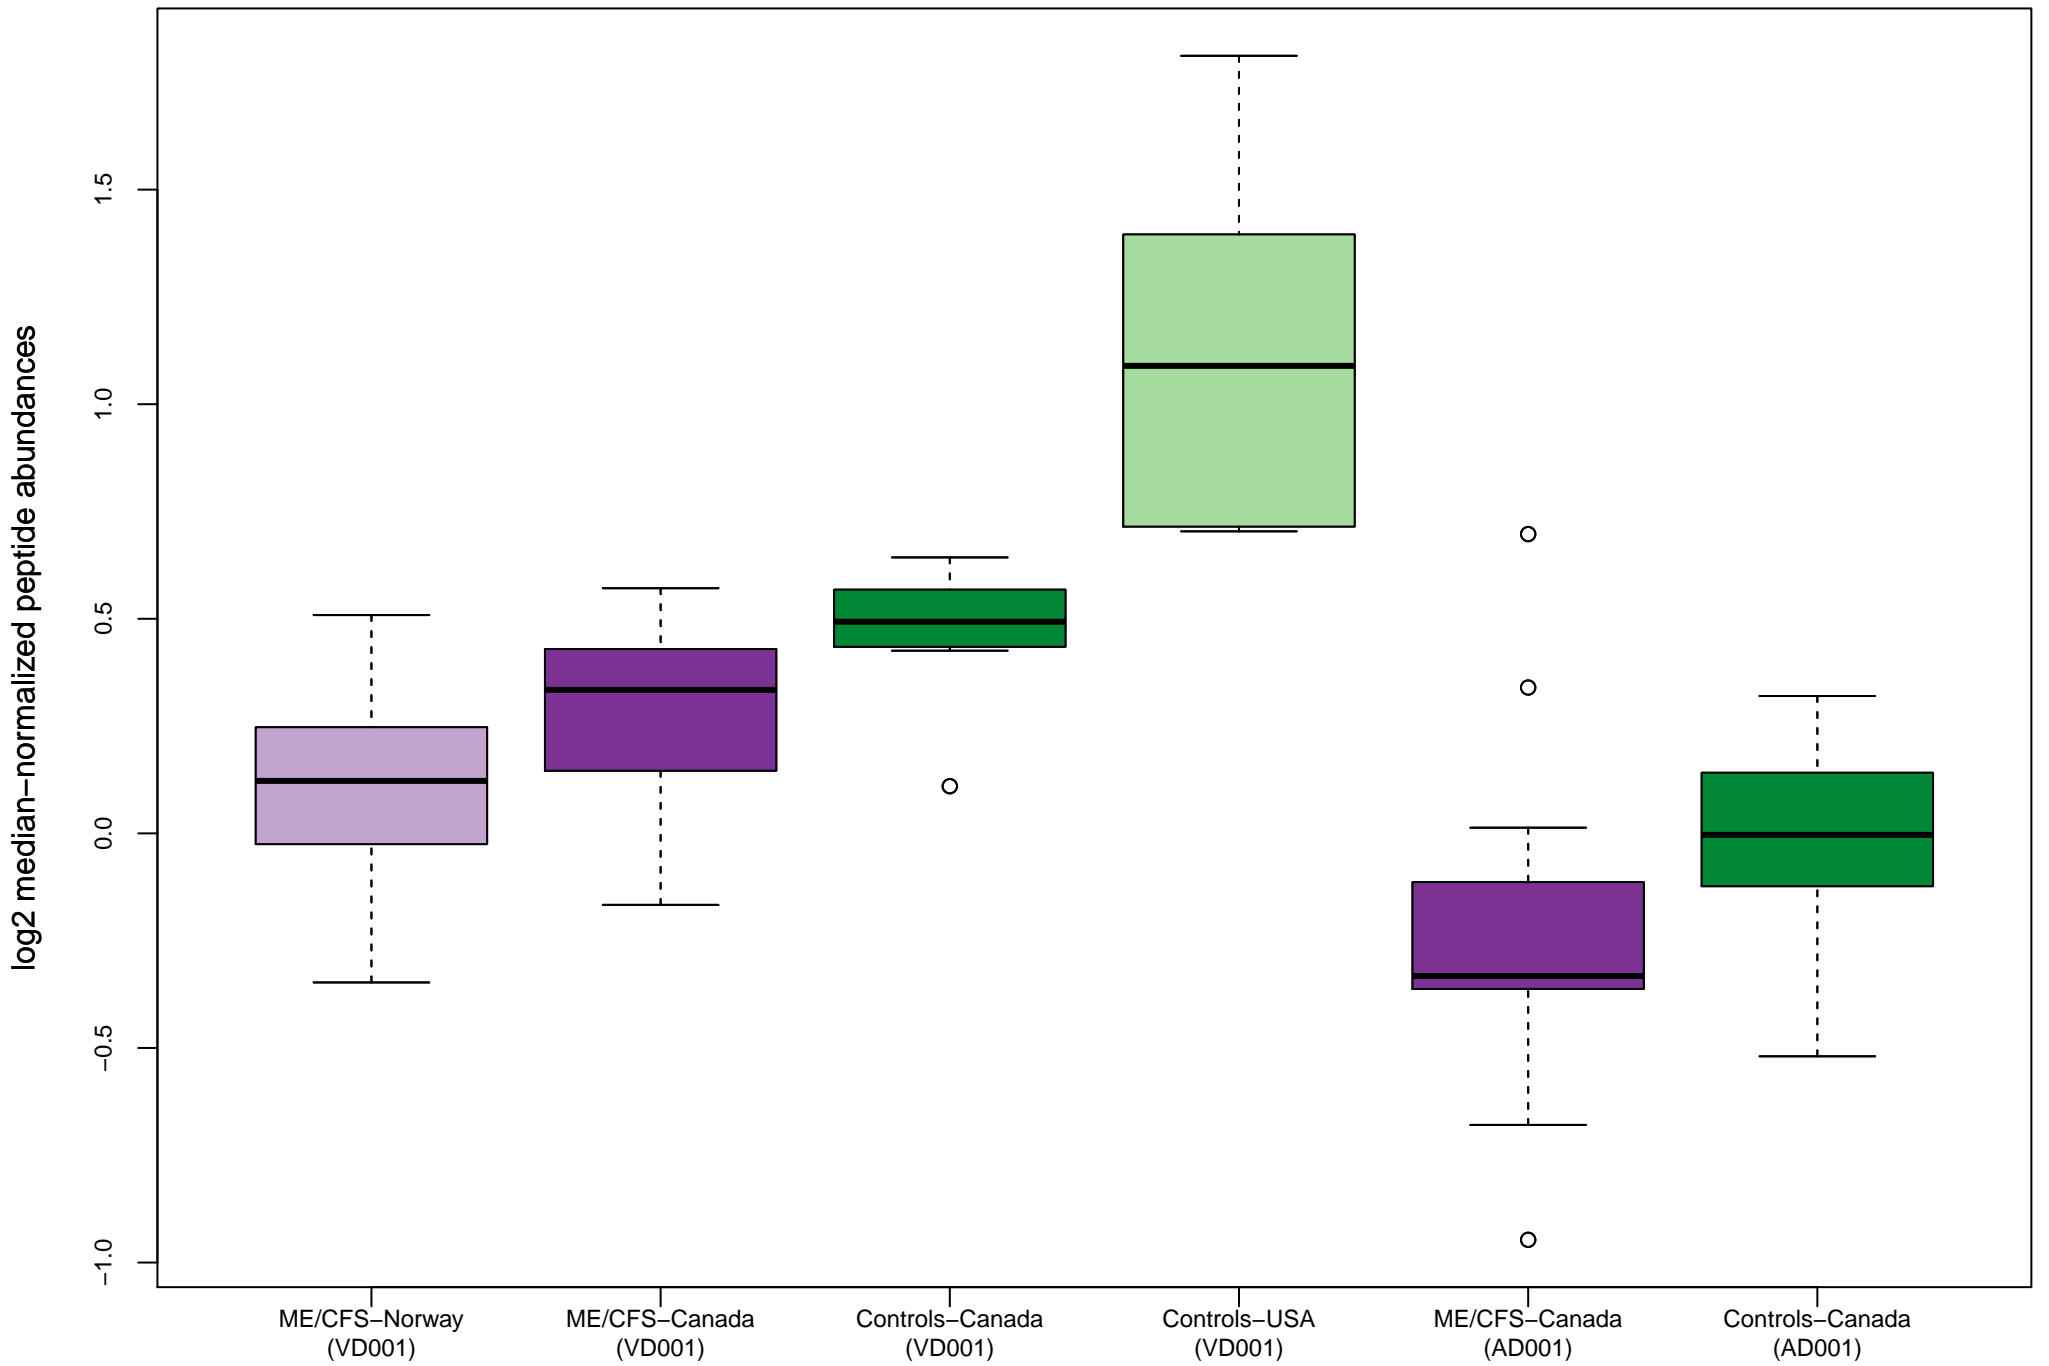



# QRFGLQFPYNAL

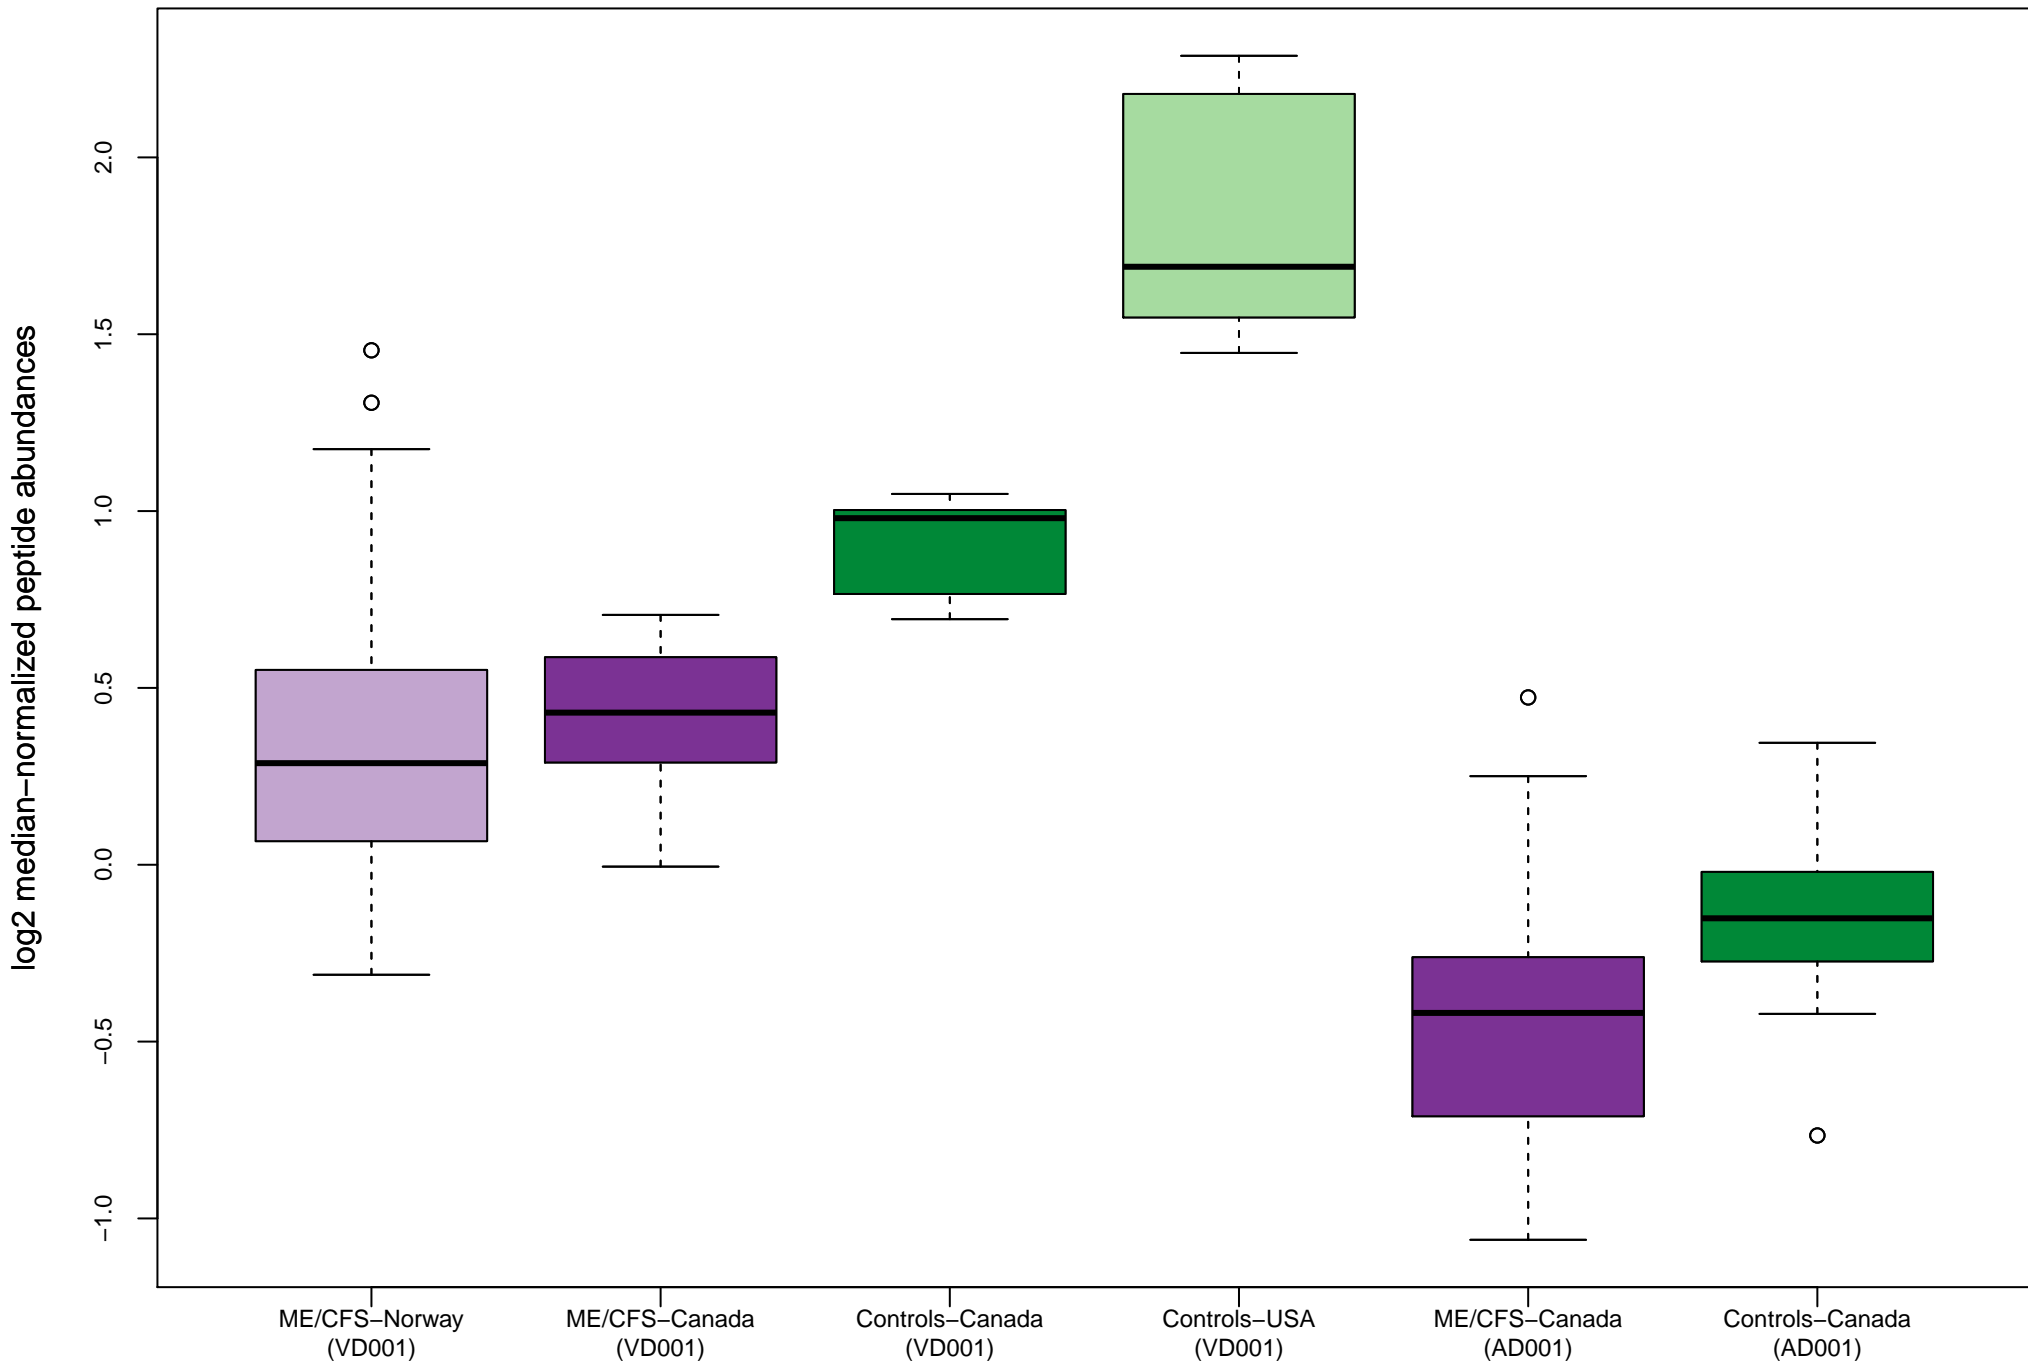

# QRSVYVRRSGALS

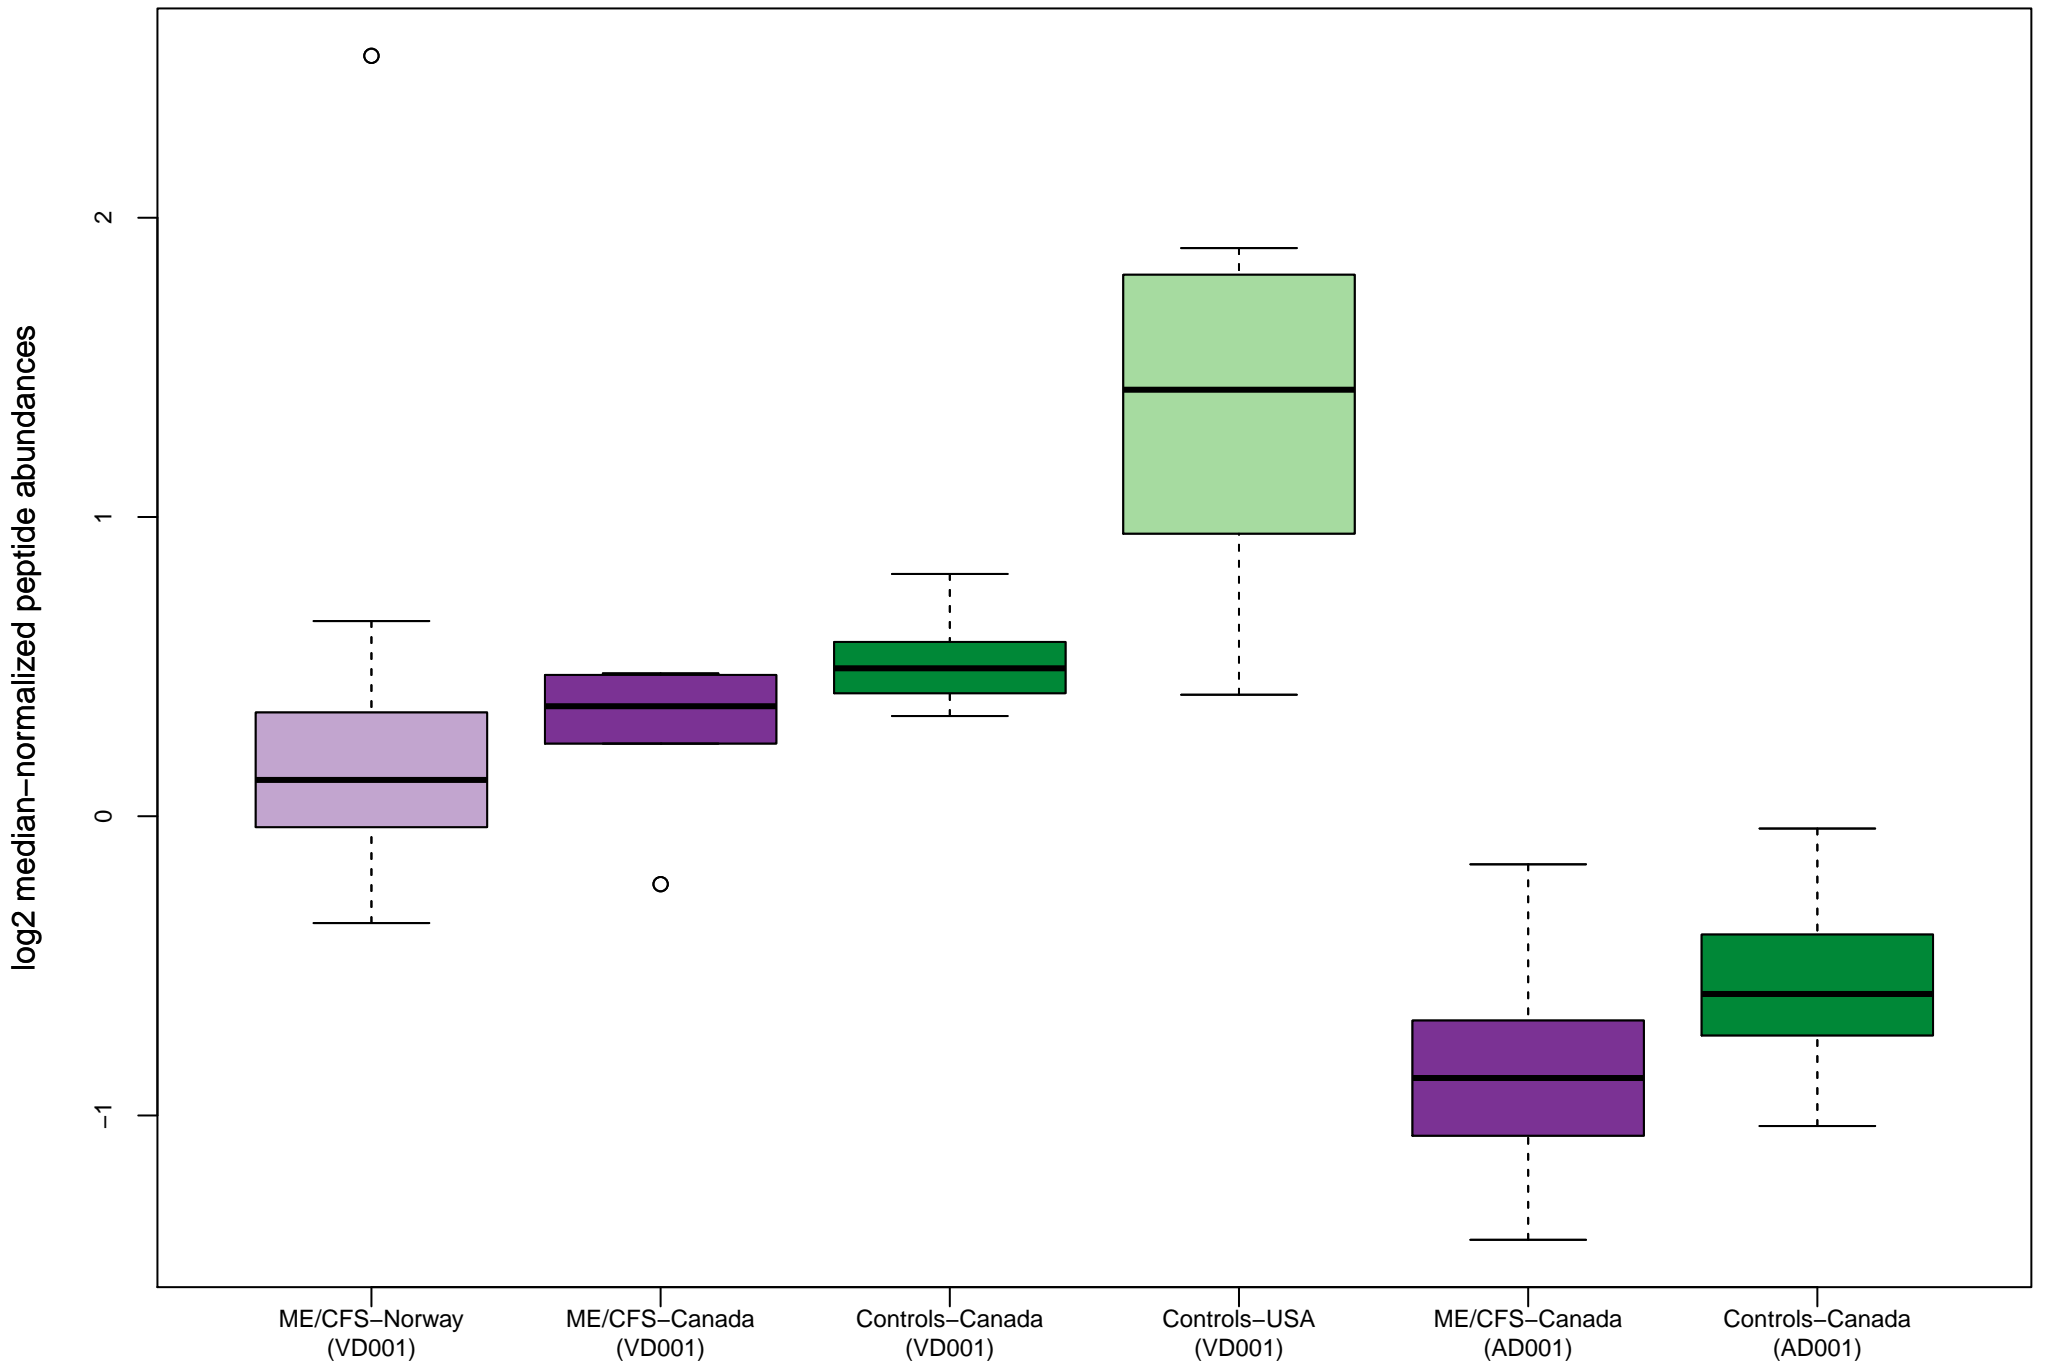

# QRFVVALKDSPN

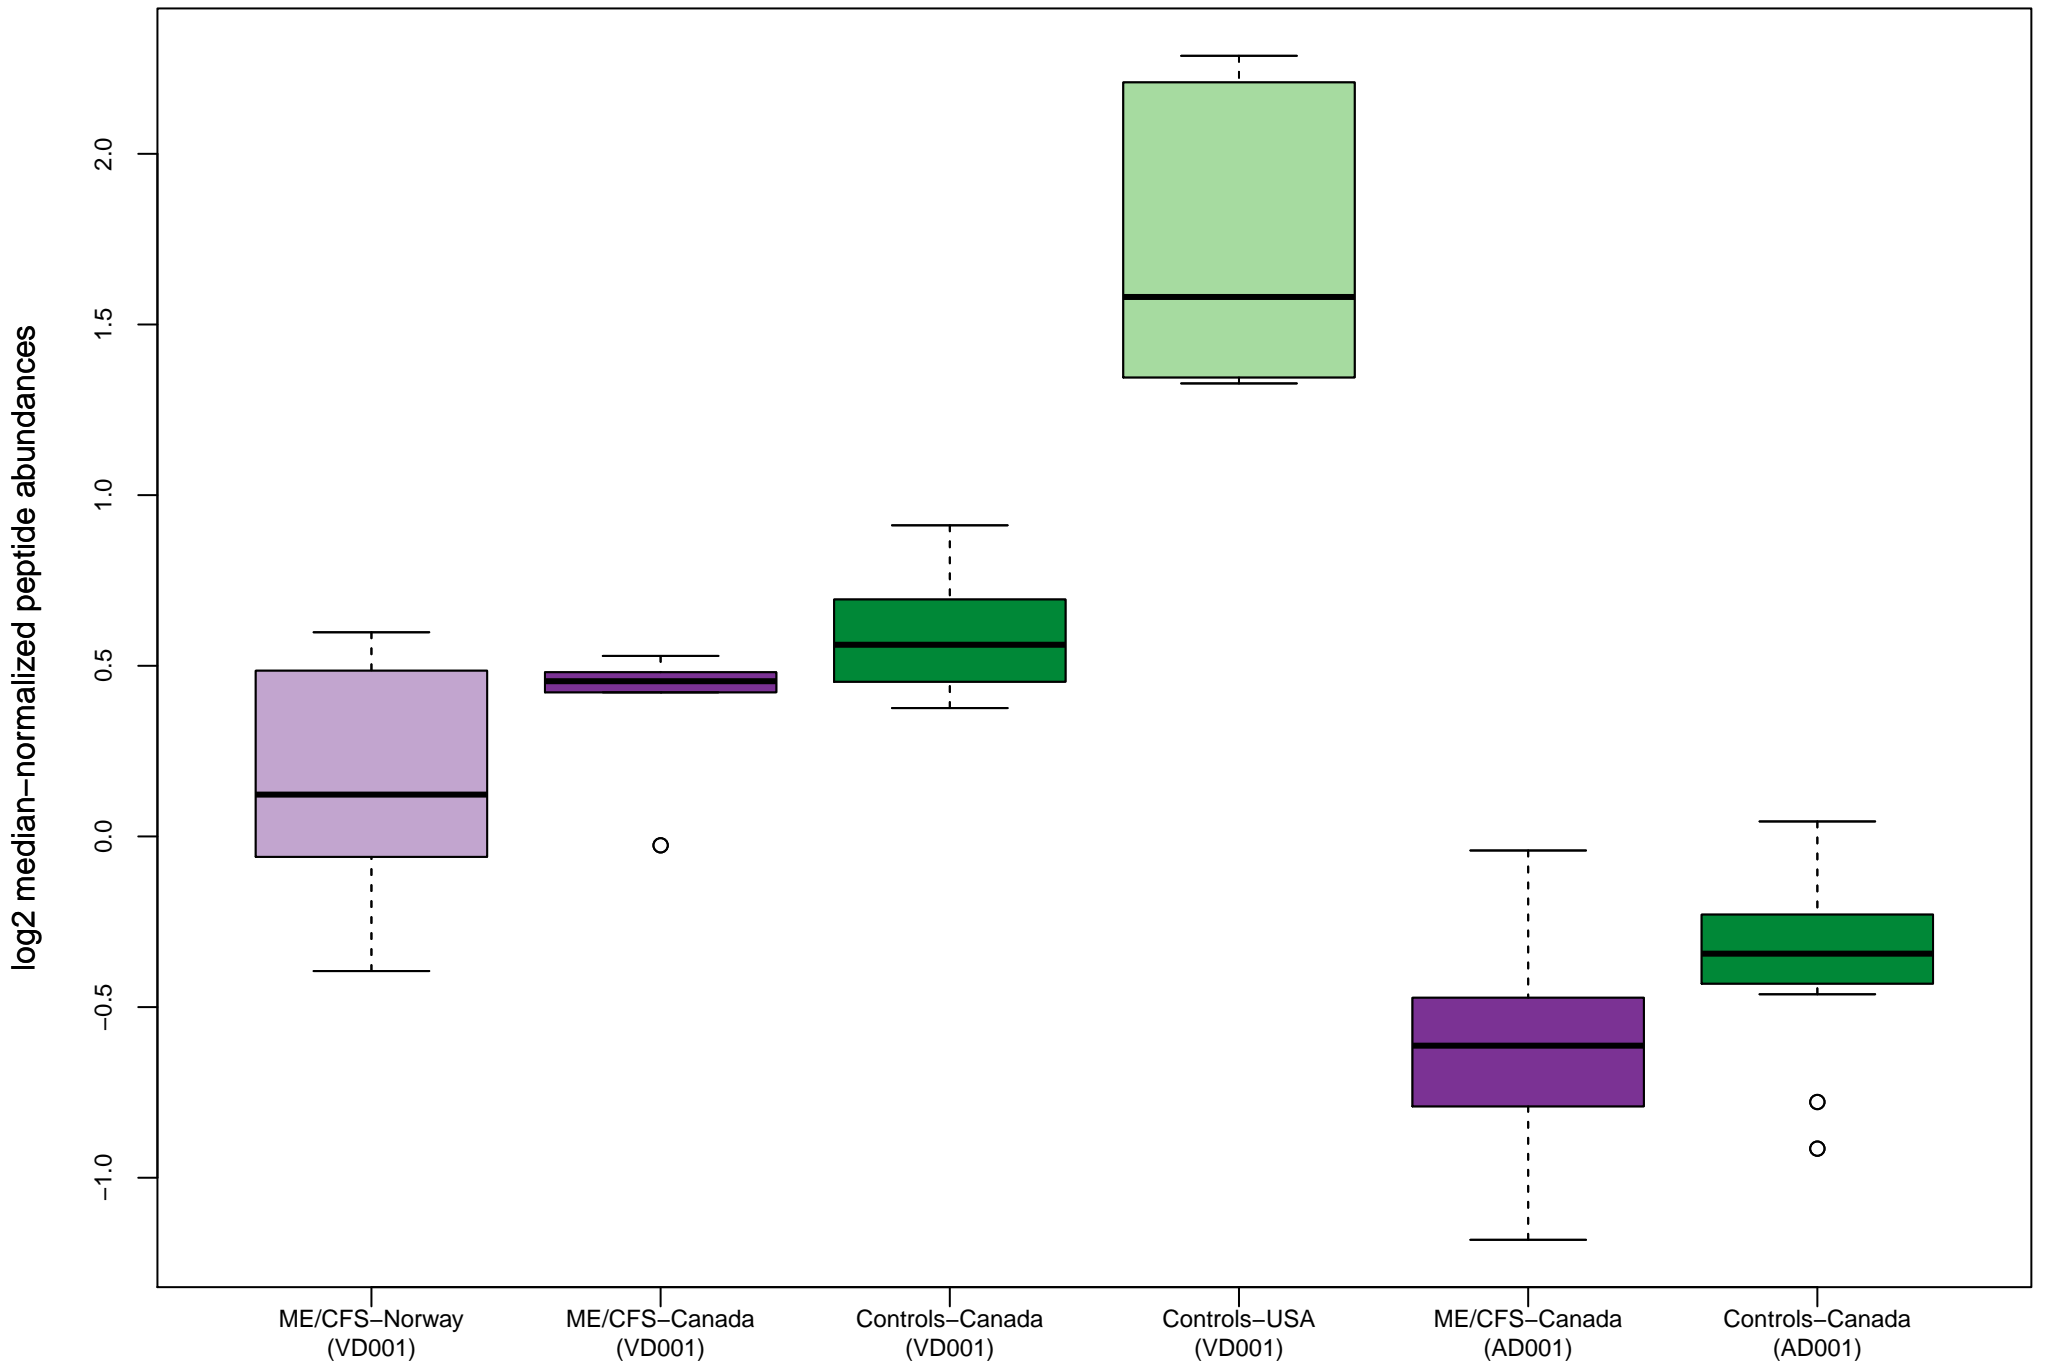

# QRVQFHWVYKSG

log2 median-normalized peptide abundances

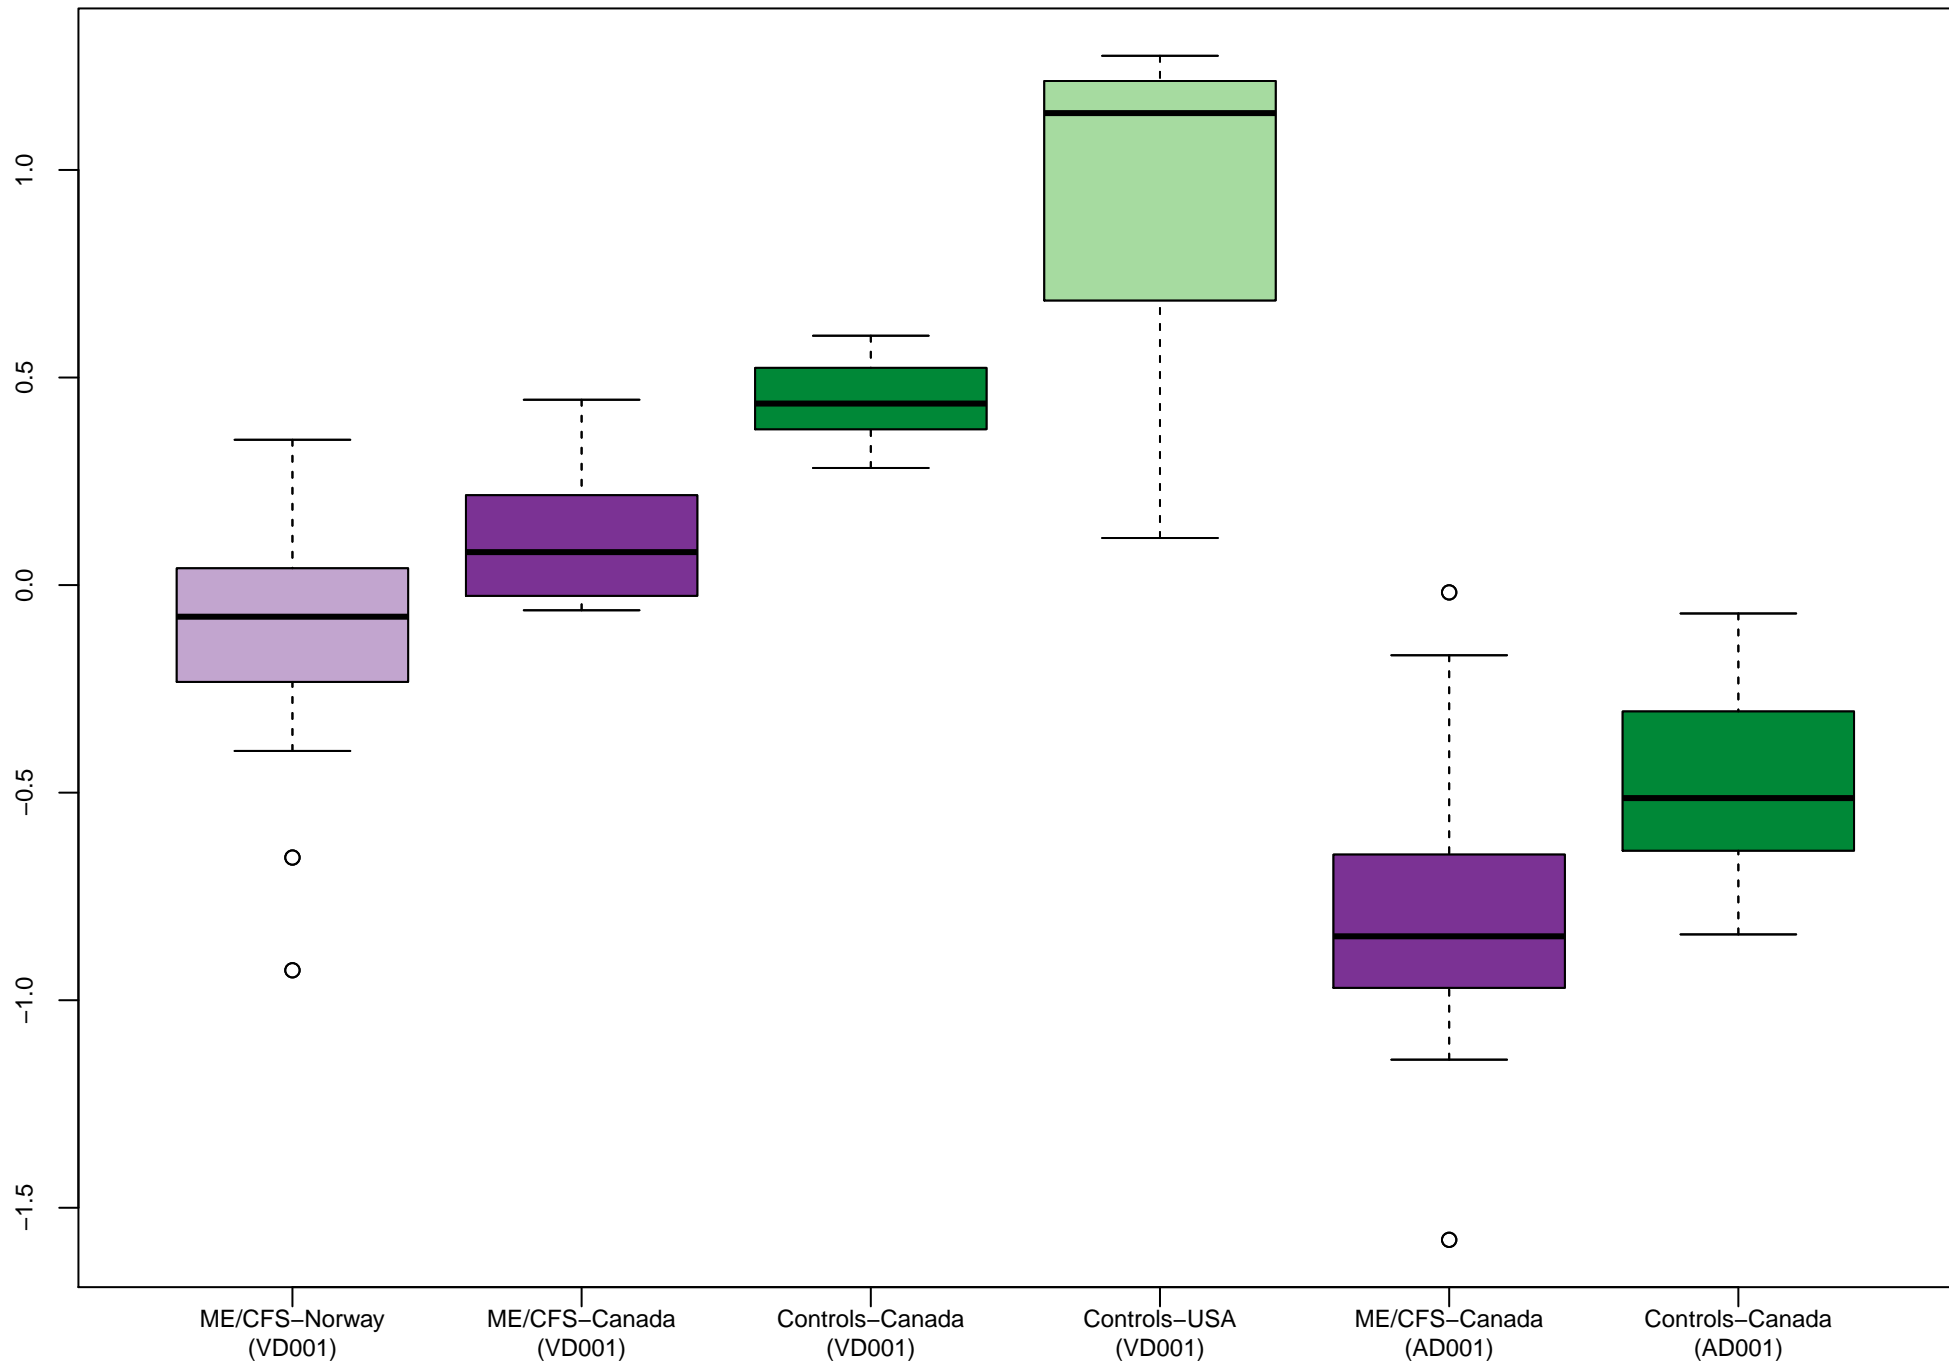

# QRWVGYGFLPN

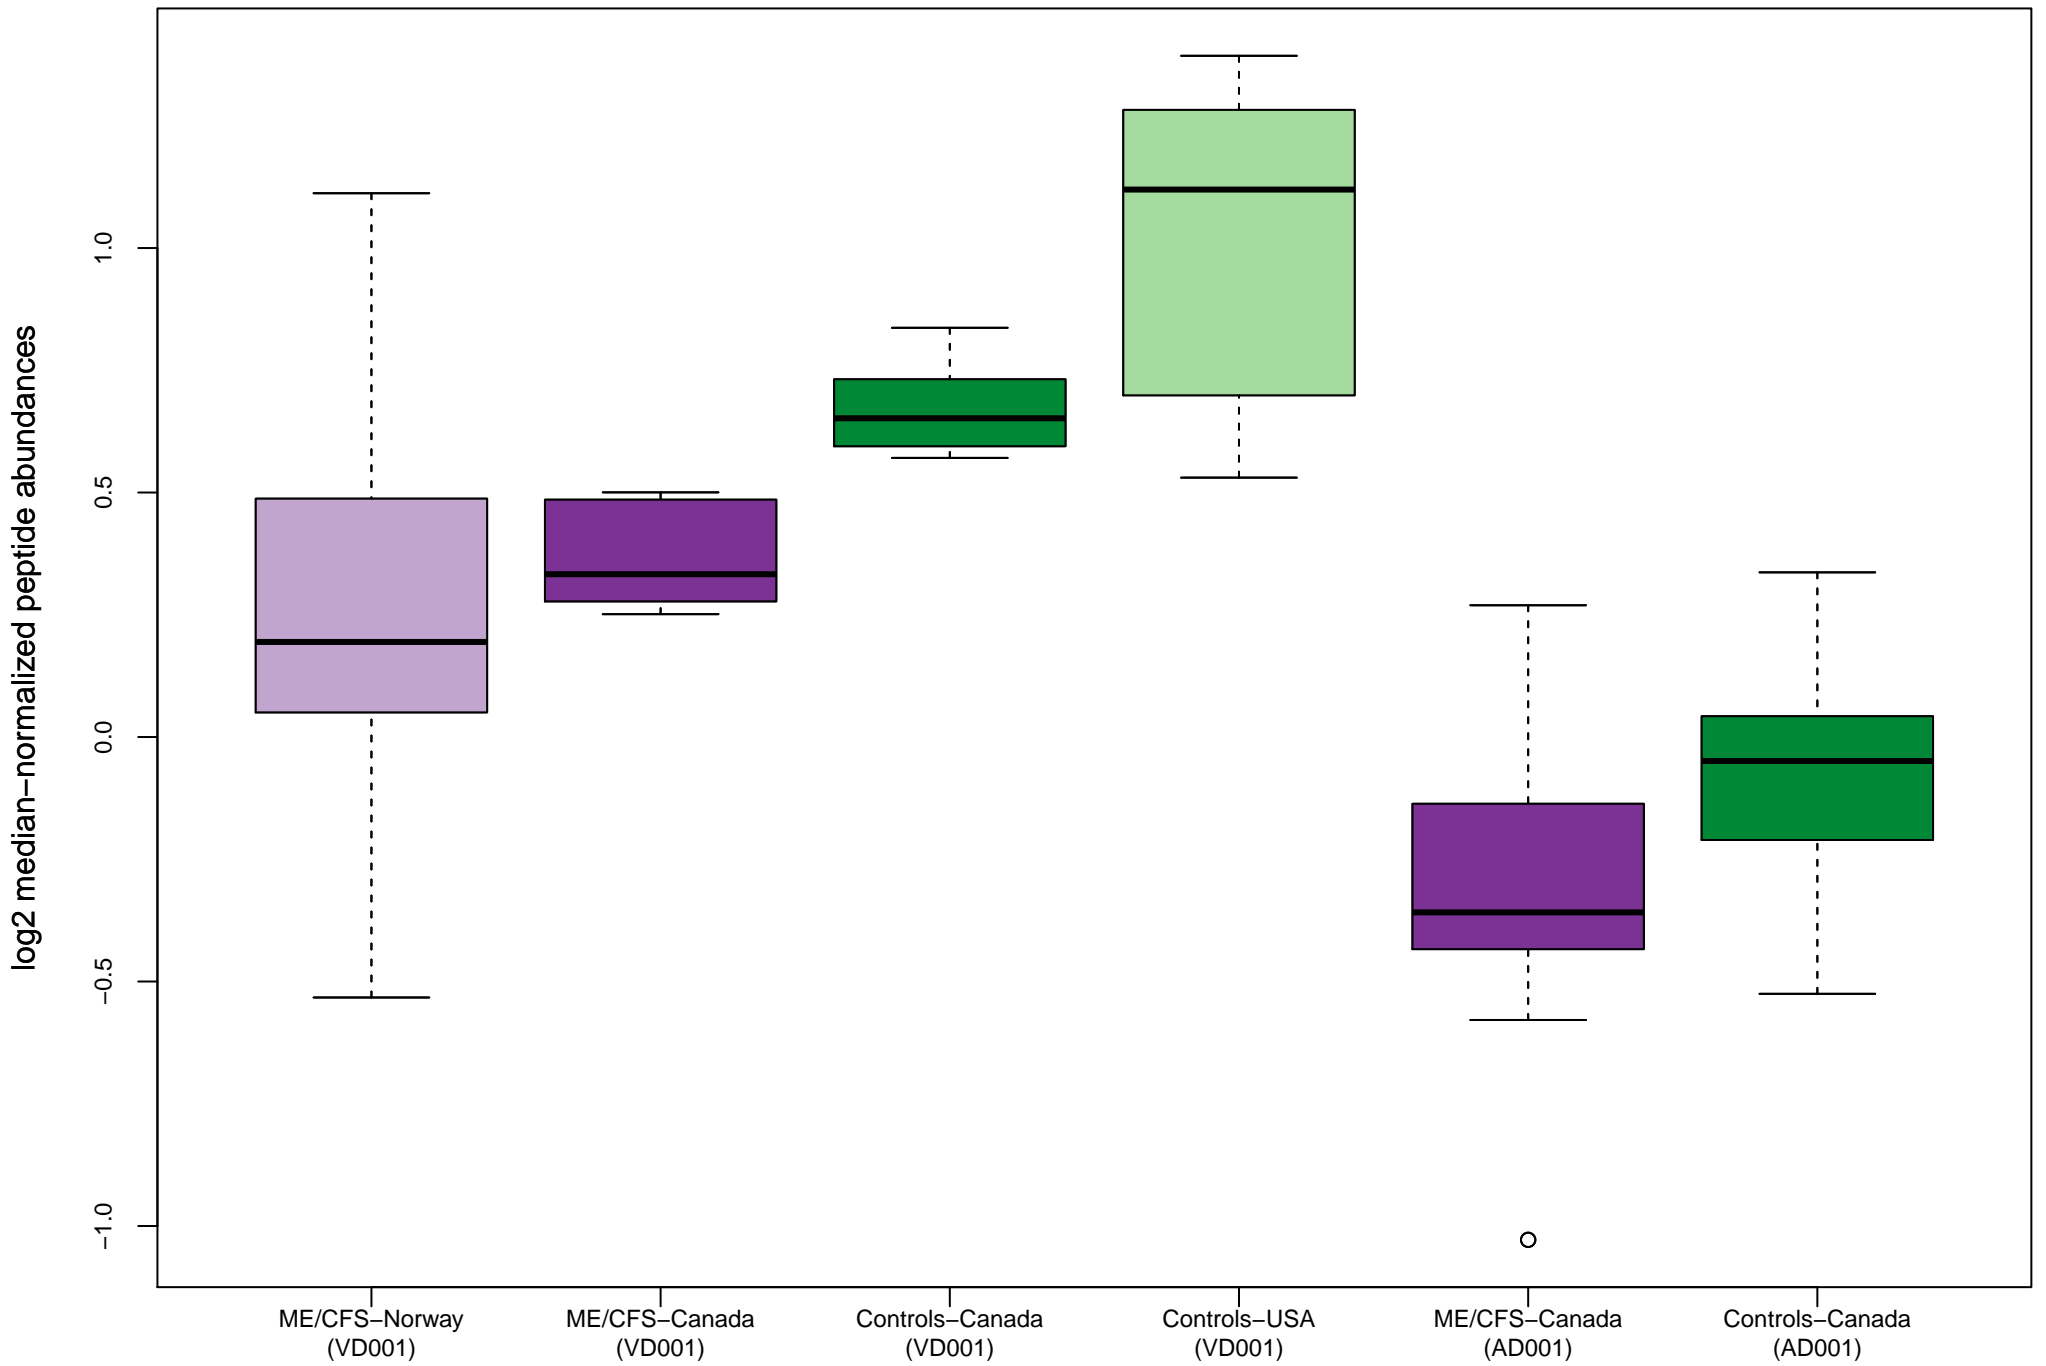

# QSLWGRVLALSG

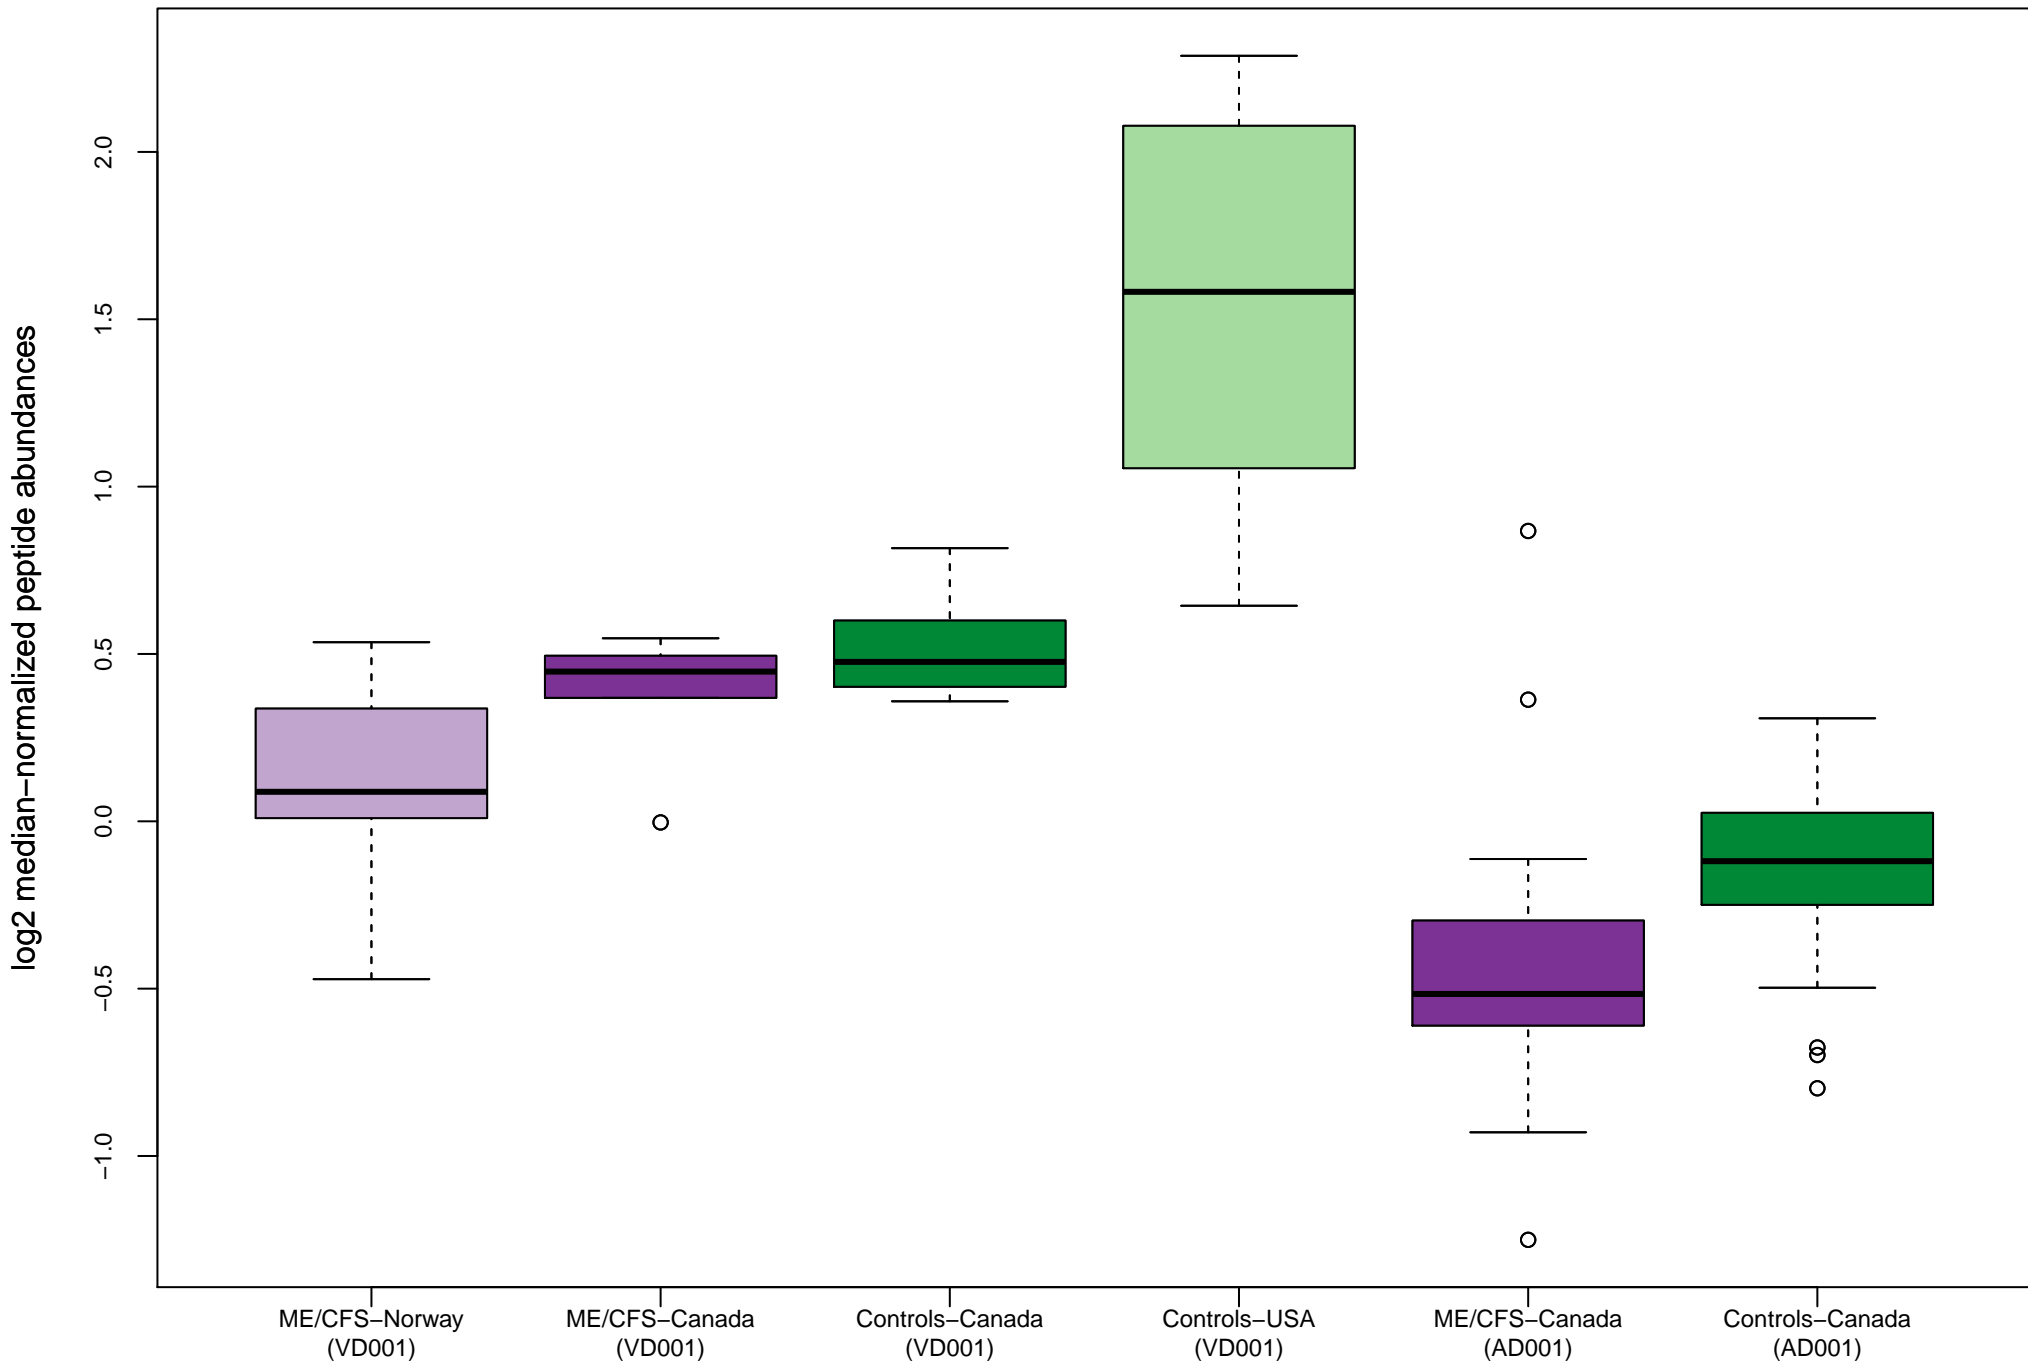

# QVFSRAFASLSG

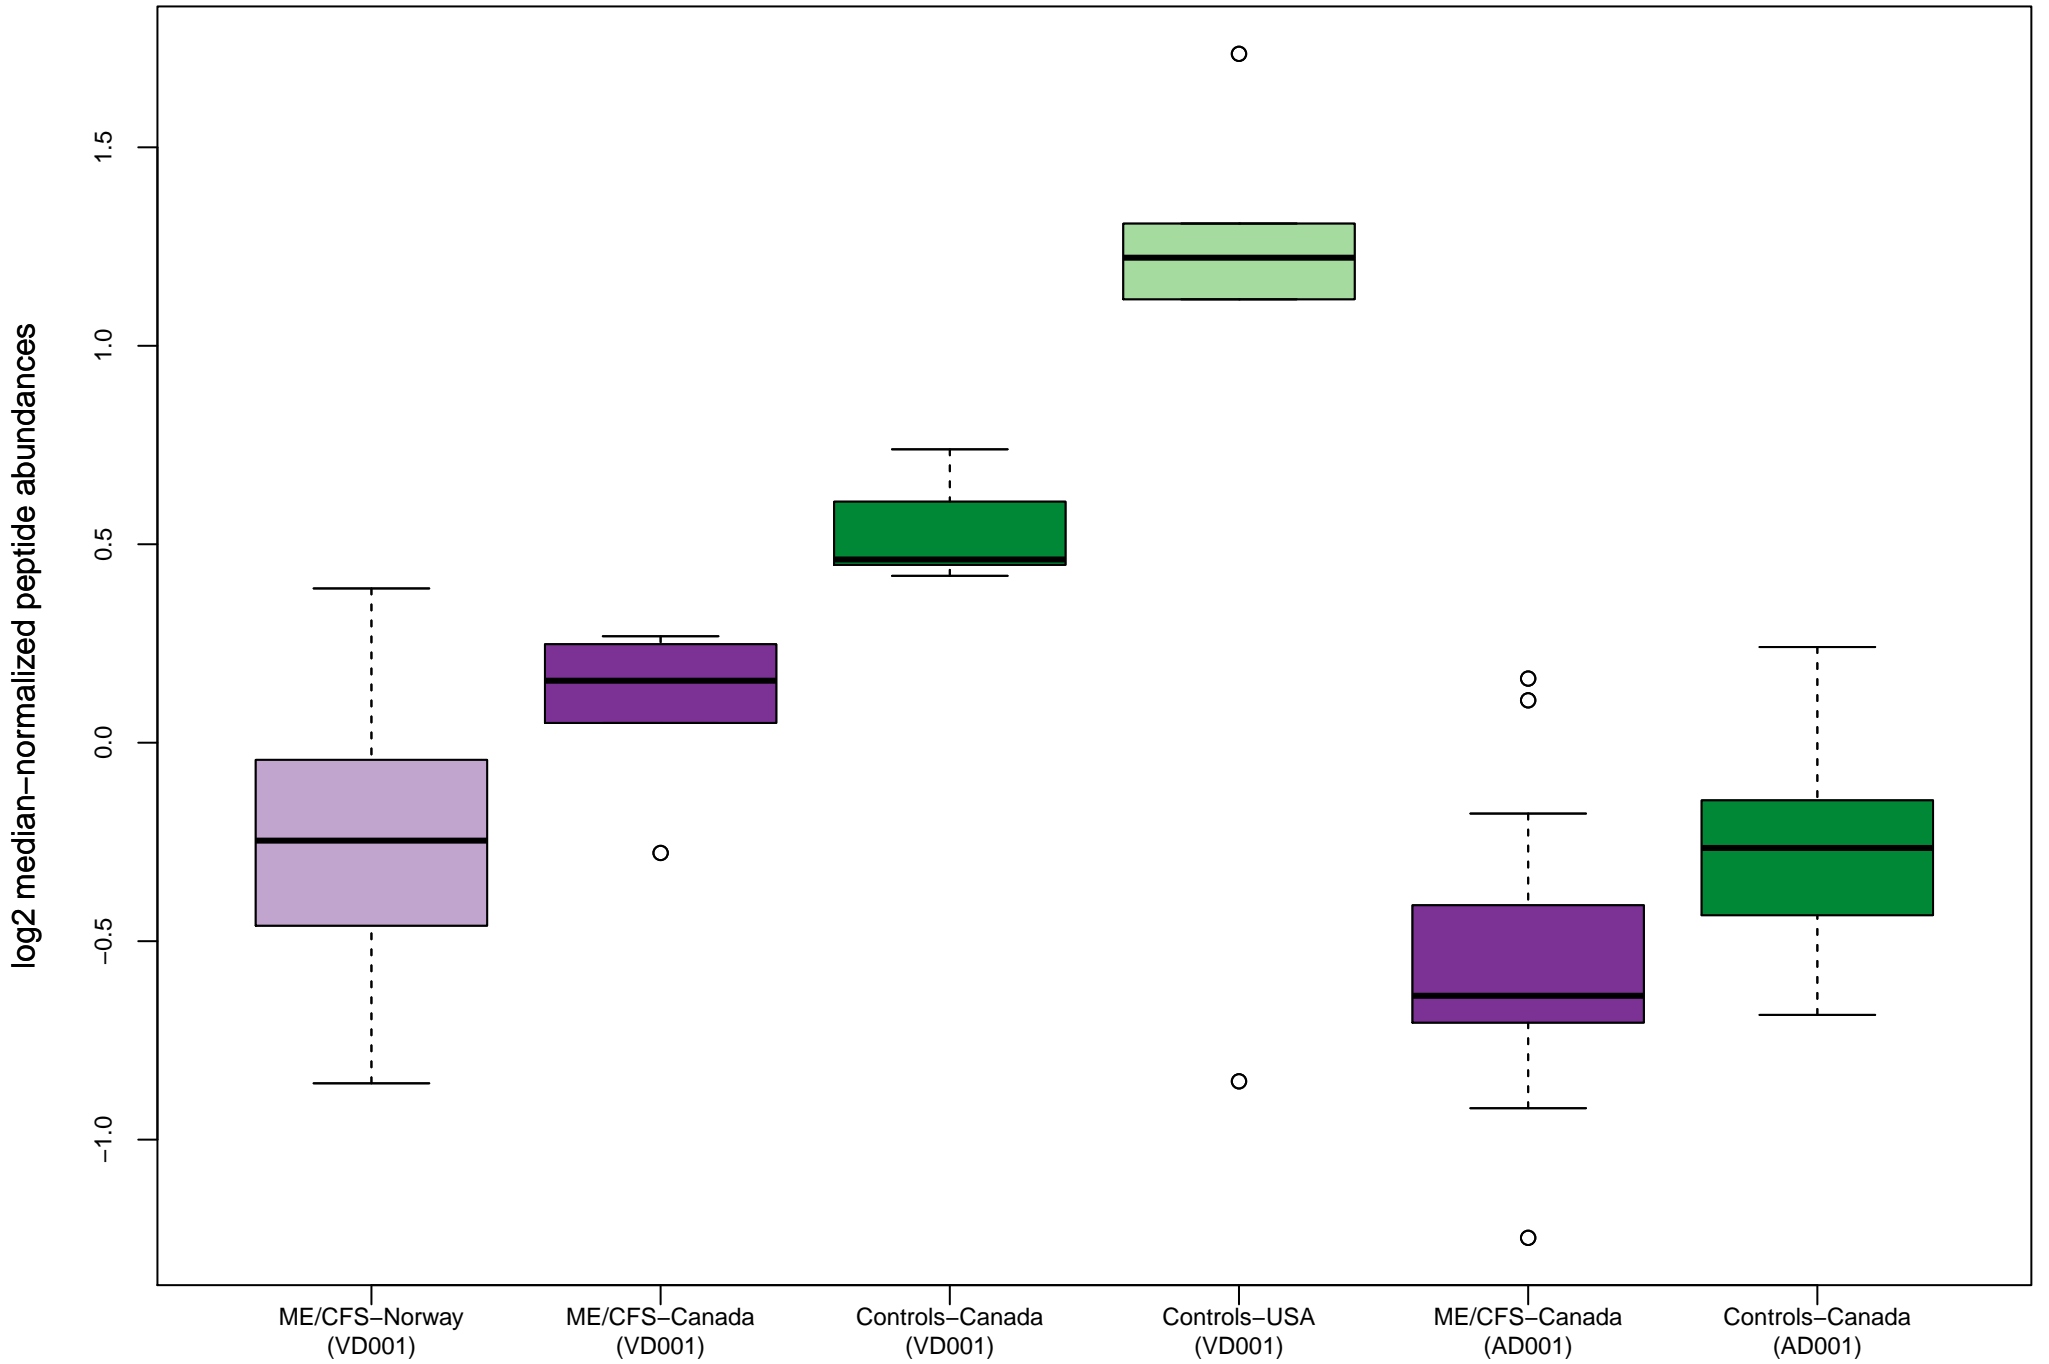

# QVFYWVRNHRVA

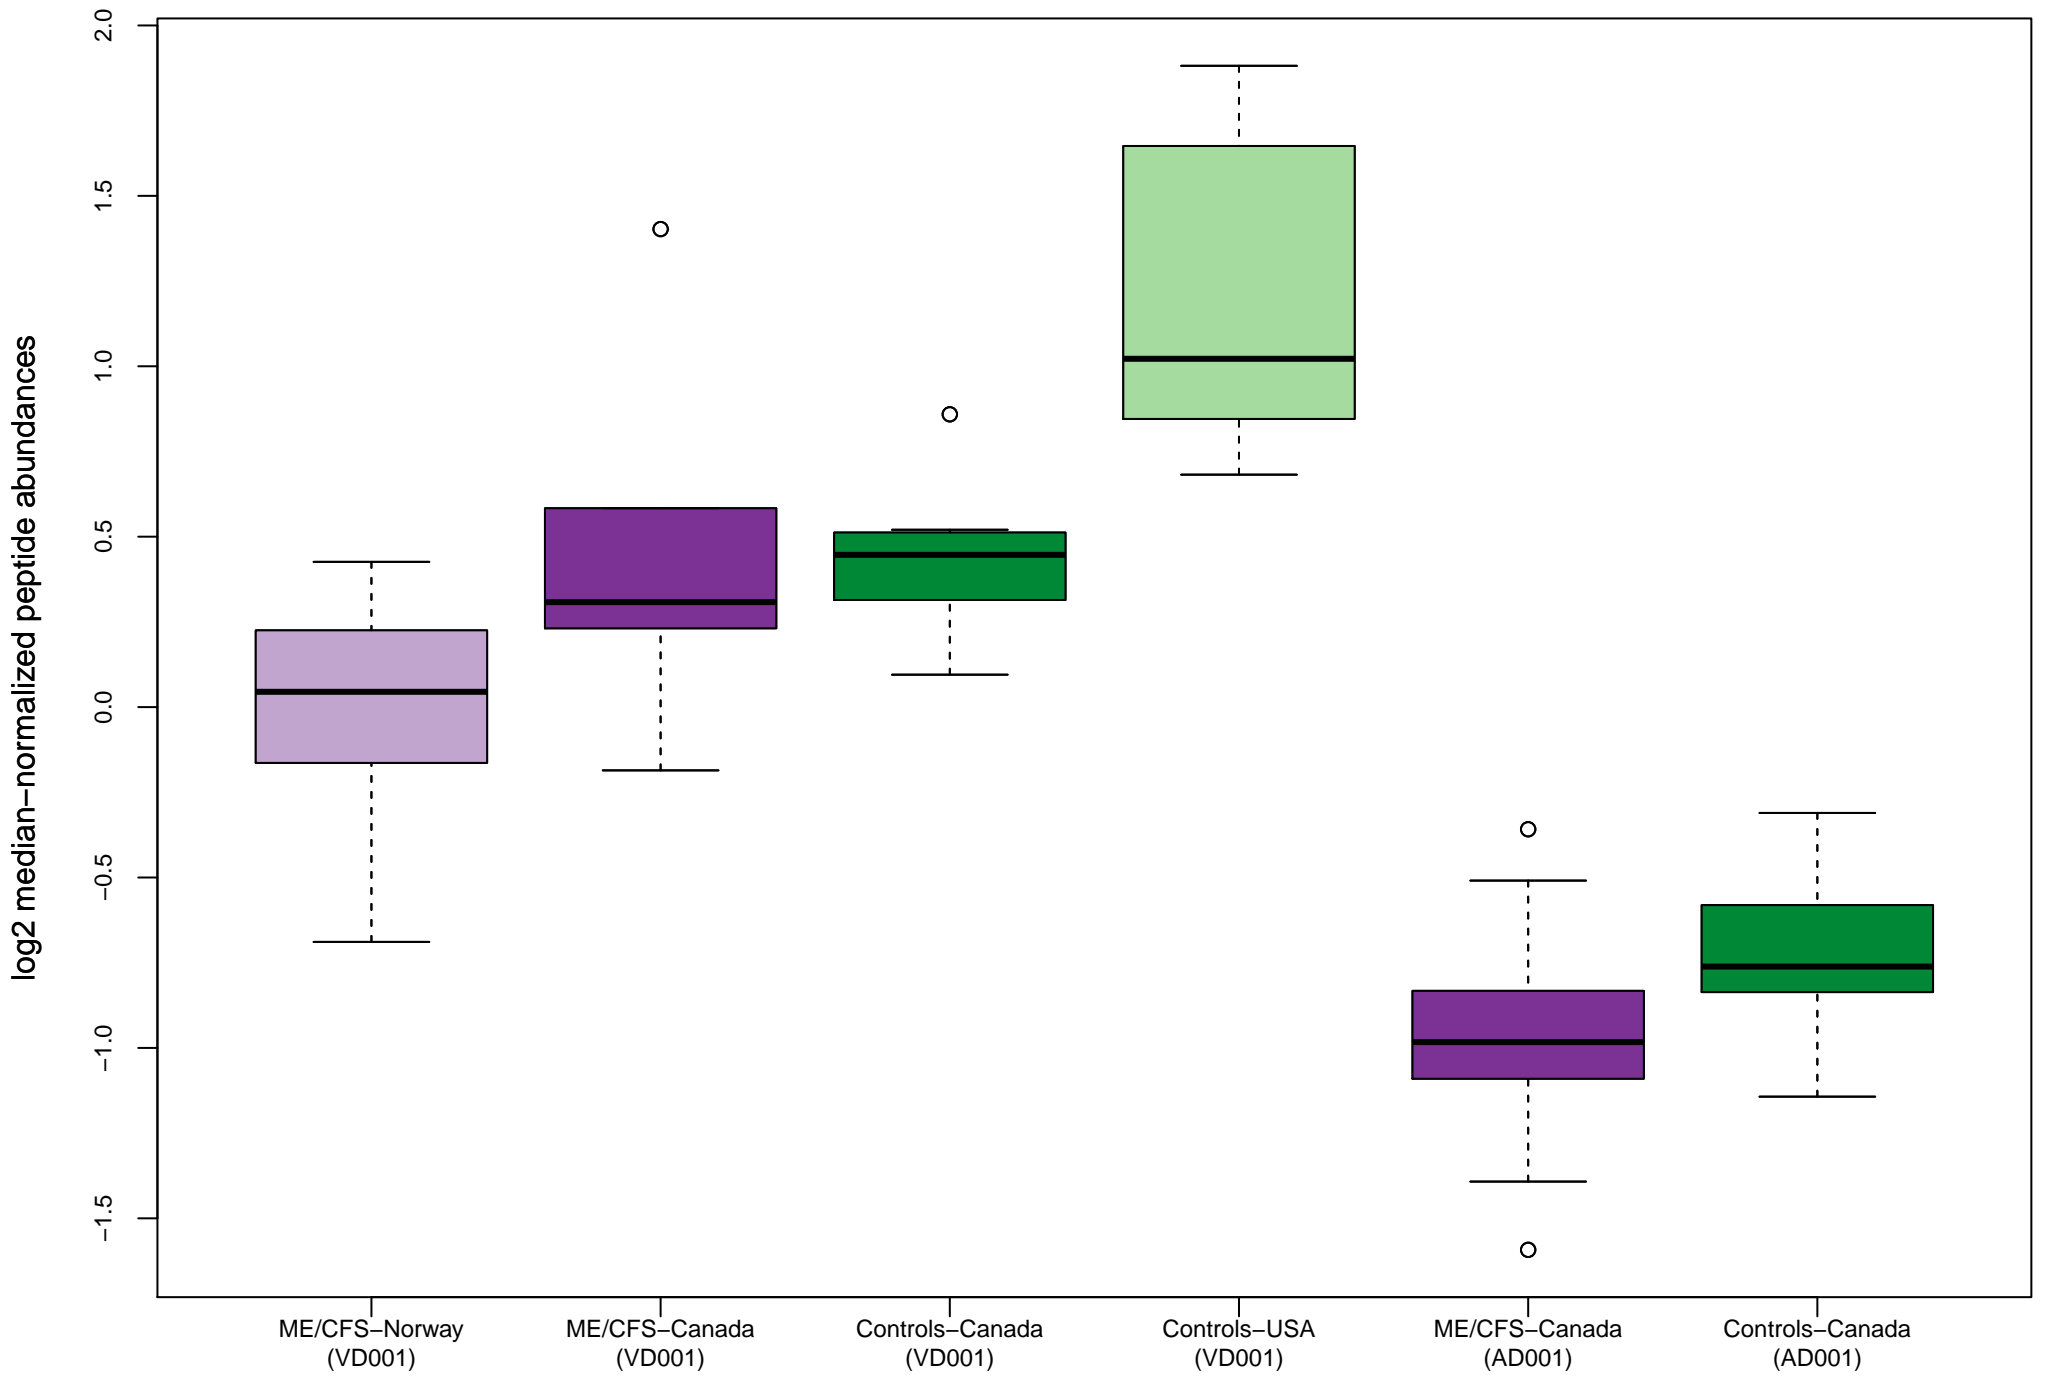



# QVGPPWLRYVSV

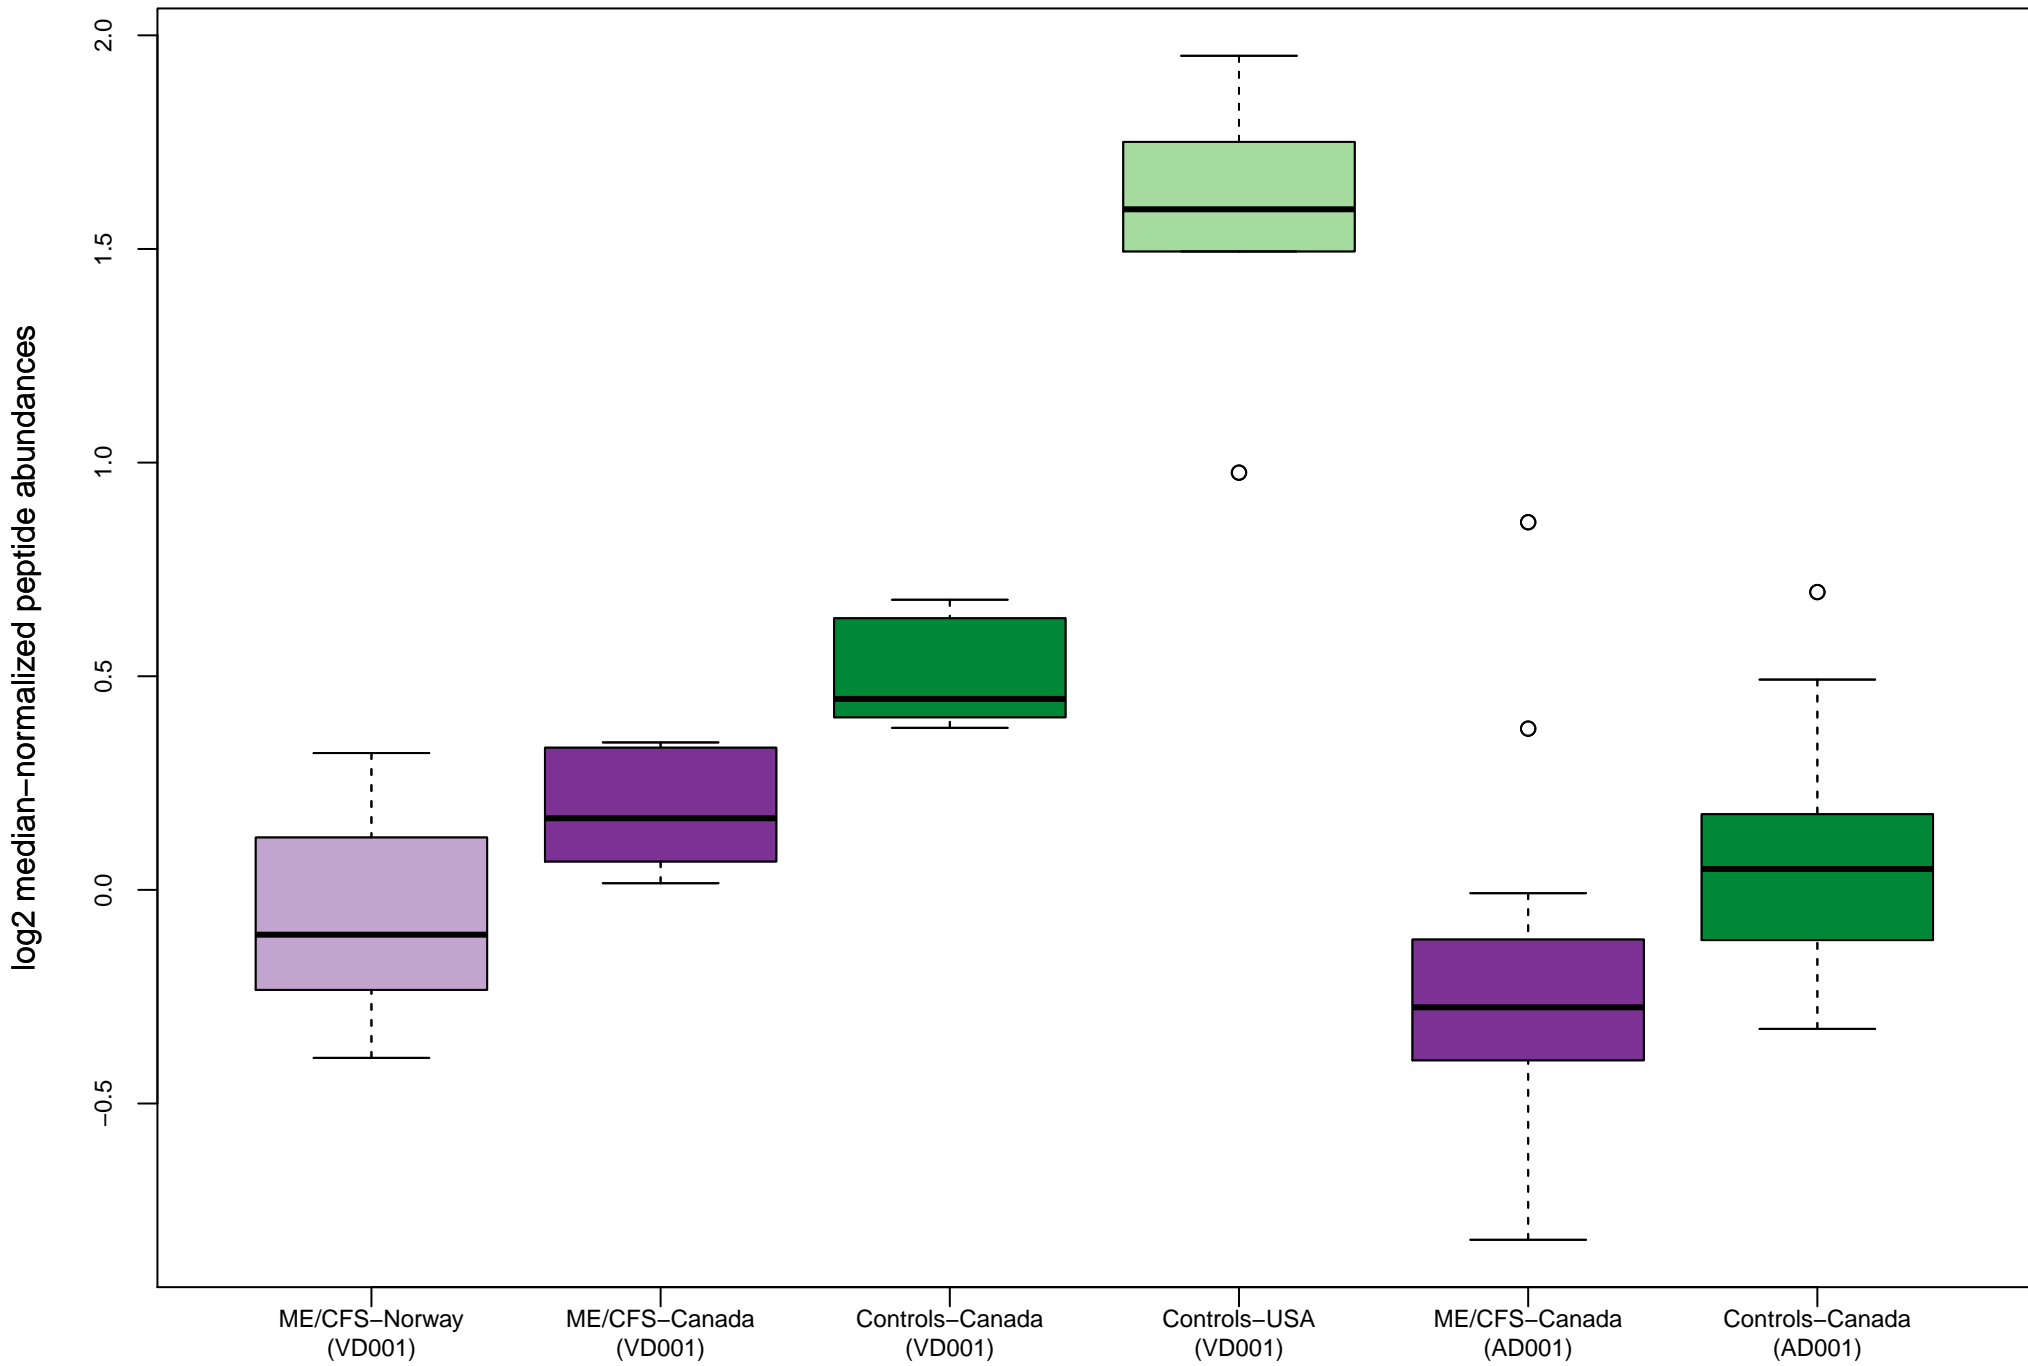

# QVRFLSPNVVSG

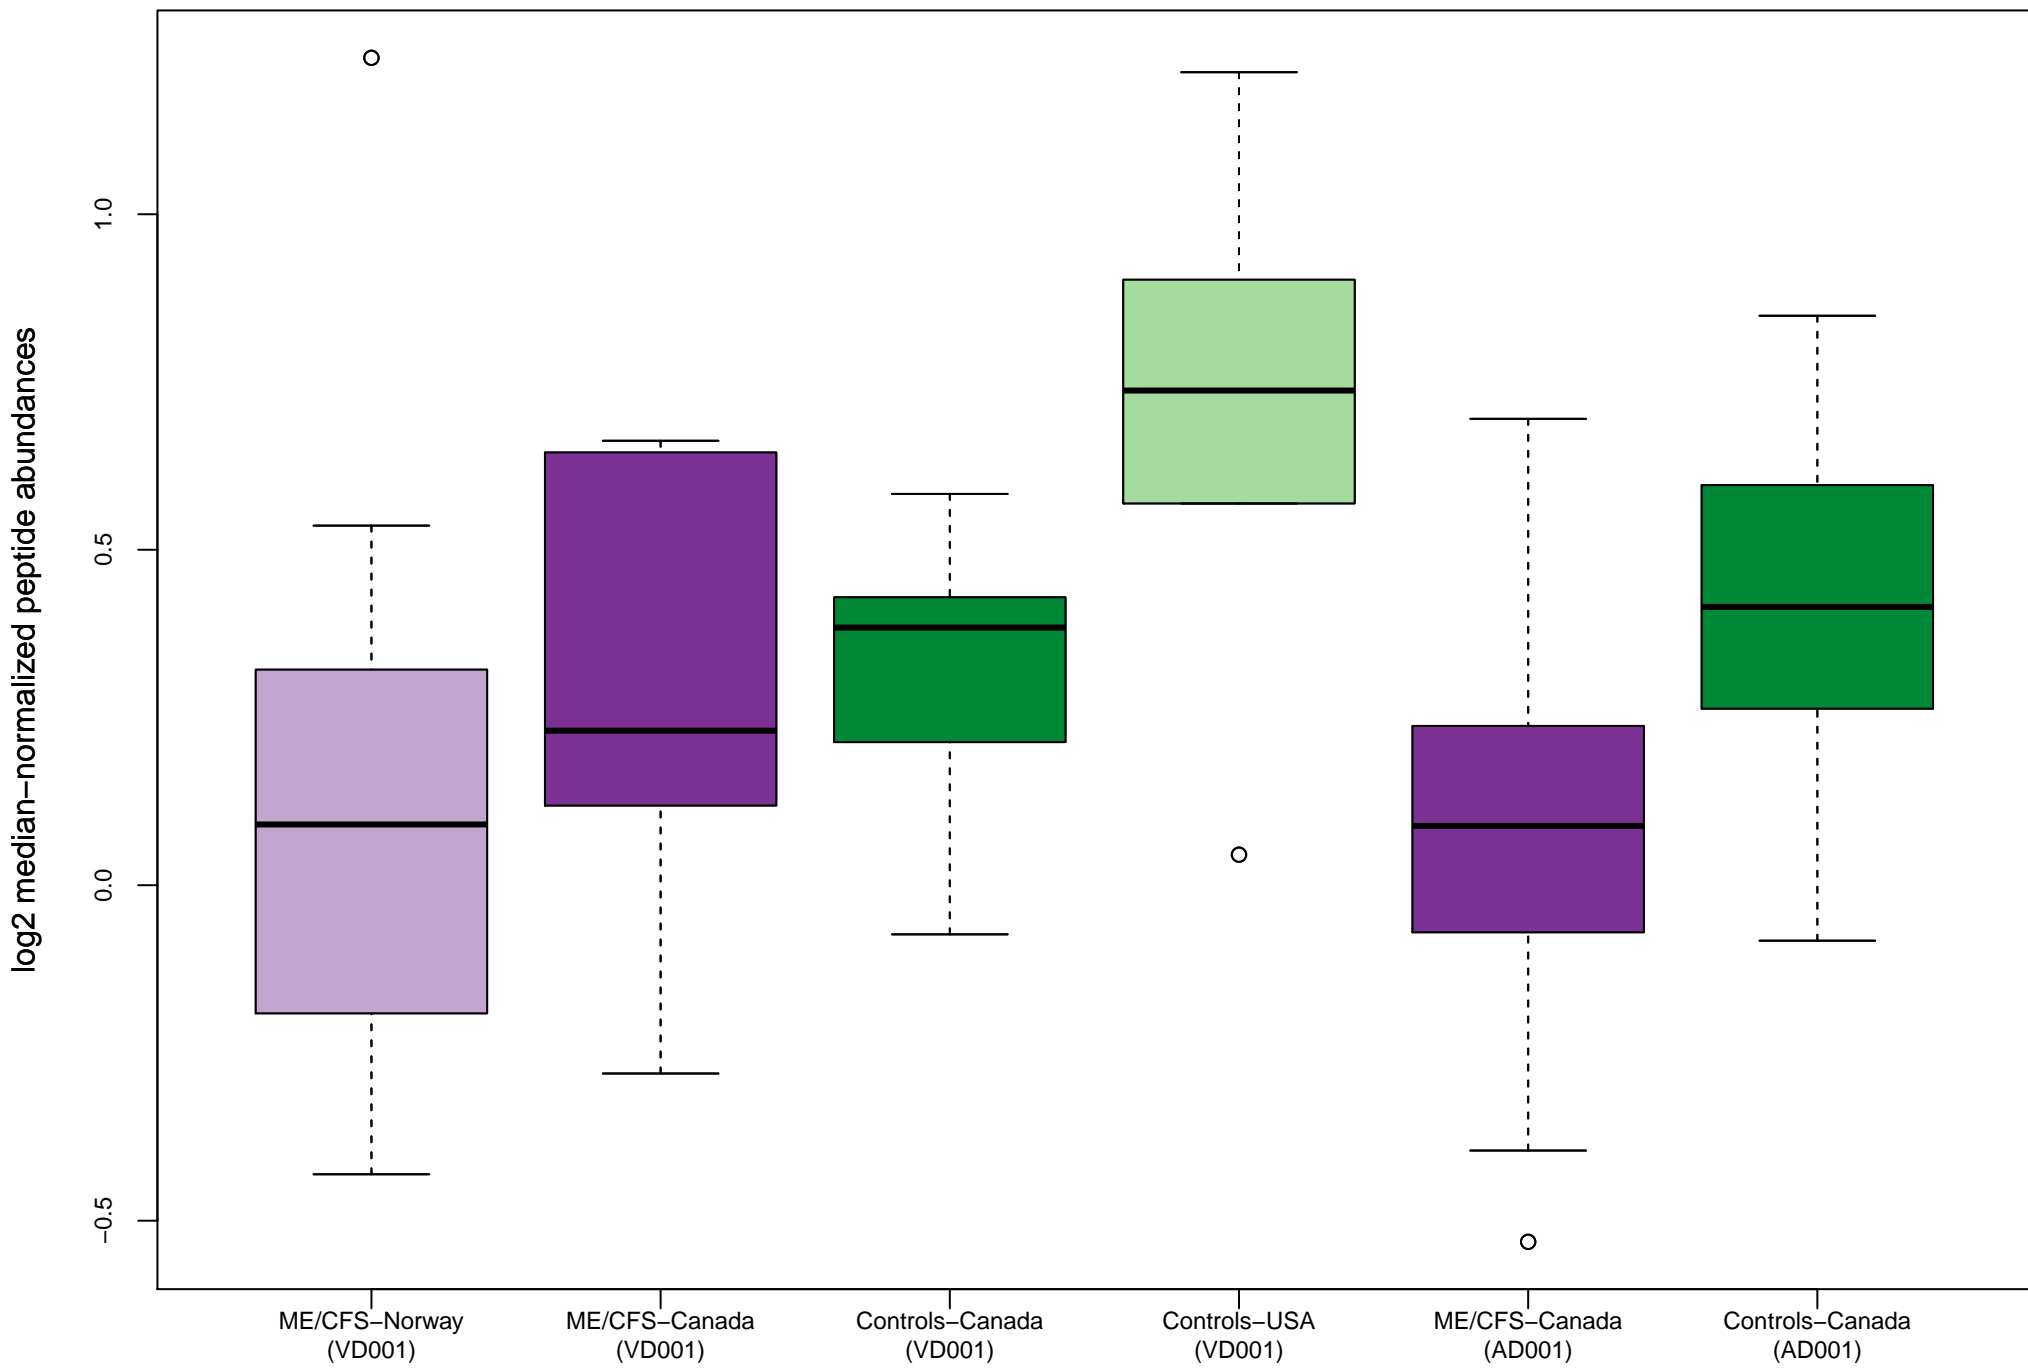

# QWLAFRWSKVGA

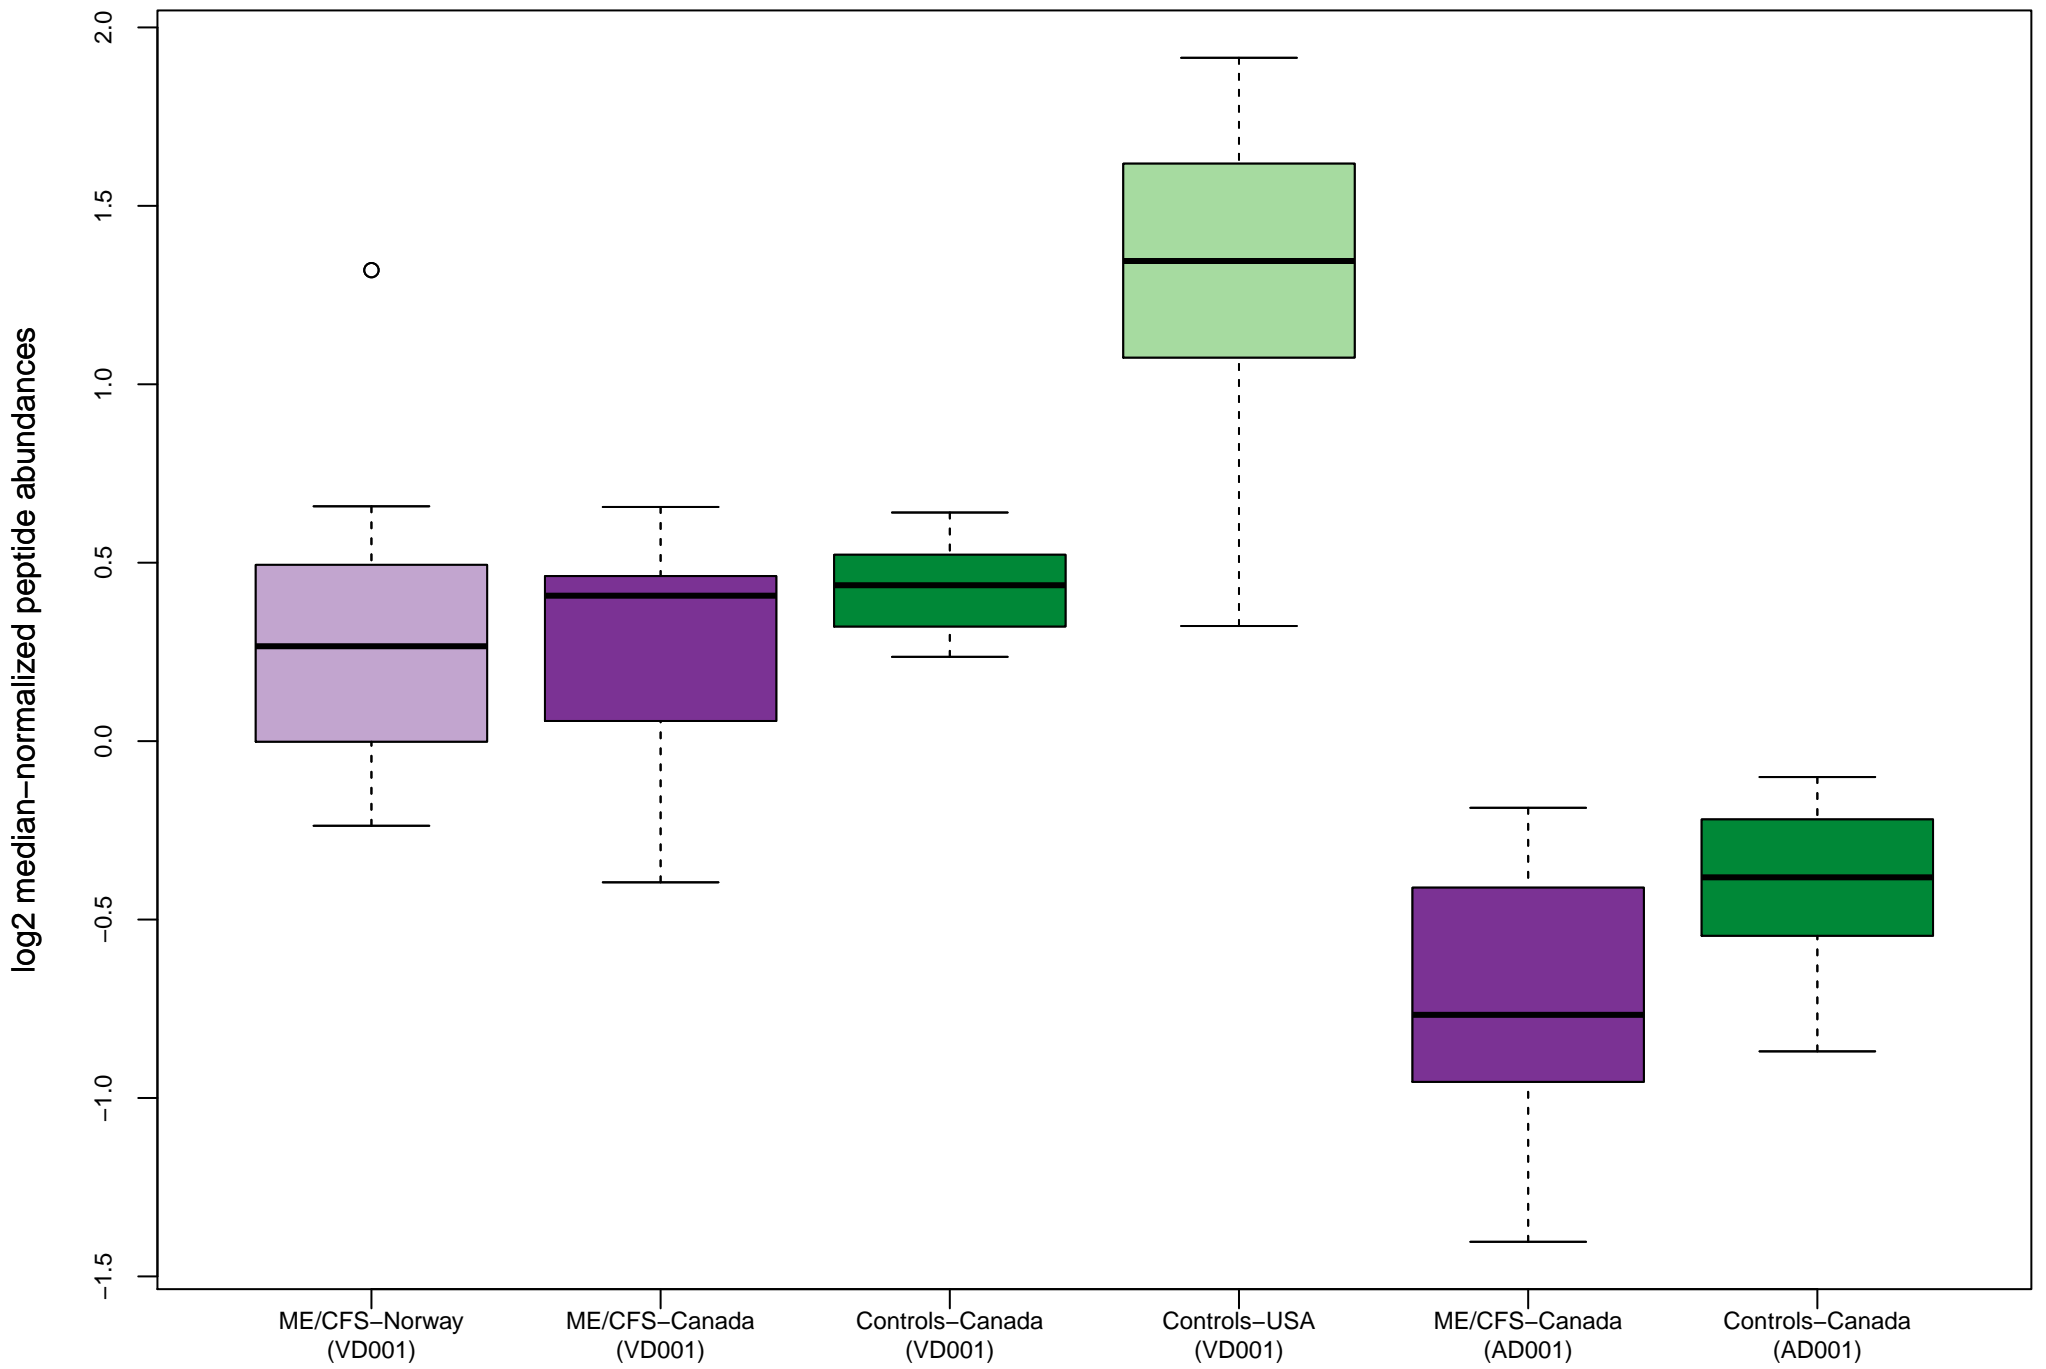

# QWLYLRPLRYKV

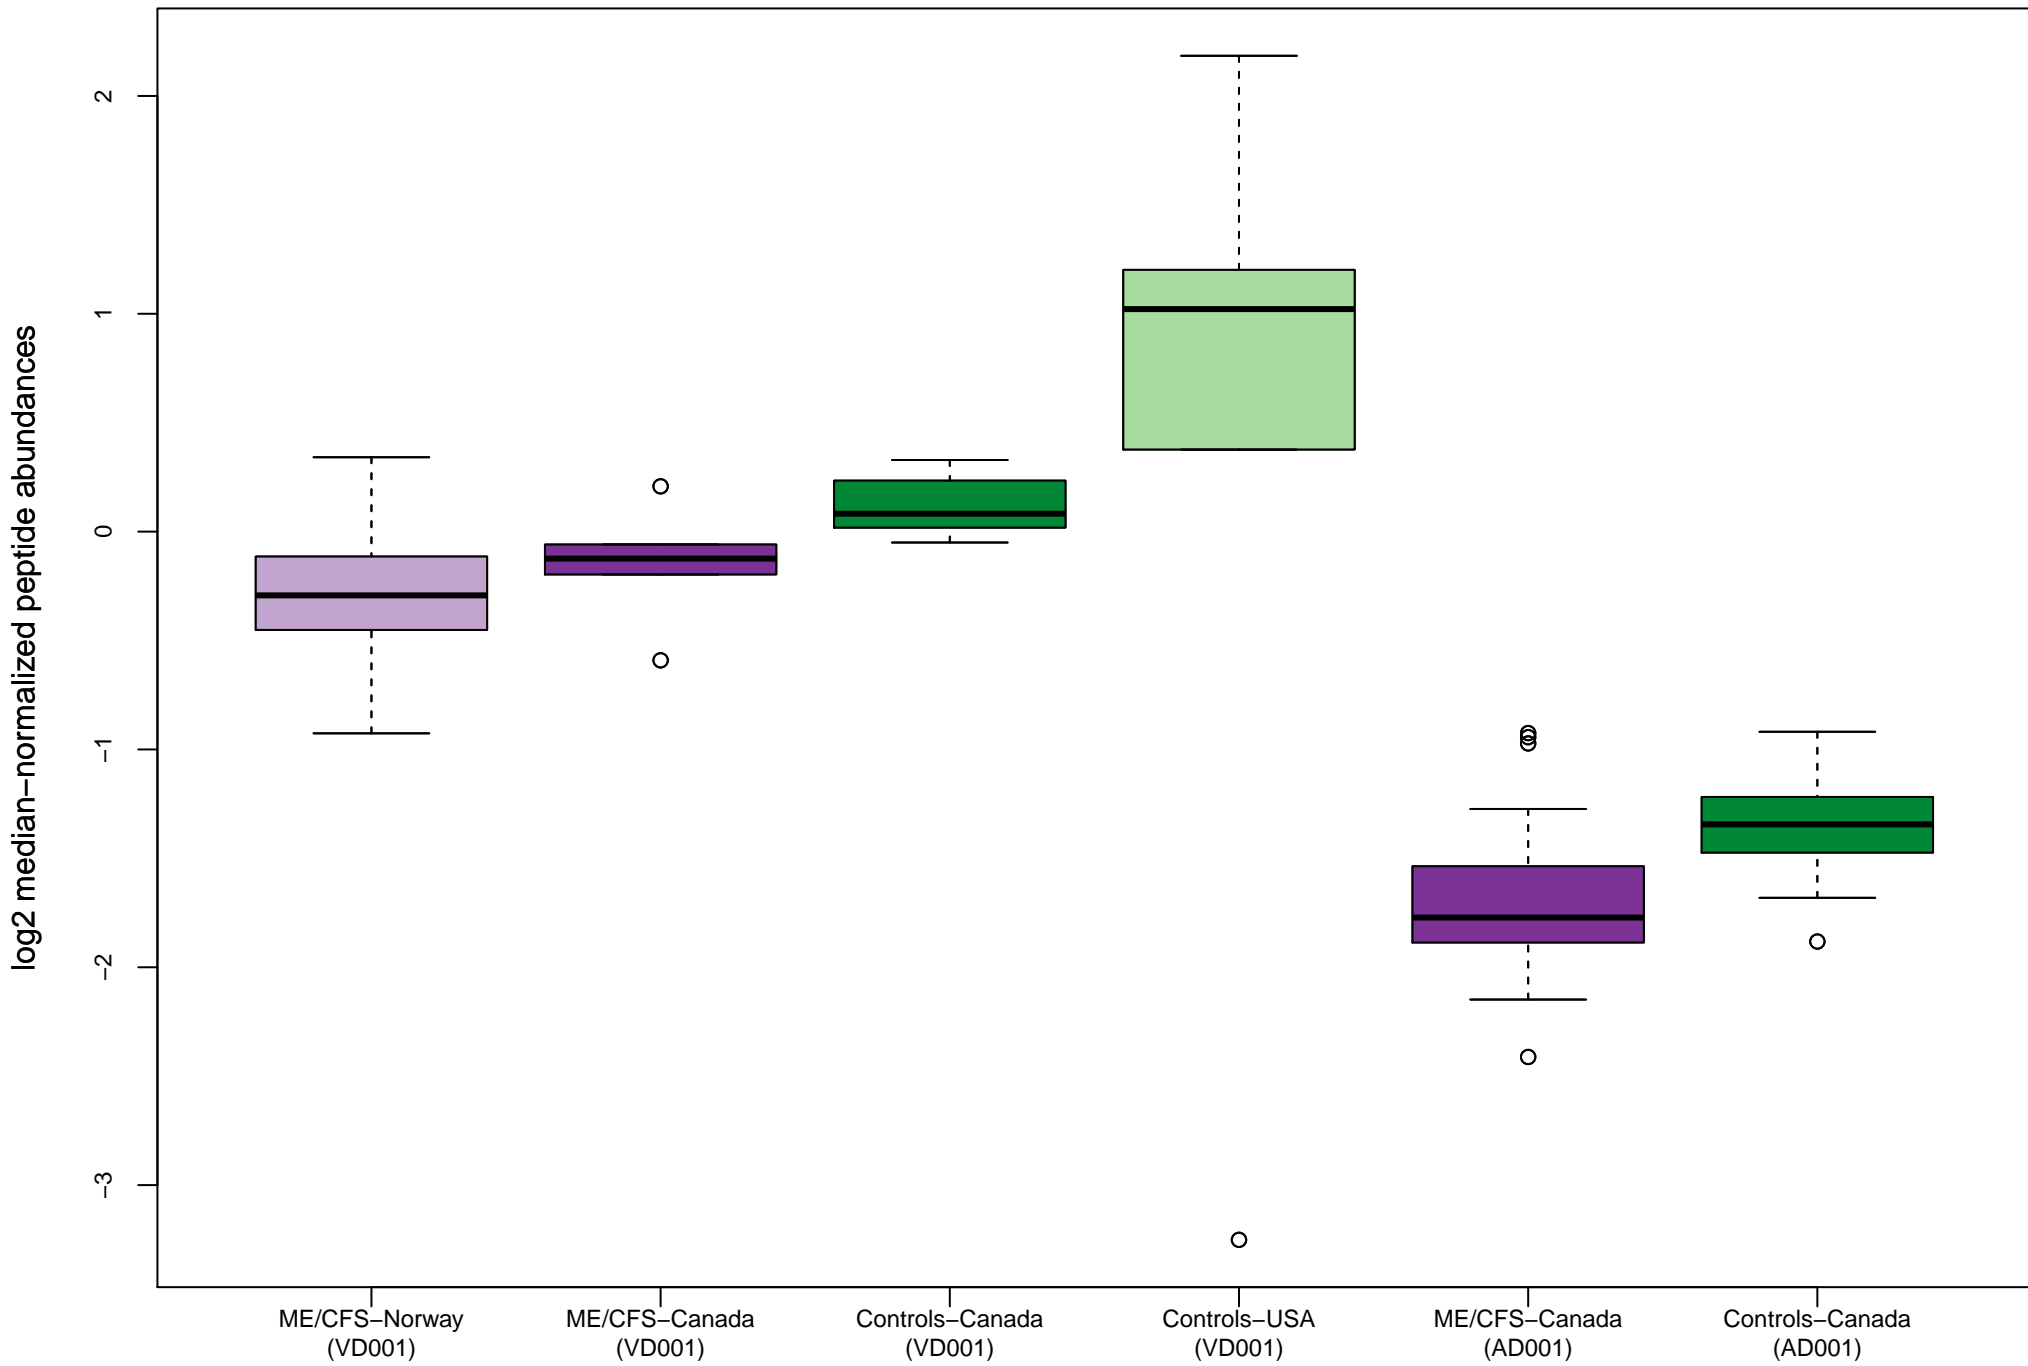

# QWVRFYNYWVG

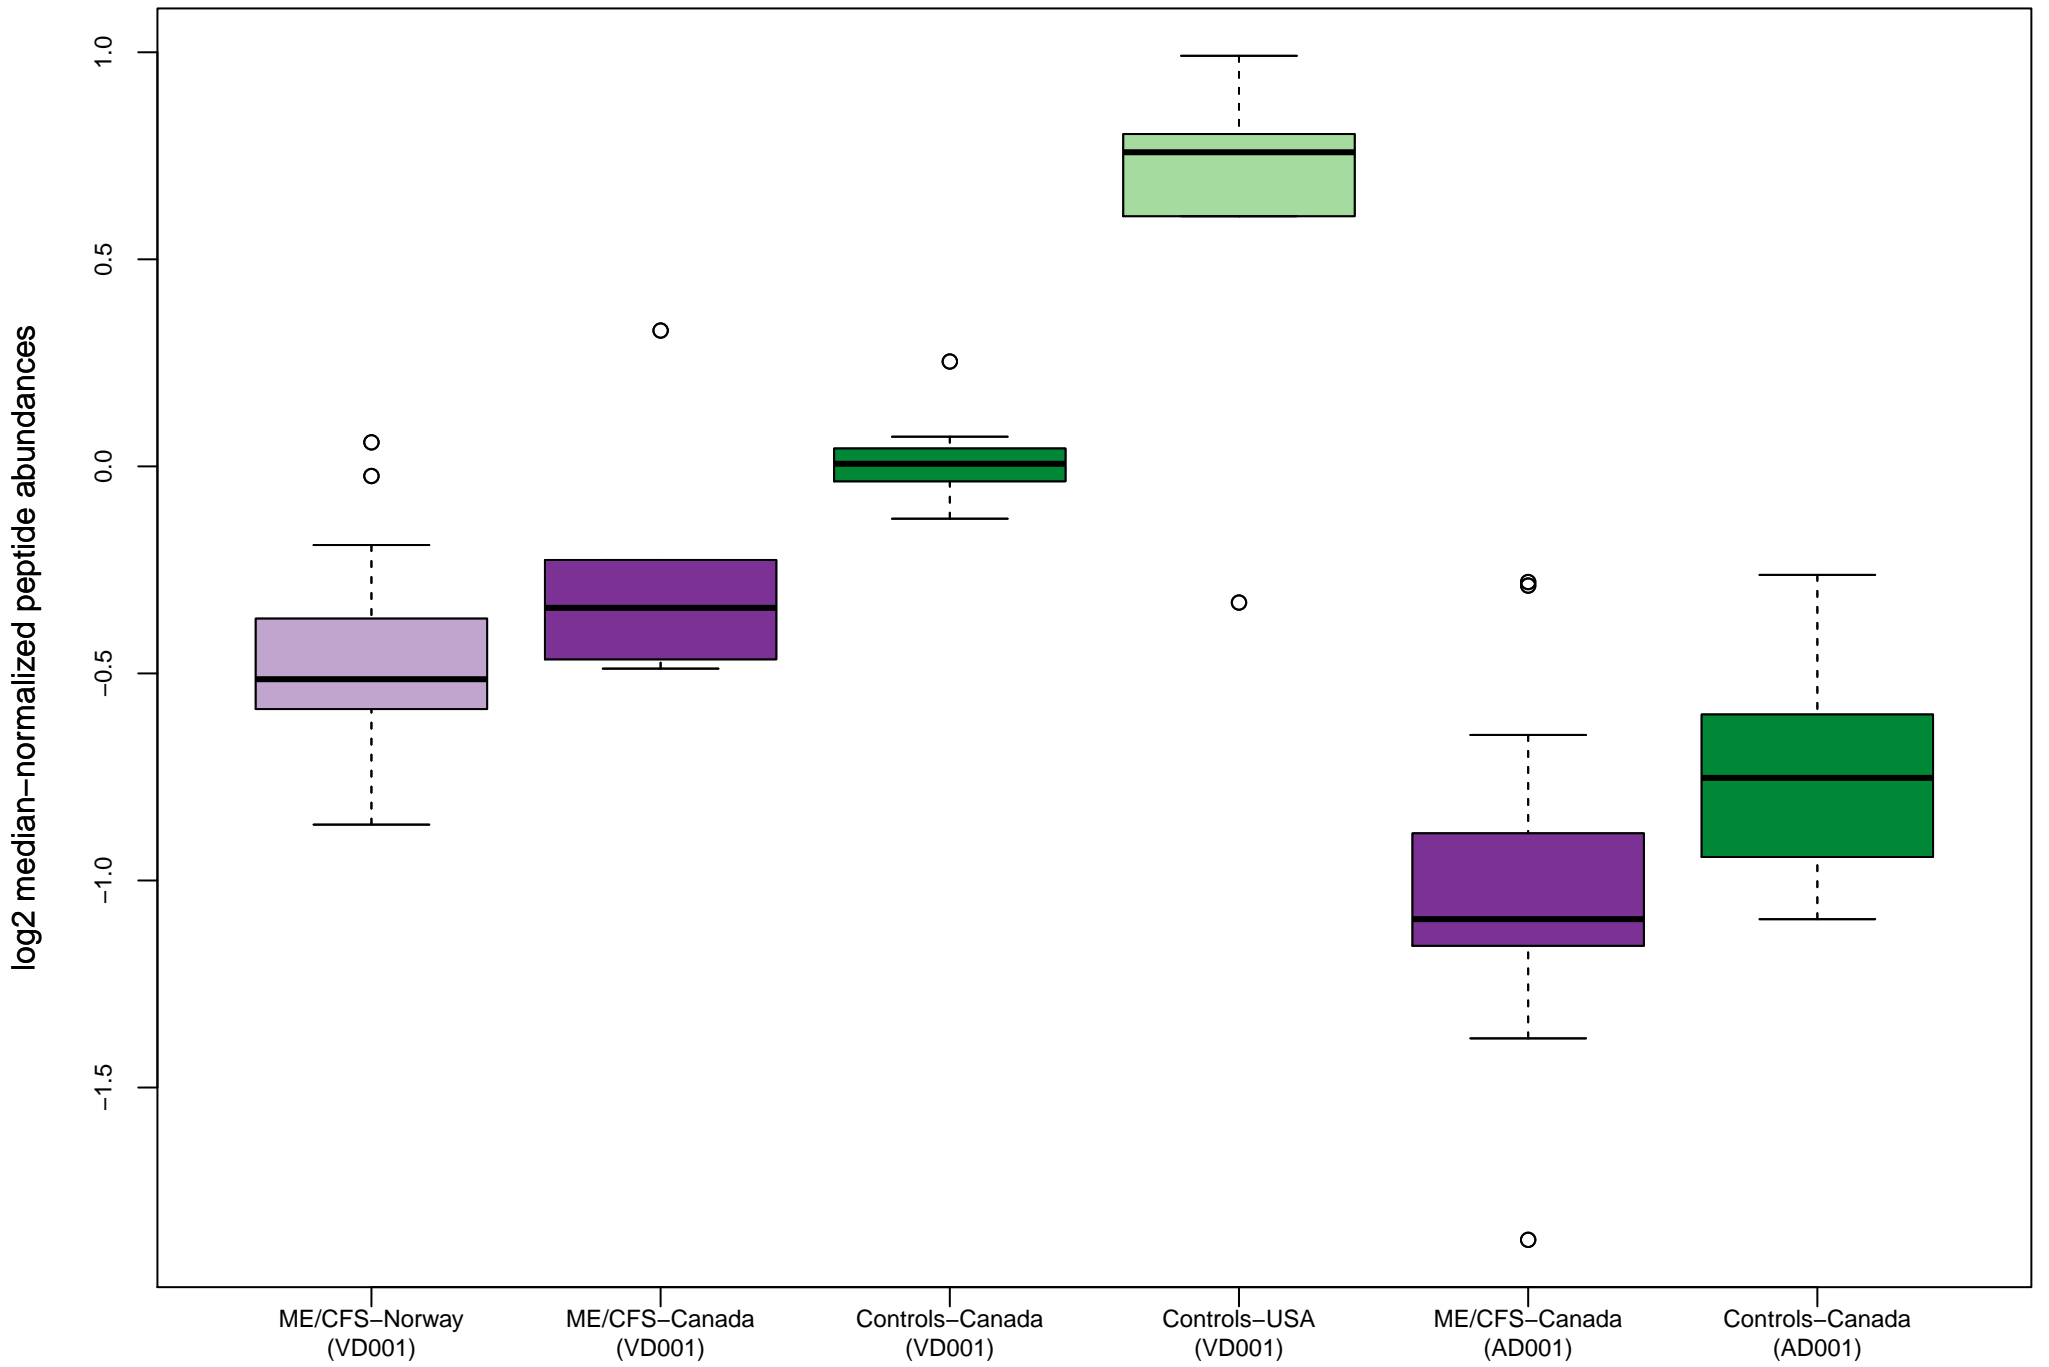

# QWWFLGRYKLSG

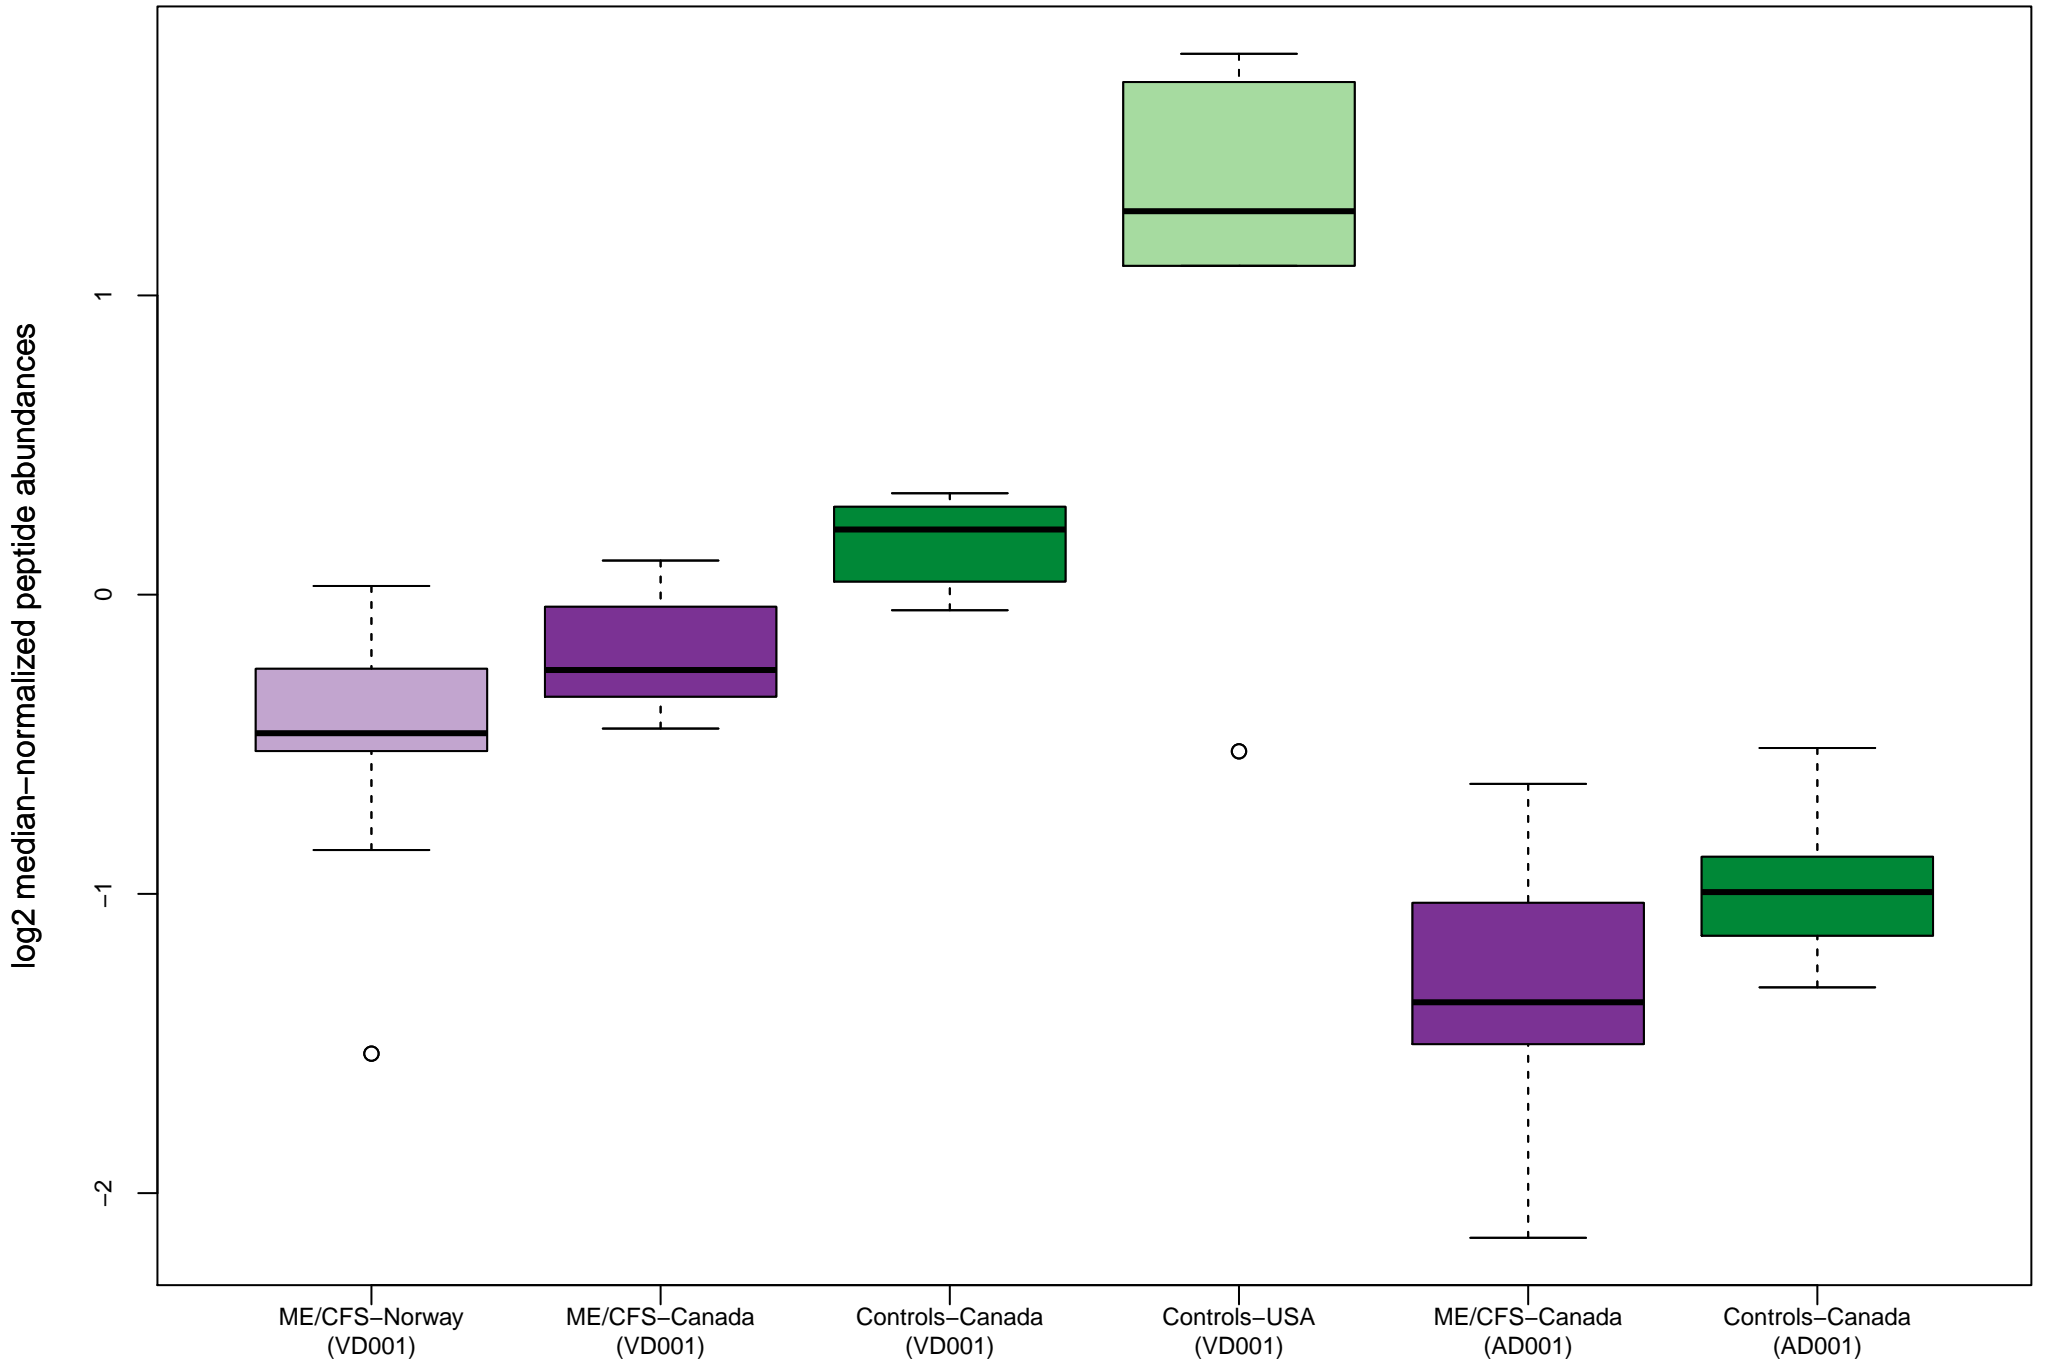

# QYLNRLFAGLS

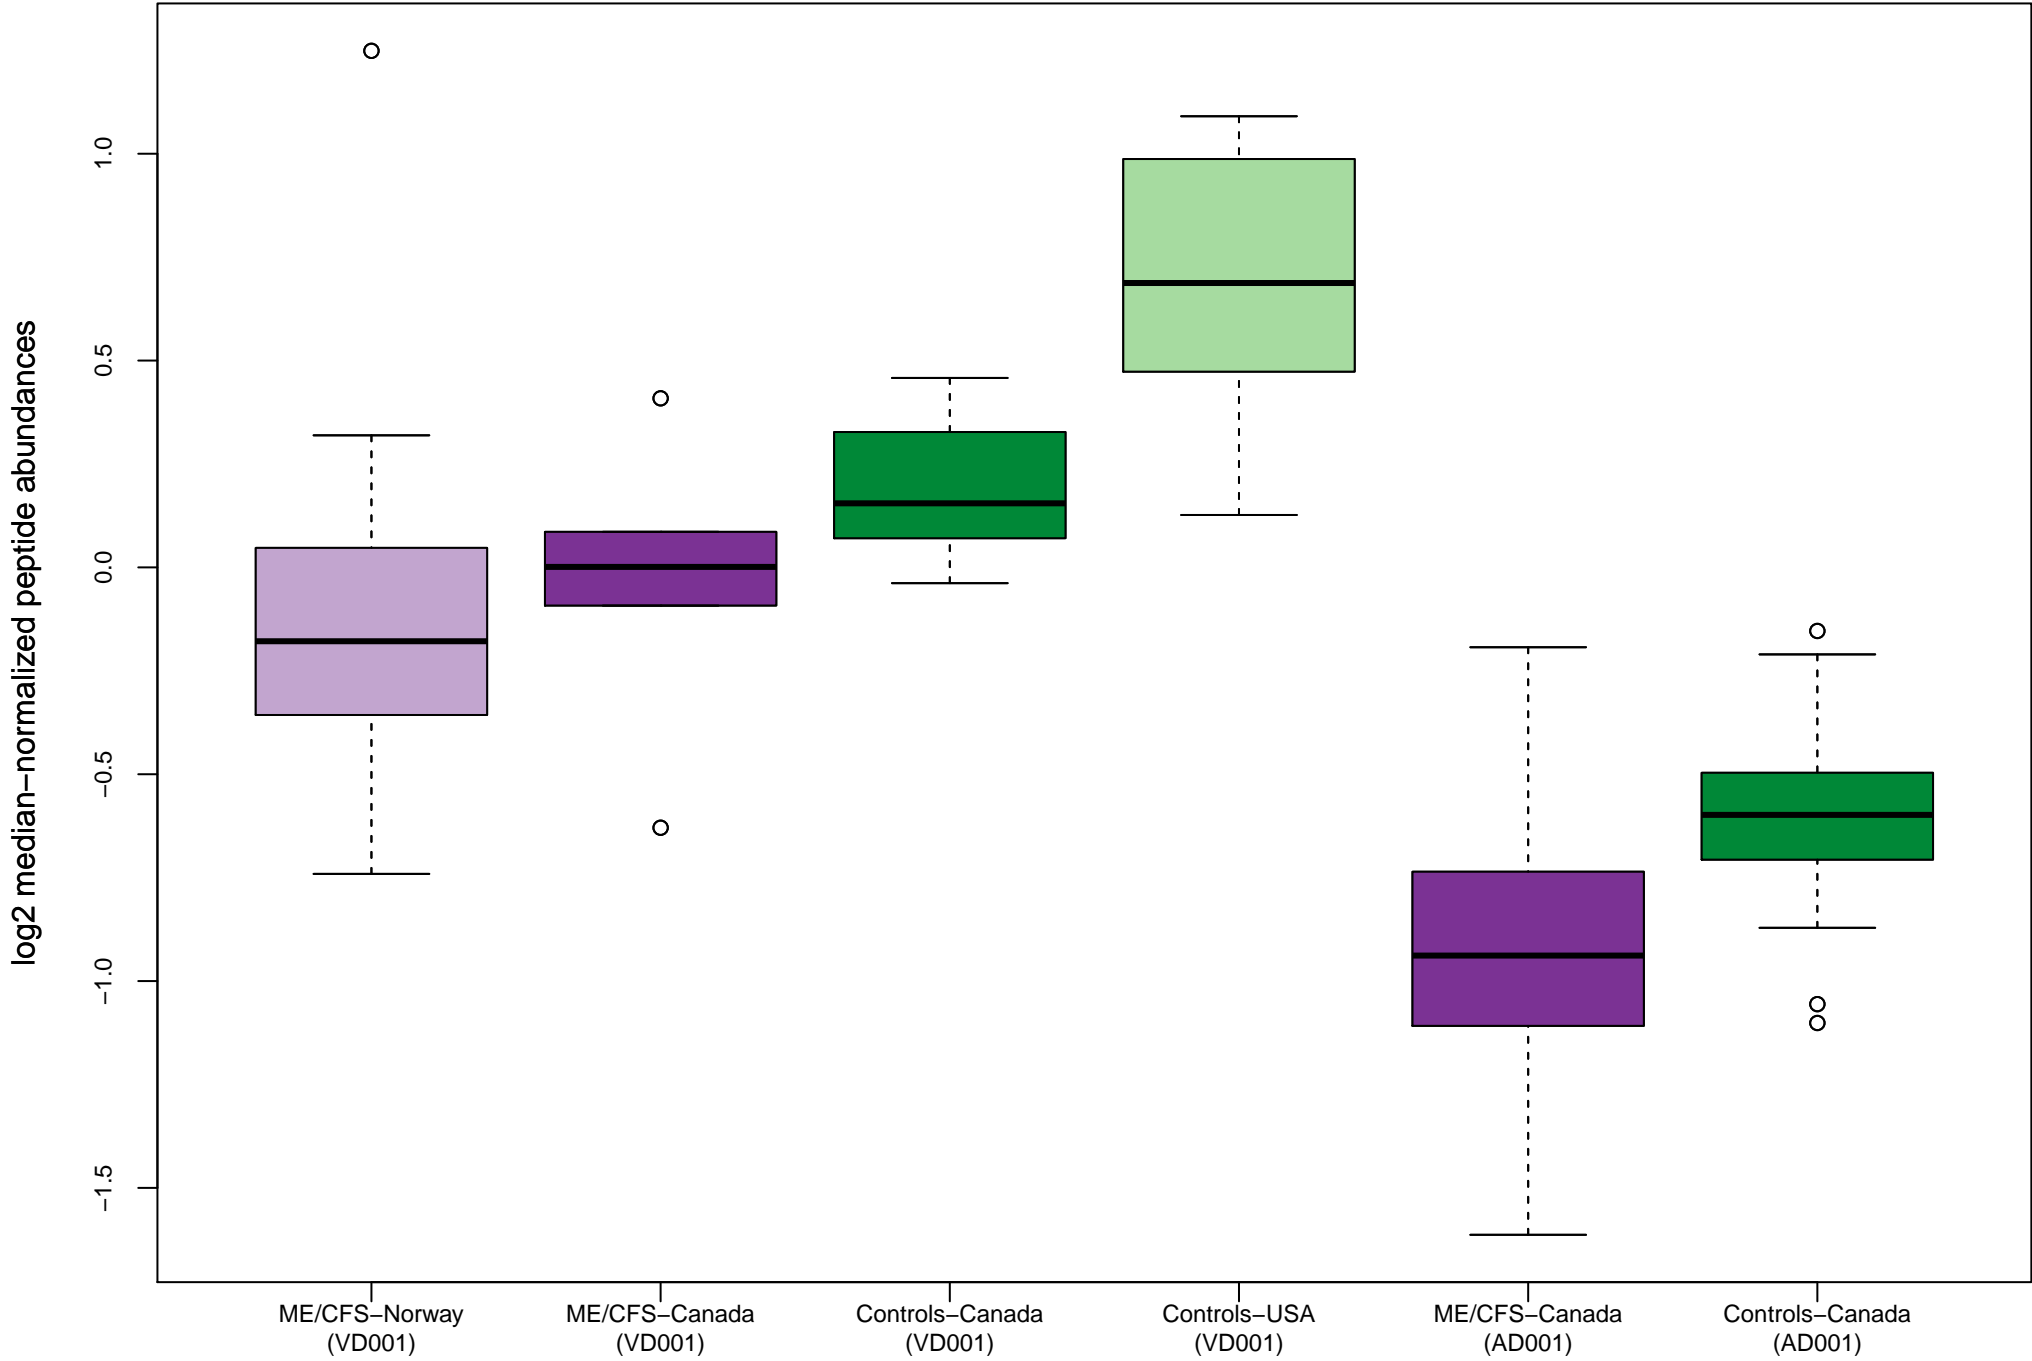

# QYNQAGRYFKLS

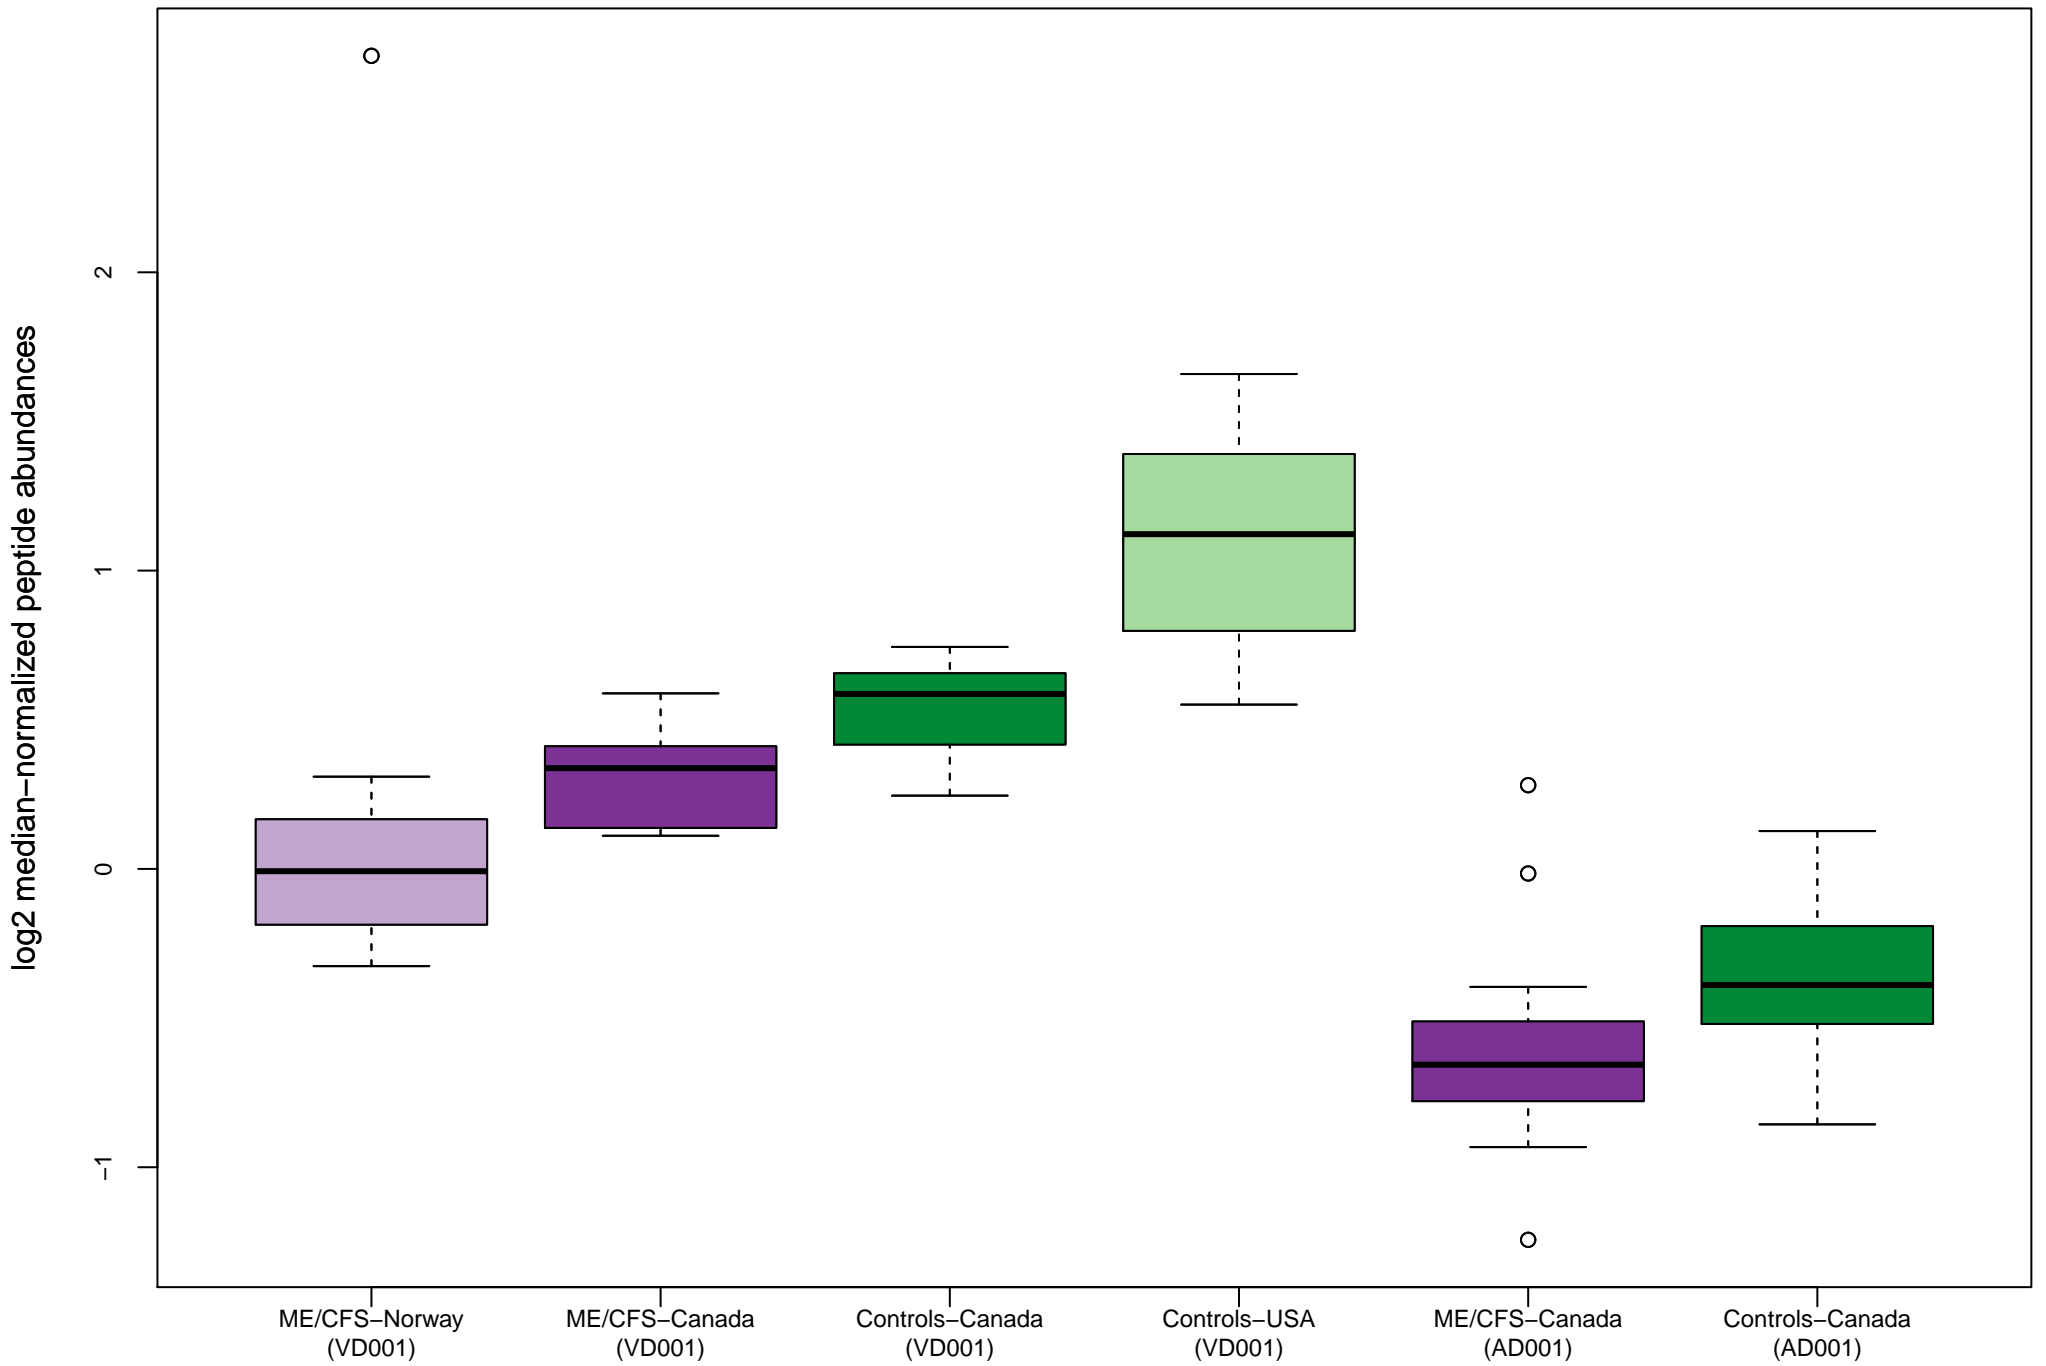



# QYWRGFWFKVAV

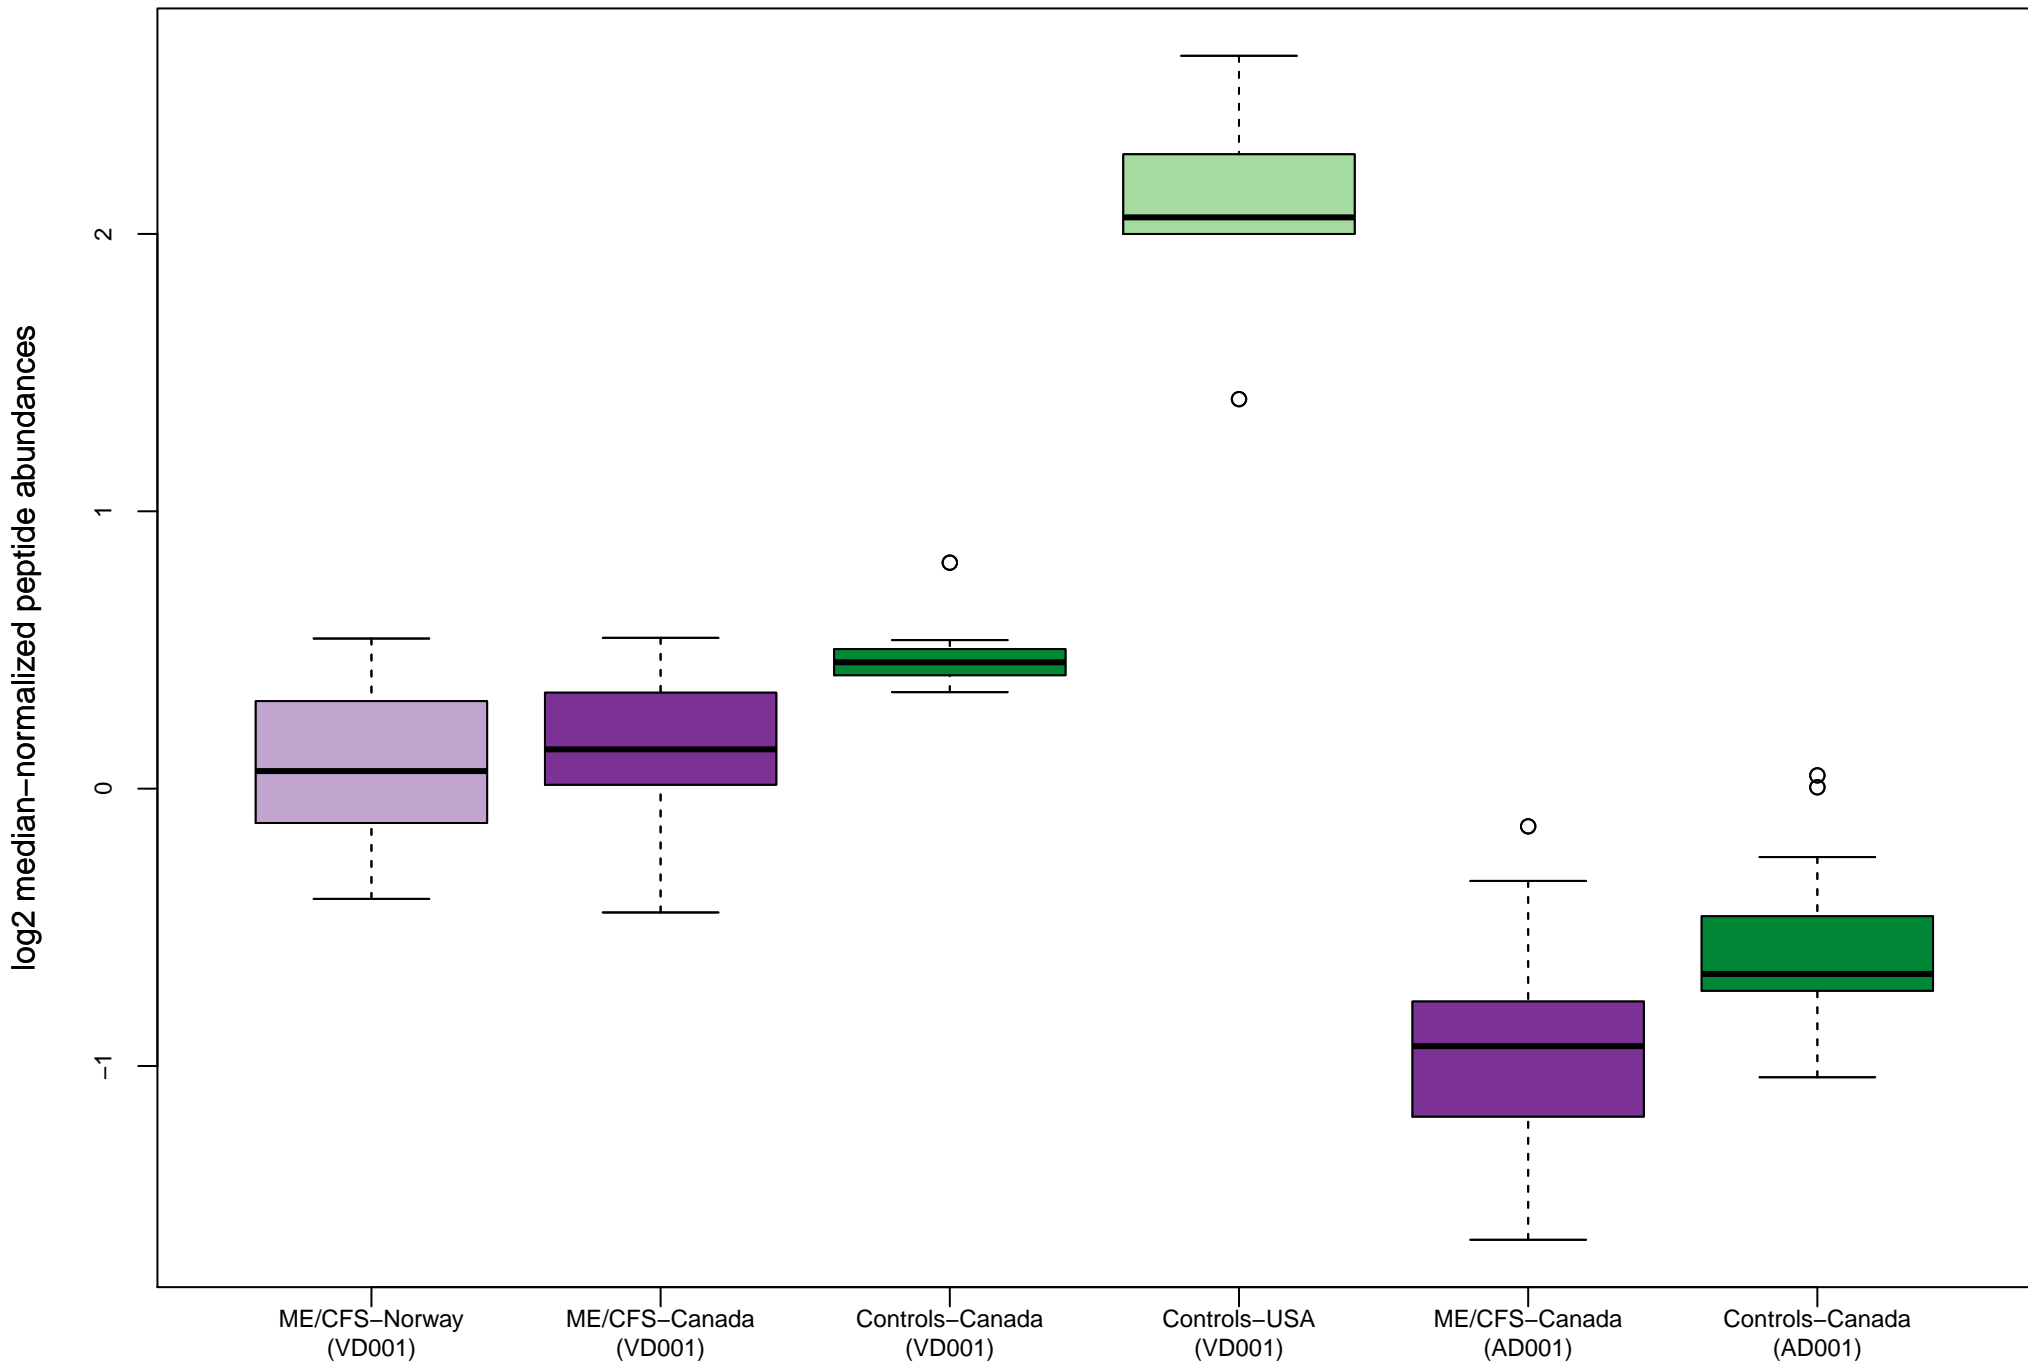

# RAFLFKFYHGVL

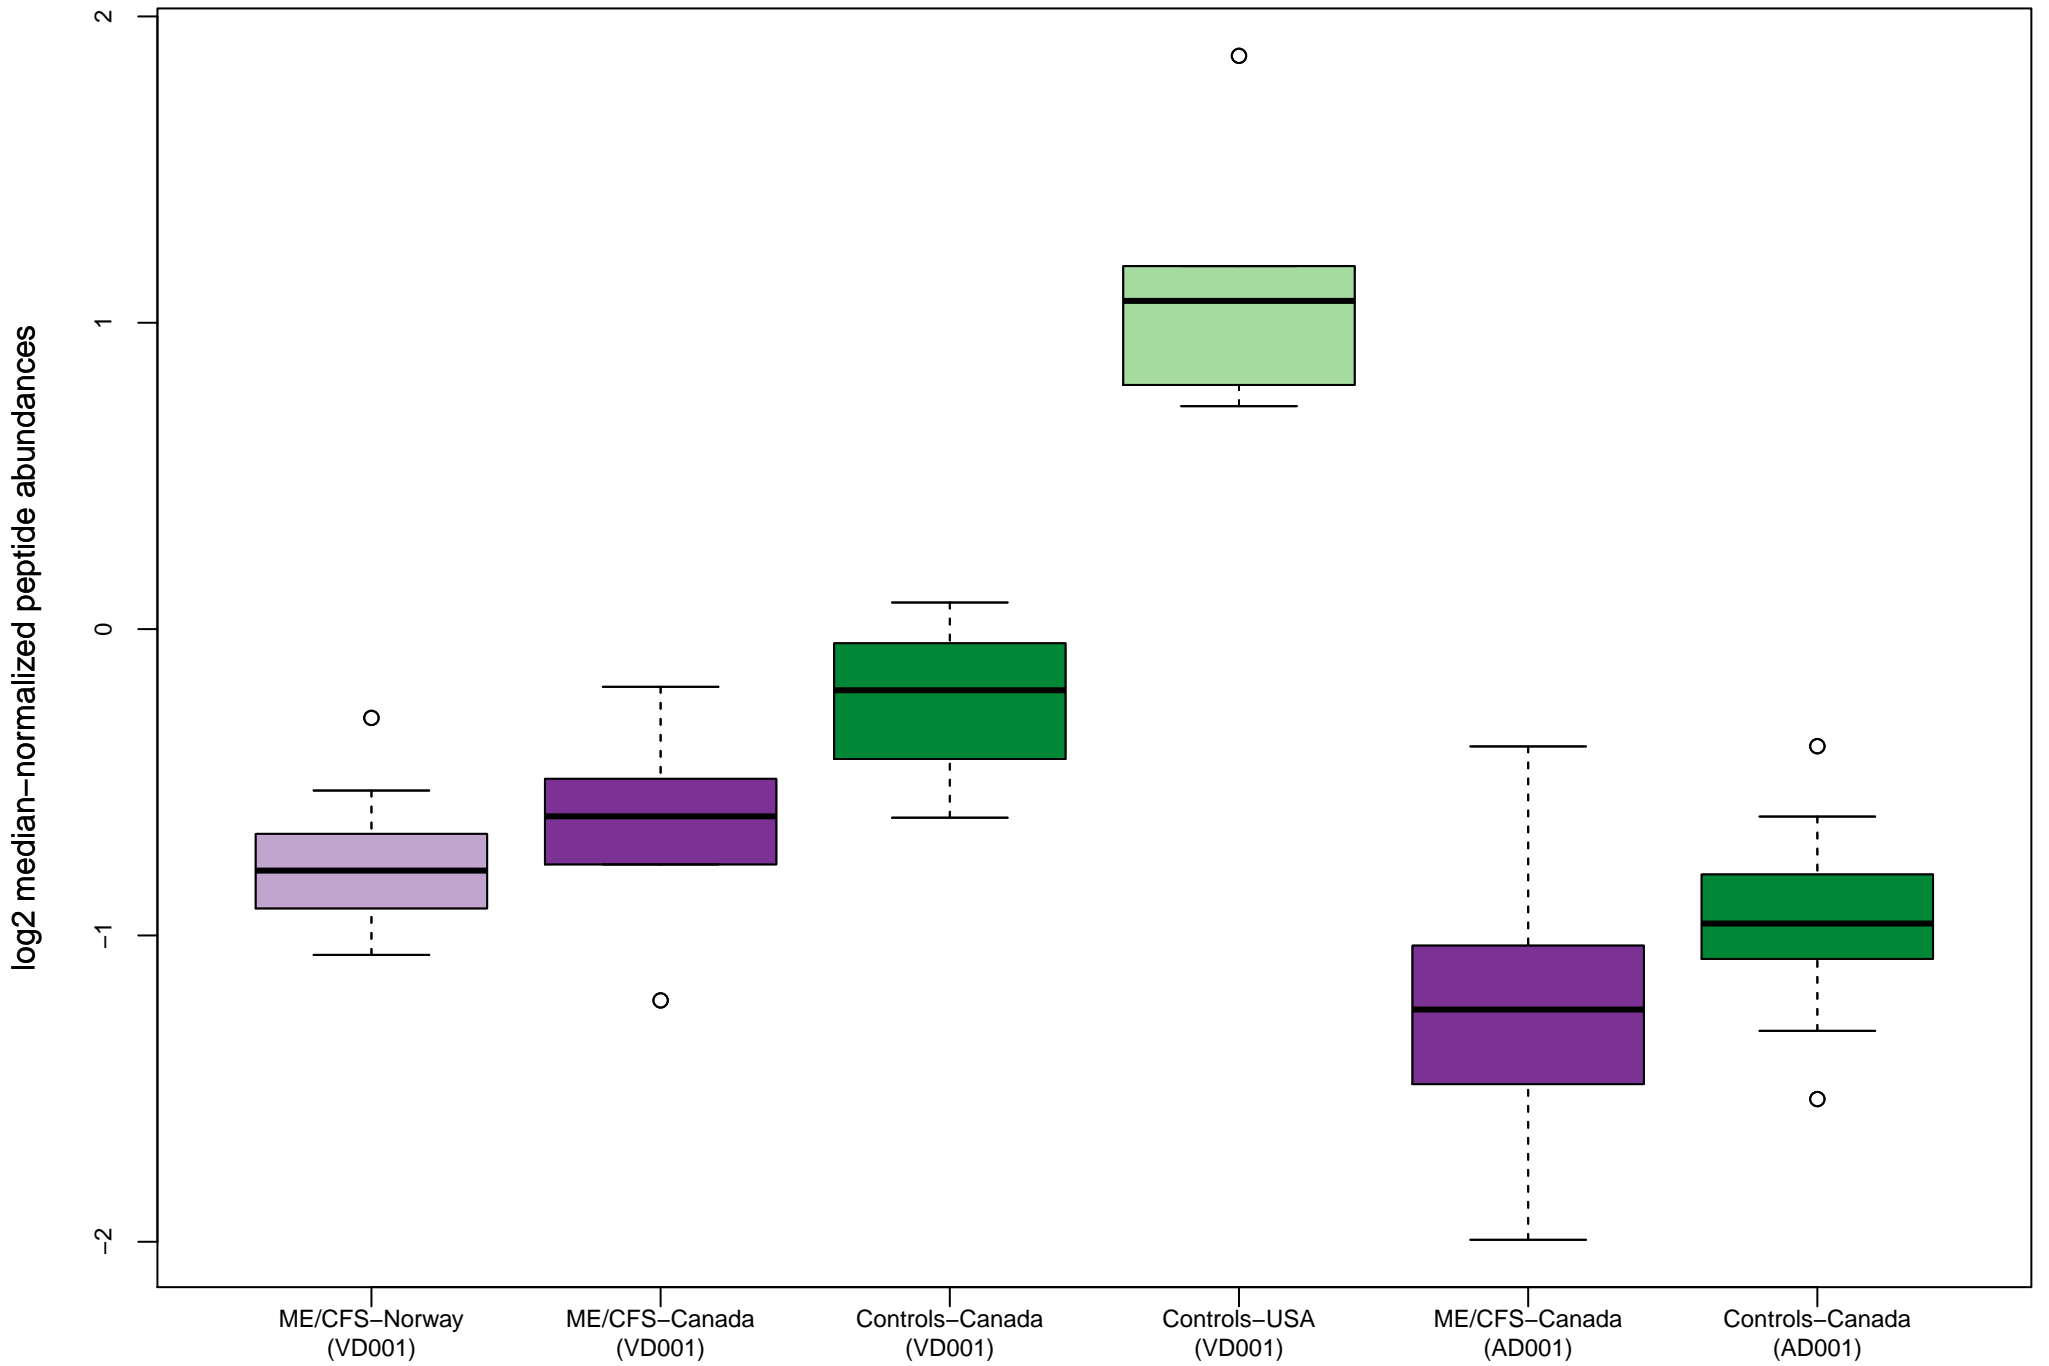

# RALLWKSYLGVL

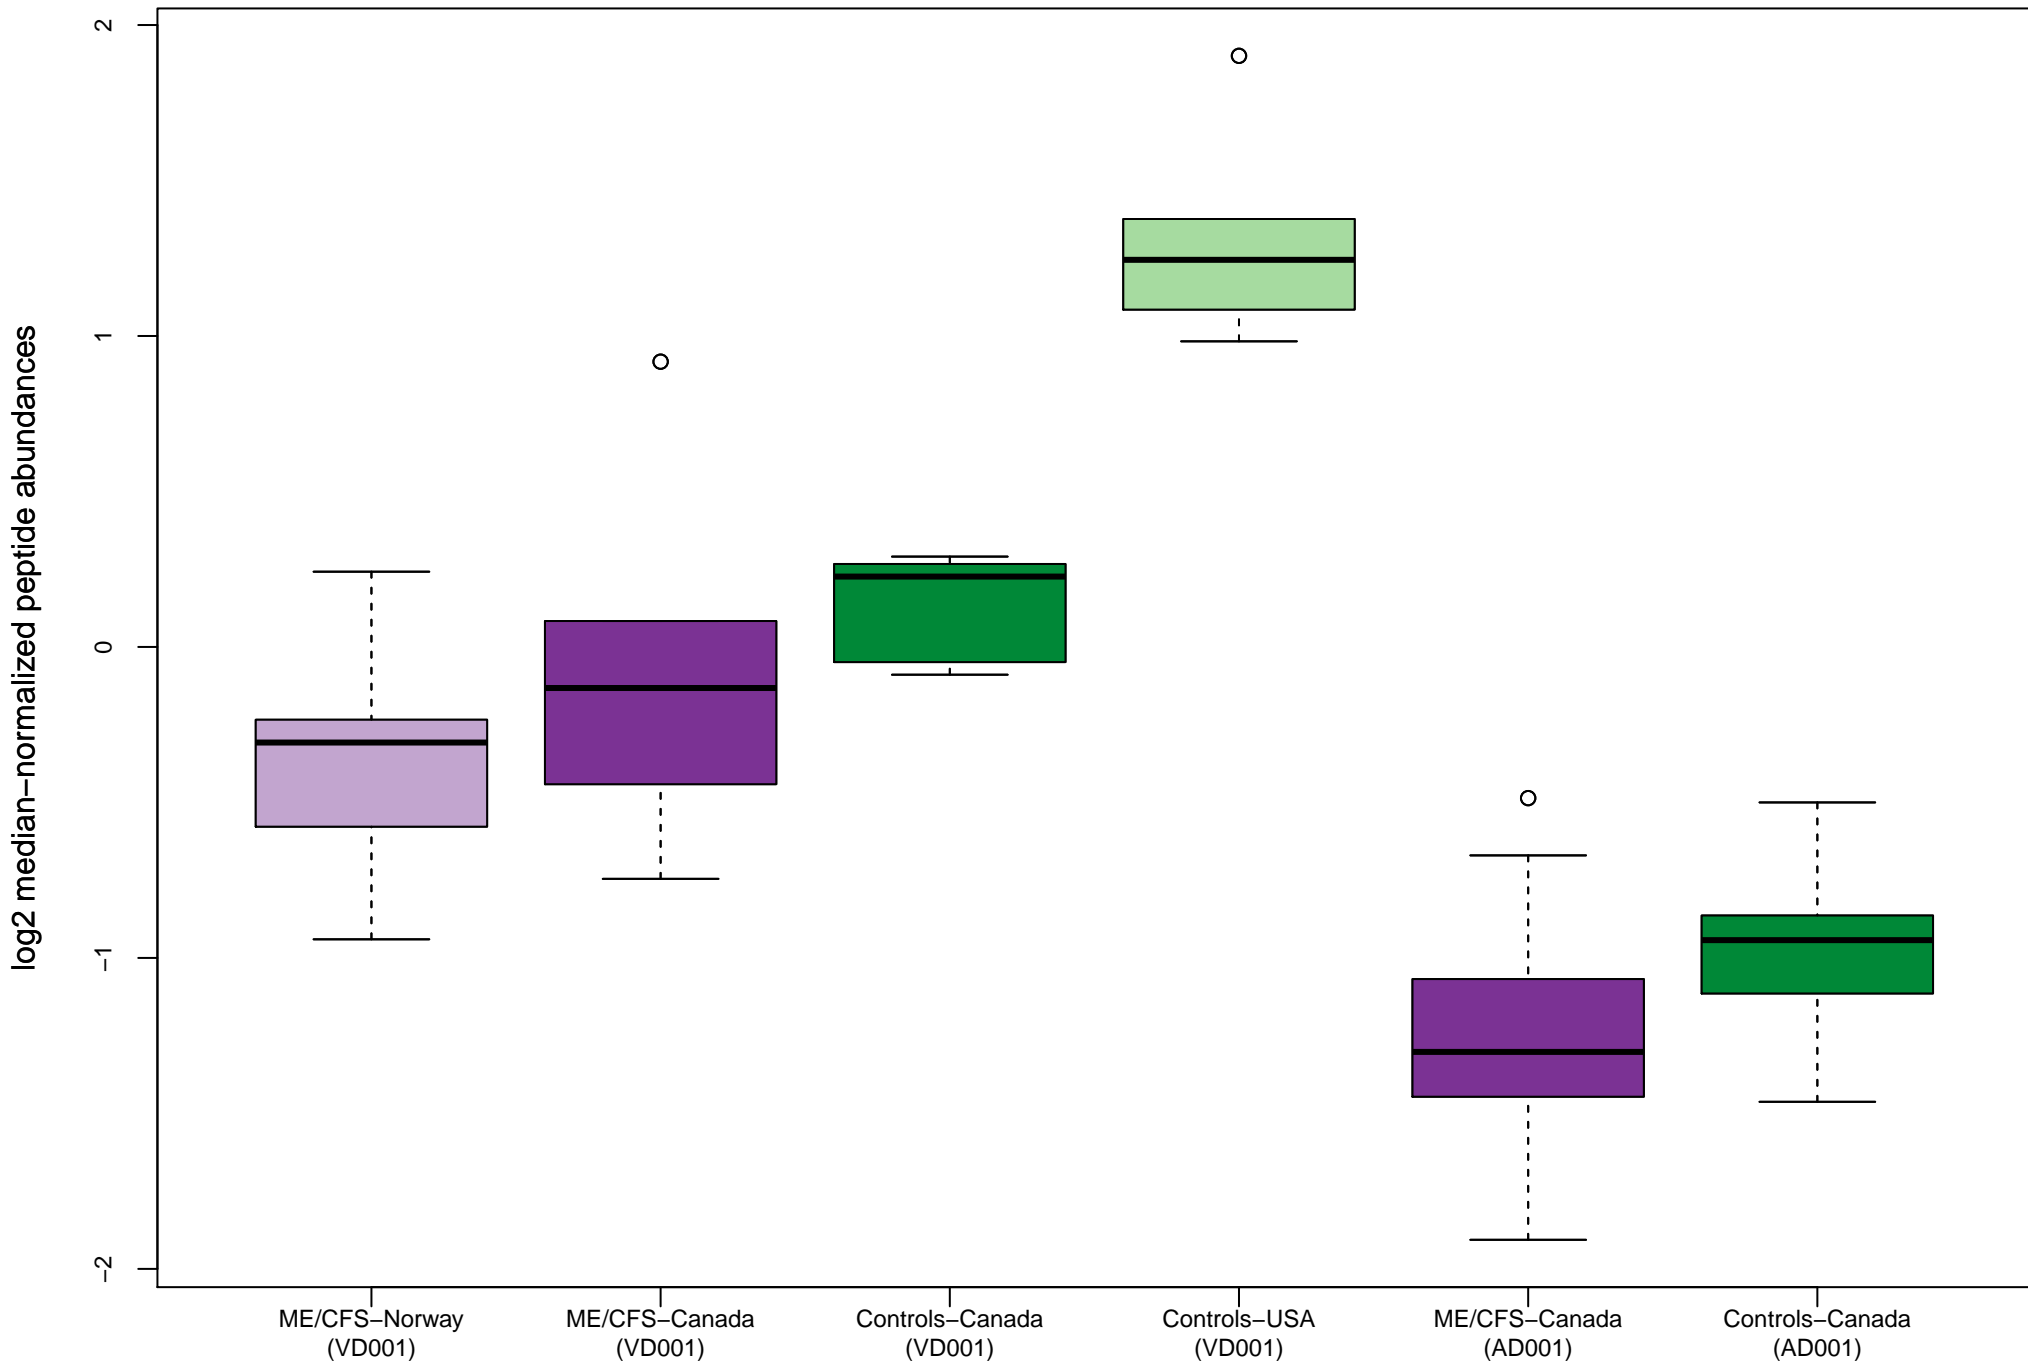

# RALRWLYDWKVG

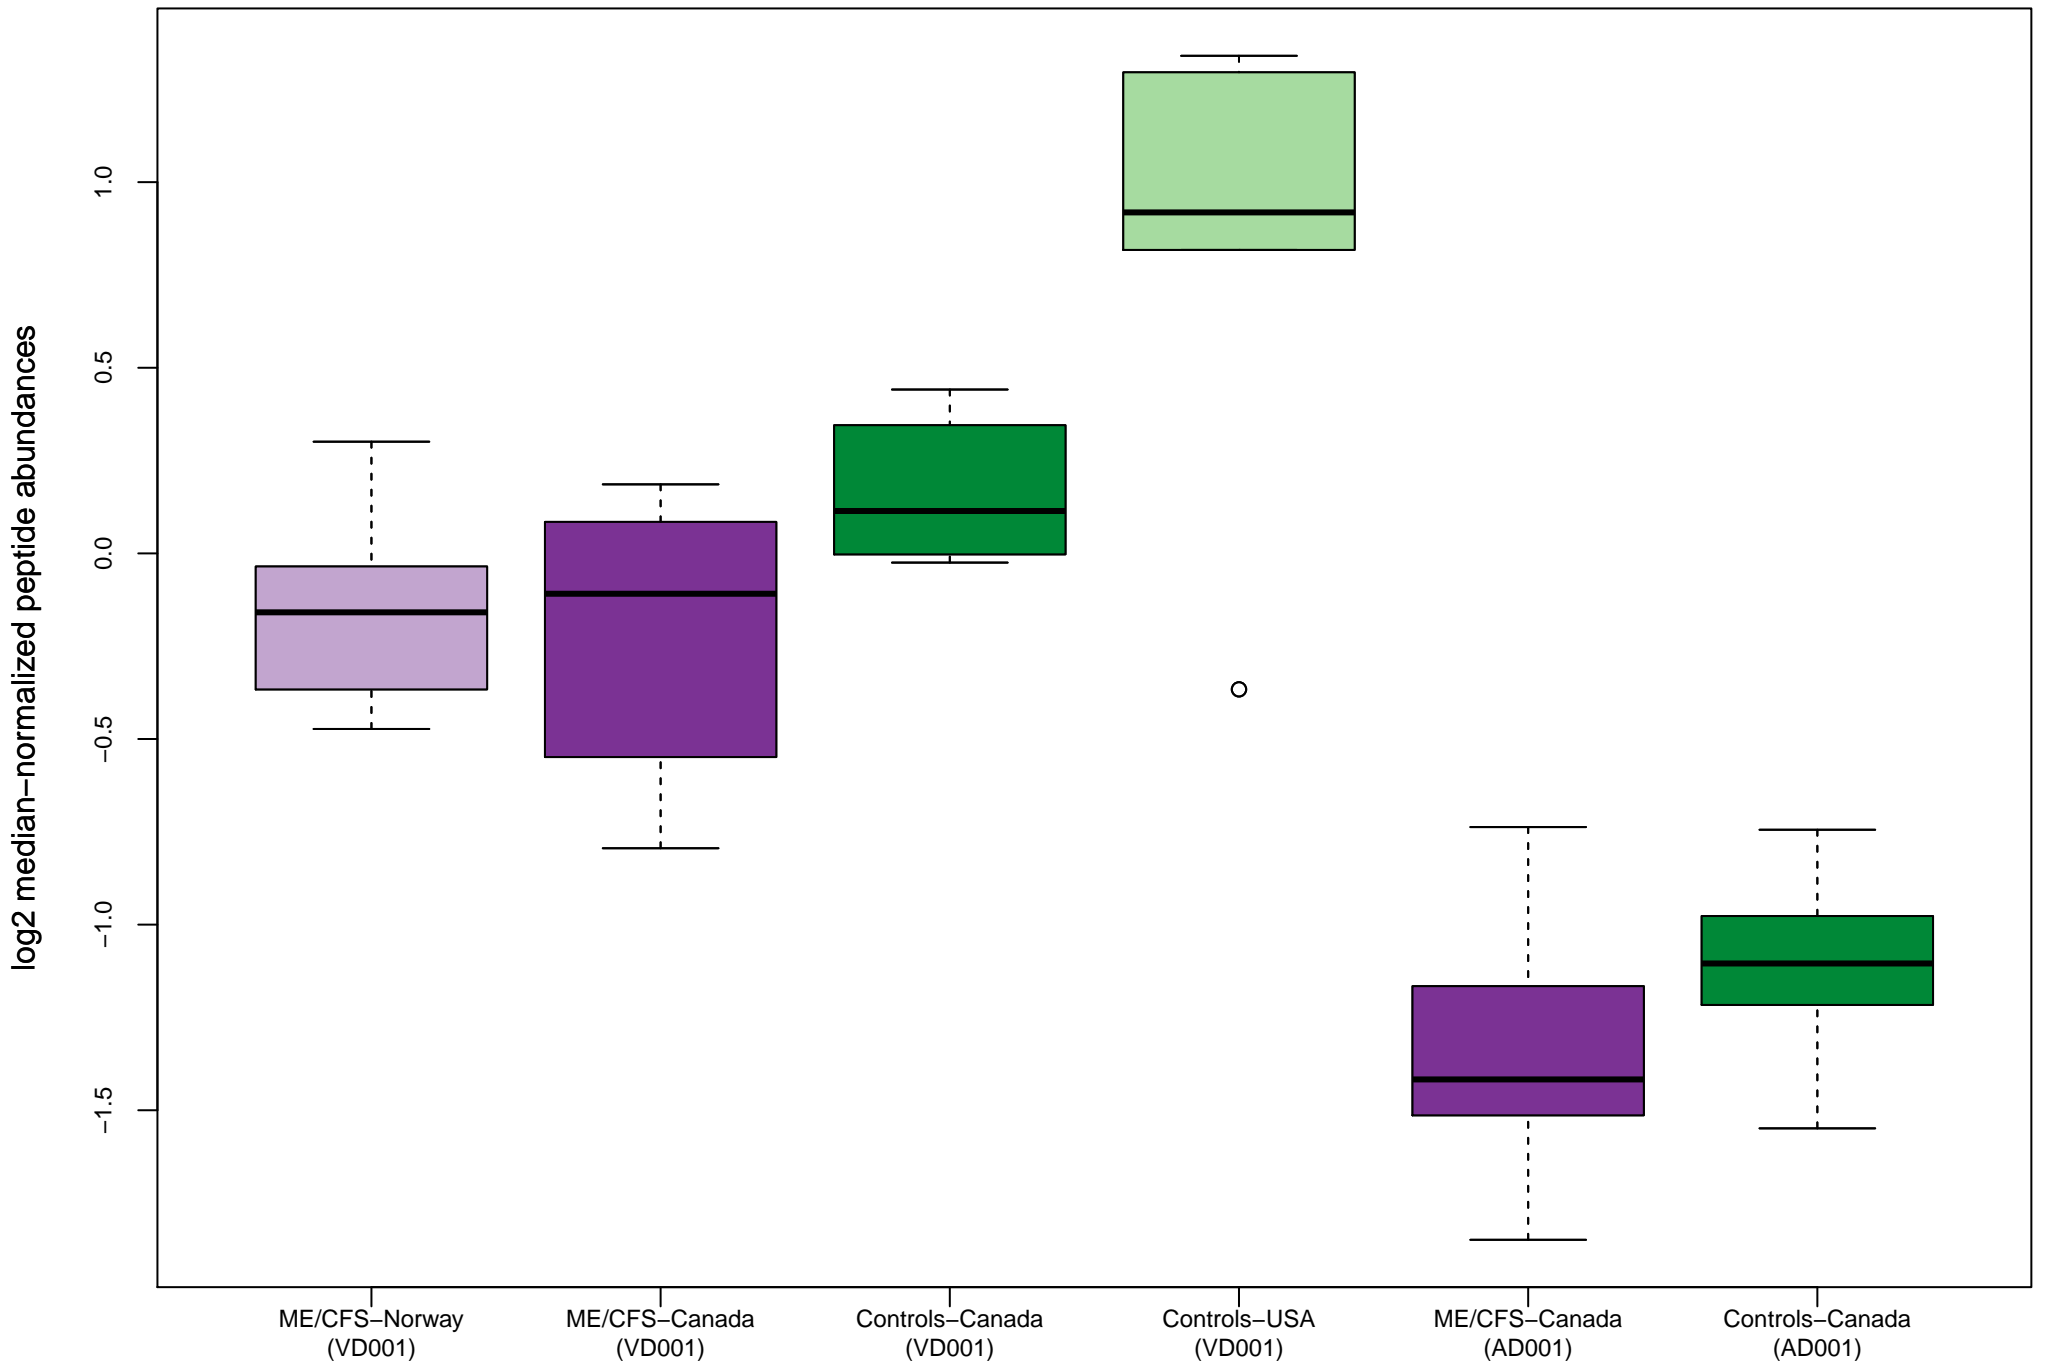

# RARYFPWVSRWV

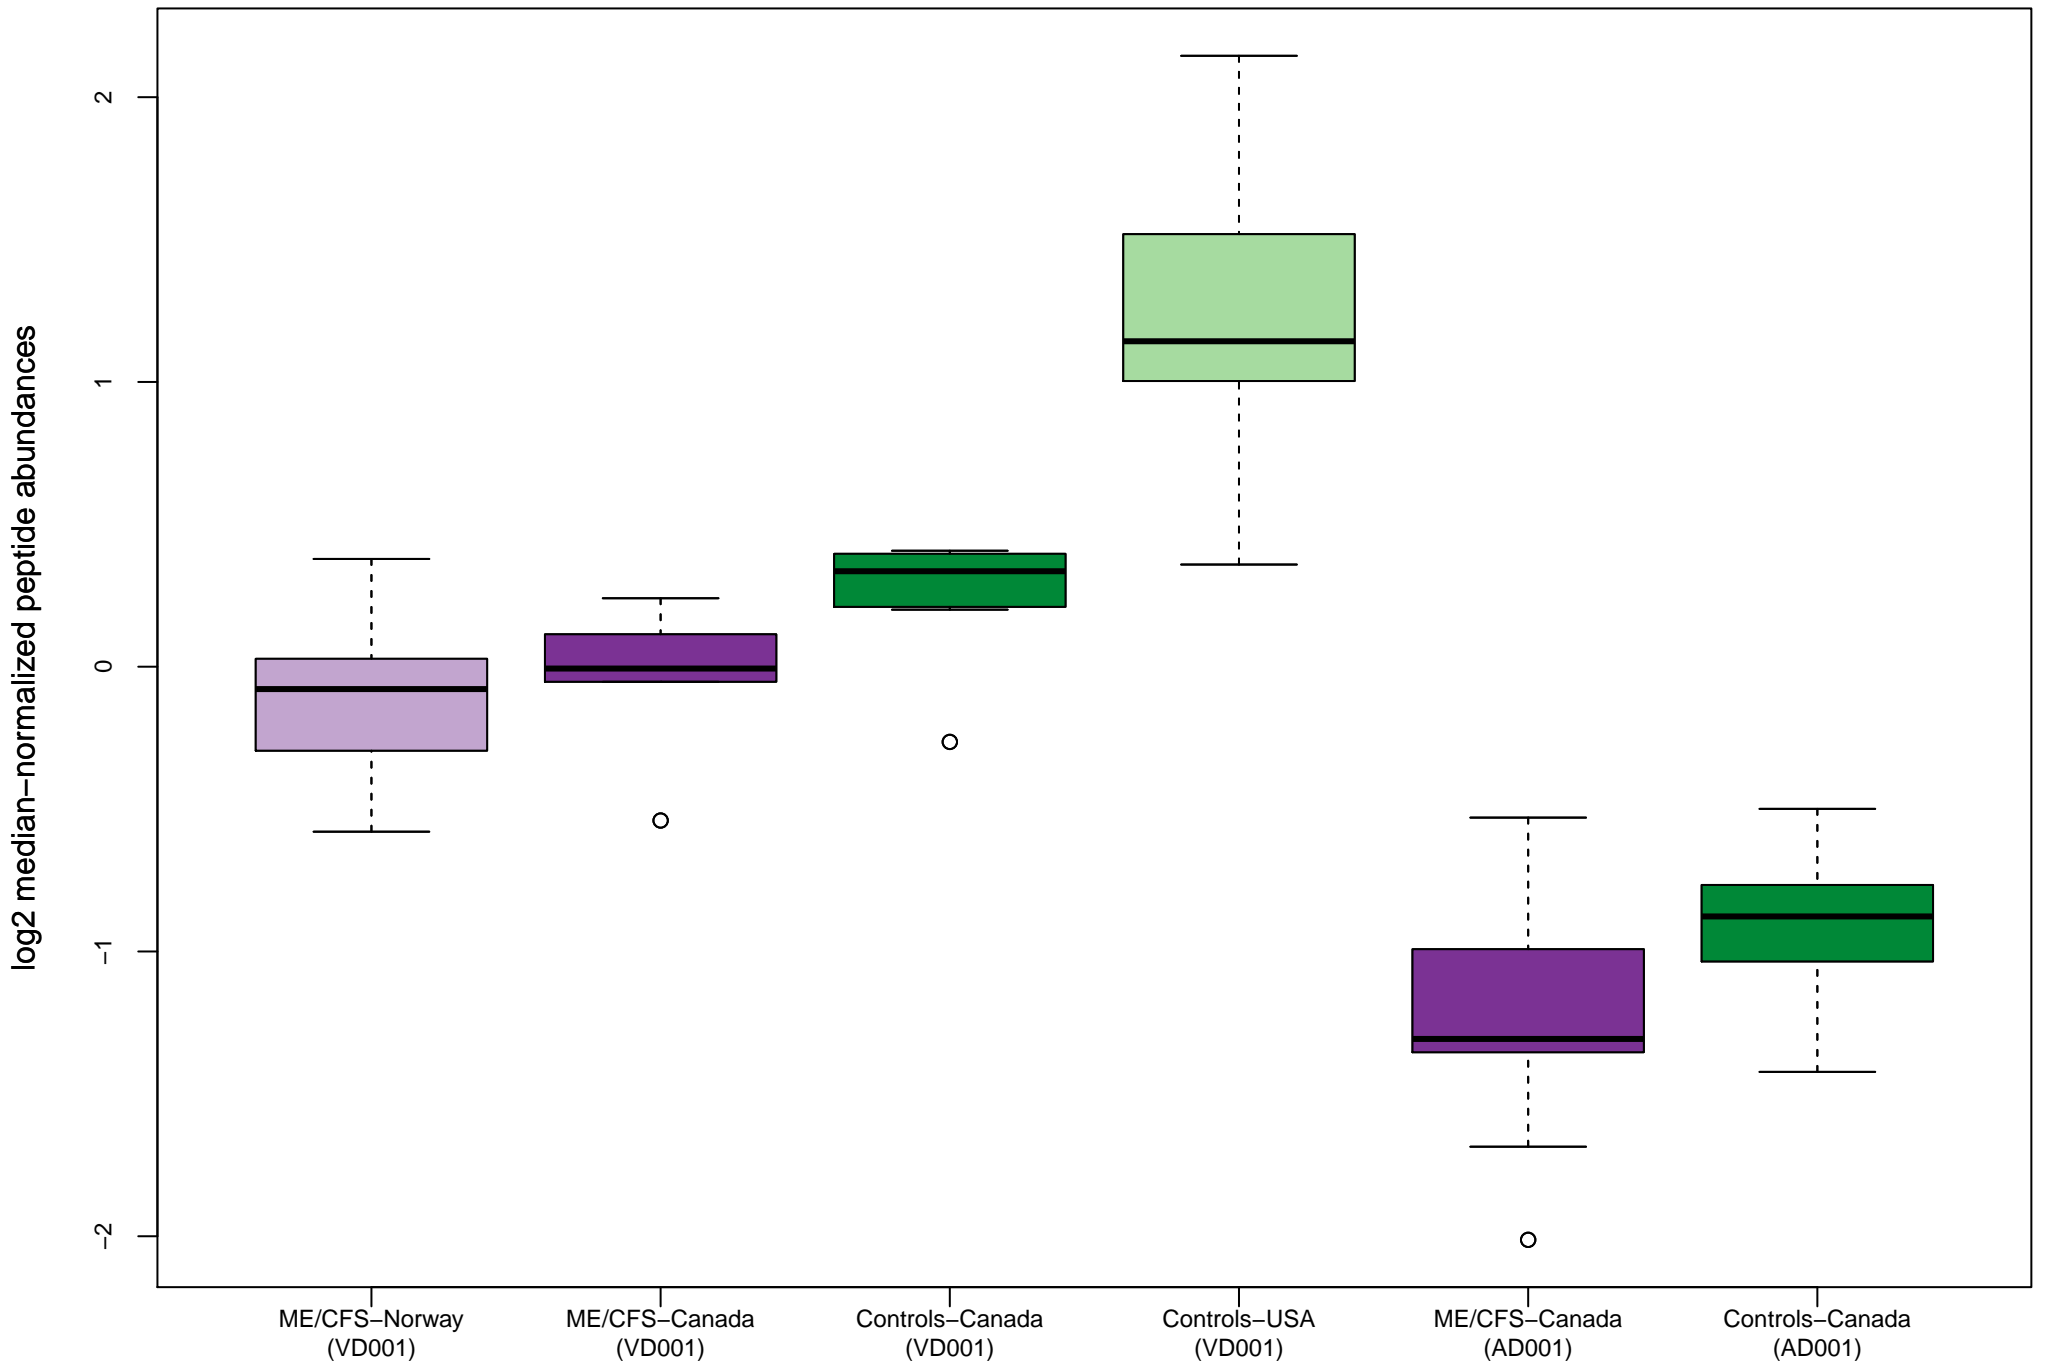

# RAVVSWLSGVSG

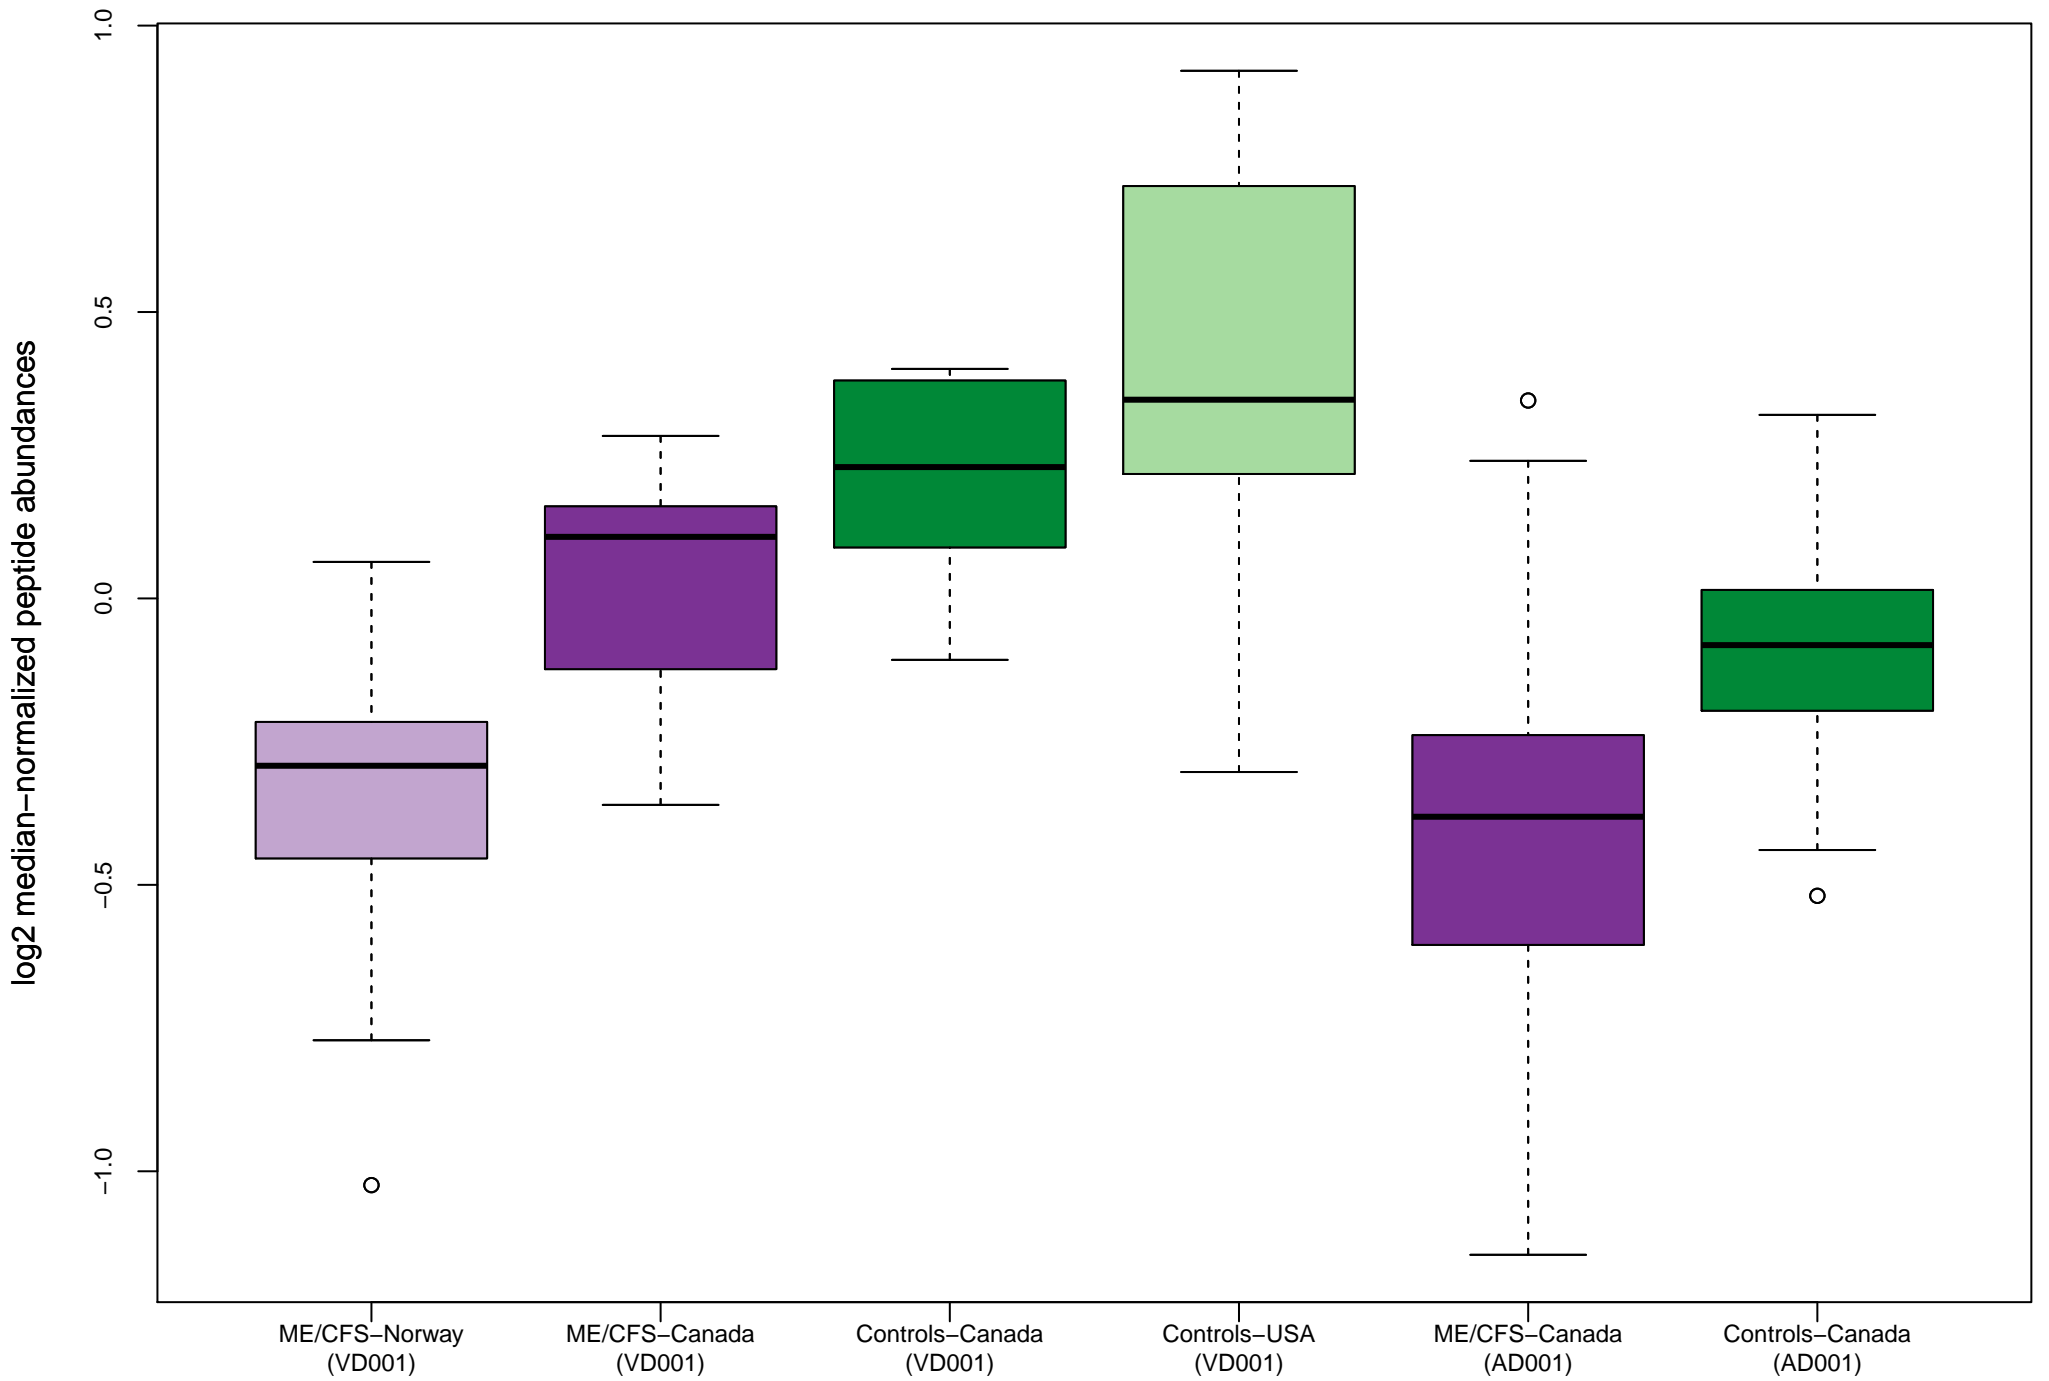

# RAYYKGPYVSLG

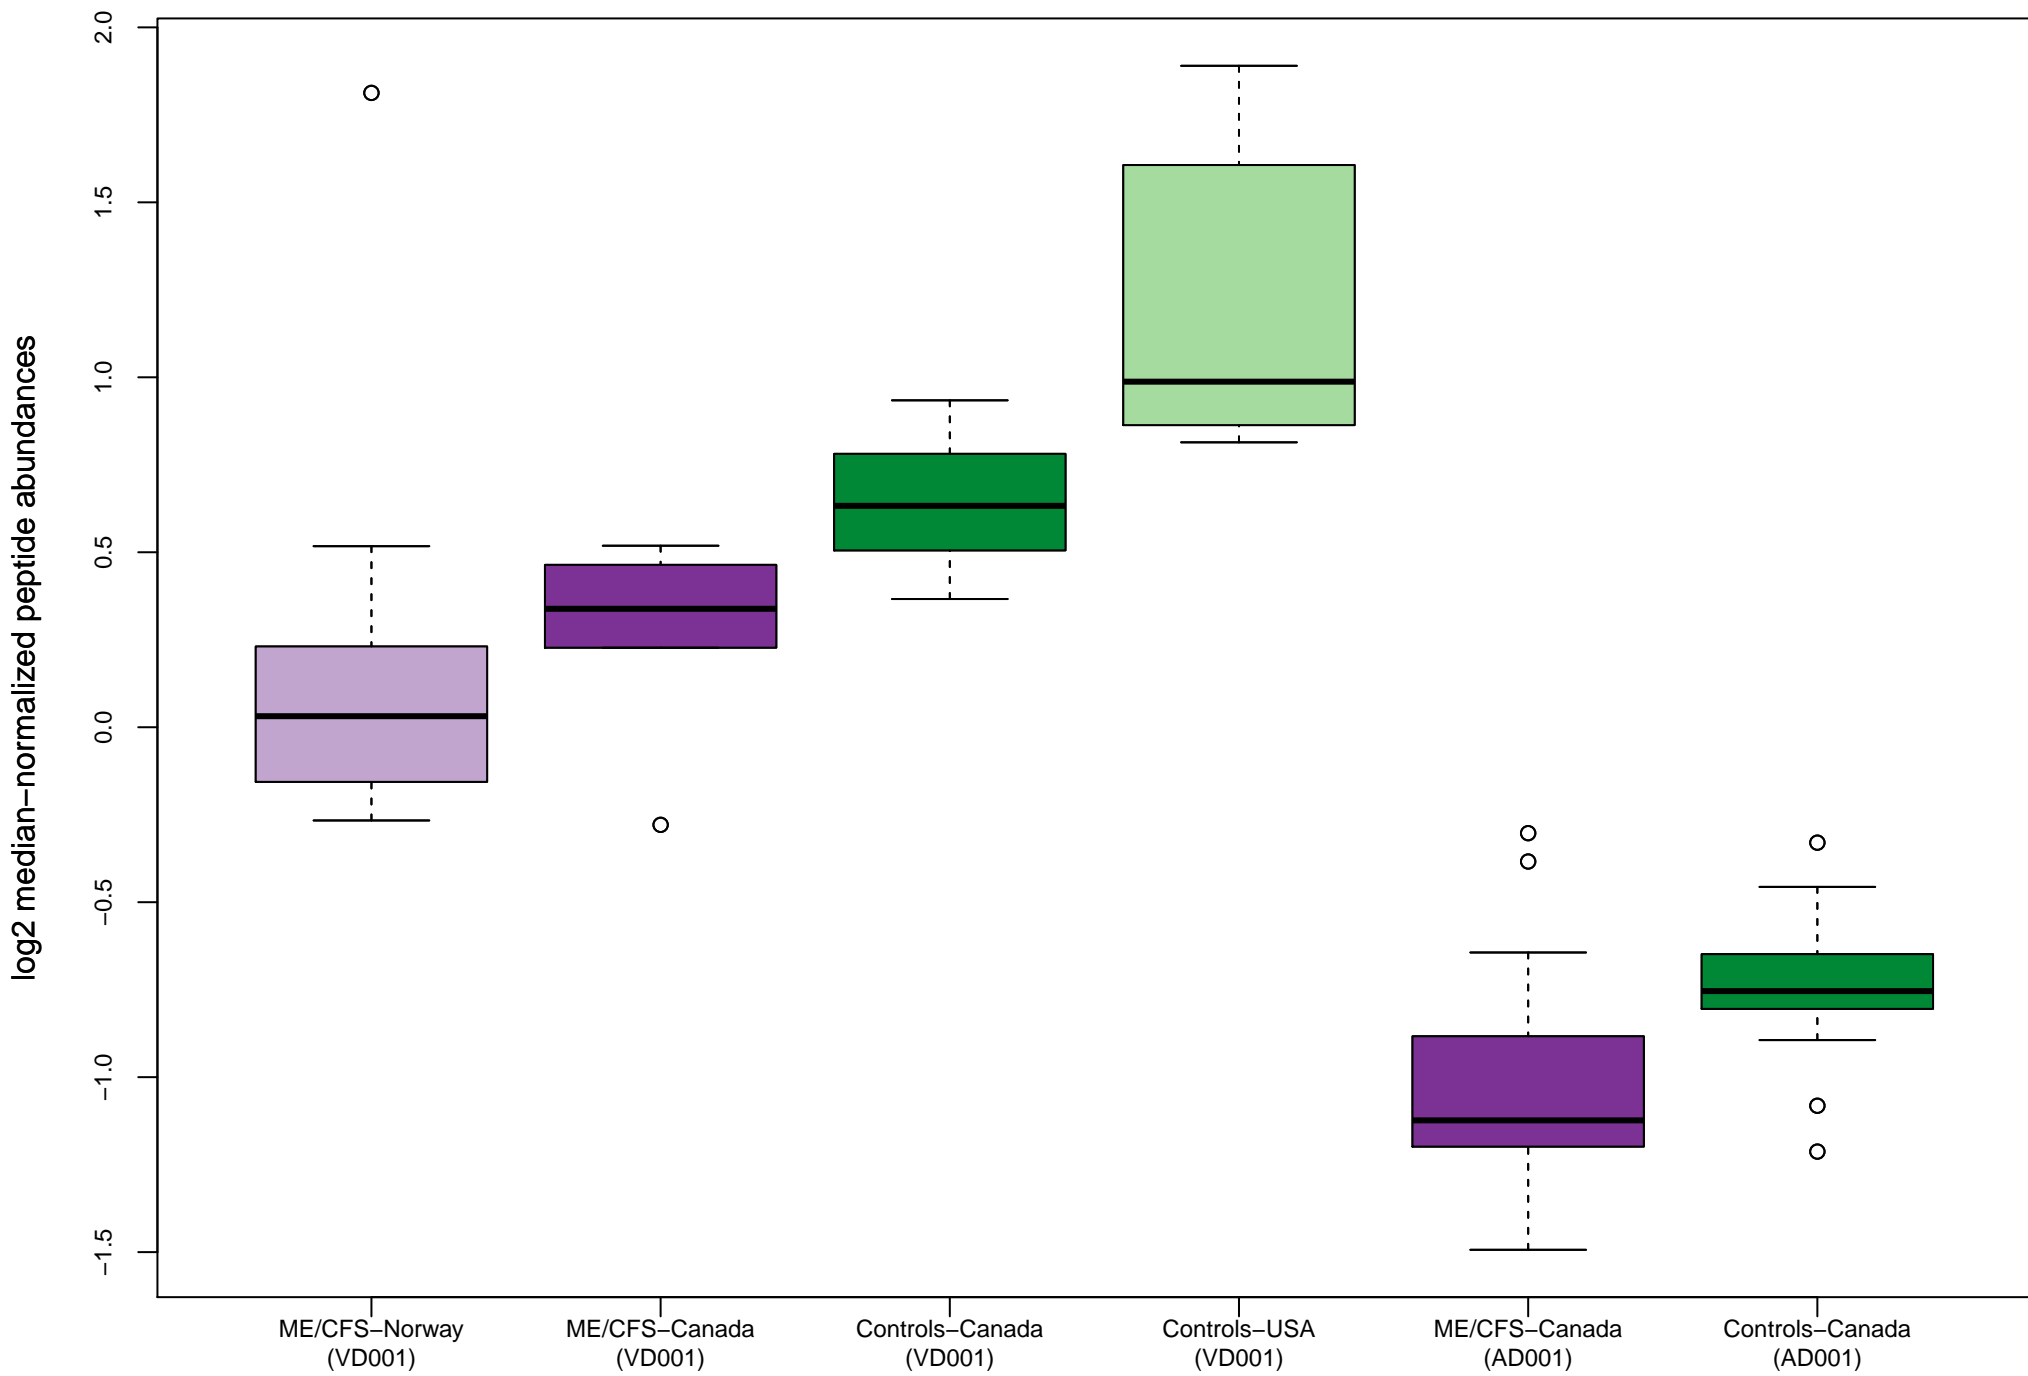

# RDRYWLAGQWLG

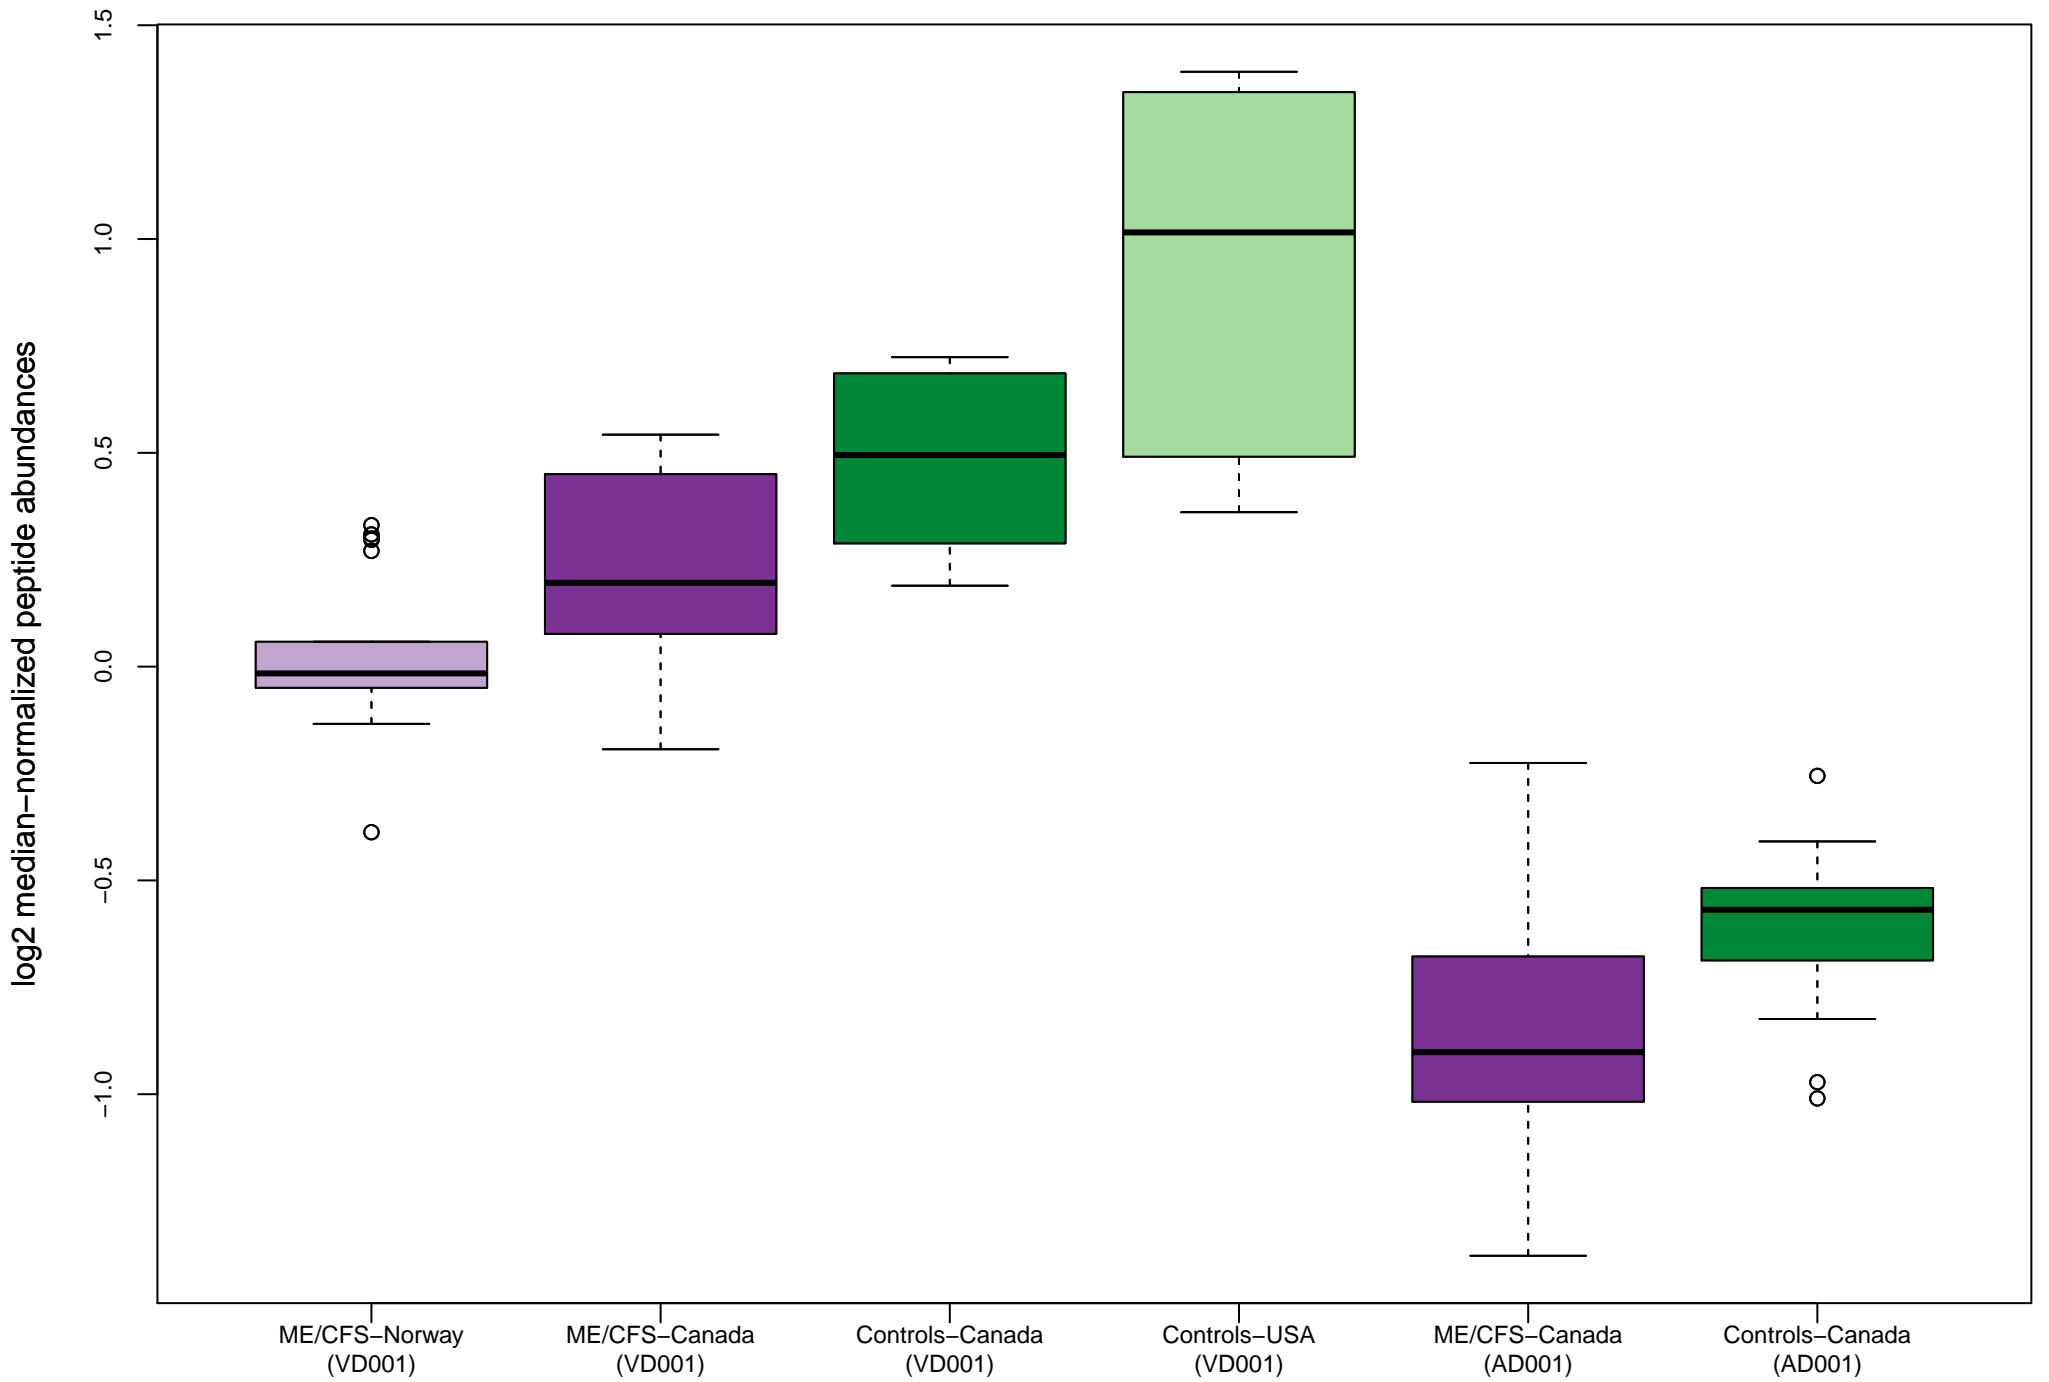



# RFFVGPALSGVS

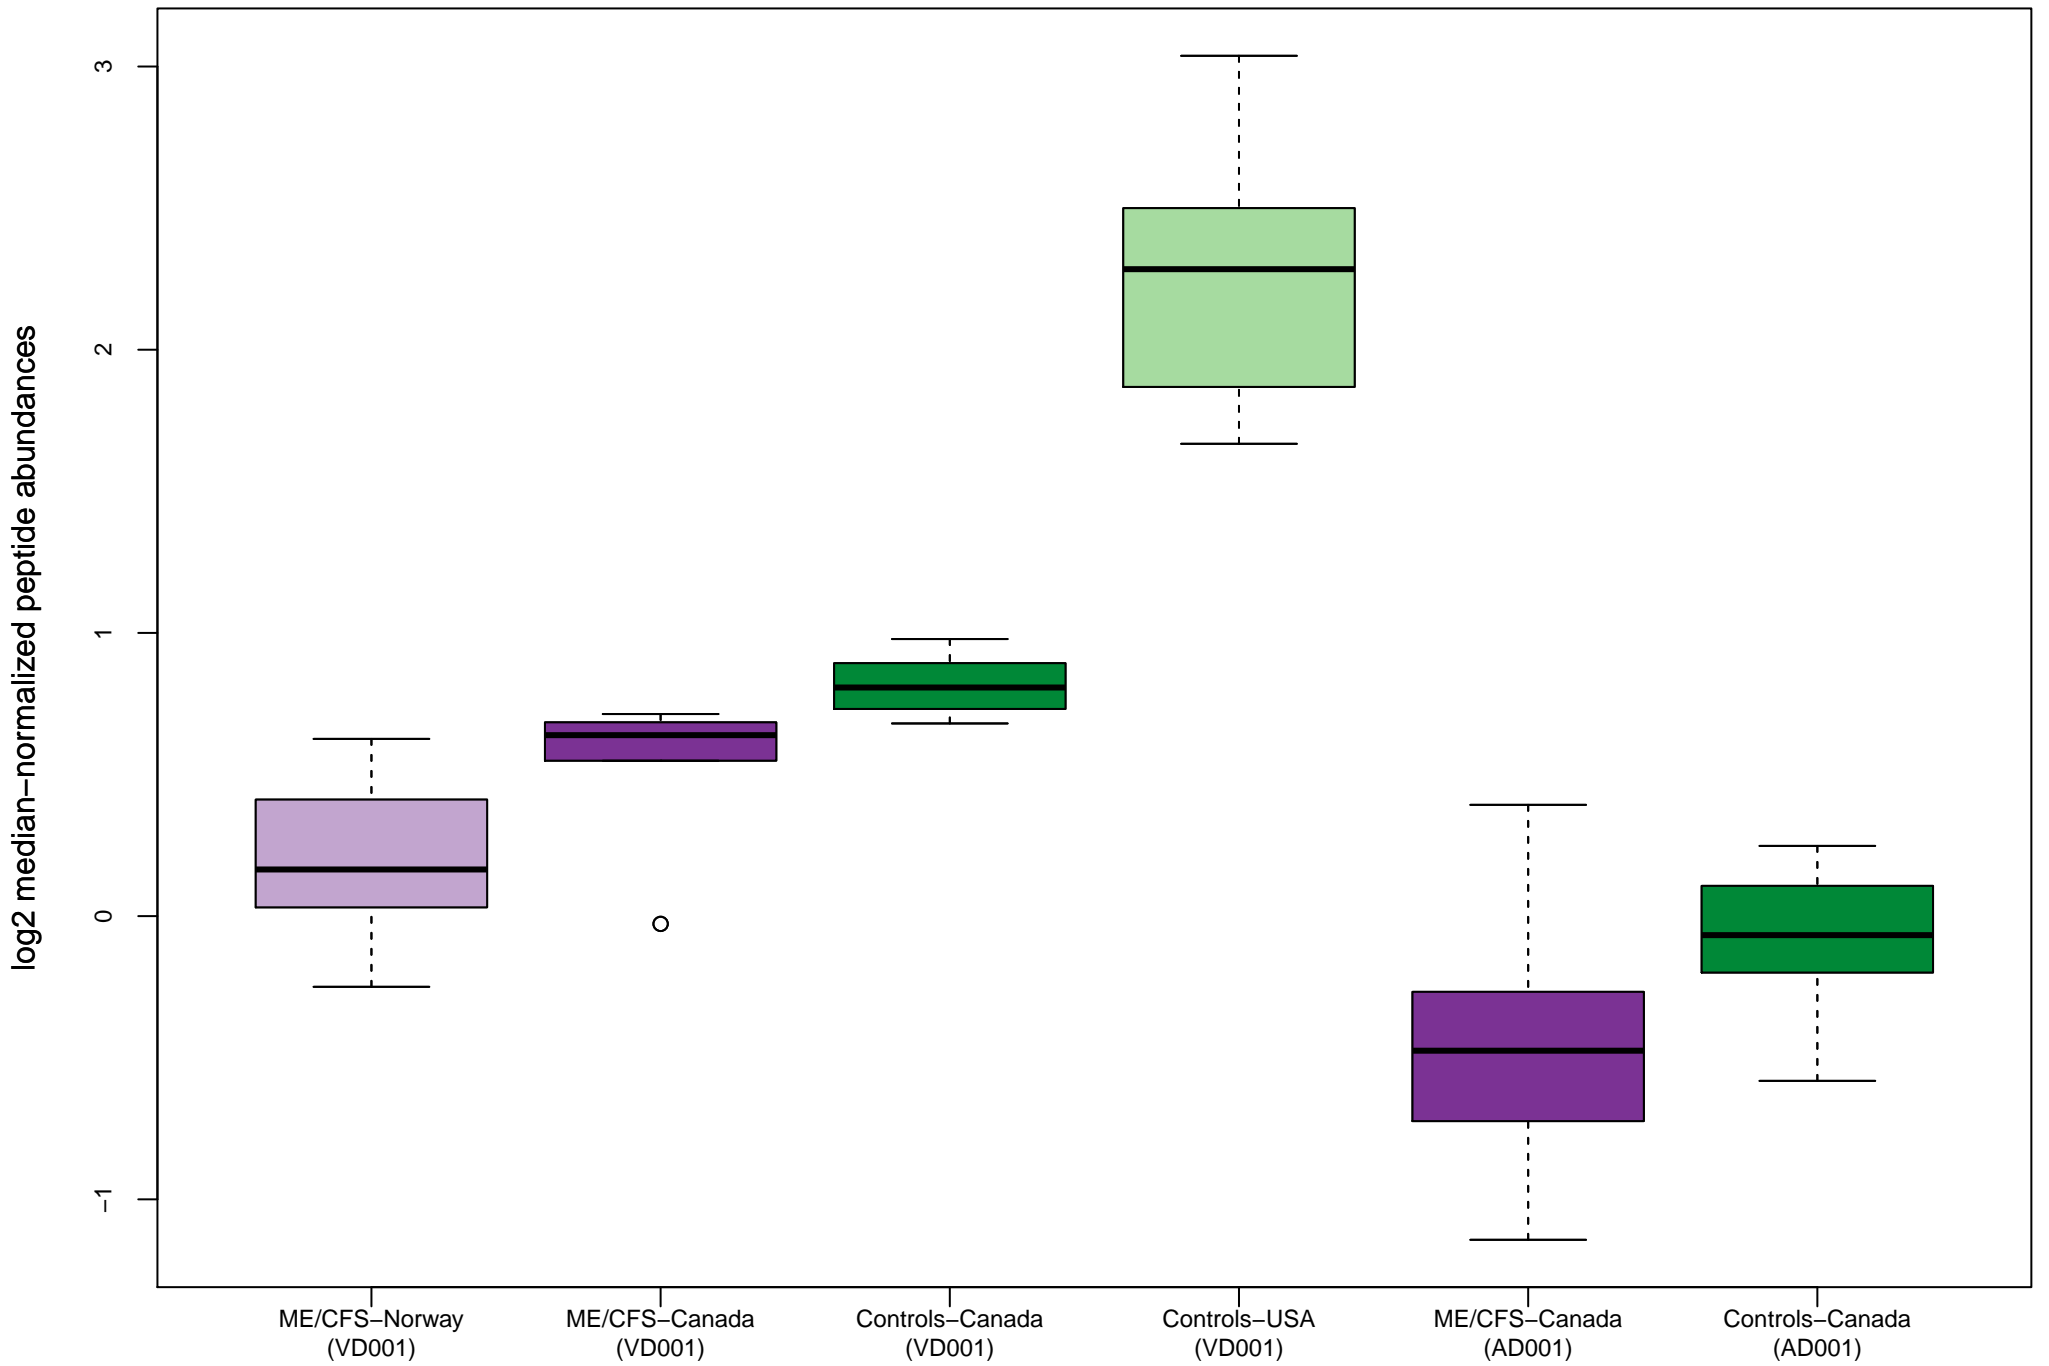

# RFFVRSVSGVSG

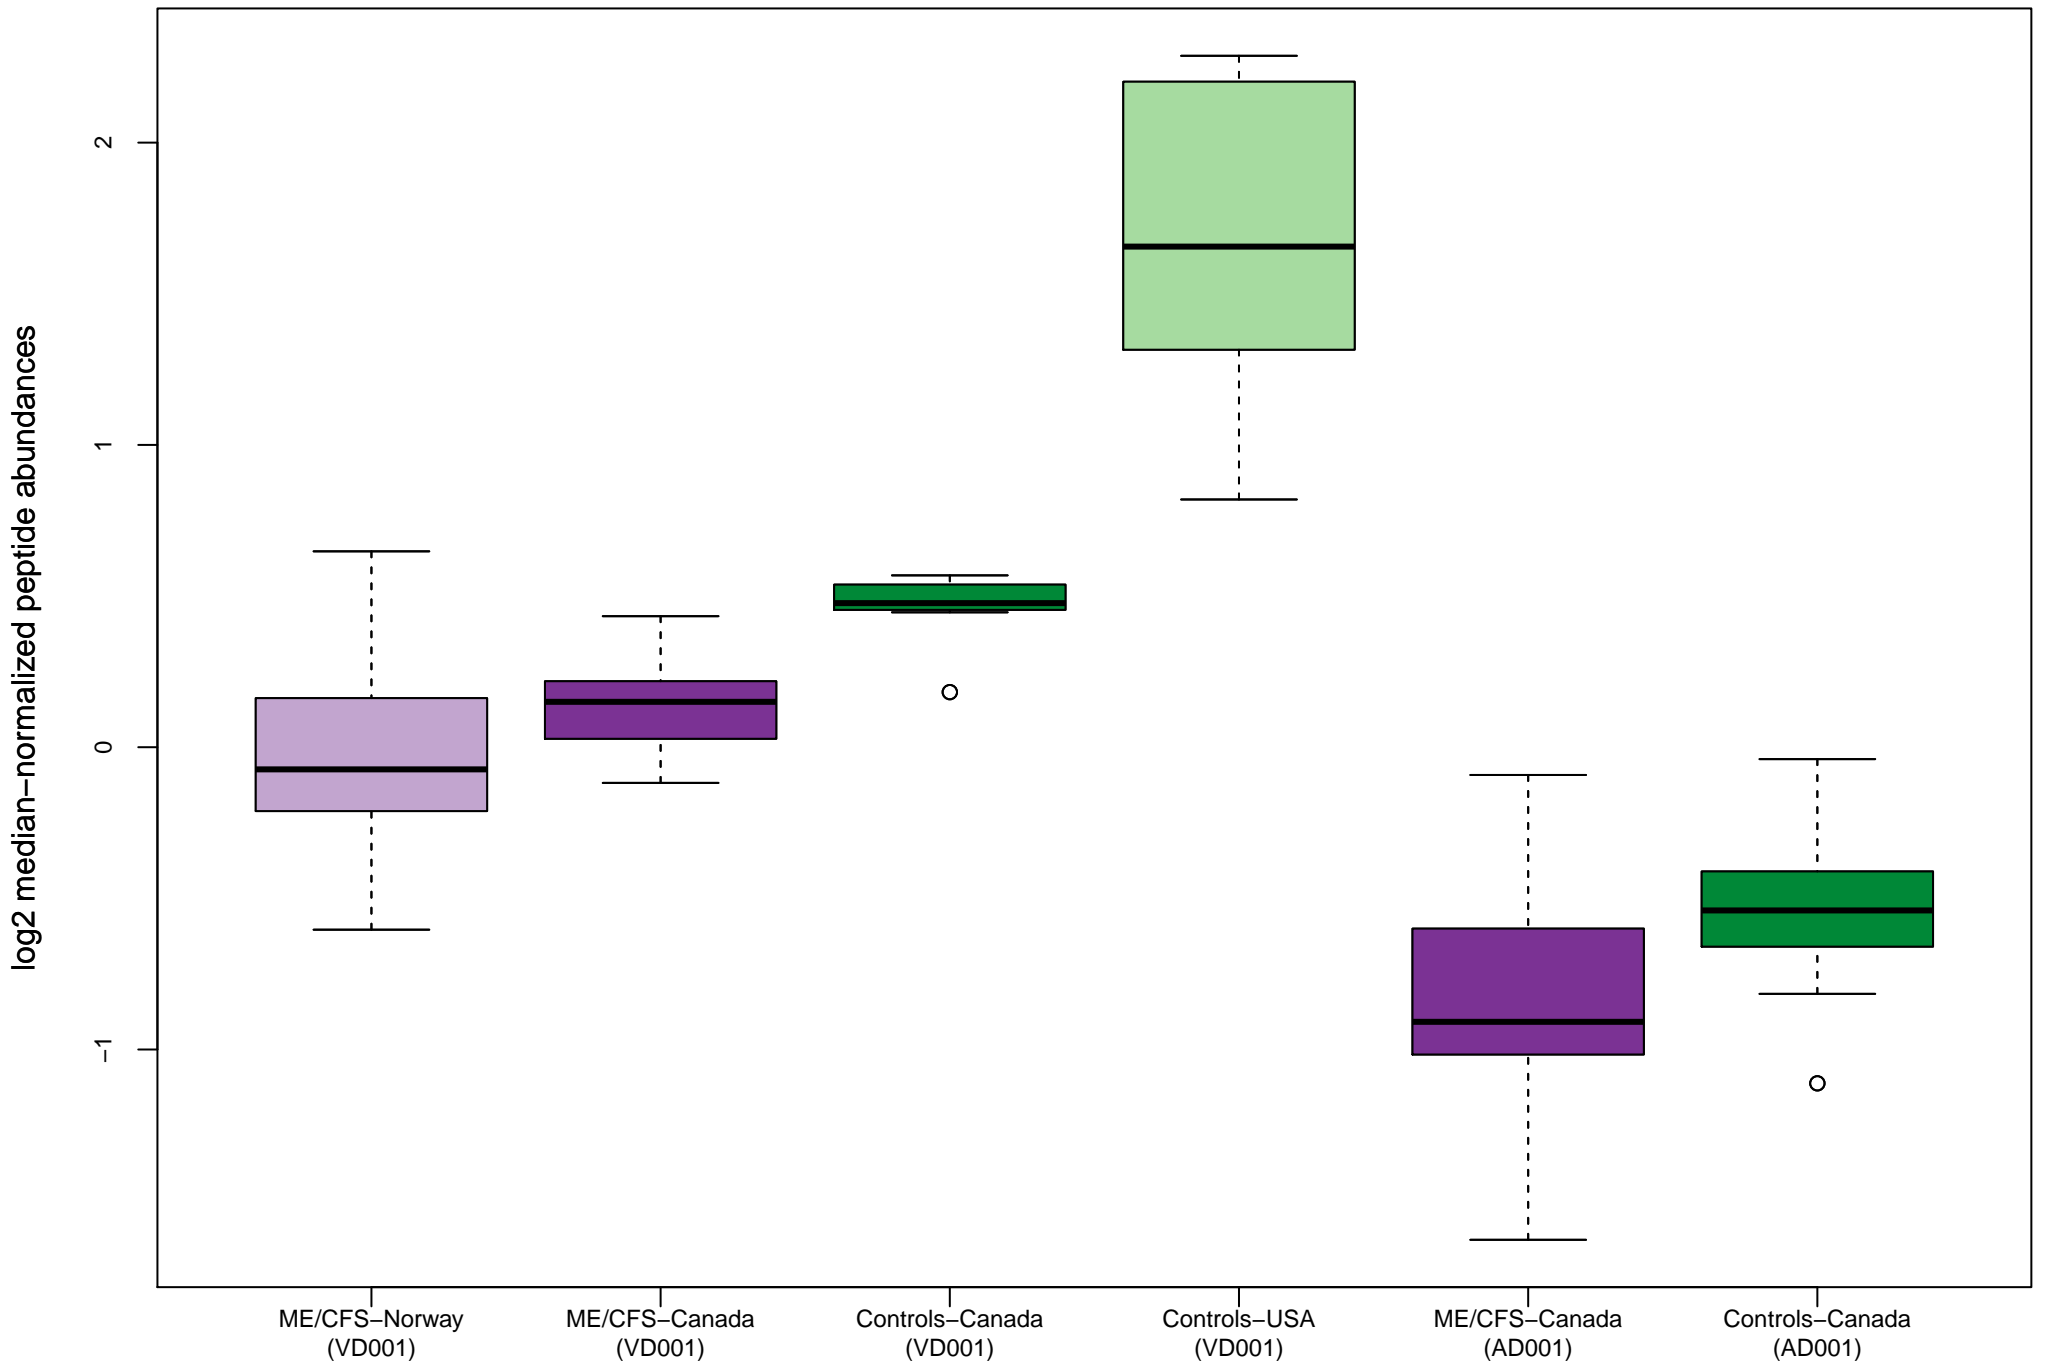

# RFGWWVSGALSG

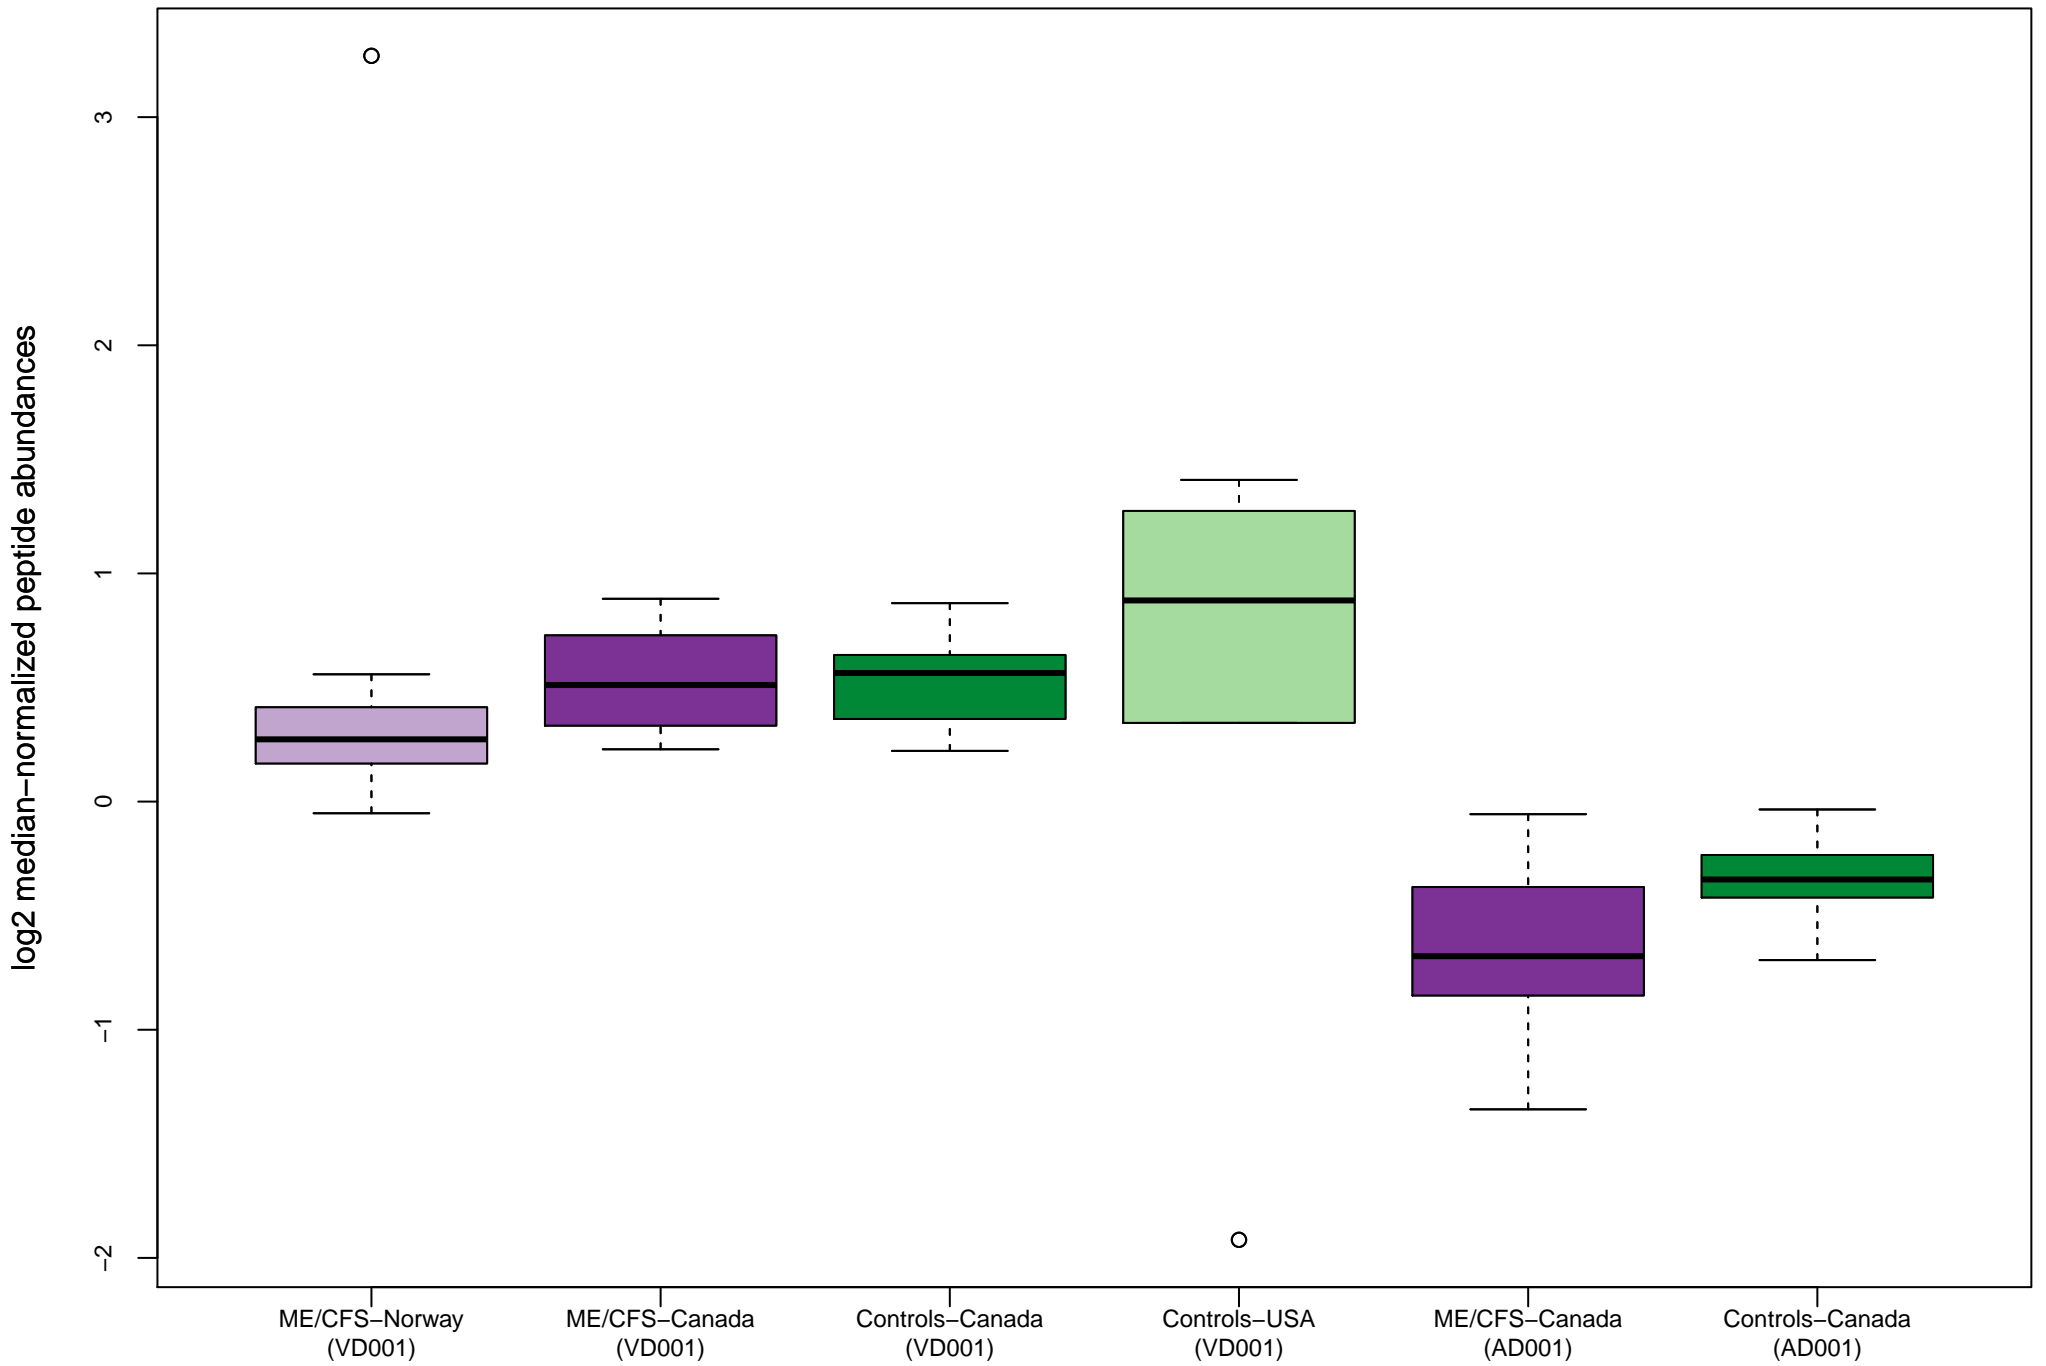

# RFGYQFLSGVAL

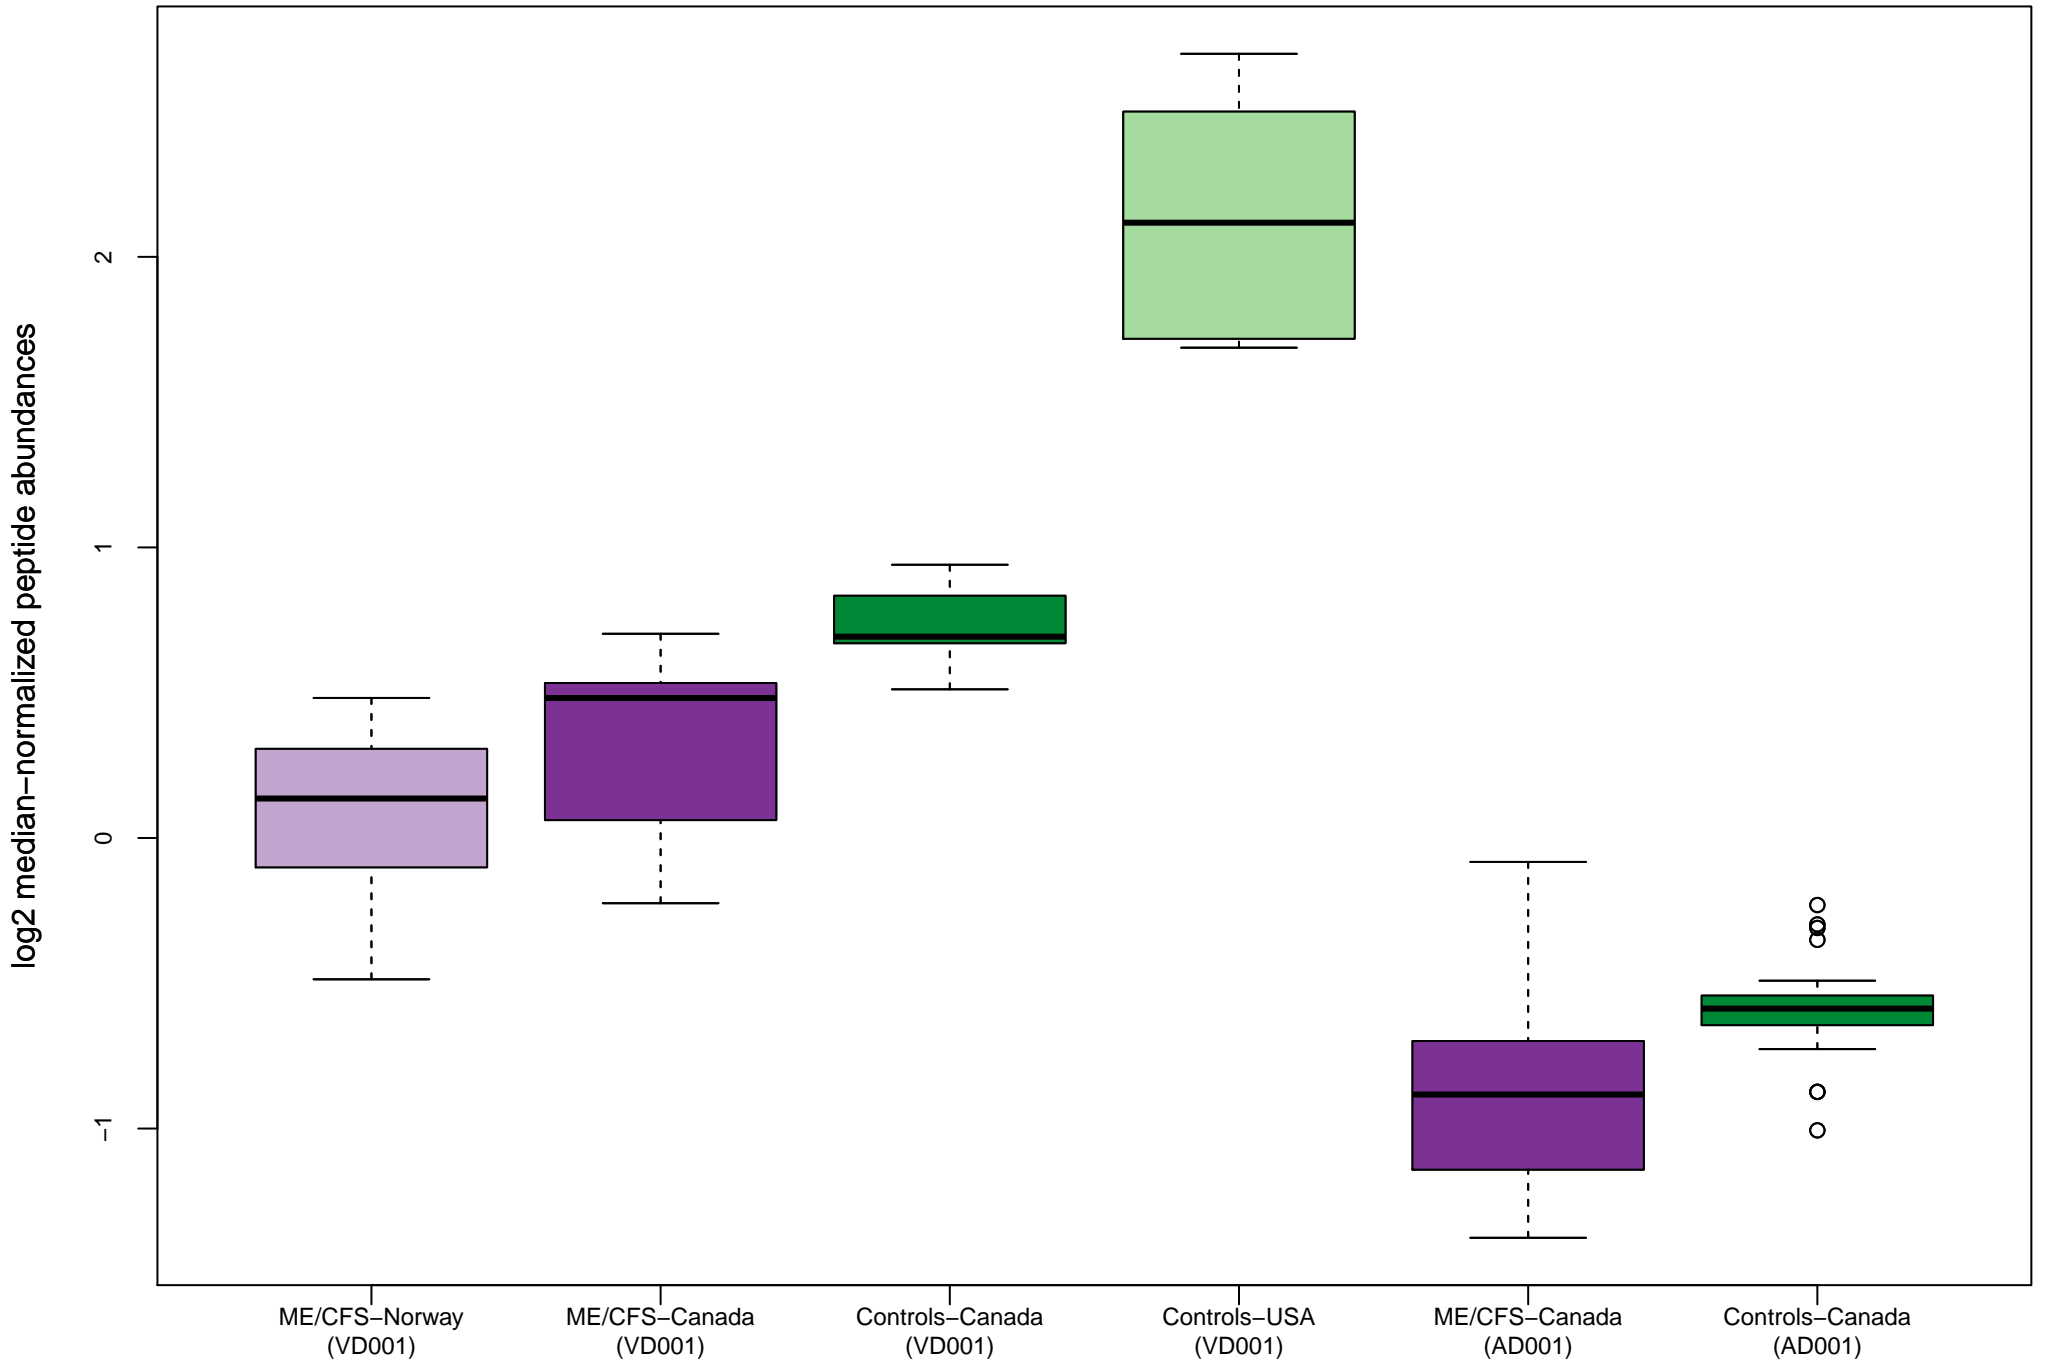

# RFLASRLSVALS

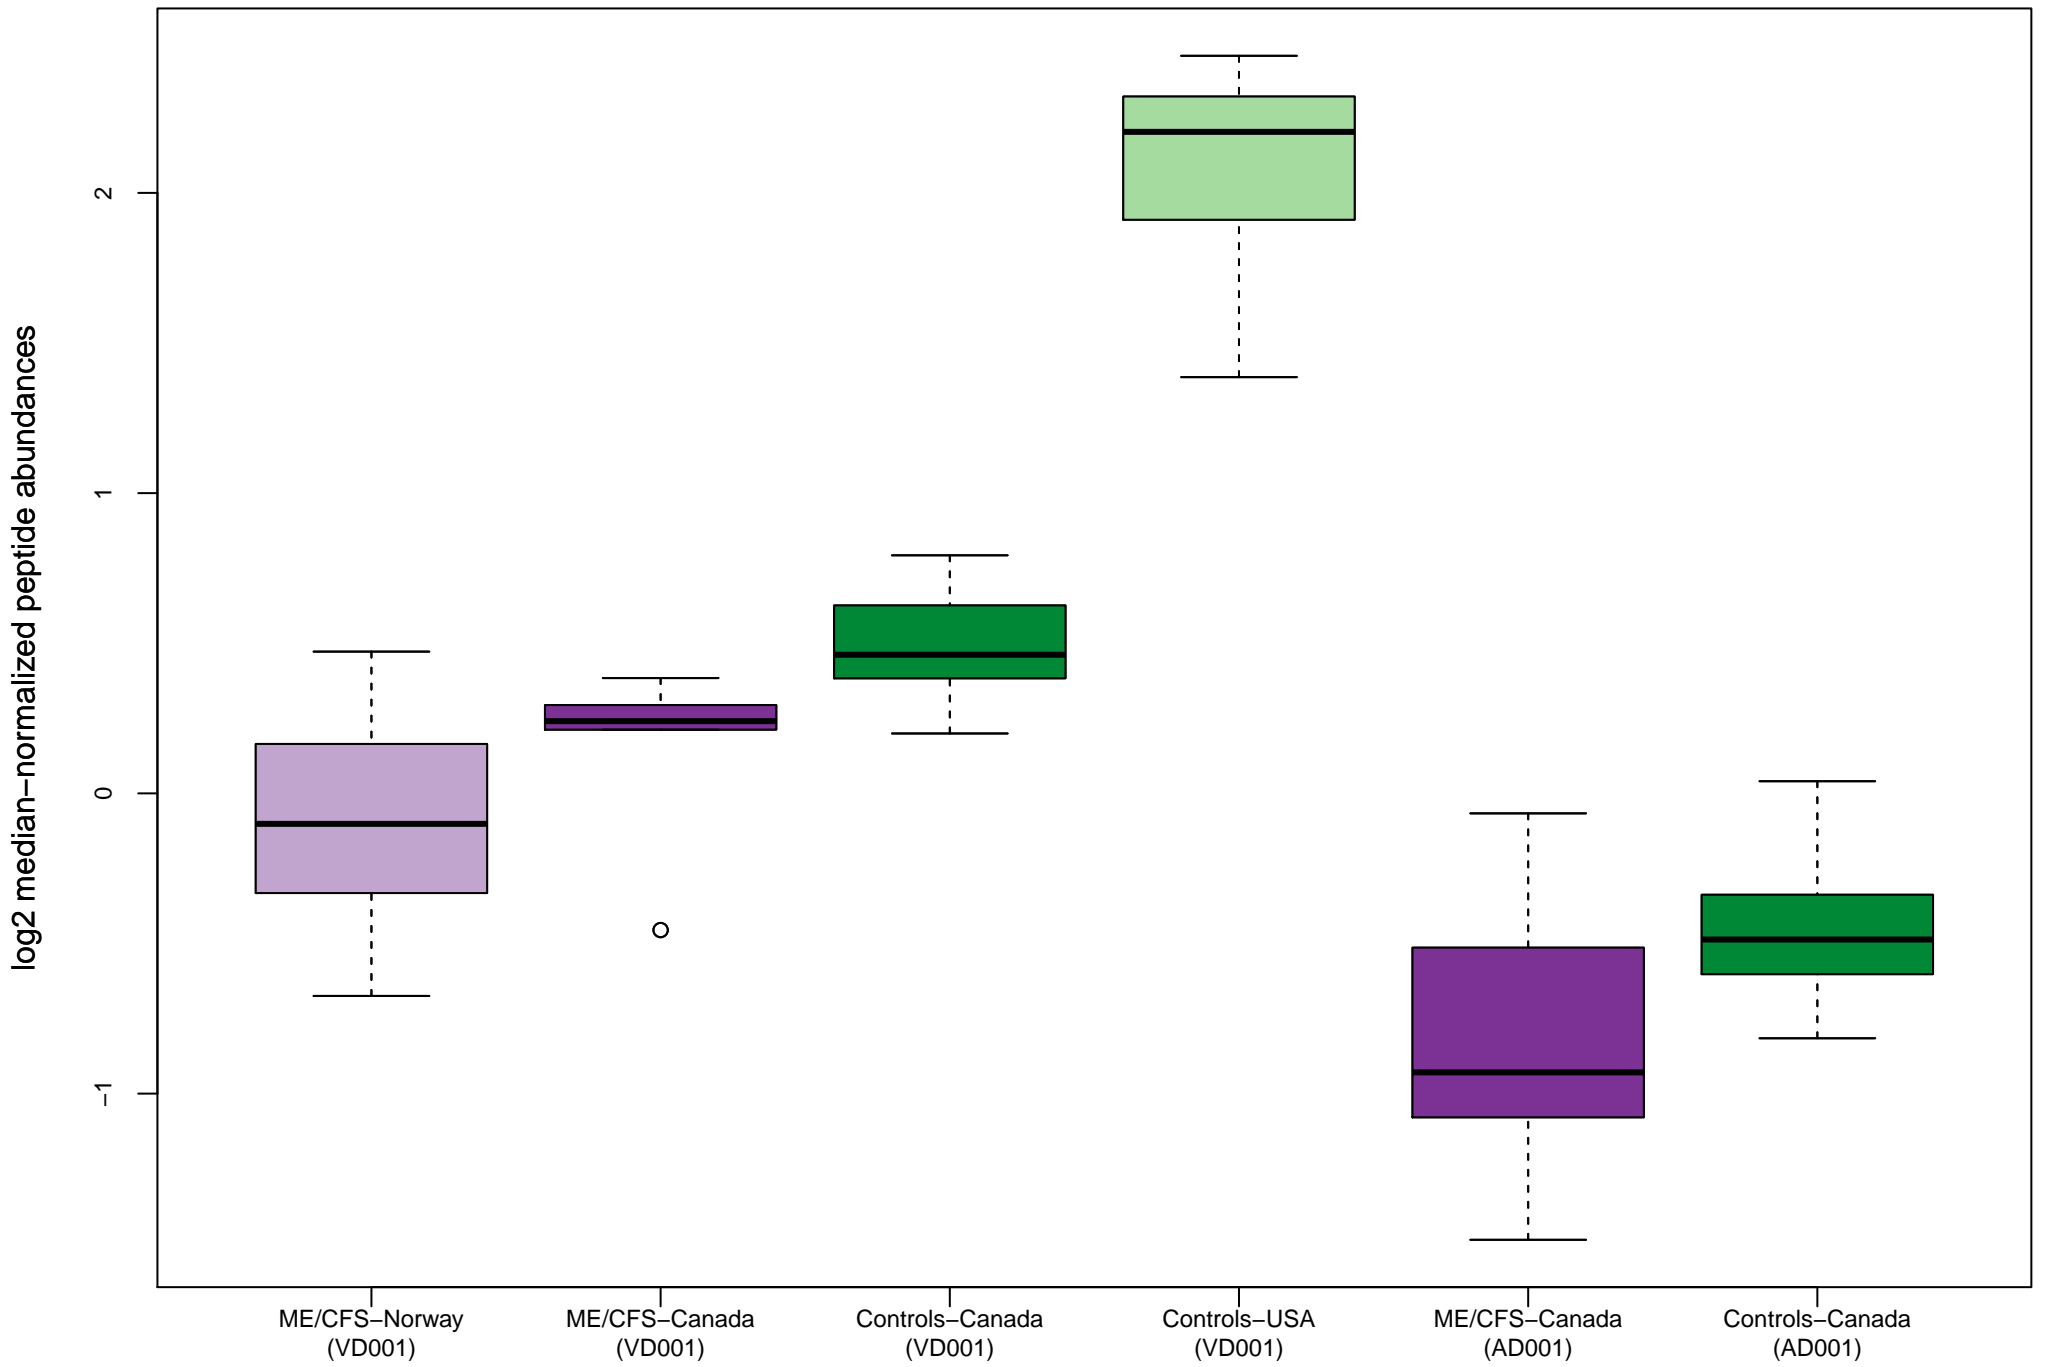

# RFLVSNLGALSG

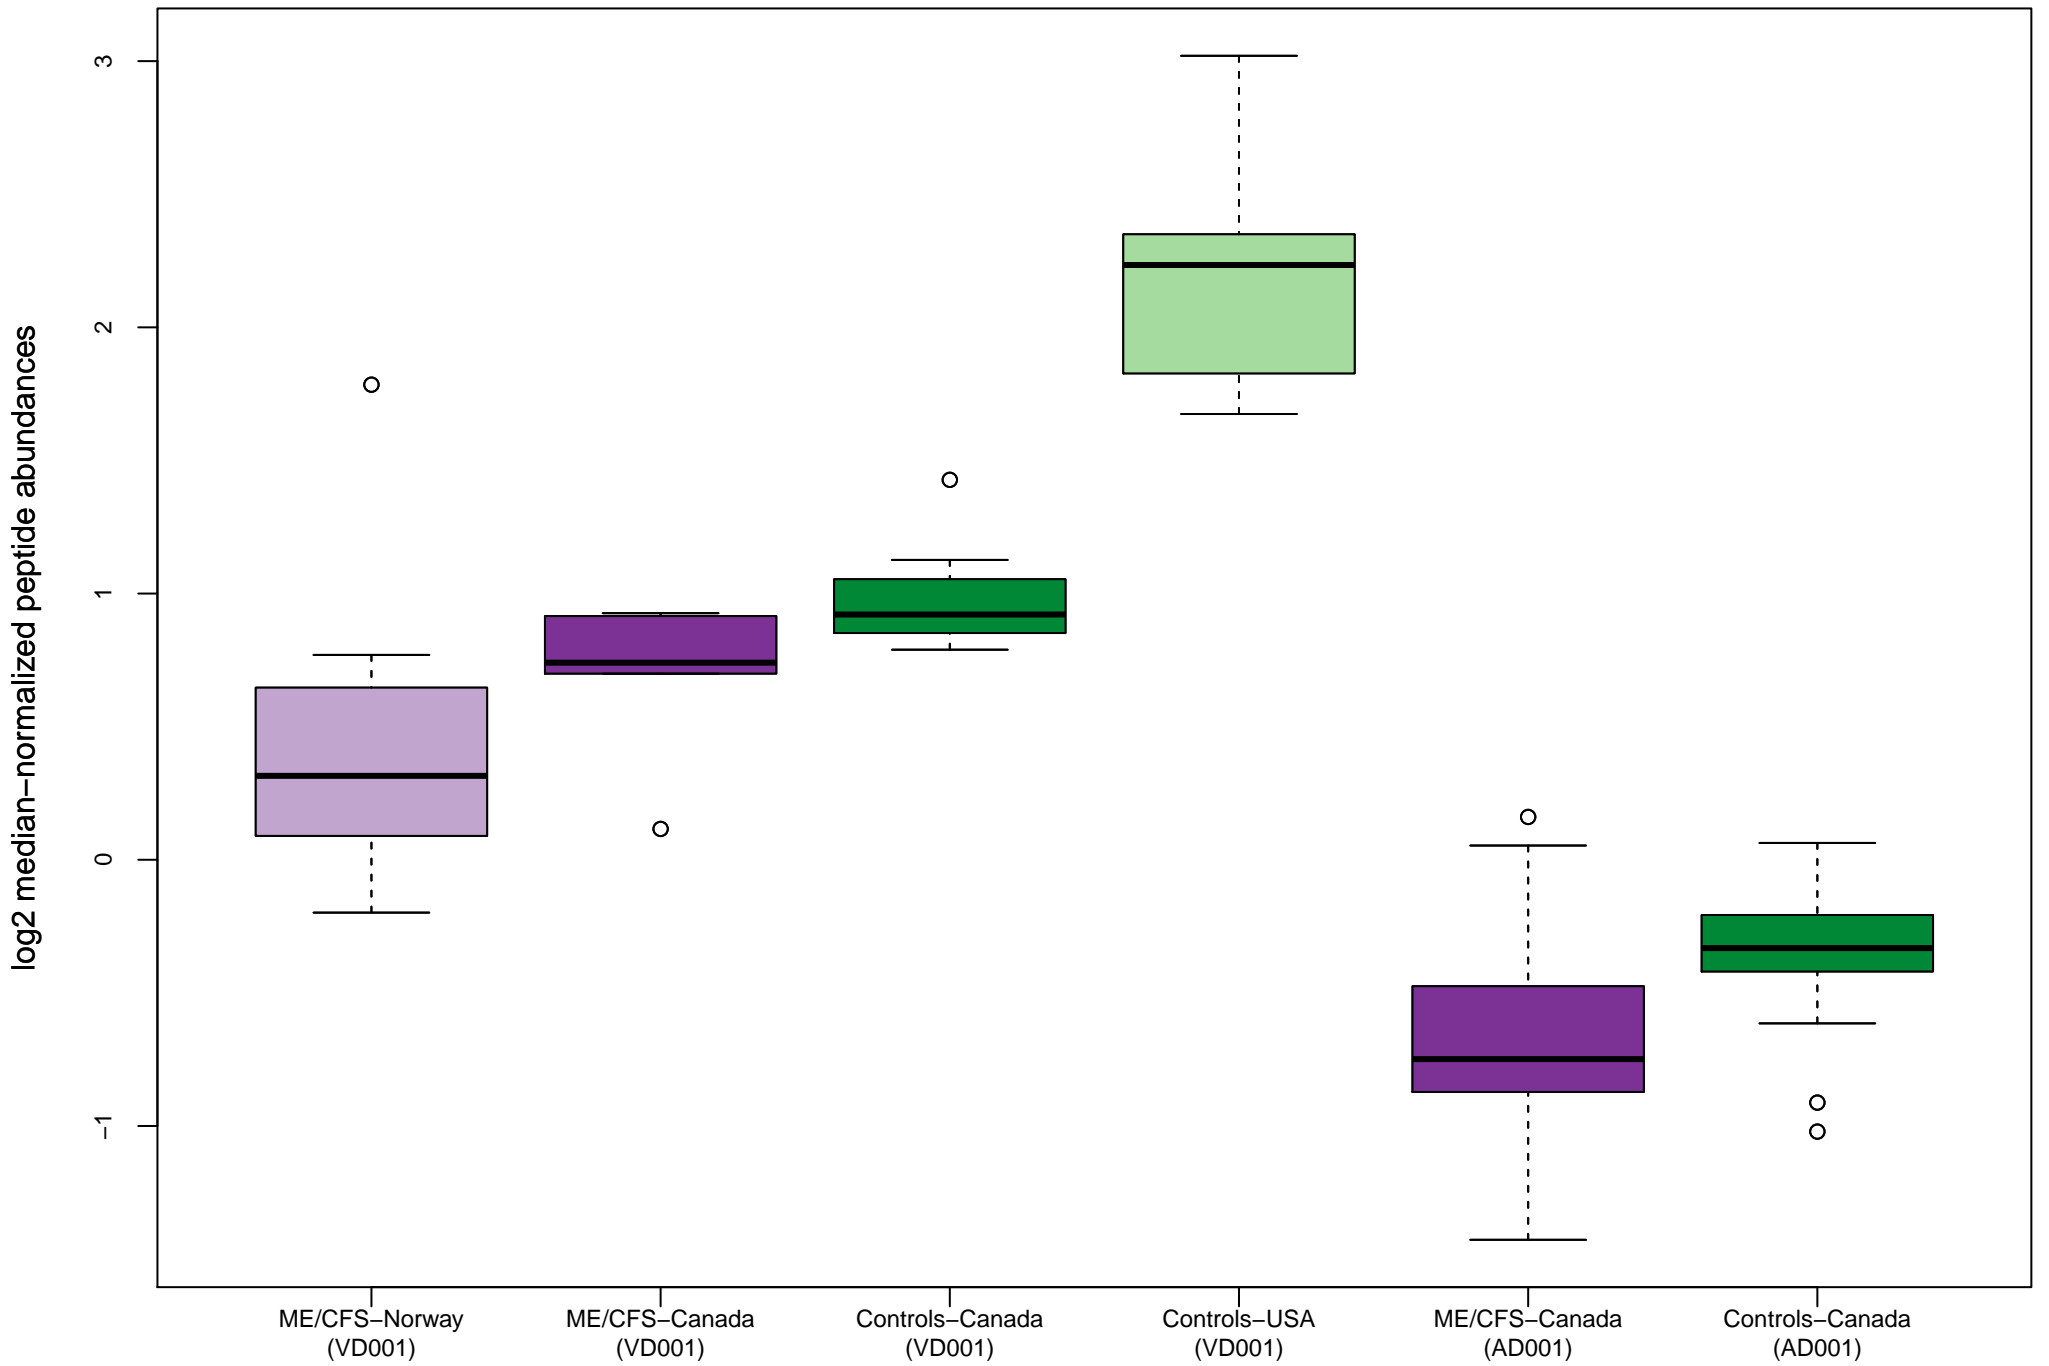

# RFNQYVLRYLGA

log2 median-normalized peptide abundances

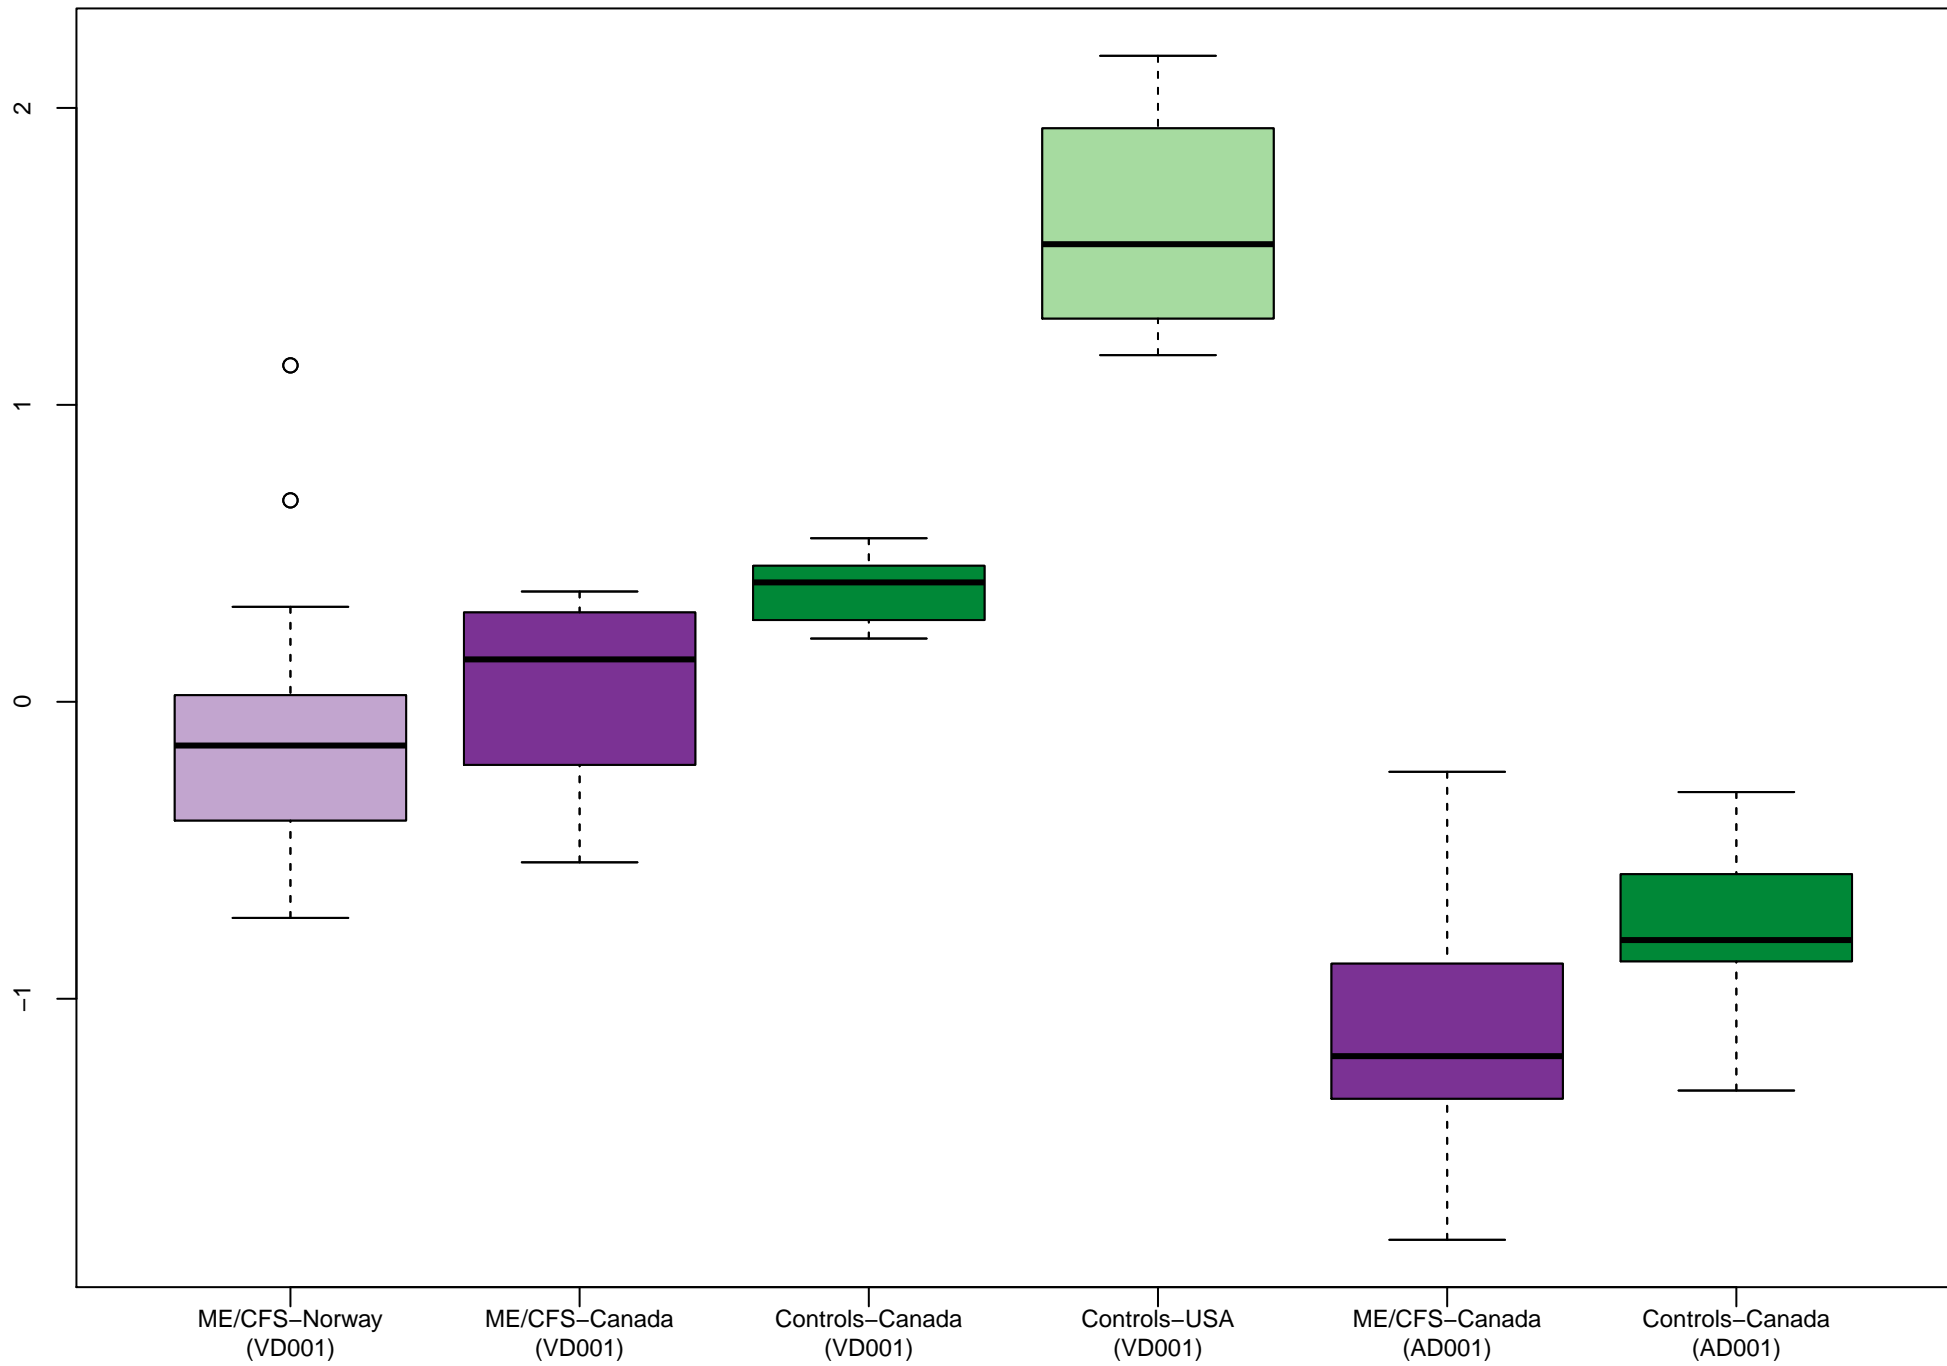

# RFPNKLHWLLS

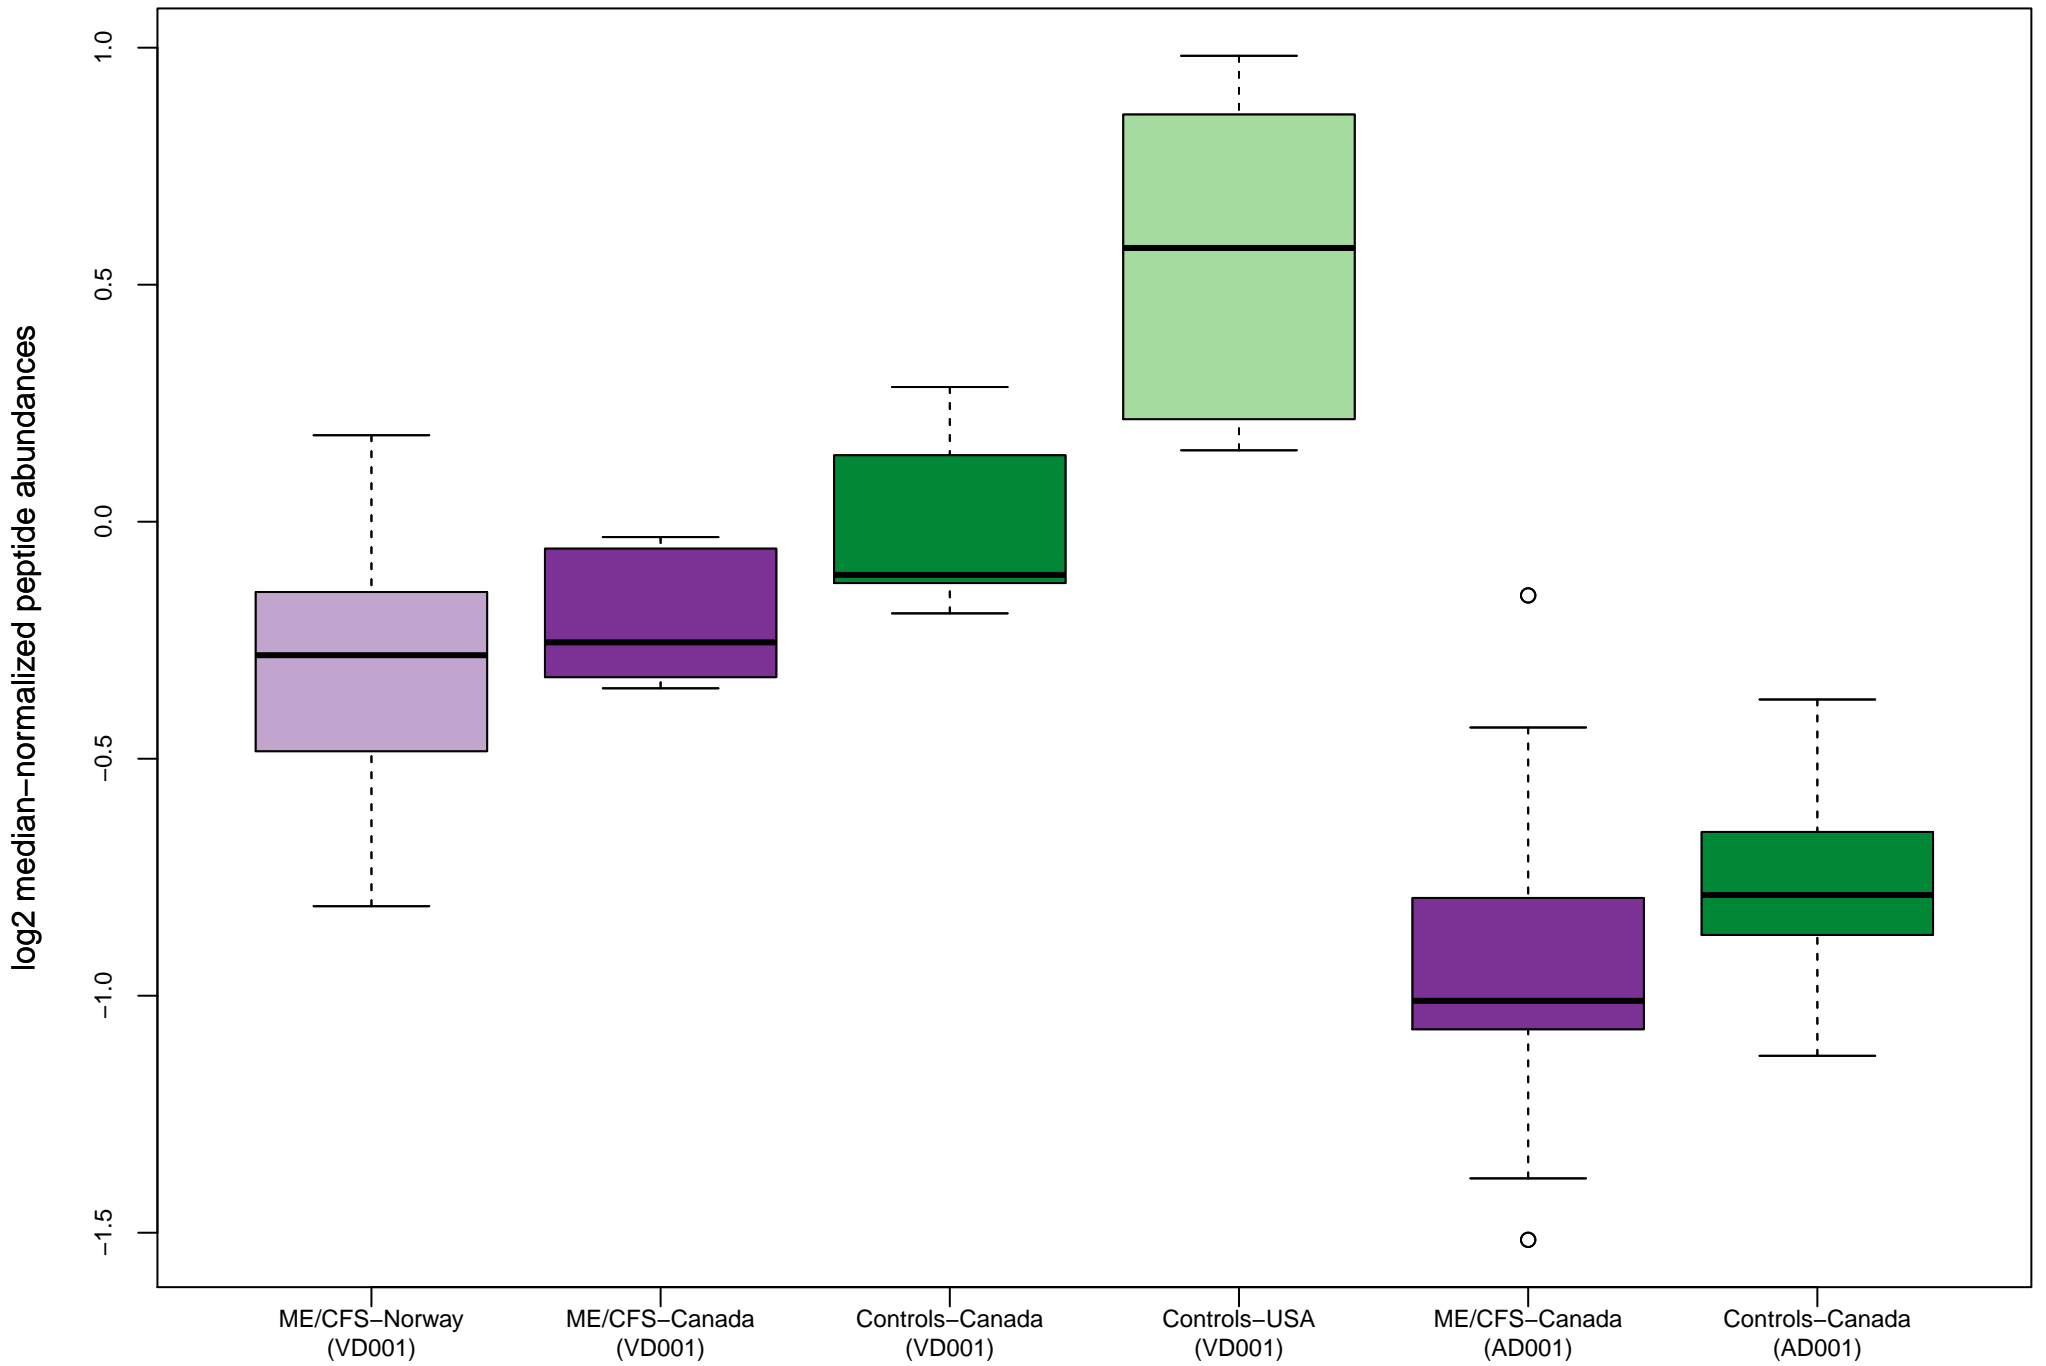



# RFPVAVYHGLSG

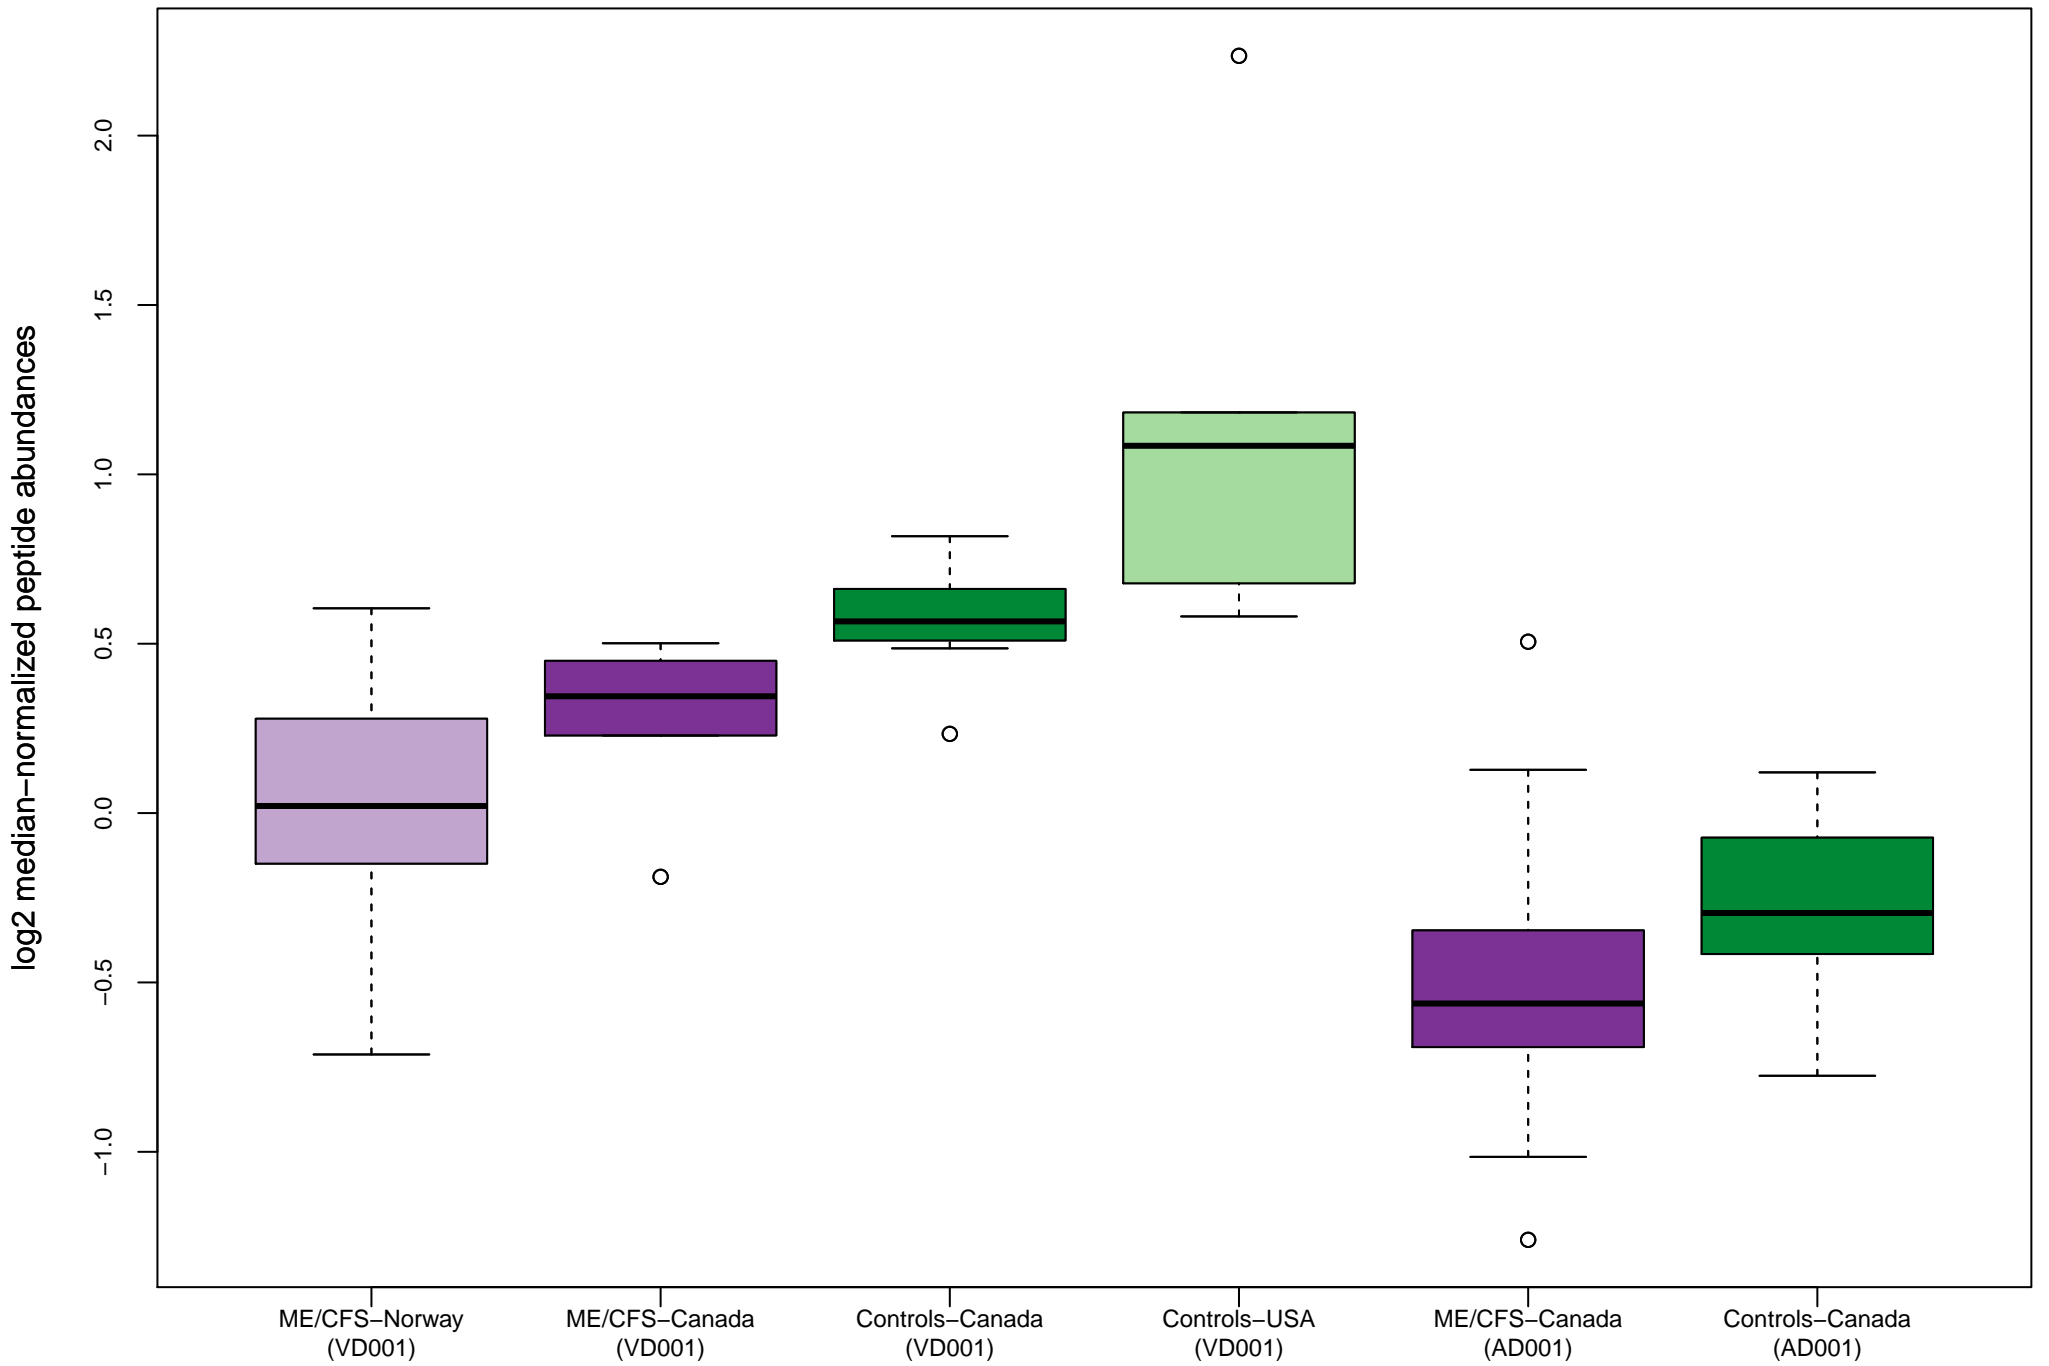

RFQFYGKALSVG

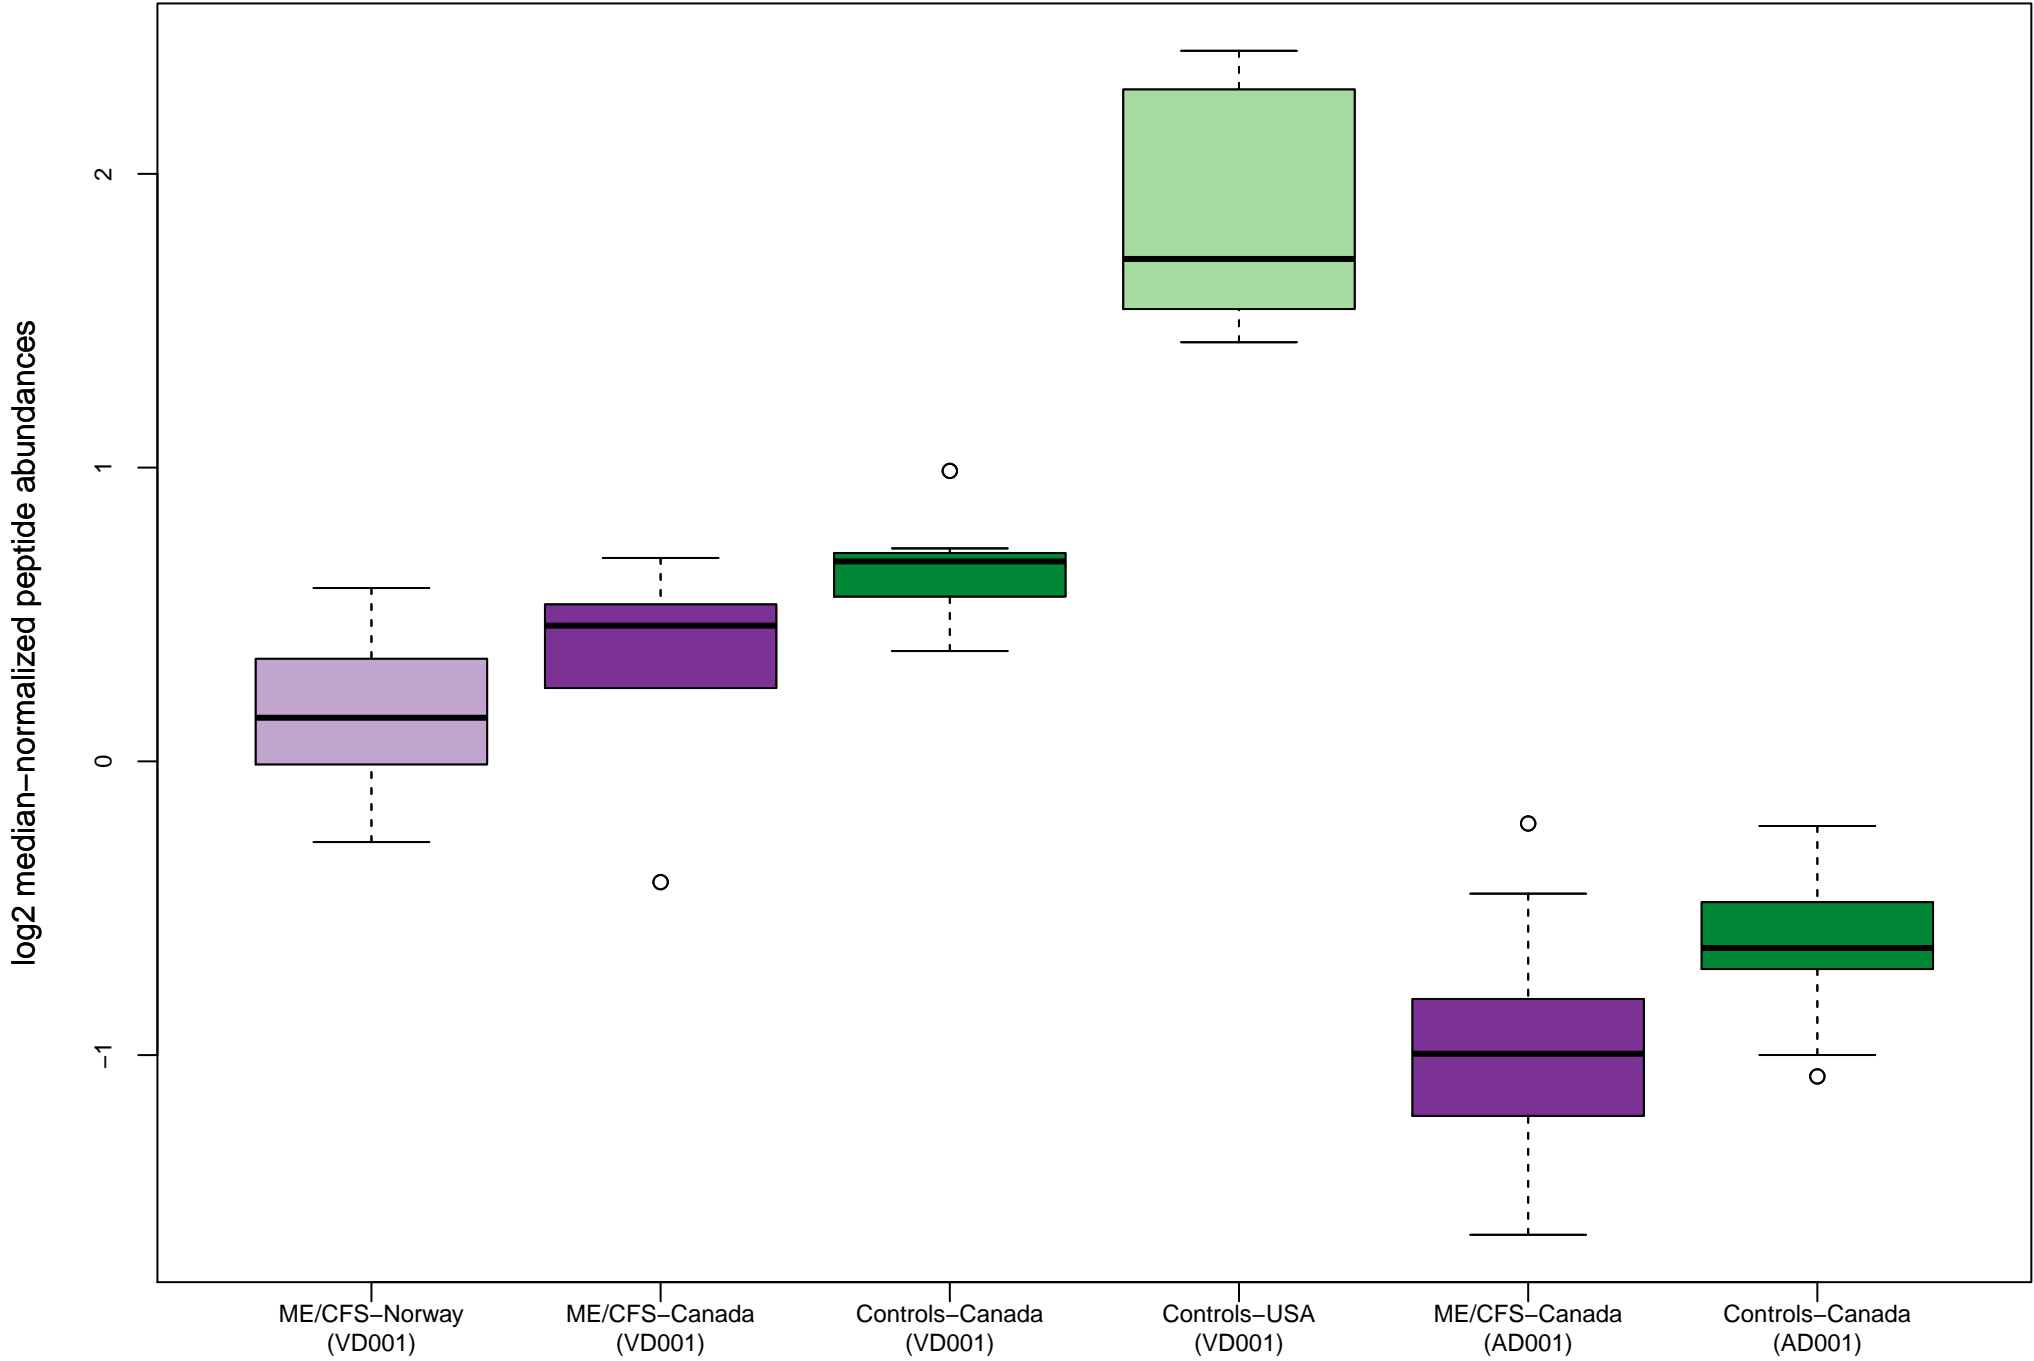

# RFRVDVRPYWLG

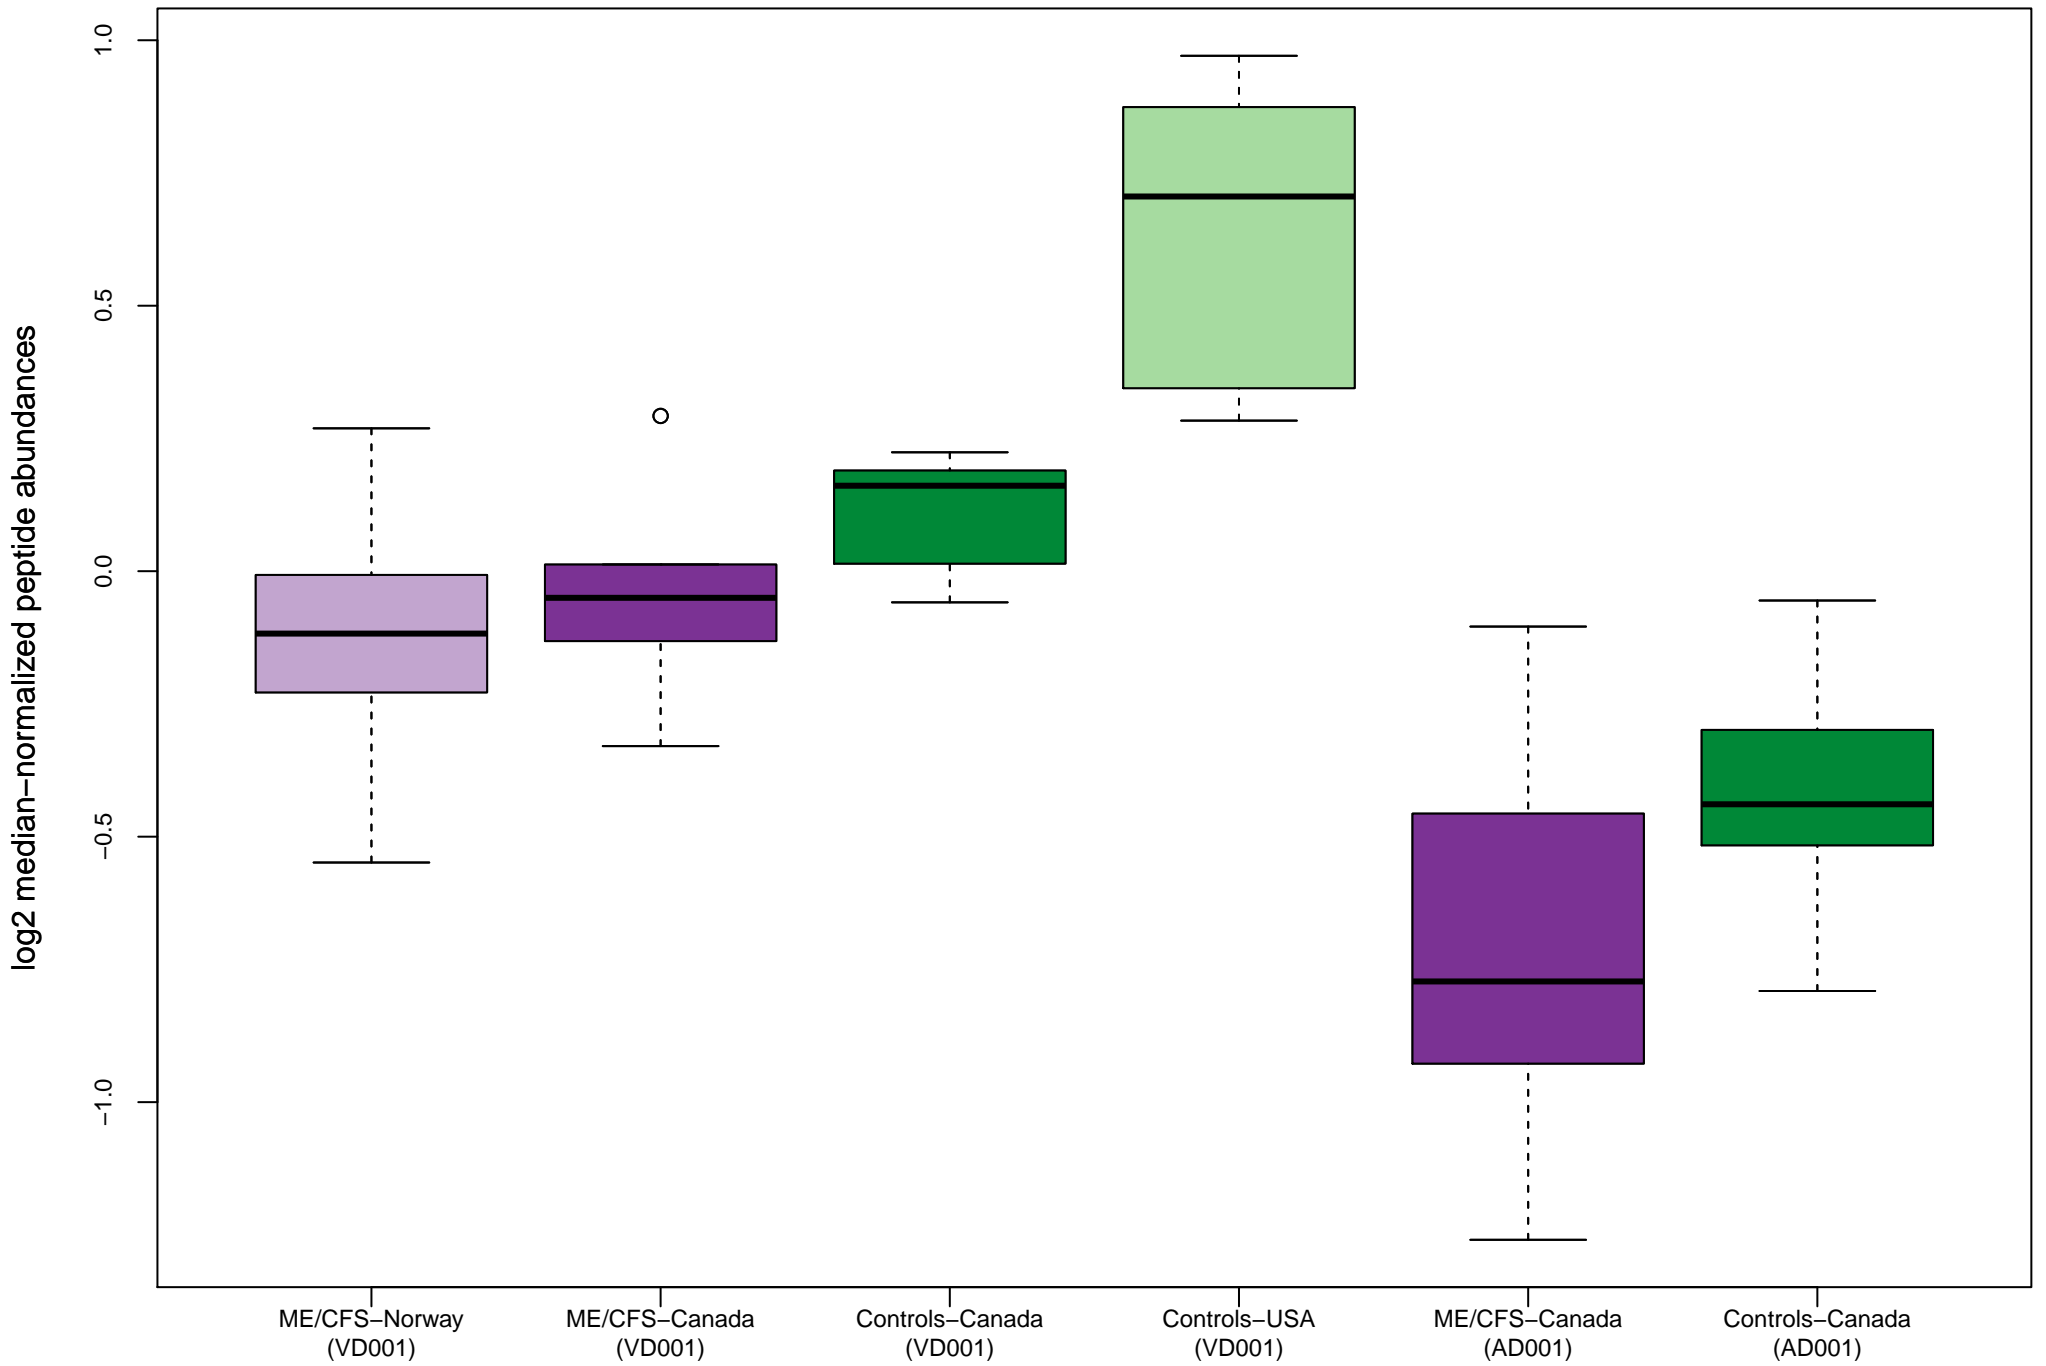

RFRWLFYVGKHL

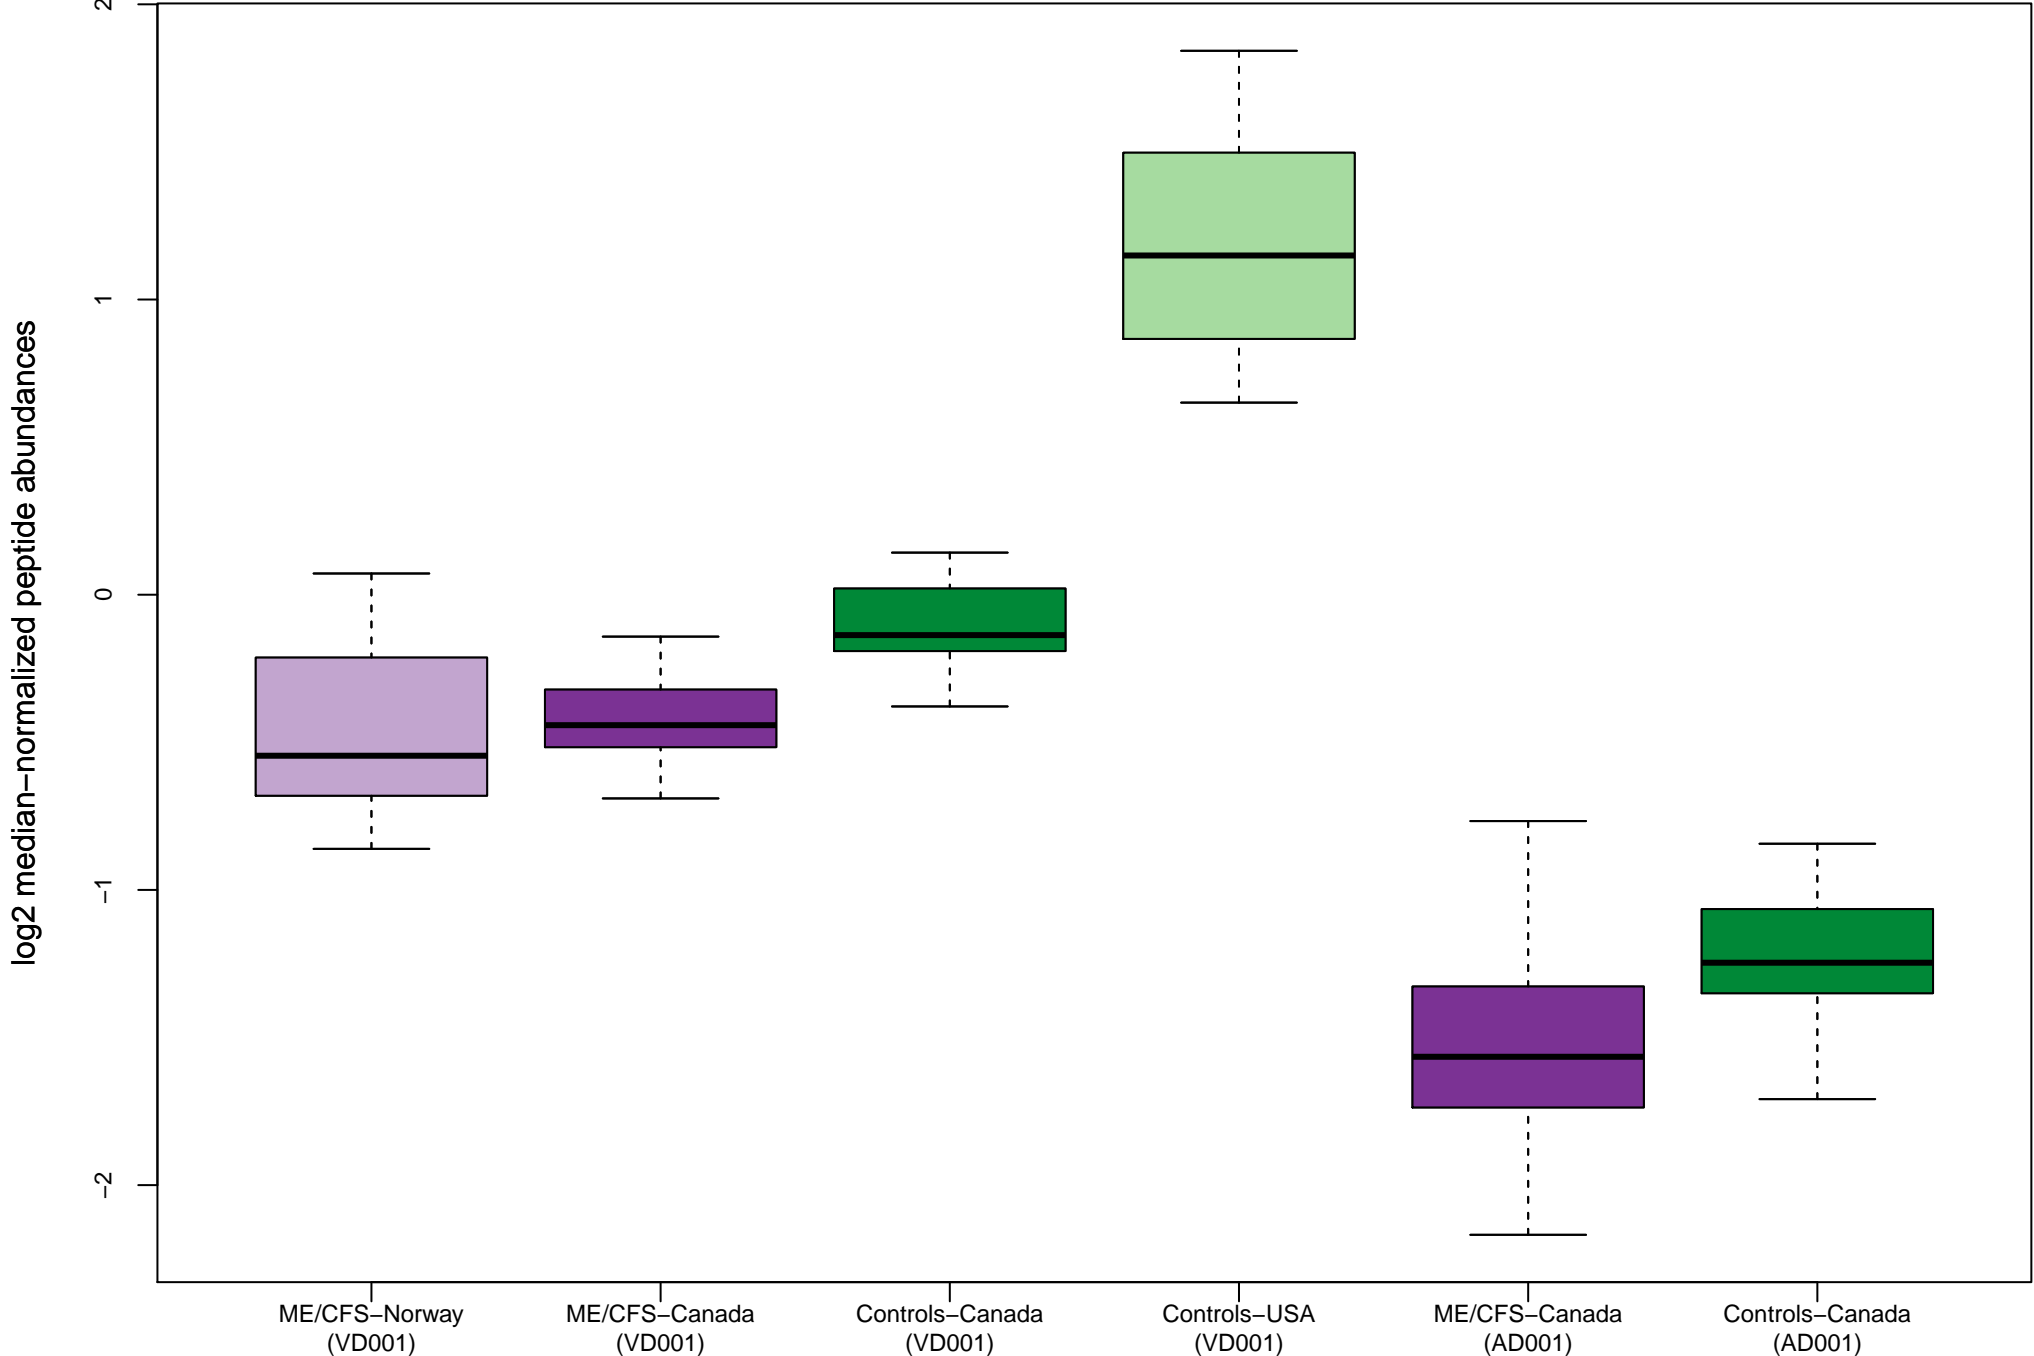

# RFSALWALSALG

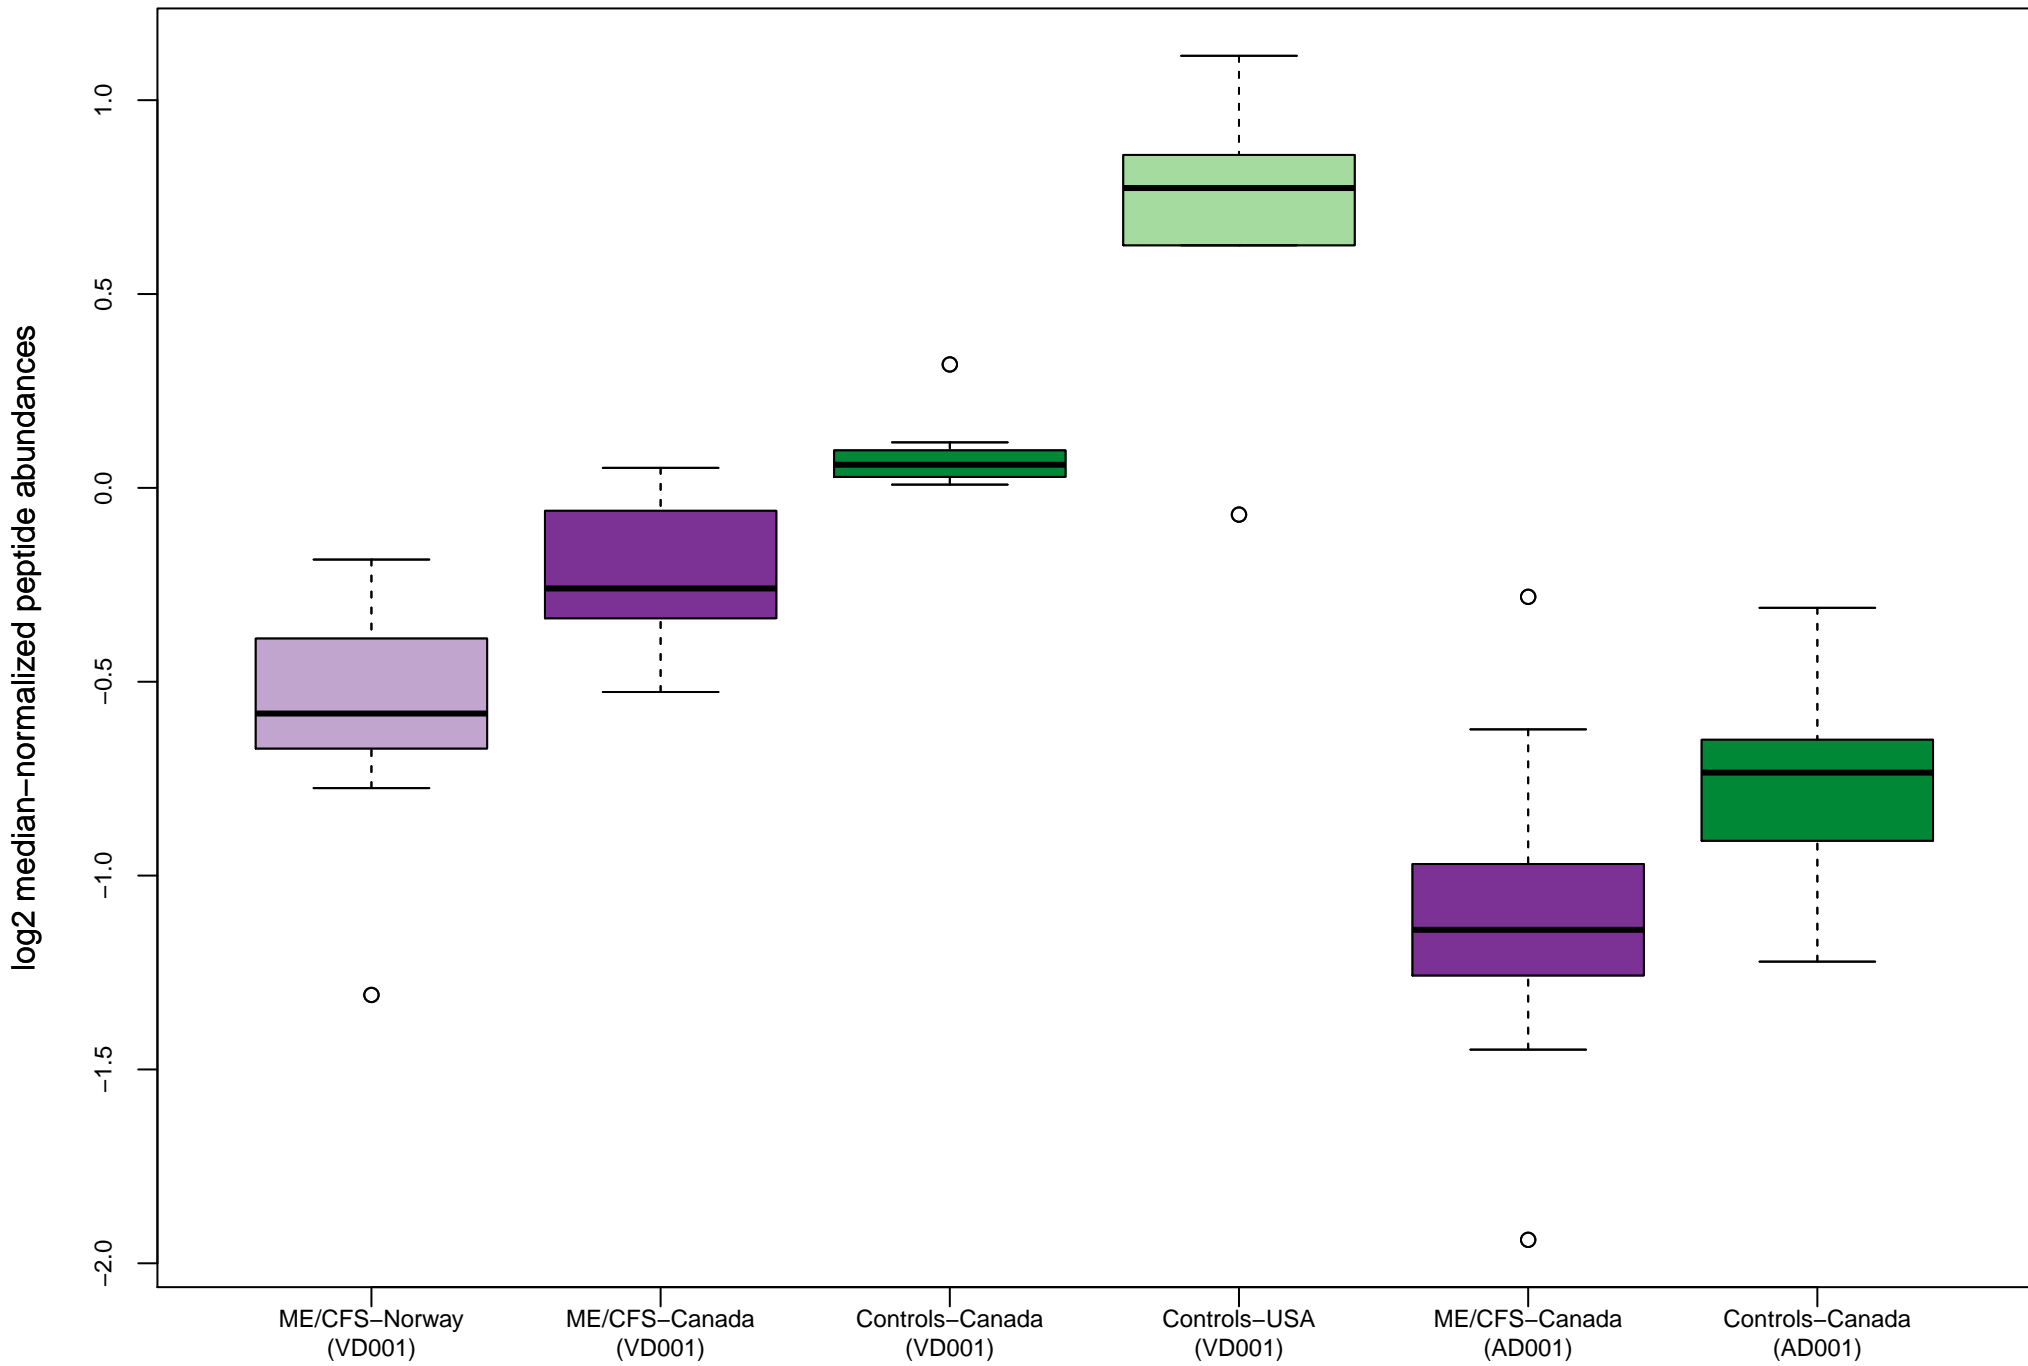

# RFVALYRPLGAL

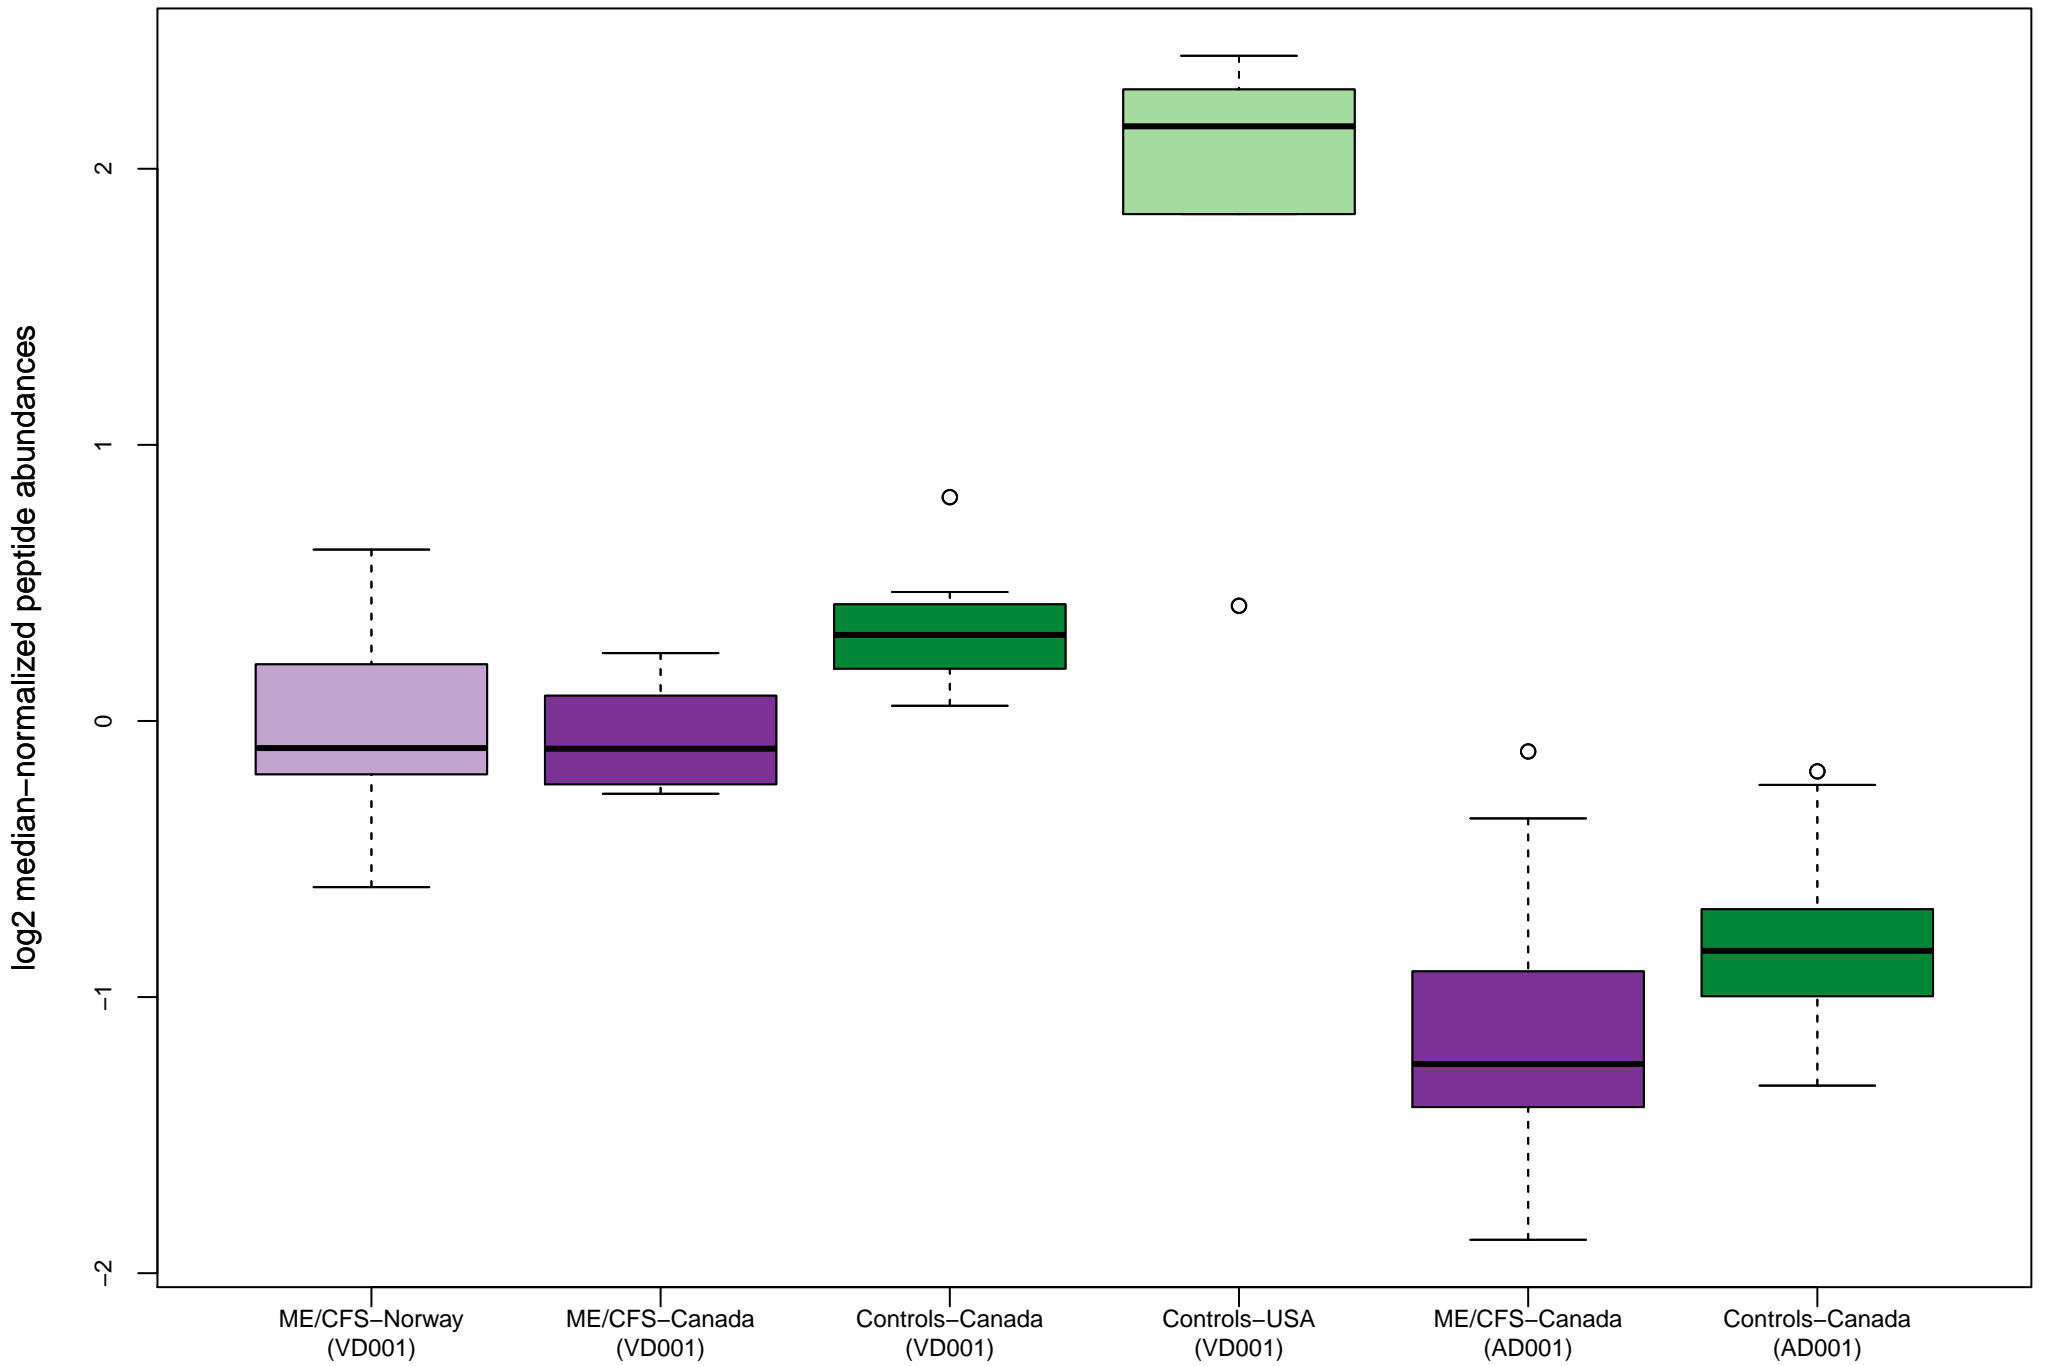

# RFVVKASGVALS

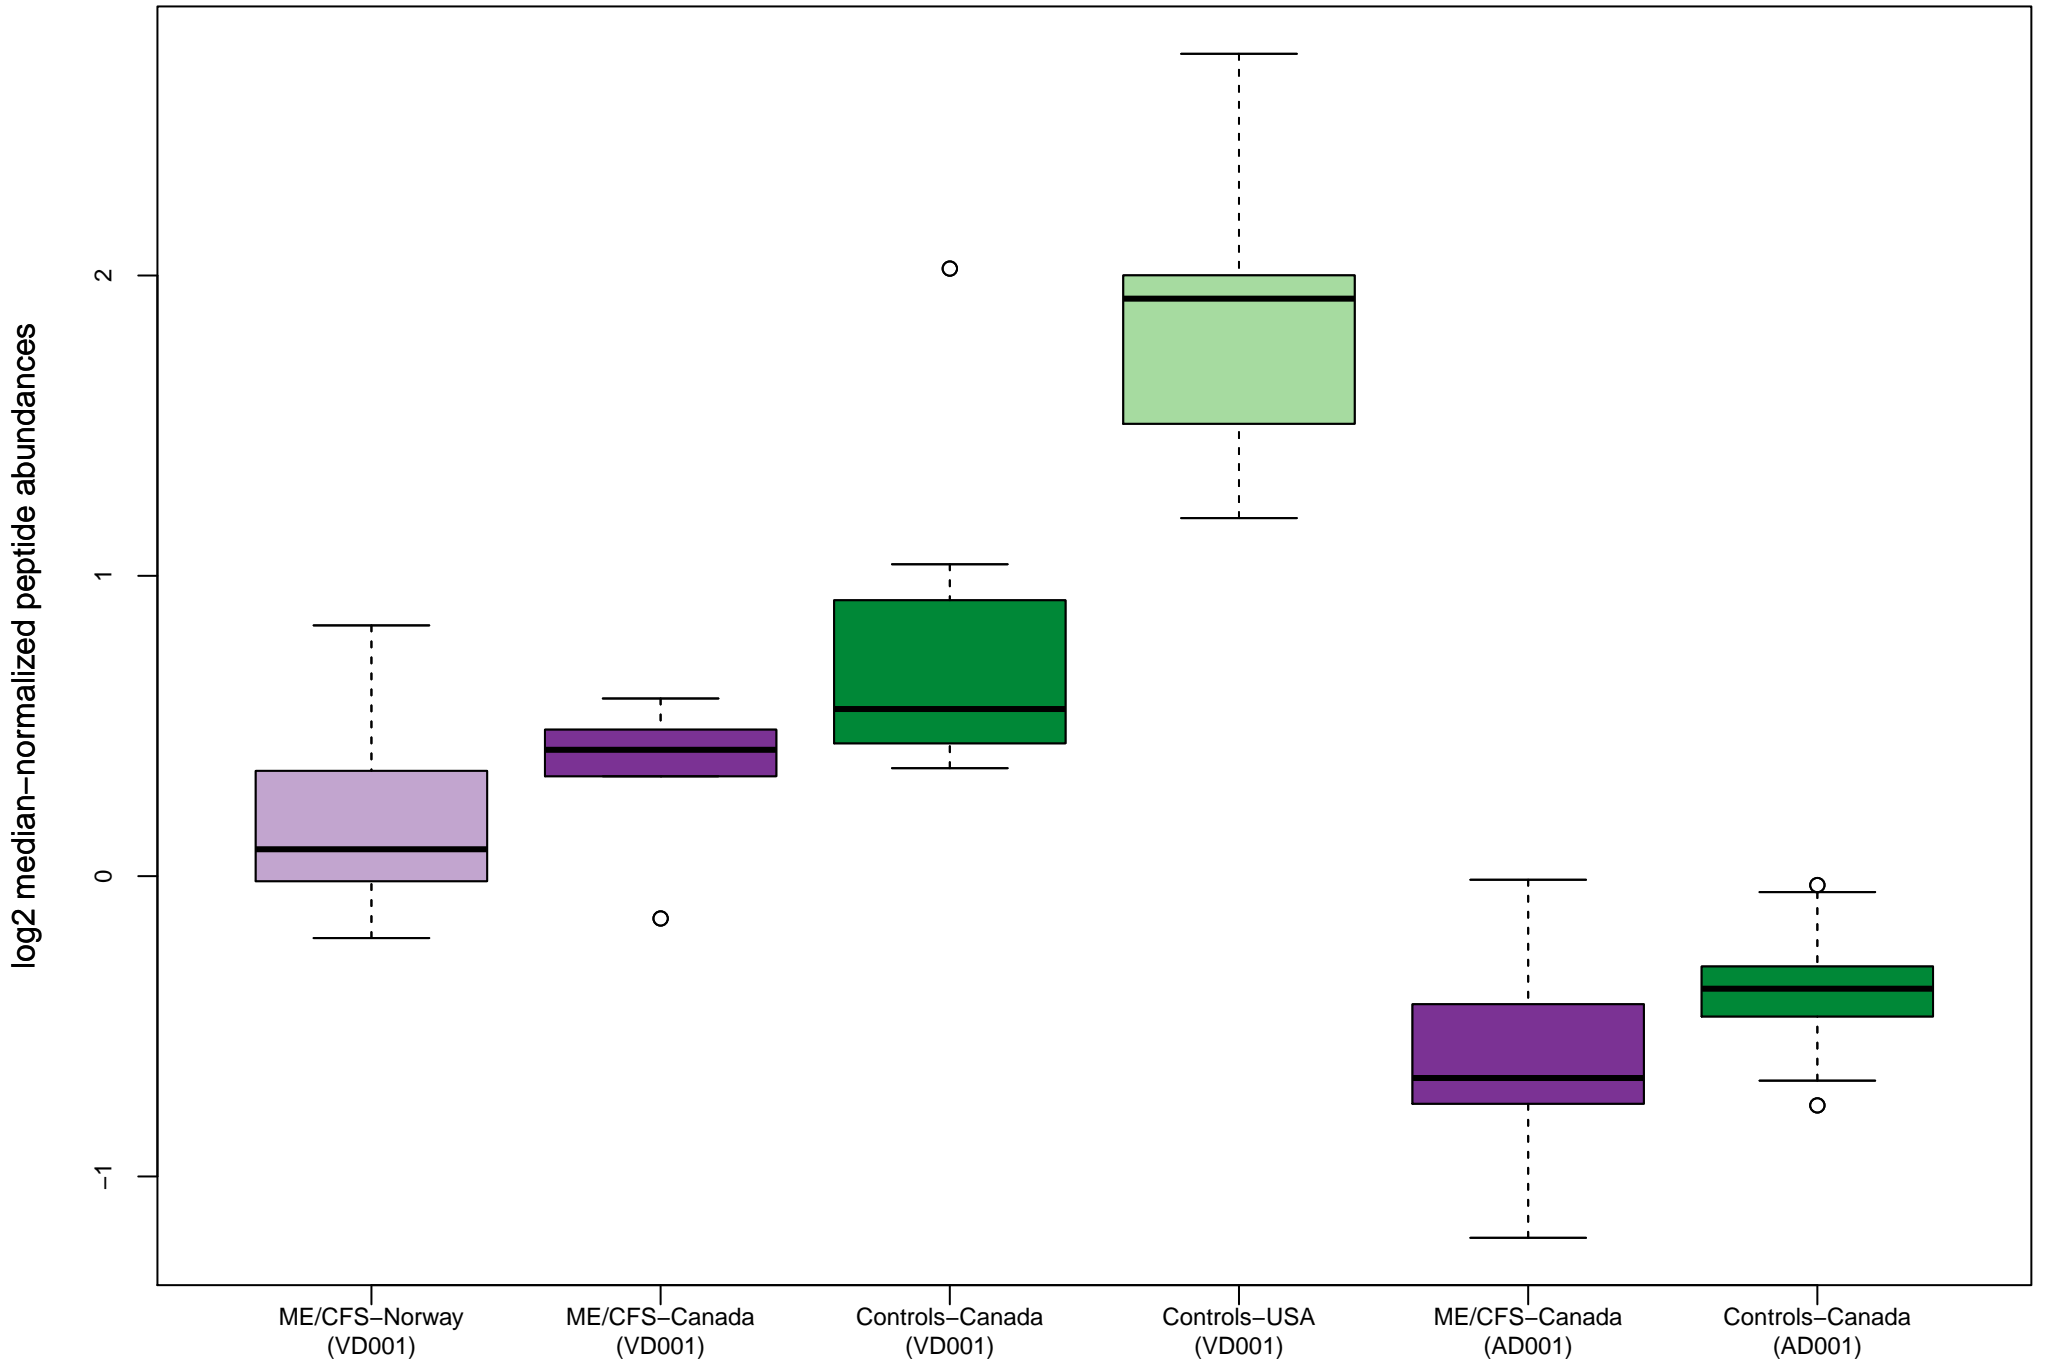

# RFWRHVFRHLVL

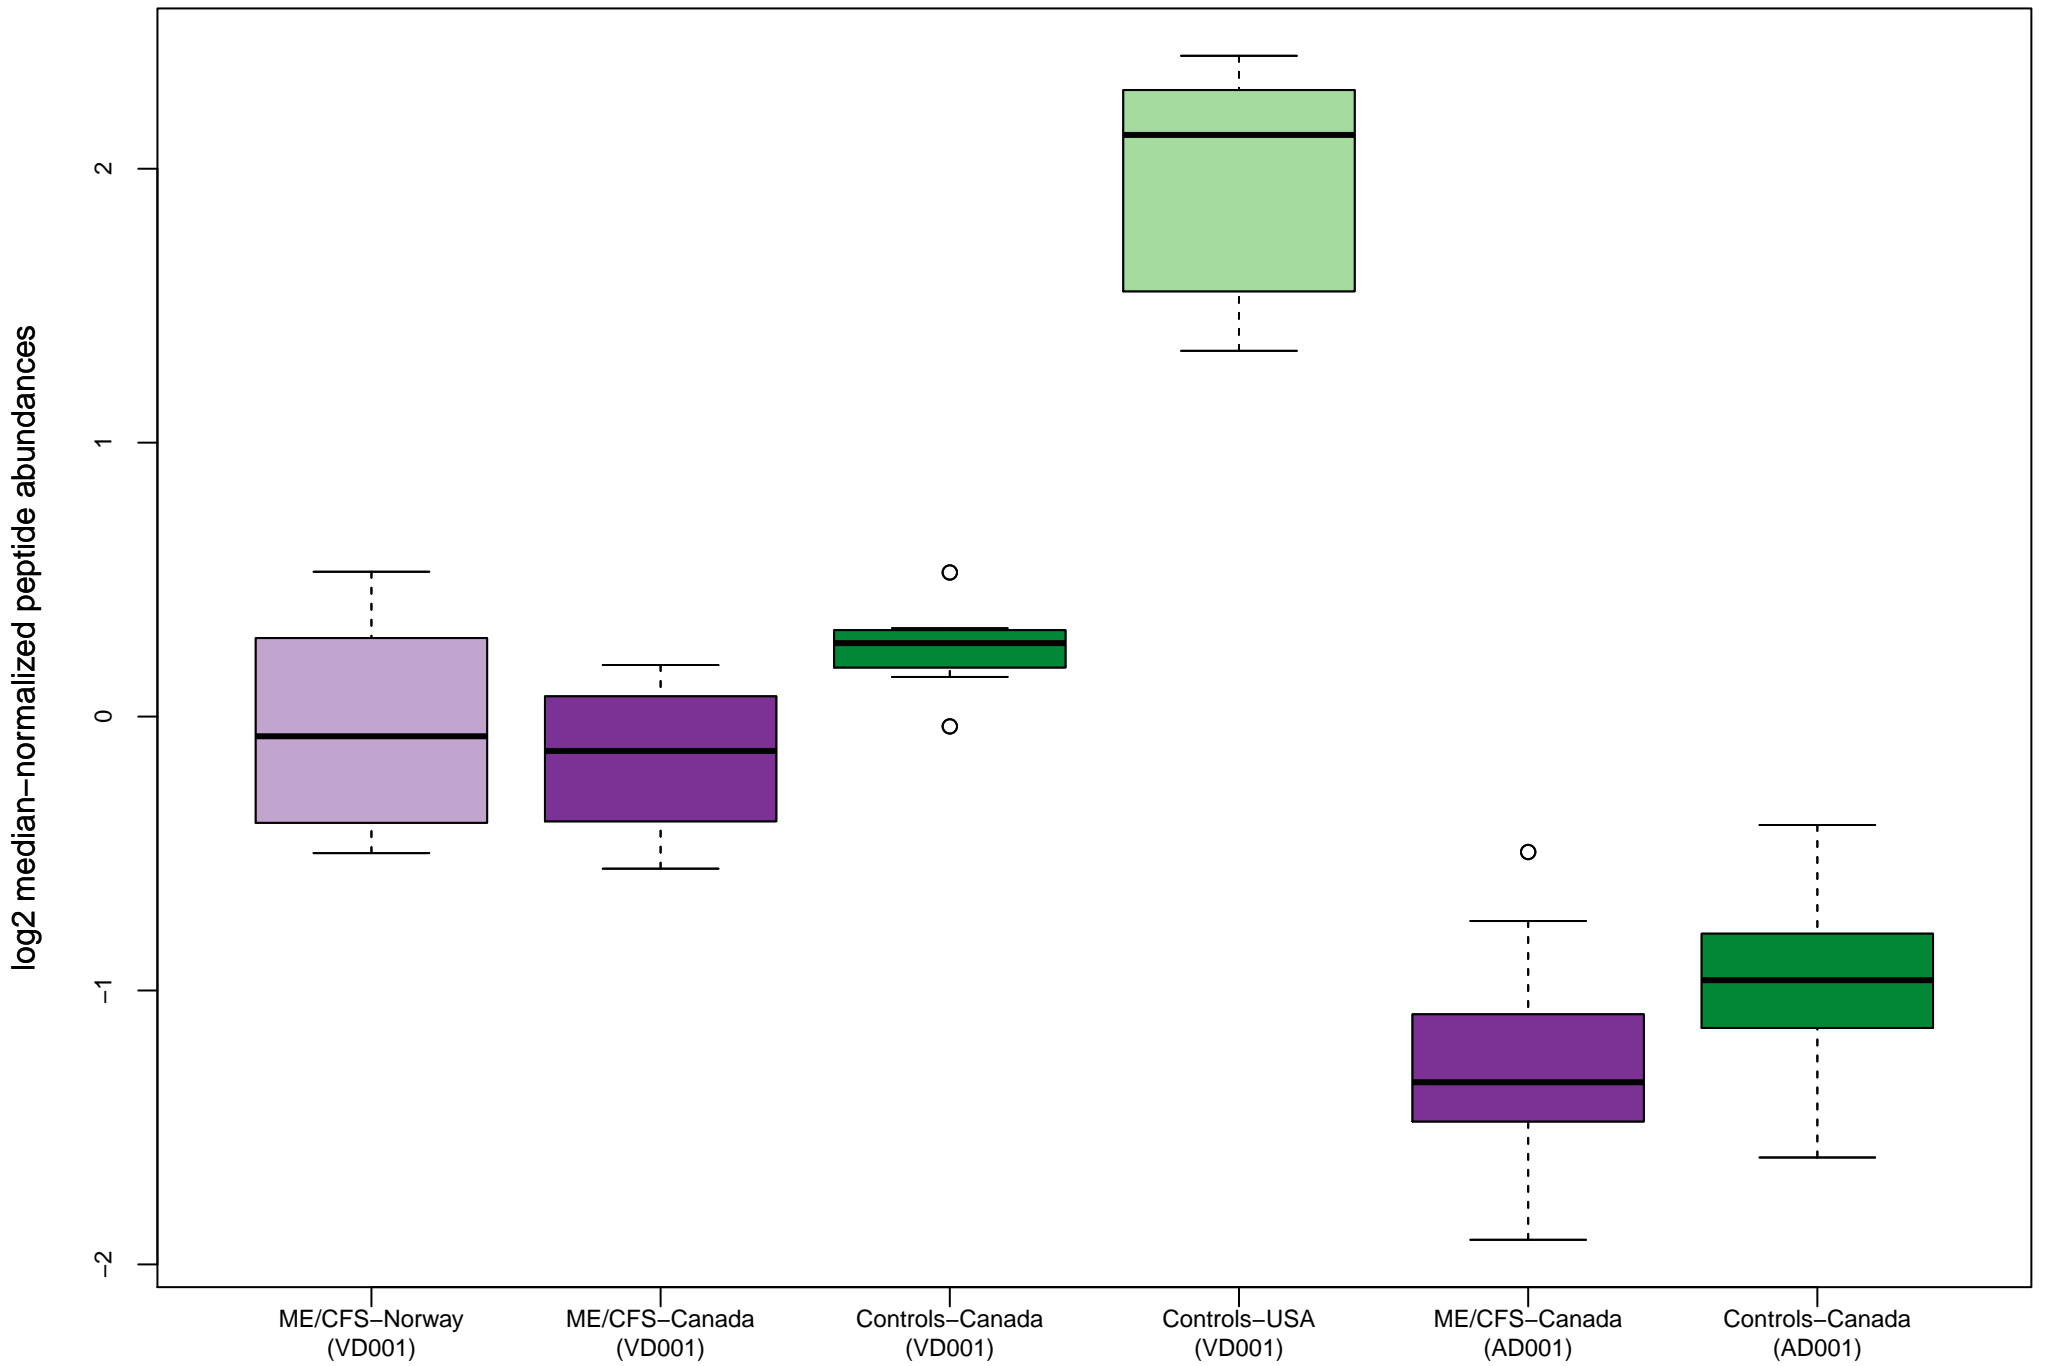



# RFWYGWVLGASG

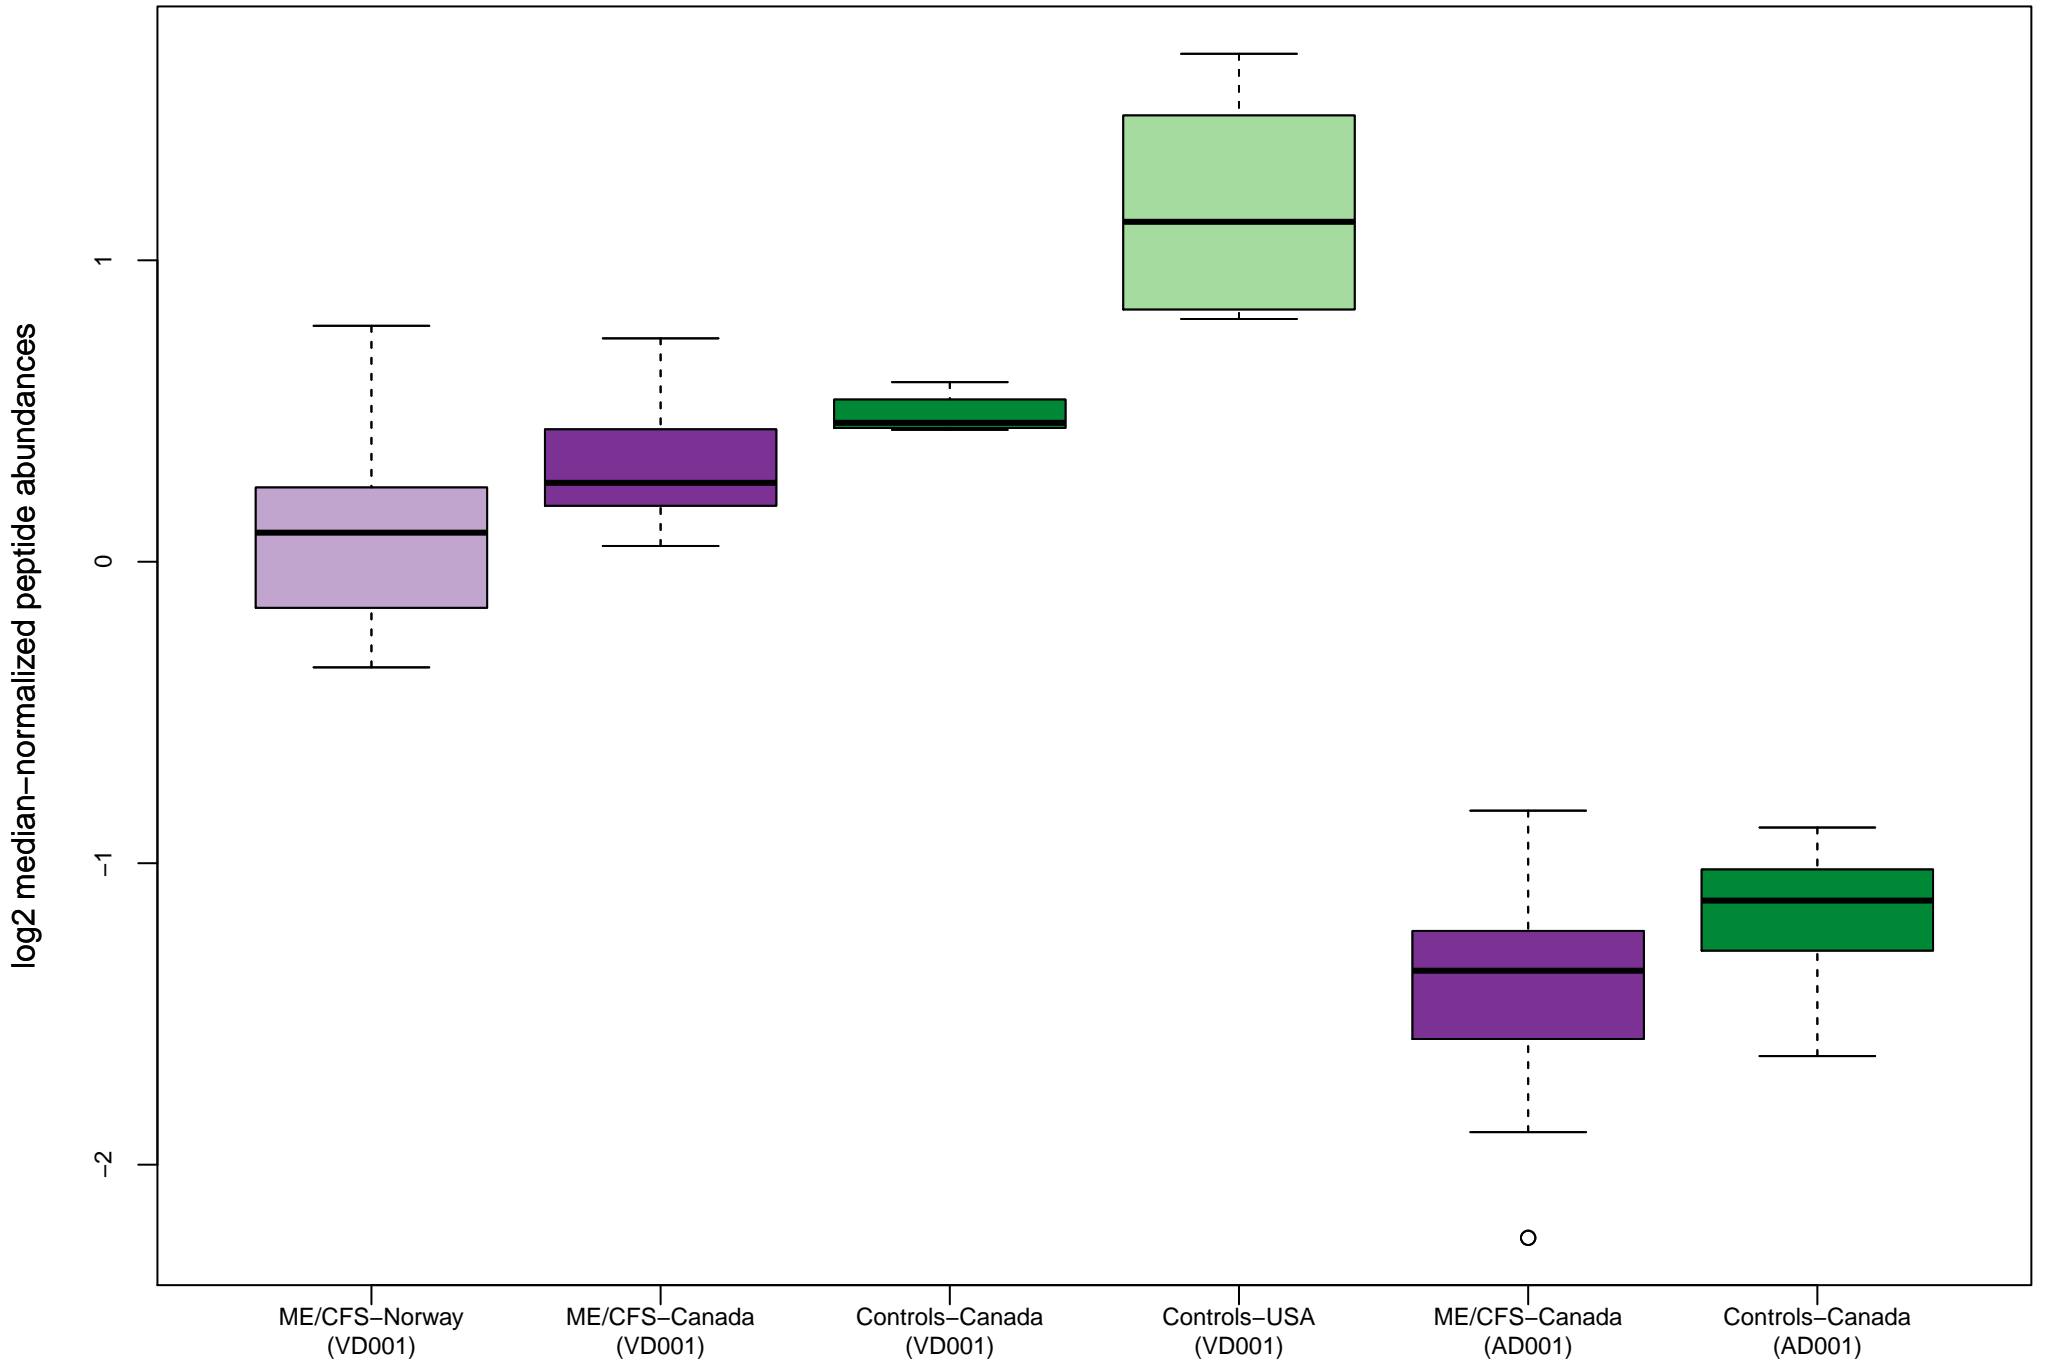

# RFYYSKVL SGLG

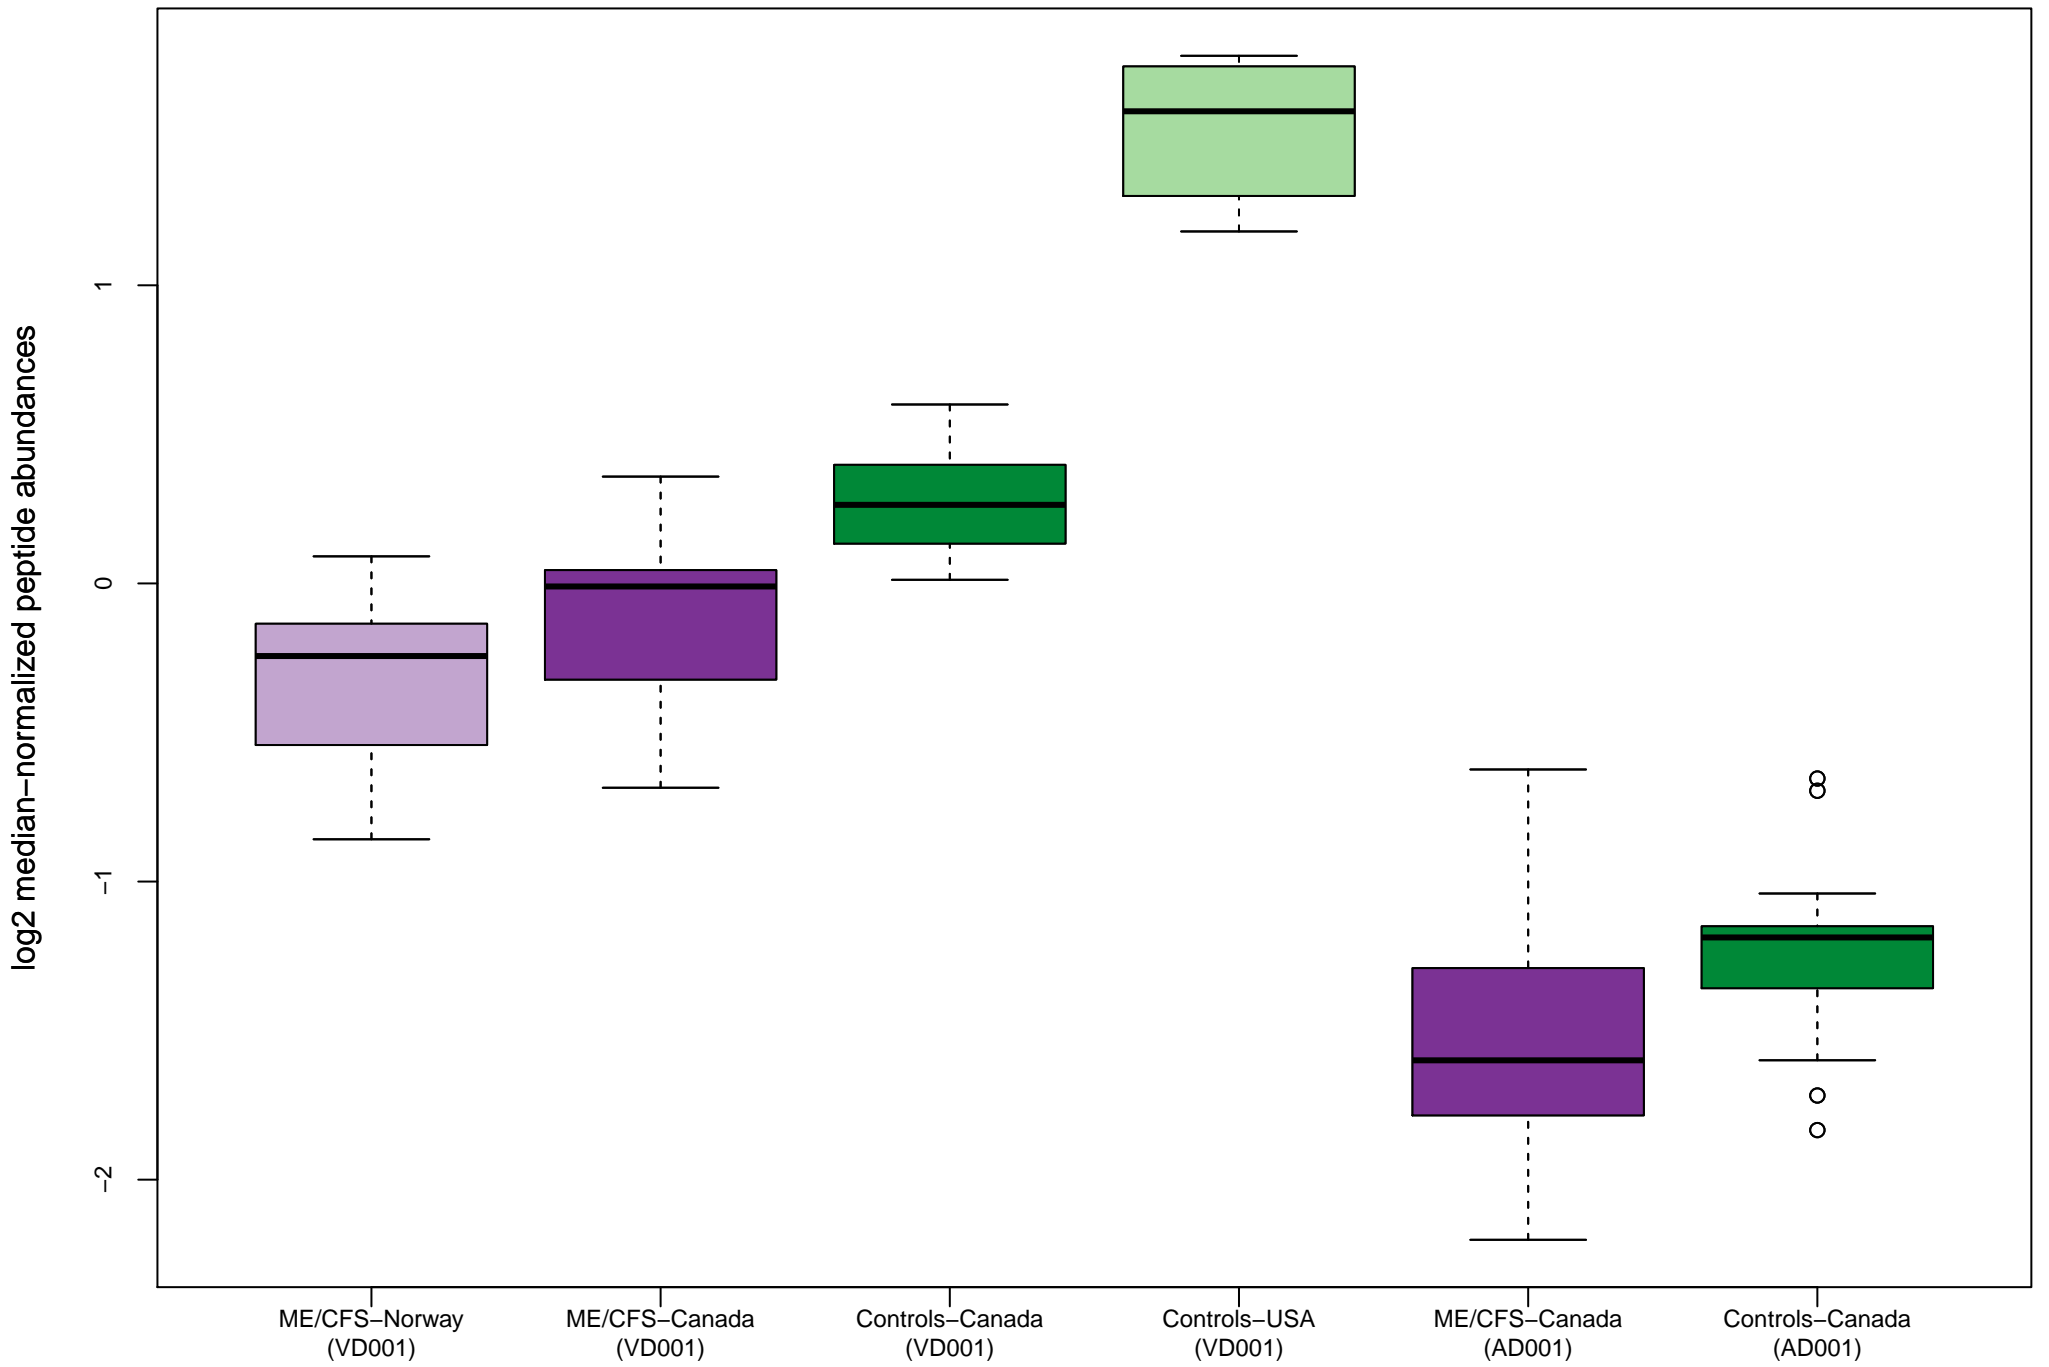

# RGQFSFPFWNL

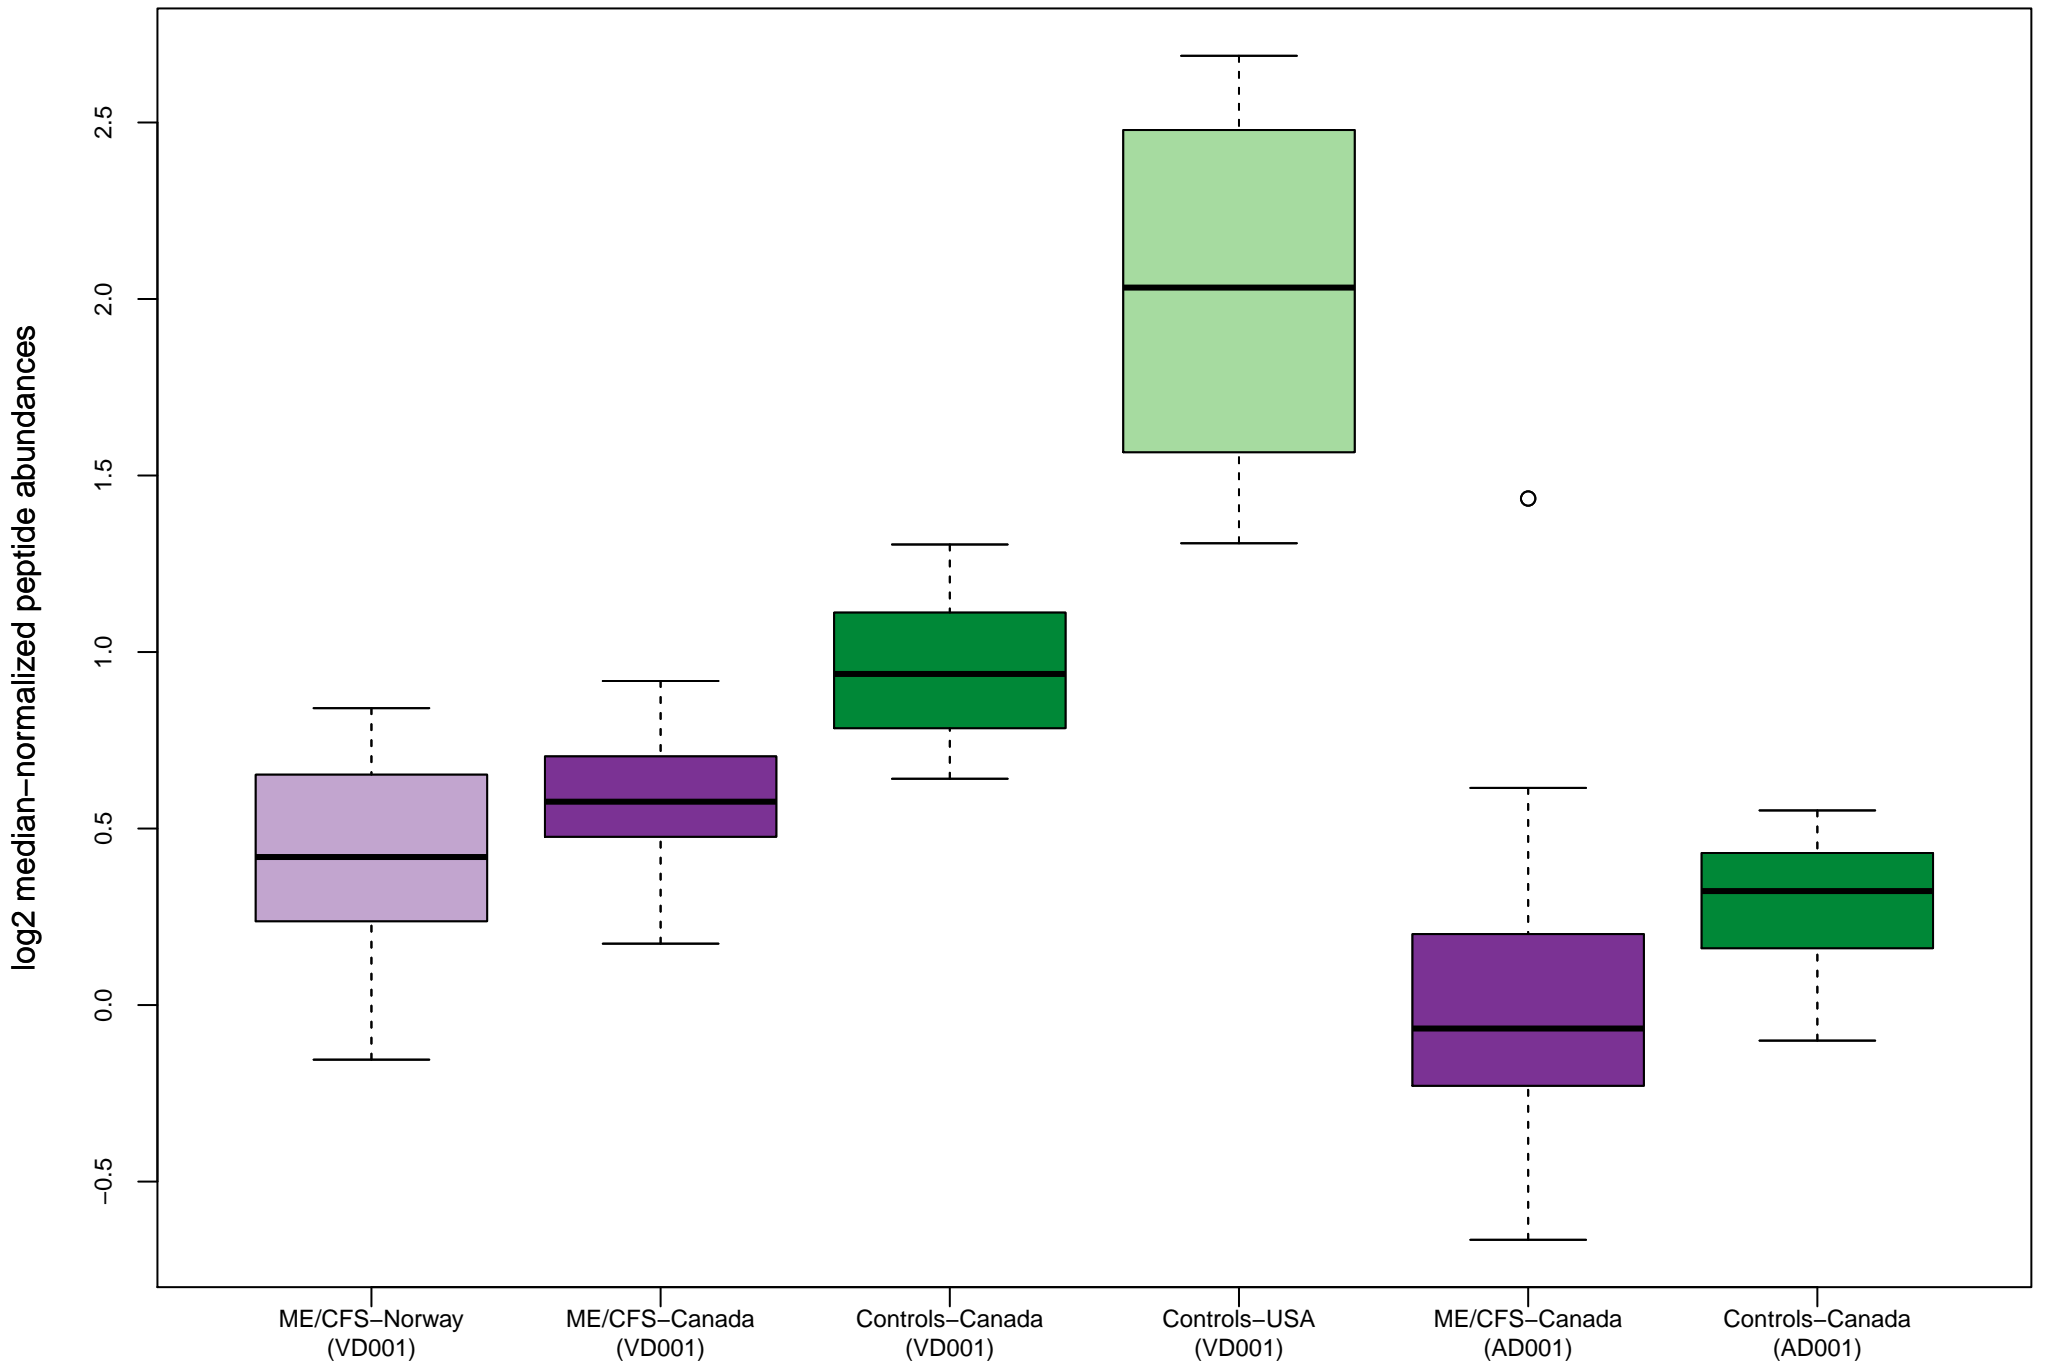

# RGRQYFEHVVAL

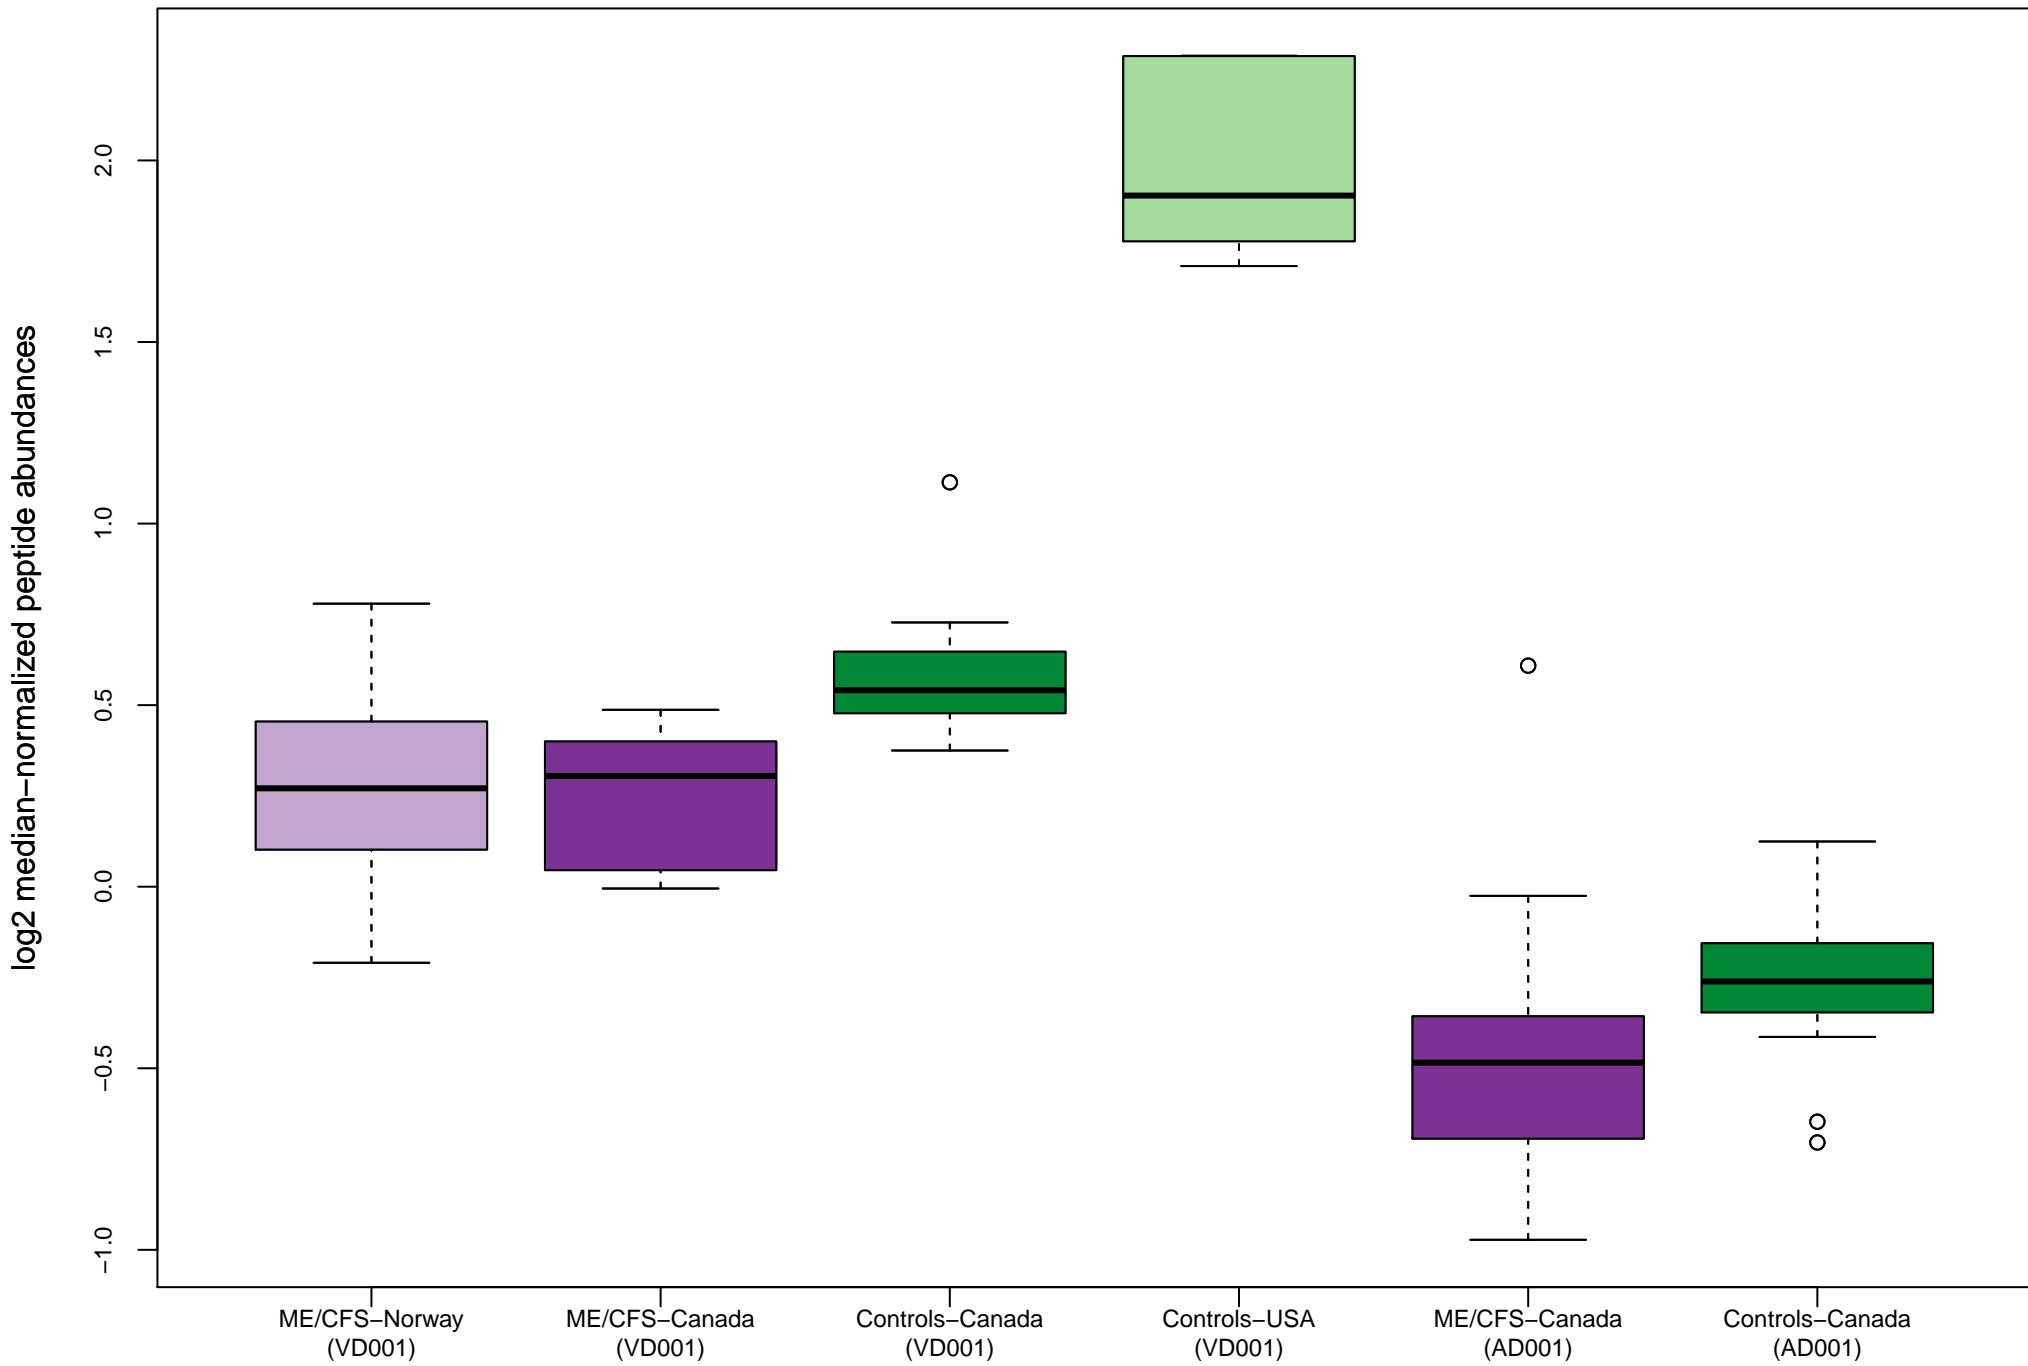

# RHWFHQFRLGAL

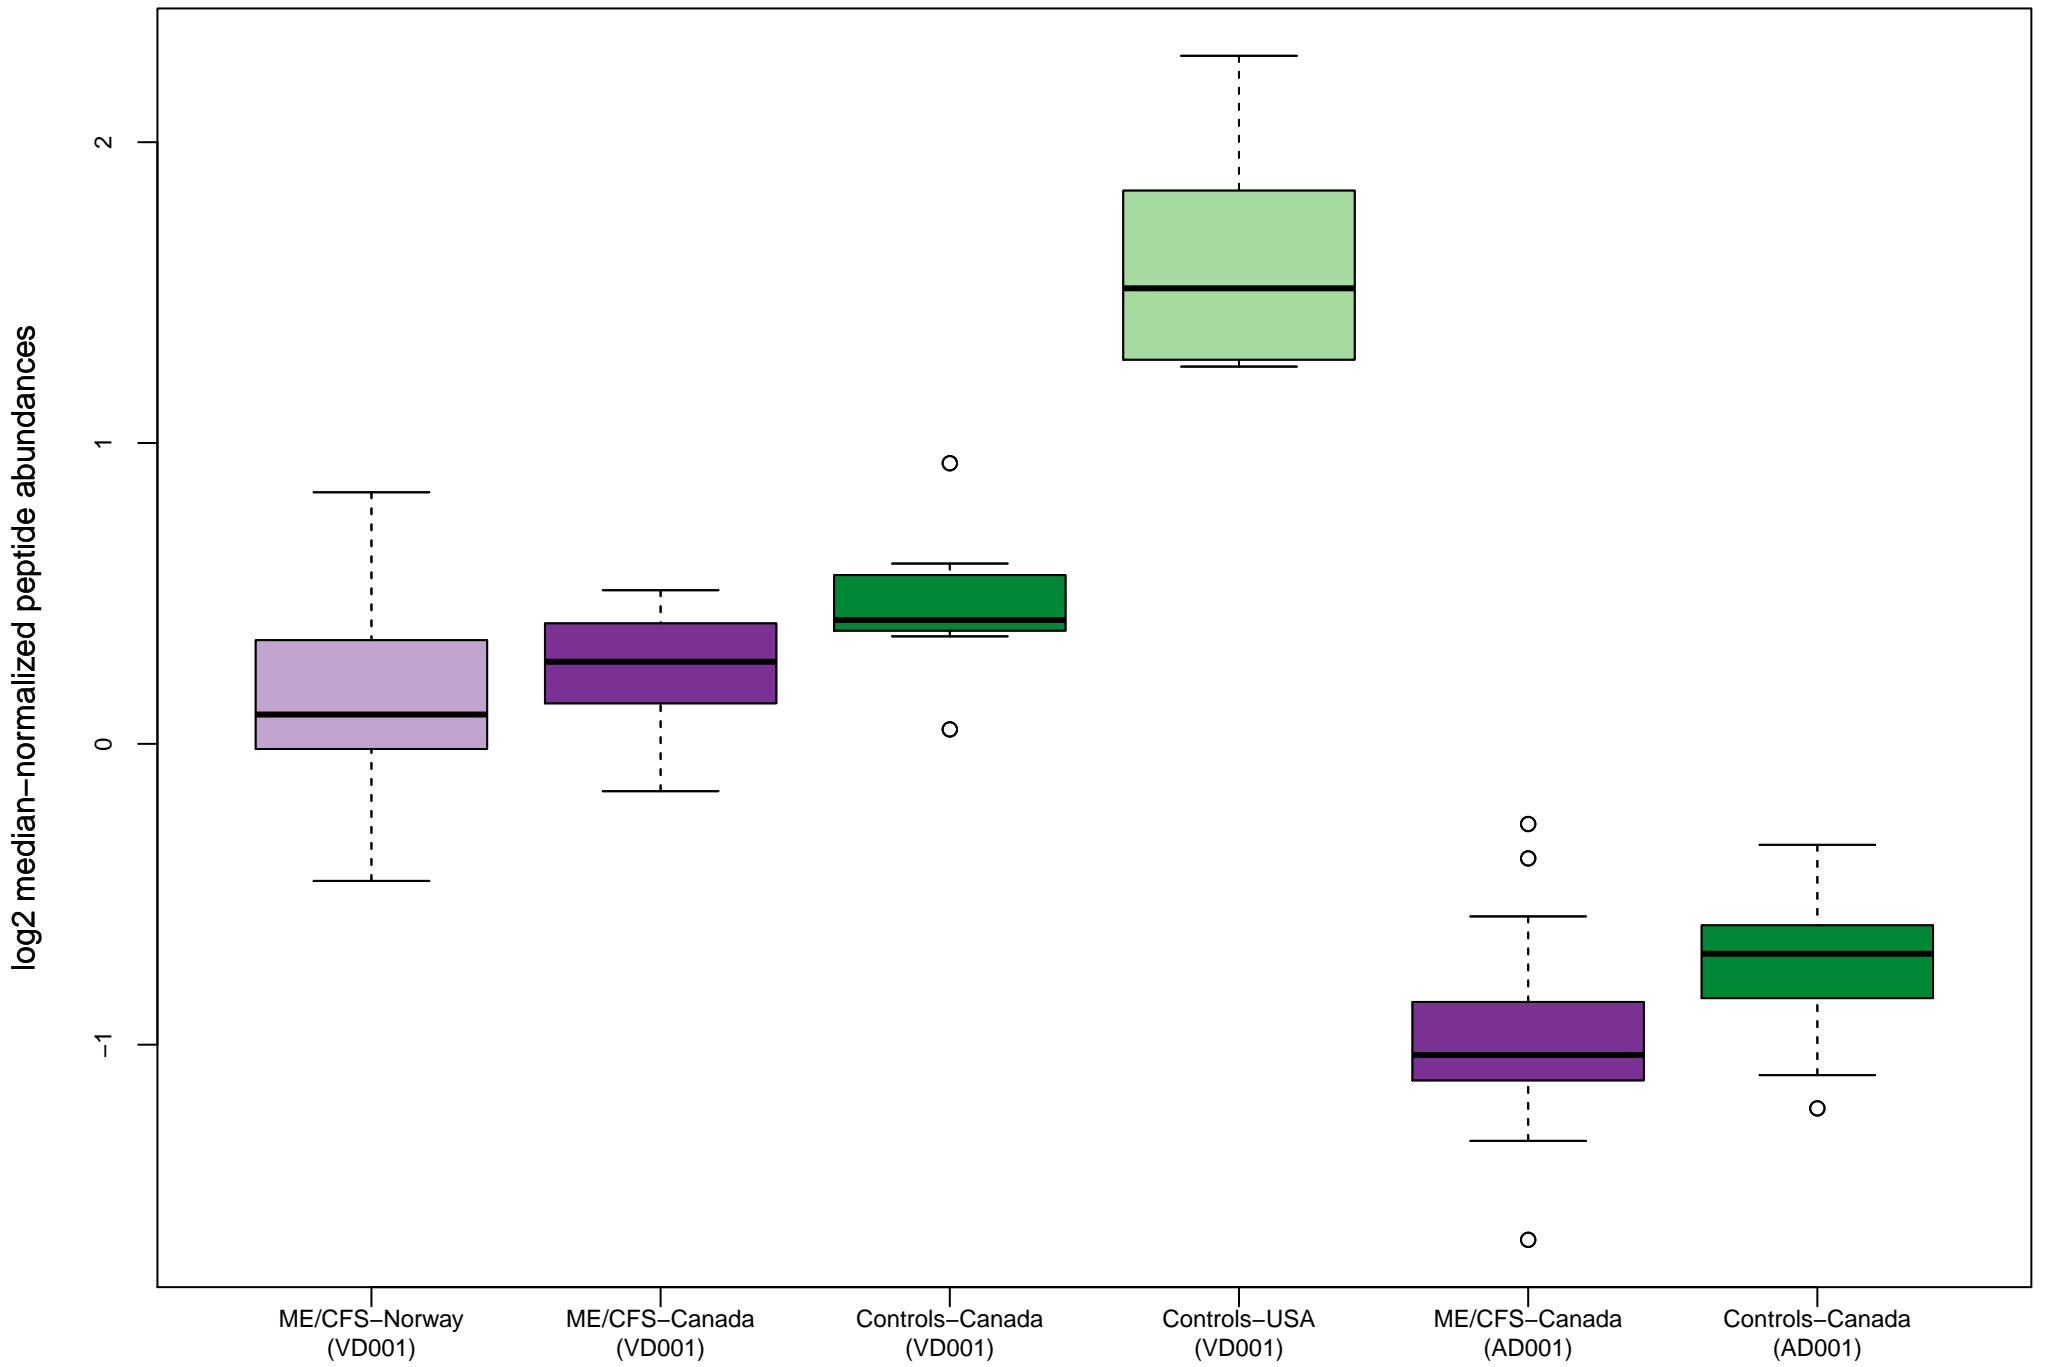

# RHYRQFYWNLSA

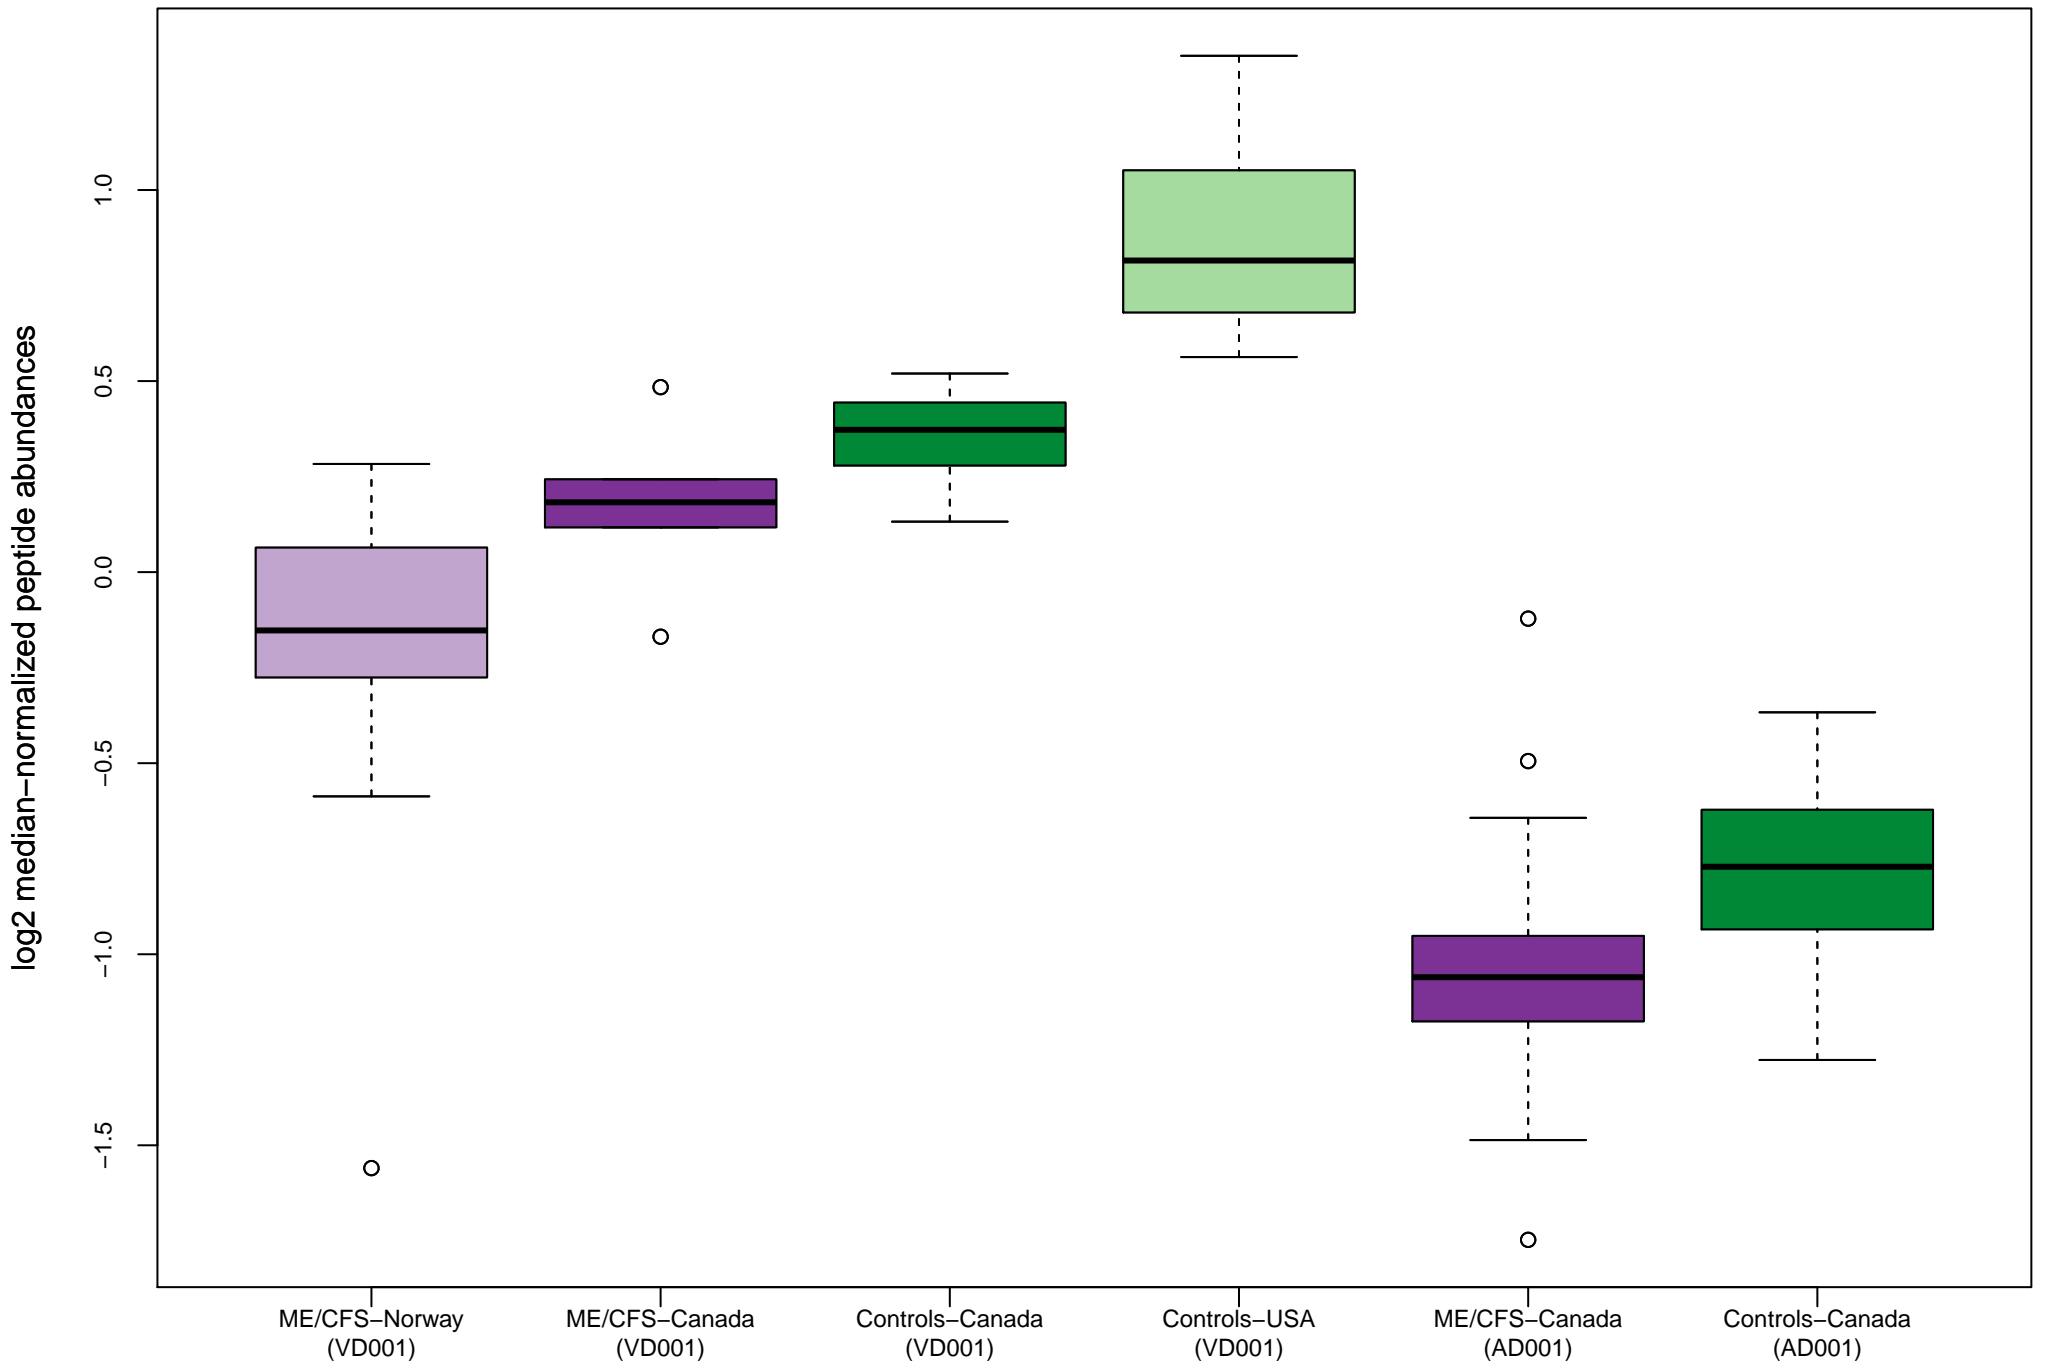

# RKLWNLFSQYAL

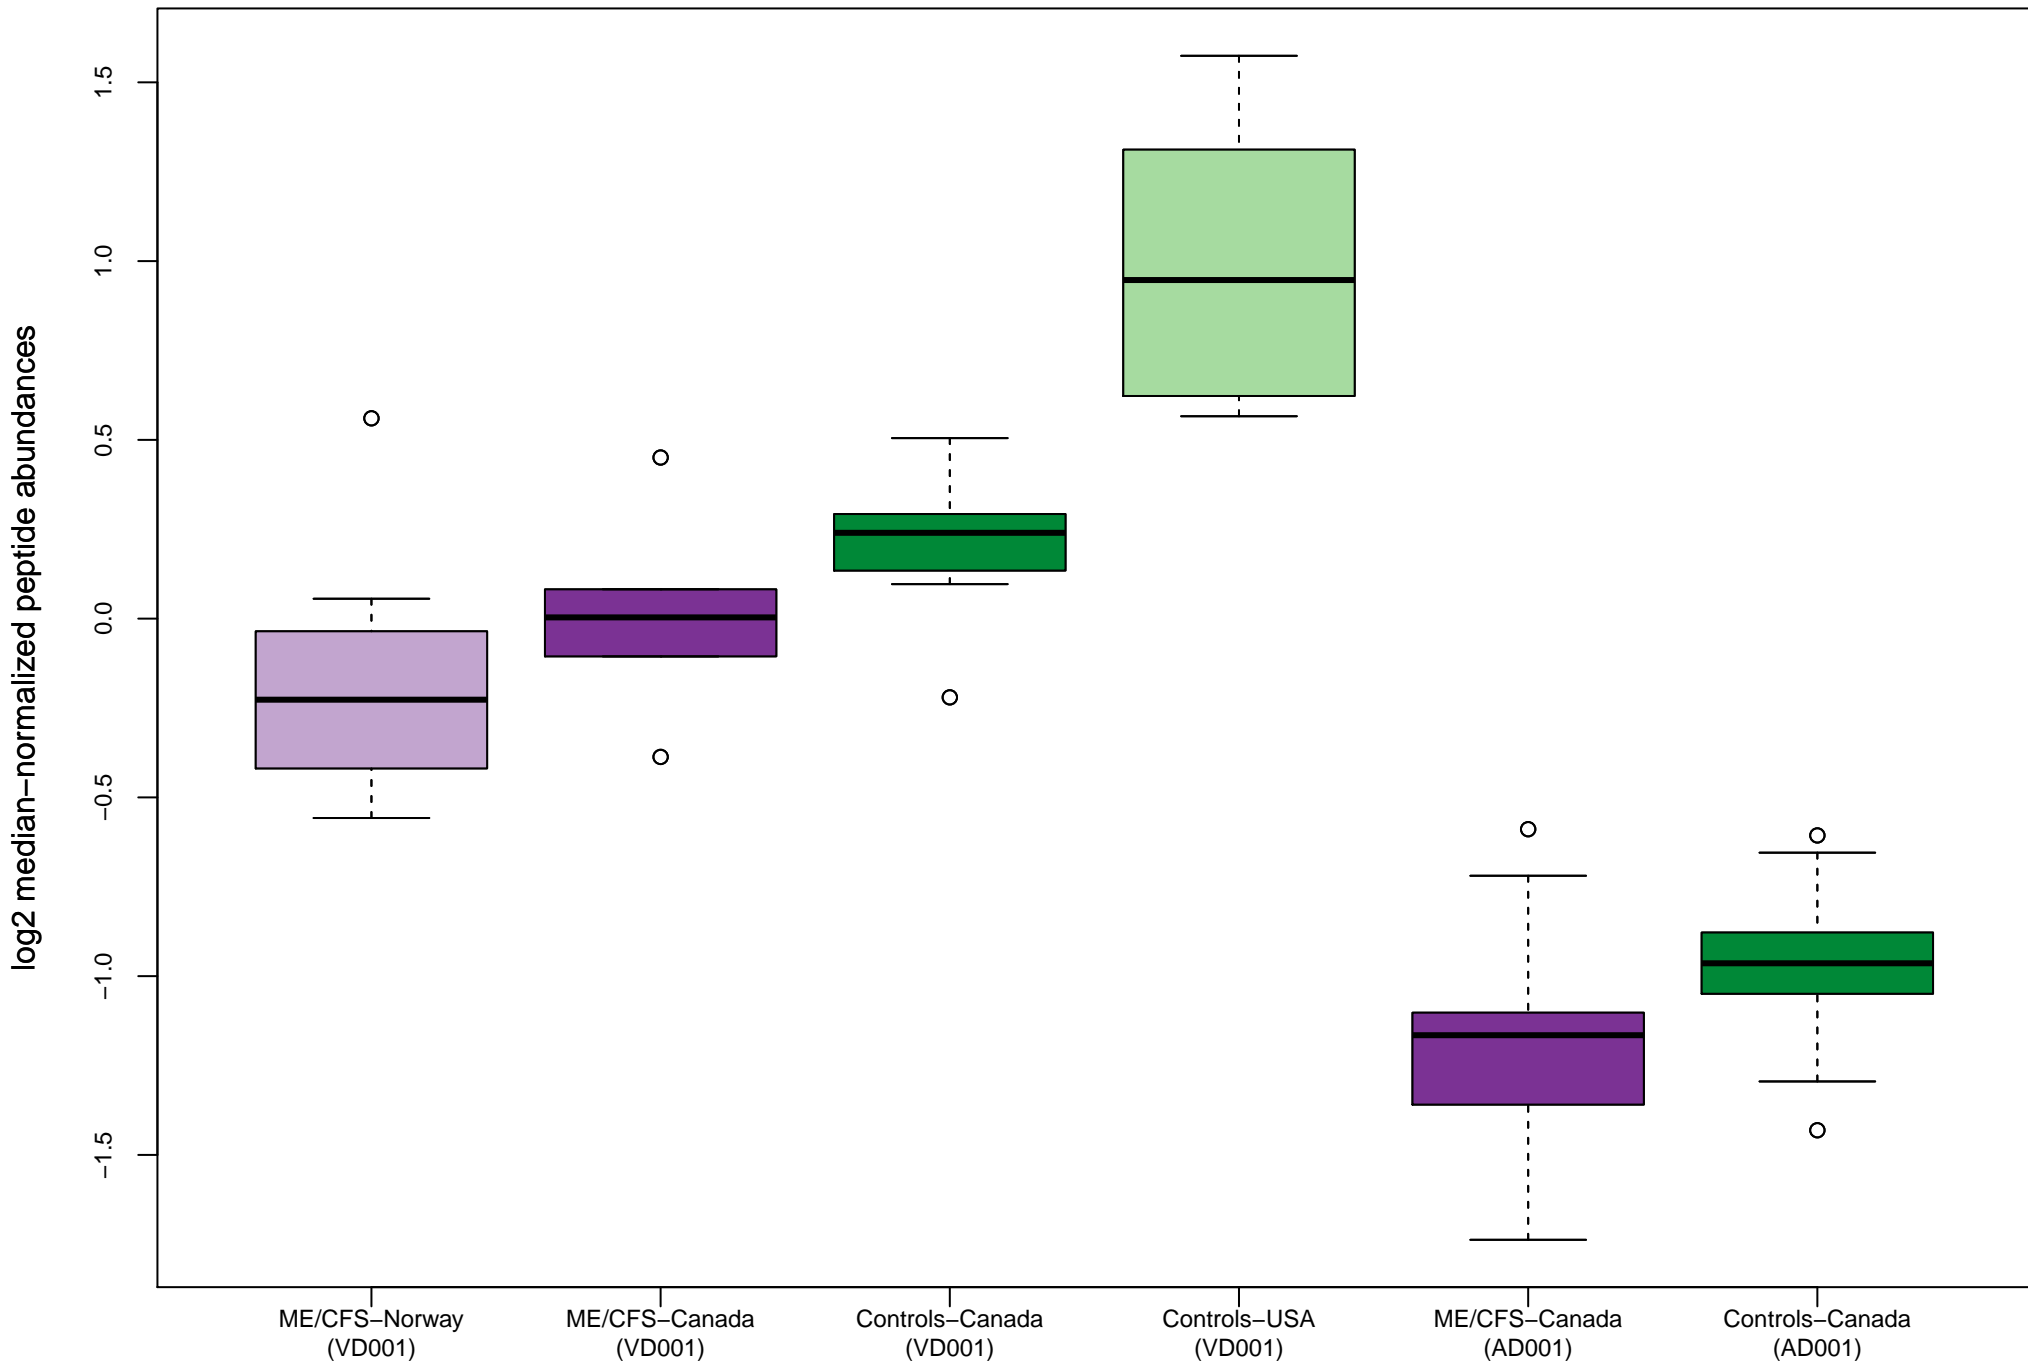

RKLYRYWFGVG

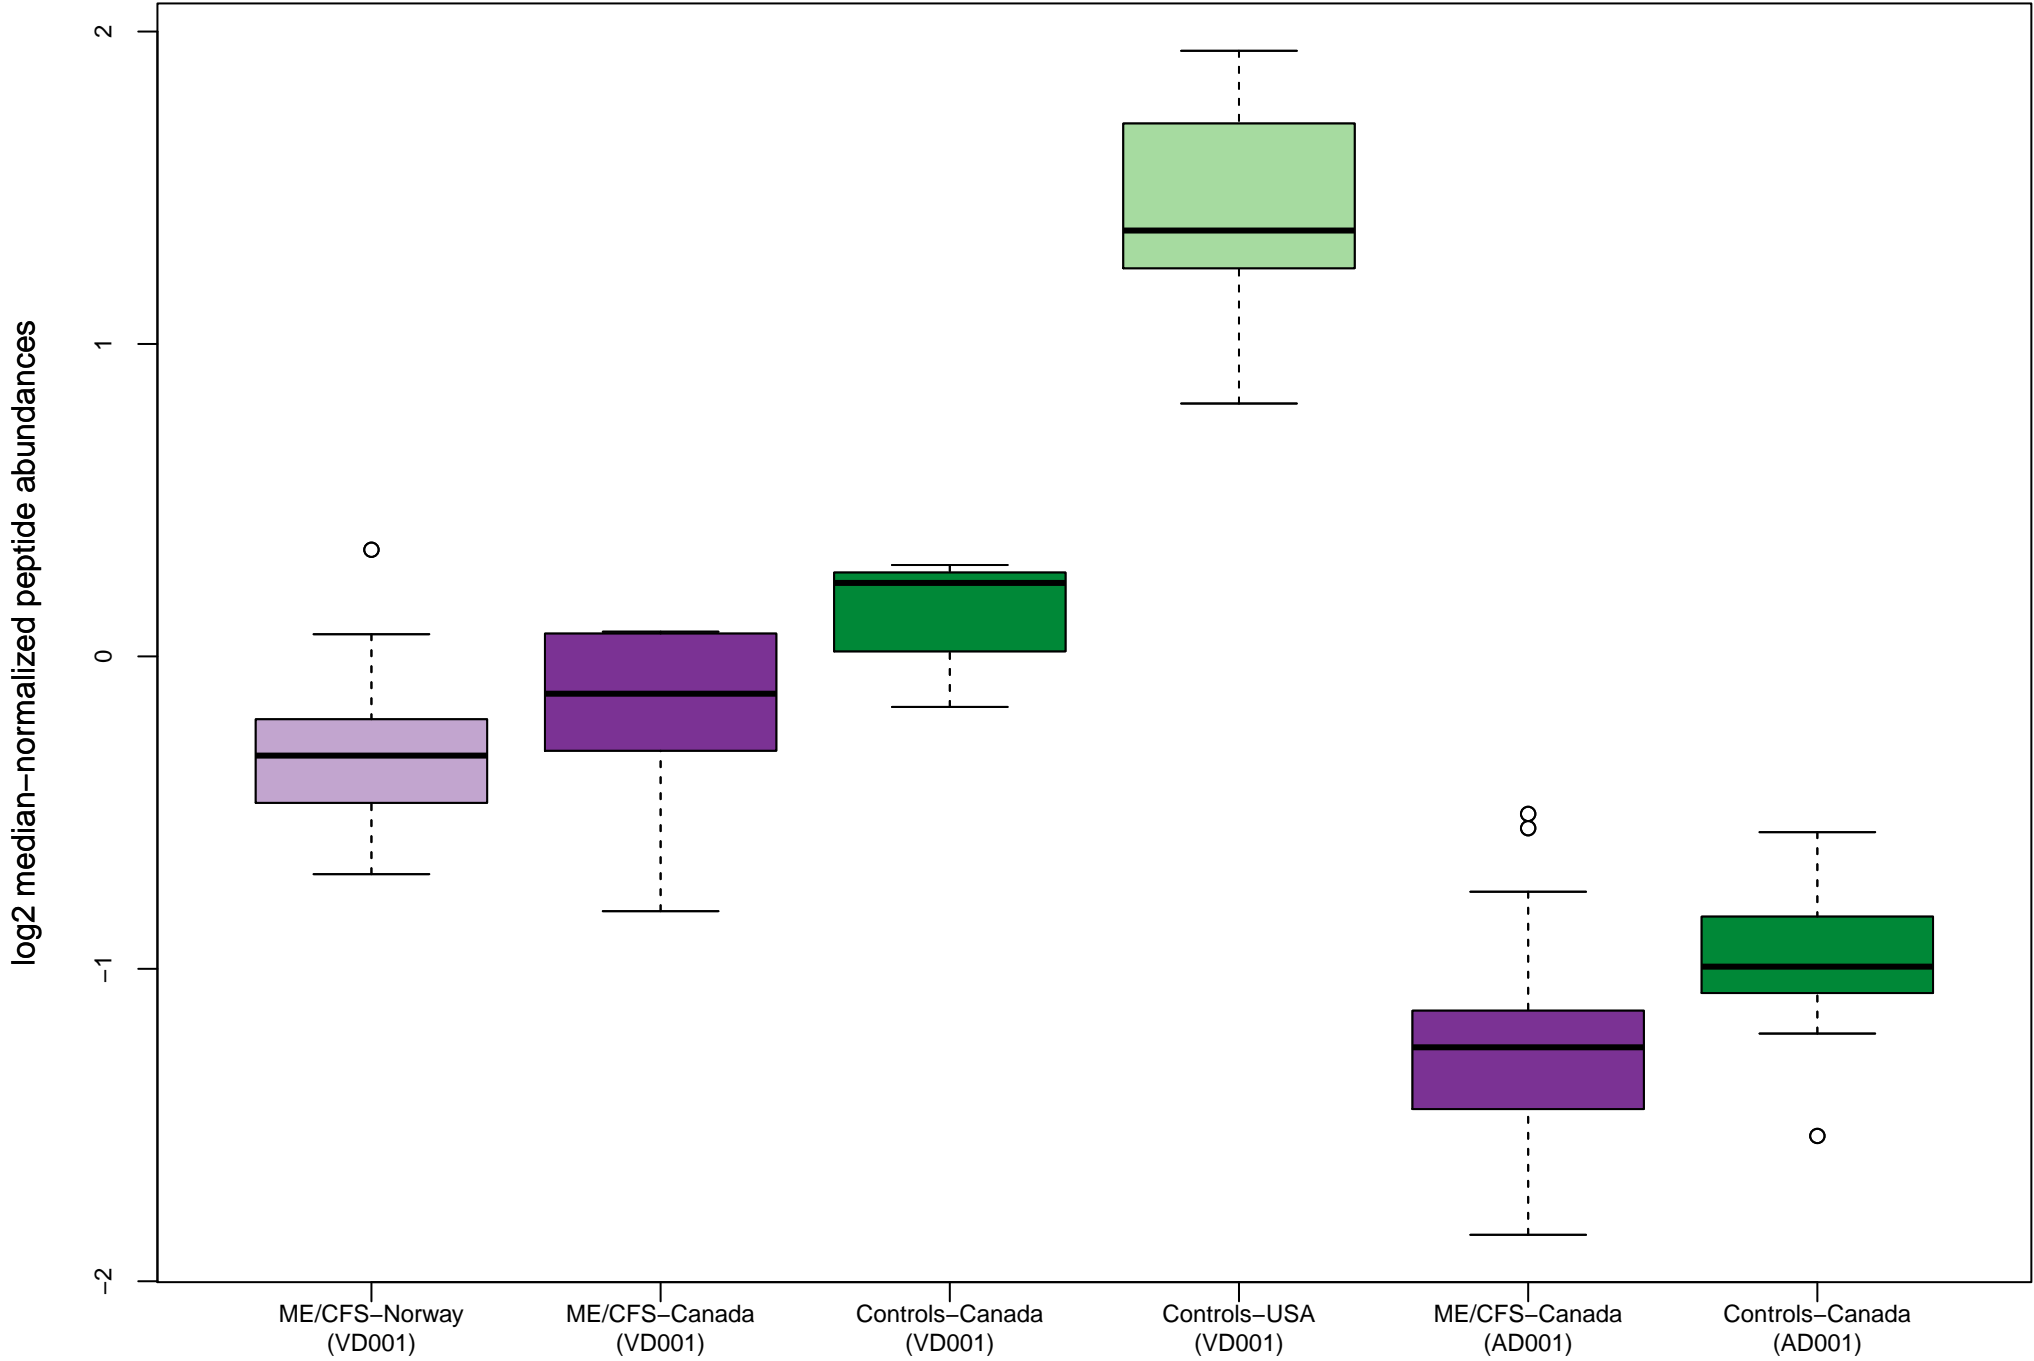



# RLALGRLYALVA

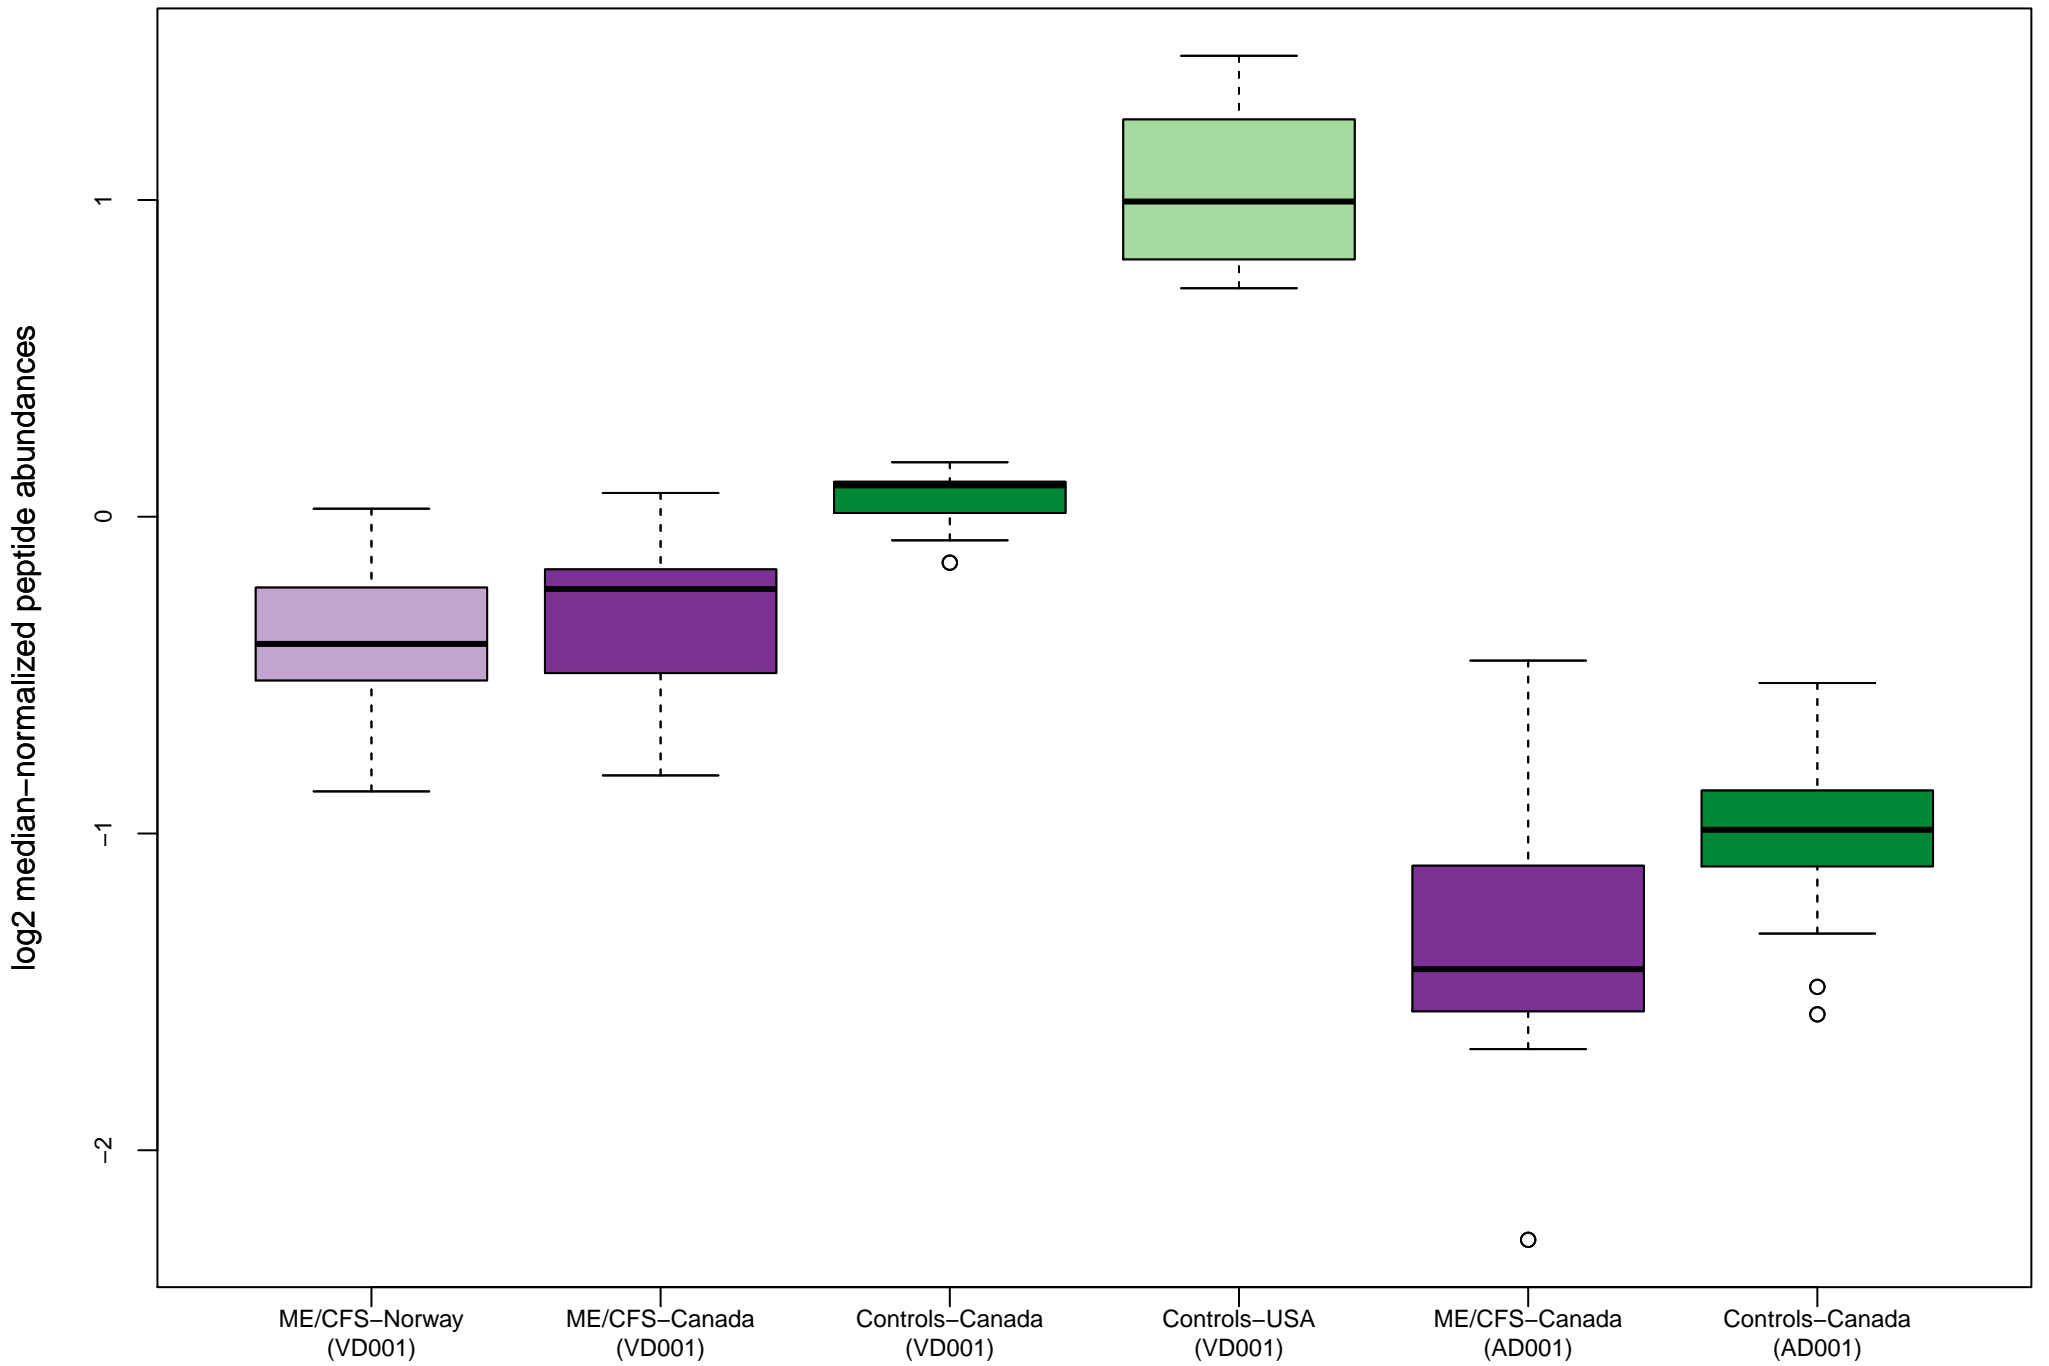

# RLEFPLRPYWLV

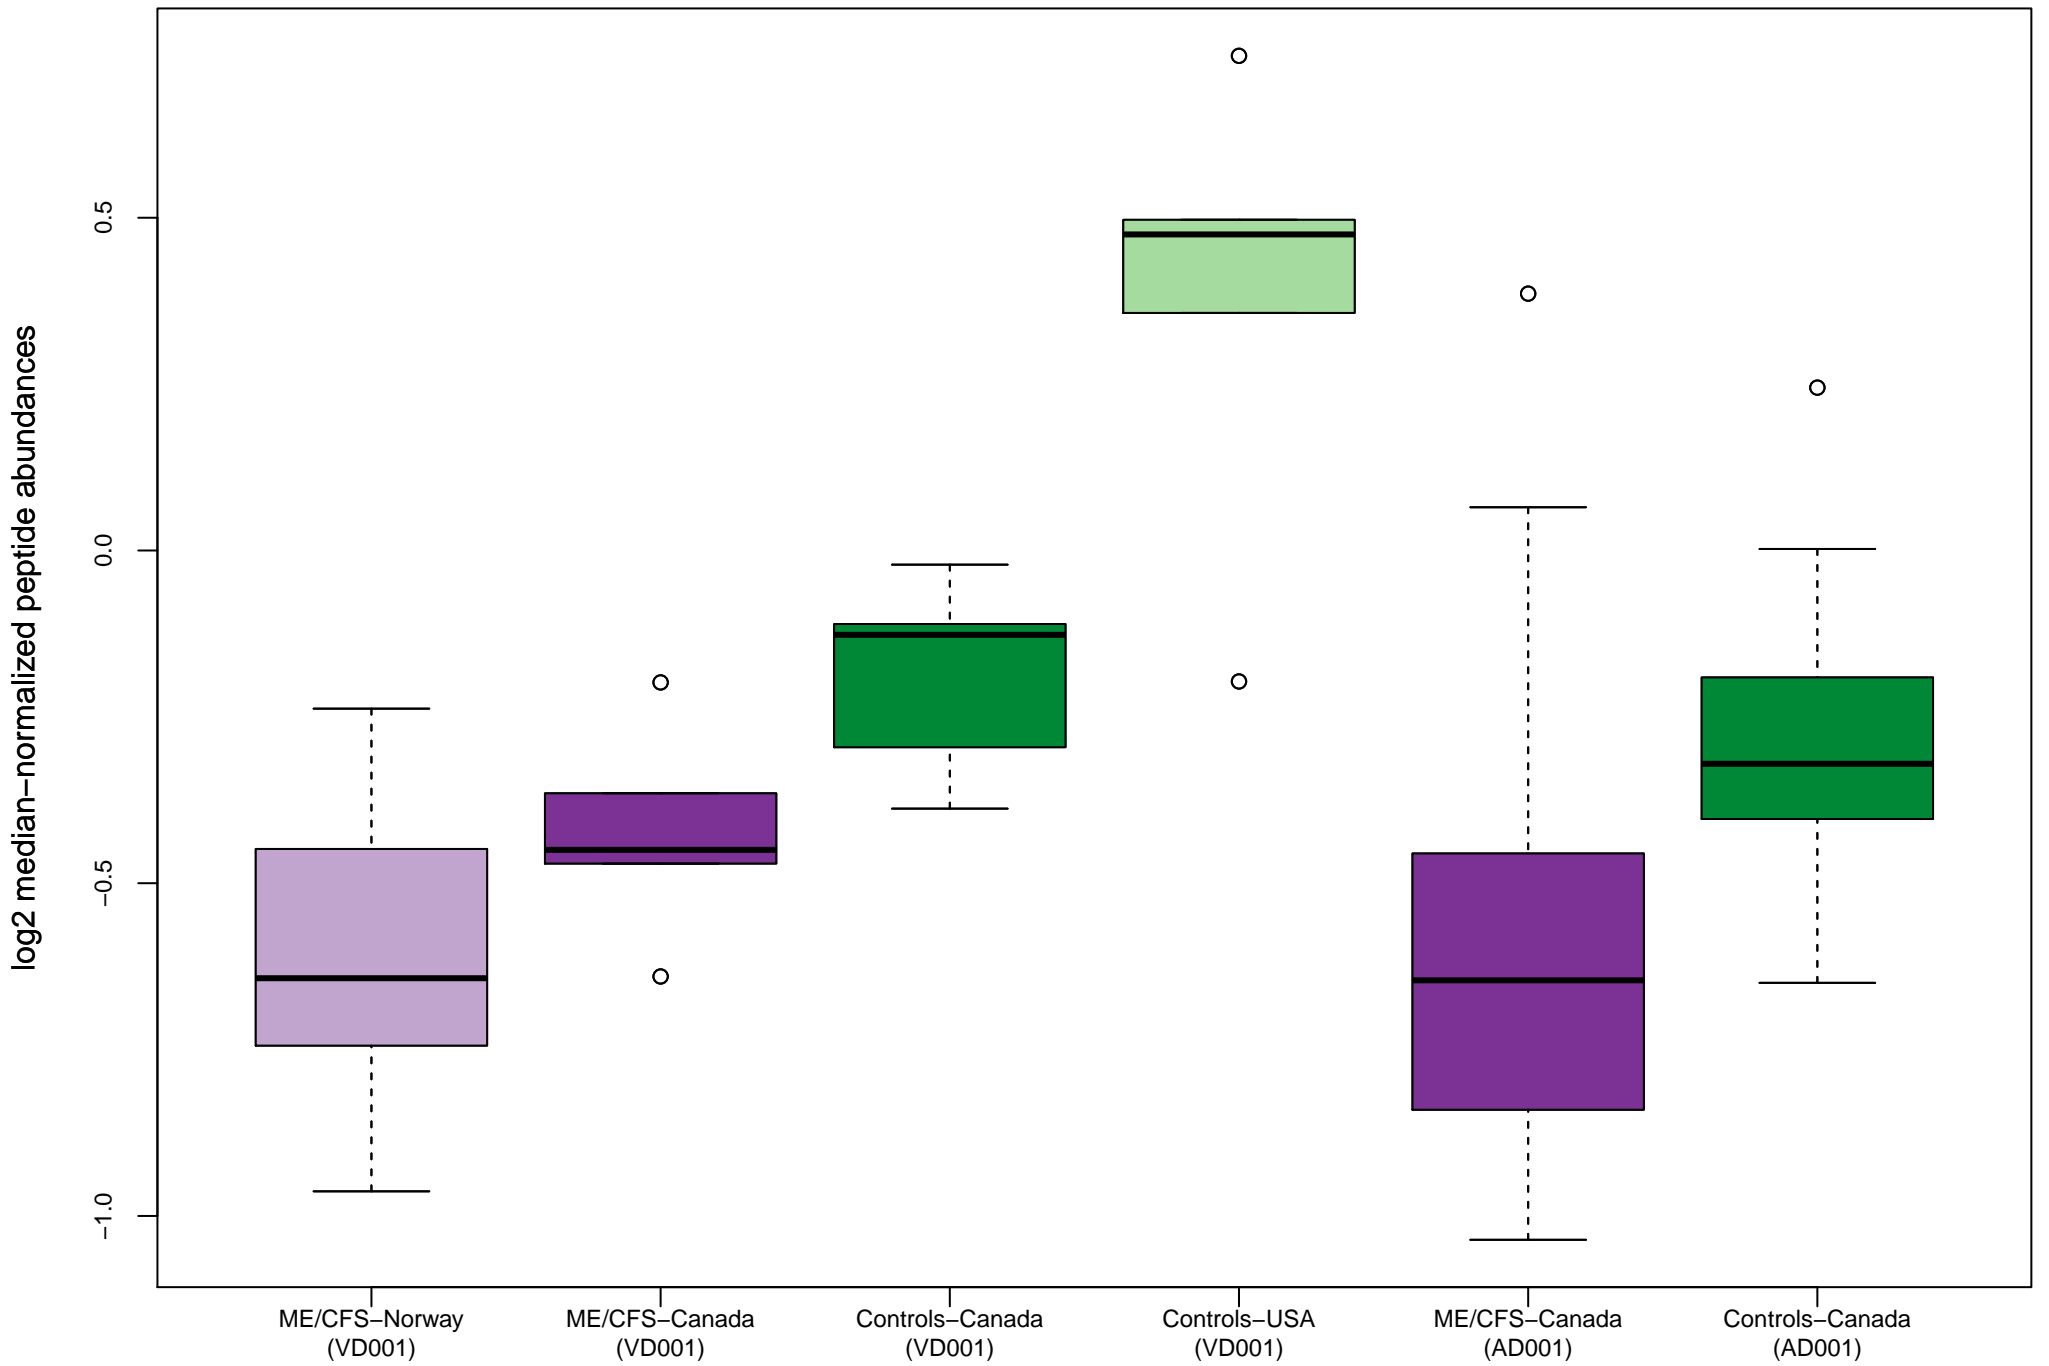

# RLENFRYQPWSL

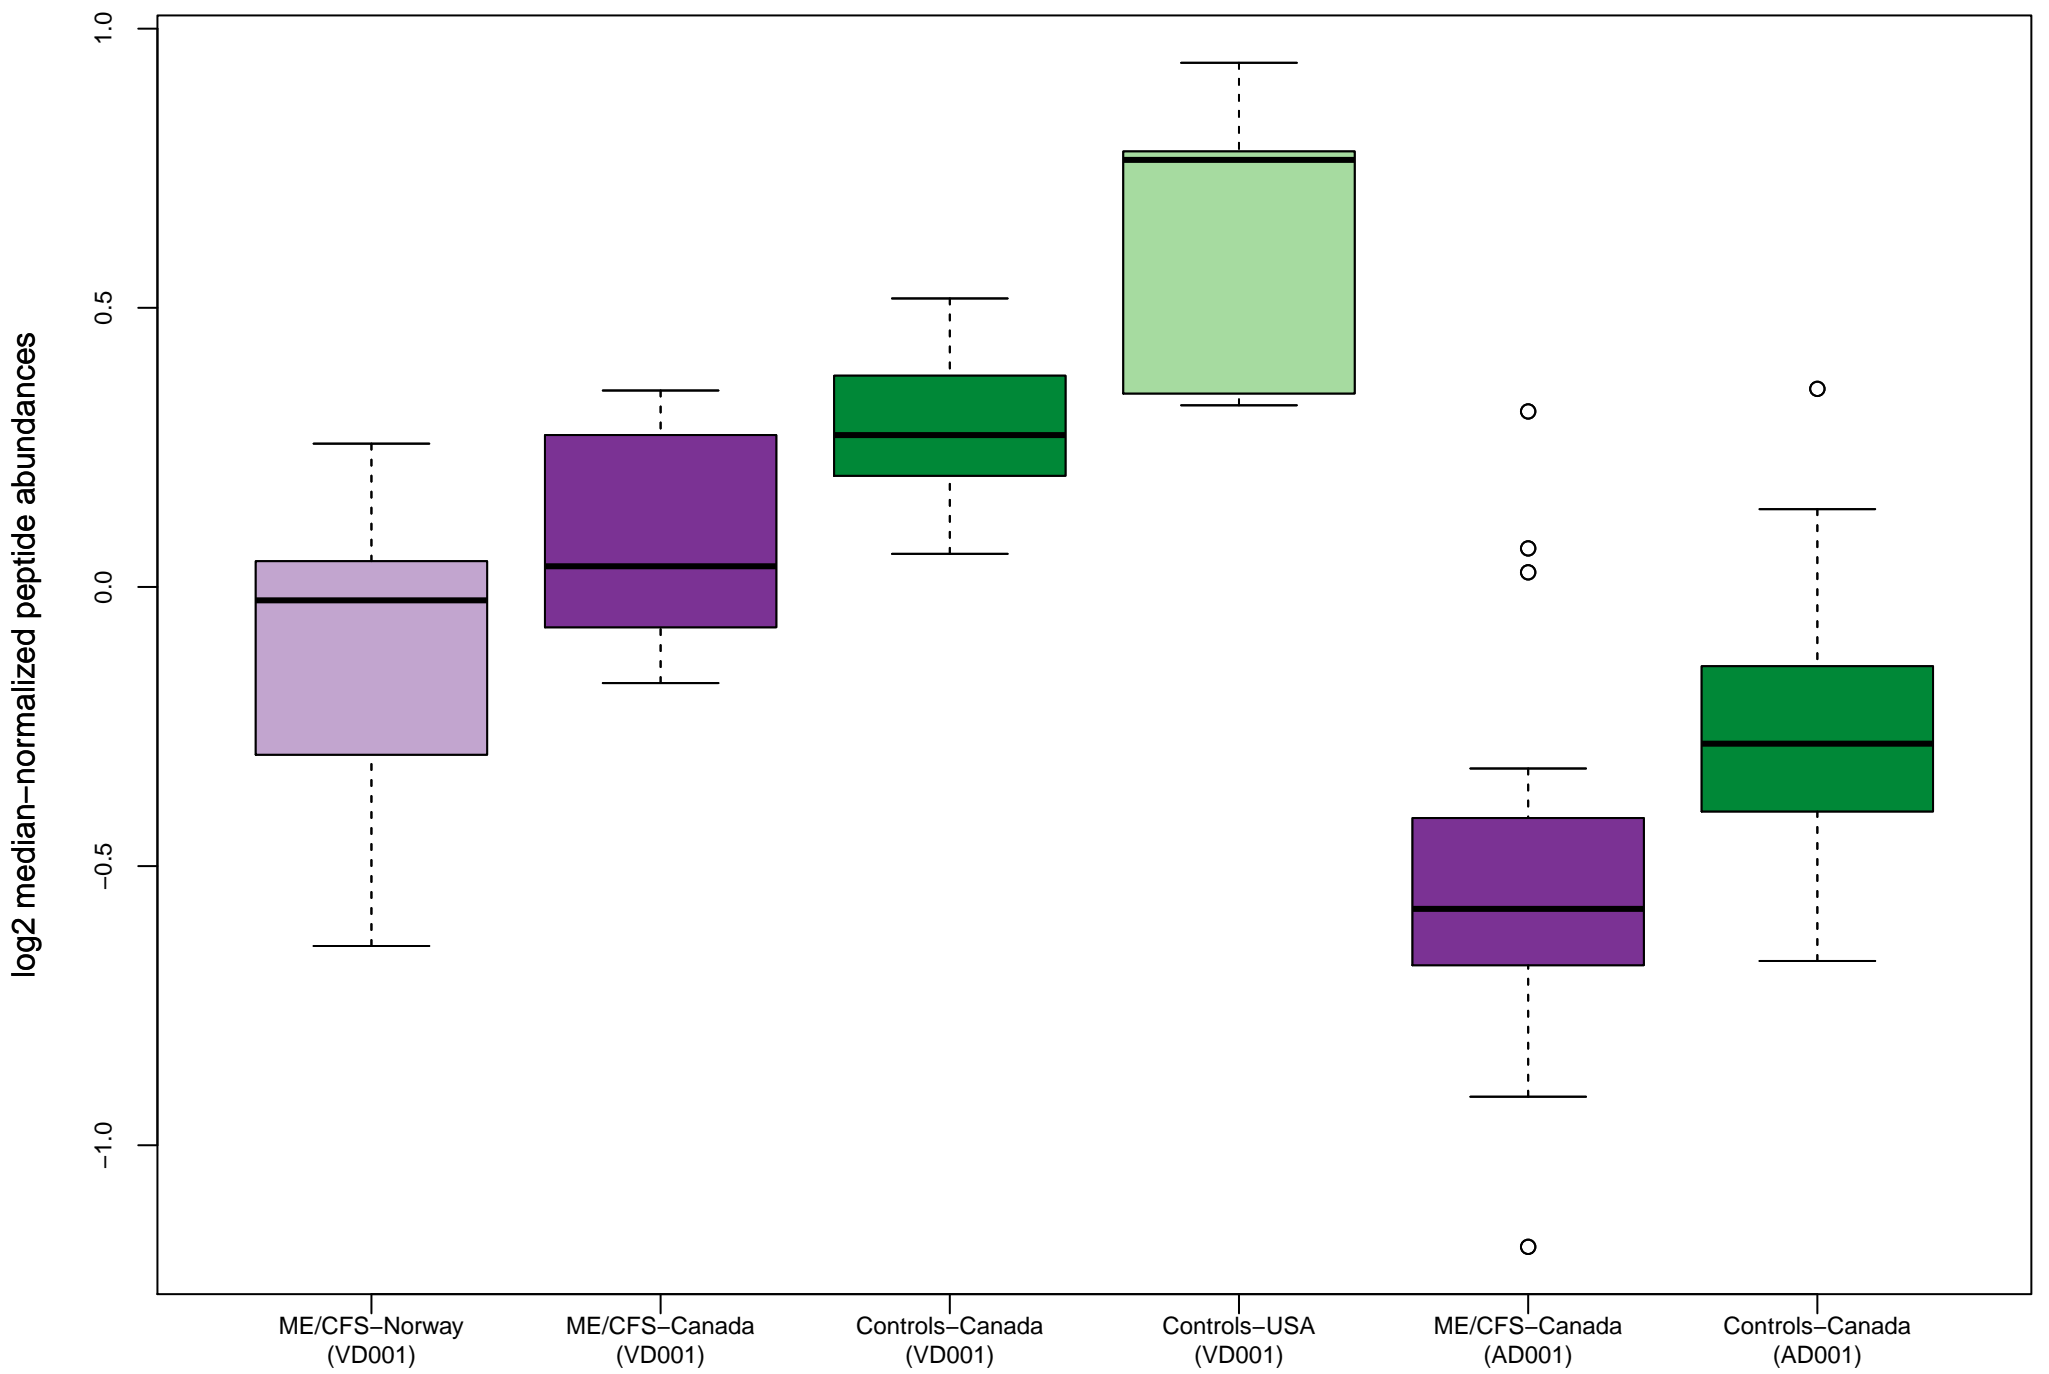

# RLFSGAFVASGA

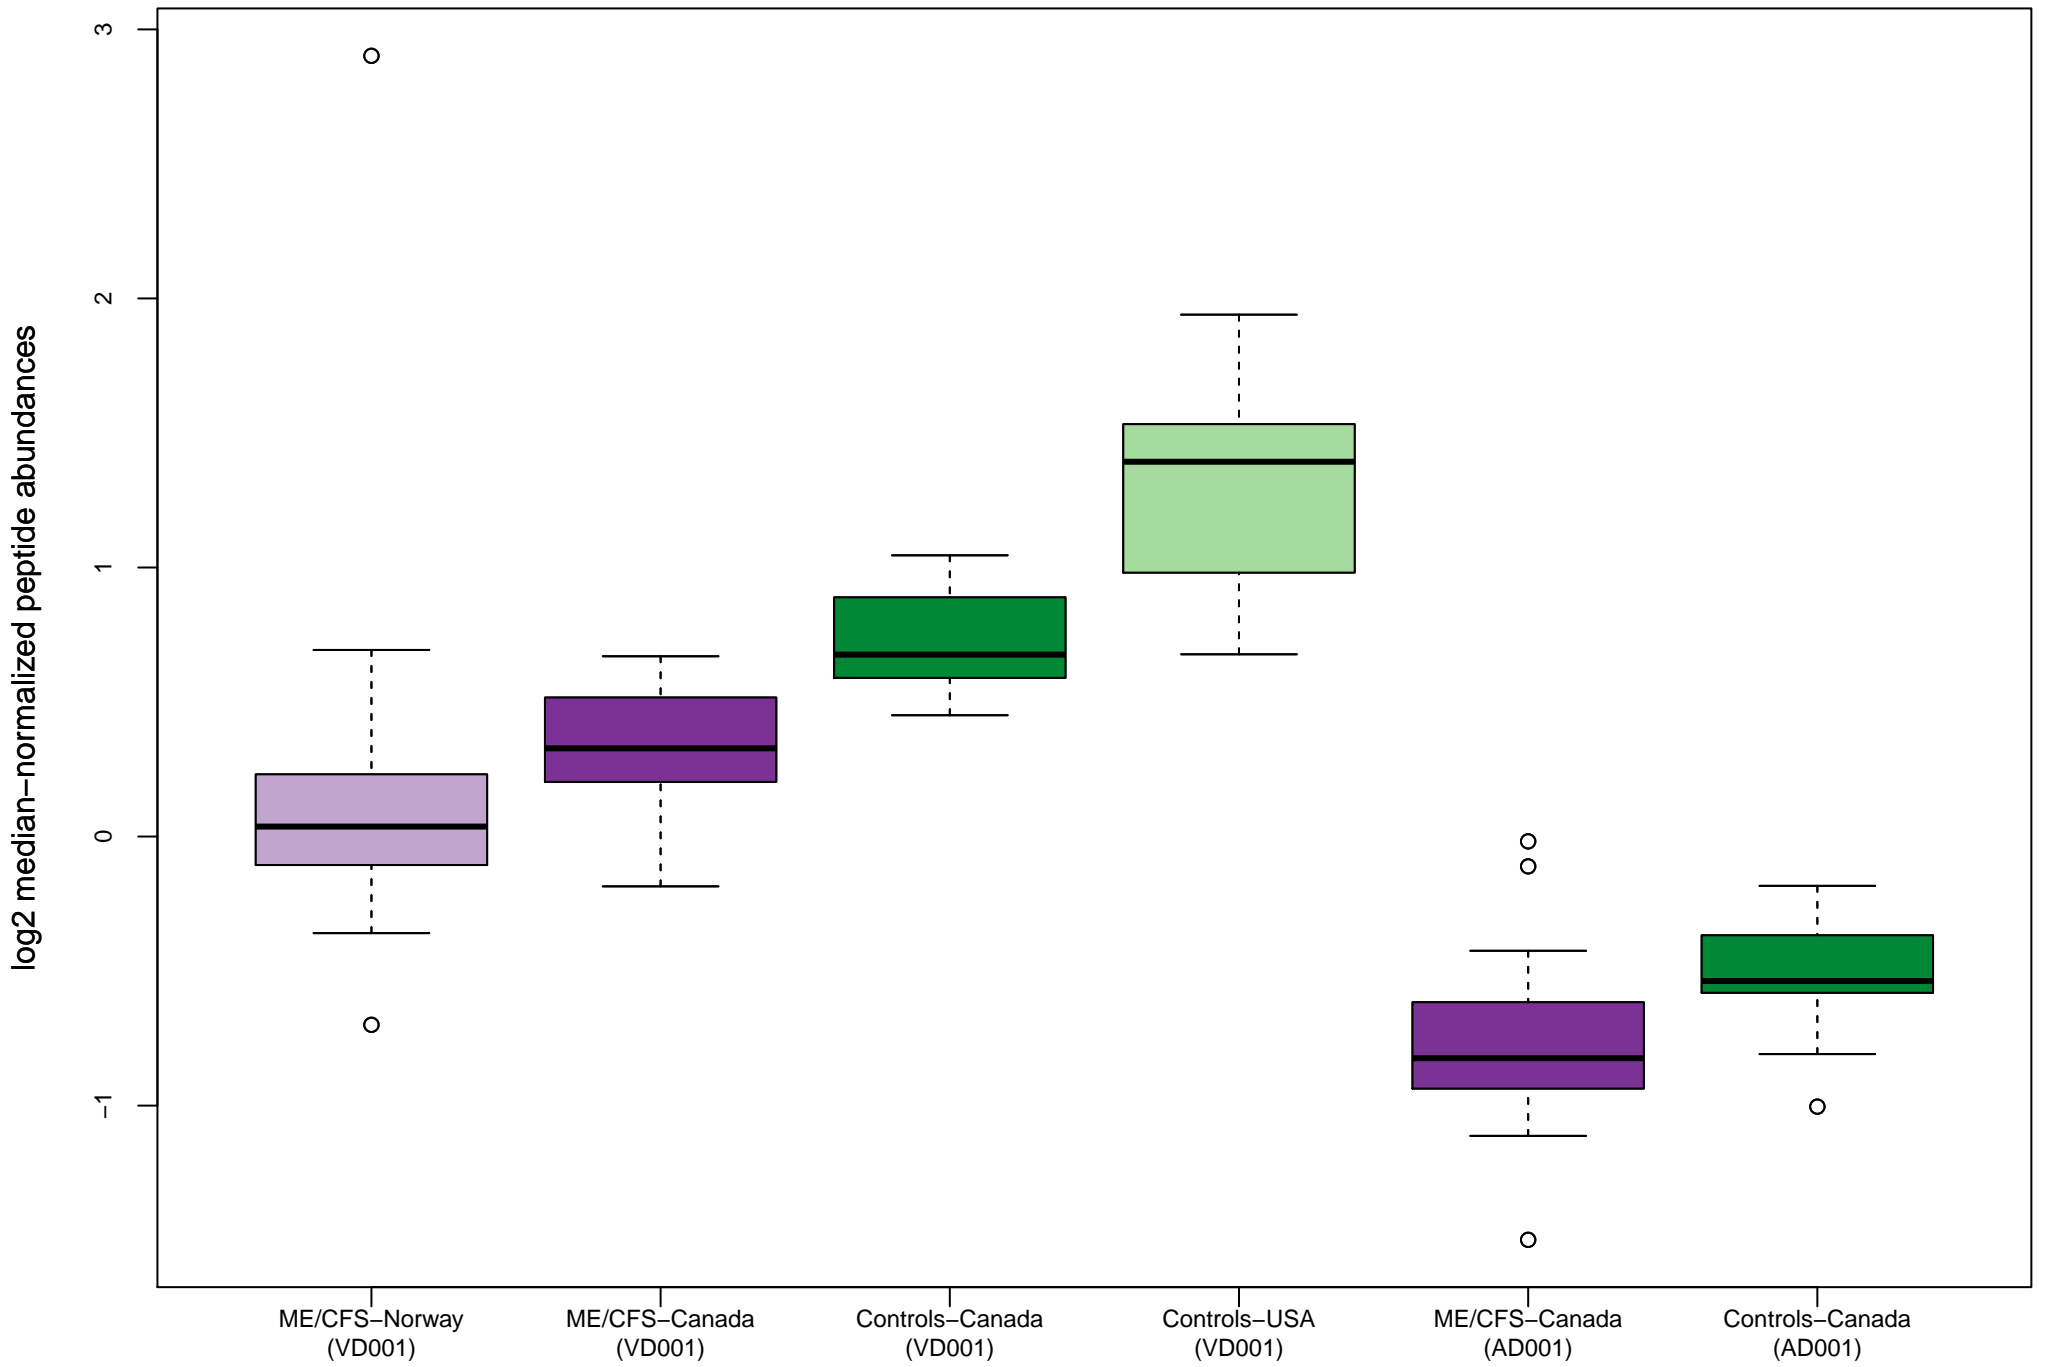

# RLGYYNKLVLSG

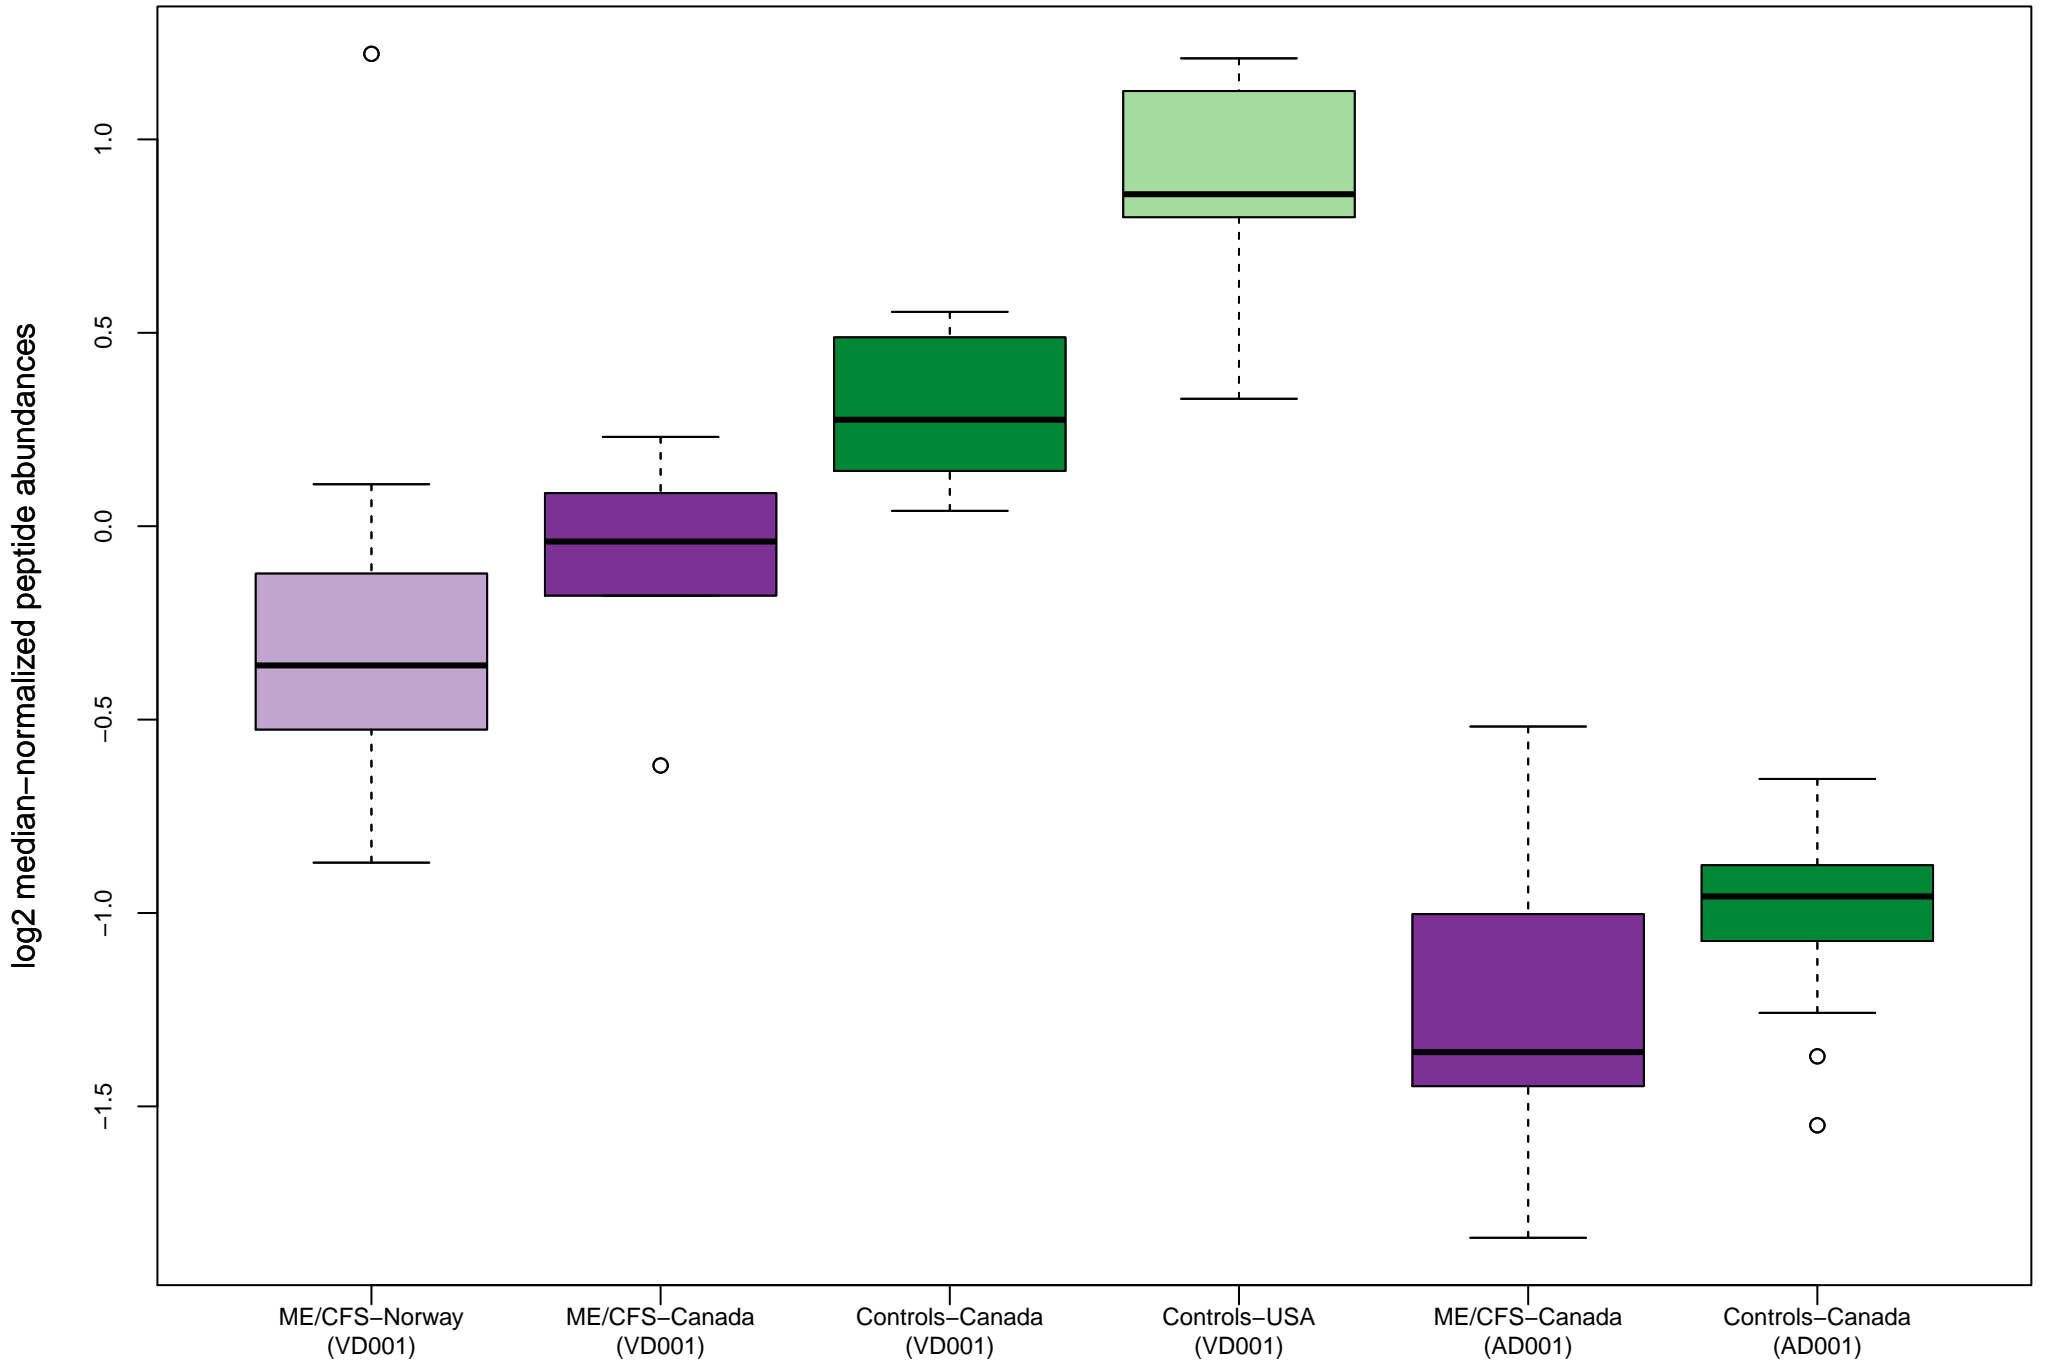

# RLRHSVSYVLG

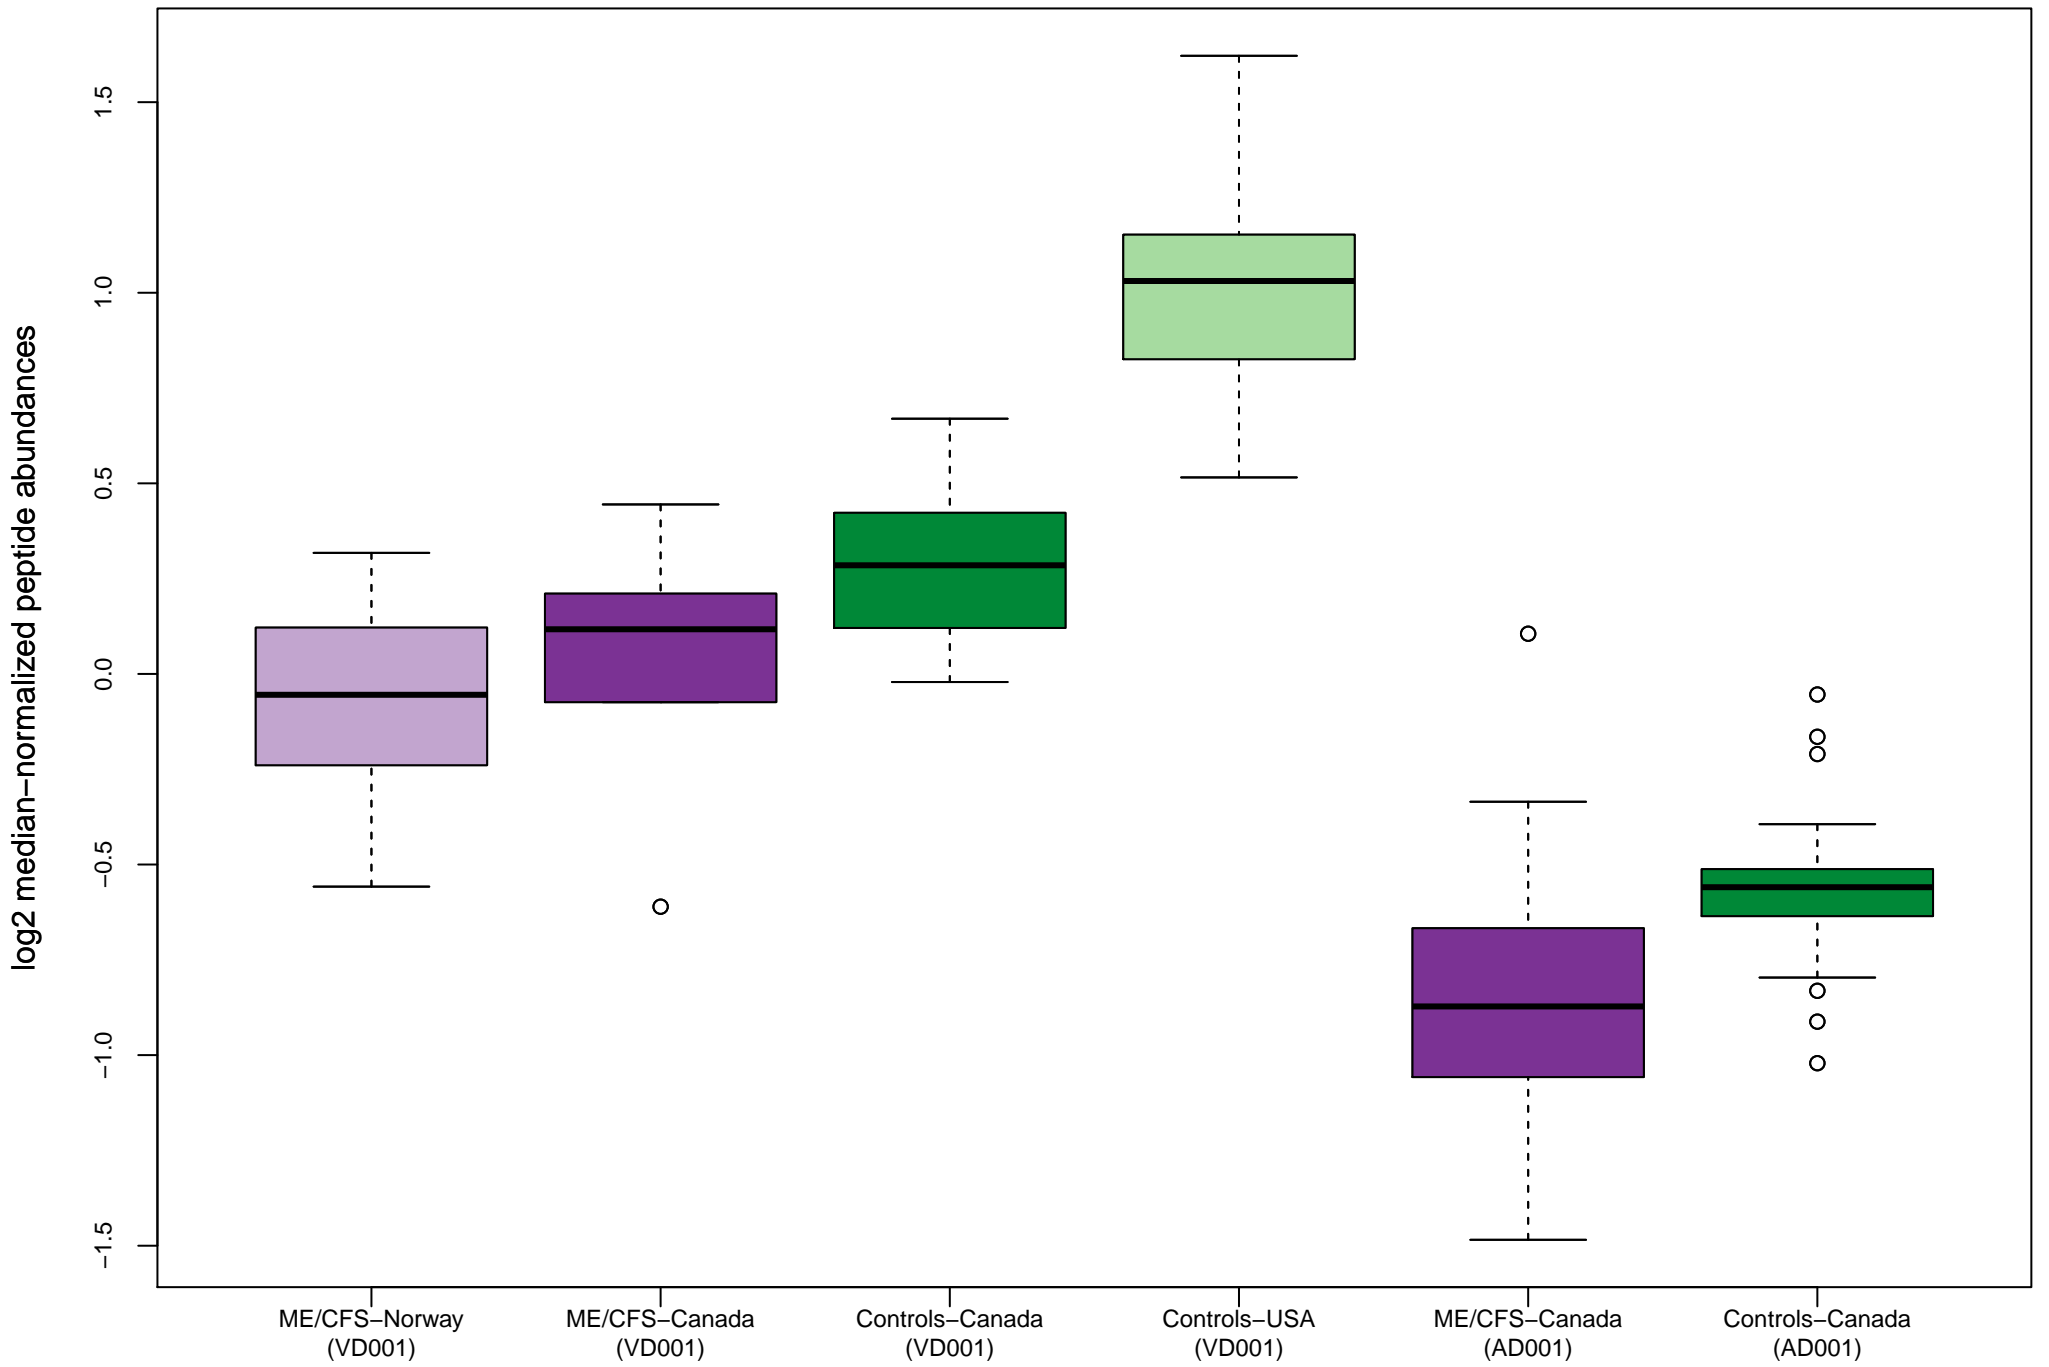

# RLSRWGPYWLNV

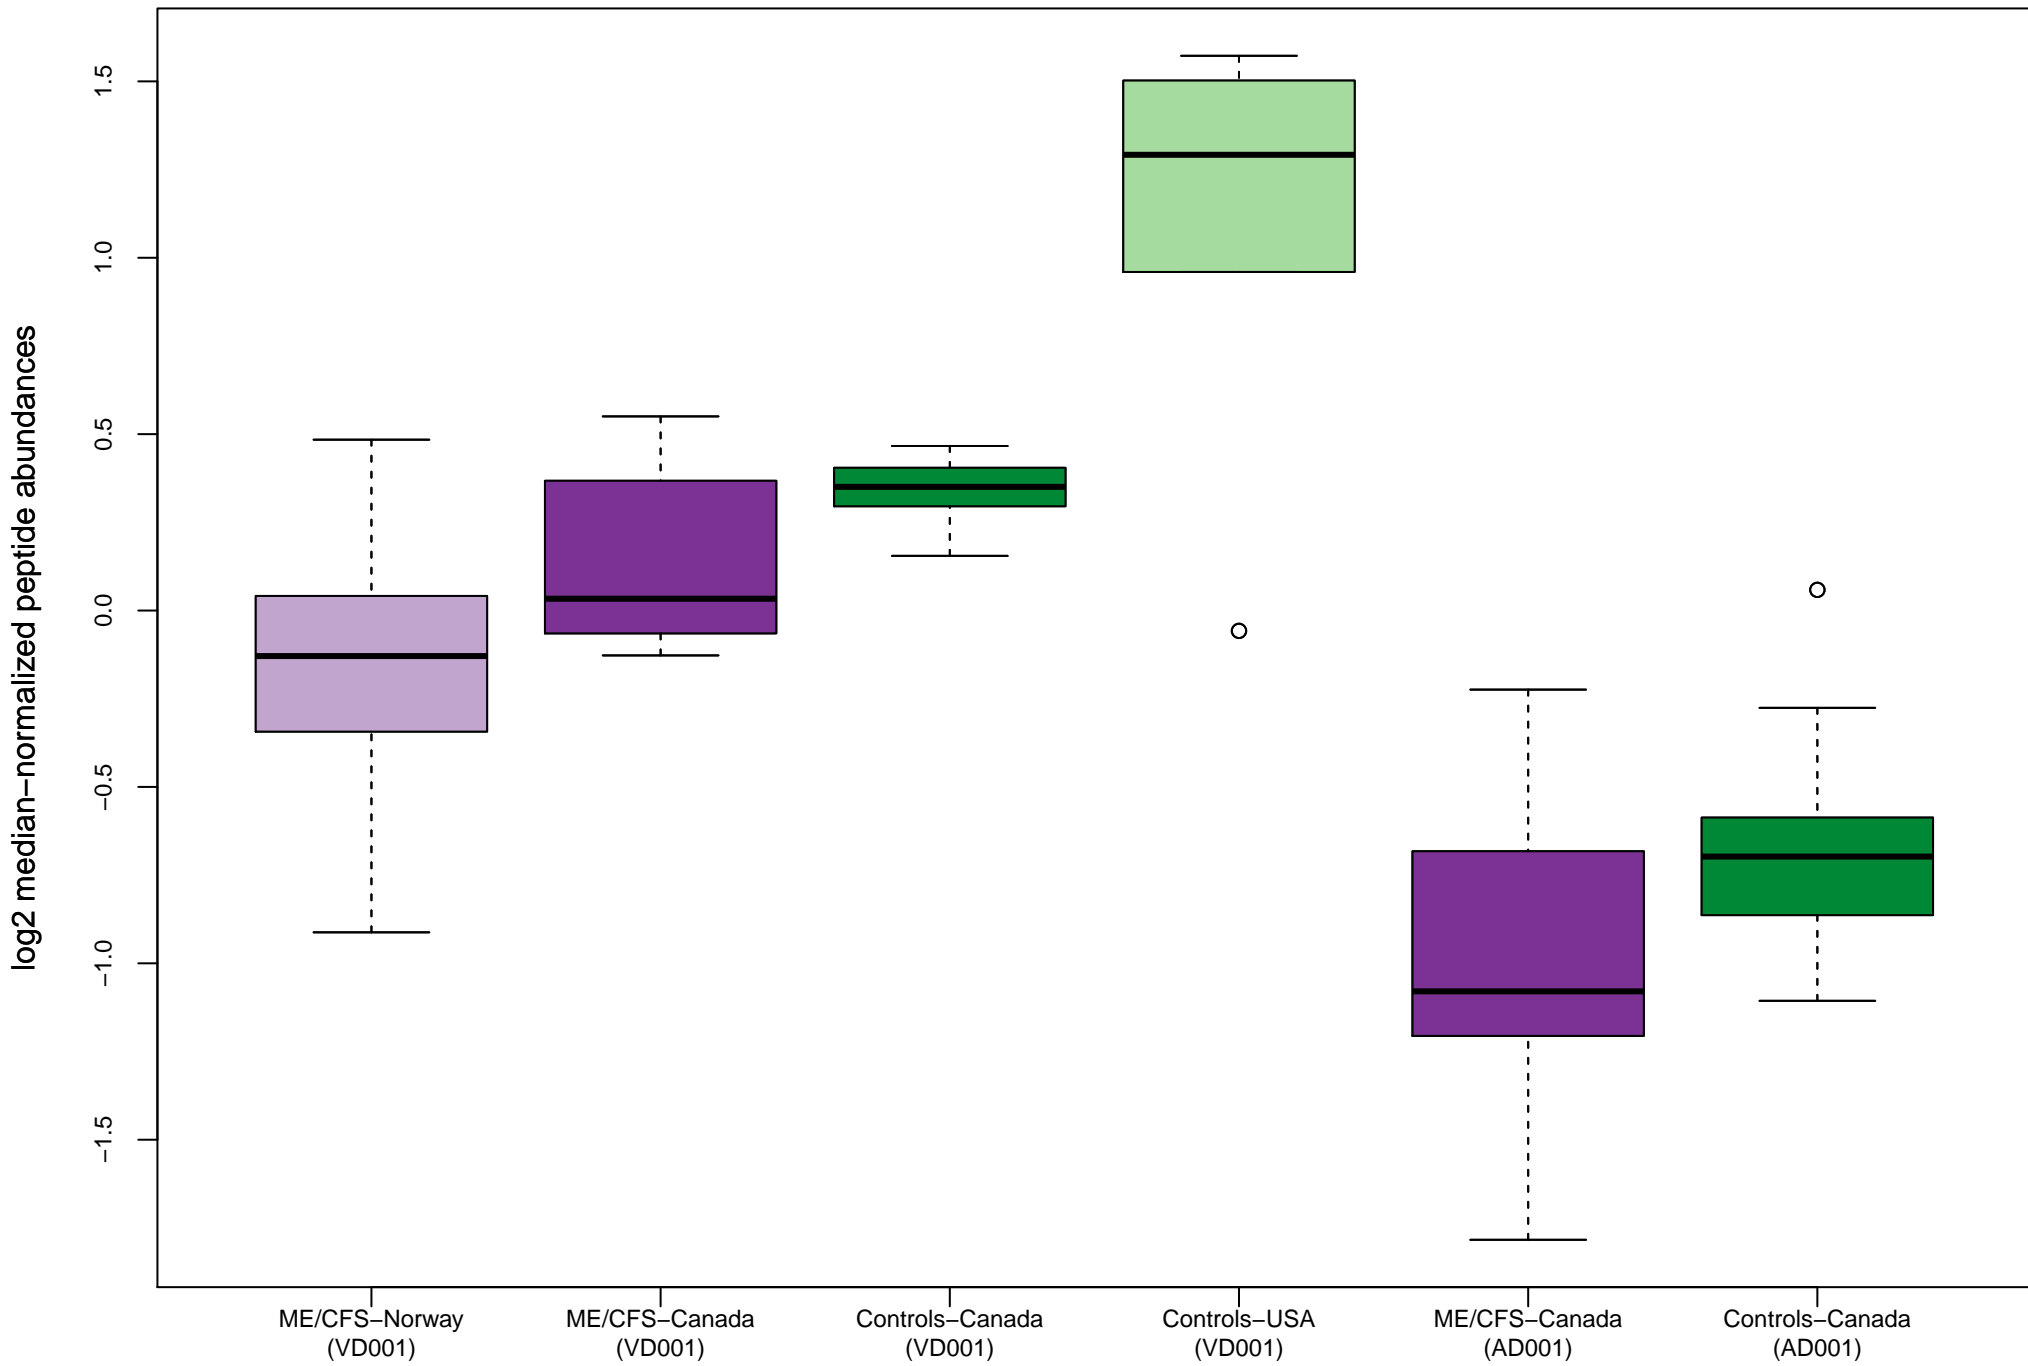

# RLVRLWDLVASG

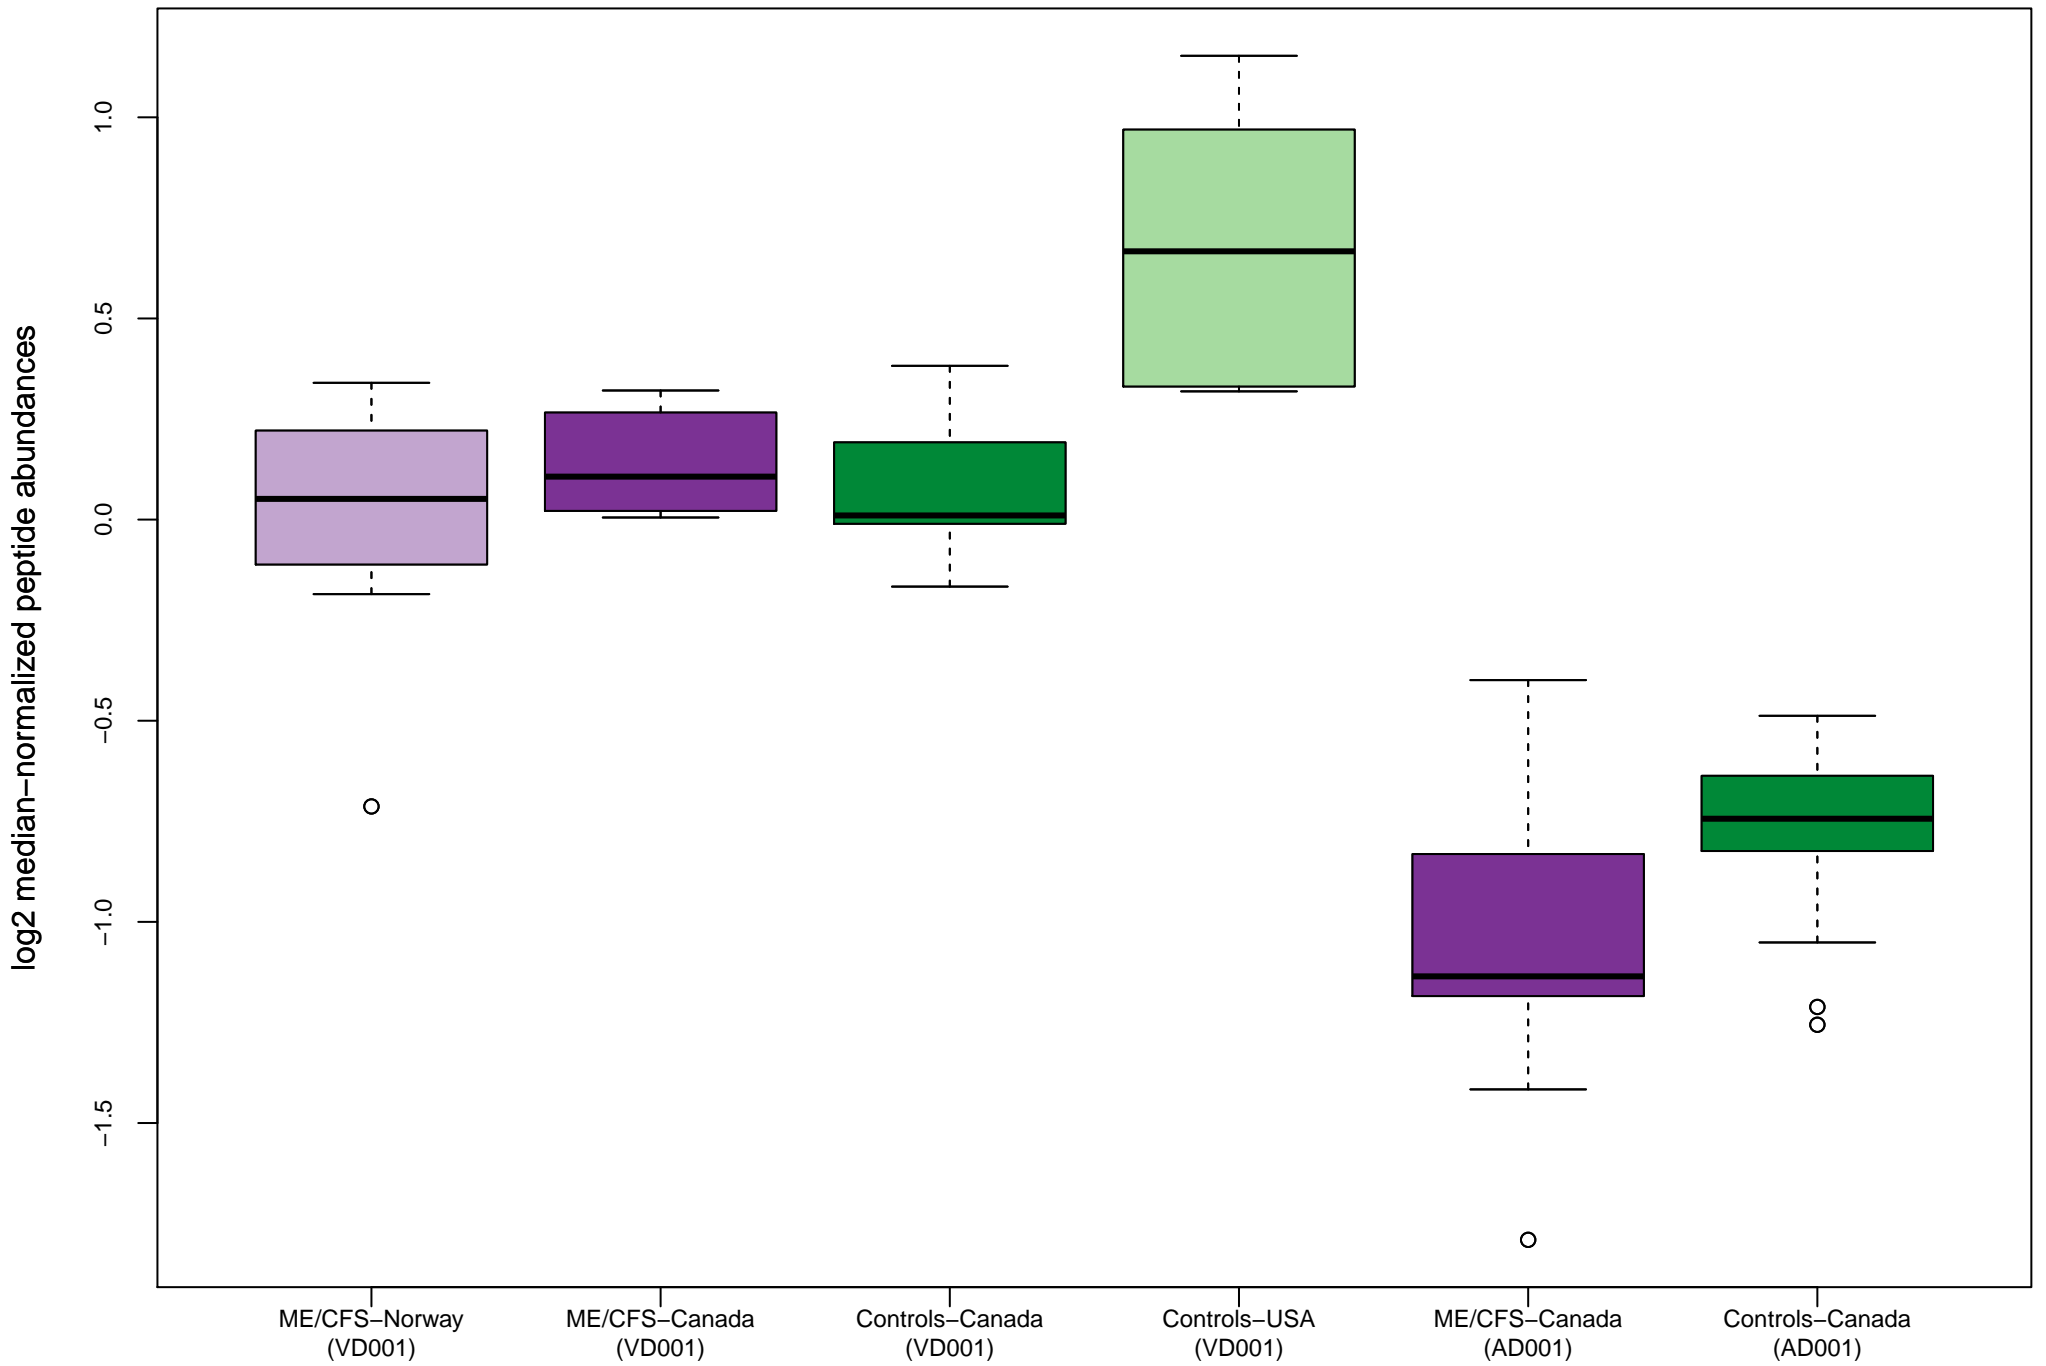



# RNFWAFSFPNVS

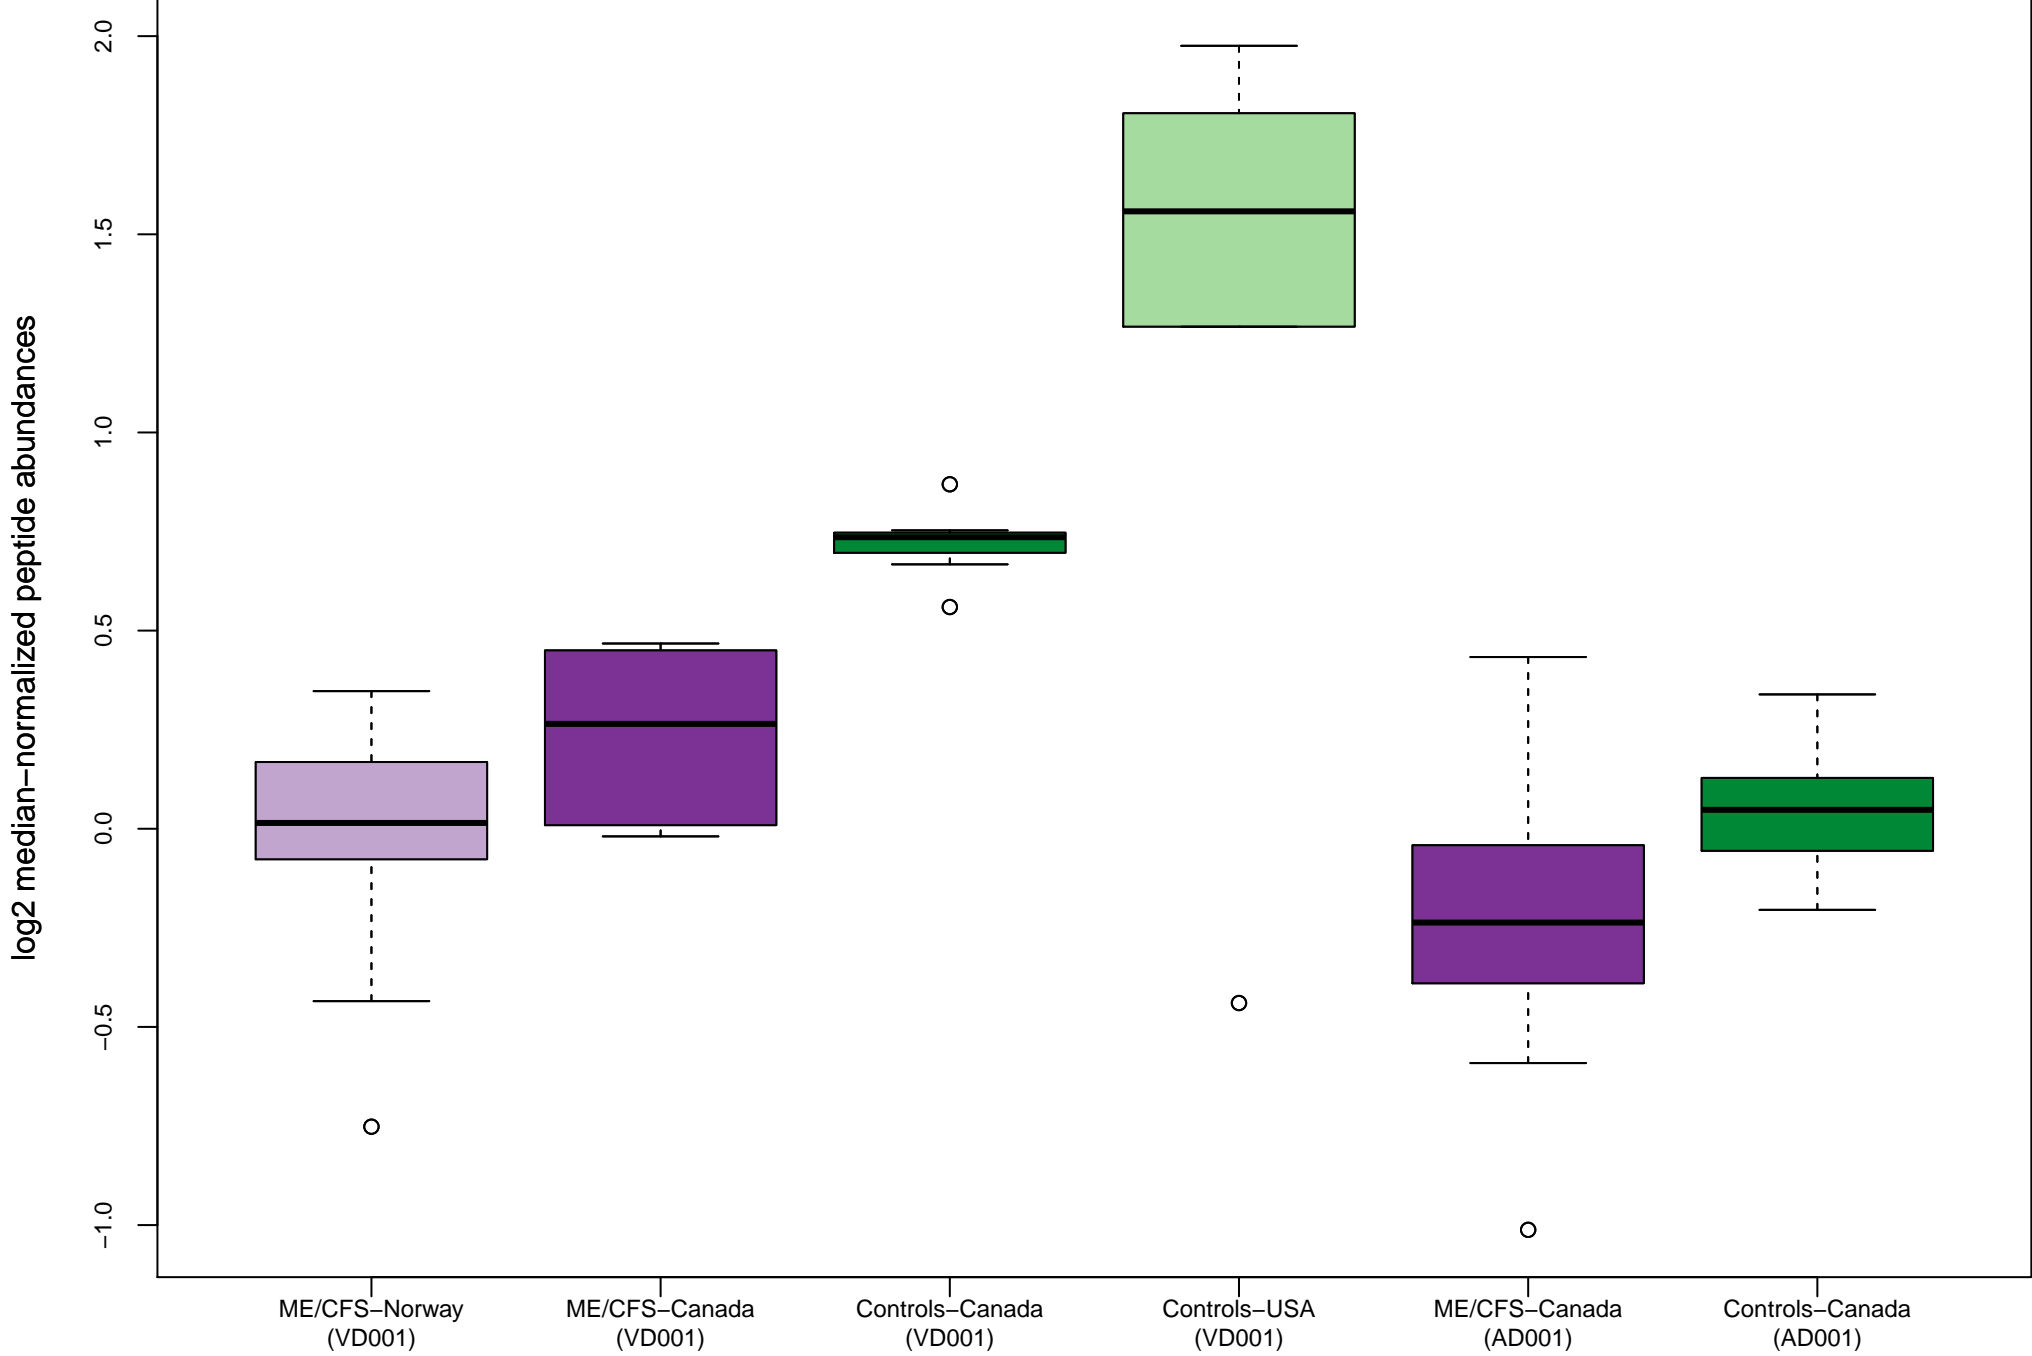

# RNQGFVLPWKSA

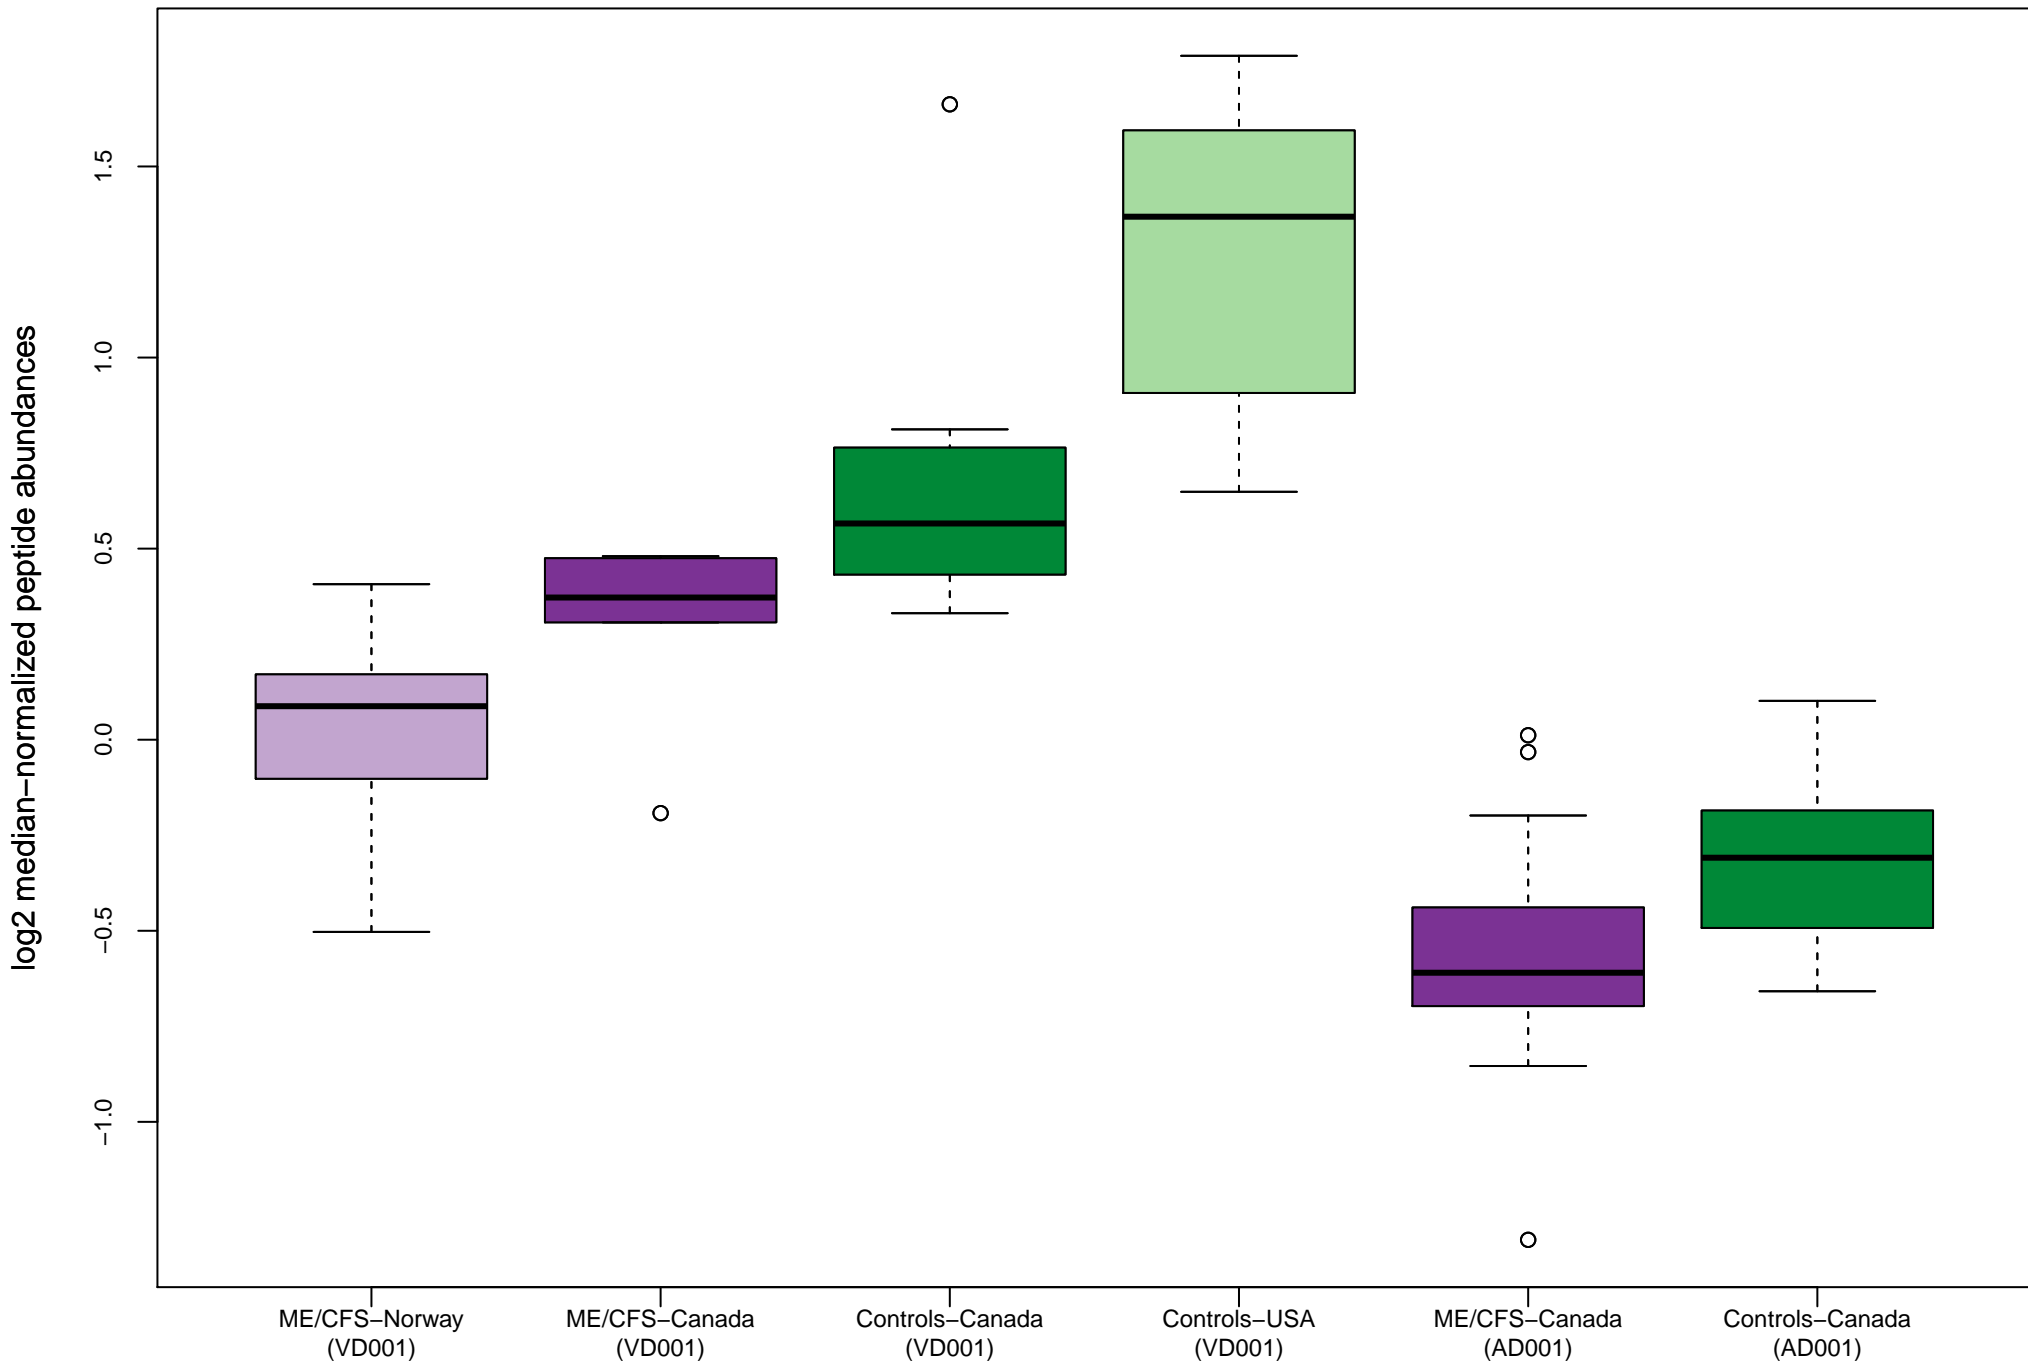

# RNRVQFSWVLSG

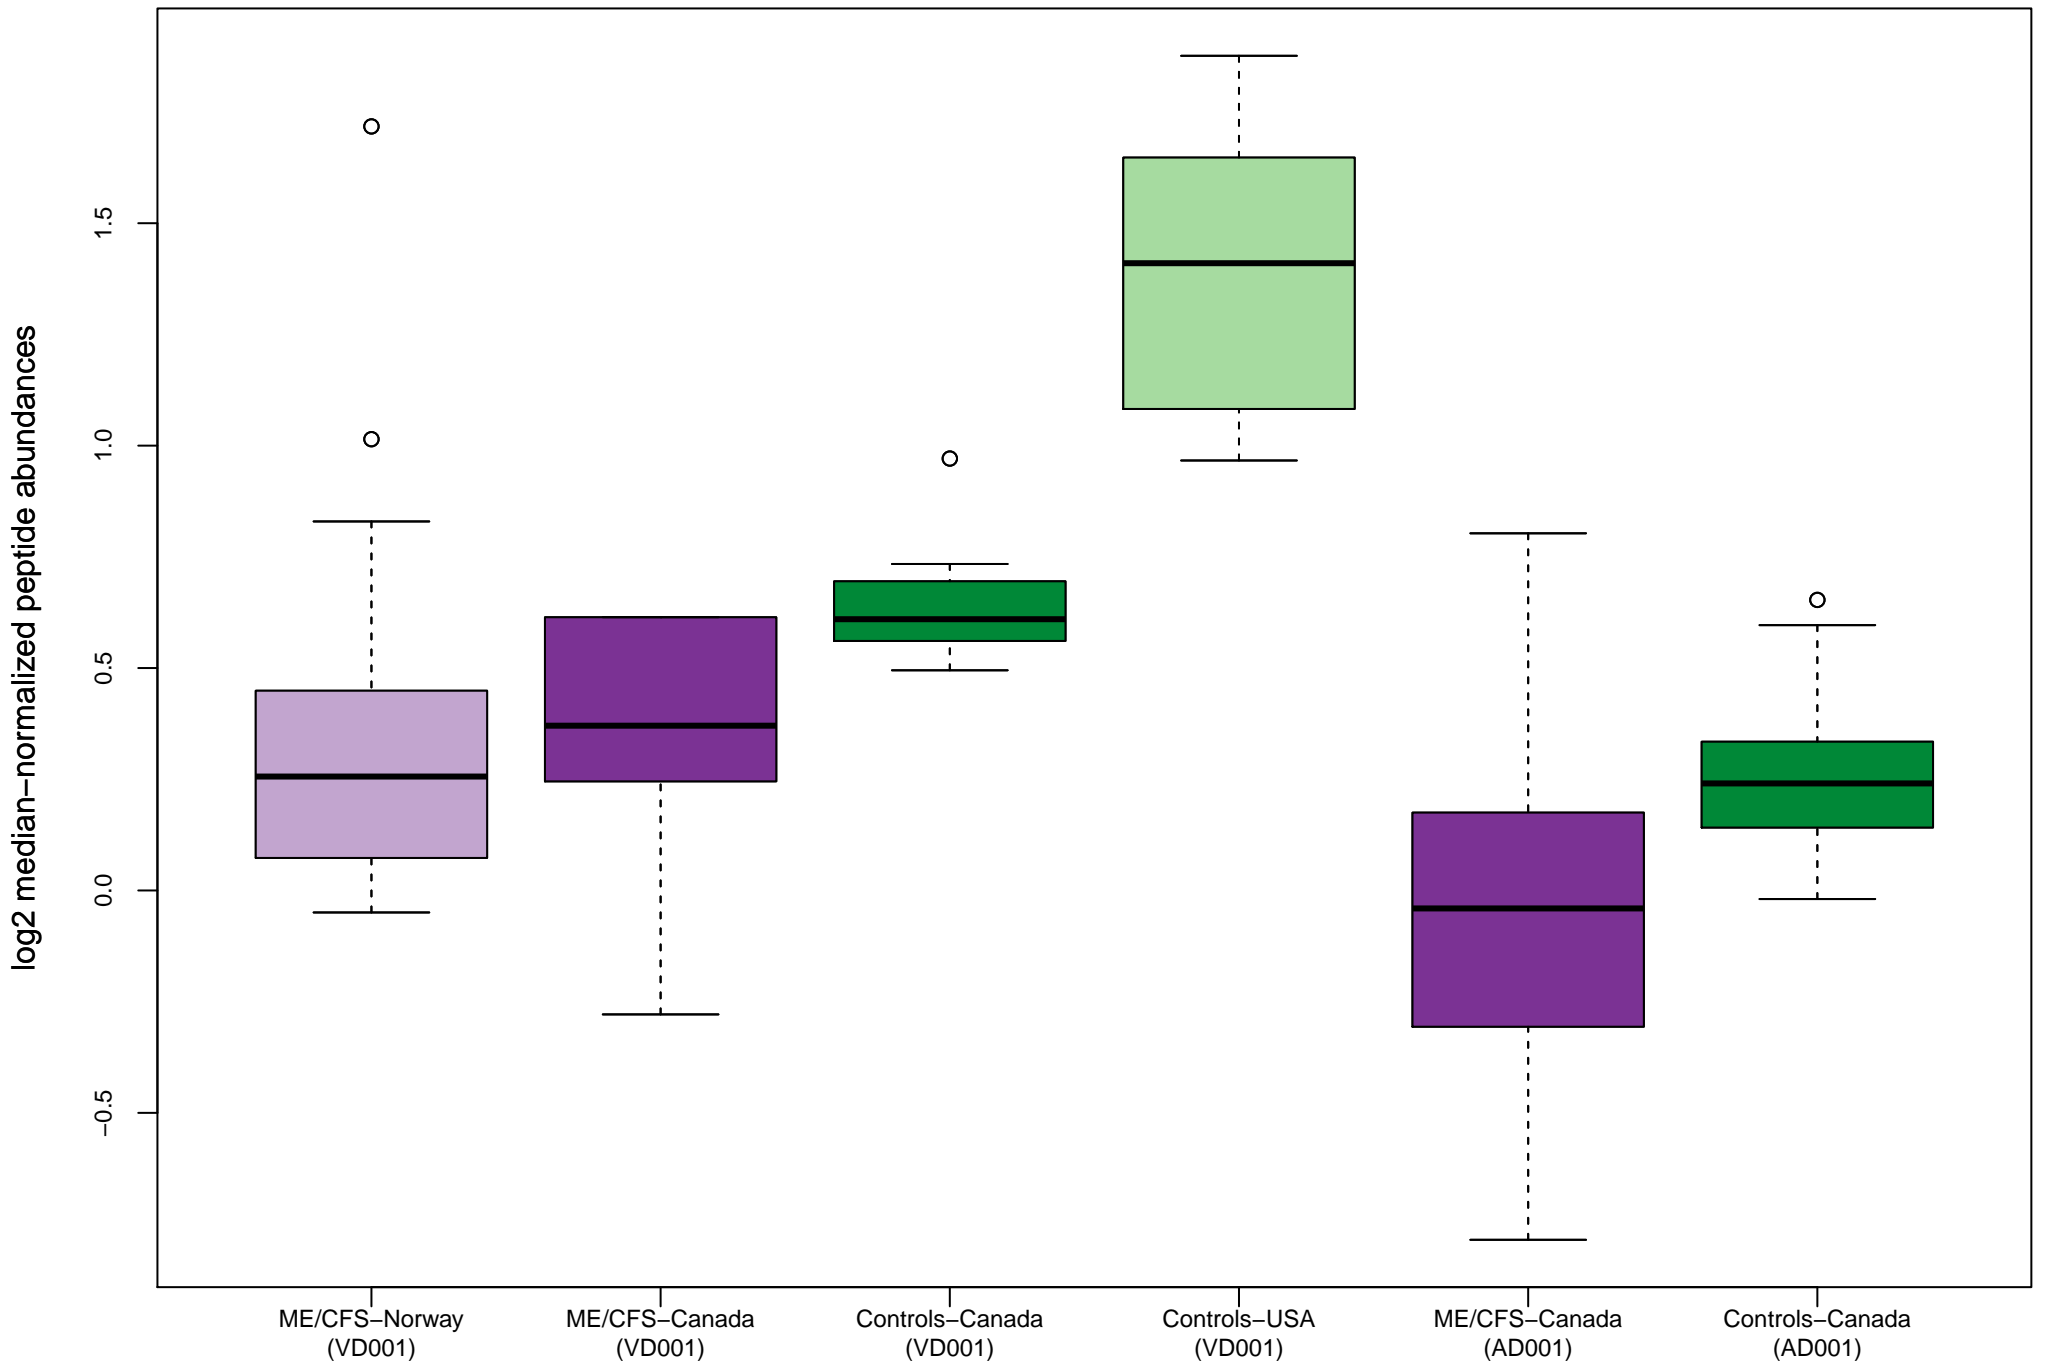

# RPFSALQYWALS

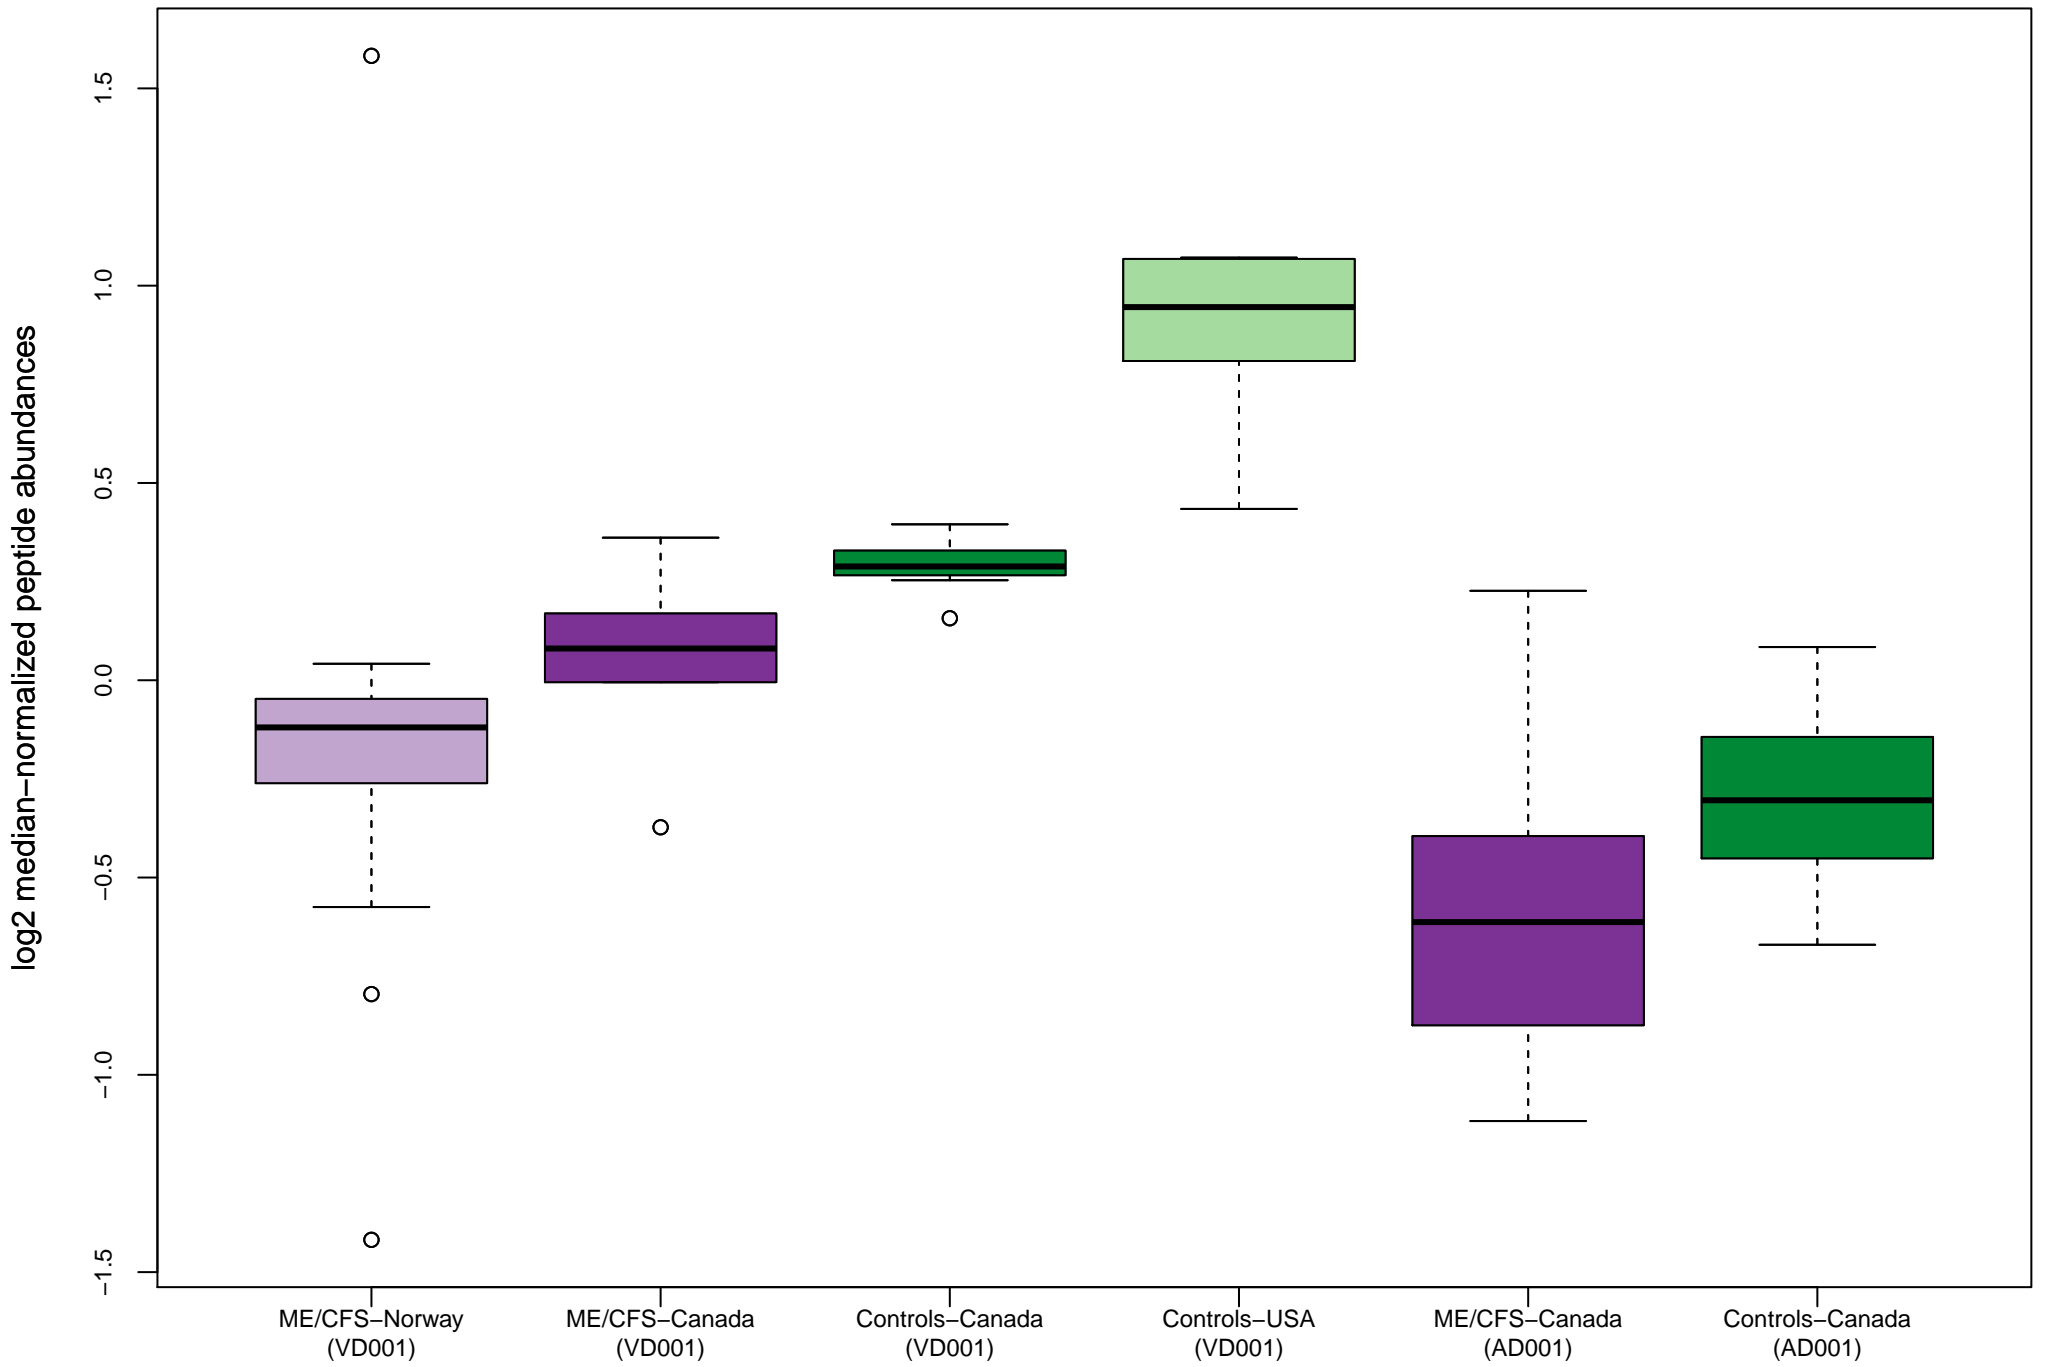

# RPGLVFRHVALS

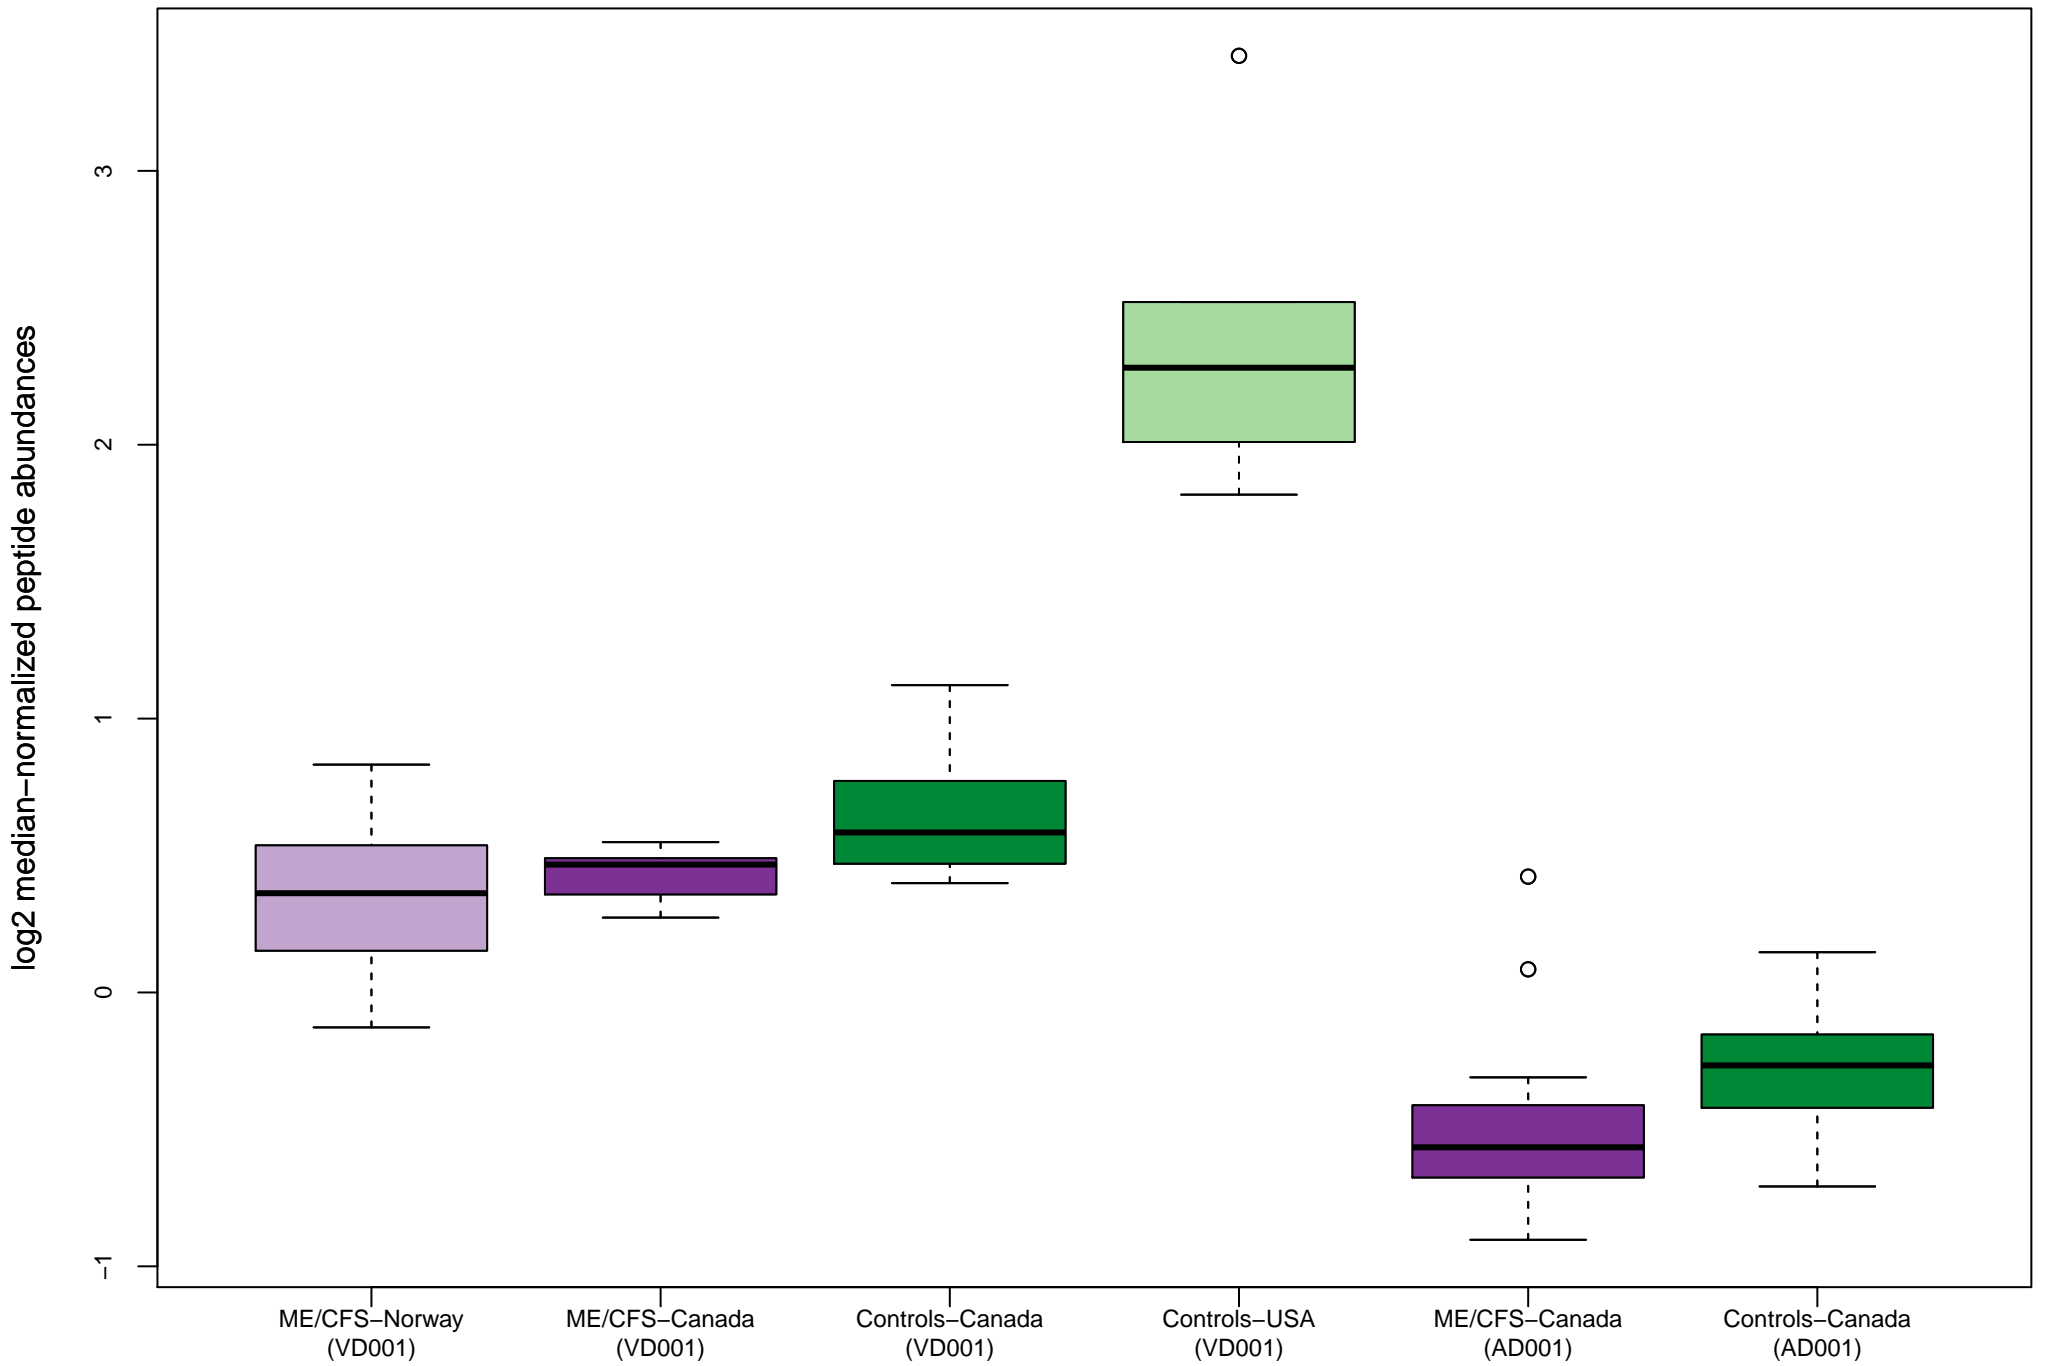

# RPKWFVVAQNVS

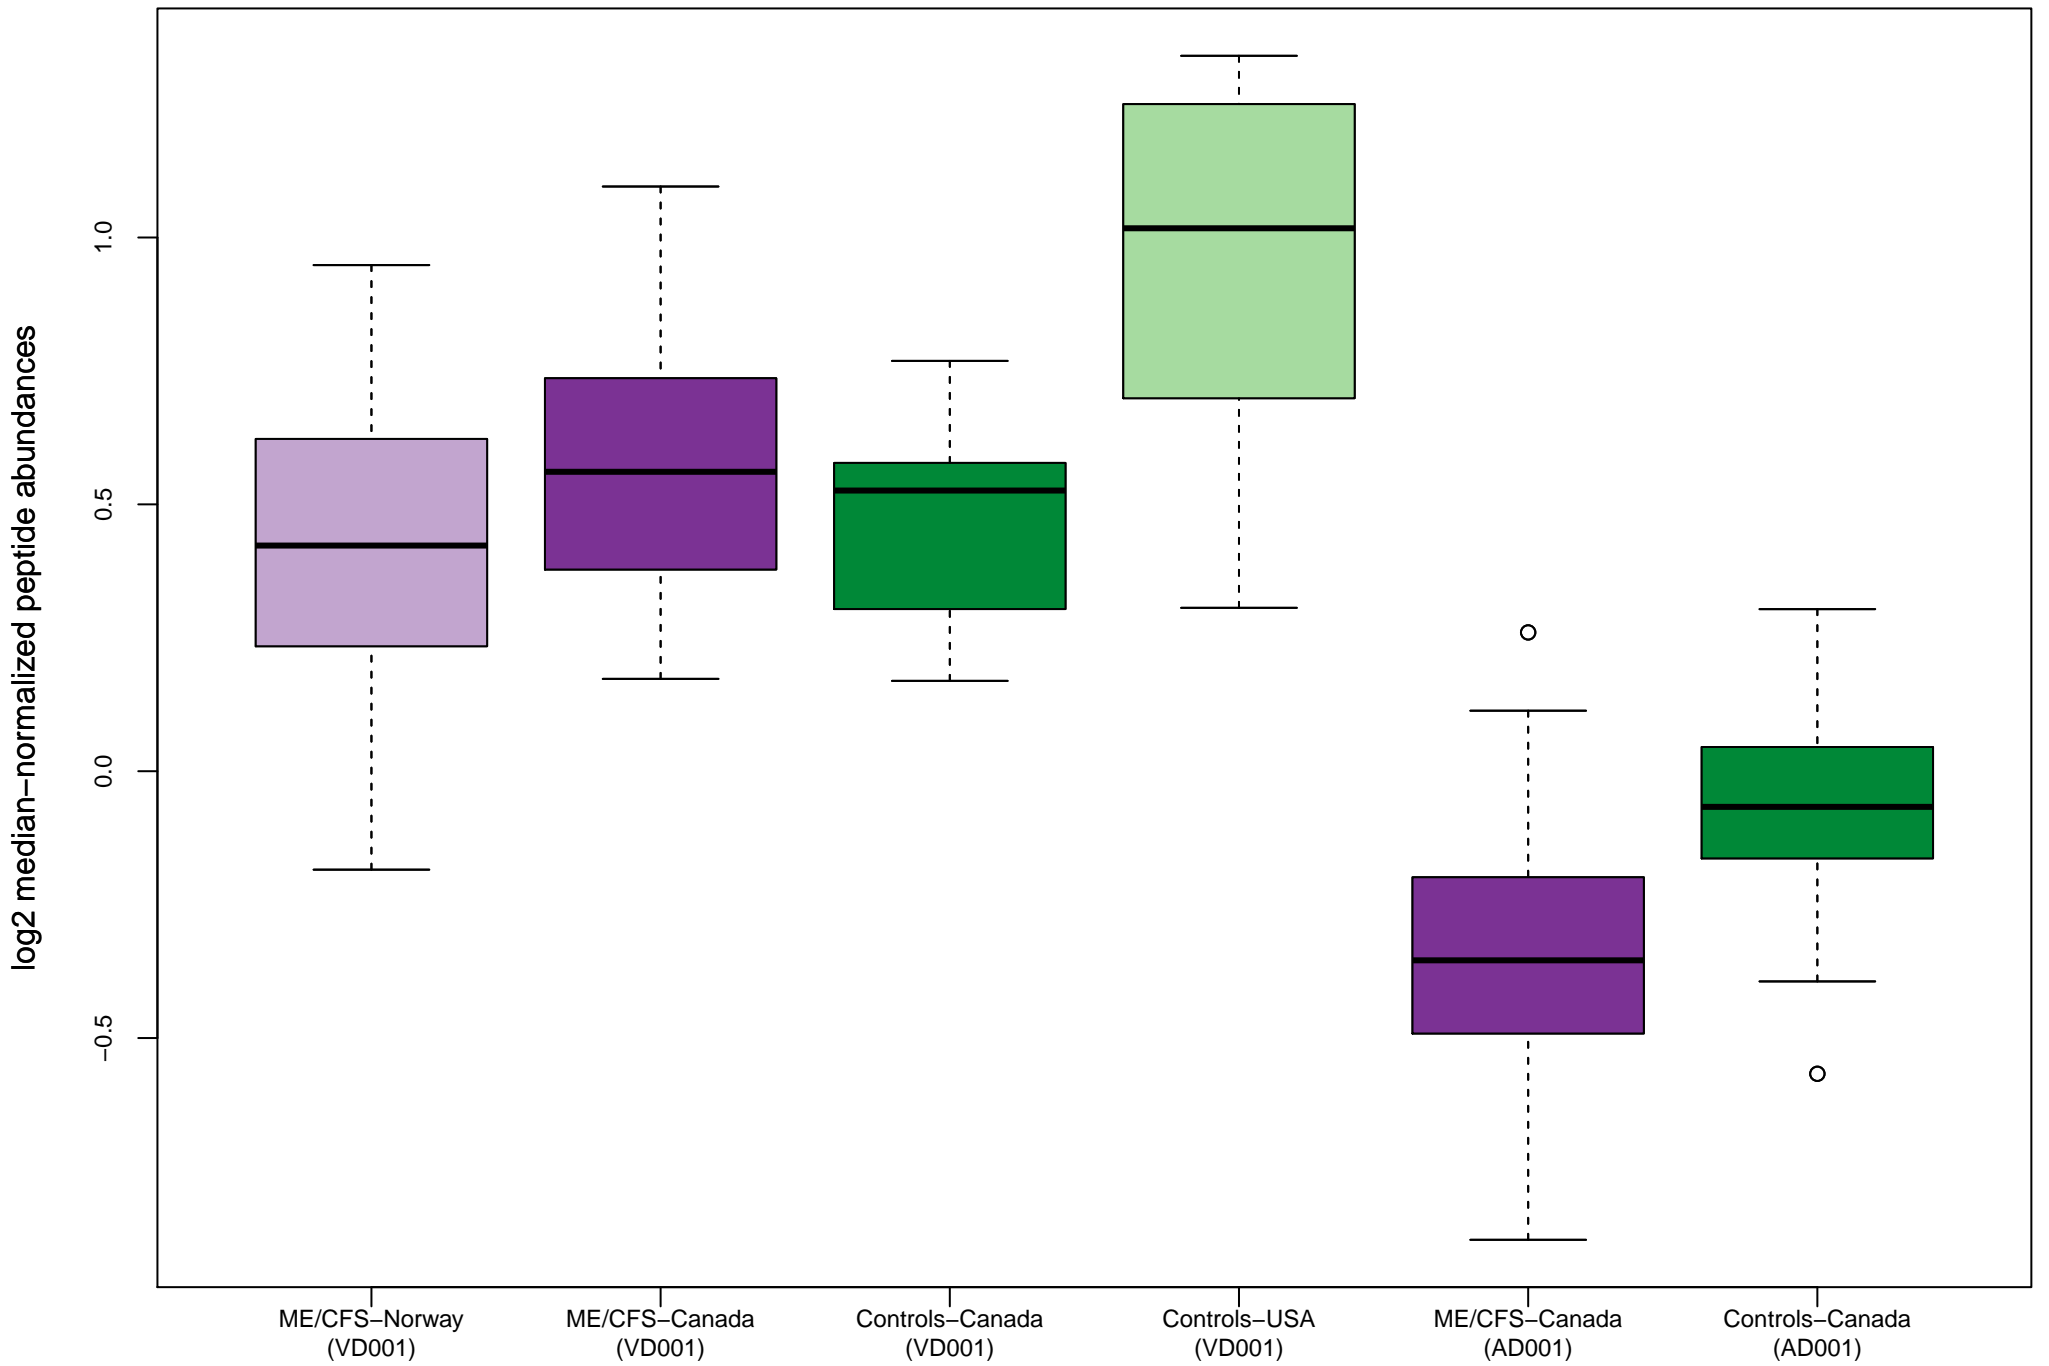

# RPLAVGYKLGSG

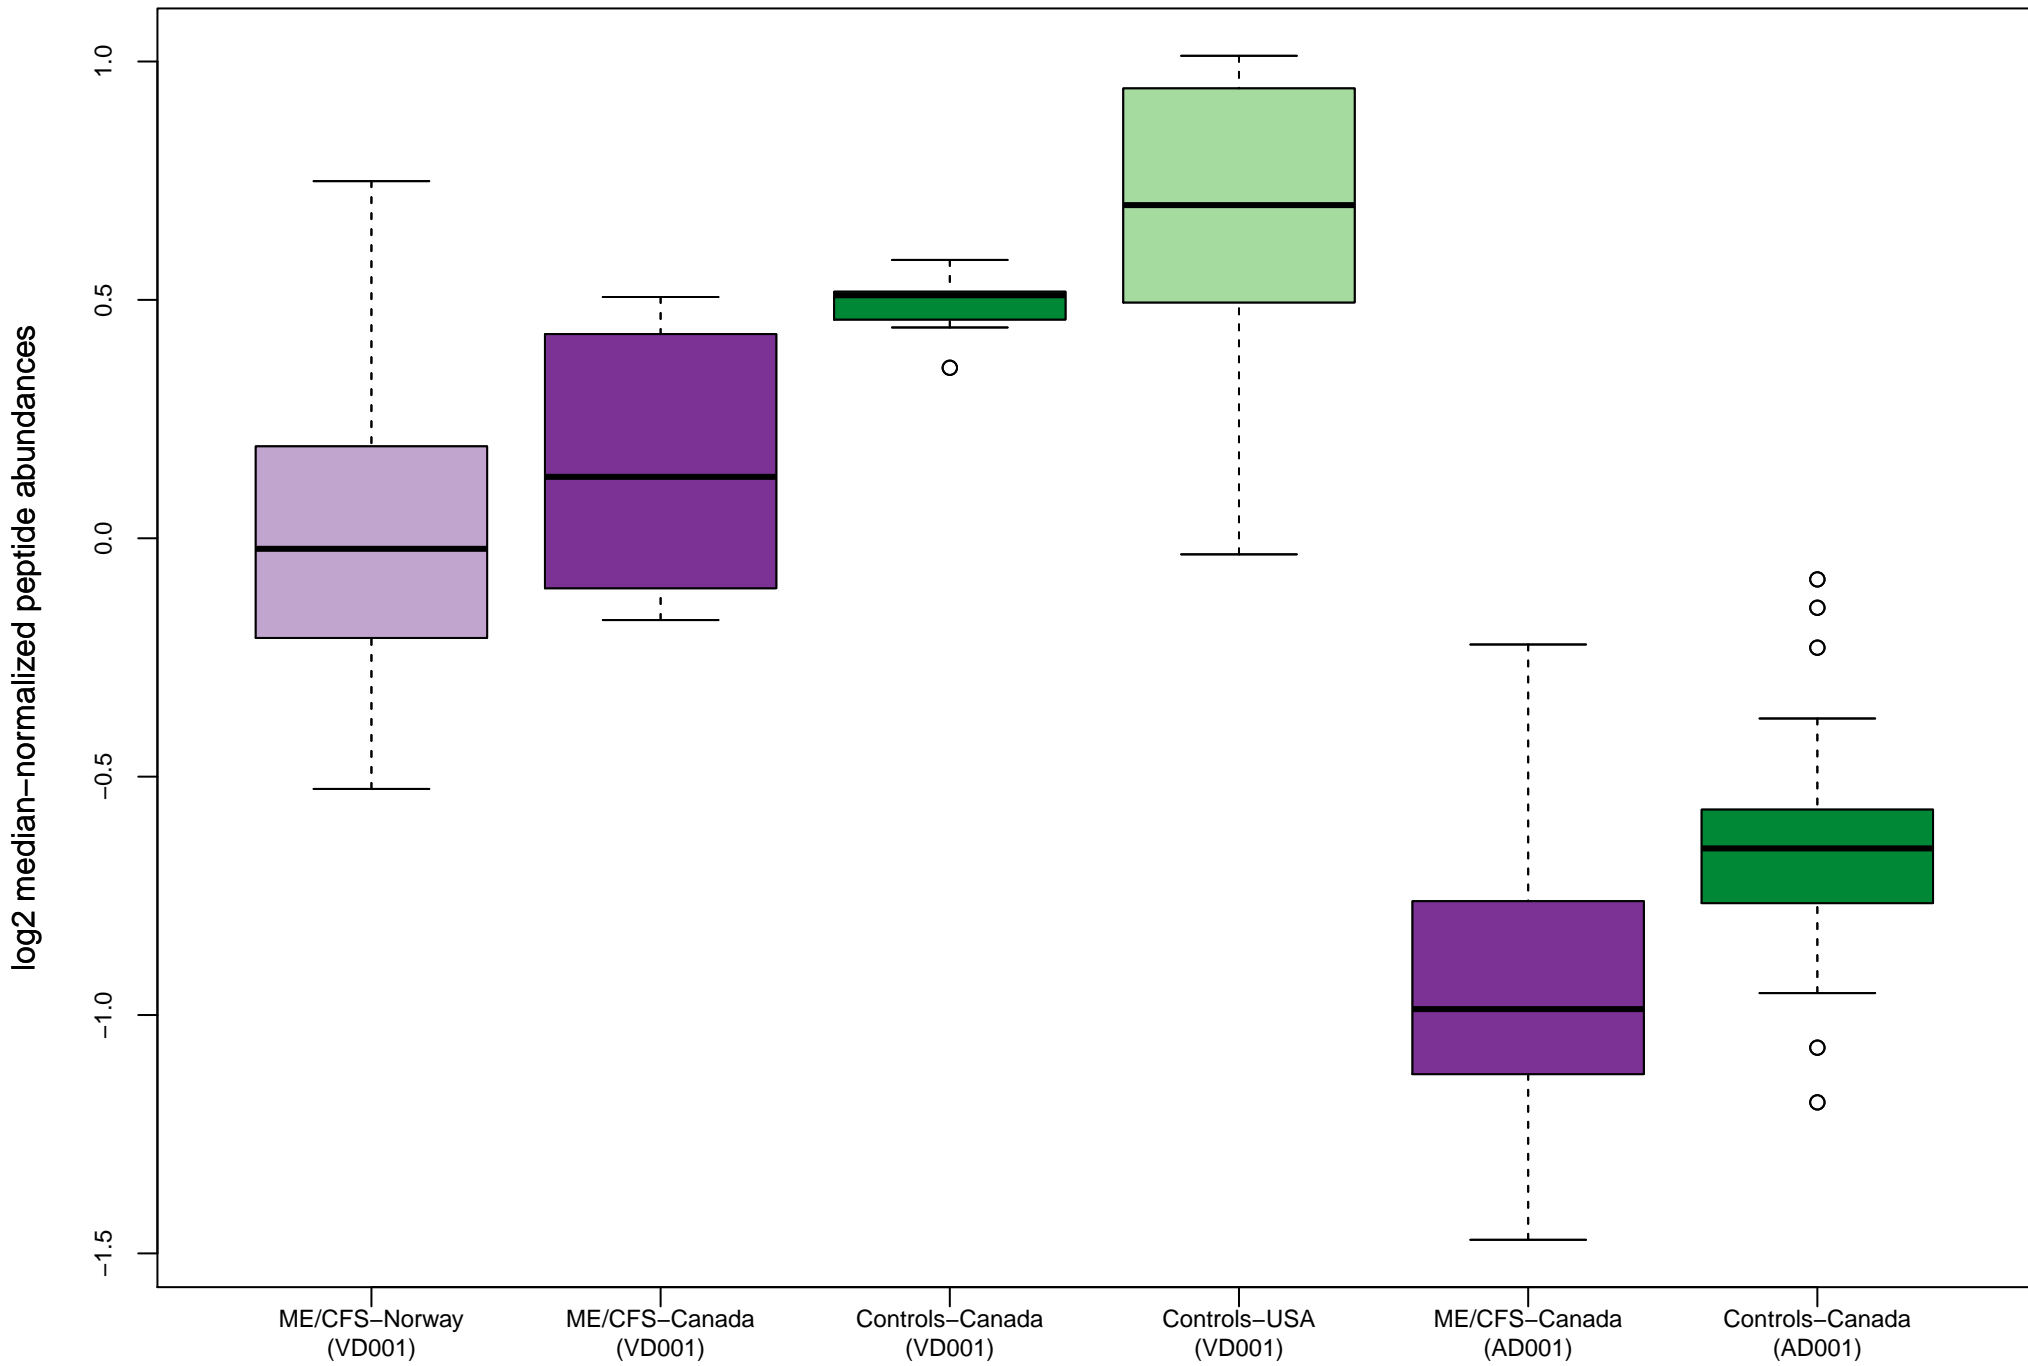

# RPLRQELFRWLS

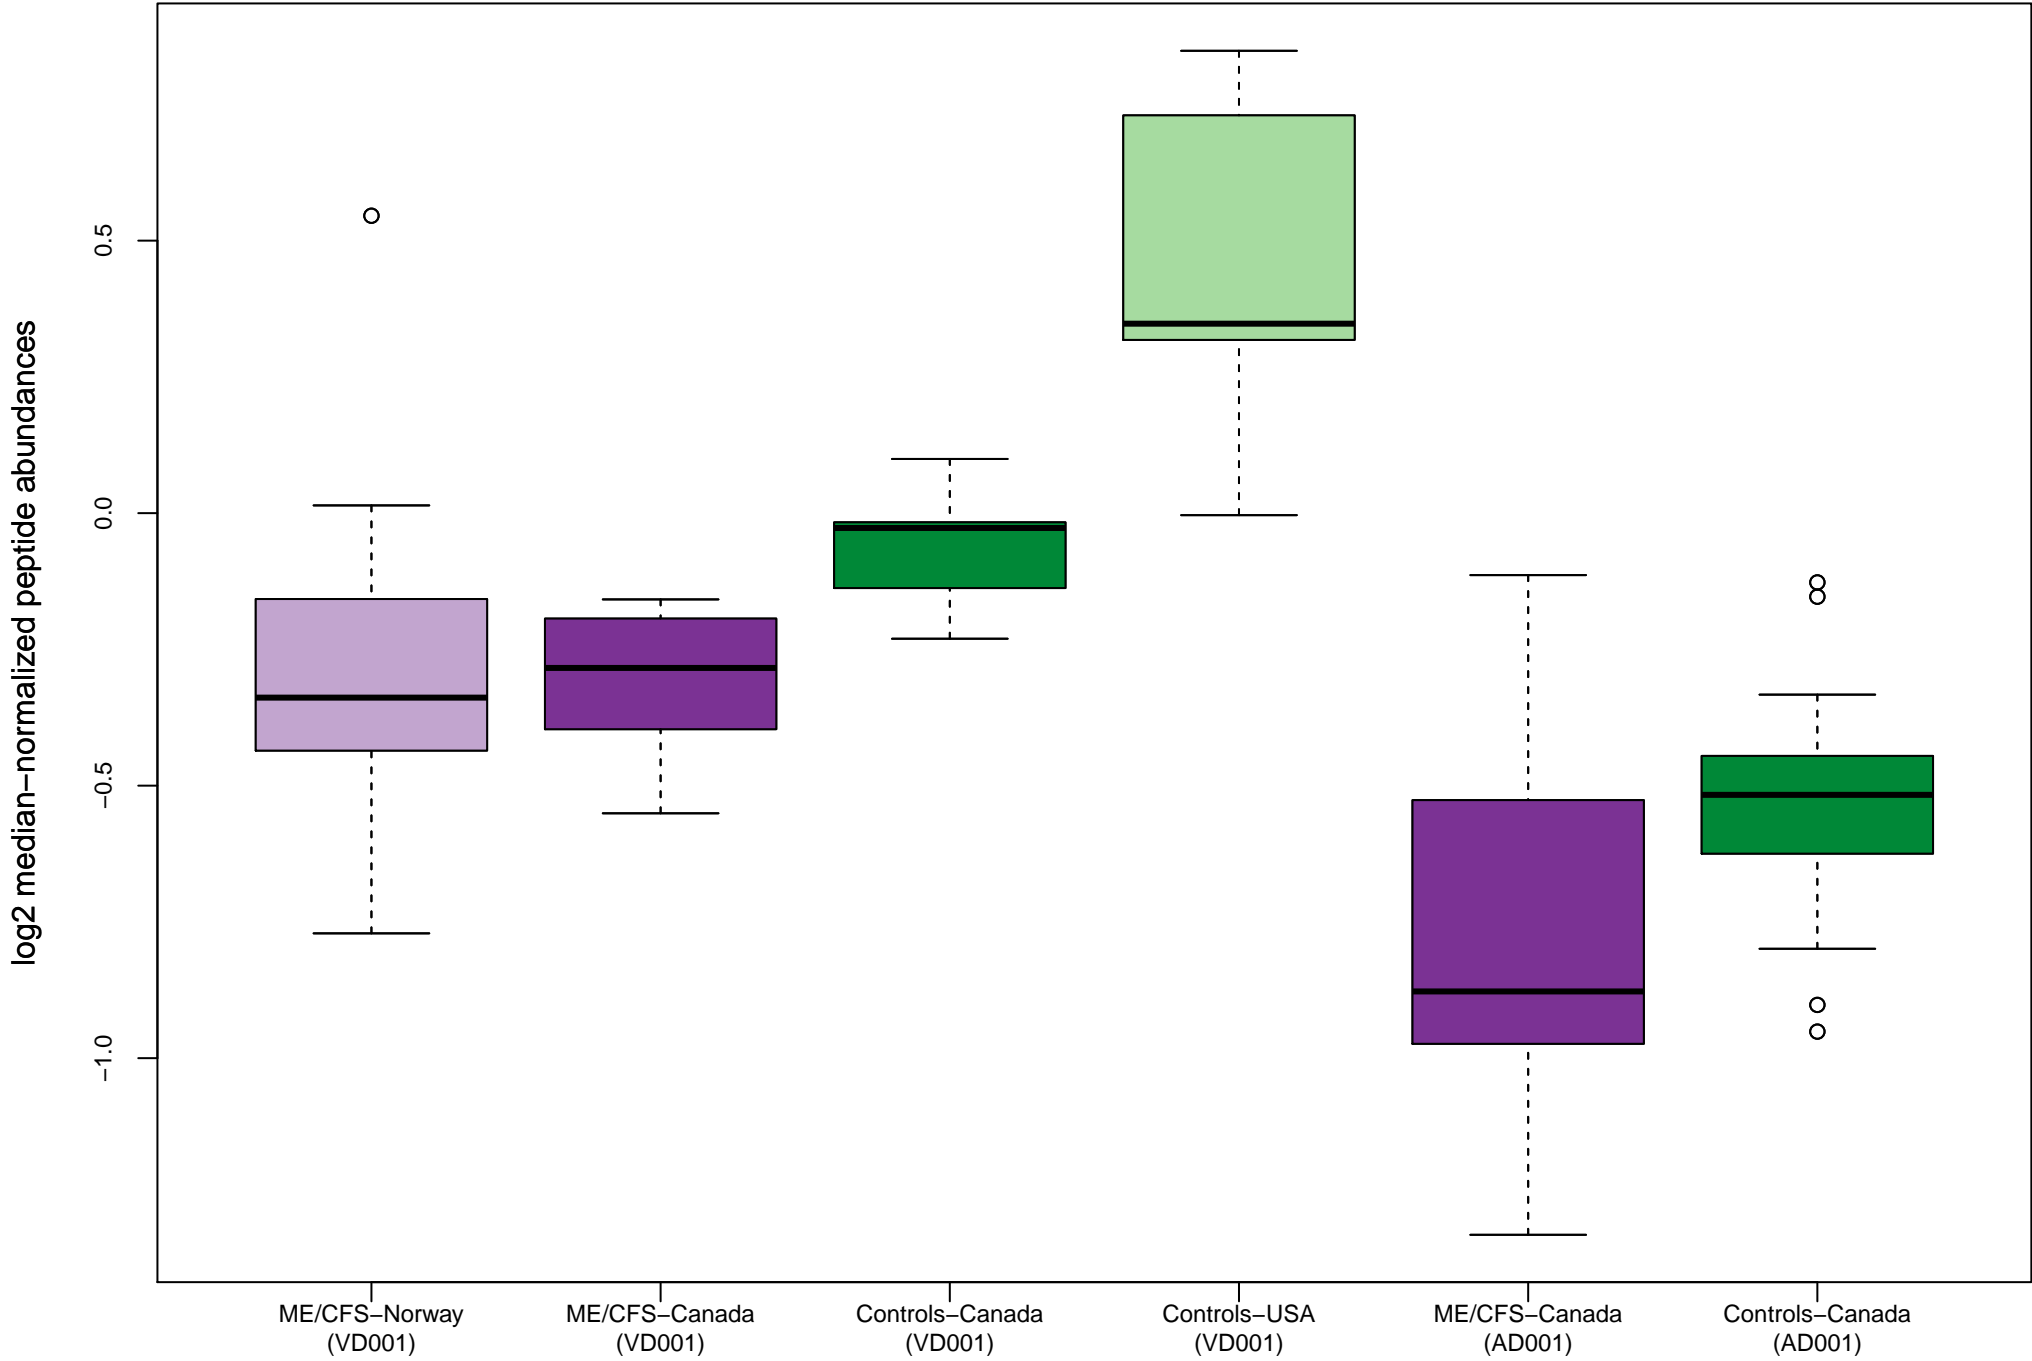



# RPVWRLFVKLSG

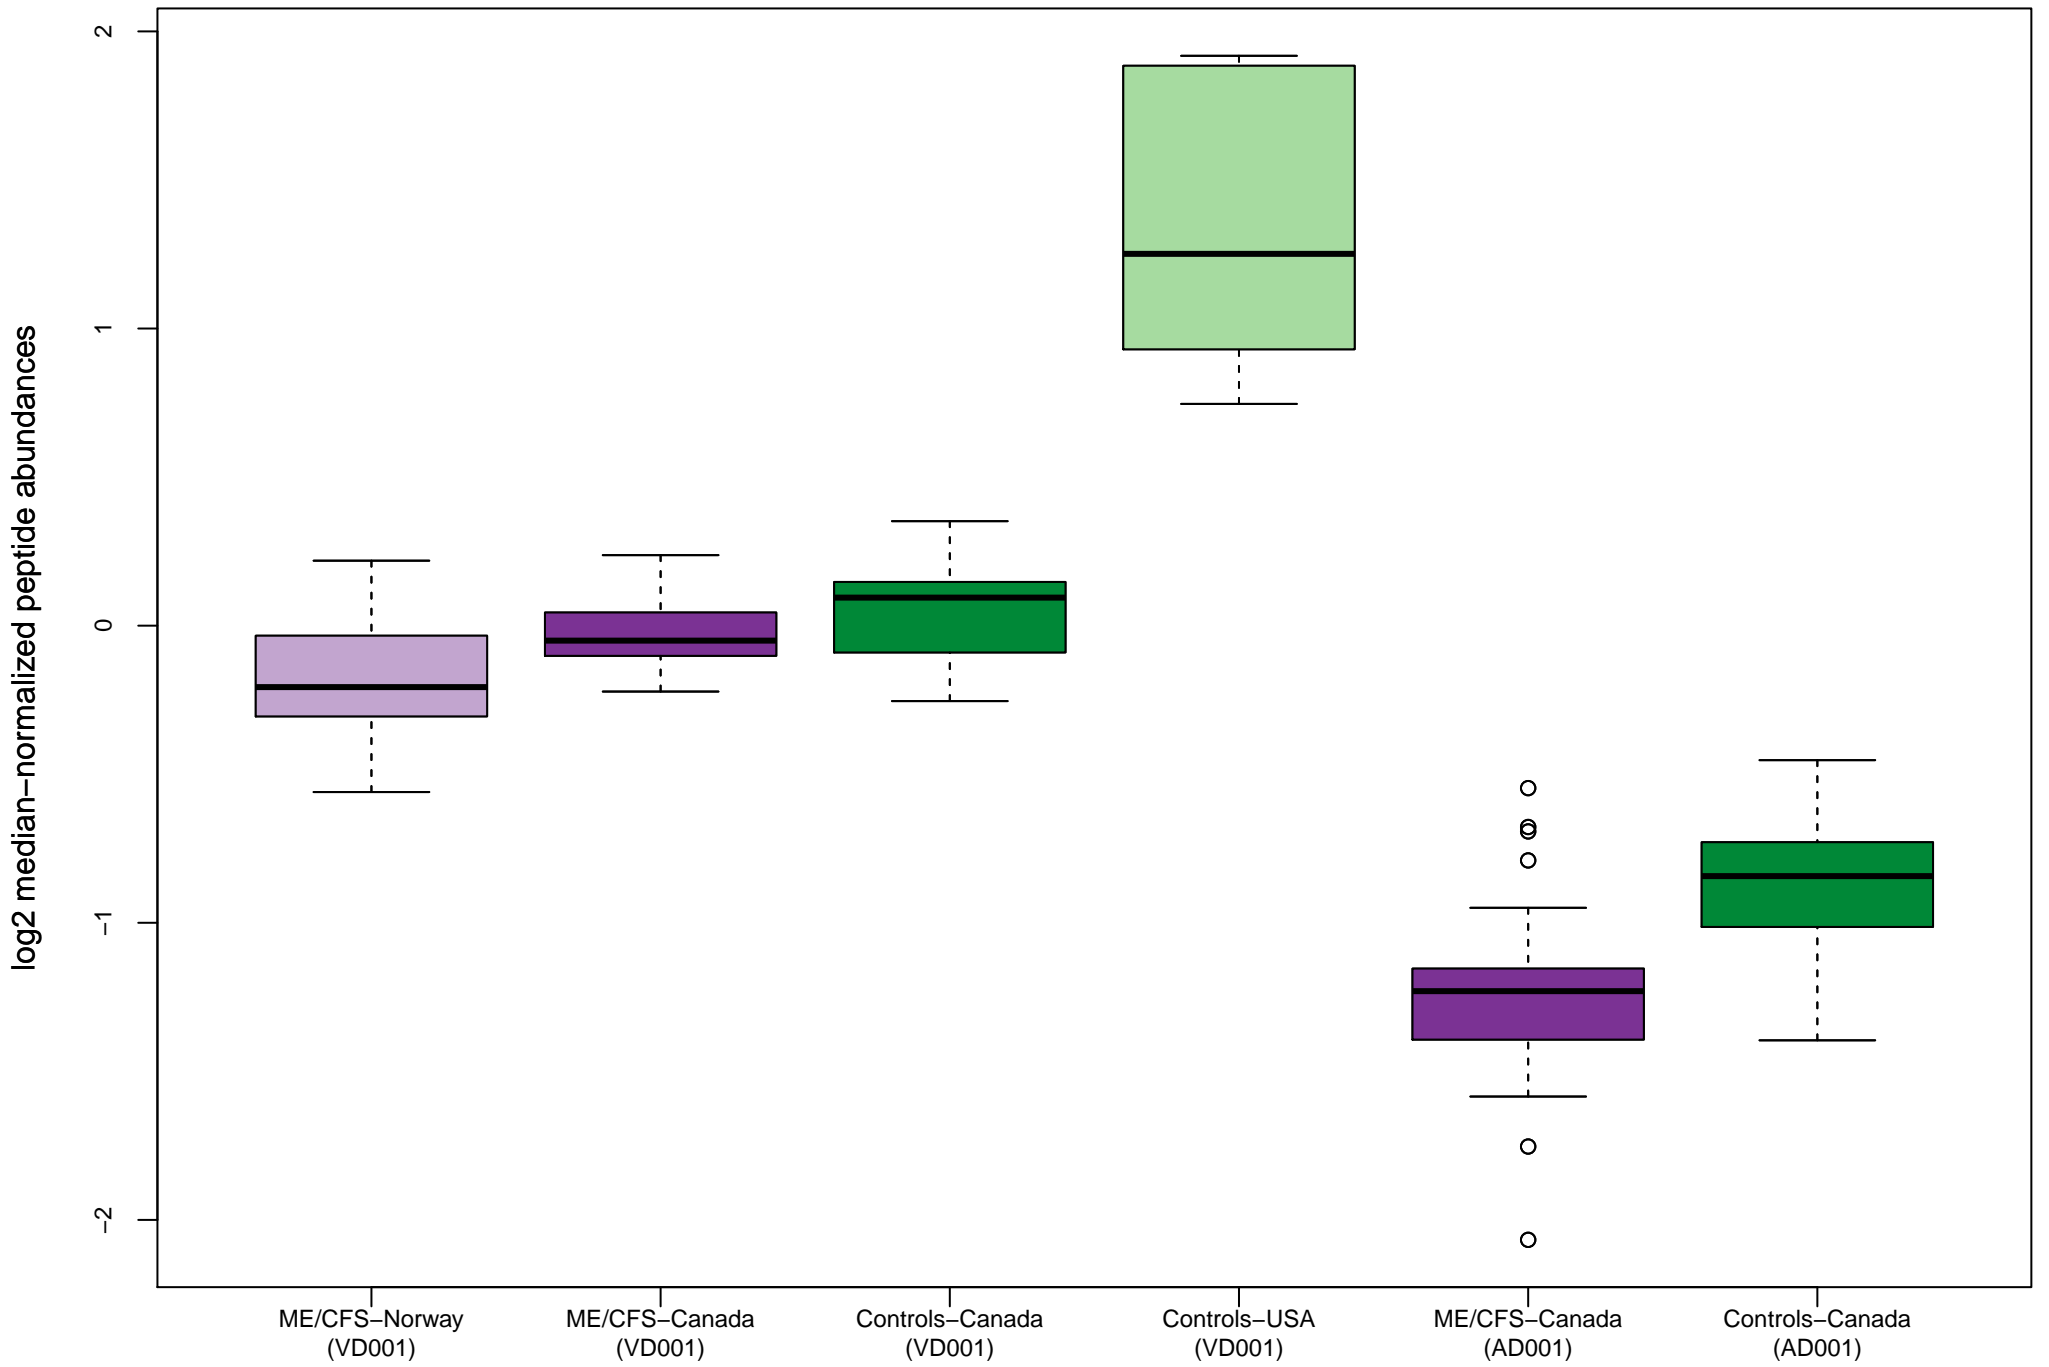

# RQFFYWPKLGAG

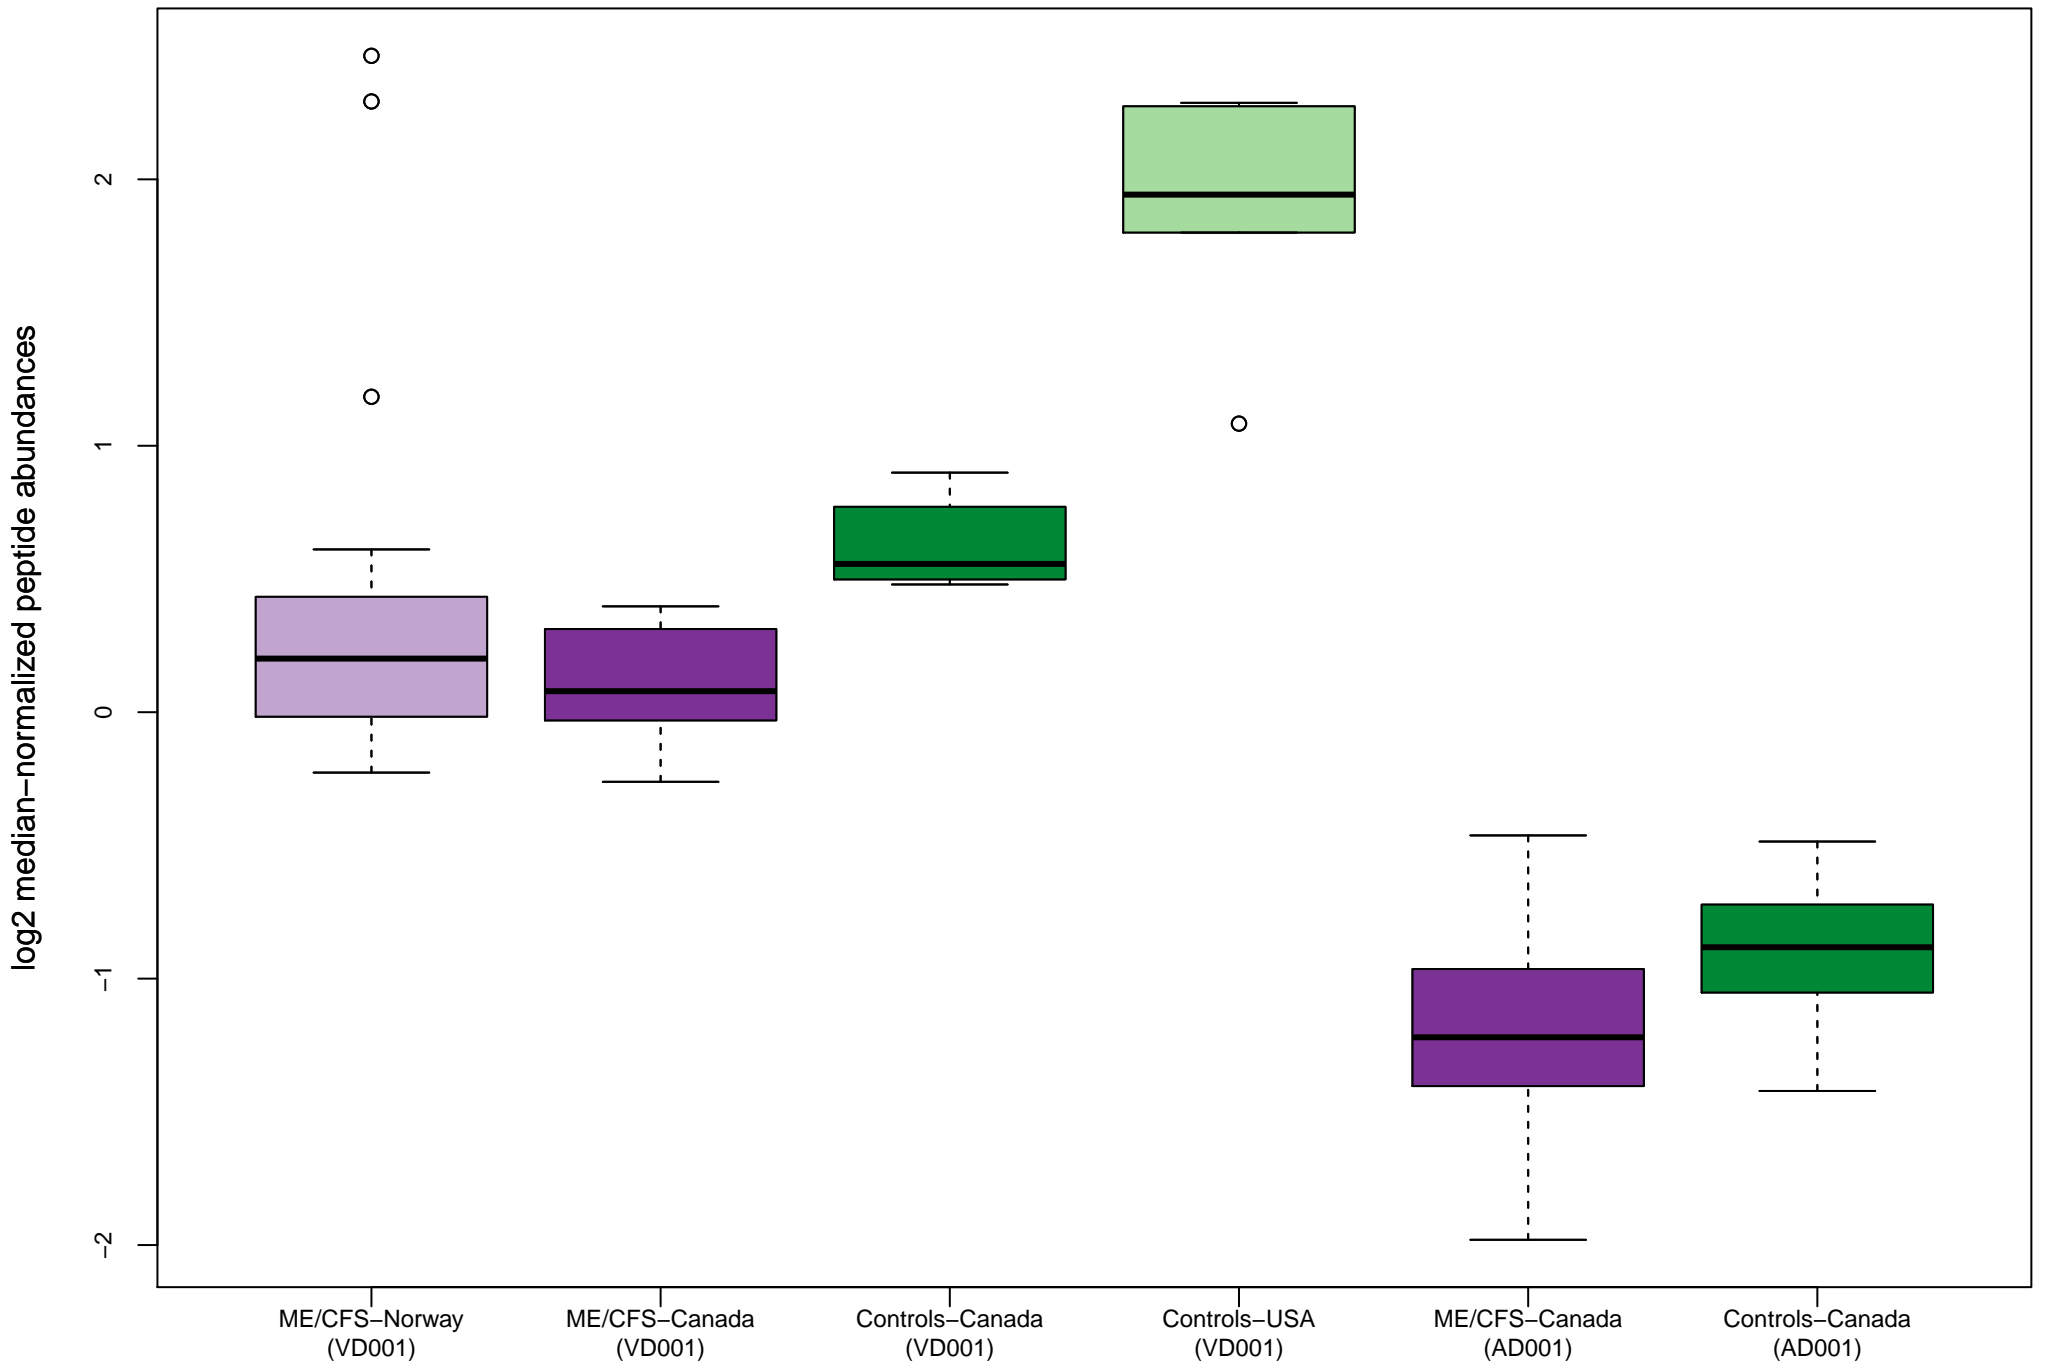

# RQVYLRYWNLSS

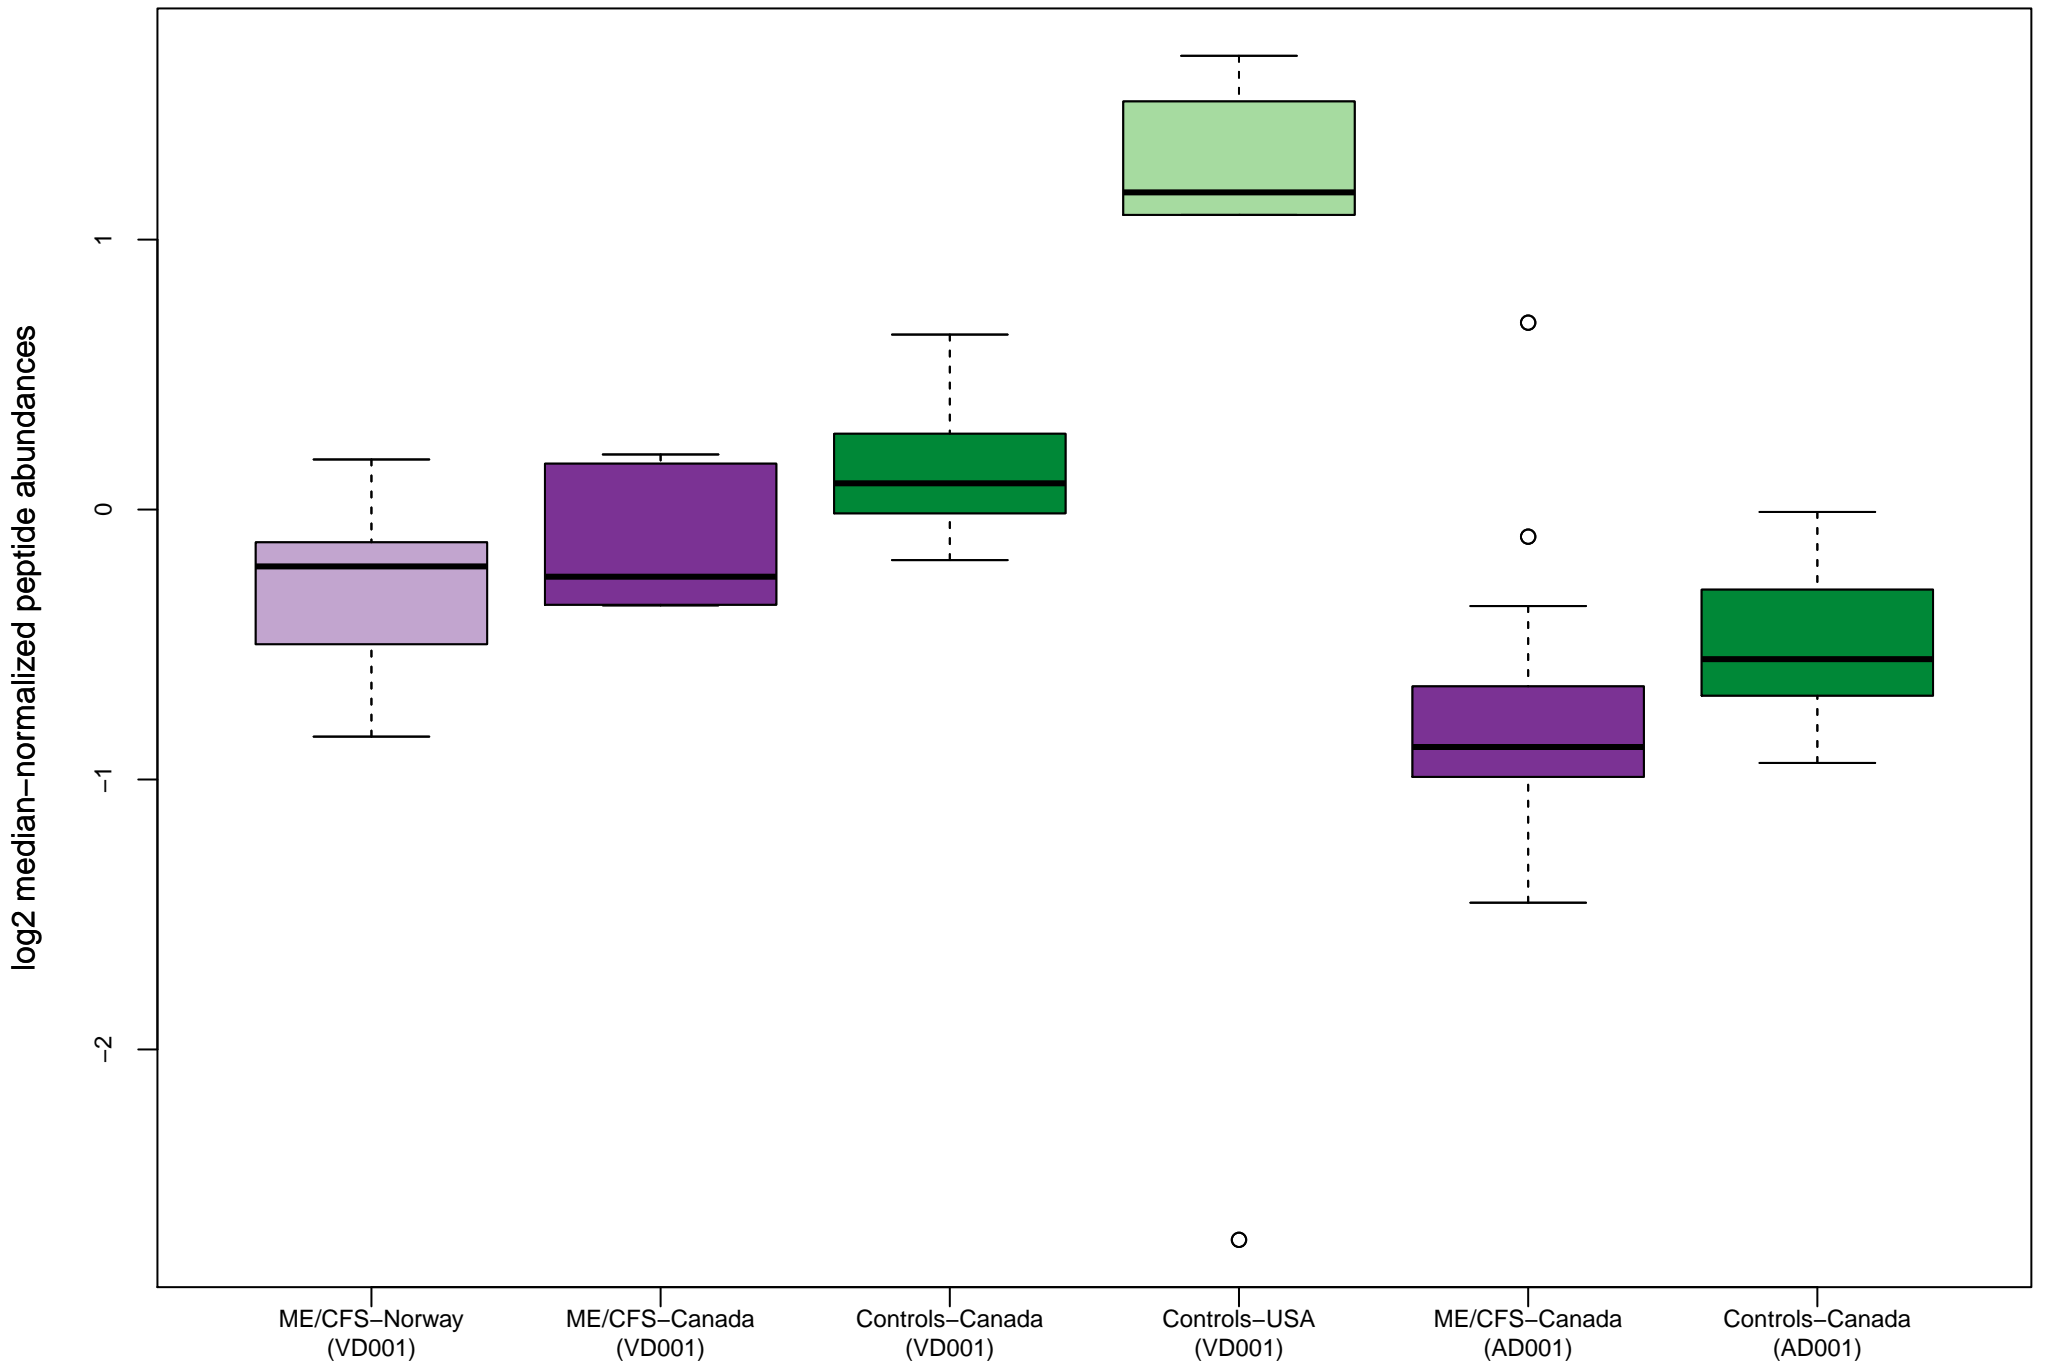

# RQYAGQRPLSFY

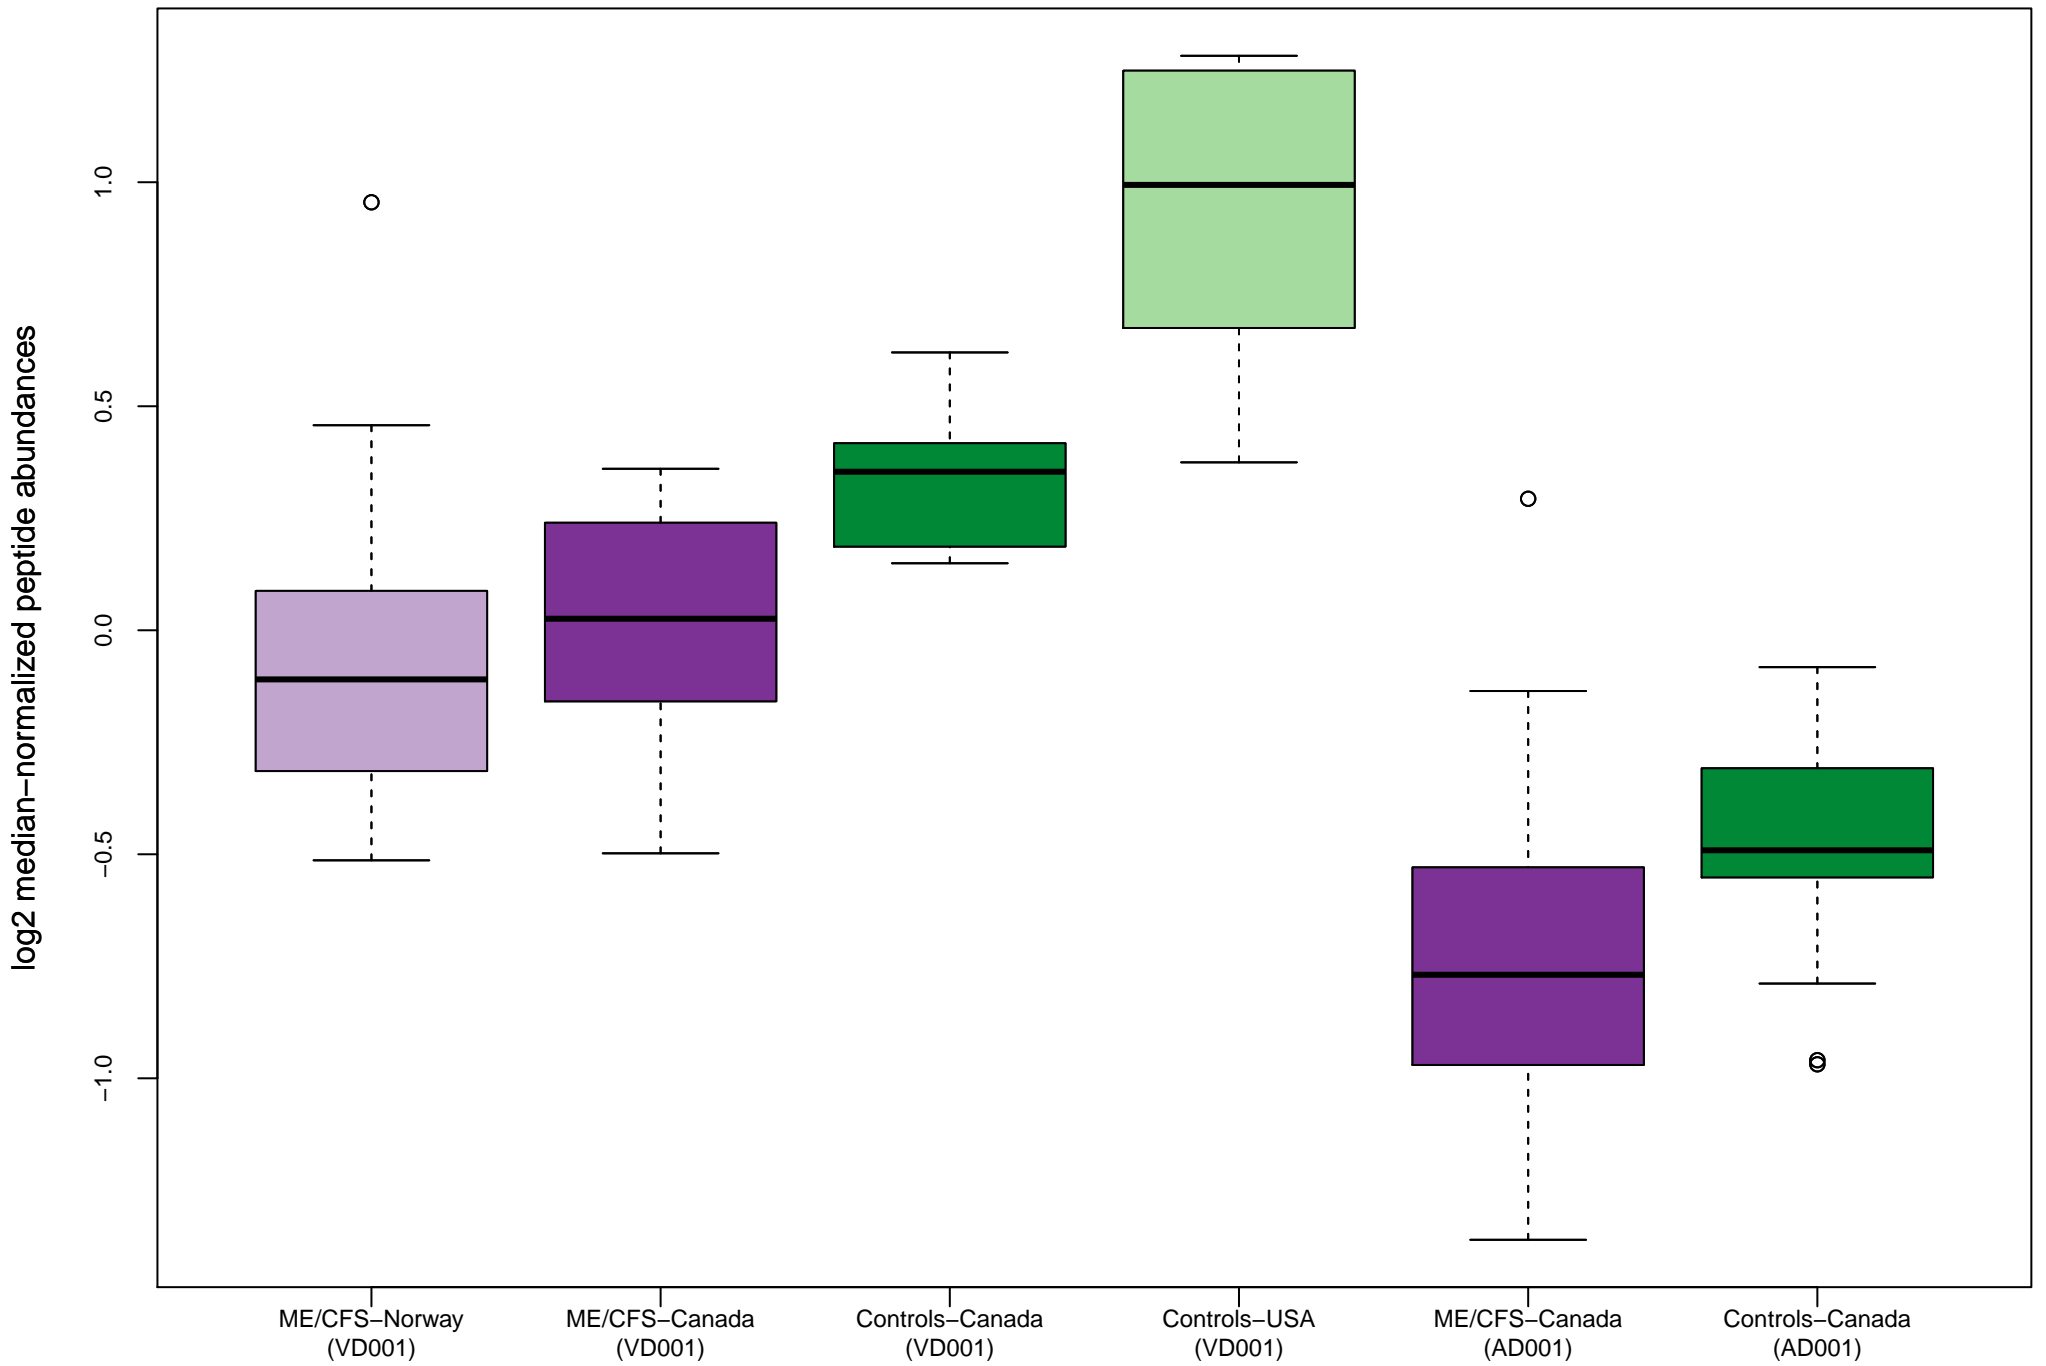

# RRAVLSGVALS

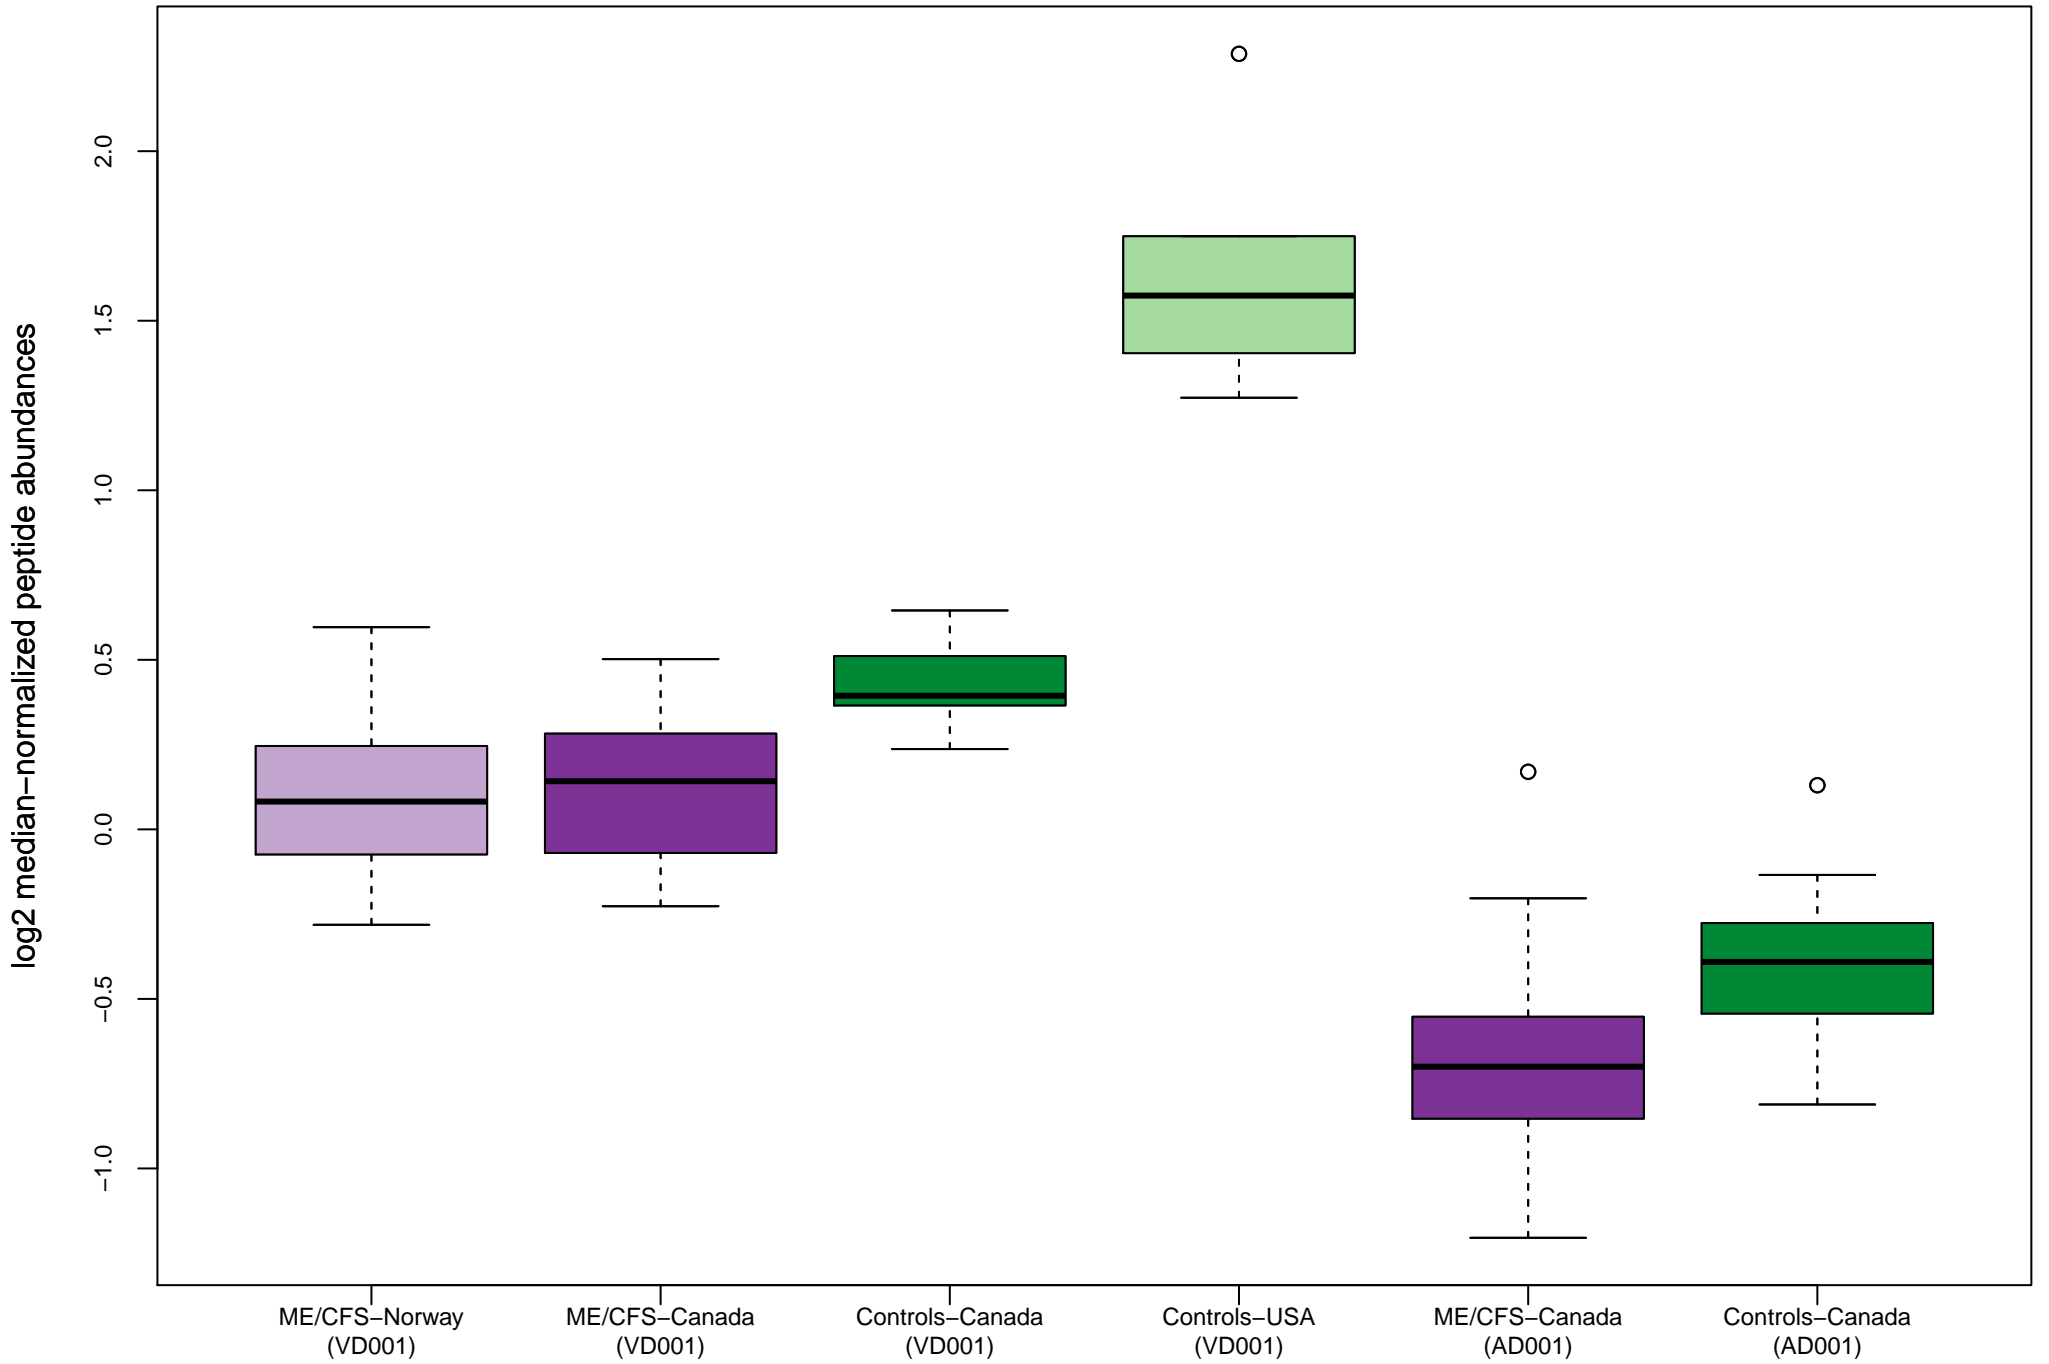

# RRFAYWGVALSG

log2 median-normalized peptide abundances

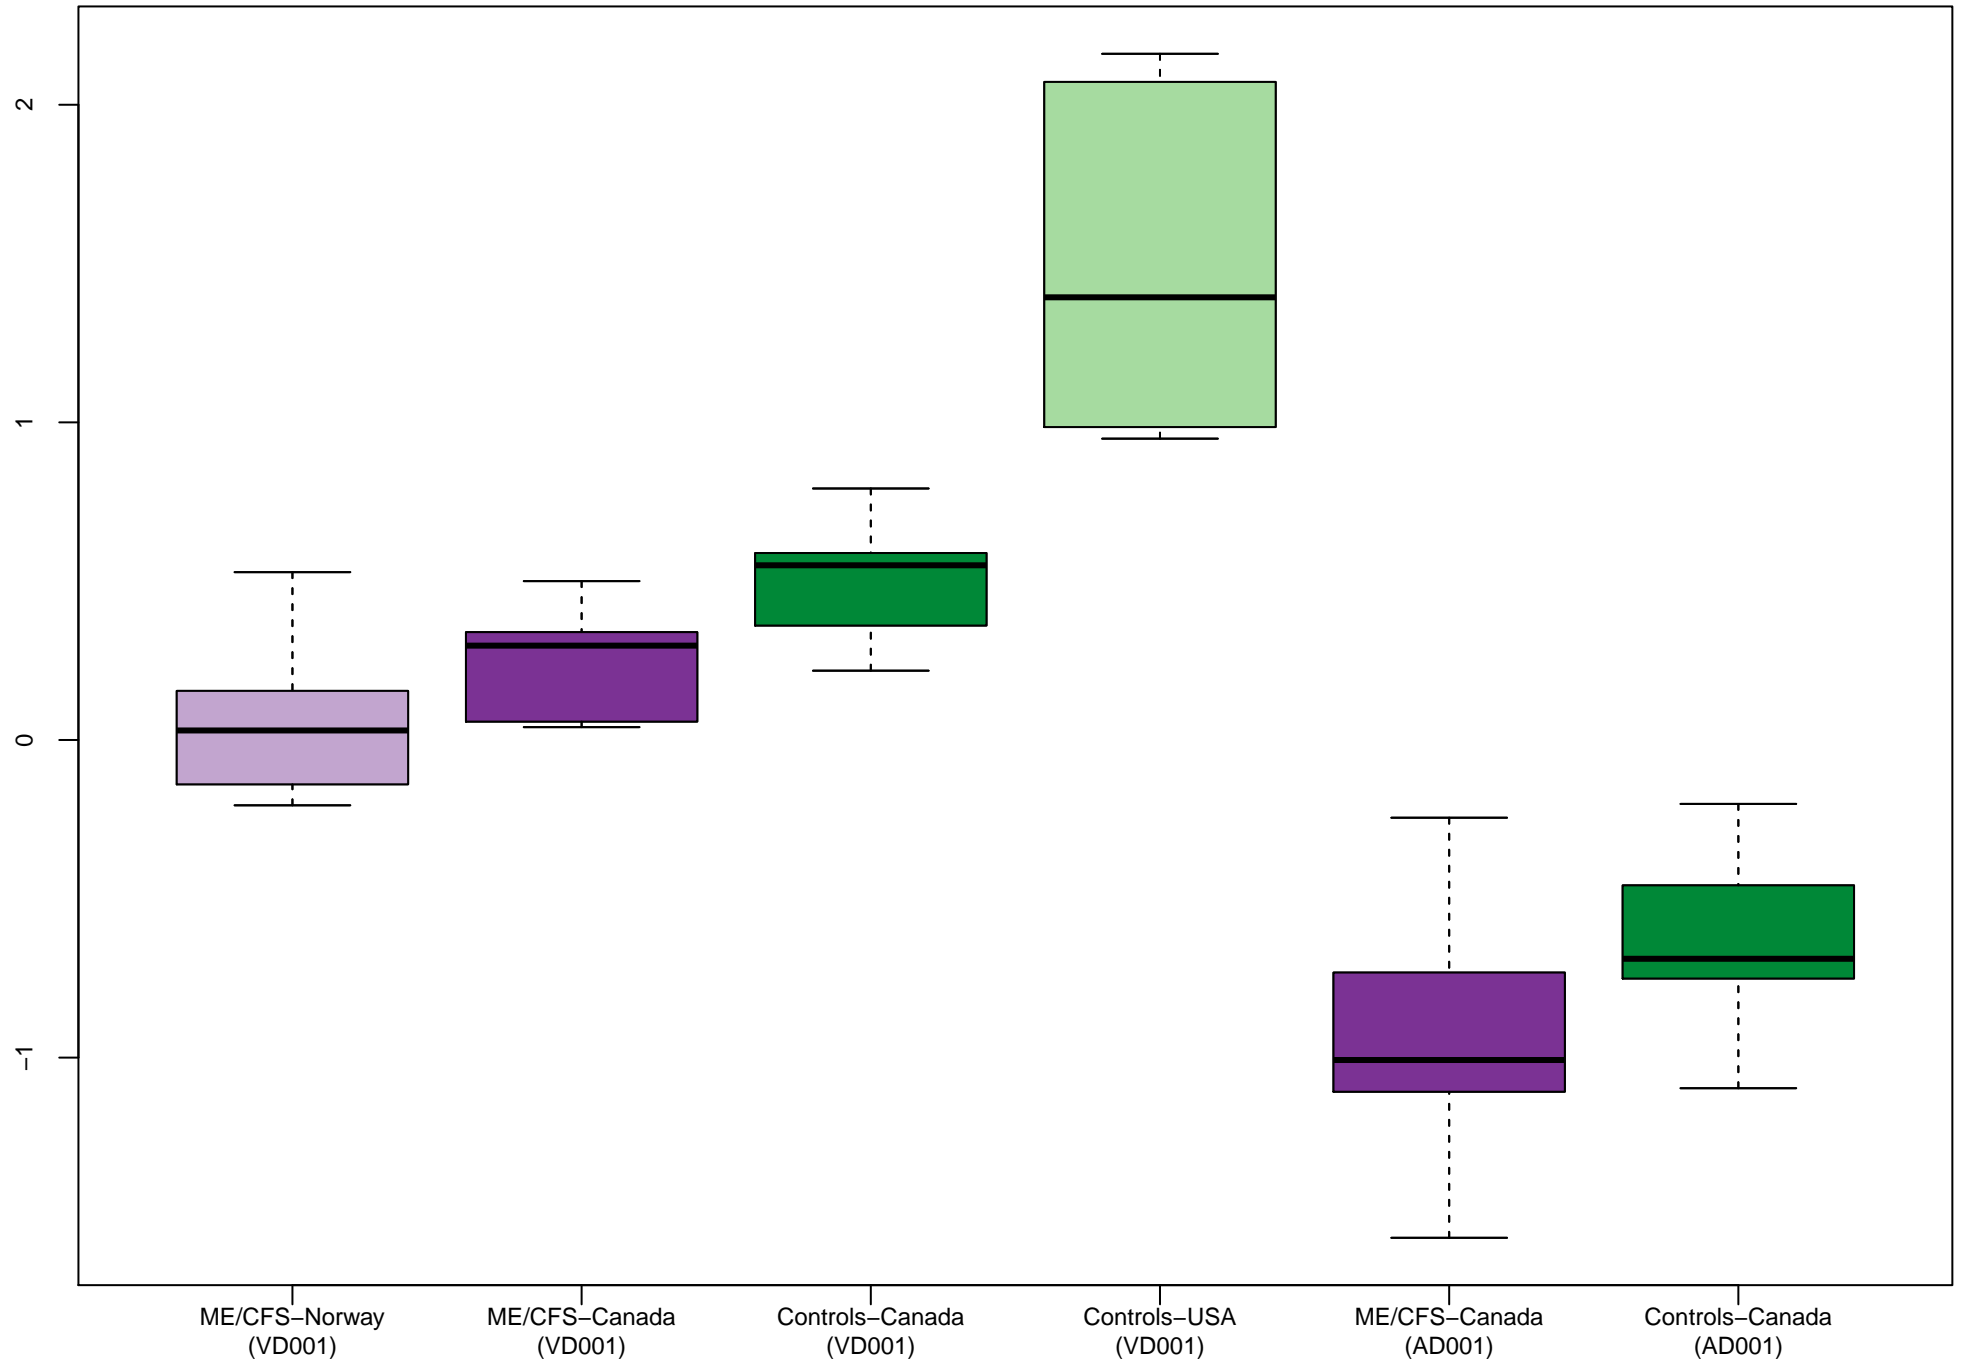

# RRFFASGVALSG

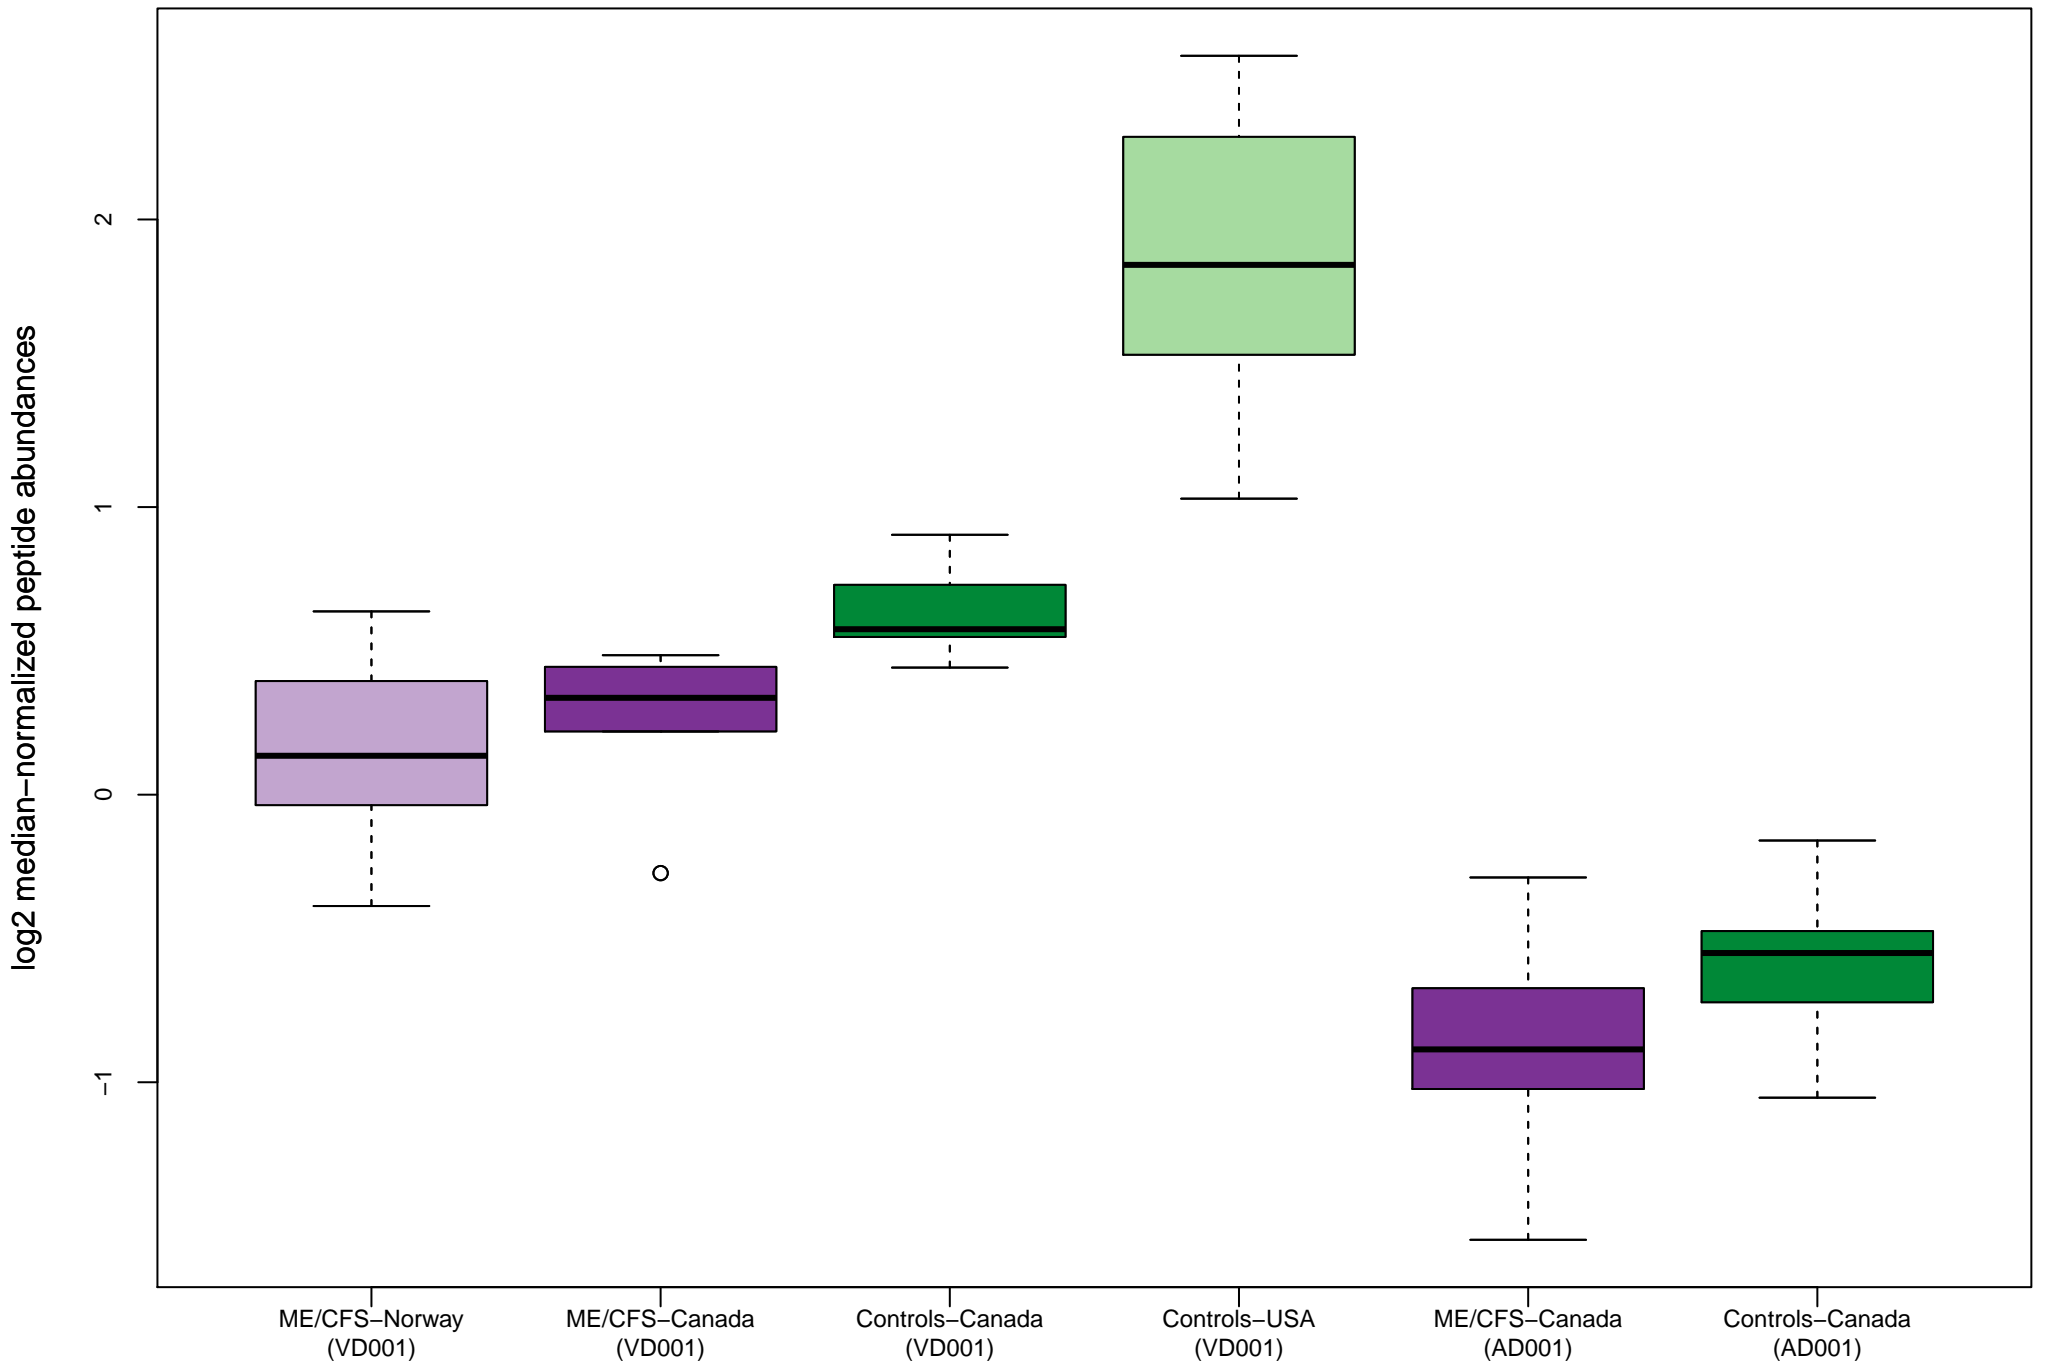

# RRNWGWVSGVAL

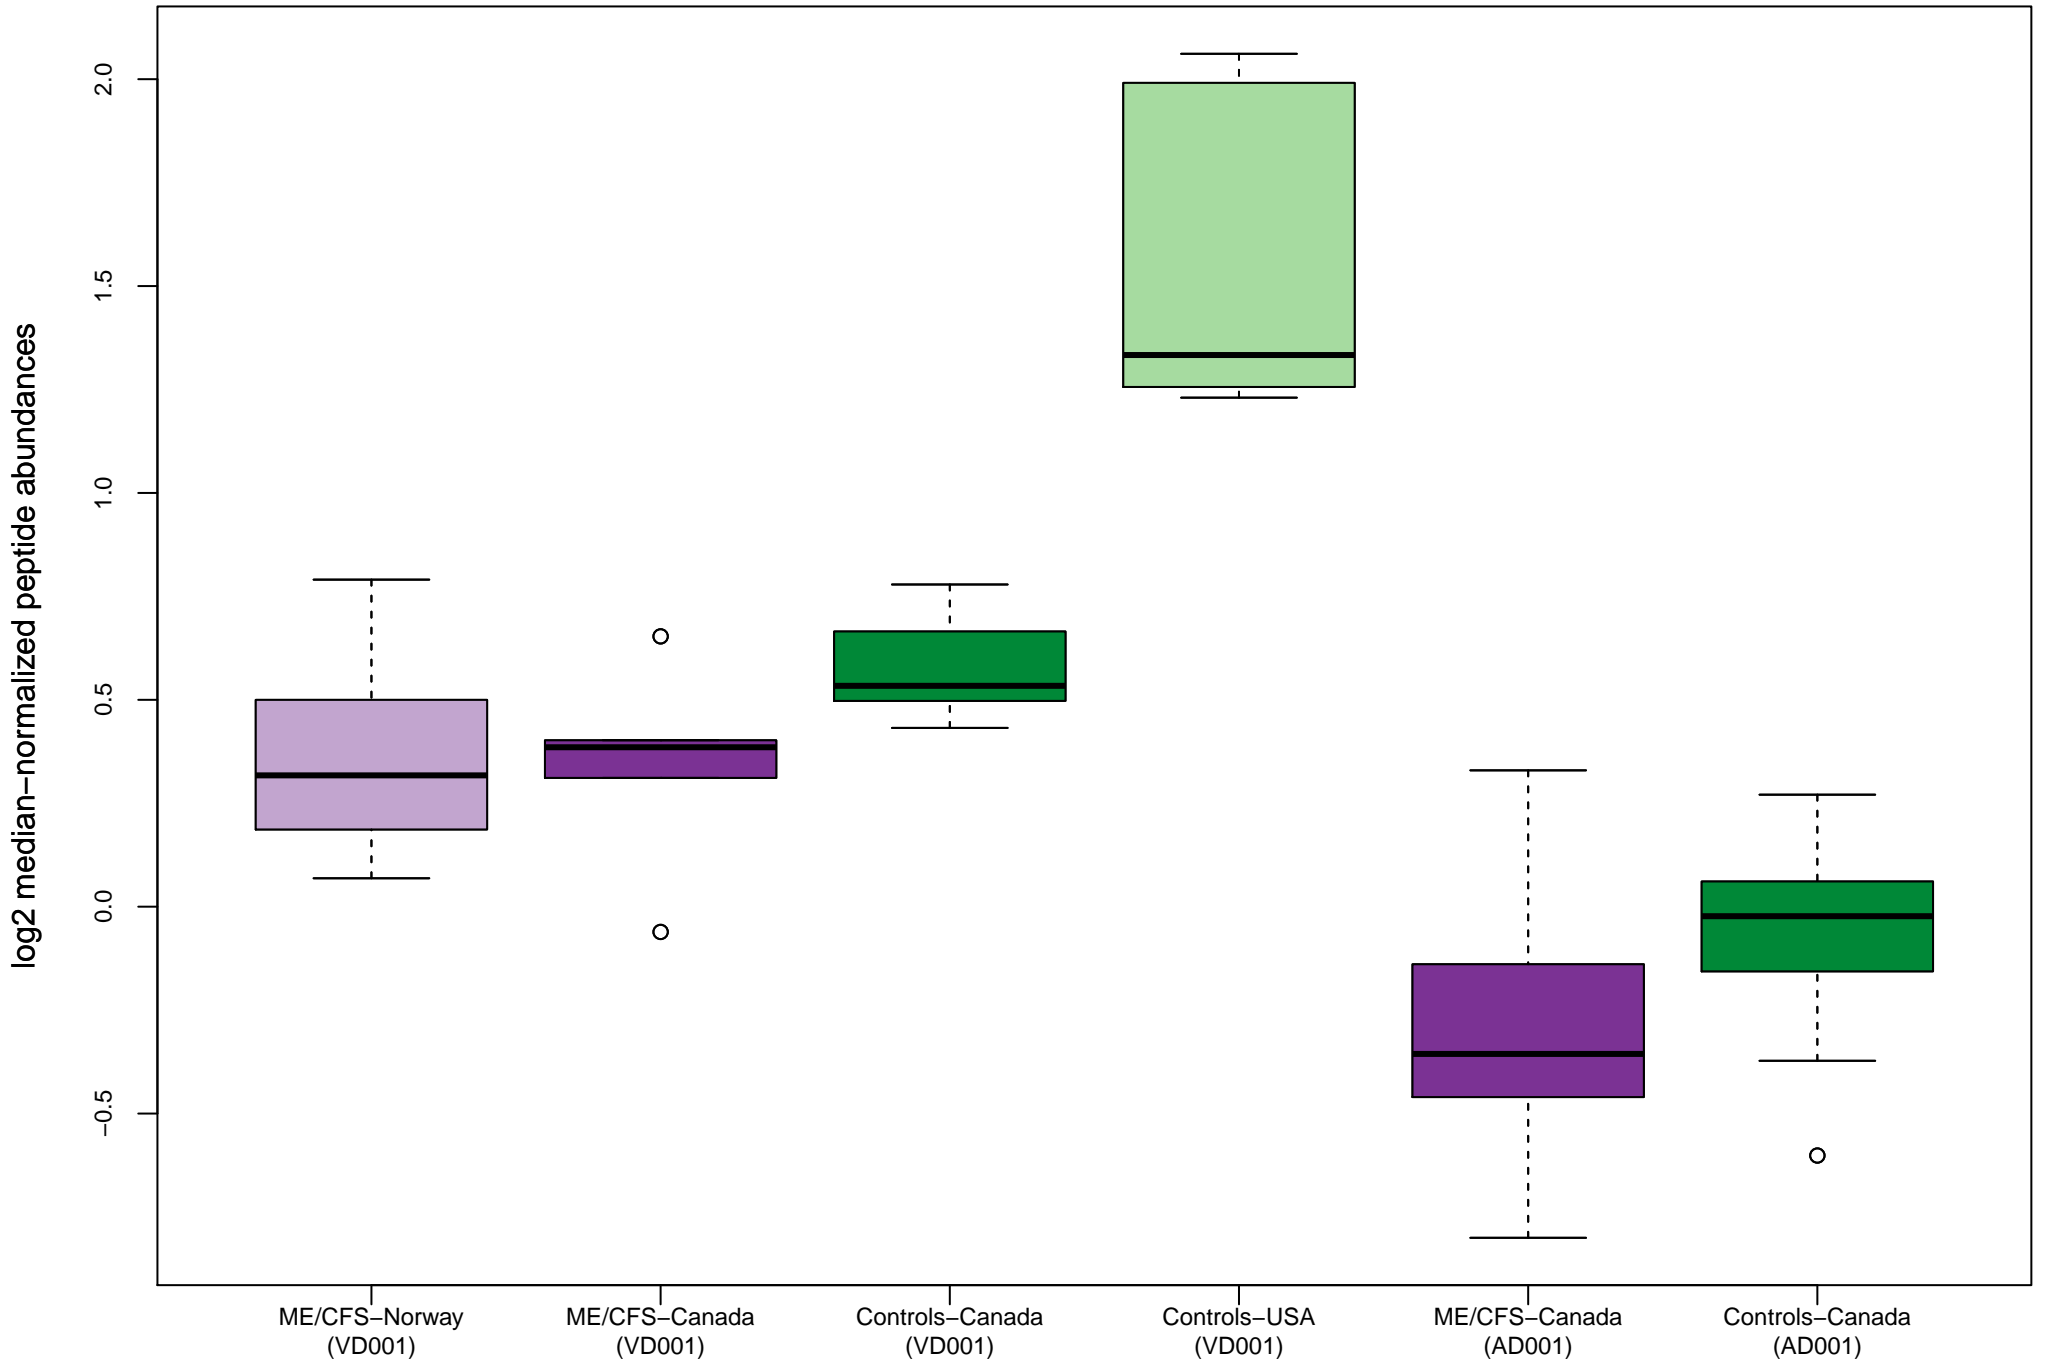



# RRSVLFLSGVLG

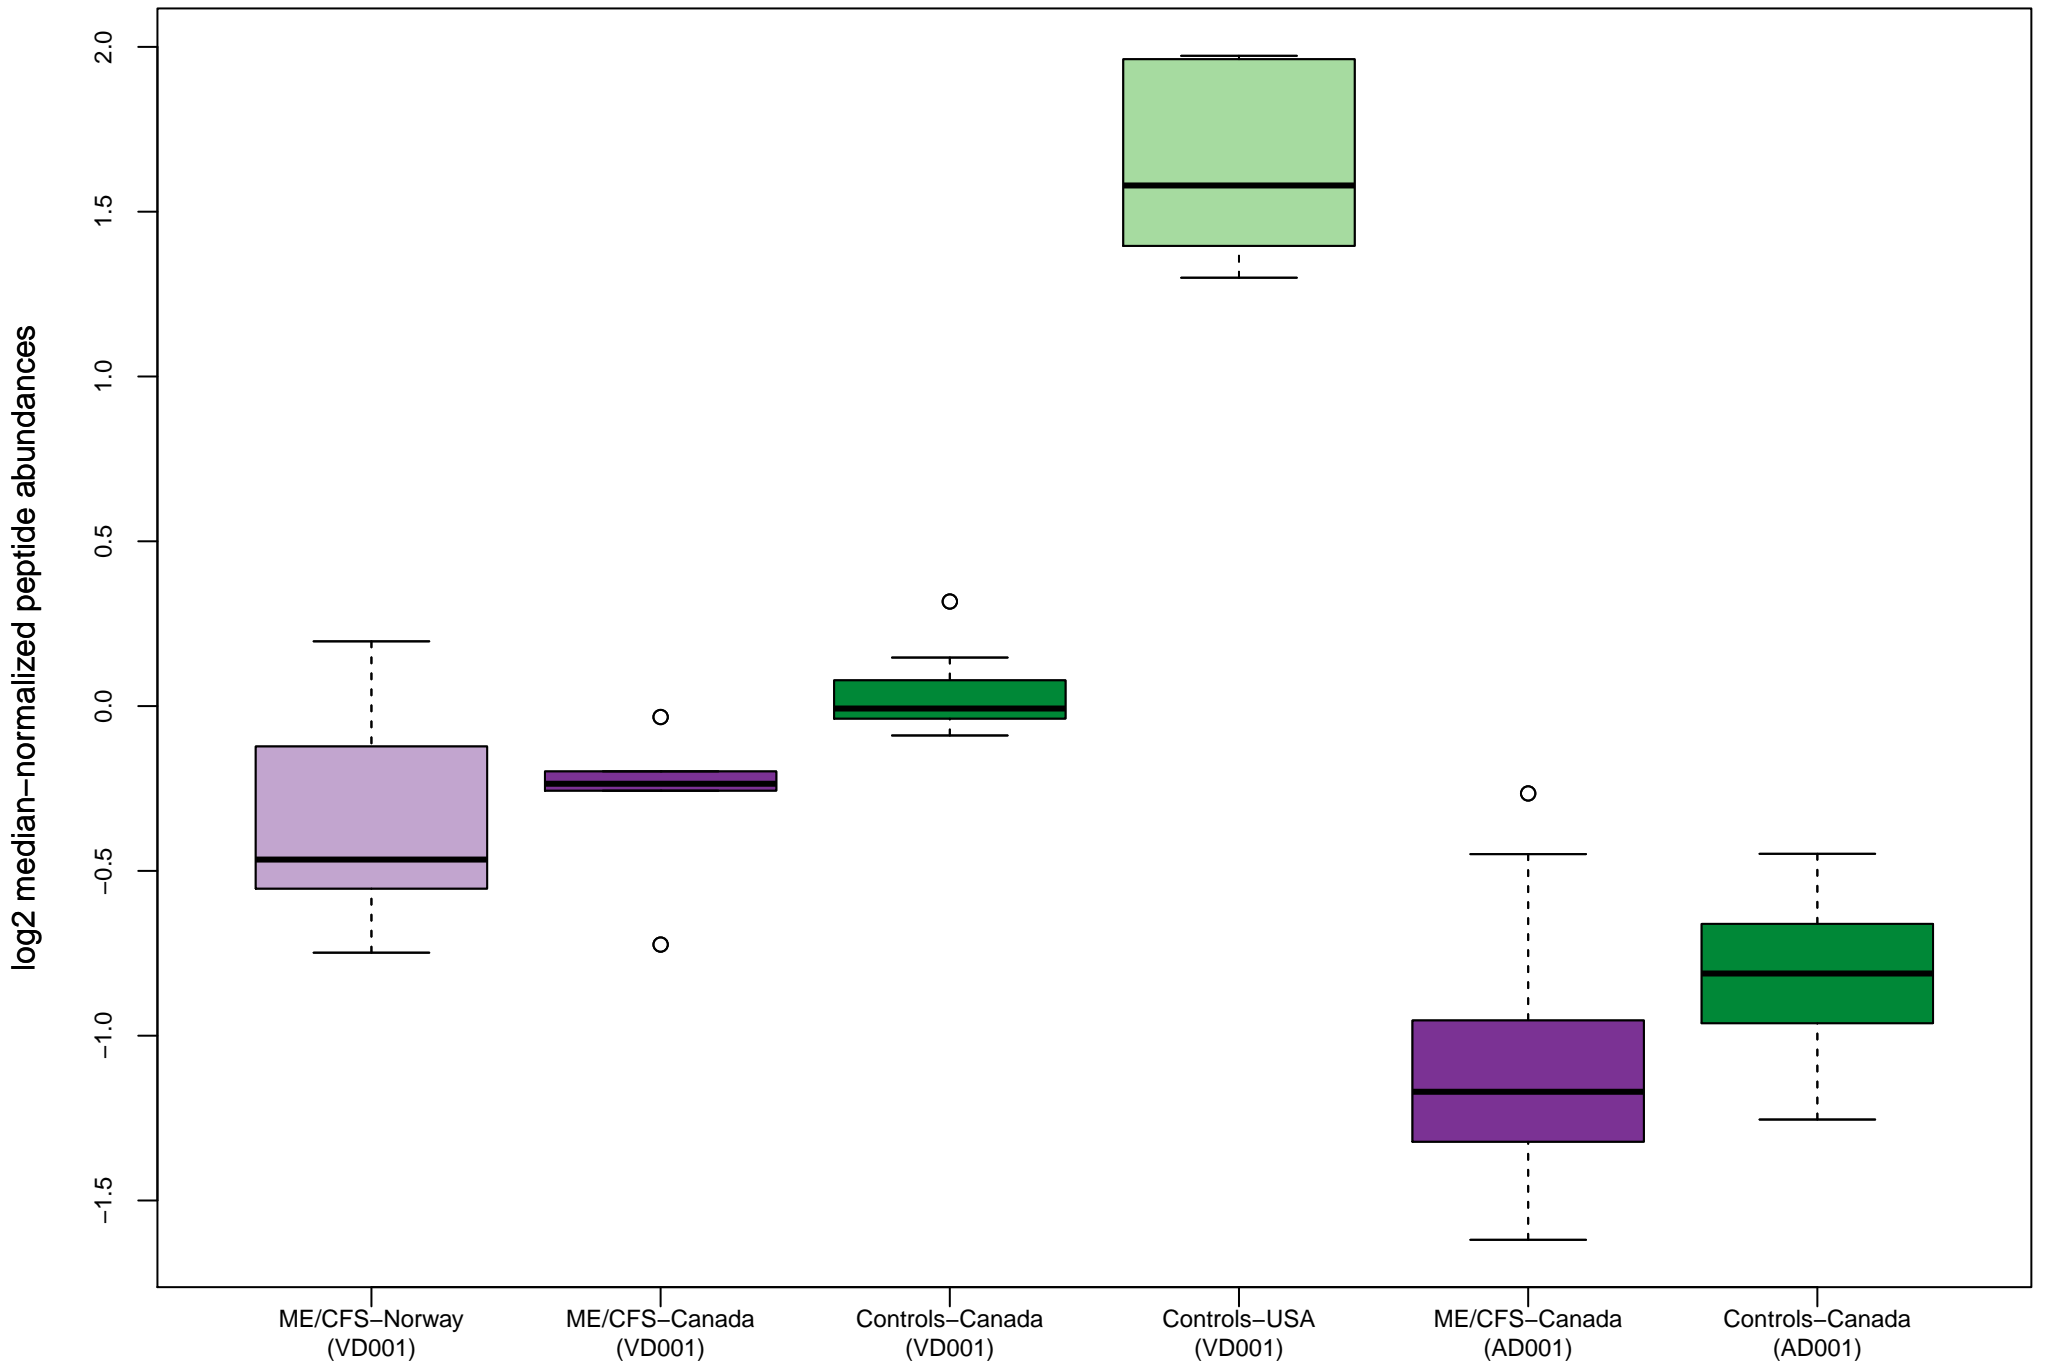

# RRSYVWSGVALS

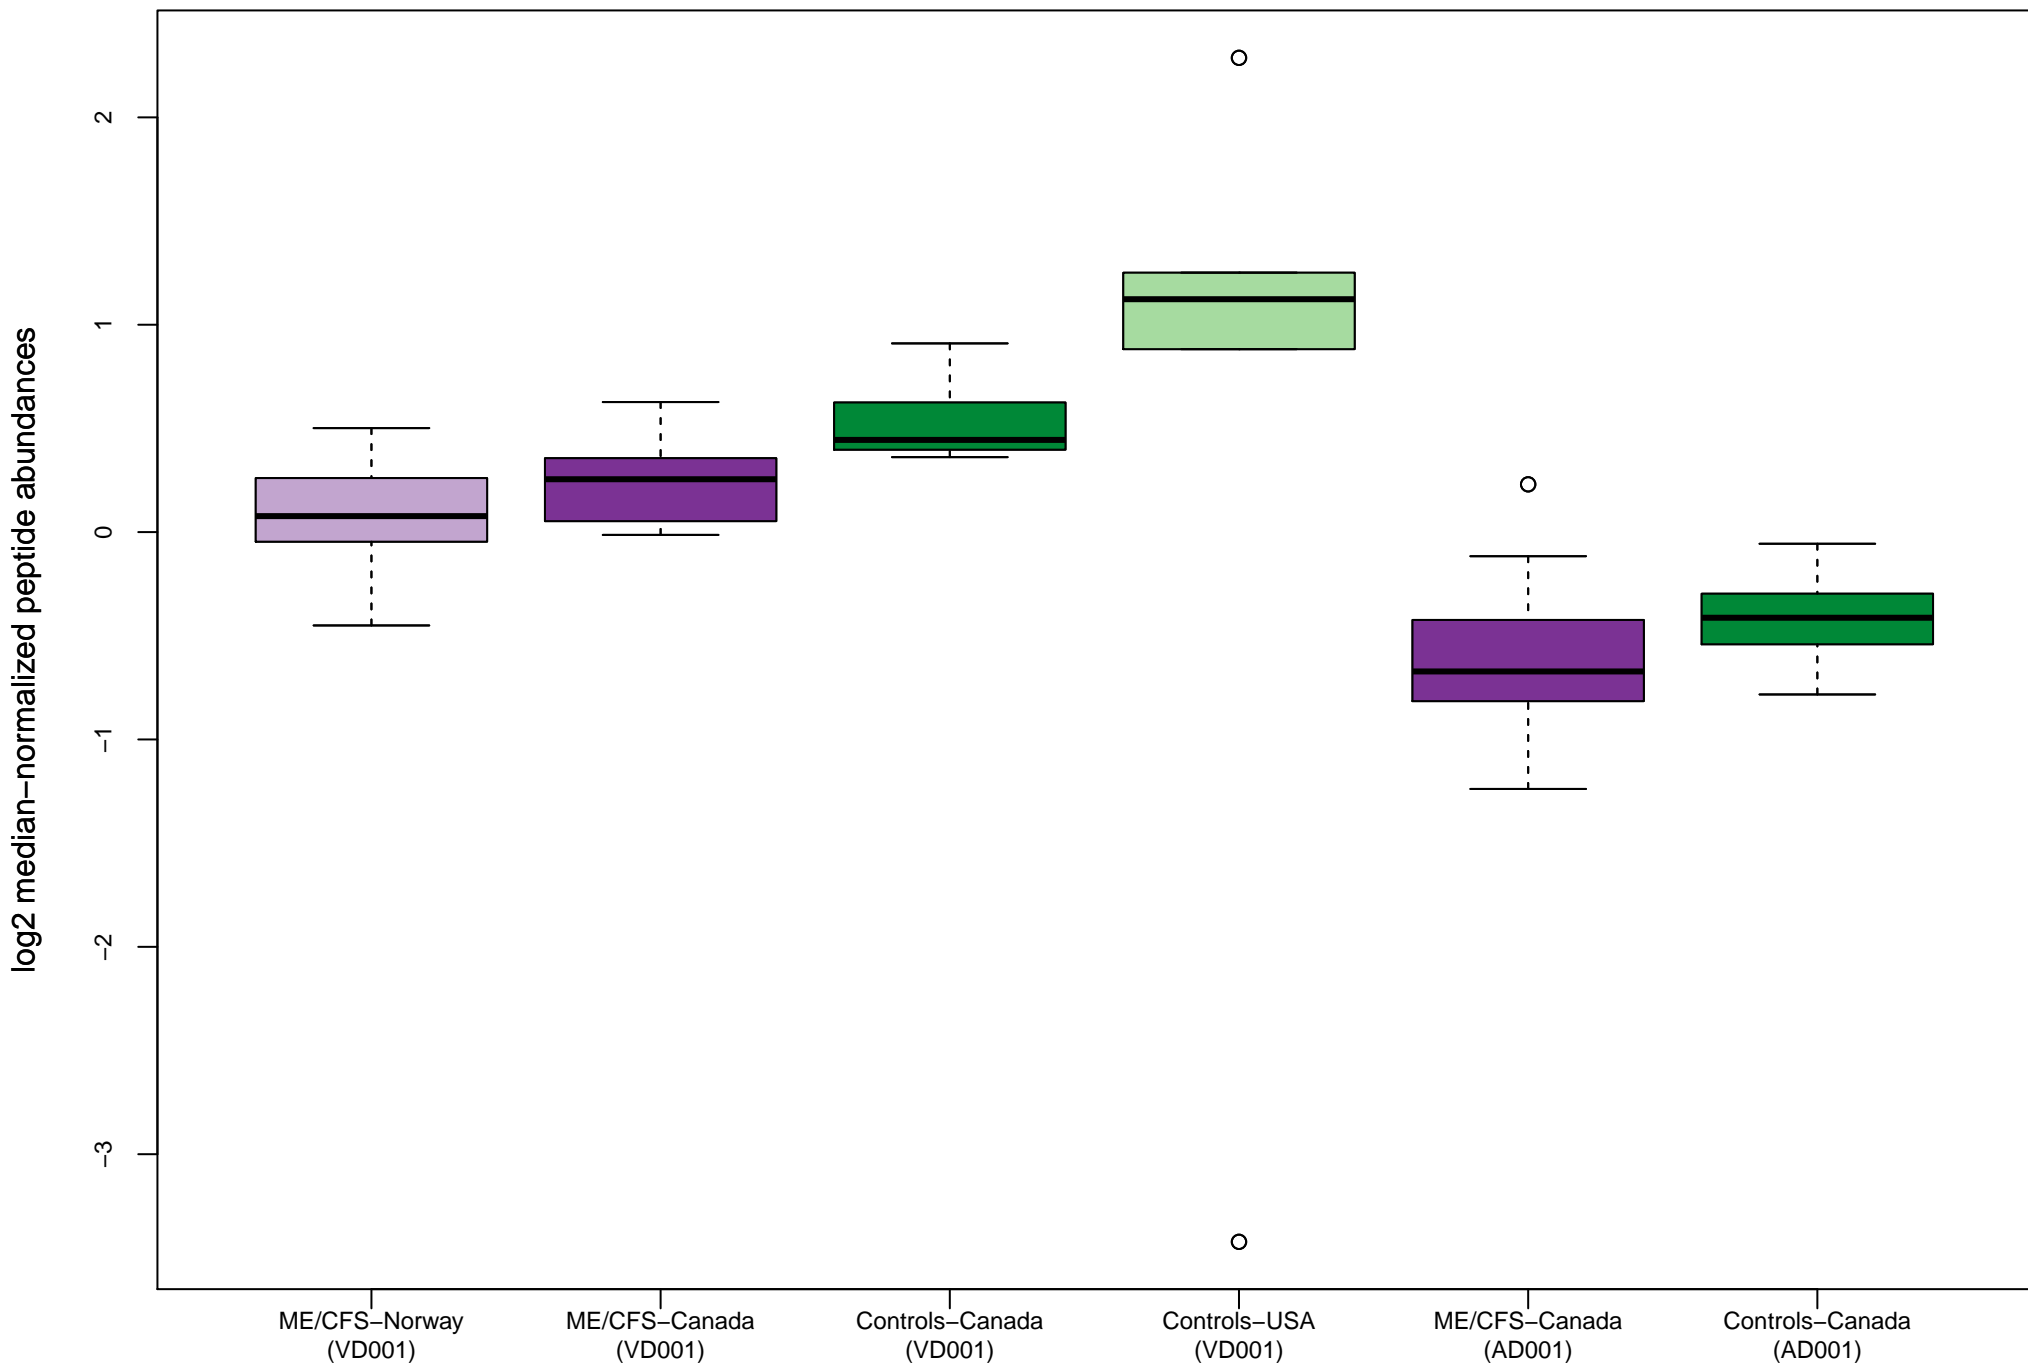

# RRVVLYLGALSG

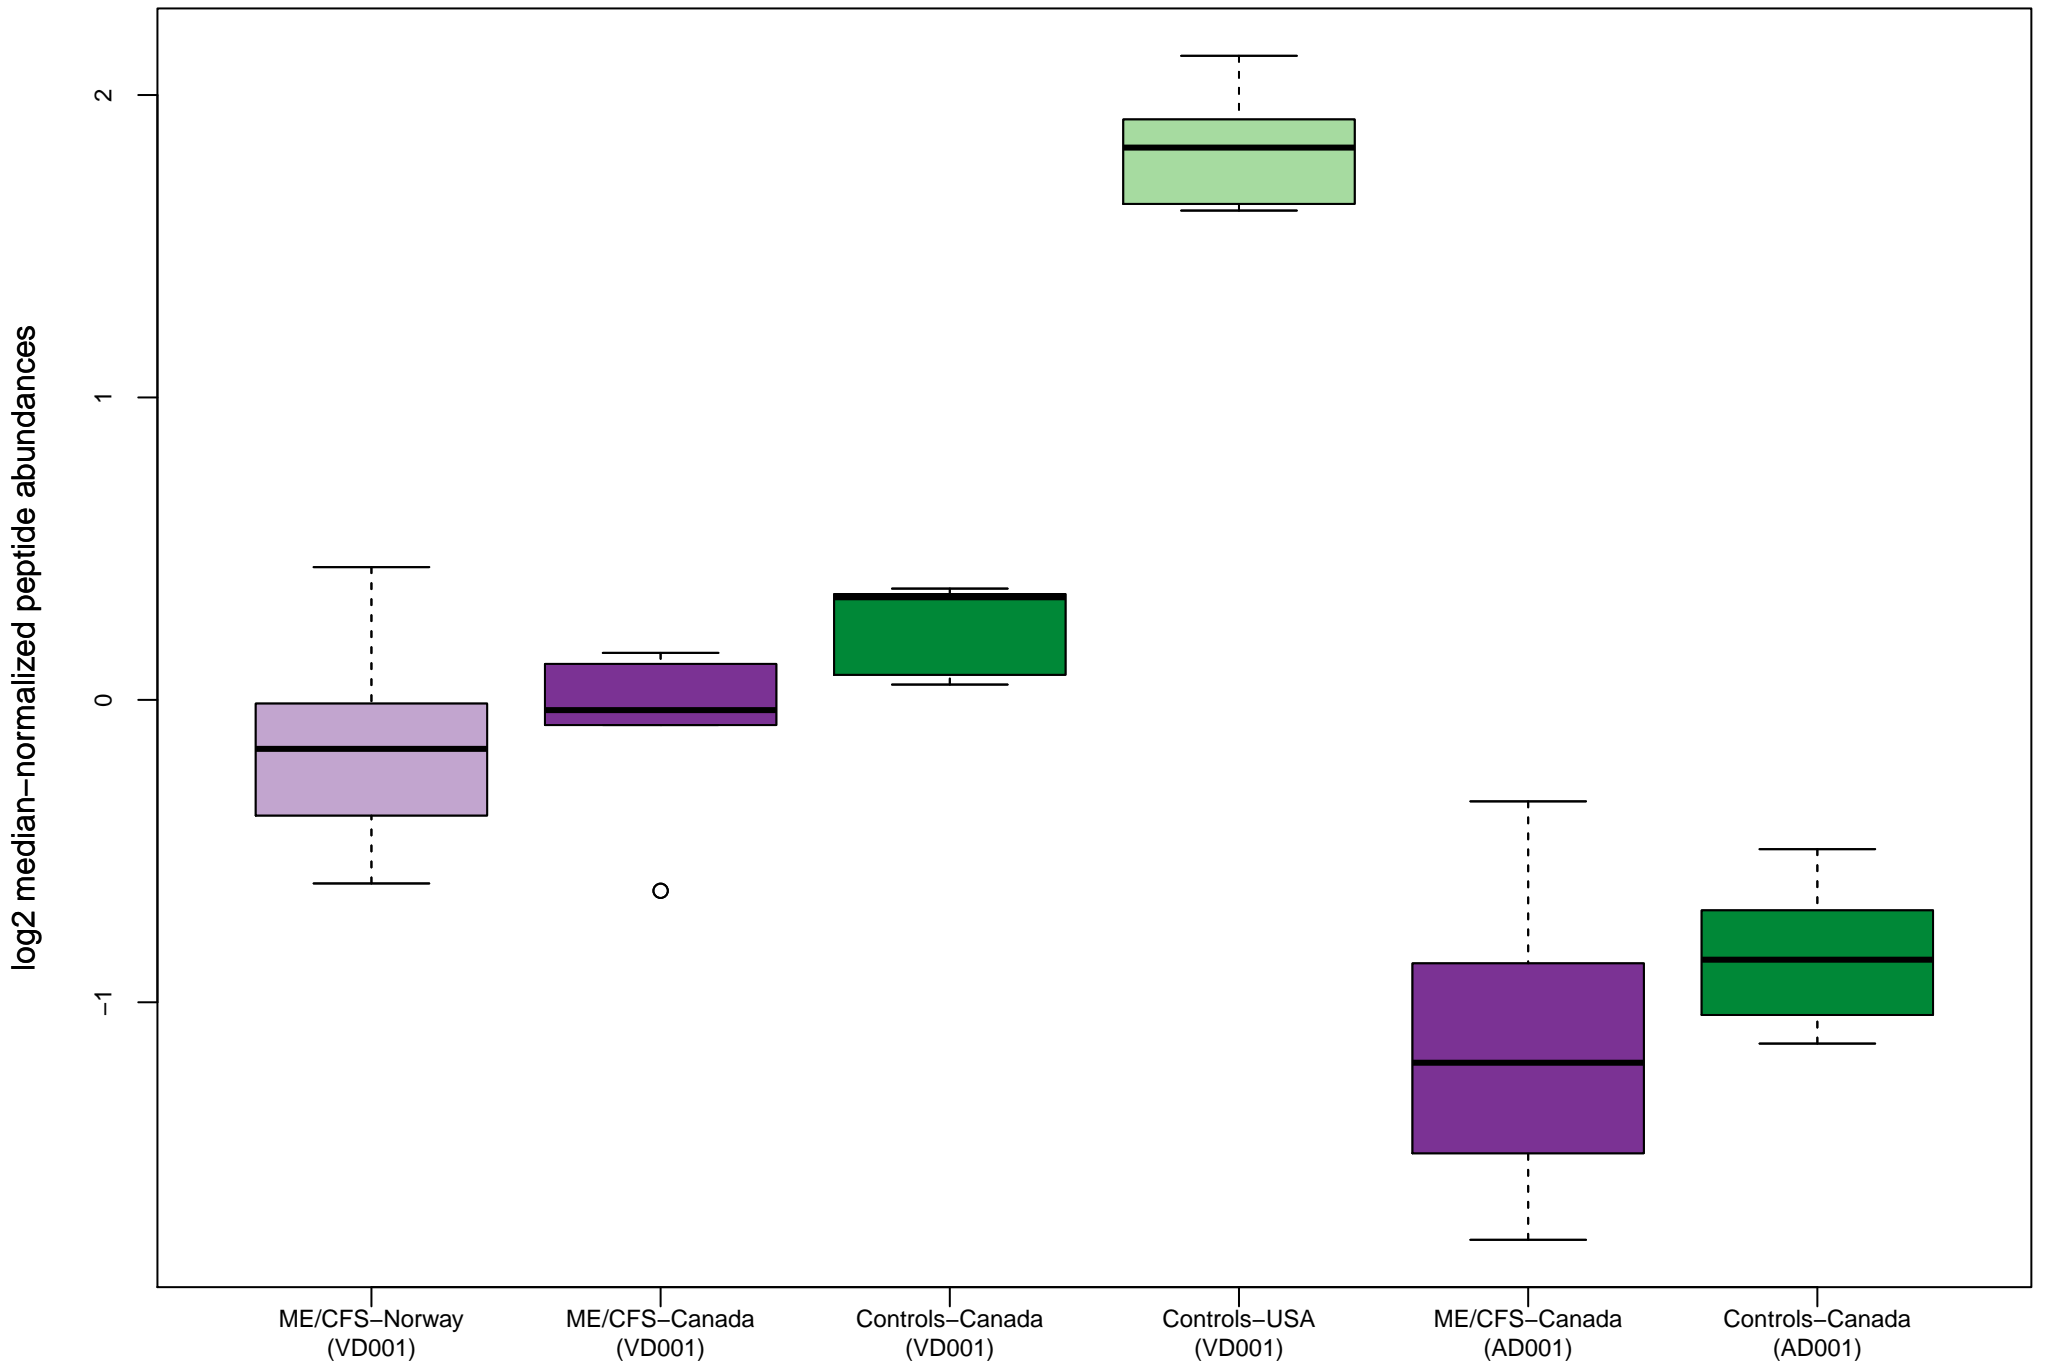

# RRWNFVSVSALS

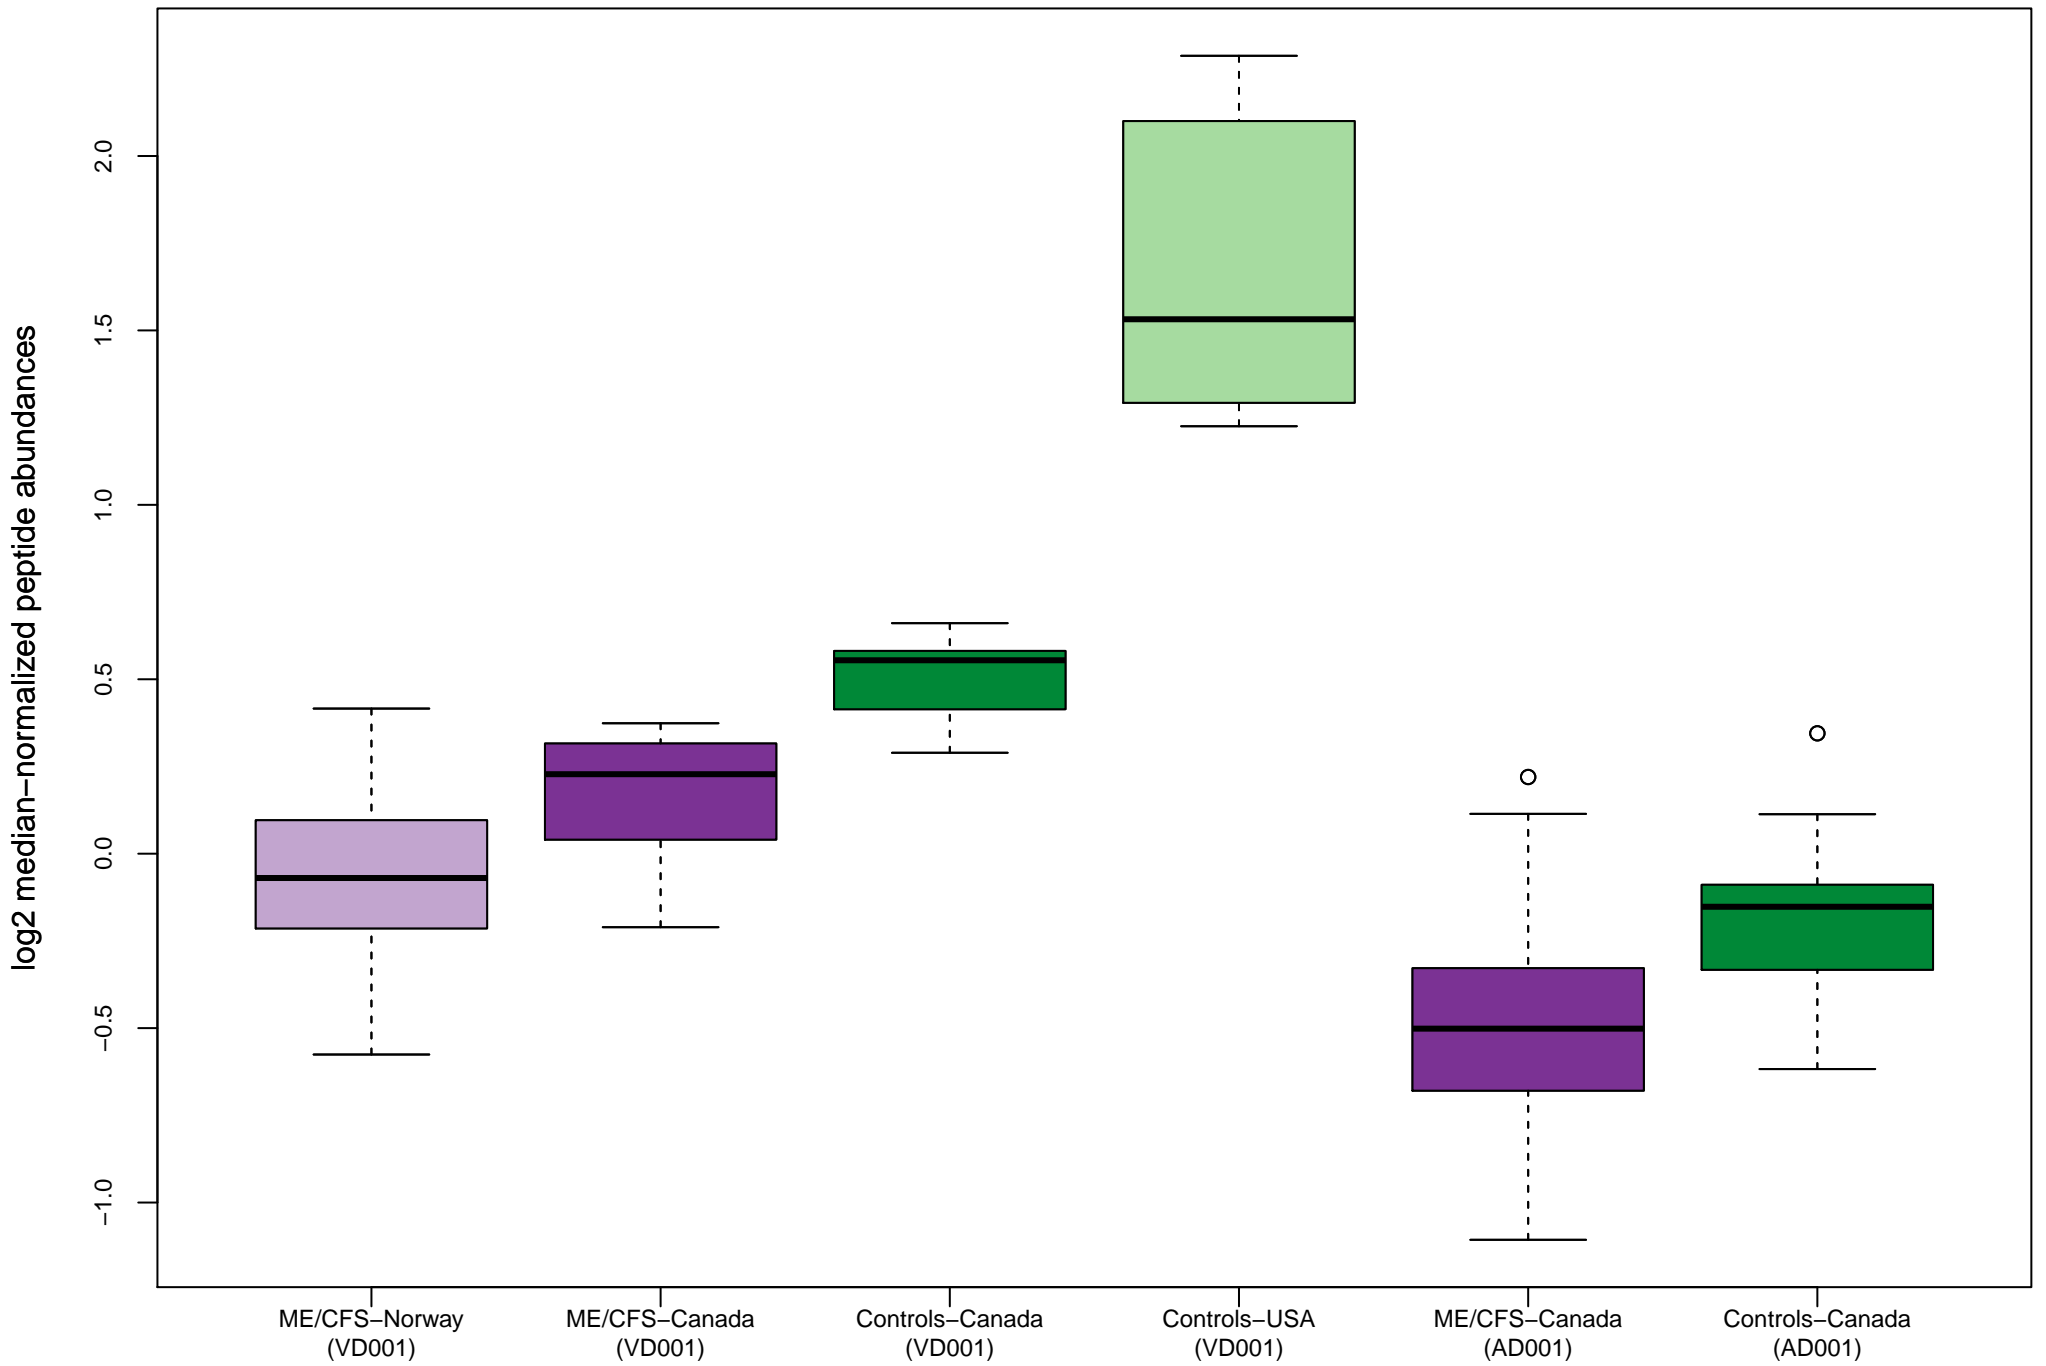

# RSGYYHLFRNLS

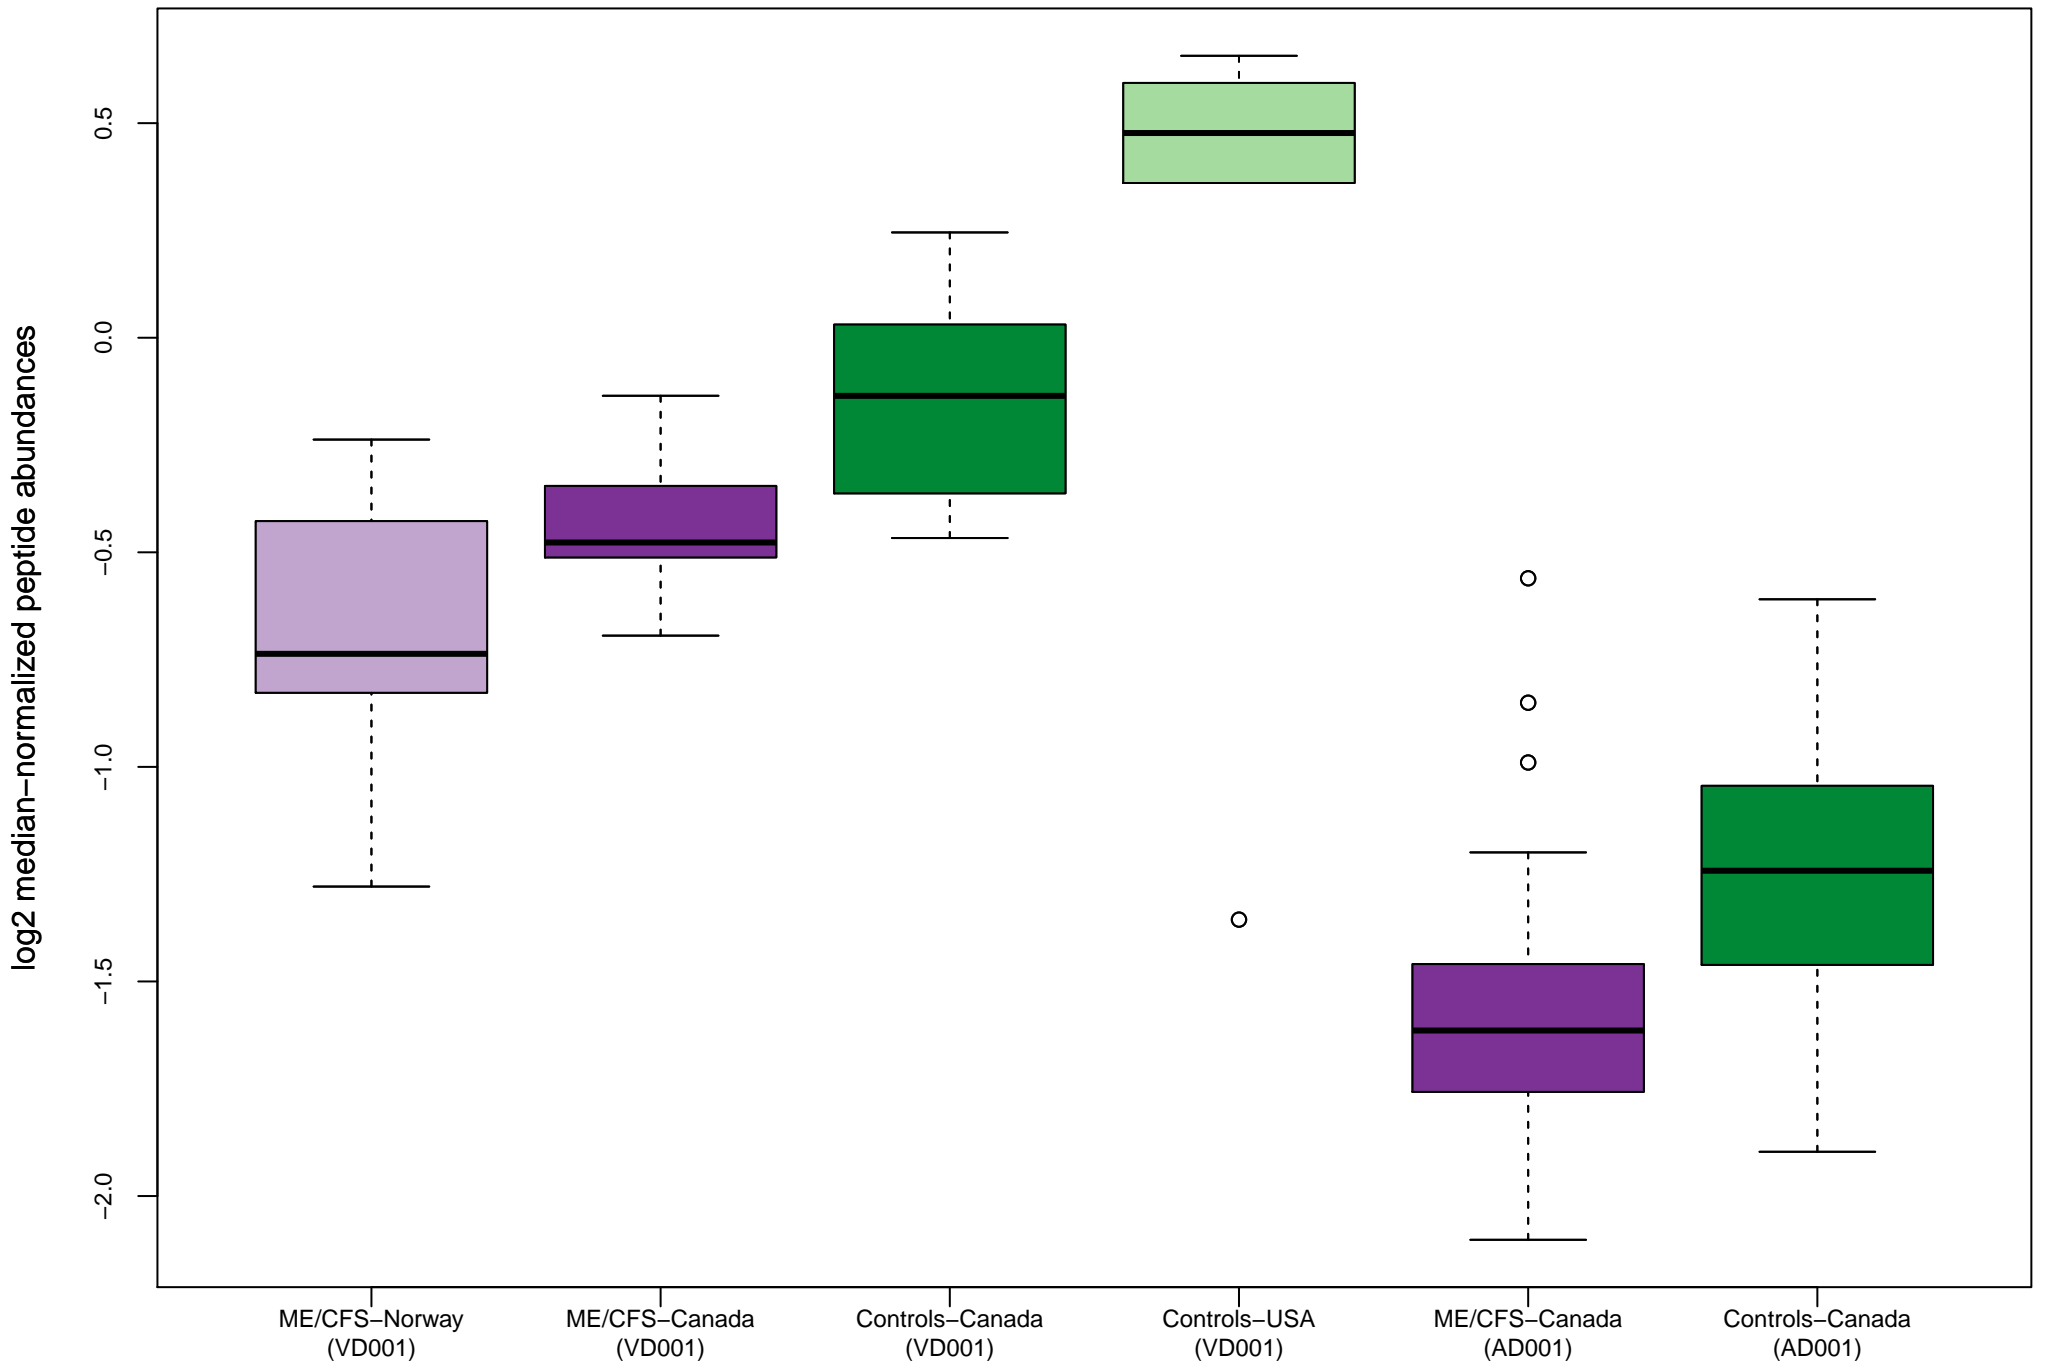

# RSLLPWVALGLG

log2 median-normalized peptide abundances

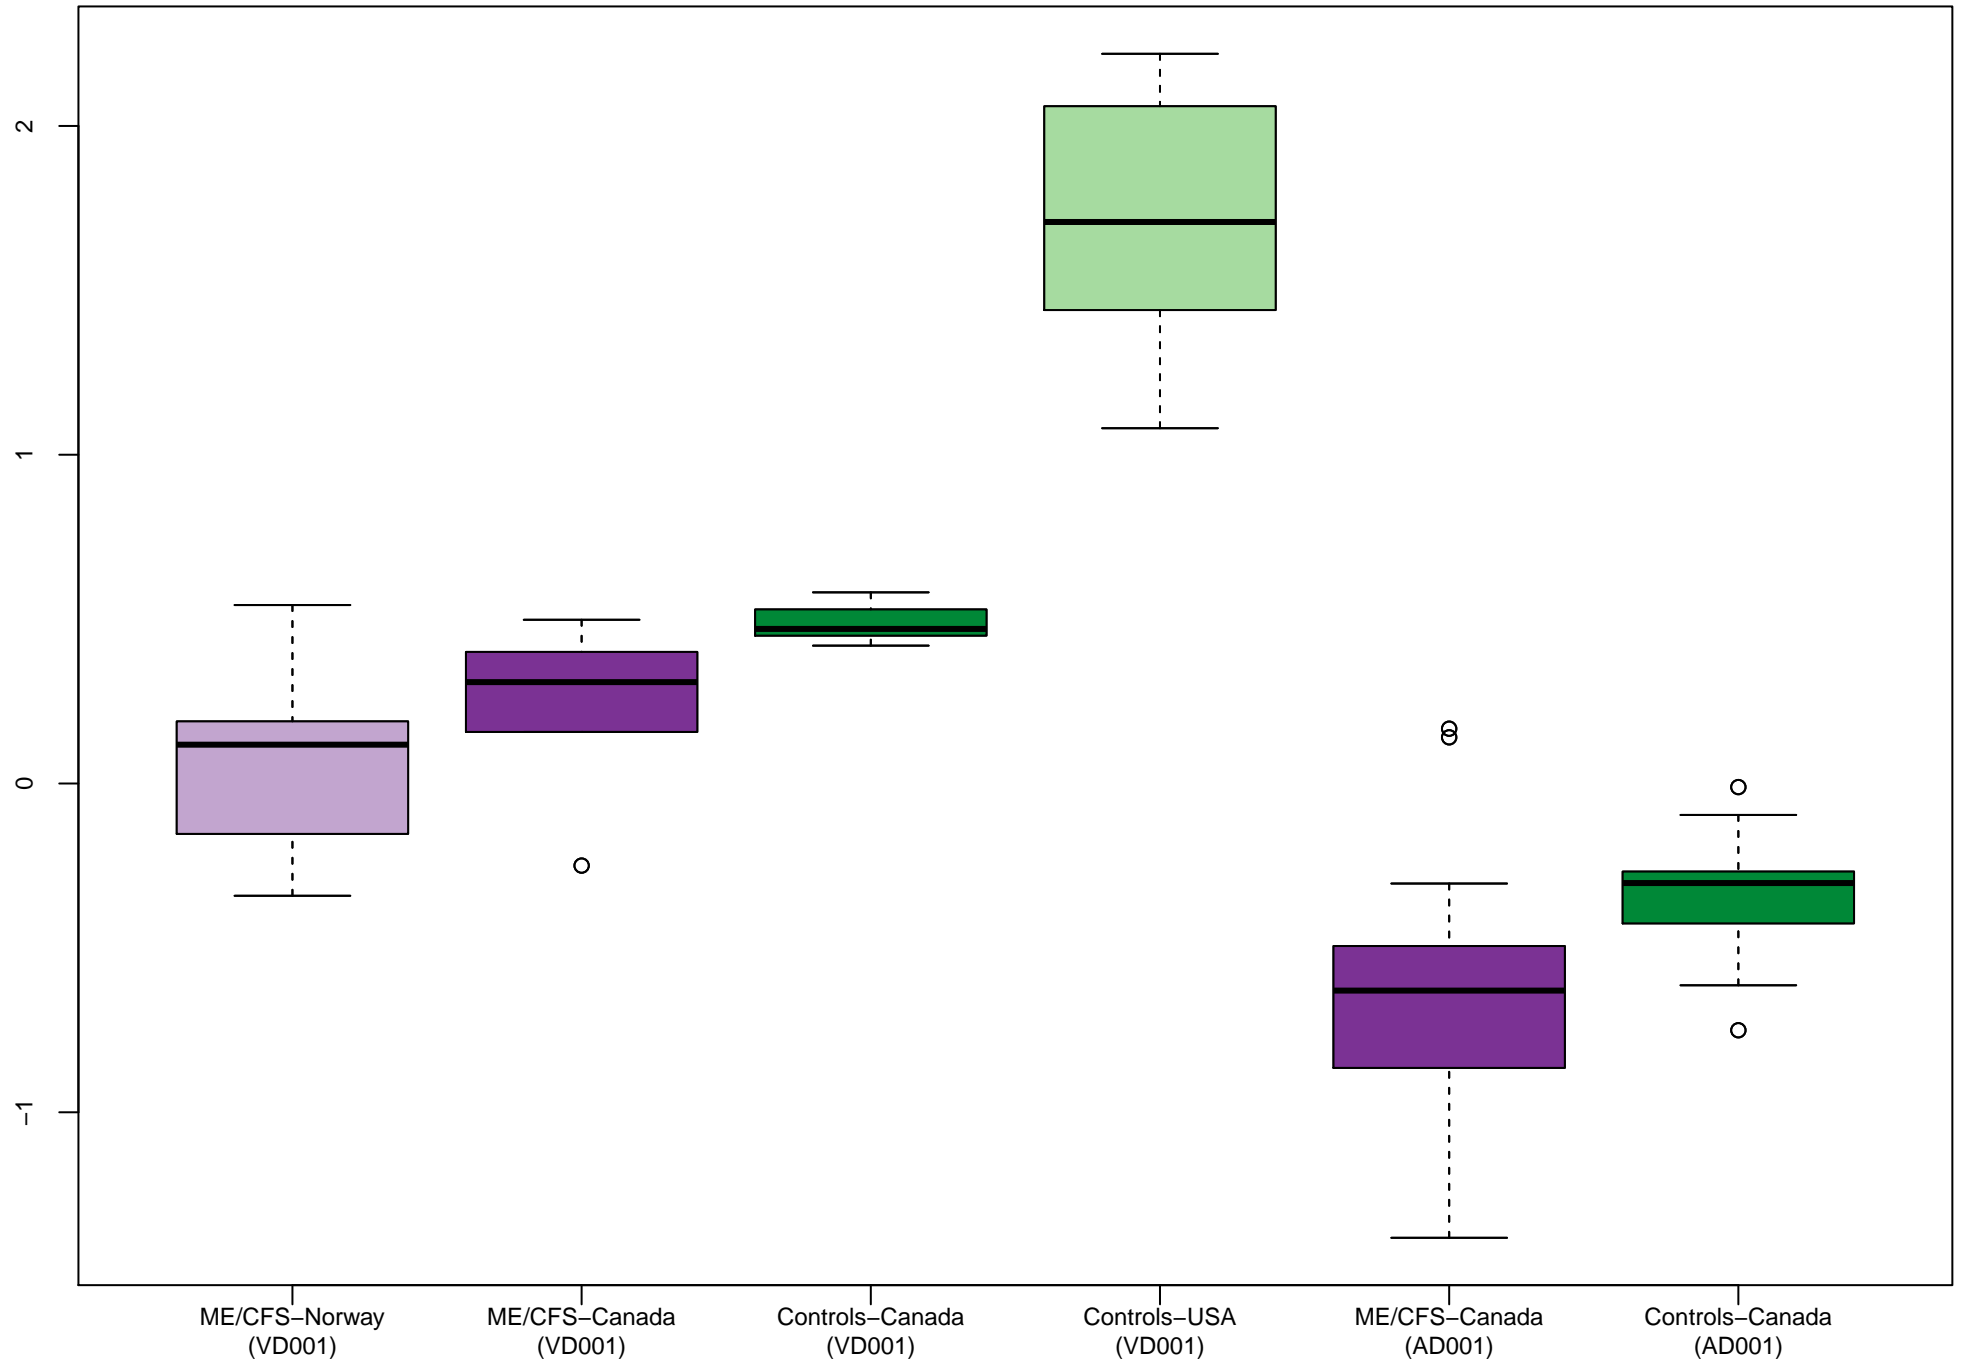

# RSVYYNGVALSG

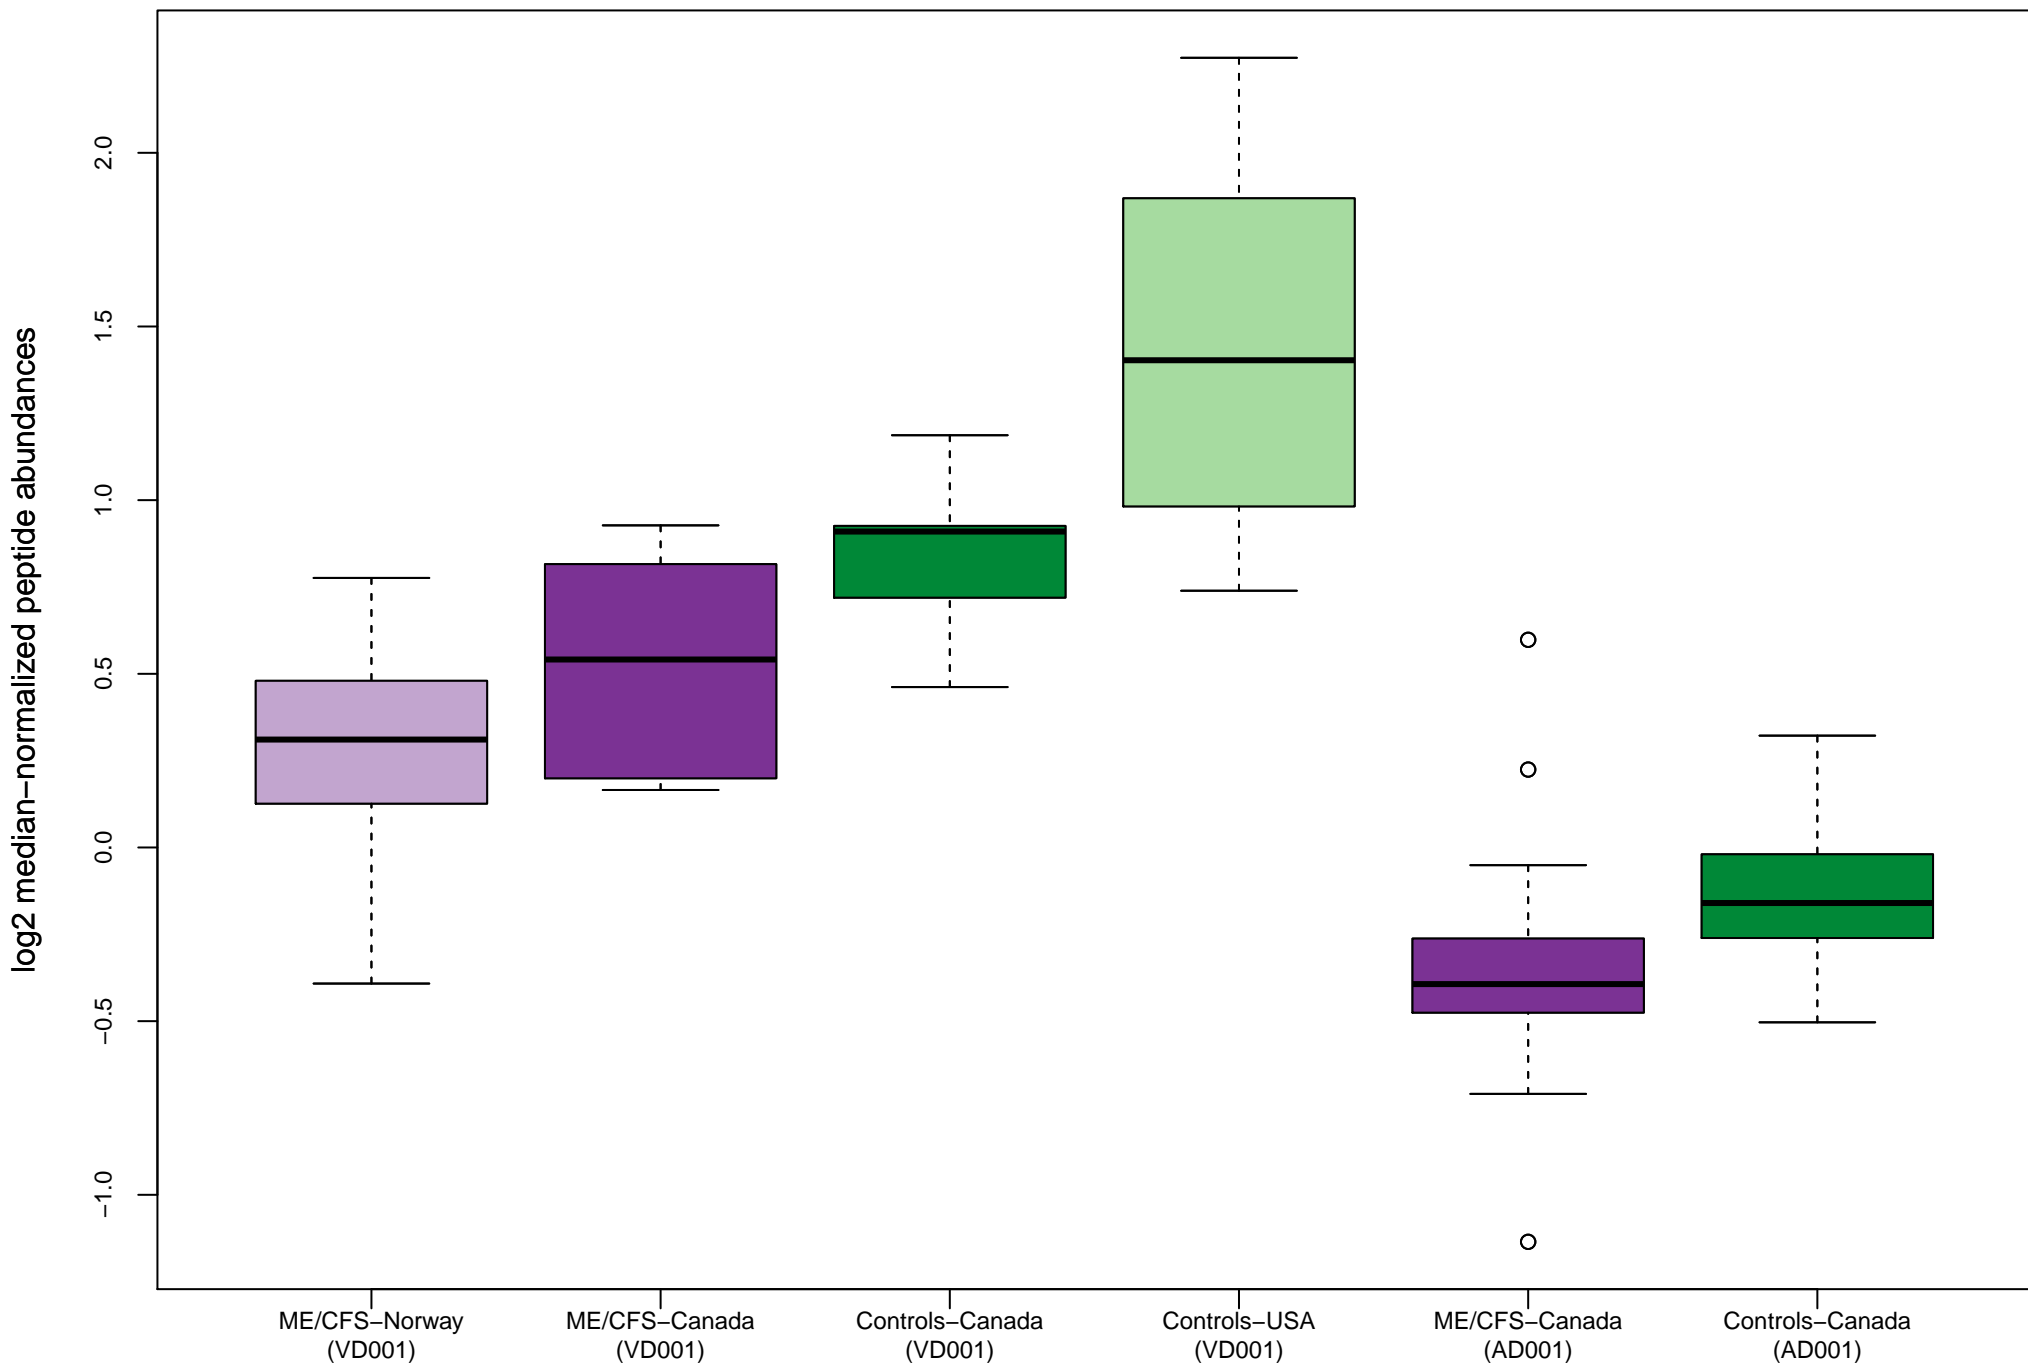

# RSYSYVFRKDLL

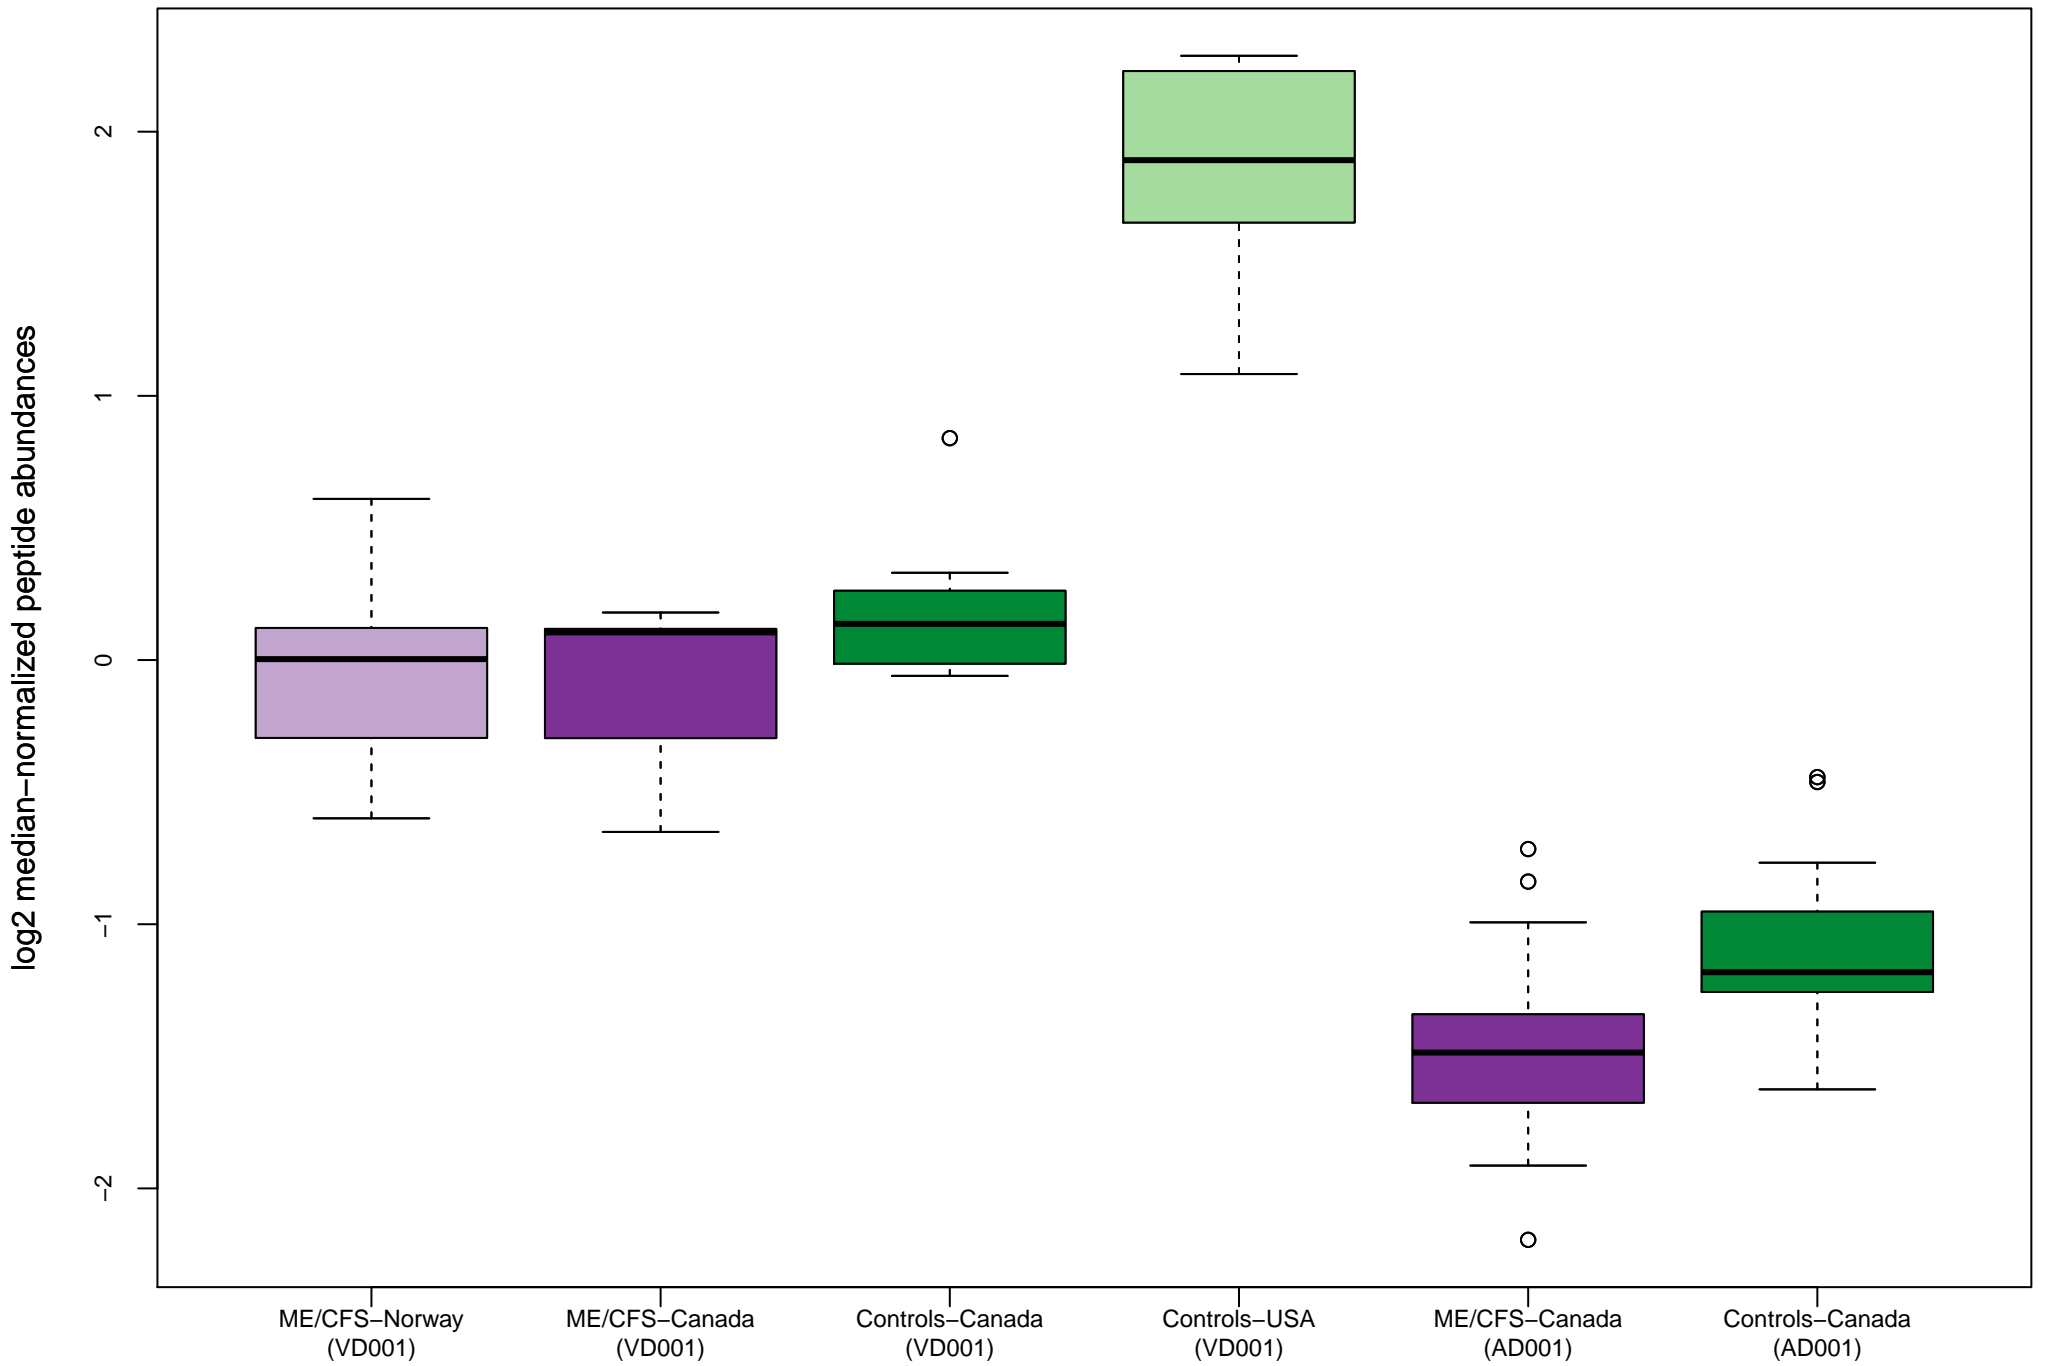



# RVFNHLYAQFNA

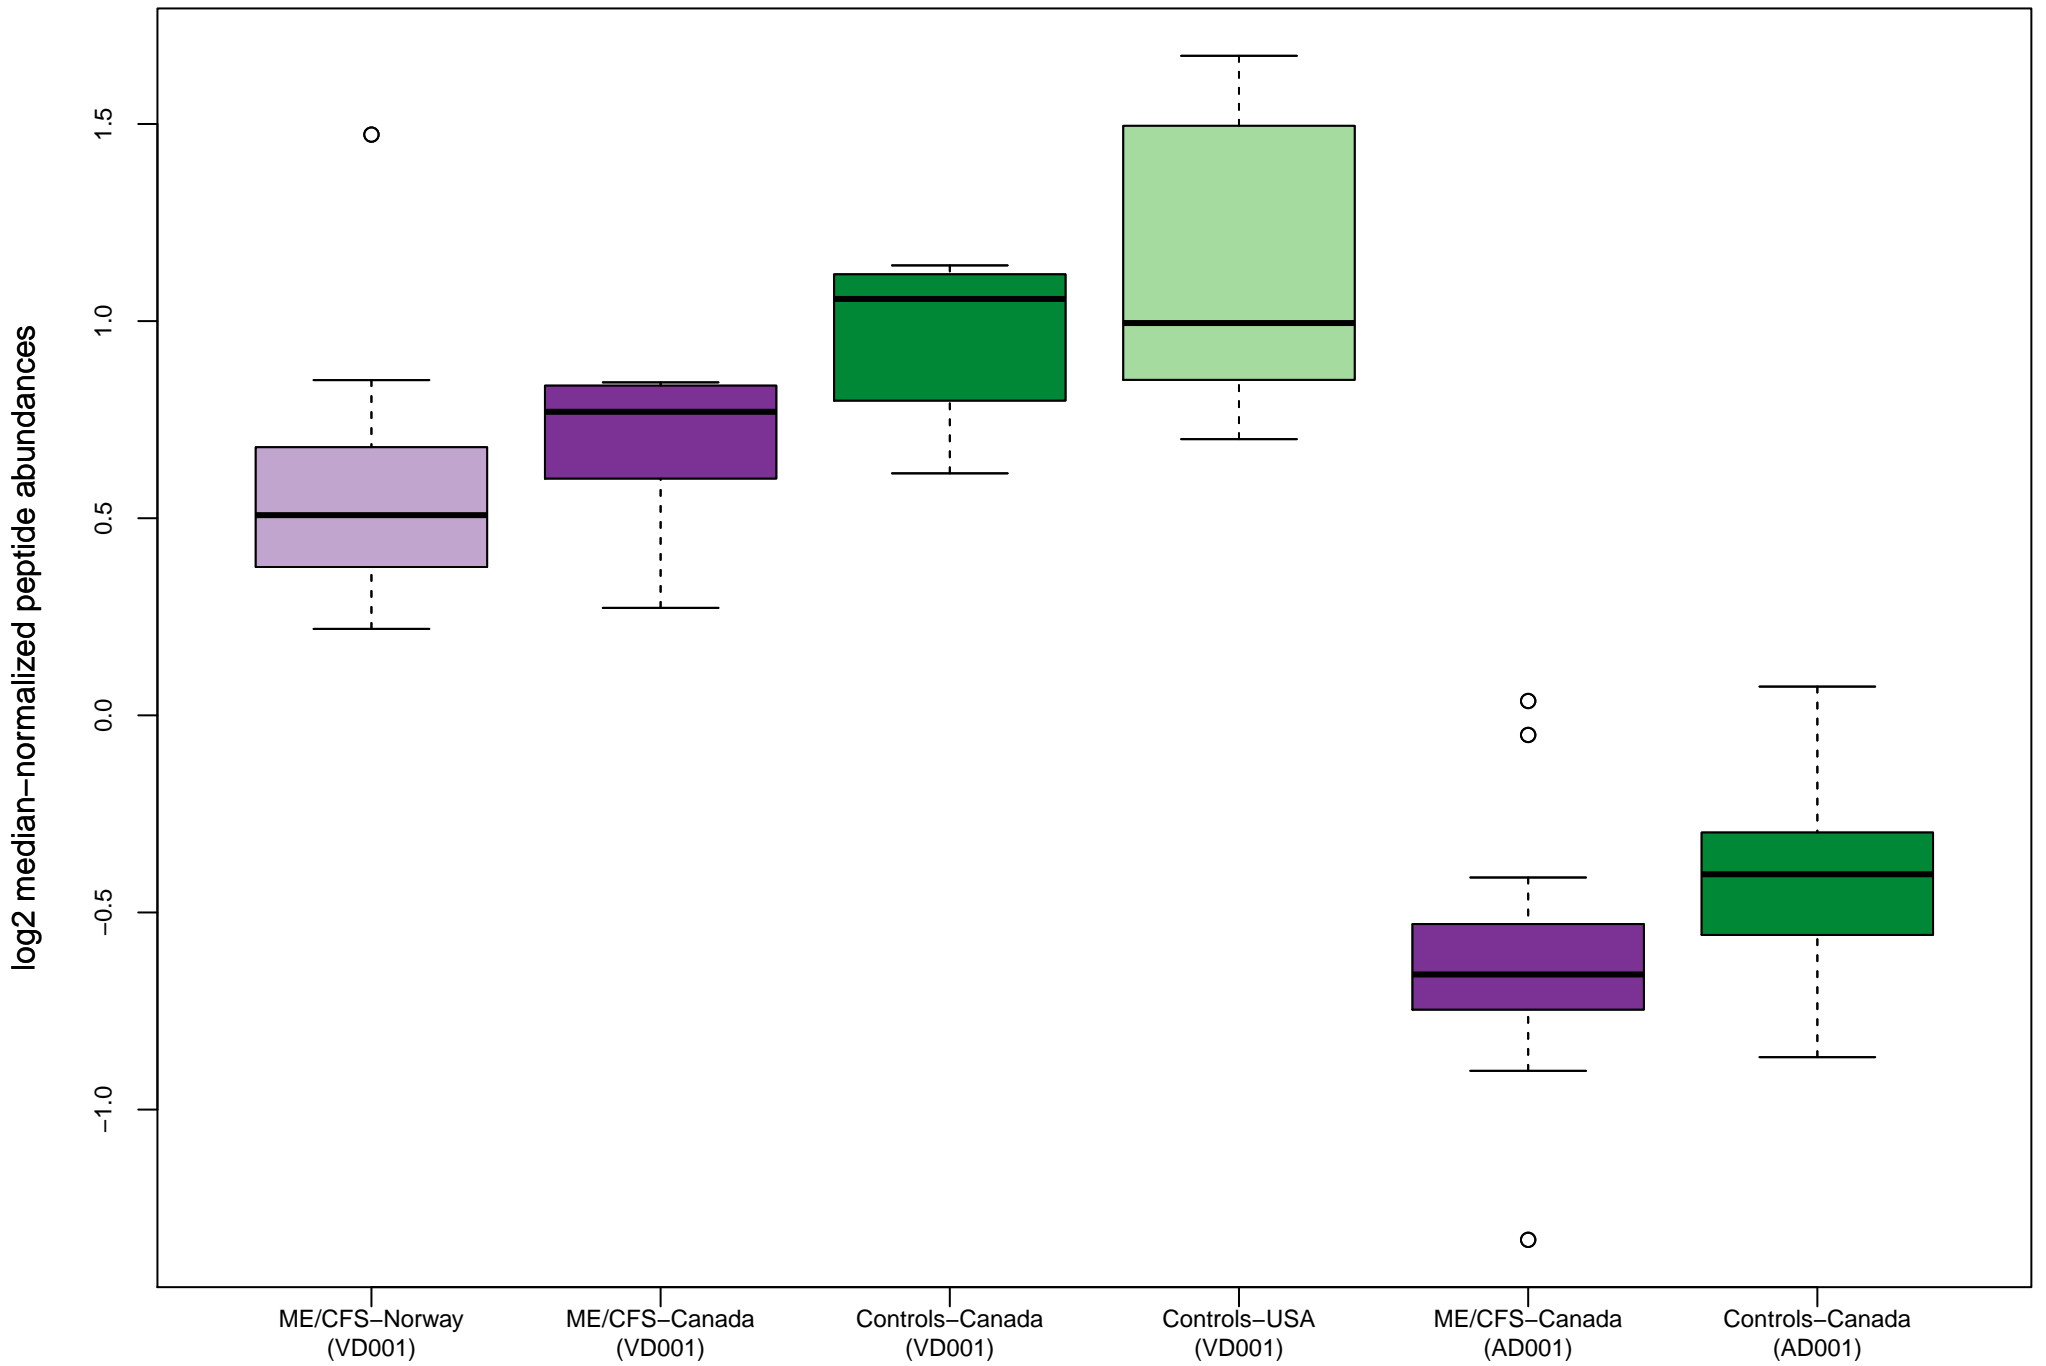

# RVFNRYARPLSL

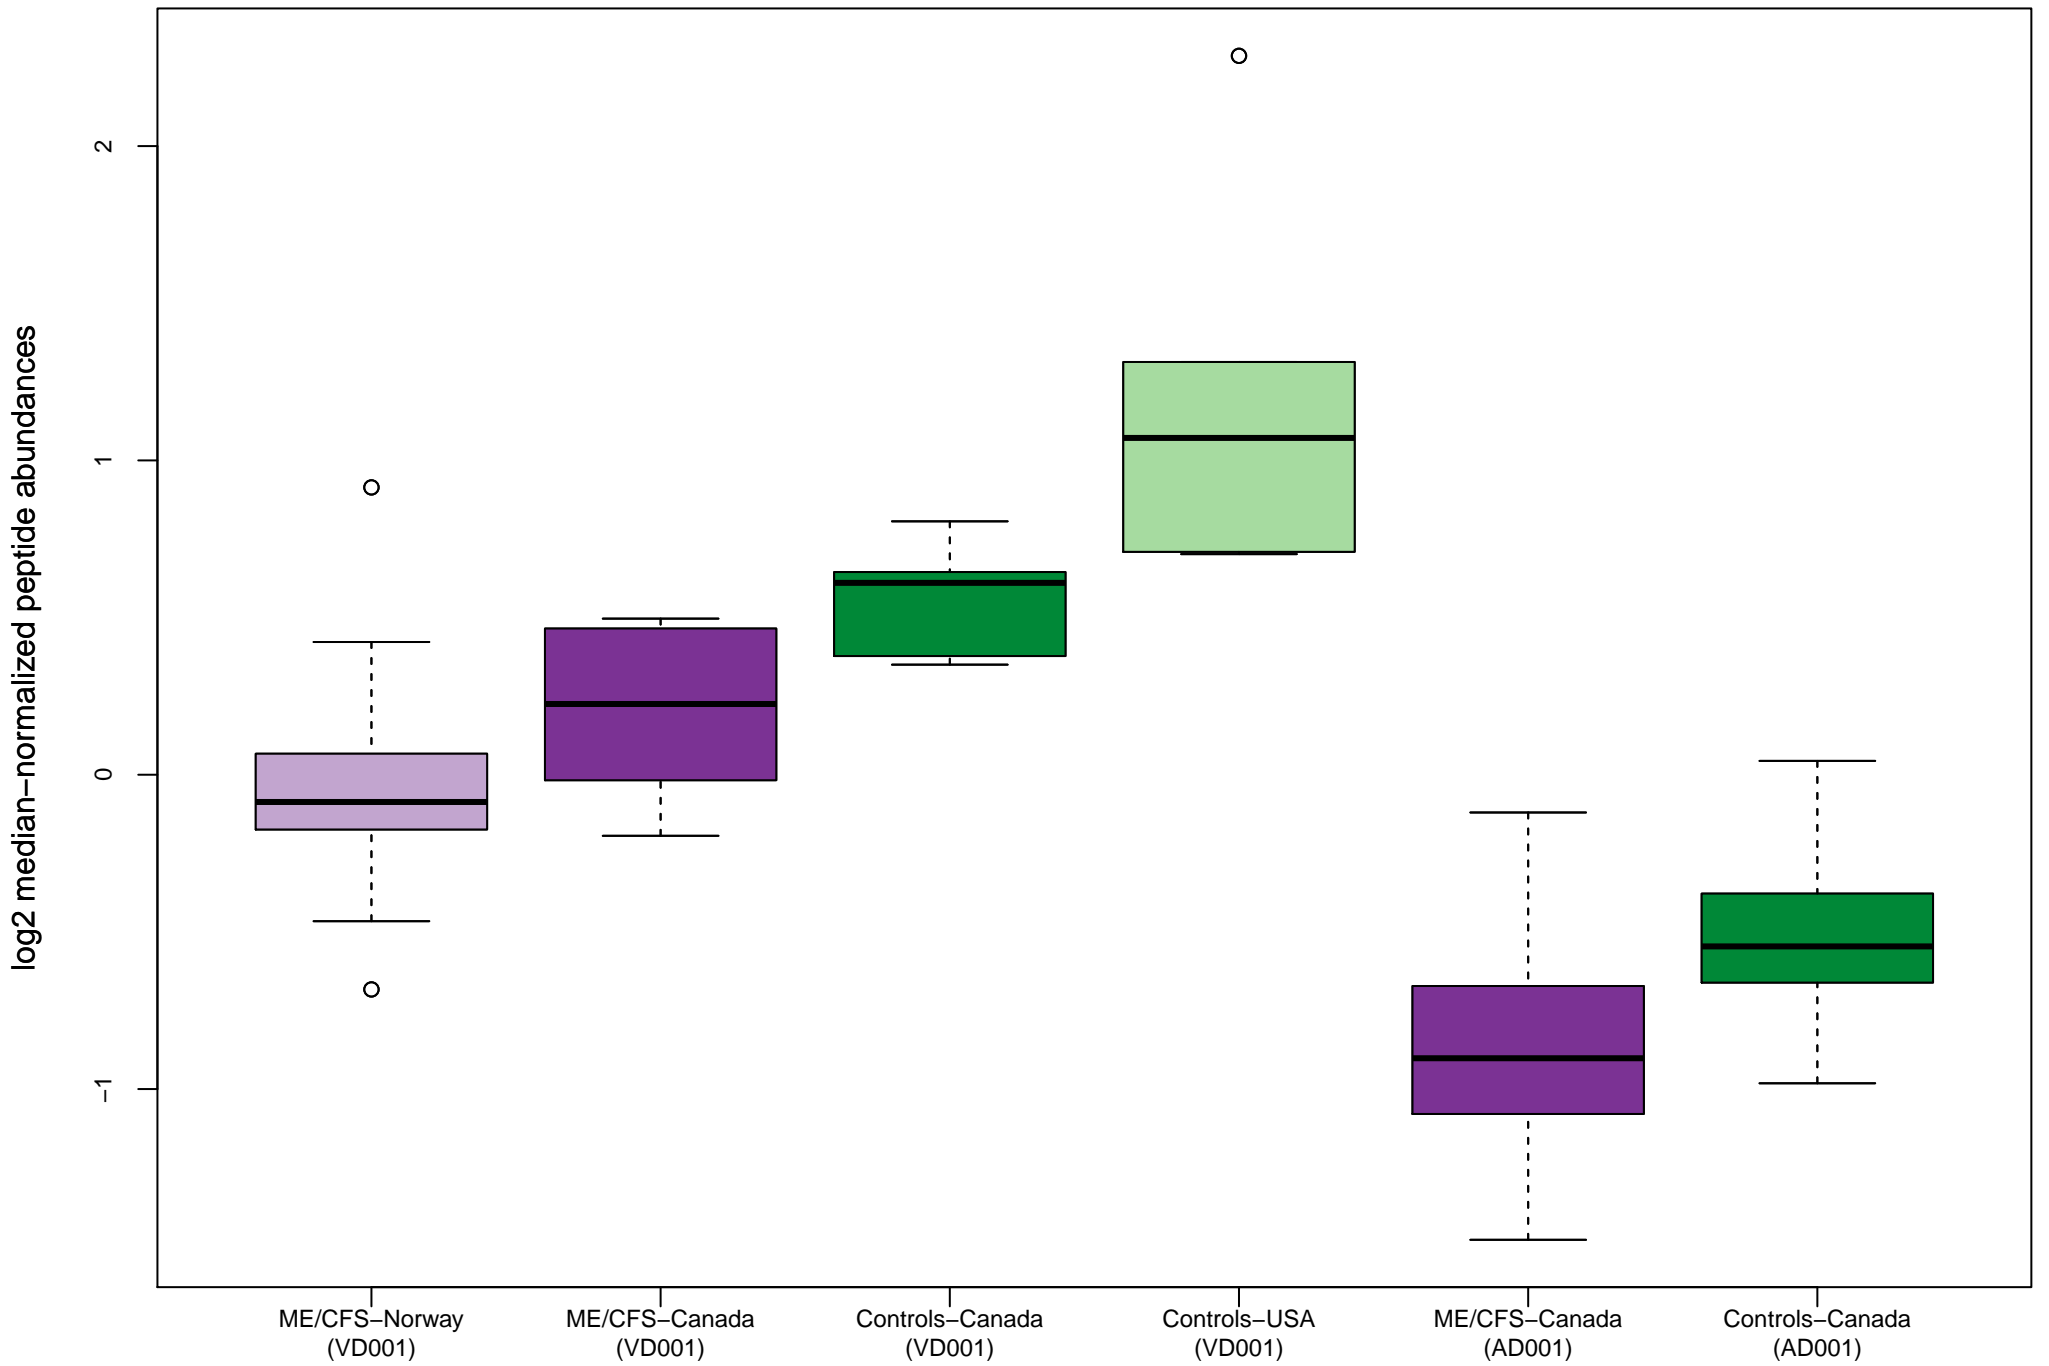

# RVNVRPWFYWKV

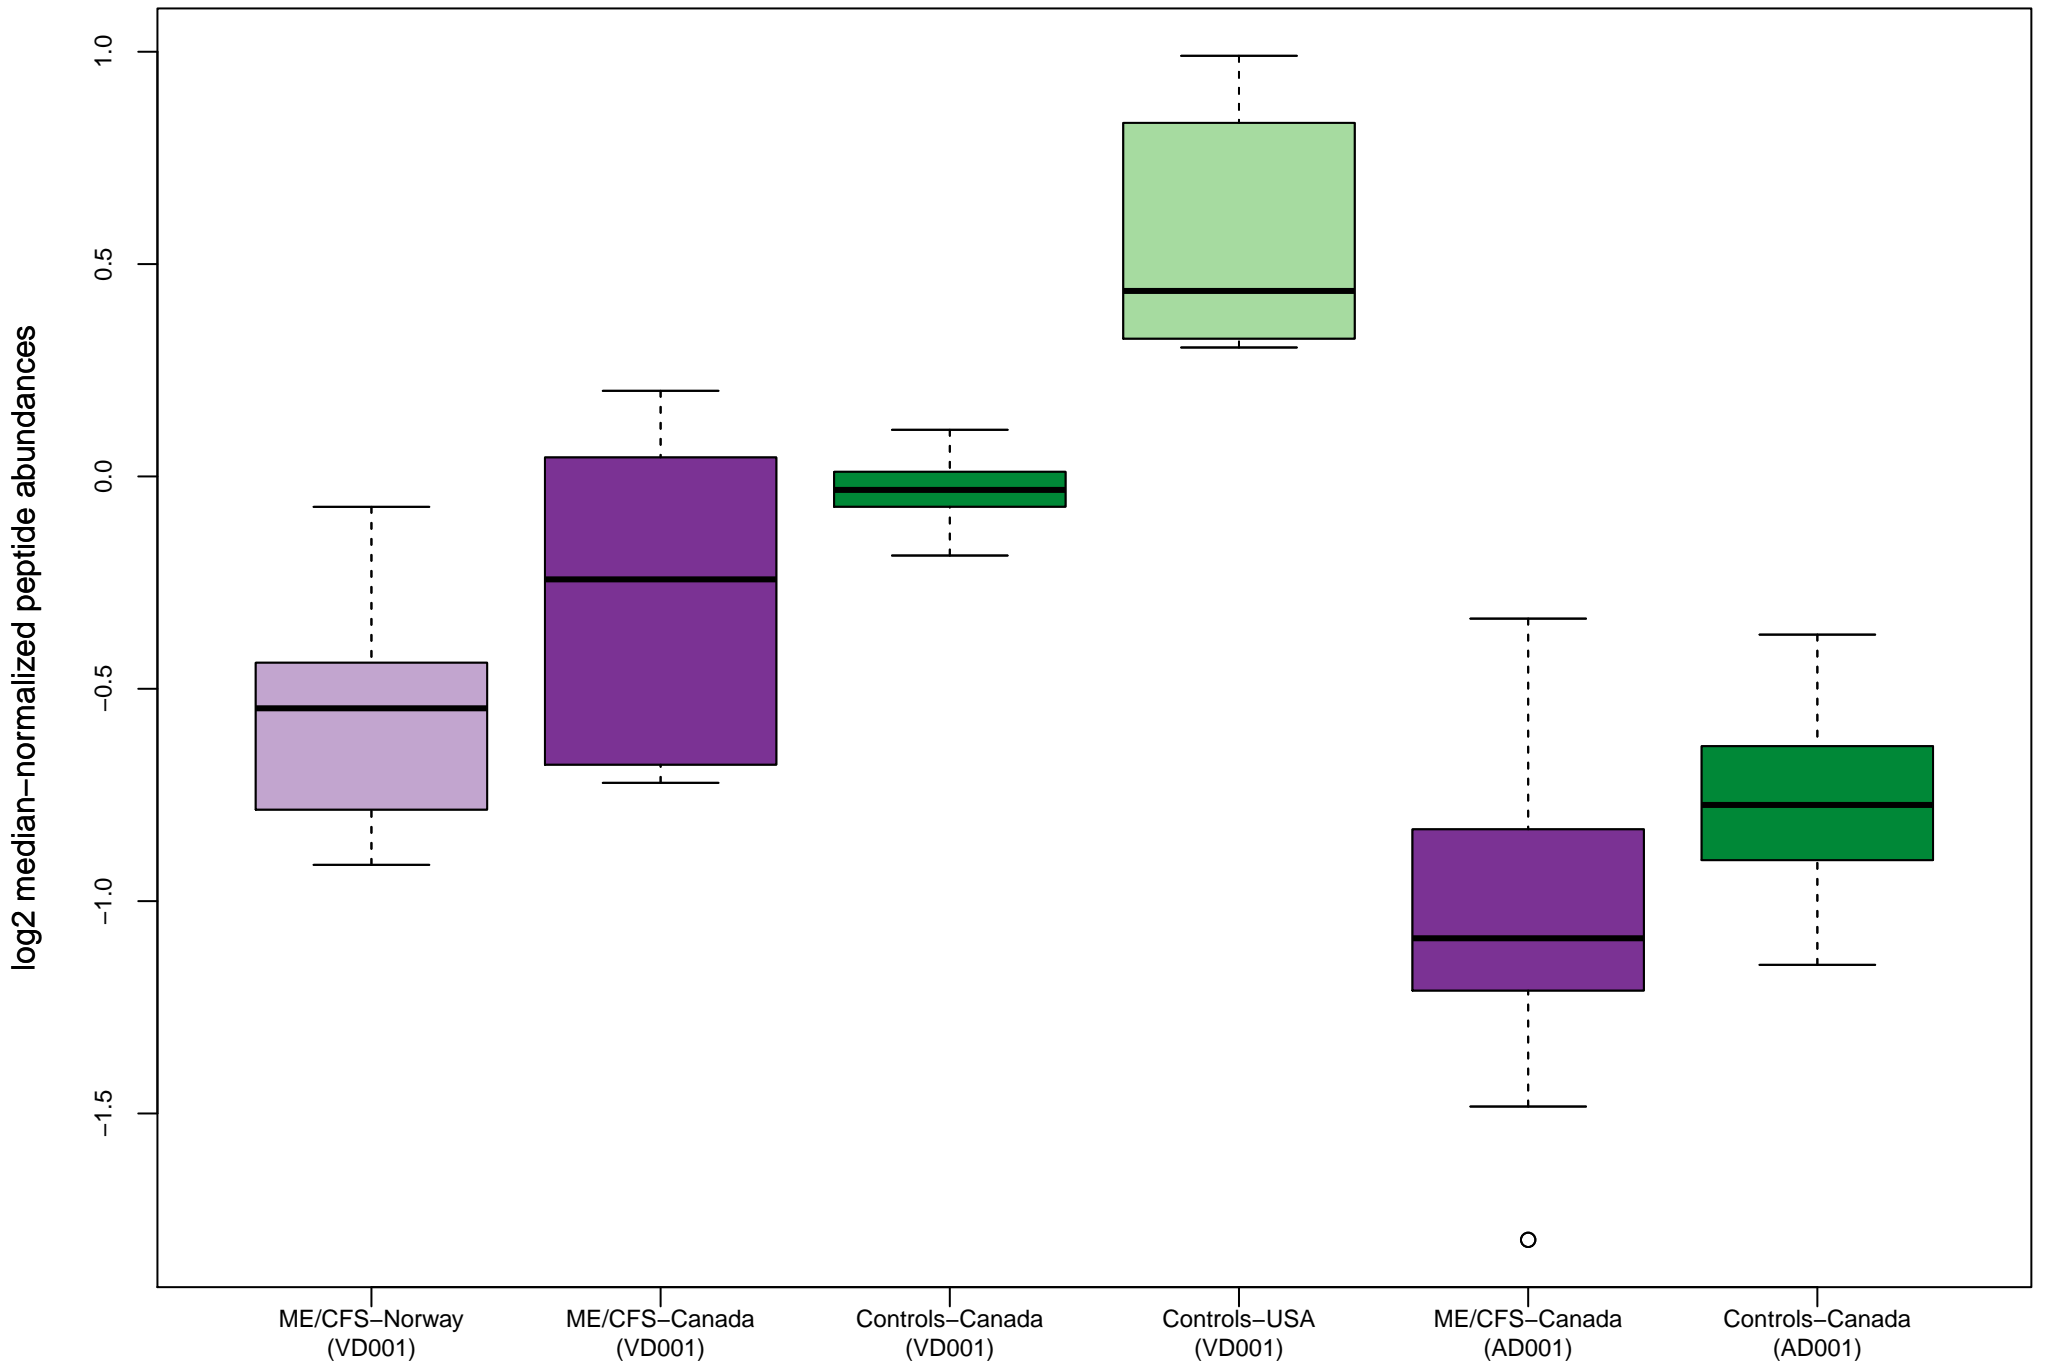

# RVRWWQPYGVLG

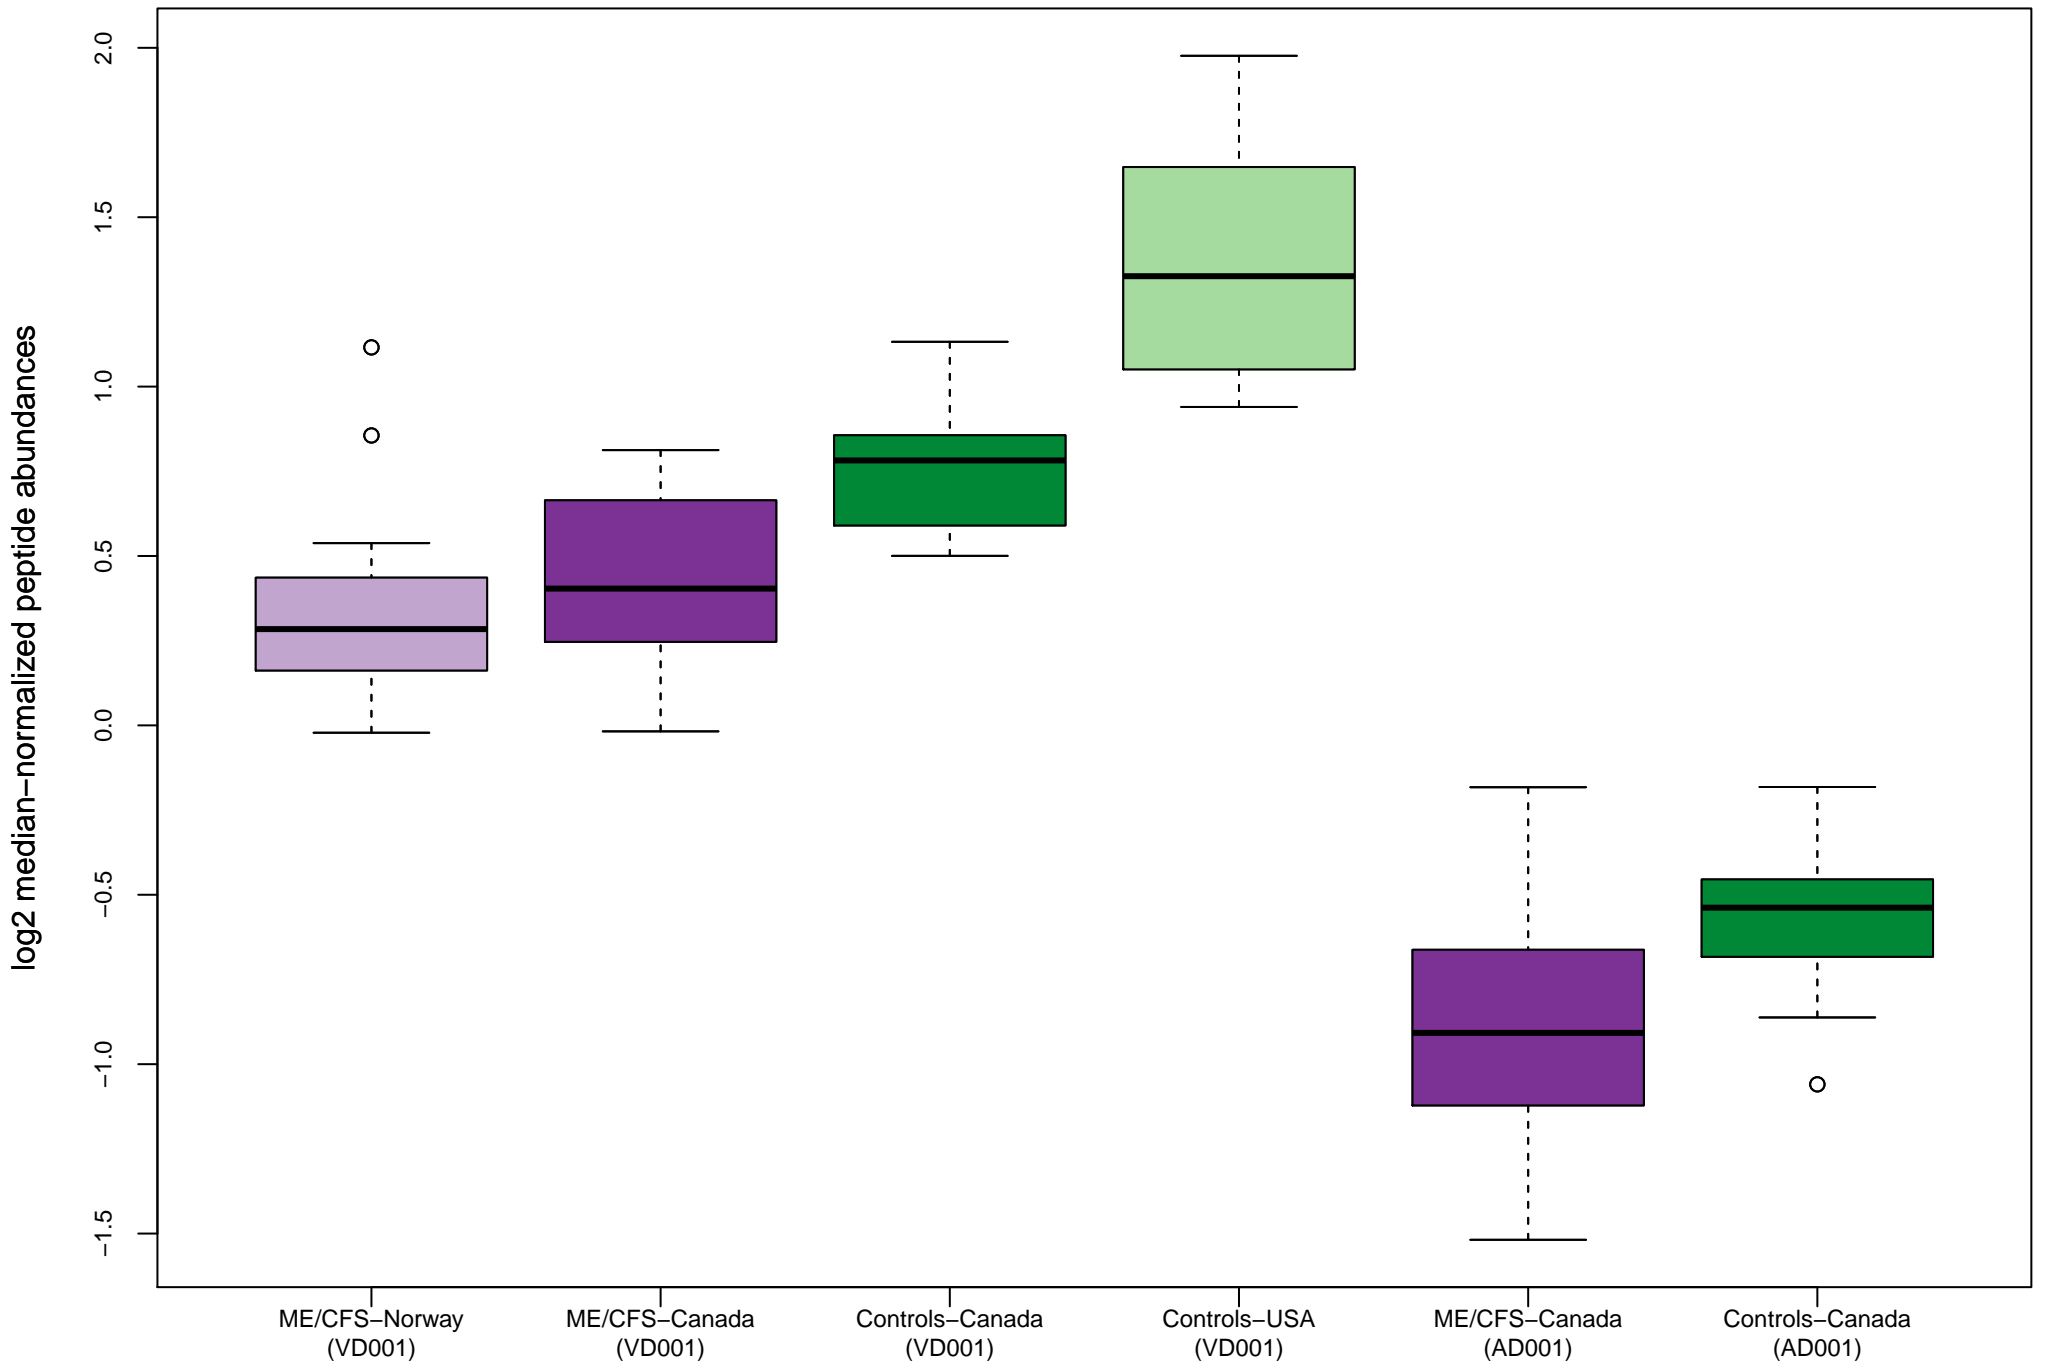

# RVRWYWLREVSL

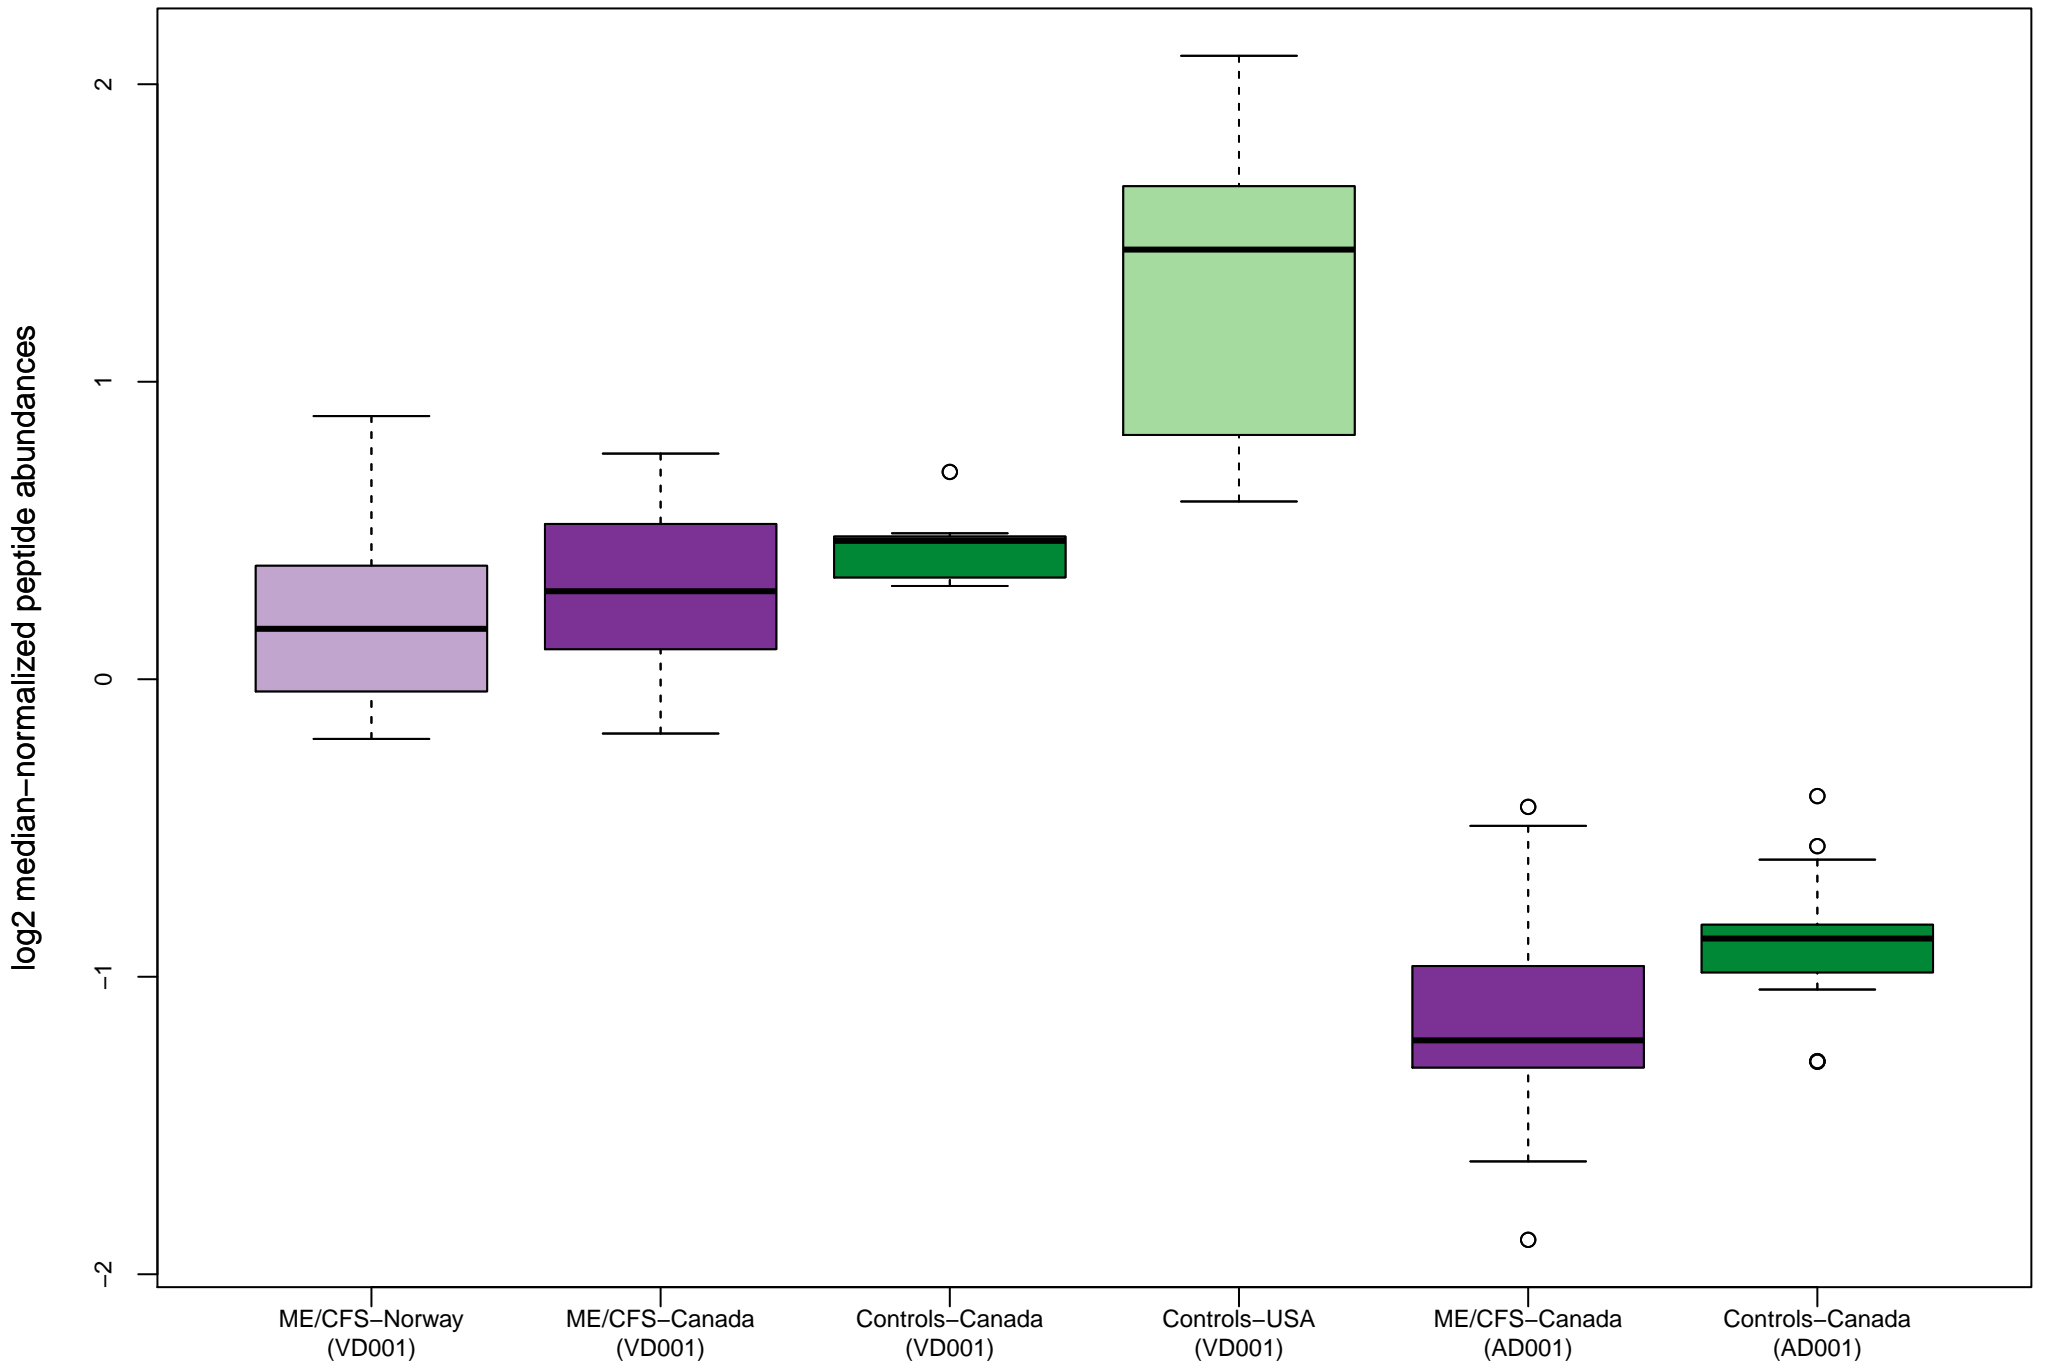

# RWALLSASYWGA

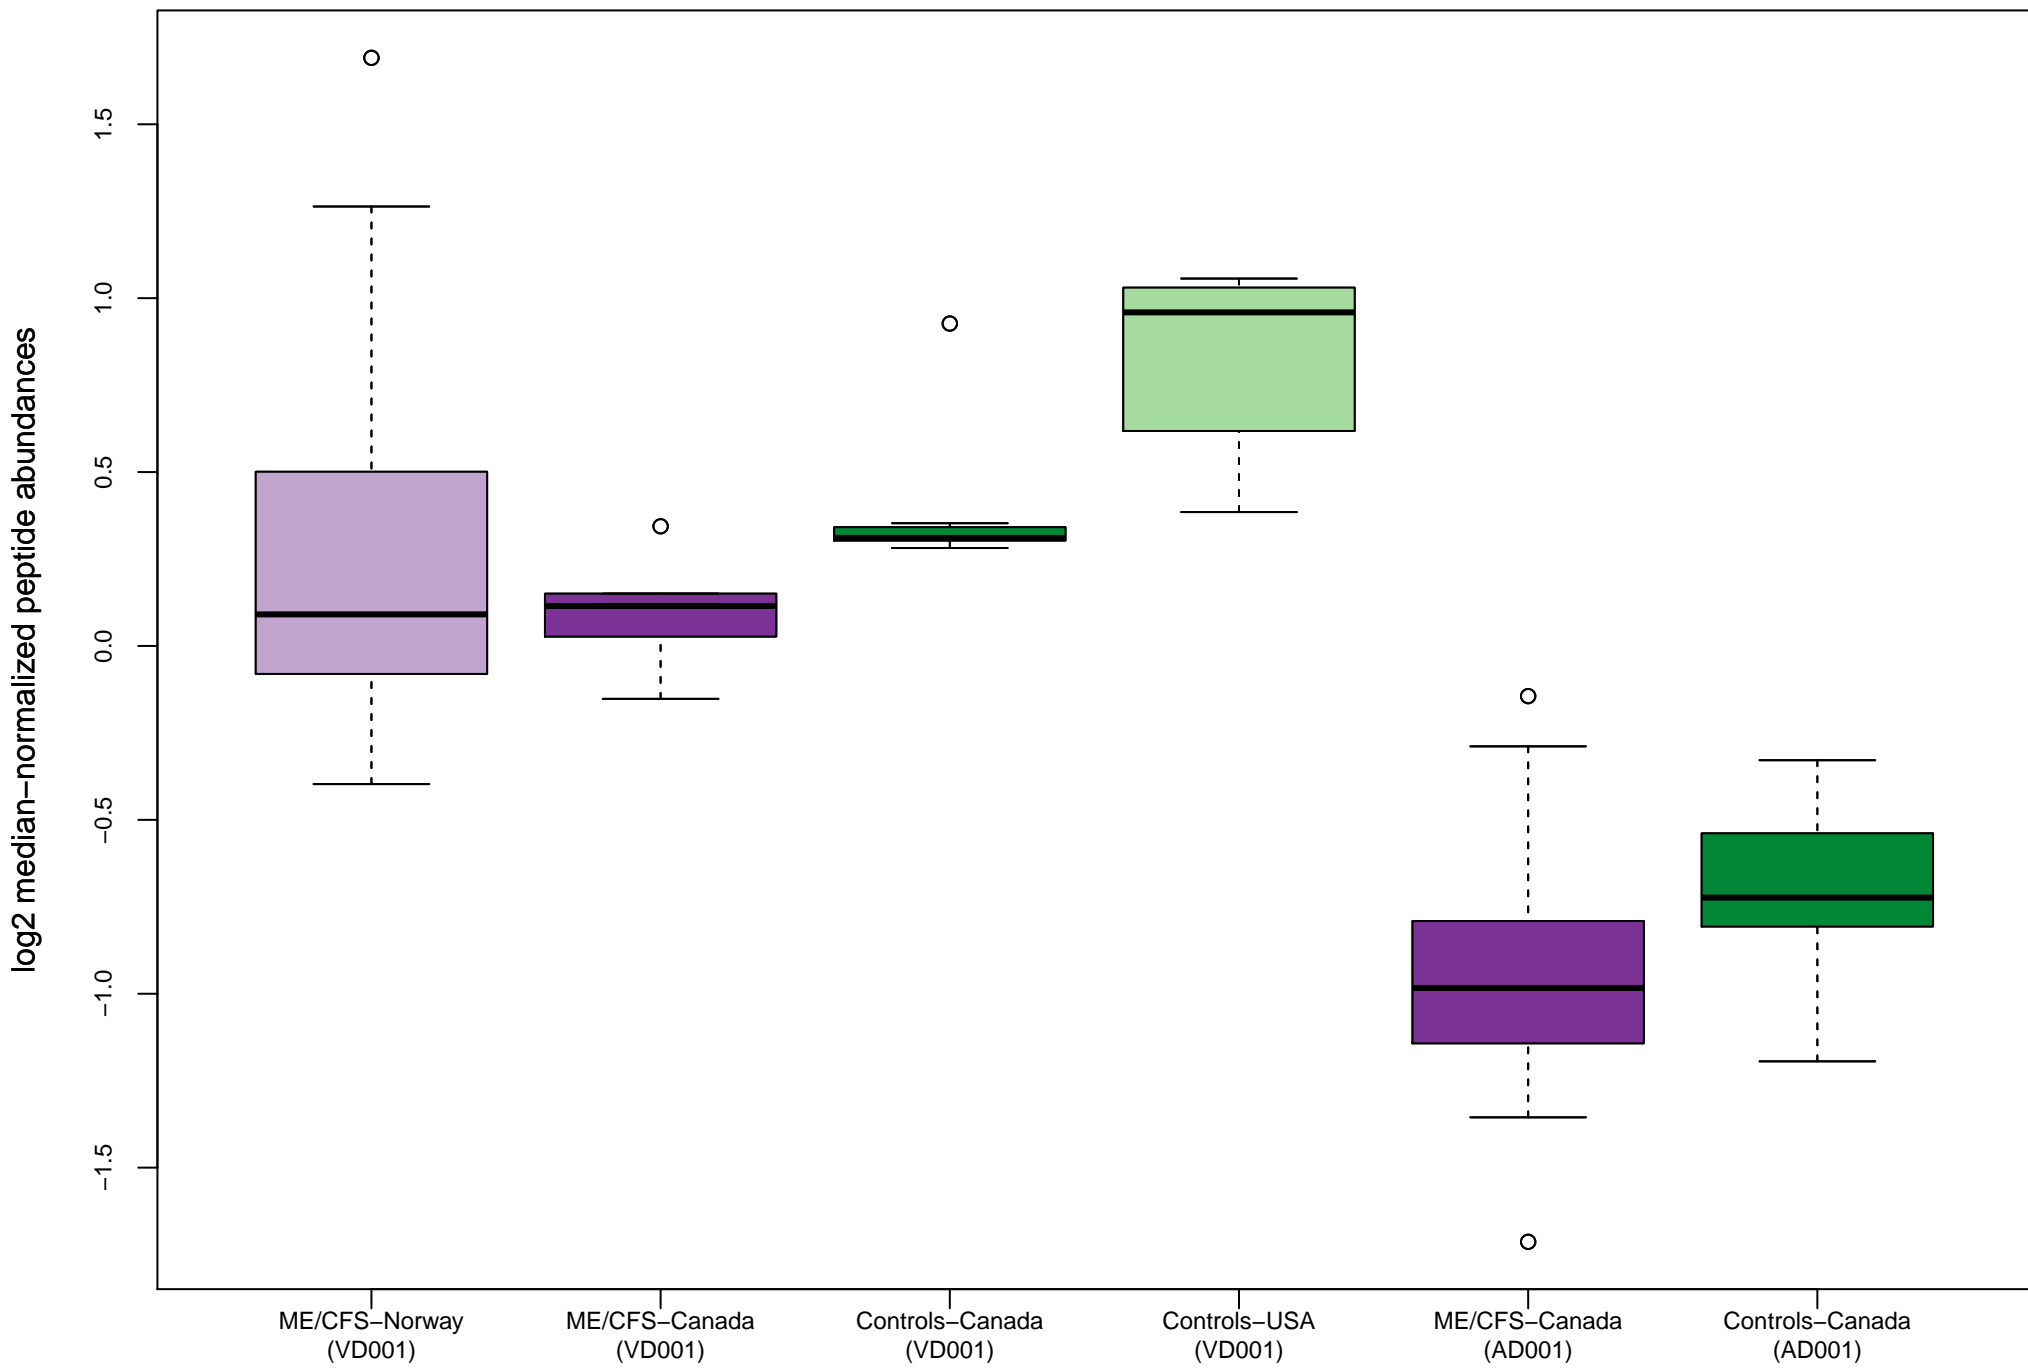

# RWAVVAGQWLGA

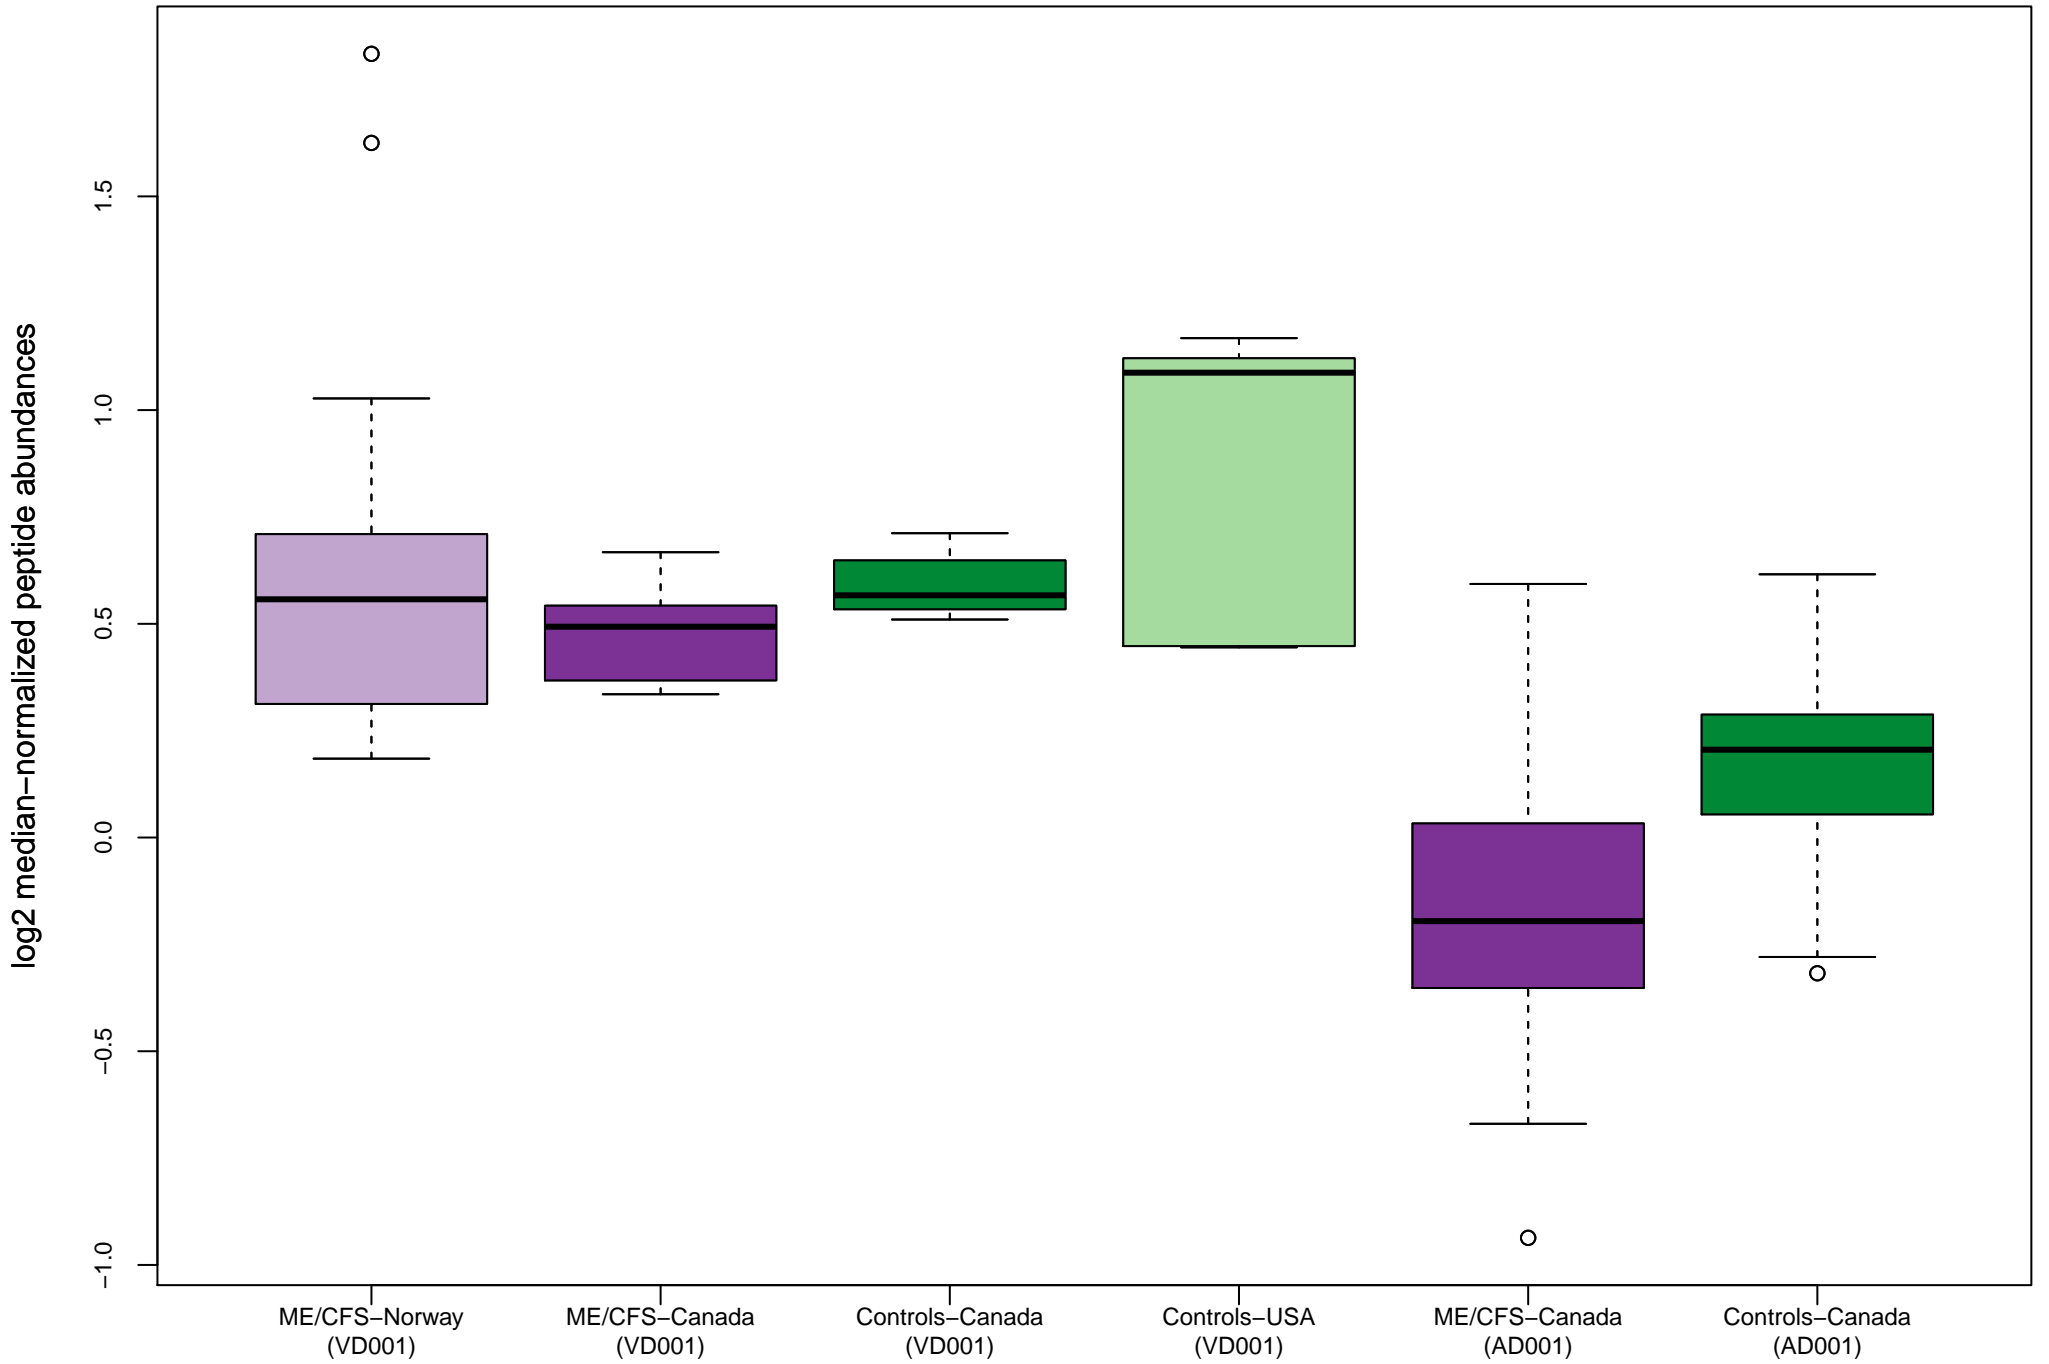

# RWVHSQRWVLG

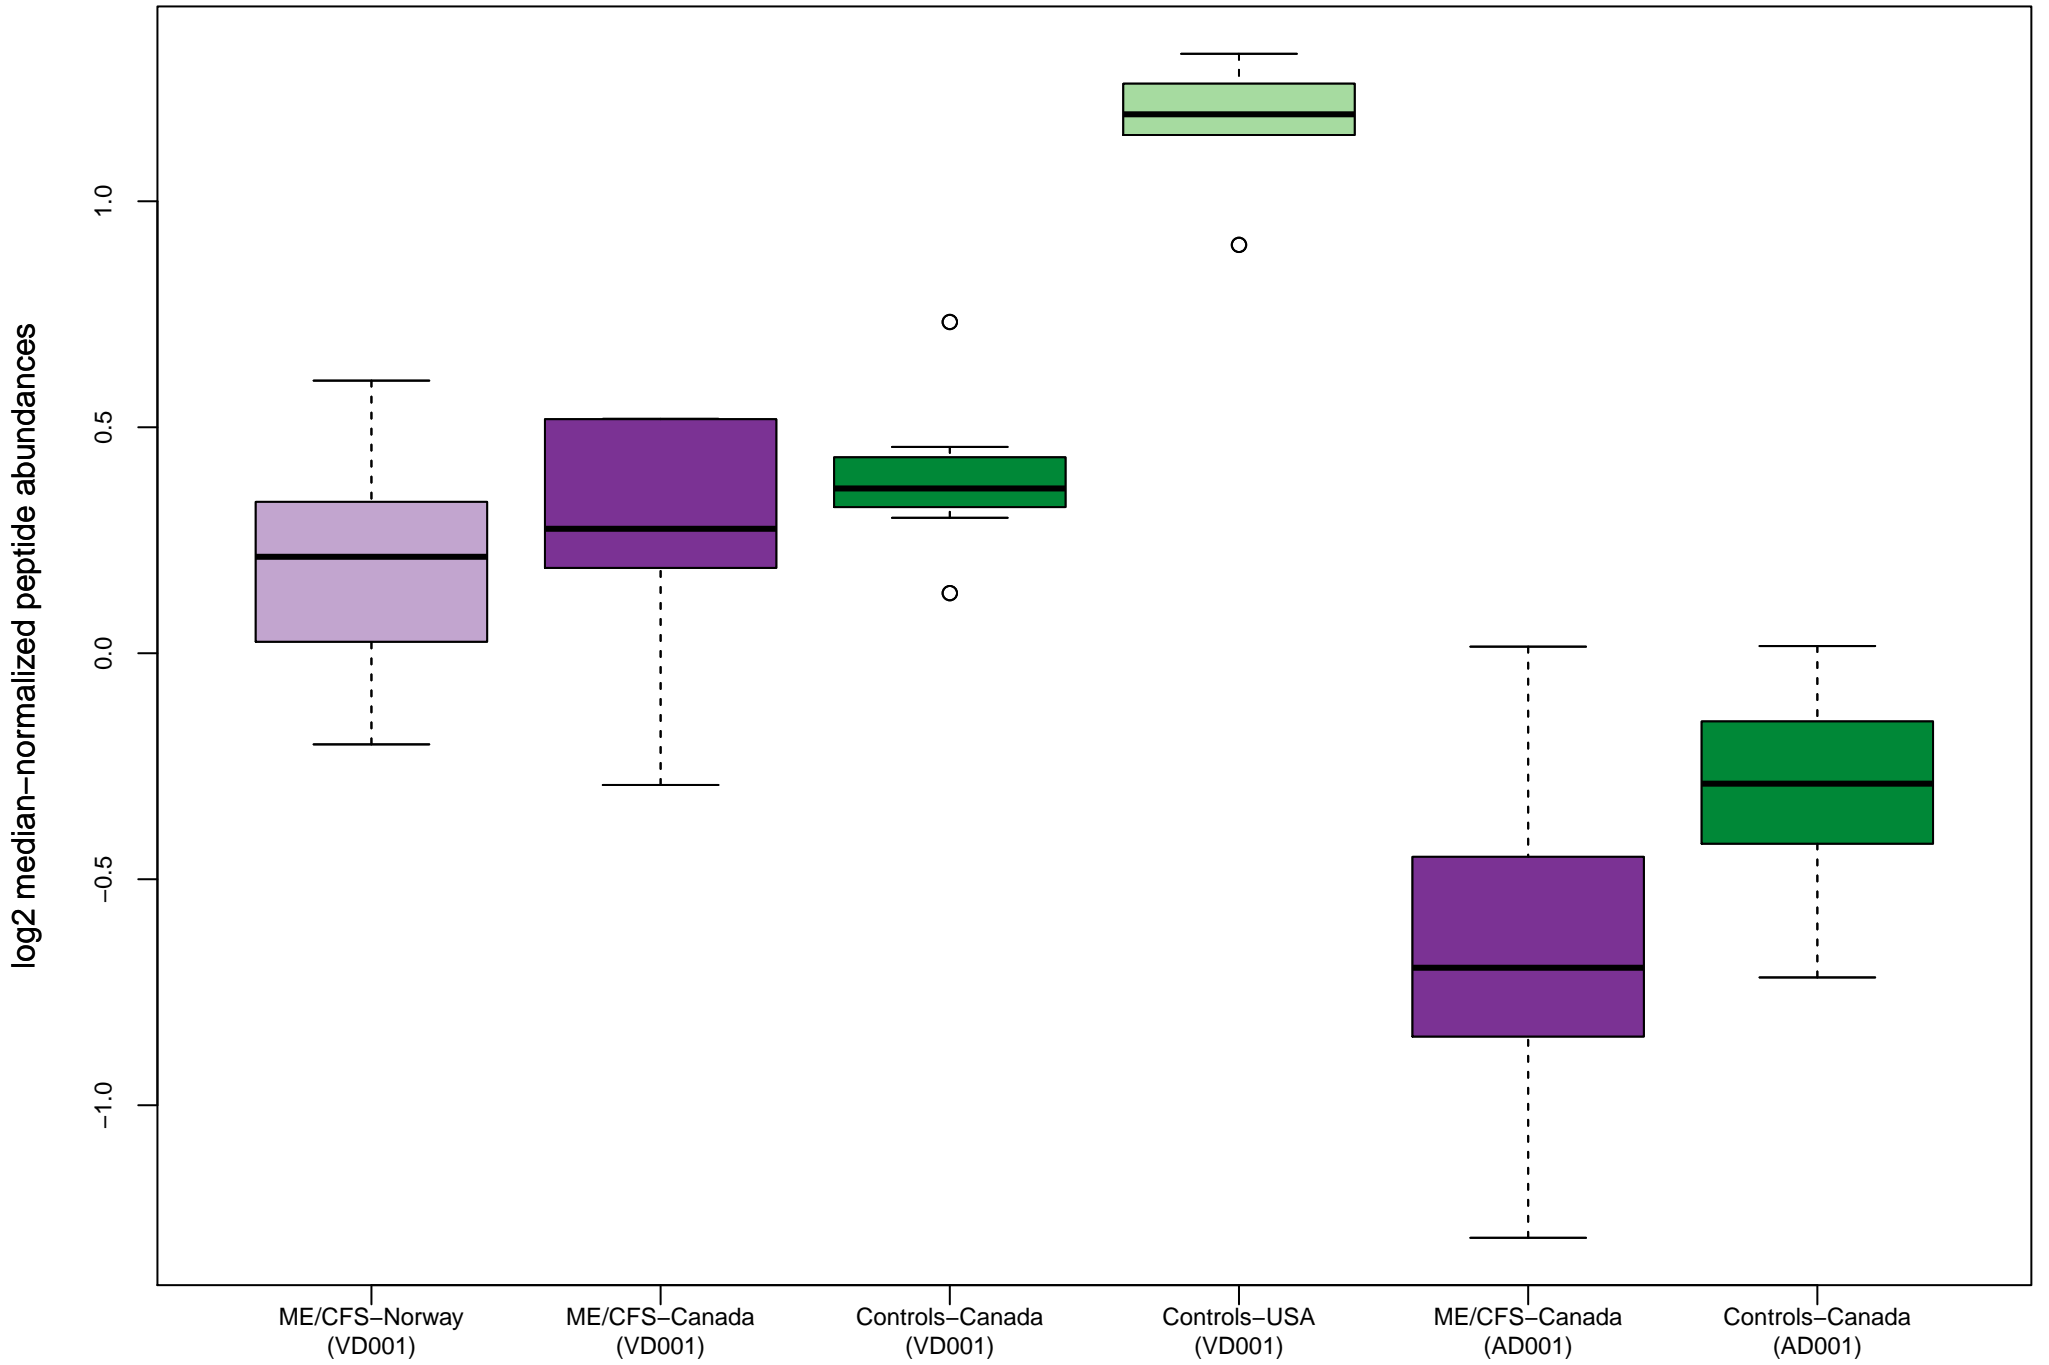



# RWGVFNKFDLVG

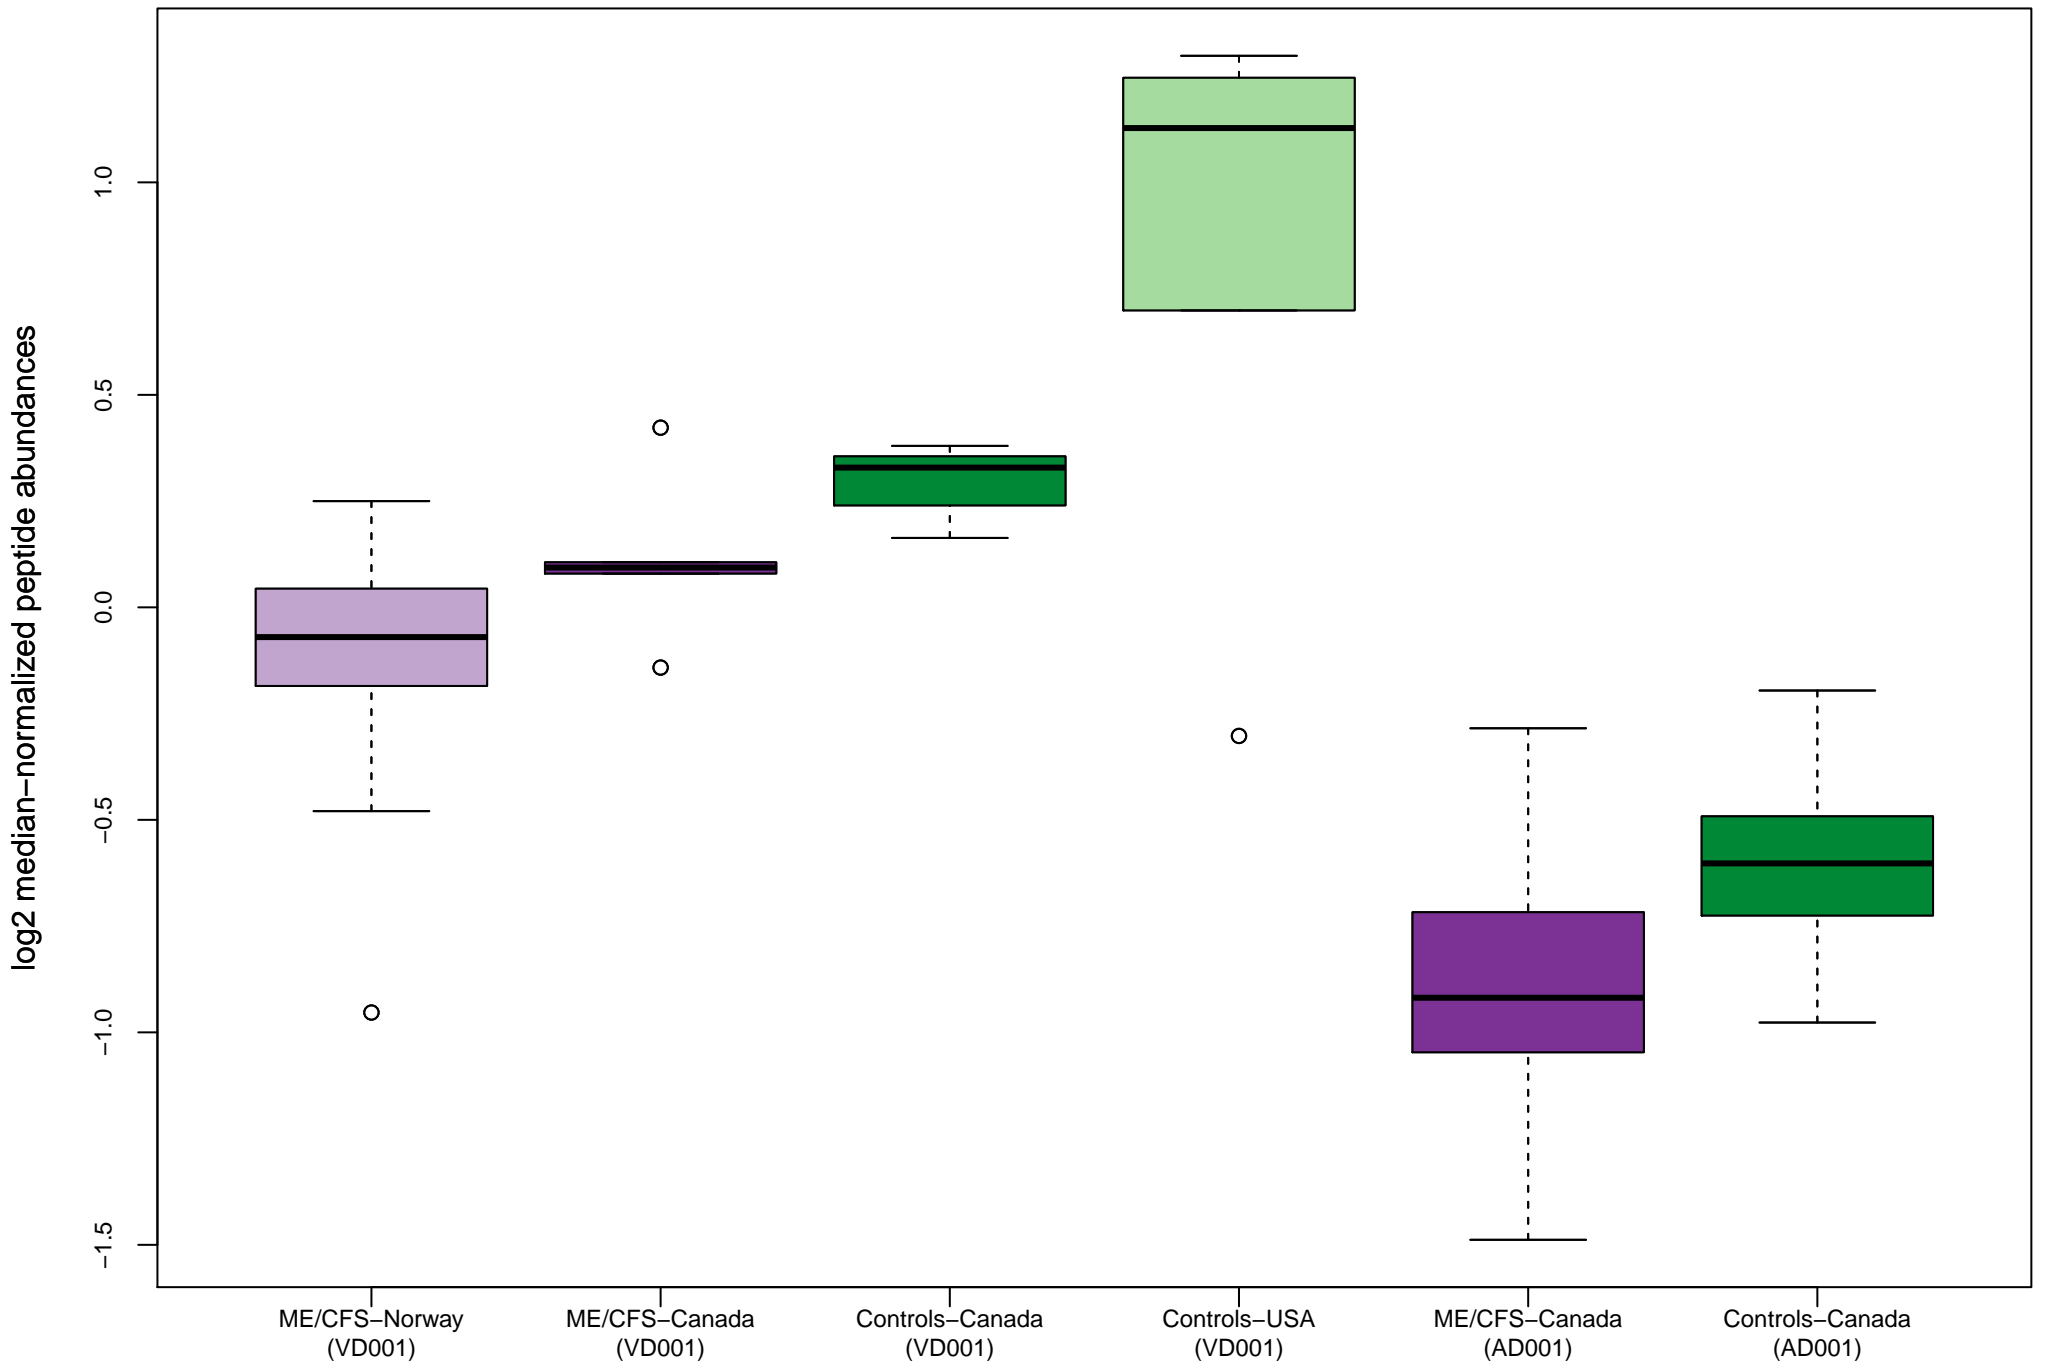

# RWKWPYNVFPVL

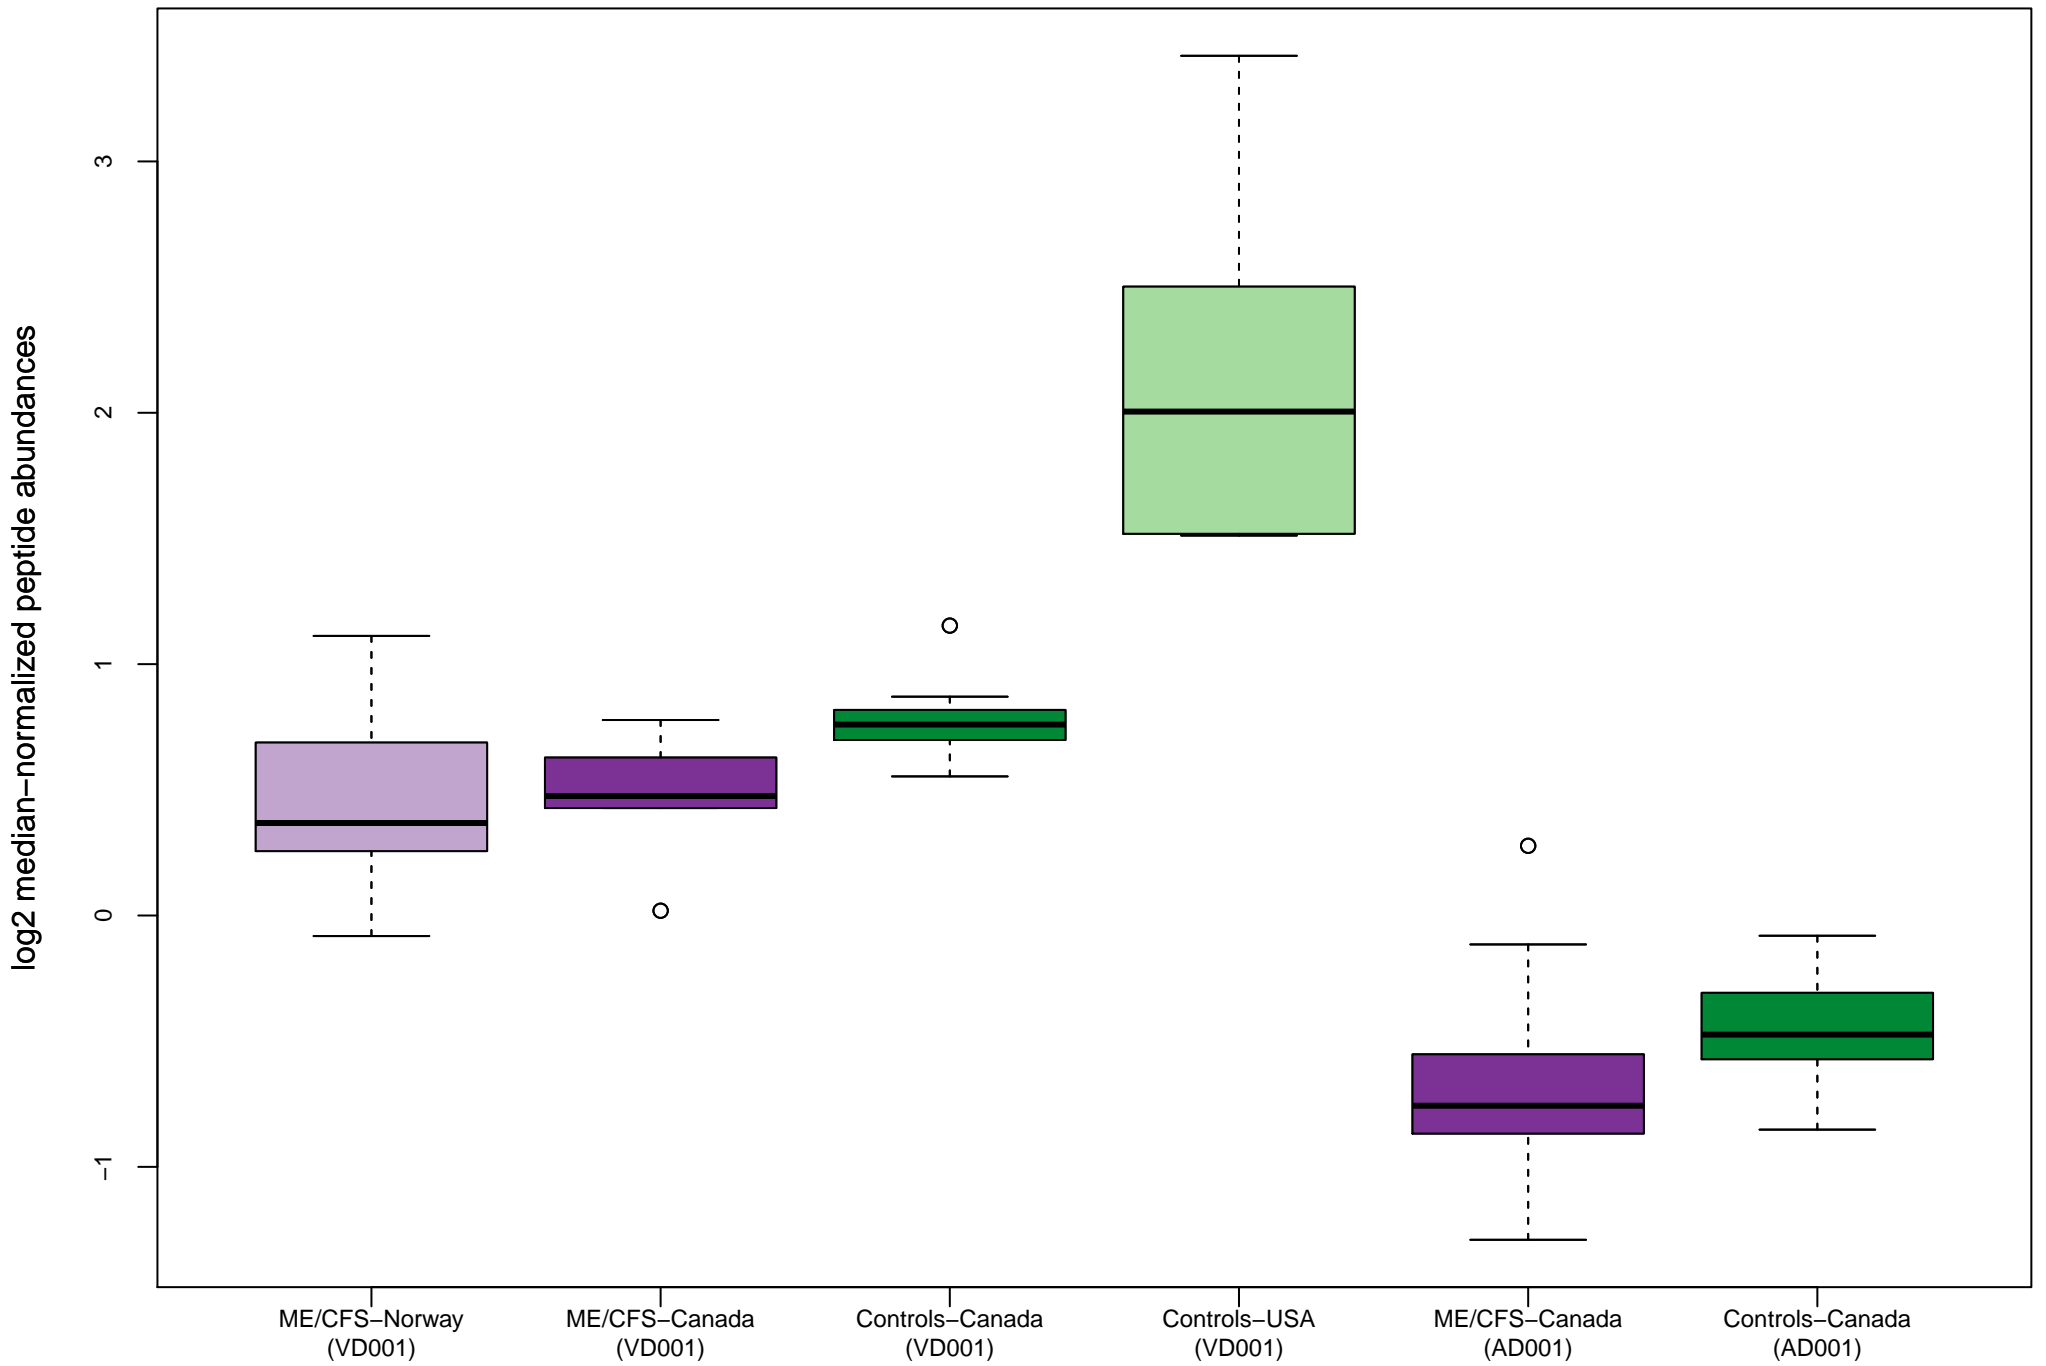

# RWNFGPYAQWVL

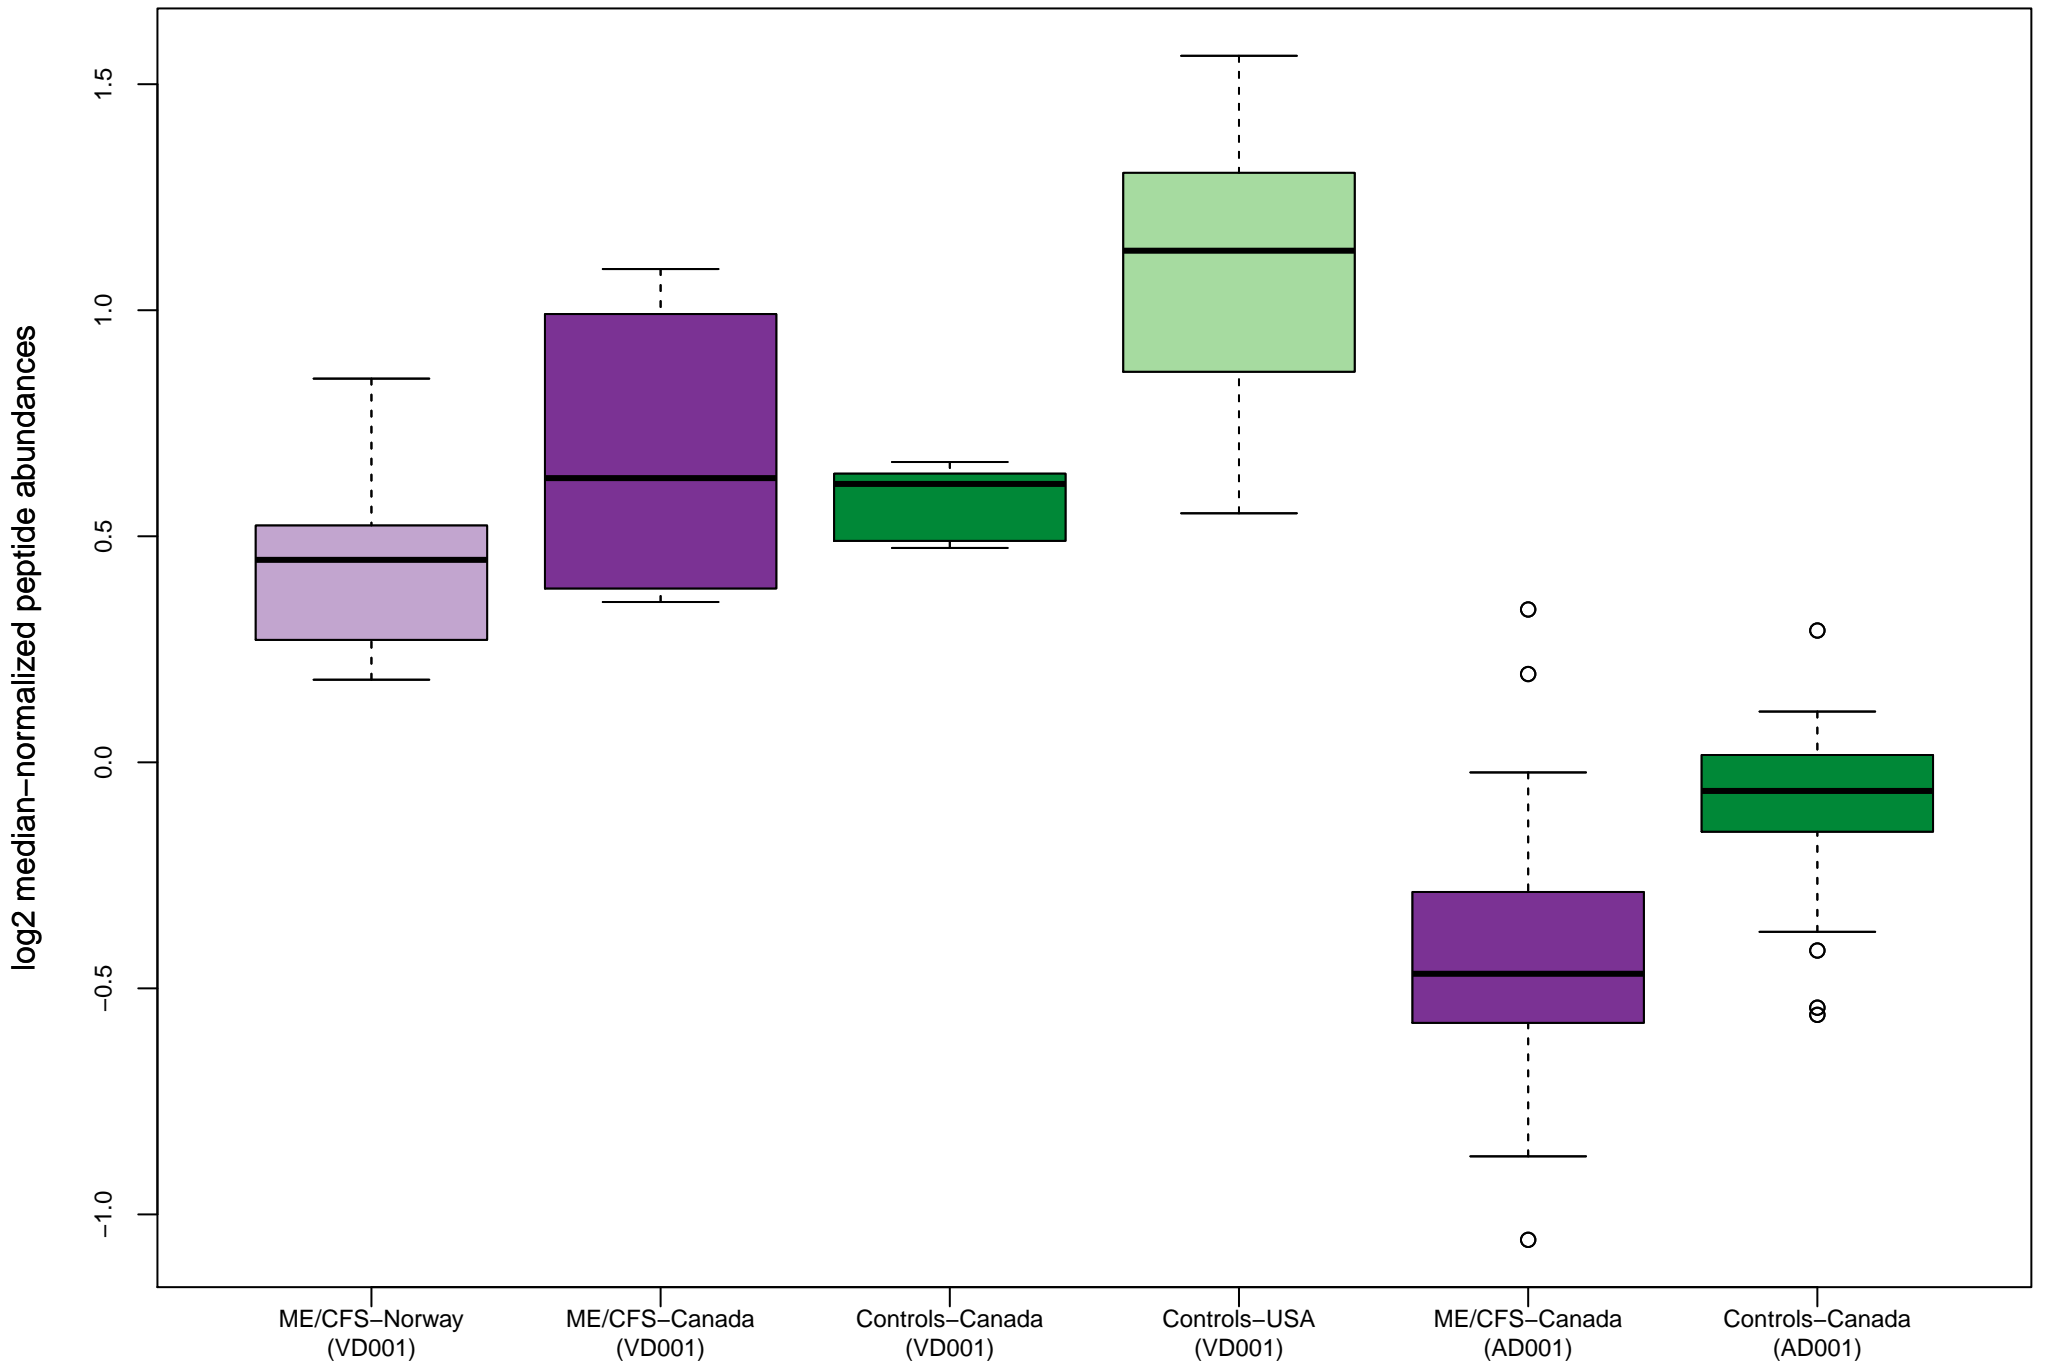

# RWRYEYGFRWHL

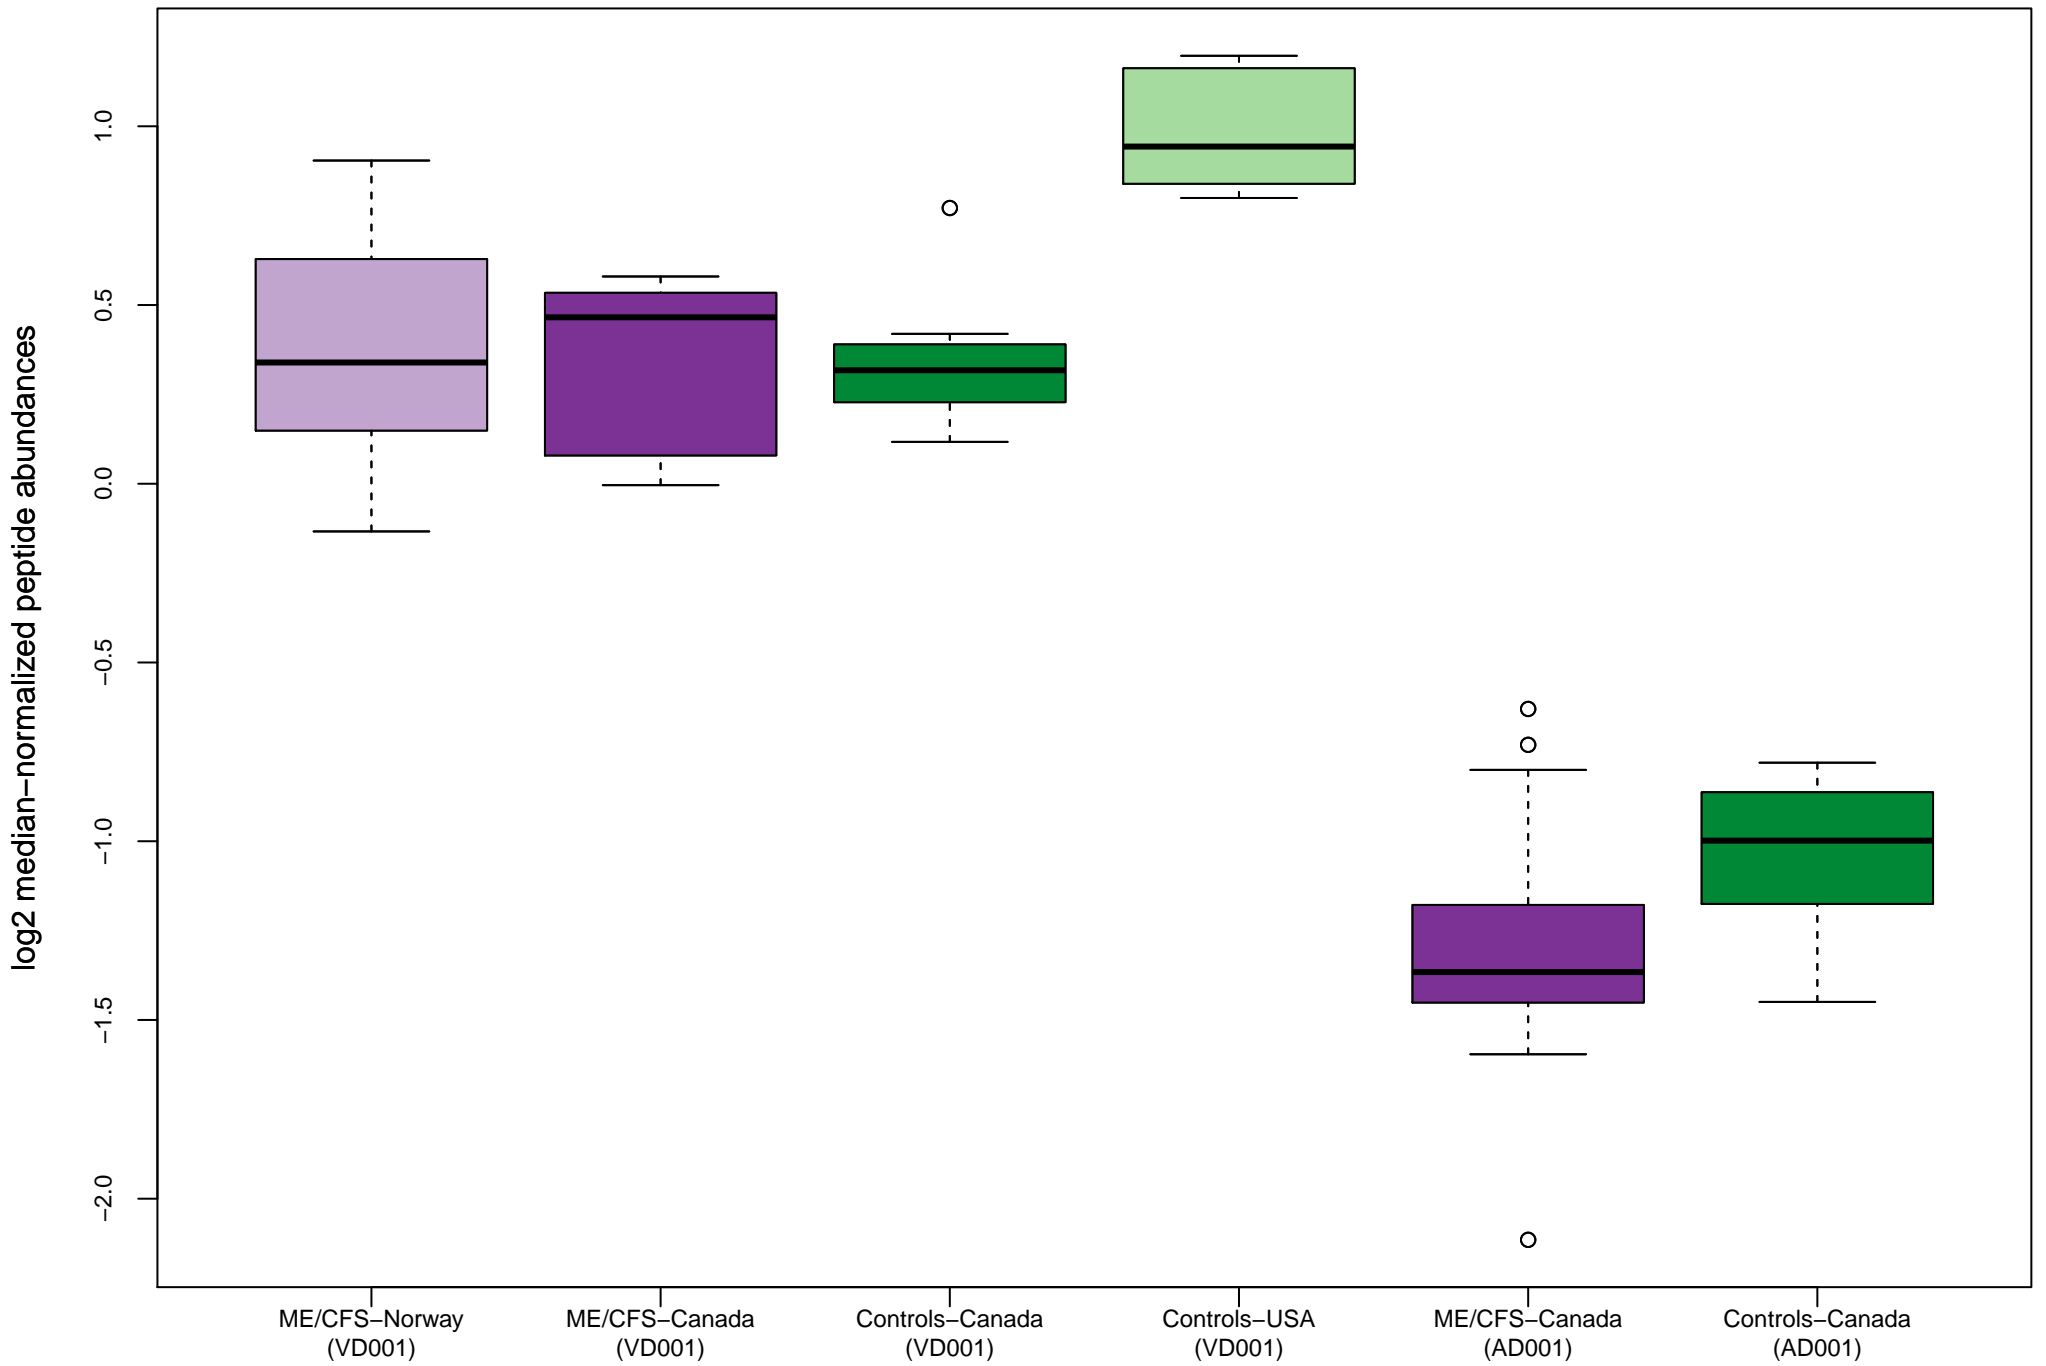

# RWWQFPGYKLLS

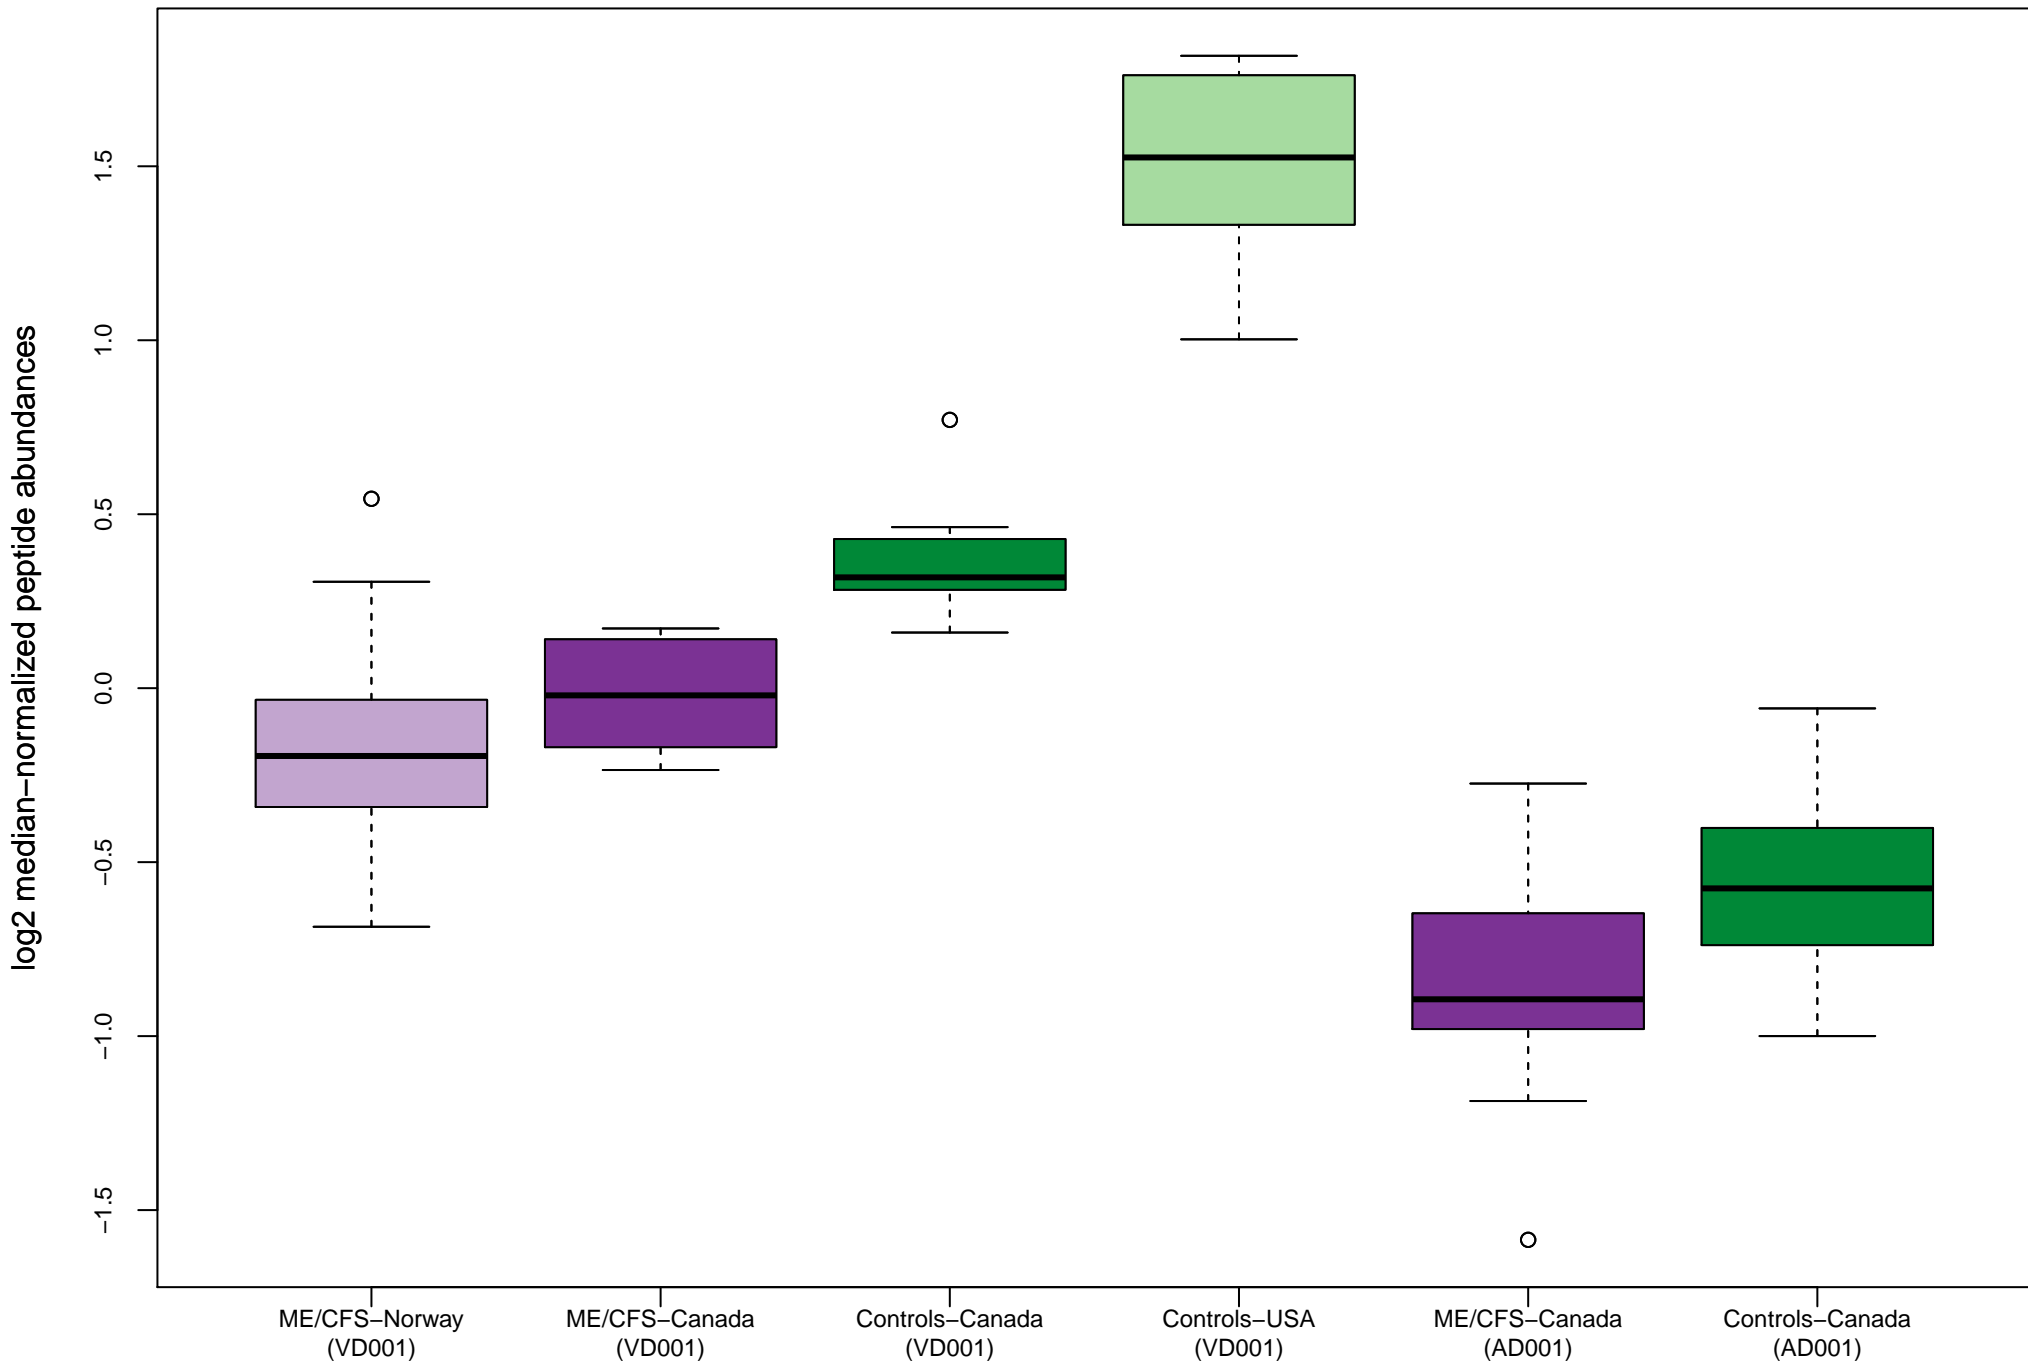

# RYAFAGRSYVLA

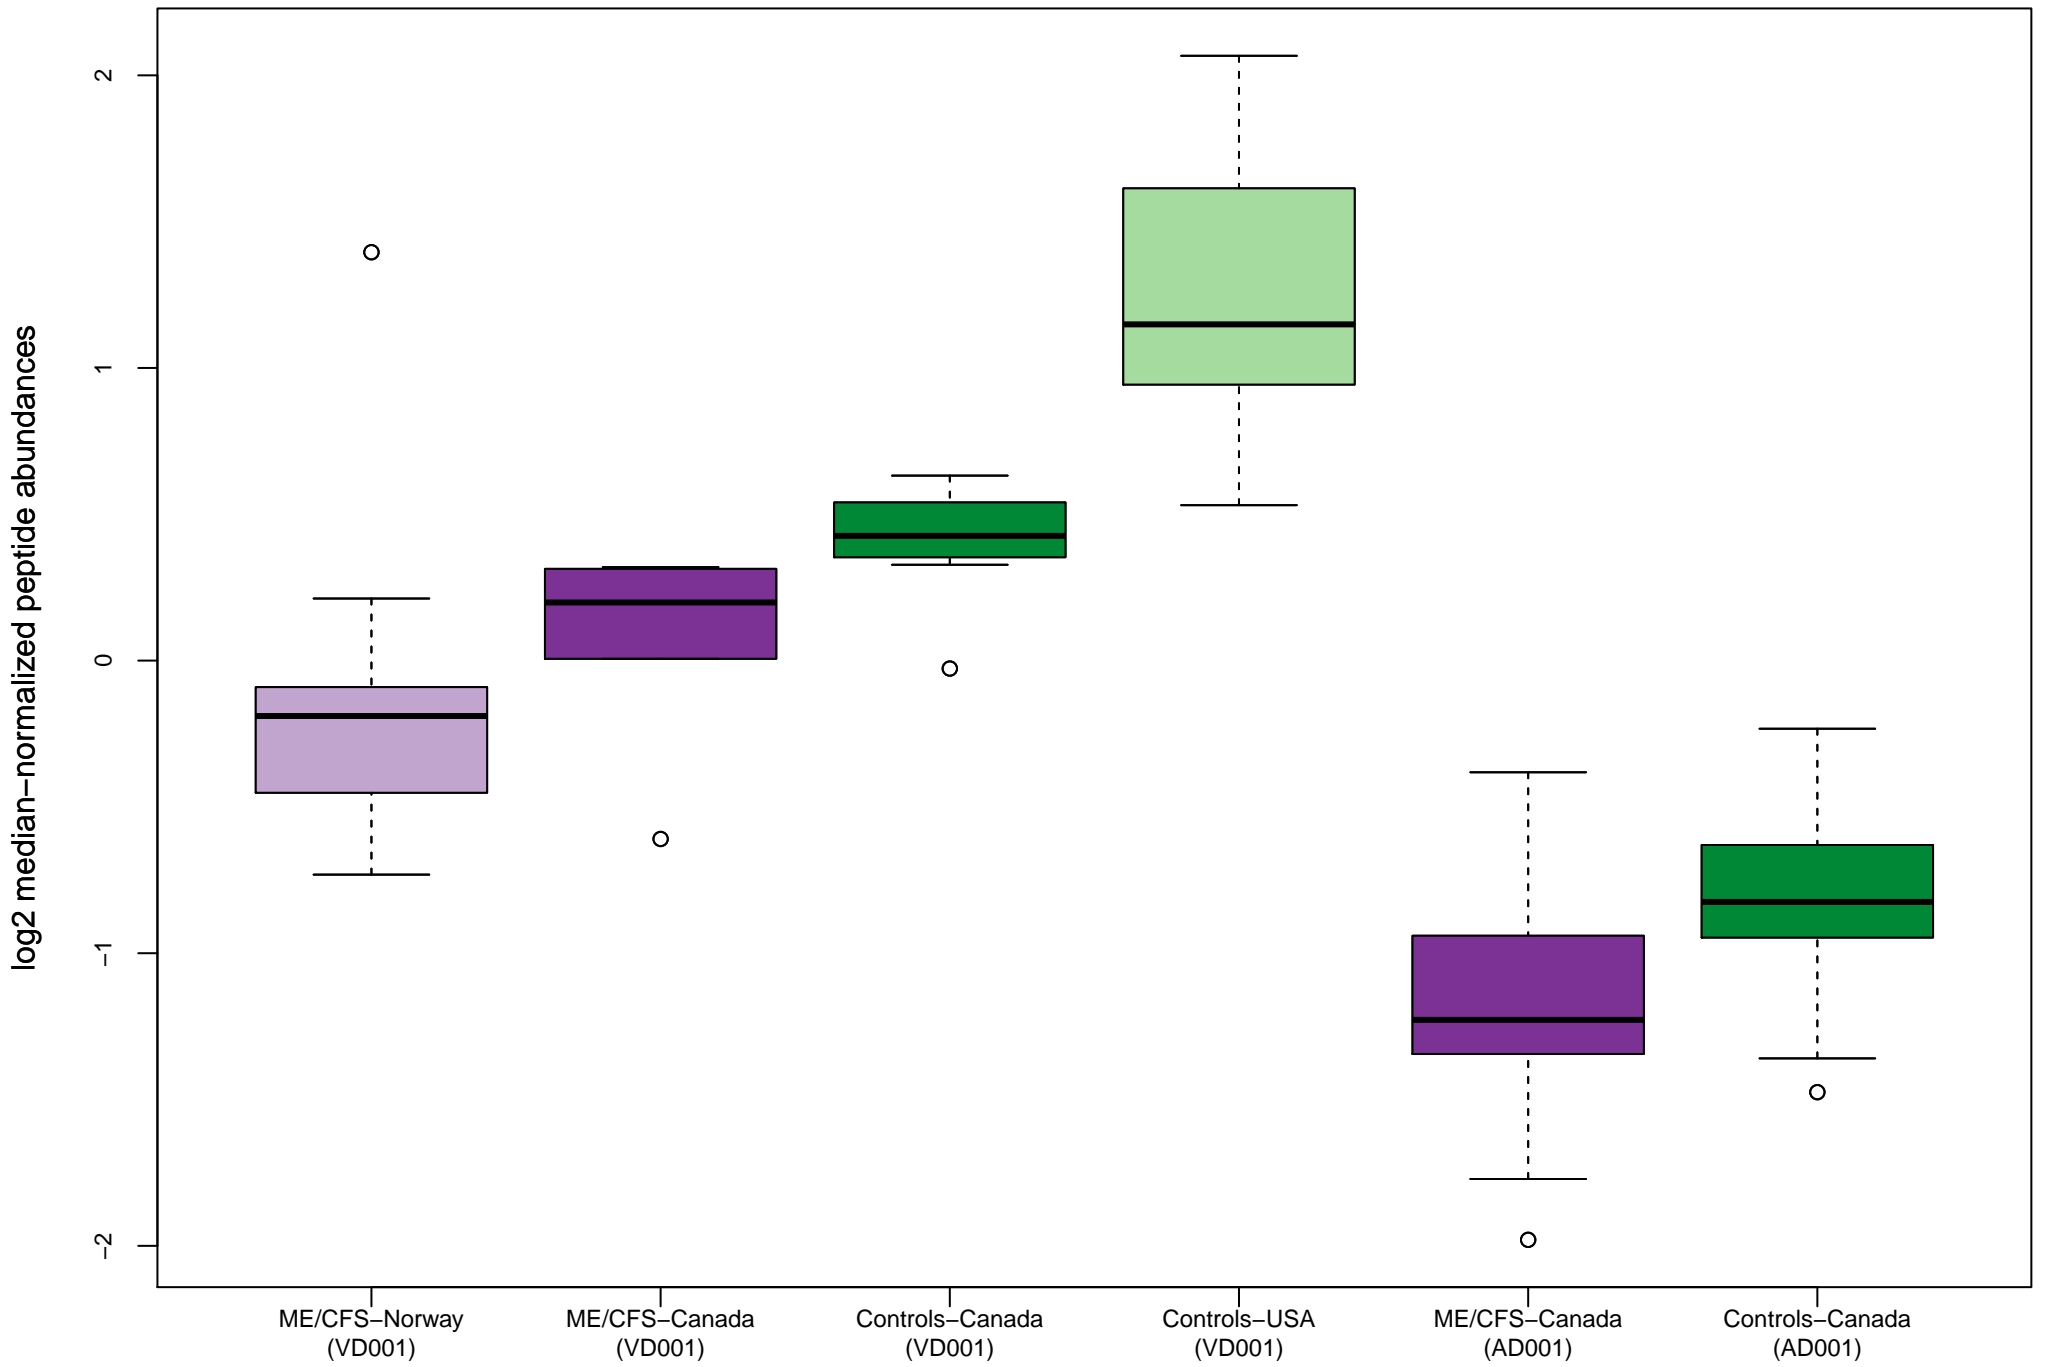

# RYAFSGRLQVLL

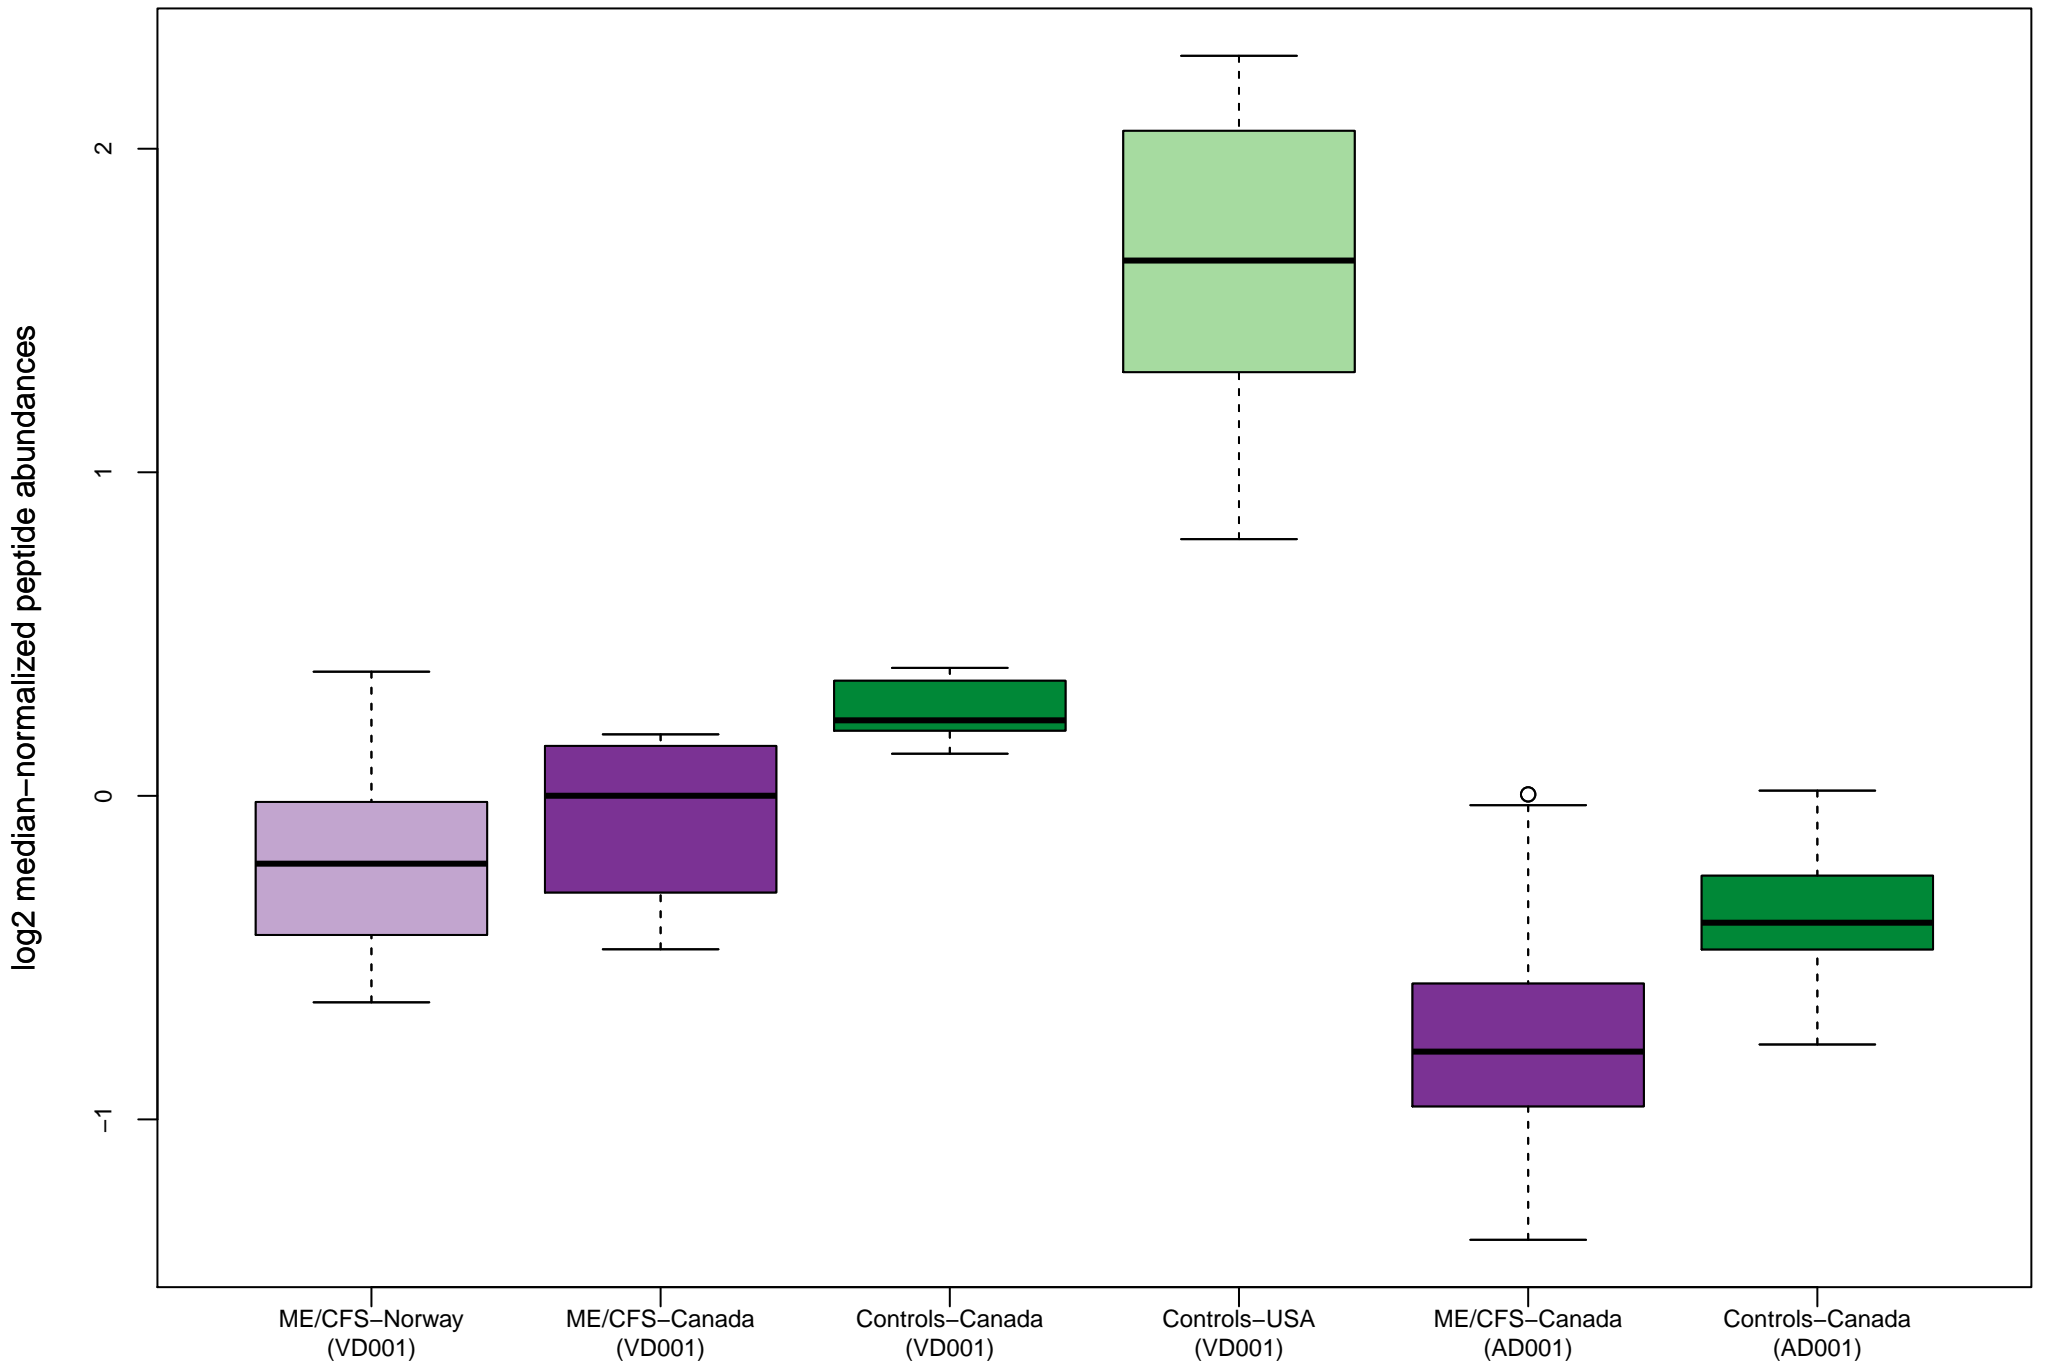

# RYFQRWVNL<sup>S</sup>AL

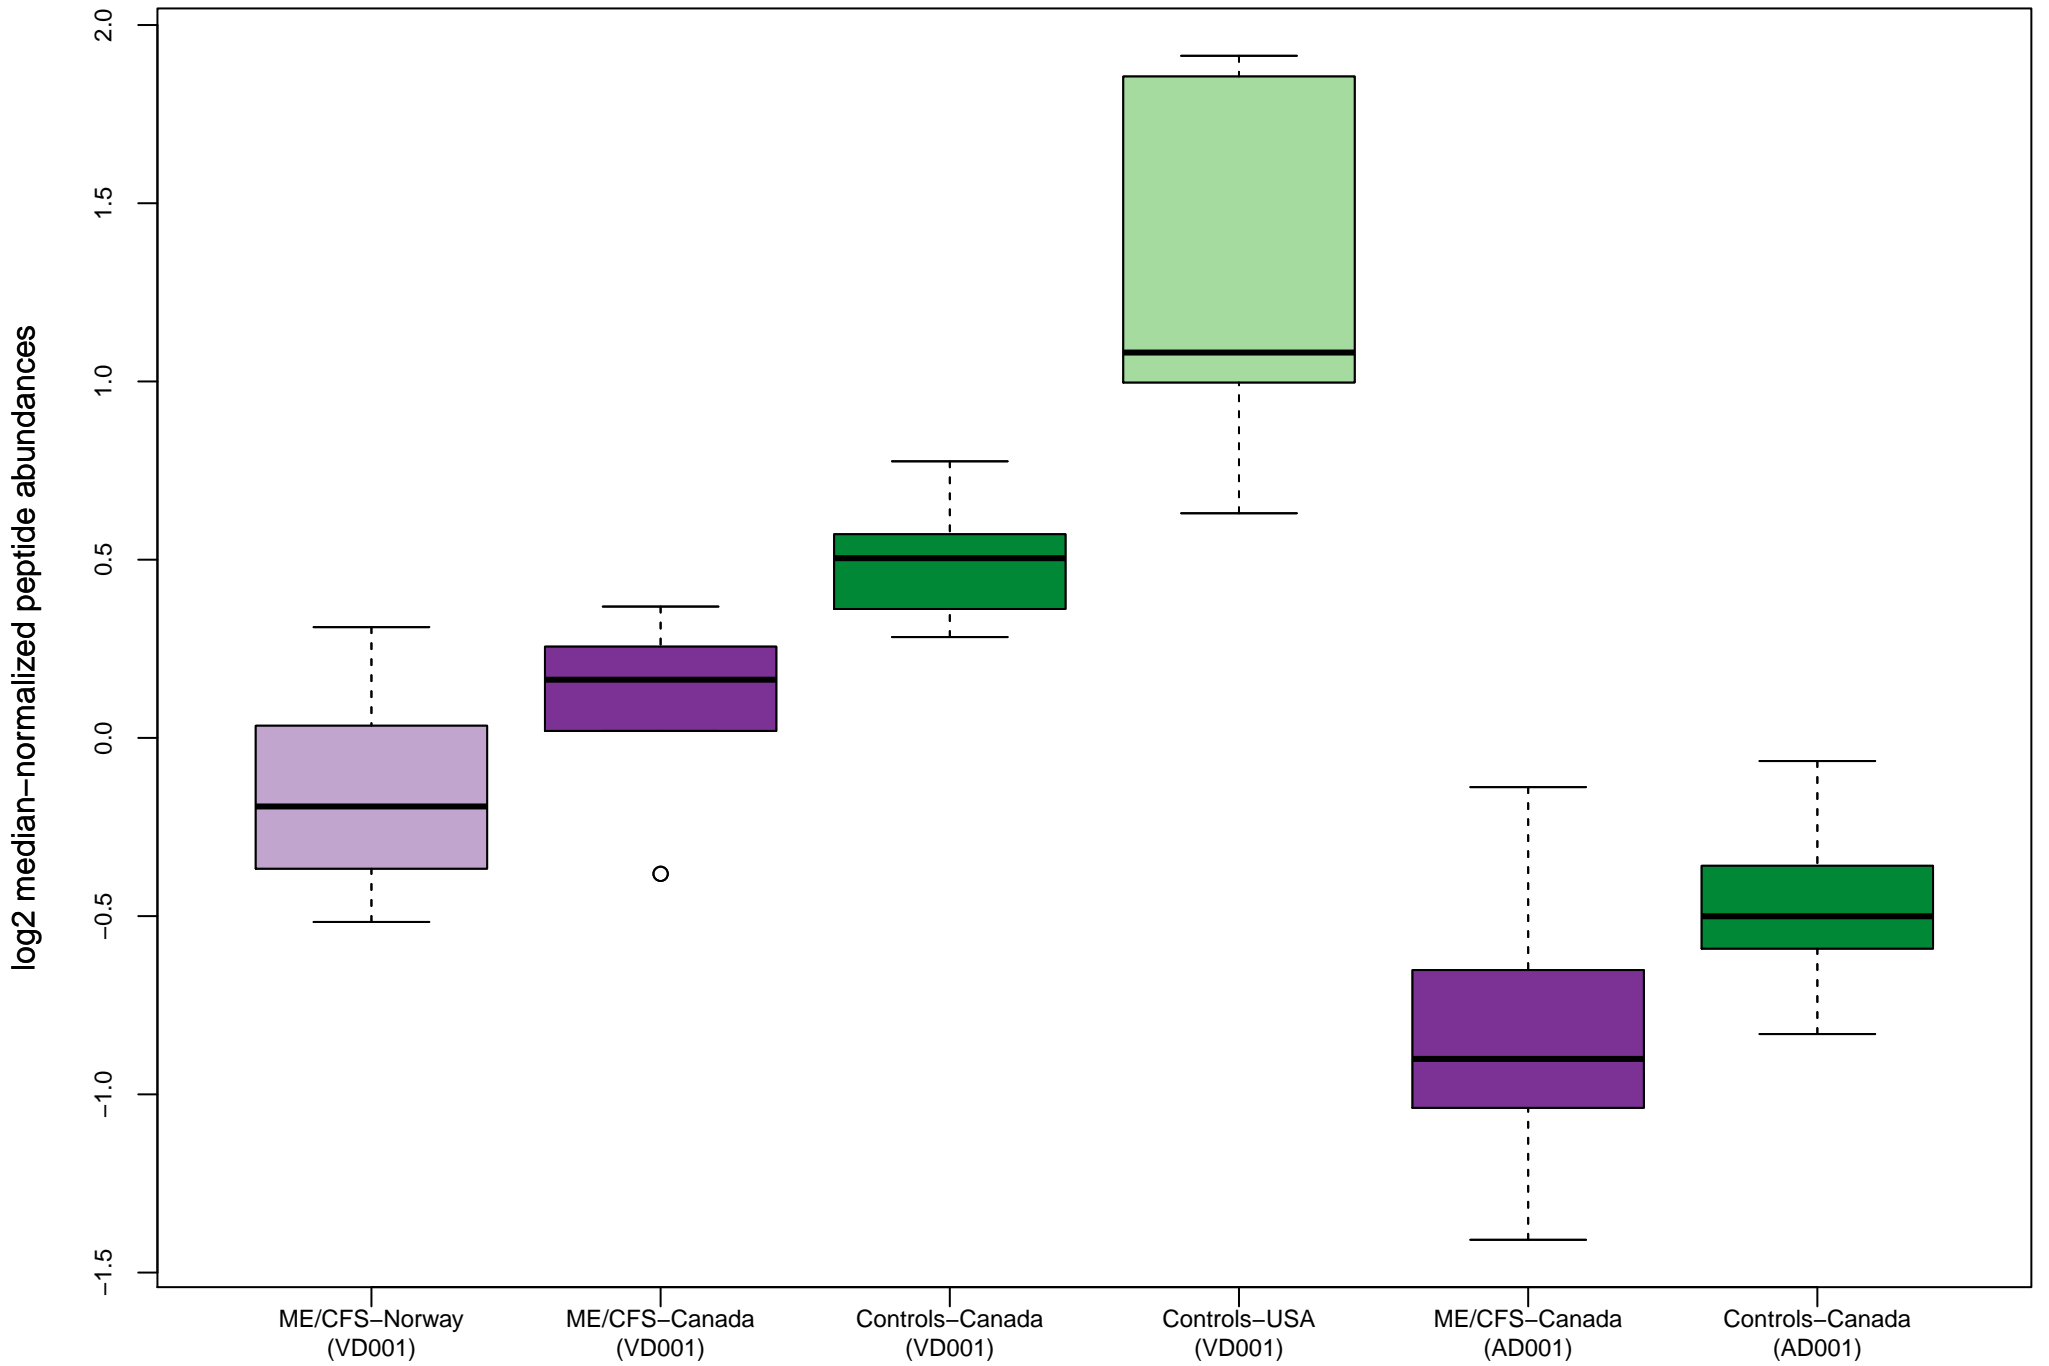



# RYFSVSRHVVAL

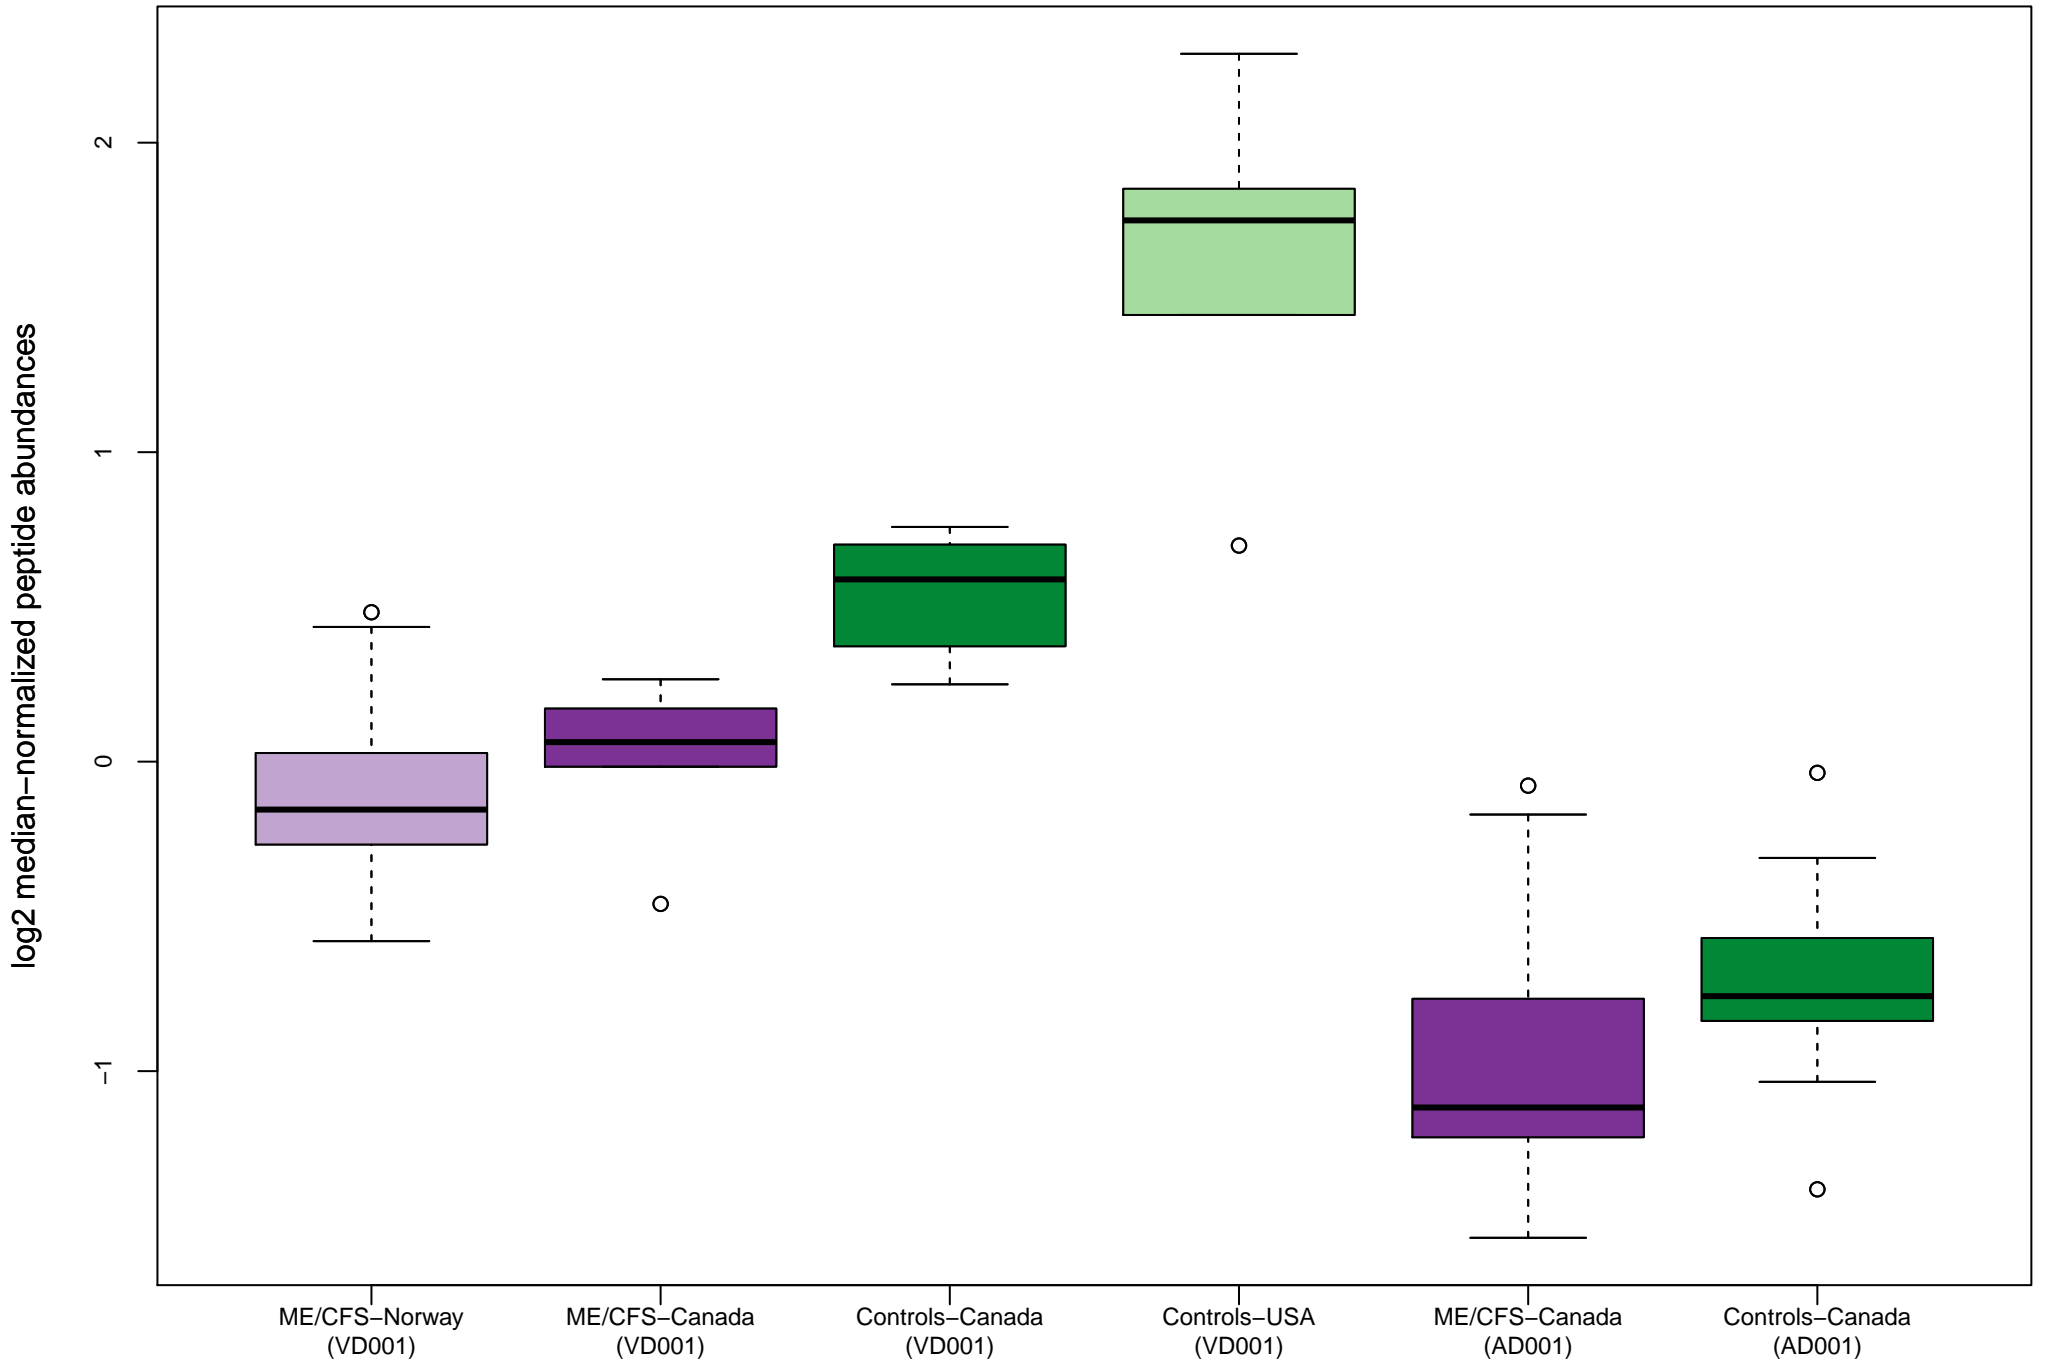

# RYLLVLNKHALS

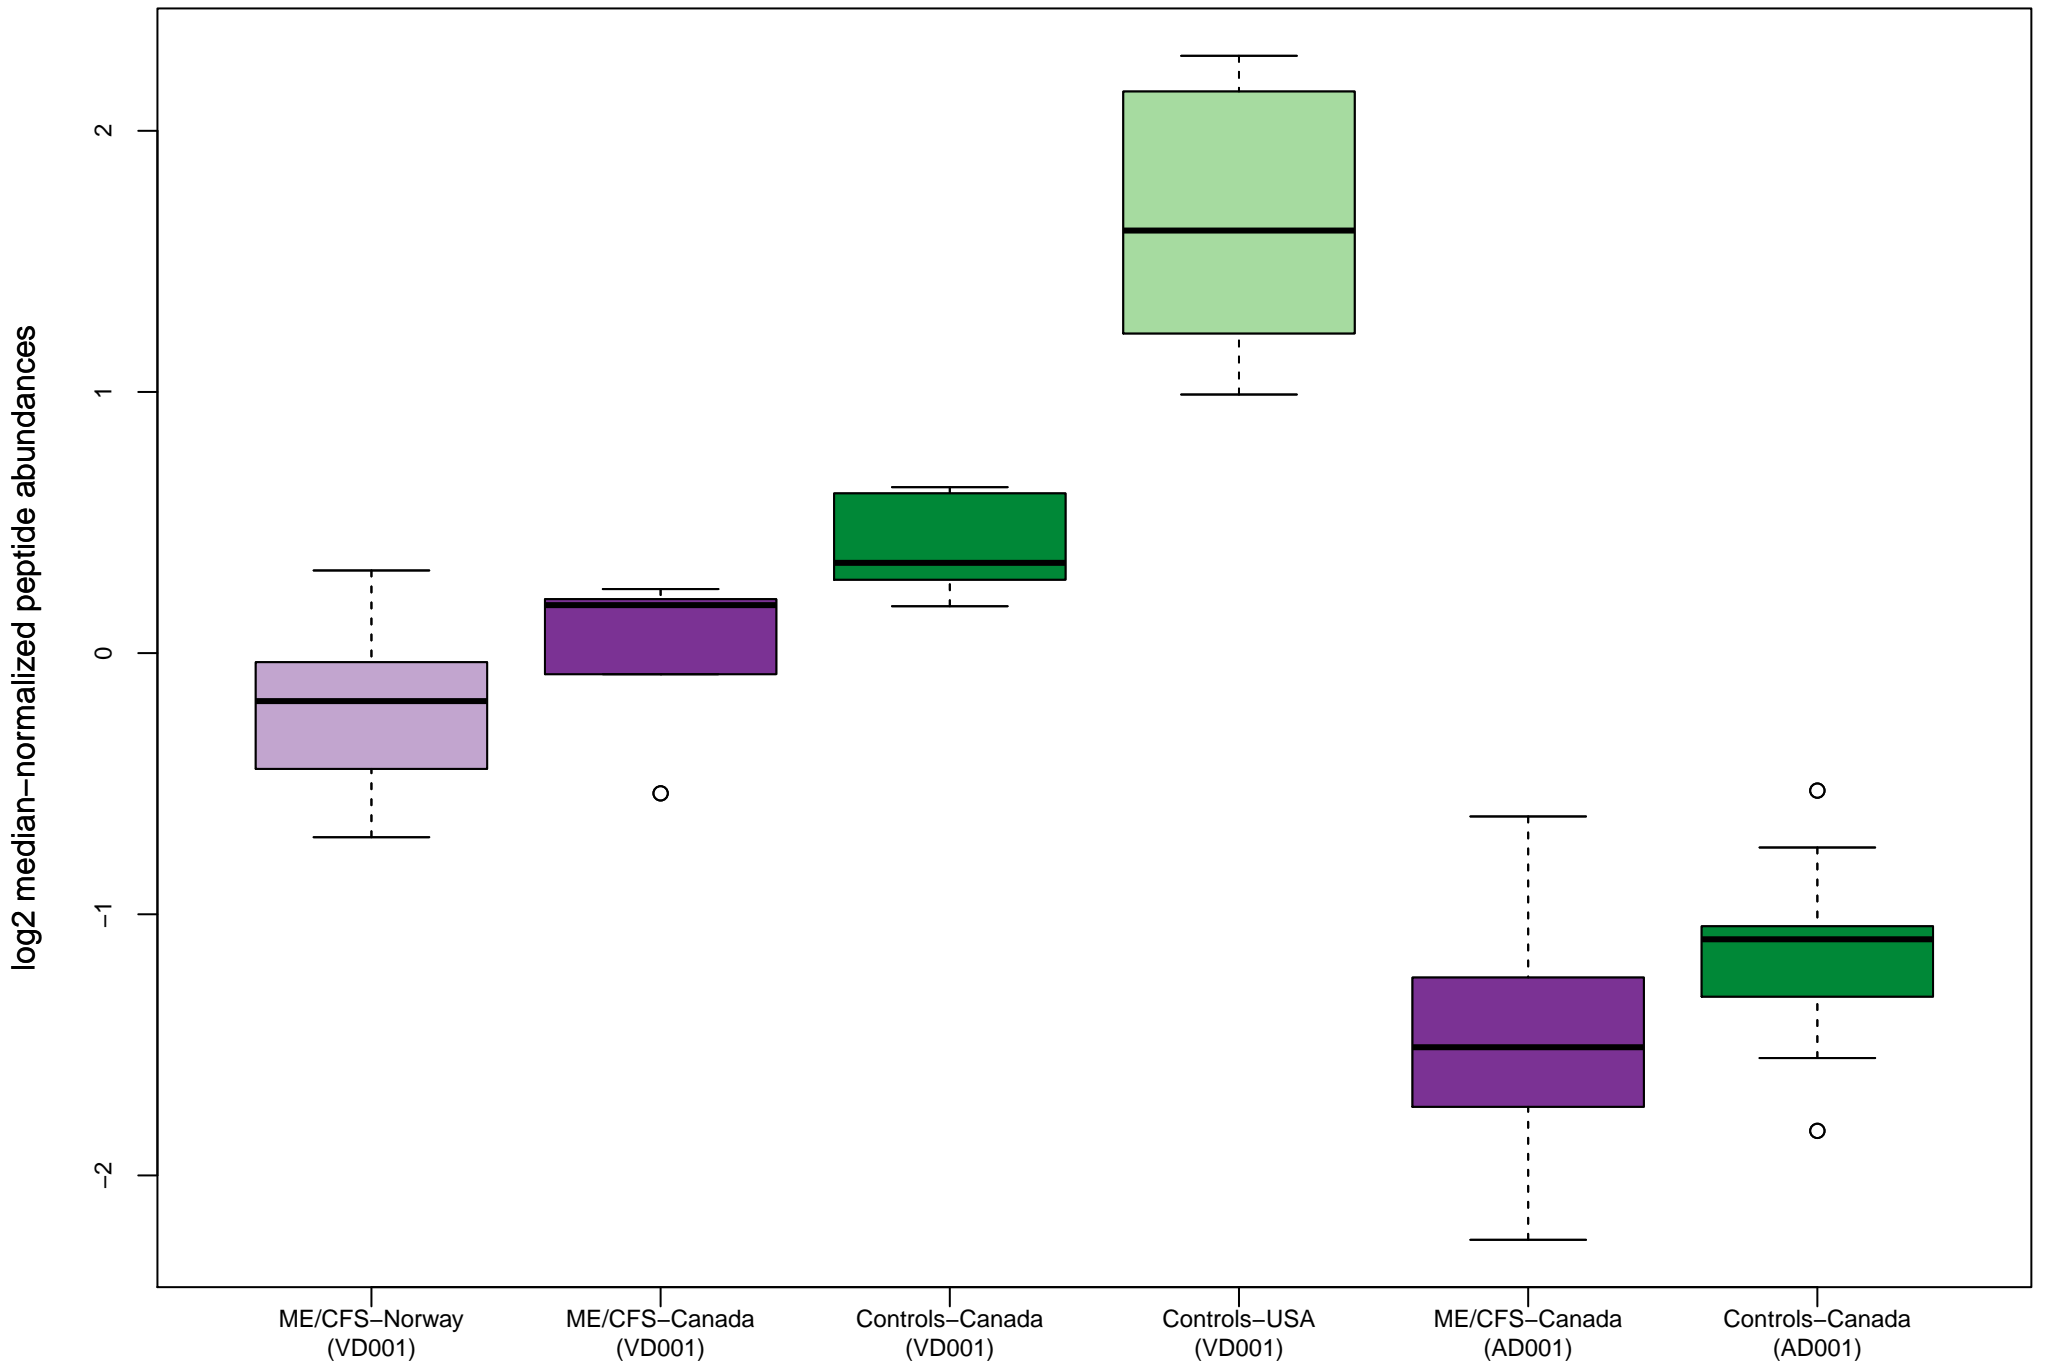

# RYPRLQFWKVV

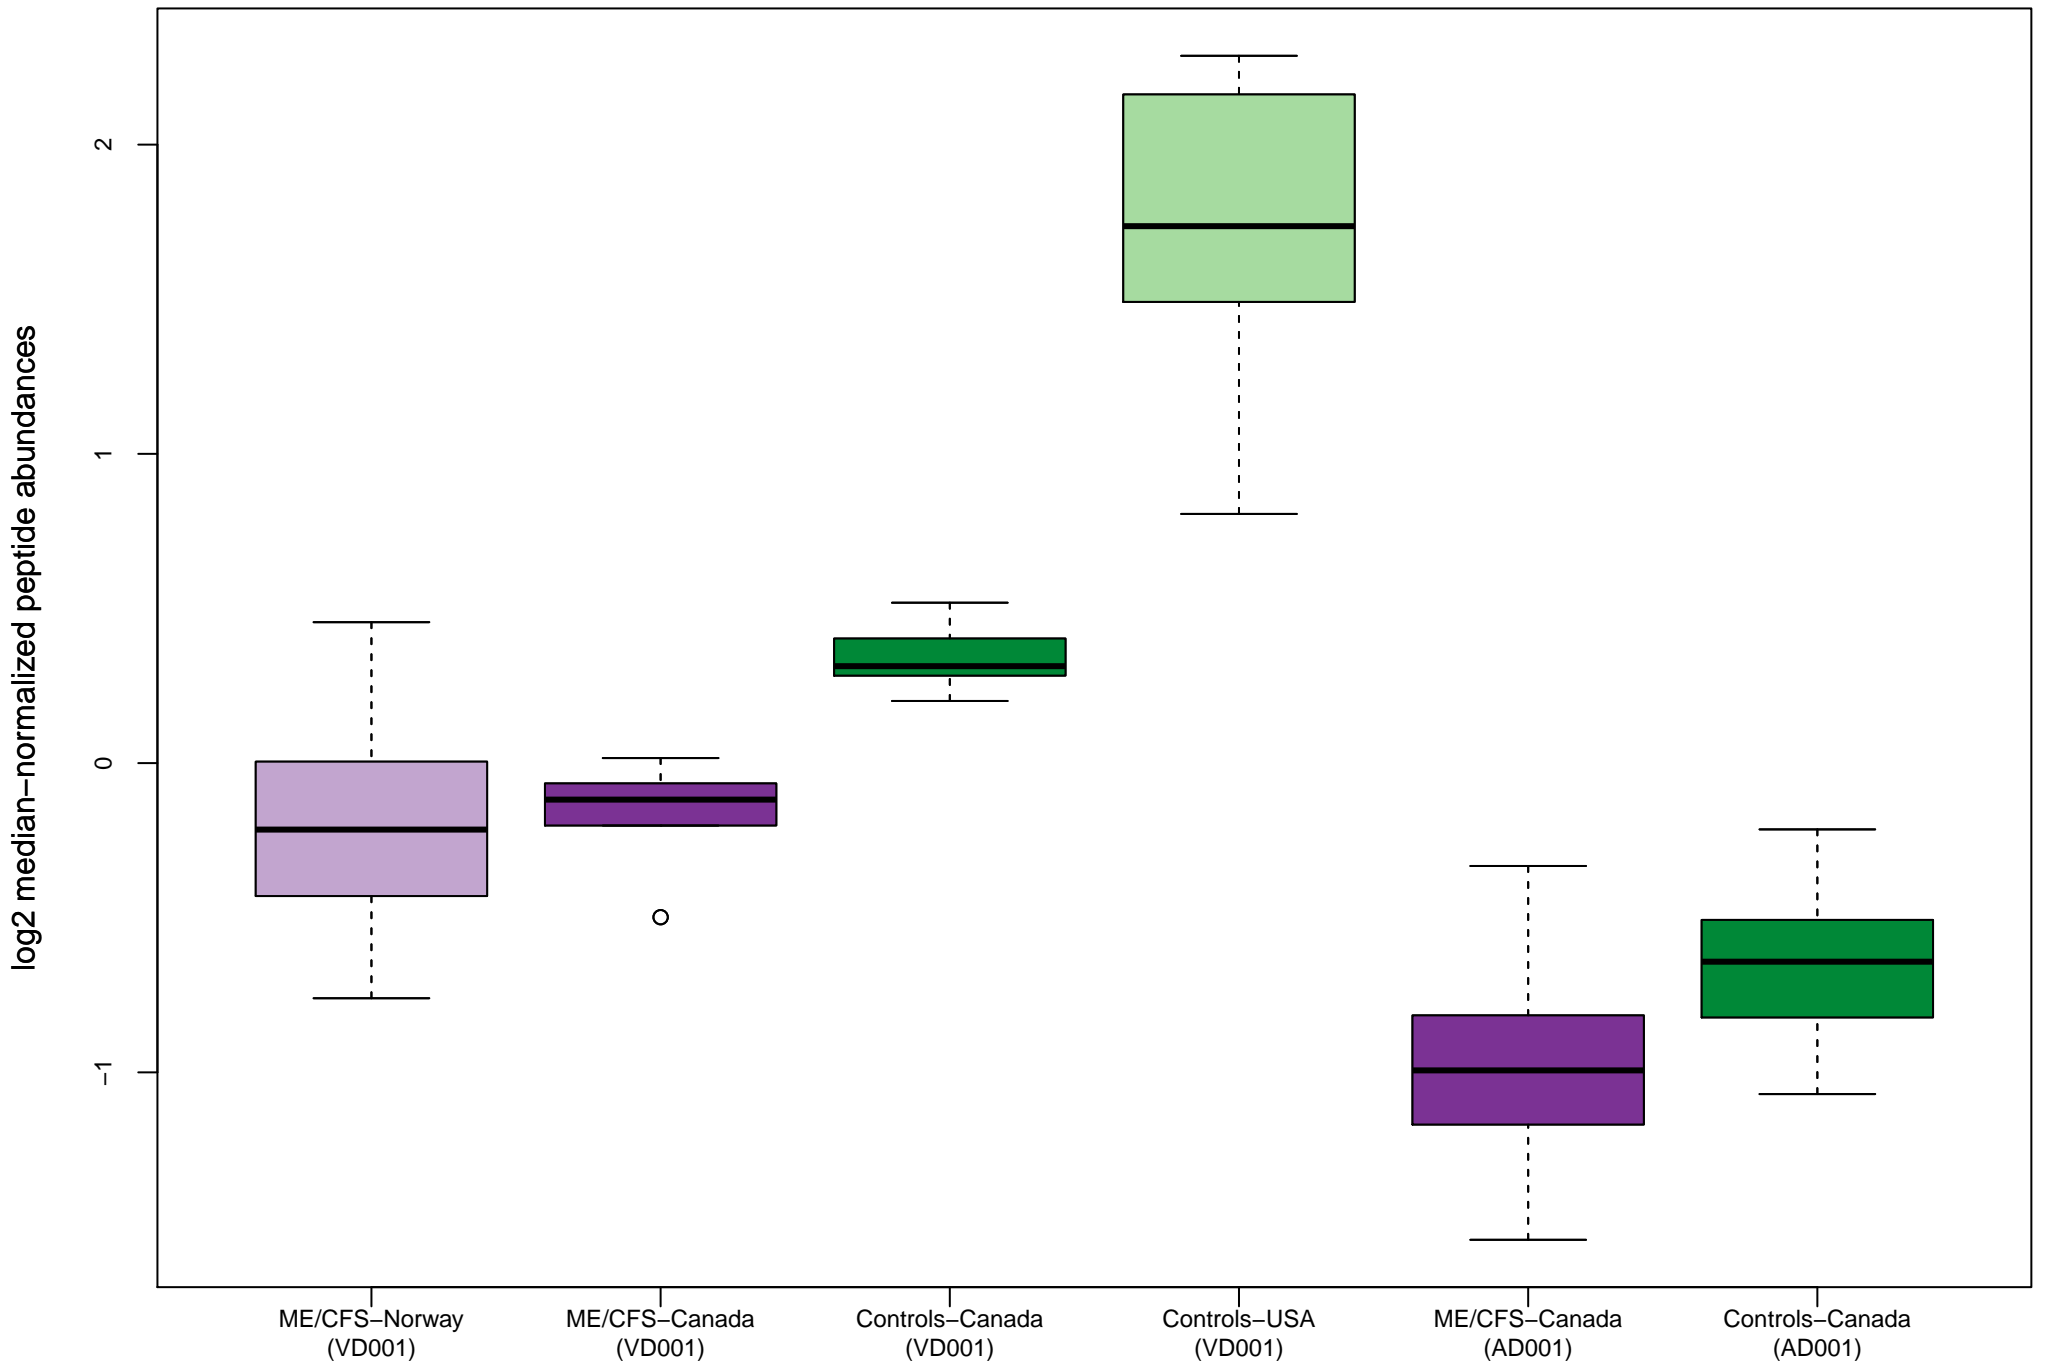

# RYQFKDGFVLR

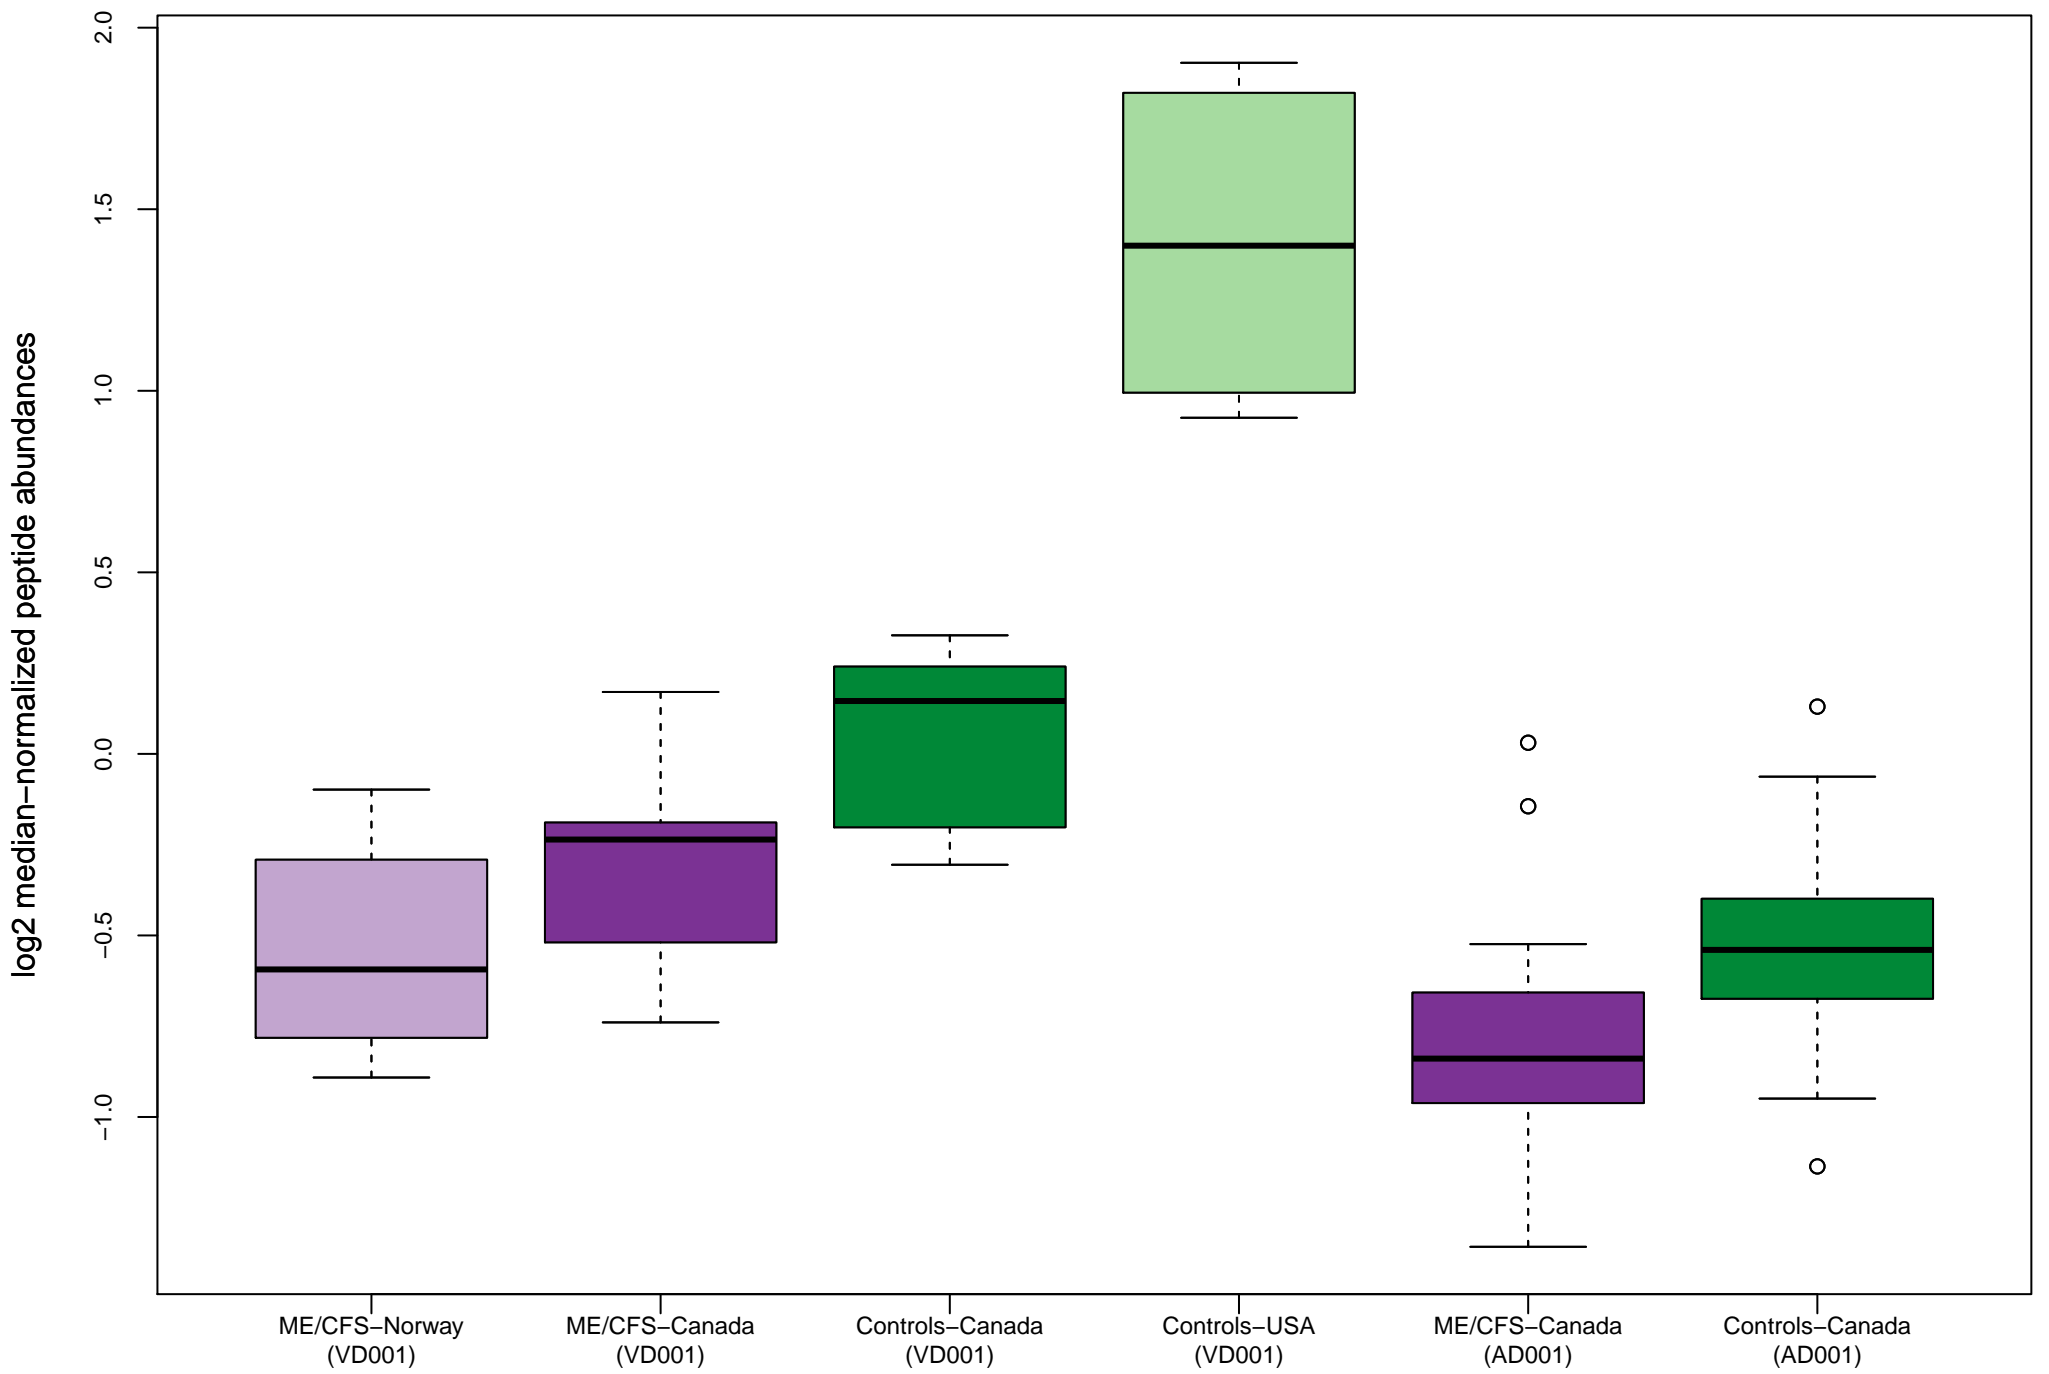

# RYVFASRYVWHV

log2 median-normalized peptide abundances

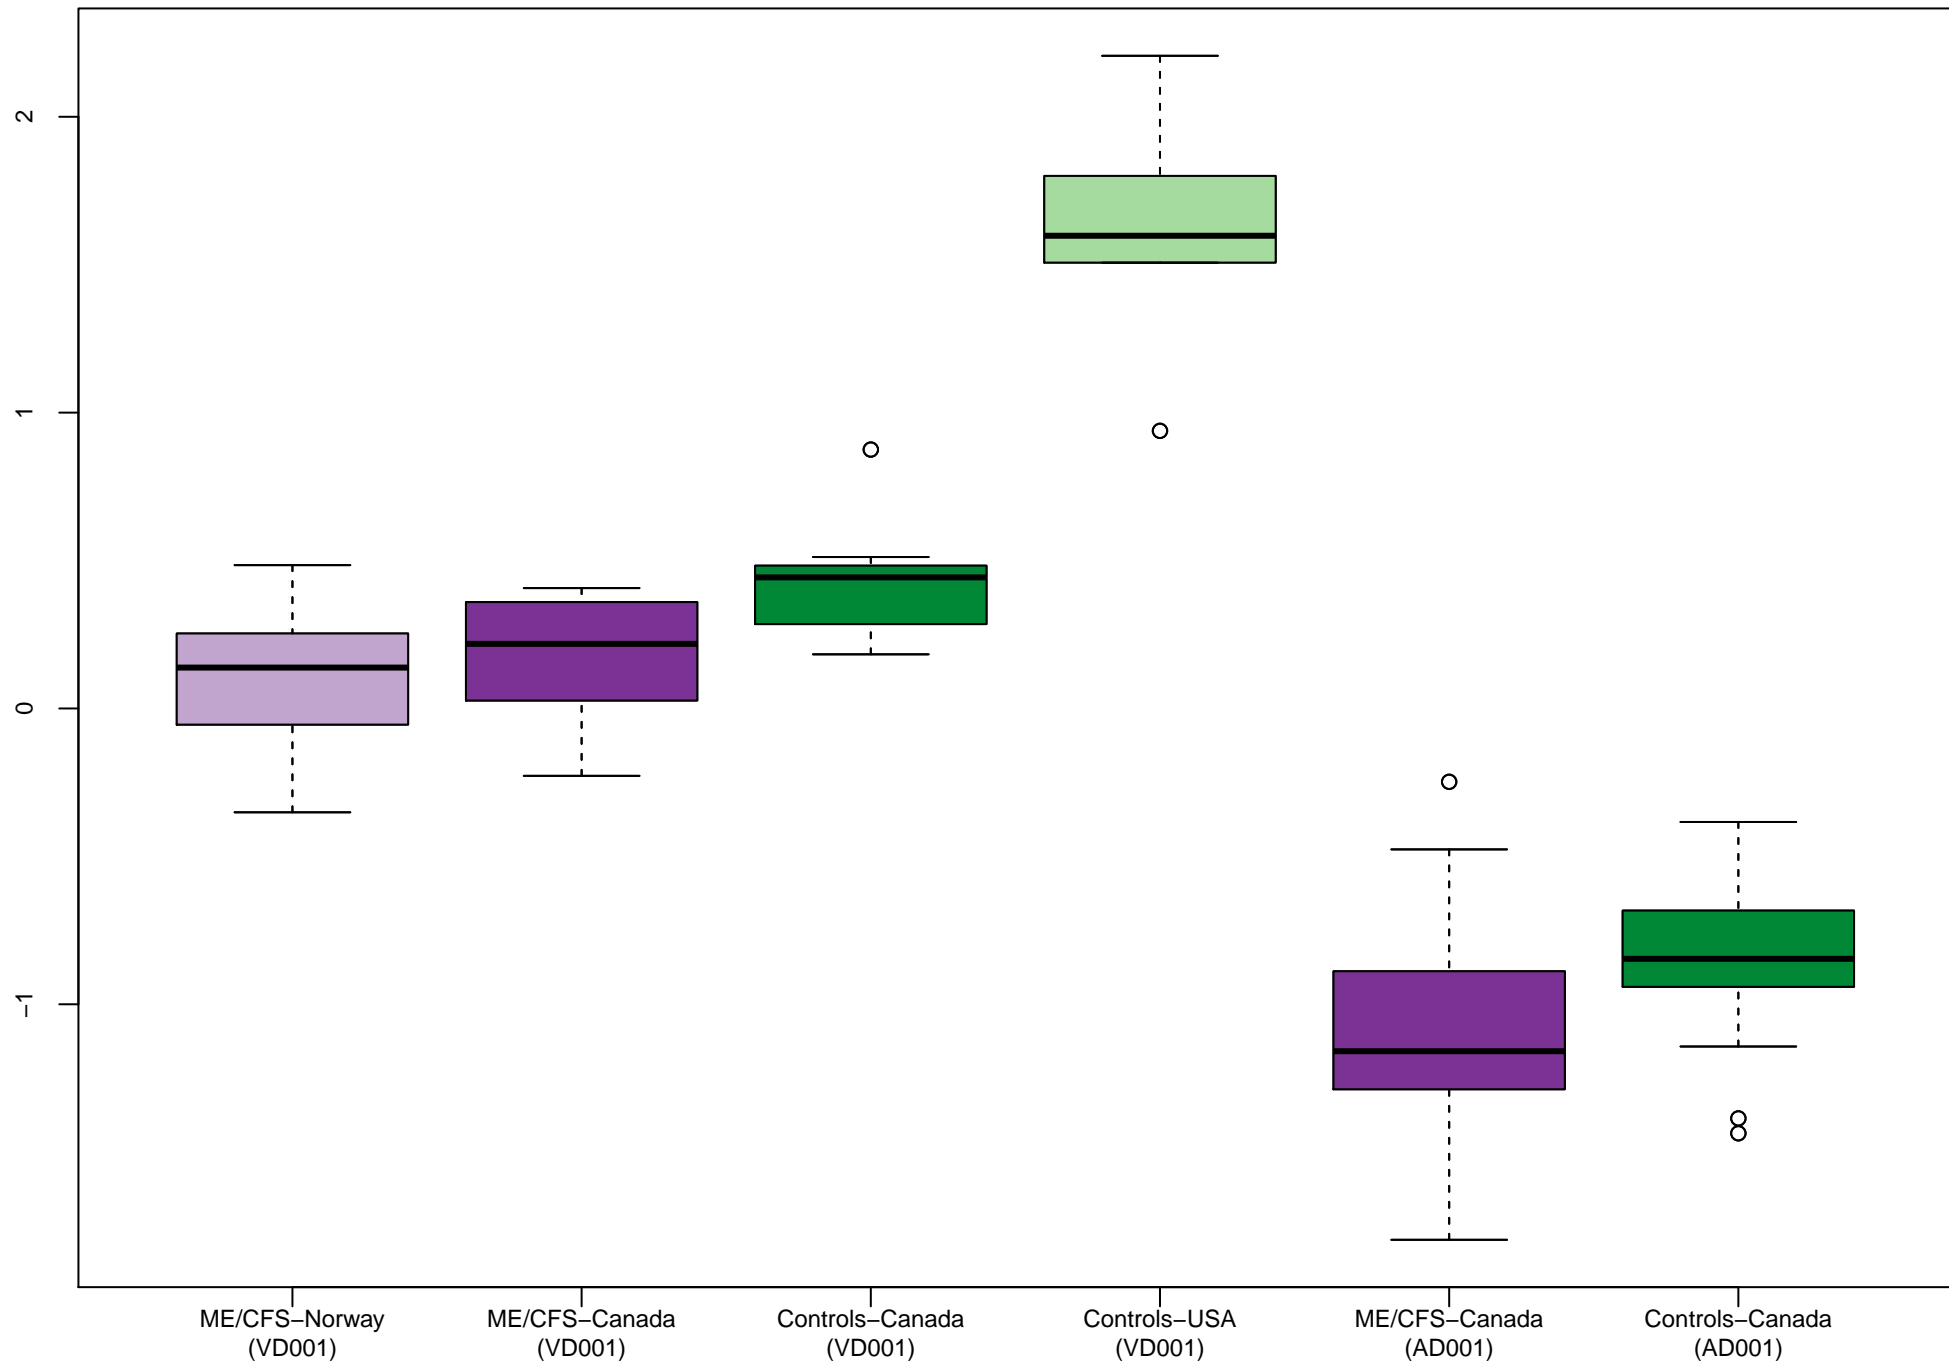

# RYWLLYKDRVLS

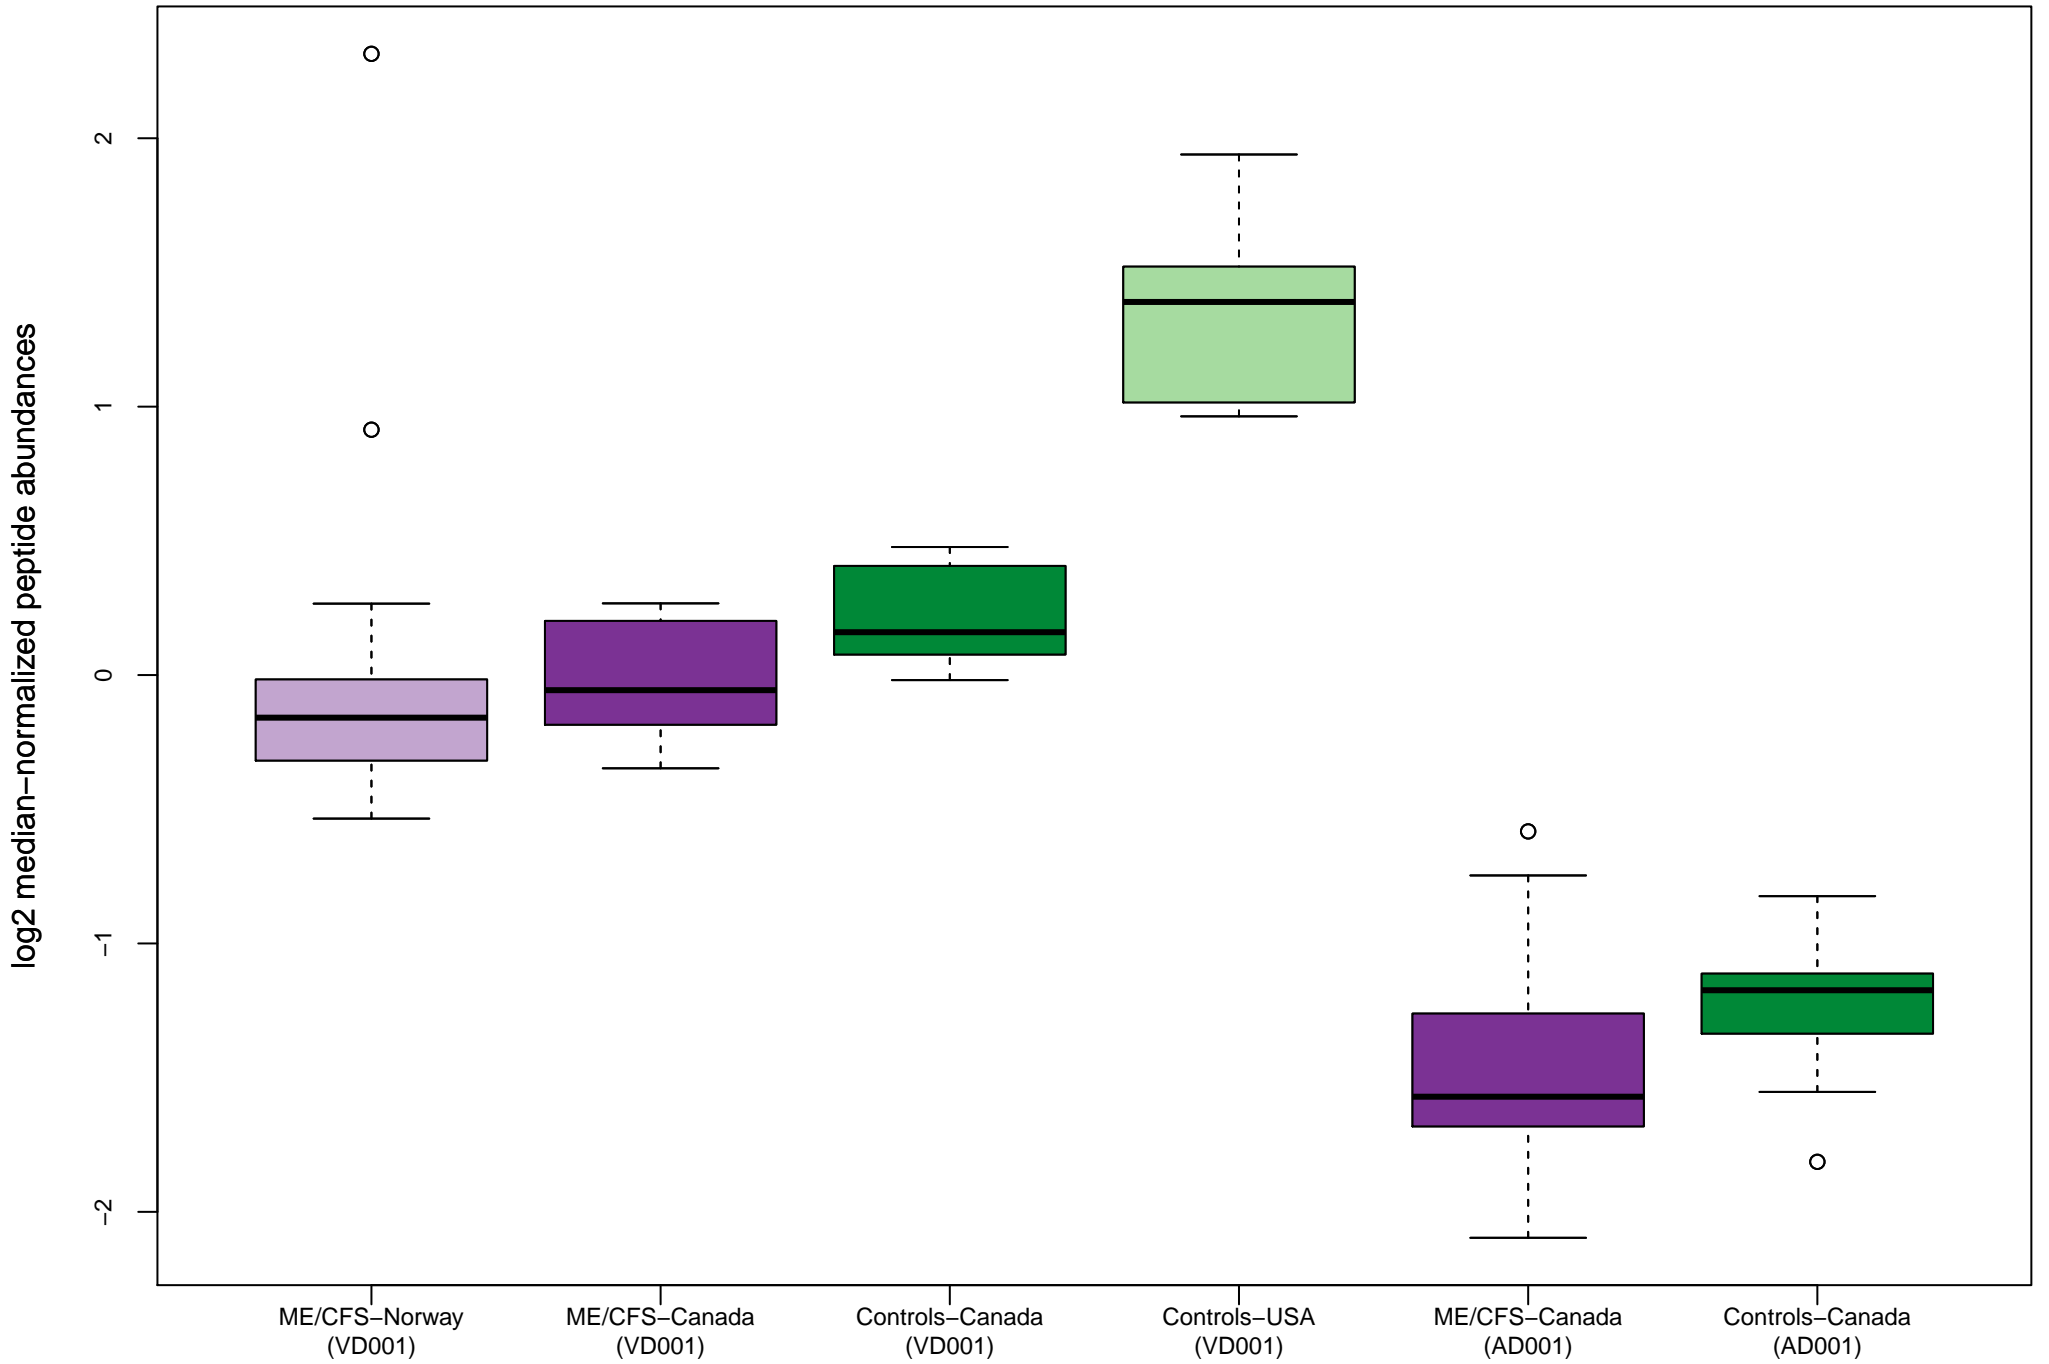

# RYYKSFLQFNAV

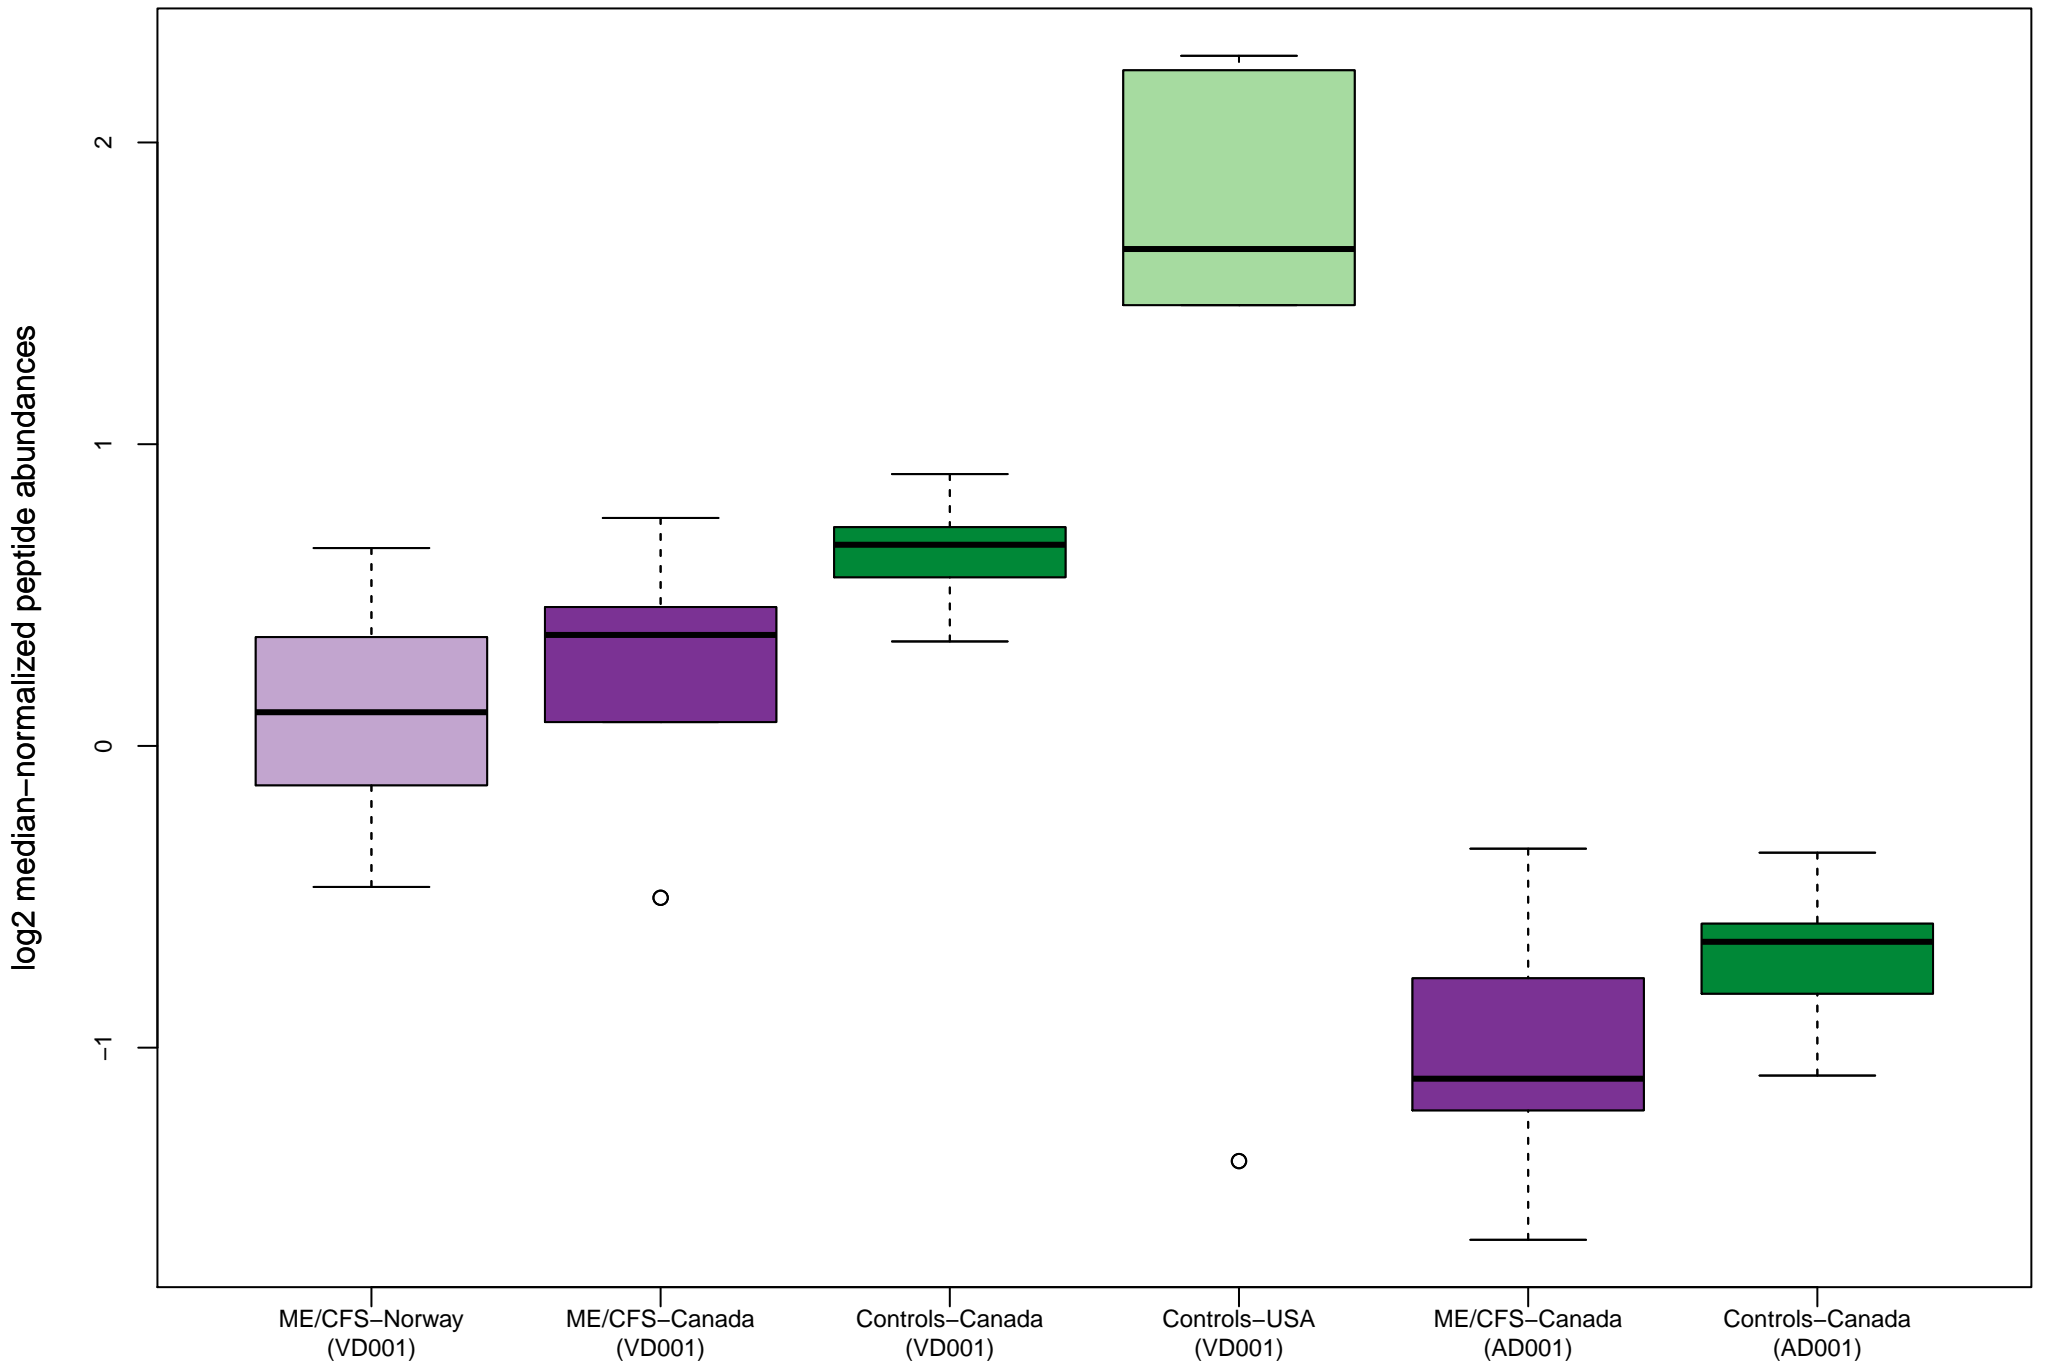

# SFFRLRSGVLSG

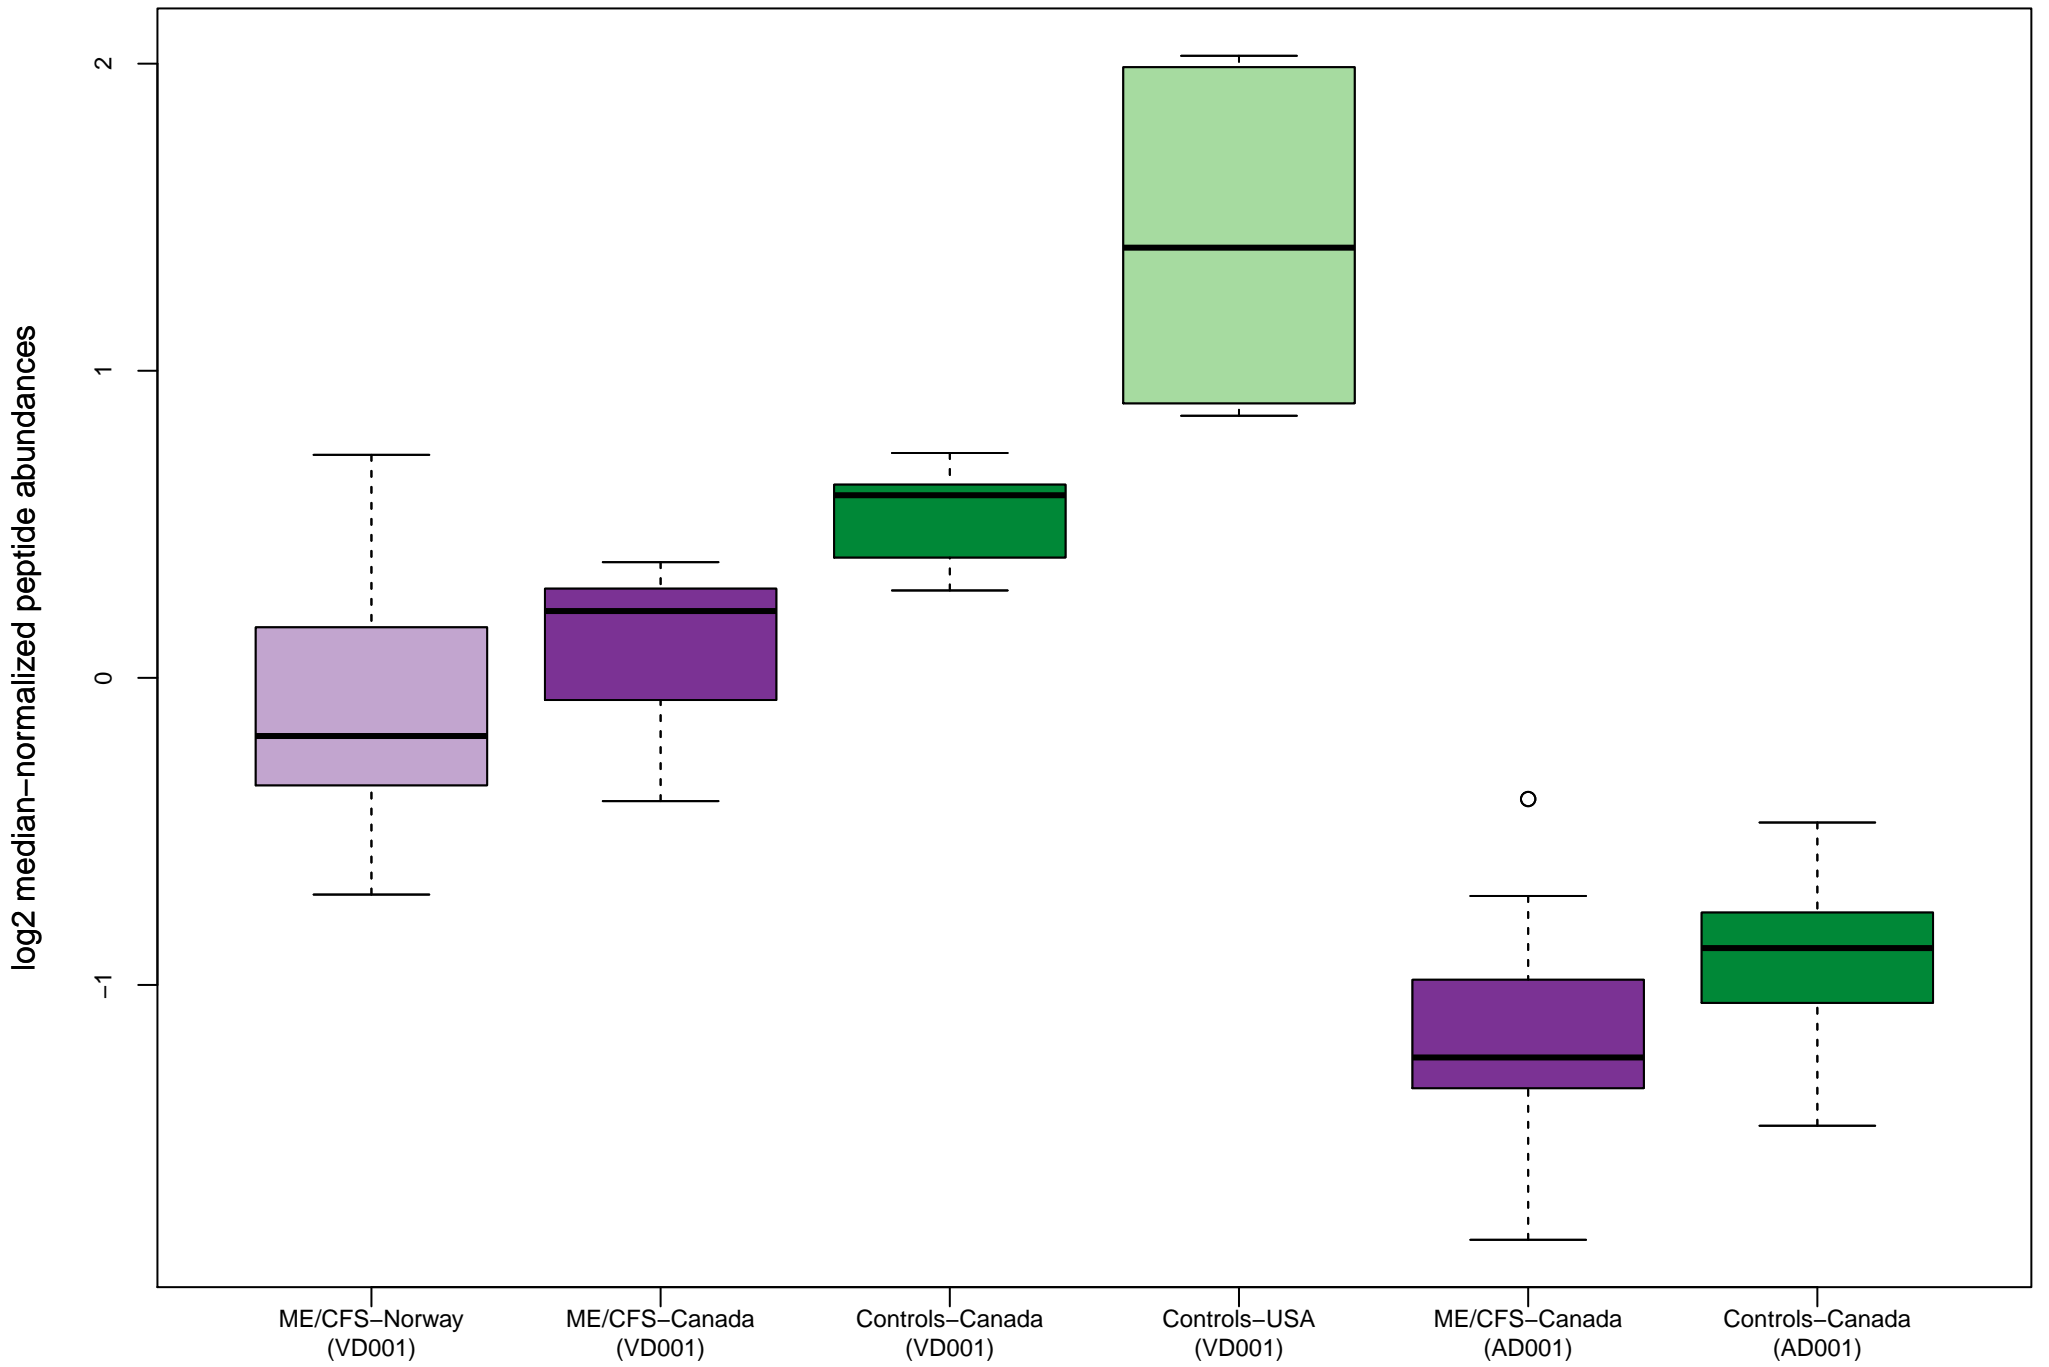



# SFRAAFYWKLS

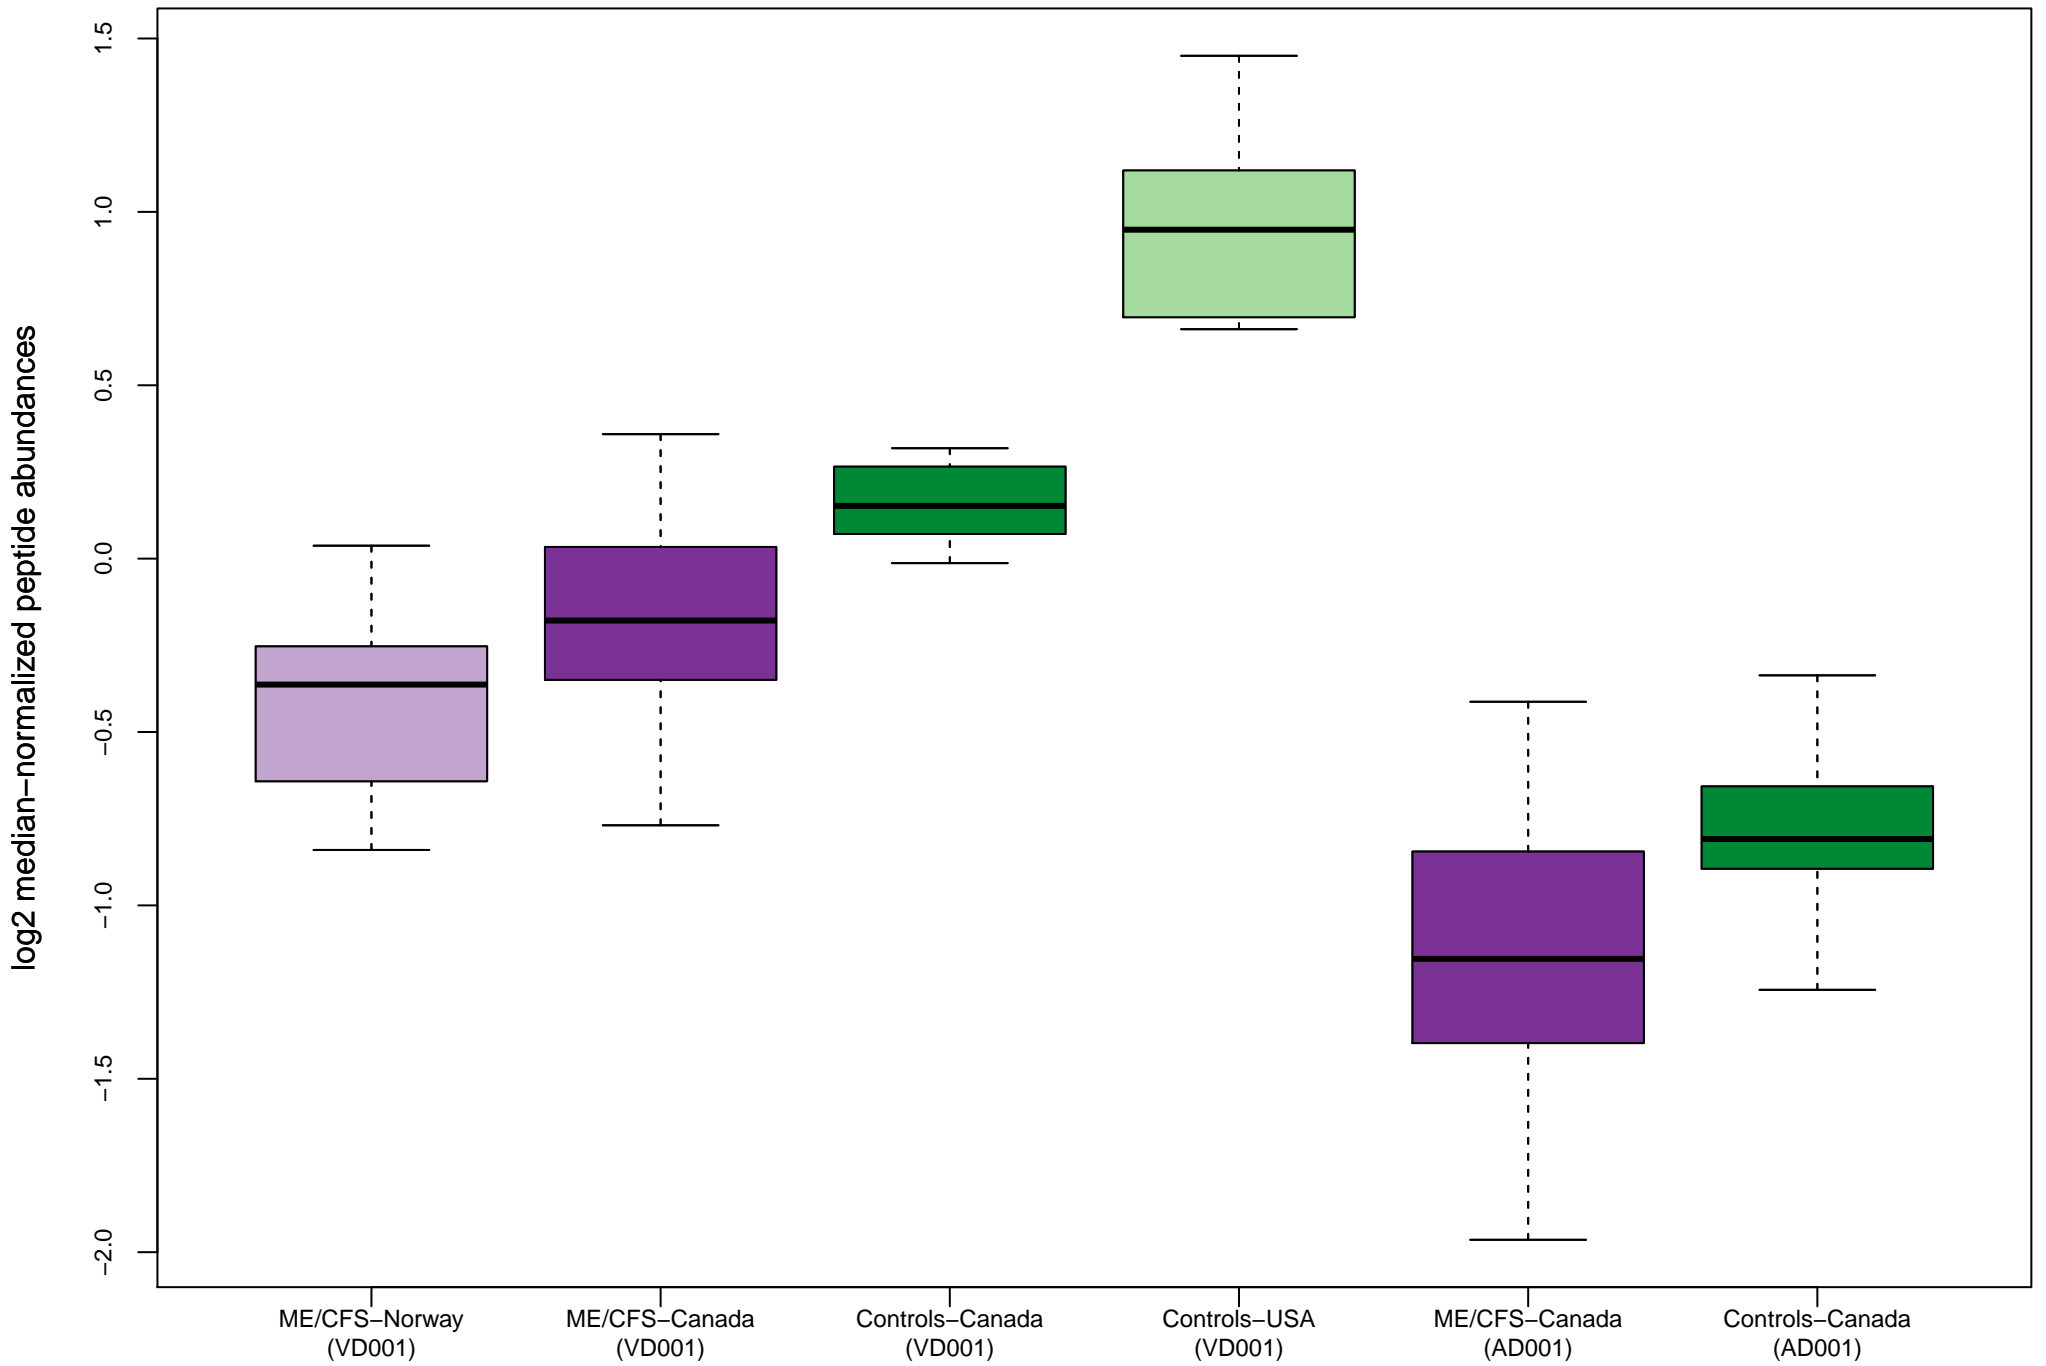

# SHRVLNLSVASG

log2 median-normalized peptide abundances

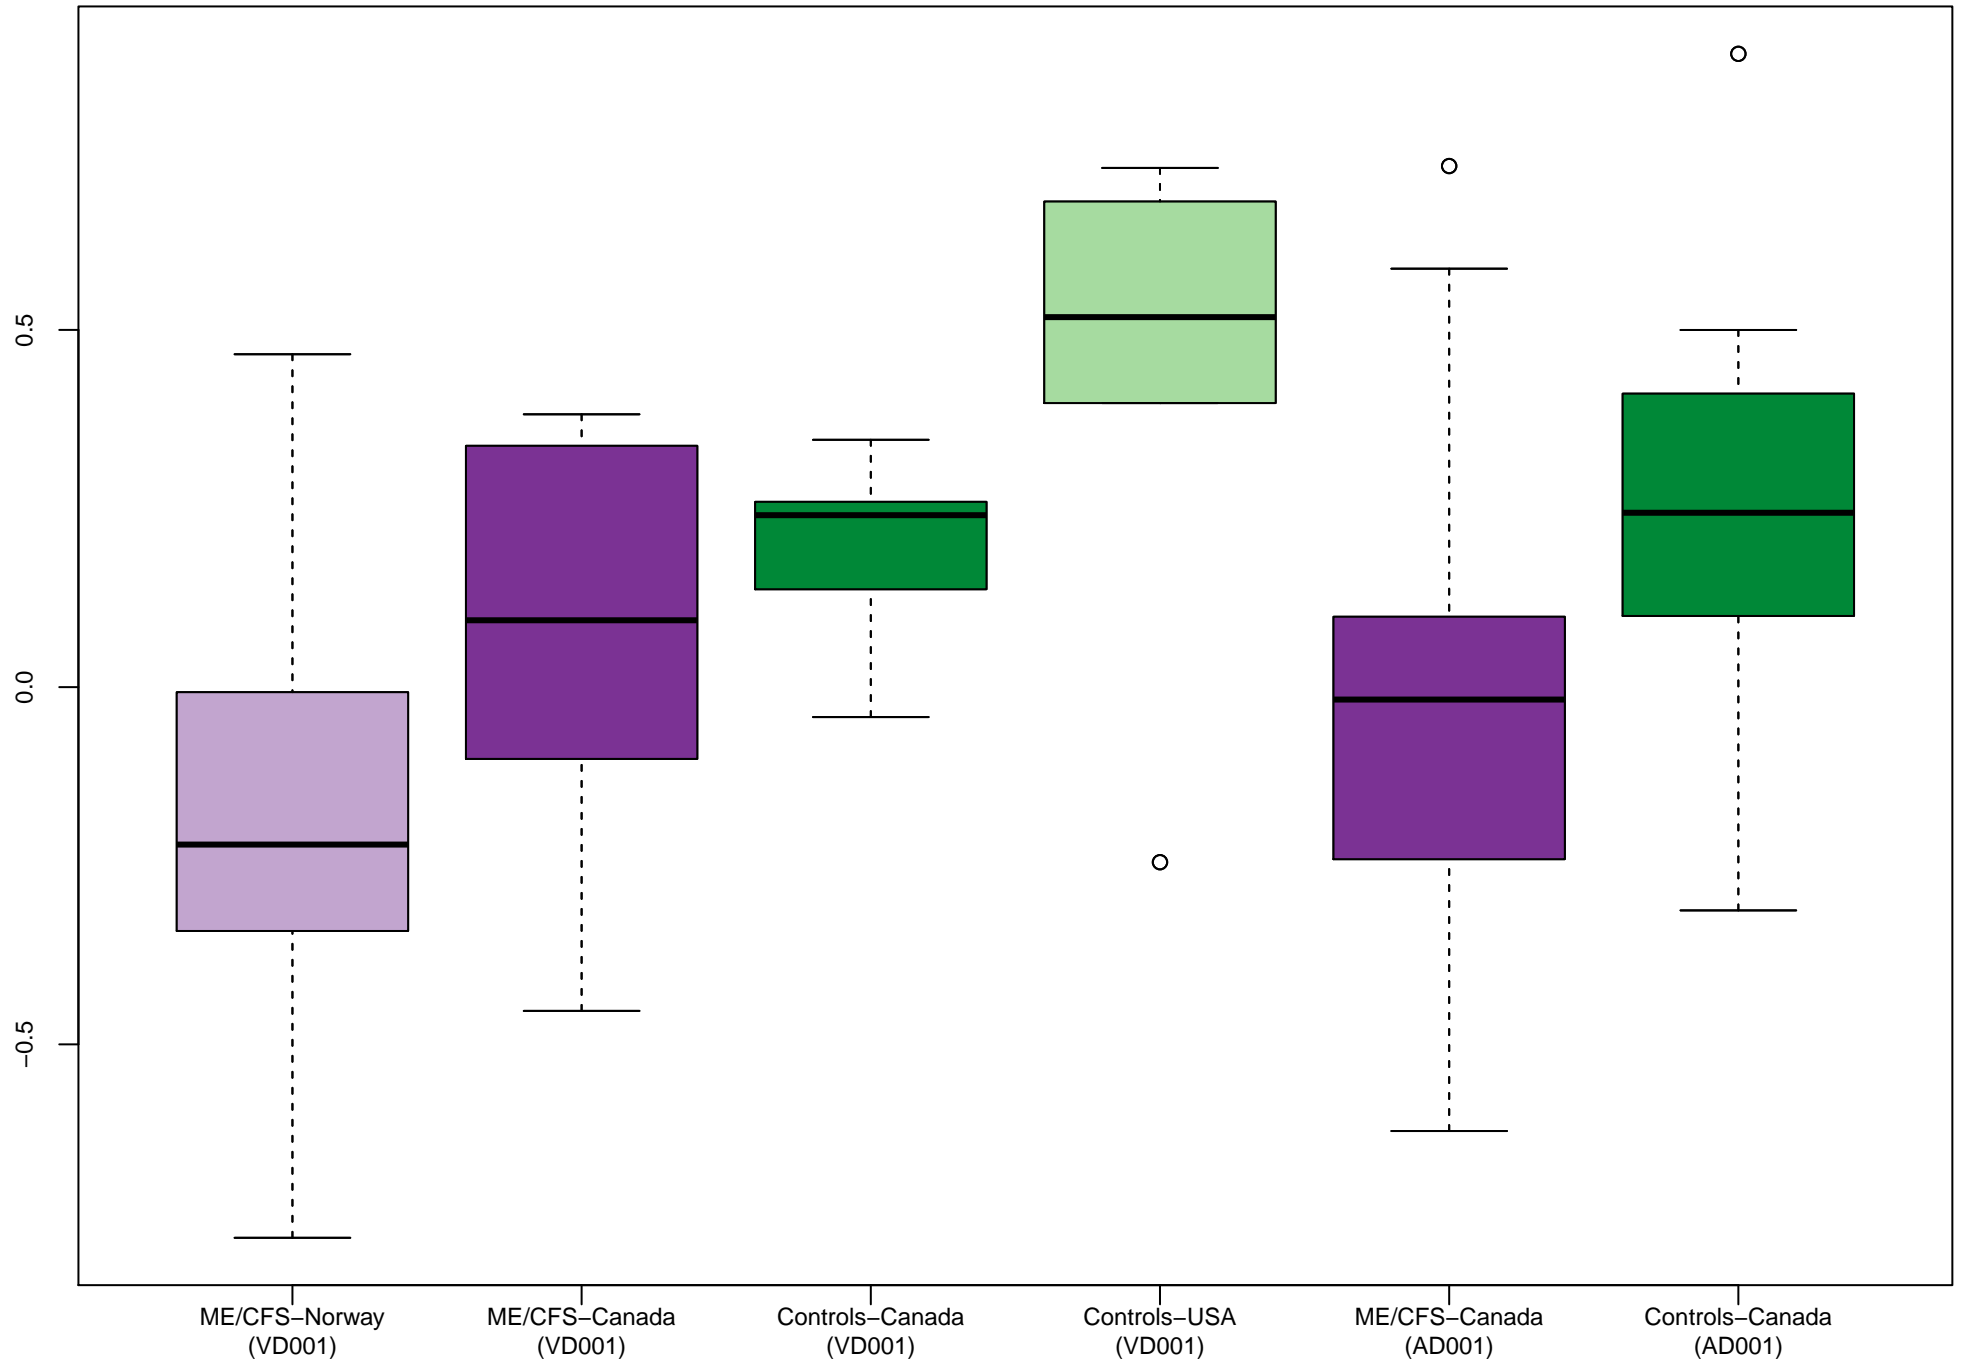

# SNQWKFGVAGS

log2 median-normalized peptide abundances

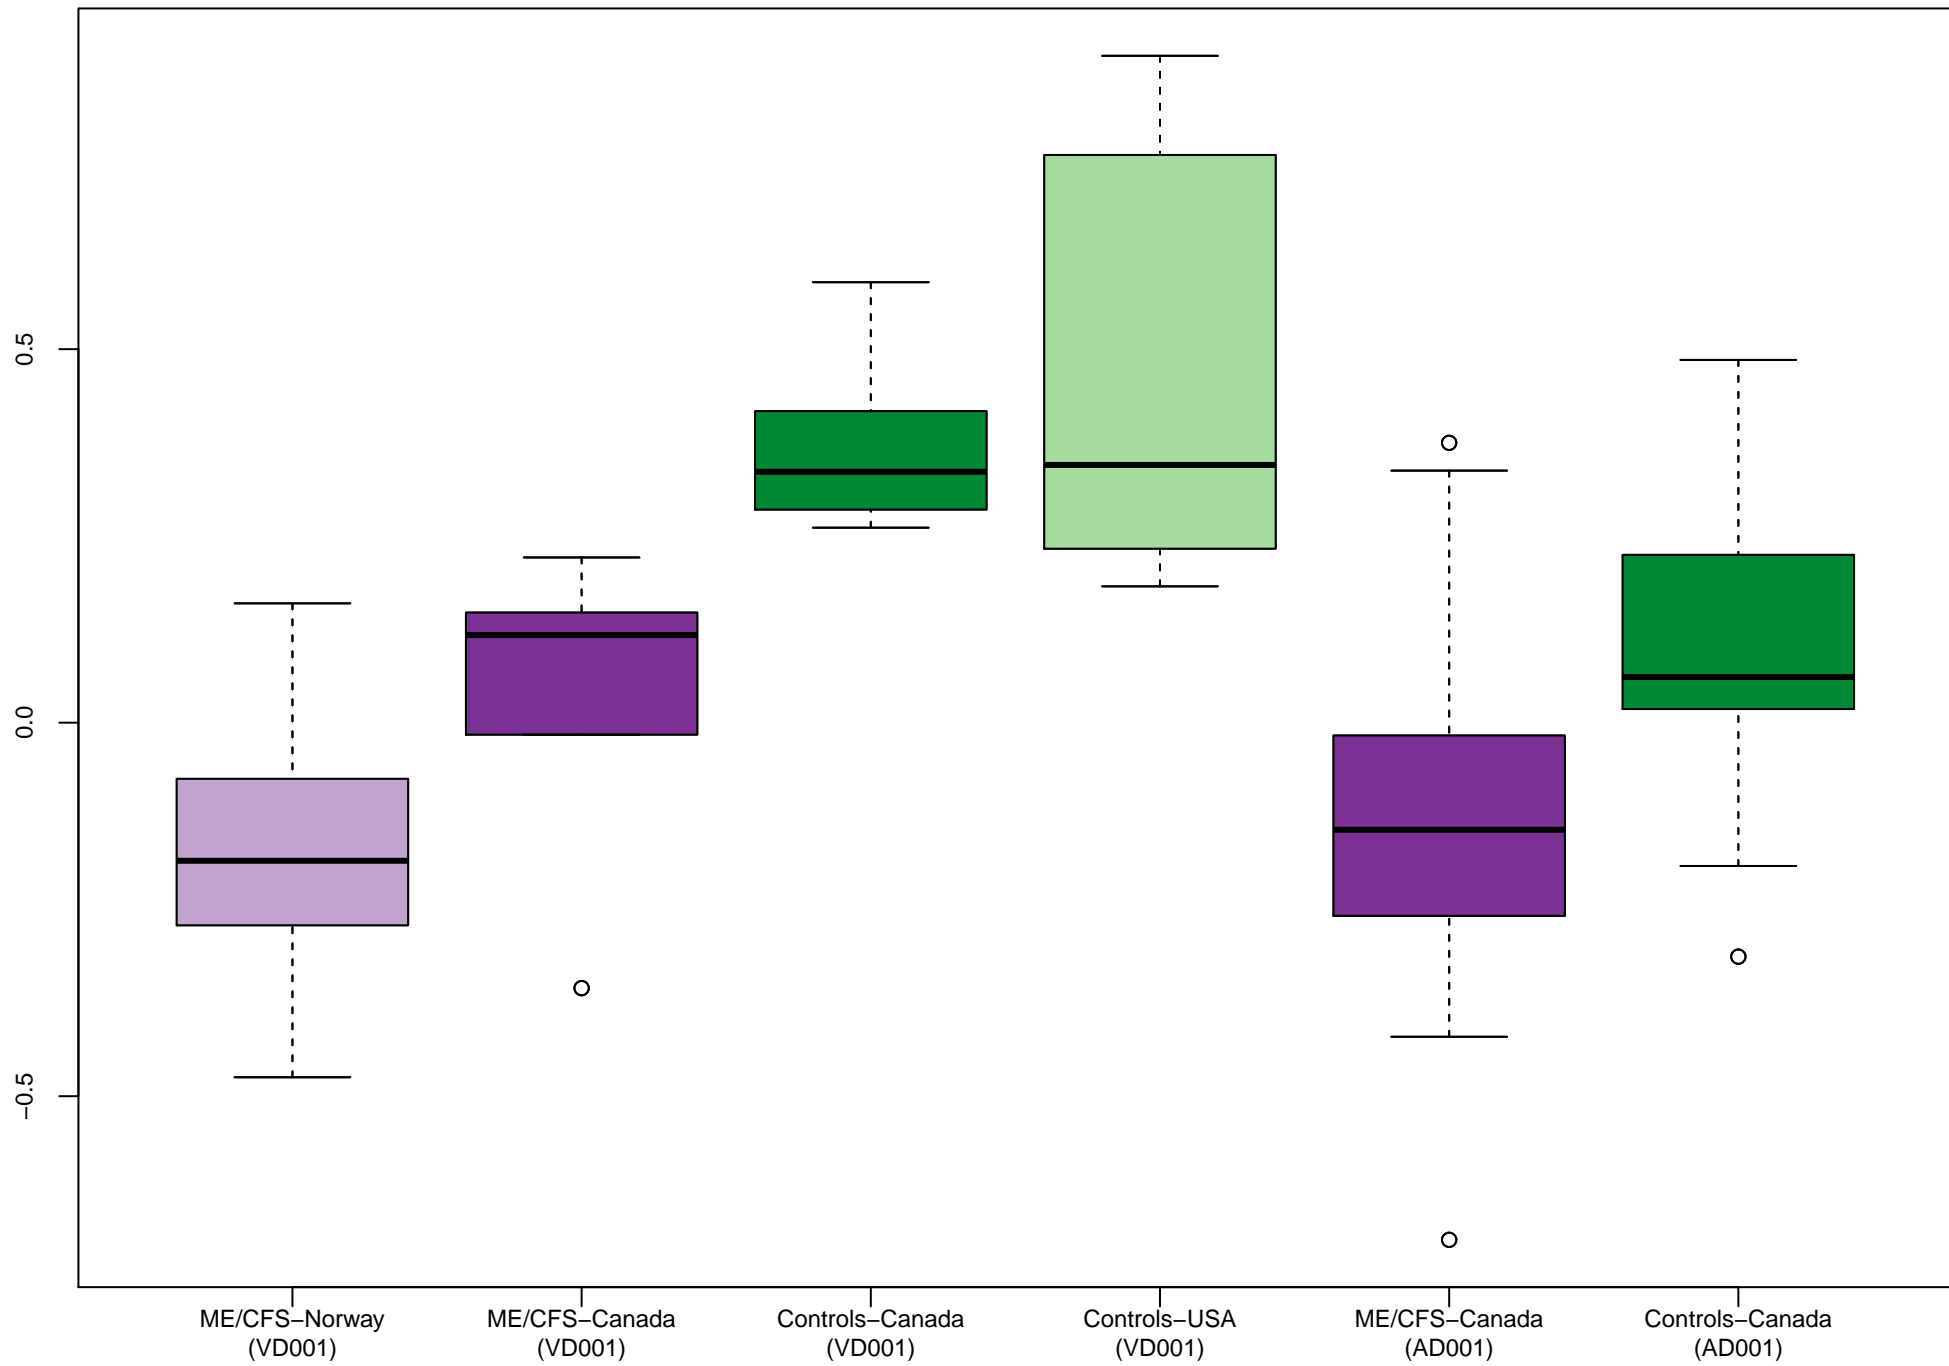

# SNVYRWLSGALG

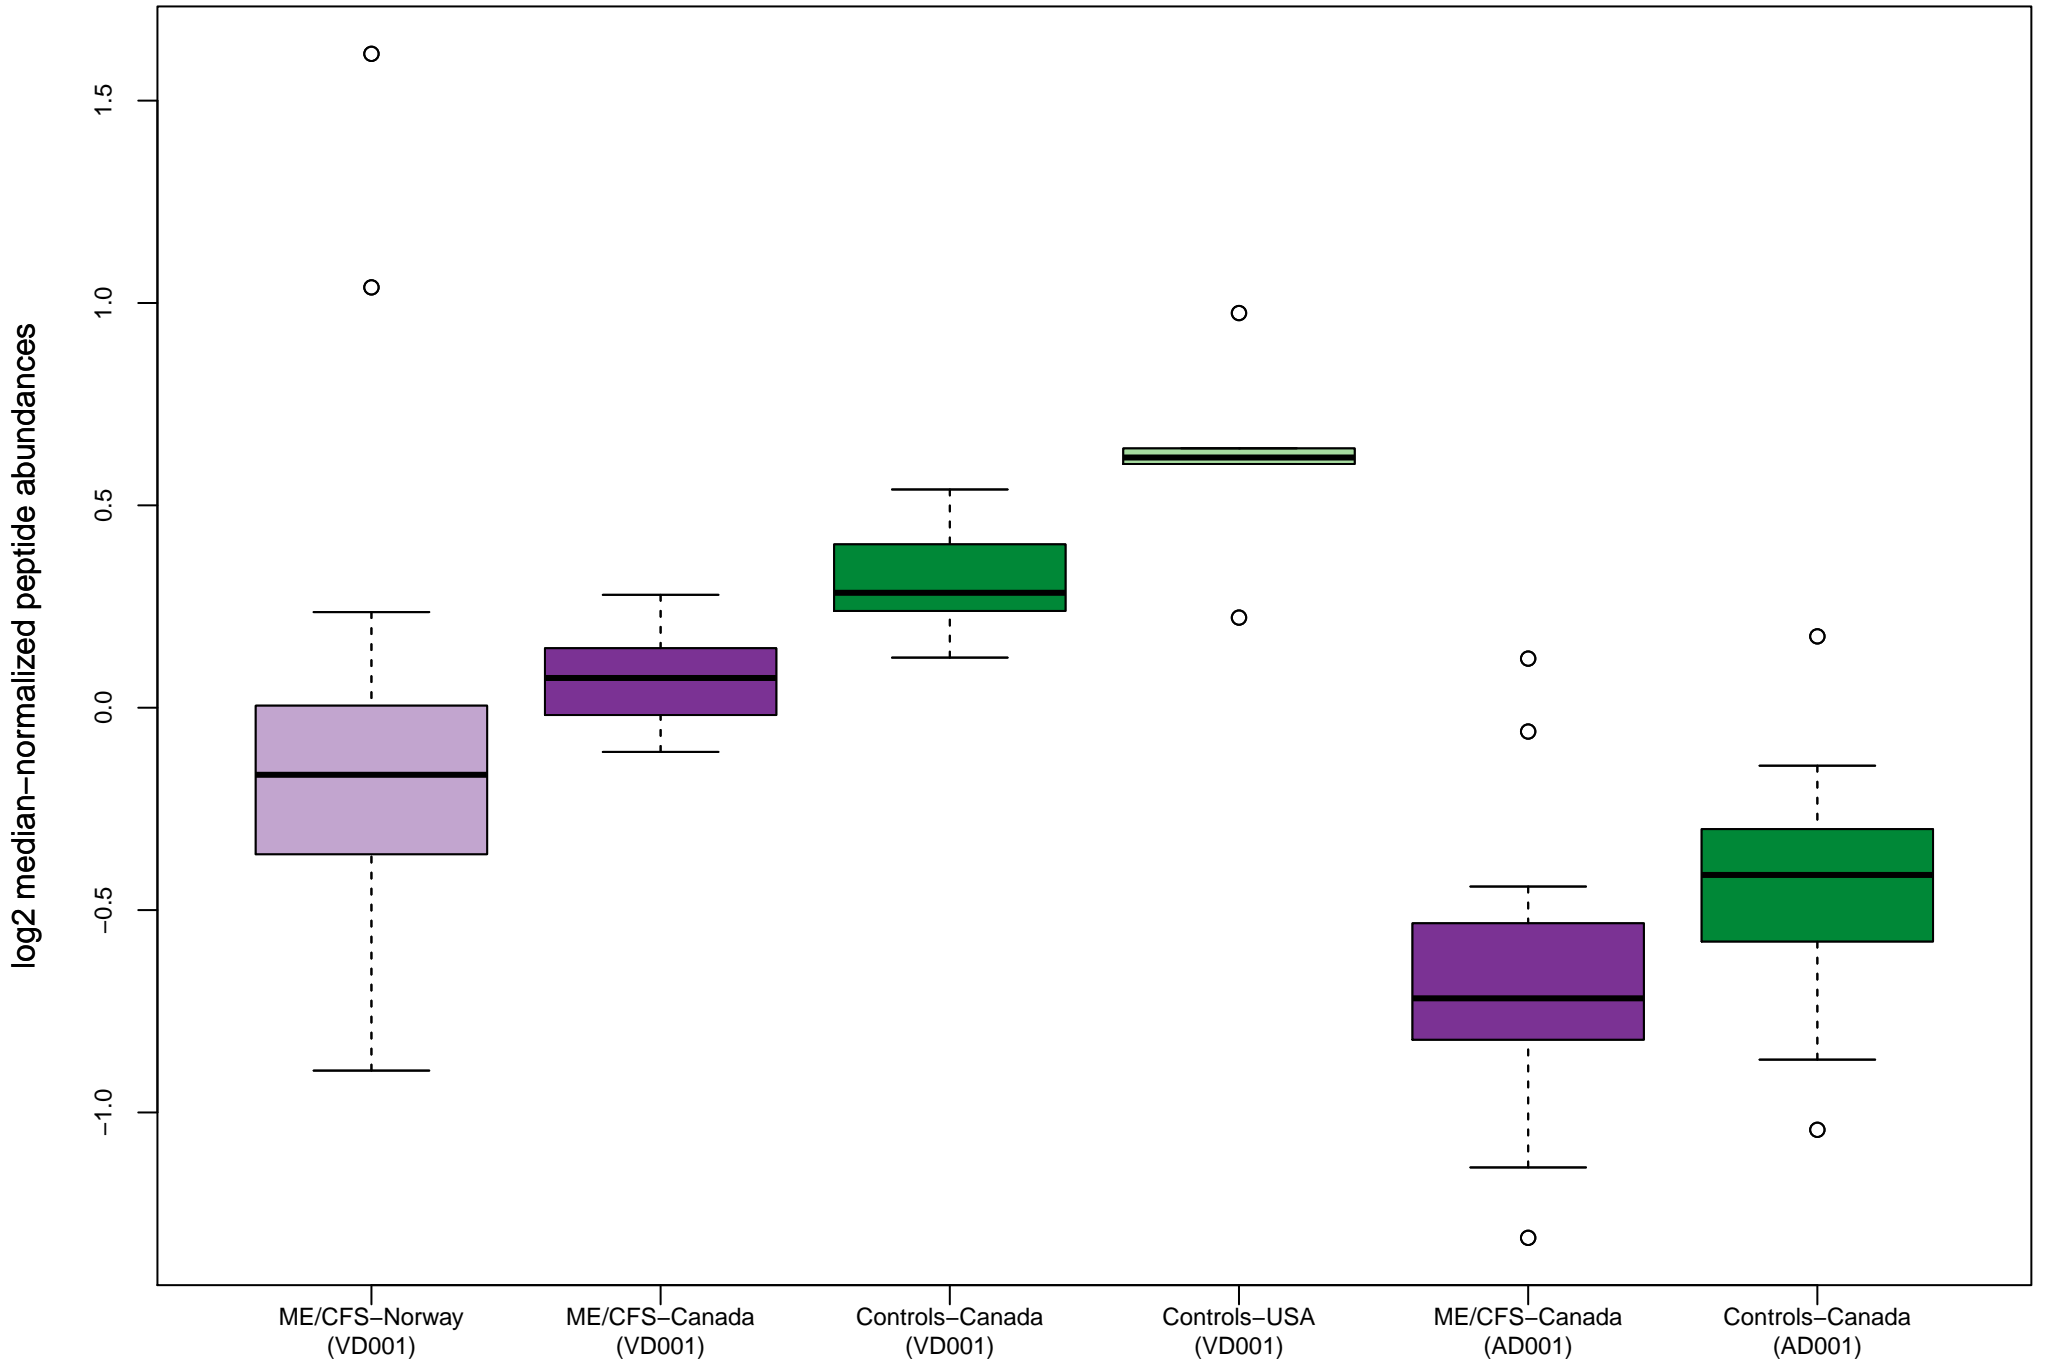

# SPFGRALVALSG

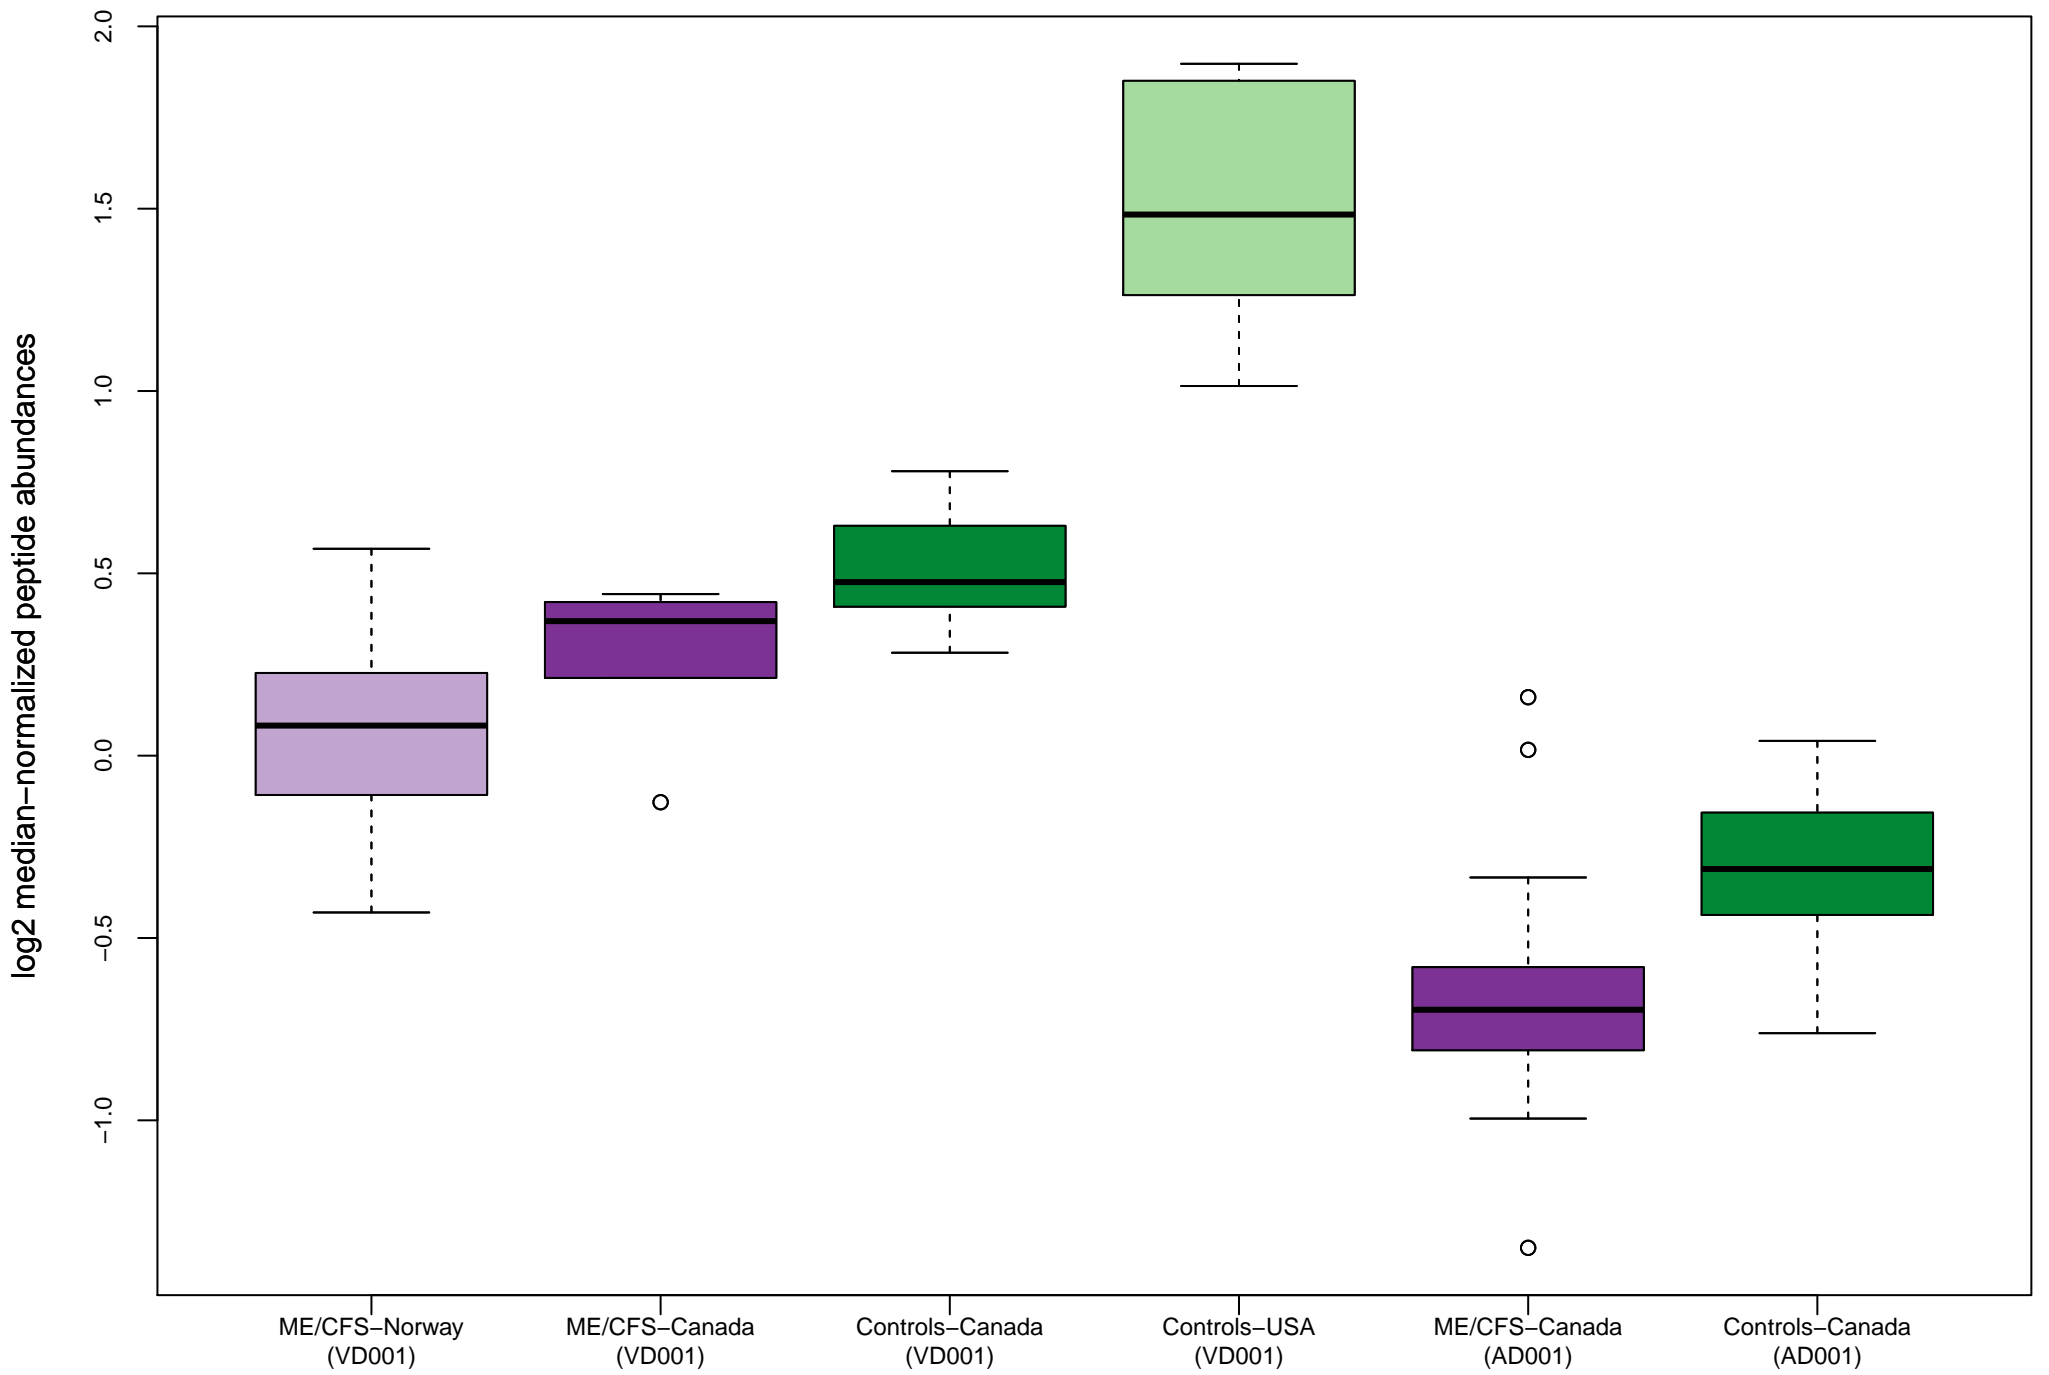

# SPFVSKLSGVLS

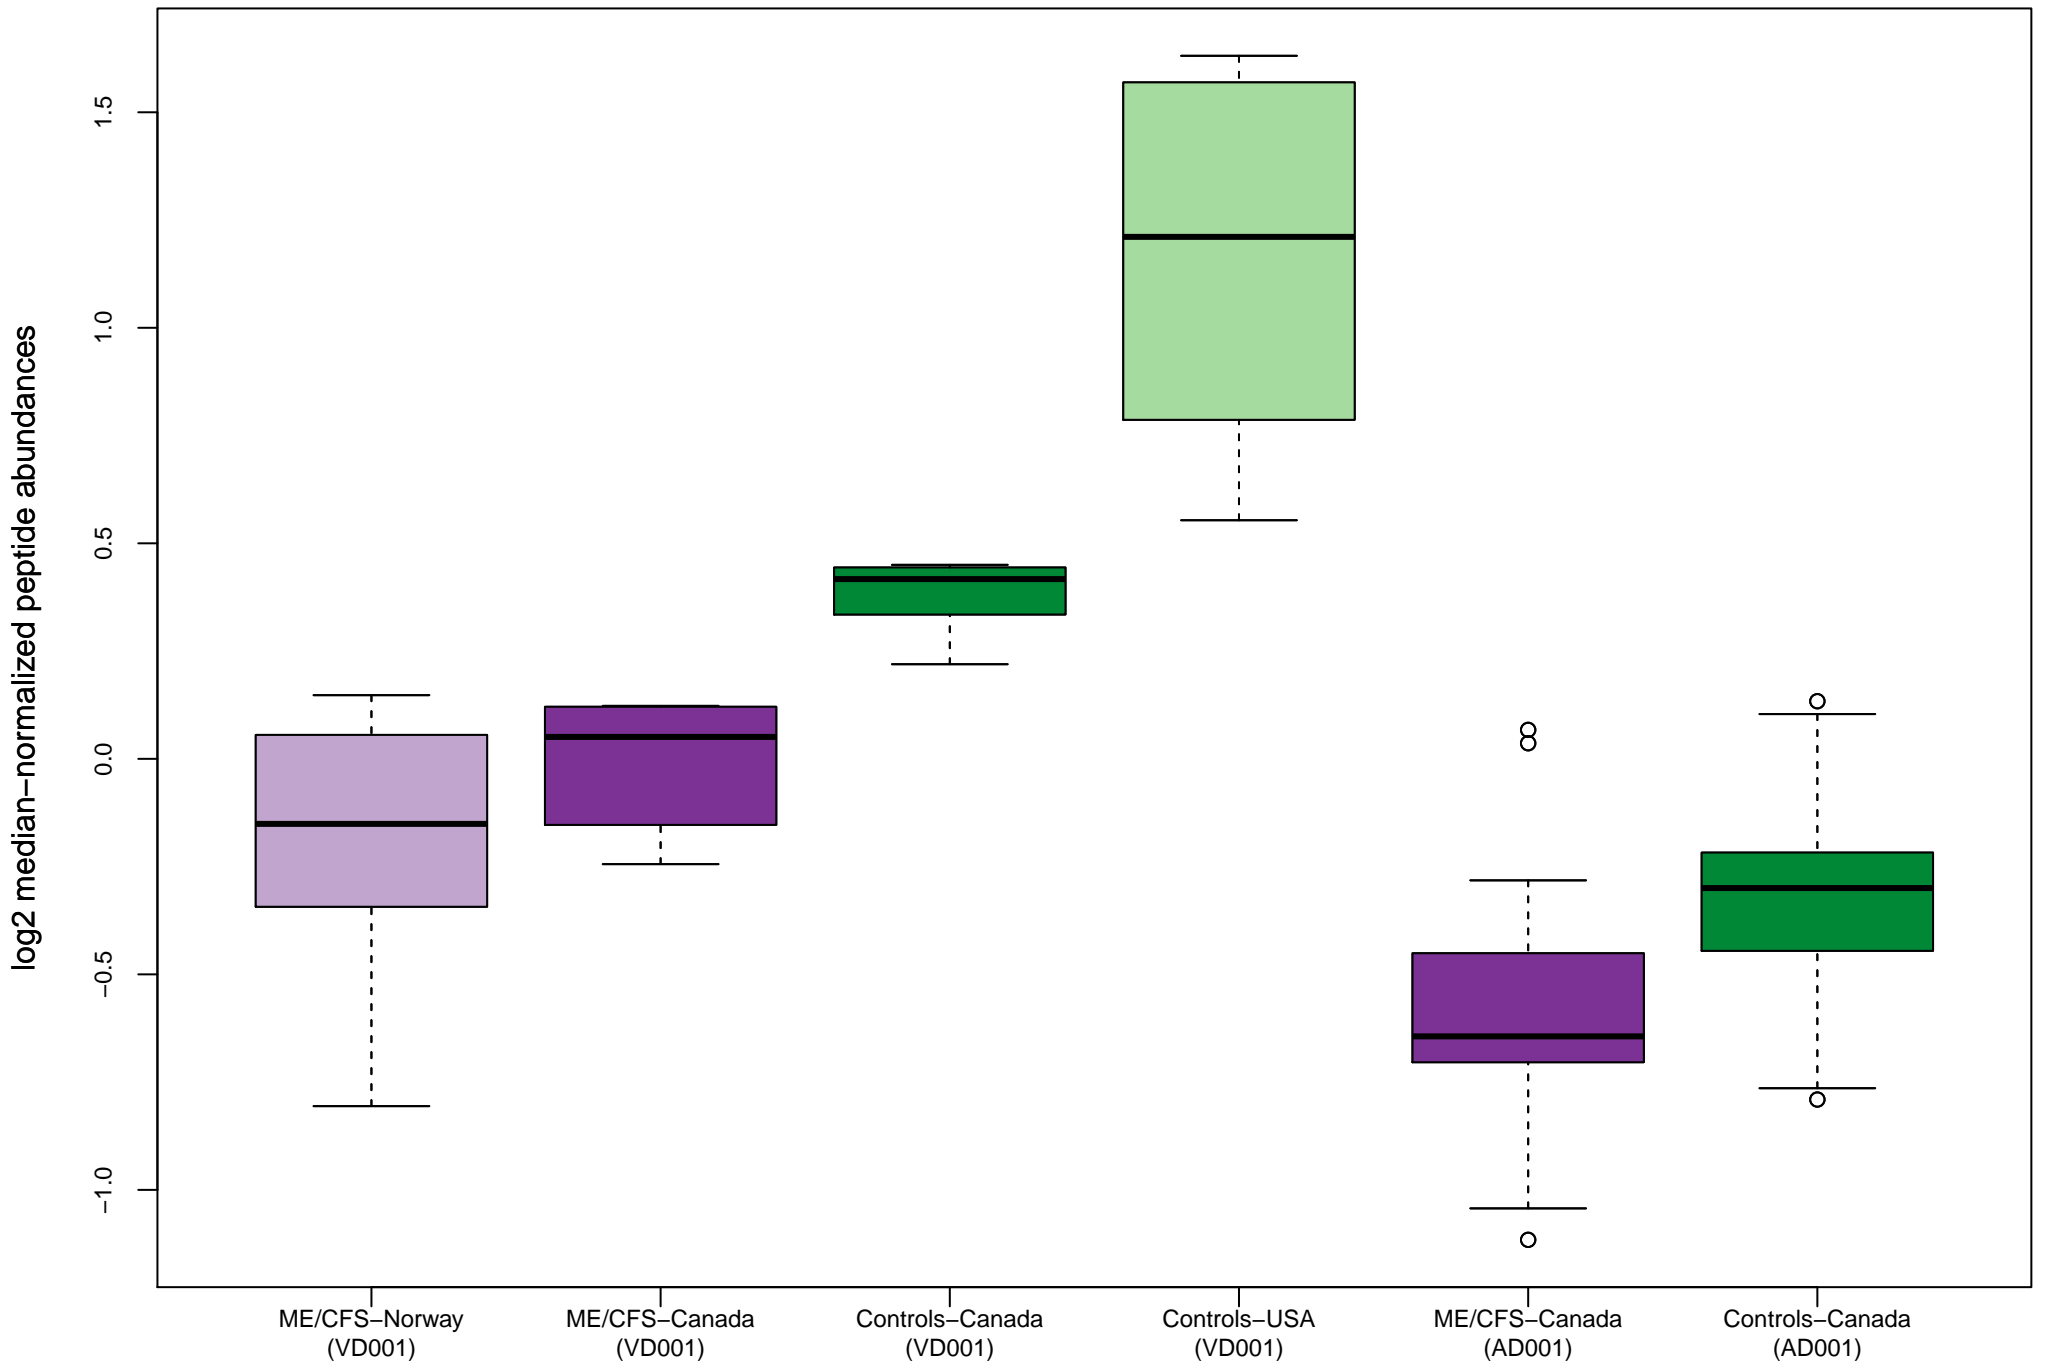

# SPKYSFPYKLVG

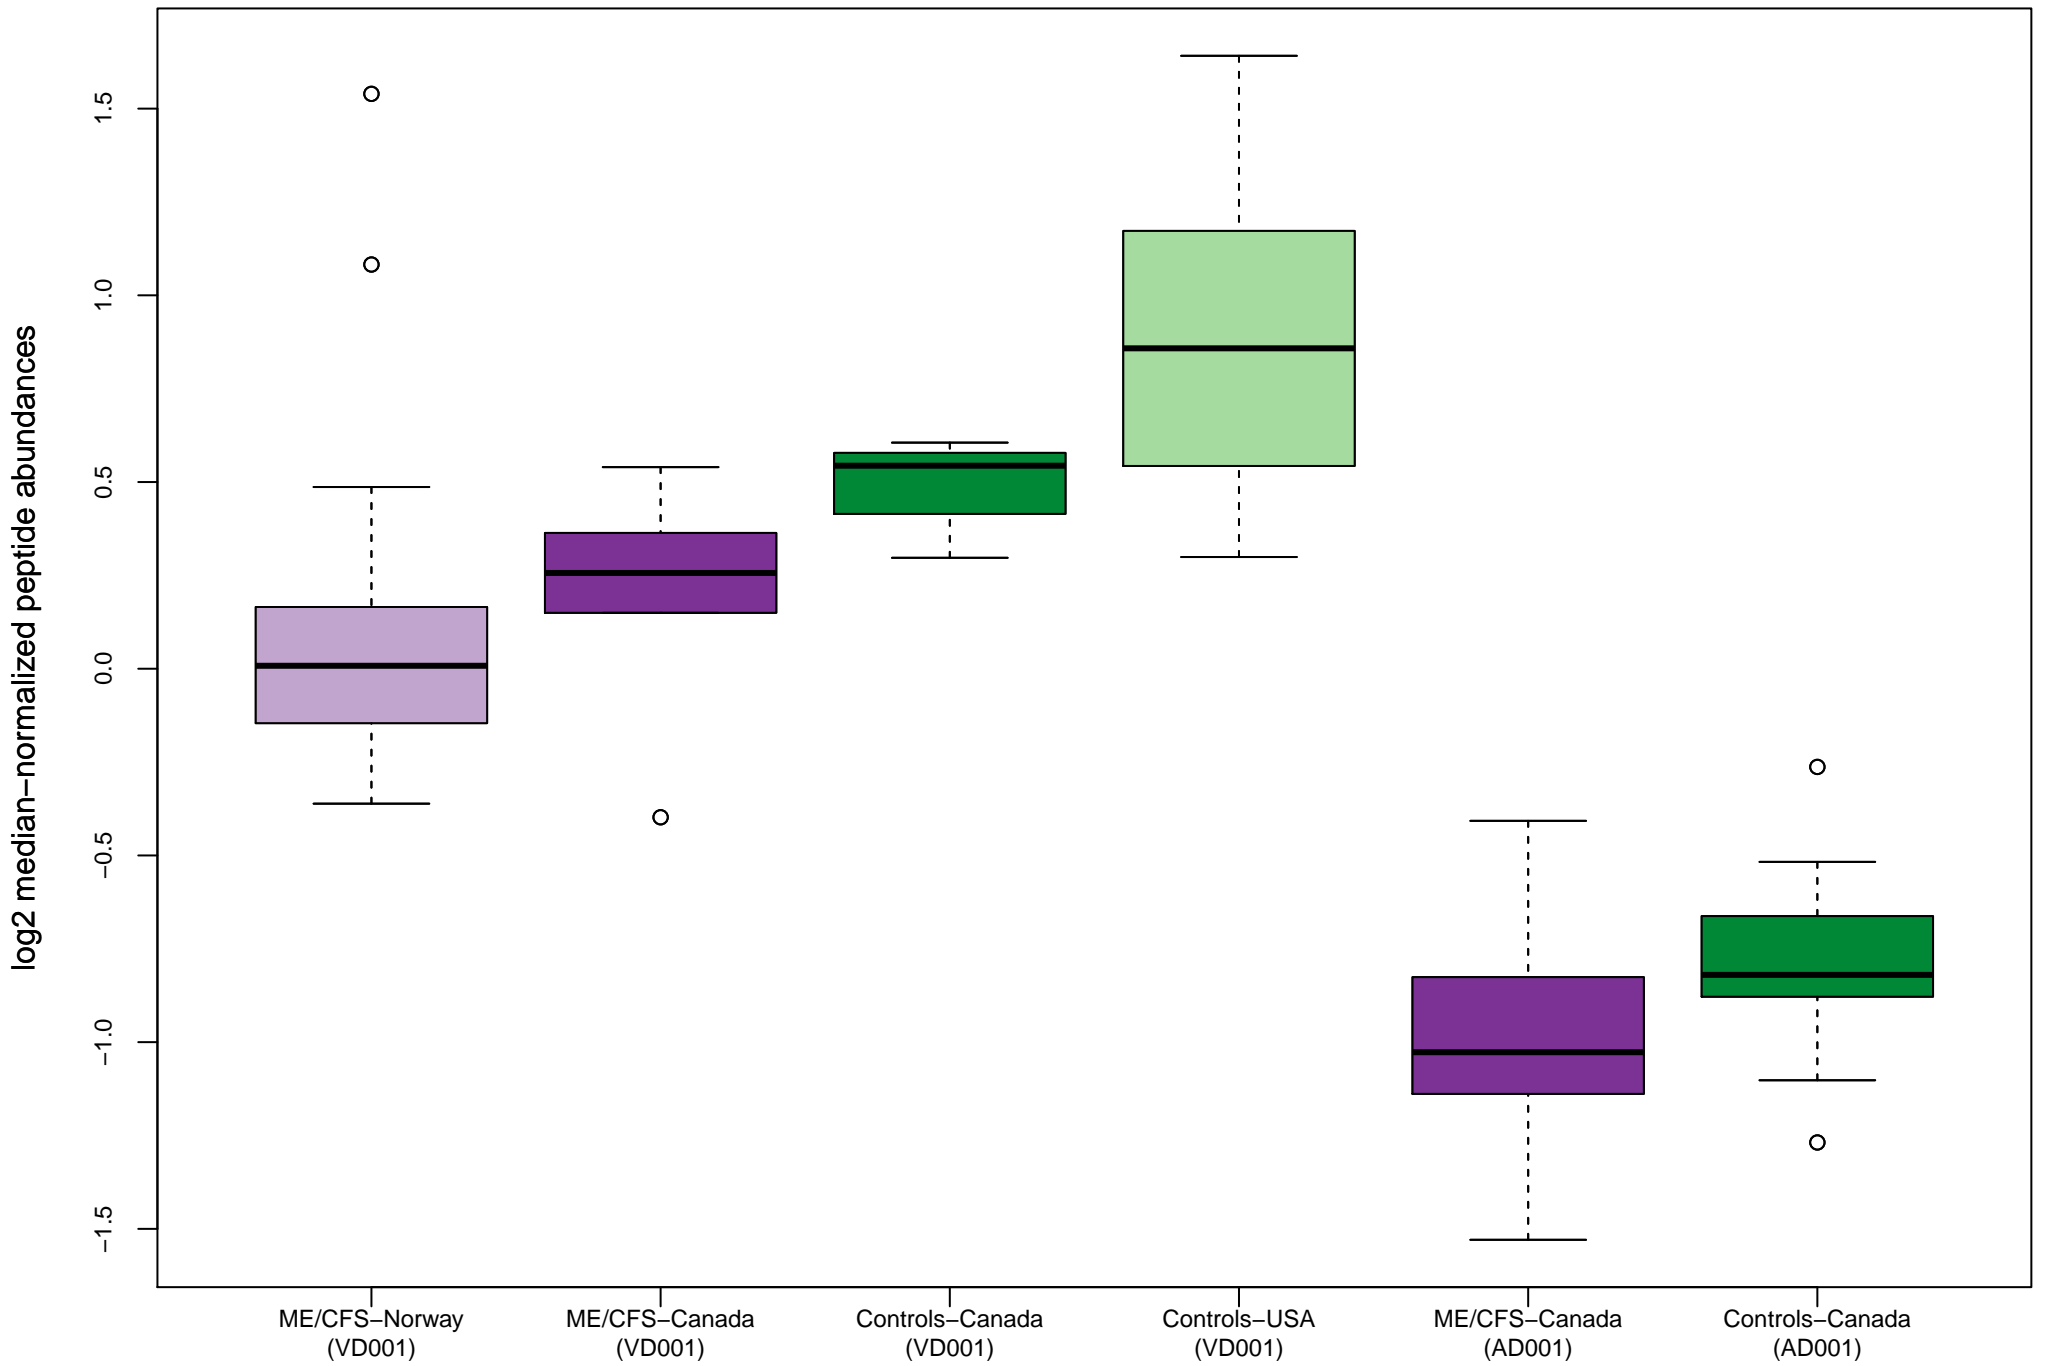

# SPLVAKLSGVLG

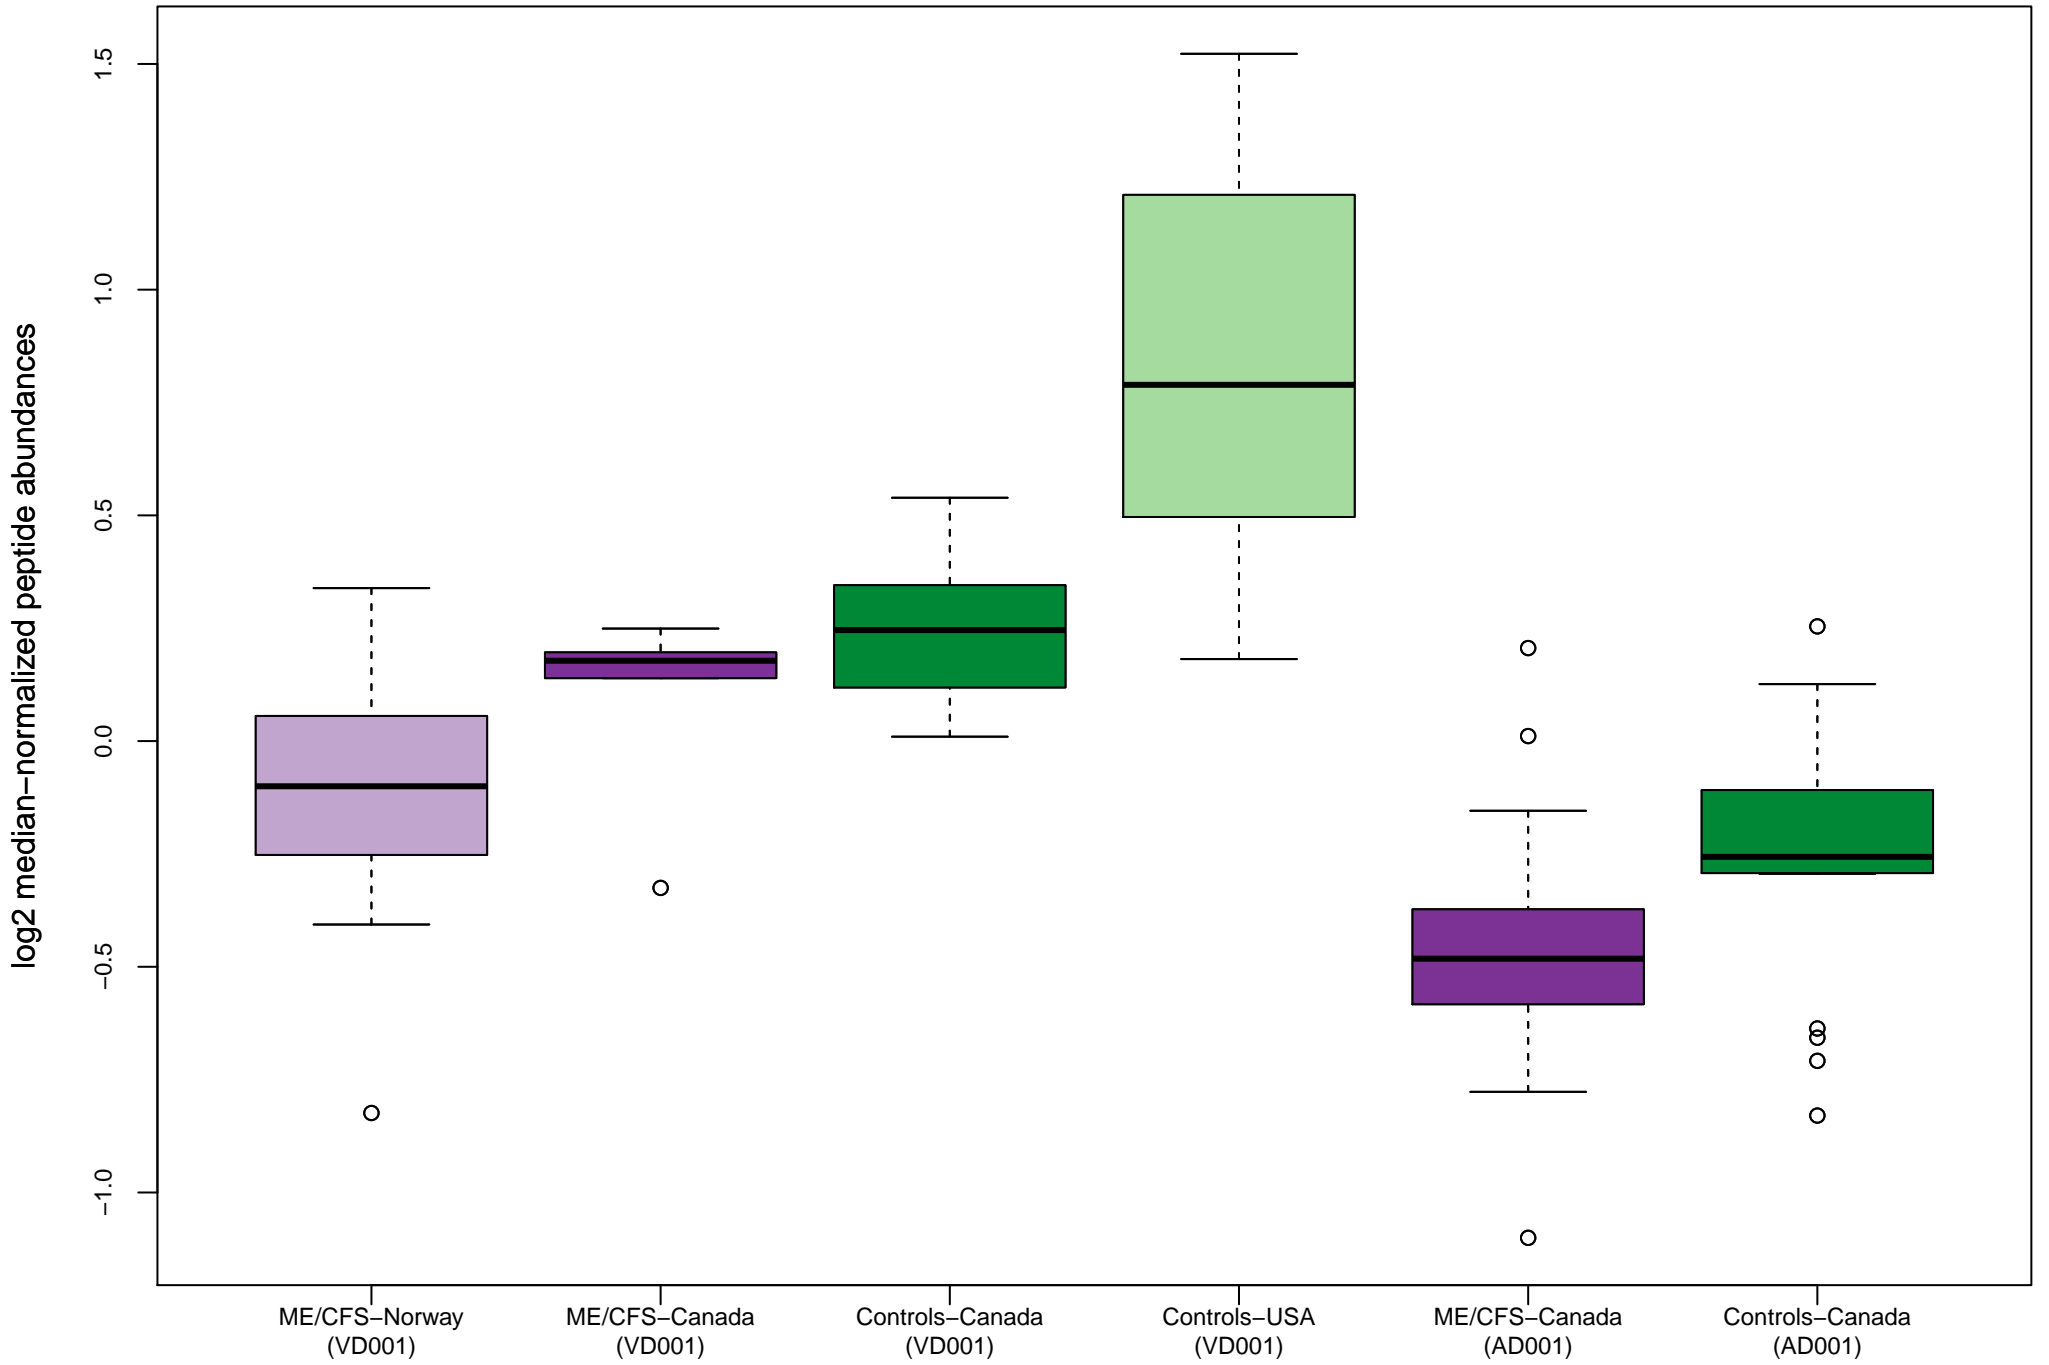



# SPQFRFWNVSGL

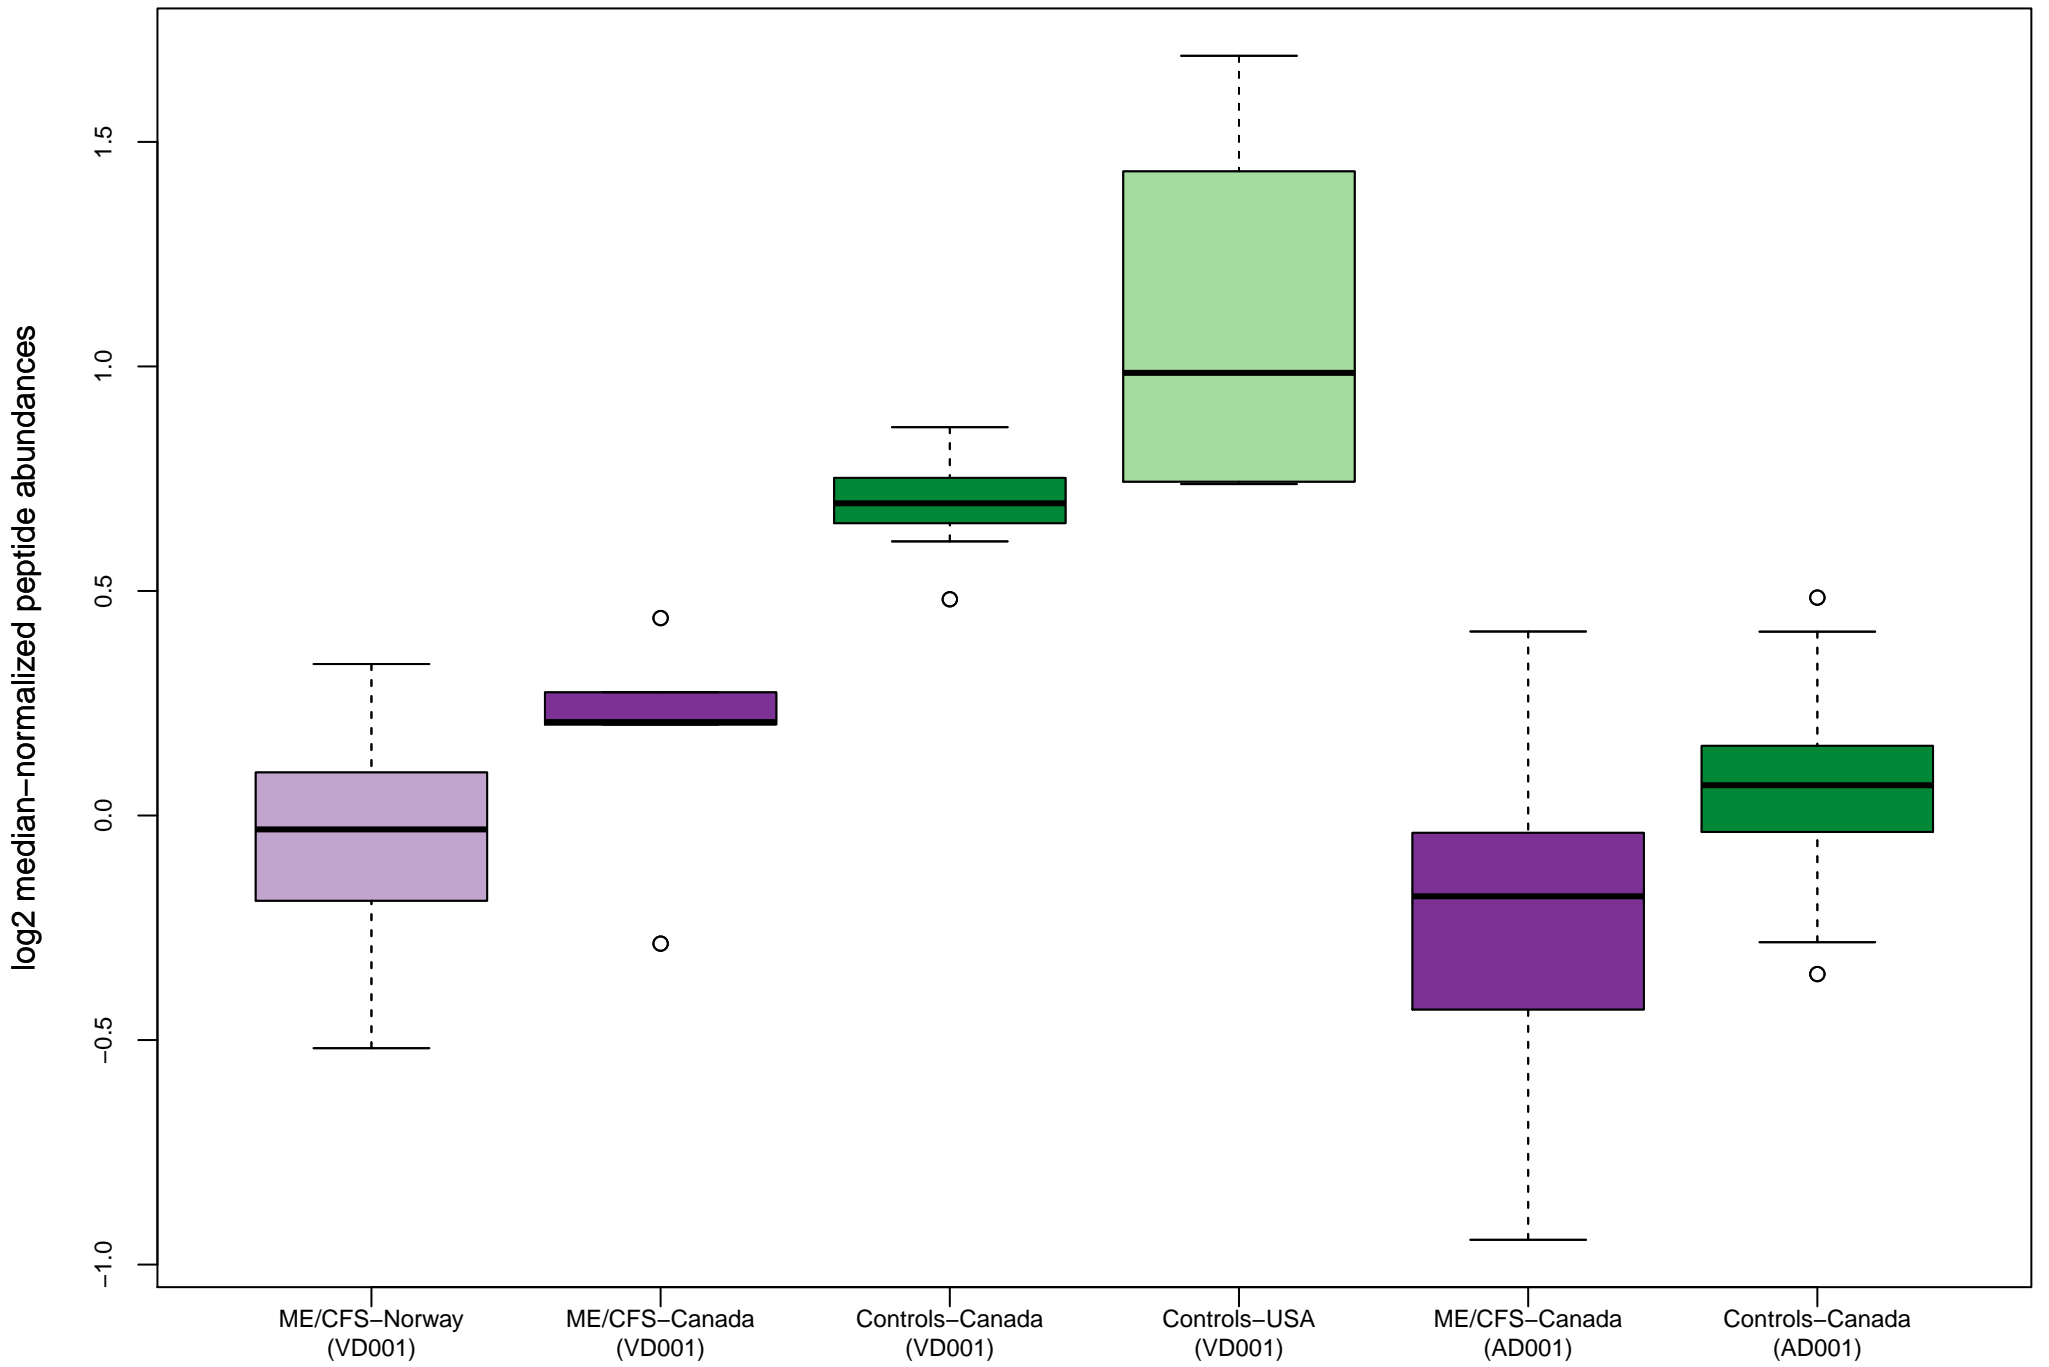

# SPRVFPGVALSG

log2 median-normalized peptide abundances

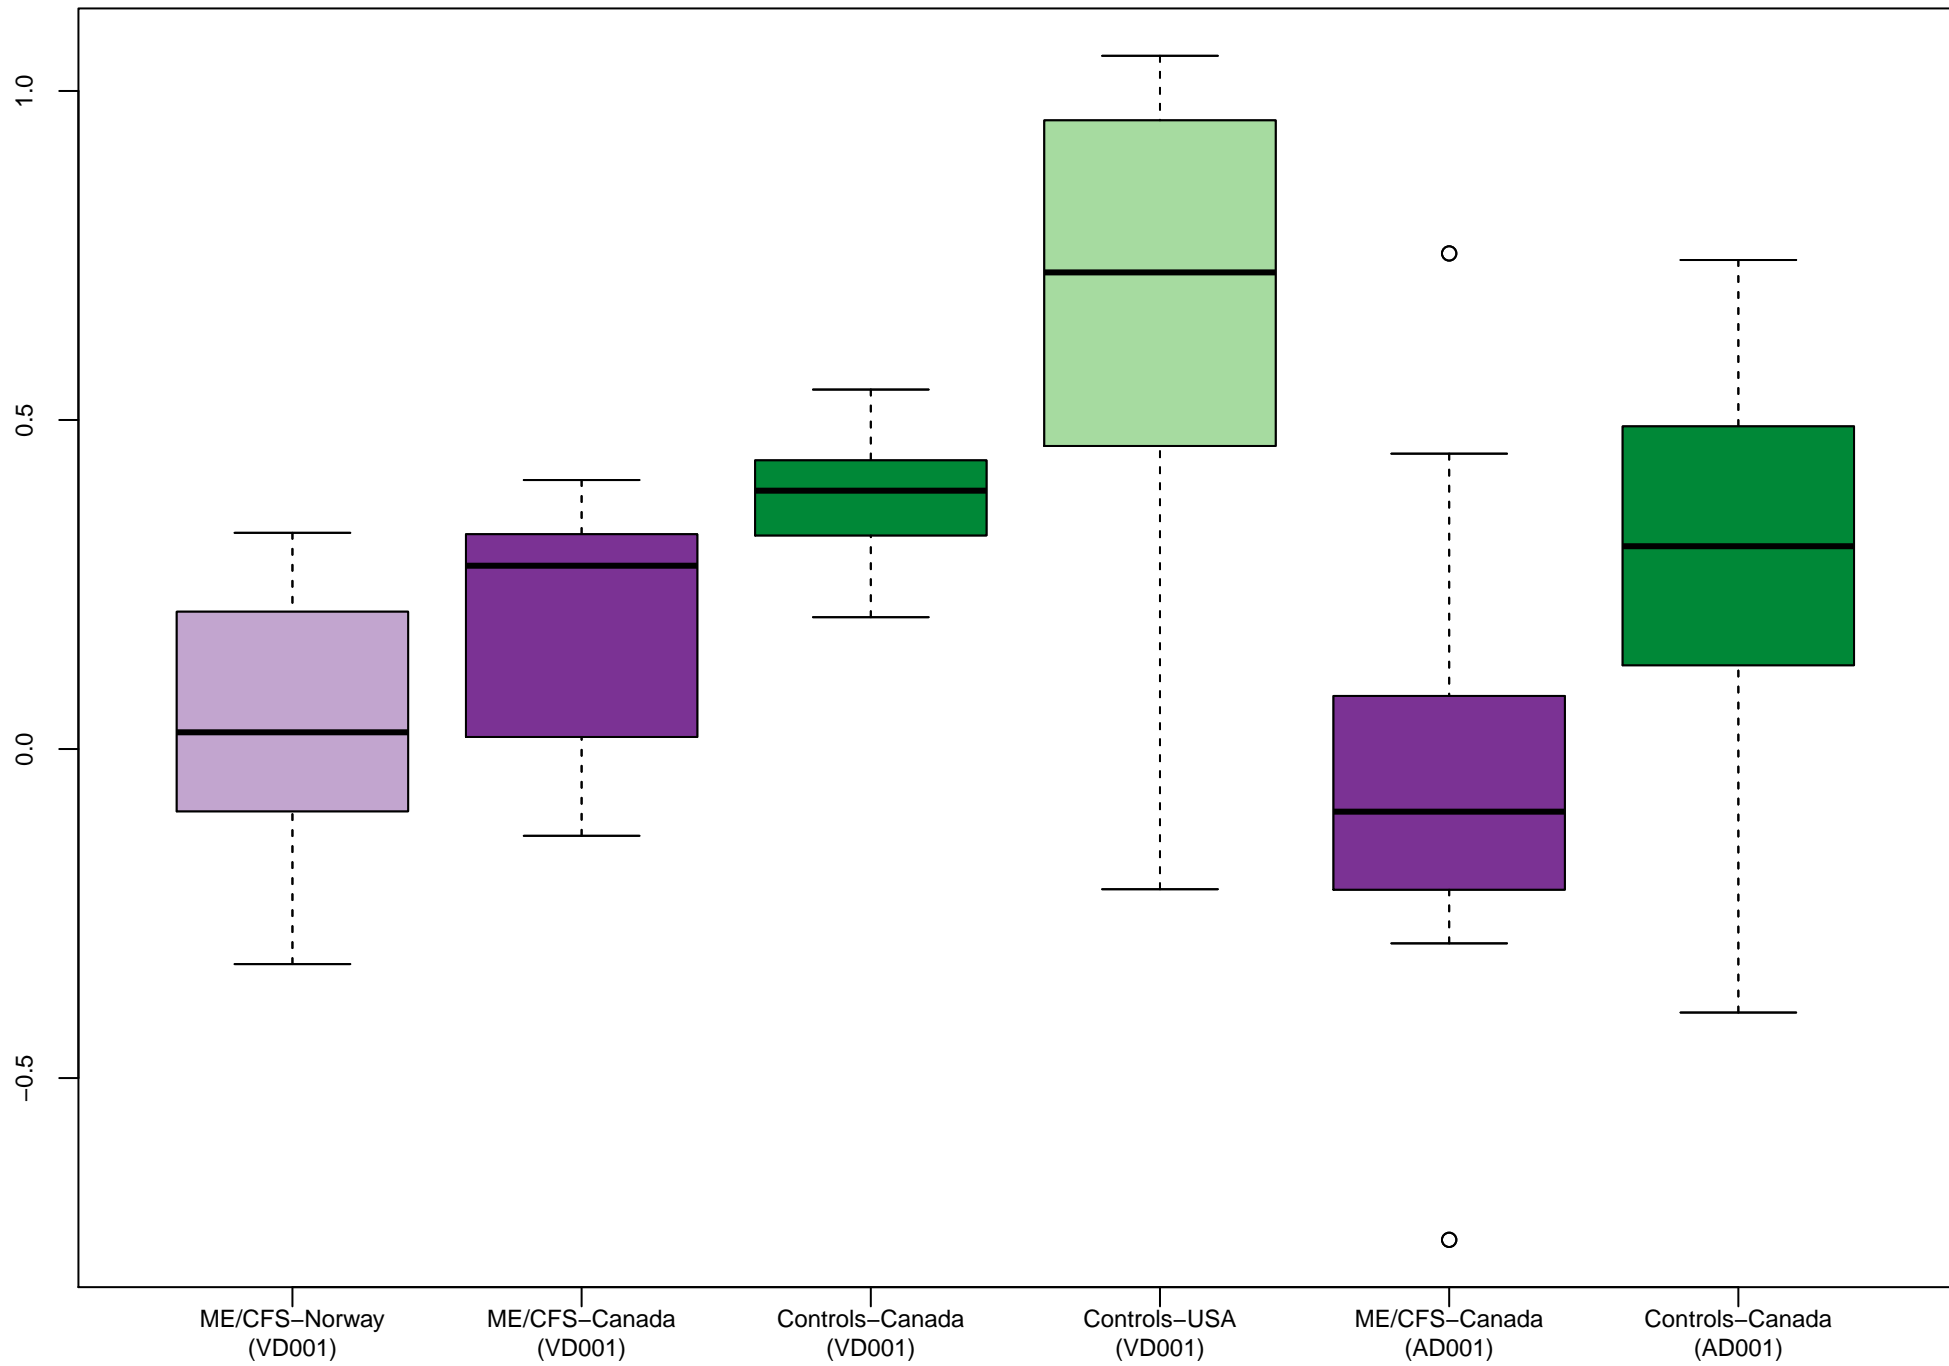

# SPRYWWLGVASG

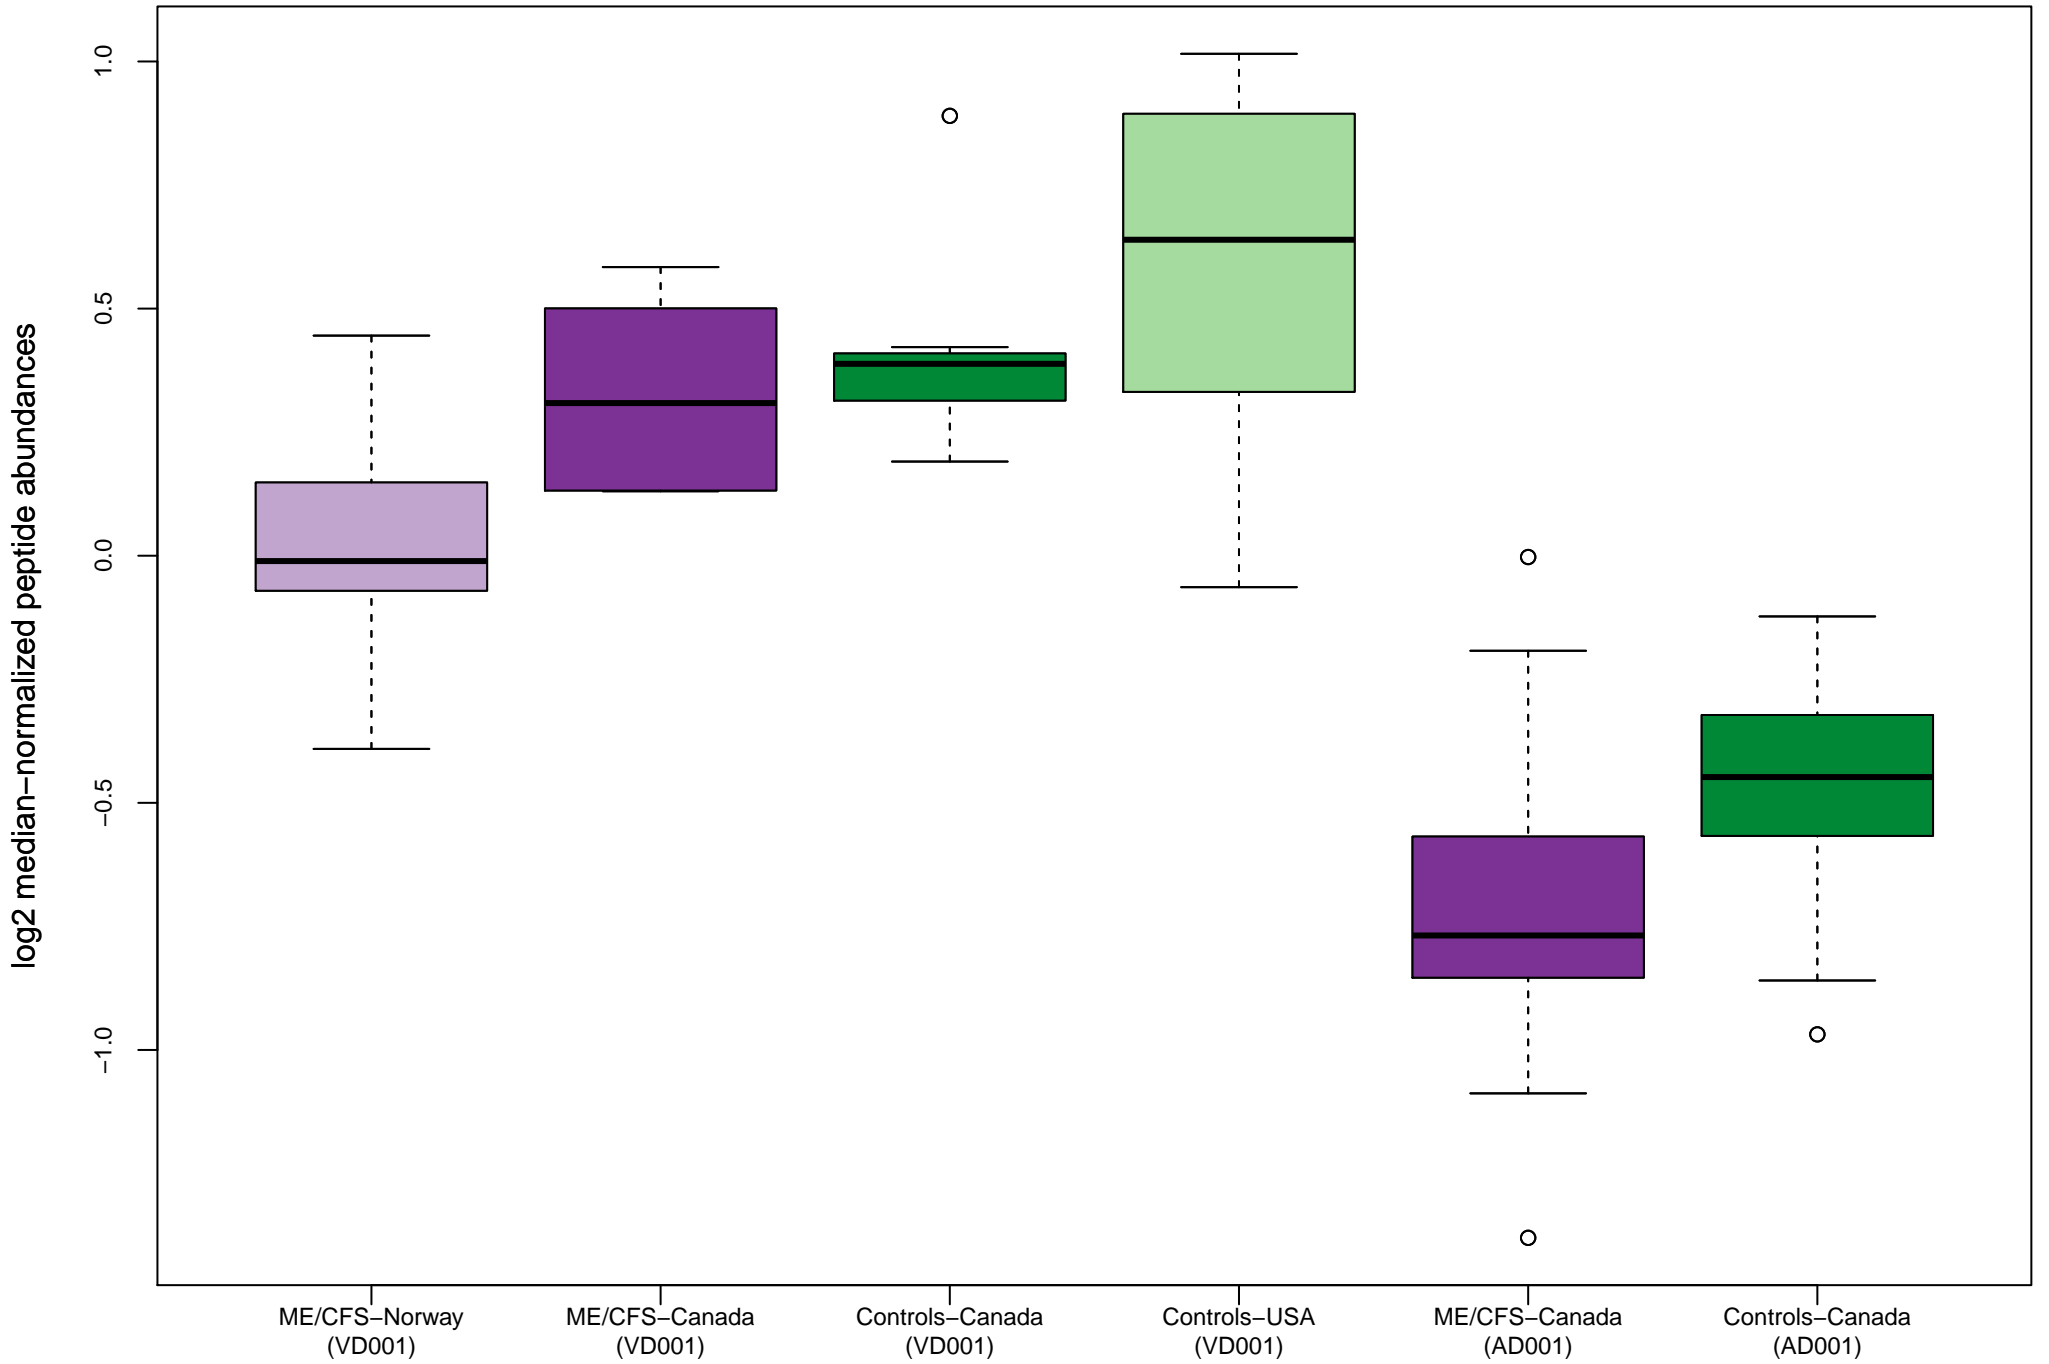

# SPWVRSVLGALS

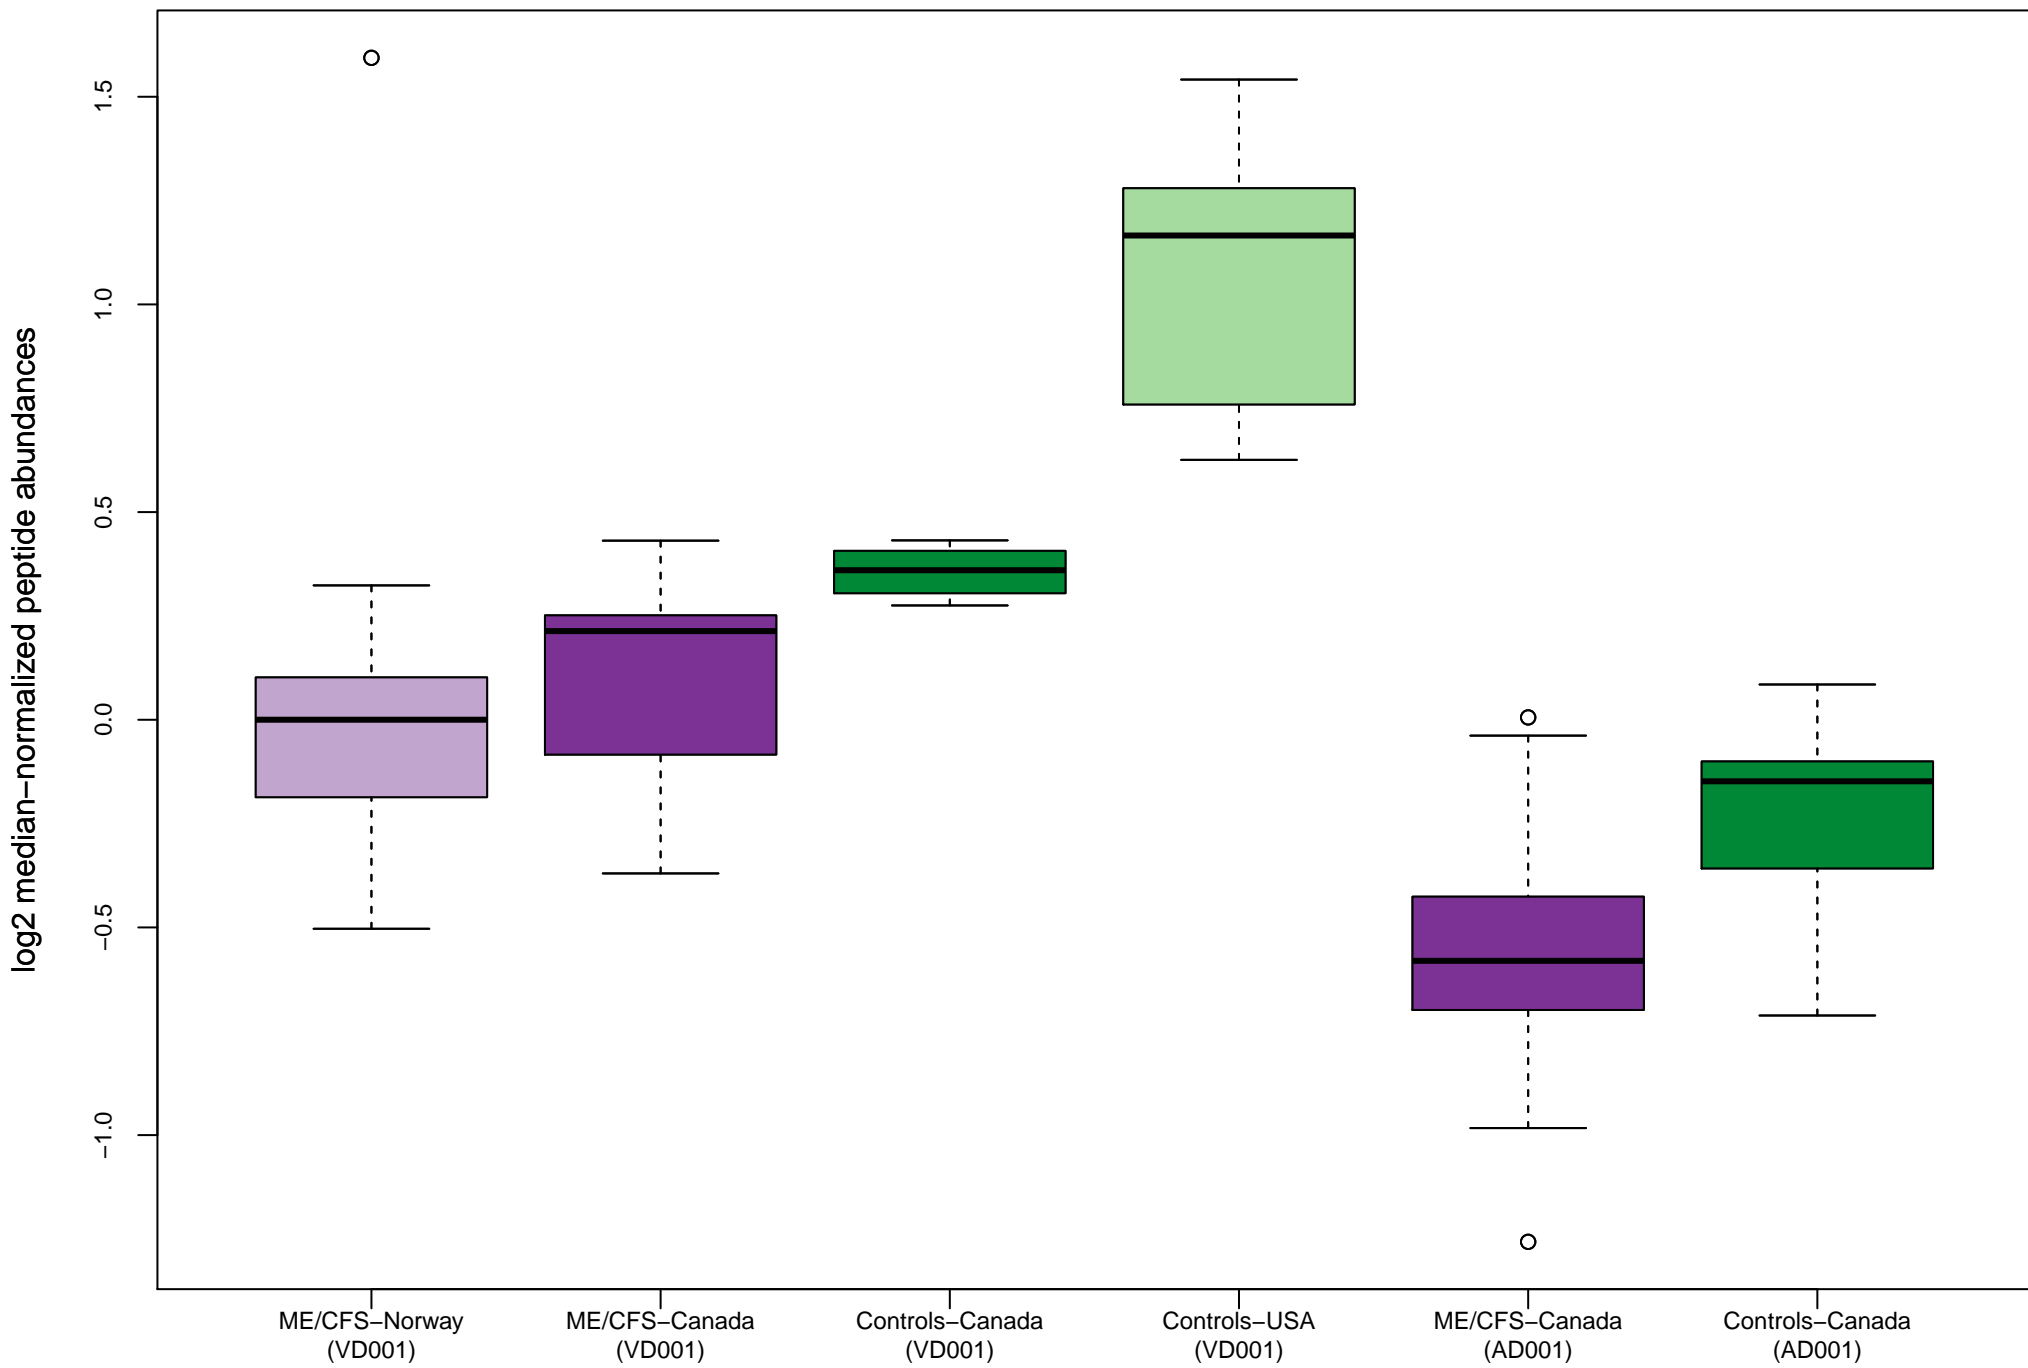

# SPYRPNFRLSLS

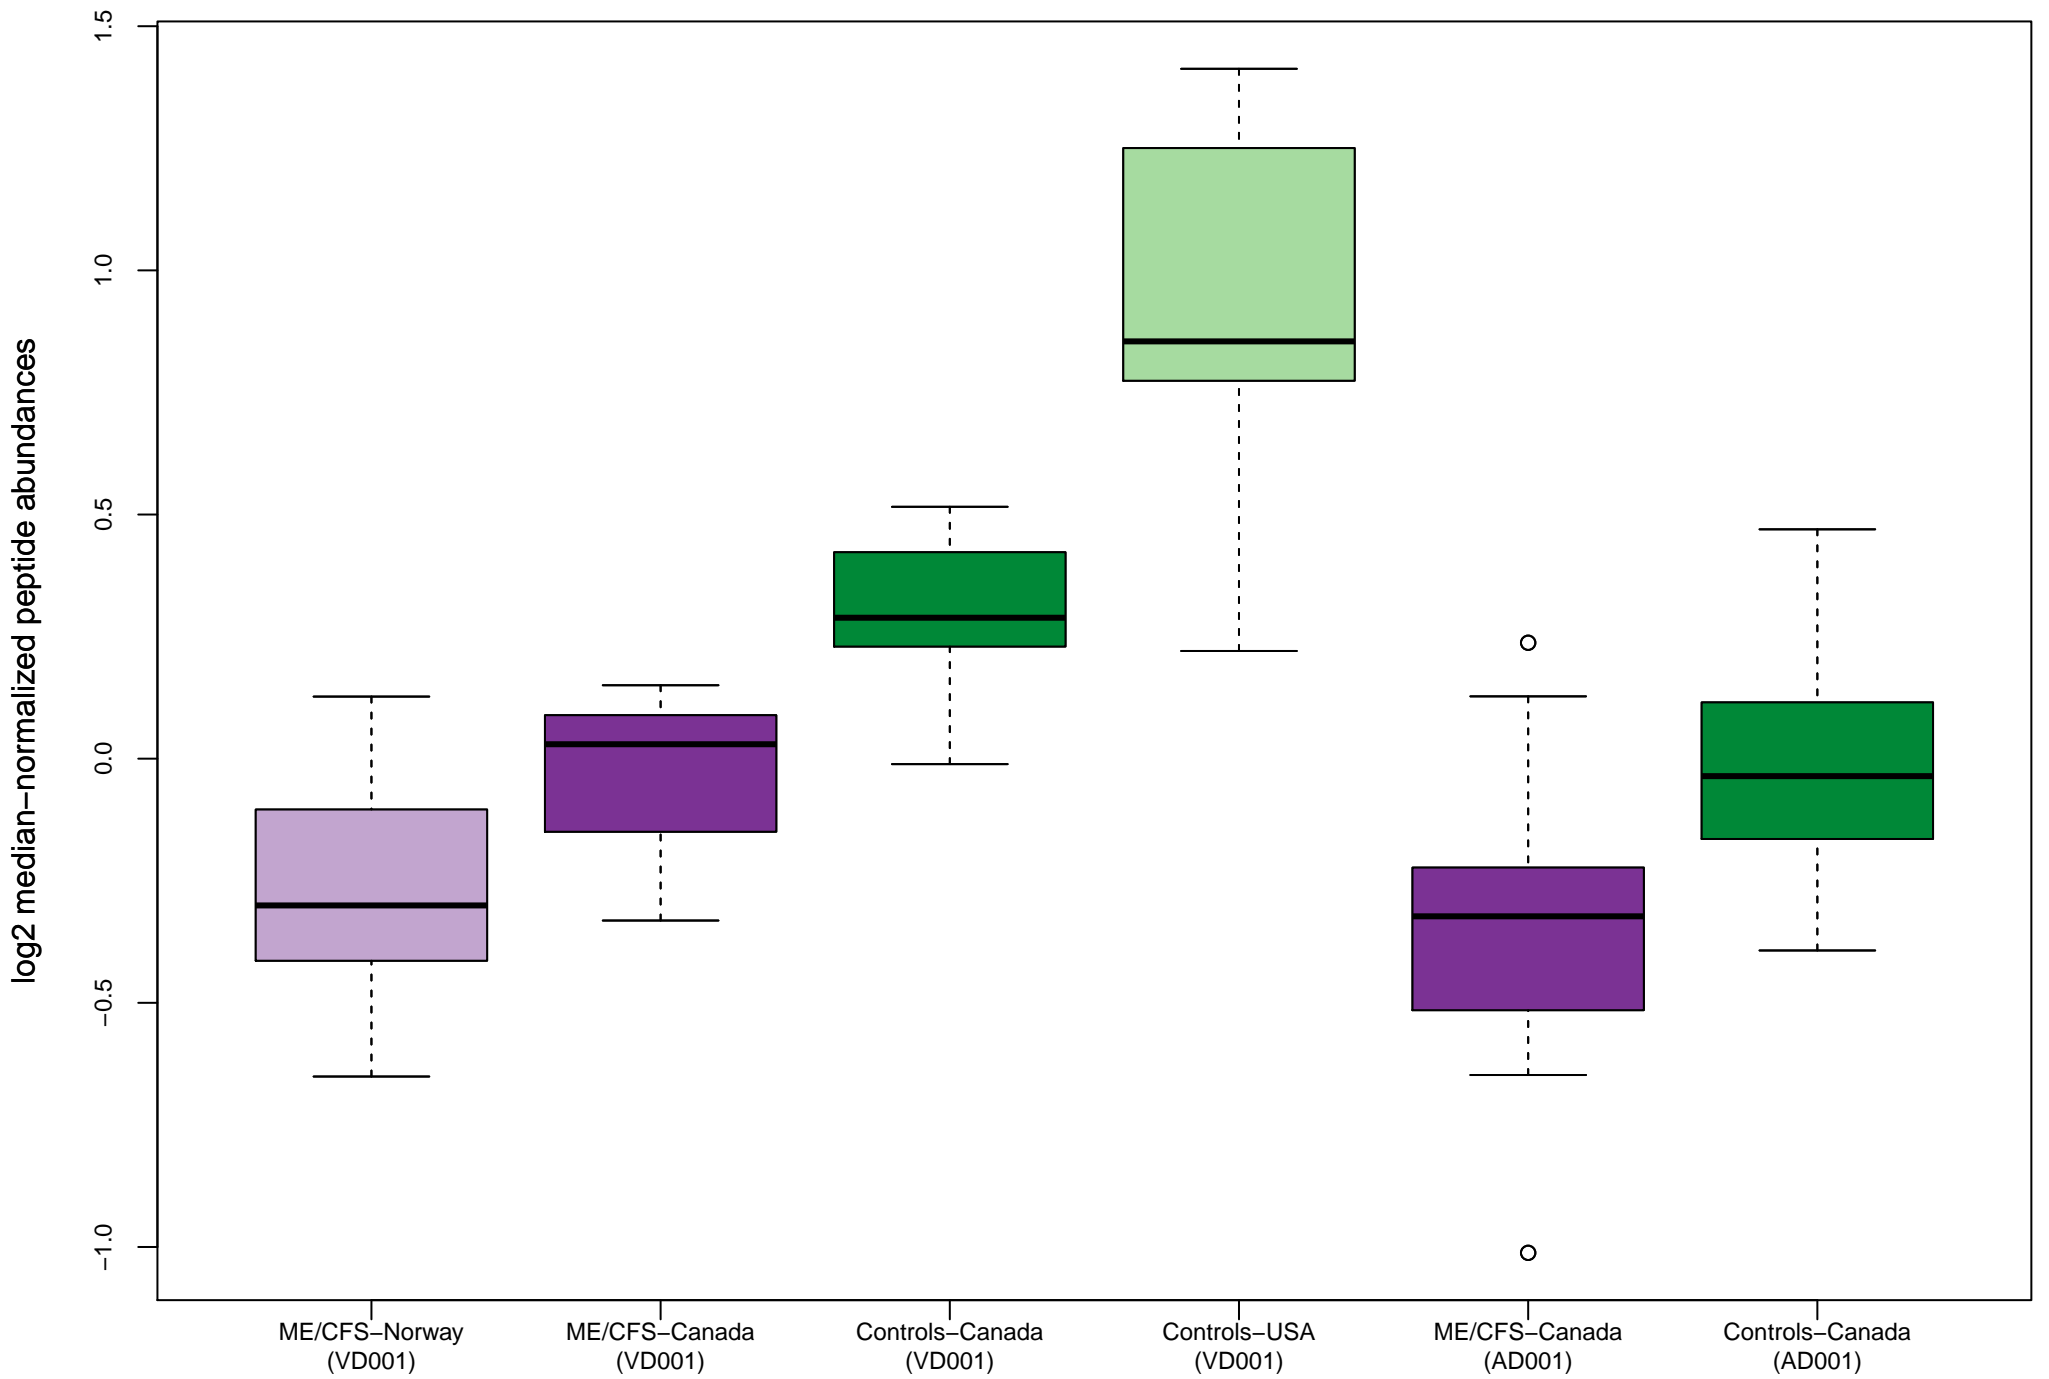

# SQYQRRWLSGLG

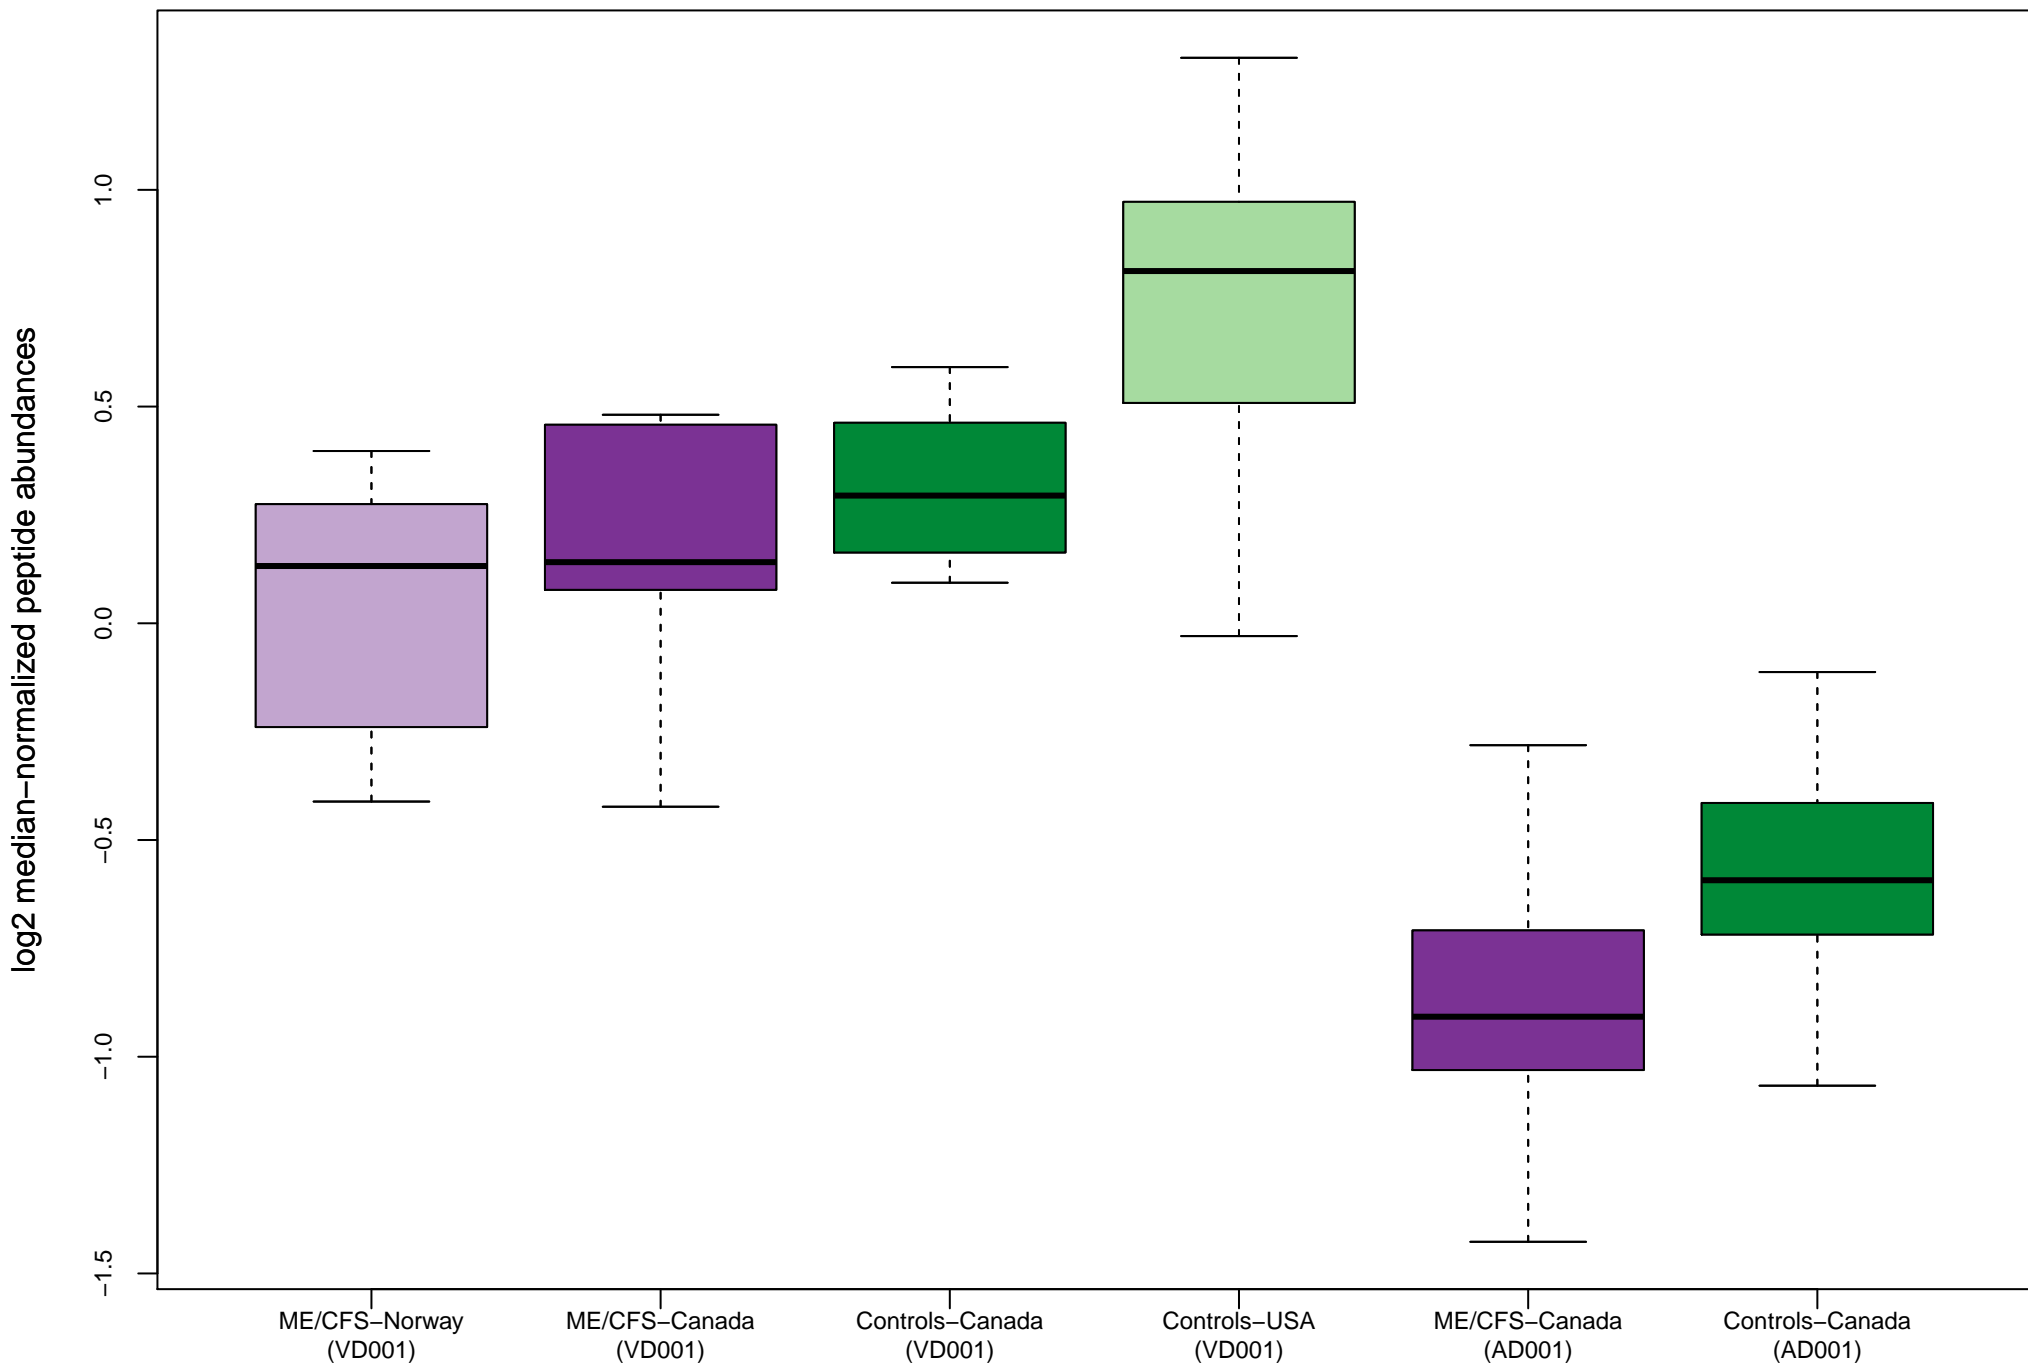

# SRFLRYLGVALG

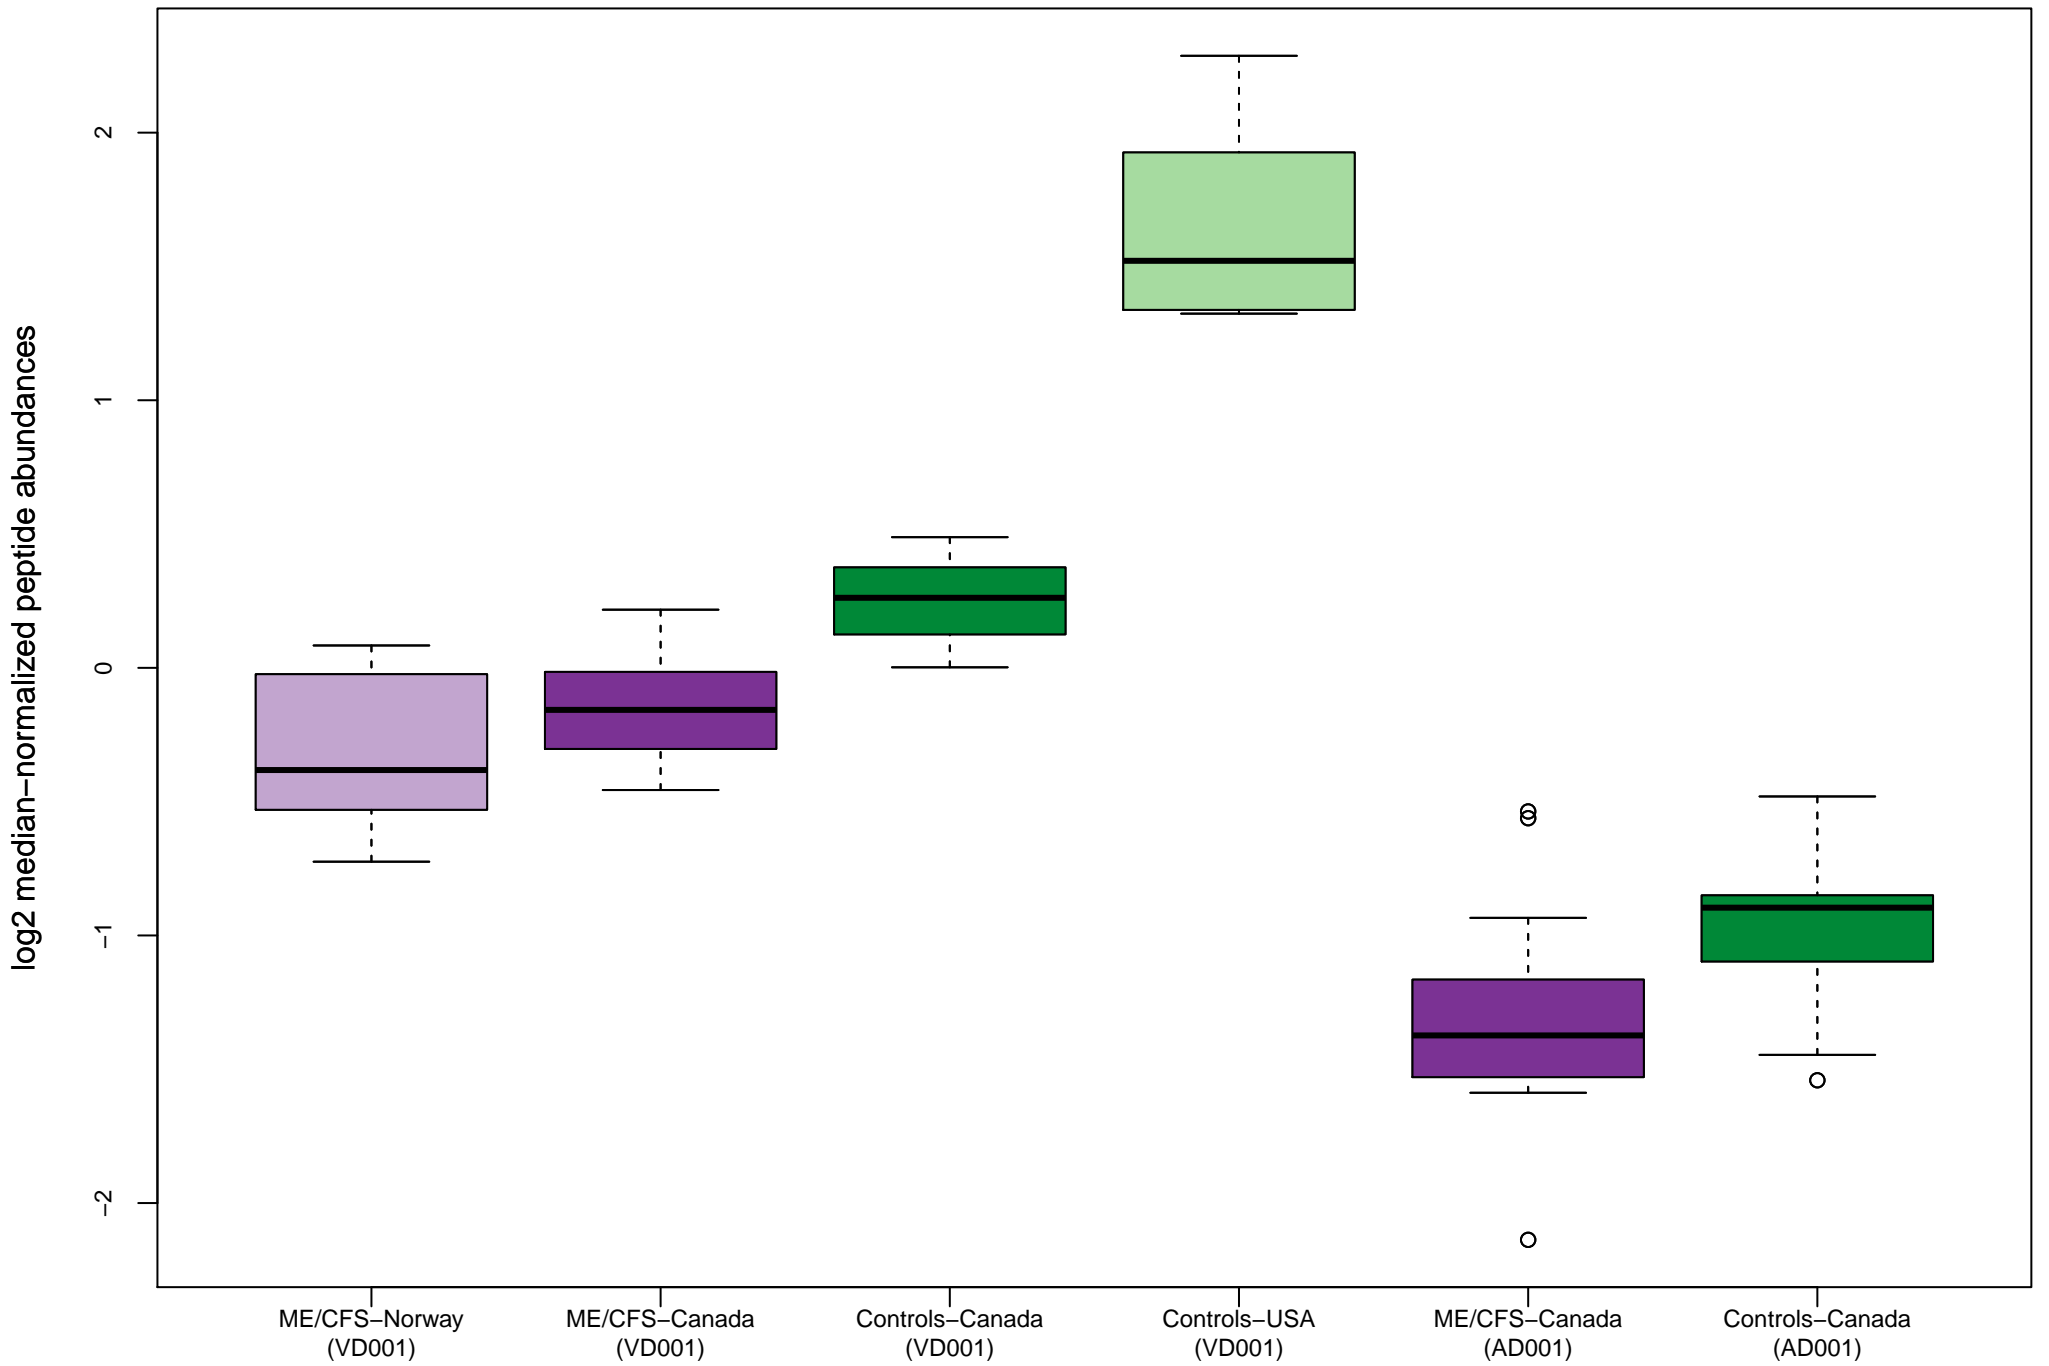

# SRLFFPASGALS

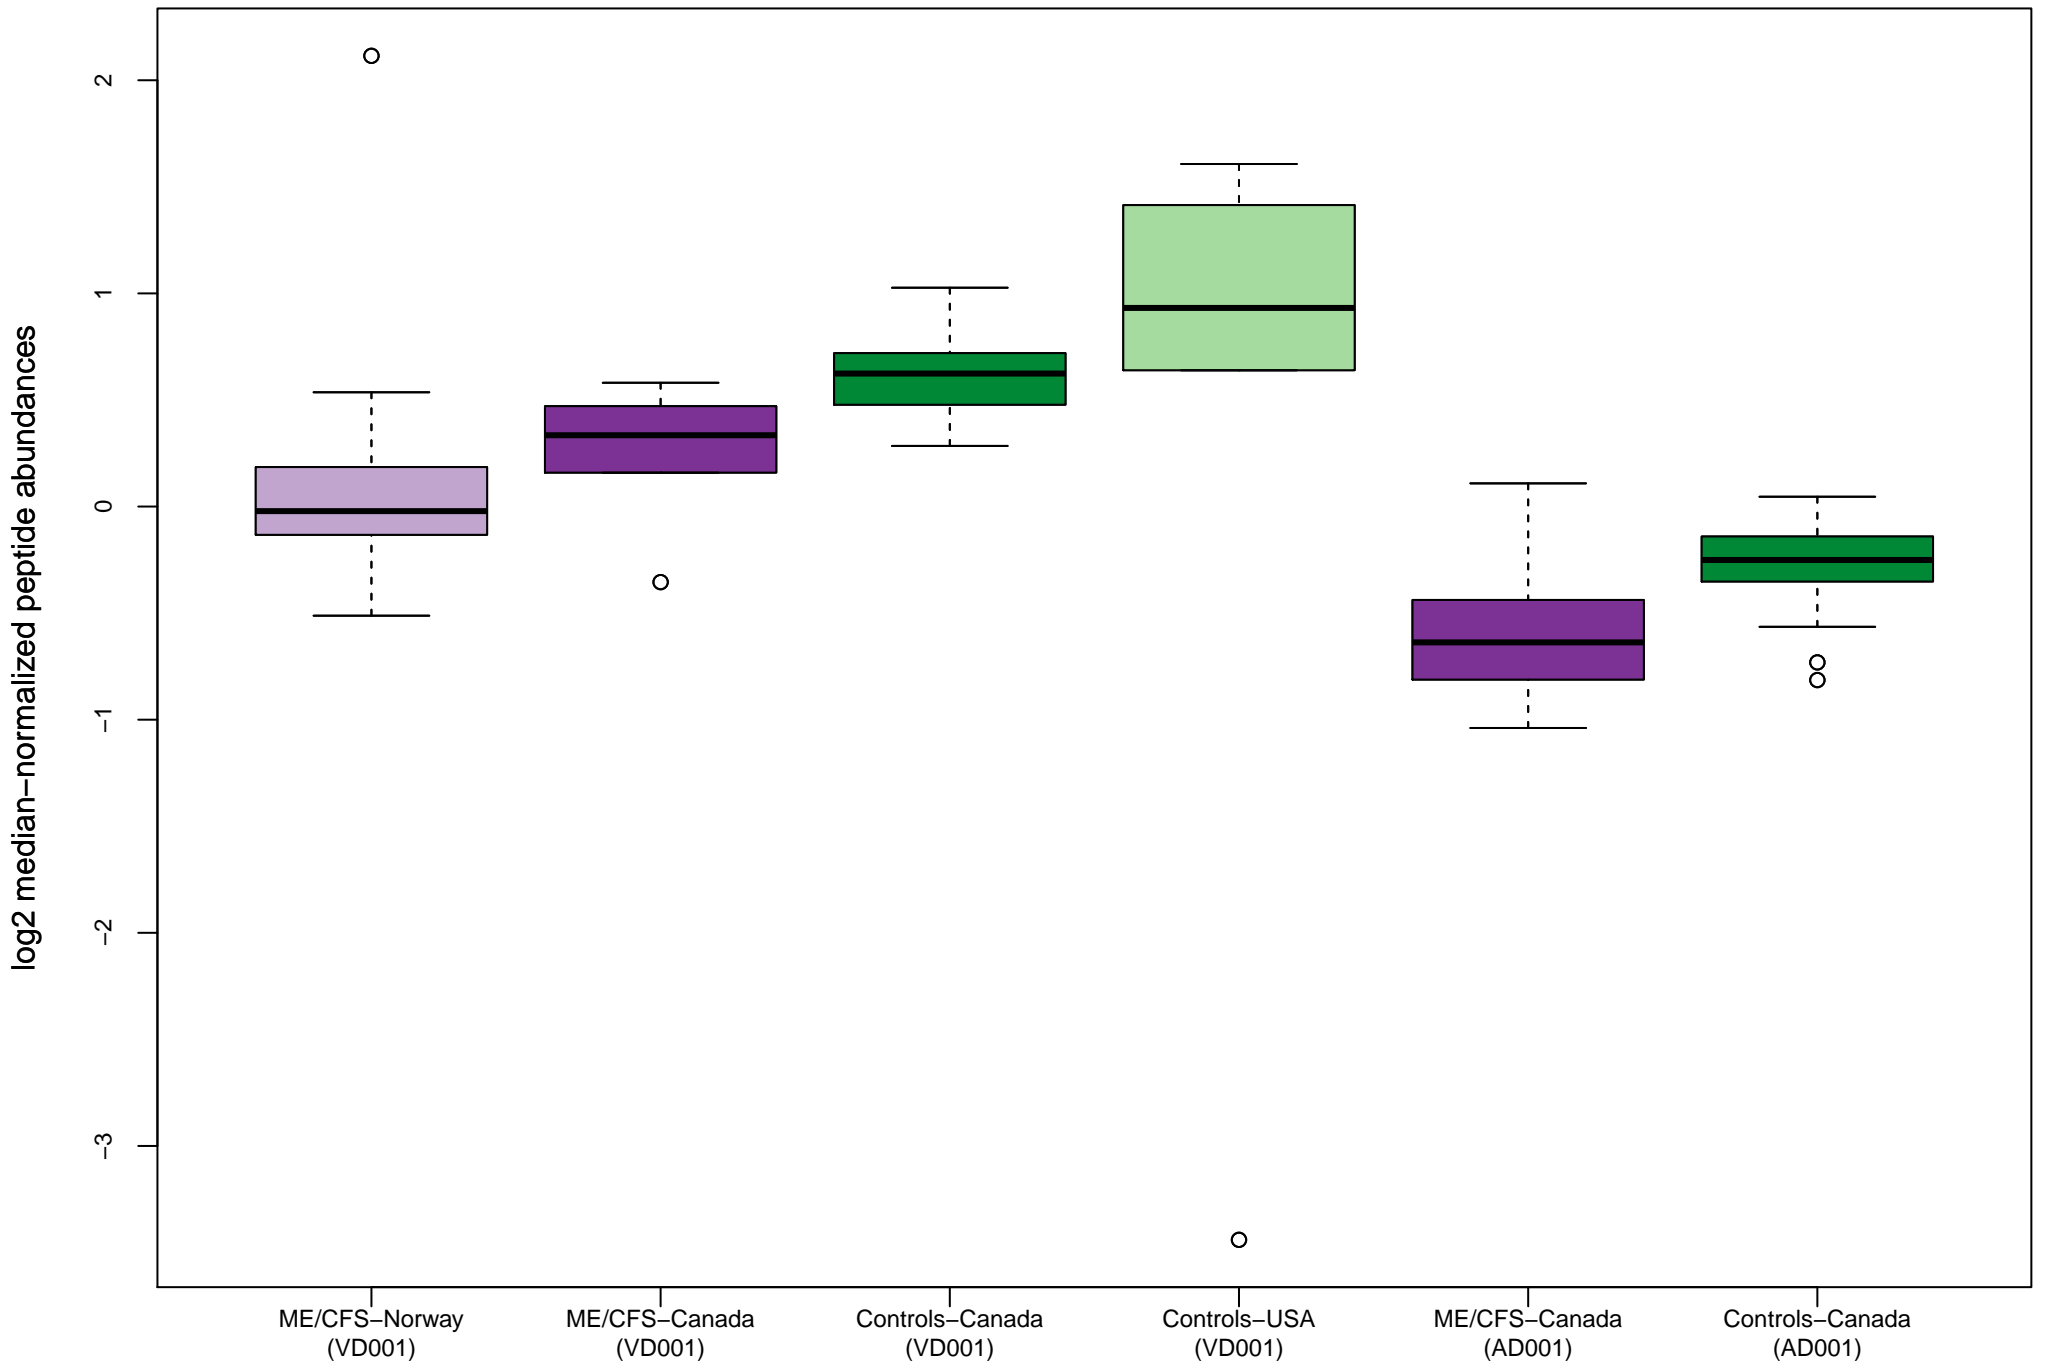



# SRLVFALGALSG

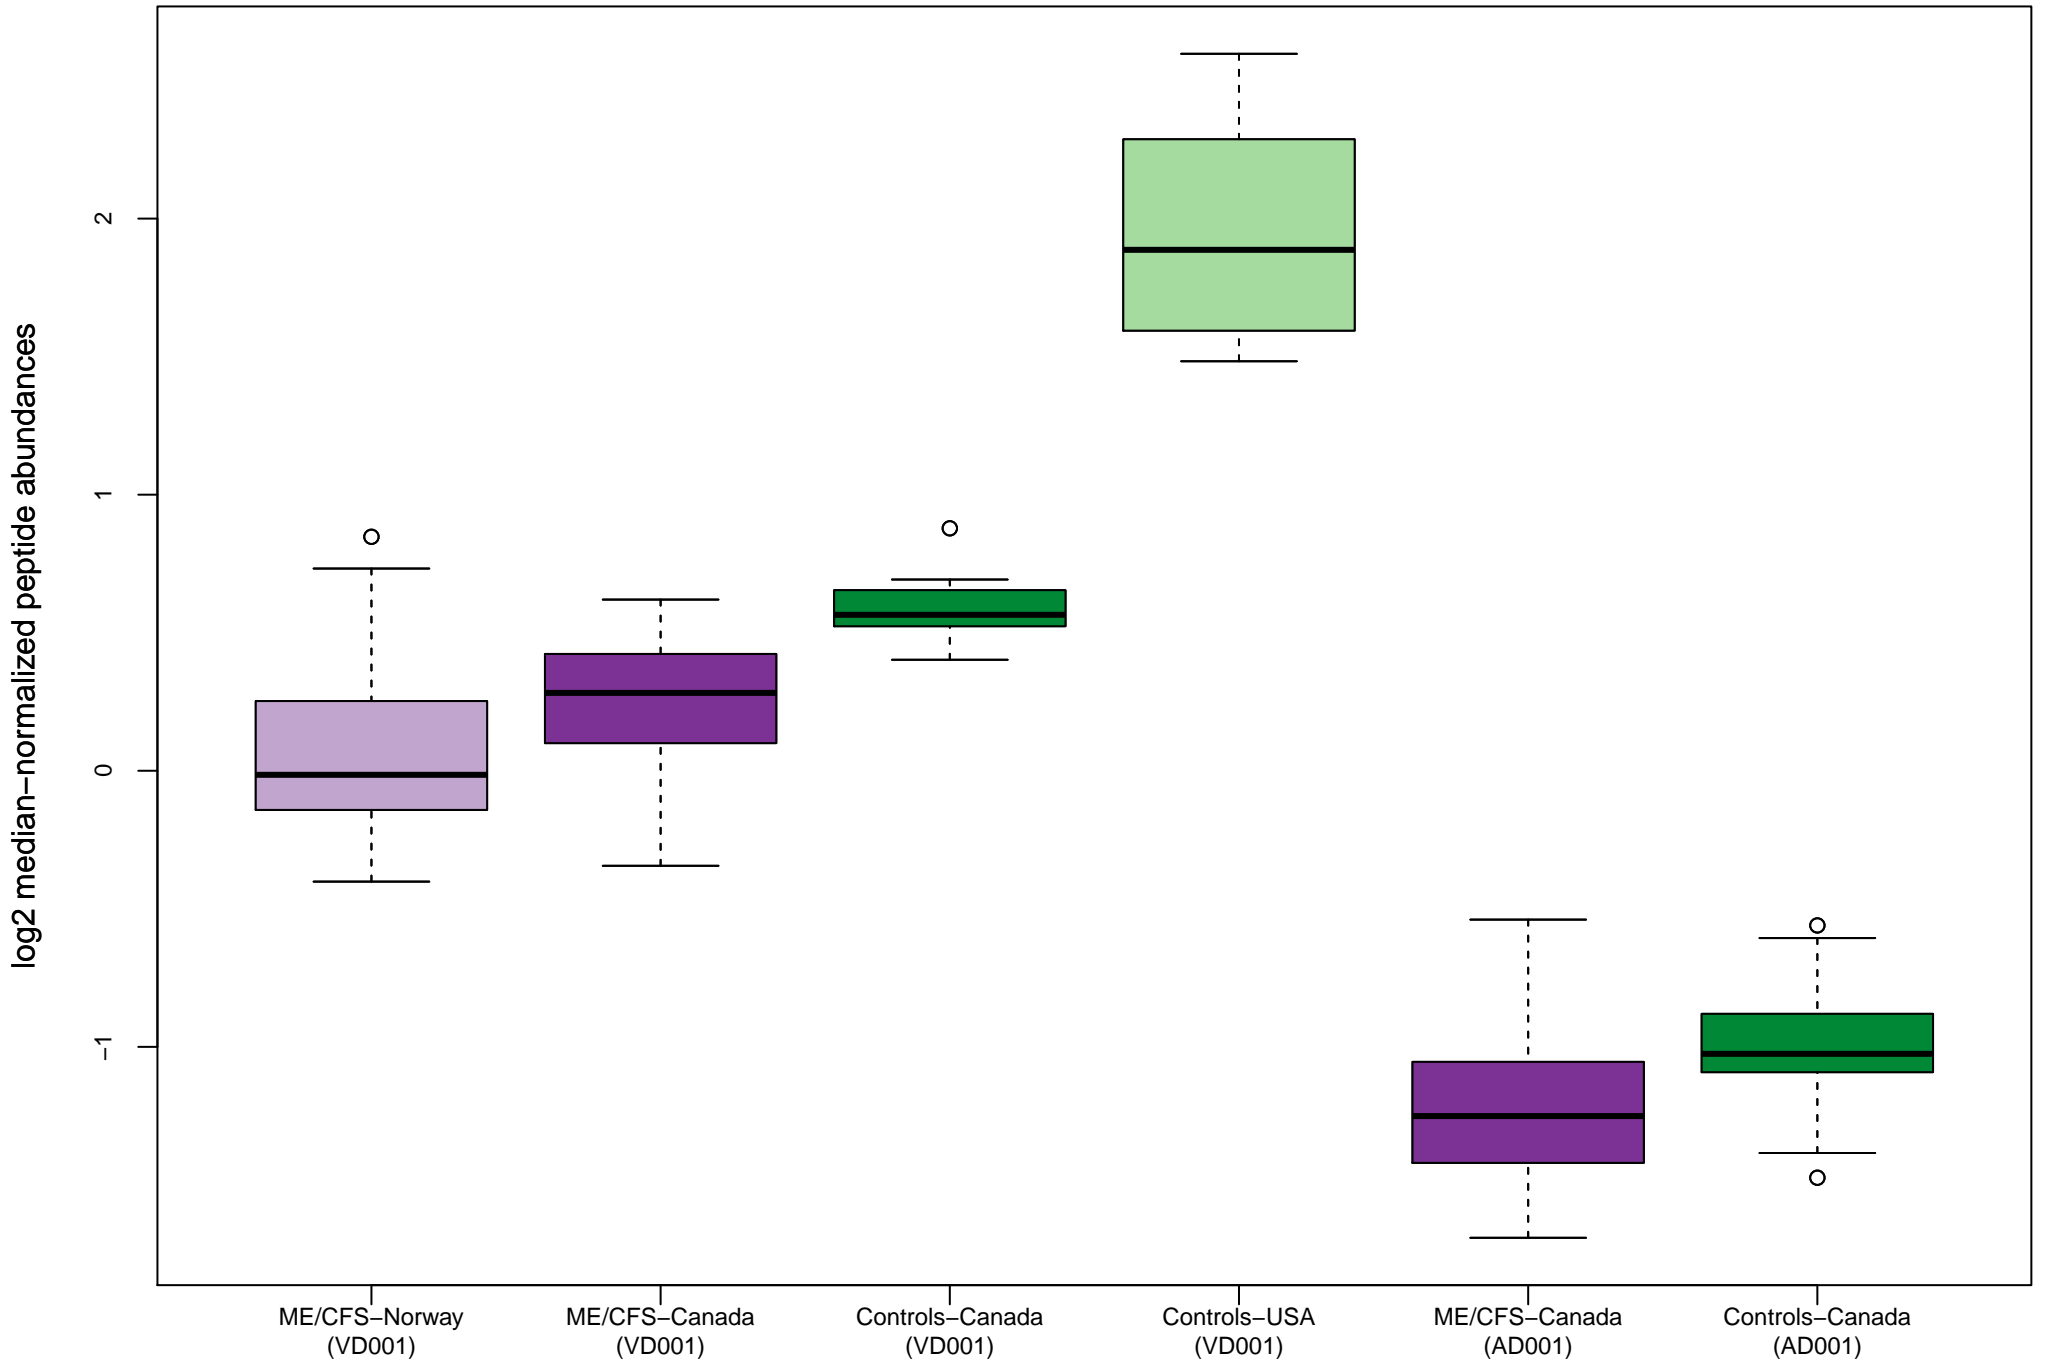

# SRNYFYKLVALS

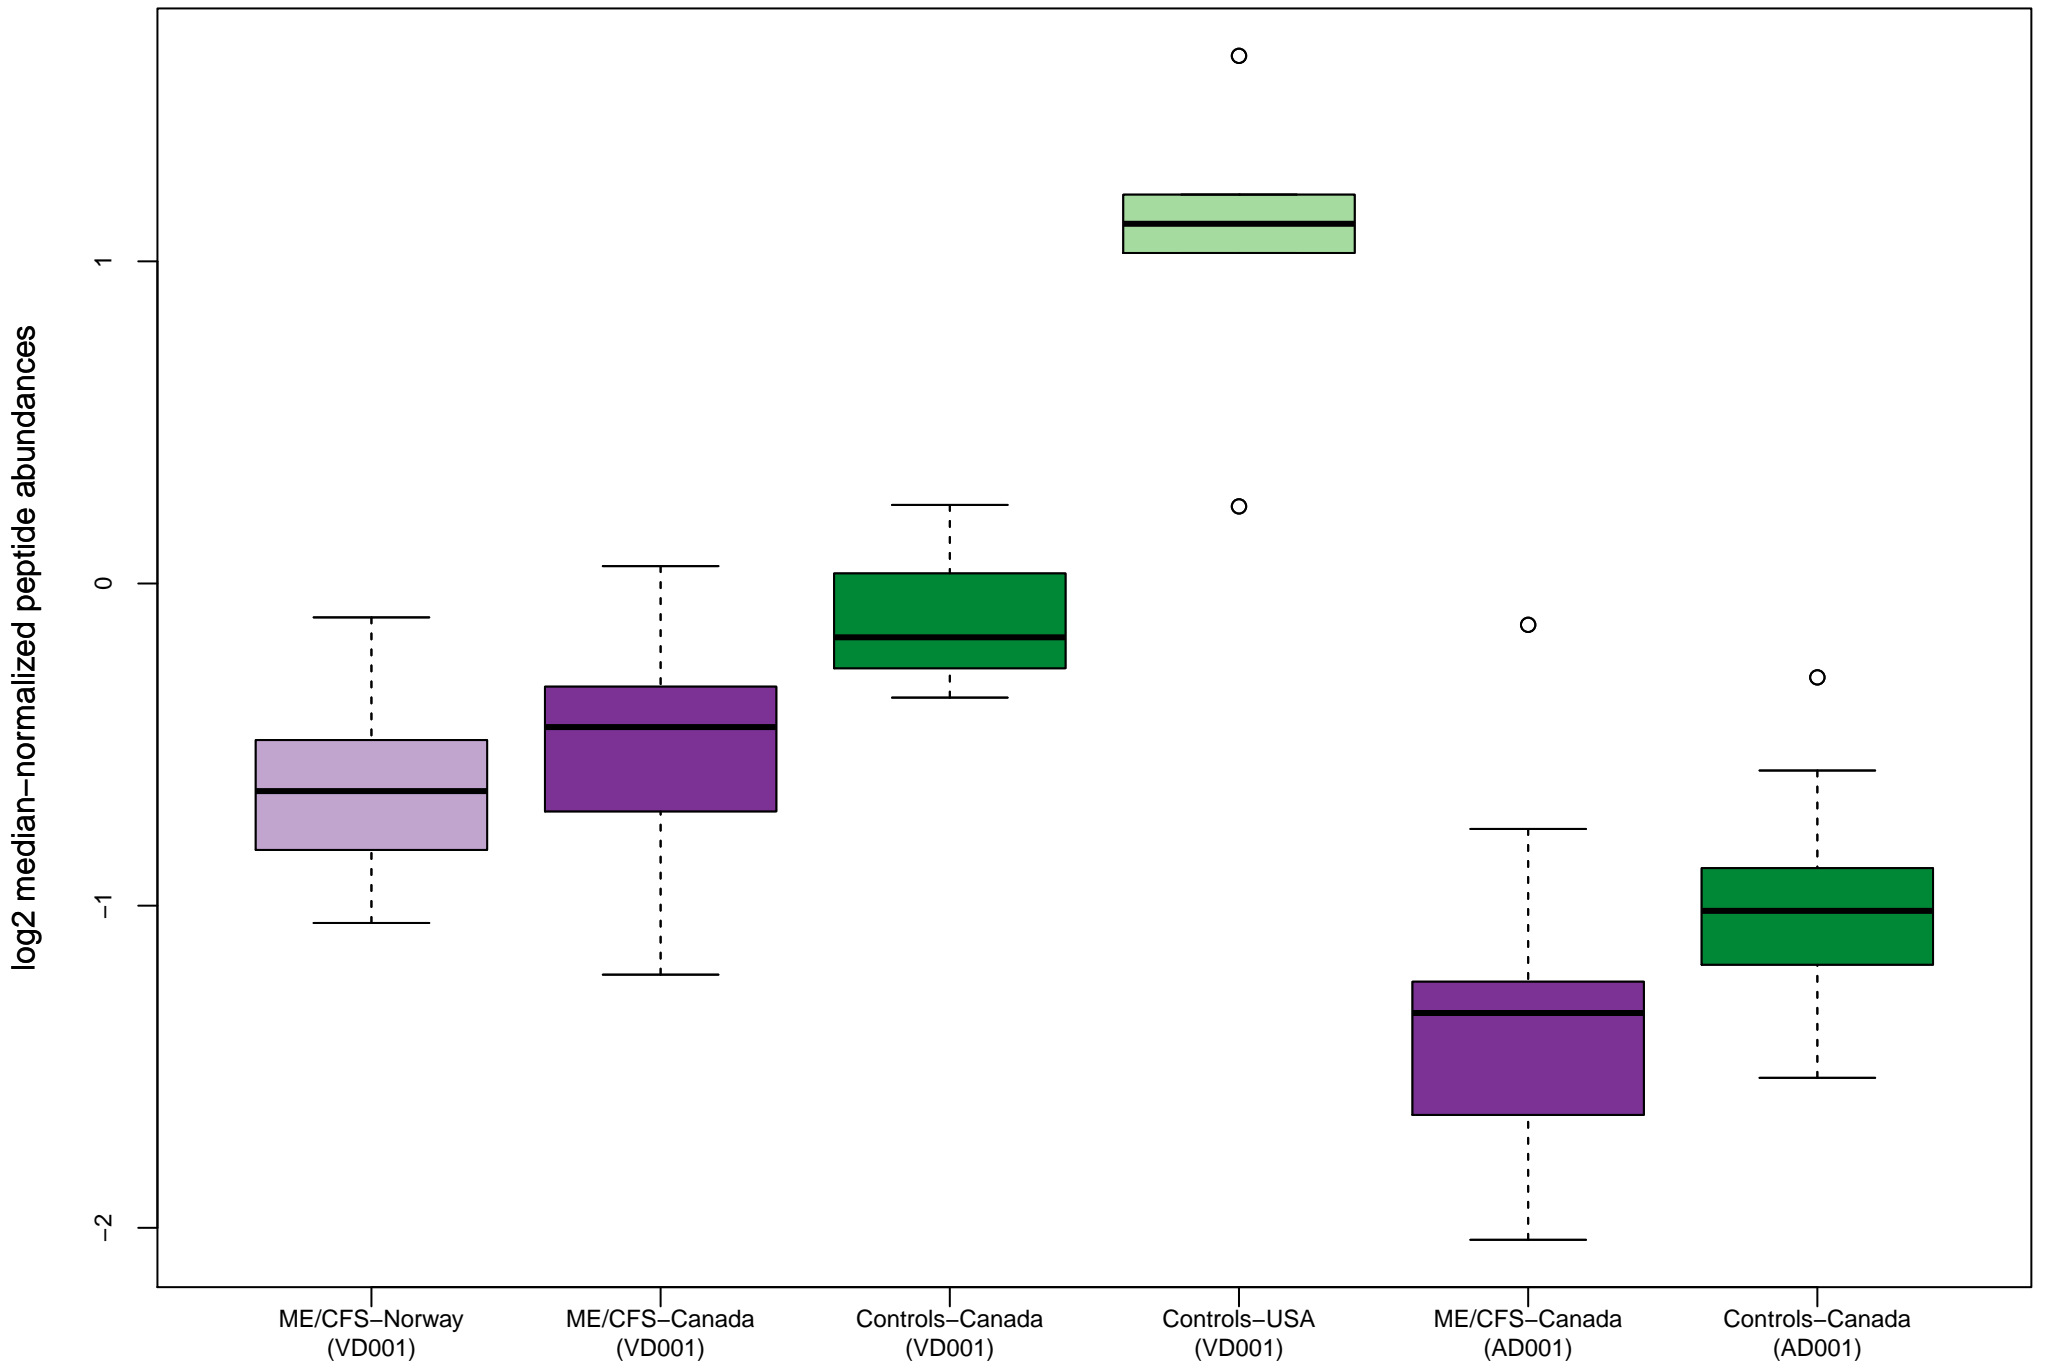

# SRPYRGRYHLSL

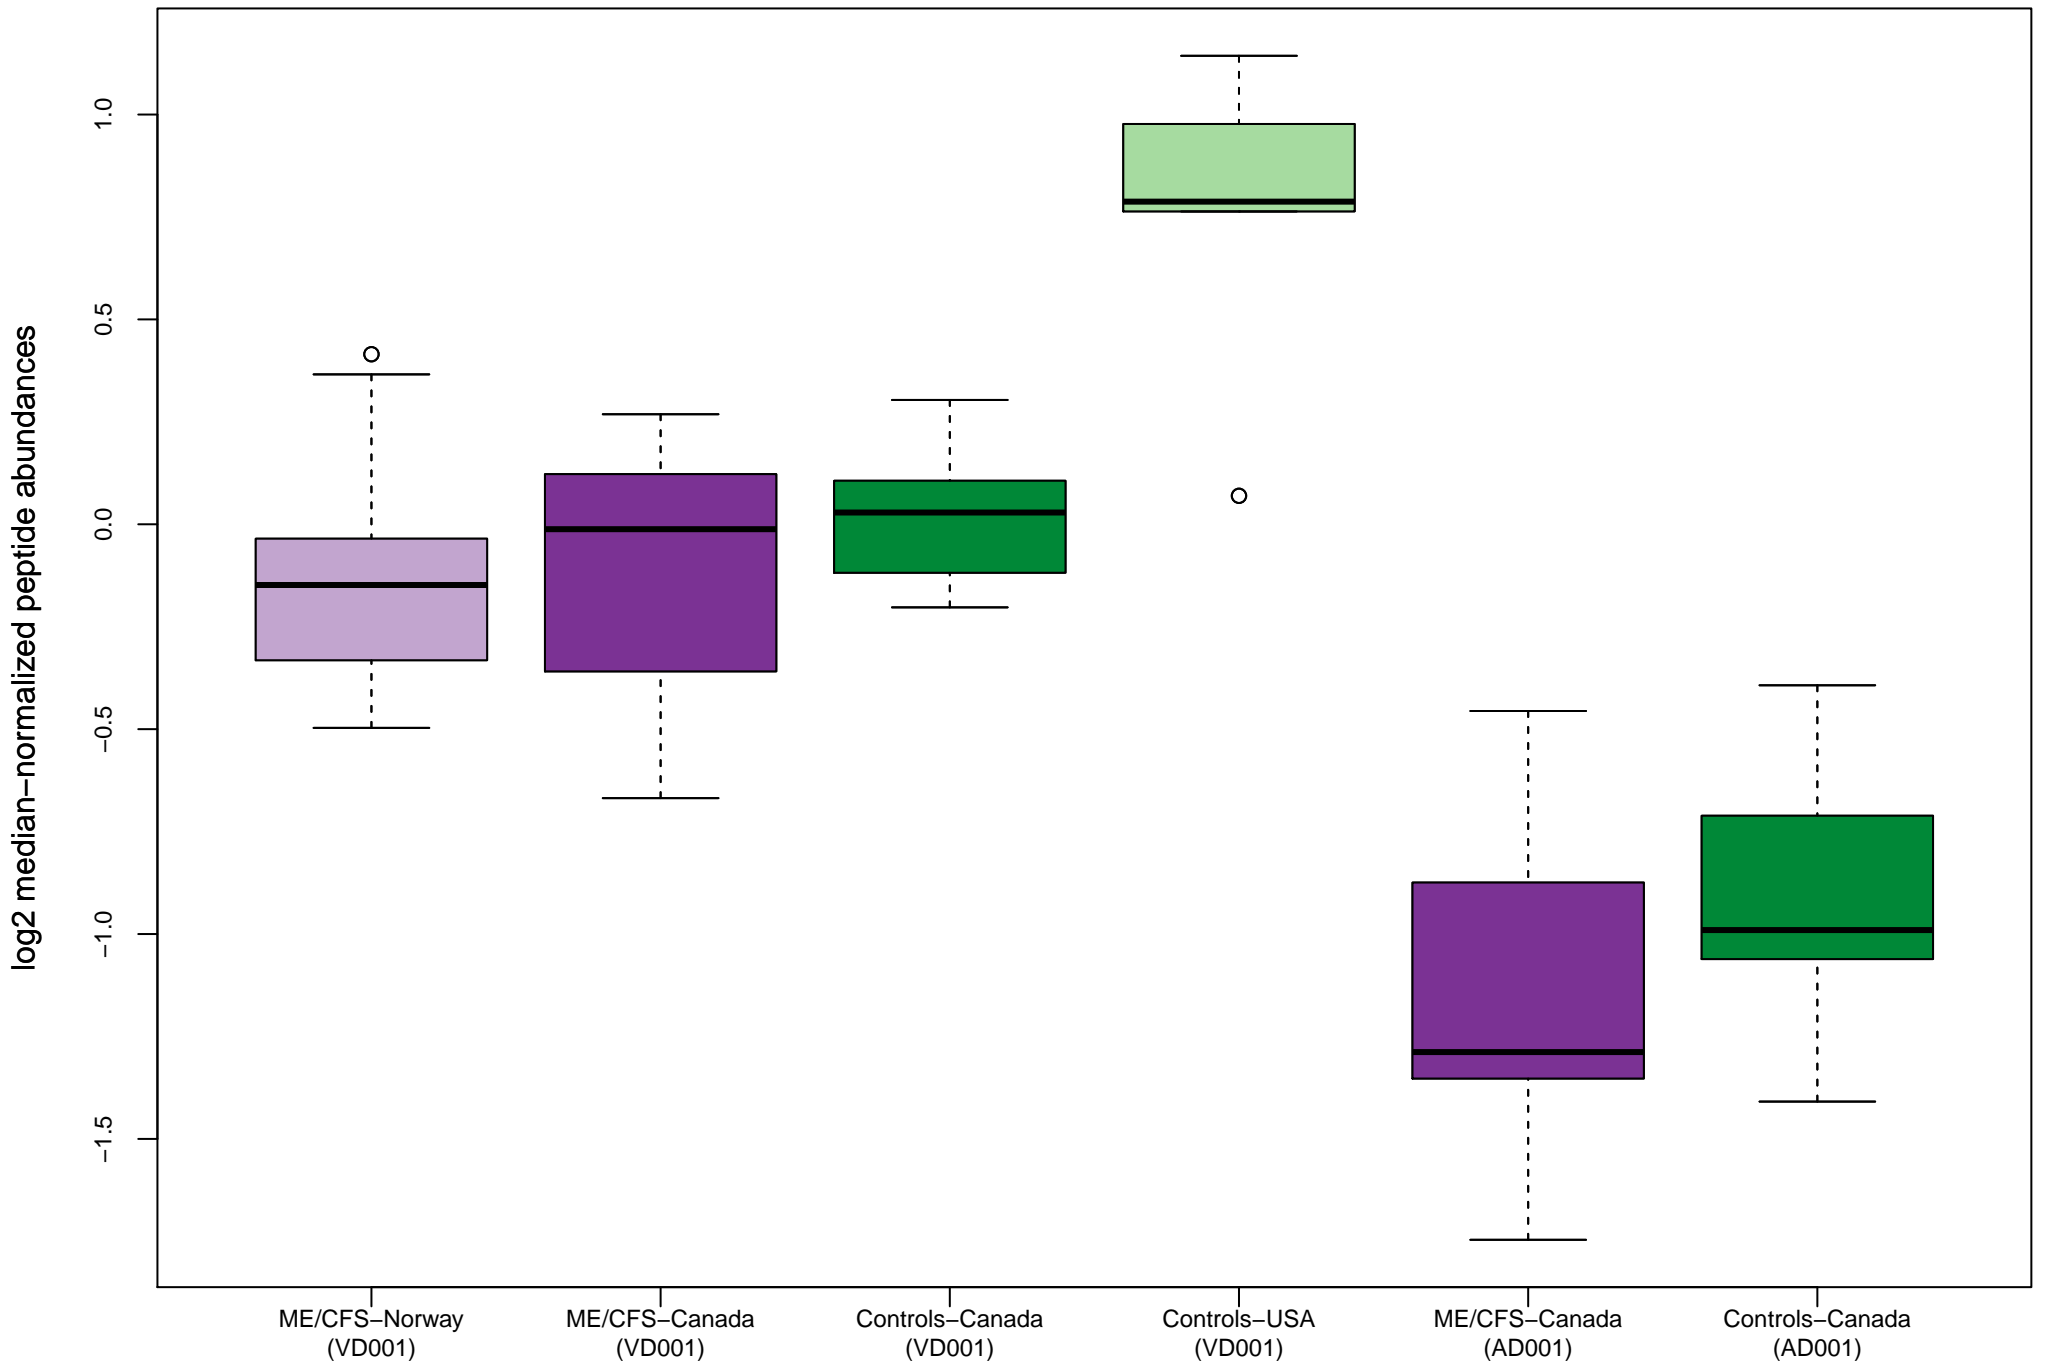

# SRQPFVALSGSG

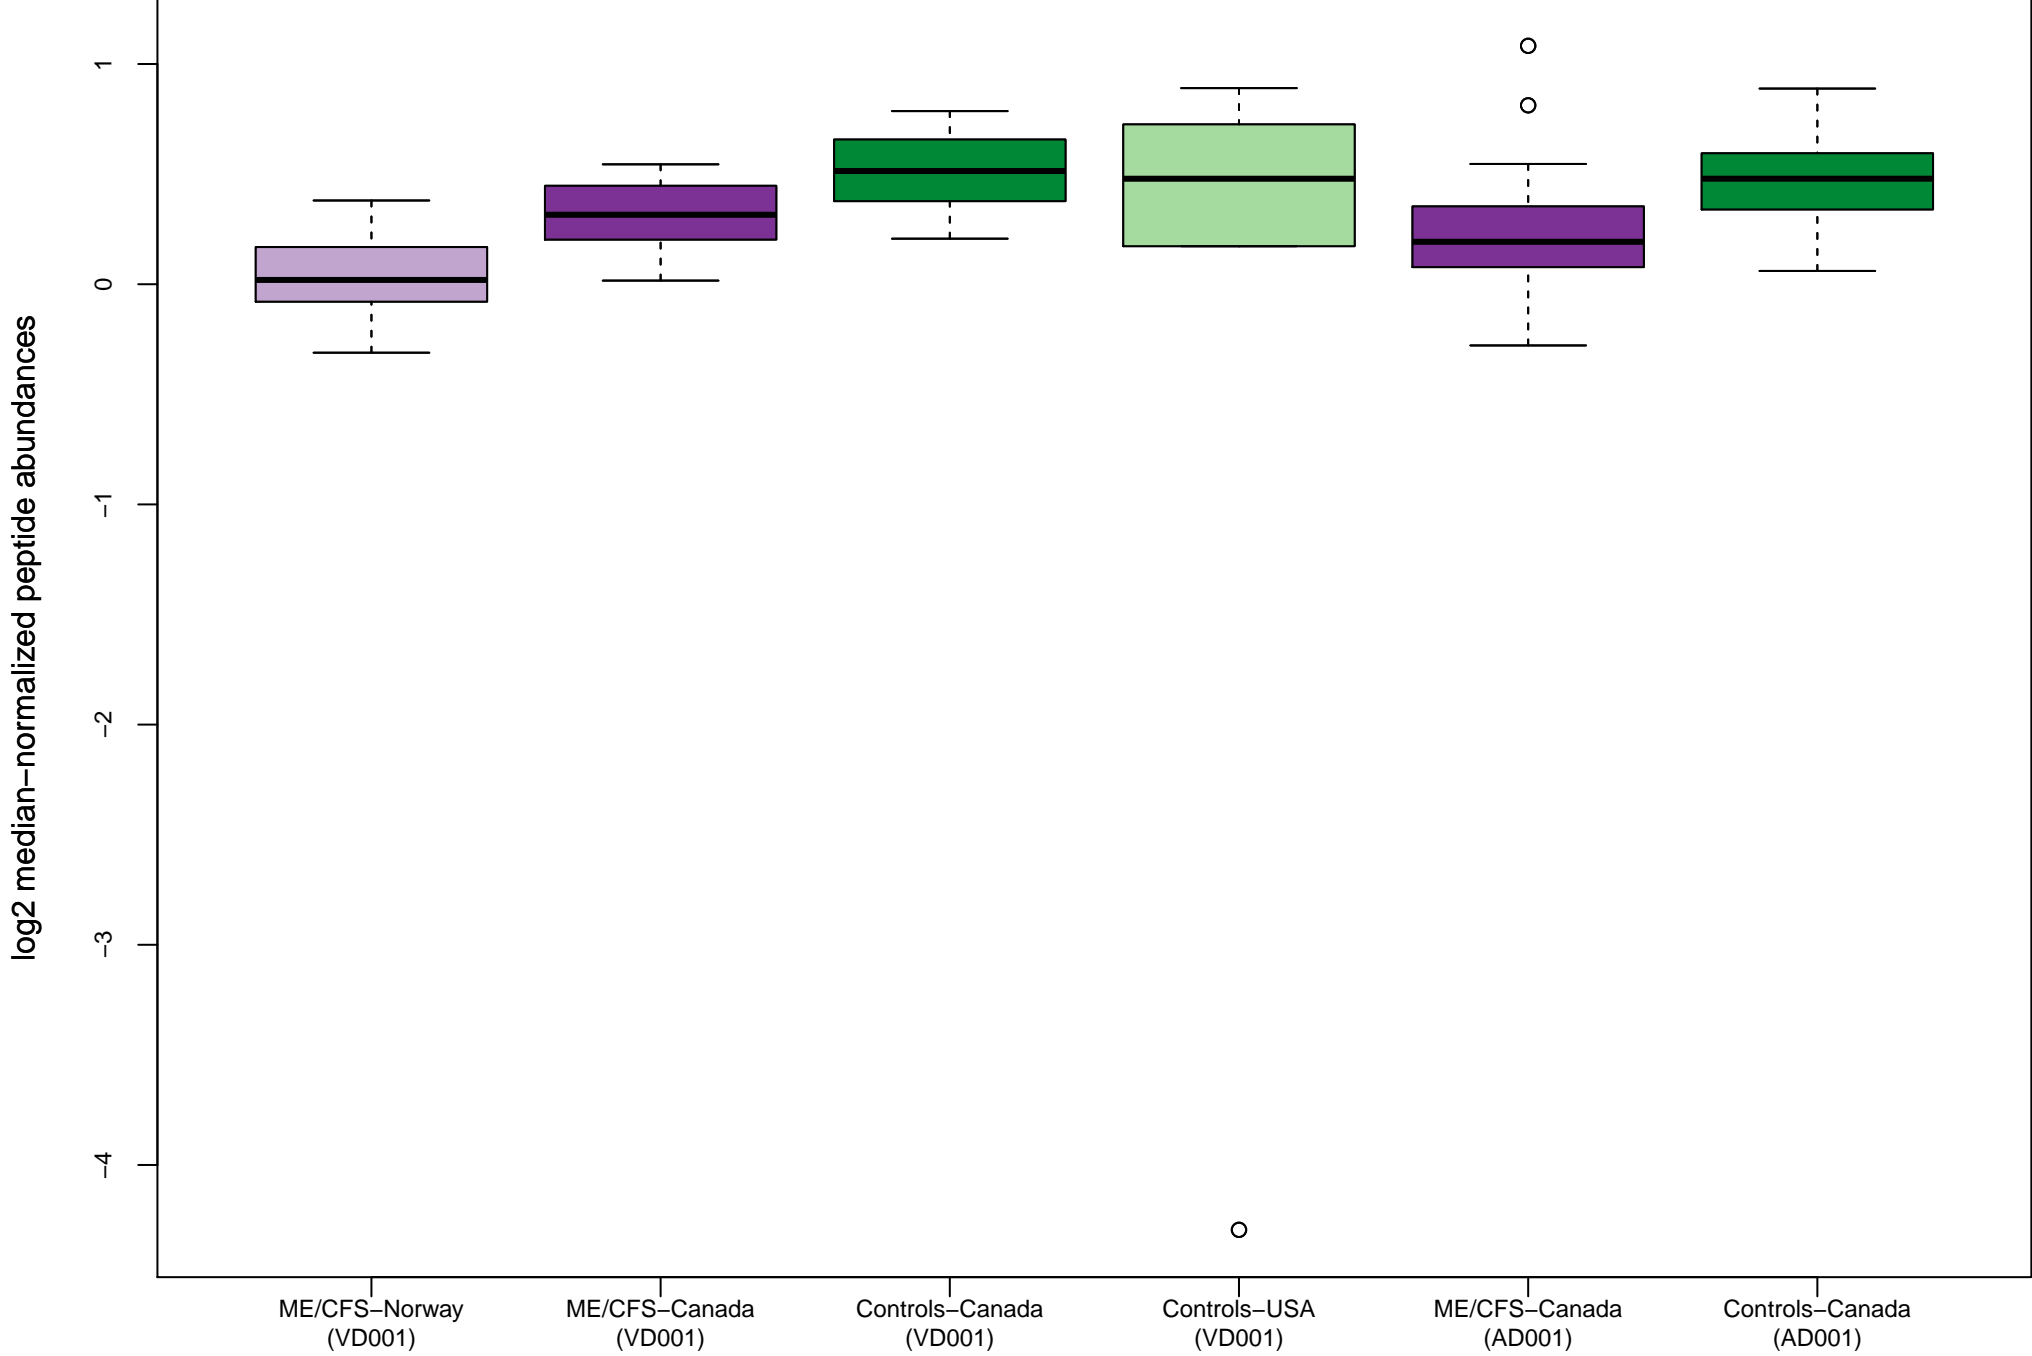

# SRRNEYVAVLSG

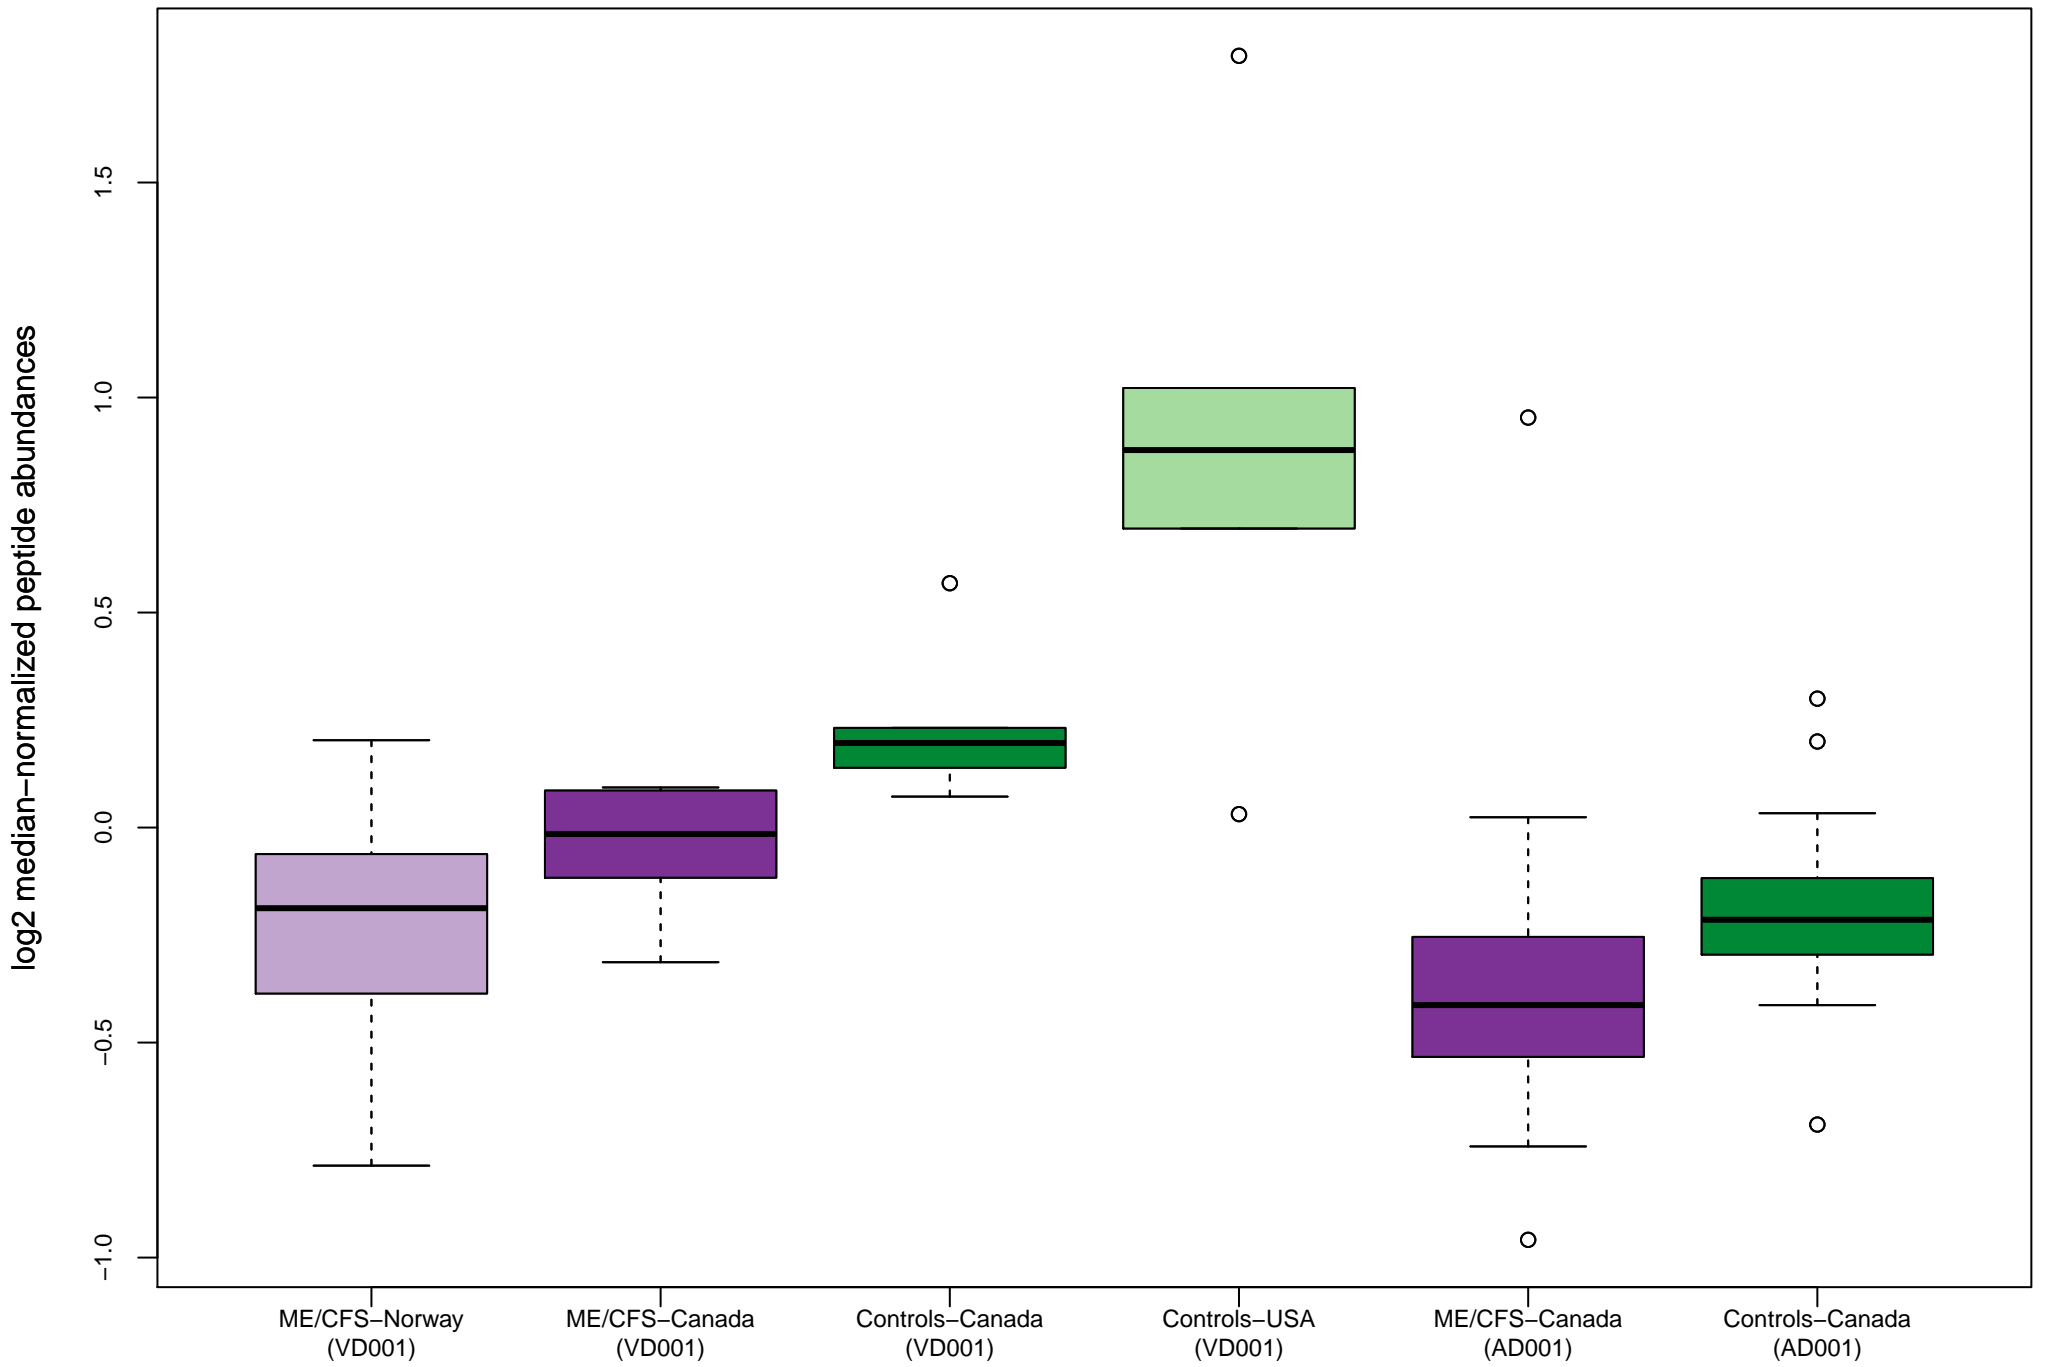

# SRWFLWKHASGL

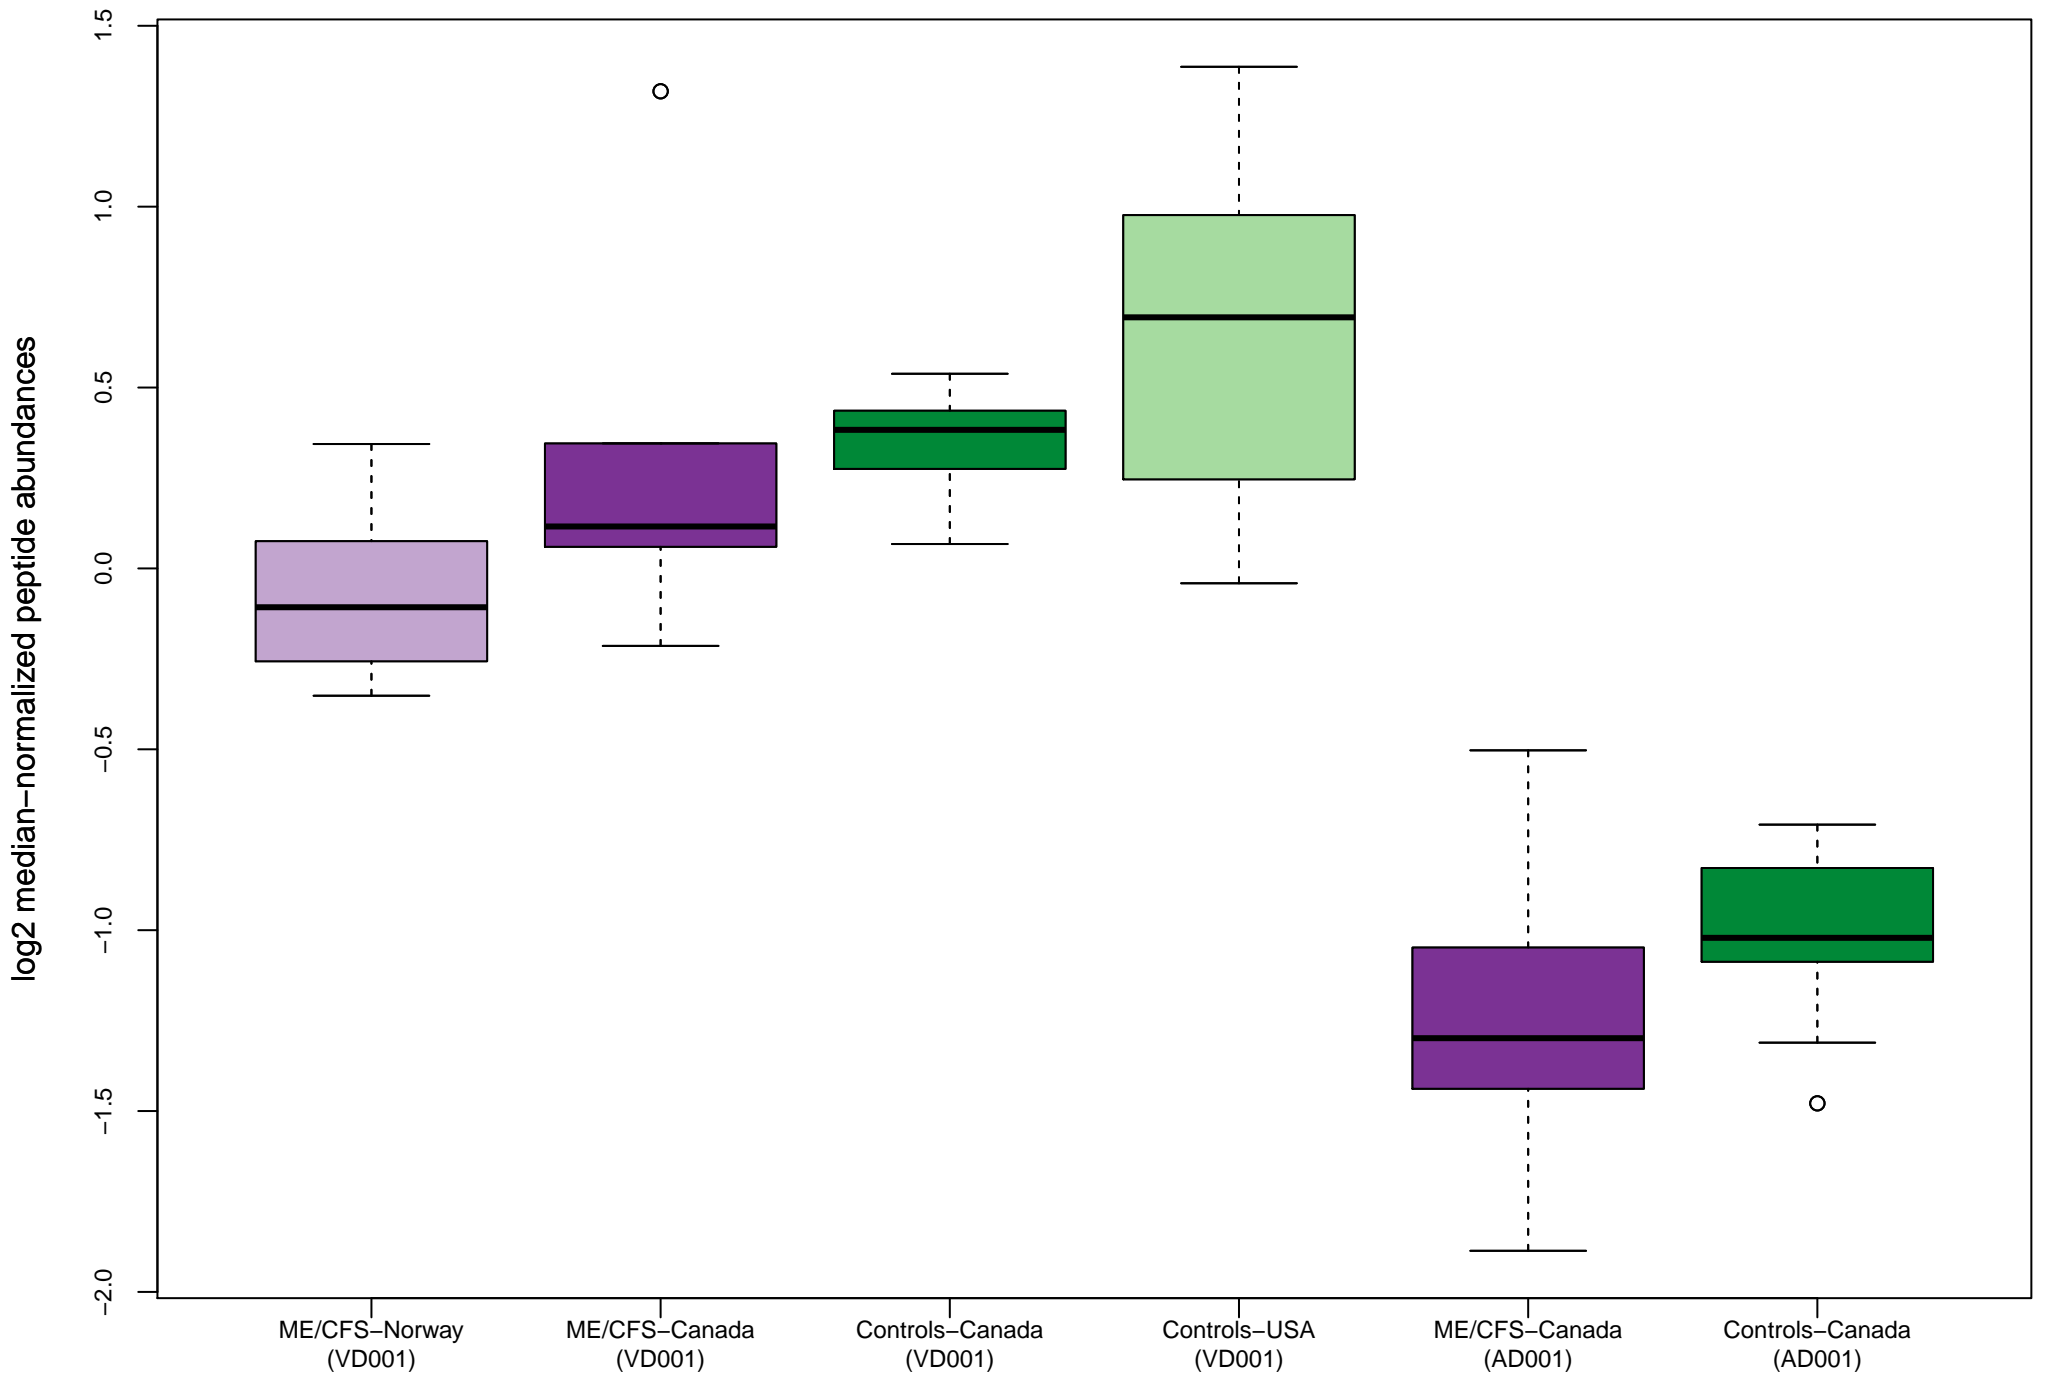

# SWRWGALGALSG

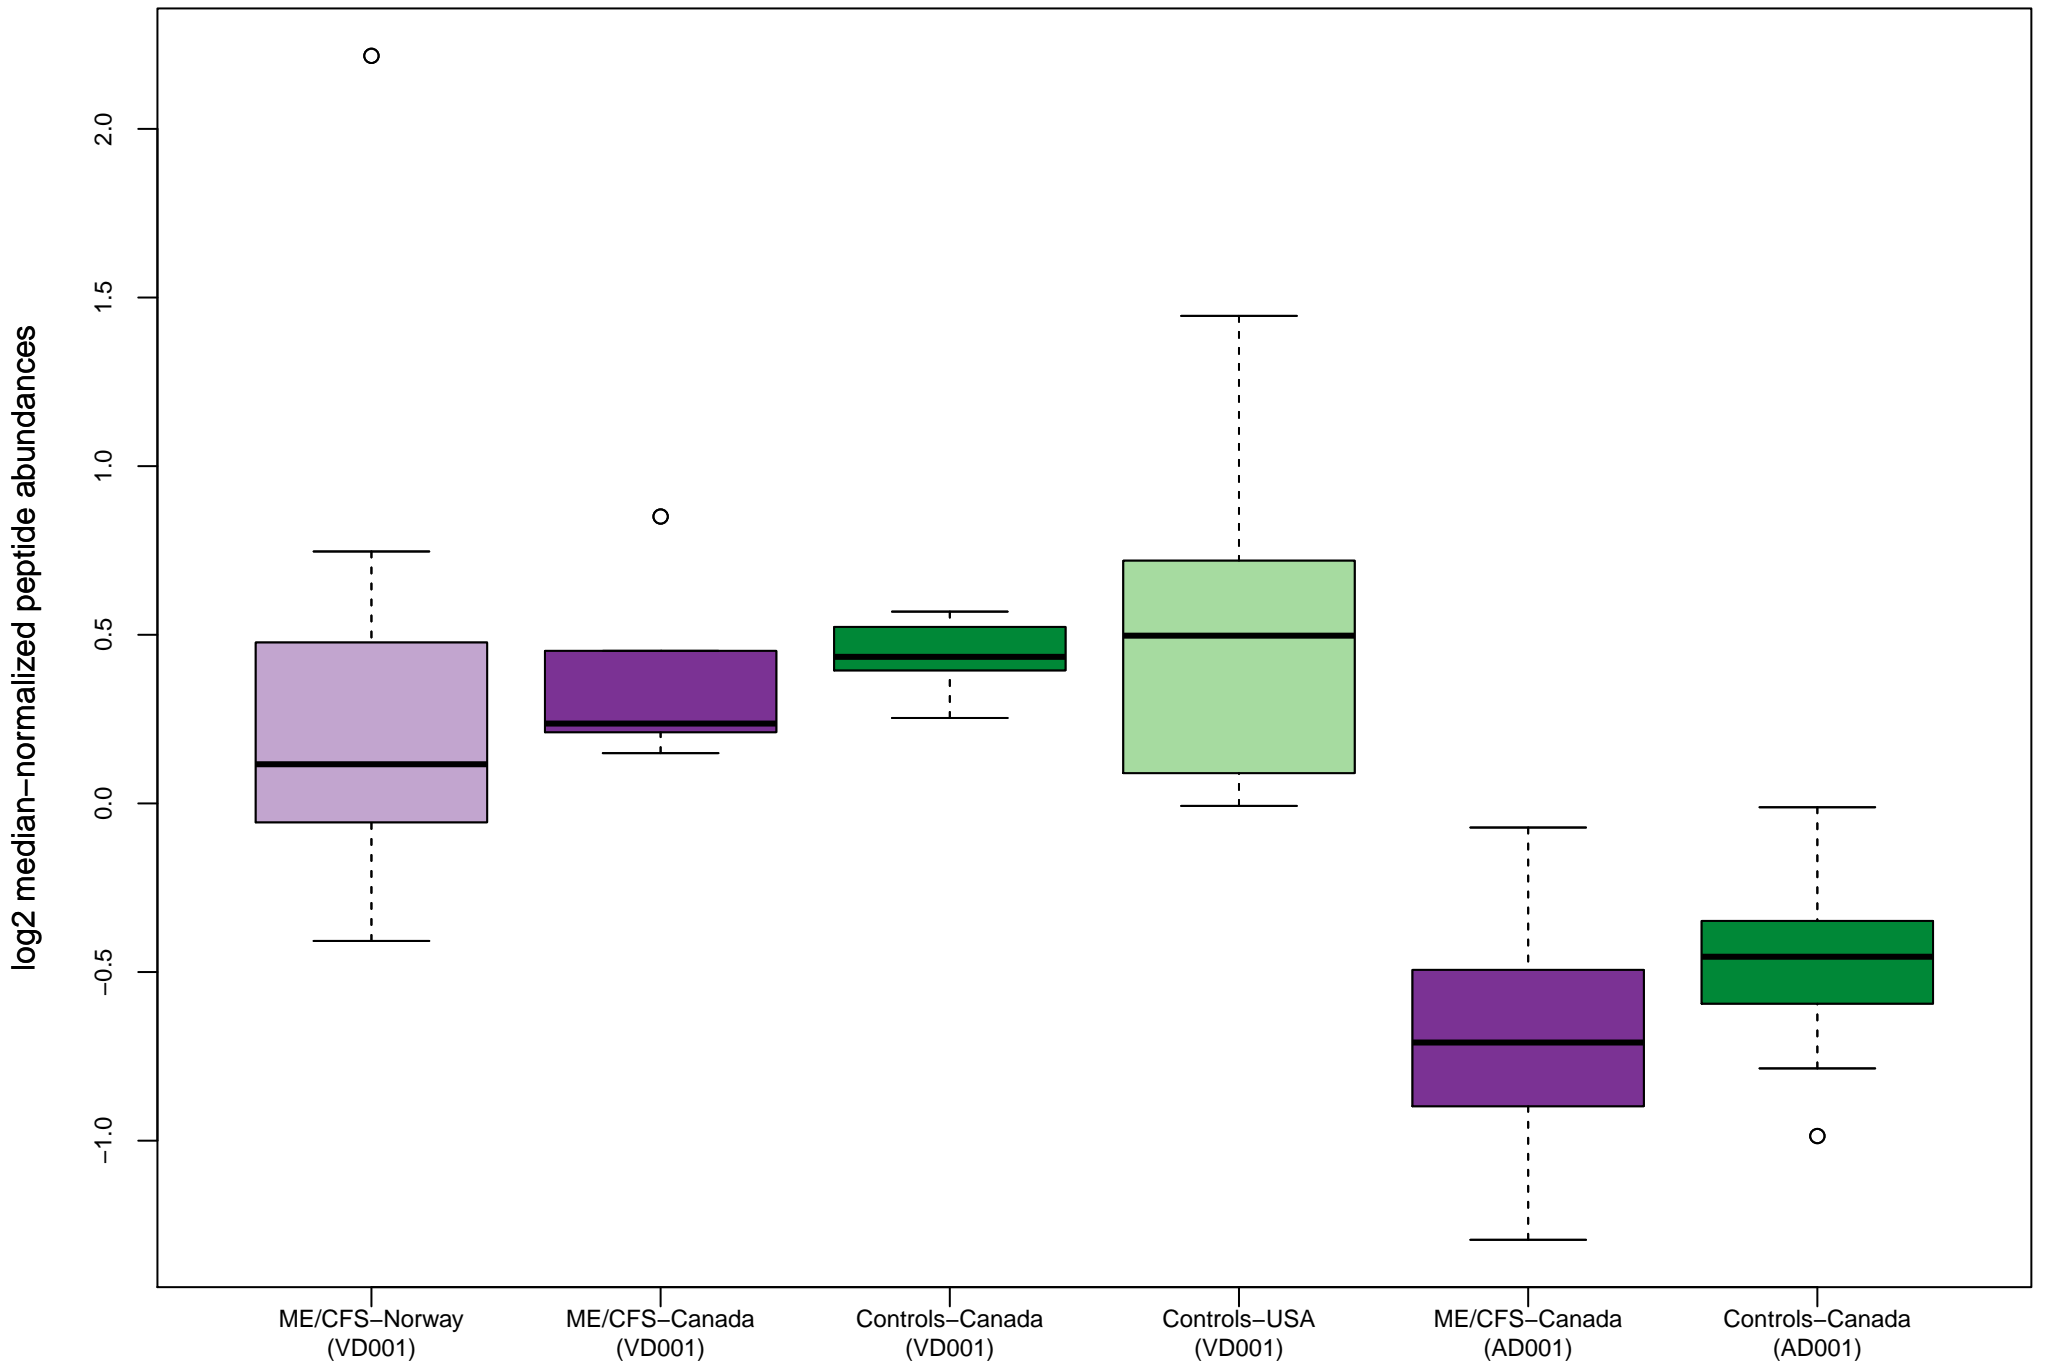

# SYNGVFRYWALS

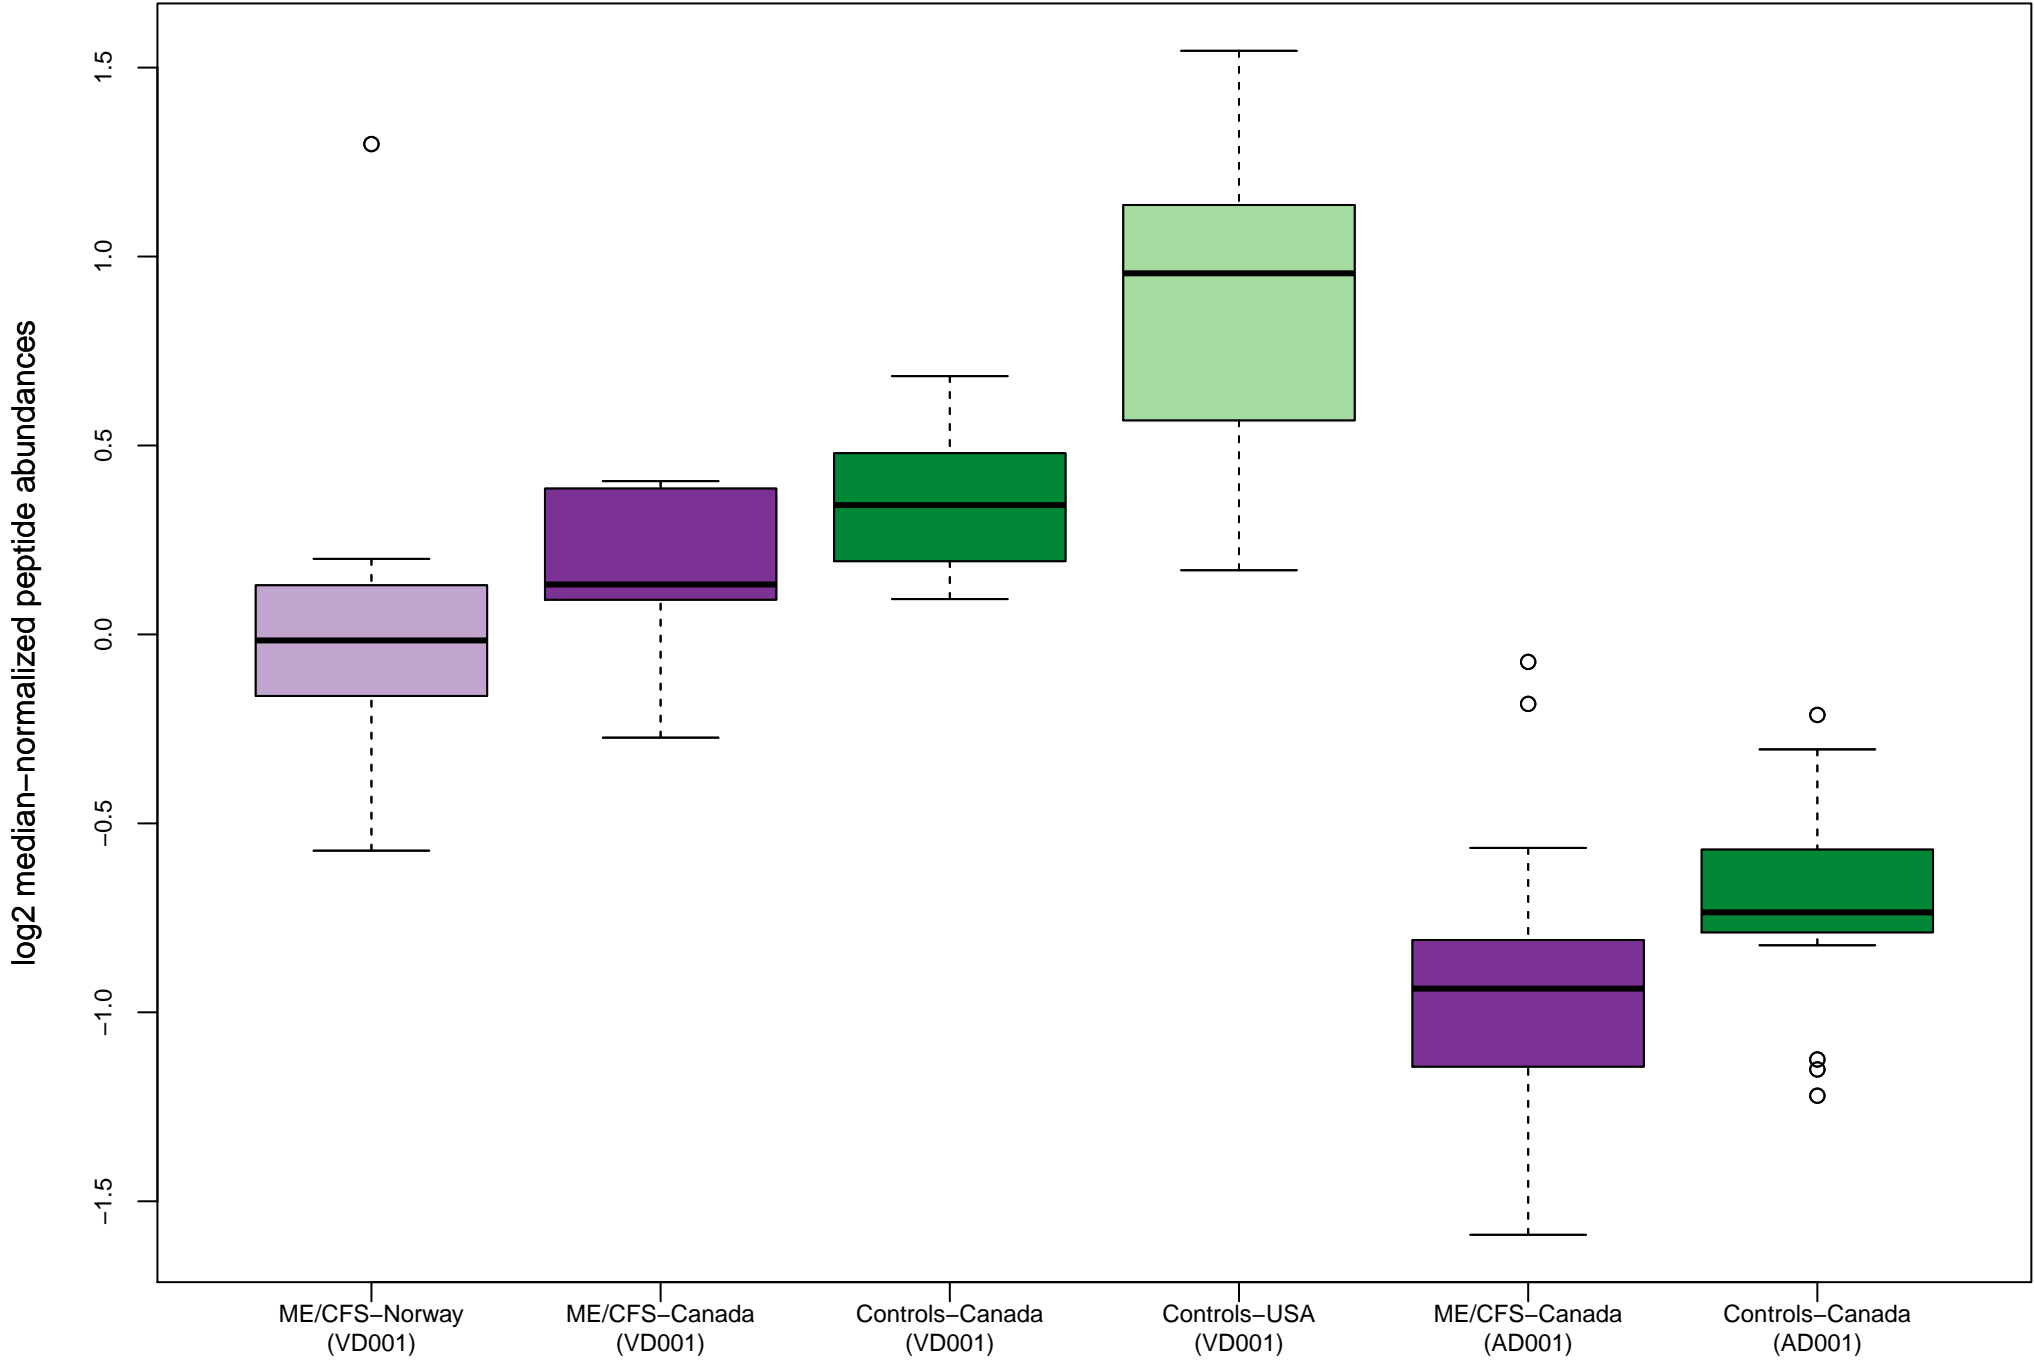



# SYRLSWLGVLSG

log2 median-normalized peptide abundances

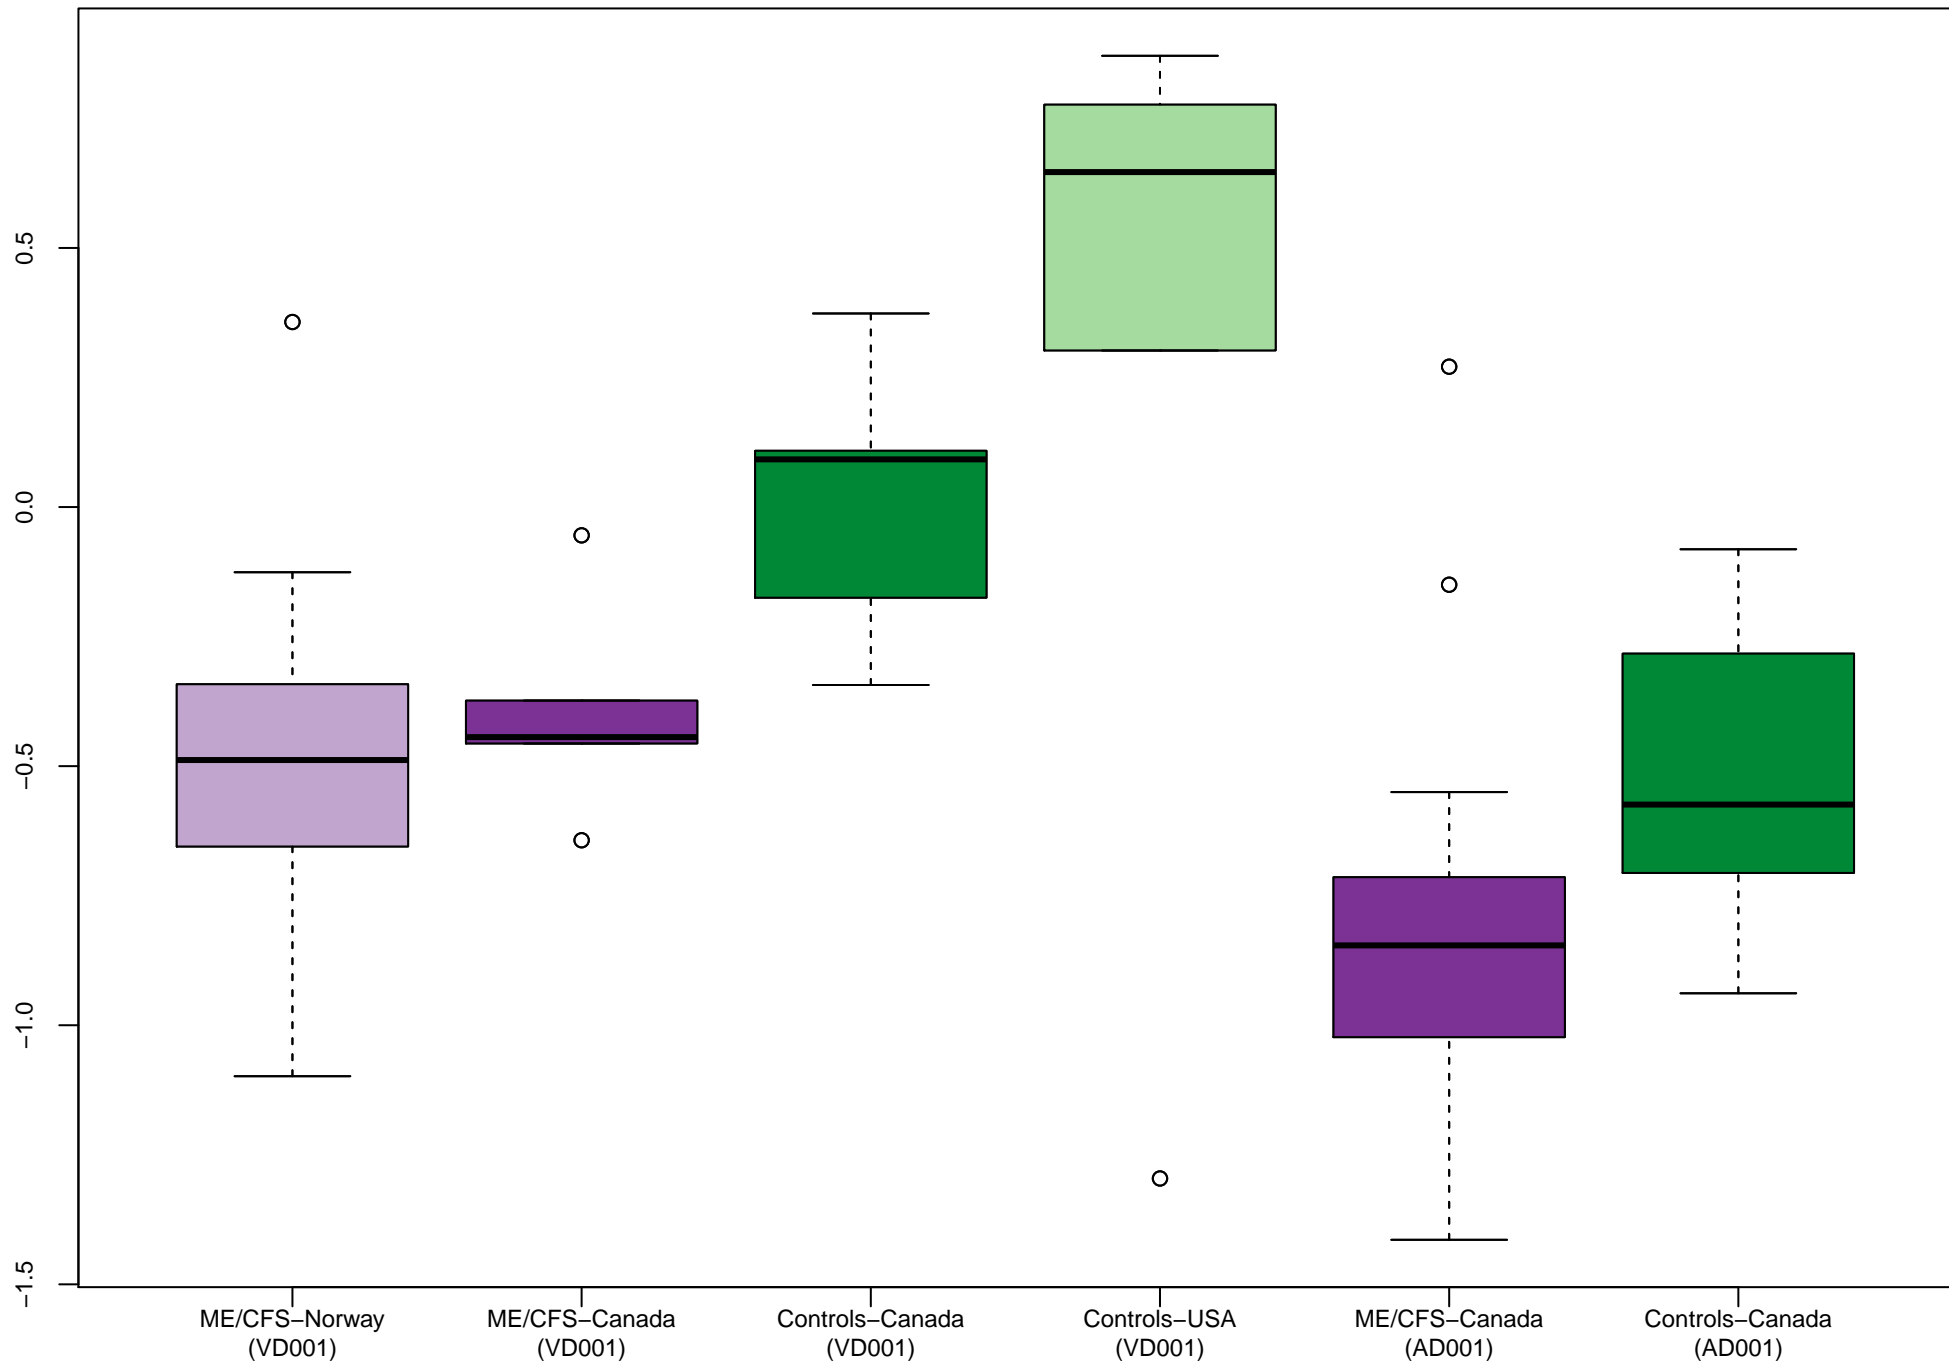

# VAKVALRLFRYH

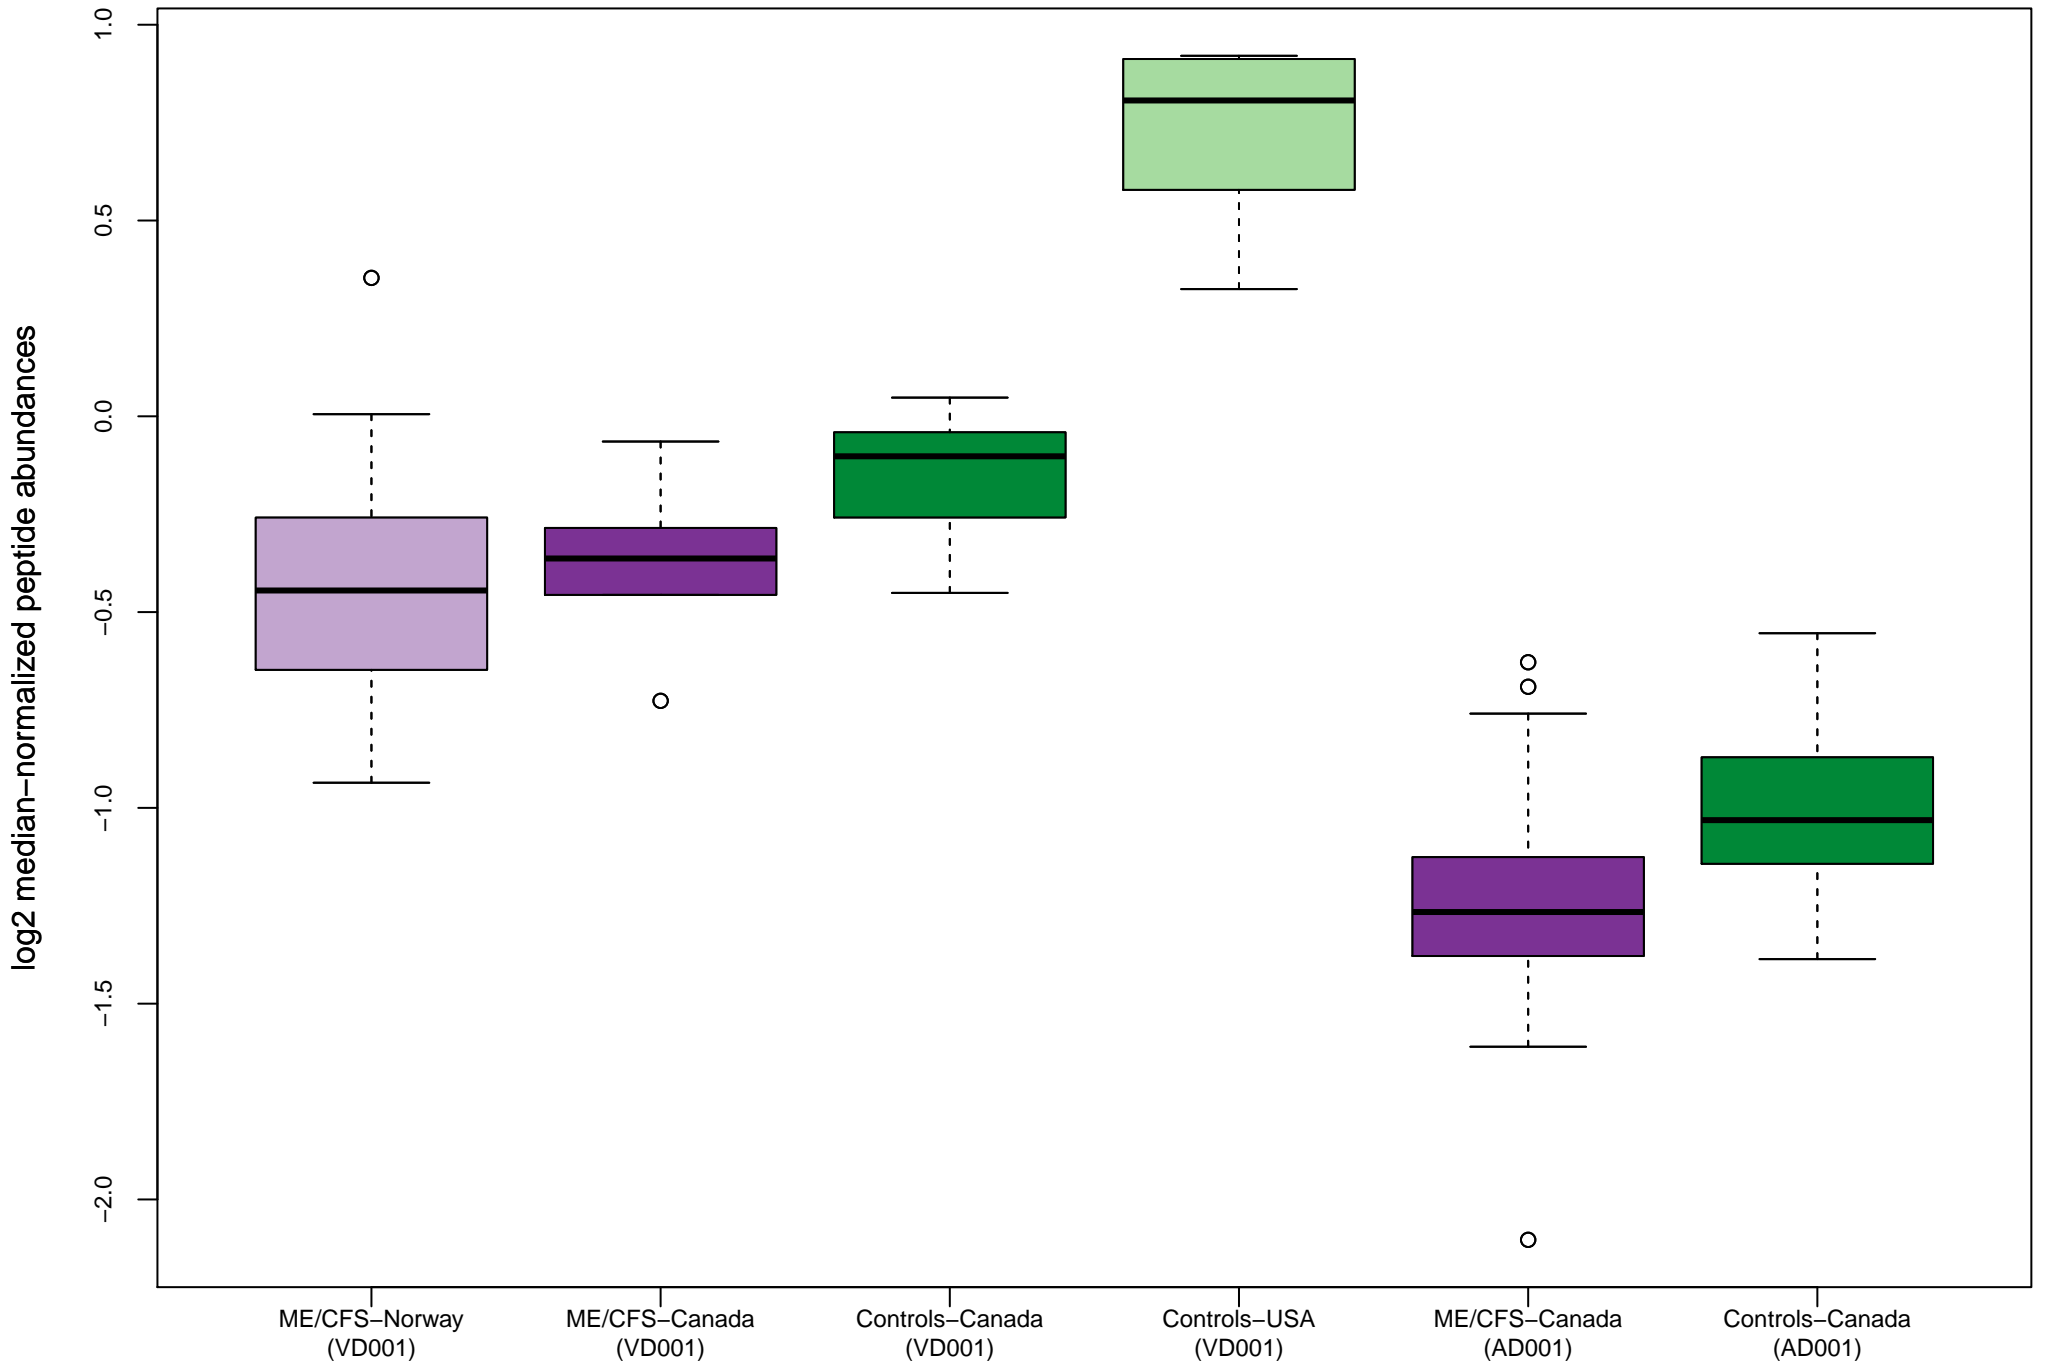

# VAVFWSPKVLGA

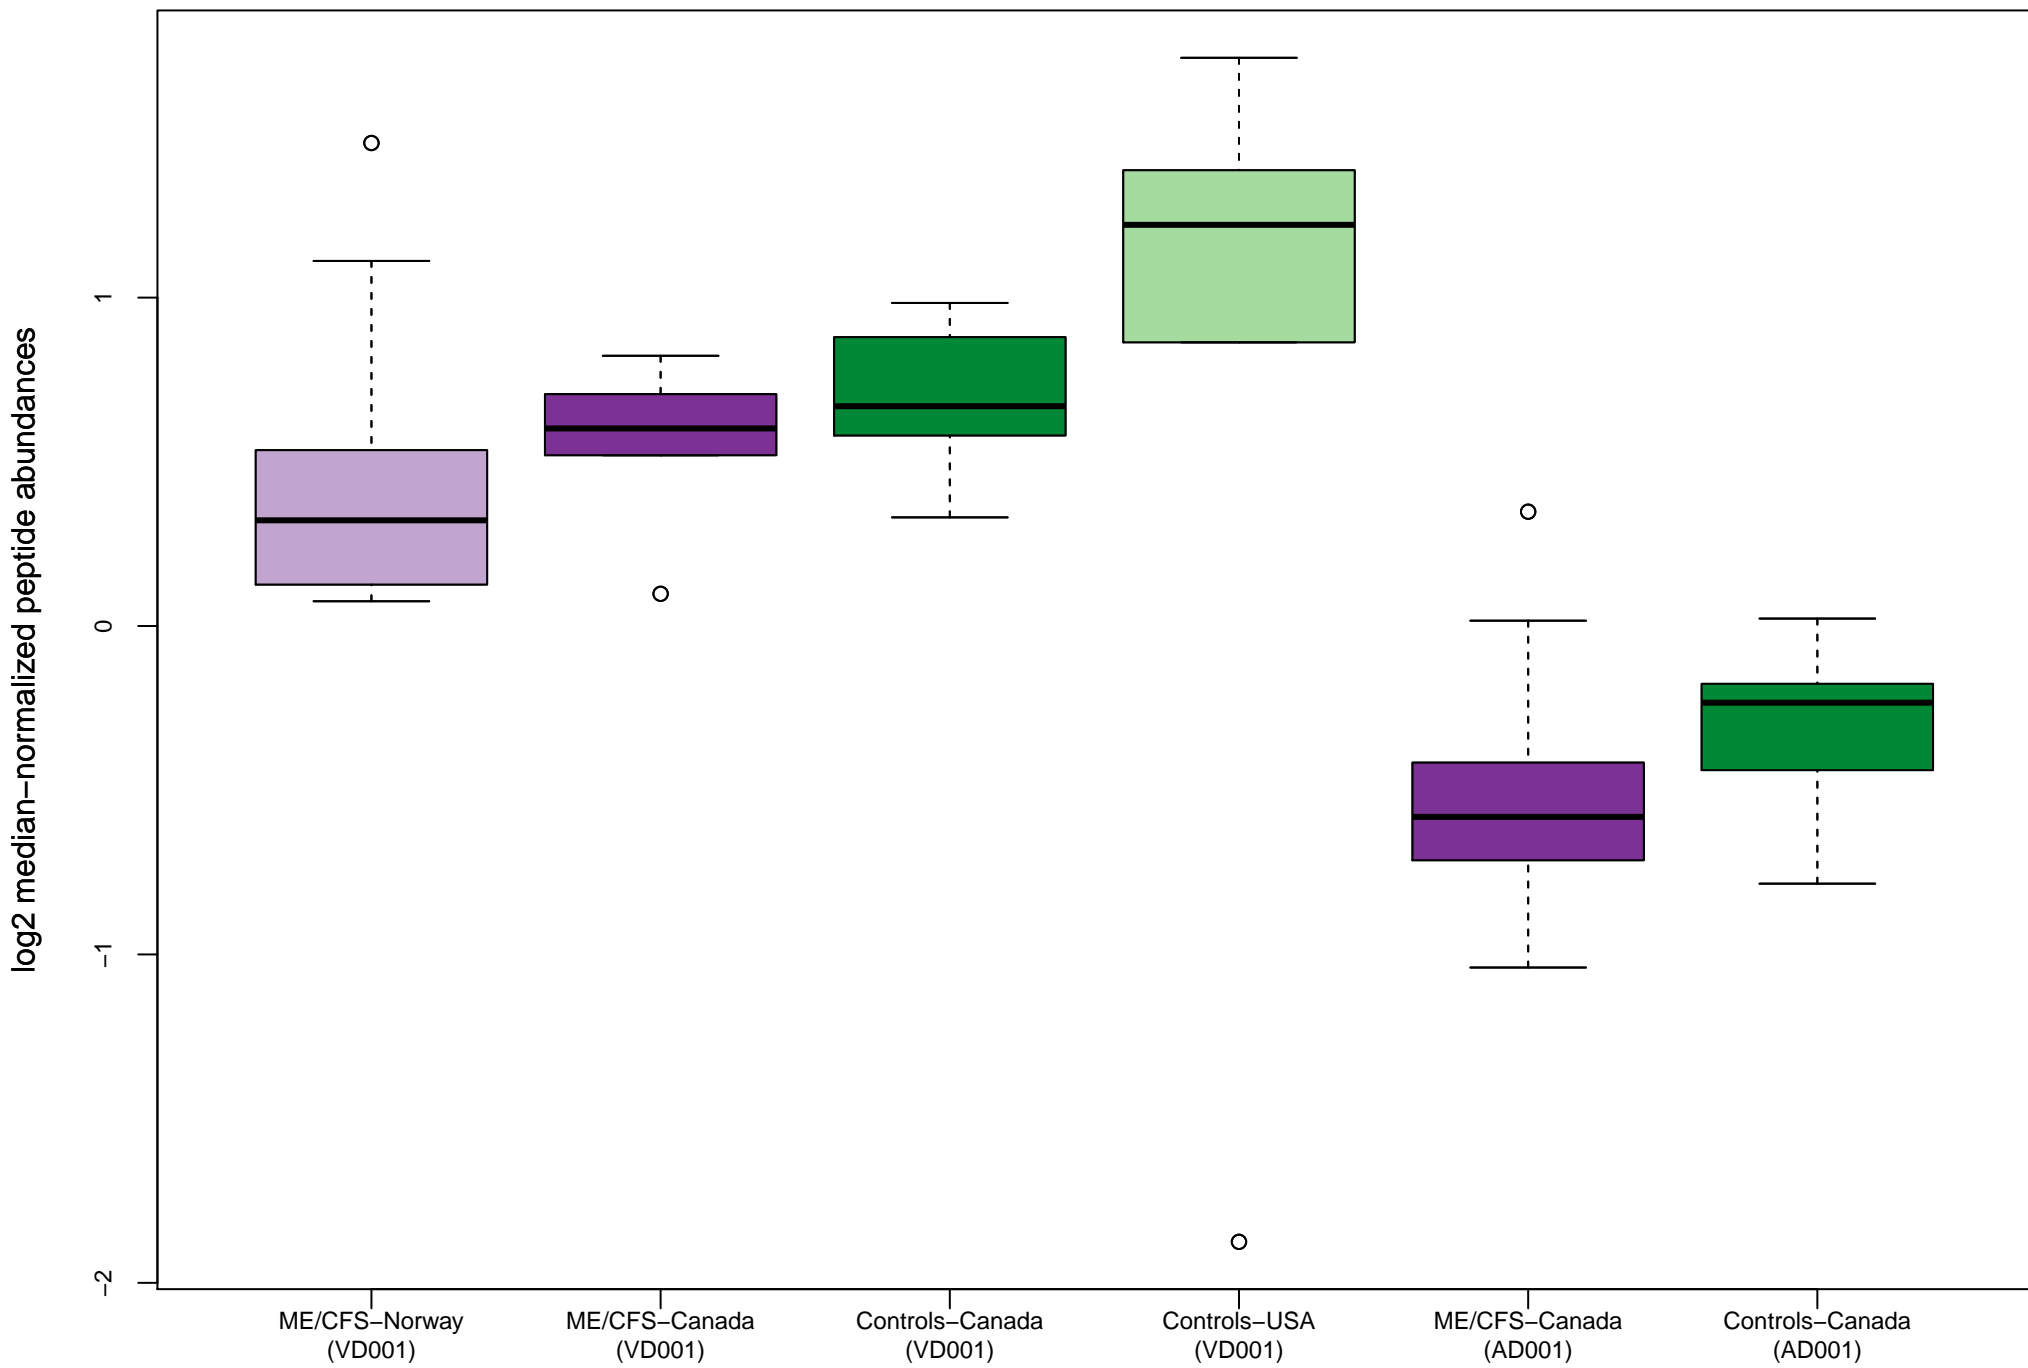

# VFAPRYLSVASG

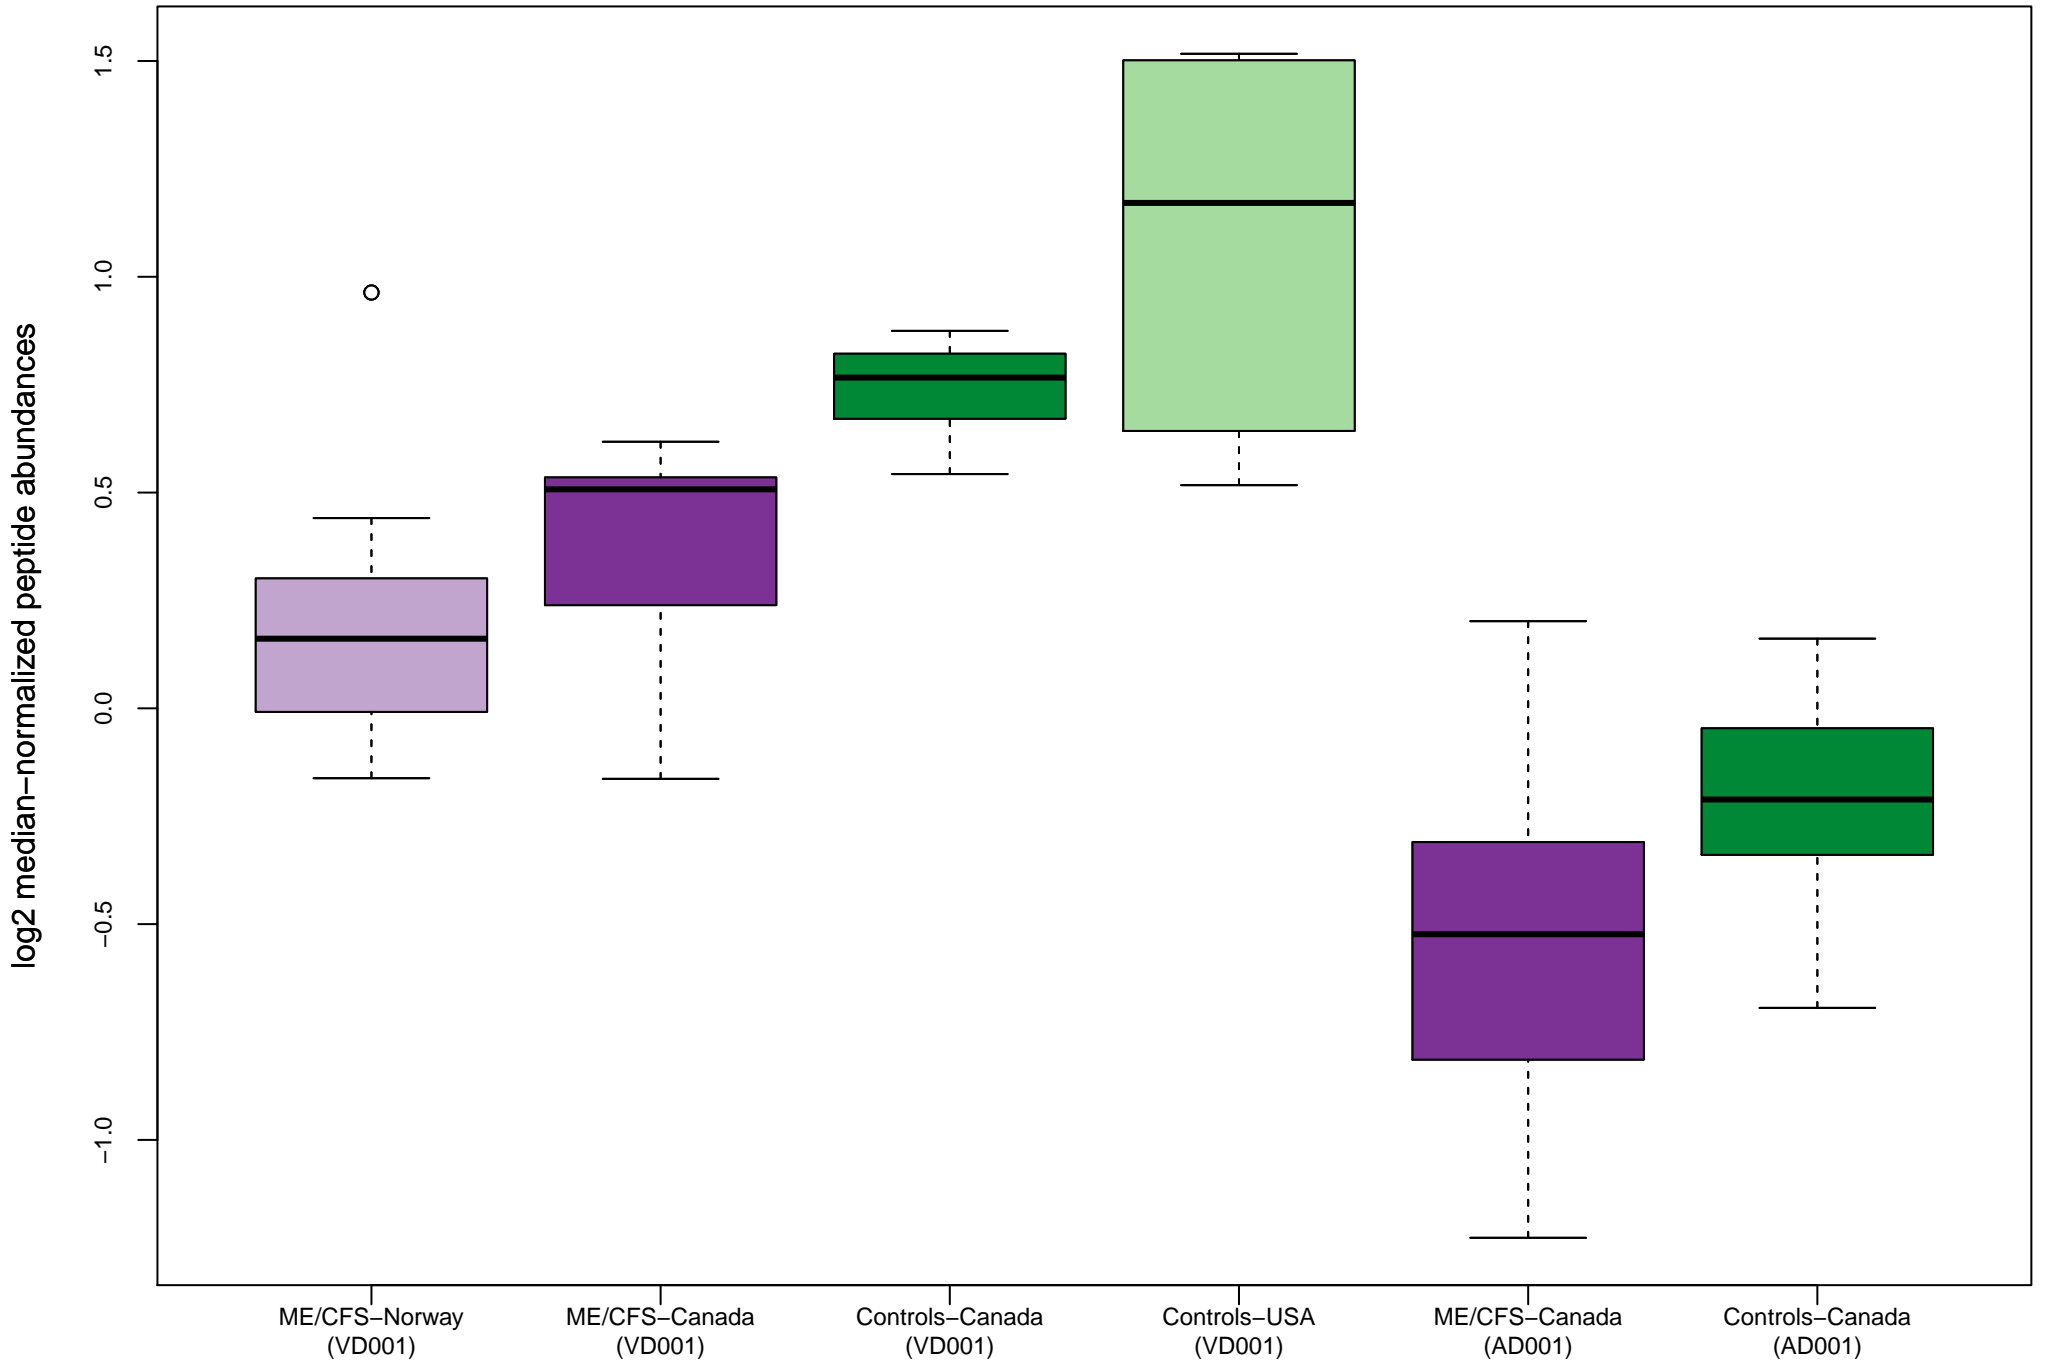

# VFGKAFLSVLSG

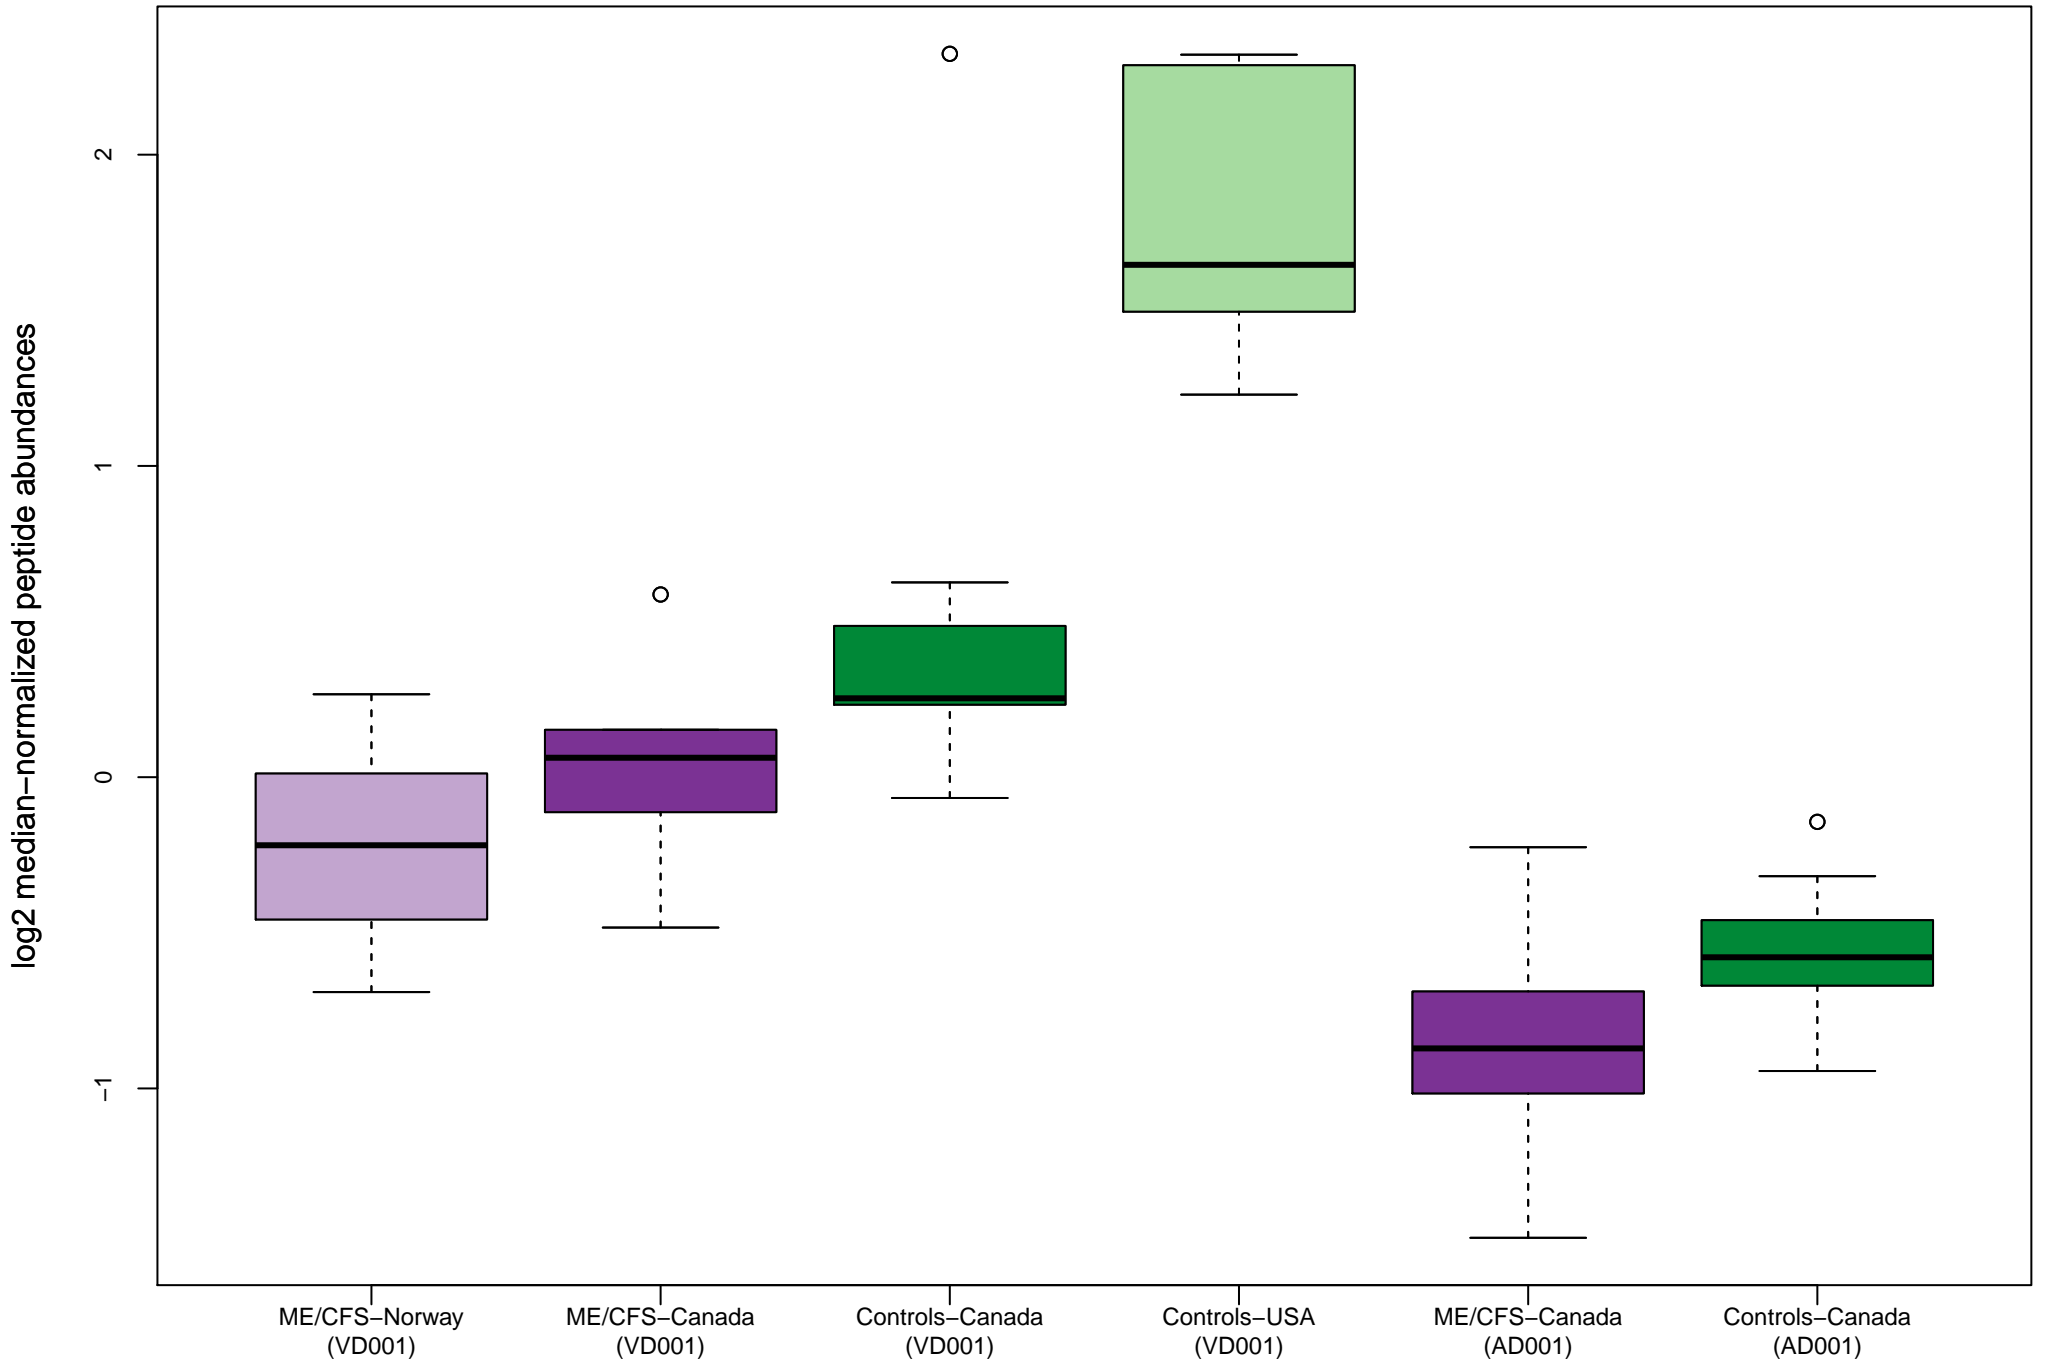

# VFNRWVFRYKVA

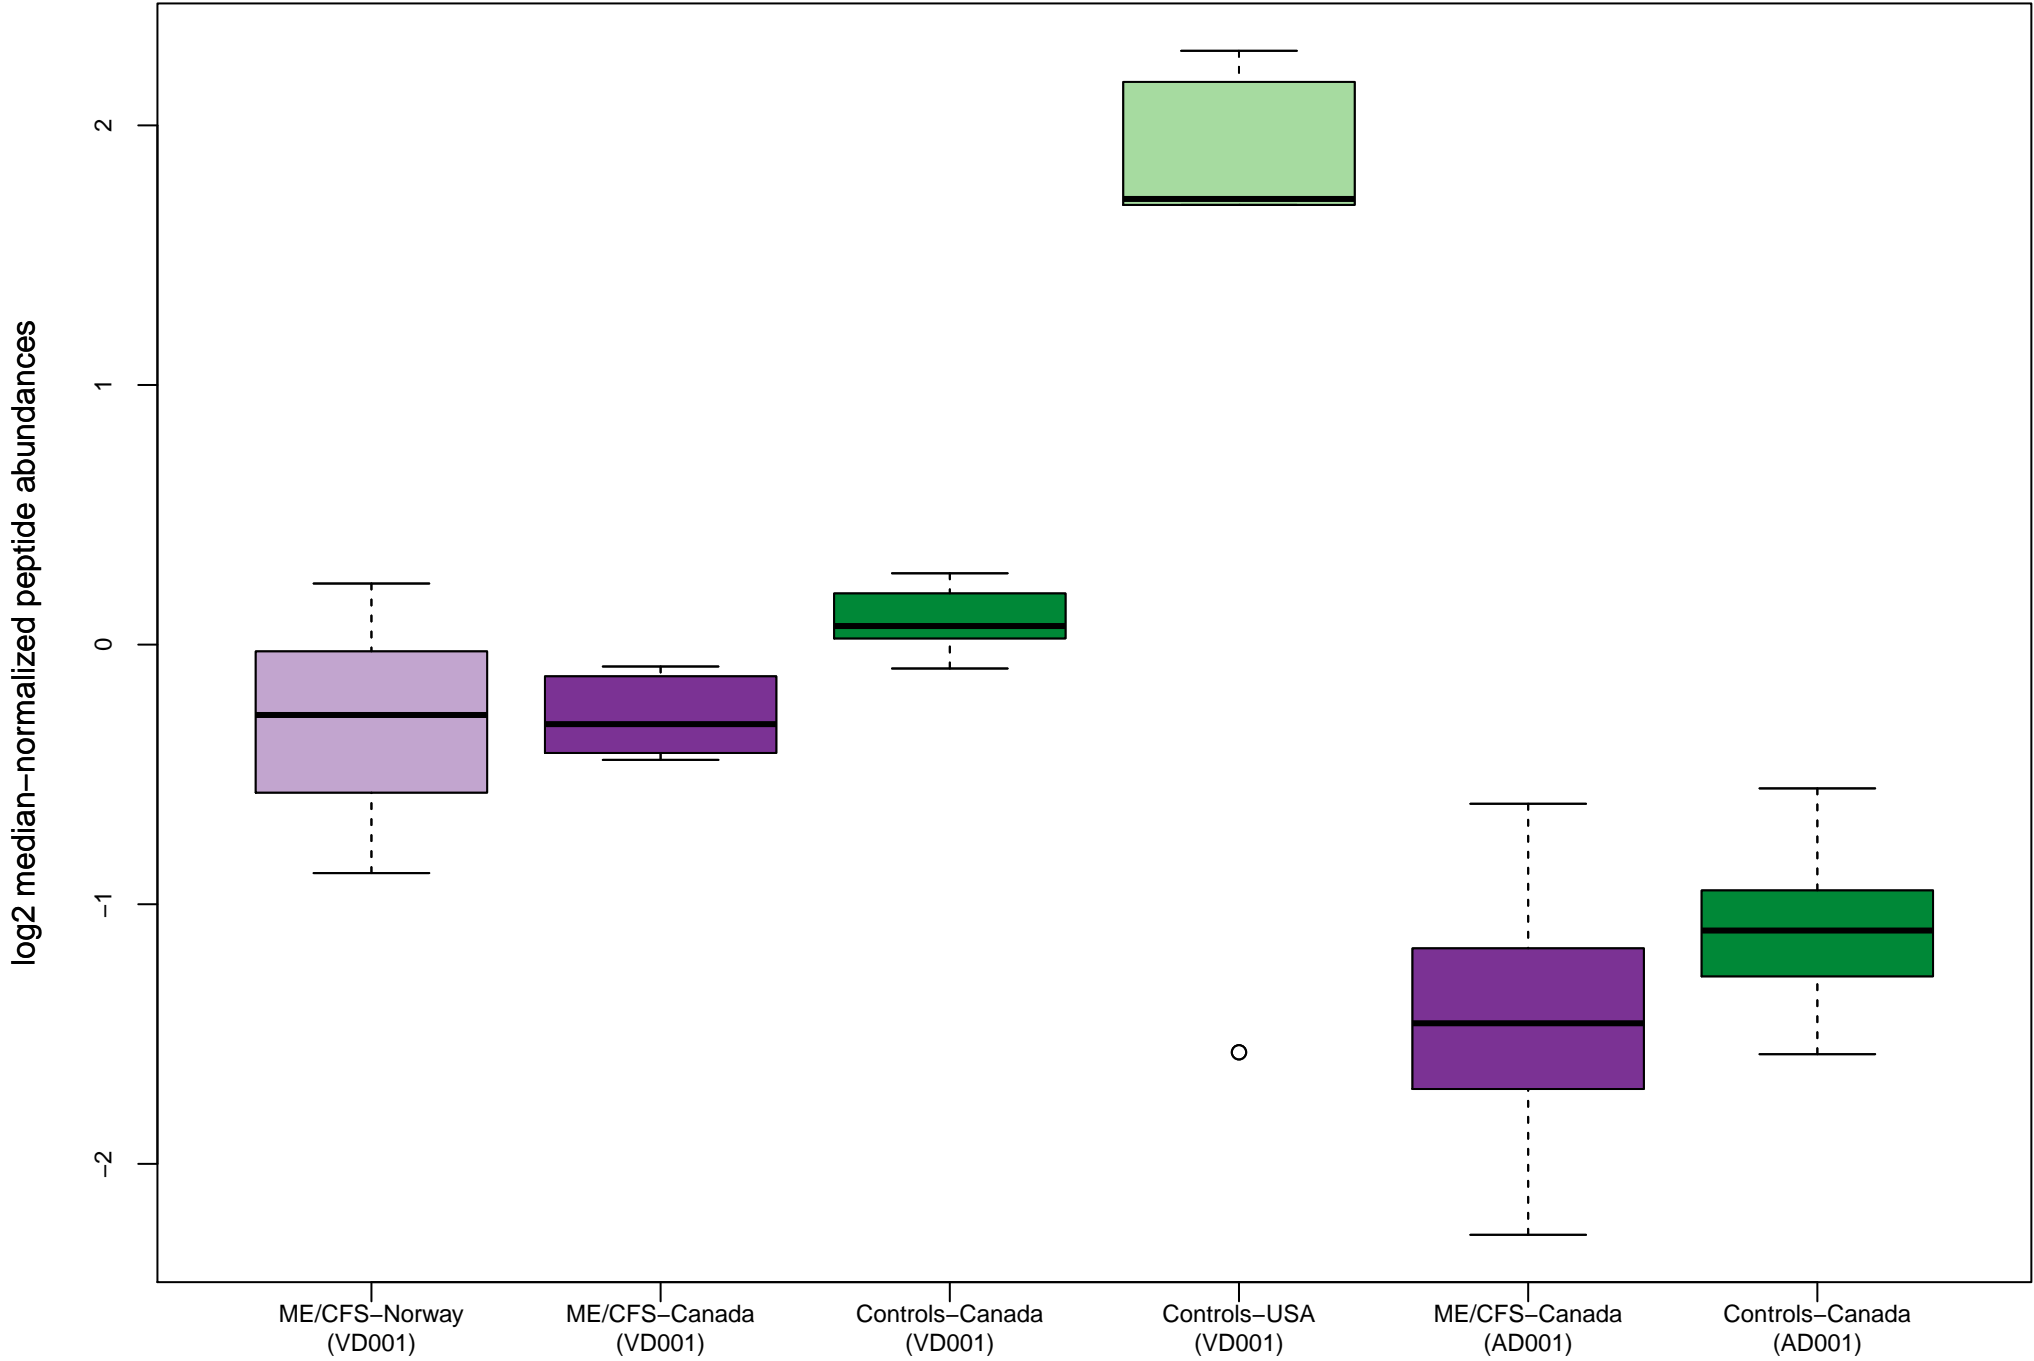

# VFWLRYWVALGR

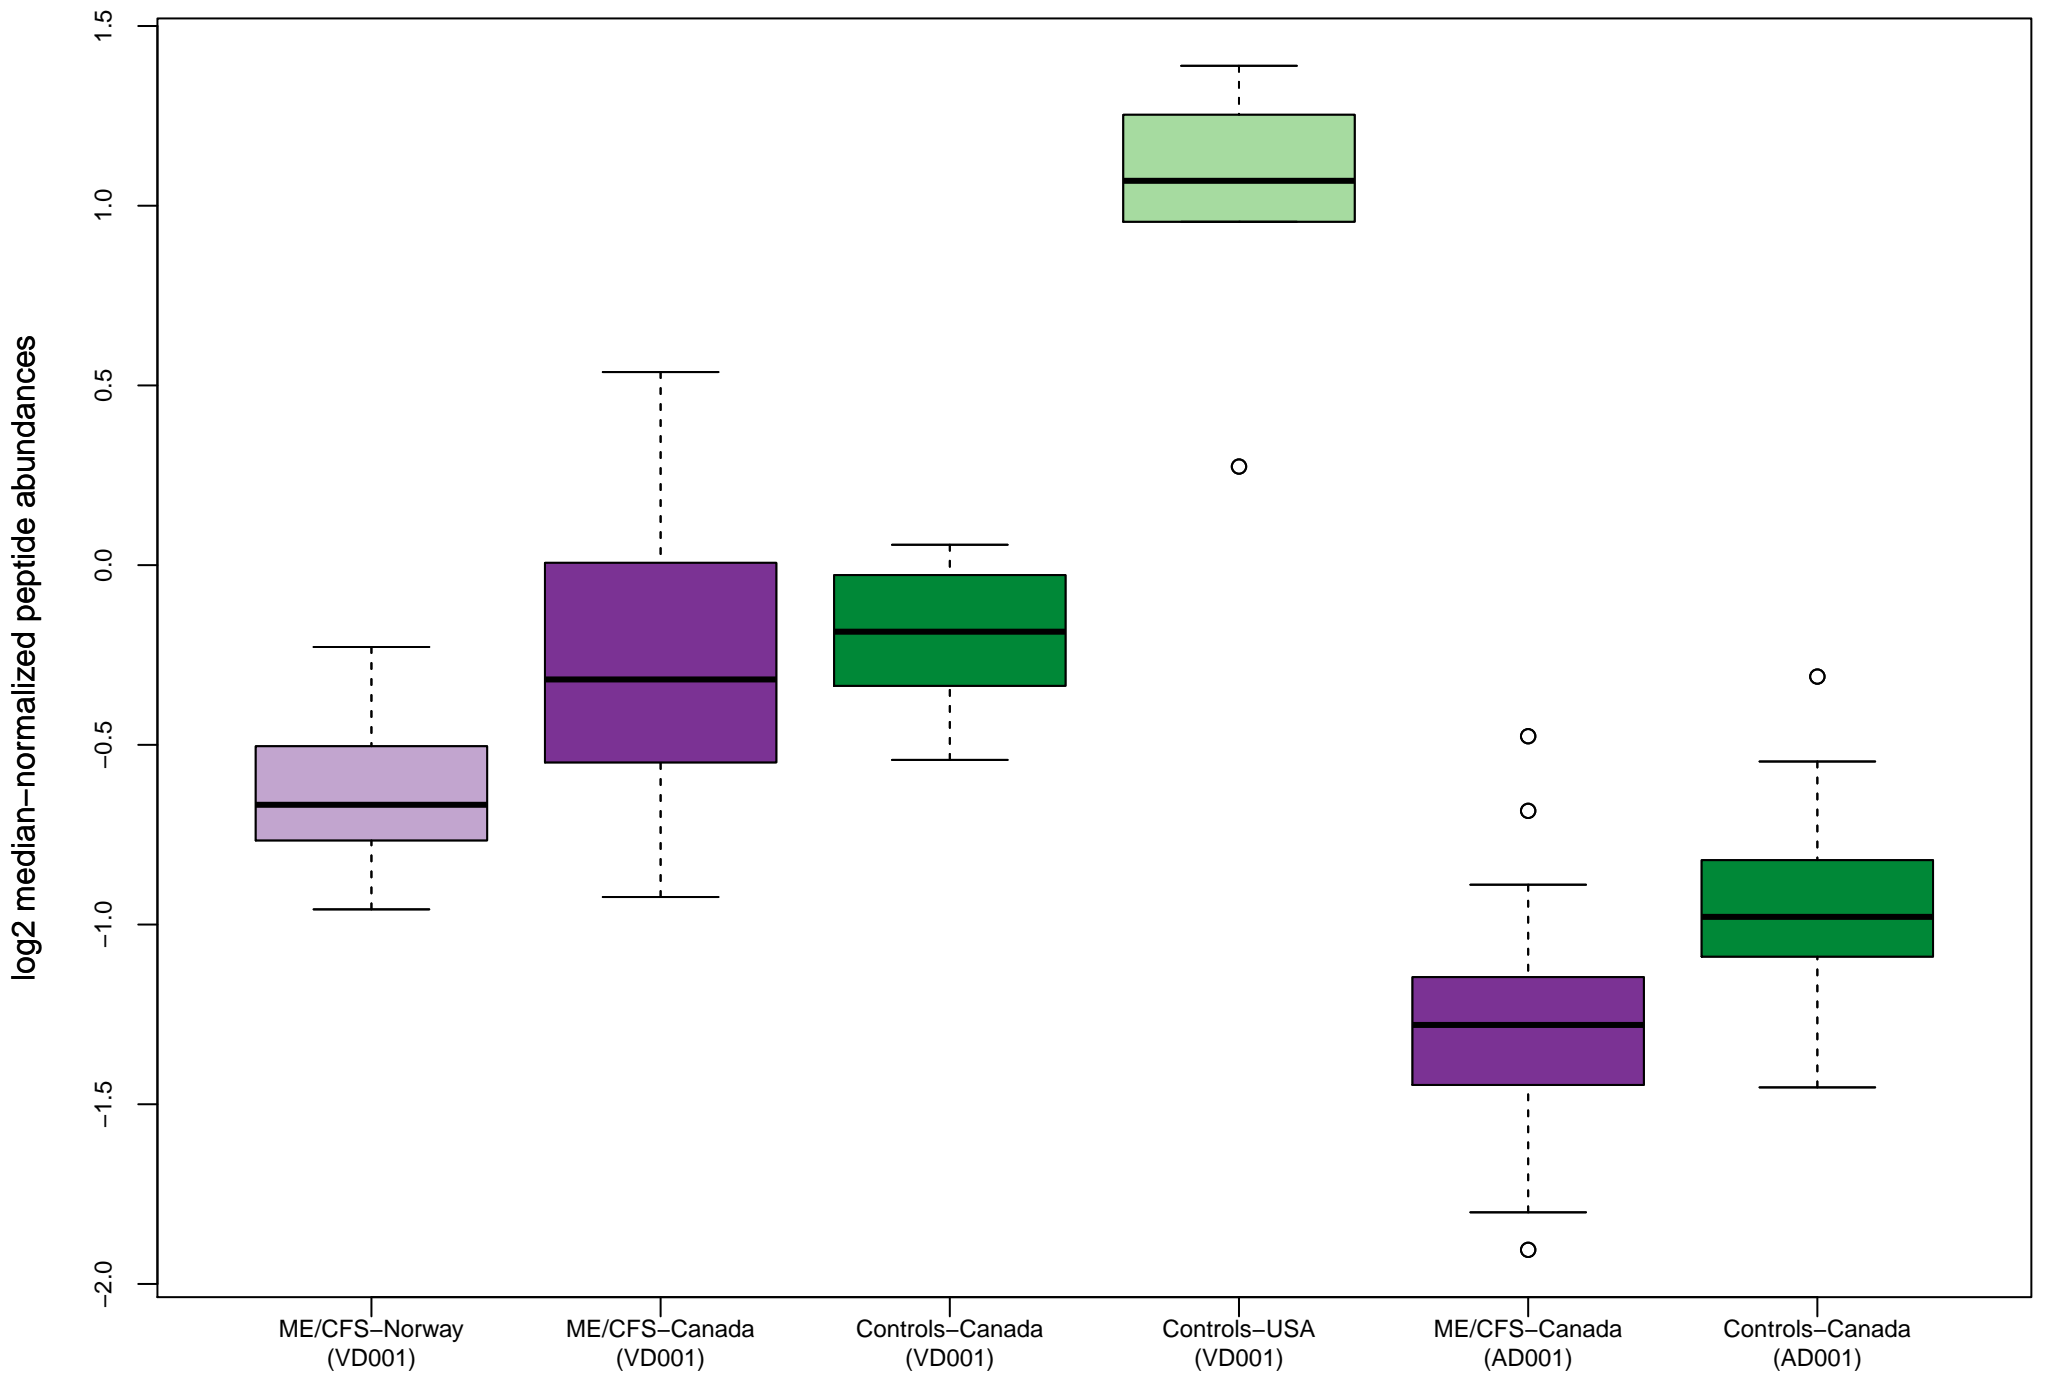

# VFYRKREWVVS

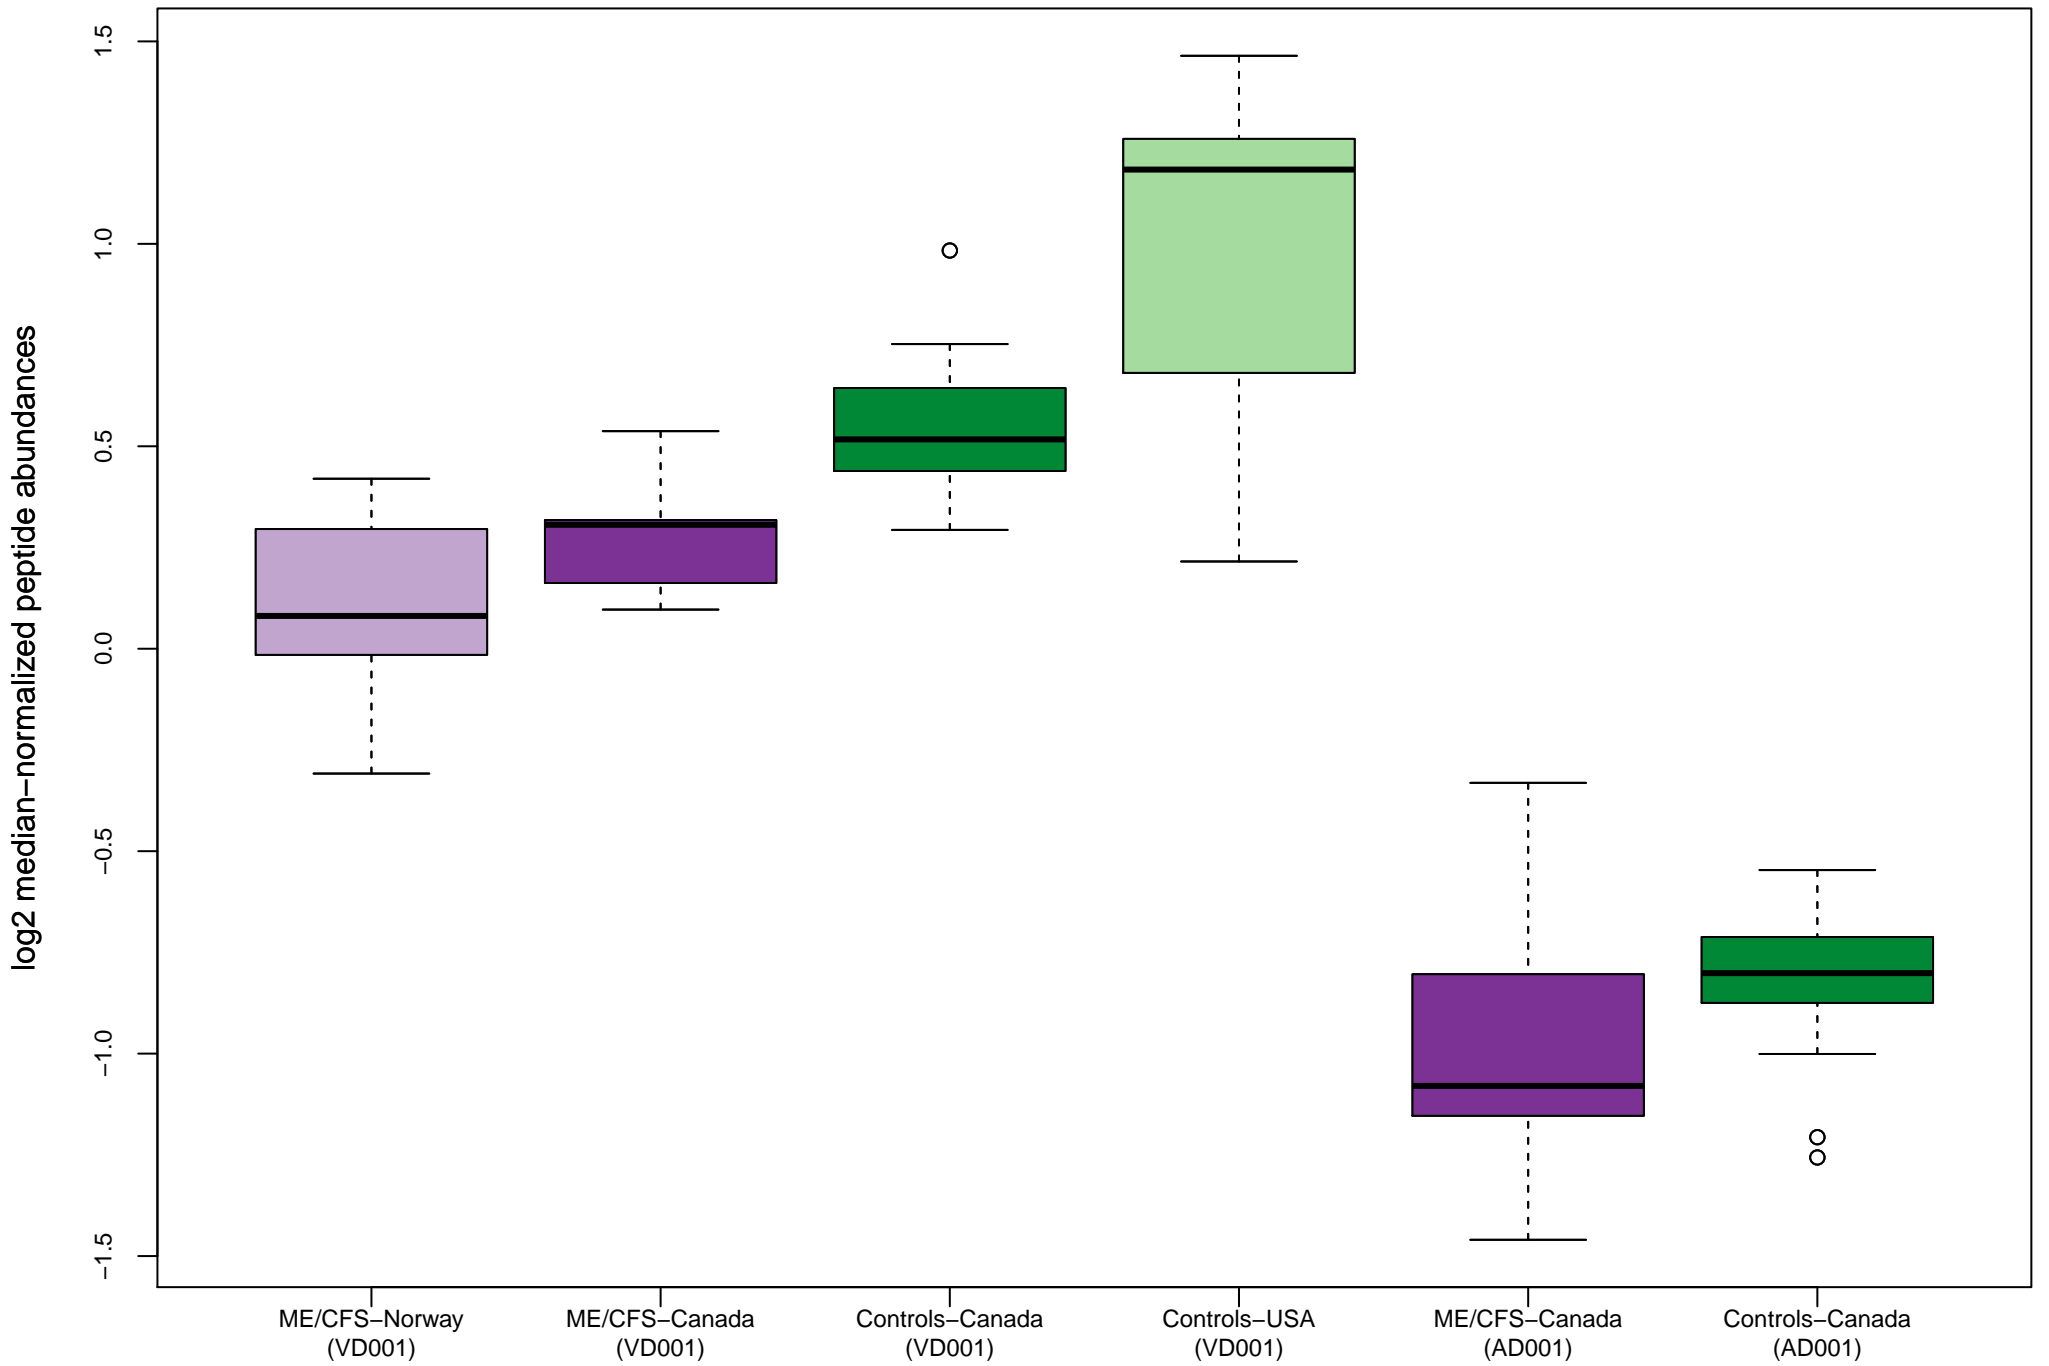



# VGWFRVLGALS

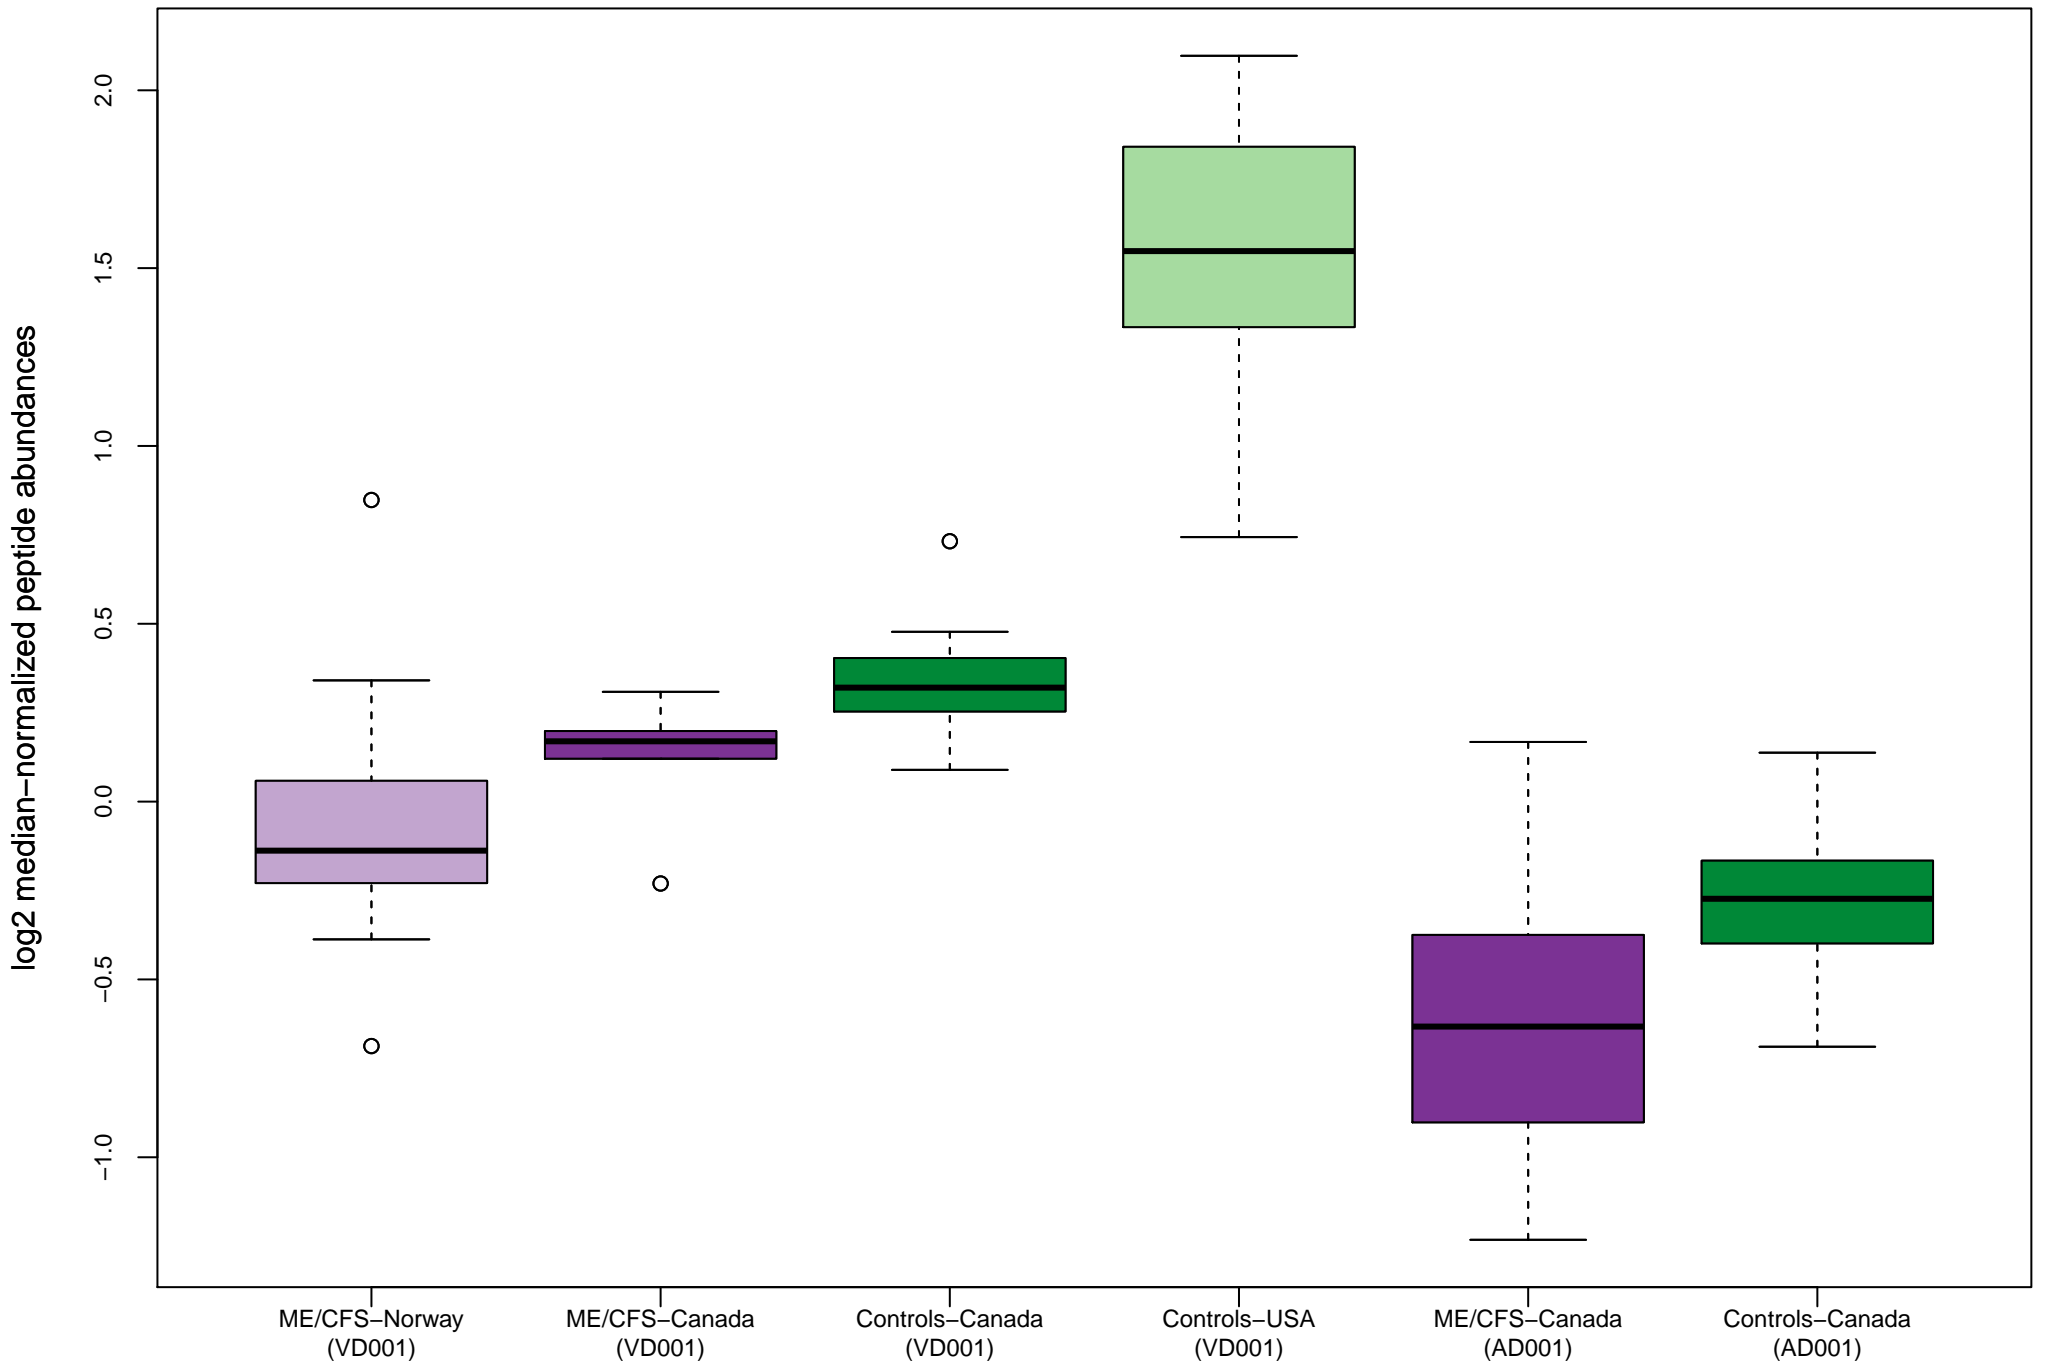

# VGWNWLRYWNAL

log2 median-normalized peptide abundances

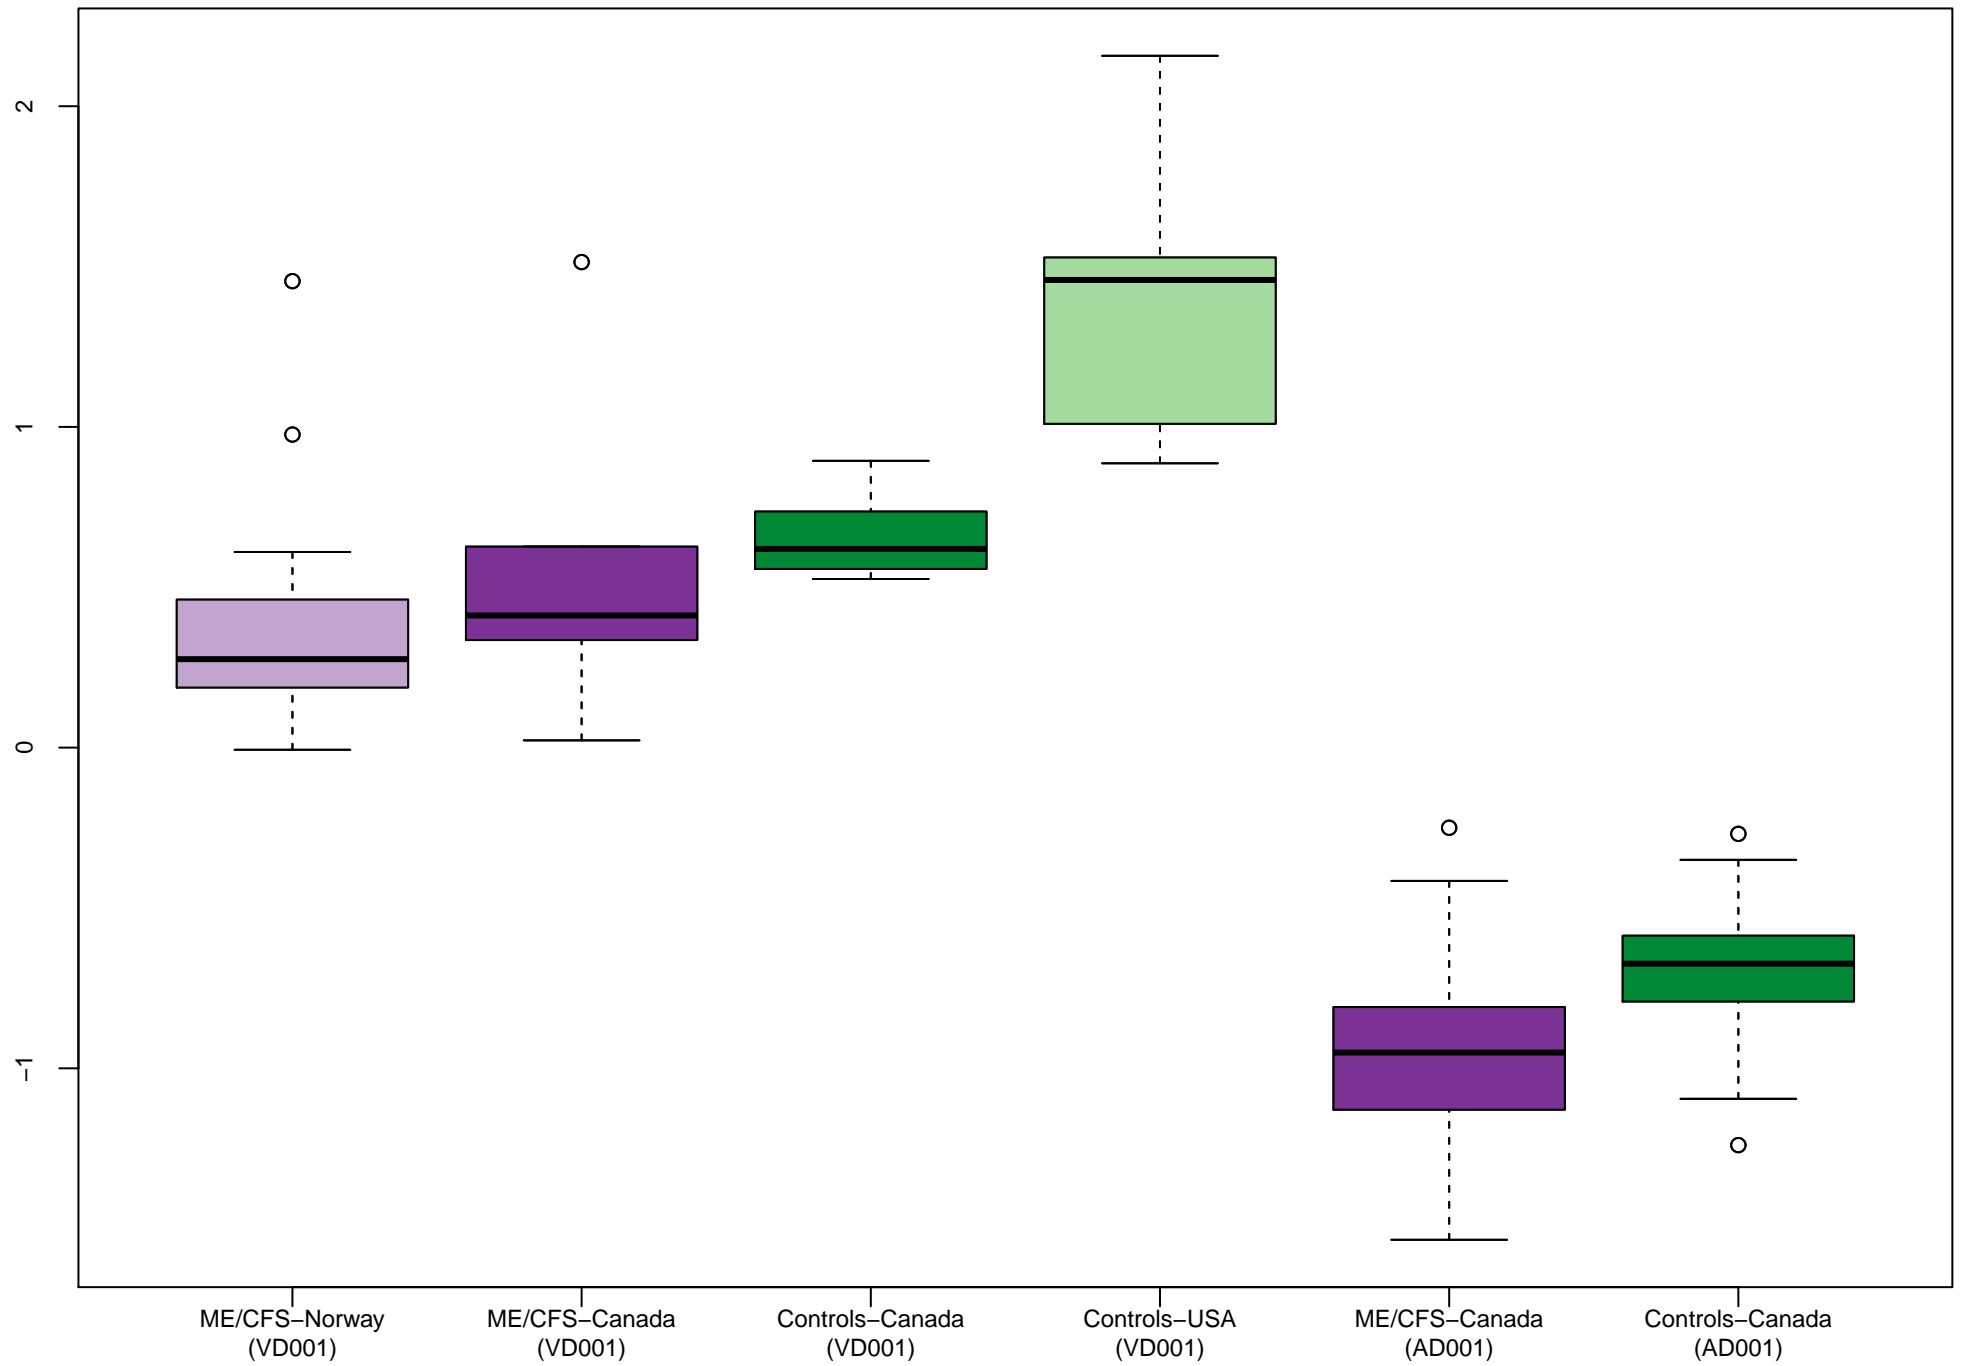

# VLWGLSFRNVLS

log2 median-normalized peptide abundances

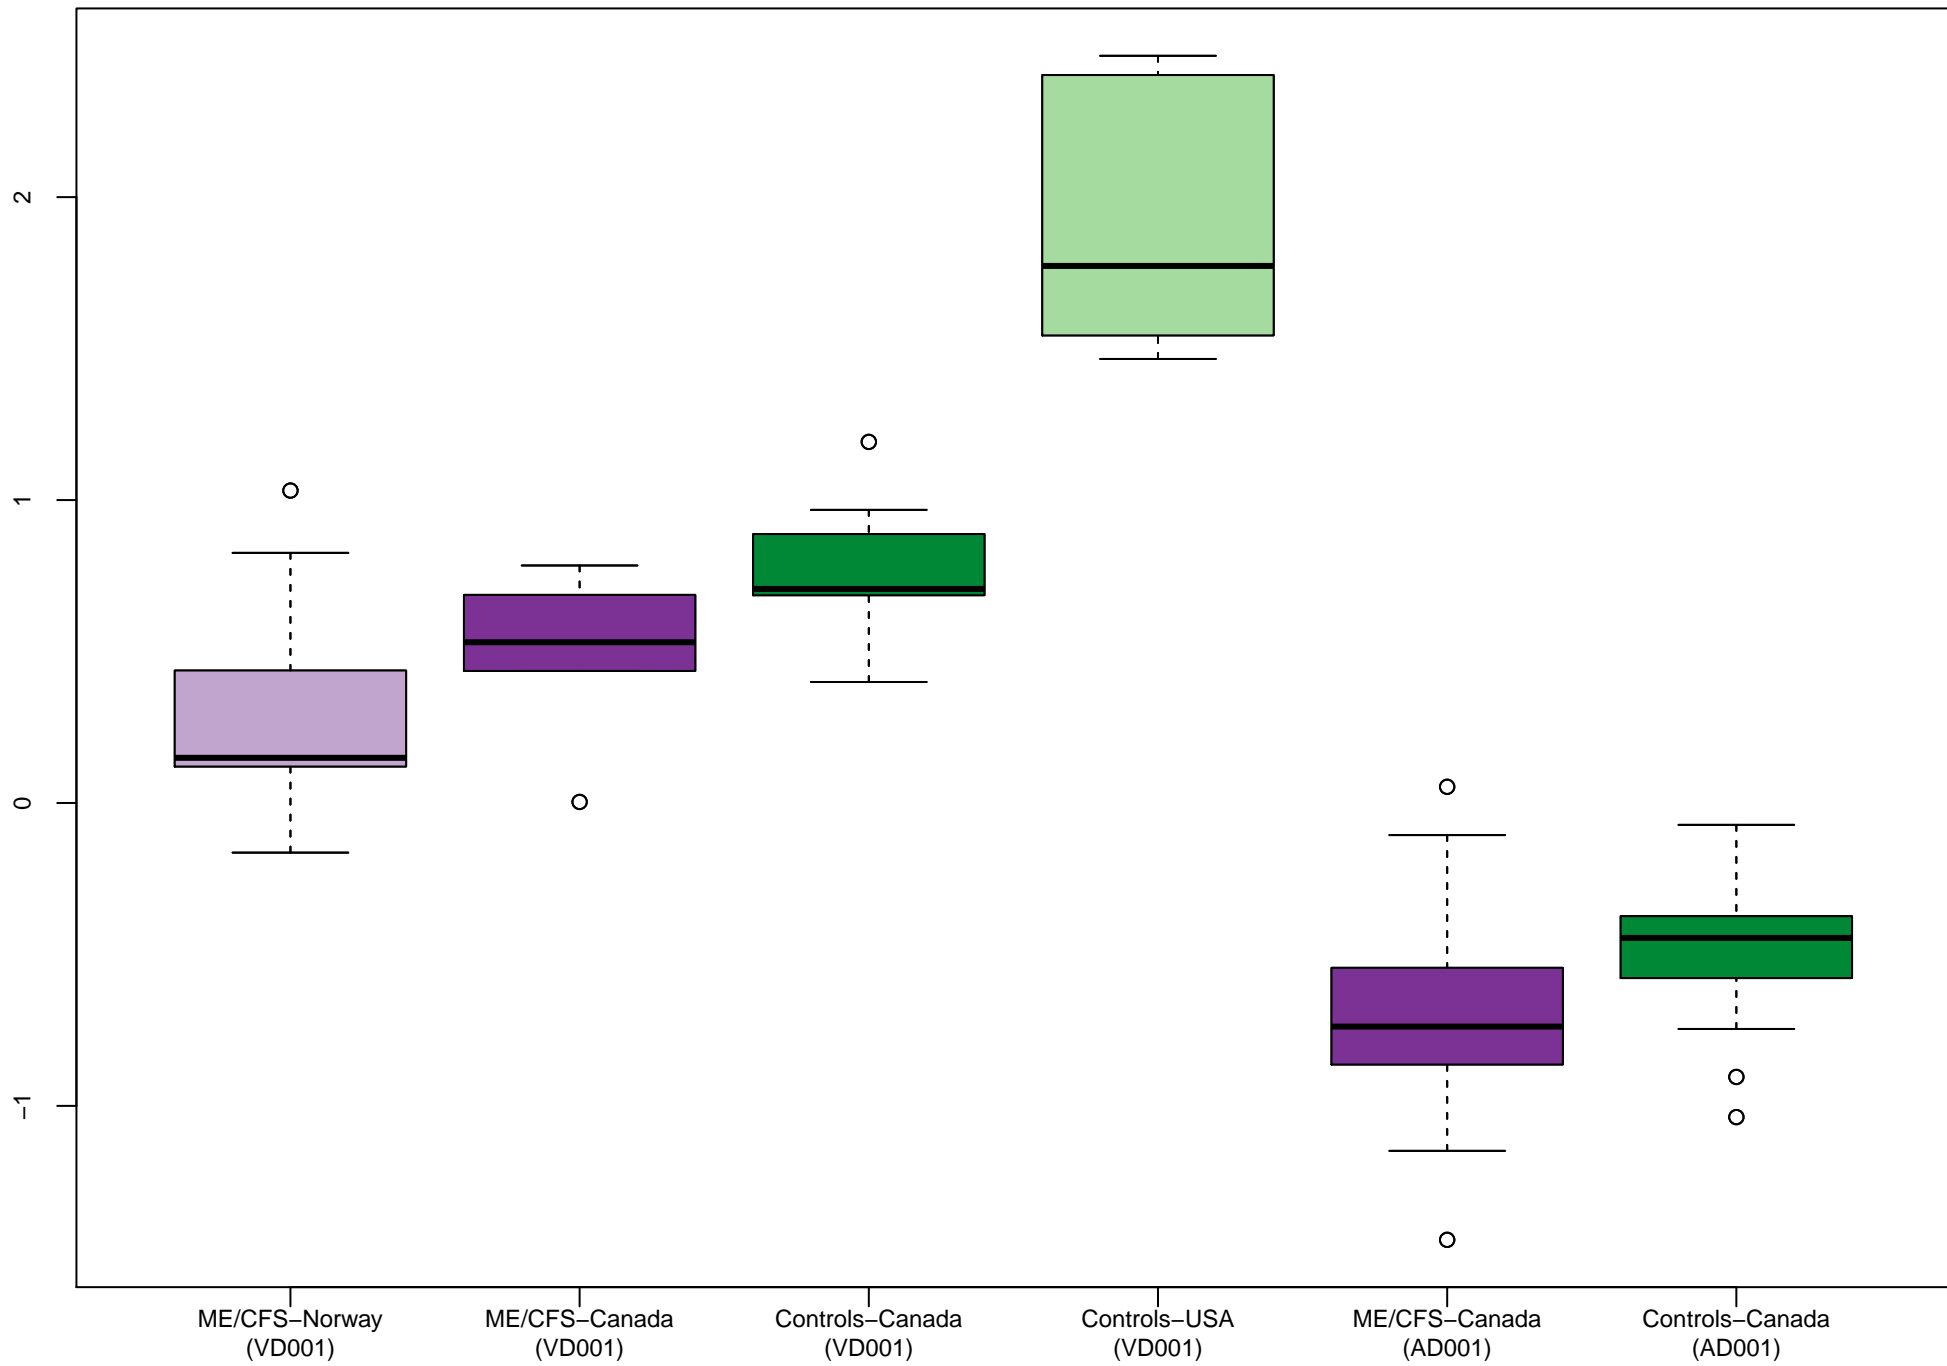

# VNAFRRPVLGVL

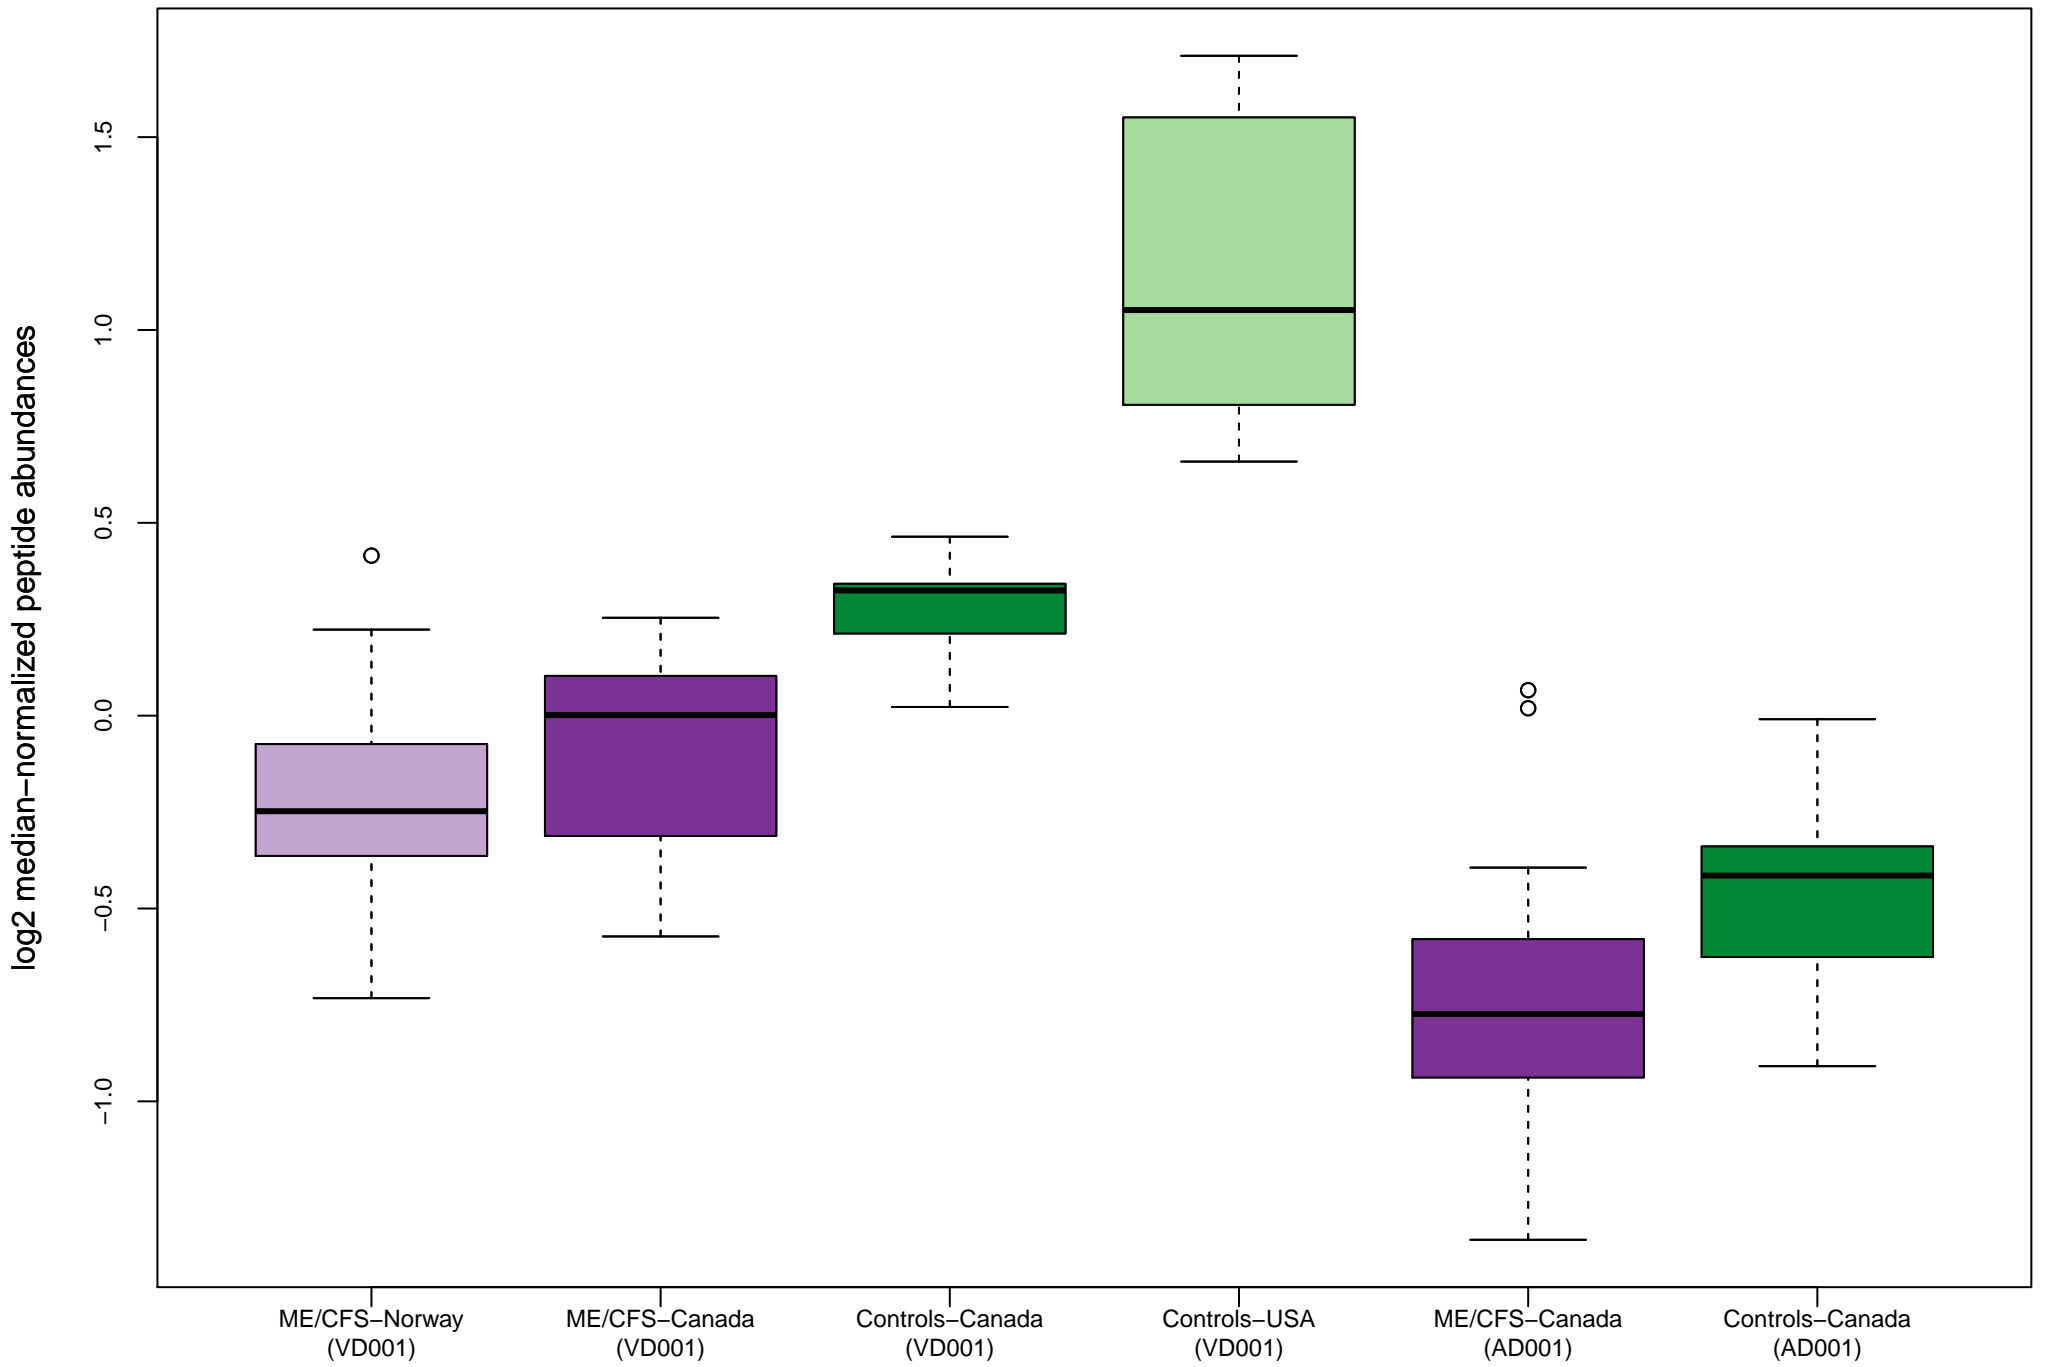

# VNGRNFWLSGVA

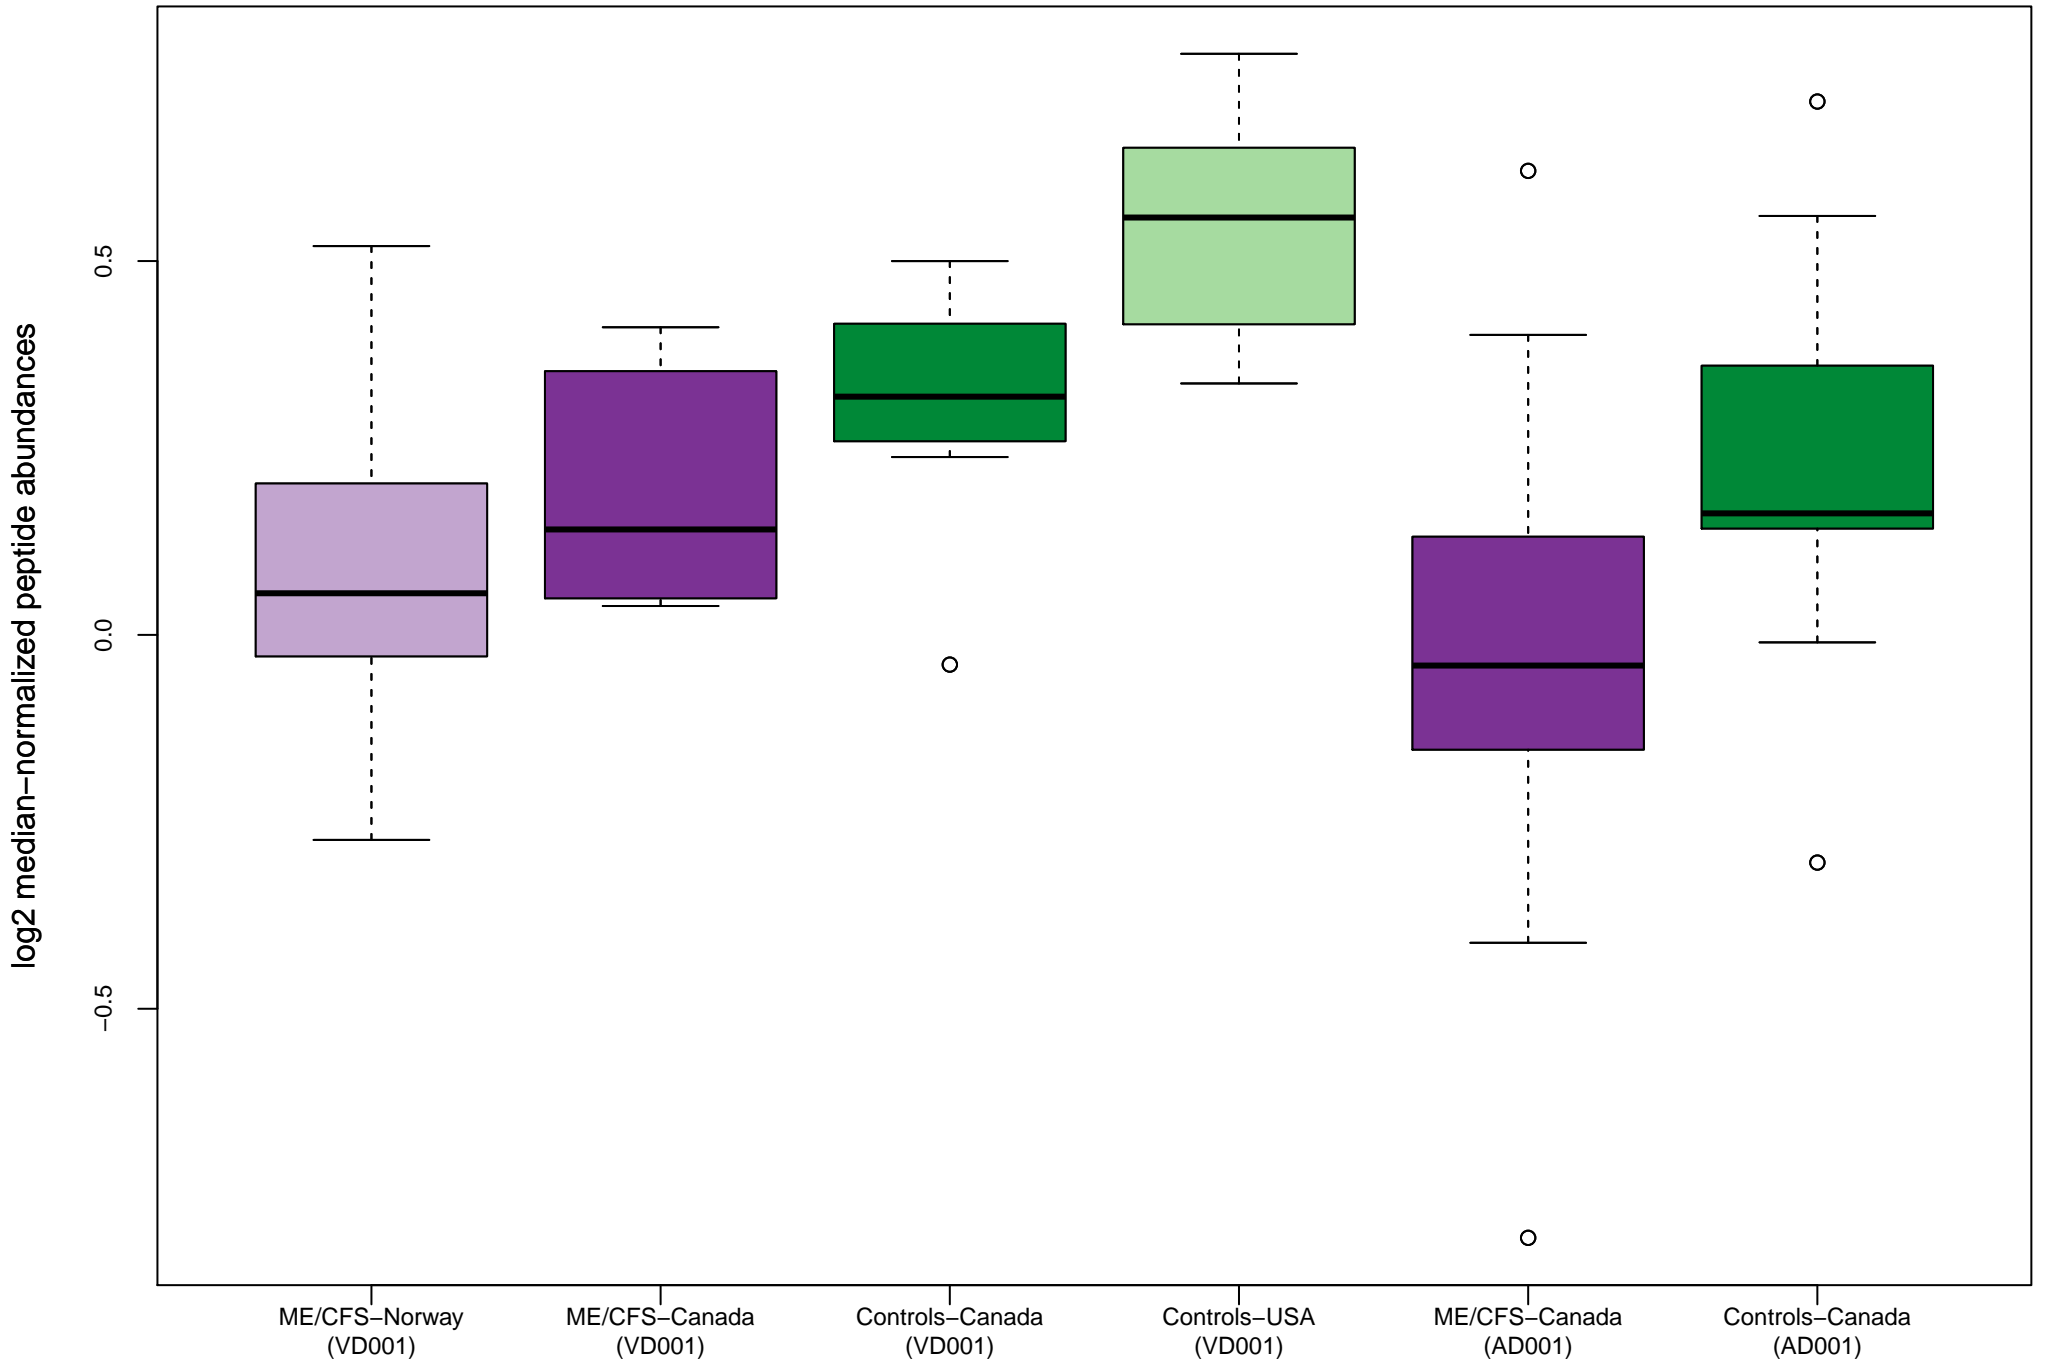

# VNRVSWLGALSG

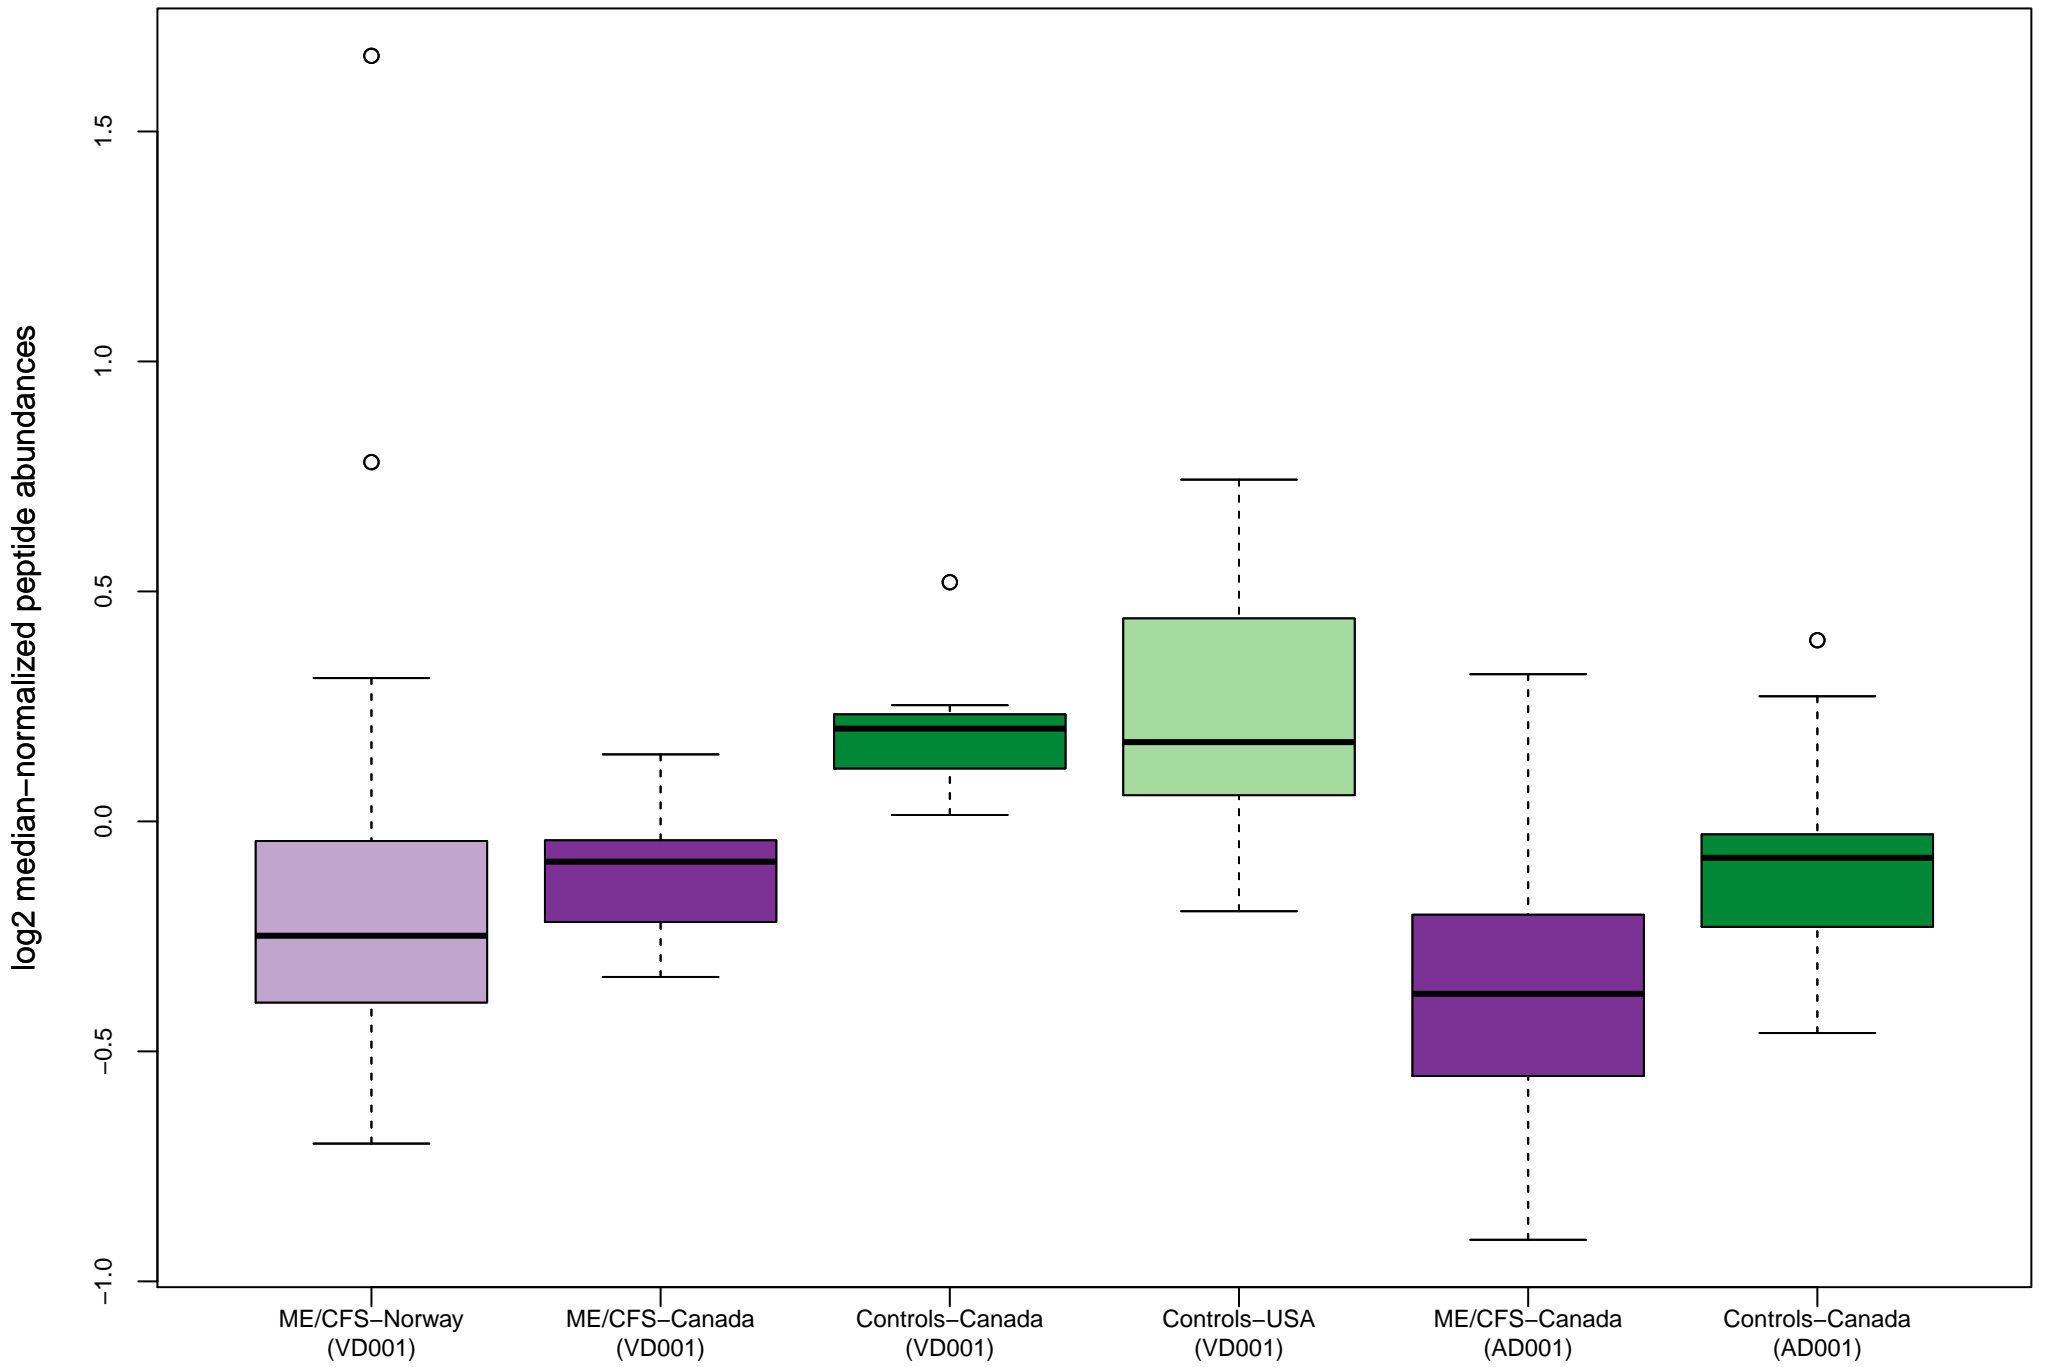

# VPFRYWRLSVLS

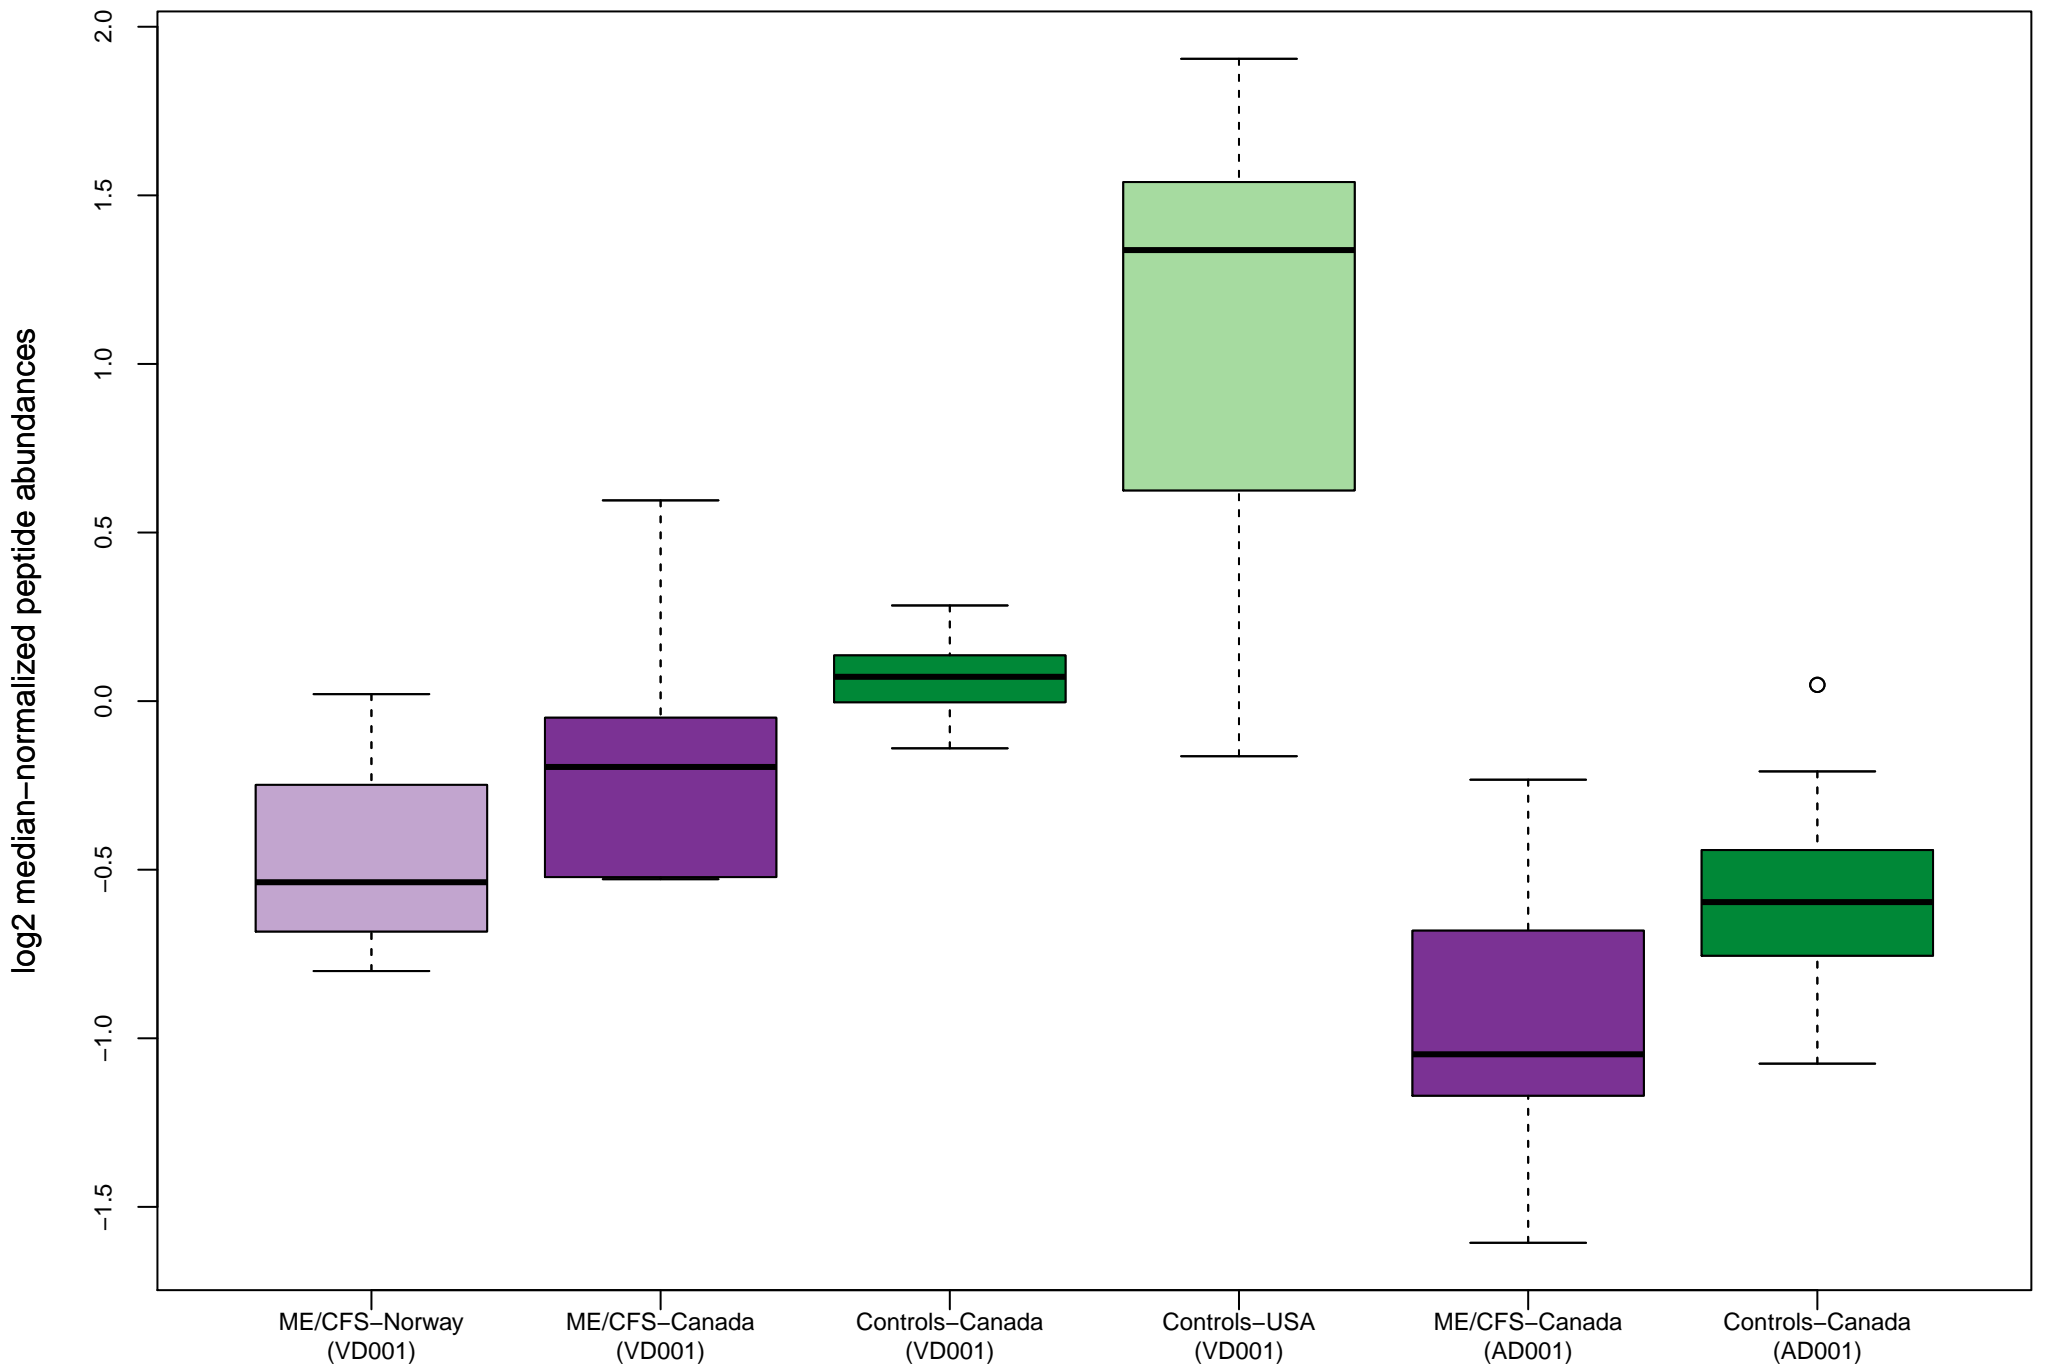

# VQYNFLGPWKVS

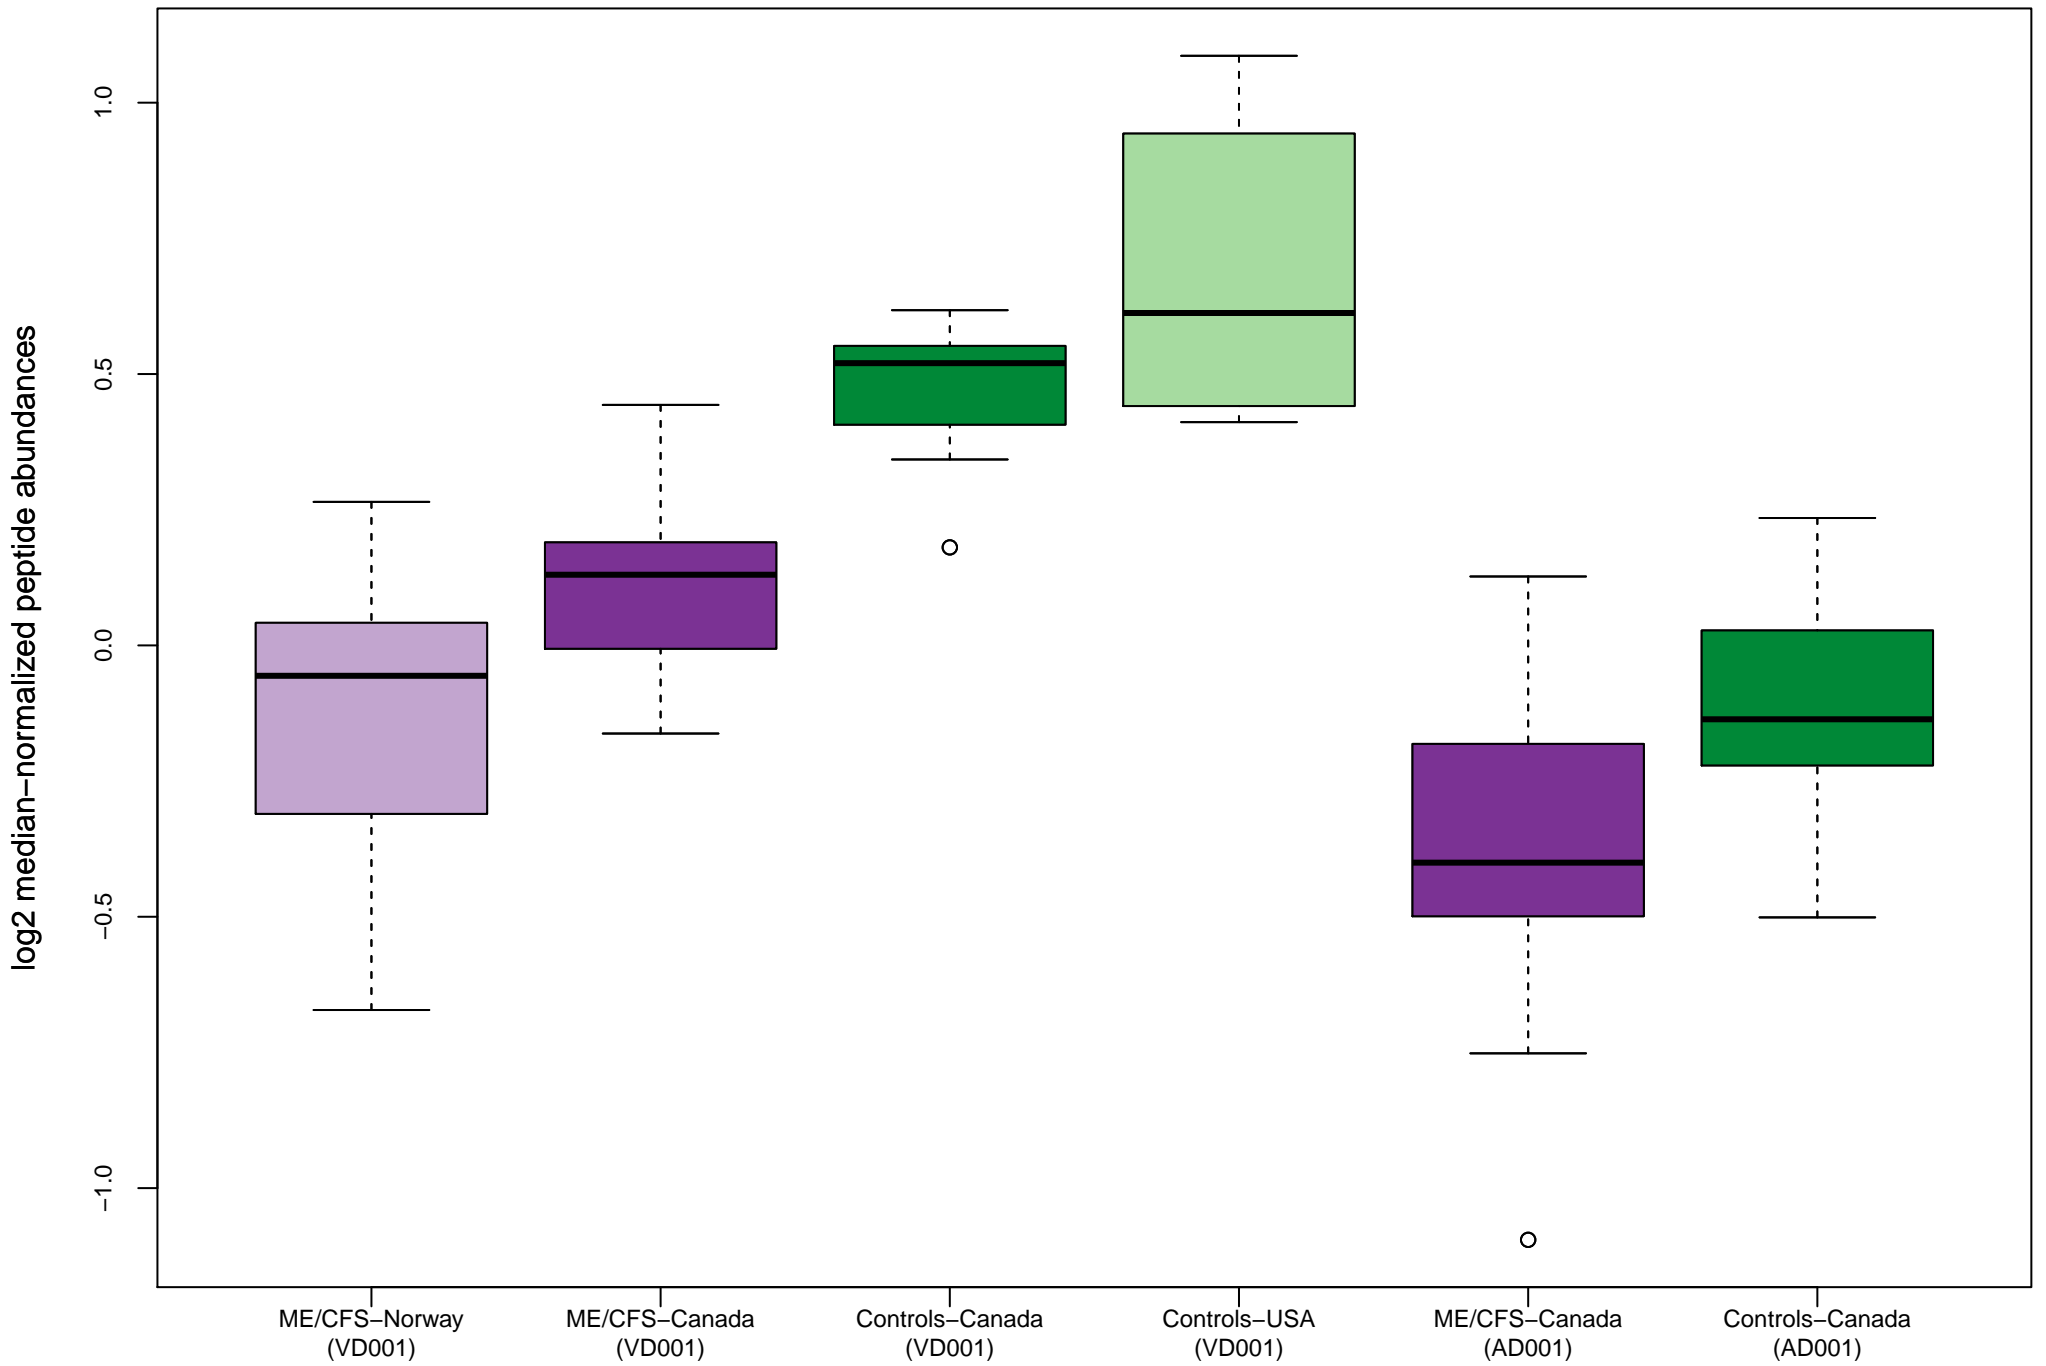



# VRFYWFKHVASG

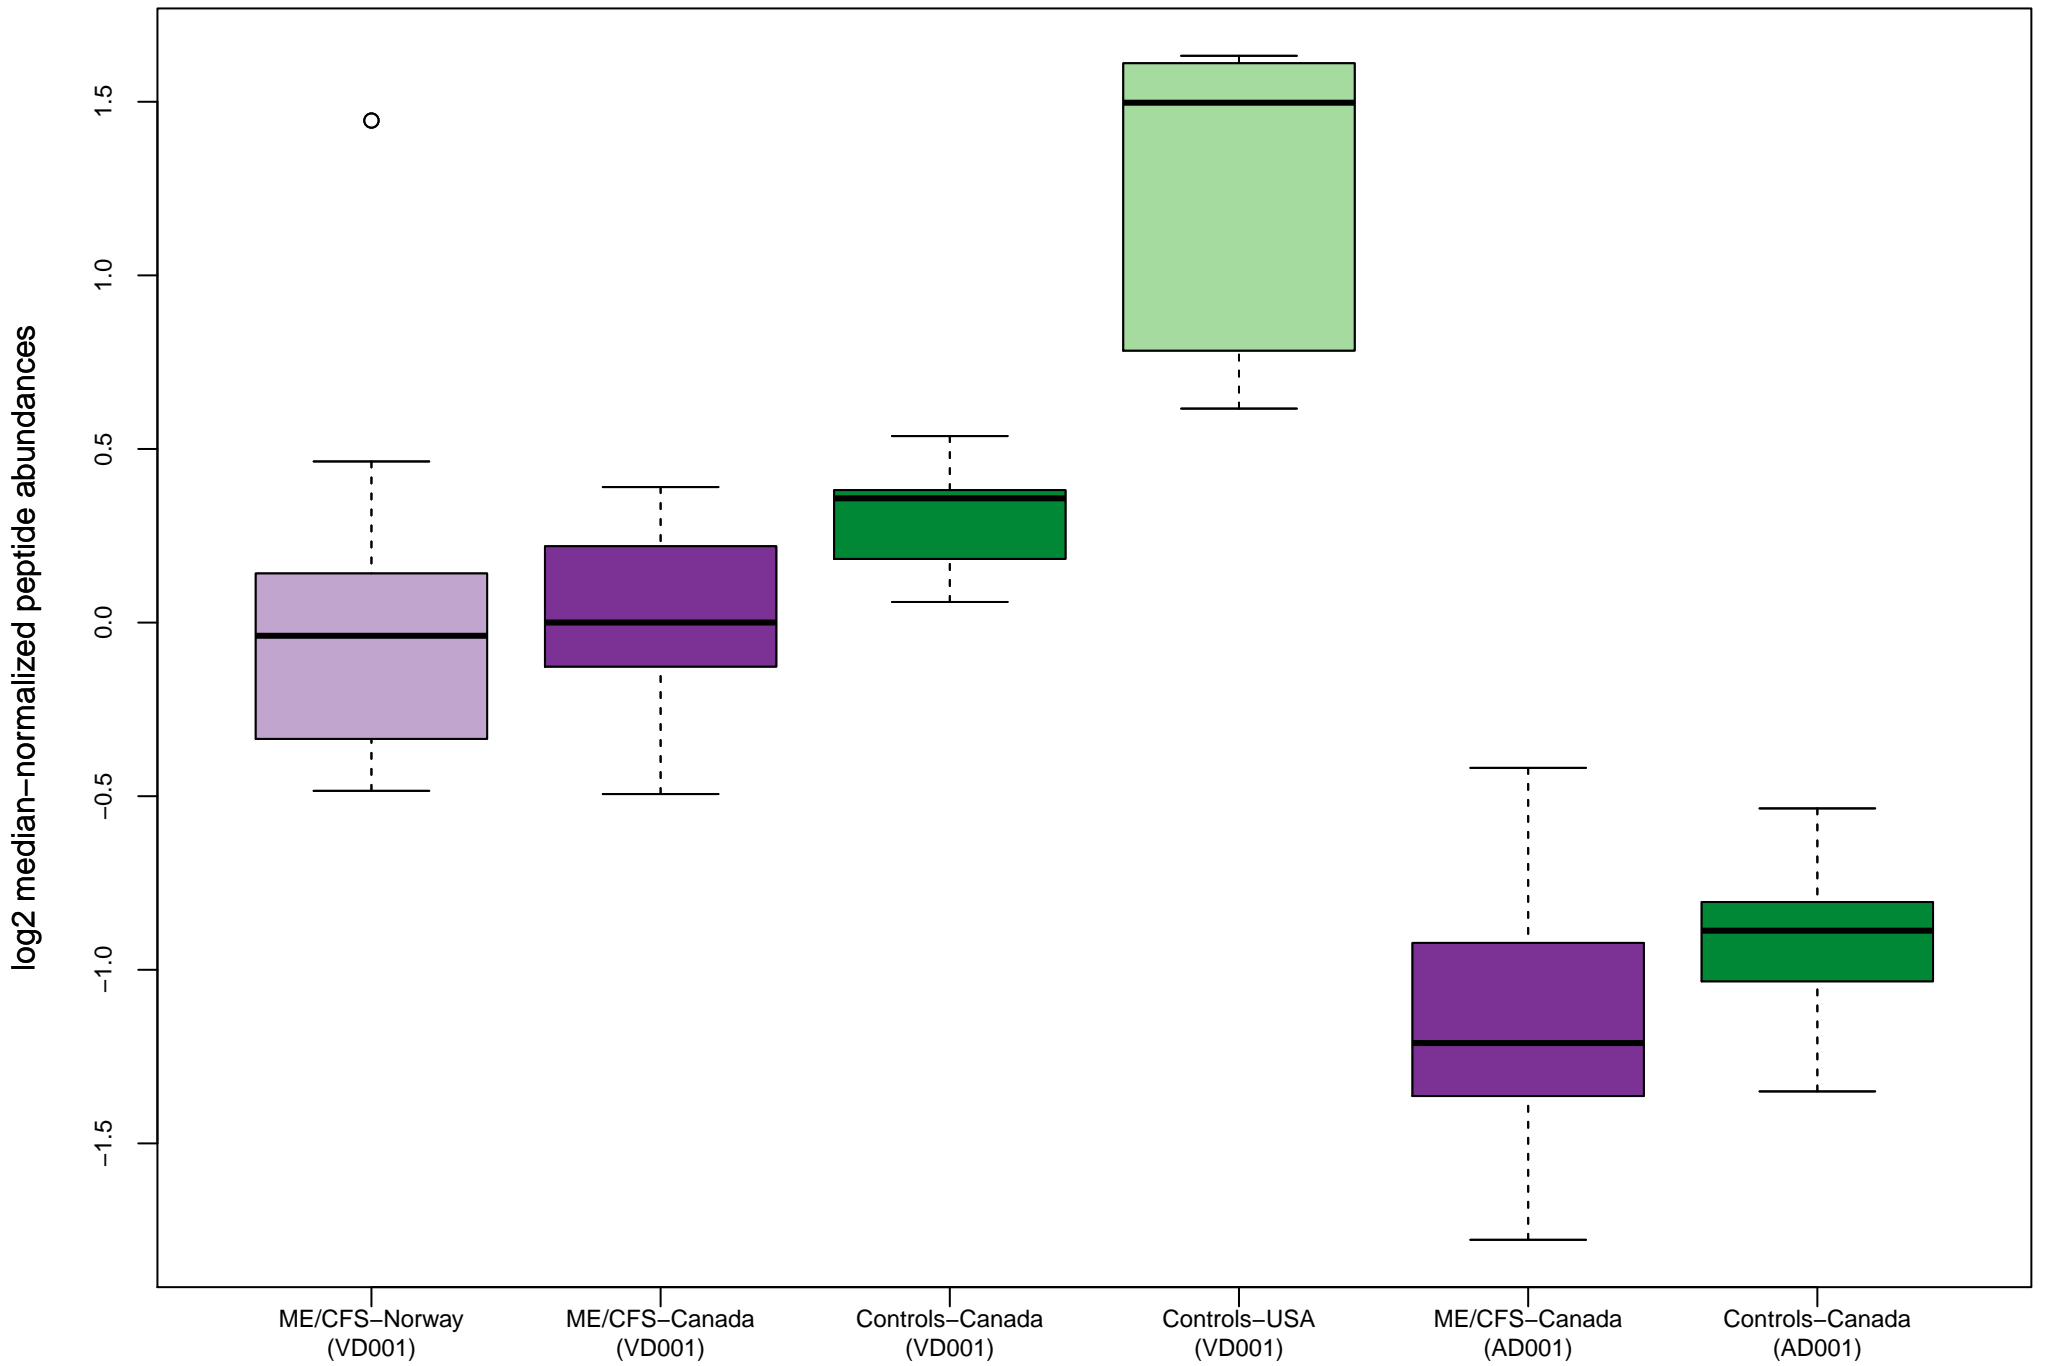

# VRLRWGYWHVLG

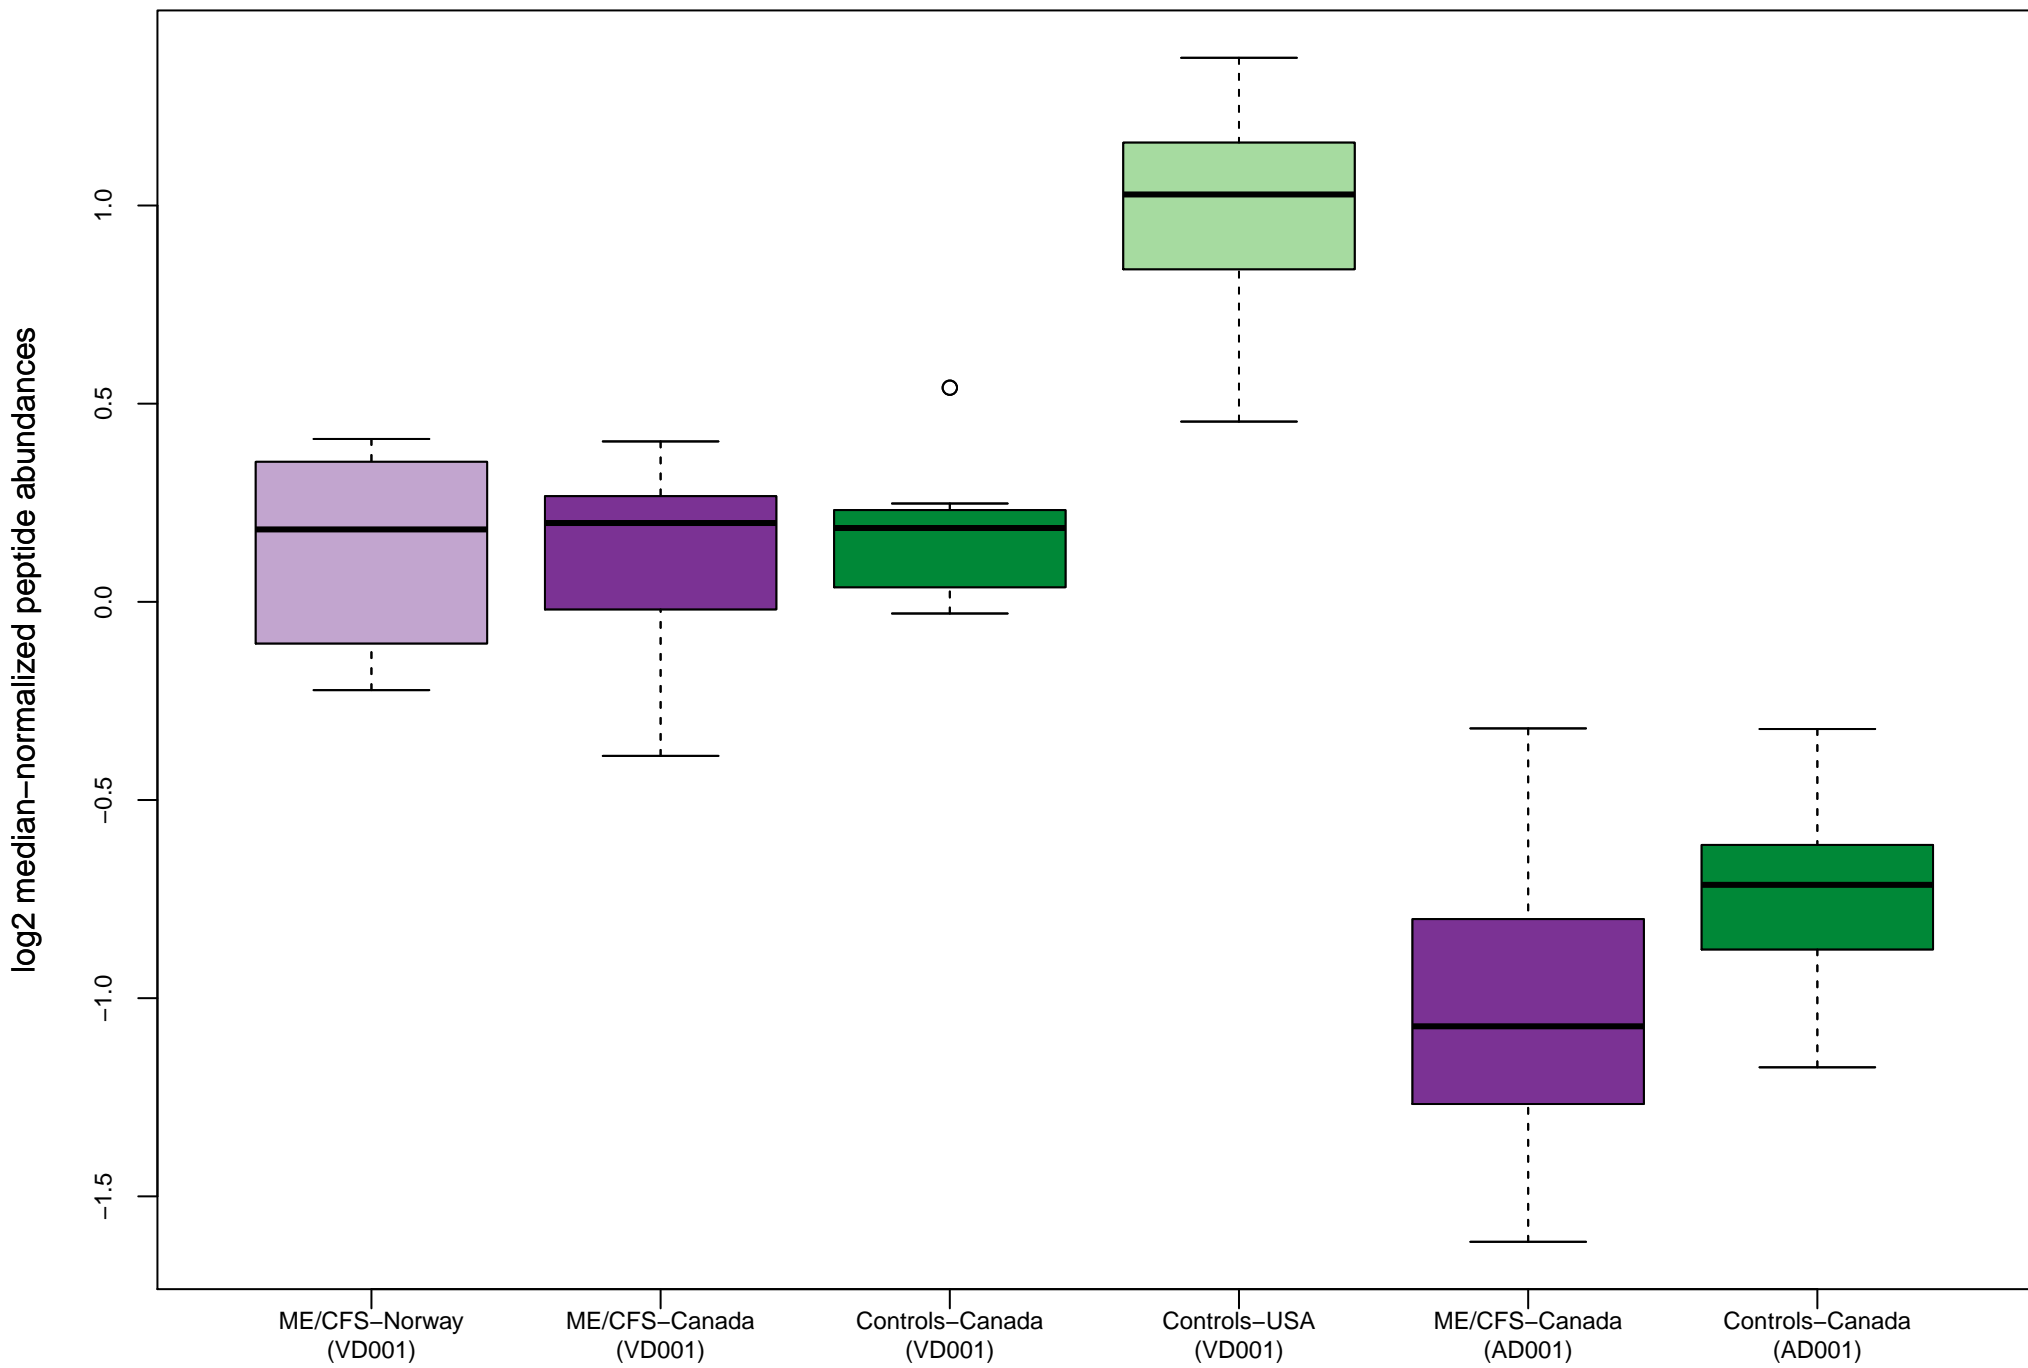

# VRPGLRWALGVA

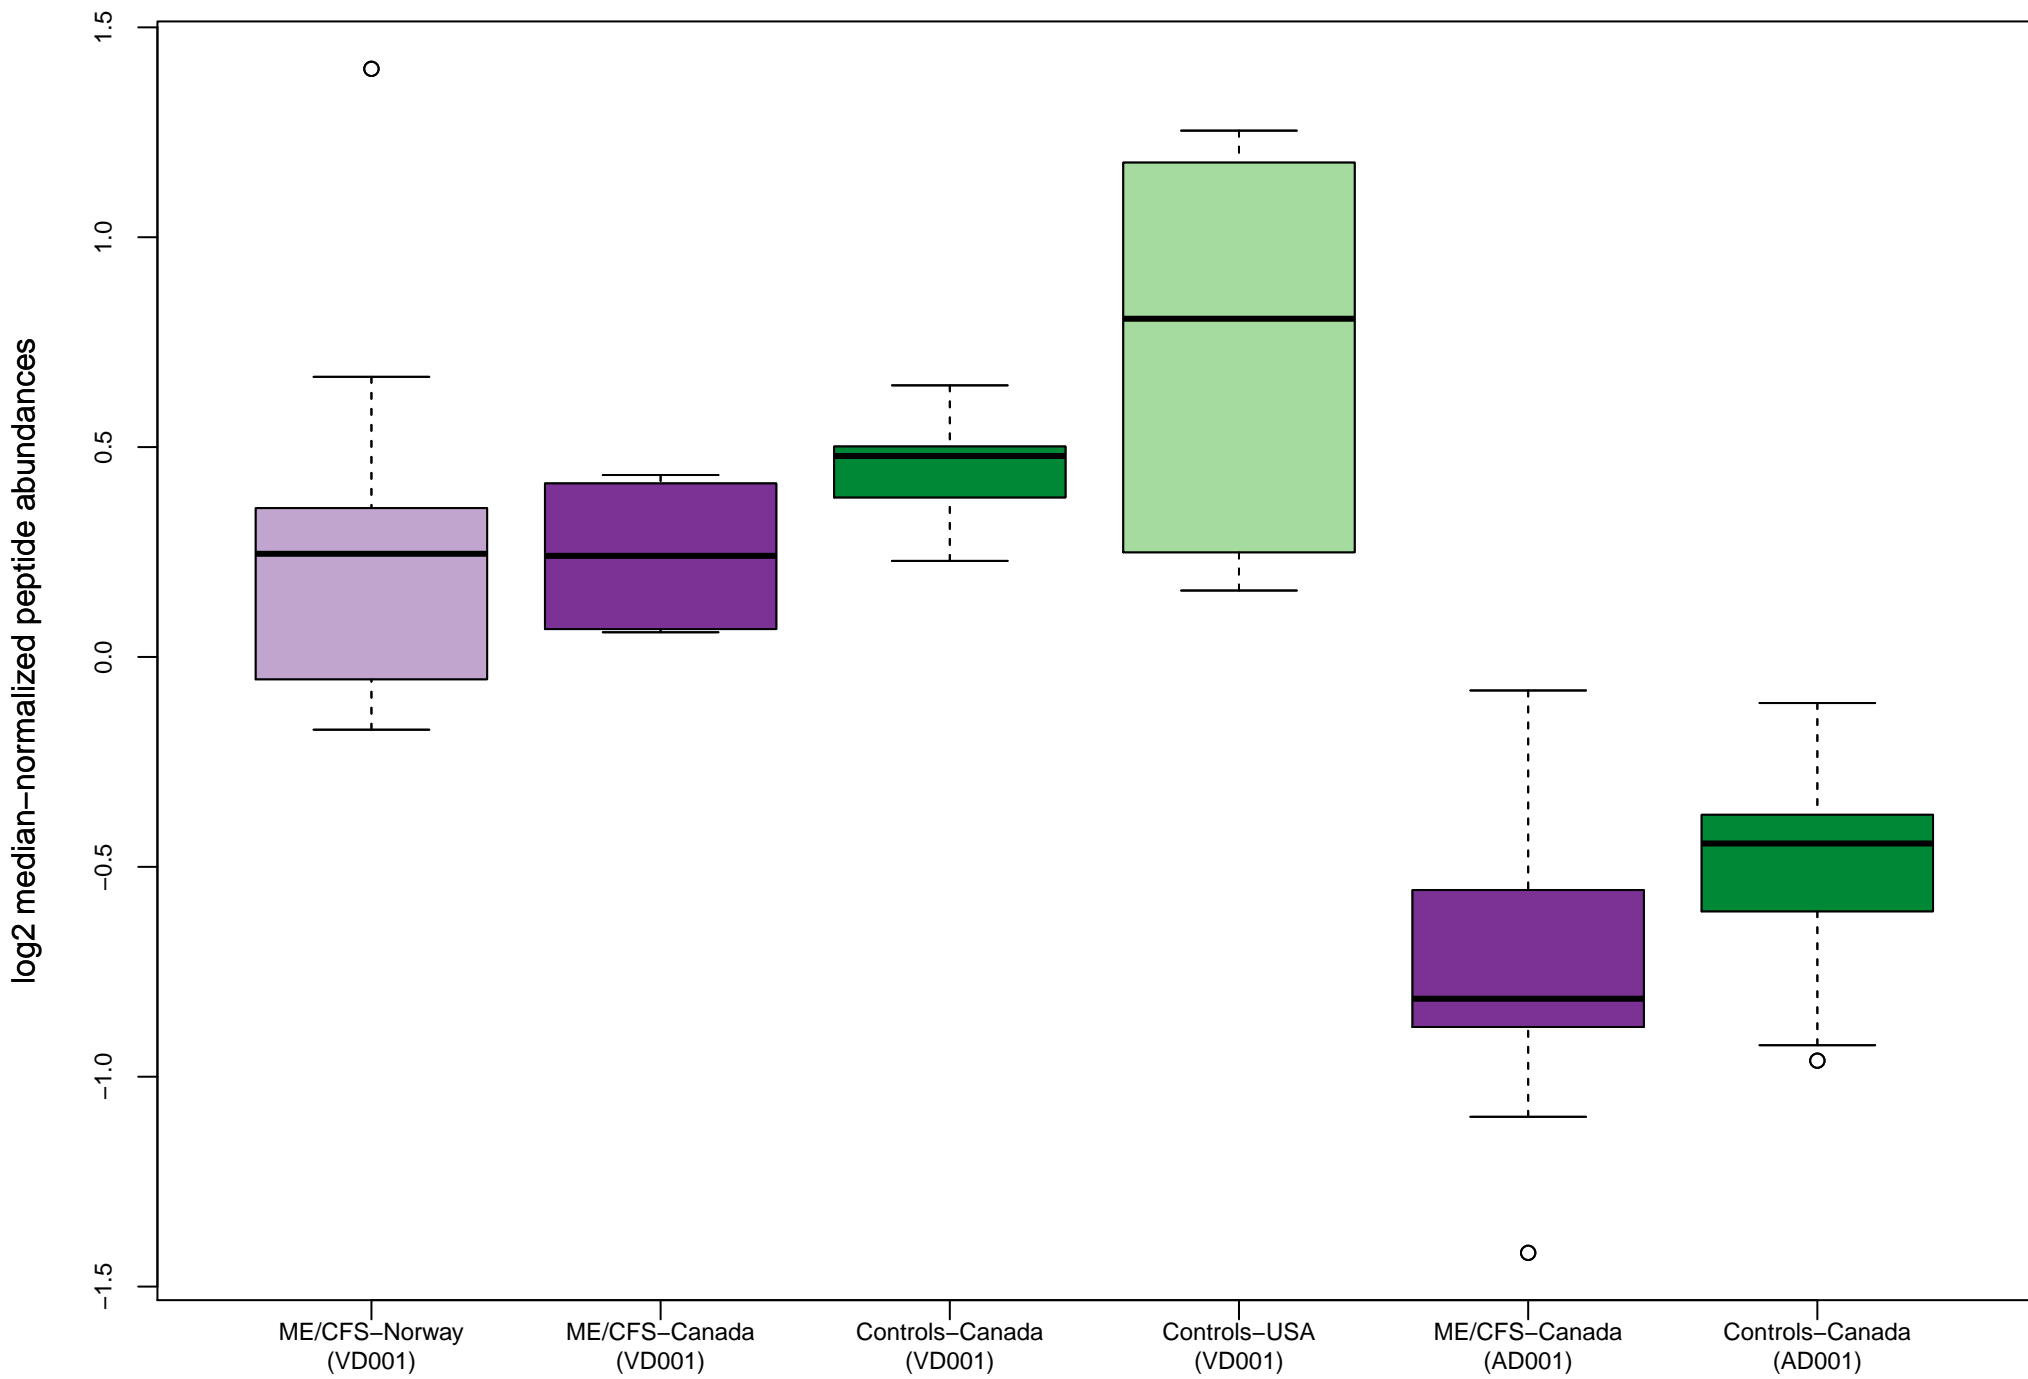

# VRVFPFRYWASV

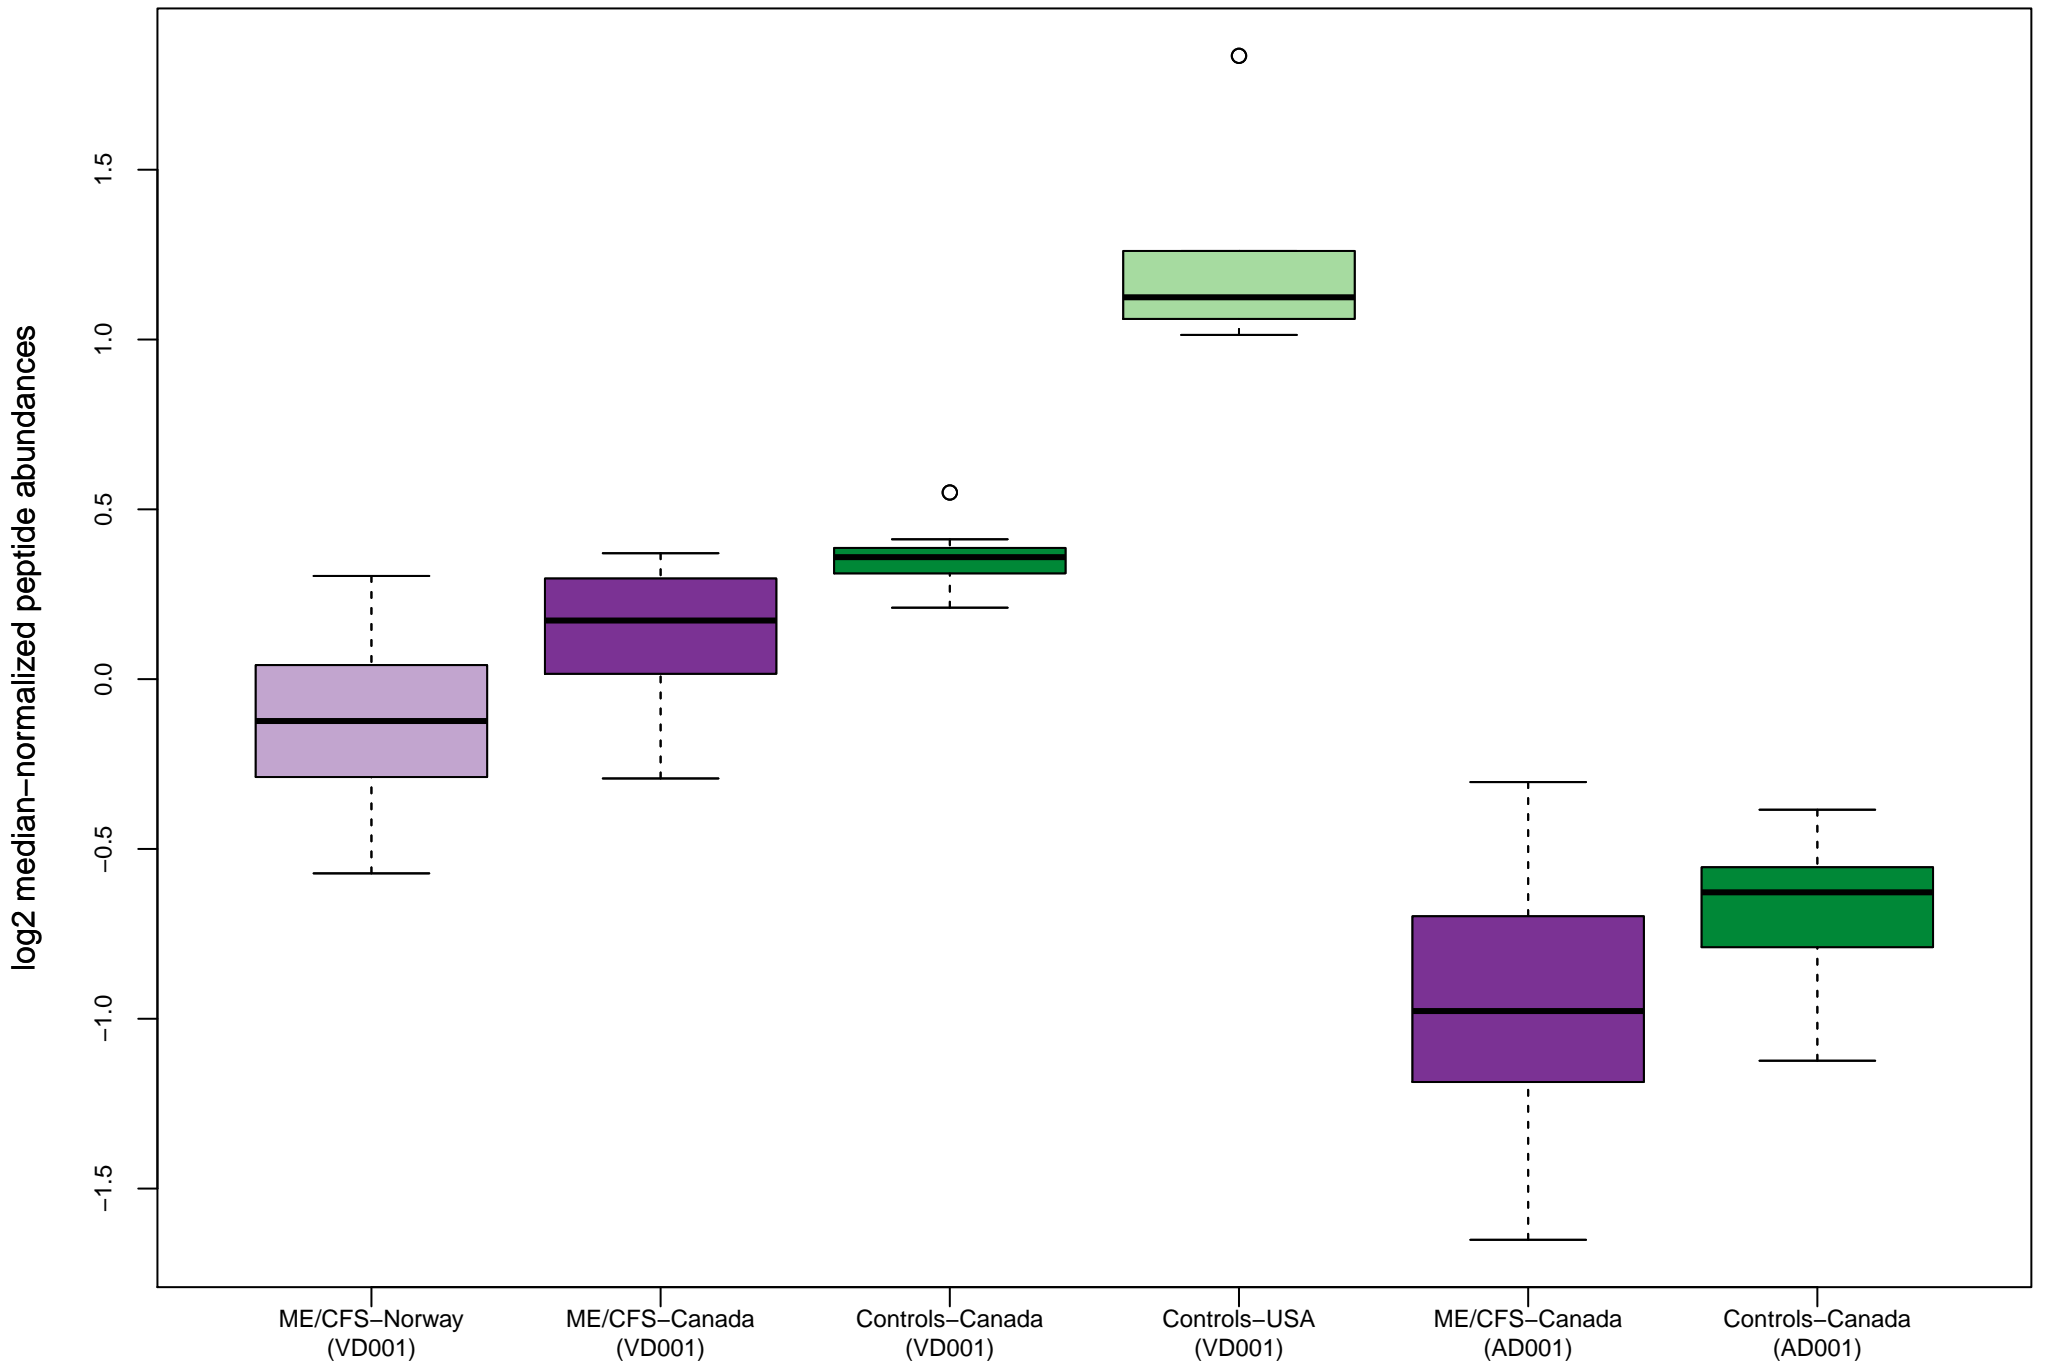

# VSSFSTRSGALS

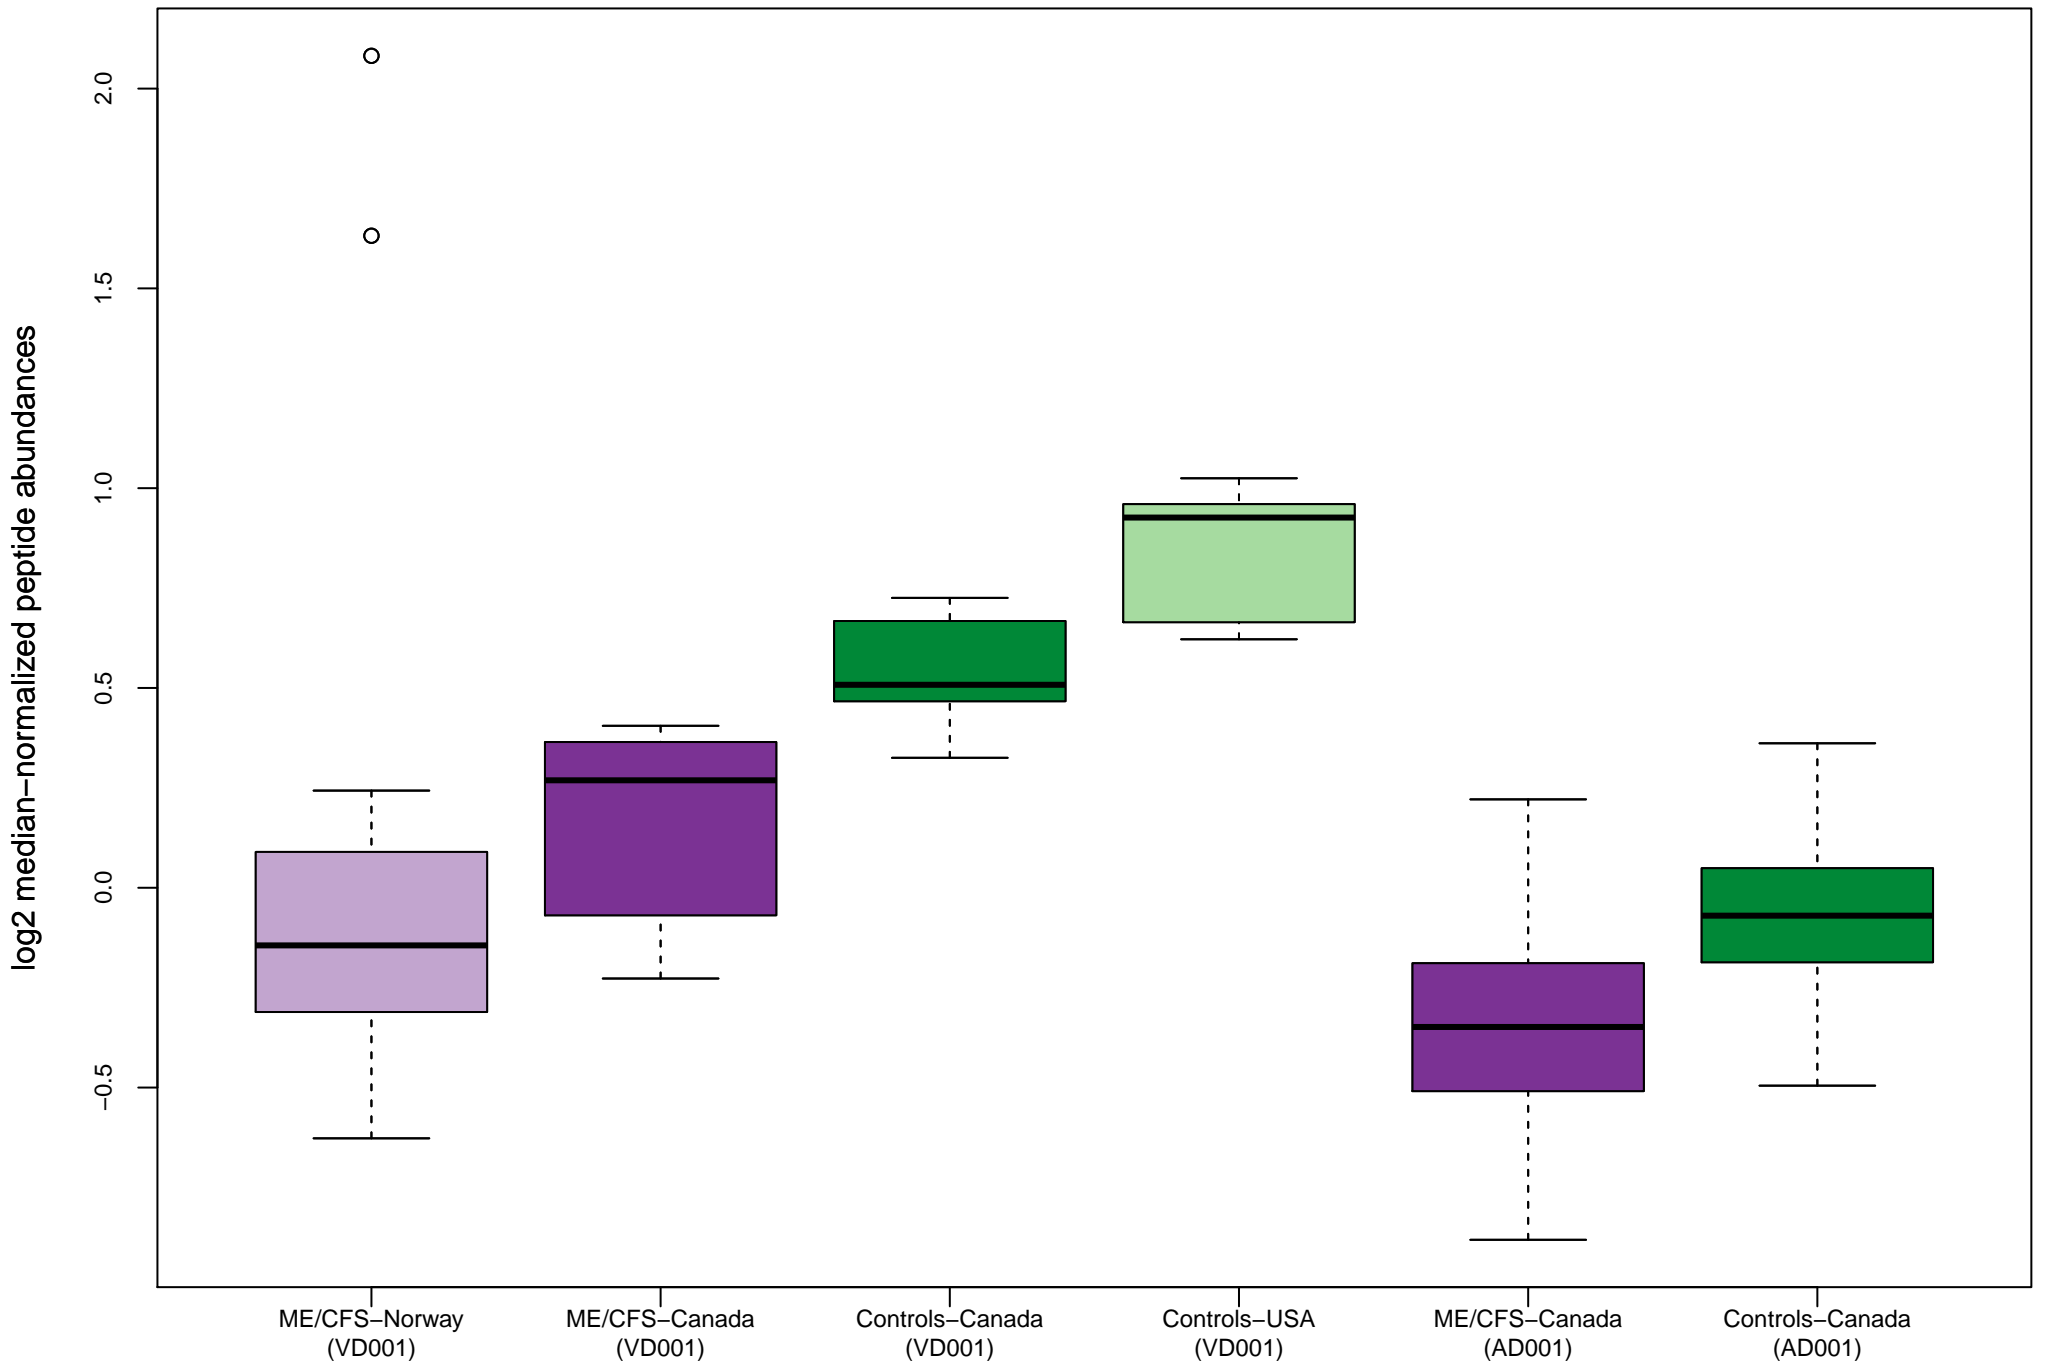

# VSSVLKLSGVAS

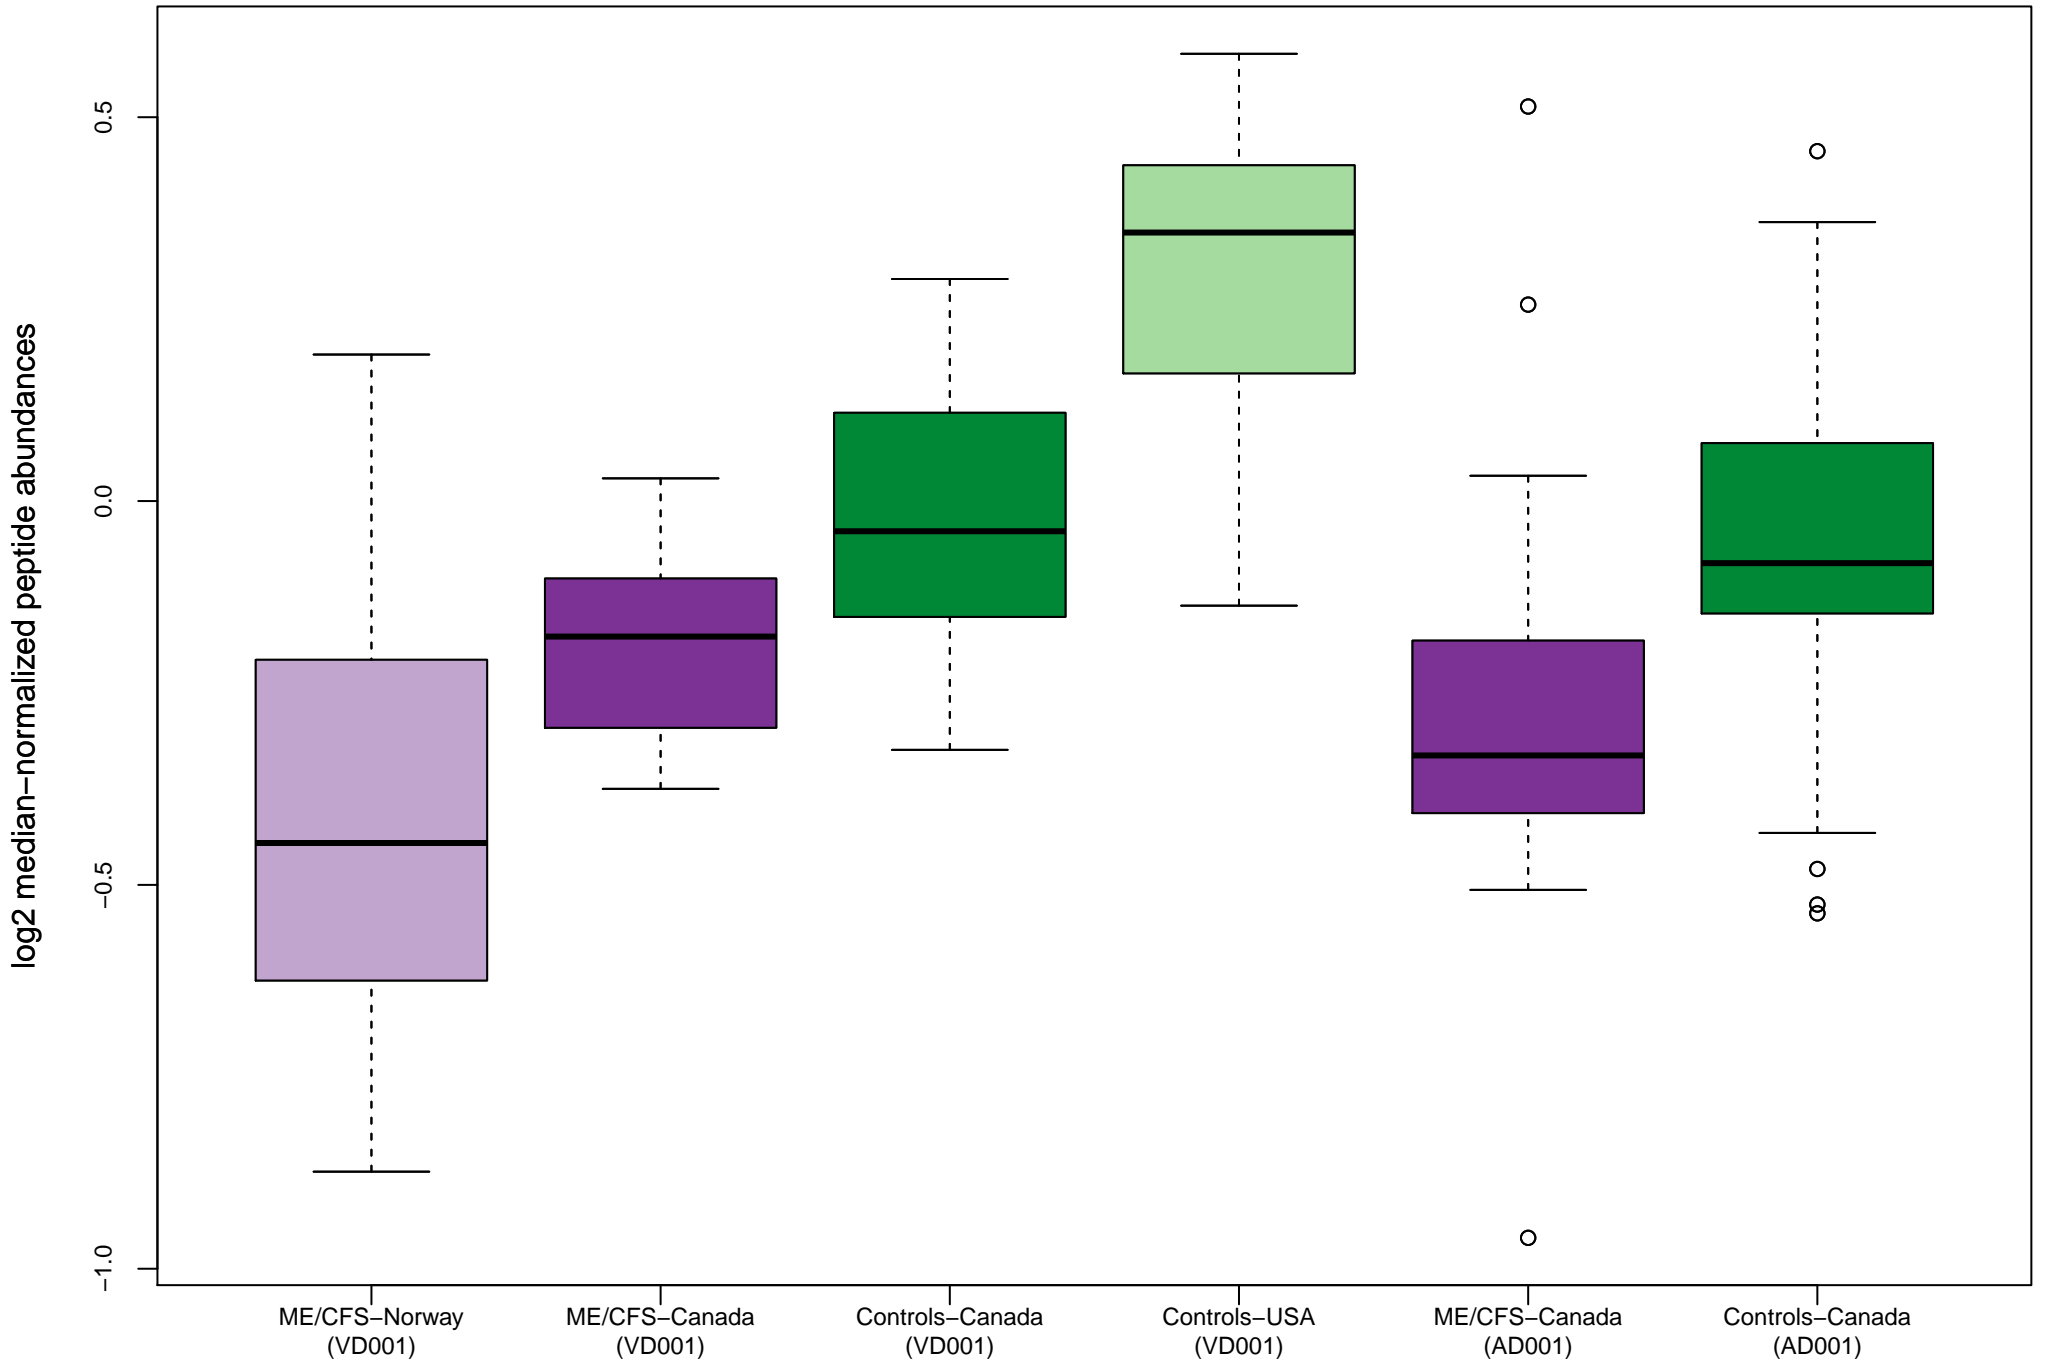

# VSWLRVWNALSG

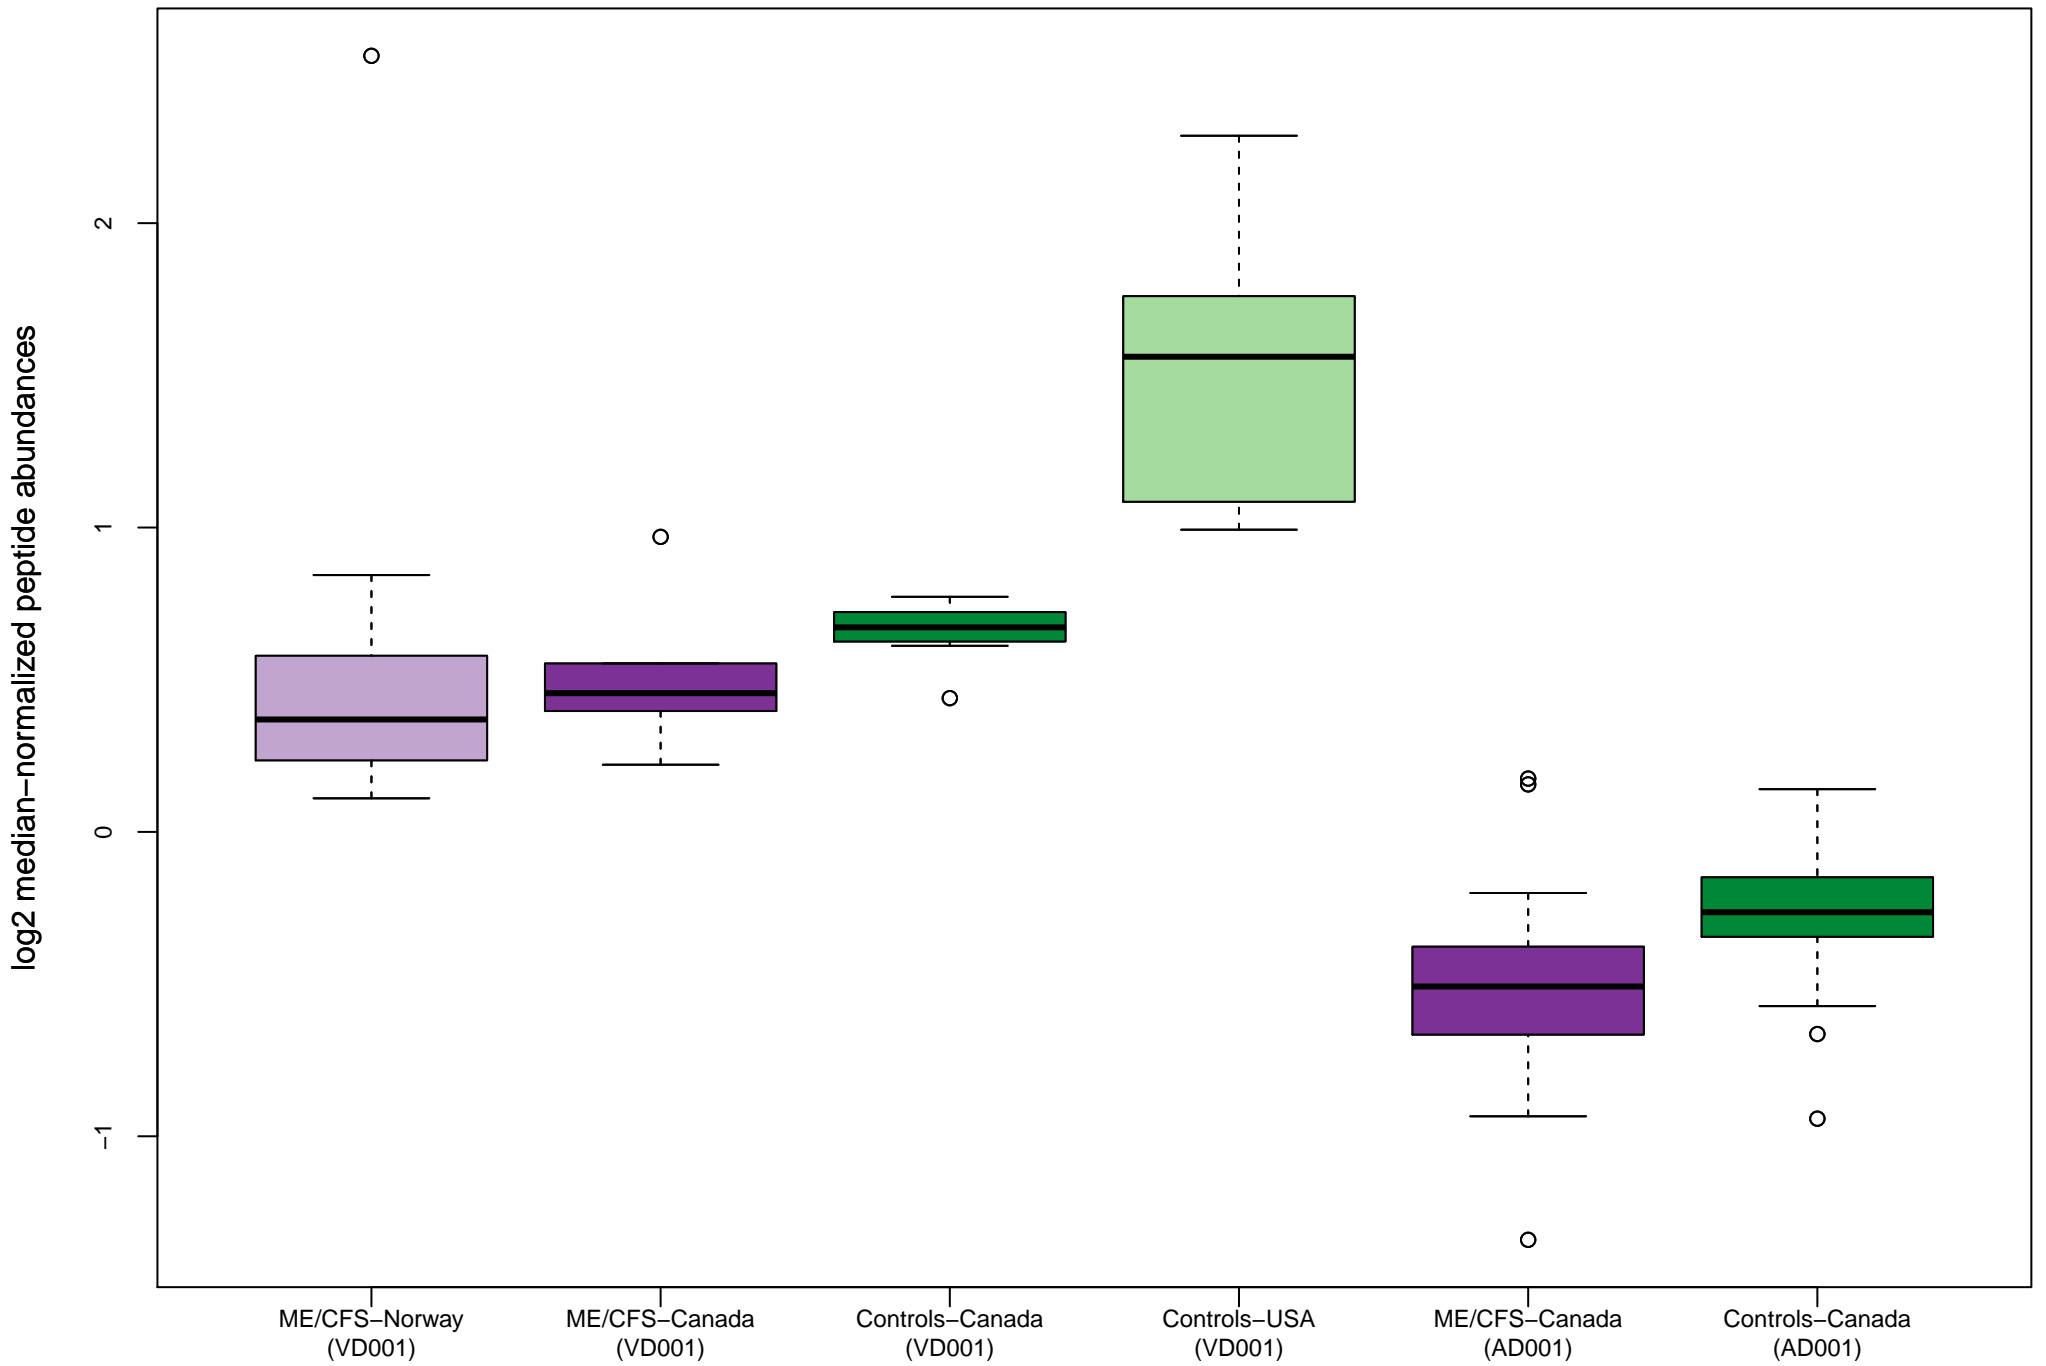

# VWAAYKALGVSG

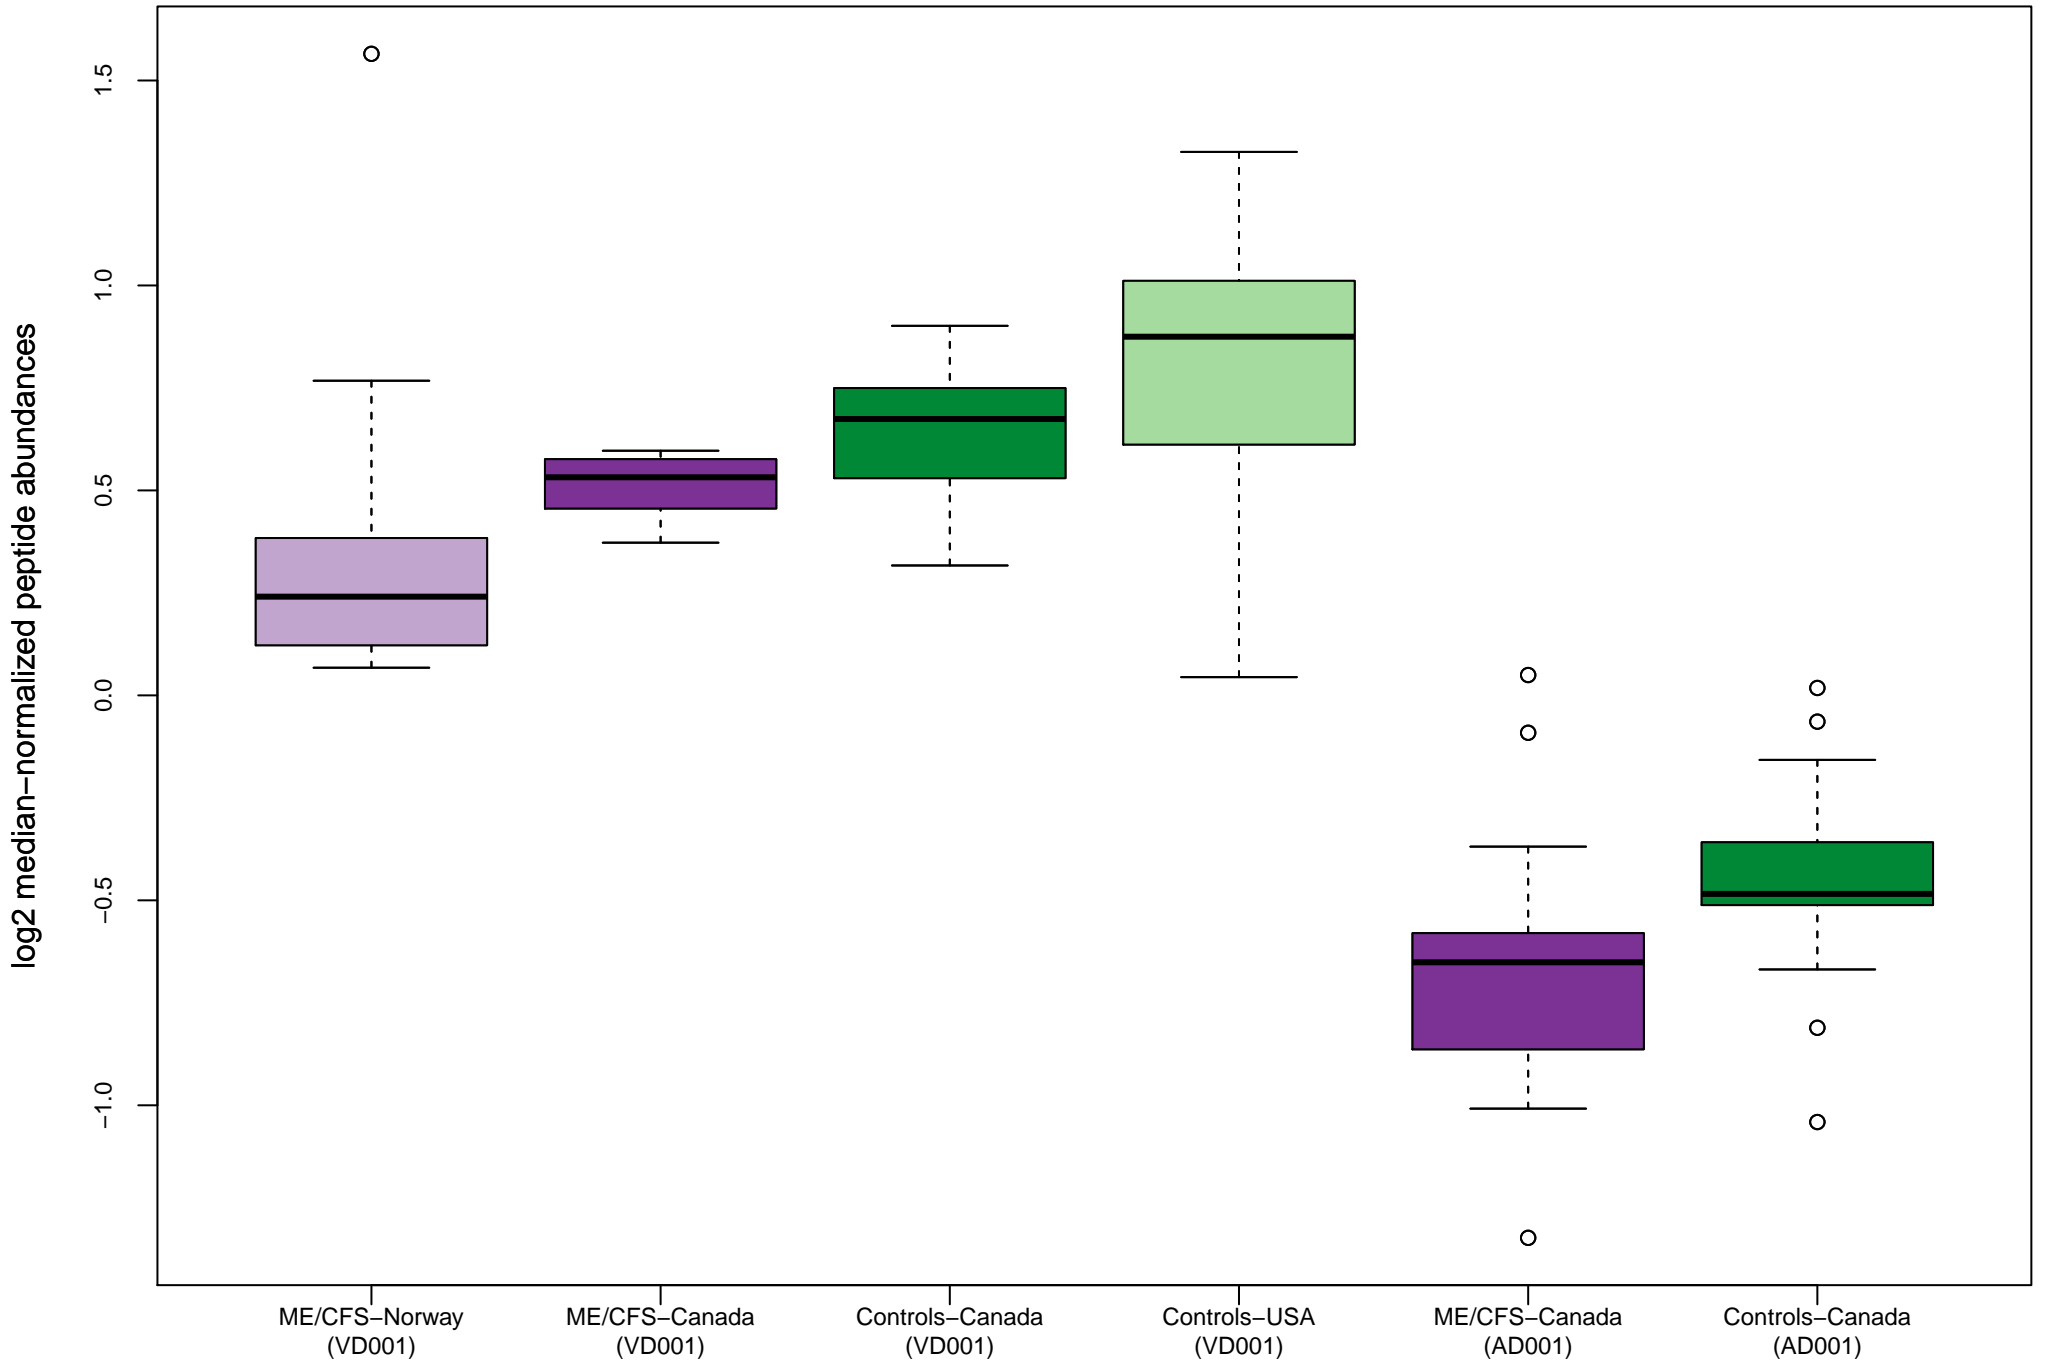



# VWRNRWALALSG

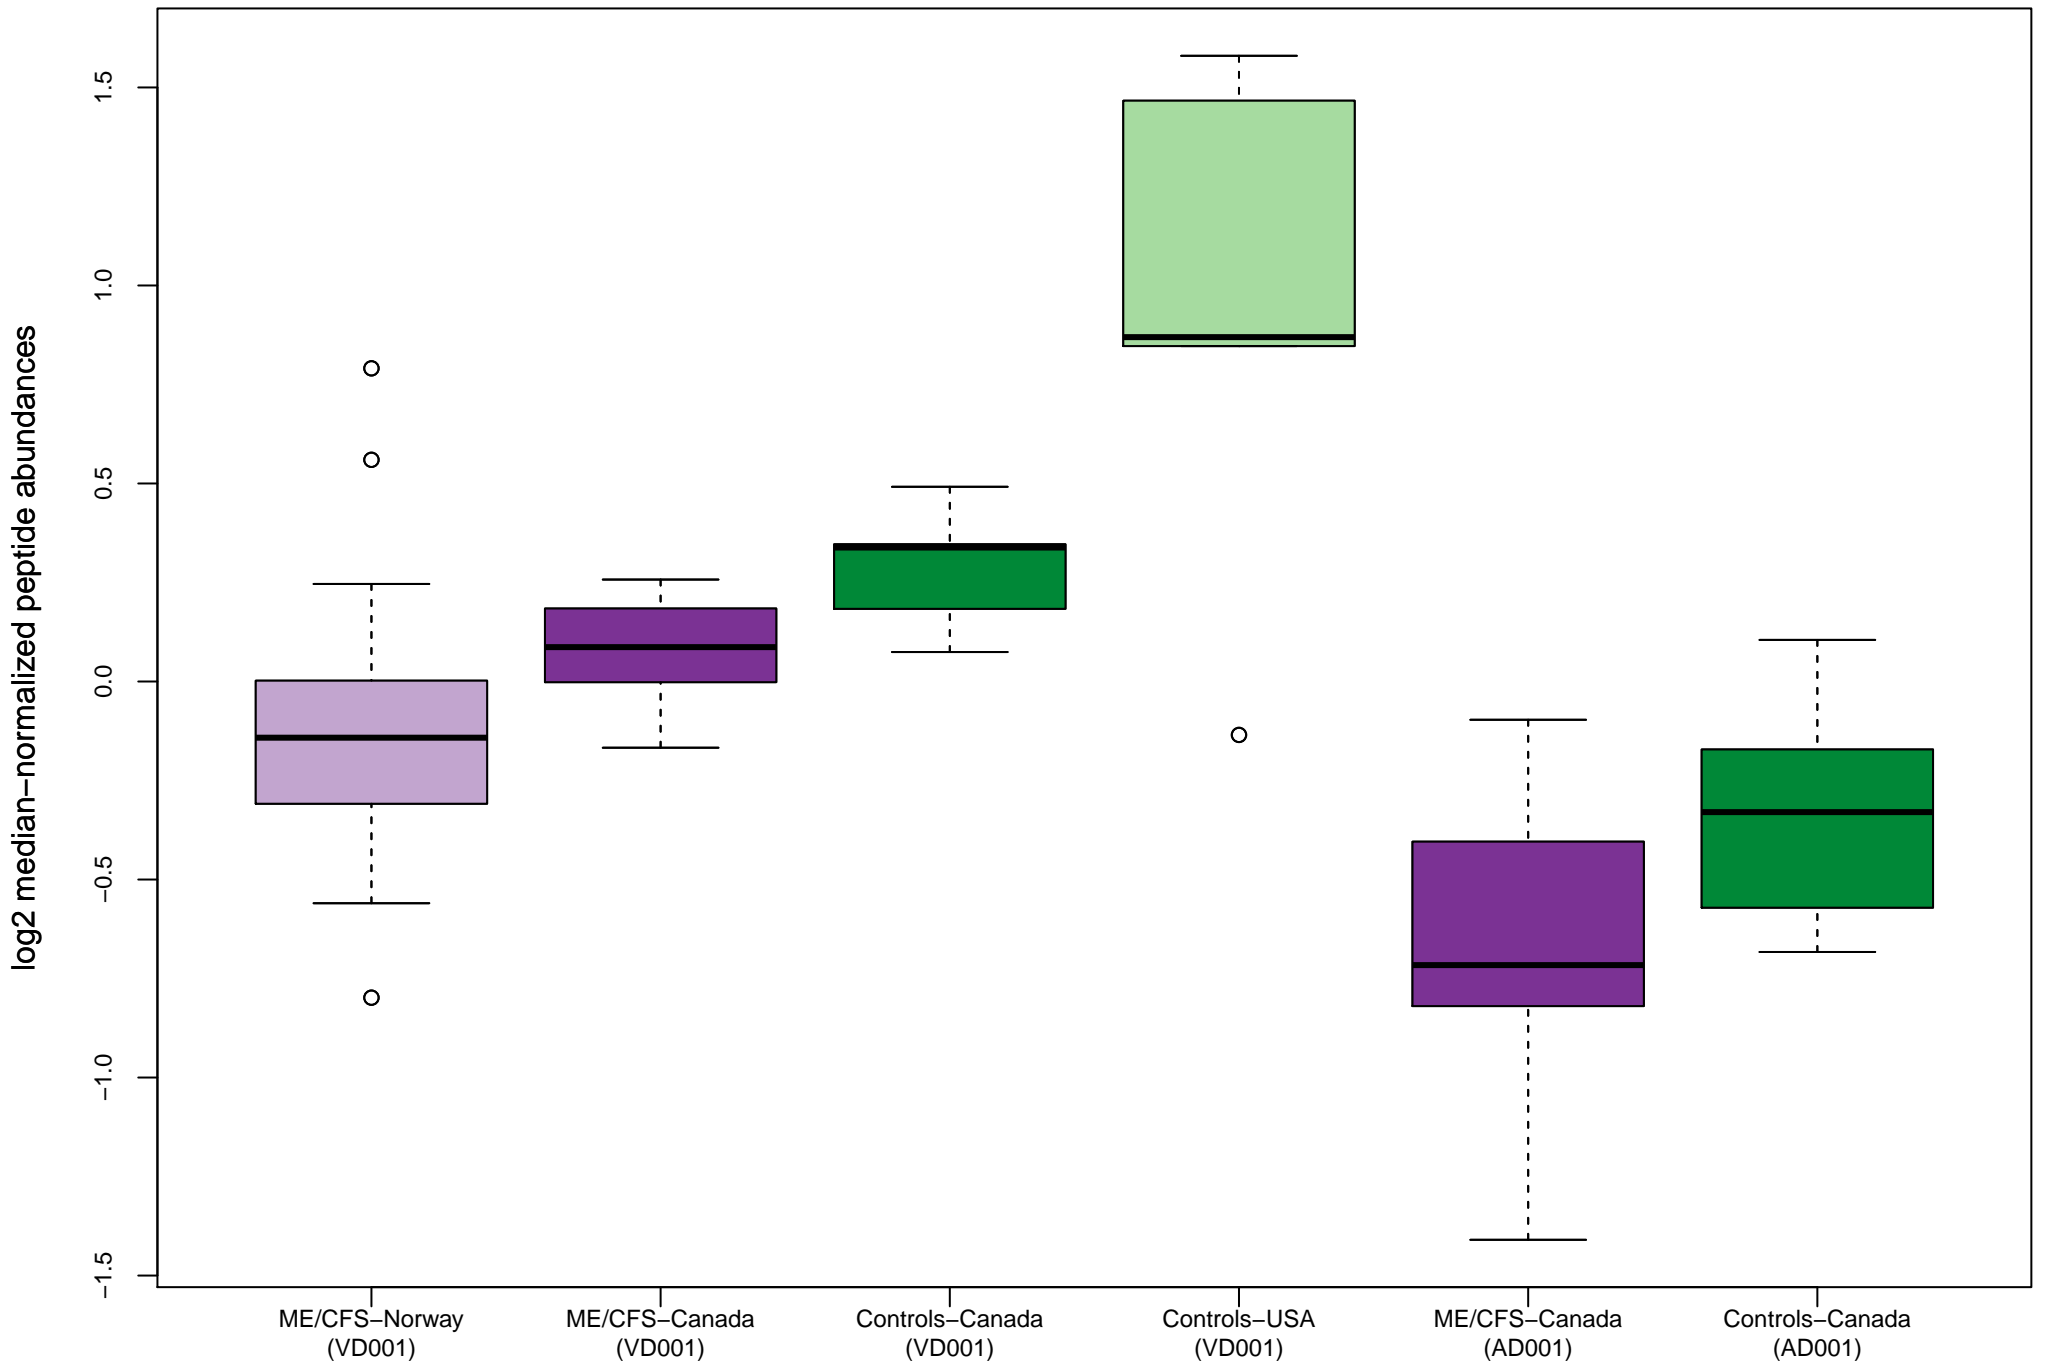

# VWYKWLGVLSG

log2 median-normalized peptide abundances

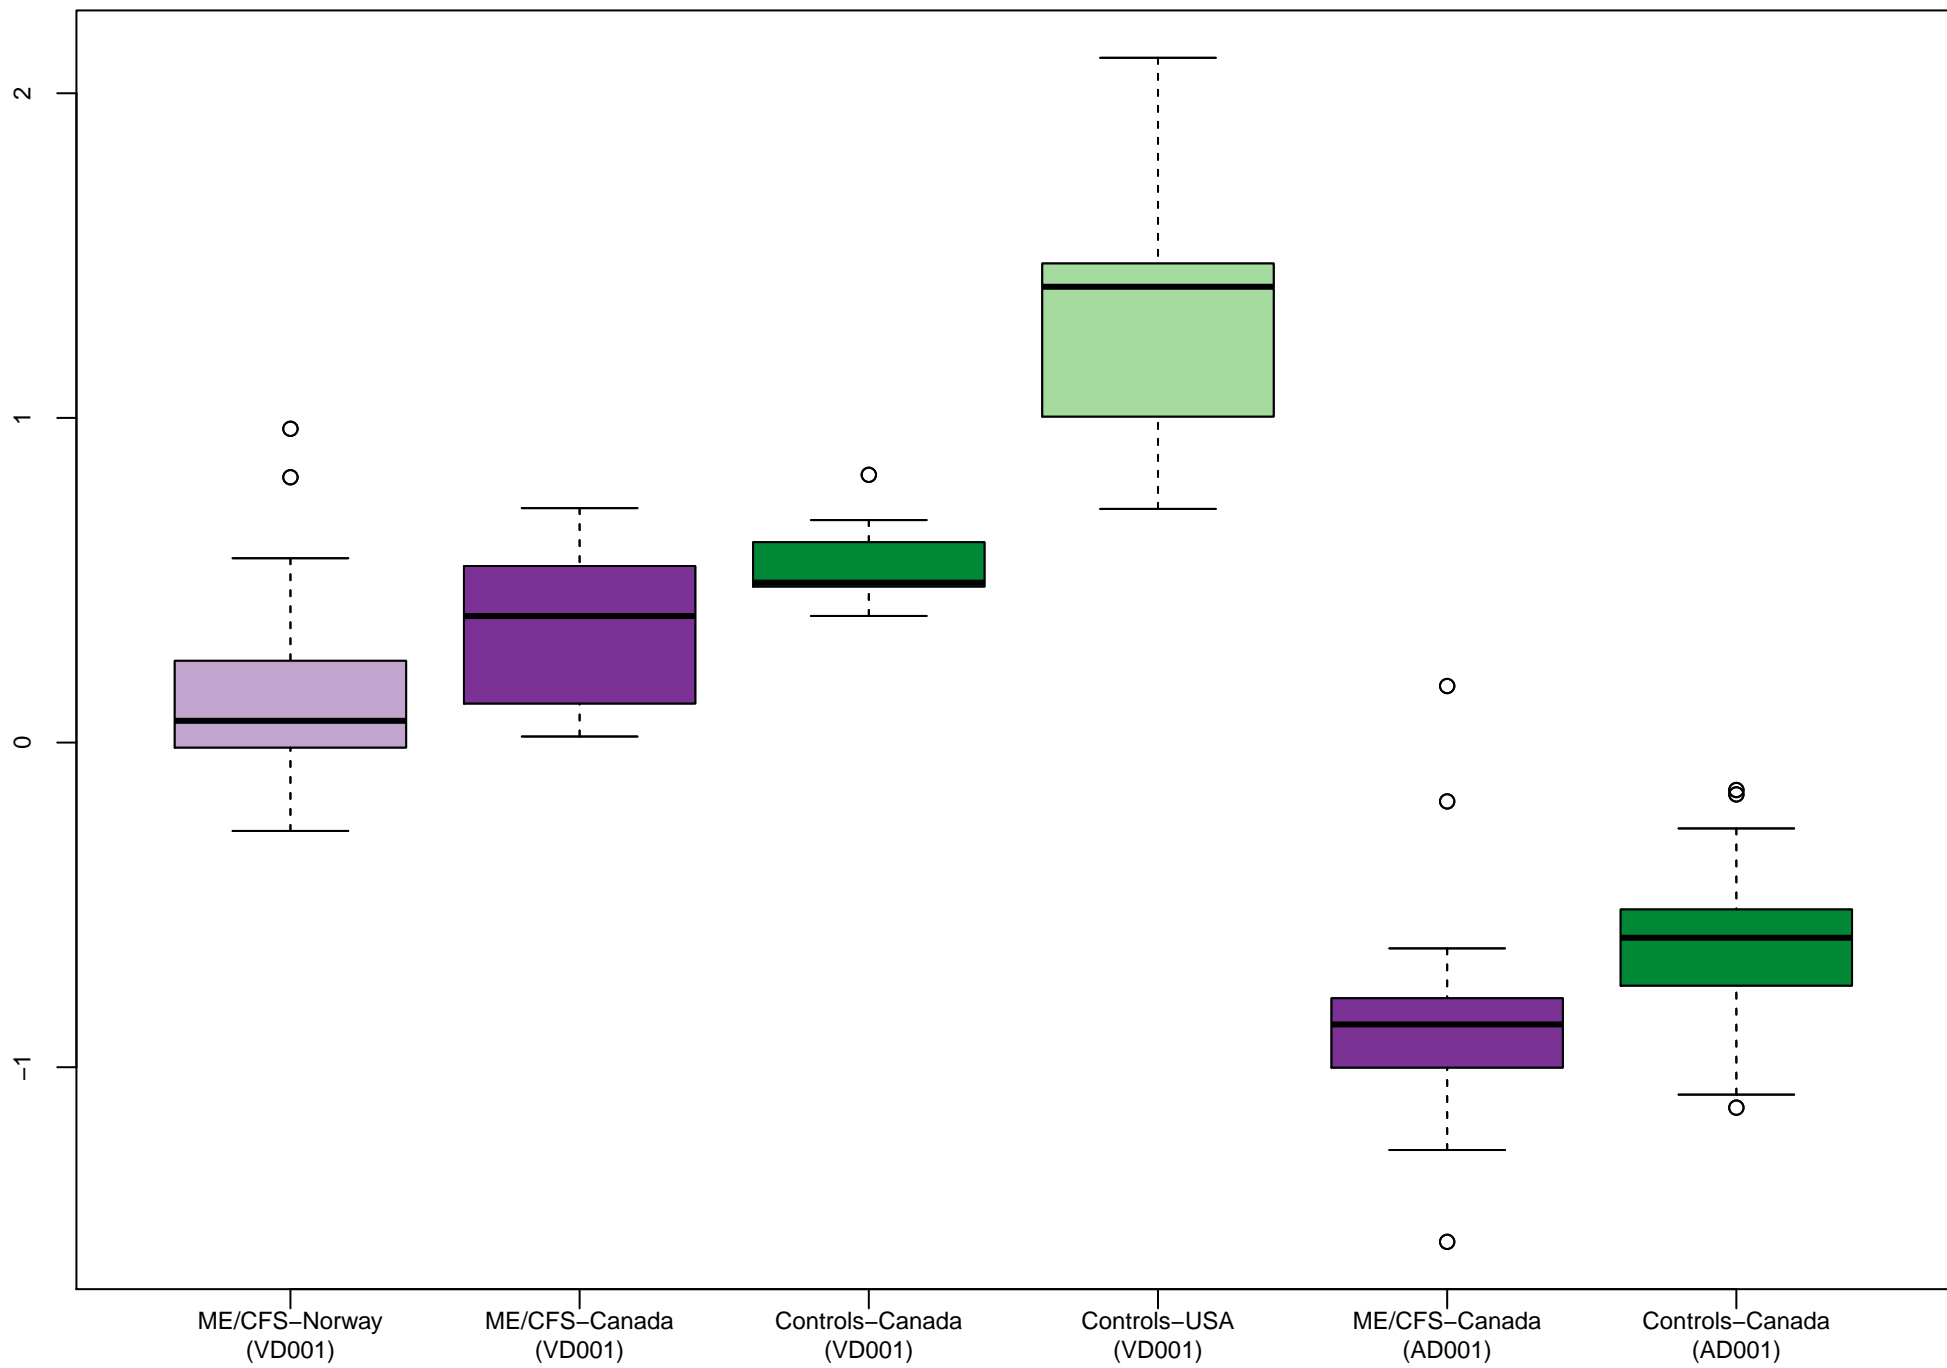

# VYFNKFASVLSG

log<sub>2</sub> median-normalized peptide abundances

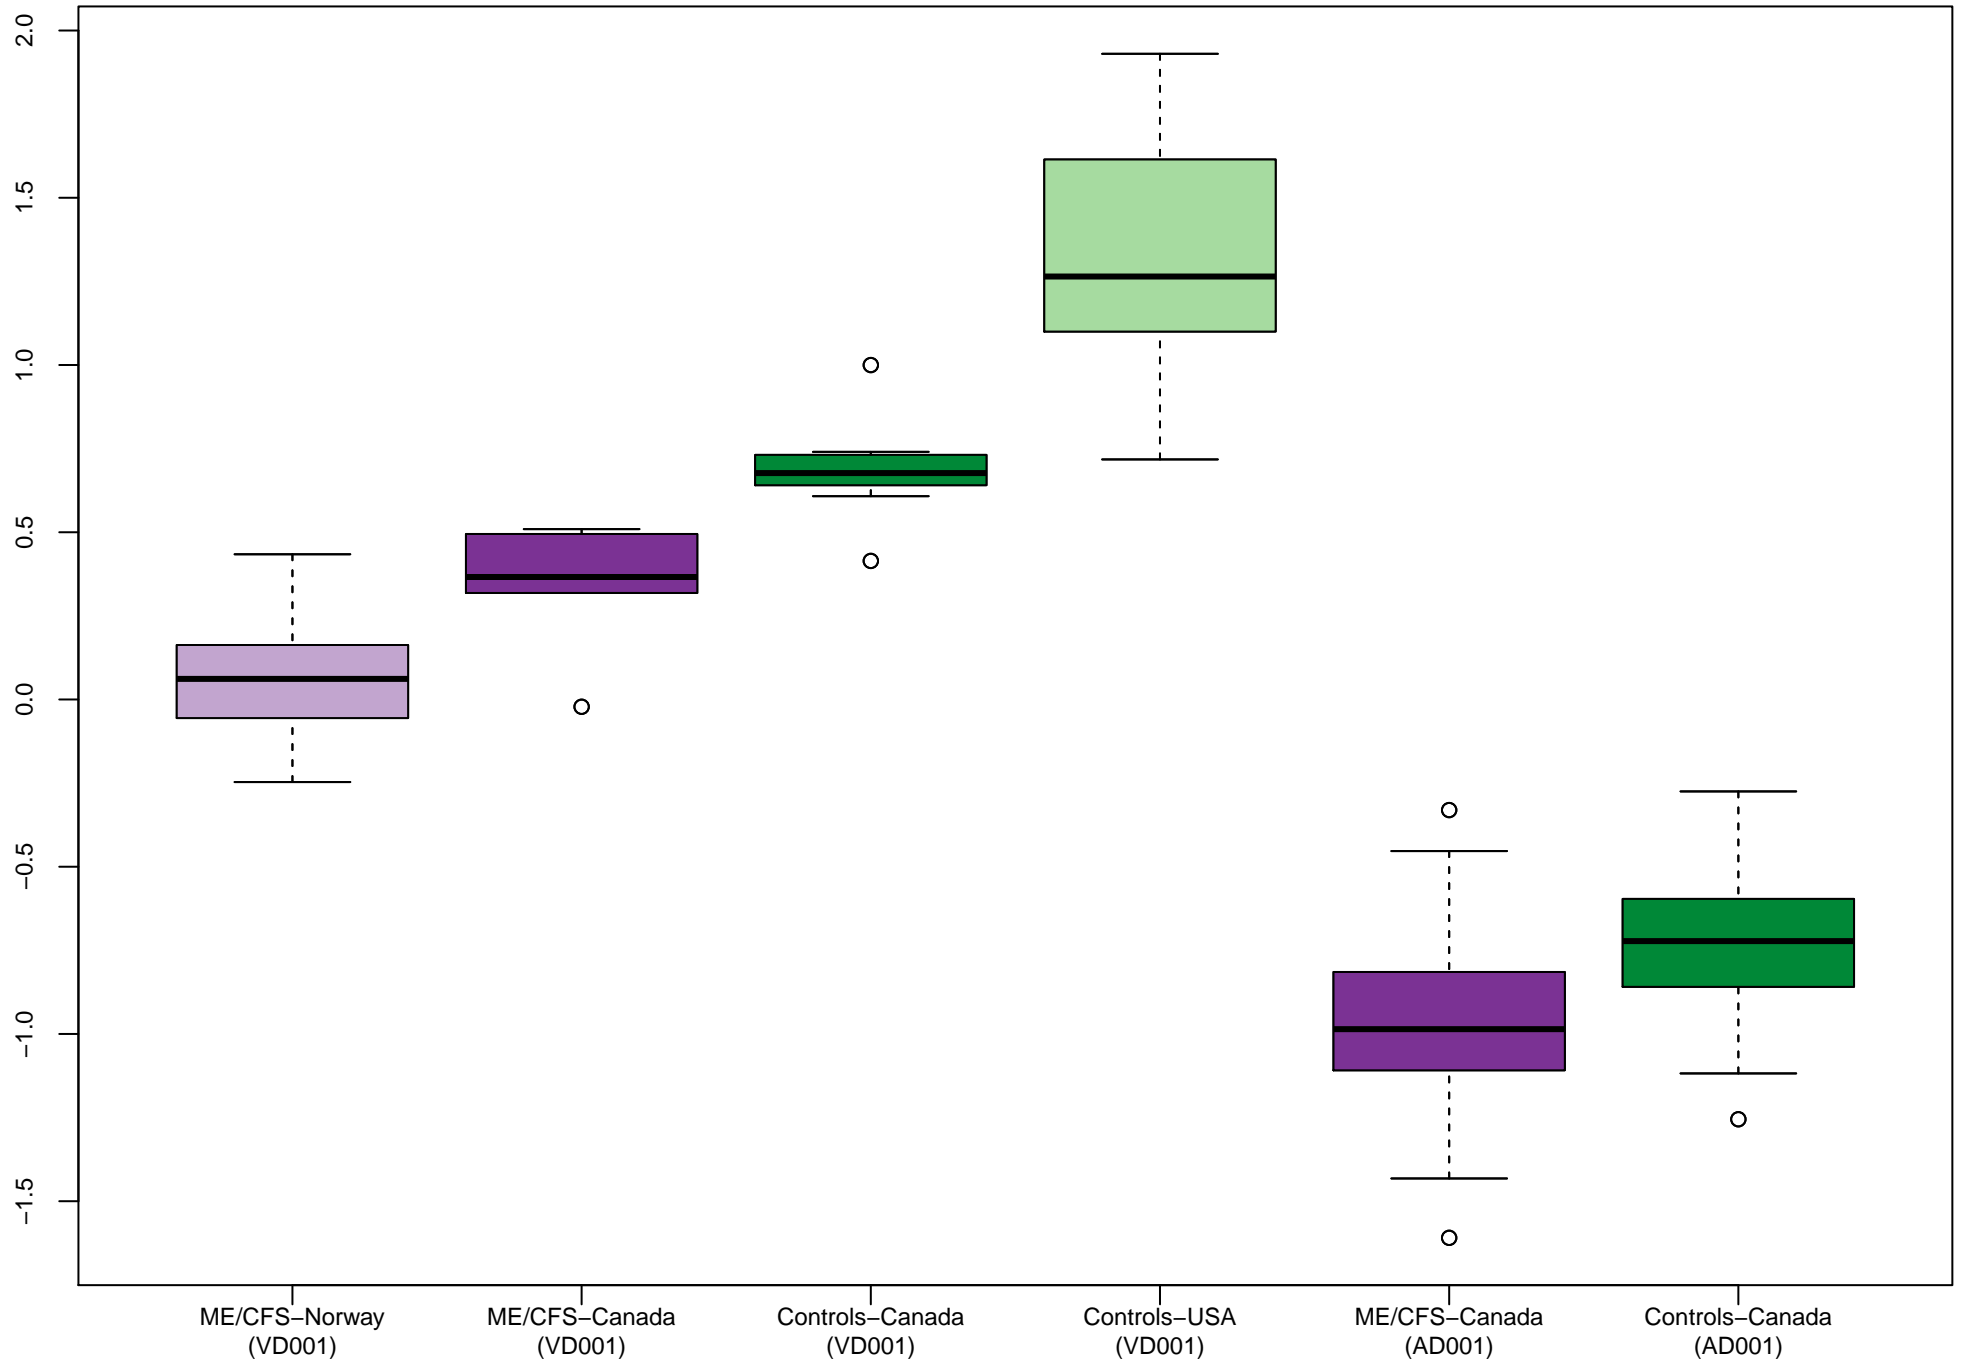

# VYGAKLGVALSG

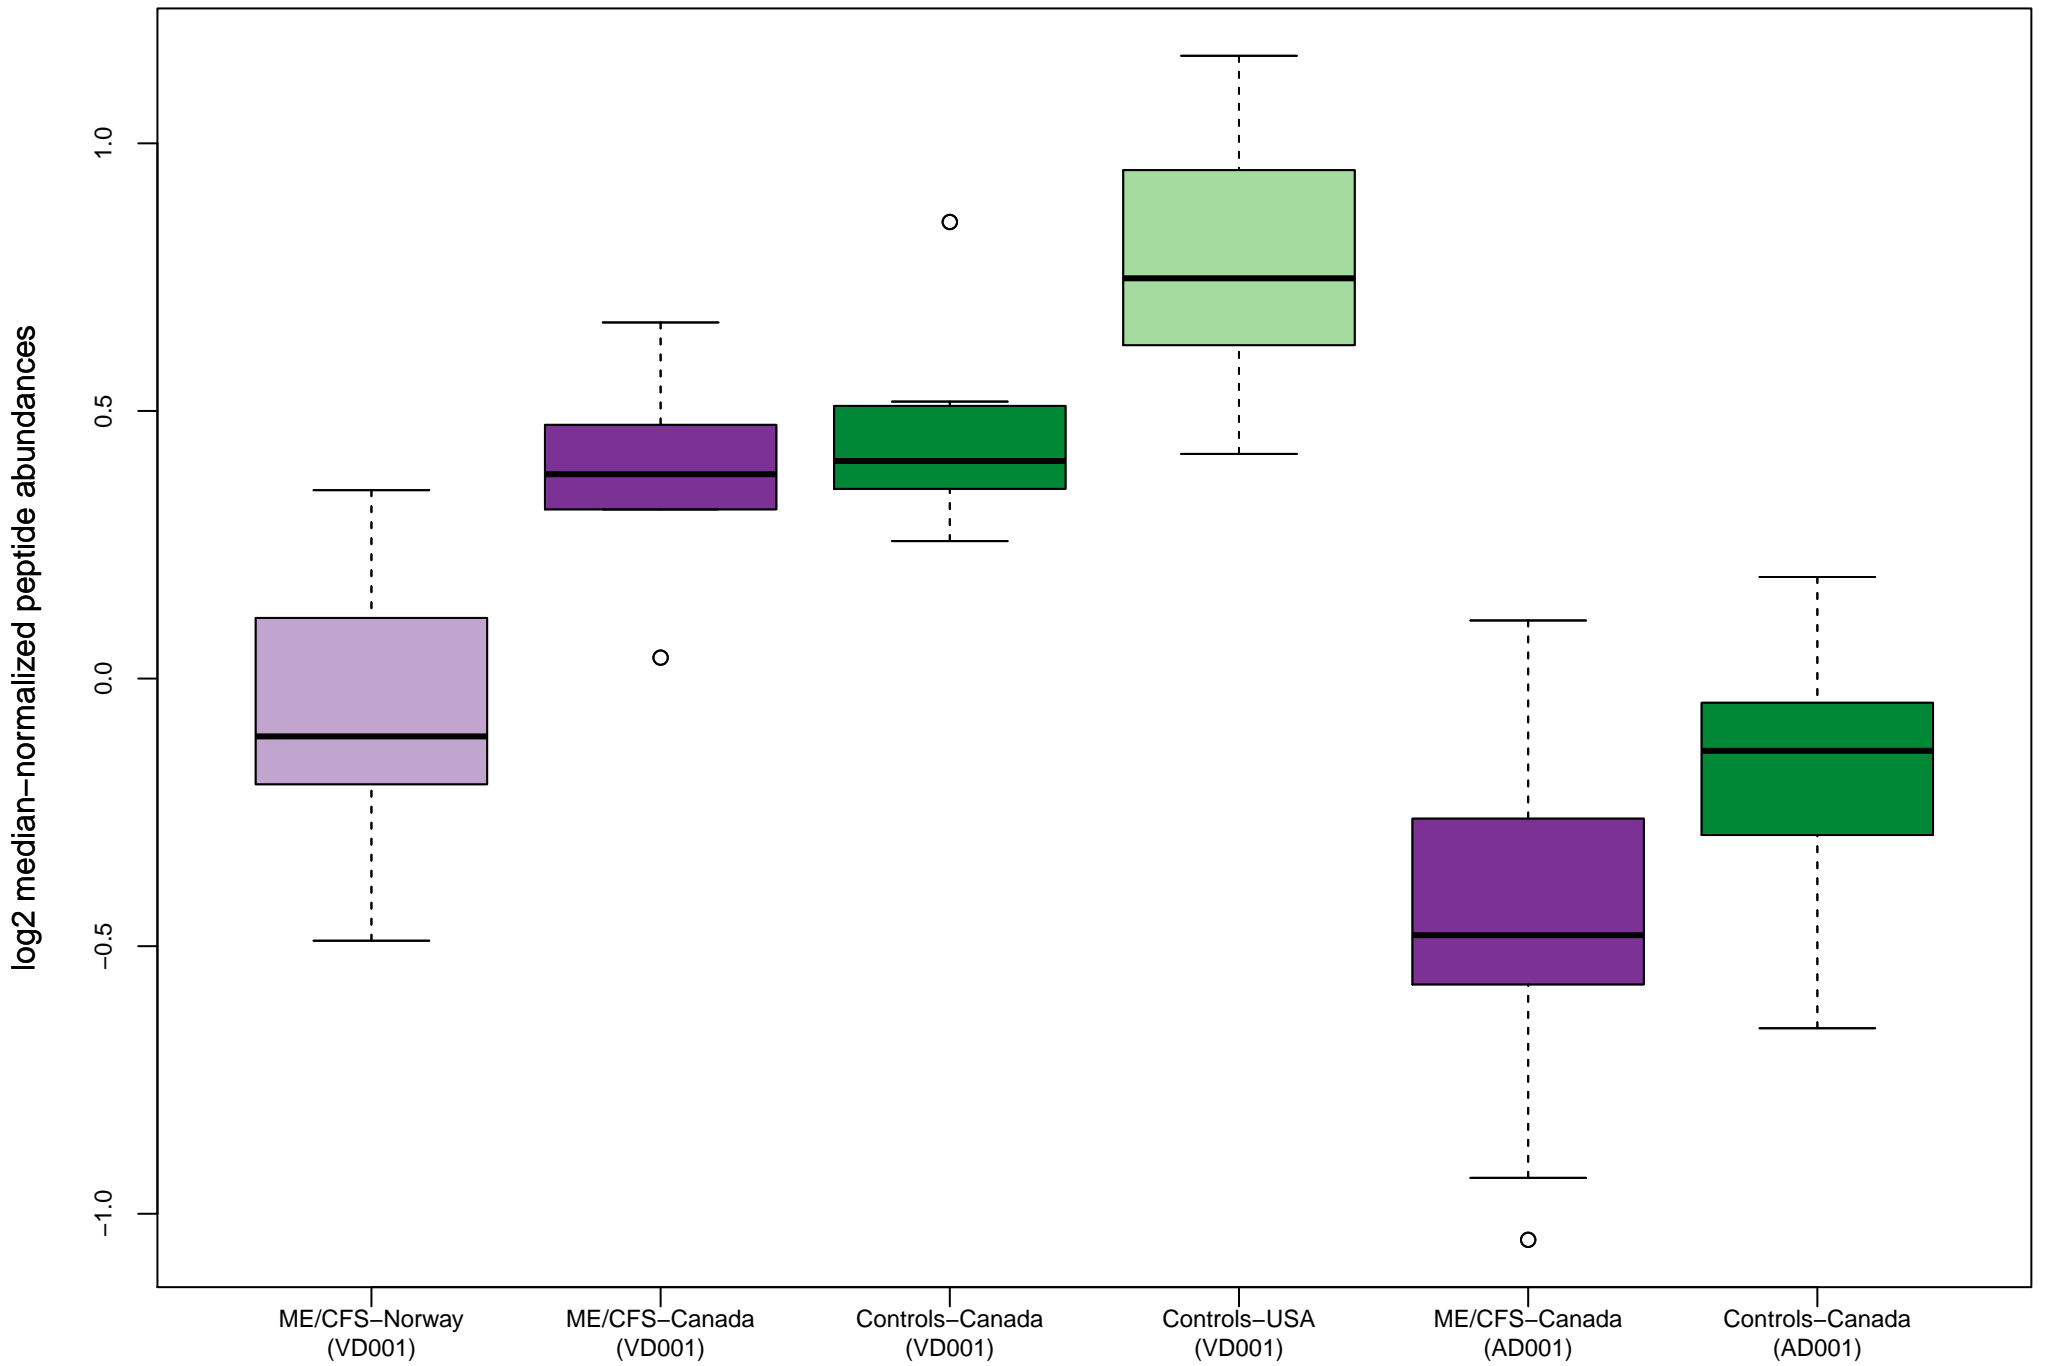

# WAARALVASGLS

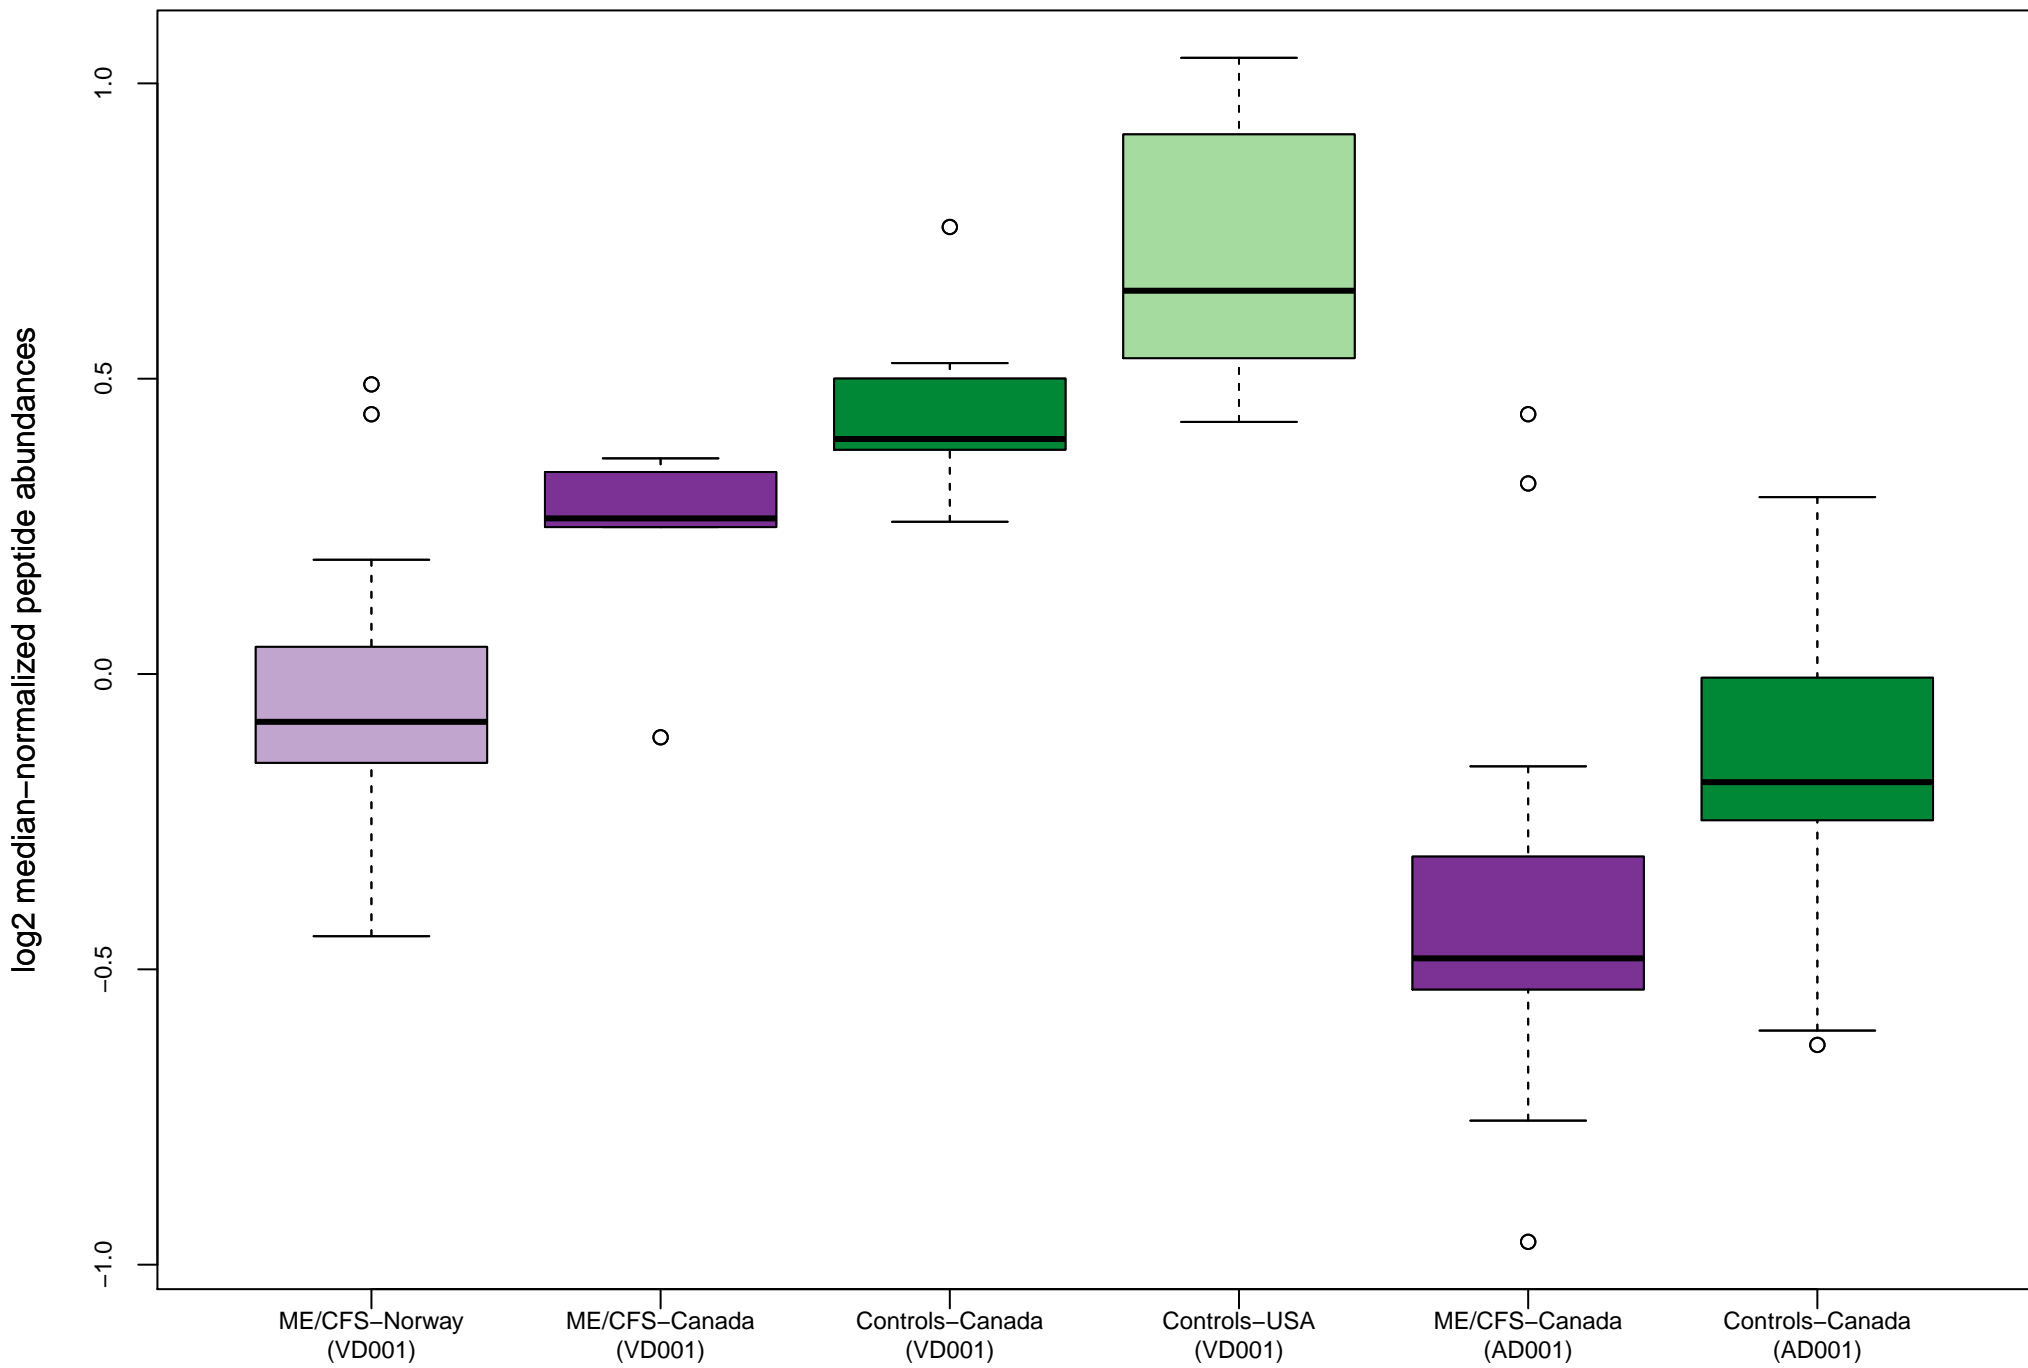

# WAFPGRYRVSGV

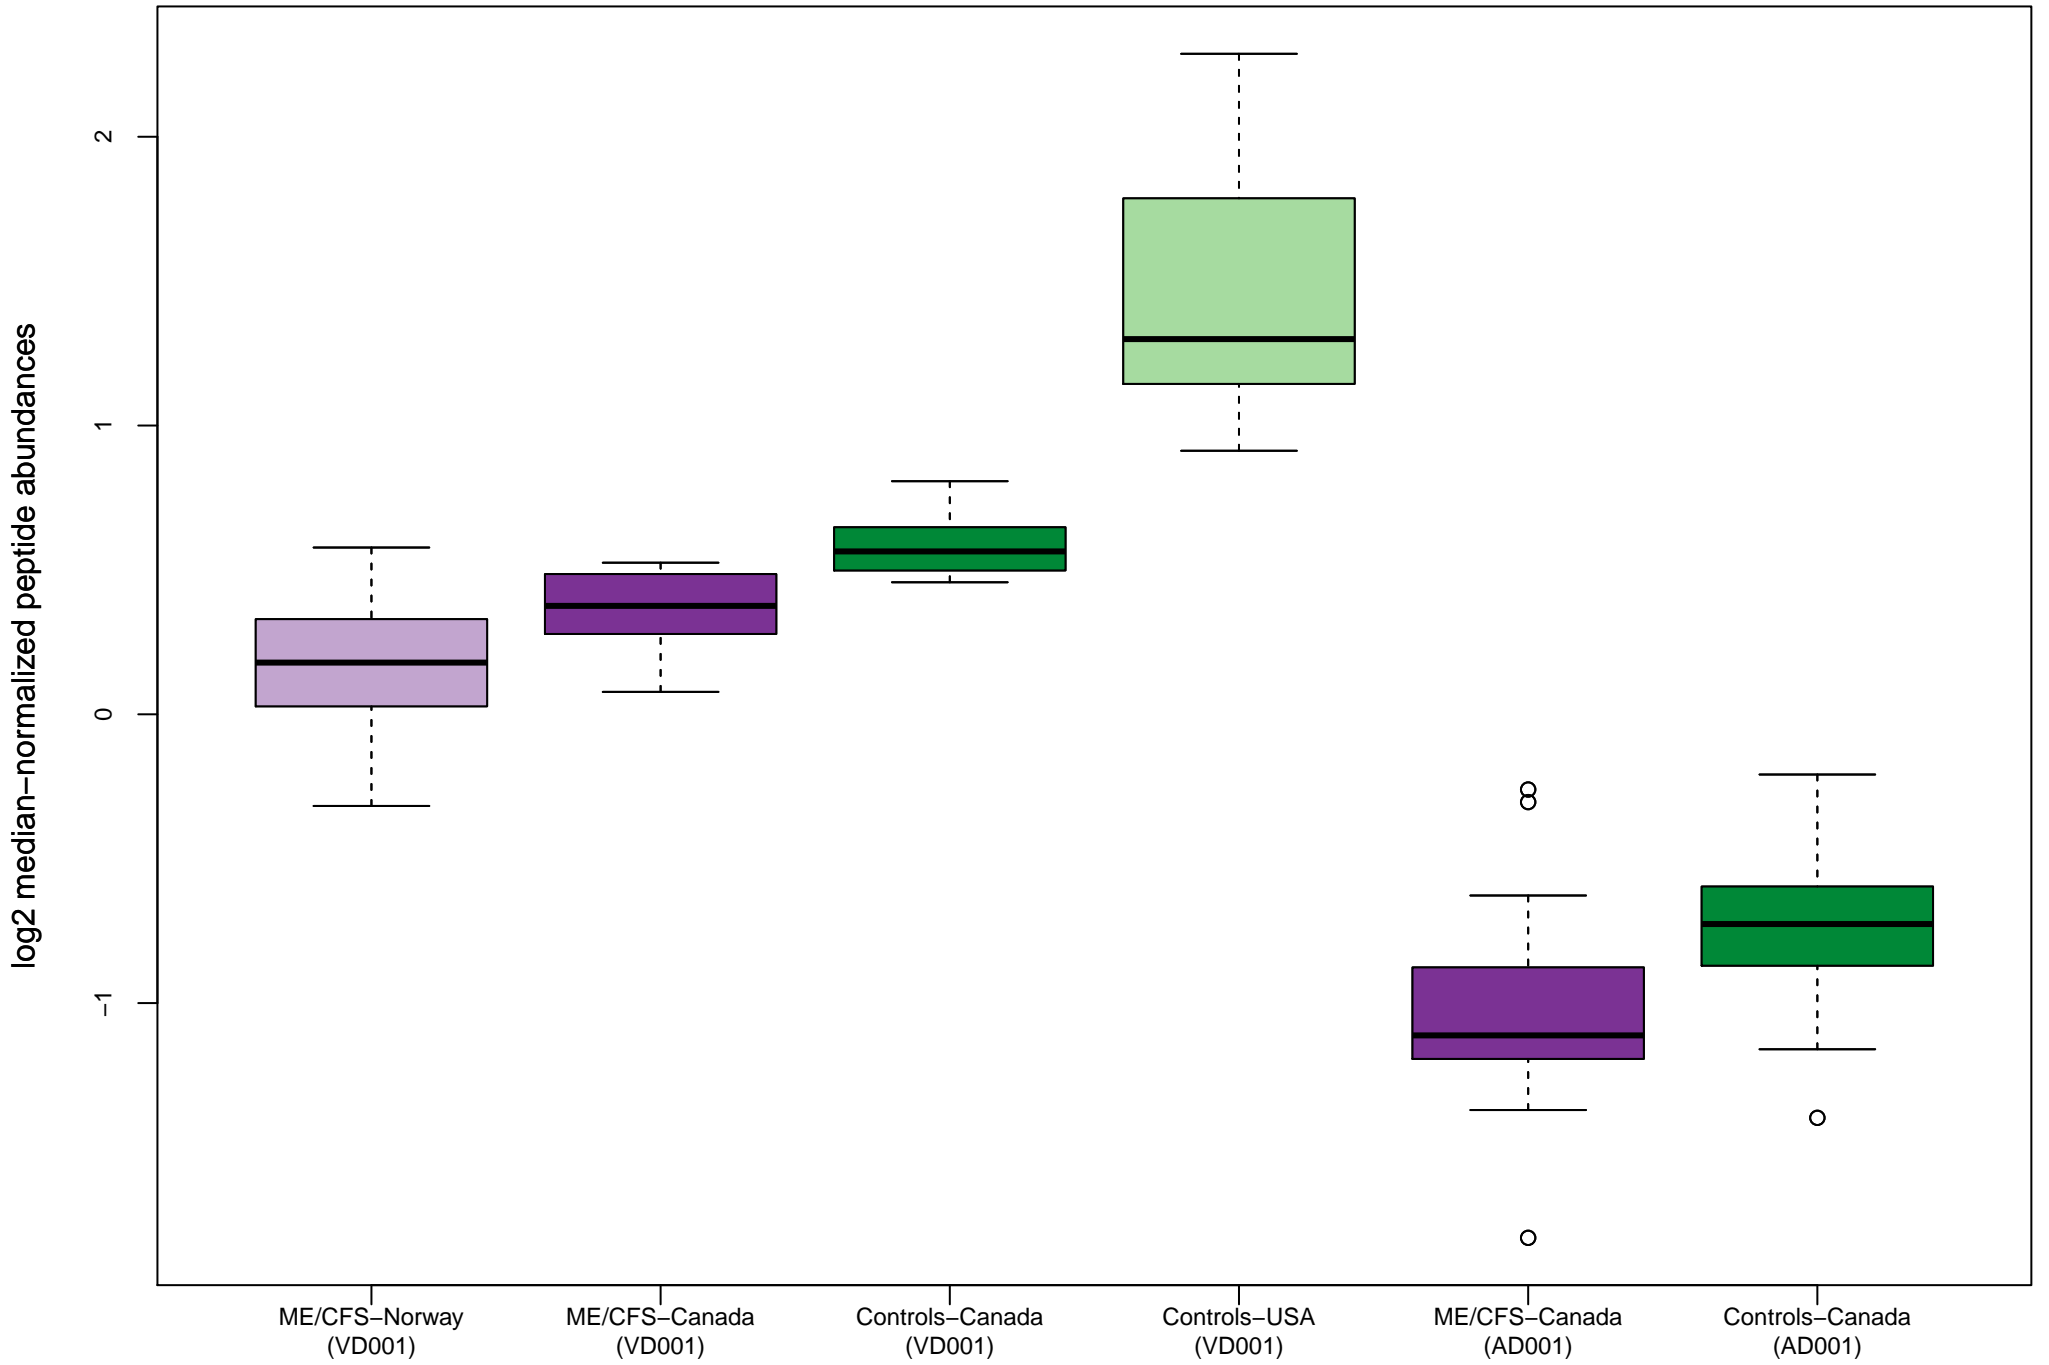

# WALWARWFRYWV

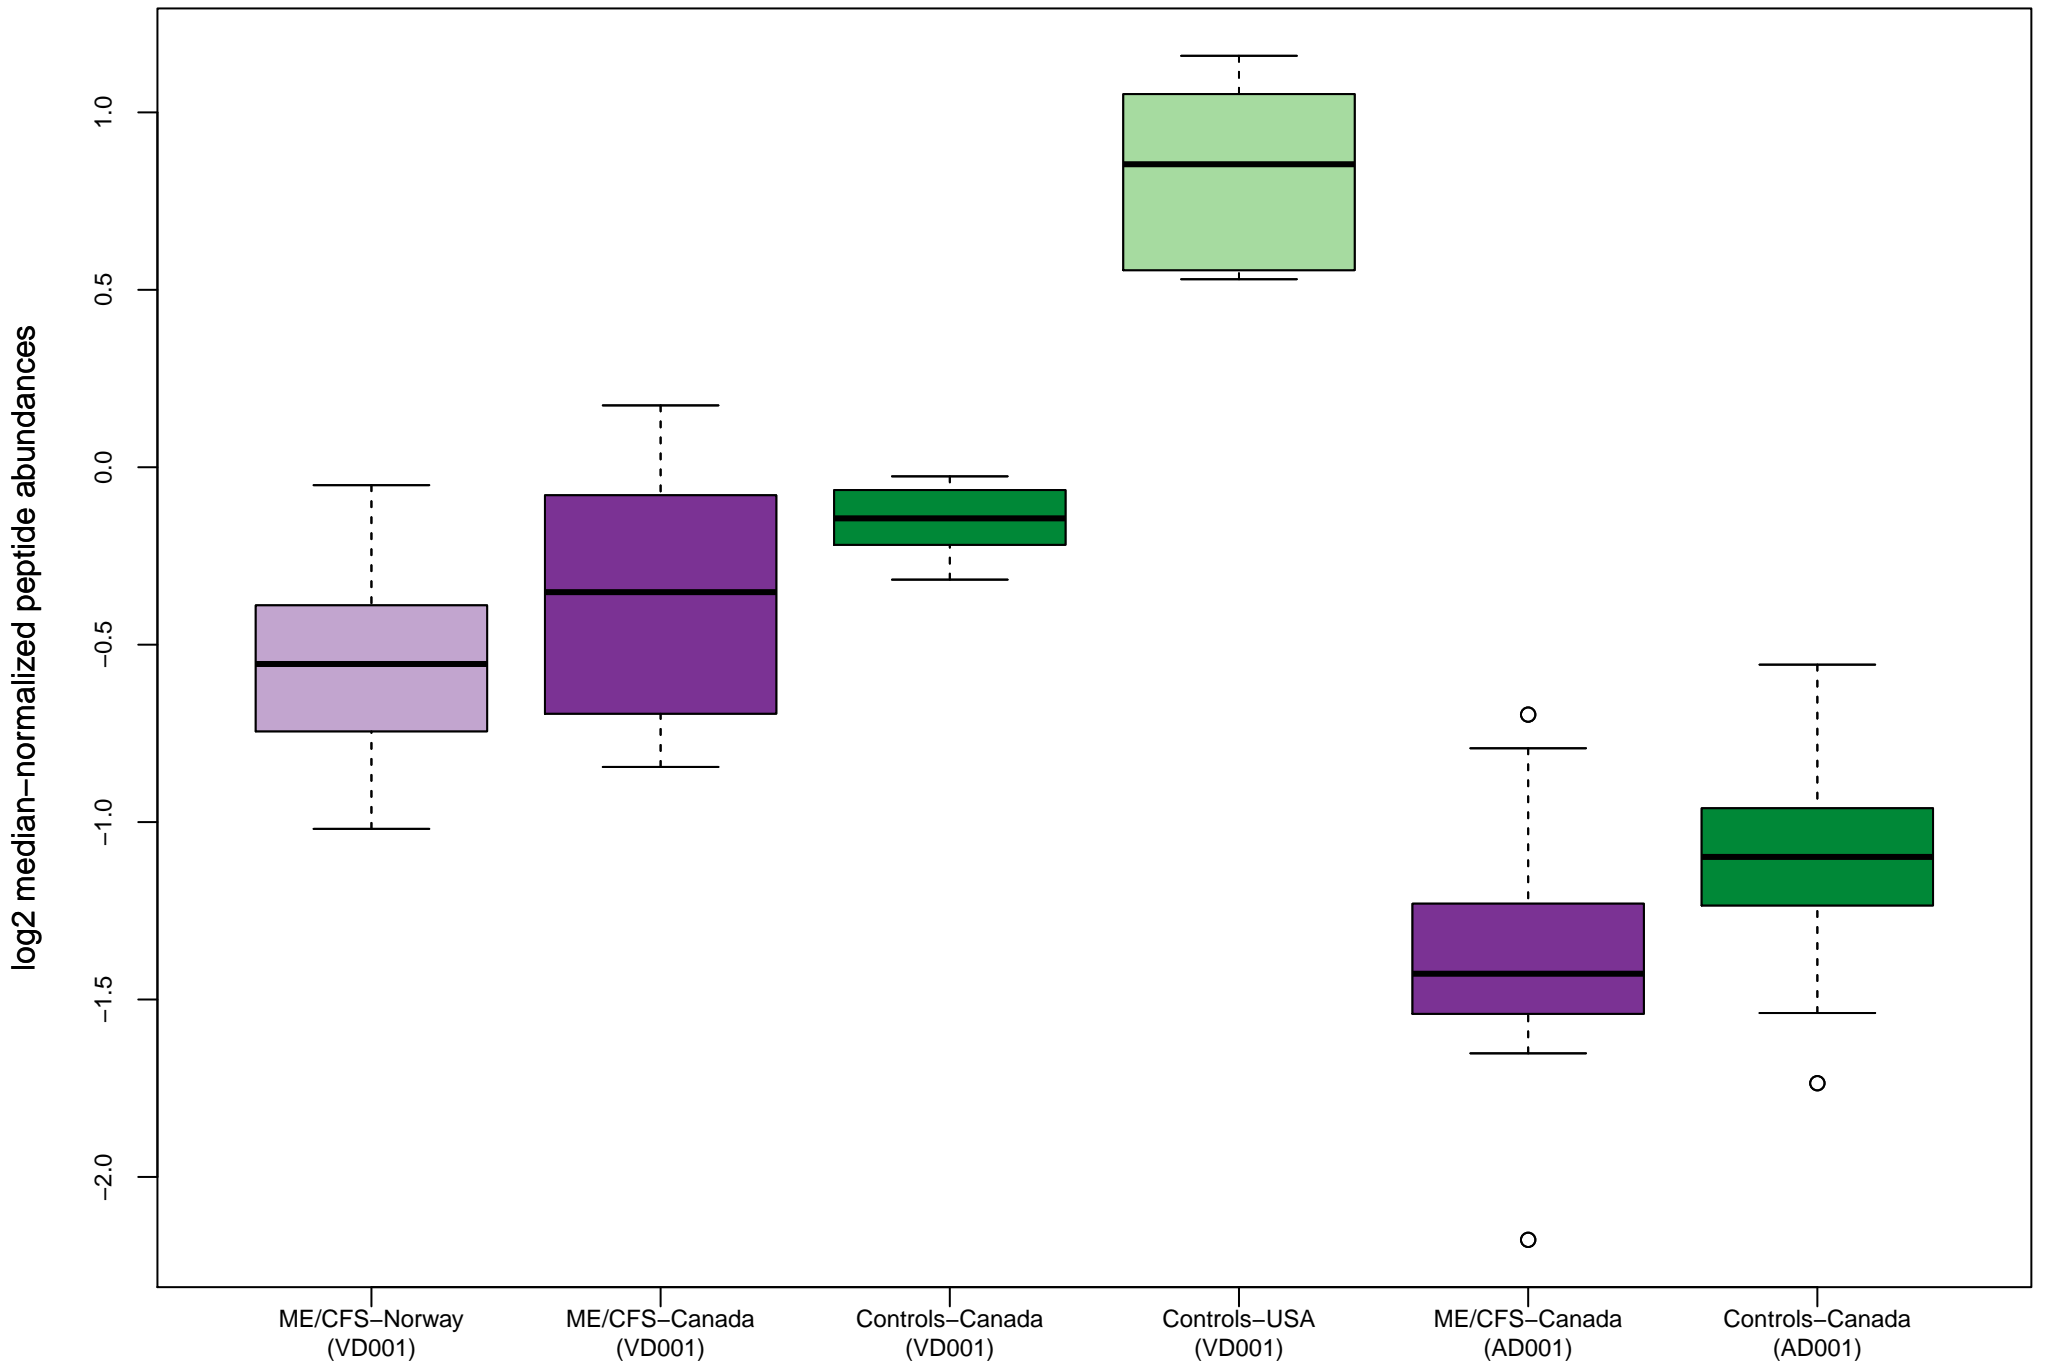

# WAVRLSGVLSG

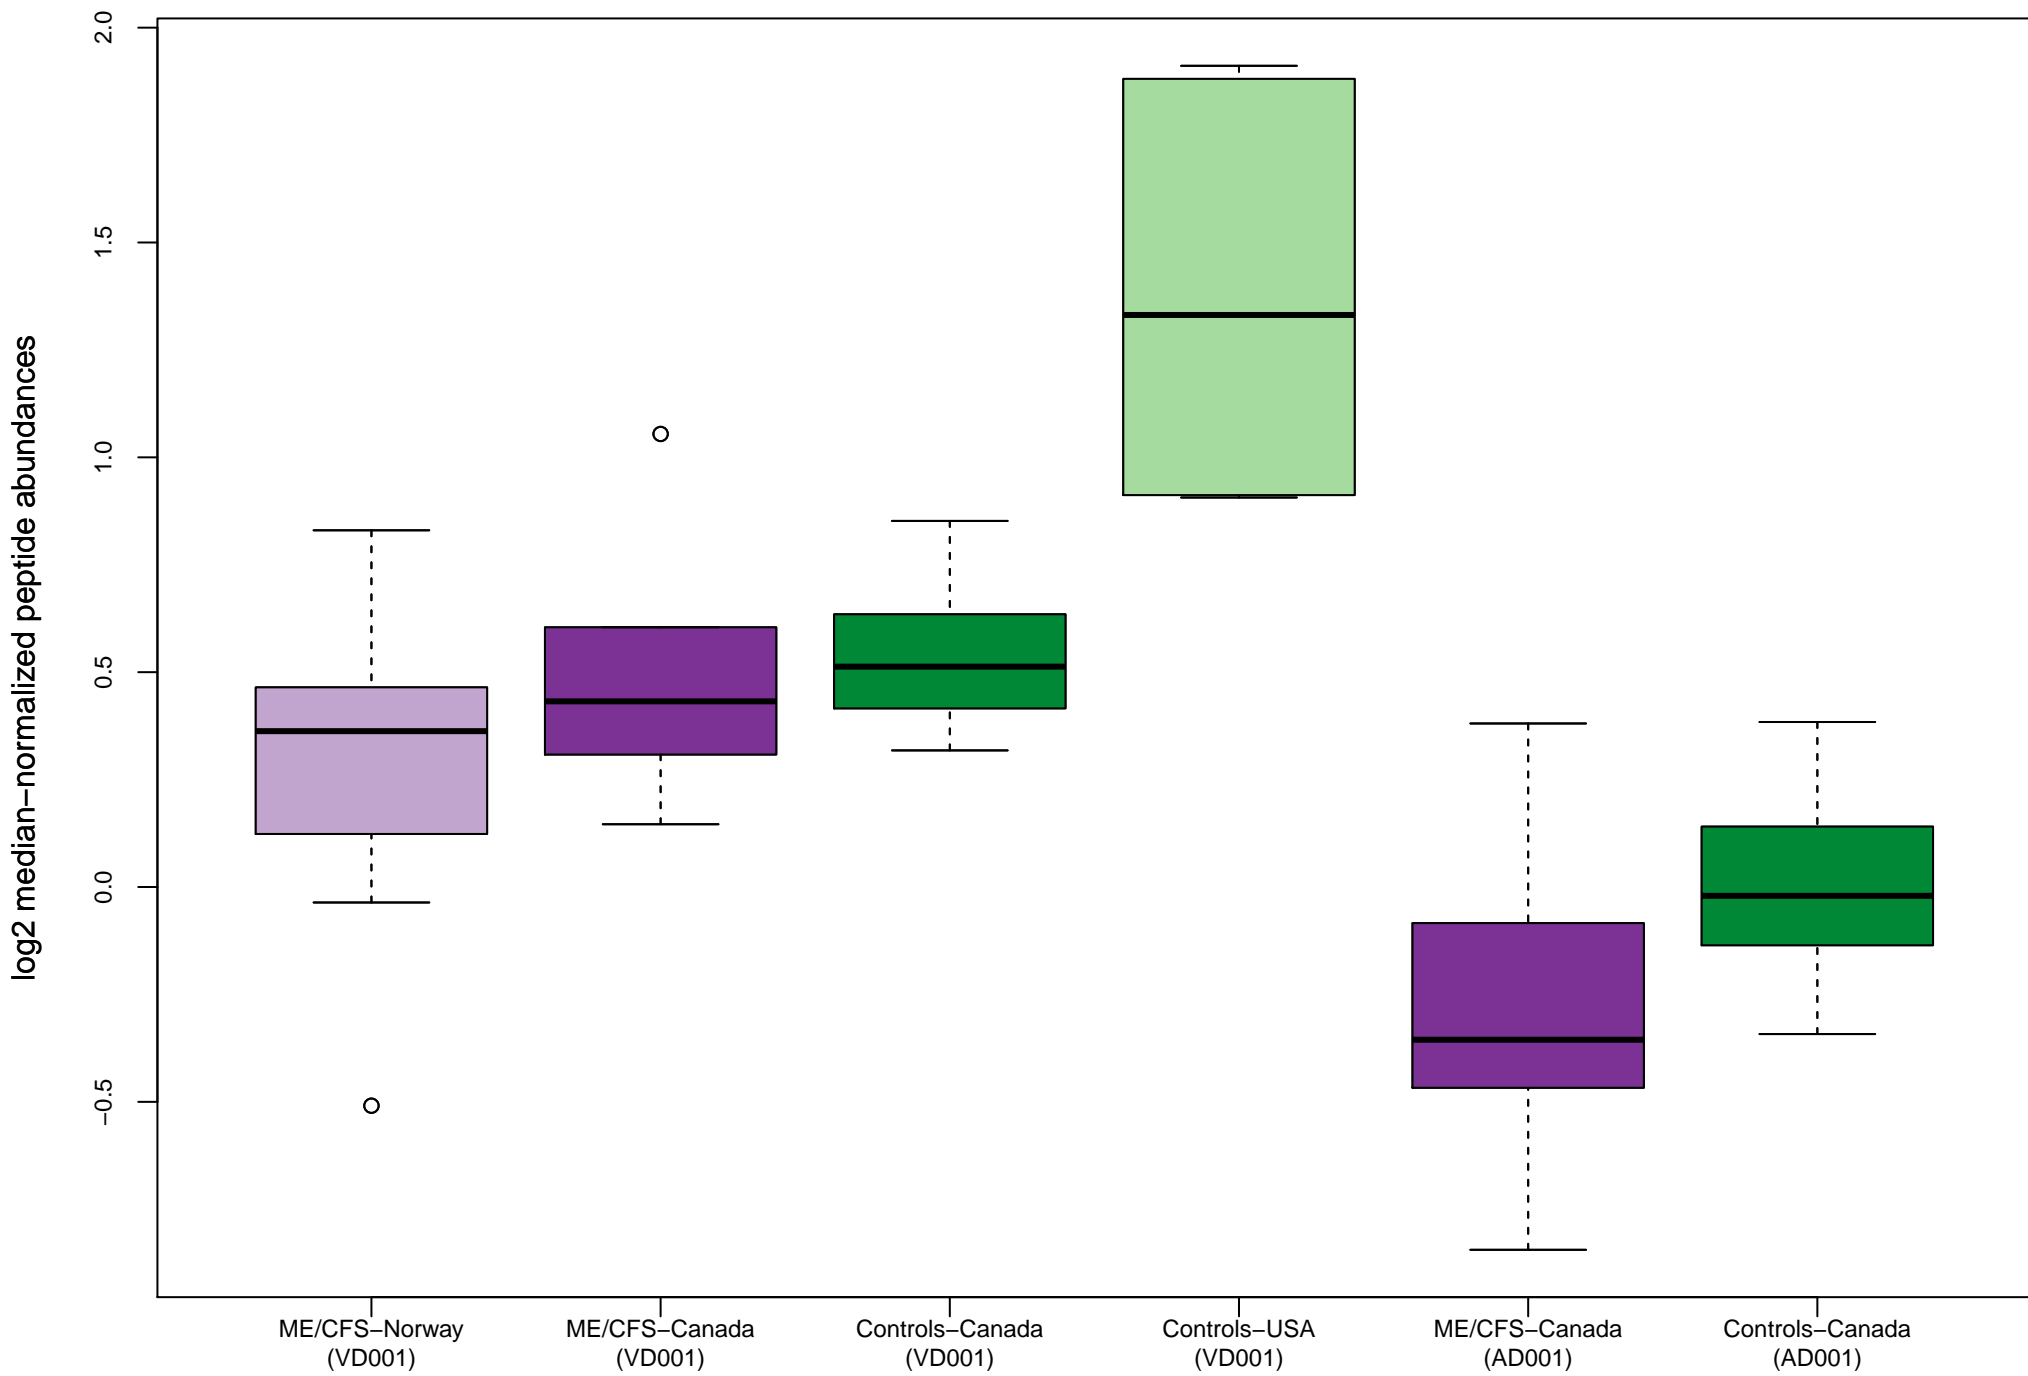



# WFFKFRGVALSG

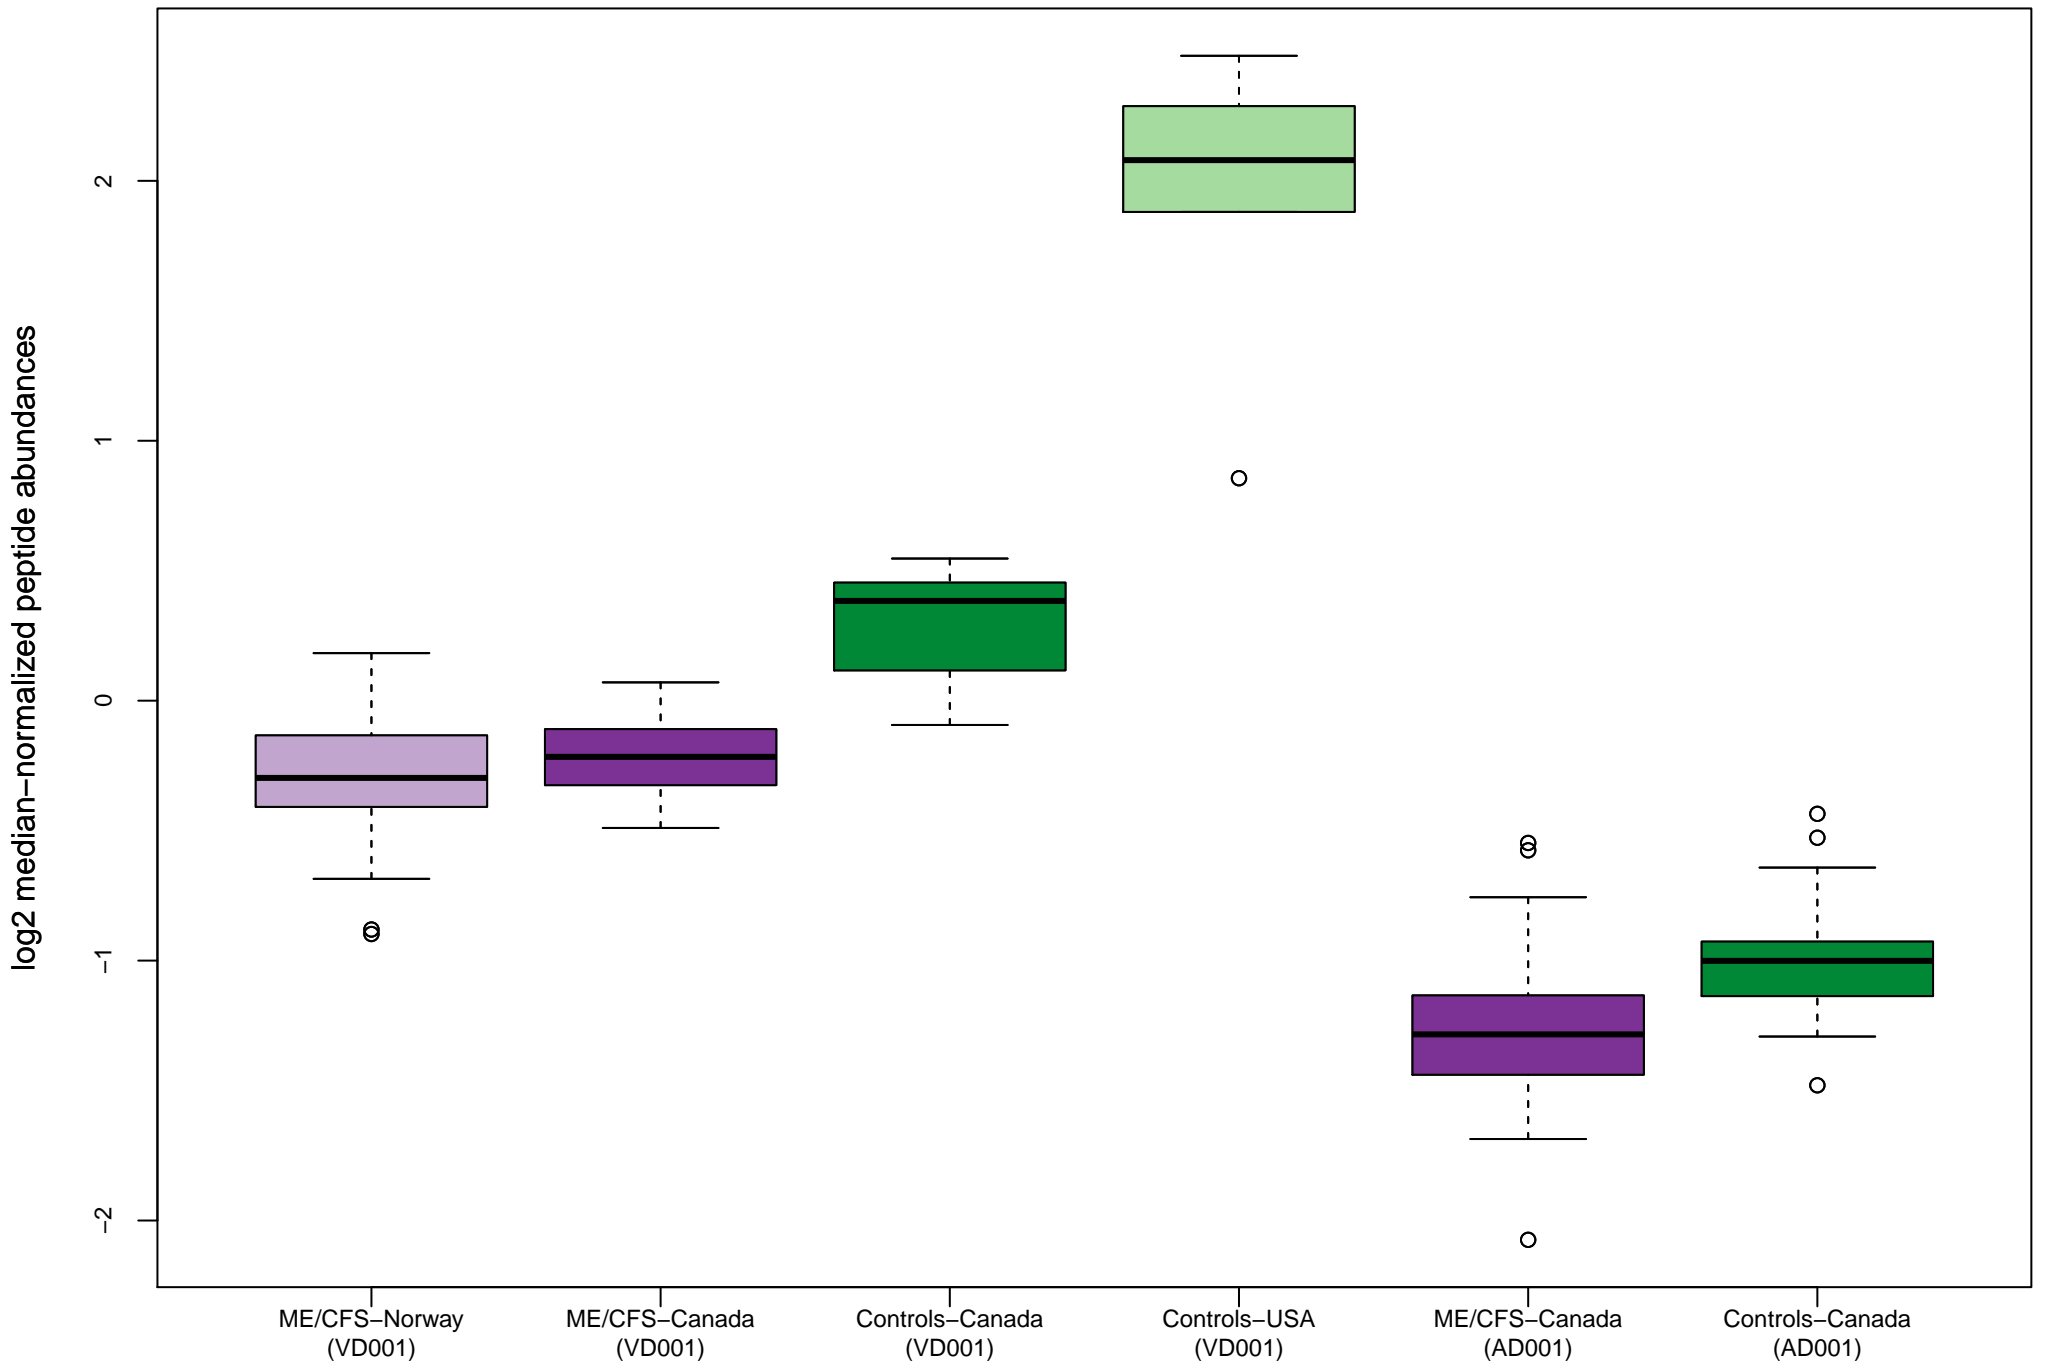

# WFGRLRYALVAG

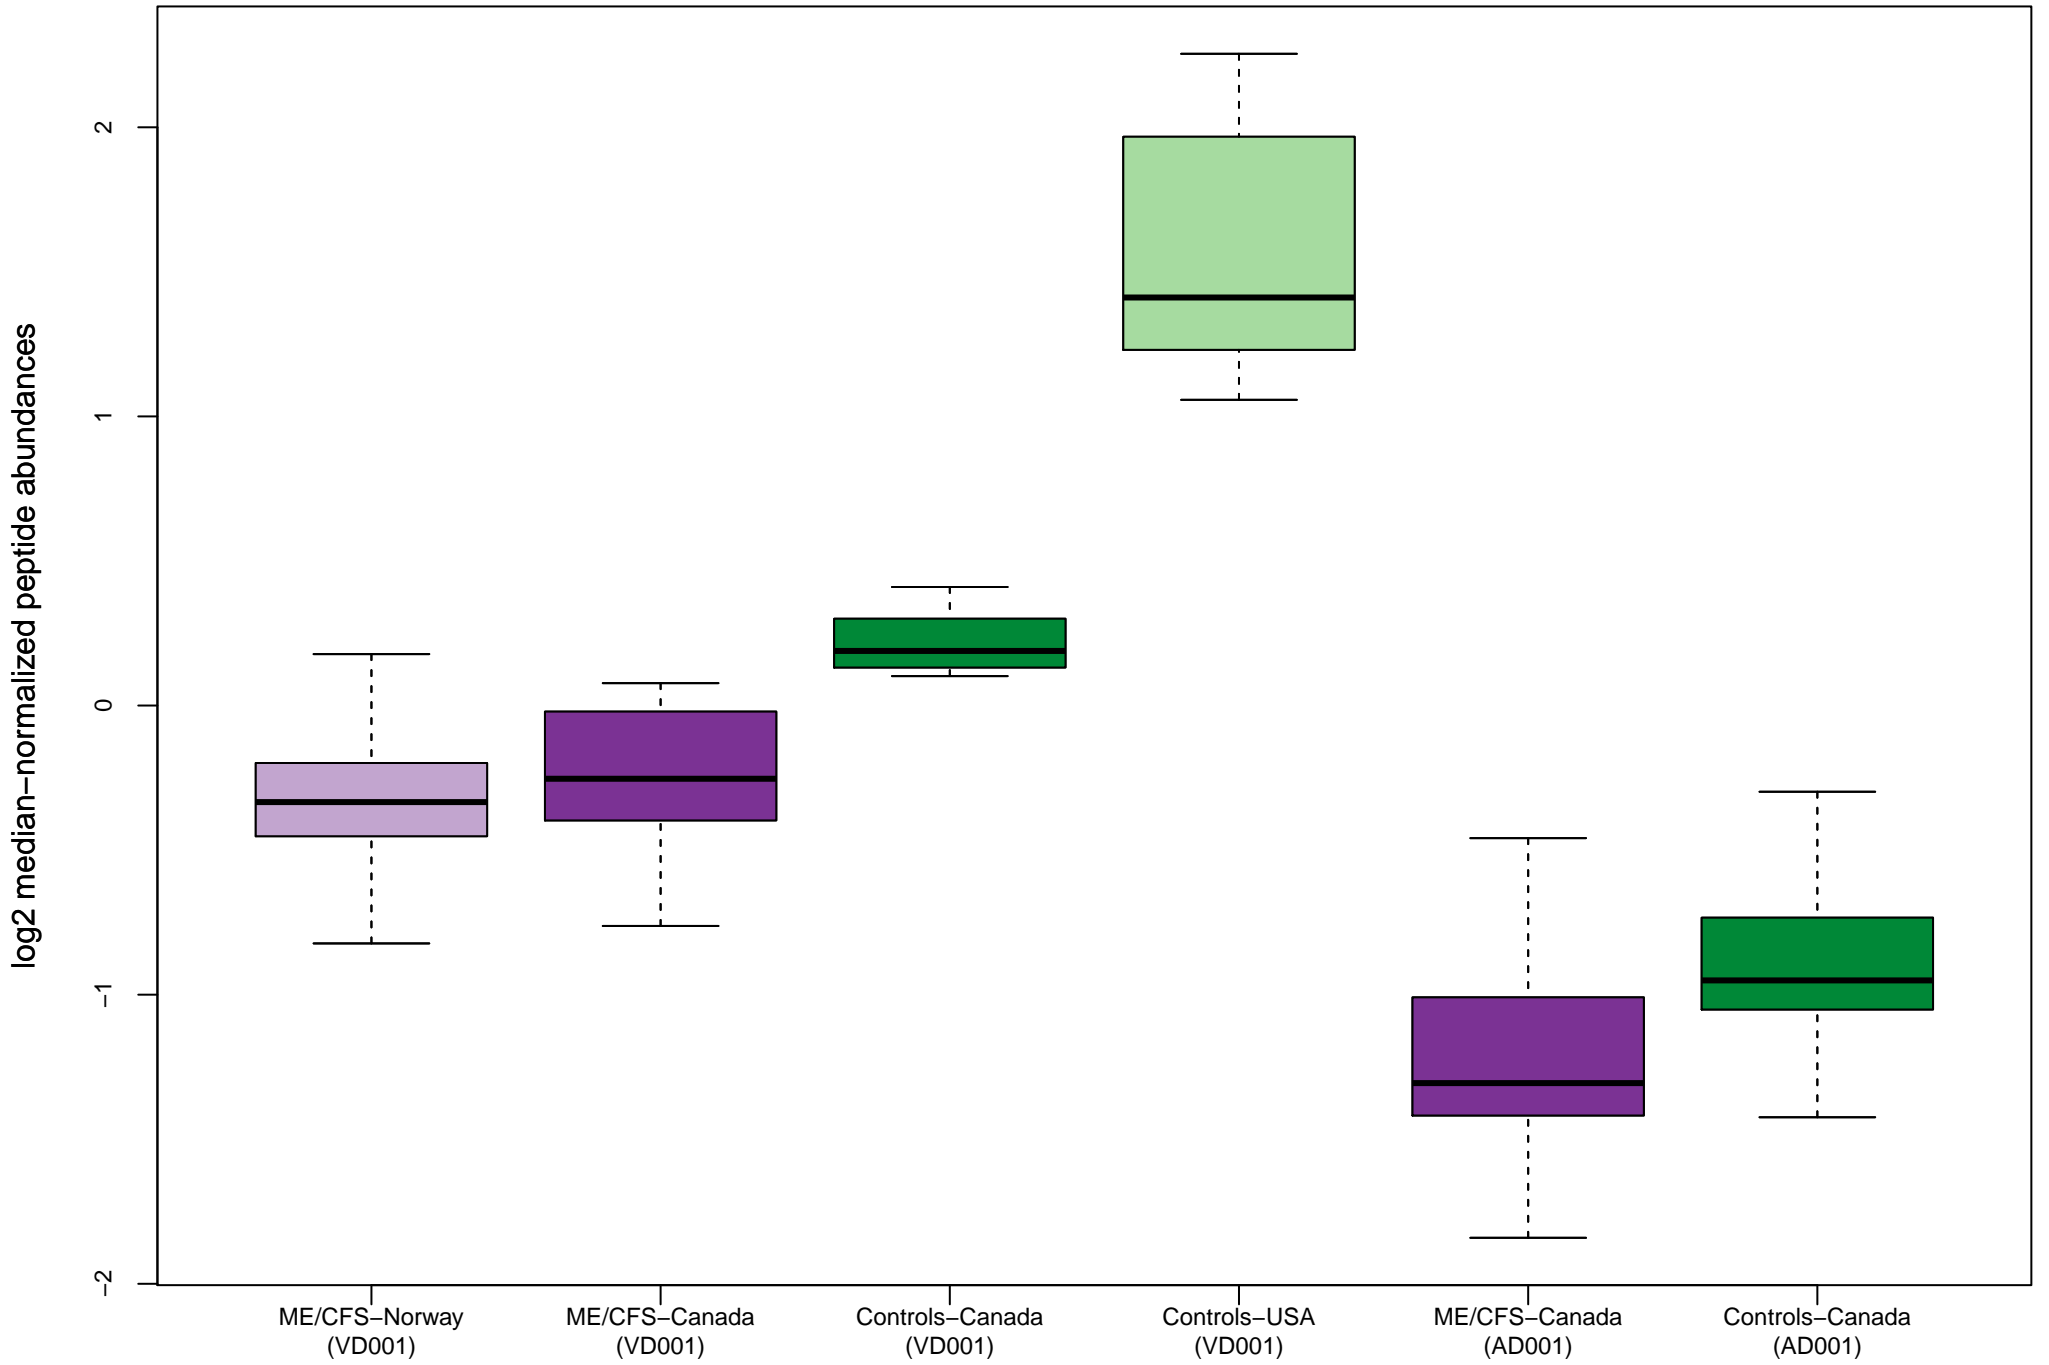

# WFKALFFRYKSA

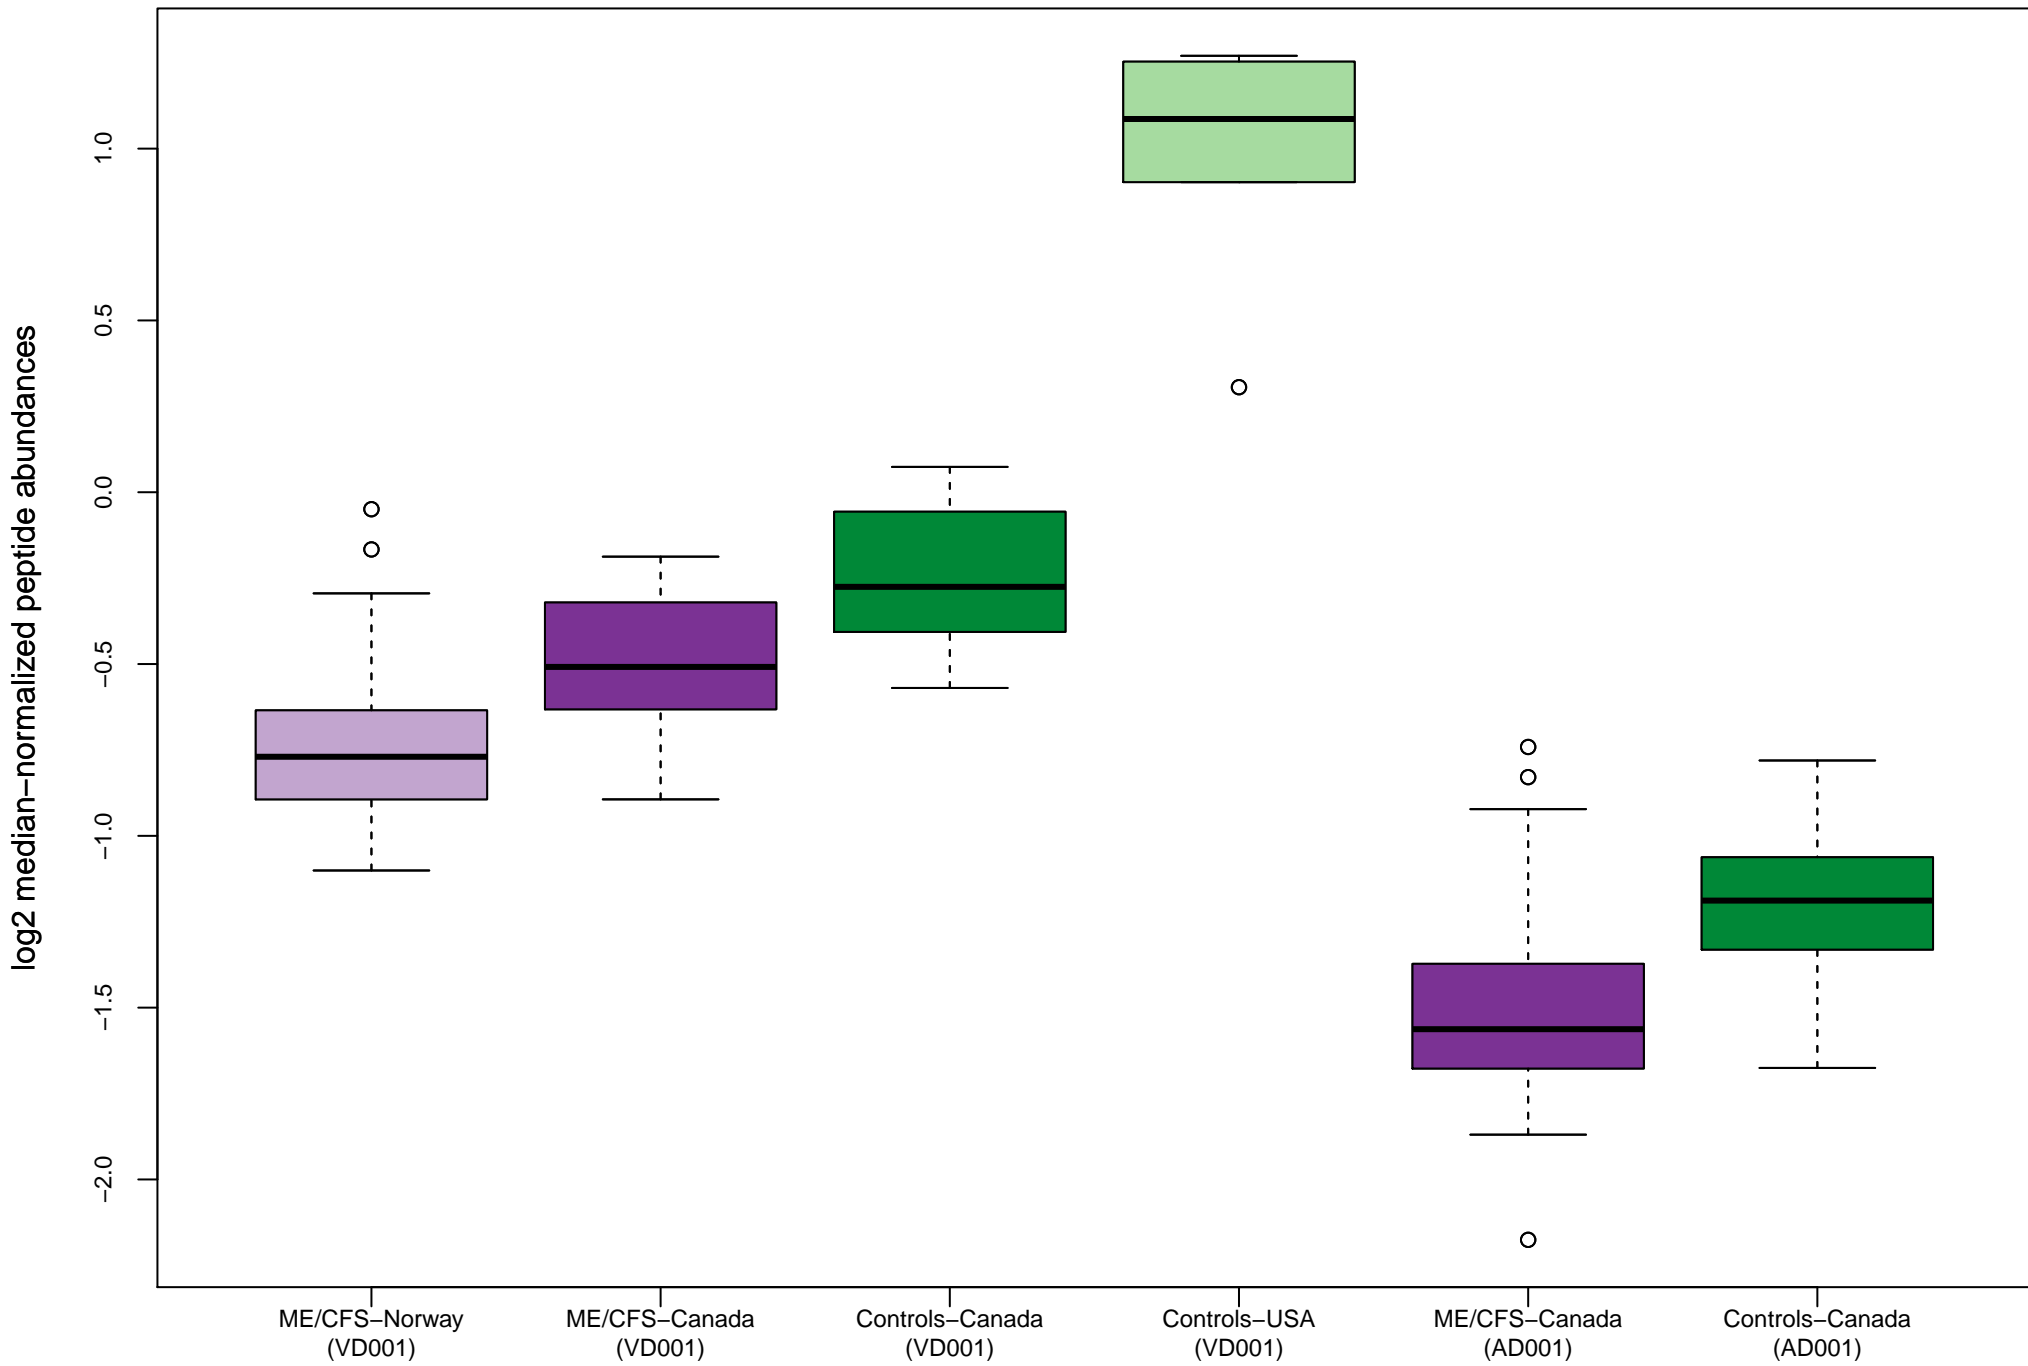

# WFKPWSPYWKVS

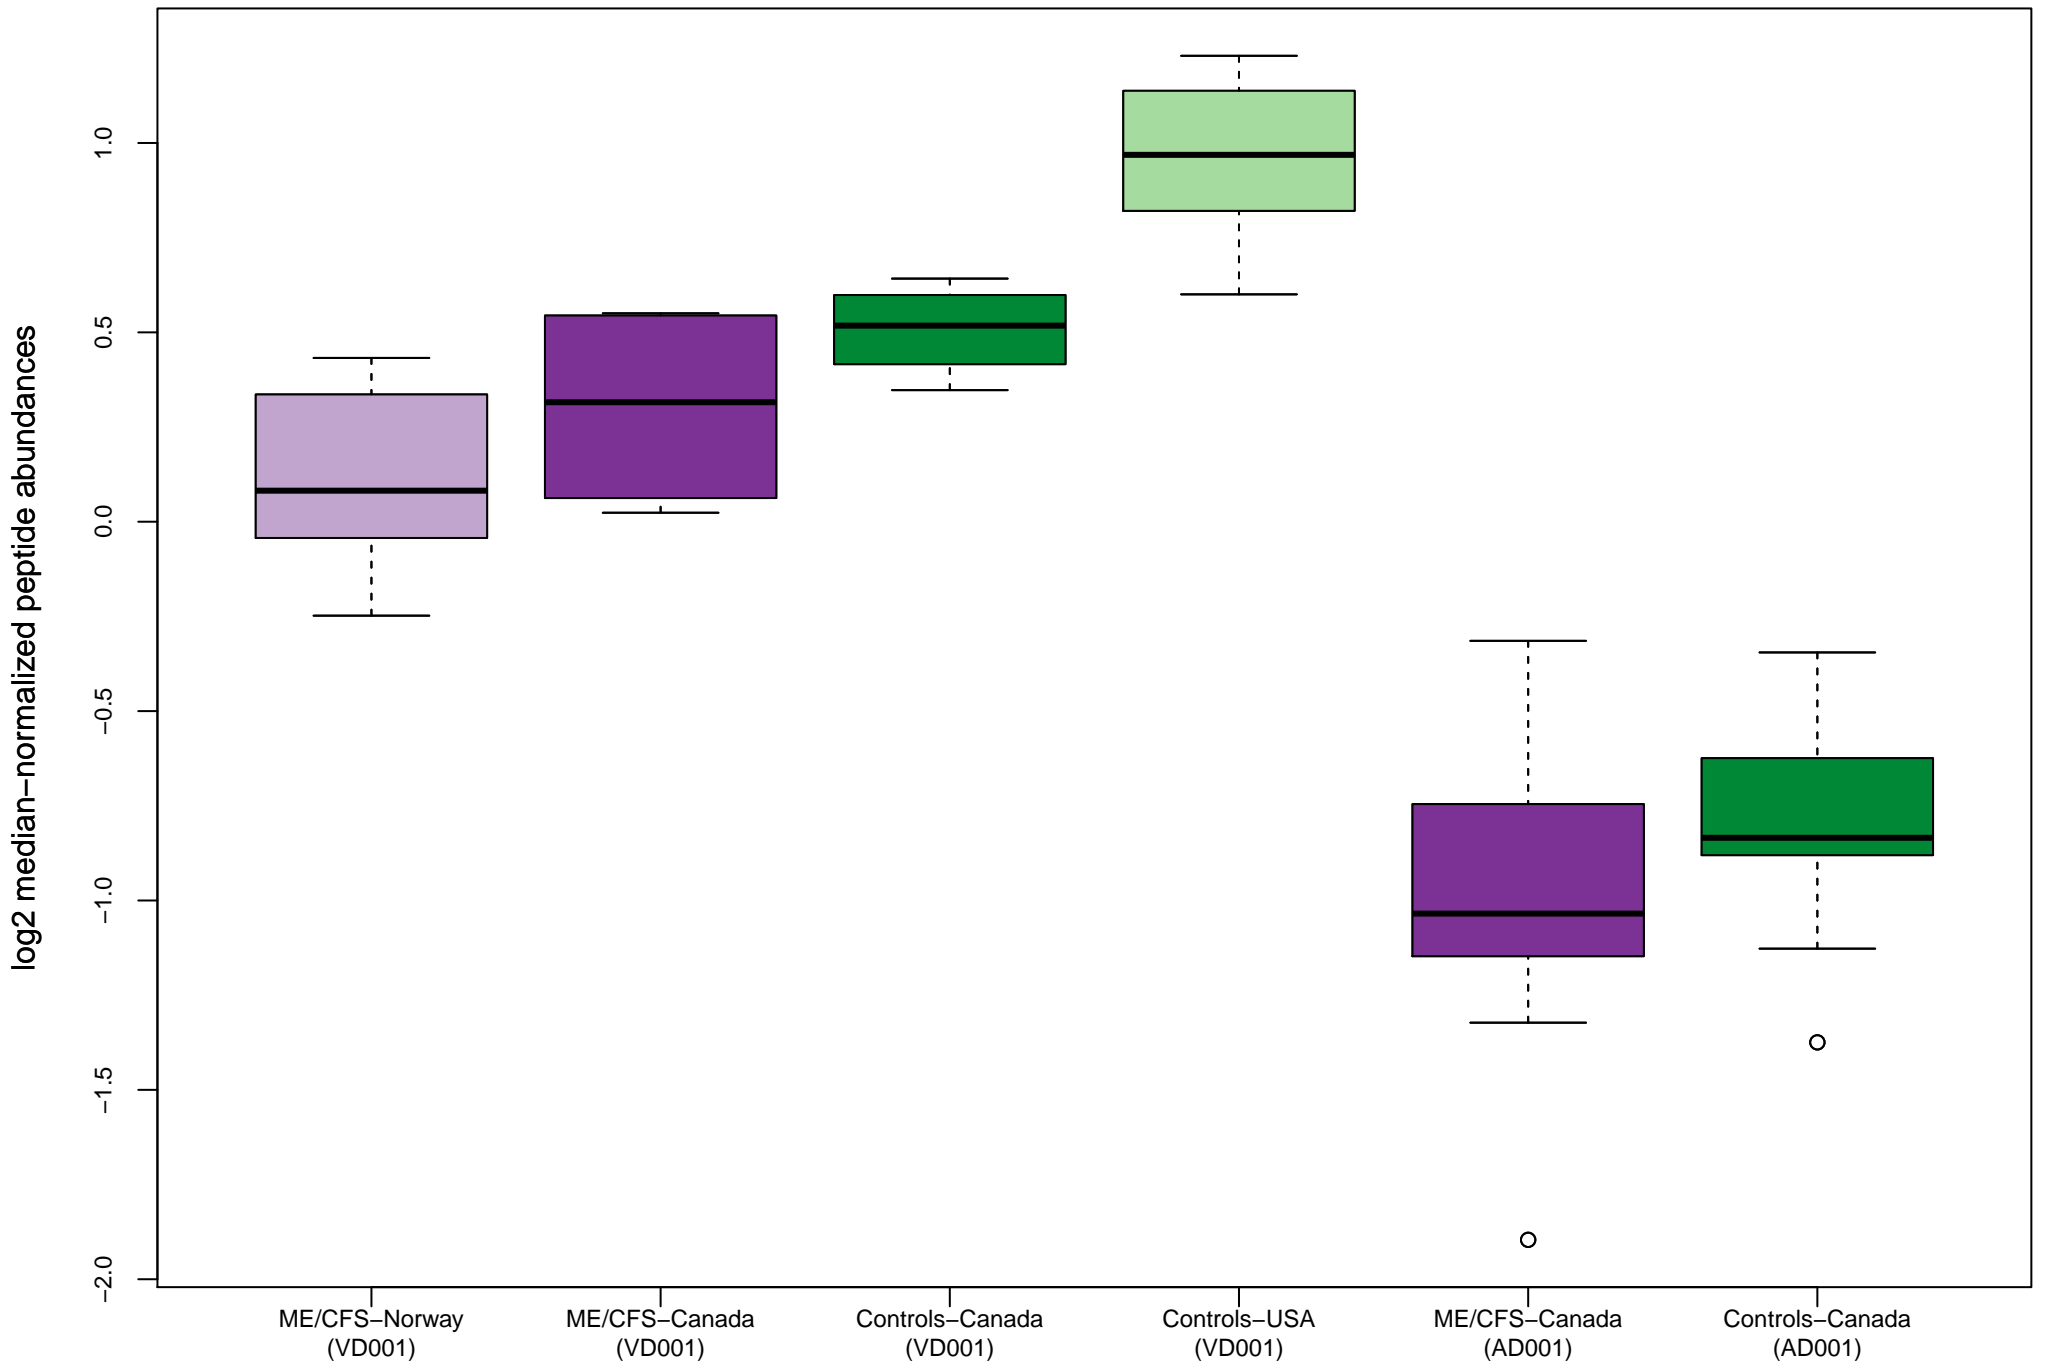

# WFLPSRSGVALS

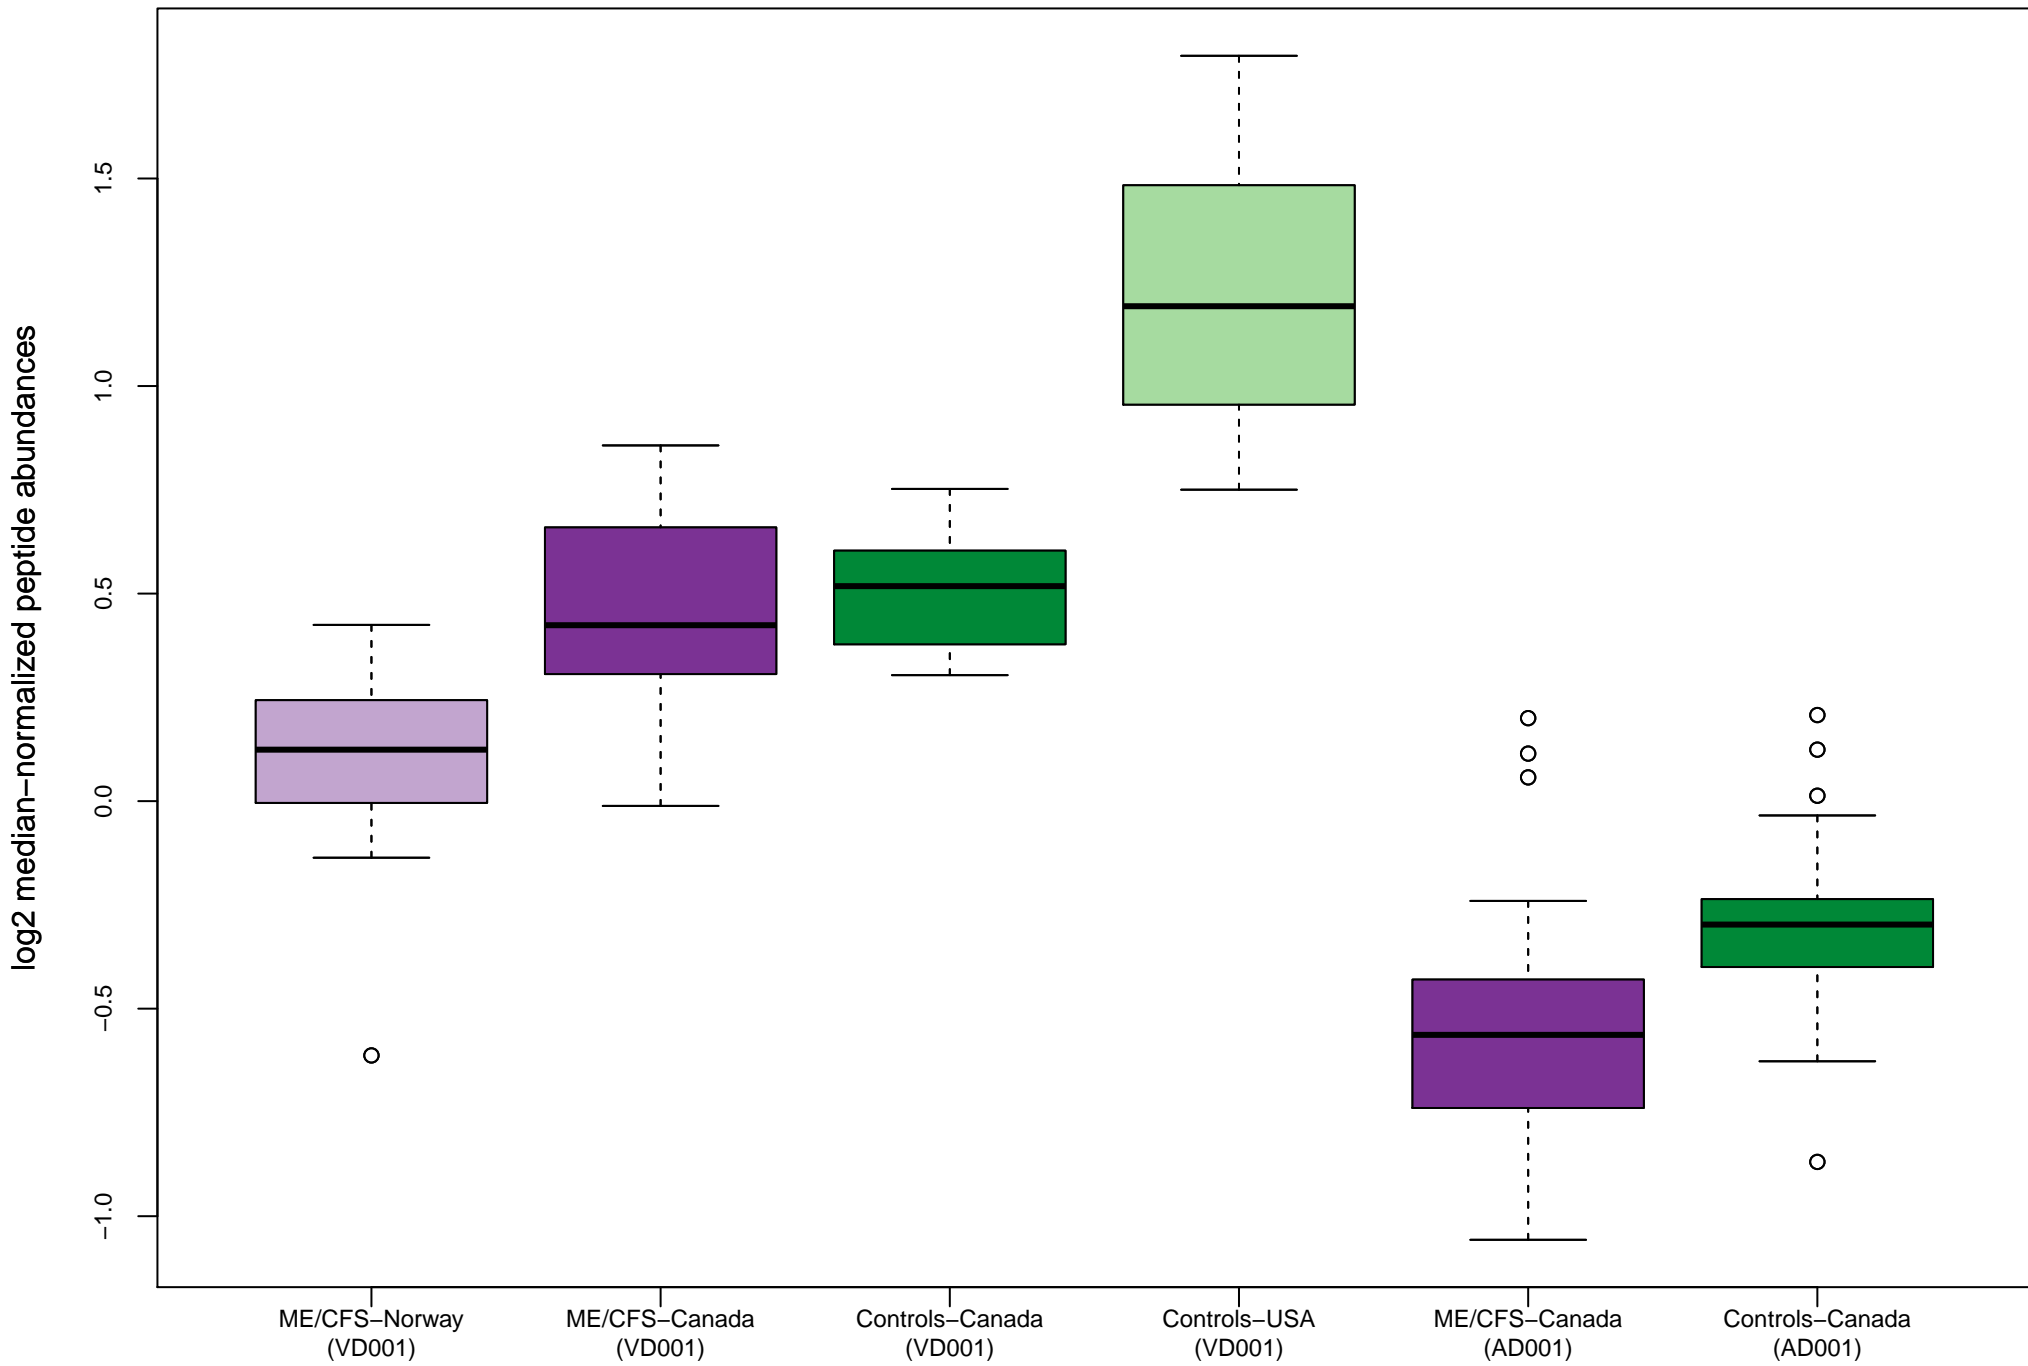

# WFRWPKVLWLSA

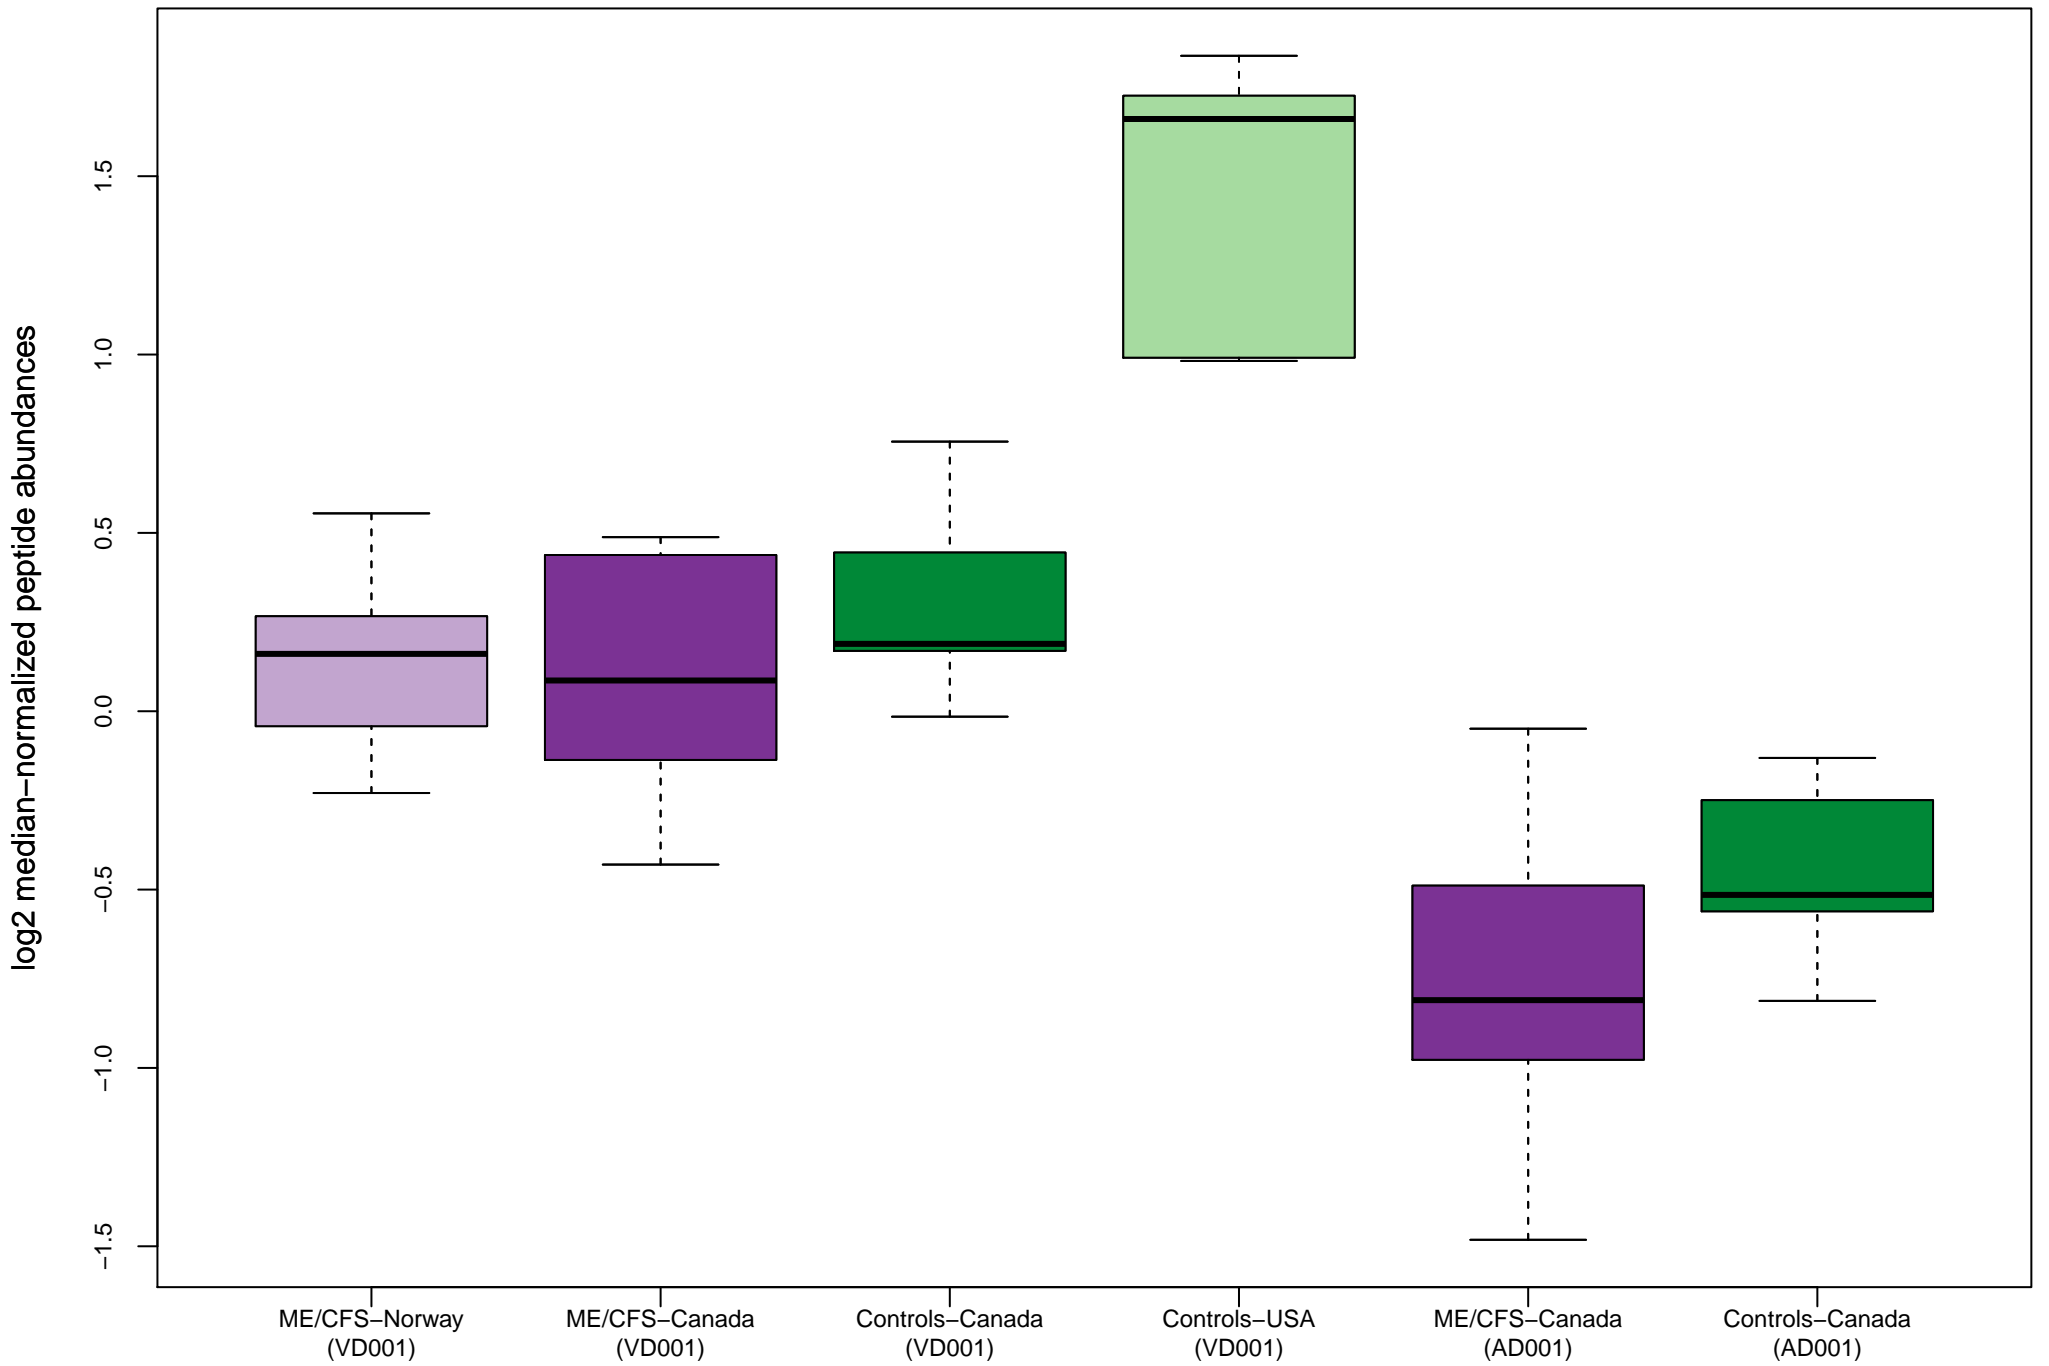

# WGQAVLFRKLSG

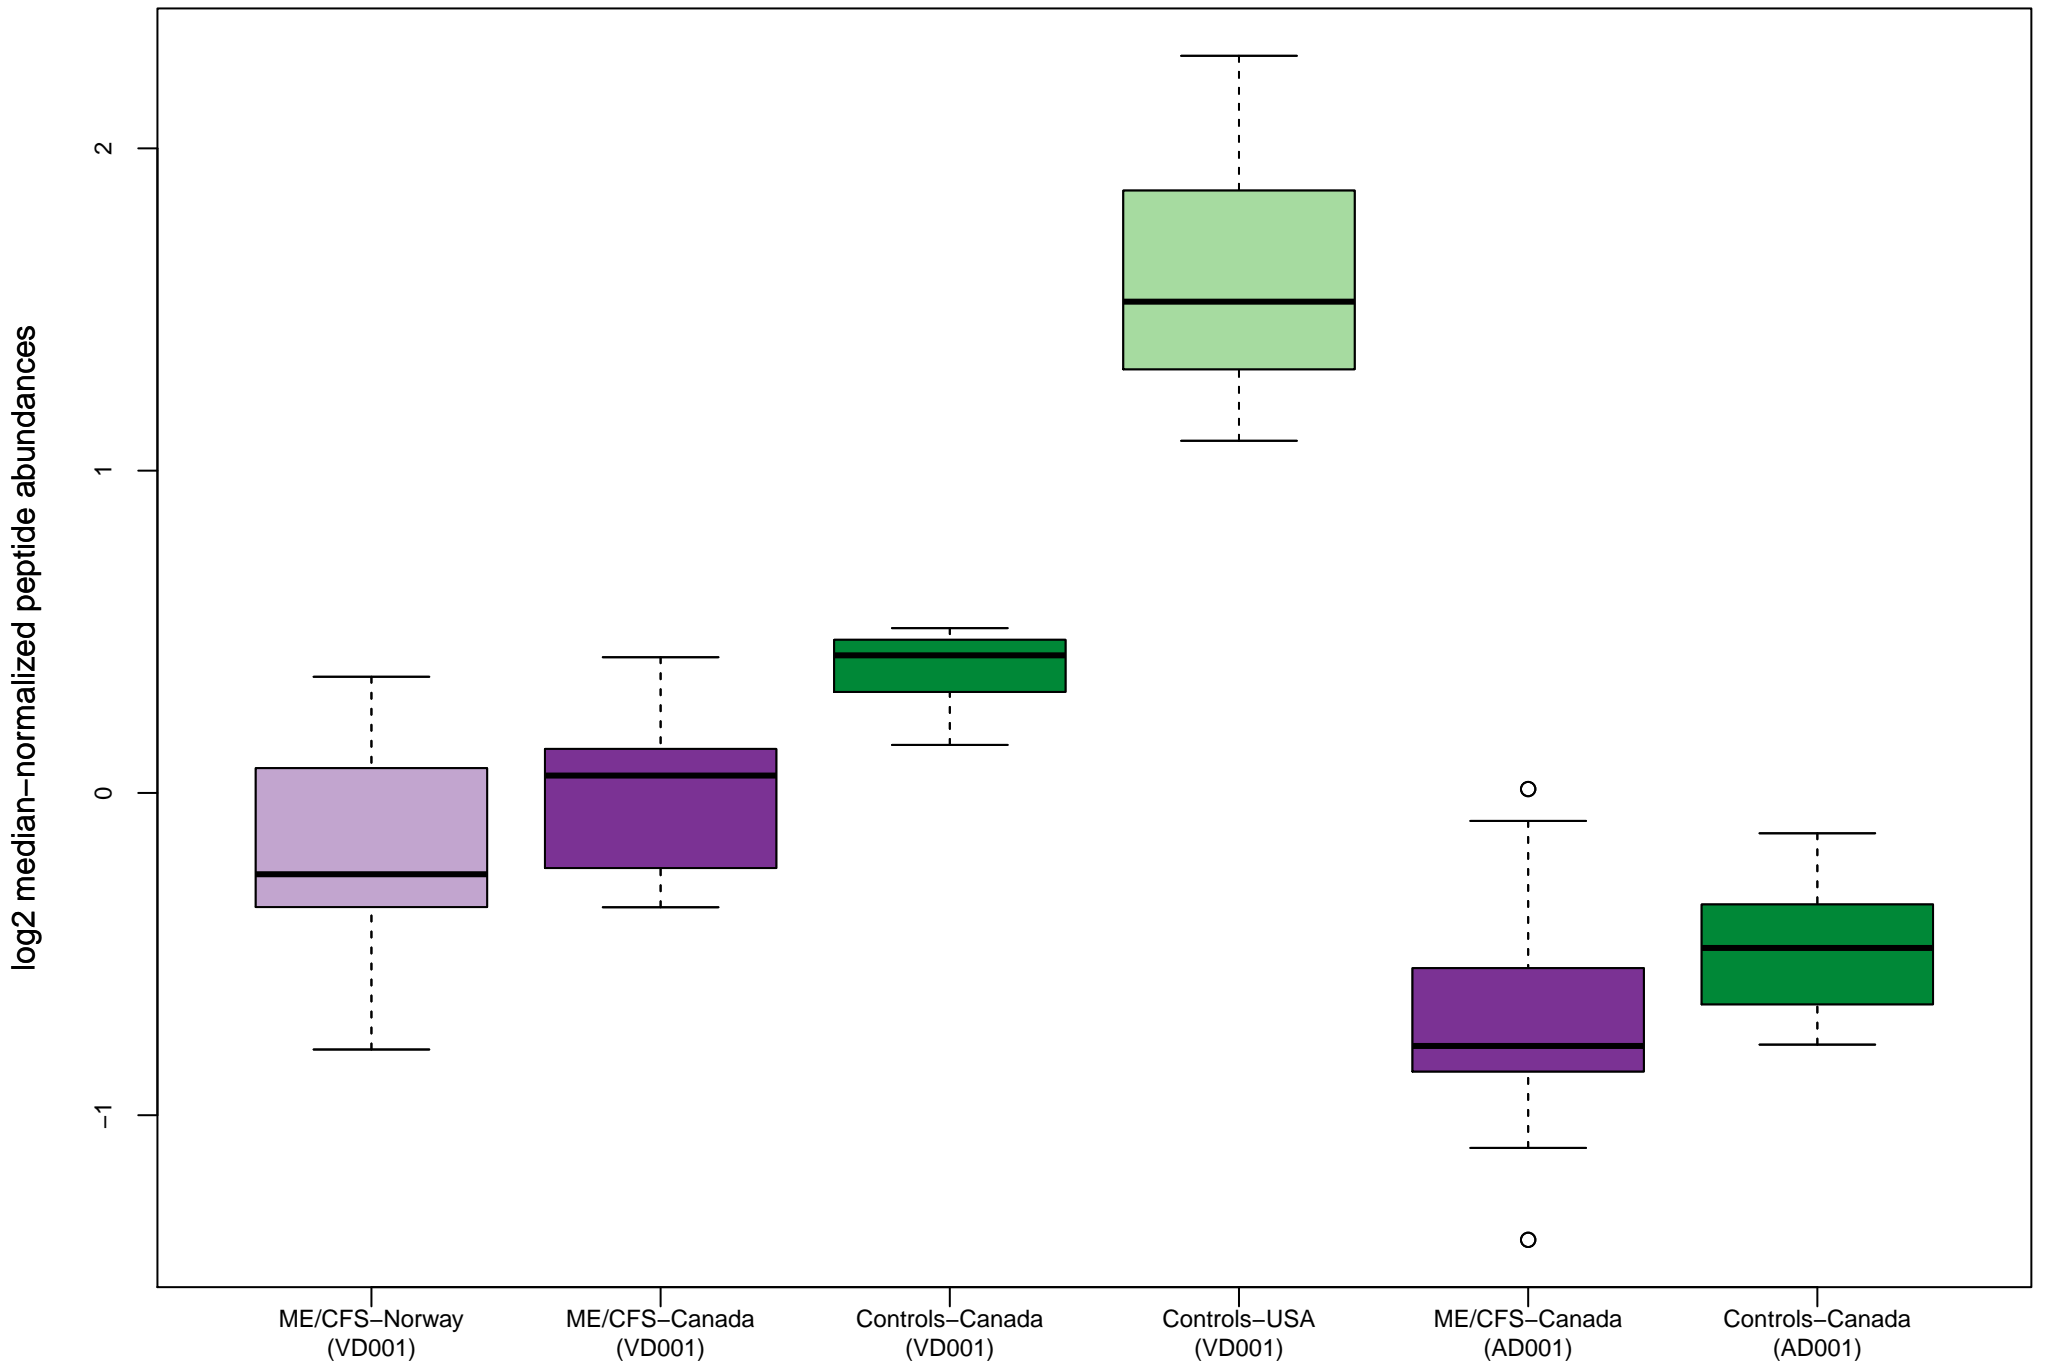

# WGRKPLQPYWLL

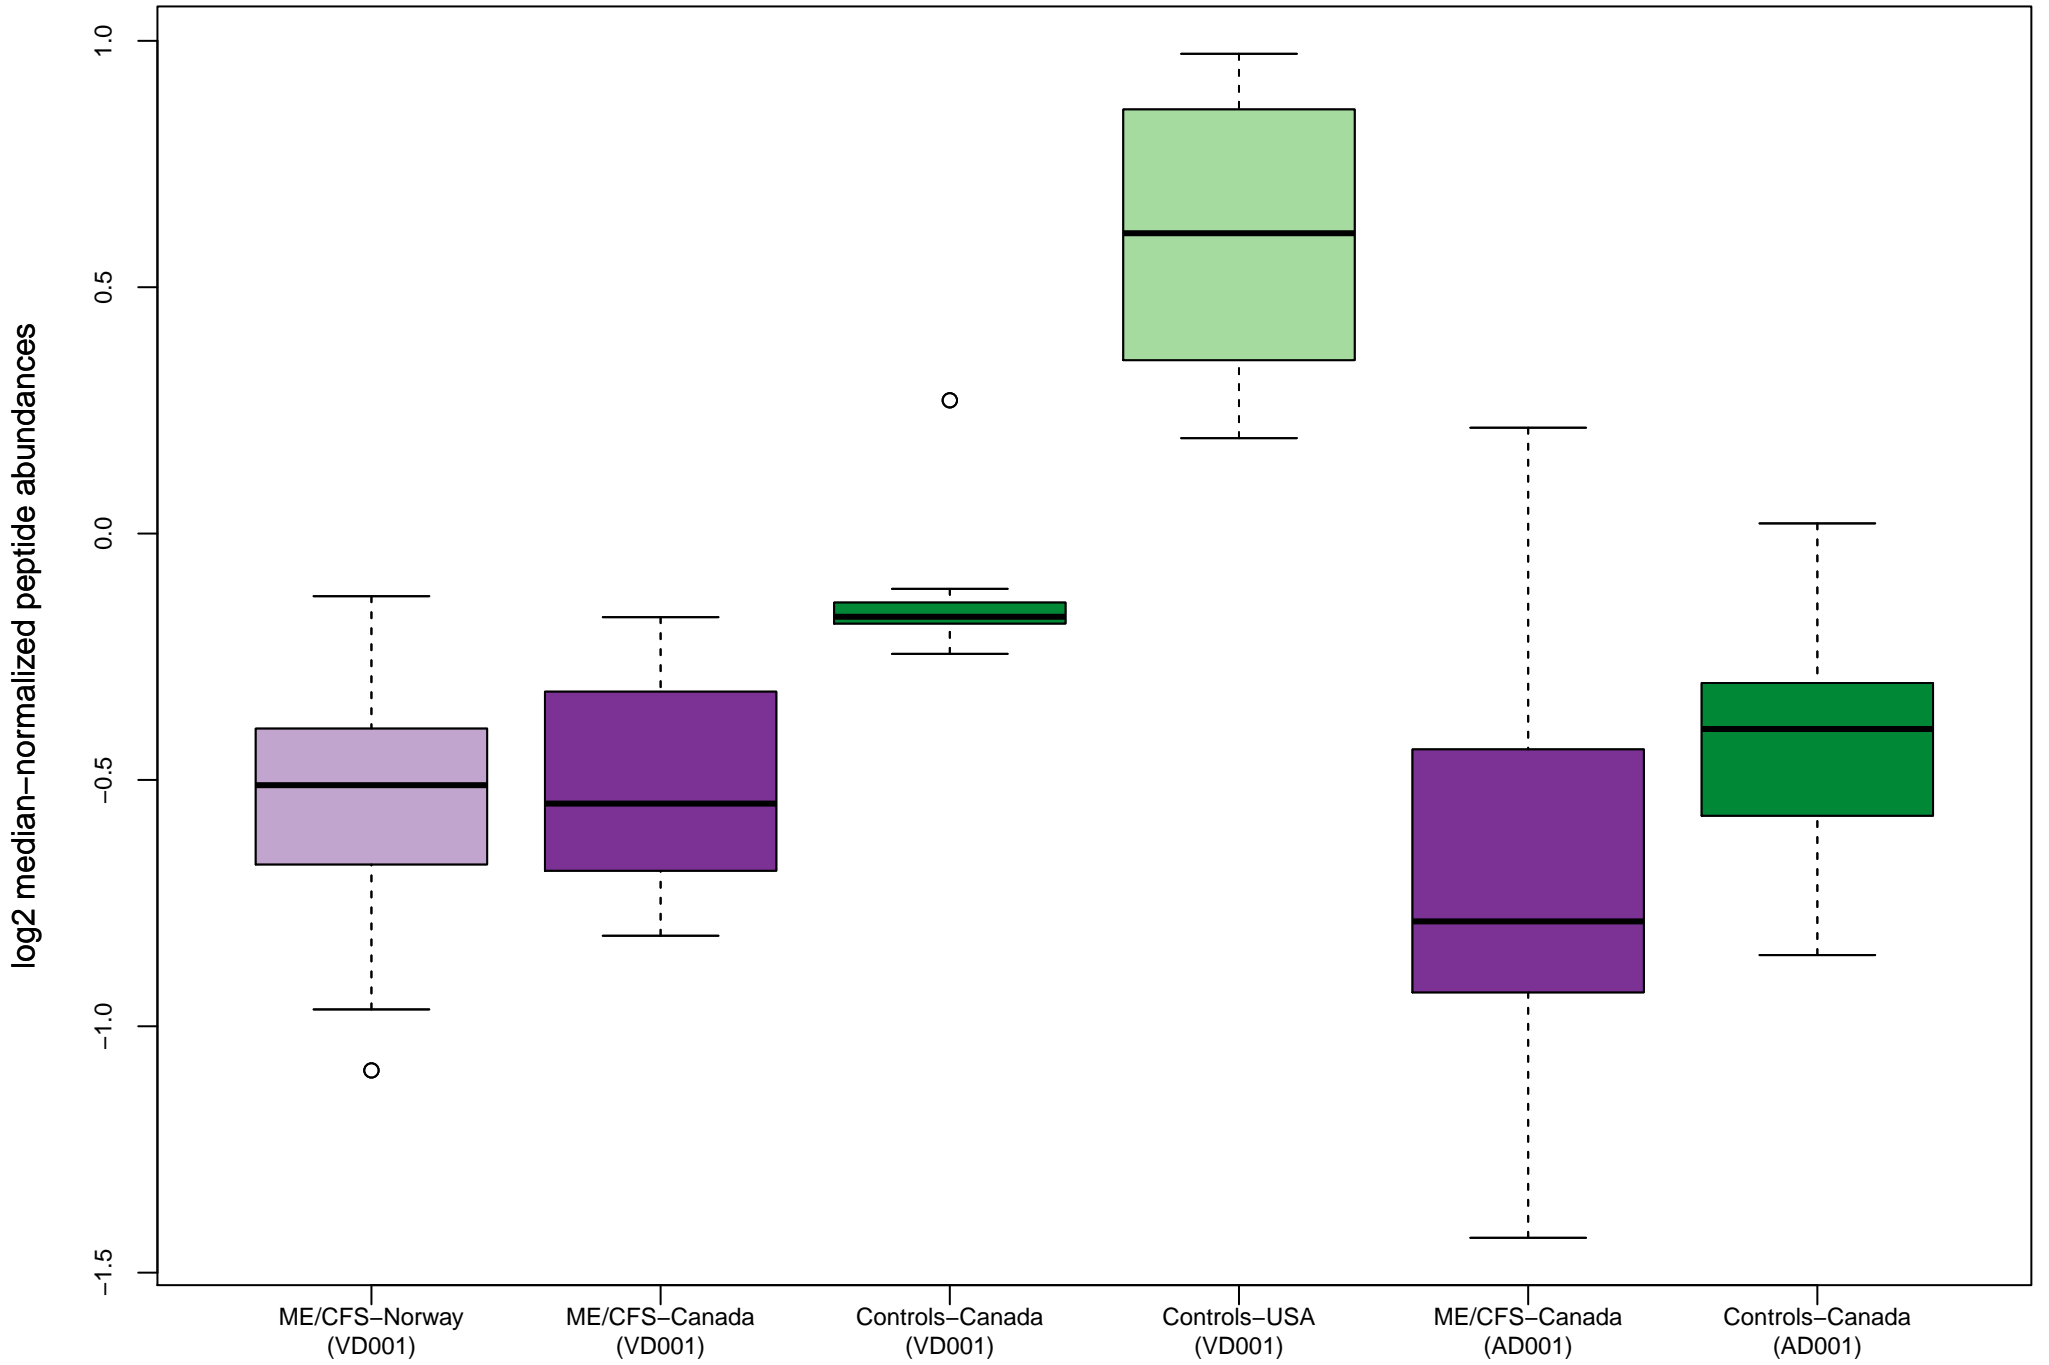



# WHVLRWREYWV

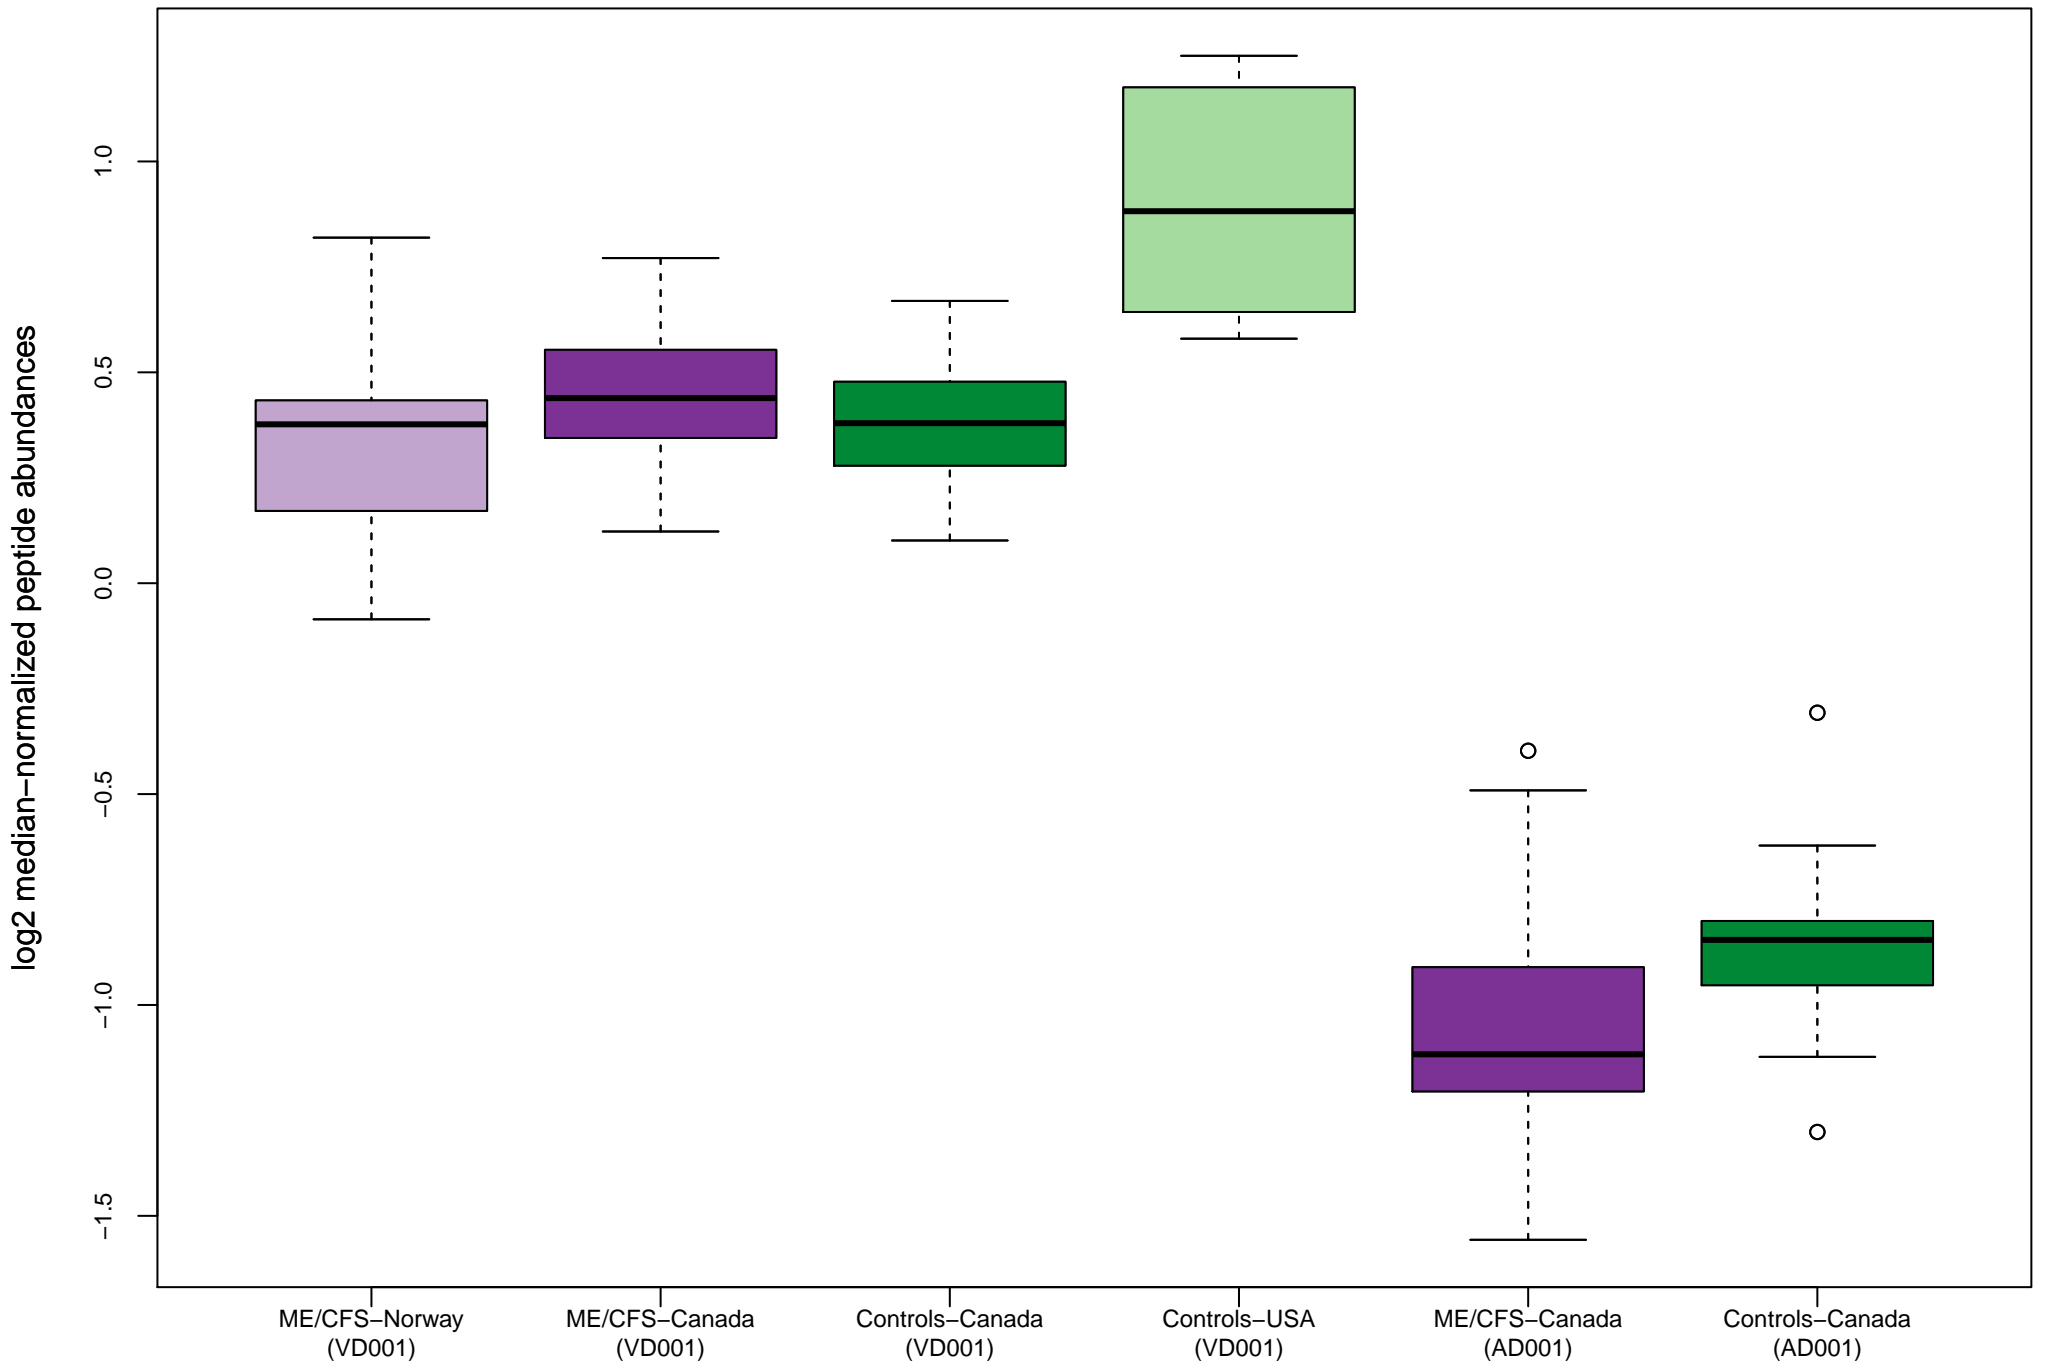

# WKFWRYLQFVGG

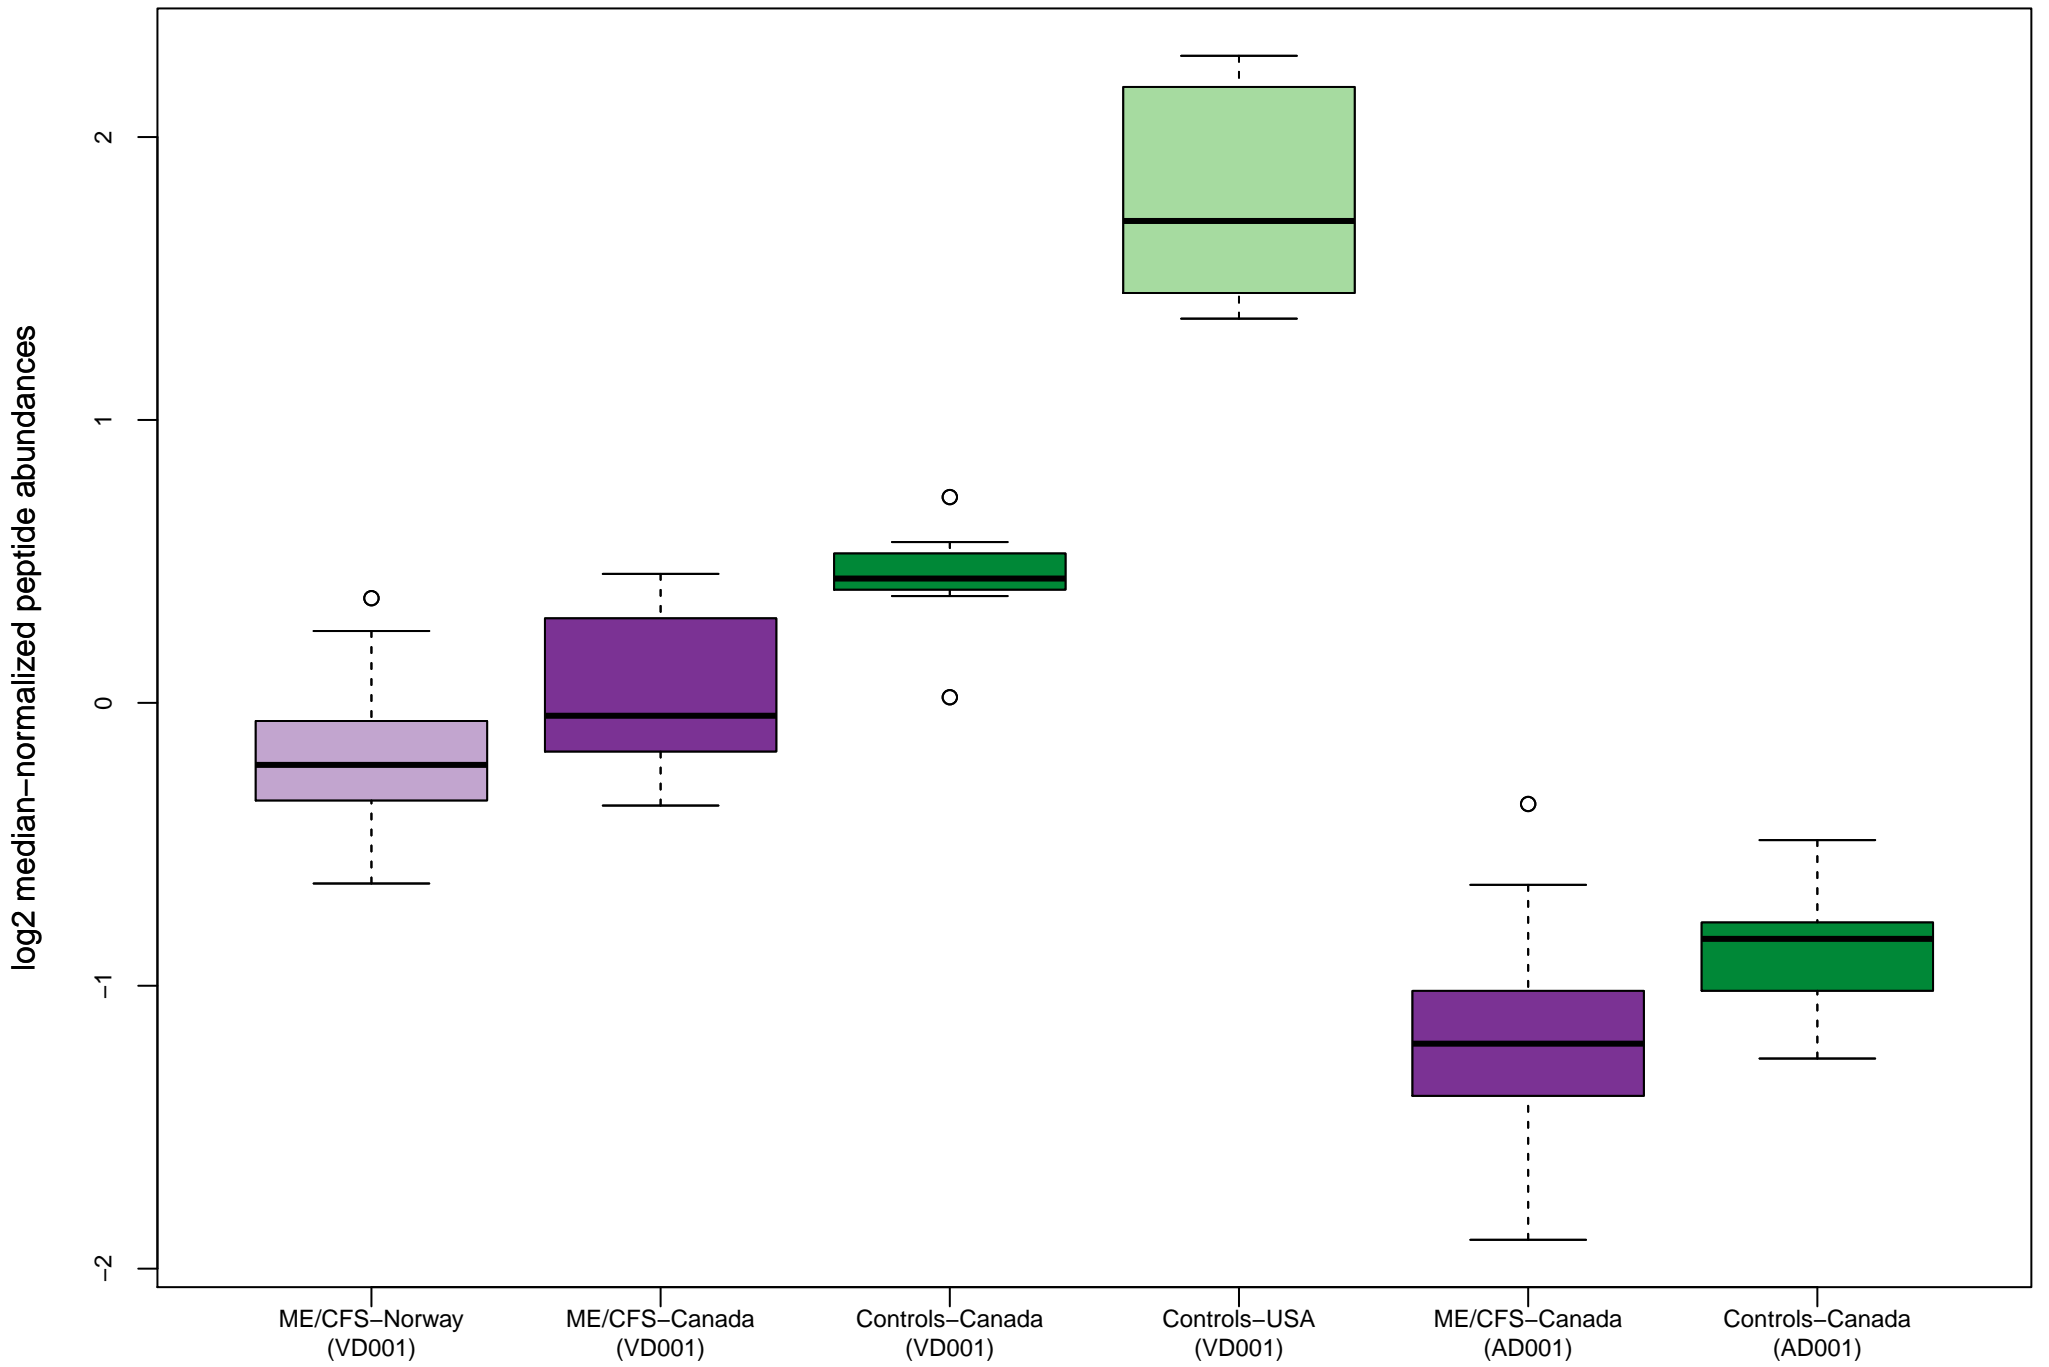

# WLRQVASFRWAS

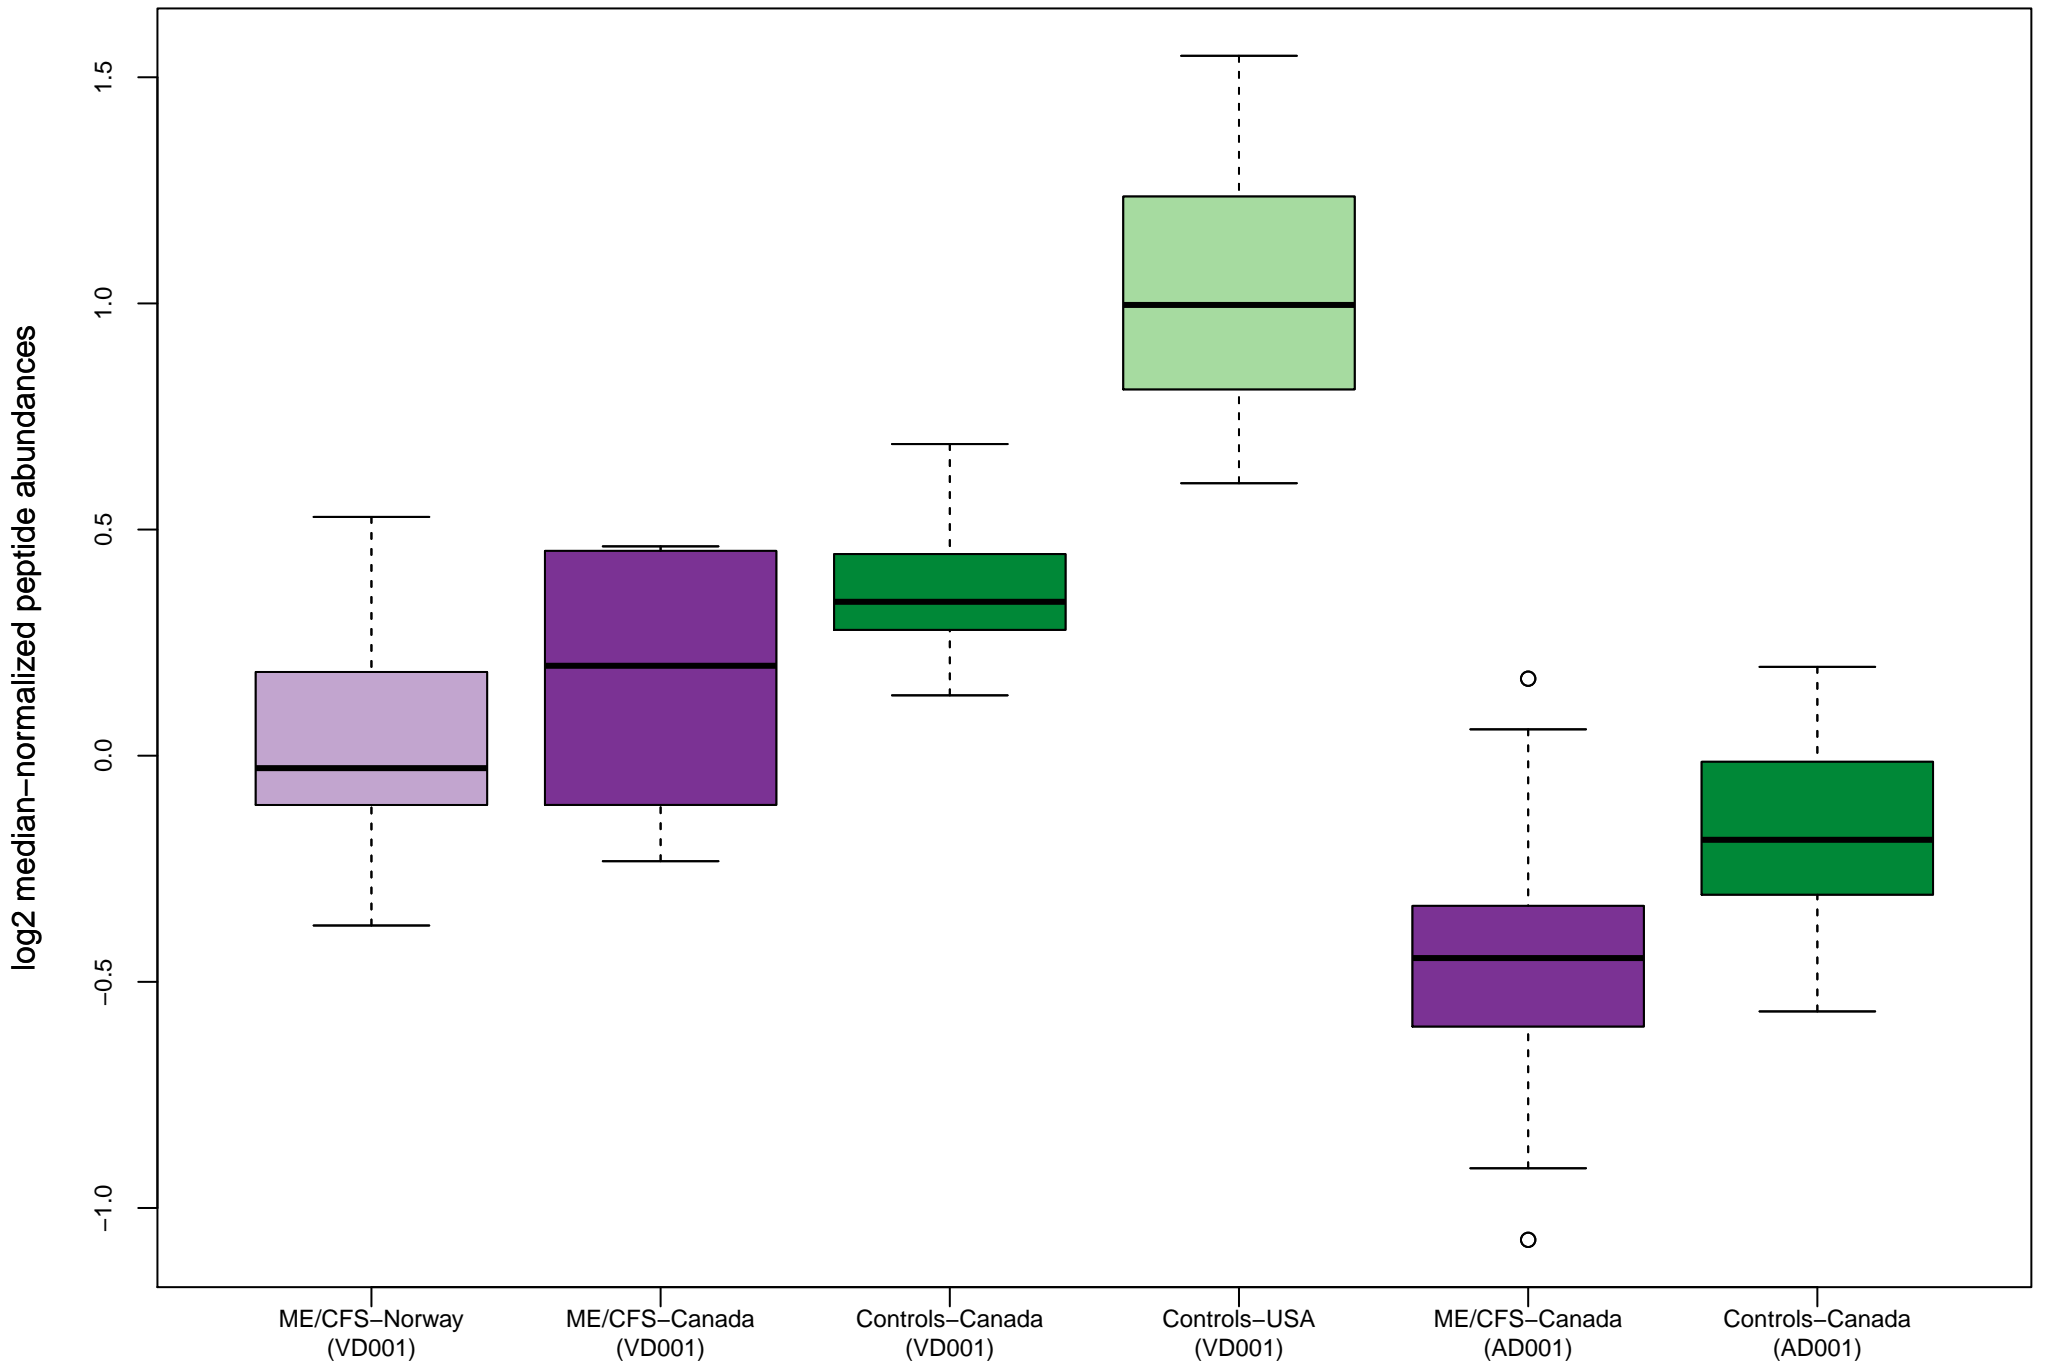

# WLRYPWVNLGA

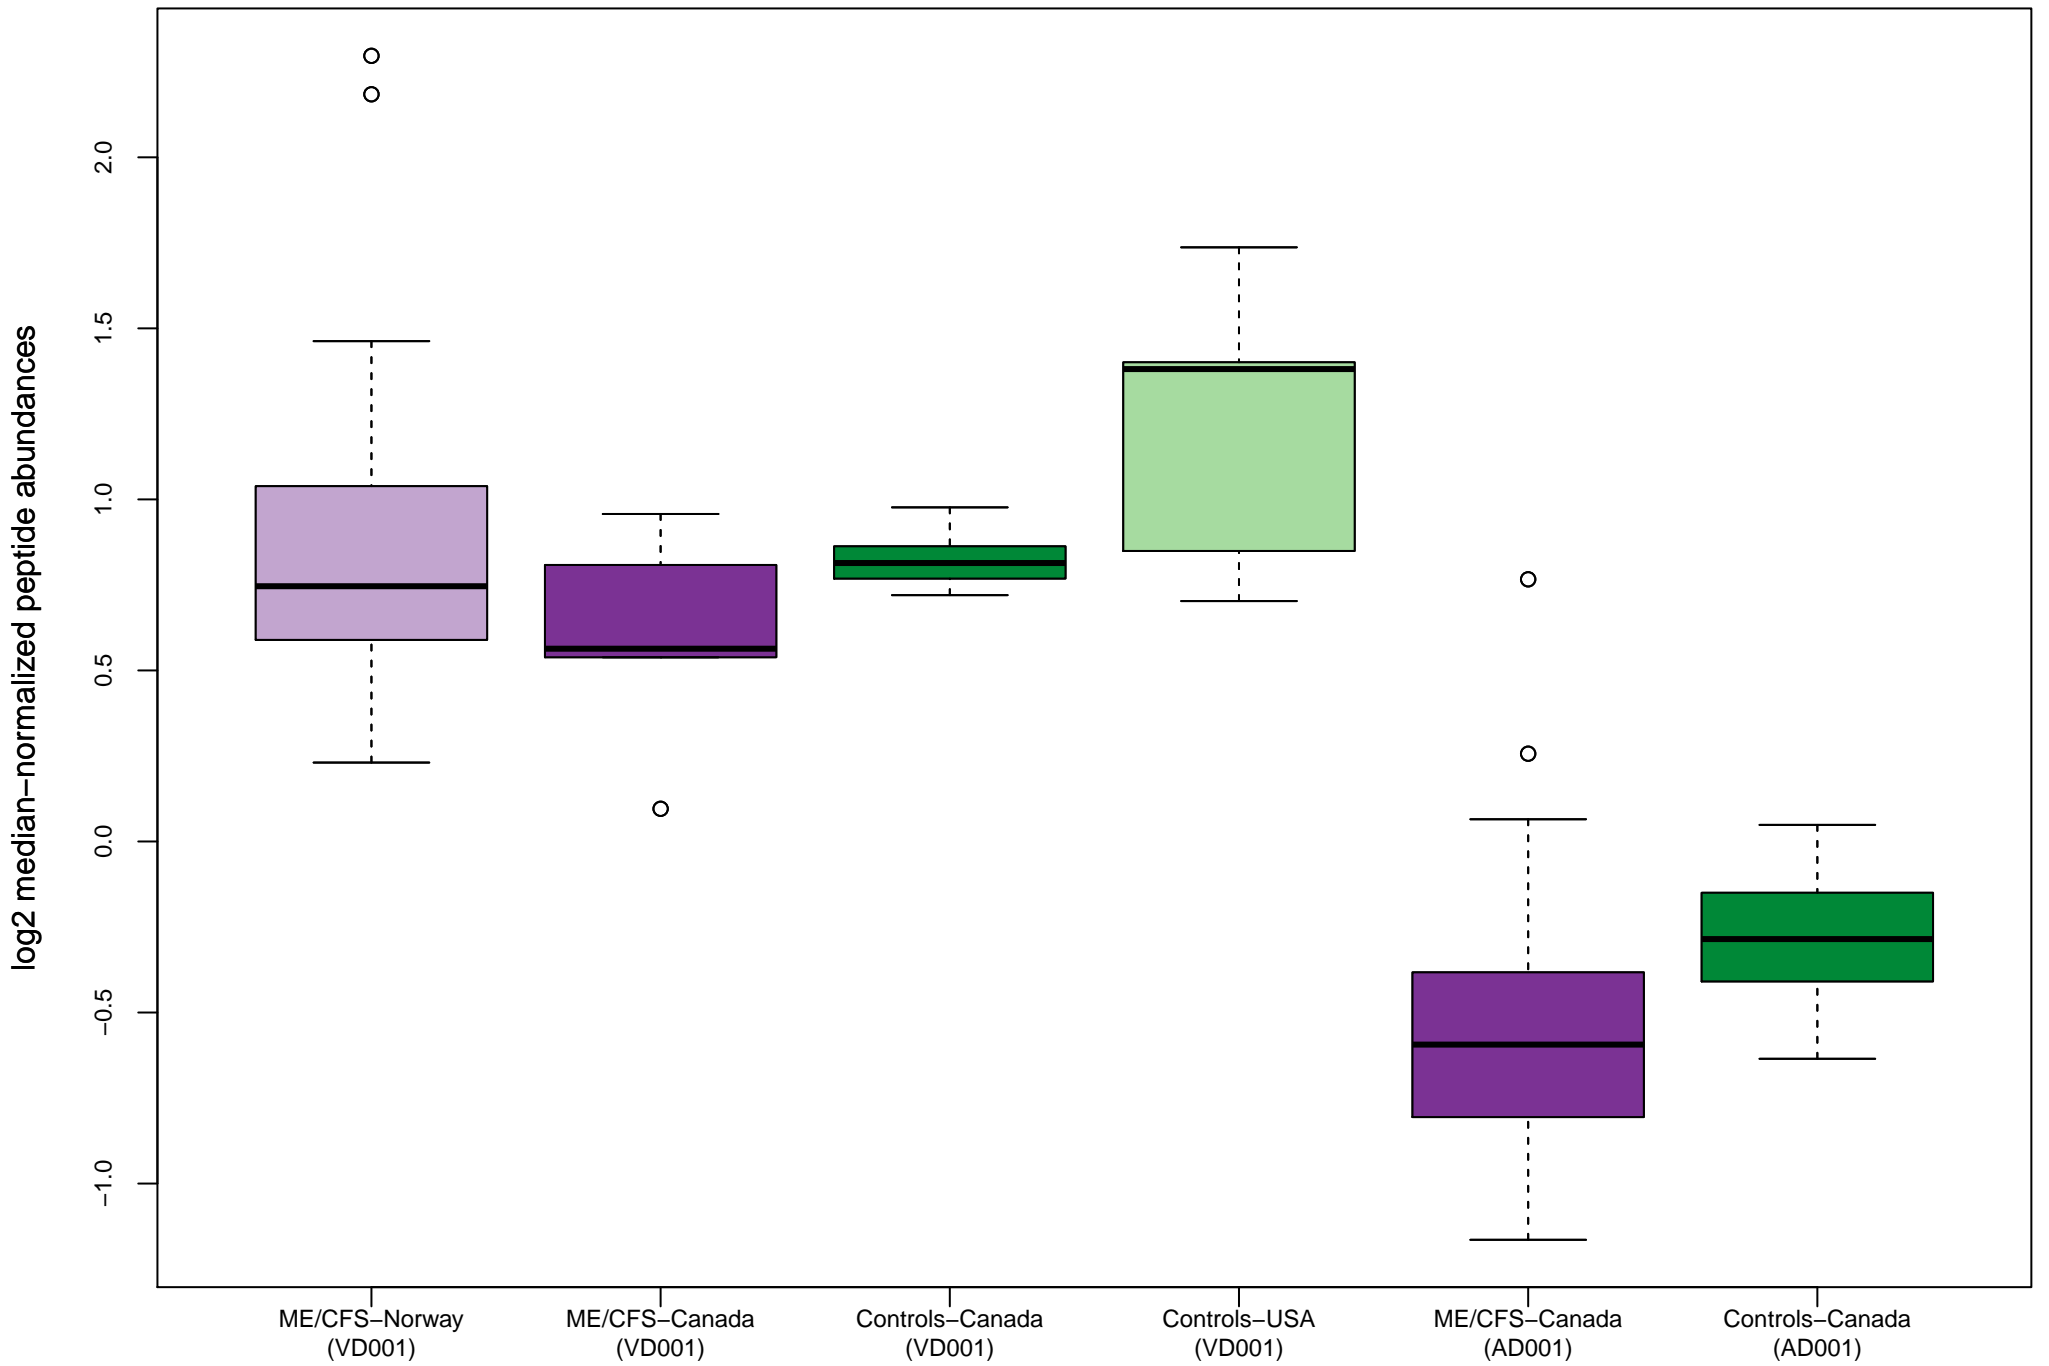

WLYSGRSFKVVS

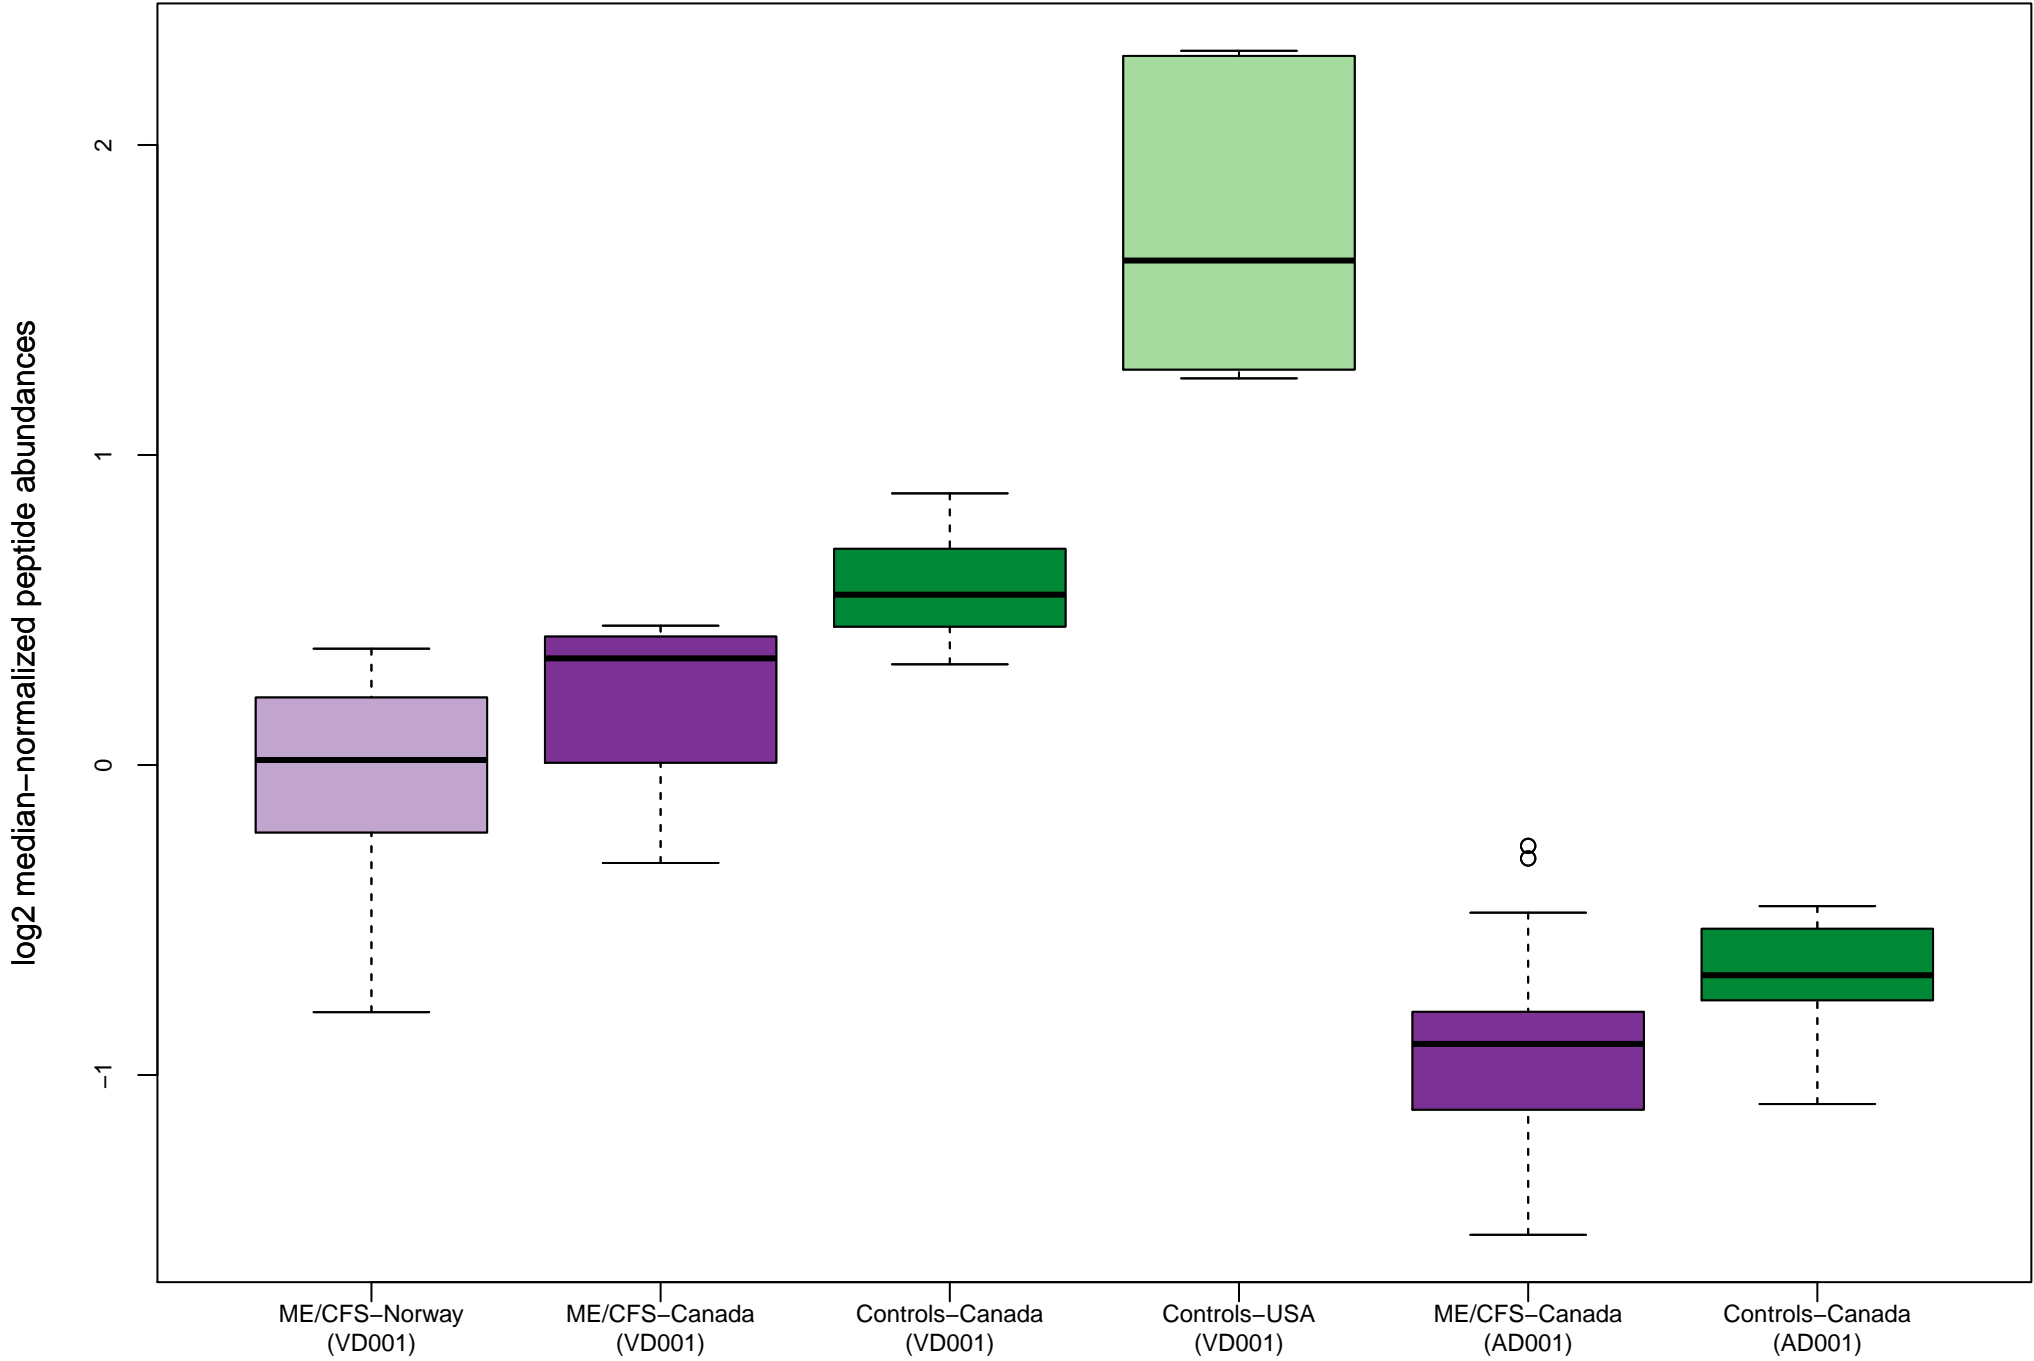

# WNWQVLKVLGAS

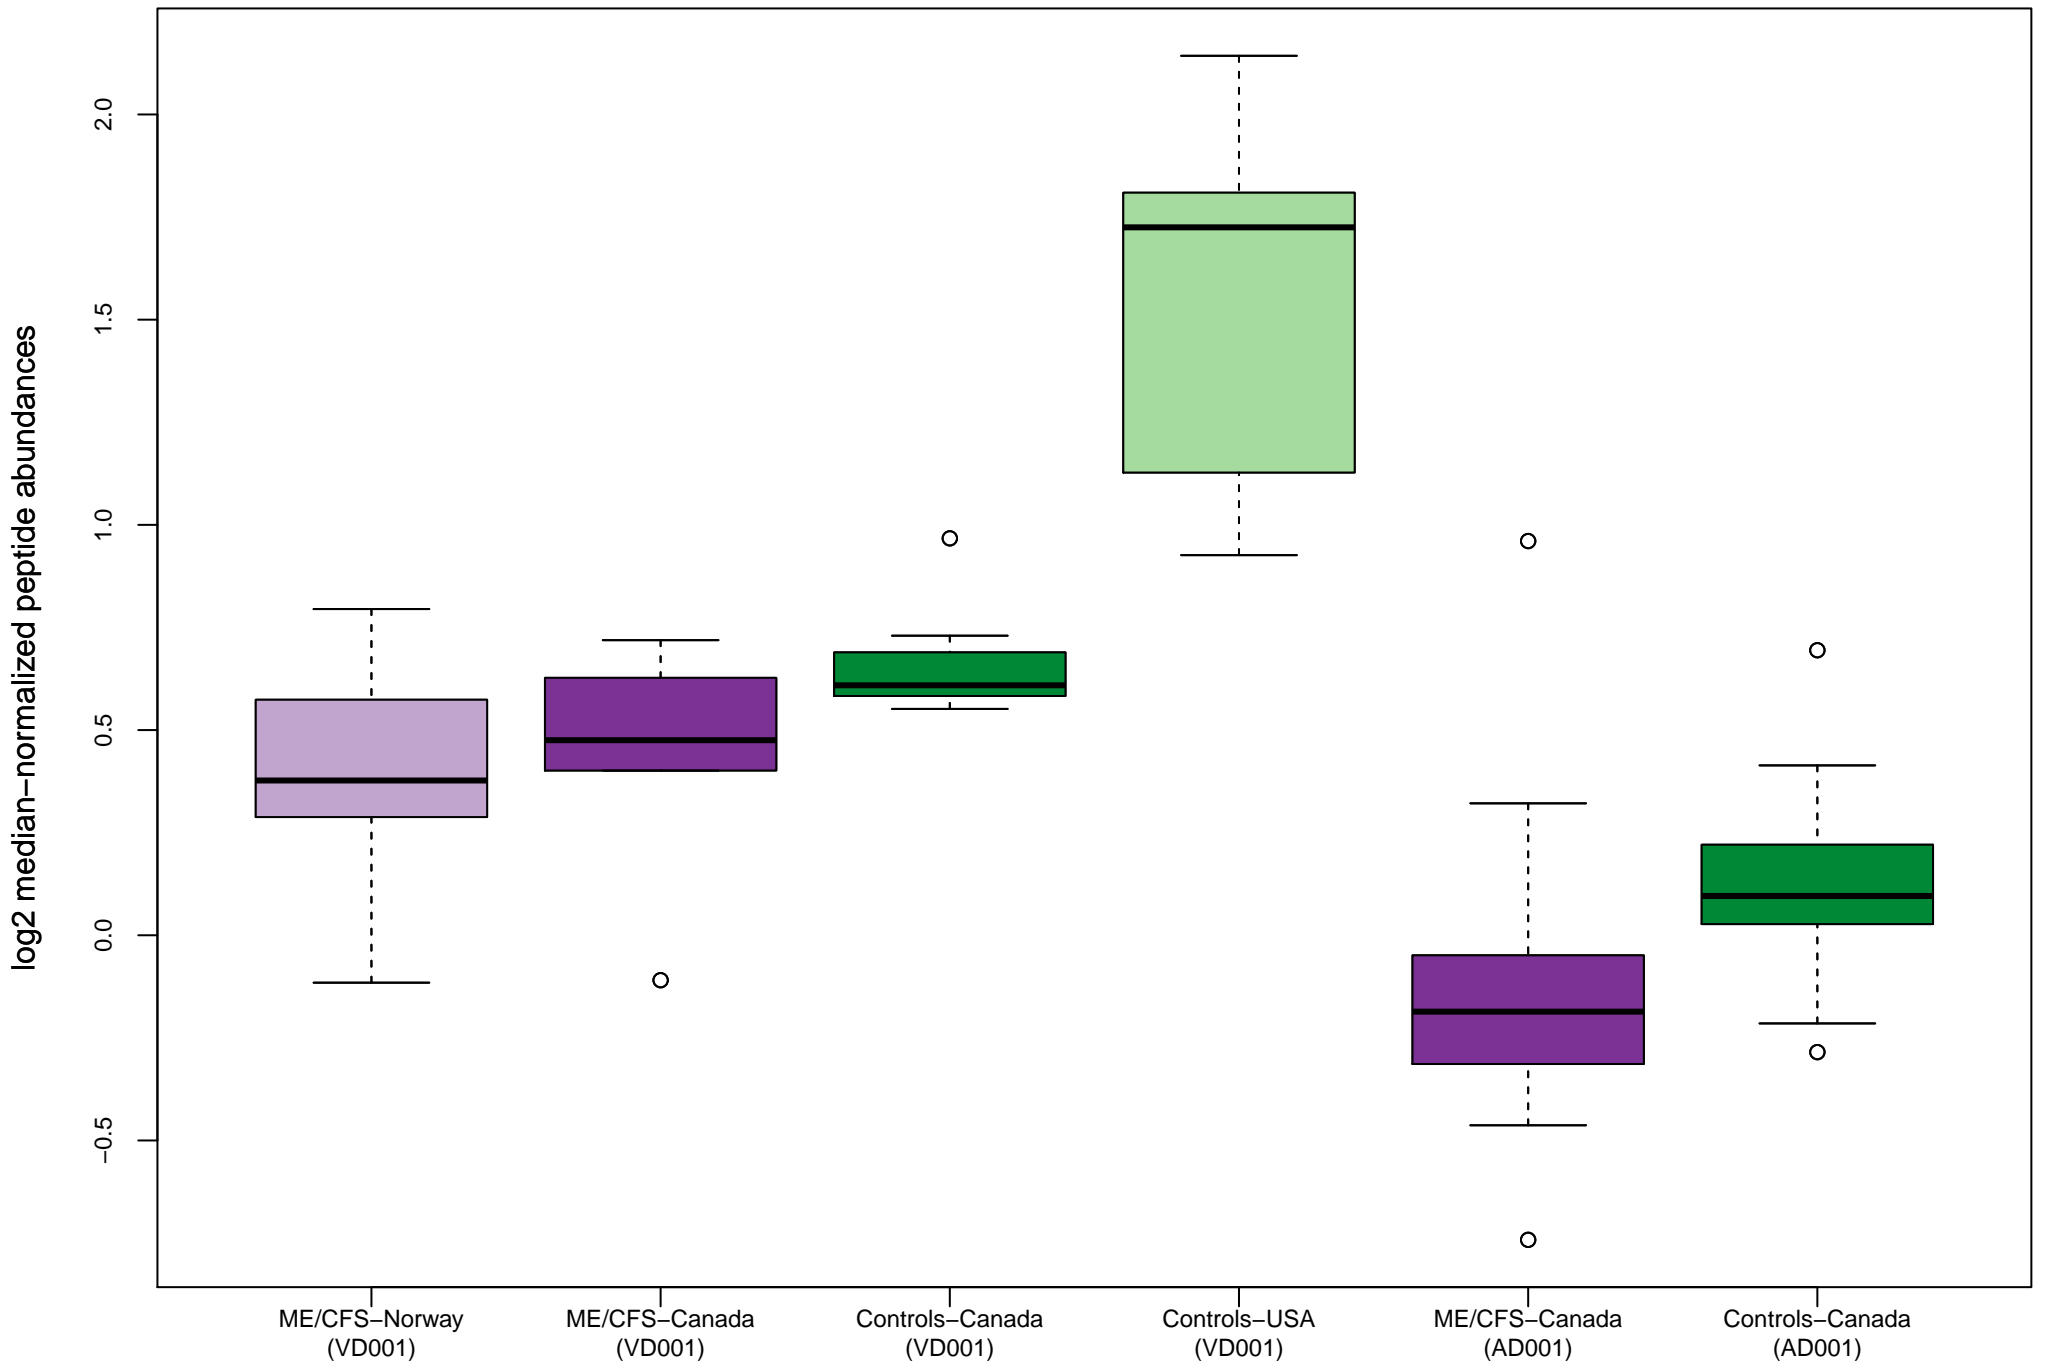

# WPLQLRSGVALS

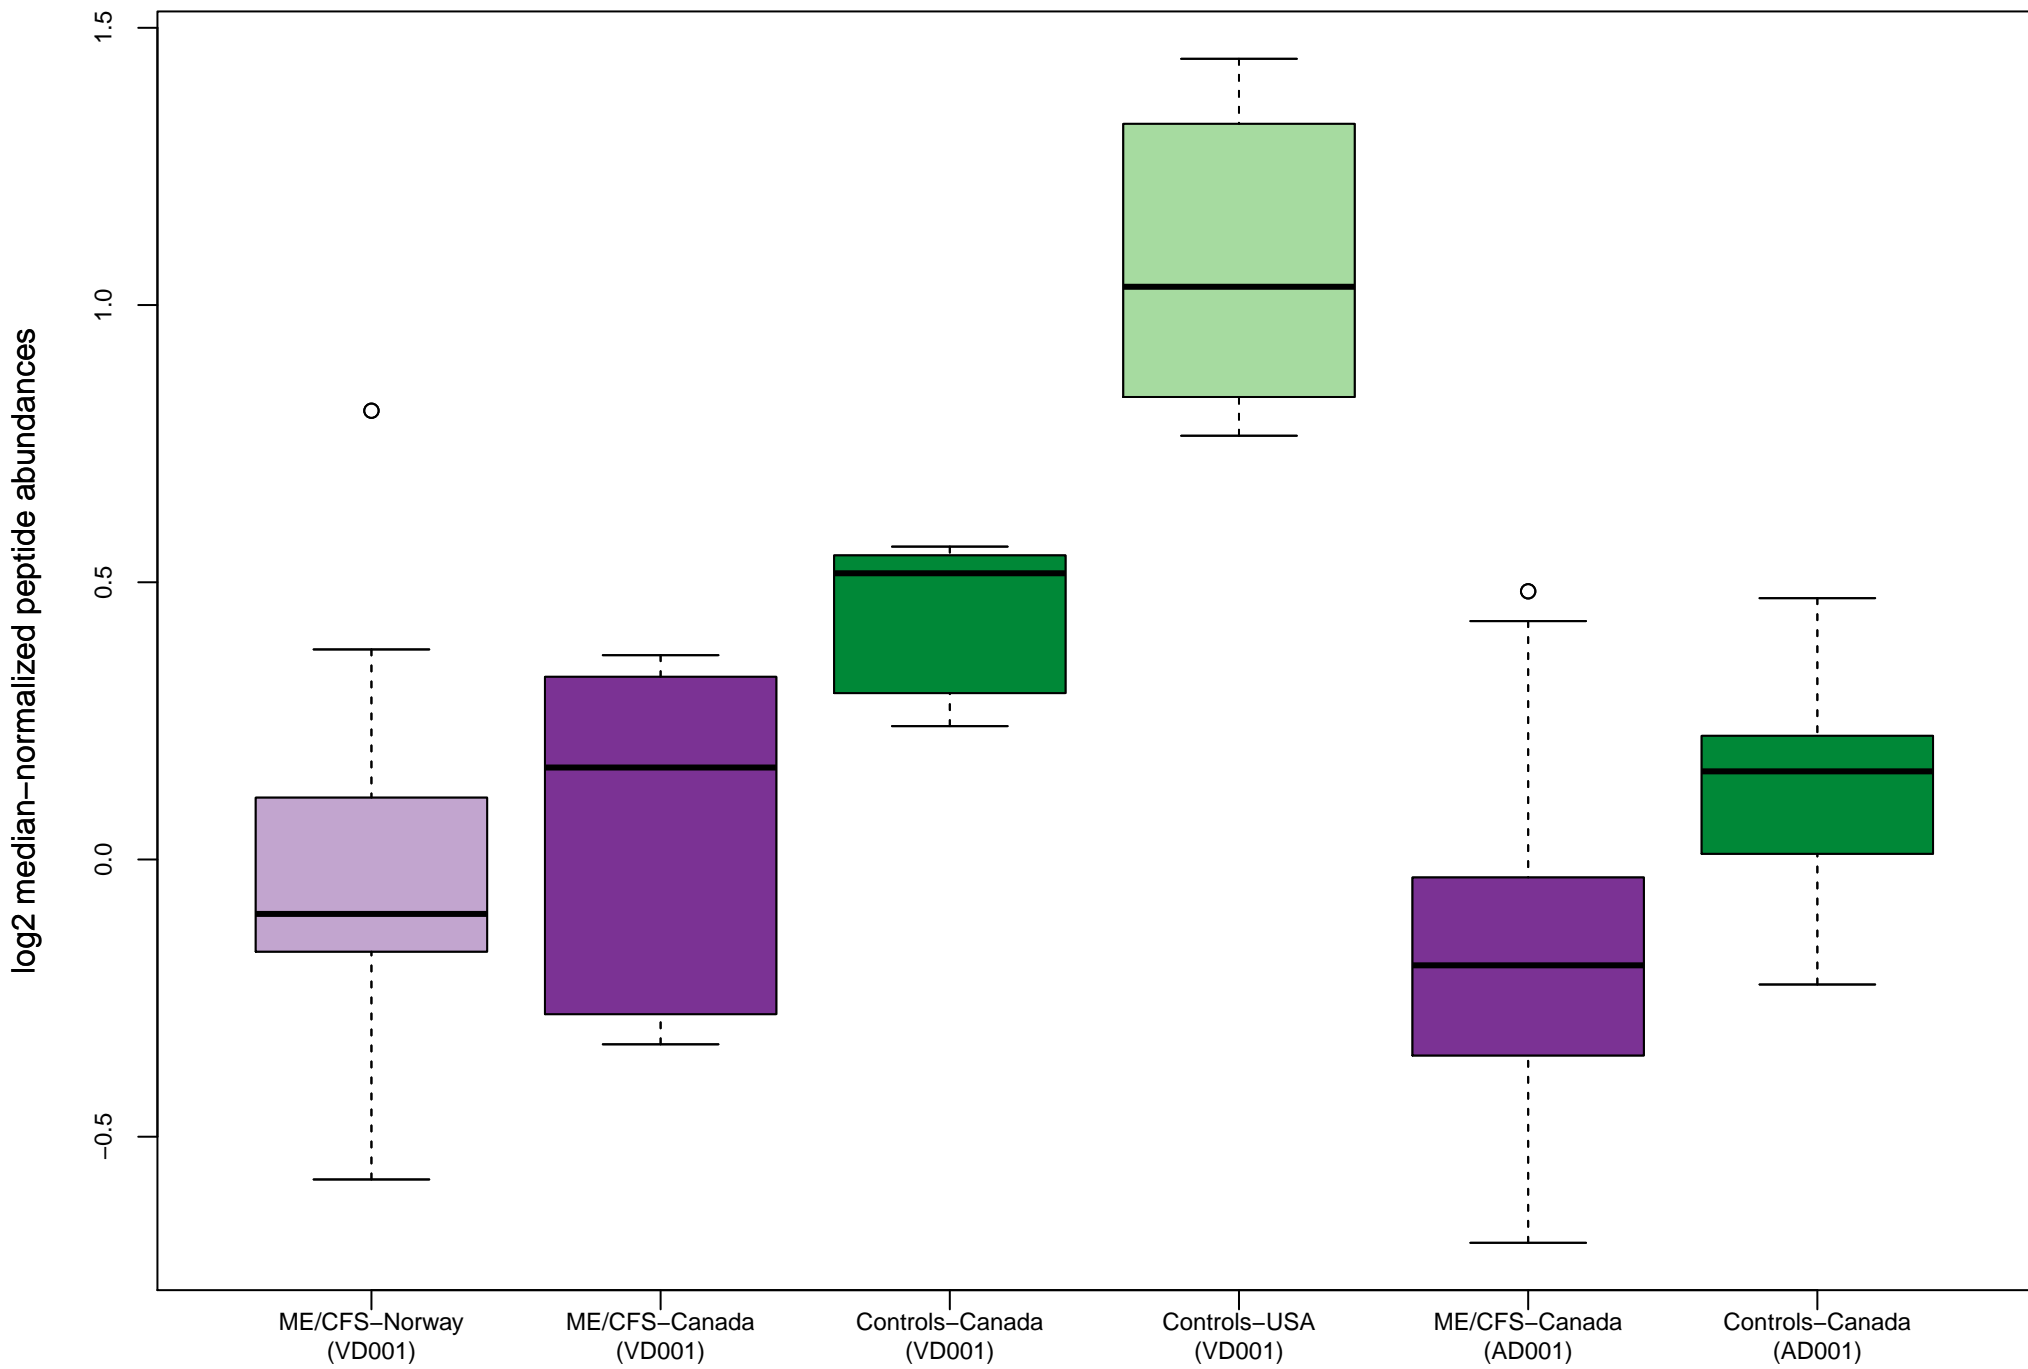

# WRFHRYSGVLSG

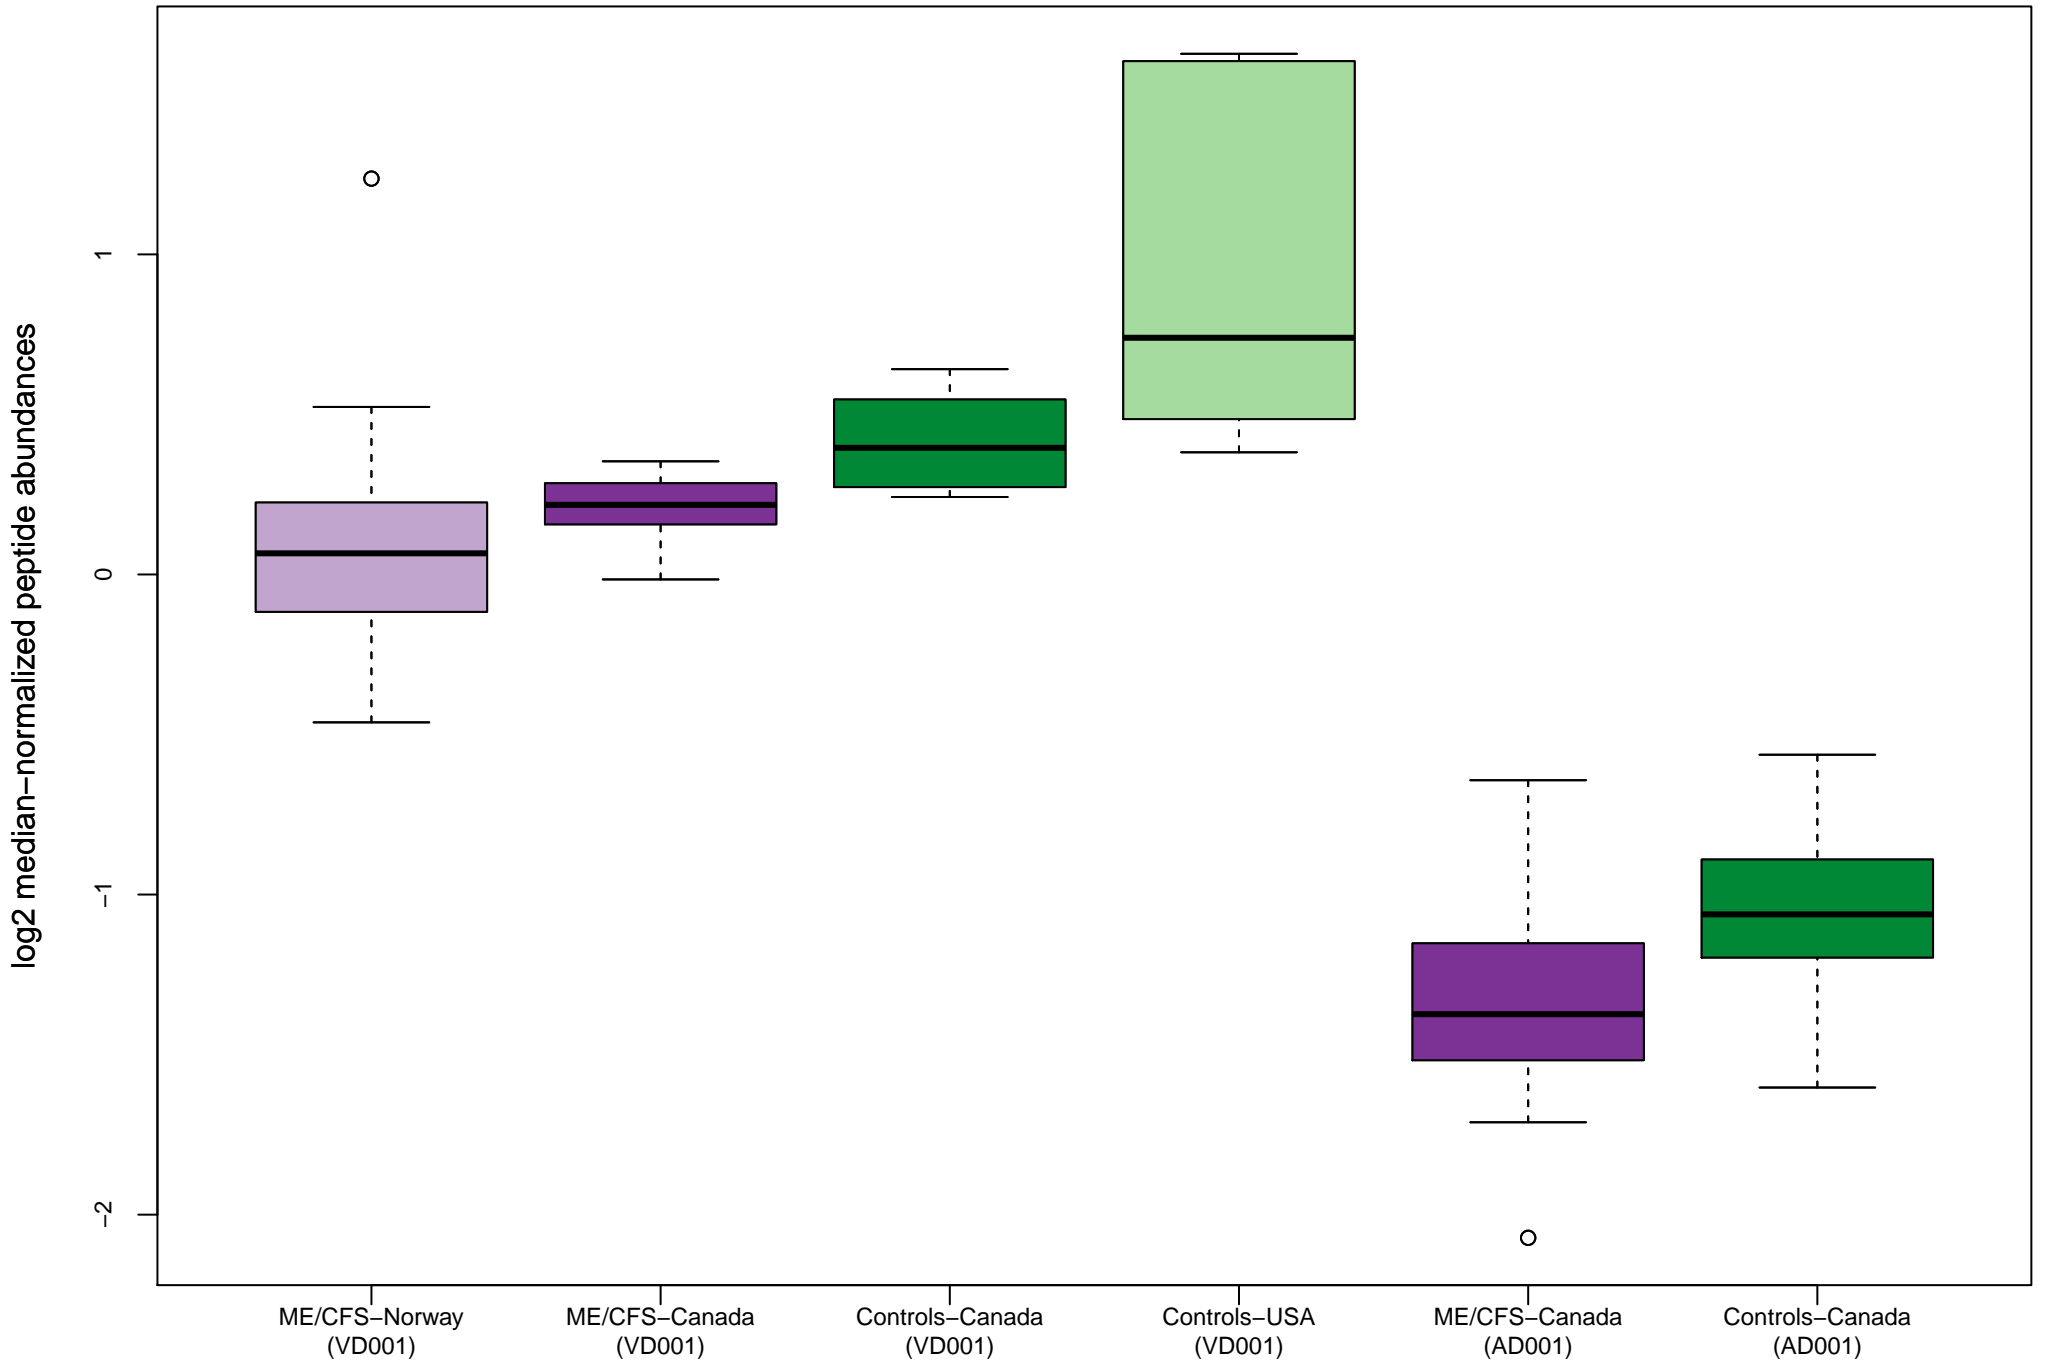



# WRGGQFRYHVAL

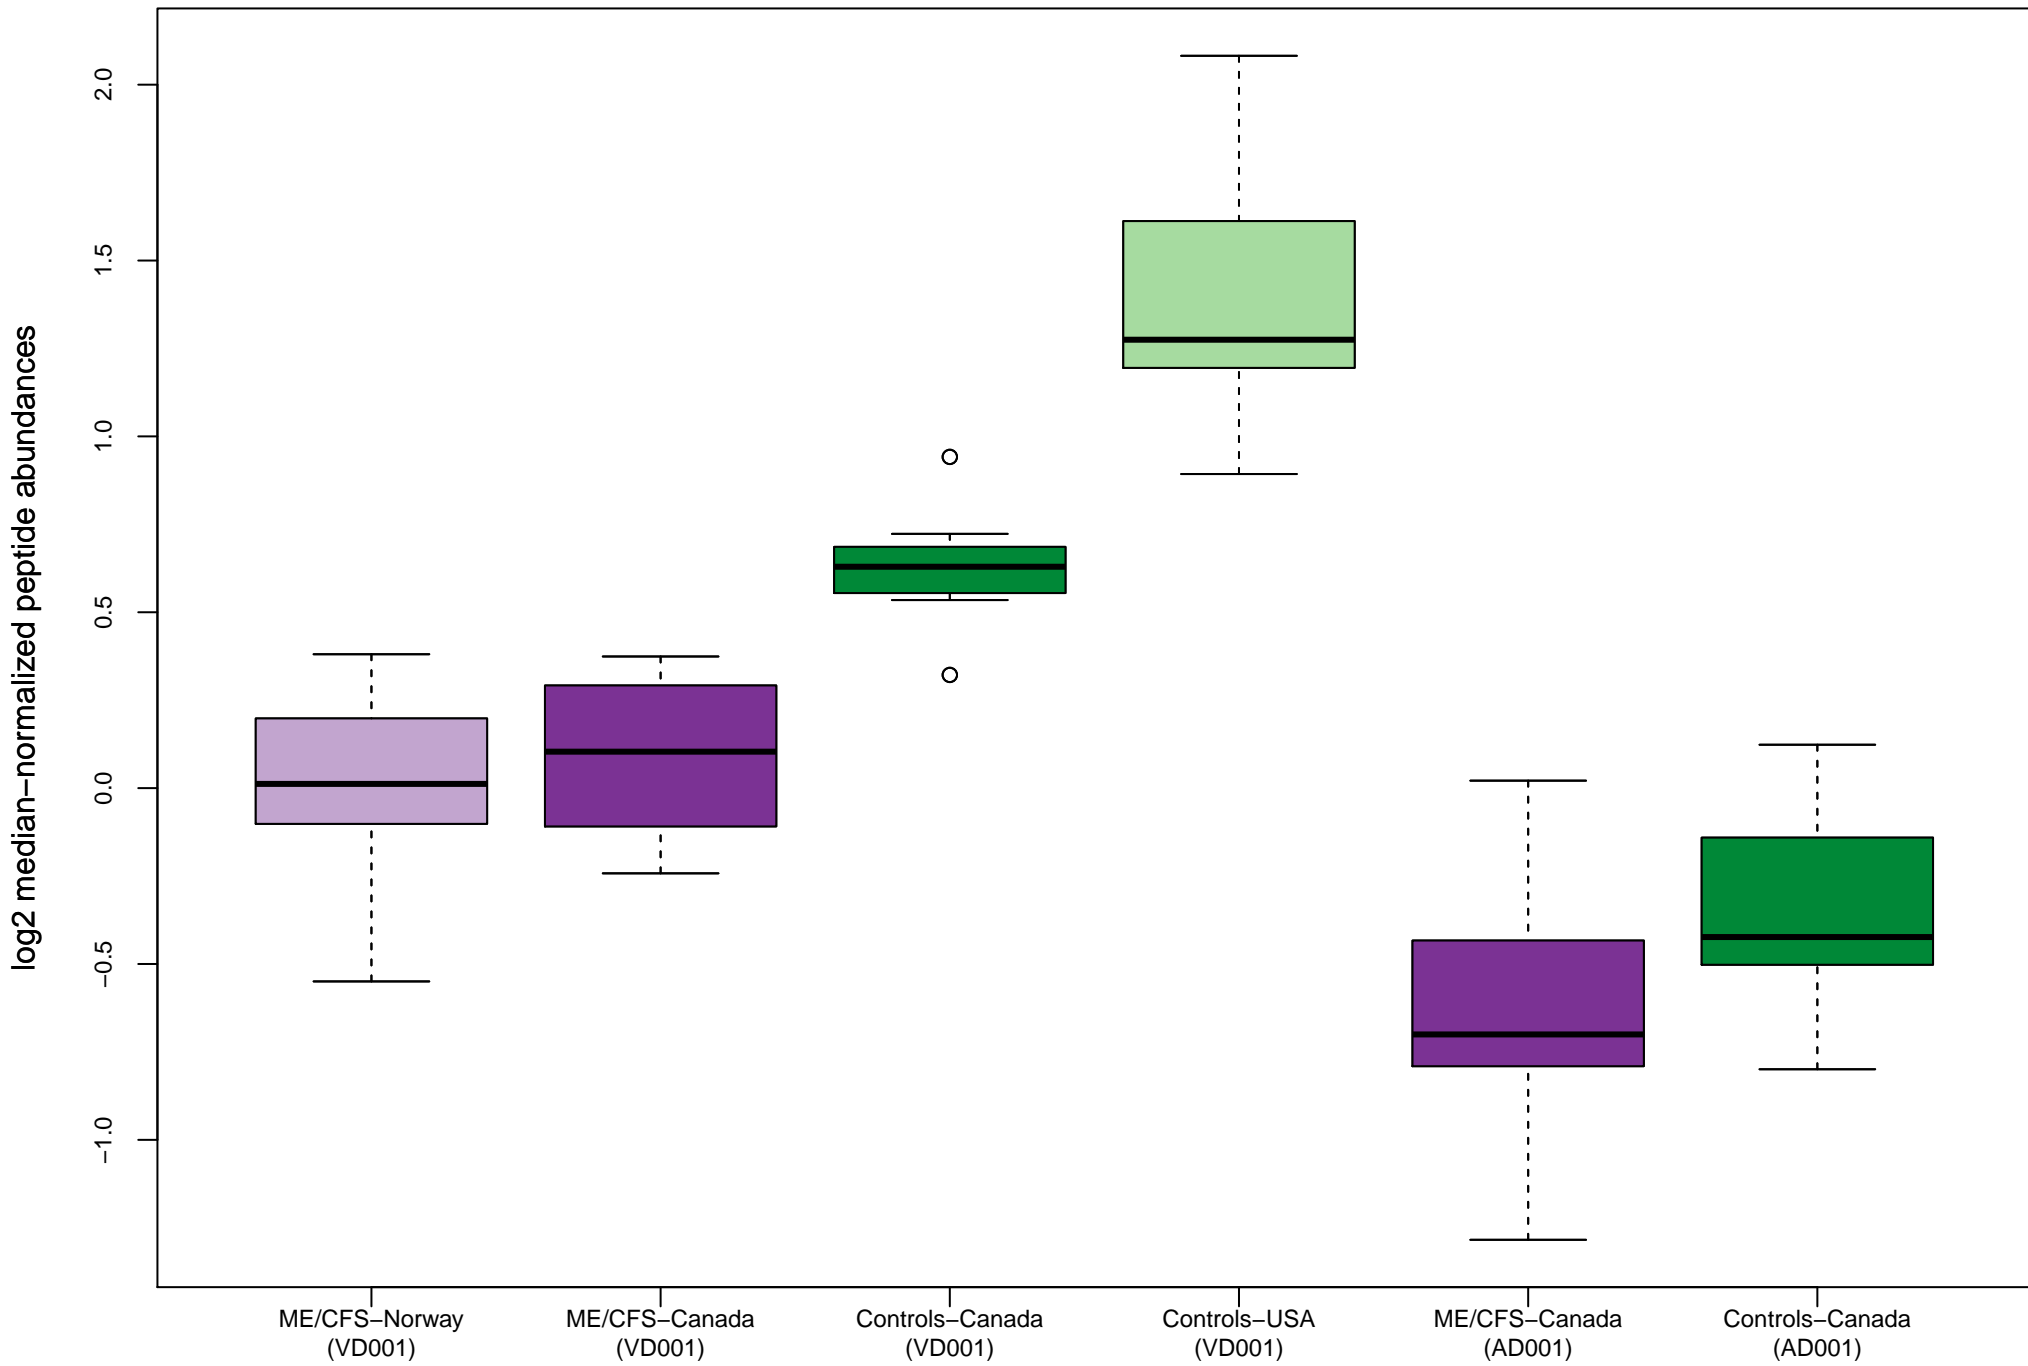

# WRSVFALSGLSG

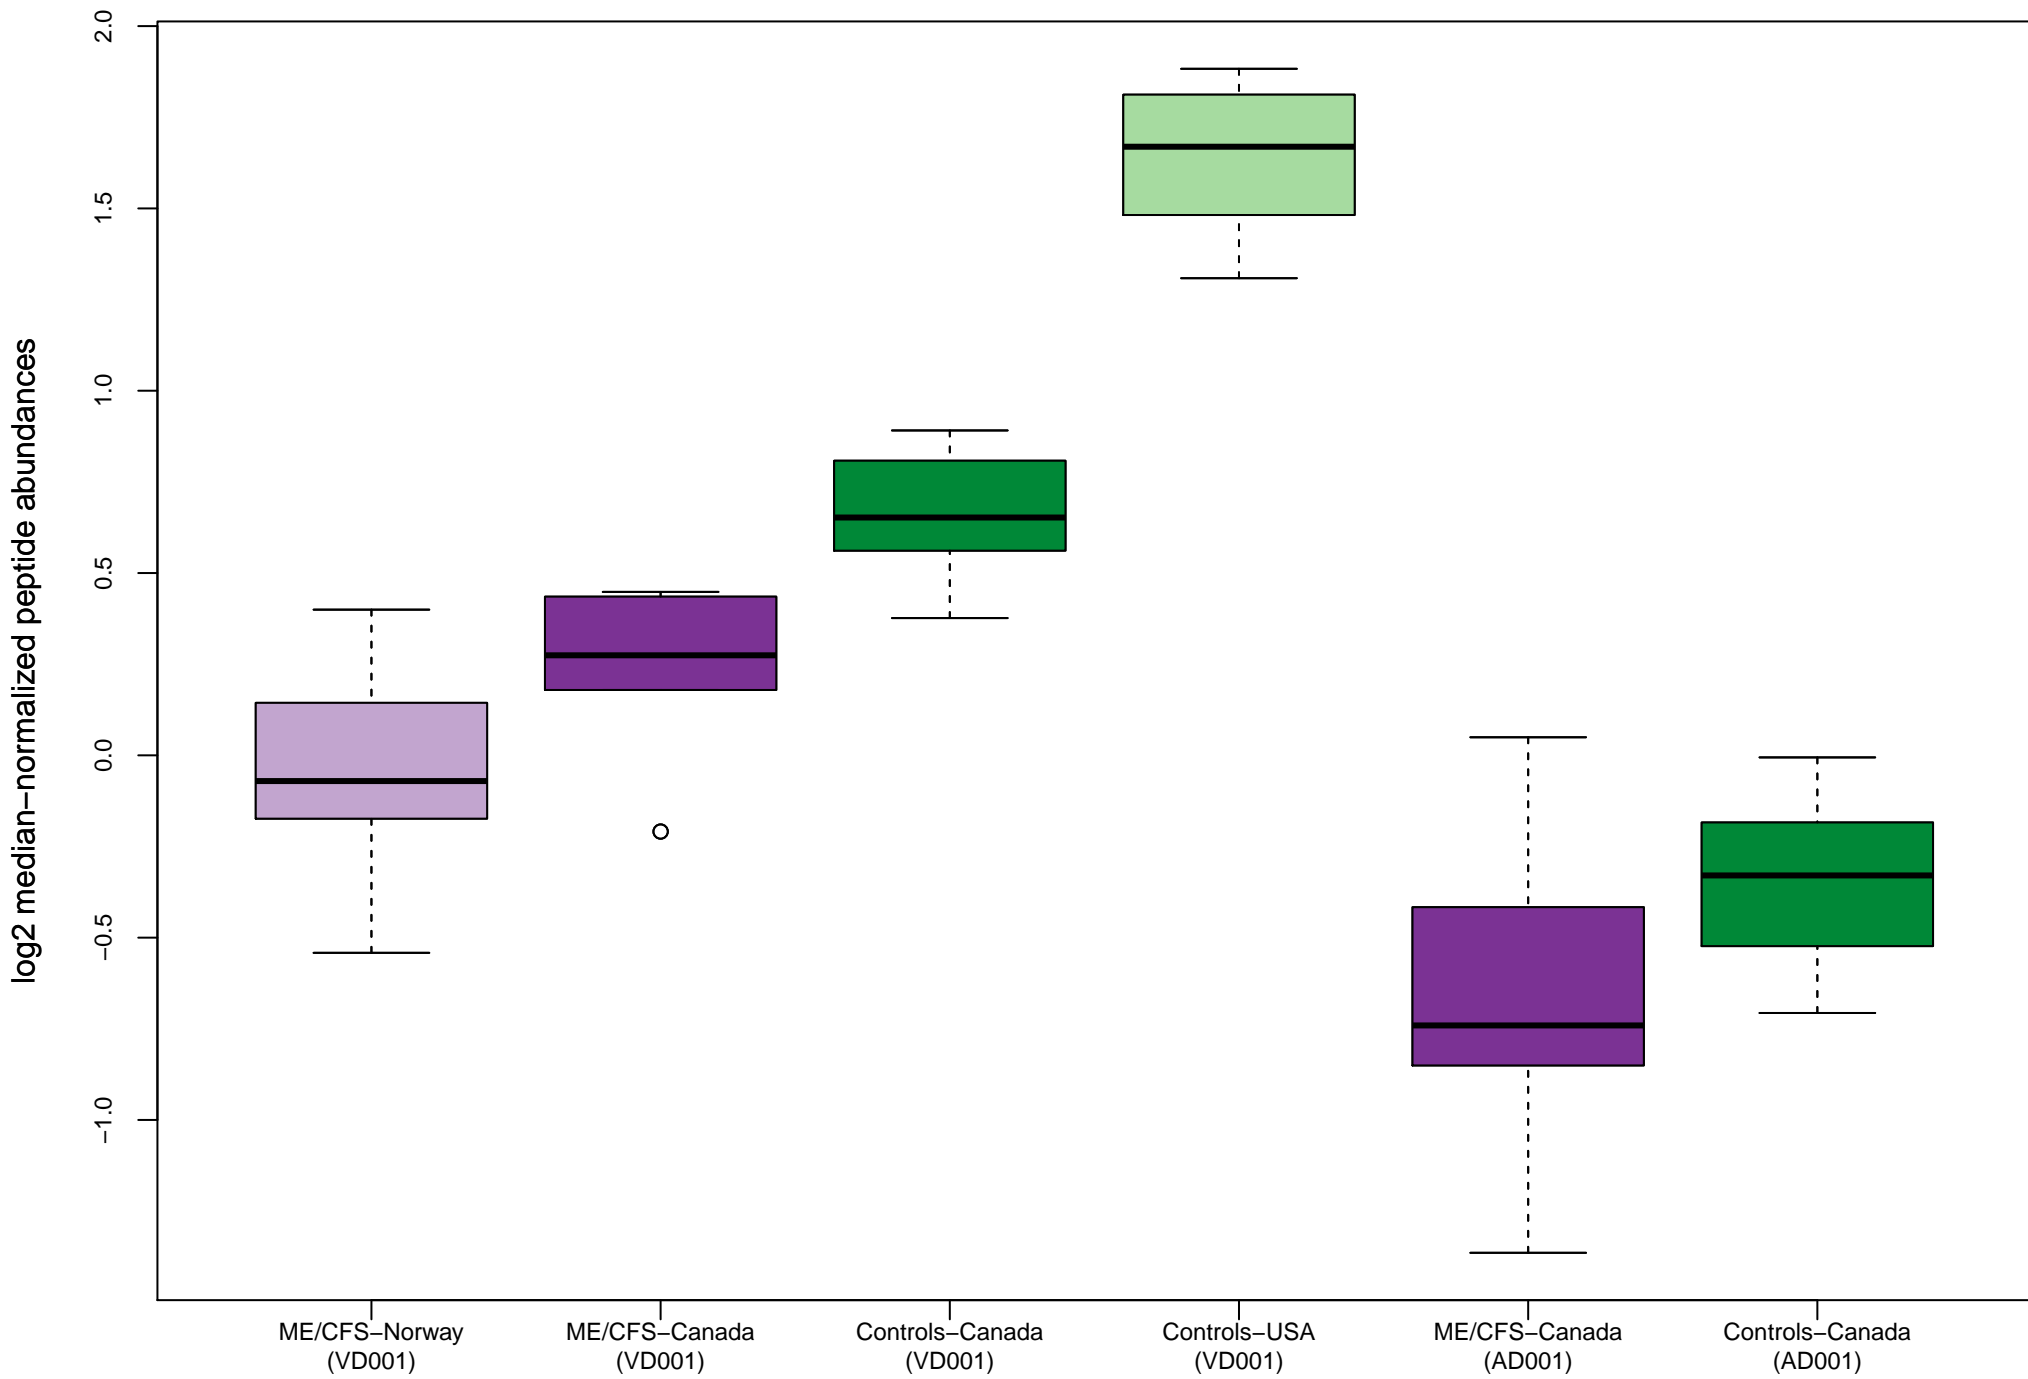

# WRVFLGPVGVAS

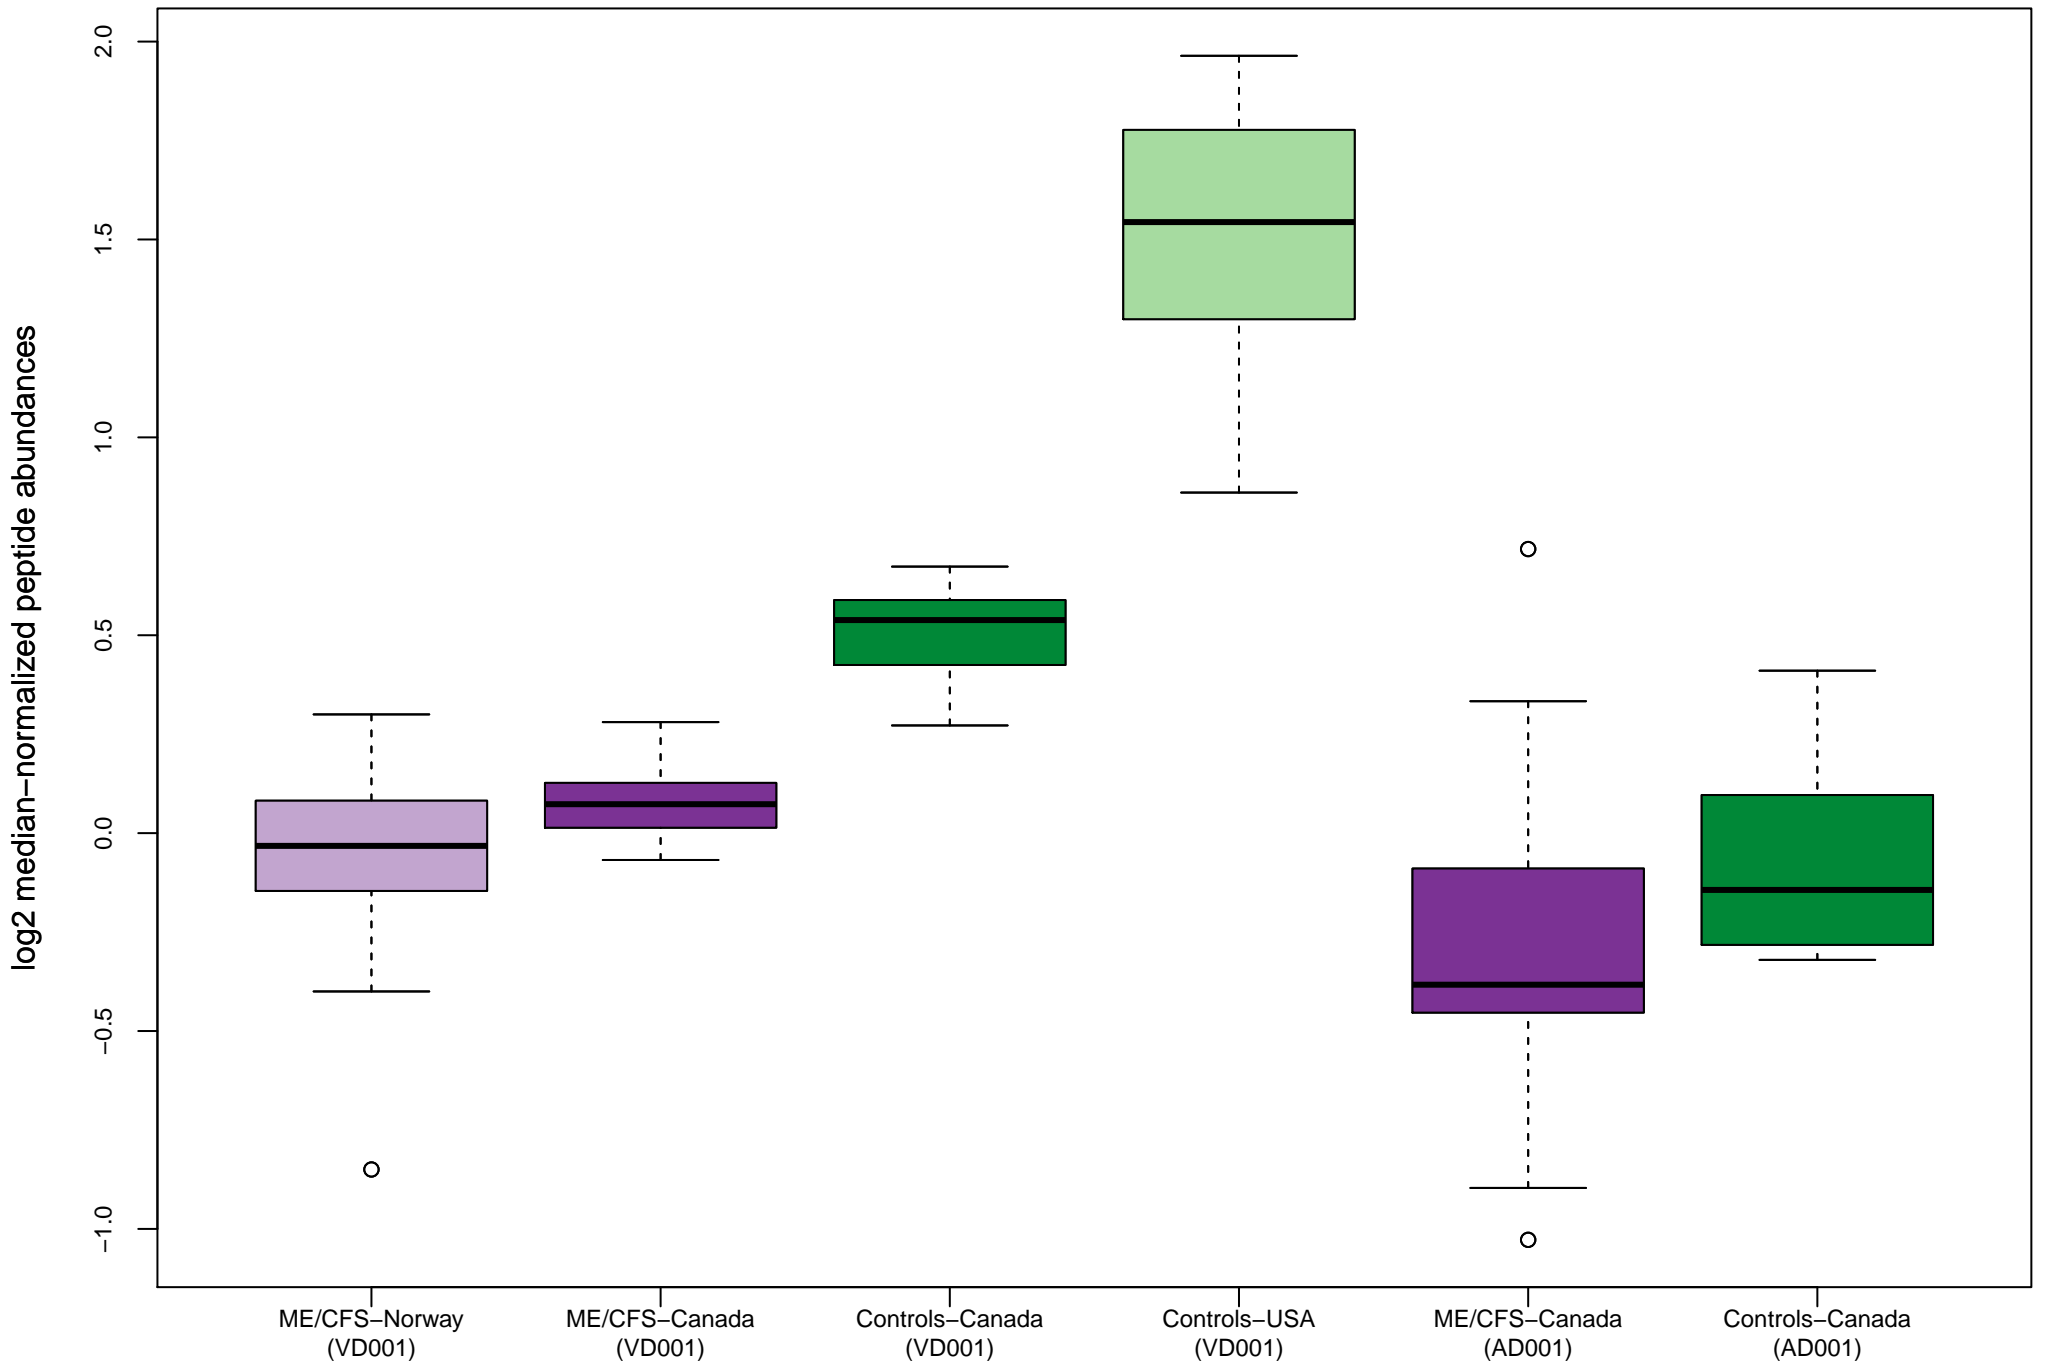

# WRVSGWVAFWNK

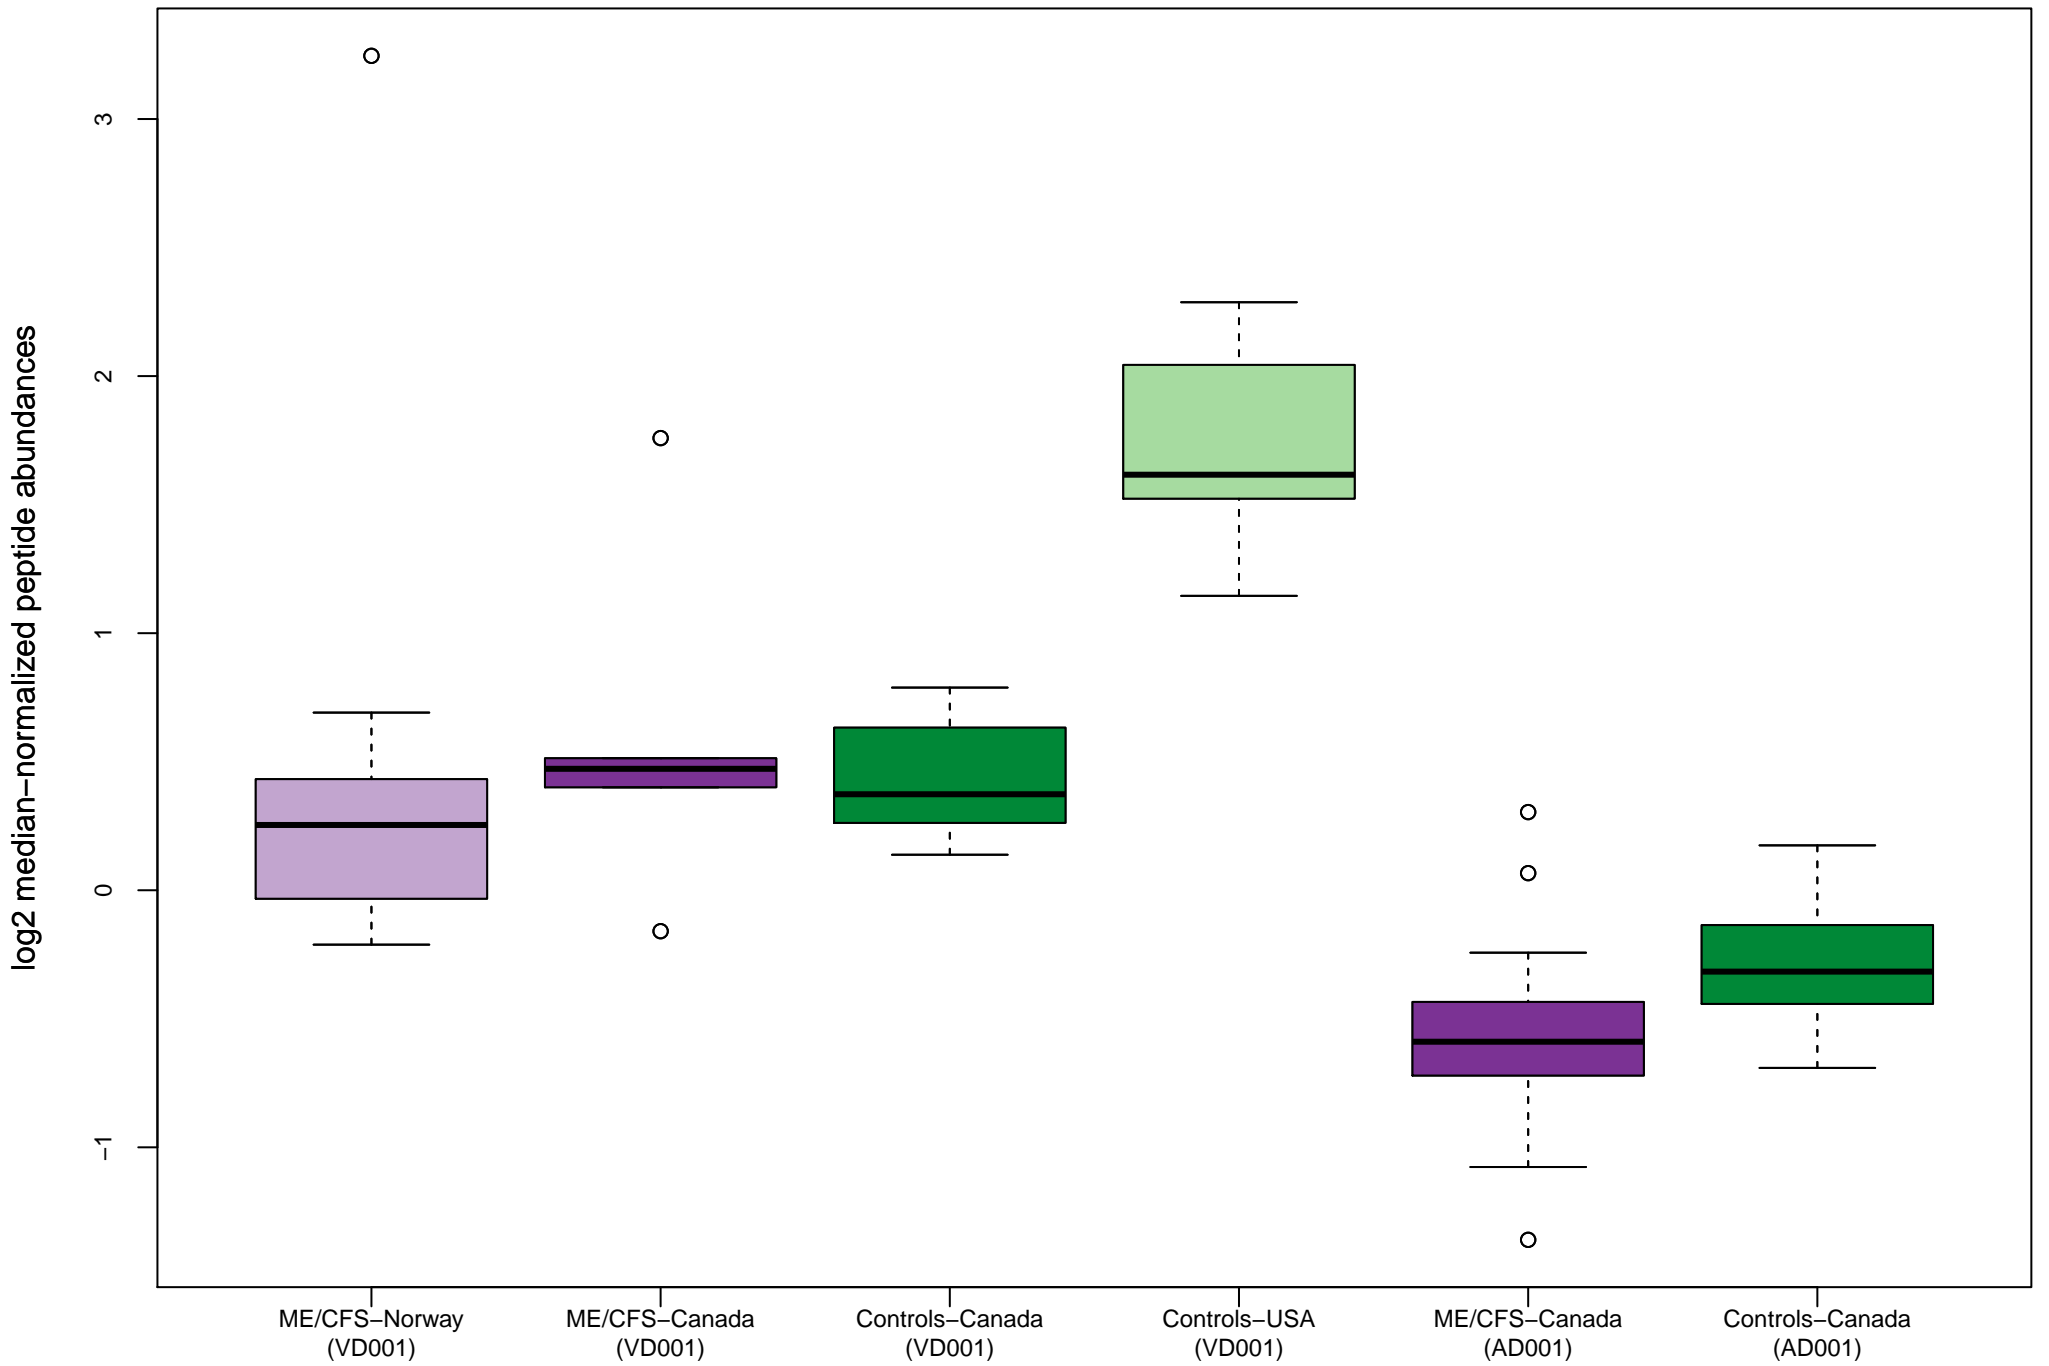

# WRYRPGYWKVAL

log2 median-normalized peptide abundances

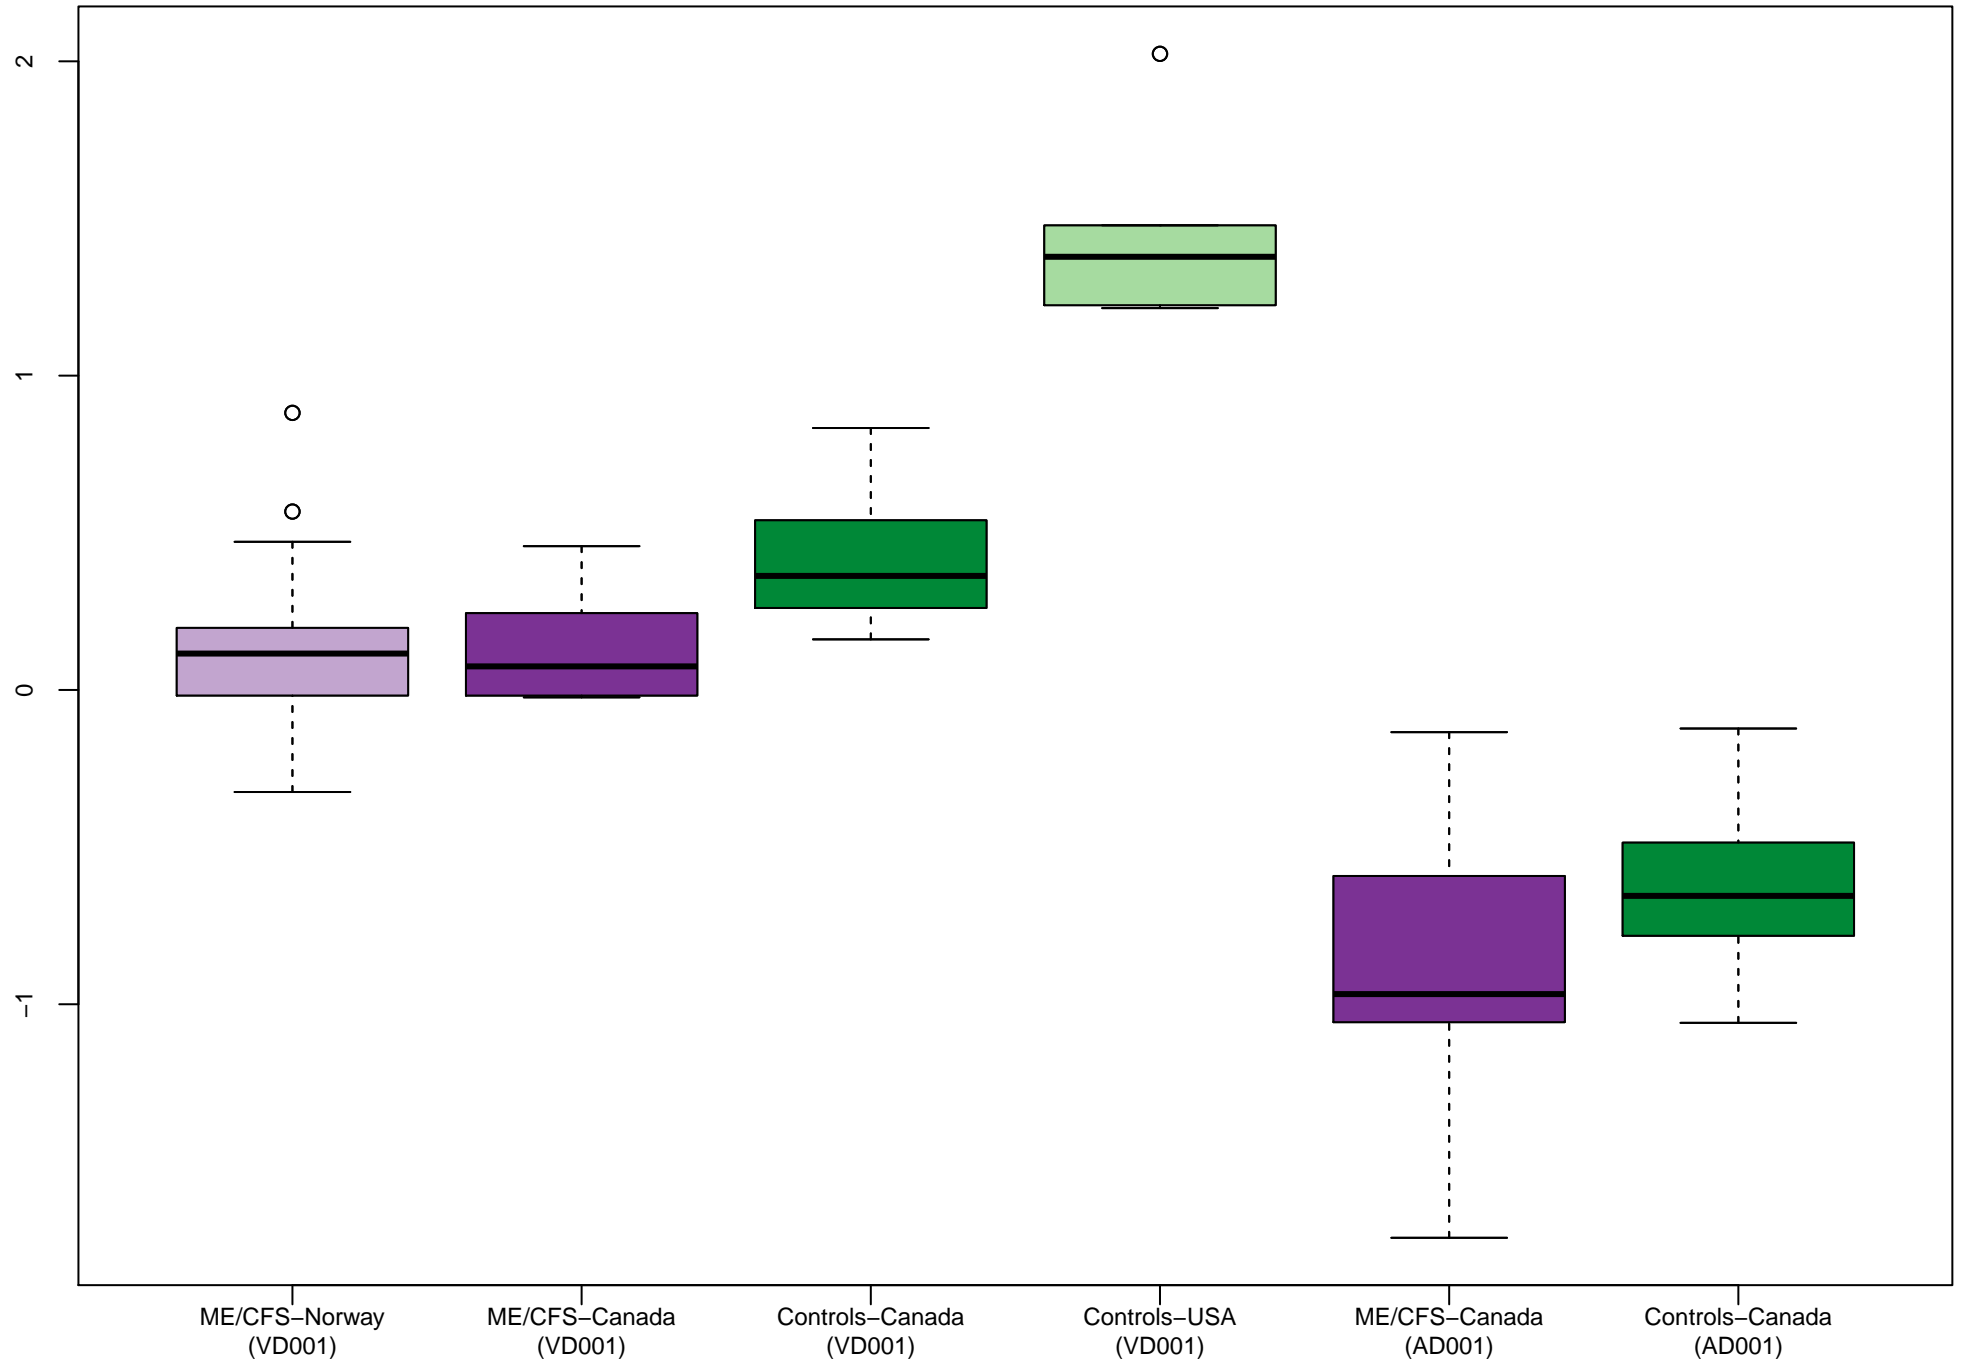

# WSAQYVQRVLGV

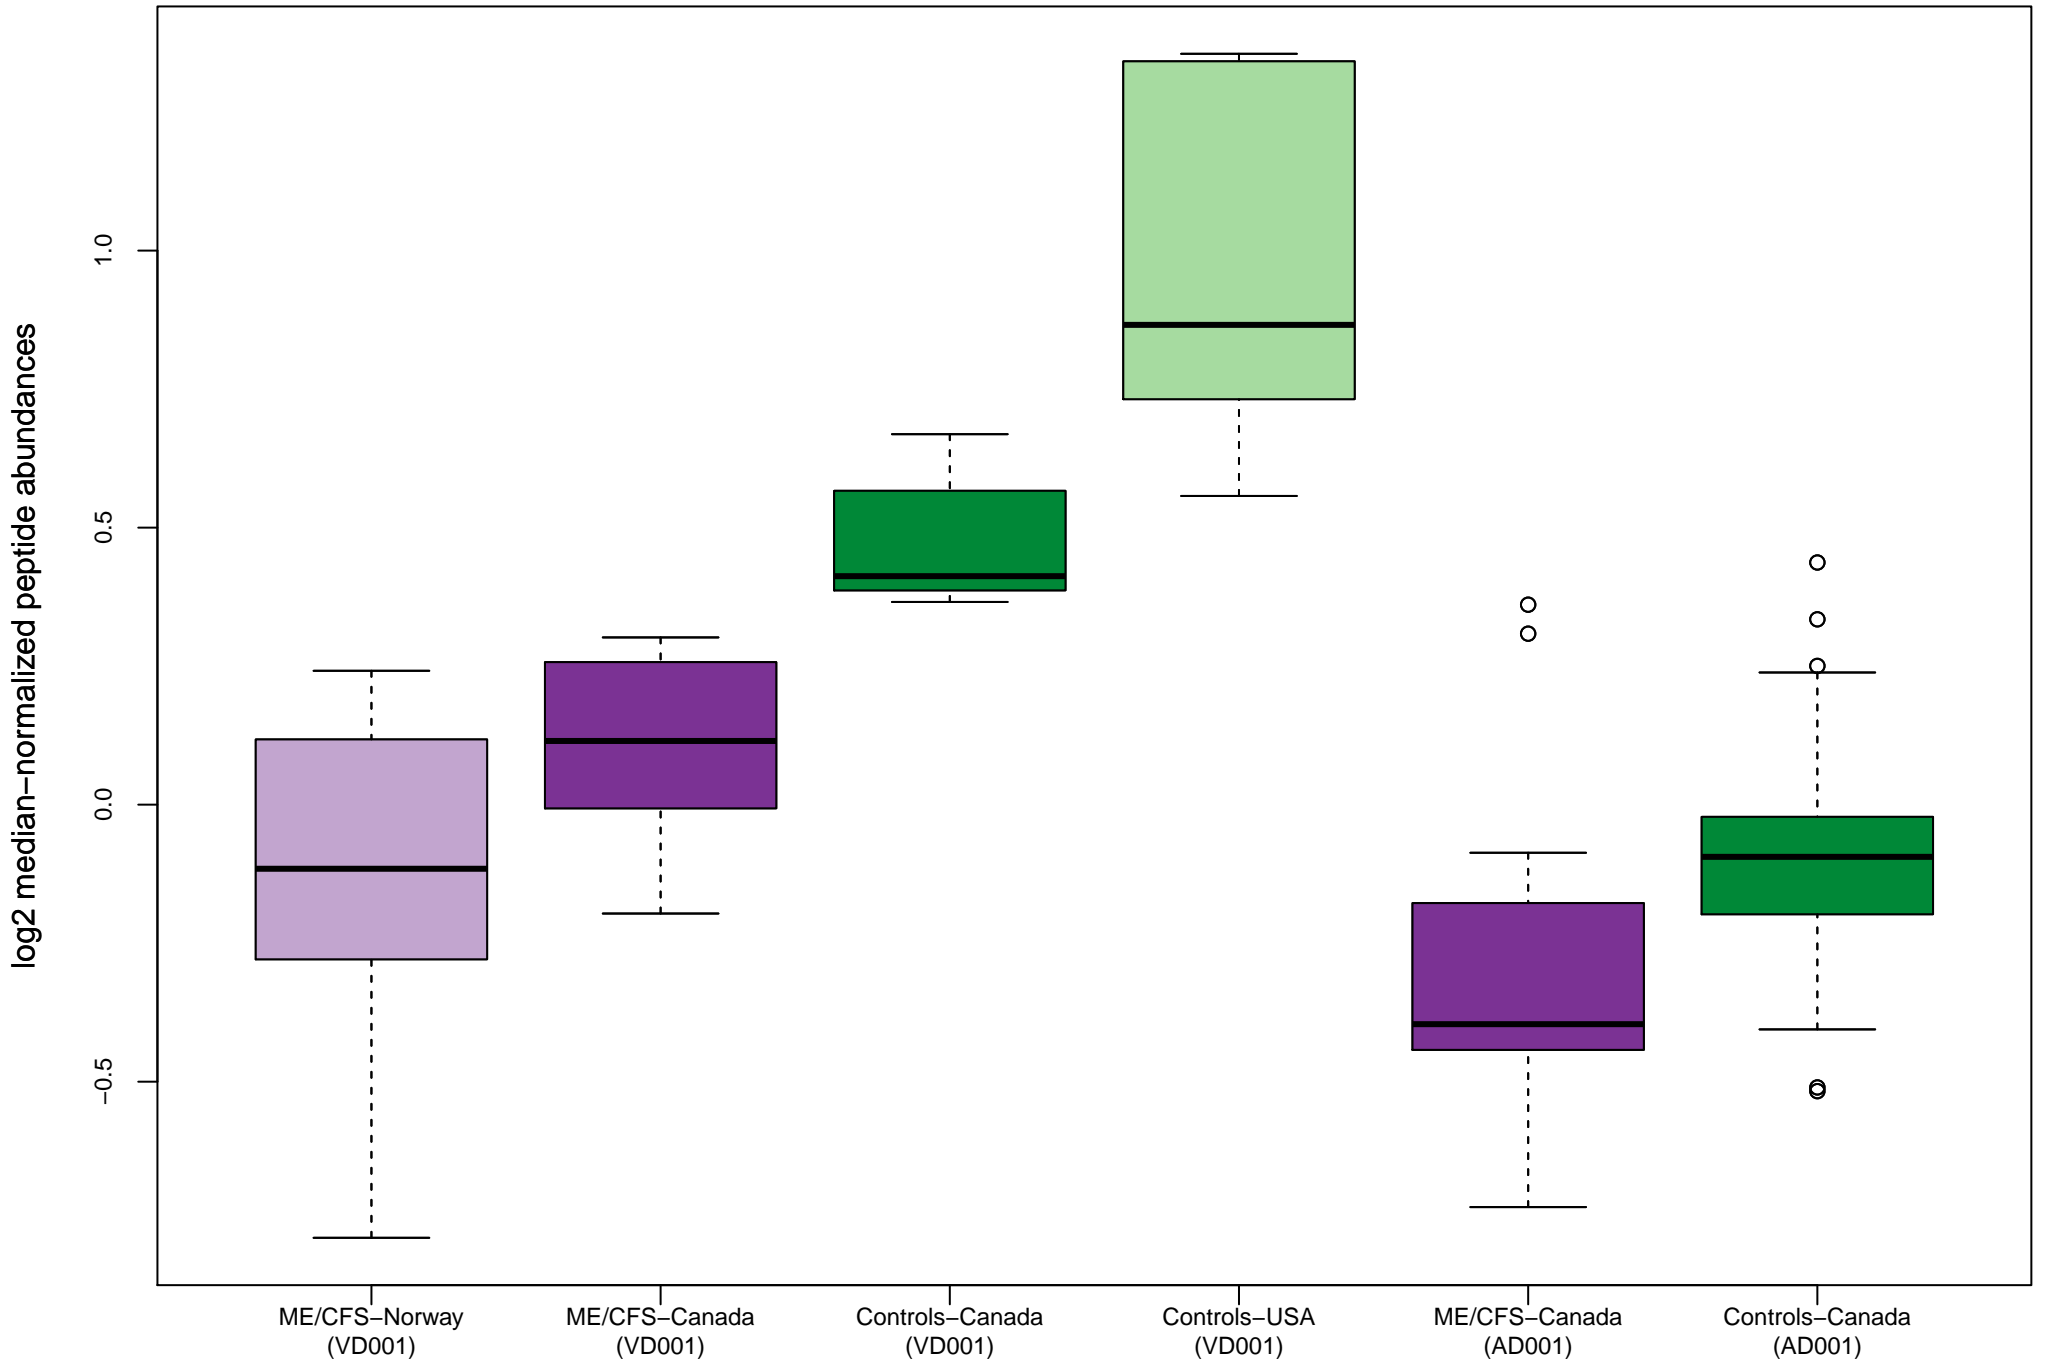

# WSPQWLRYVSA

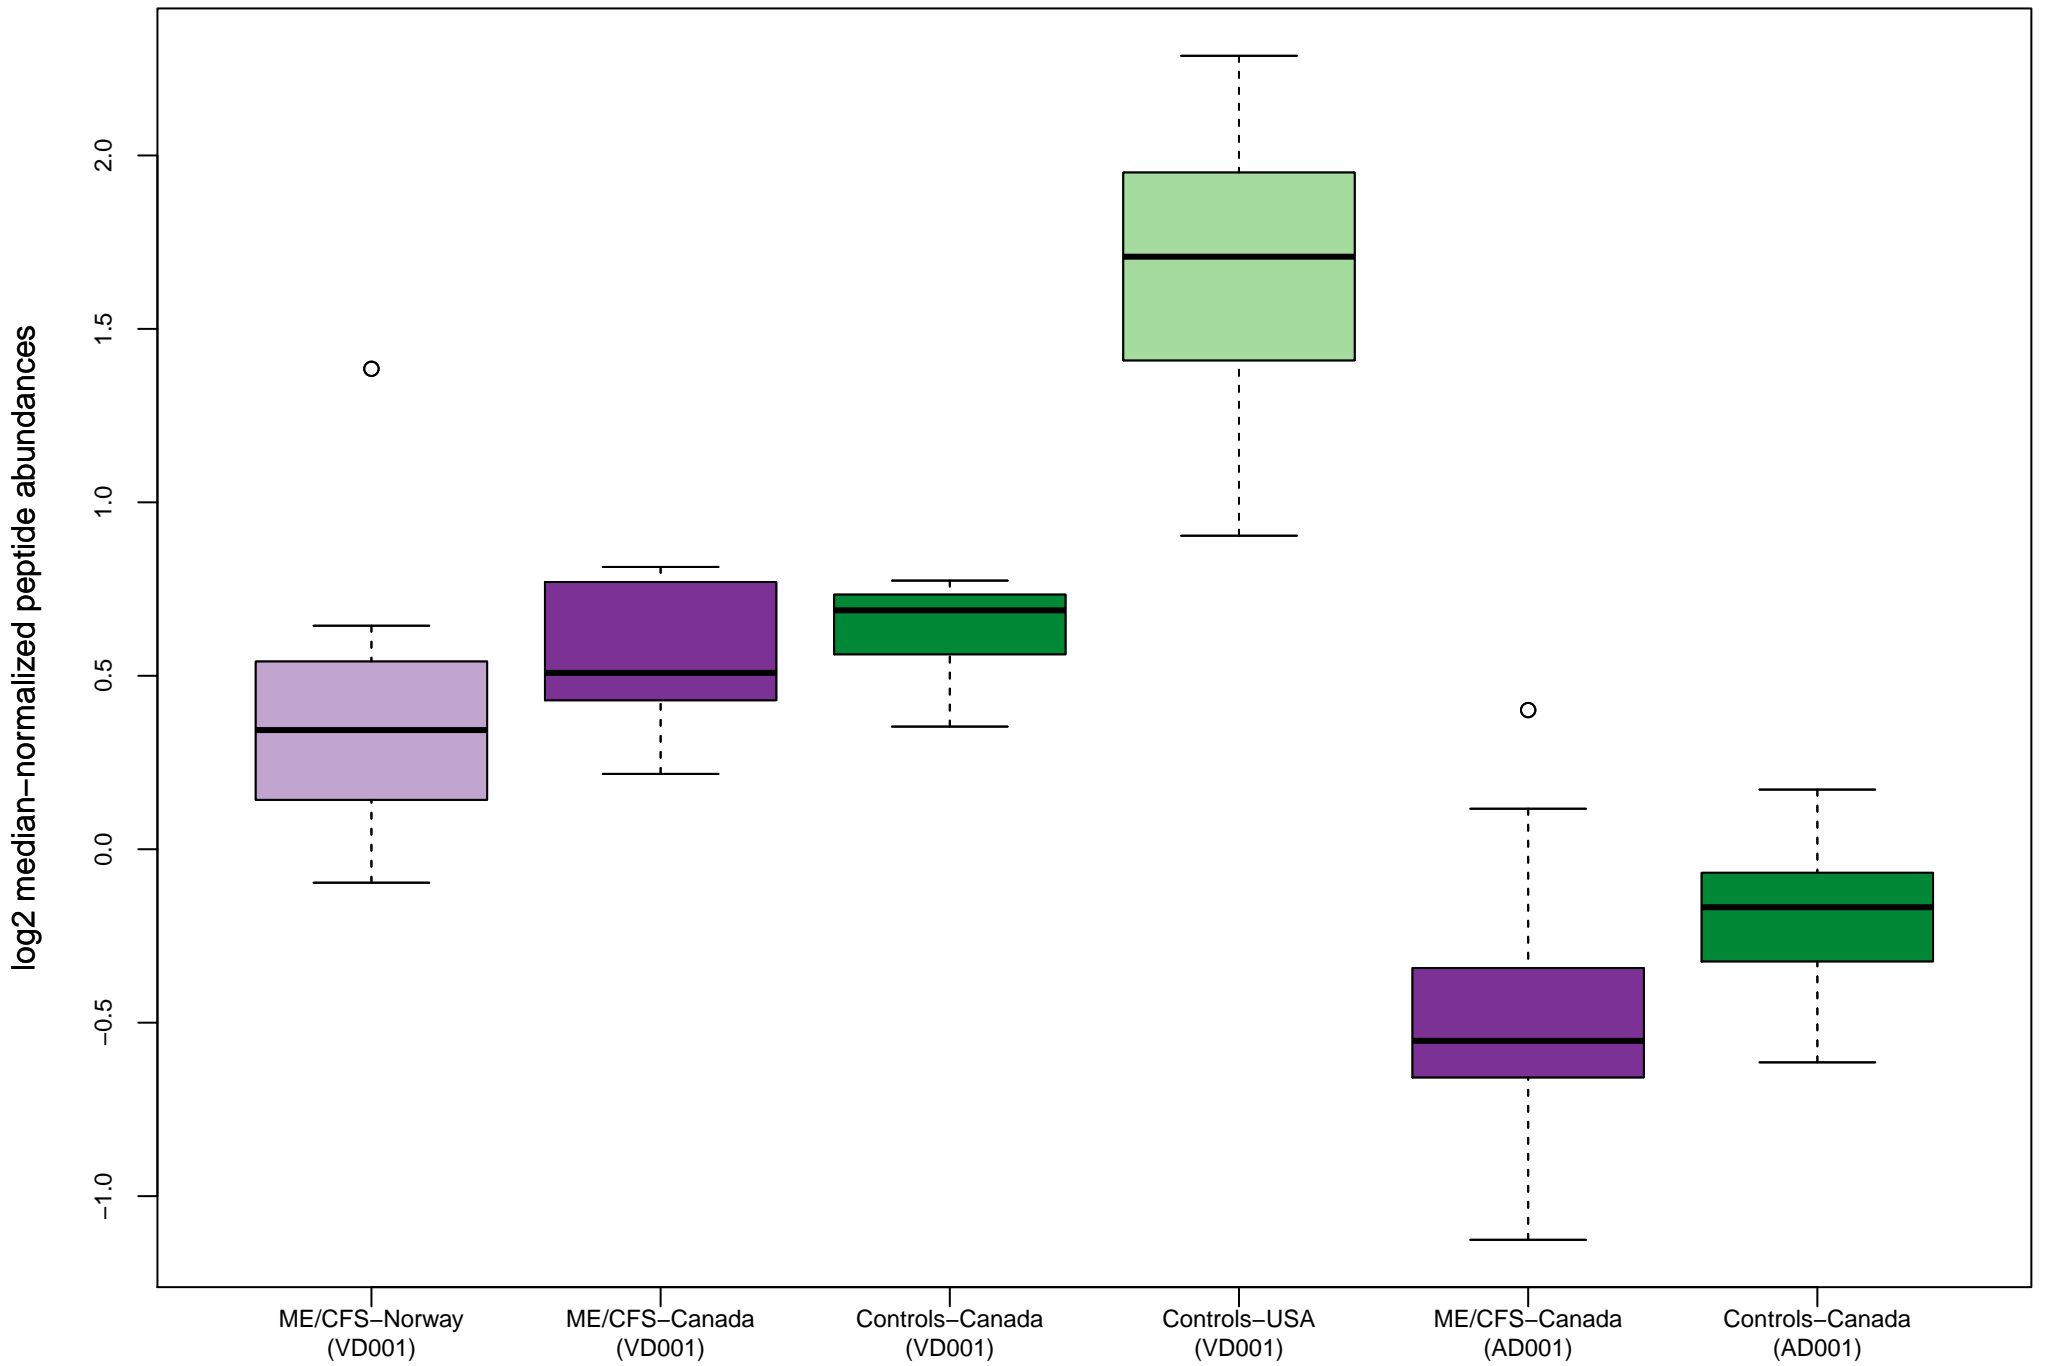

# WSWARQFALSLG

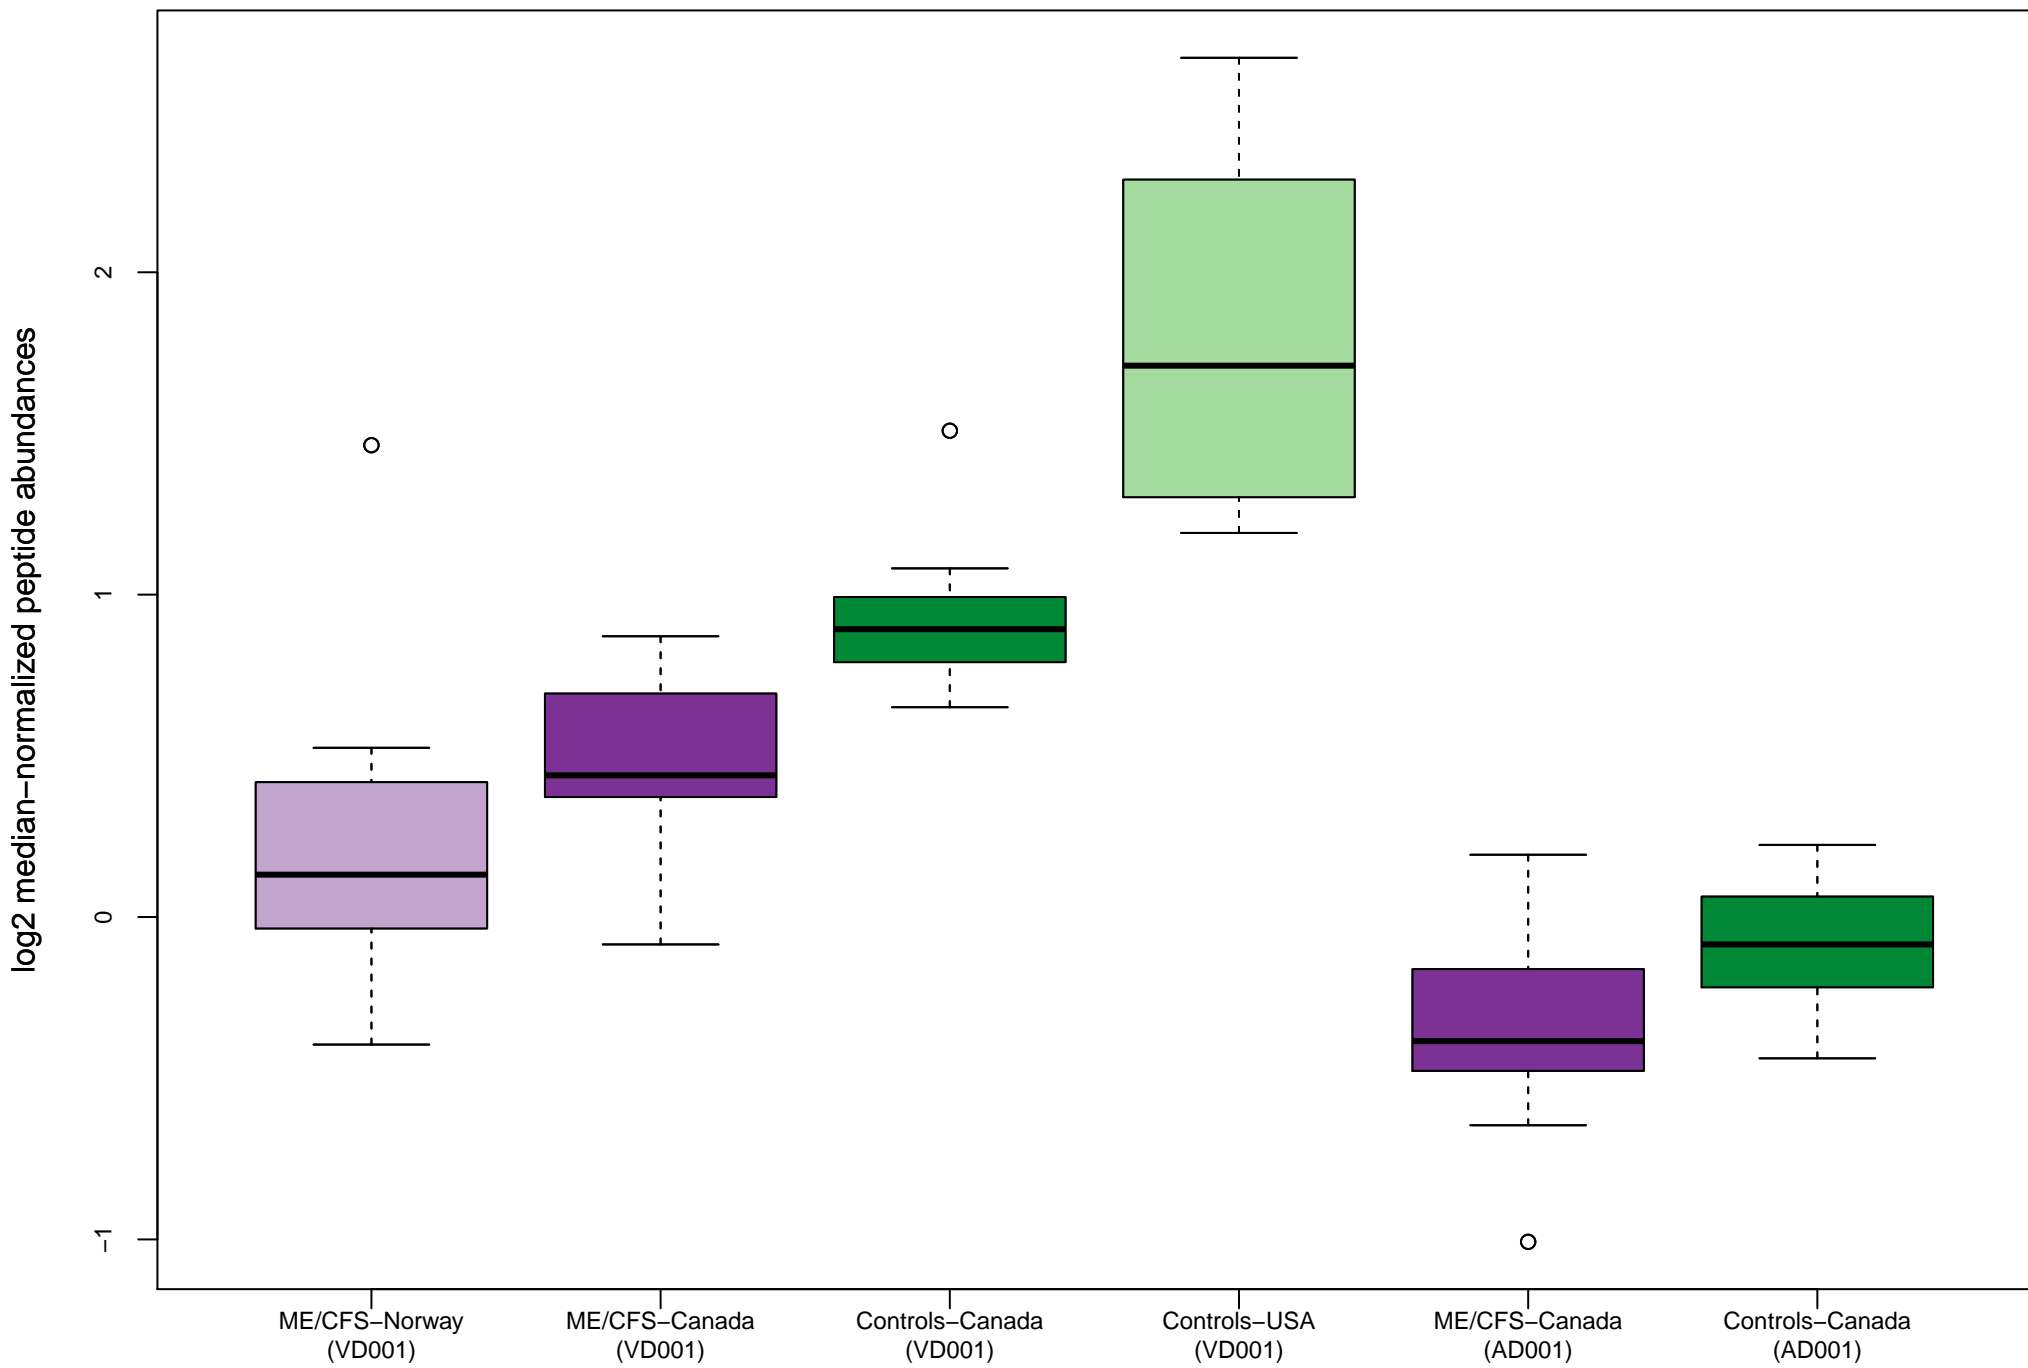



# WVWPRYNVLSSG

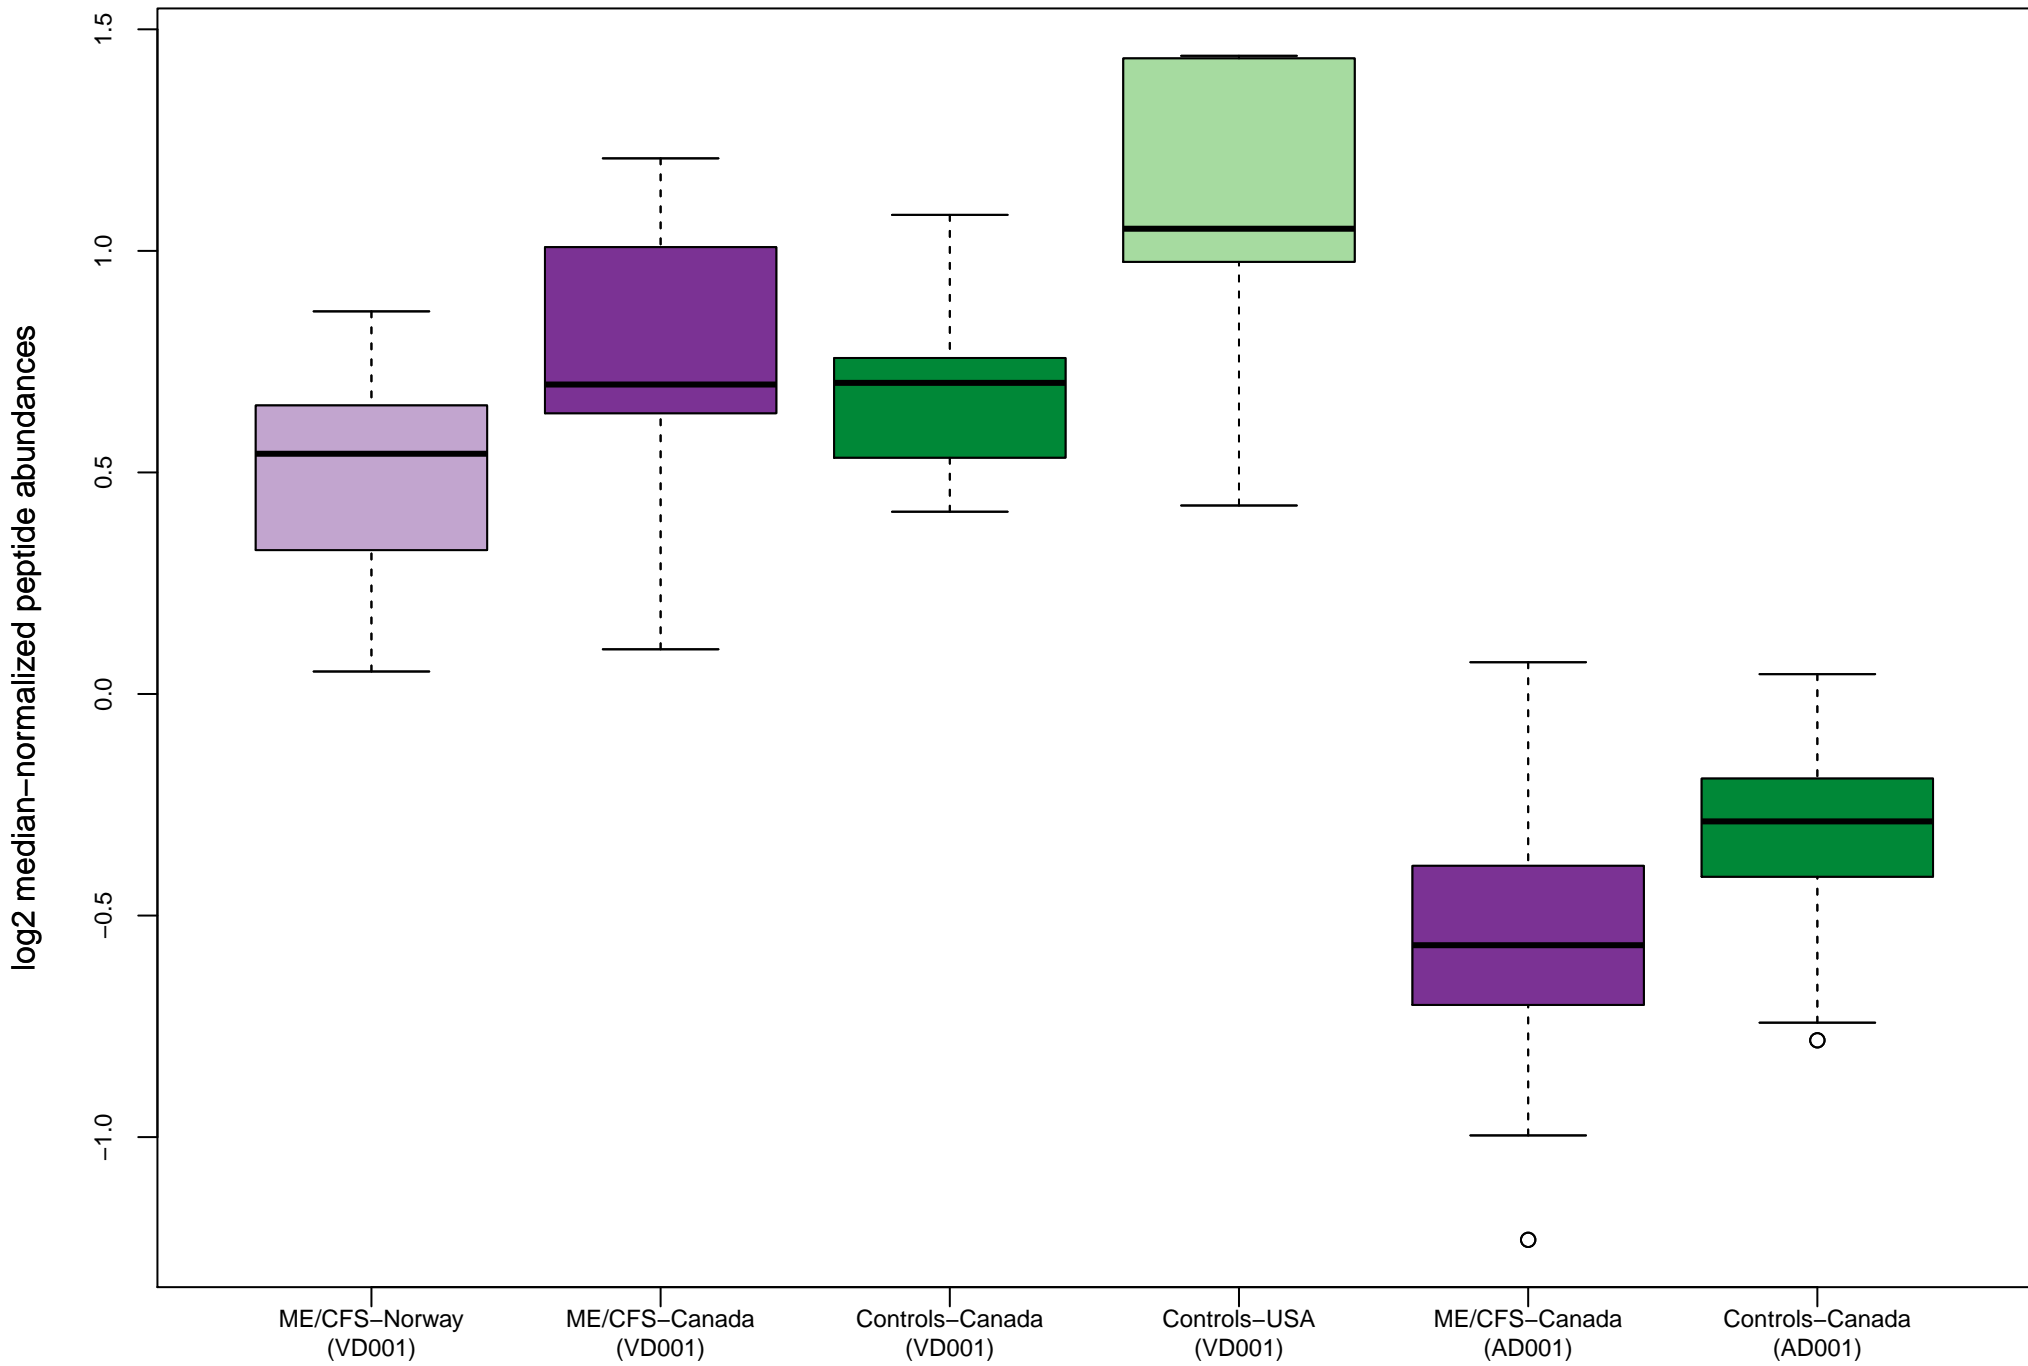

# WWARQWLSALSG

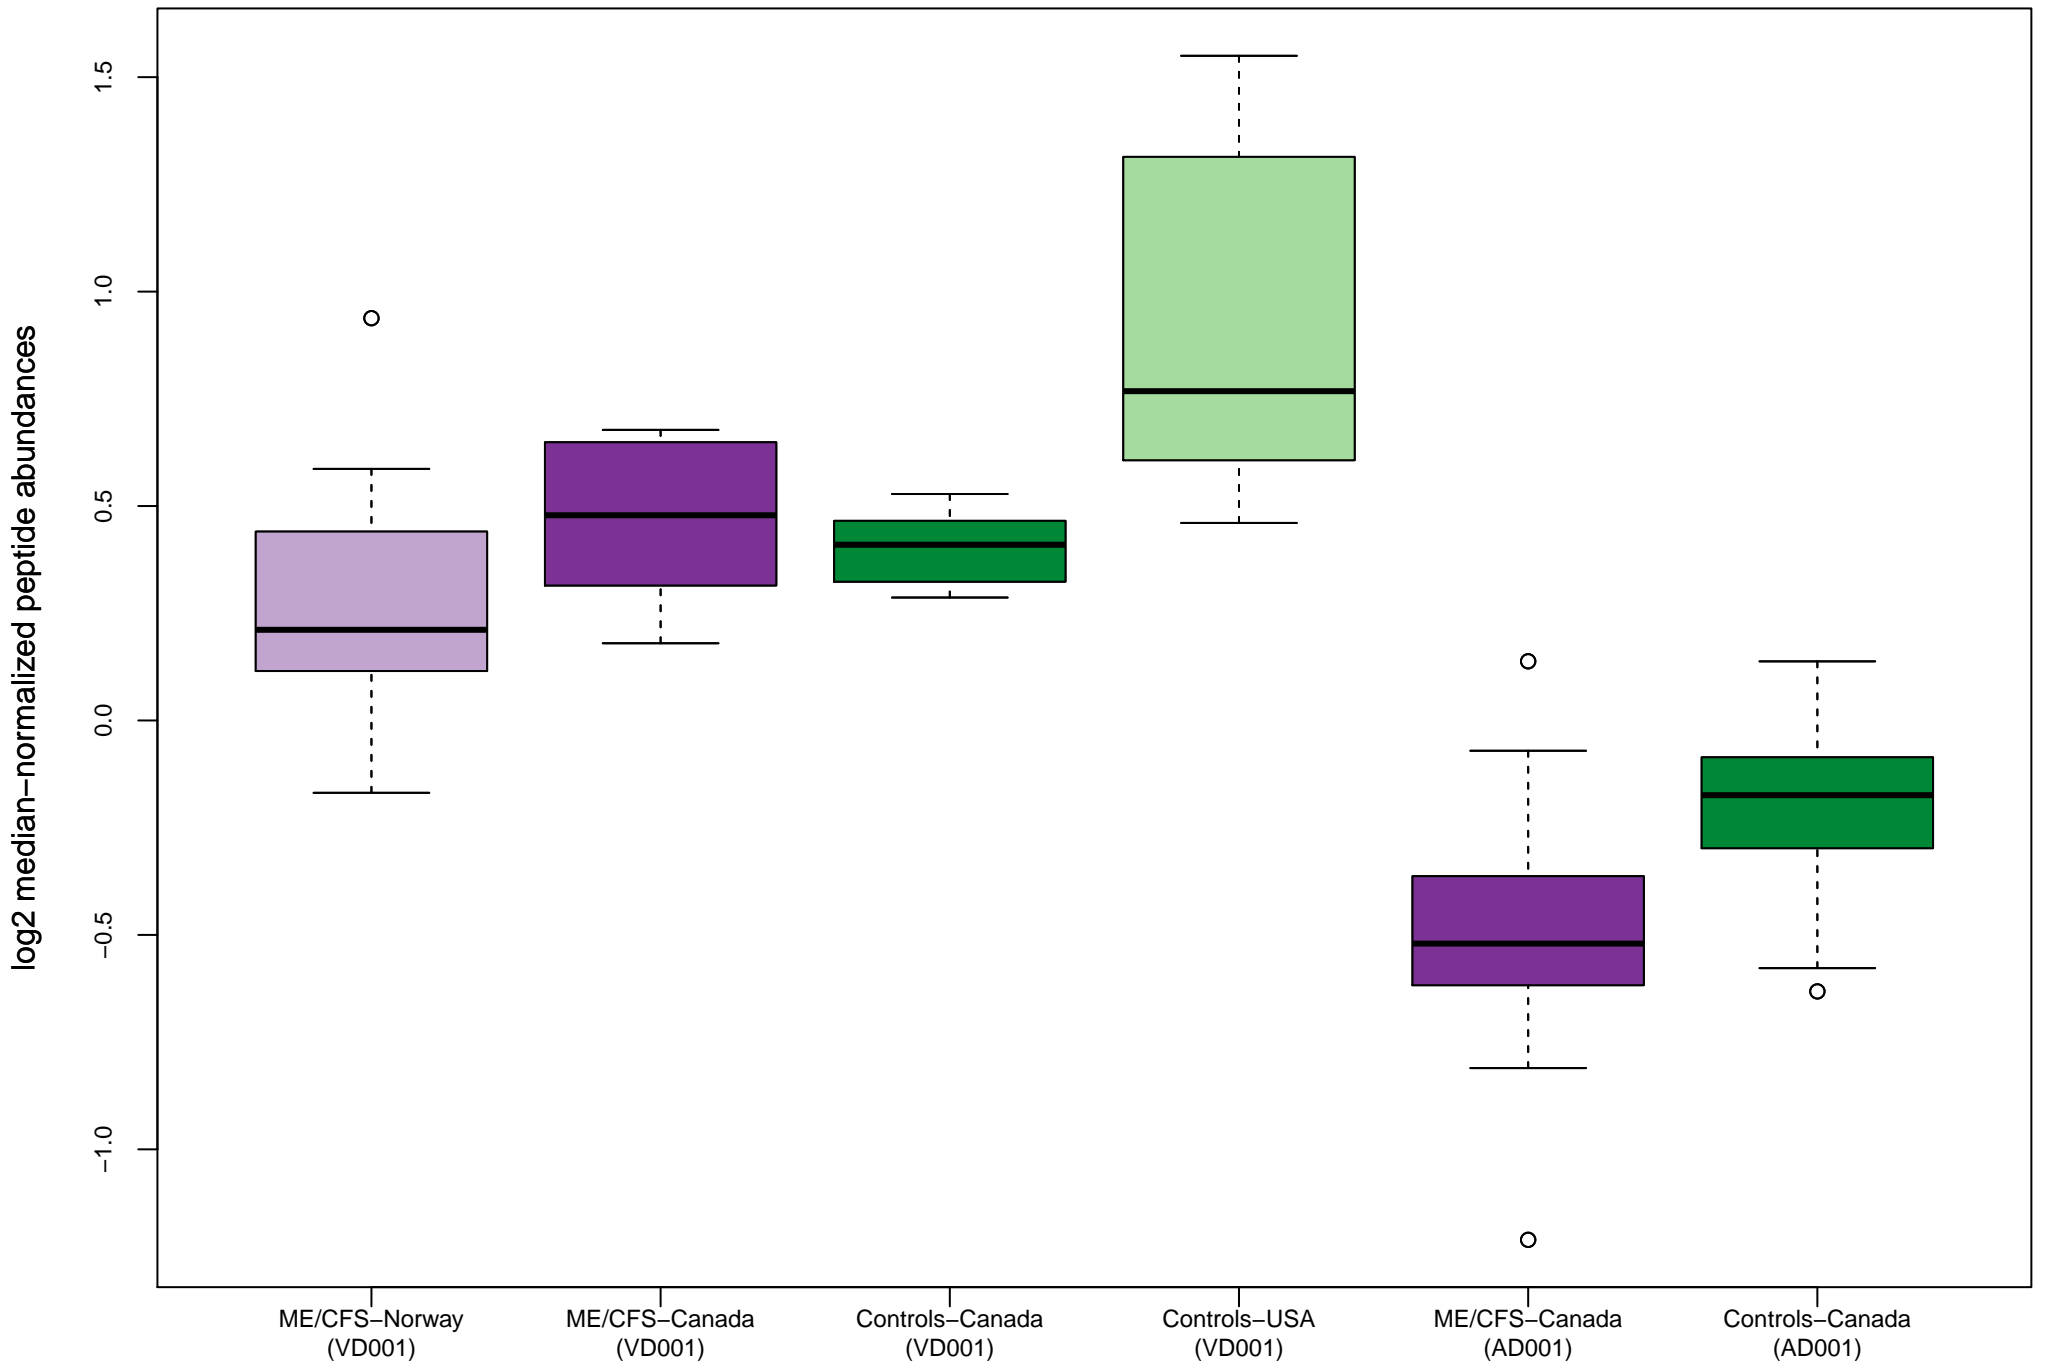

# WWRFKLSGVLSG

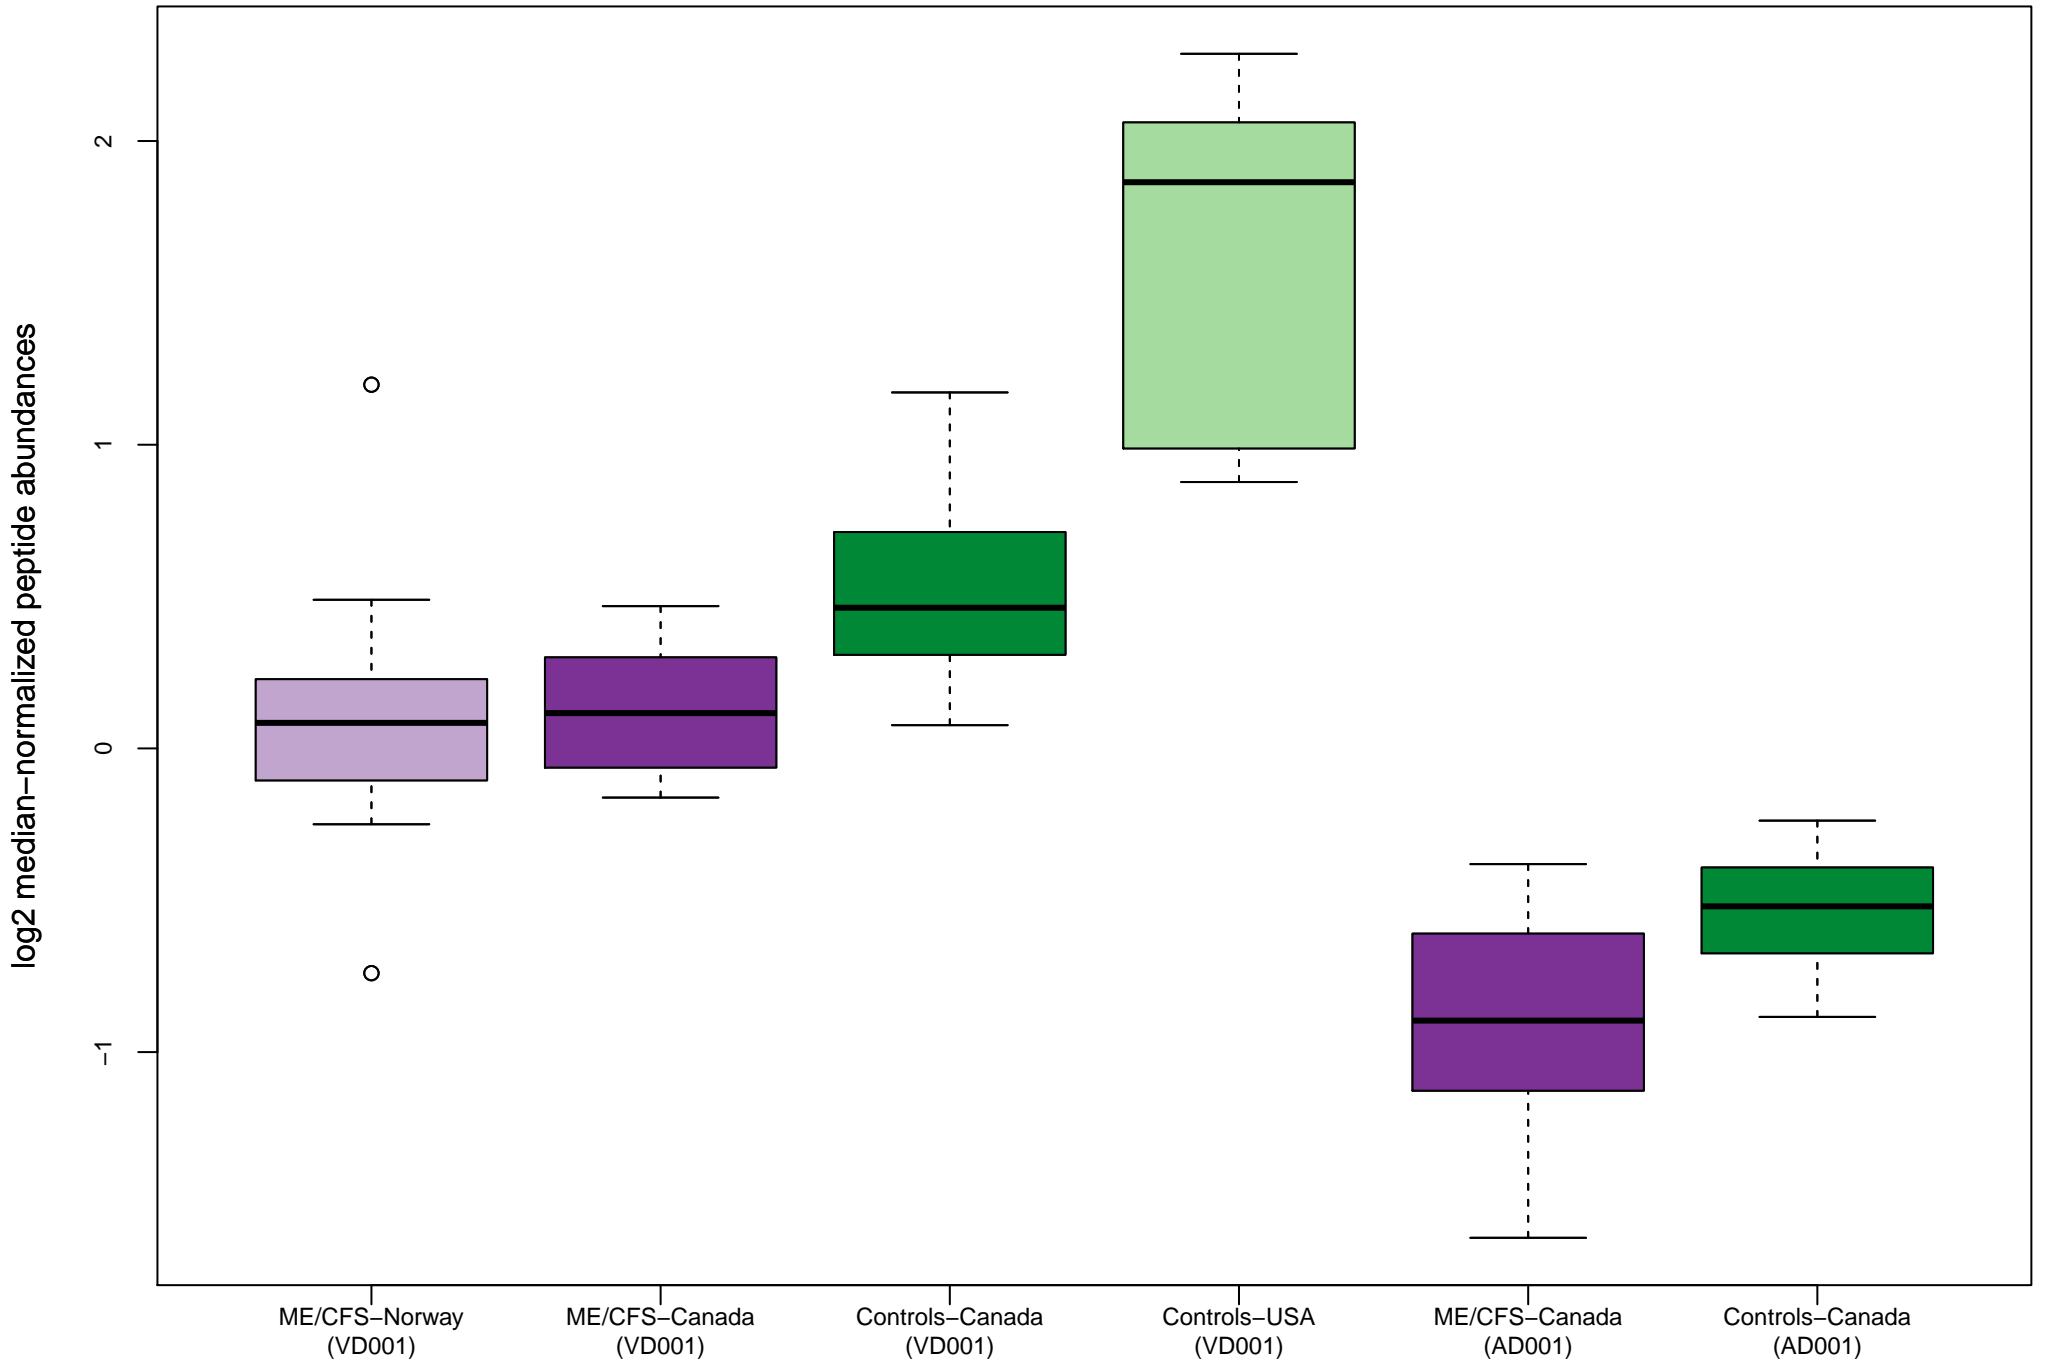

# WWSRLYVLGALG

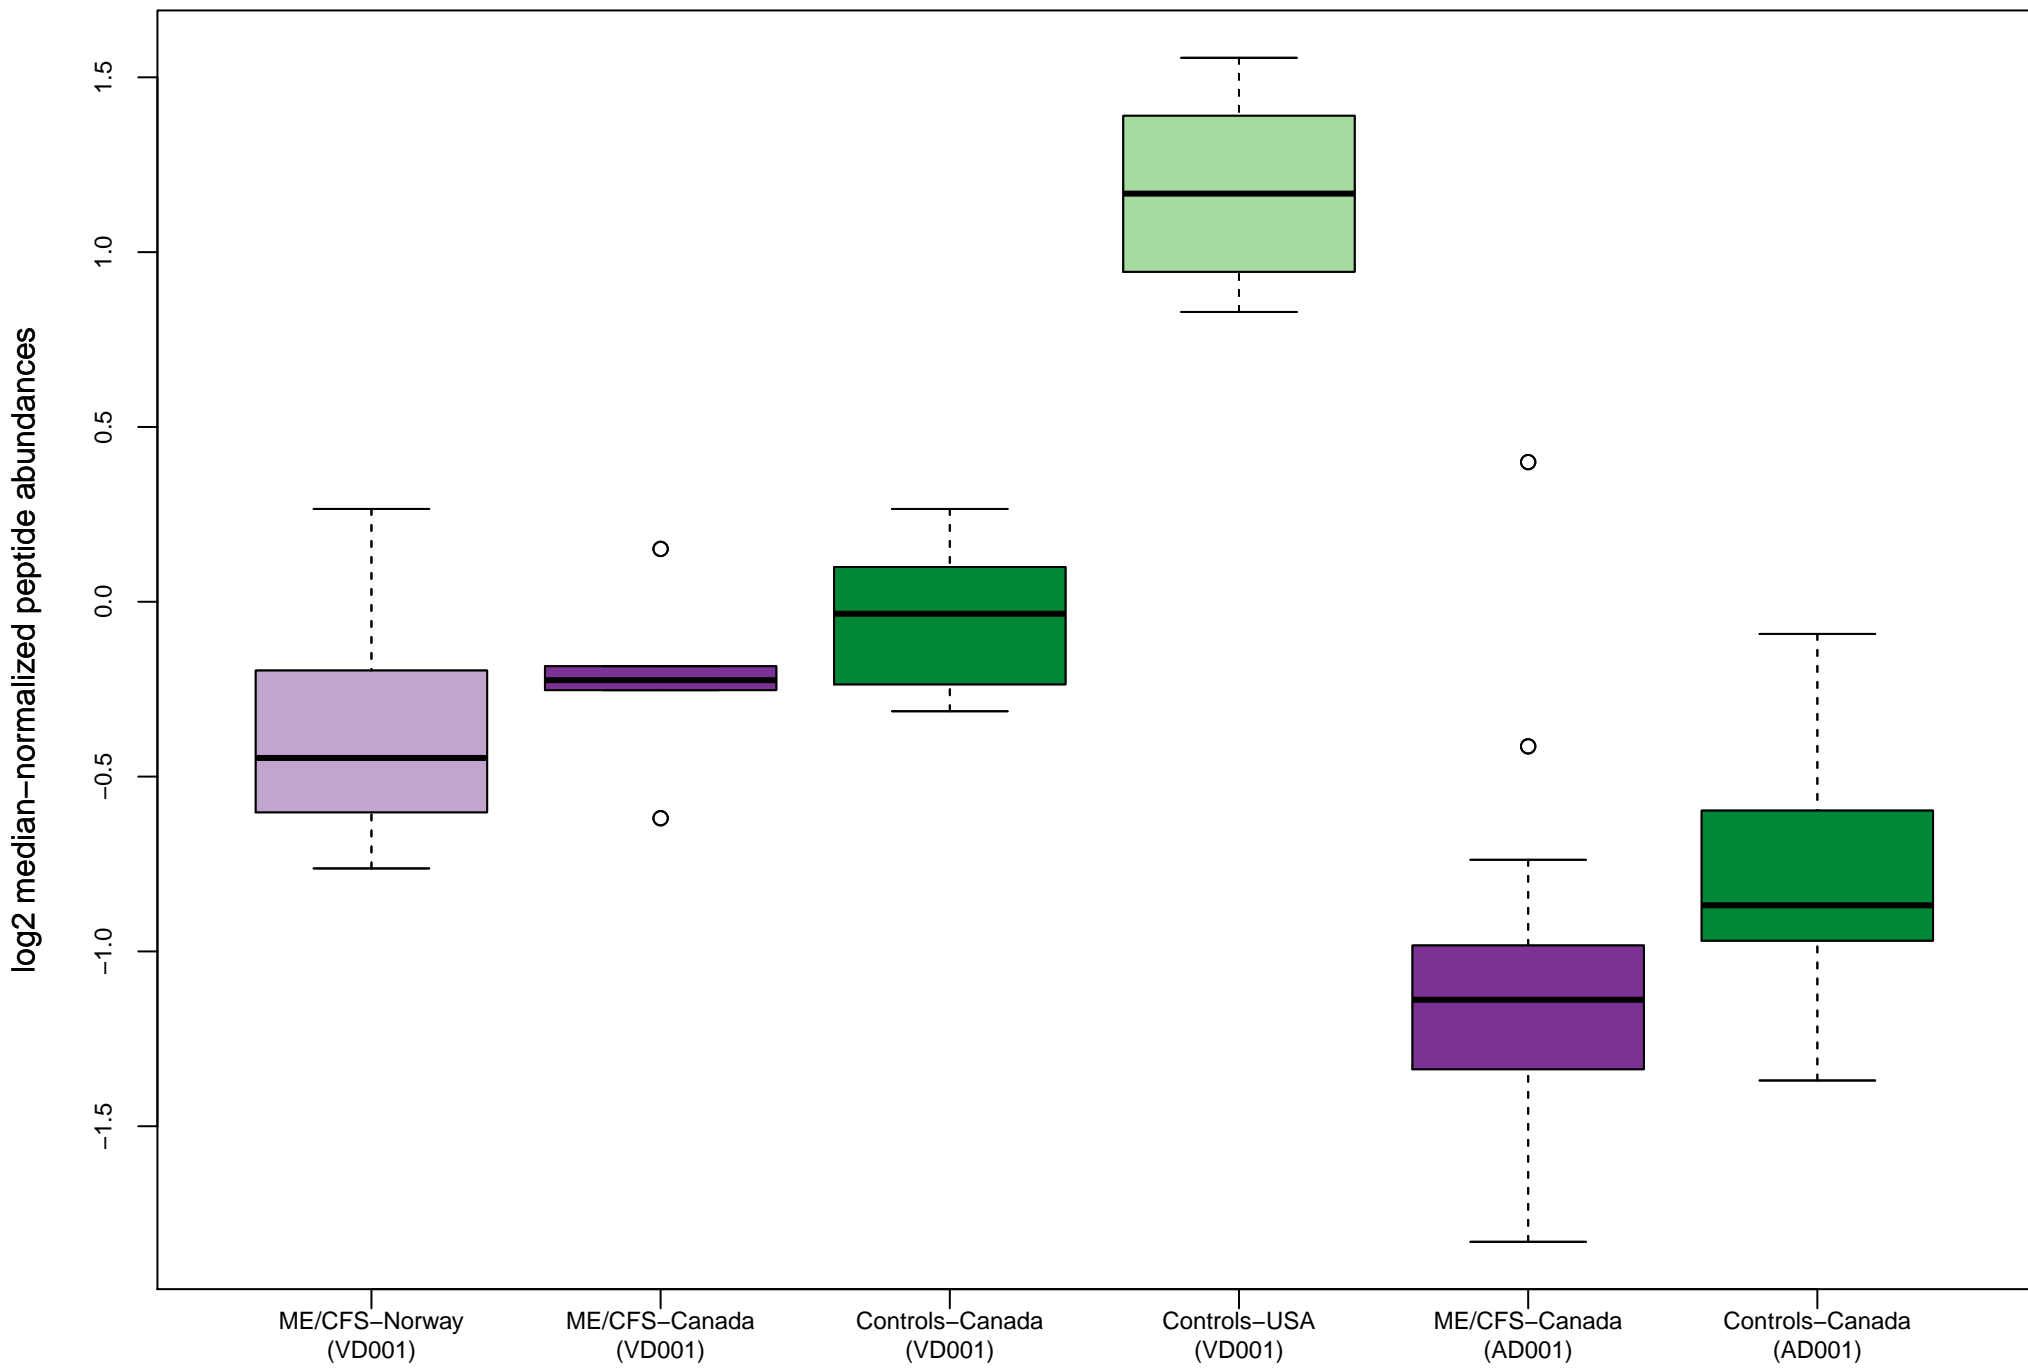

# WYFSRALSGVLS

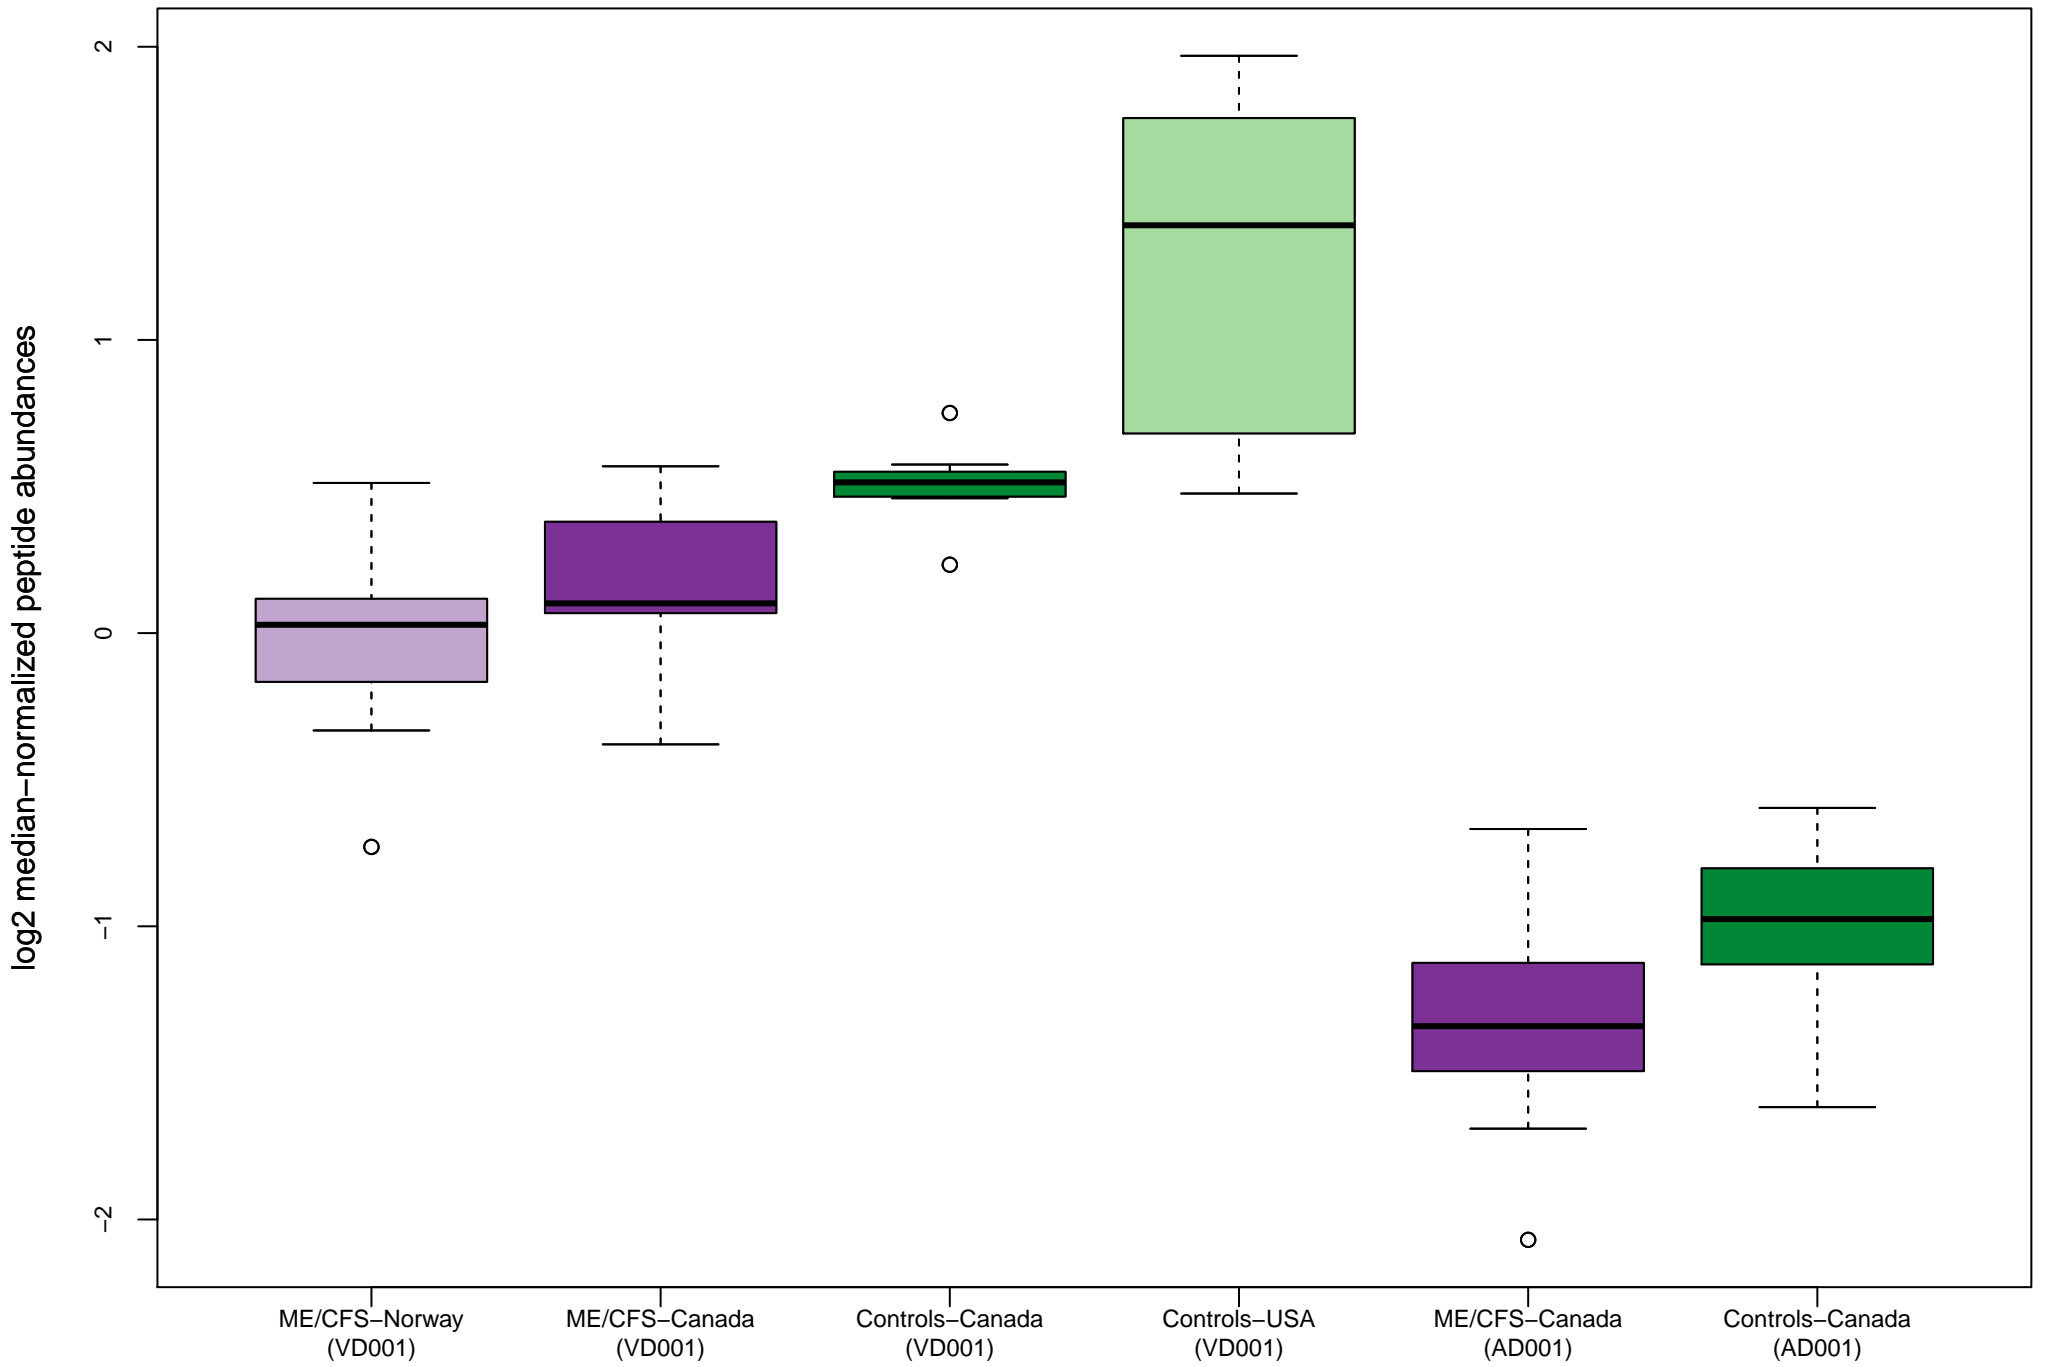

# WYRRVLSGVALS

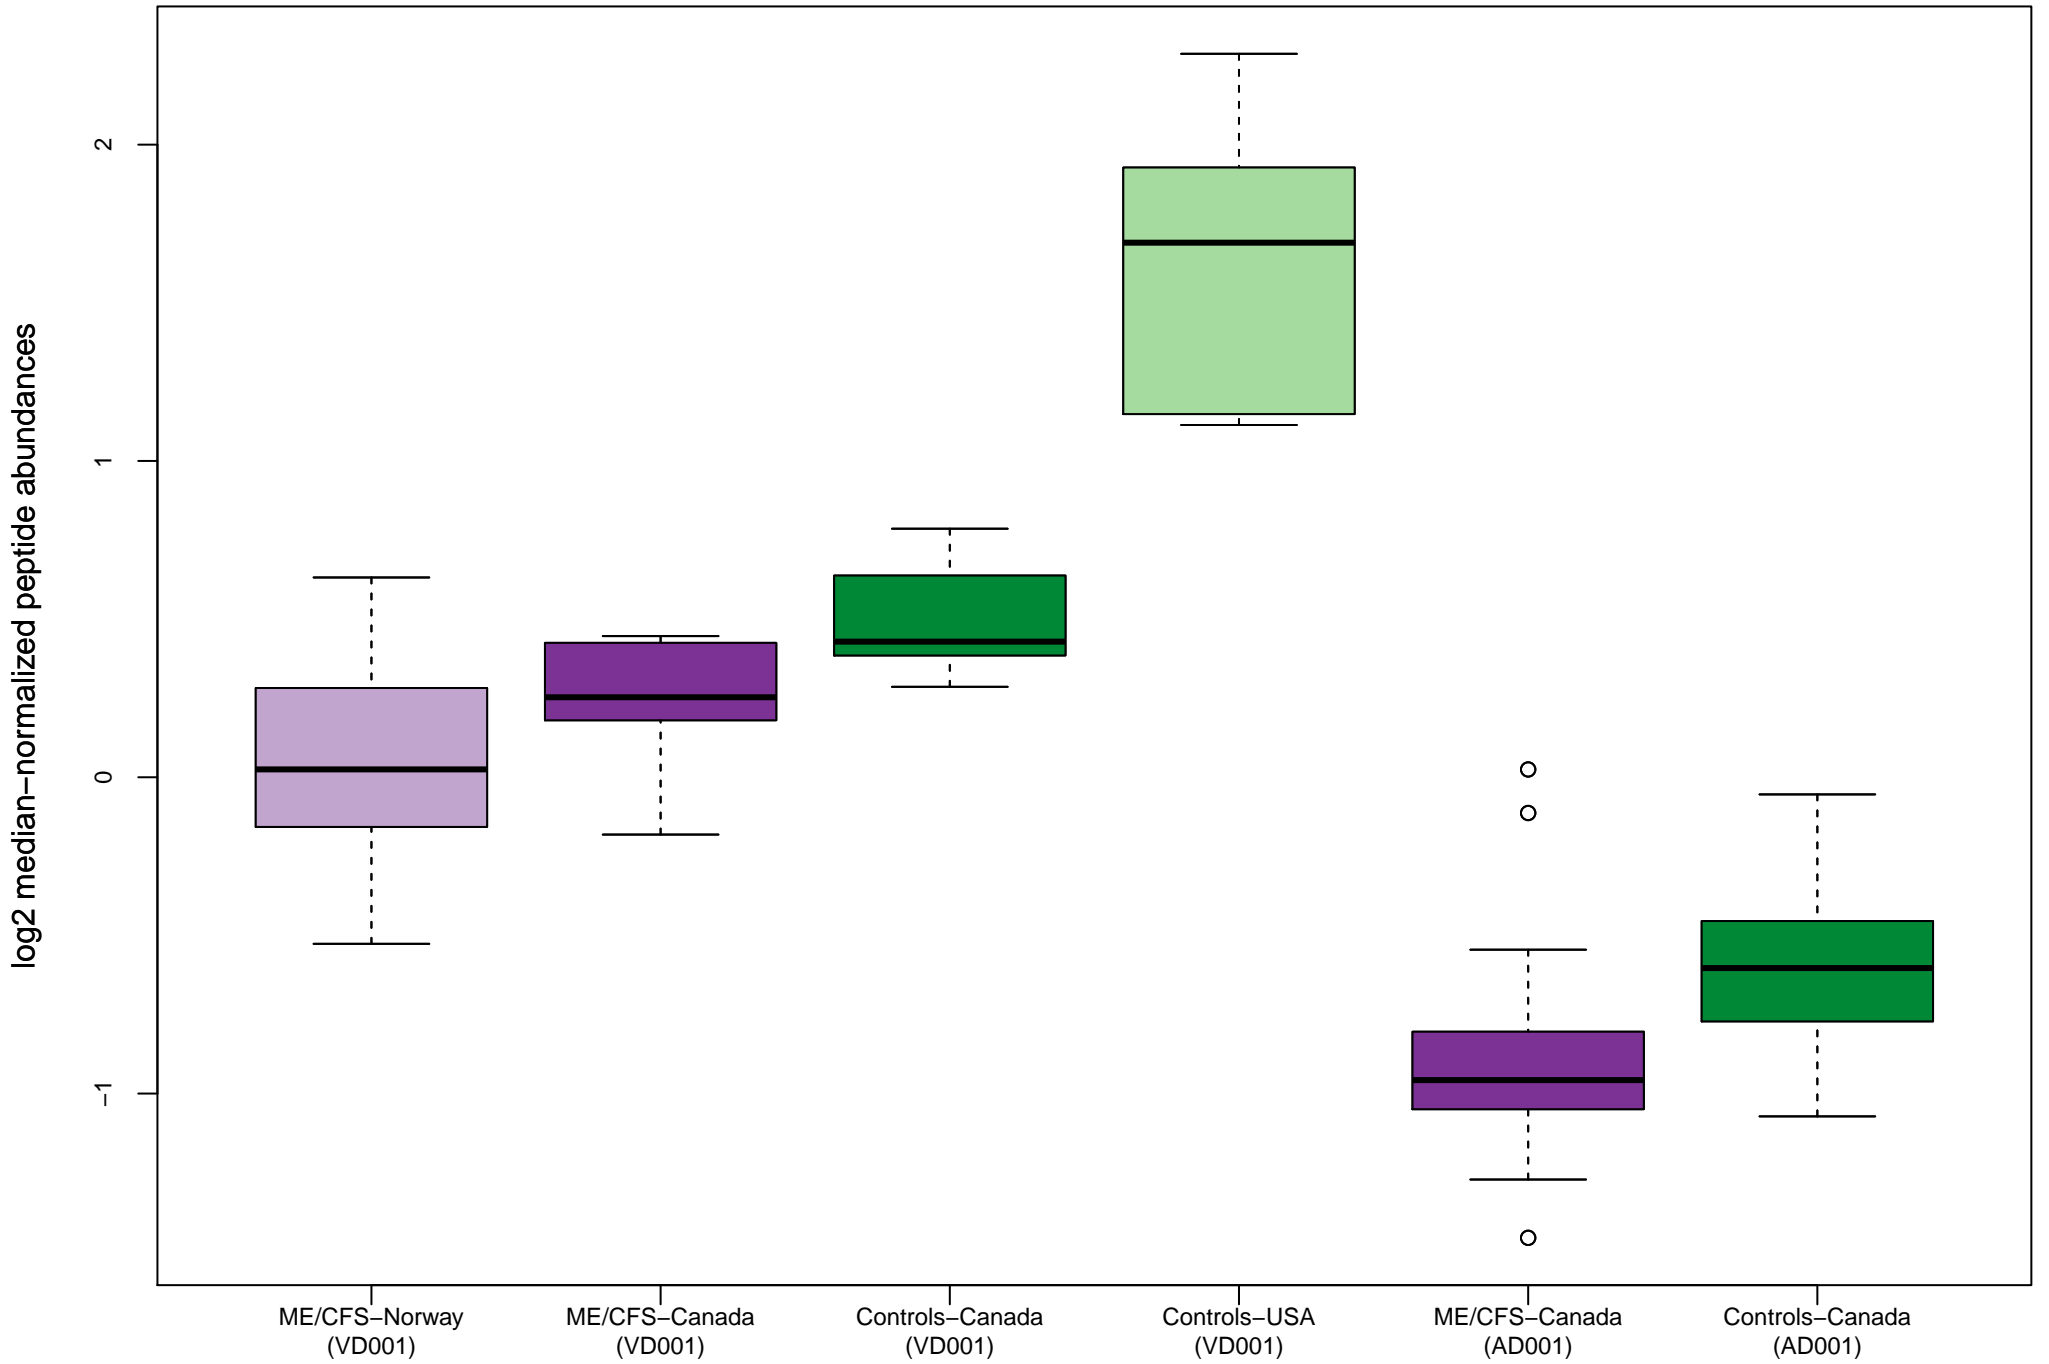

# YAPFVAFRYNKG

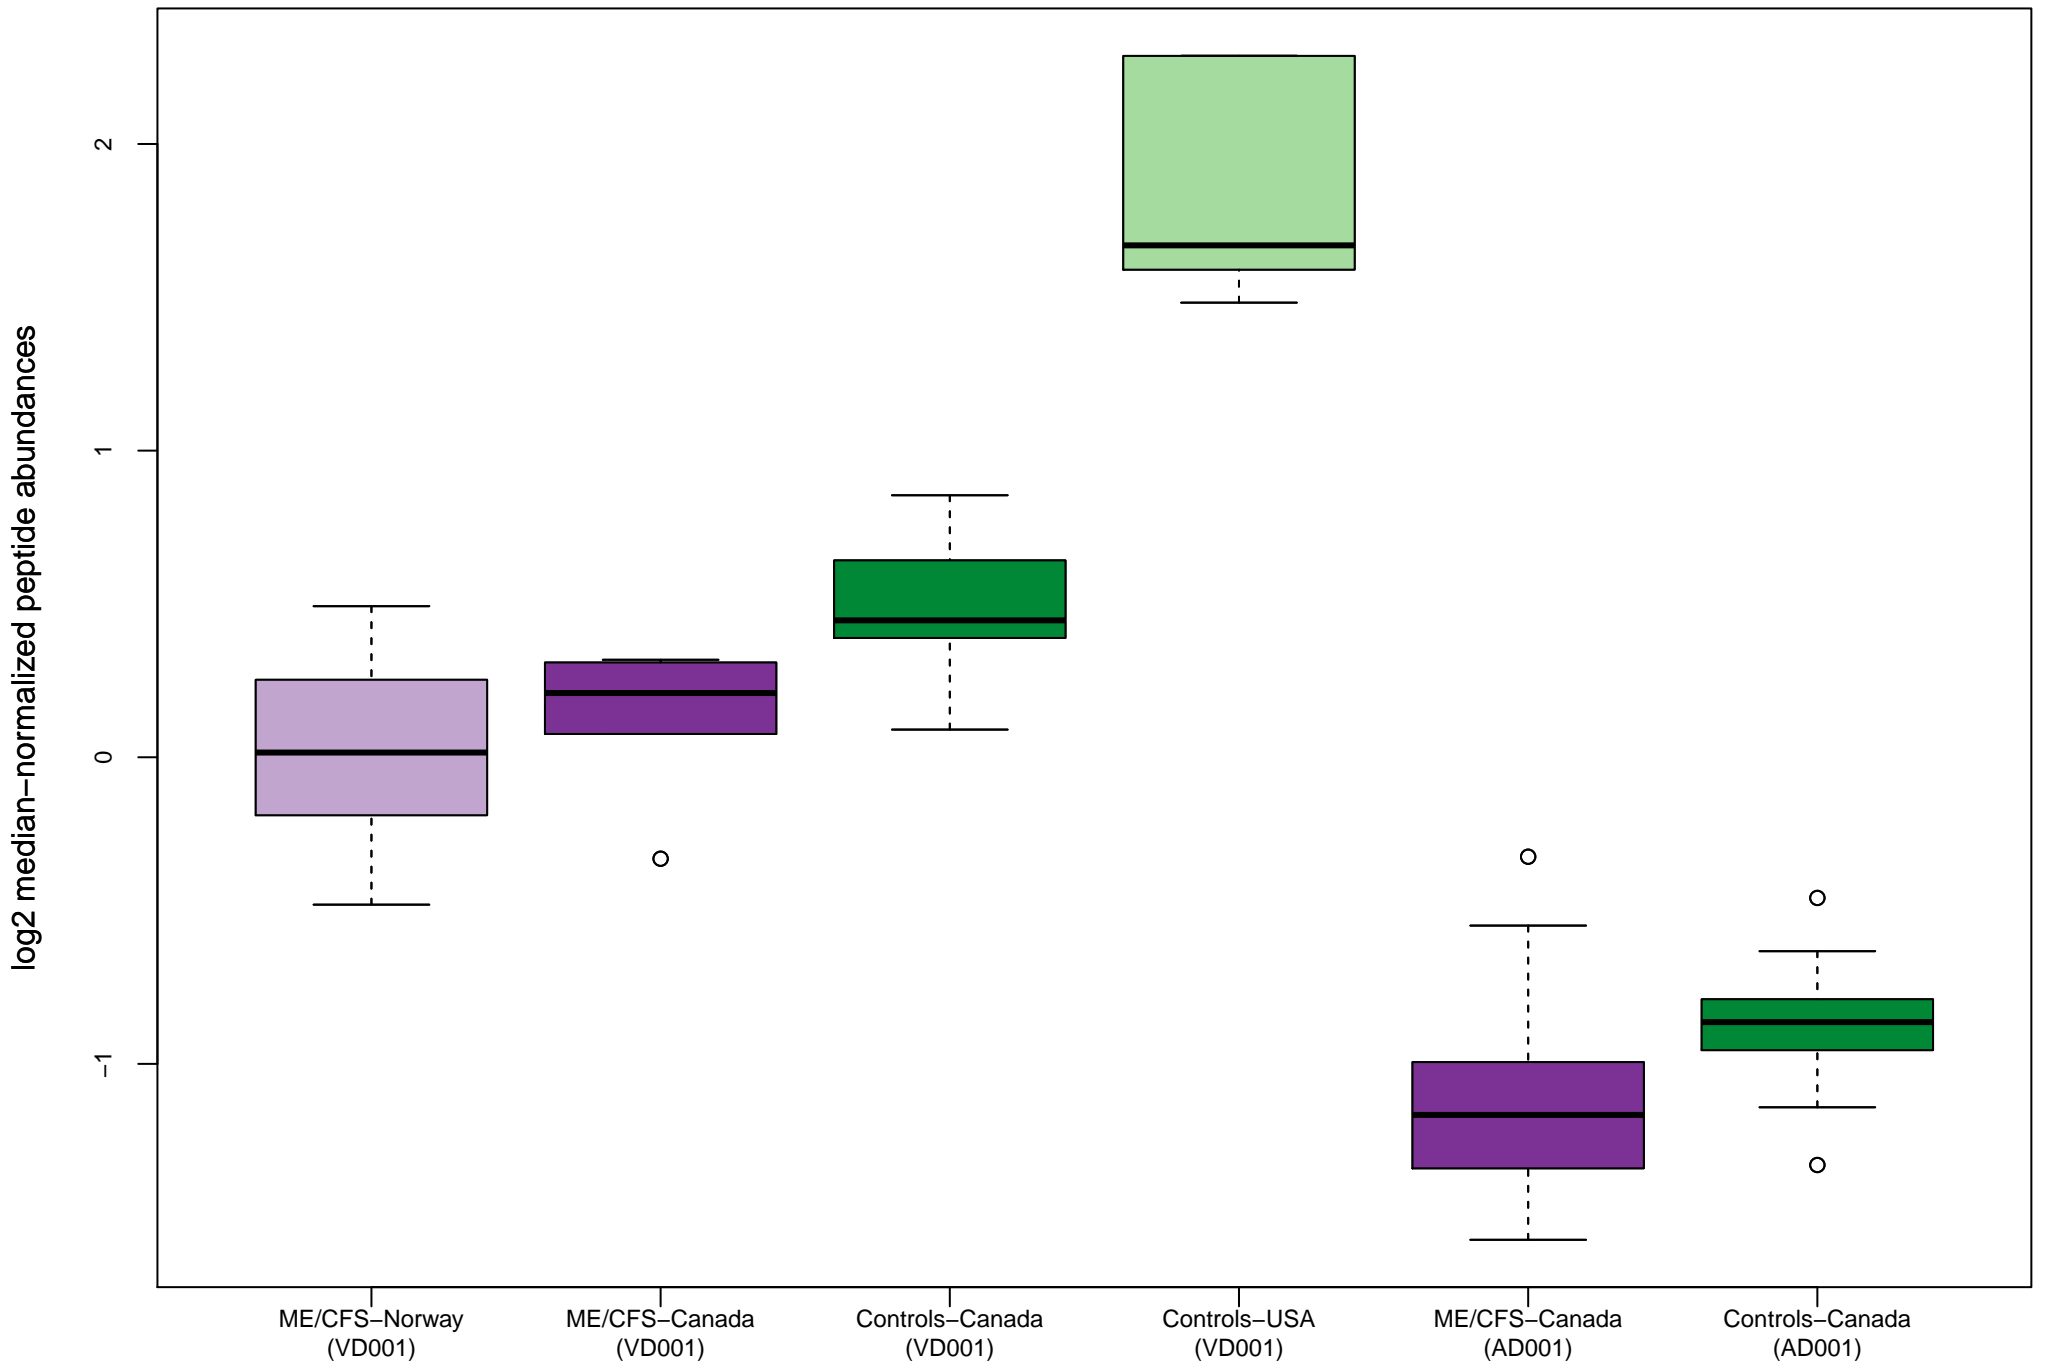

# YARLWKLHLGAL

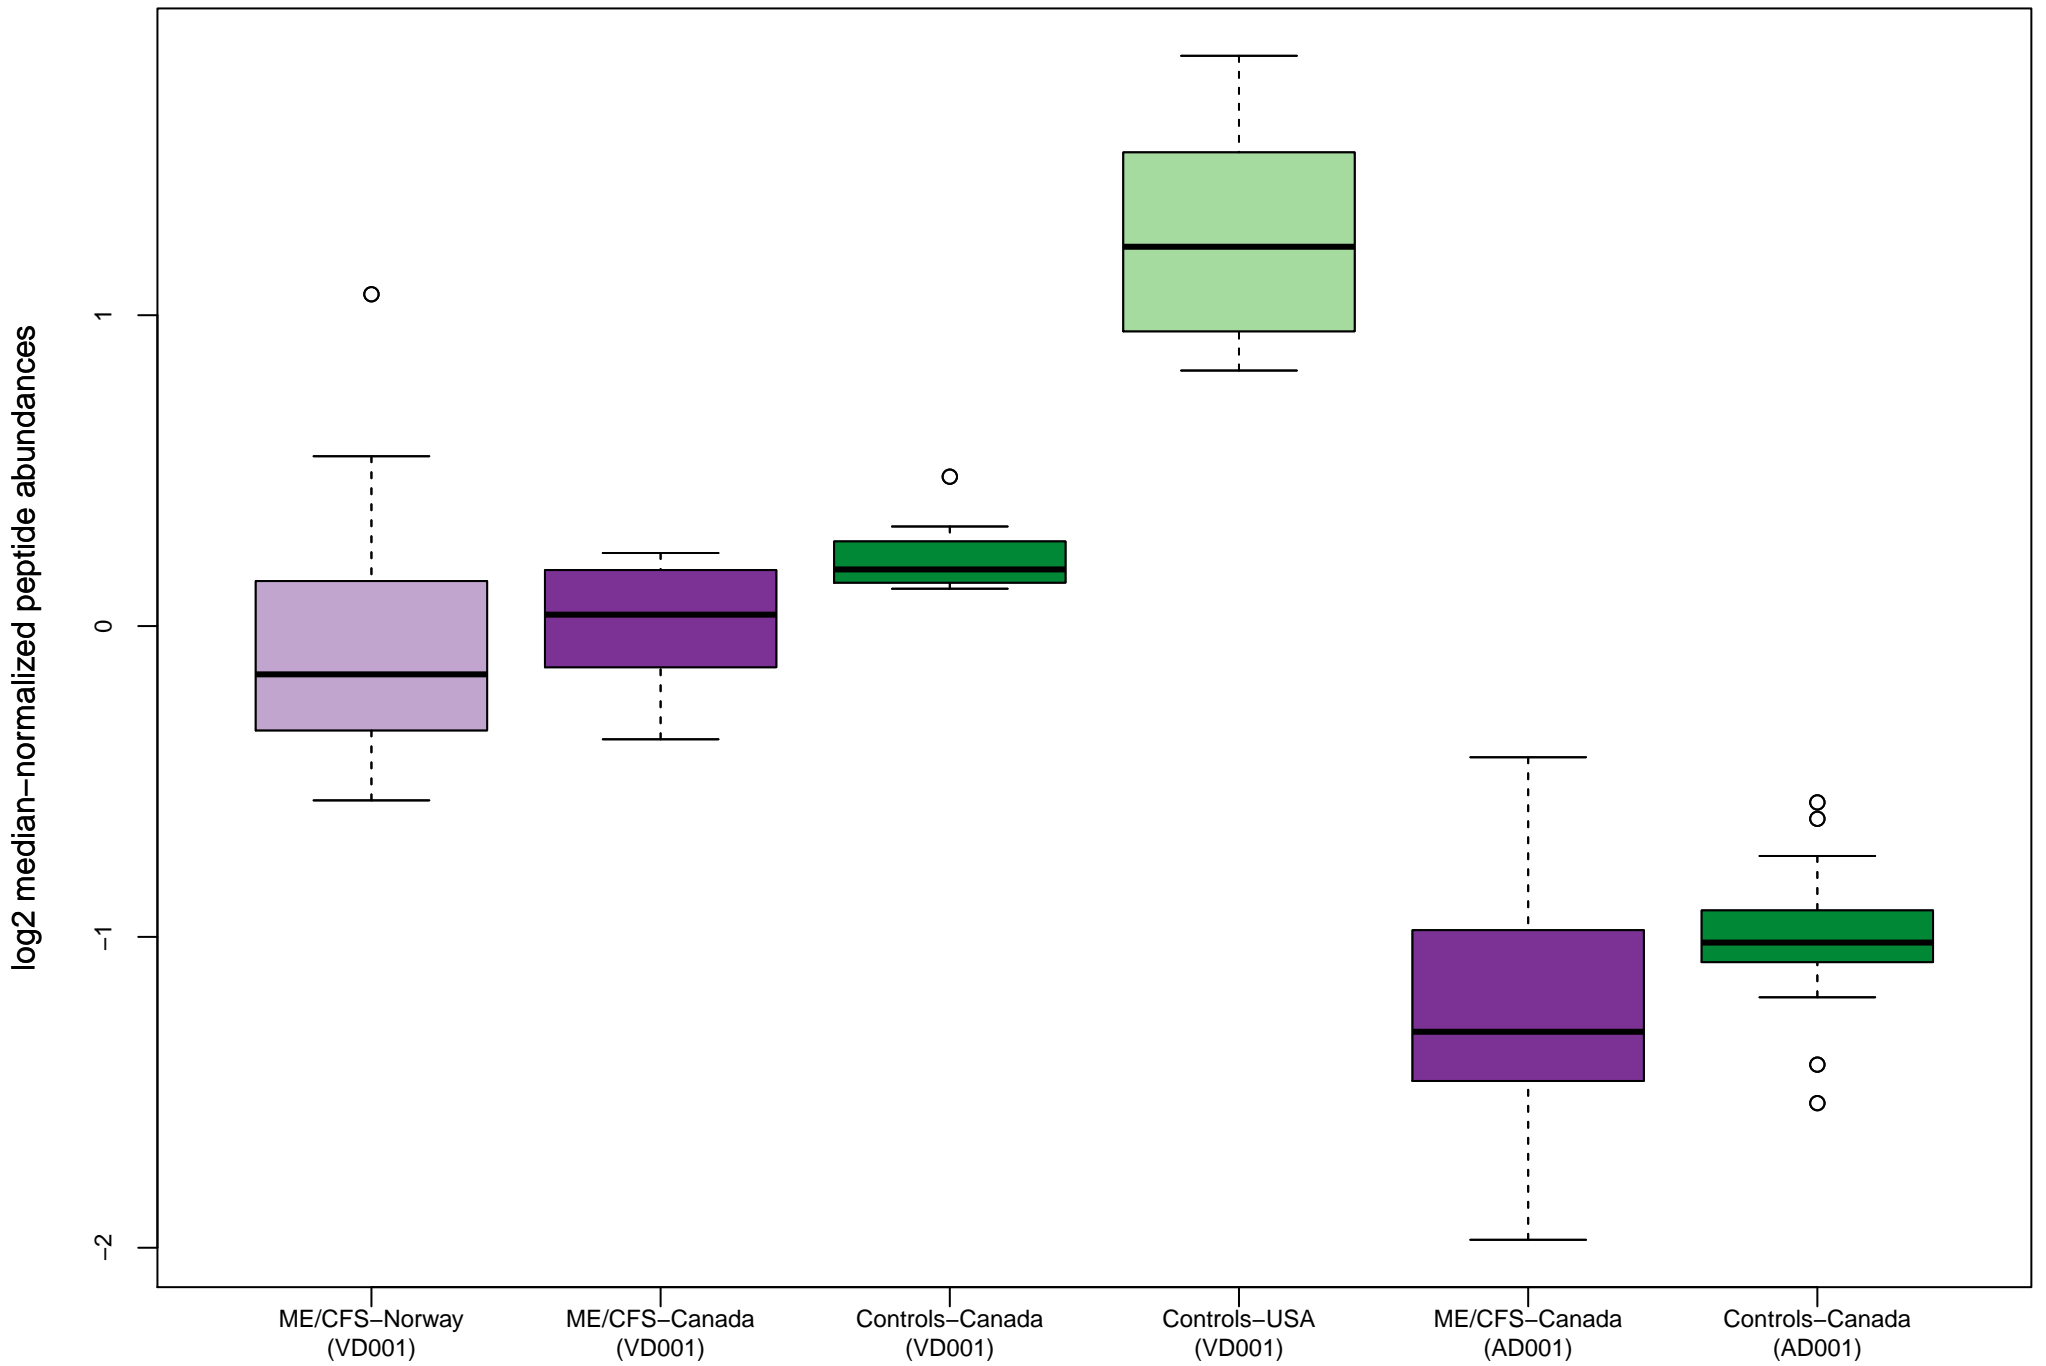



# YDVLQVYKLWAL

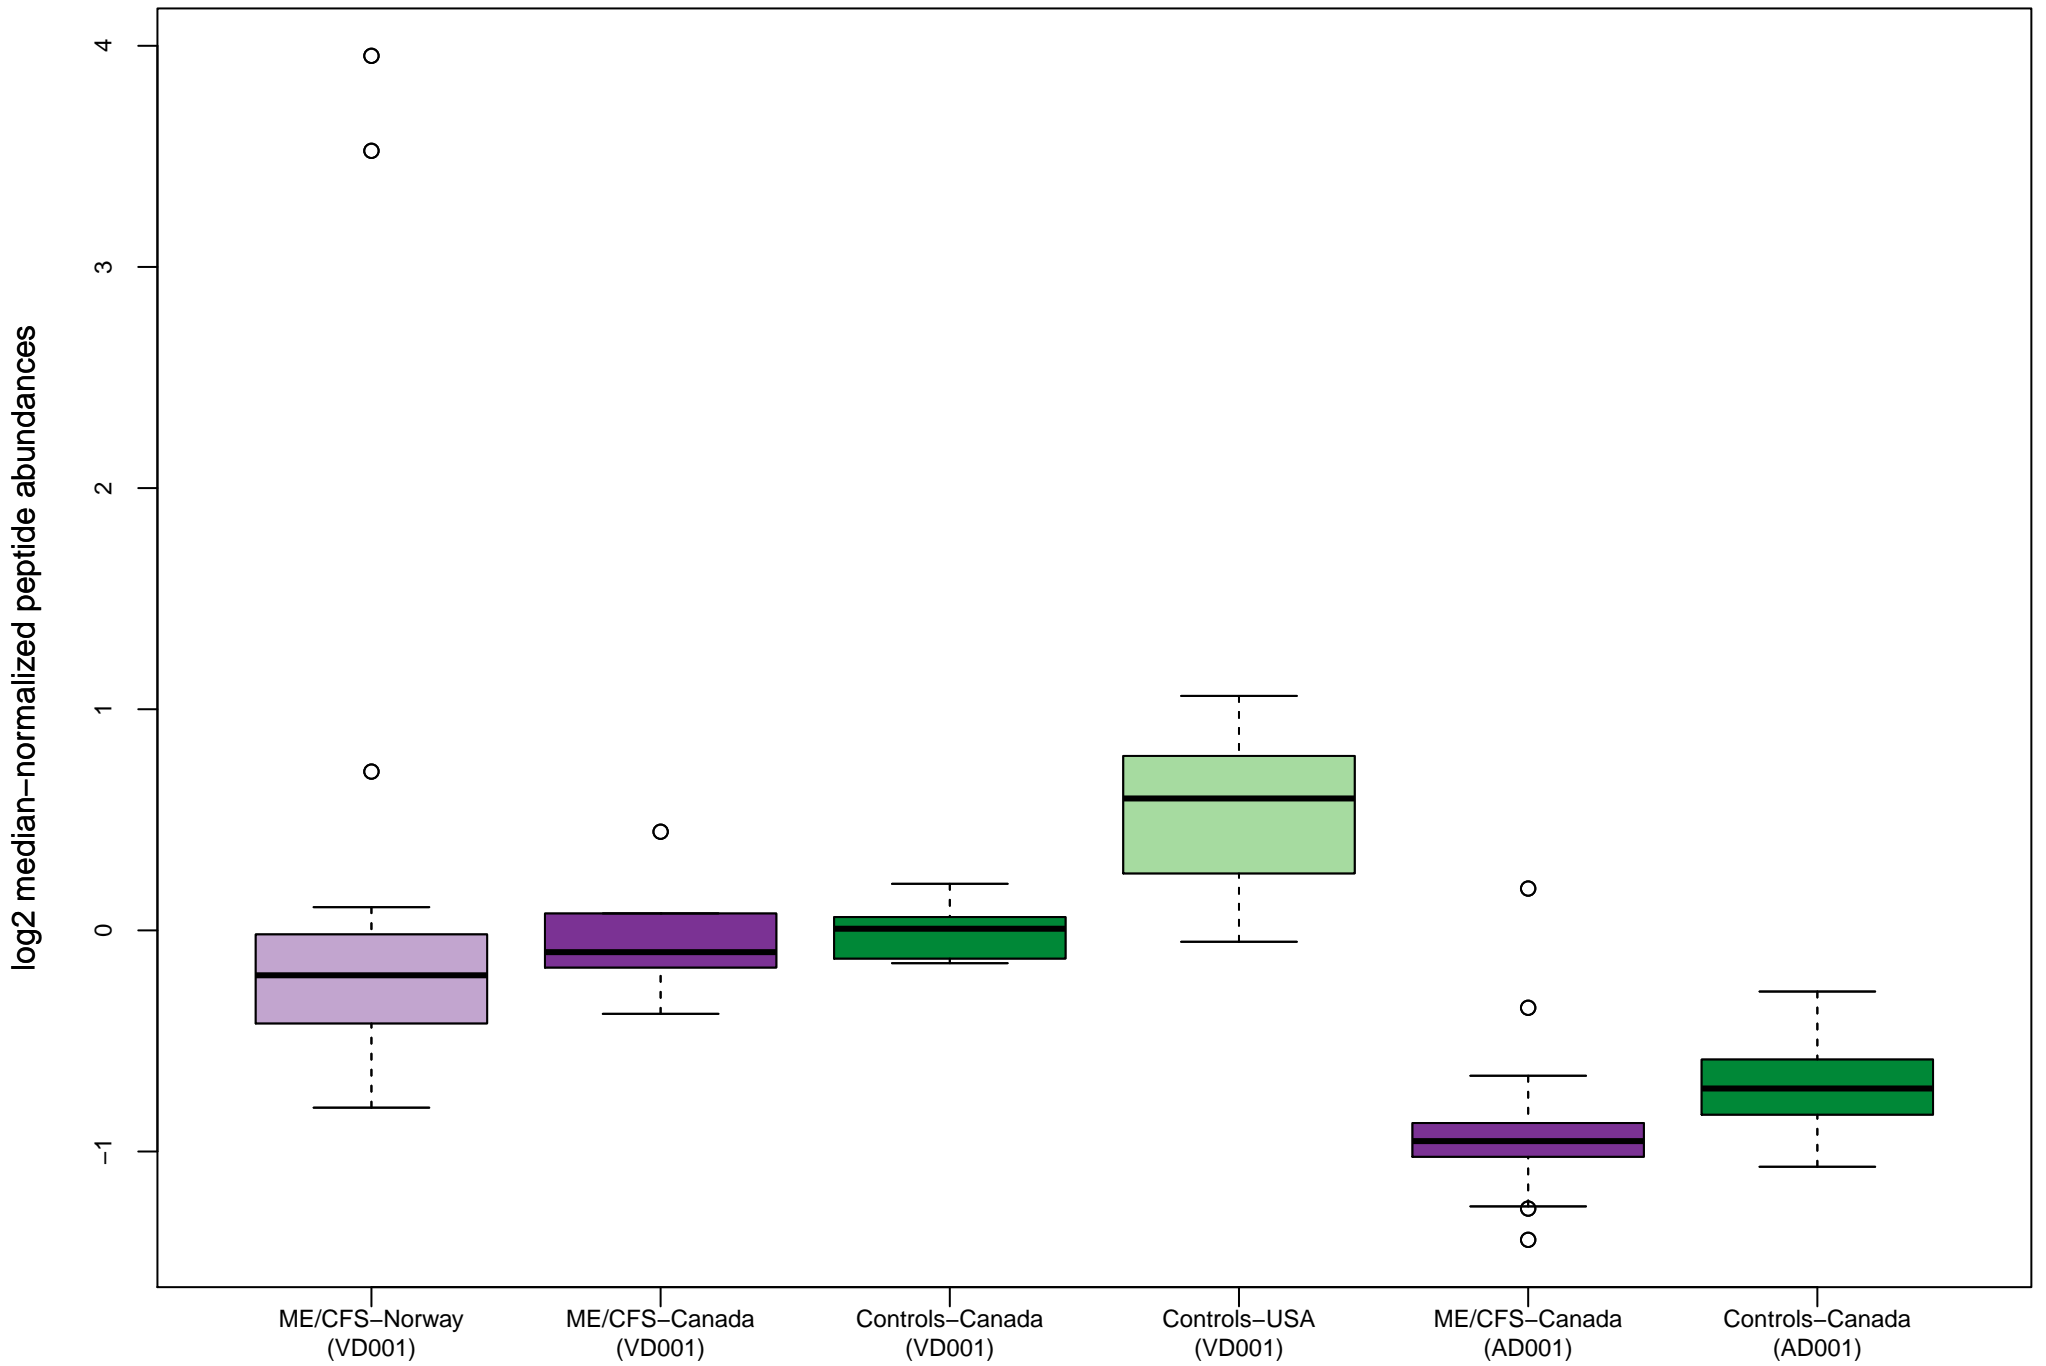

# YFRAPYLFKVLG

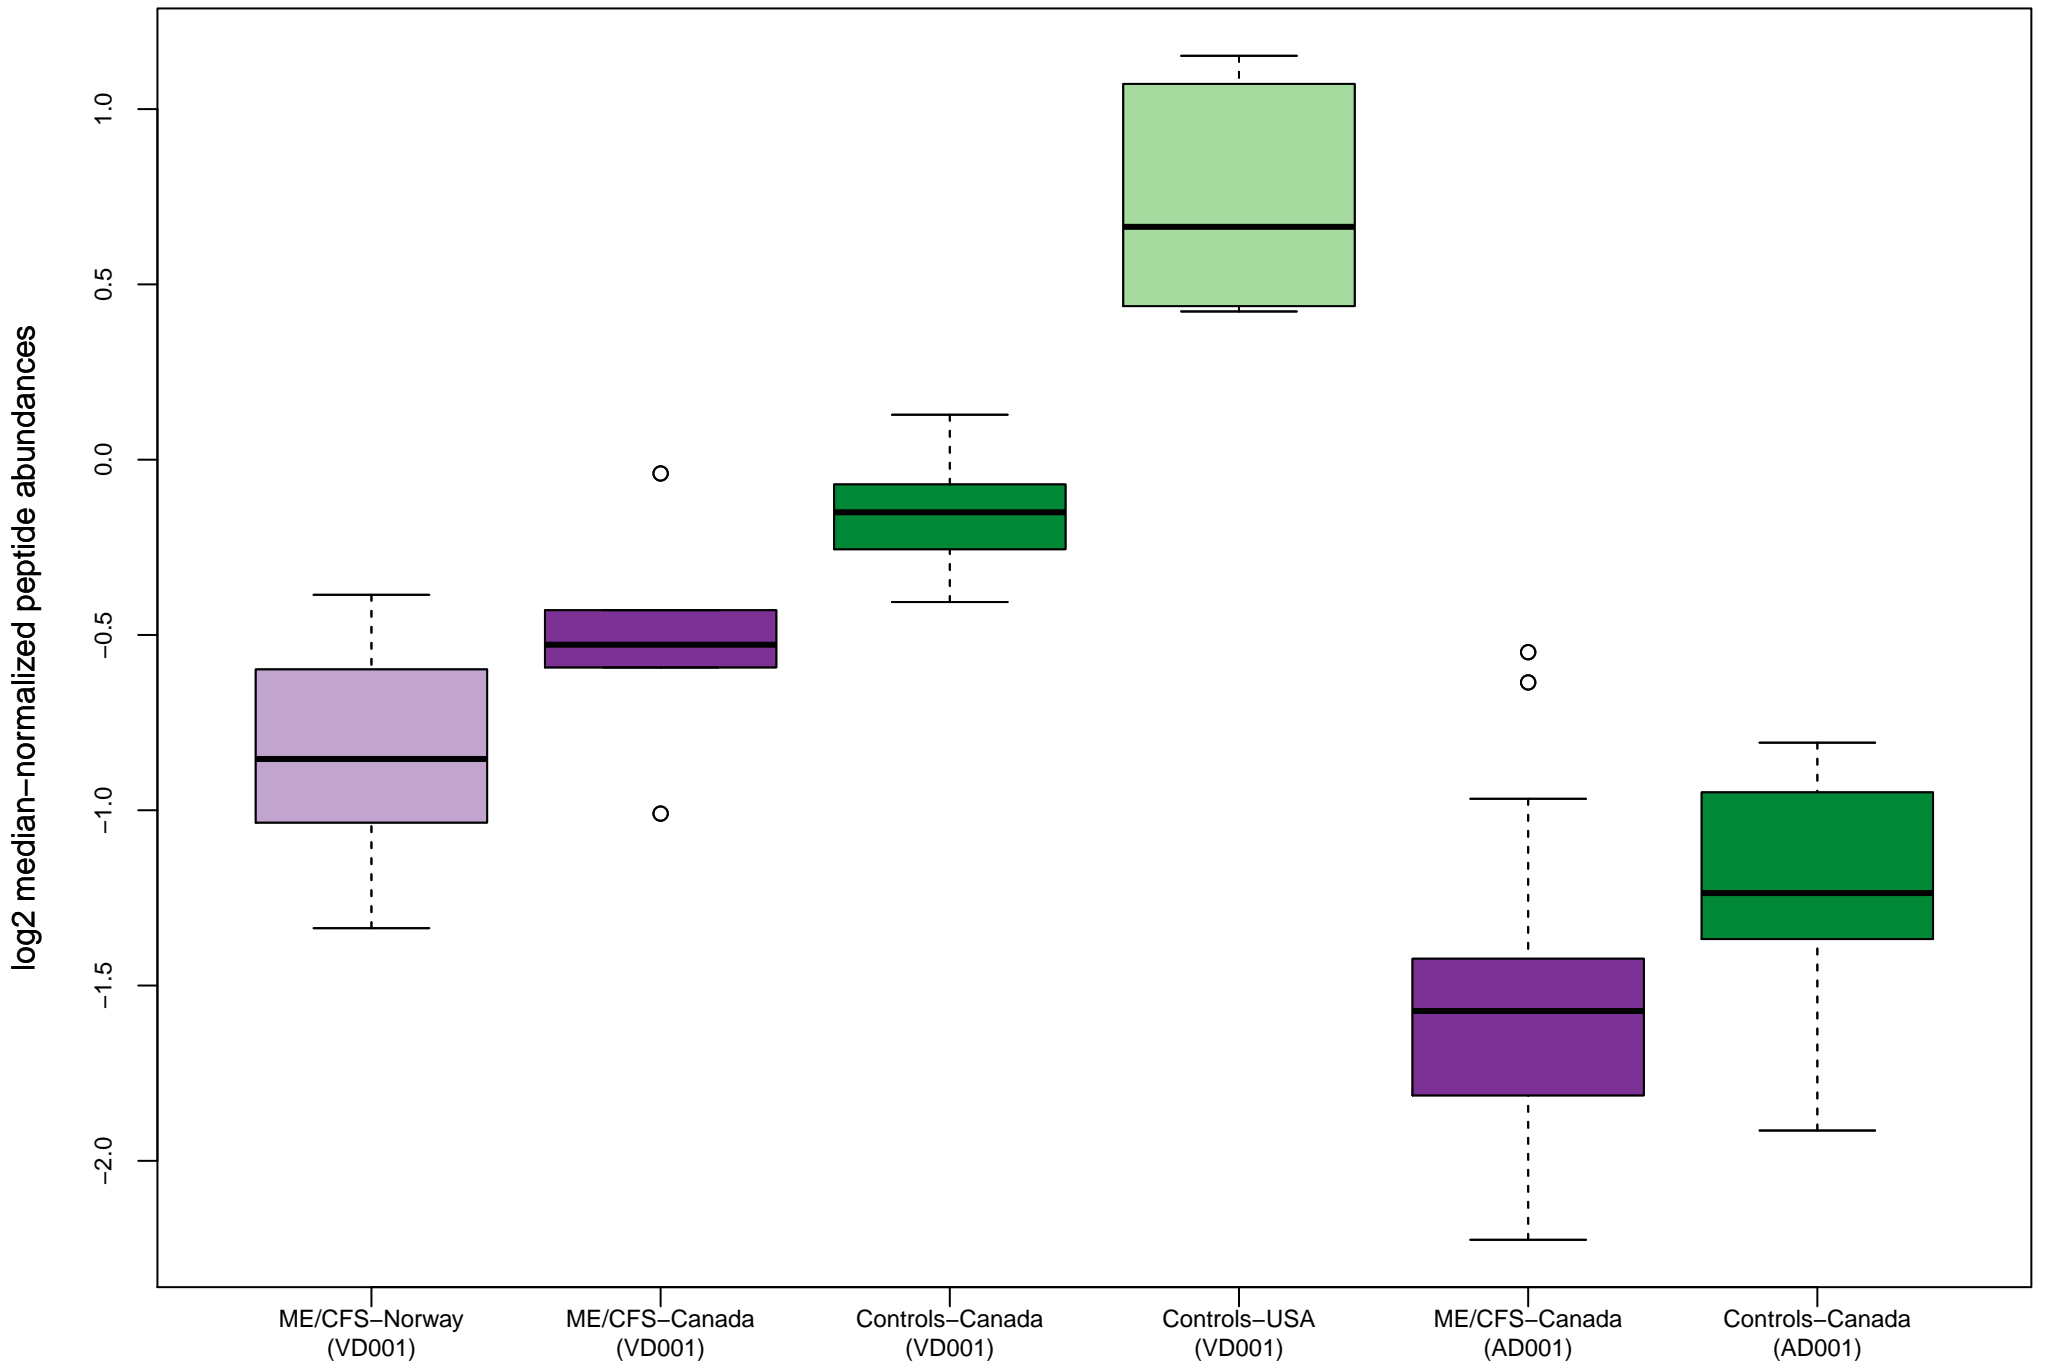

# YFRKAWPYWASL

log2 median-normalized peptide abundances

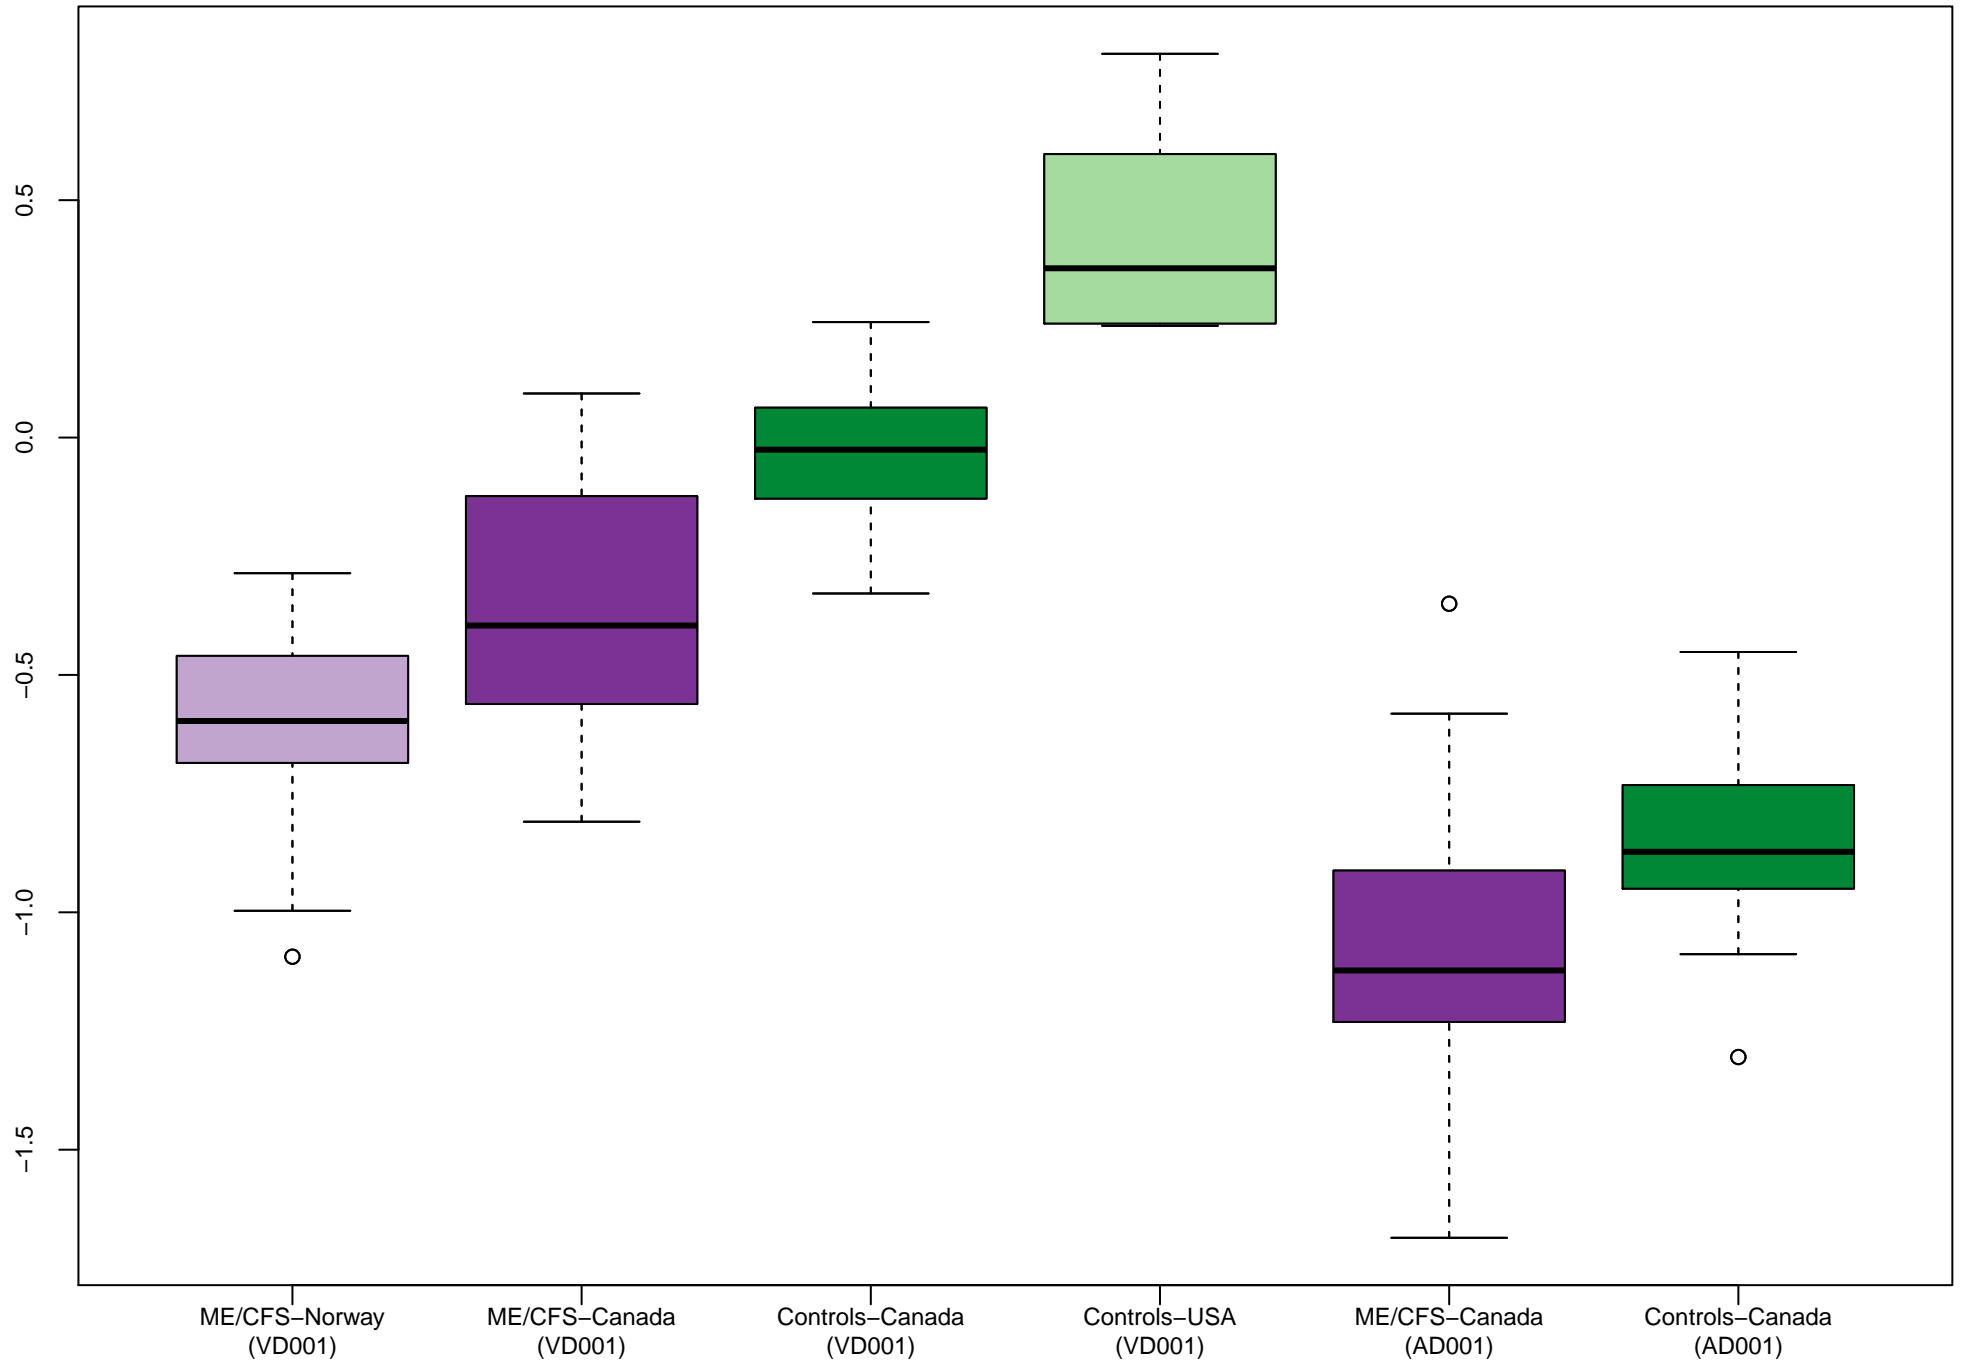

# YFRRWLFASGVA

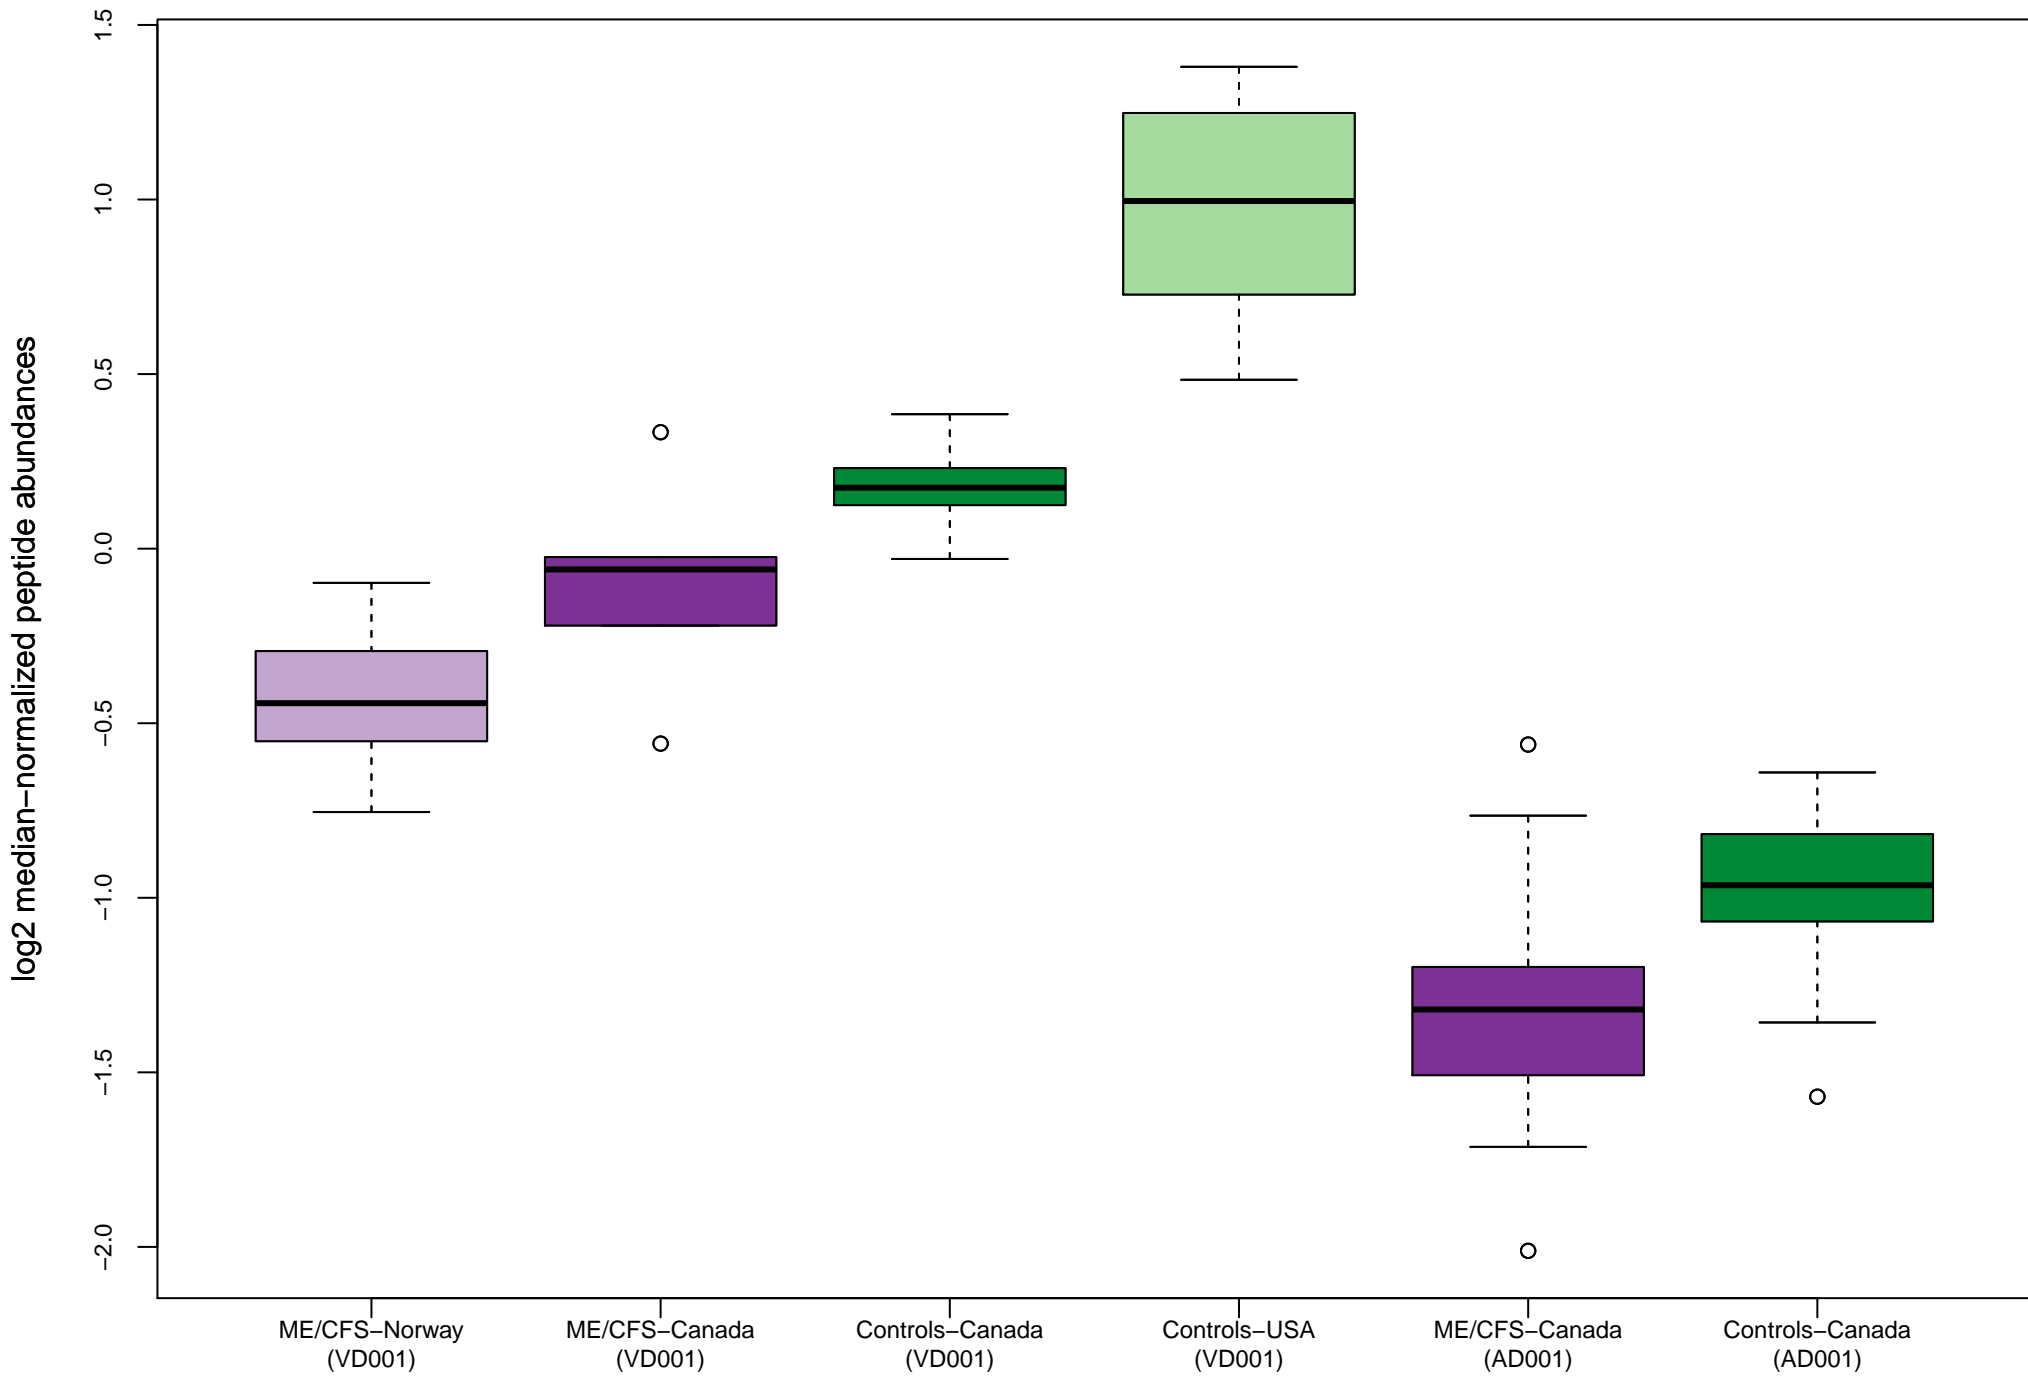

# YFYHRVRYALLS

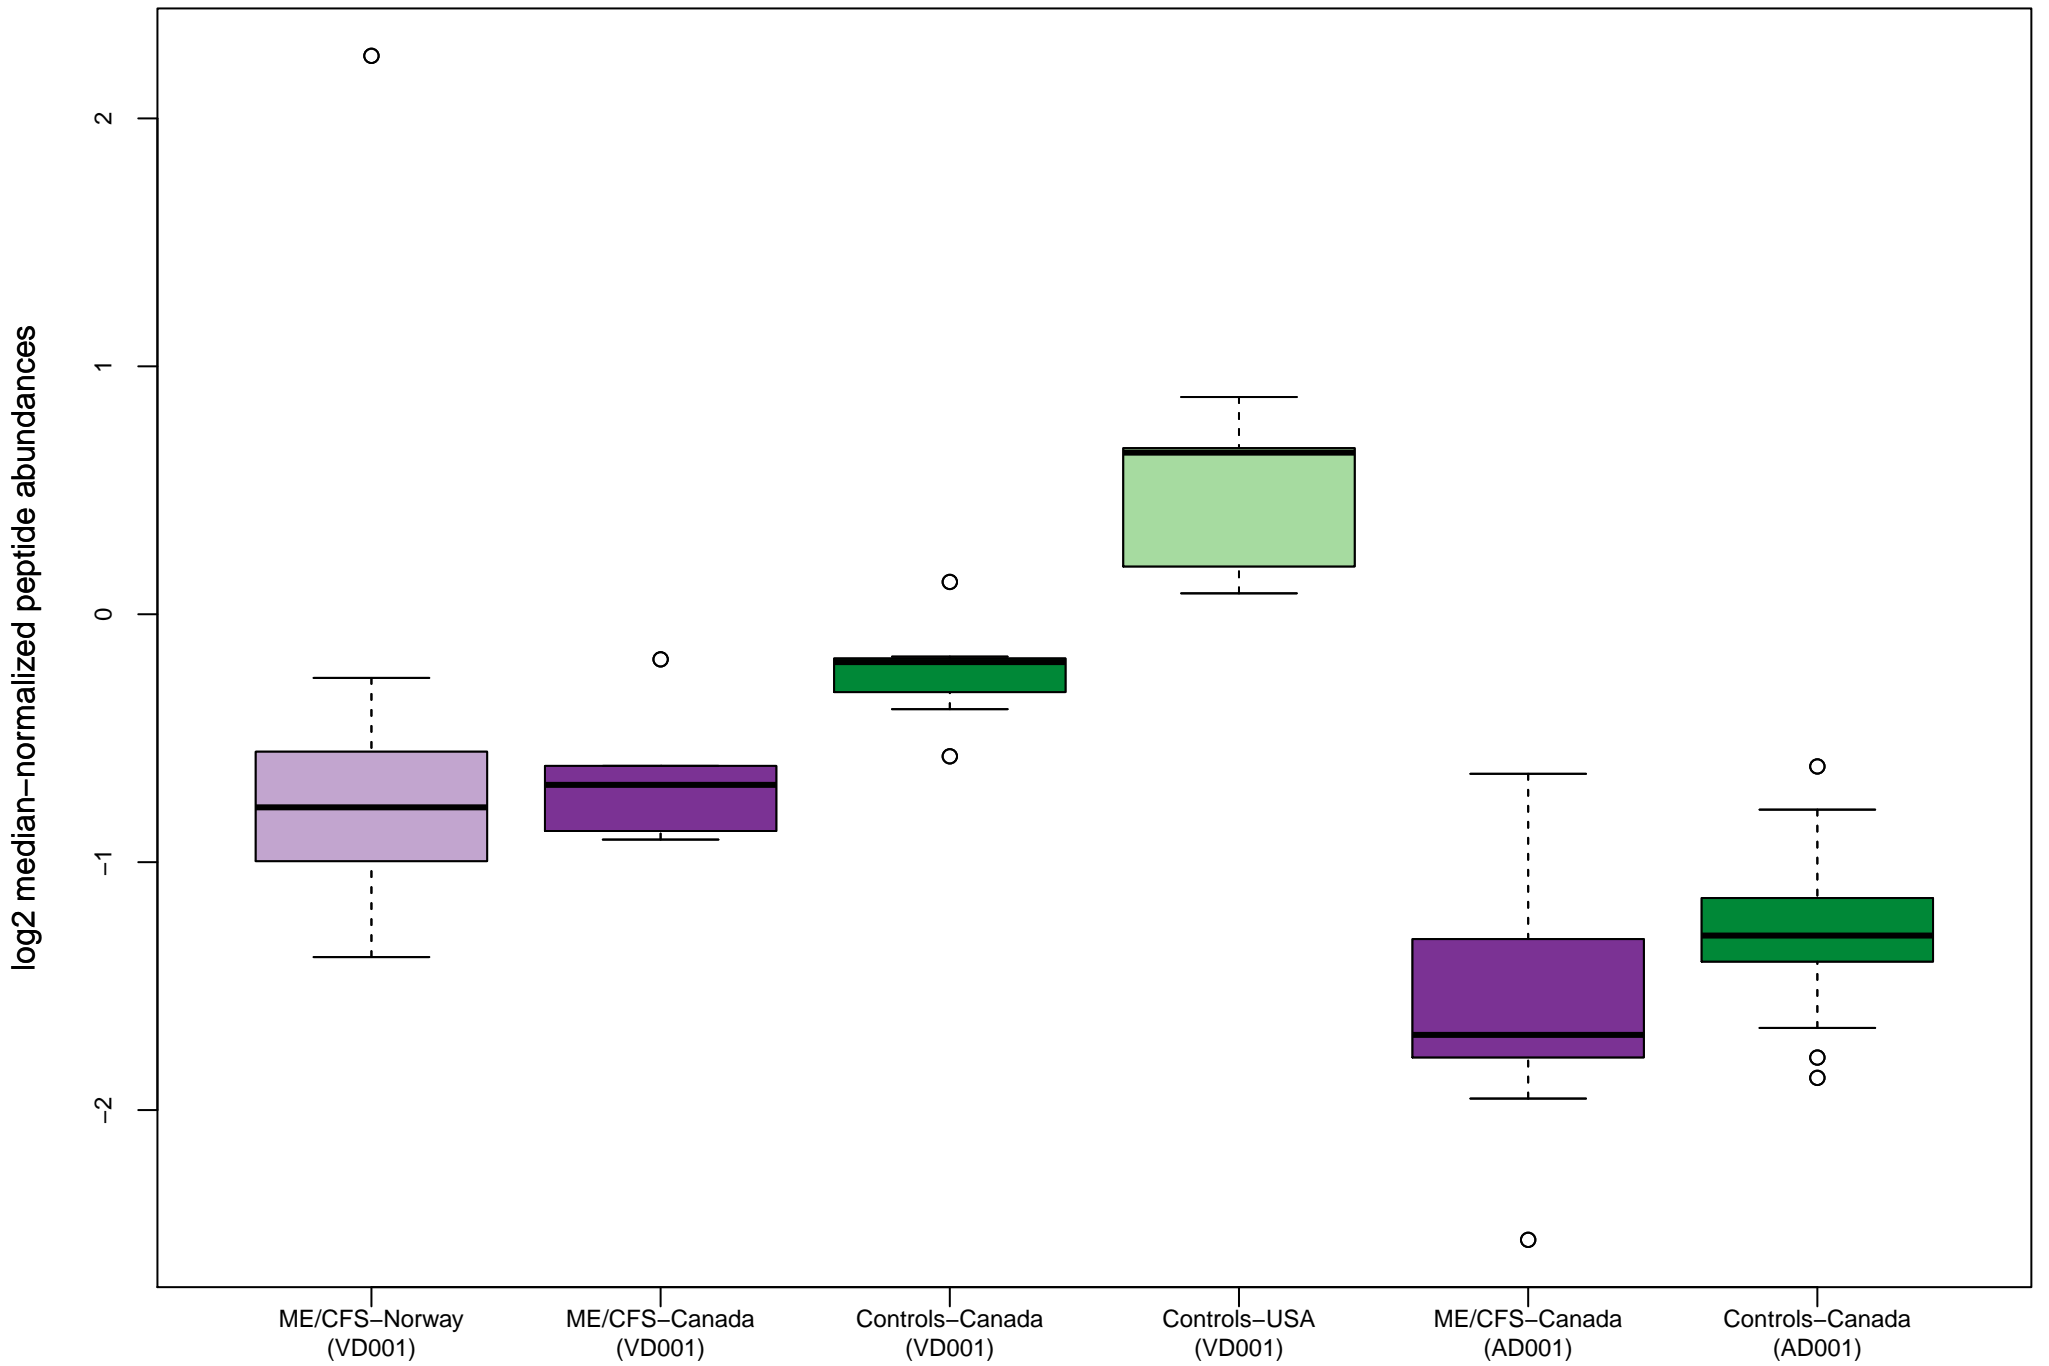

# YKQSQRLRPYWL

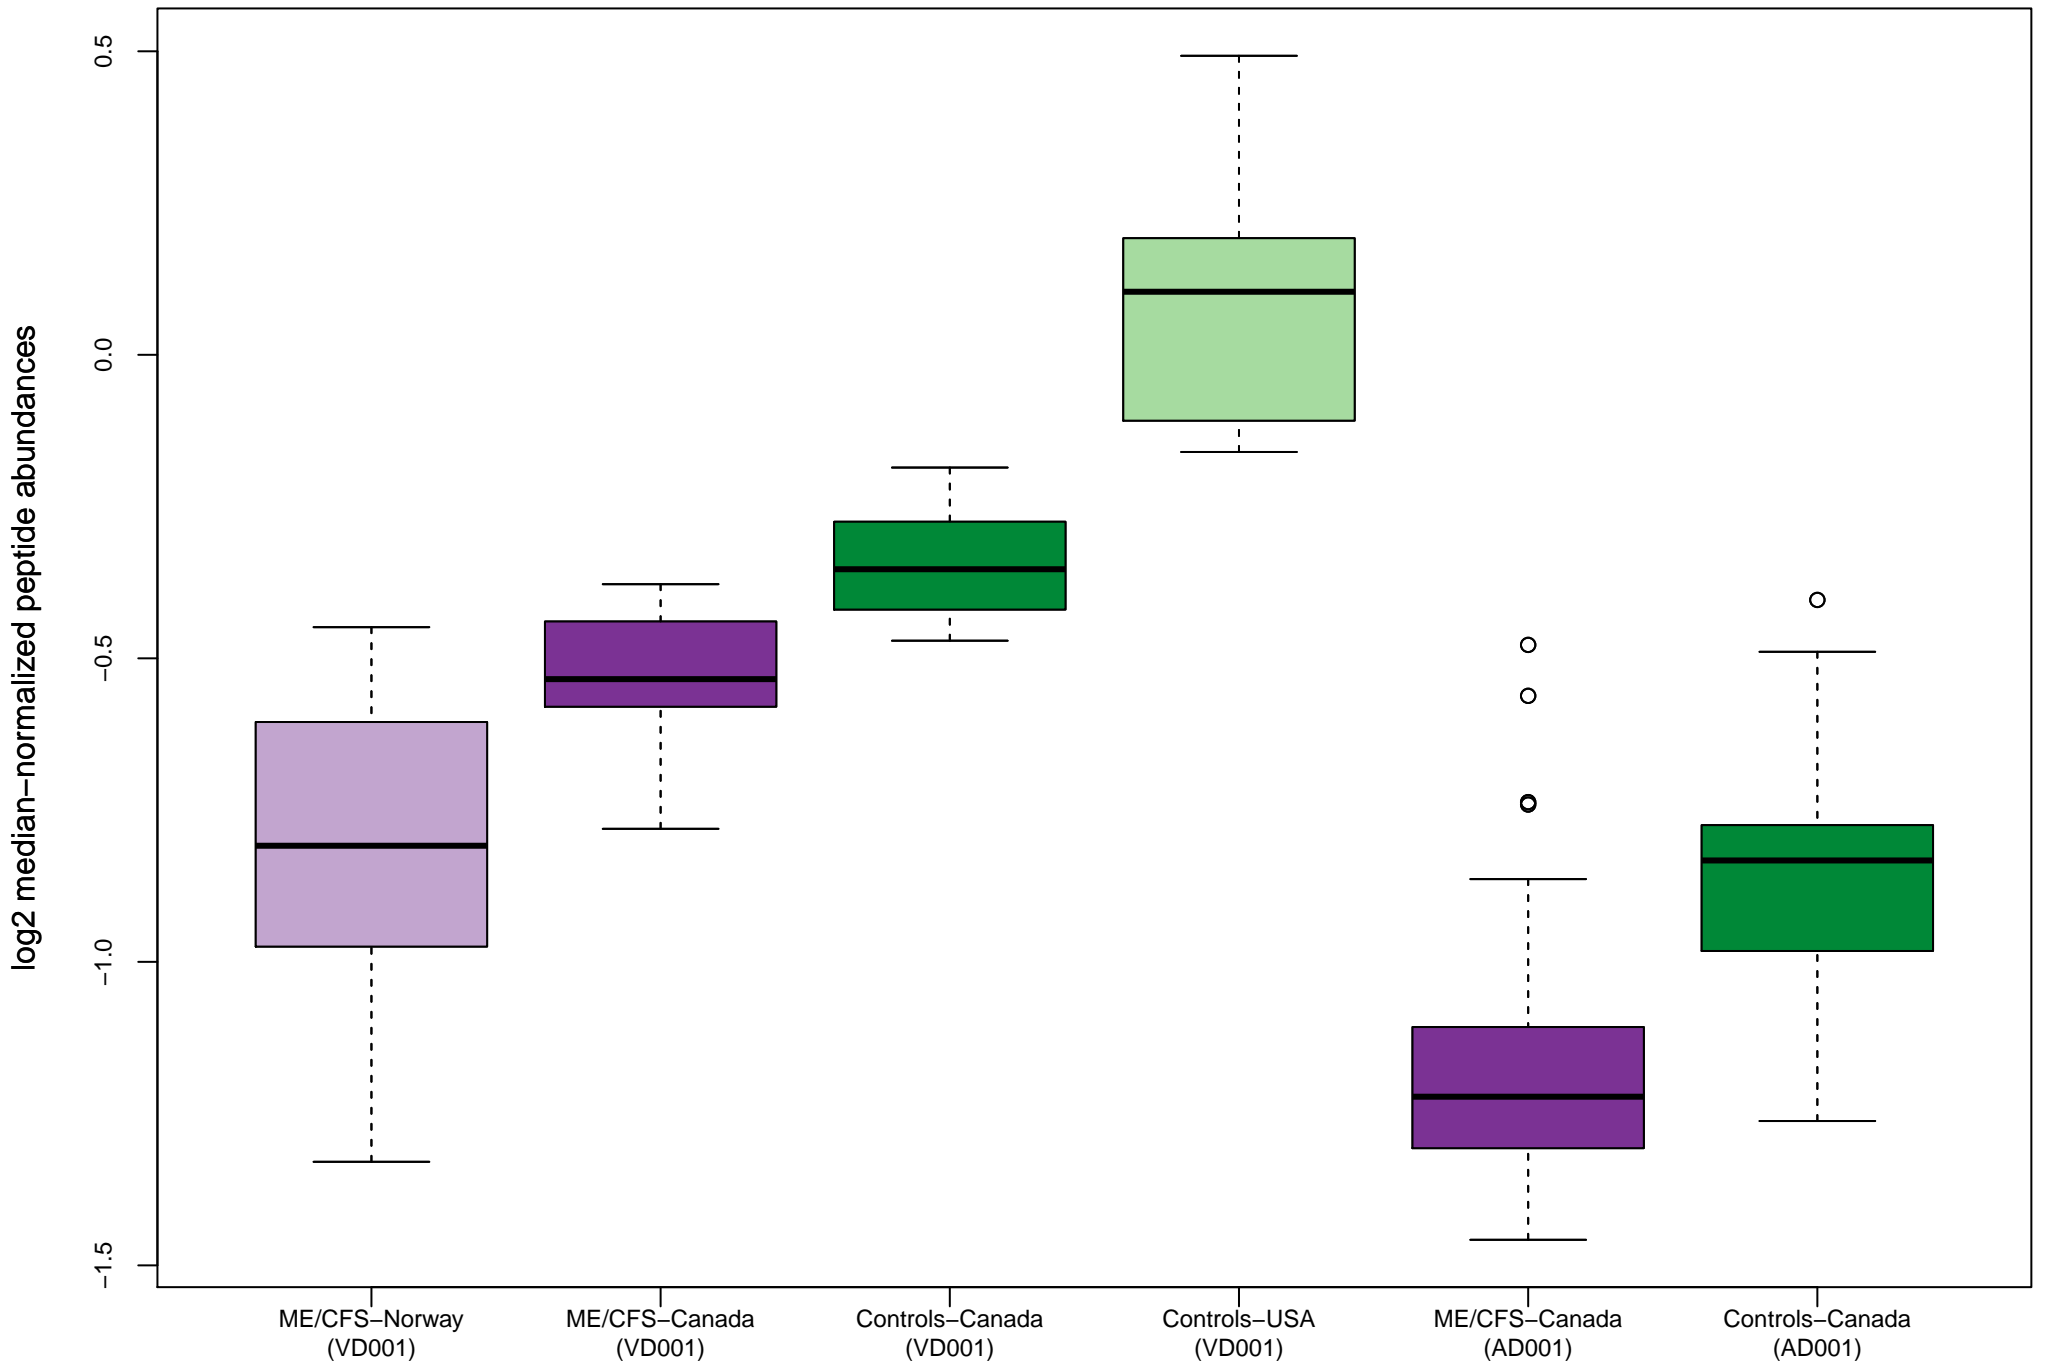

# YKVGRPLFYRYH

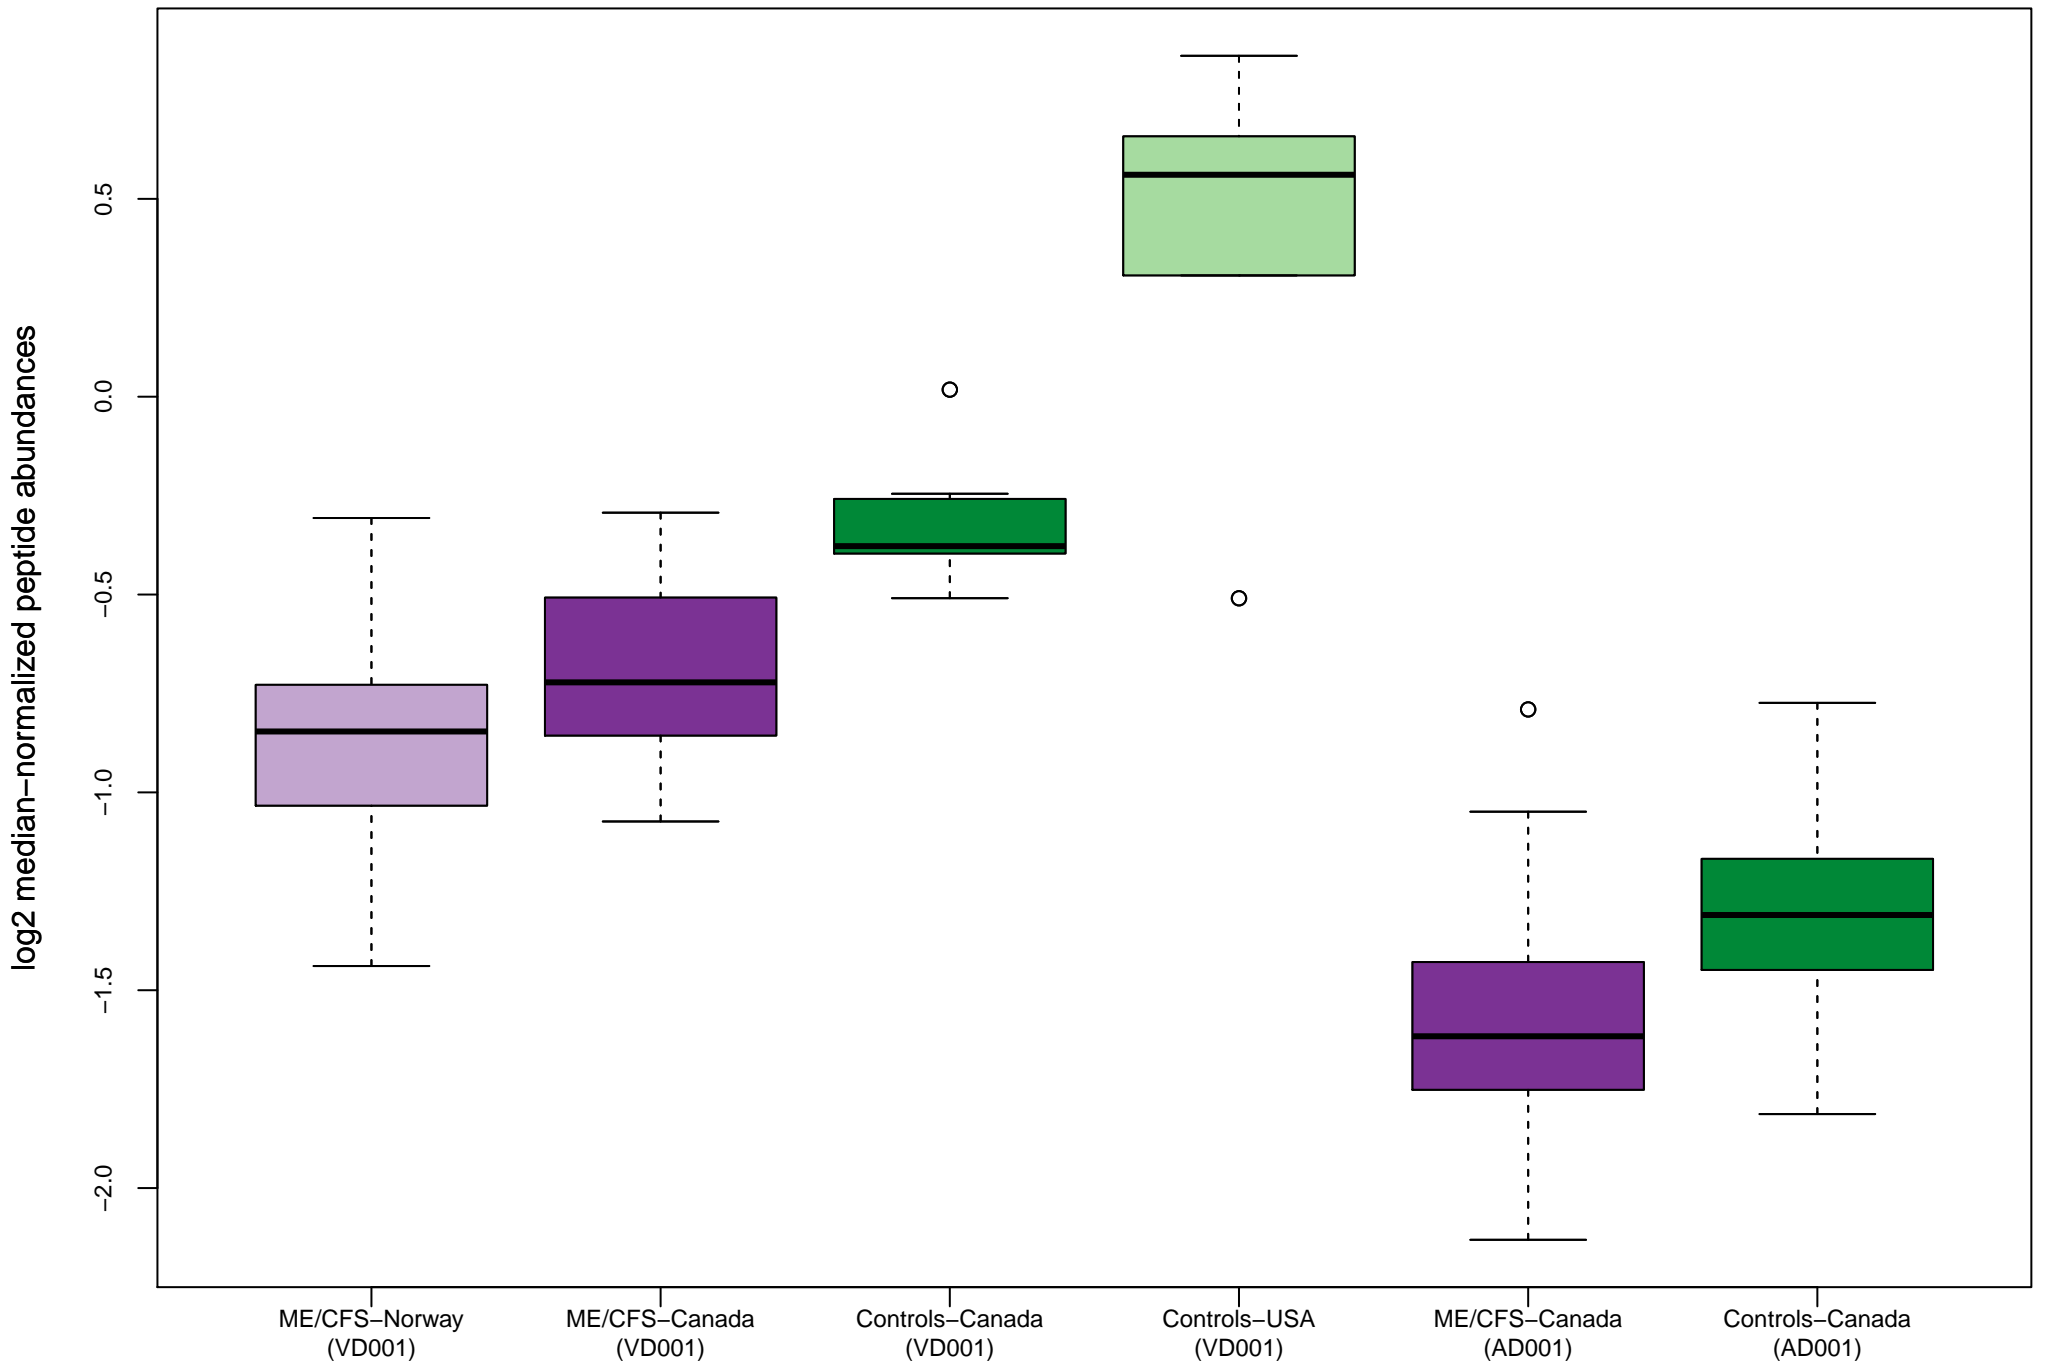

# YKVSLSRVGAS

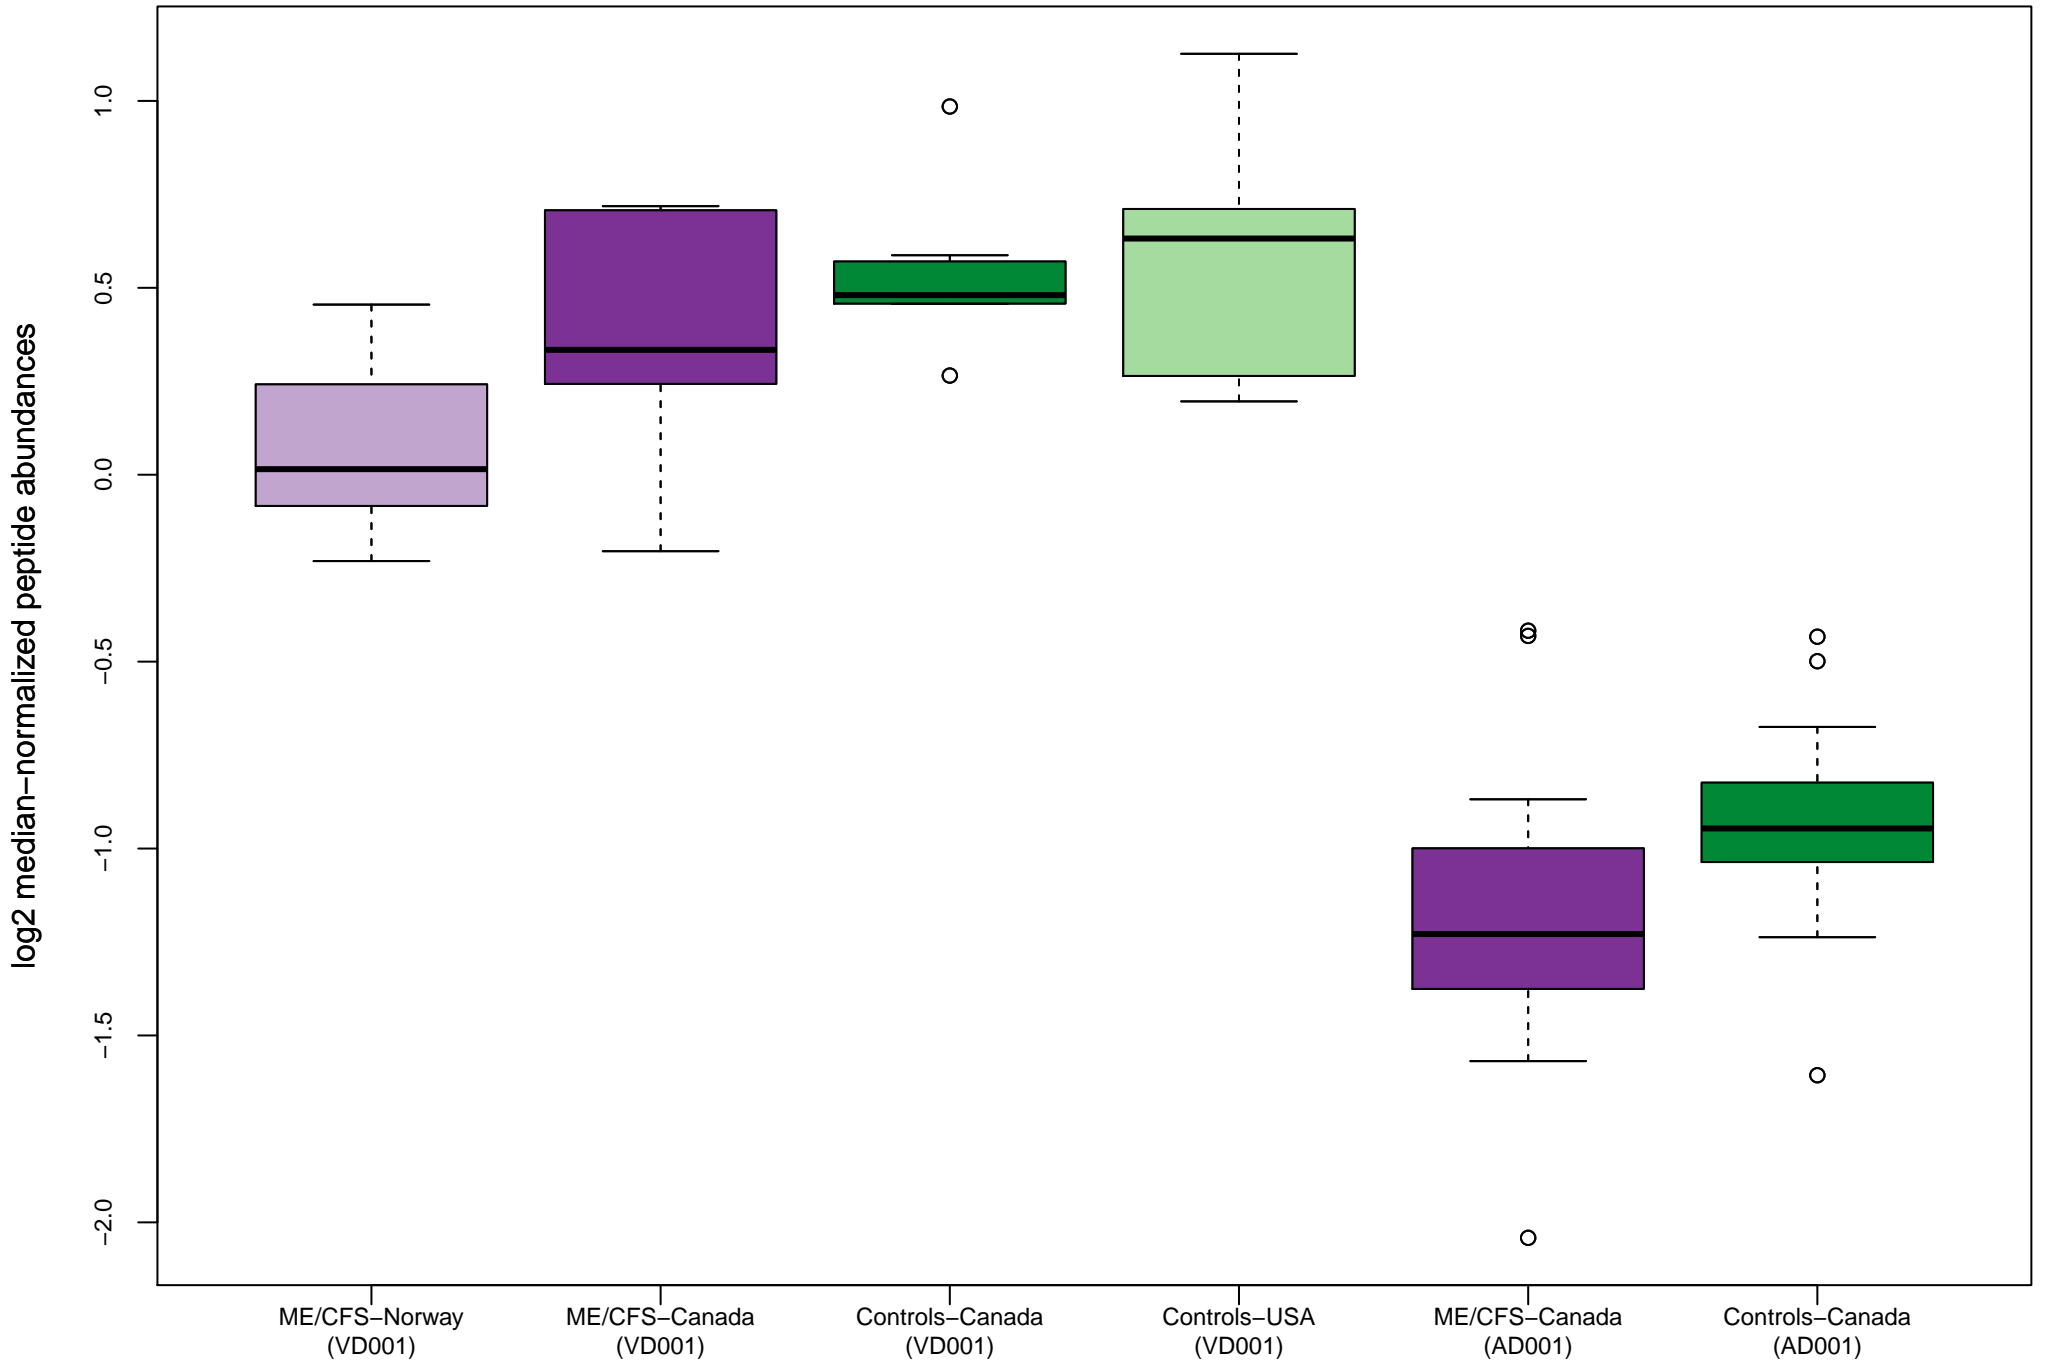



# YLFRRYNWVLVG

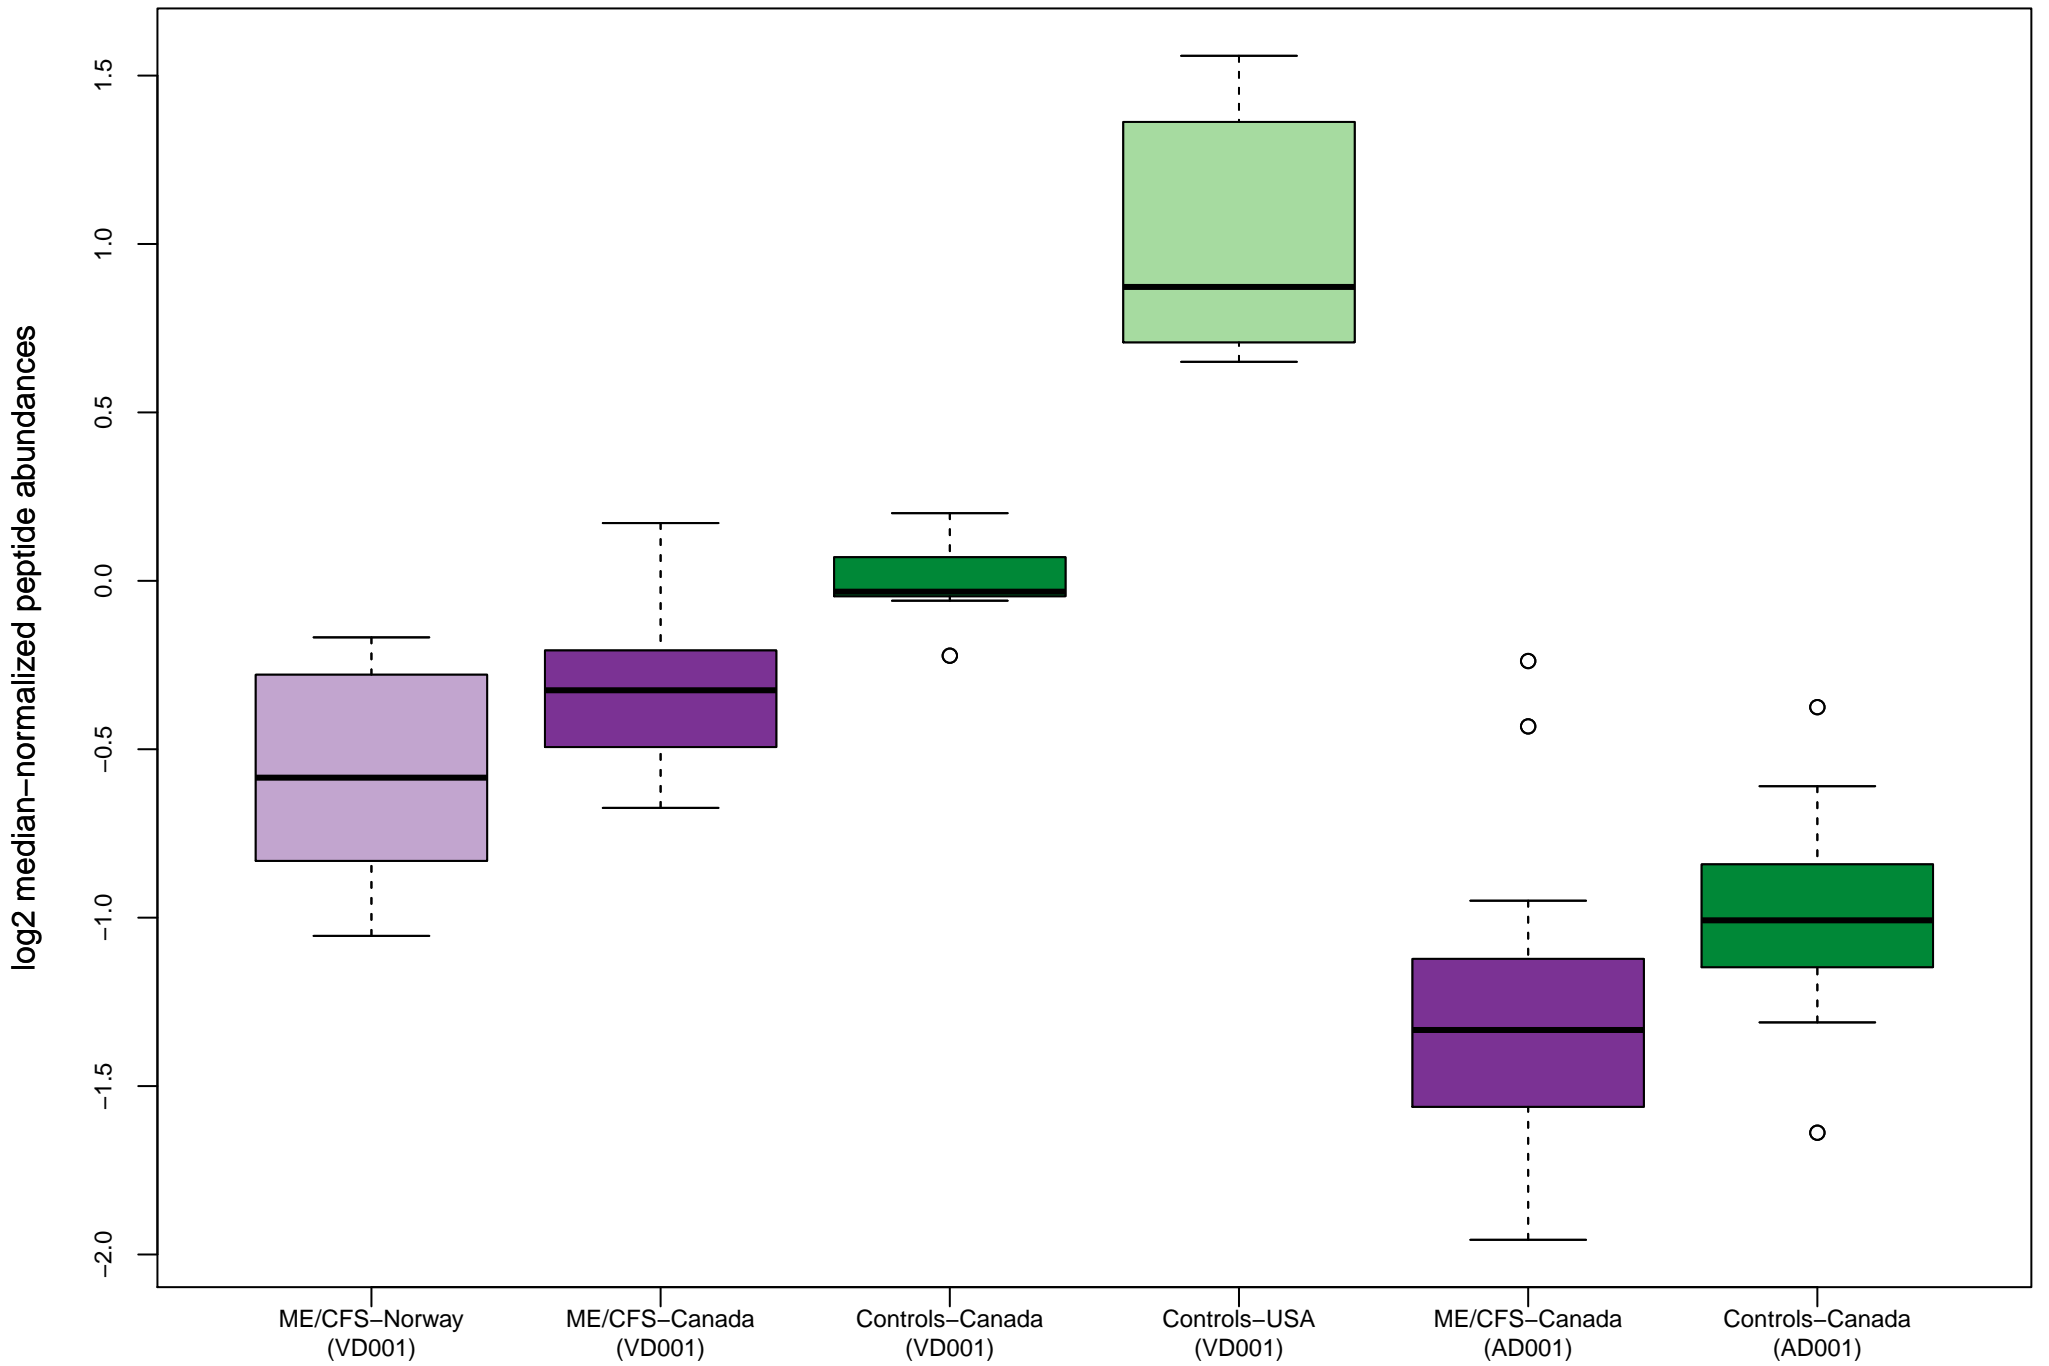

# YLKKFWVLGVLG

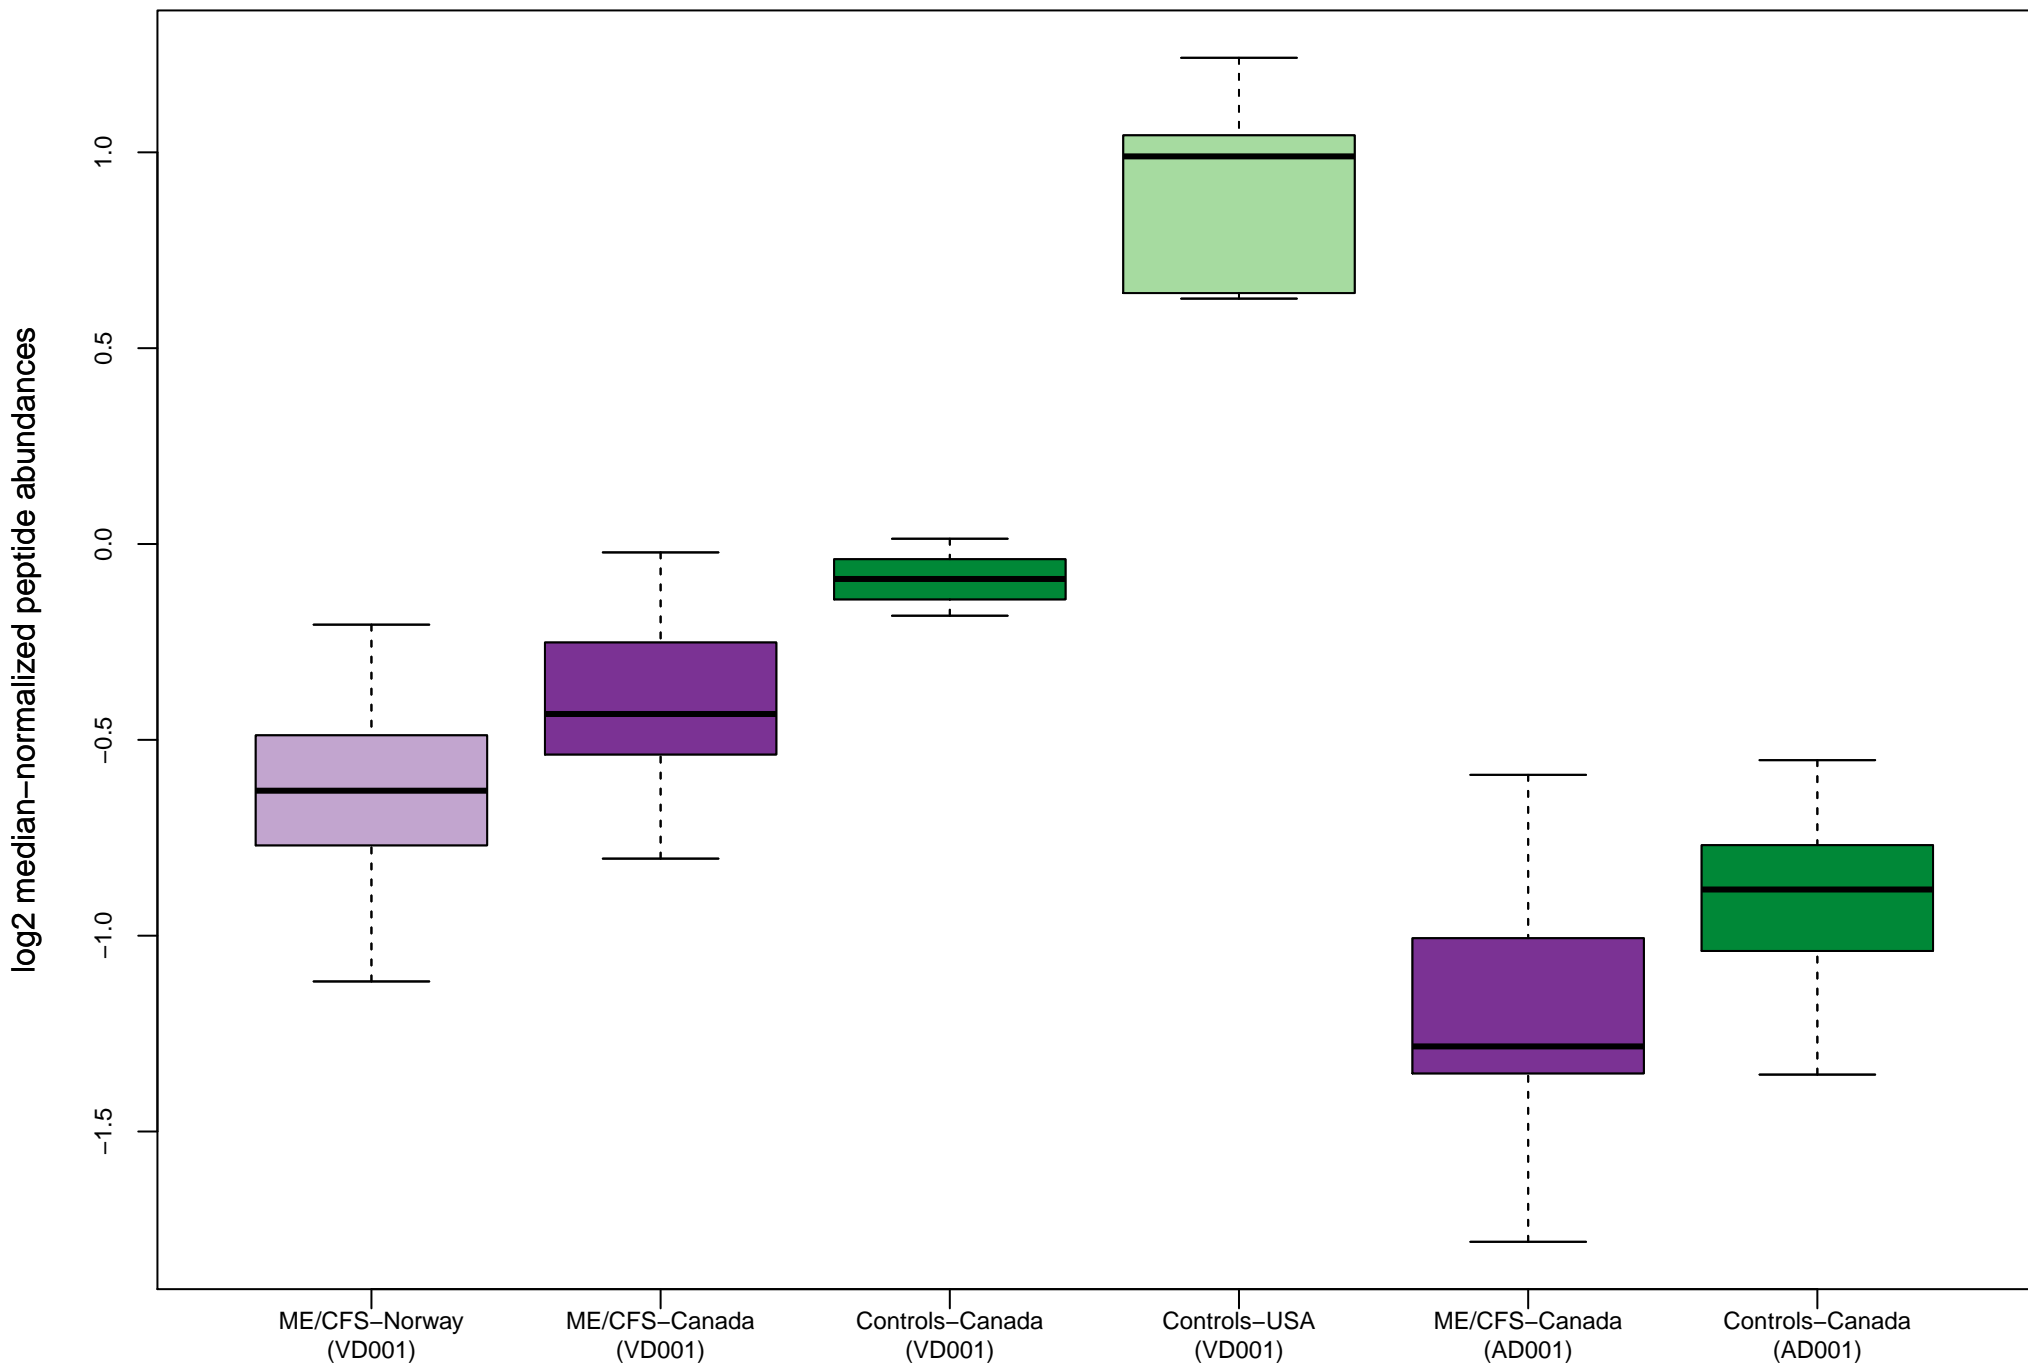

# YLLLG RGVALSG

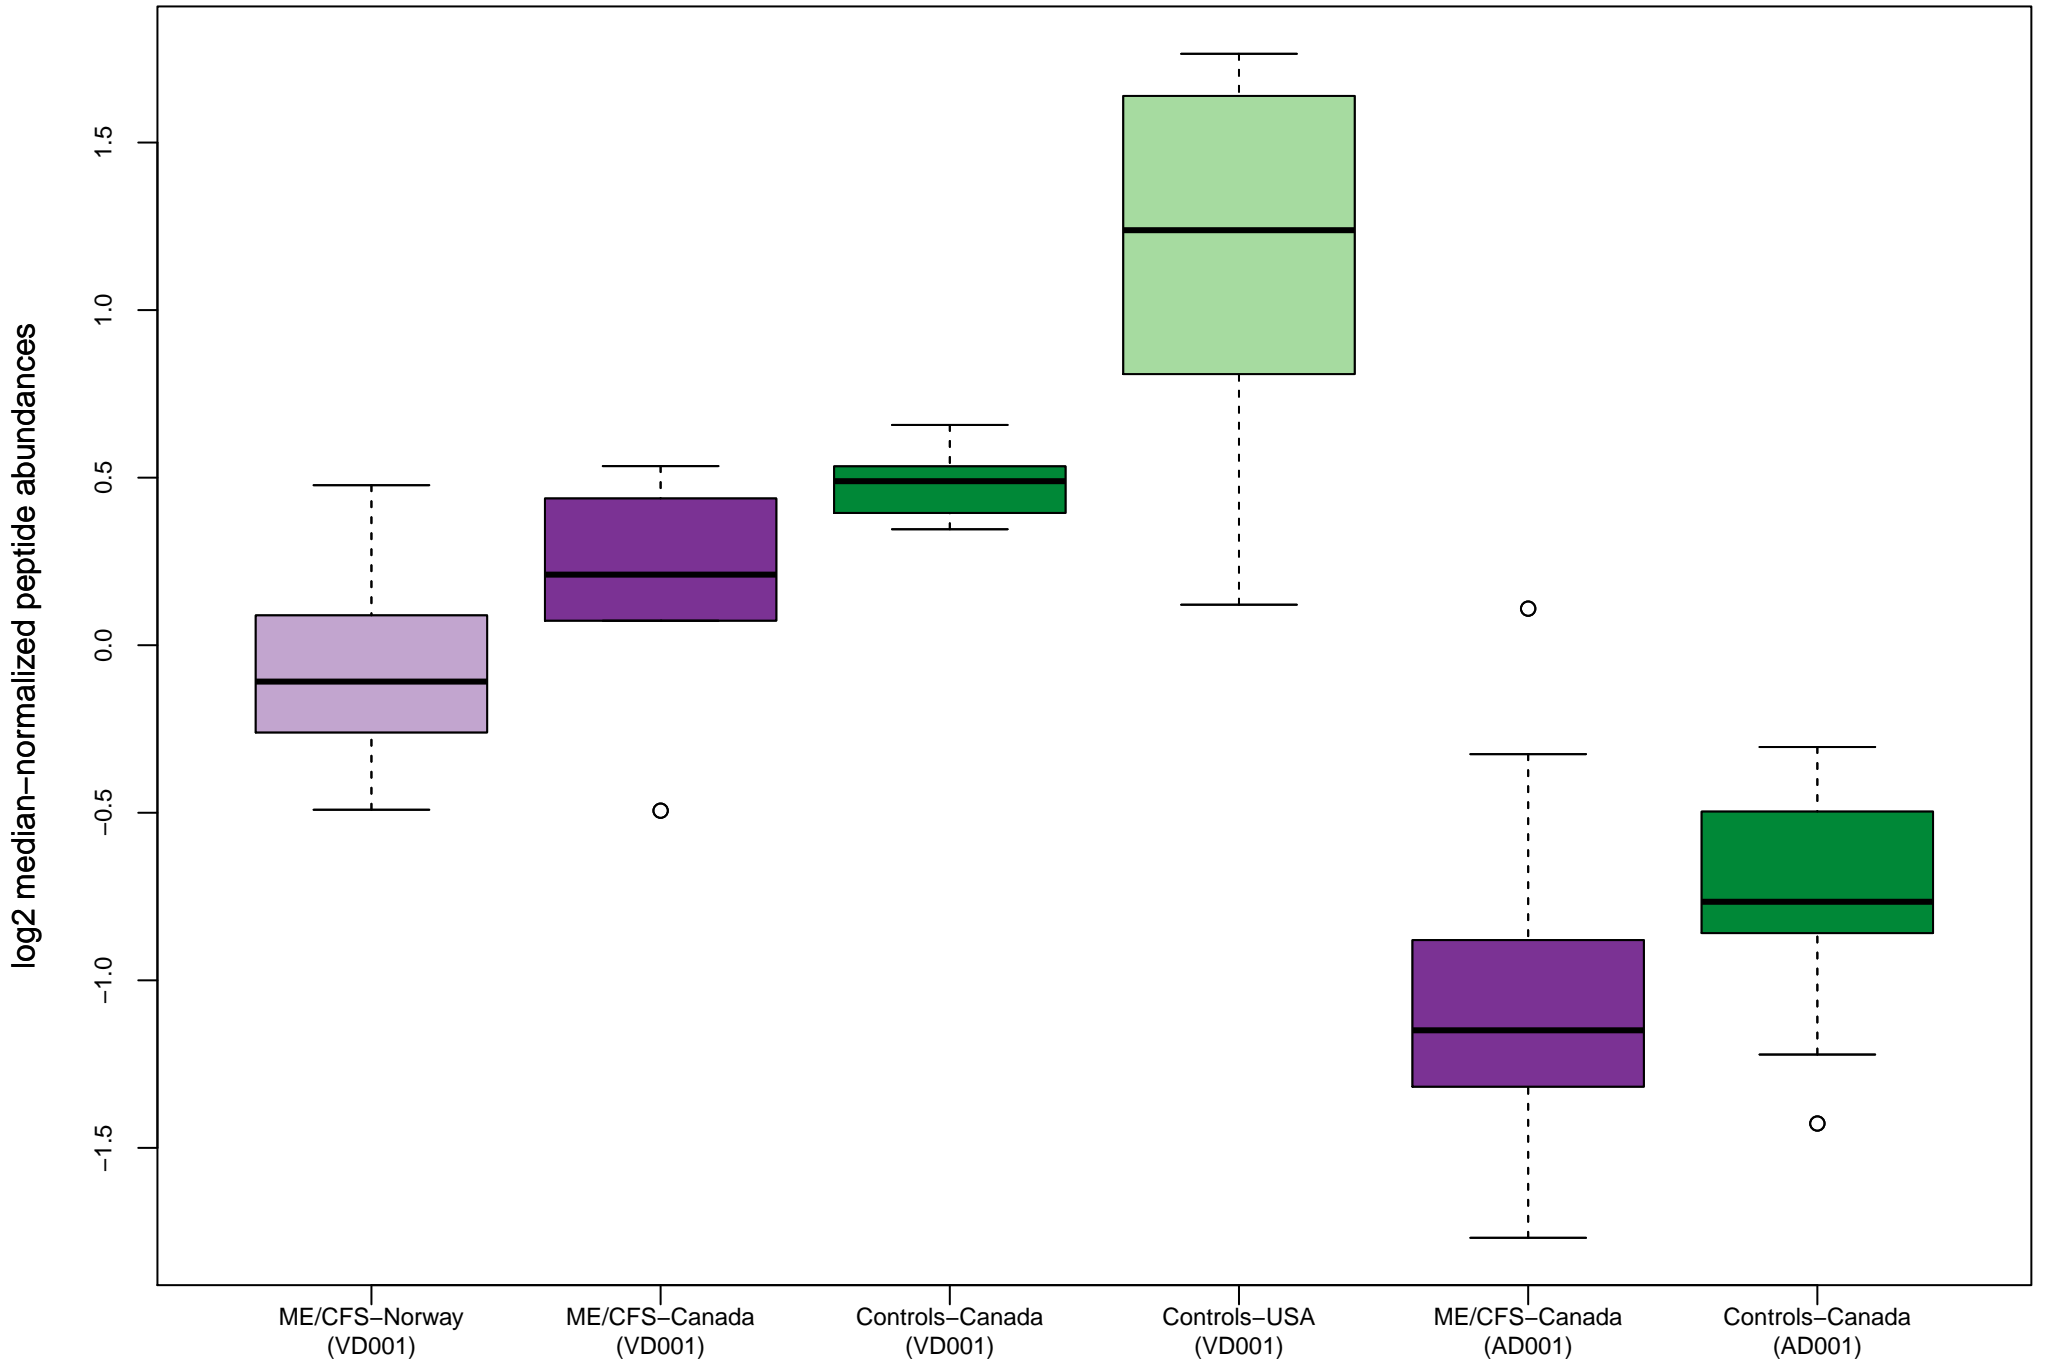

# YLRFAGRYNVGS

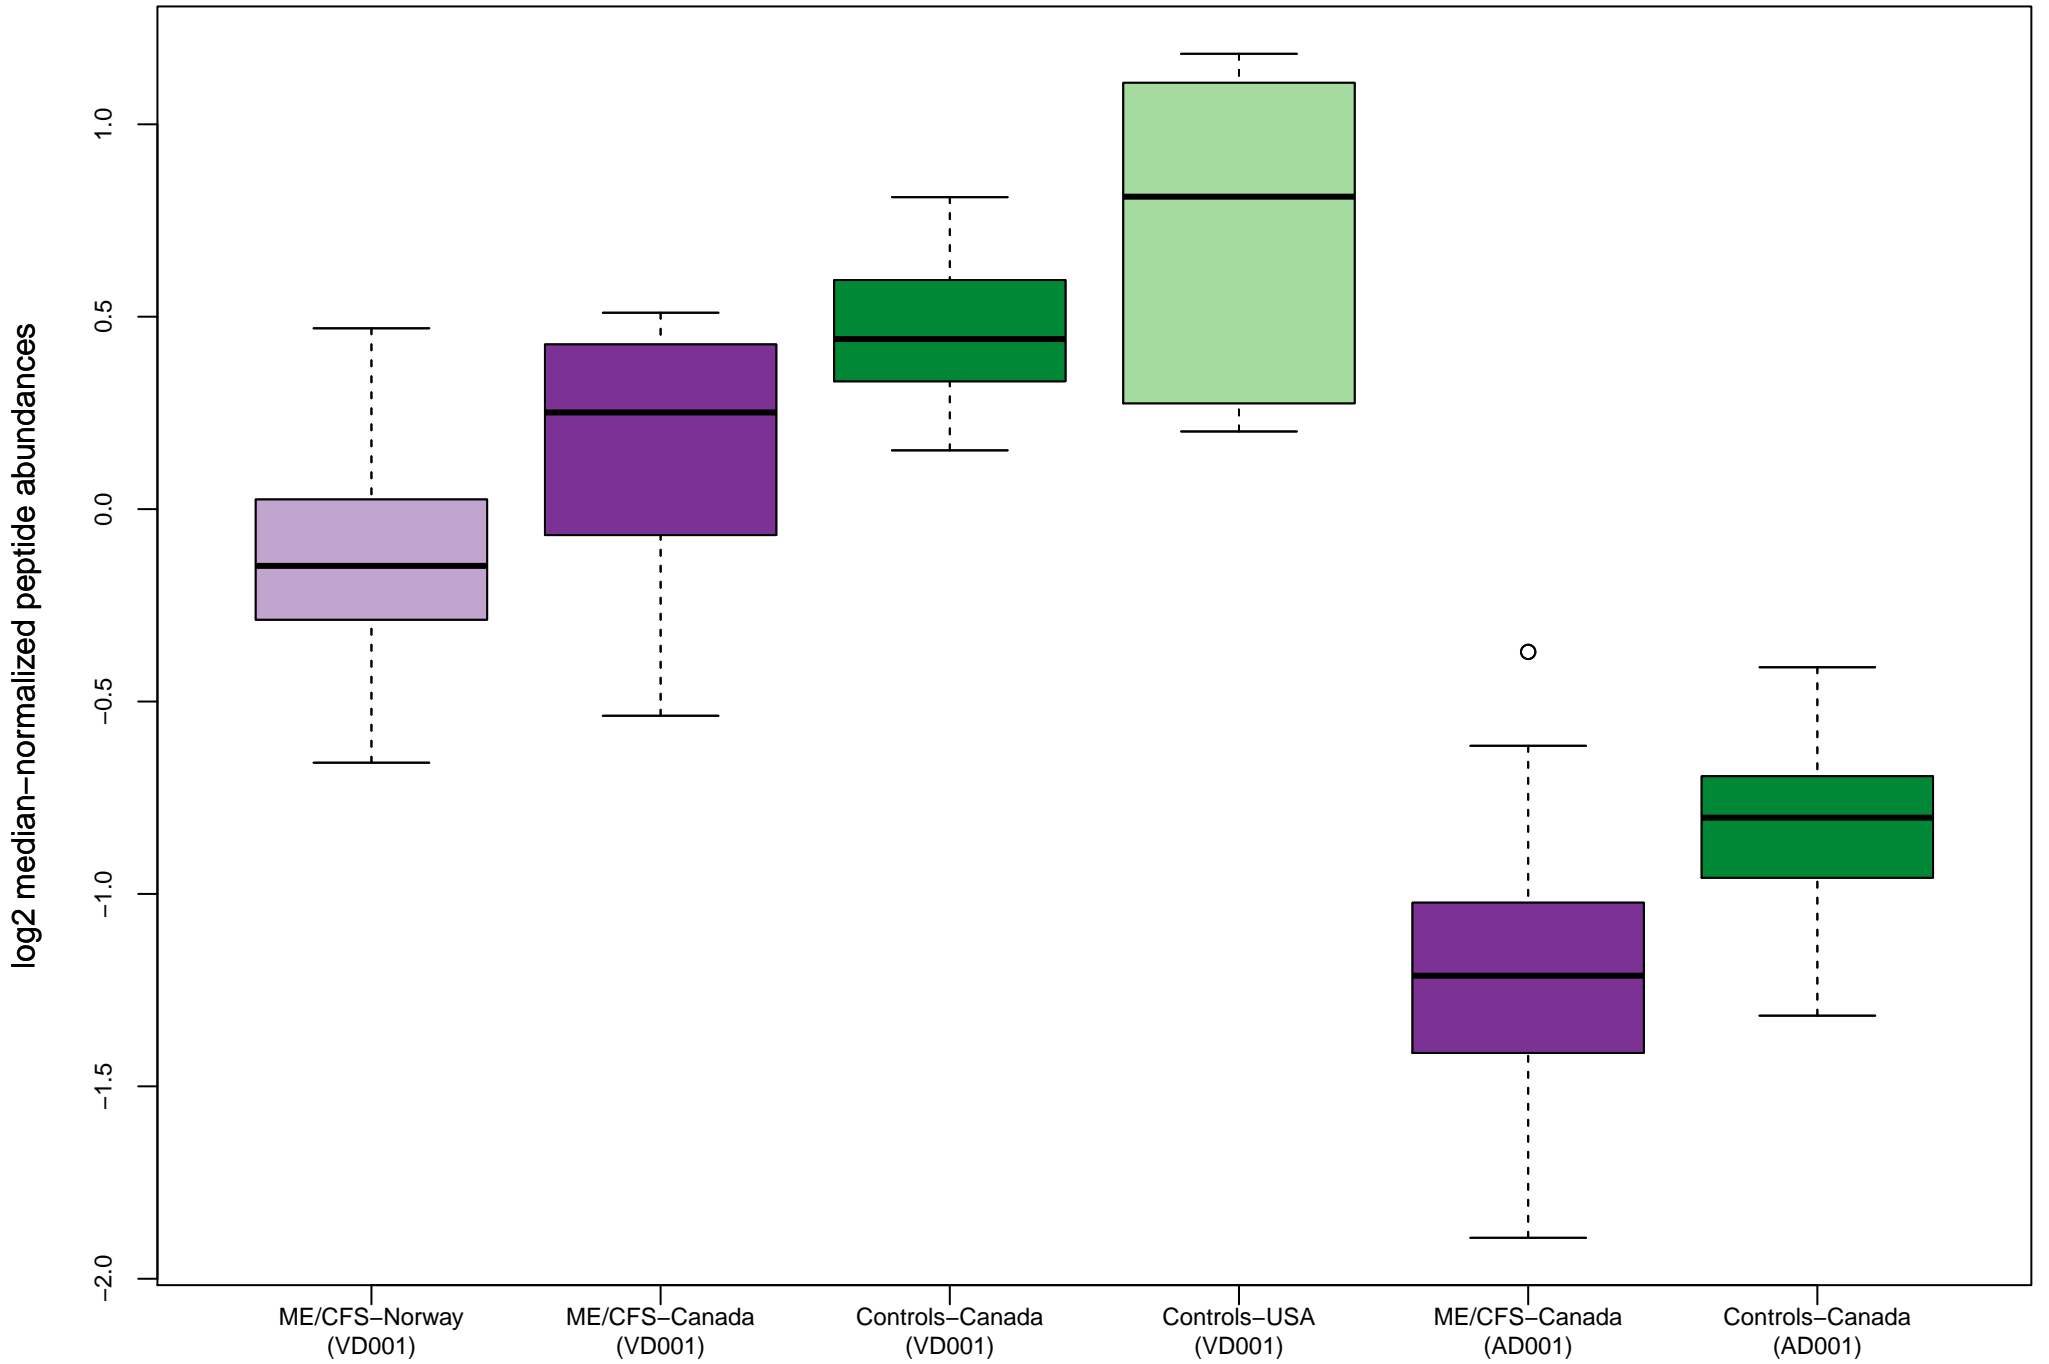

# YLRKYAQWHVLS

log2 median-normalized peptide abundances

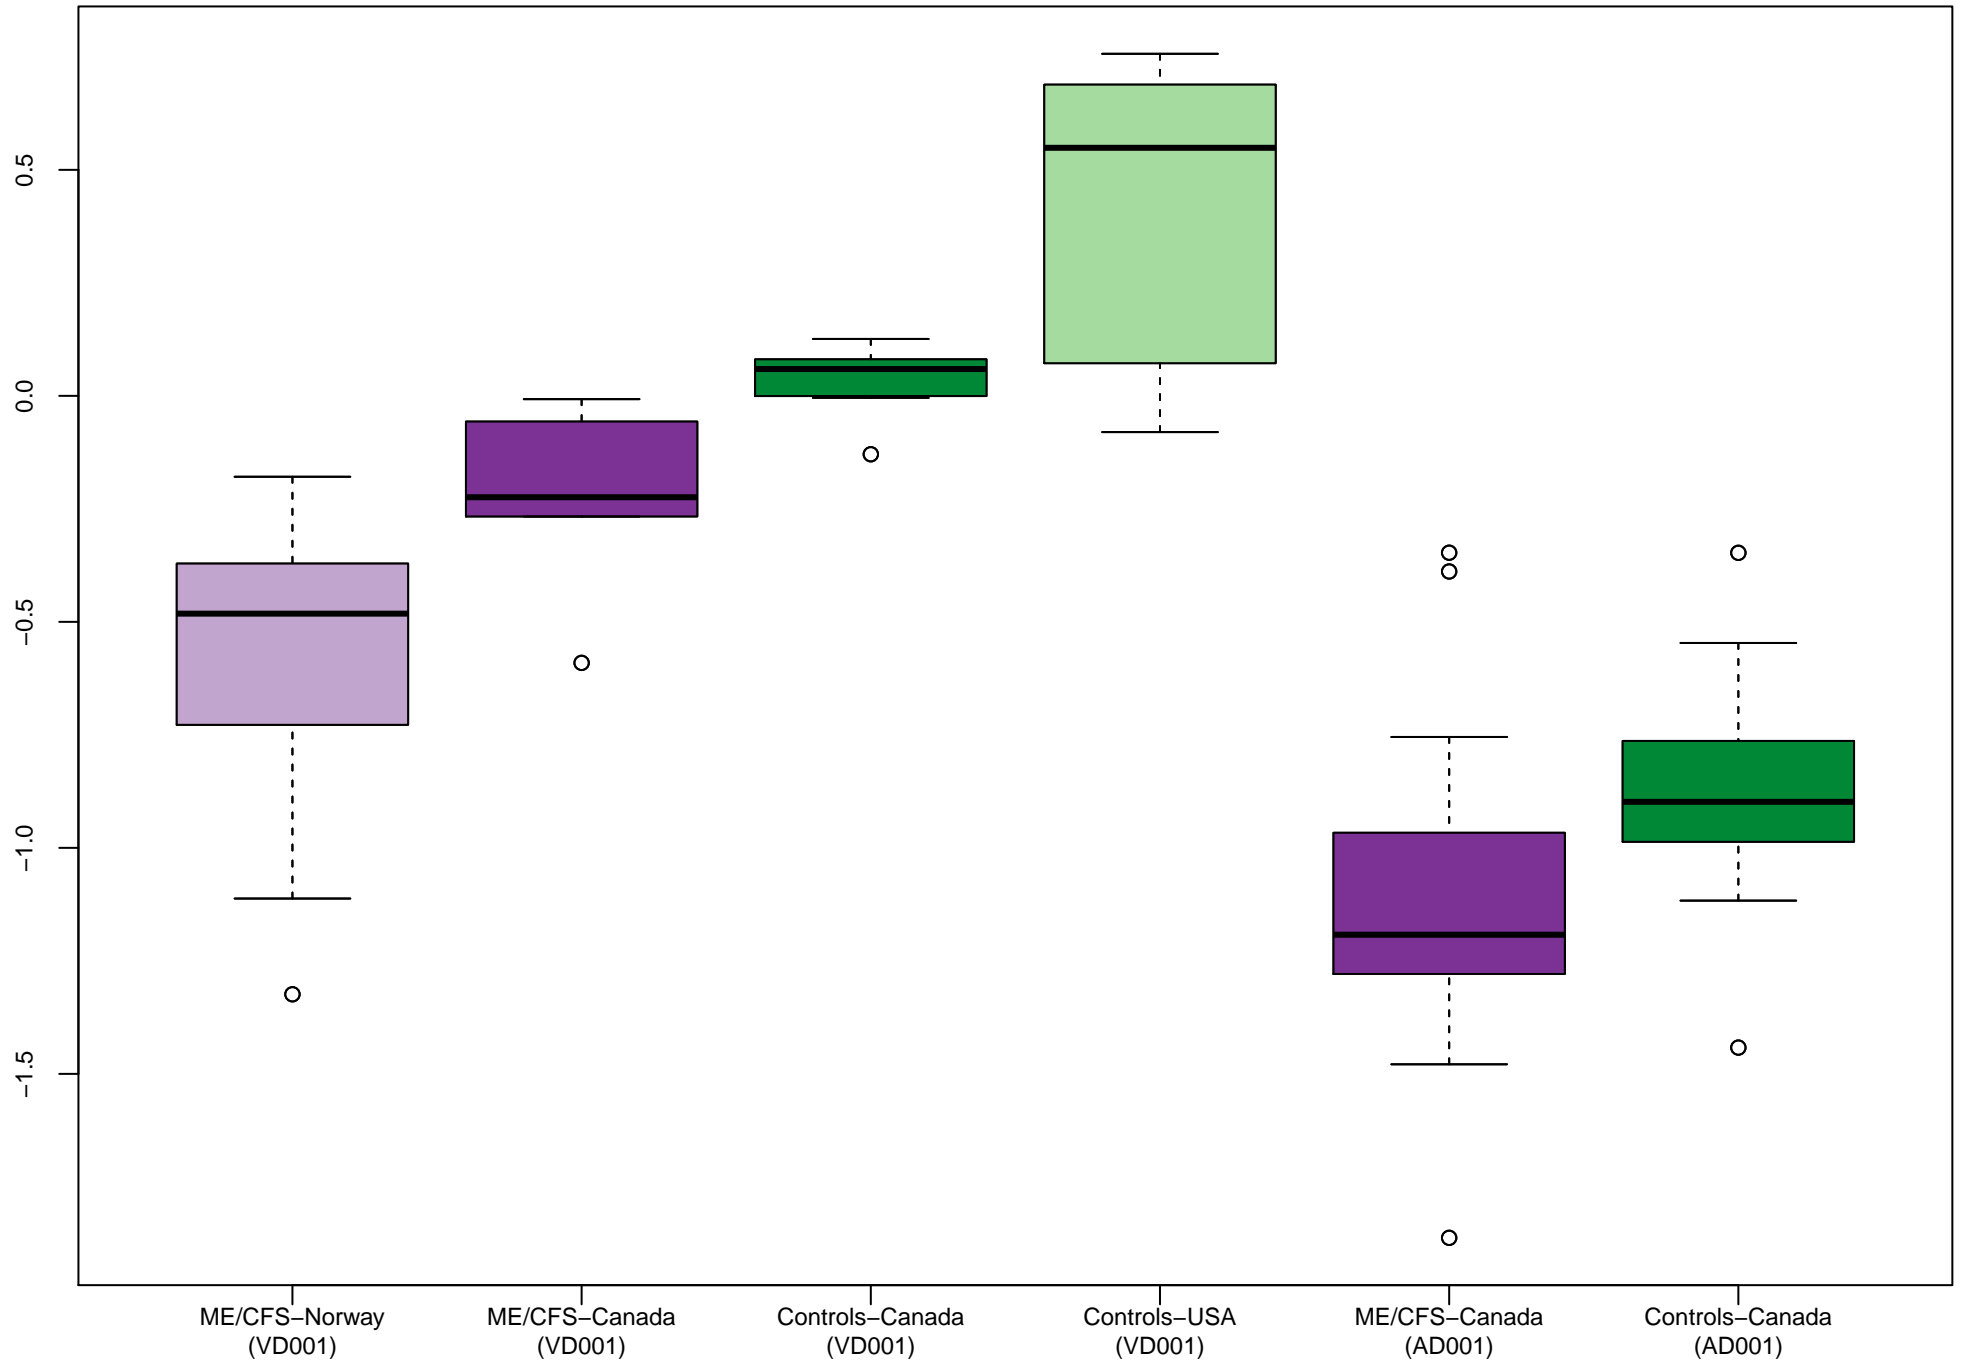

# YLRSLGFRPWLL

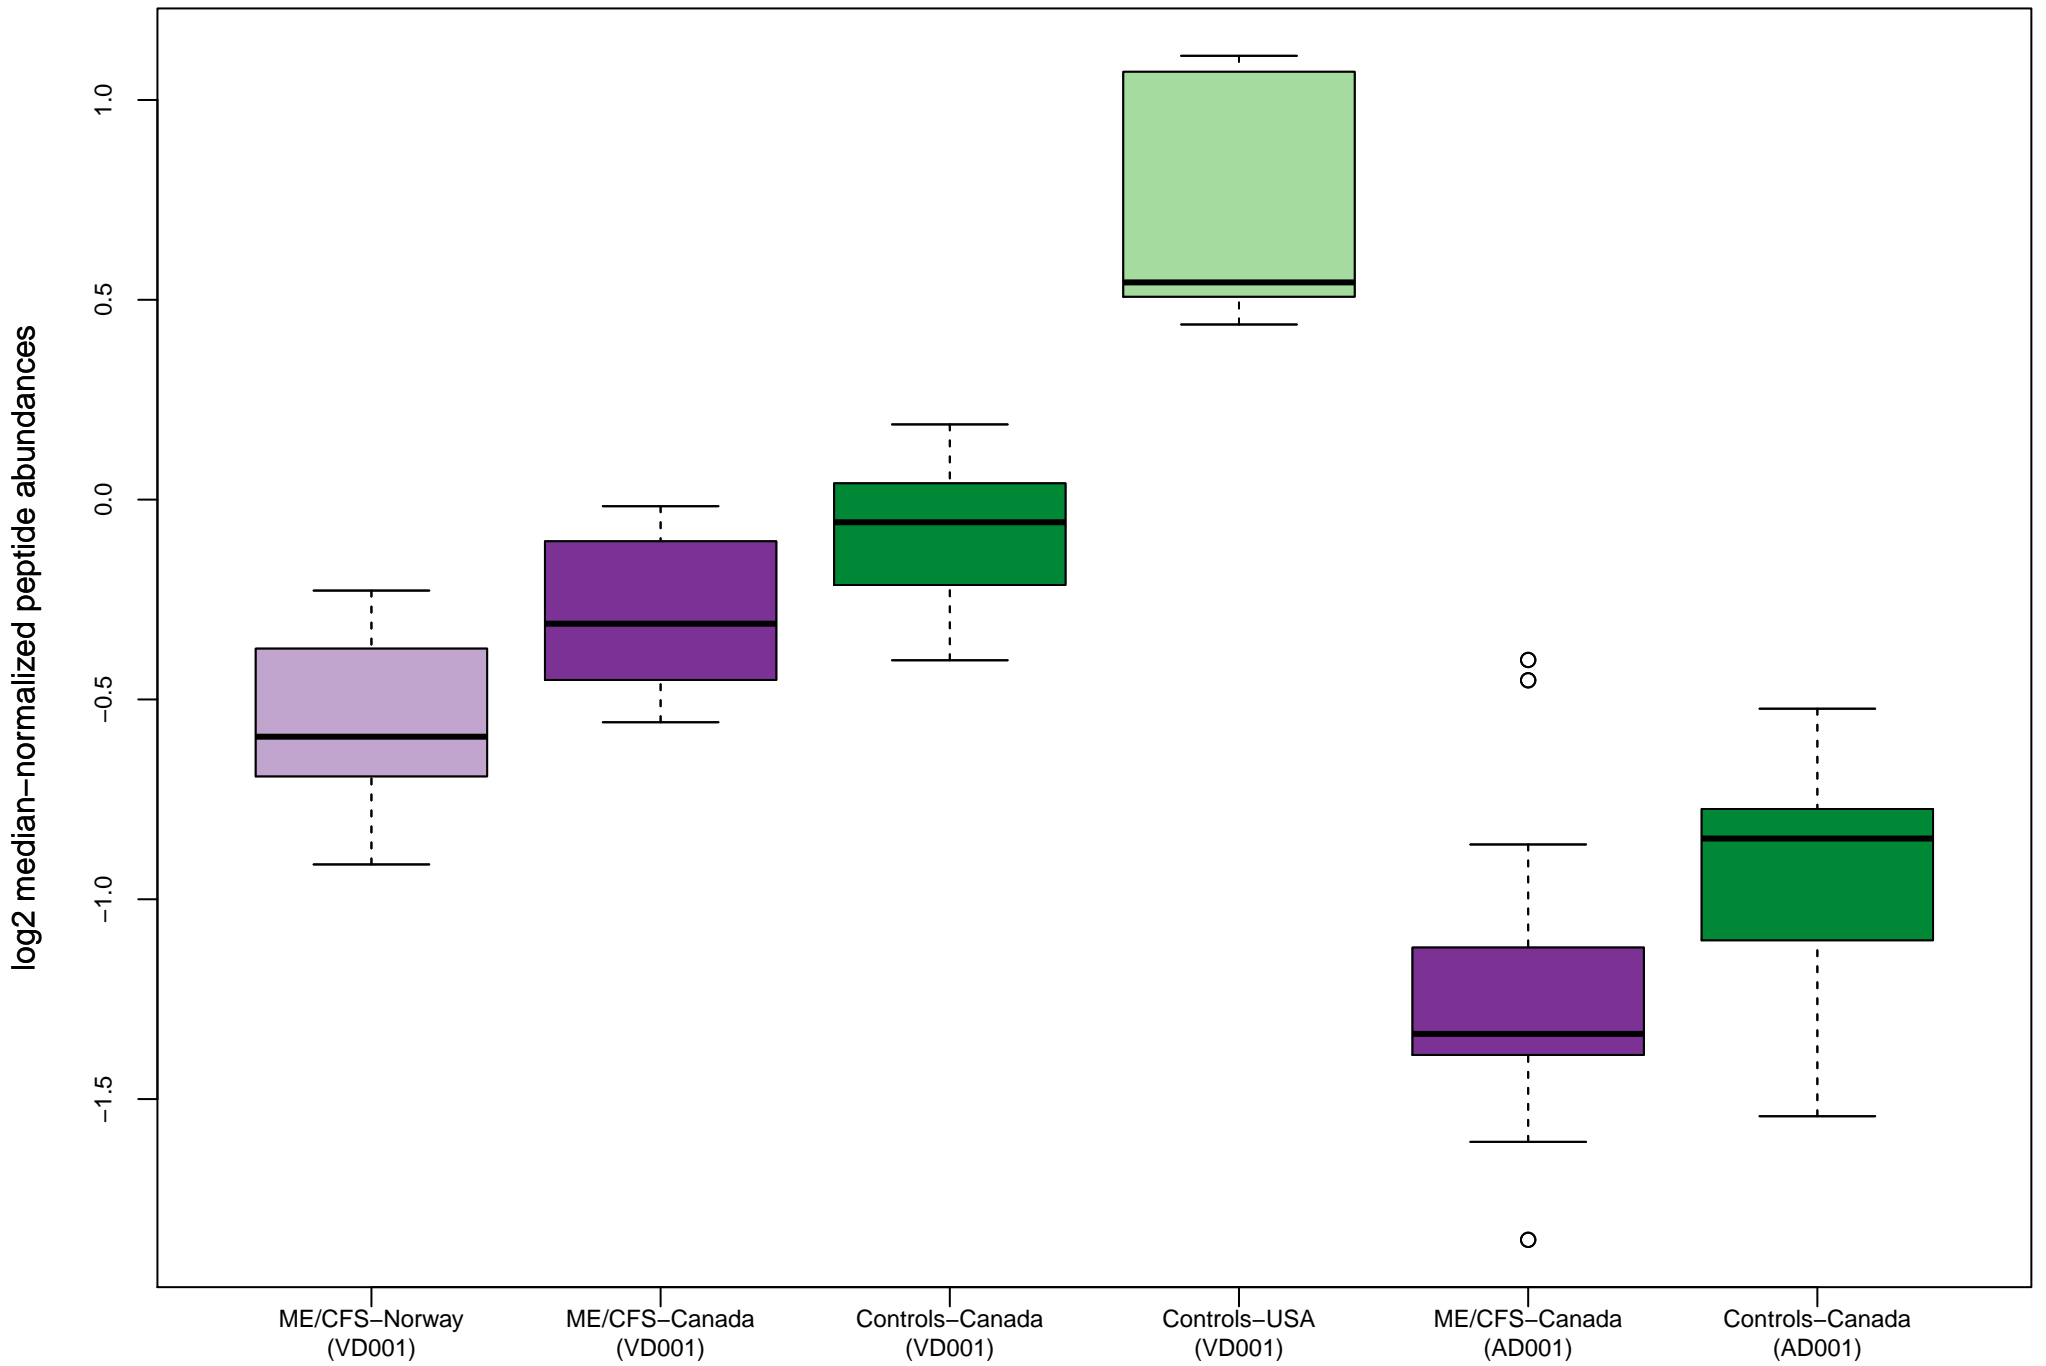

# YLVNKLRLHVLVA

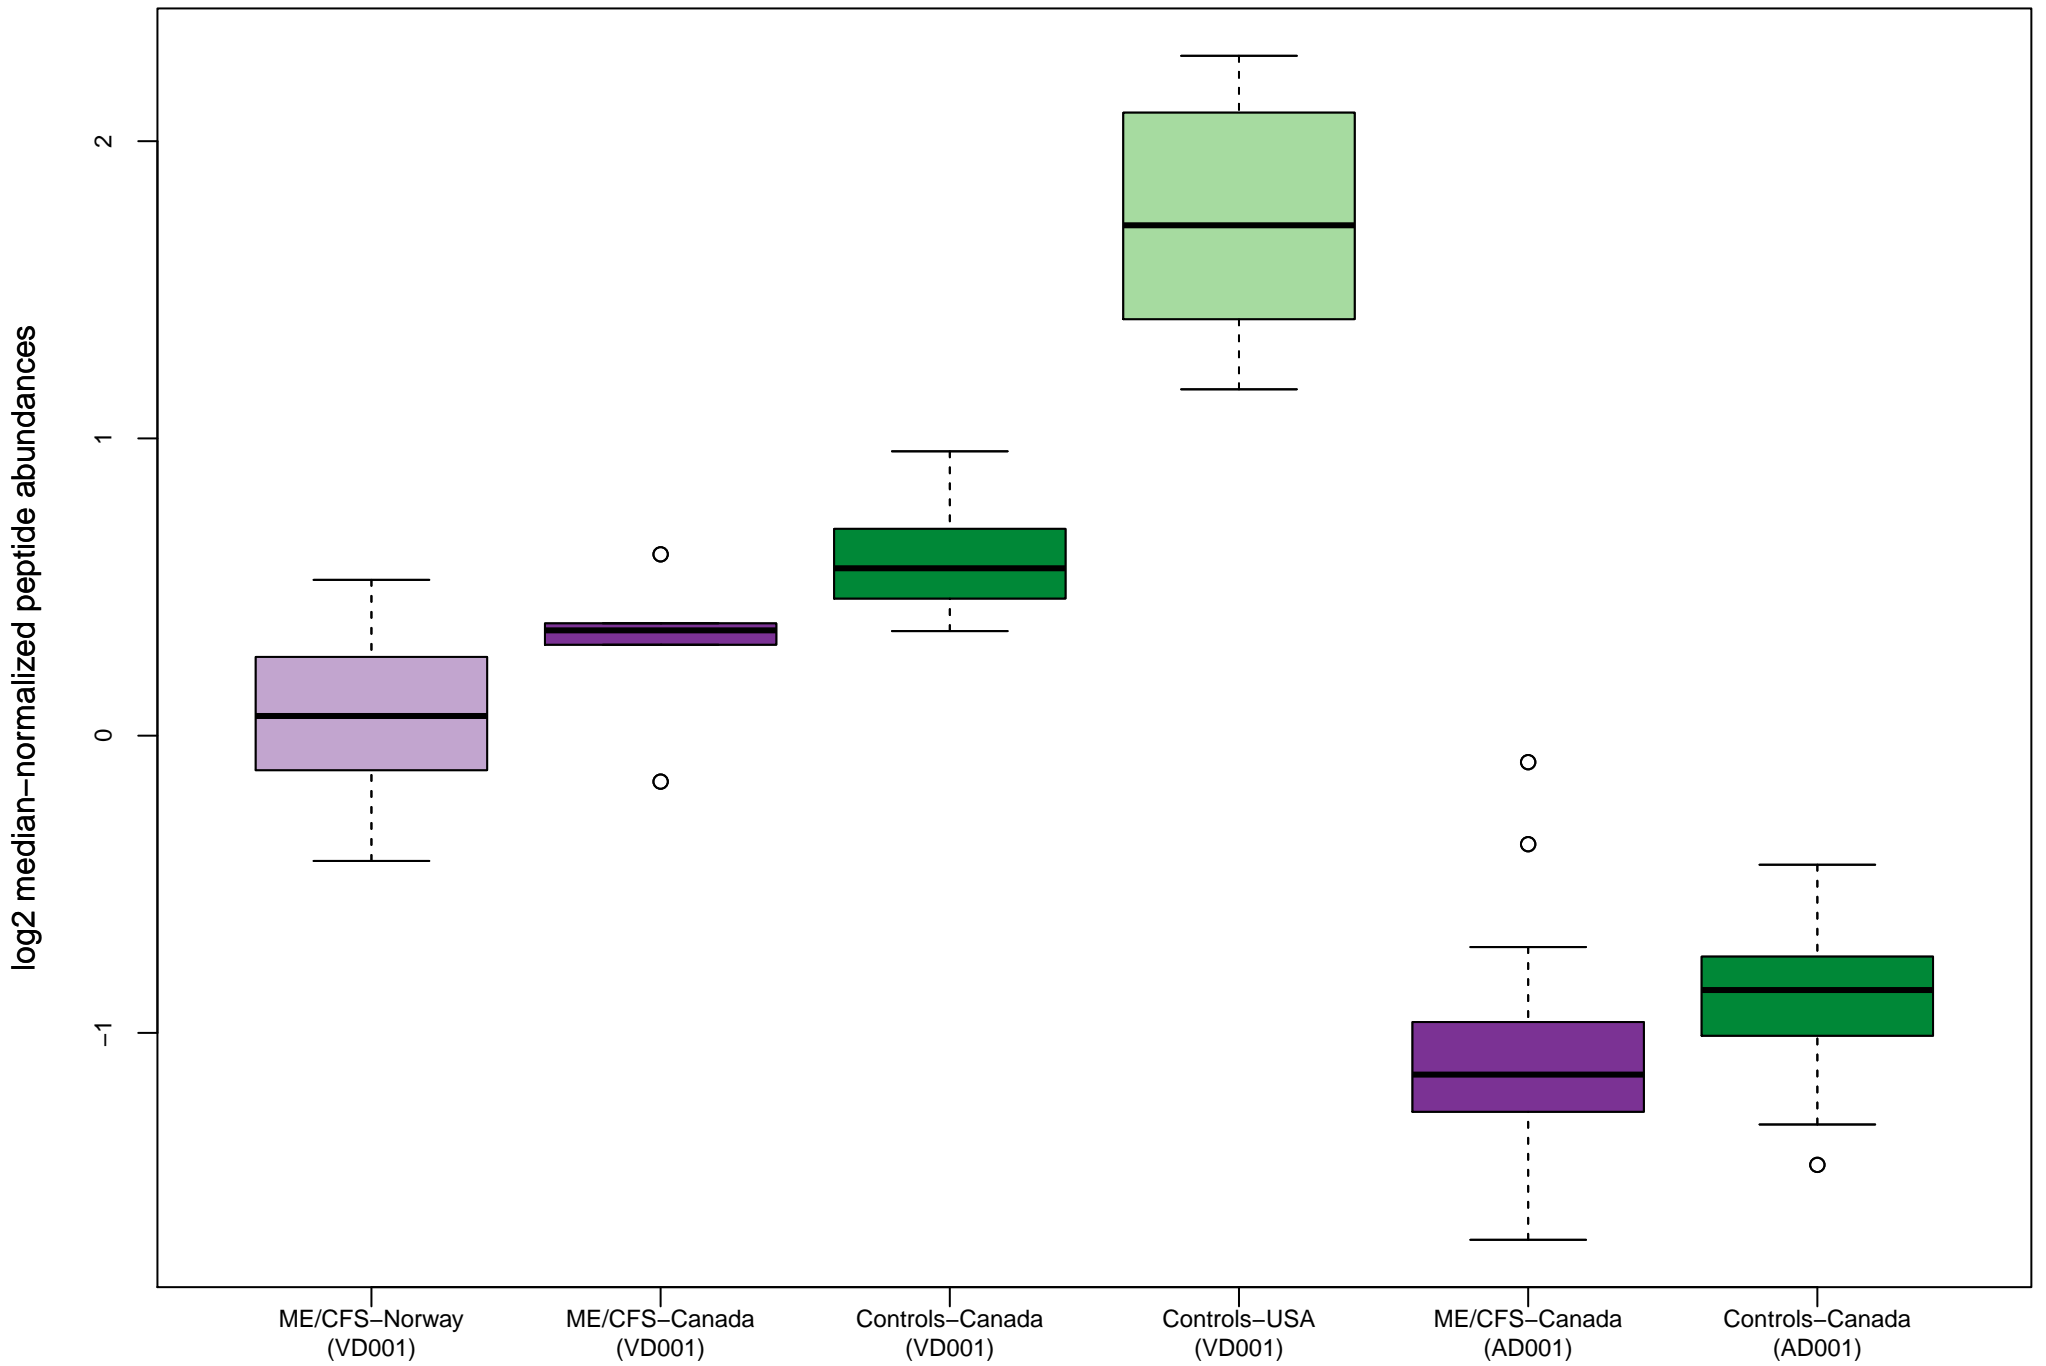

# YNAPLSFRAKVL

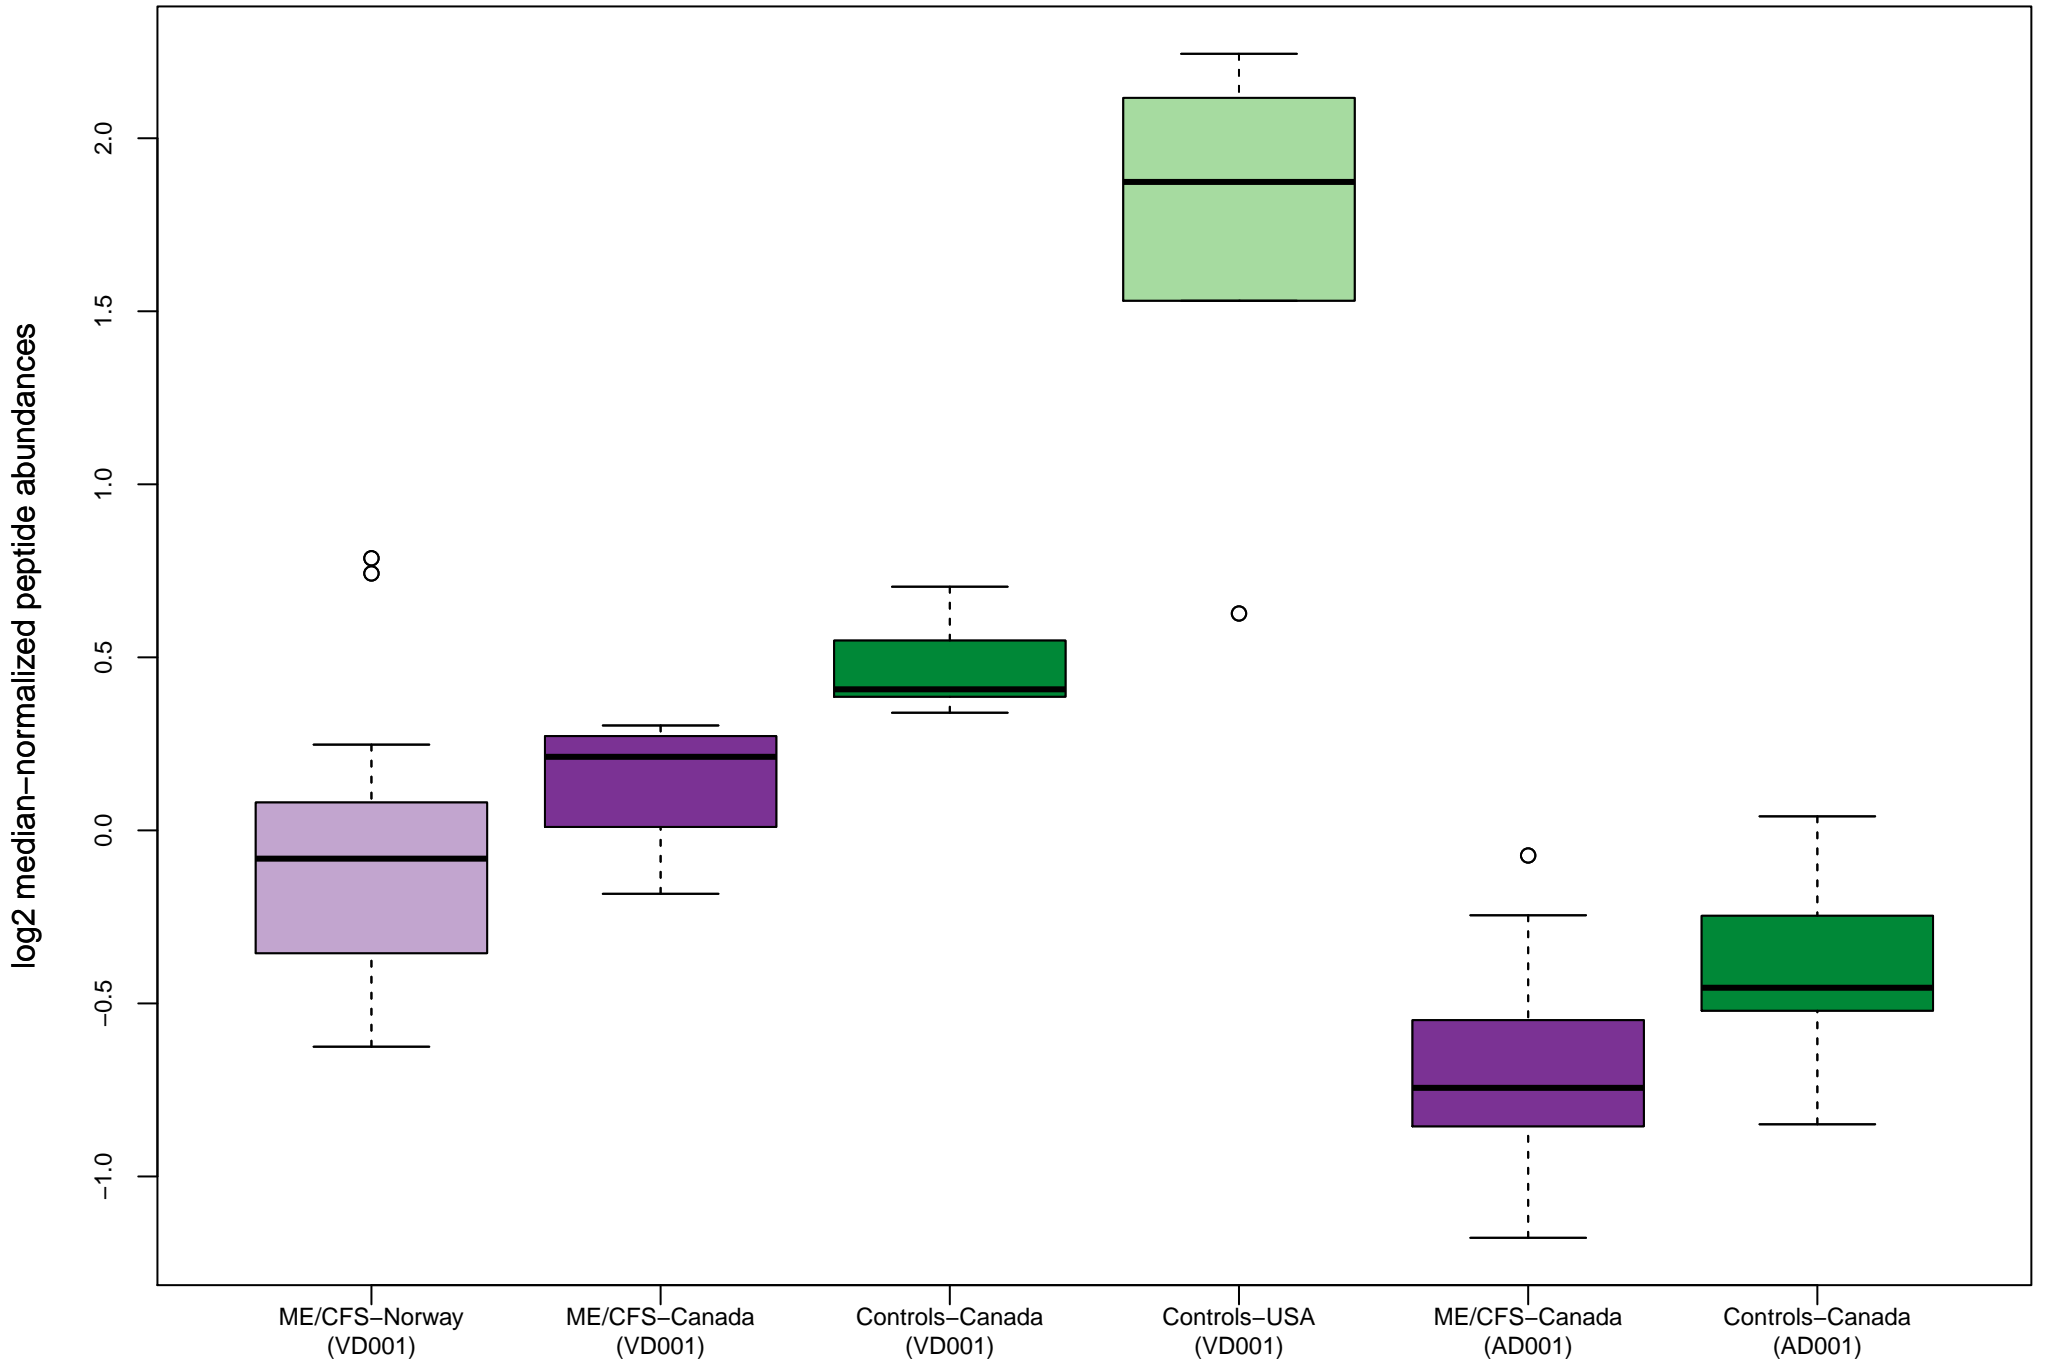



# YPAVRVLGALSG

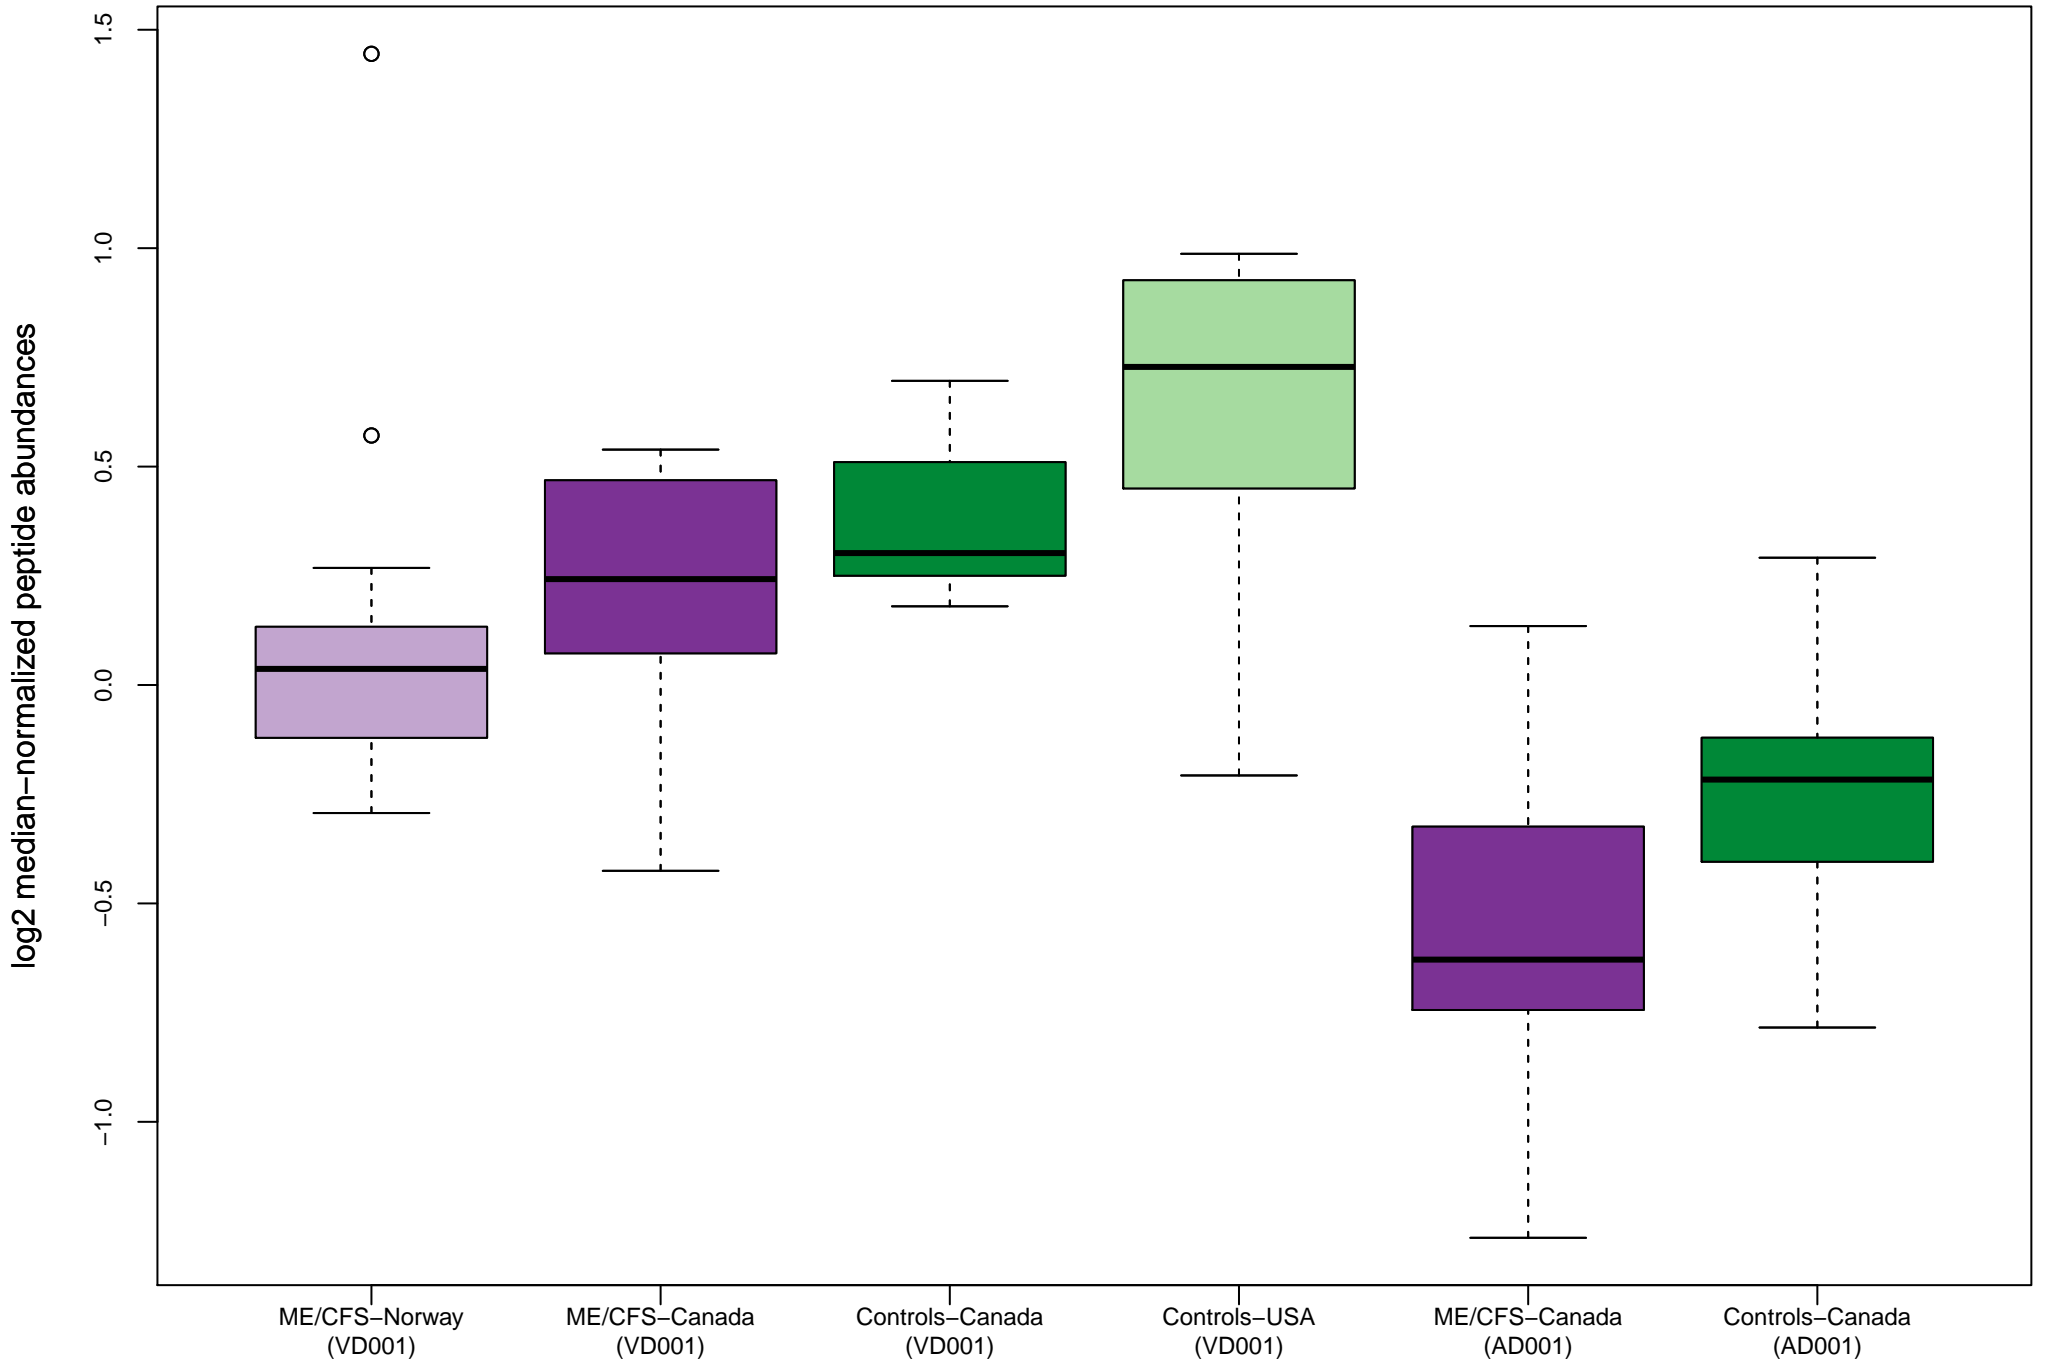

# YPLYKYLGVLSG

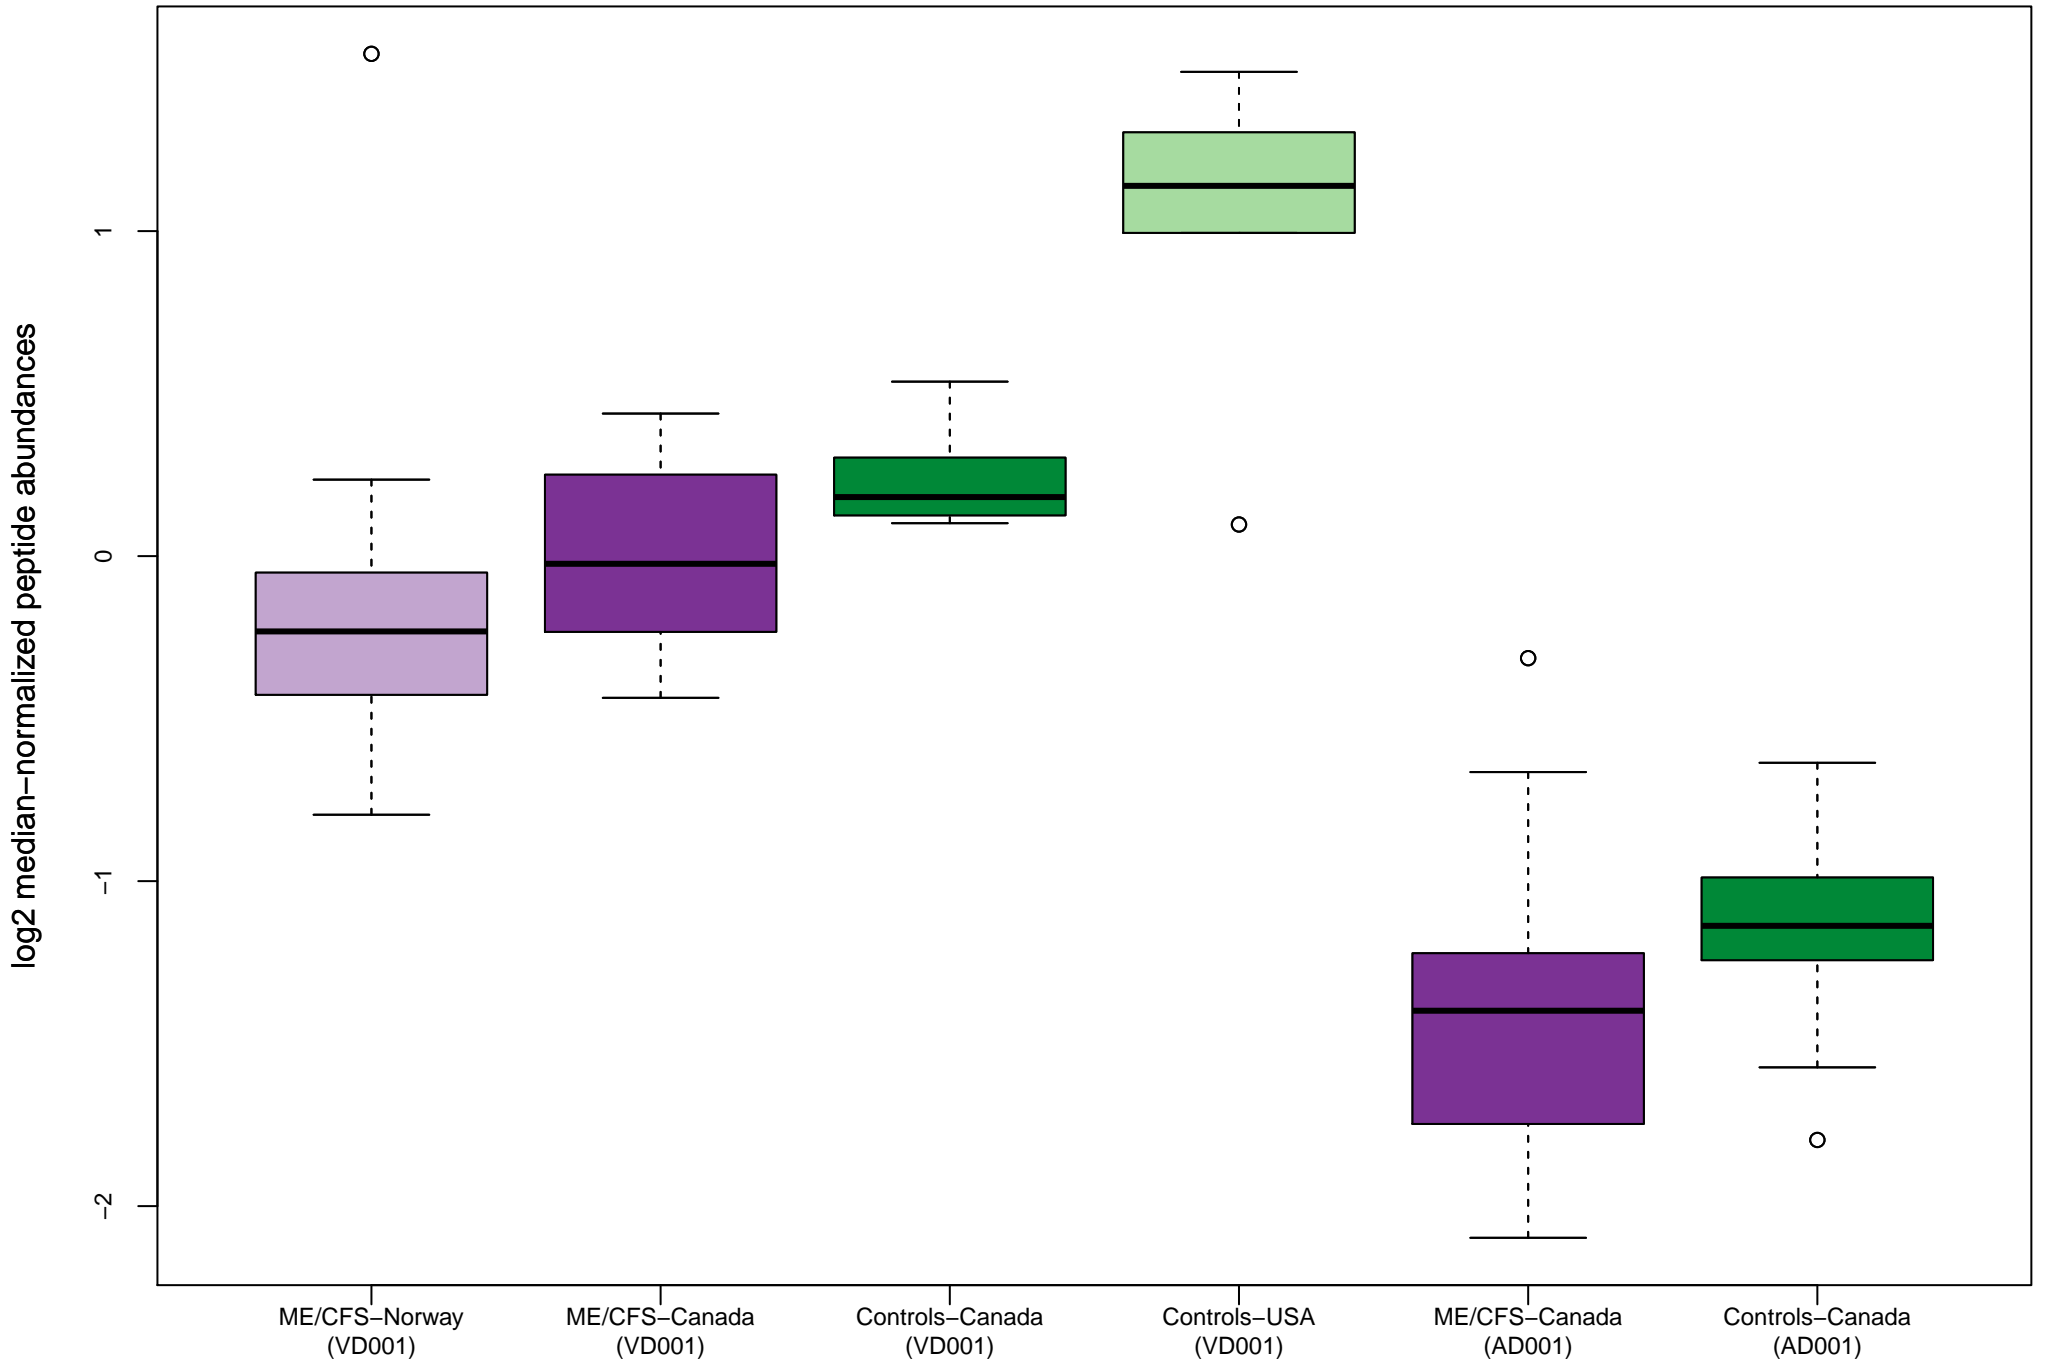

# YPVNFRLSVLS

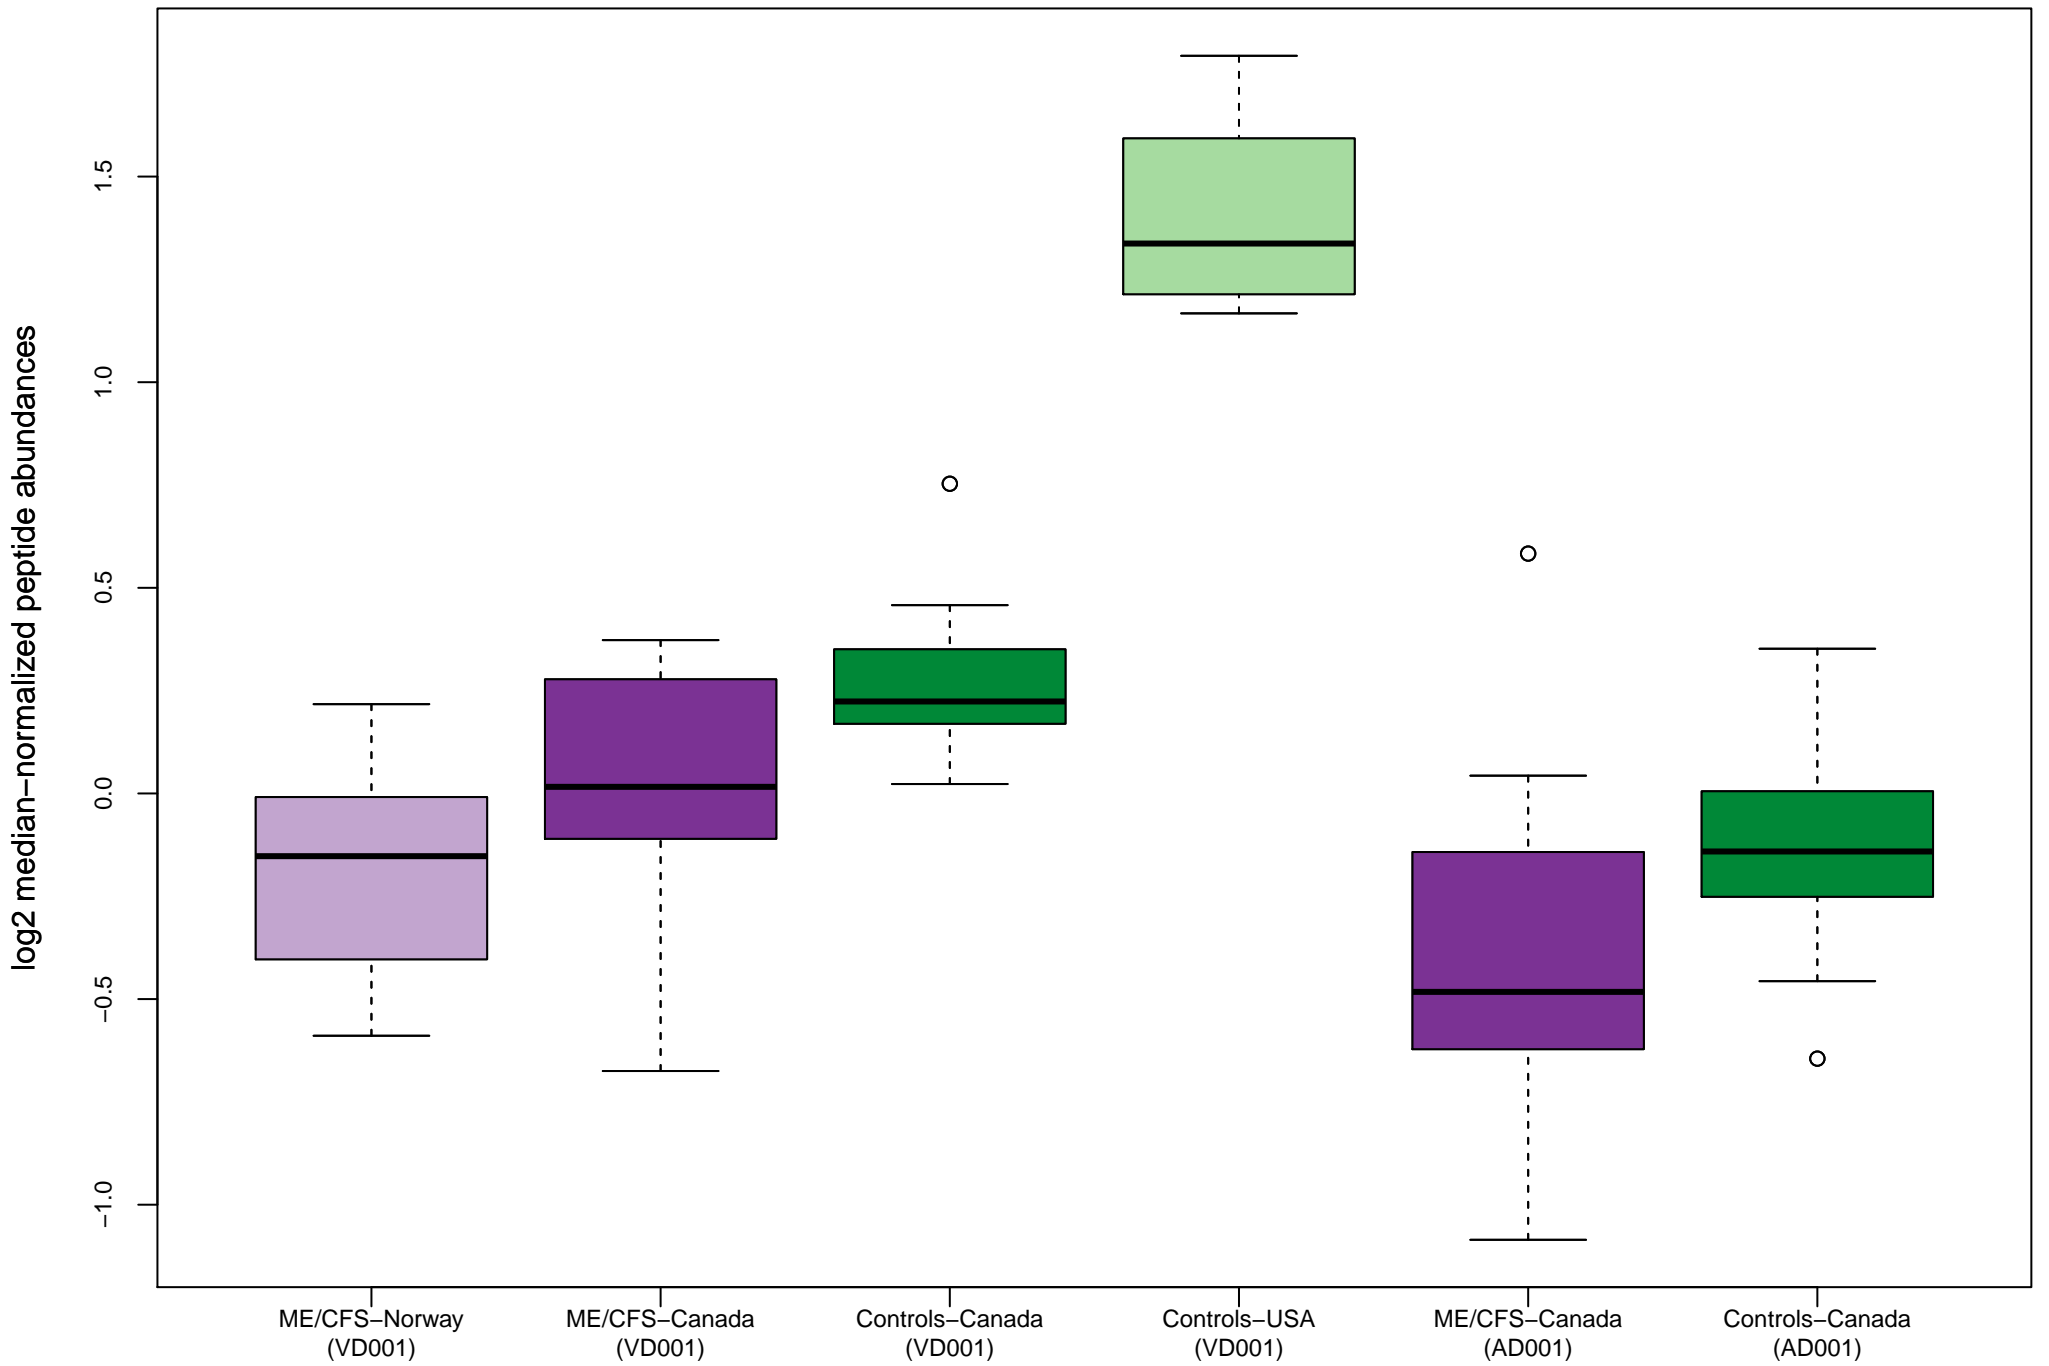

# YRAAVLSGVLSG

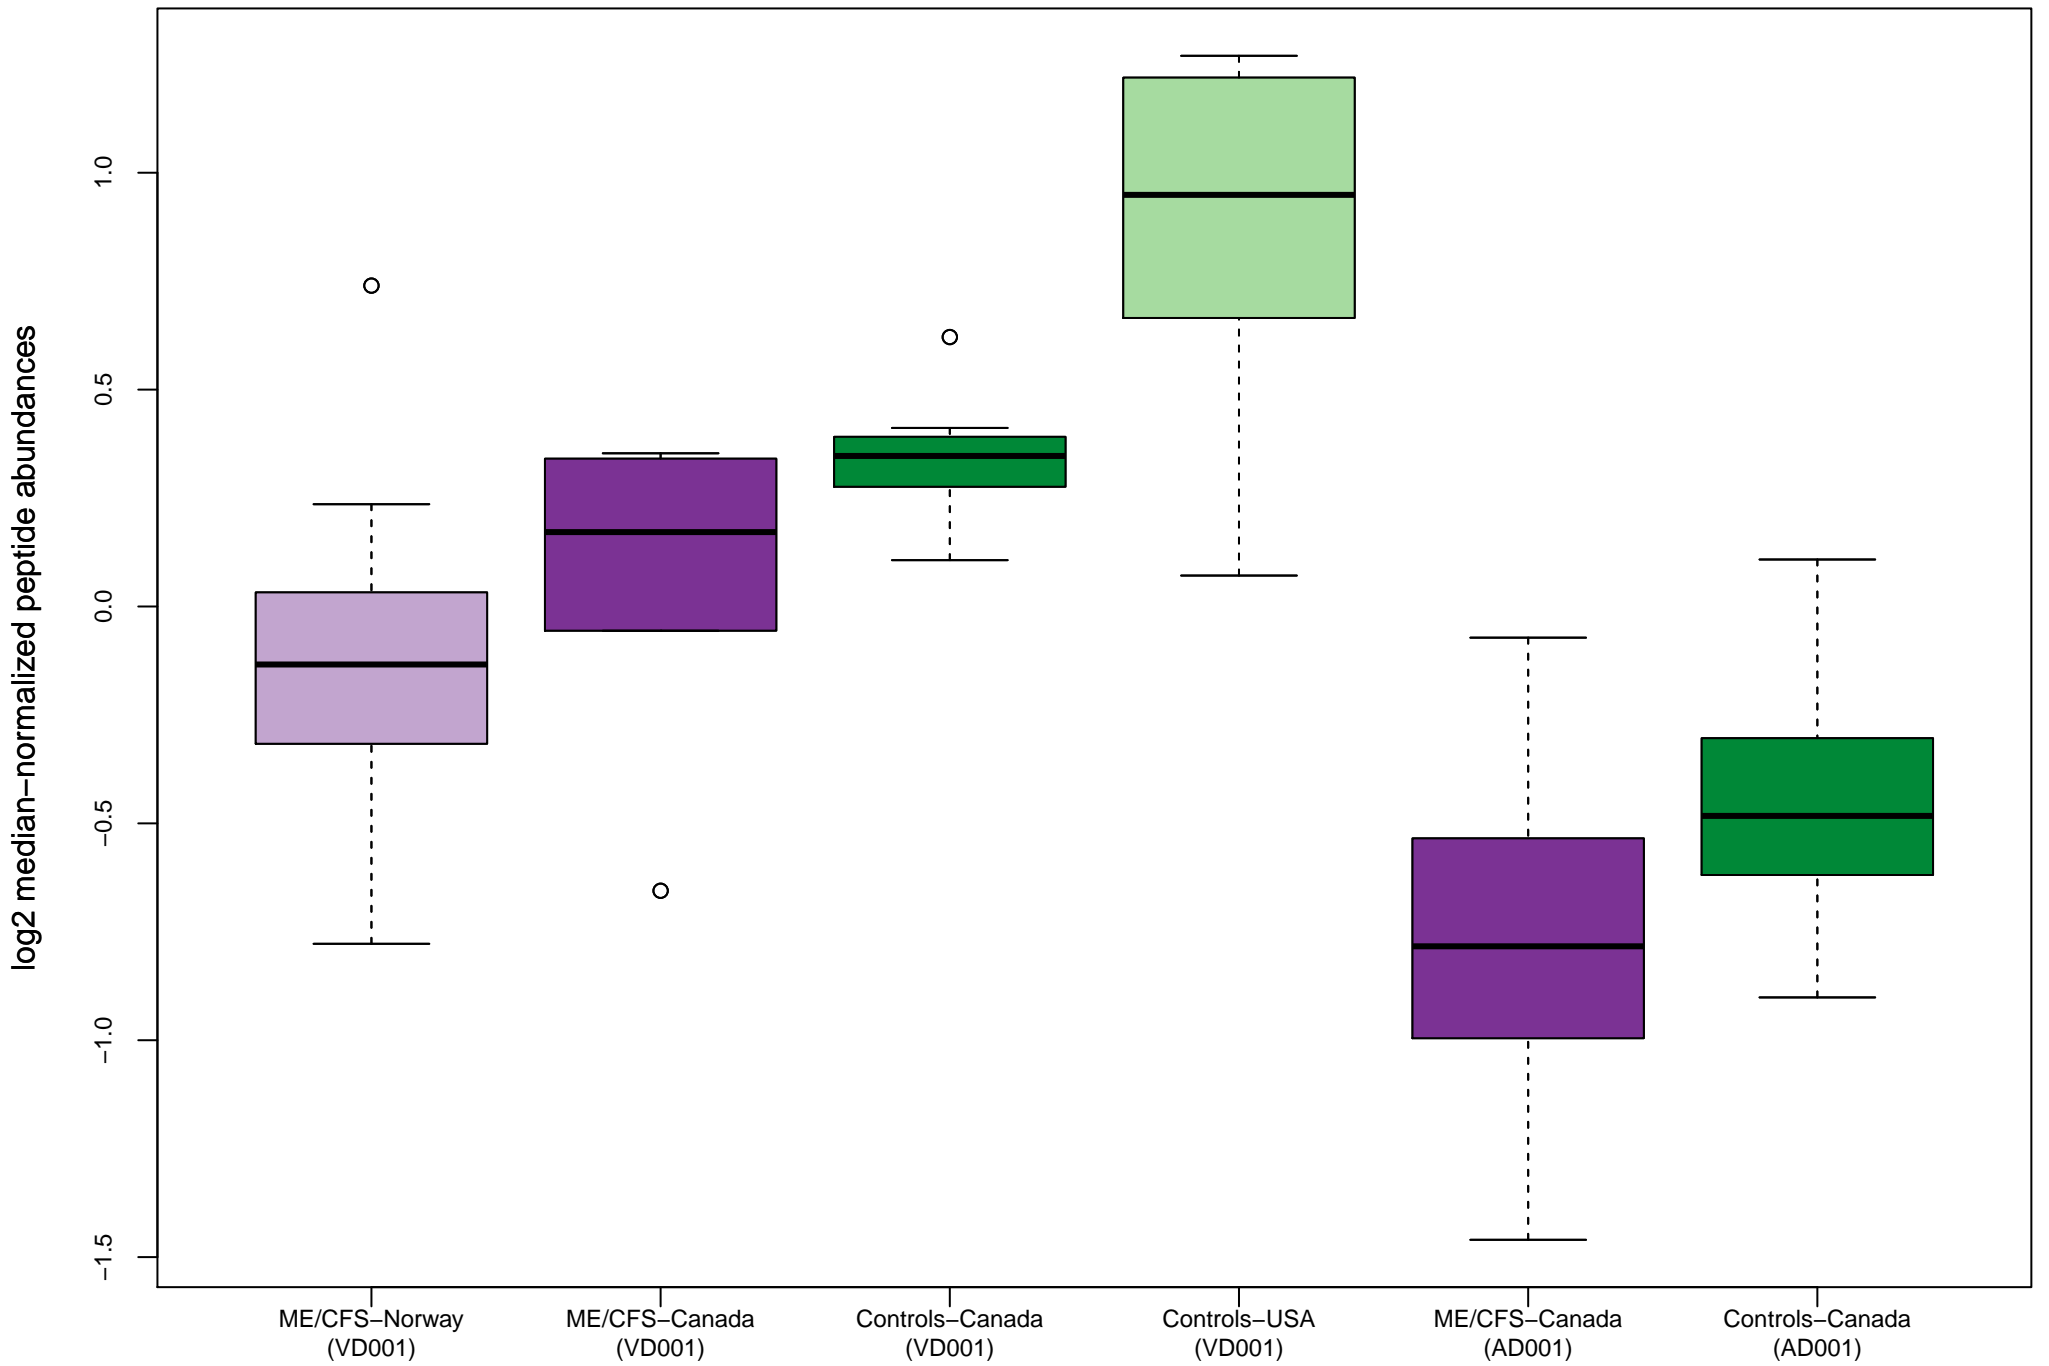

# YRFLSWGVALS

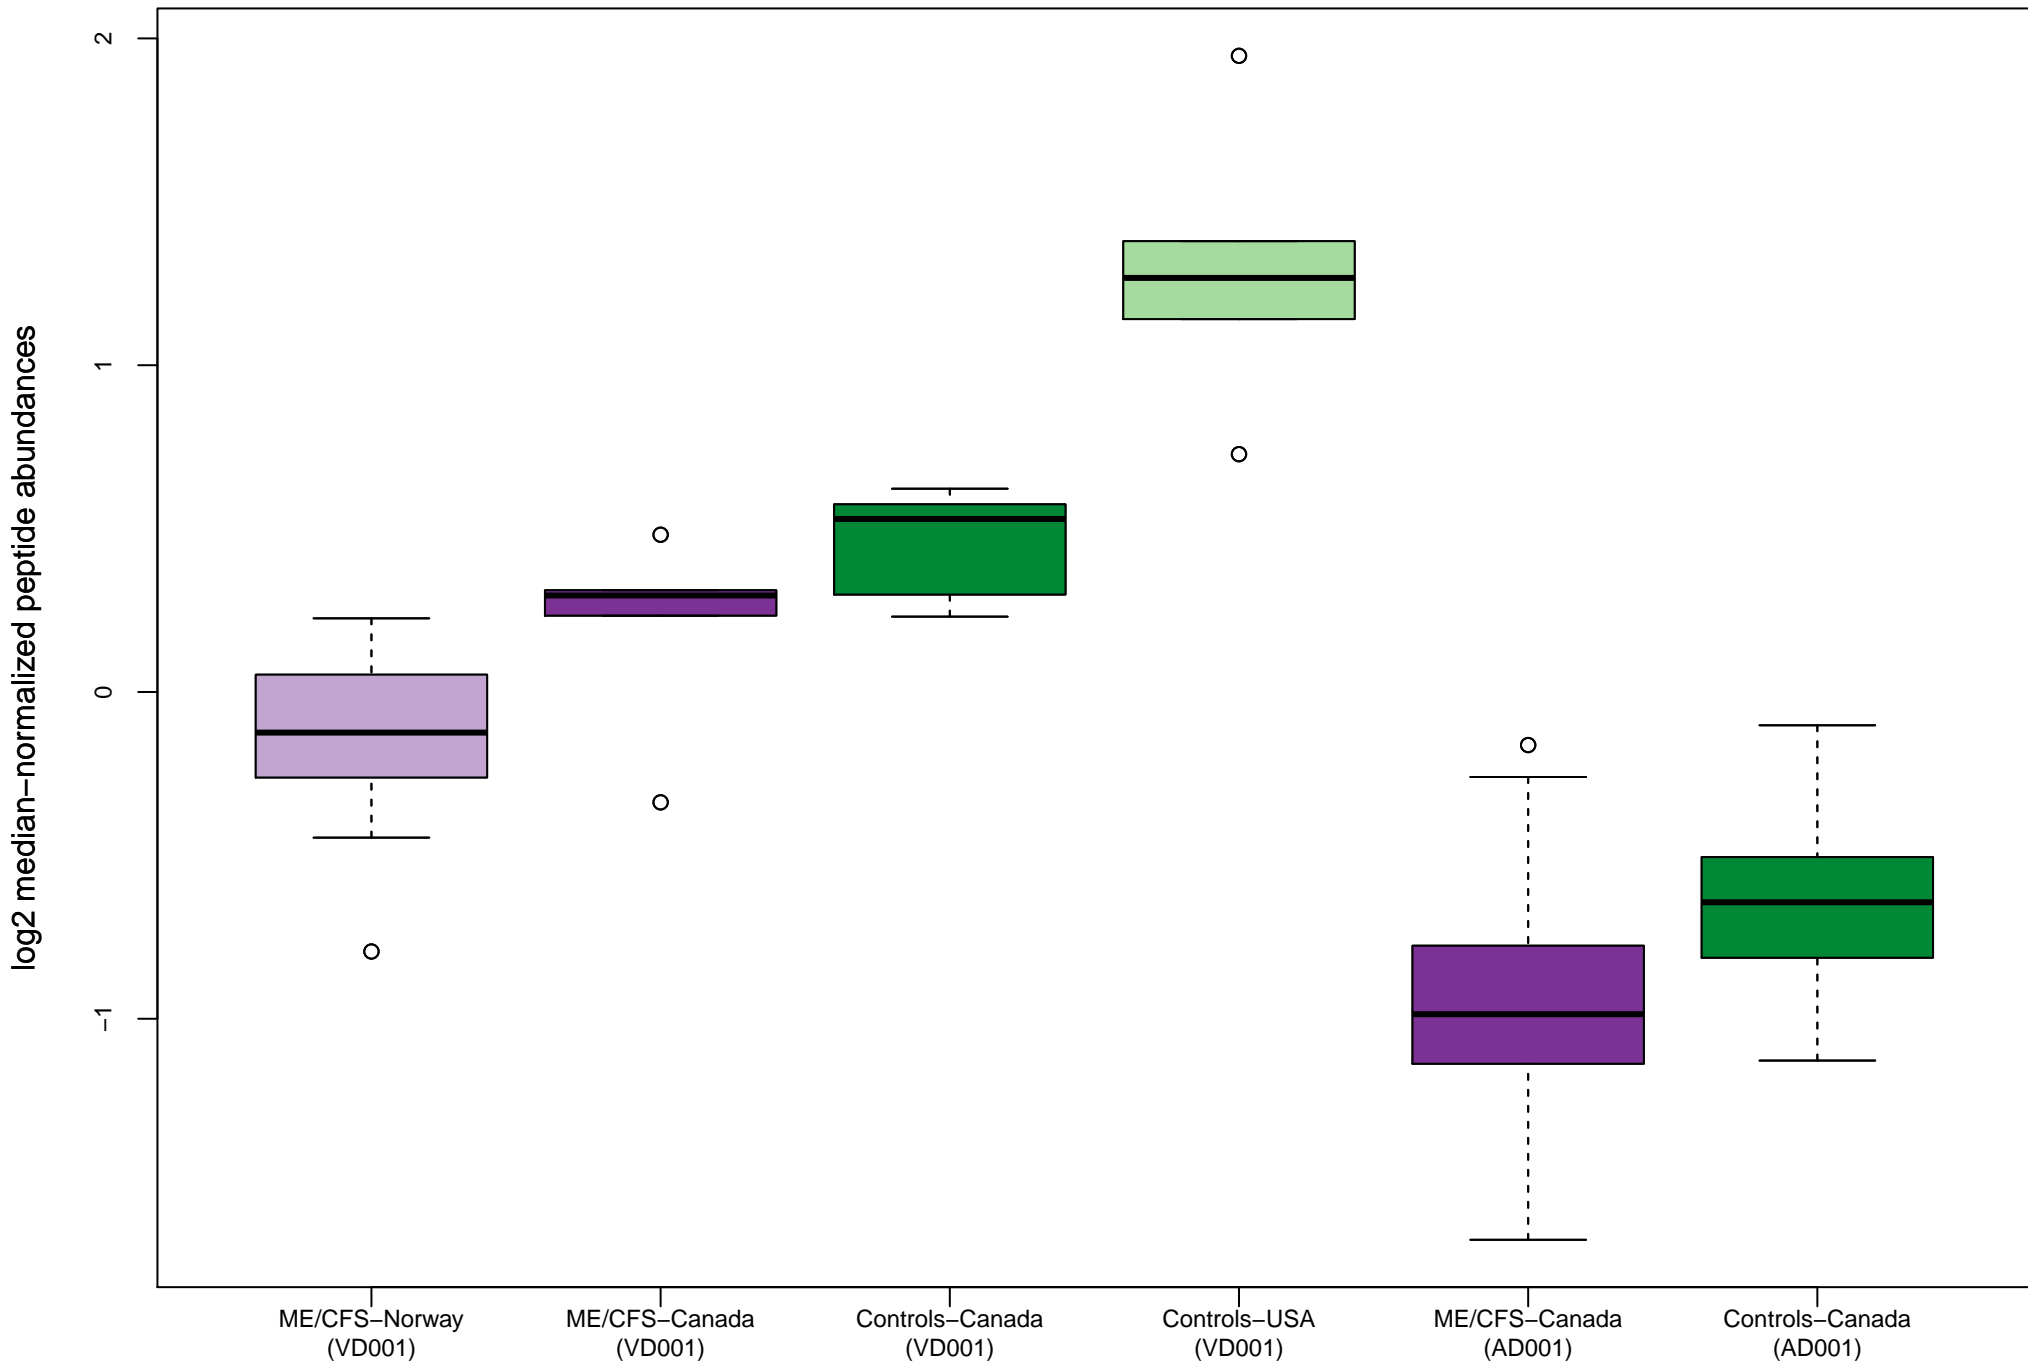

# YRGAYVSGVALG

log2 median-normalized peptide abundances

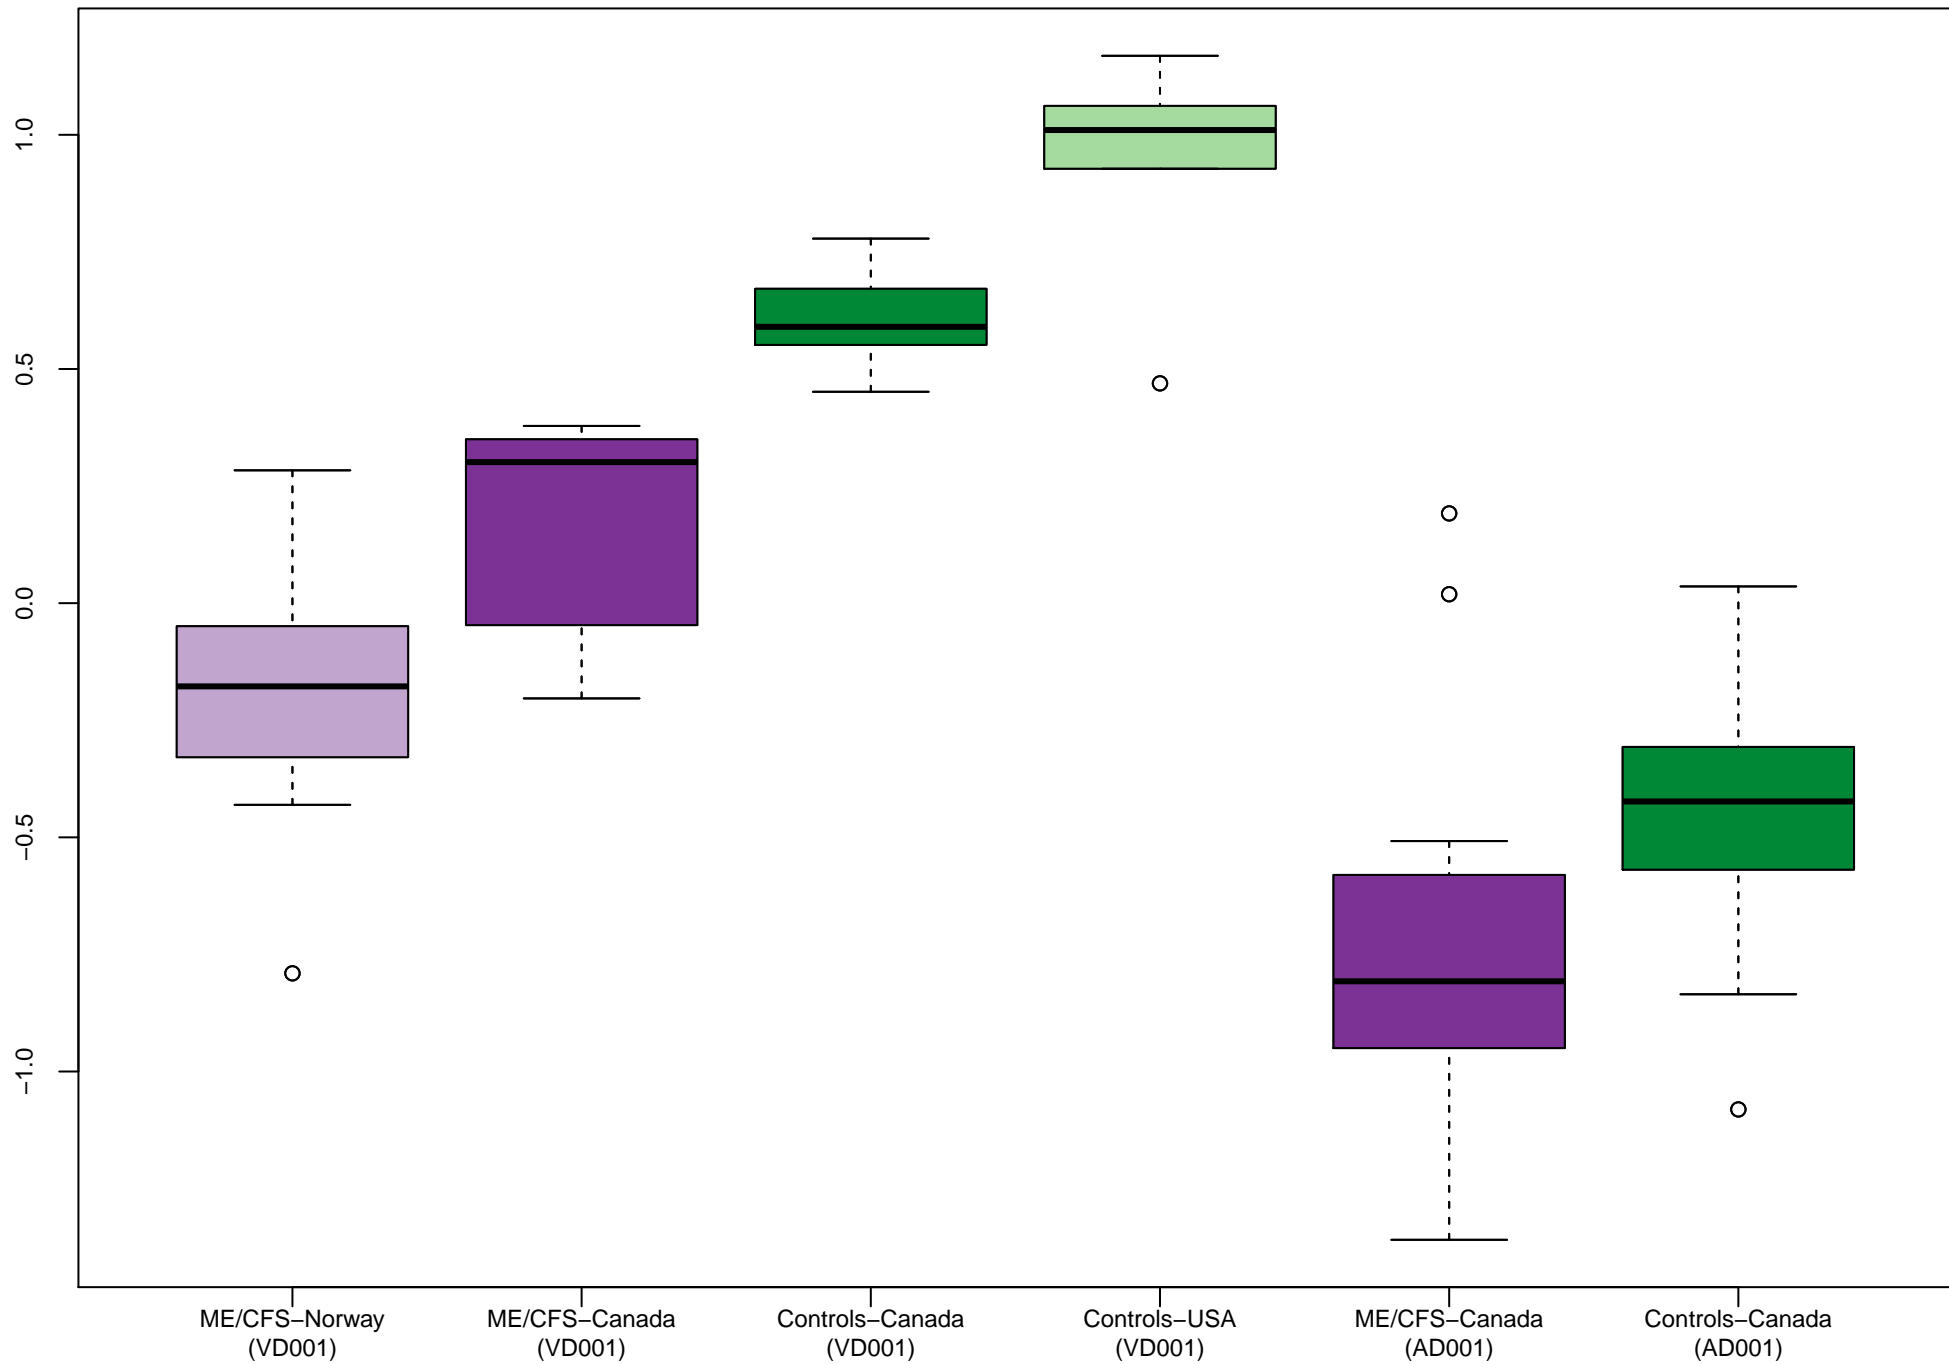

# YRLNLFVSGALG

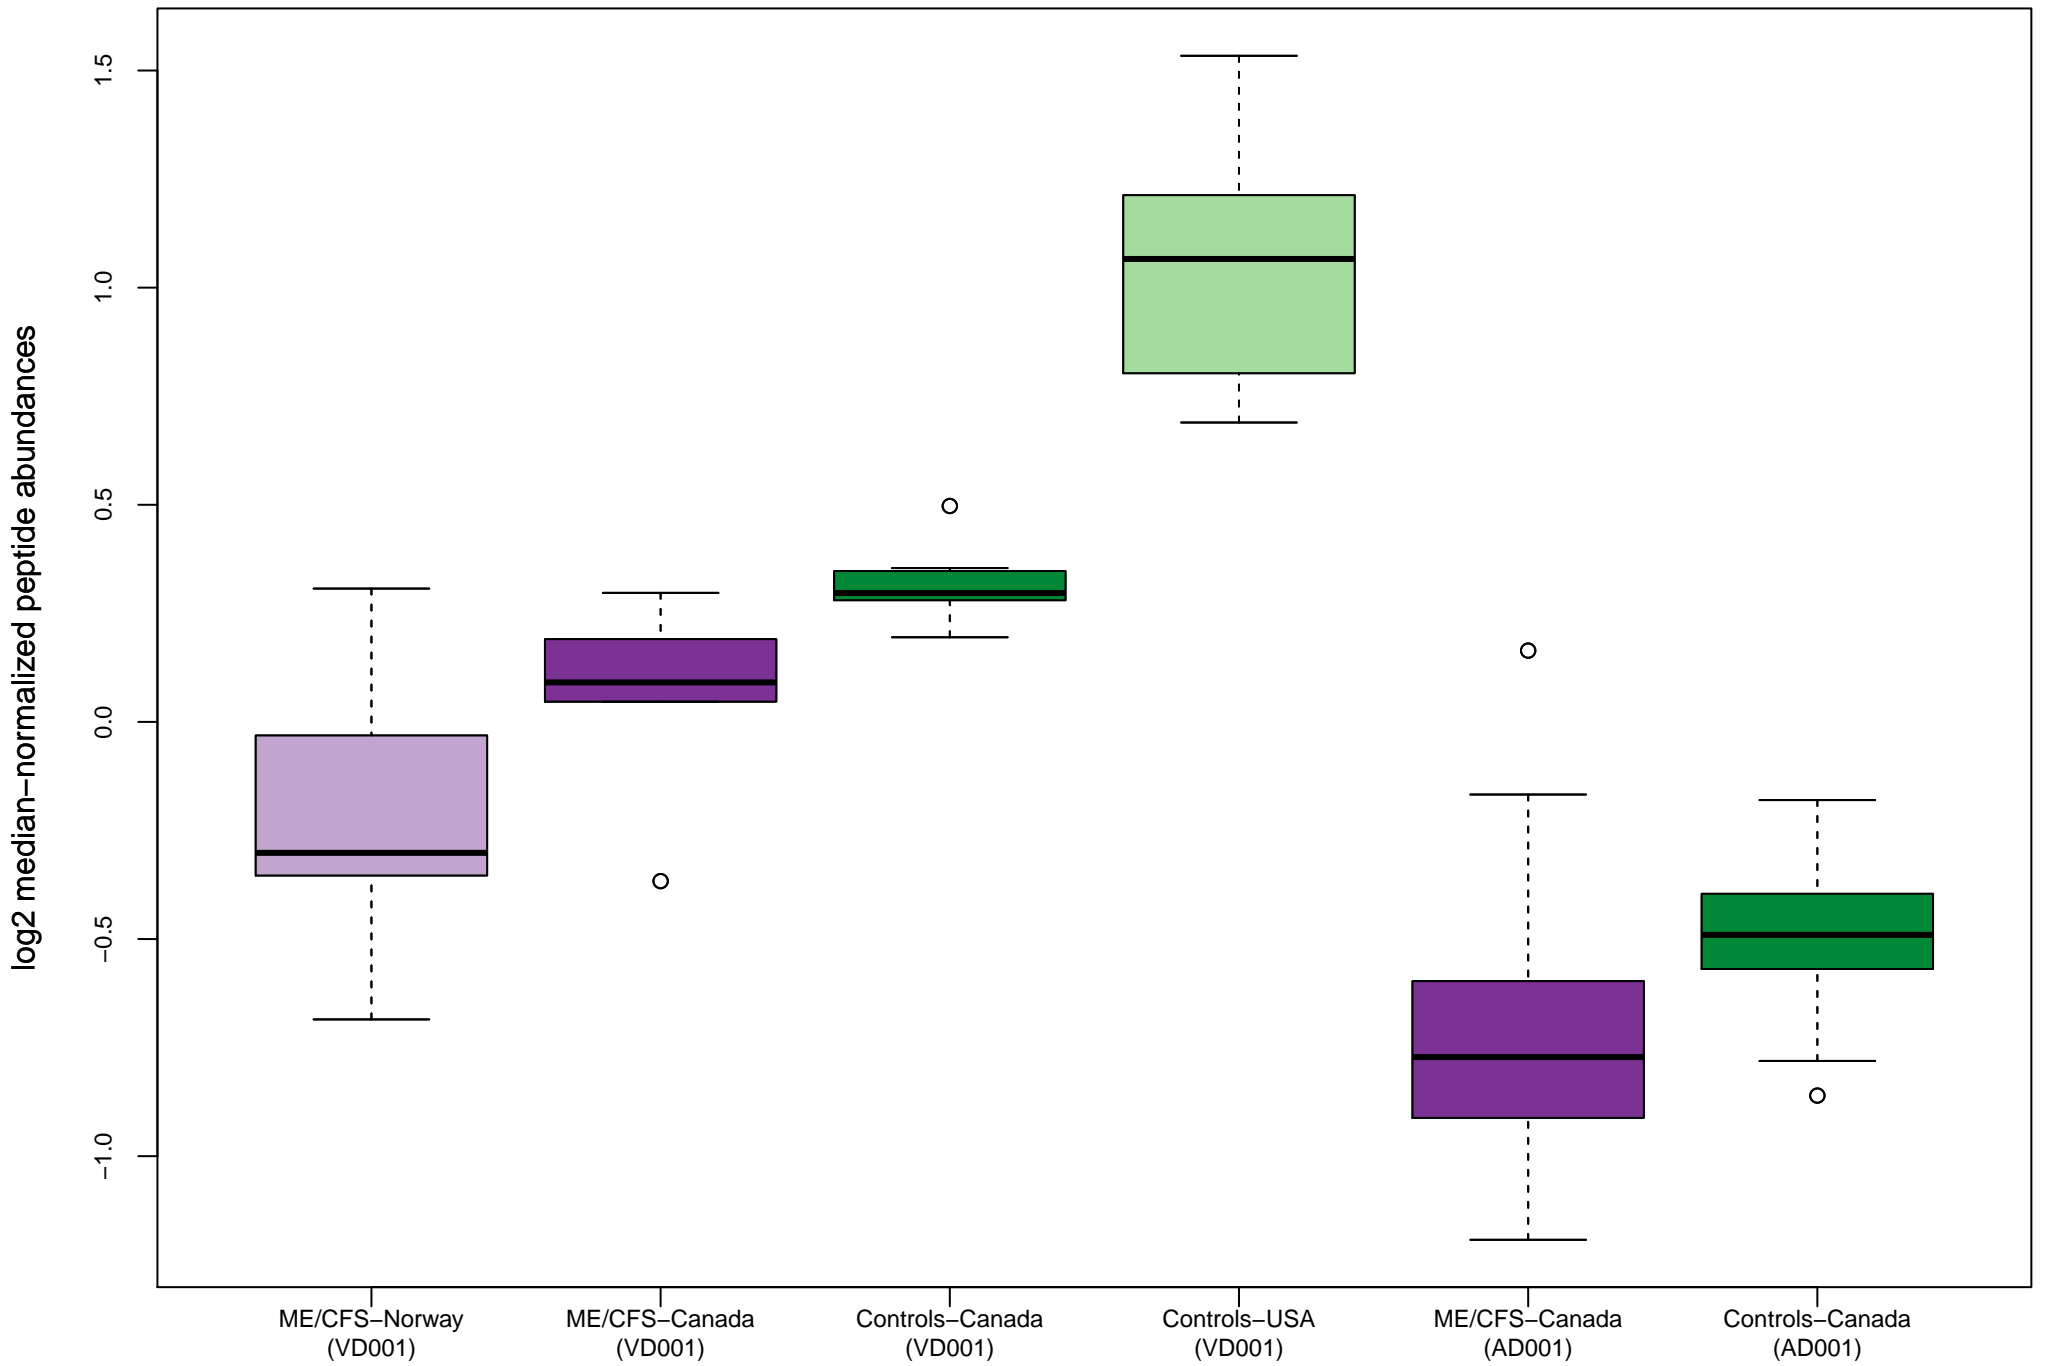

# YRLWFRVSGVLS

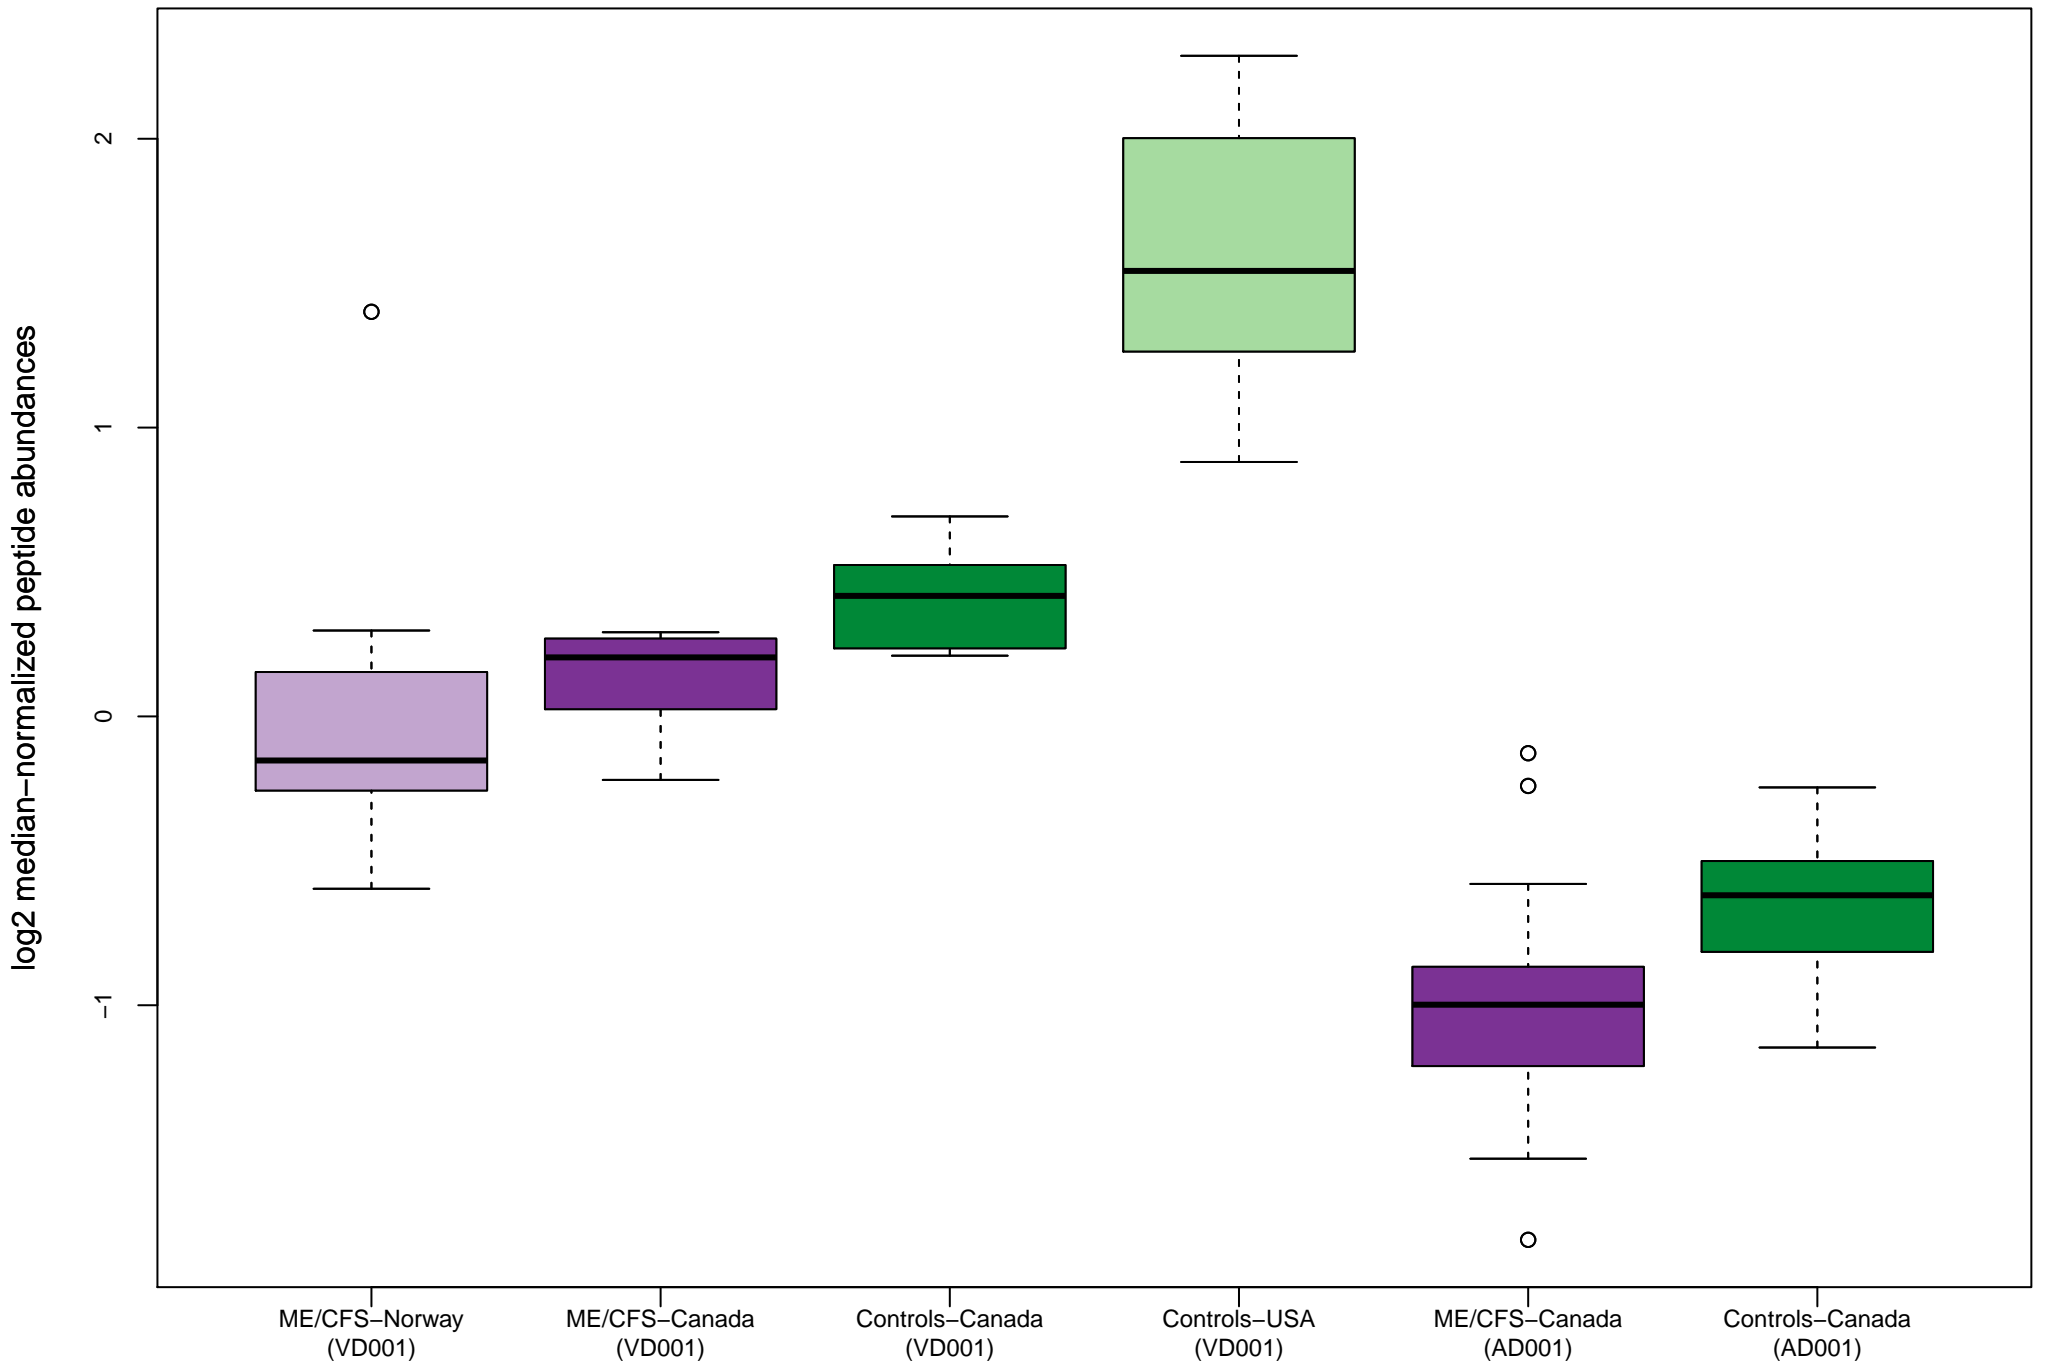



# YRPFARWHVAAL

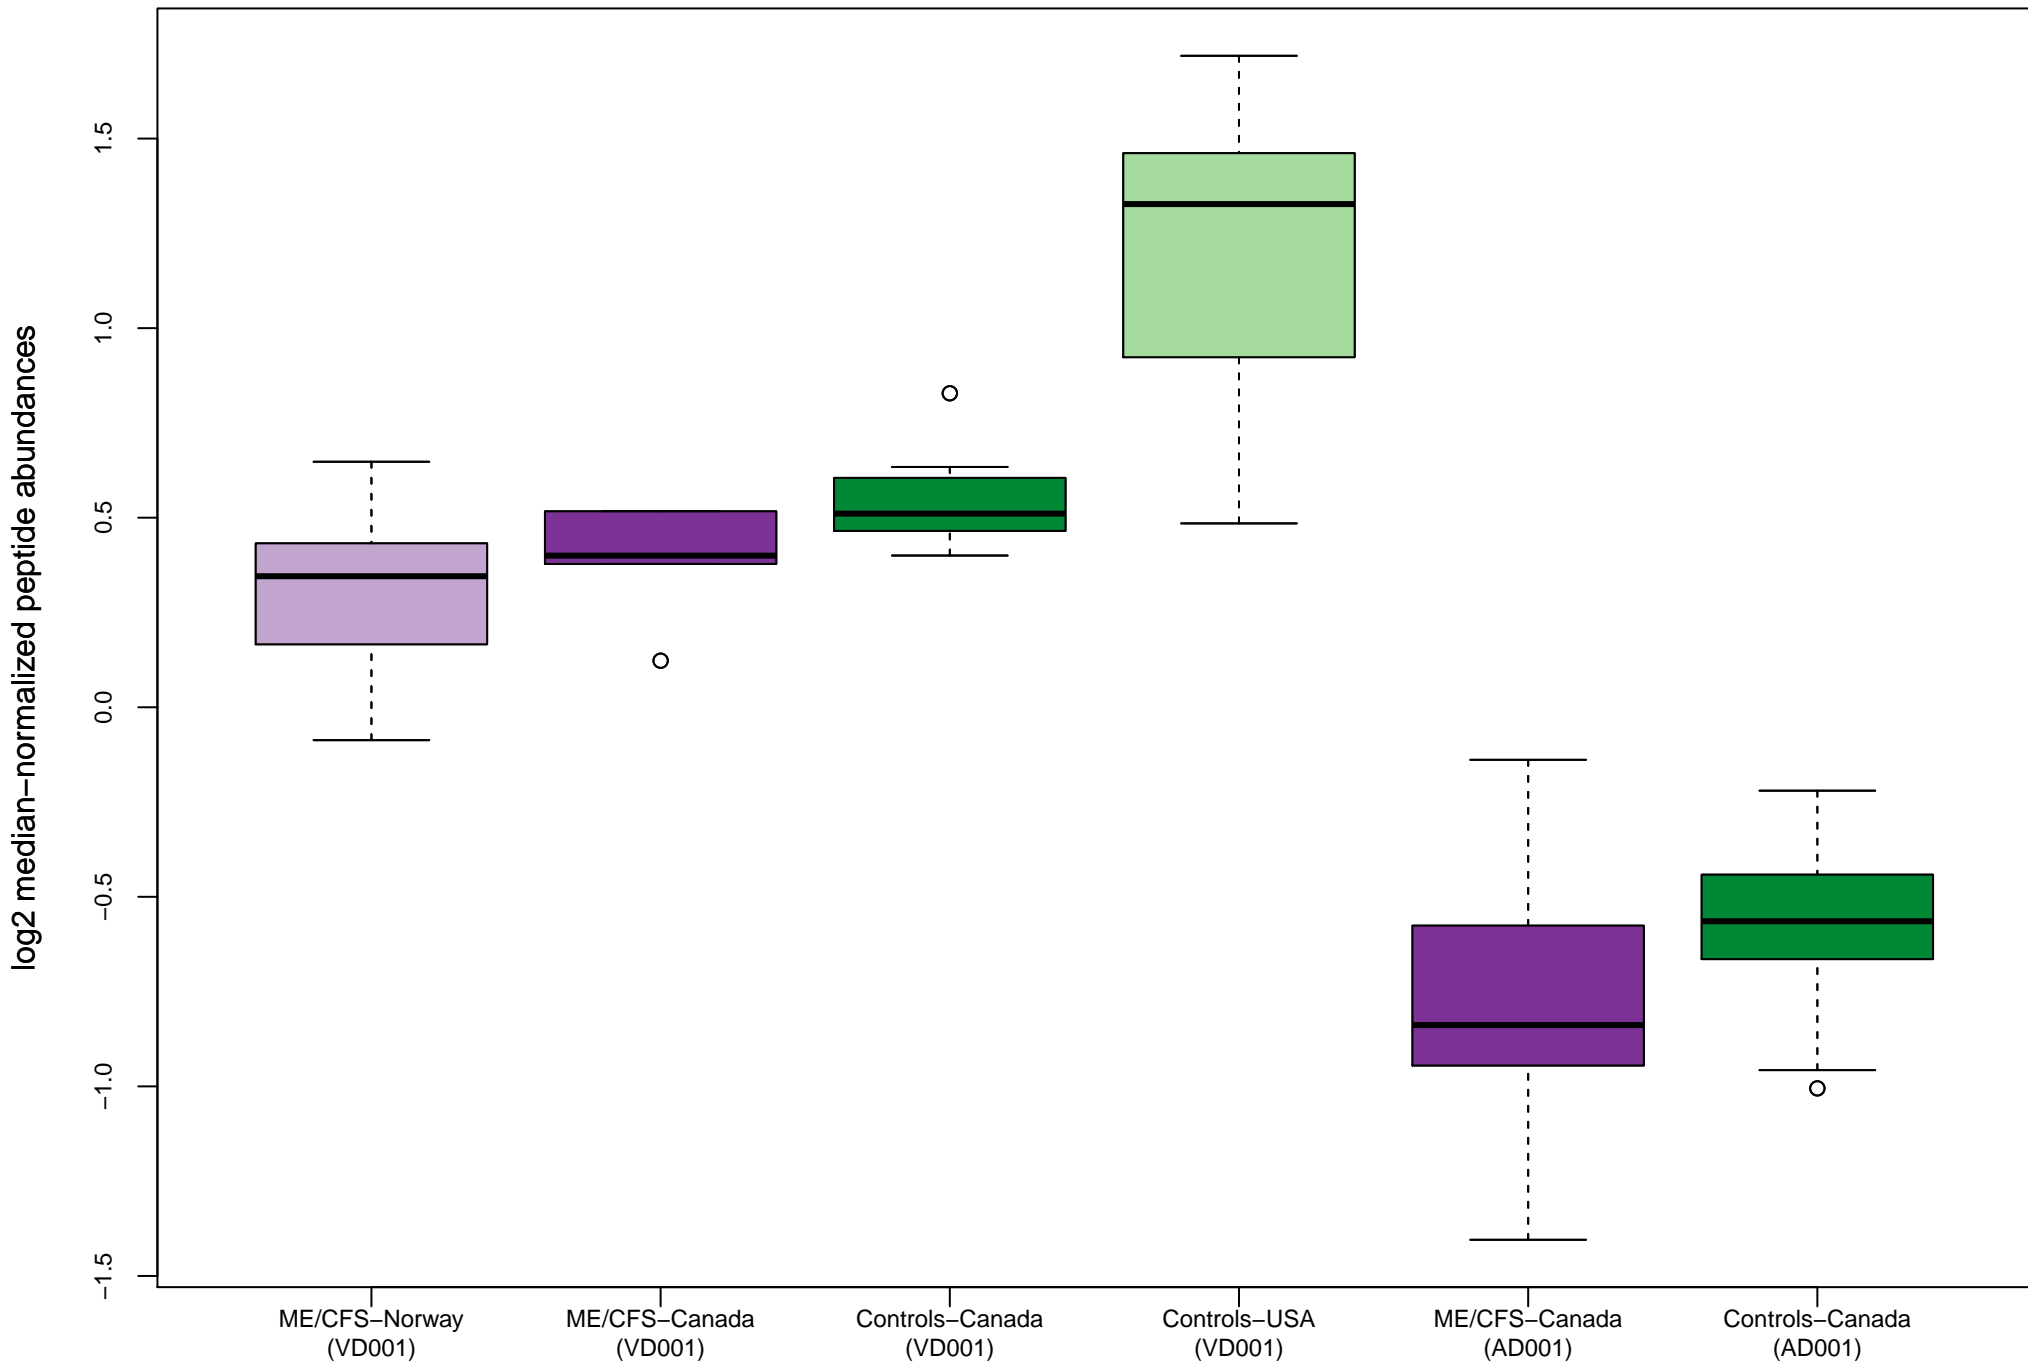

# YRVLPAGPVLGS

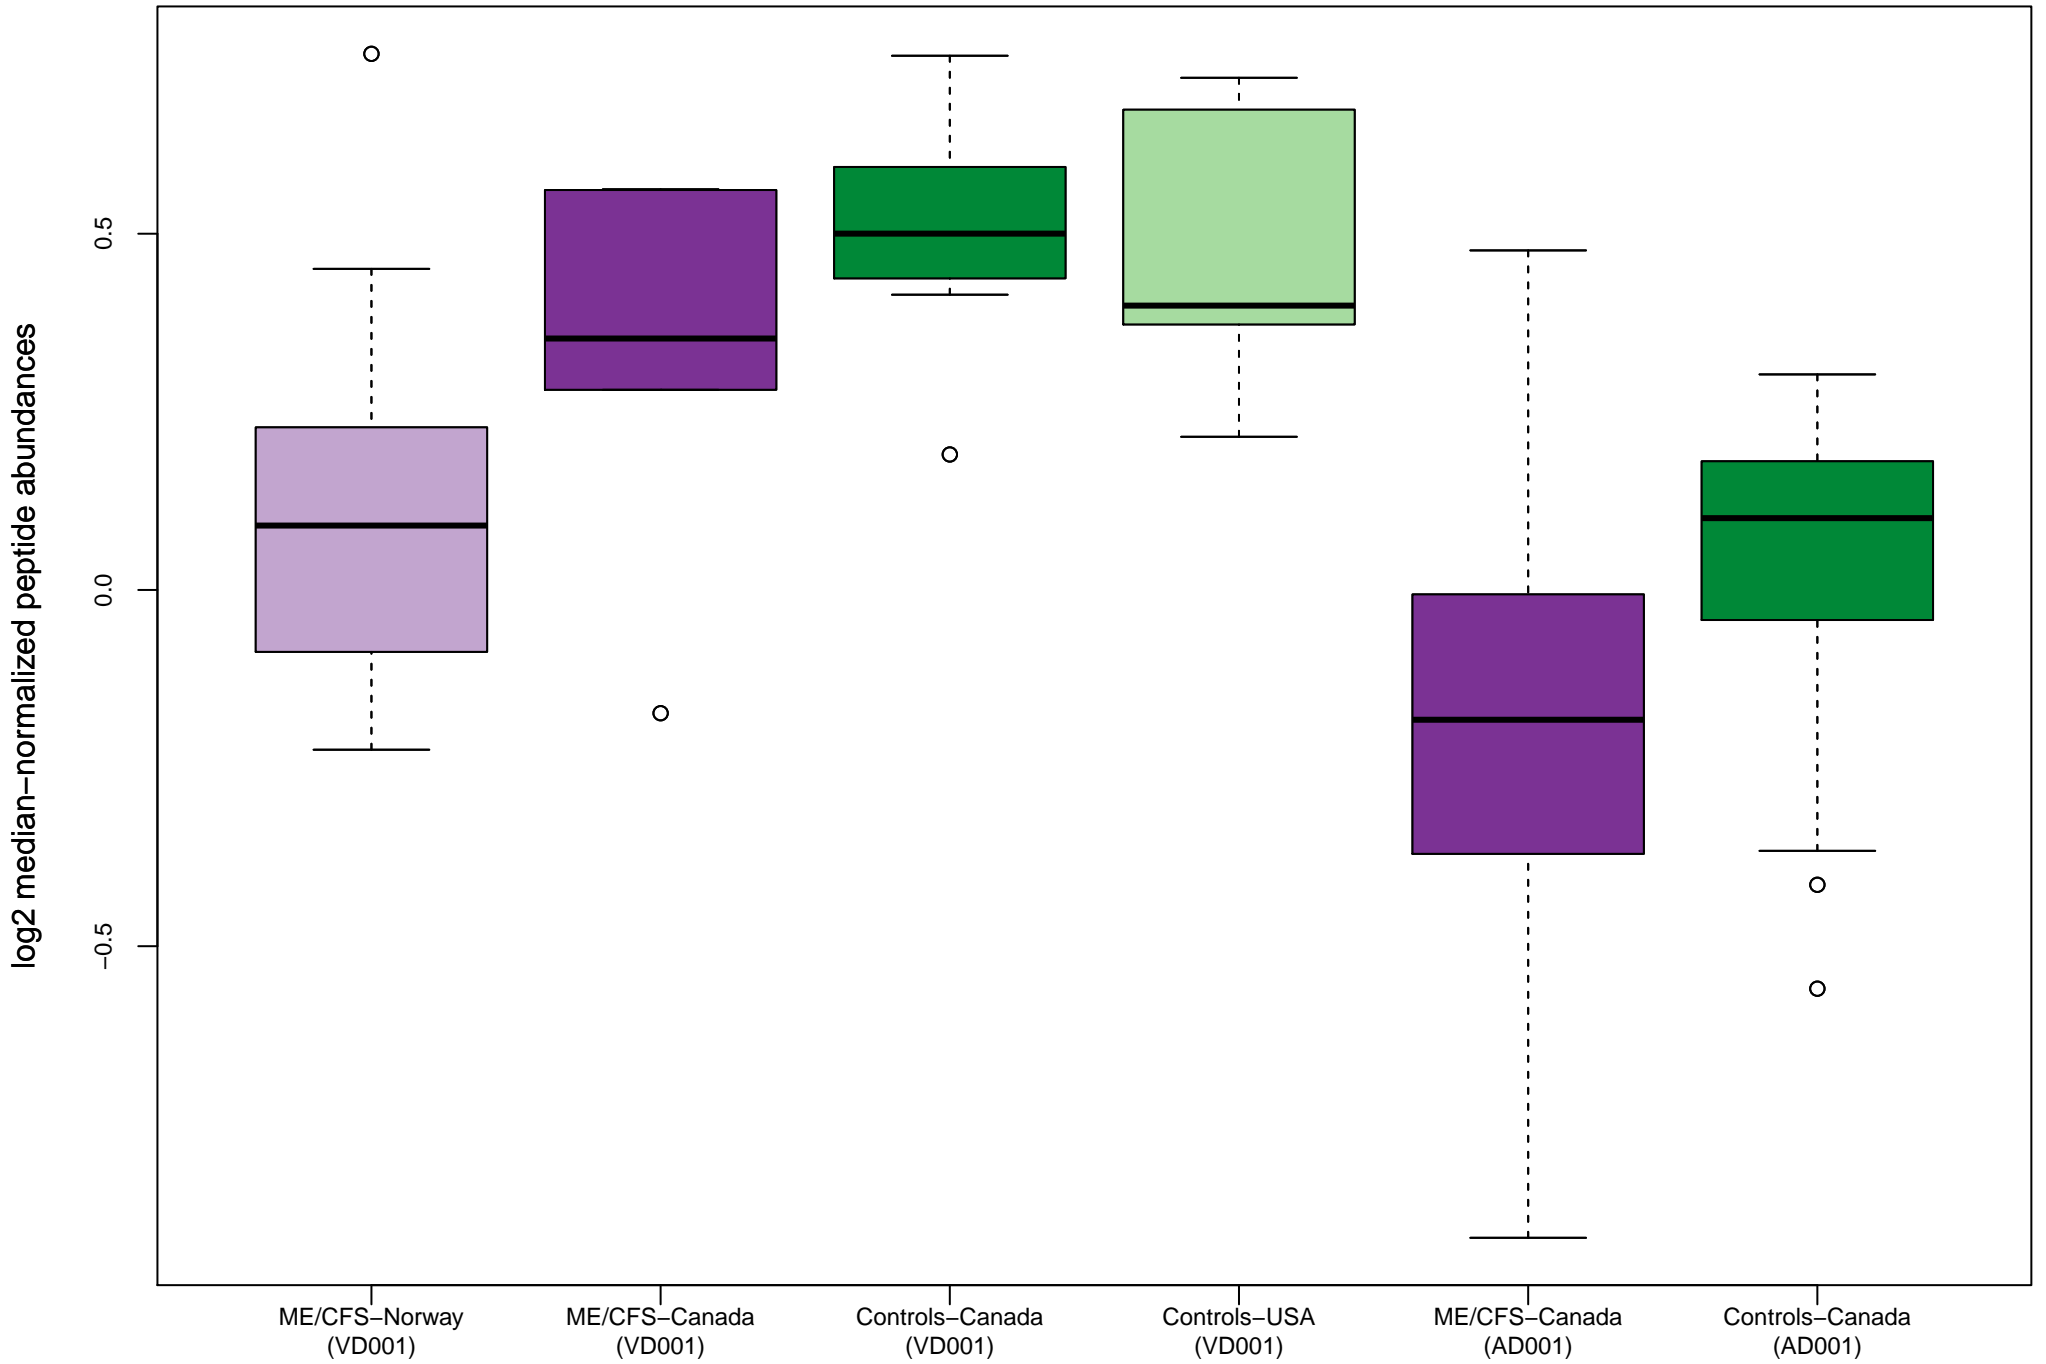

# YRYQYVARWNAS

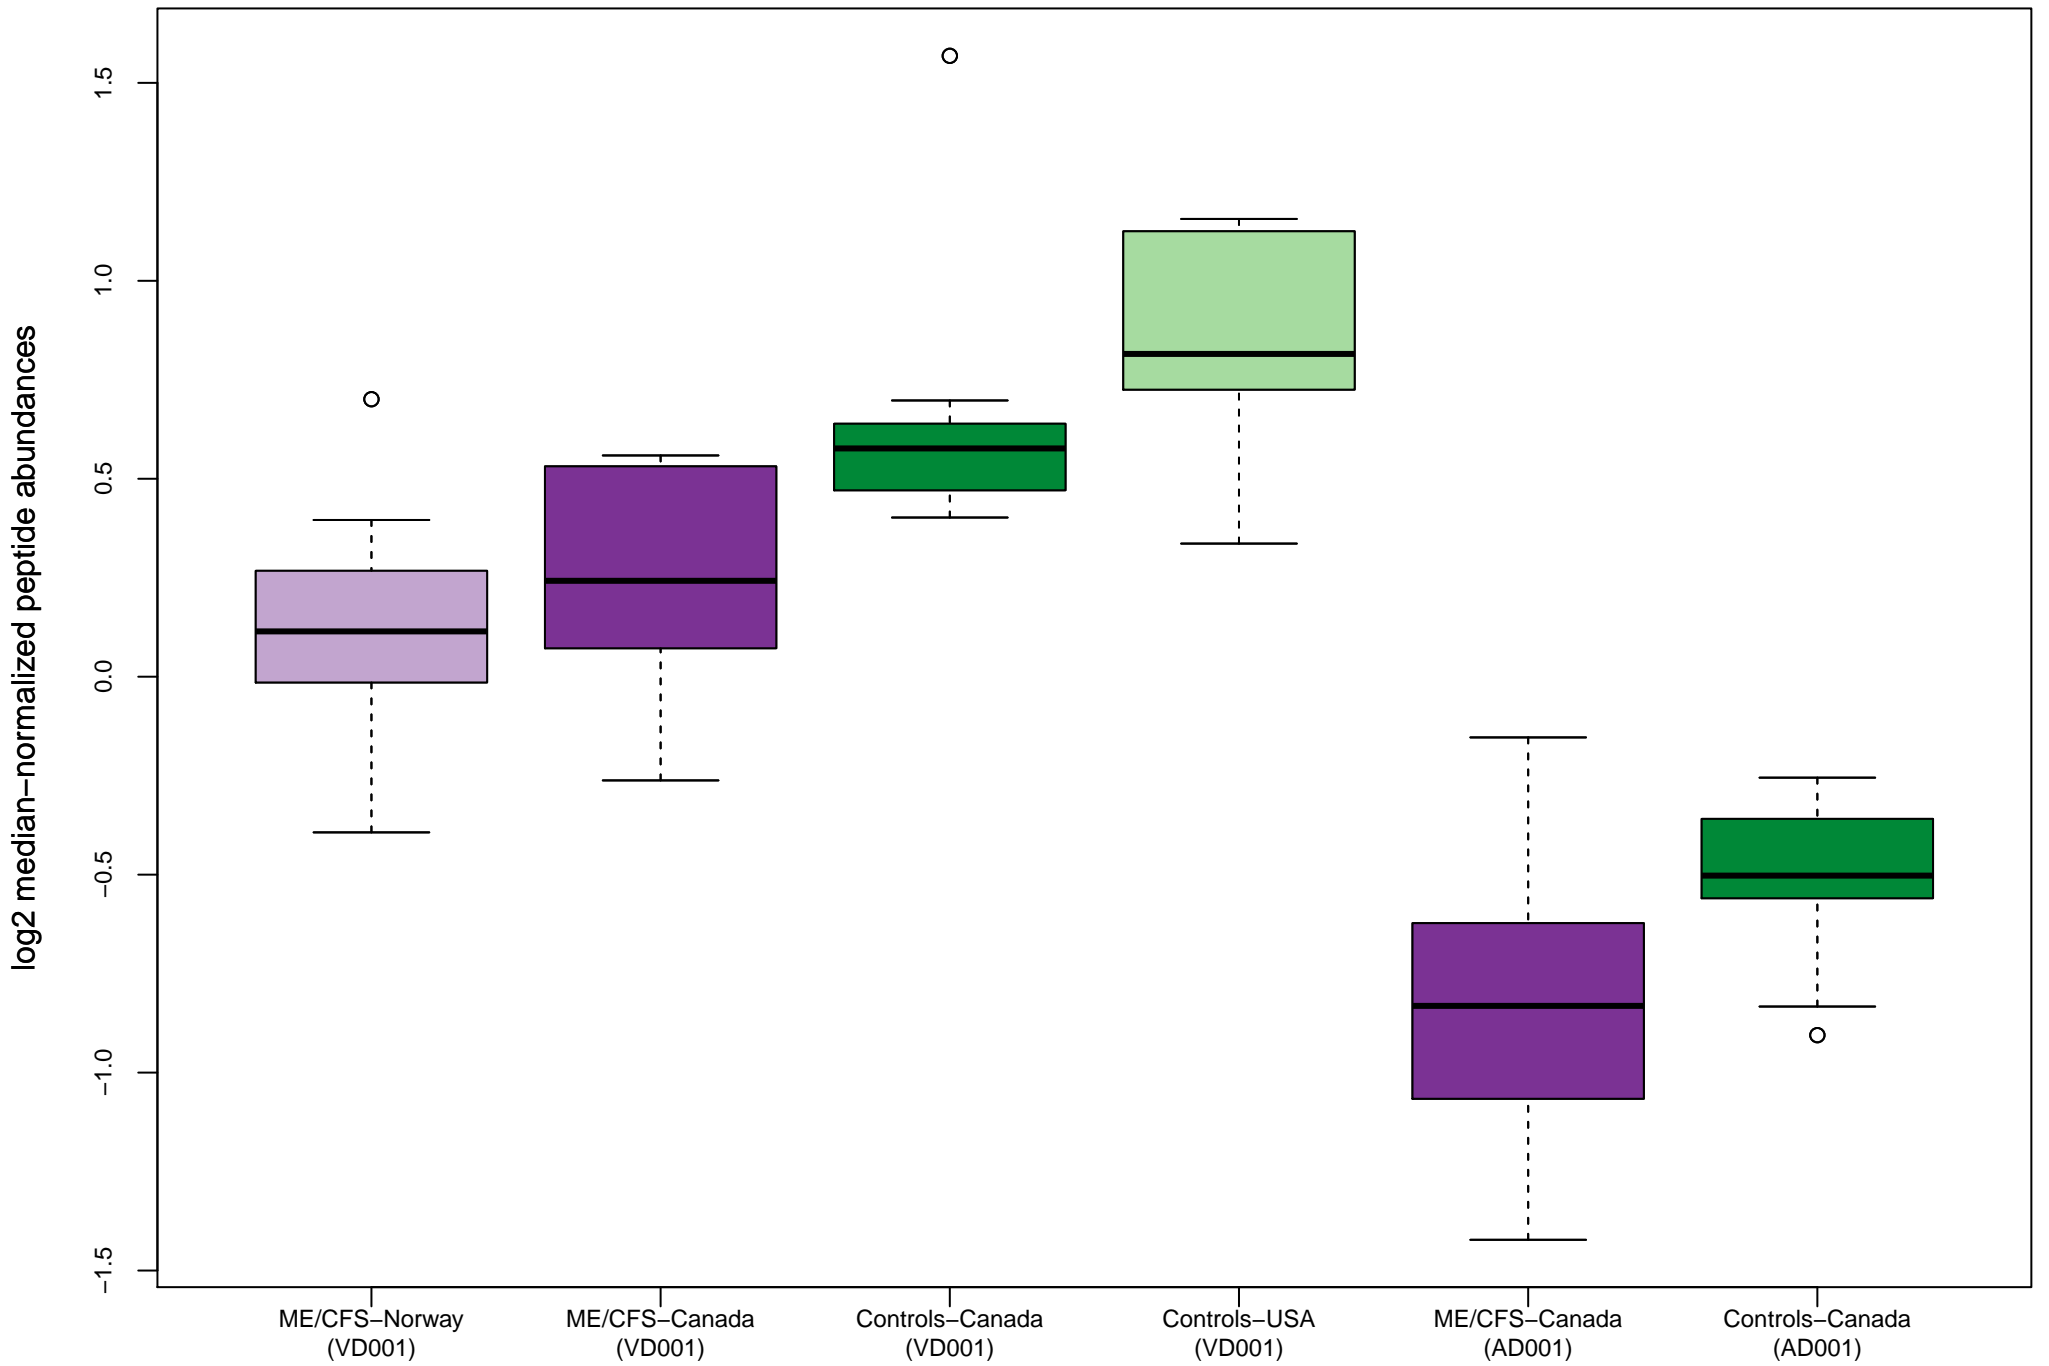

# YRYWELRWKLGS

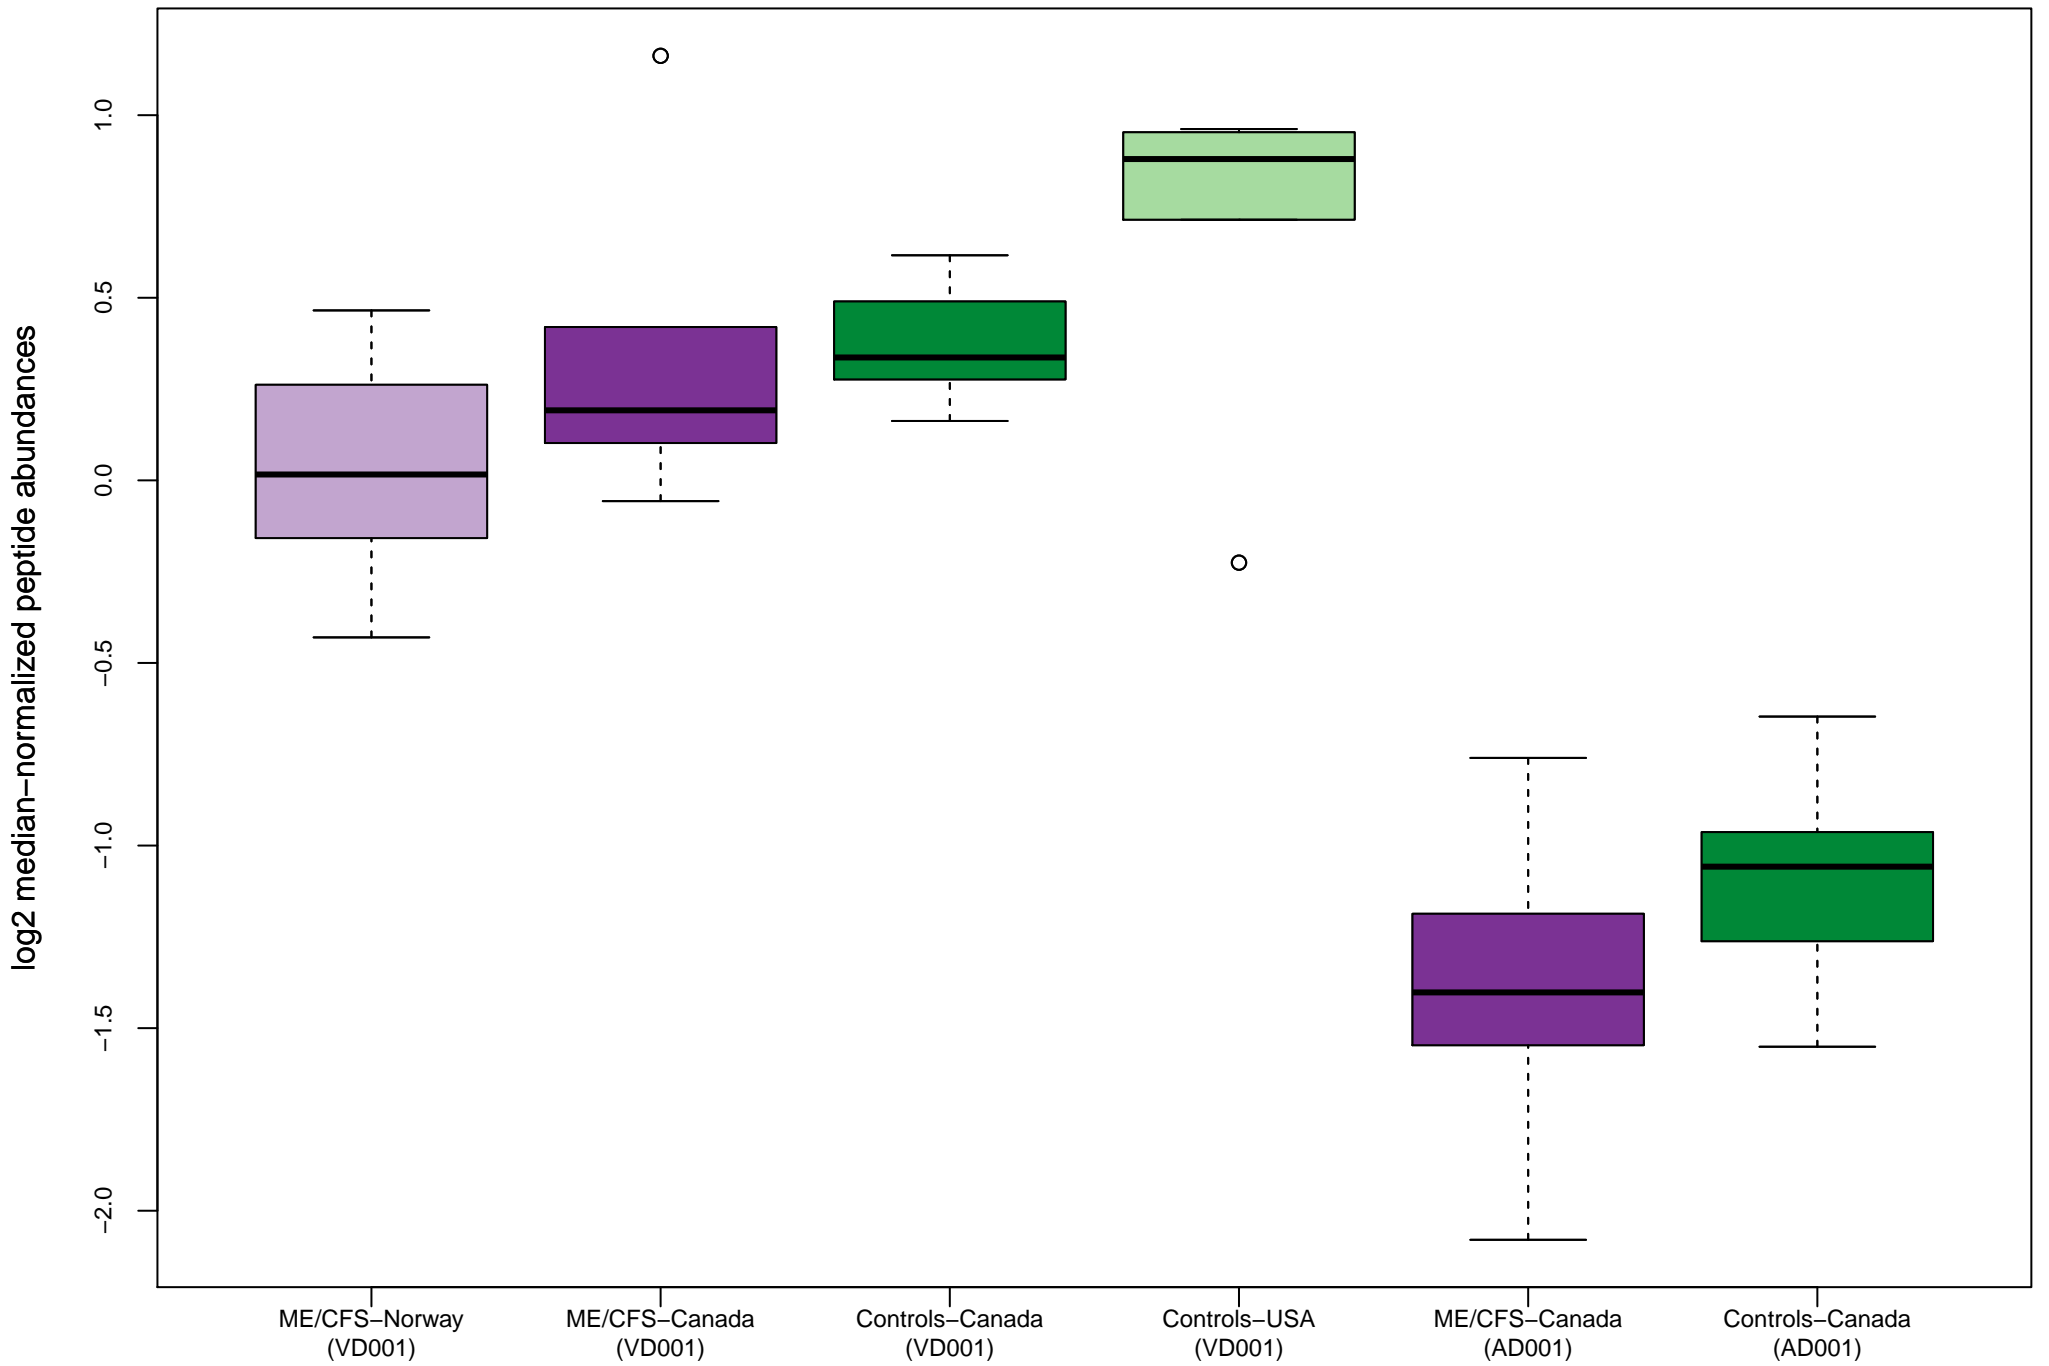

YSPKLFKYWDAL

log2 median-normalized peptide abundances

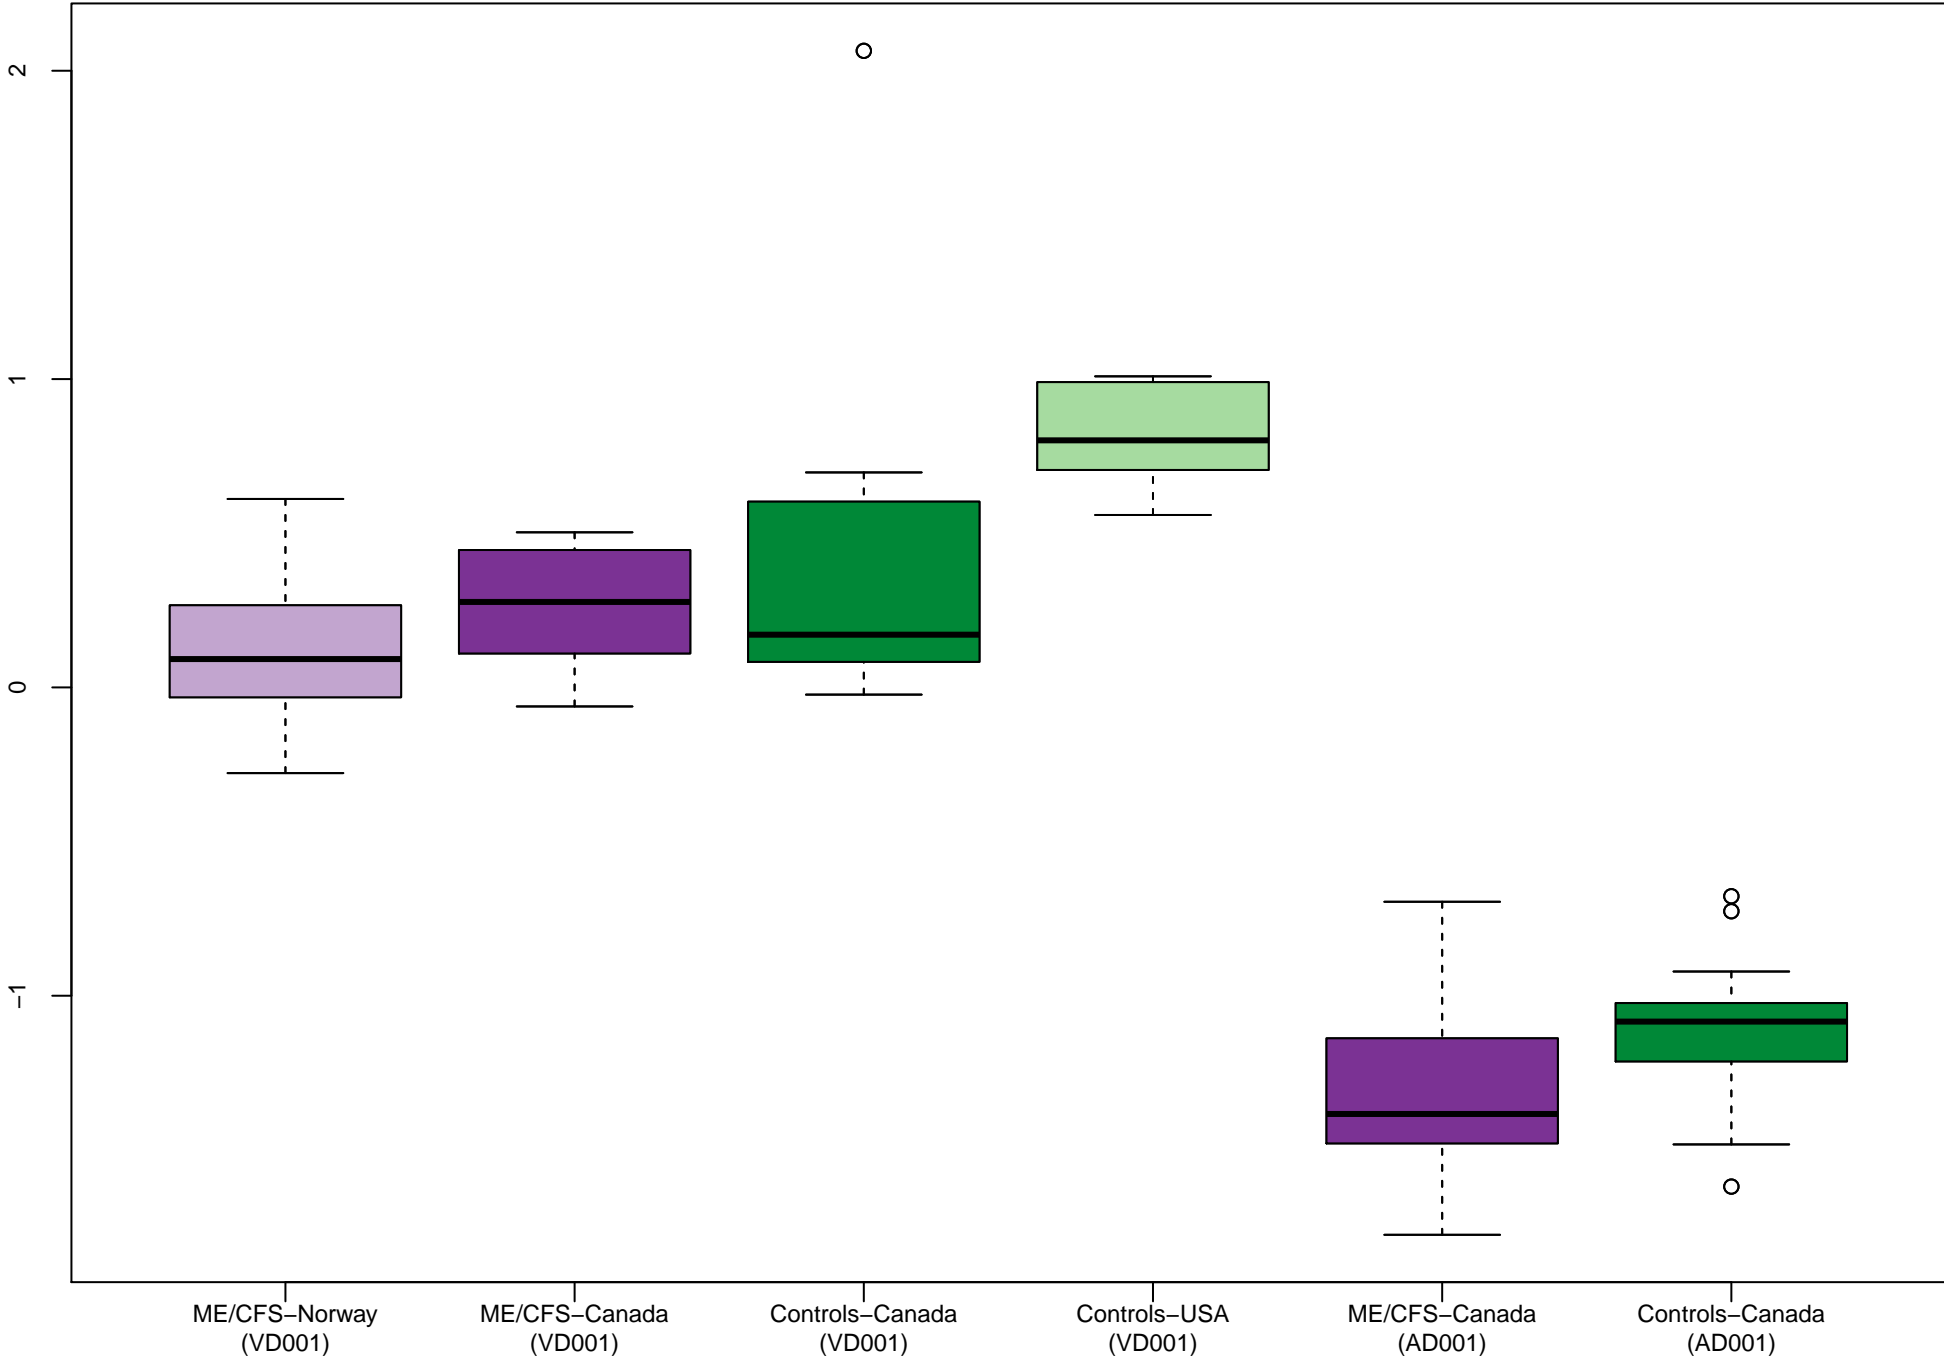

# YVNPARLSVALS

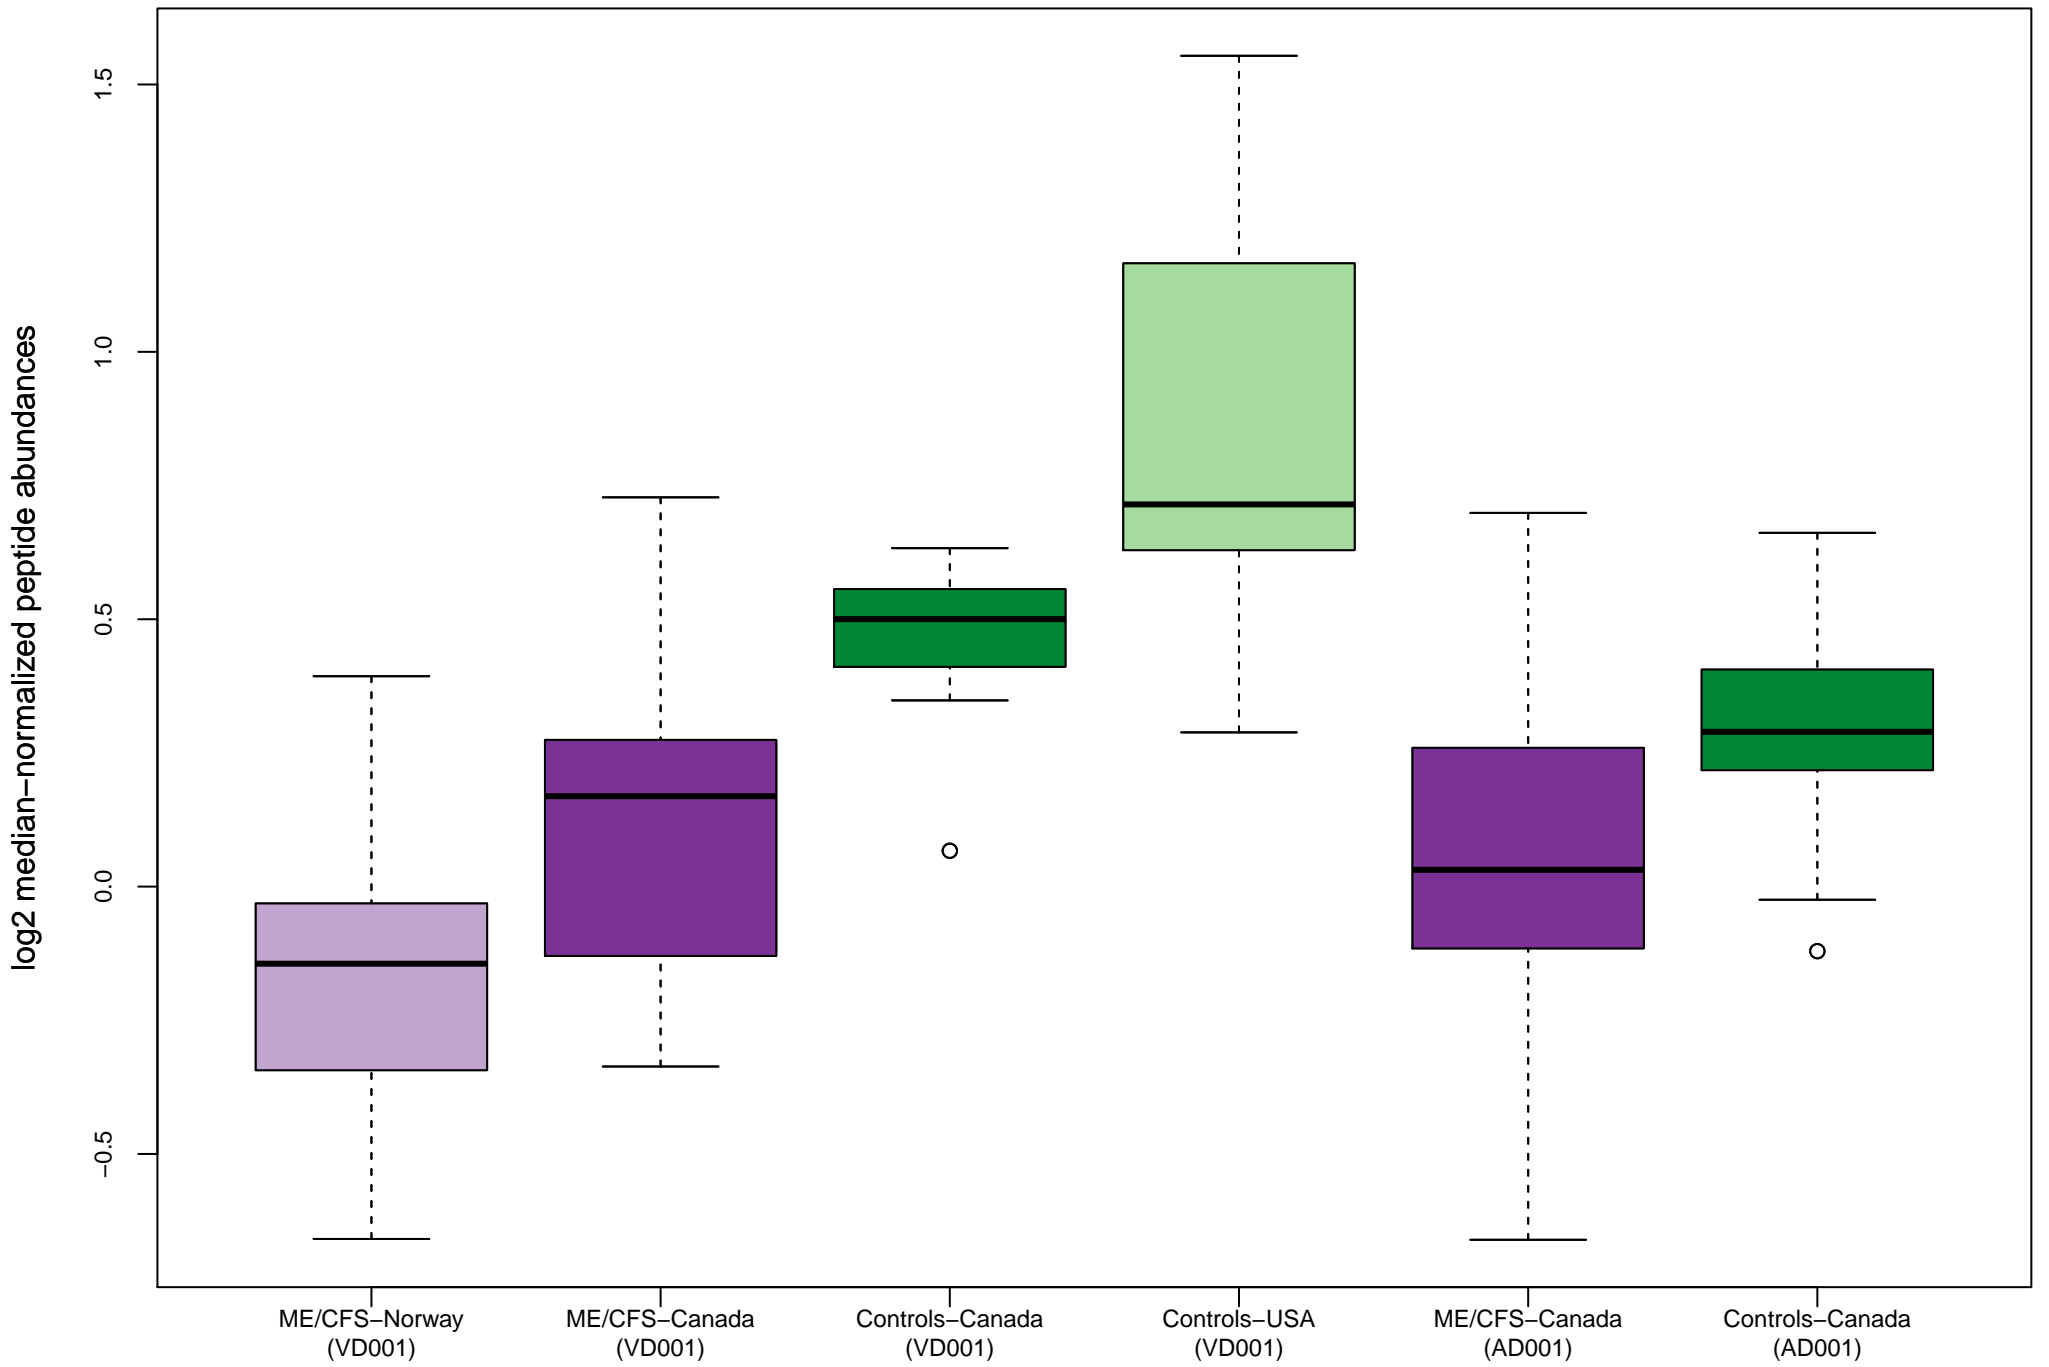

# YVRPYHVGQFLR

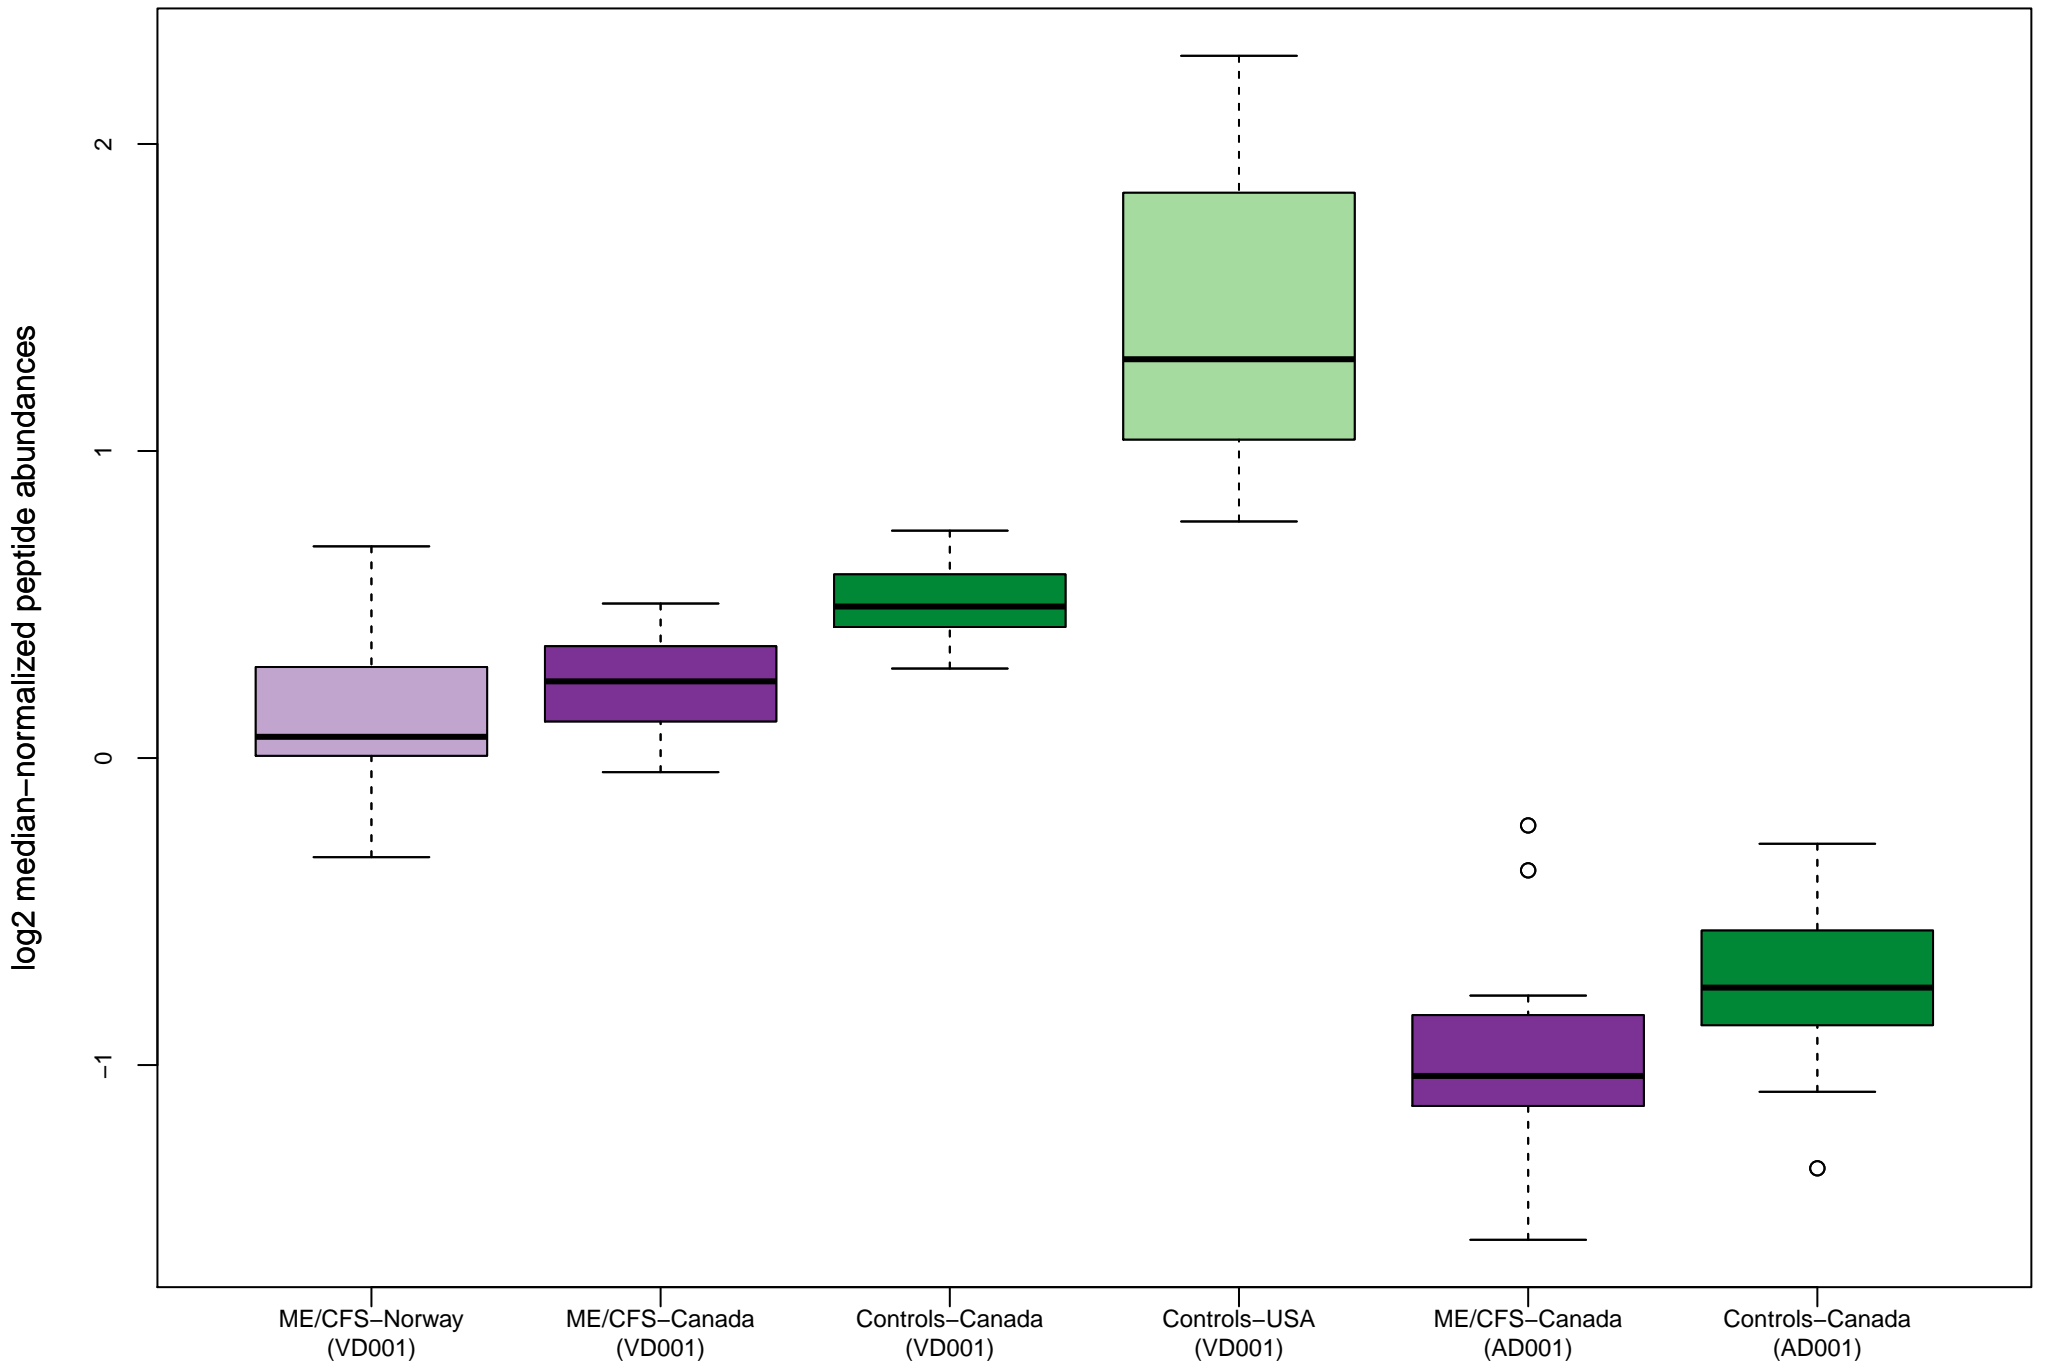

# YVNFRLSGVLG

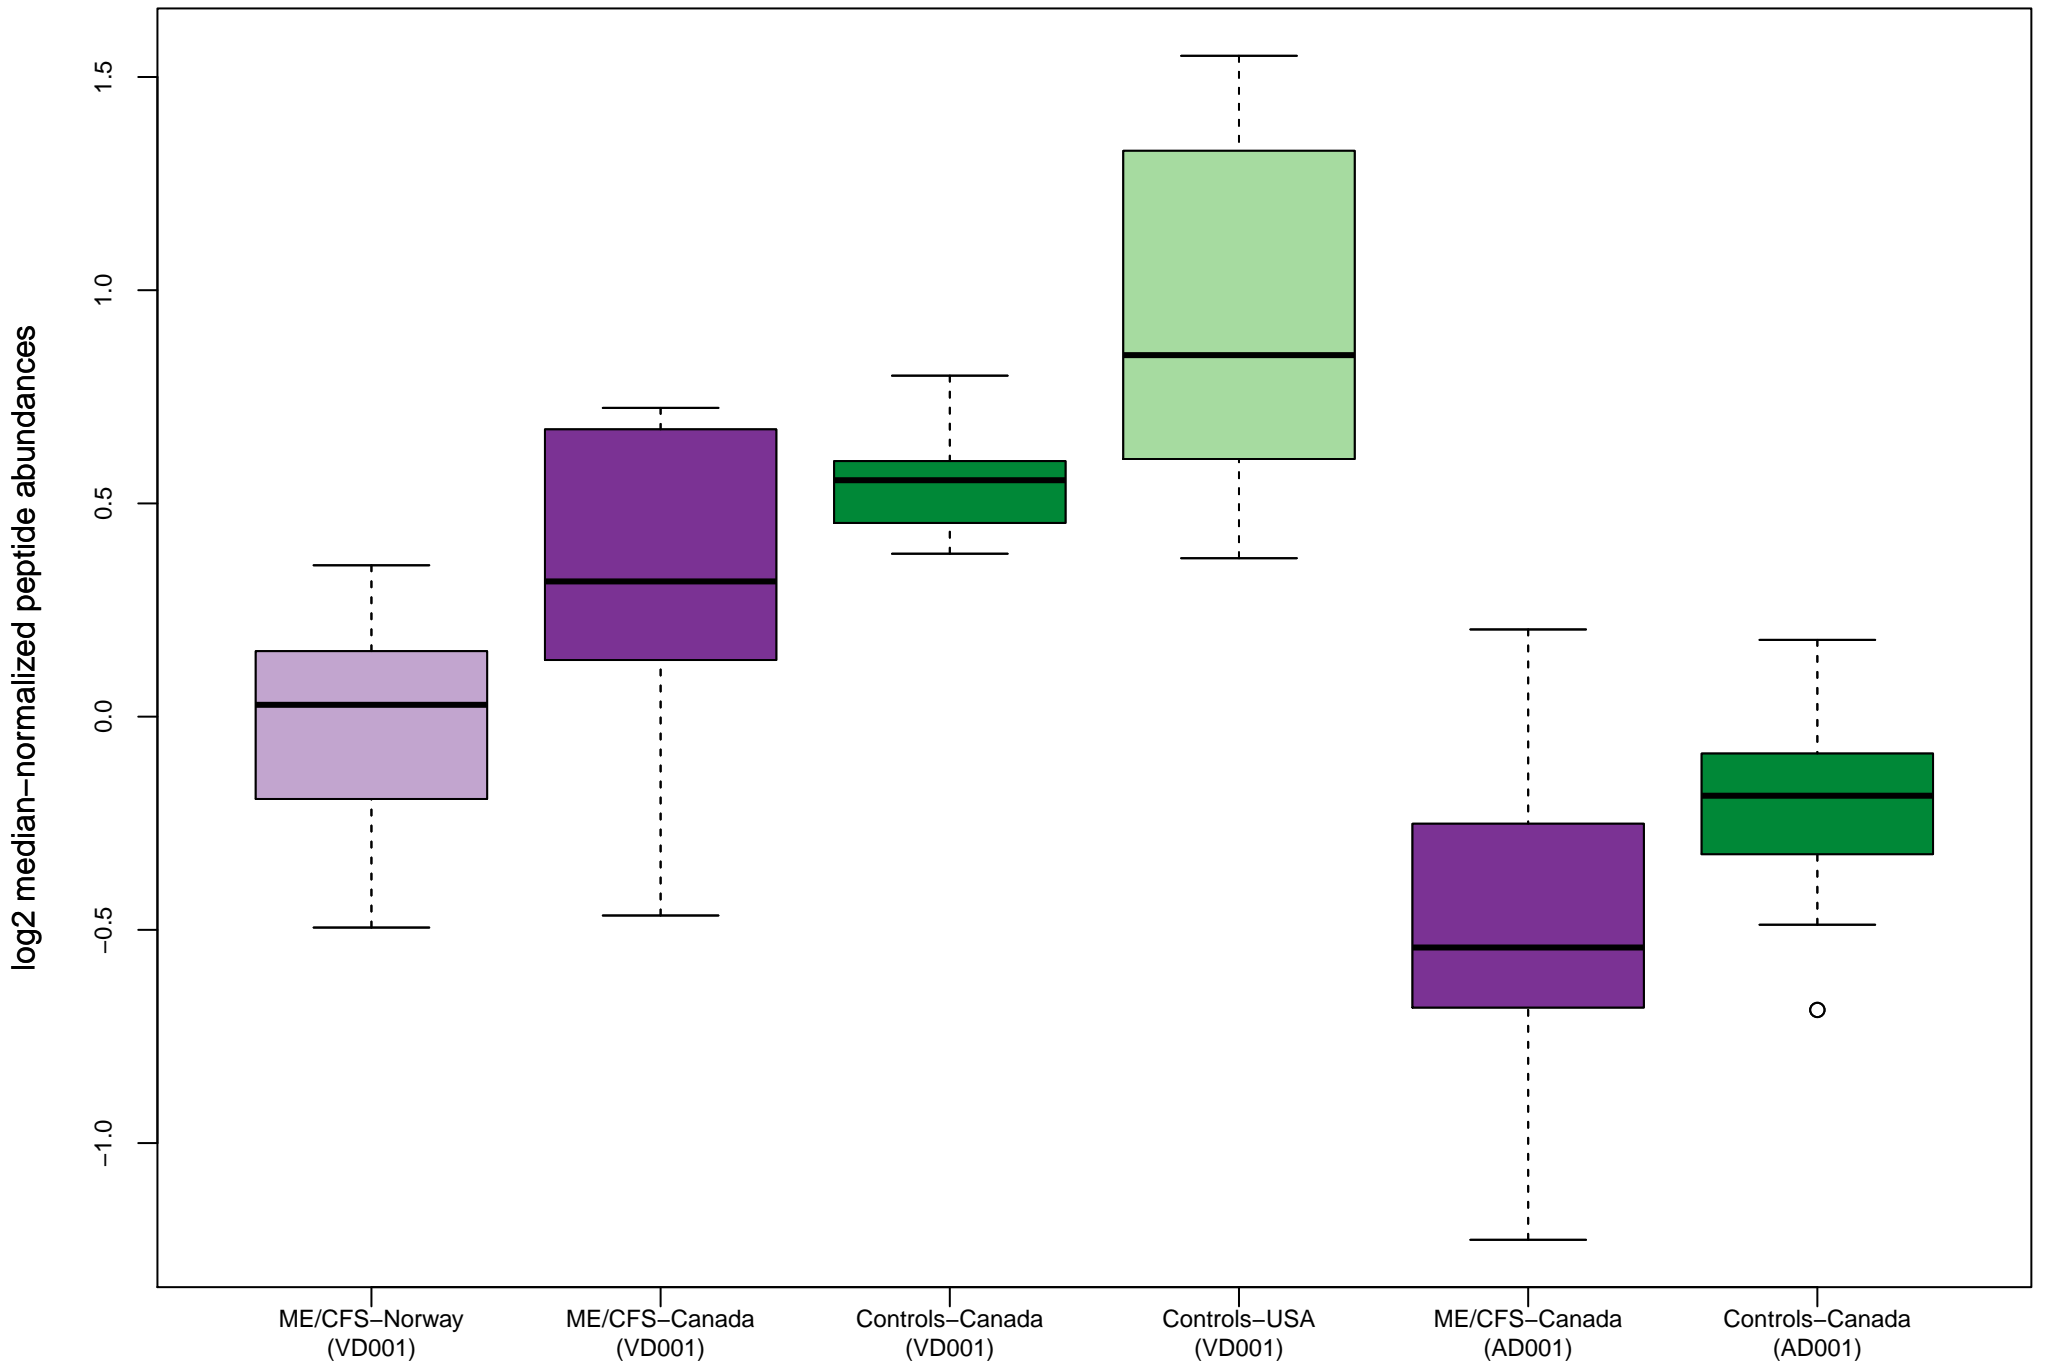



# YWKRFHVSGYWS

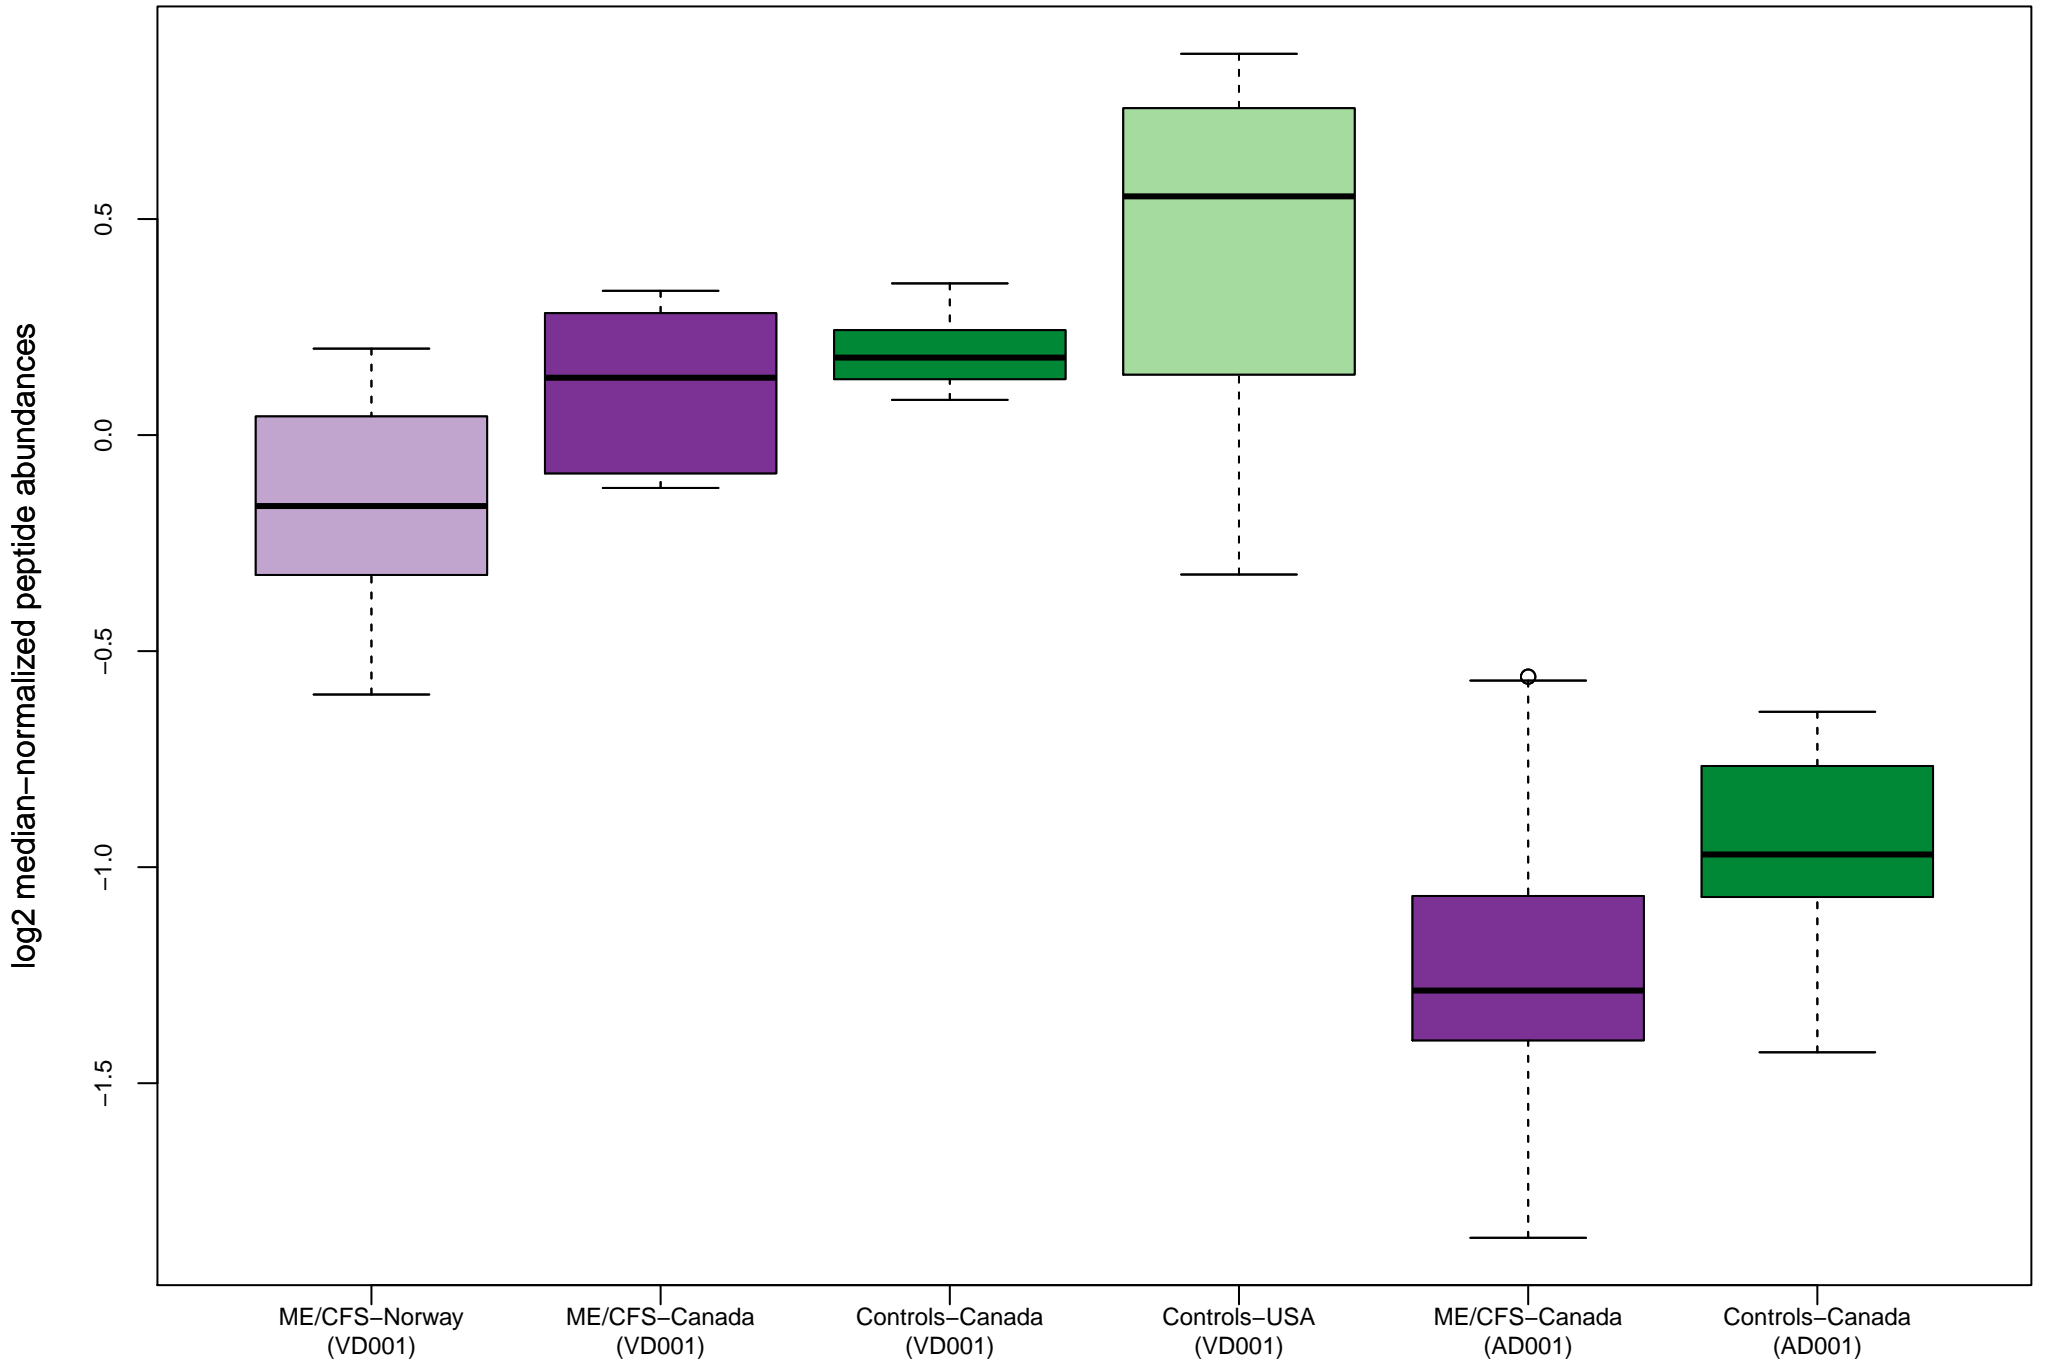

# YWLPPYLFRWKA

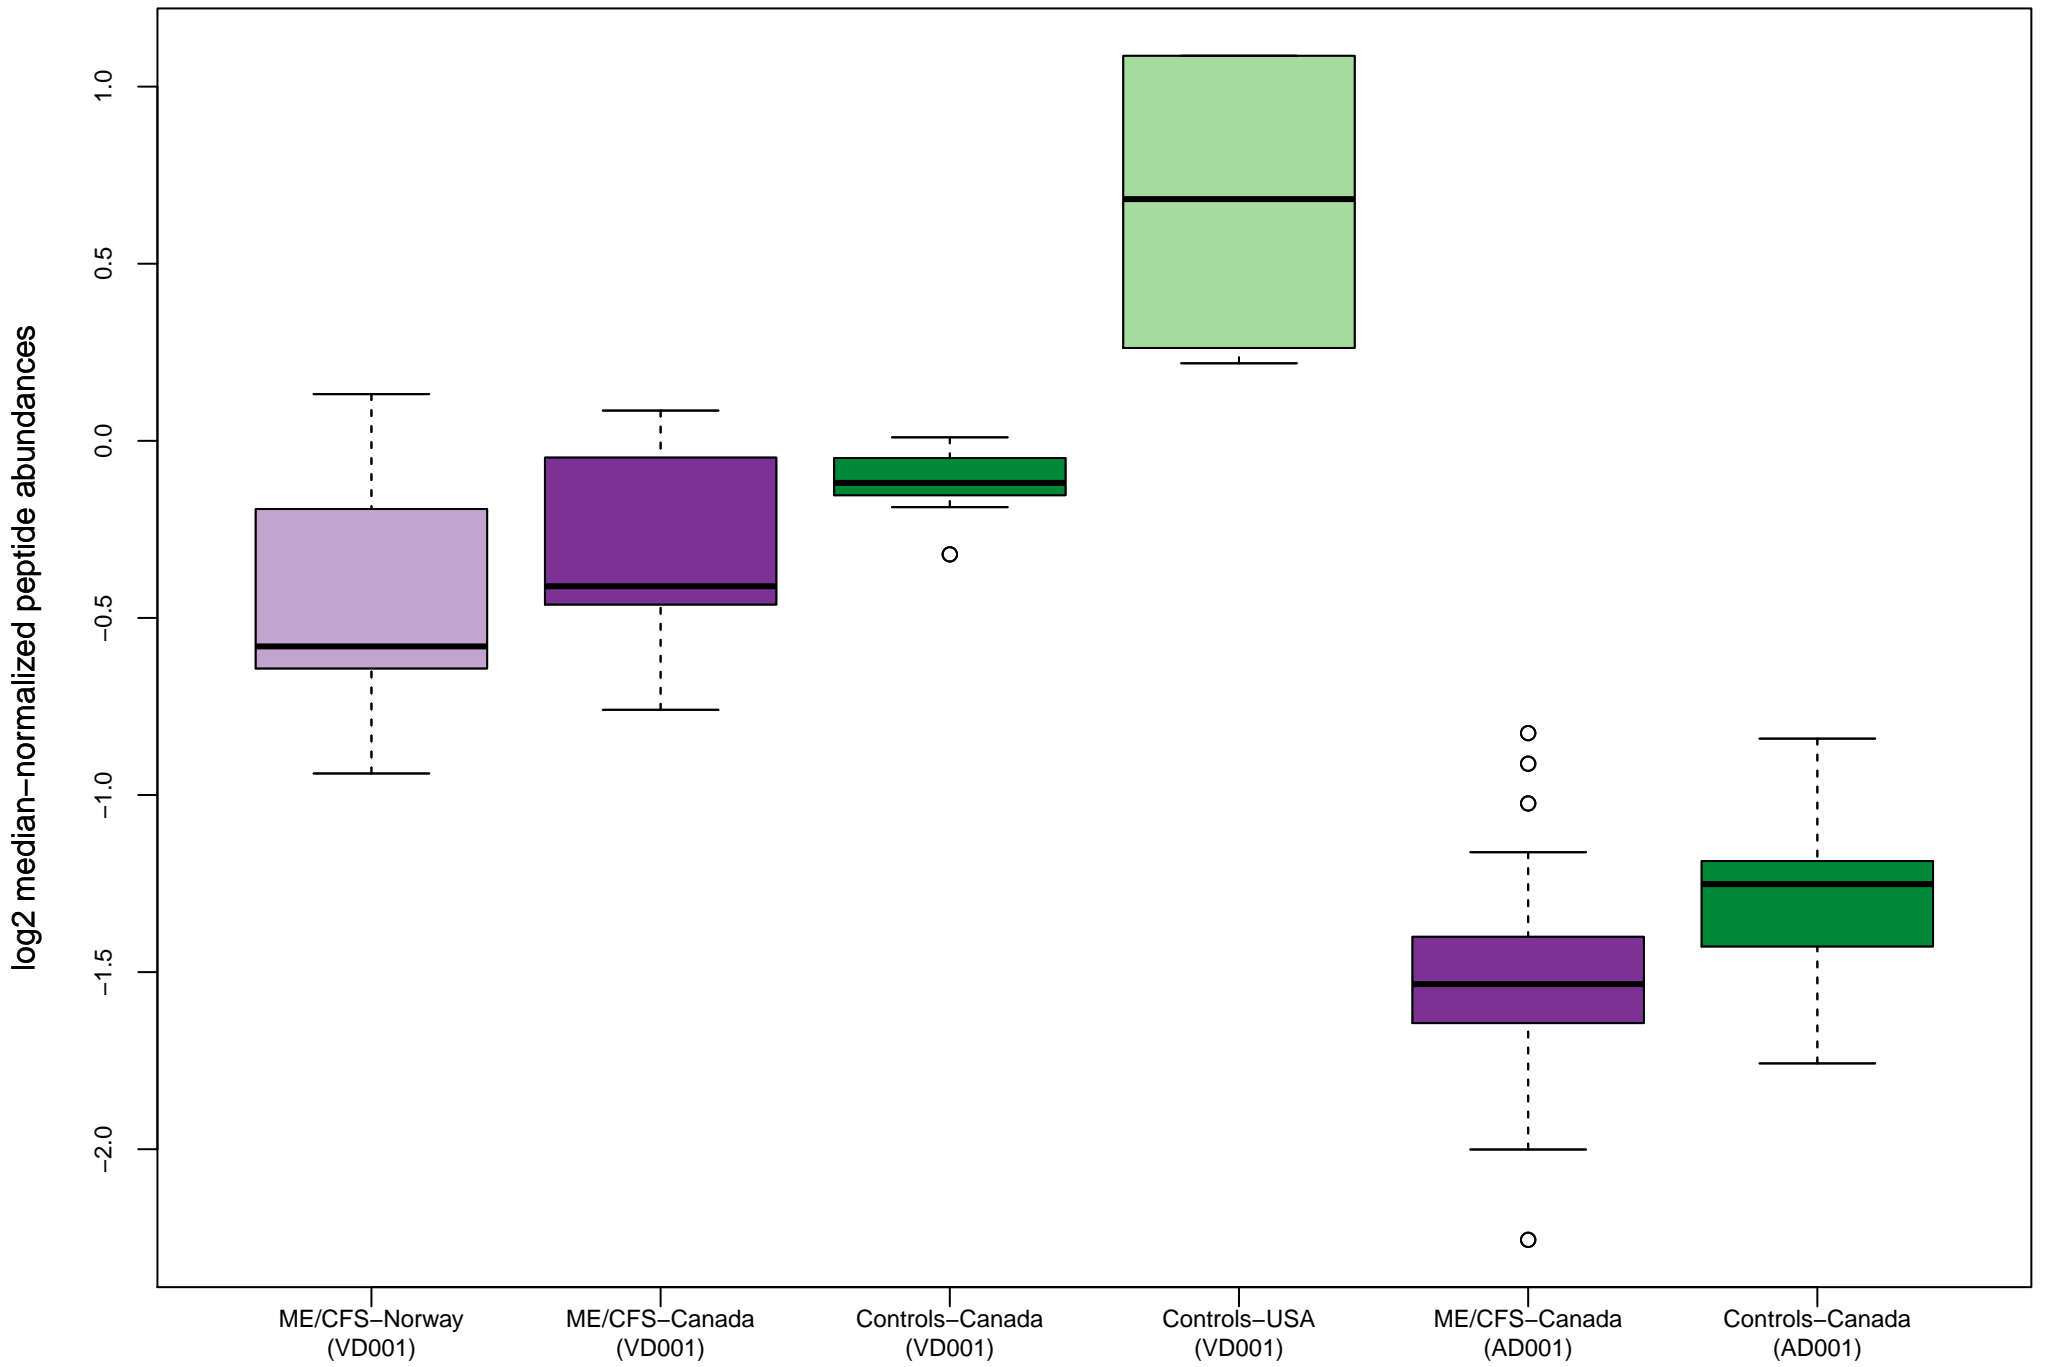

# YWRFLWKLSGAL

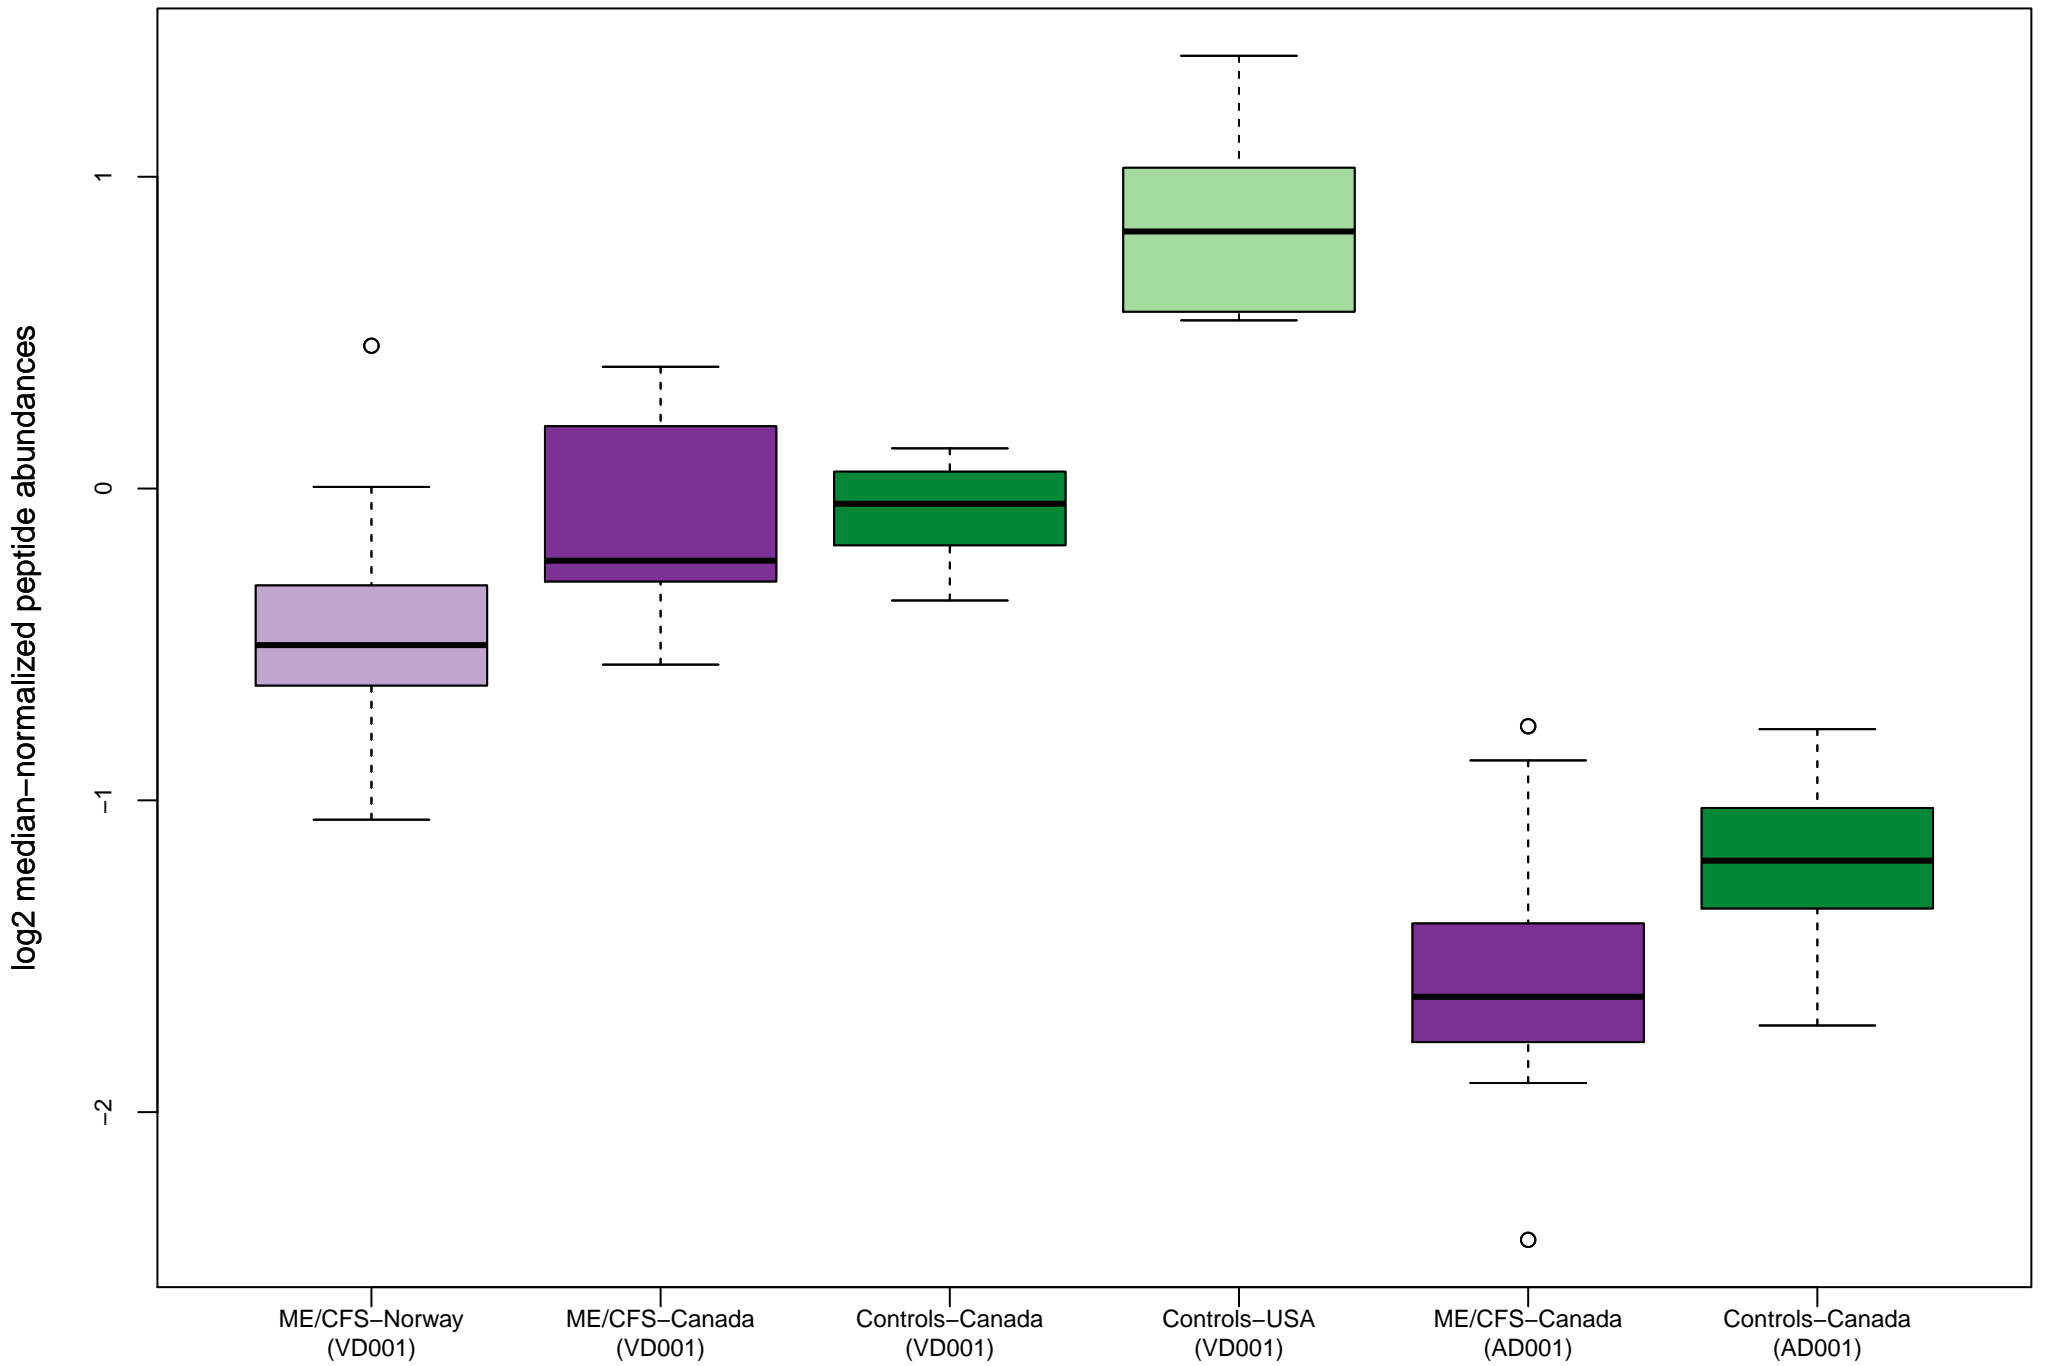

# YWRRRPYWVVLG

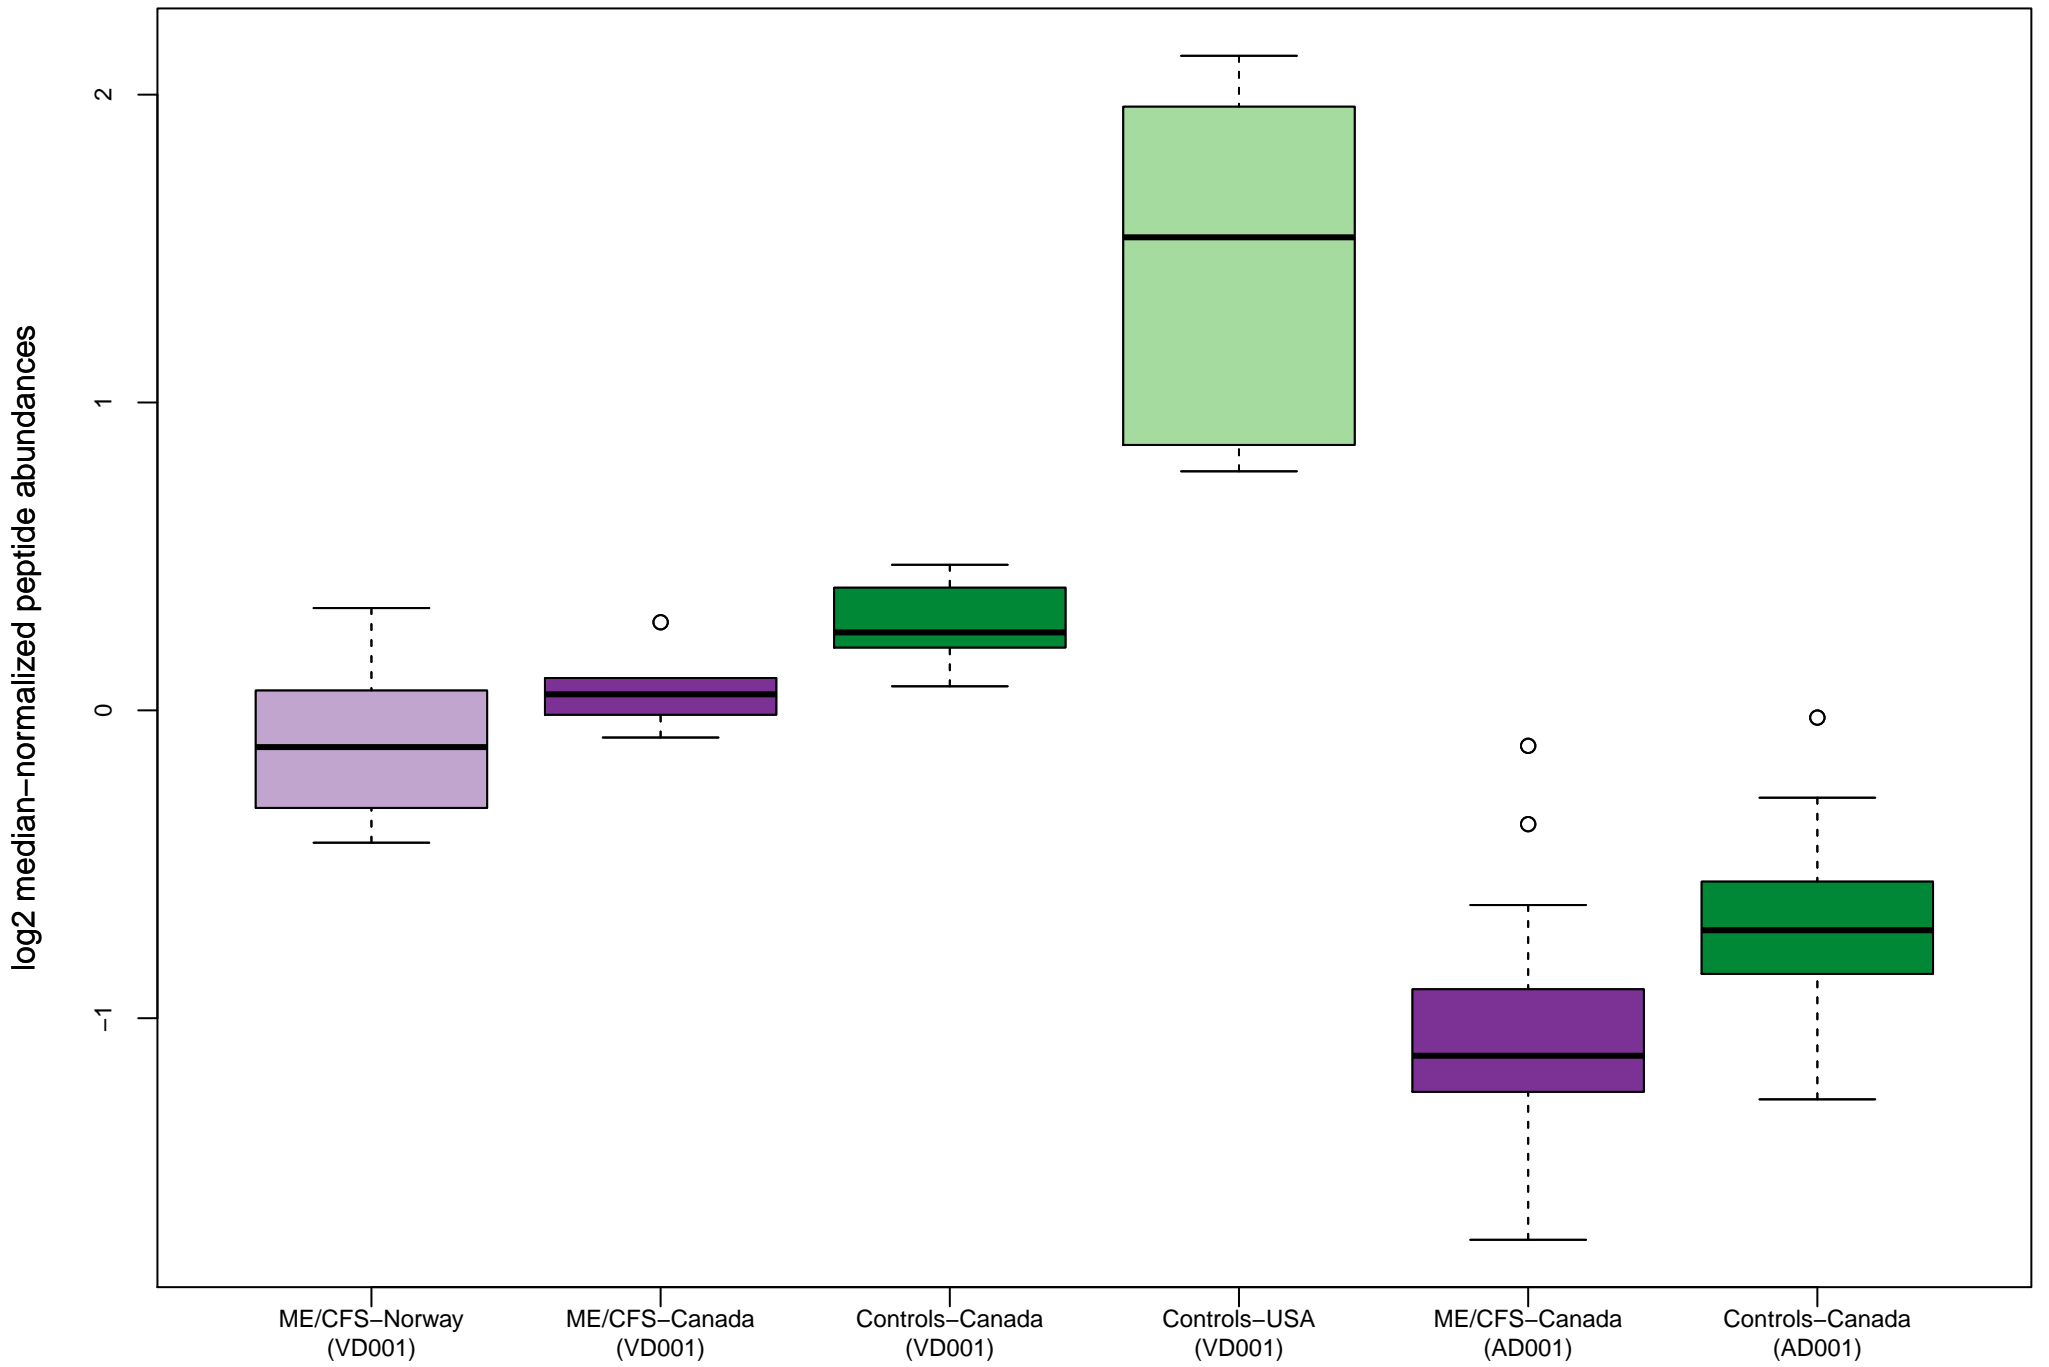

# YWVFNHRLFRSL

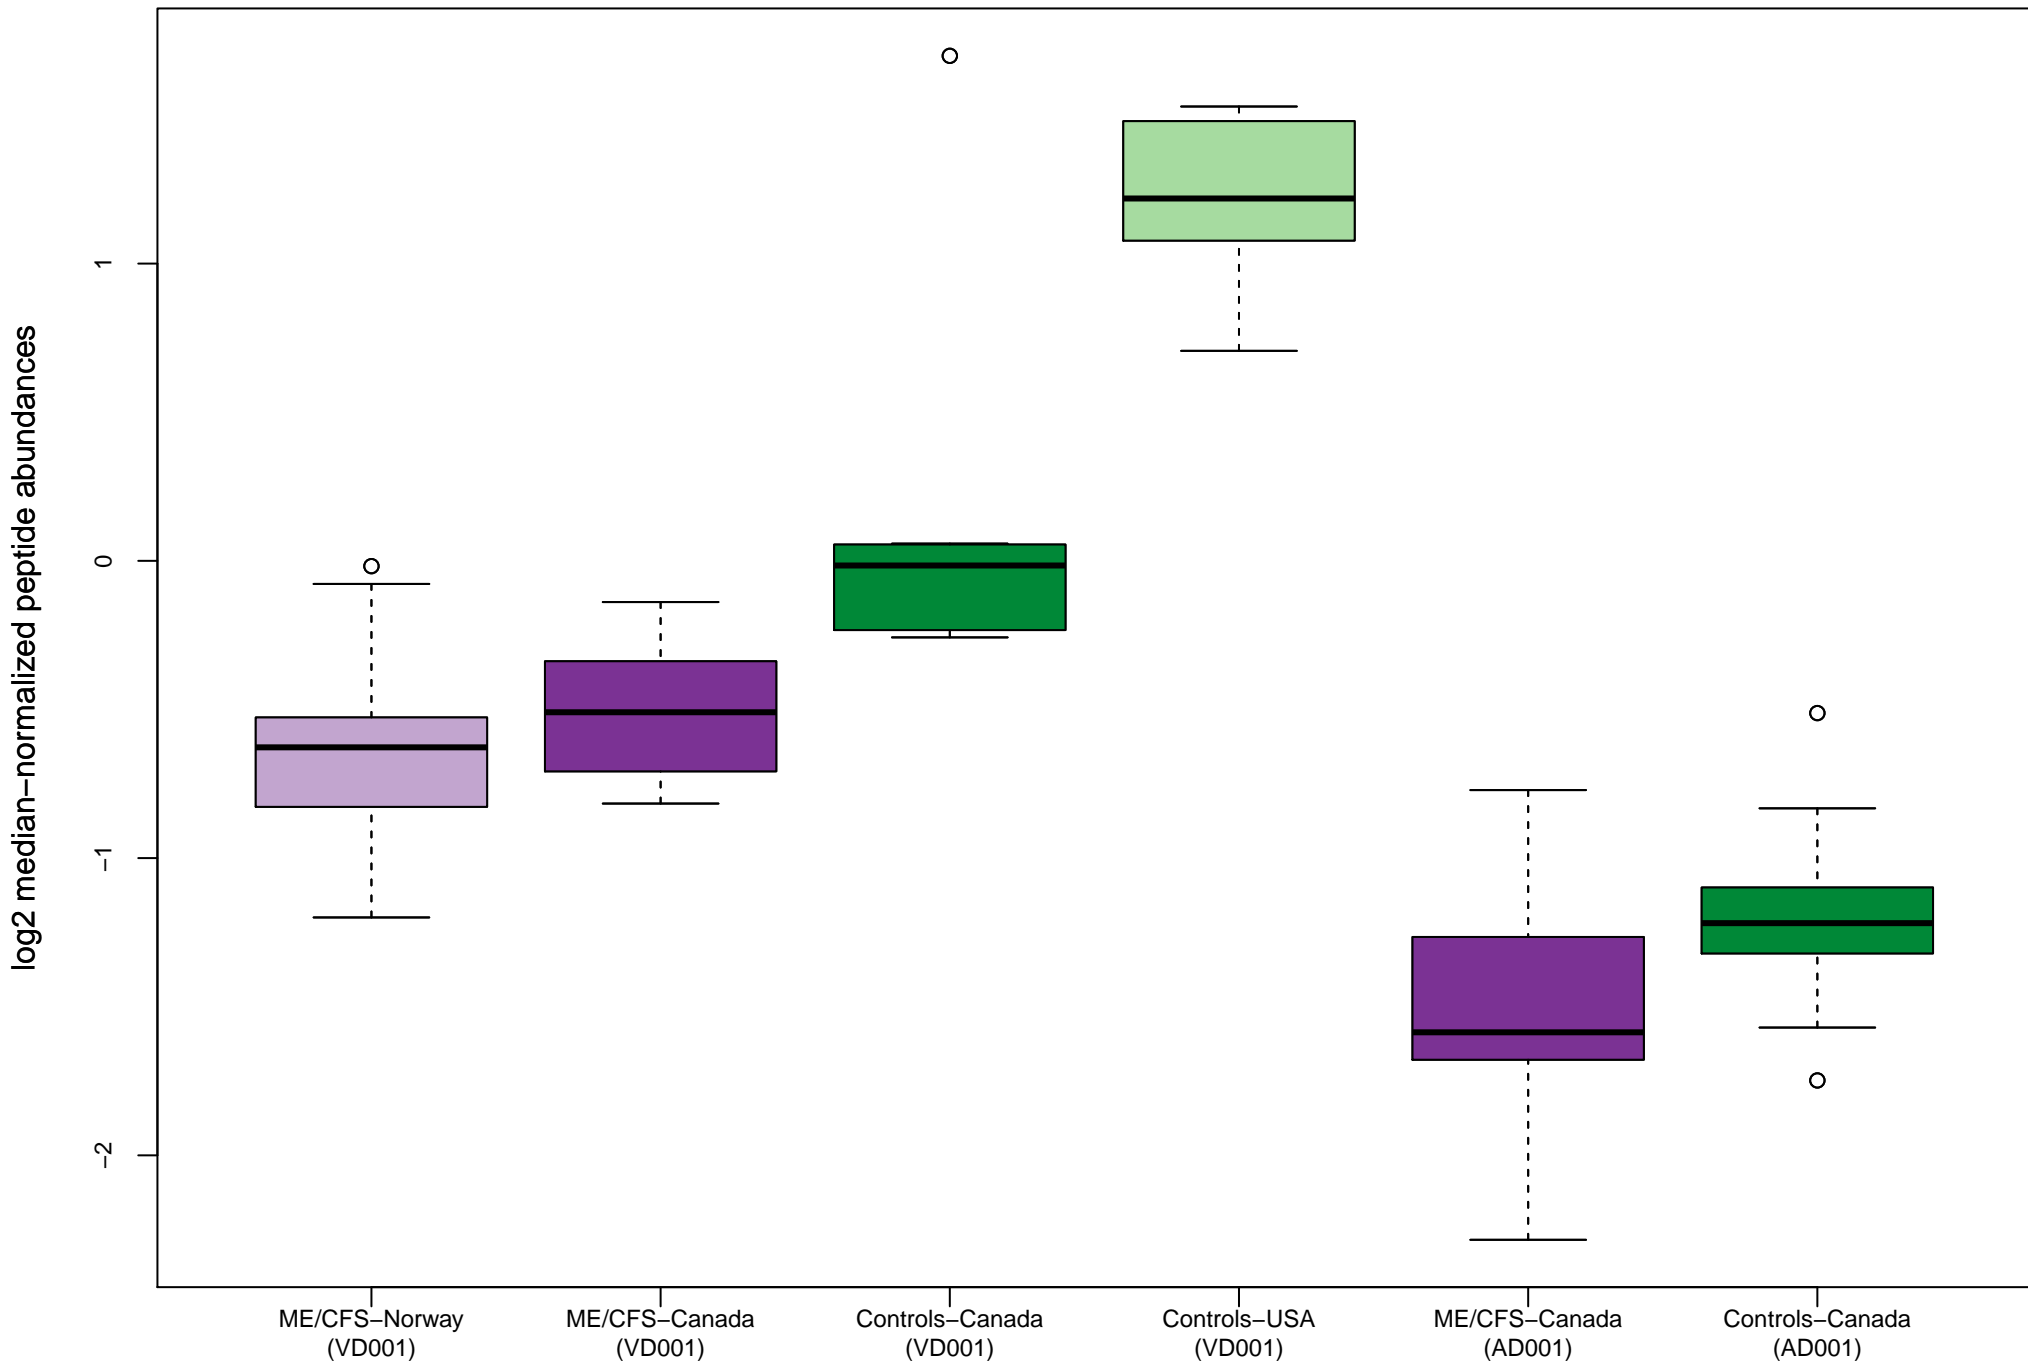

# YYKNFWKLGVLS

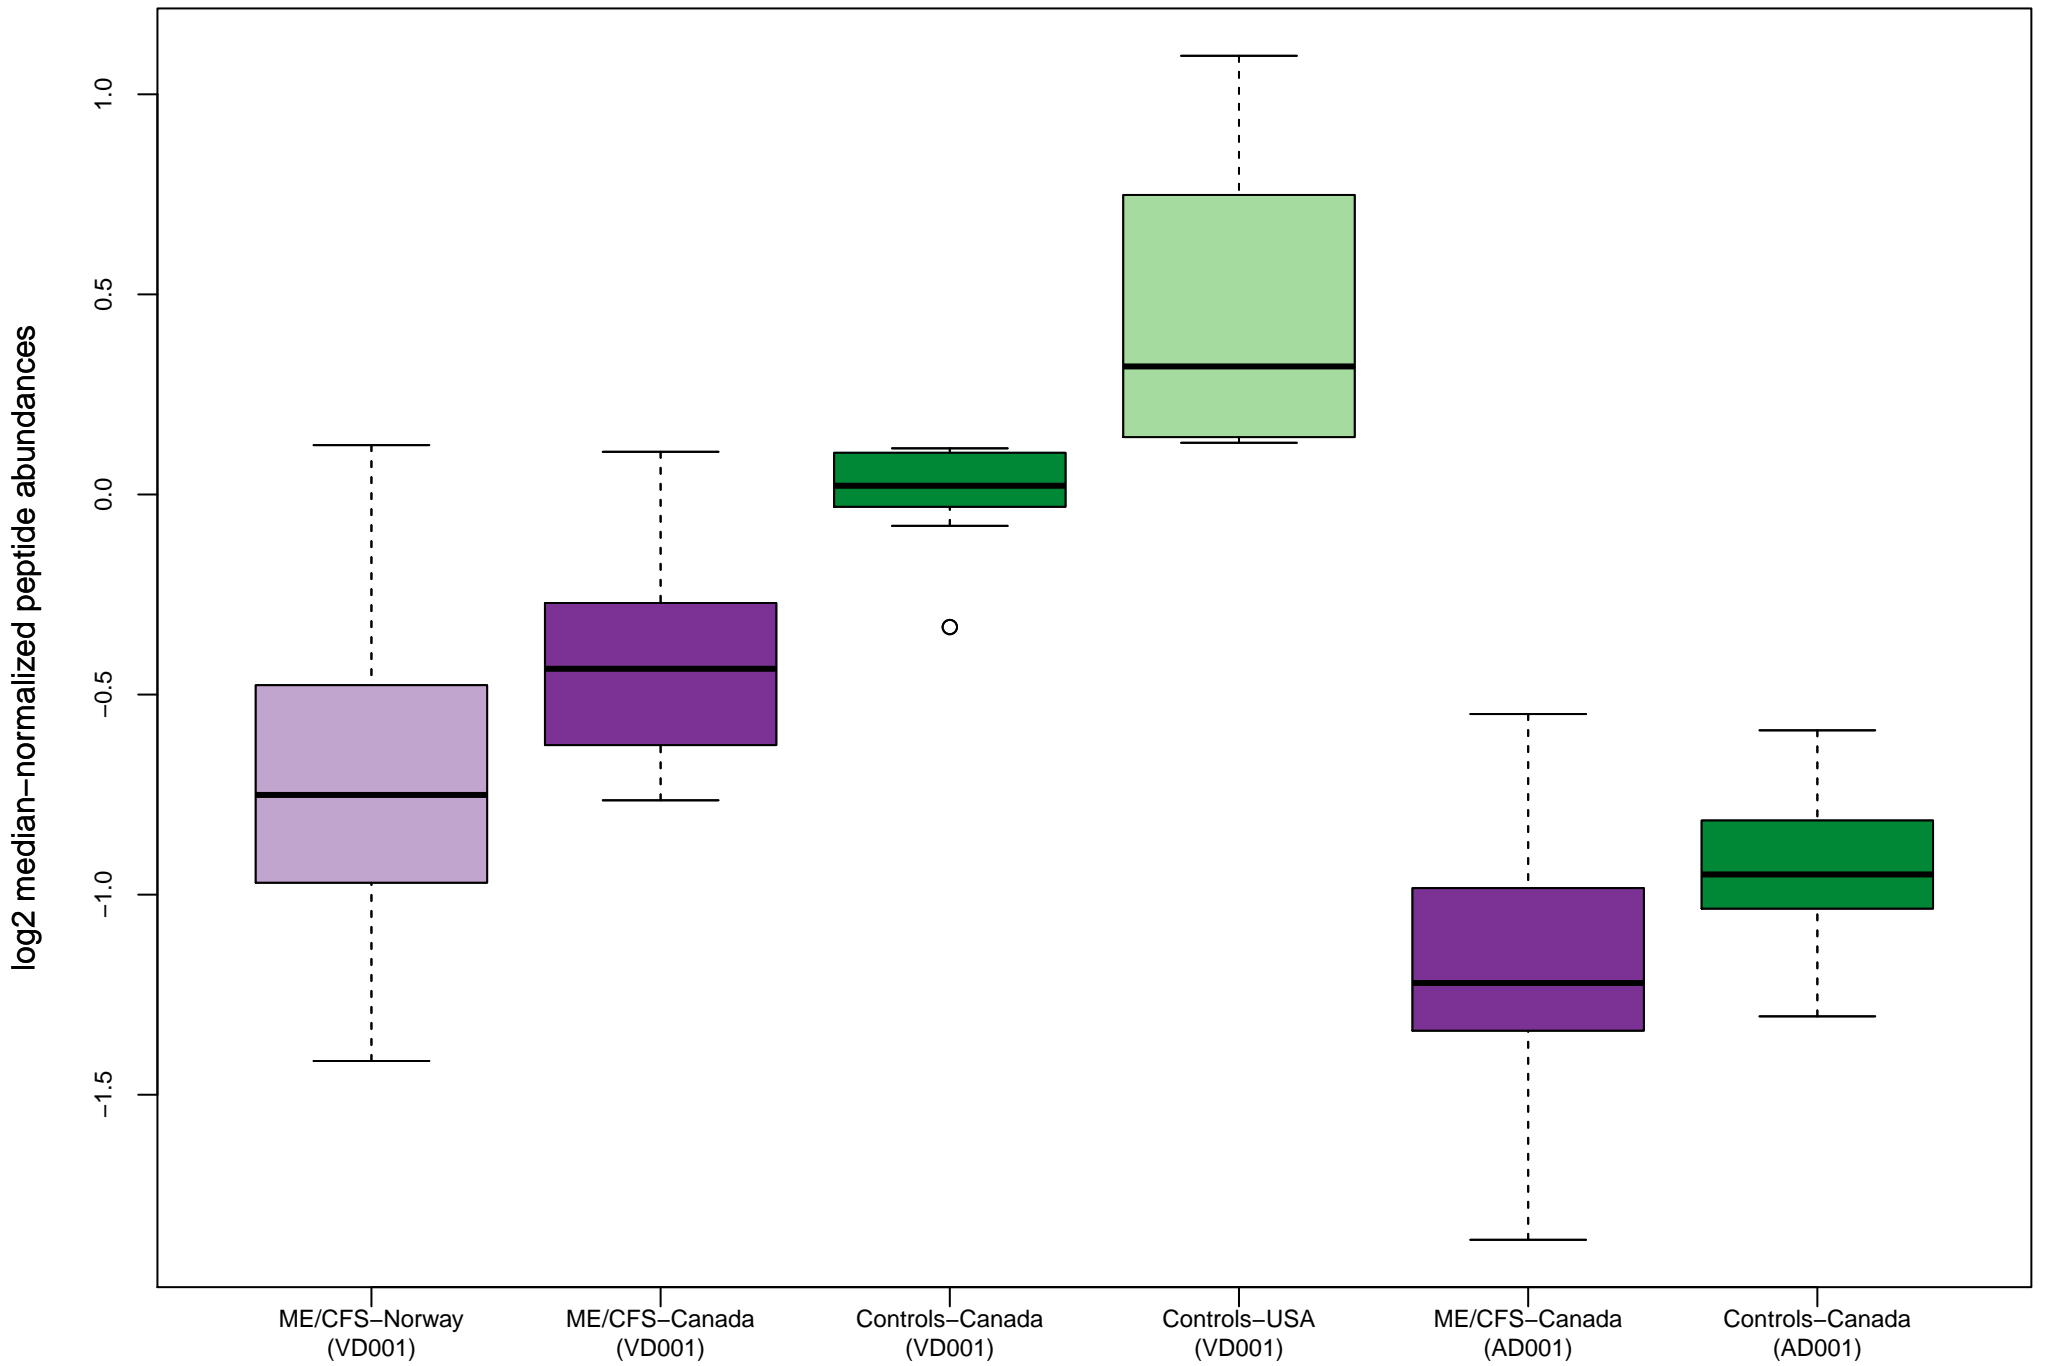

# YYKRLGYLVALS

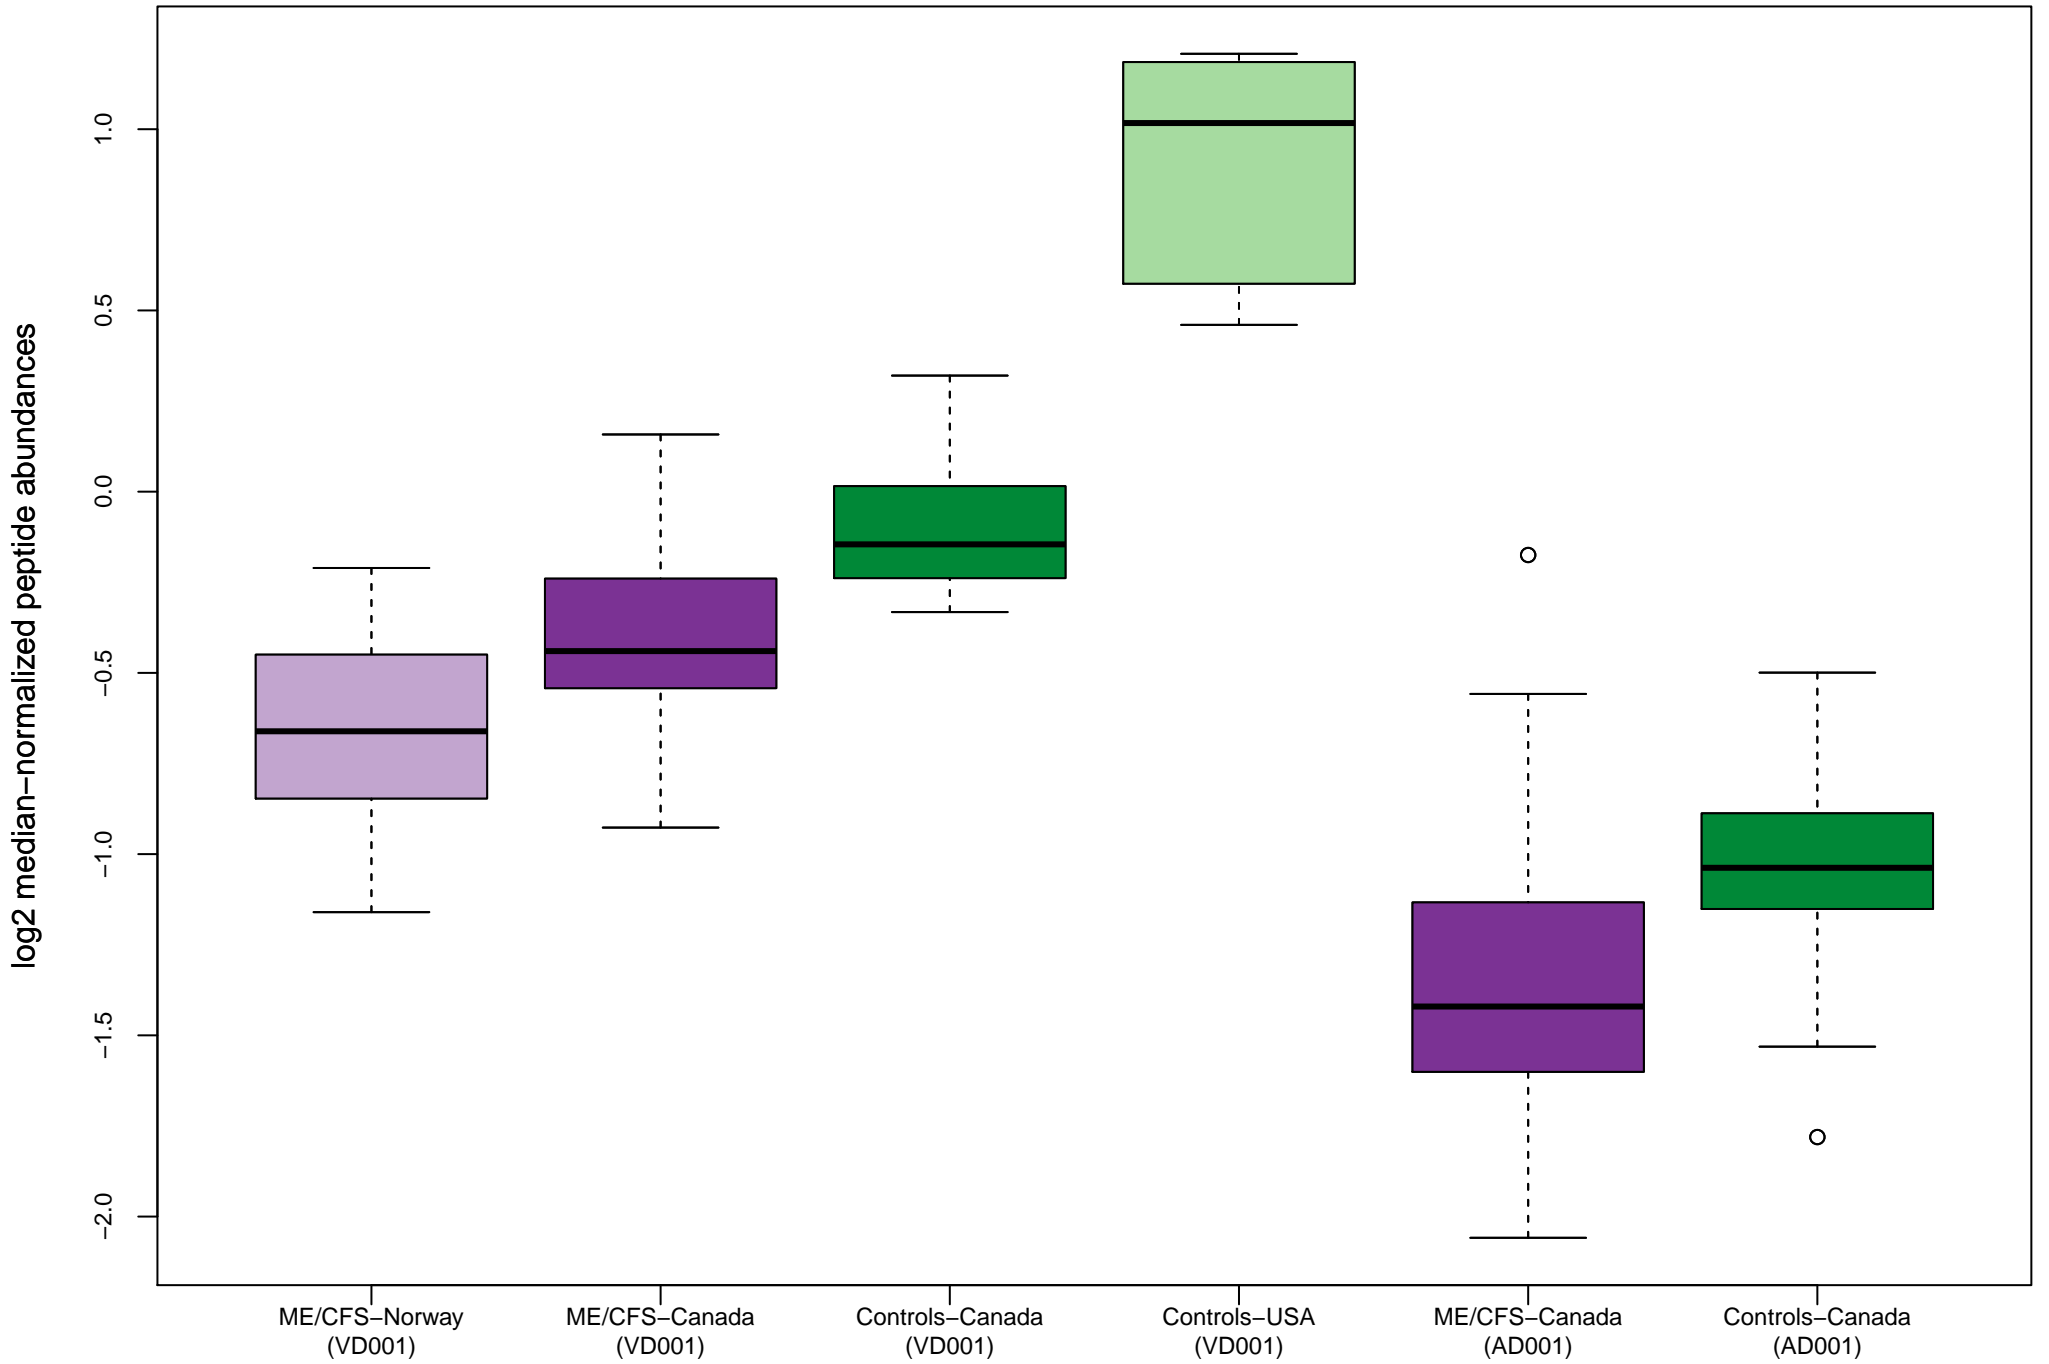

# YYLPVRLSGVLG

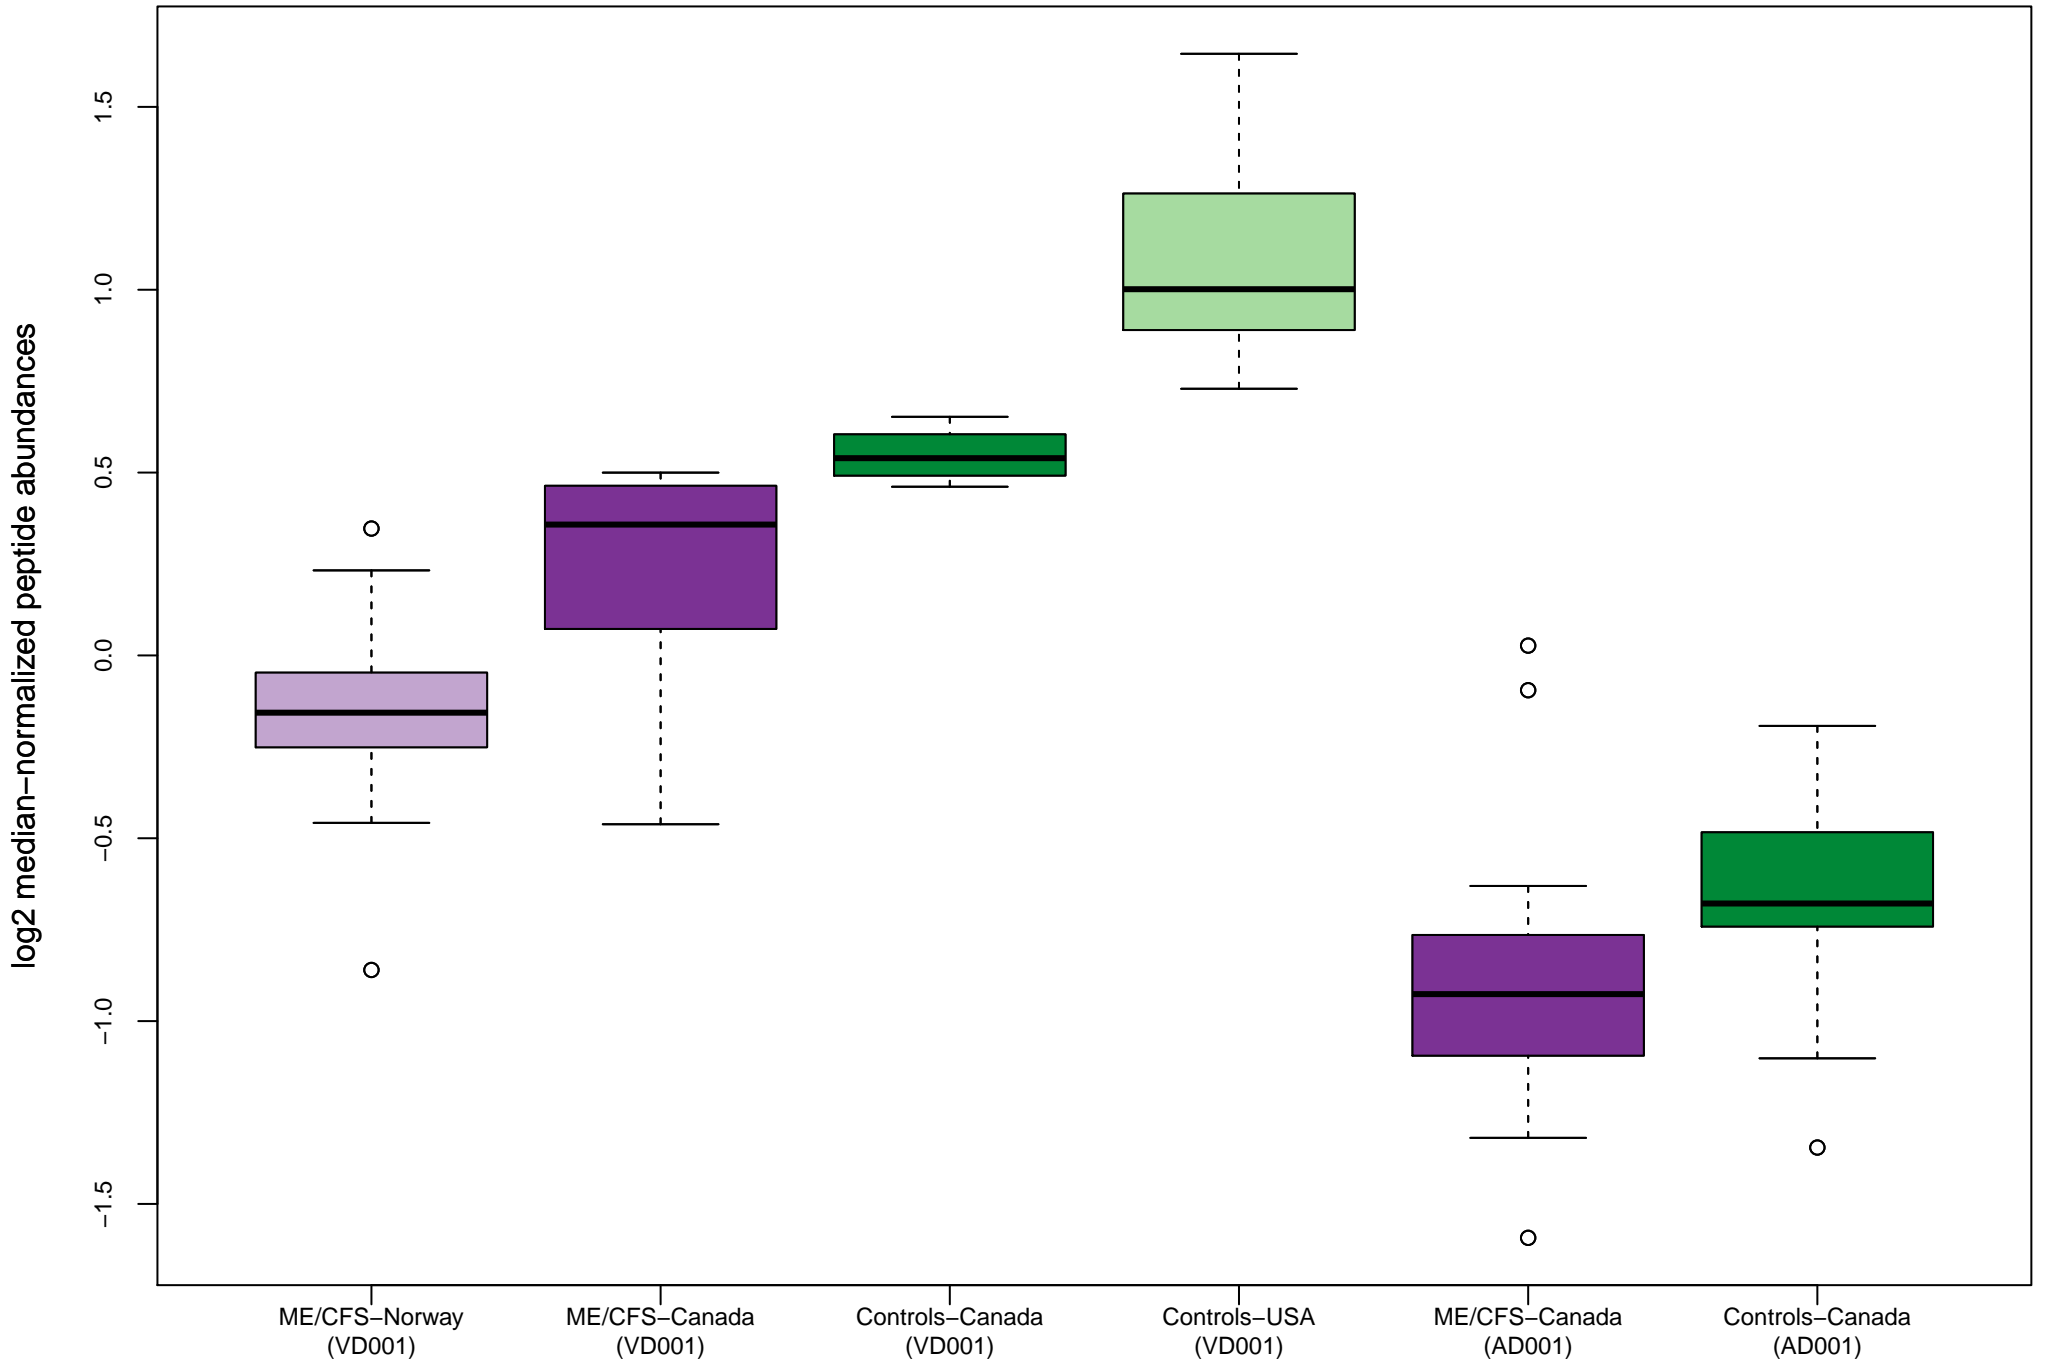



# ALFGASRWNKVG

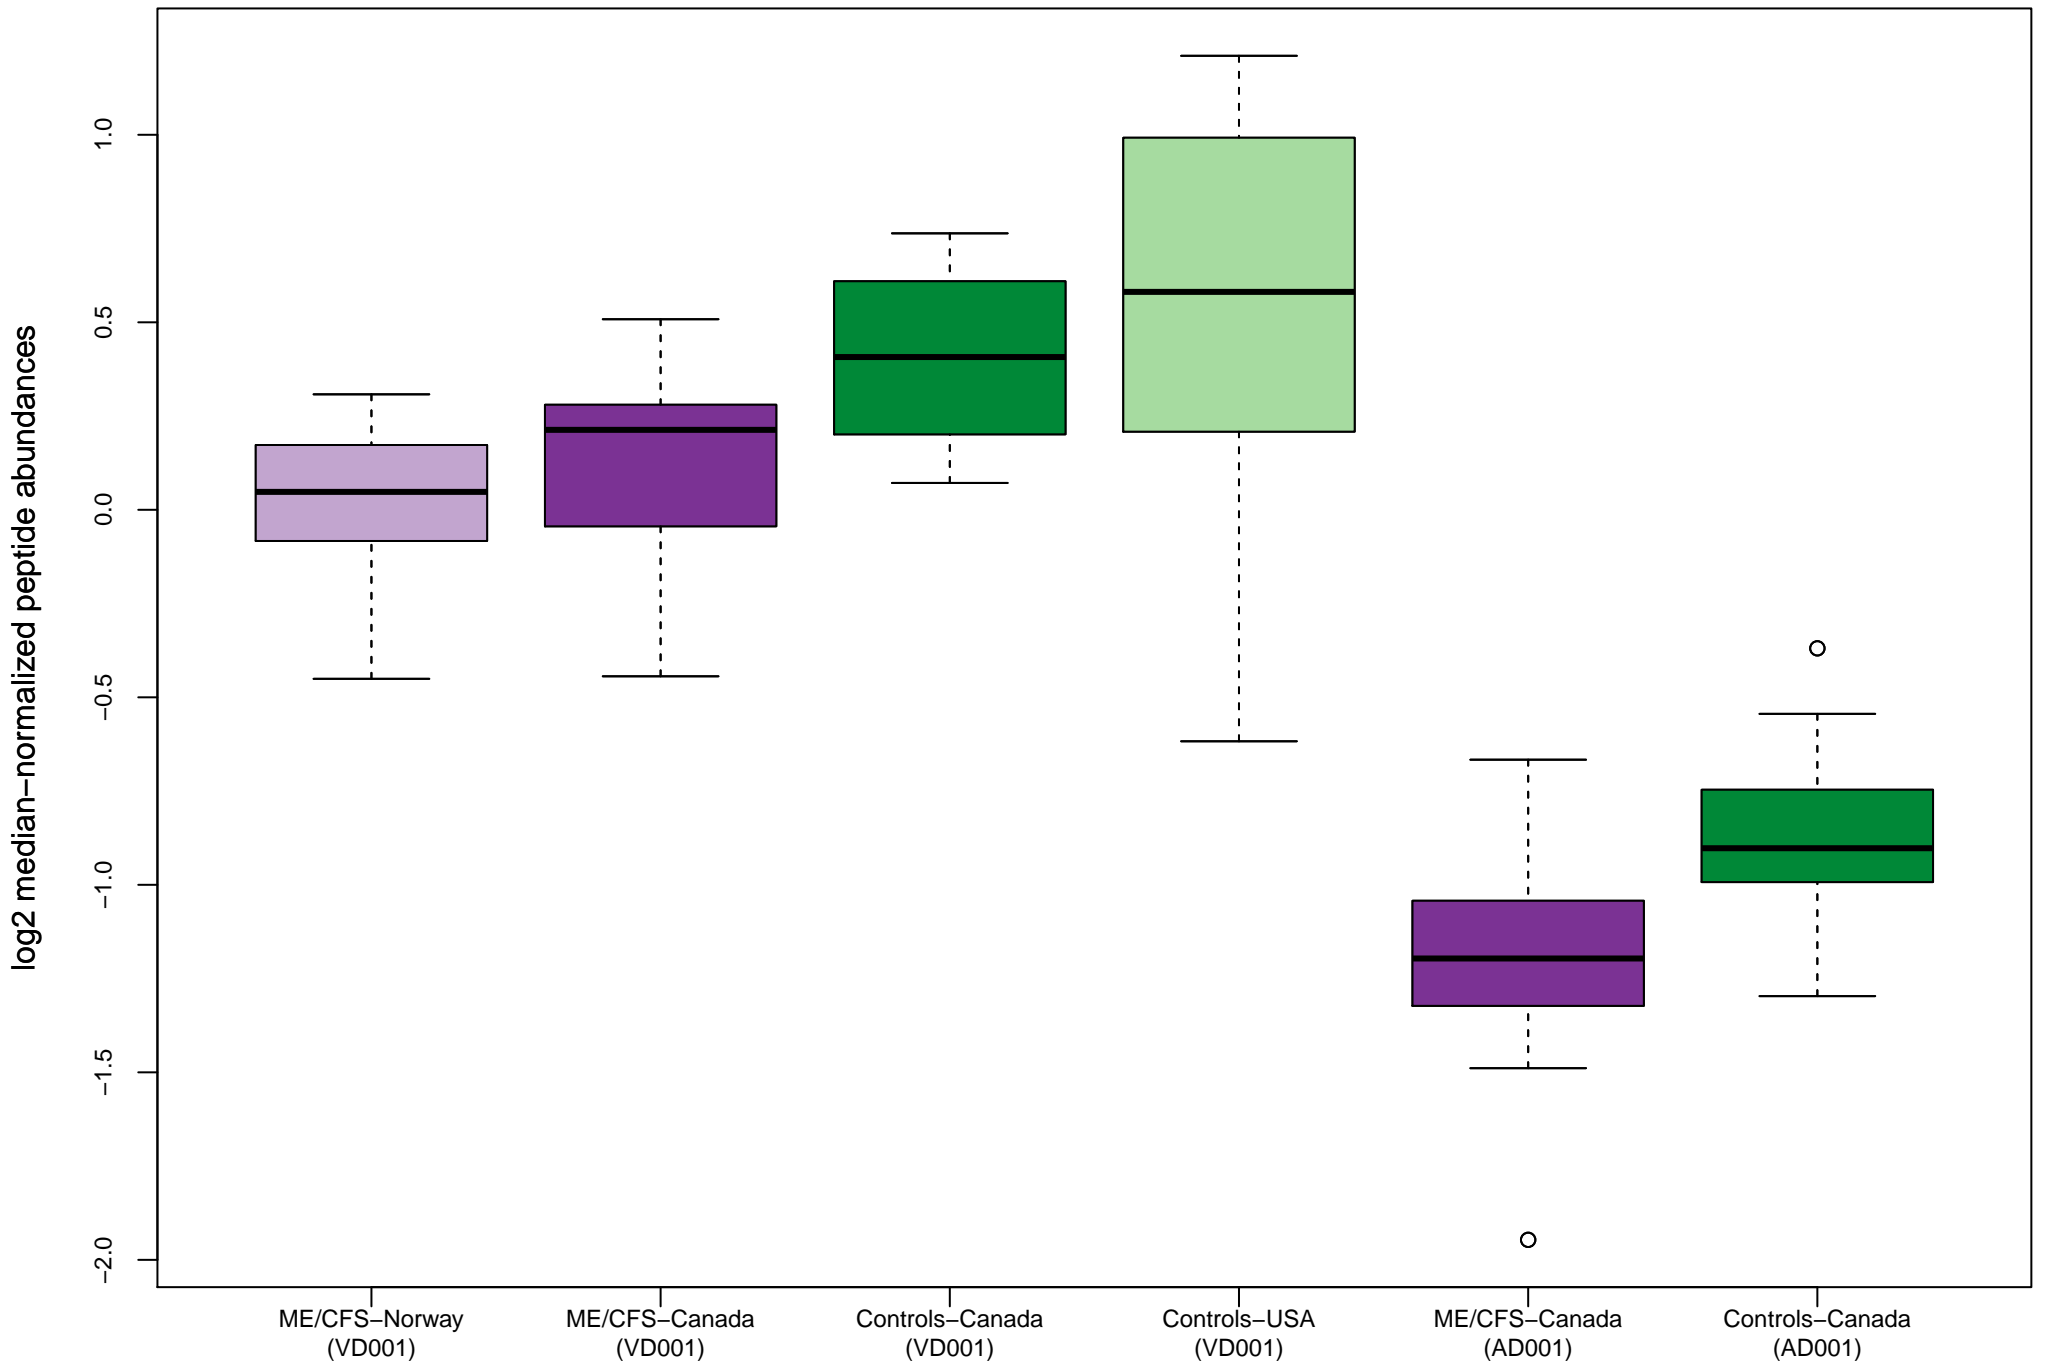

# ALHRGRYWKVAL

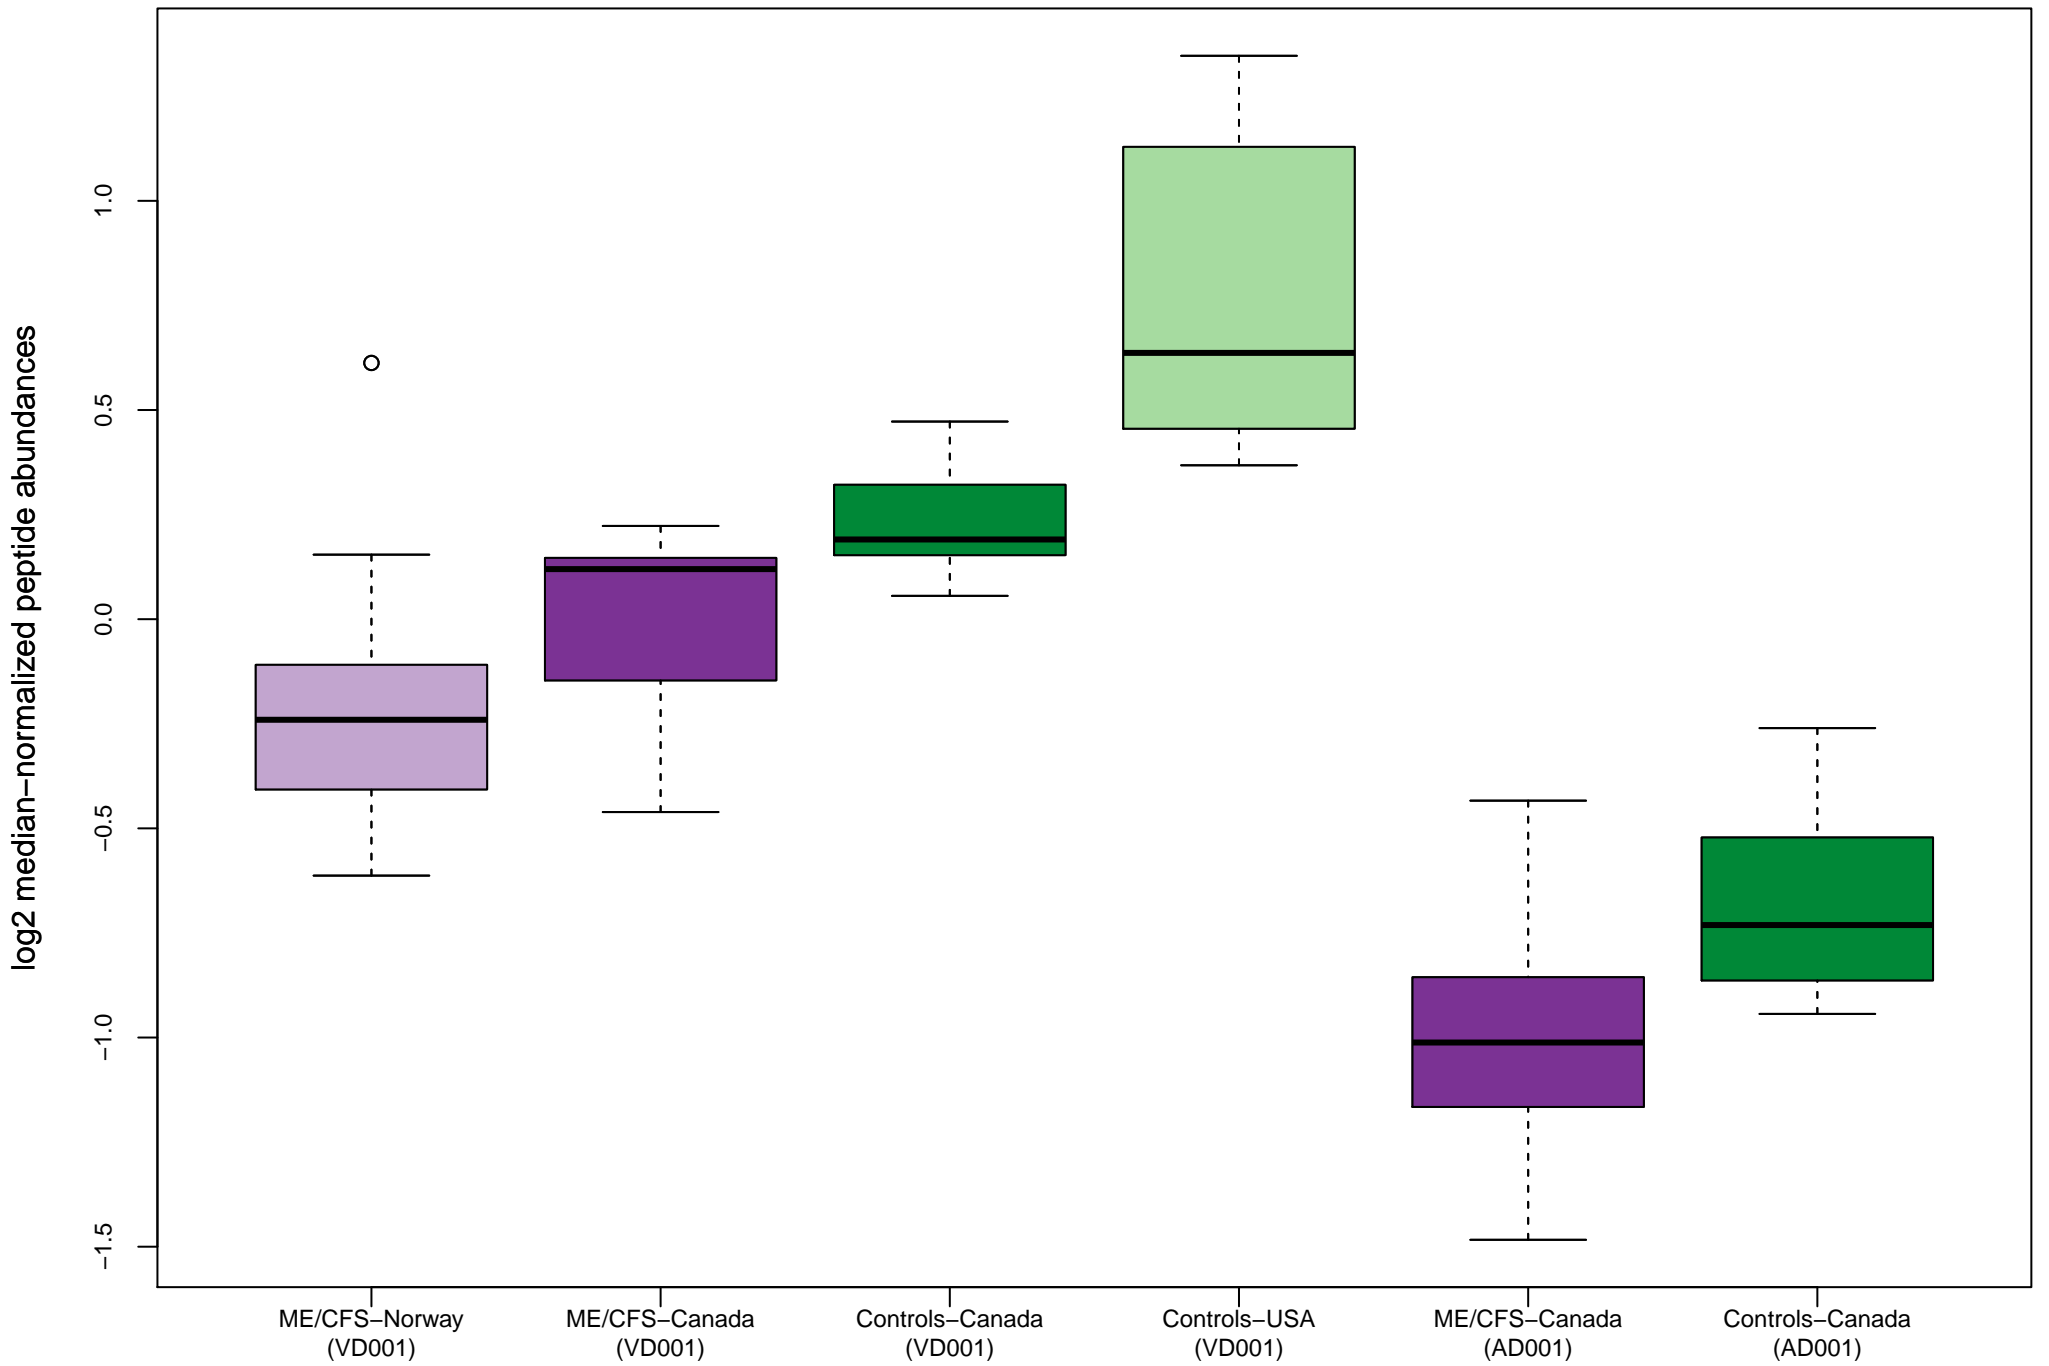

# AQPLVGRPWKSL

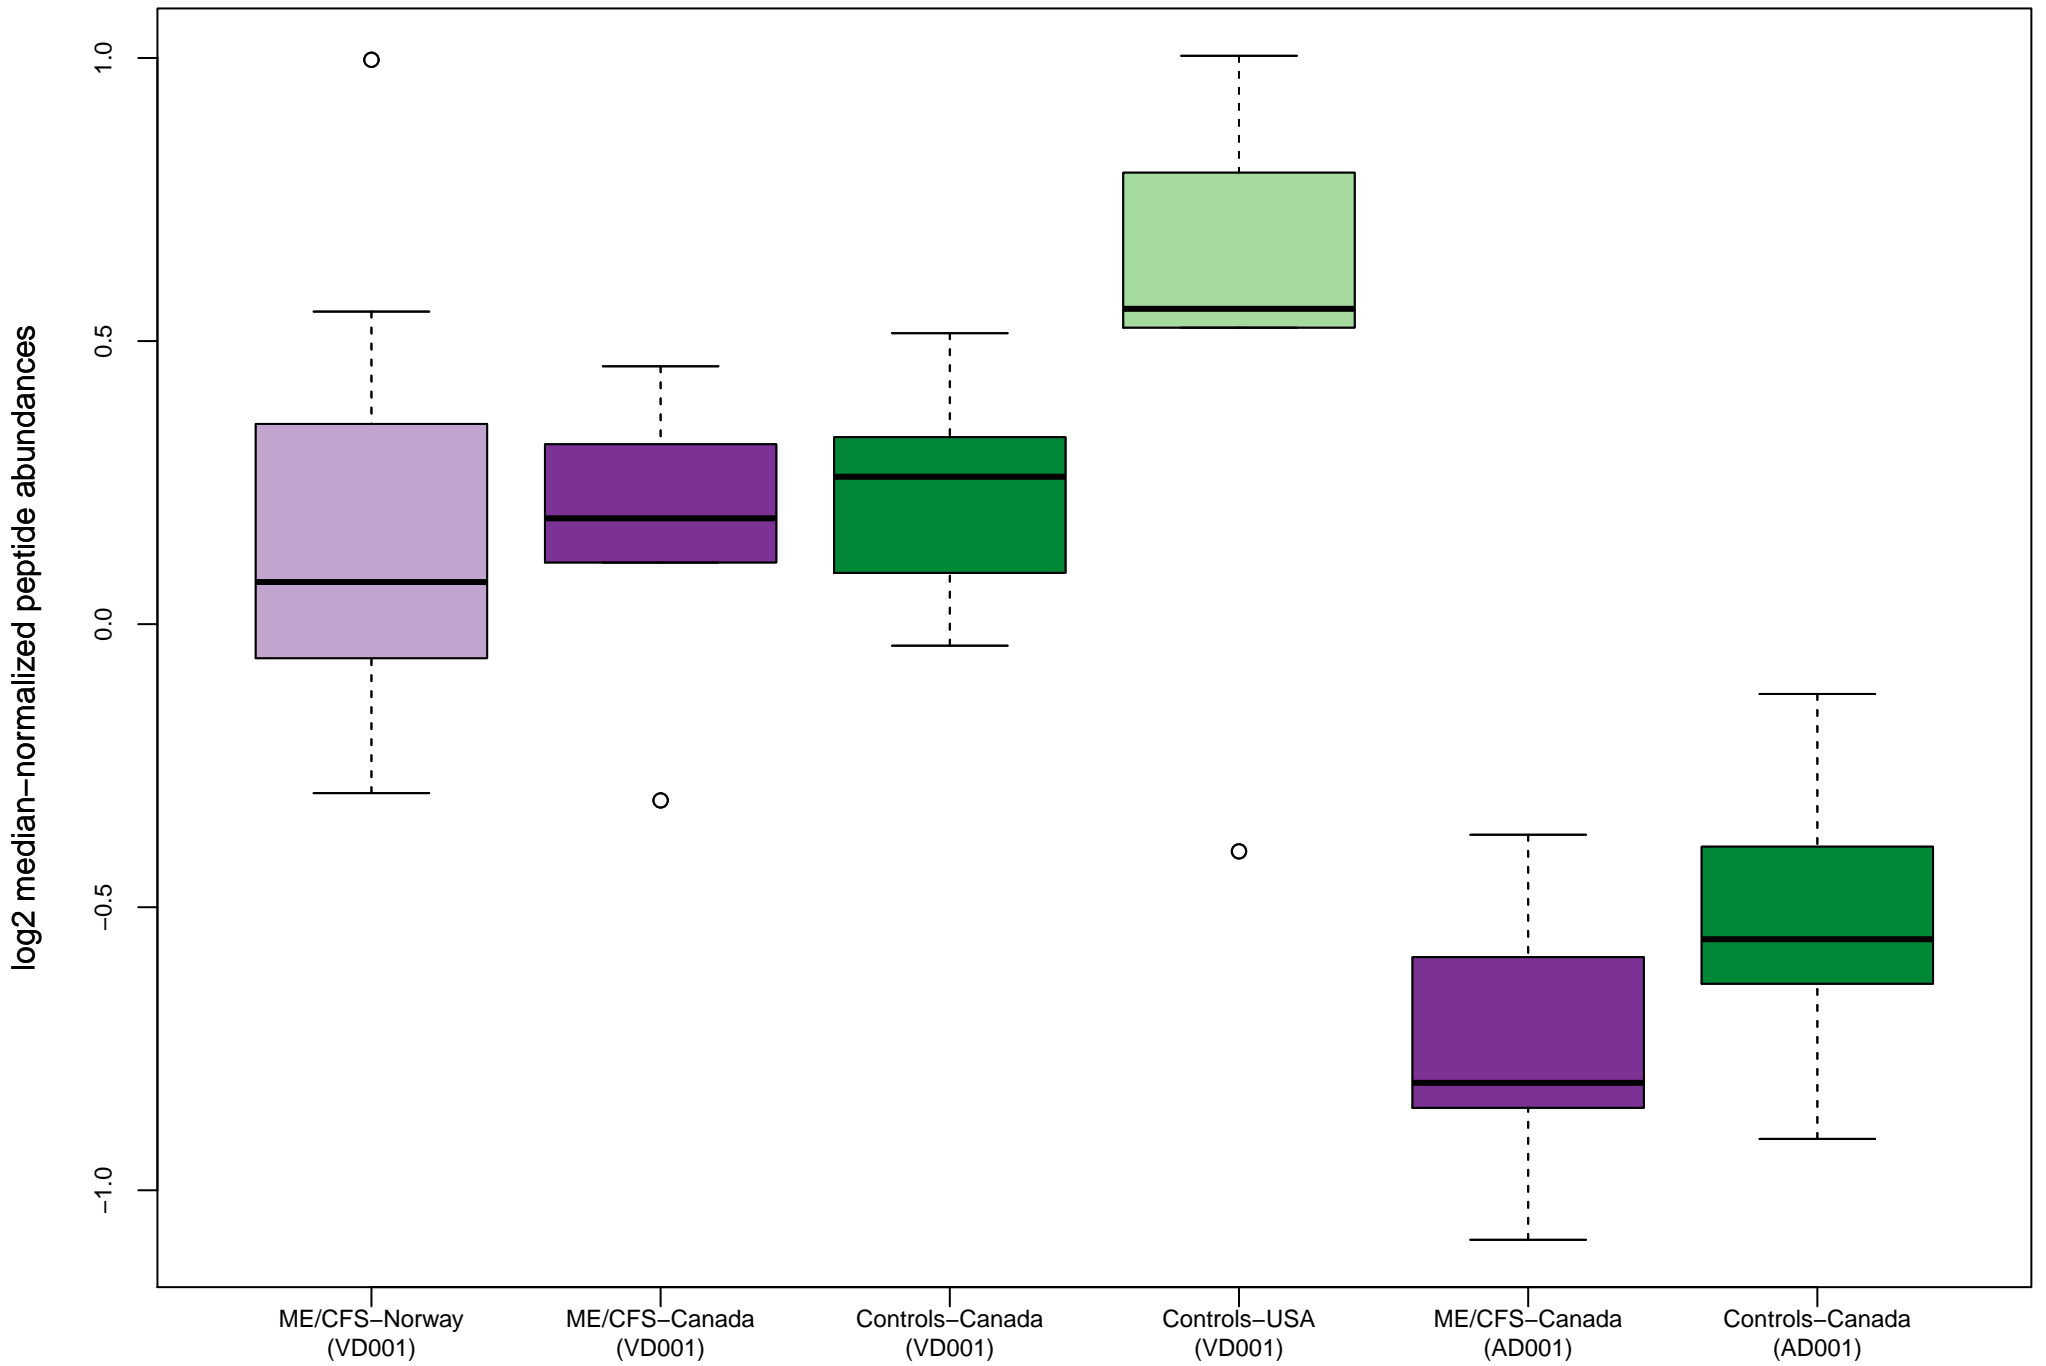

# ARFVSRALSASG

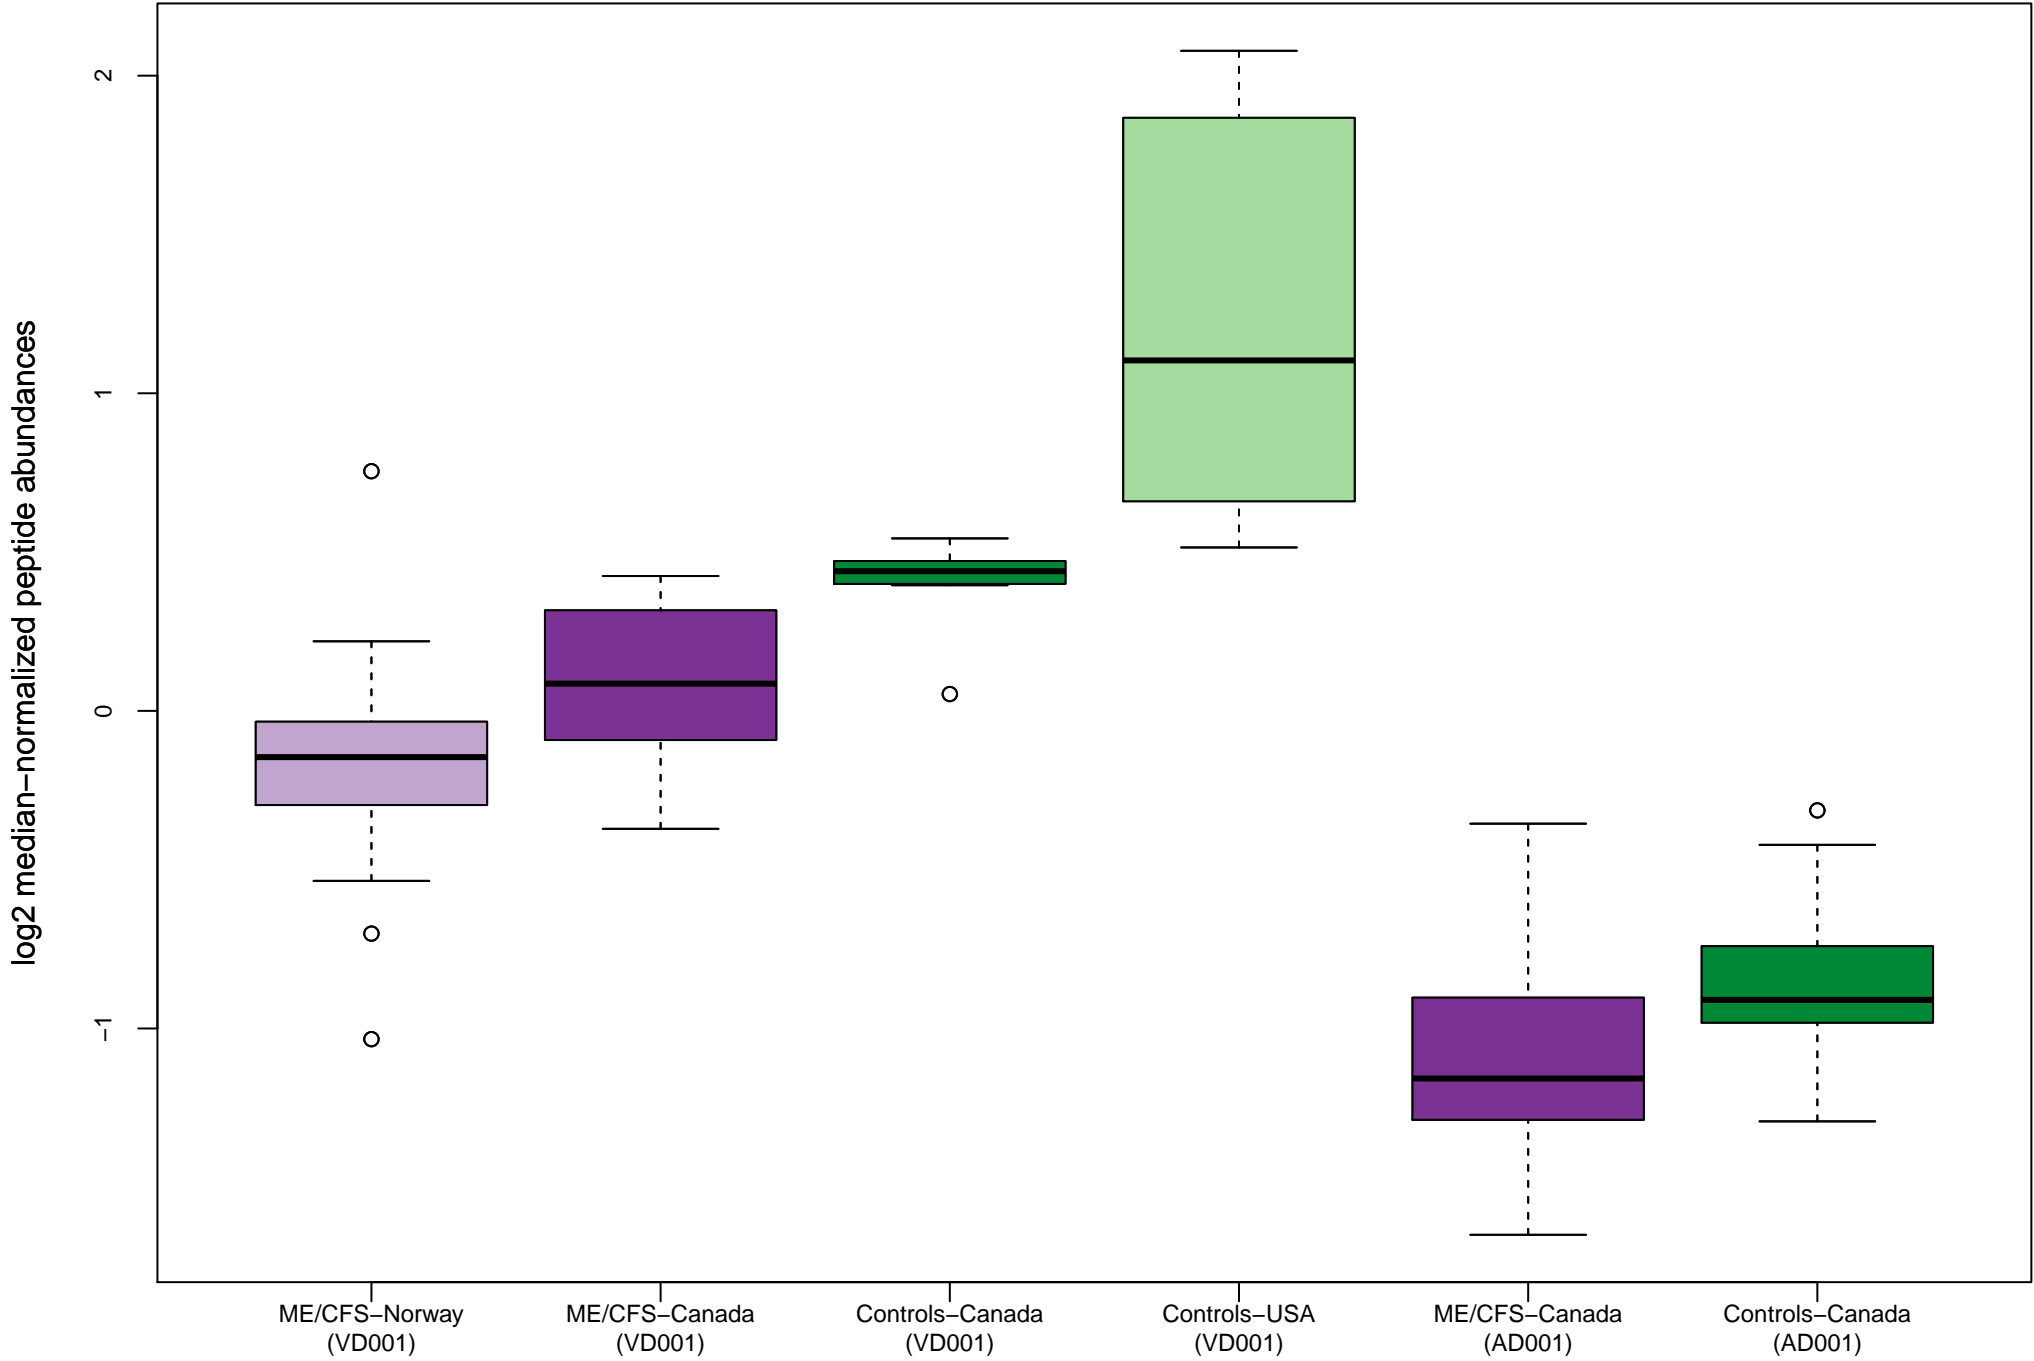

# AYFYWKRGLSG

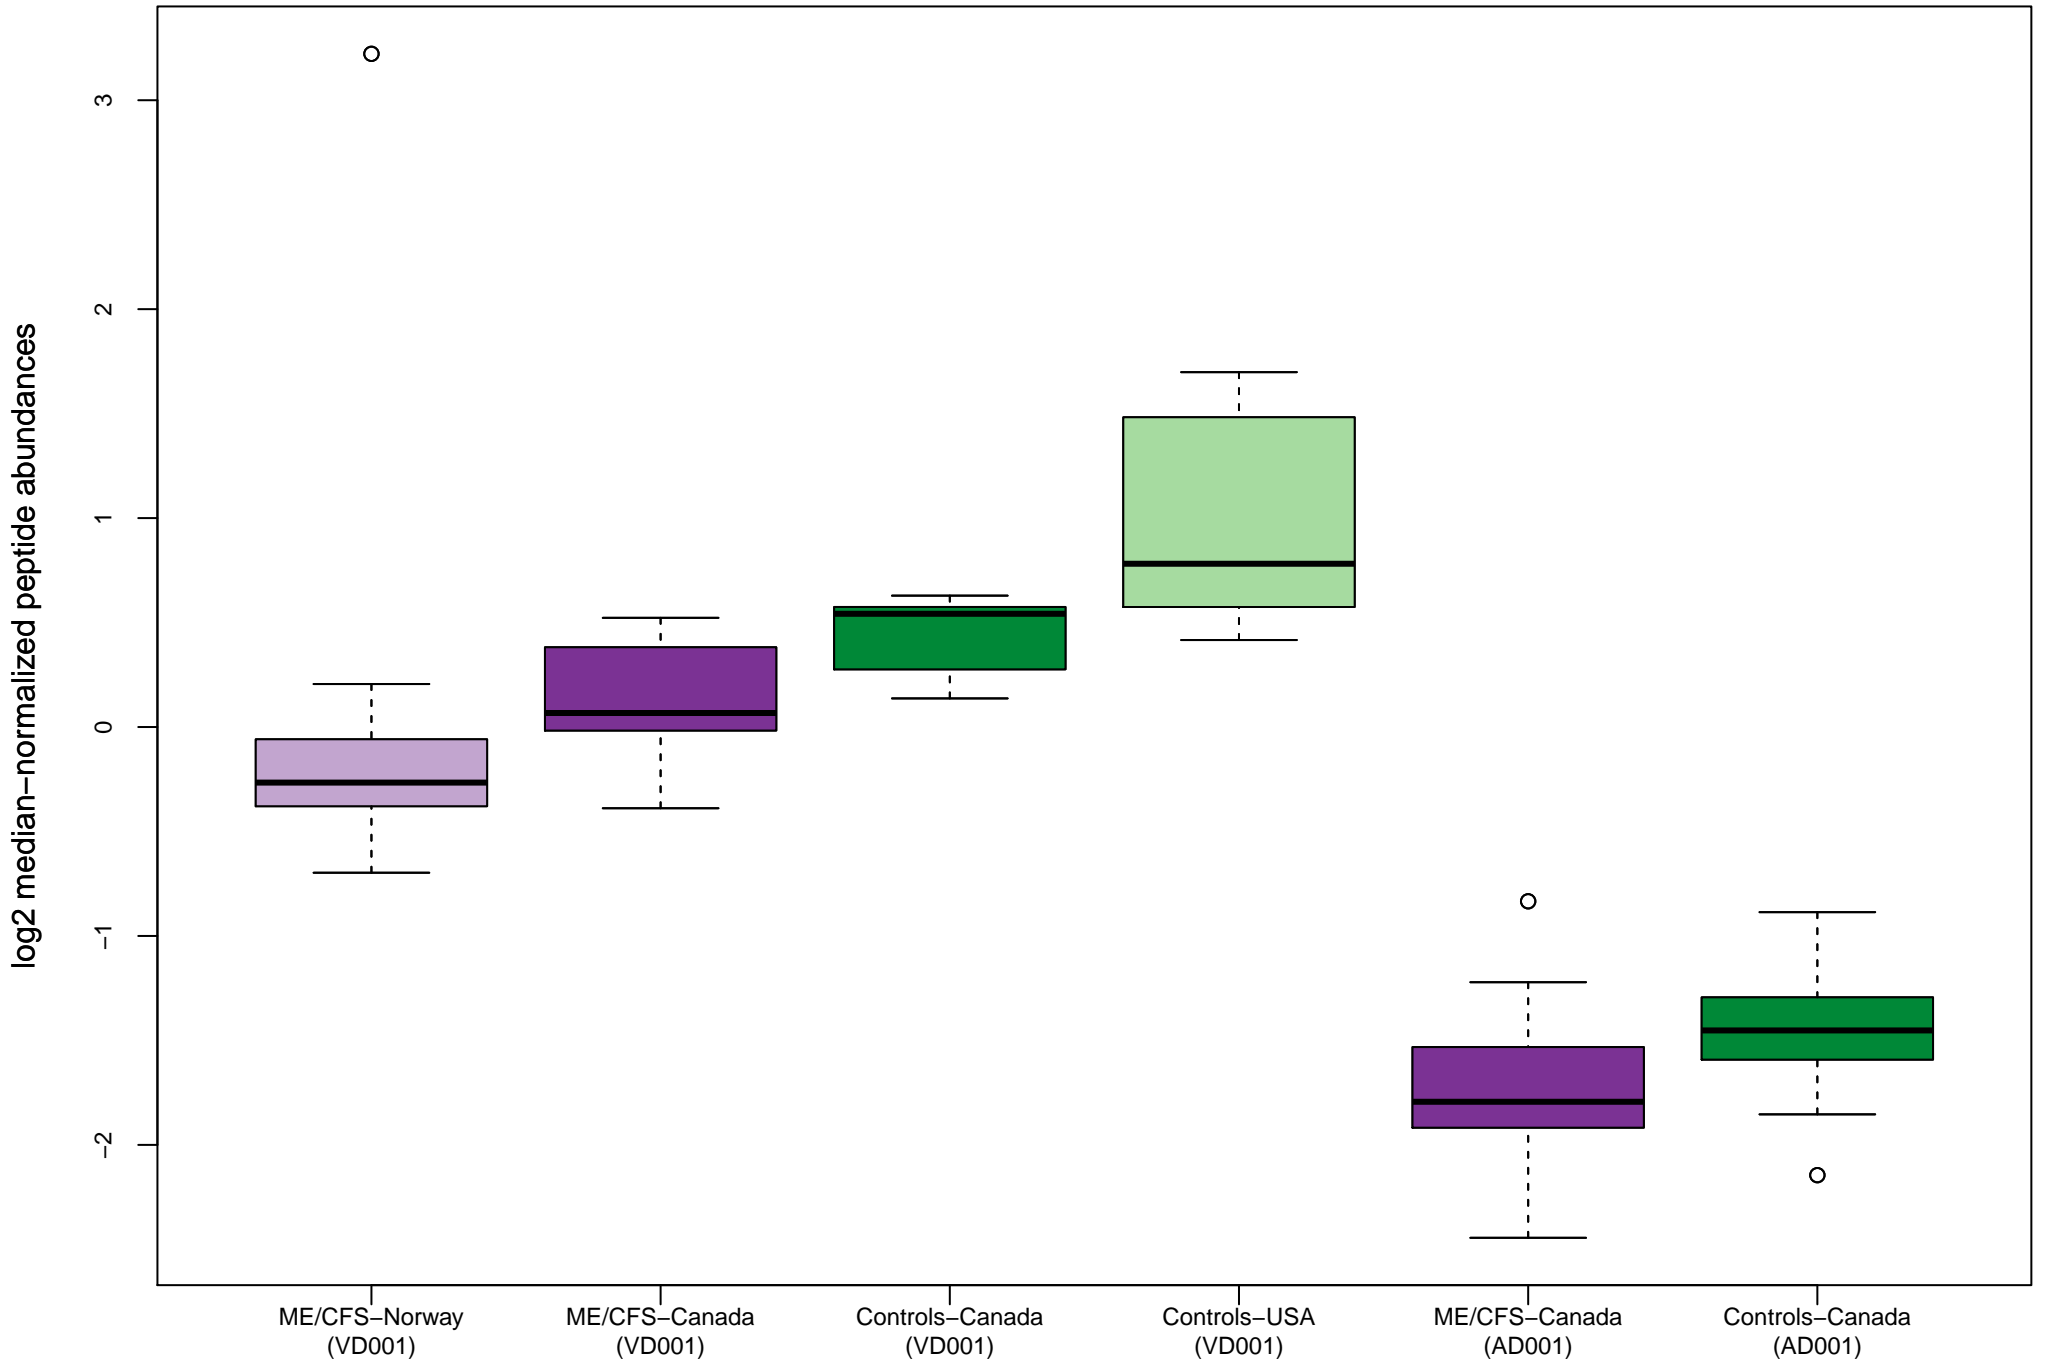

# FARWRLSFWASG

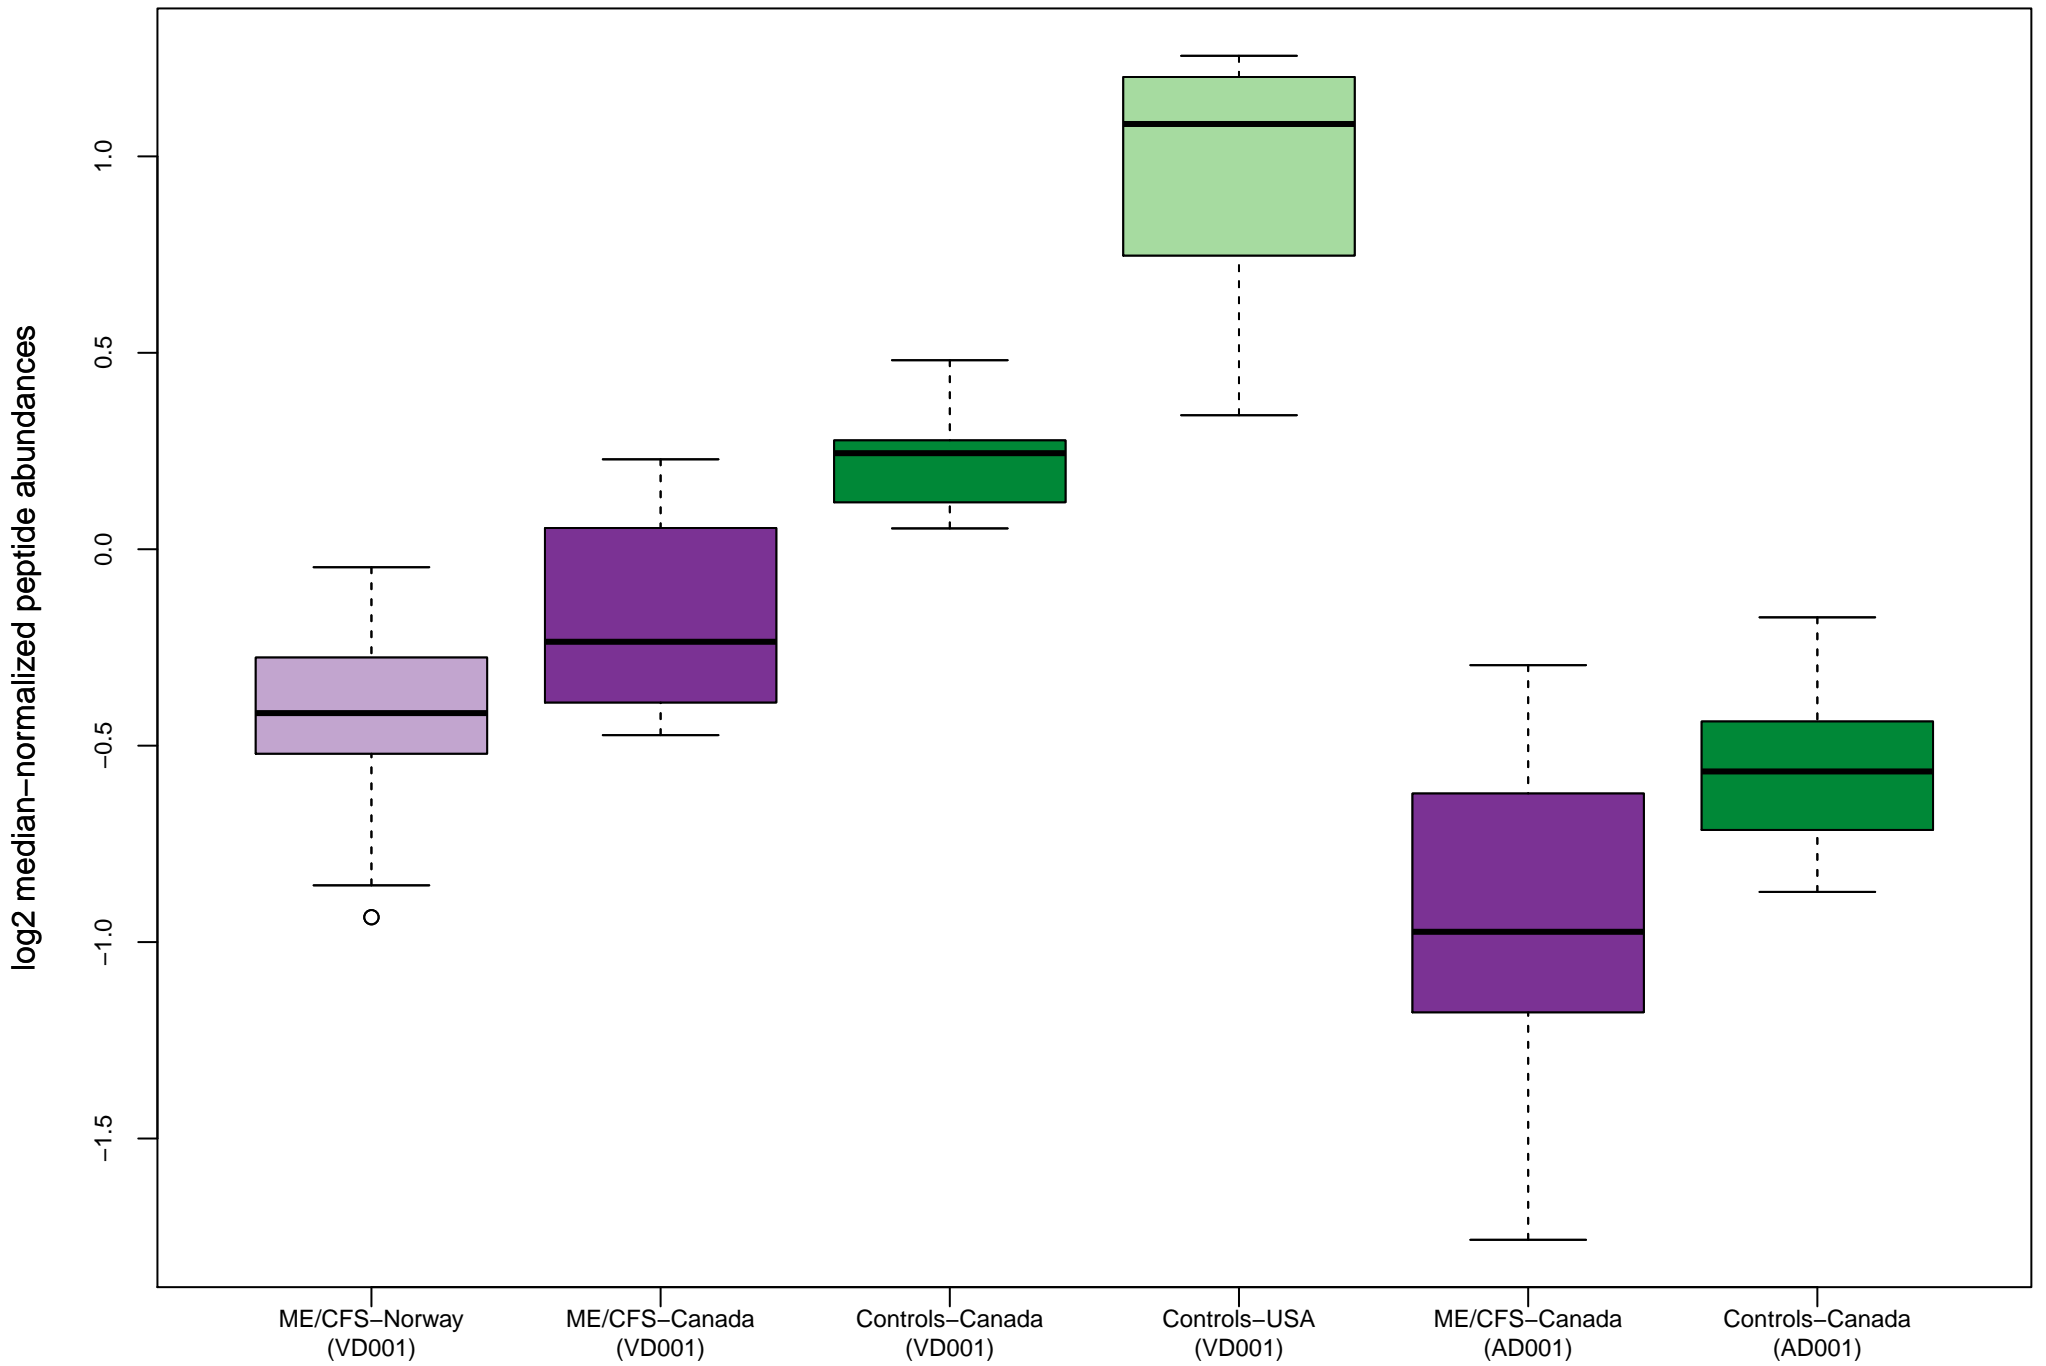

# FAWPRWKSGLSG

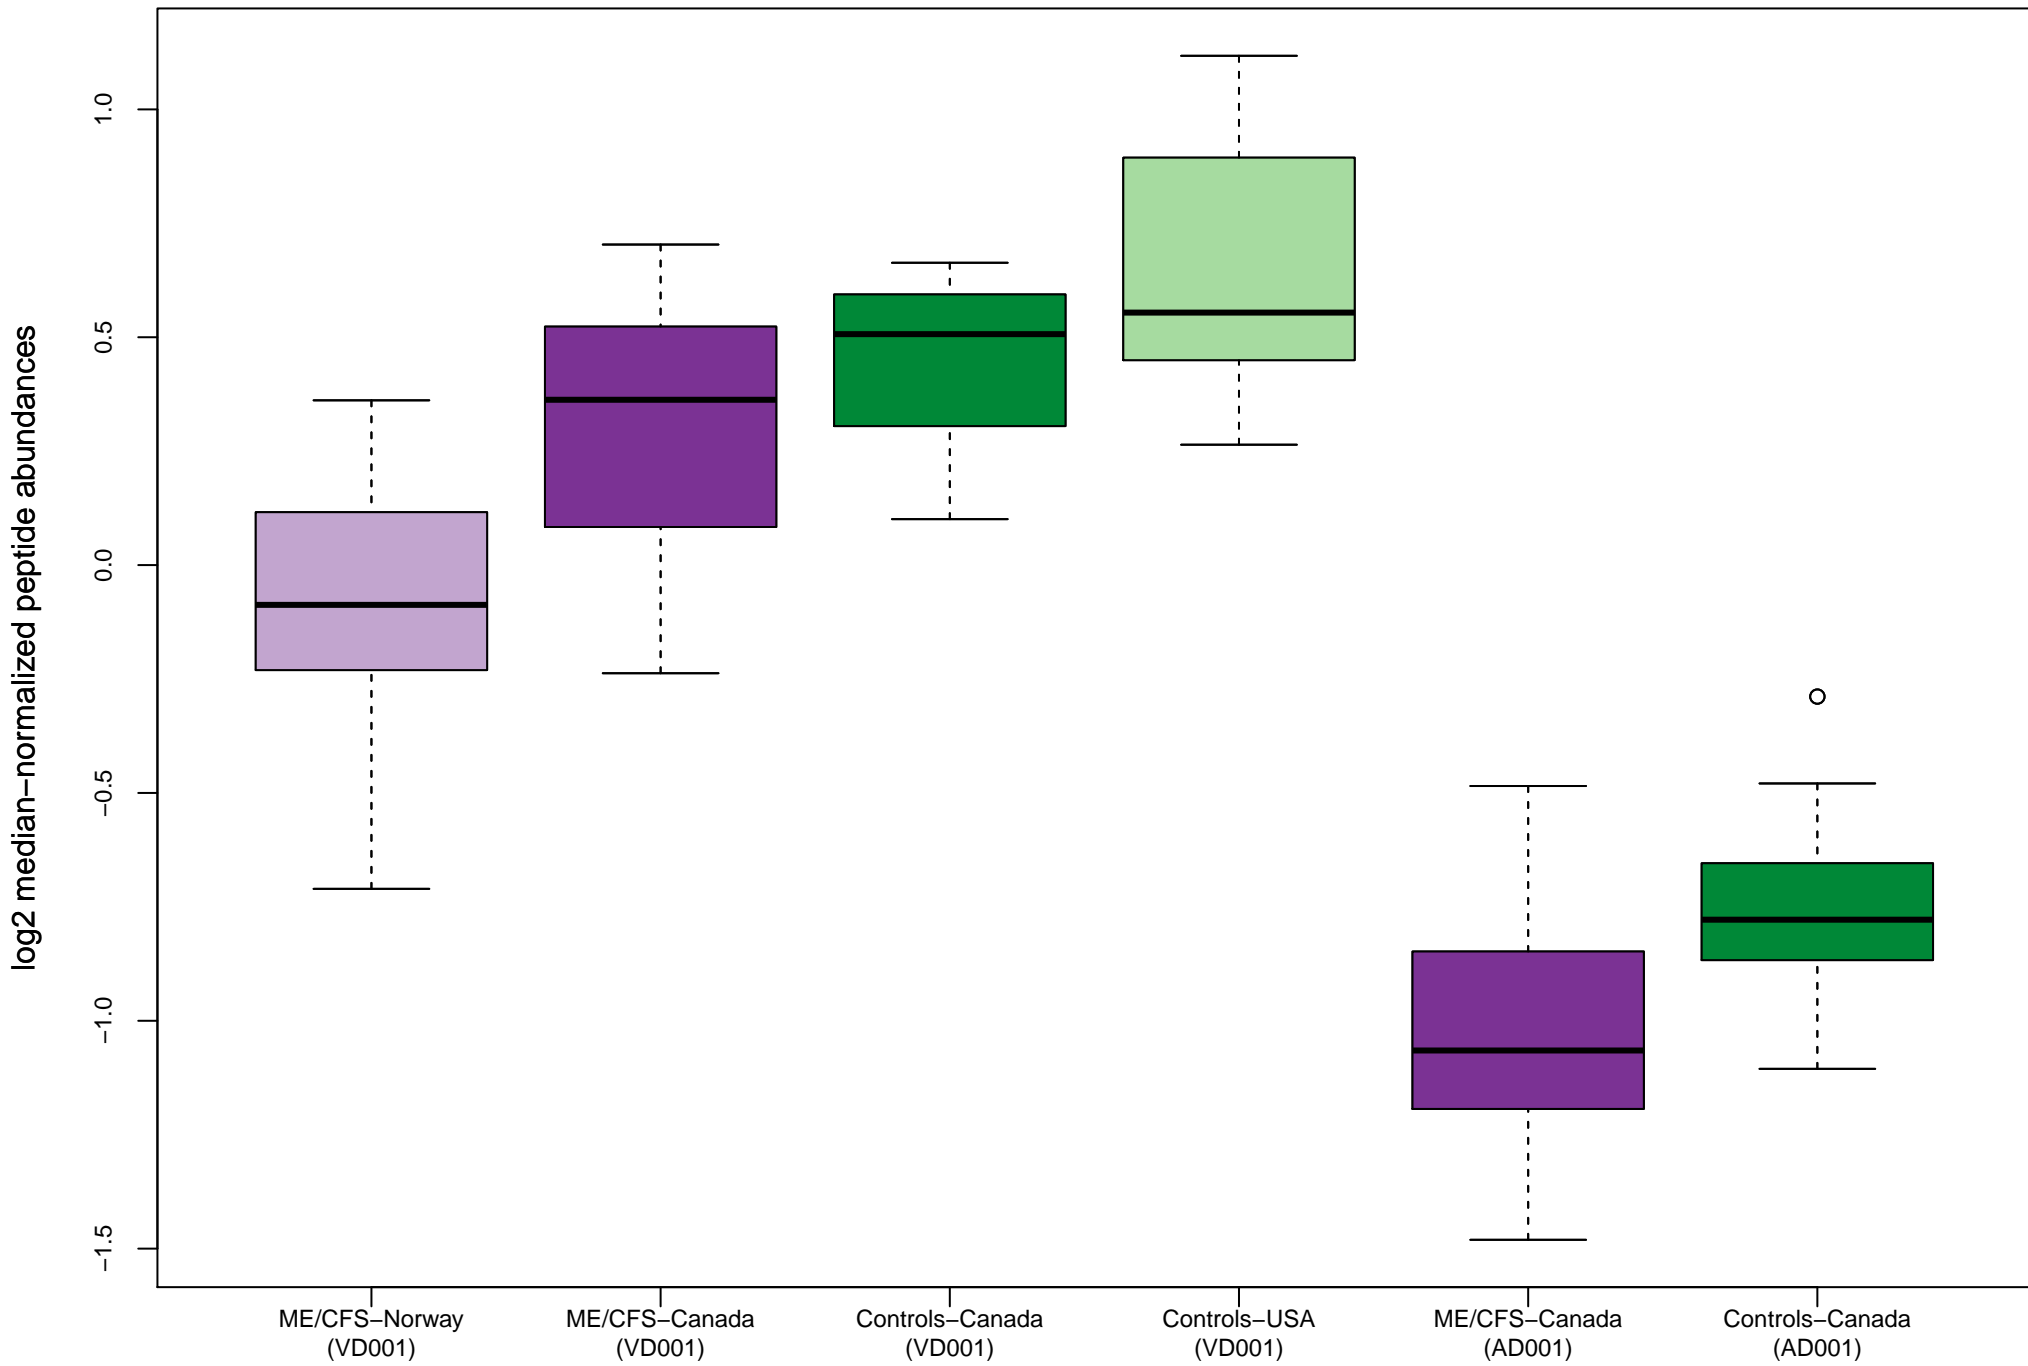

# FFKSAWKALSG

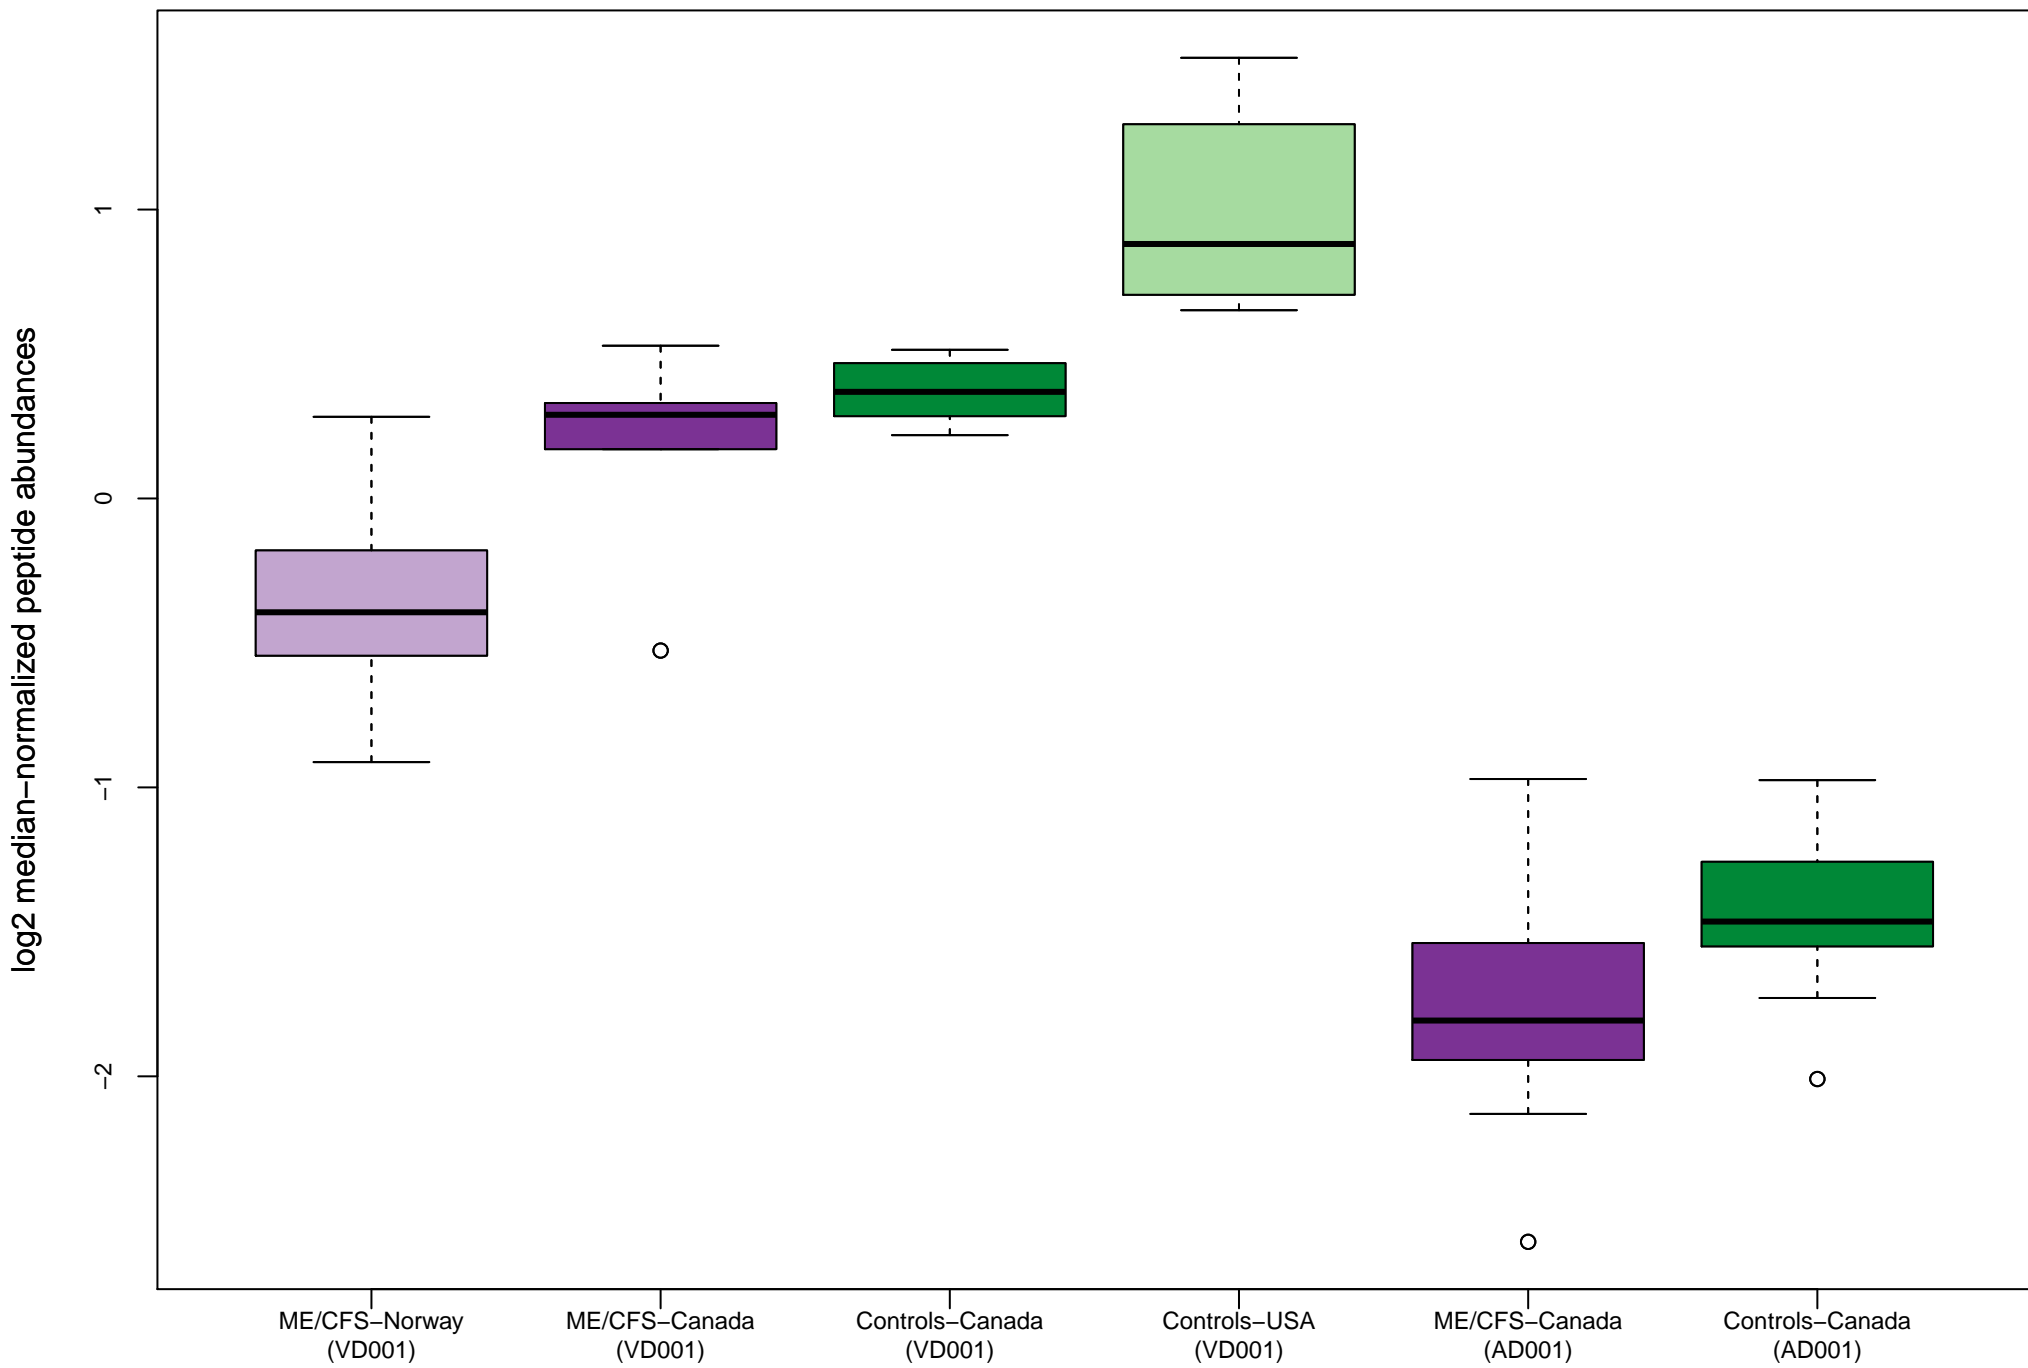



# FGGRFRLSGALS

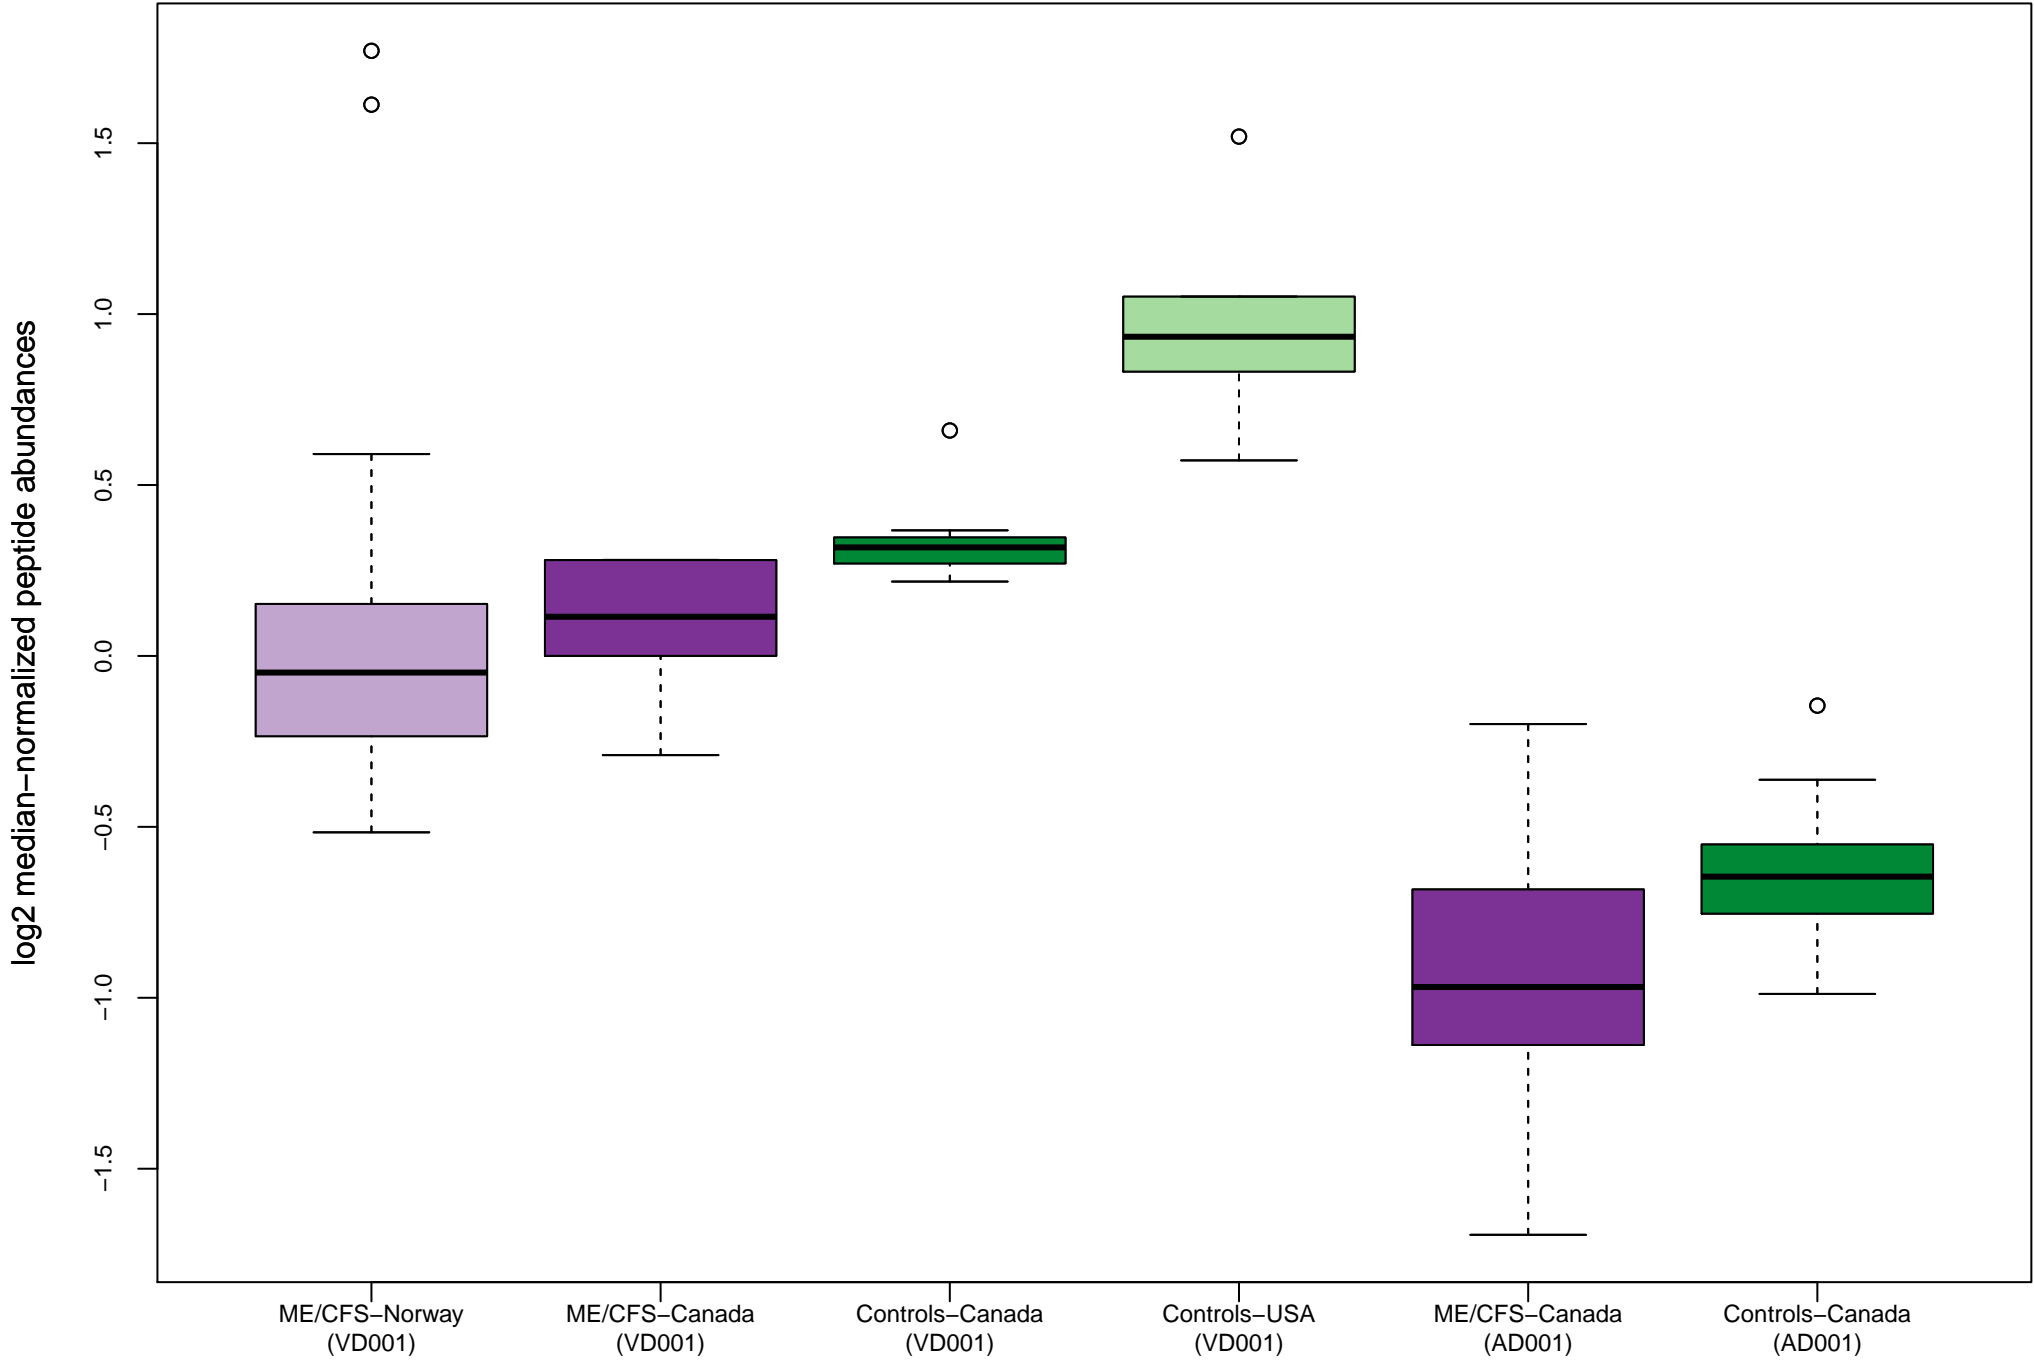

# FGNRLSGWKLGV

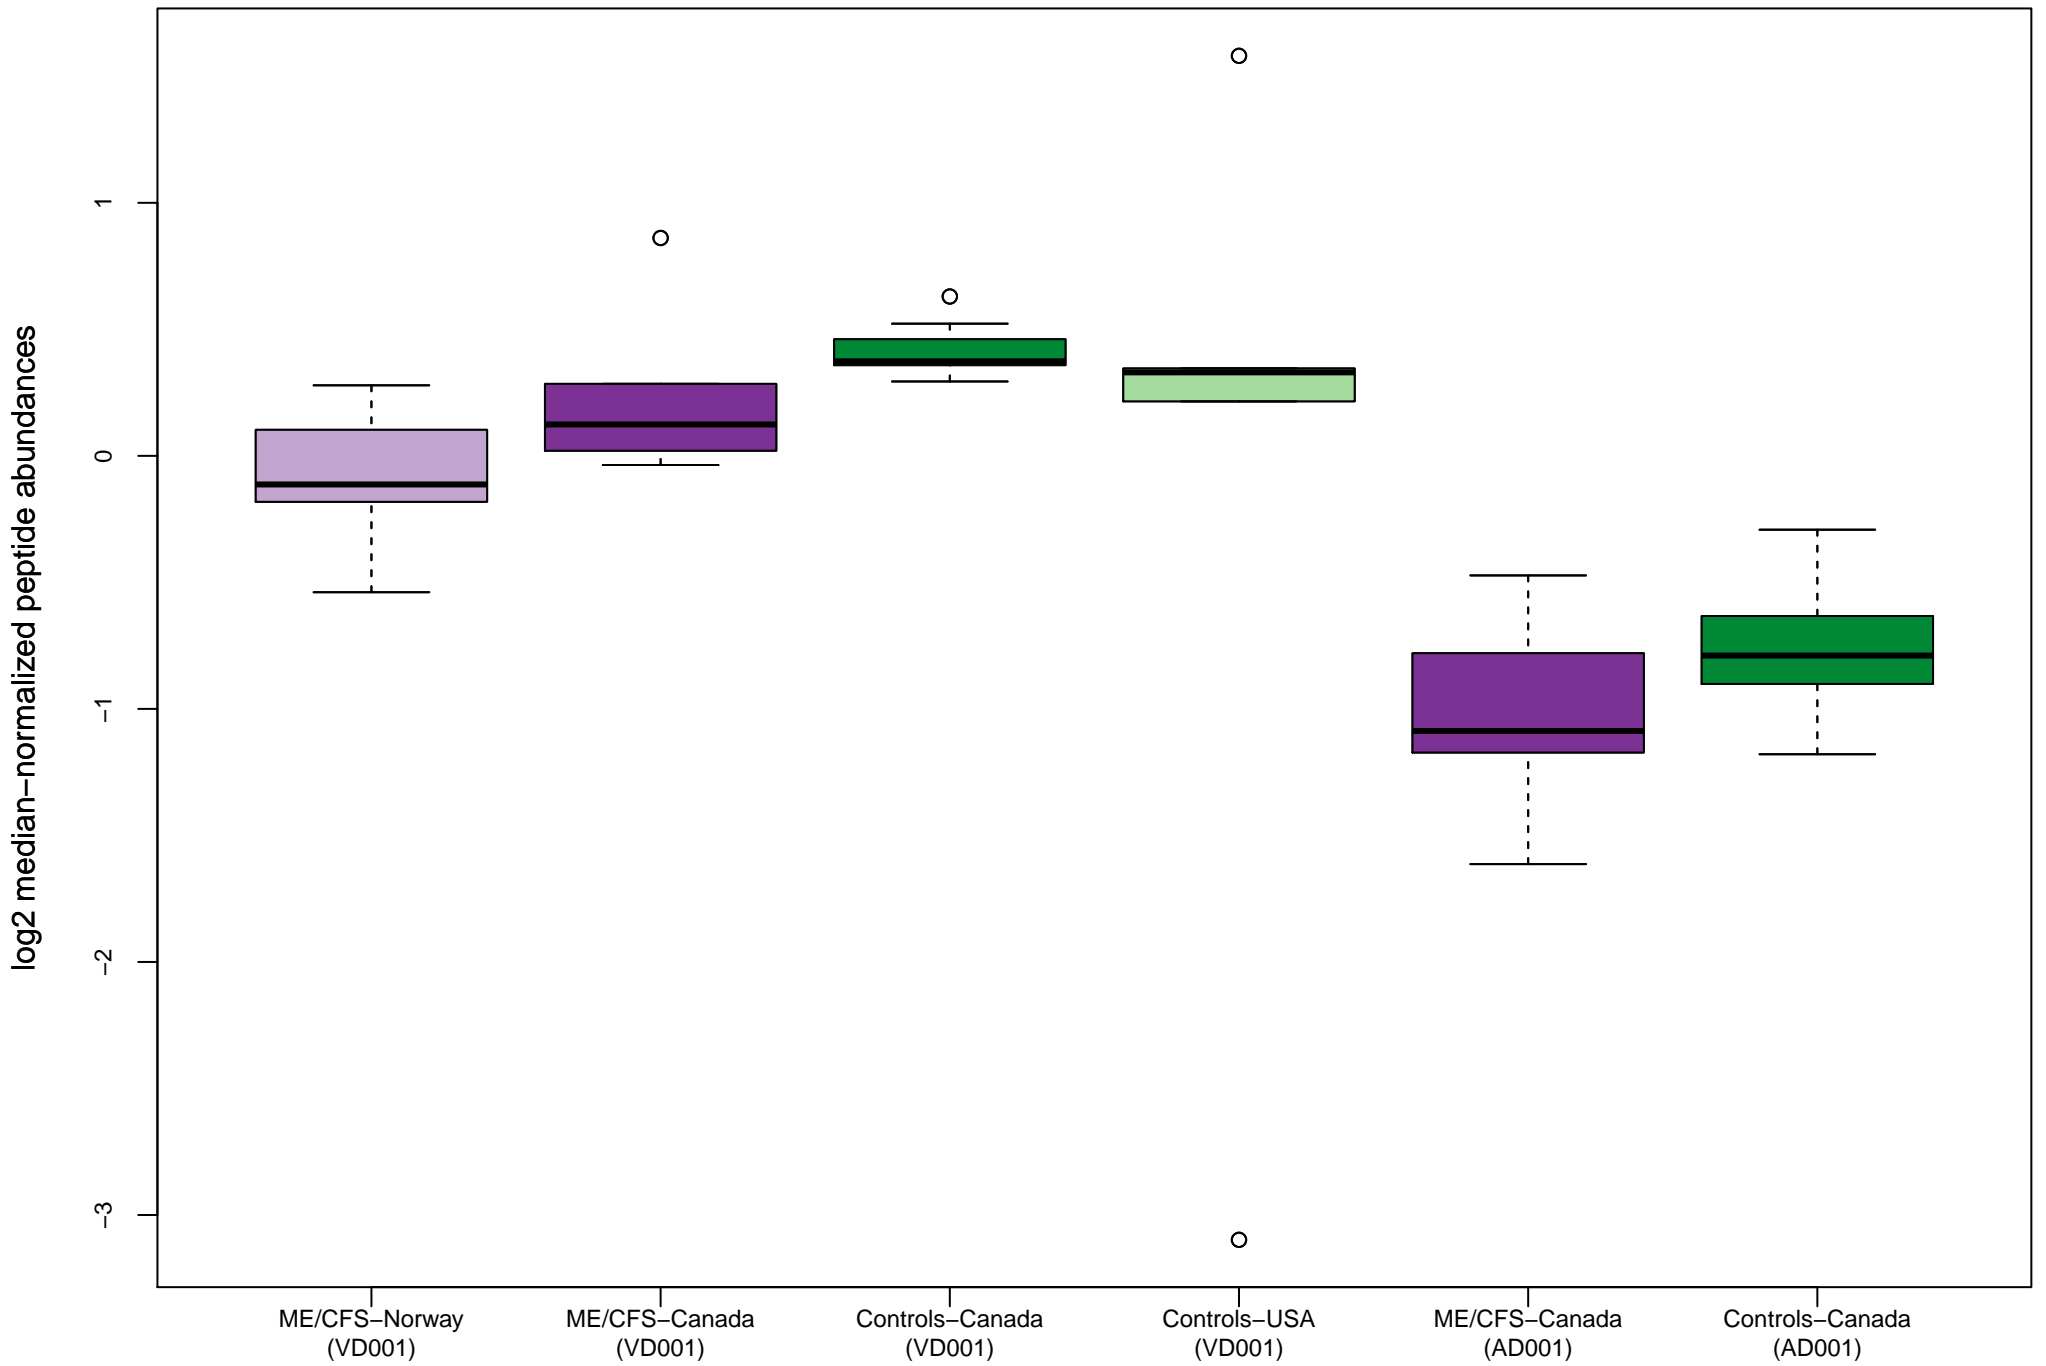

# FGRLVQFRNAGG

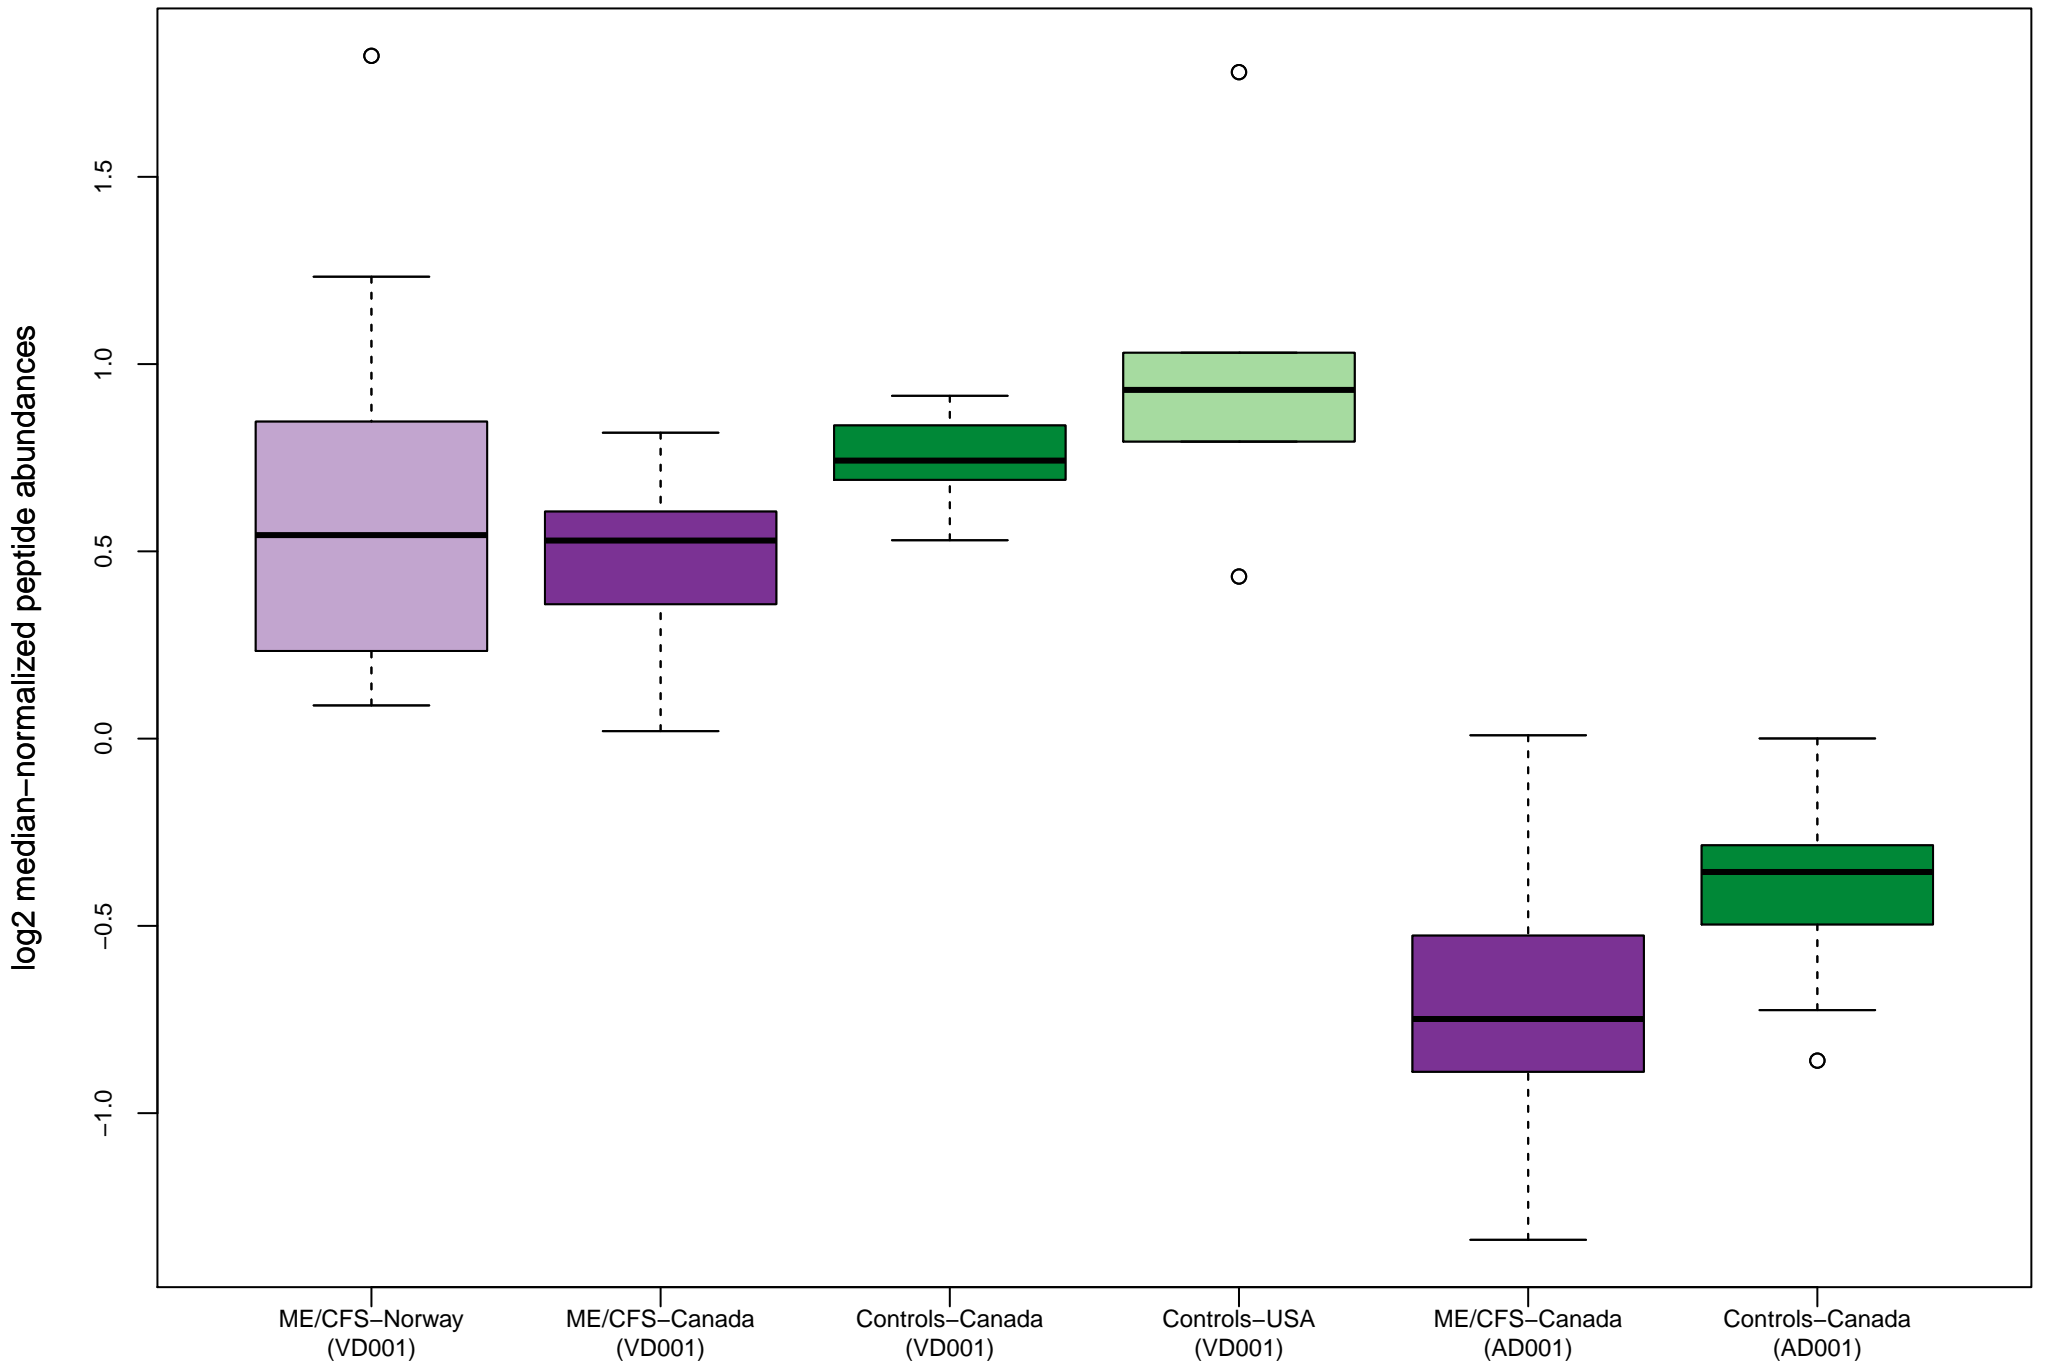

# FKSFHVLSKPNV

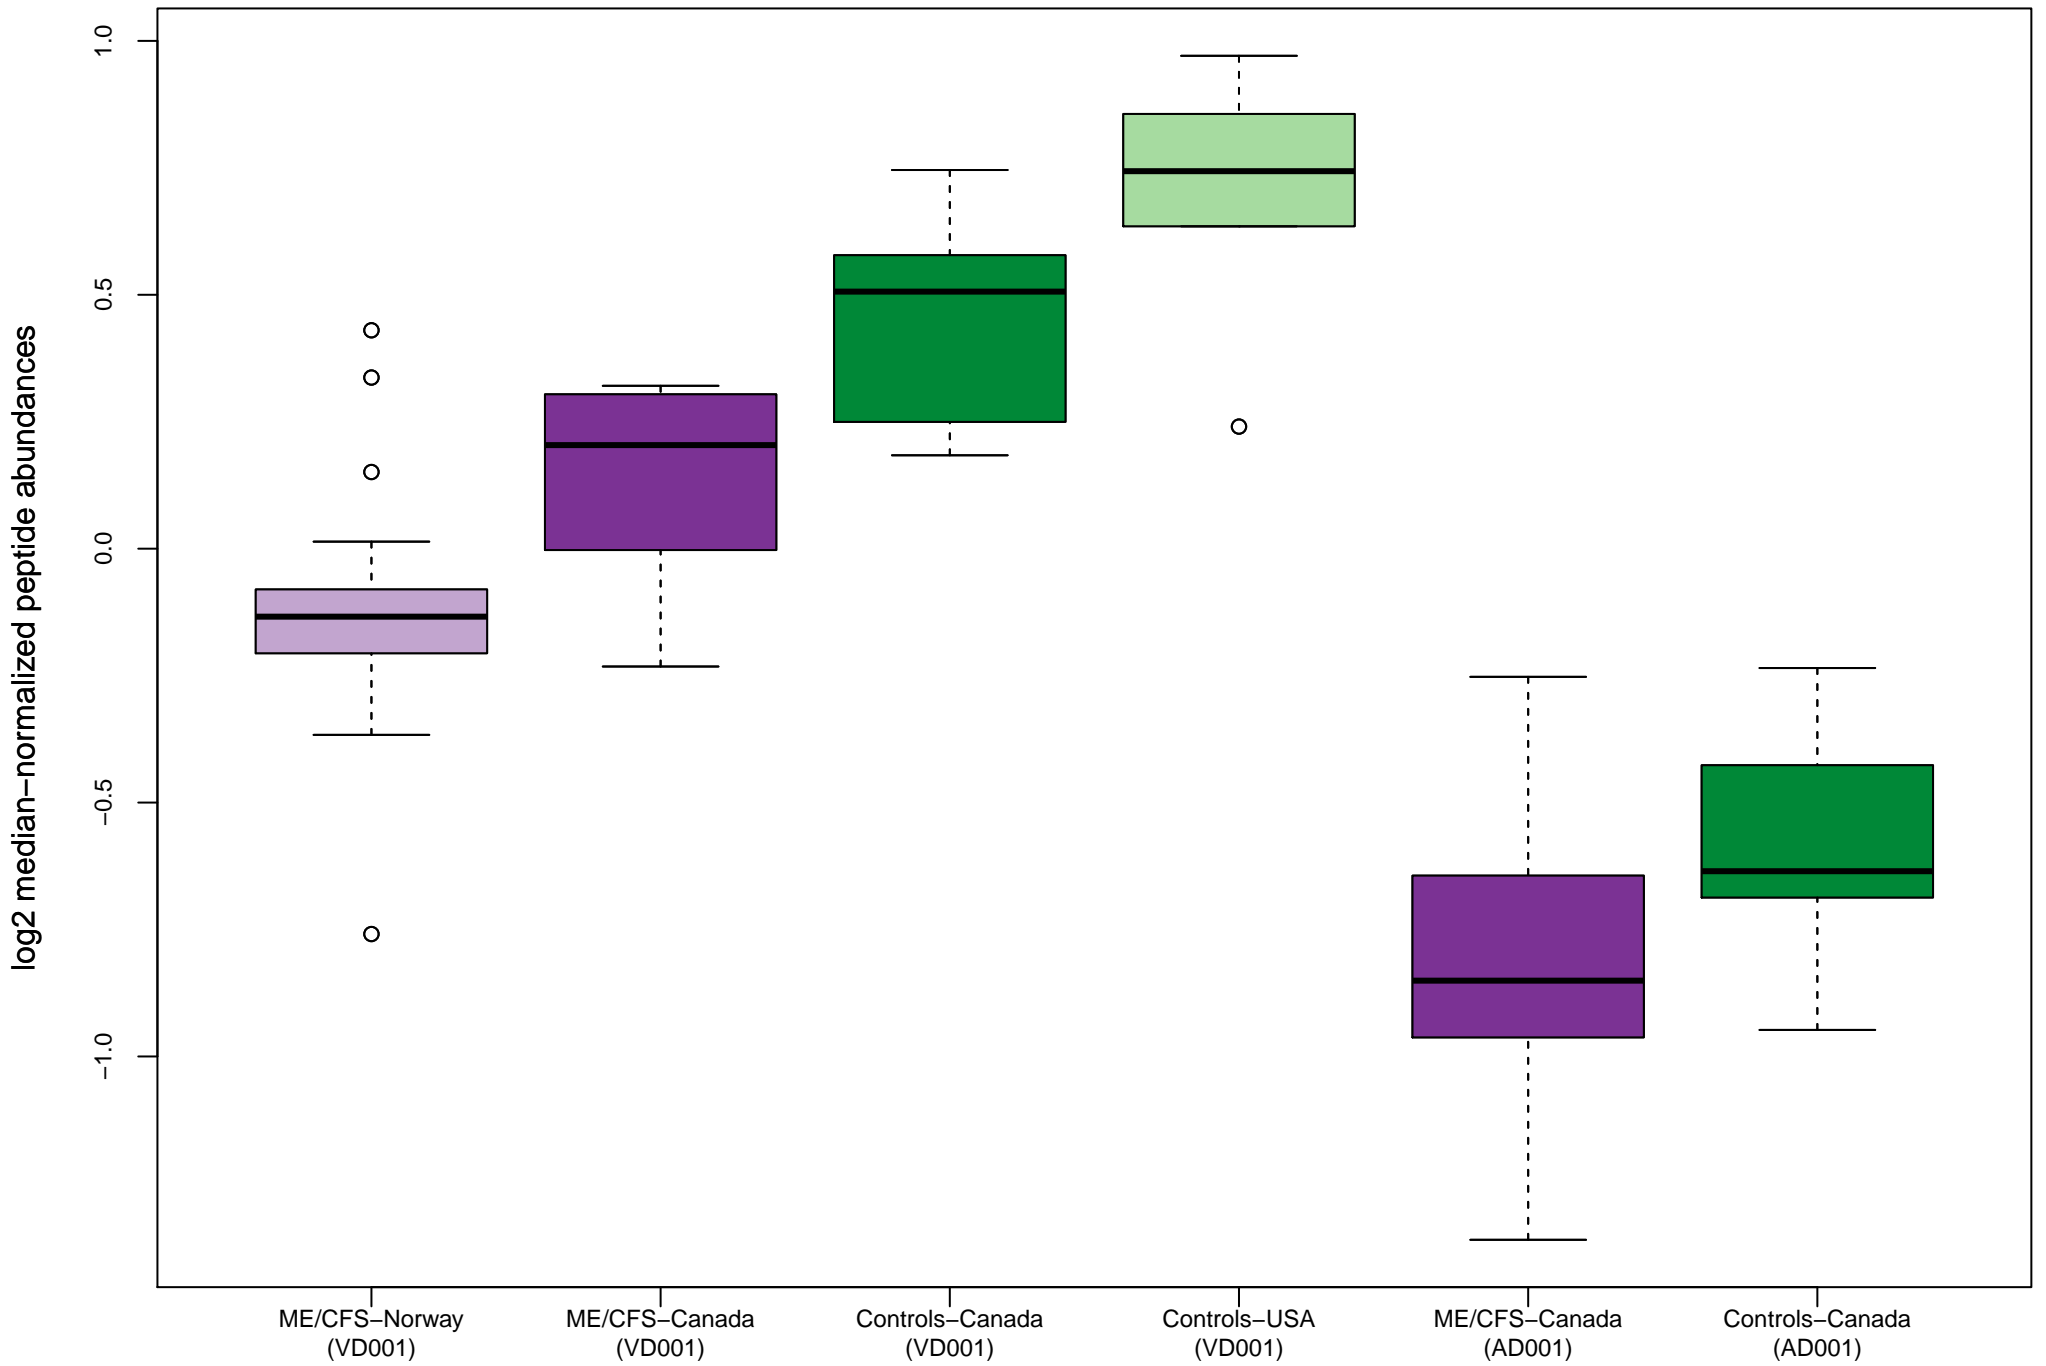

# FNRAVRWNLGAL

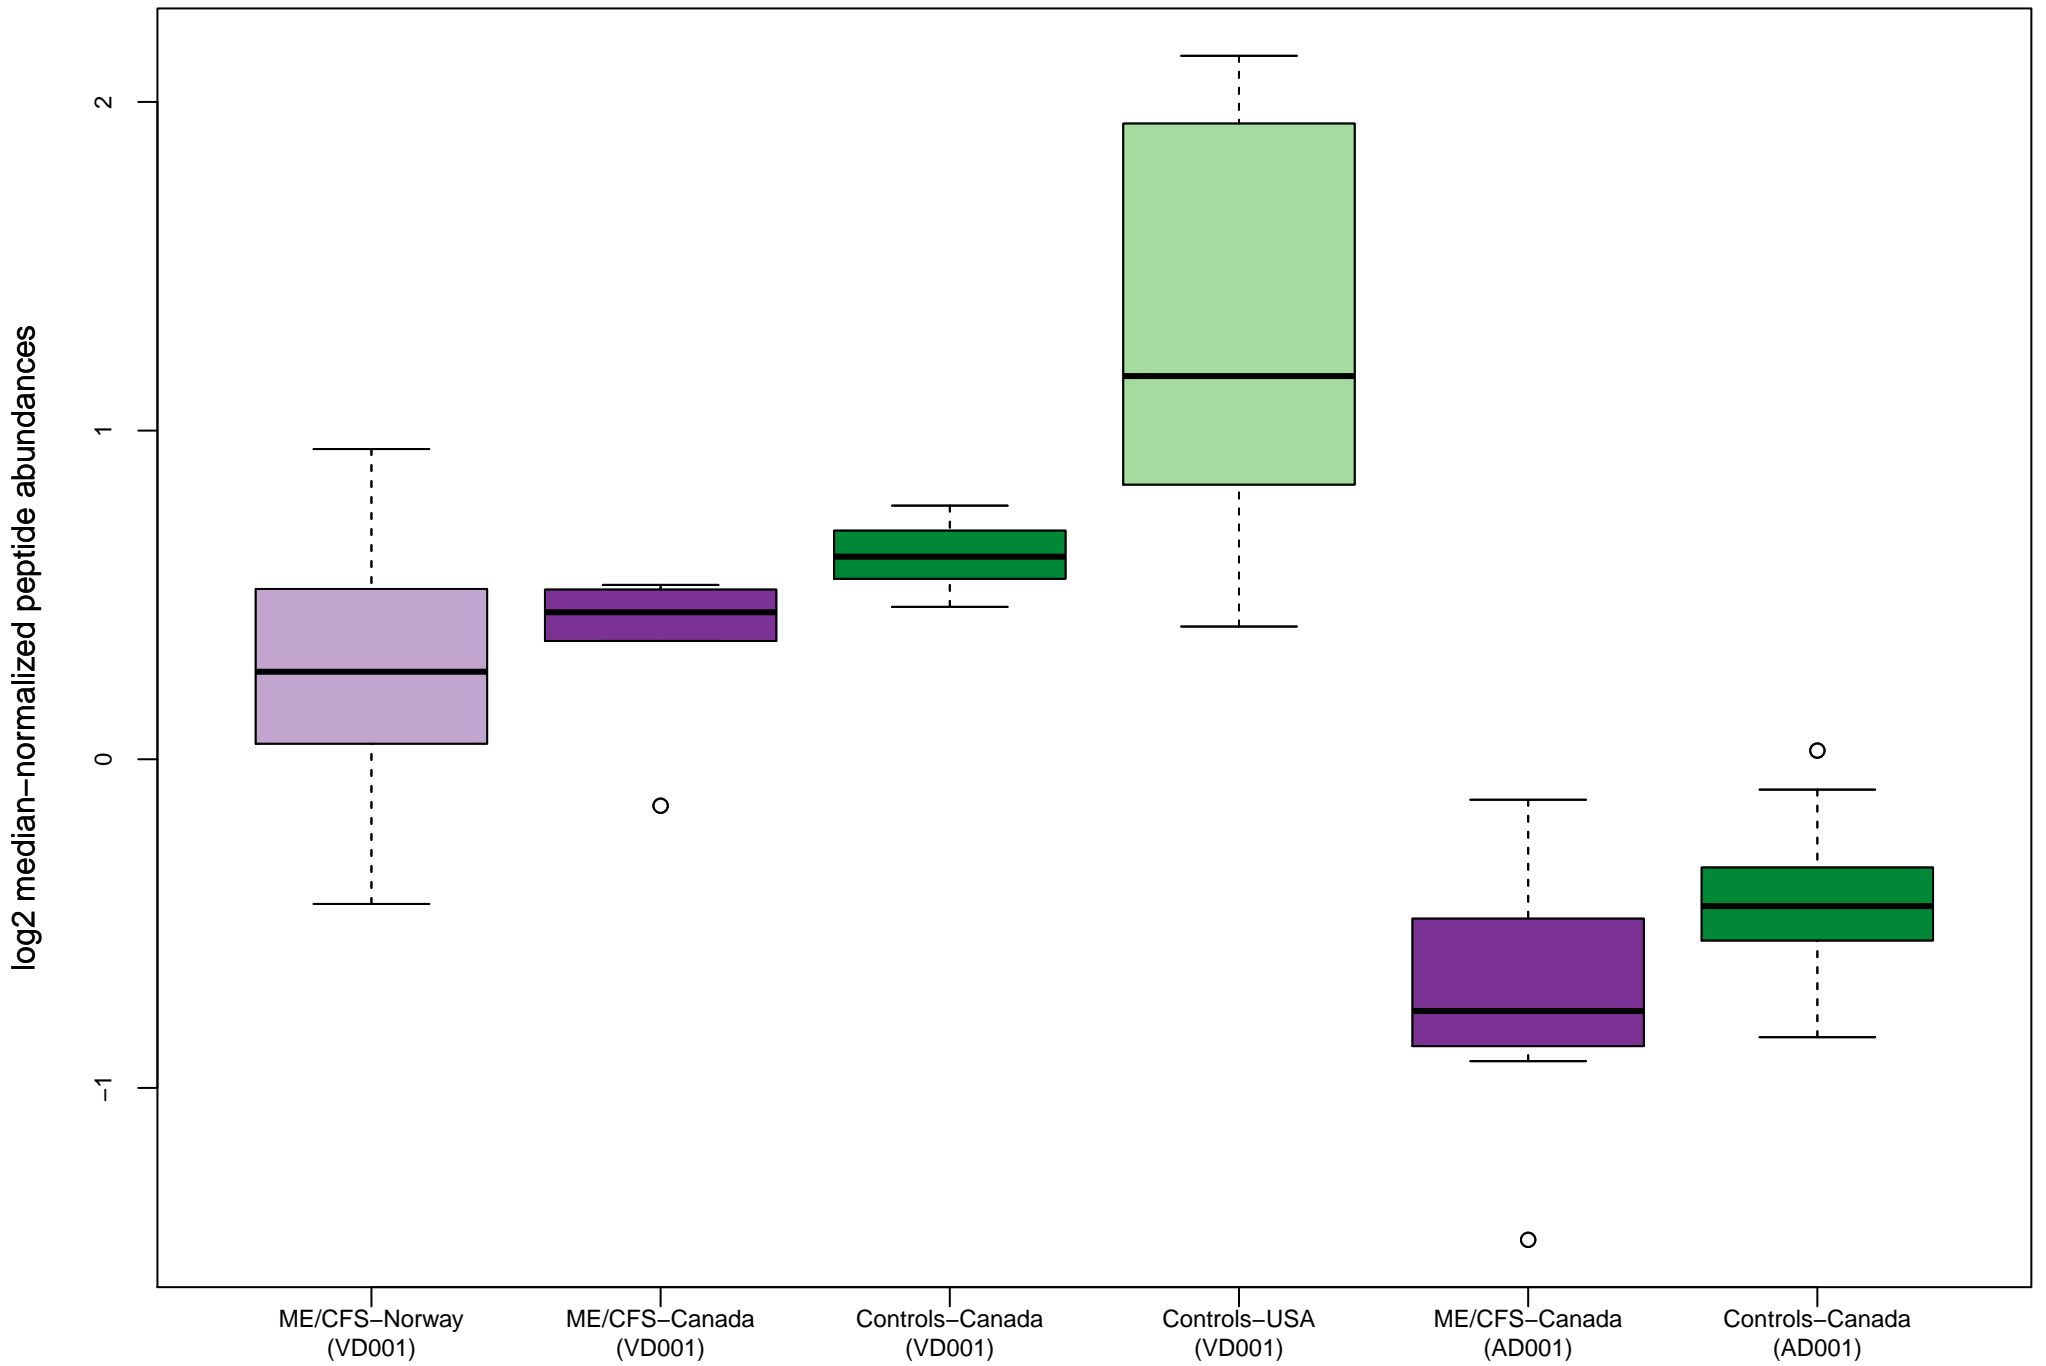

# FRAFLGNLRPLG

log2 median-normalized peptide abundances

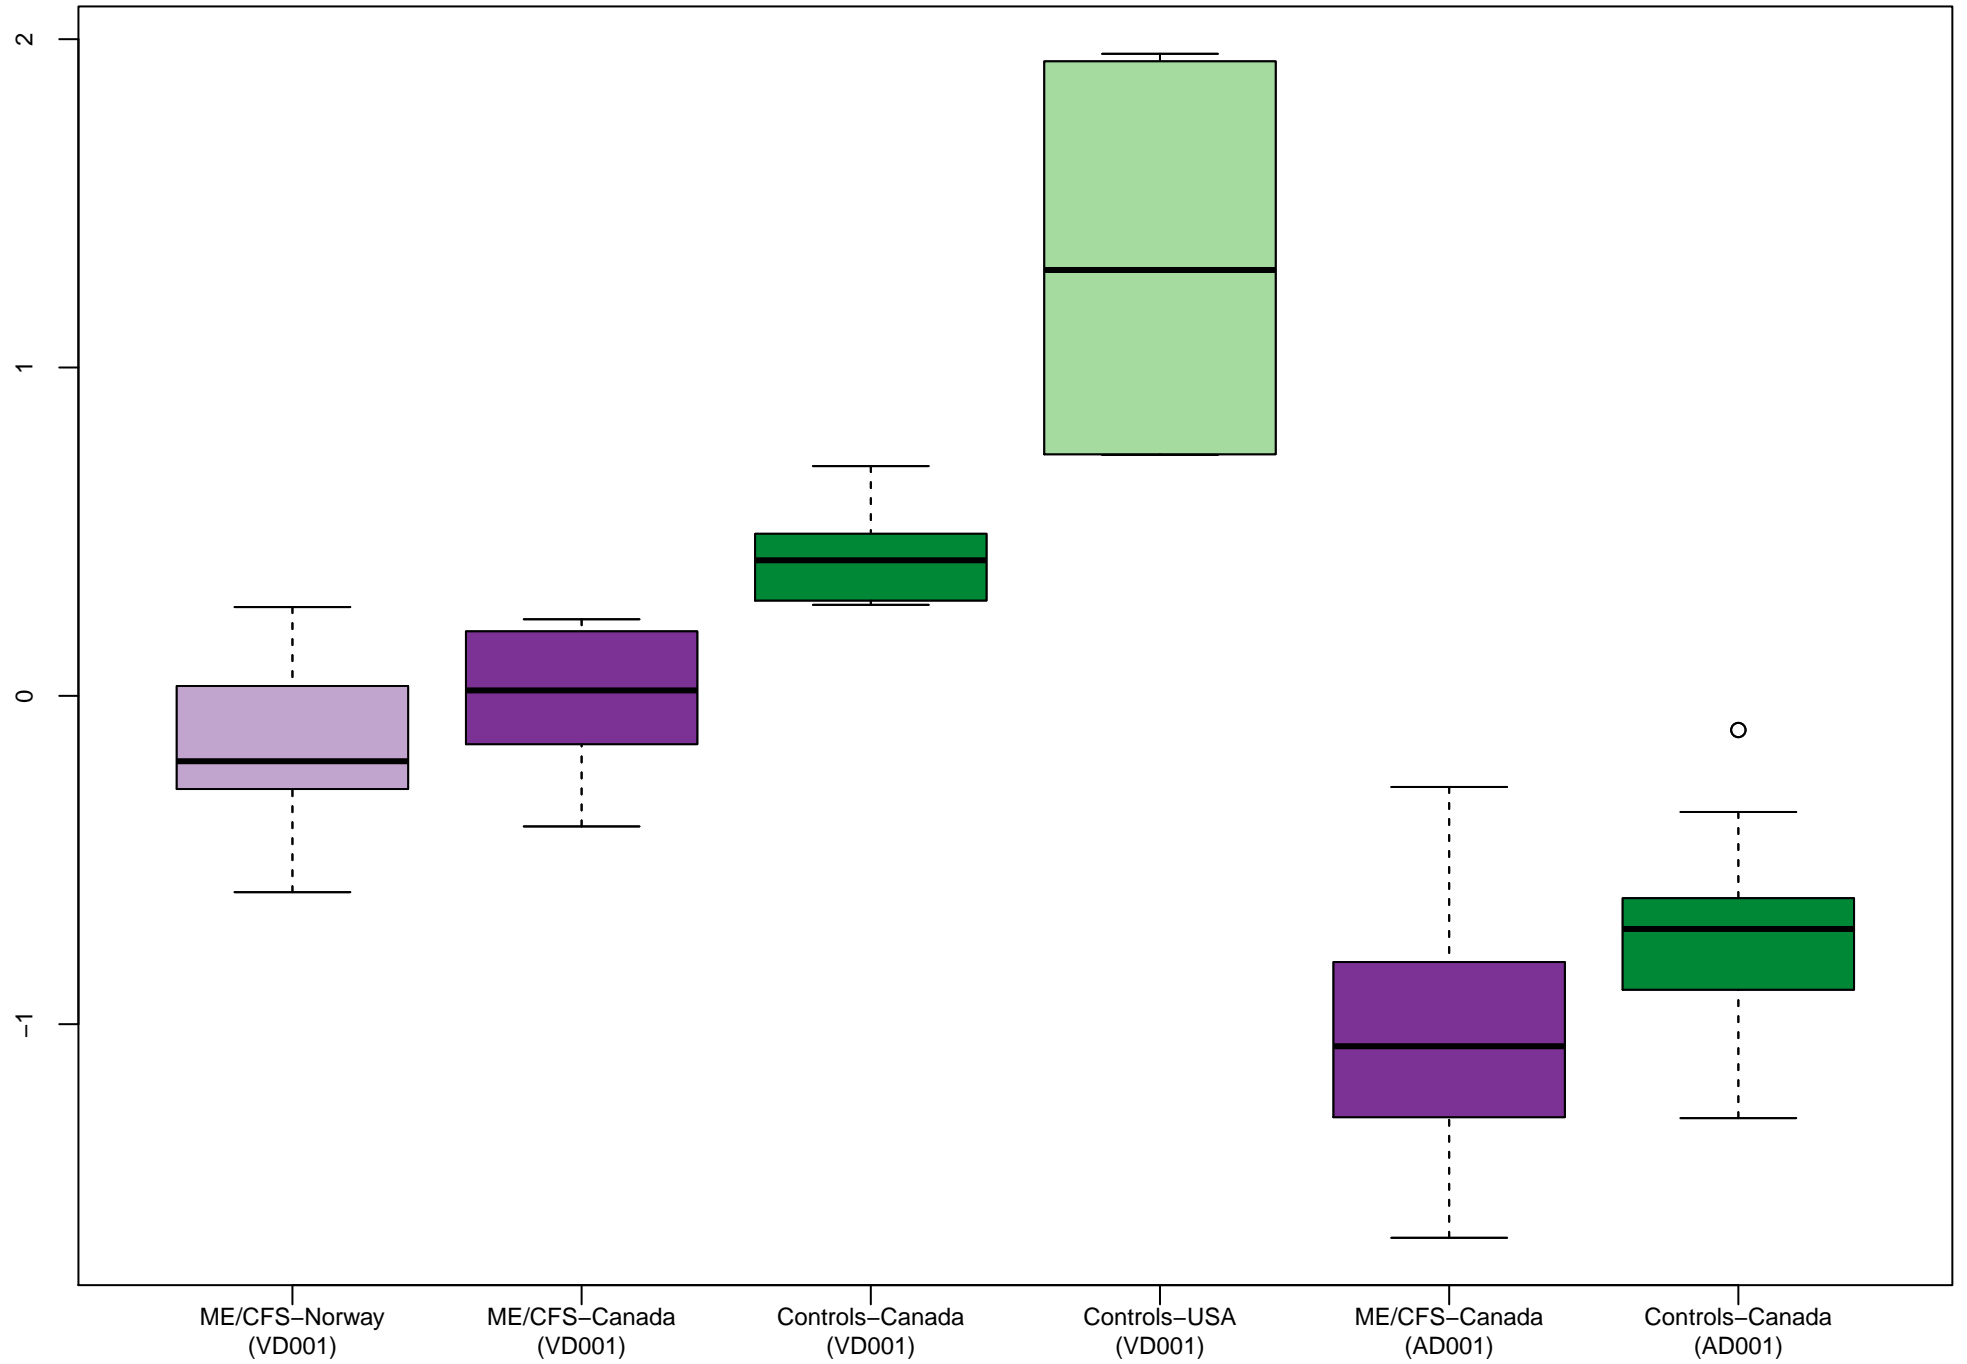

# FRGWPHLNKAS

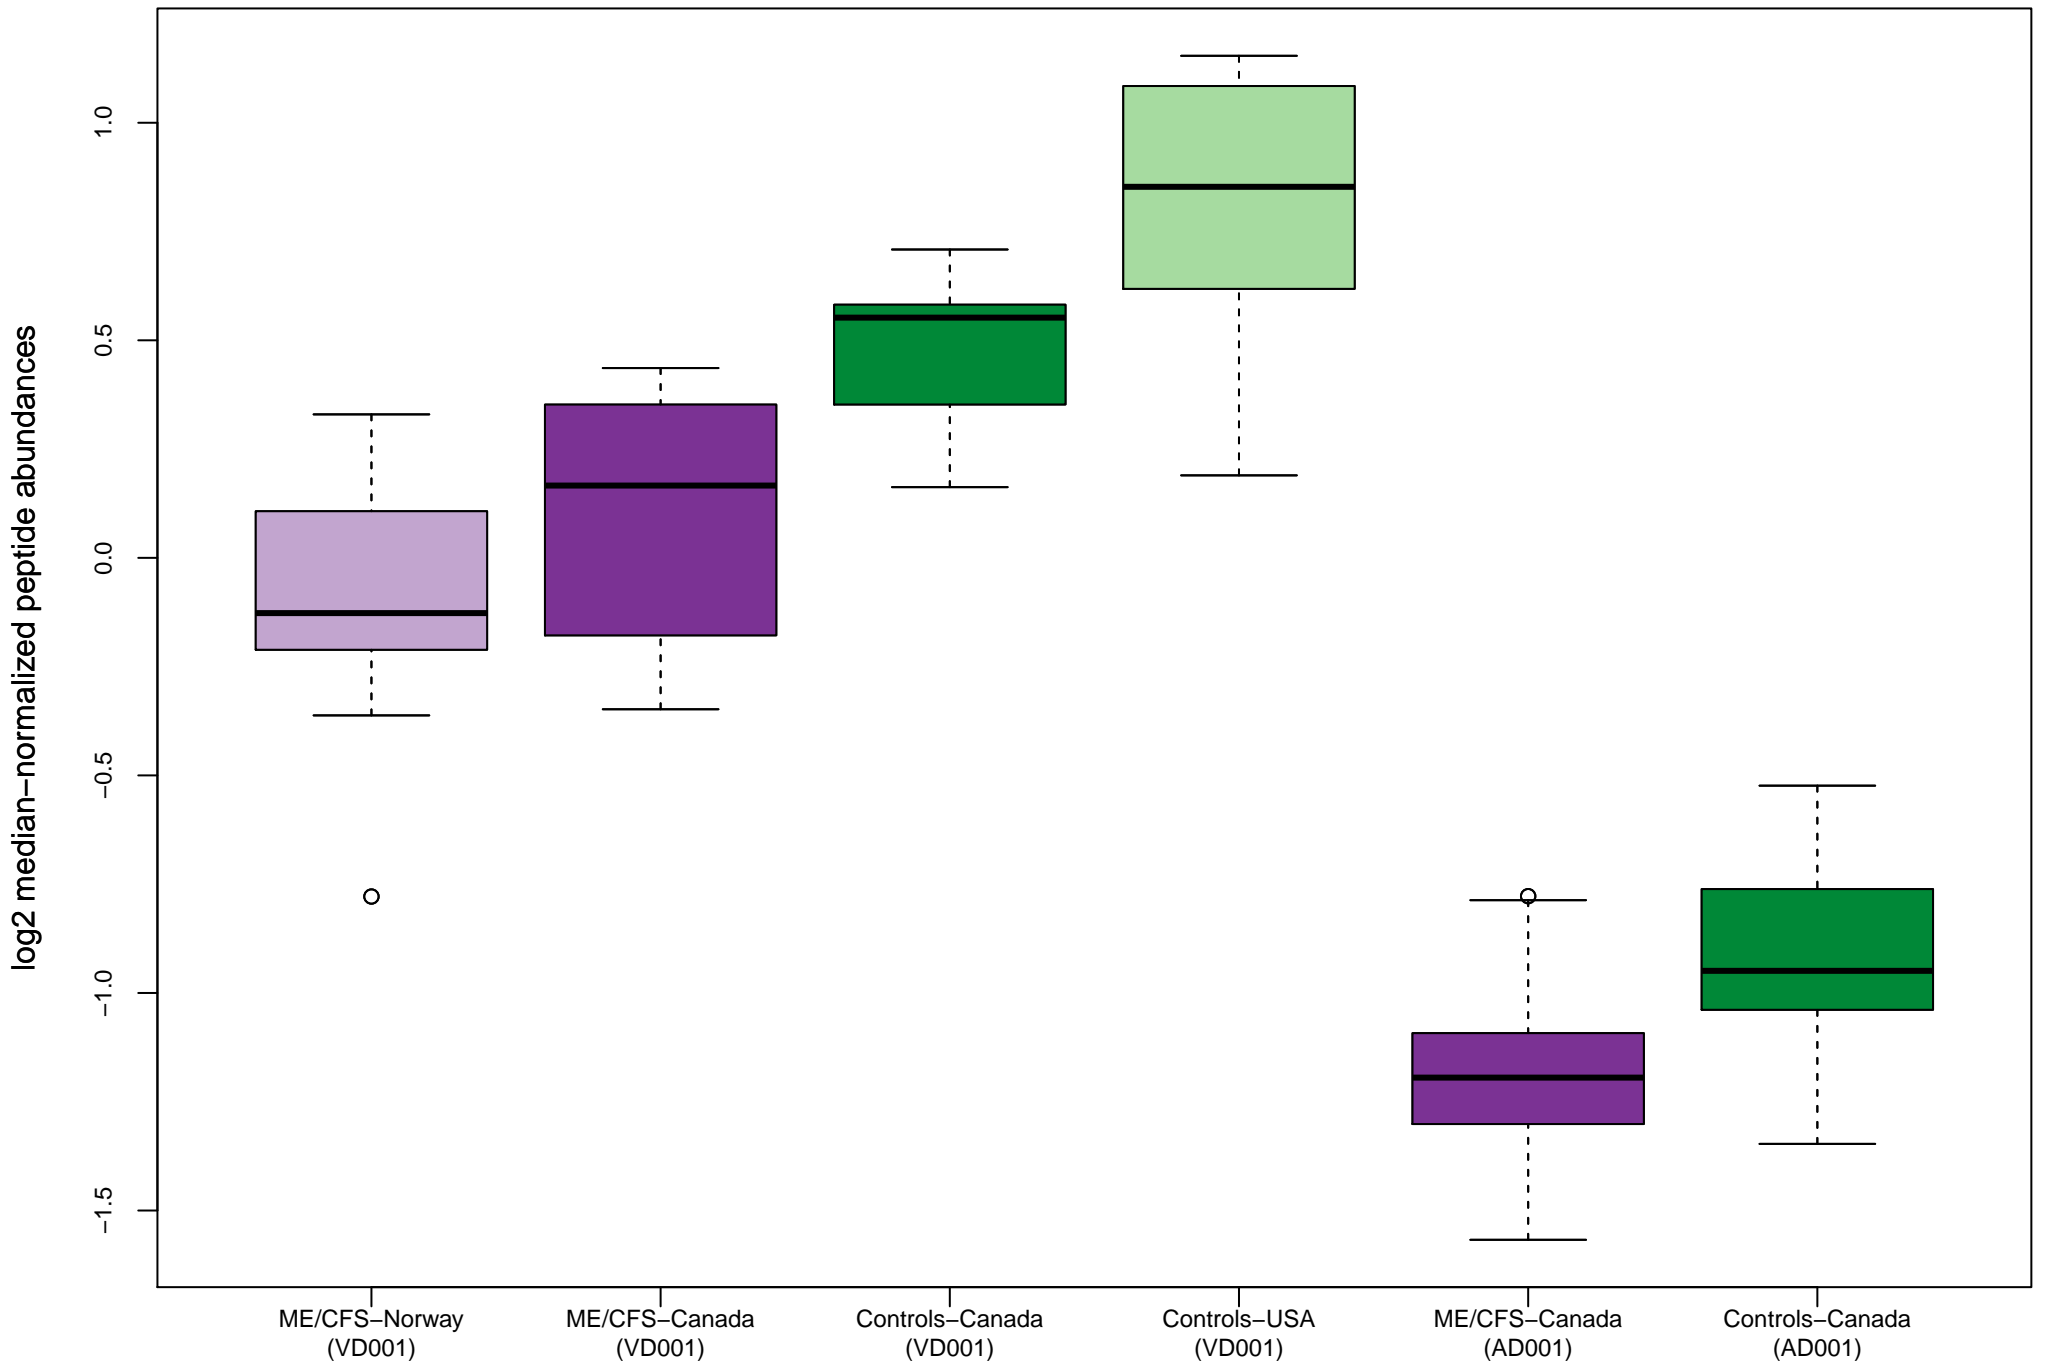

# FRQFFRWWKALG

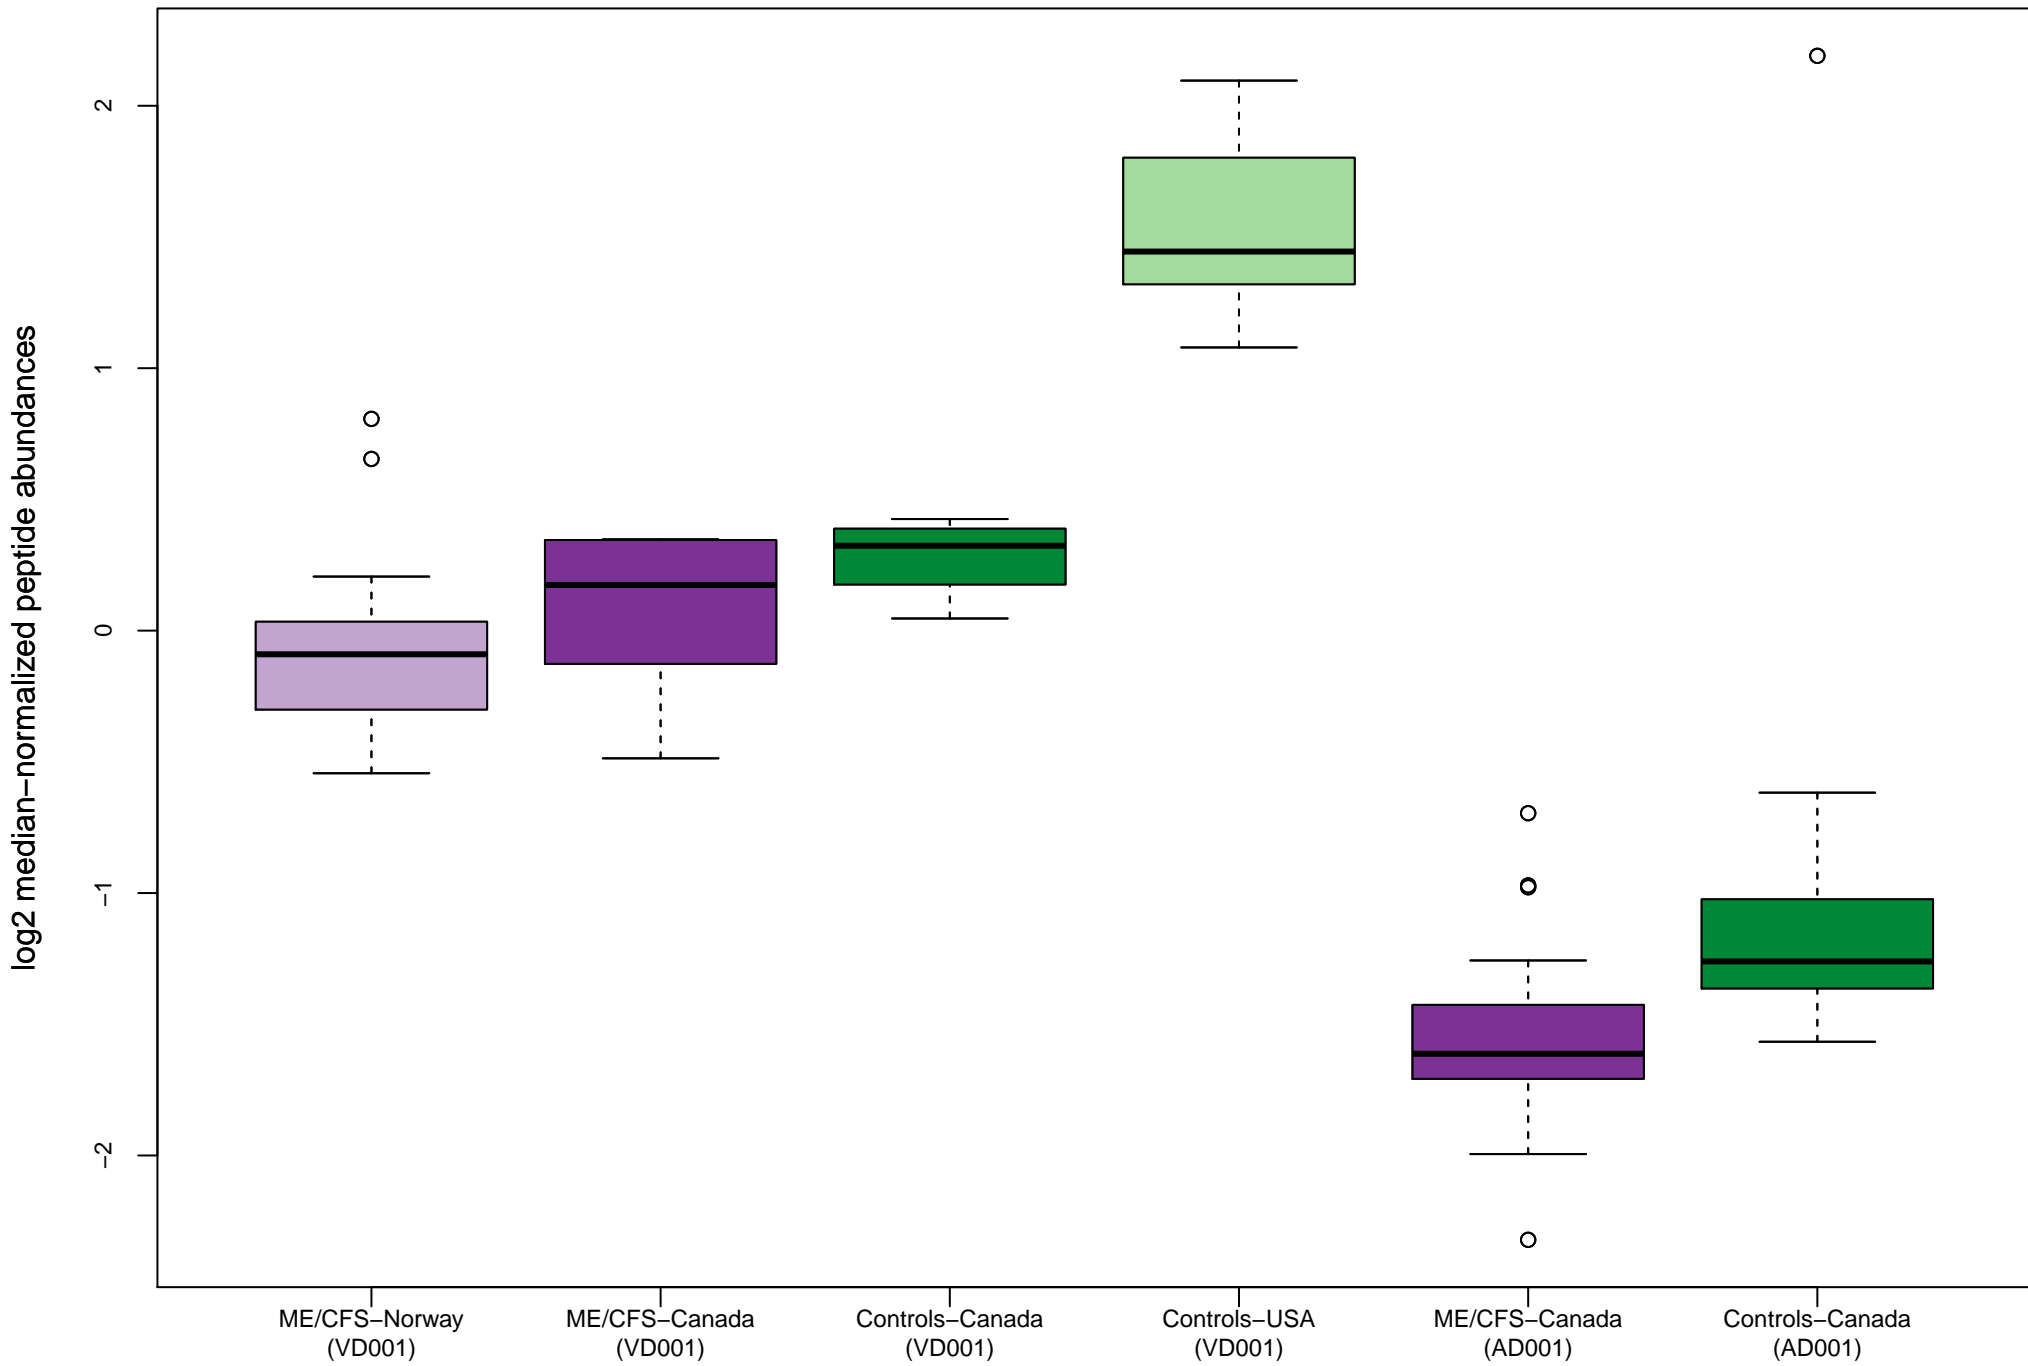



# FRVFRARPLSG

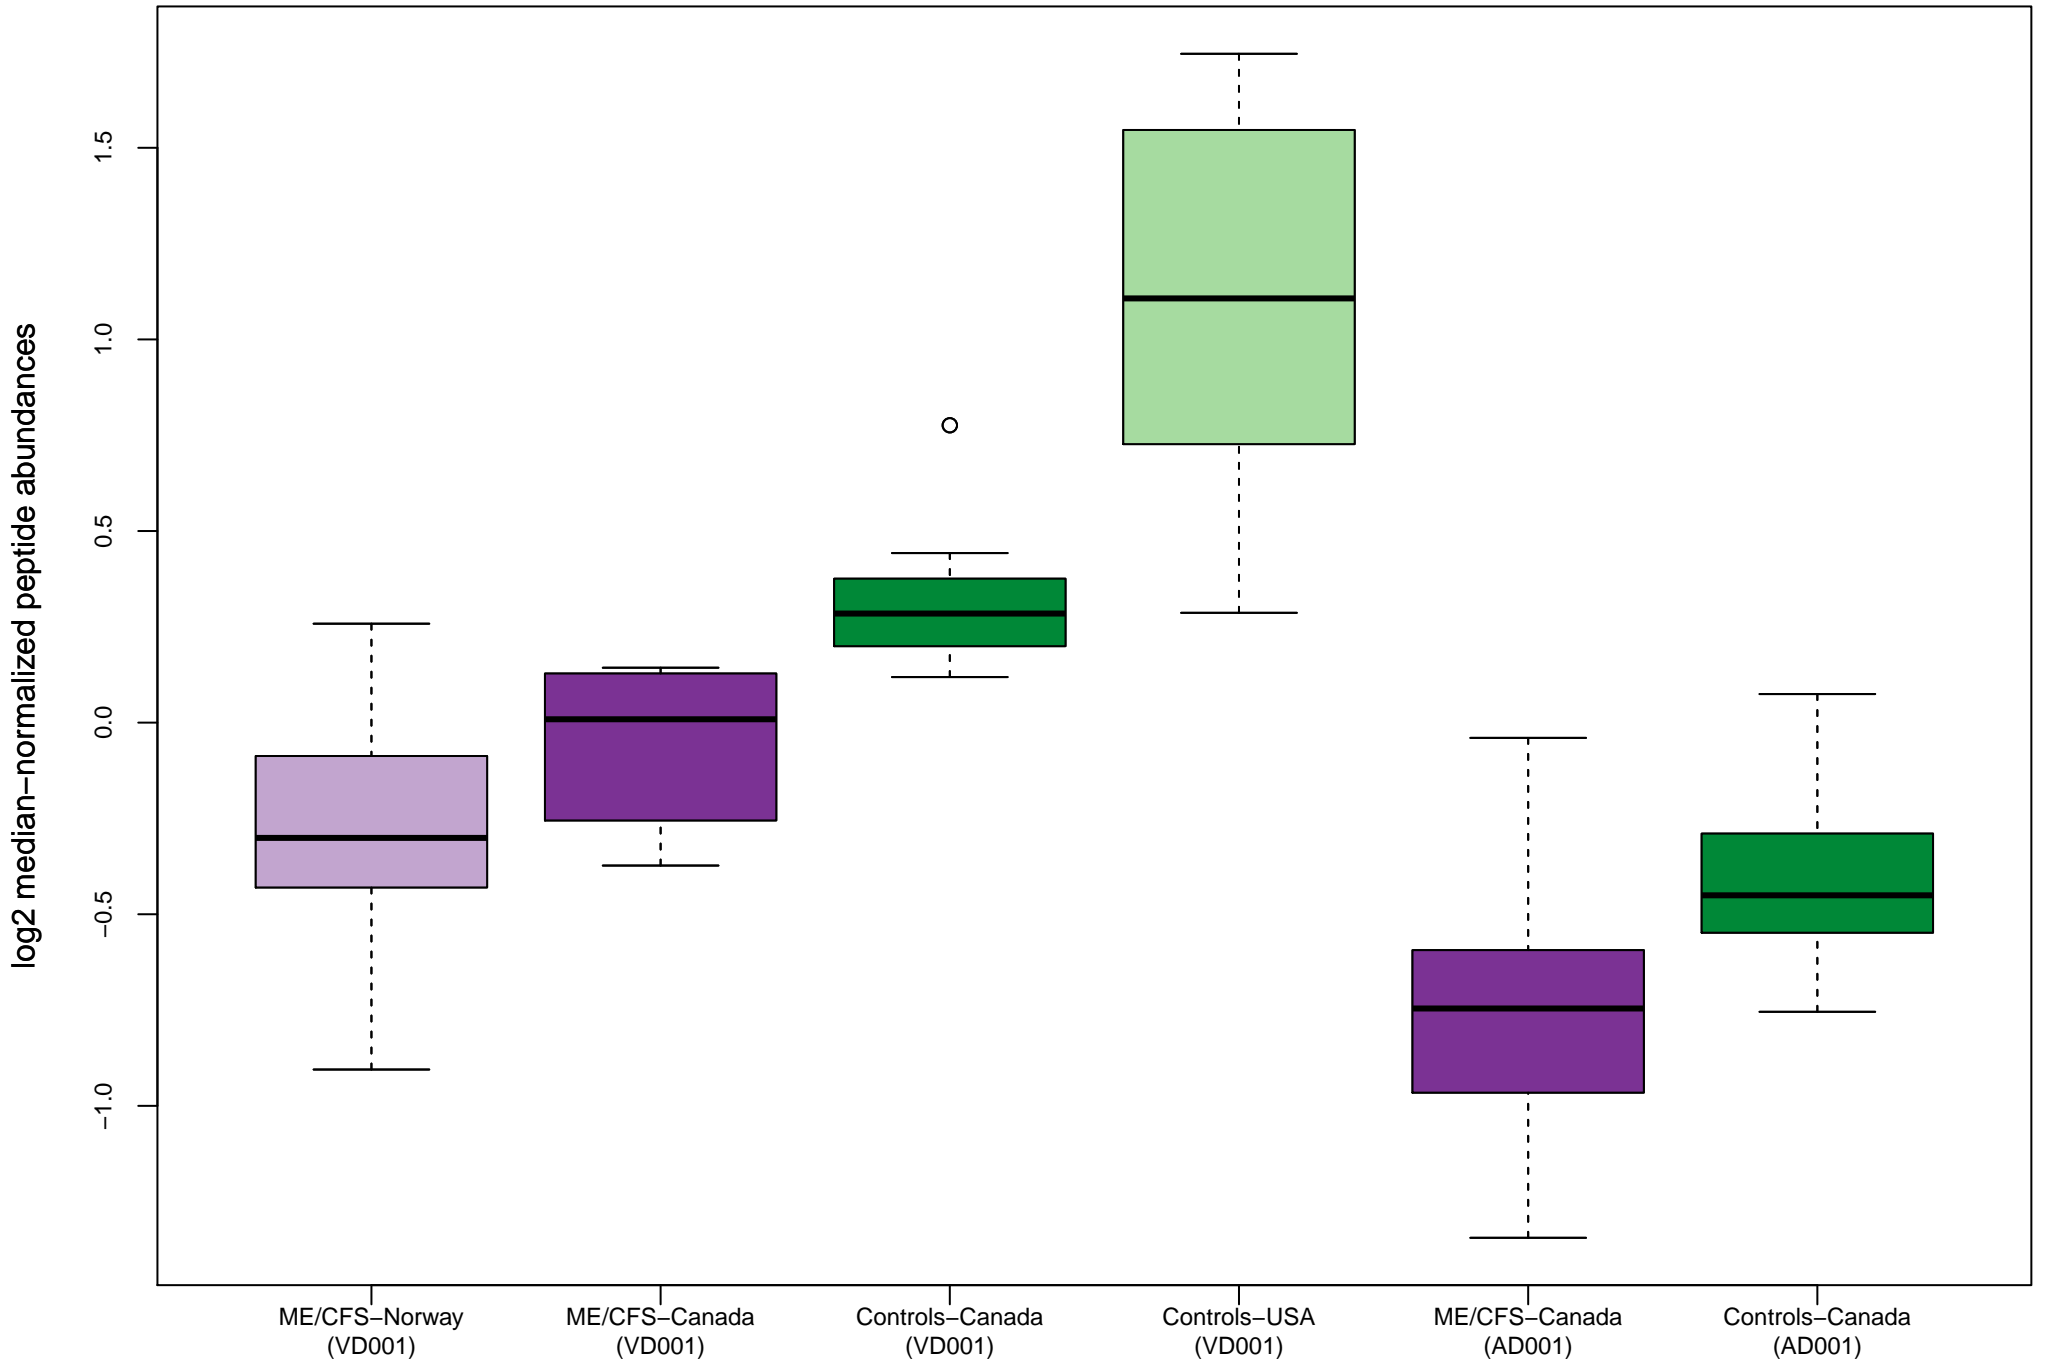

**FSVYRKVSGVSG**

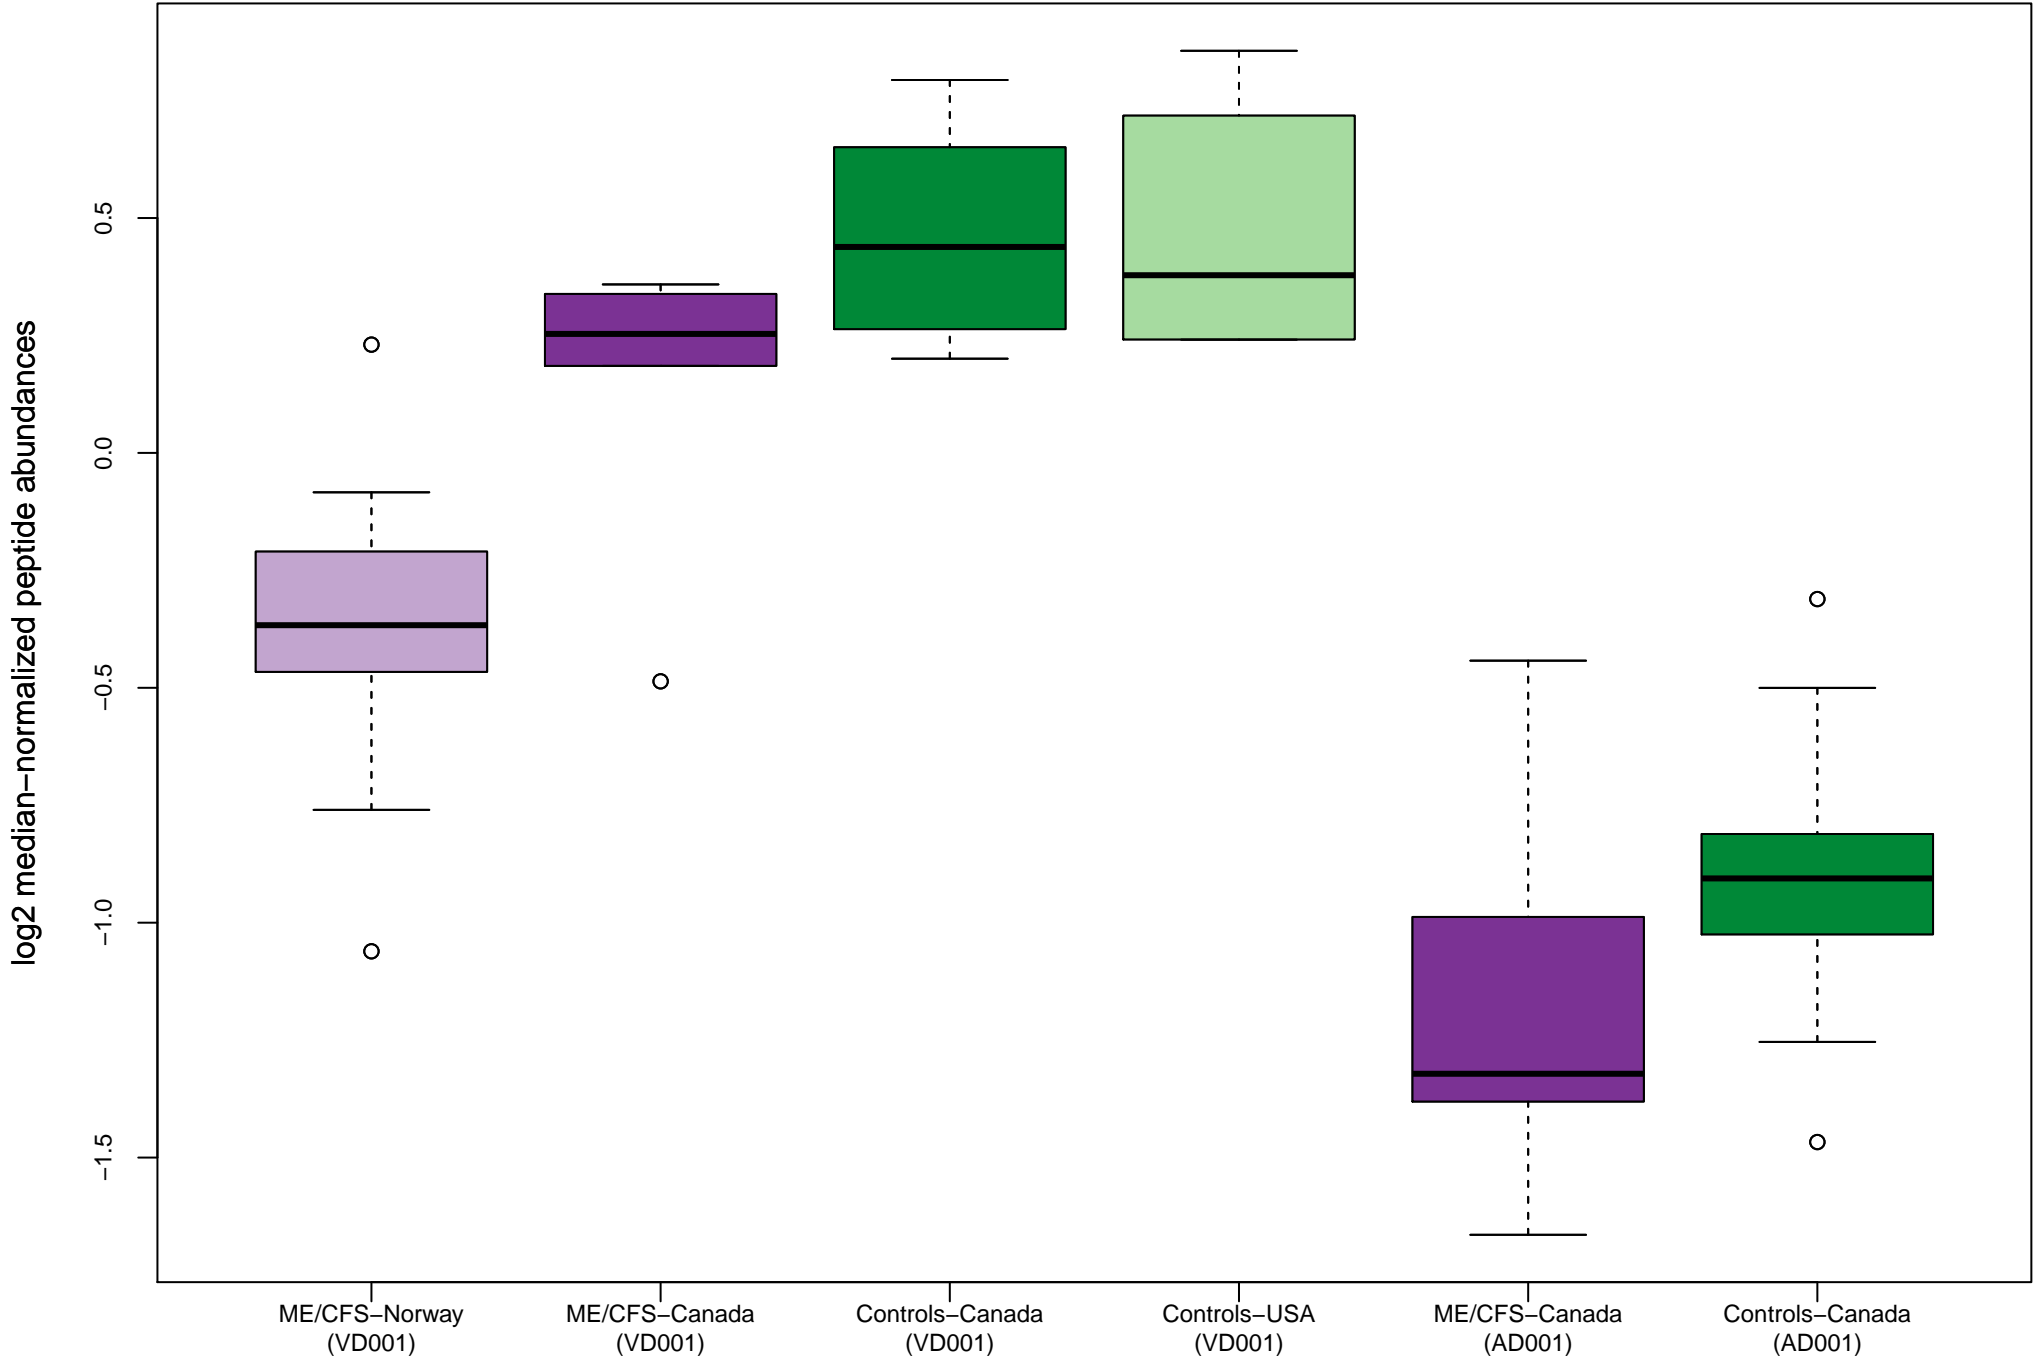

# FWRRVLSNKASV

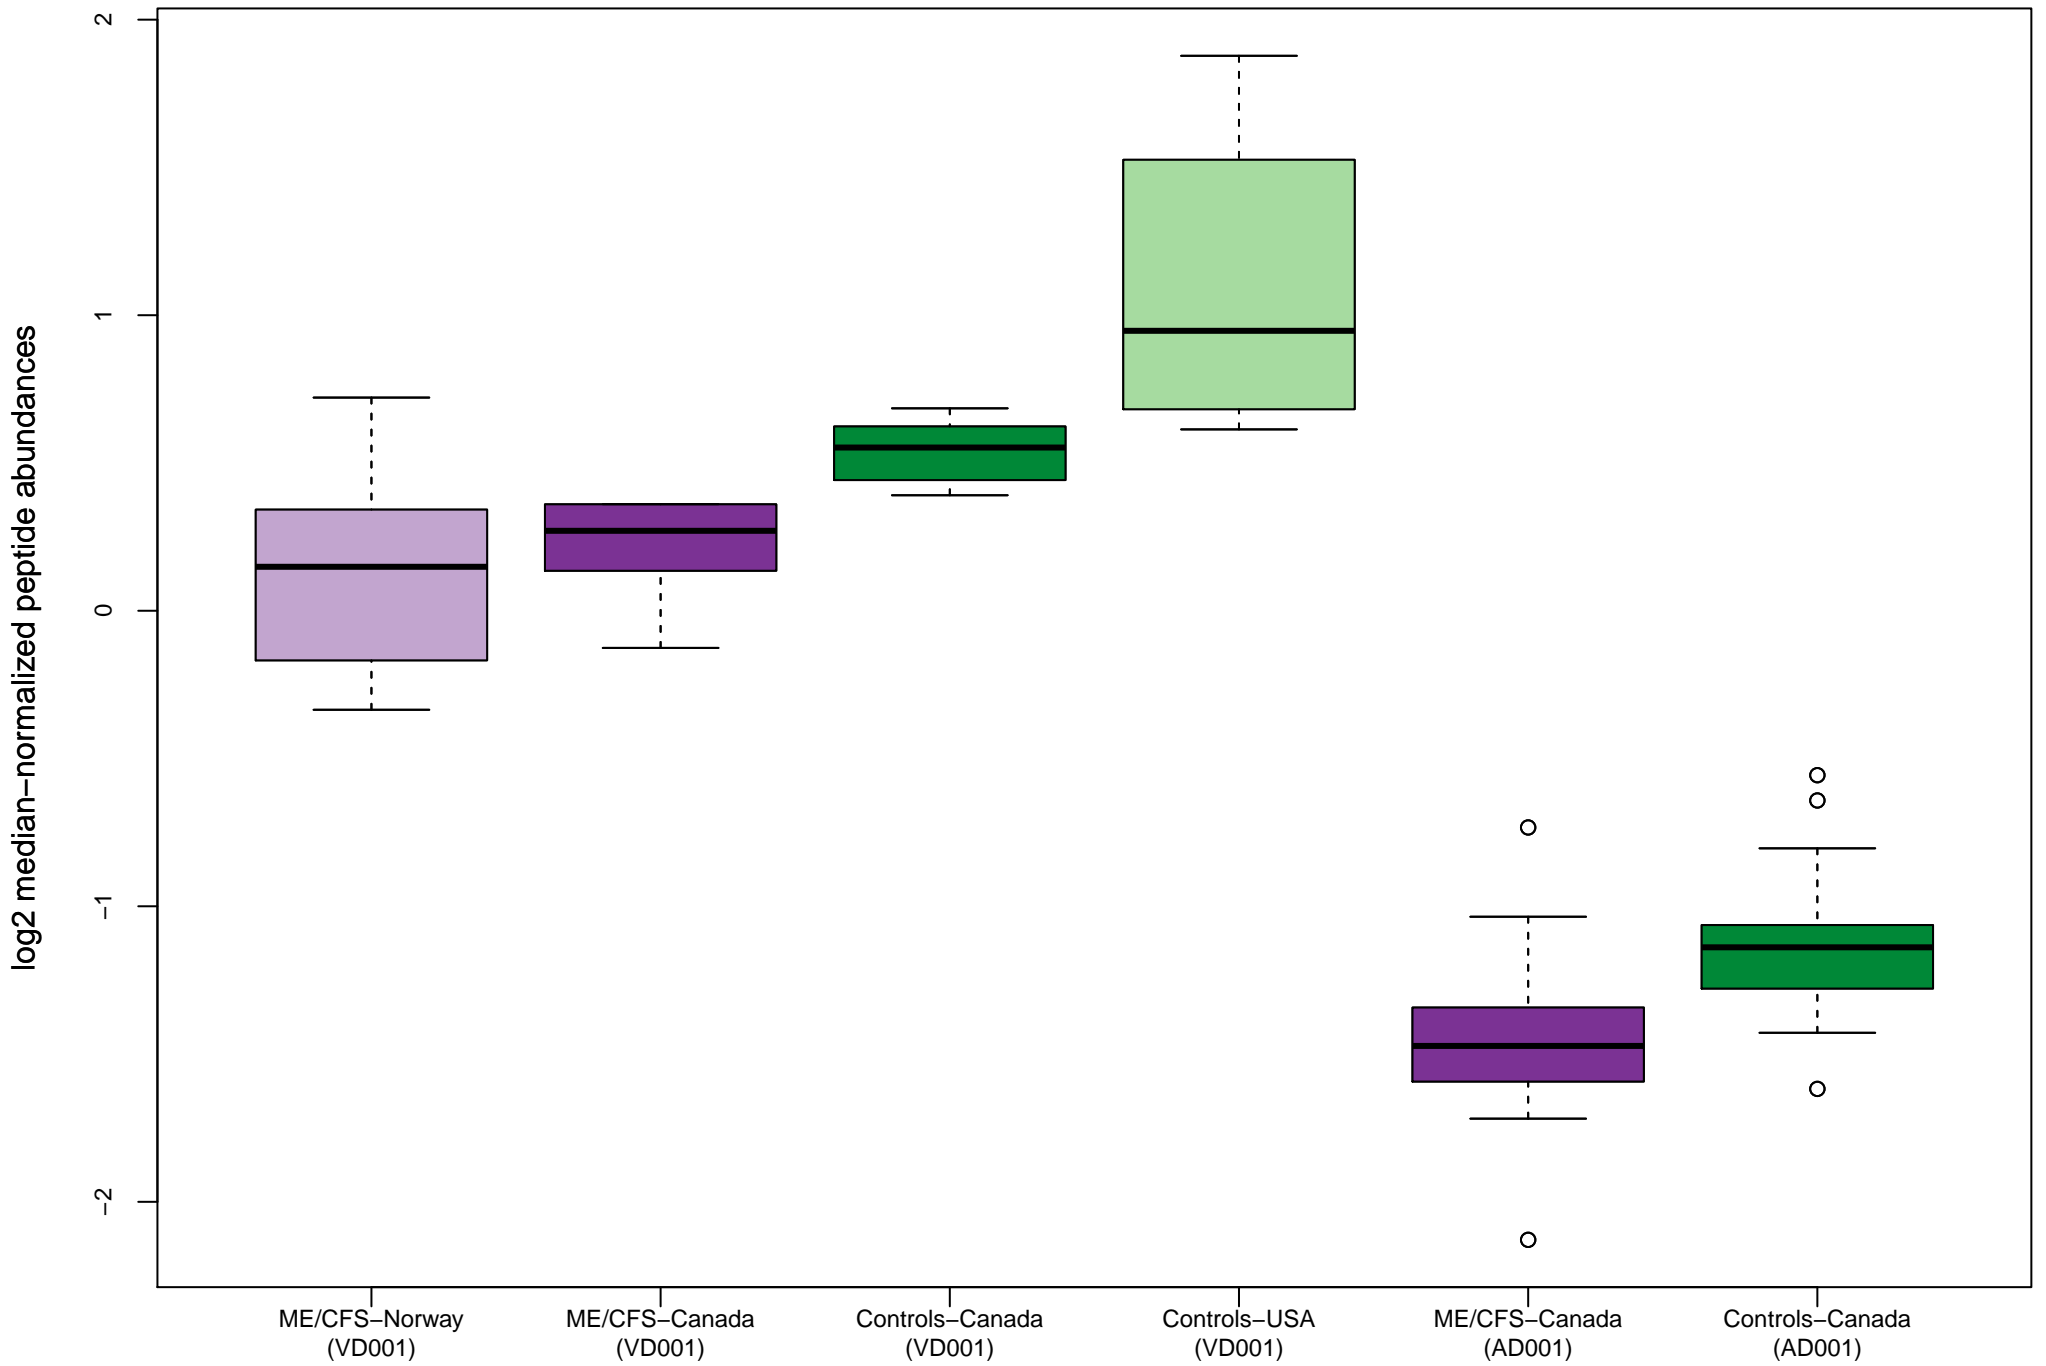

# GFARRYWLSGVG

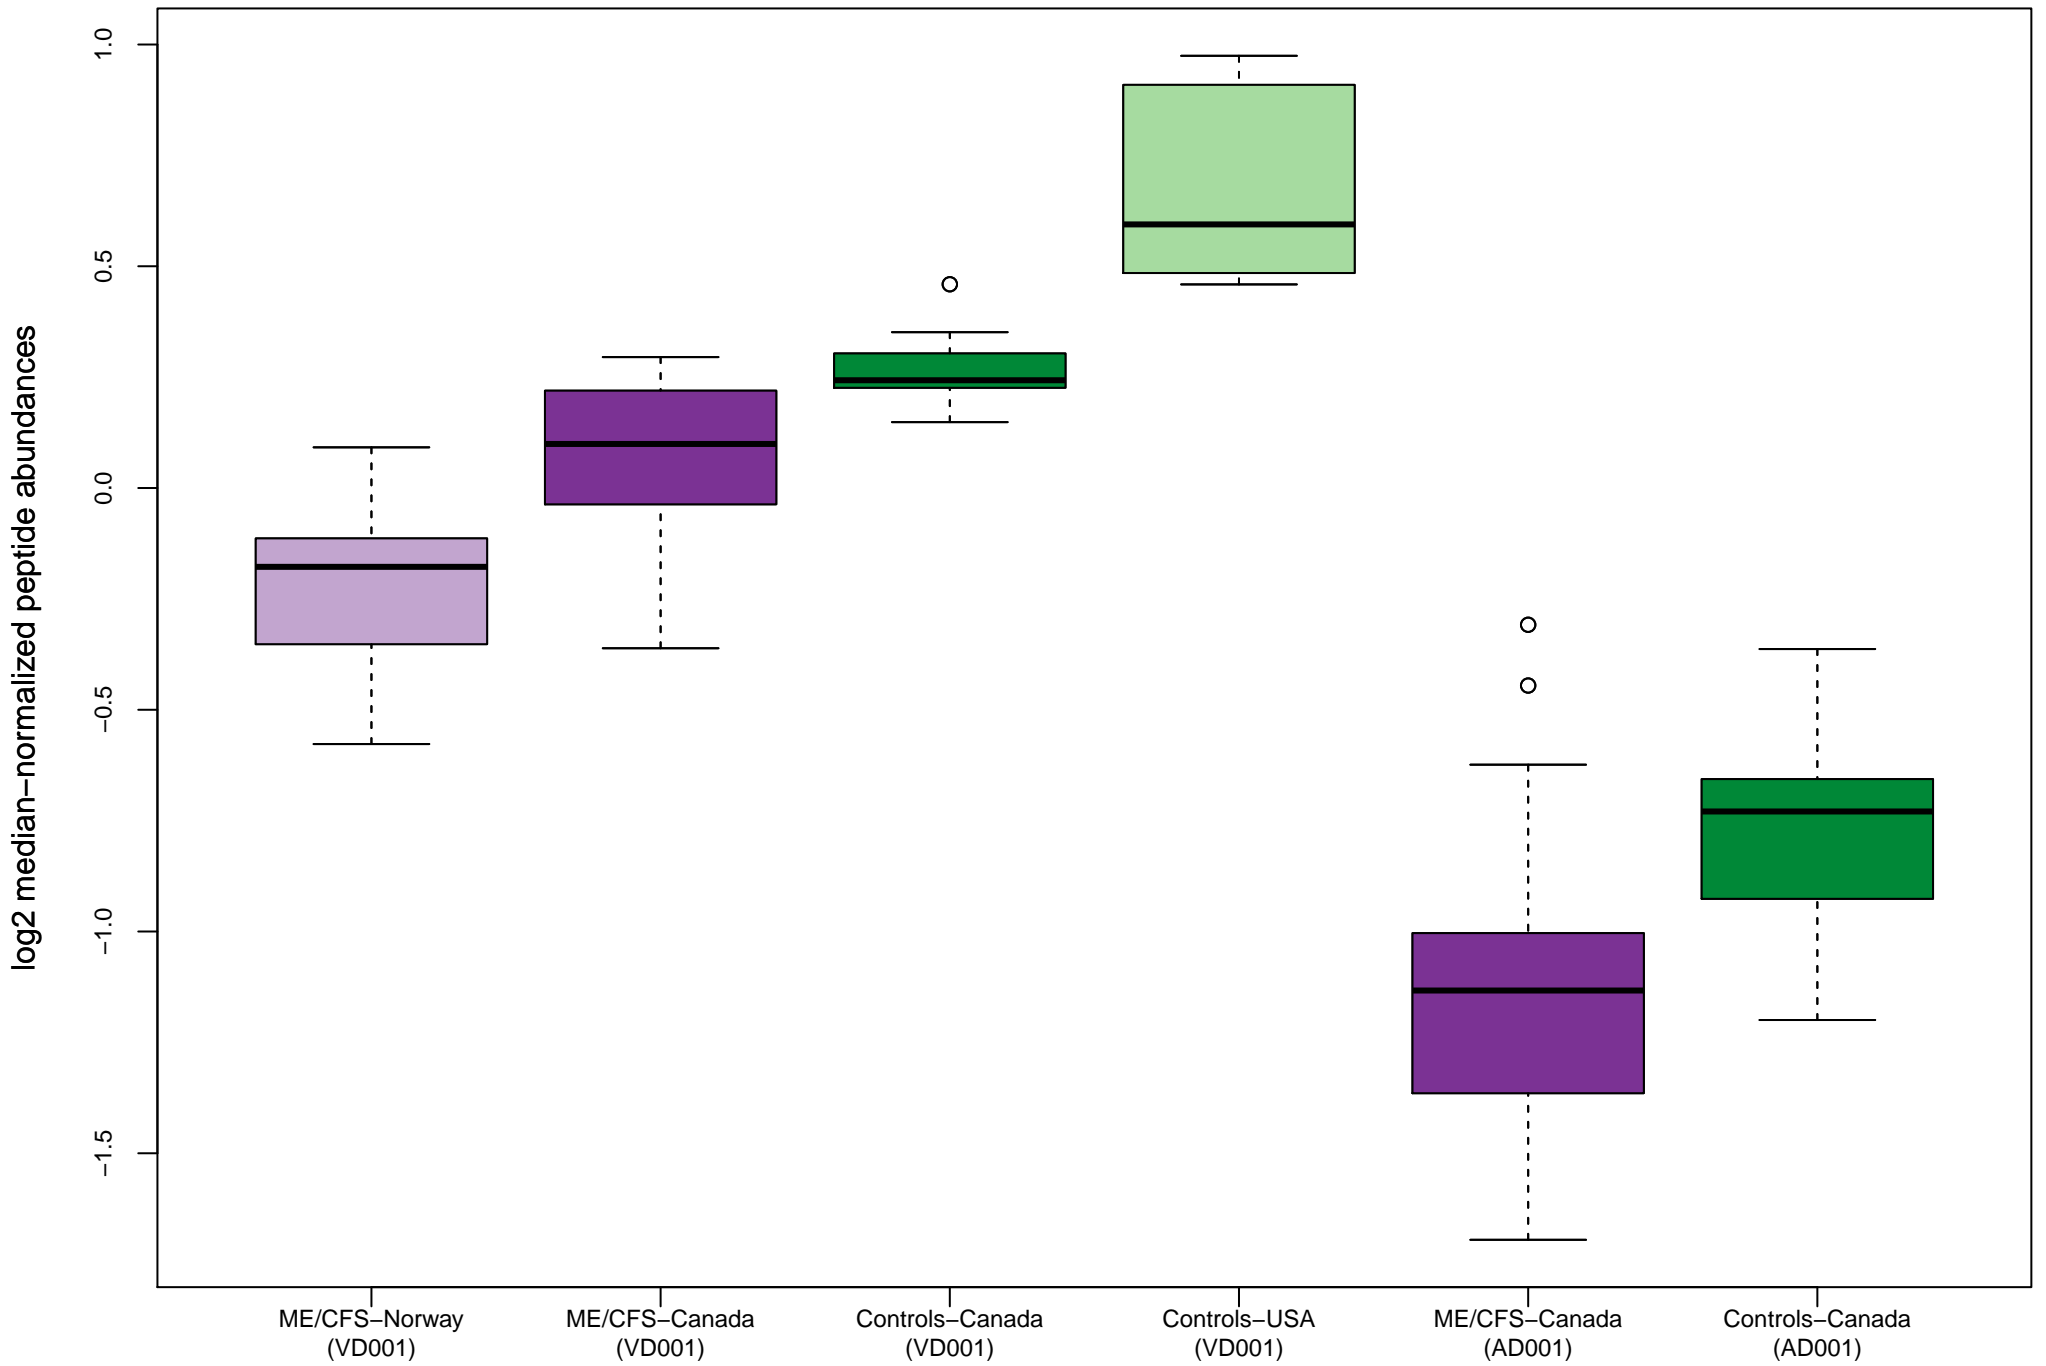

# GFKAWFRYKLSS

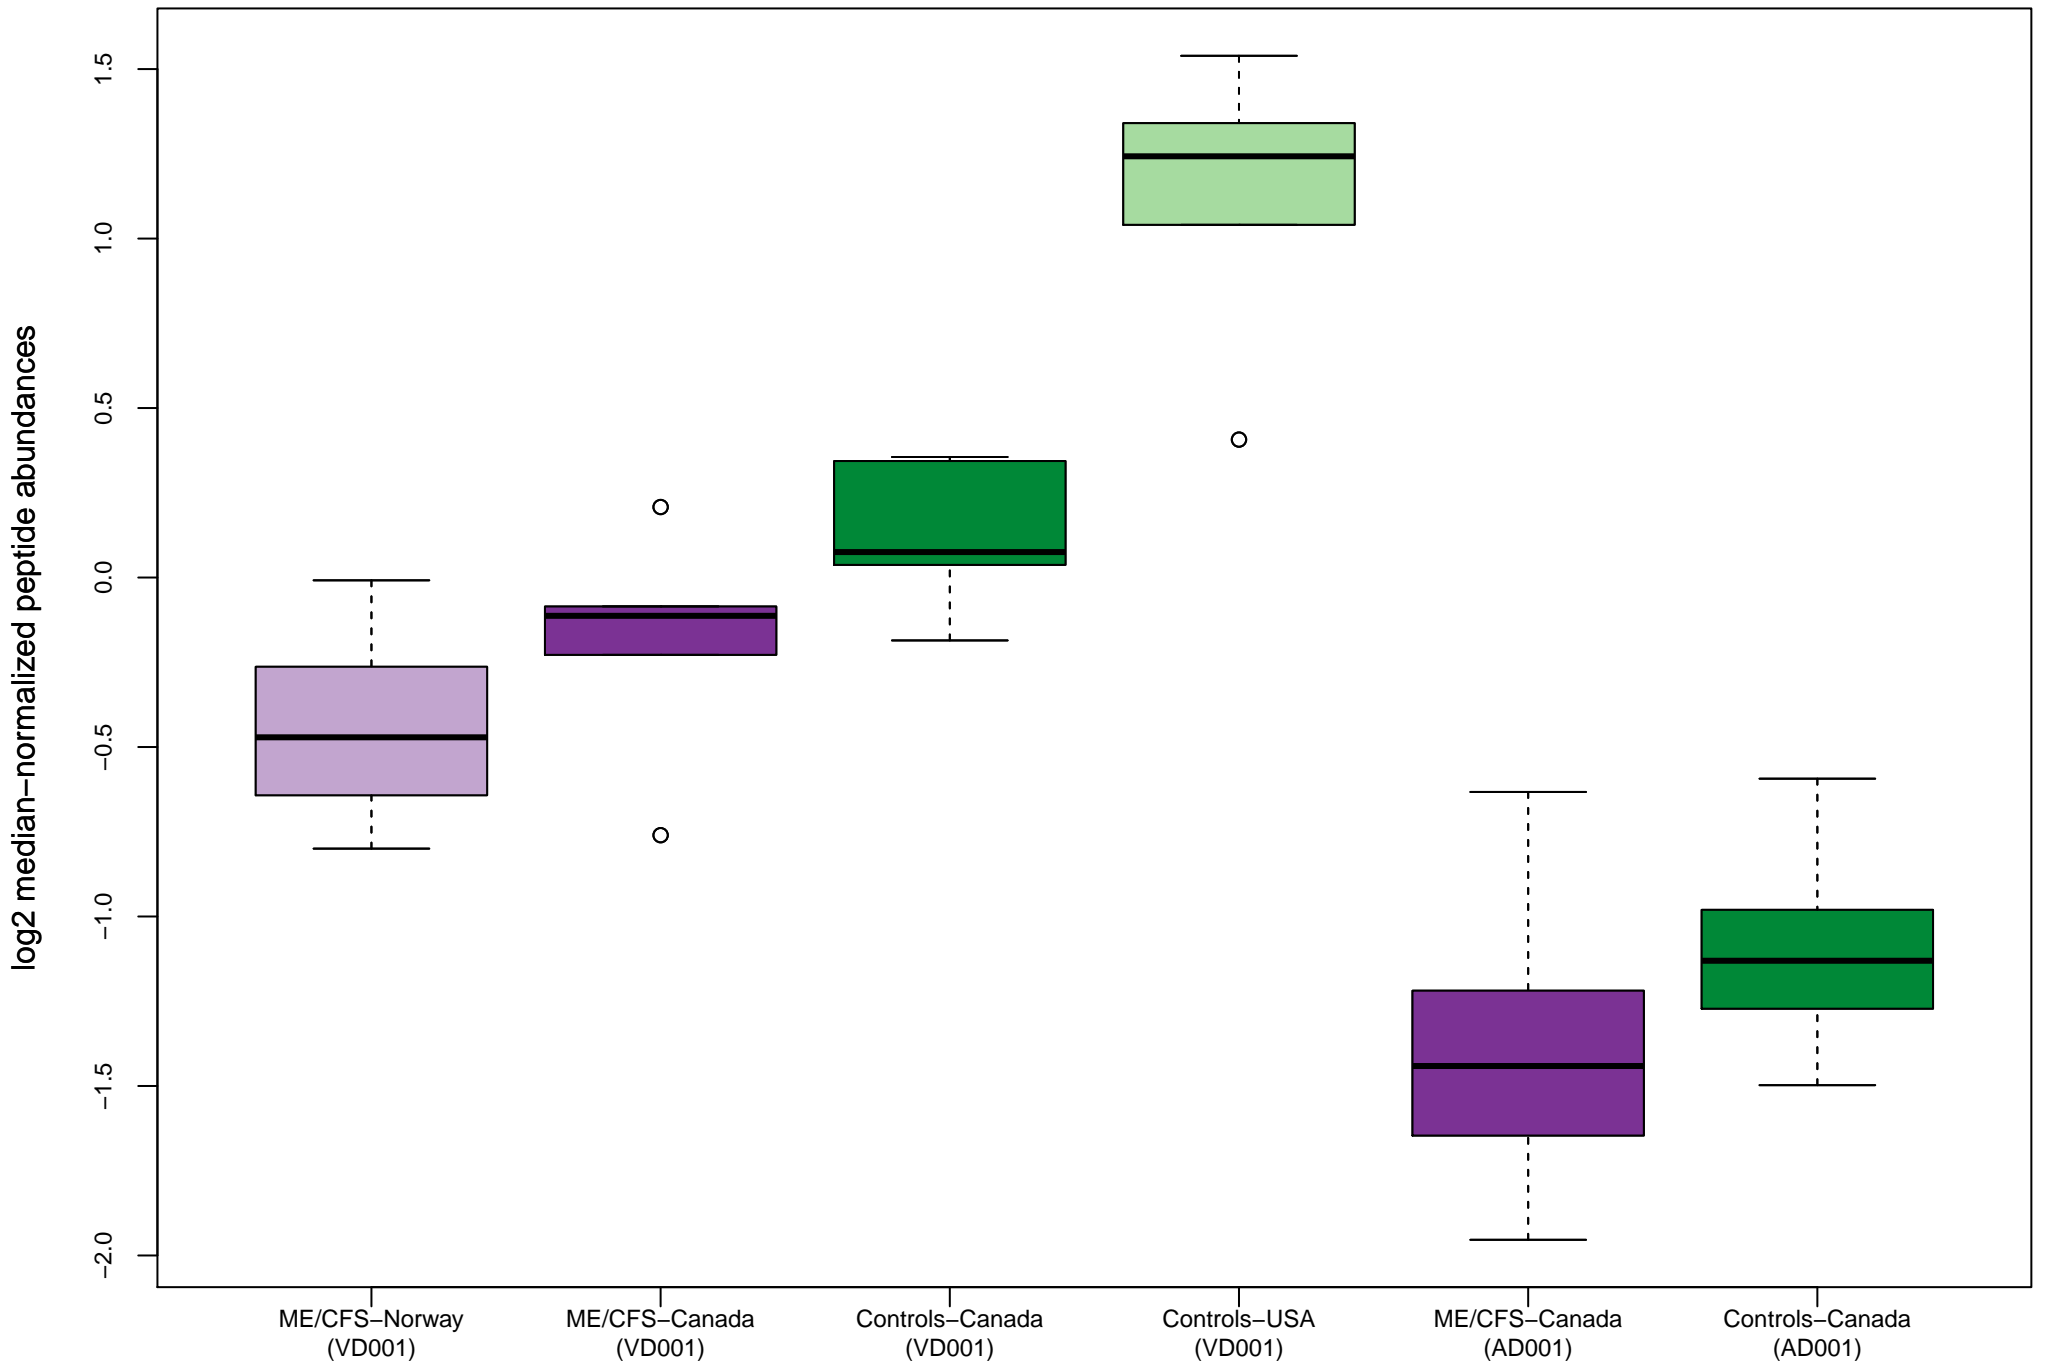

# GFSFRKVRVLAG

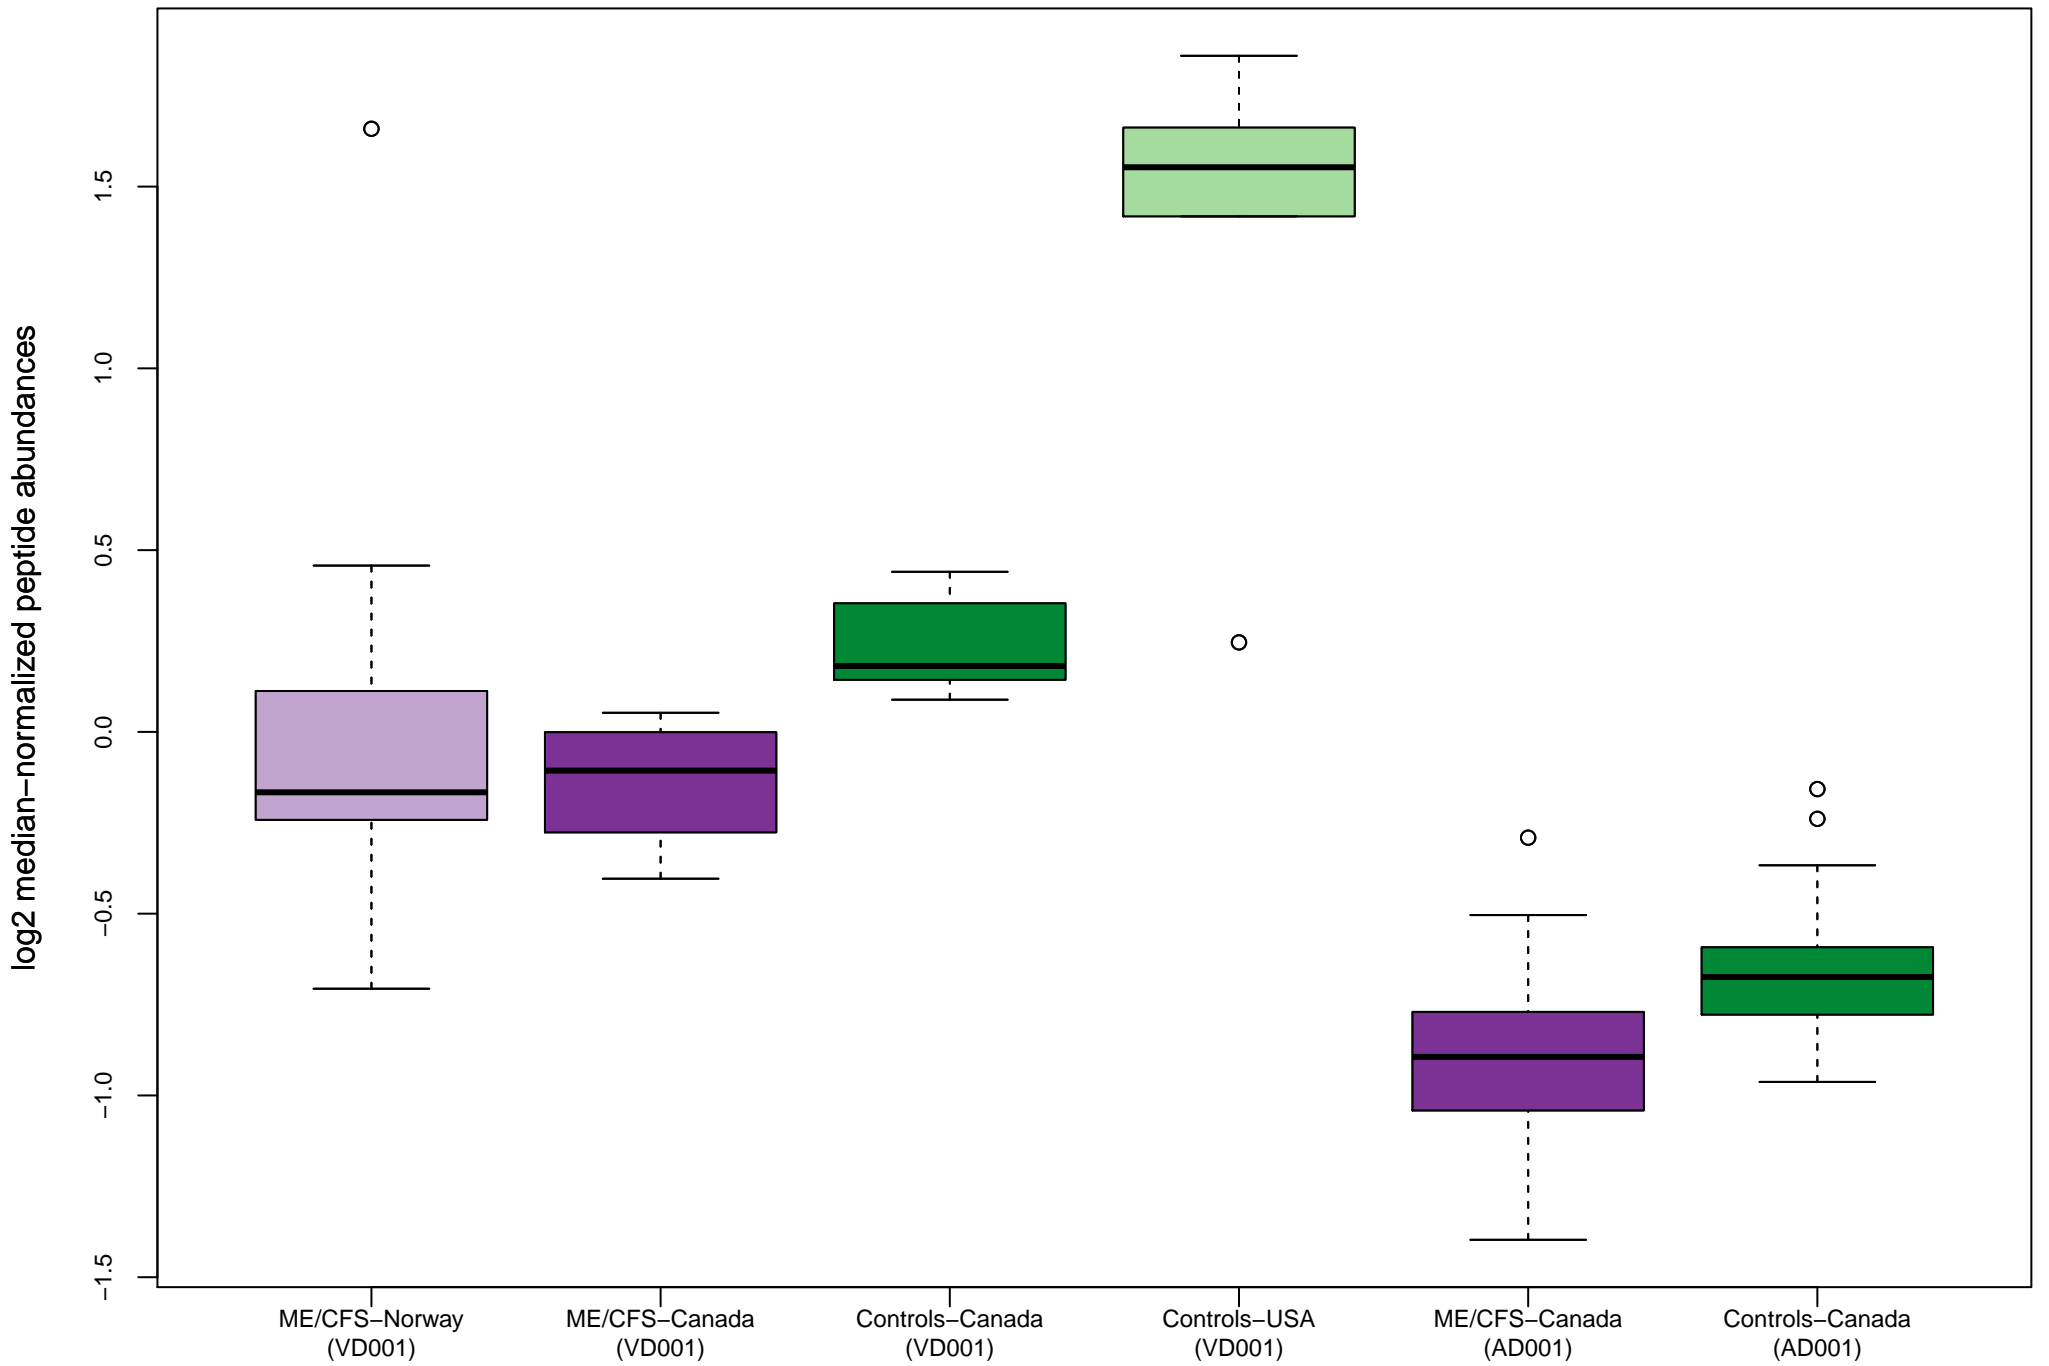

**GKLQRRHVLALS**

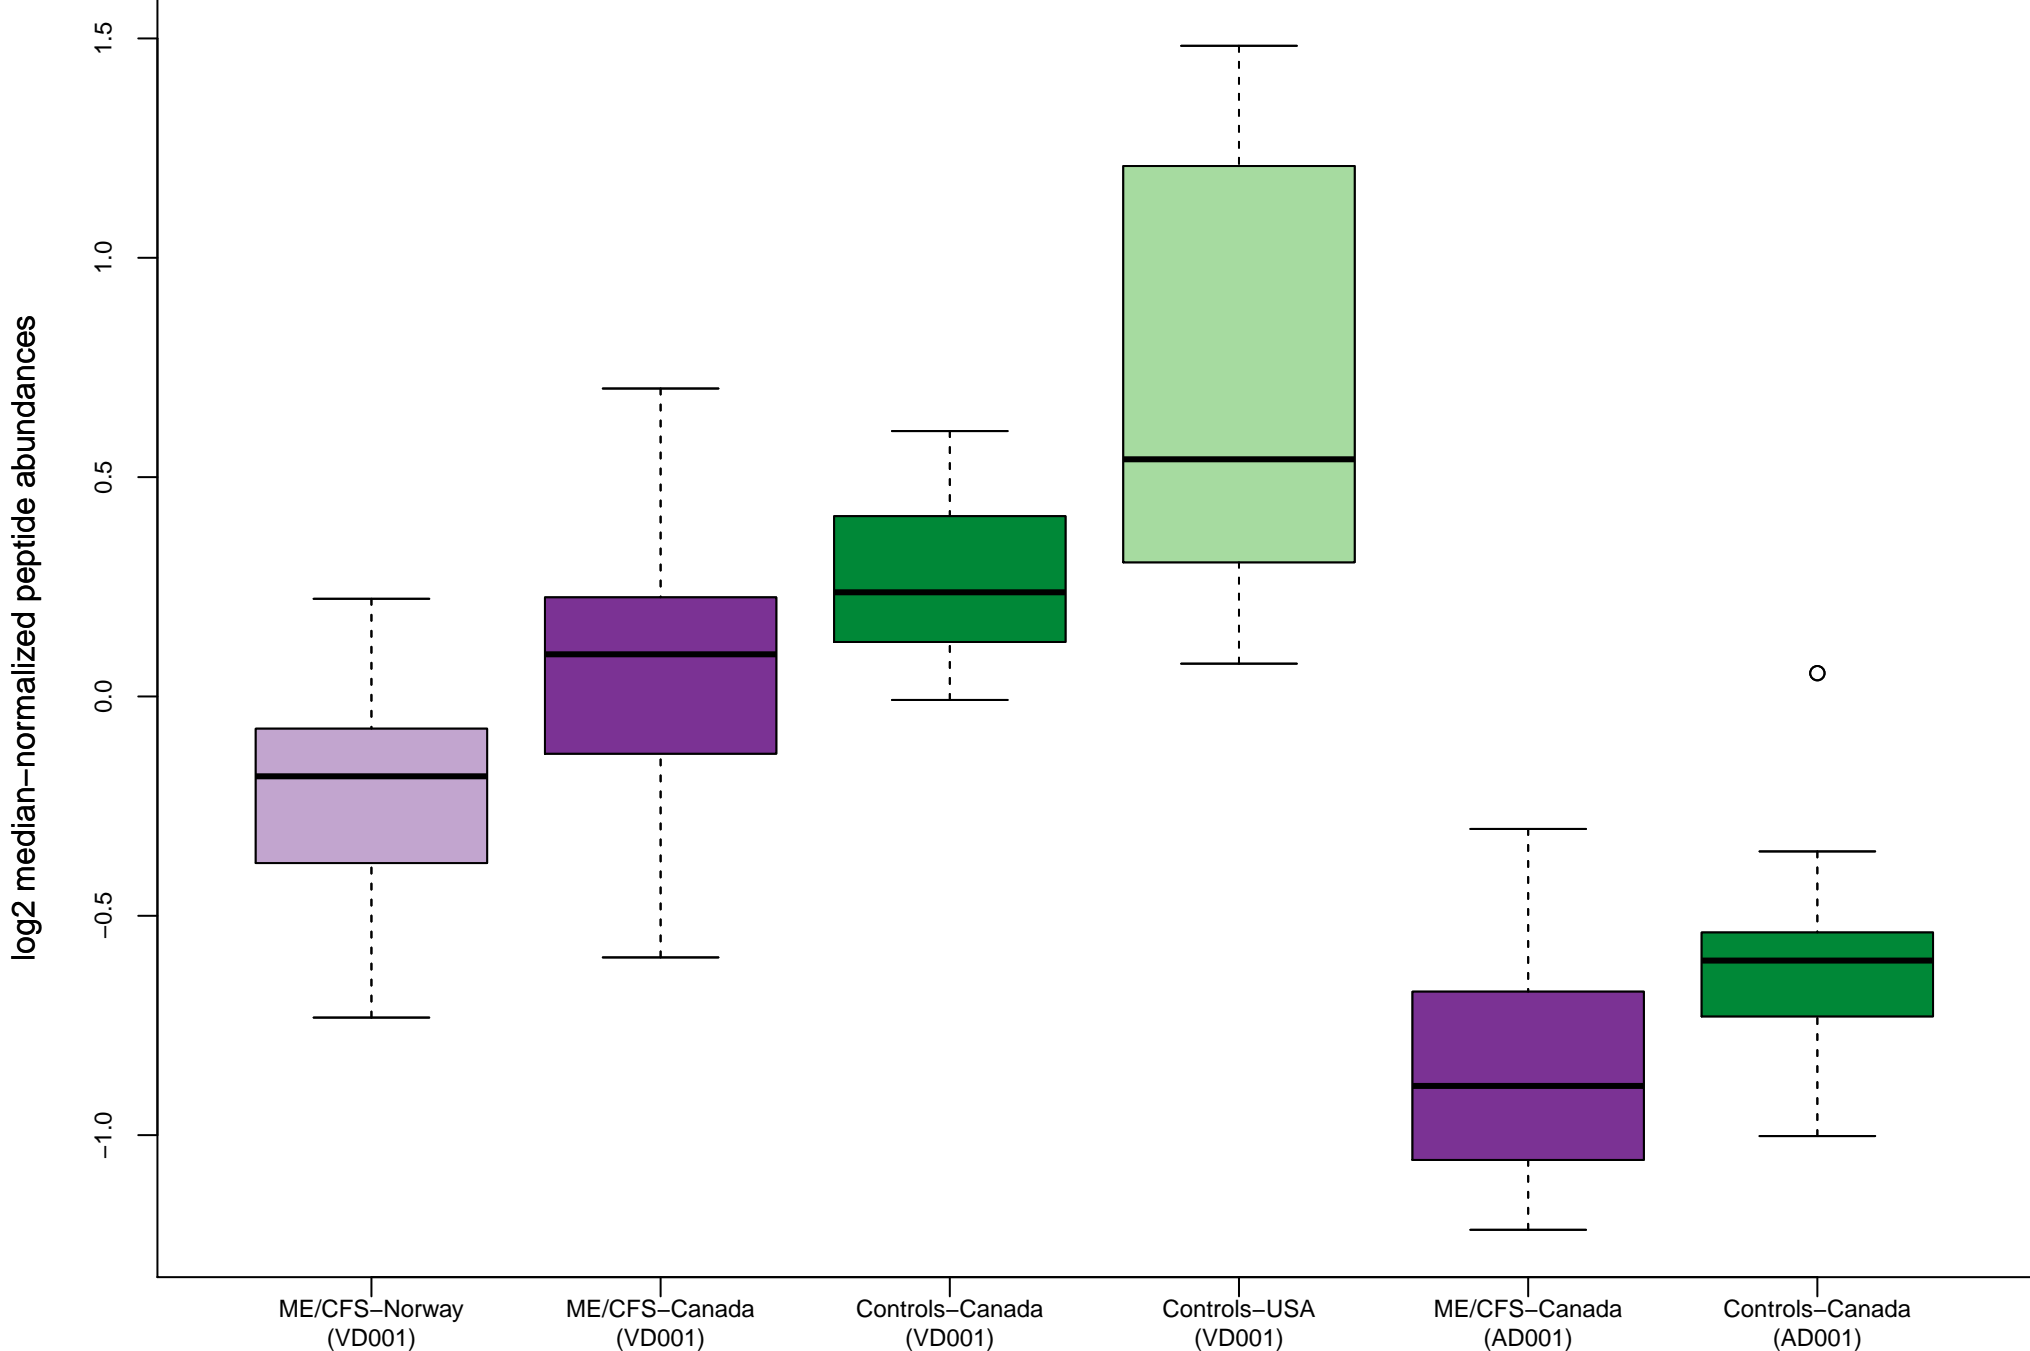

# GLFRNRASGLSG

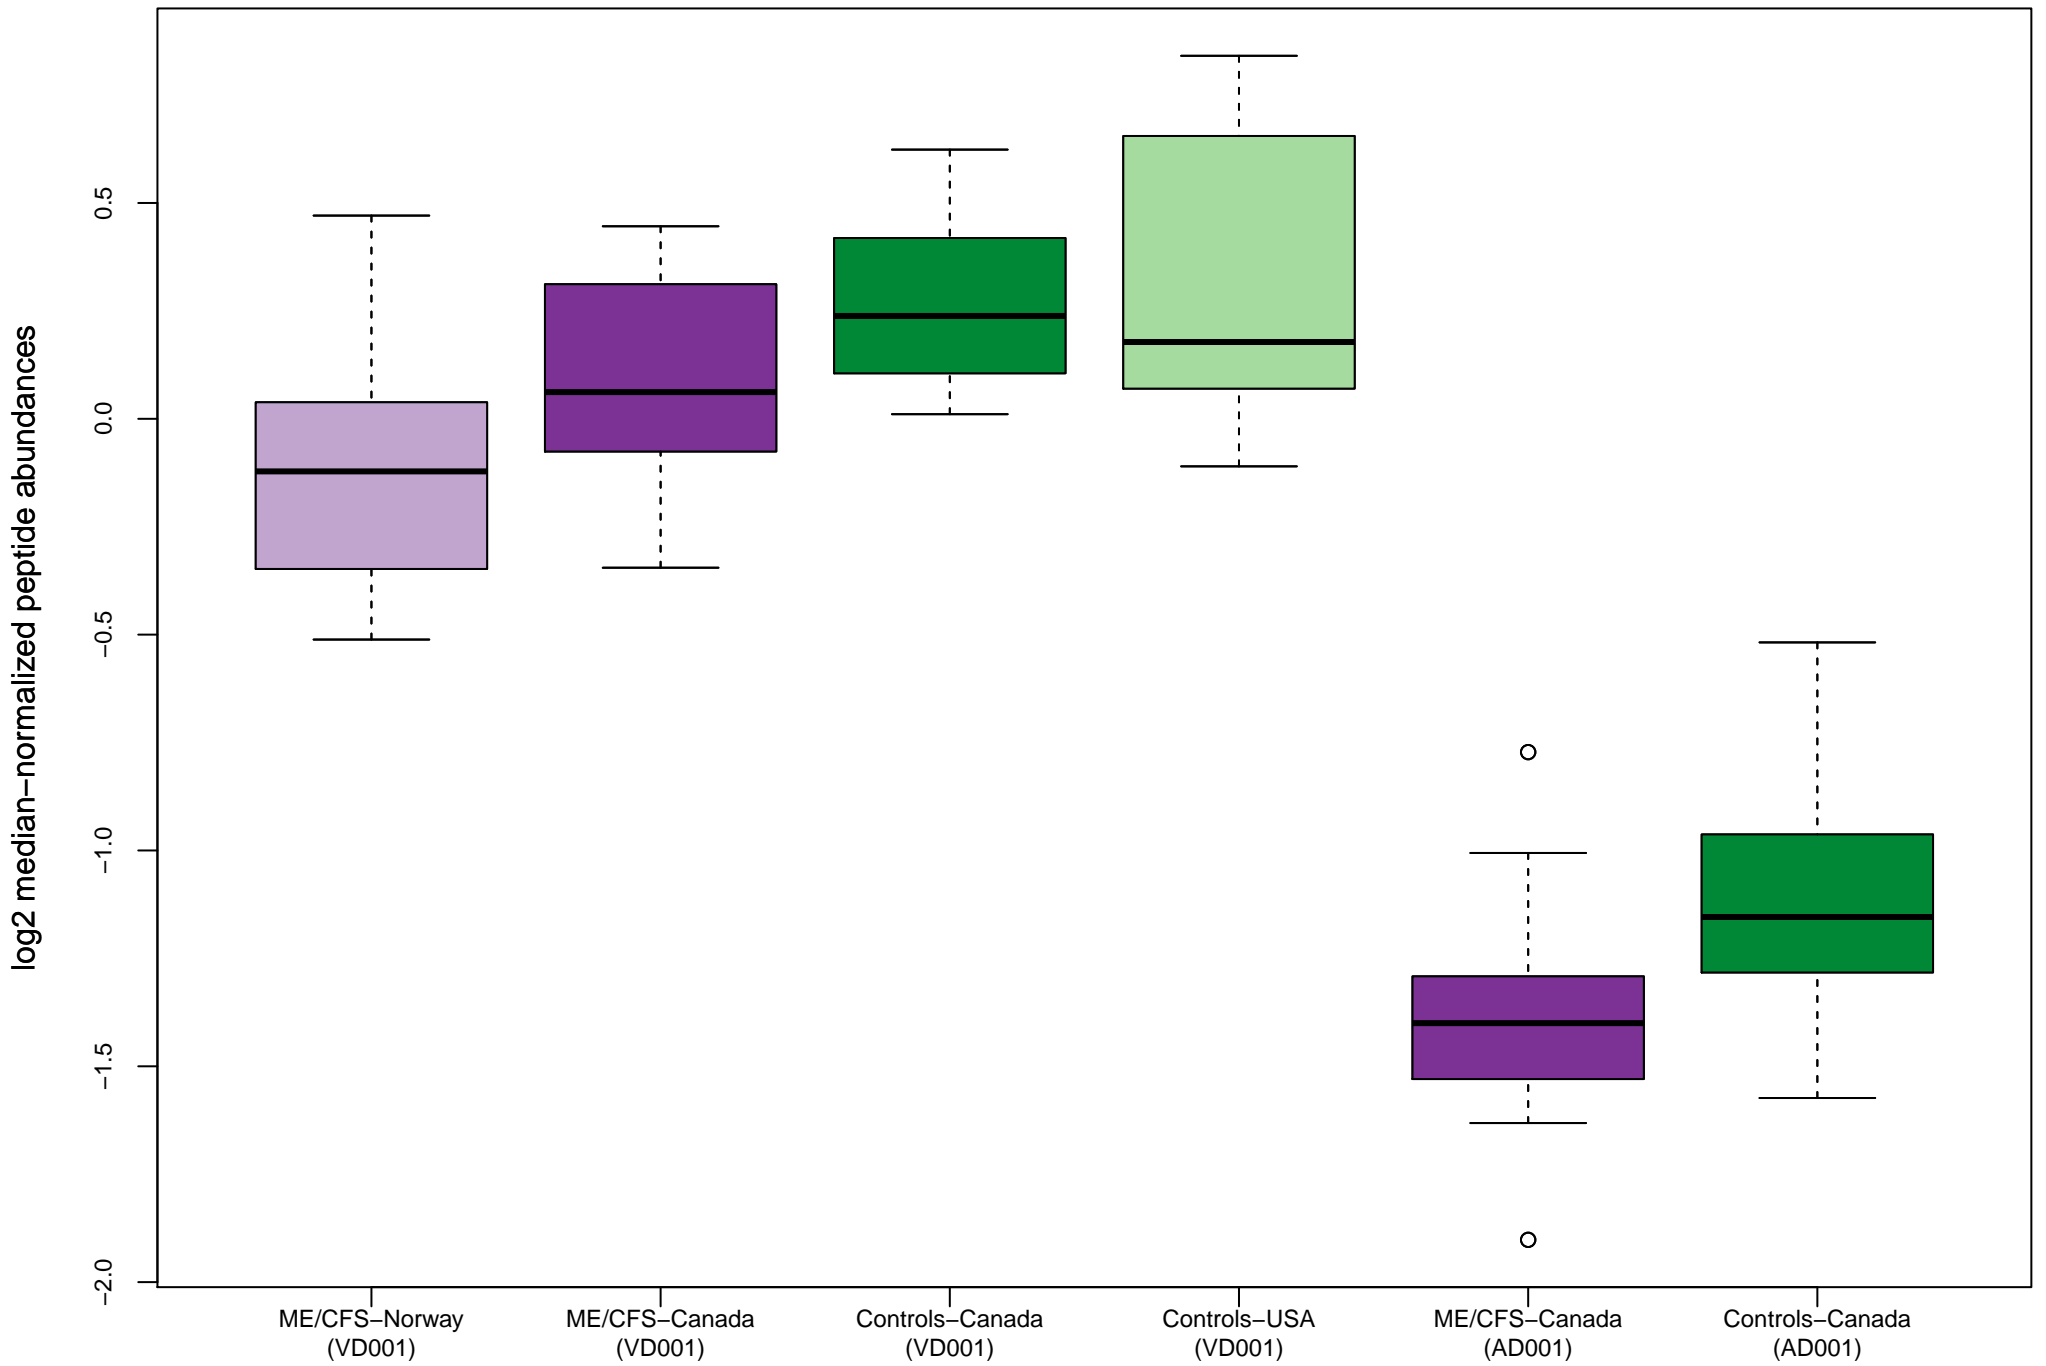



# GQRFVLRPWKAL

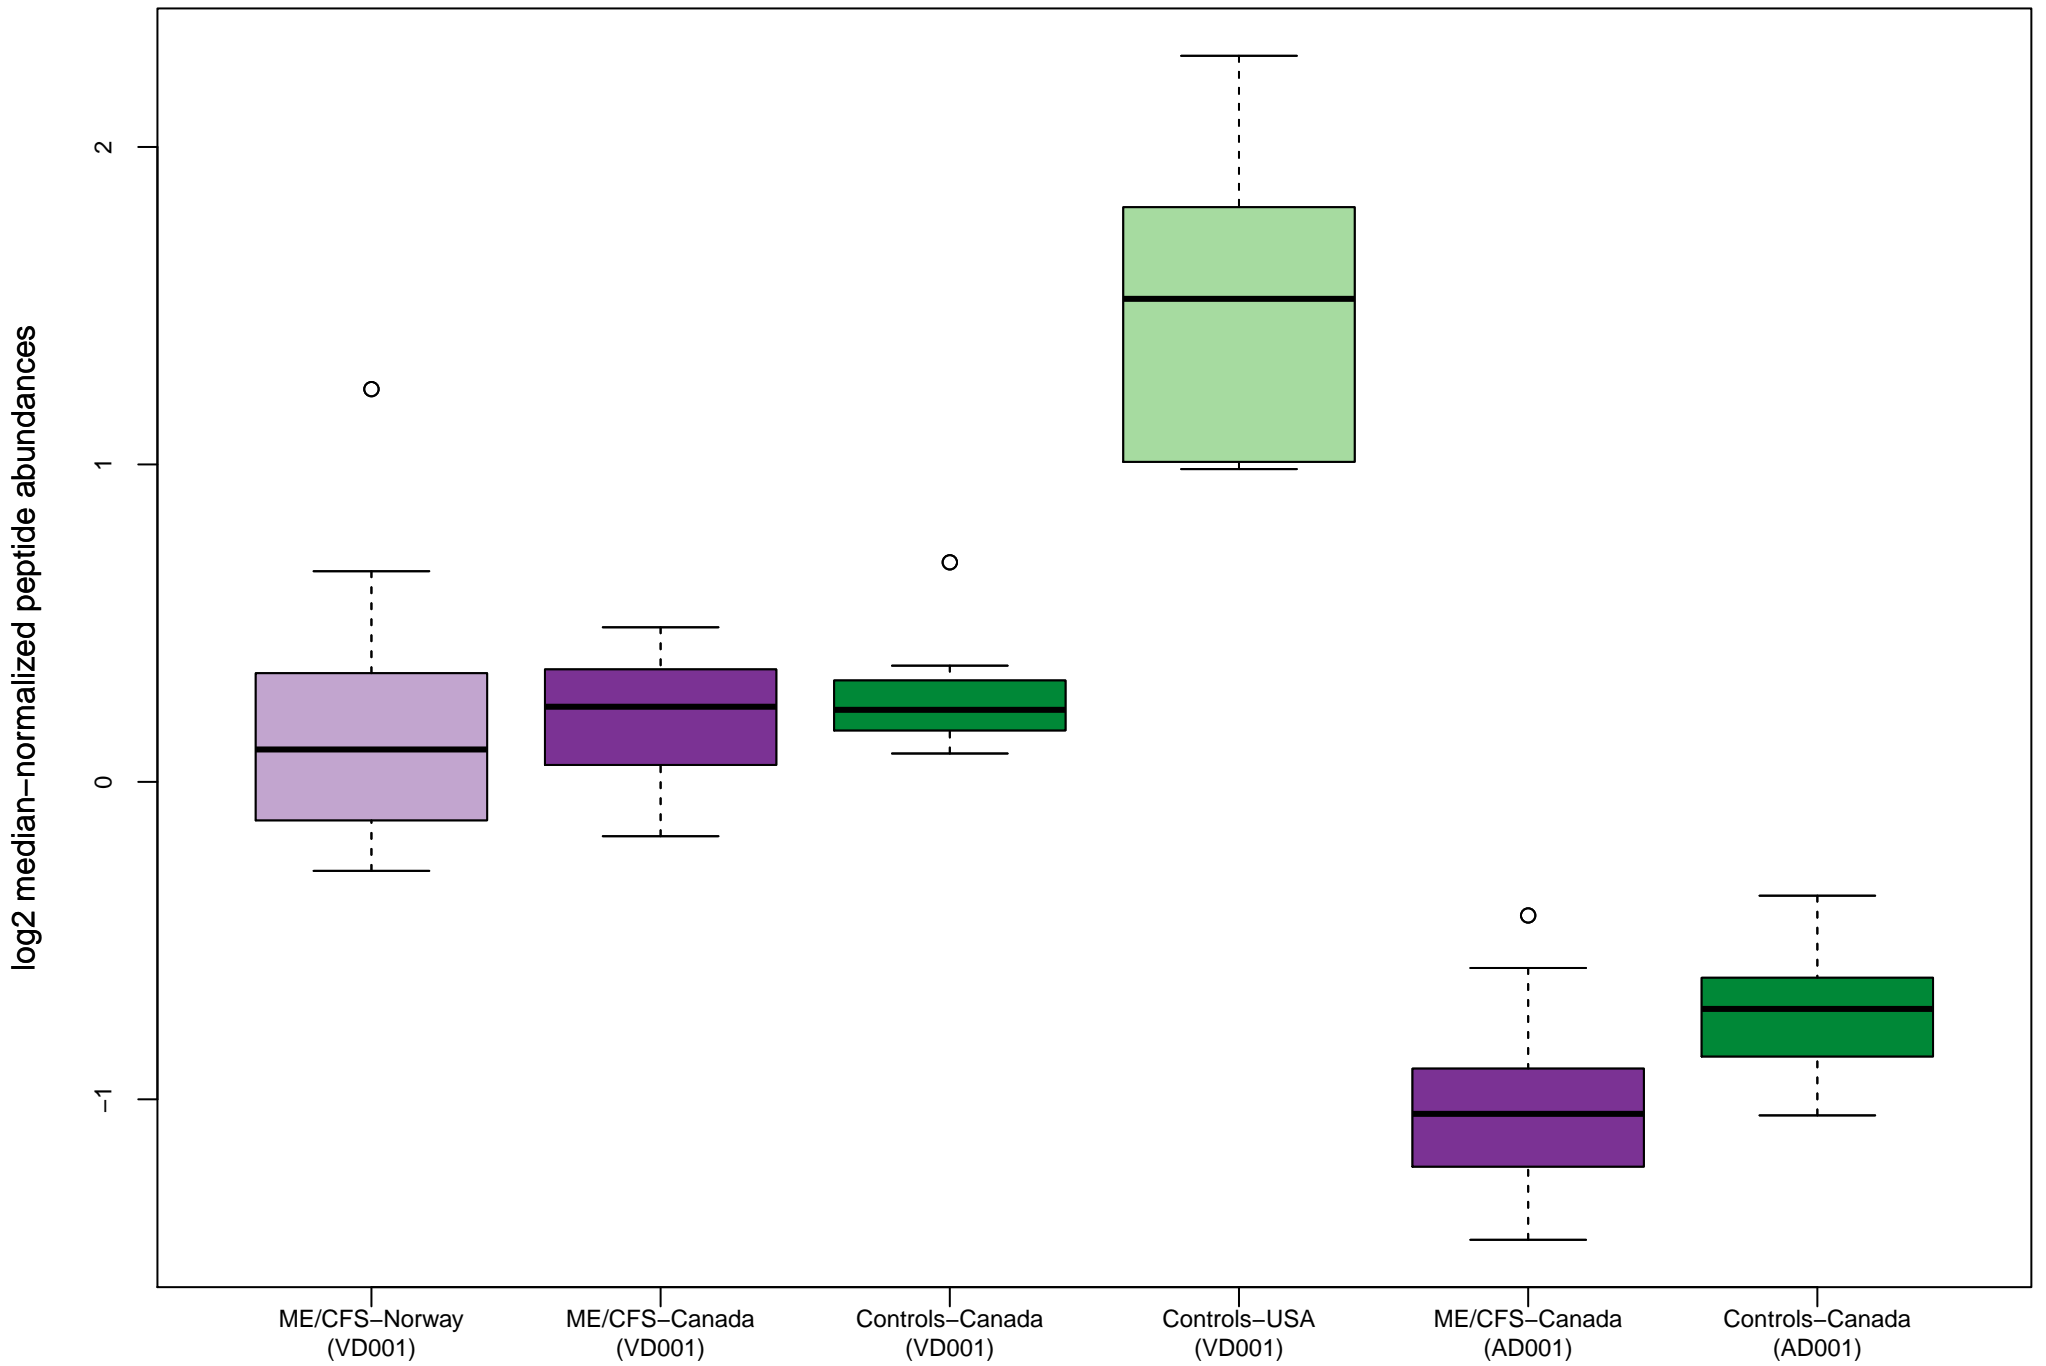

# GRLSRYFRAGVS

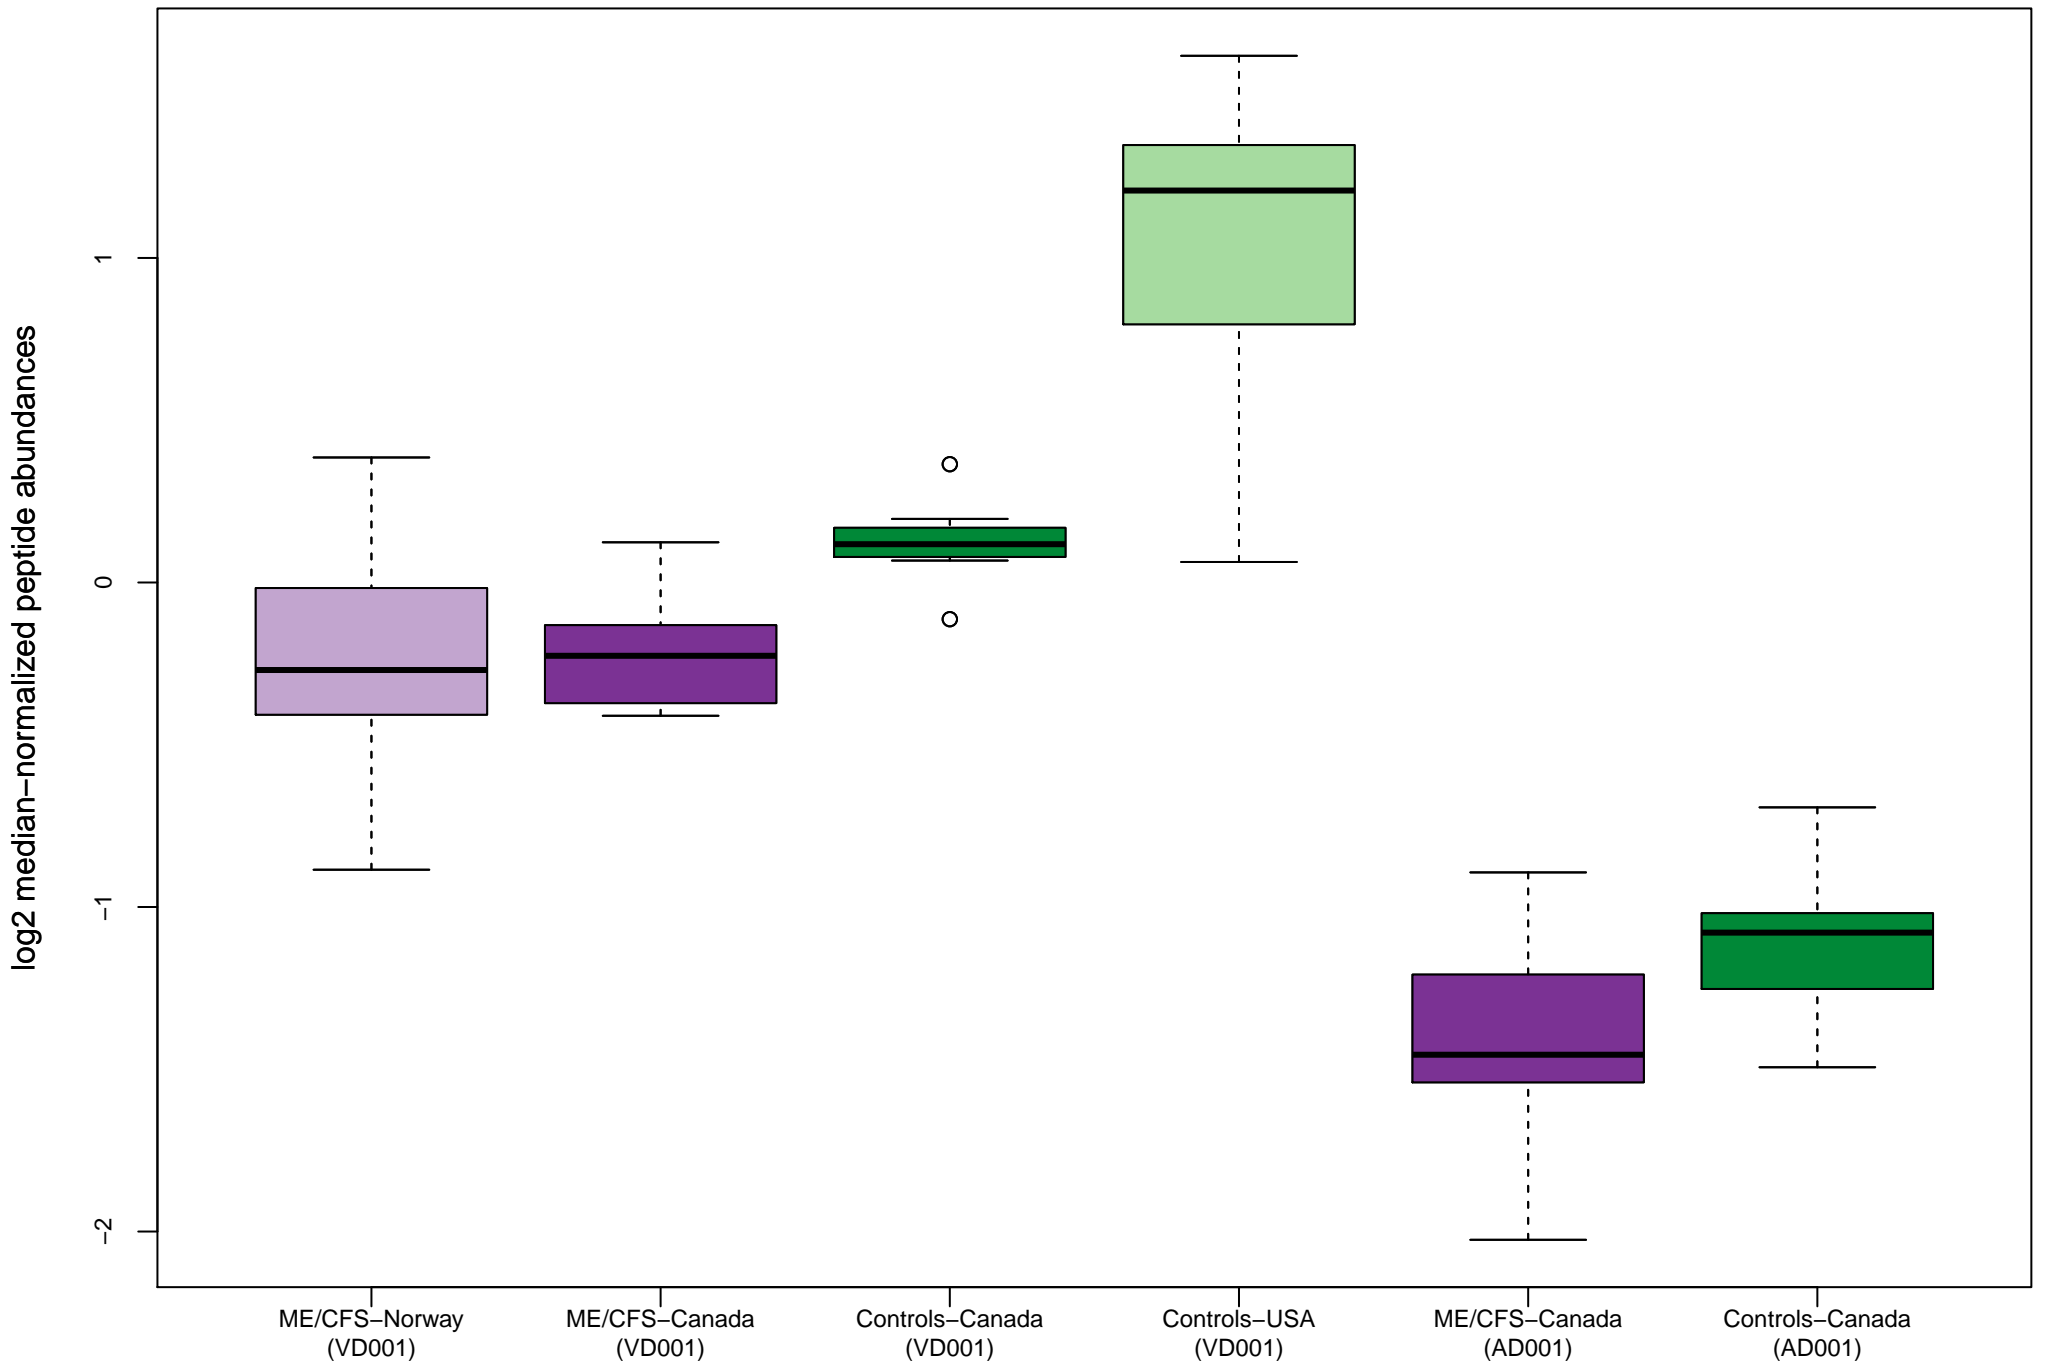

# GRLYKGFYWNV

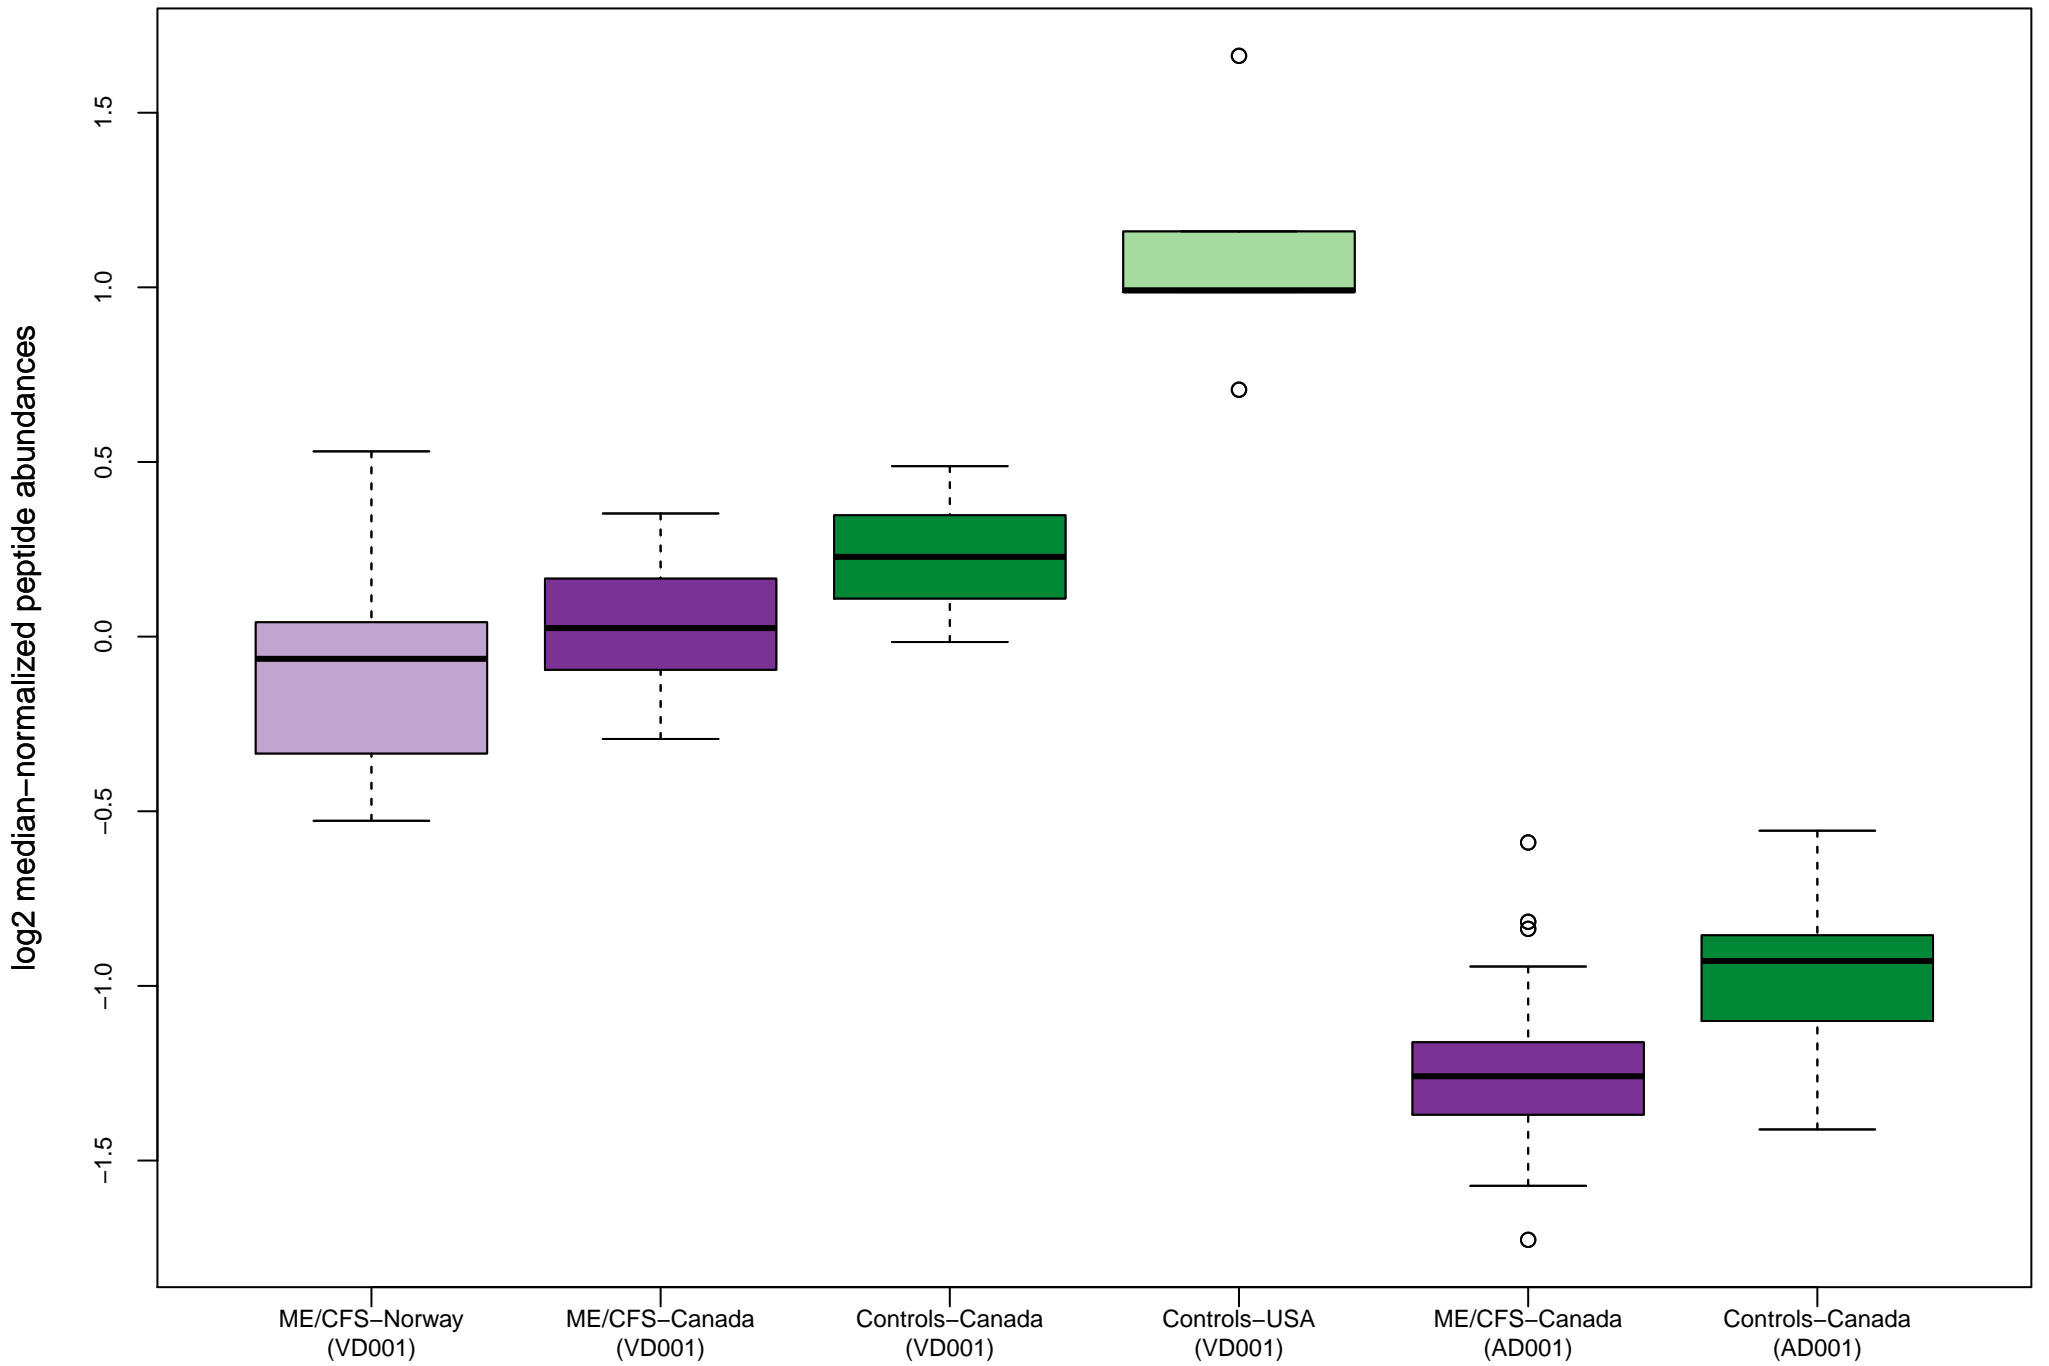

# GRPYFLRKLSGV

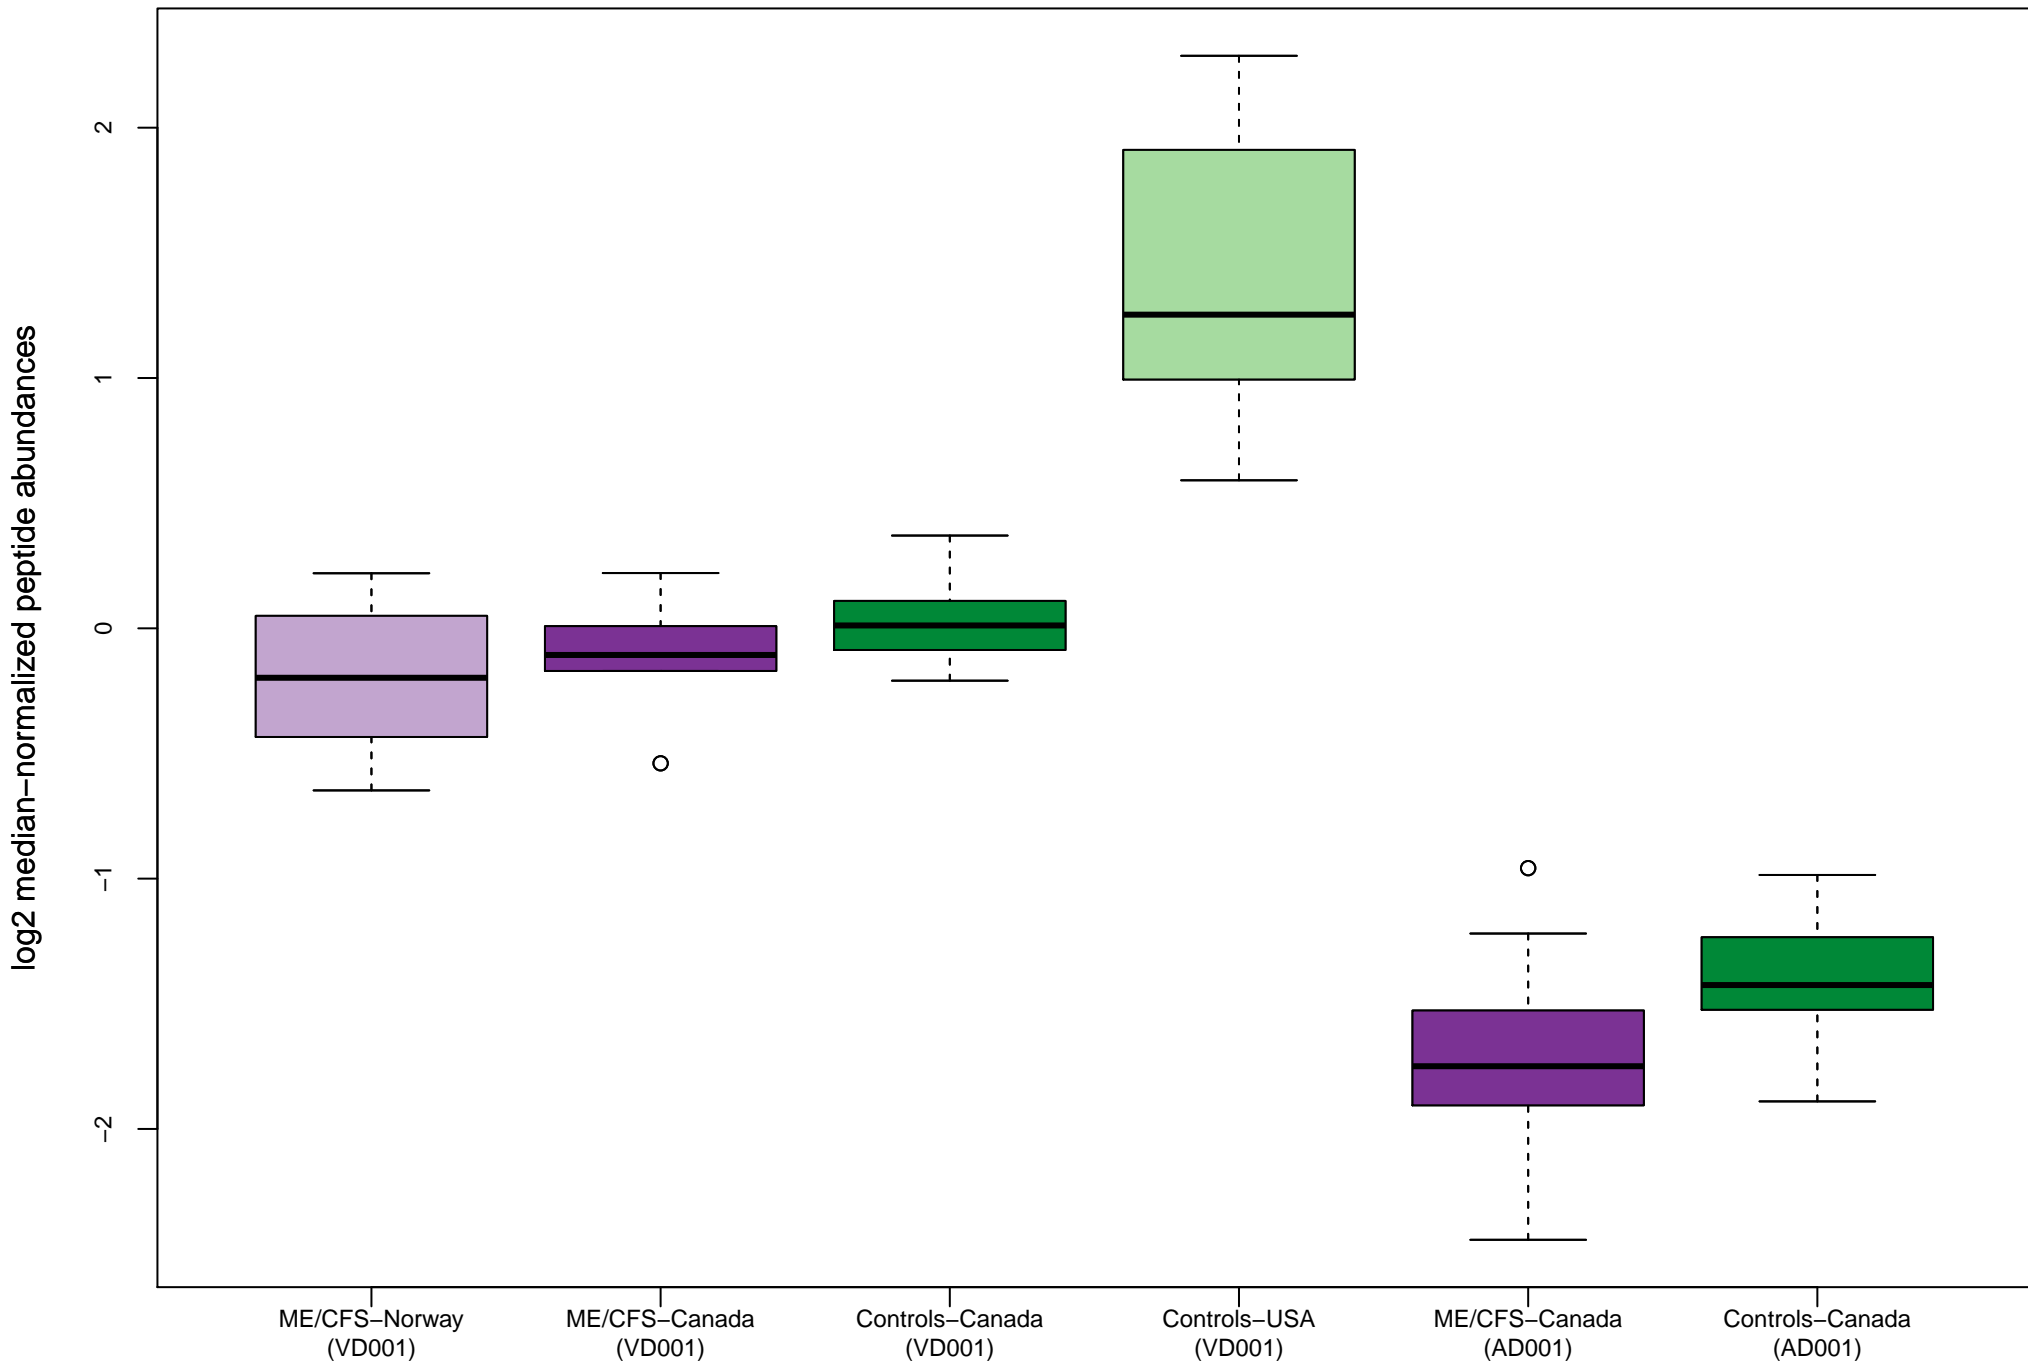

# GRWRGYKLSVLS

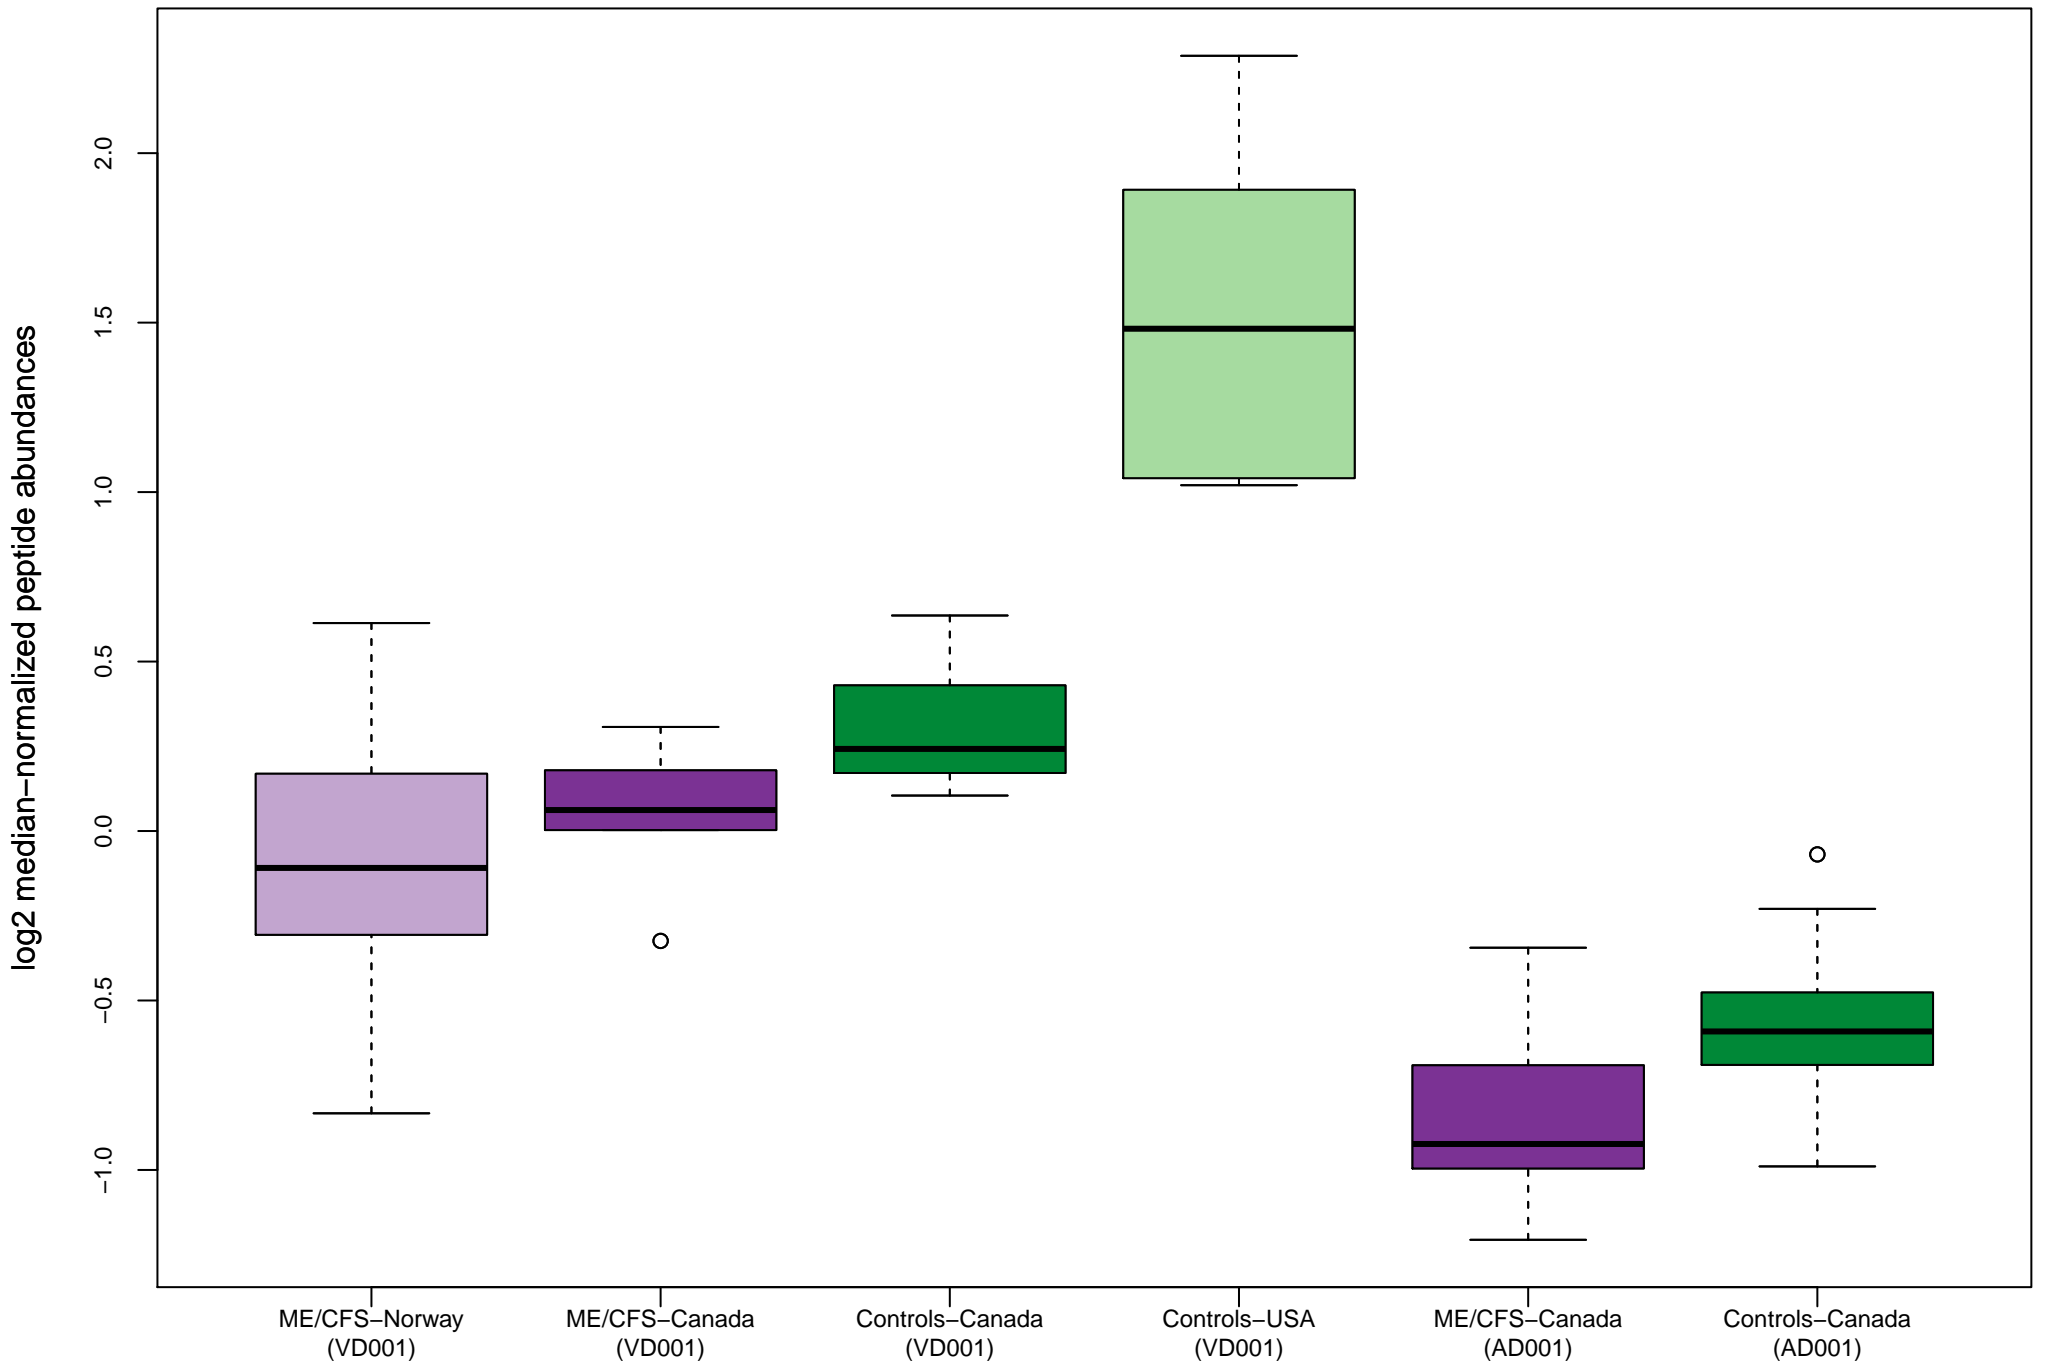

# GWLFRKPLSALG

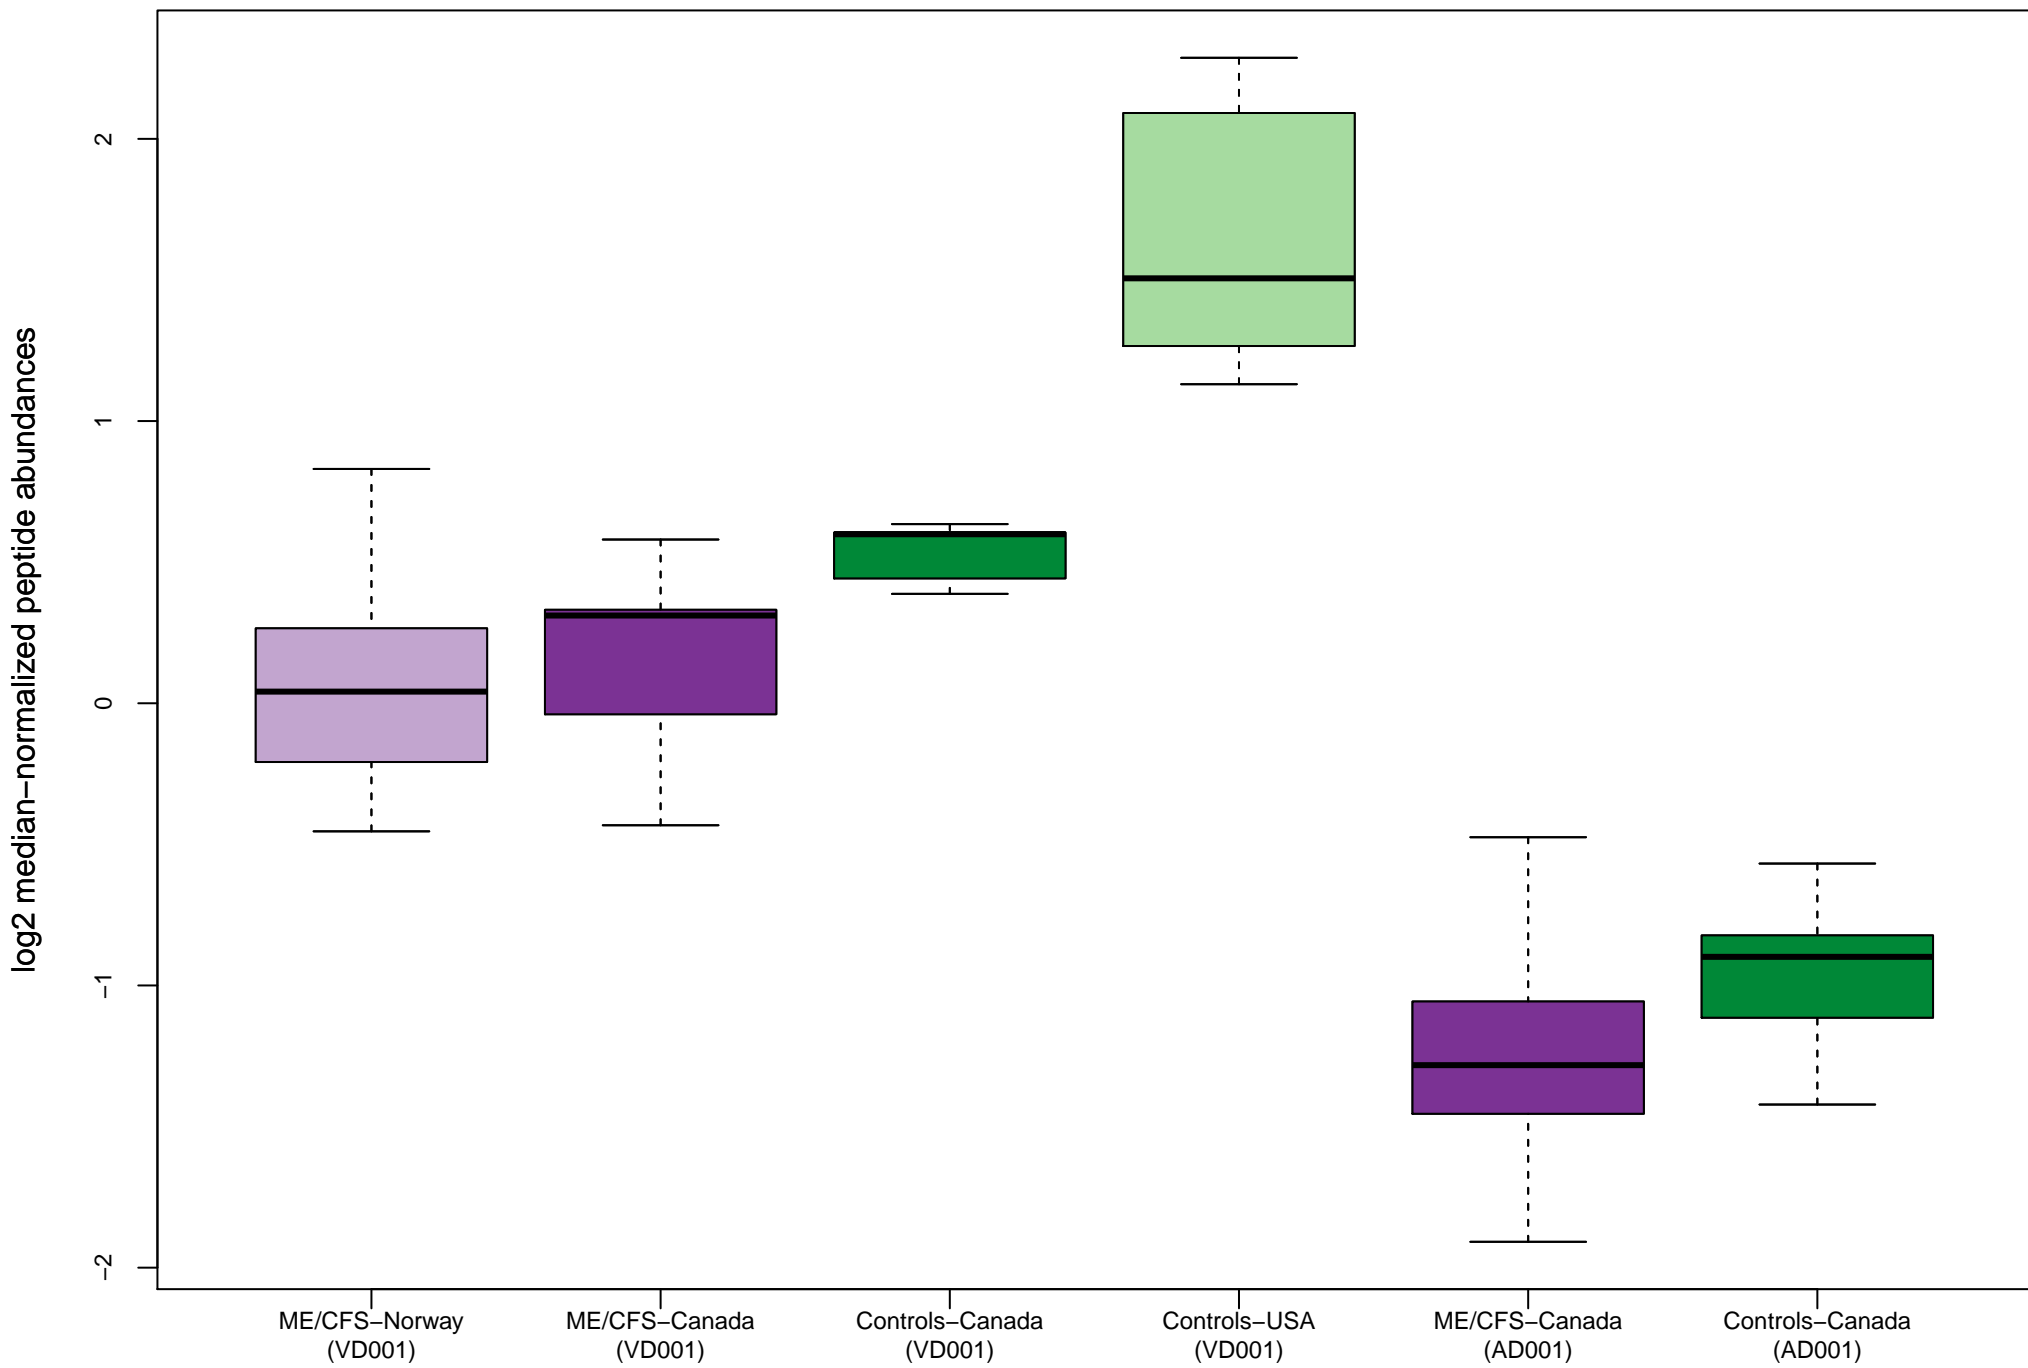

# HGFFGRWNVVA

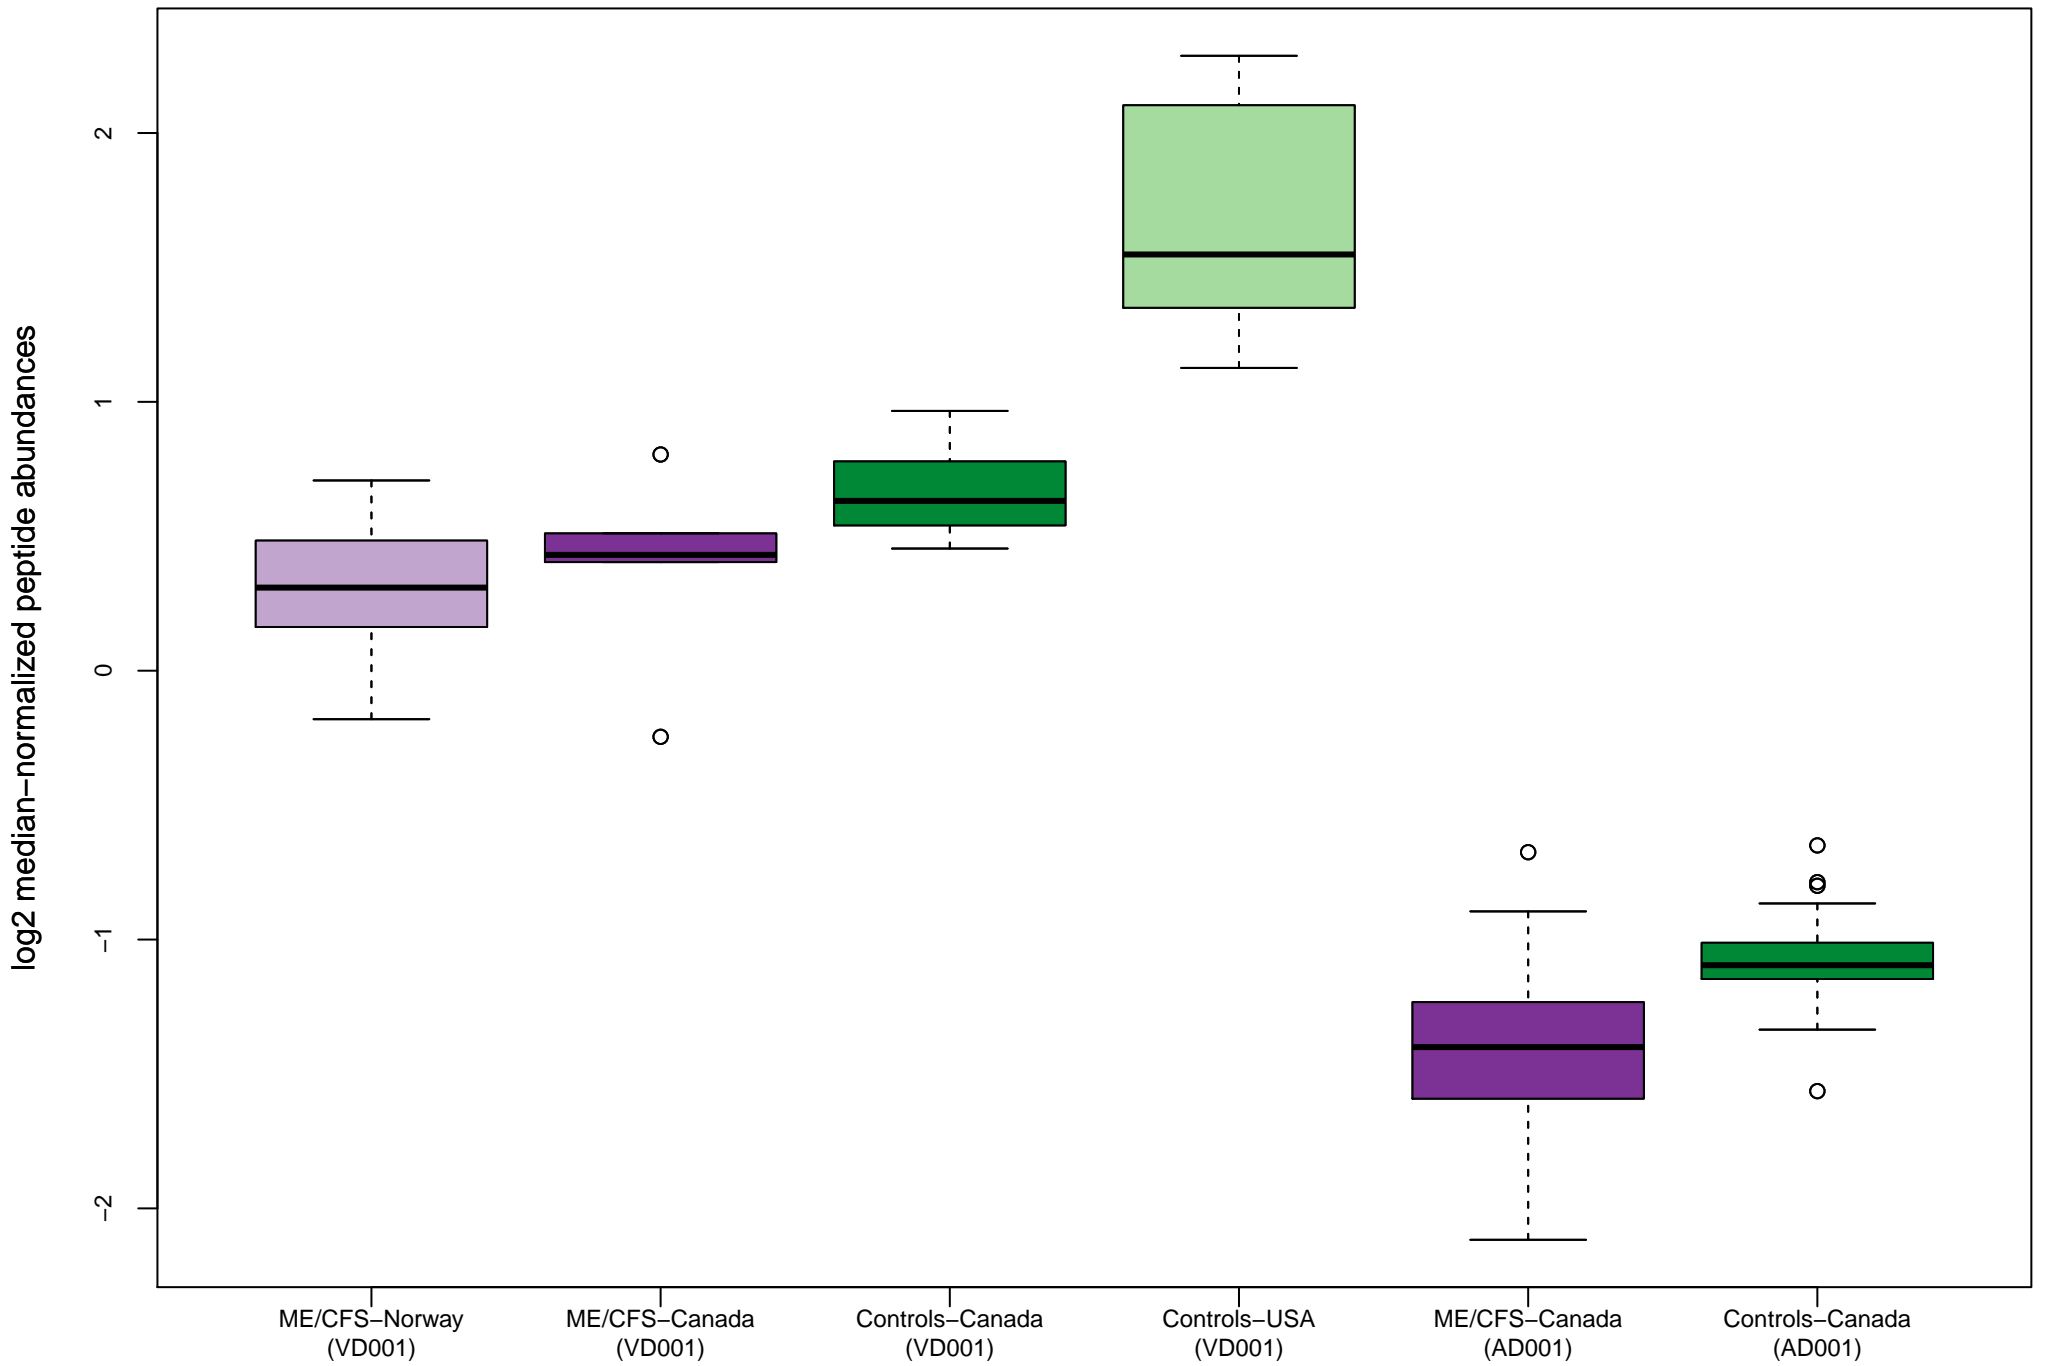

# HVWRVAPWKSAS

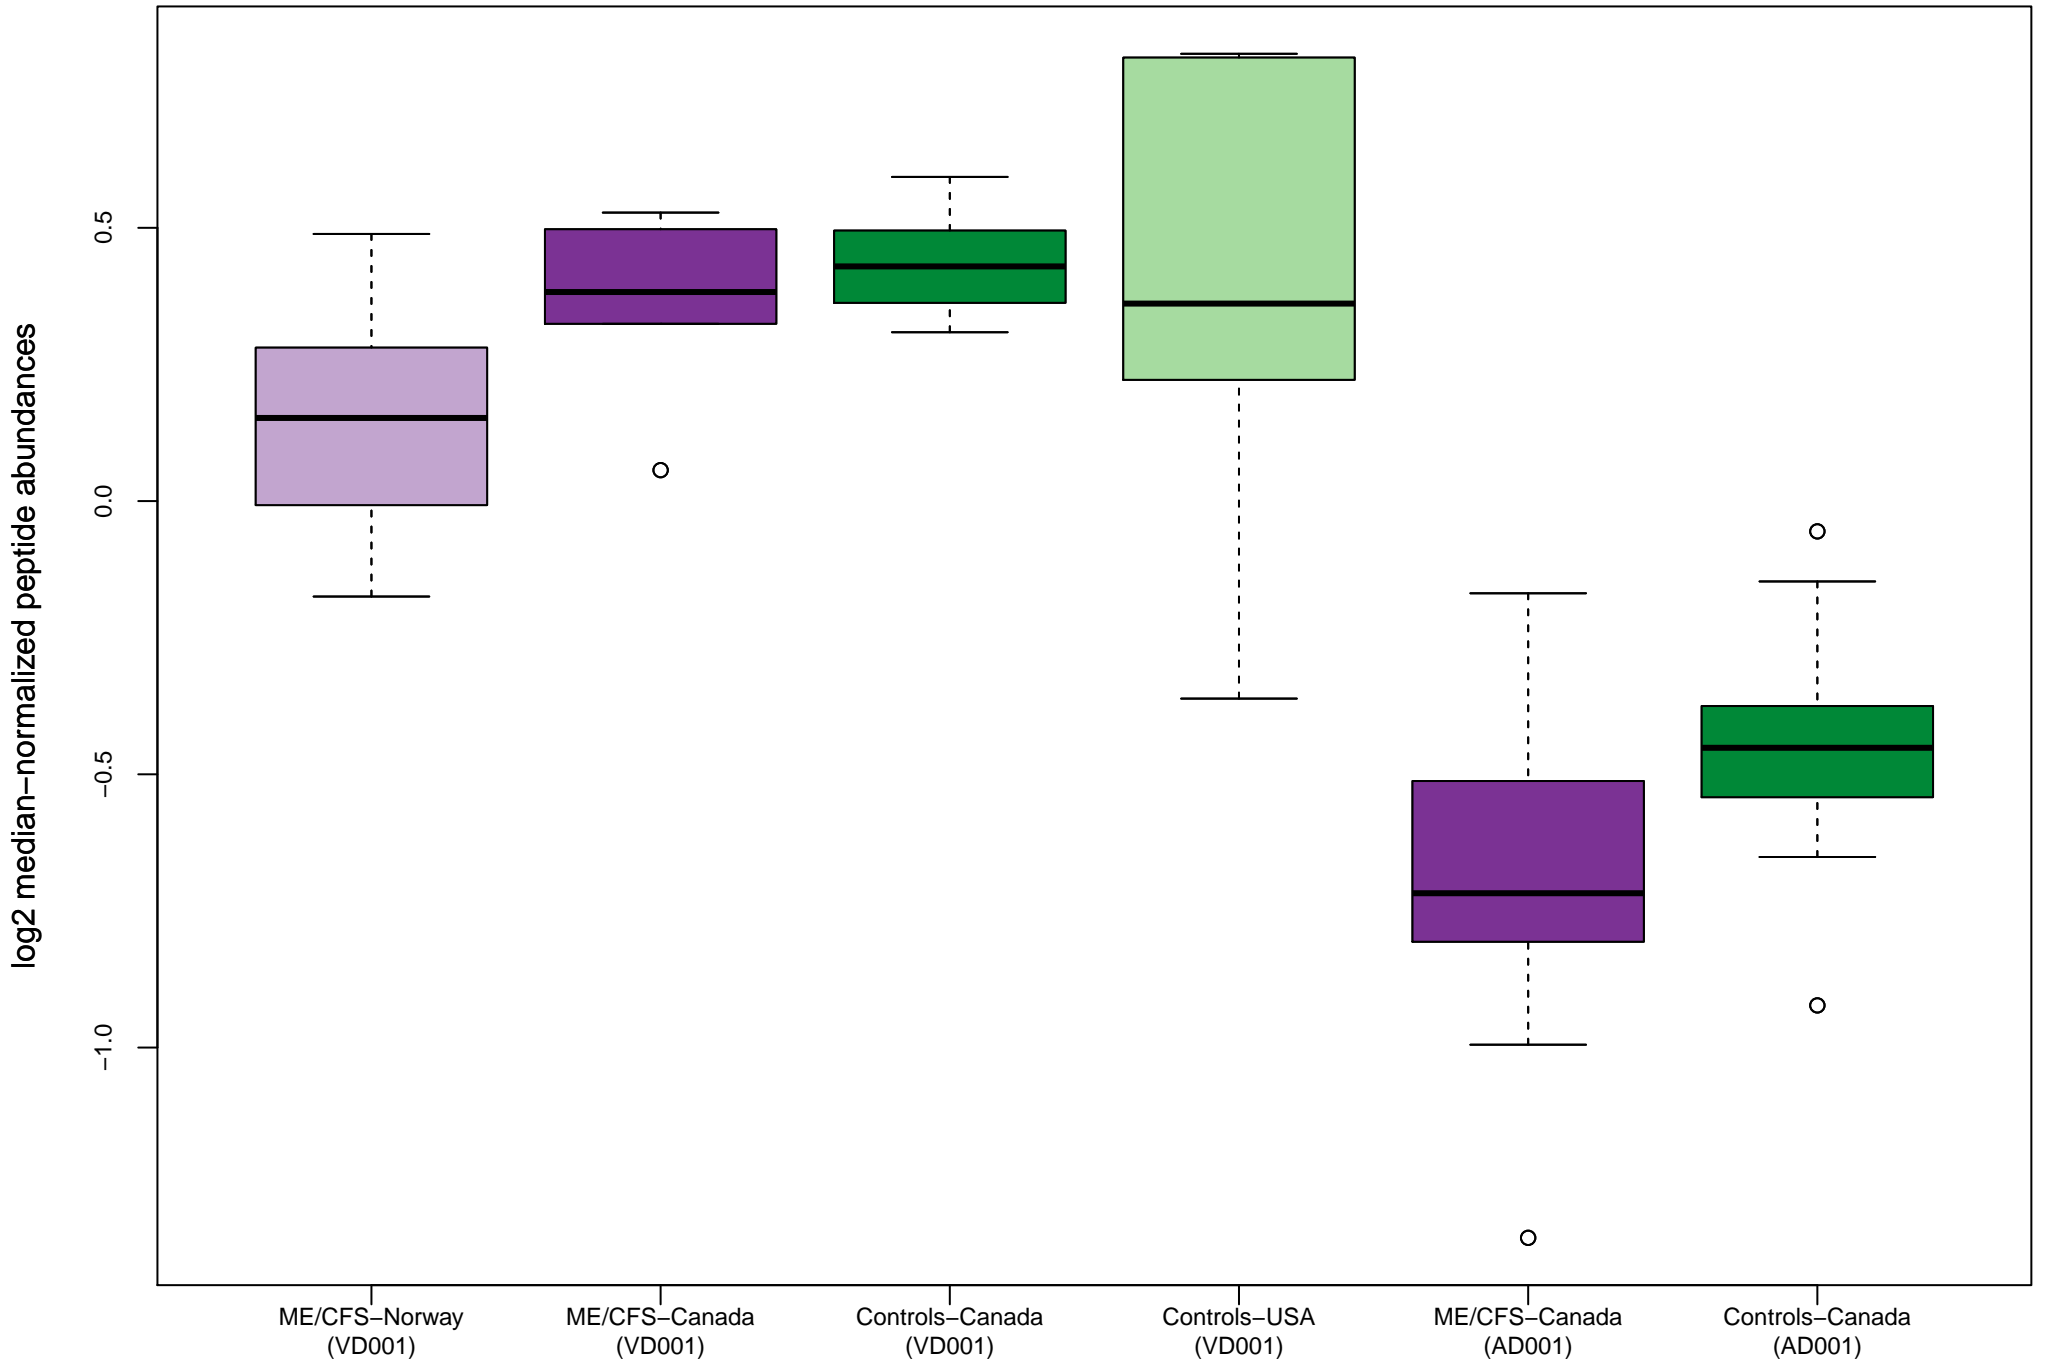



# KLLAYKALSGAG

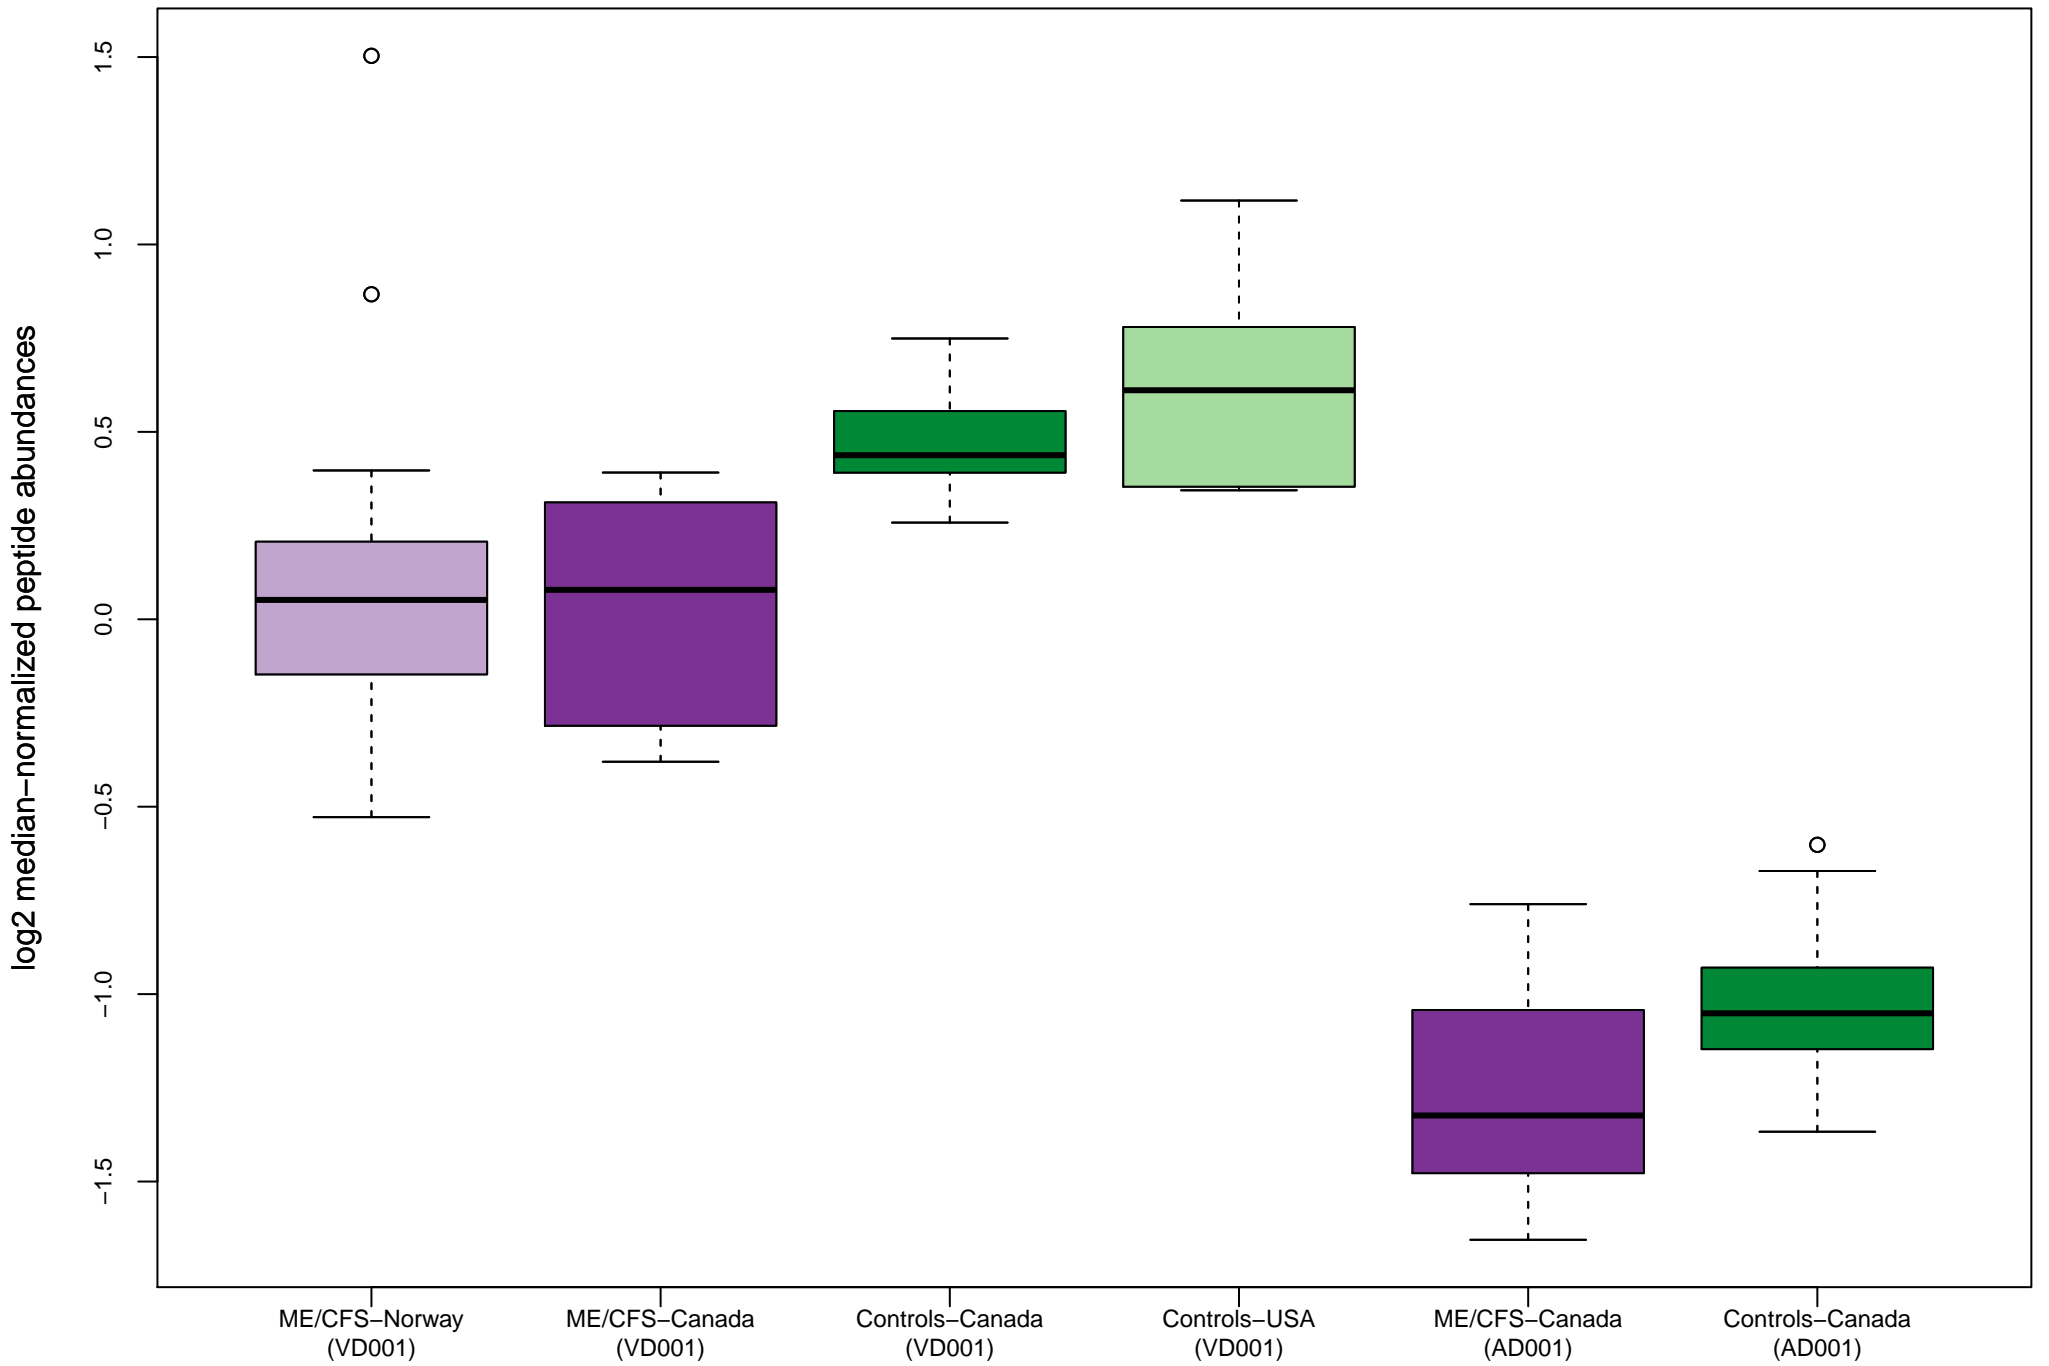

# KQWRVSRPYWNA

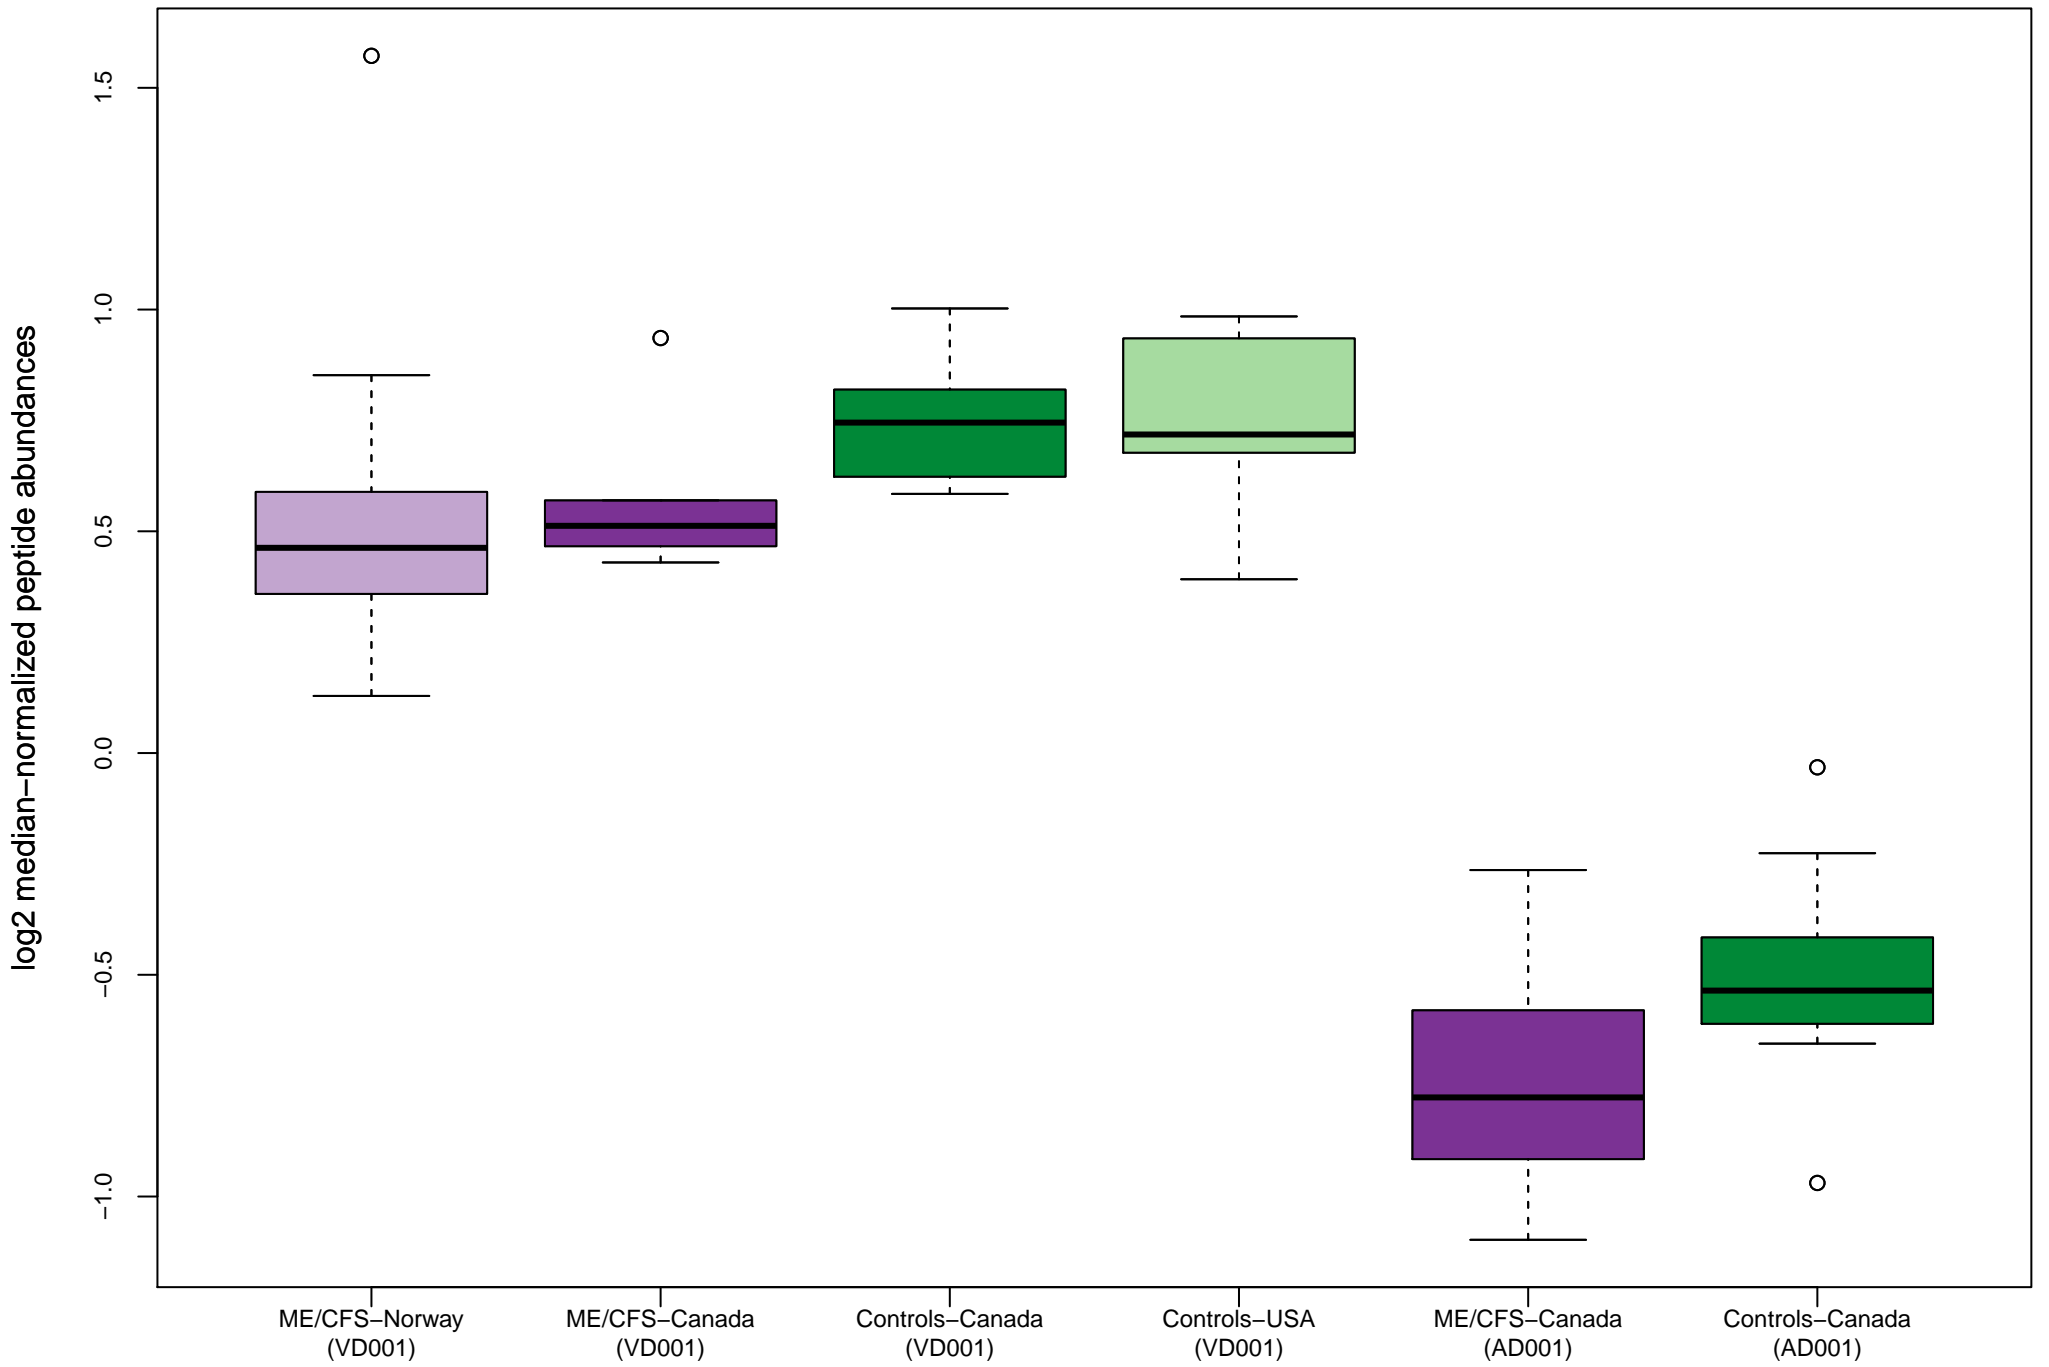

# KRFLFRLSGVSG

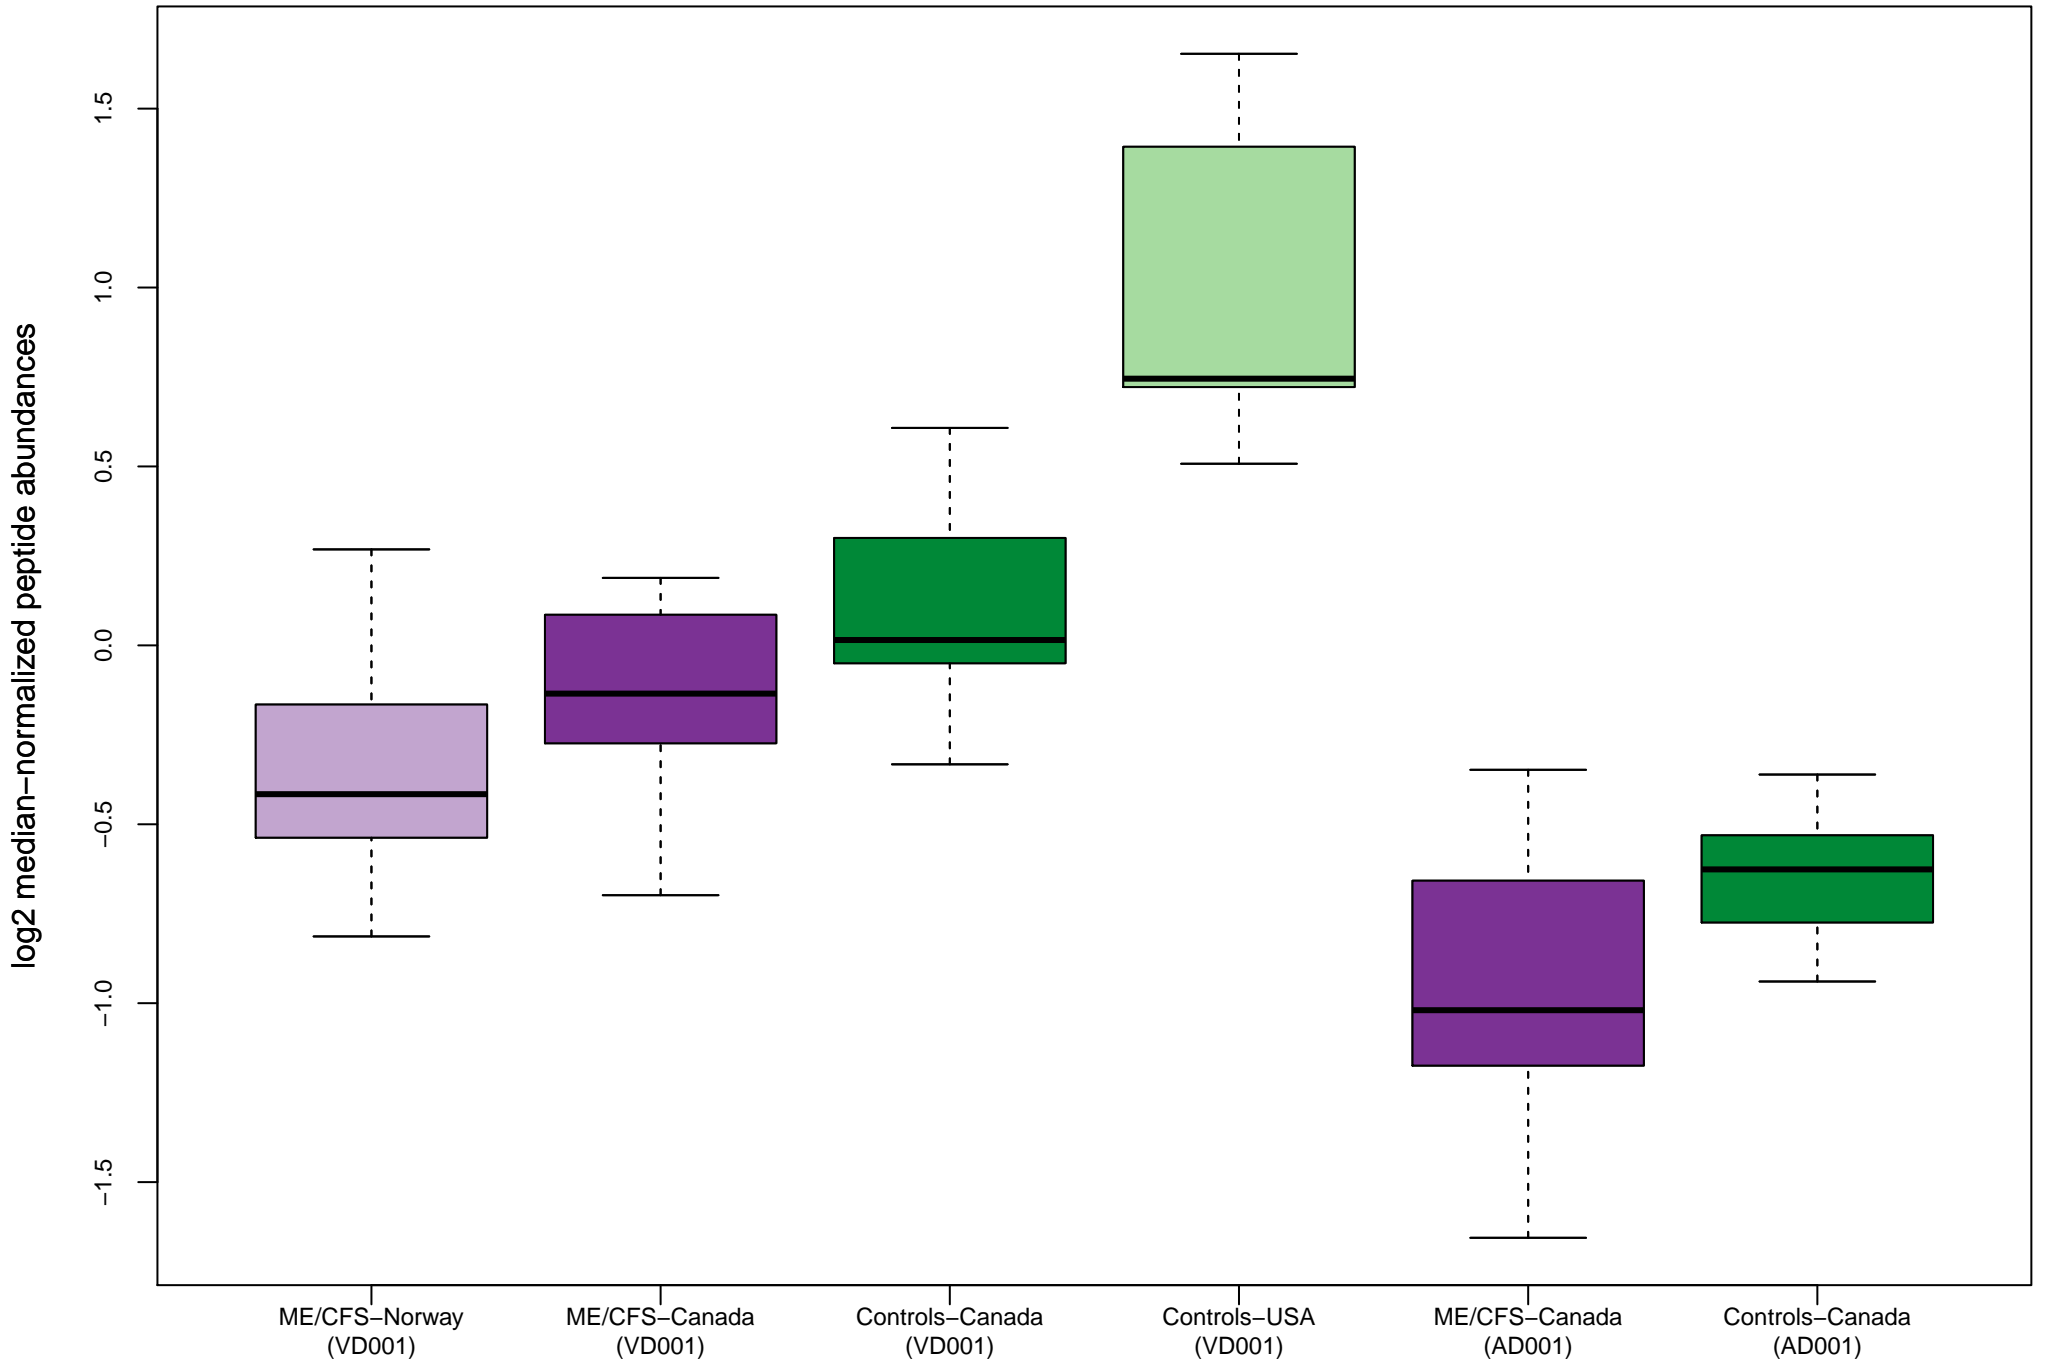

# KVAPLFRLRPLS

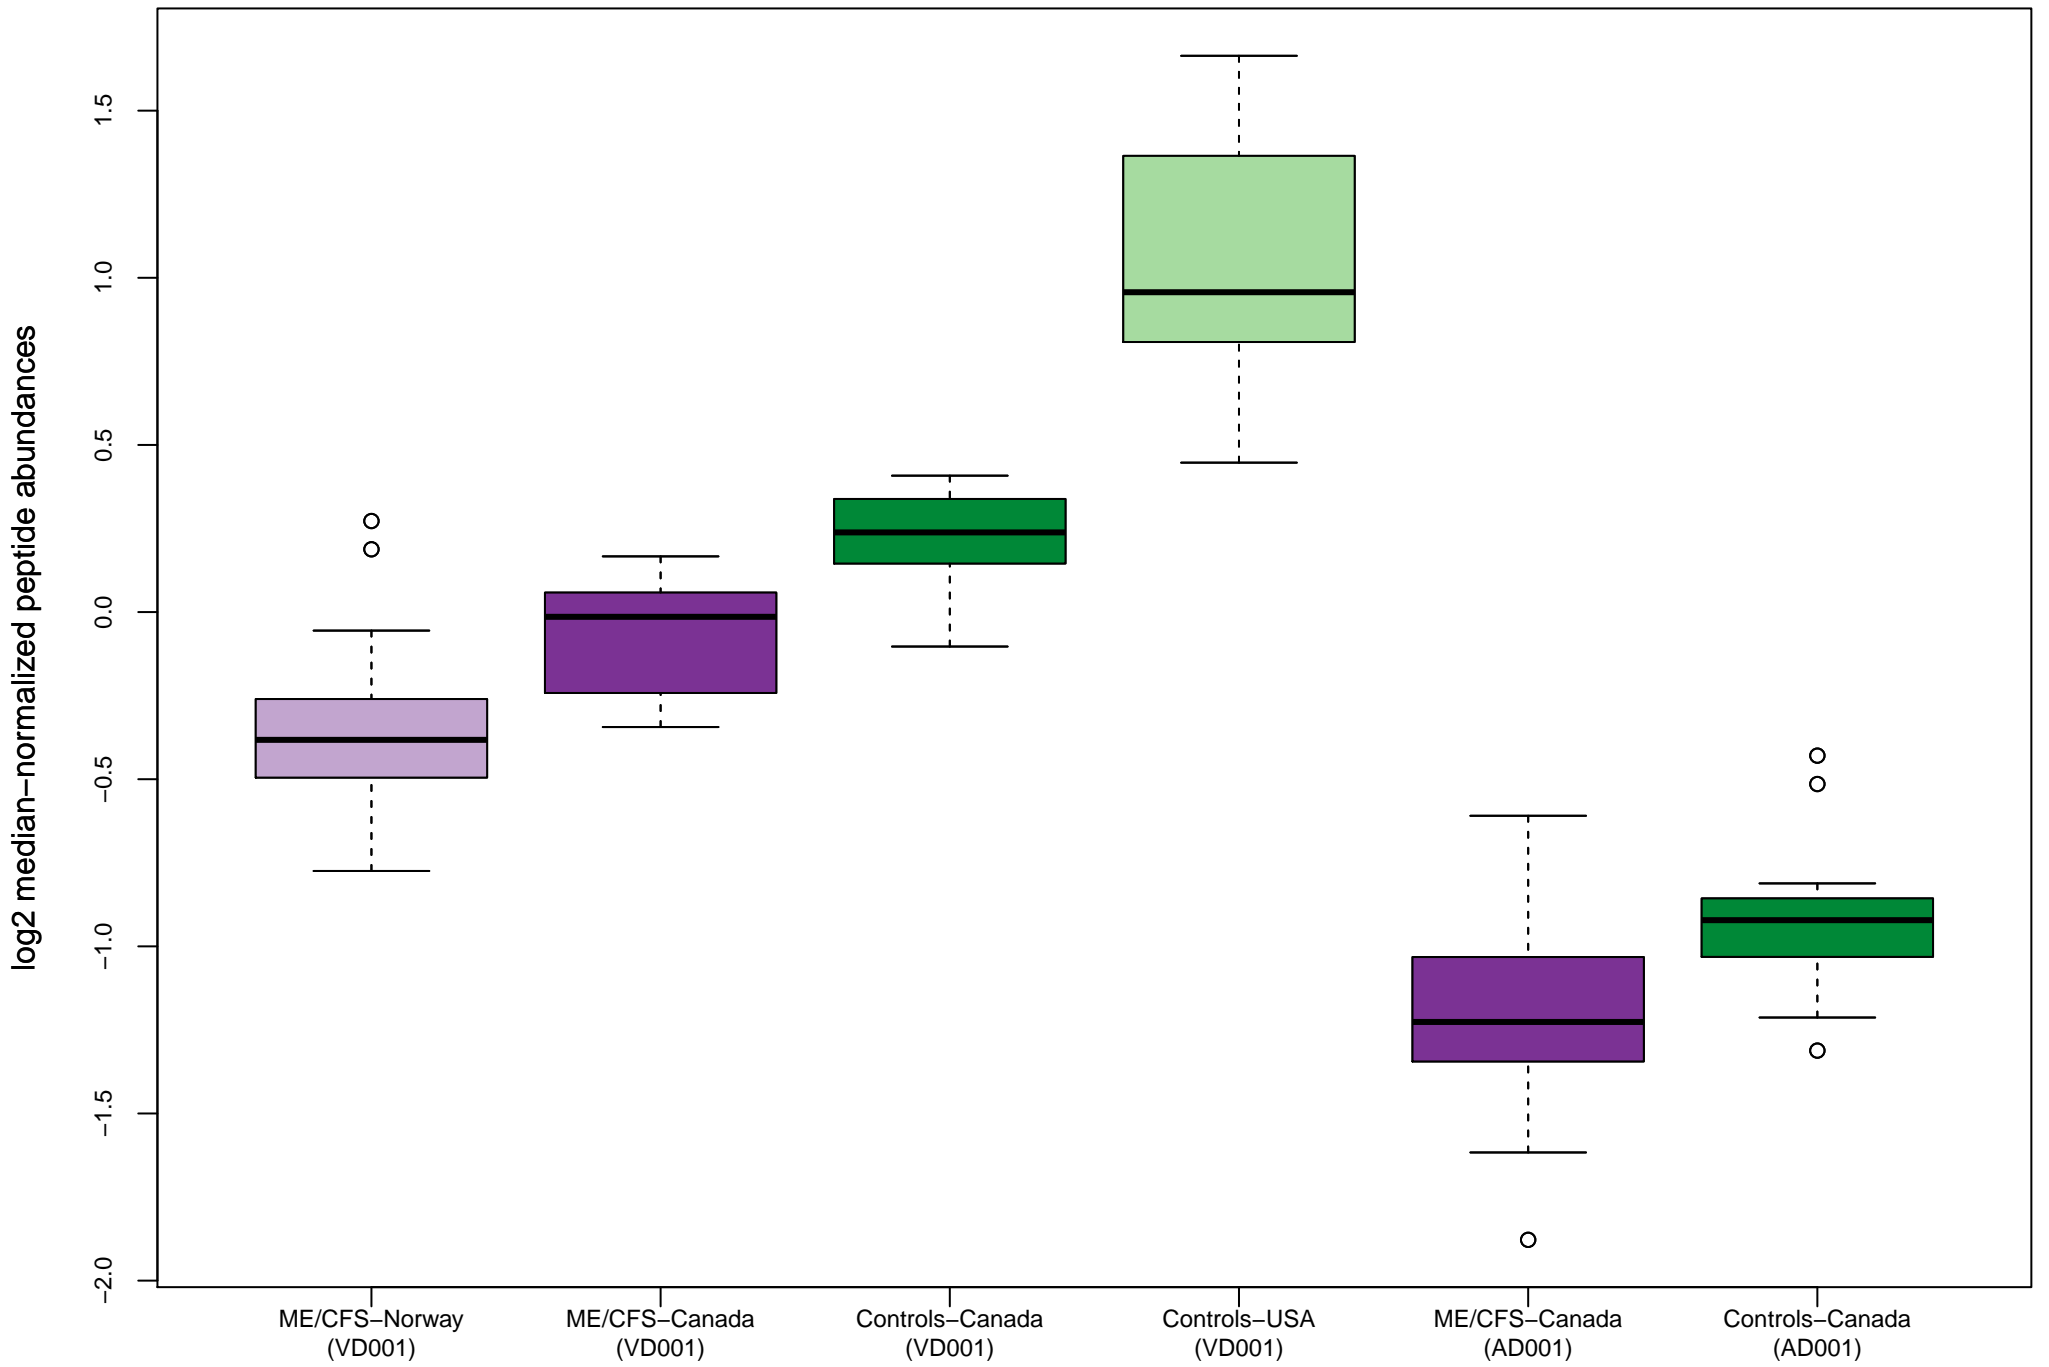

# LFLQFRNRLGAS

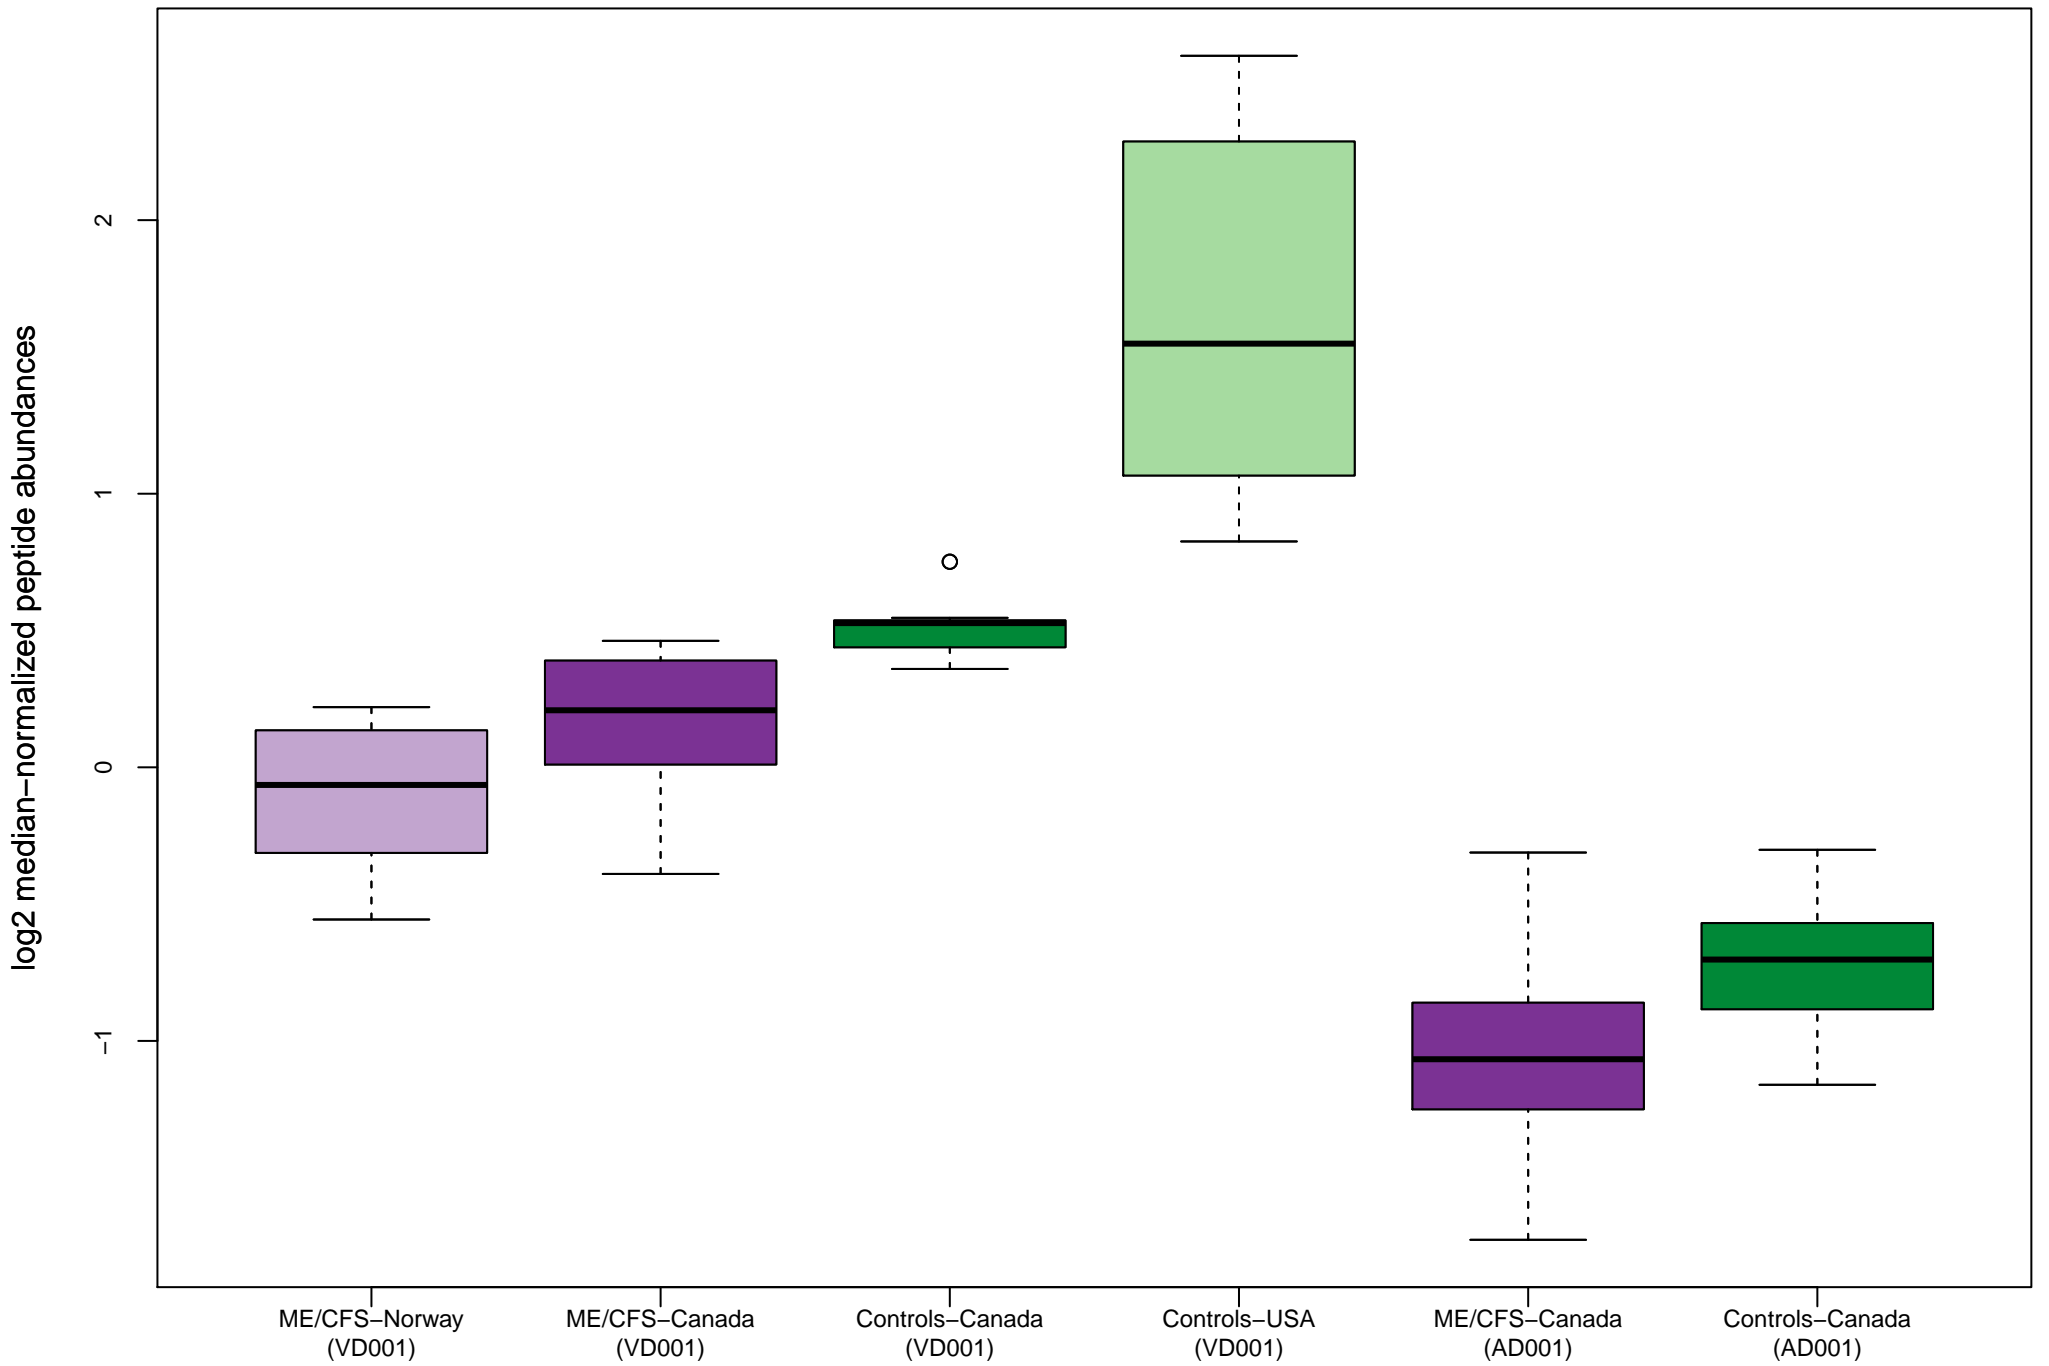

# LFRAGGFKLALS

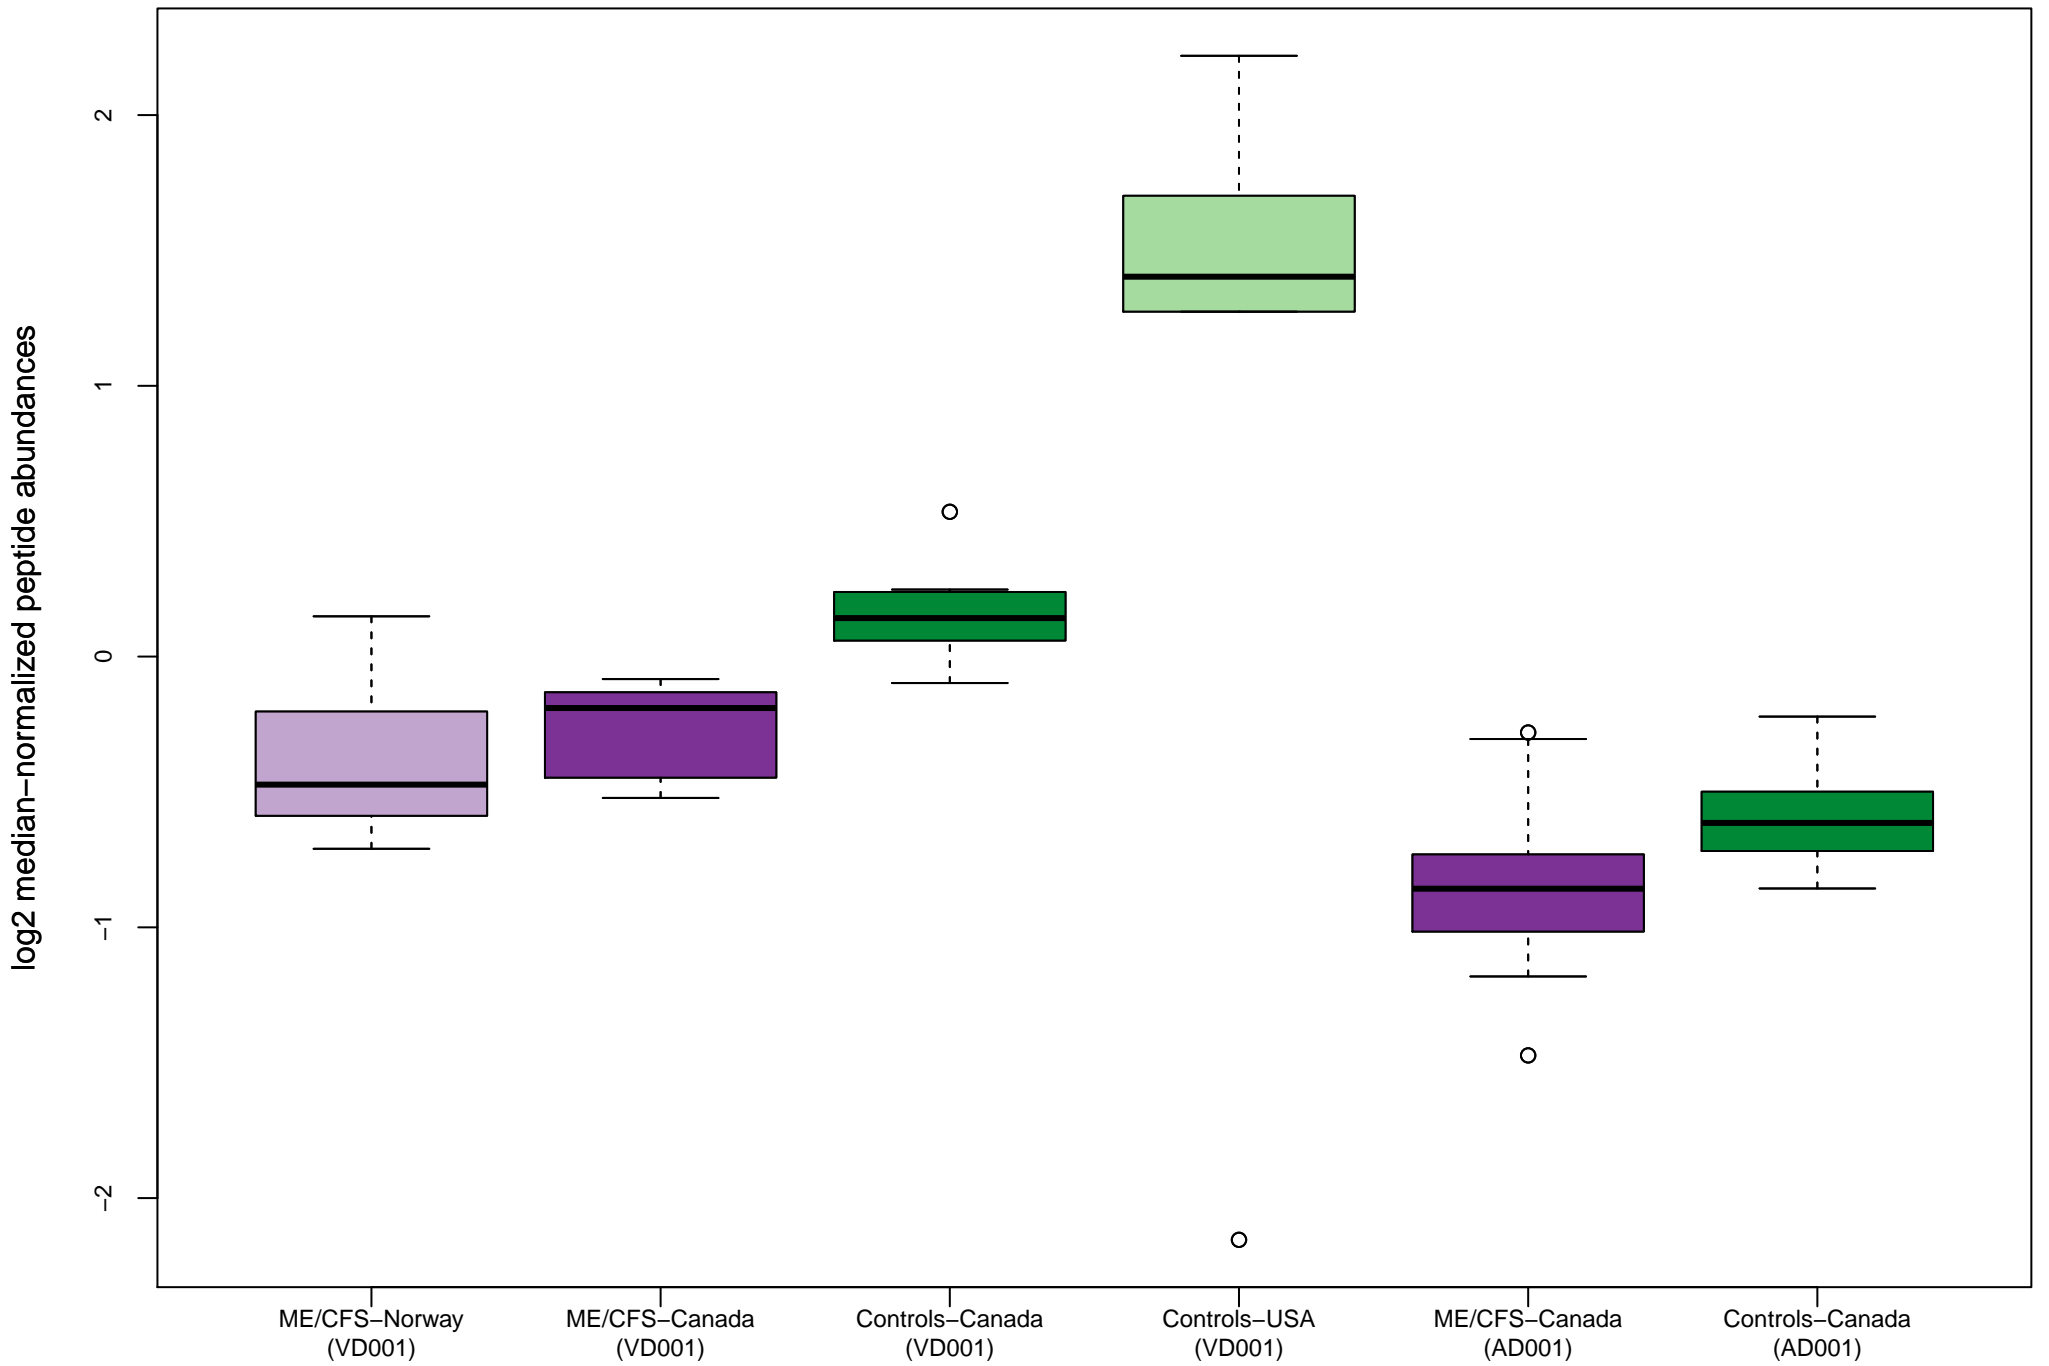

# LFRWQRAFRYGL

log2 median-normalized peptide abundances

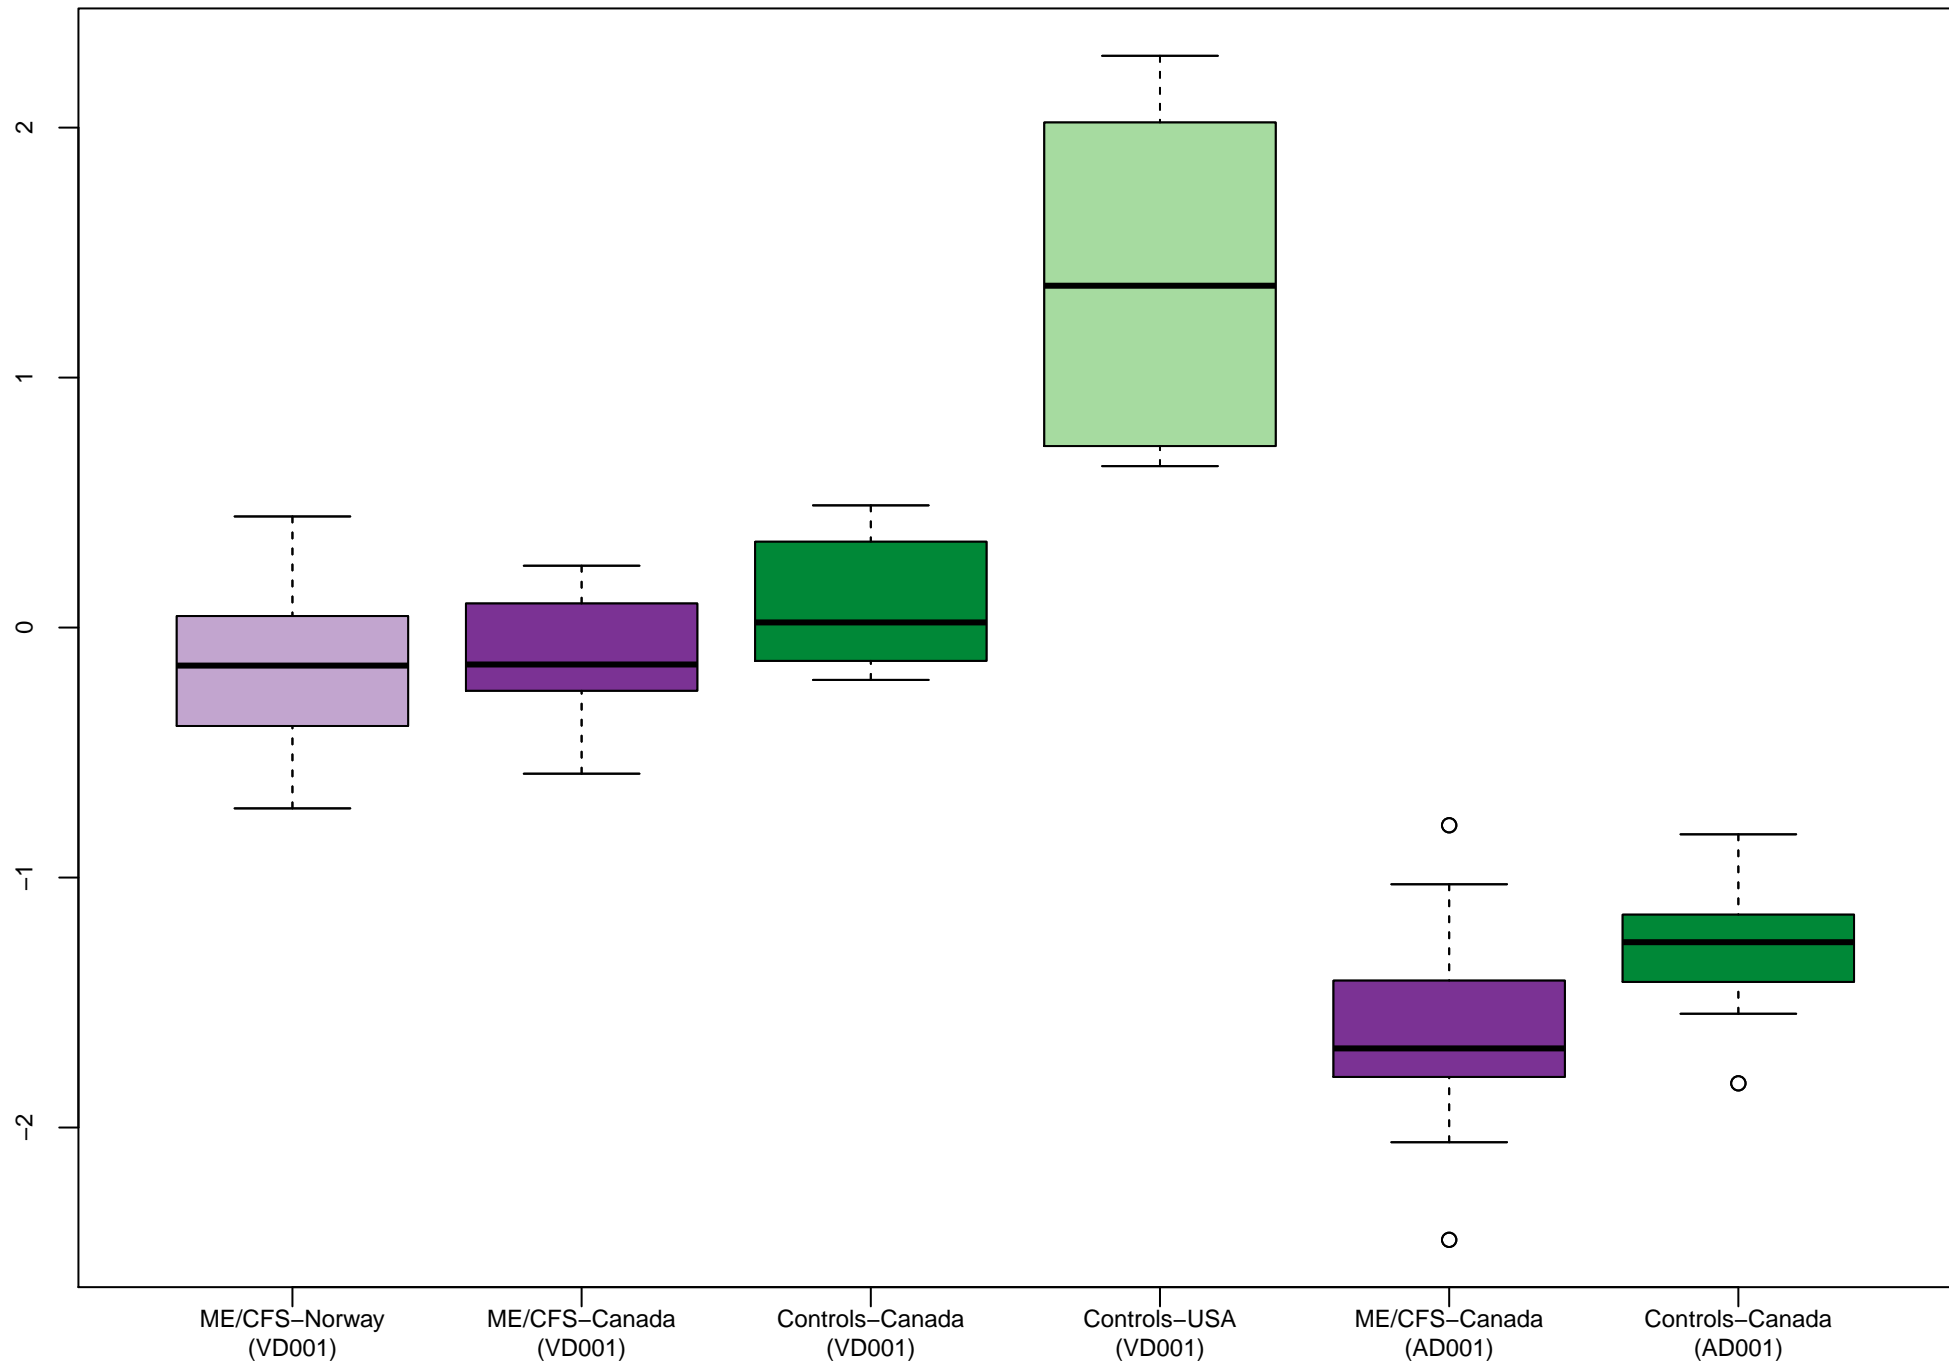

# LGVFRYSRPWKA

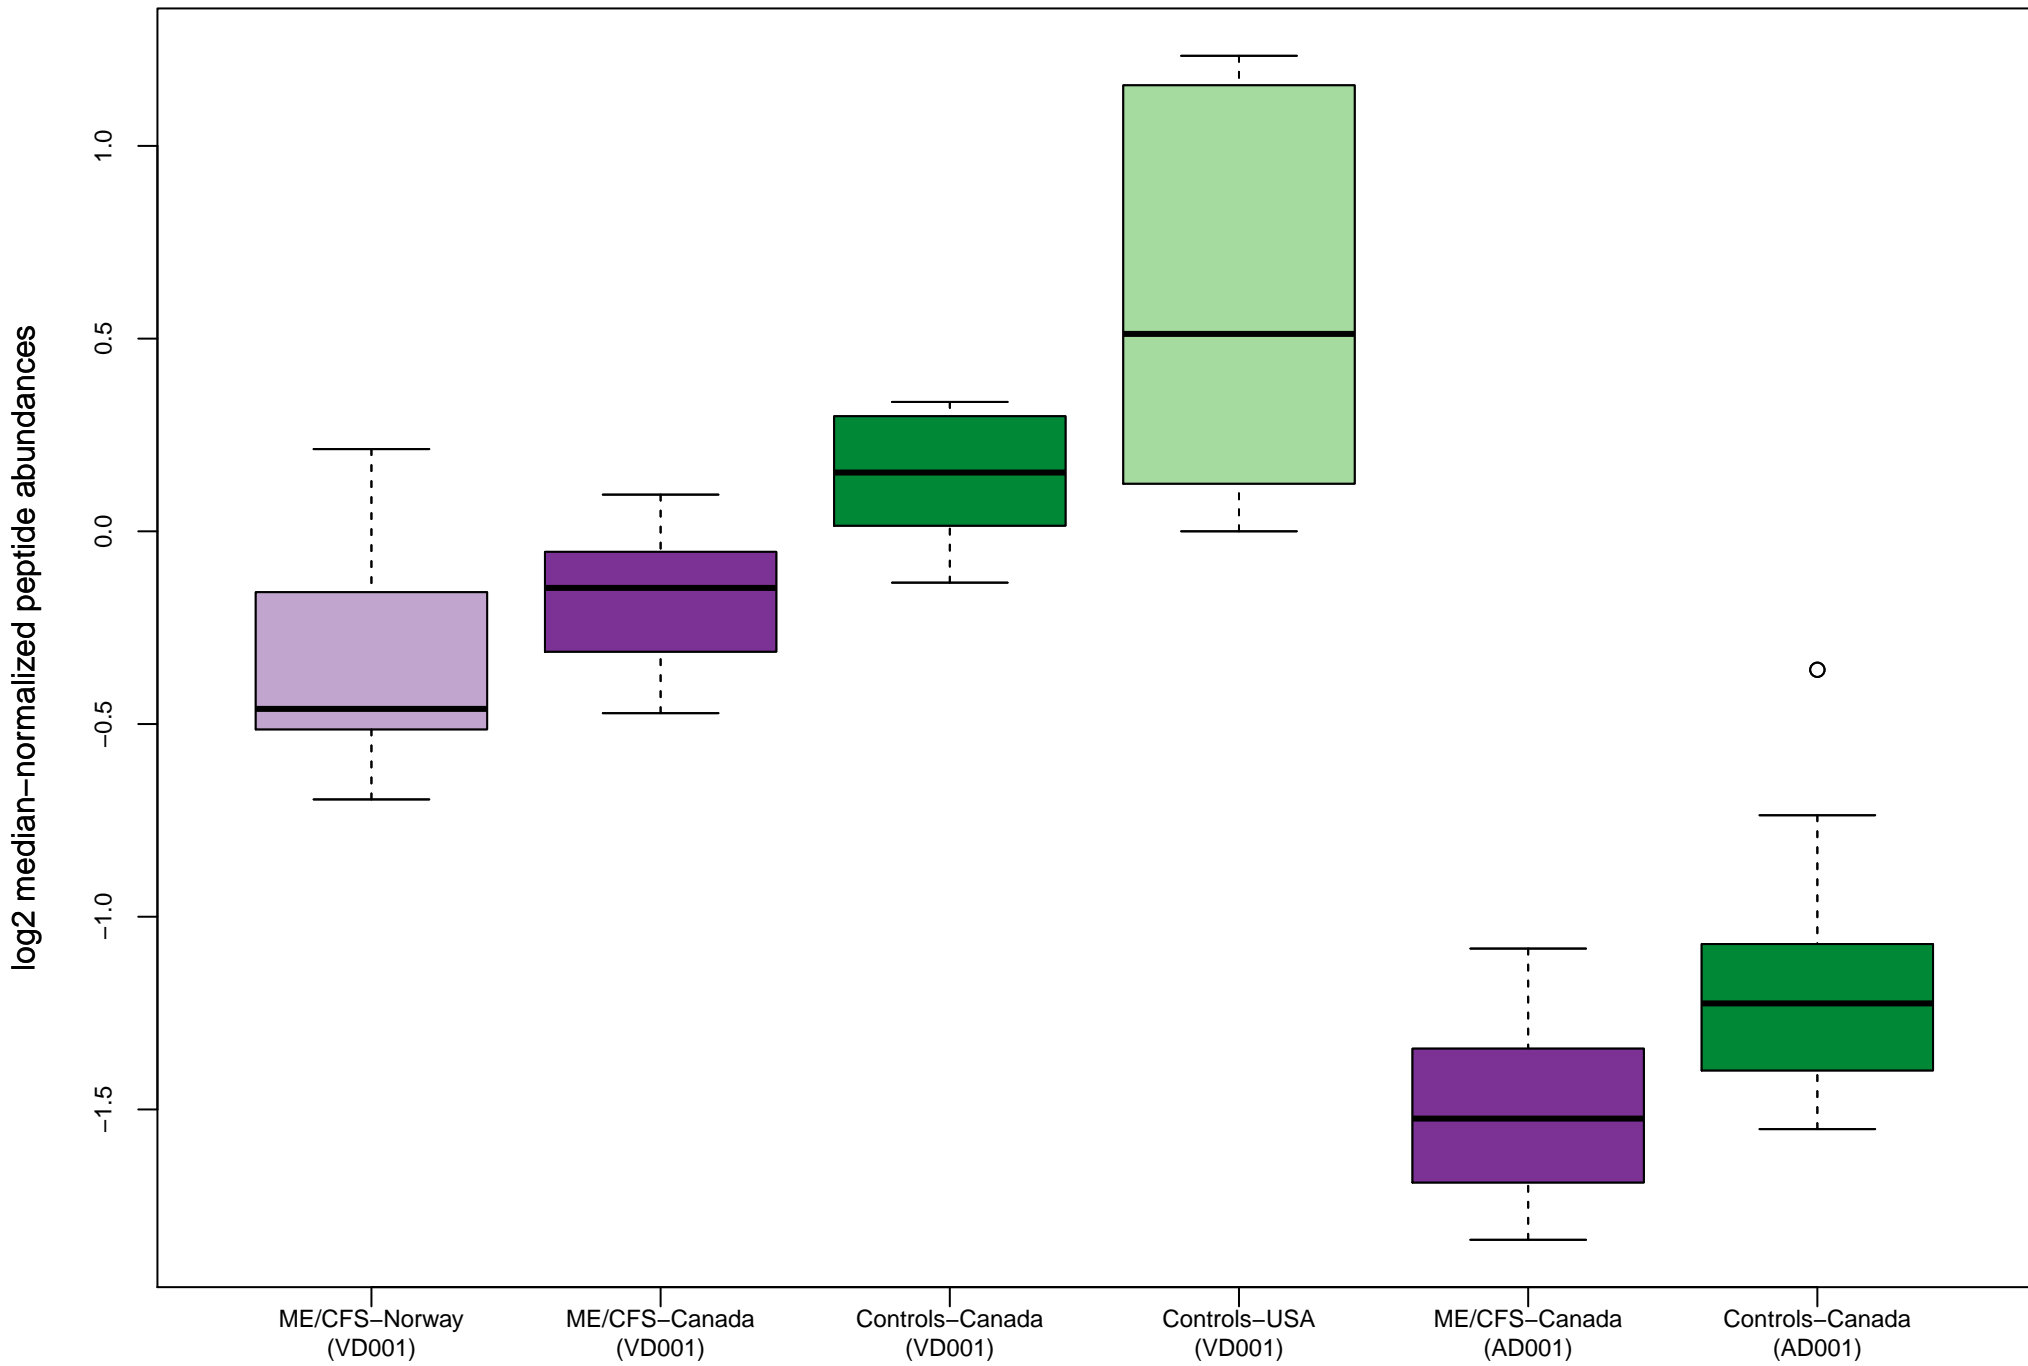



# LRSWFKLSGLSG

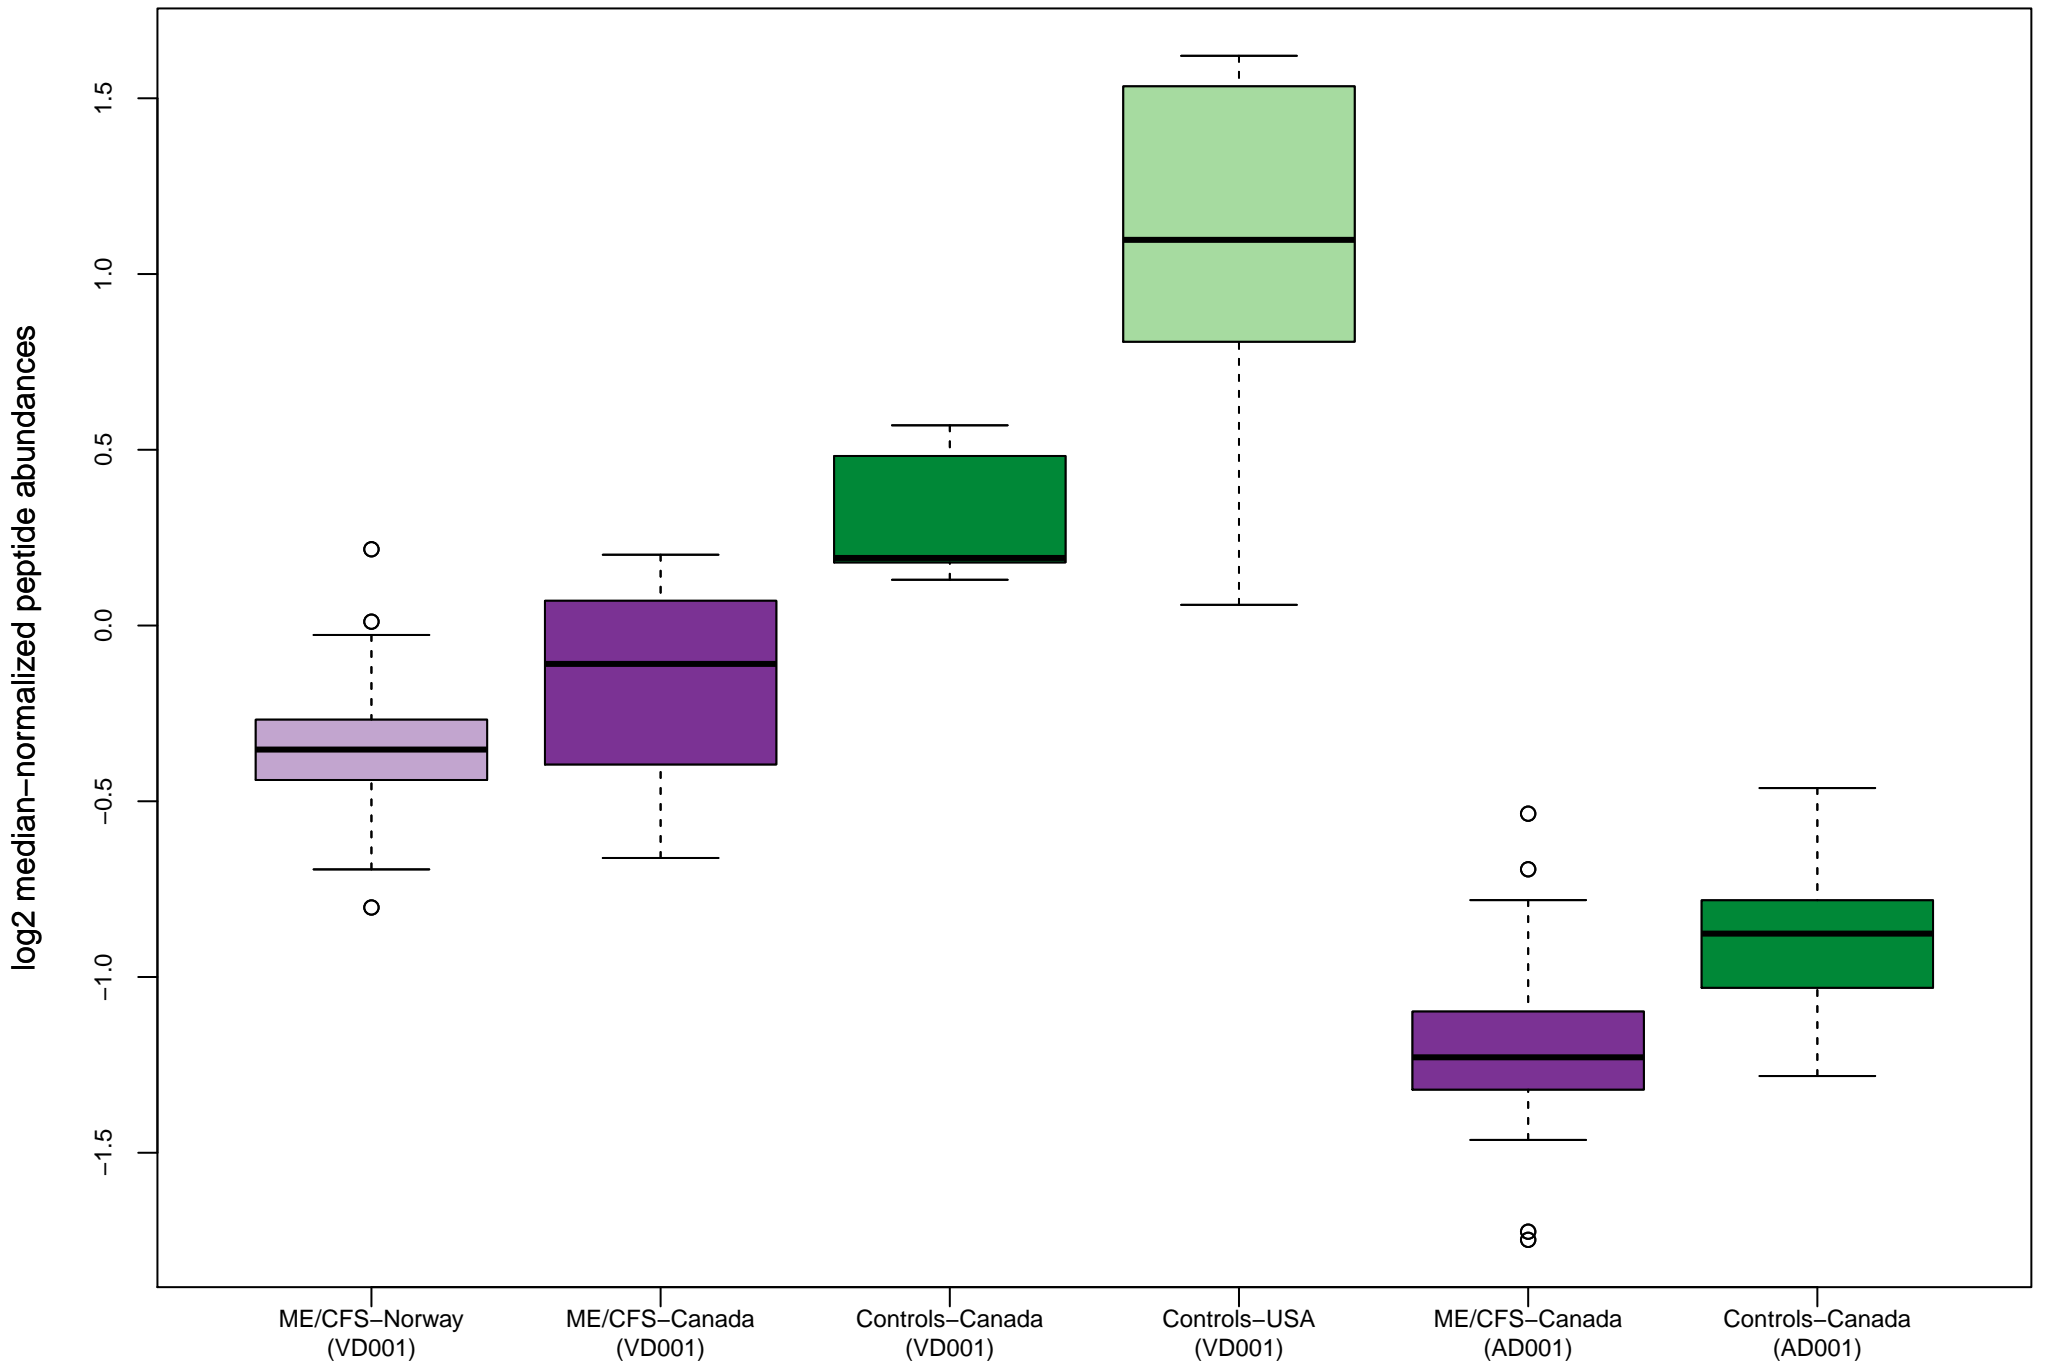

# LRWVARNFLSAG

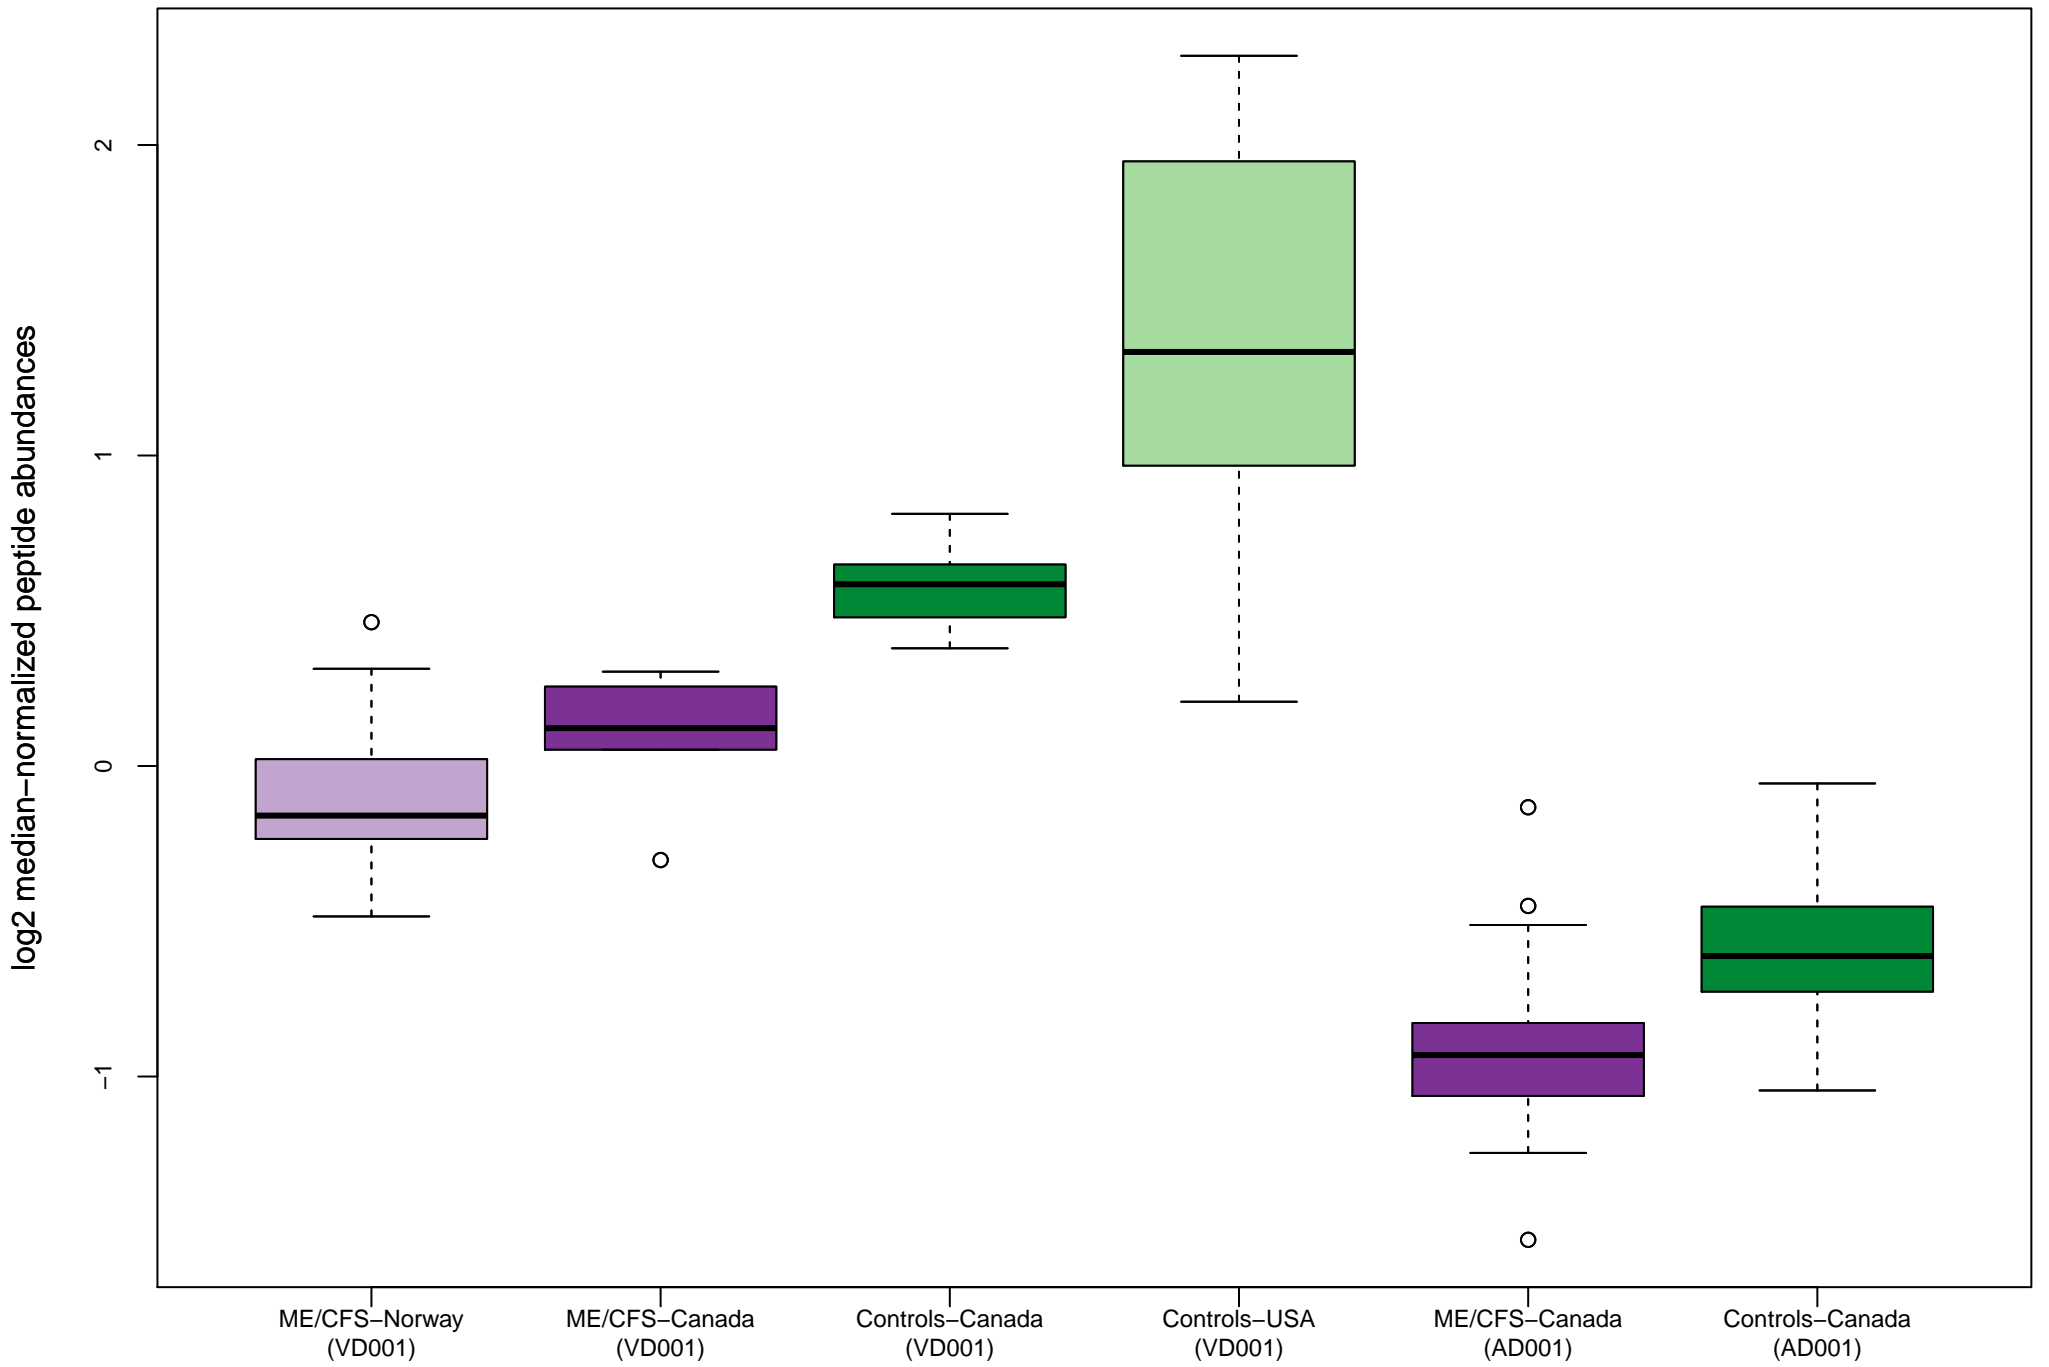

# LRYVGQFKLQRY

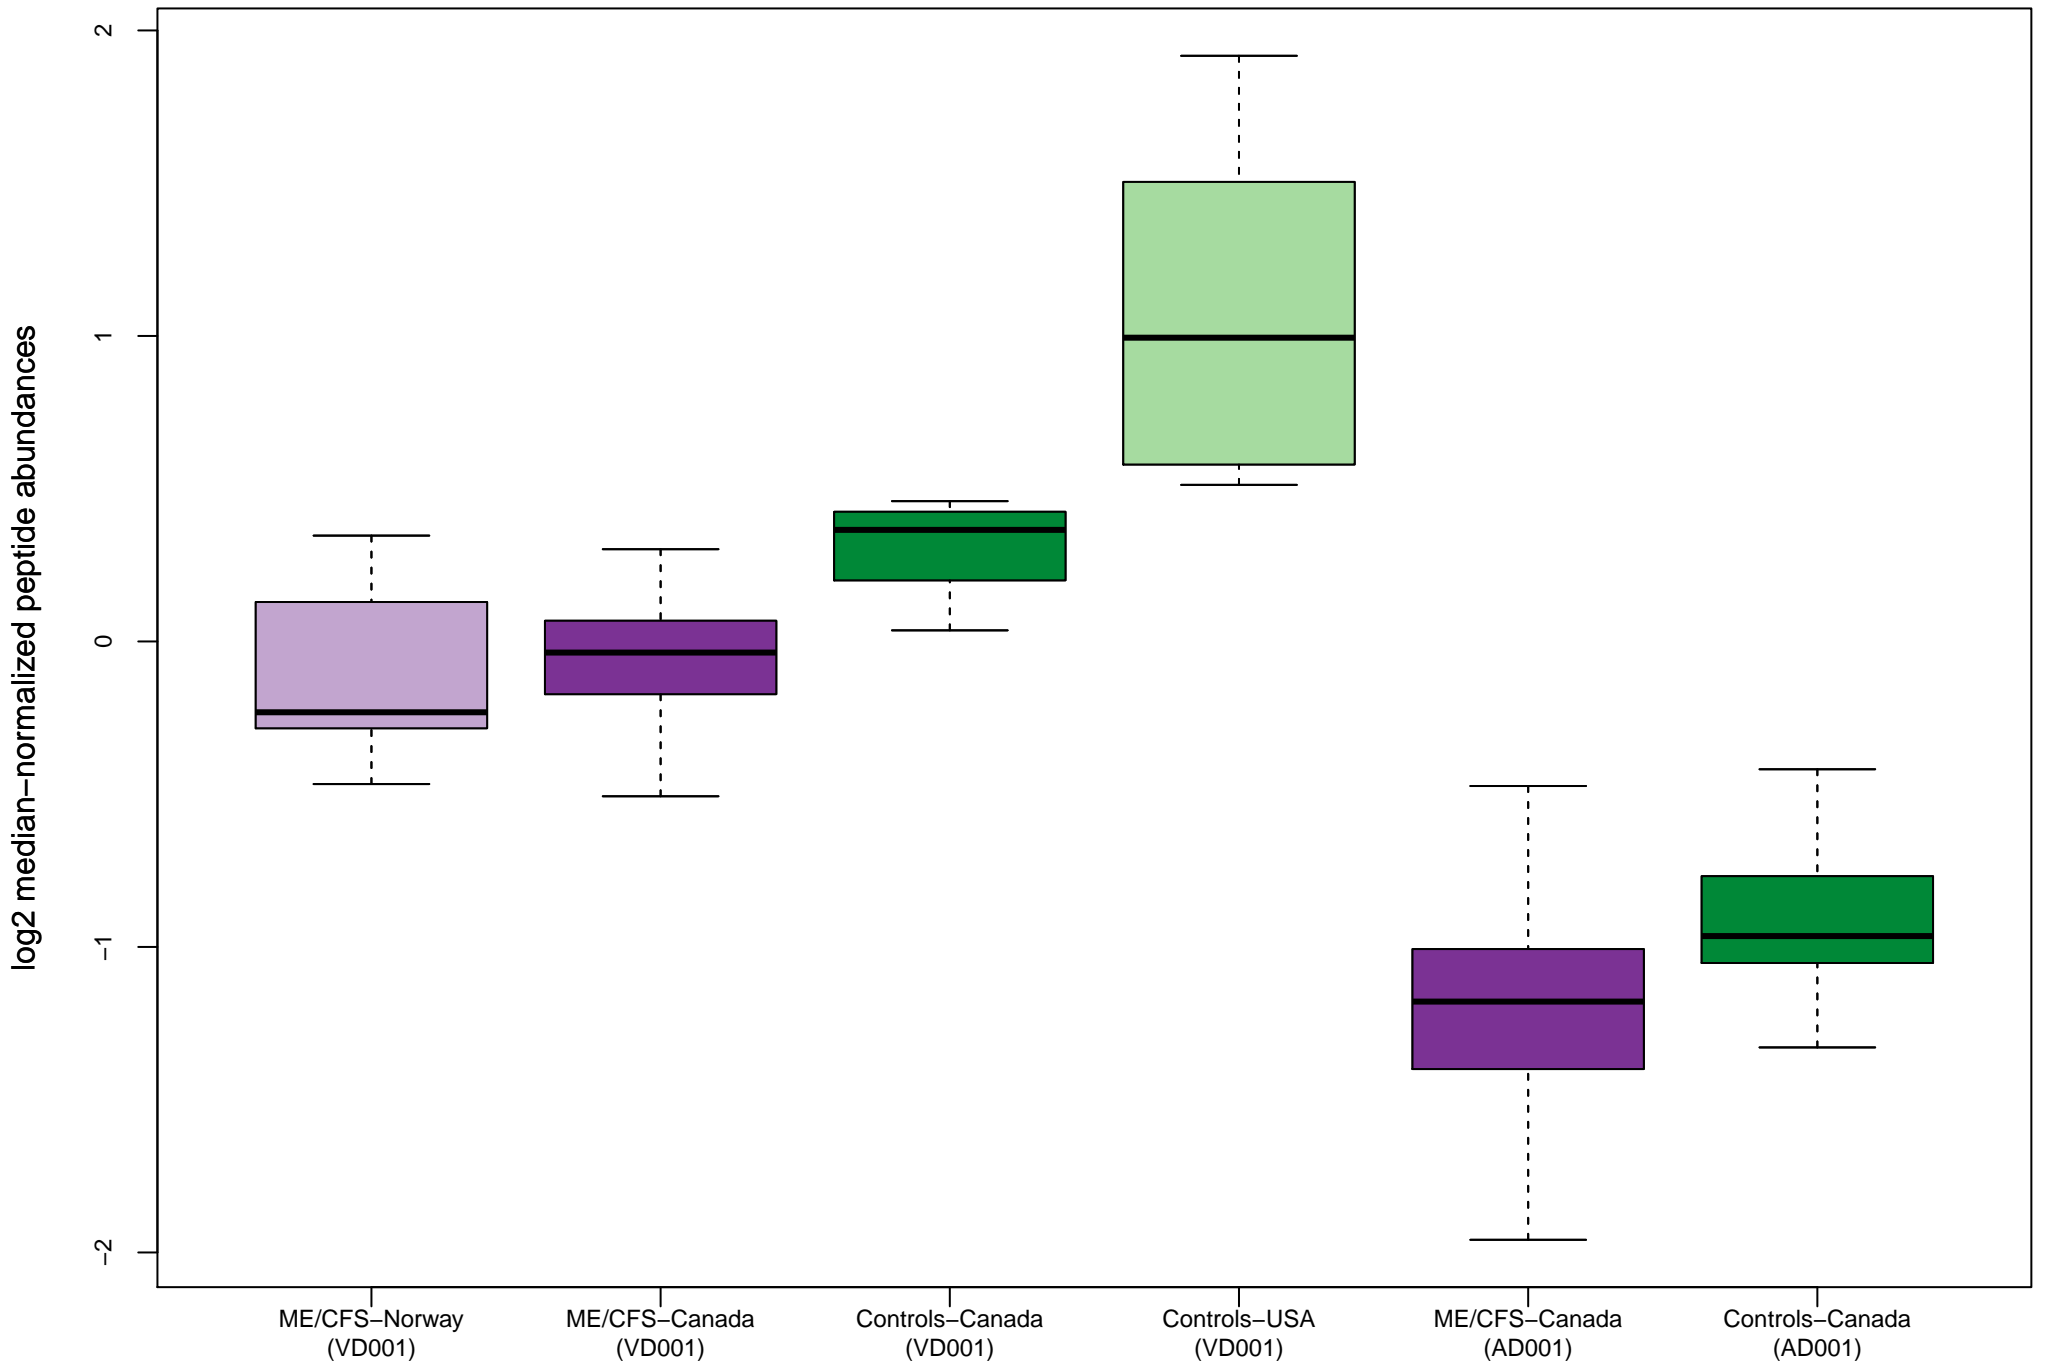

# LSRFSFREWKAL

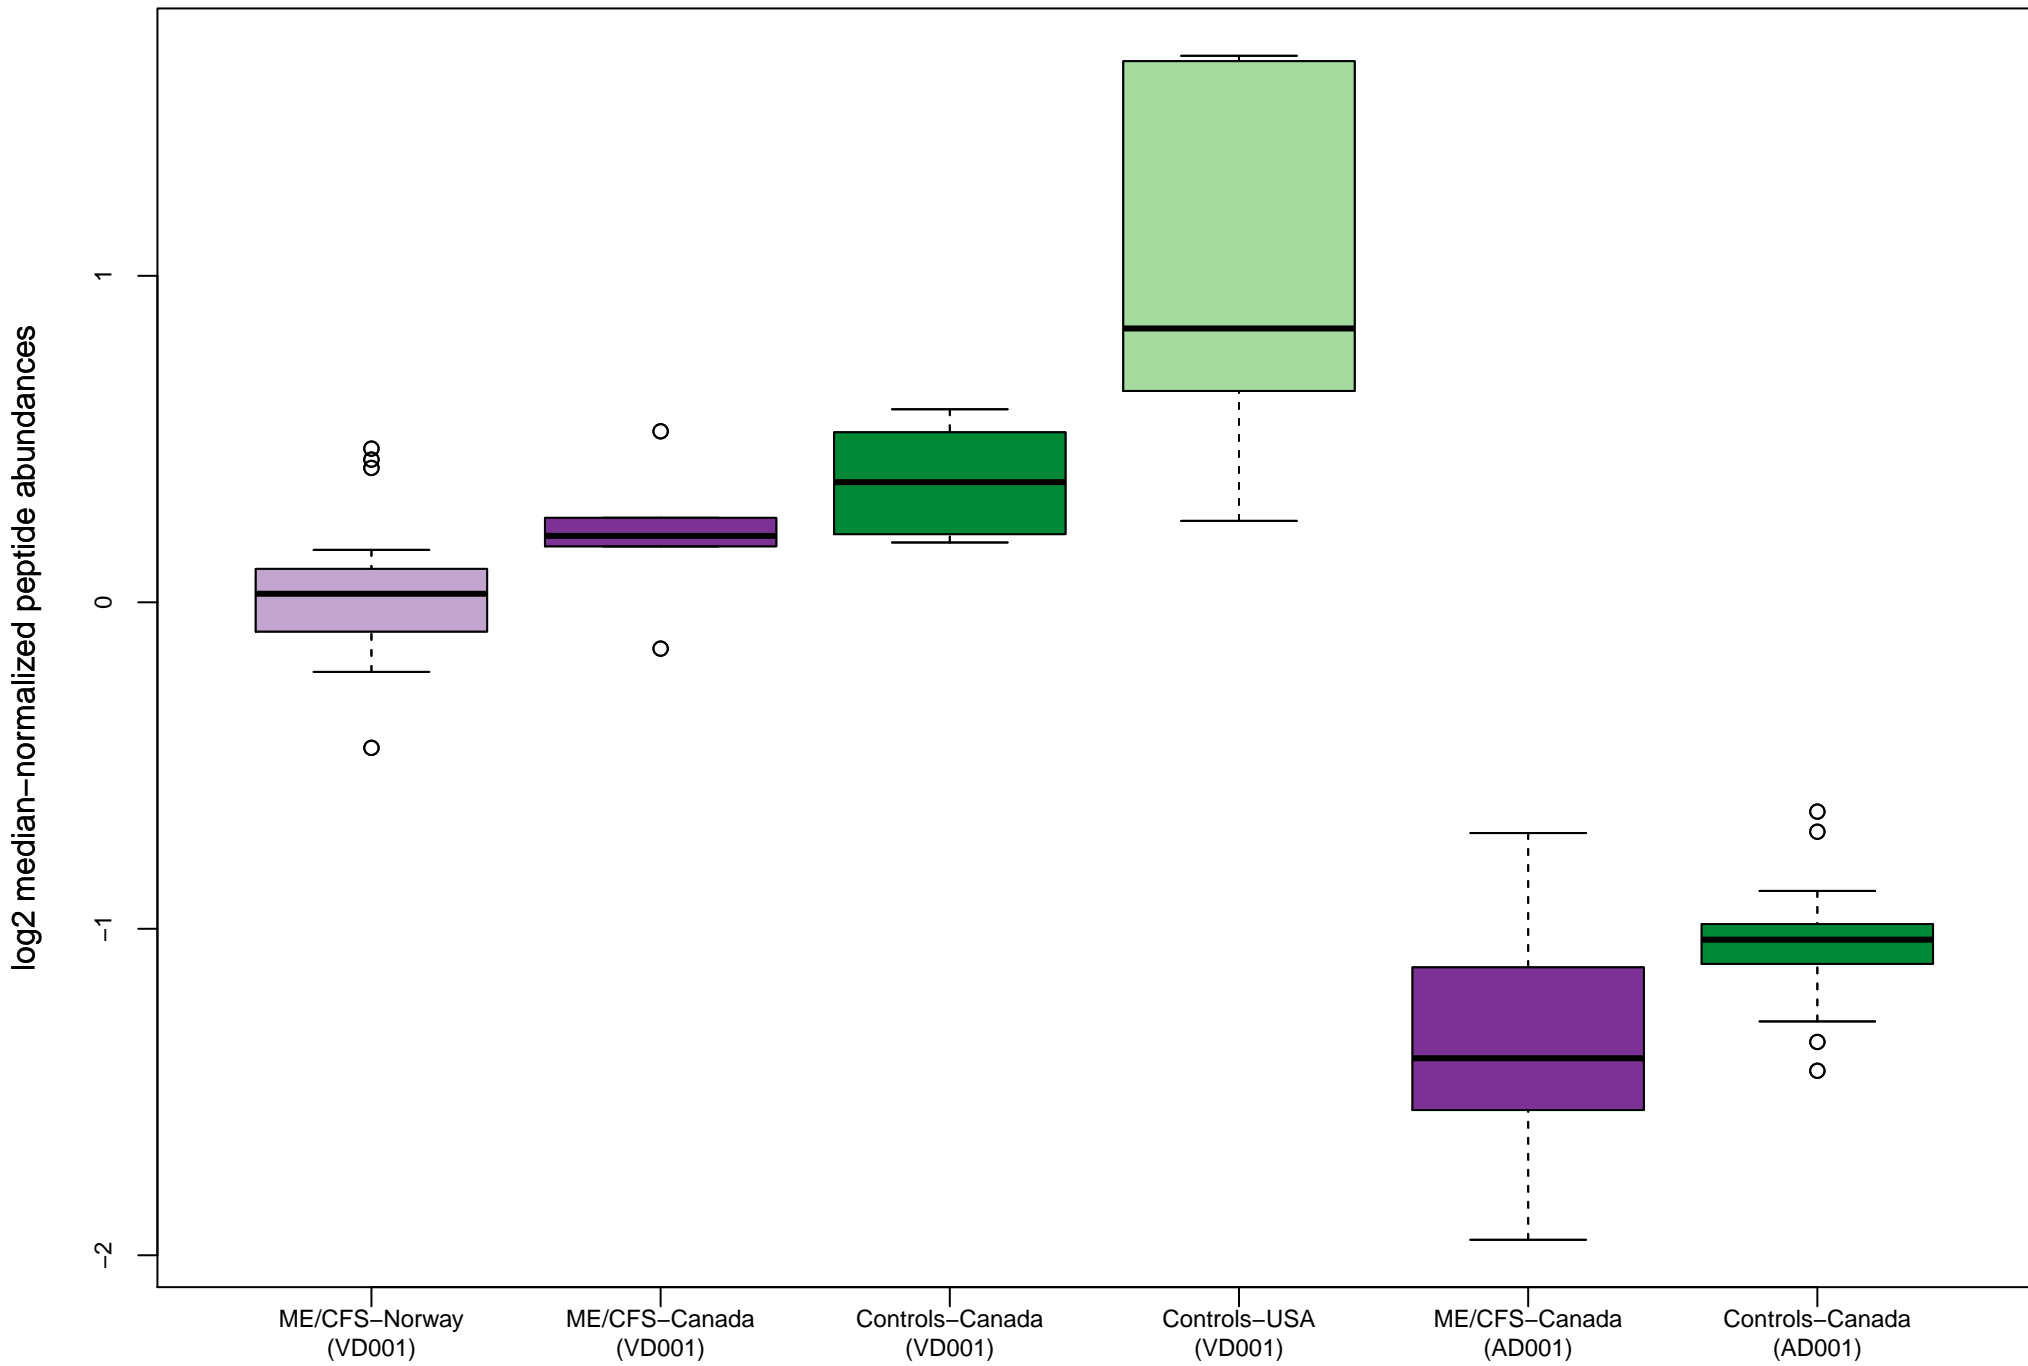

# LWRHFKLSGALG

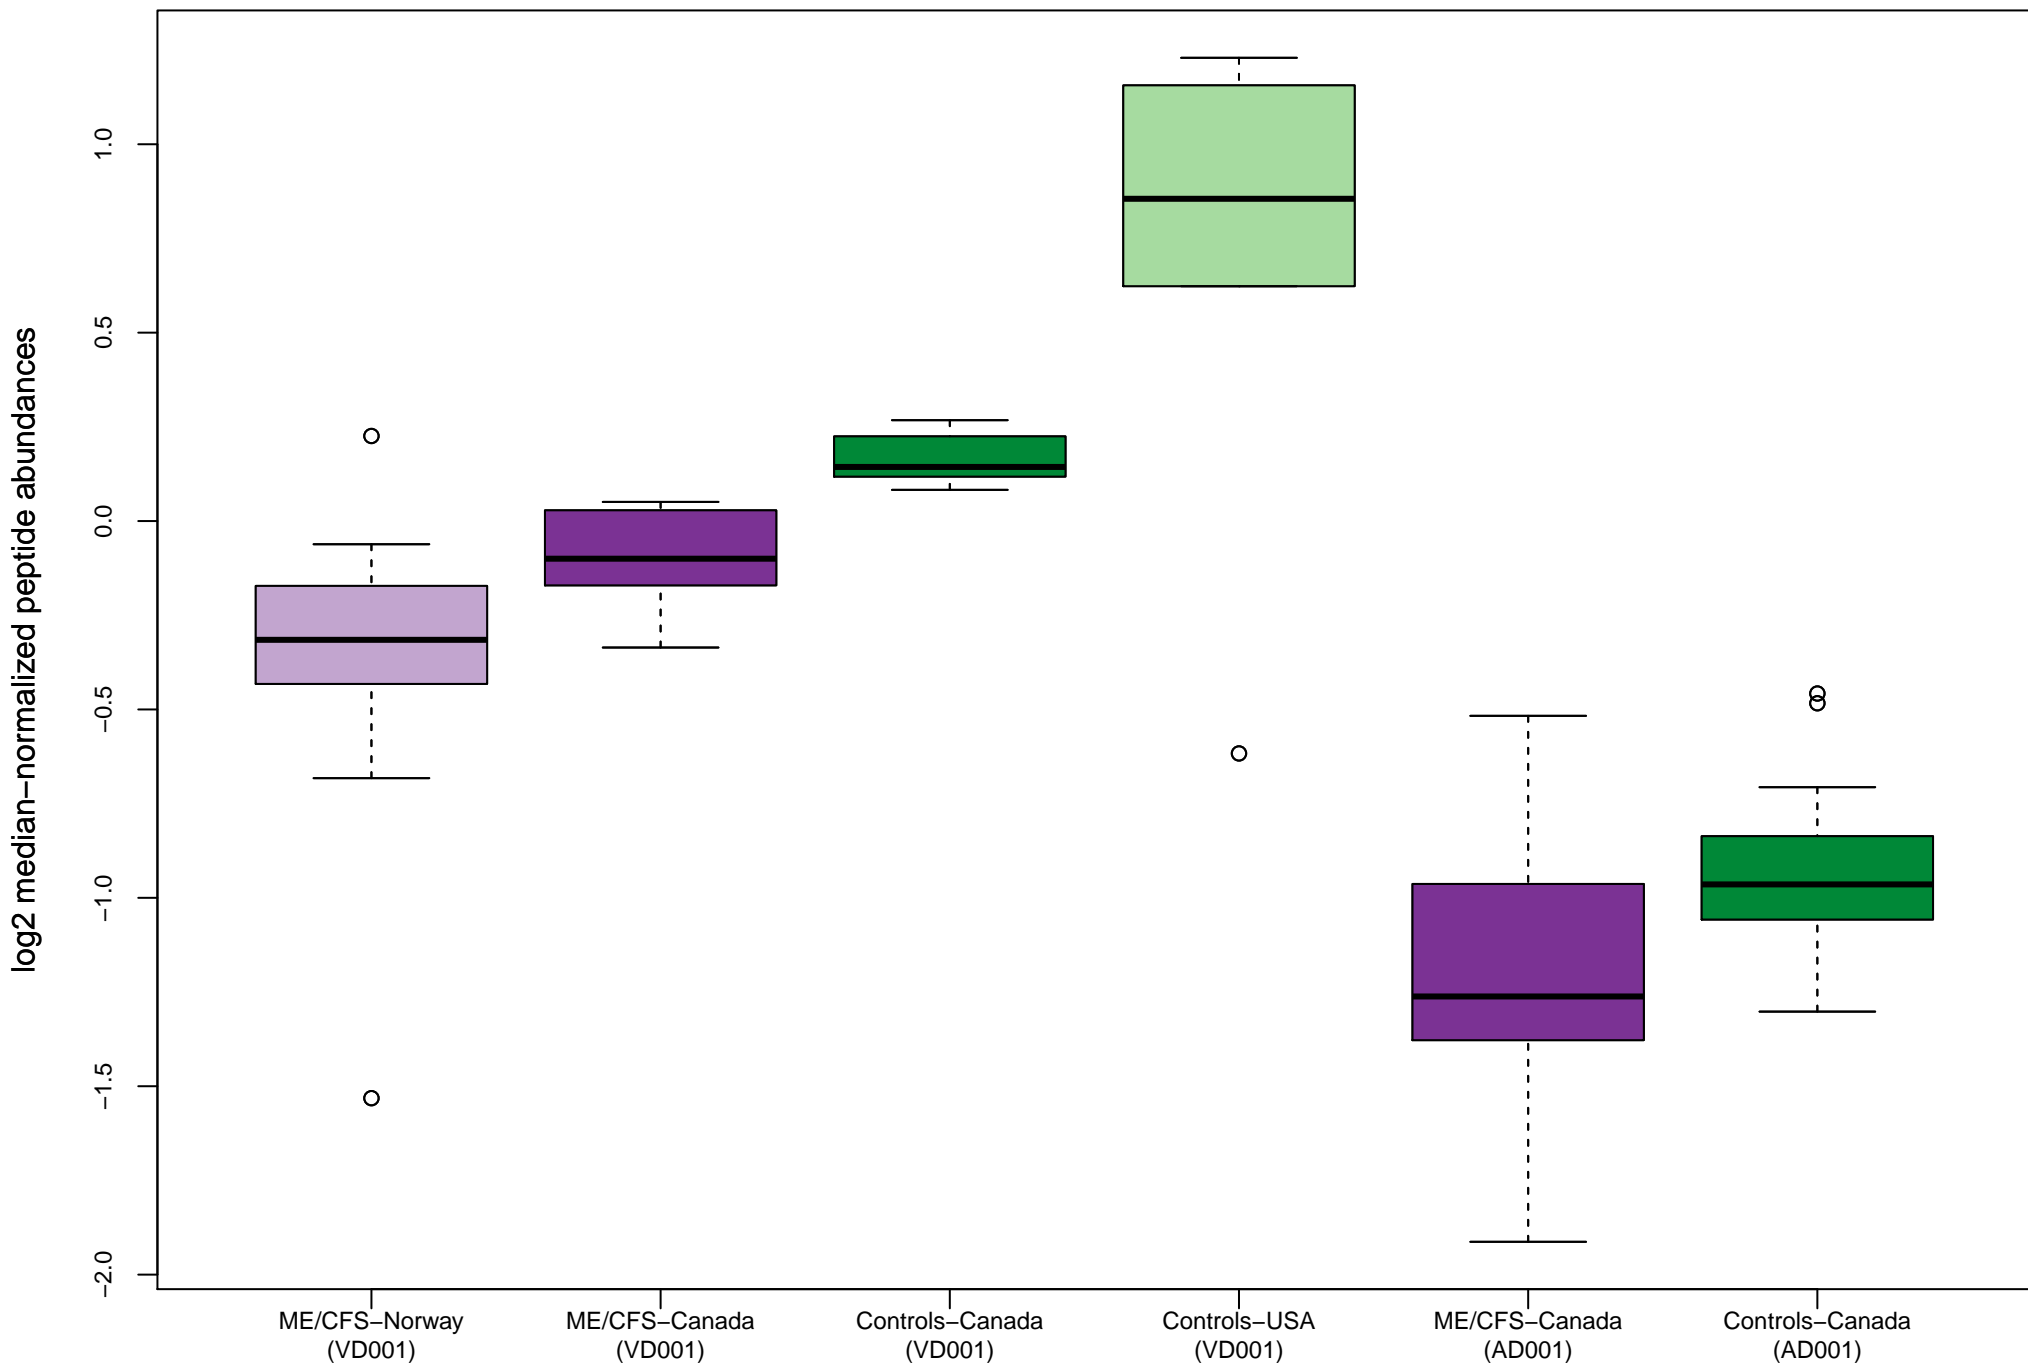

# LWRYLKAGVASG

log2 median-normalized peptide abundances

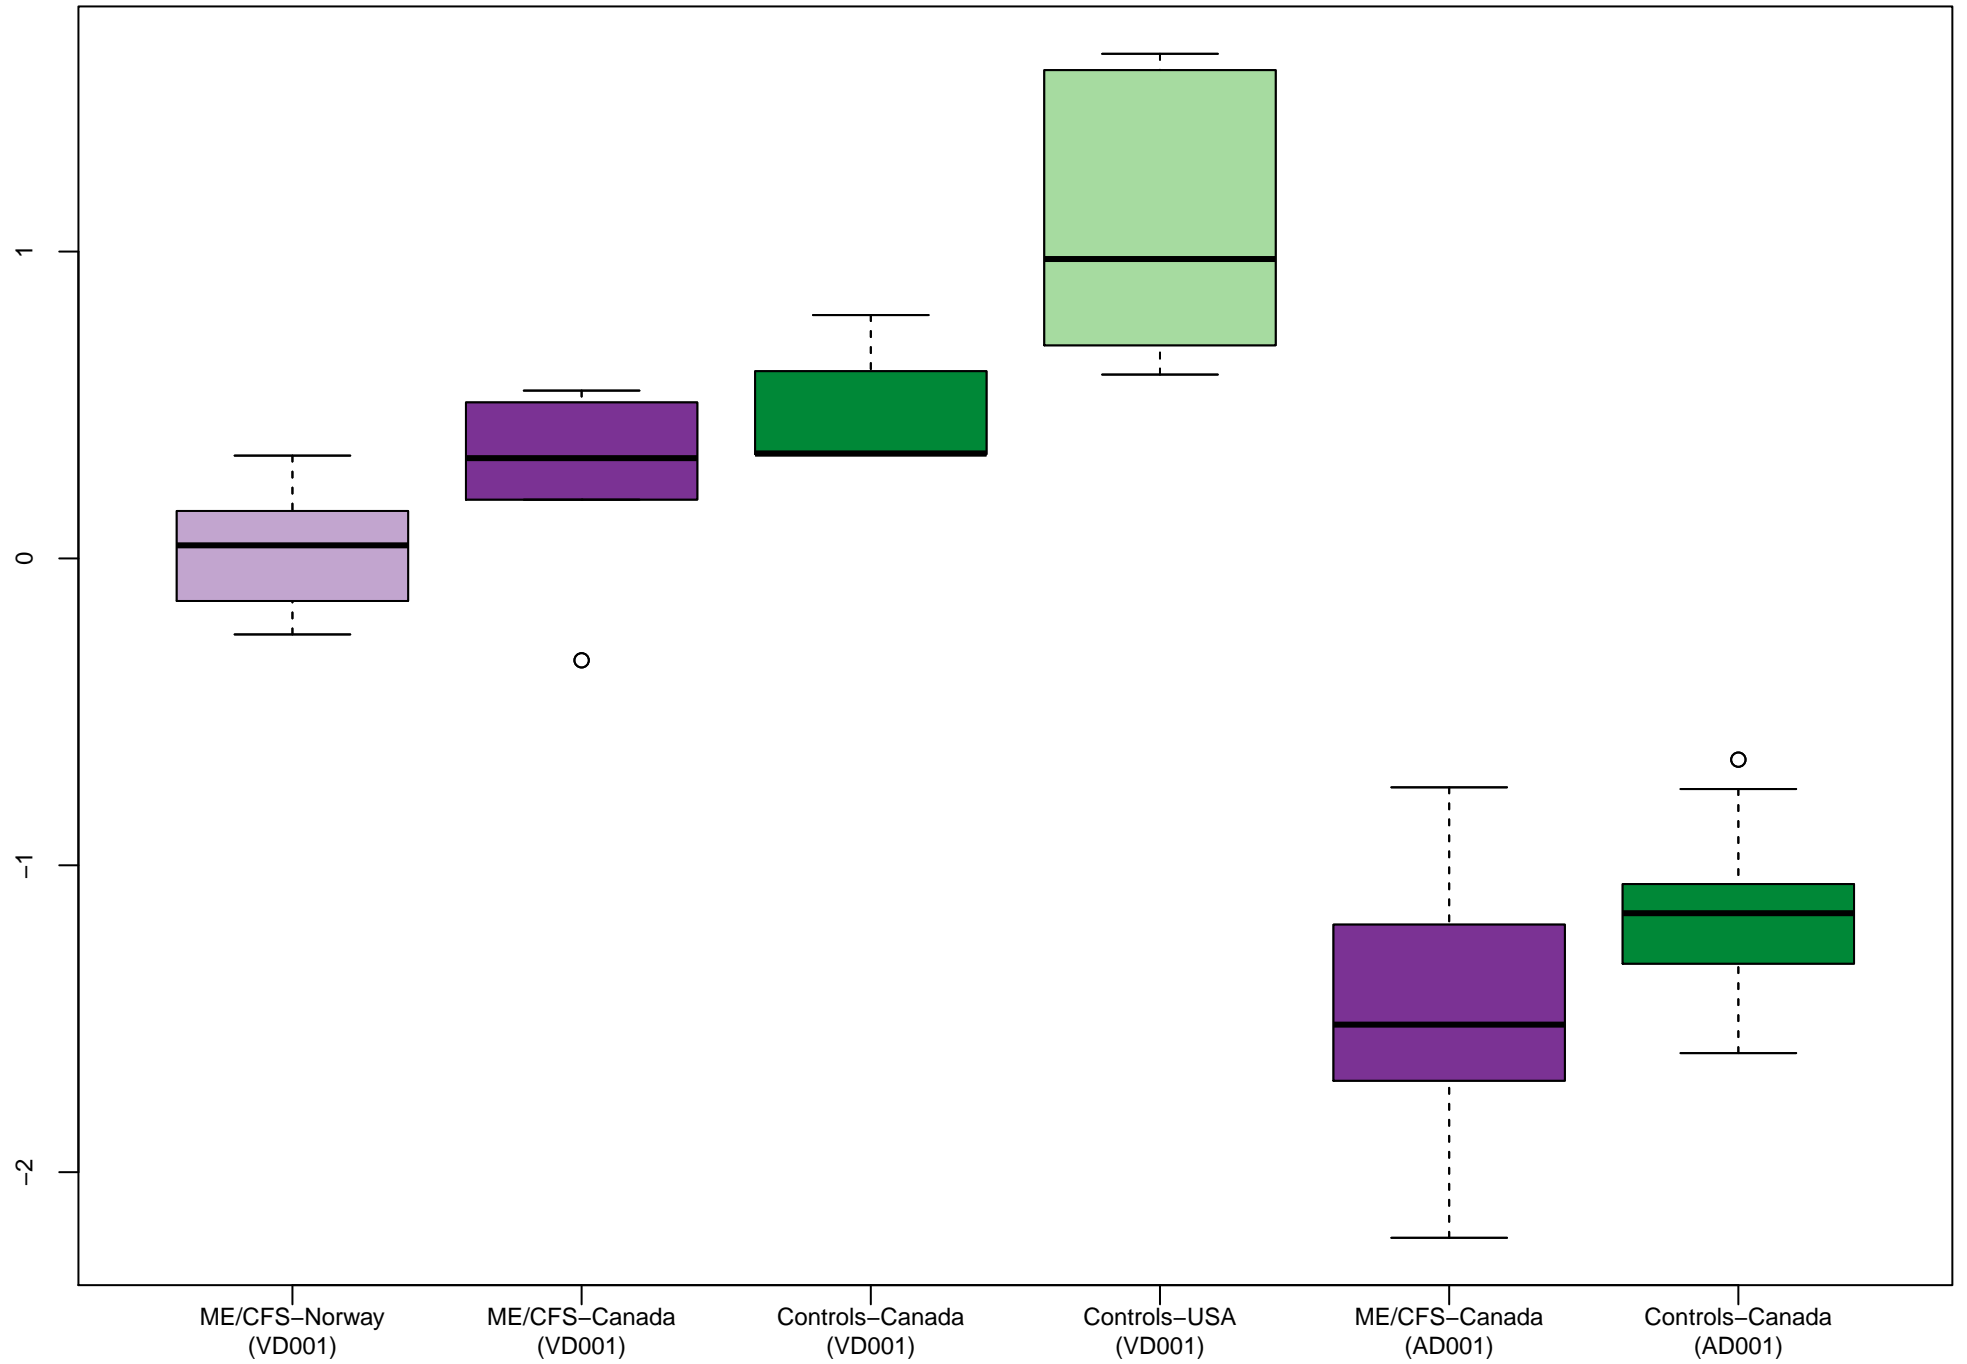

# NRLKFWLSVAG

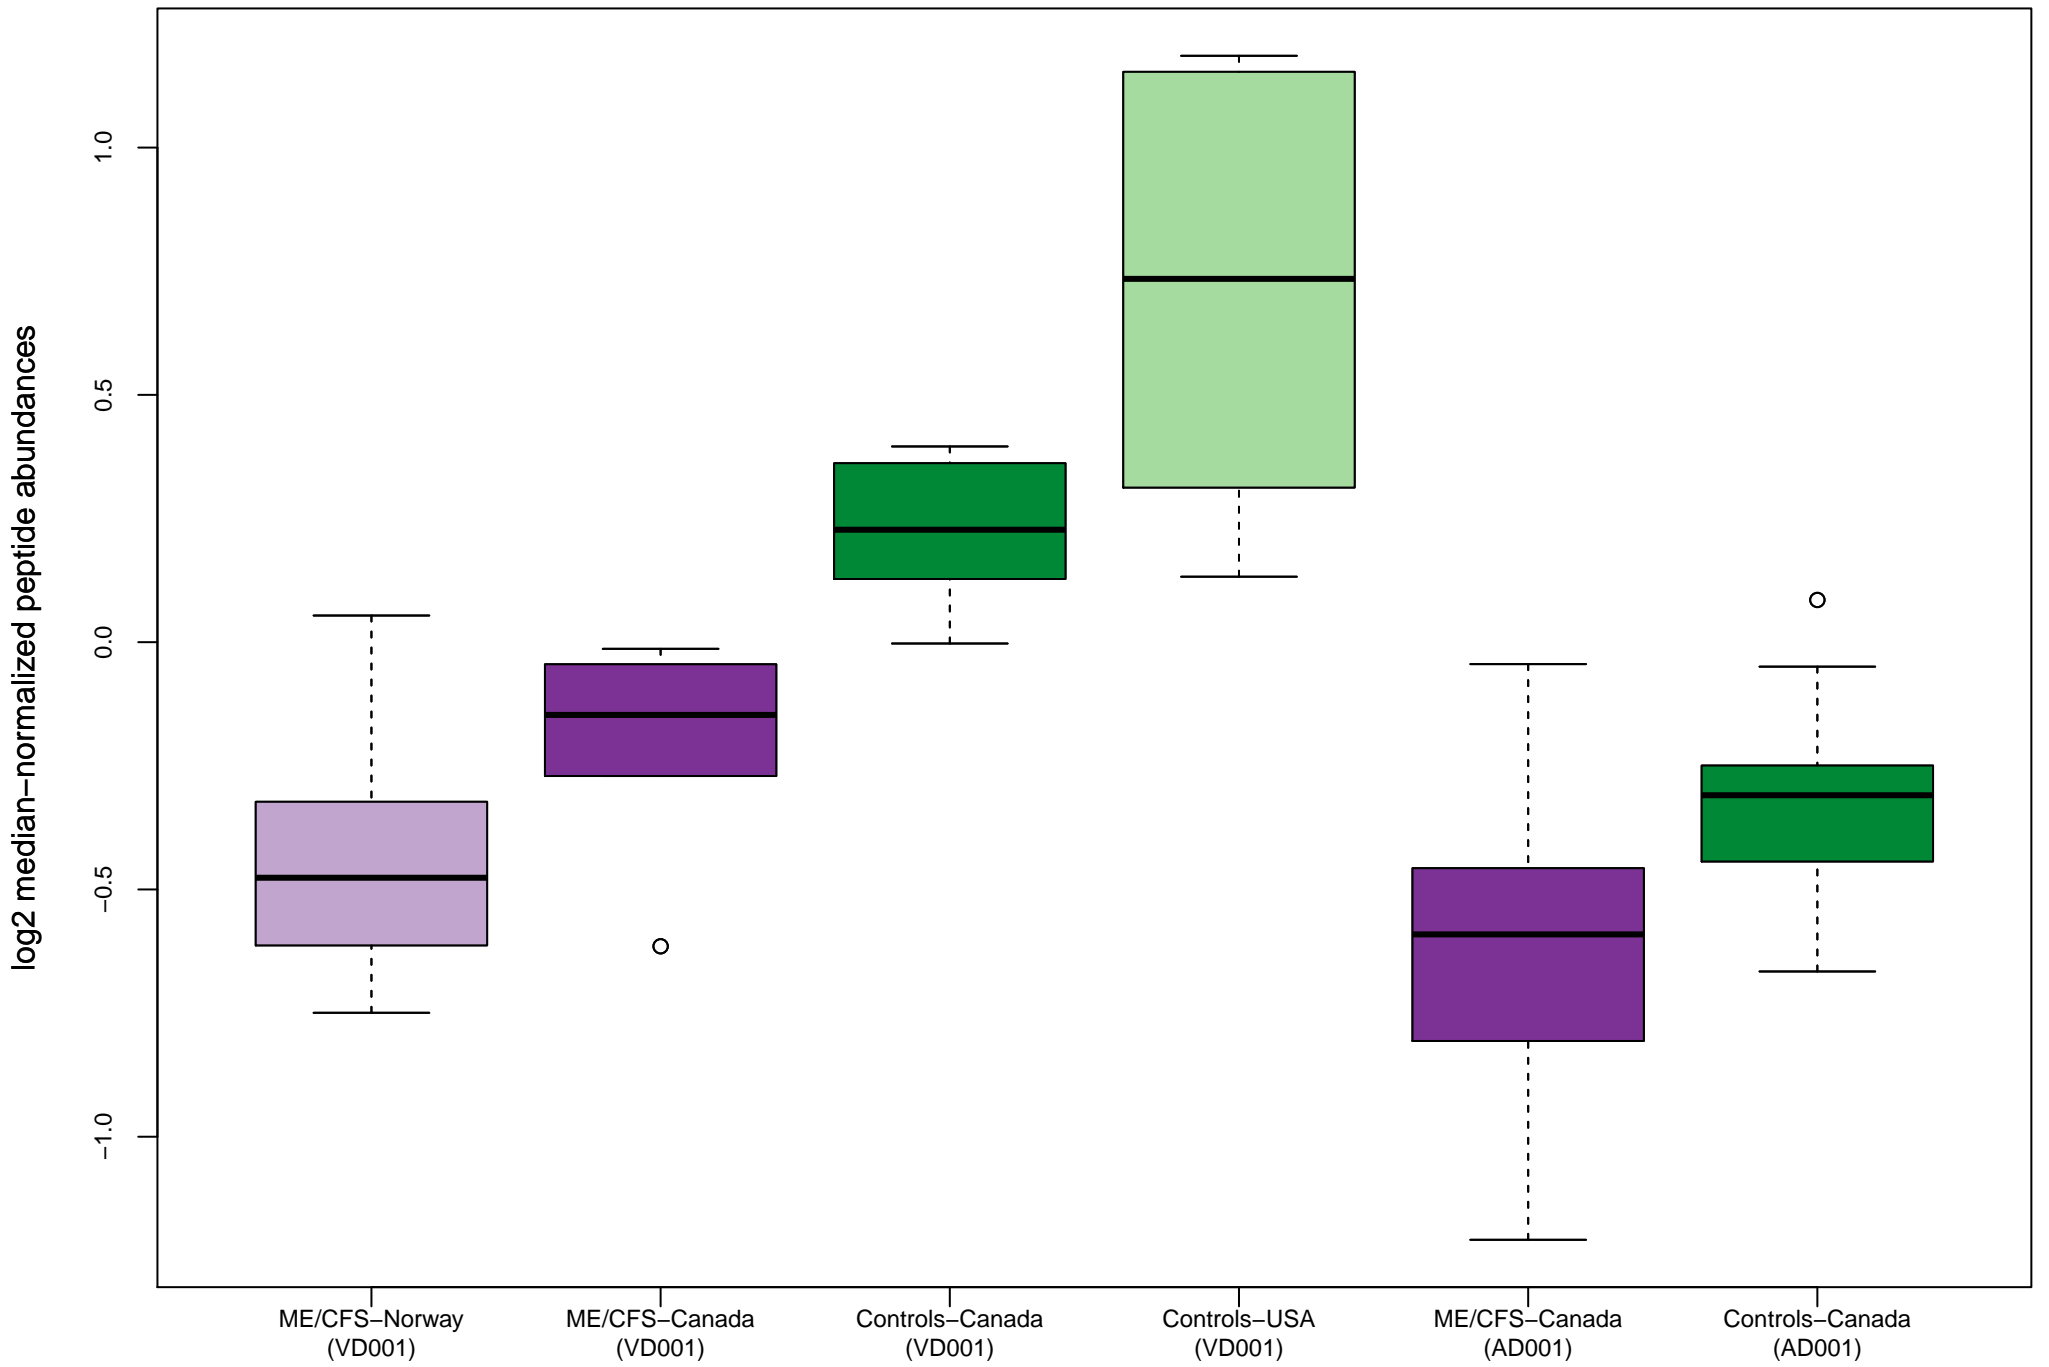

# NRLYGRVLSGAS

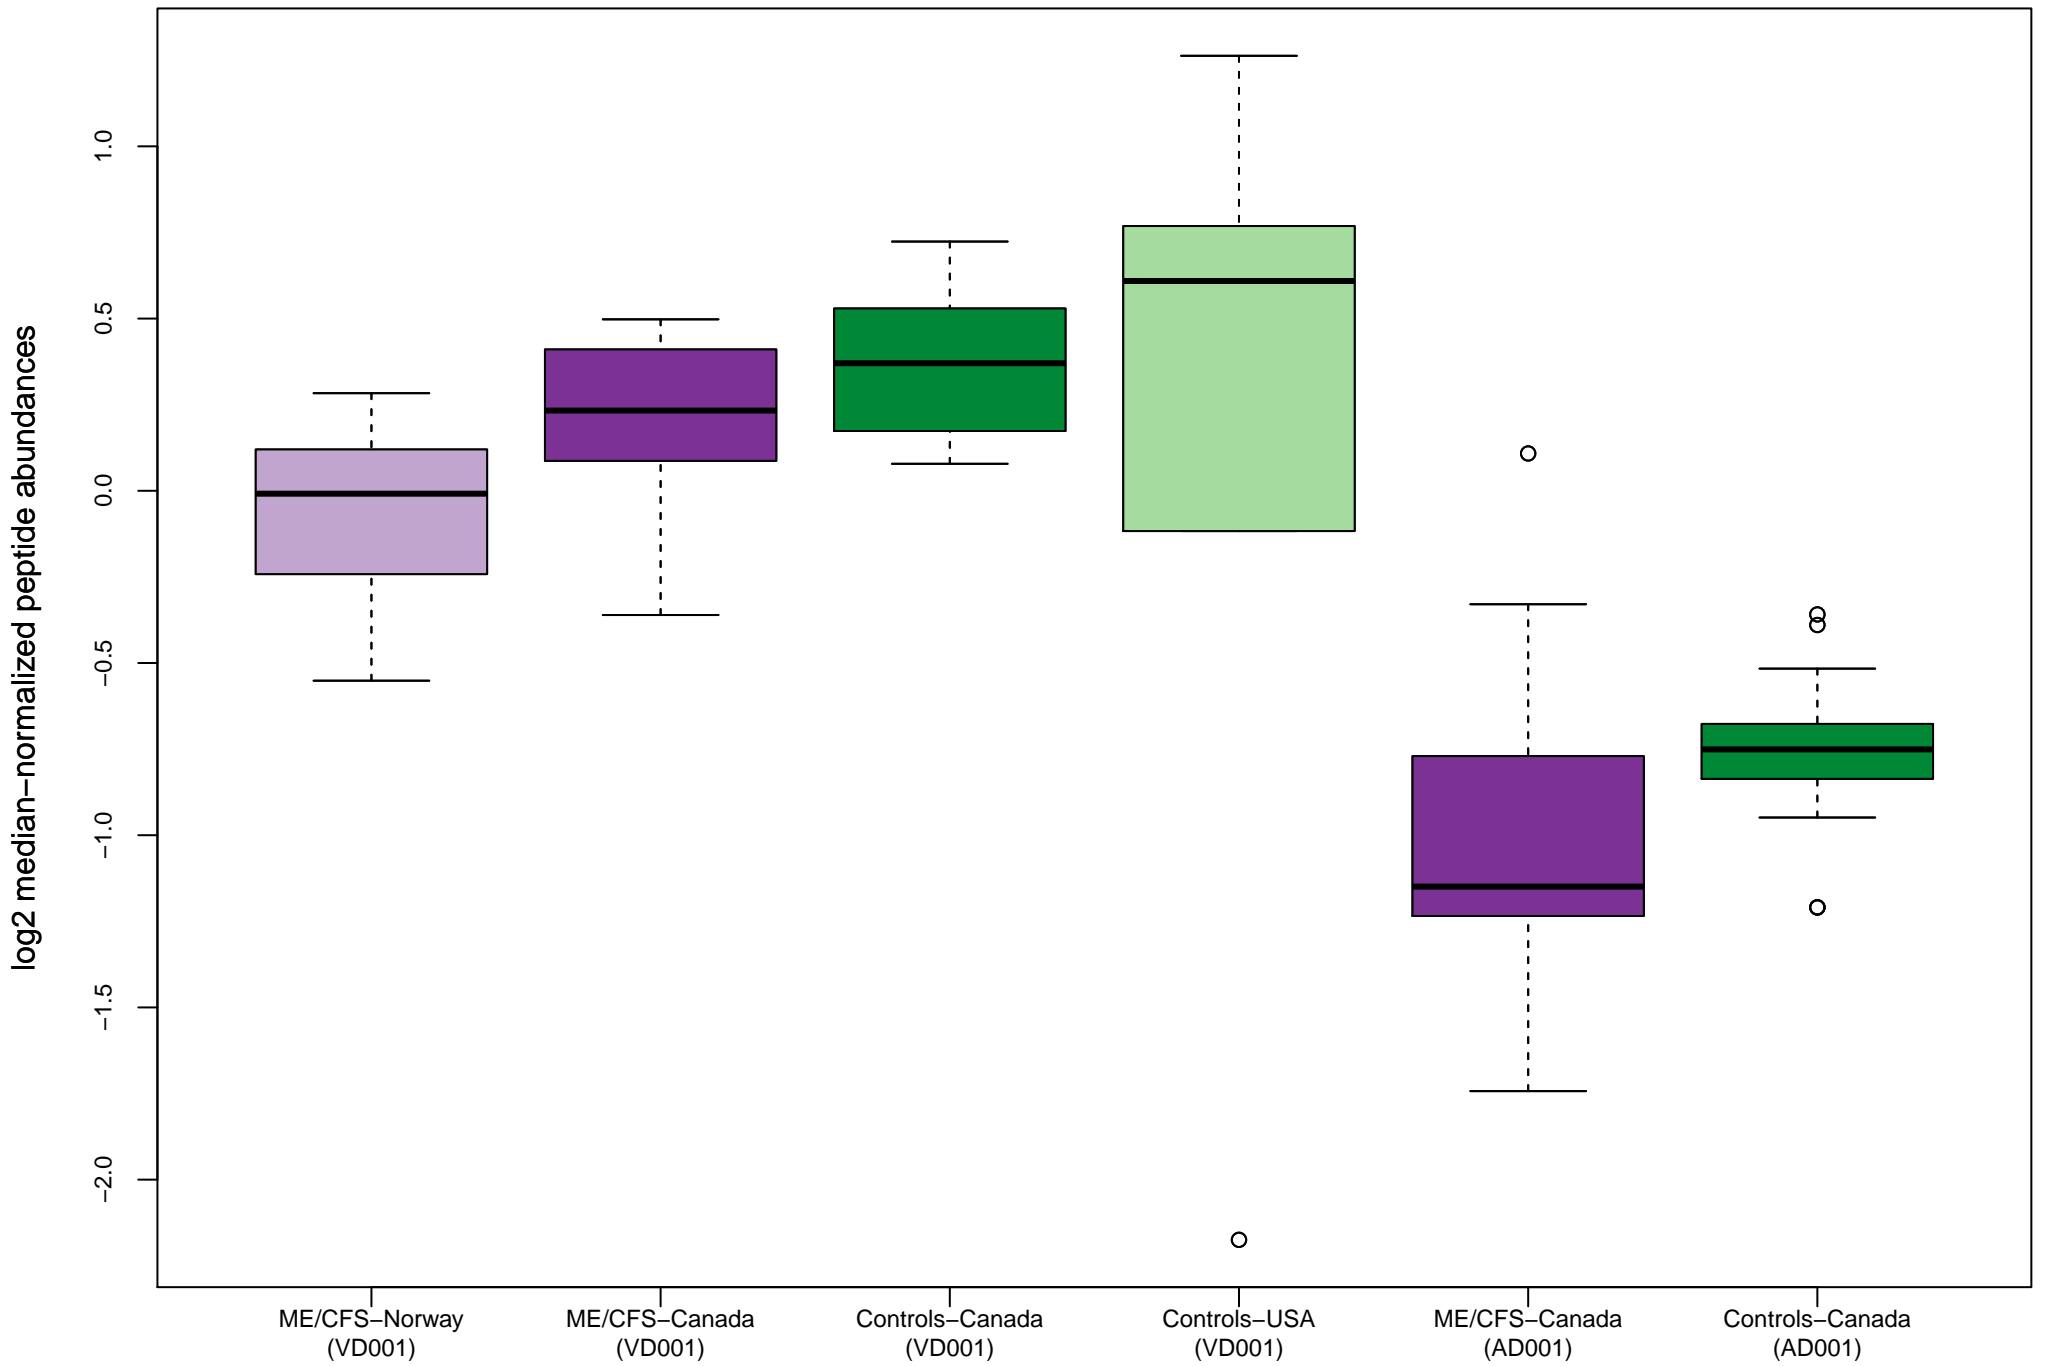



# NRRWPNHVLAS

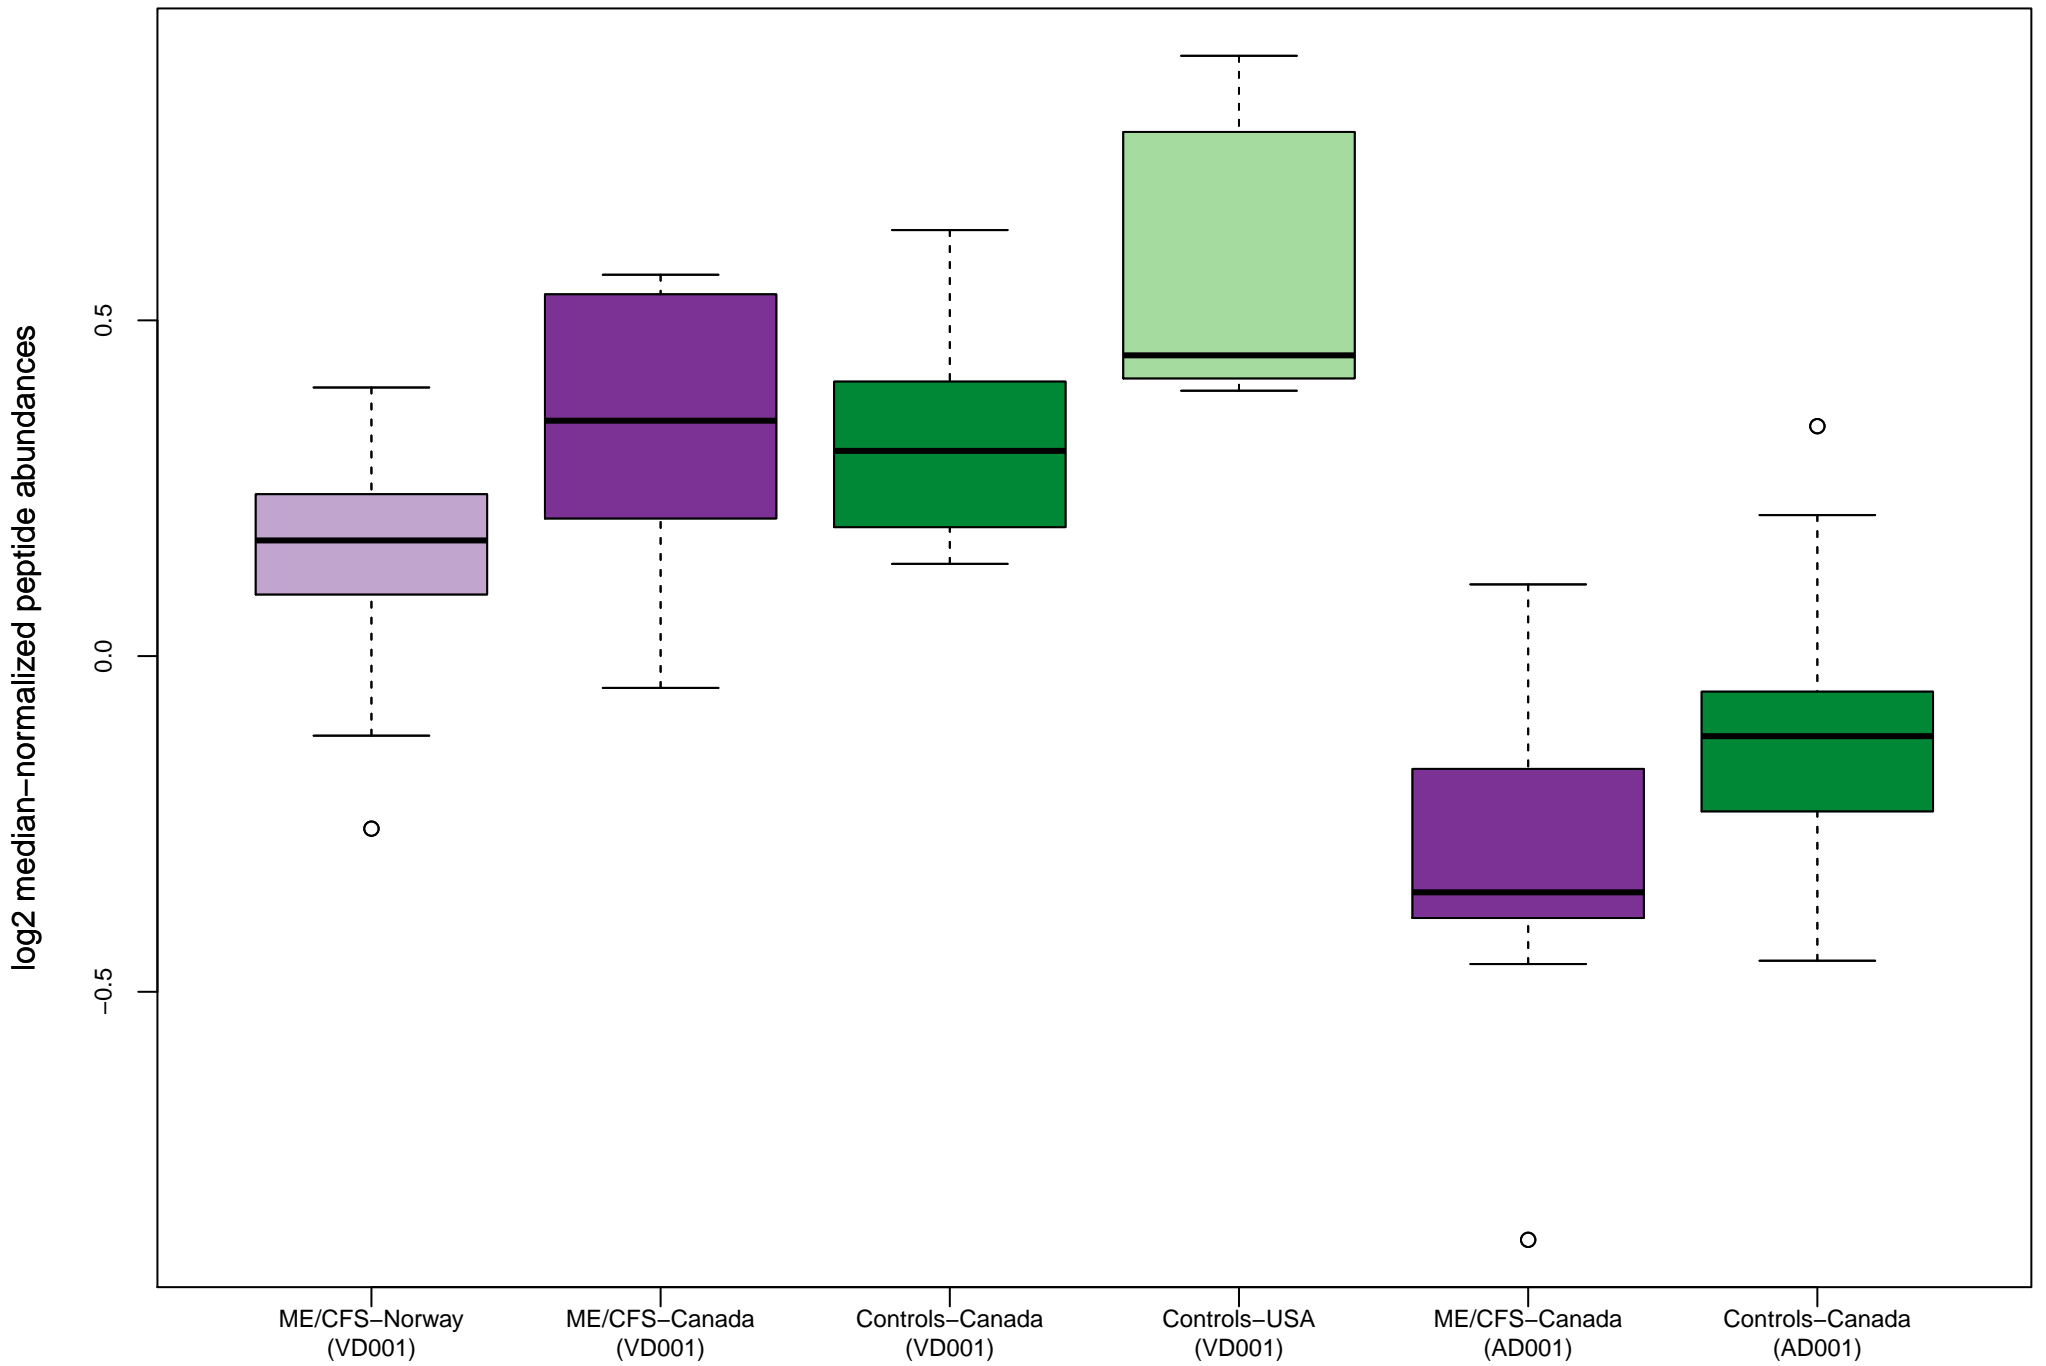

# NVAFLDVFPDAG

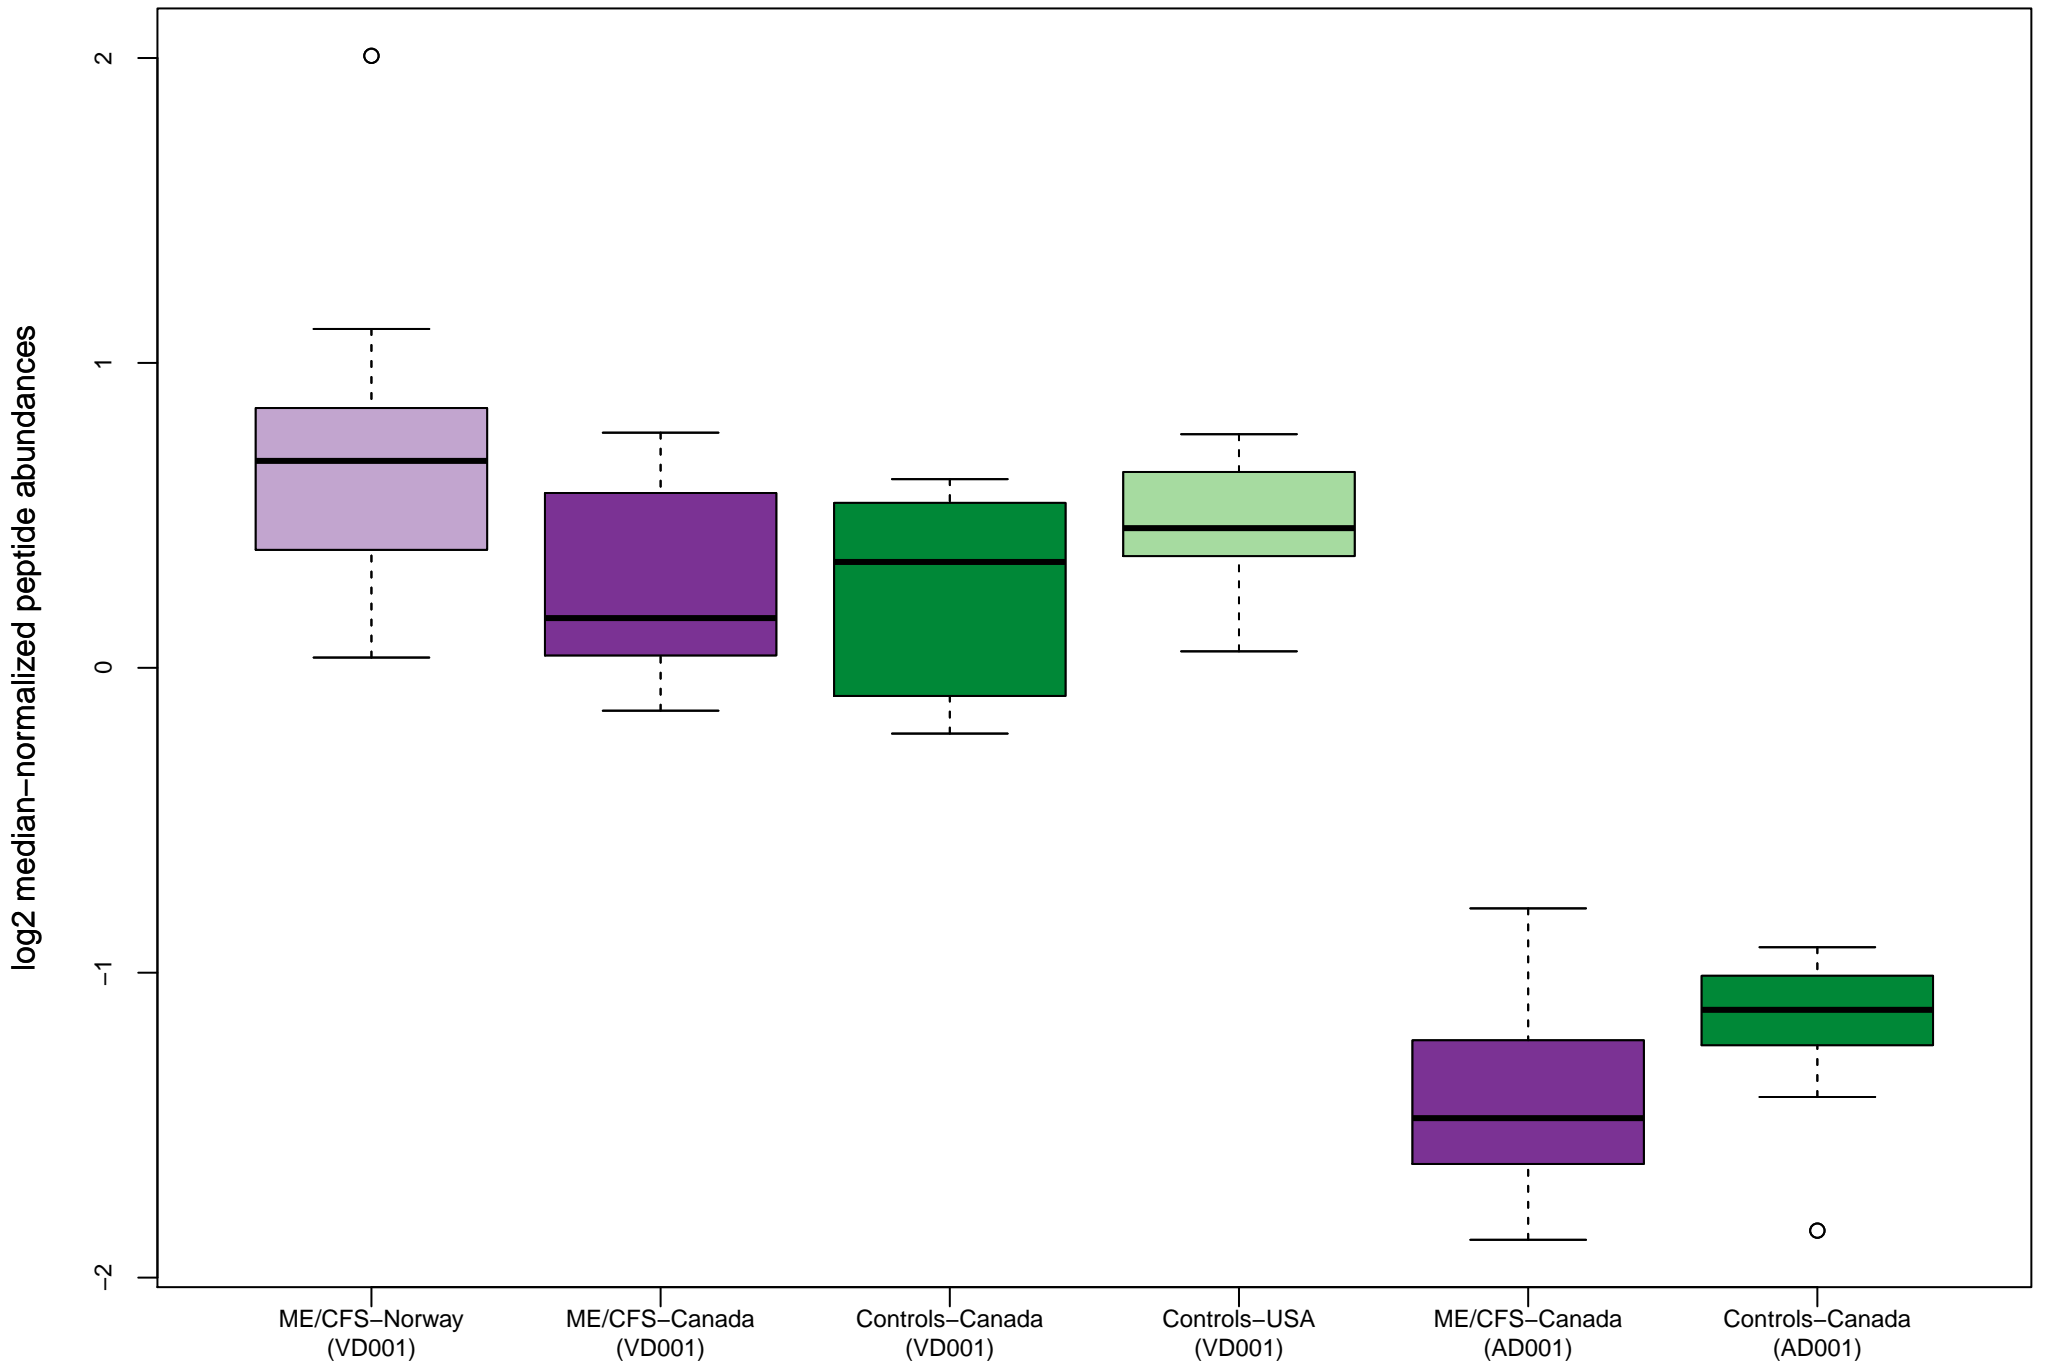

# PFDRVRALGASG

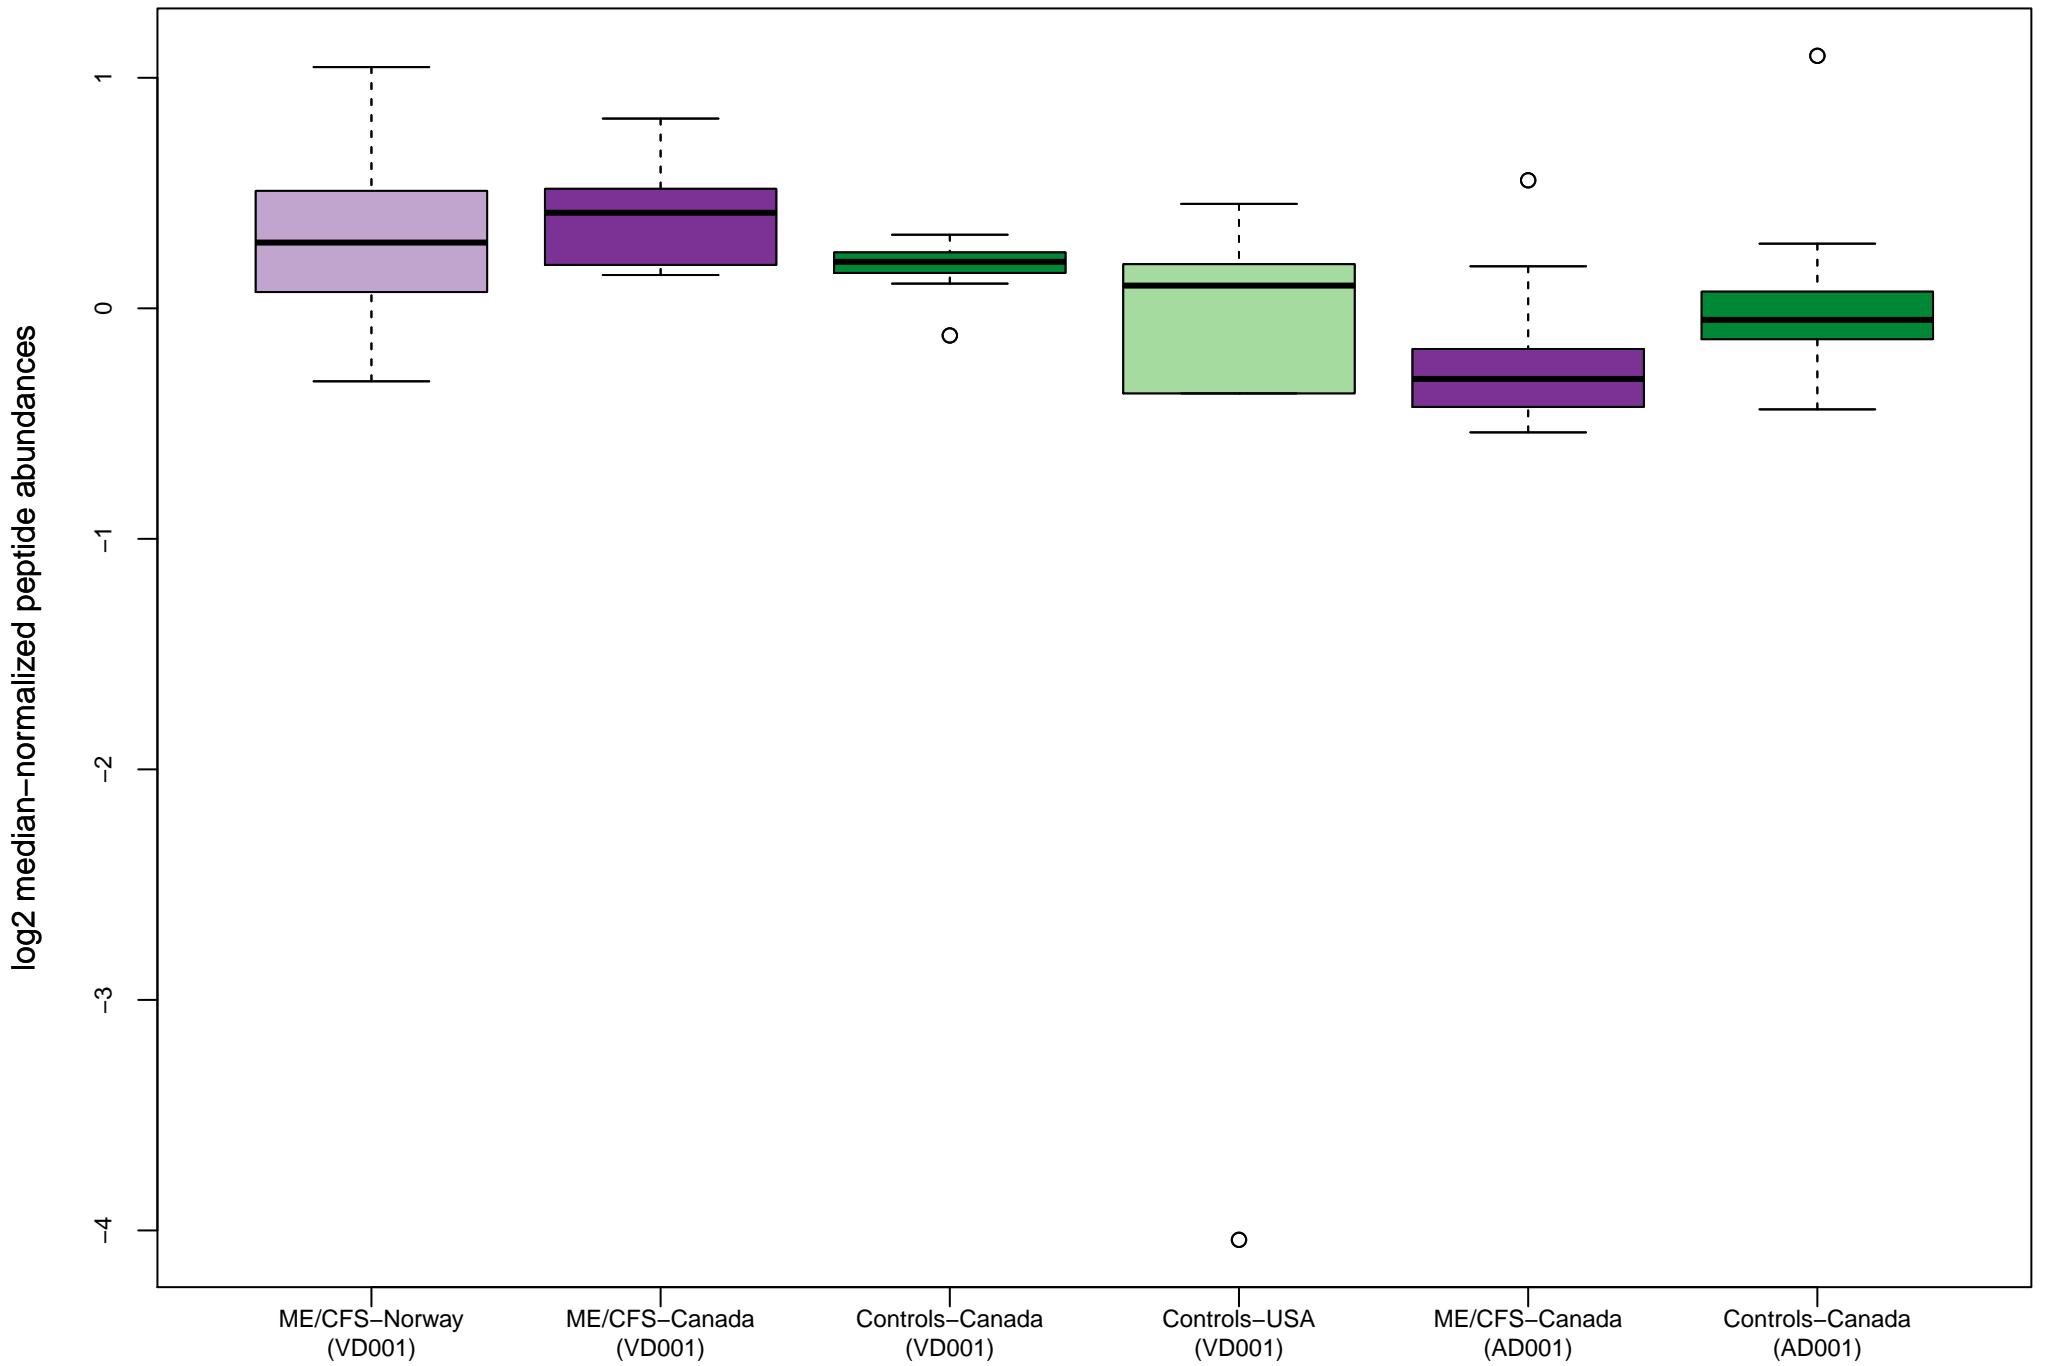

# PRFAFKSGVALS

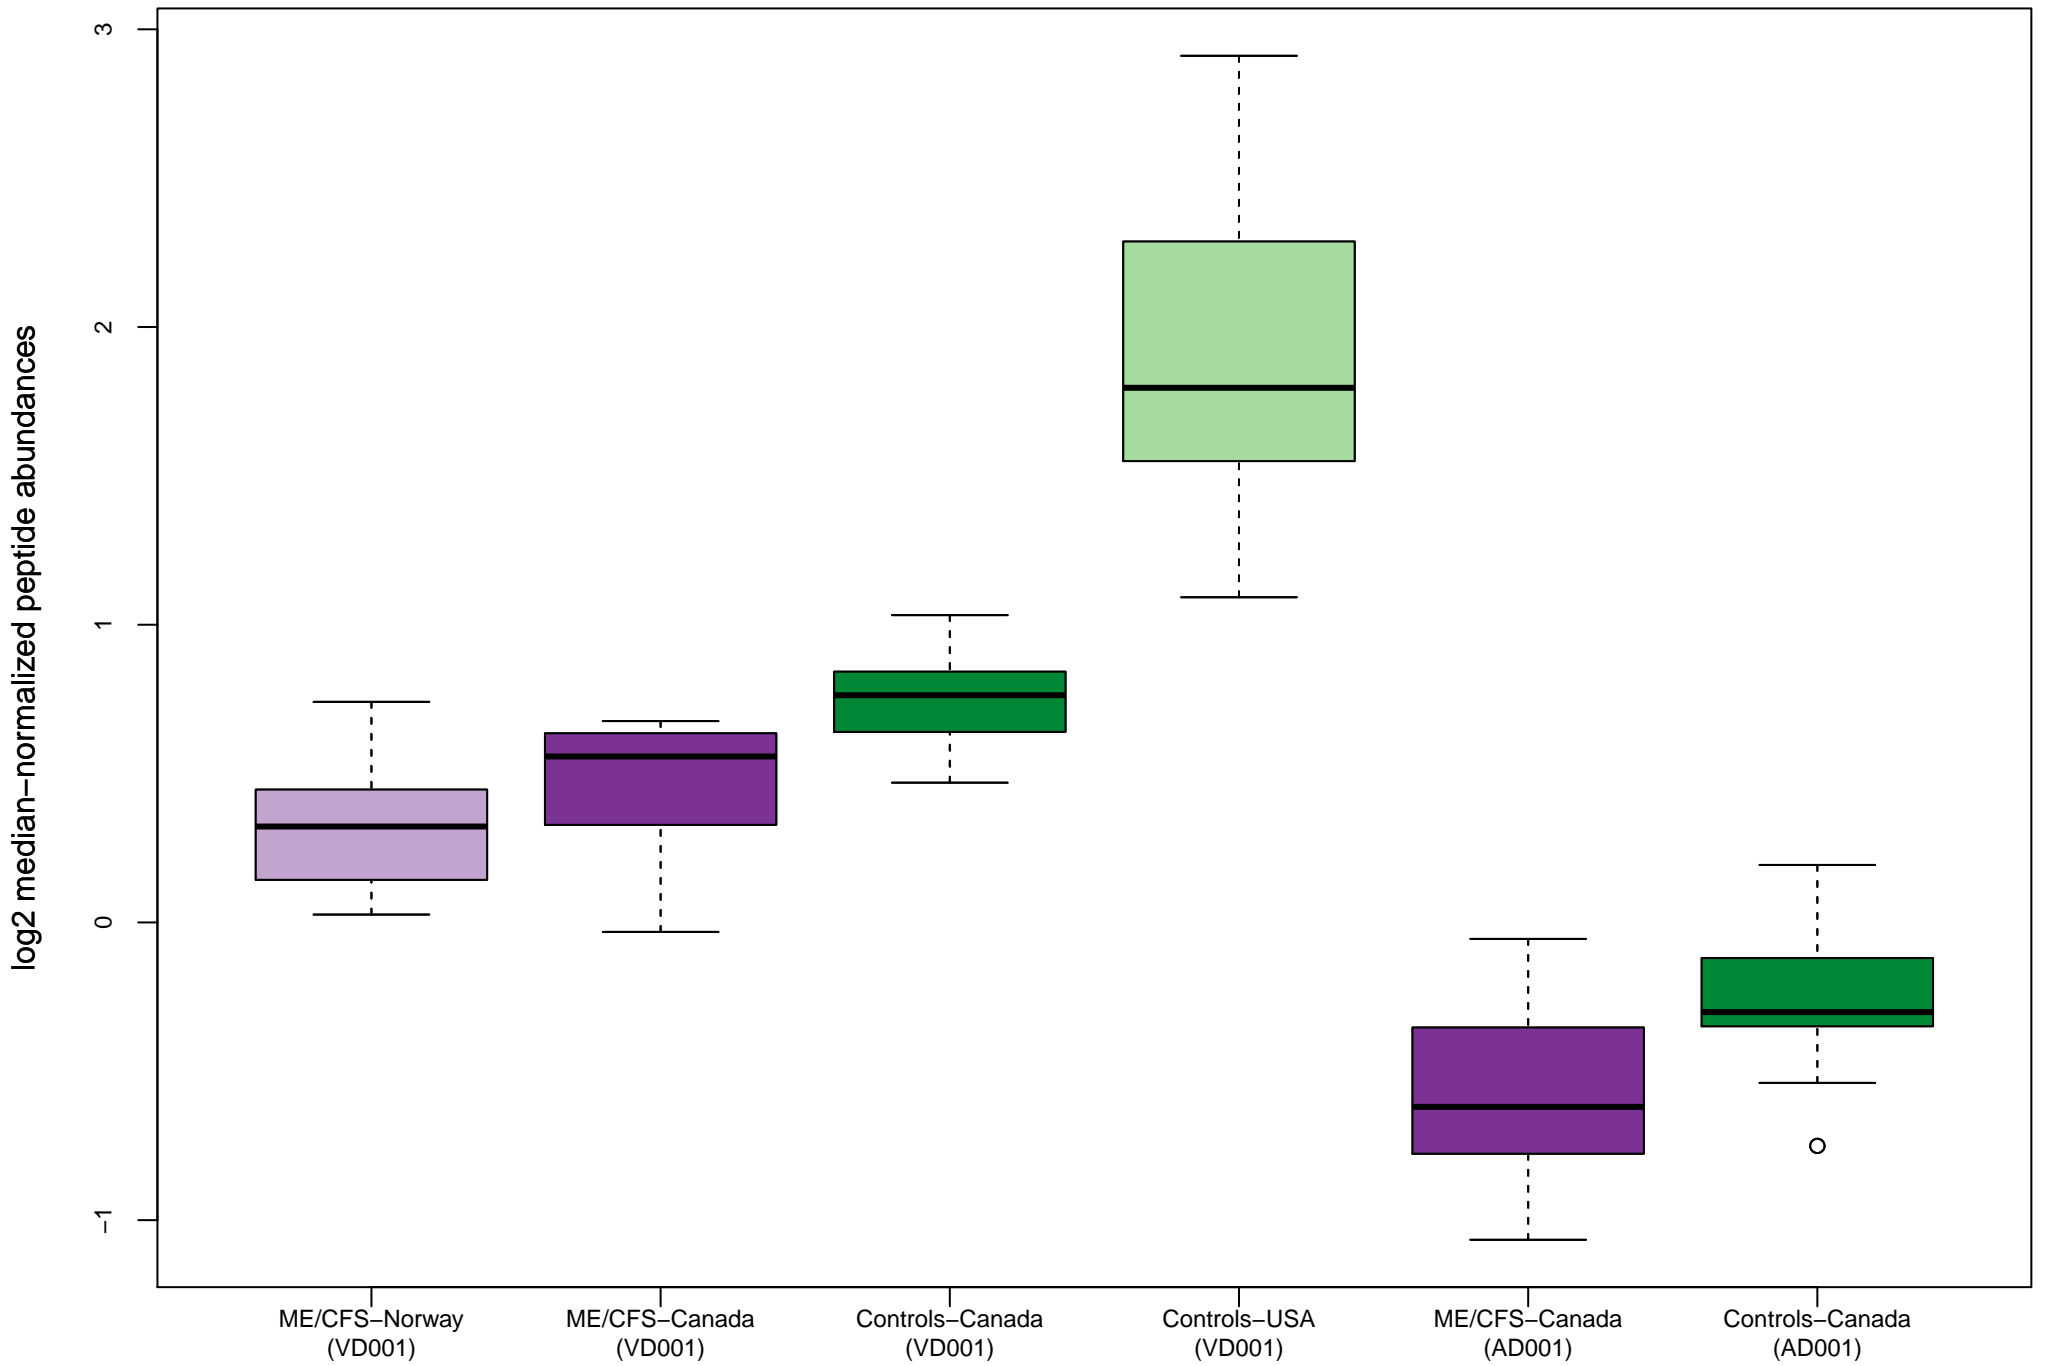

# PRPYGAFRYKHL

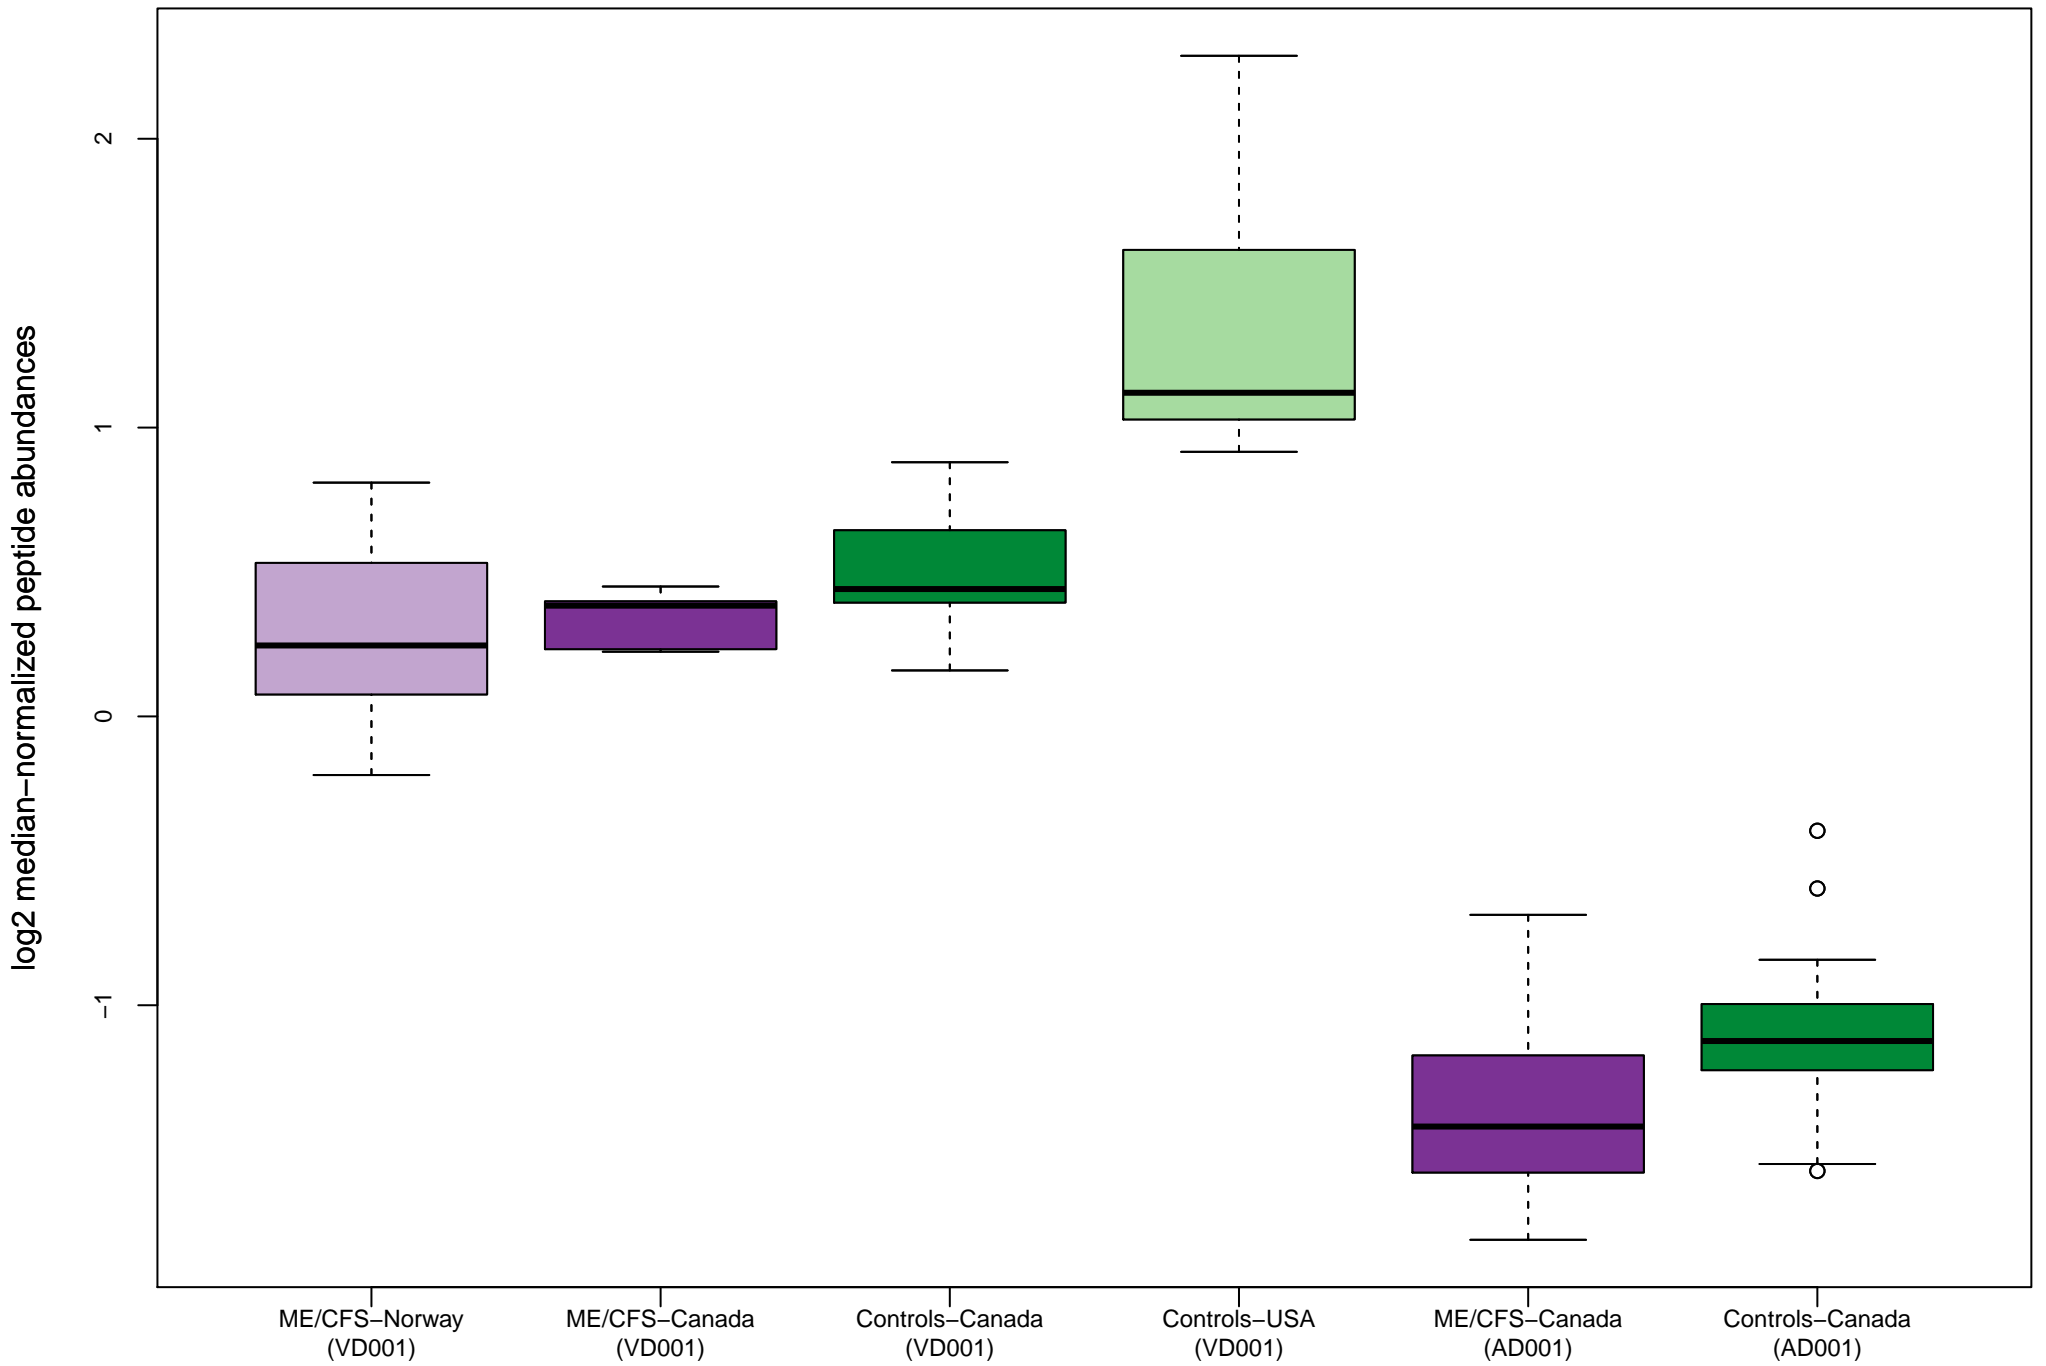

# PRYFFRWNKASG

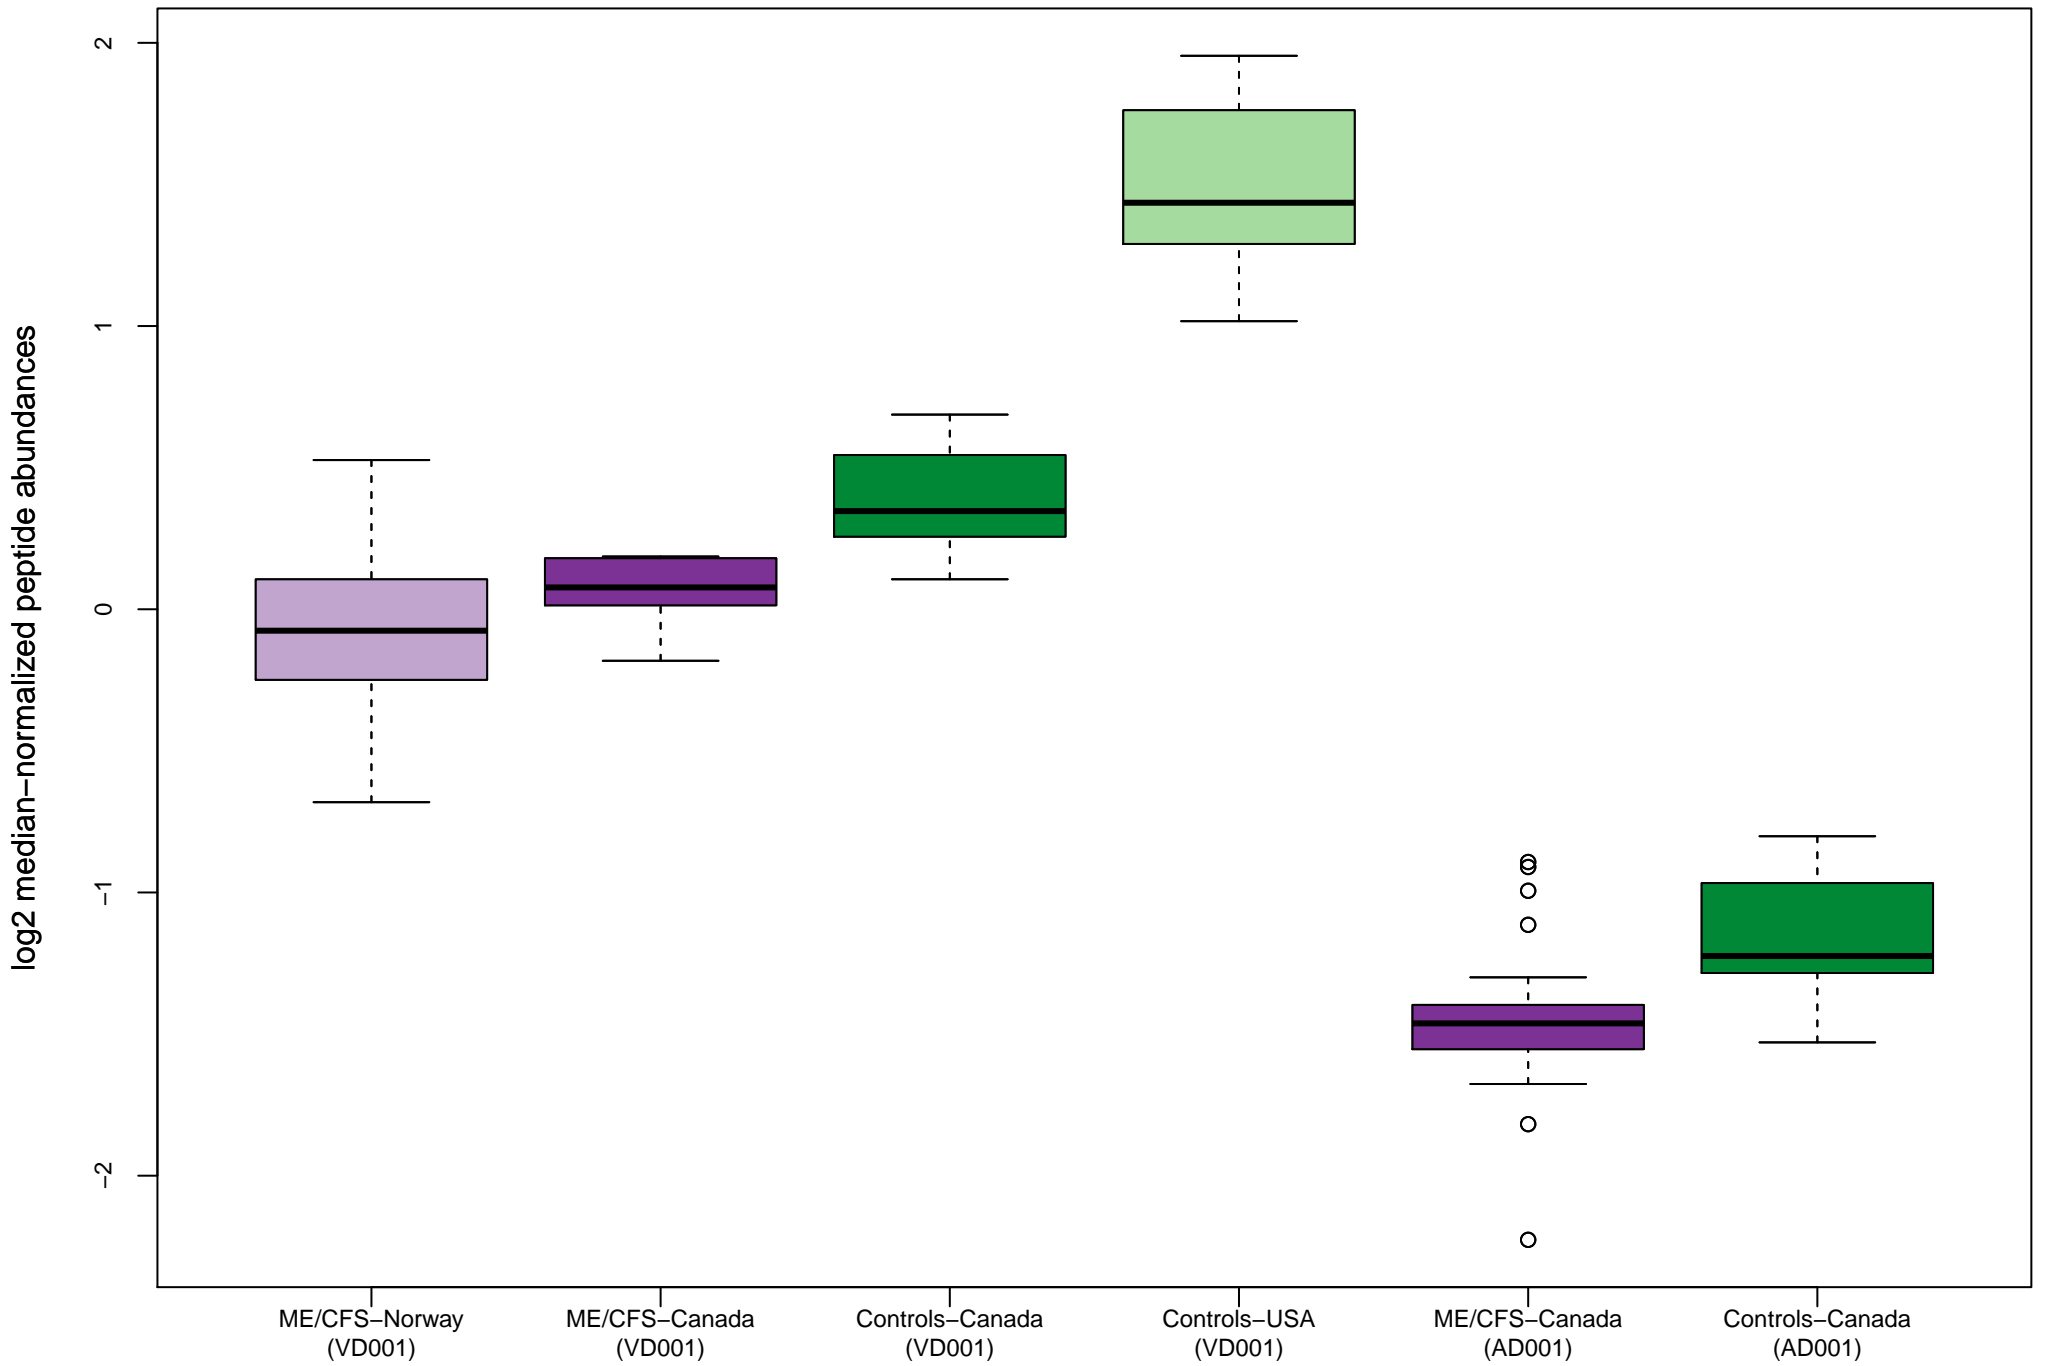

# PSEHEDFEWDVA

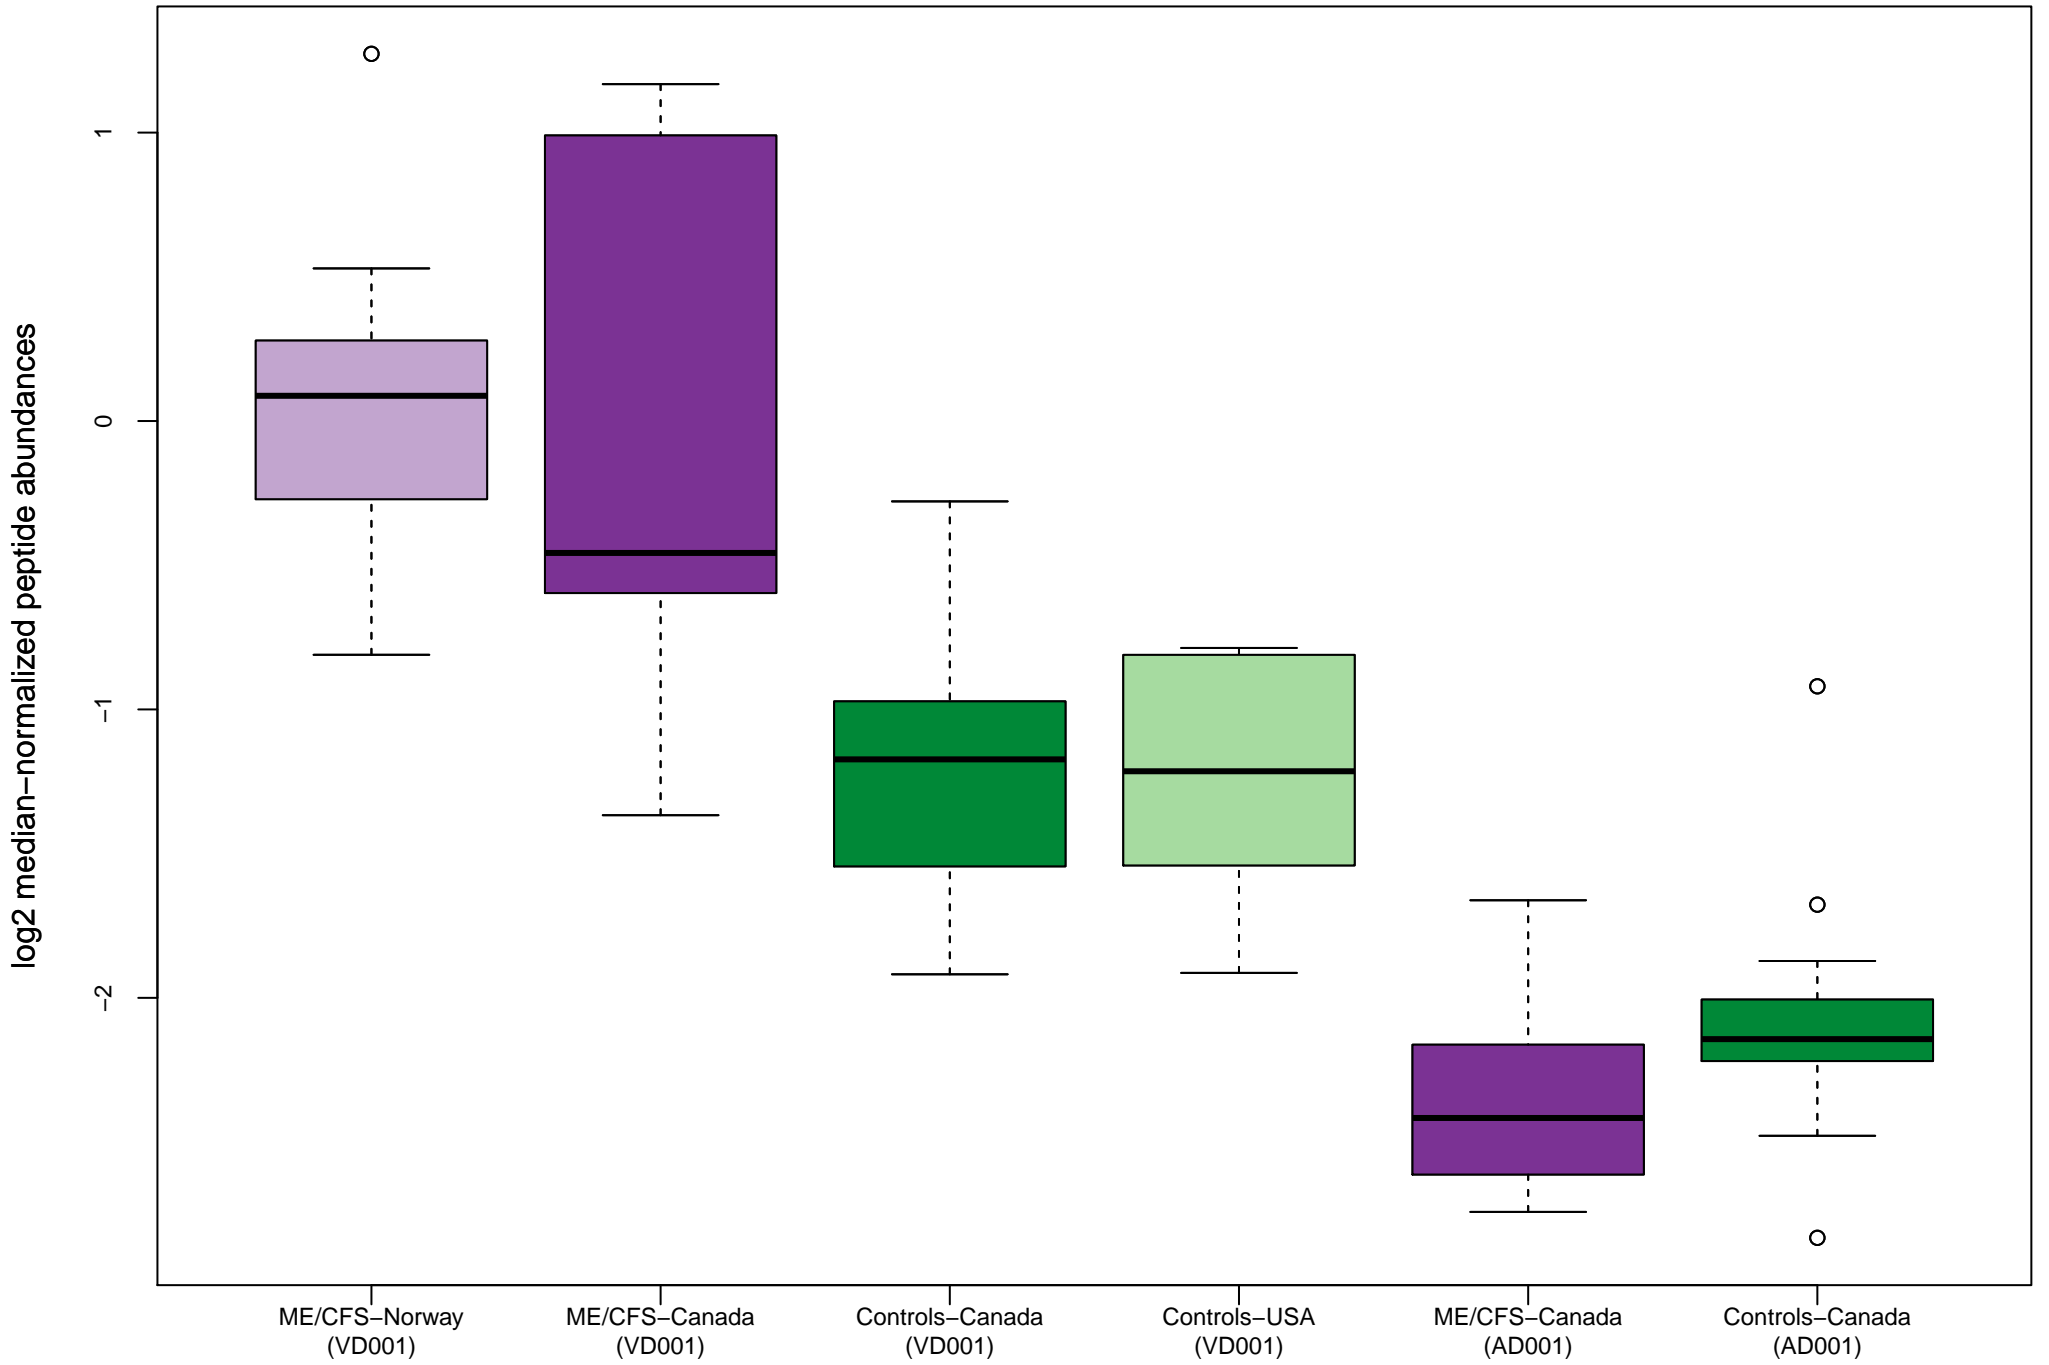

# PYFELRWRPWKG

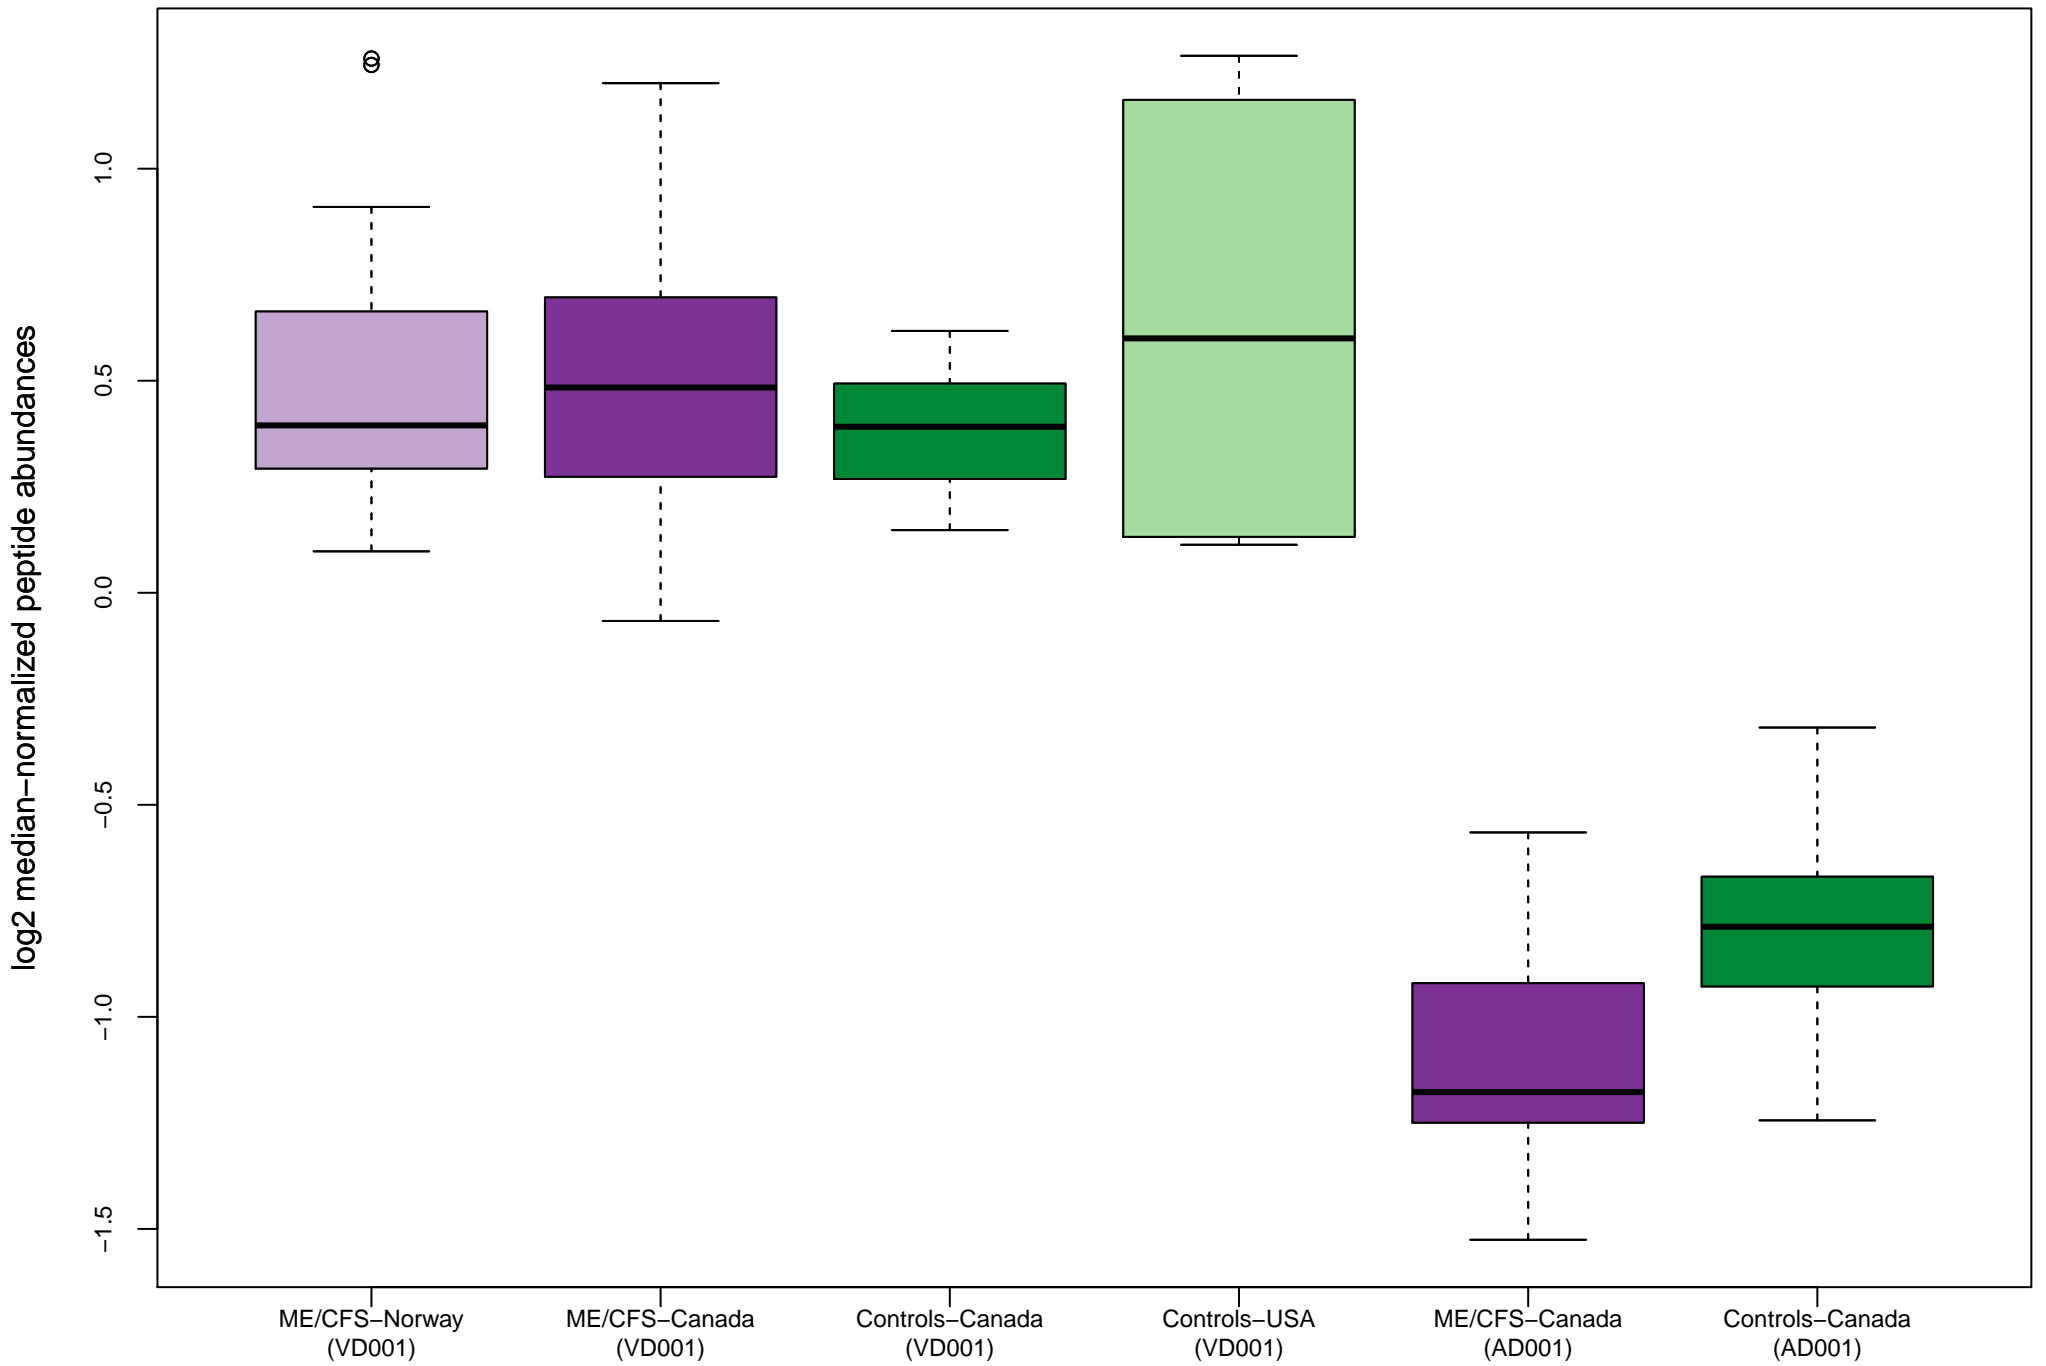



# PYLRALFRKSGK

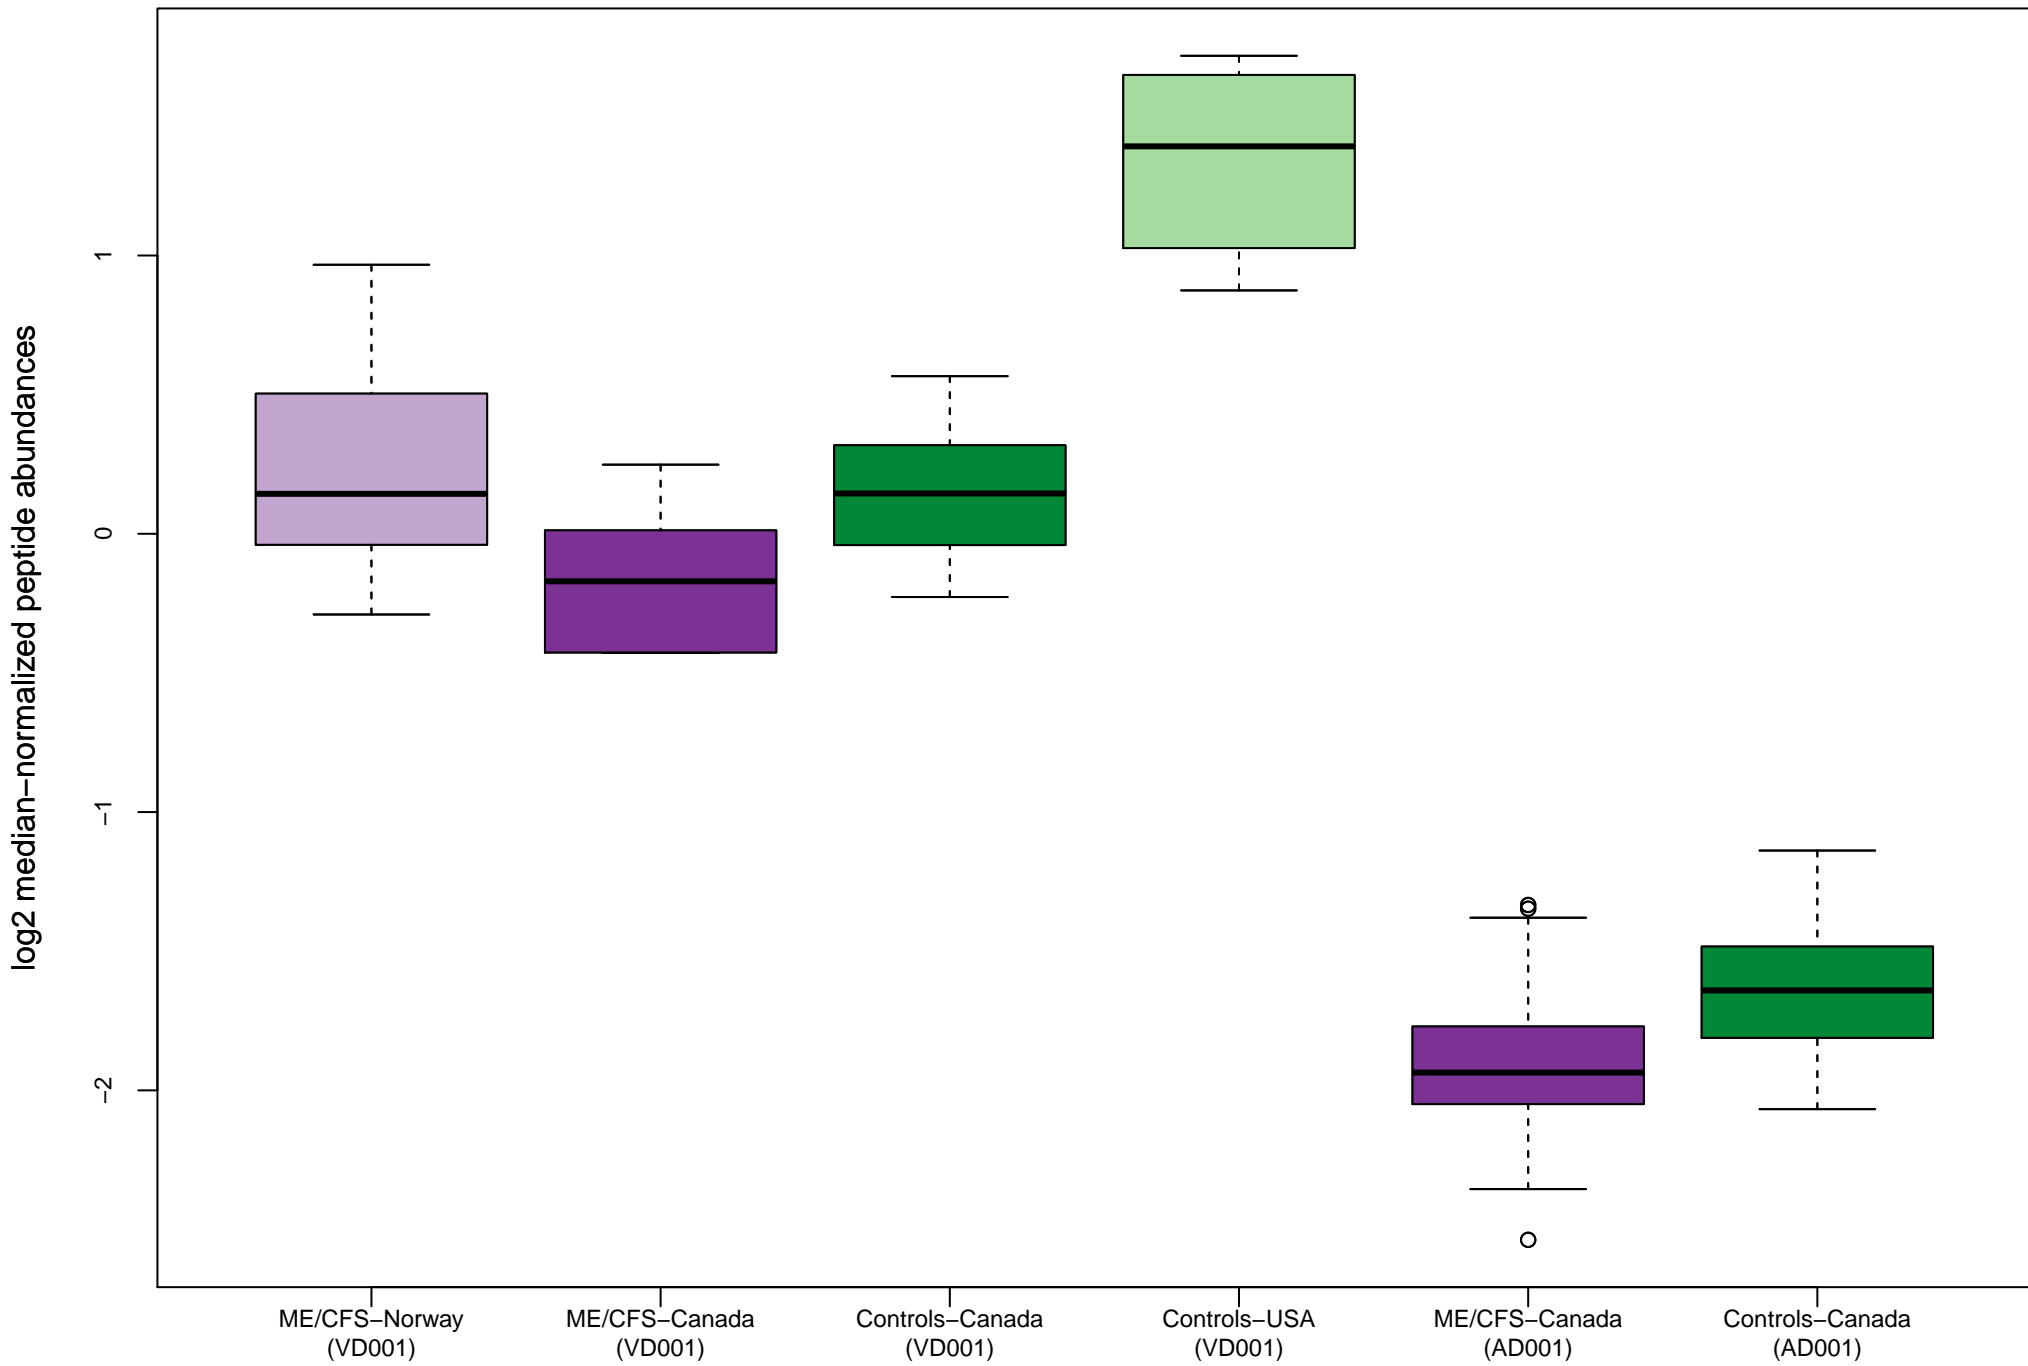

# QAFEGENDEWDL

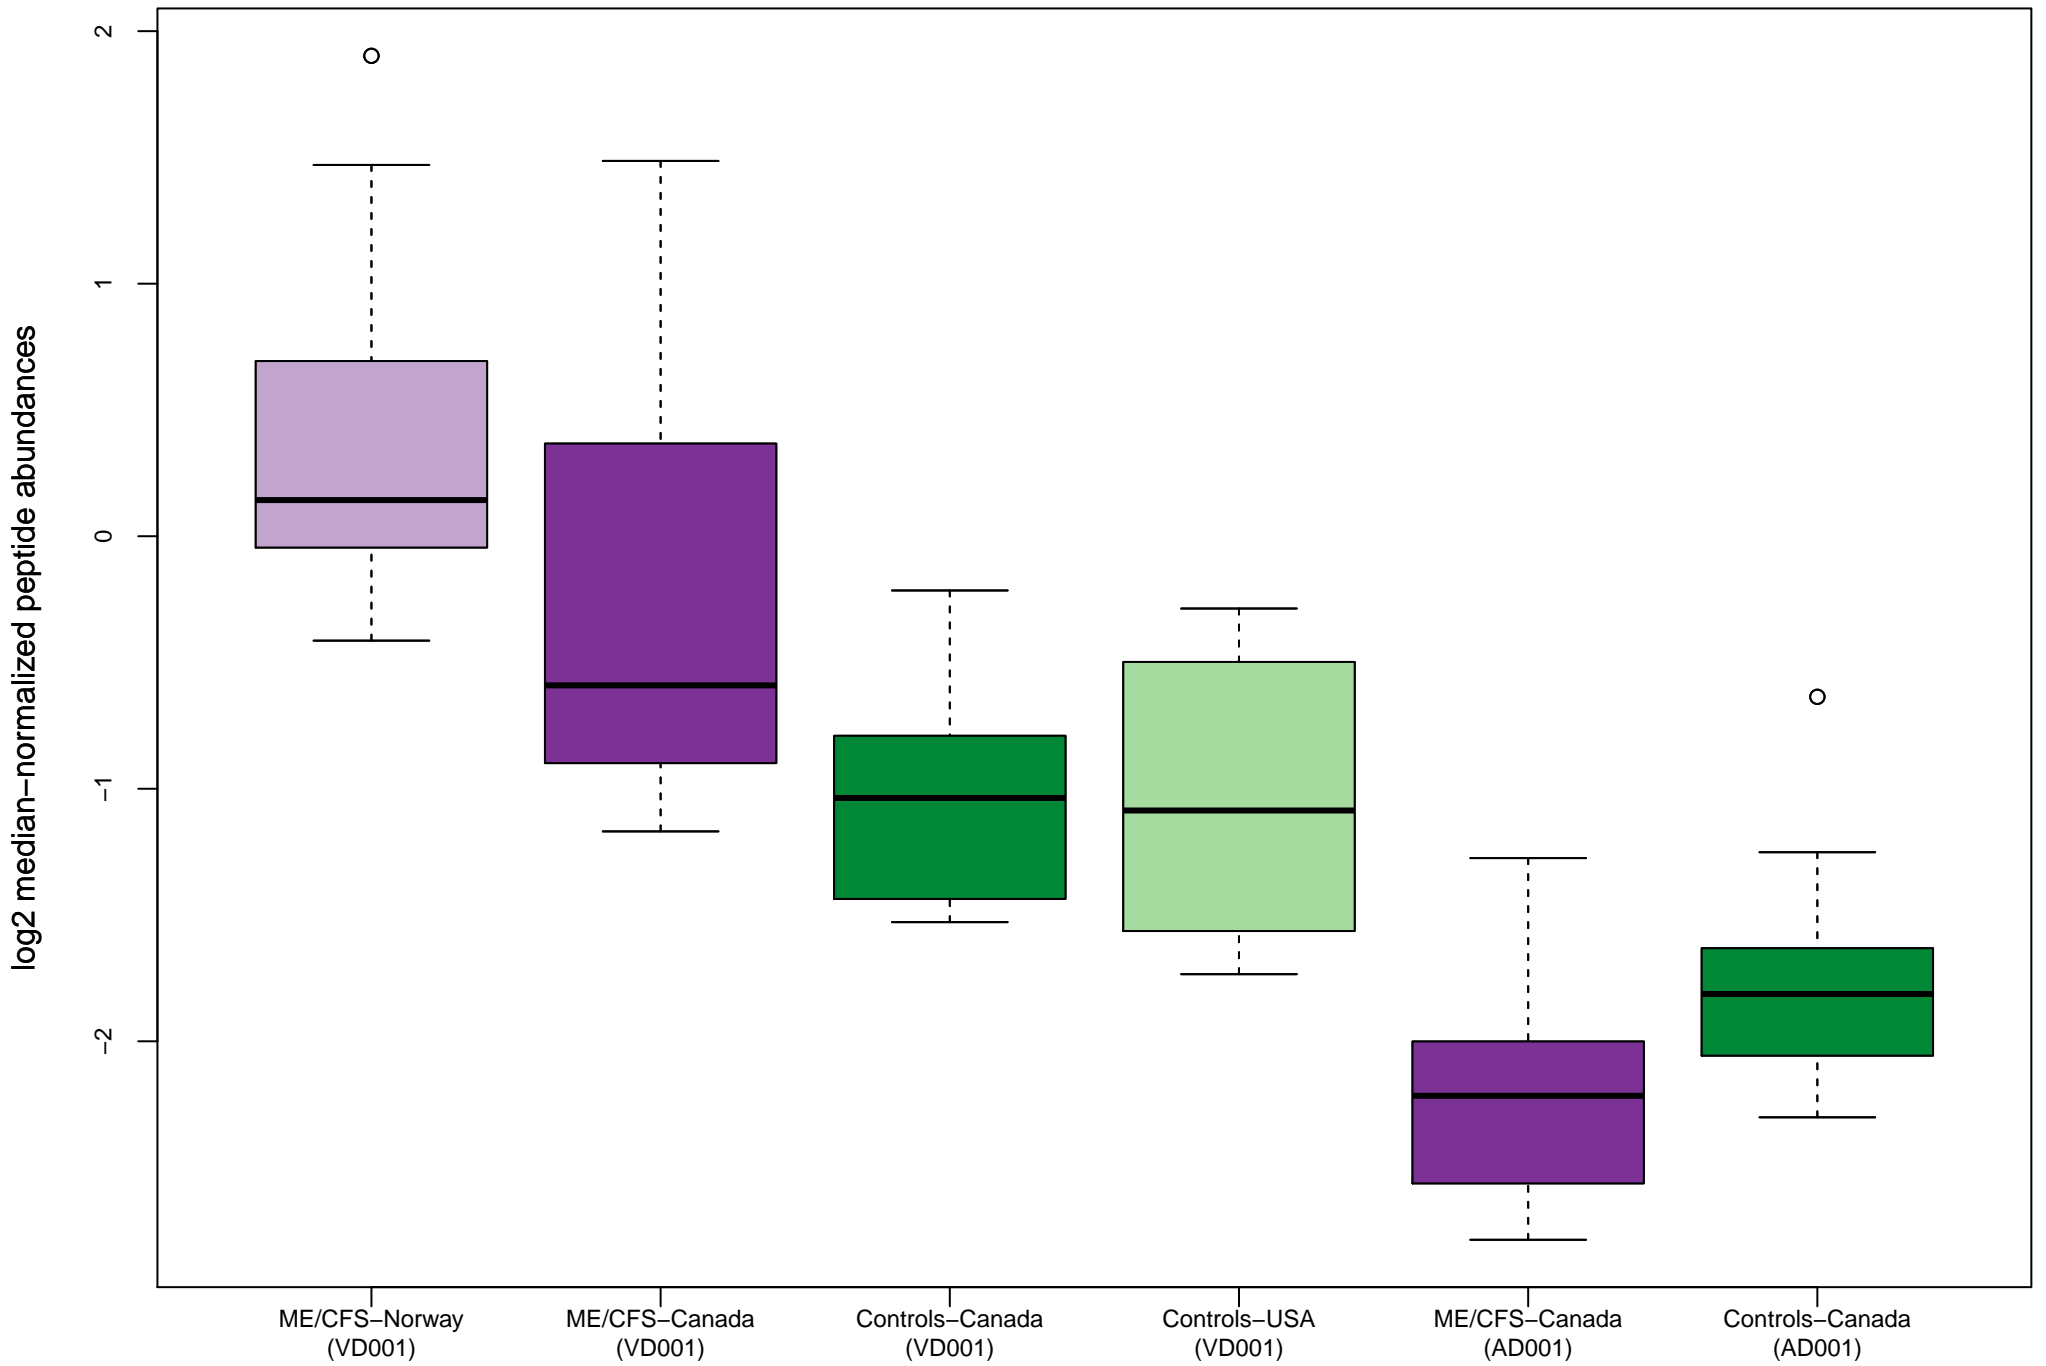

# QFRFFYKRNHVL

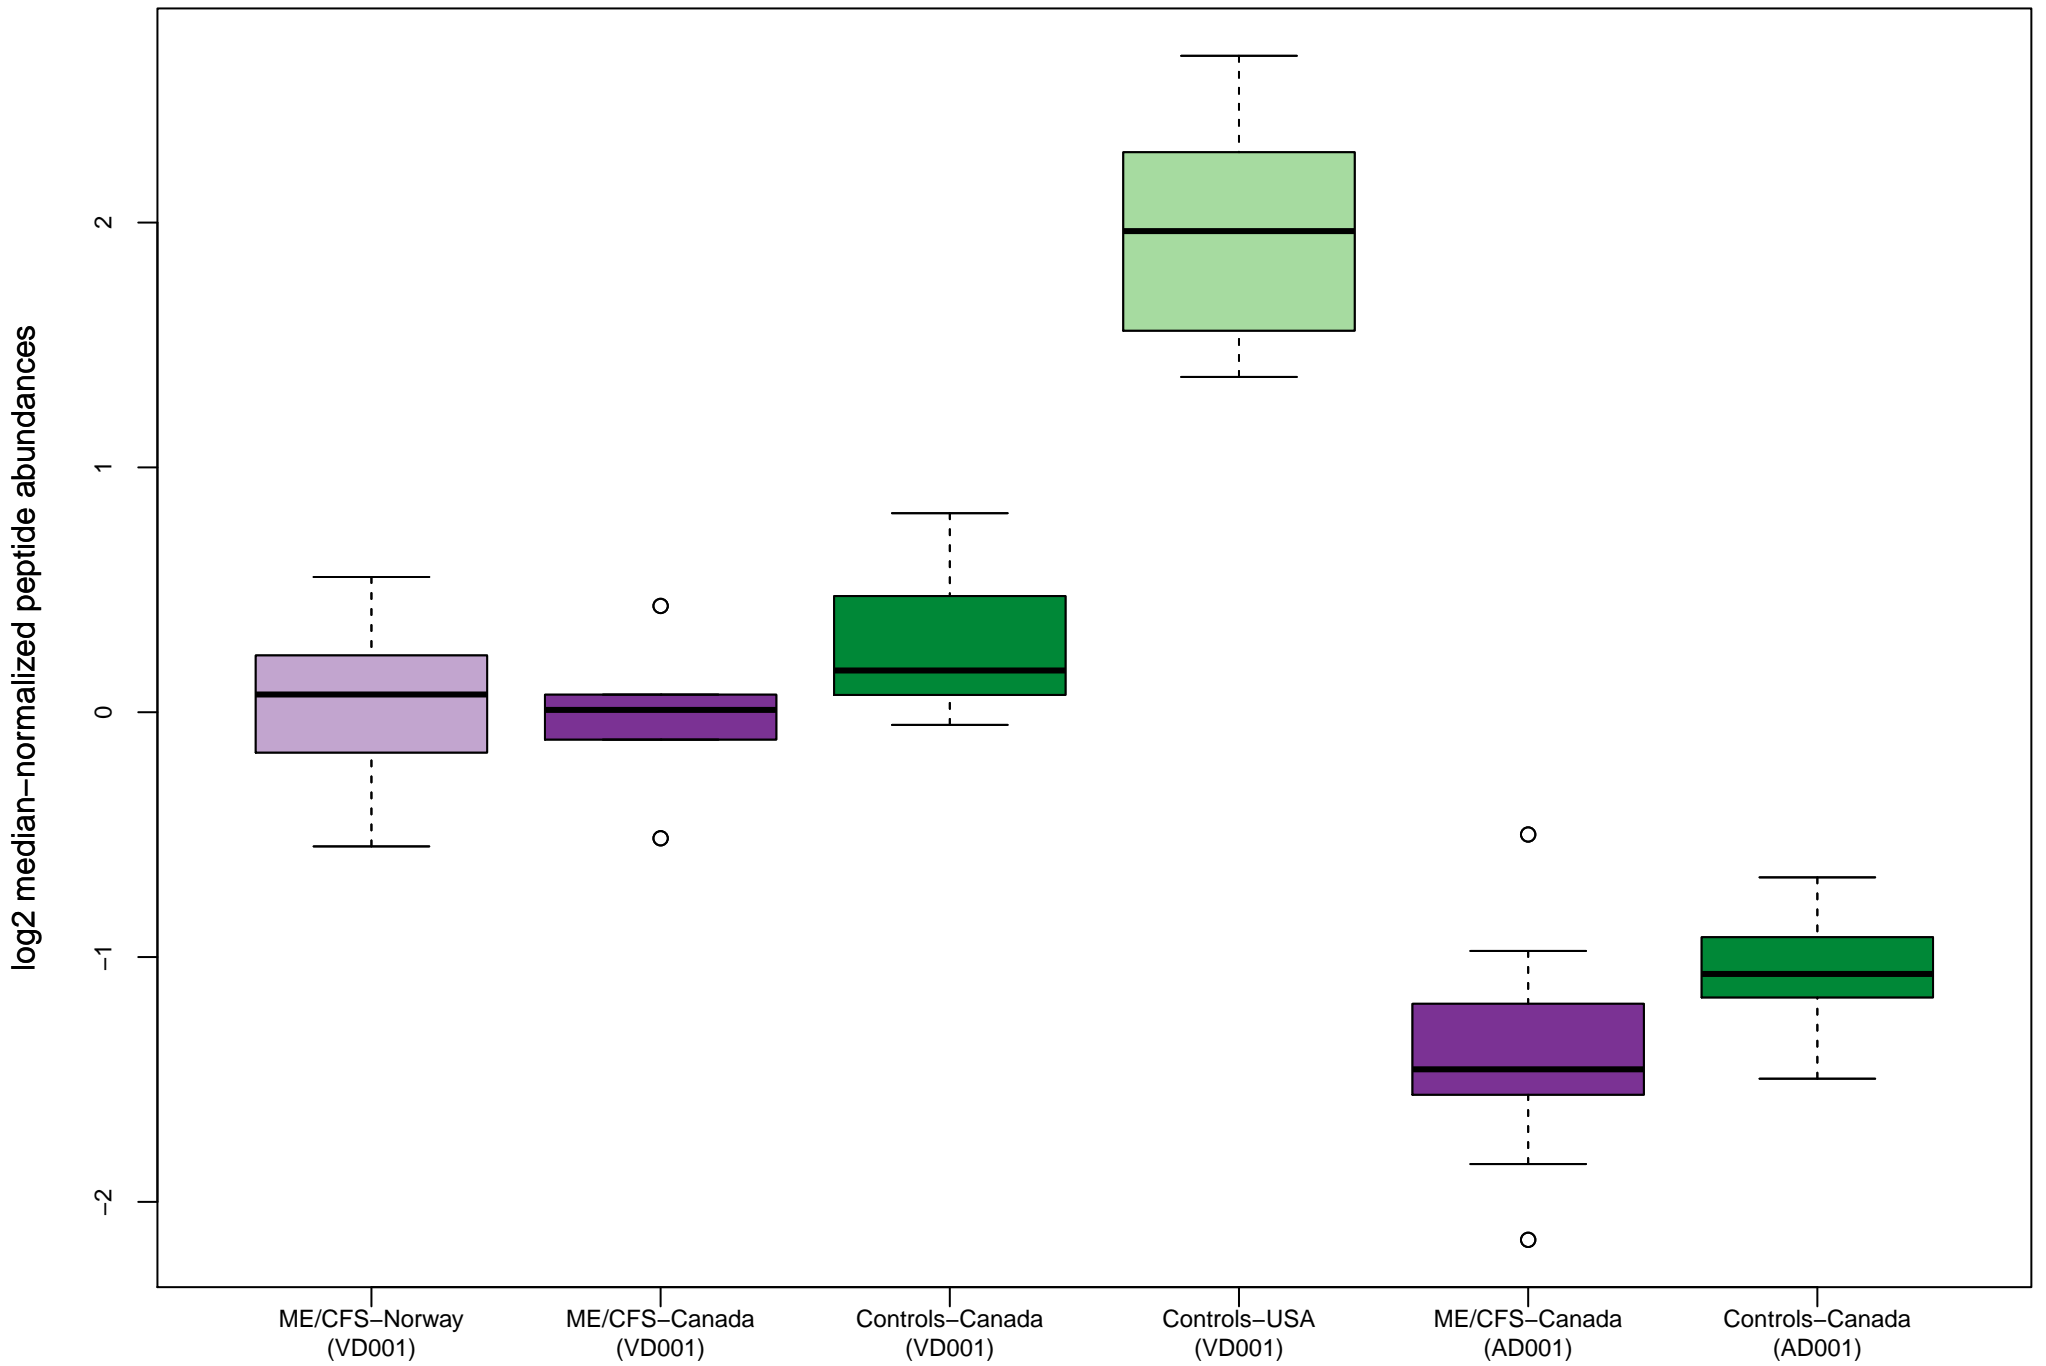

# QFRKHFLWPYNK

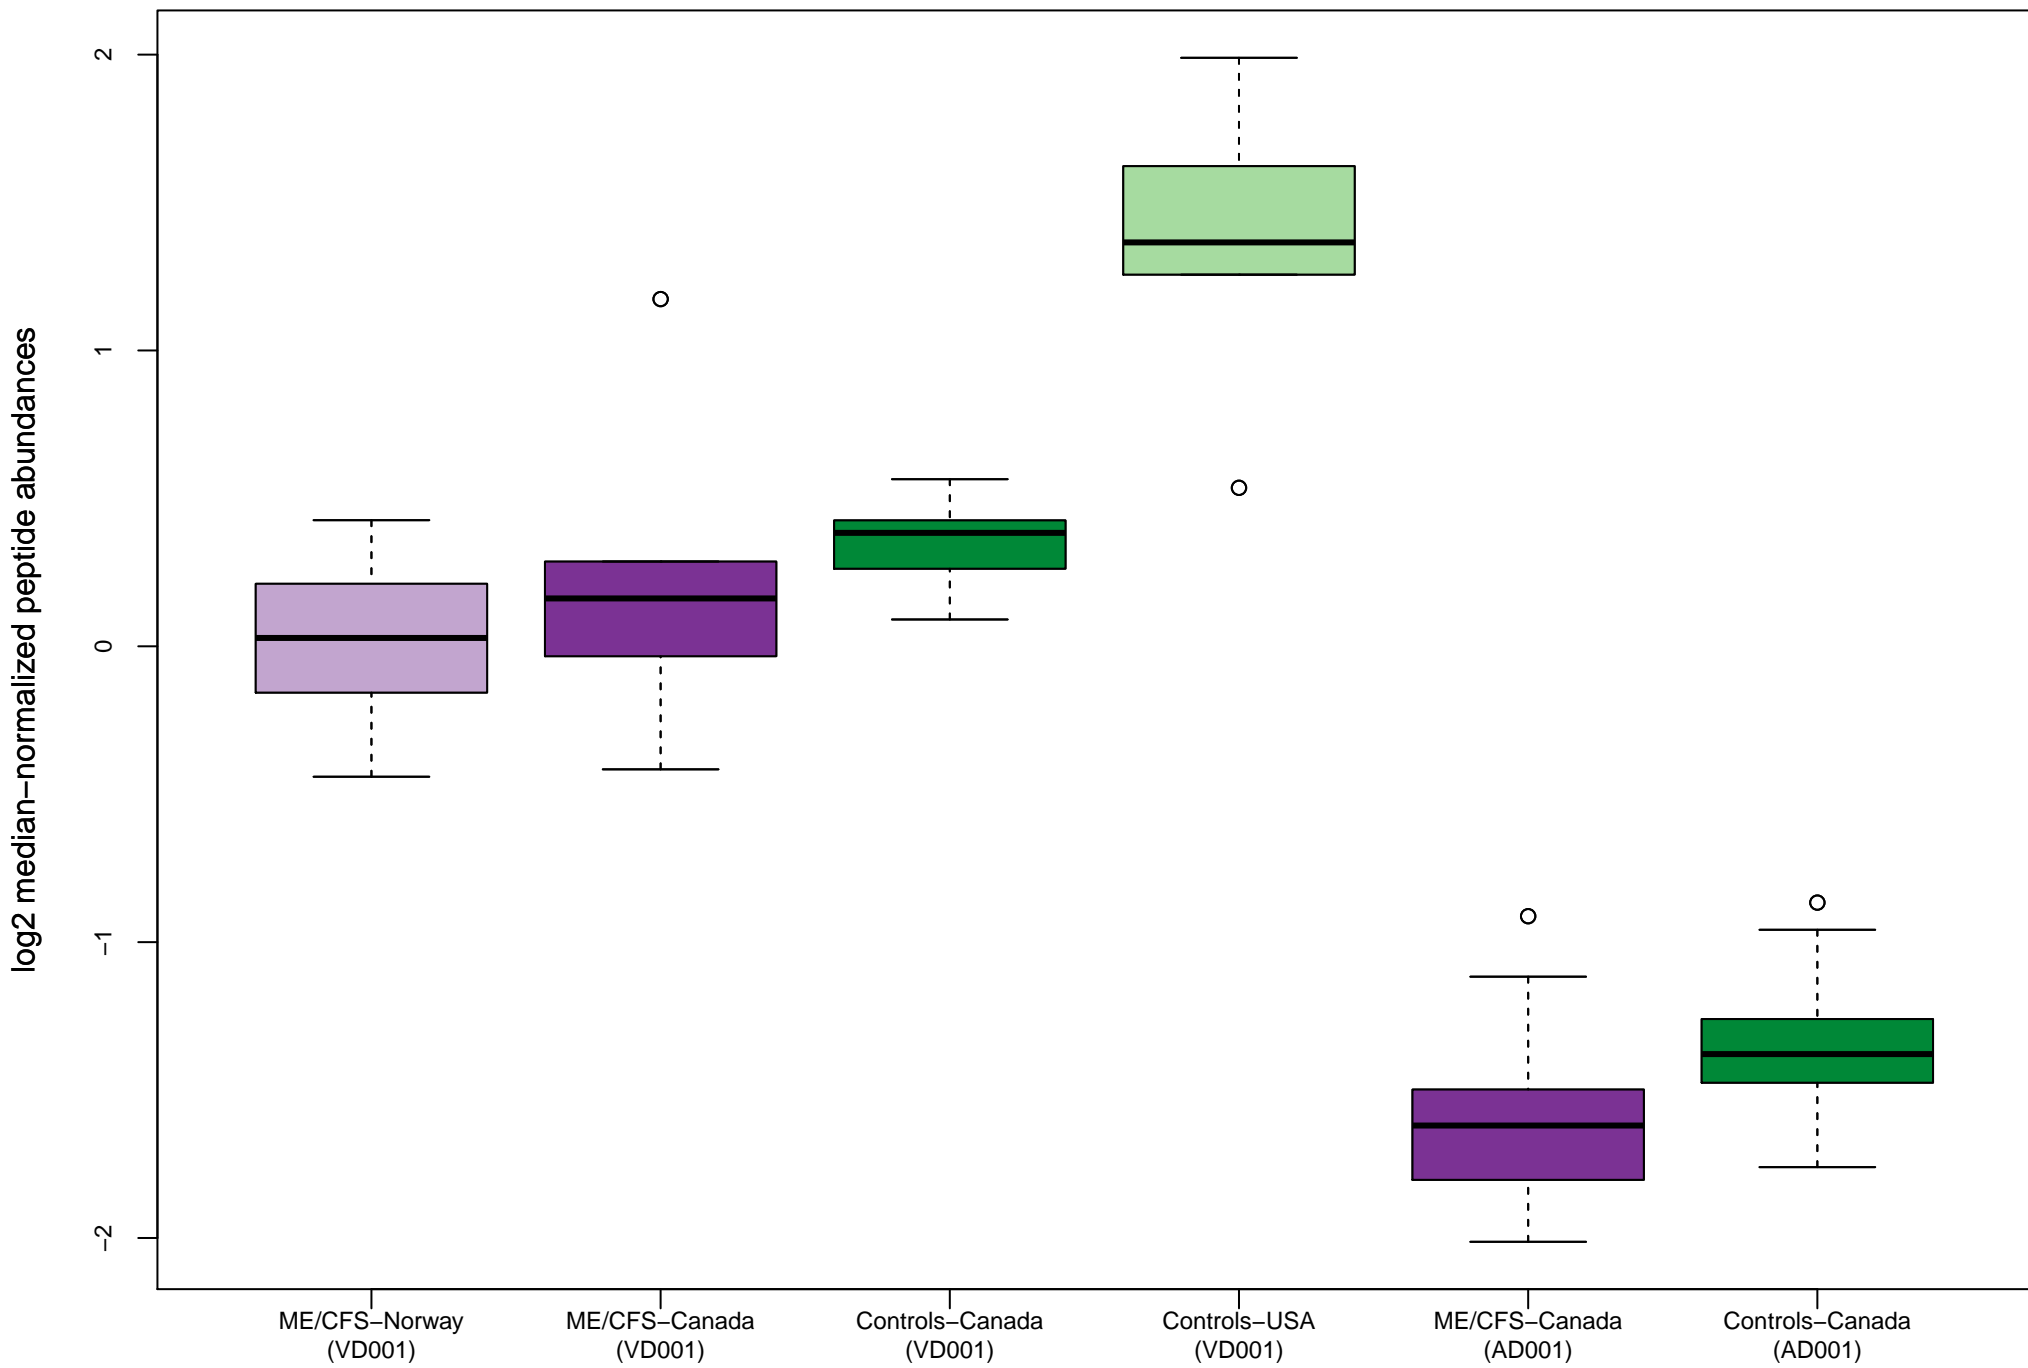

# QFYPSQRLYNKV

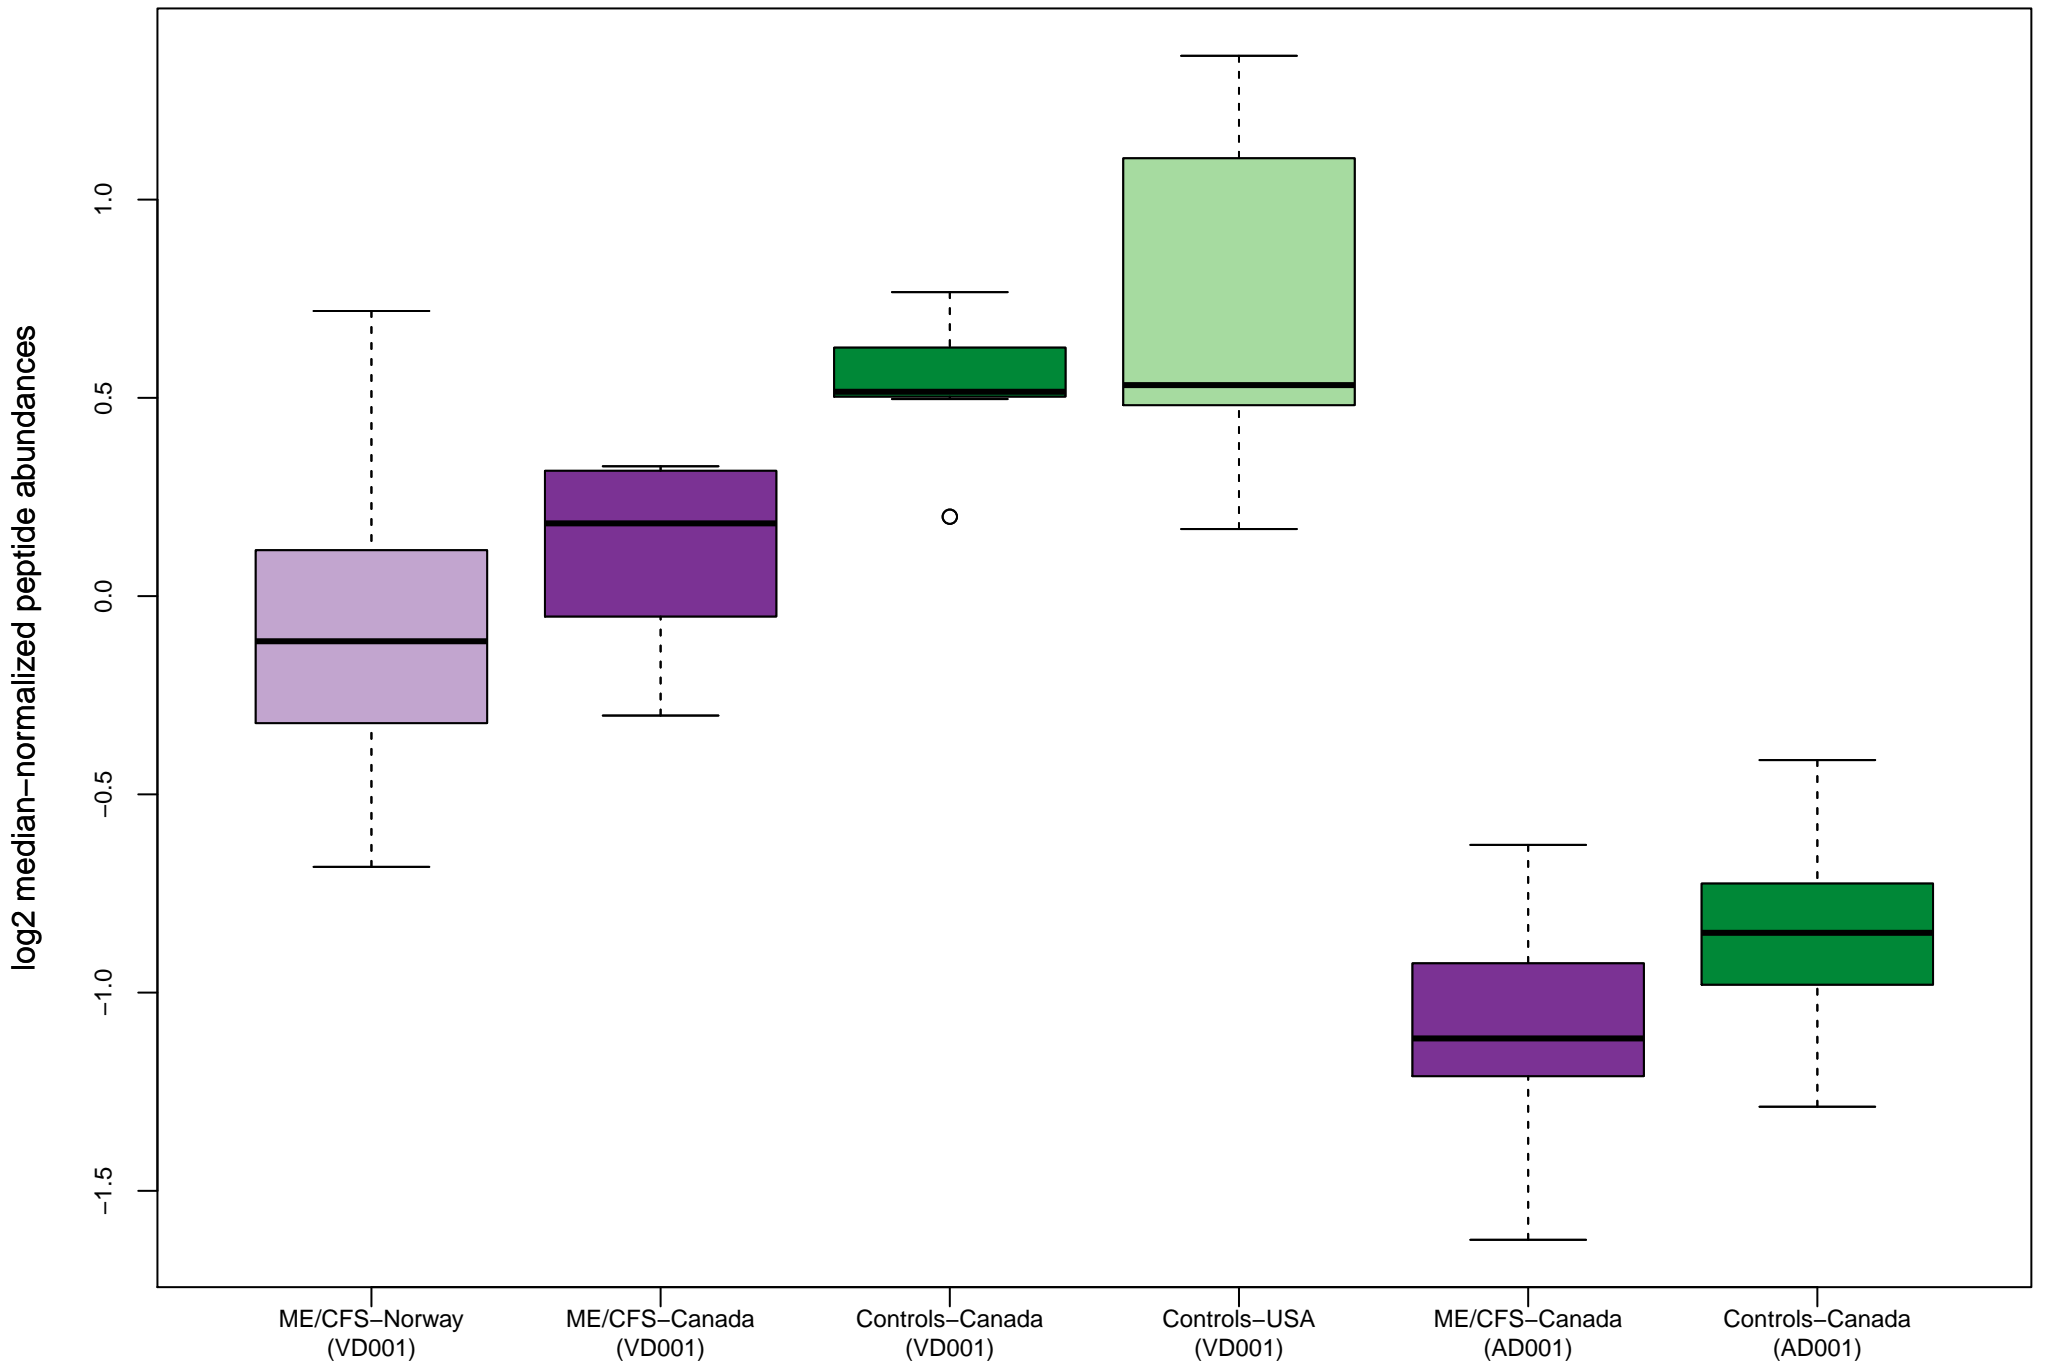

QLRRFRLGVLSG

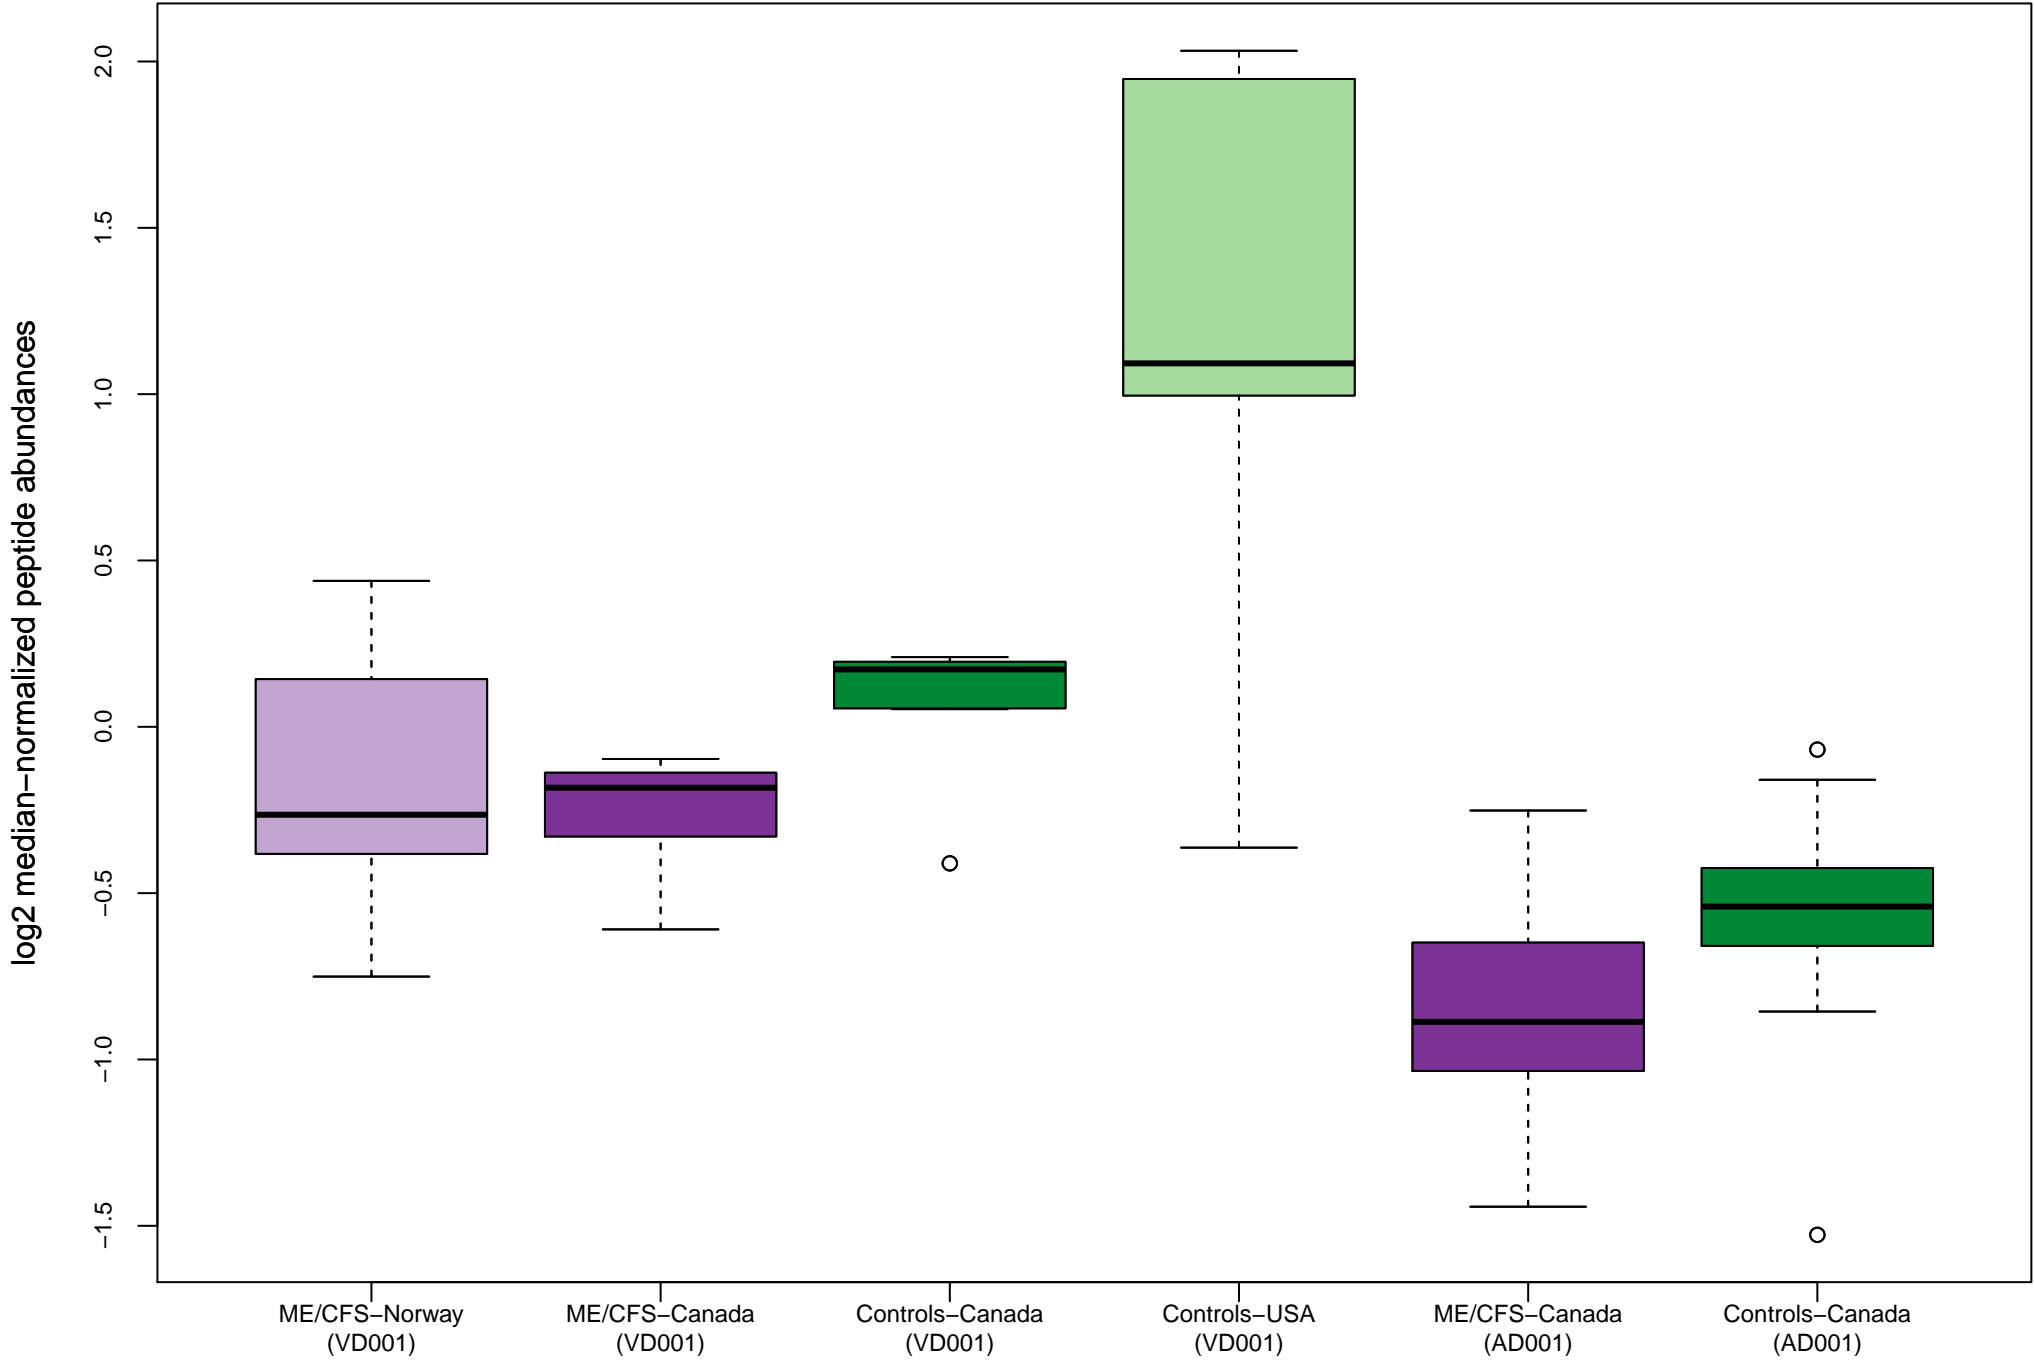

# QLSRYRGYLGLS

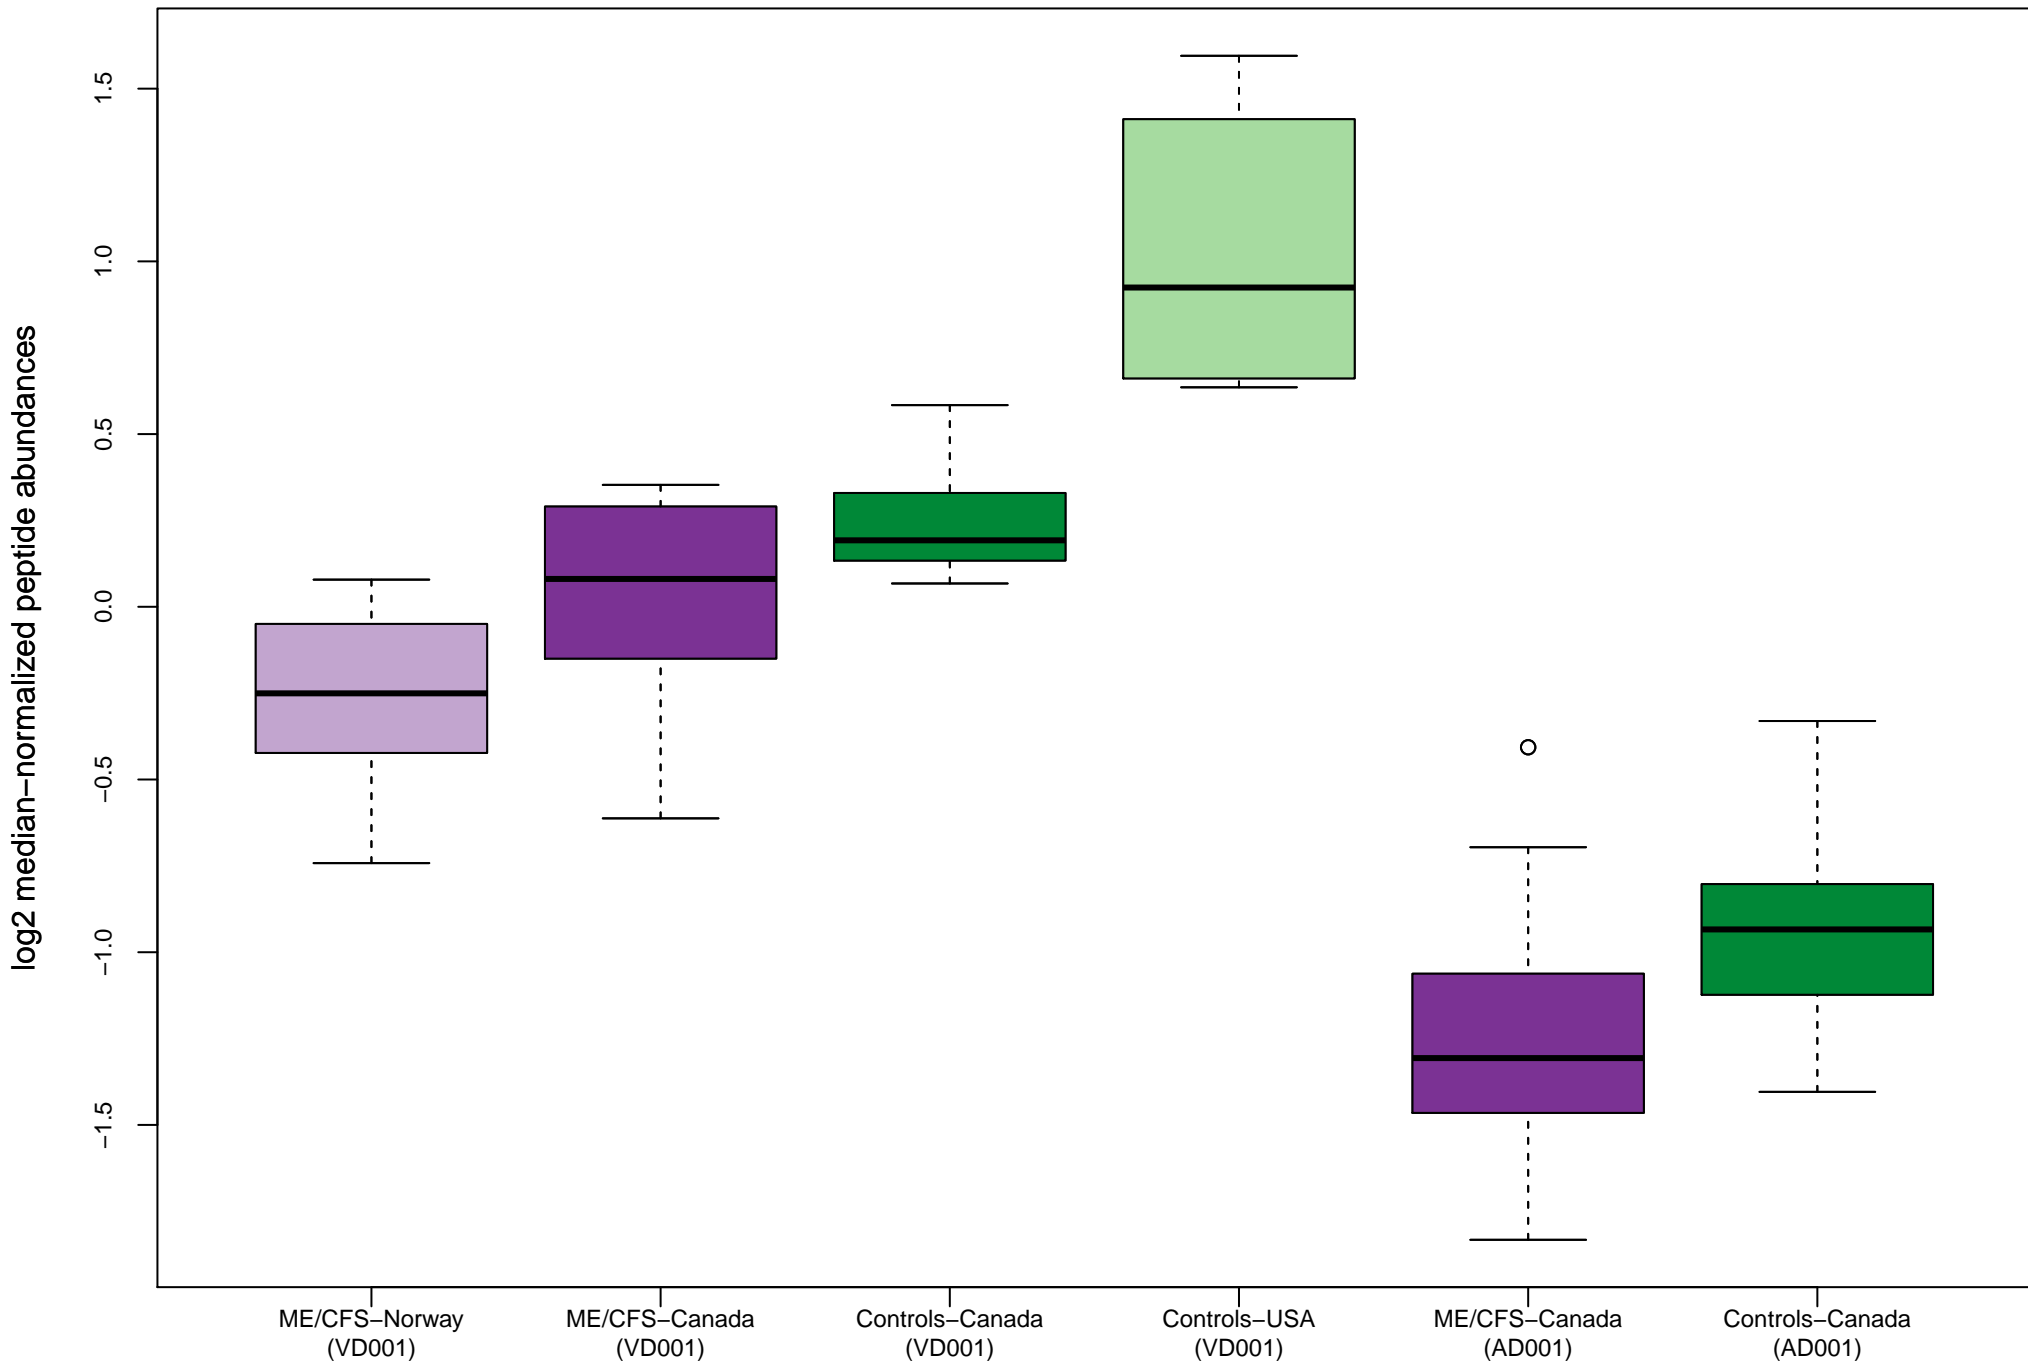

# QNHPWREVQRKV

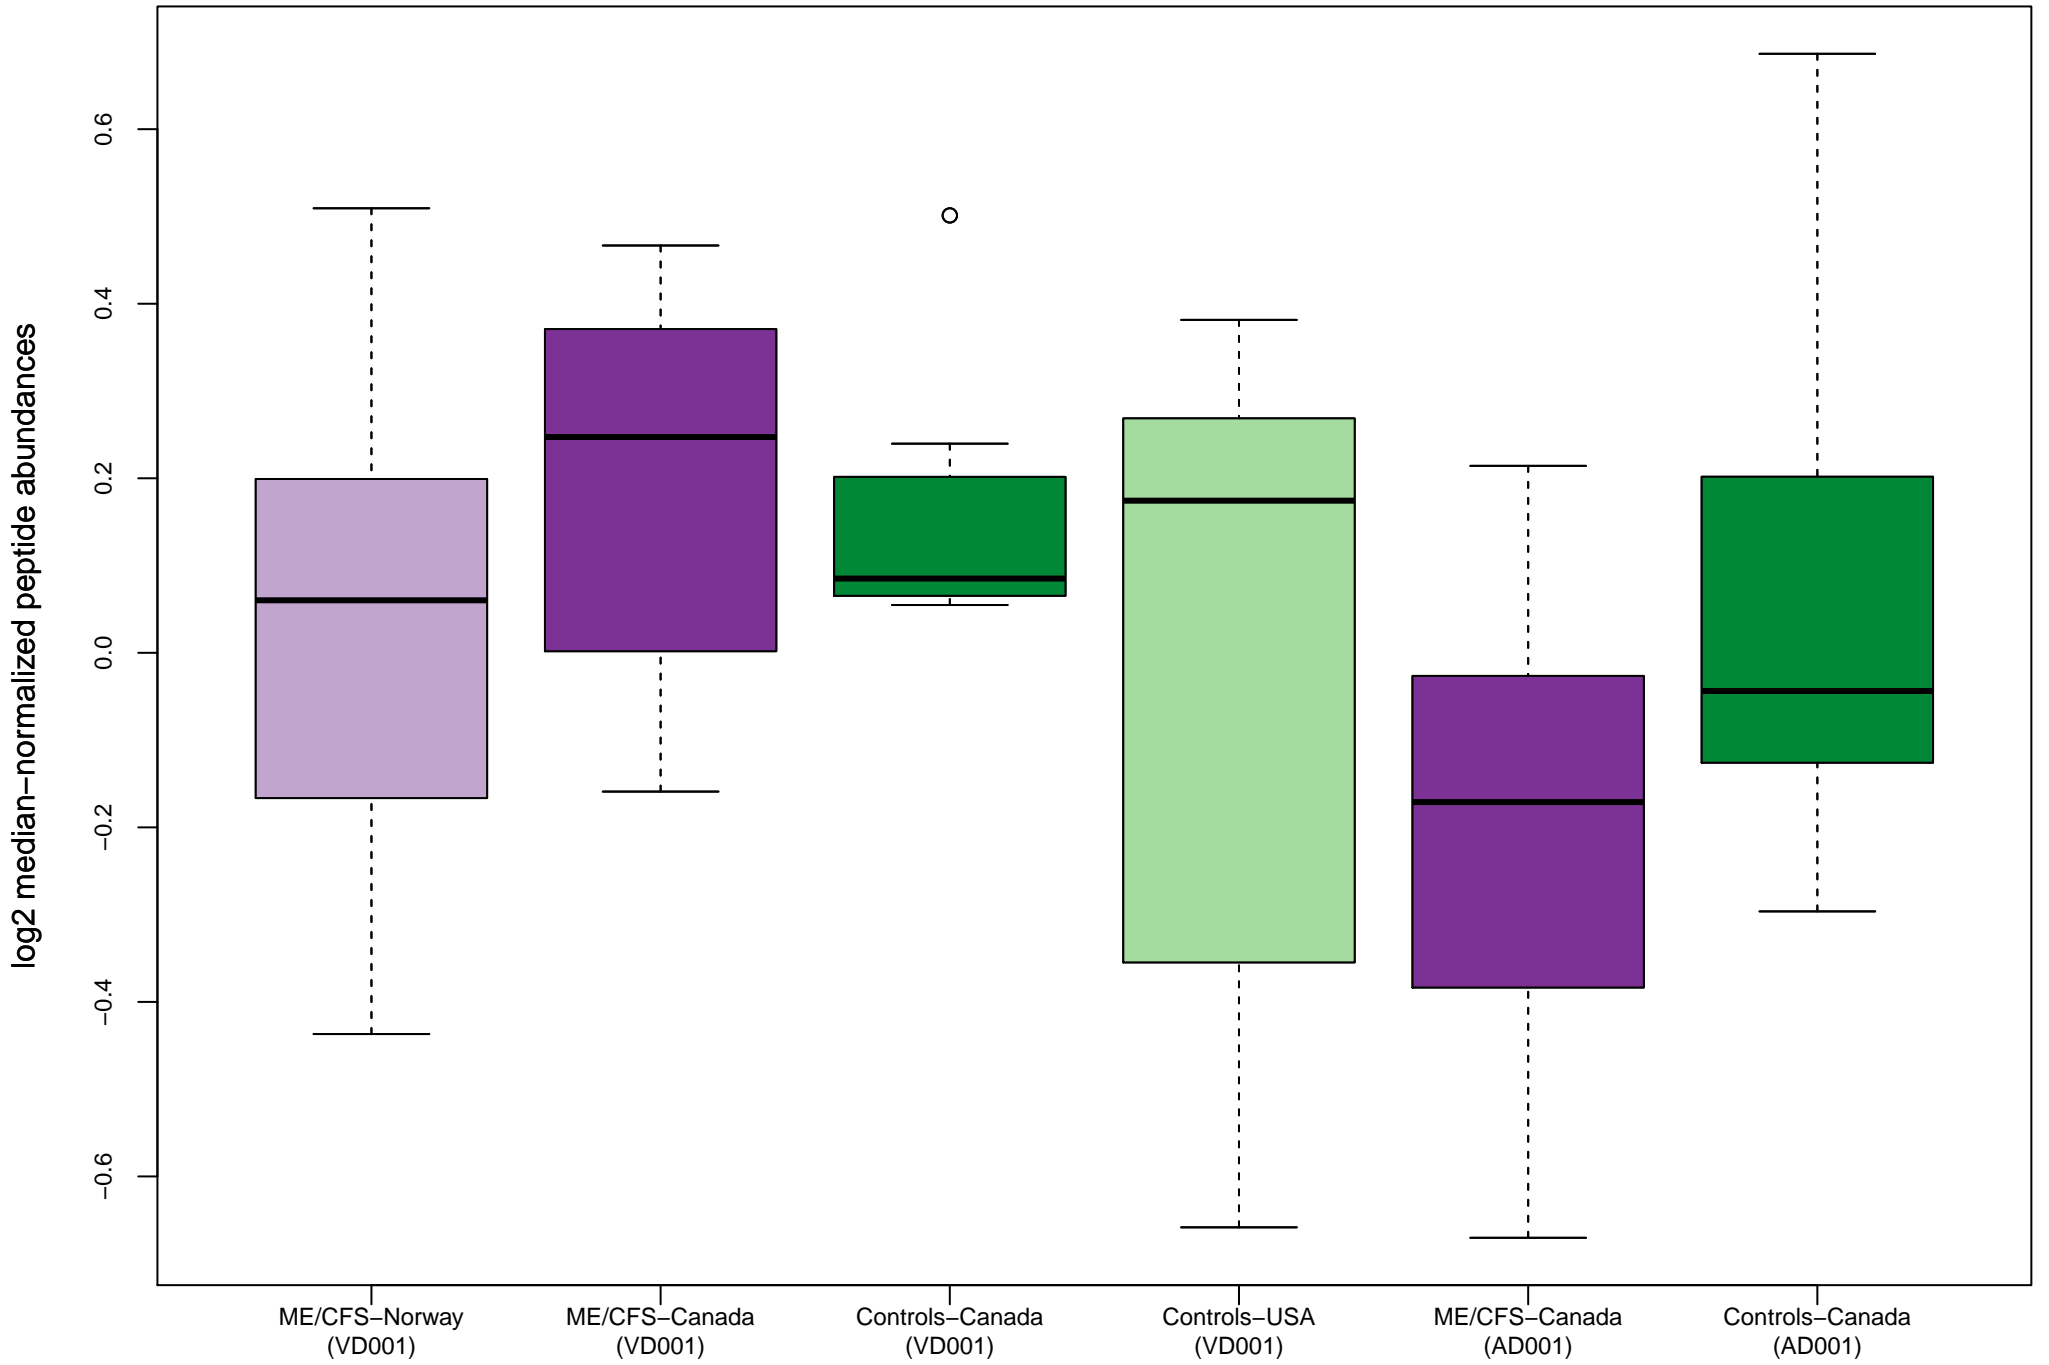



# QRKLRWSRYYSG

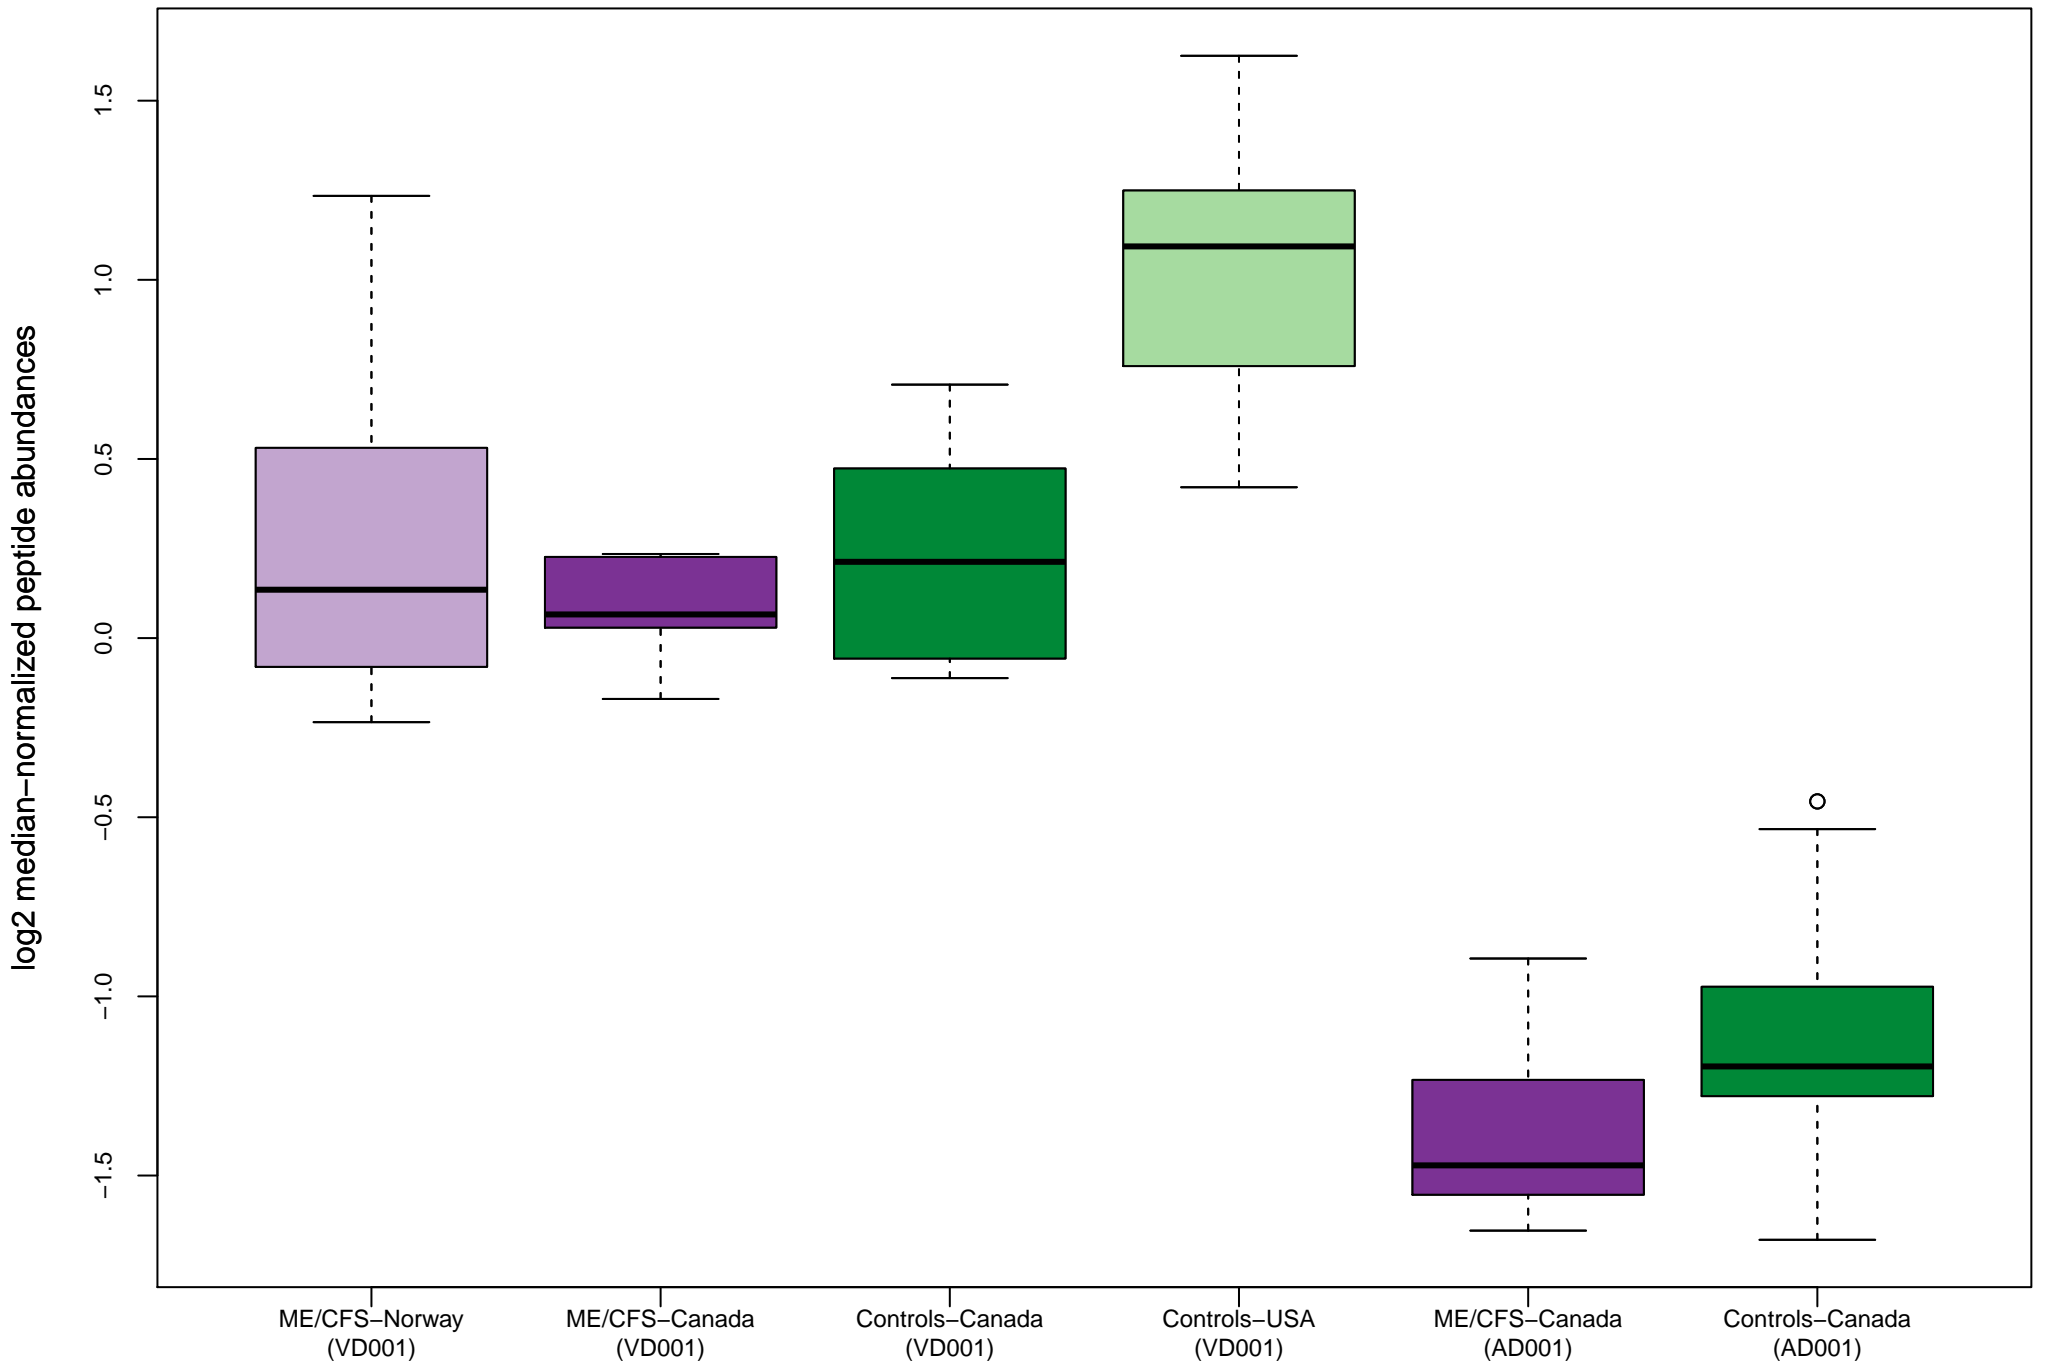

# QRLPRPNFYWDS

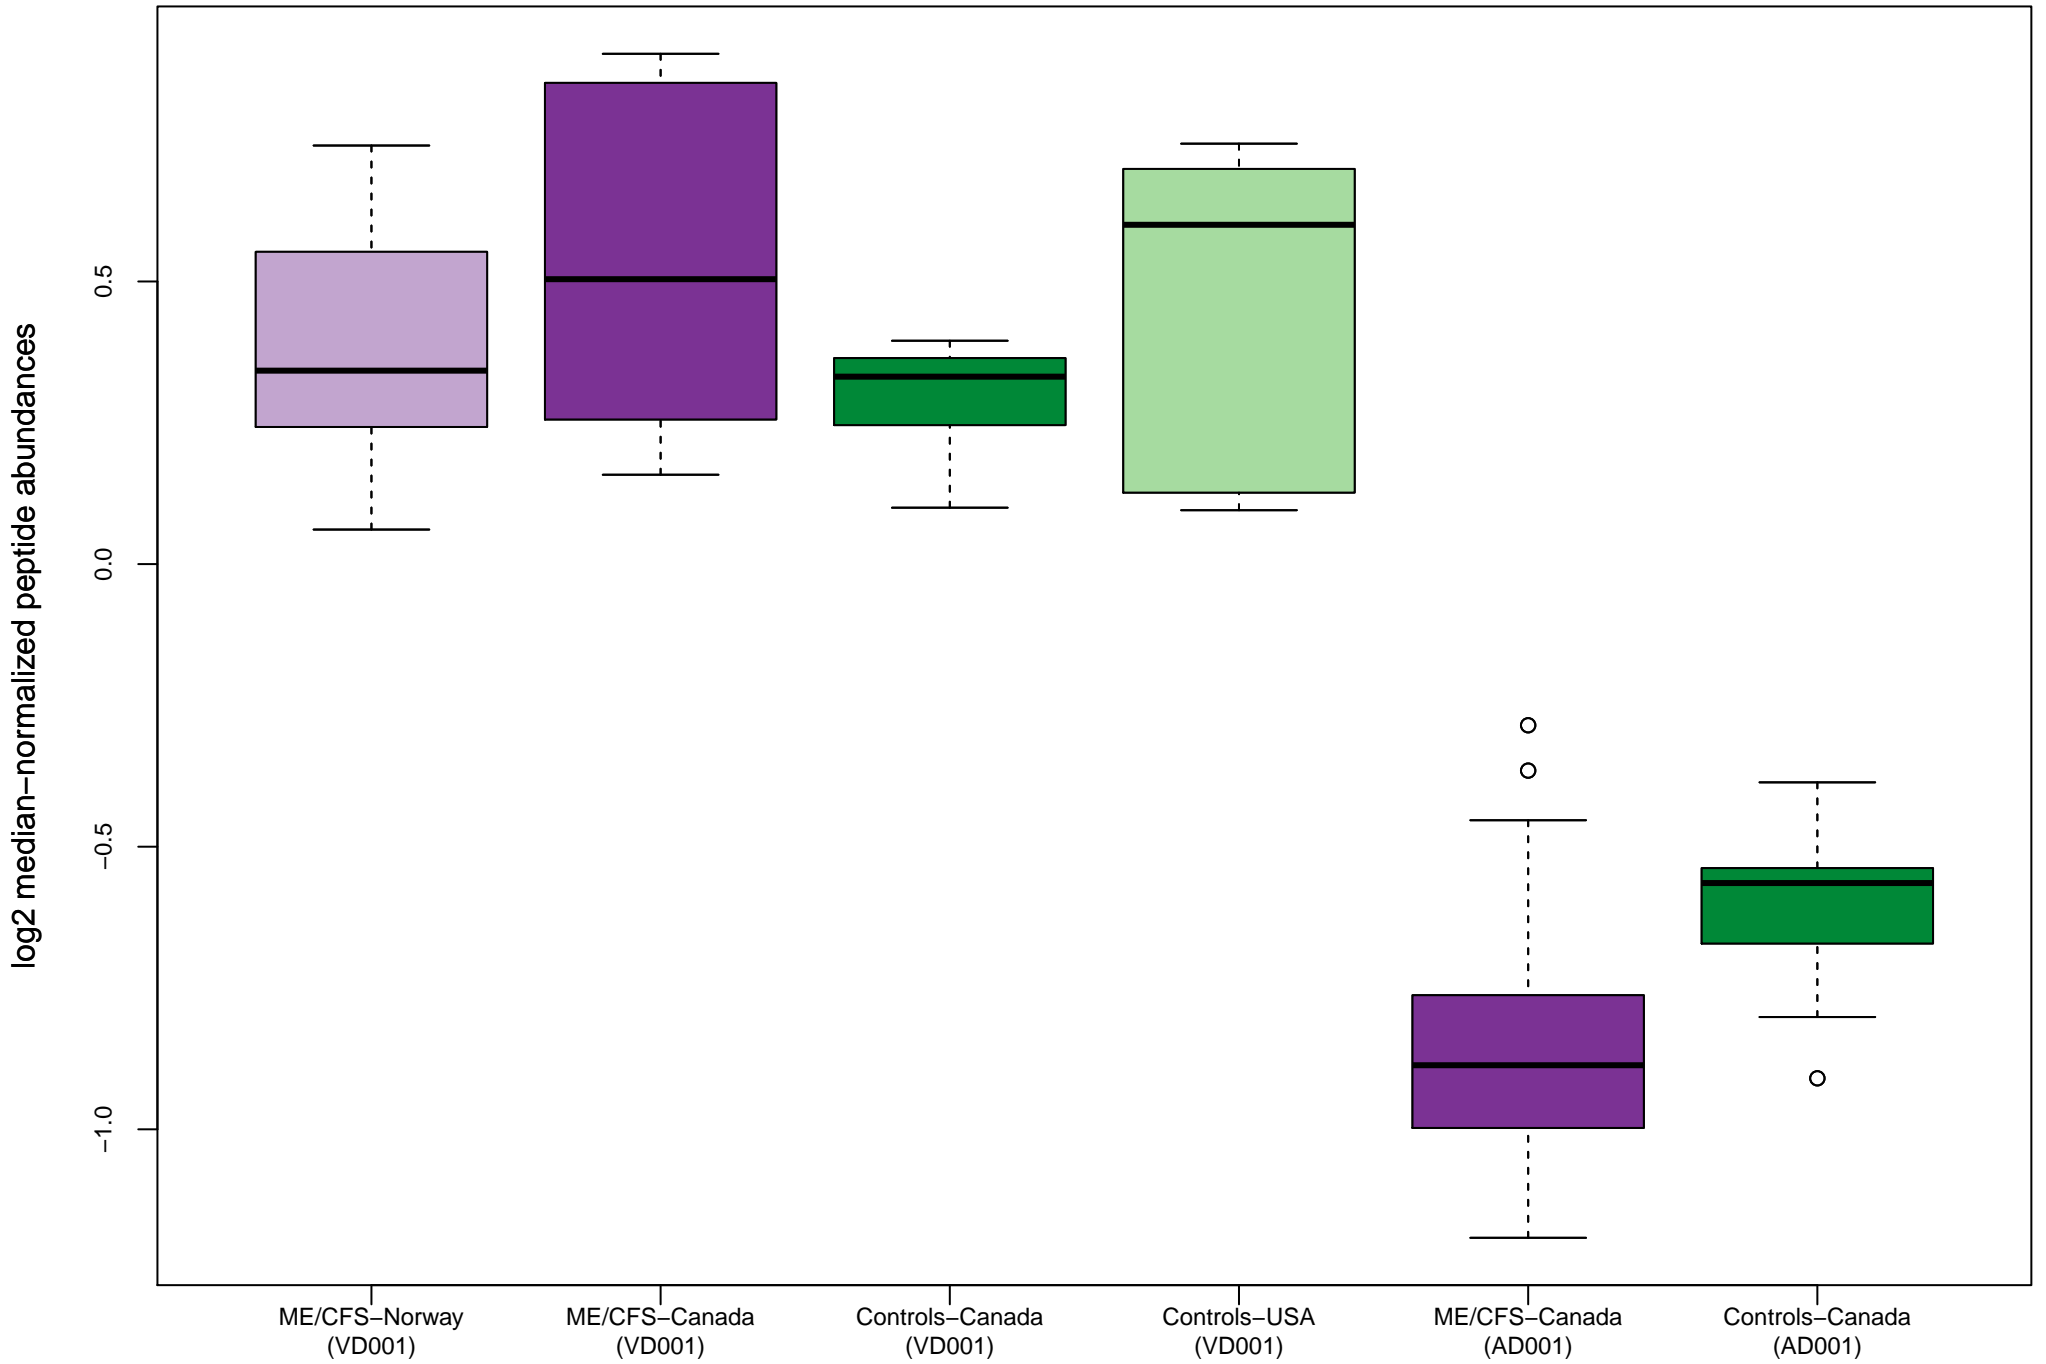

# QRLYADVRKVLG

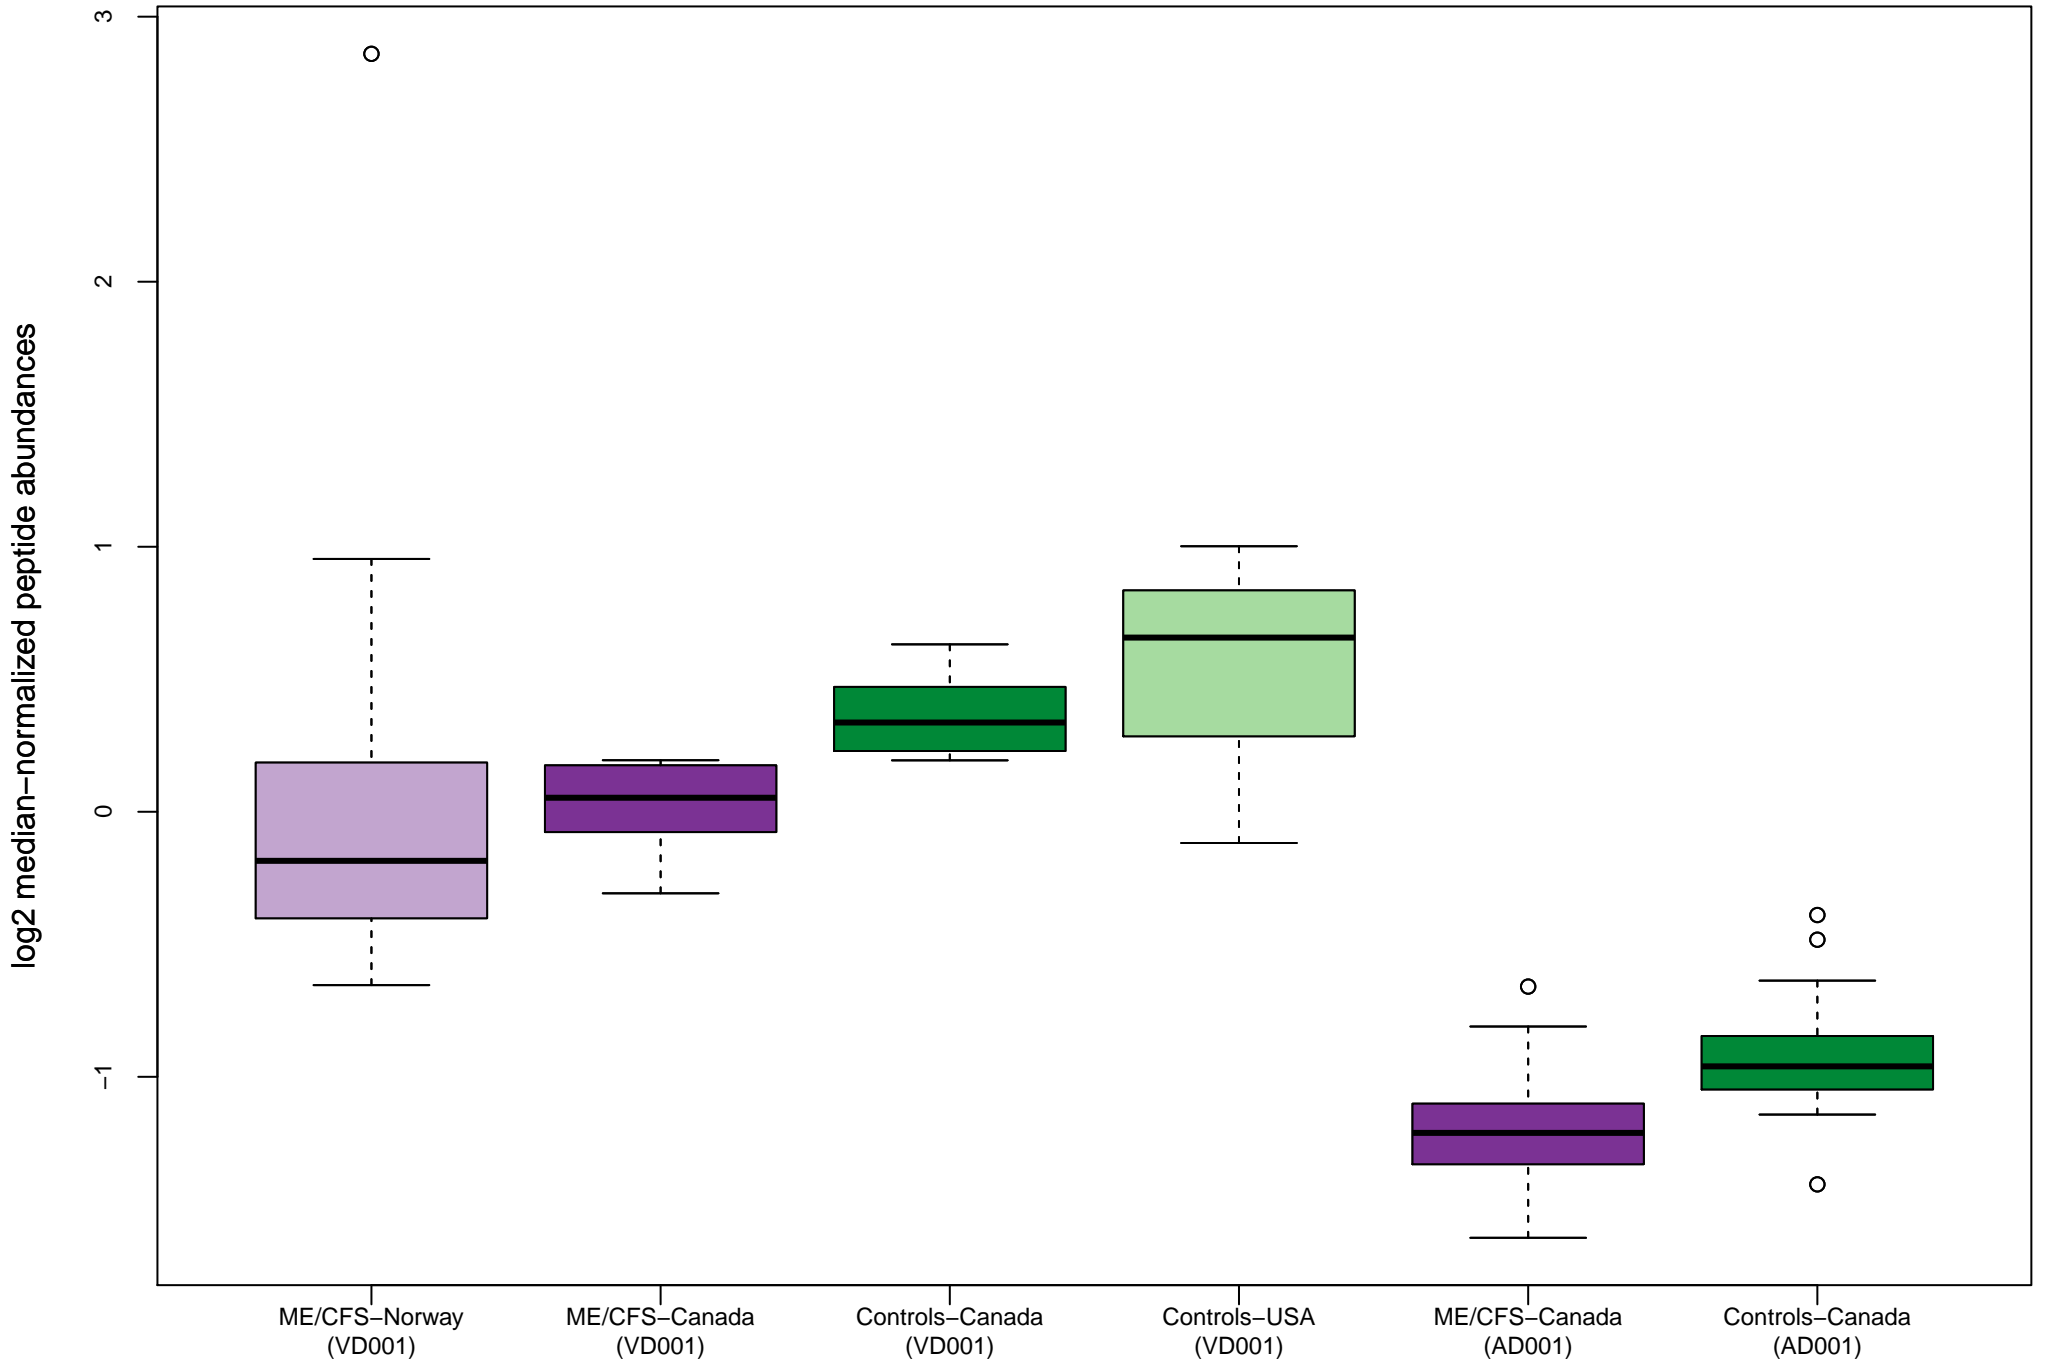

# QRNWFRARVASV

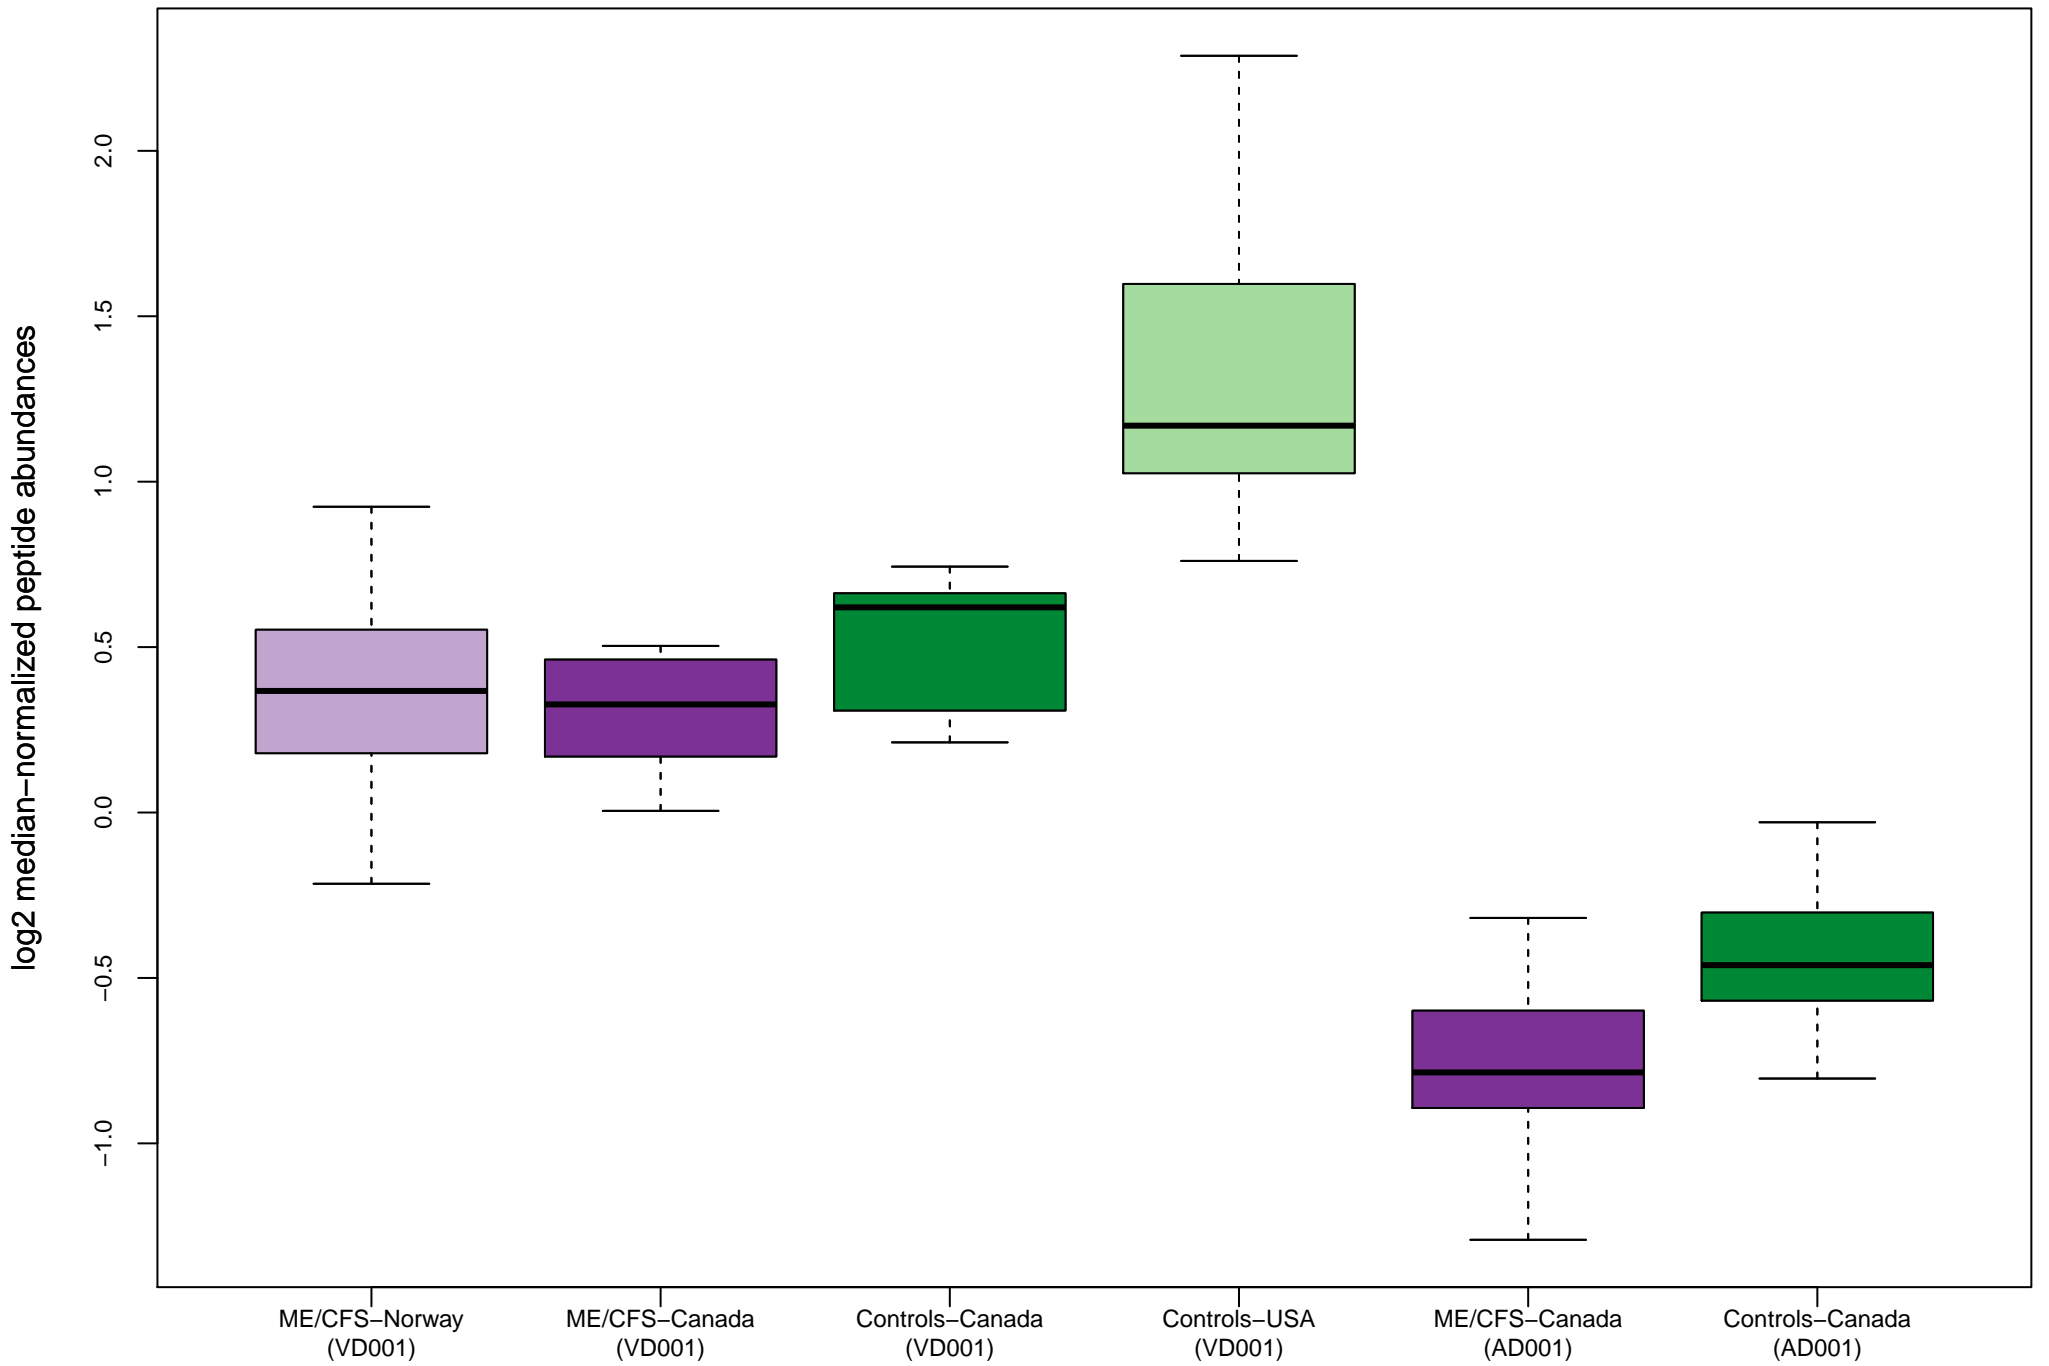

# QRRLLGYLSGSG

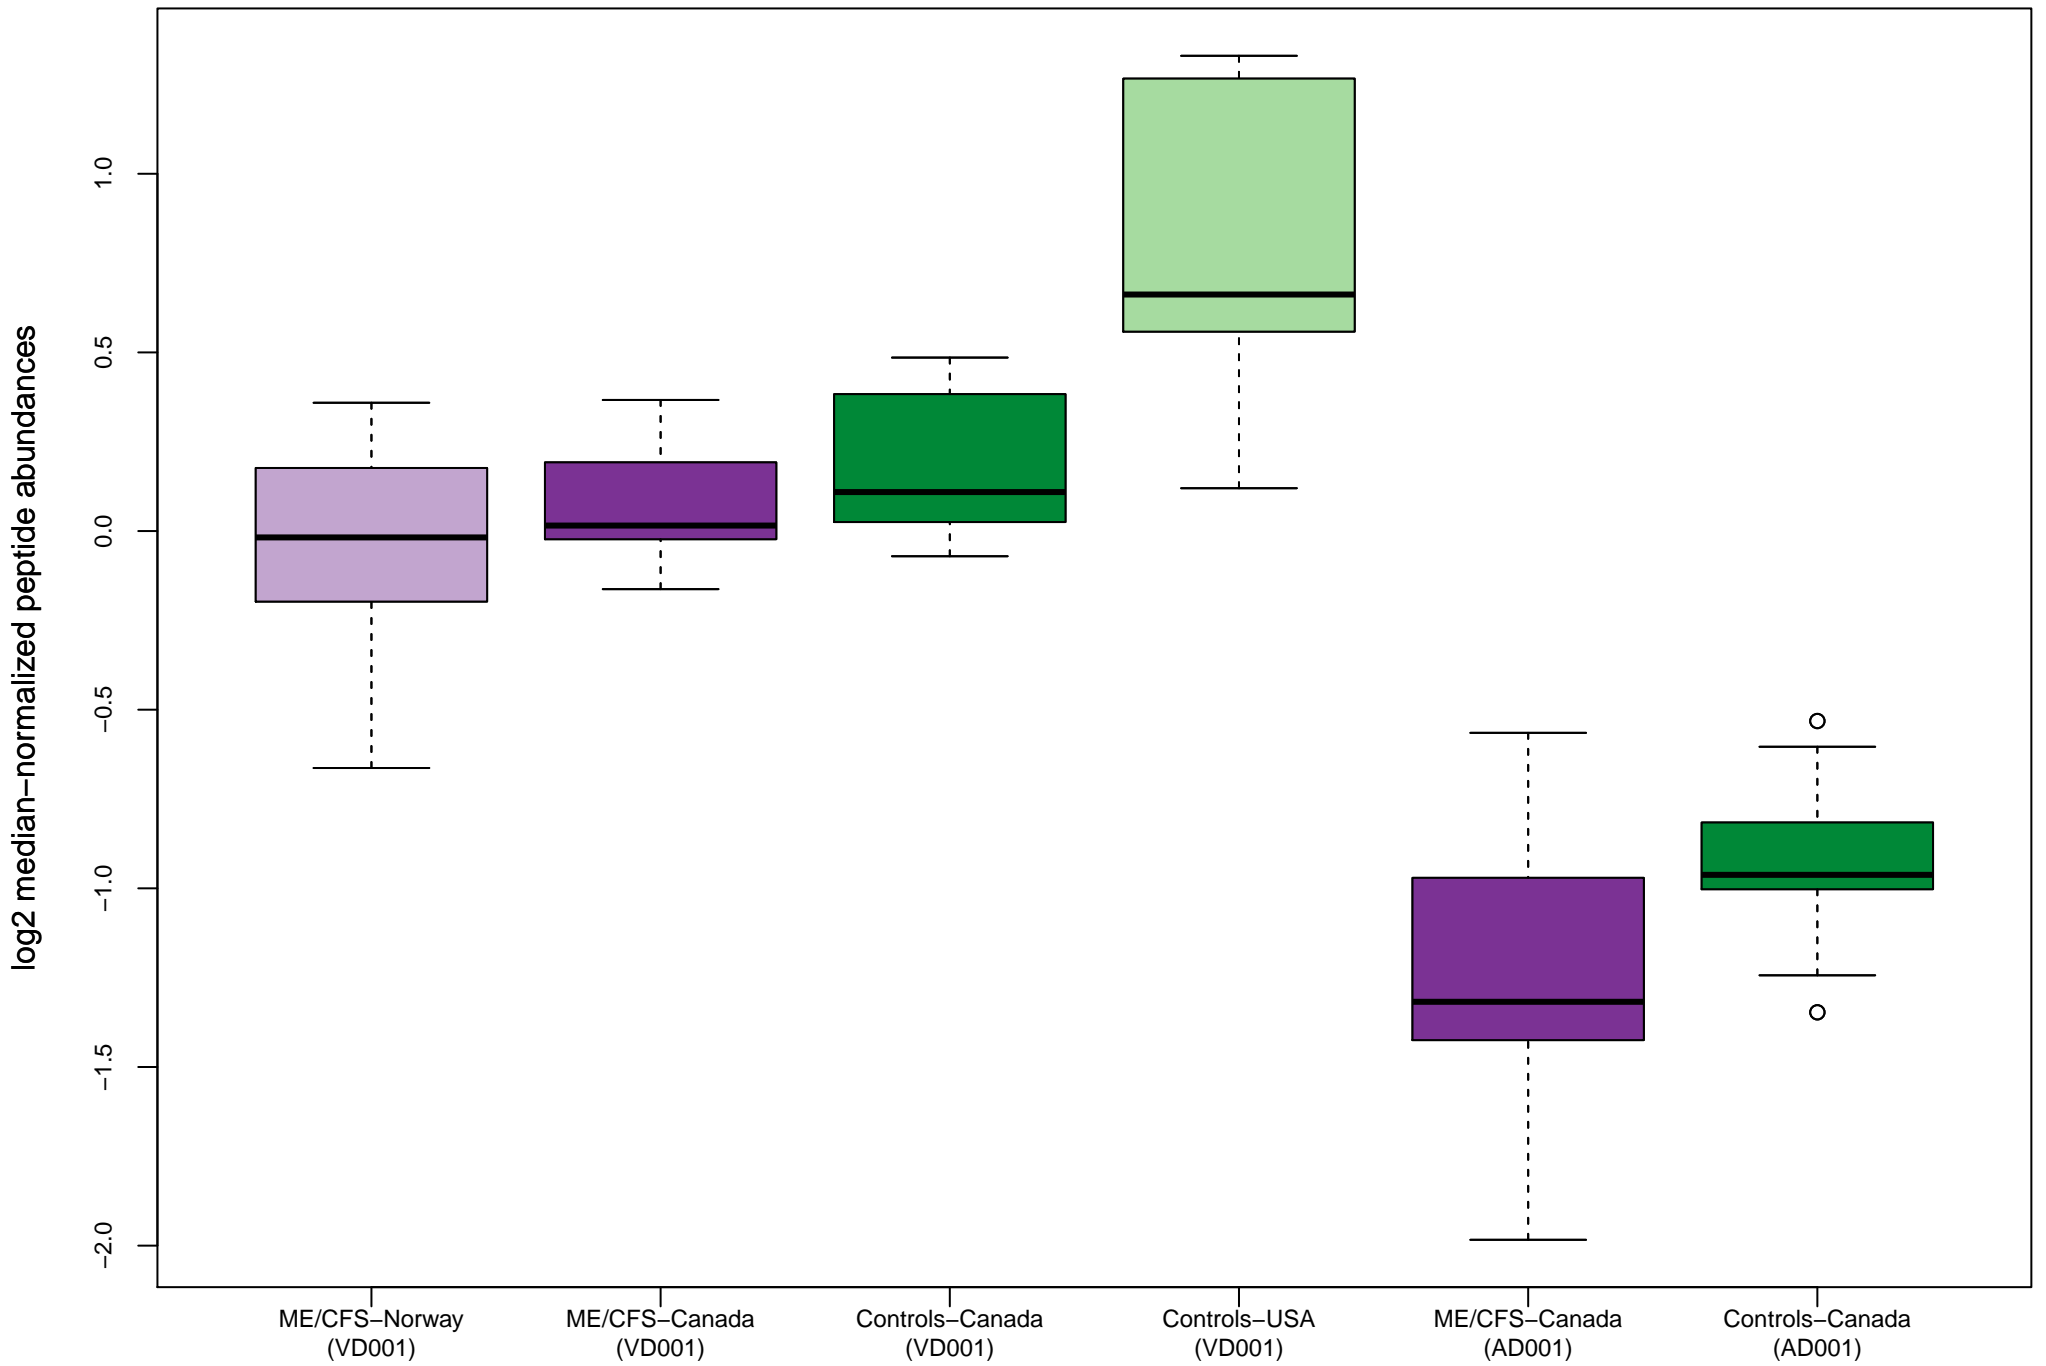

# QYFQGRPYWNKV

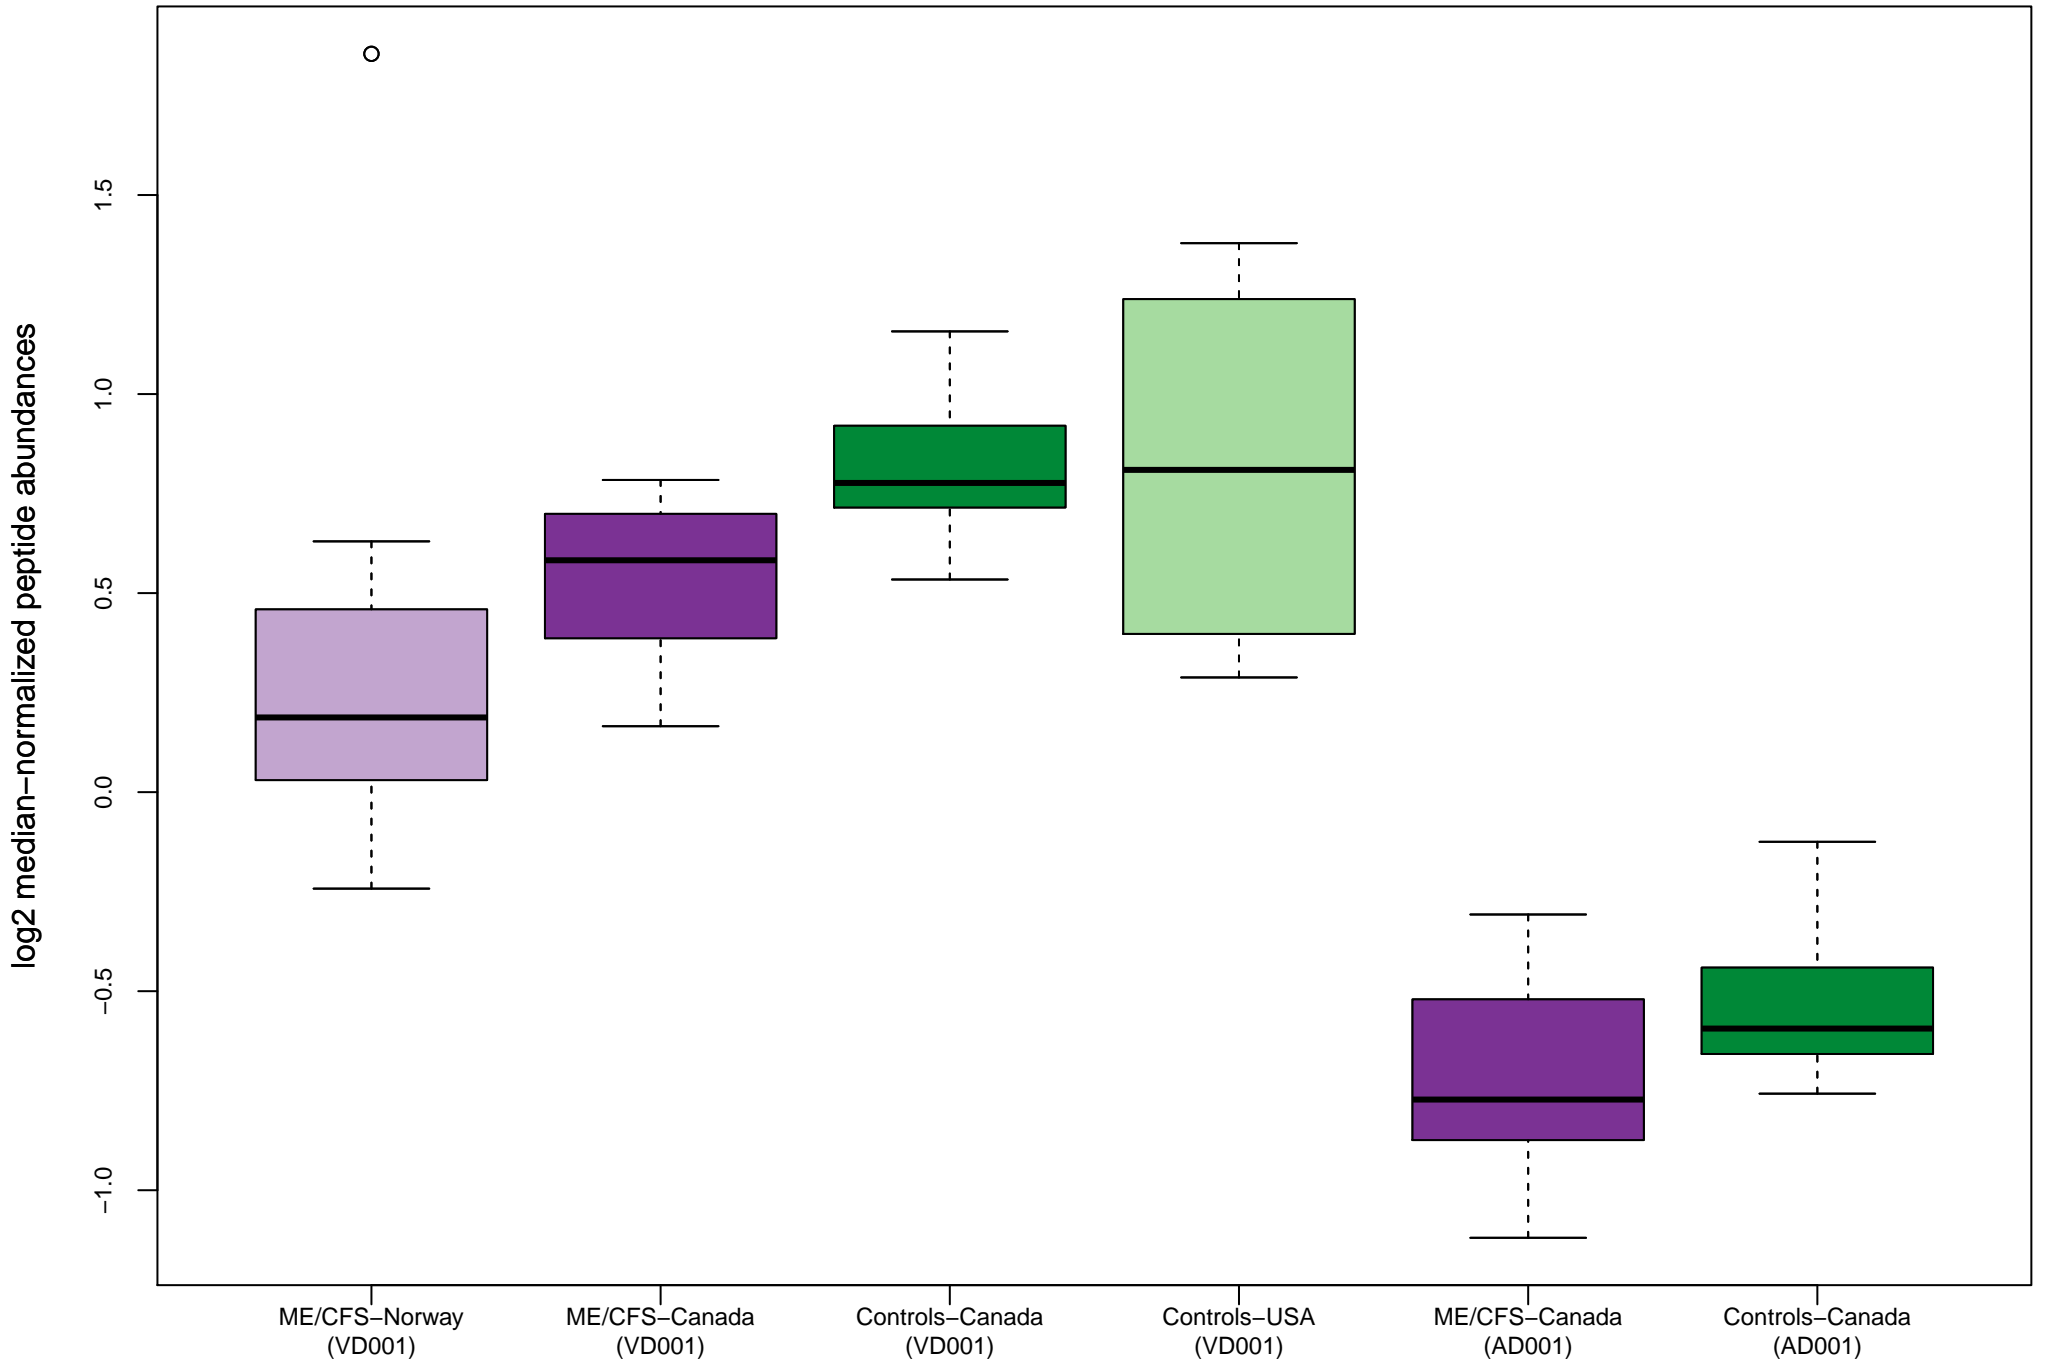

# RALEWKFFRHAV

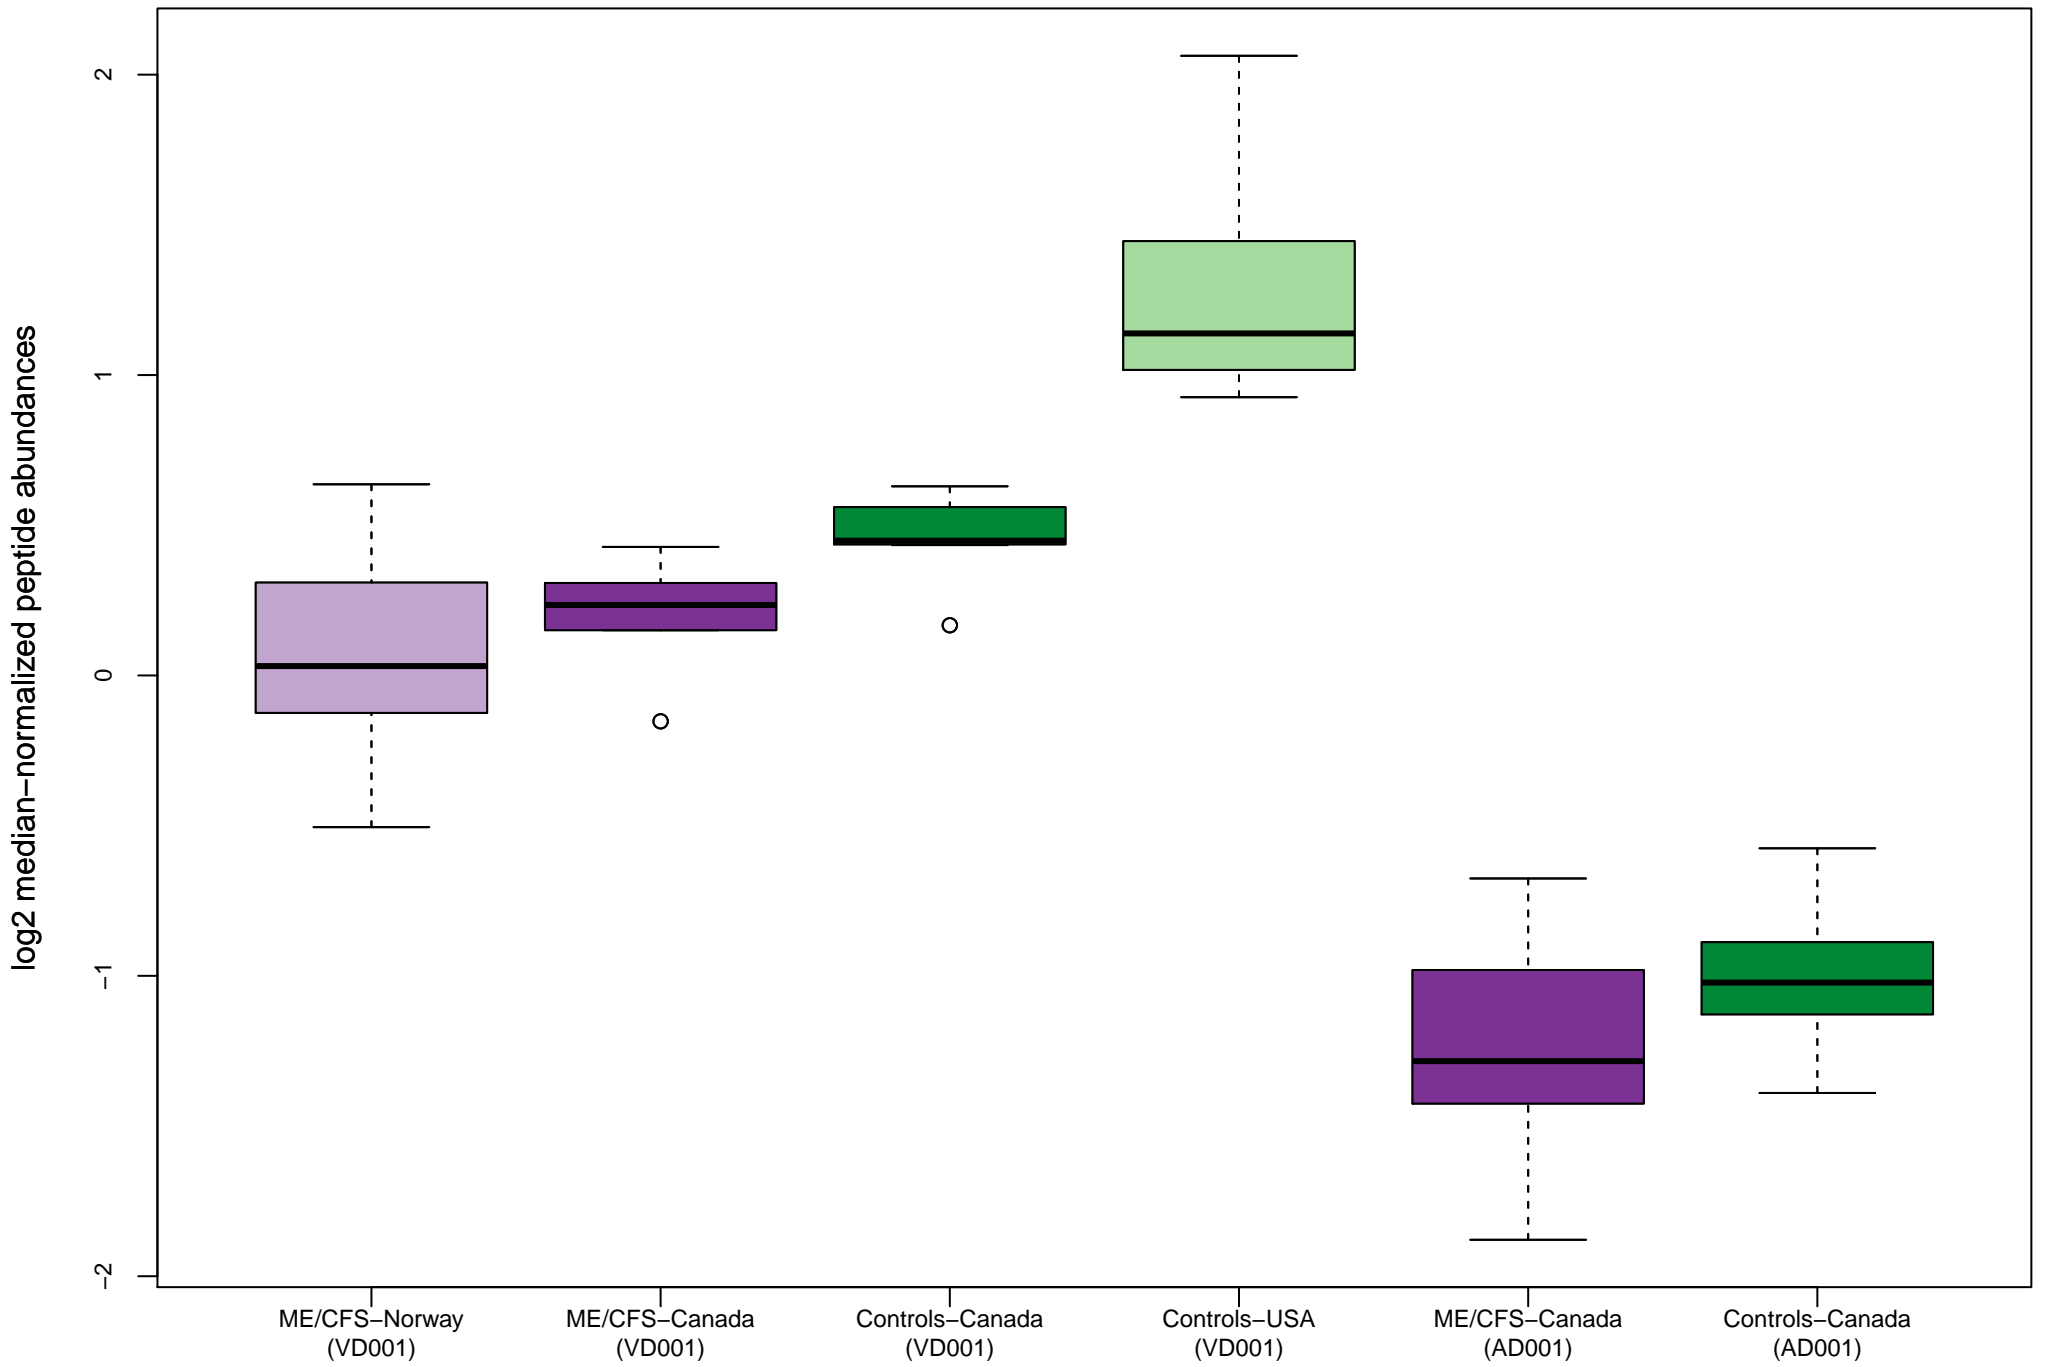

# RALGPWLNPYNK

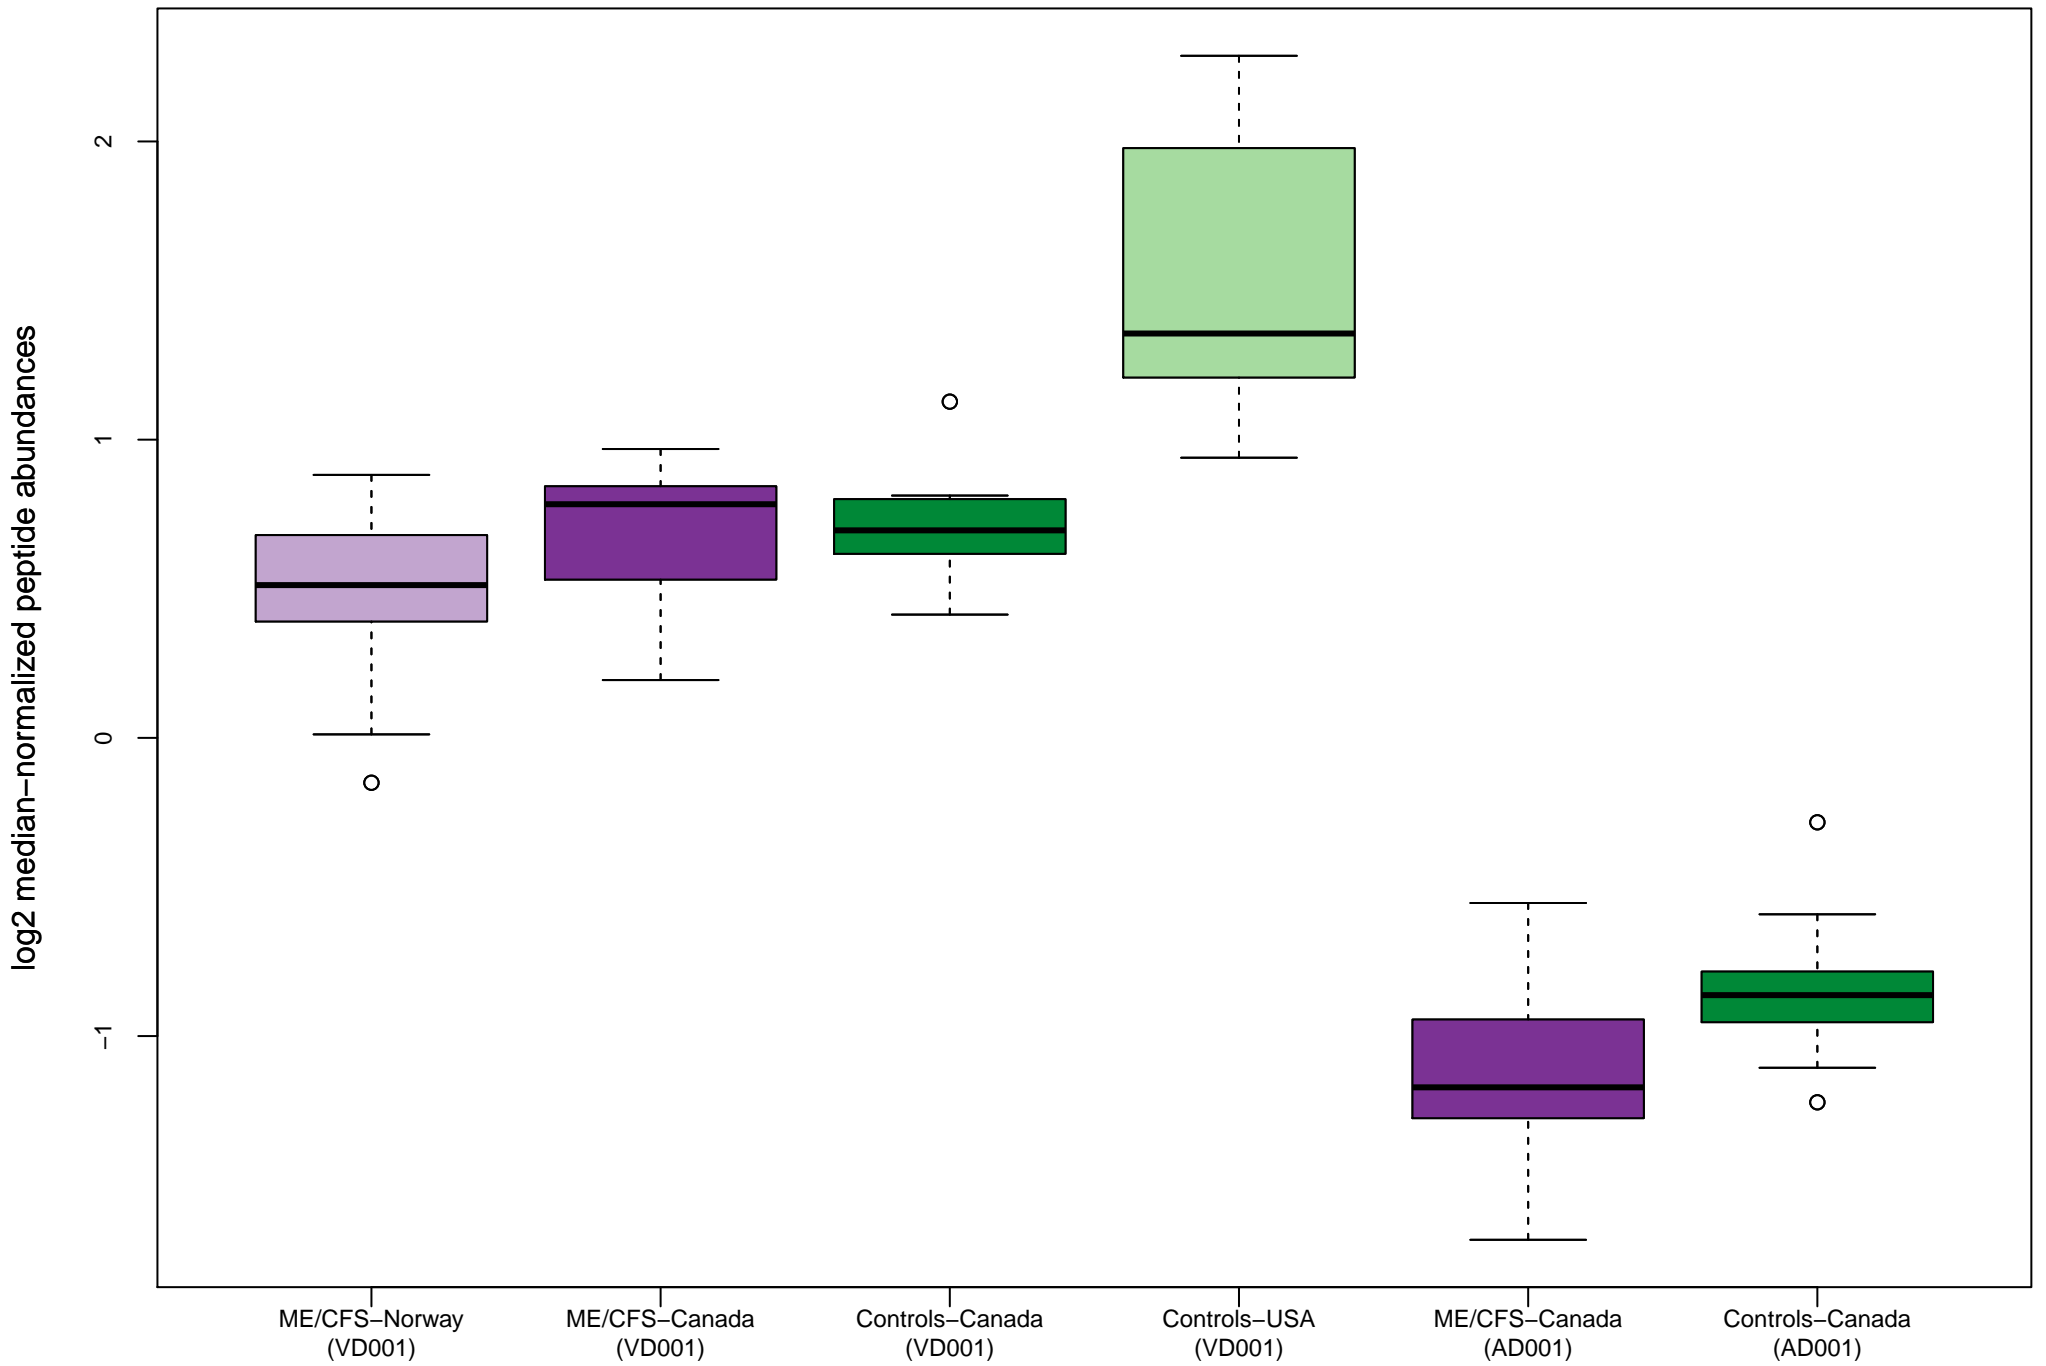



# RAWNFVFRKHVV

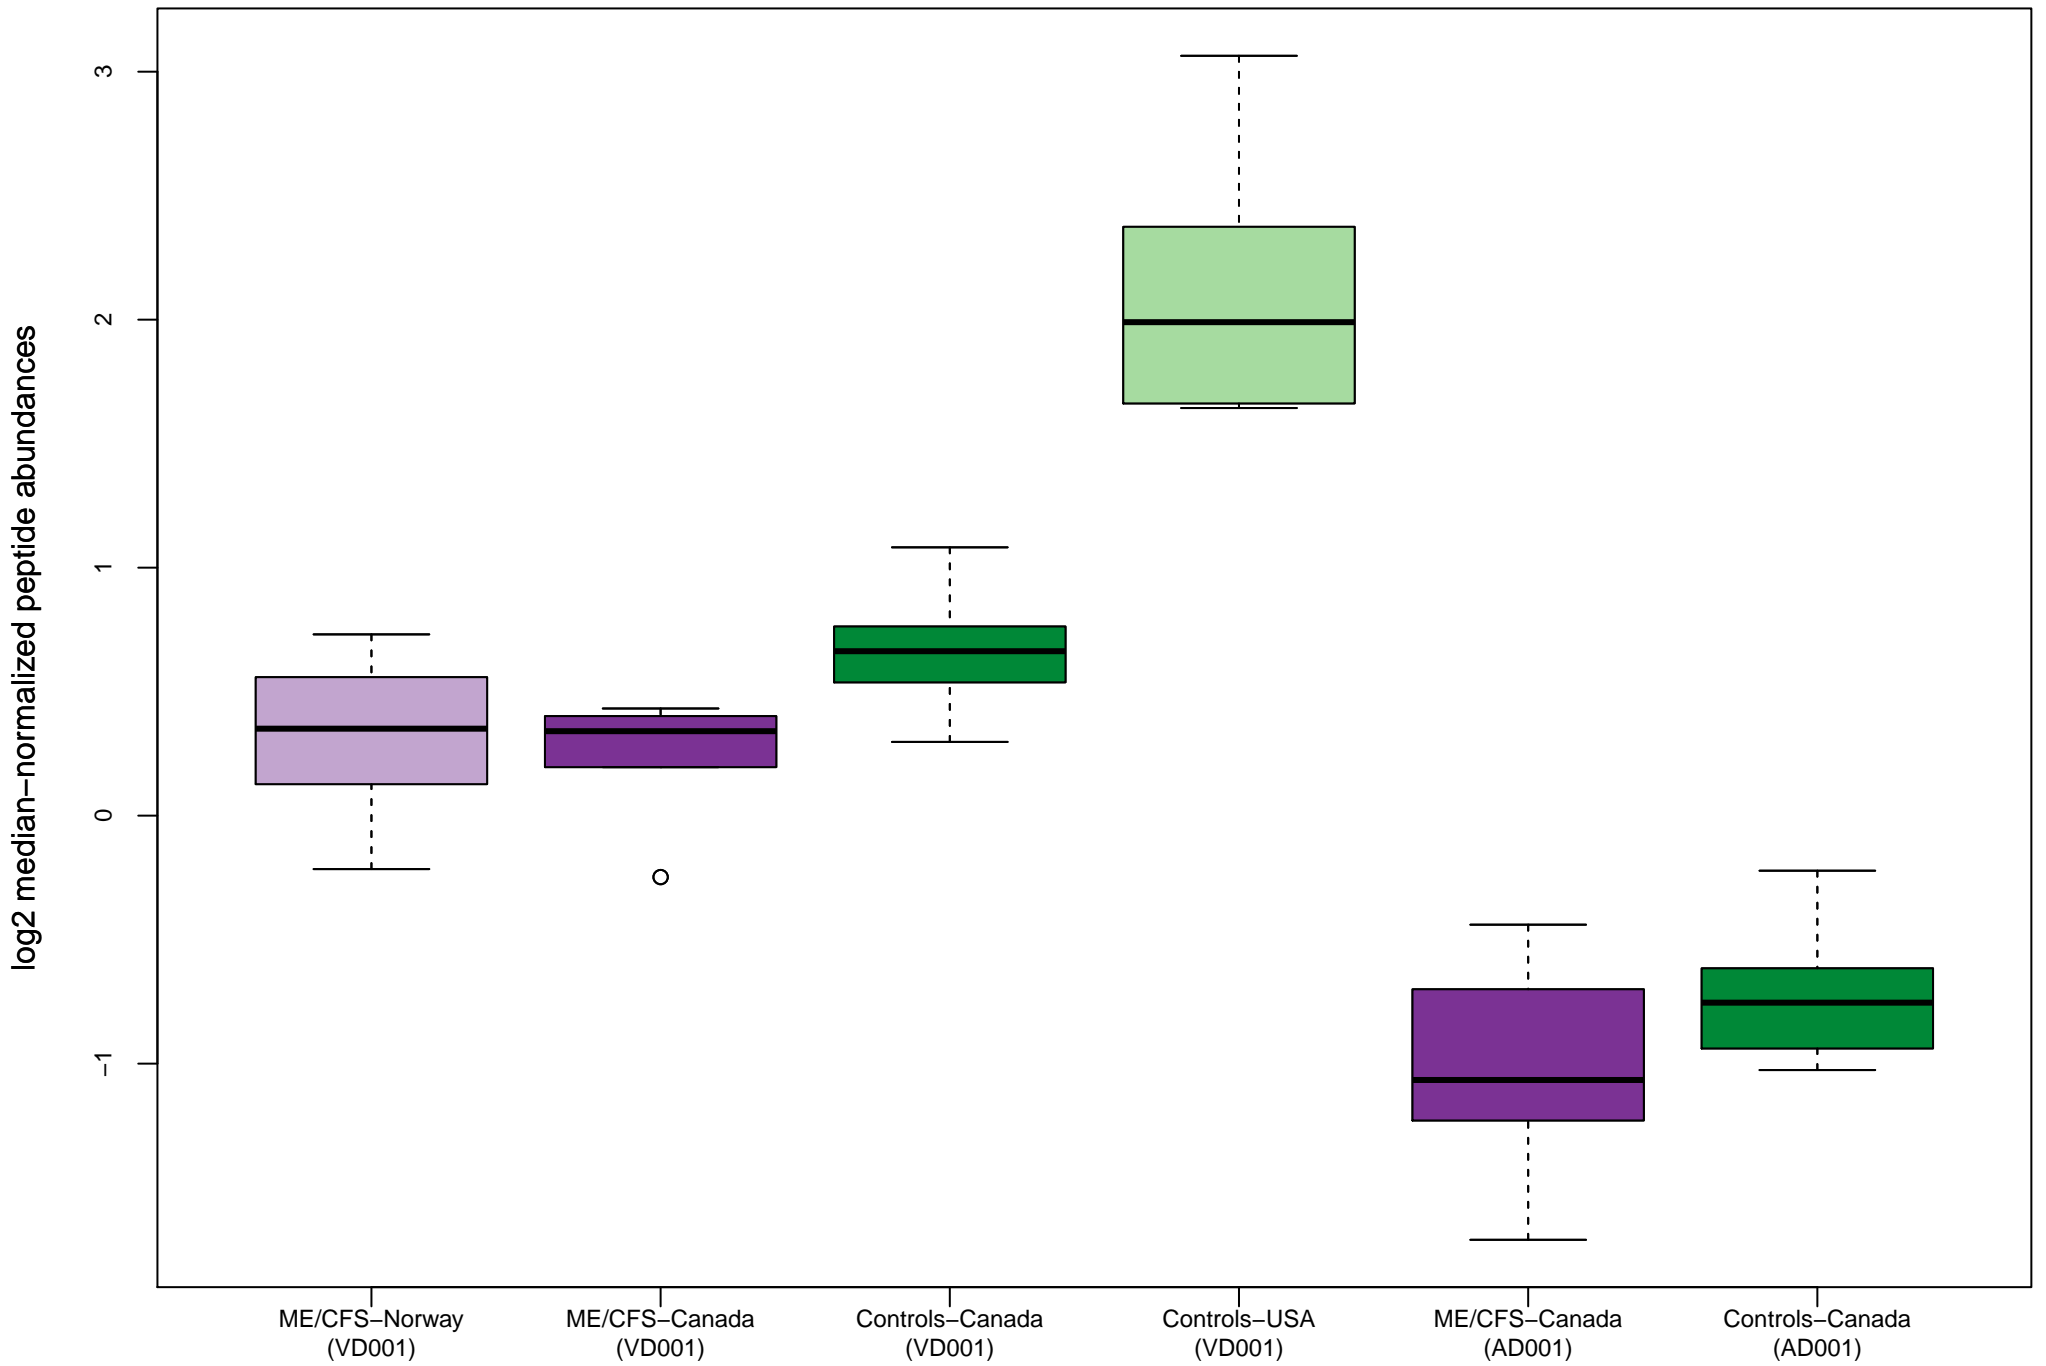

# RFFFKALSGLSG

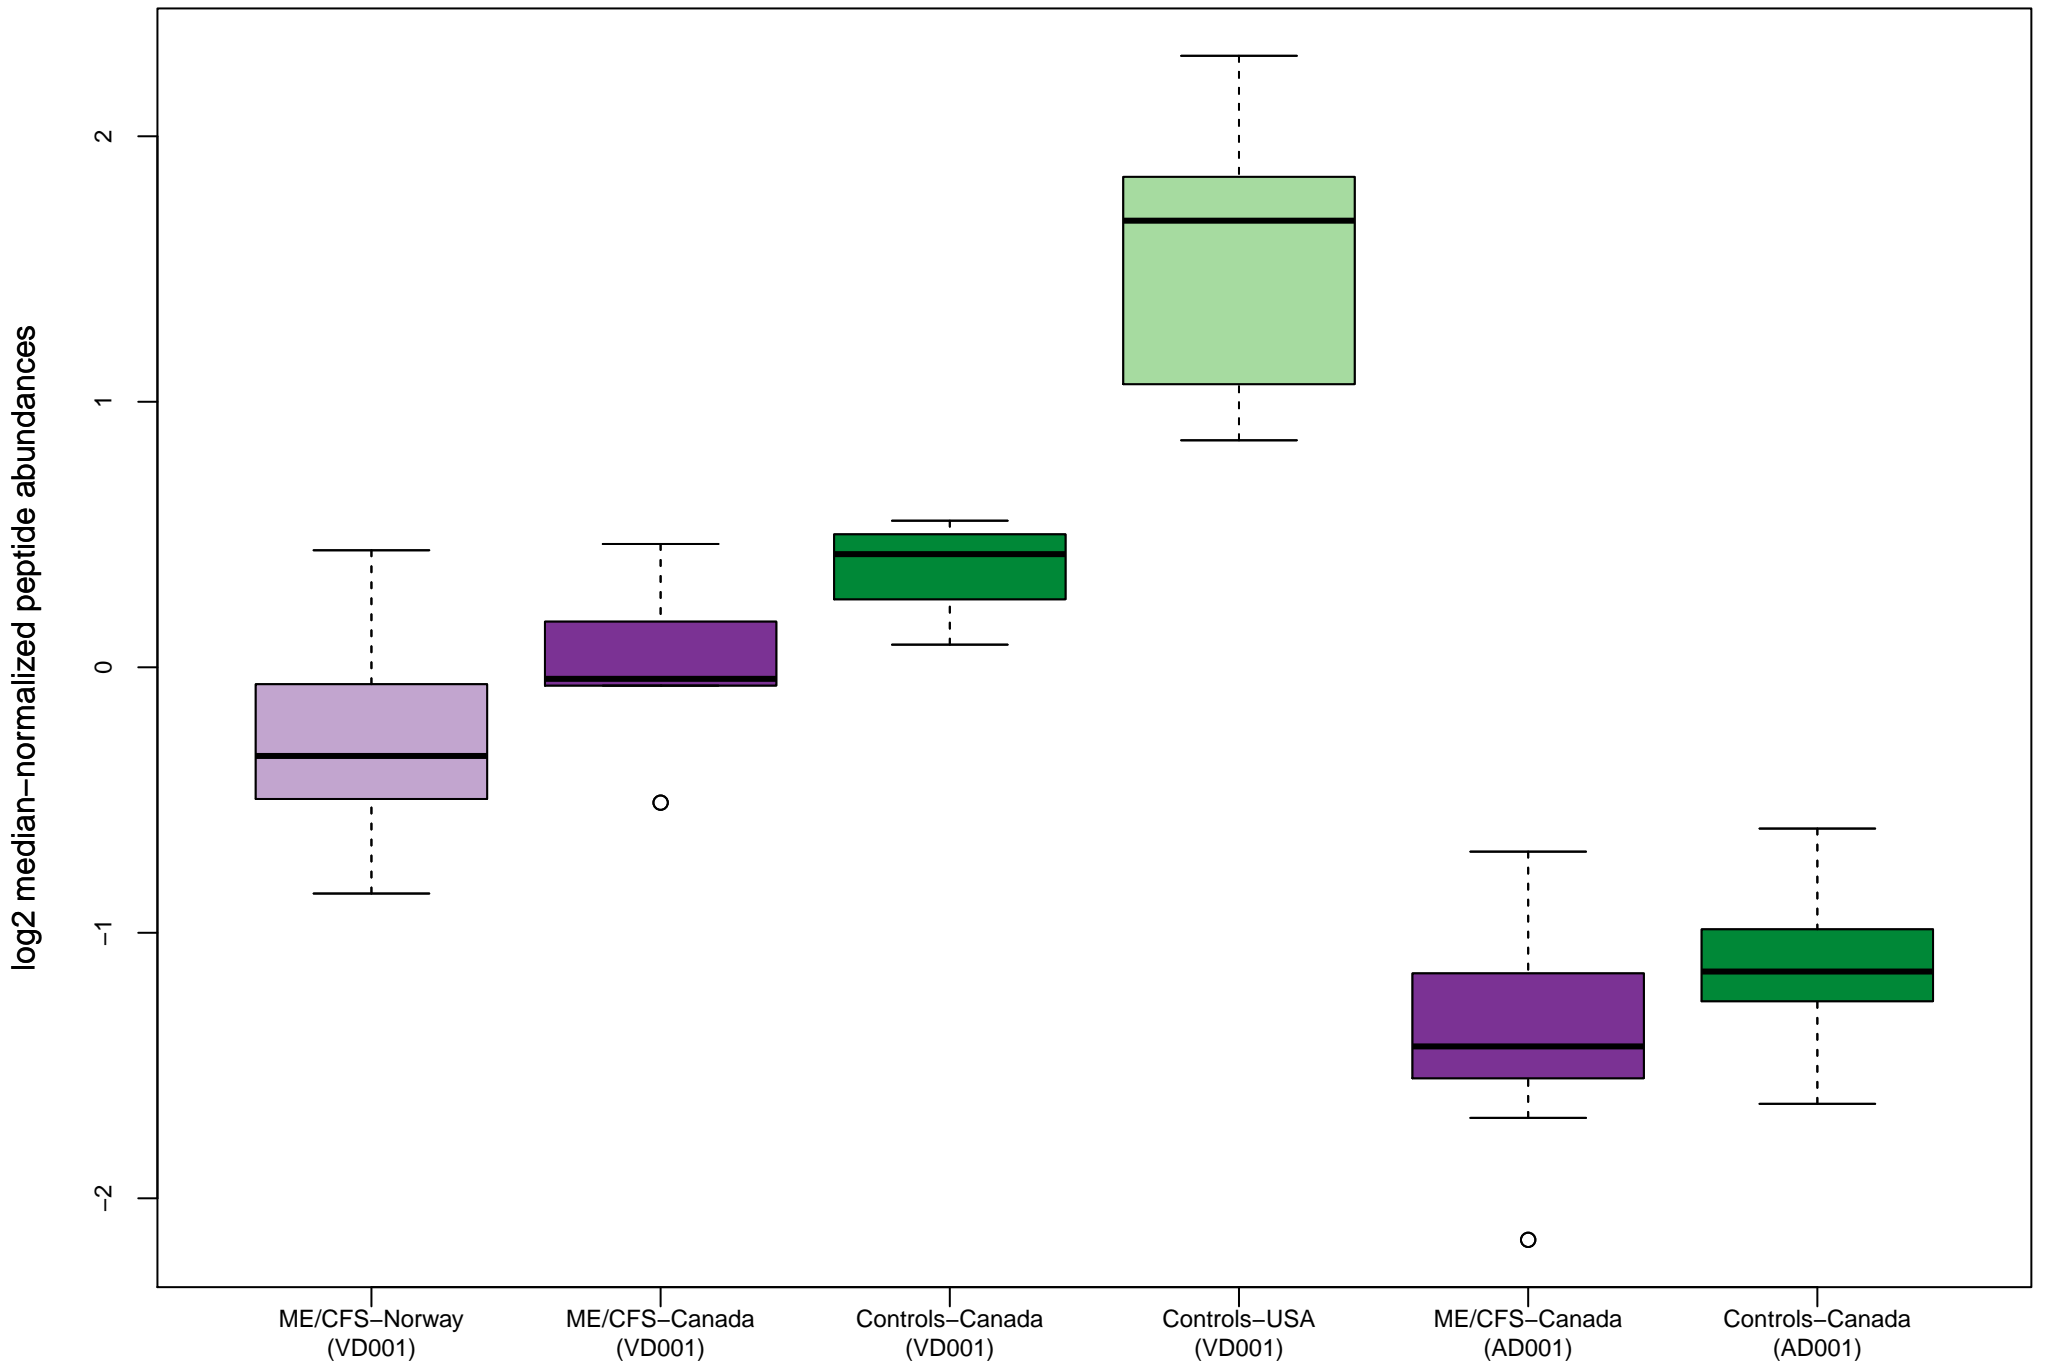

# RFFWKQRLGALS

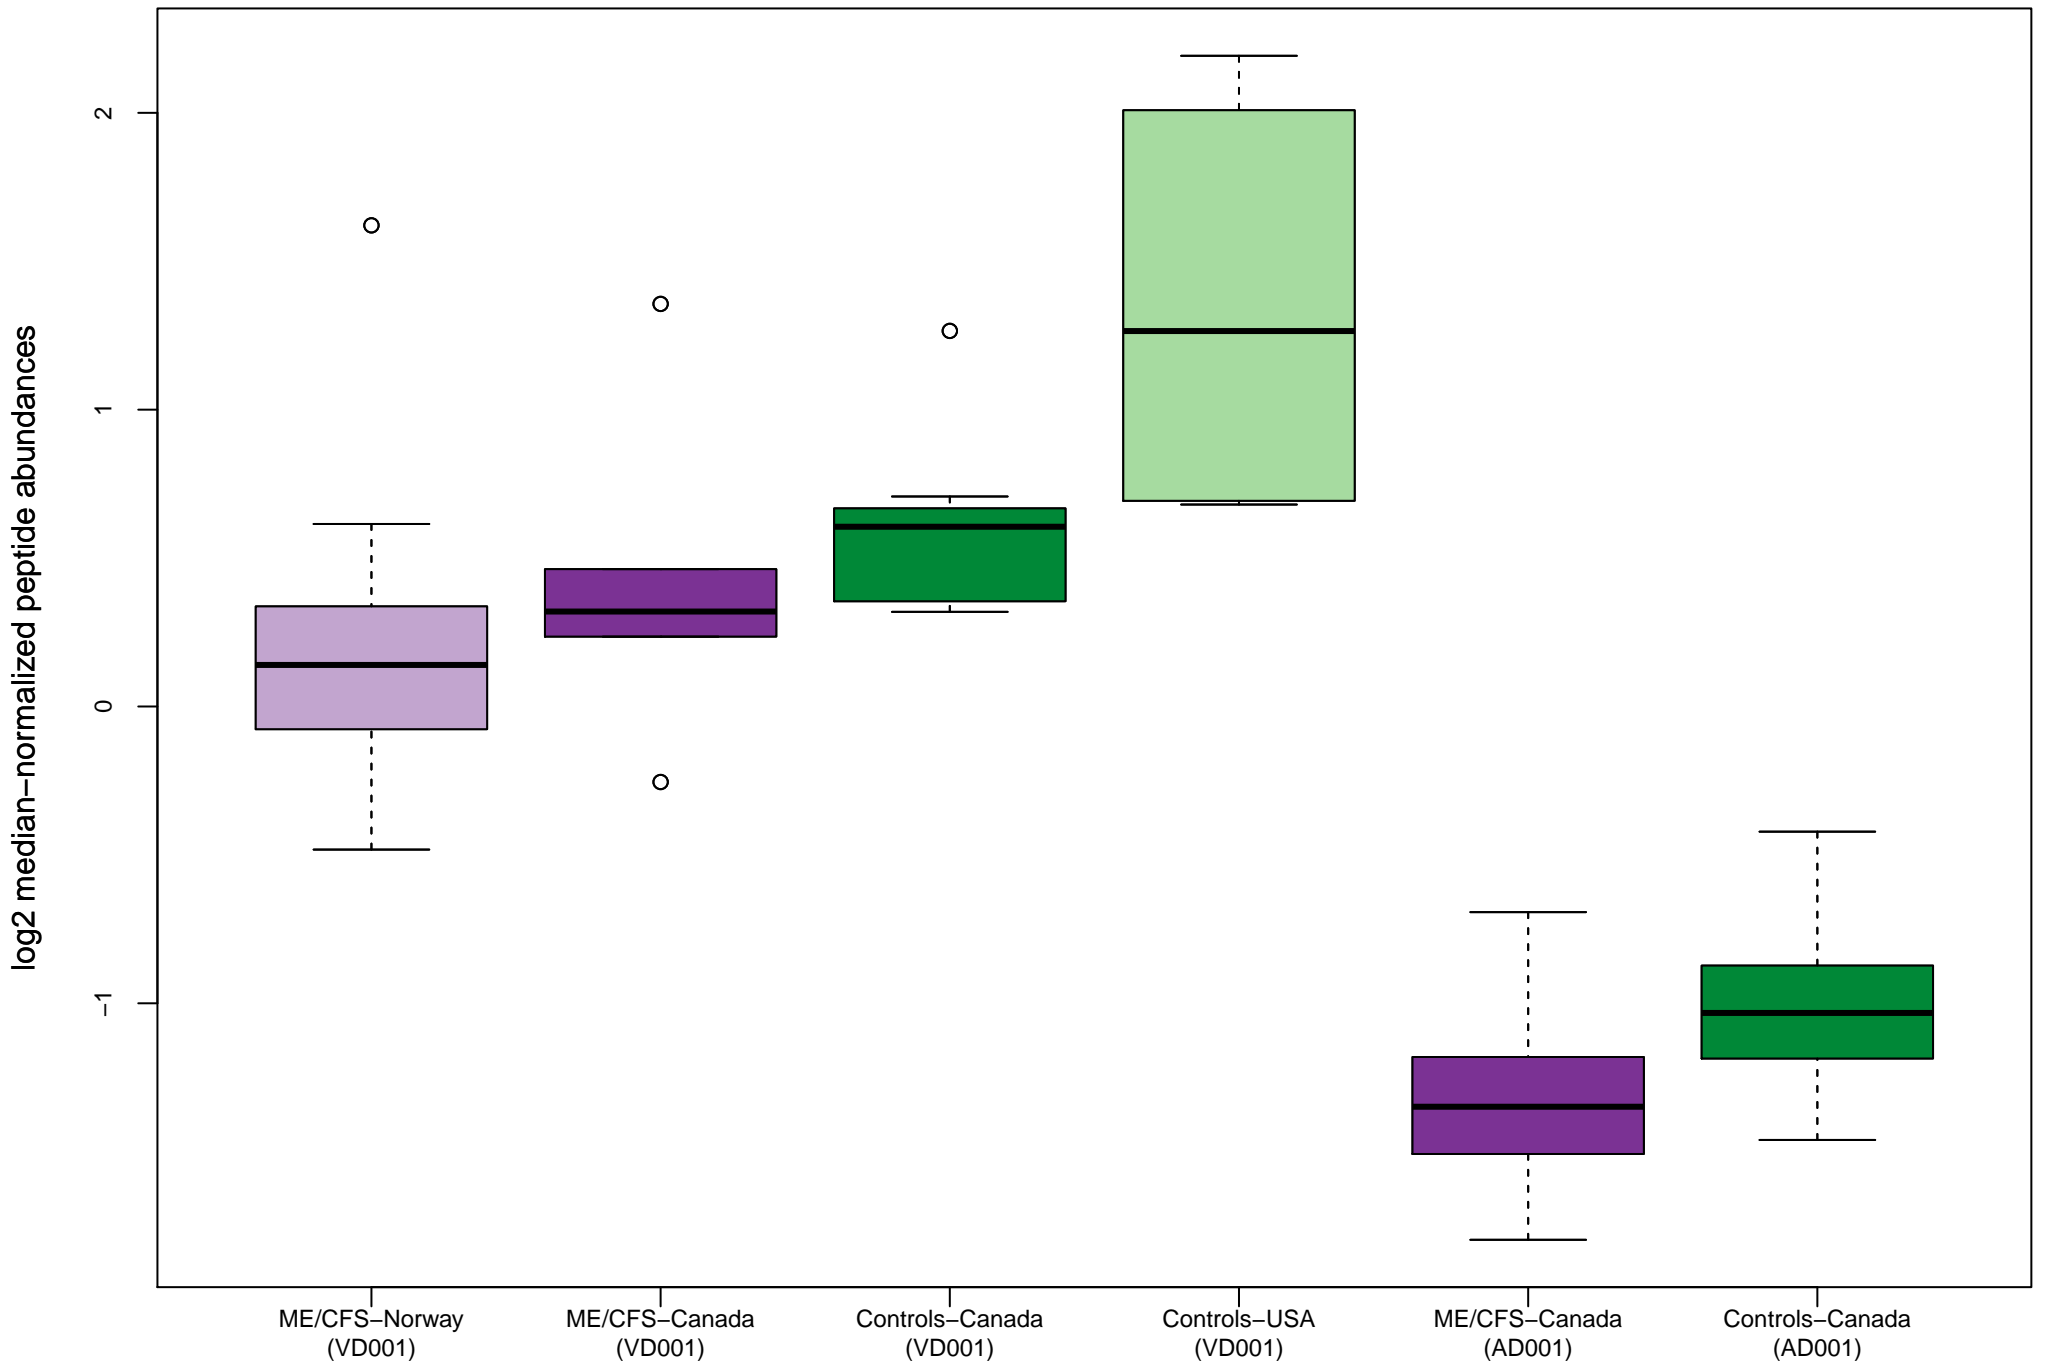

# RFGAWNALSALG

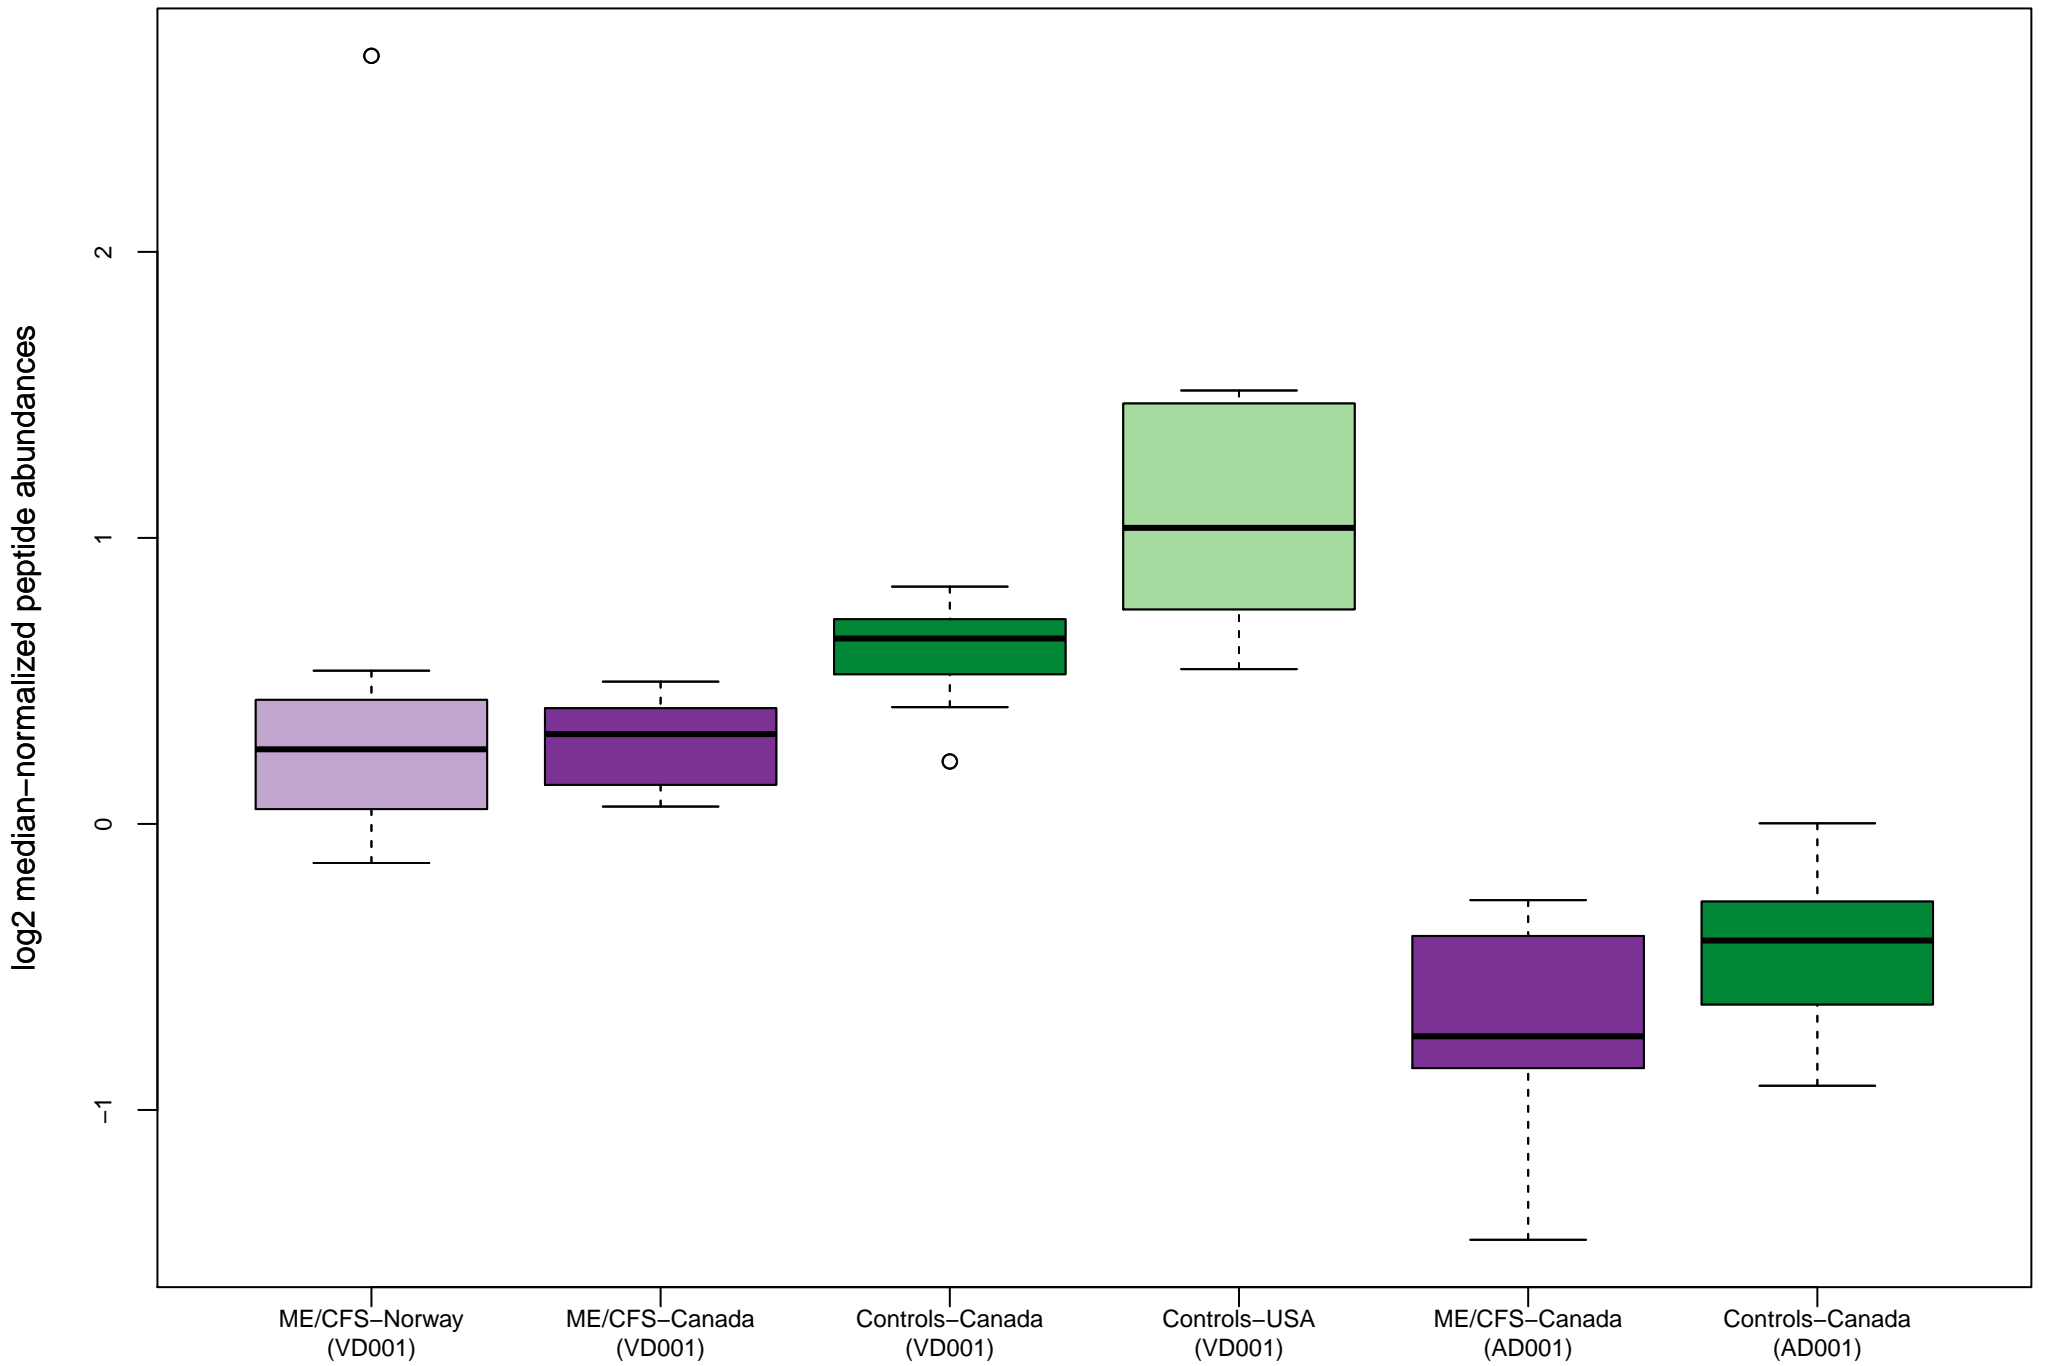

# RFGNVFRGVALG

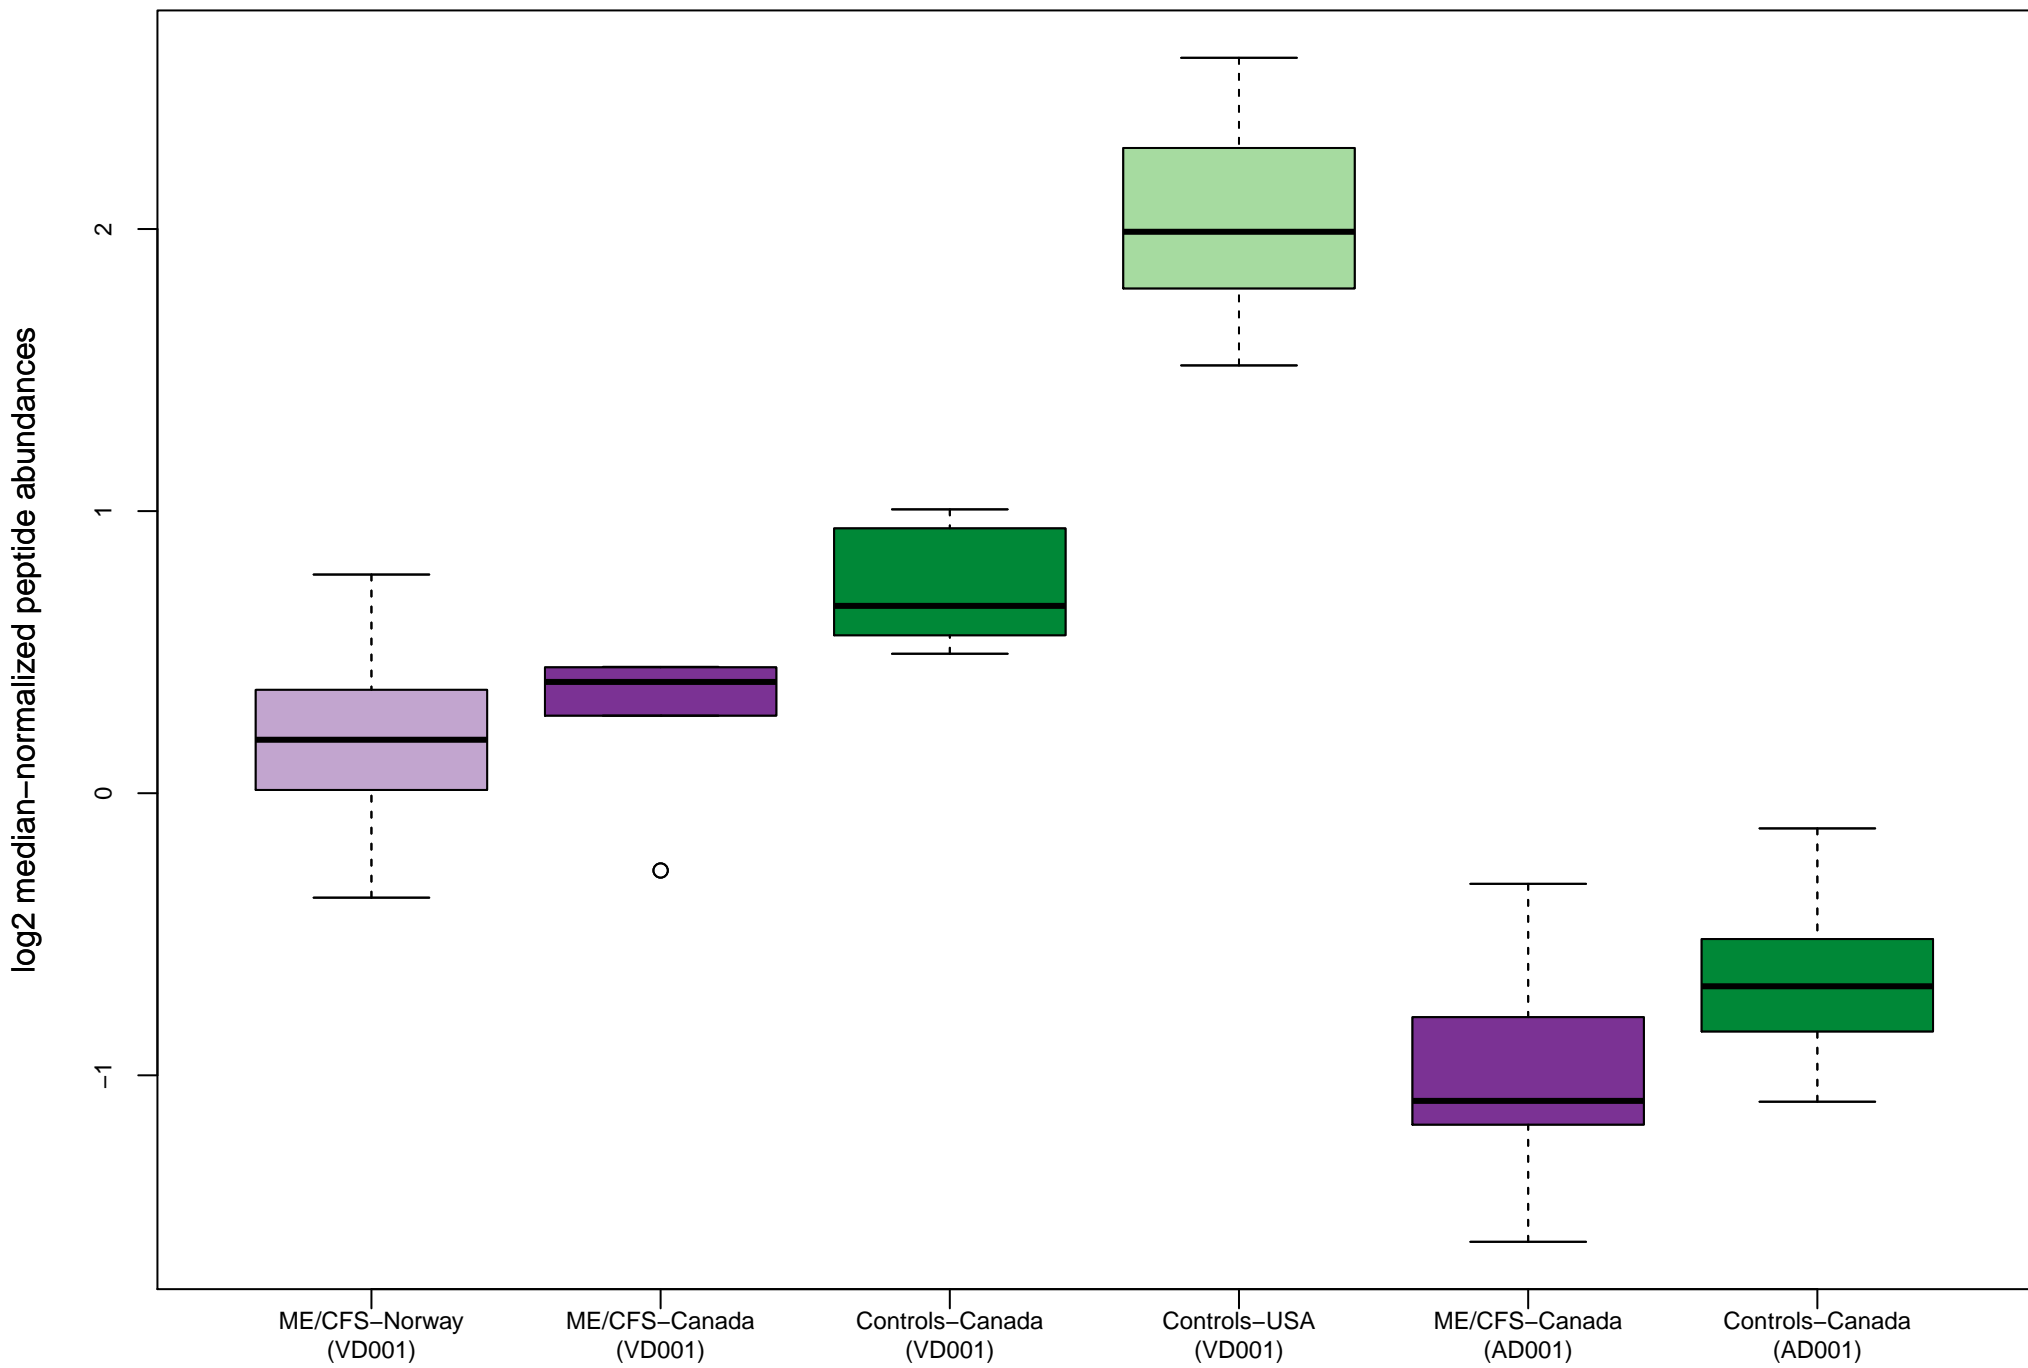

# RFGWRNALVLSG

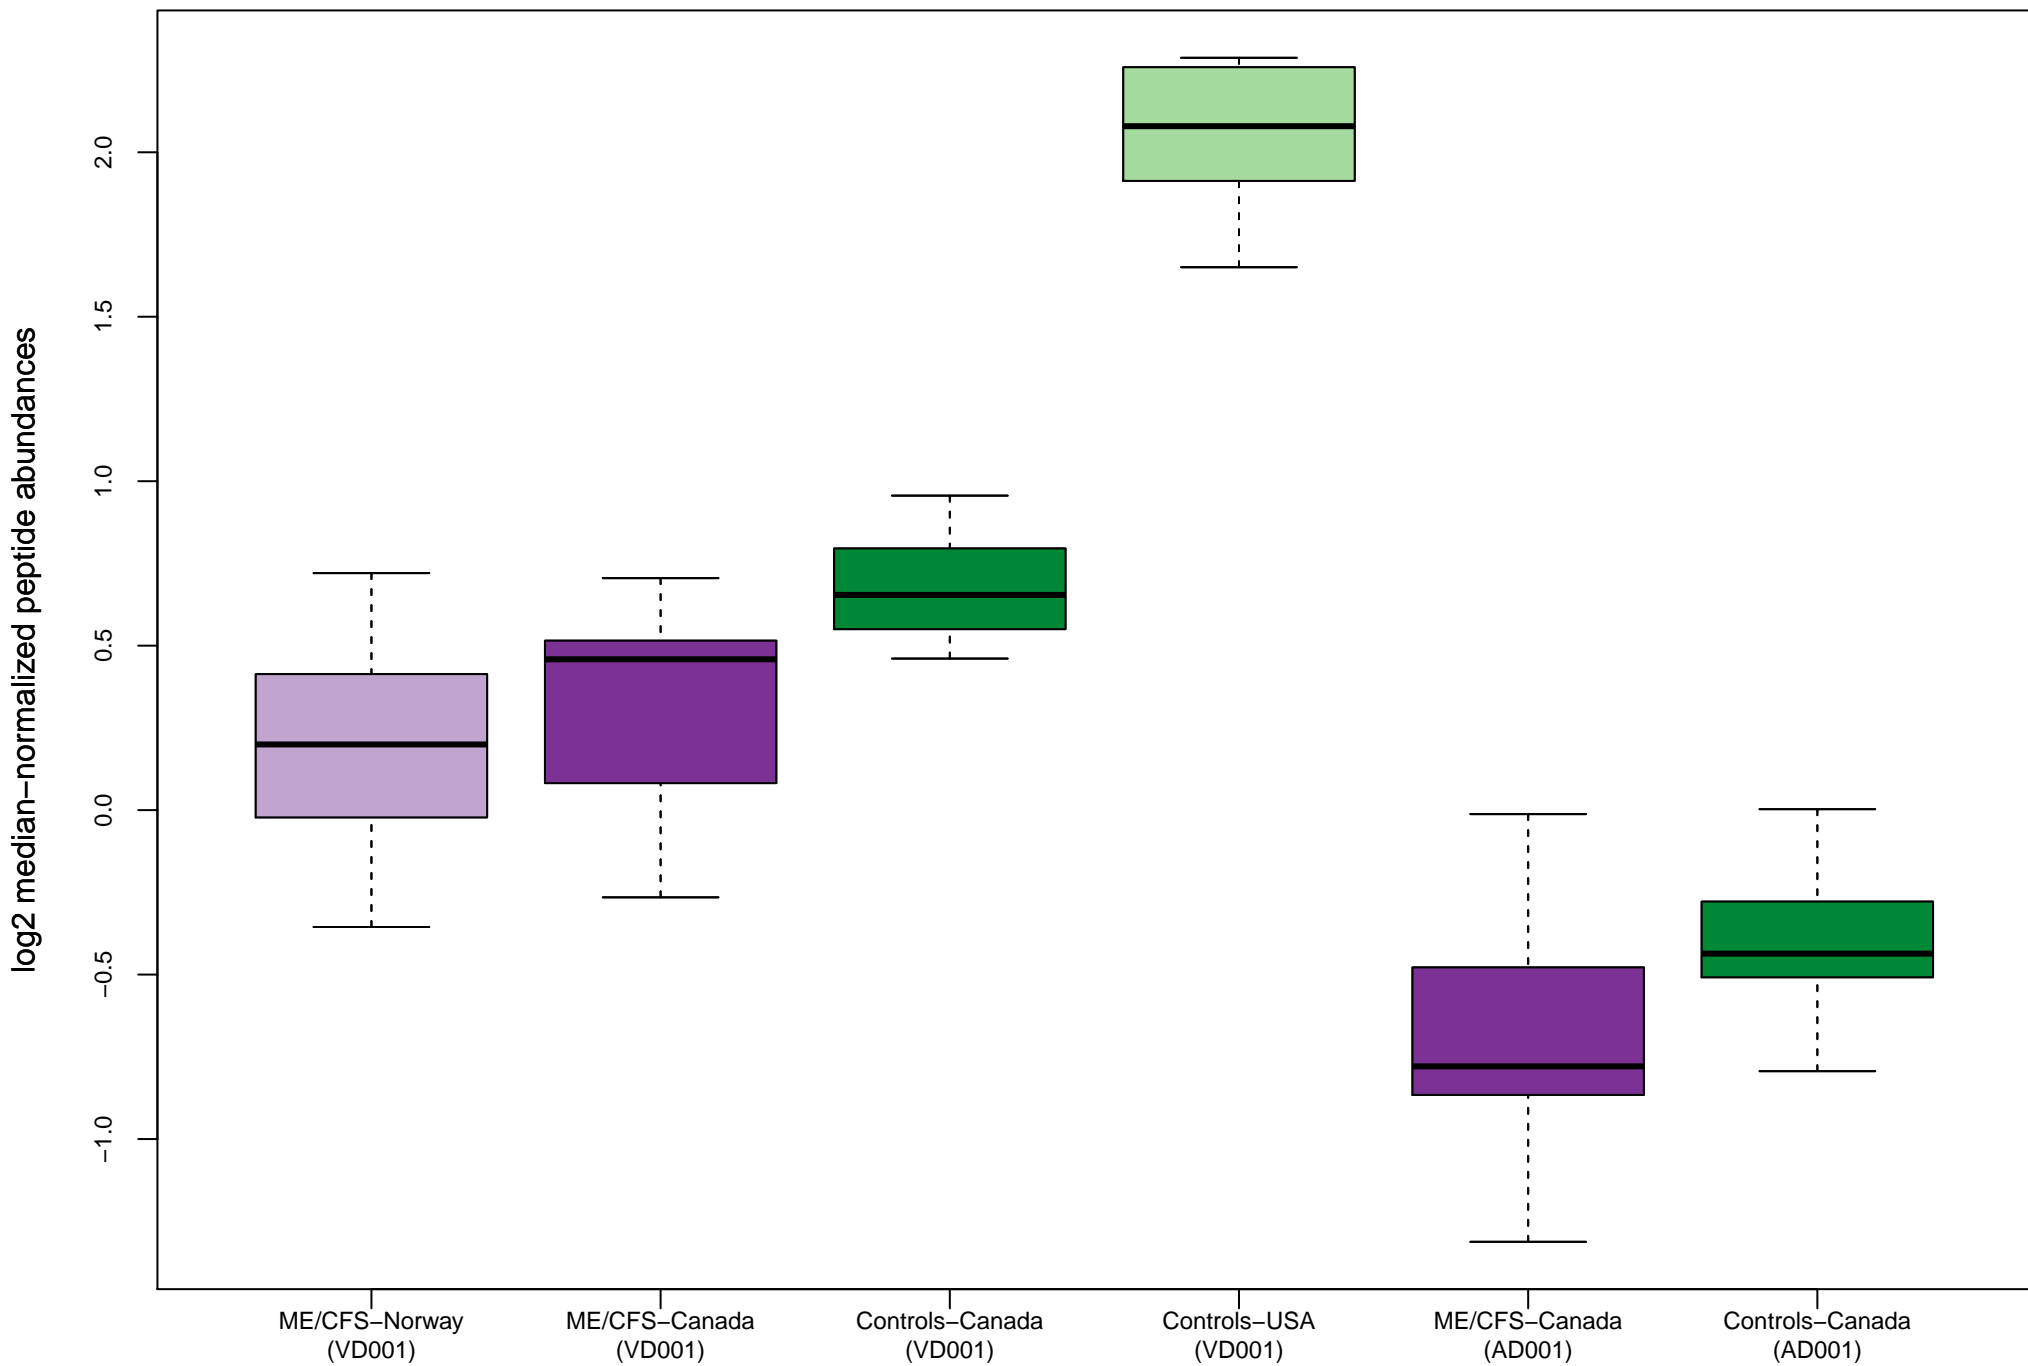

# RFLKYLSGVLSG

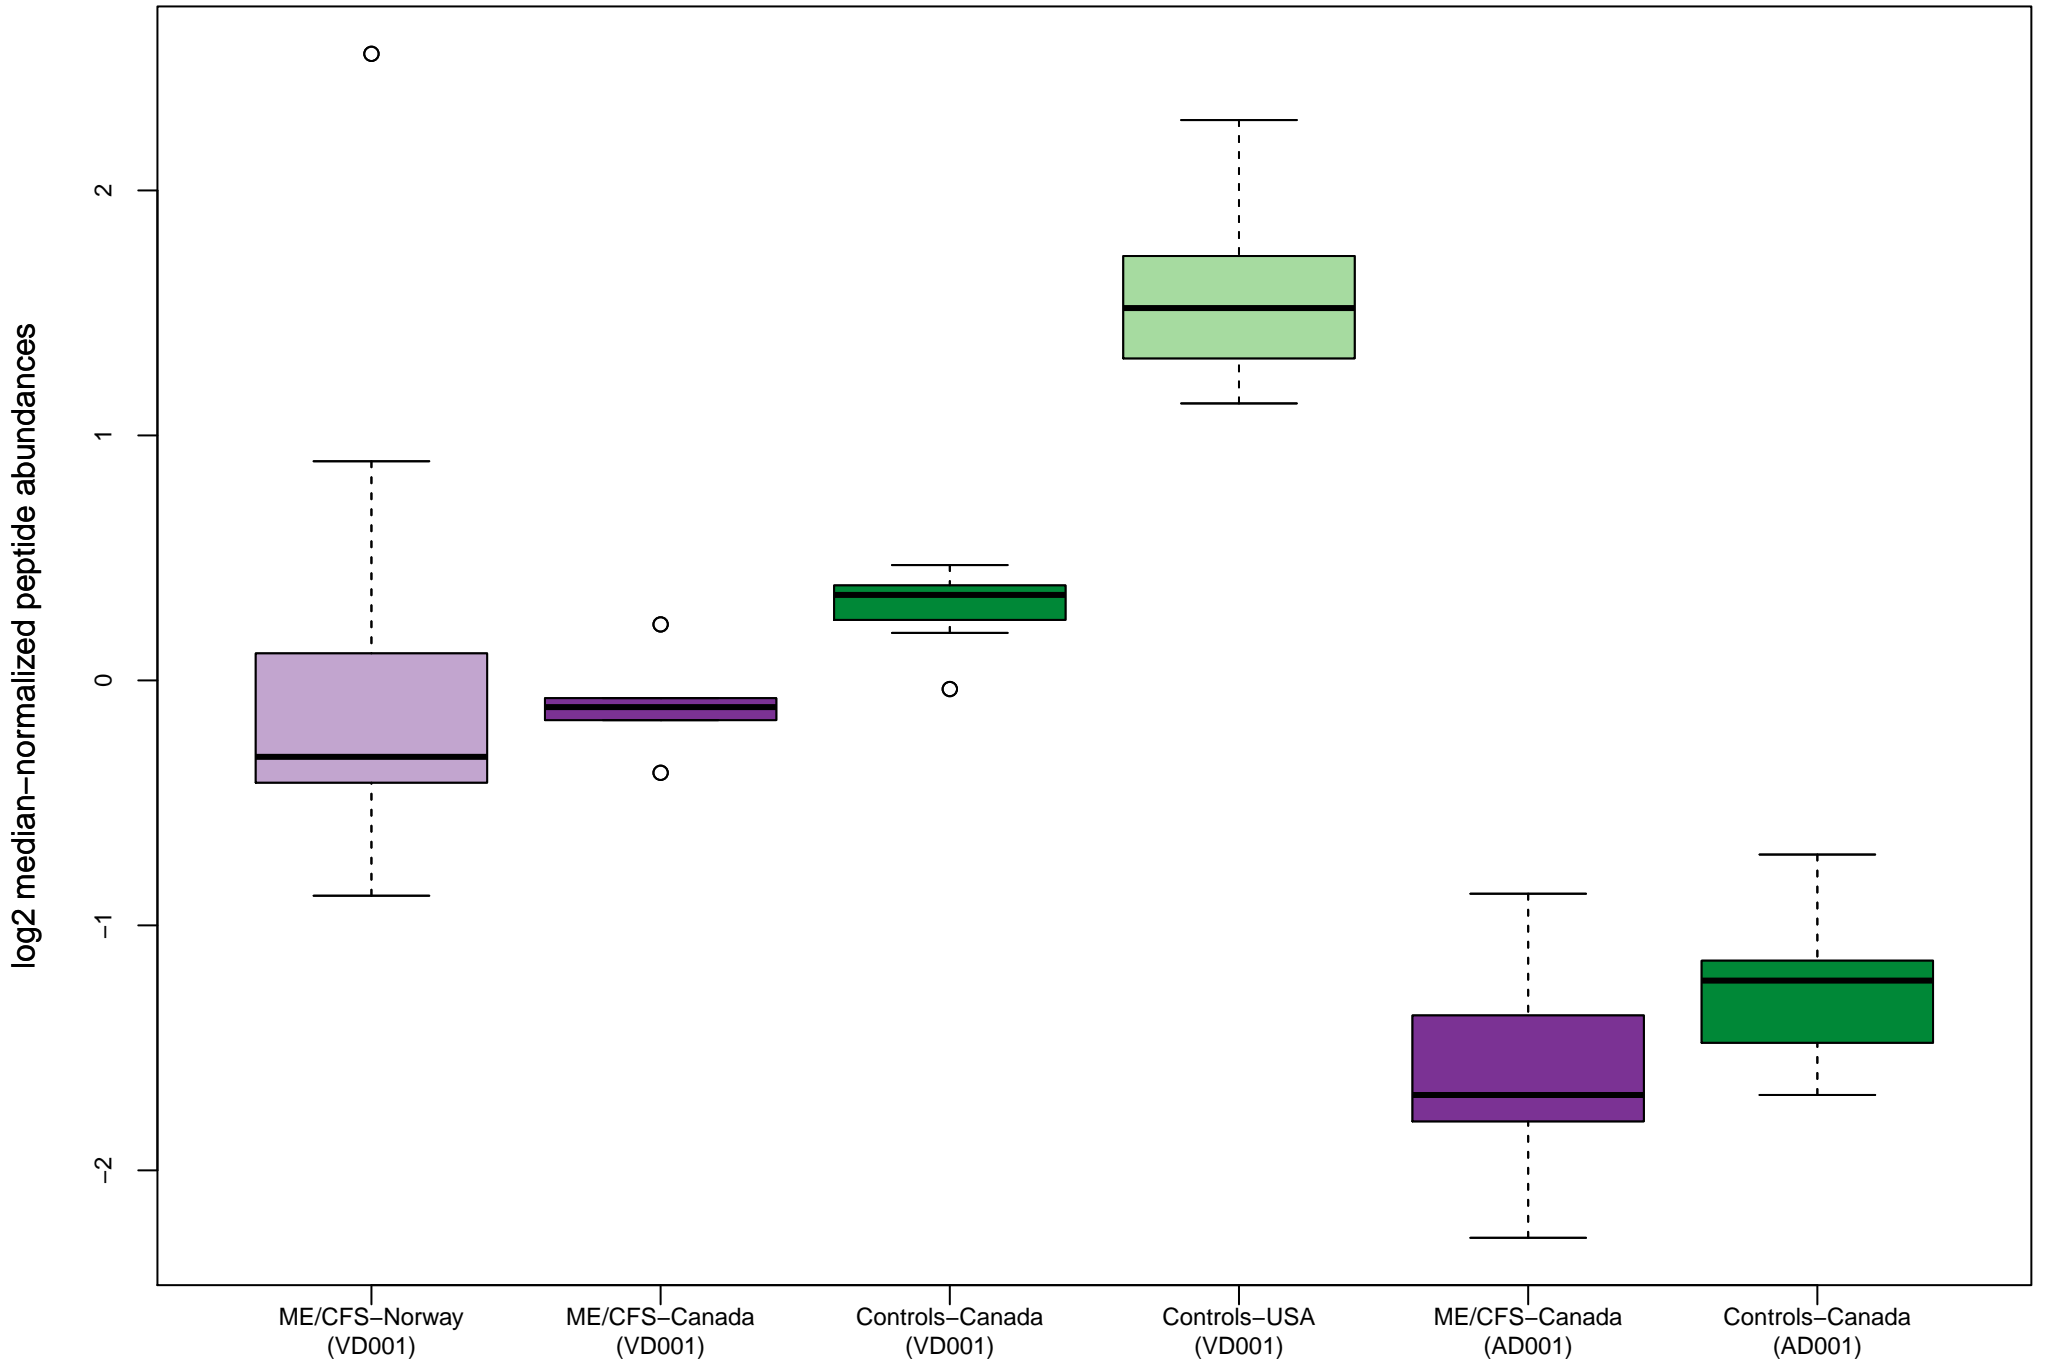

# RFLSYNRVAGLS

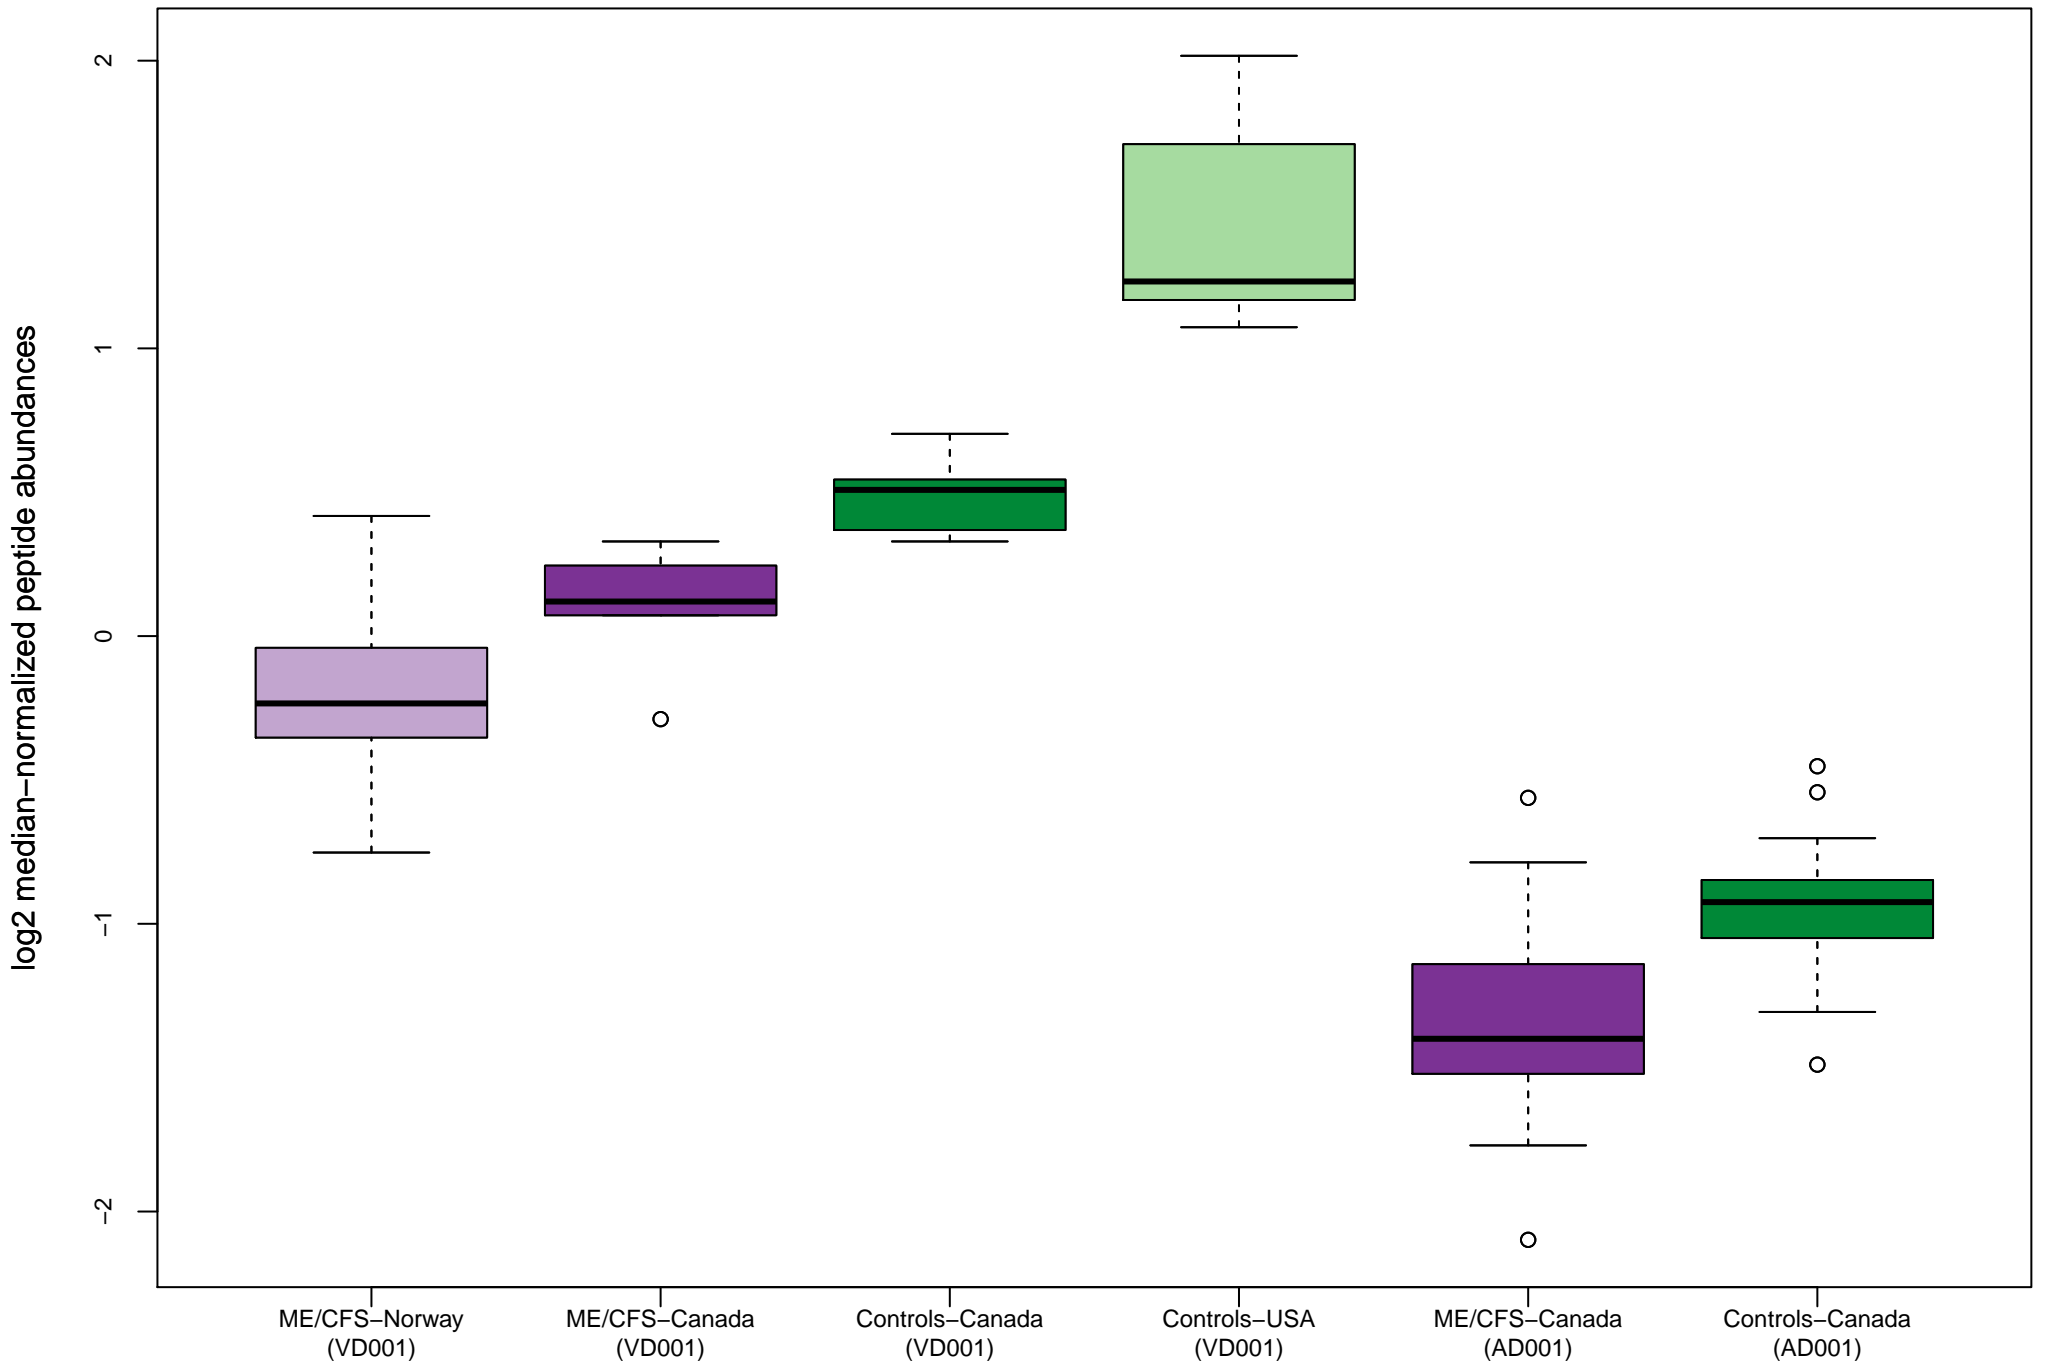



# RFWARQVLSLSG

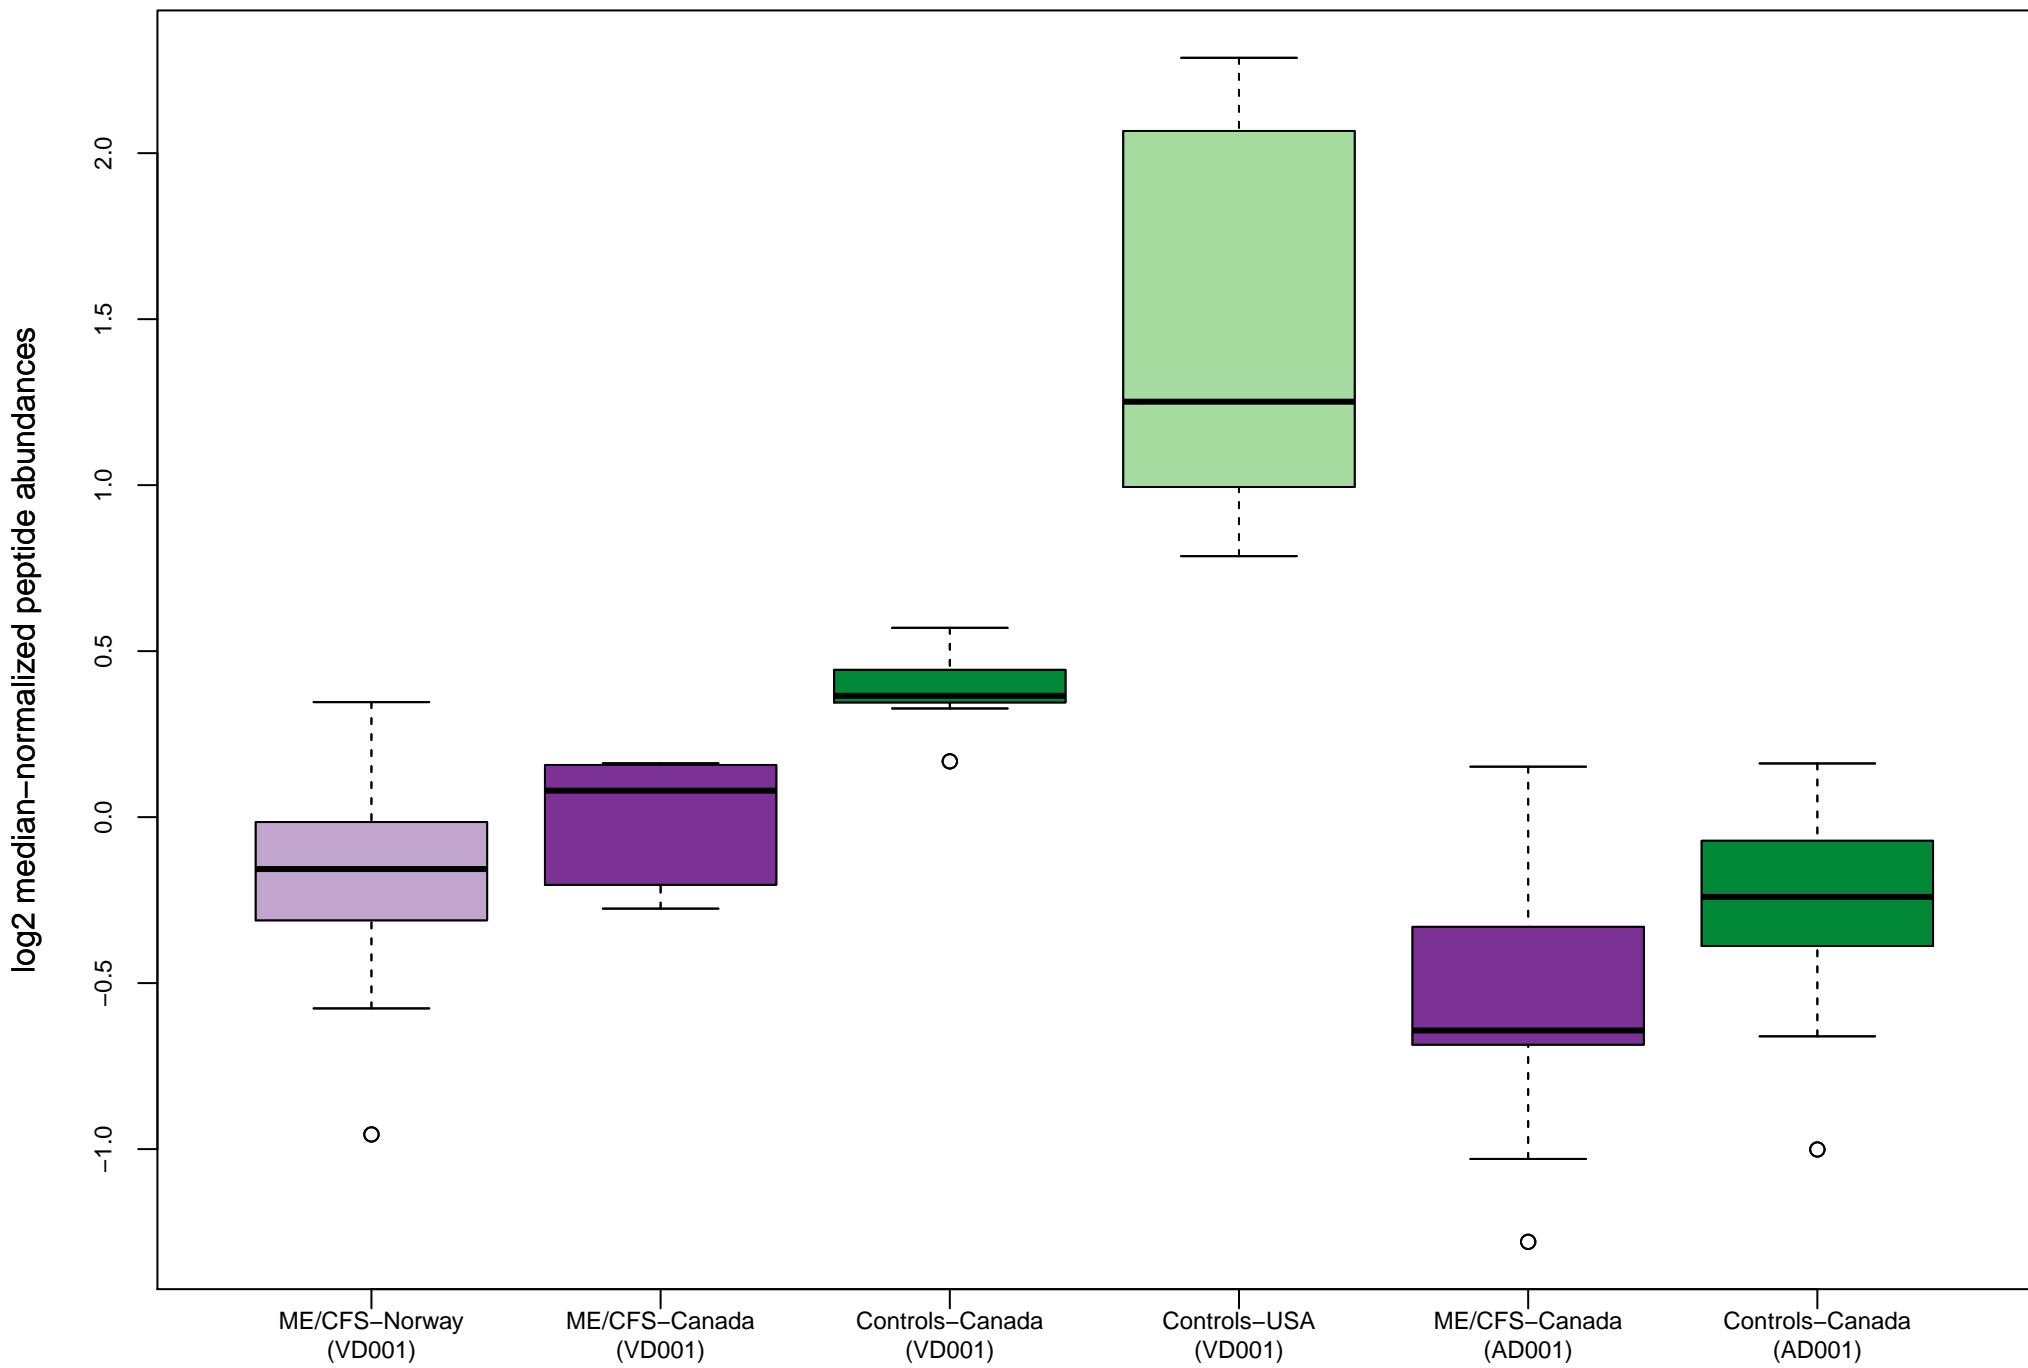

# RFWFAQPWNKSG

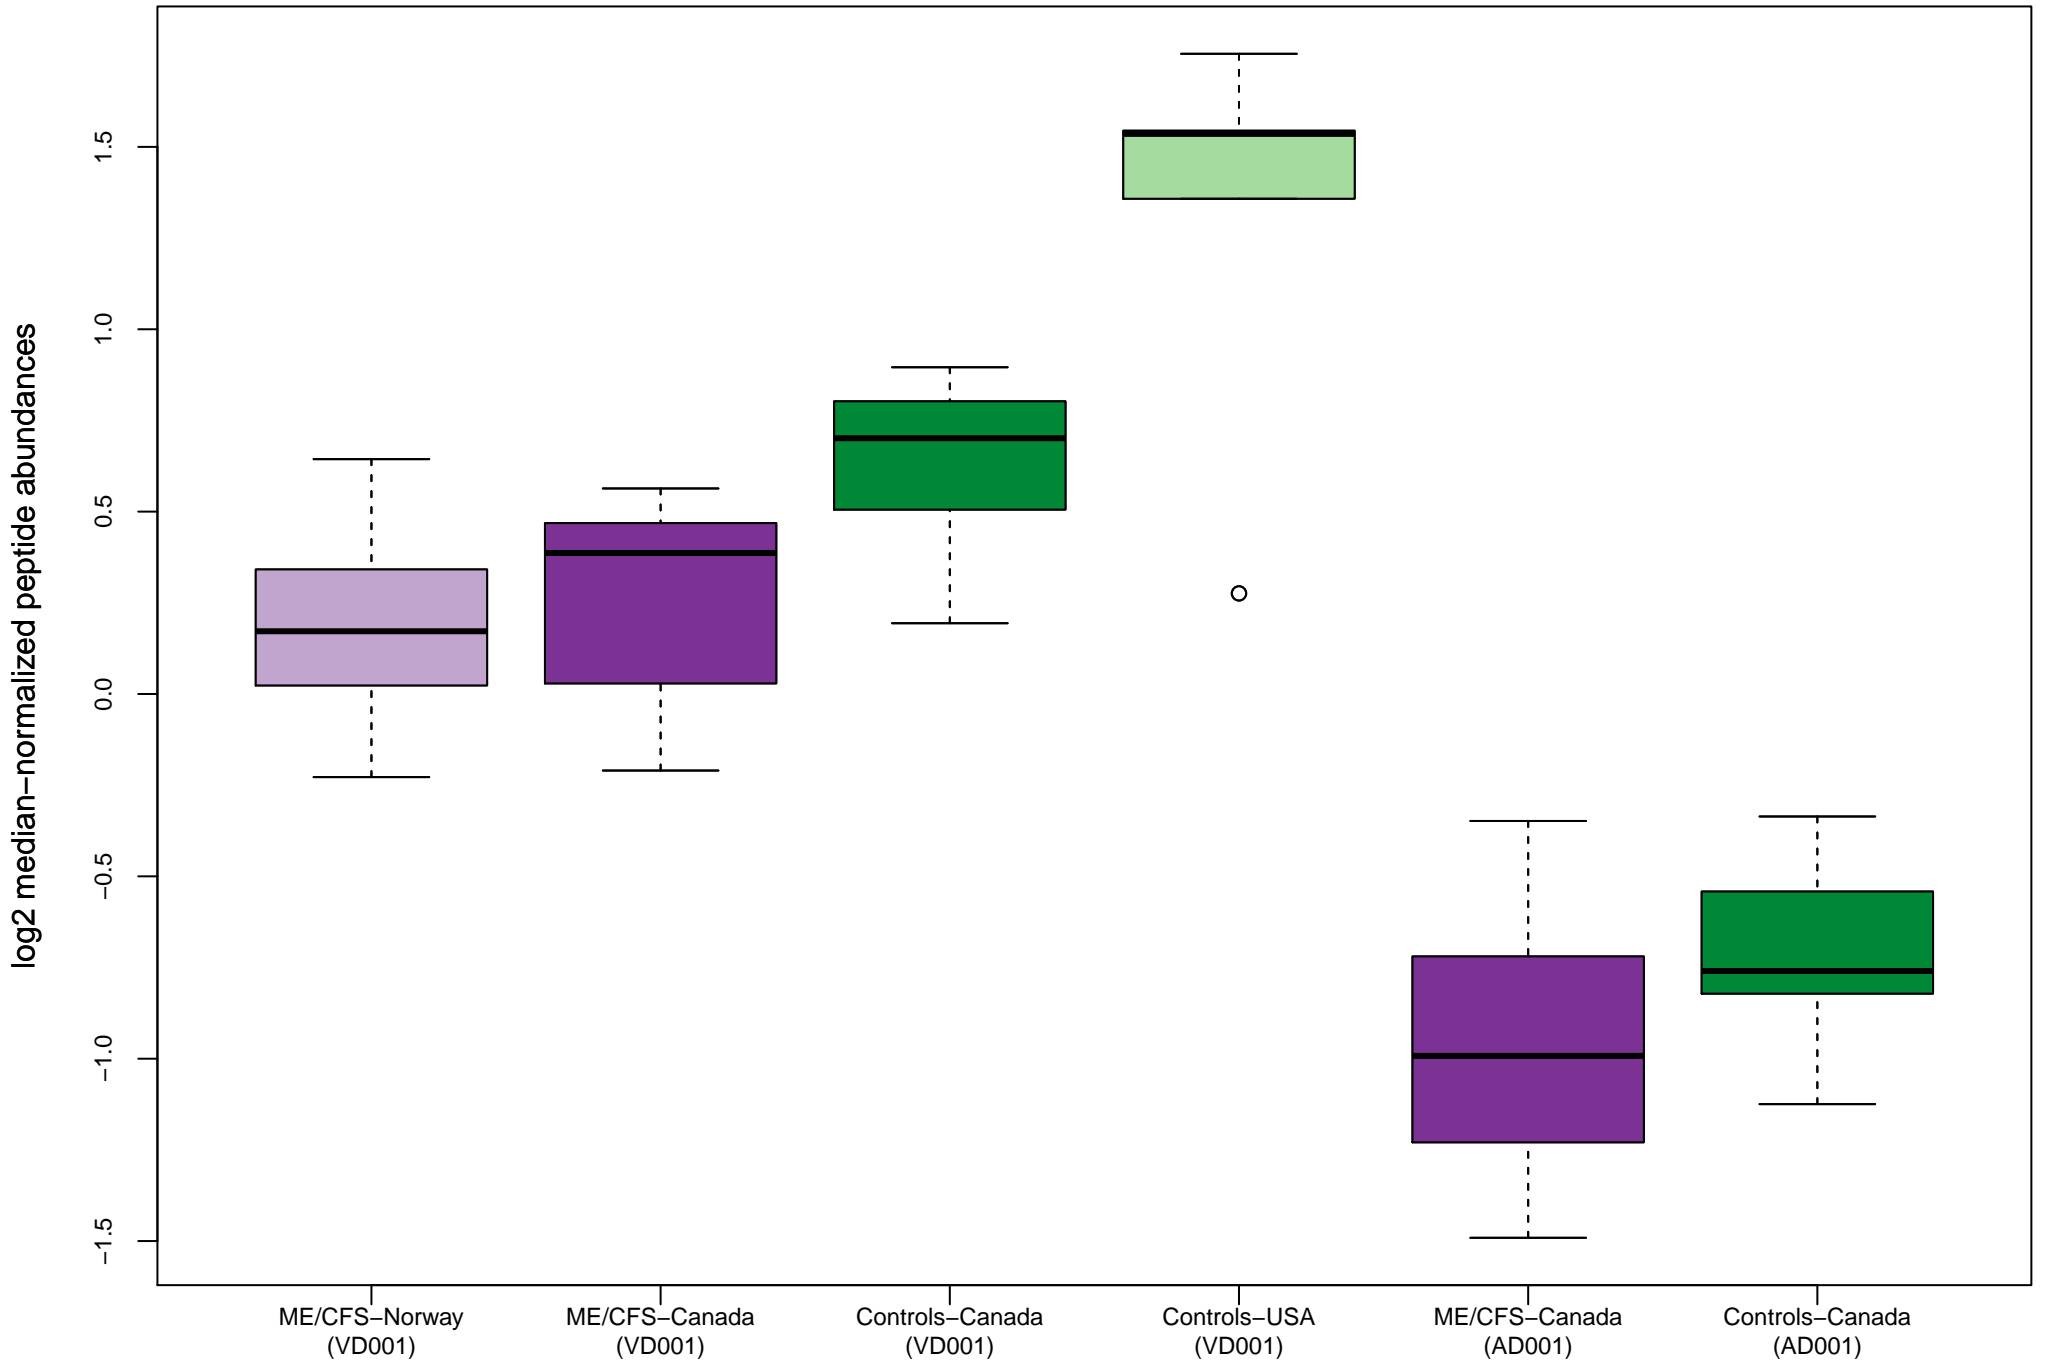

# RFWRANVLGALS

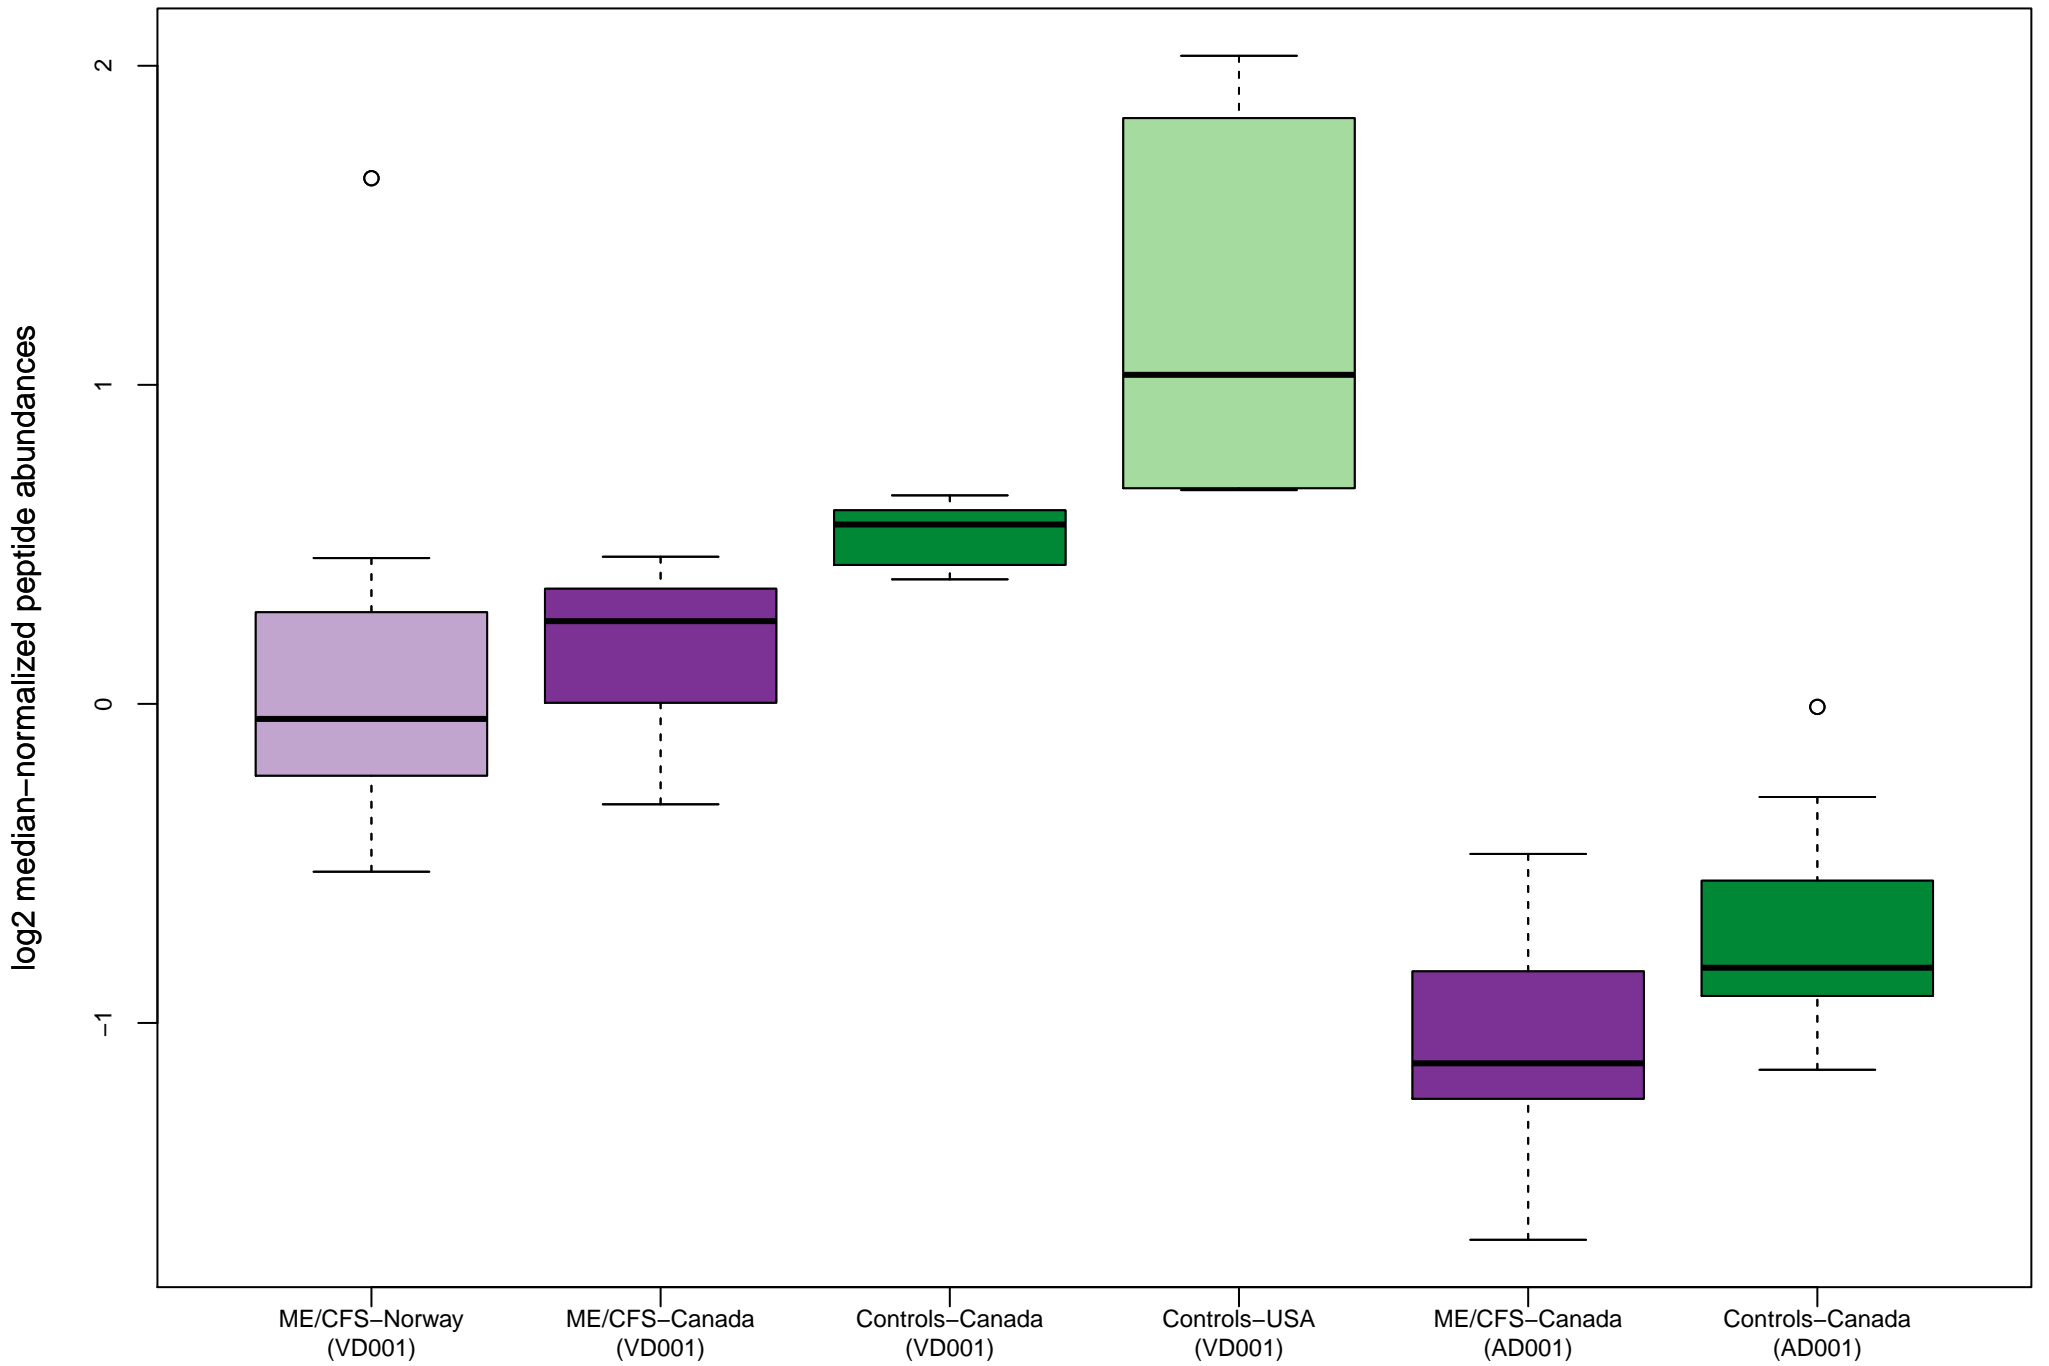

# RFYNKYARWNKL

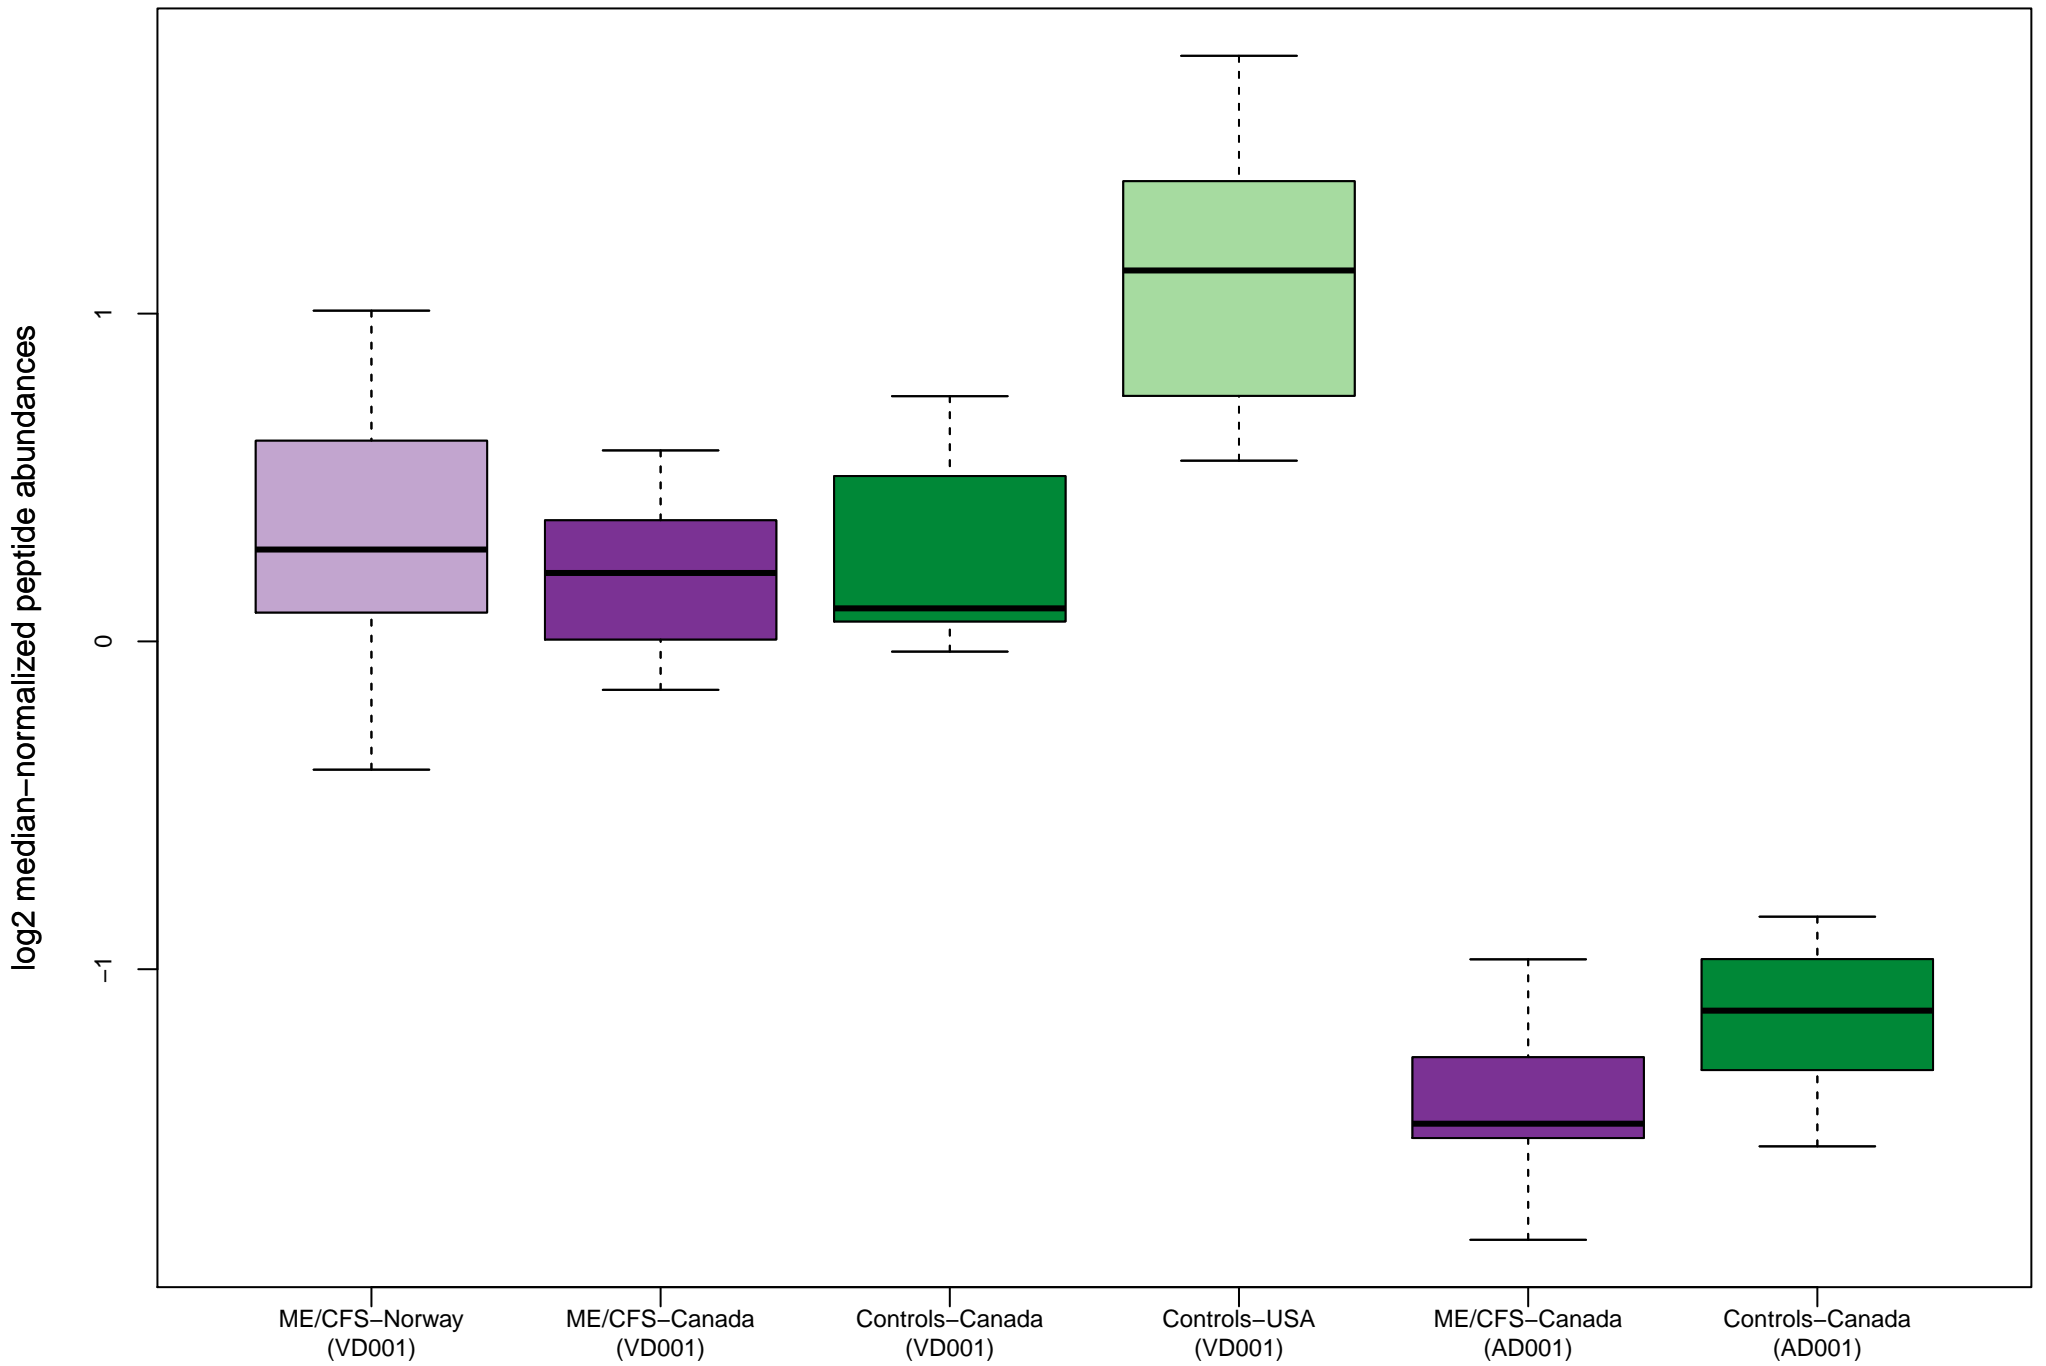

# RGPFEPYKVAS

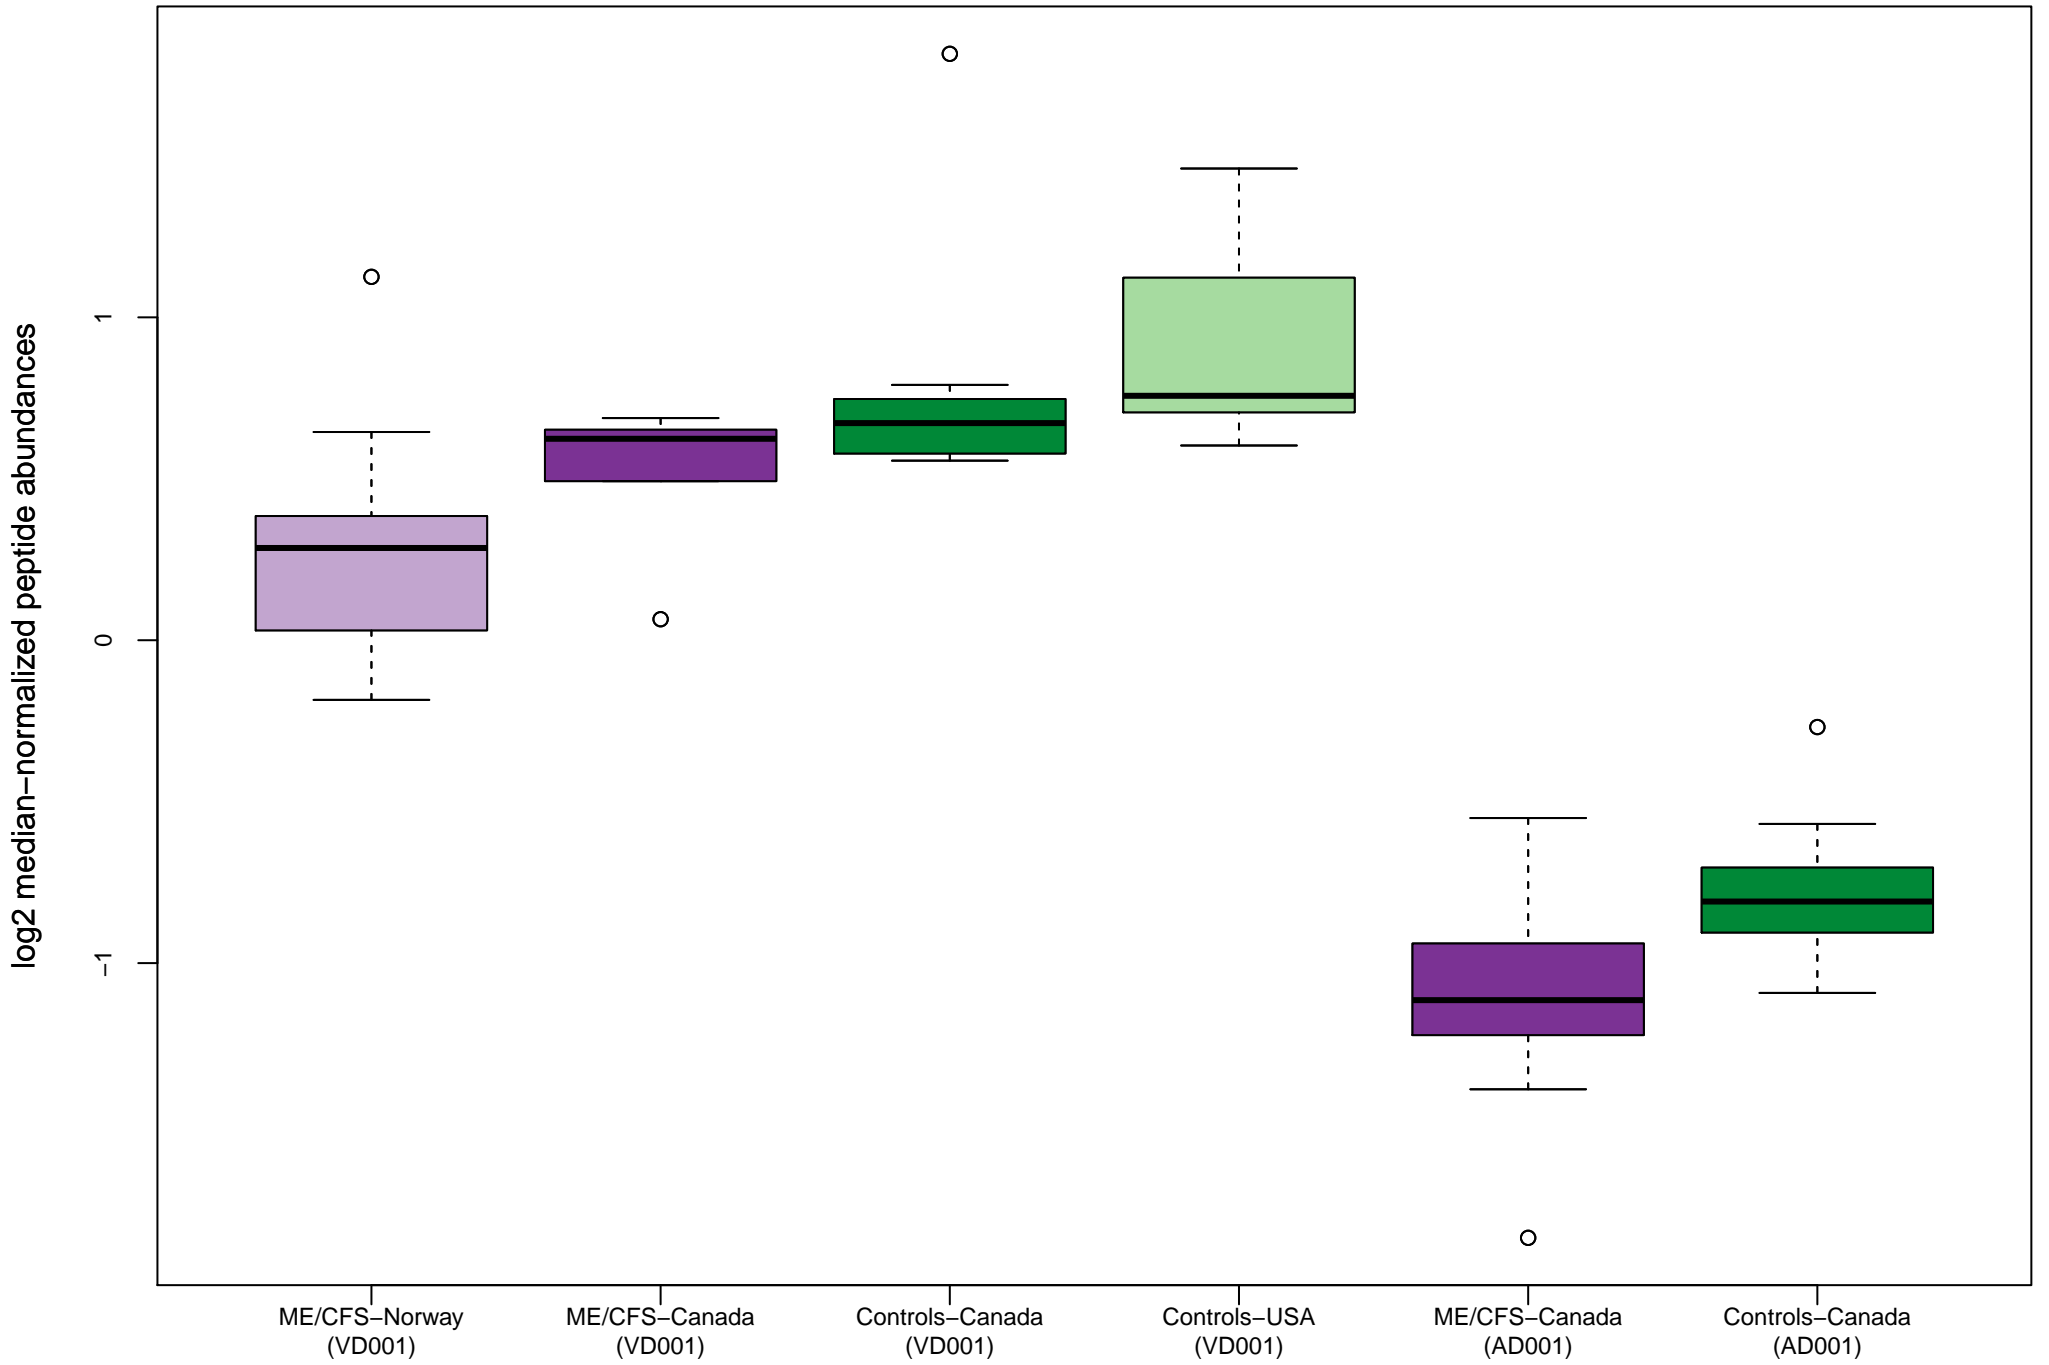

# RHRWRWFDALGV

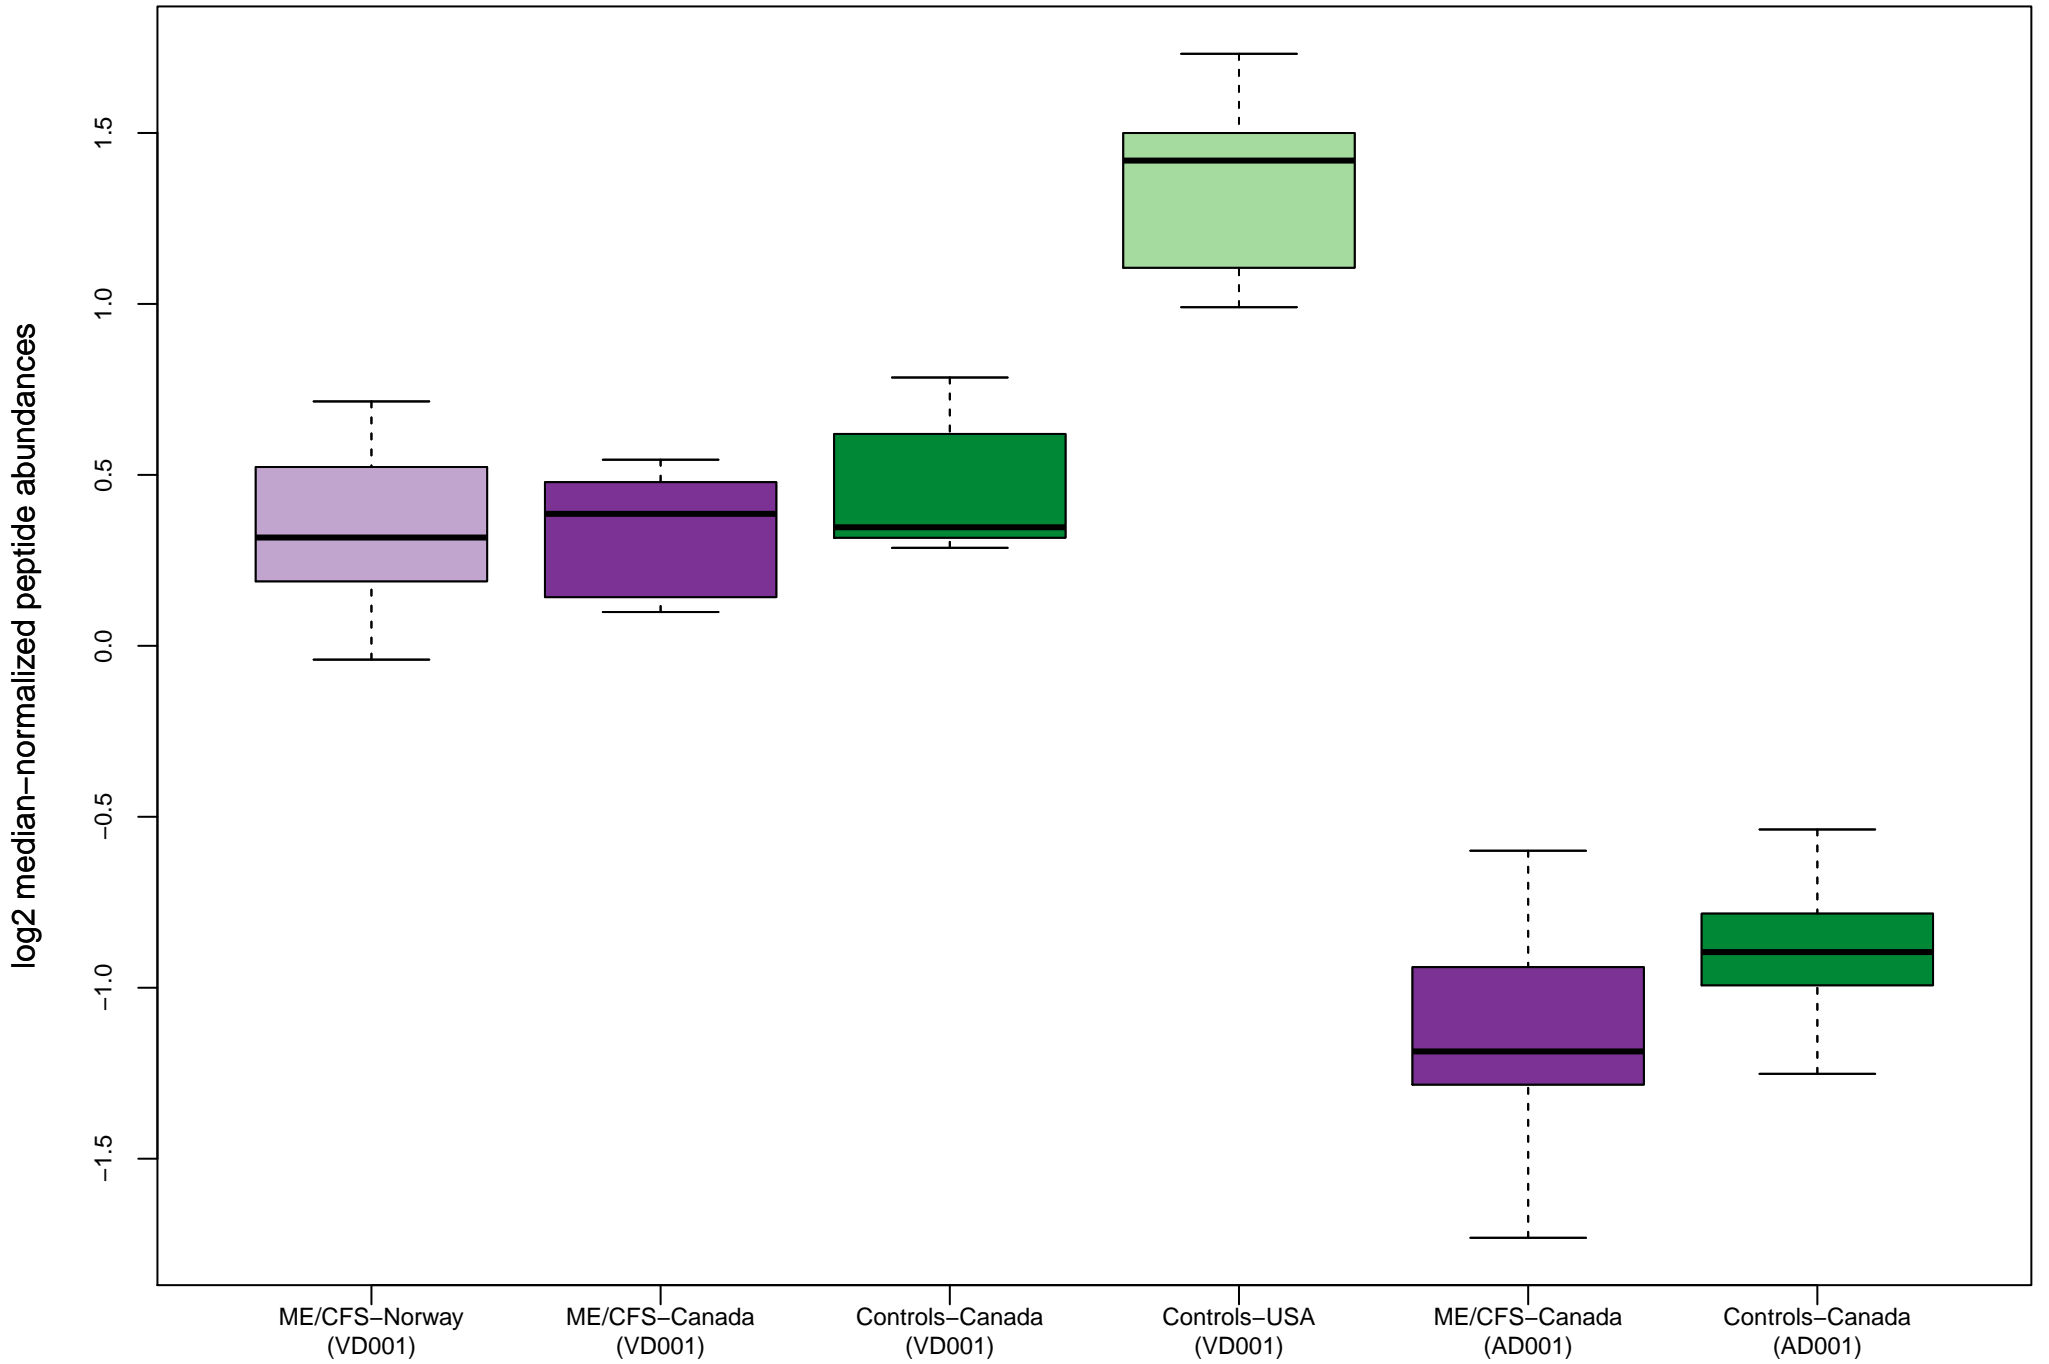

# RKFYLVNQWNGG

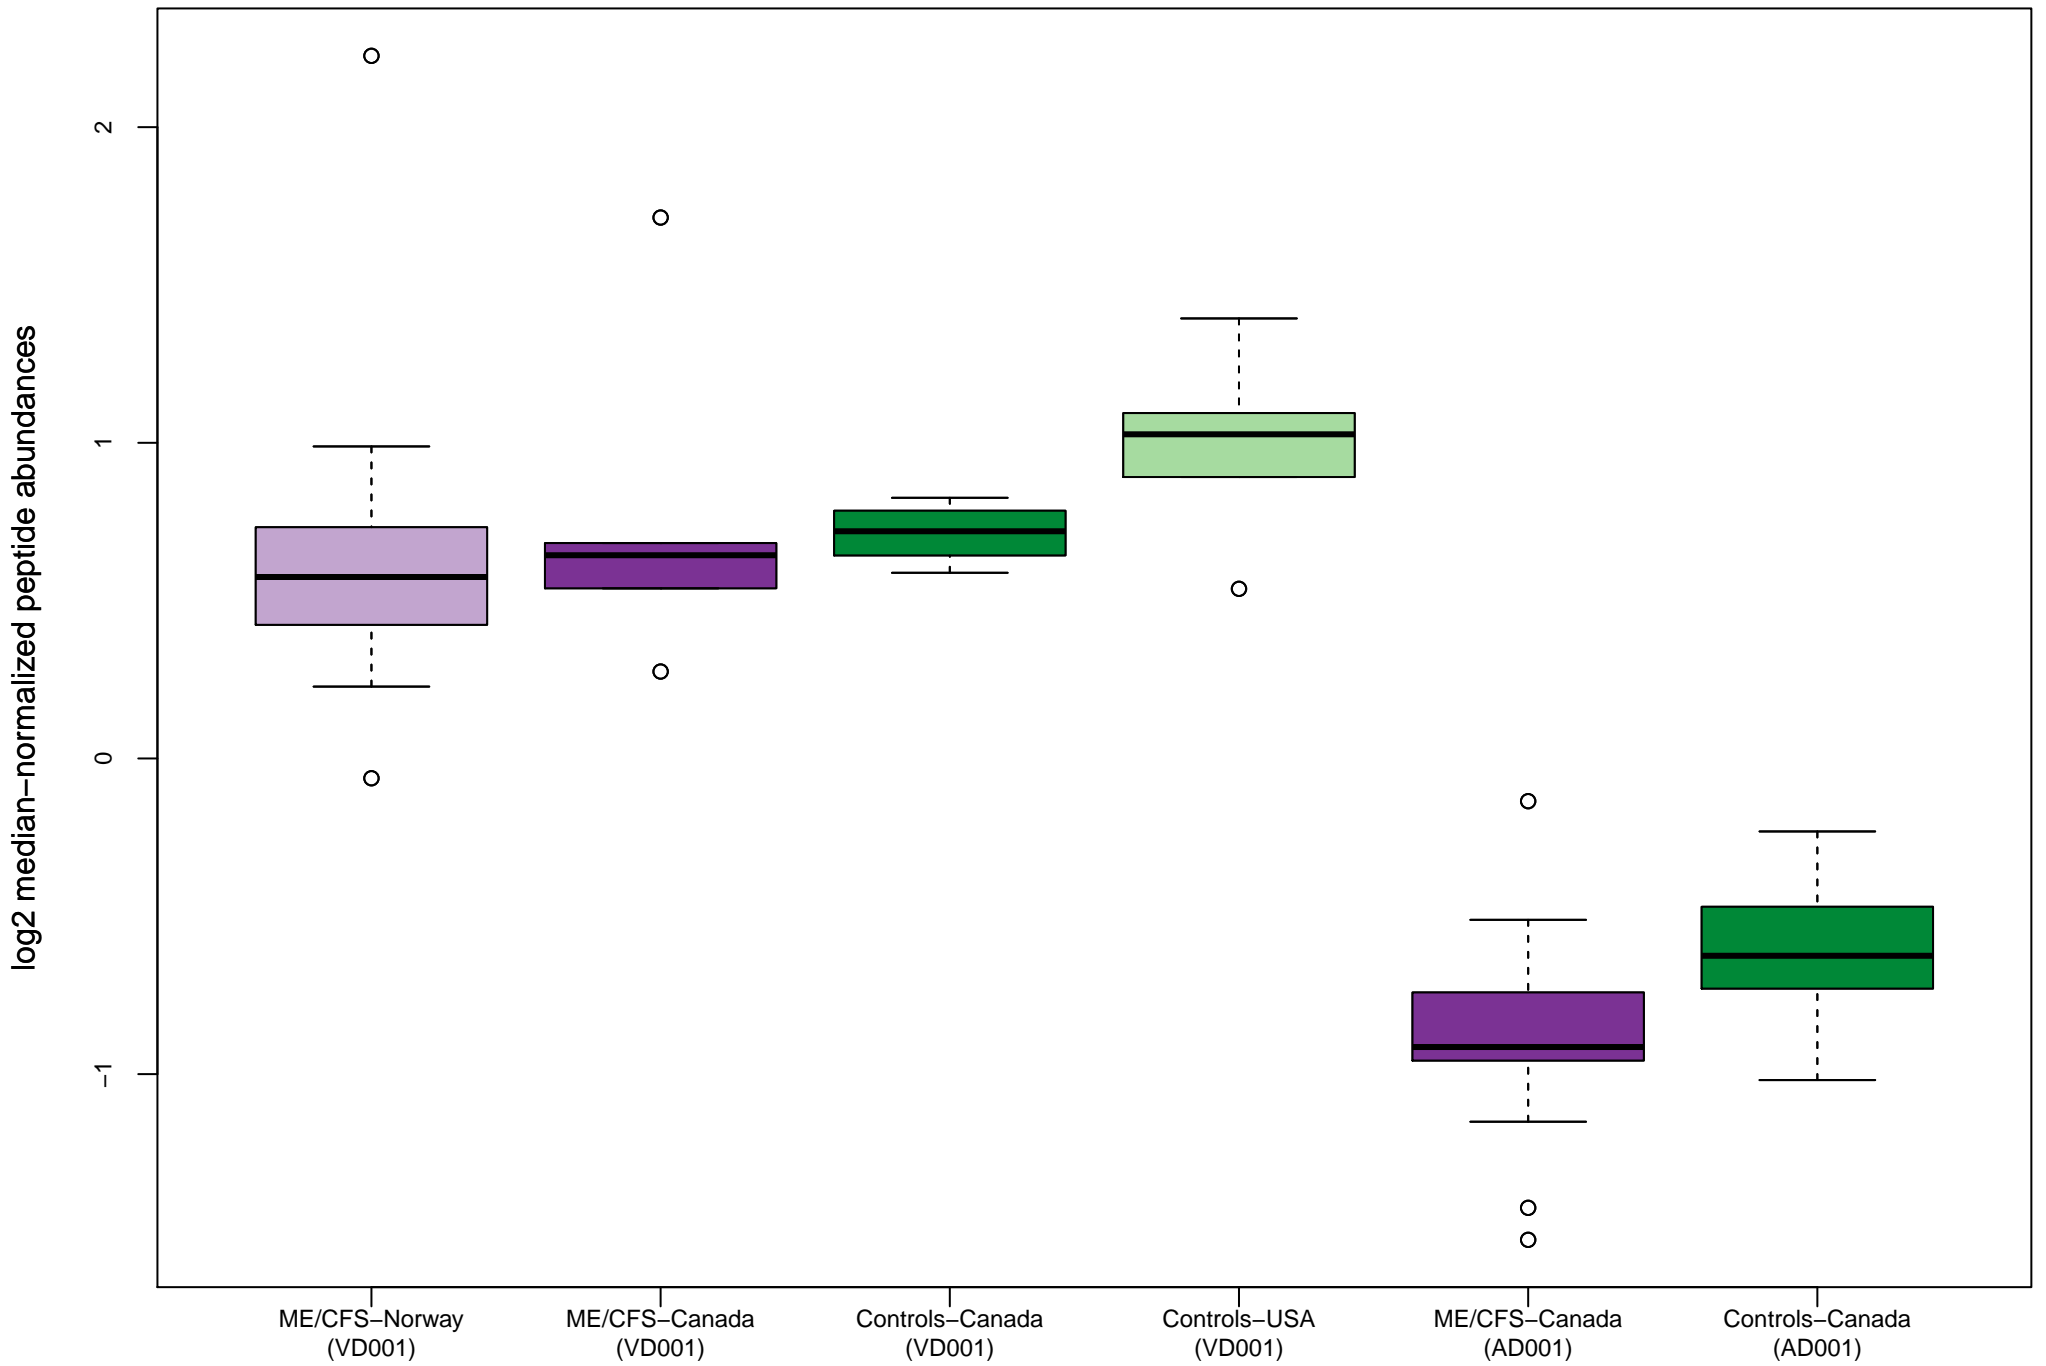

# RKLFARWWDVAVS

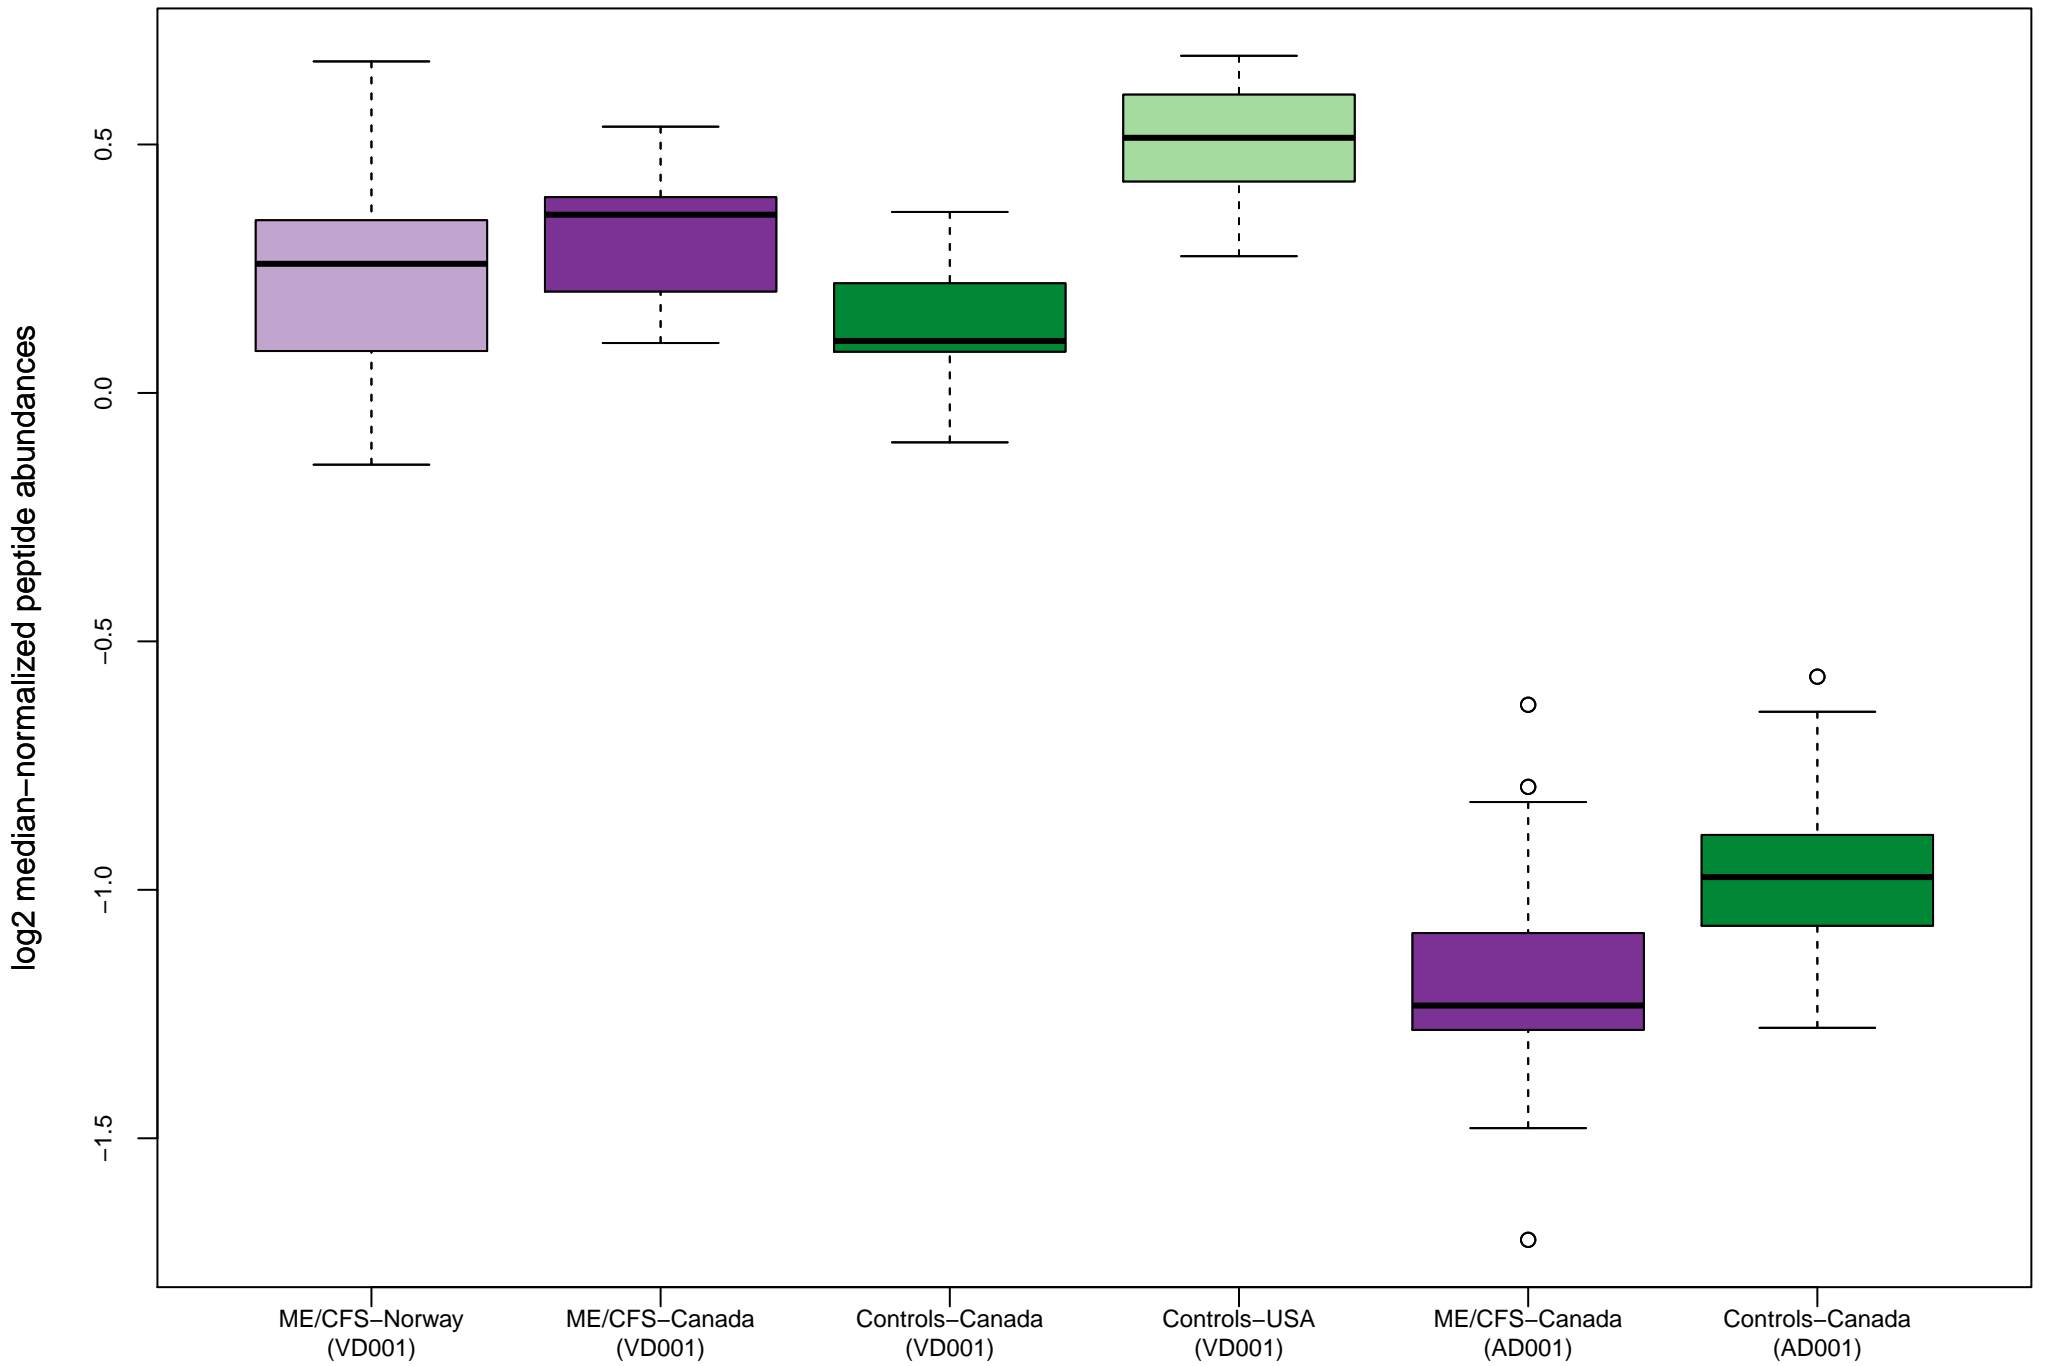



# RLGRFSFKGASG

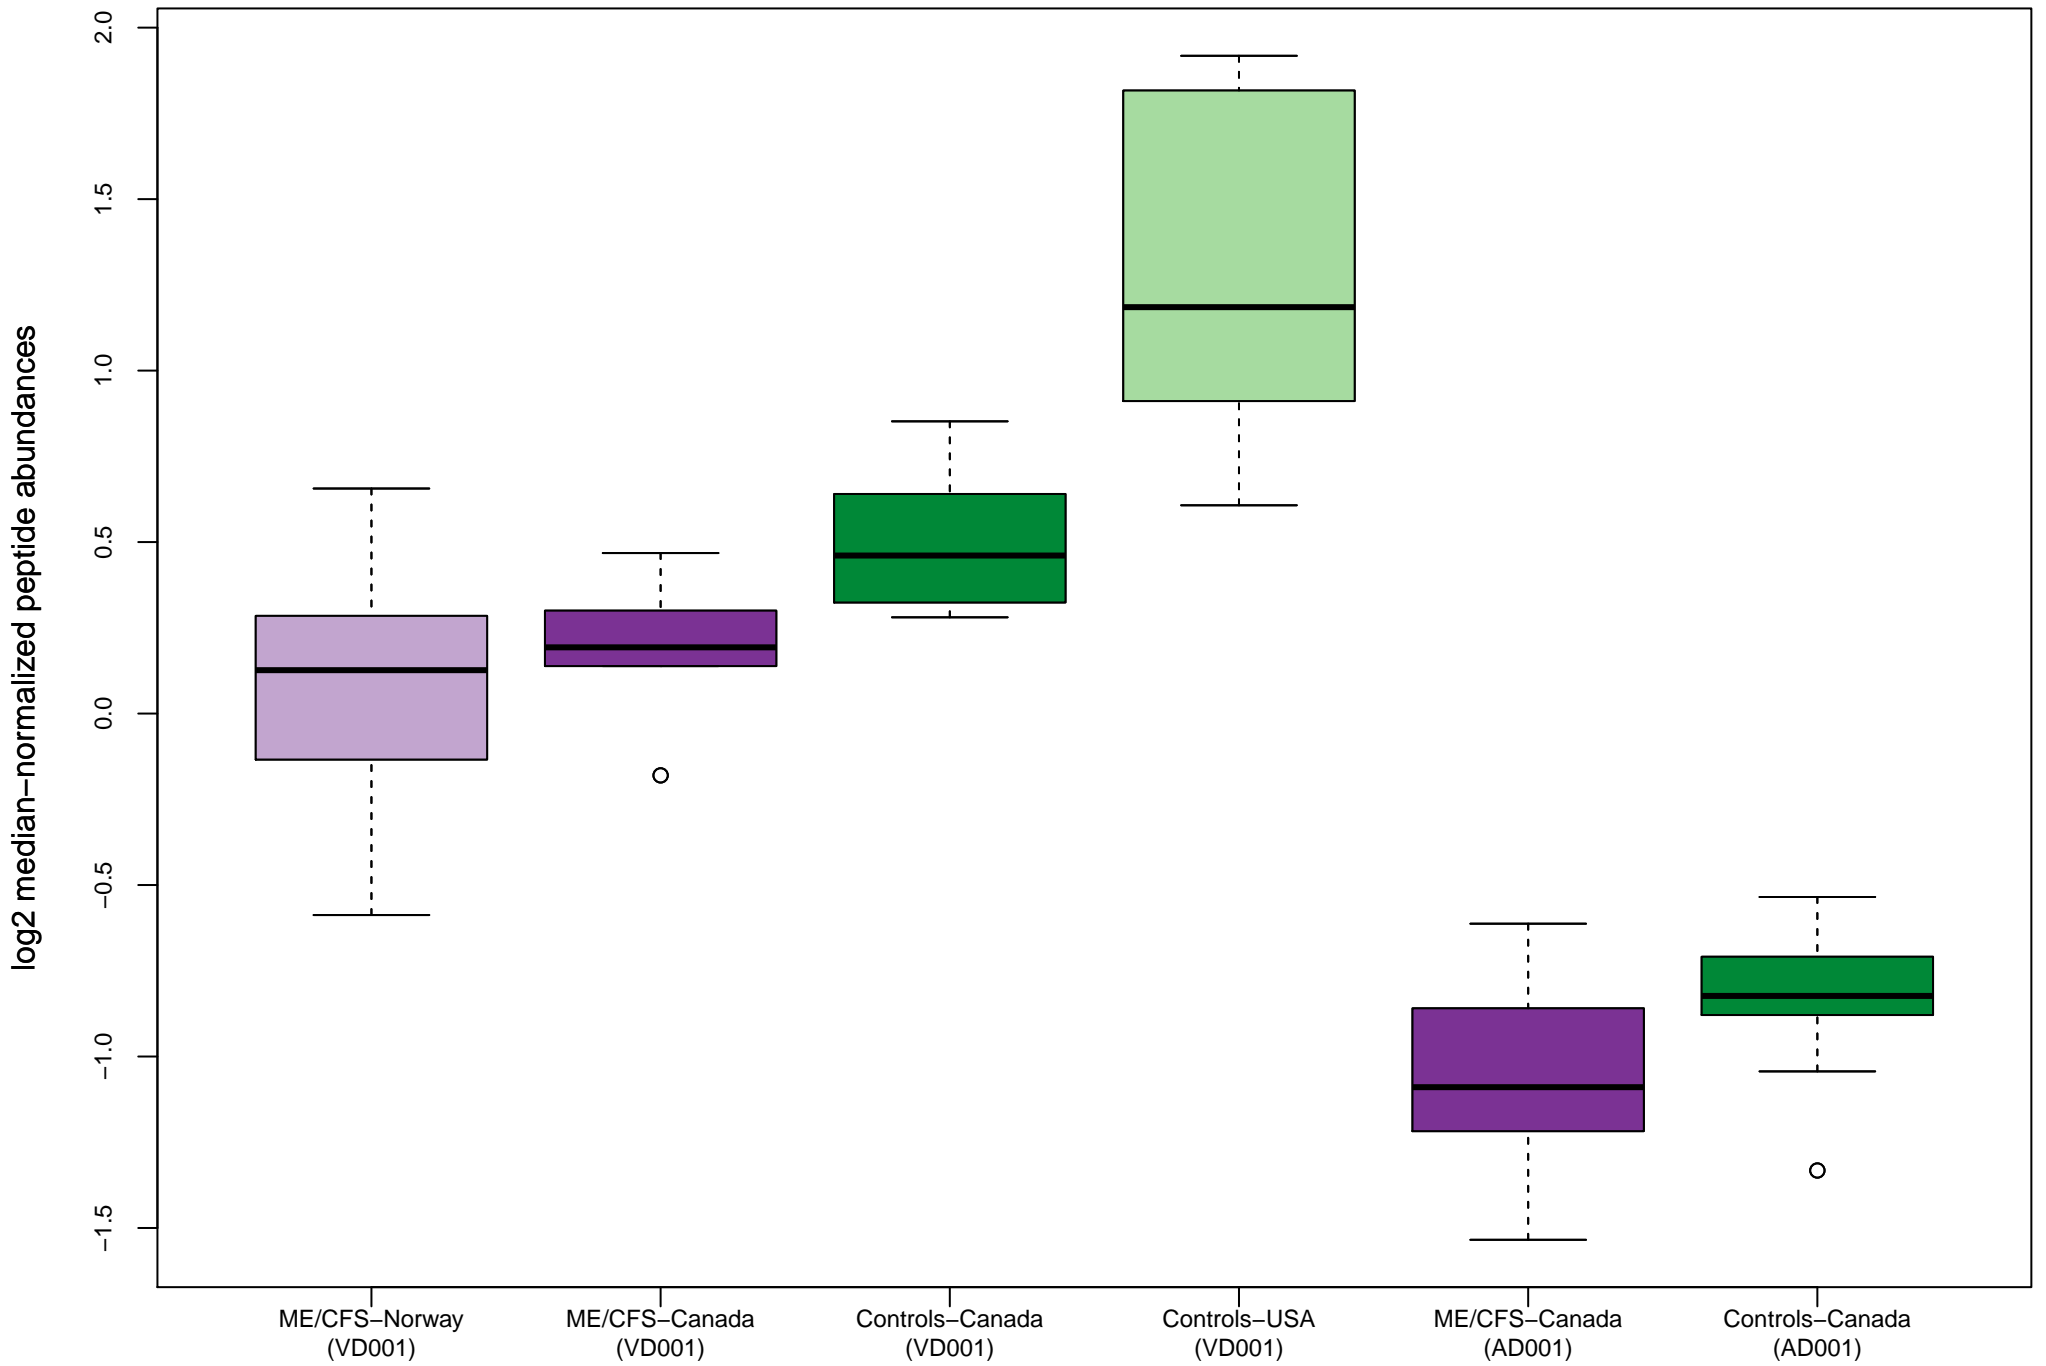

# RLLFWVRKALAS

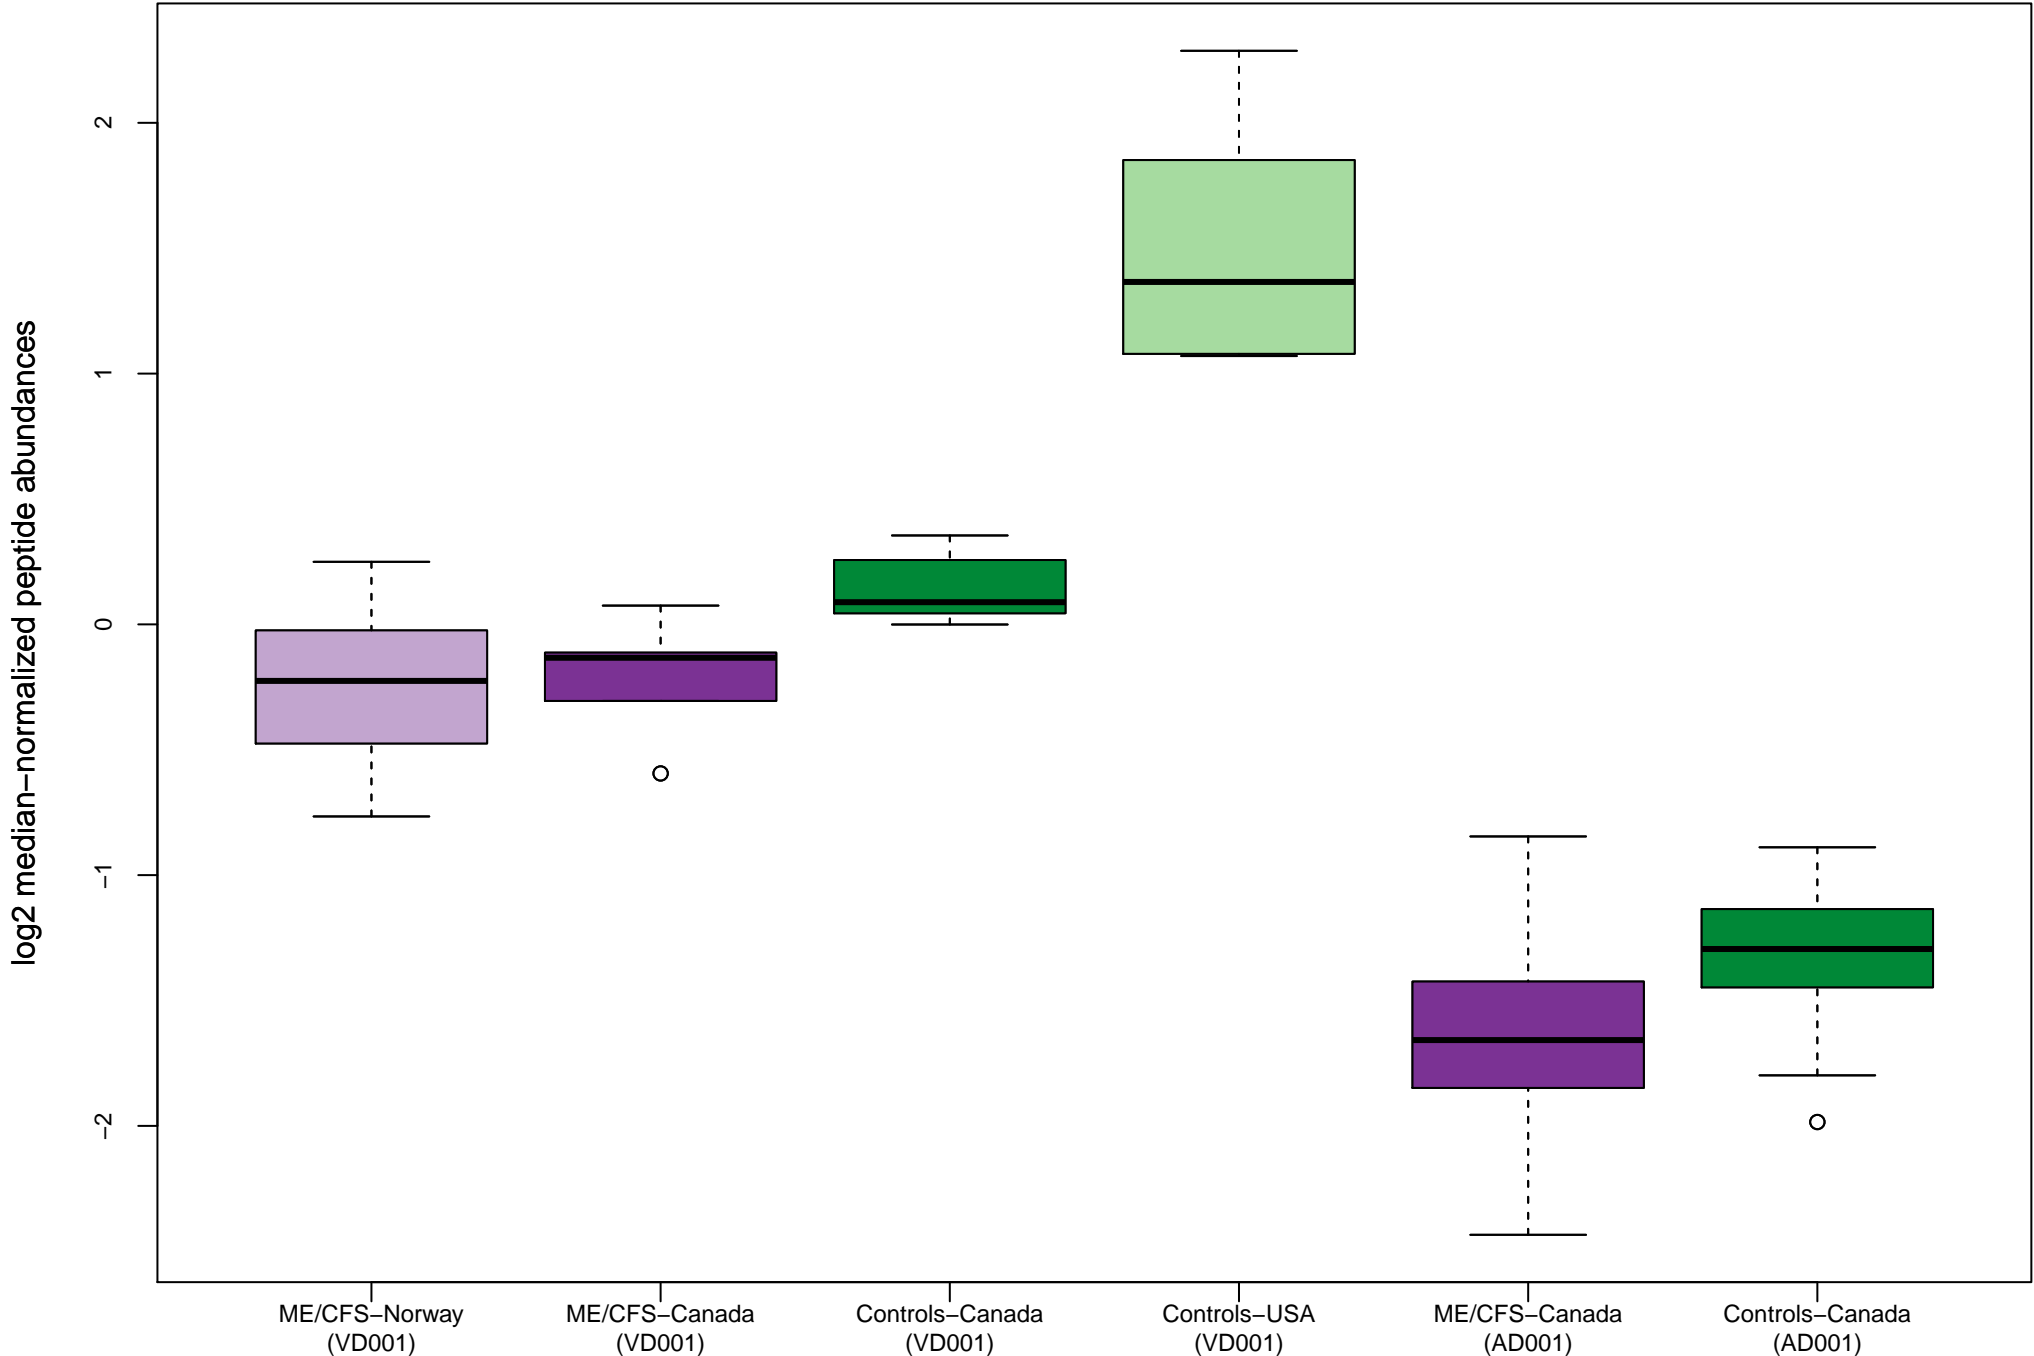

# RLRAAFRPYWNG

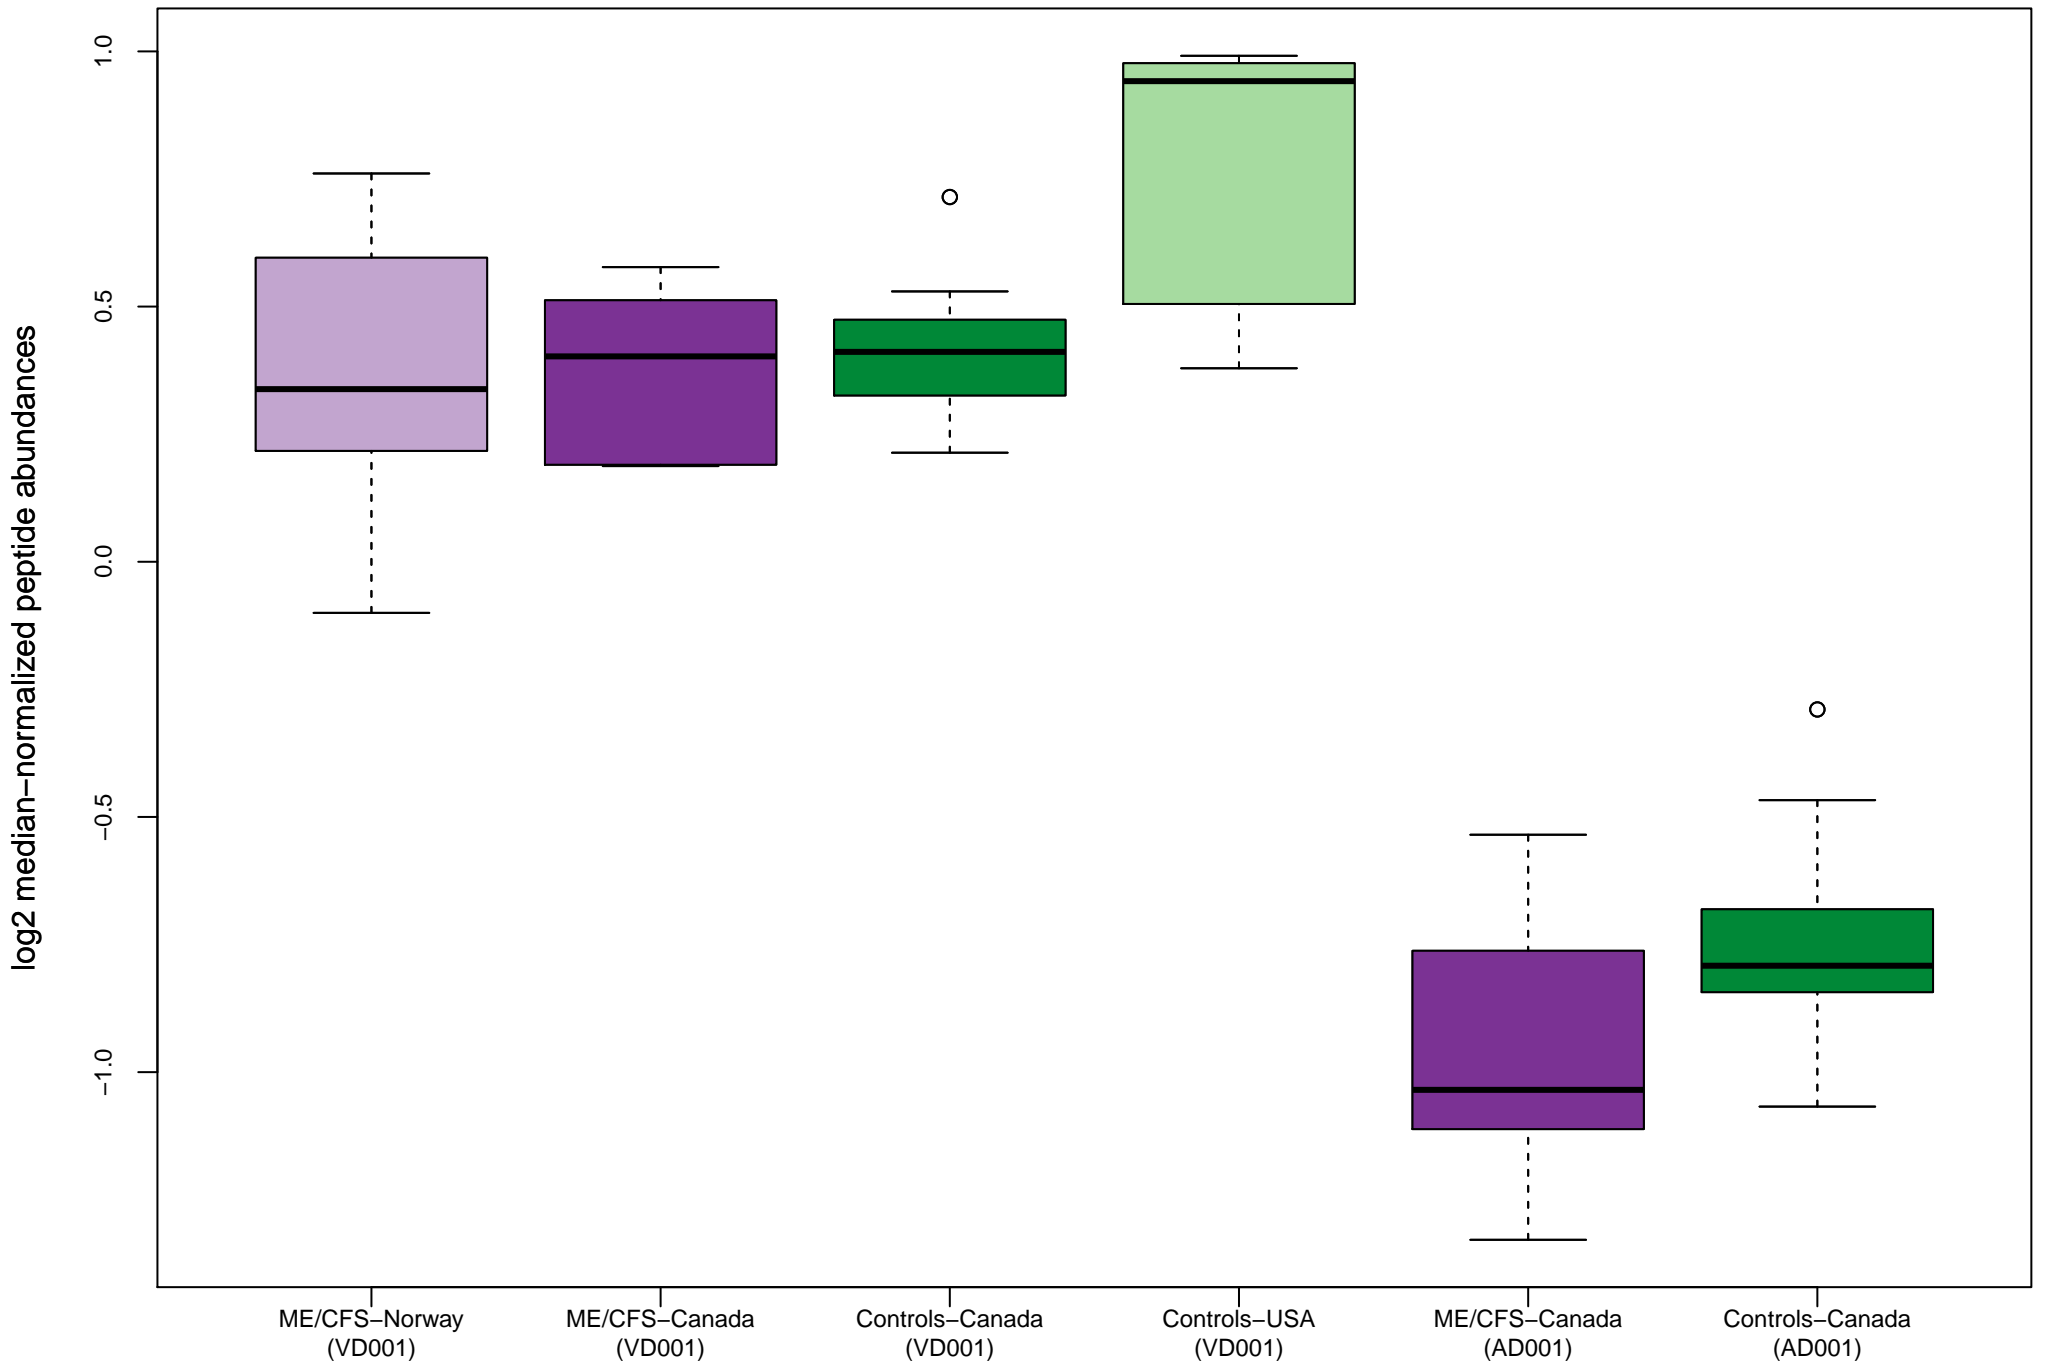

# RLSLLGWKAGAL

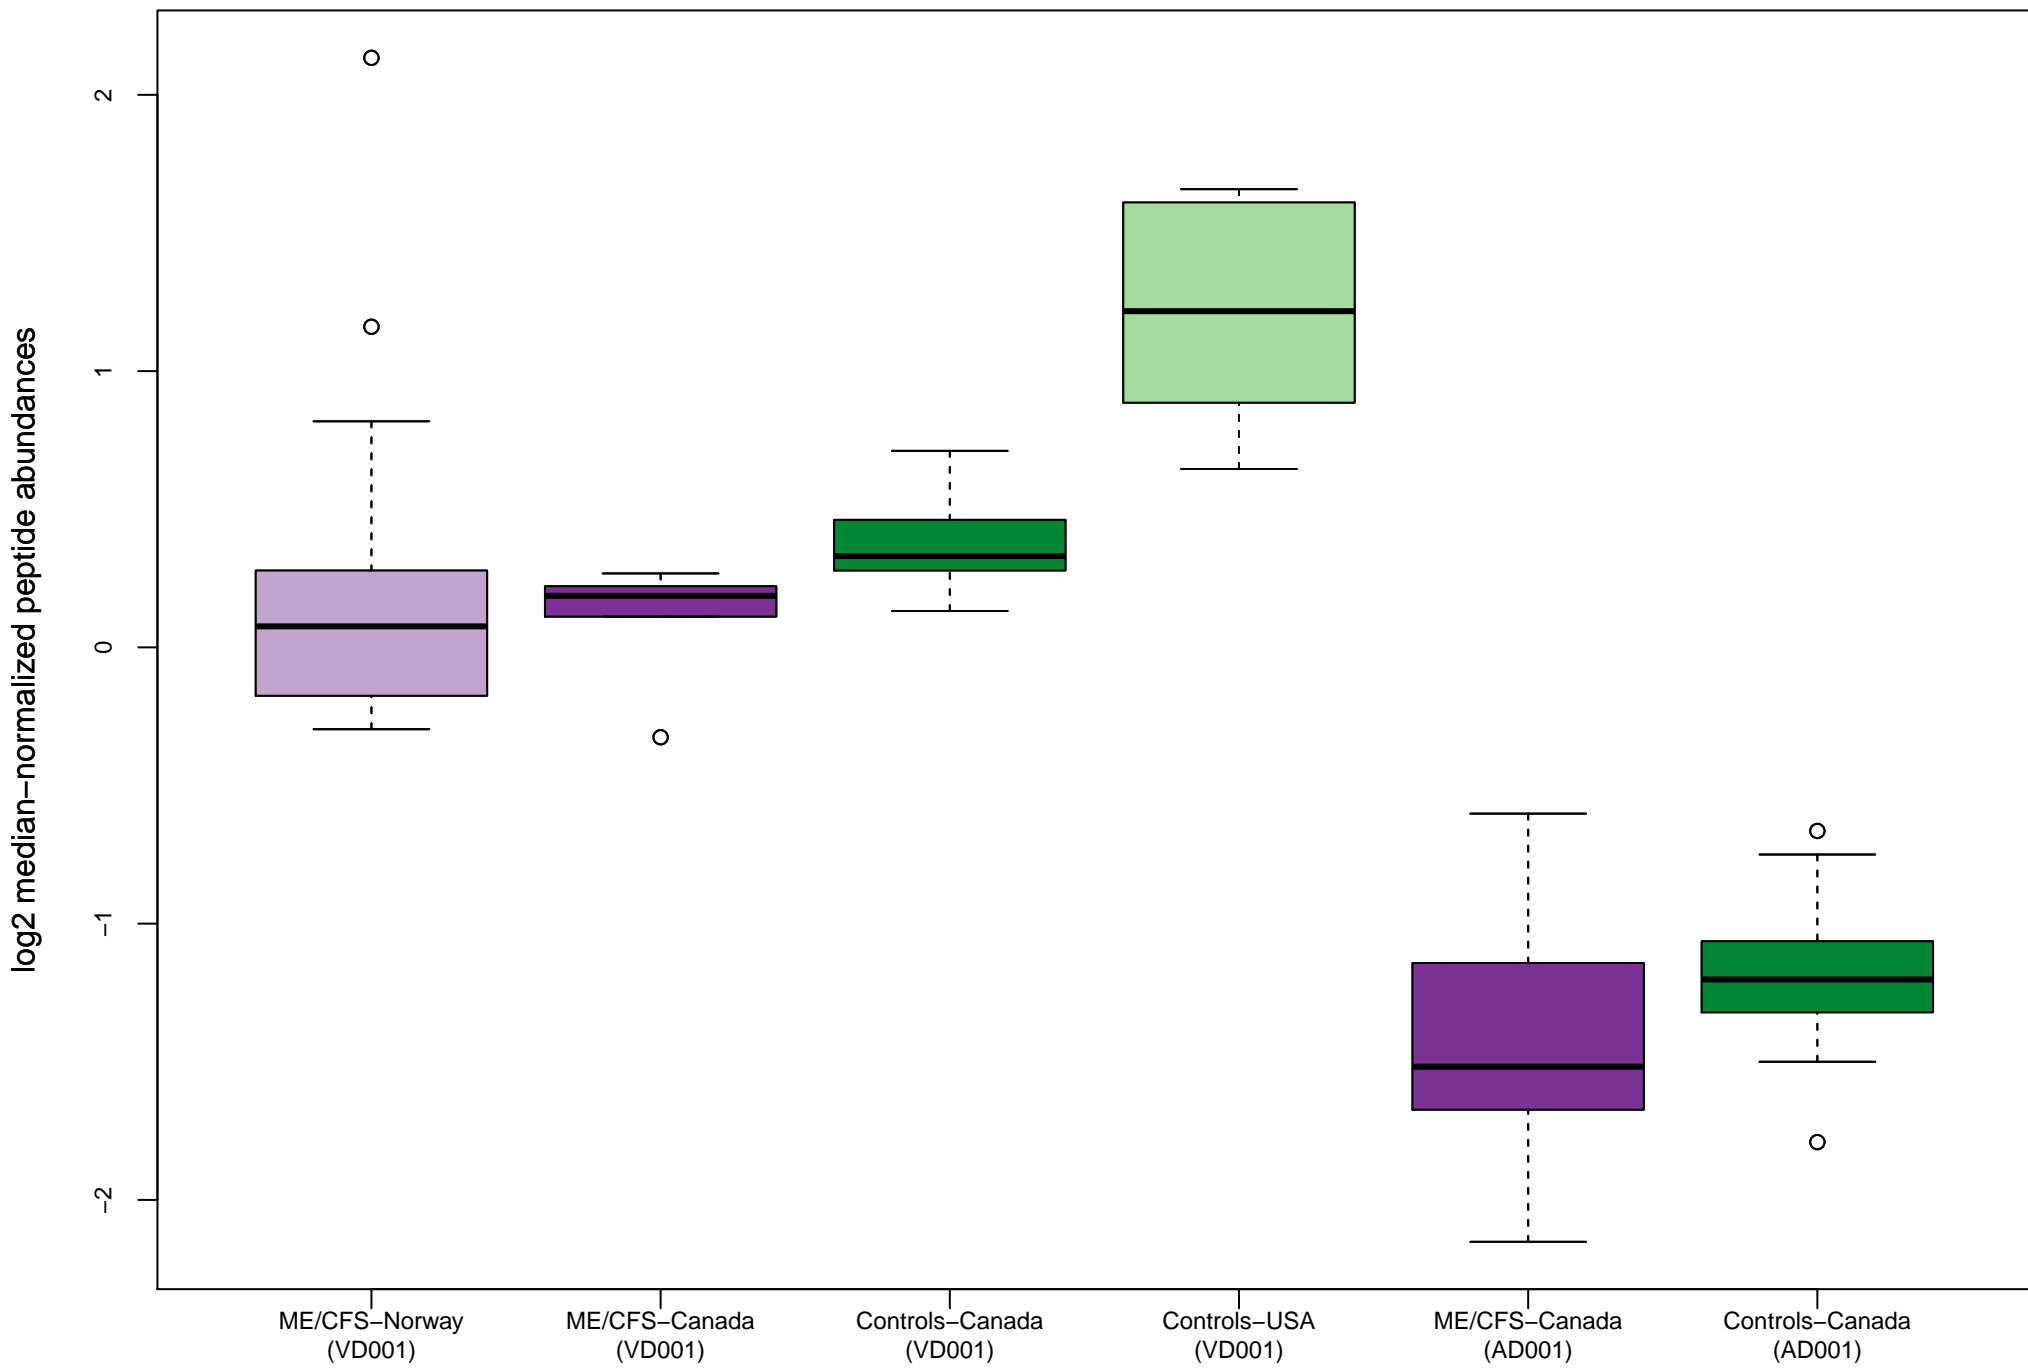

# RLVAYSNKVLGV

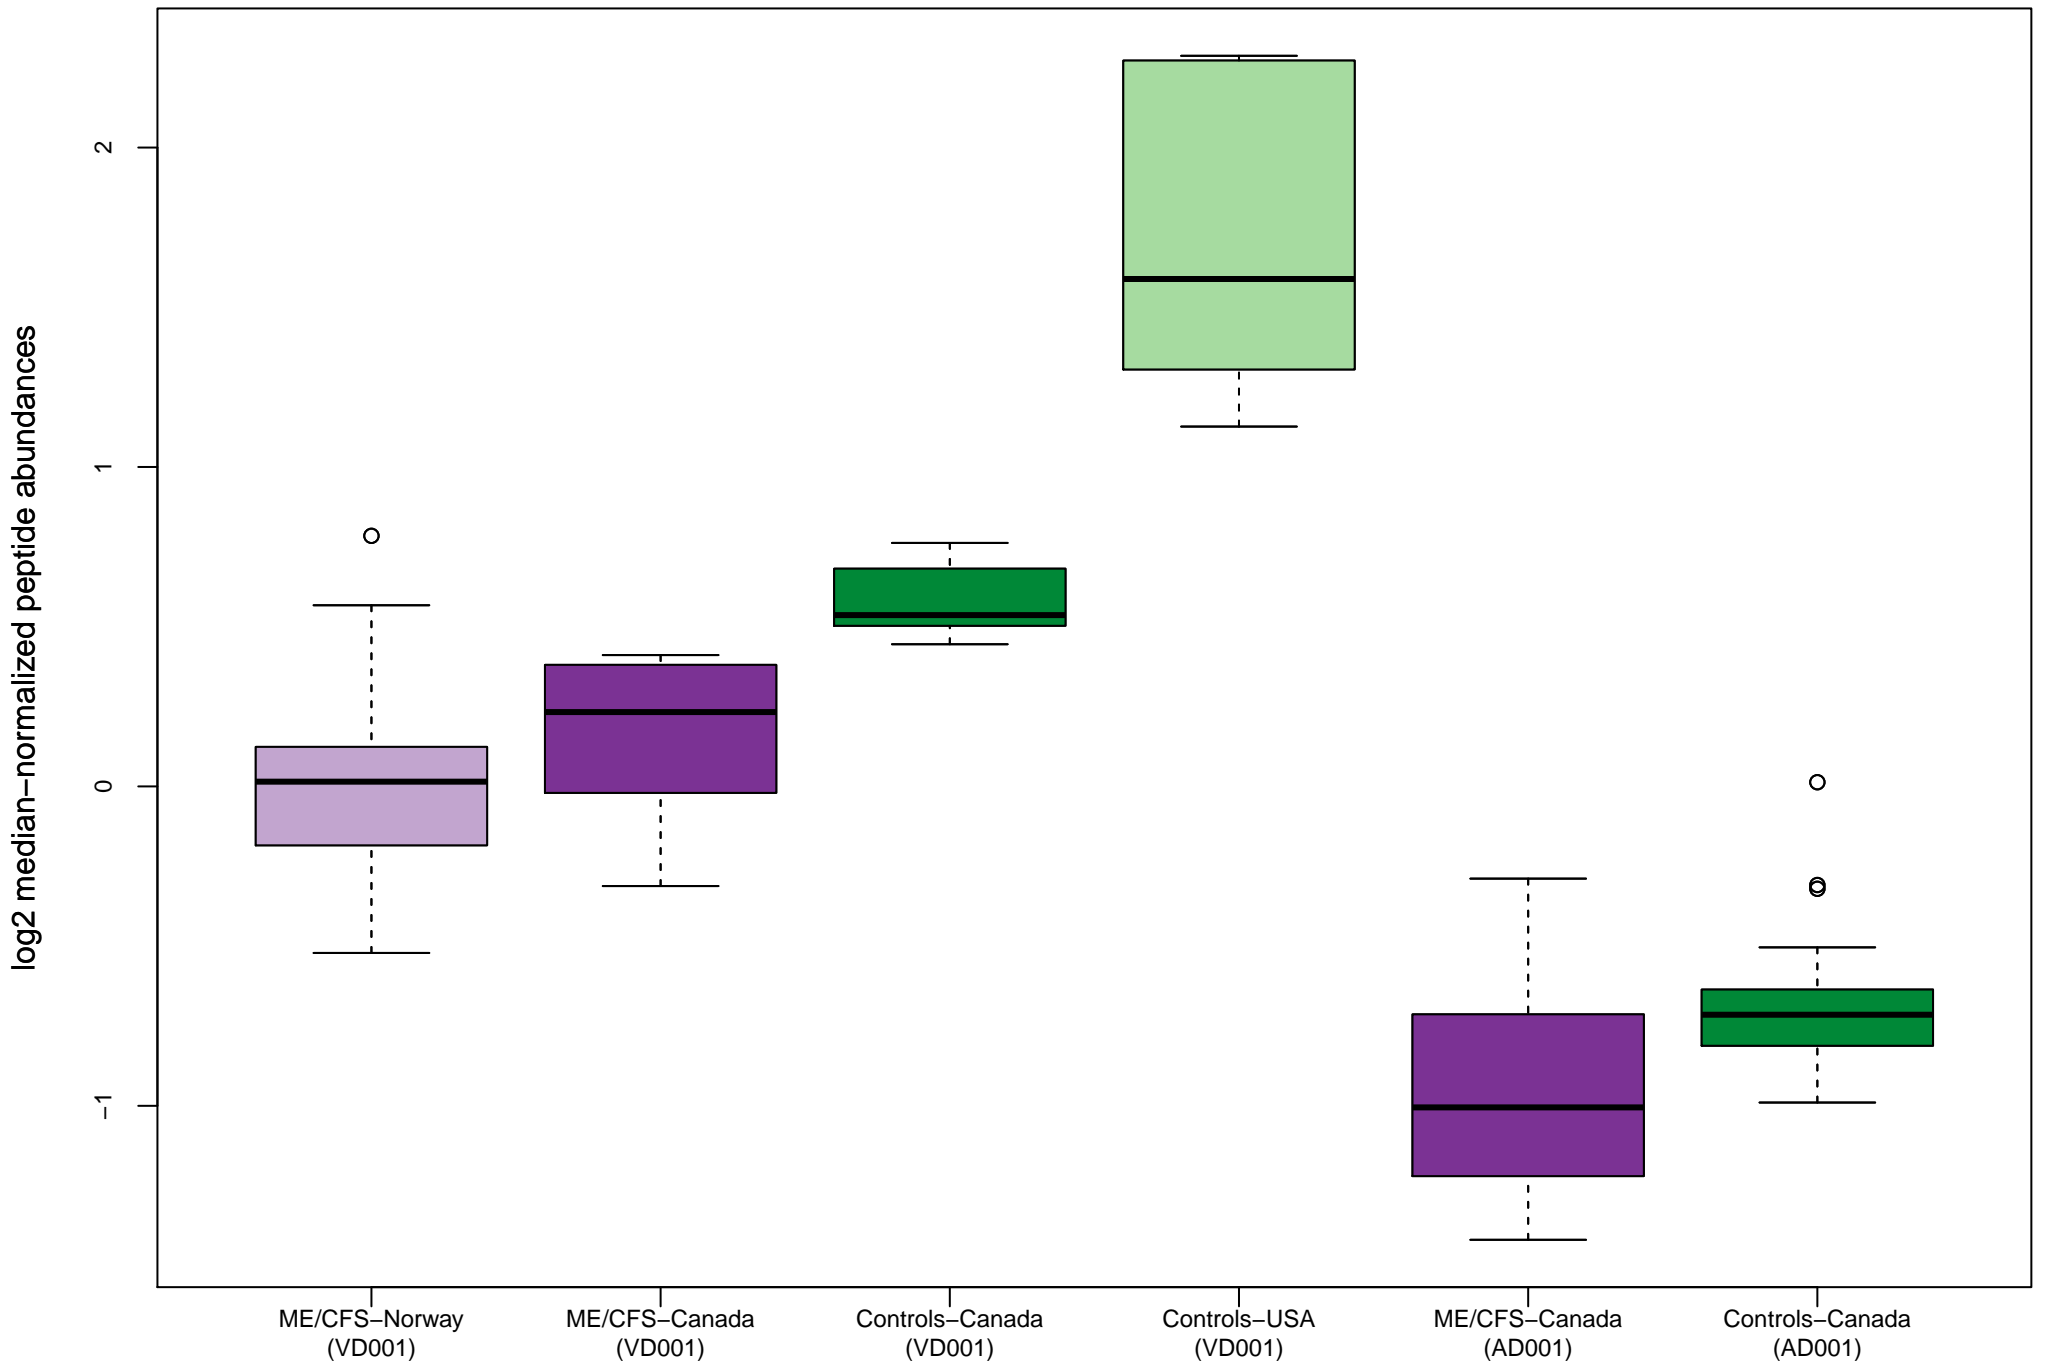

# RNNHYSQYWKAL

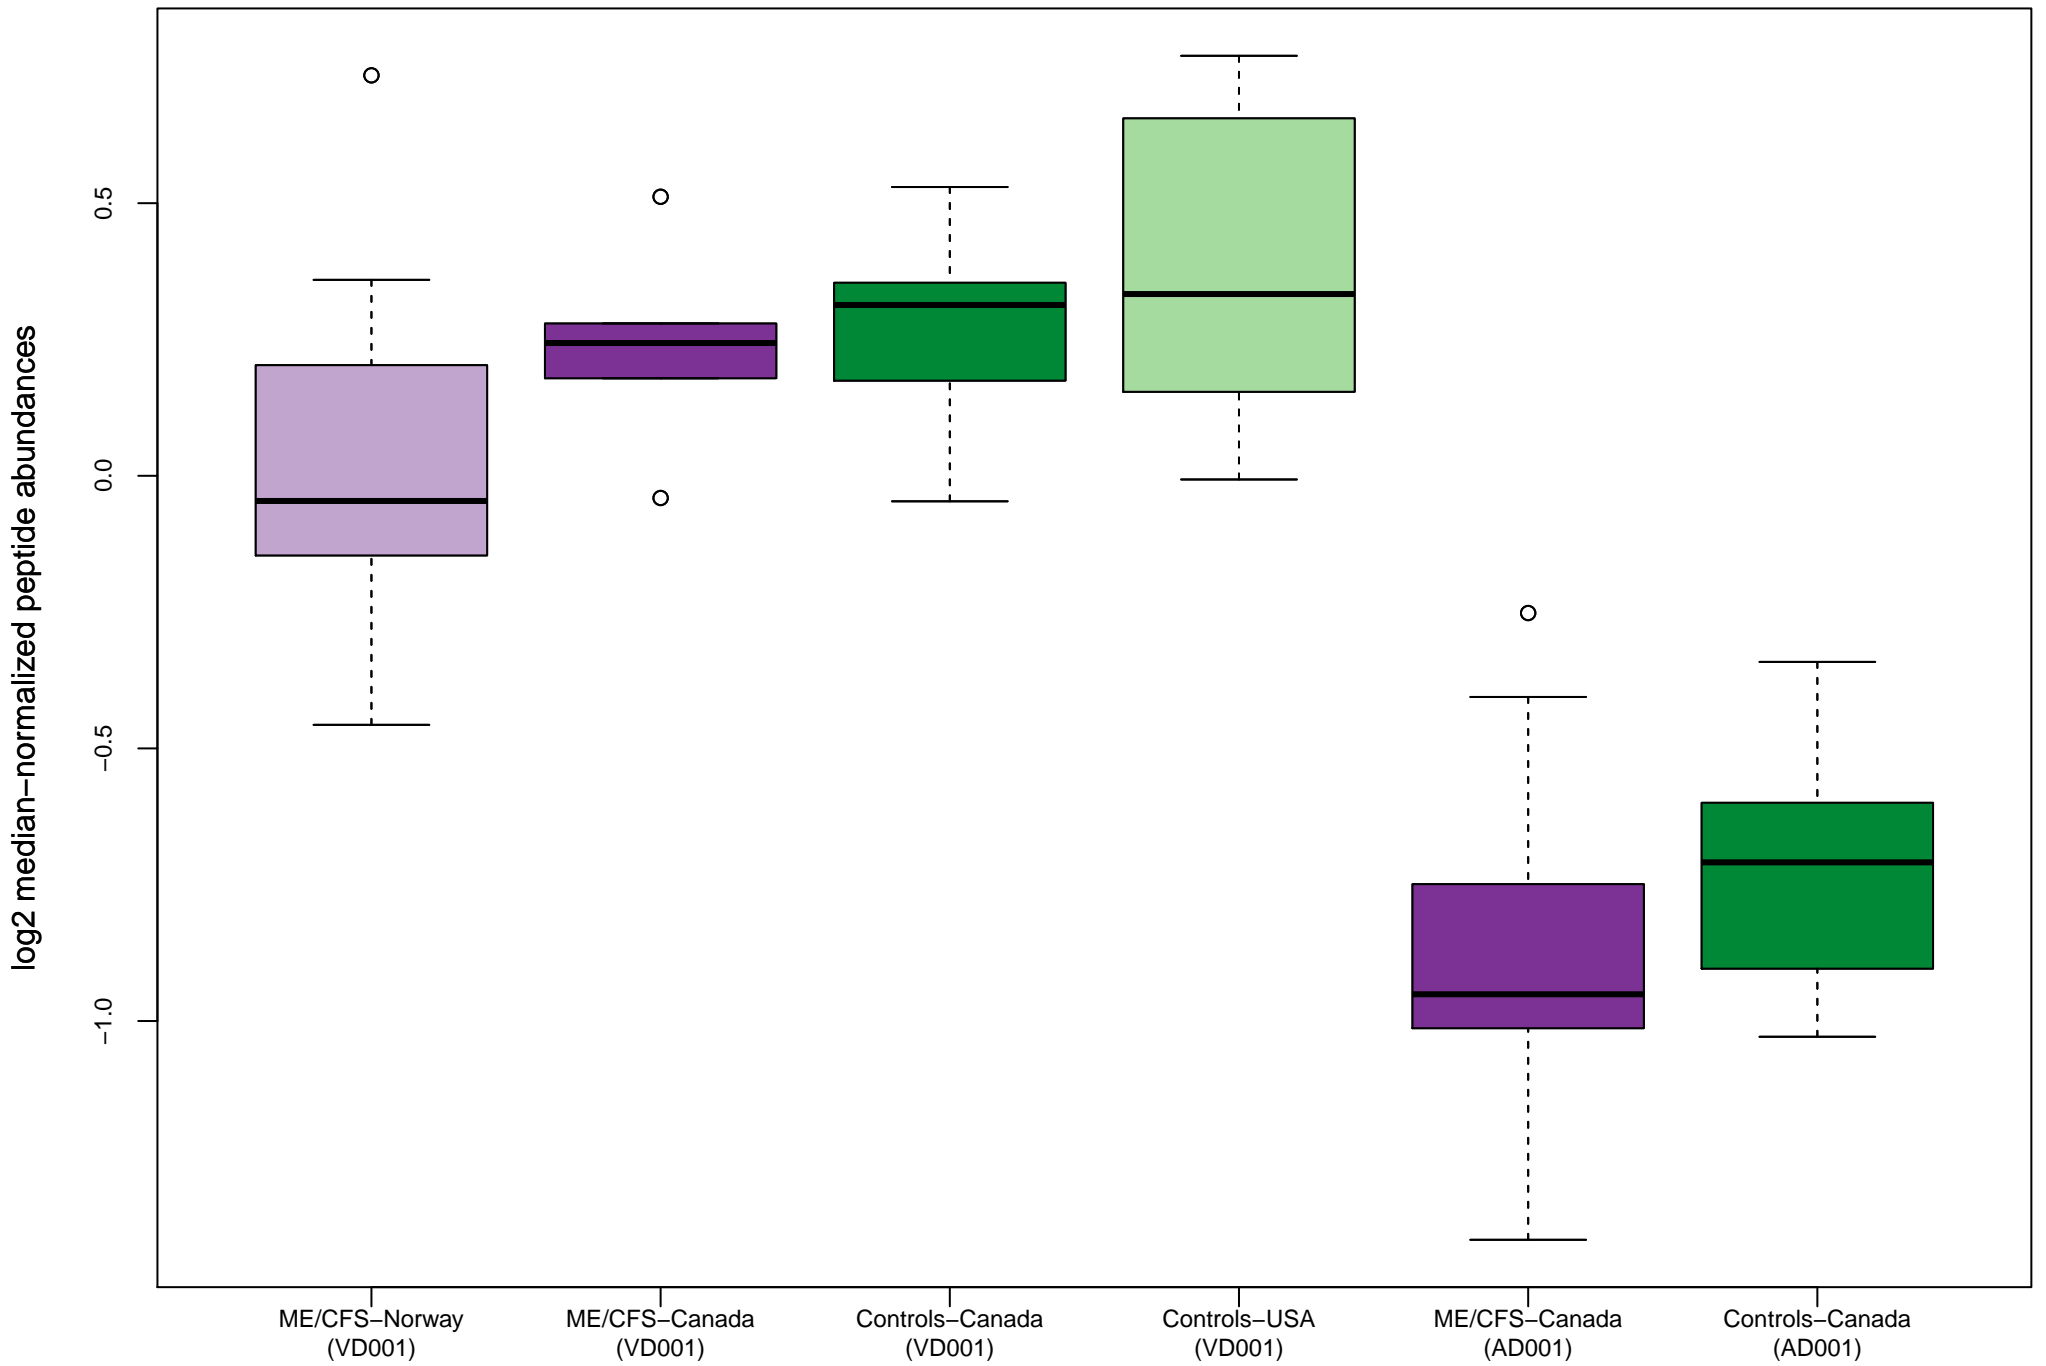

# RNYSPLRVSSG

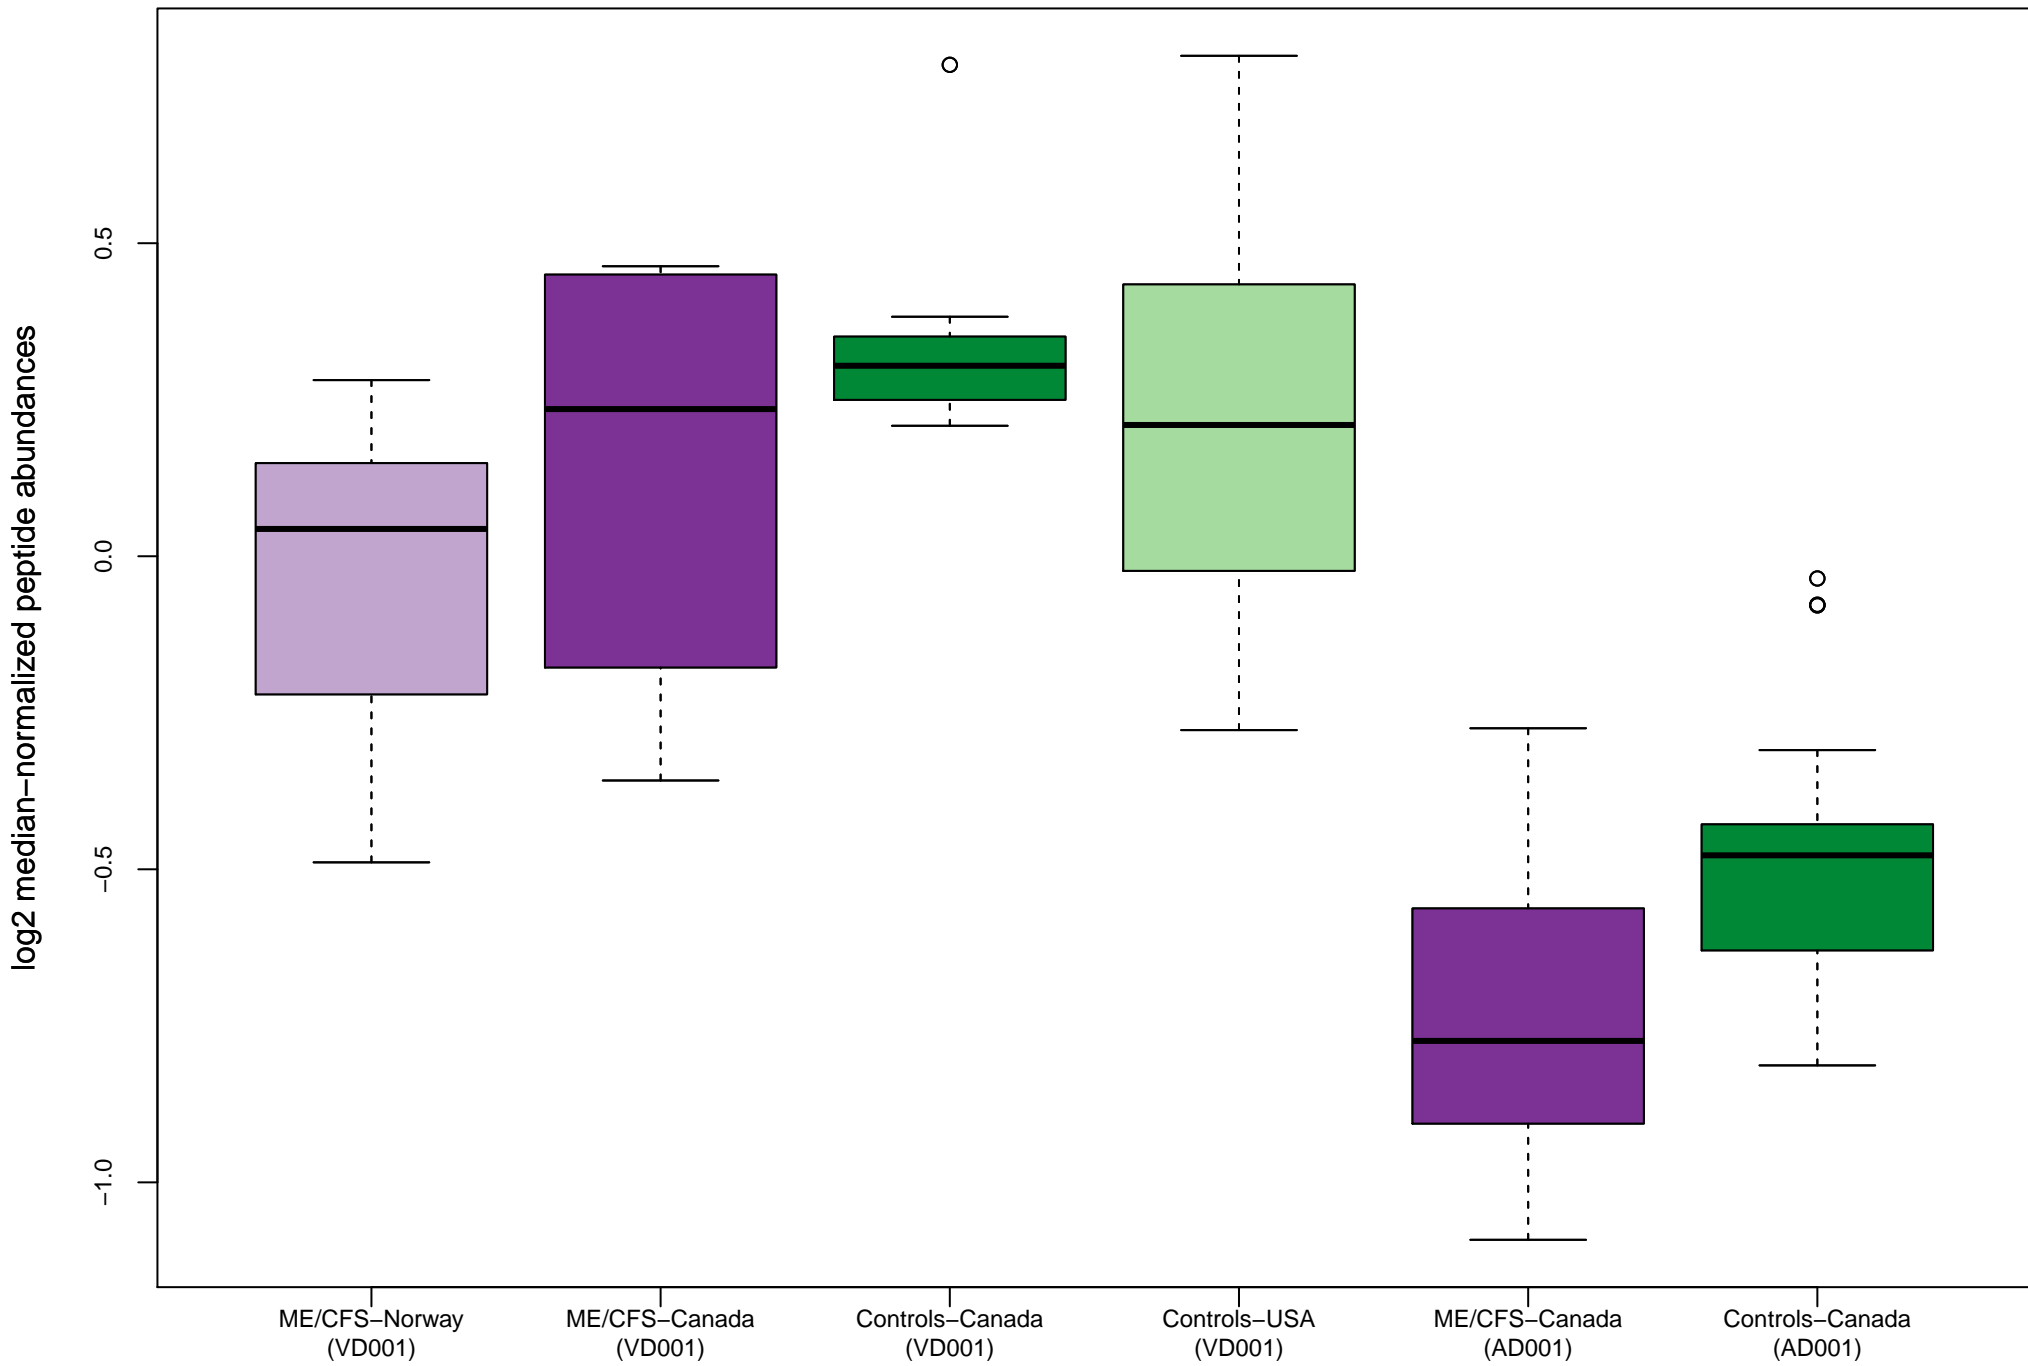

# RPLHNHLFRYKL

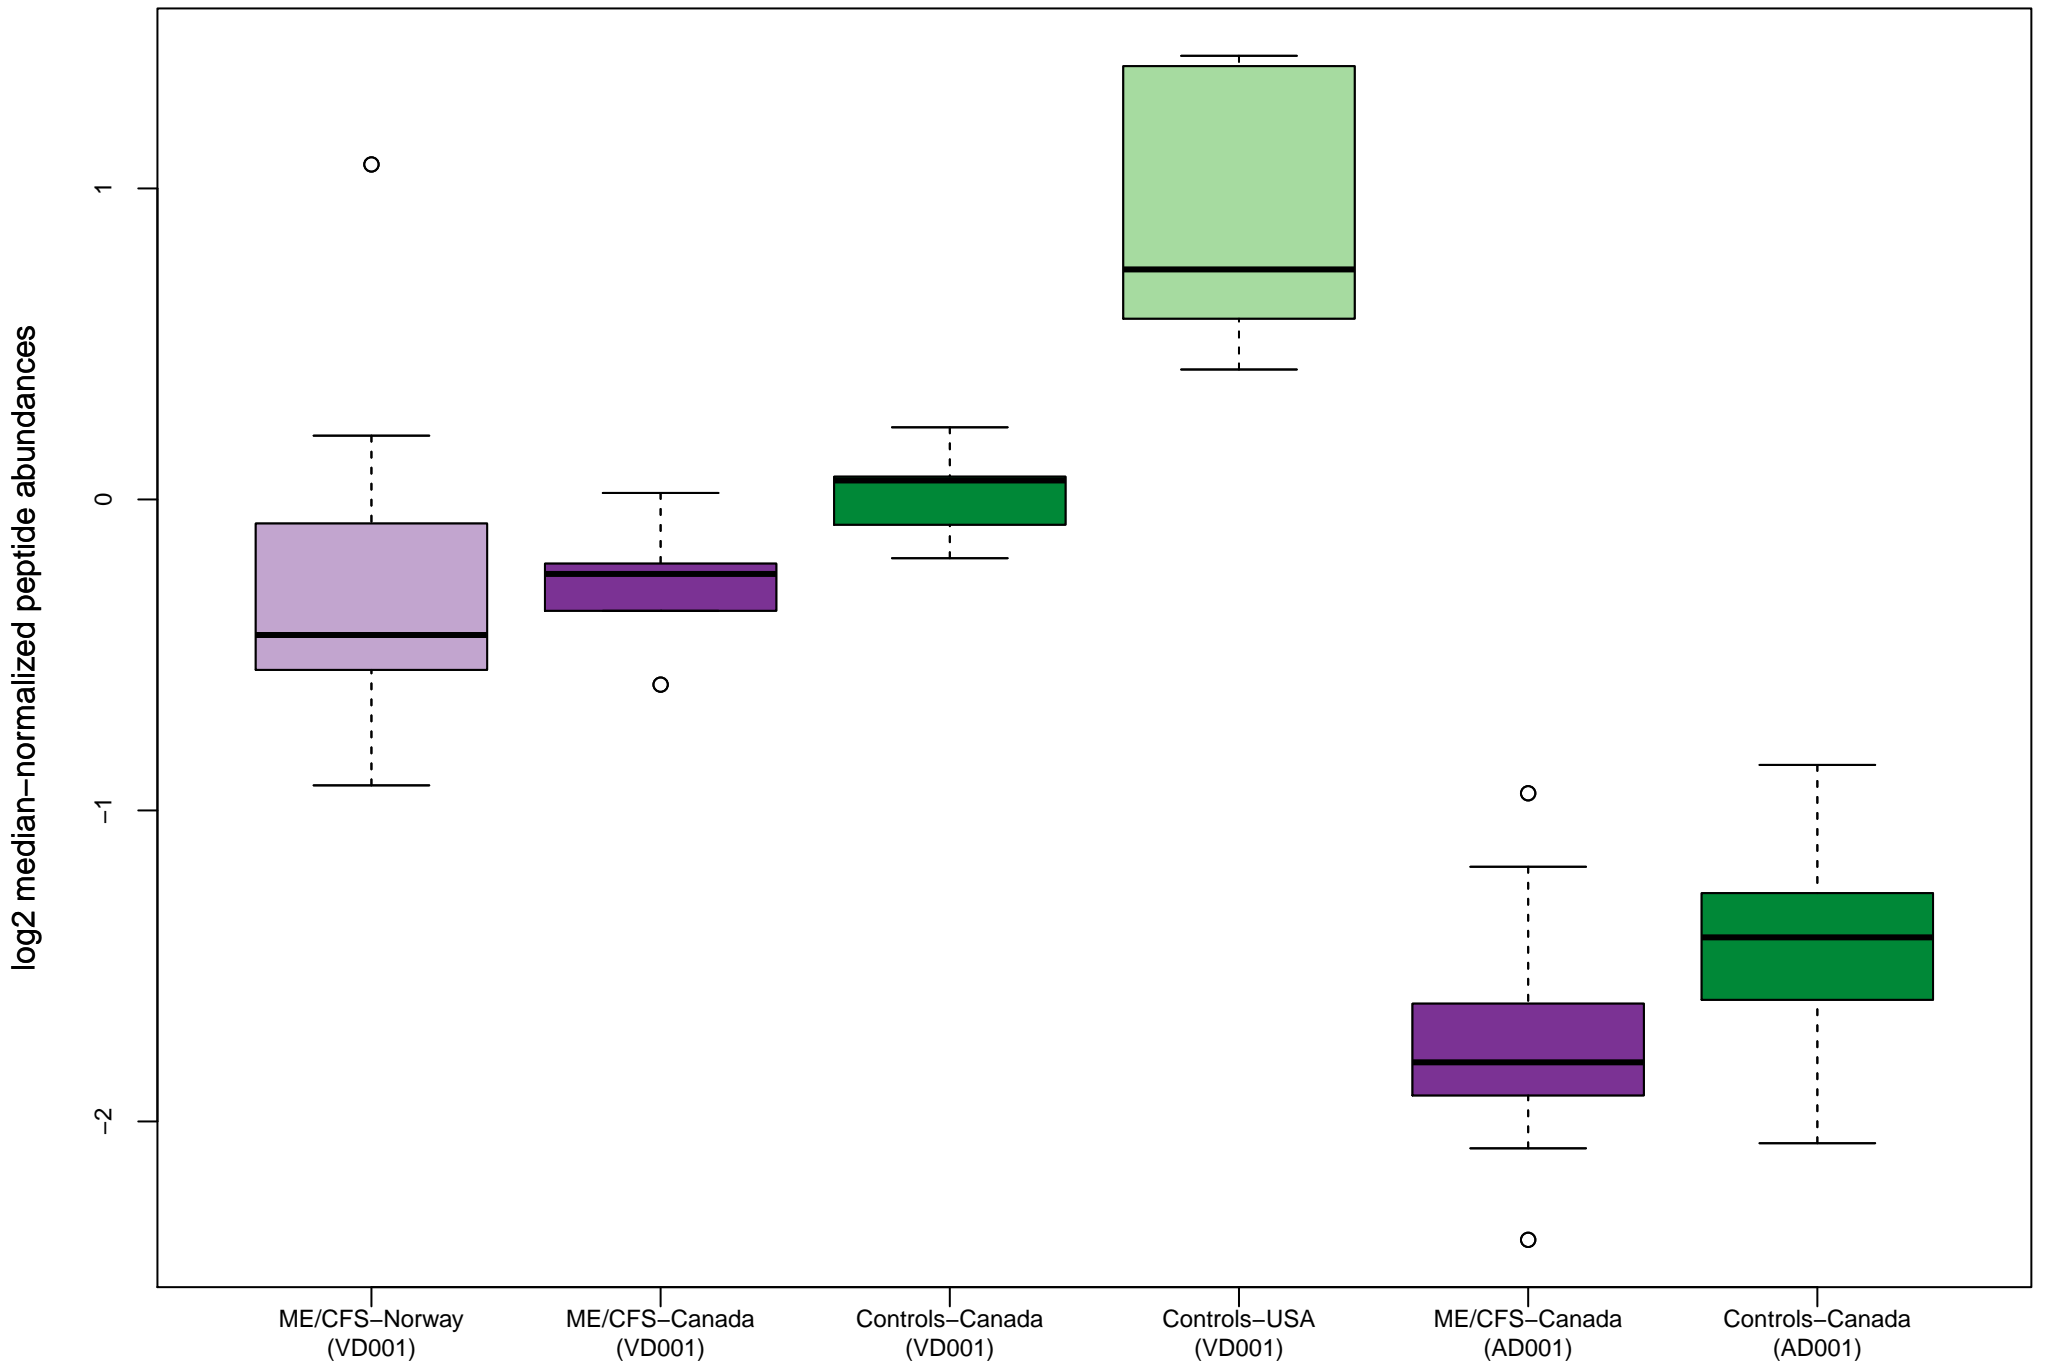



# RRAAFWLSGALS

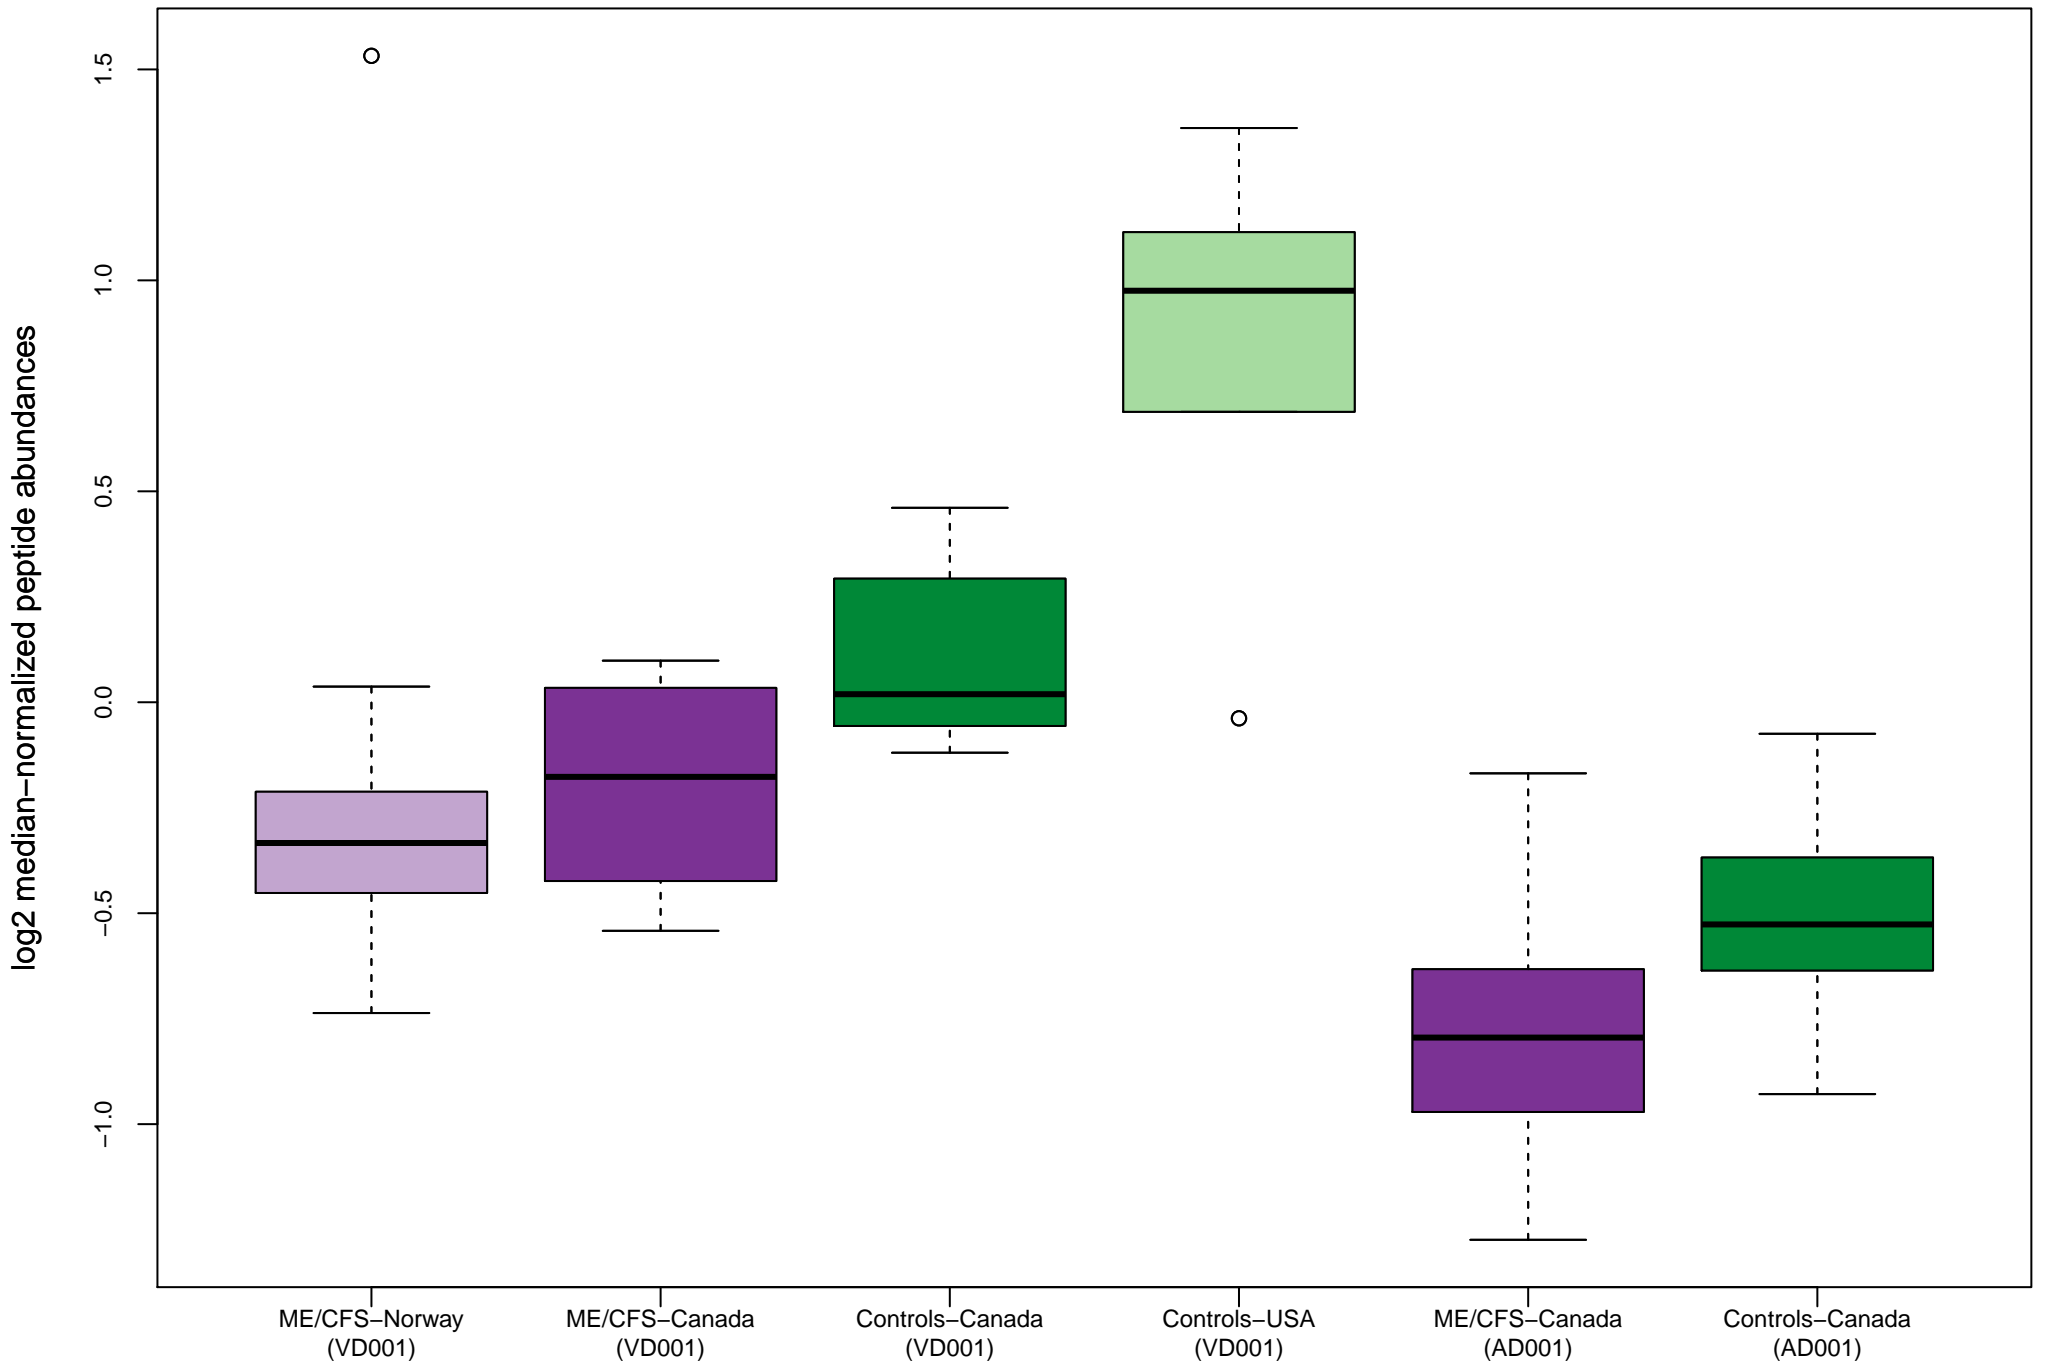

# RRFYQFPGVALG

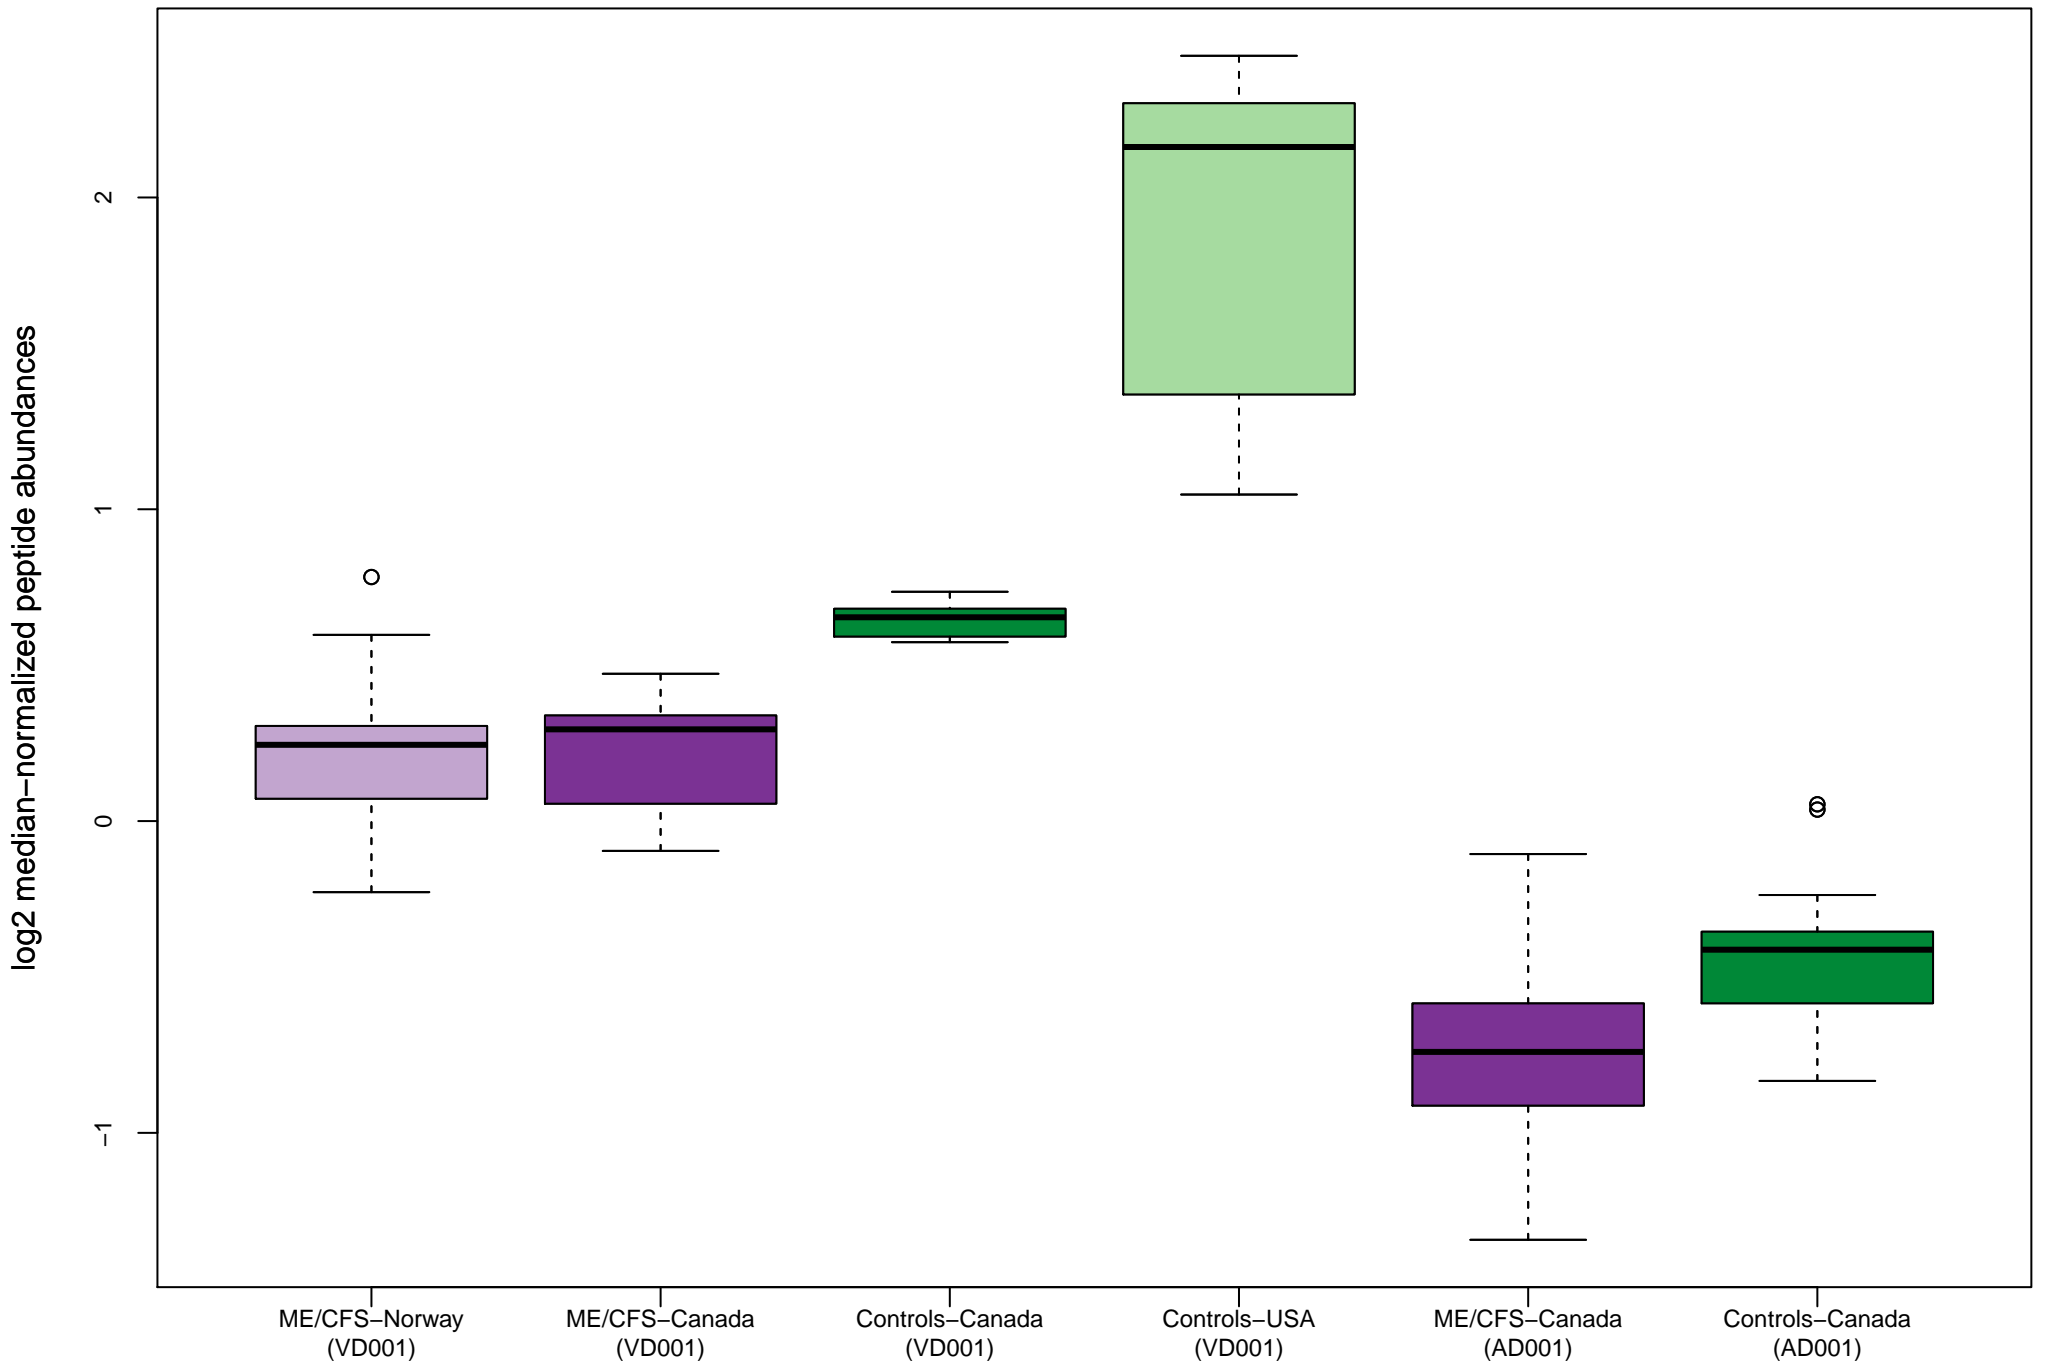

# RRYVLVSFRPNG

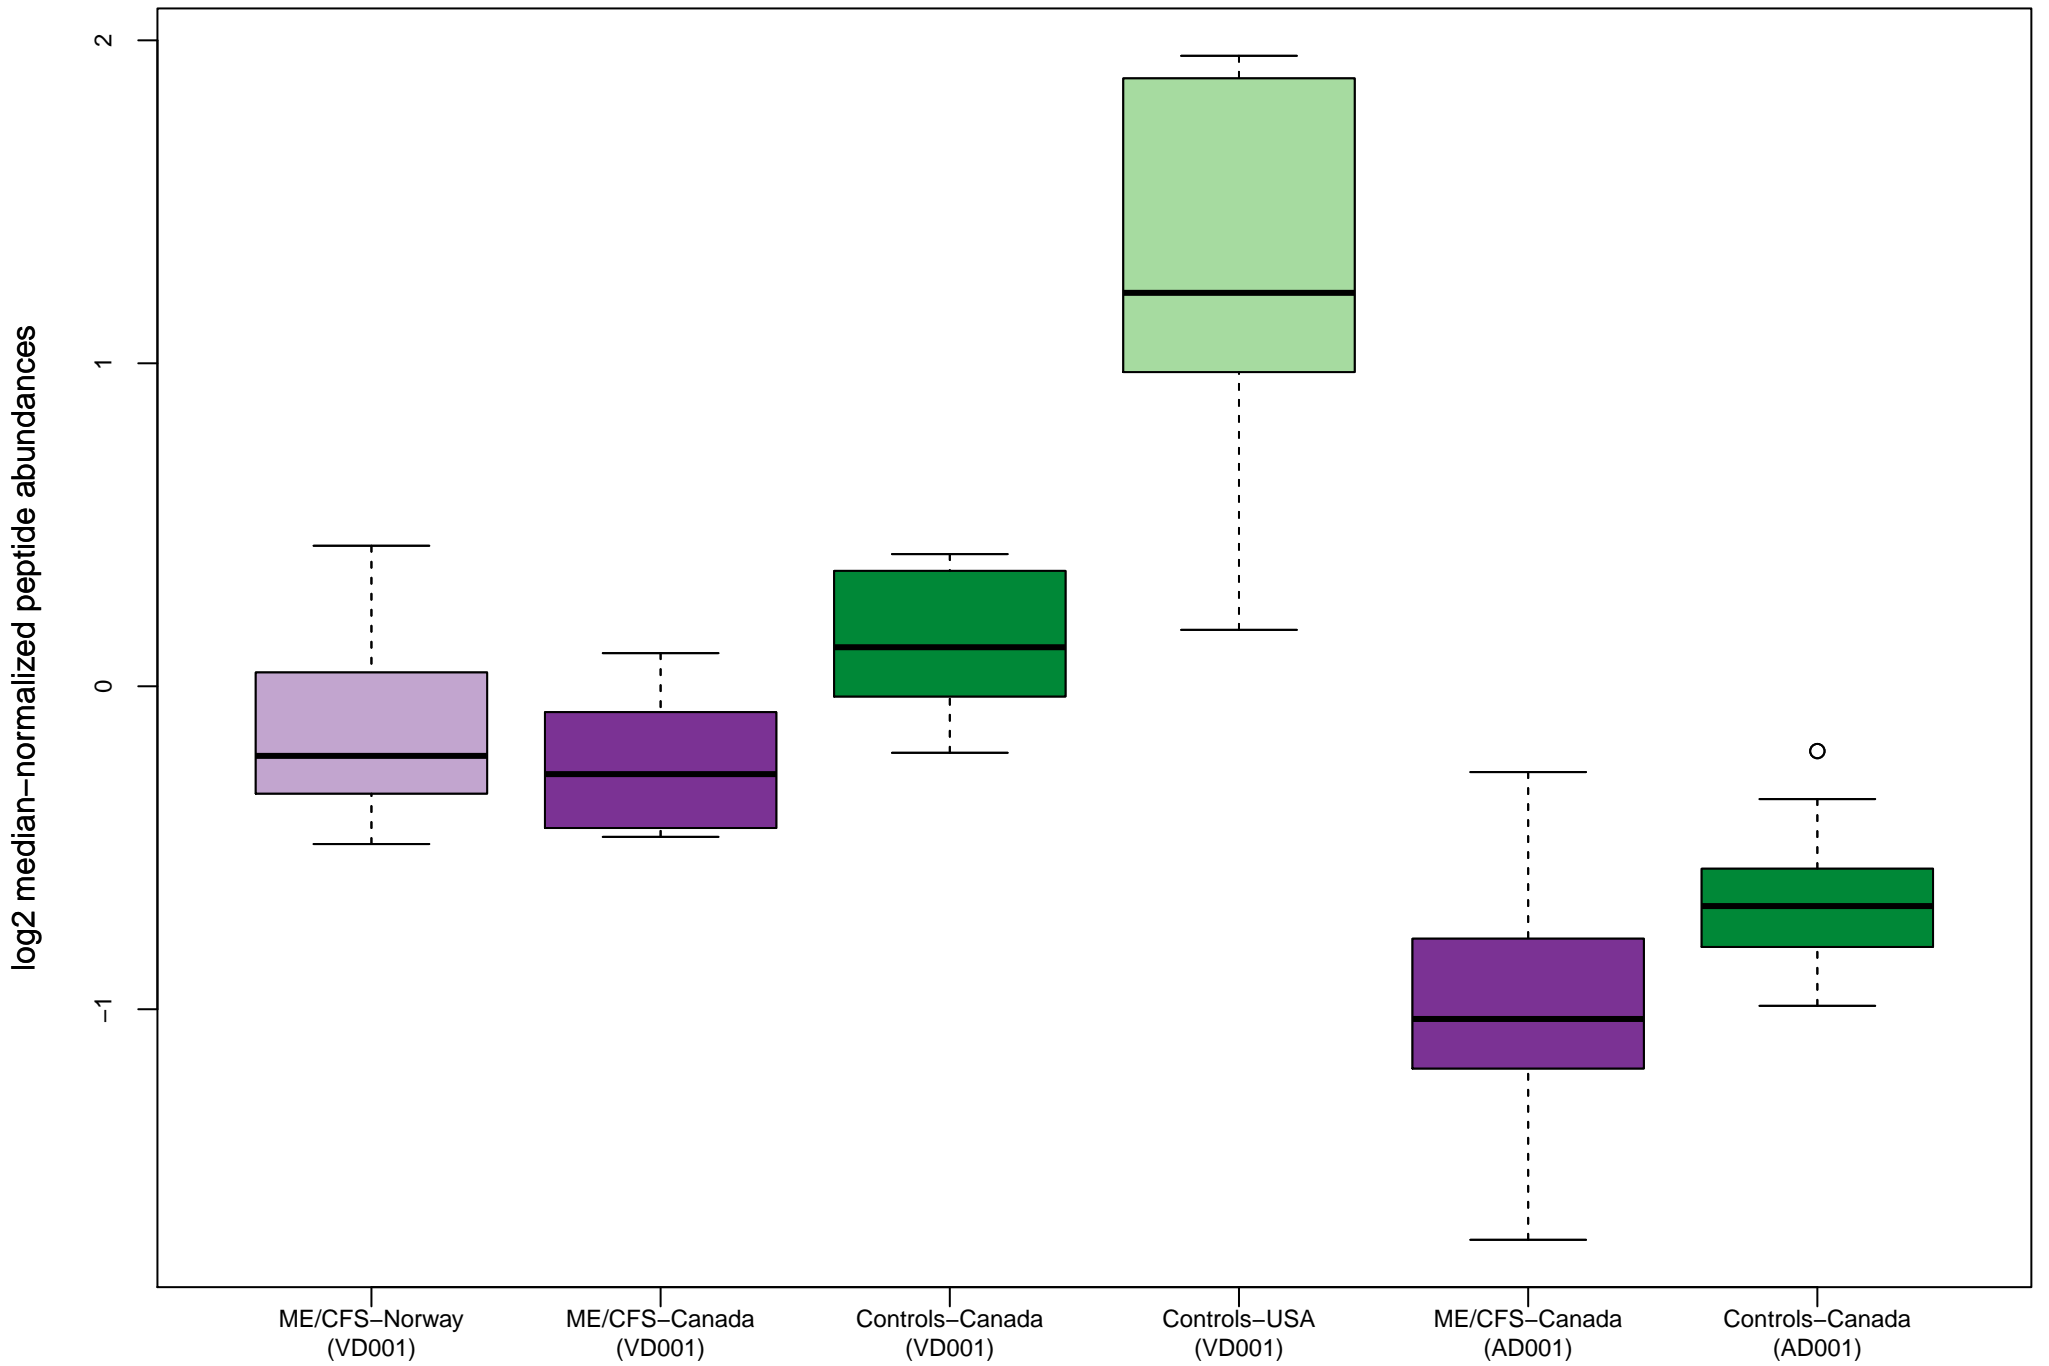

# RSLWSRYLSALG

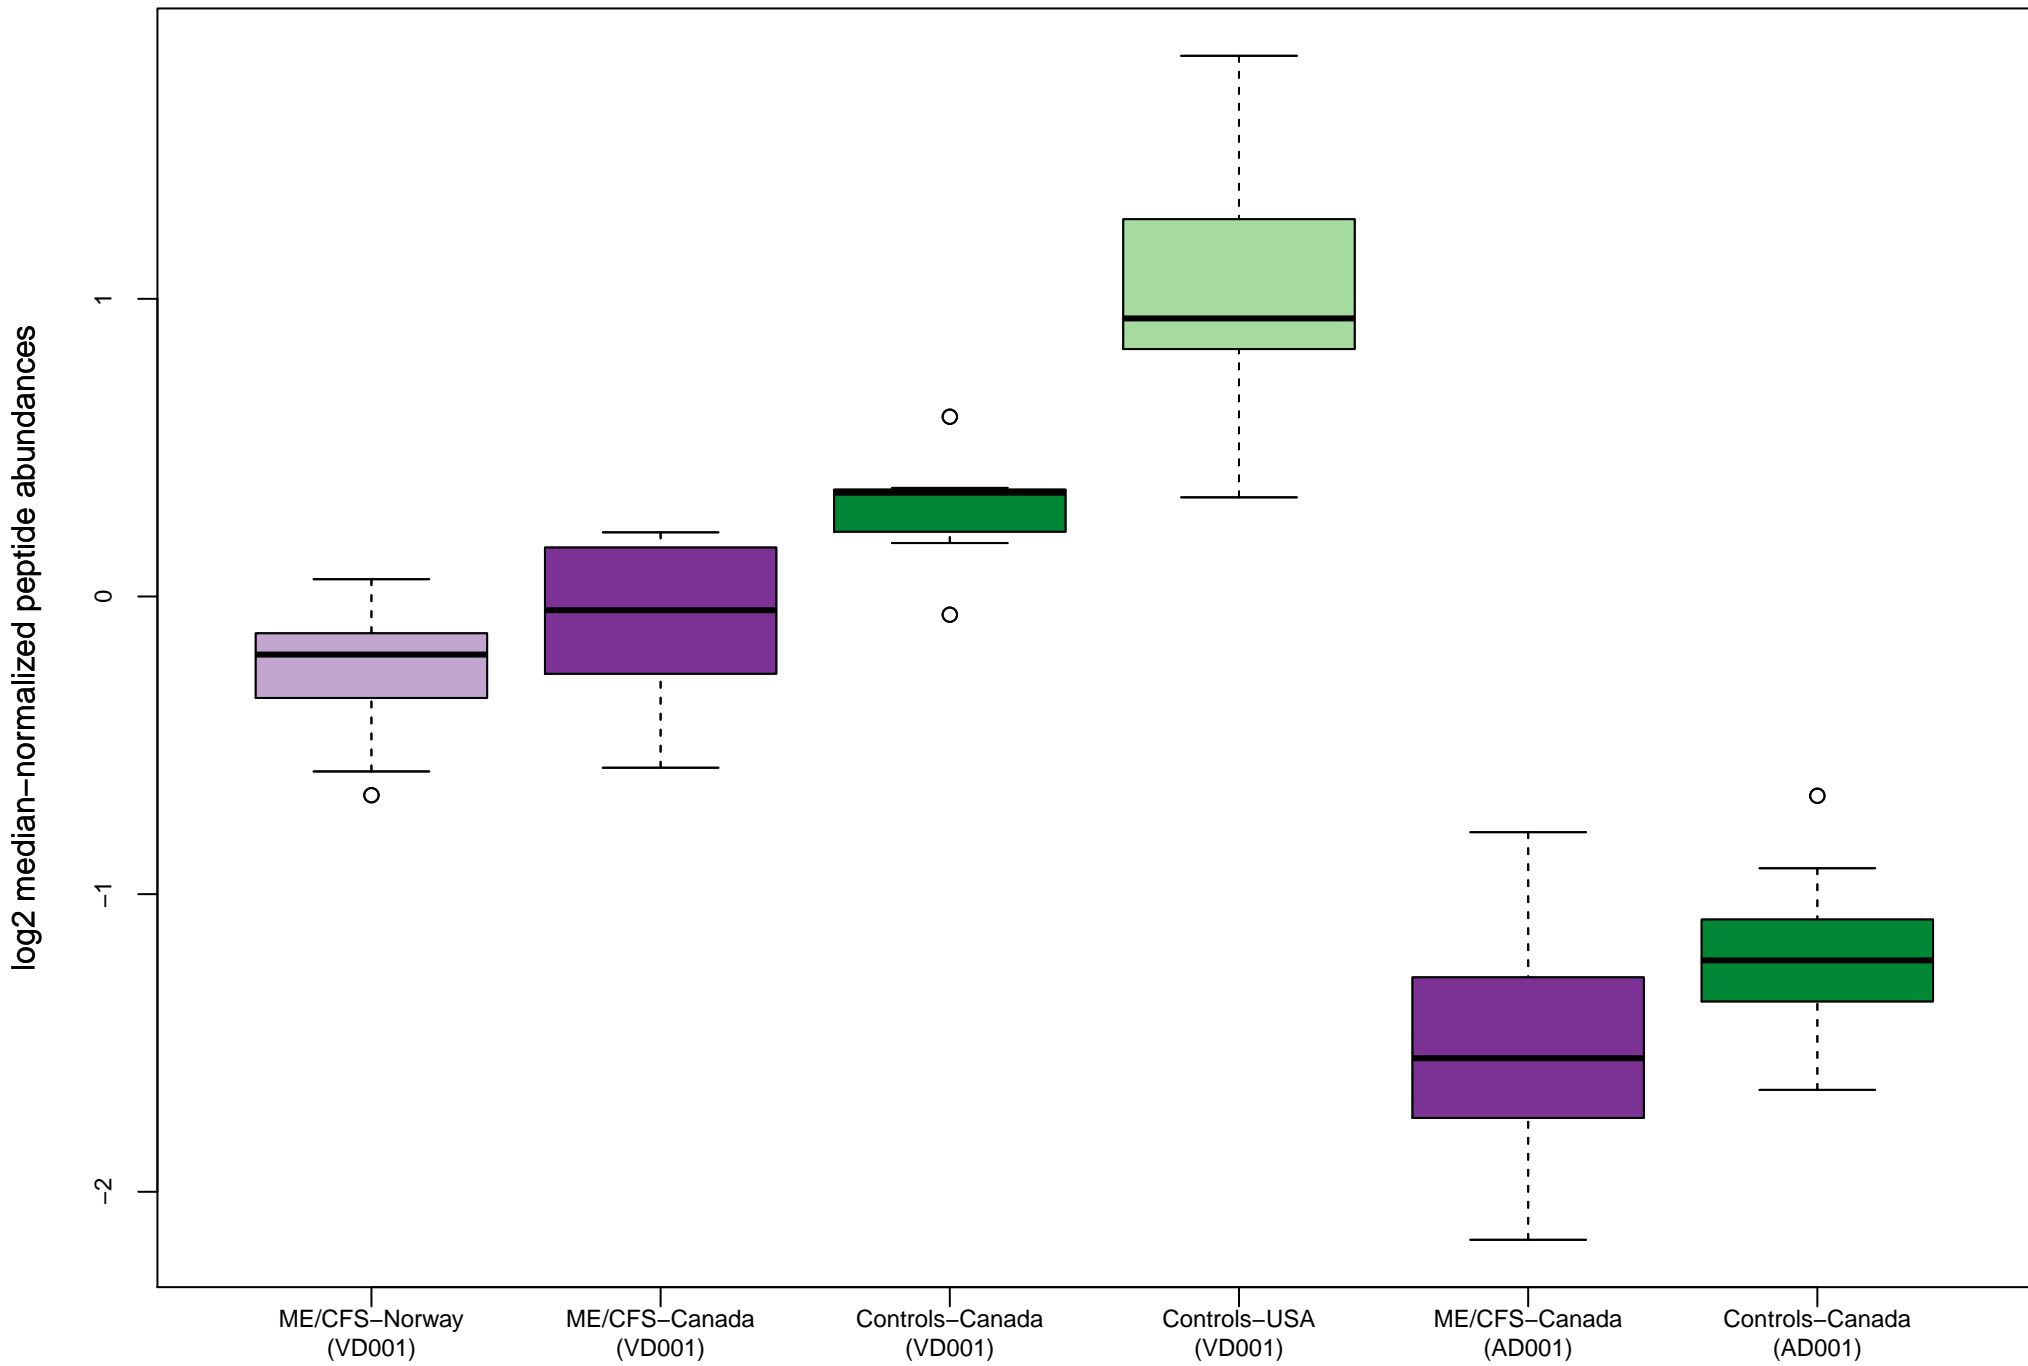

# RSRLFAGPYNVV

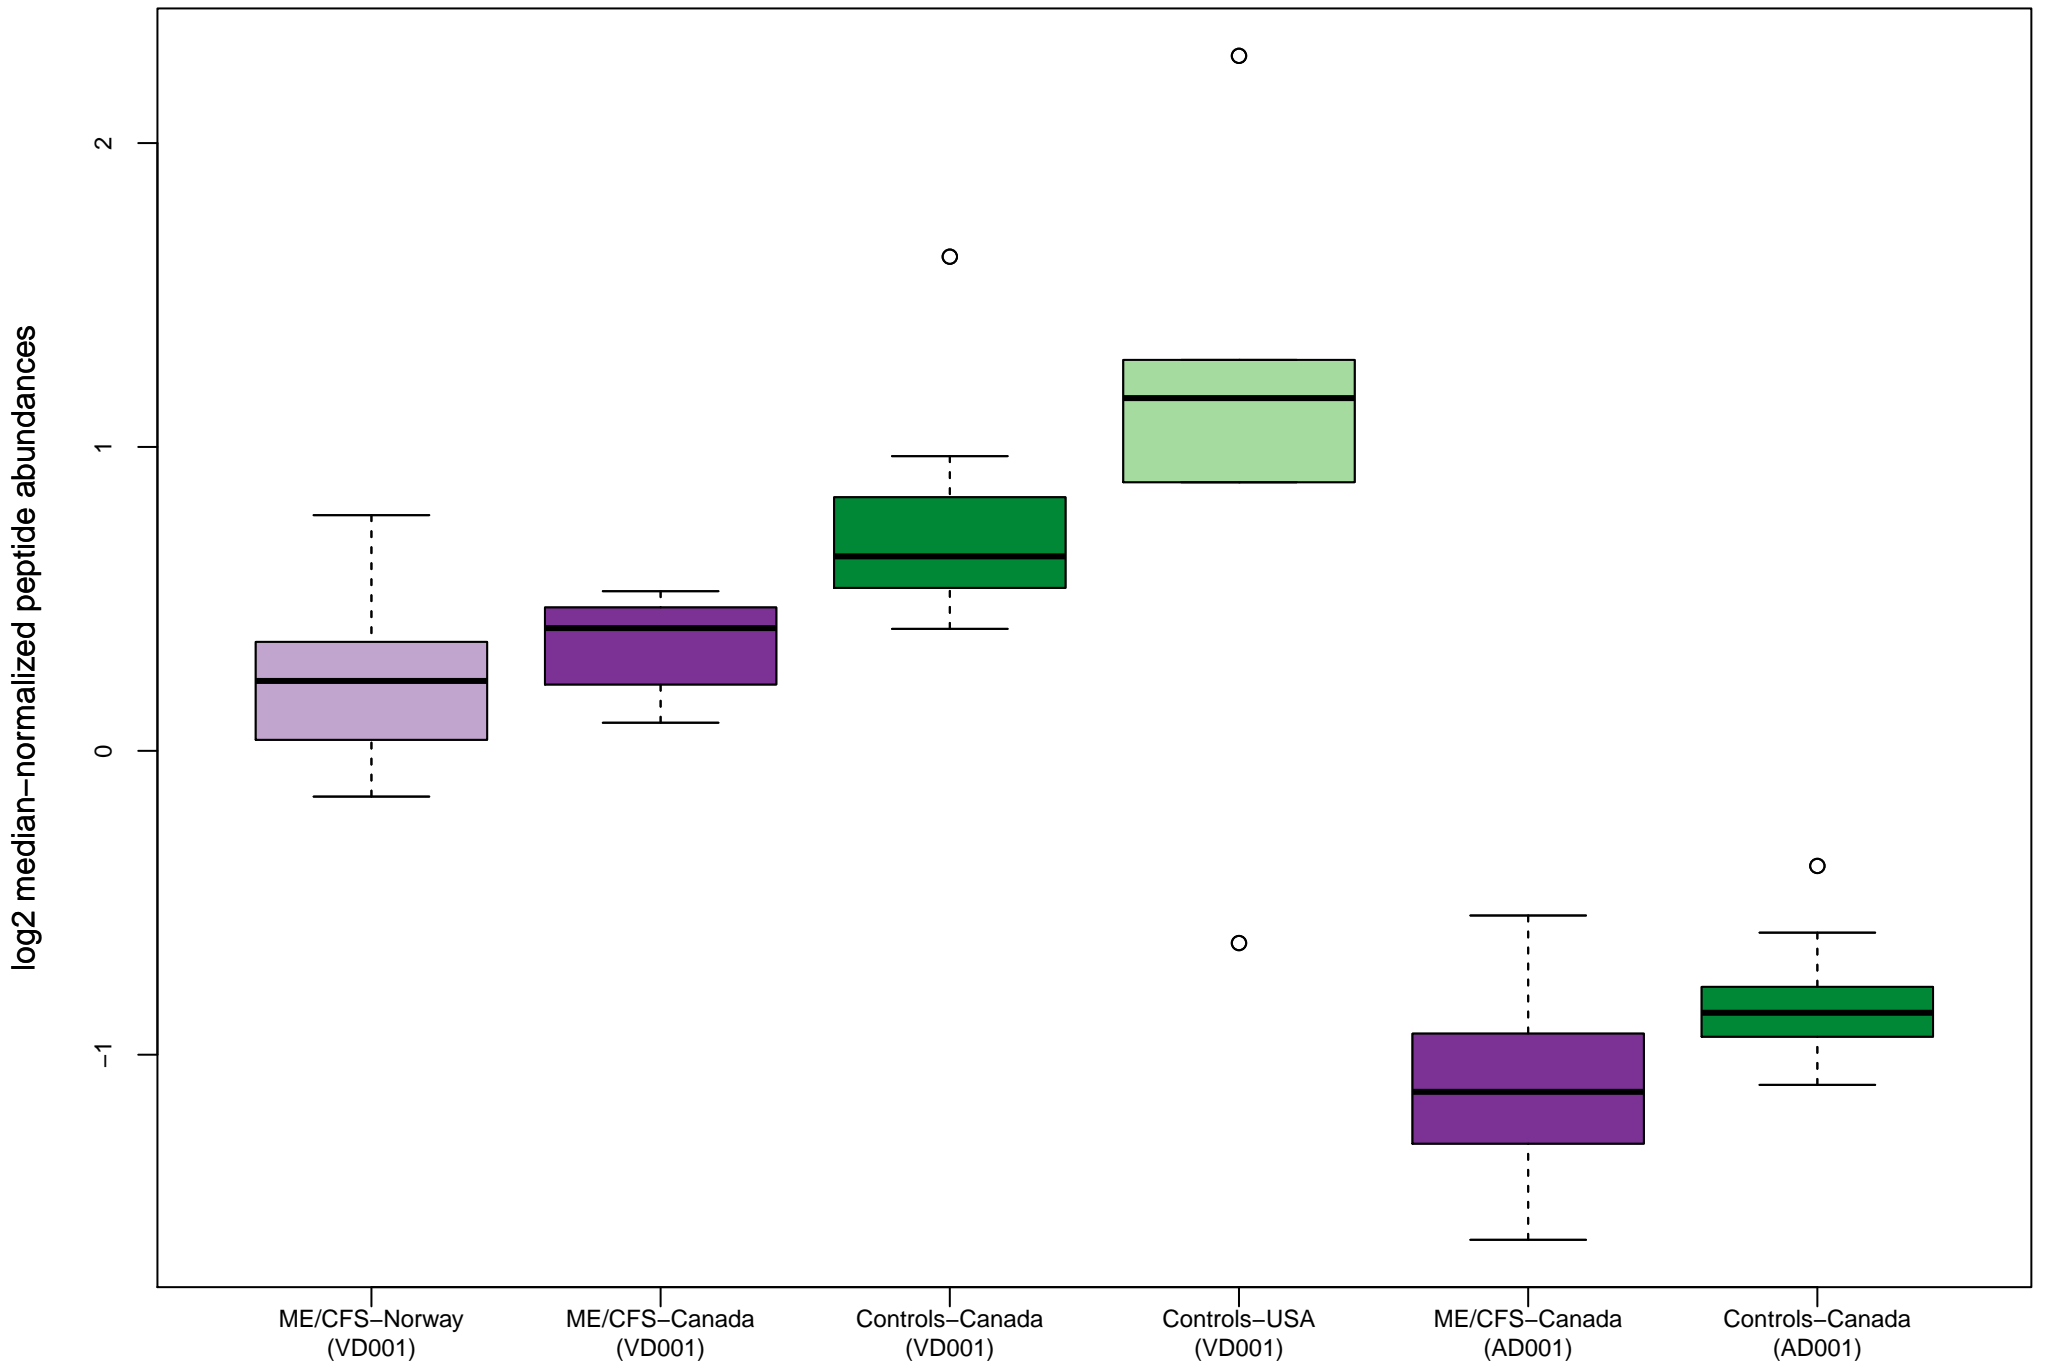

# RVLYLSAQPKGV

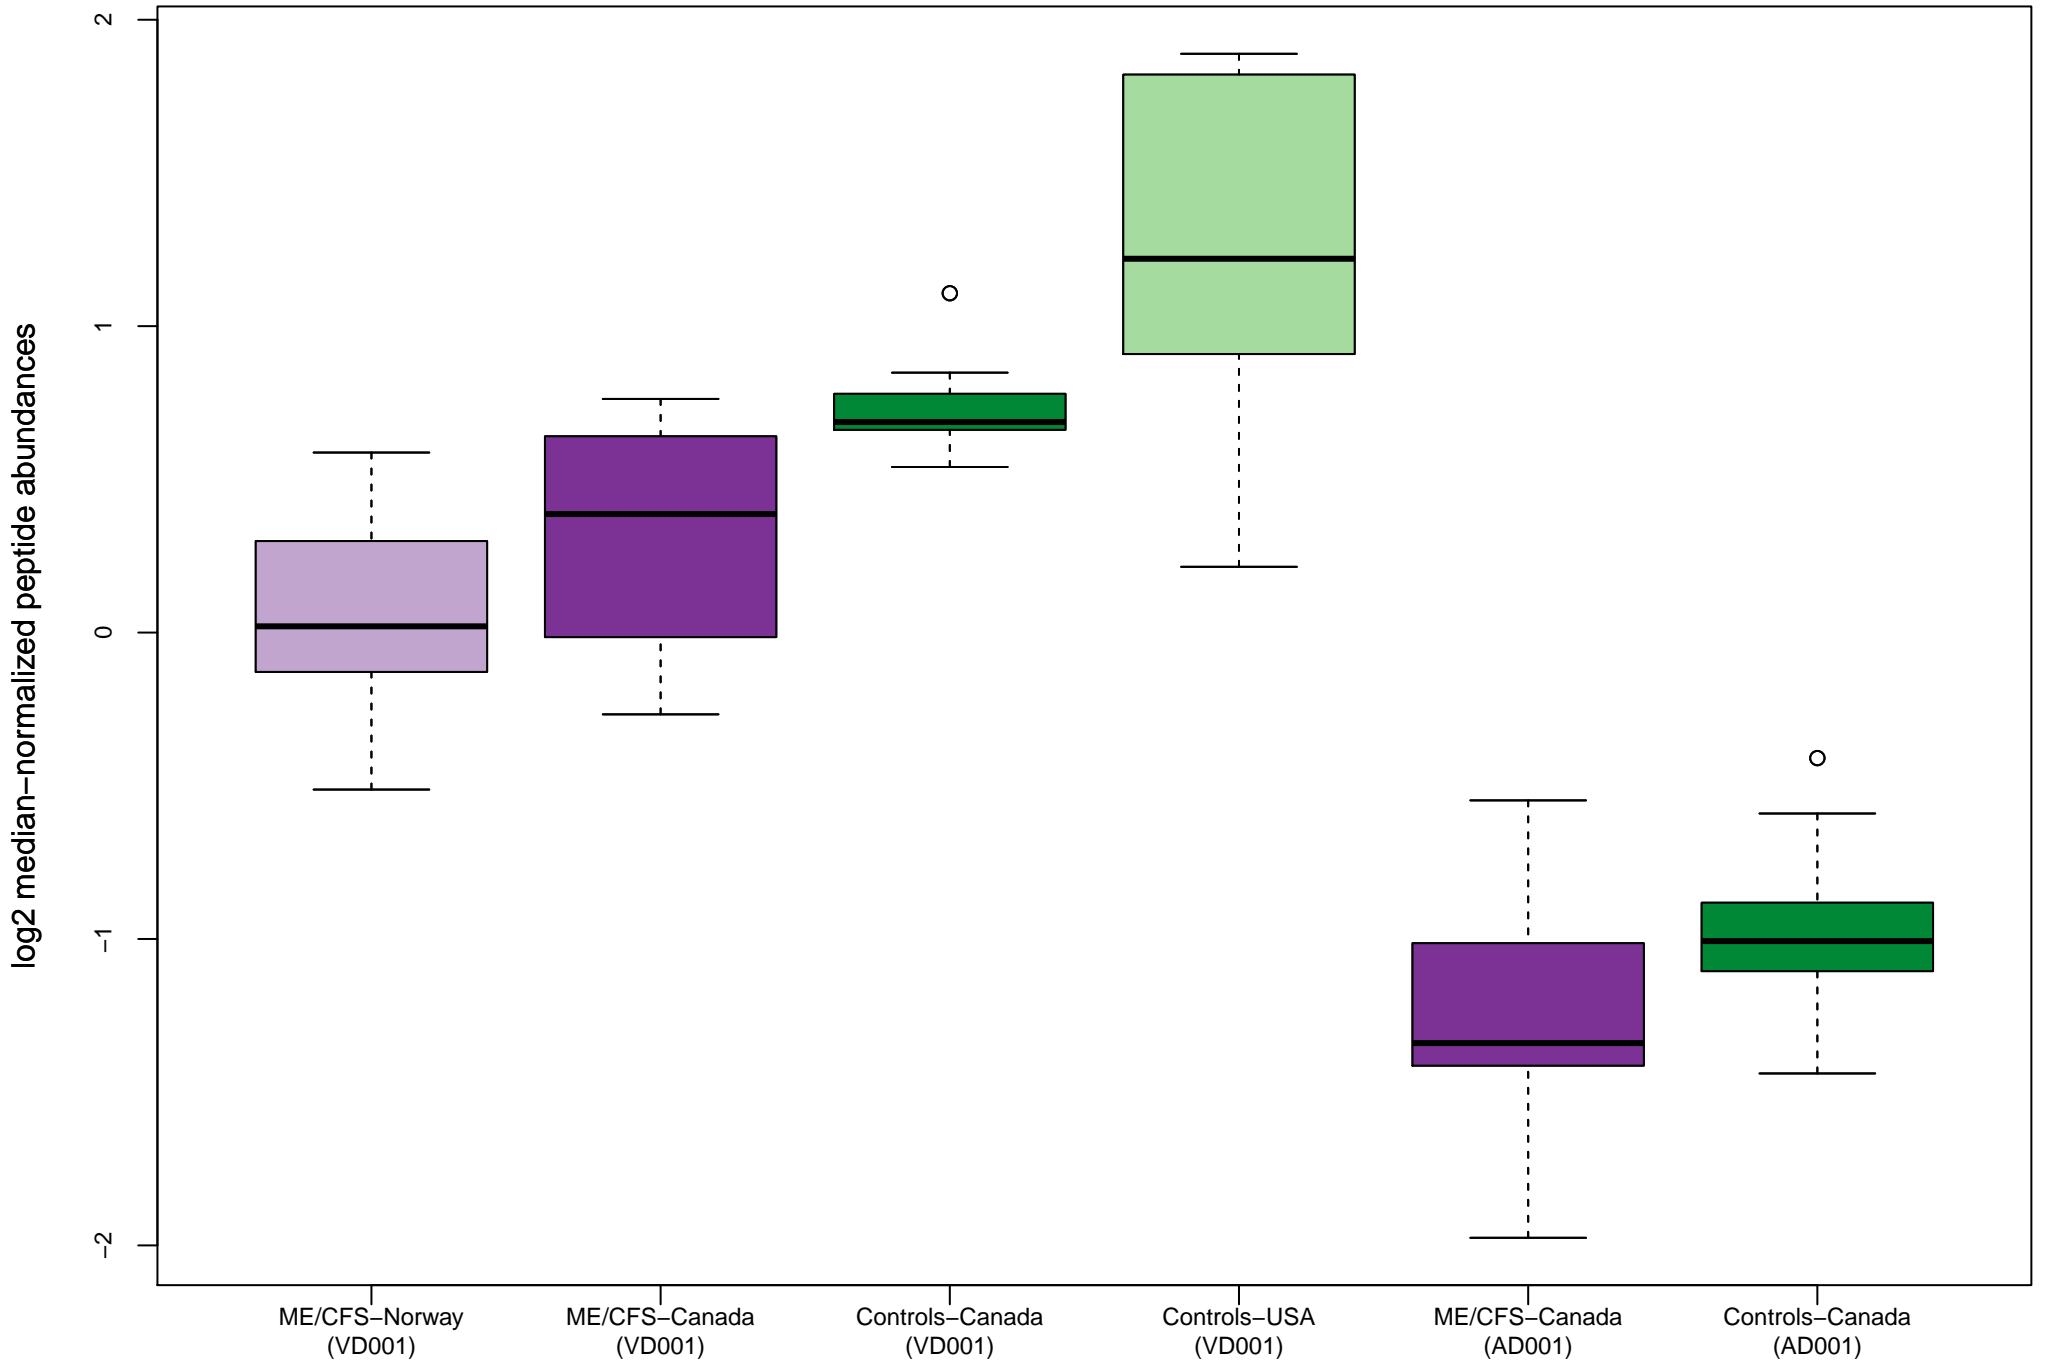

# RWPHAWLGRWKA

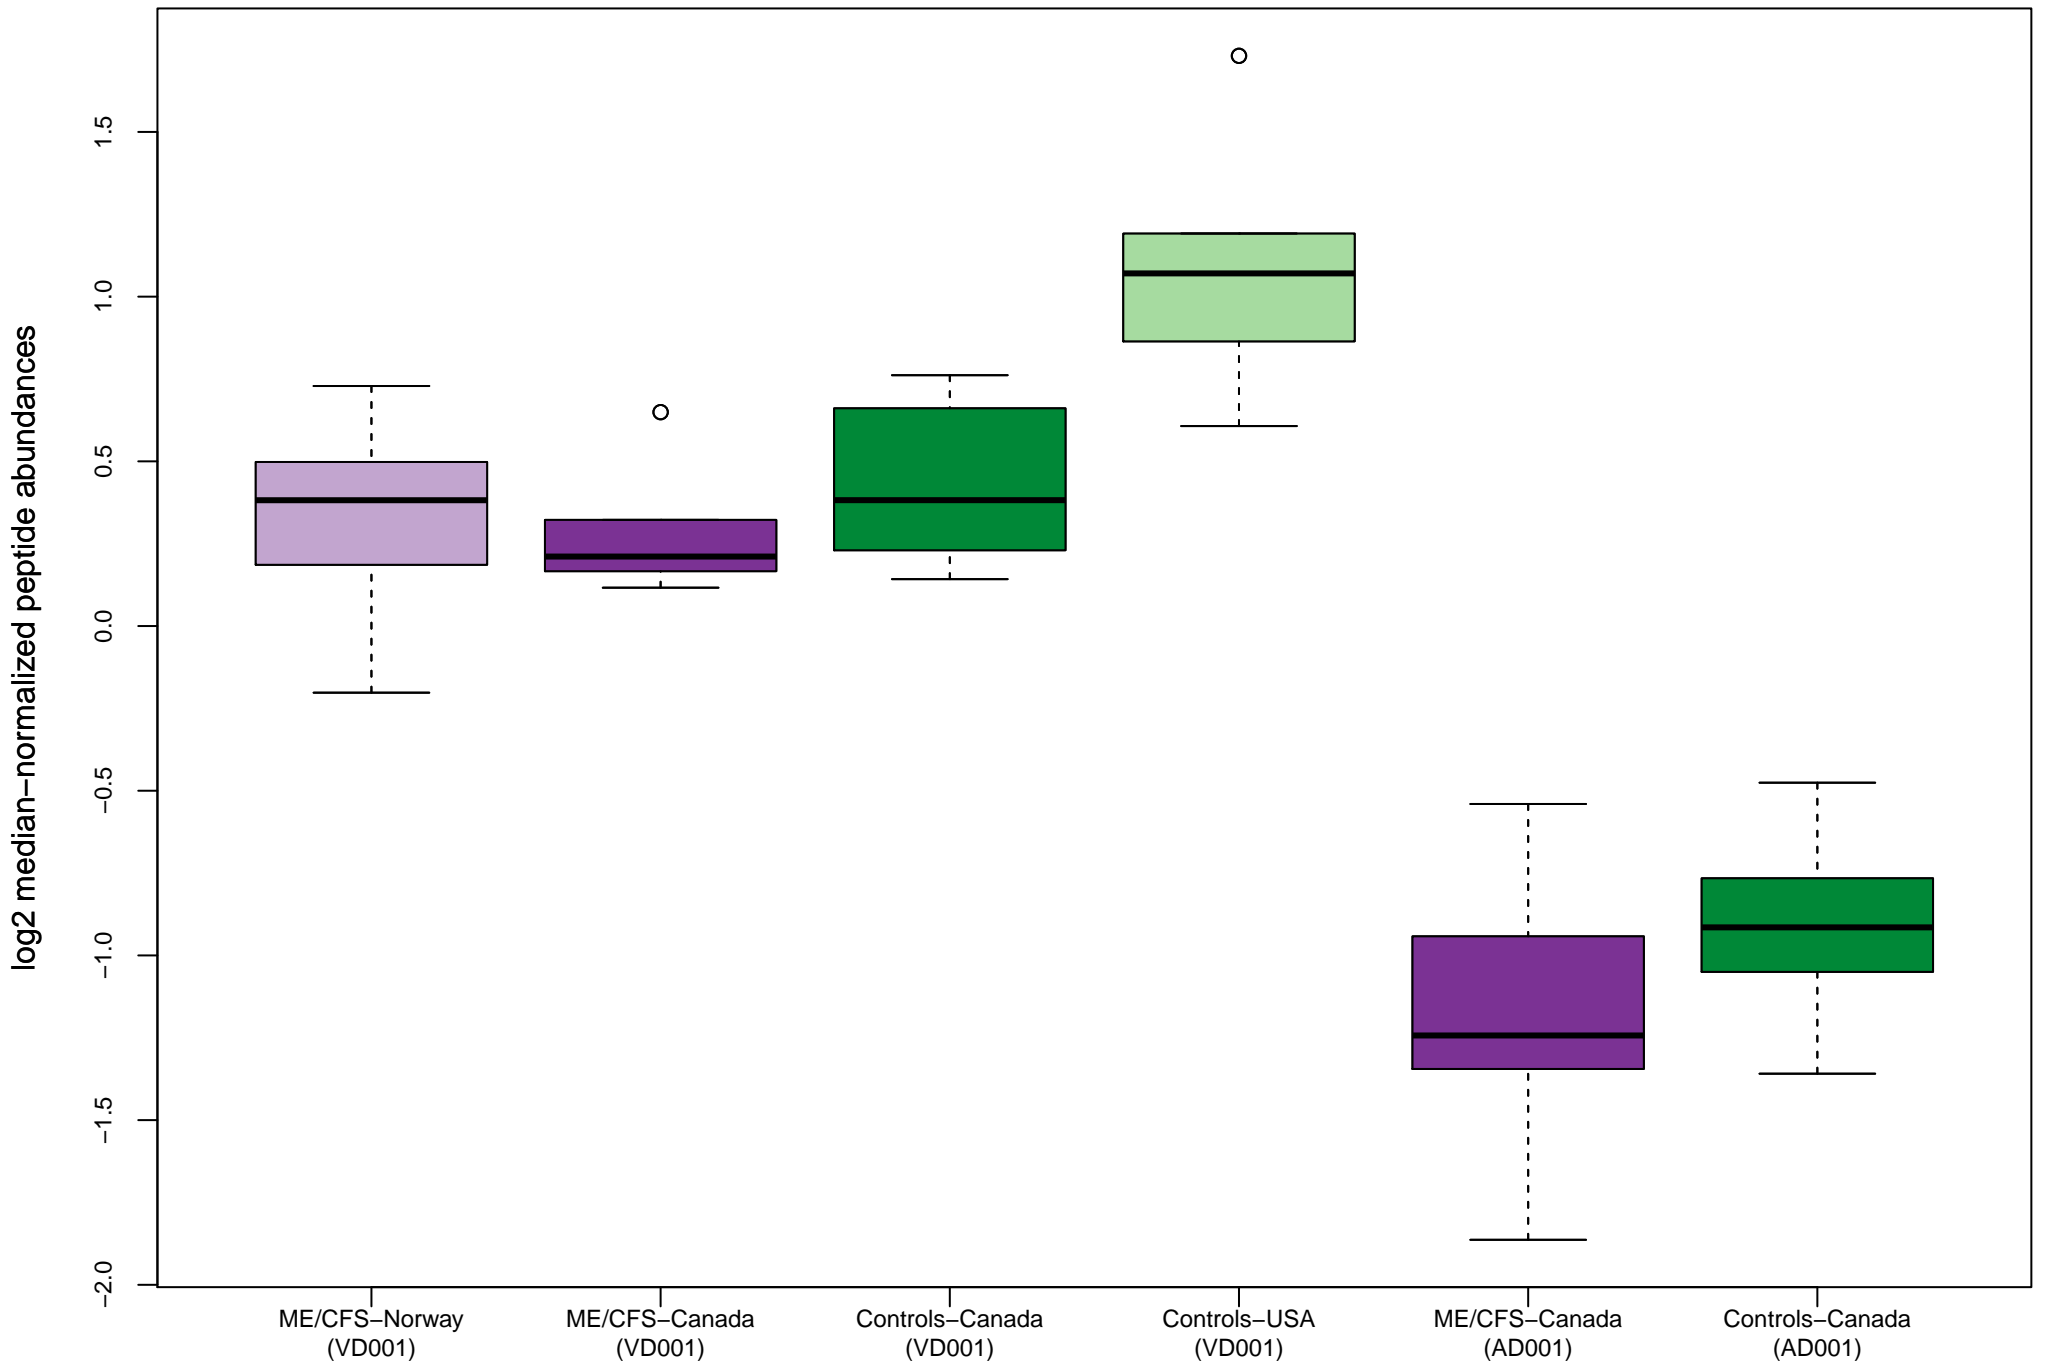

# RWSQVARAFWKL

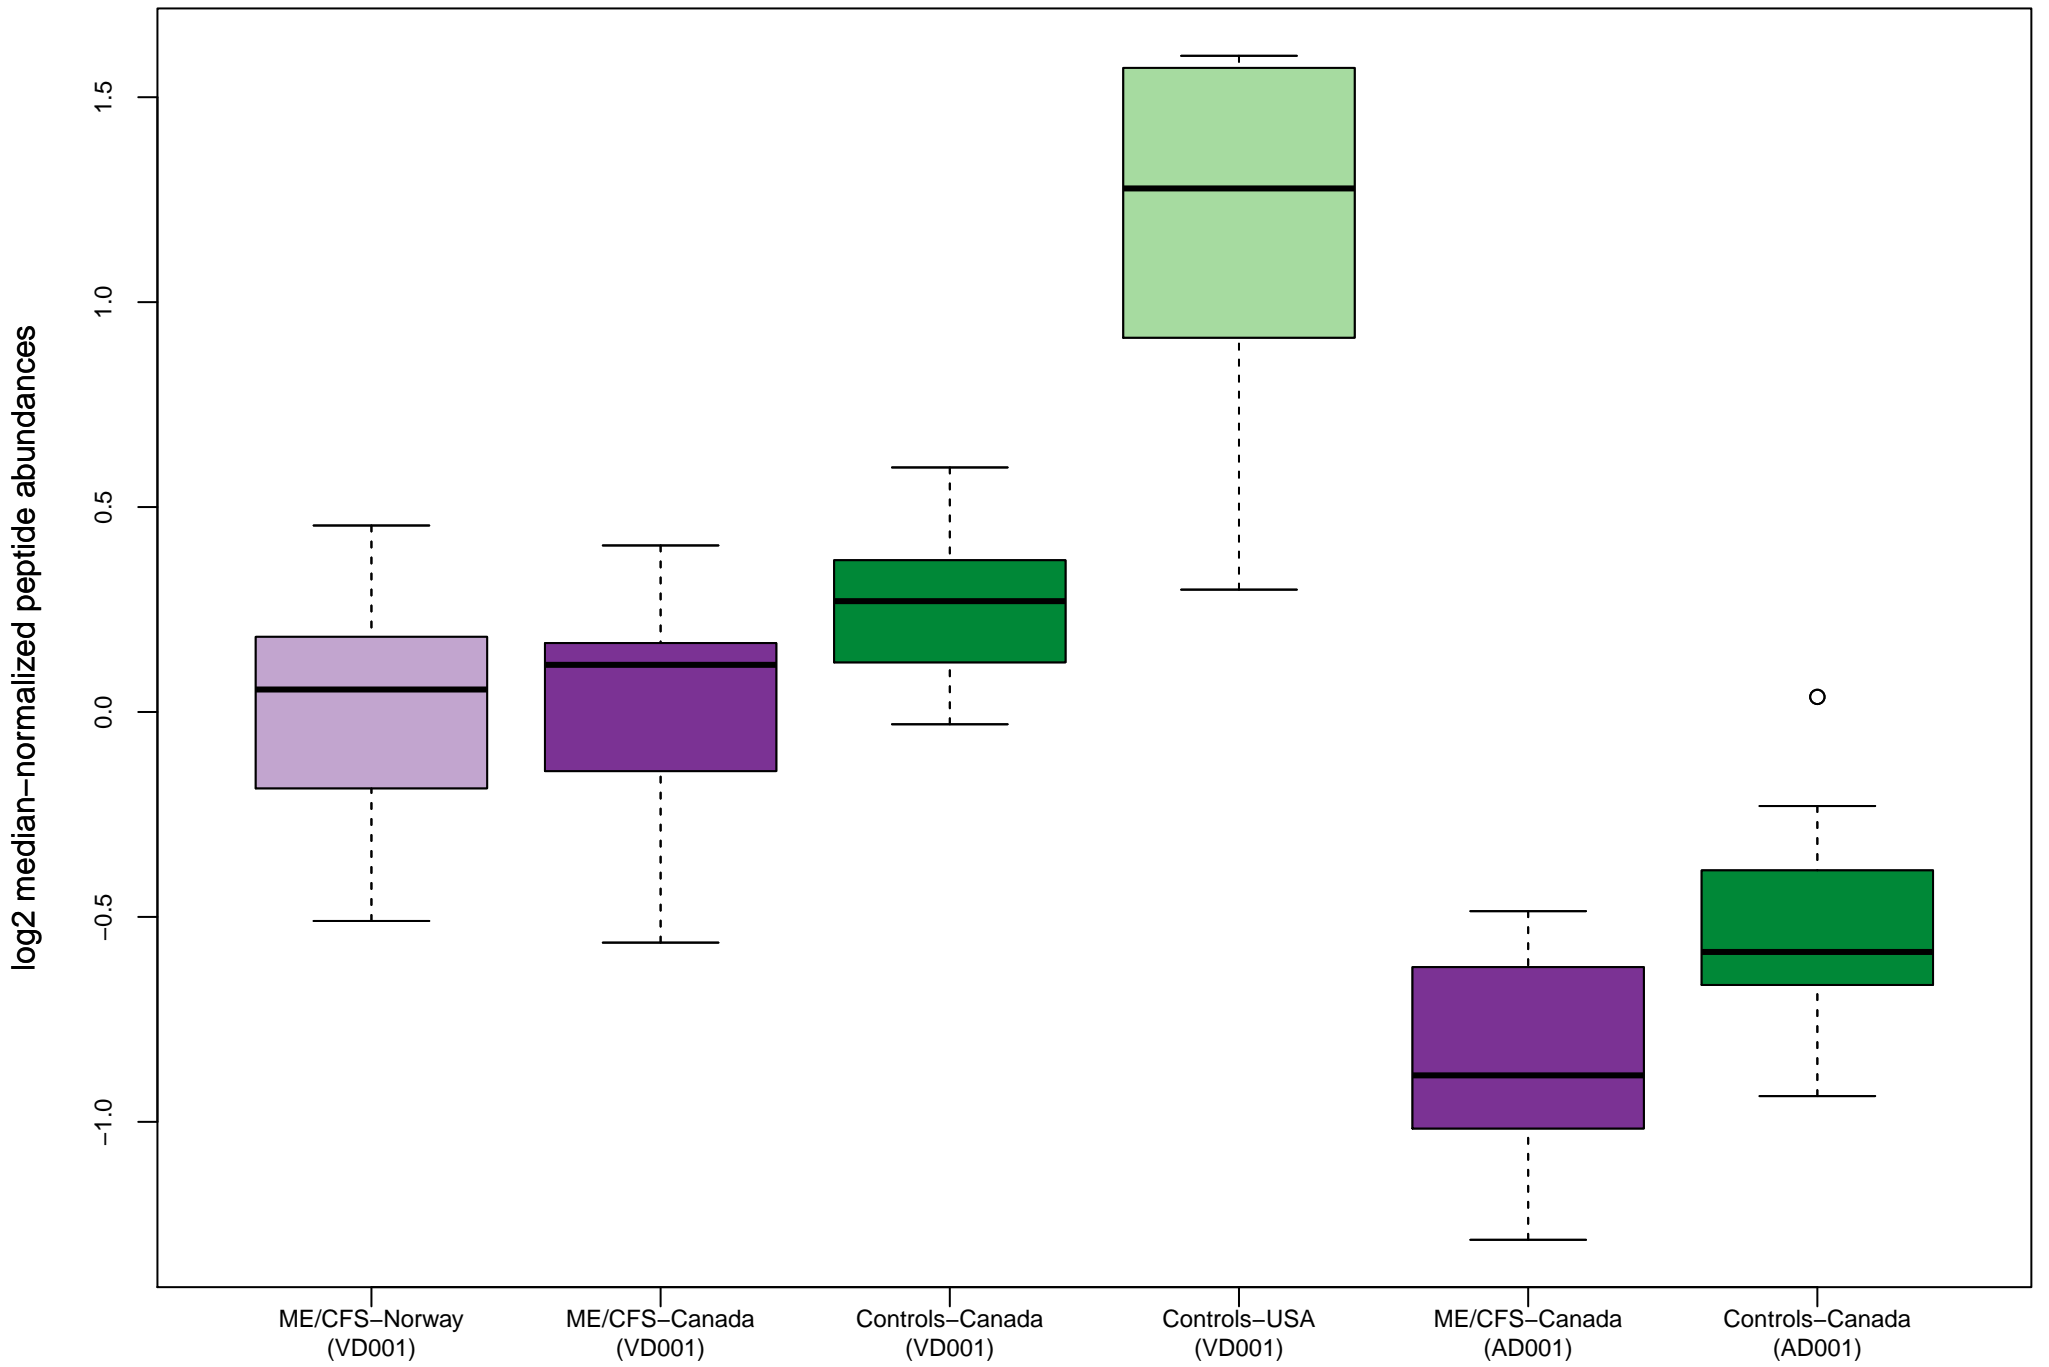



# RYAYWKGWVVRP

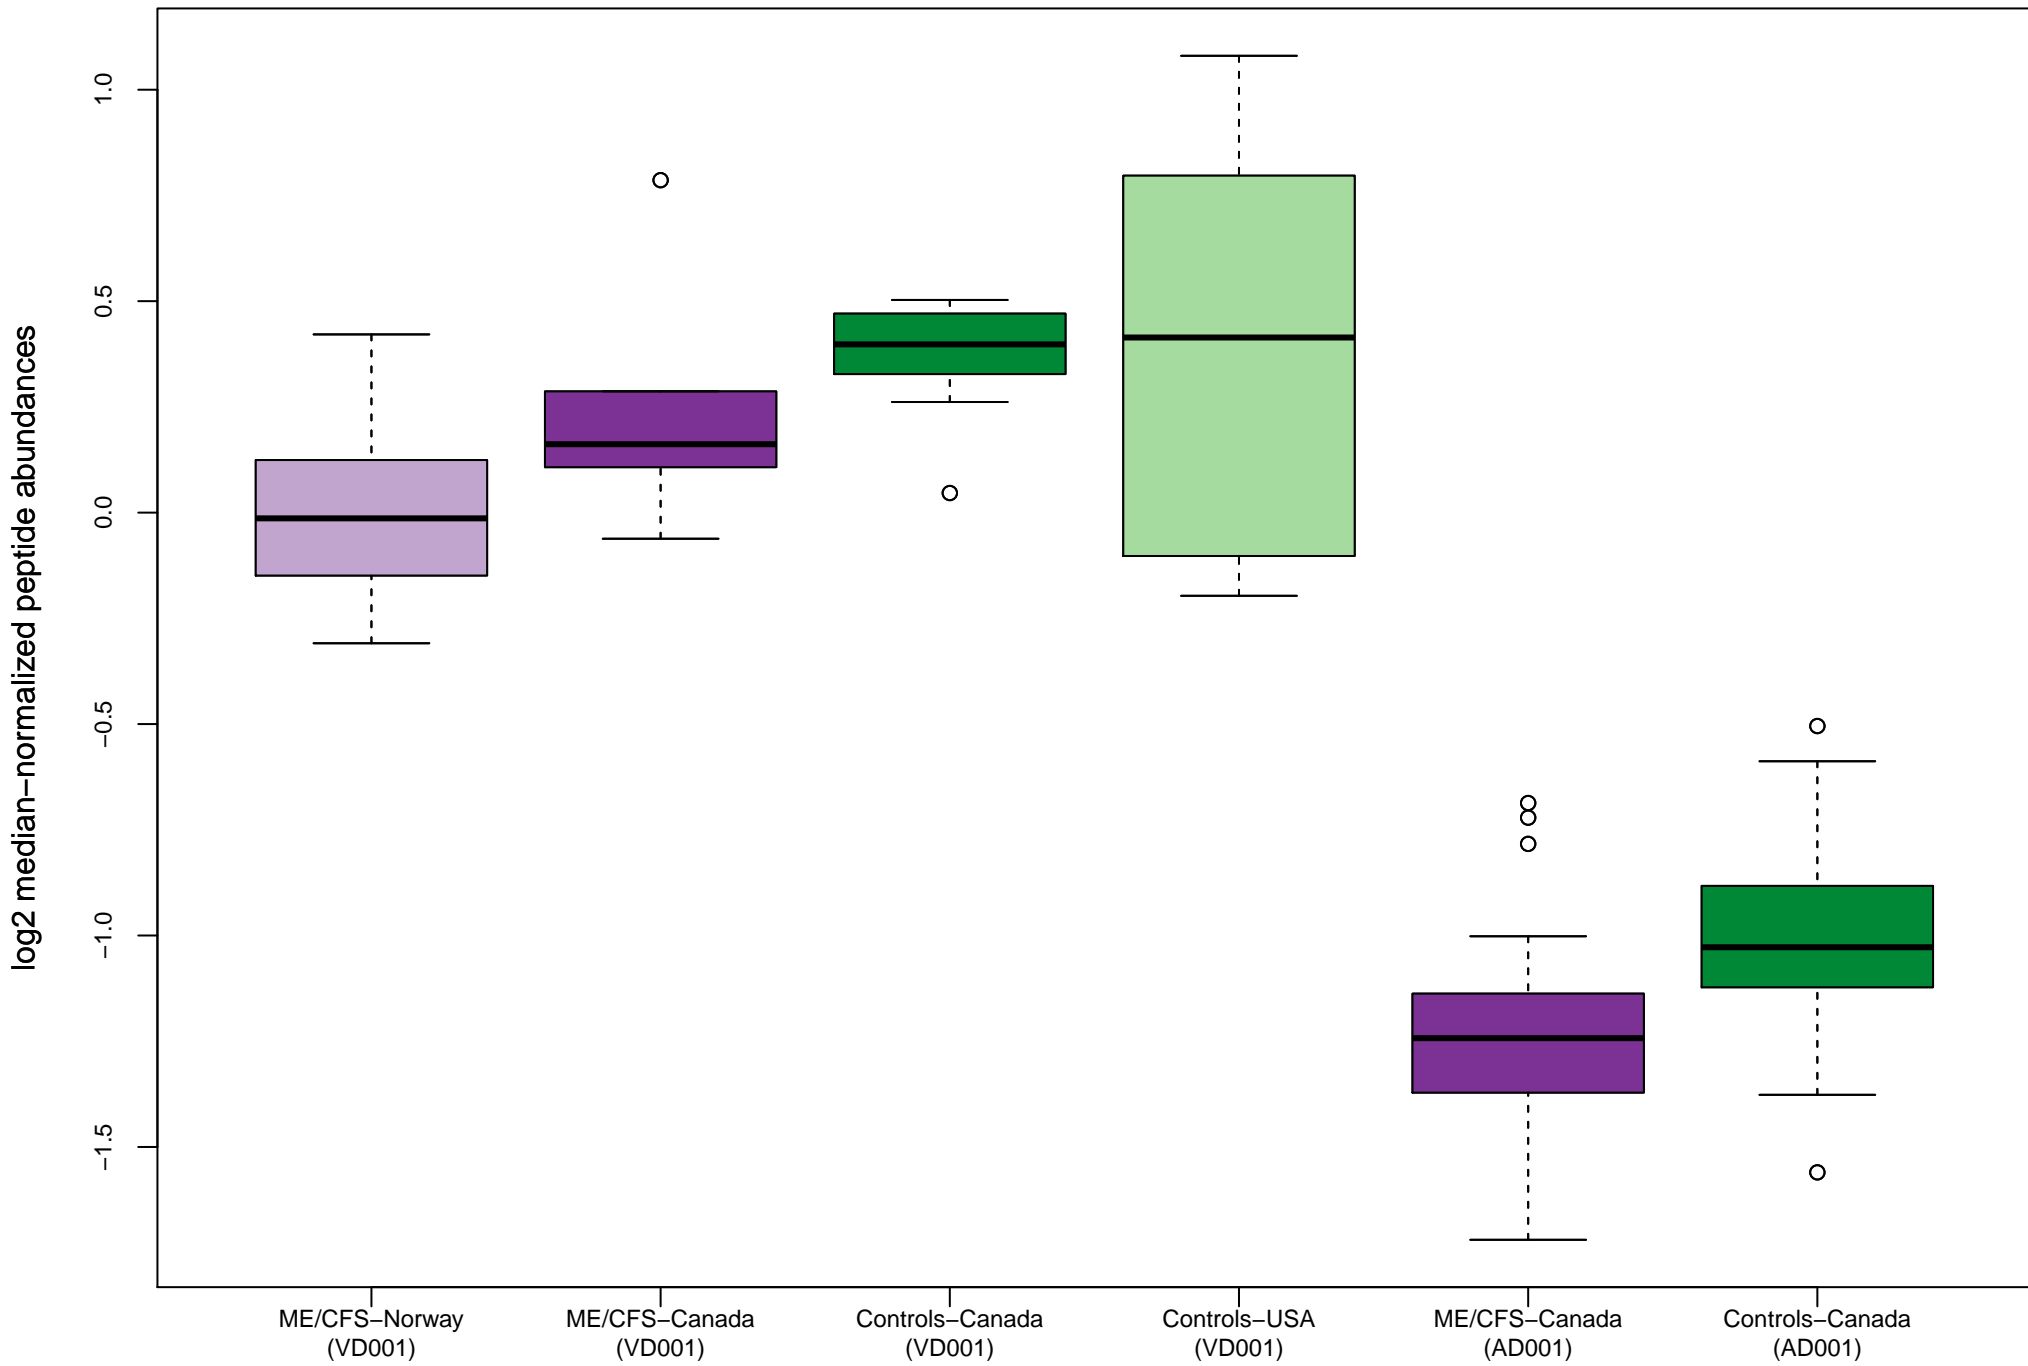

# RYFNRYKLHLGA

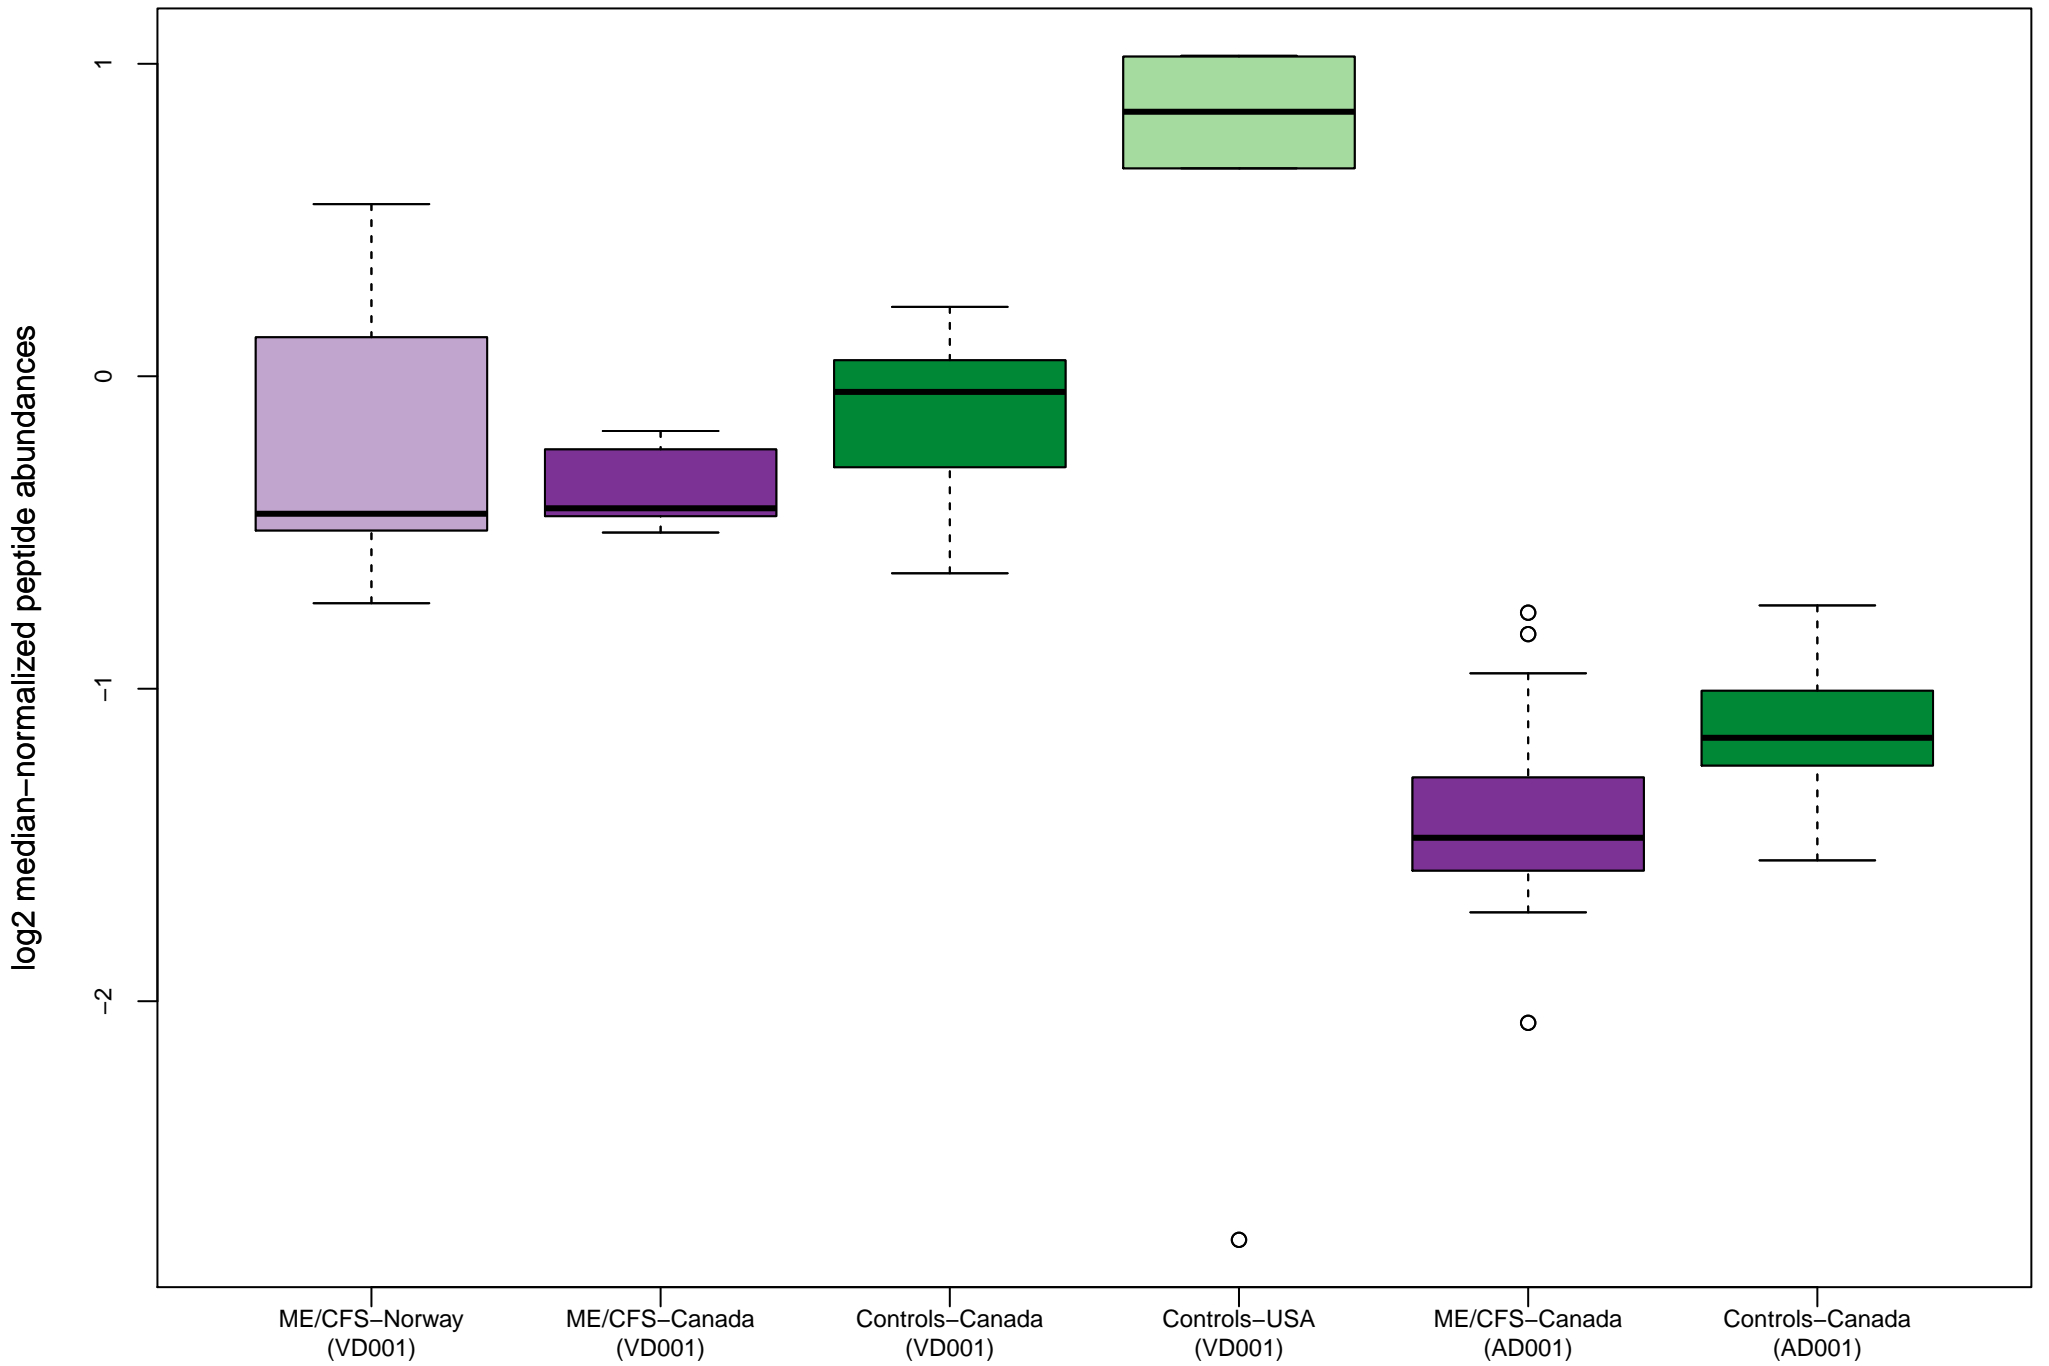

# SLFRSFRSGVAS

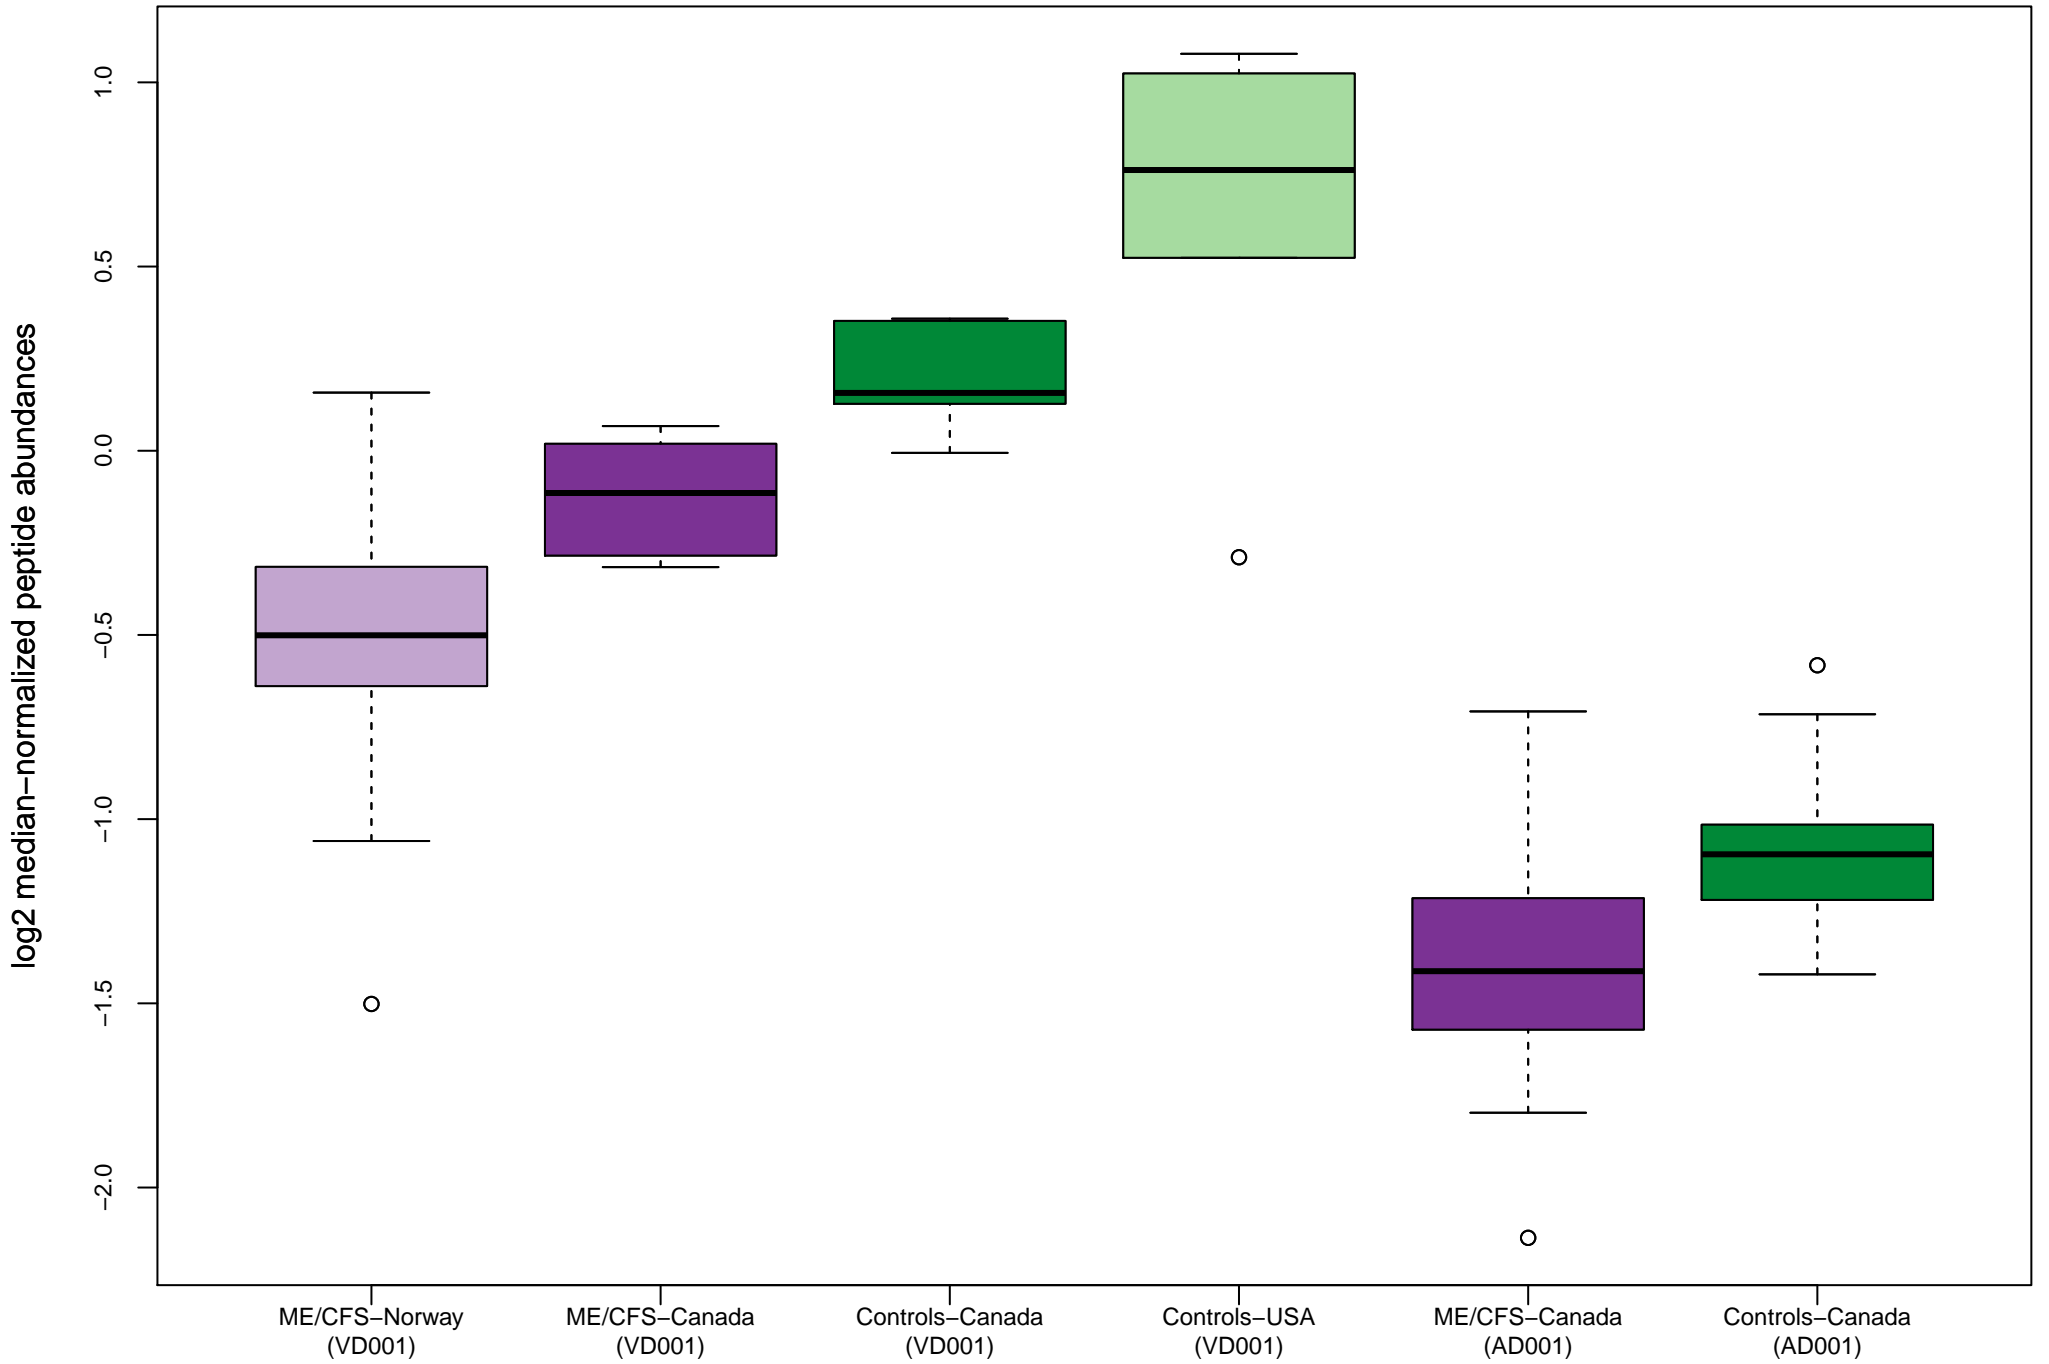

# VFGQPLFRWKGV

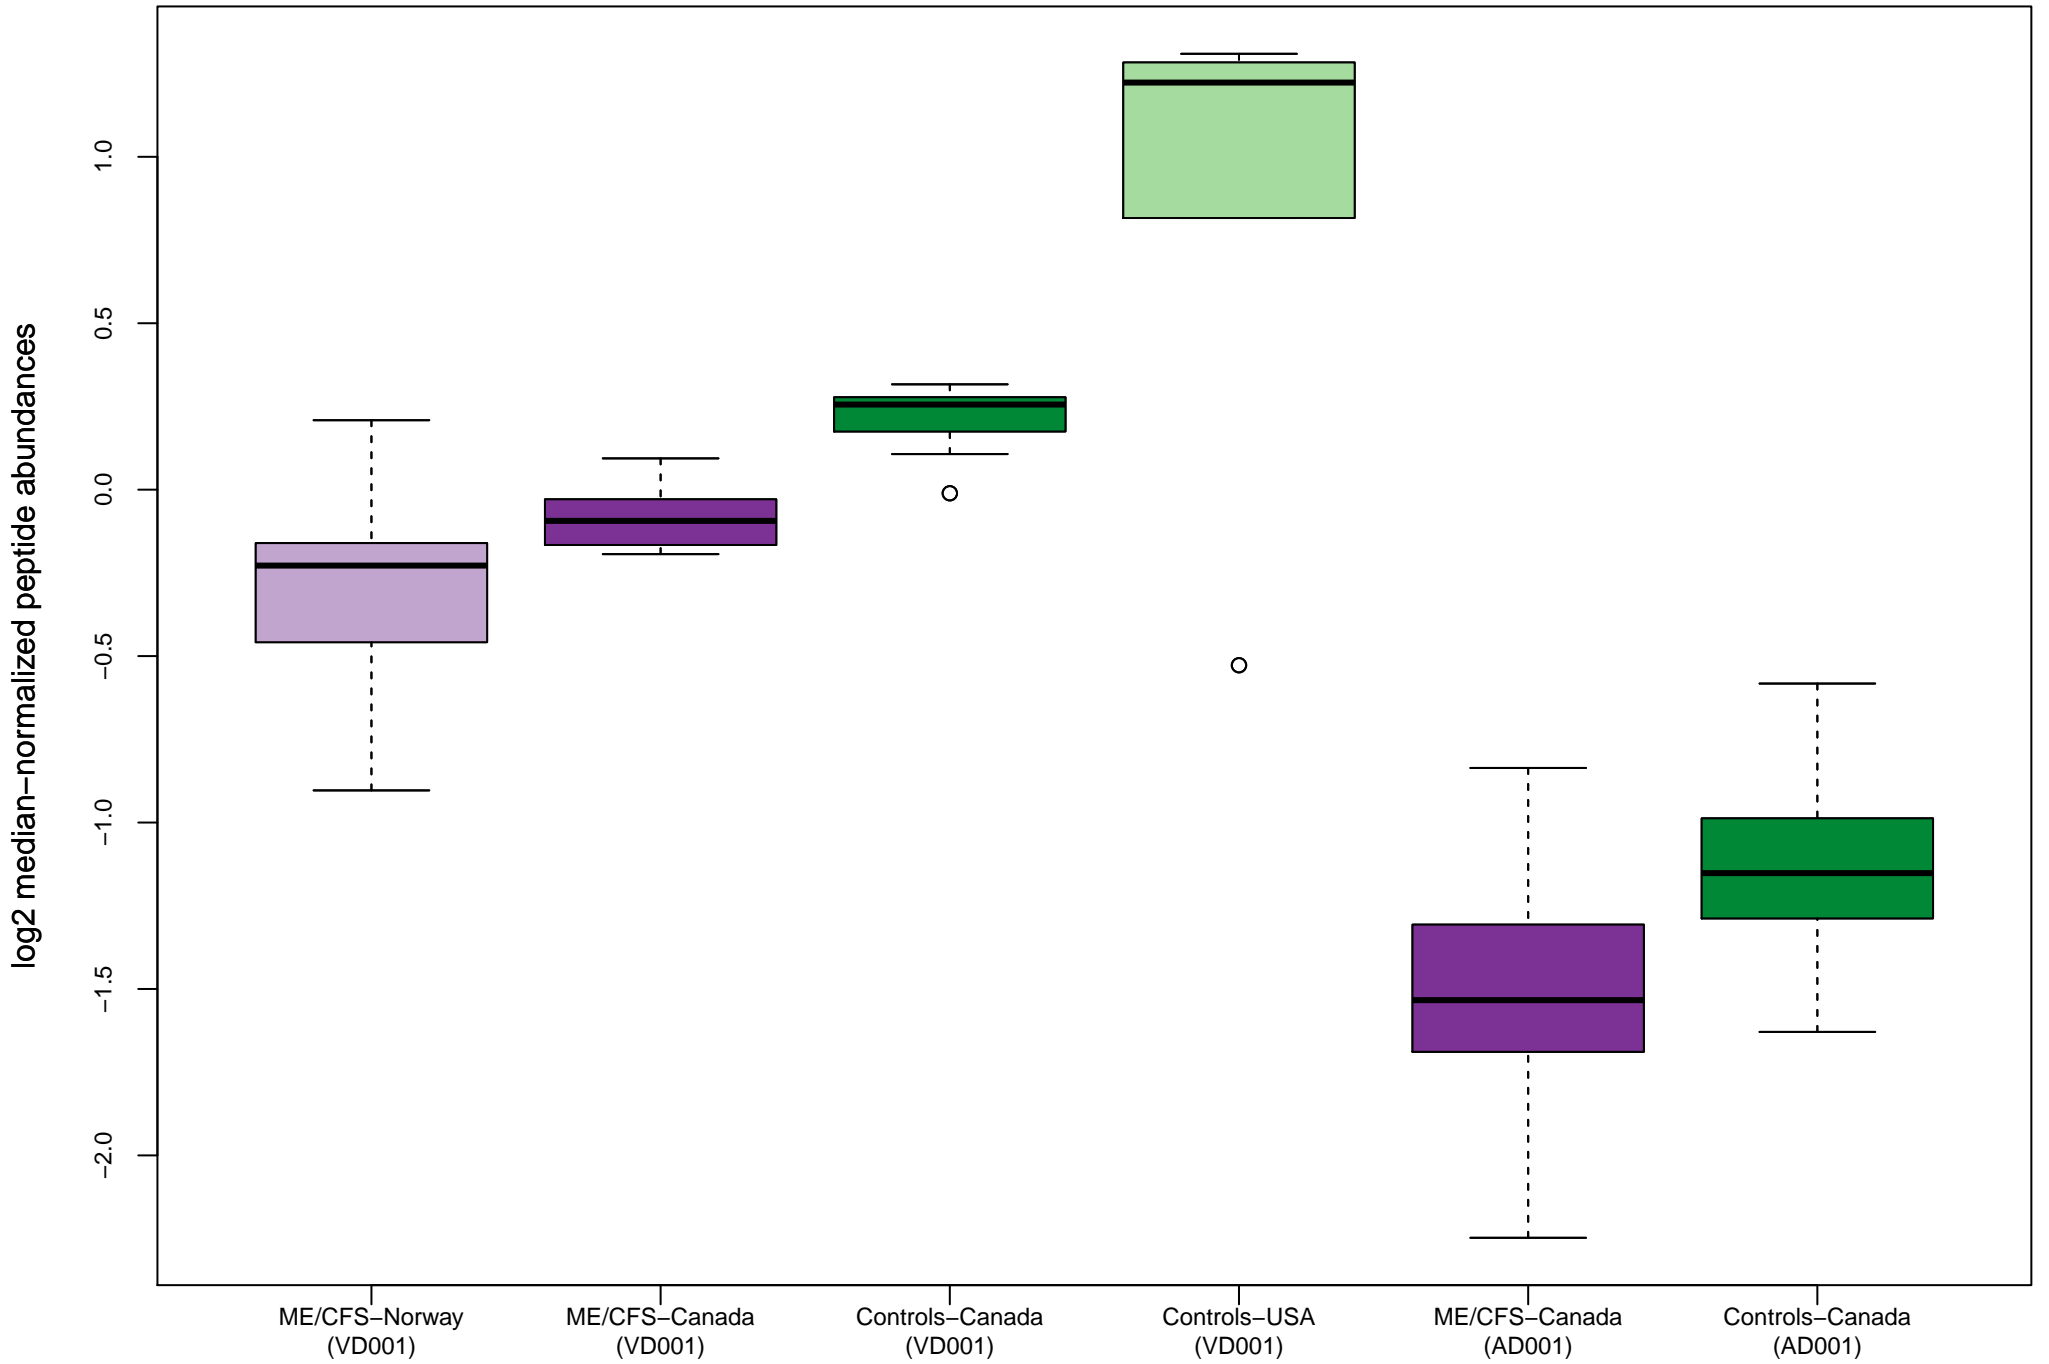

# VLFWRKSRWSGV

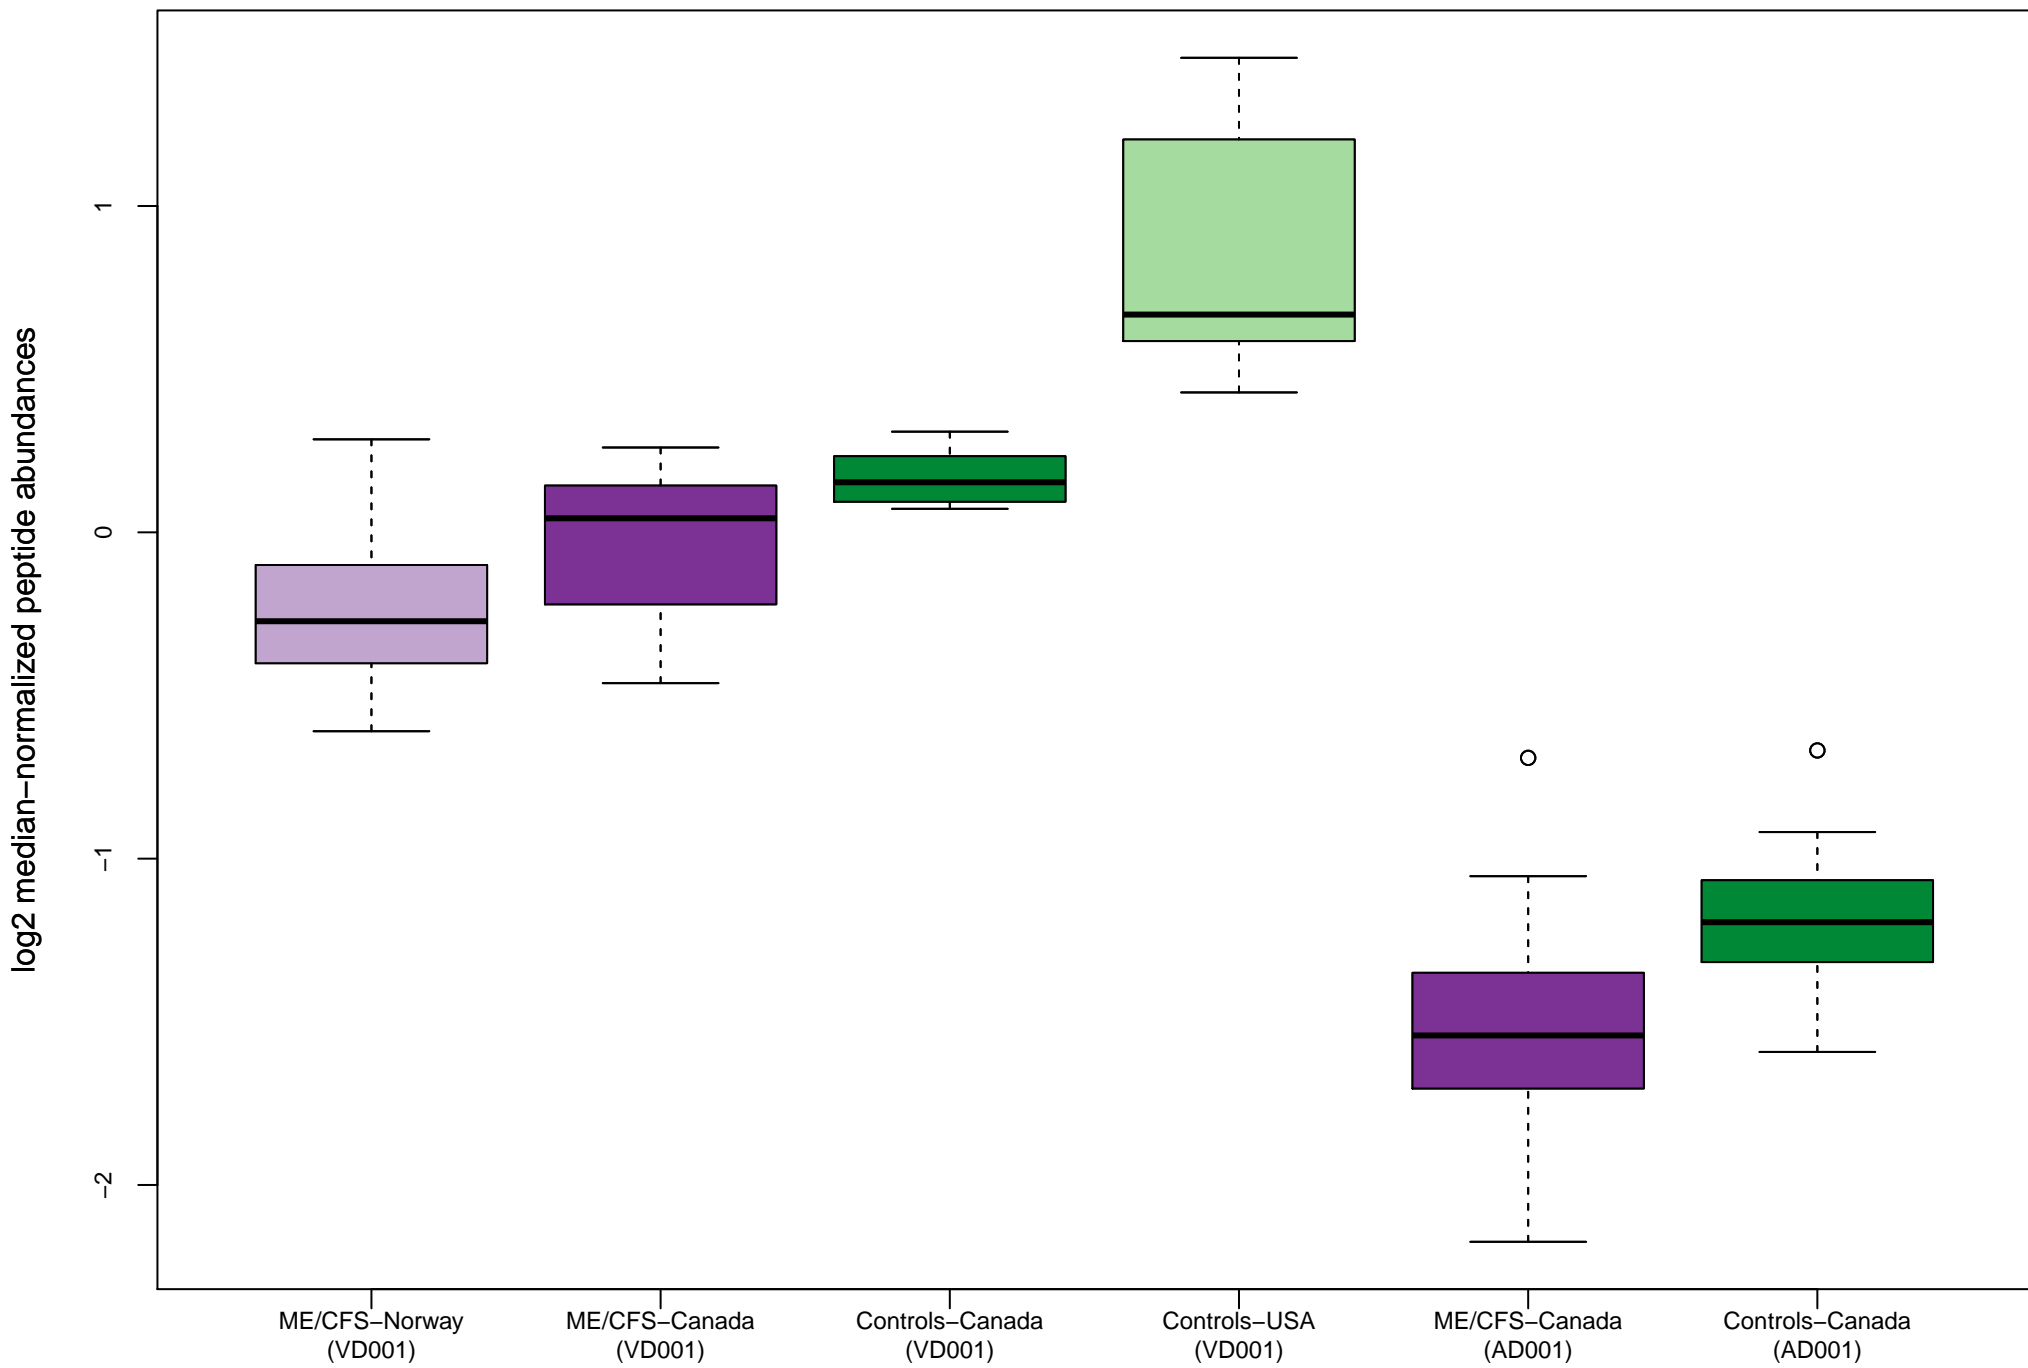

# VNLRNYKSVLSG

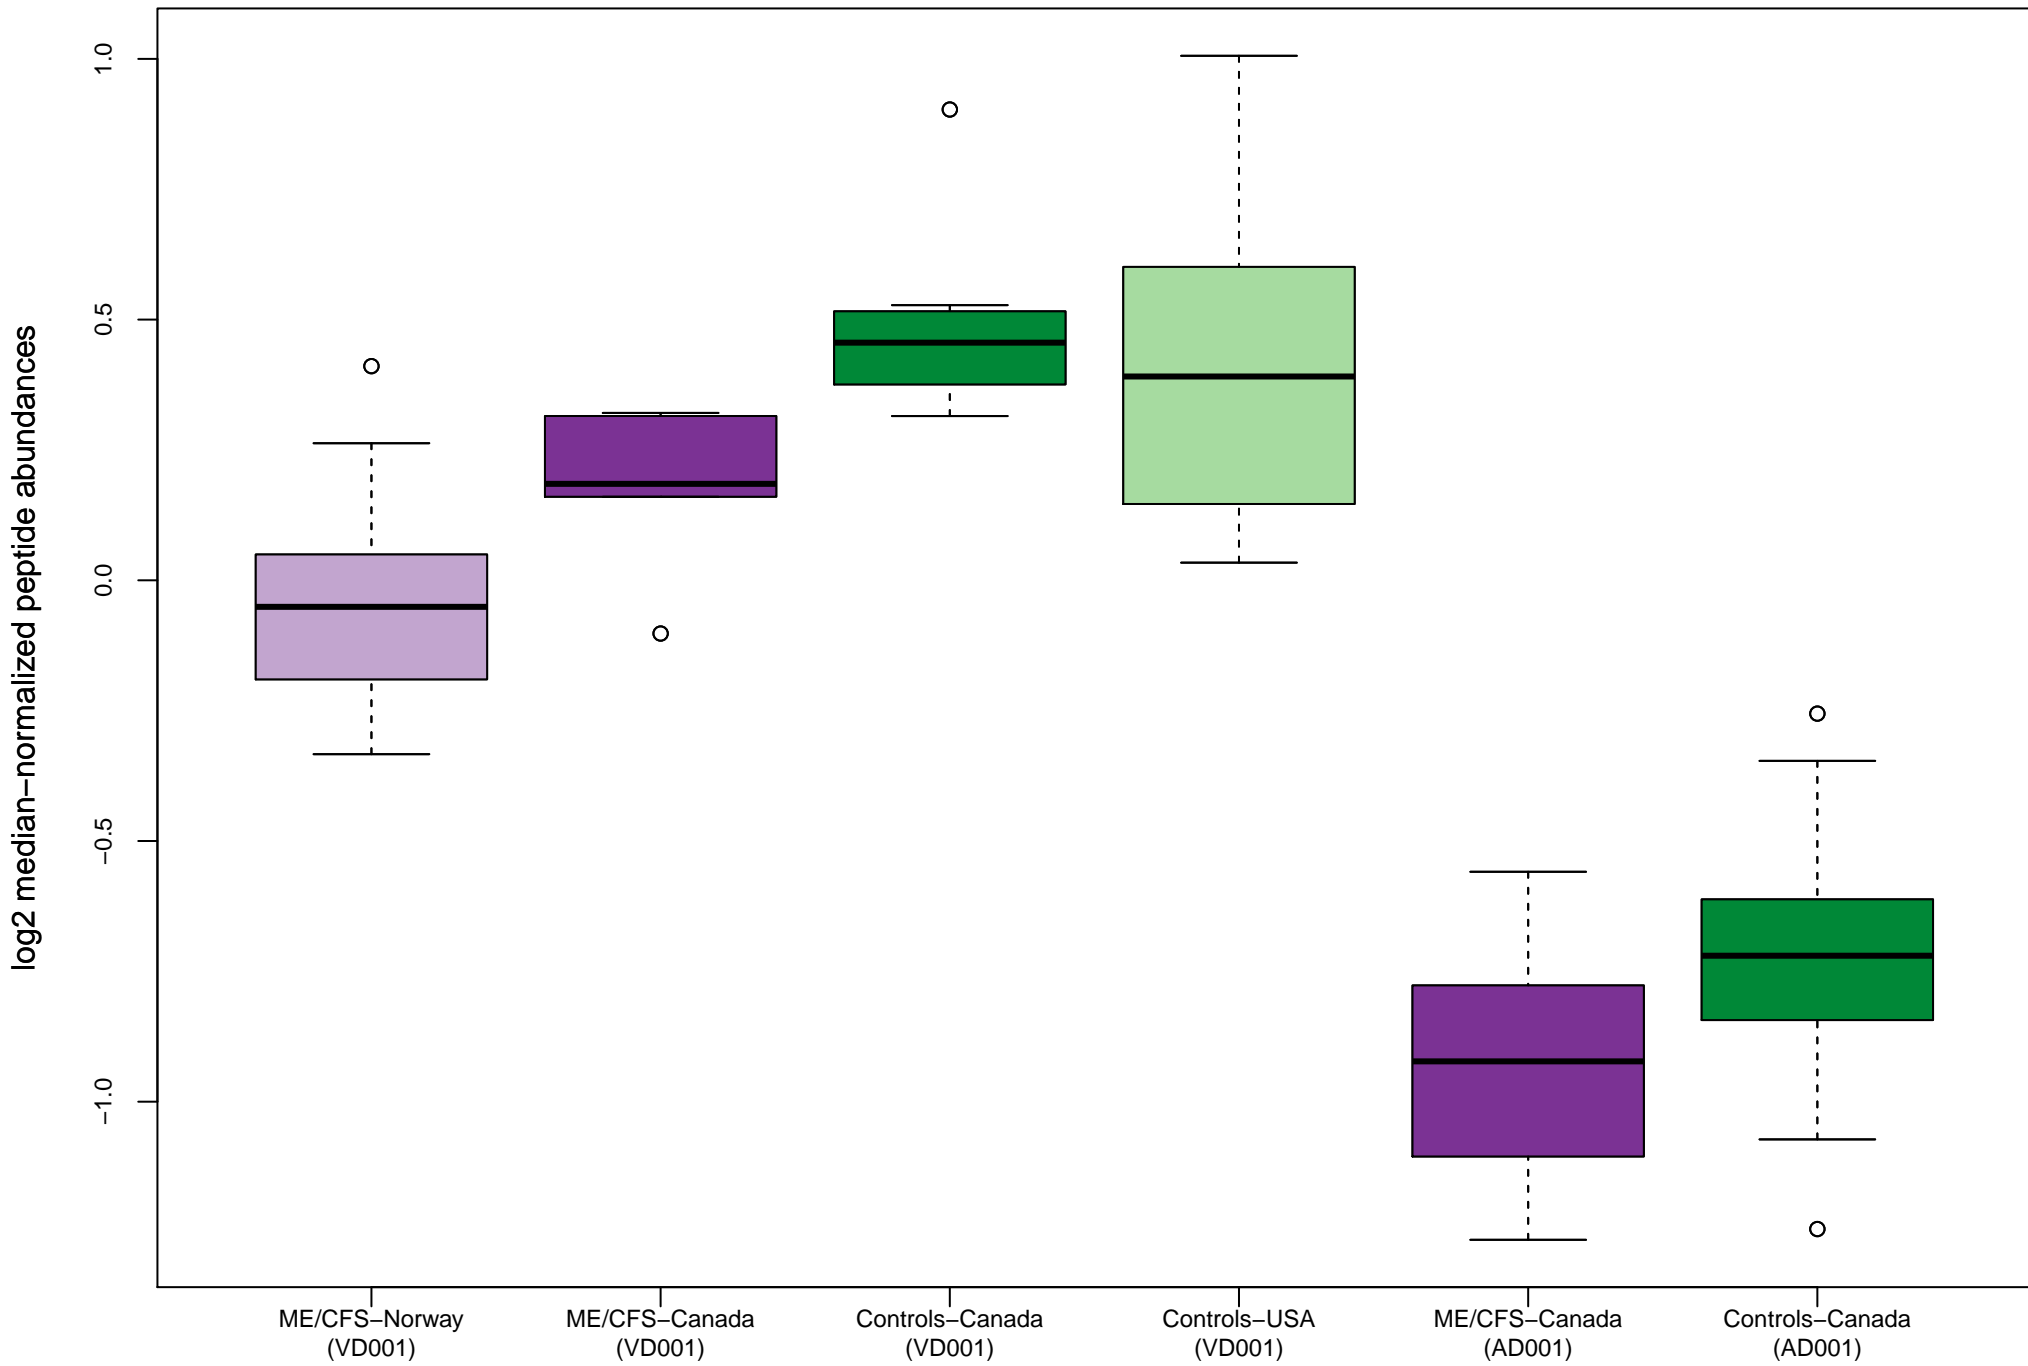

# VRAFRAPYWSGG

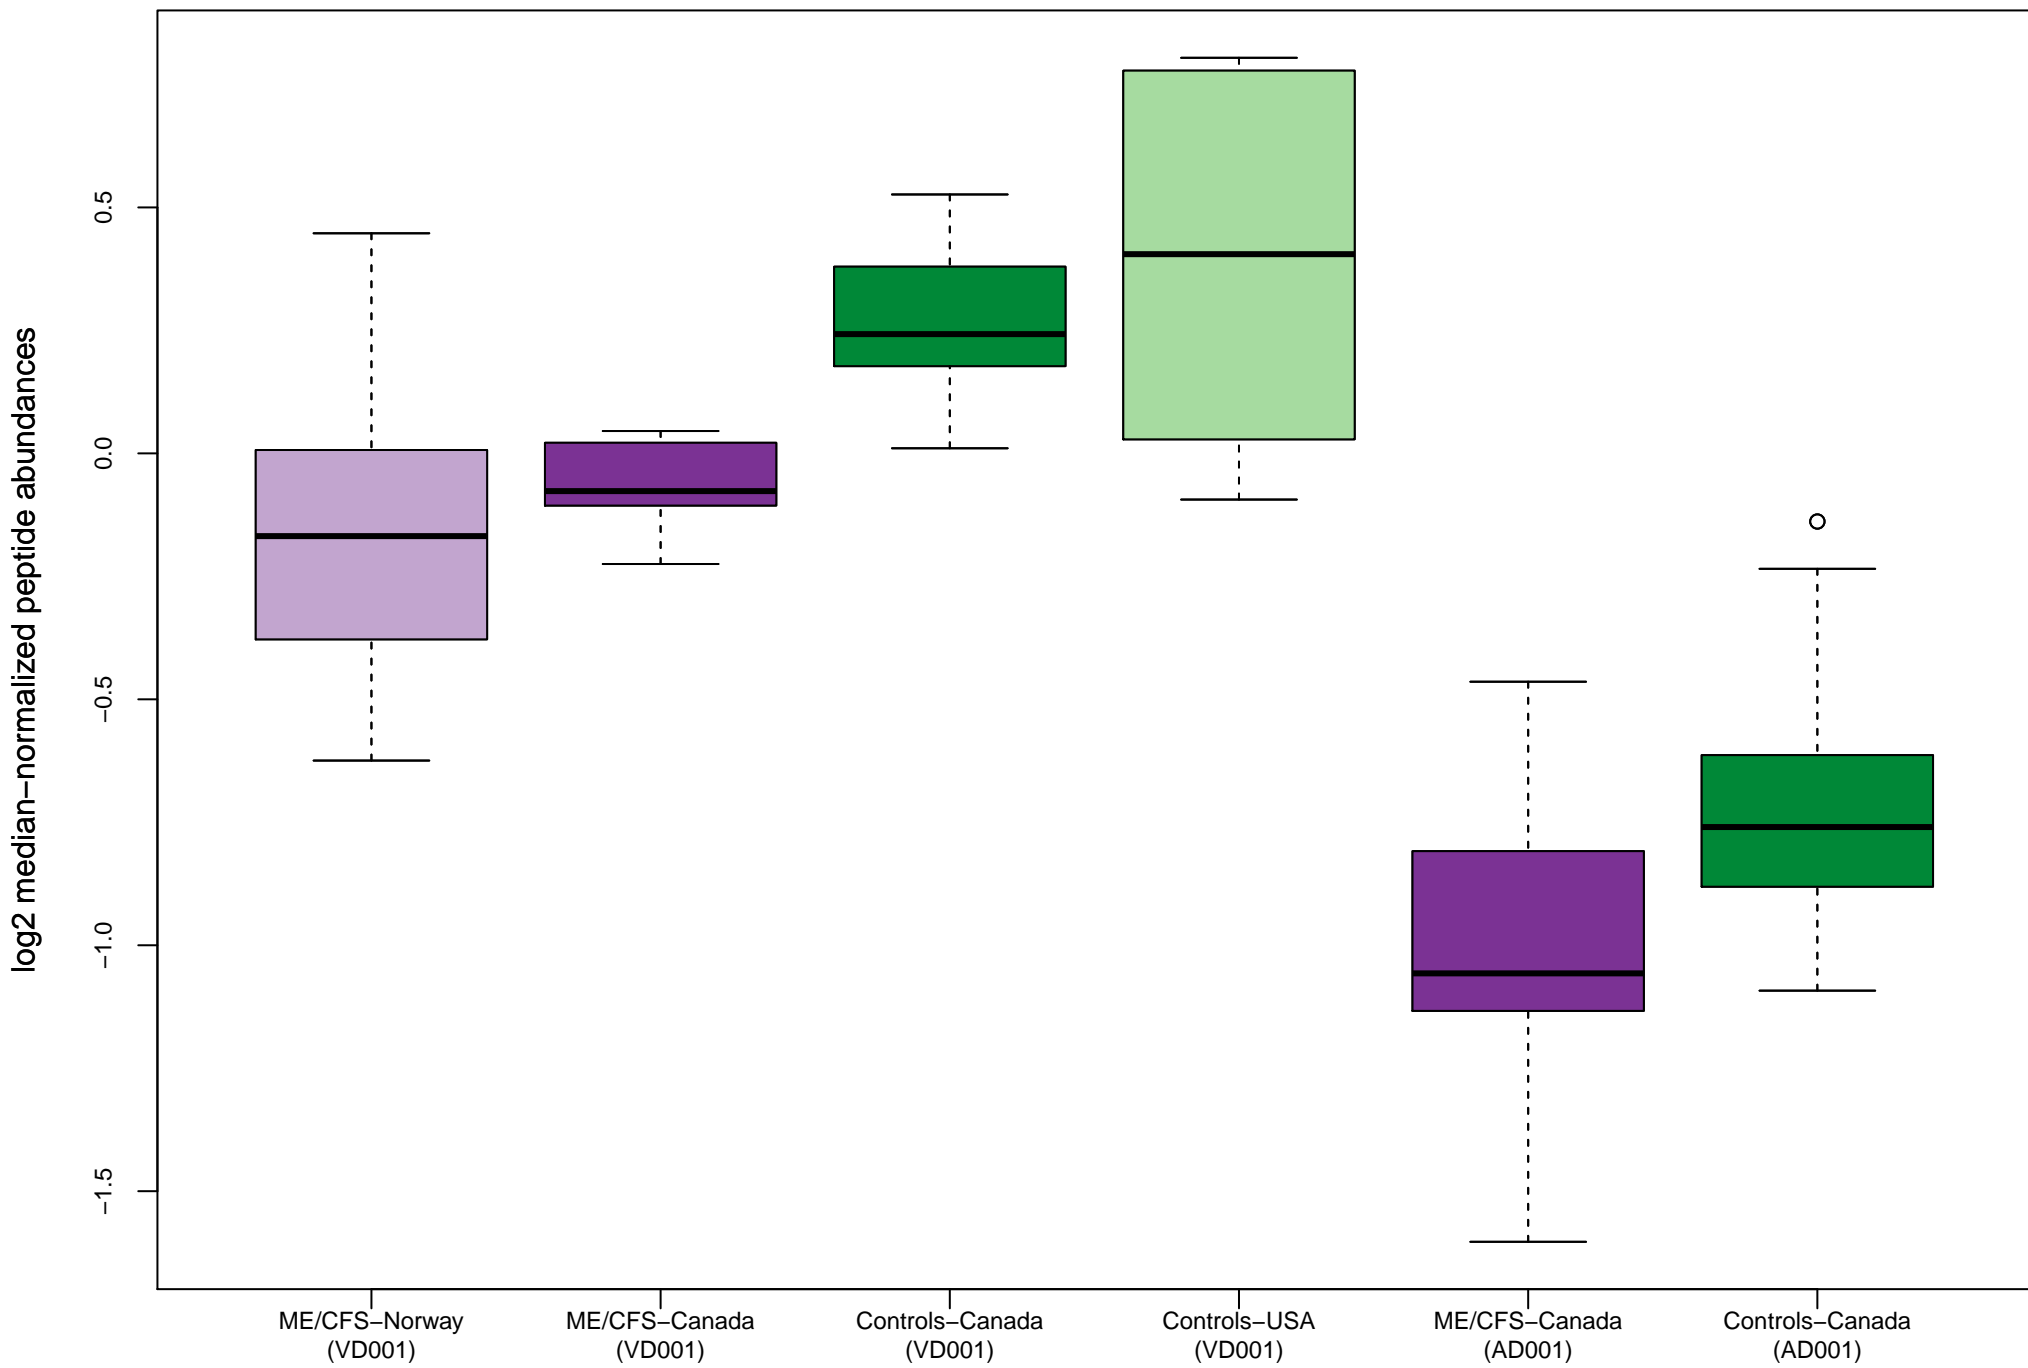

# VRWWRNVLGLSG

log2 median-normalized peptide abundances

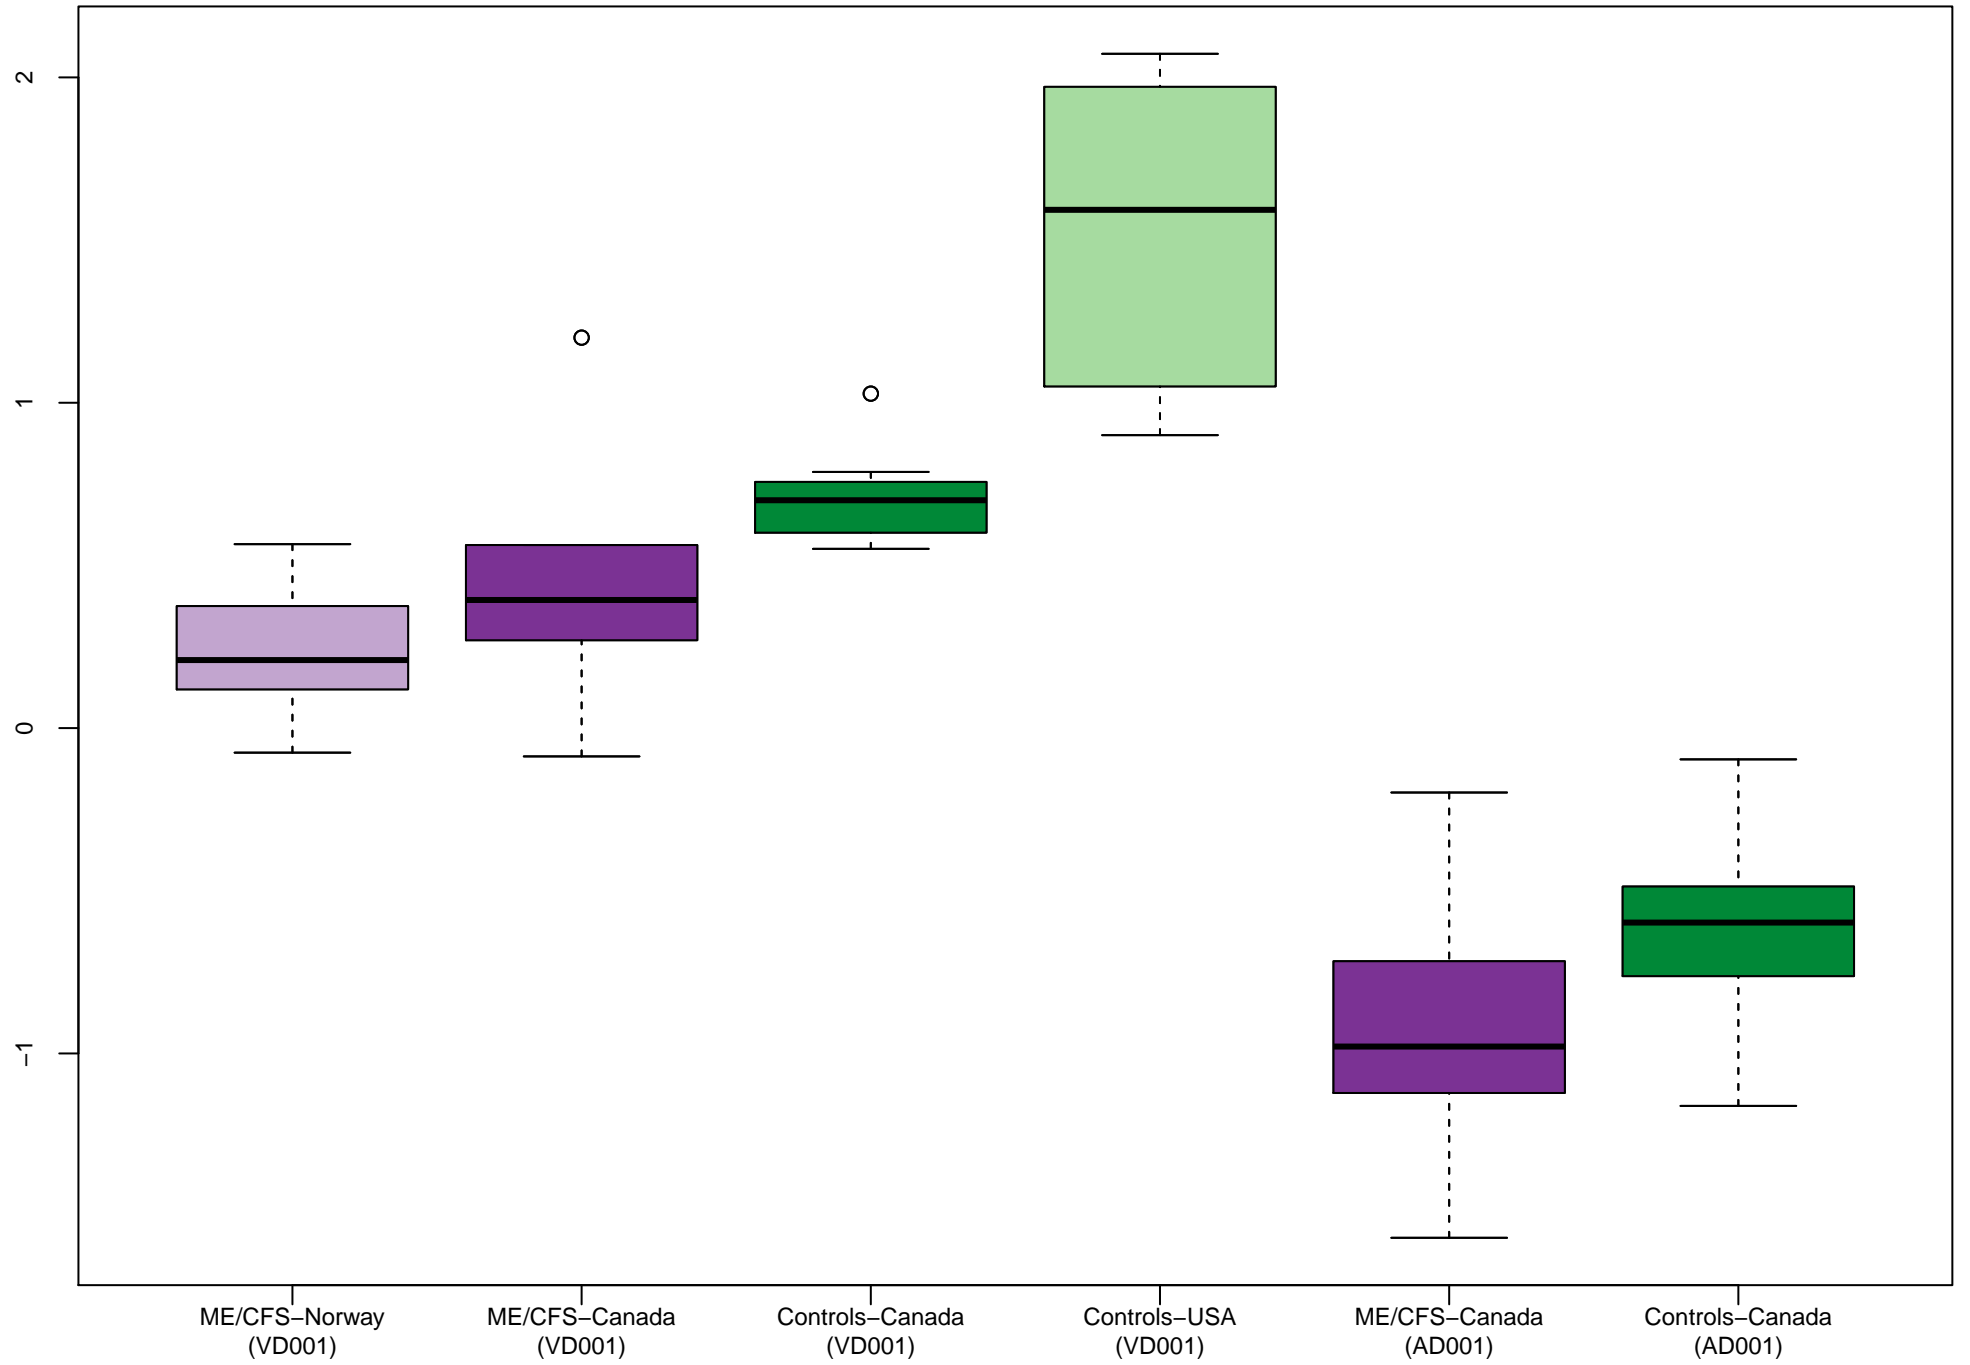



# WESRRYGVALSG

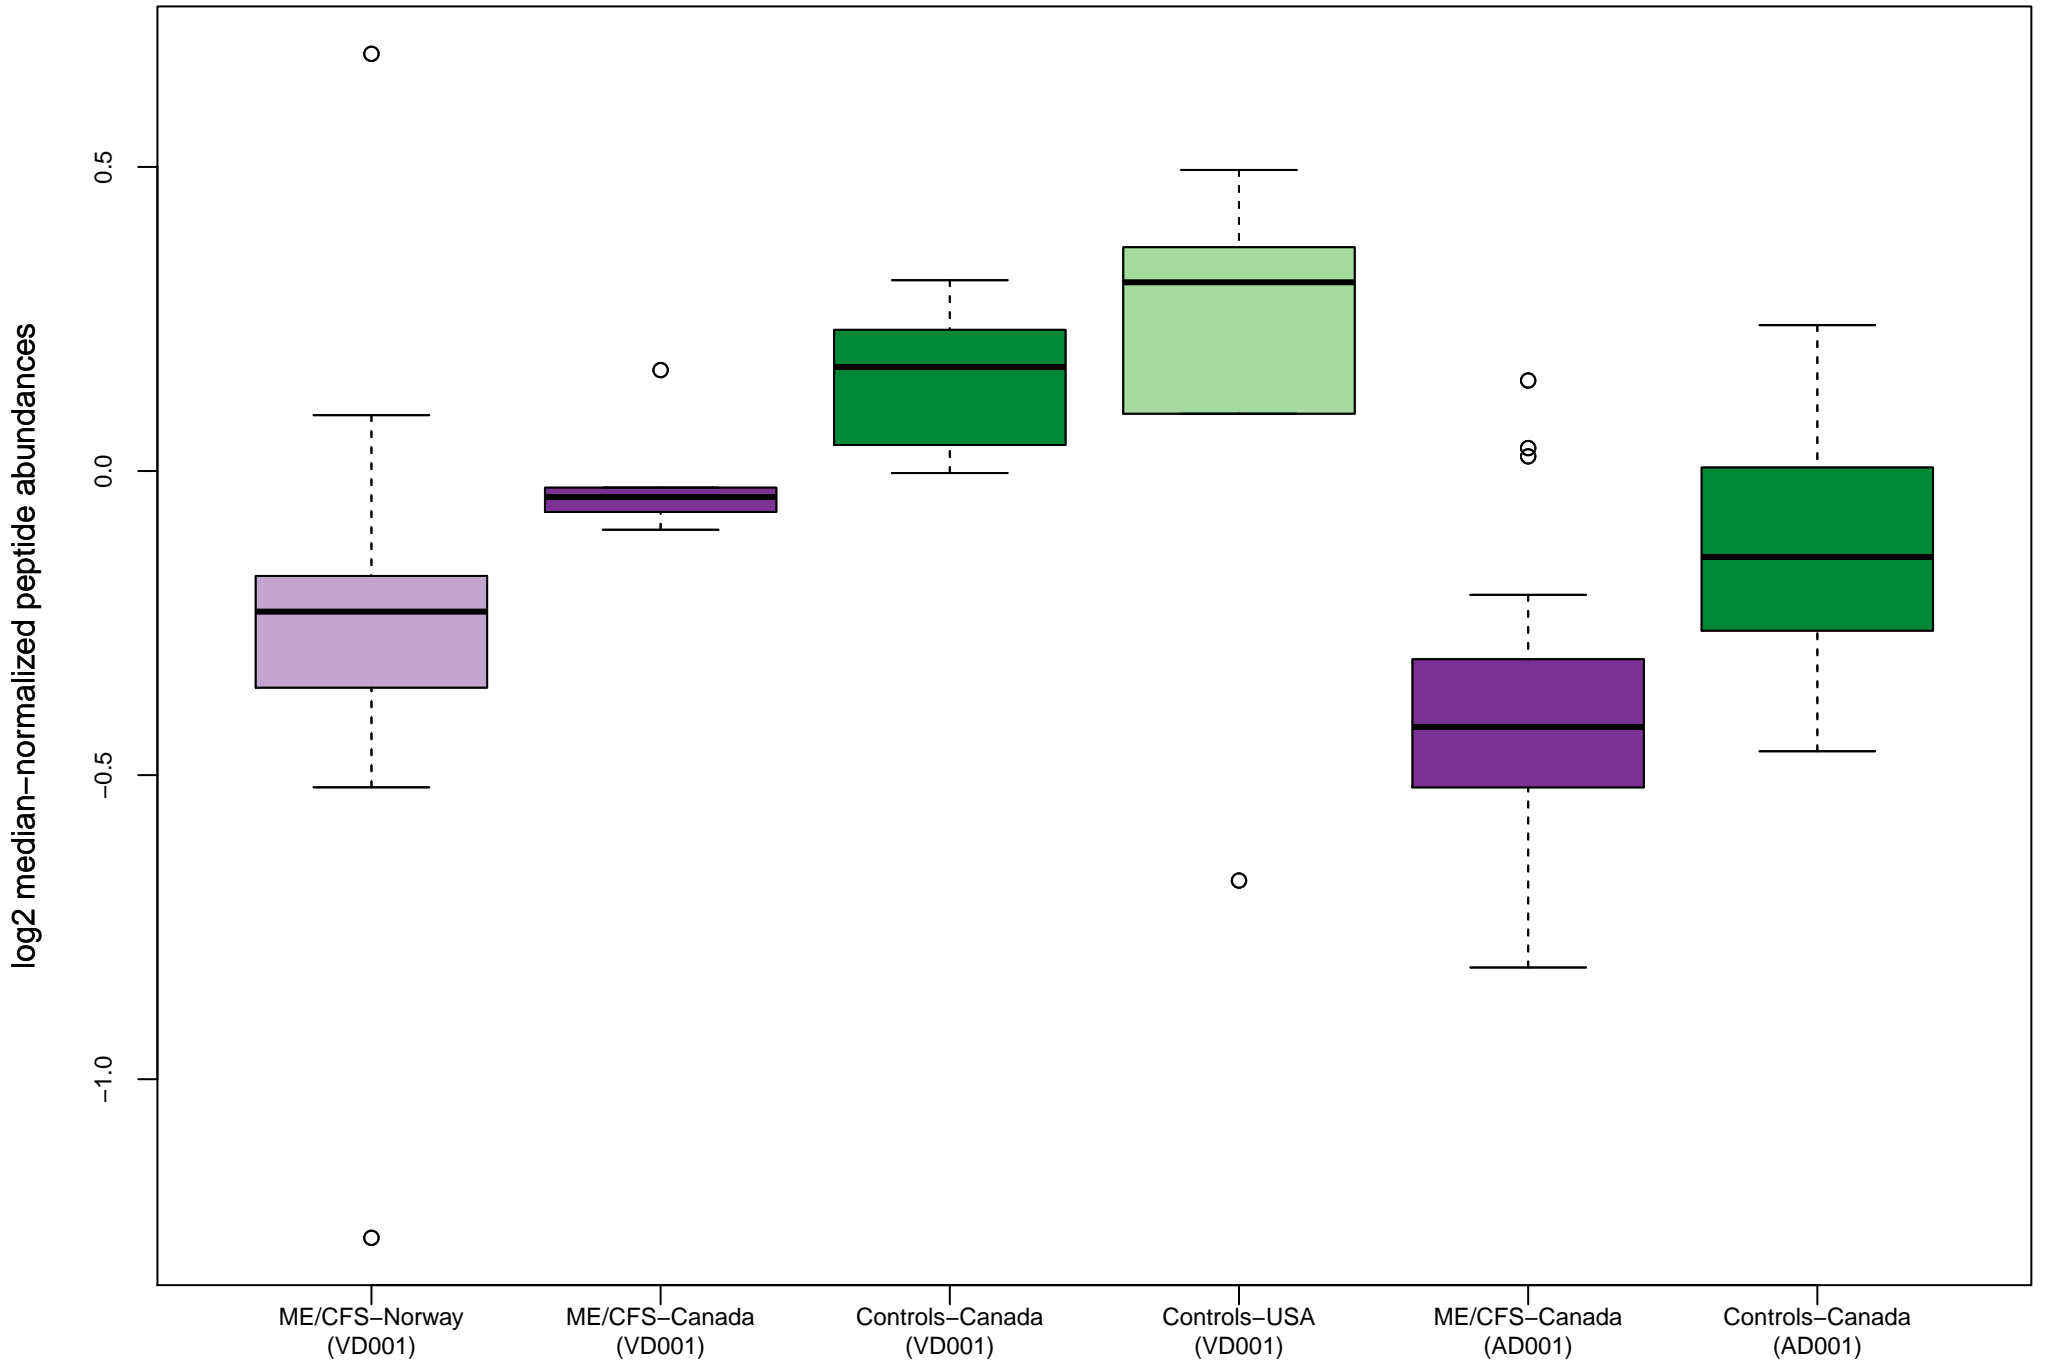

# WFPRSRWGVALS

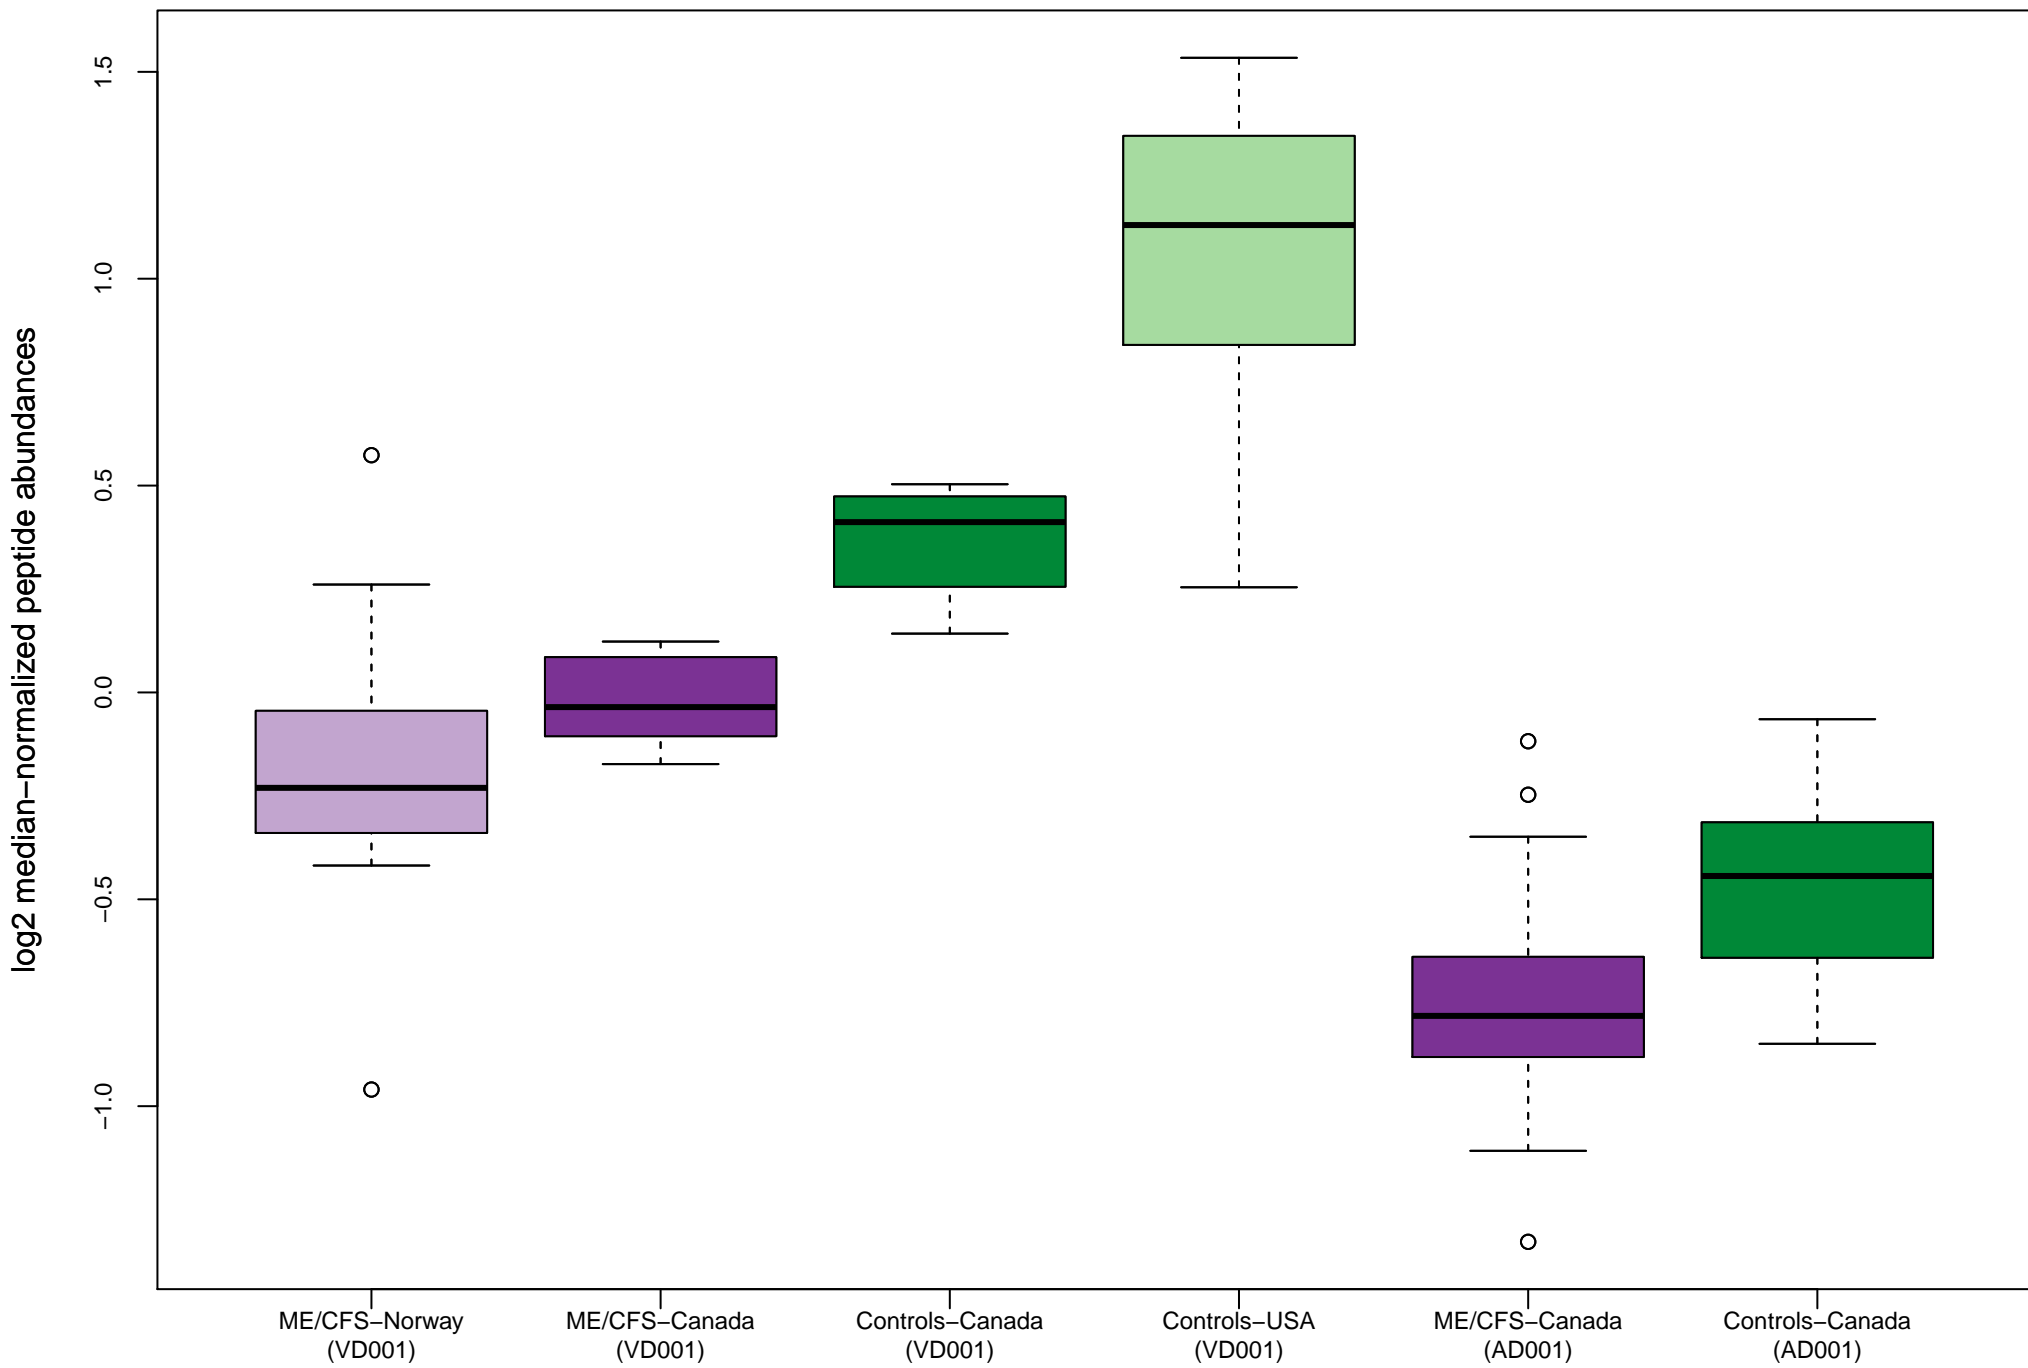

# WFSWKRAGVLSG

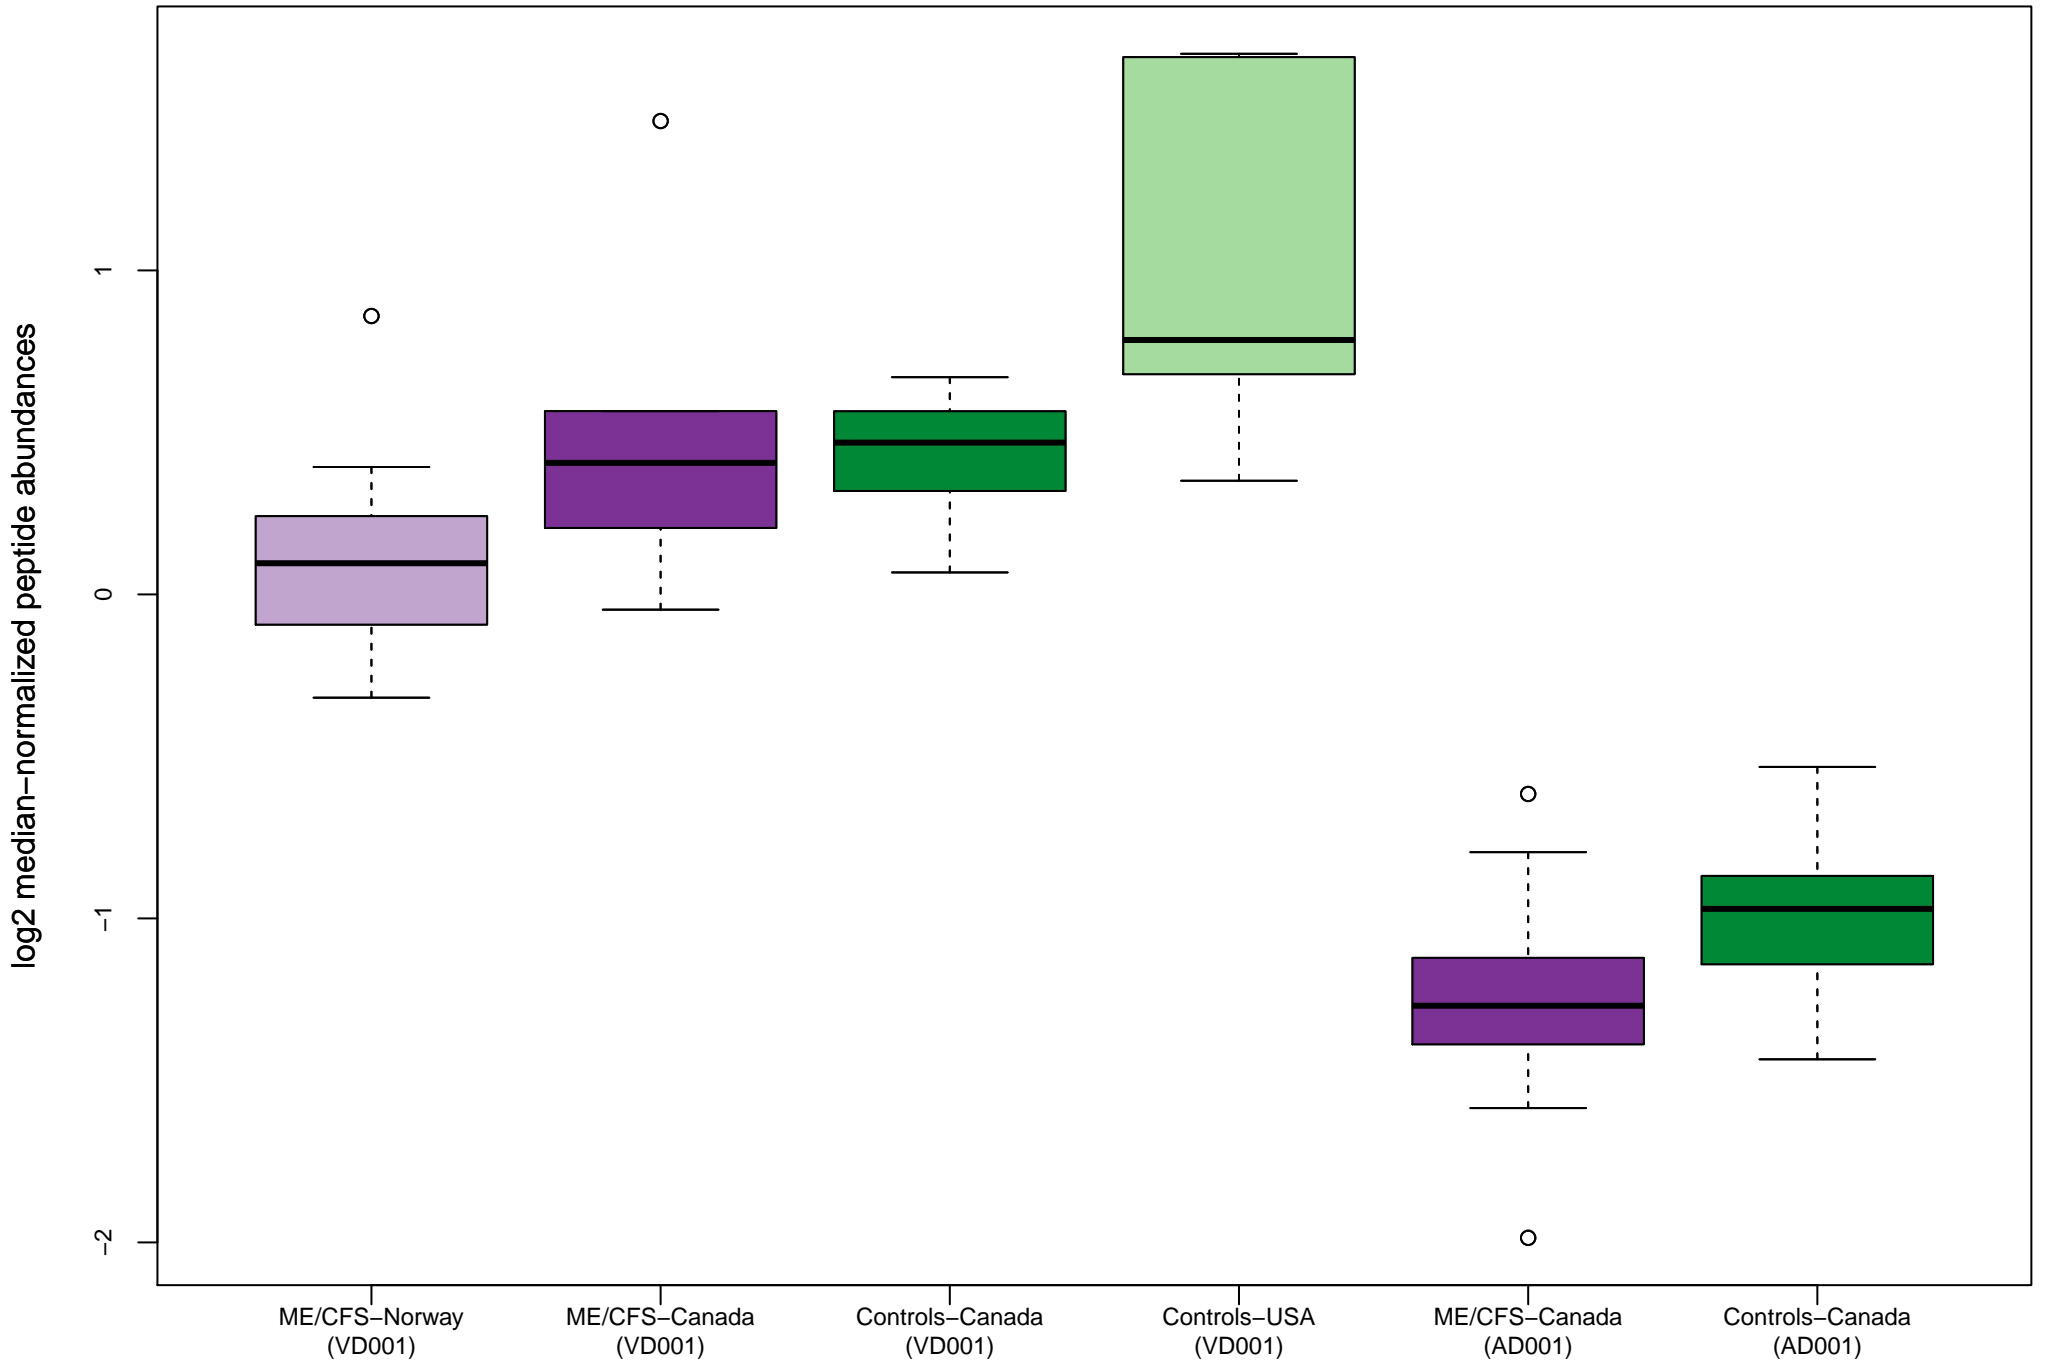

# WGLKRYGVALSG

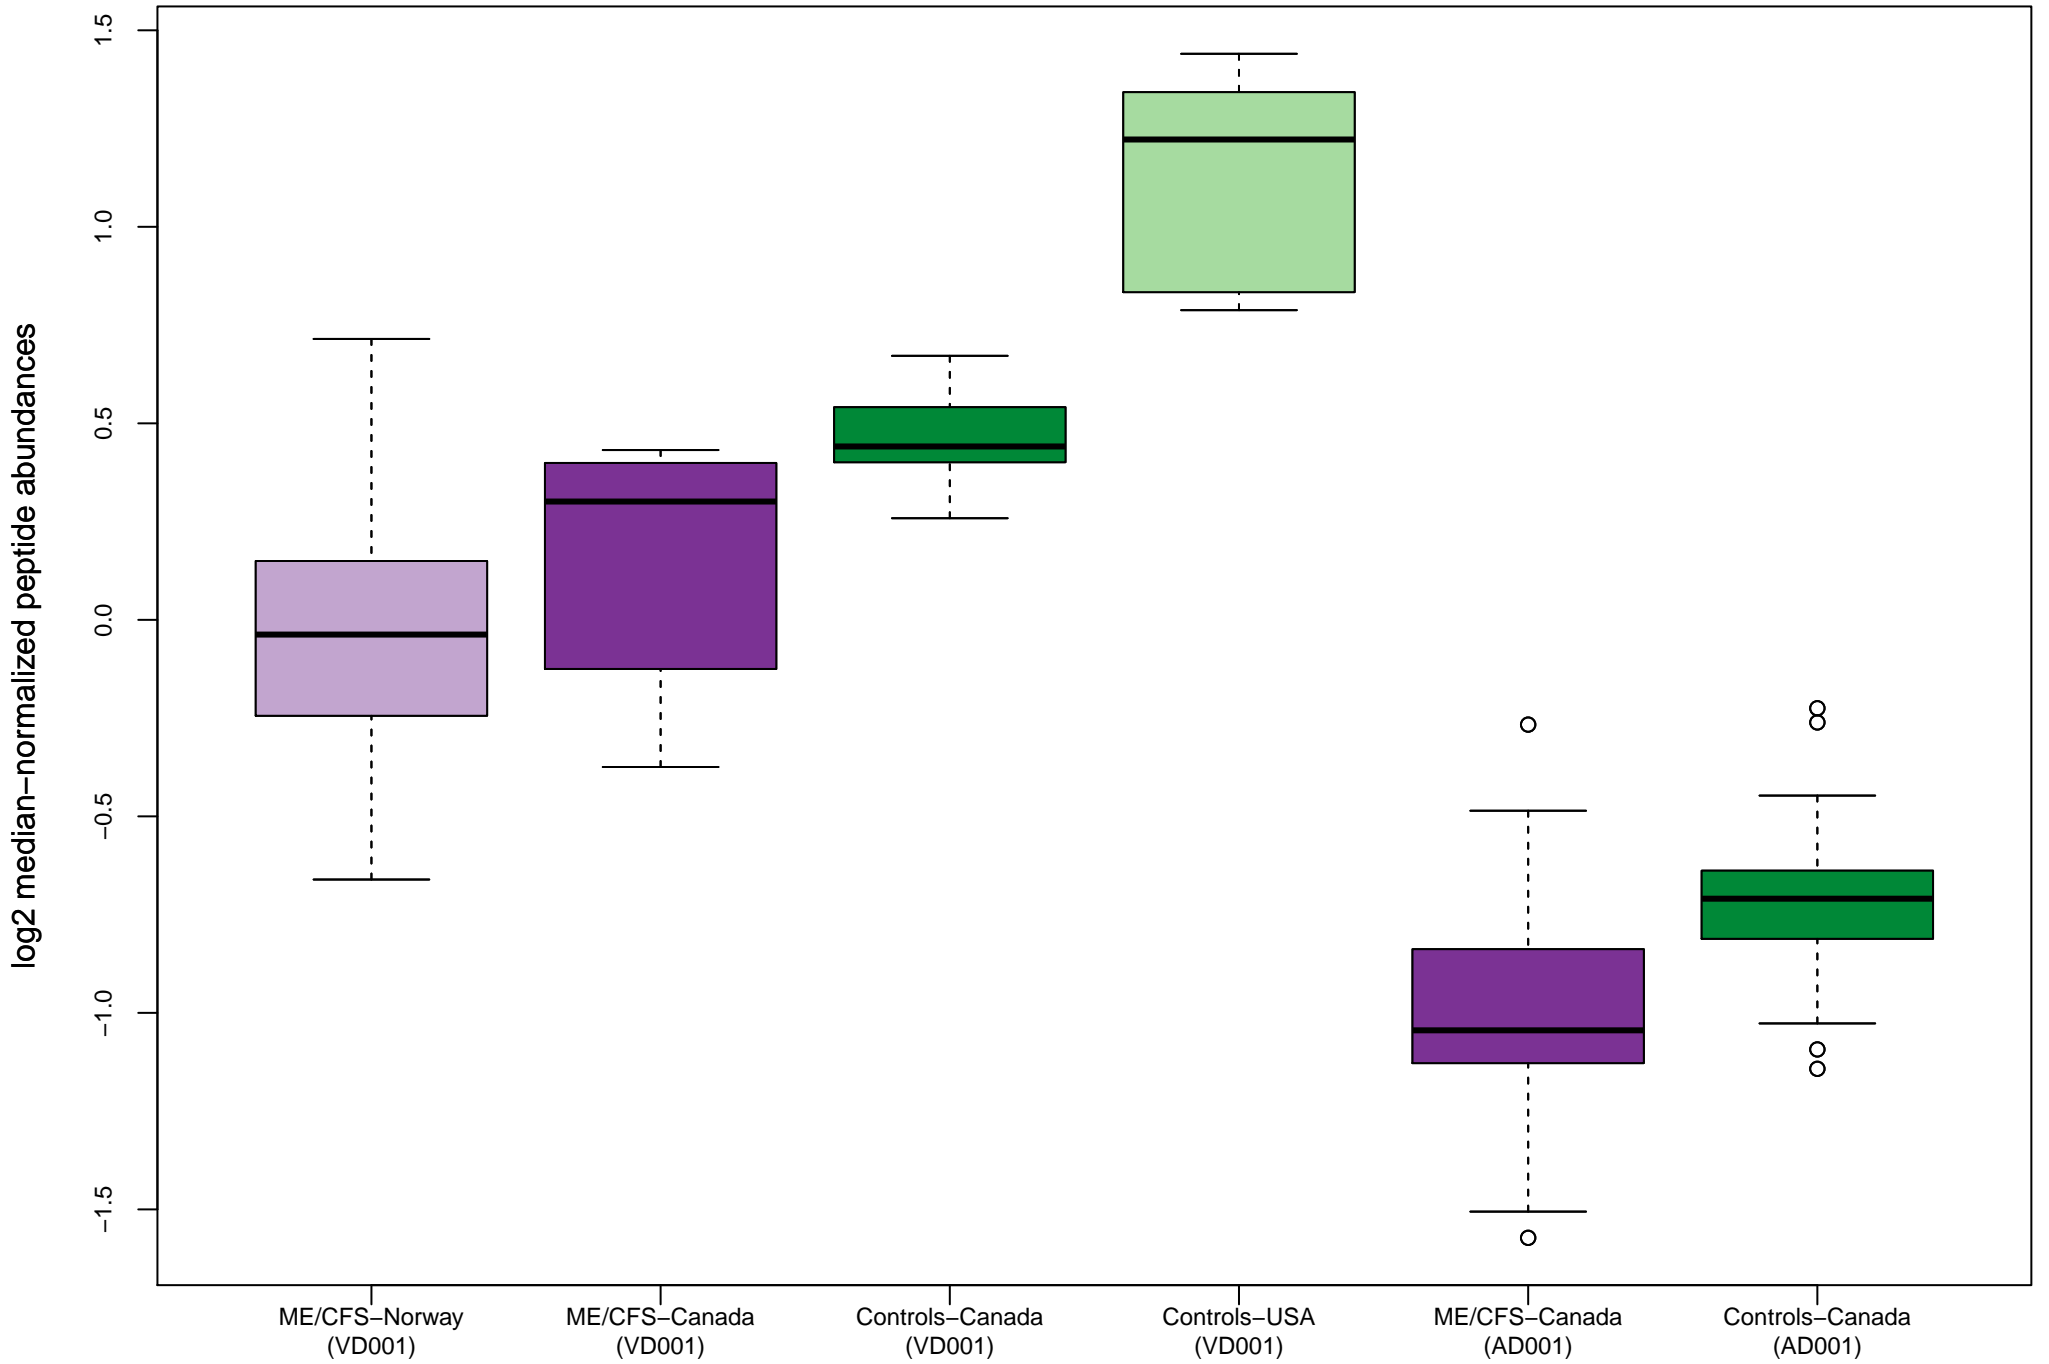

# WKRAQFYGRWLG

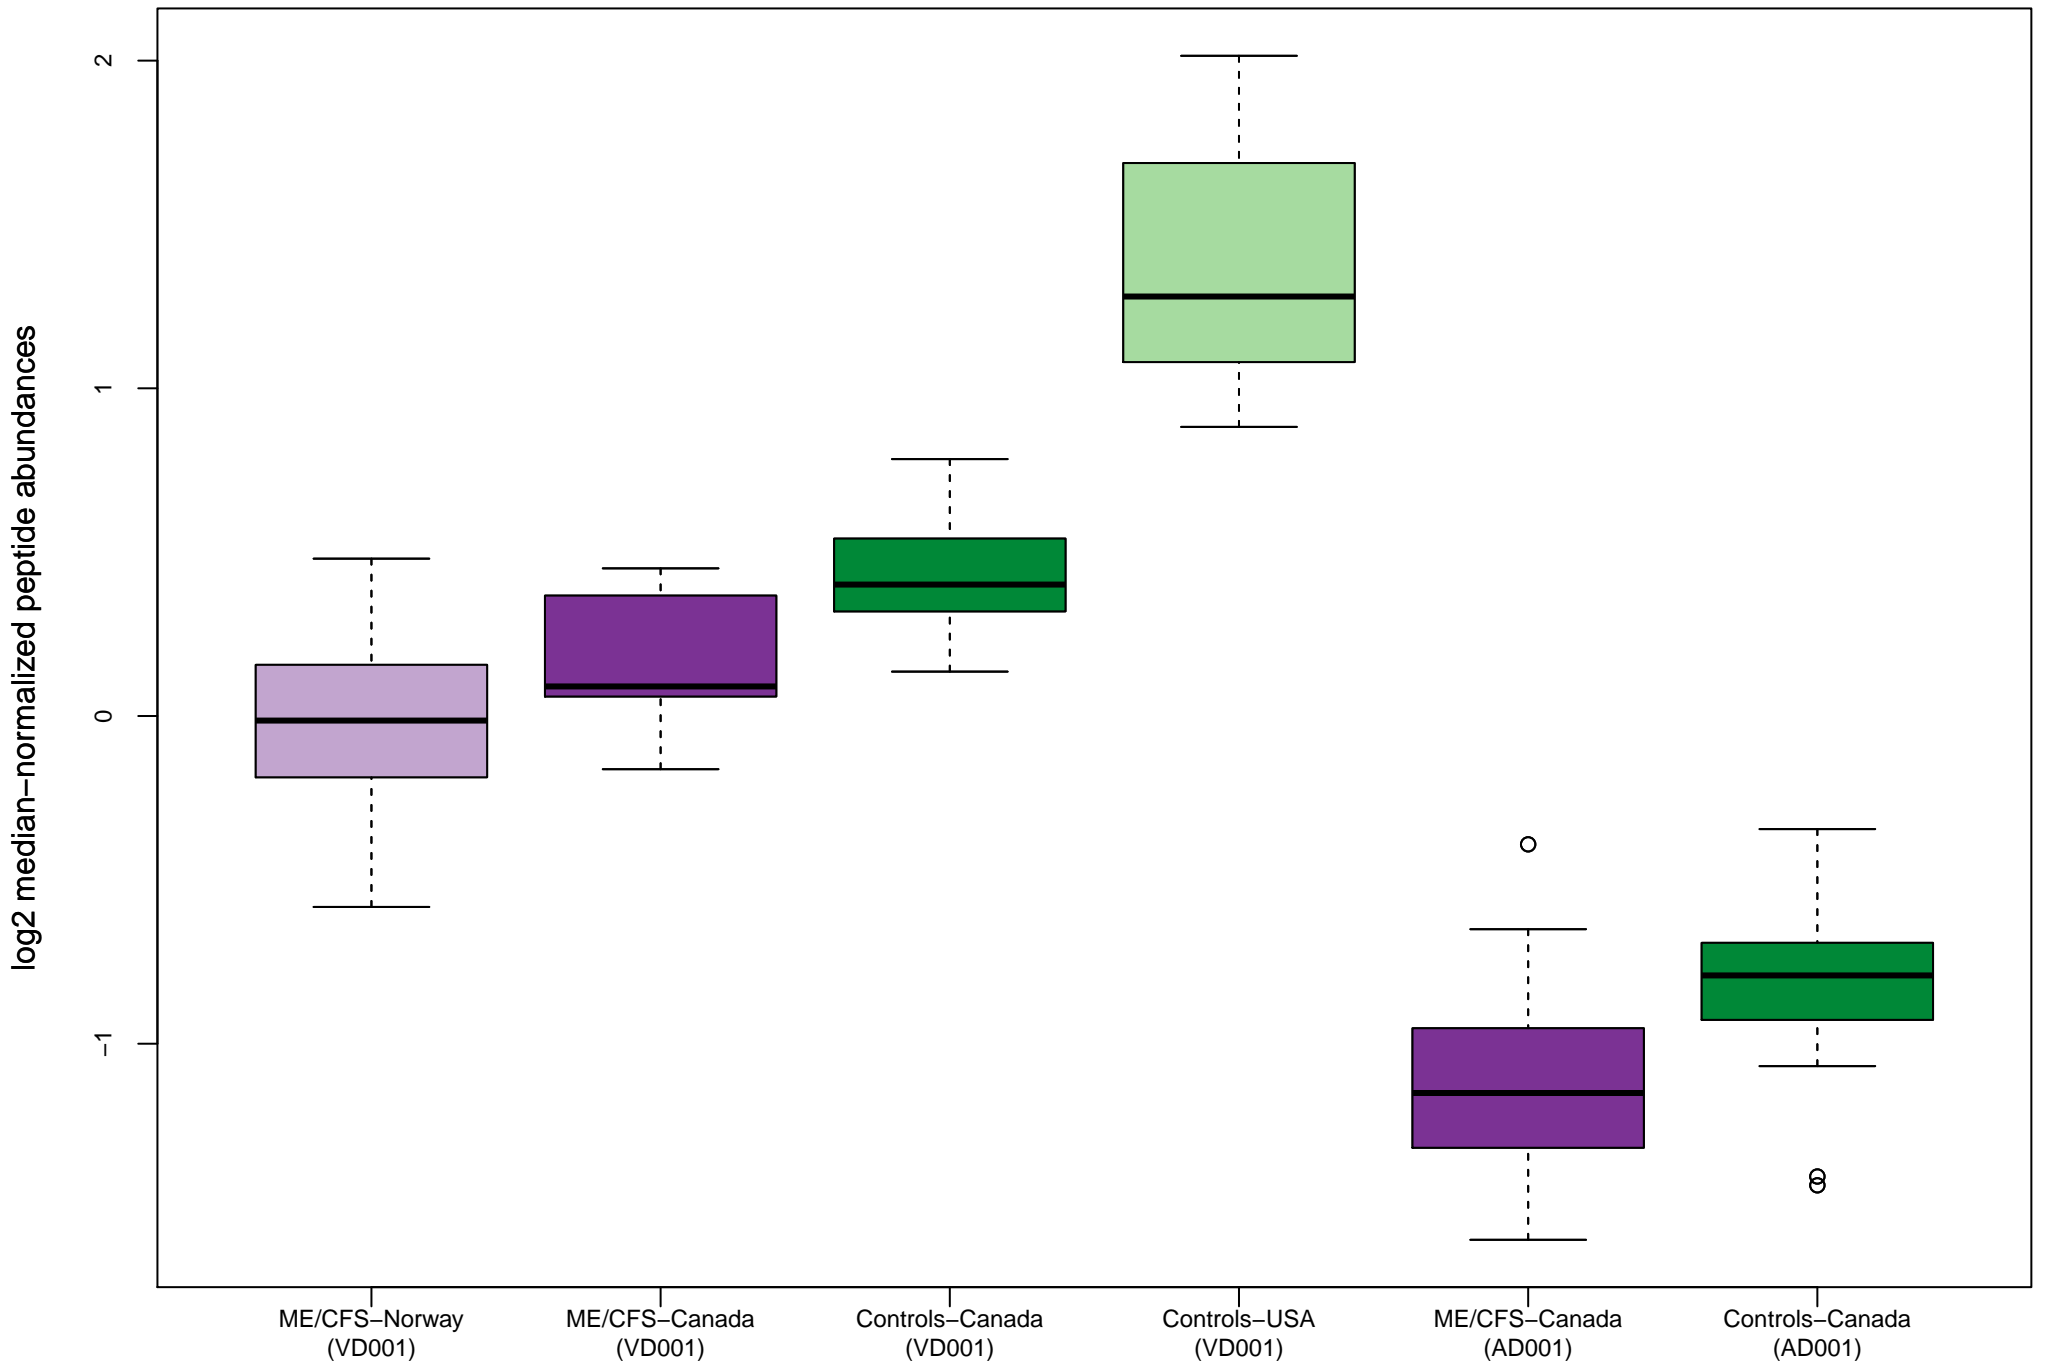

# WLKLGRPWLSGR

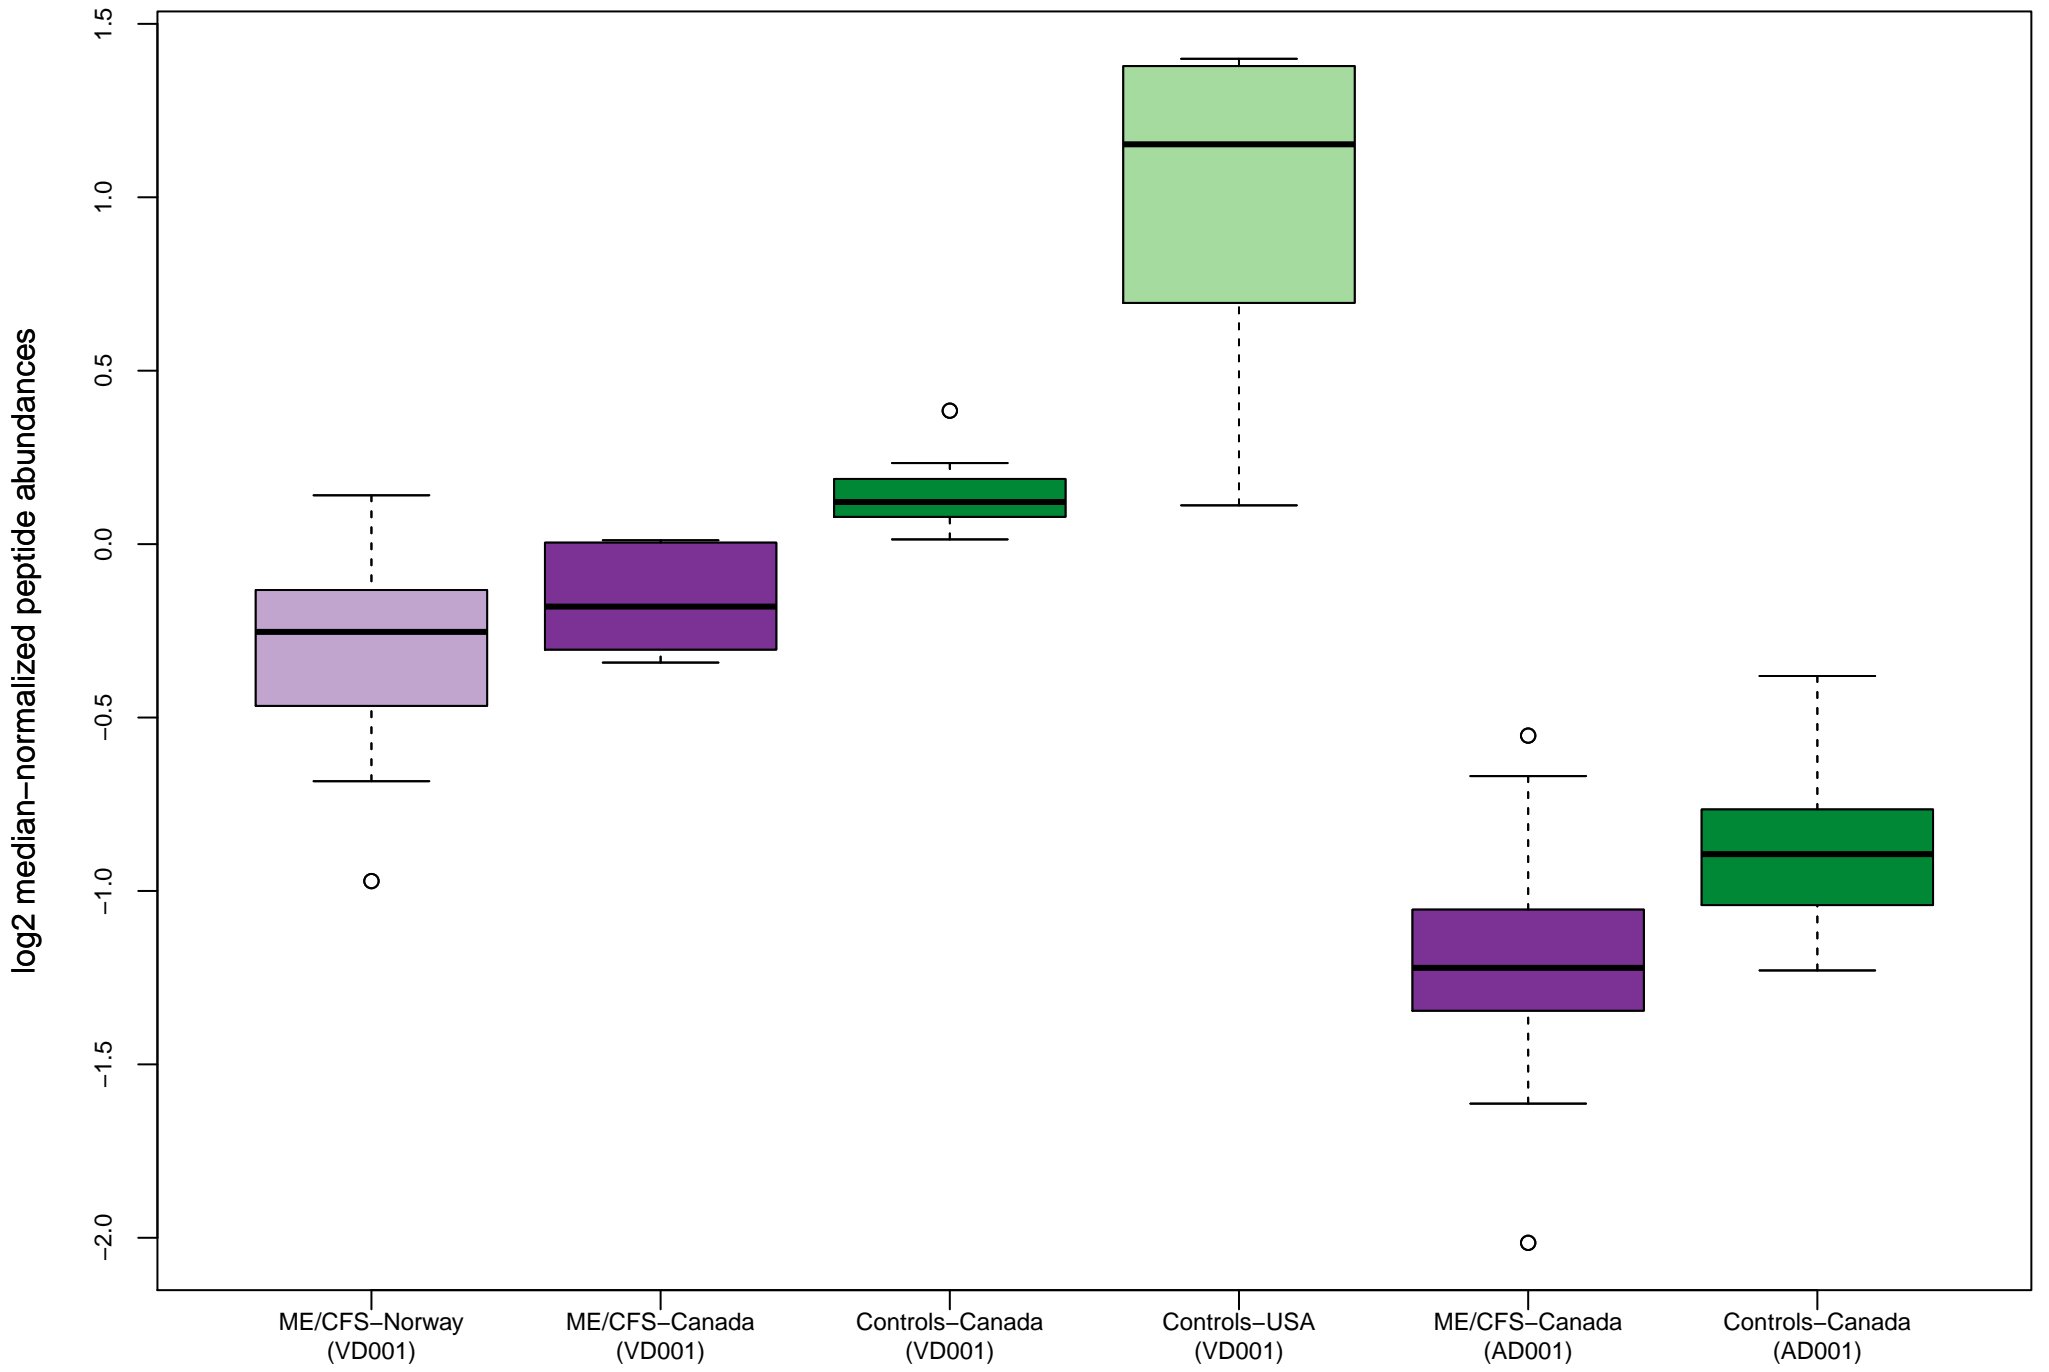

# WLRKWALWKALS

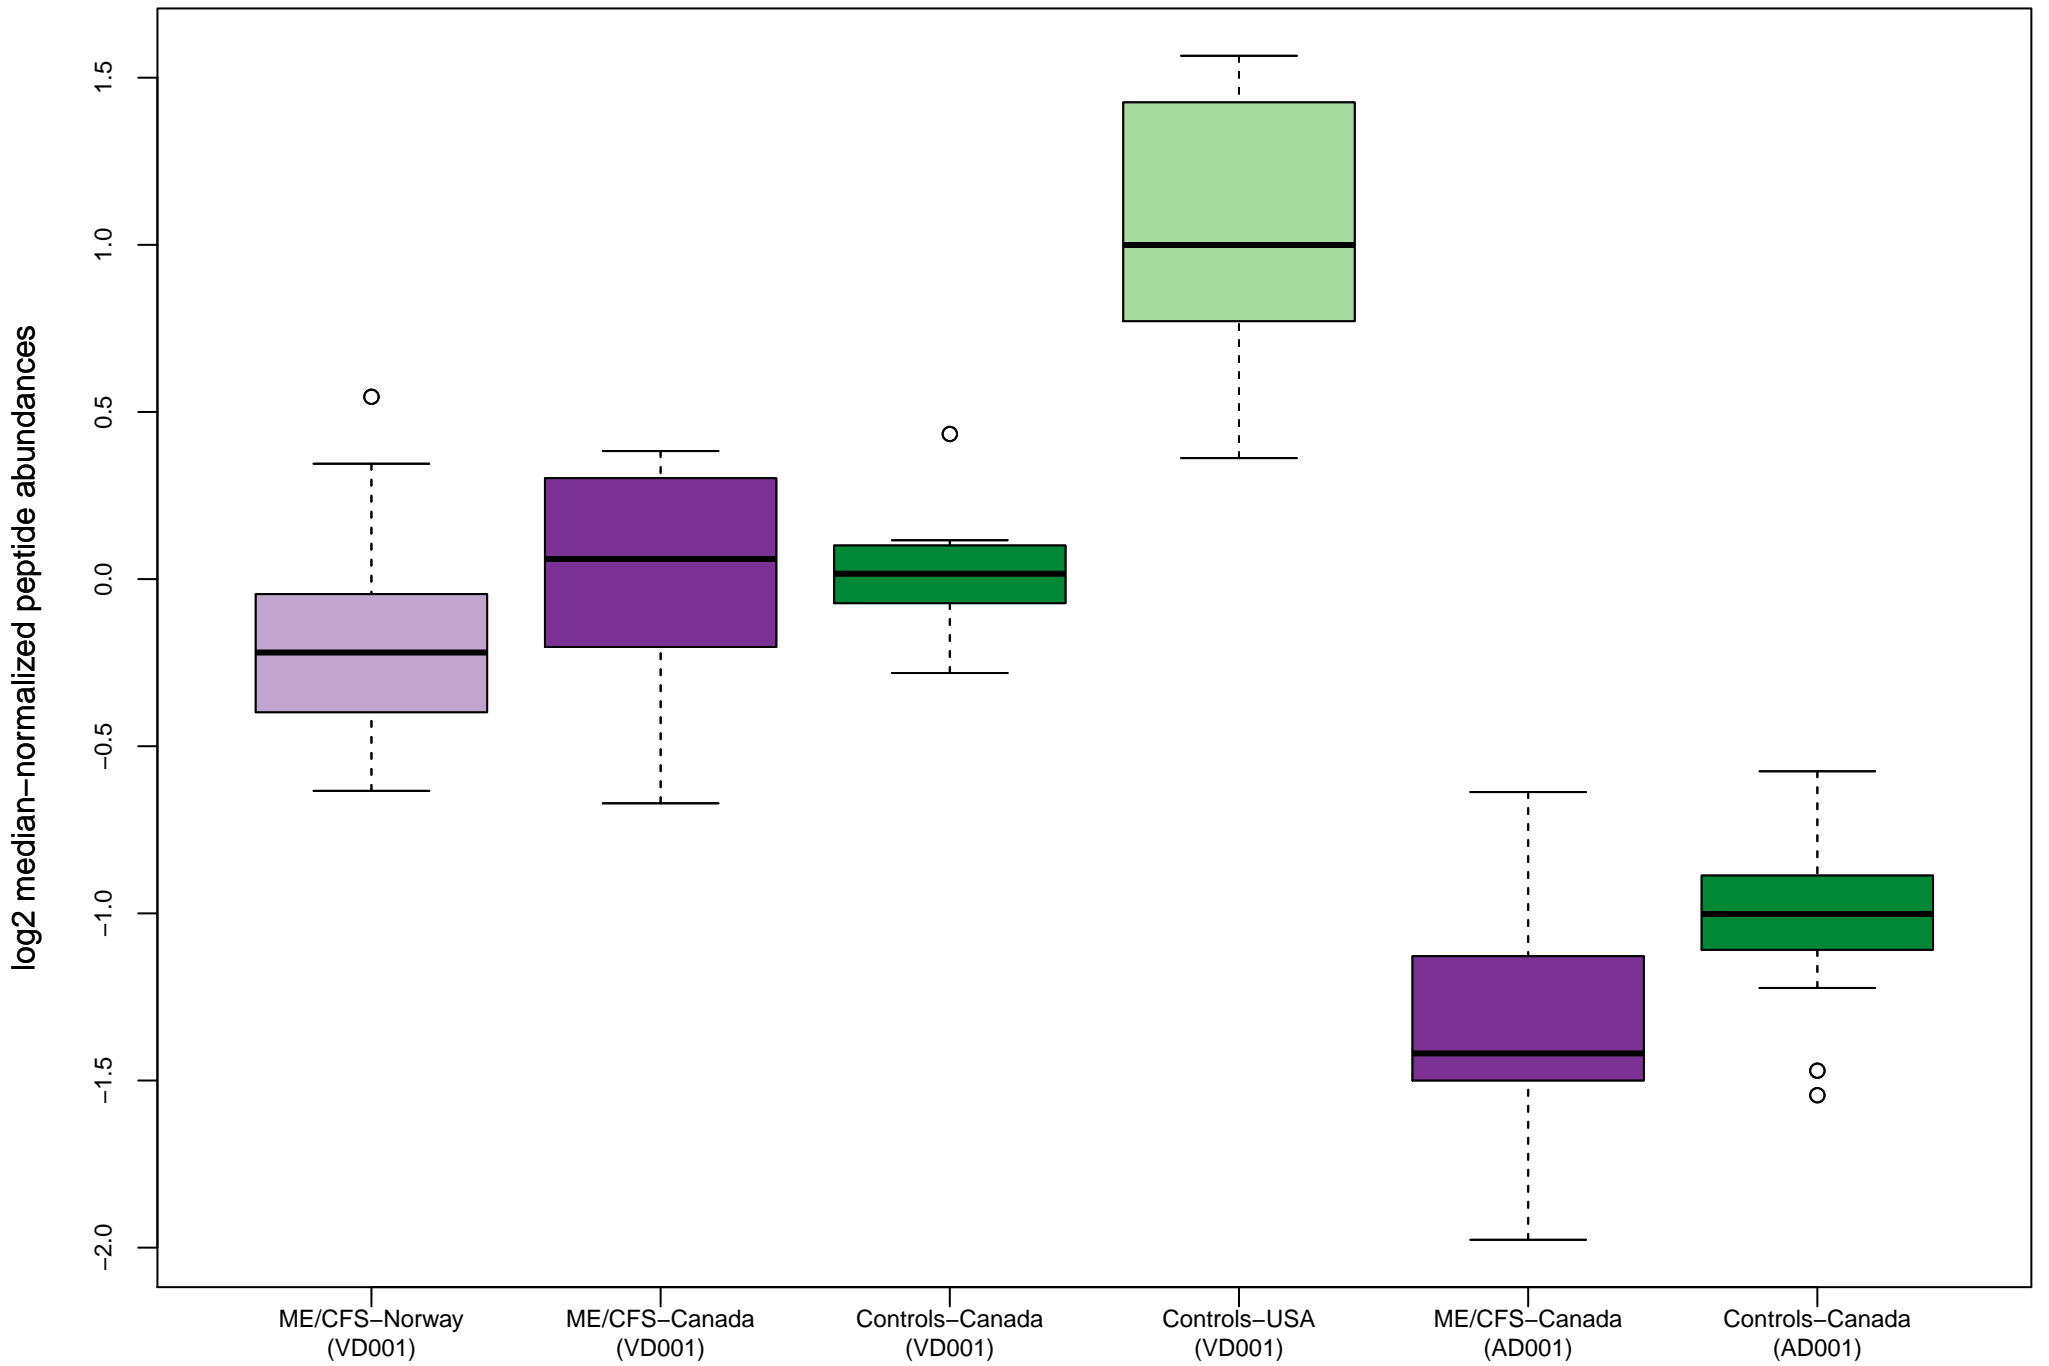

# WQRSGRLYKLSV

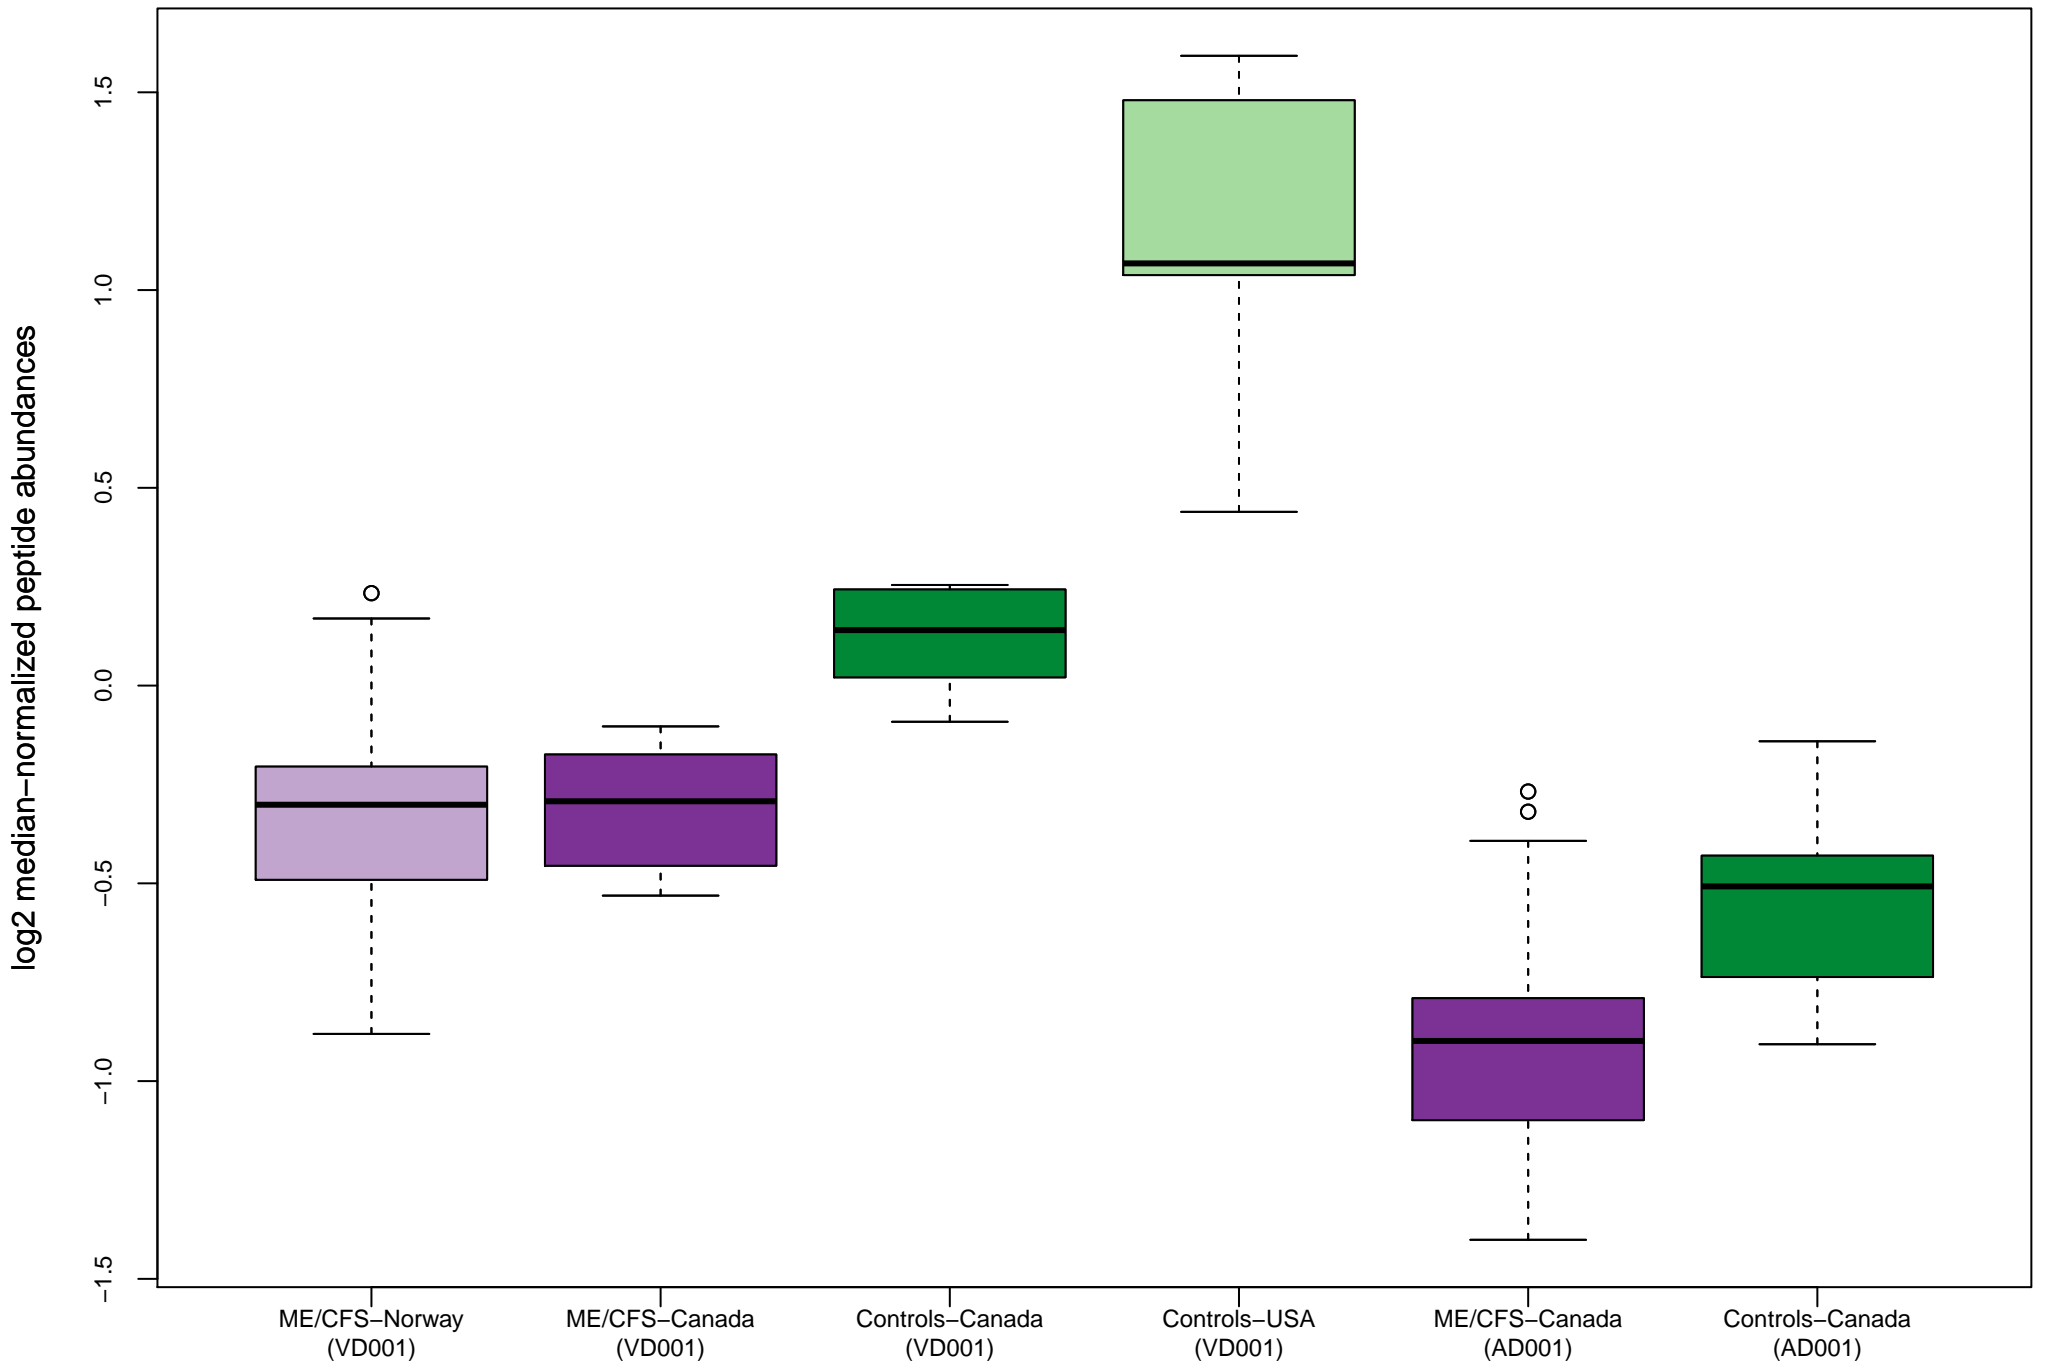



# WRKDFAFRALLS

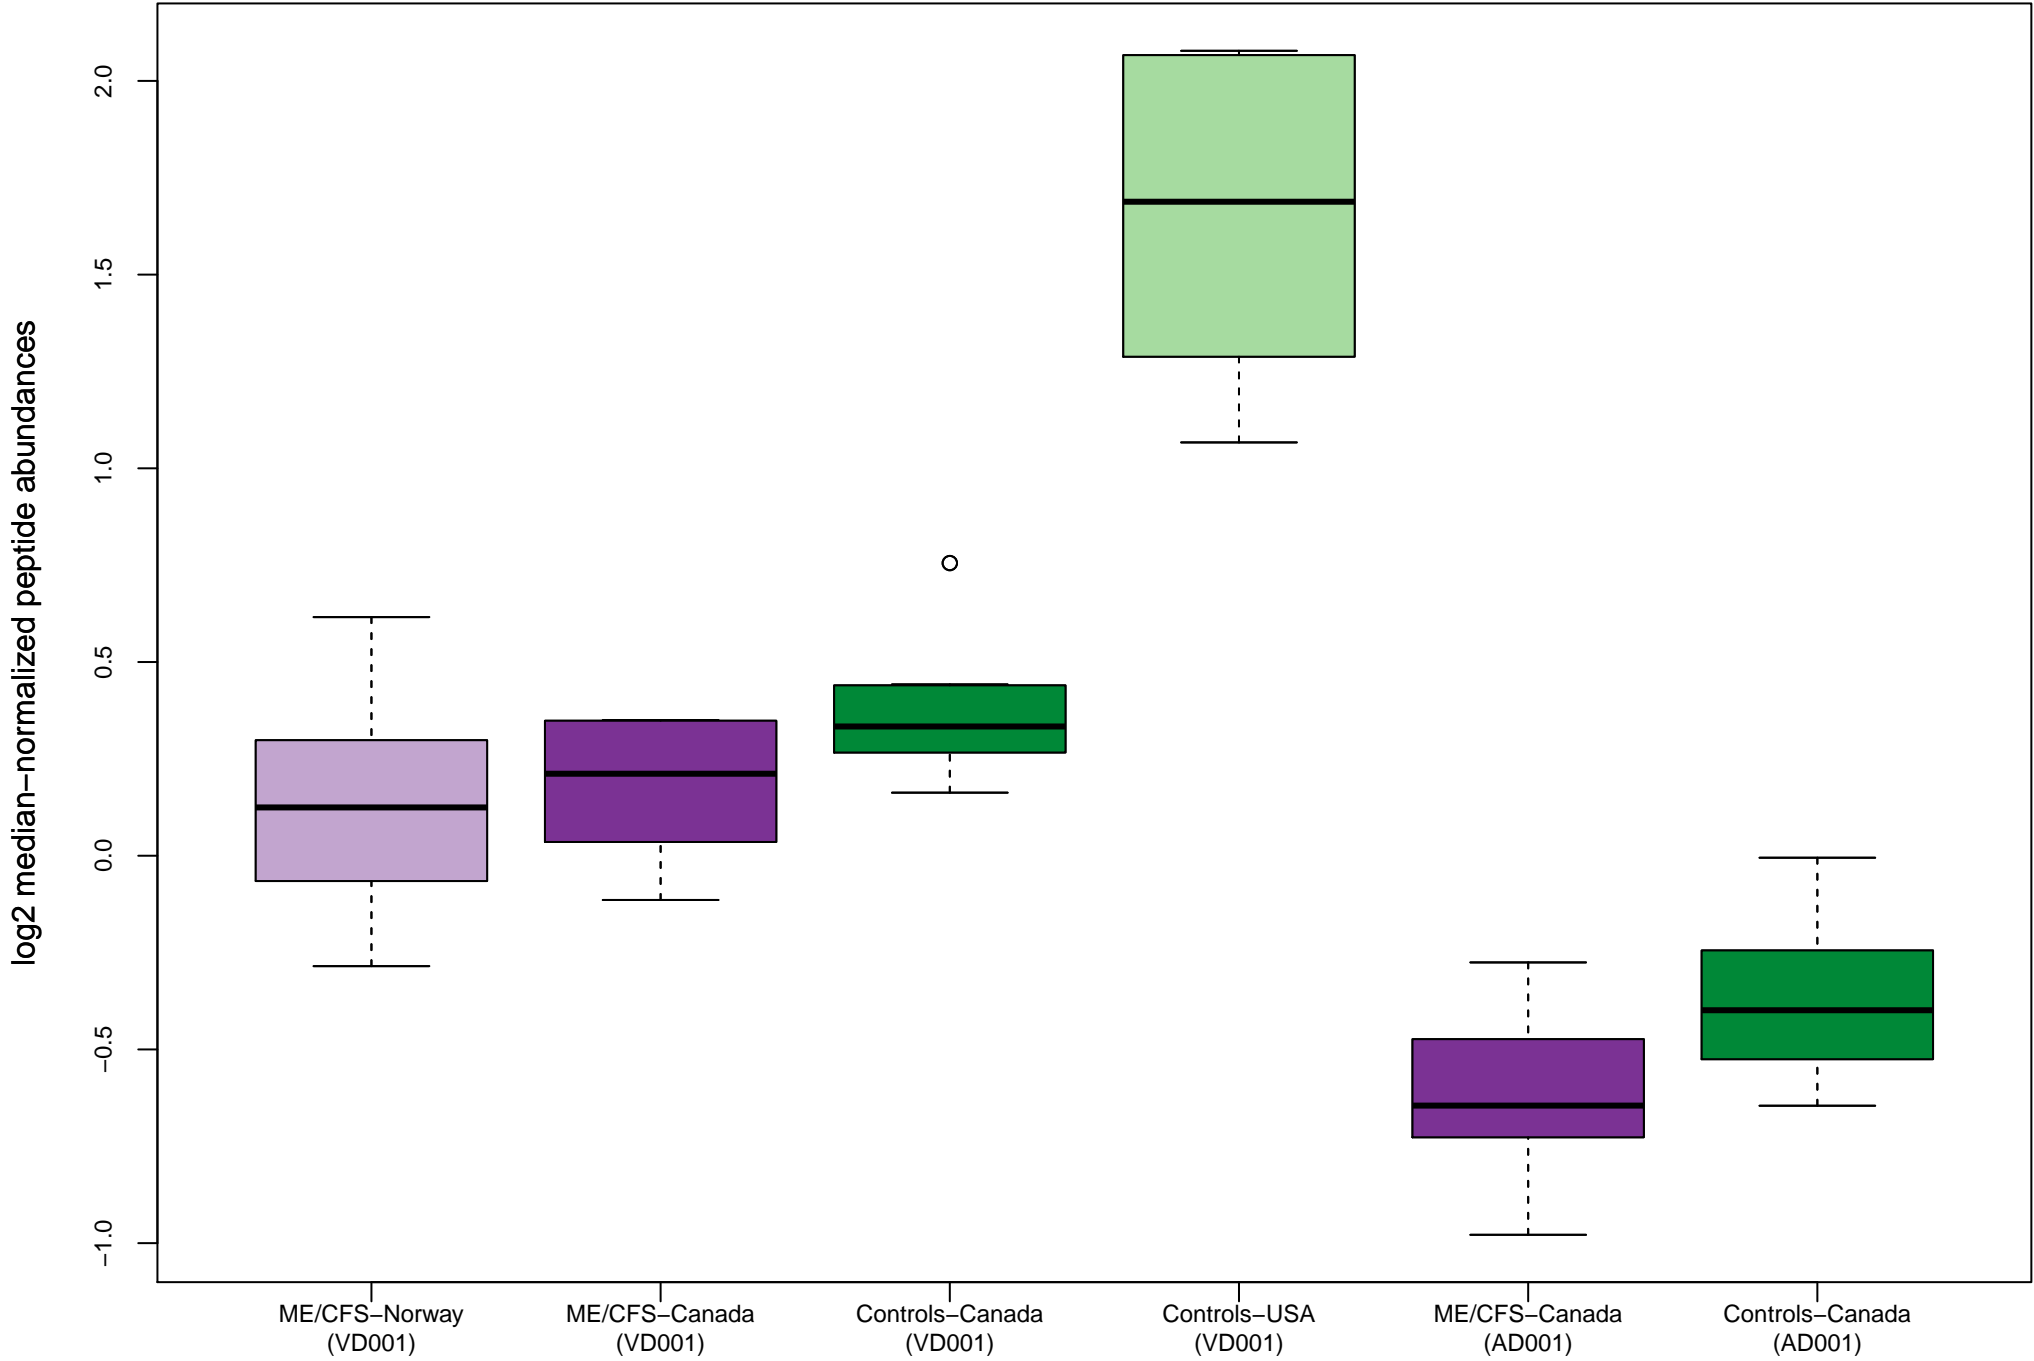

# WRKFFEPYWNL

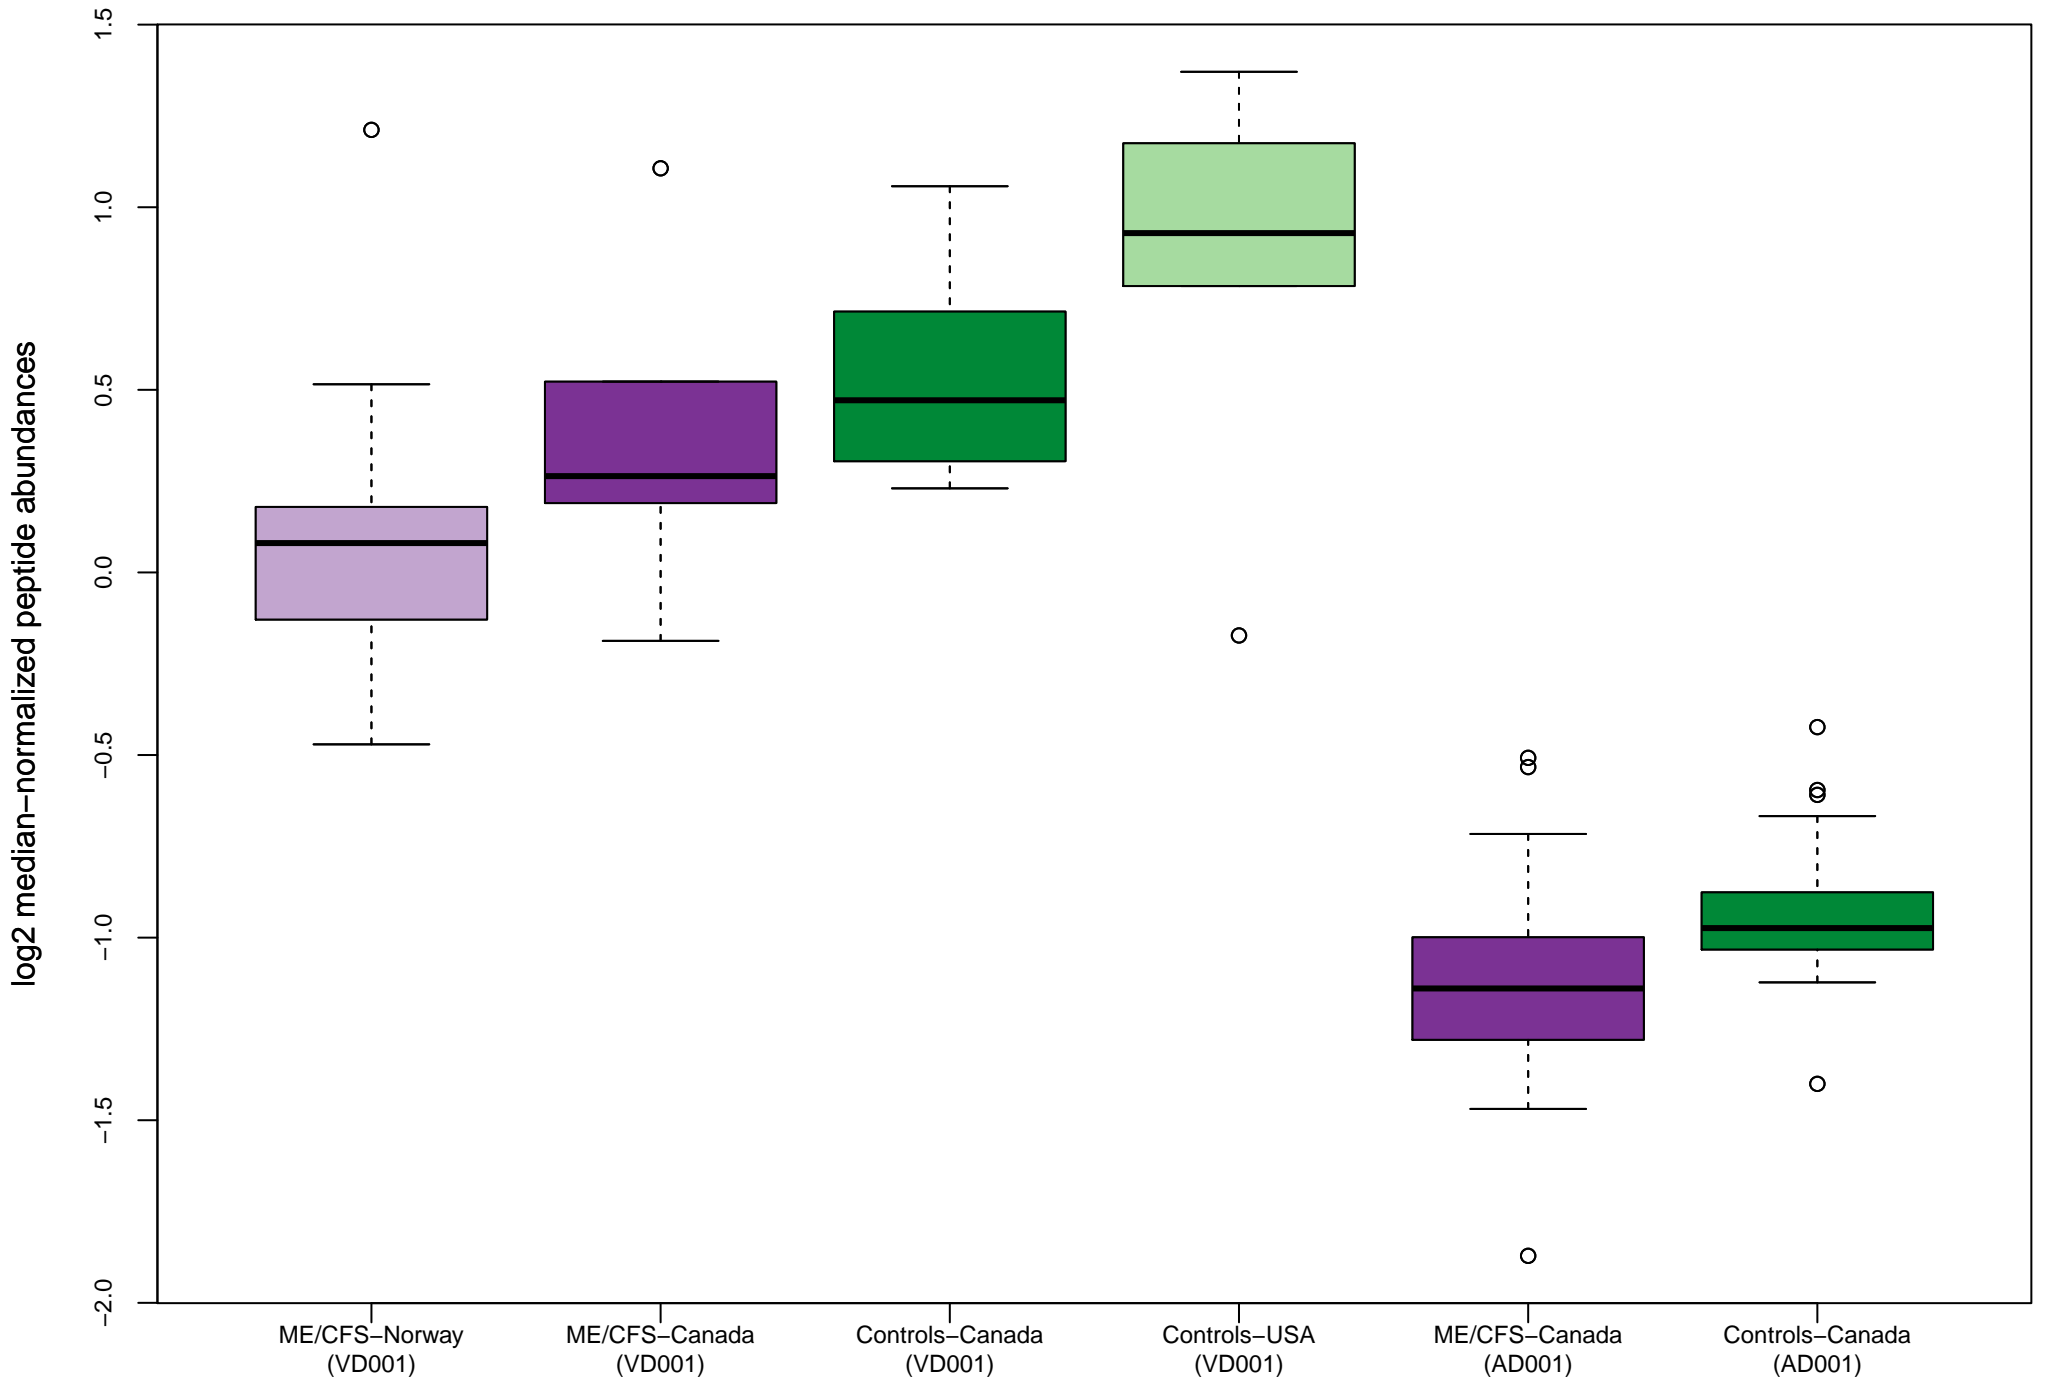

# WVRLWKGPYWNA

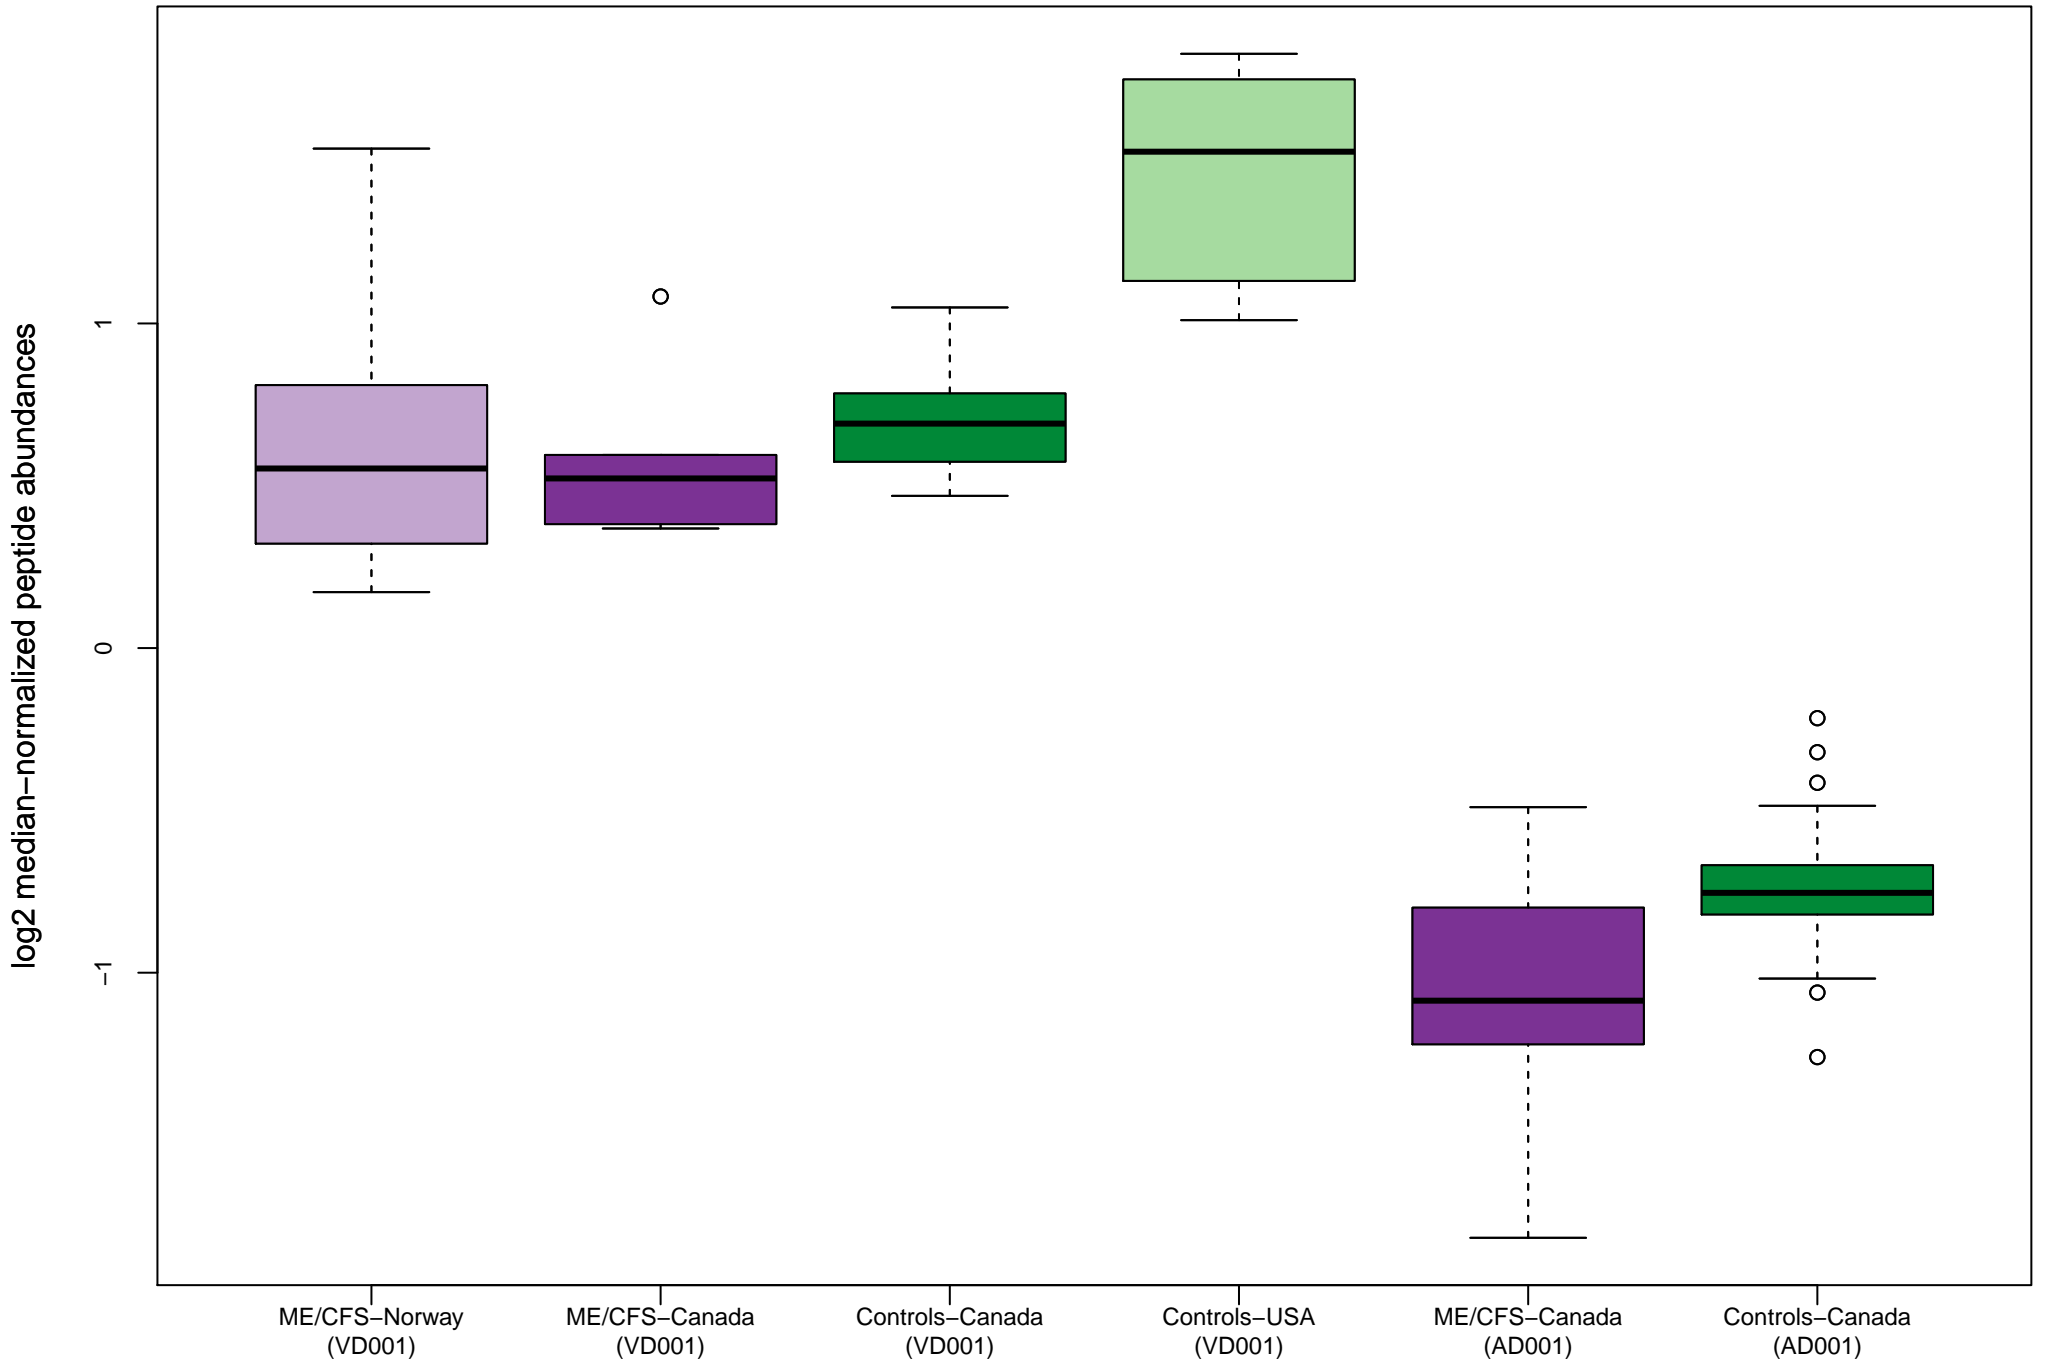

# WWVKRKLGVLSG

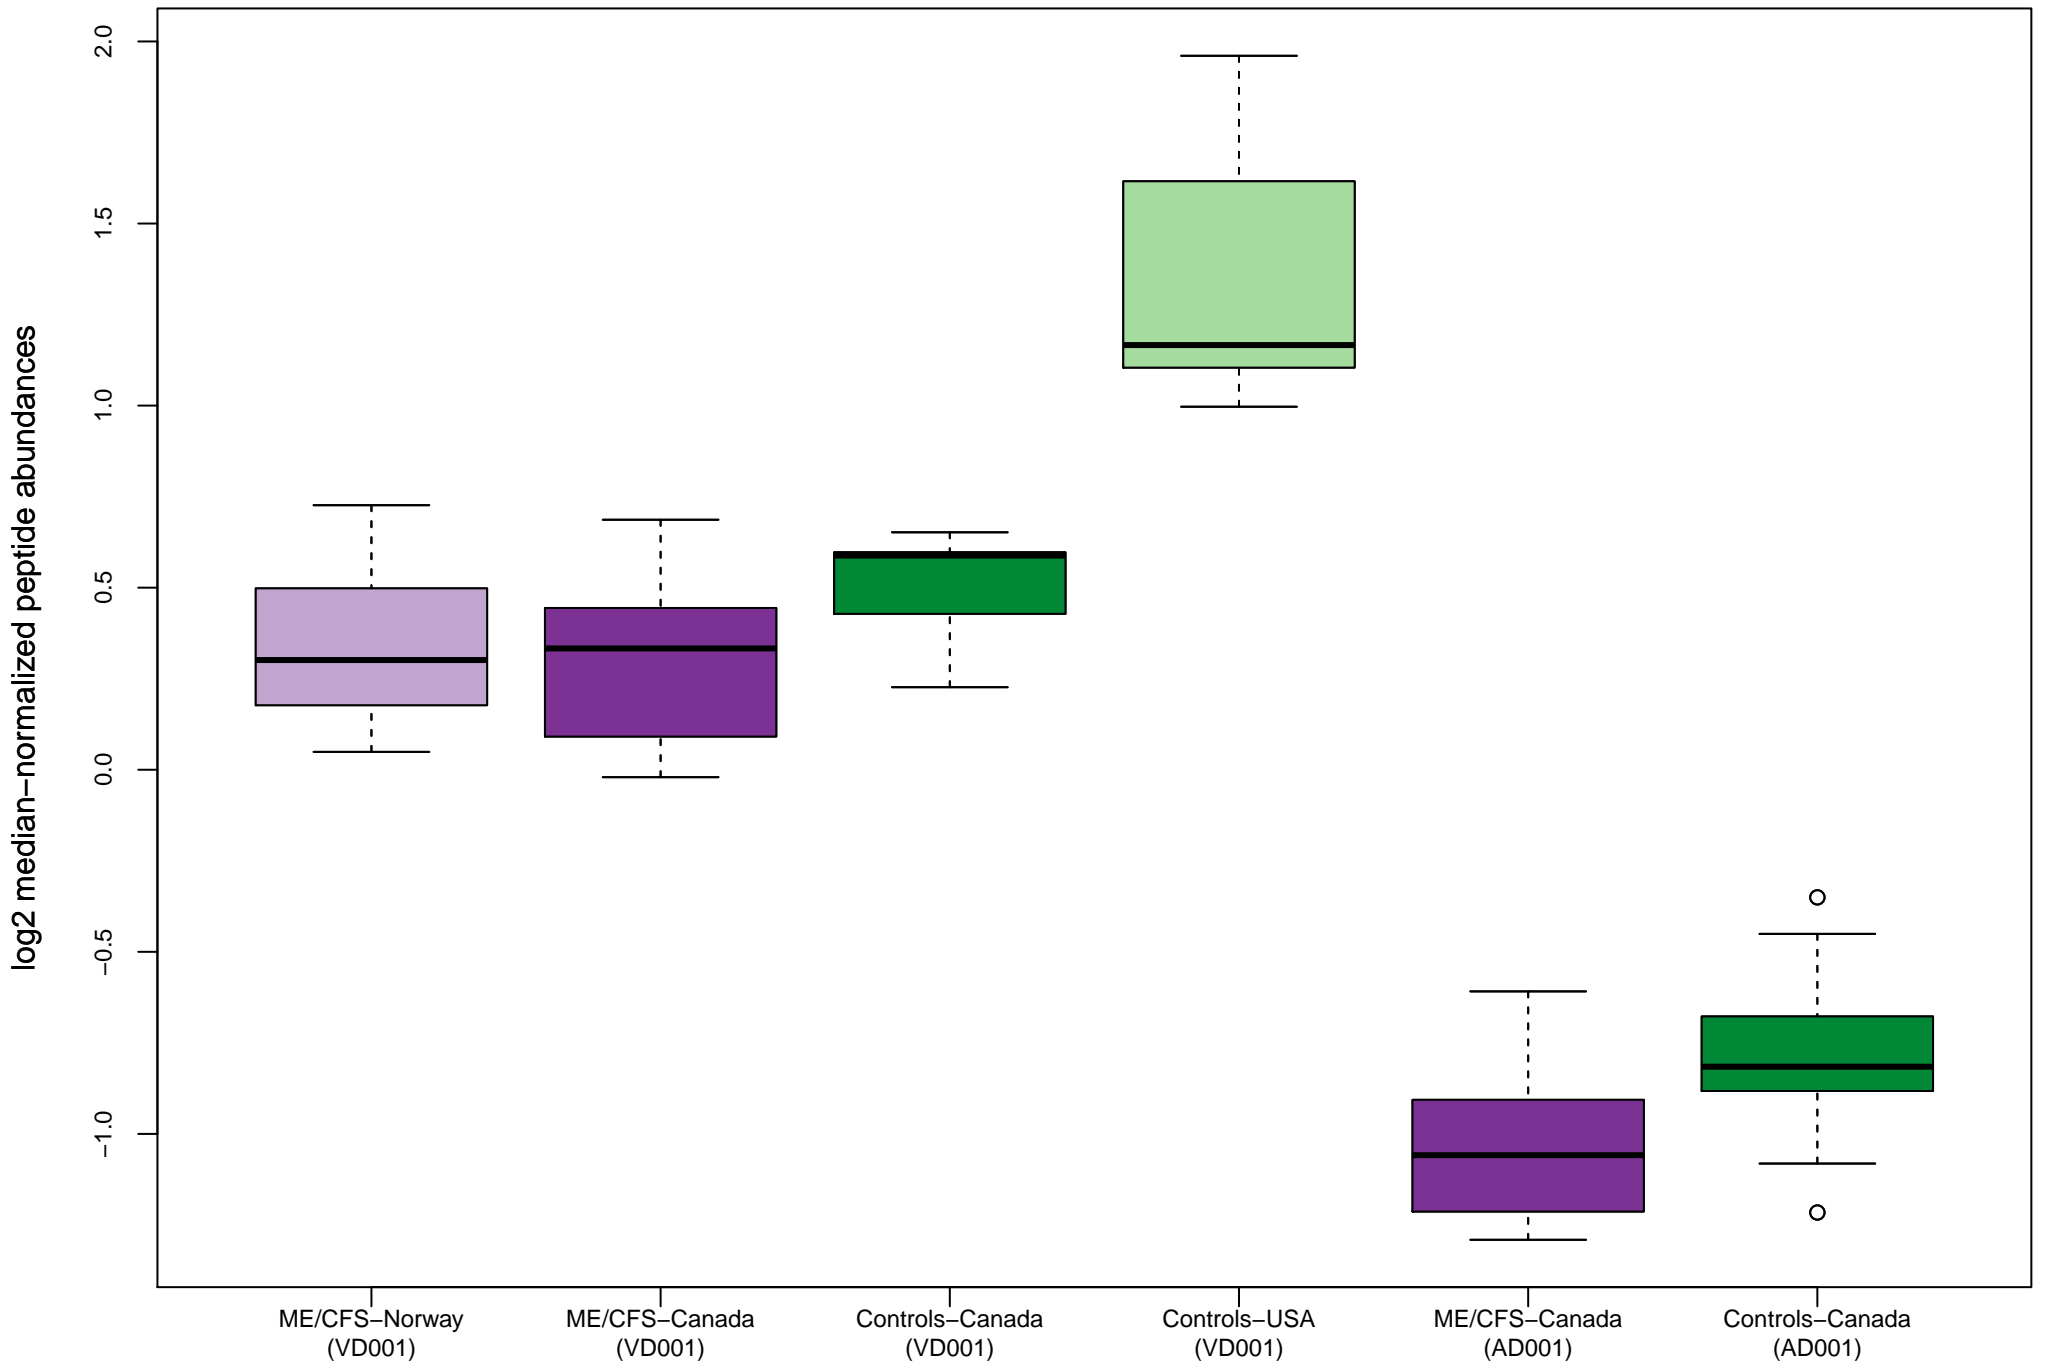

# YAALRGFKAGAS

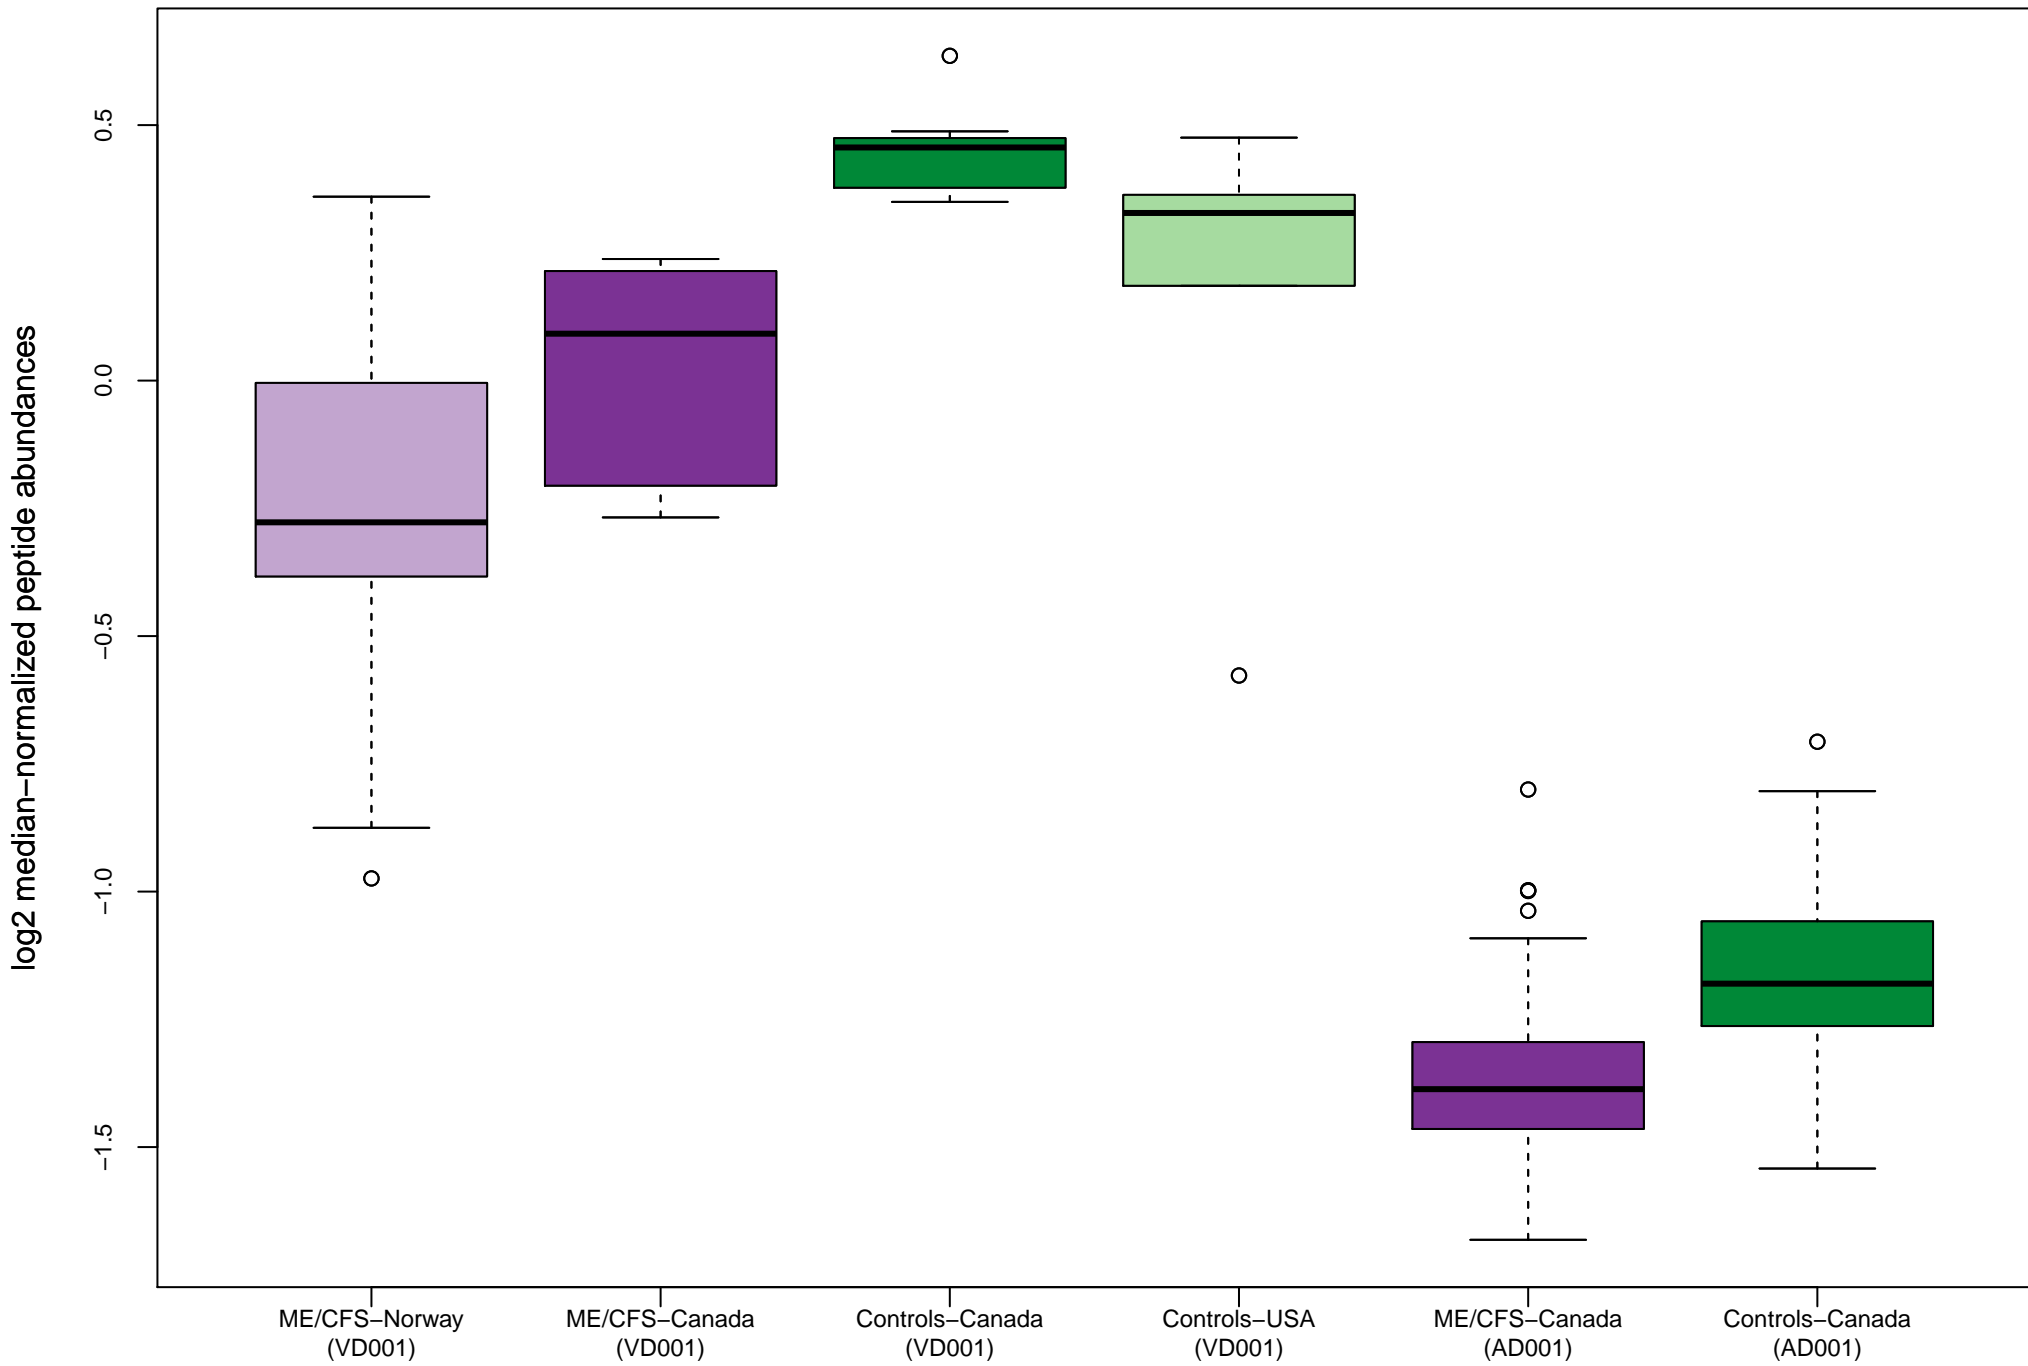

# YKLHSRARYSGG

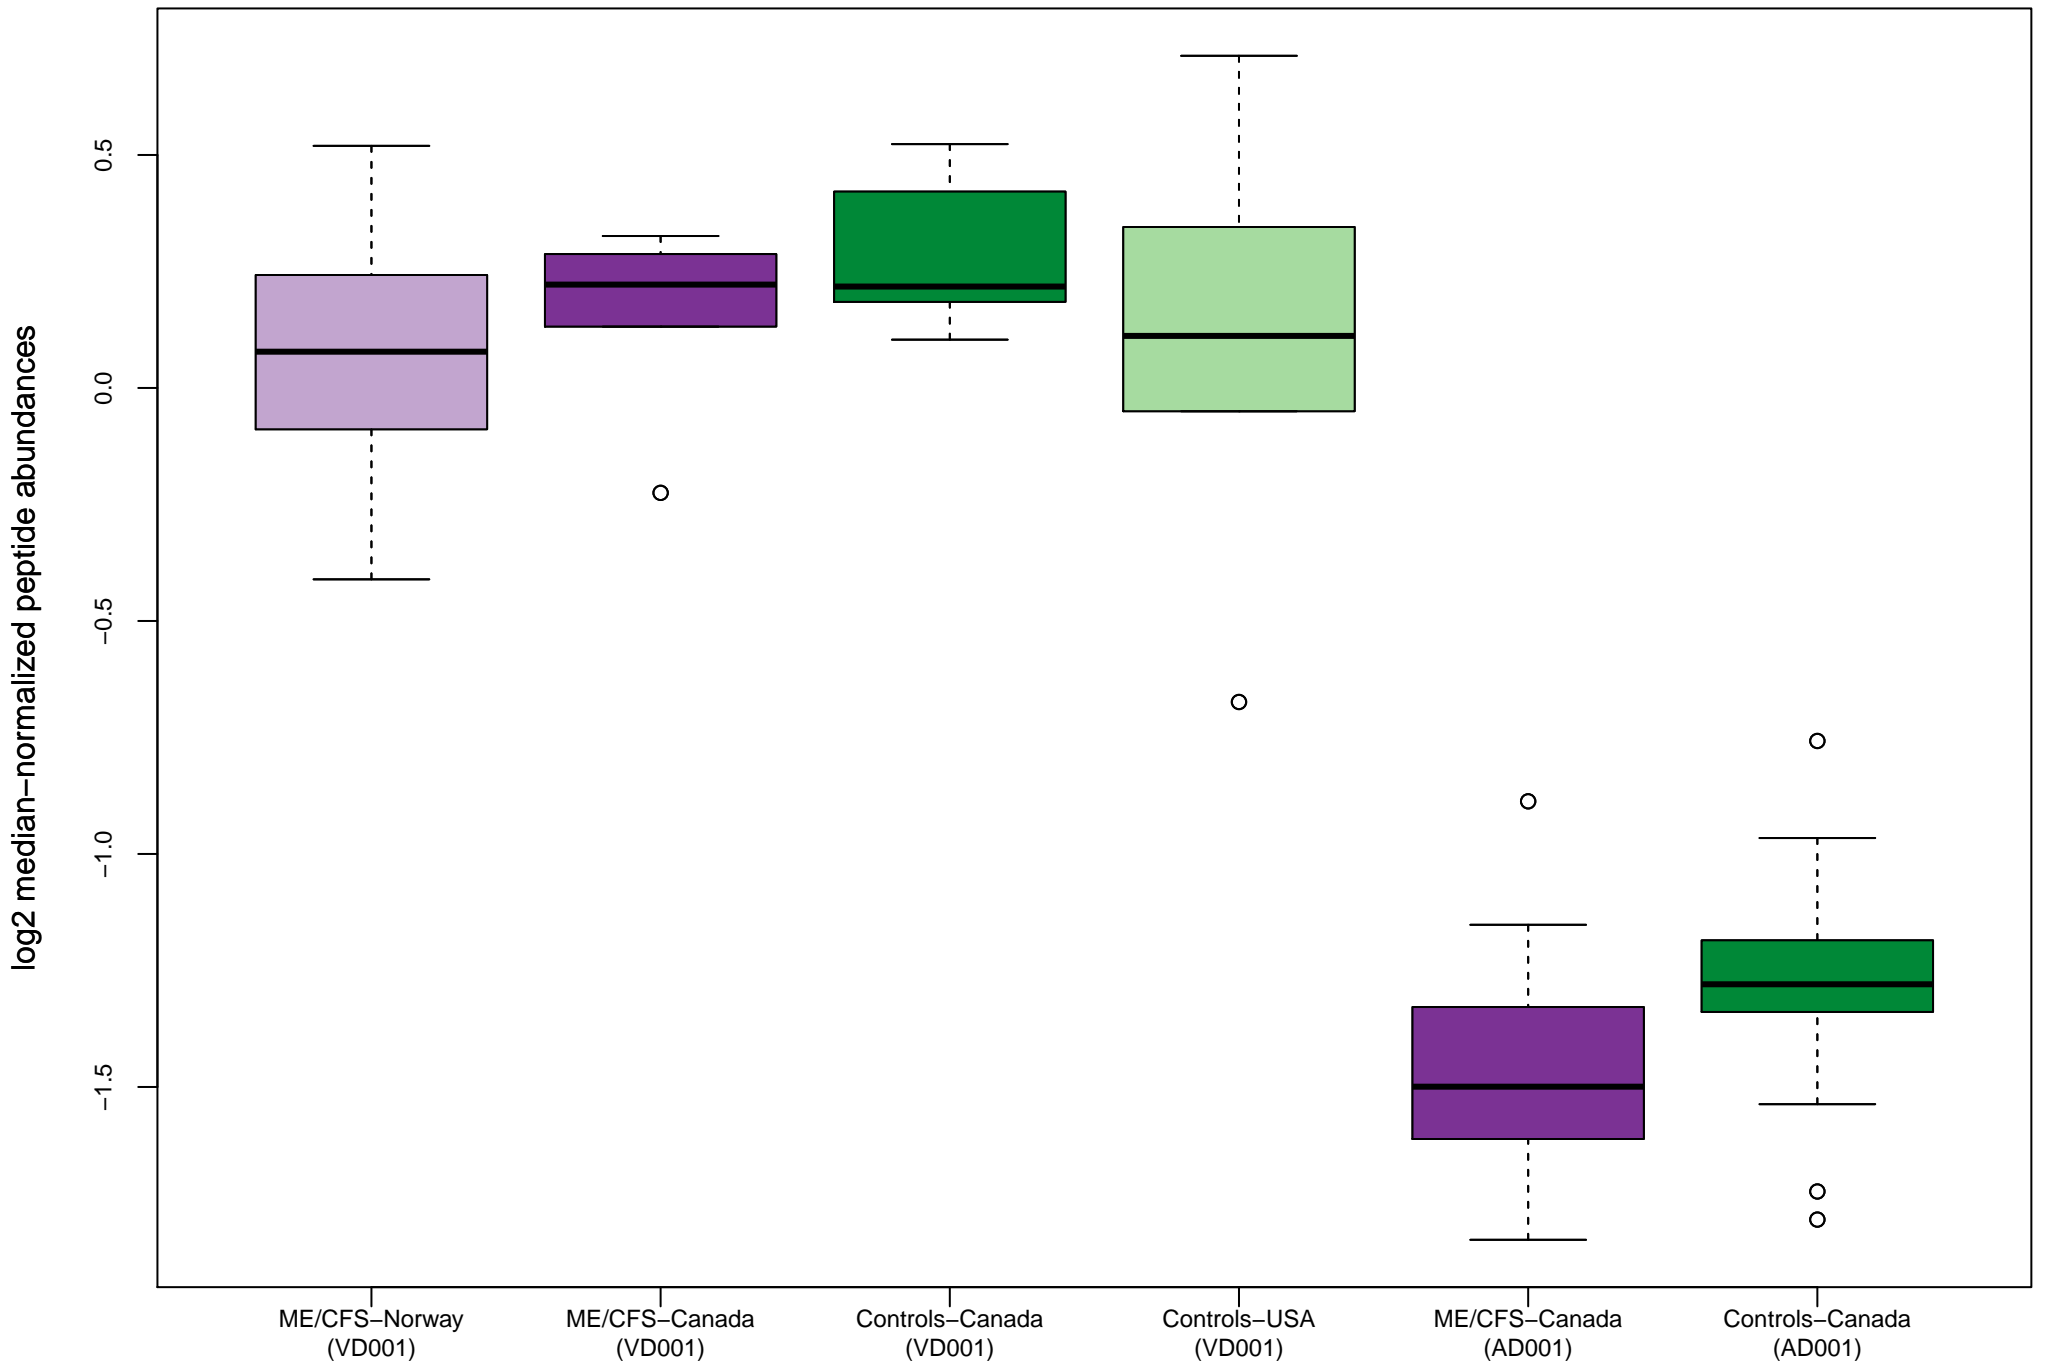

# YKQLSRLFWNAA

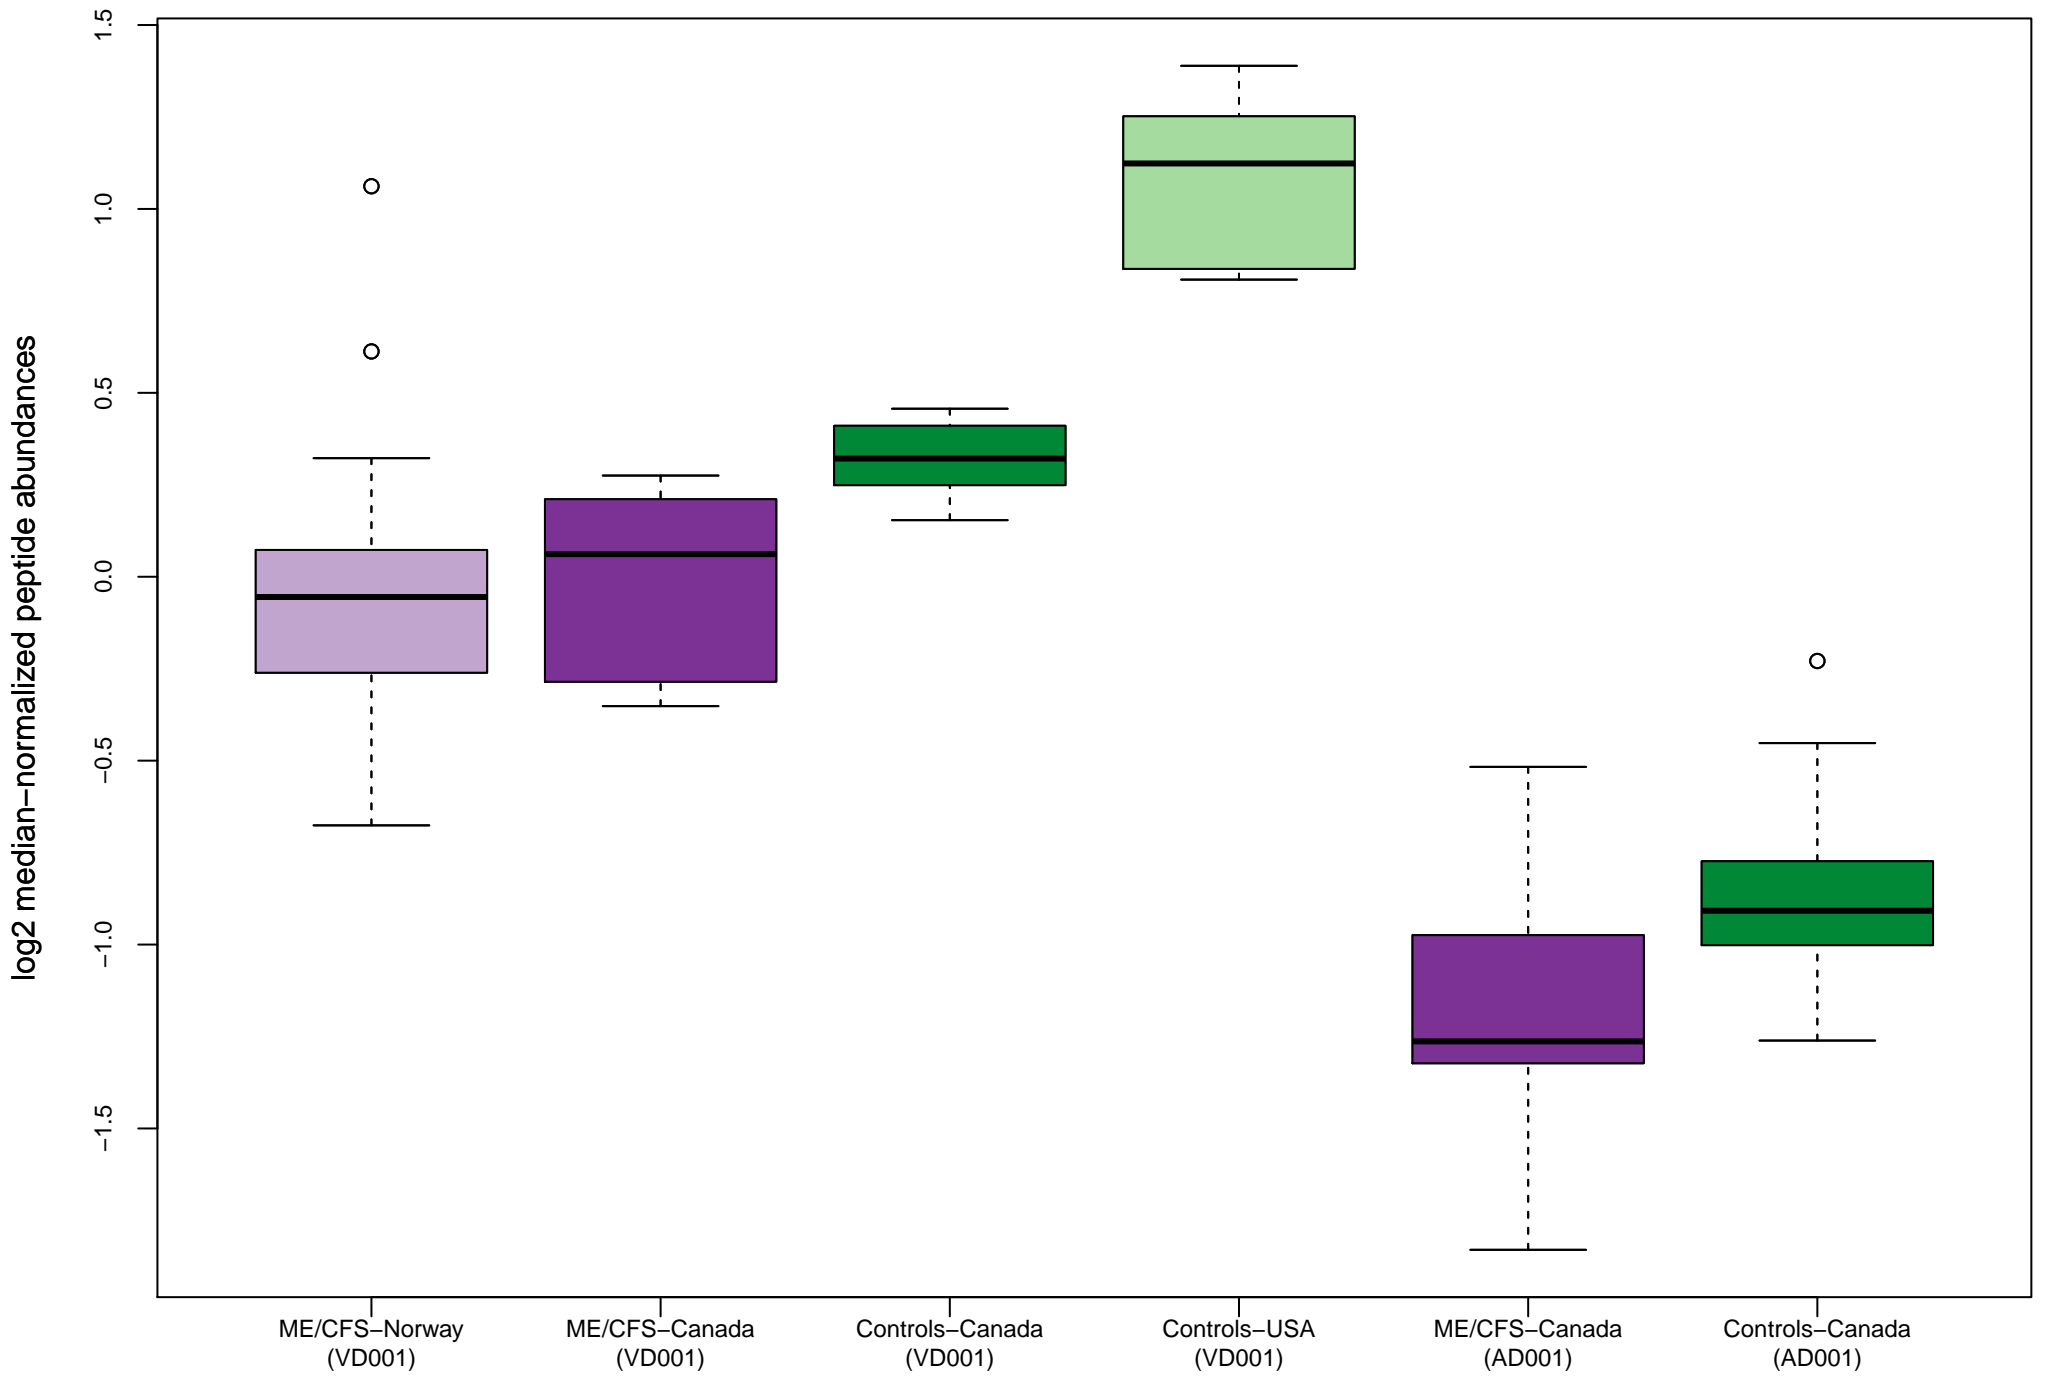

# YRFGPKLSVLSG

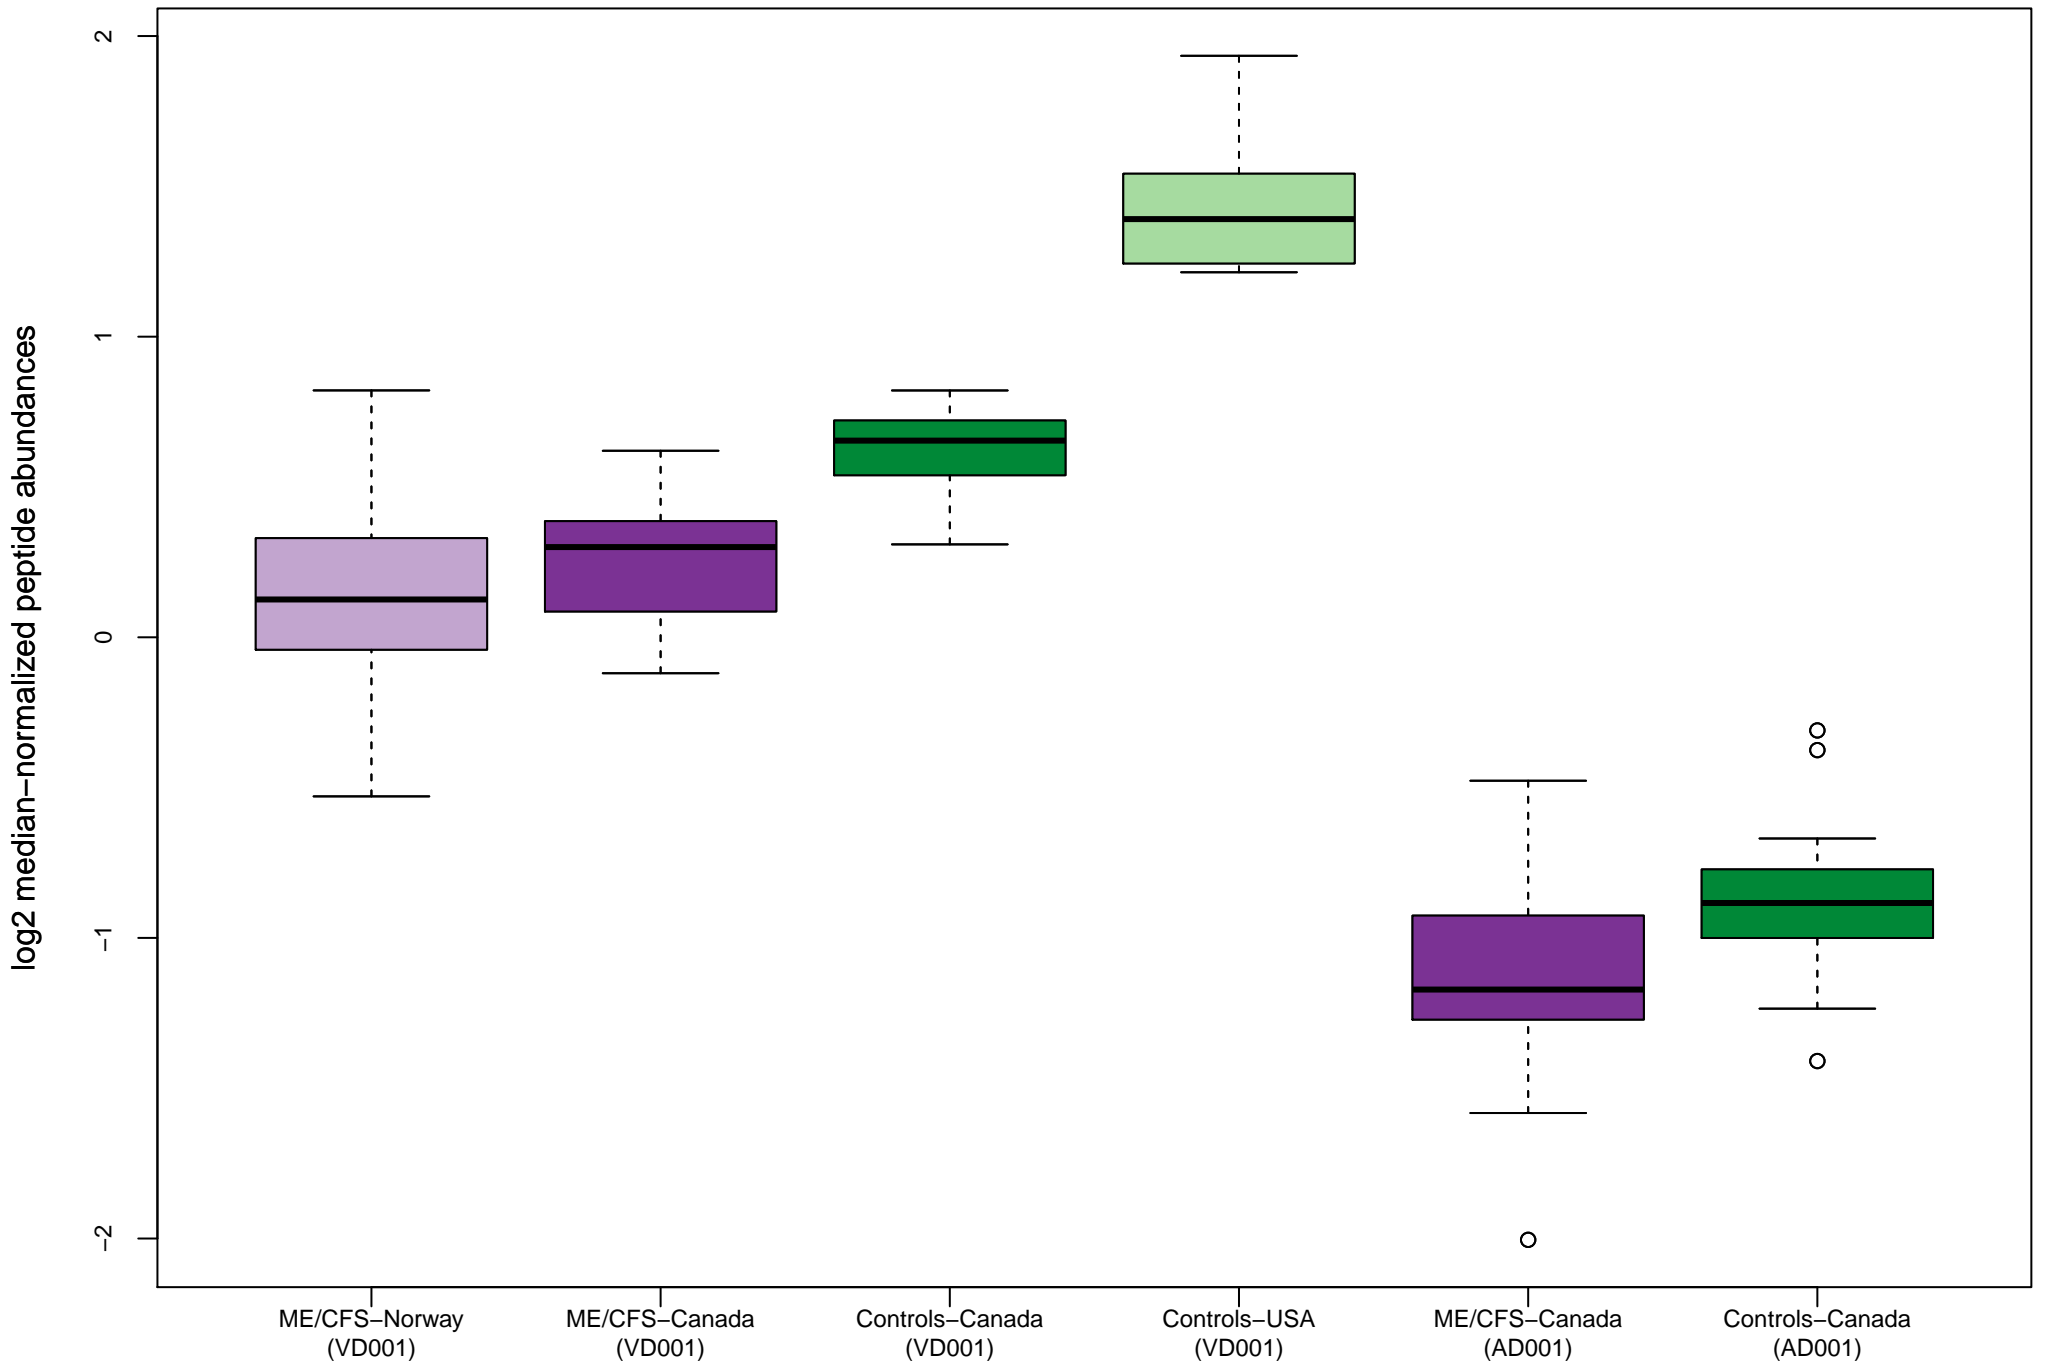



# YRRWSFRGVALG

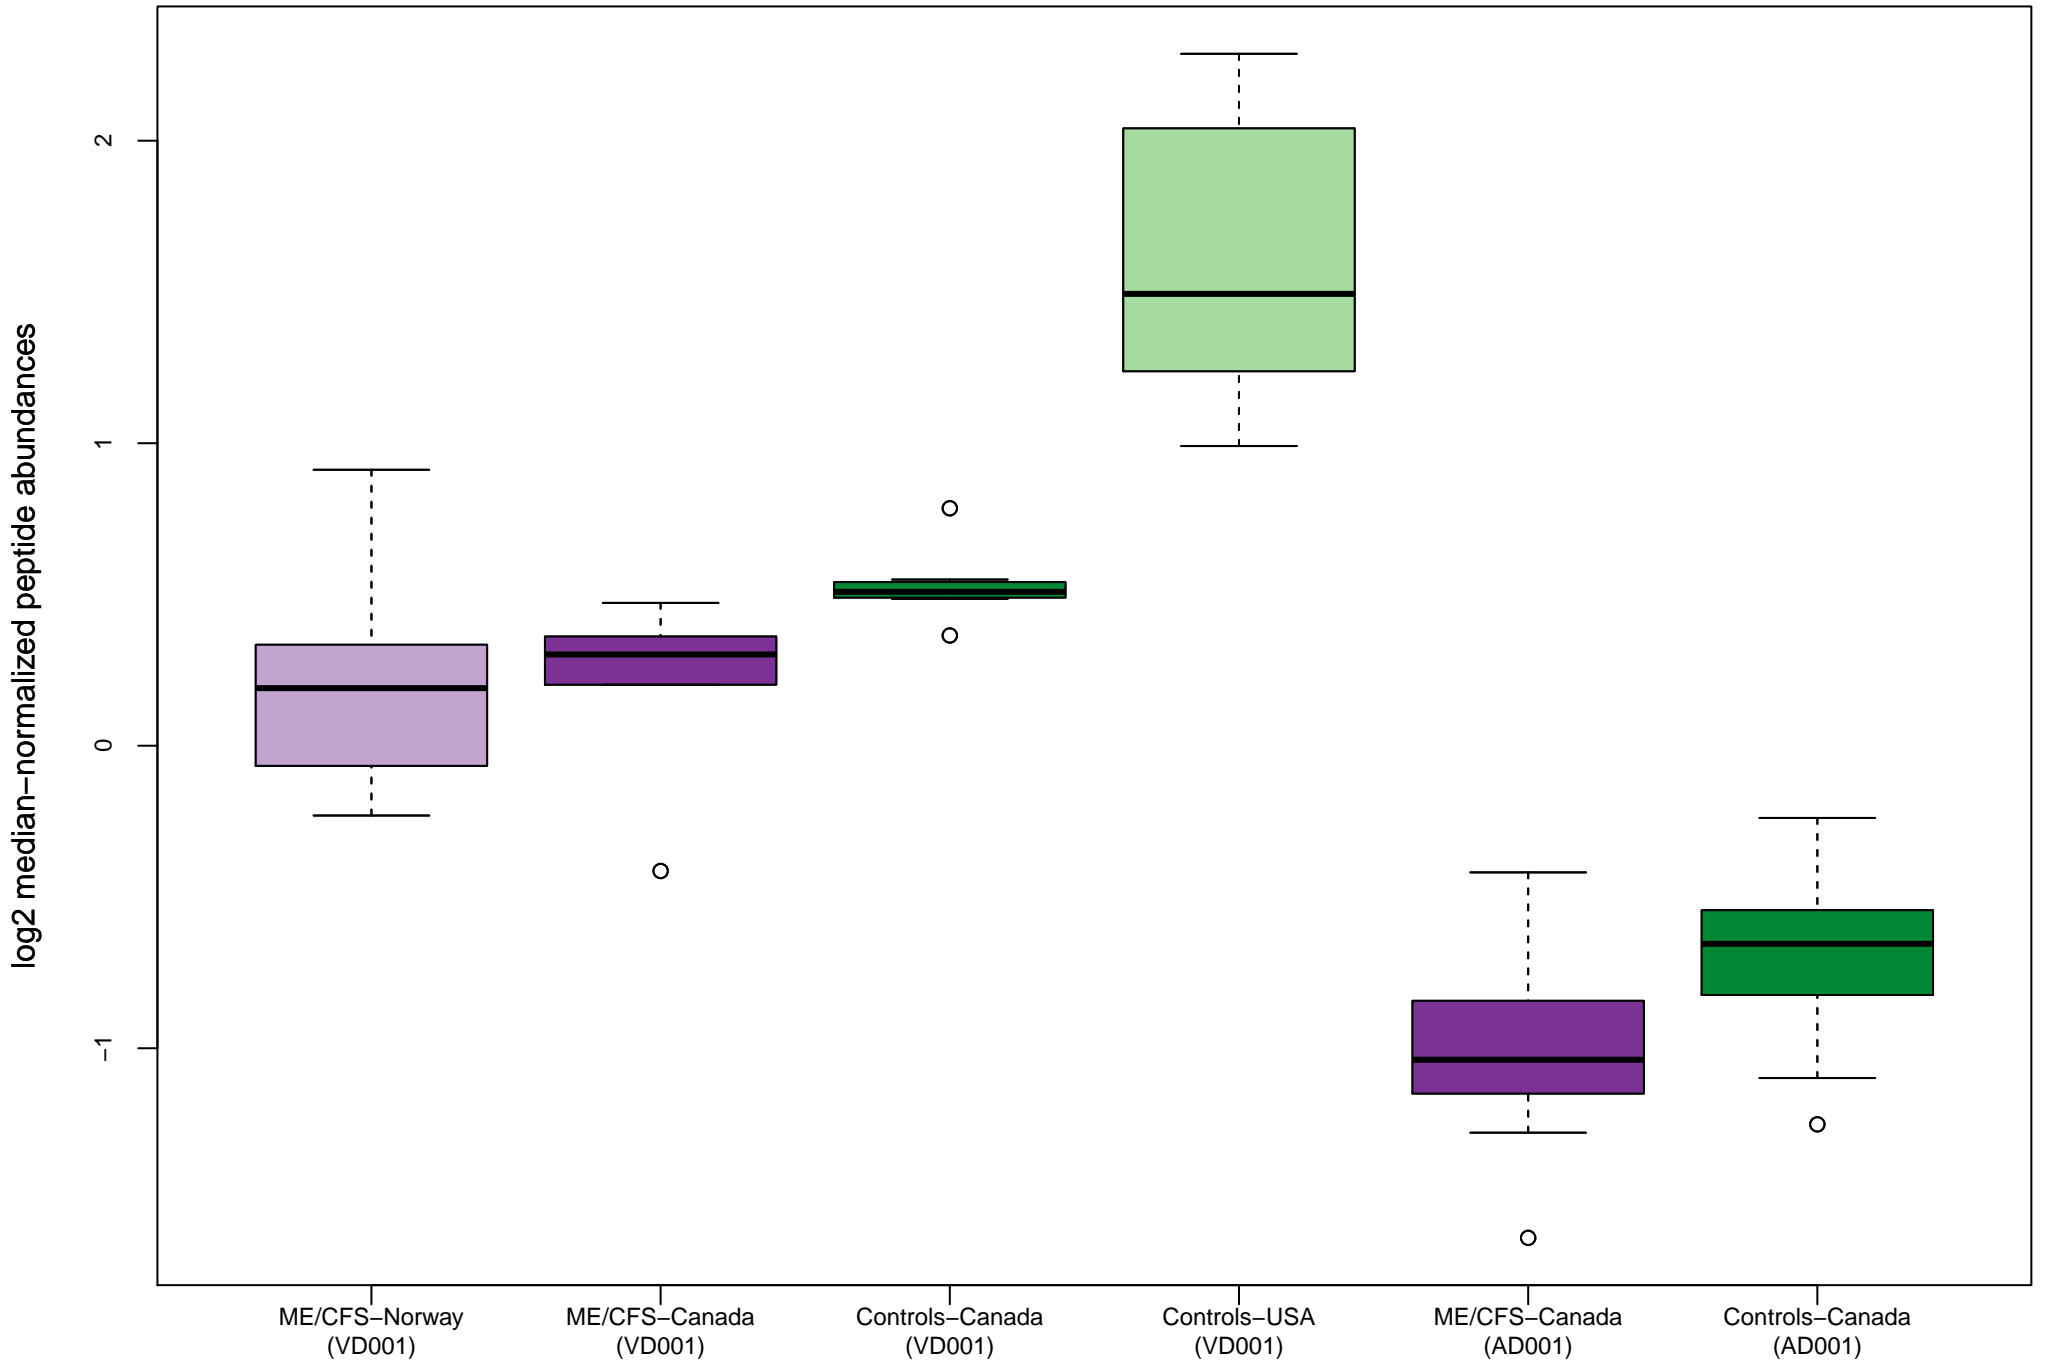

# YRVKRYSGVALS

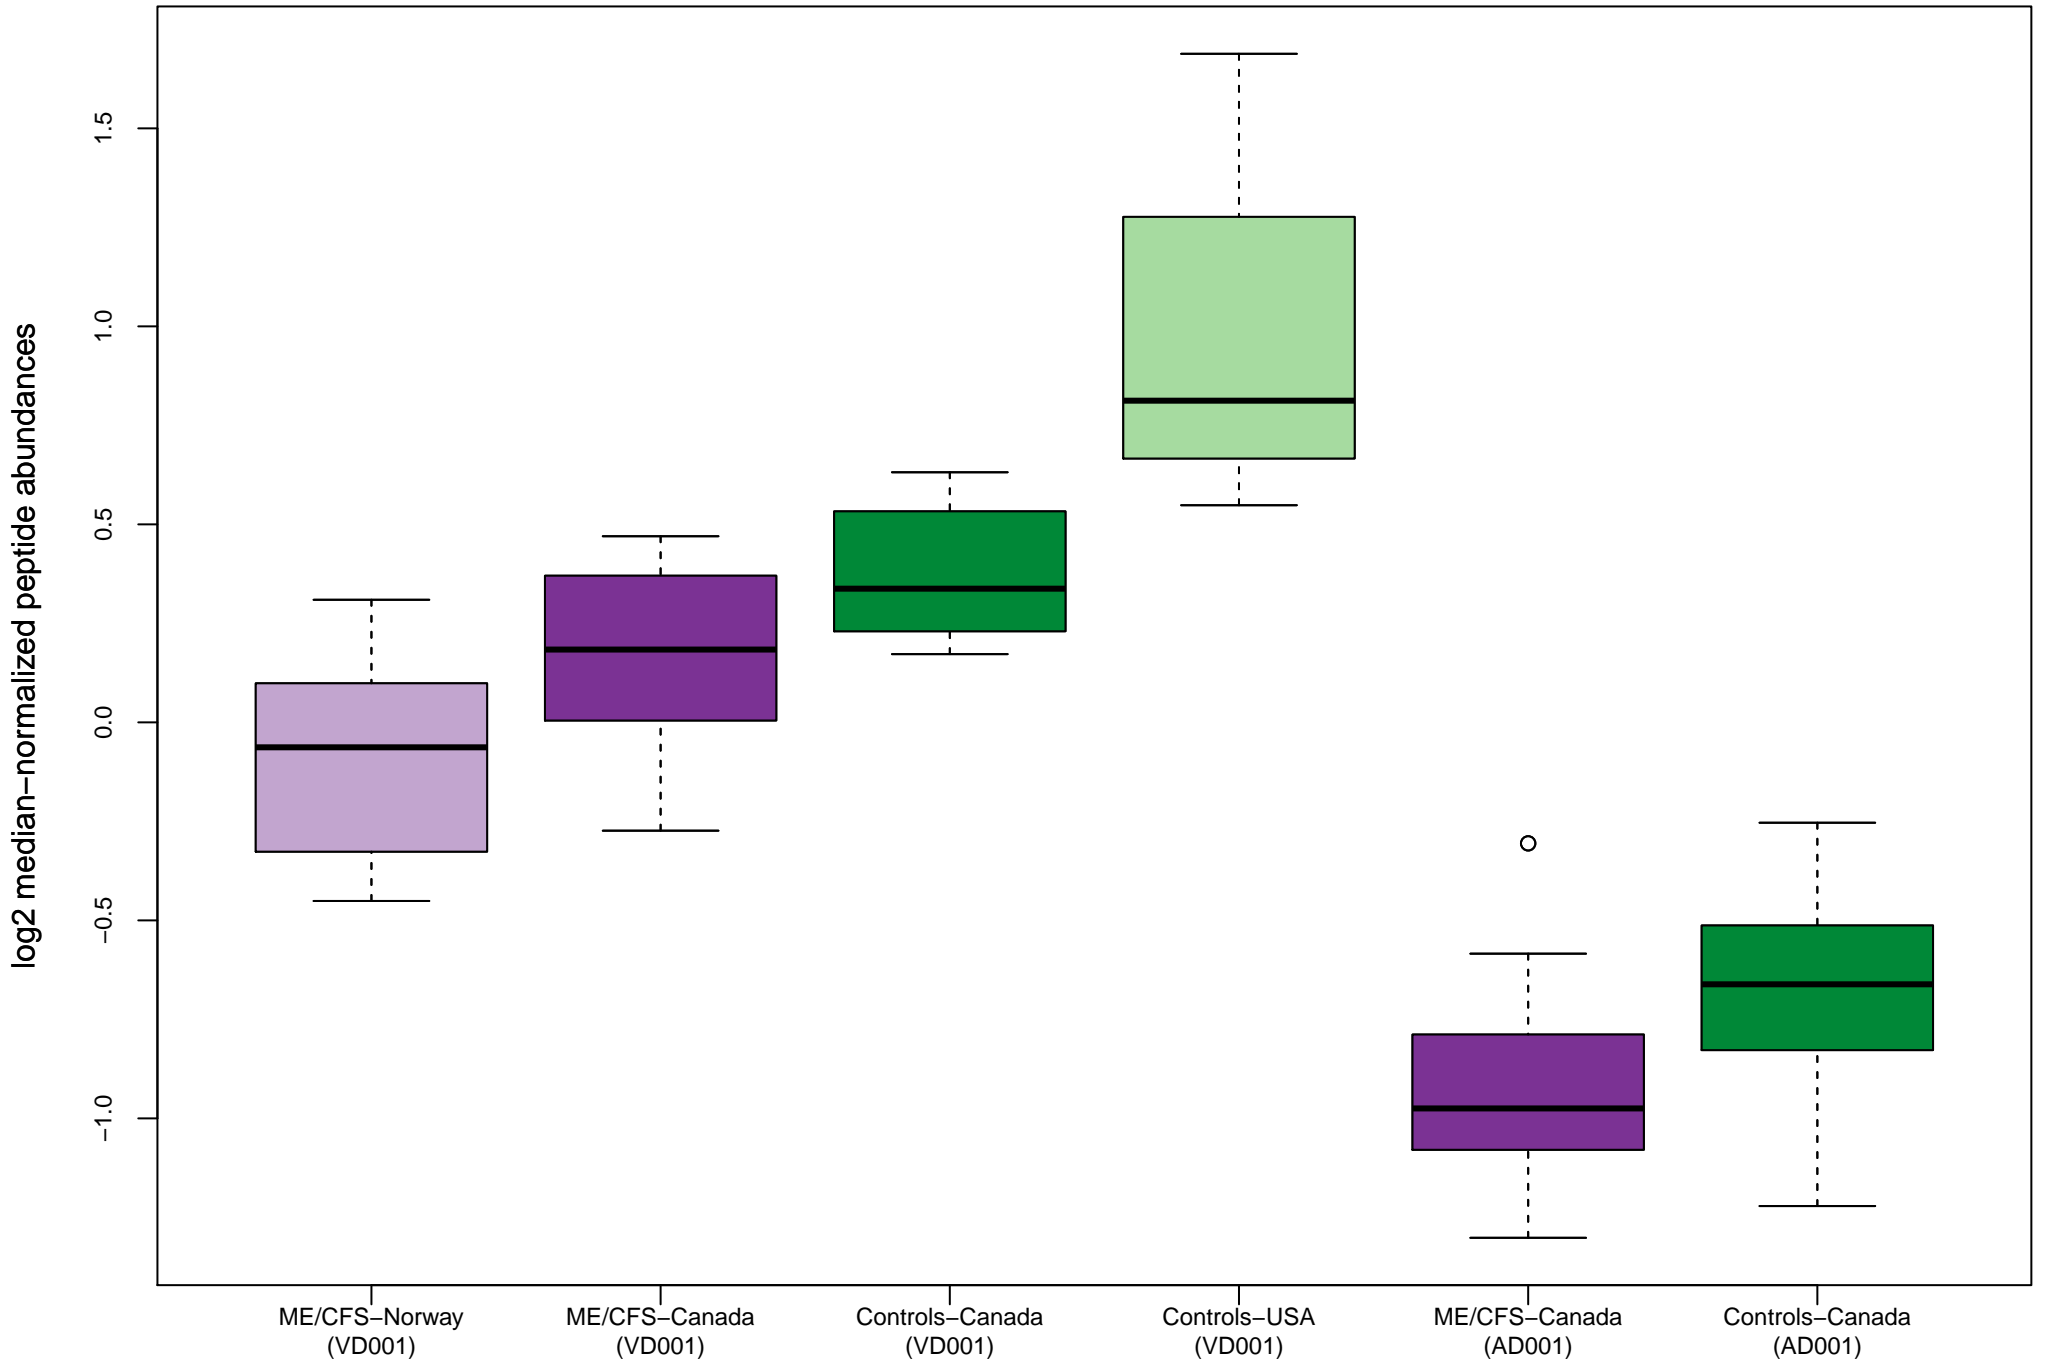

# YSYLLRKGVALS

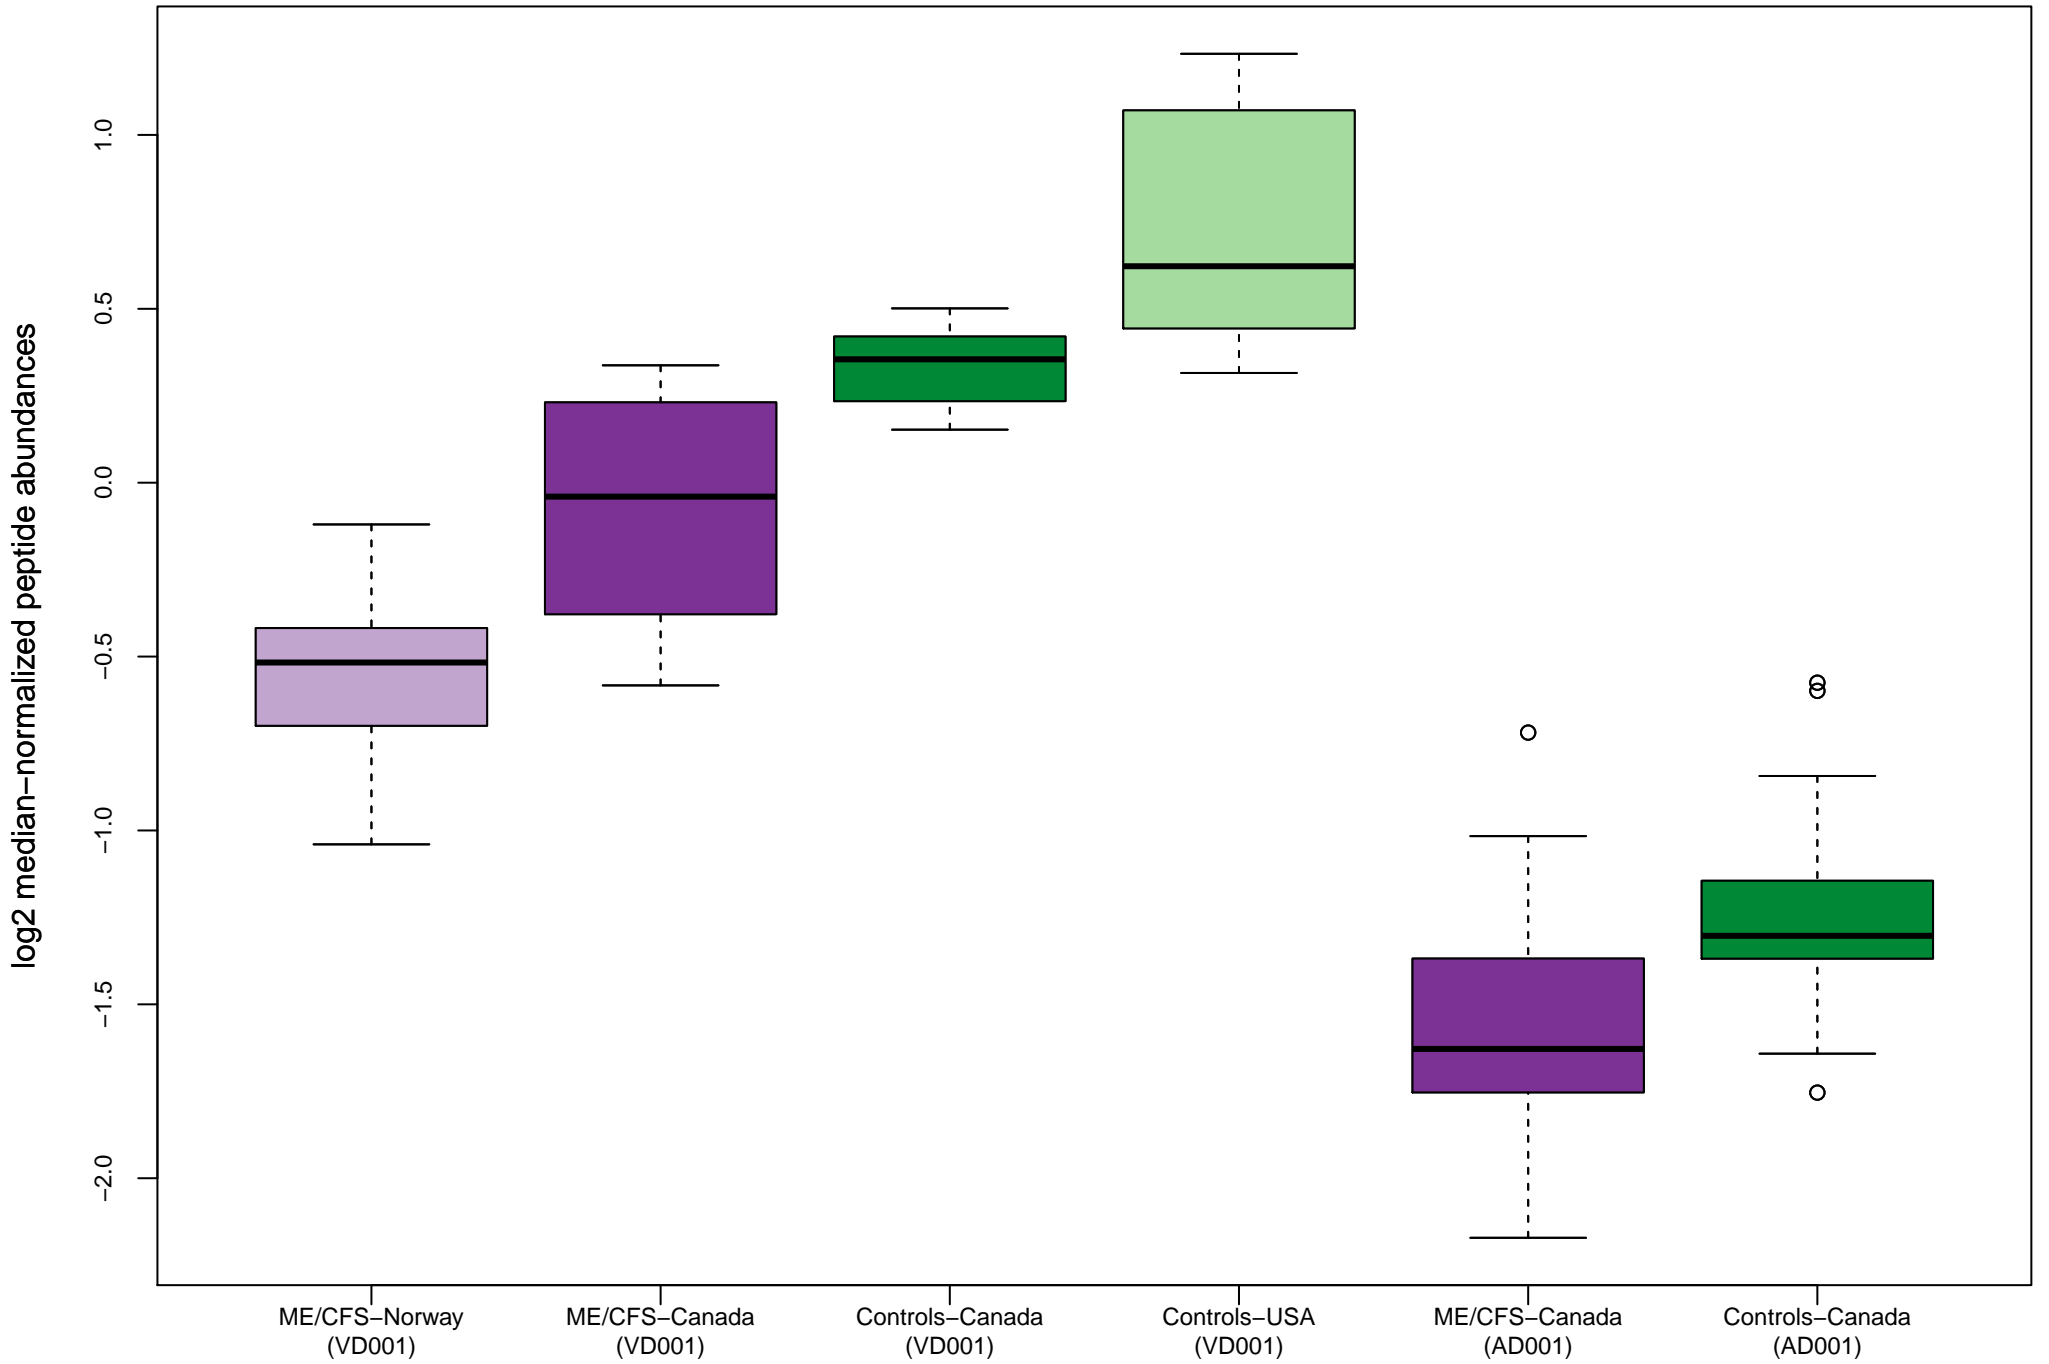

# YVGRPRPYNYWK

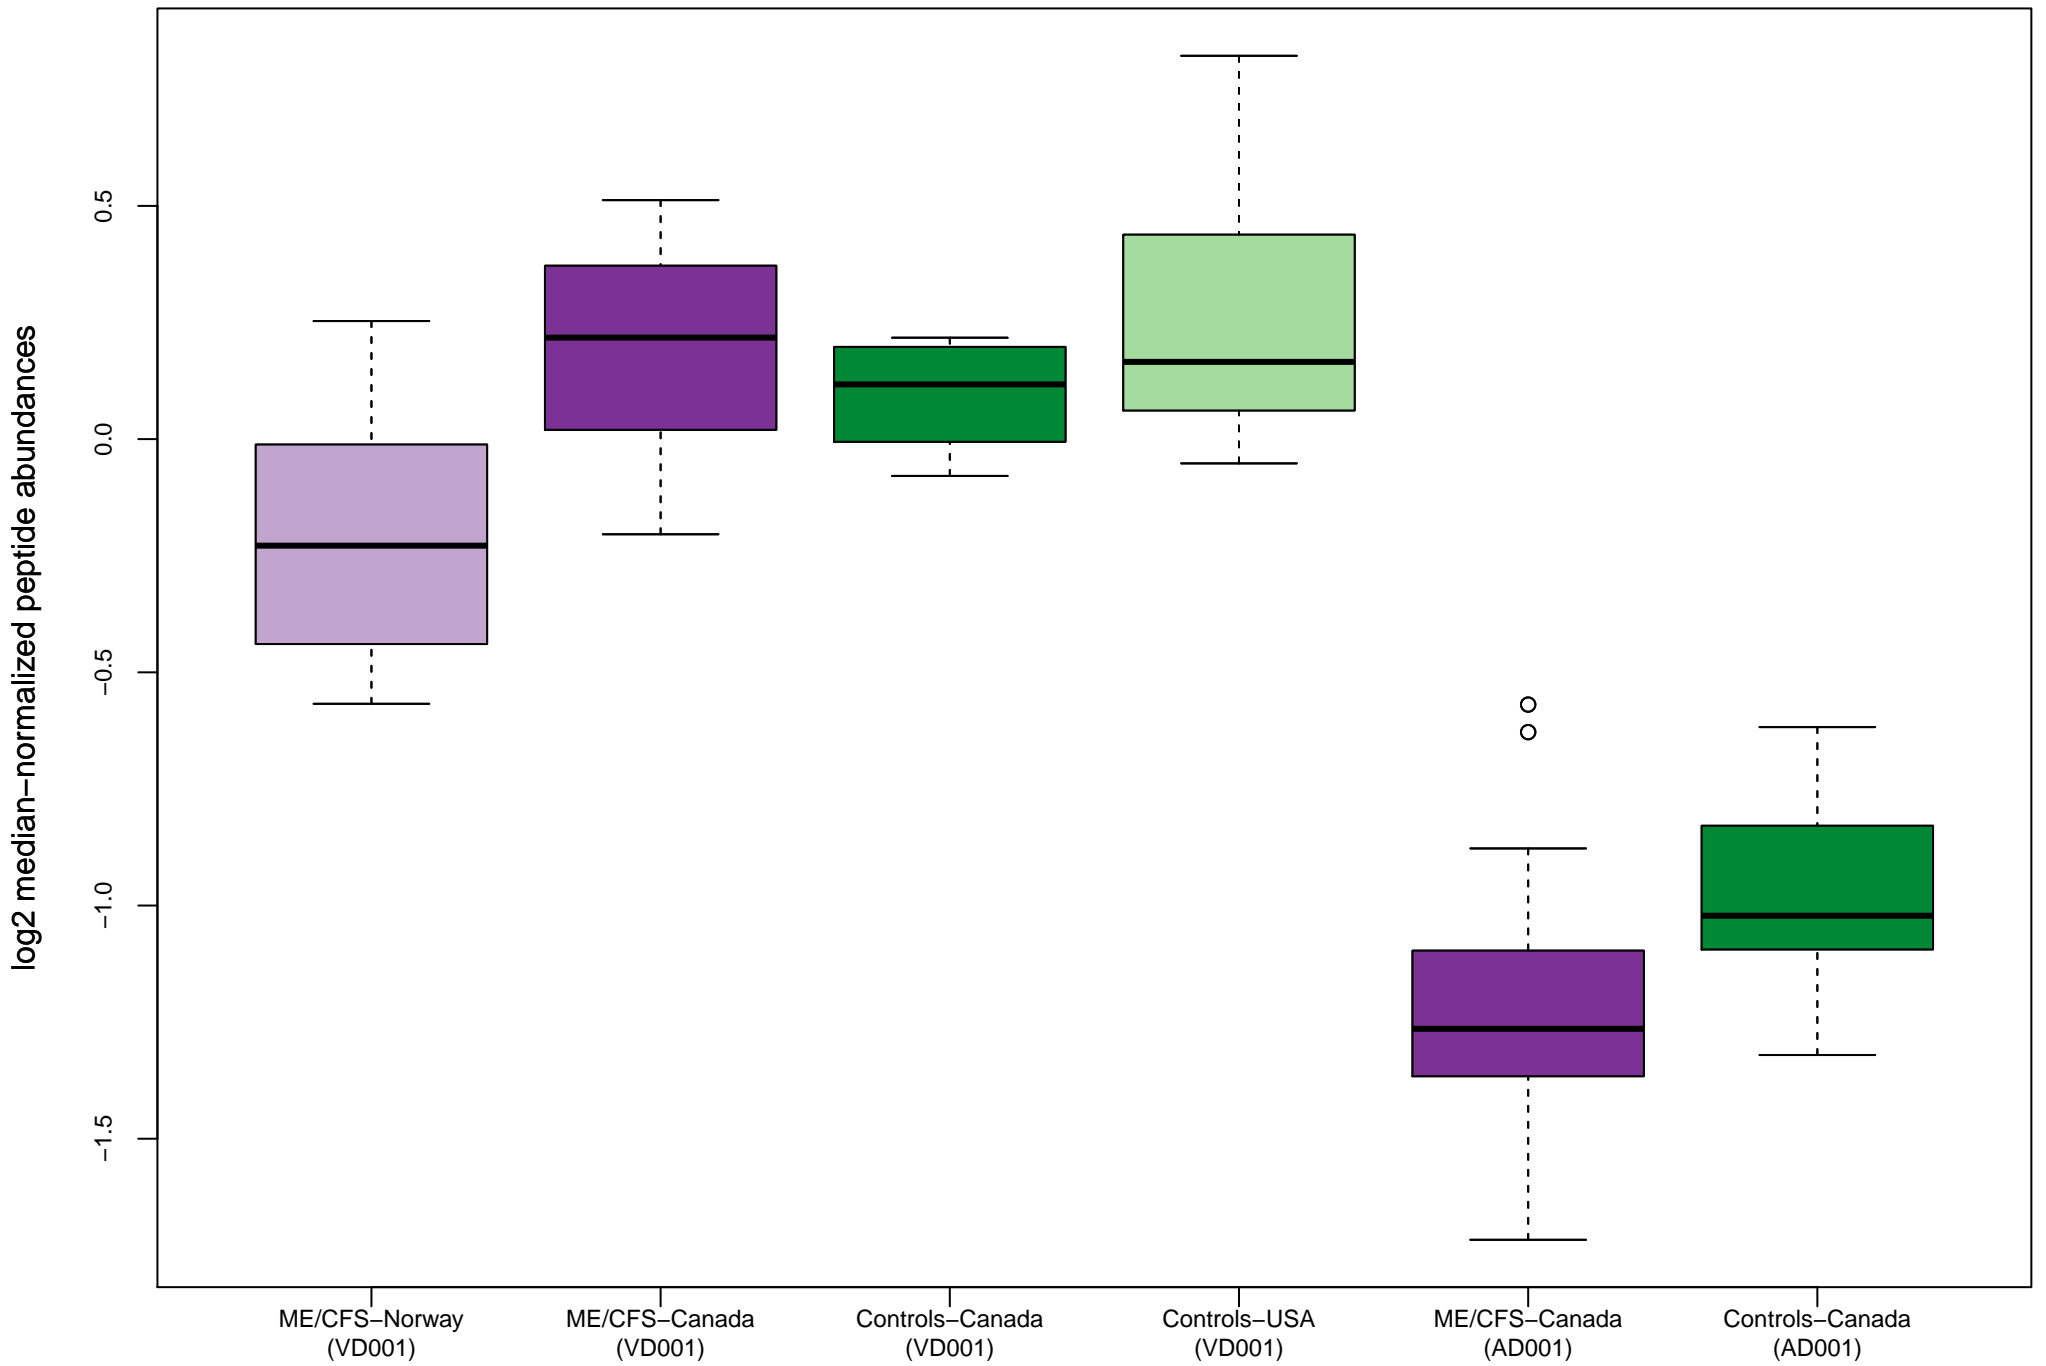

# YWQYRNKARWVV

log2 median-normalized peptide abundances

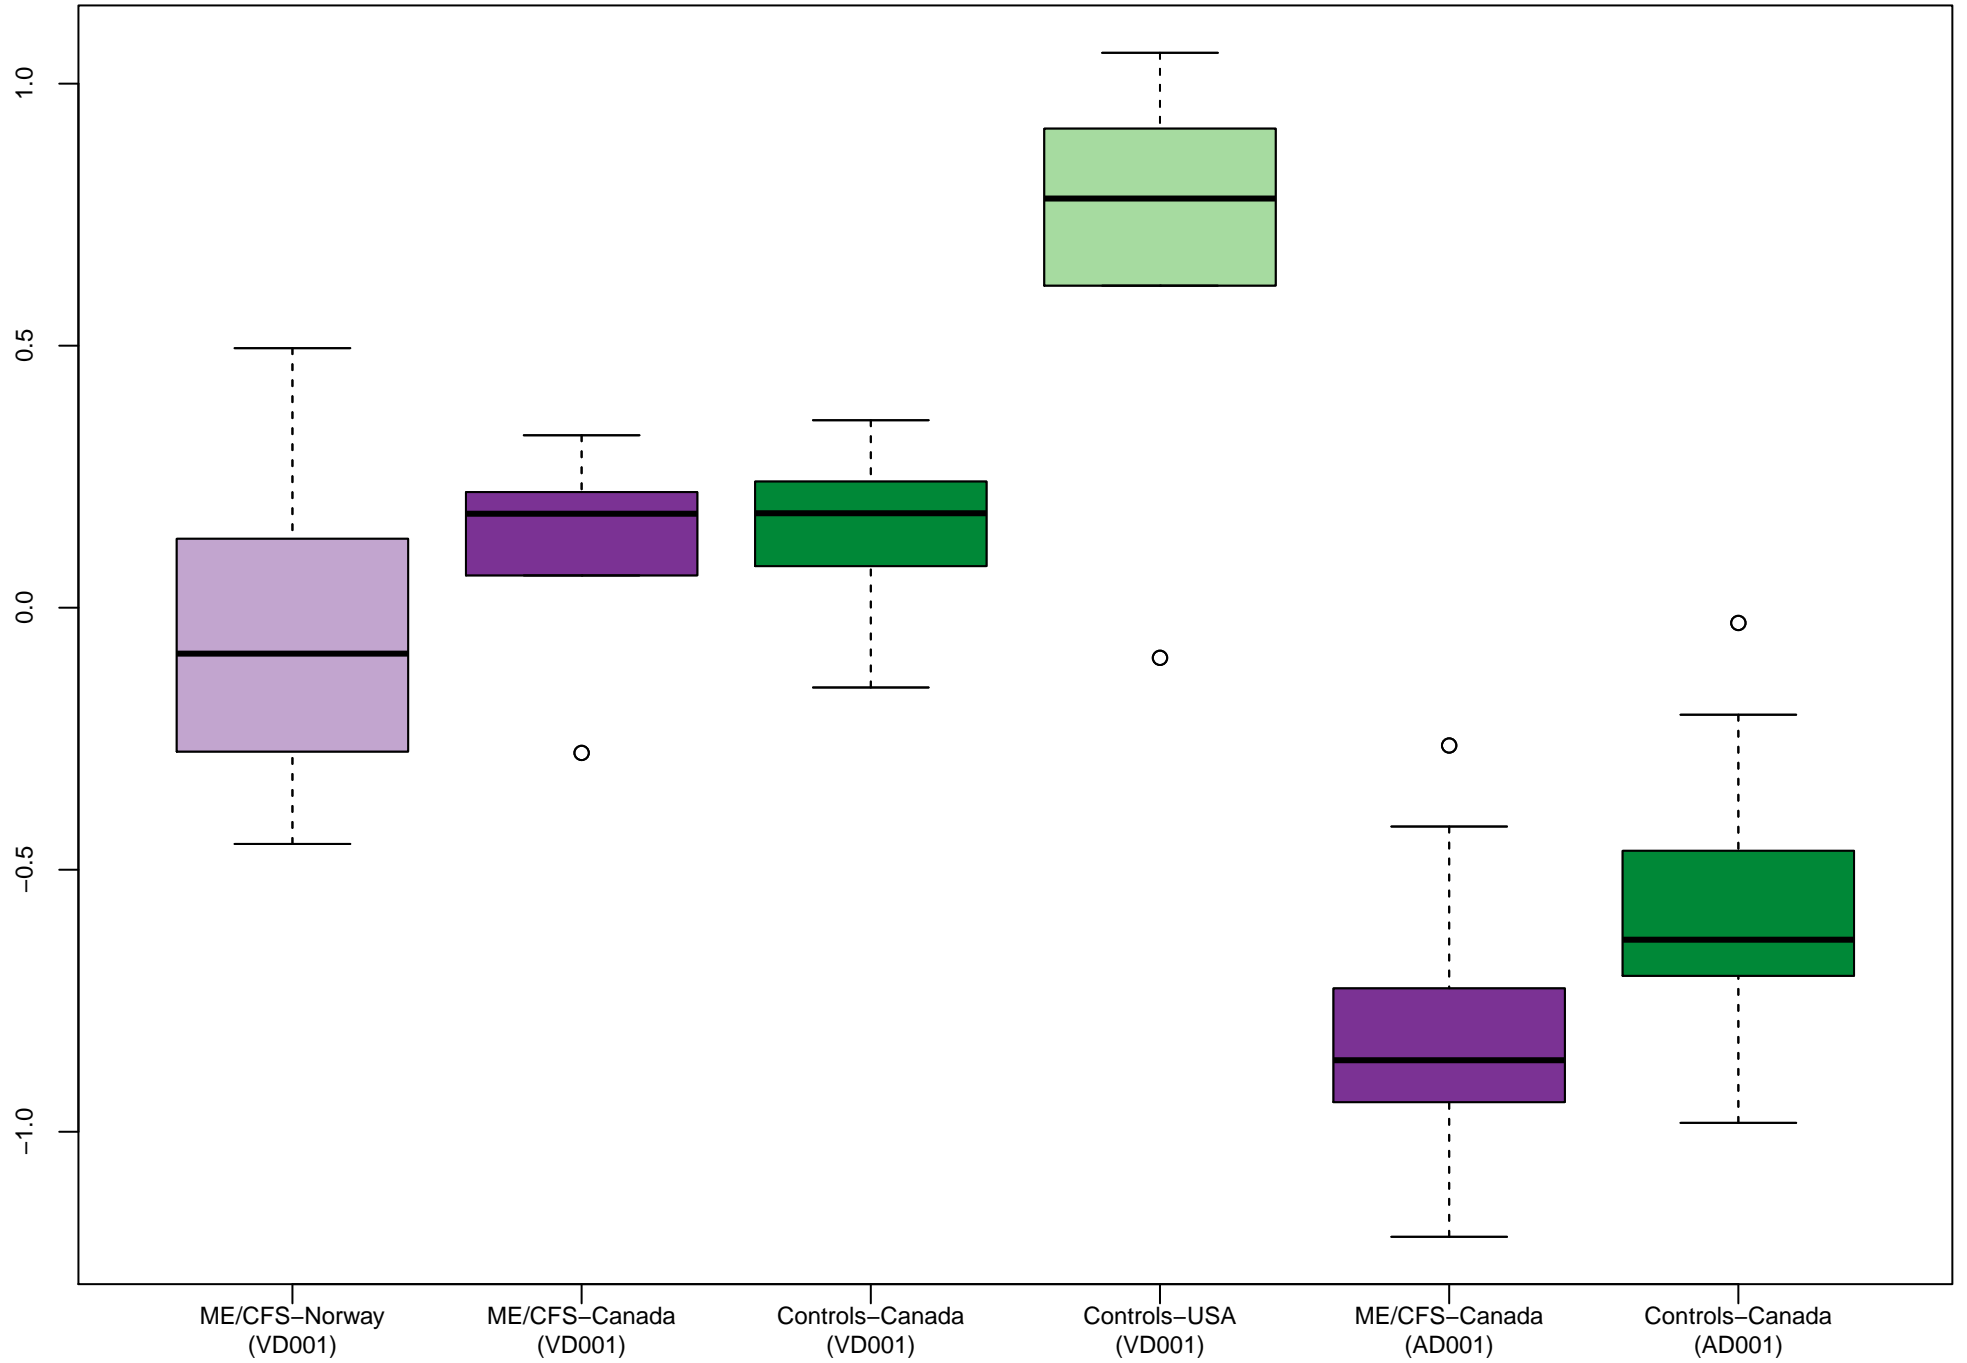

# YWRVGKLFNAGA

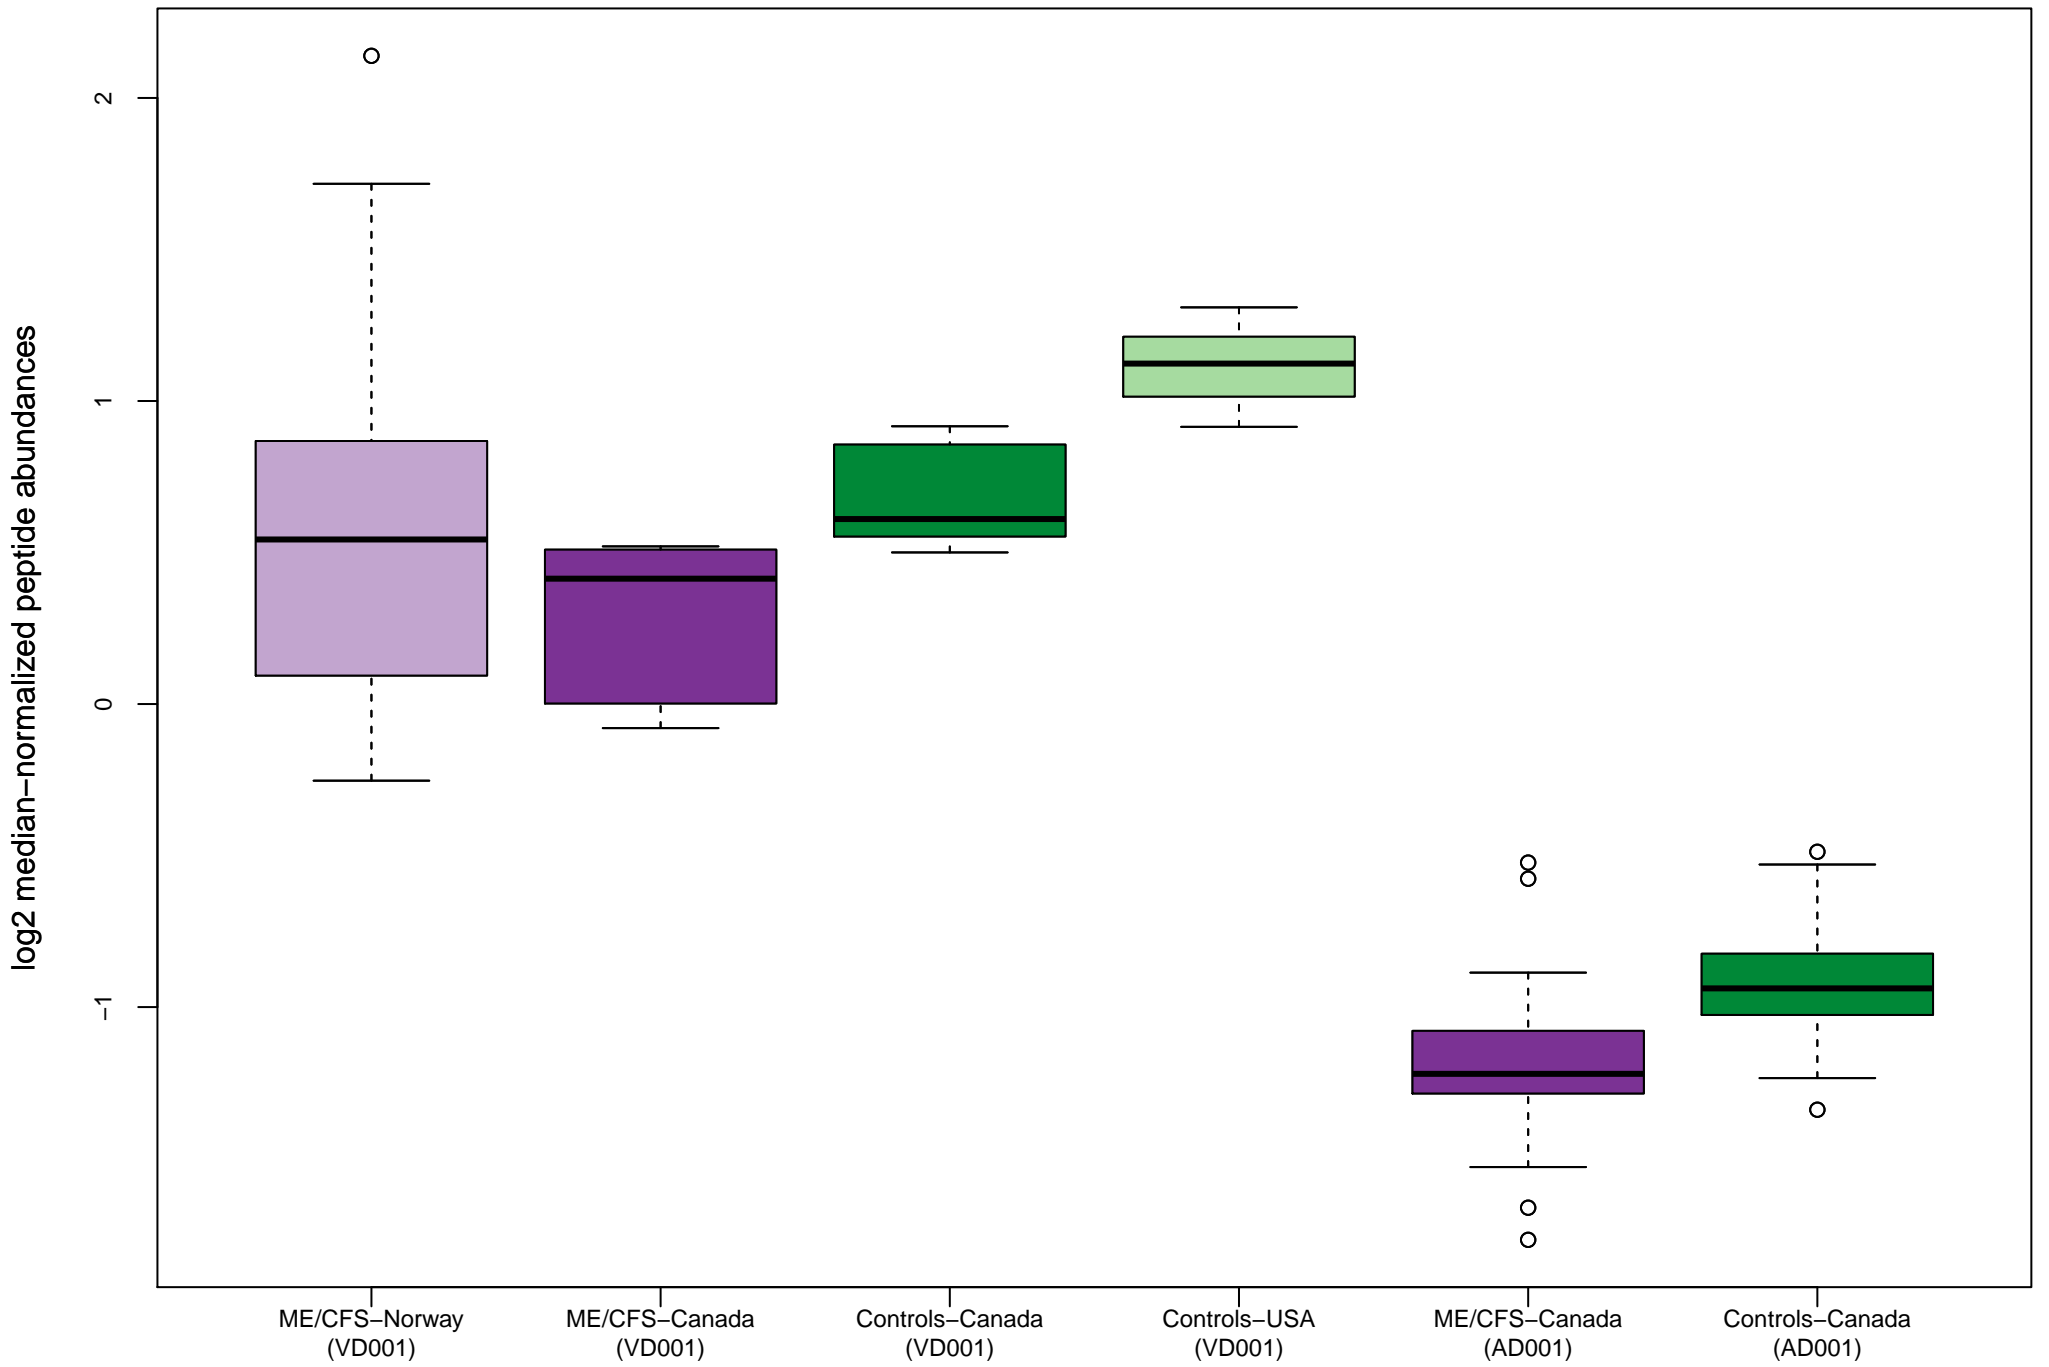

Supplement: 12035_2018_1354_MOESM5_ESM.pdf [file 12035_2018_1354_MOESM5_ESM.pdf]
