# Supplementary material for: Immunosignature Analysis of Myalgic Encephalomyelitis/Chronic Fatigue Syndrome (ME/CFS)
Source: PubMed Central journal article supplement (PMC6505503; doi:10.1007/s12035-018-1354-8), 2018-10-08

# AFQKHRLSVALS

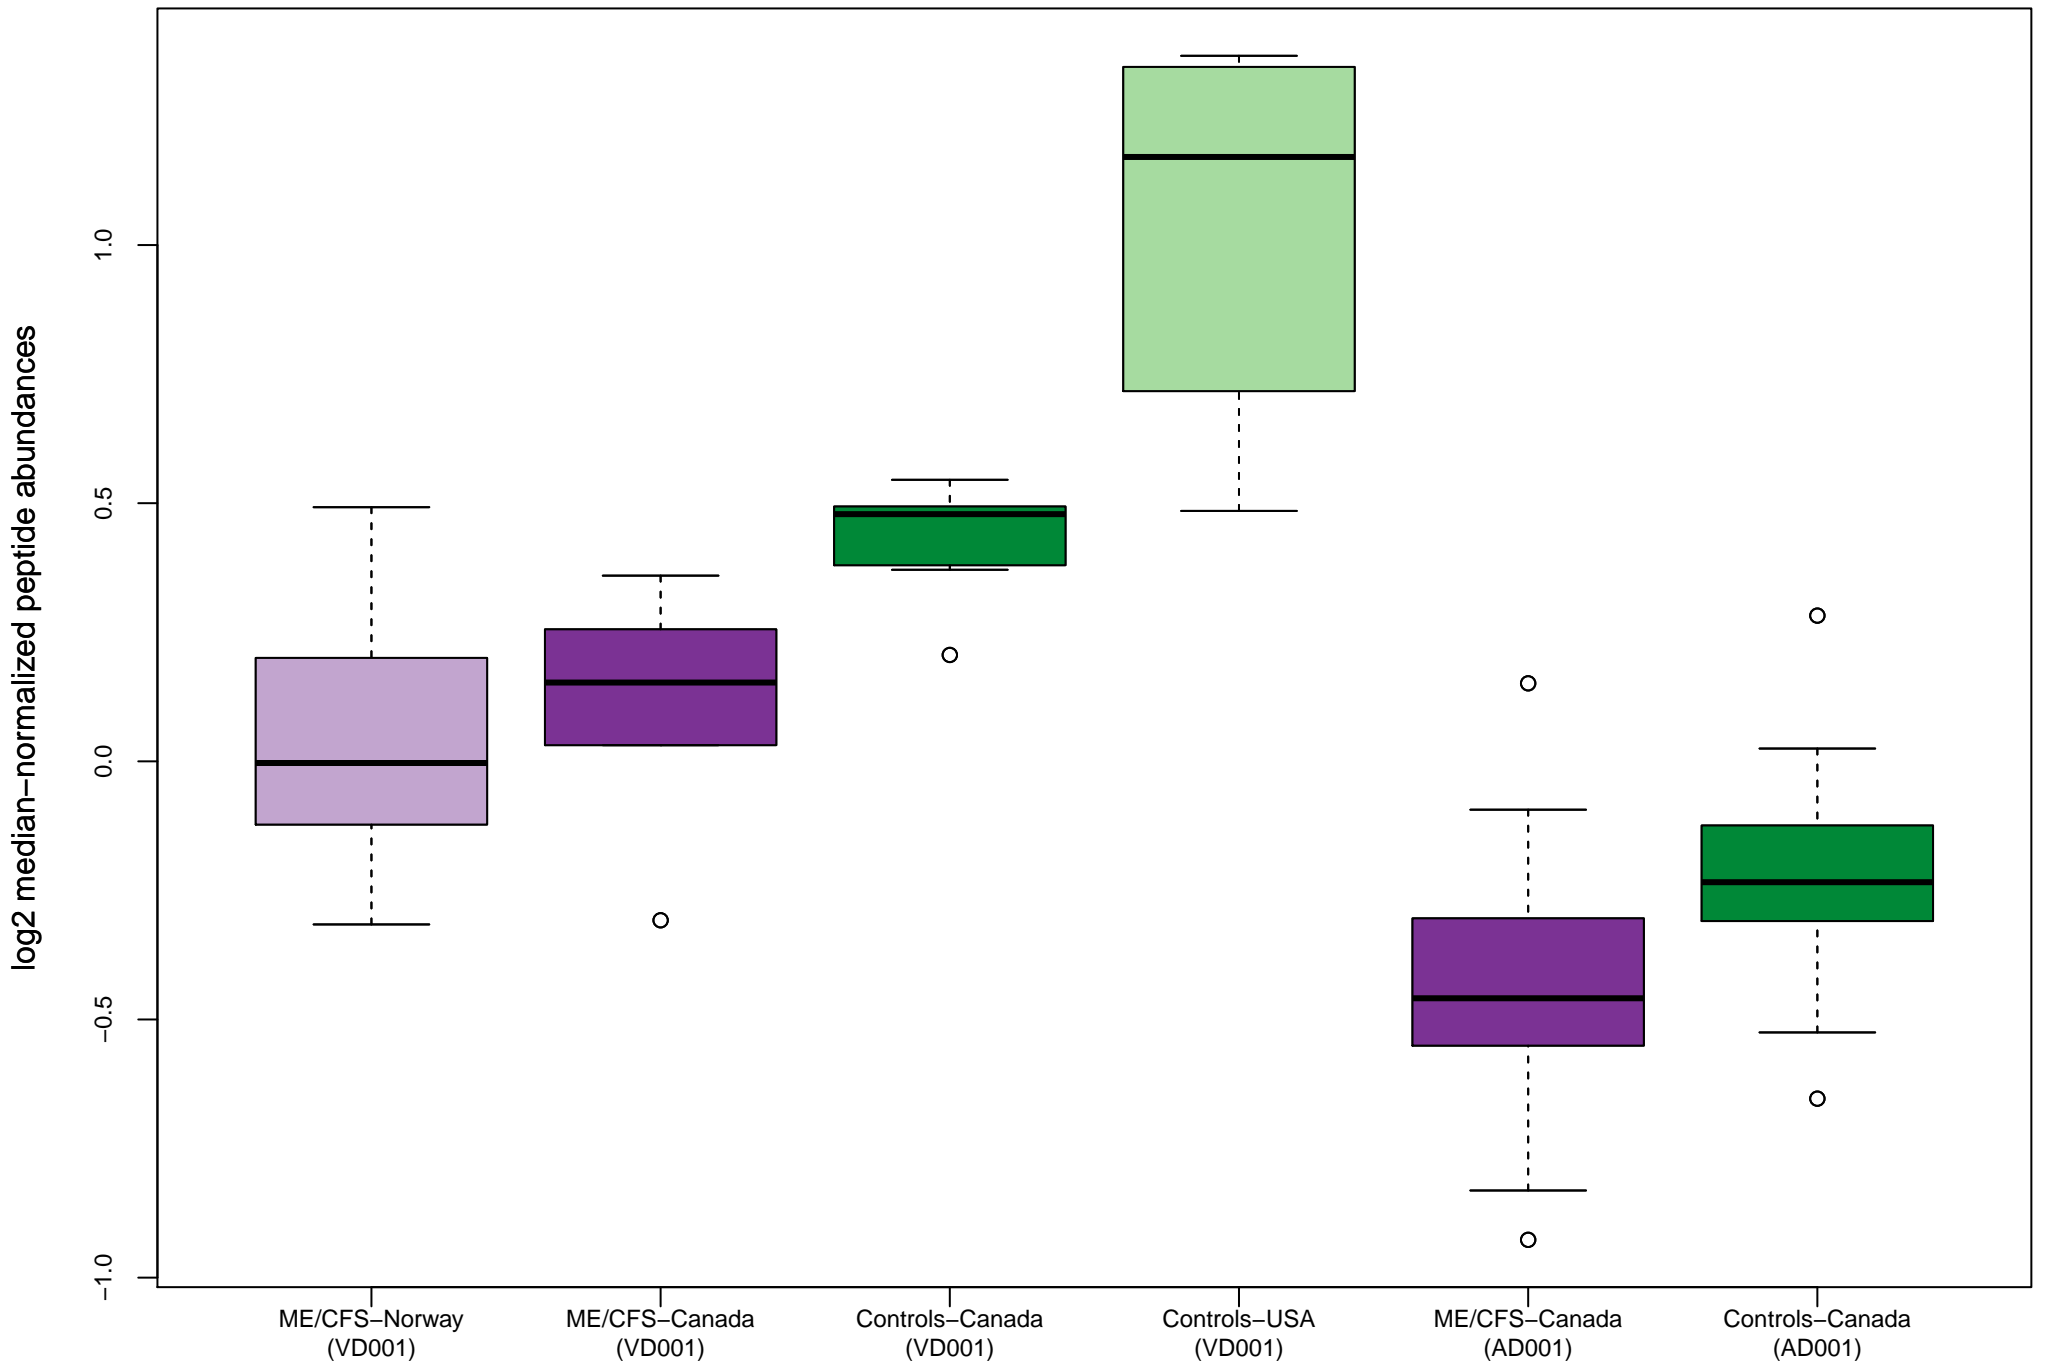

# AFRSWQPLSGVL

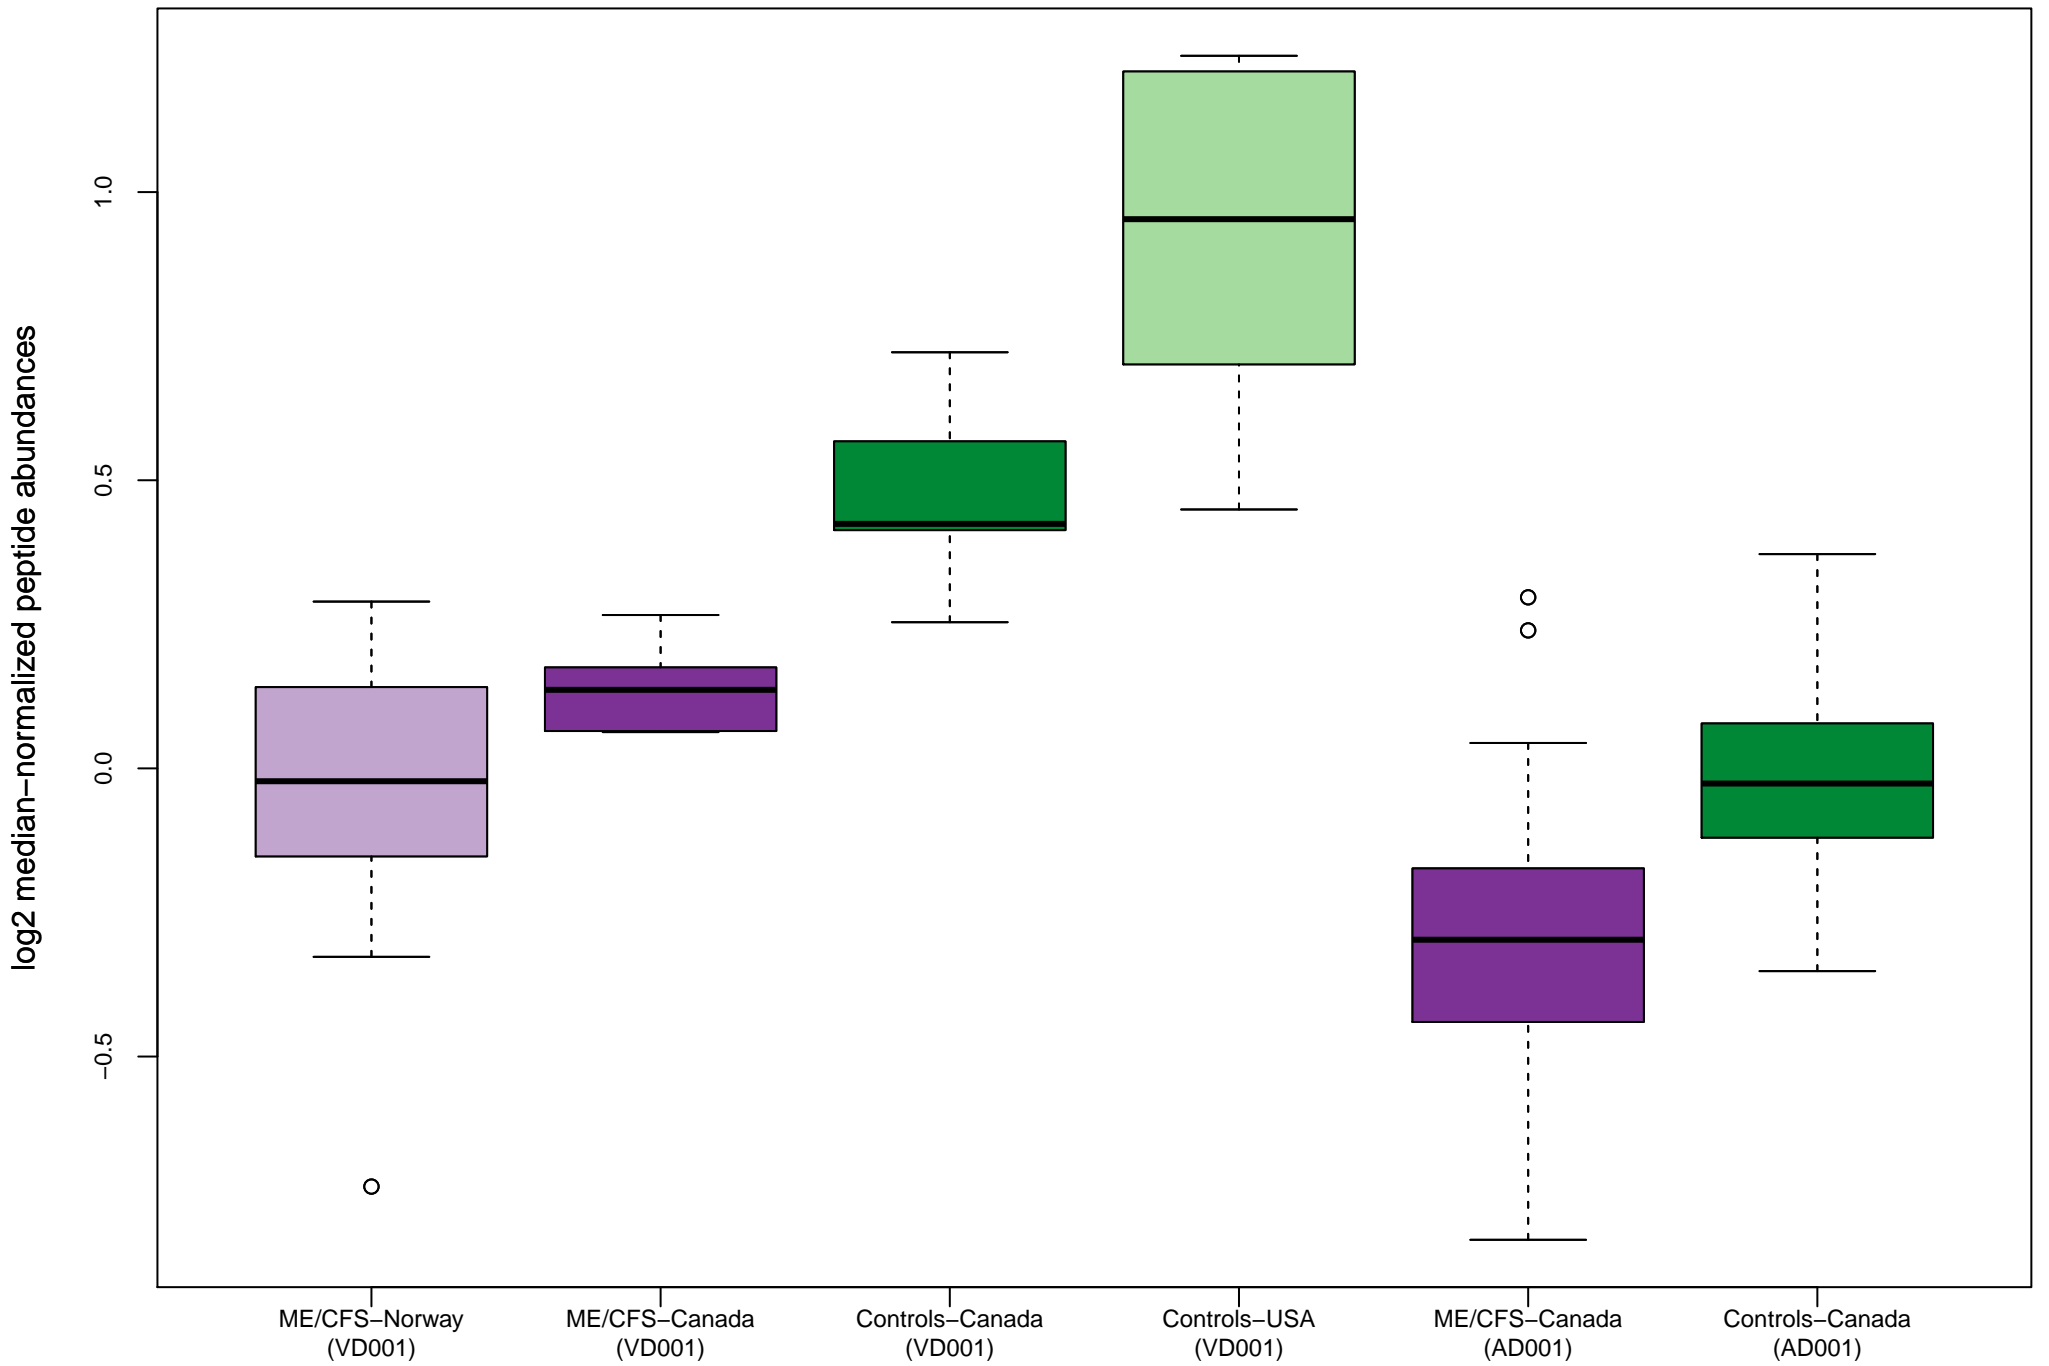

# AFYRWGFYKVLS

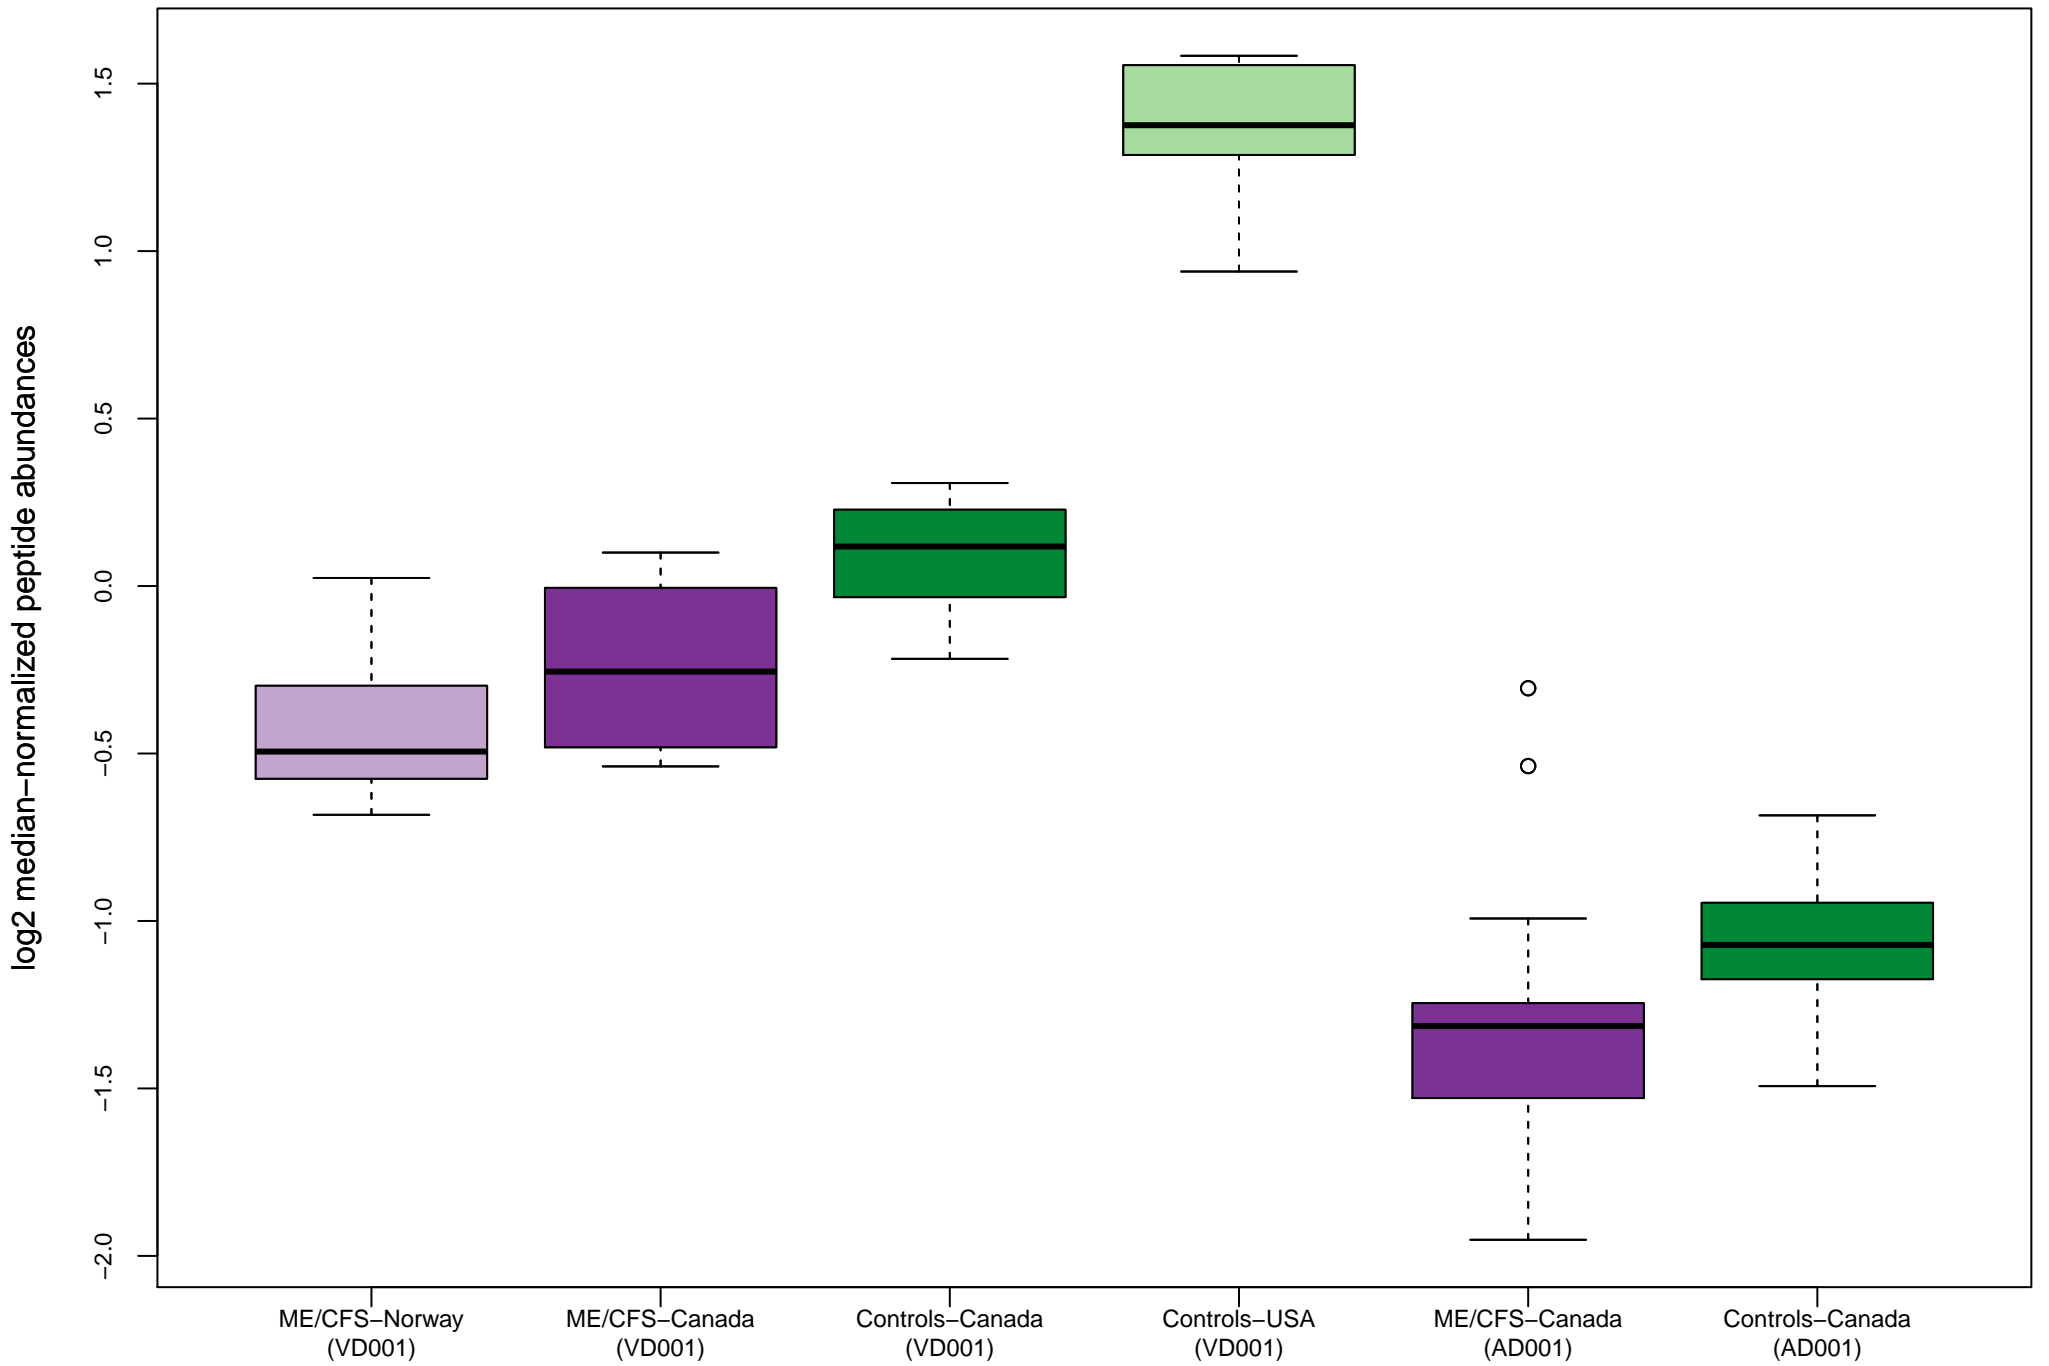

# ALHVLRFPYKLG

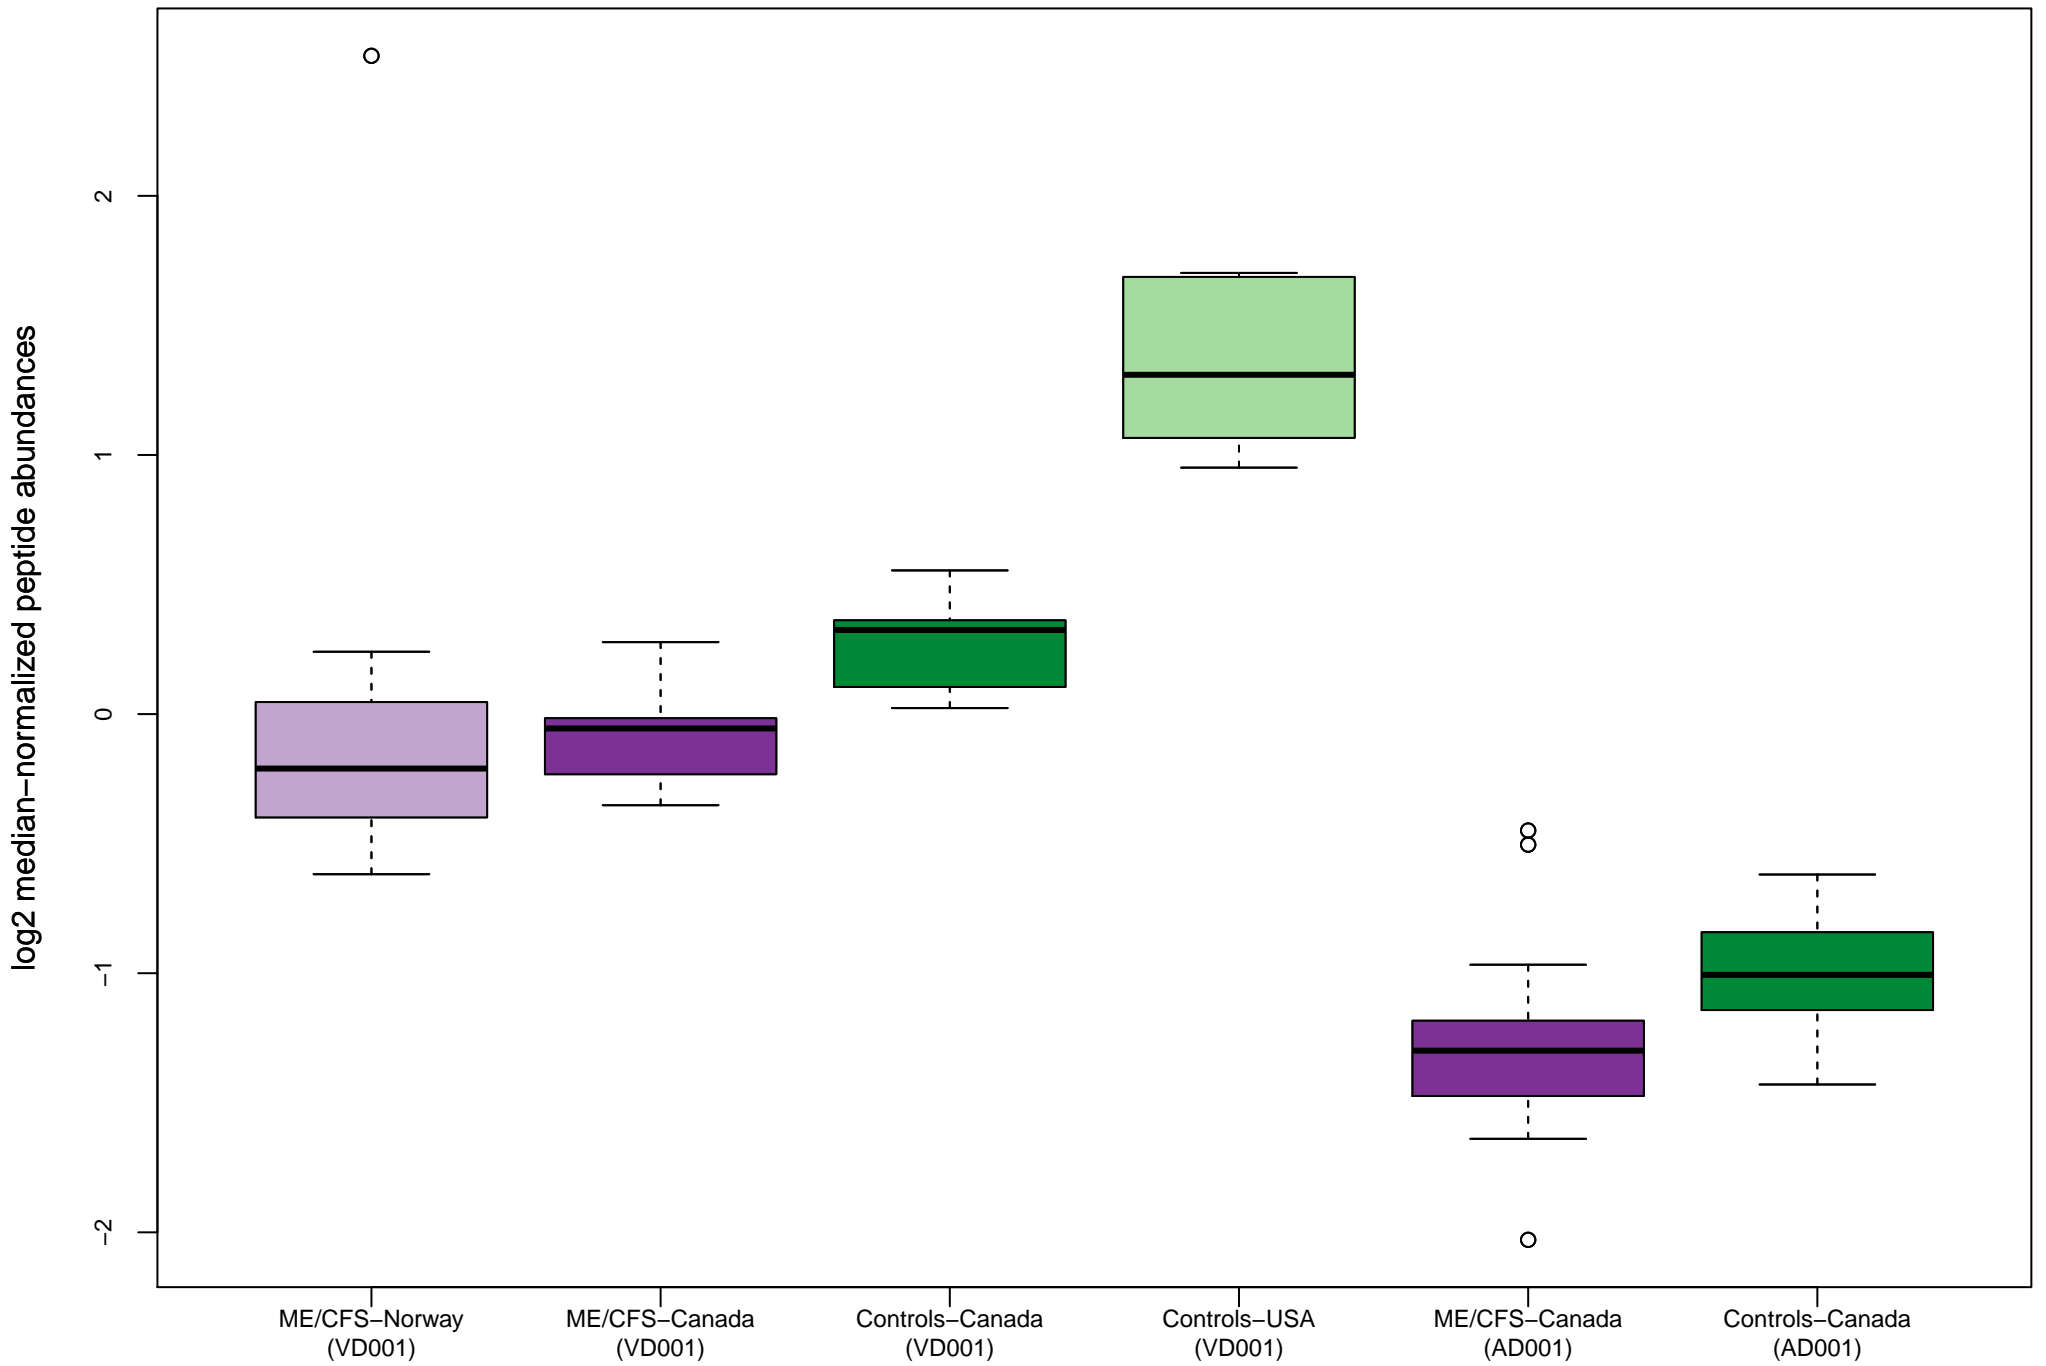

# ALLKYWGVALSG

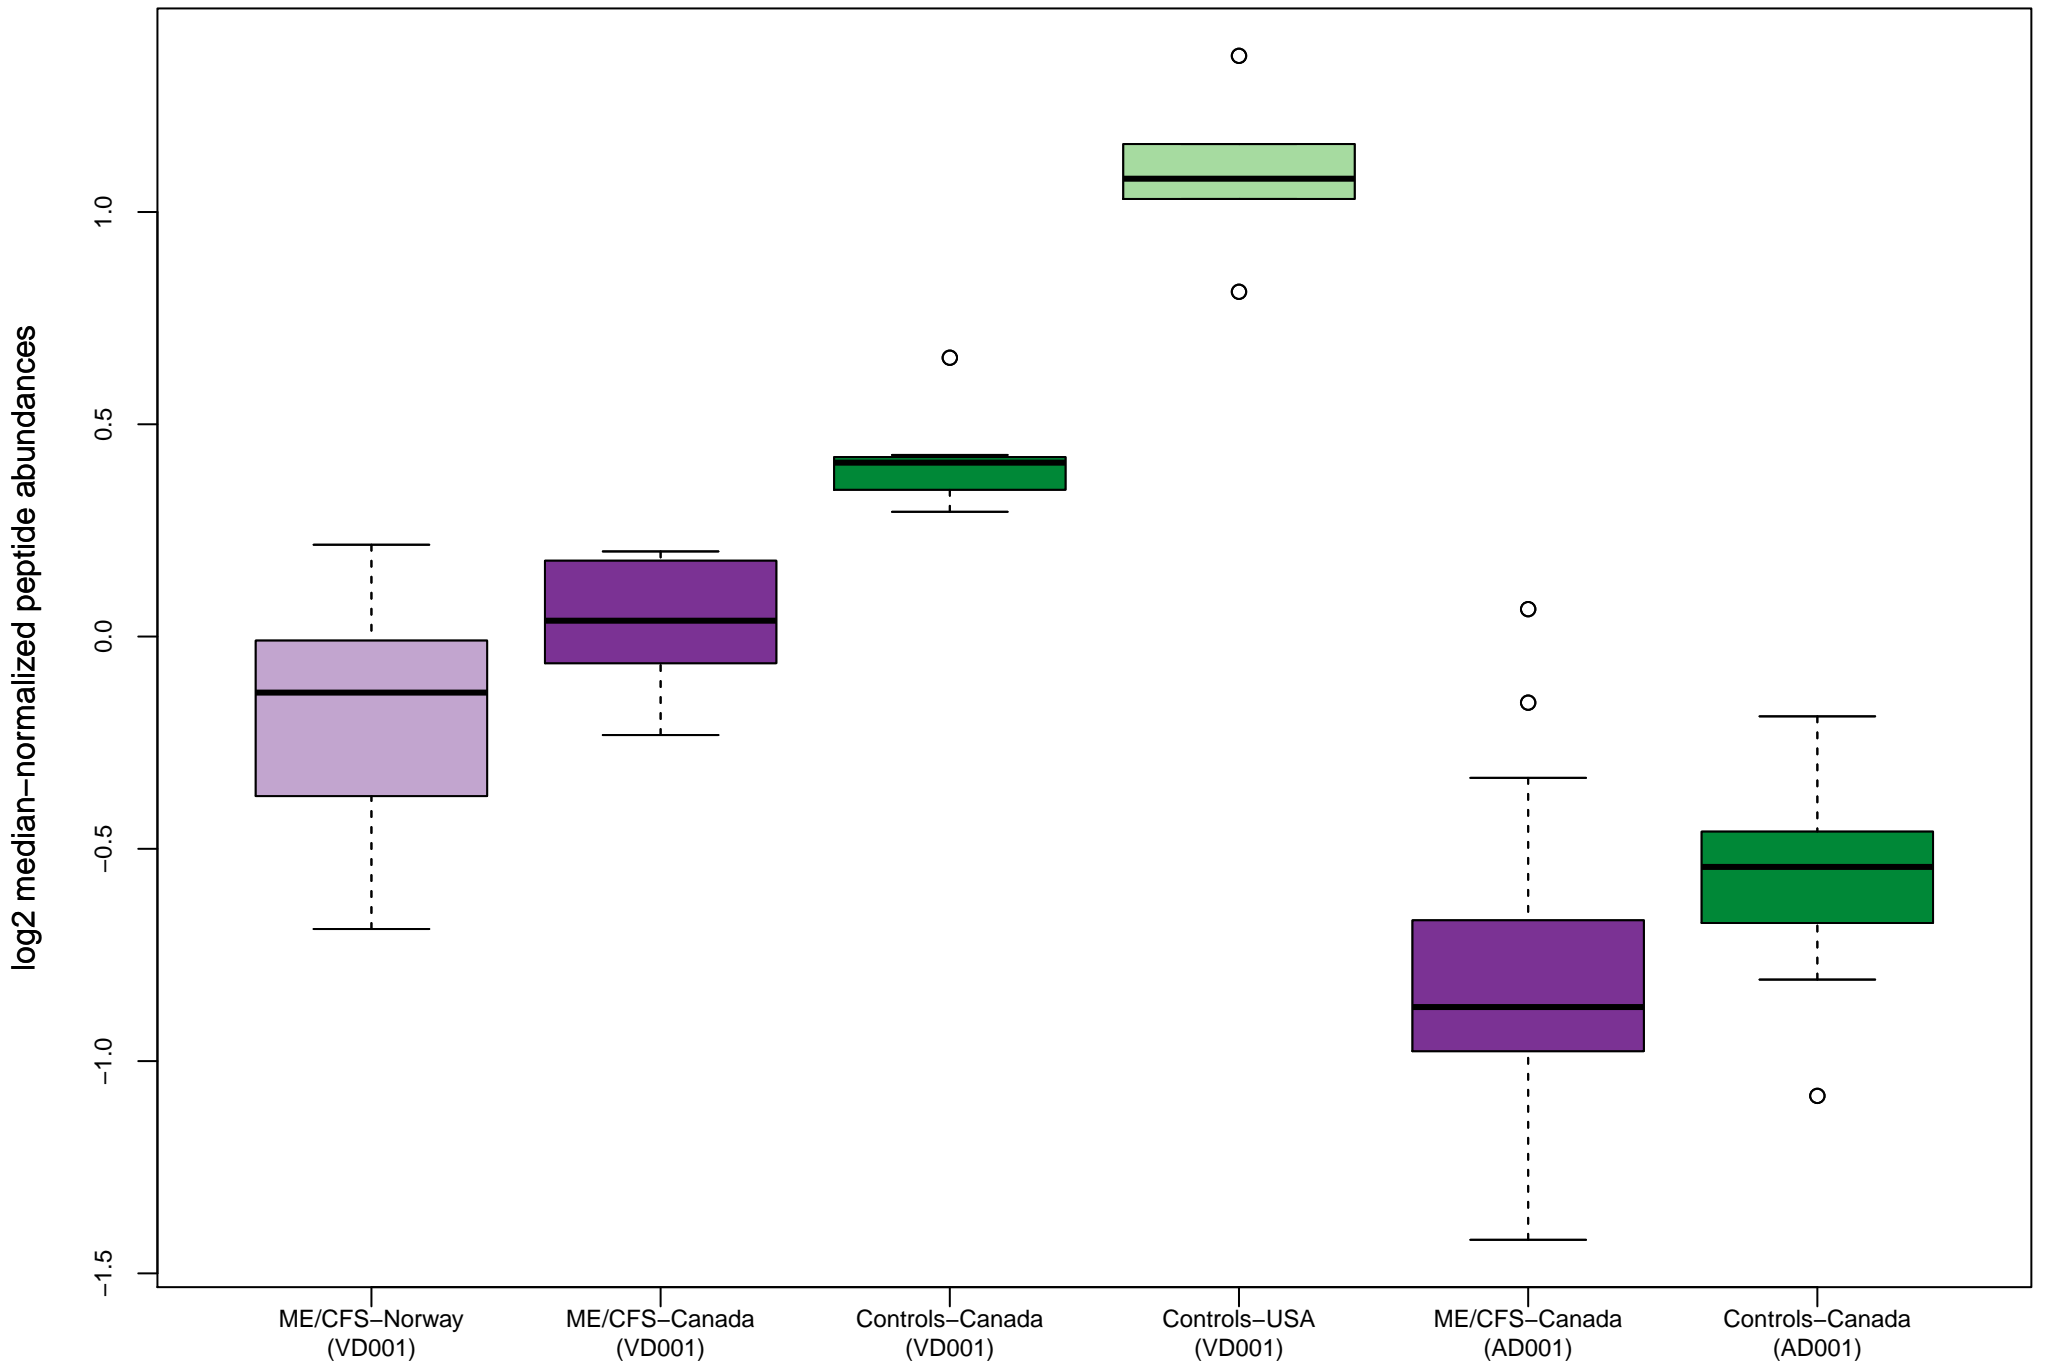

# ALNNVLFYWSL

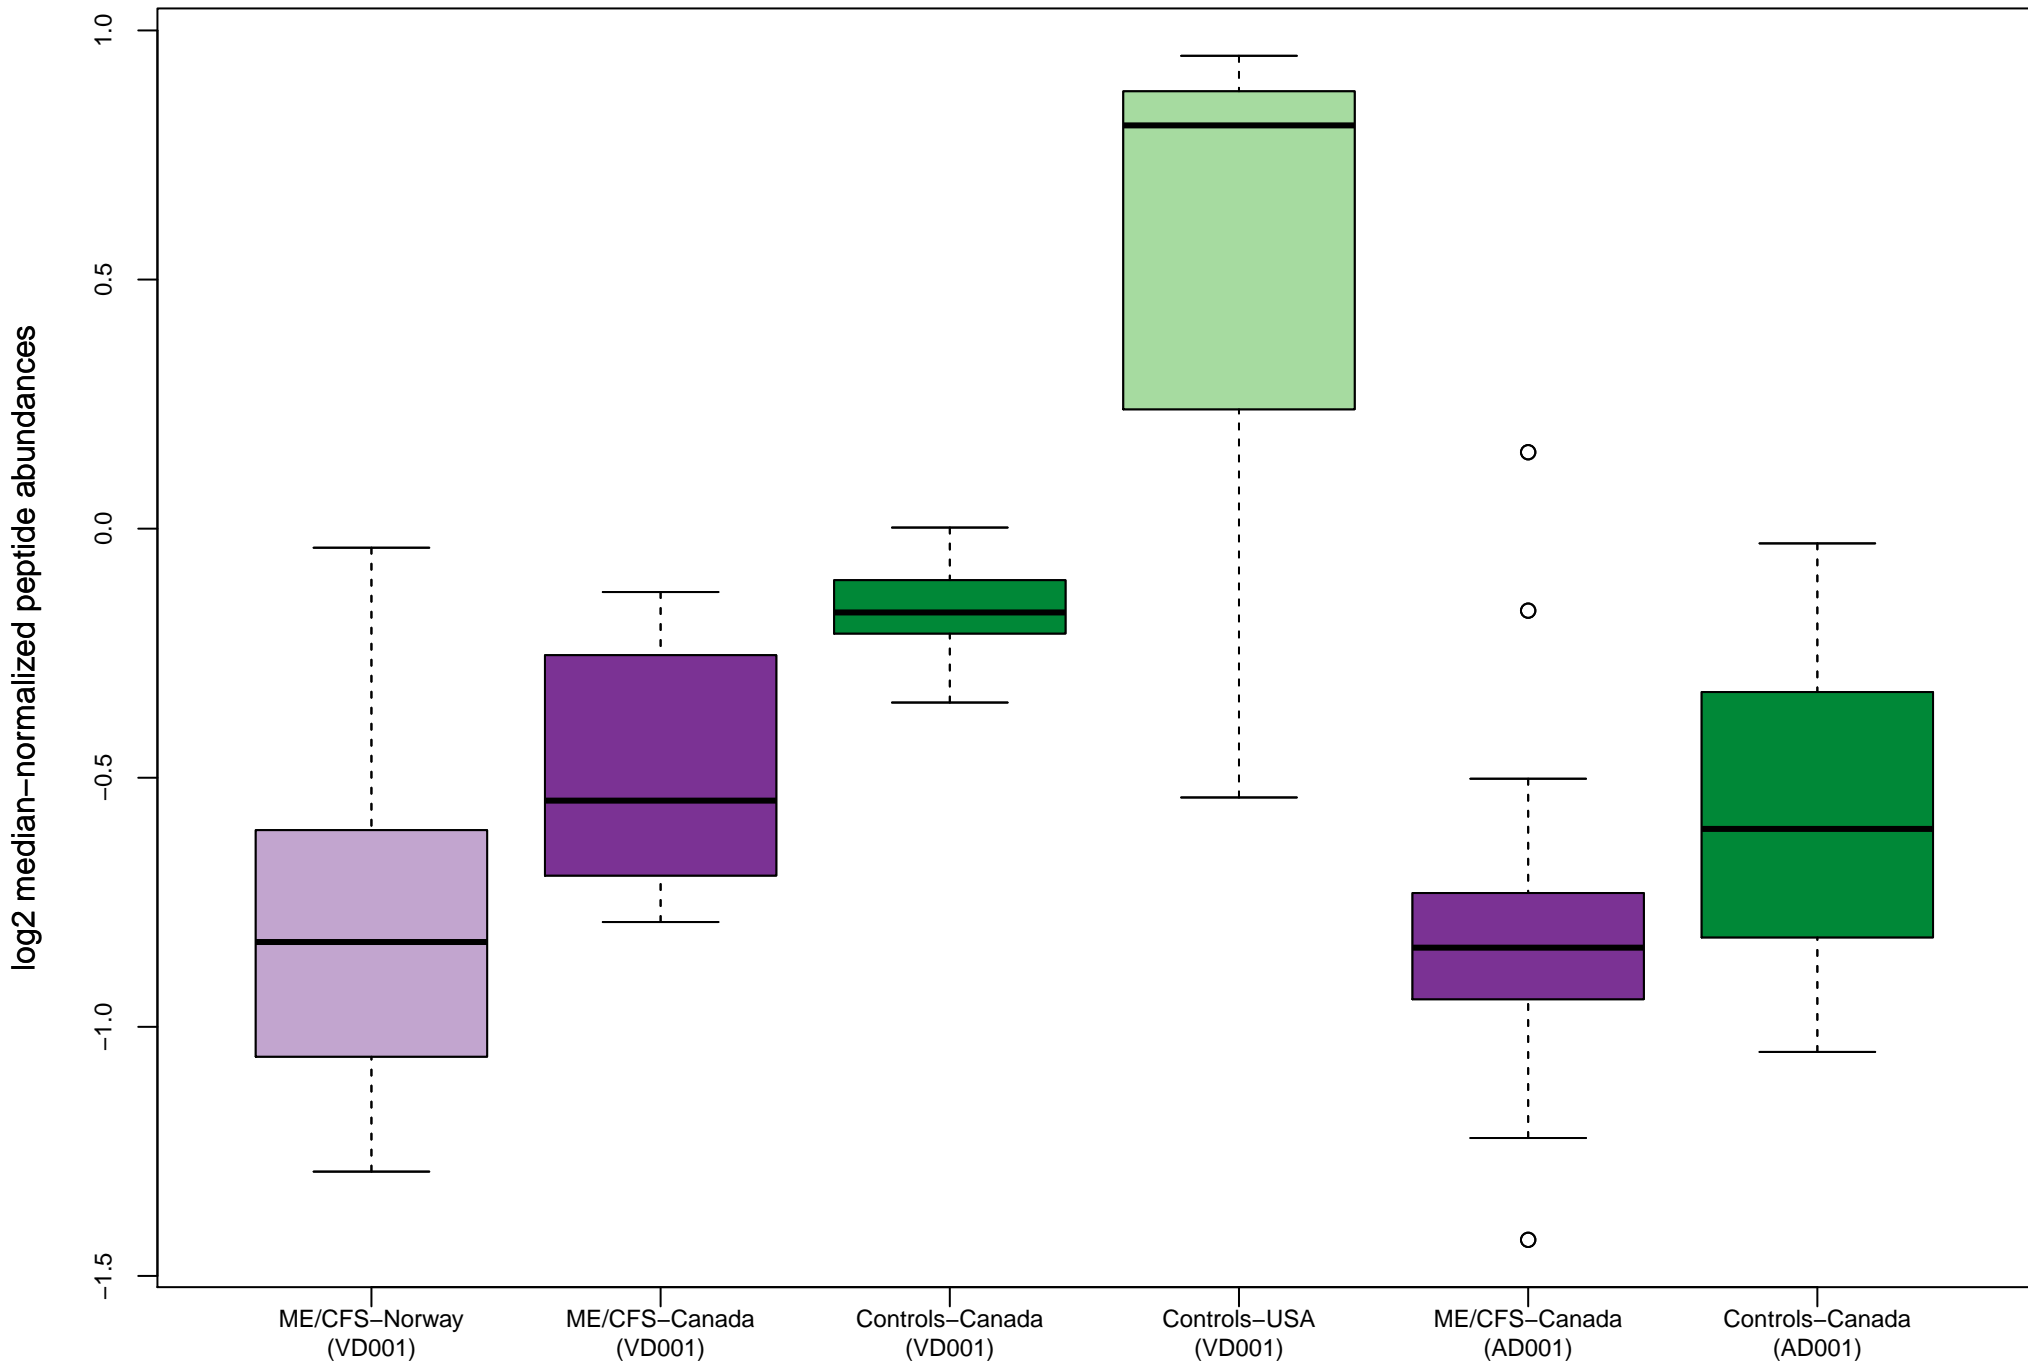

# ALSRFNVFPVAG

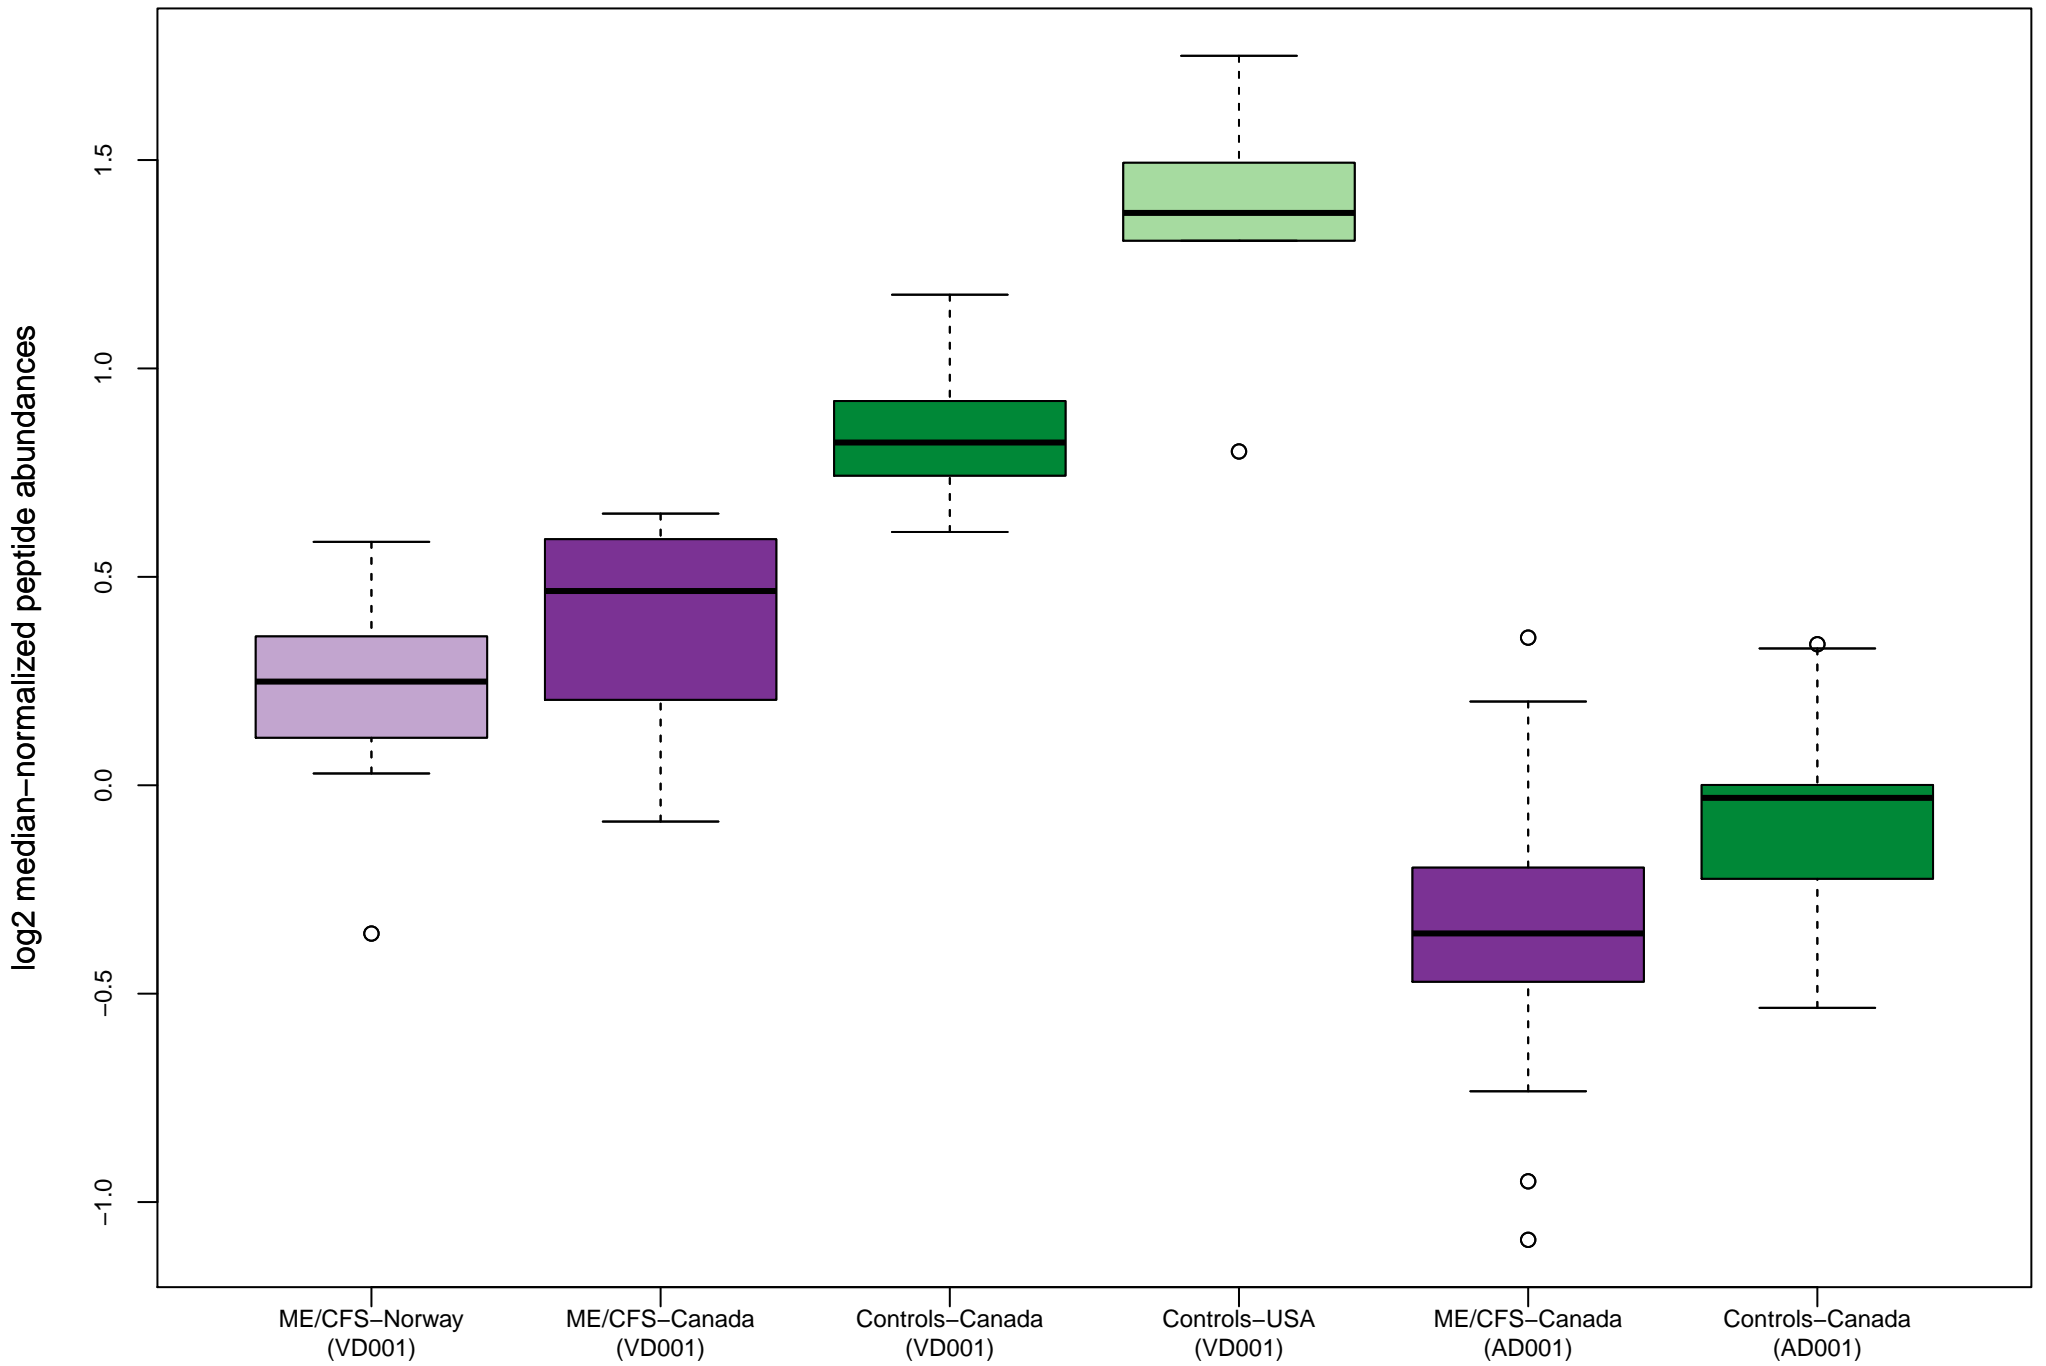

# ANHVLRYRWVSV

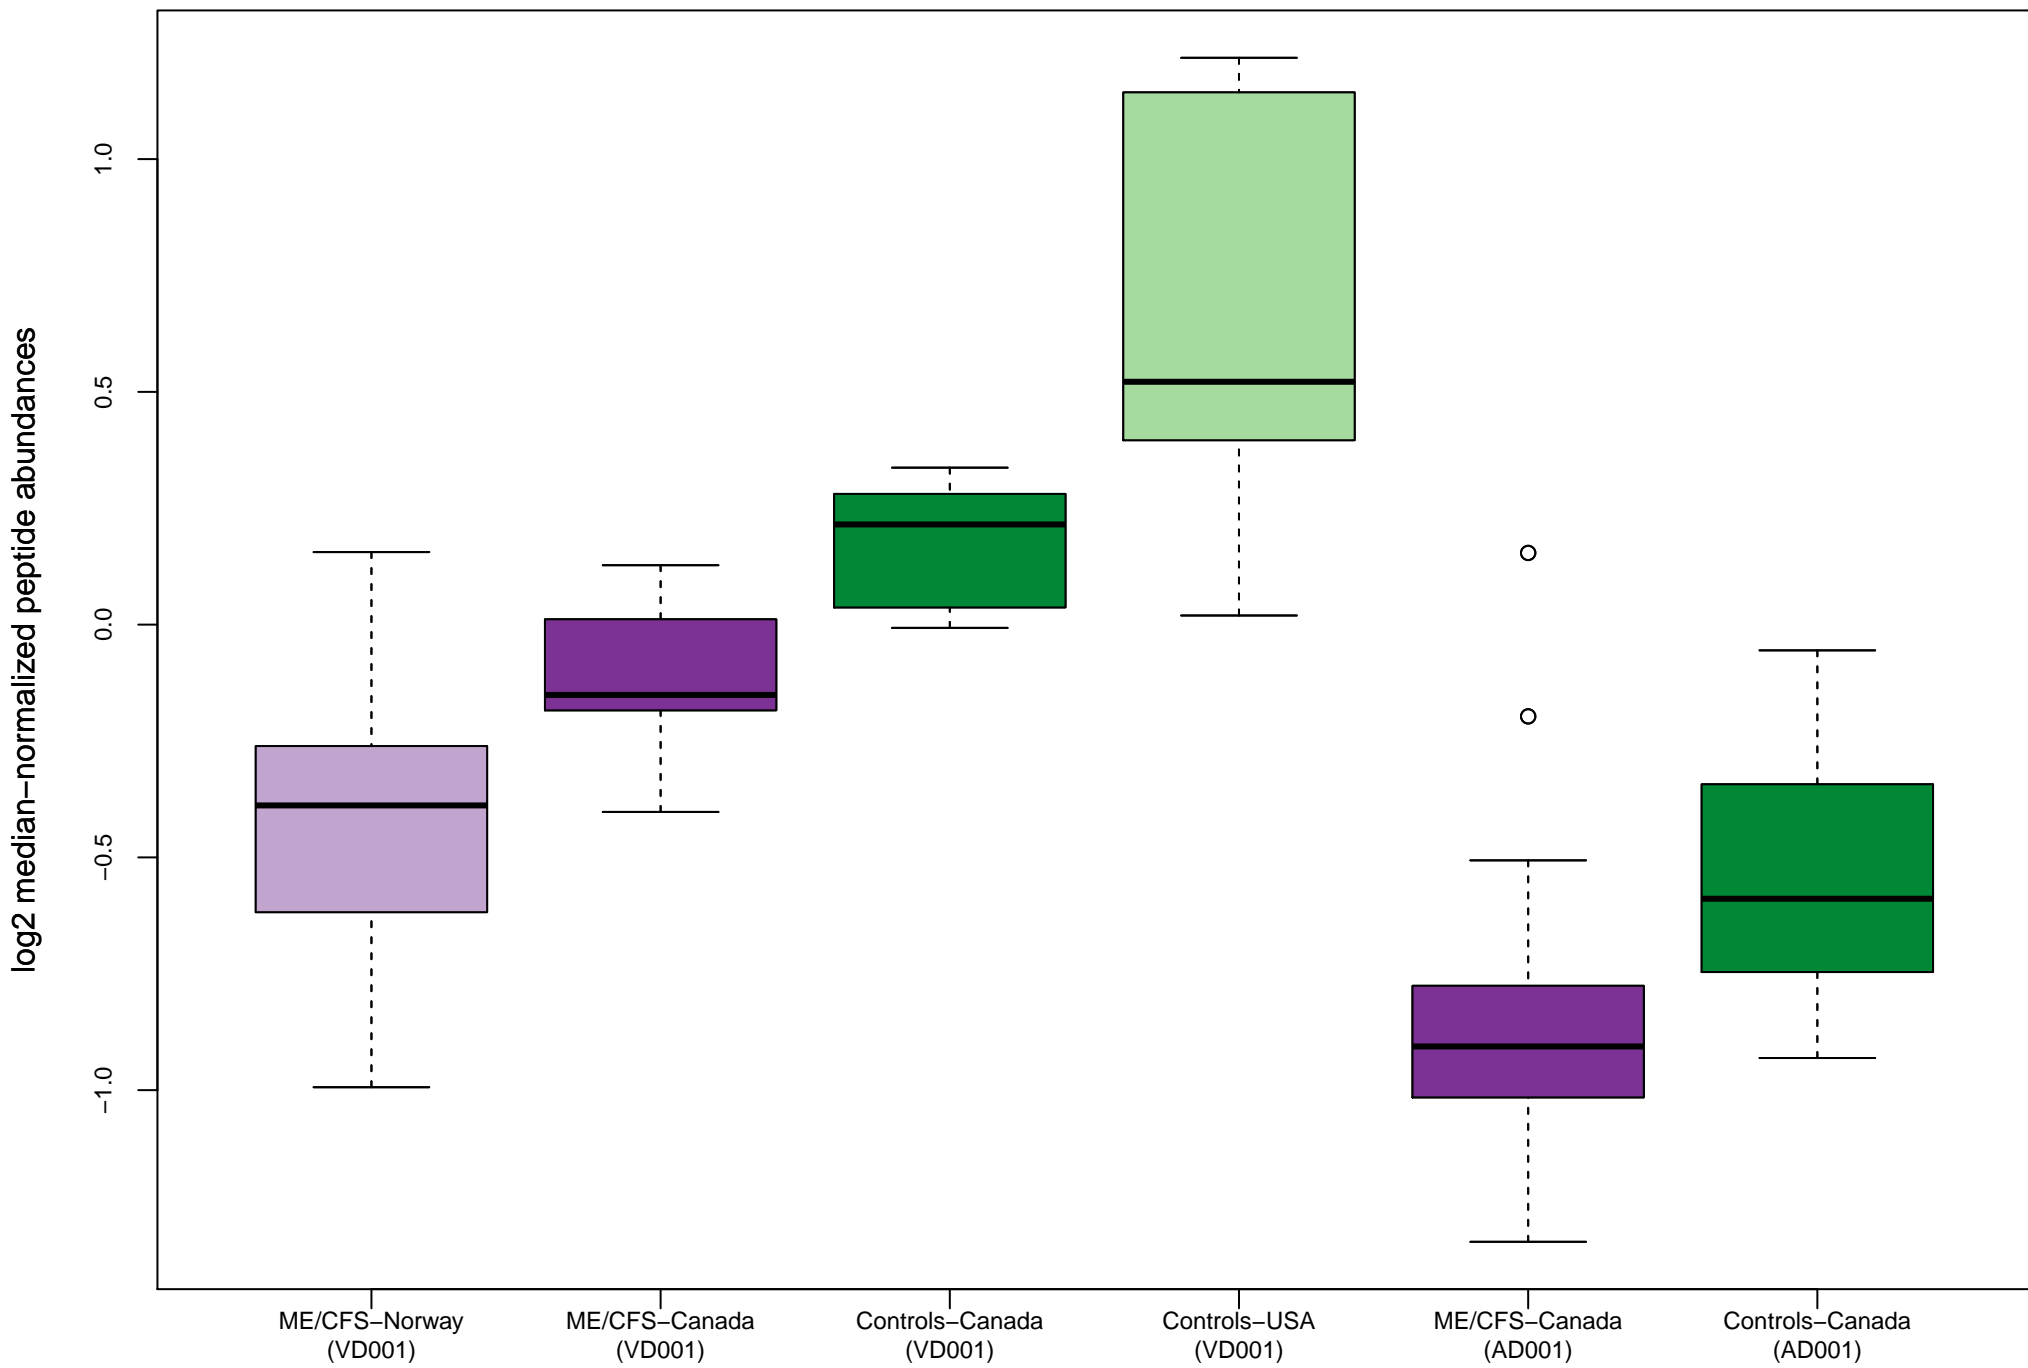



# APFFRLGVALSG

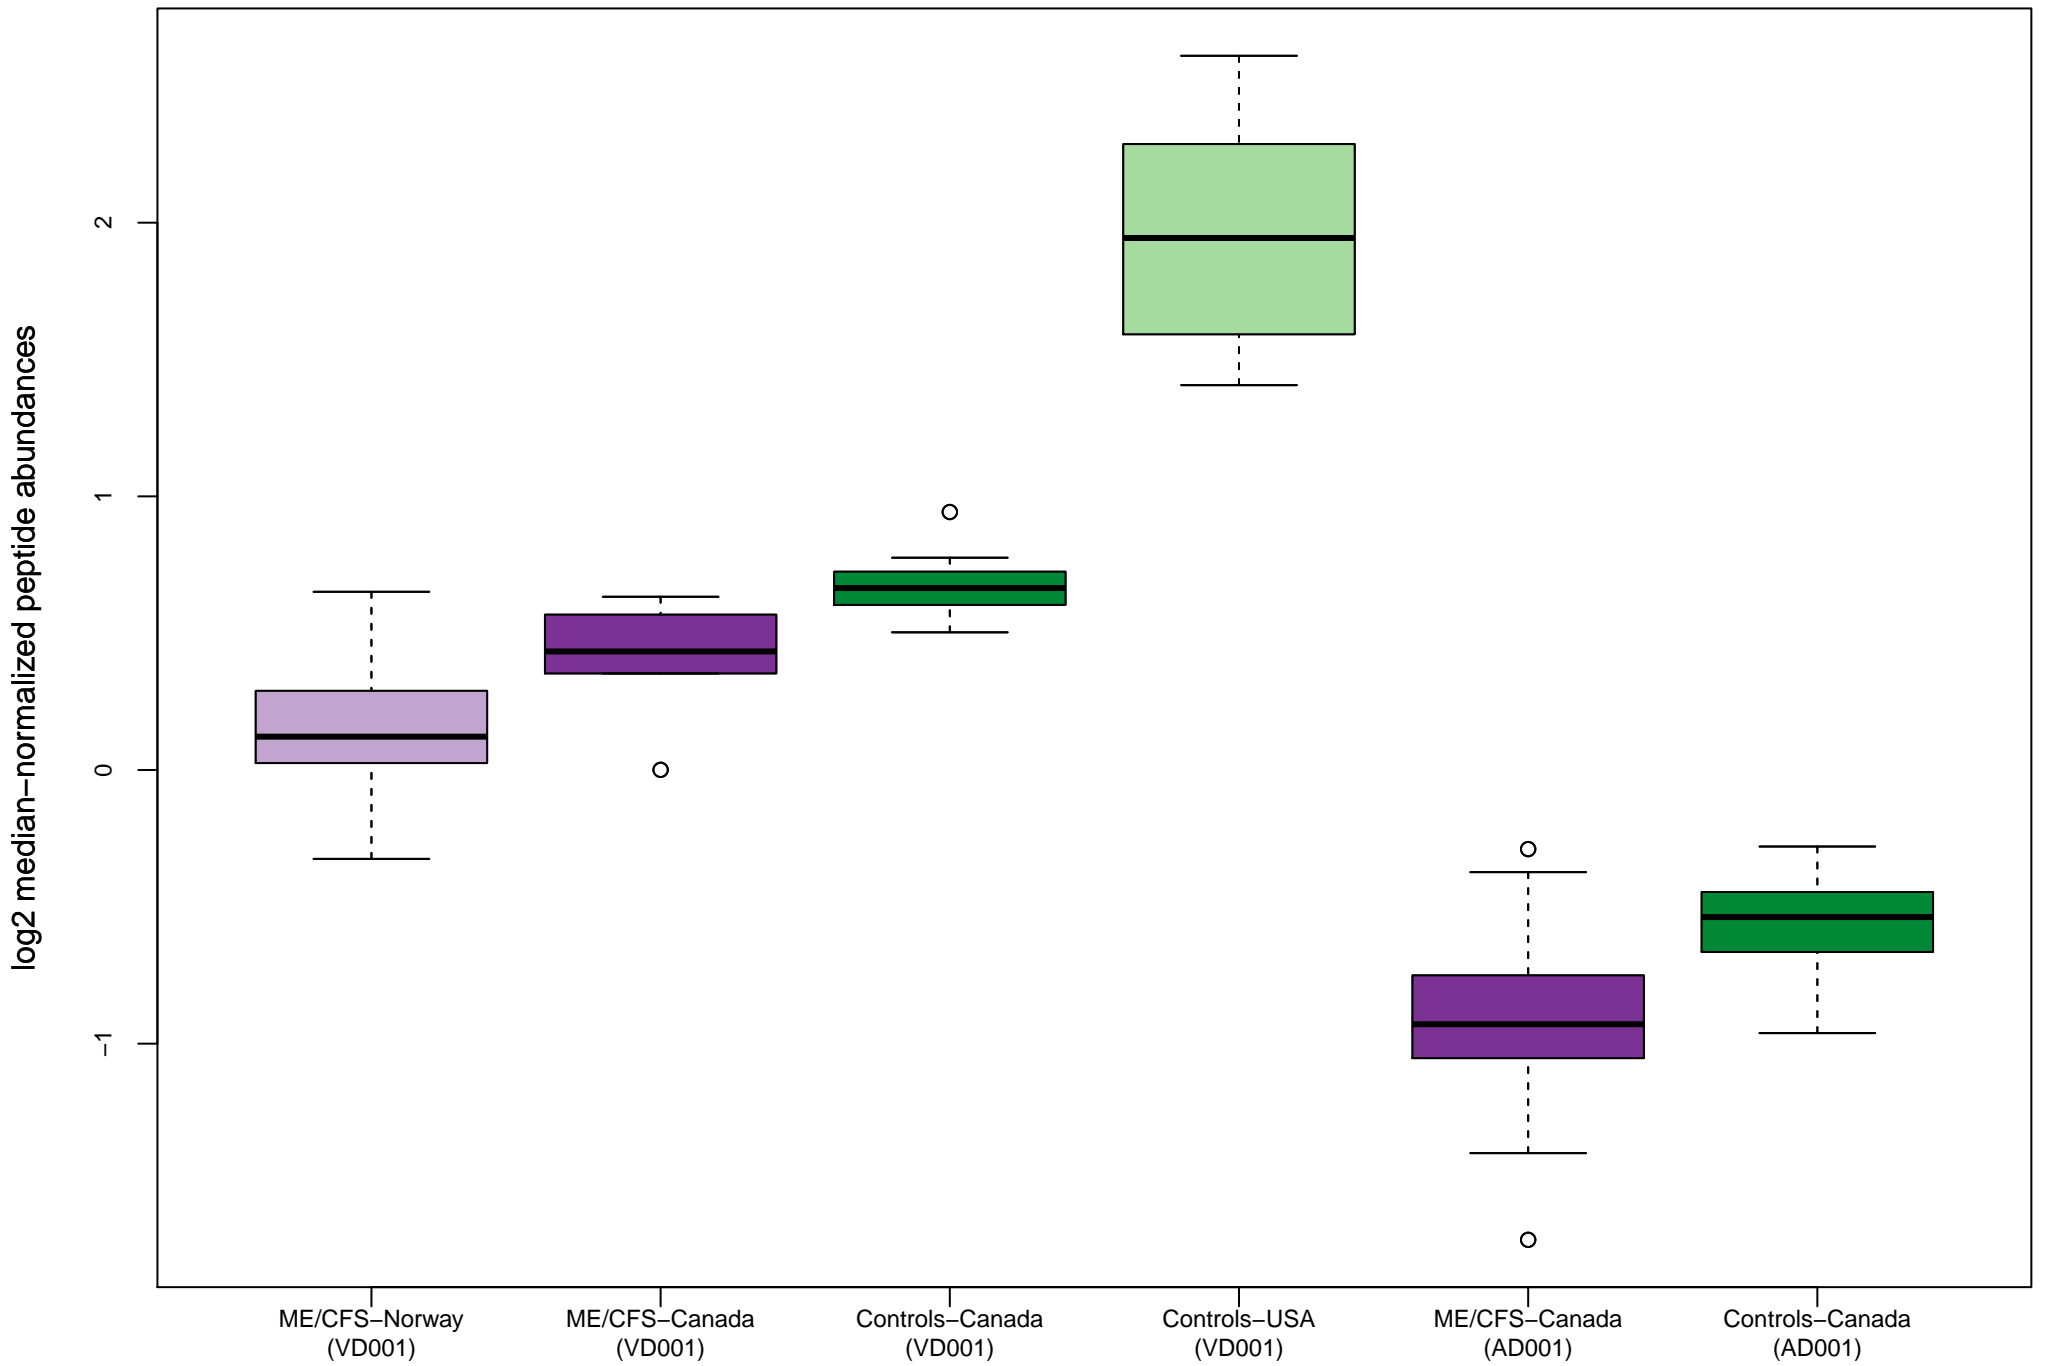

# ARALYFRSALG

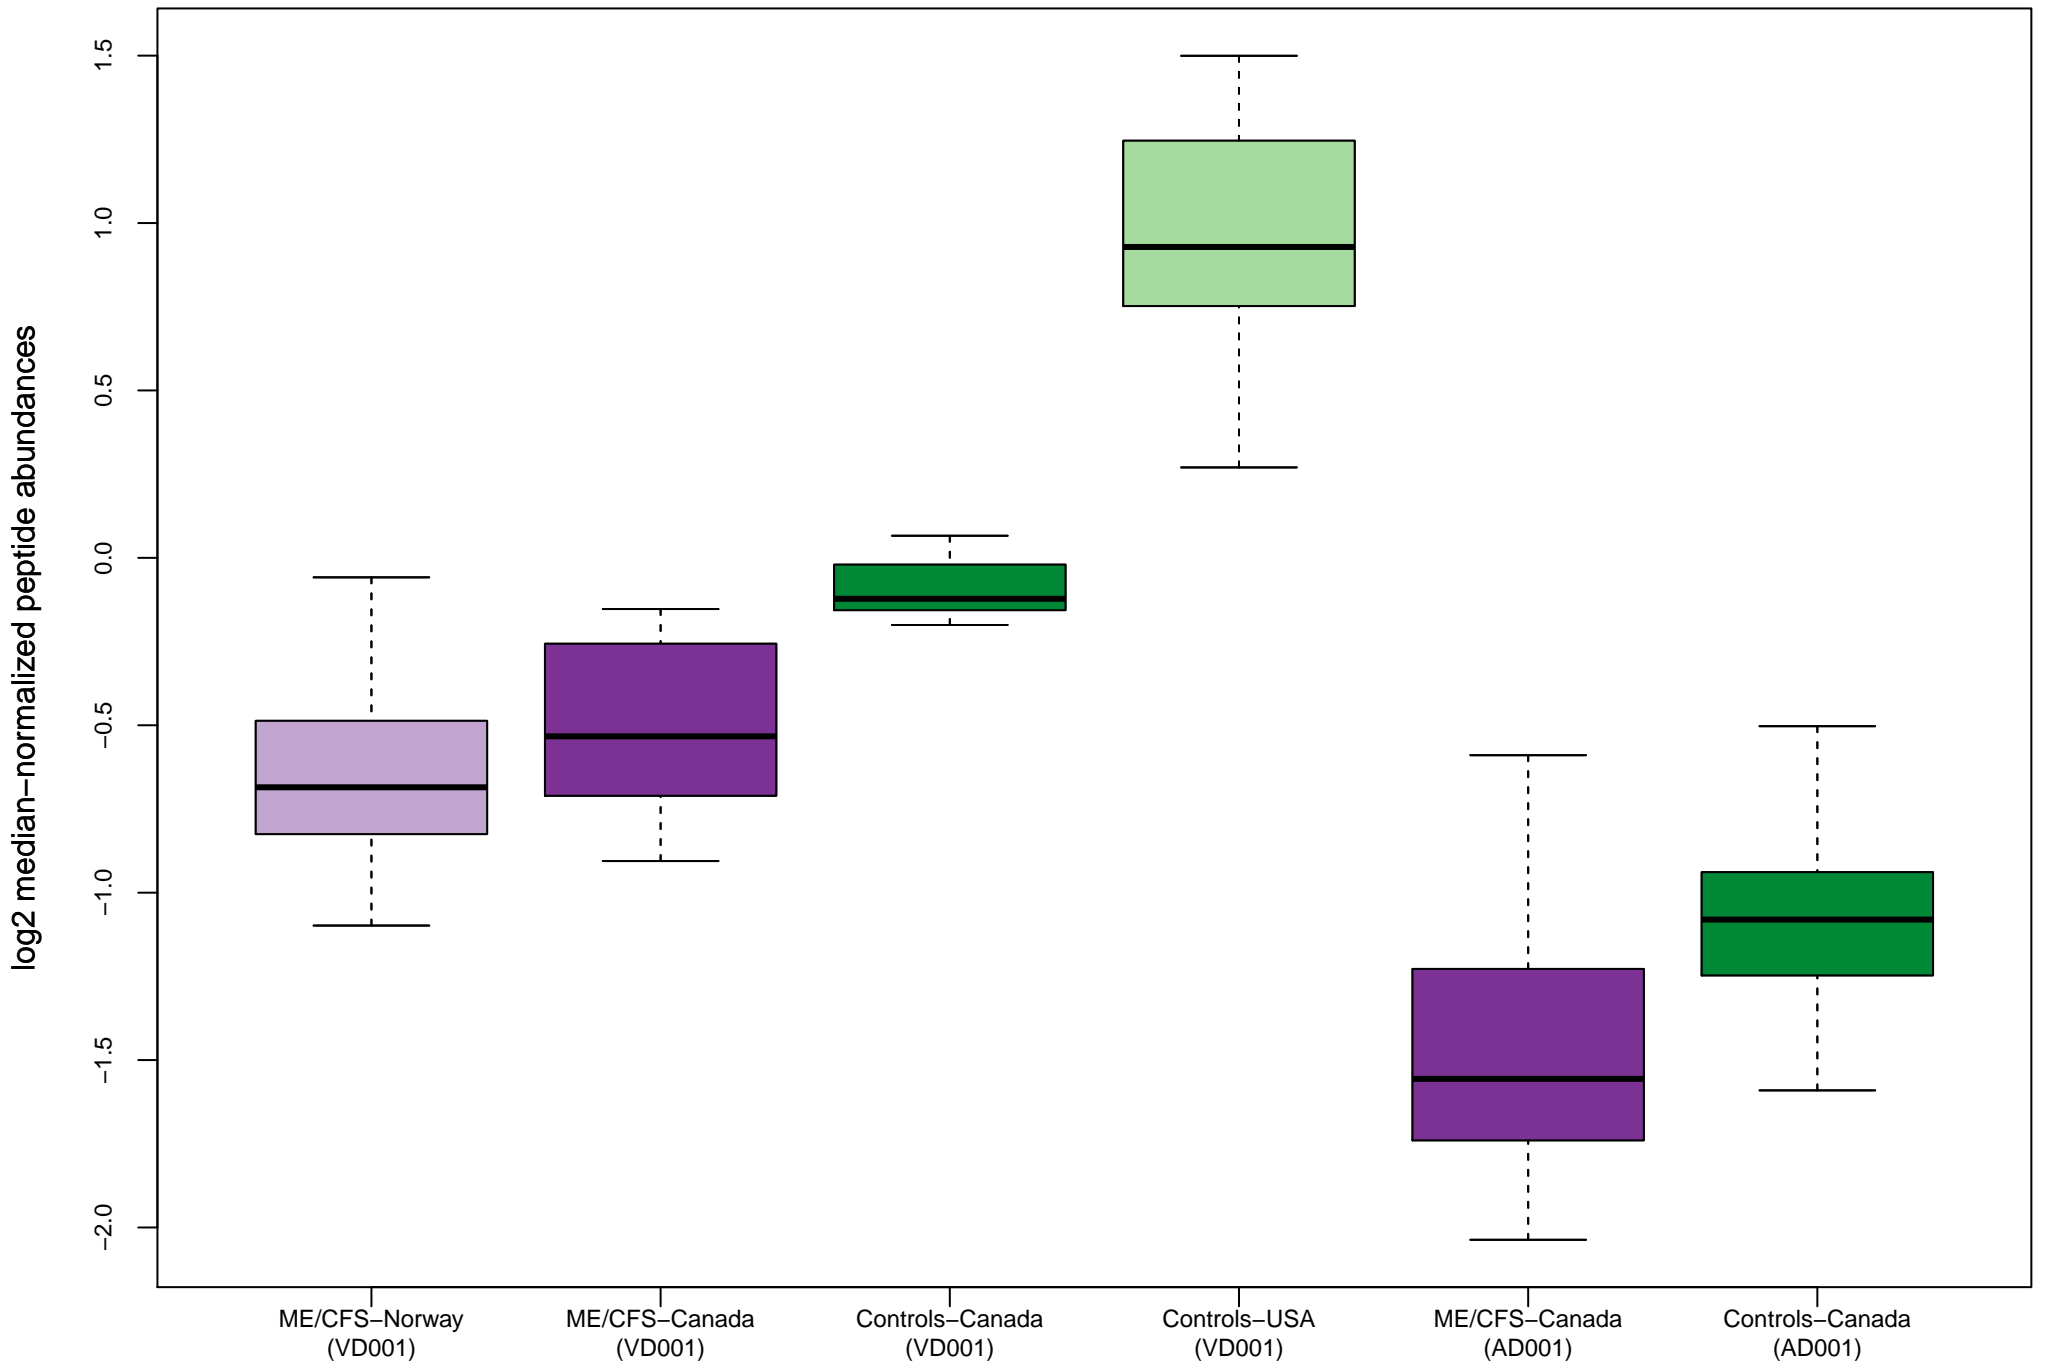

# ARAVLNALSVLS

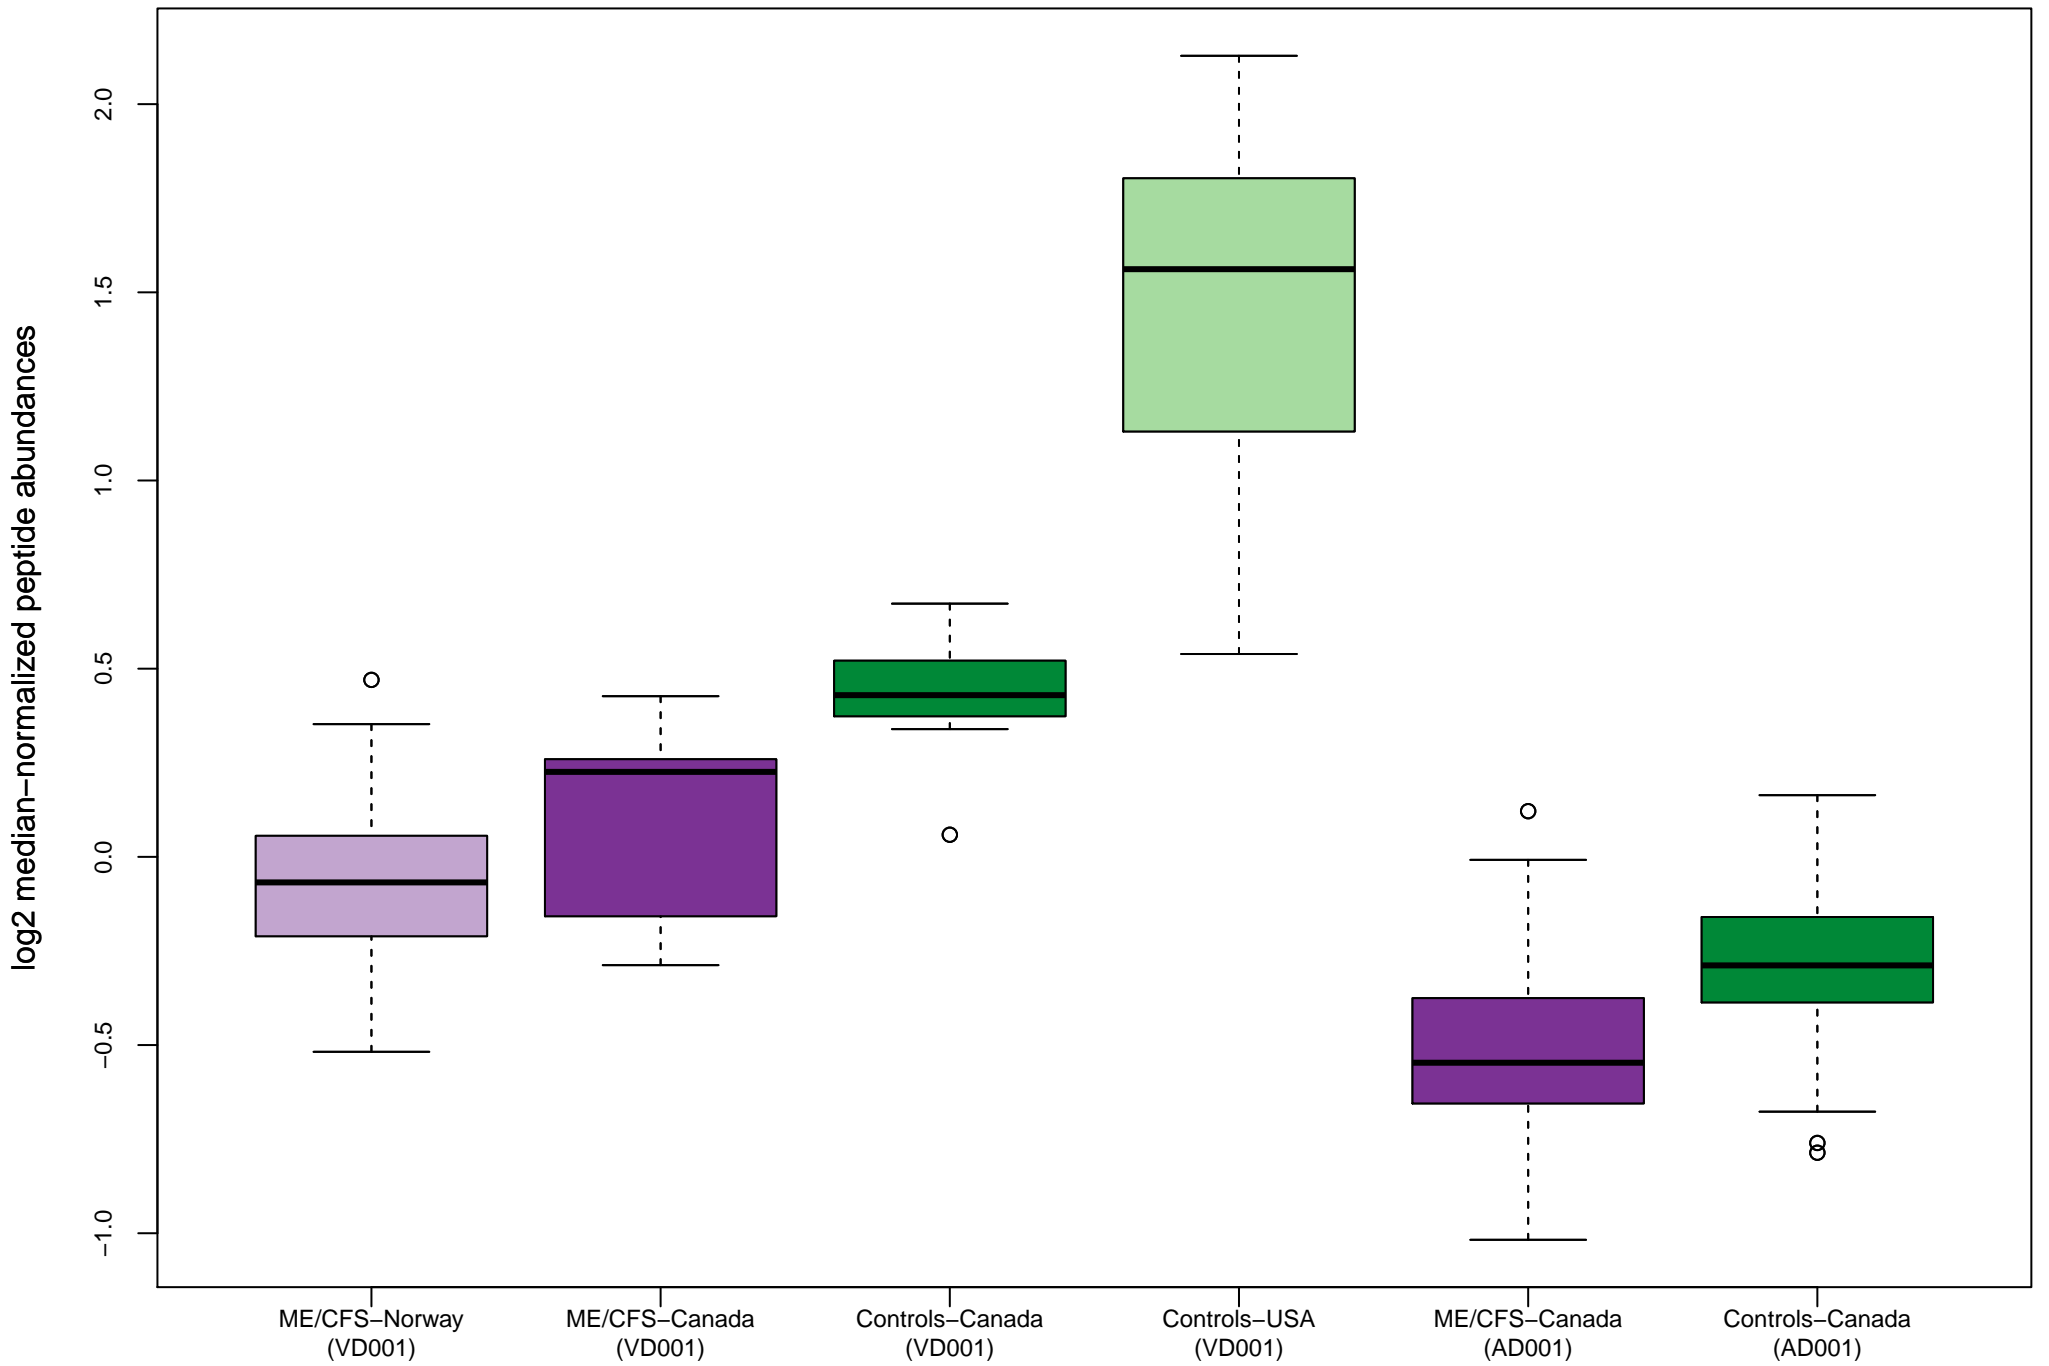

# ARGYVWASGVLS

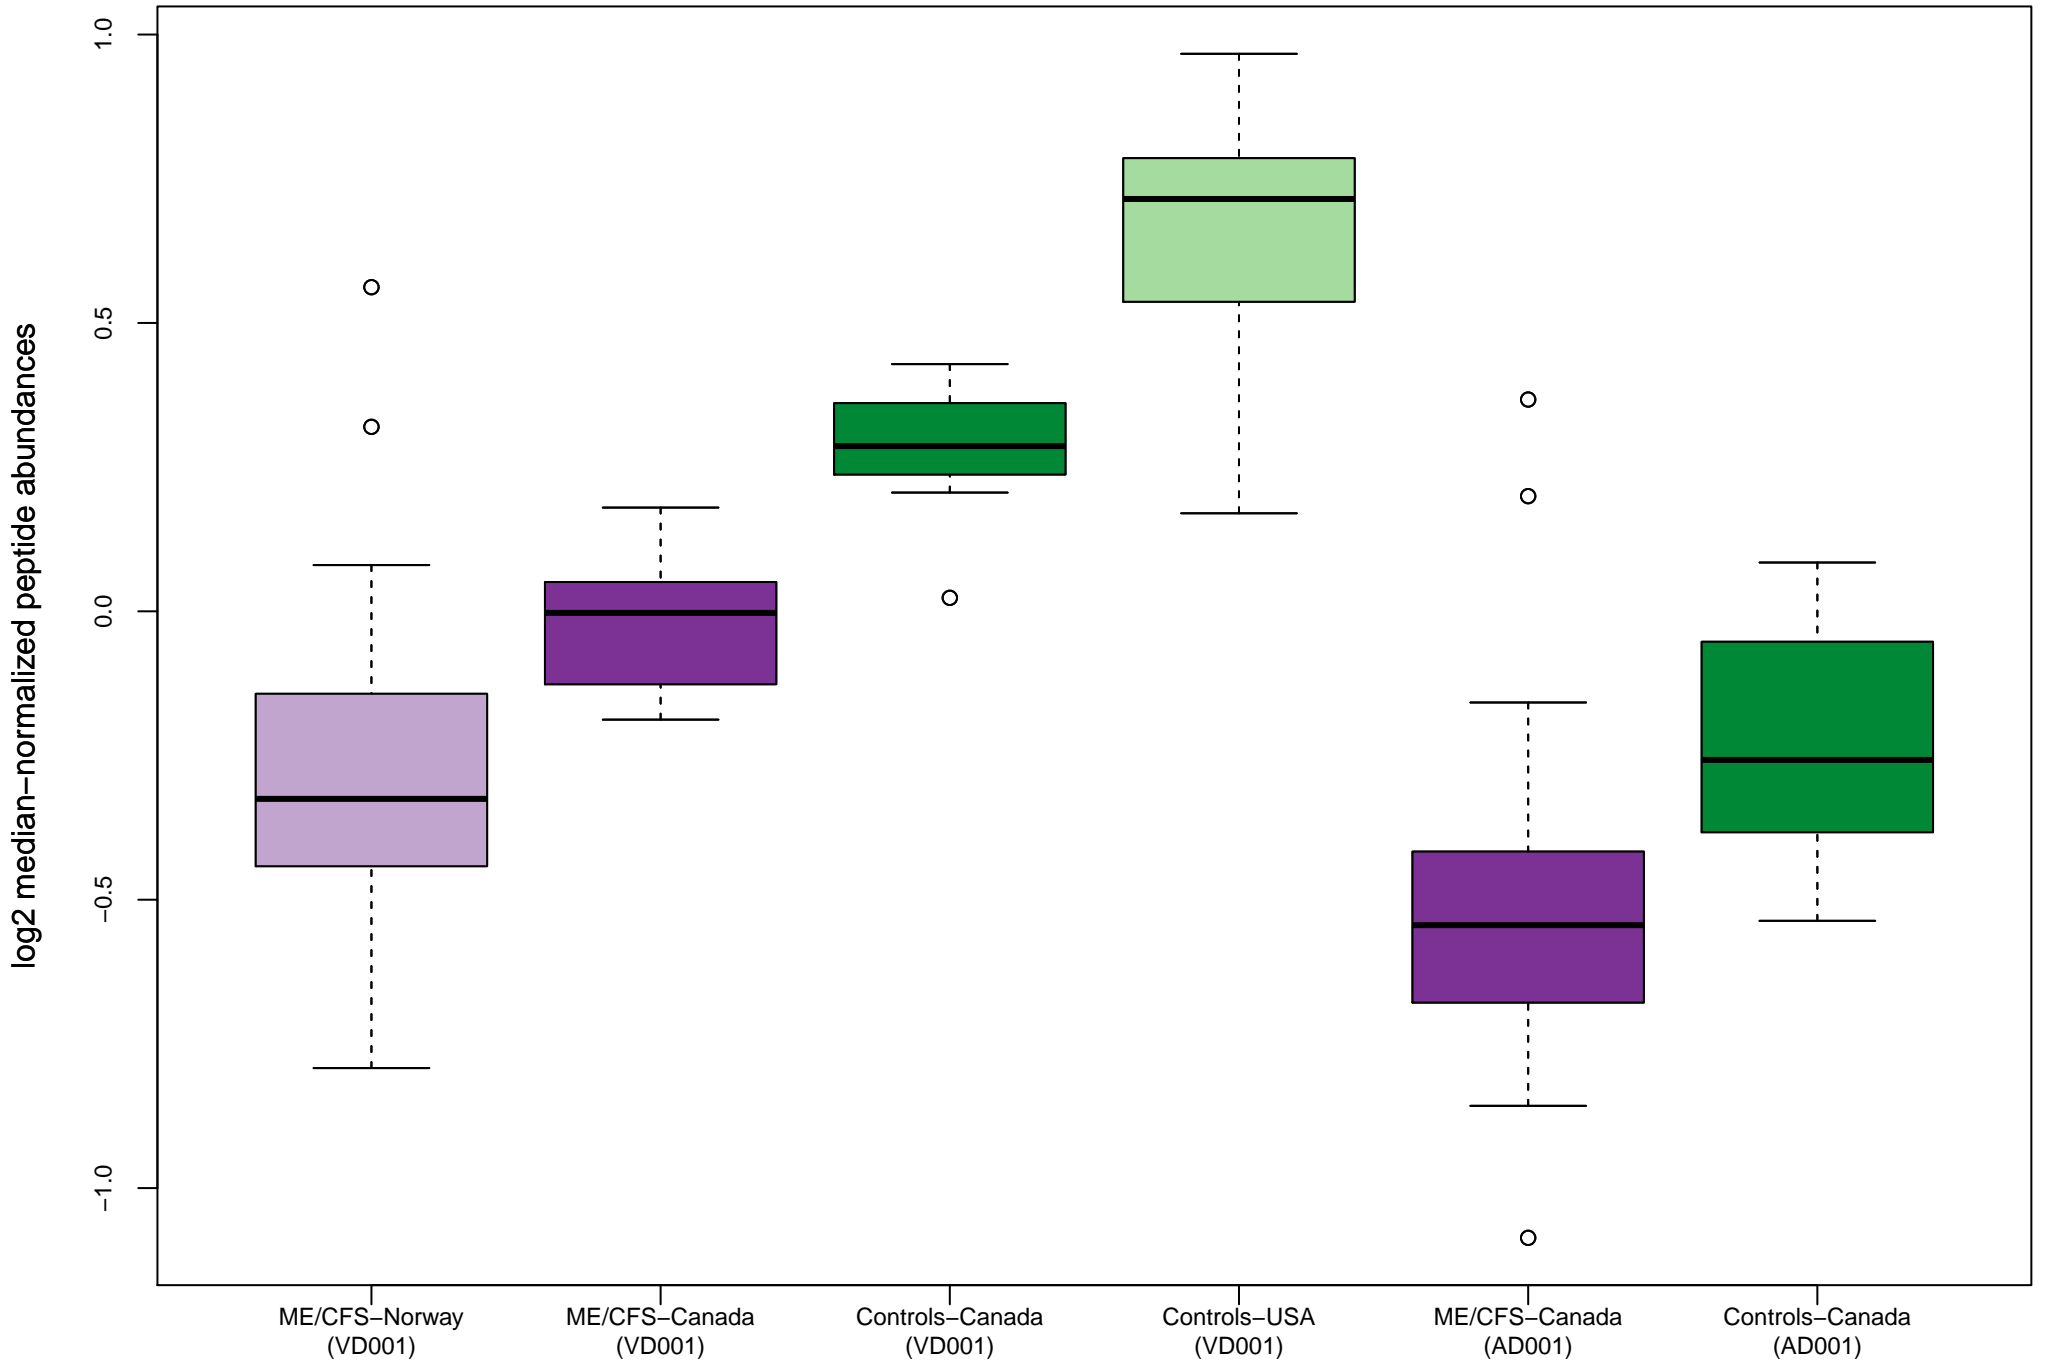

# ARNQLWAGVALS

log2 median-normalized peptide abundances

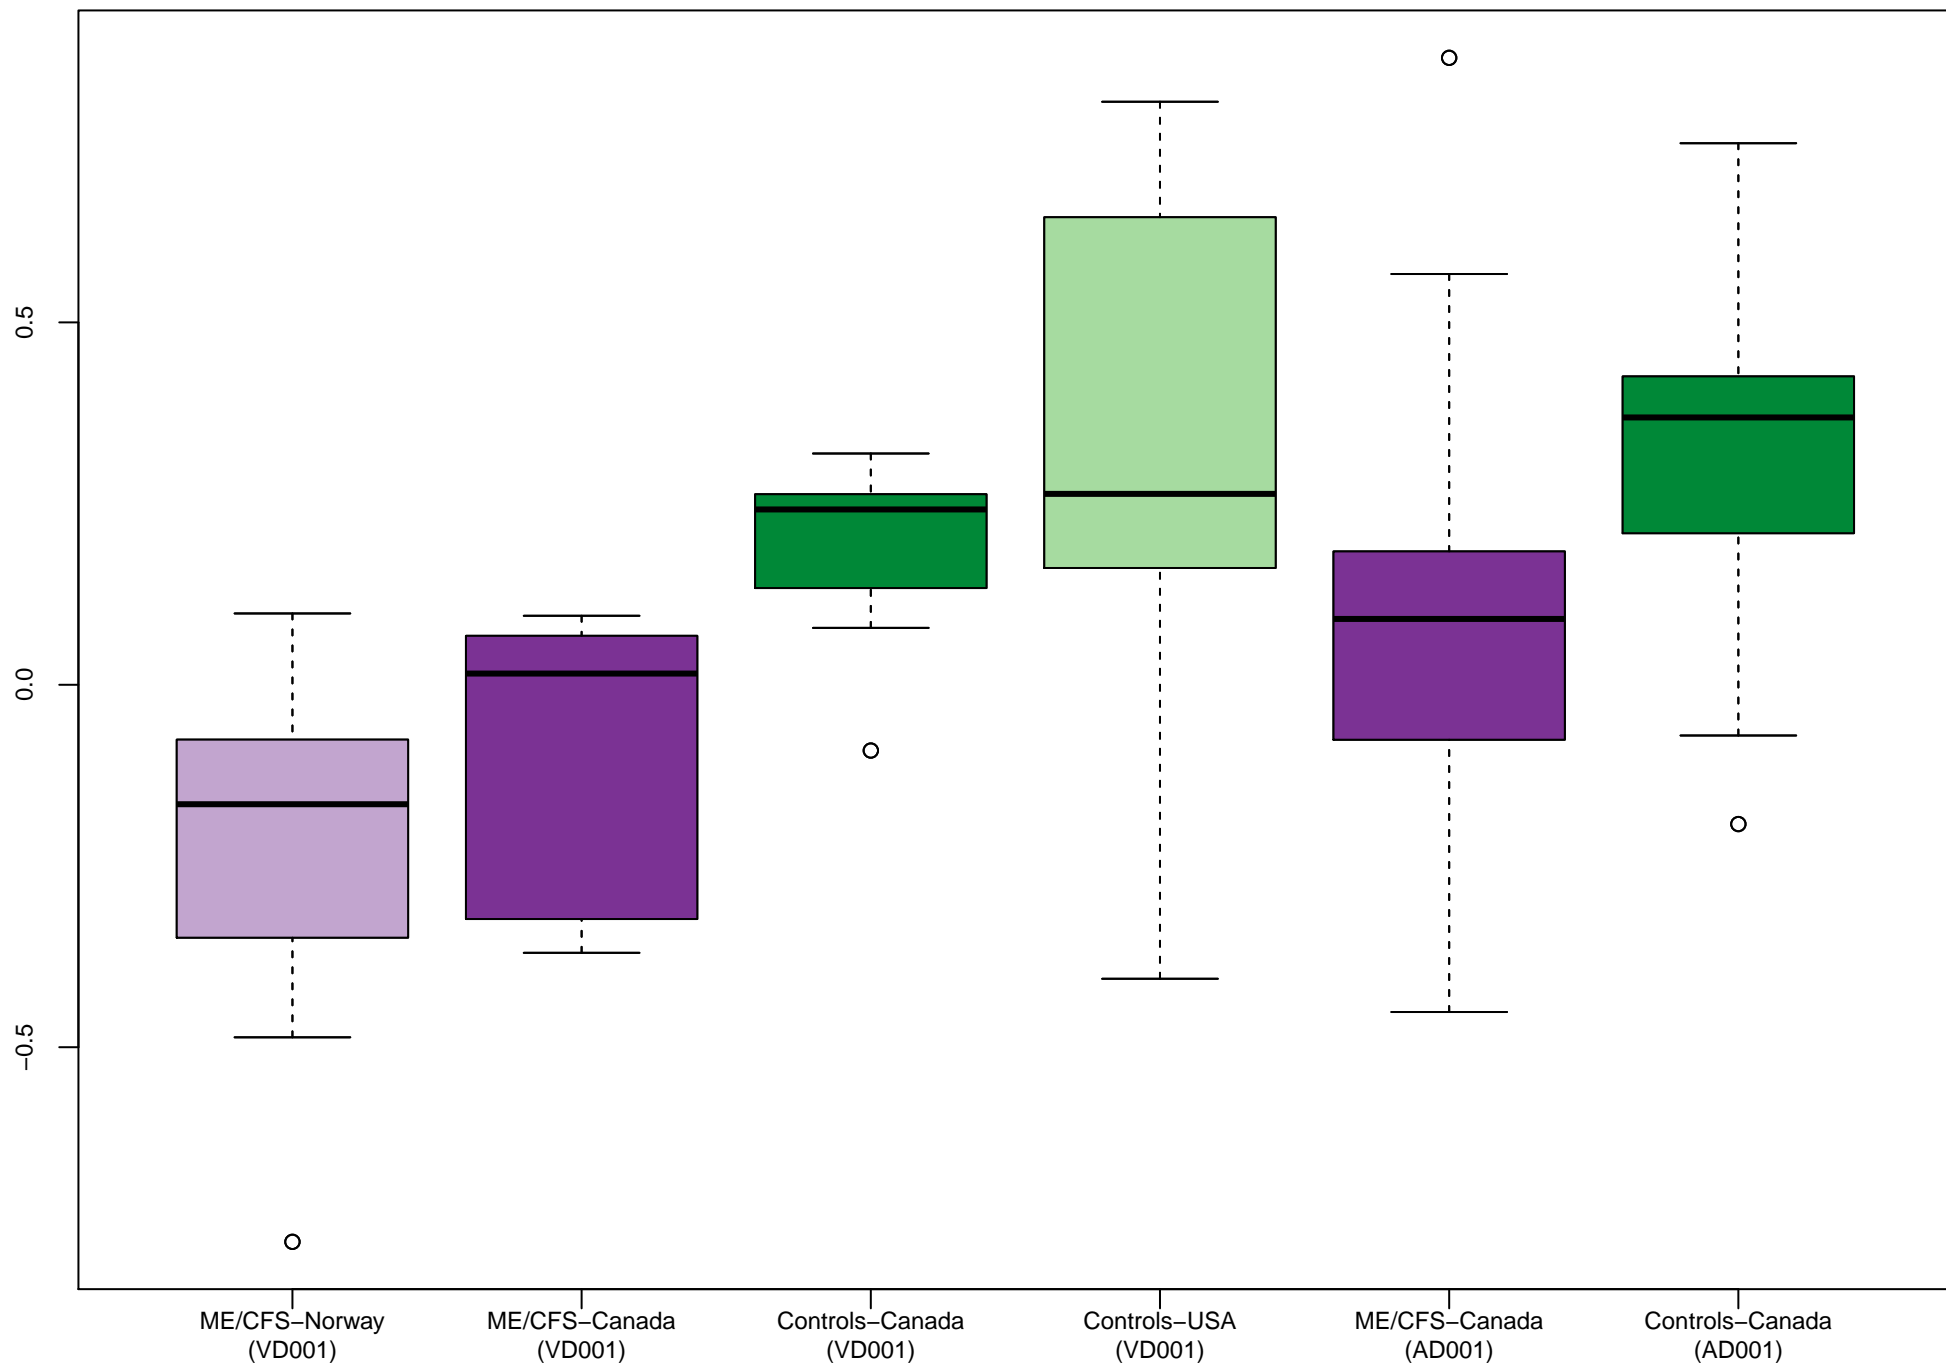

# ASRVFRLSYWKD

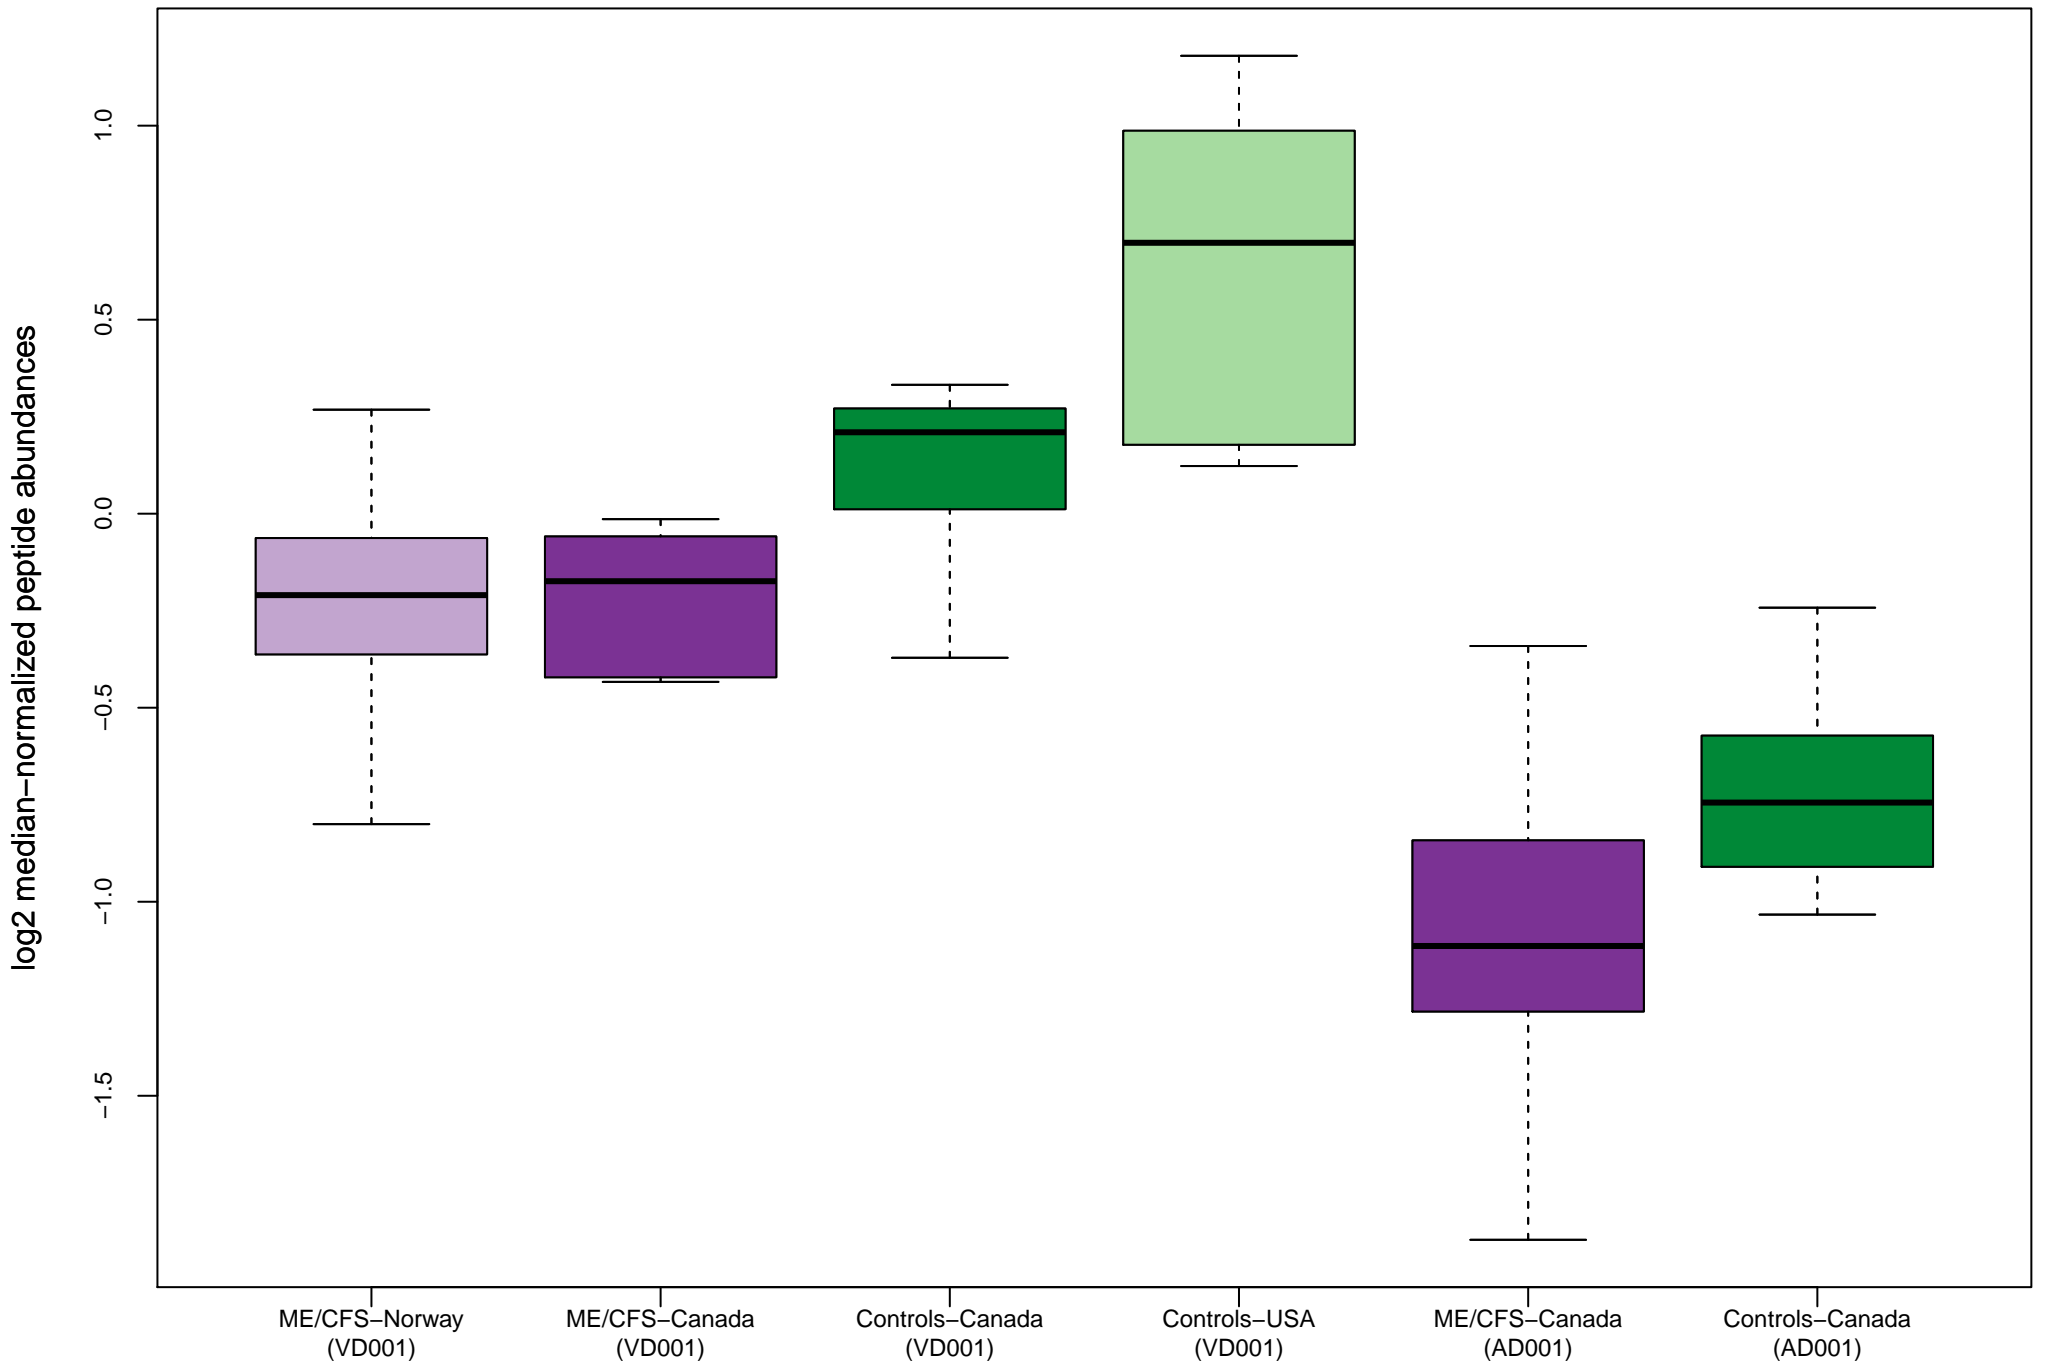

# AVLSLKLGVASG

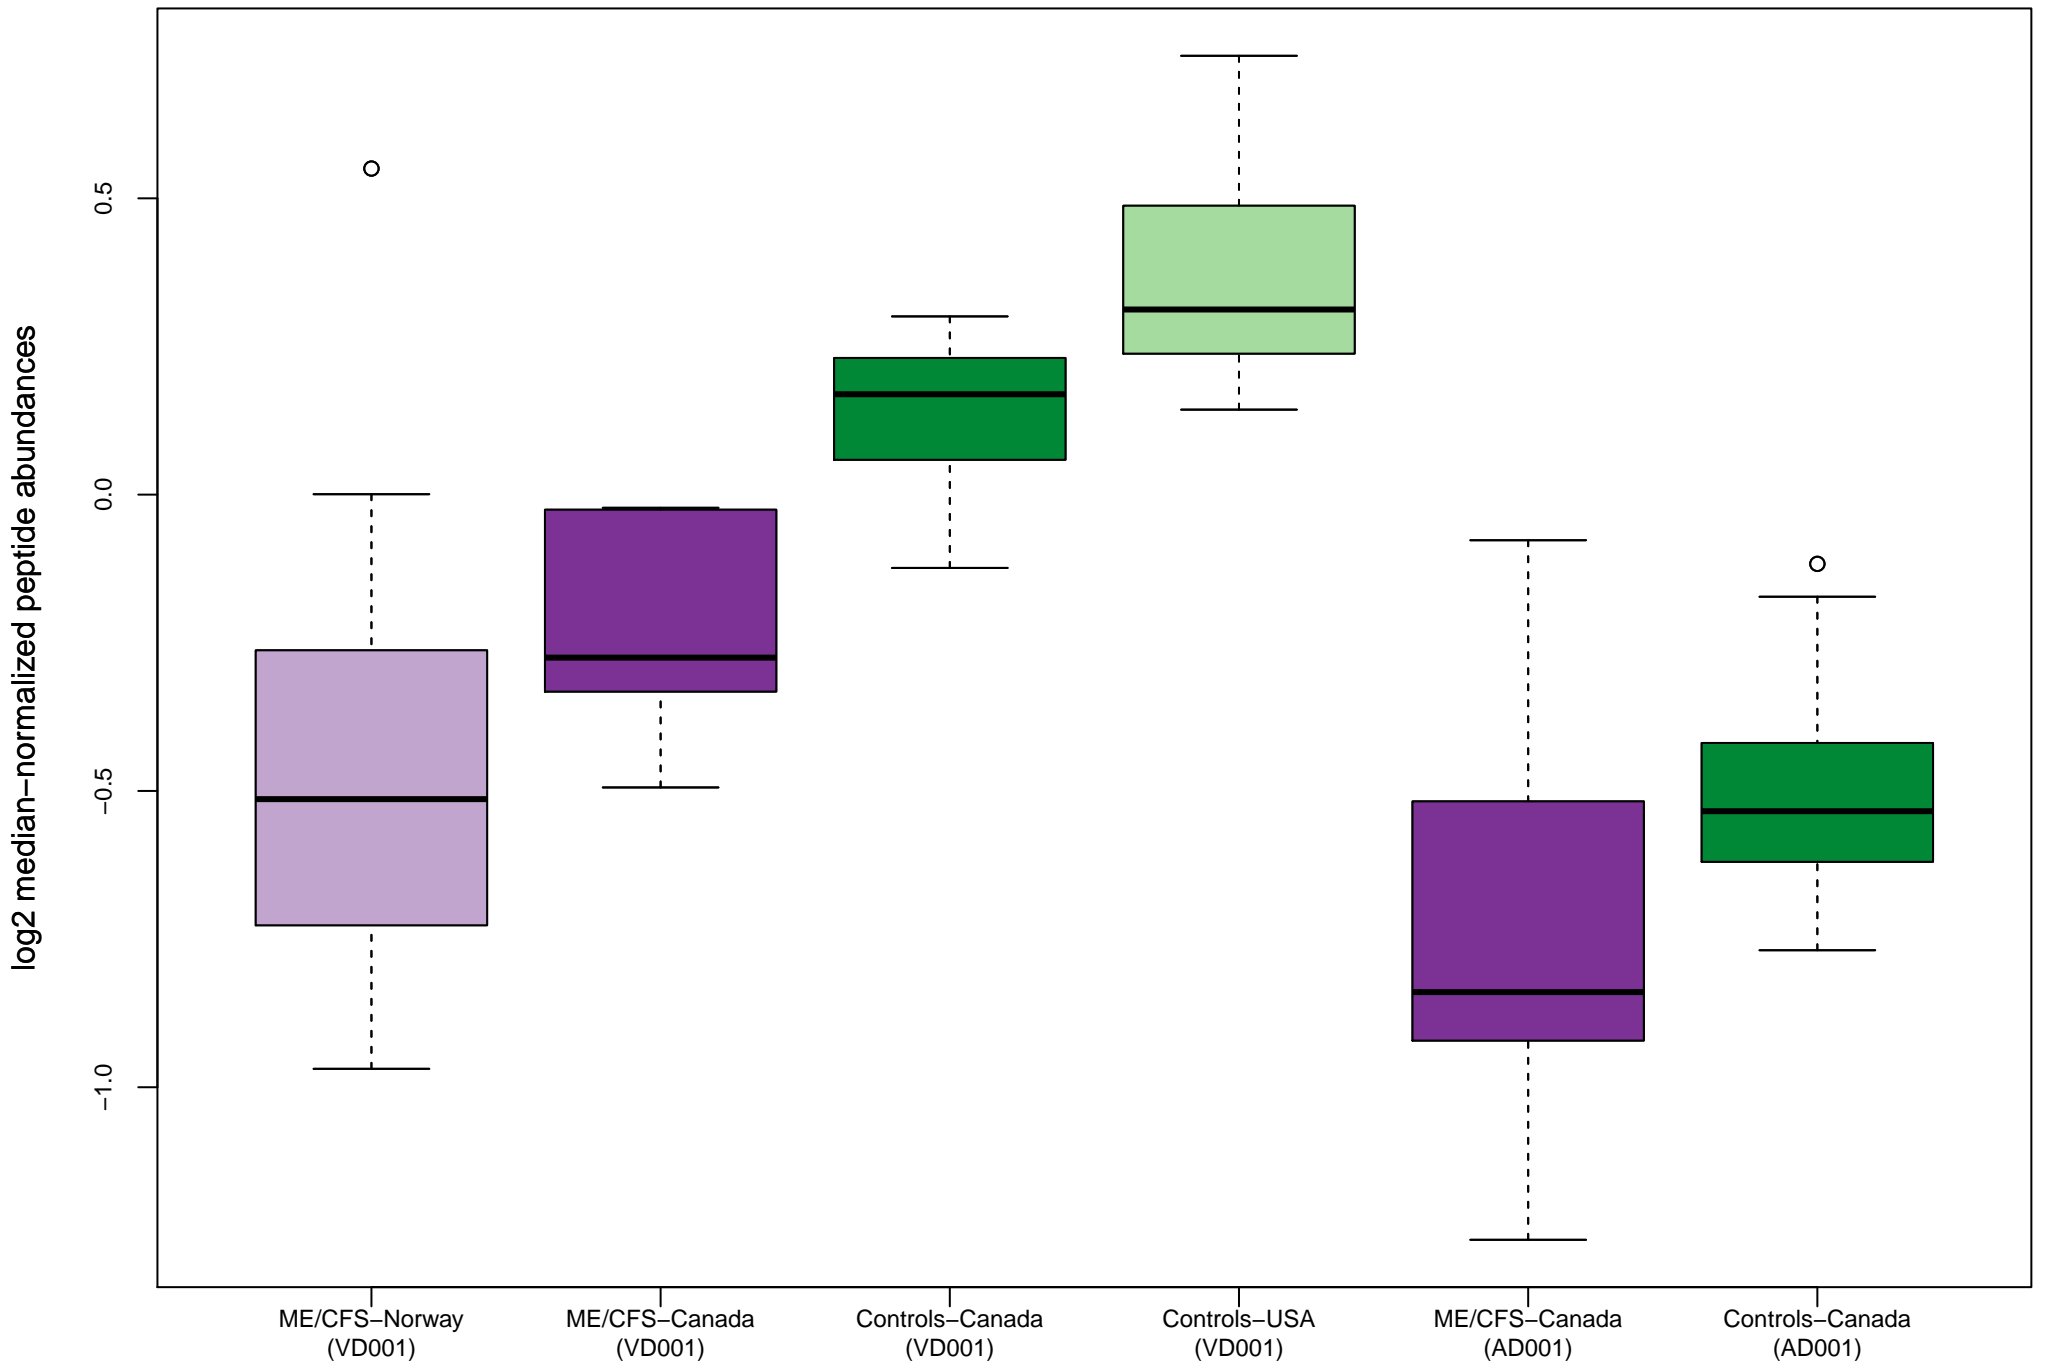

# AVRFWSGVALSG

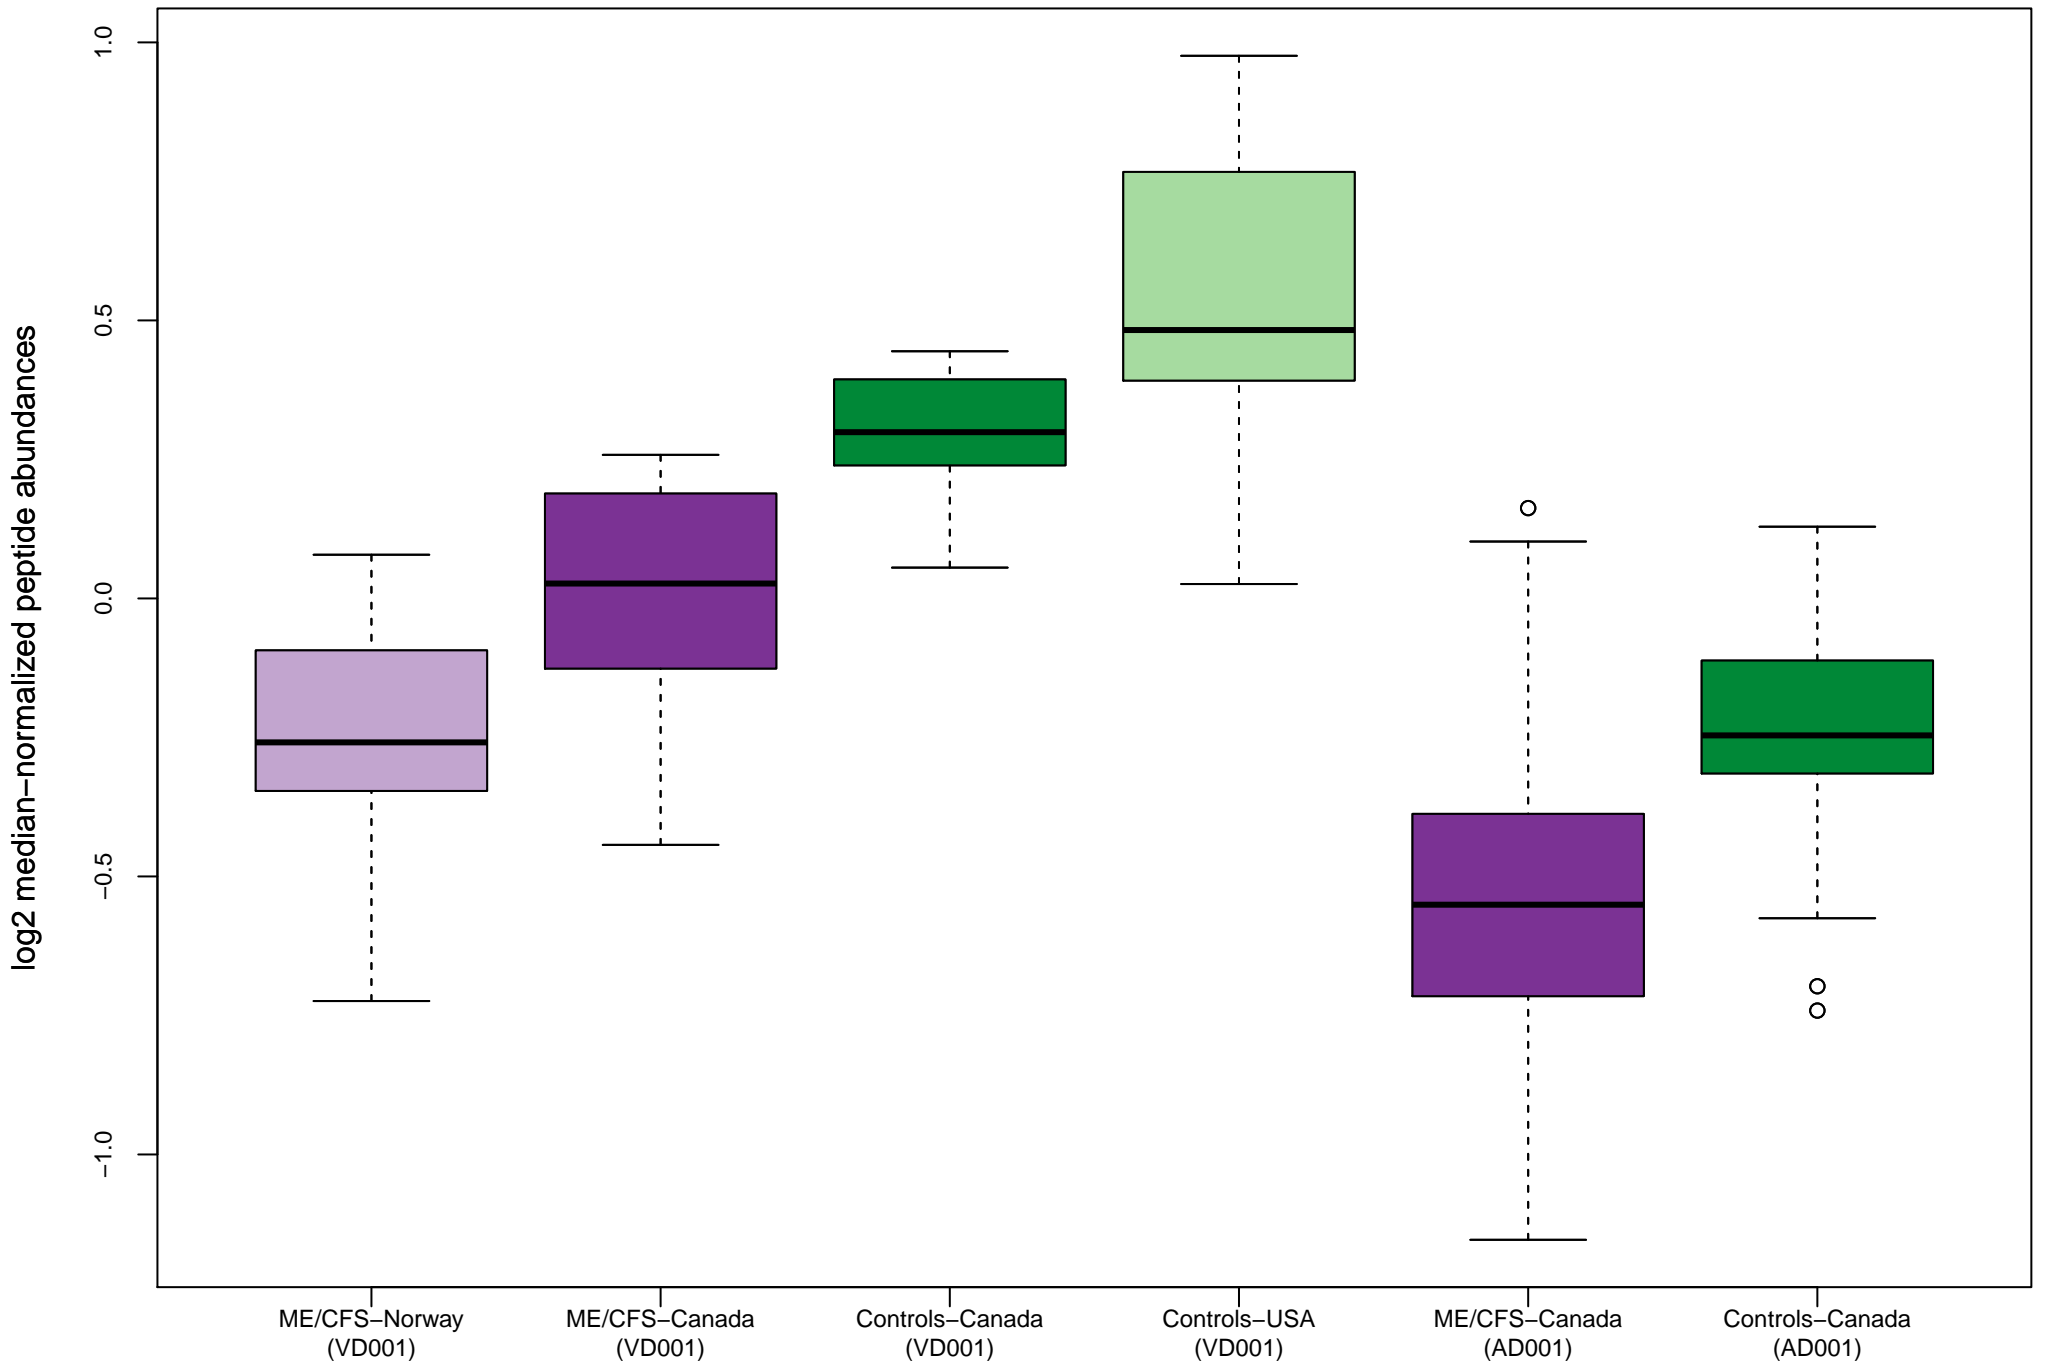



# AVSRWLSNLSAL

log2 median-normalized peptide abundances

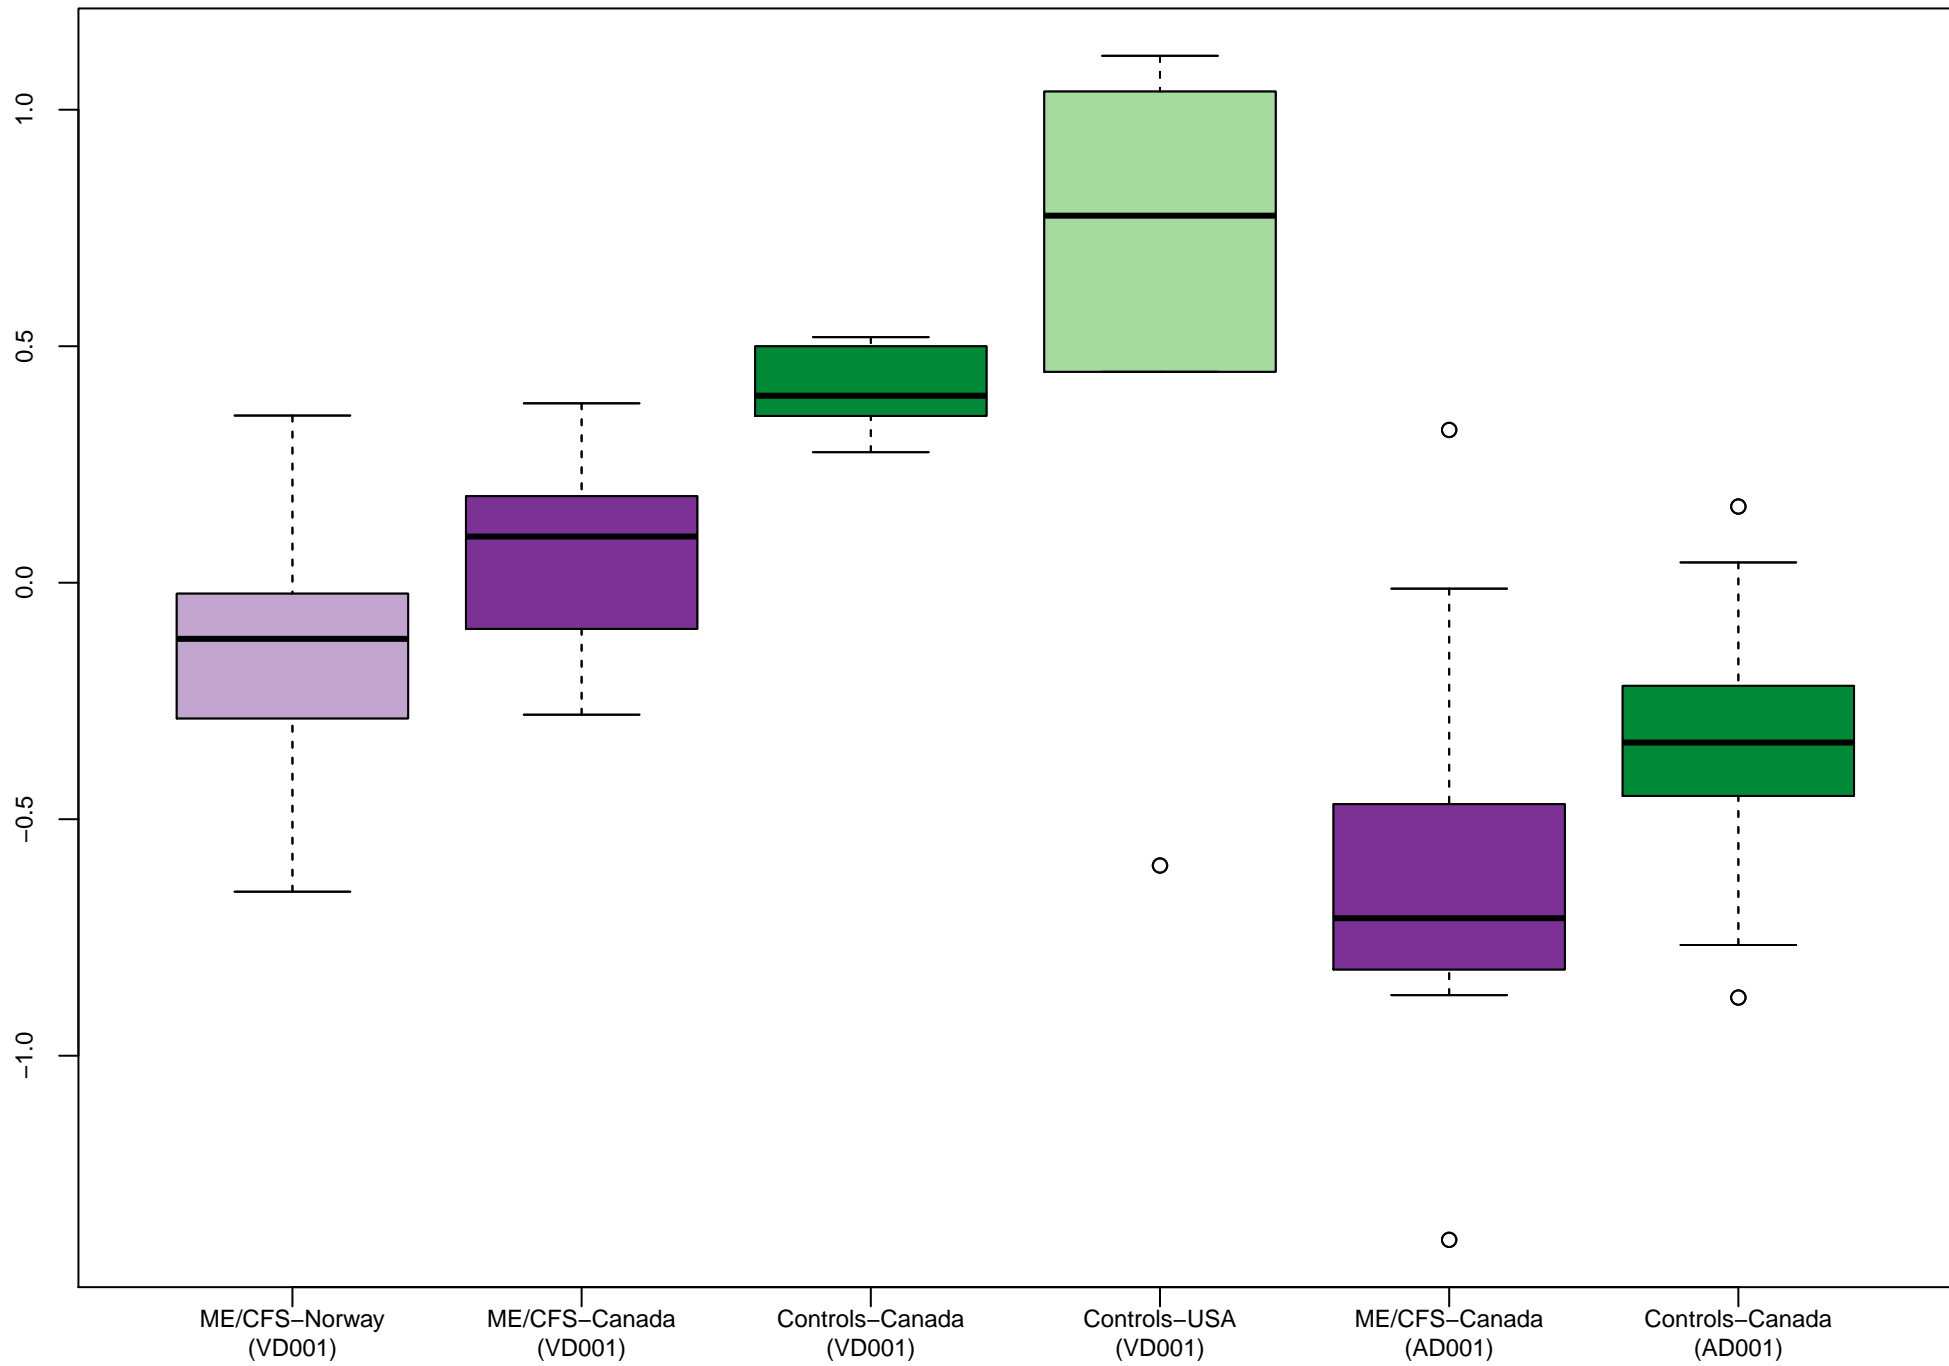

# AWFRQFYALSAL

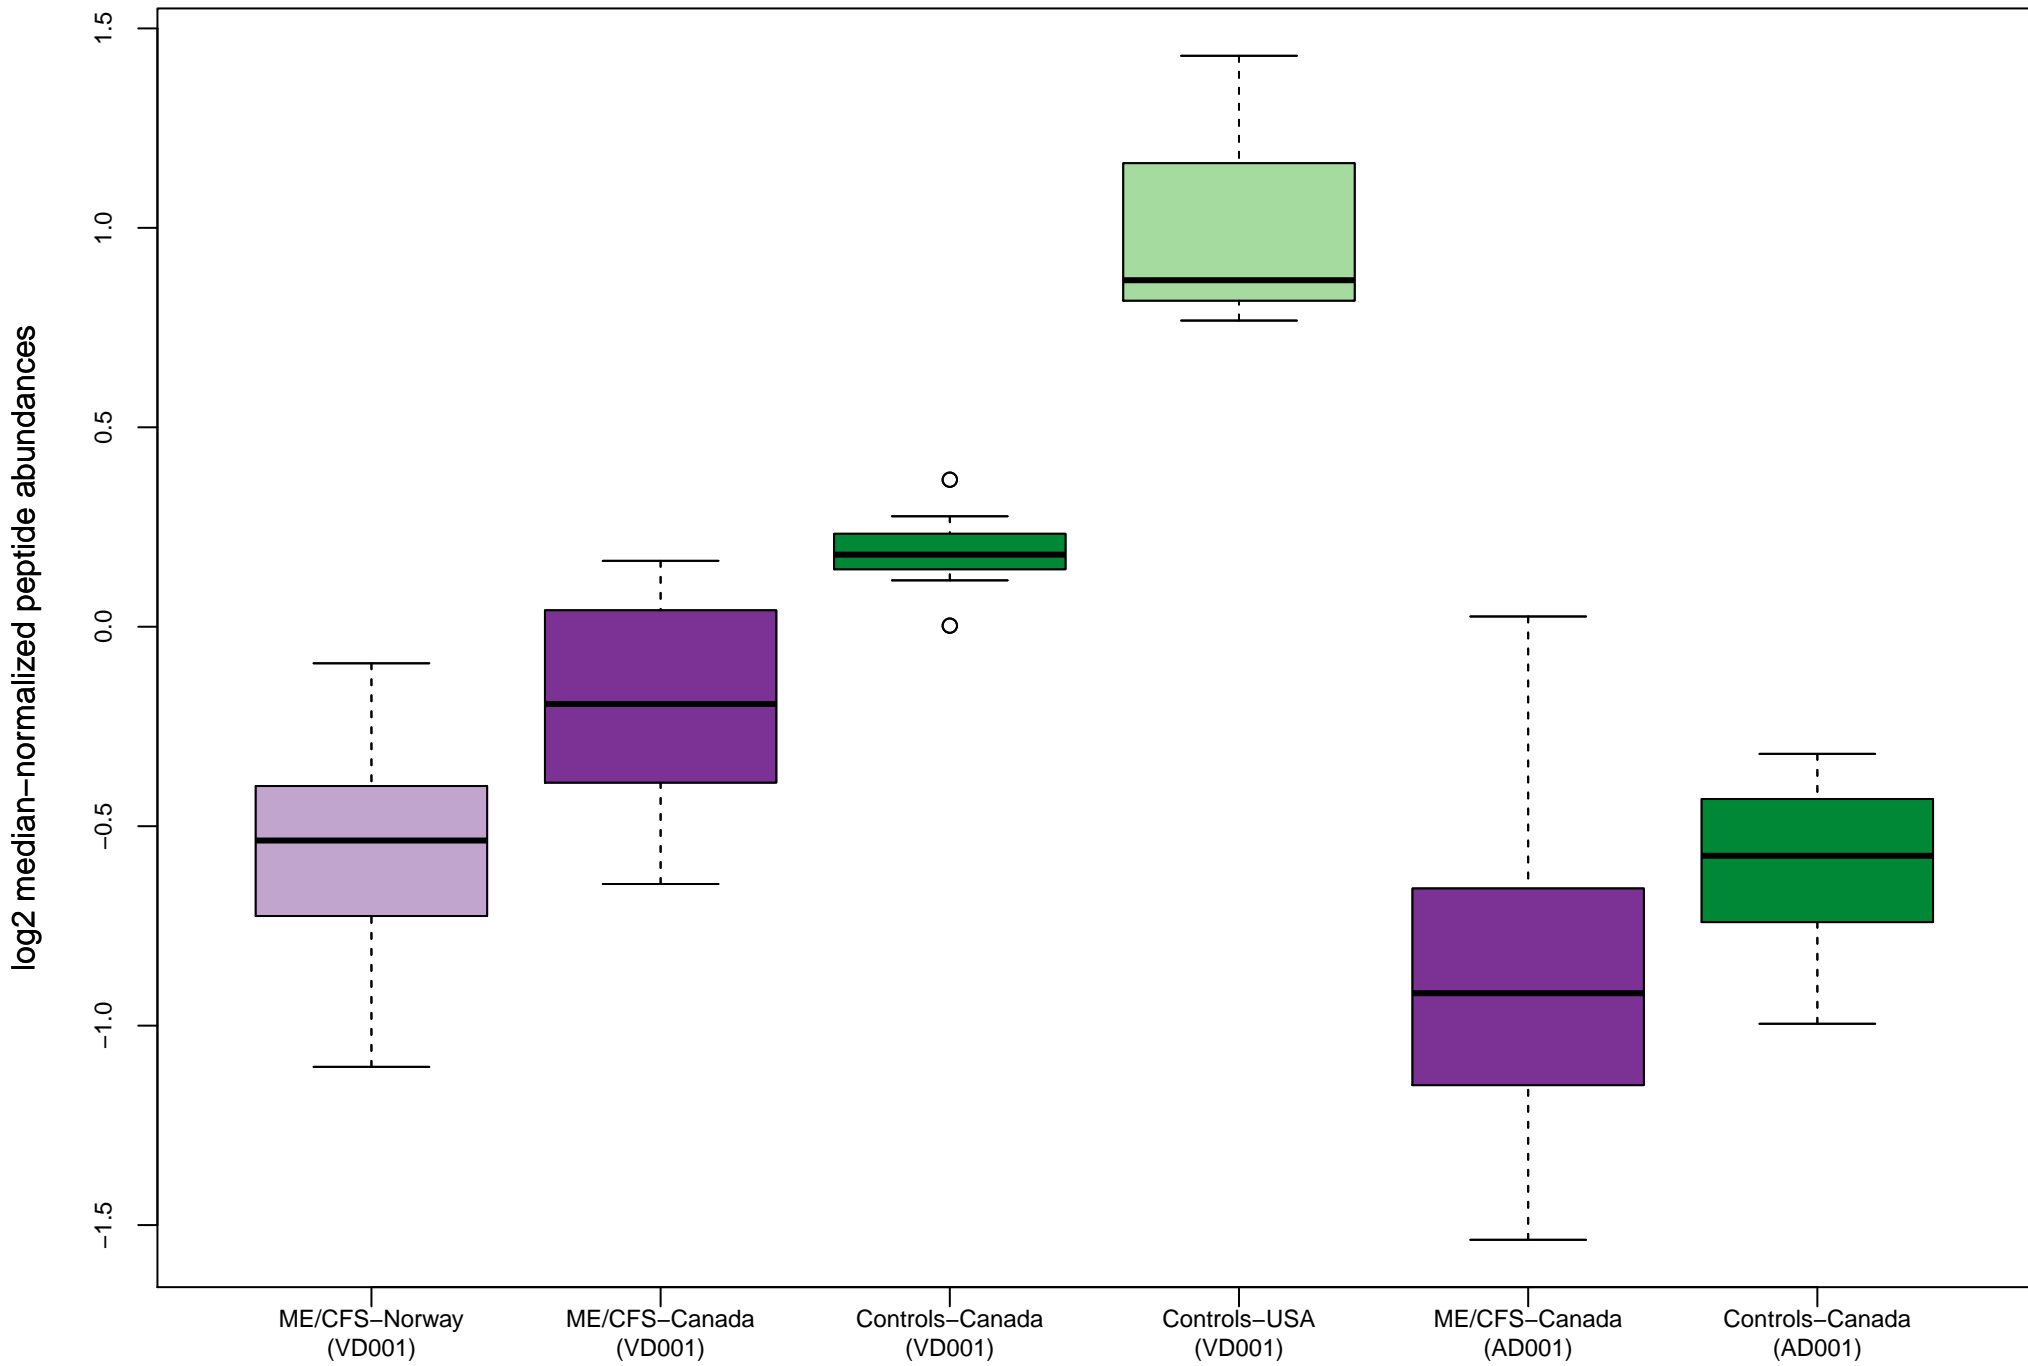

# AWRASVLSGVAL

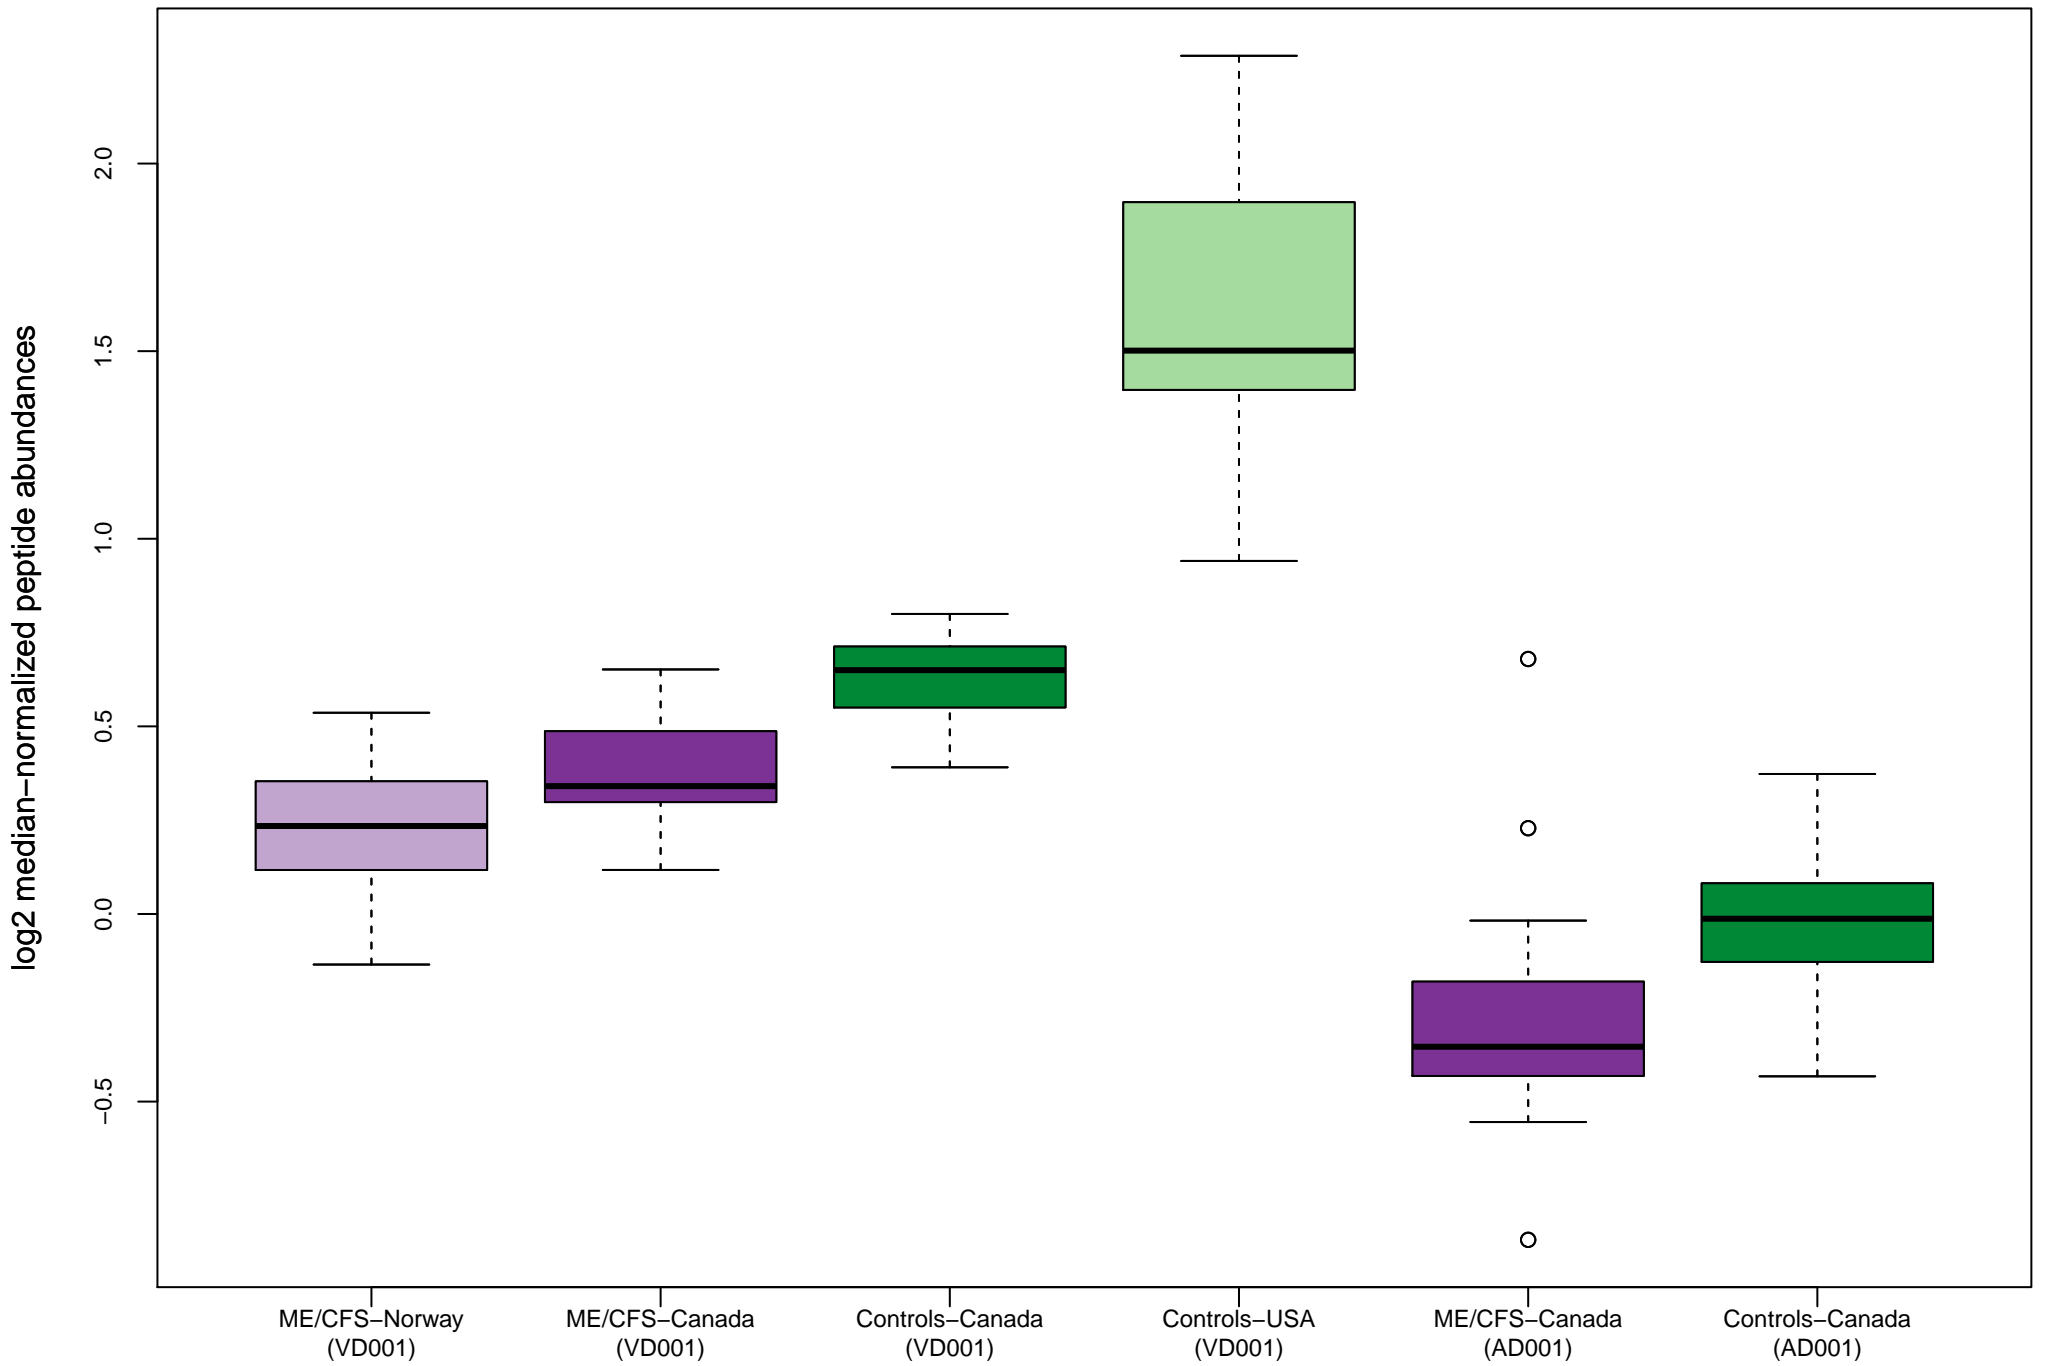

# DFLYLRKVL SLS

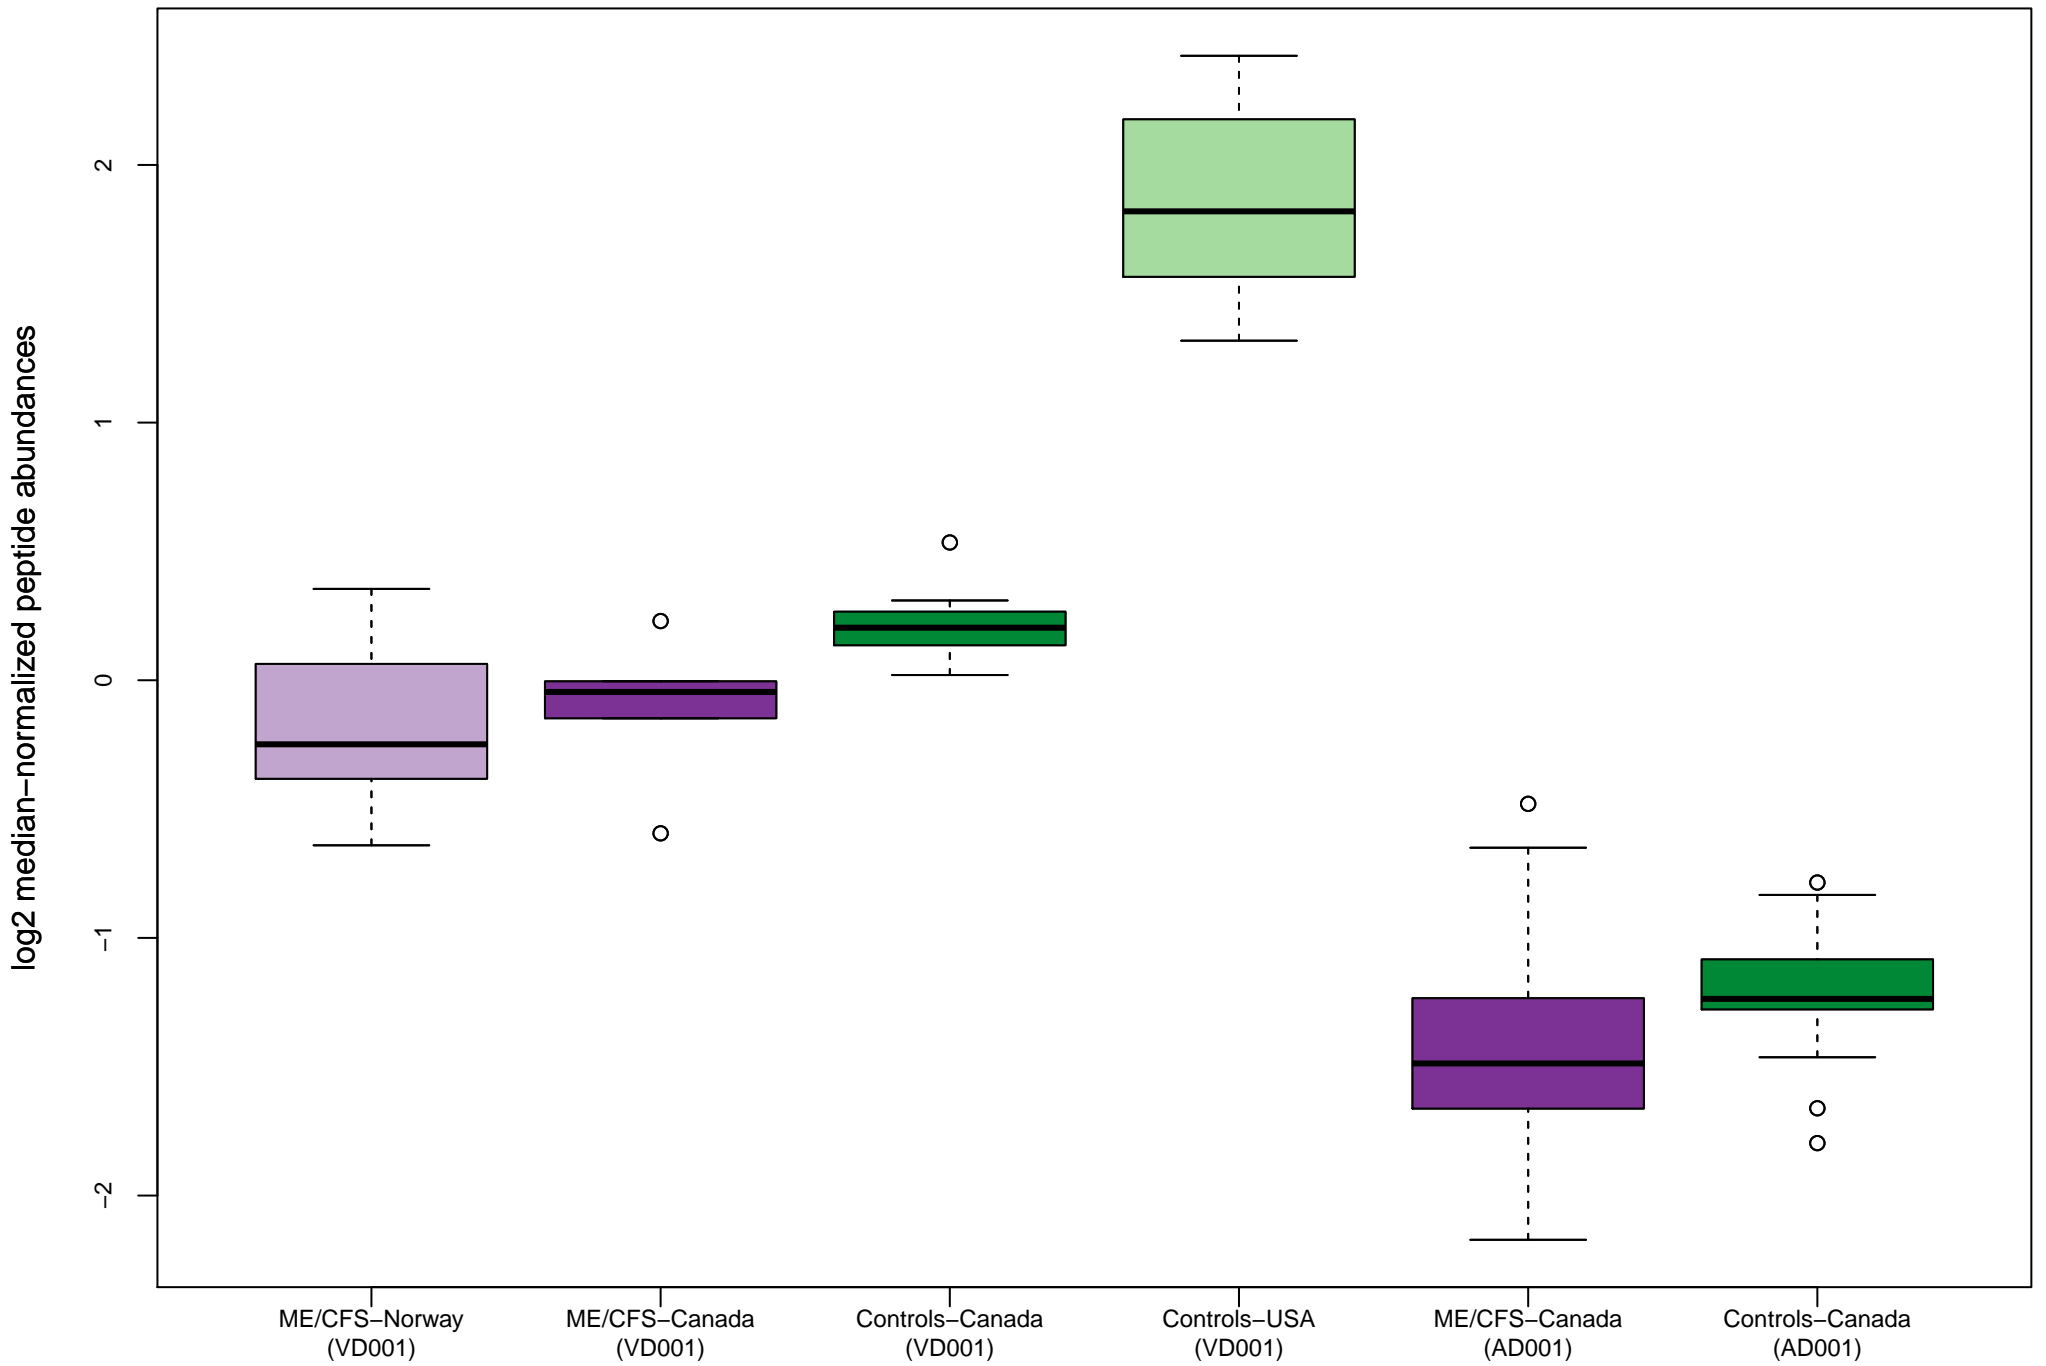

# DRGYWFRALSVL

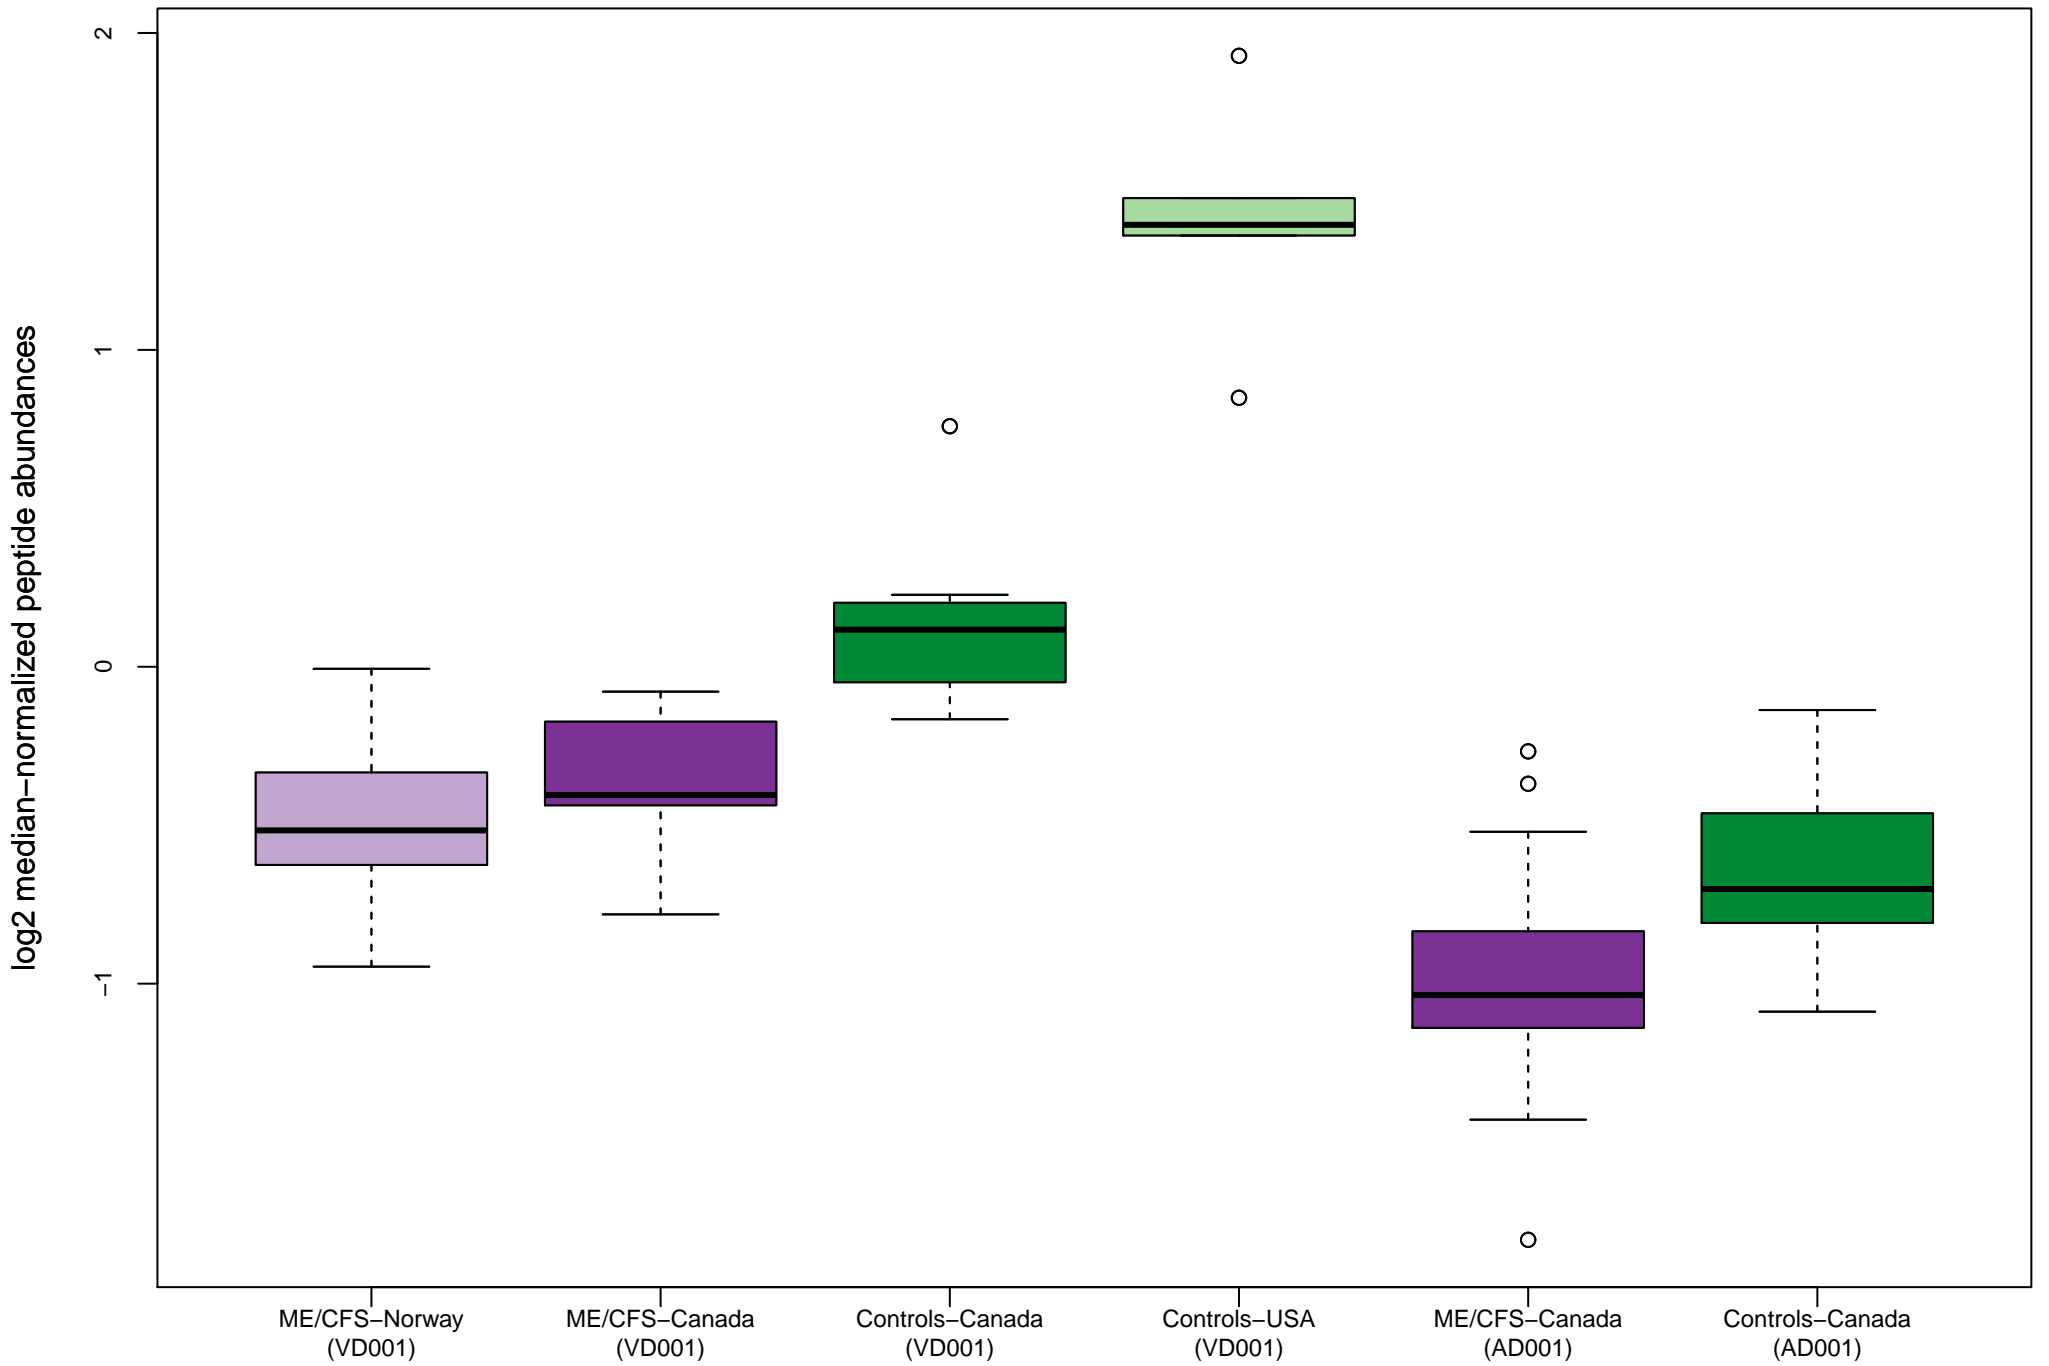

# DRSFFRALSGLS

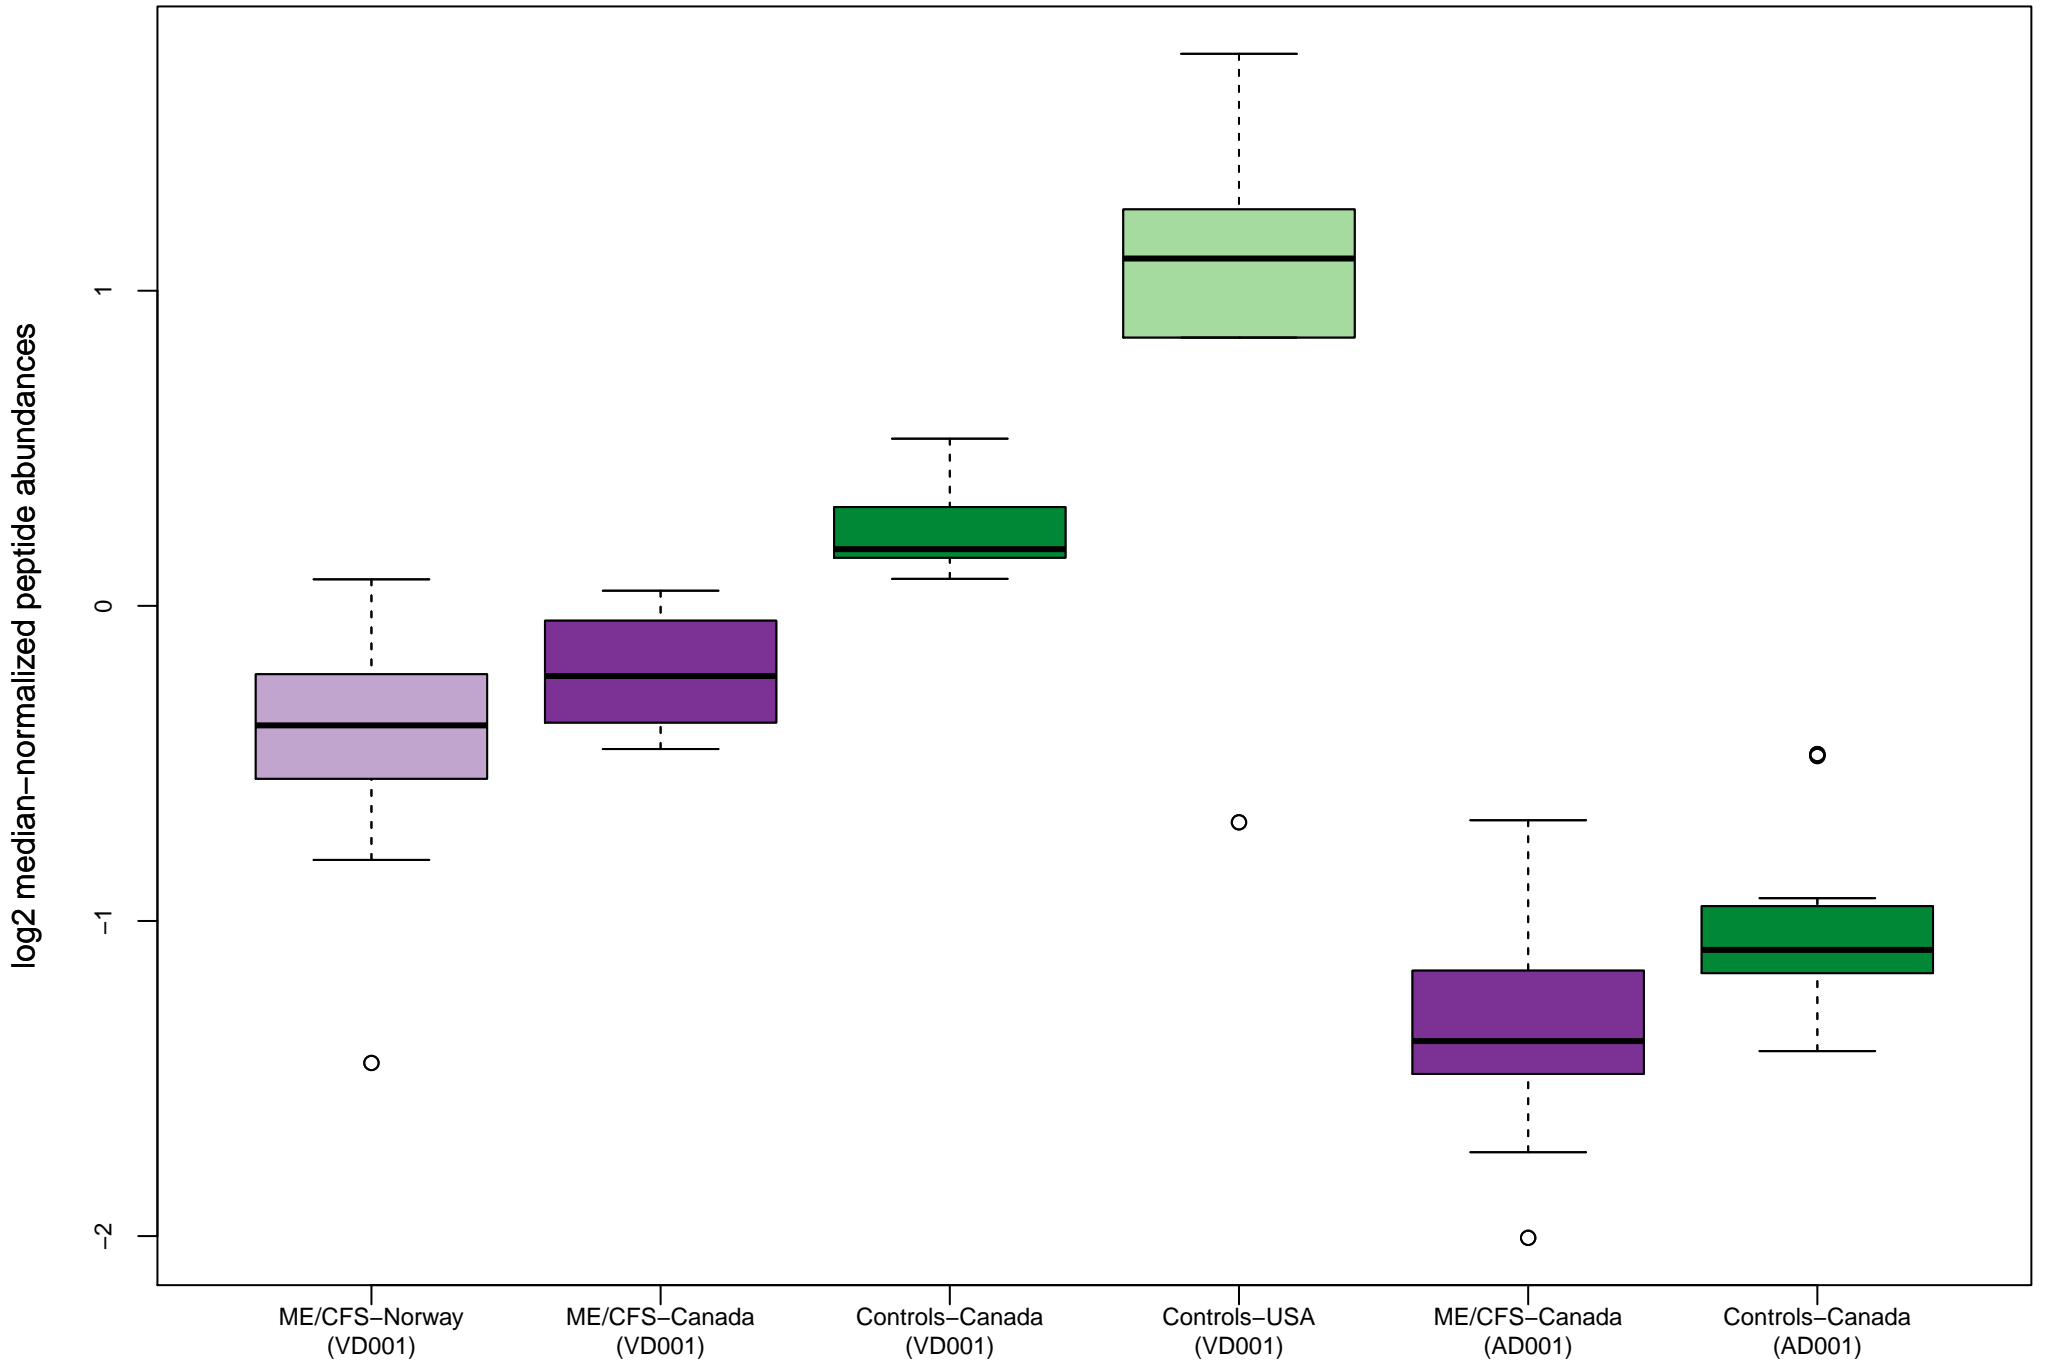

# EYPNLRVFWKVL

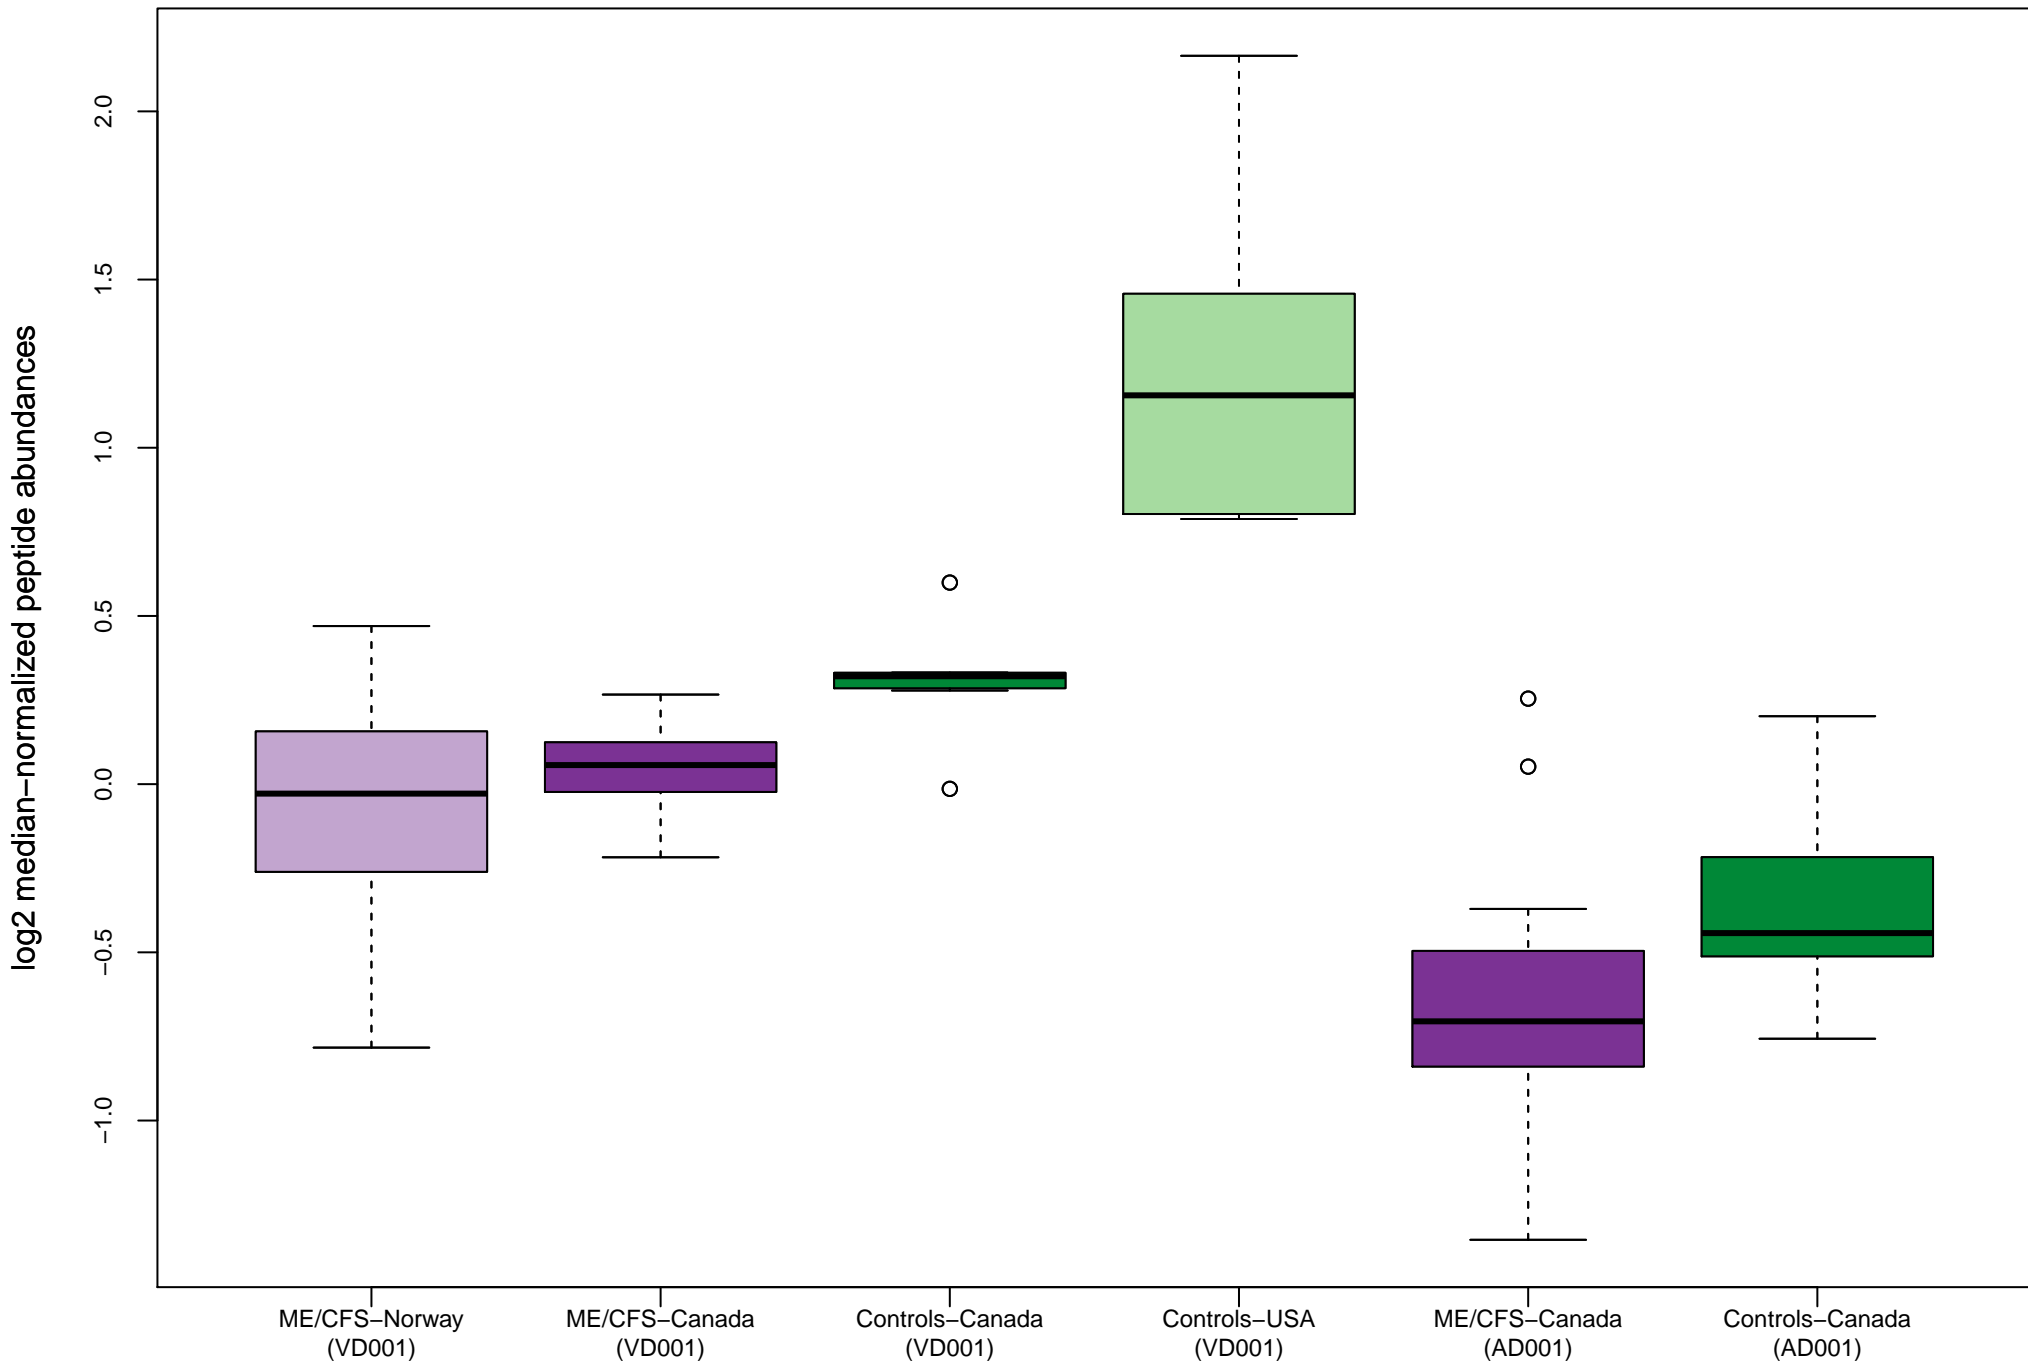

# FAKLEVAFYKGV

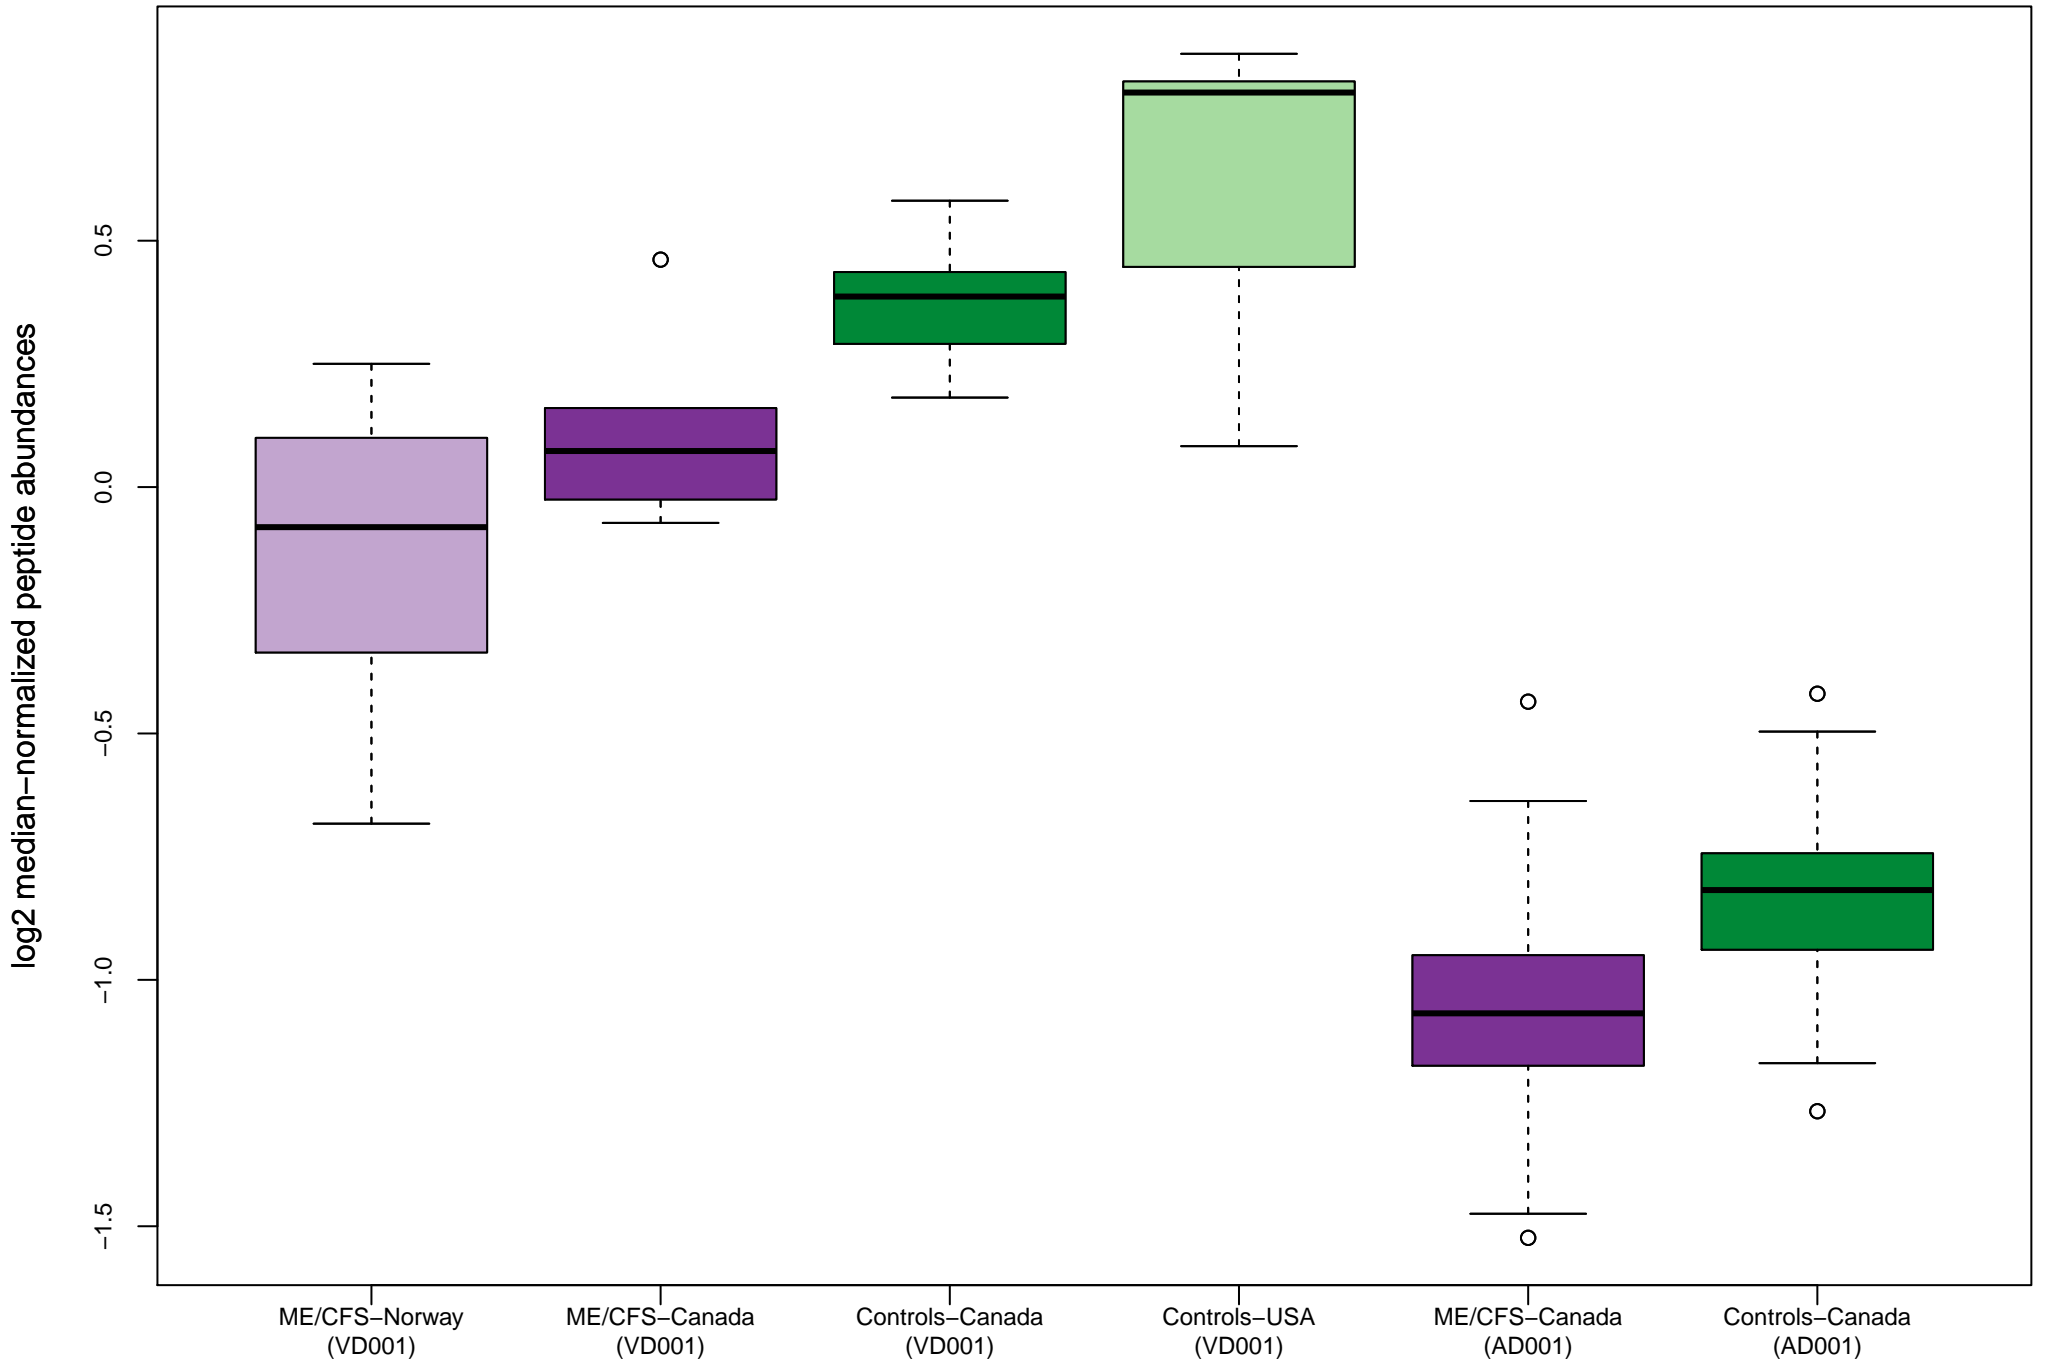



# FARFQRYSGVAL

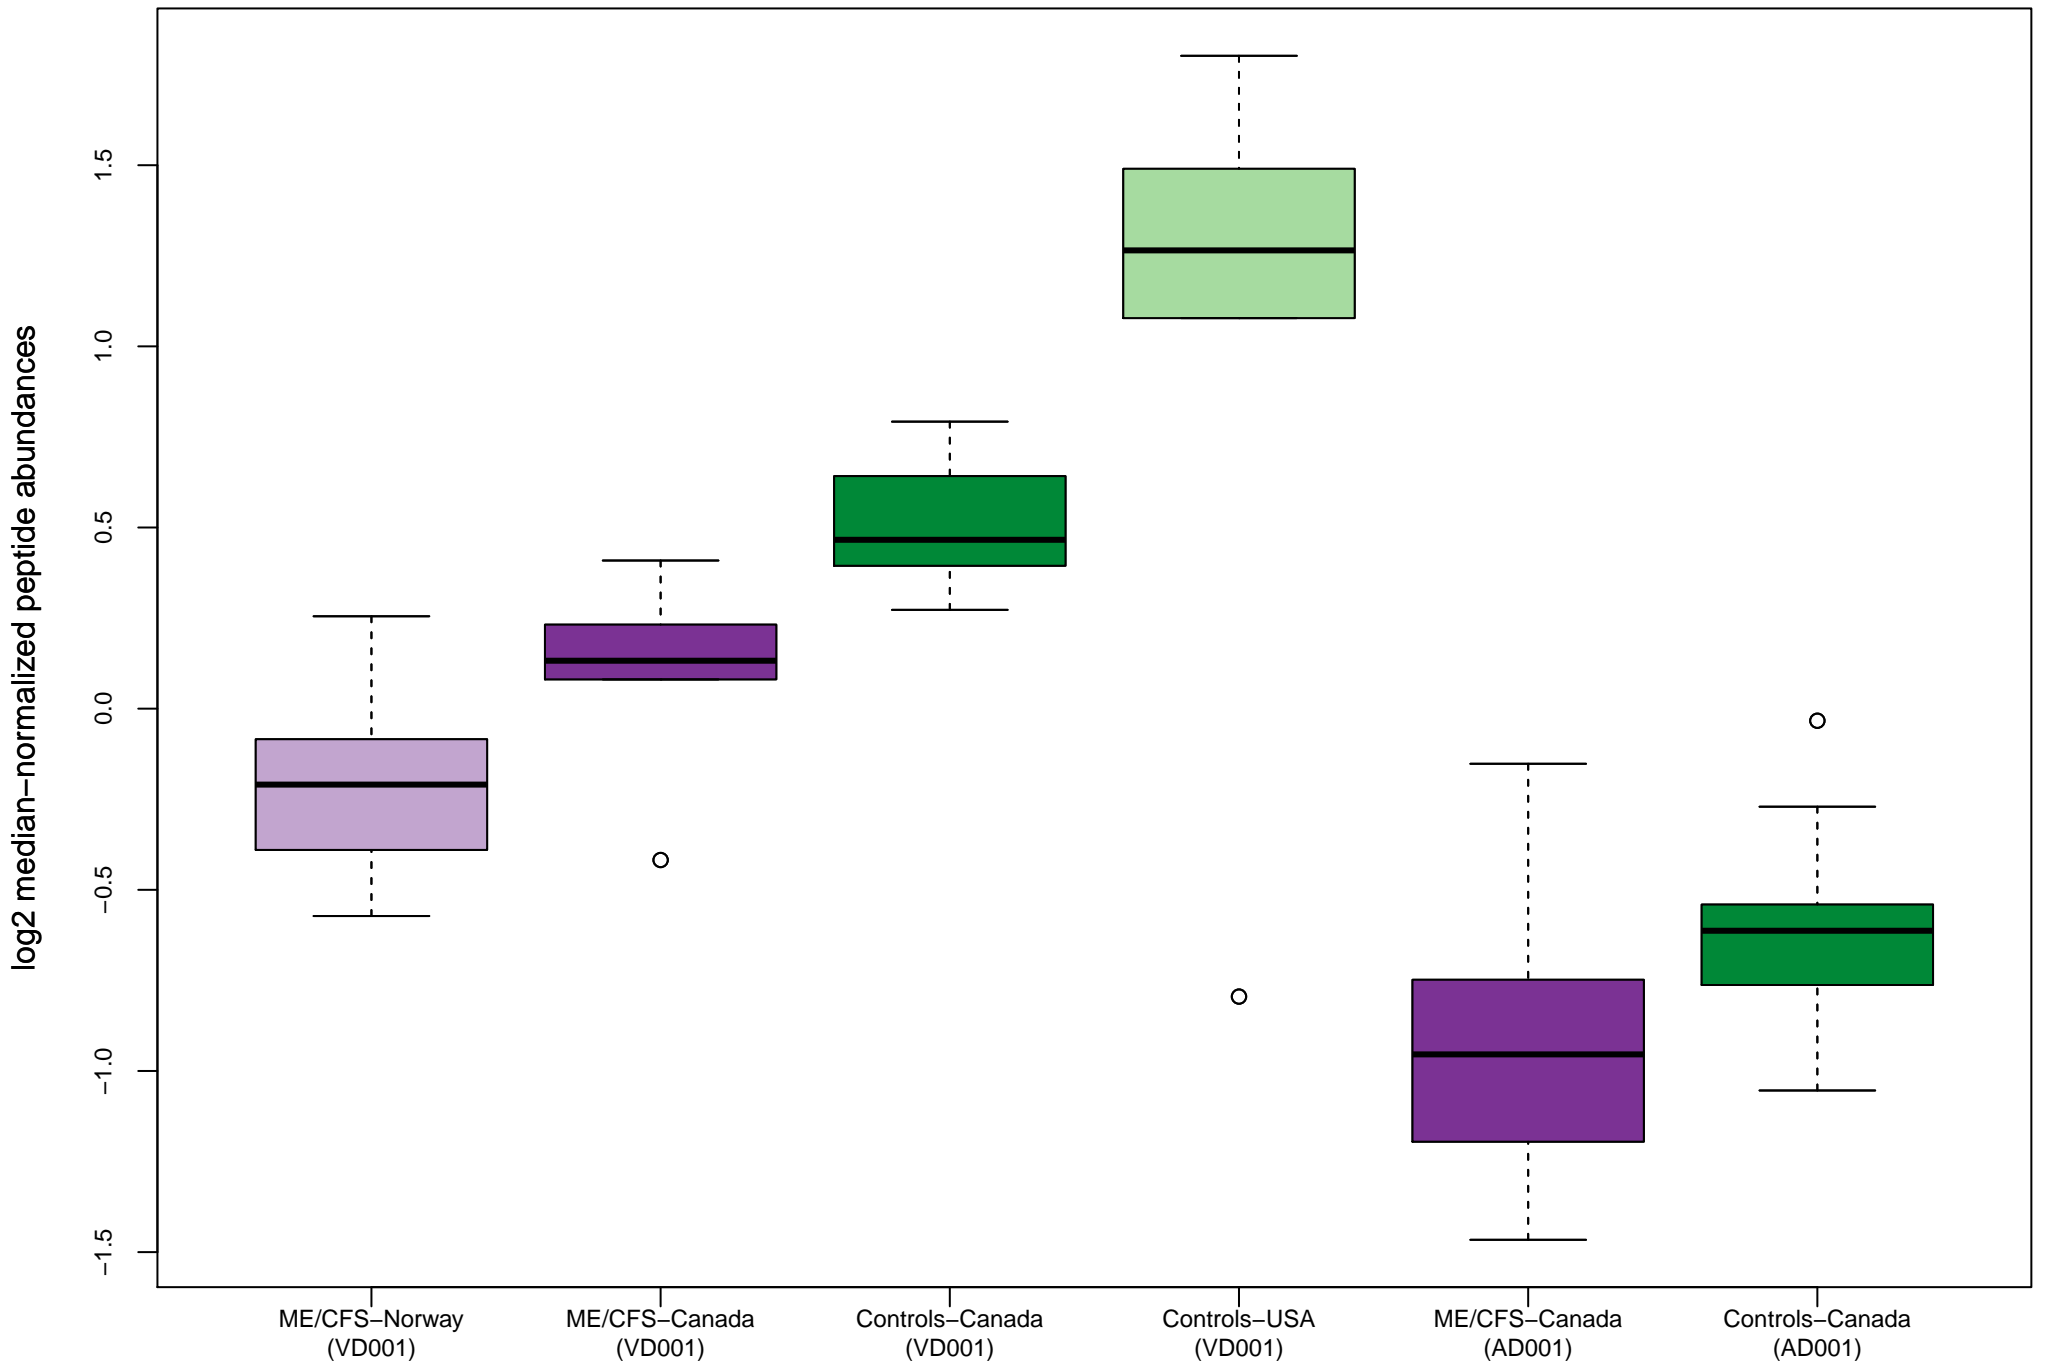

# FARPQRYSWVGL

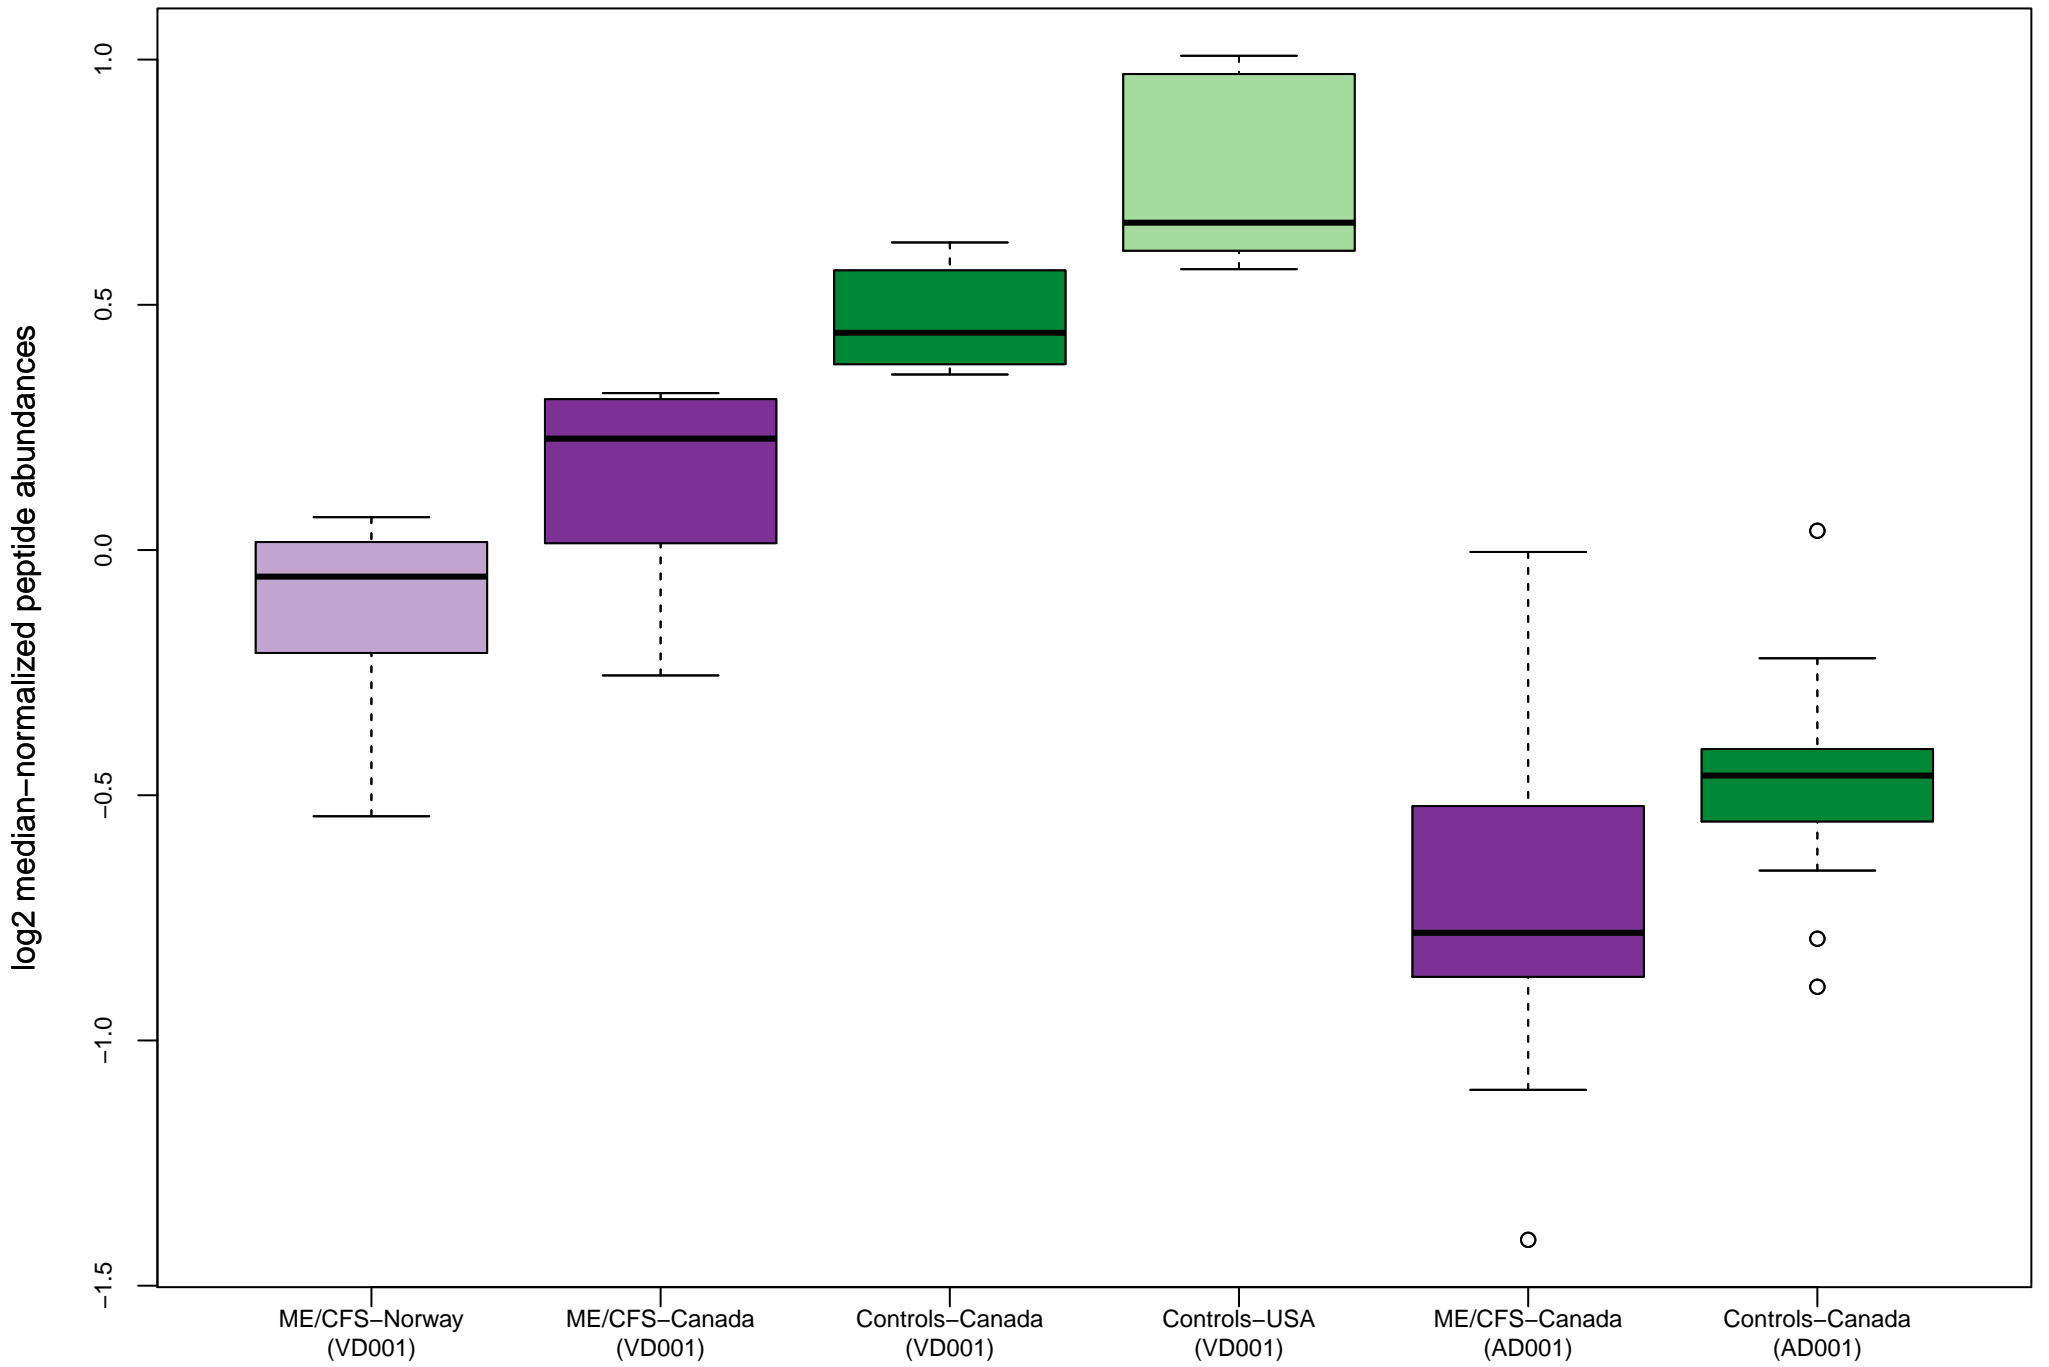

# FEPRYVALRRYA

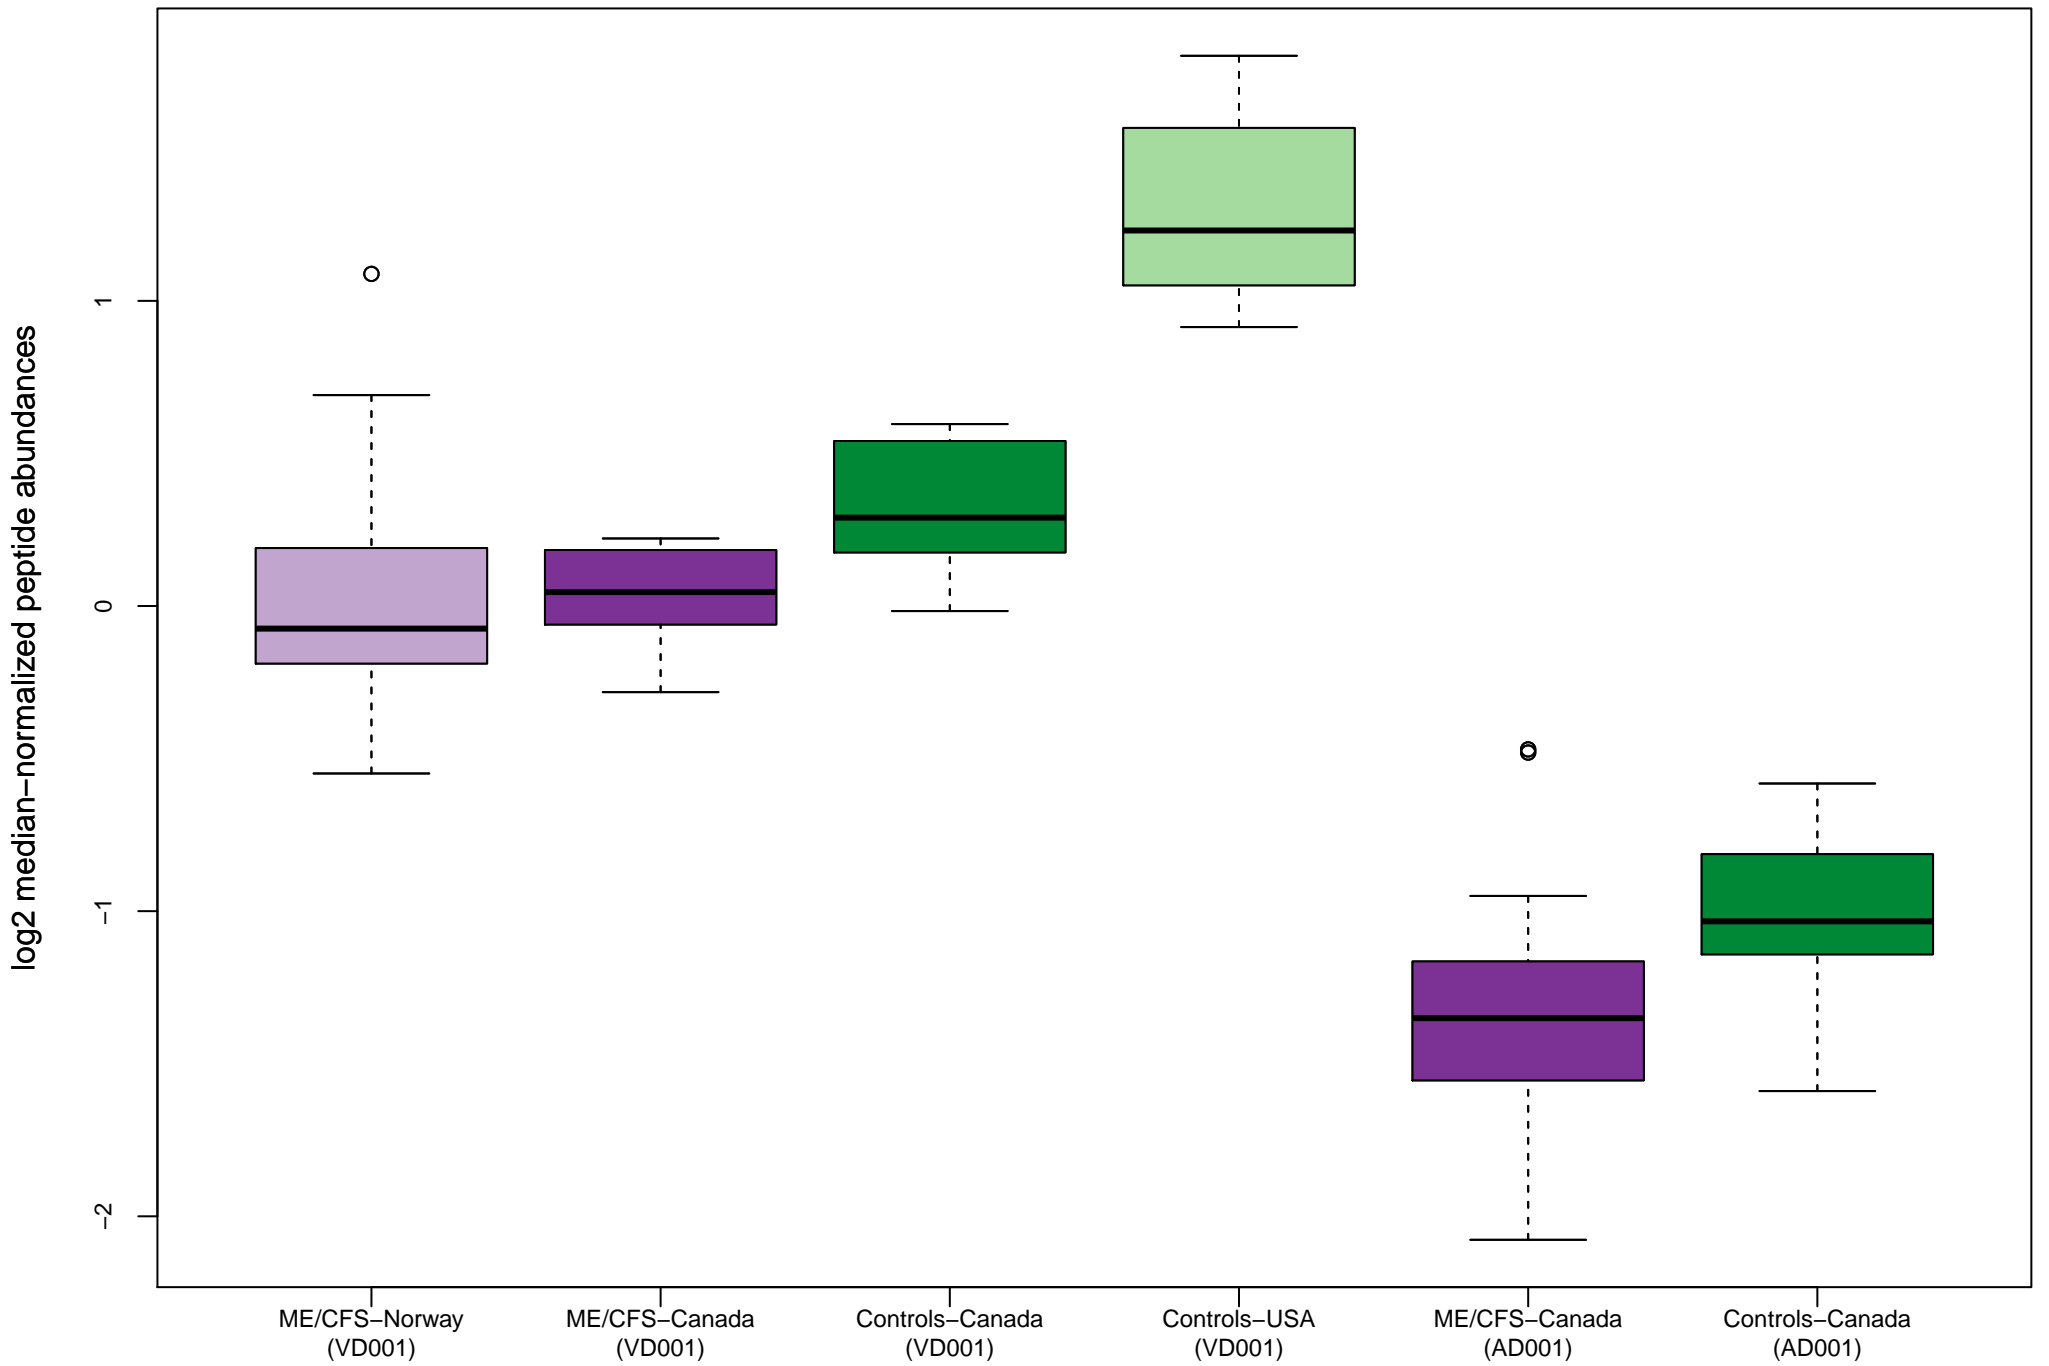

# FFRAVAYWKHVL

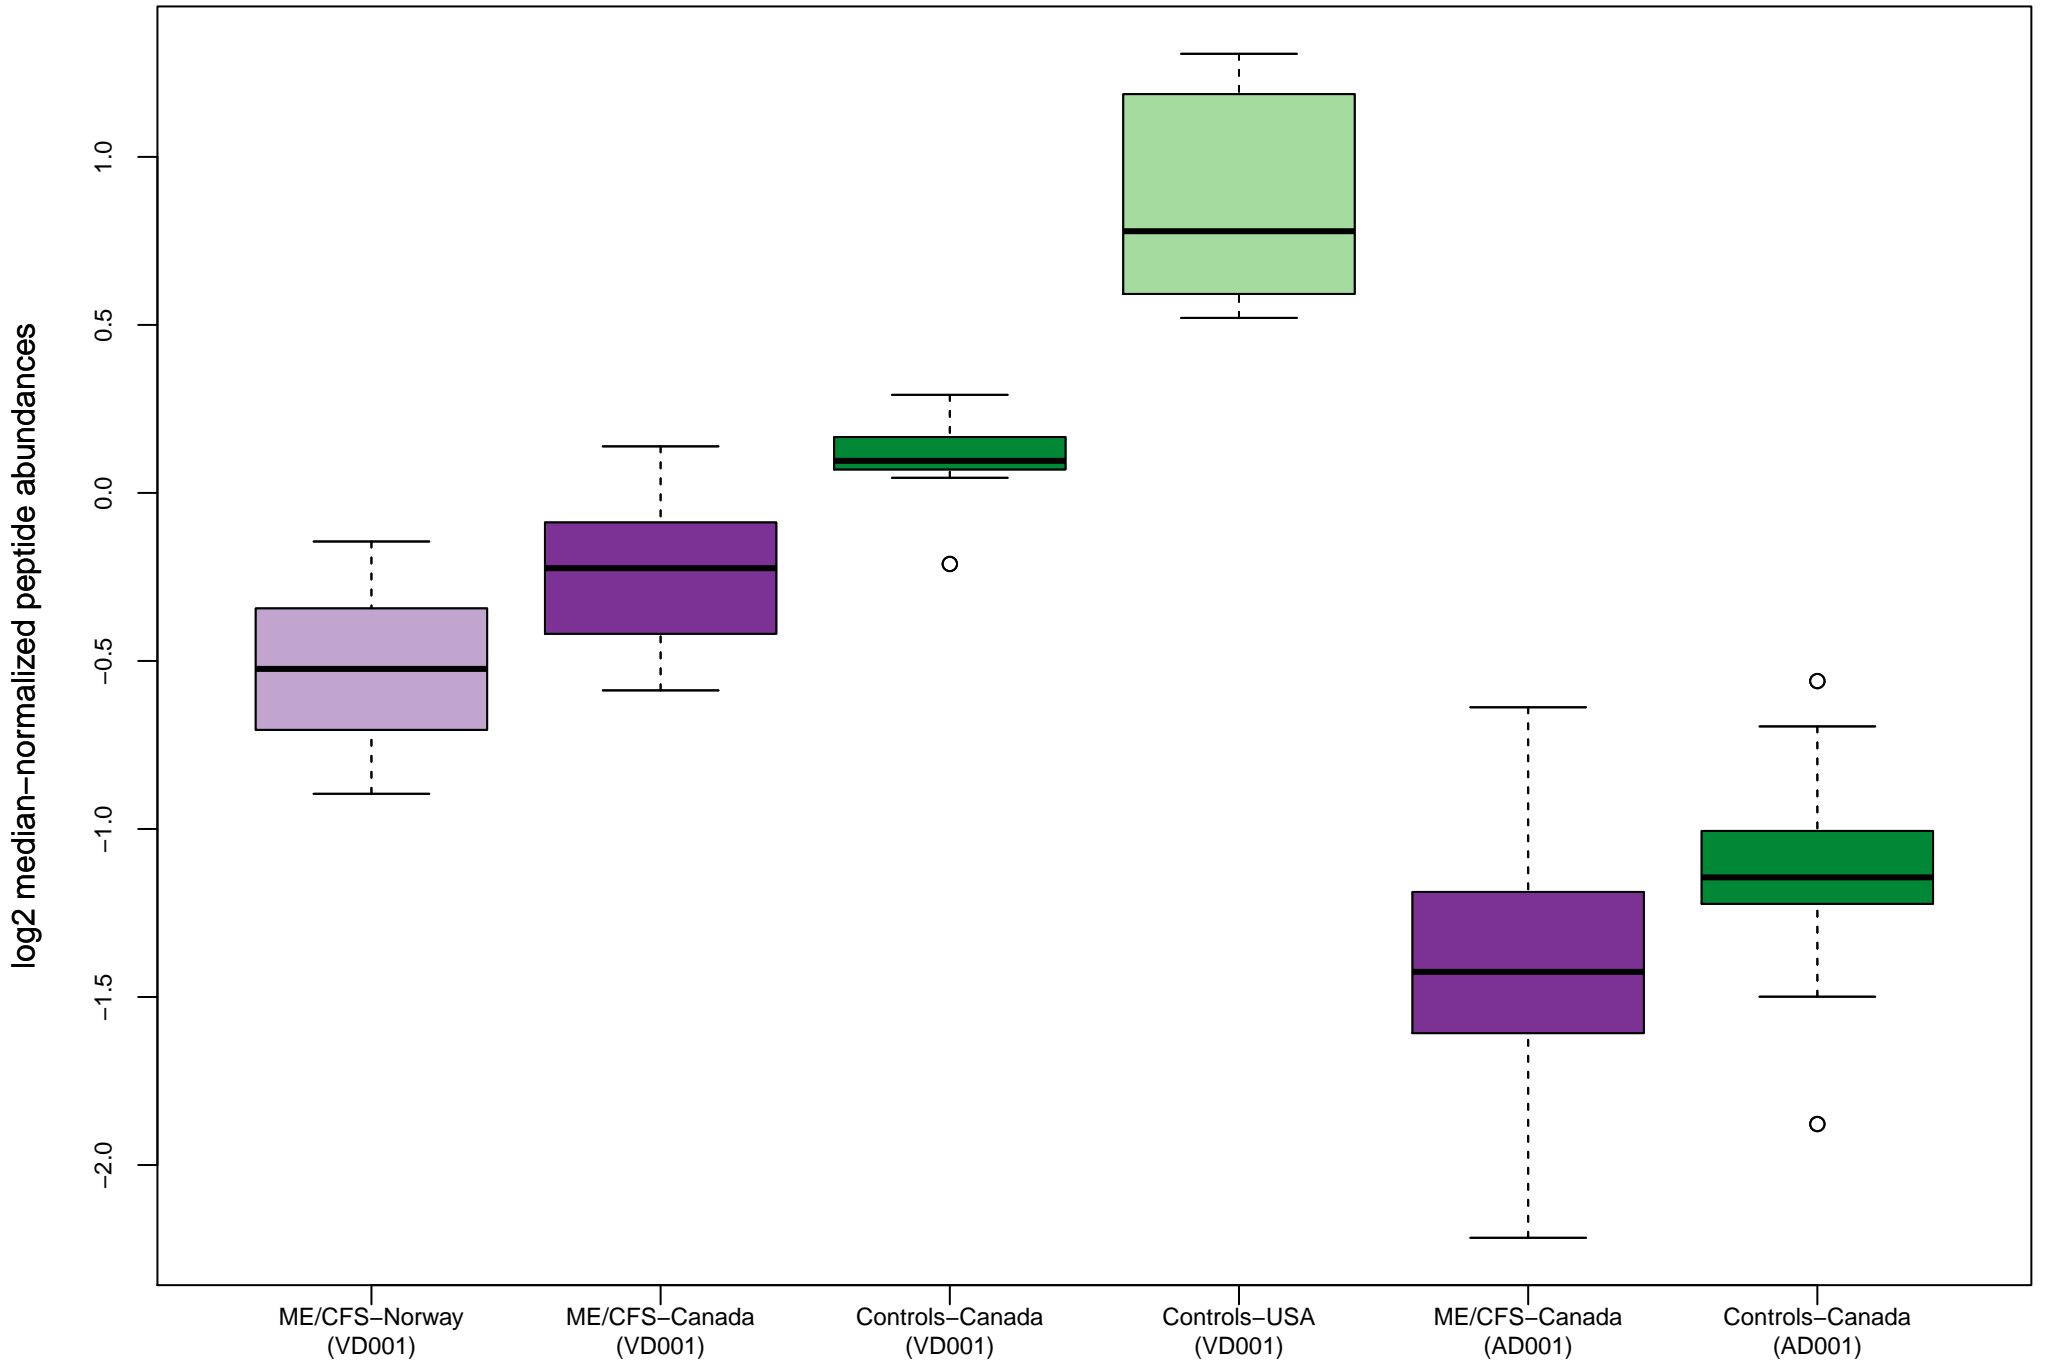

# FHLYSRKSFVAL

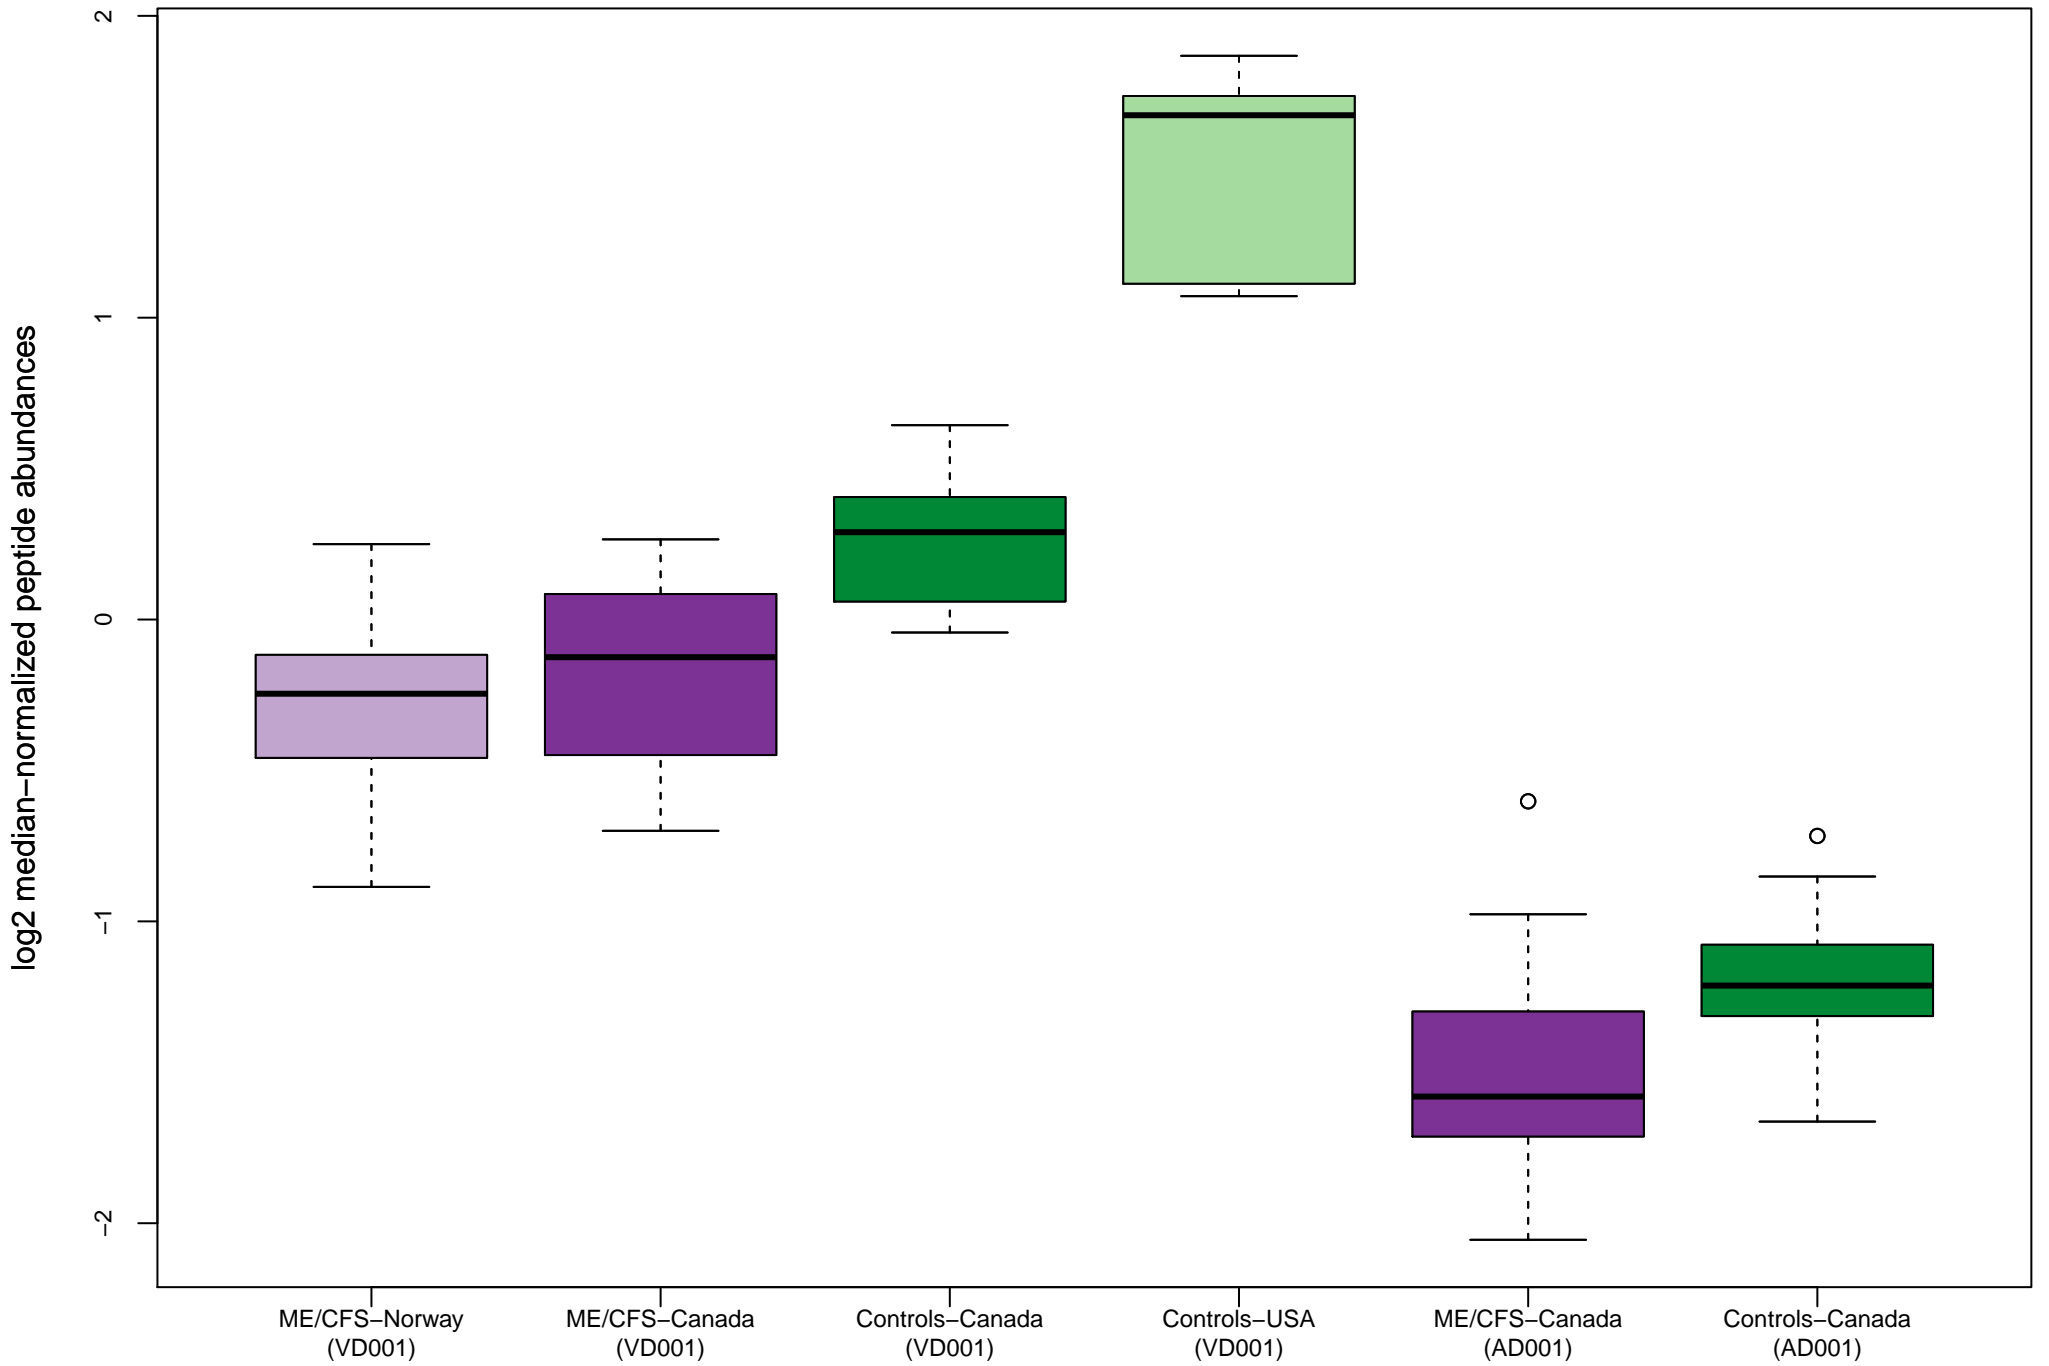

**FKWSPYSVLSLG**

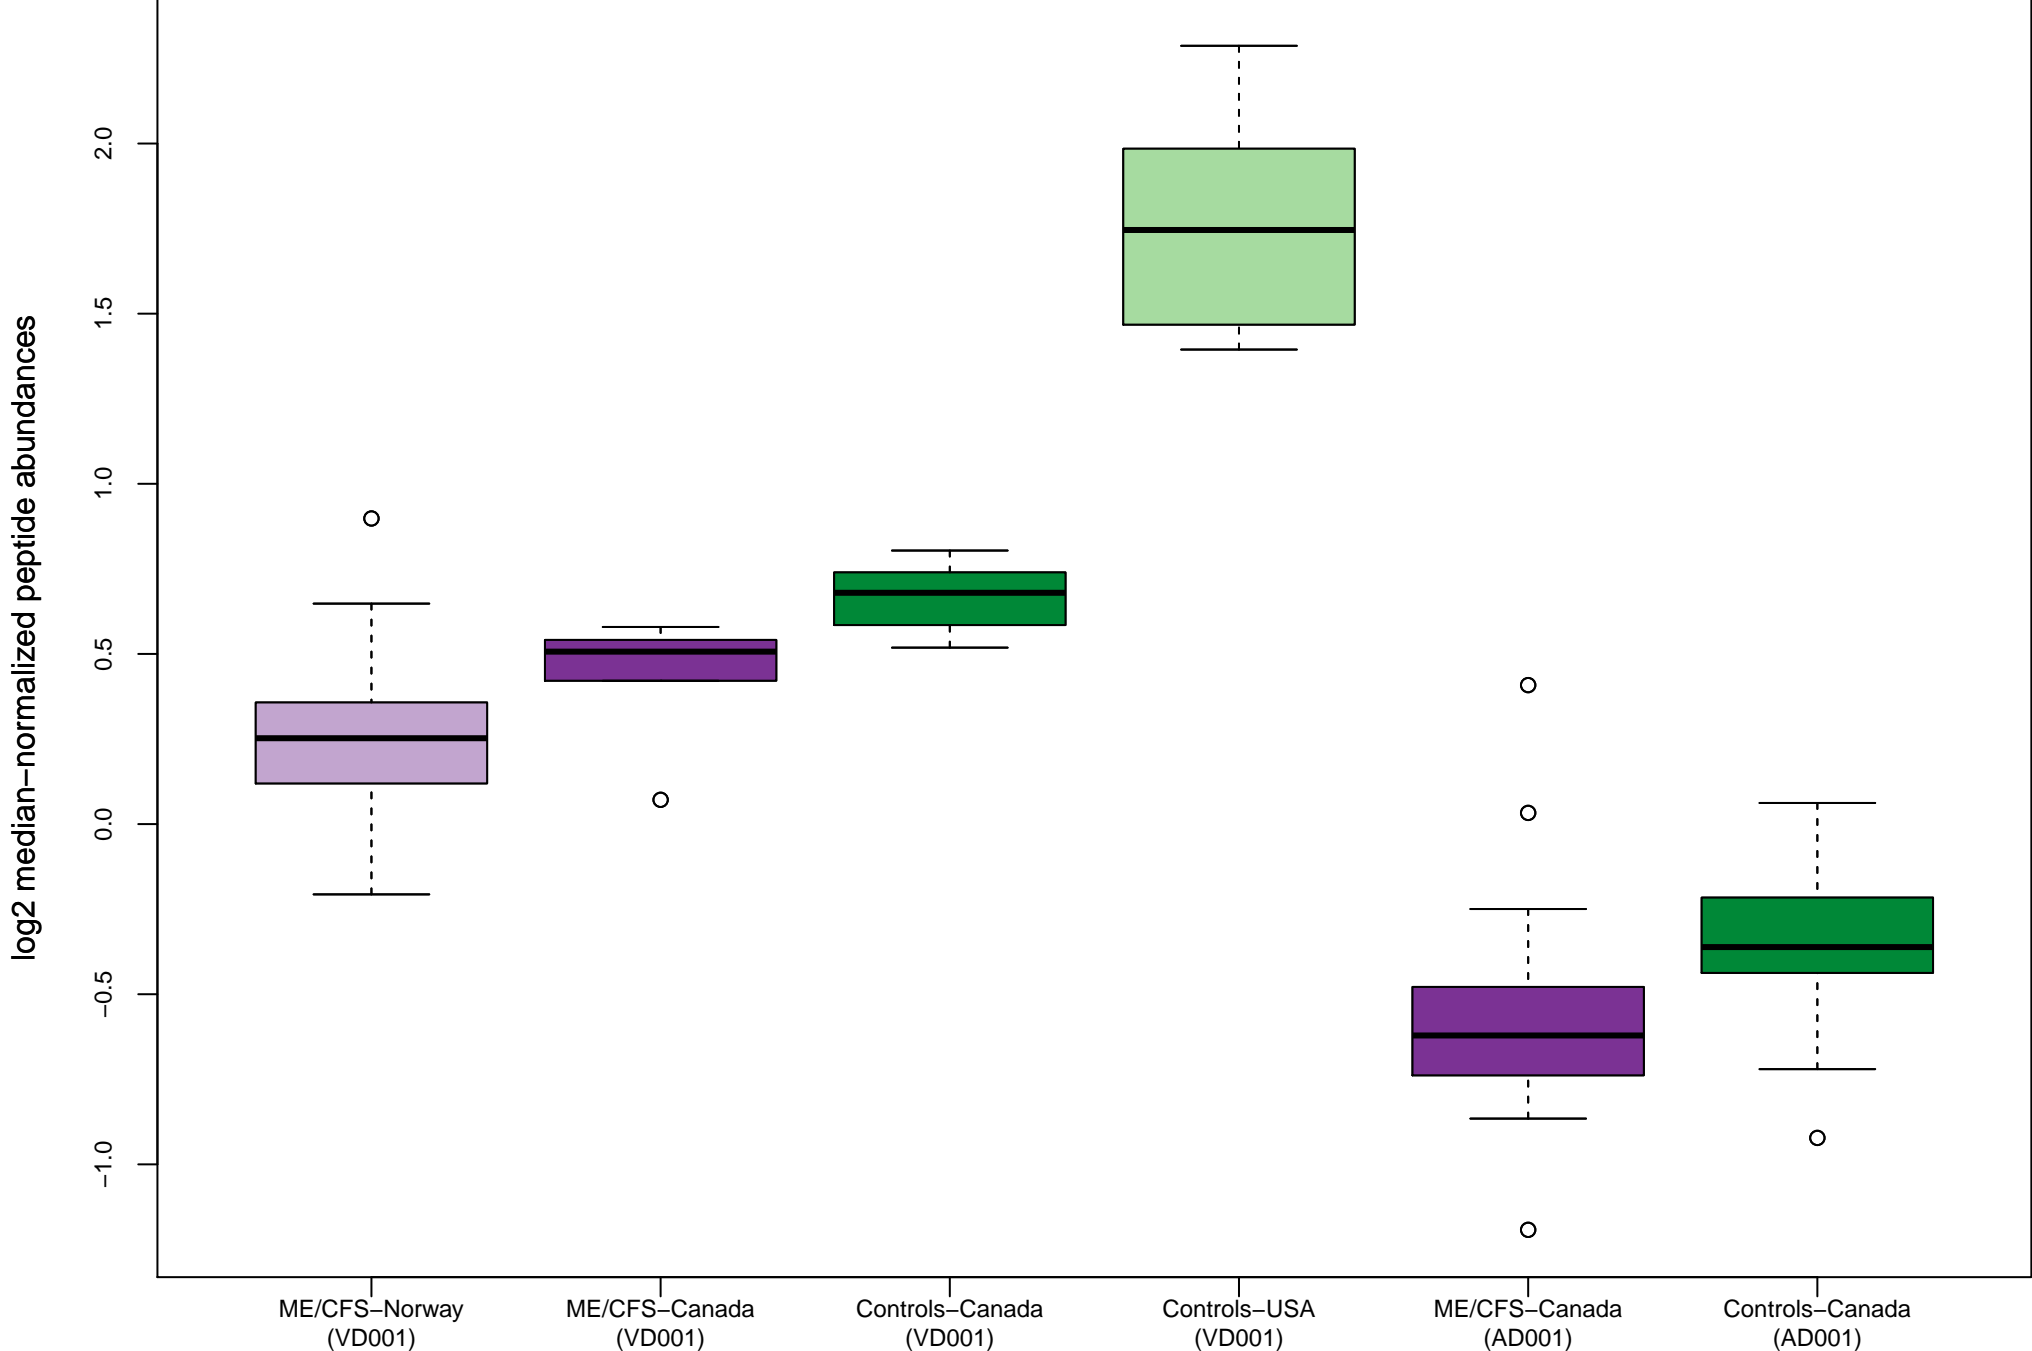

# FPLYYVGRKHSL

log2 median-normalized peptide abundances

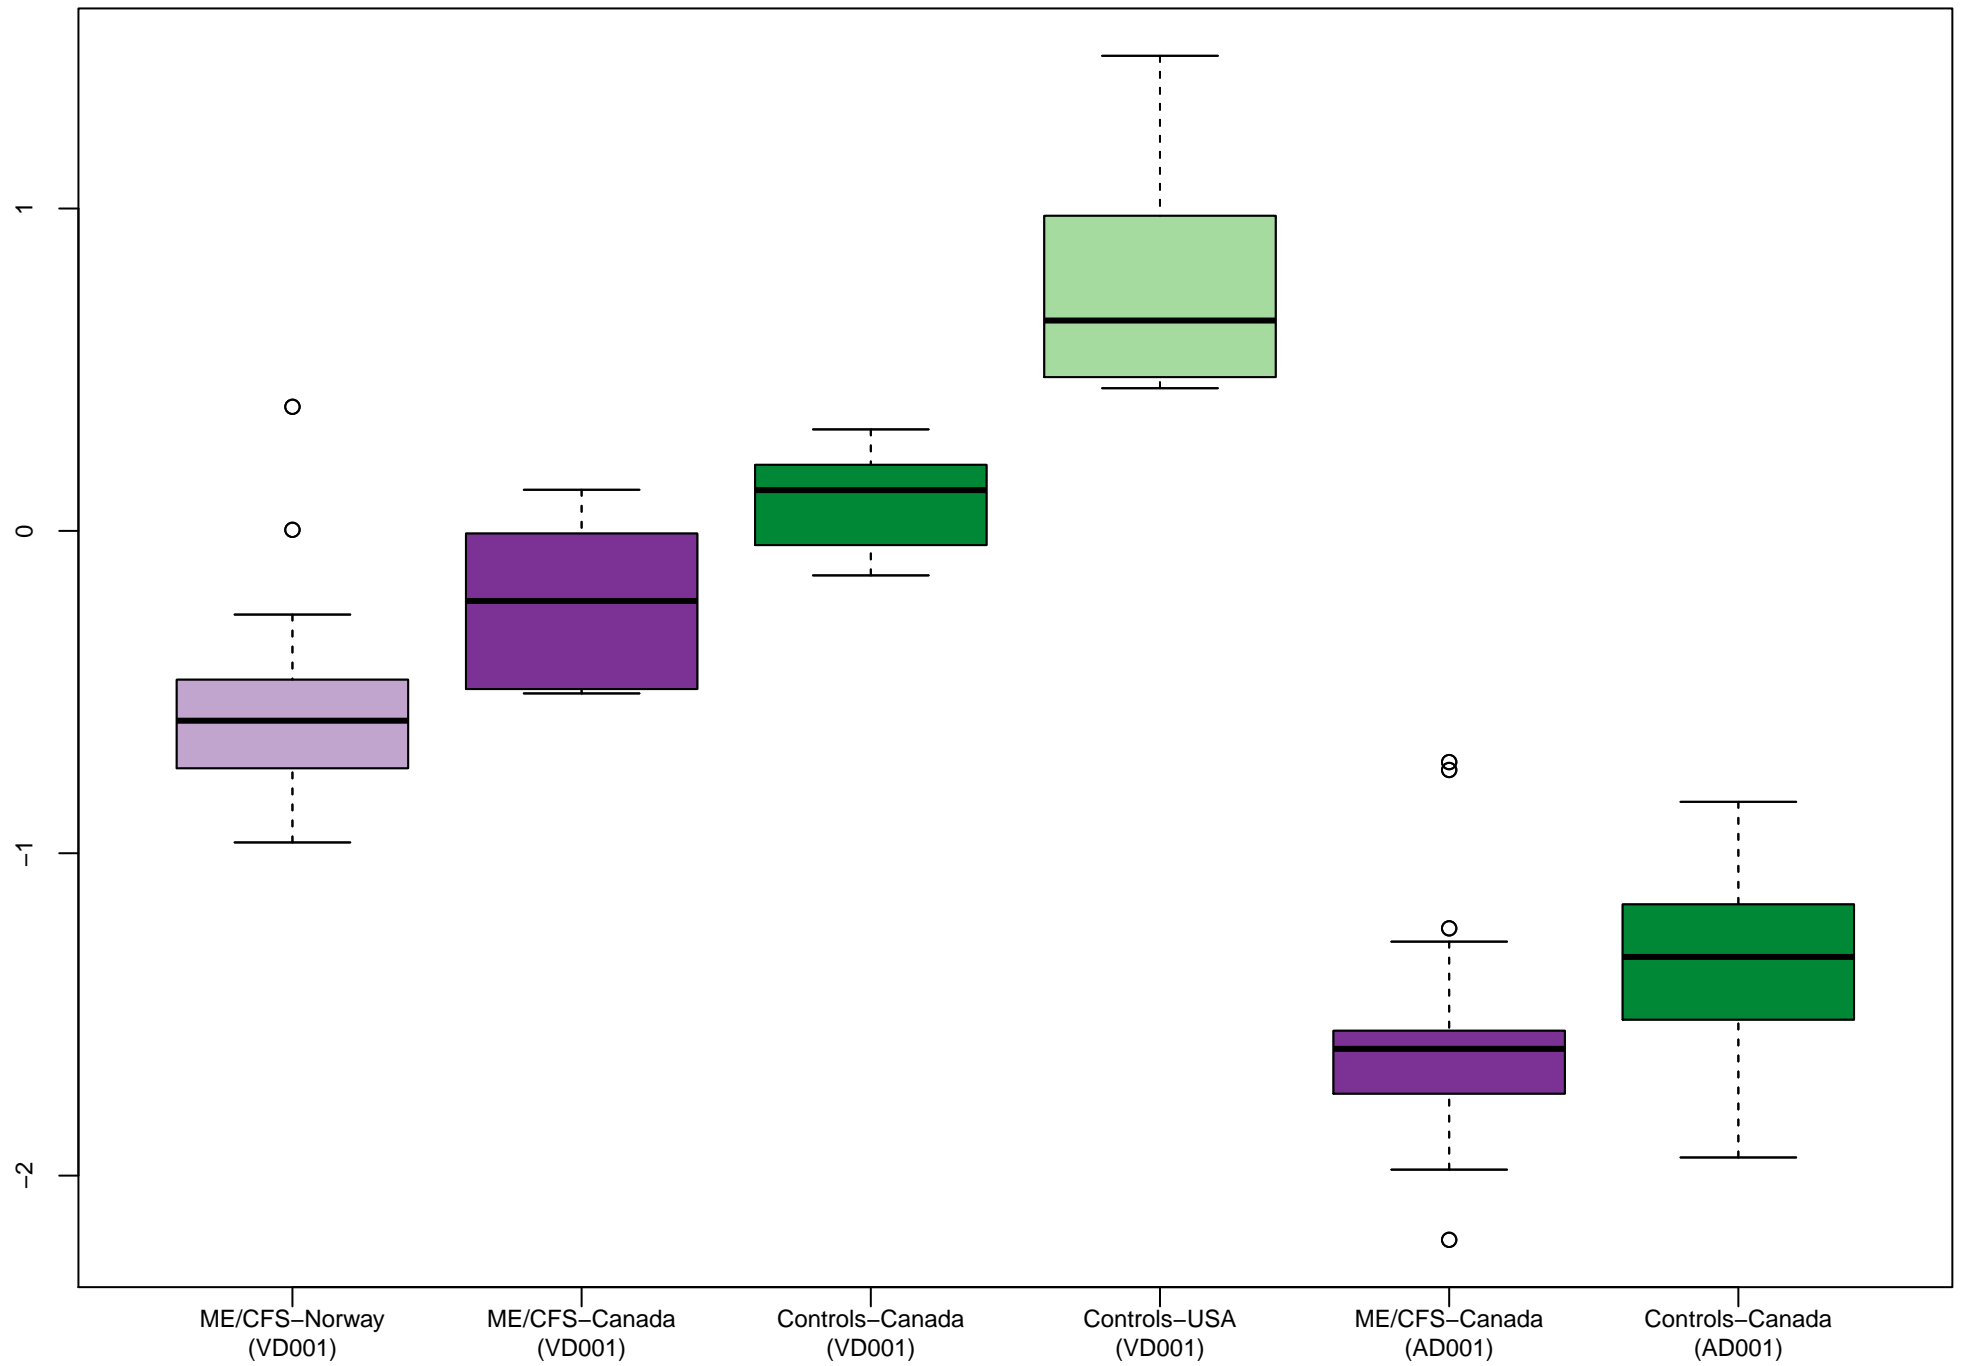

# FPPYFRWSNLGL

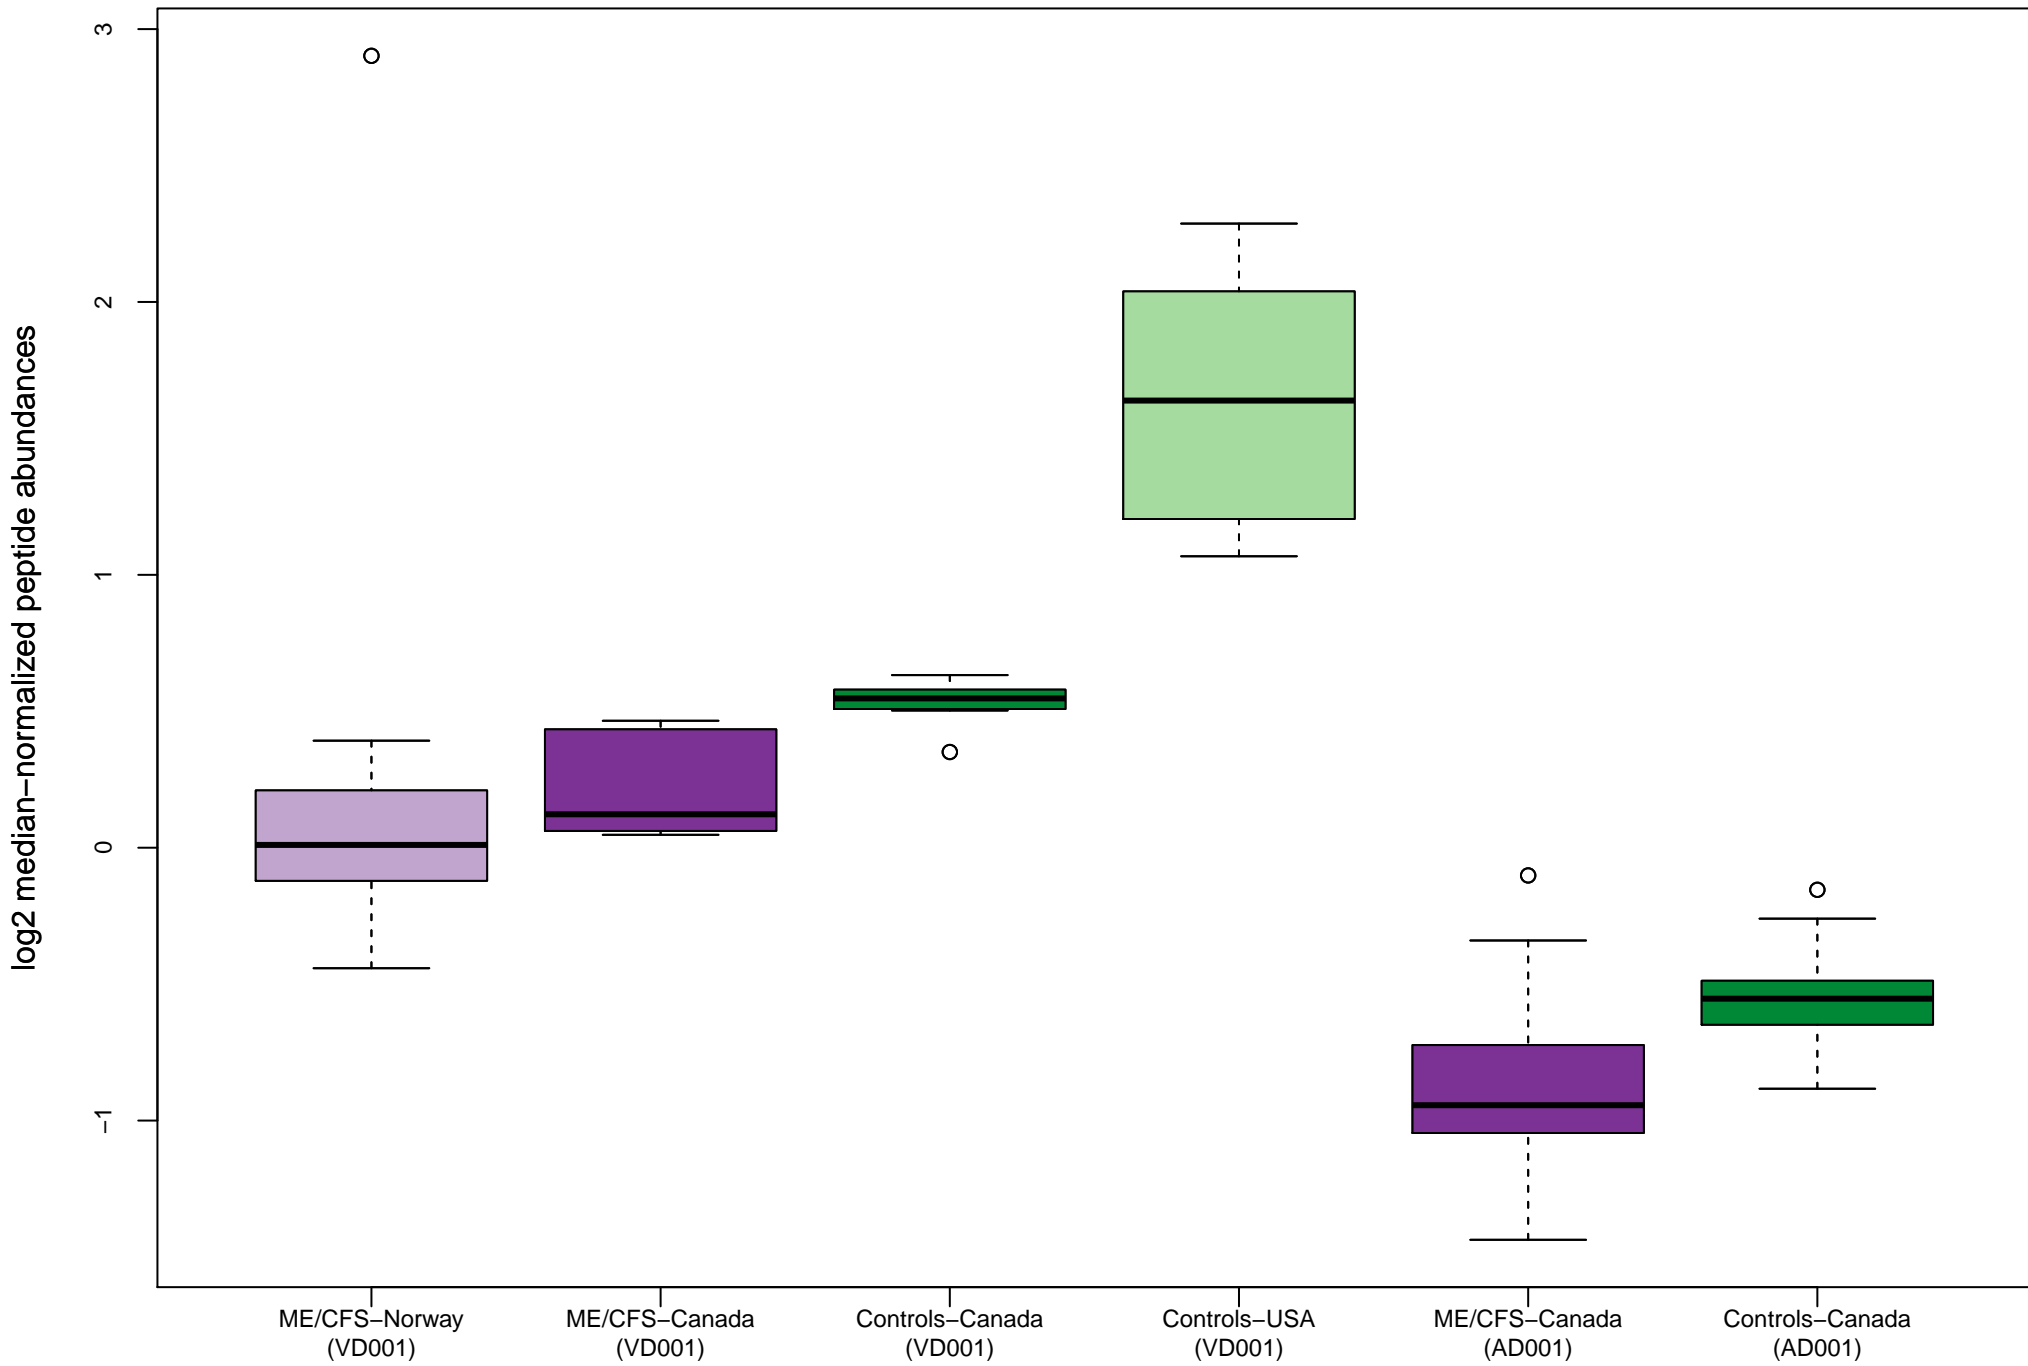



# FPRFLSFRYNVL

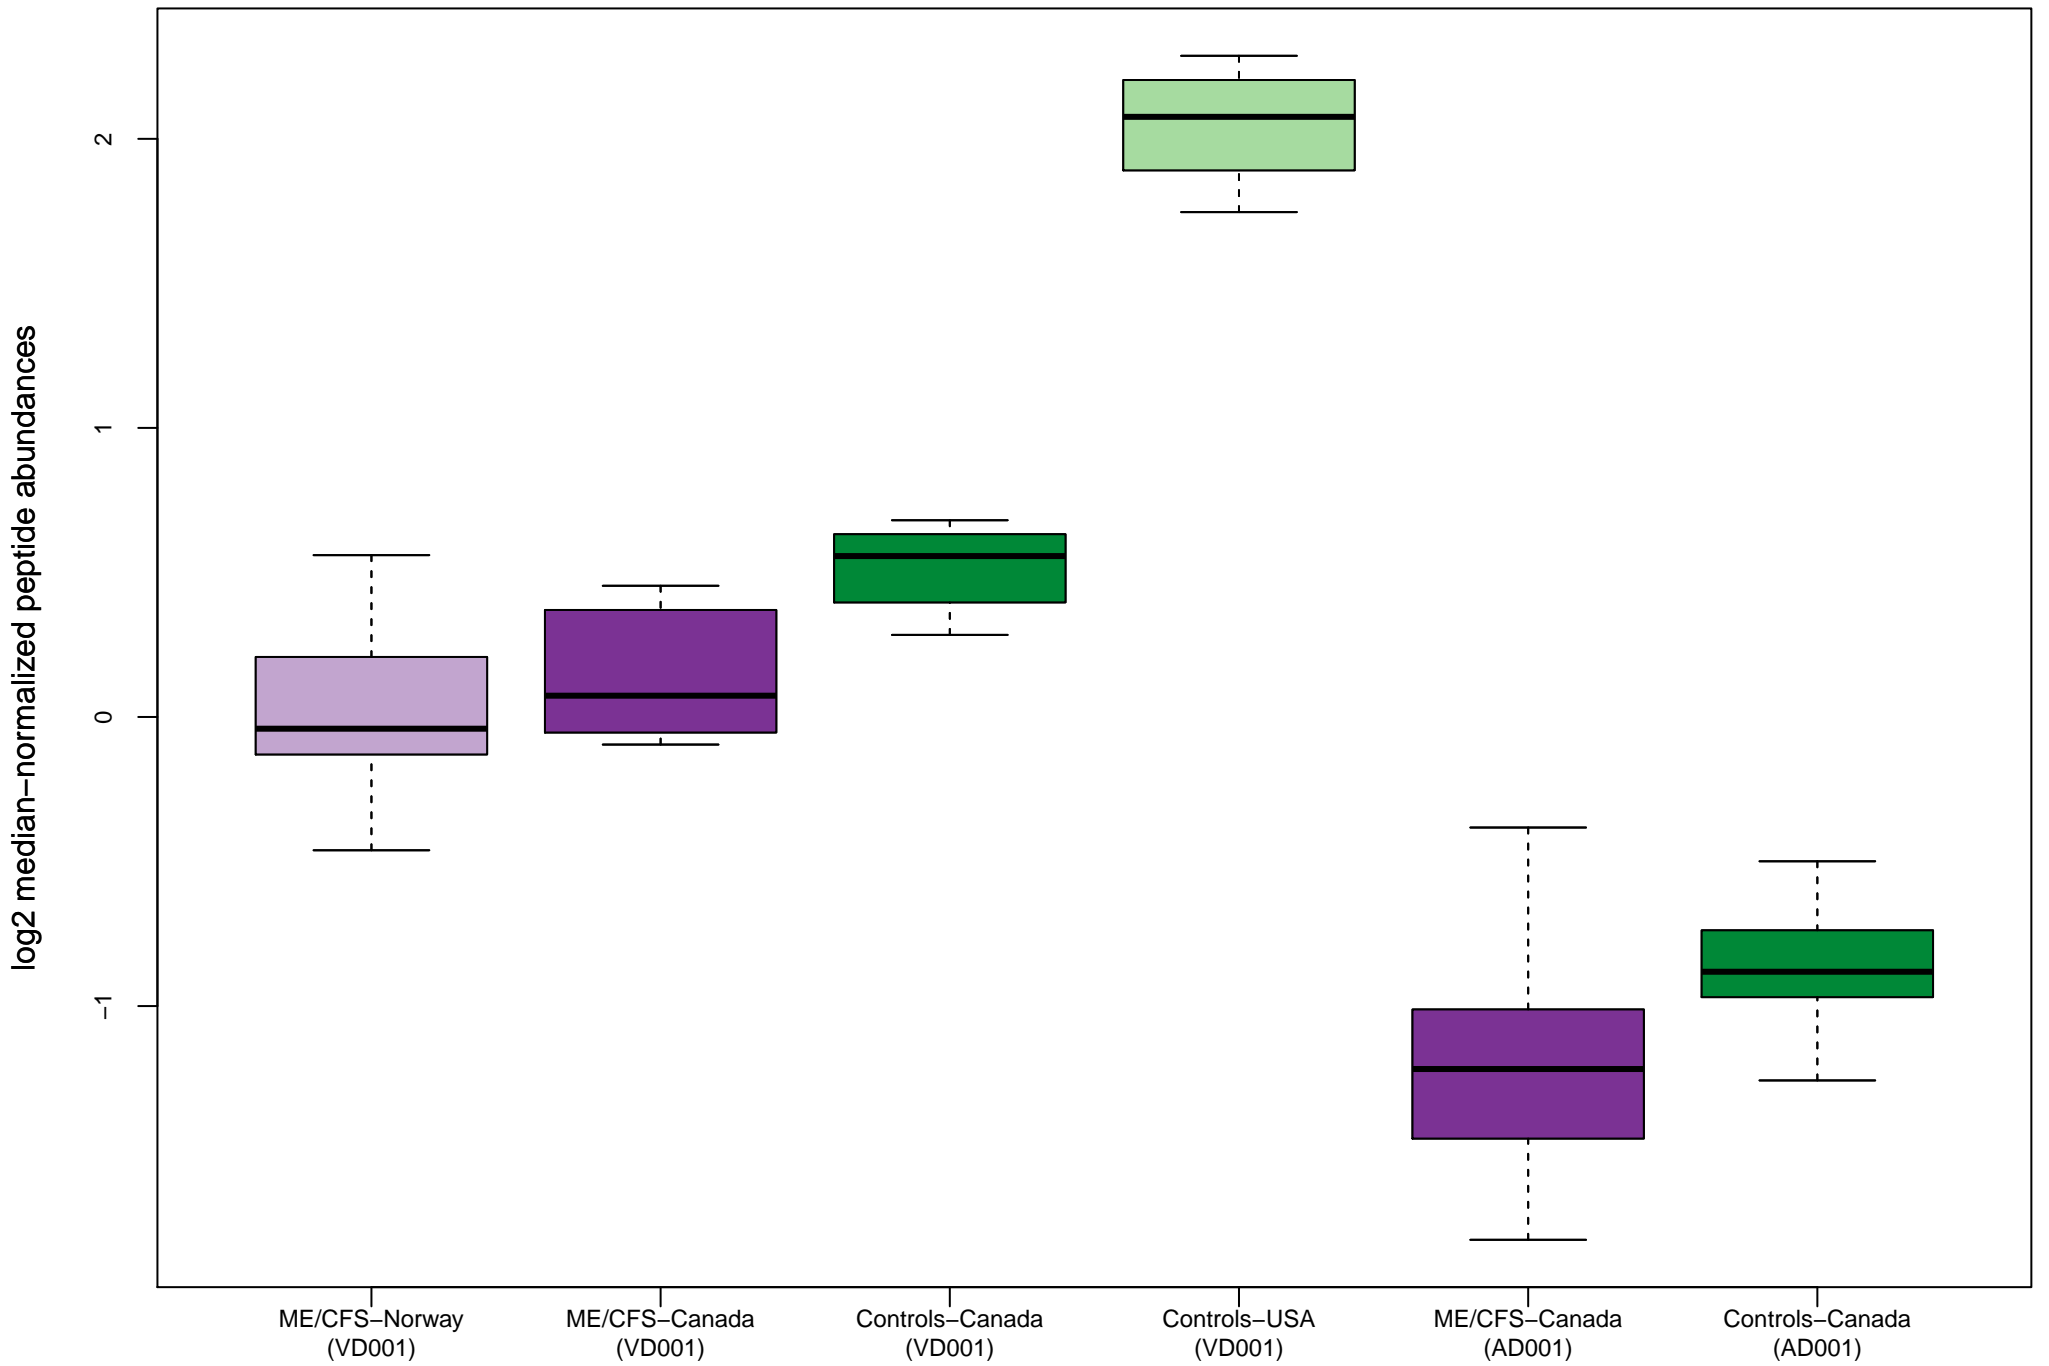

# FQPYFARYALSG

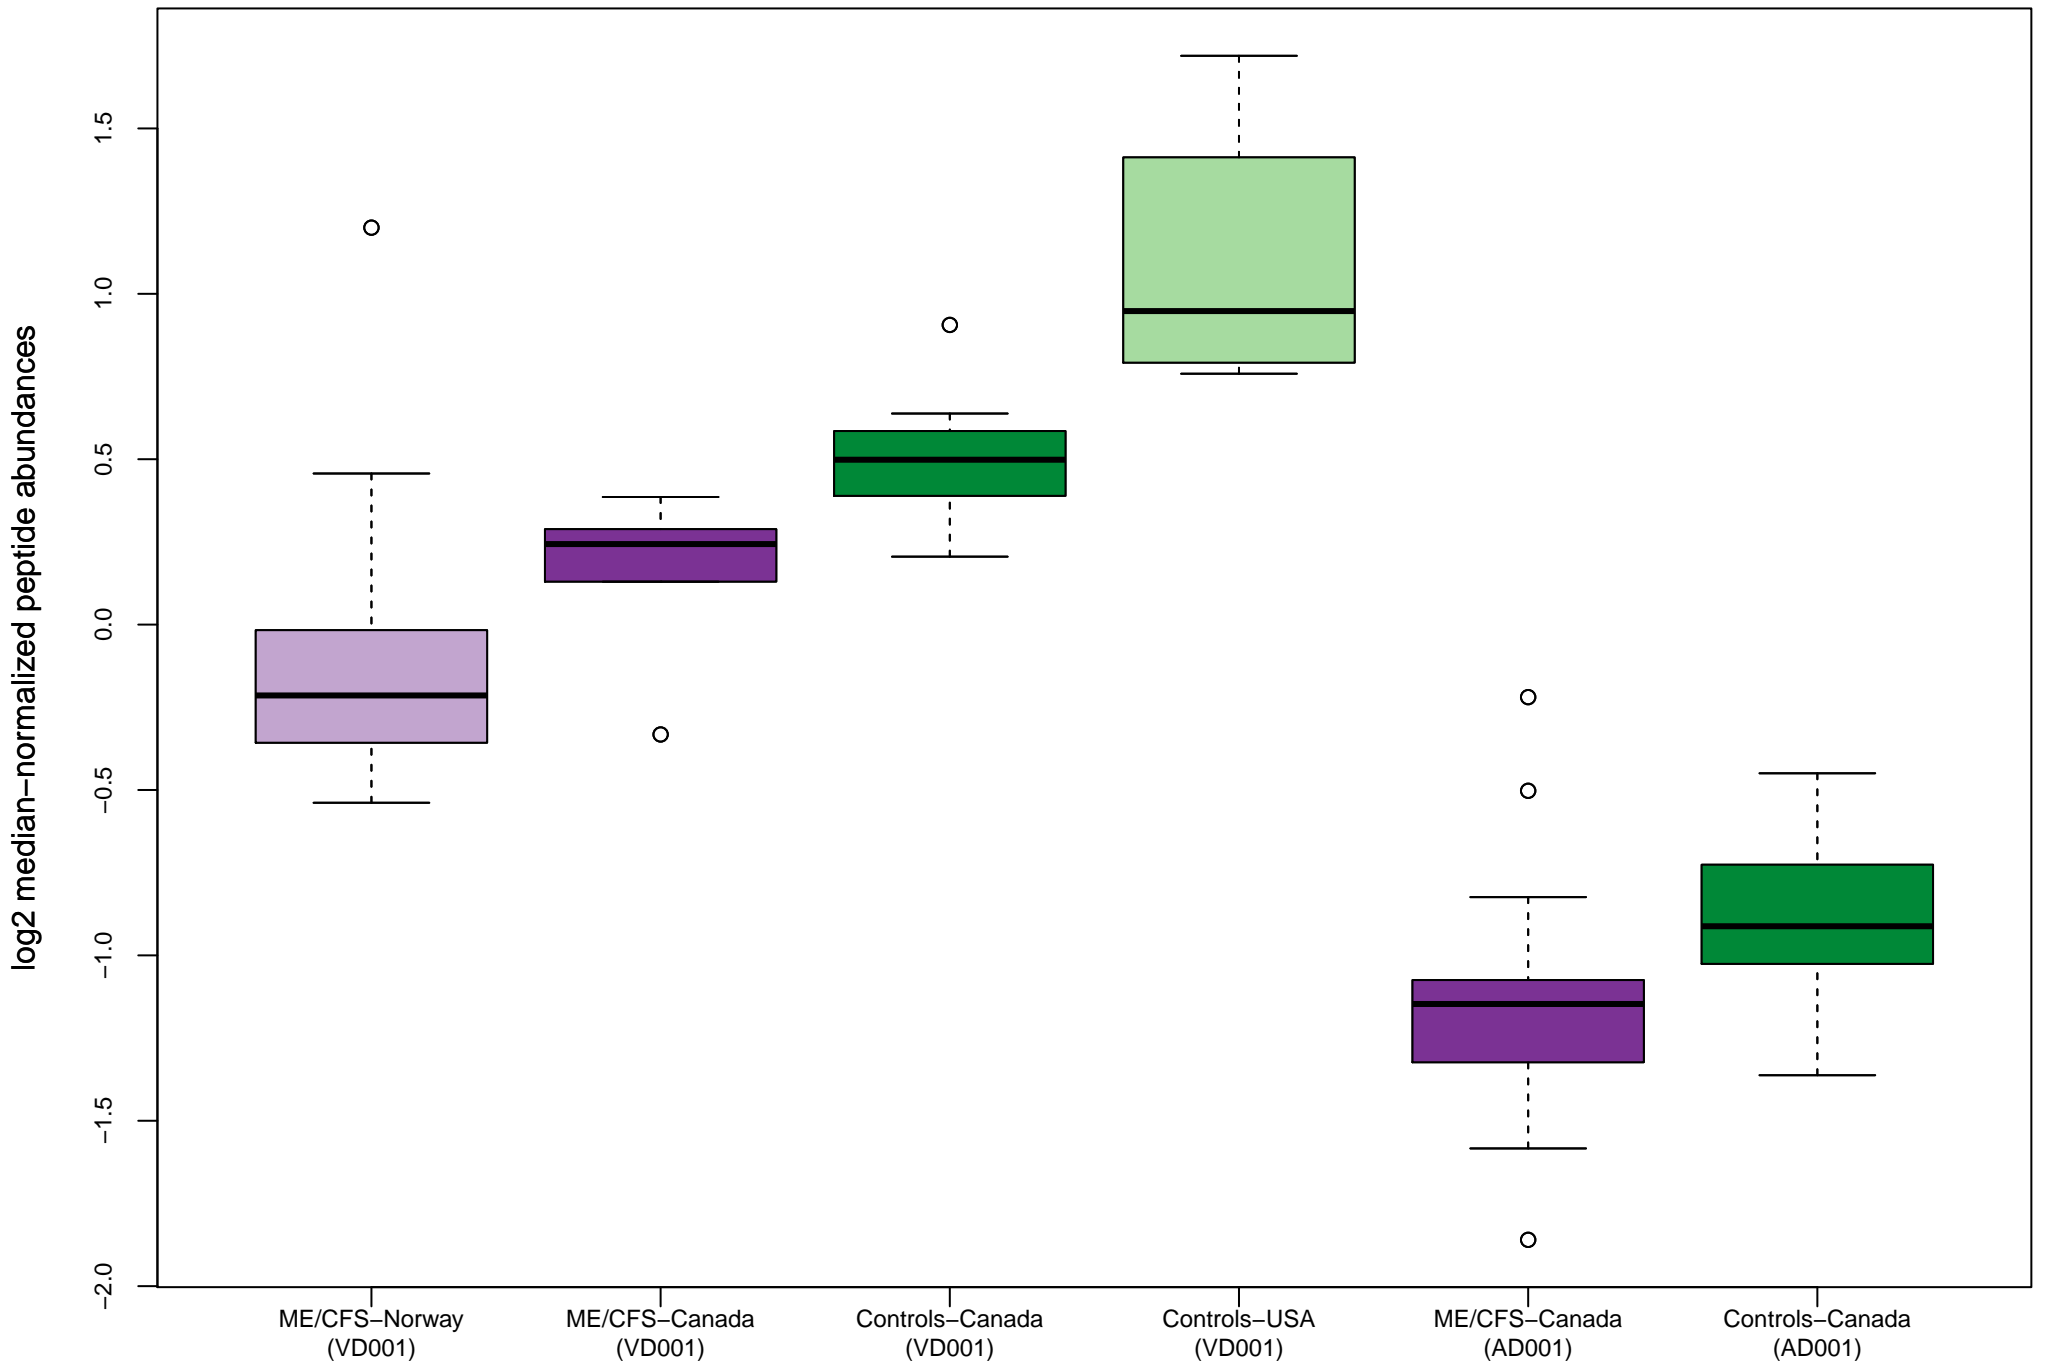

# FQVRGWVLGVSG

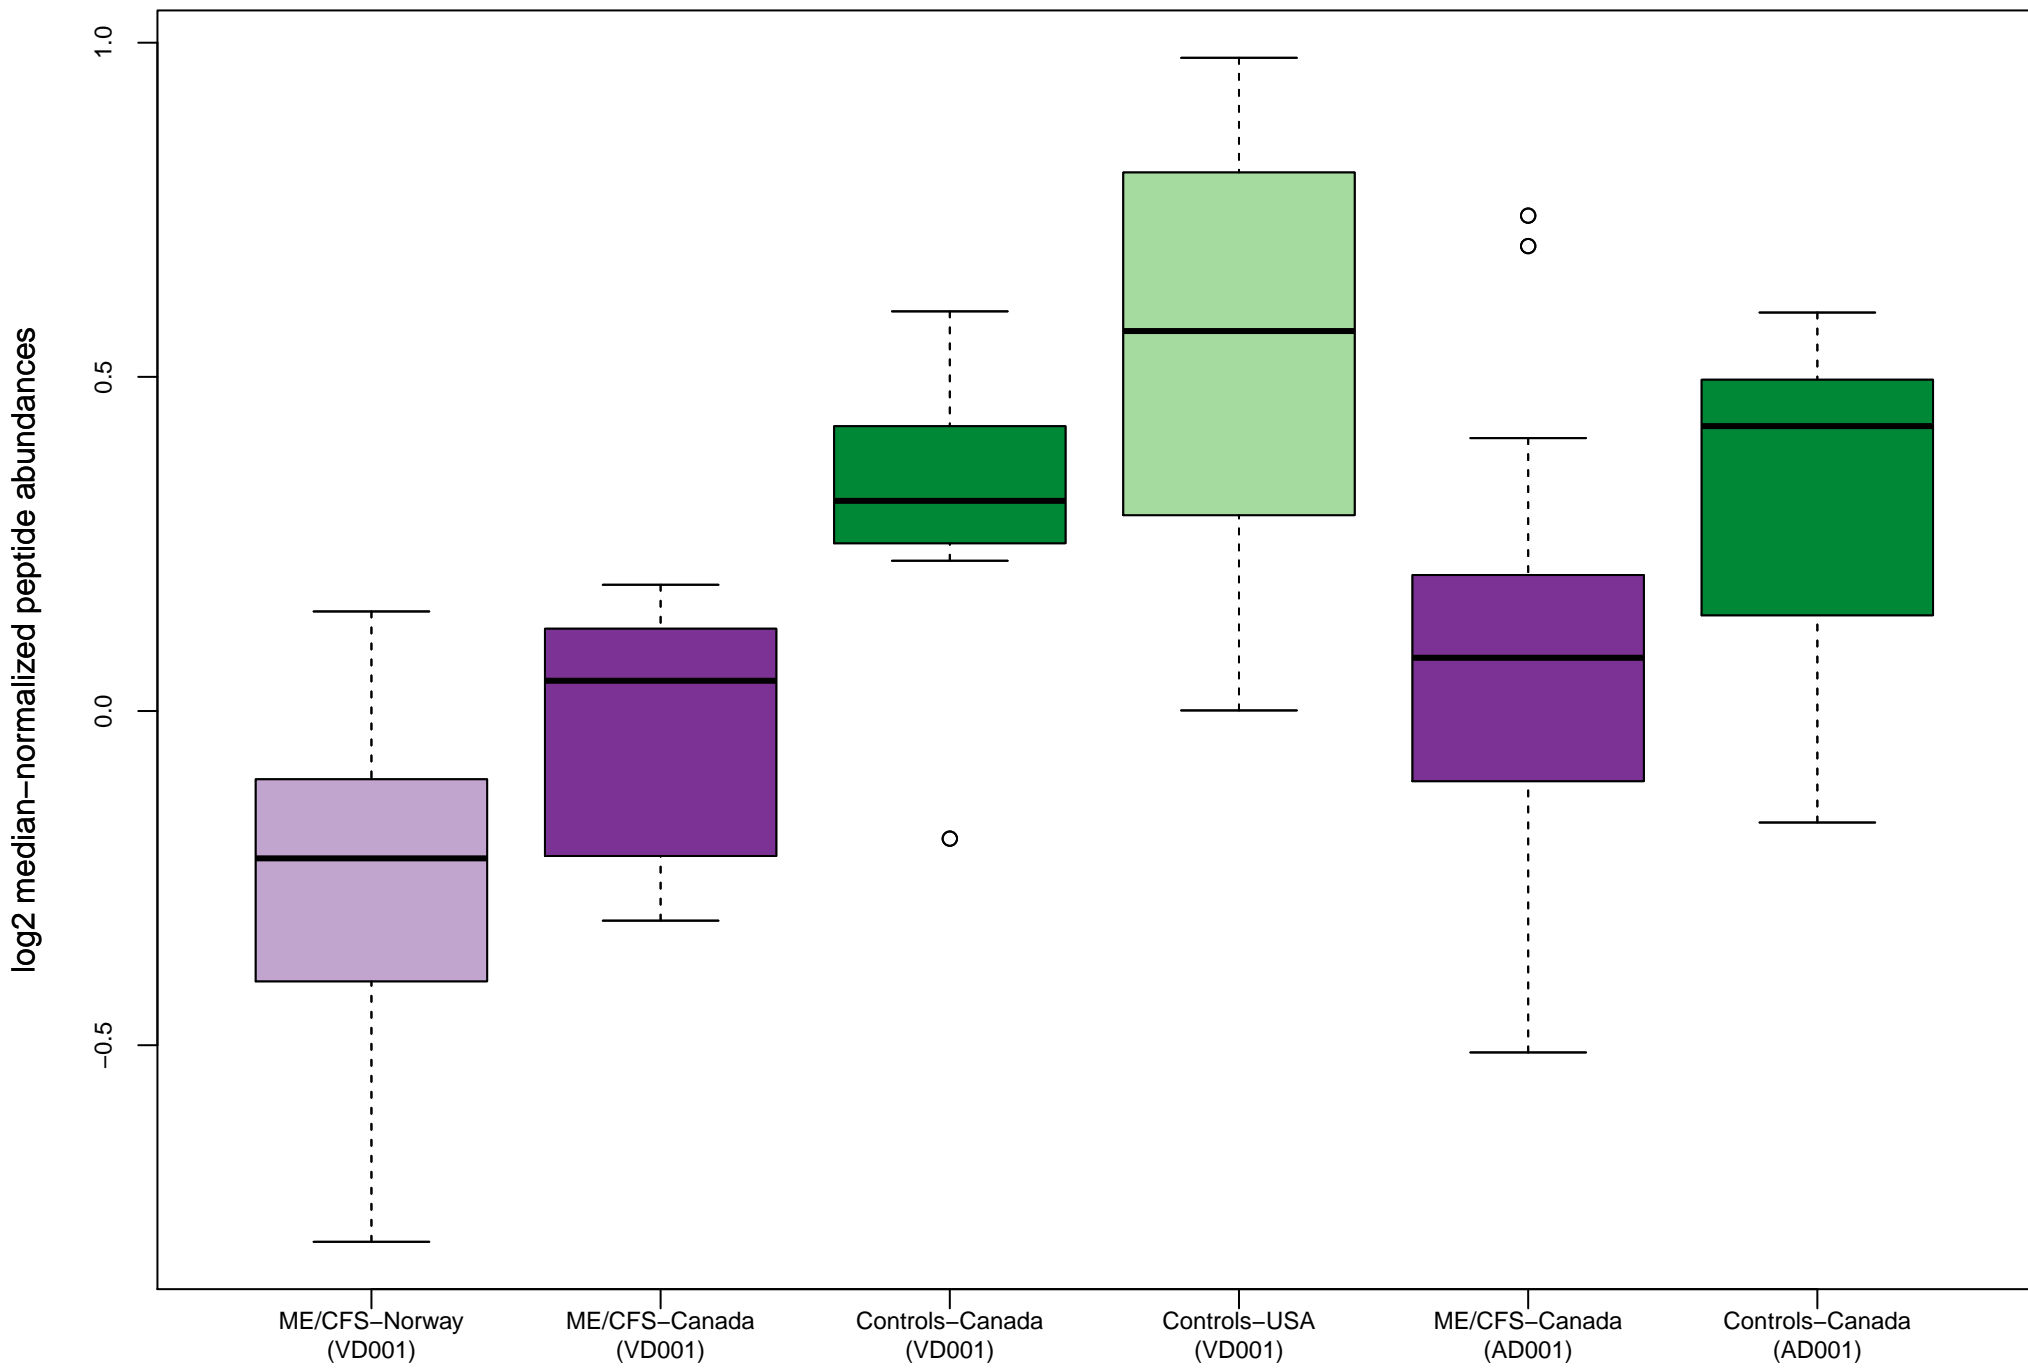

# FQYKFLSYWNKS

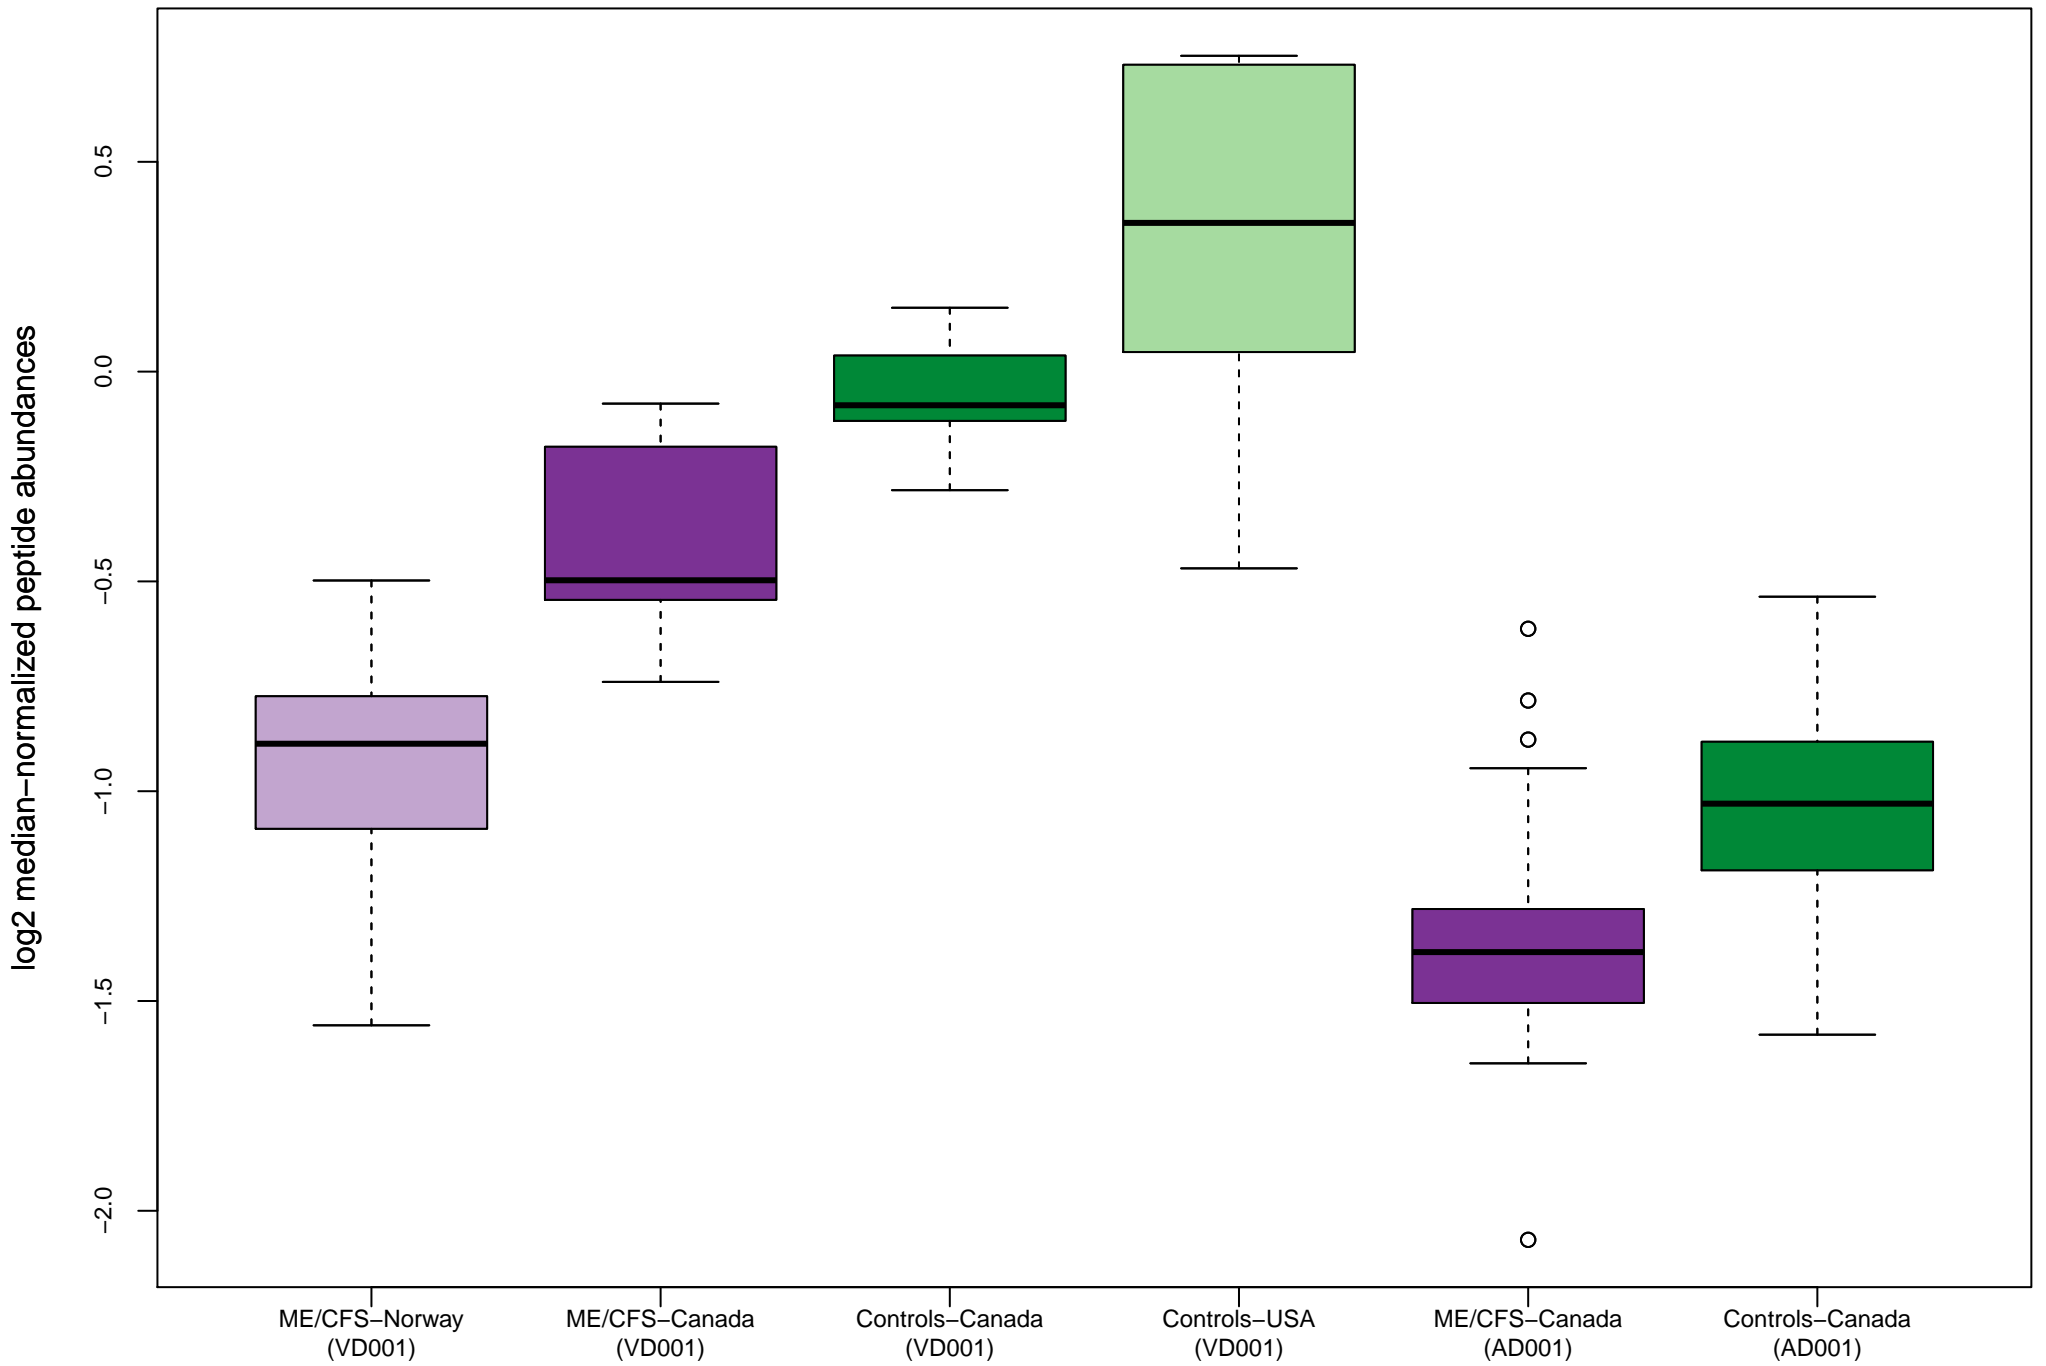

# FRLYAFRSGFYG

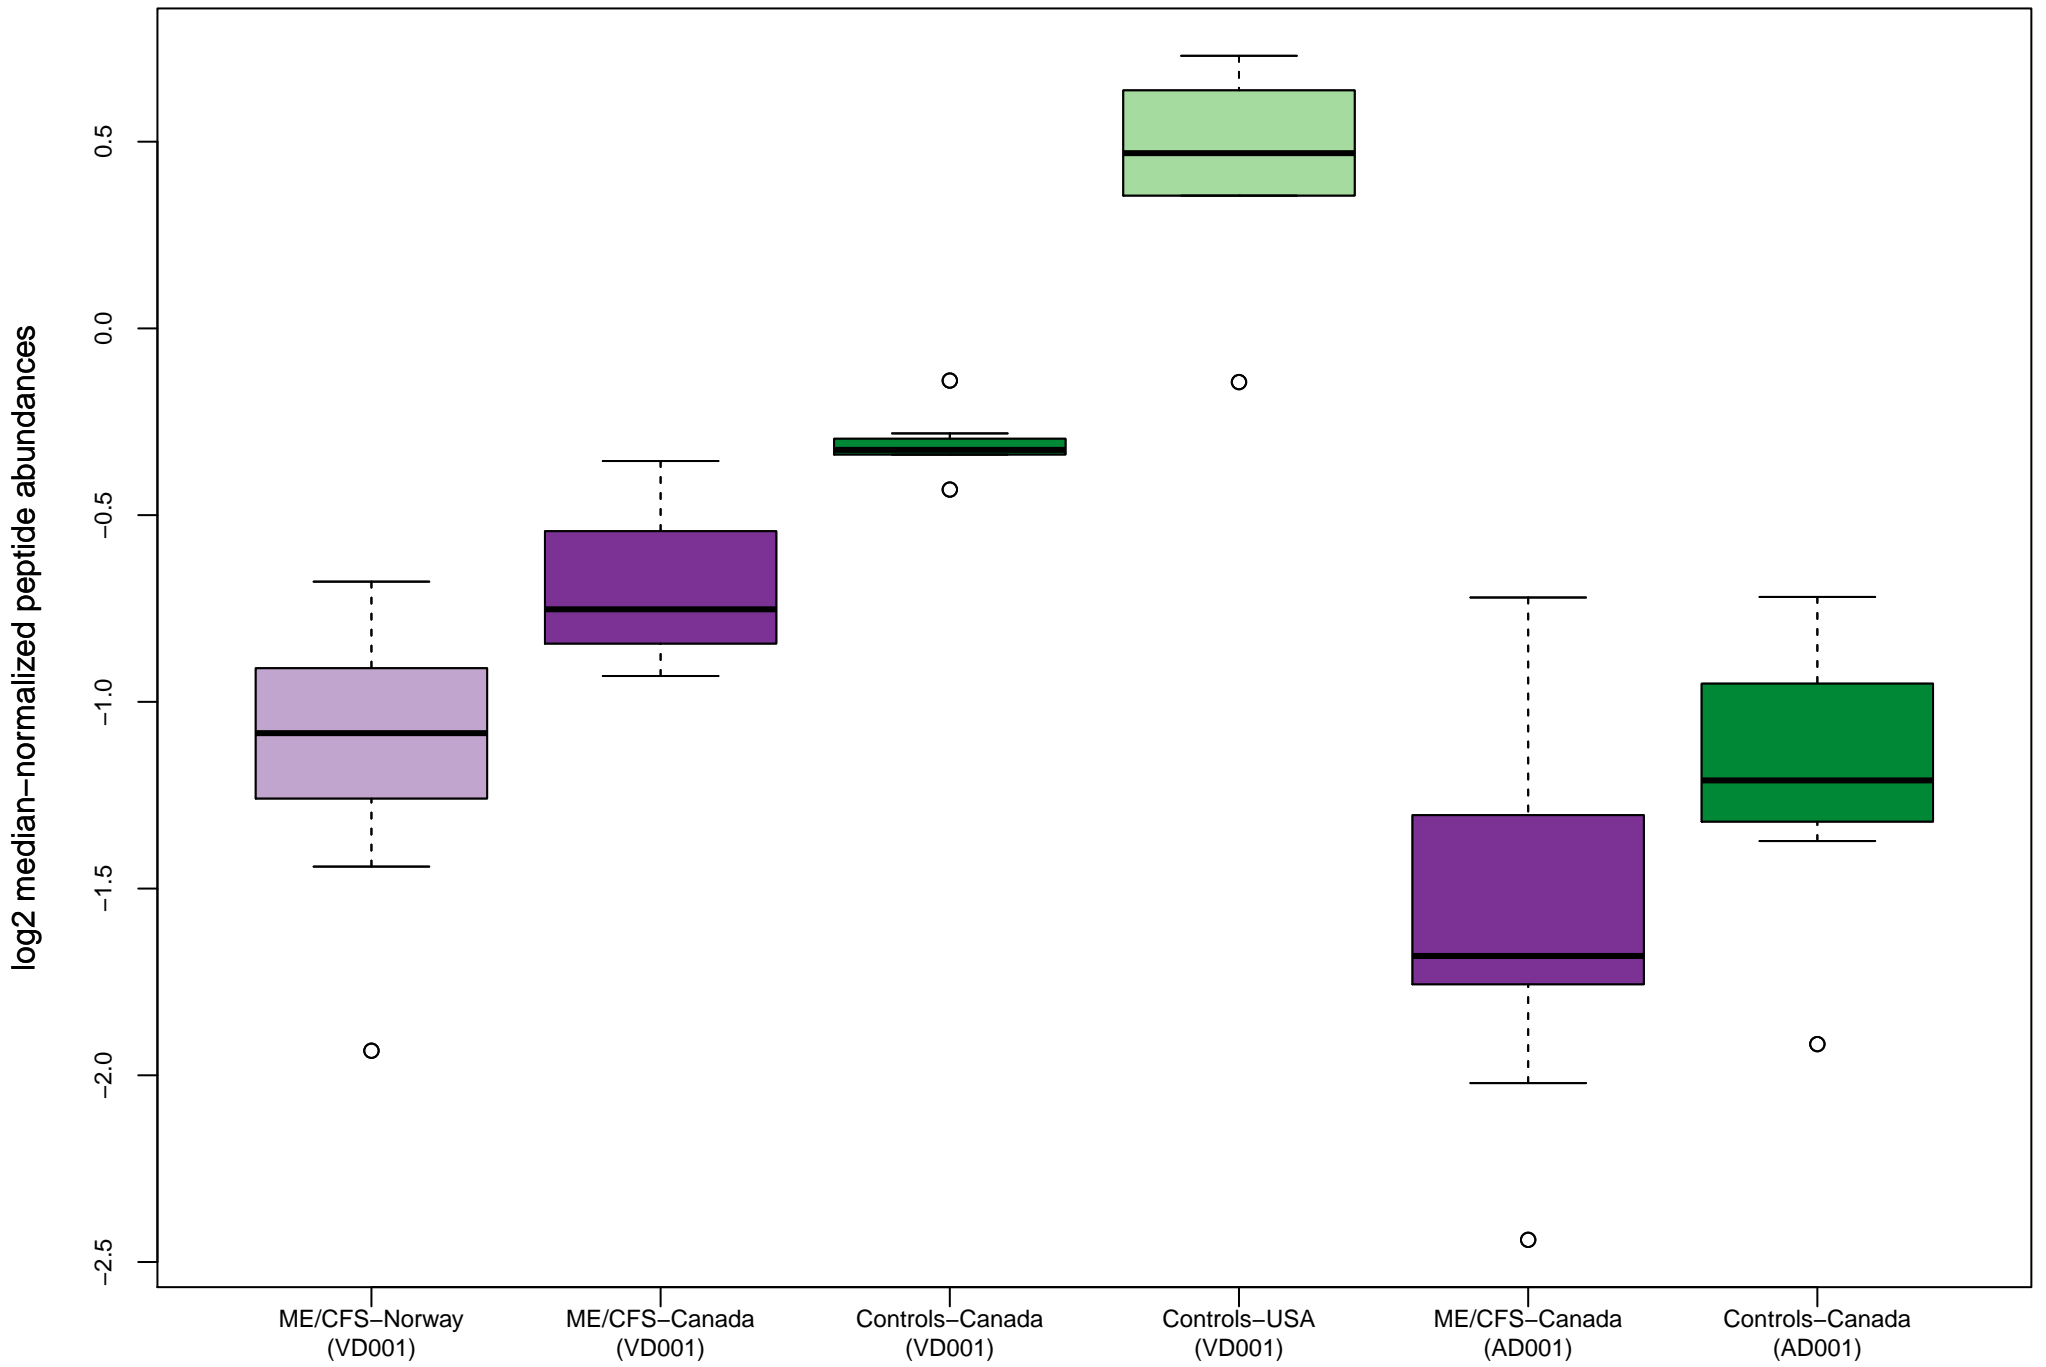

# FSNRFPLSVLSG

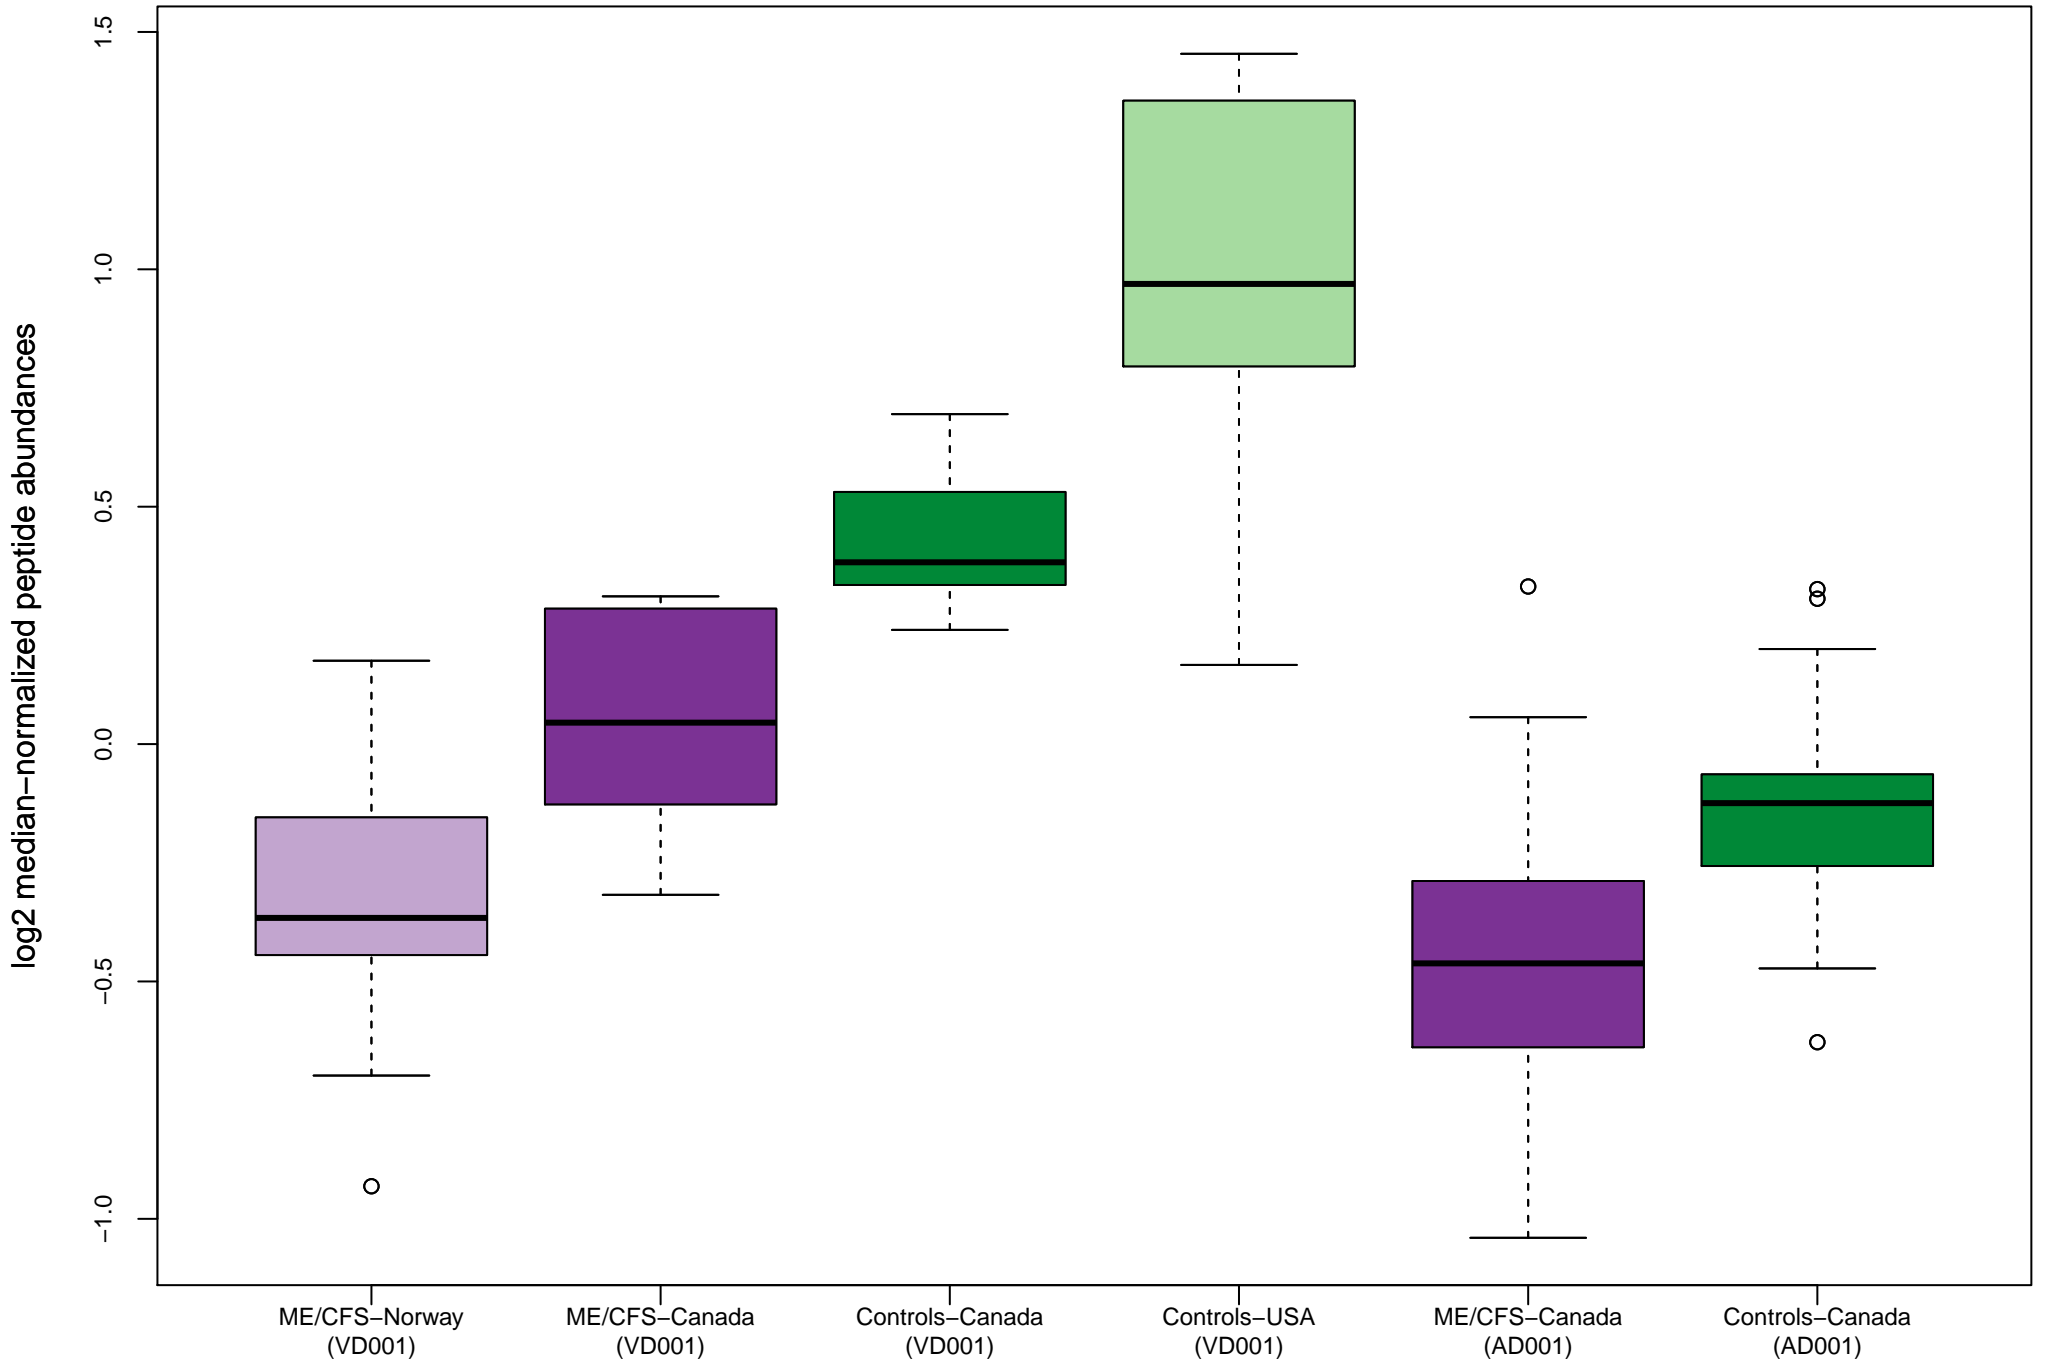

# FVRLVLRNAGAS

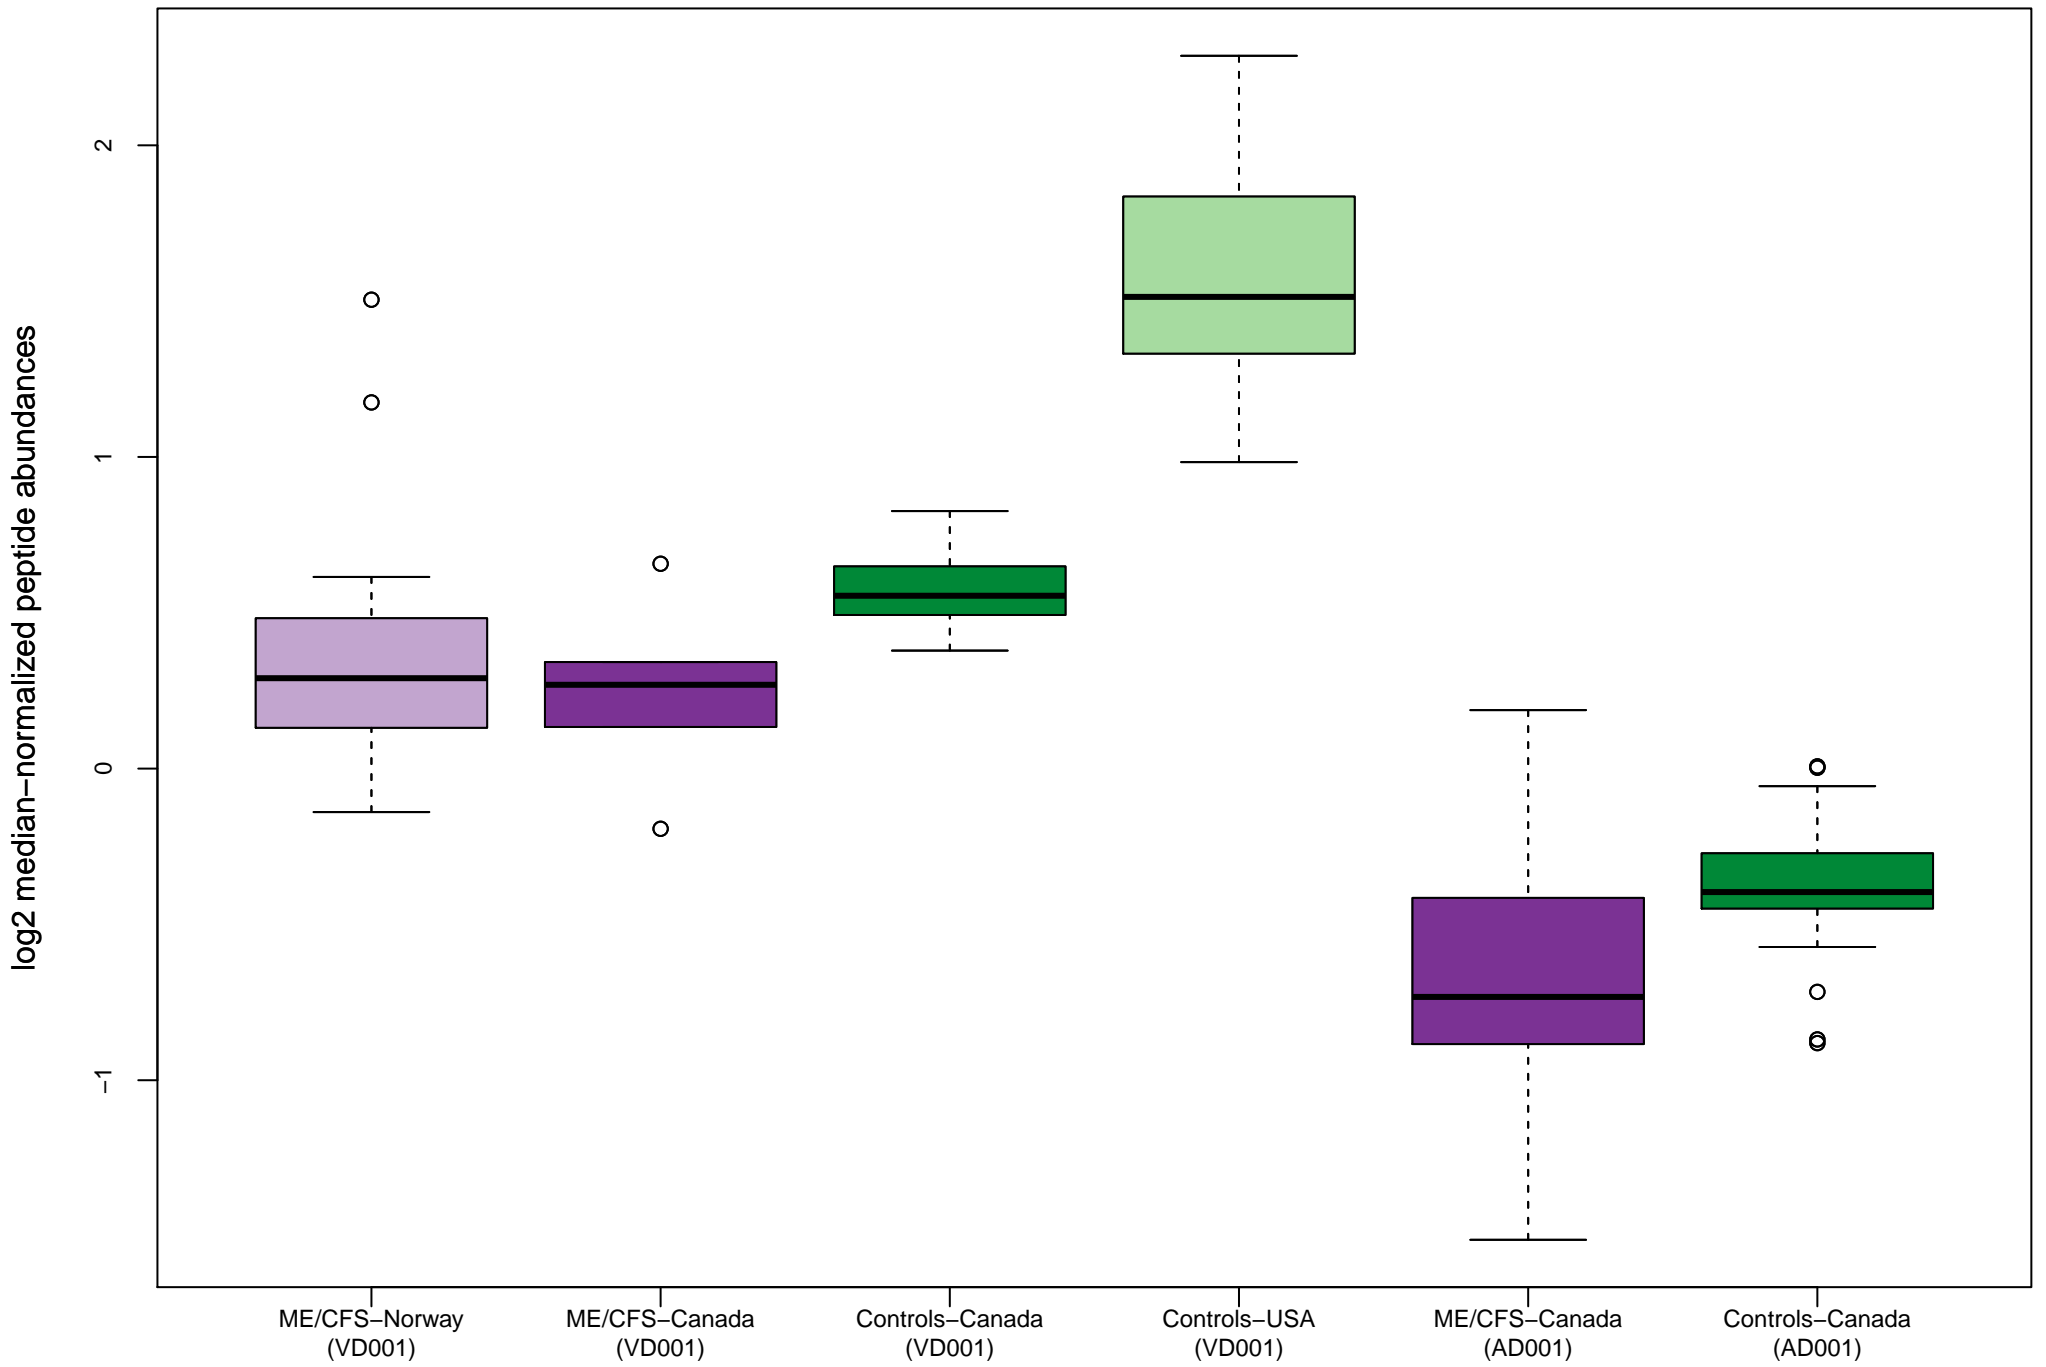

# GFRQHLFRWVG

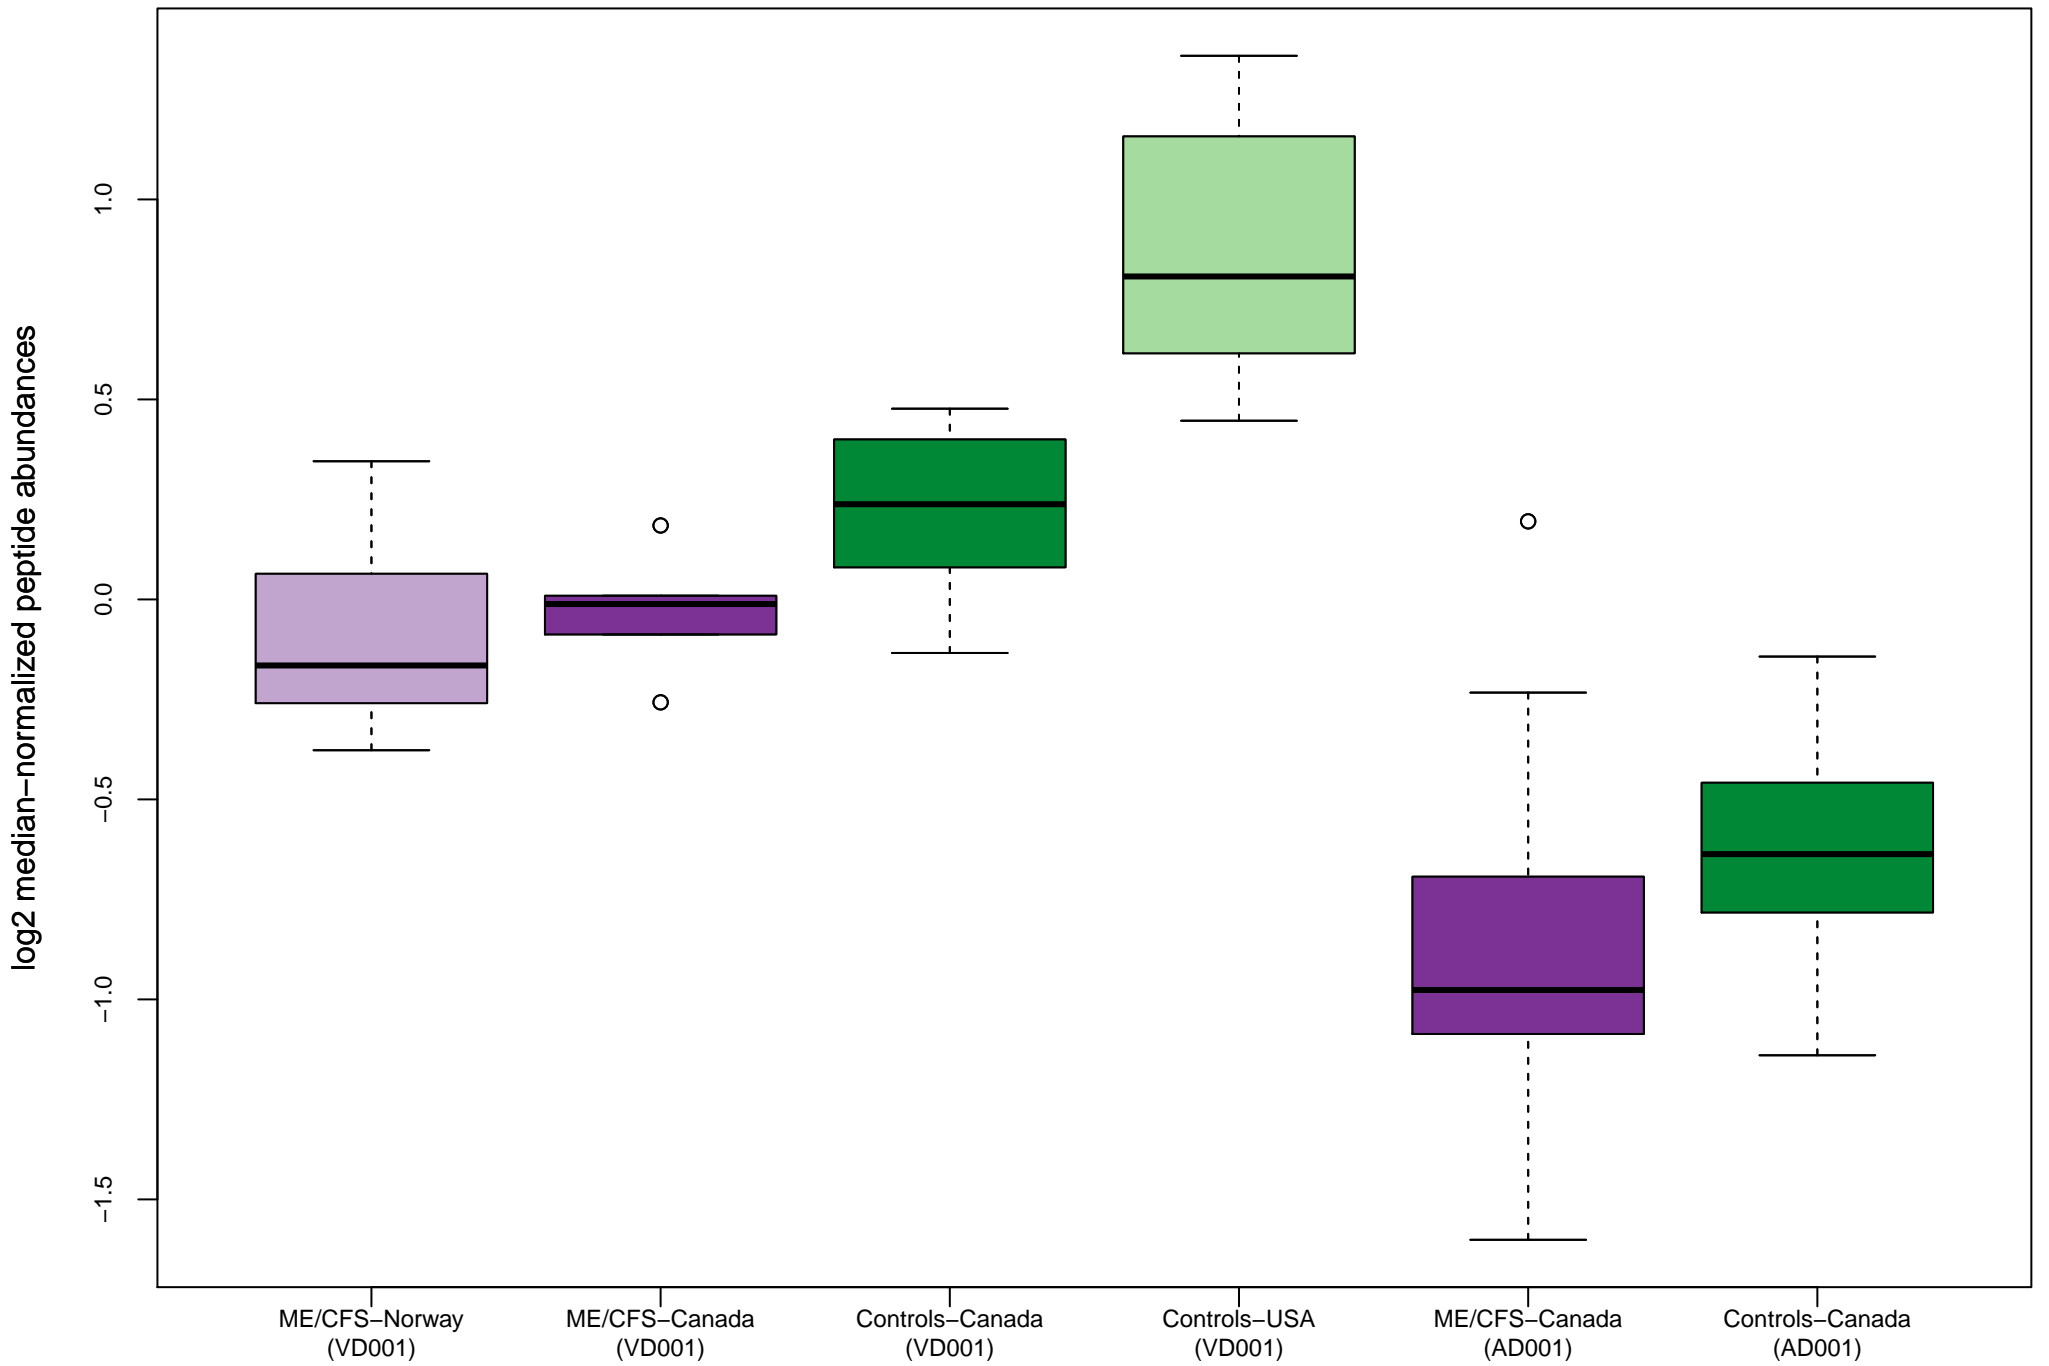



# GFVKLLSGVLSG

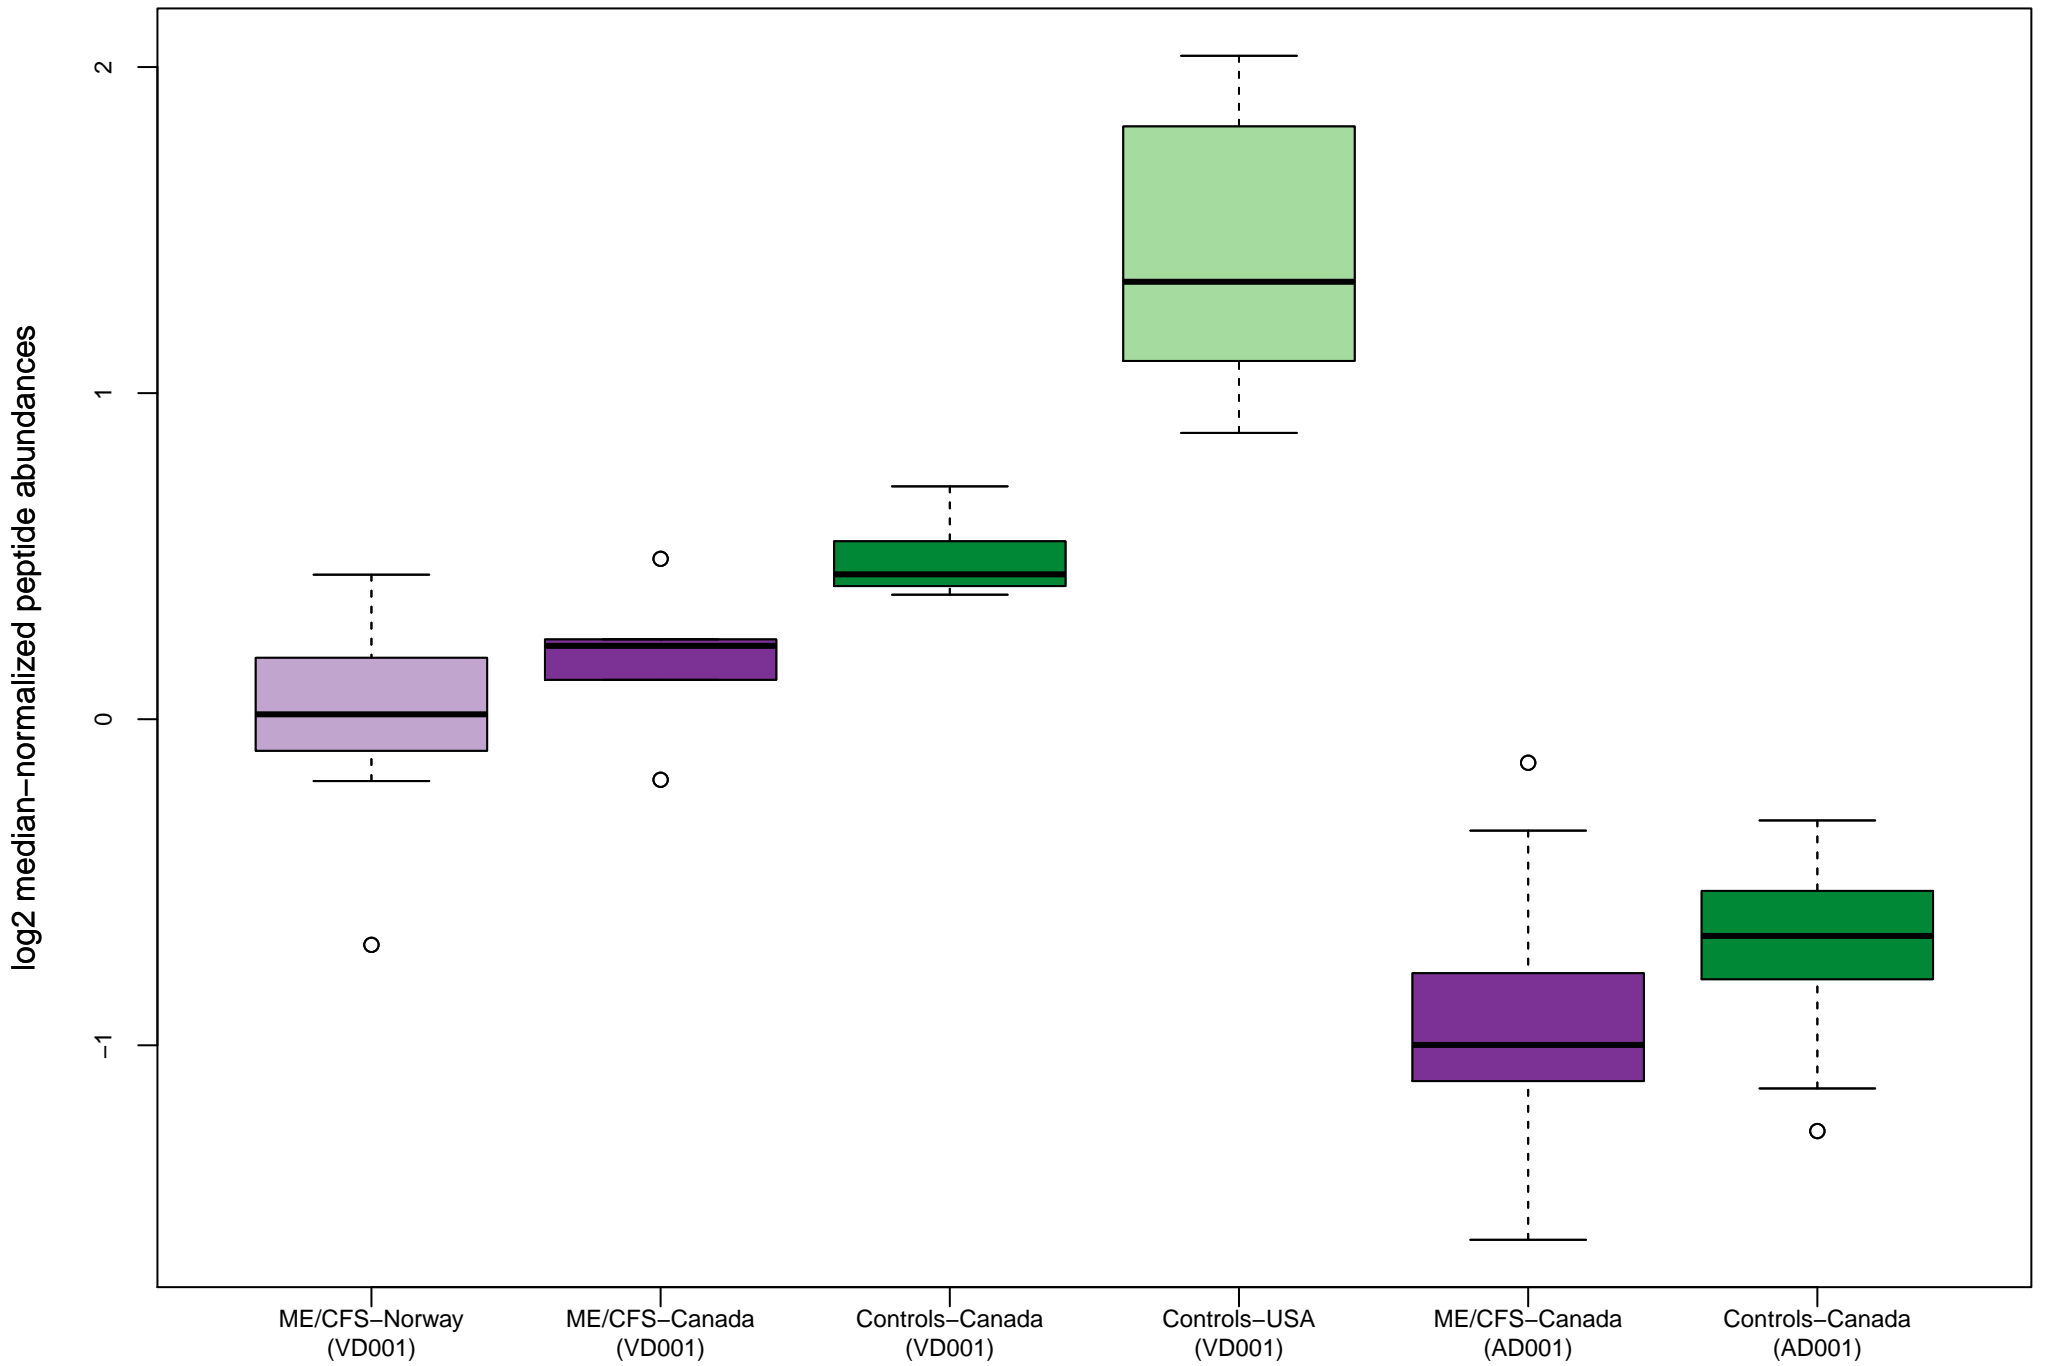

# GRFLYNLSVLSG

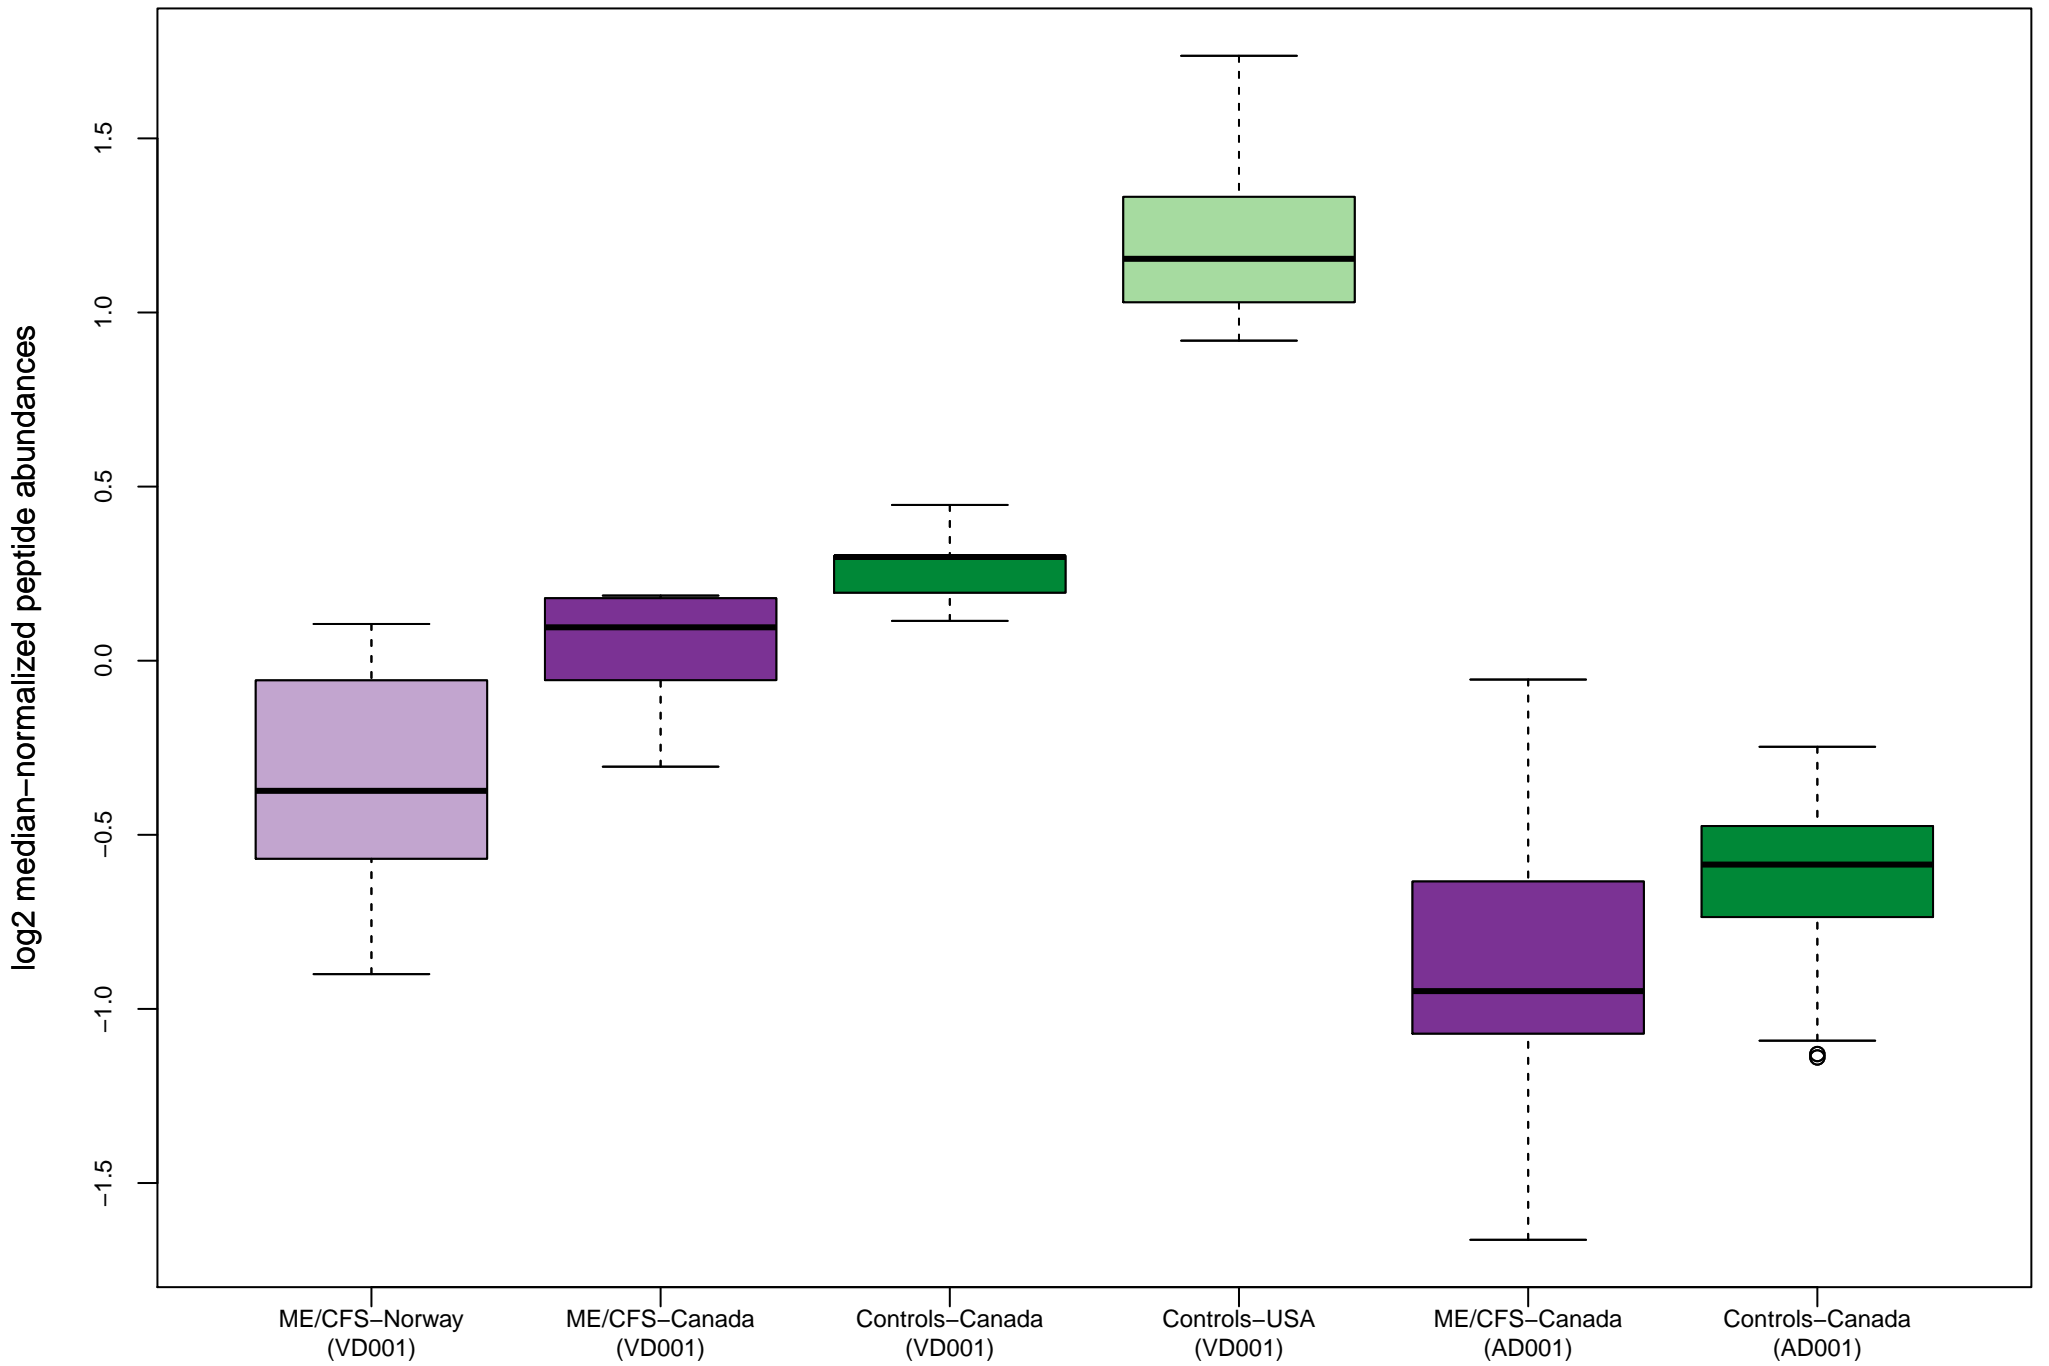

# GRFRNYVALSGL

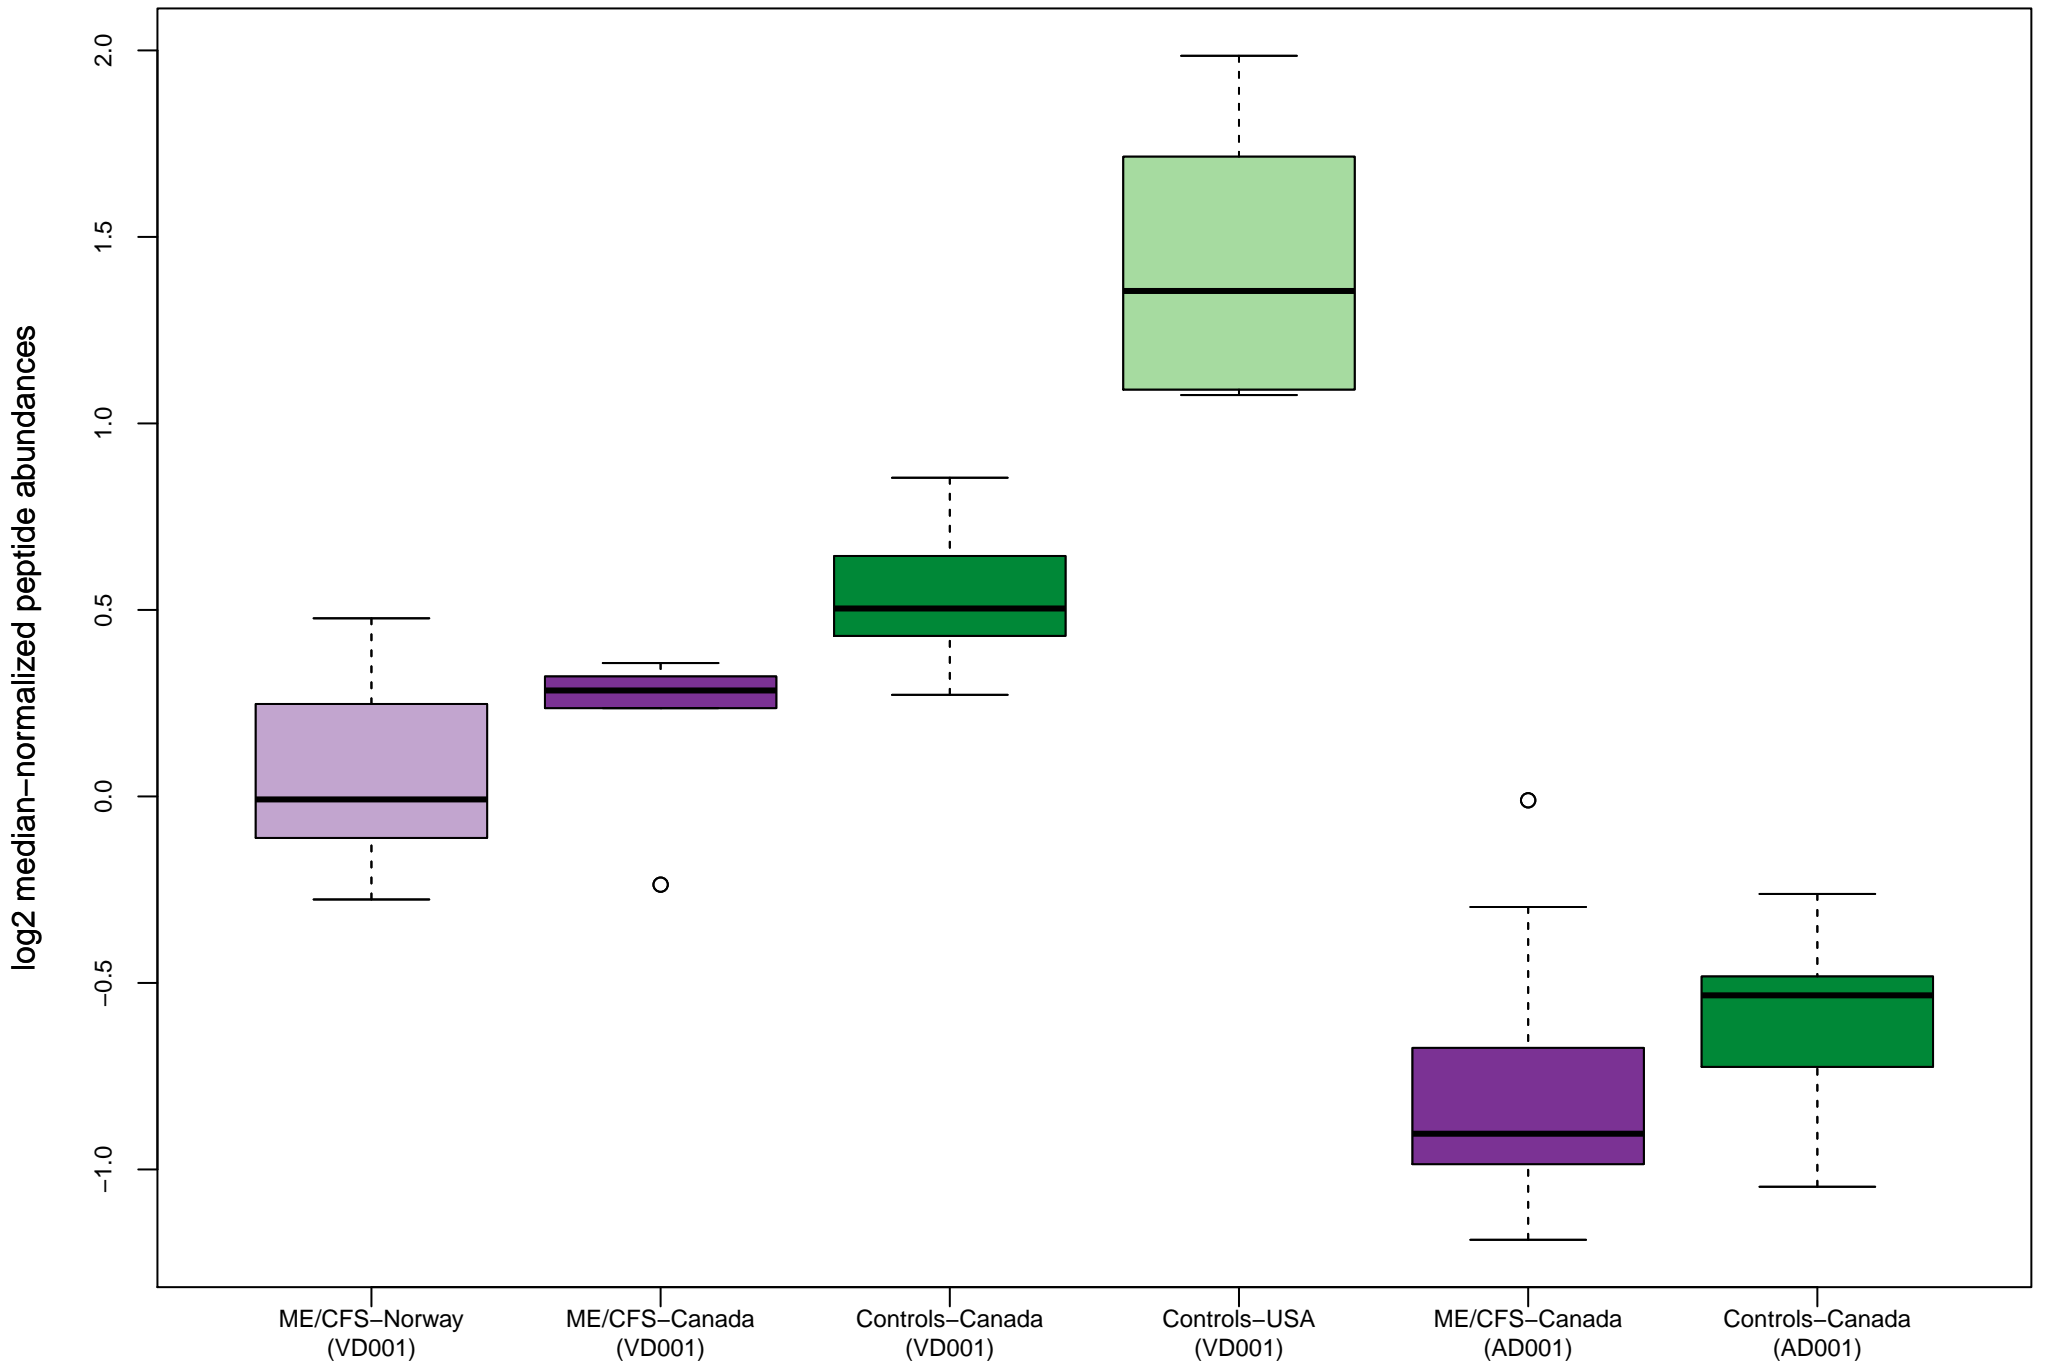

# GRFVYNLGVALS

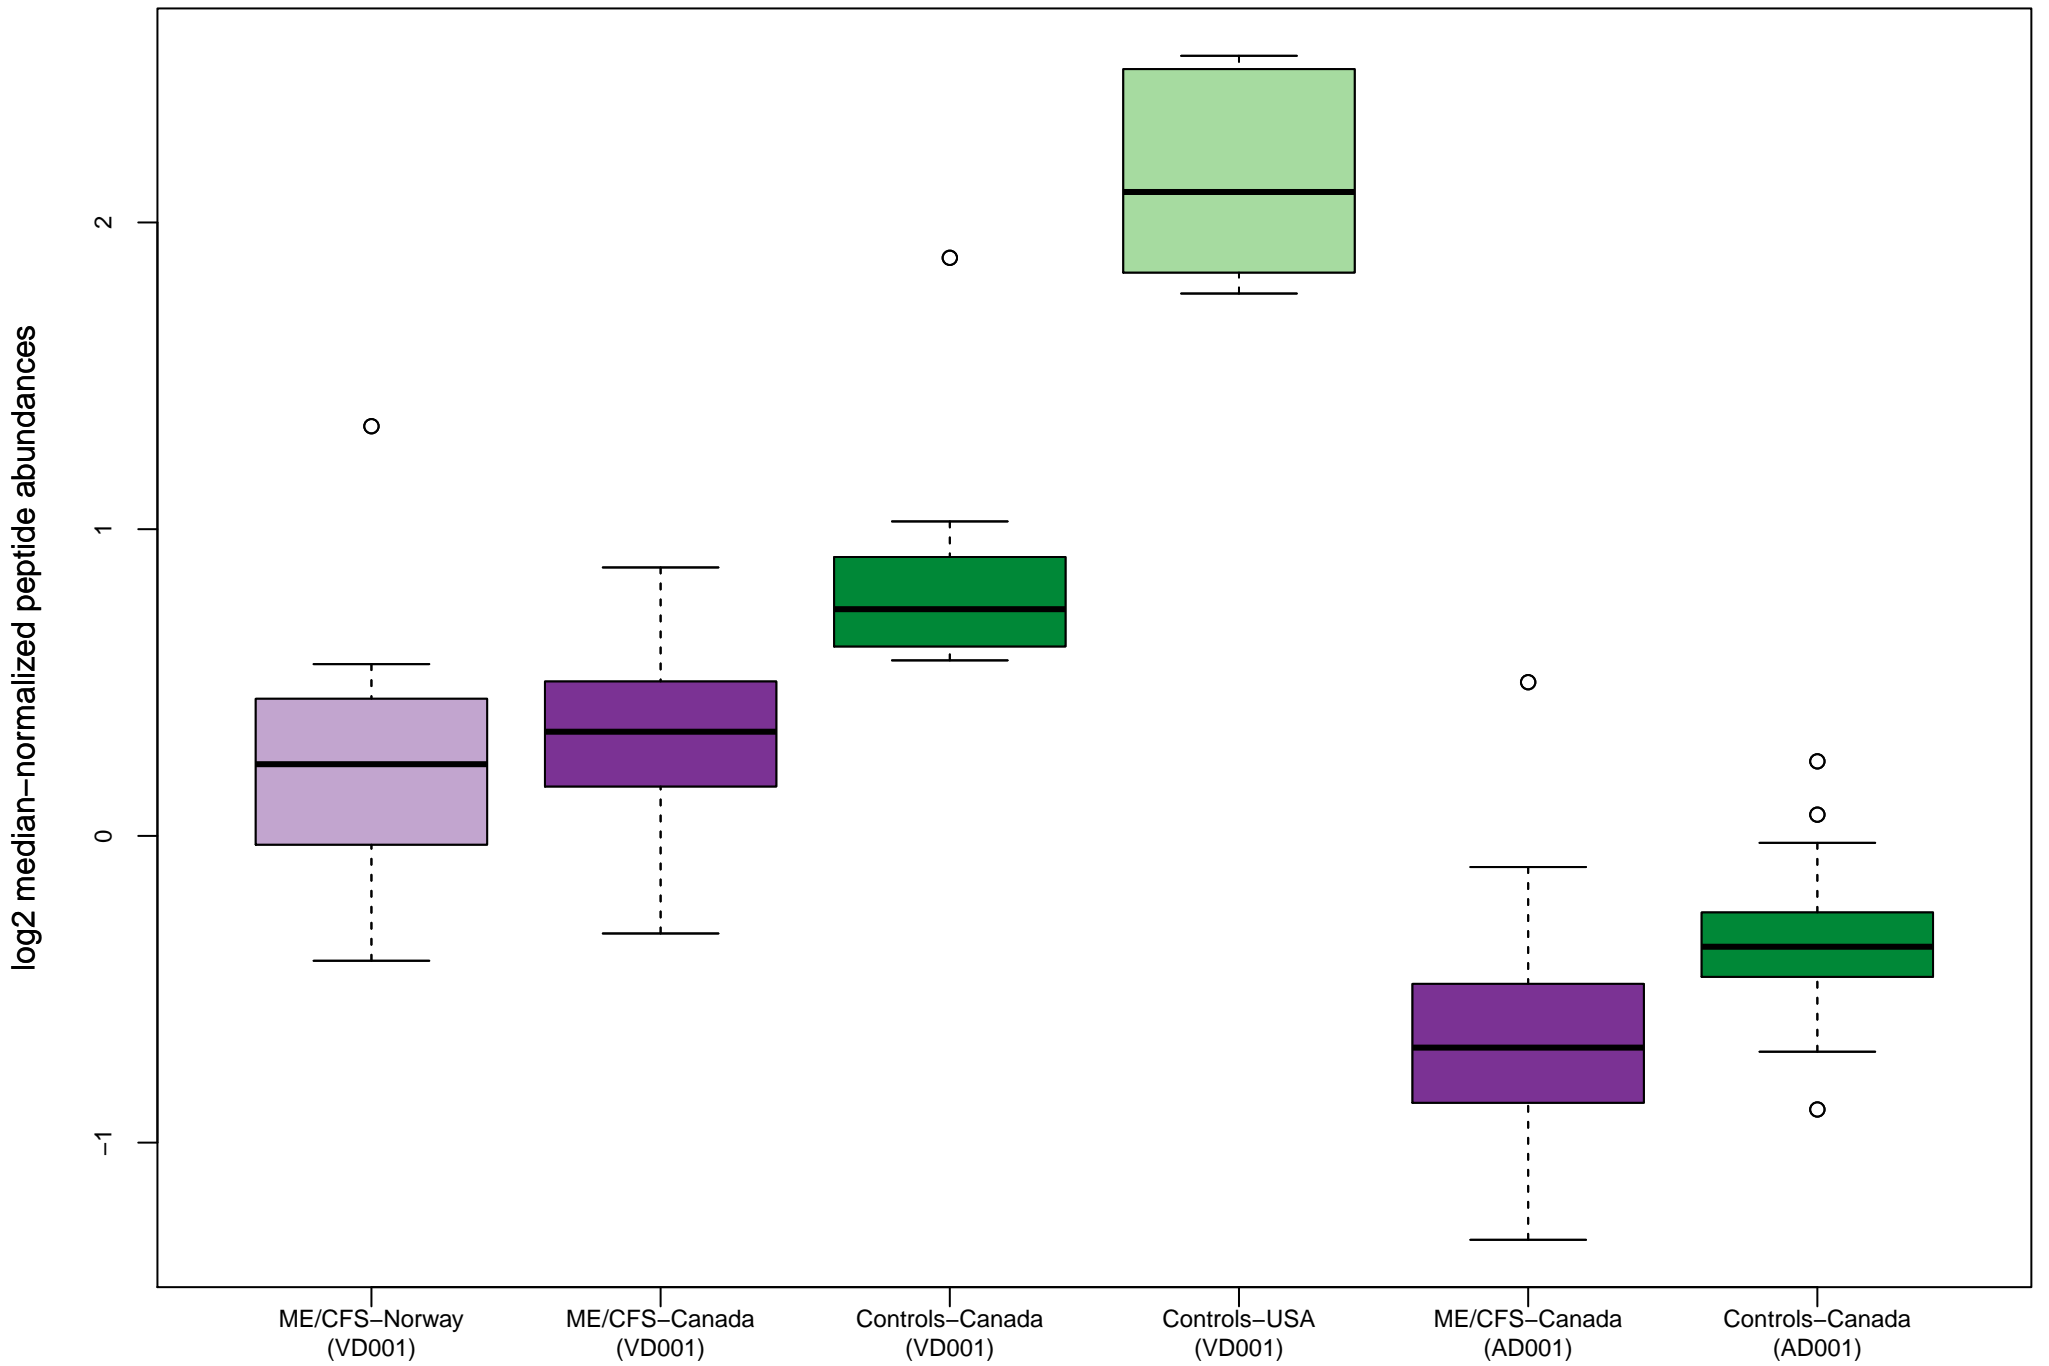

# GRLWYNALSVLS

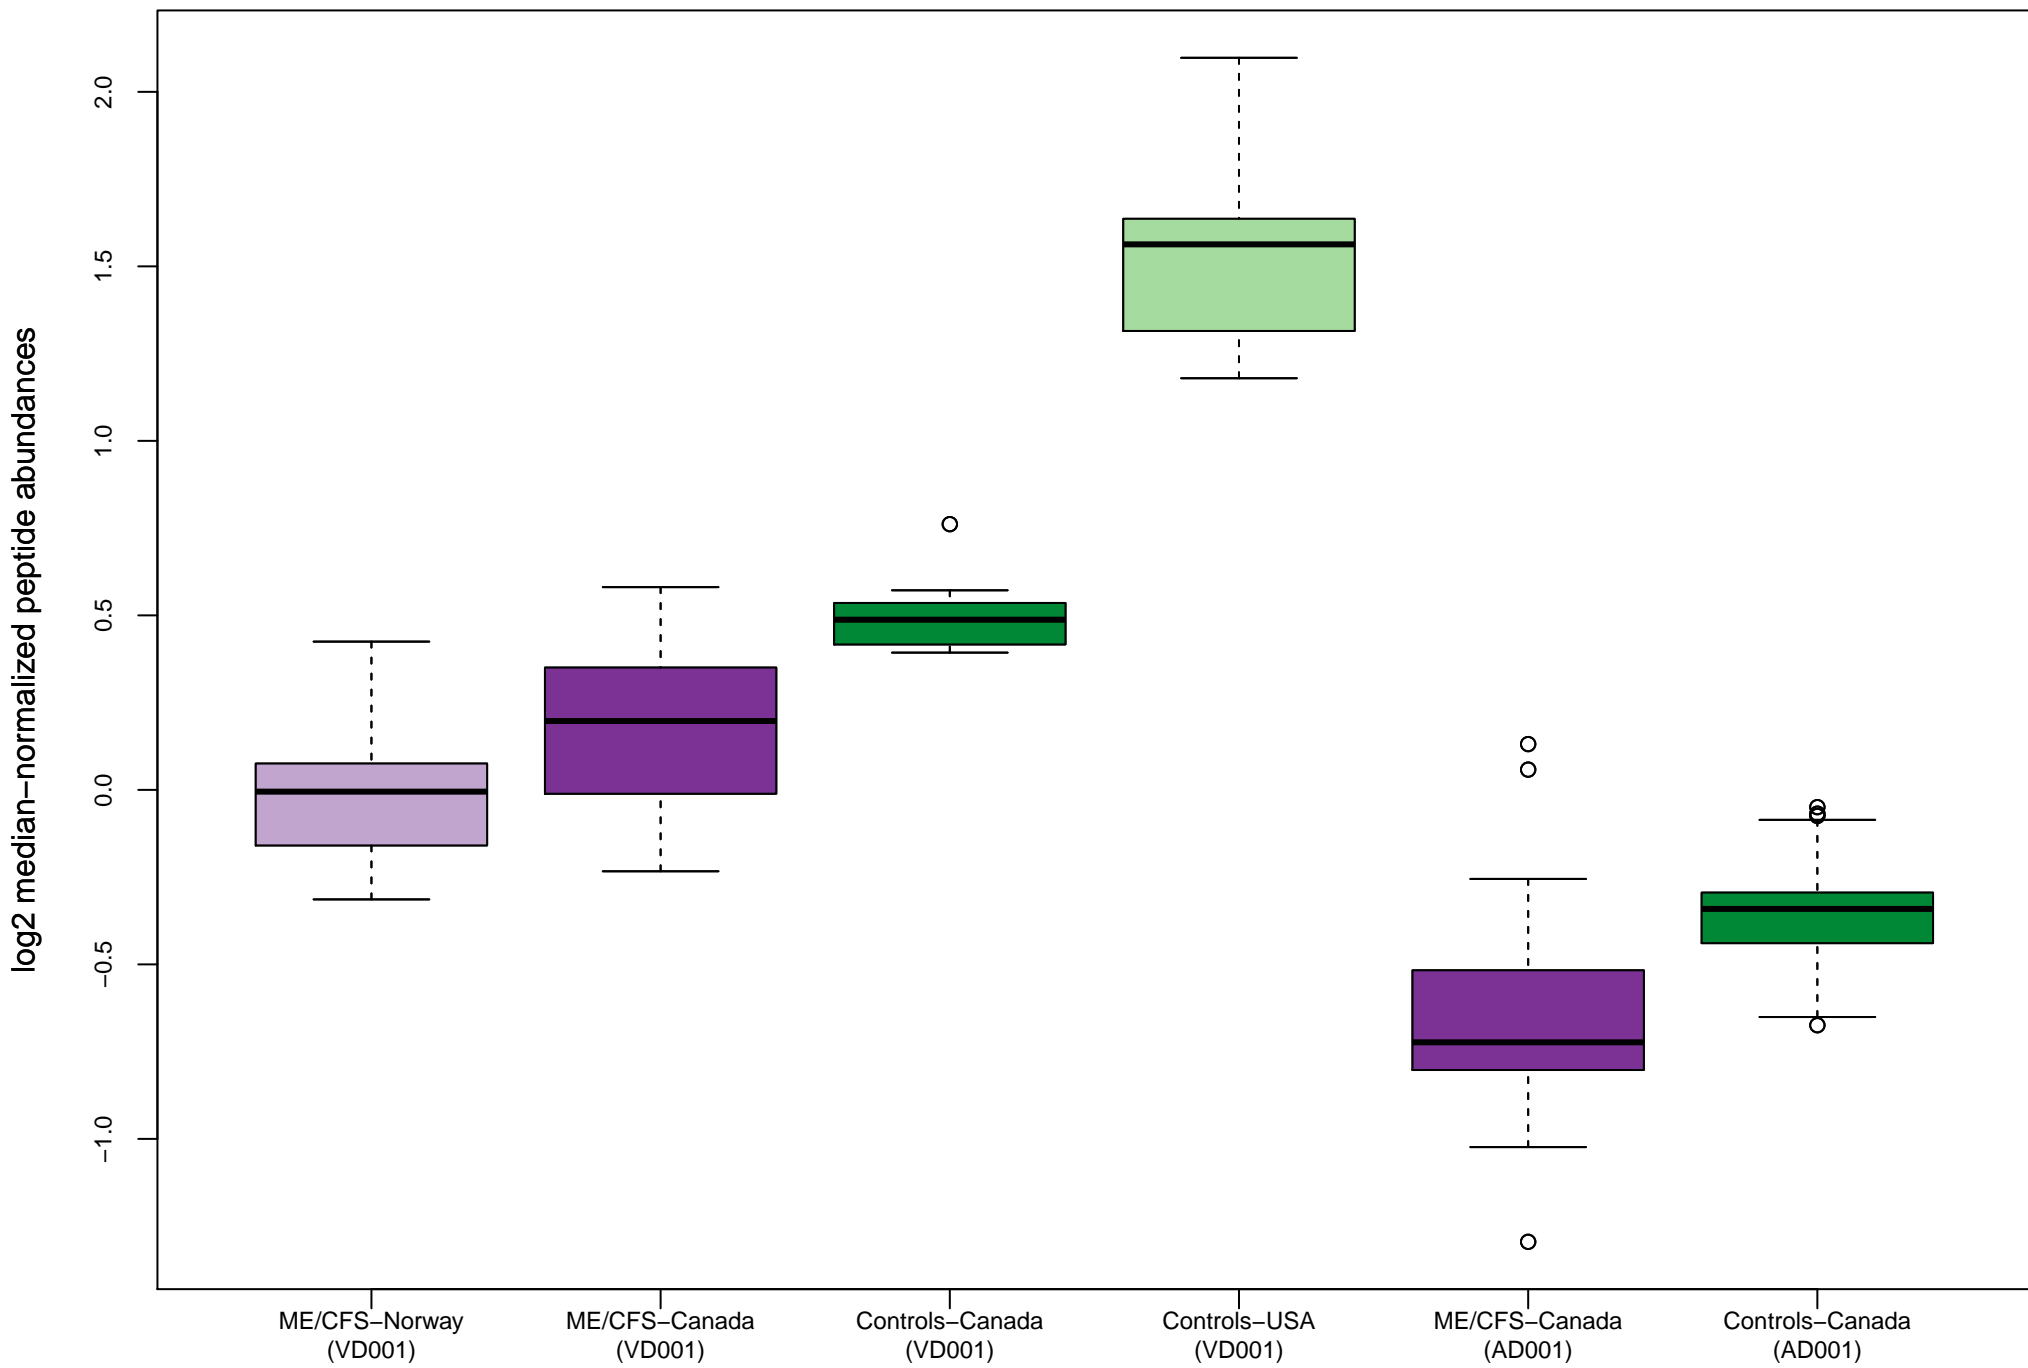

# GRYSRWWVLGVL

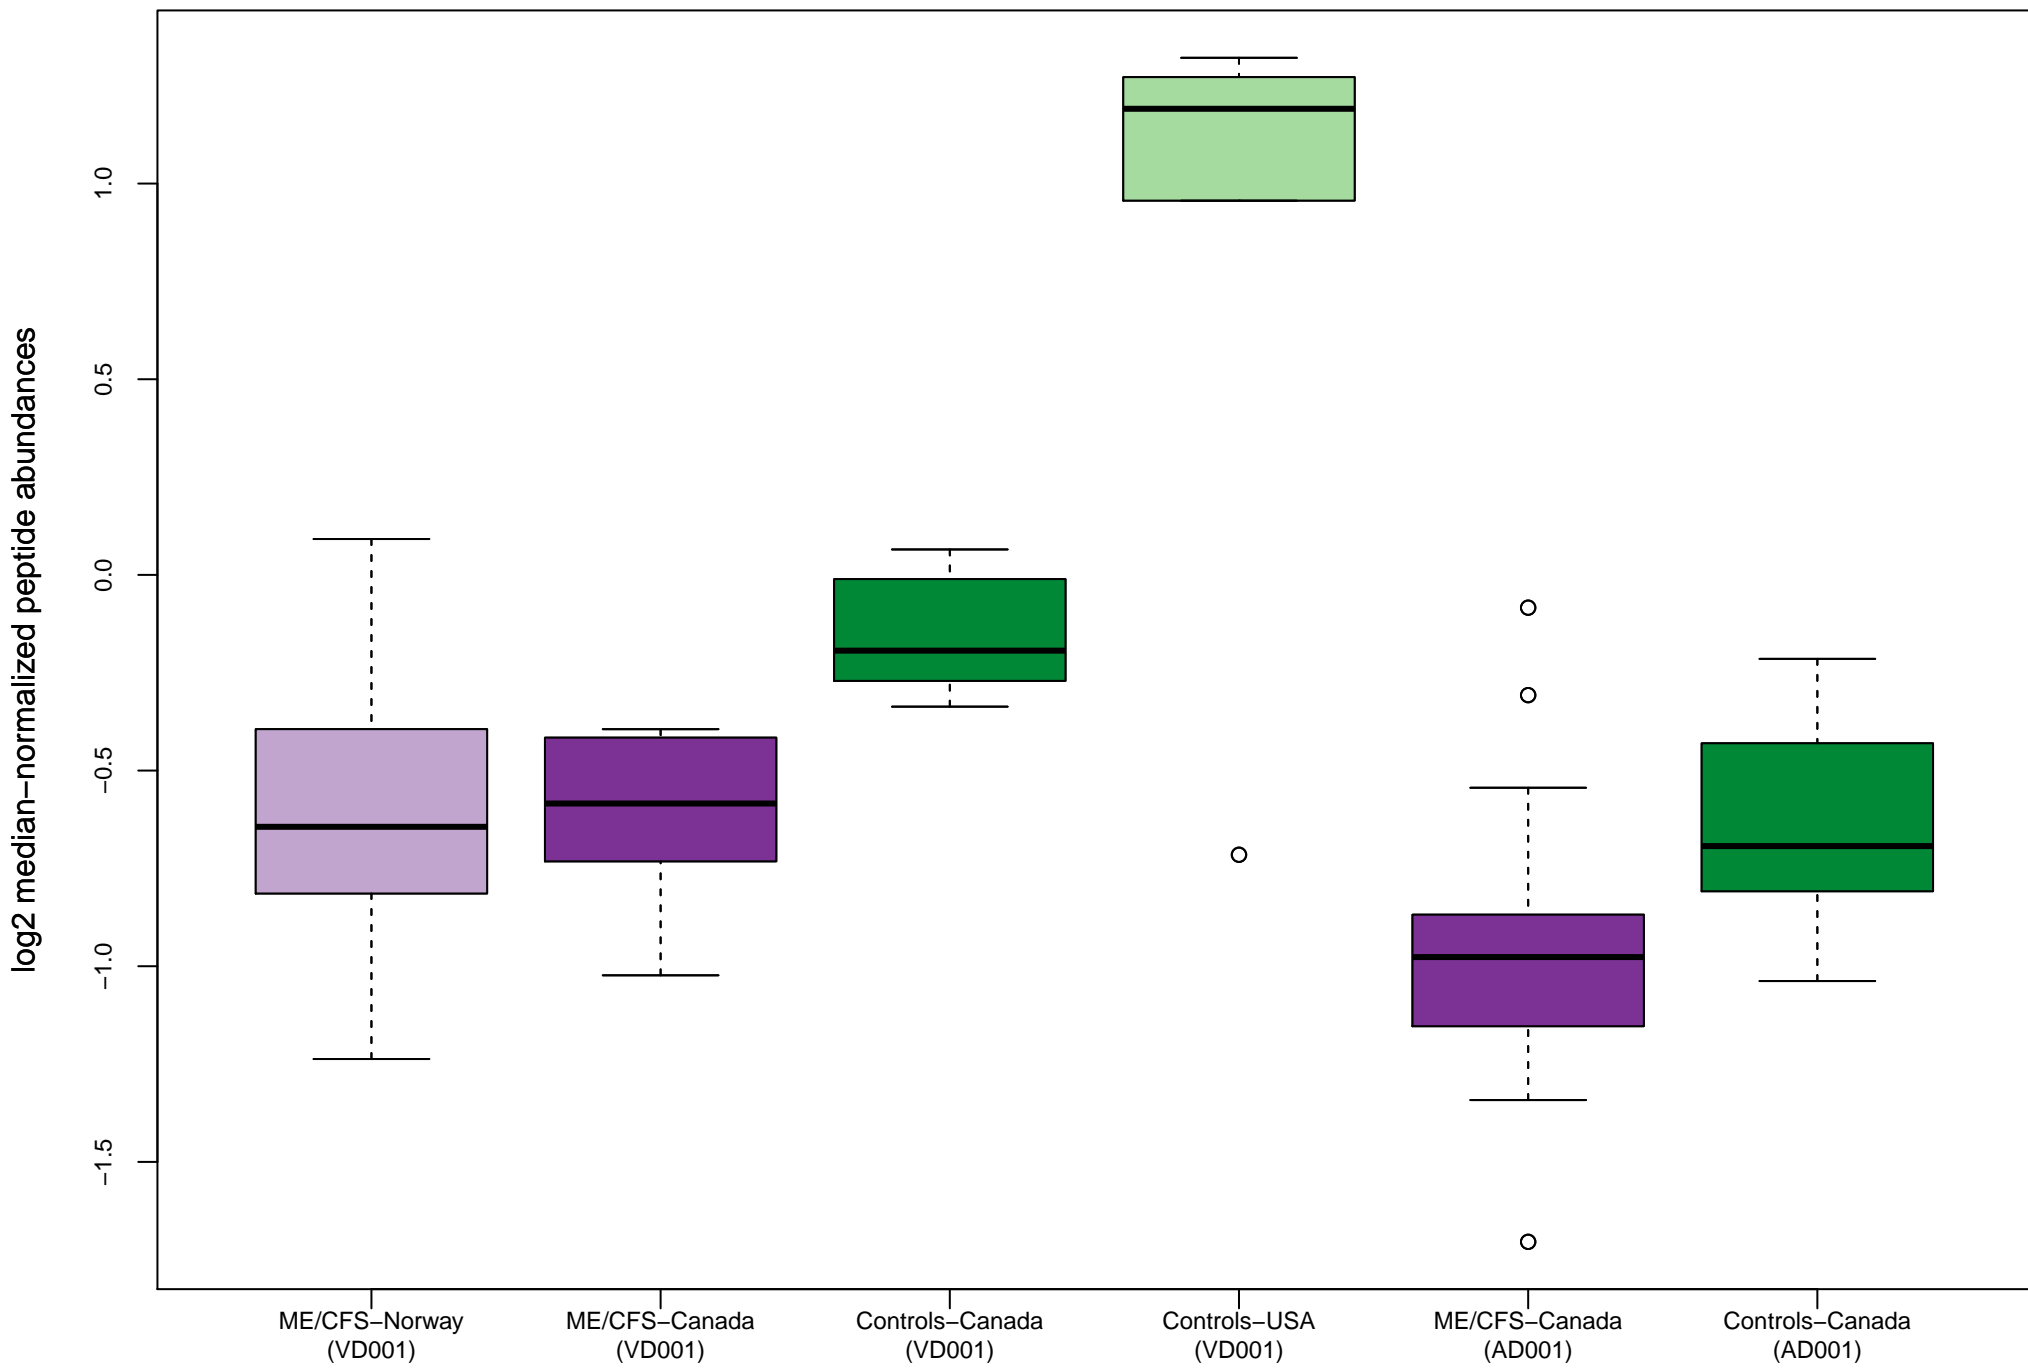

# GSYLRLSGVLSG

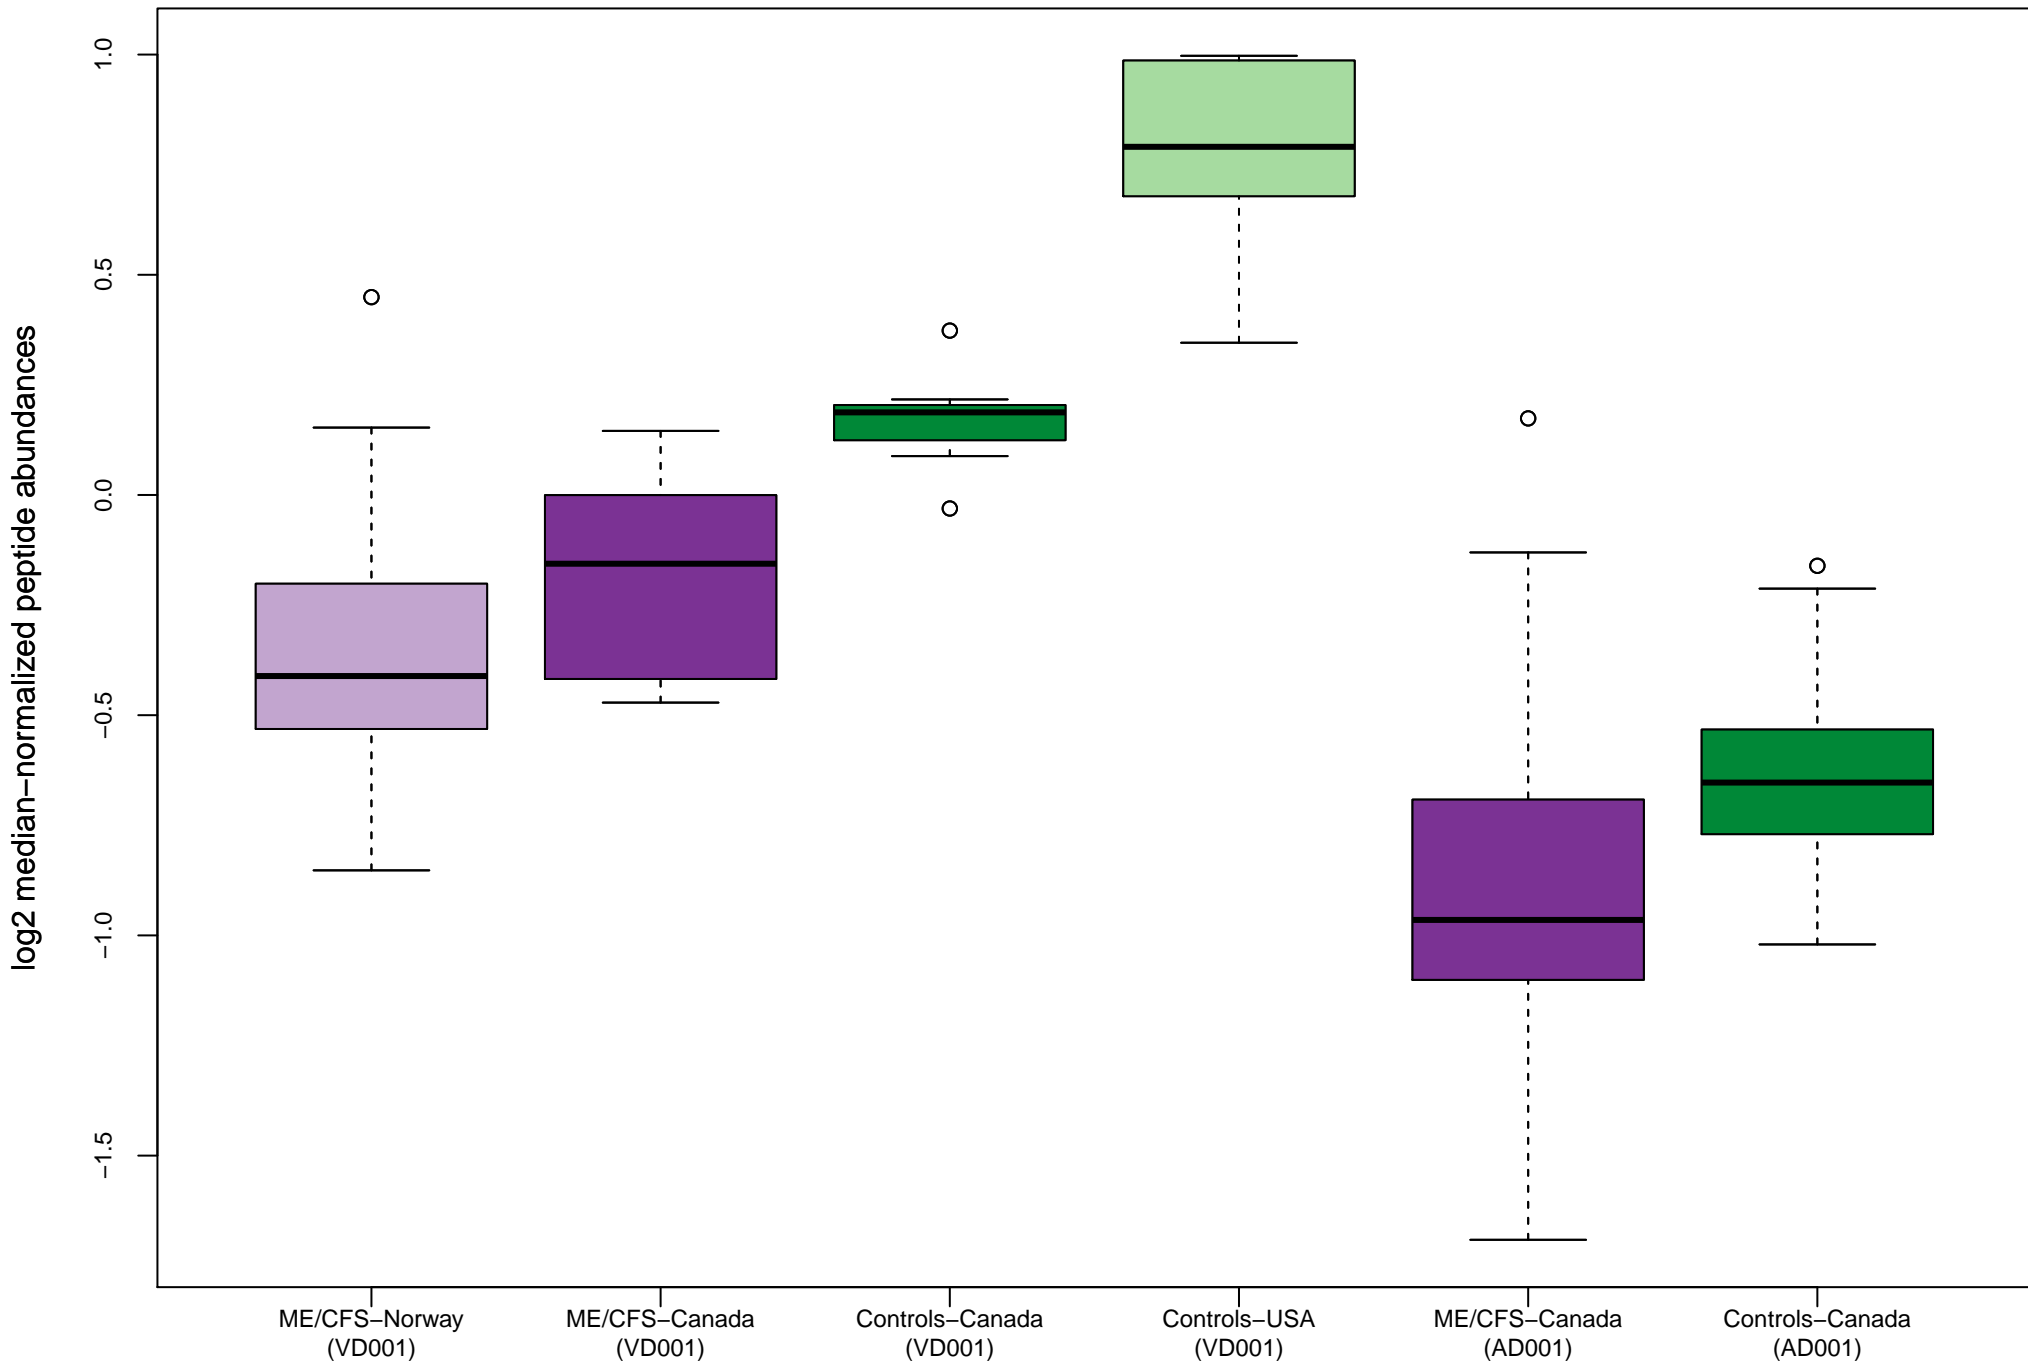

# GSYQFRPWSAL

log2 median-normalized peptide abundances

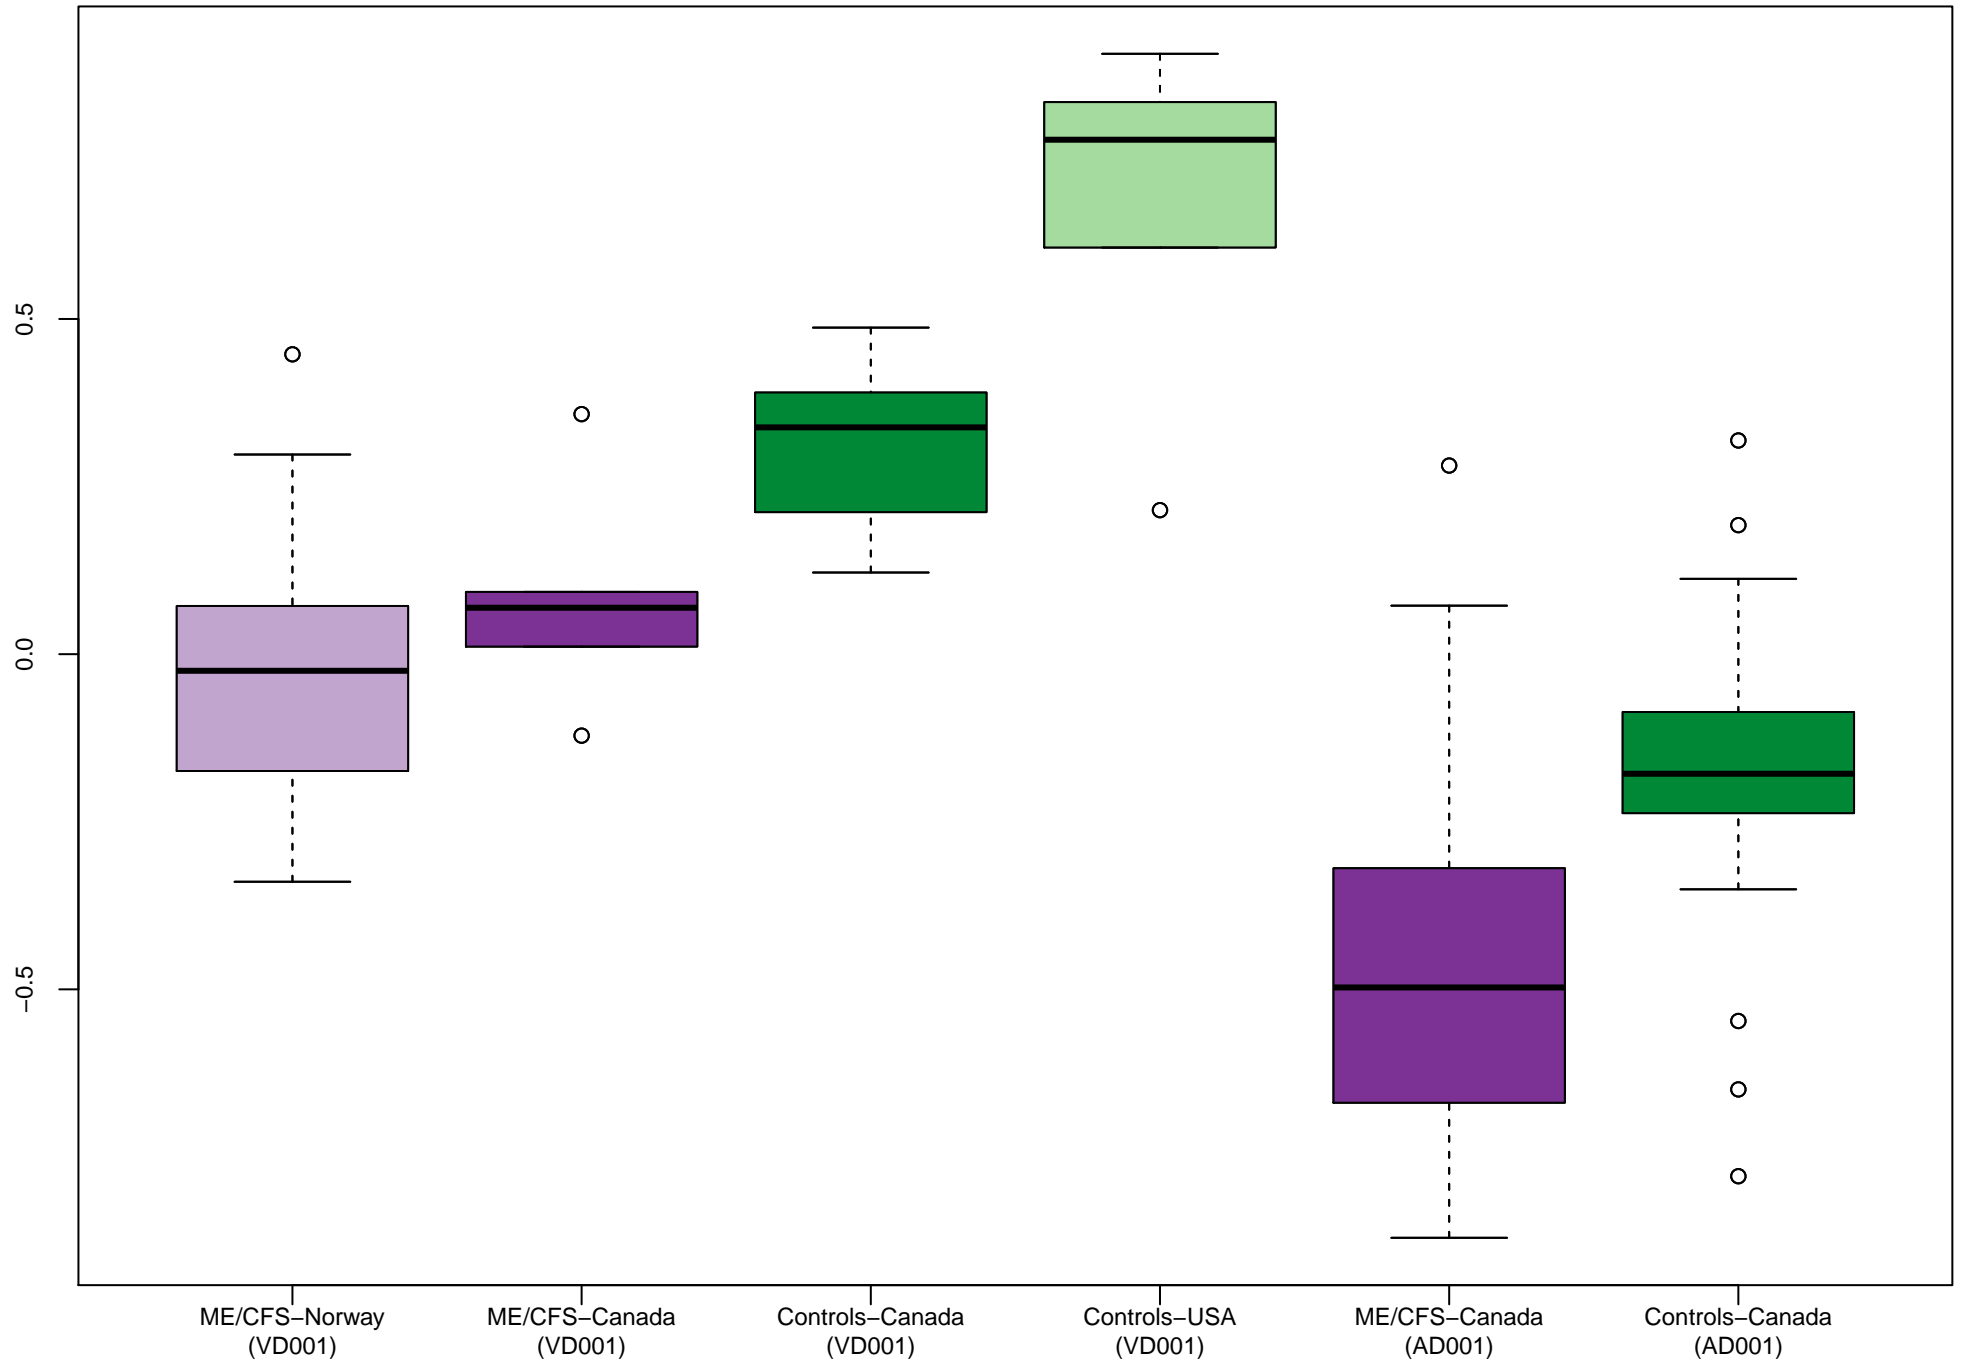



# GVQRPFLGVLSG

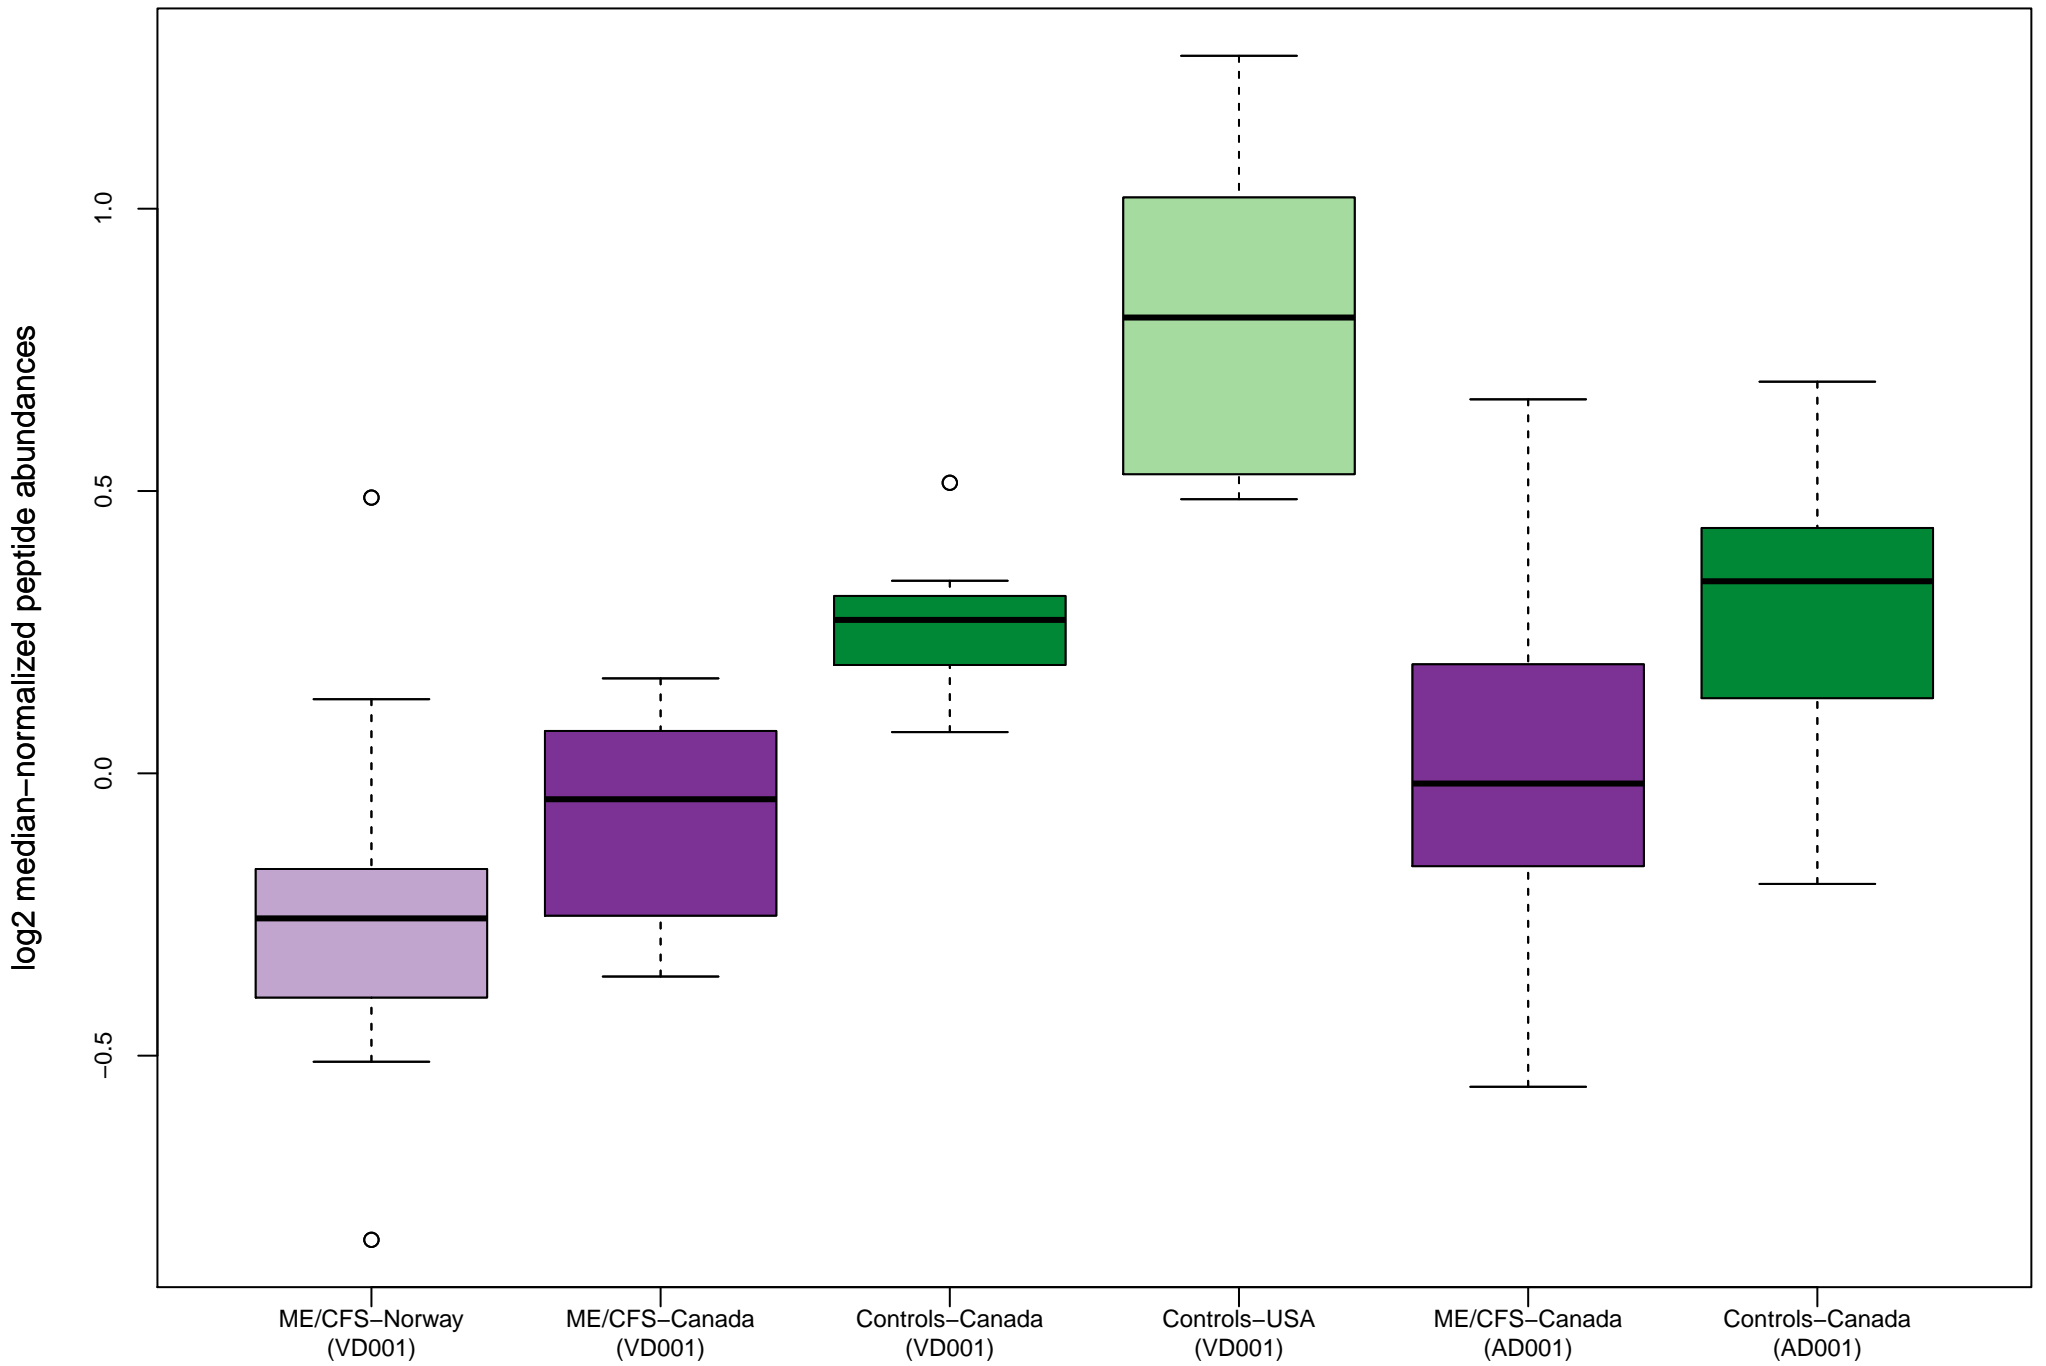

# GVMRYSGVALSG

log2 median-normalized peptide abundances

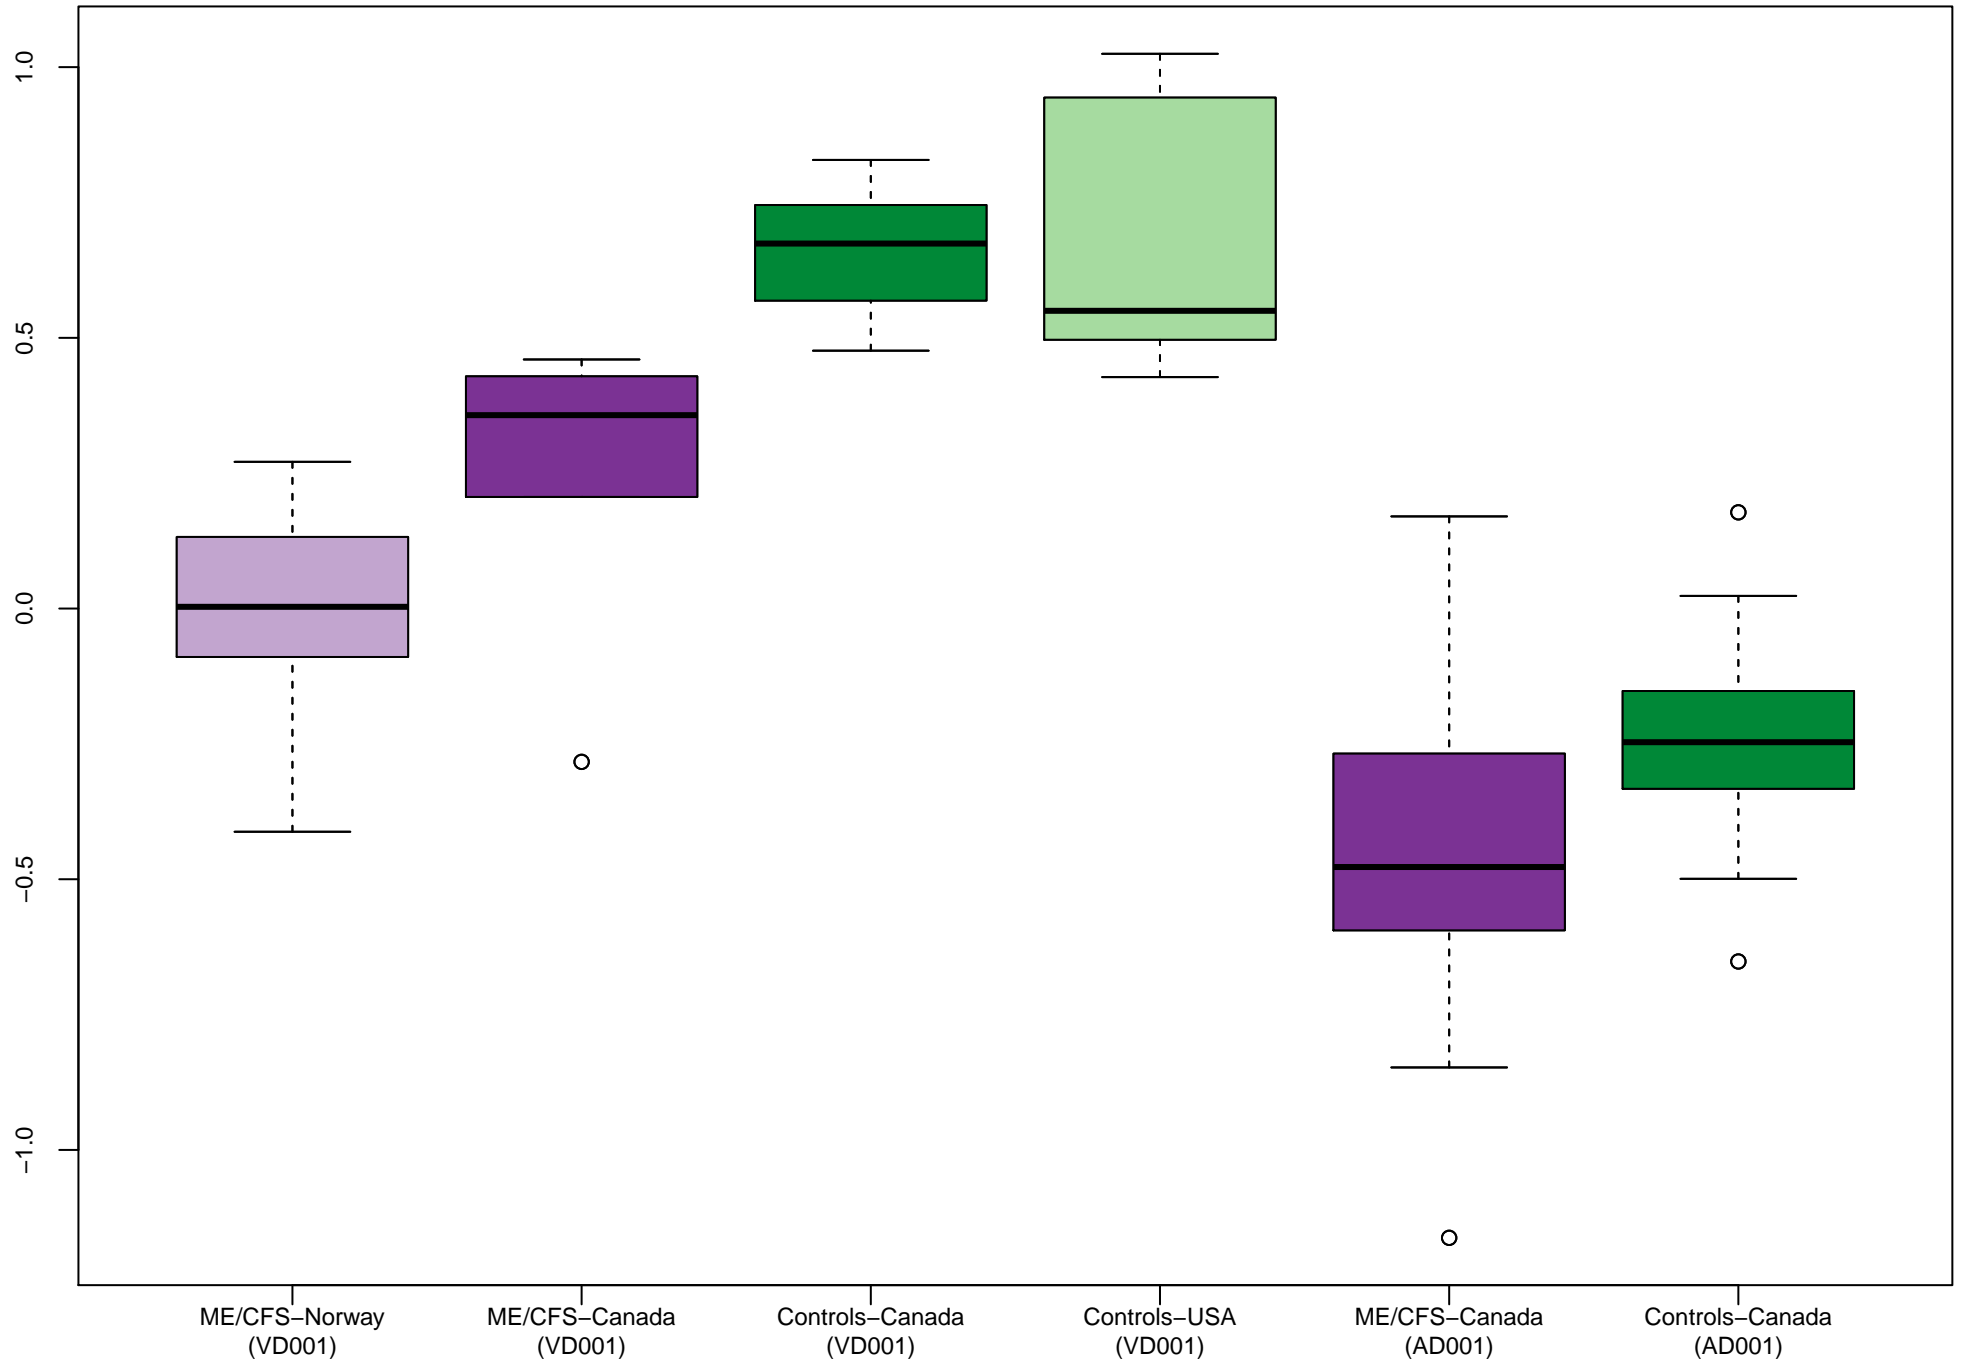

# GWLLKSGVALSG

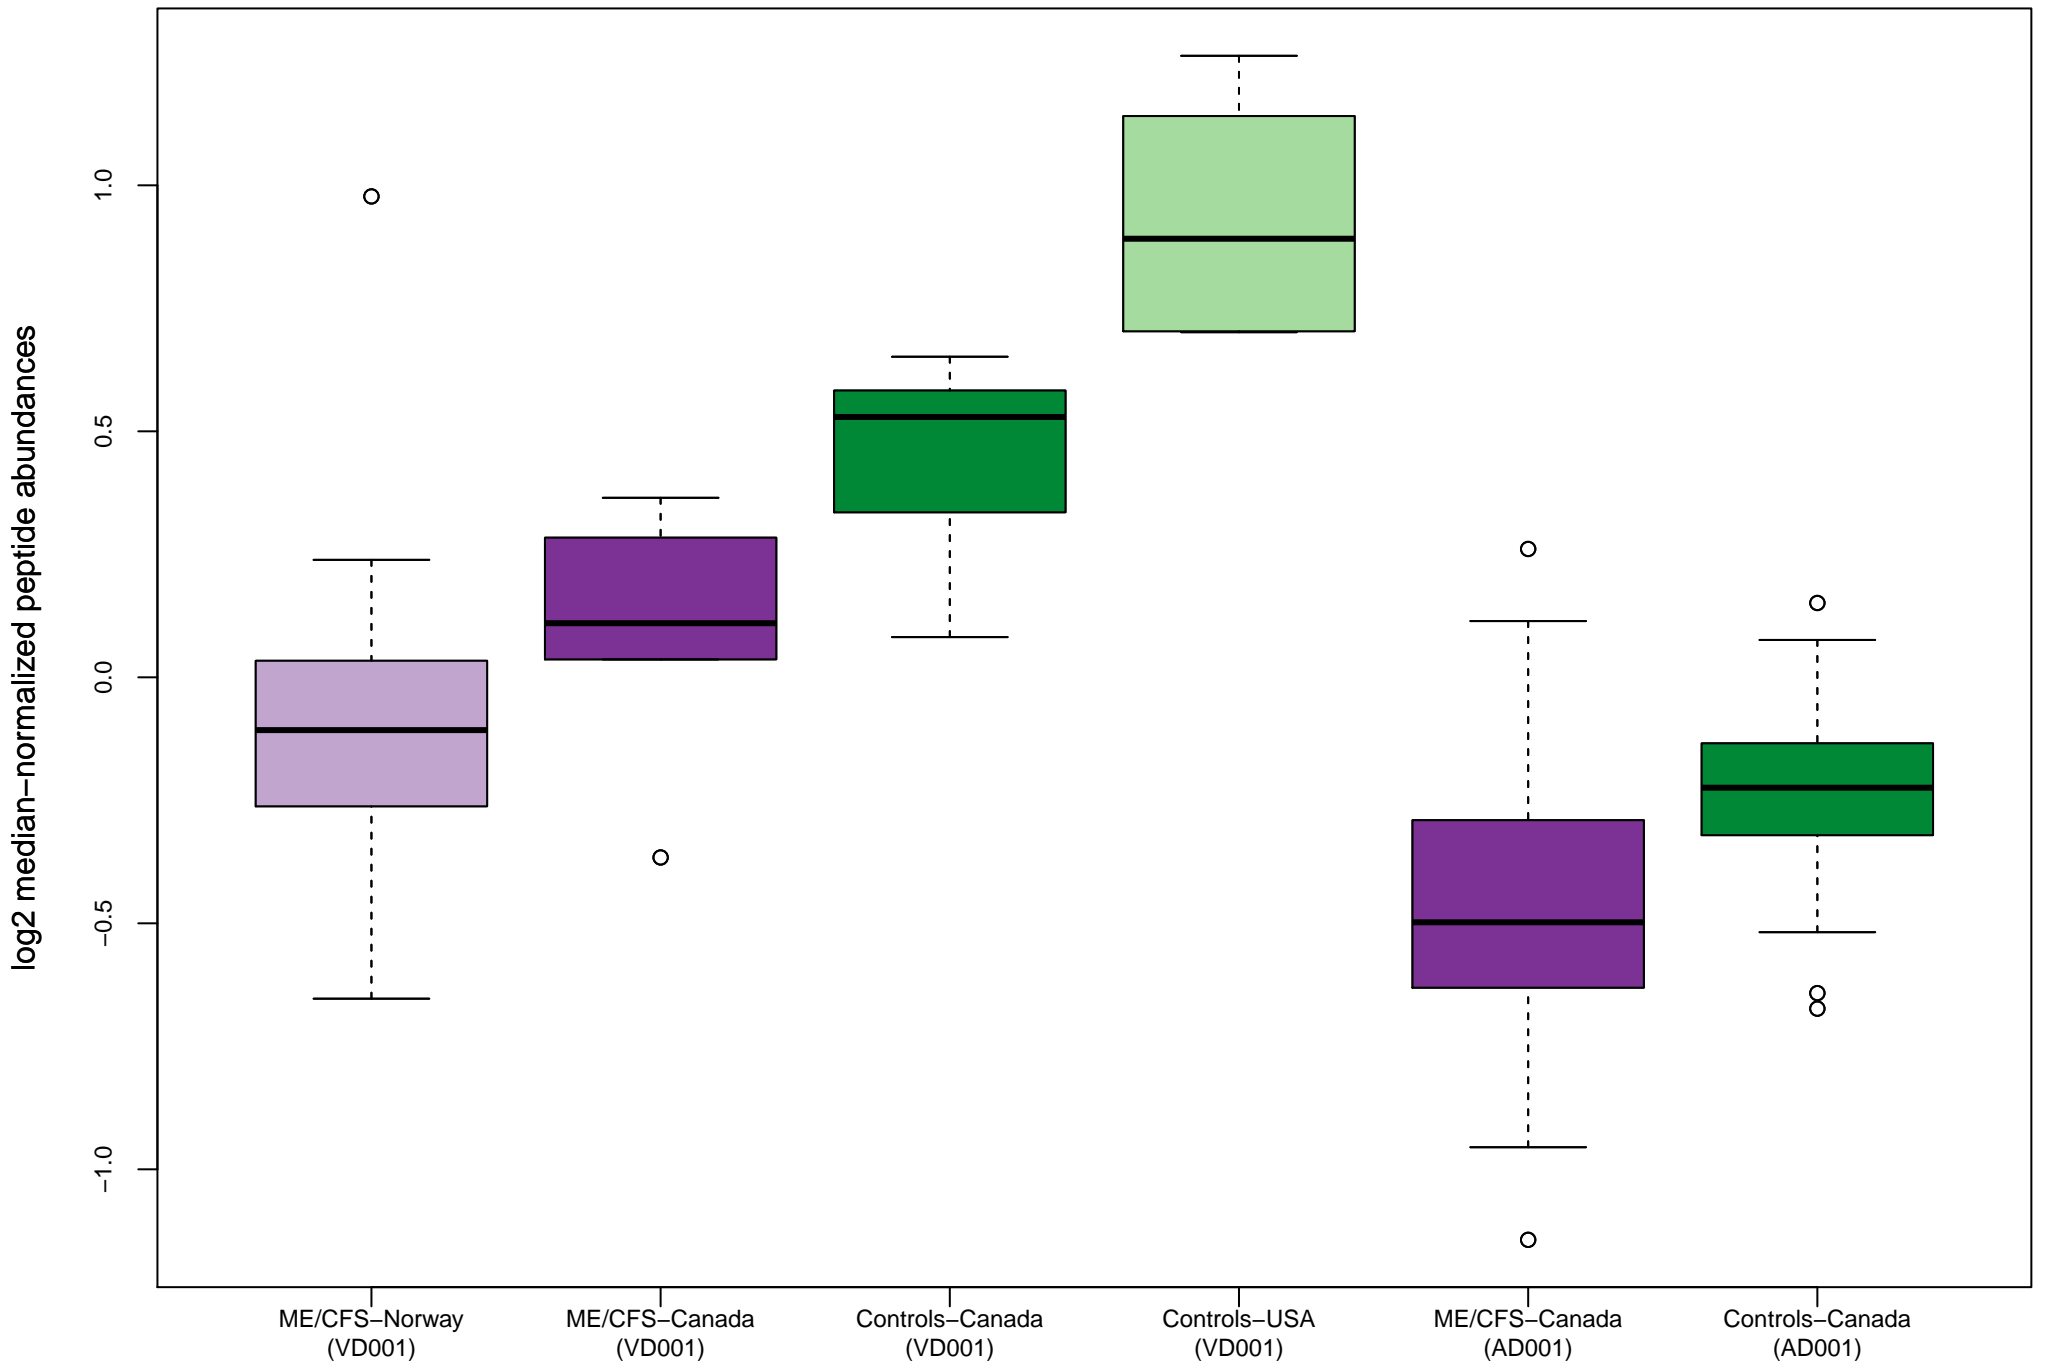

# GWVQWARLSVSG

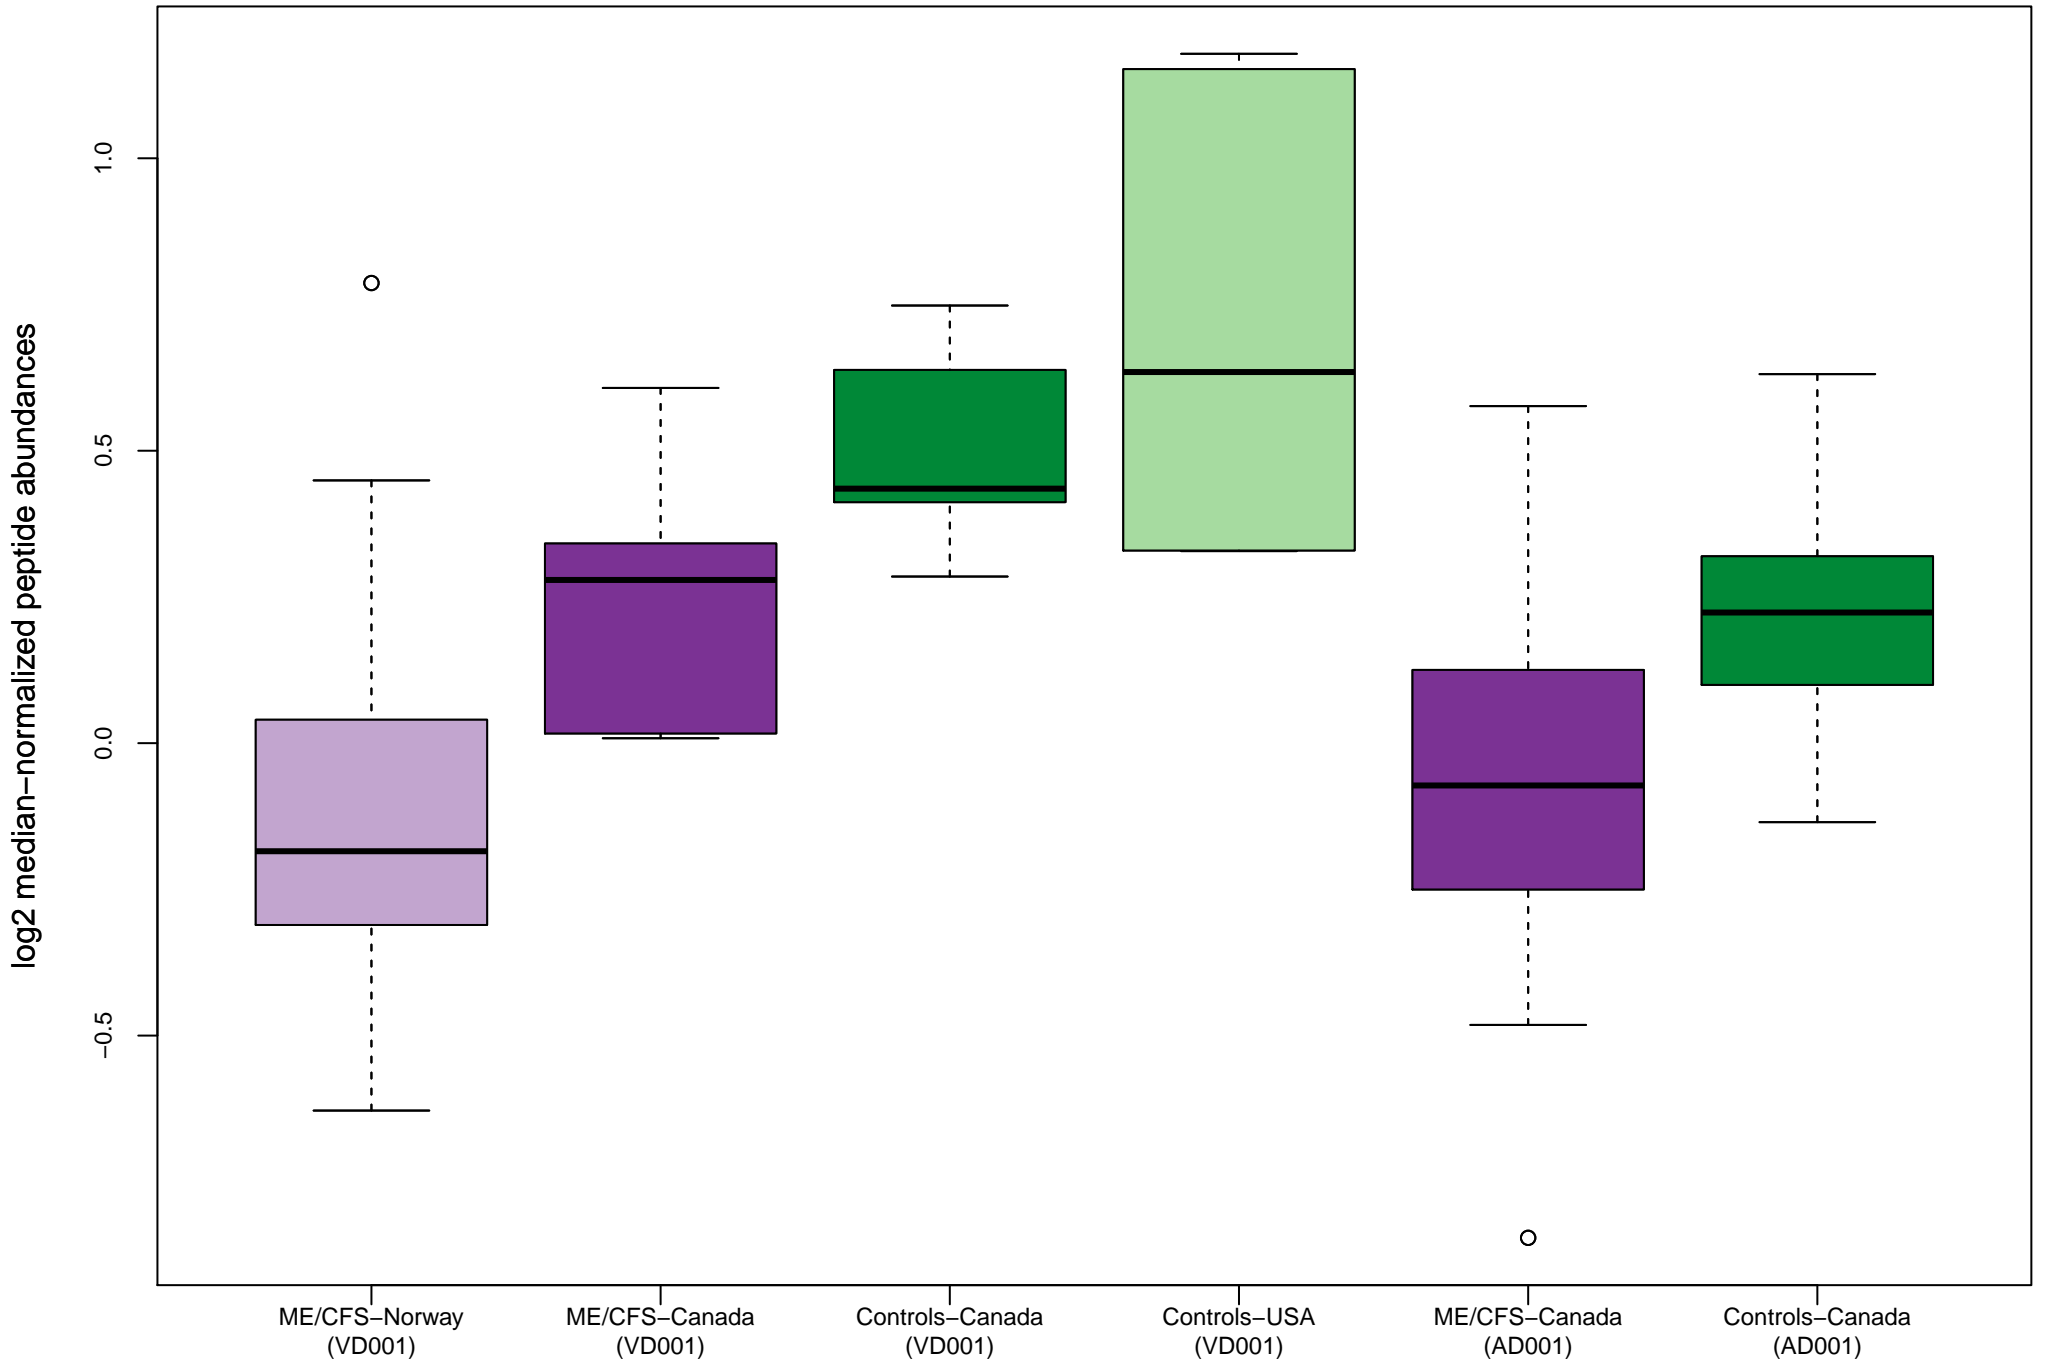

# GYARVFNLSVLS

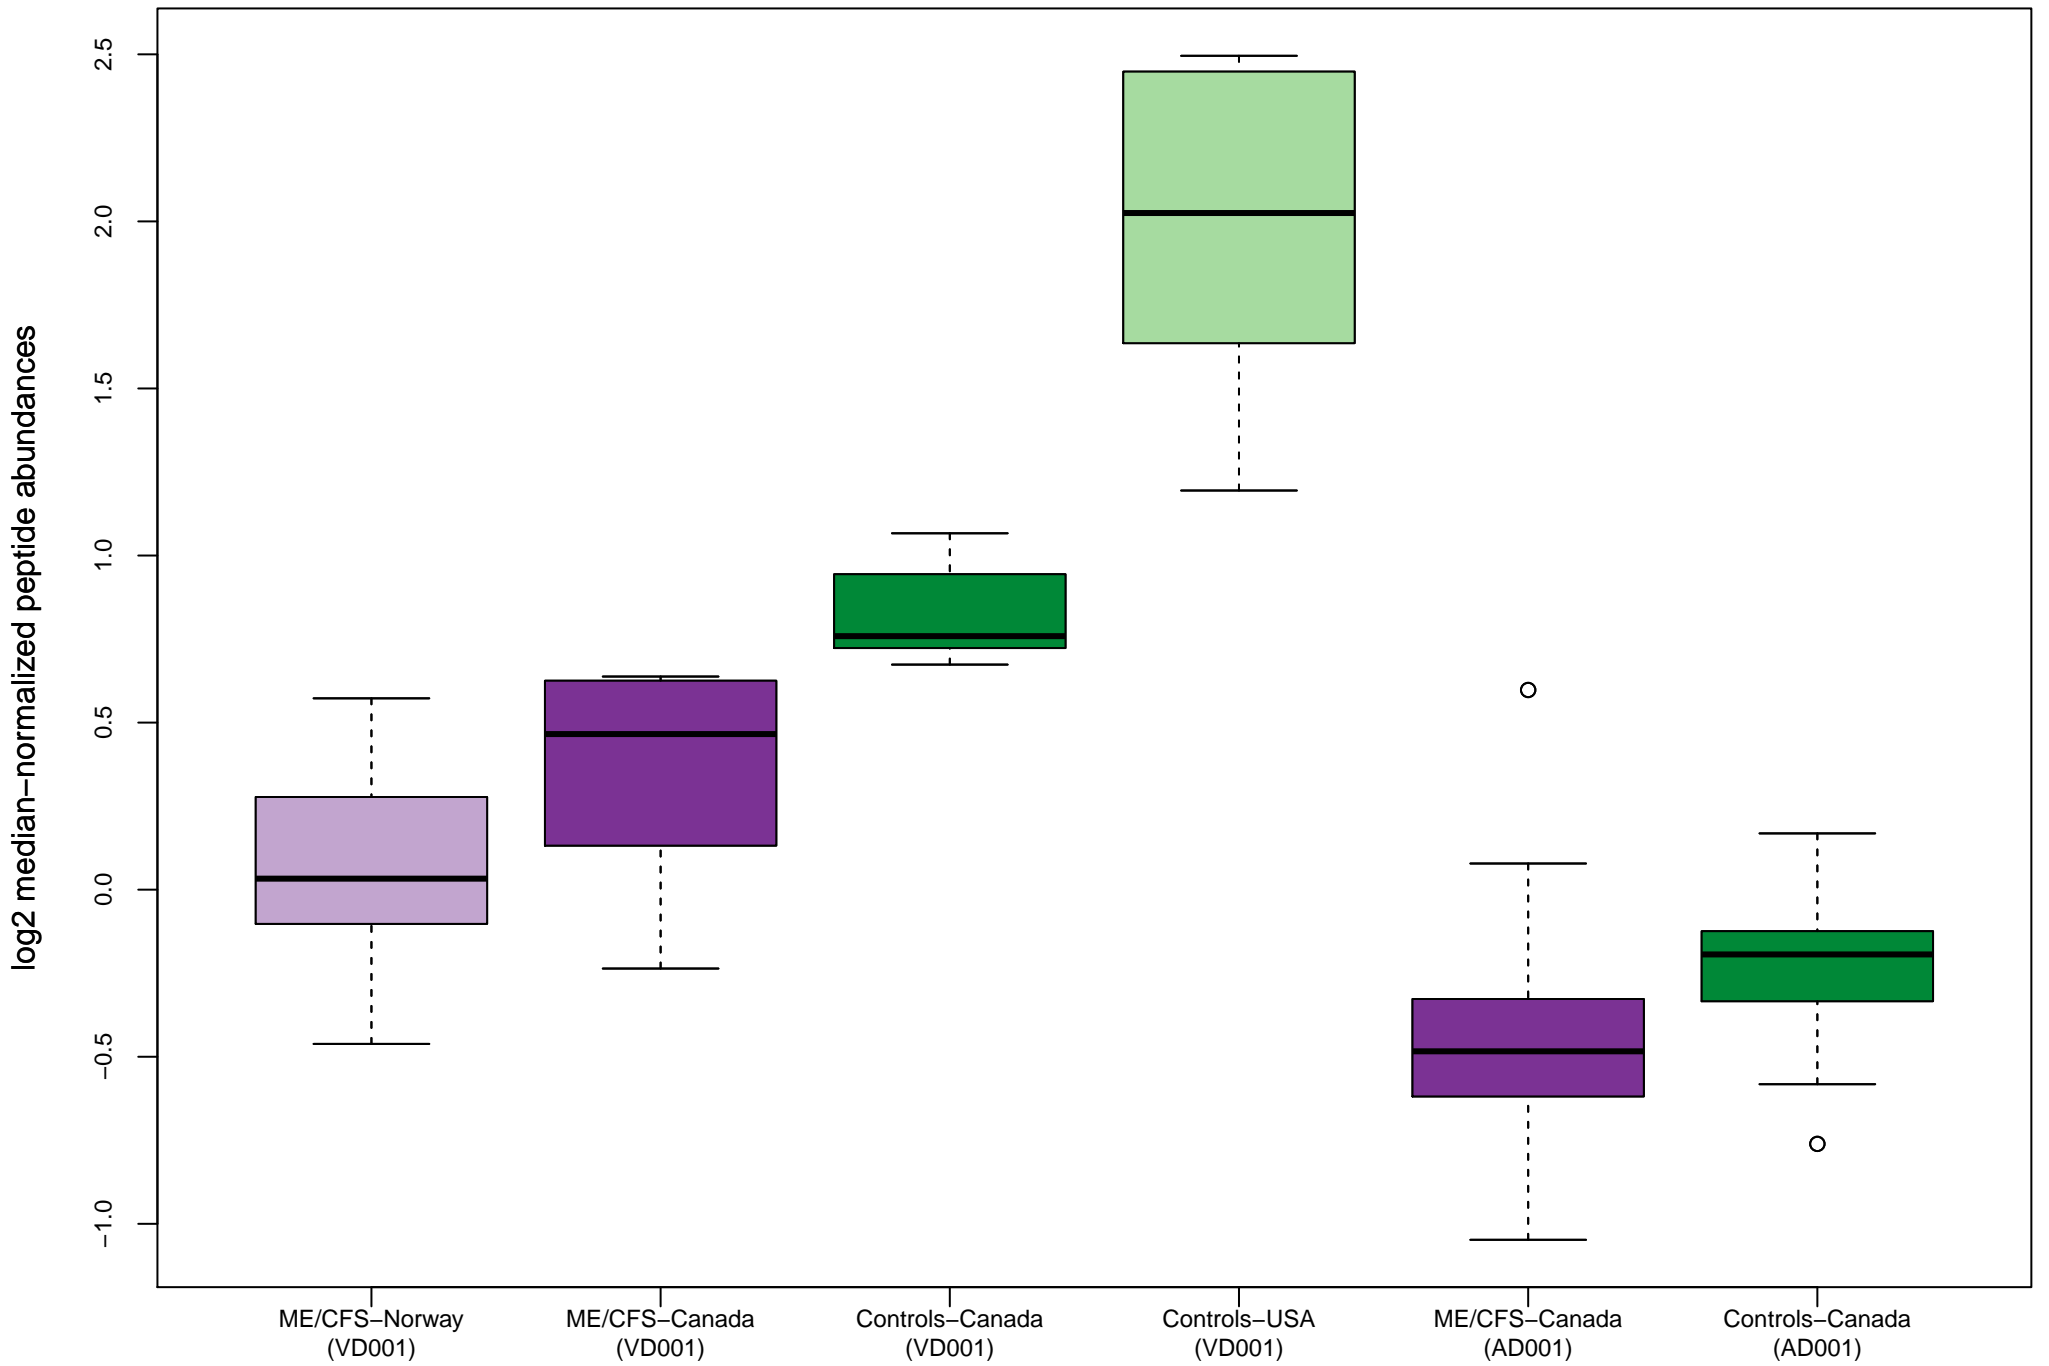

# HDGFARSFRVAV

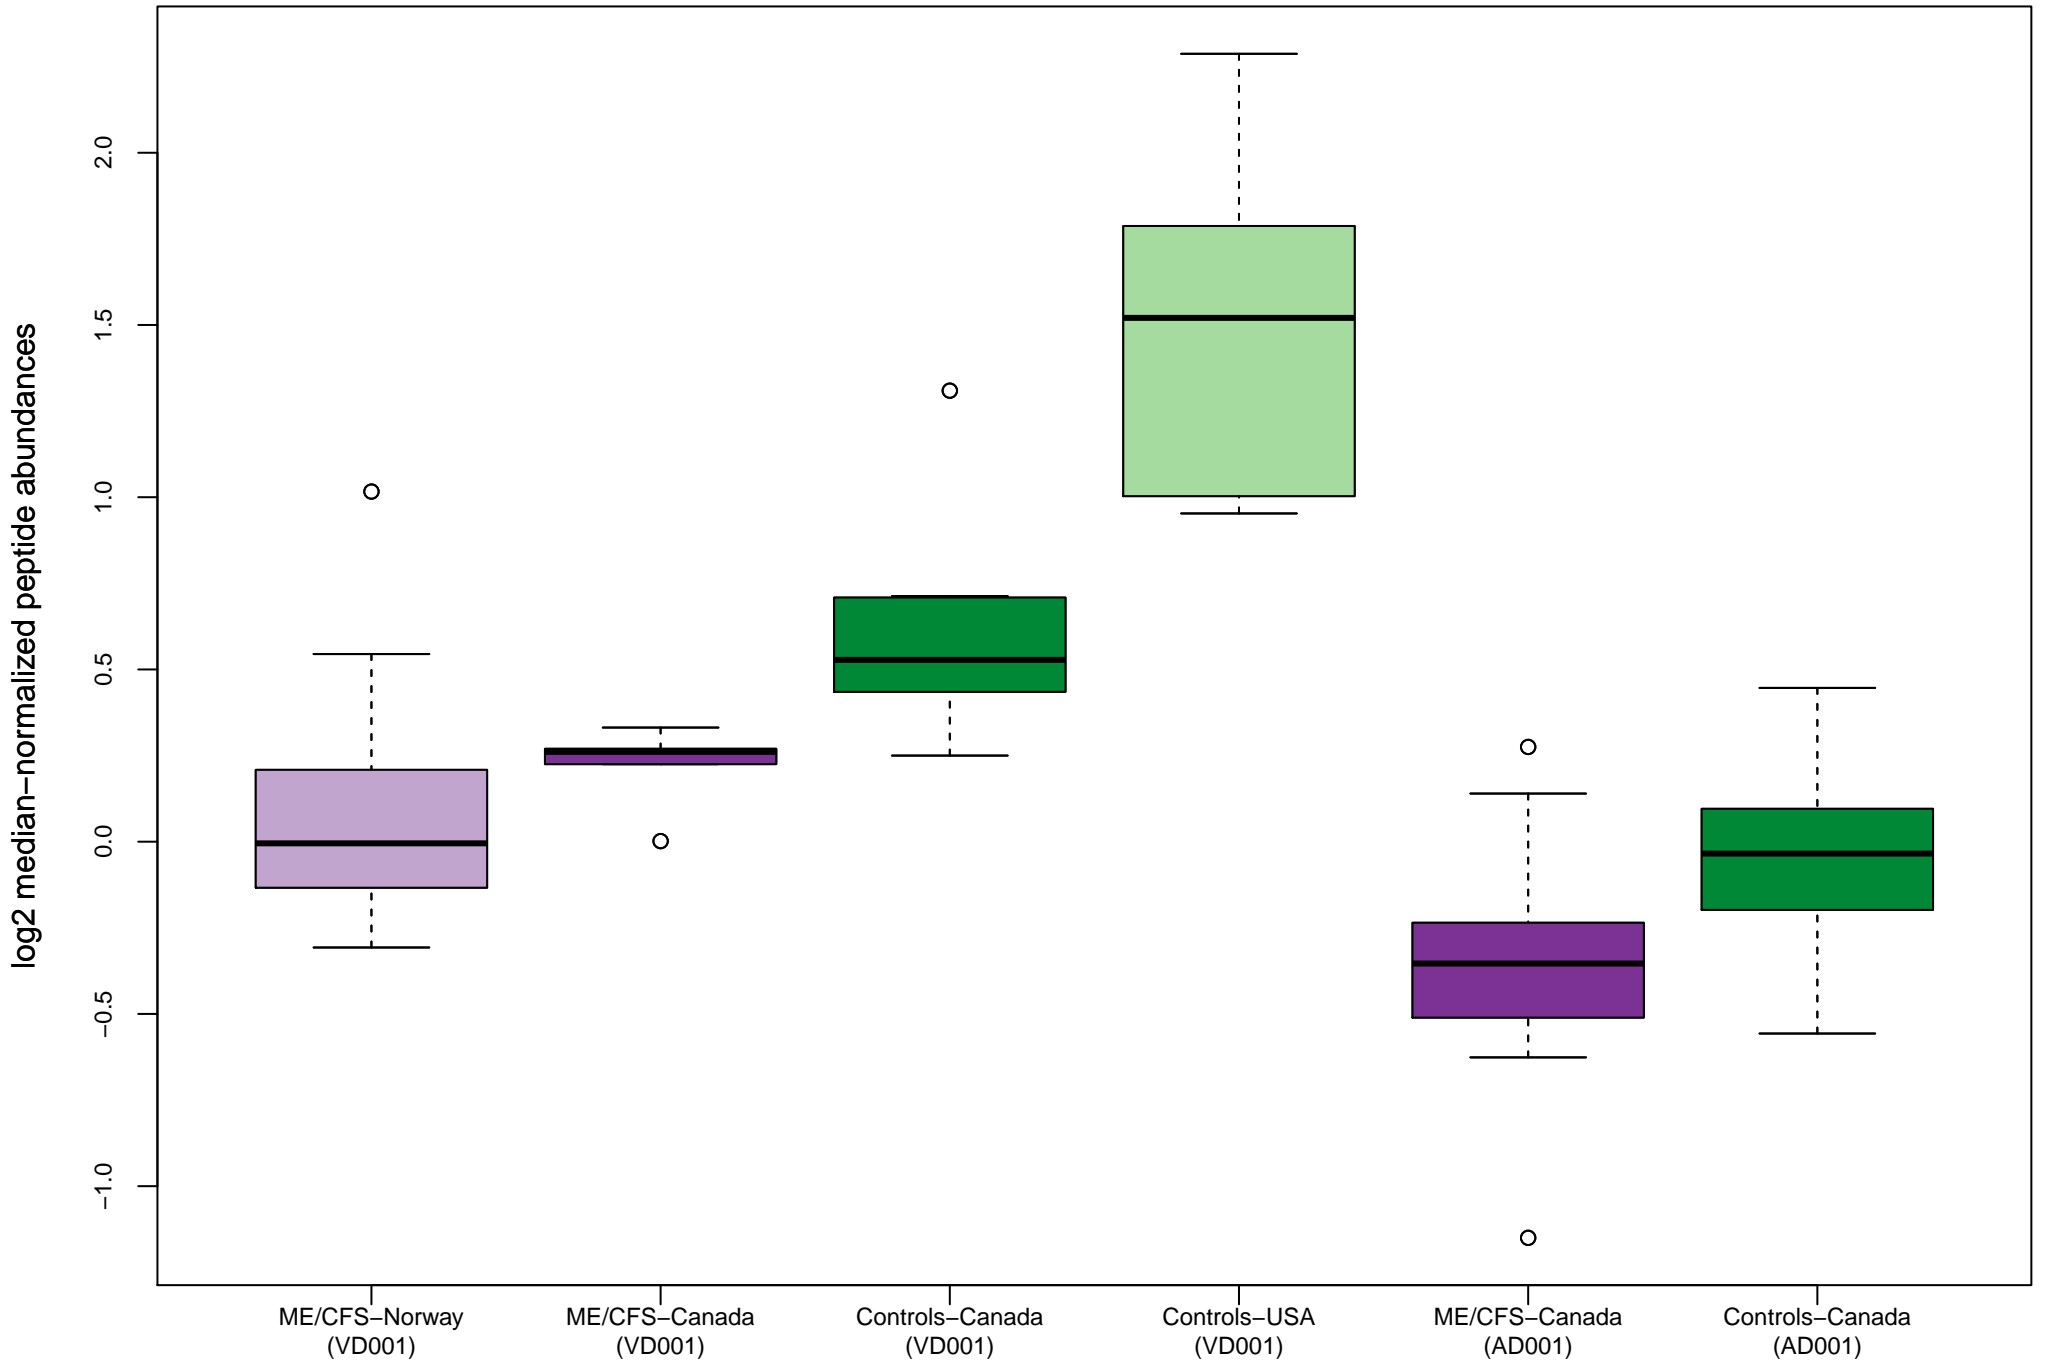

# HLYKALFGRVAL

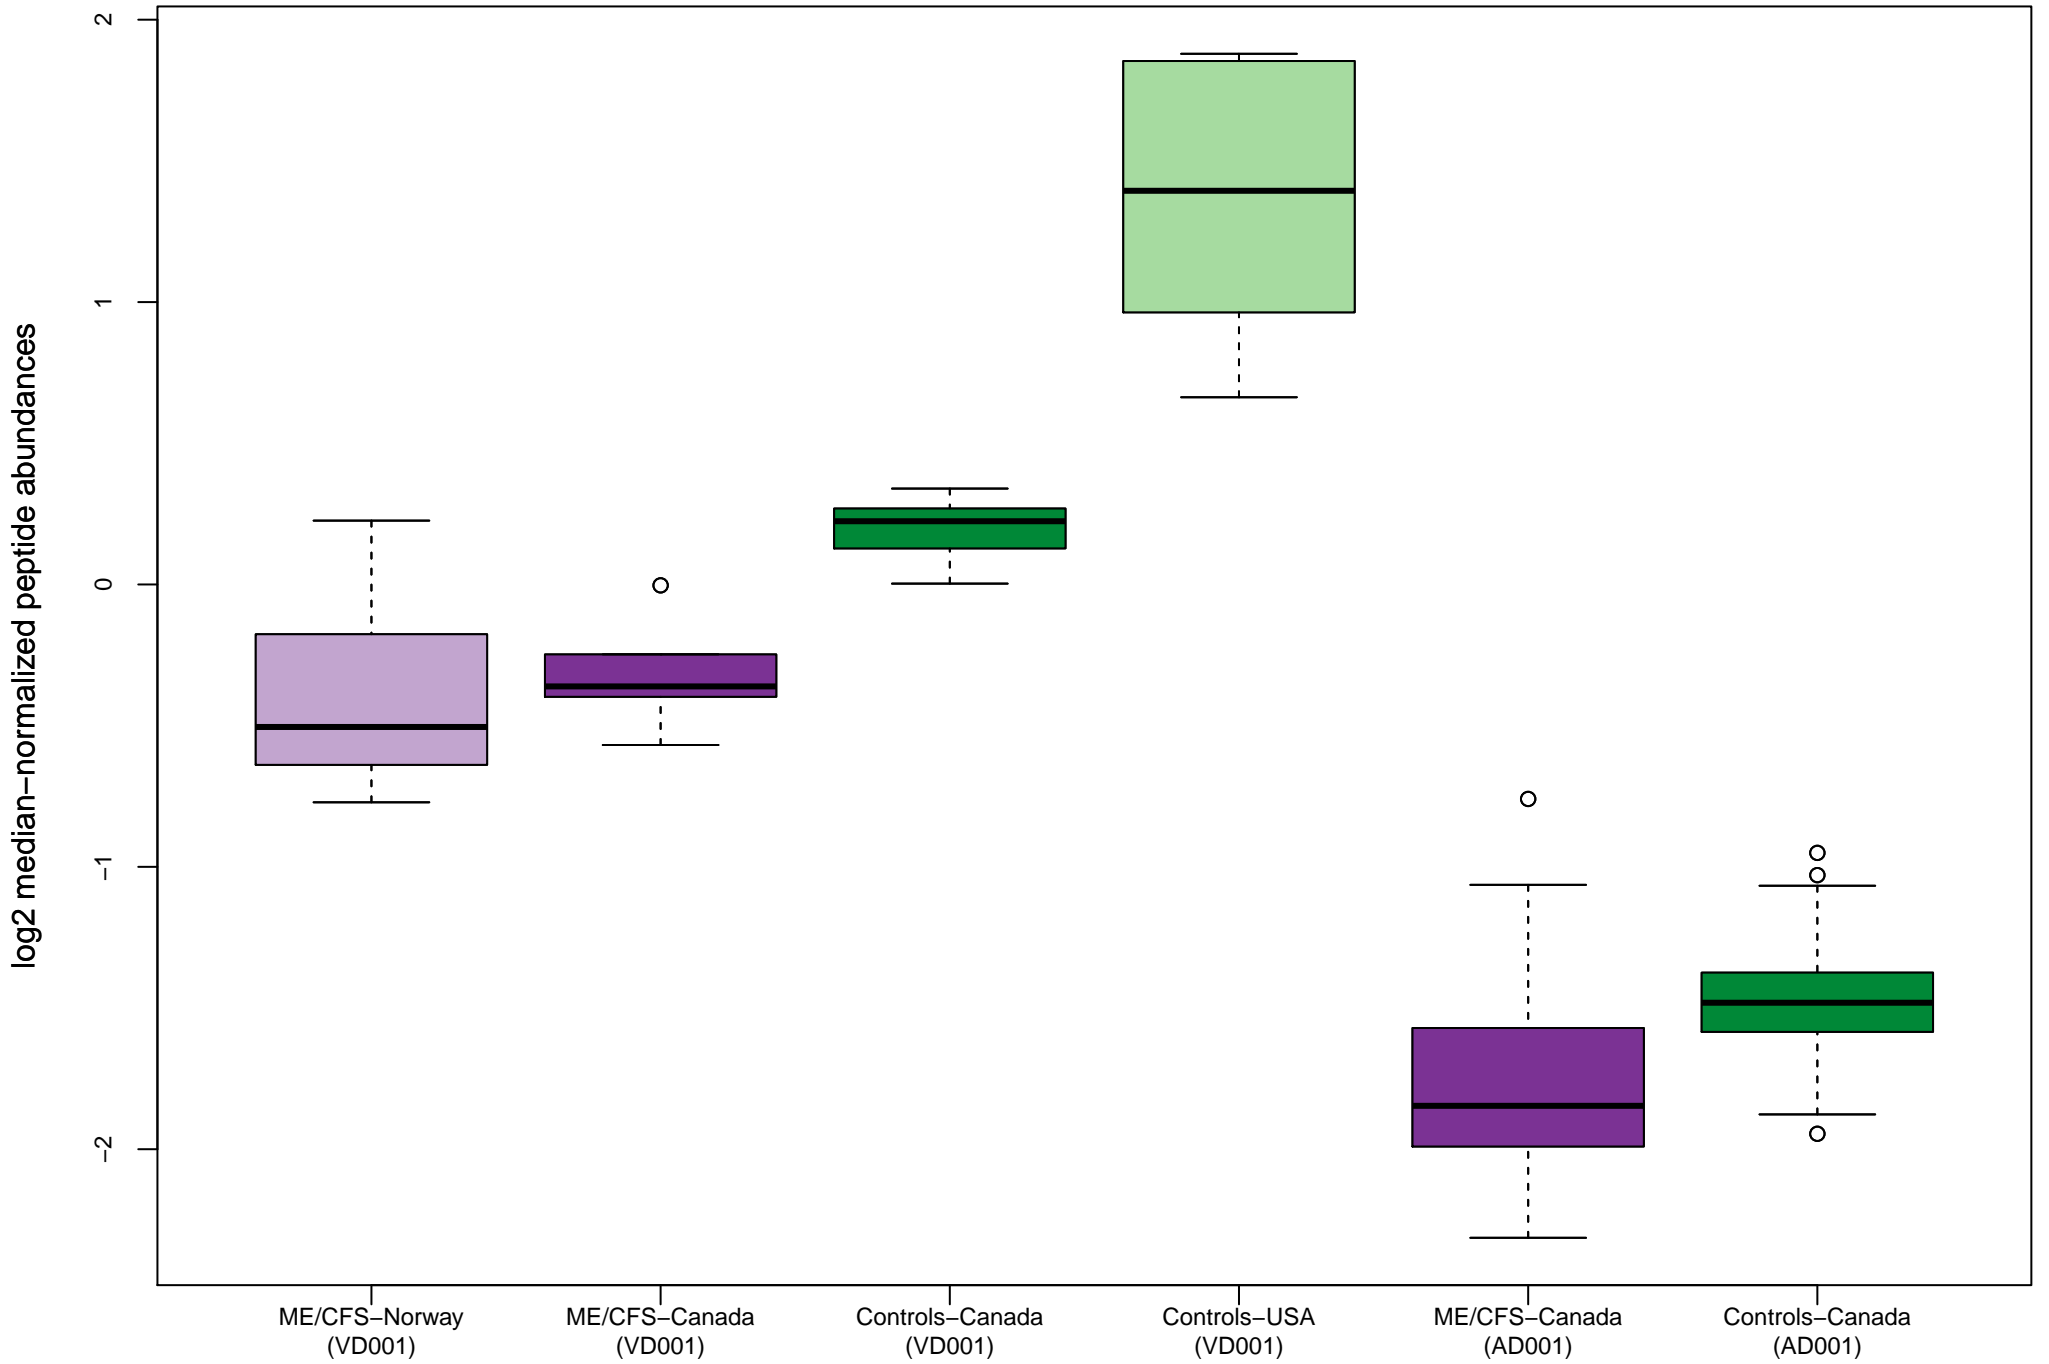

# HPFFRASGVALG

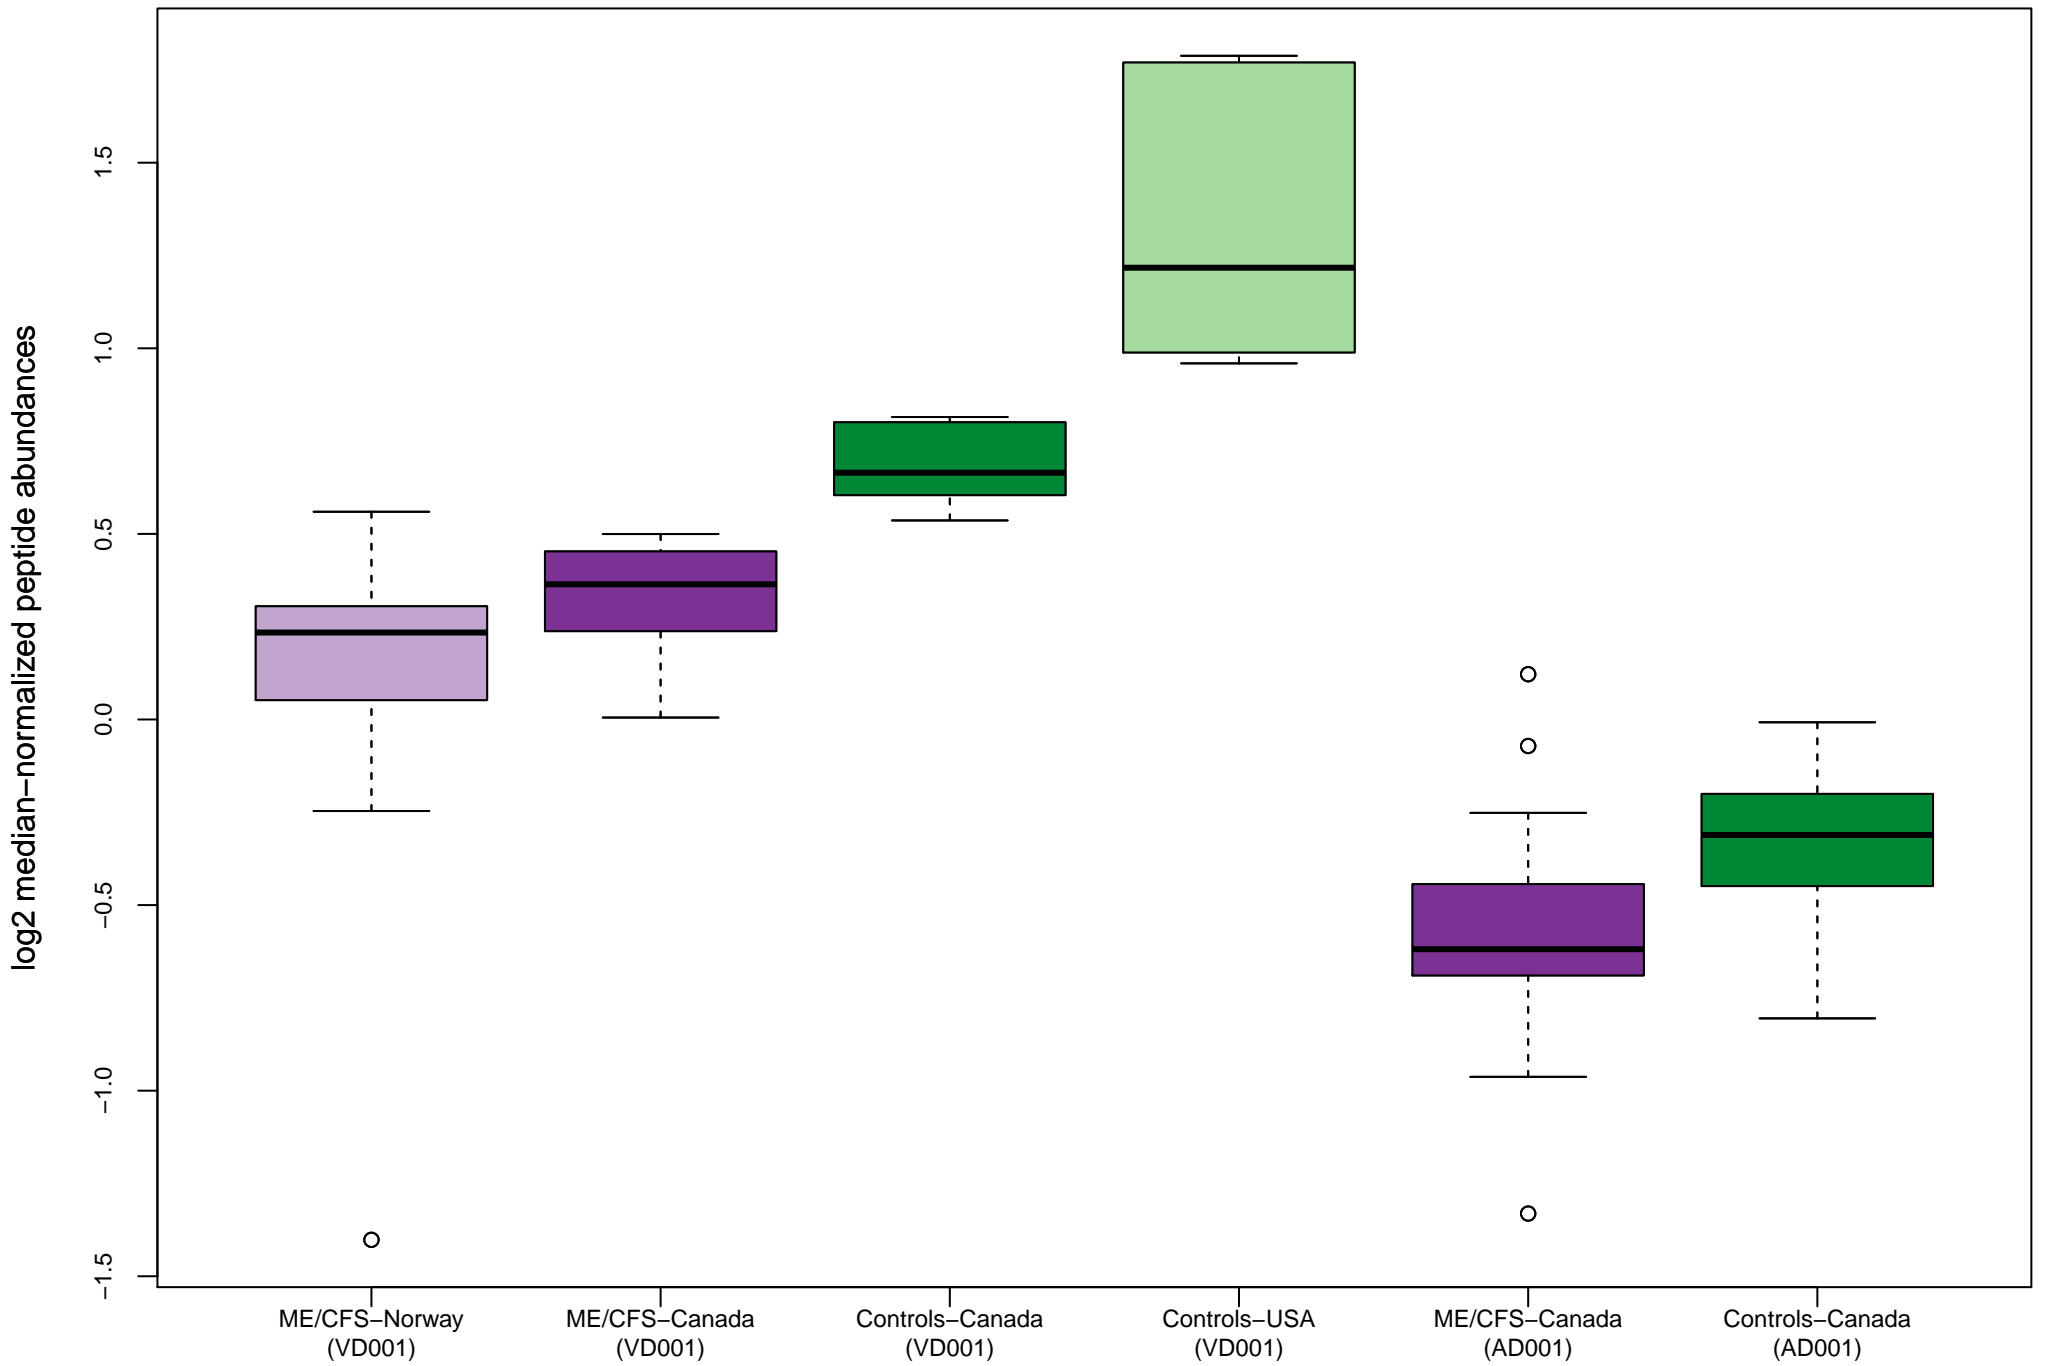



# KAWWAFPYKVLS

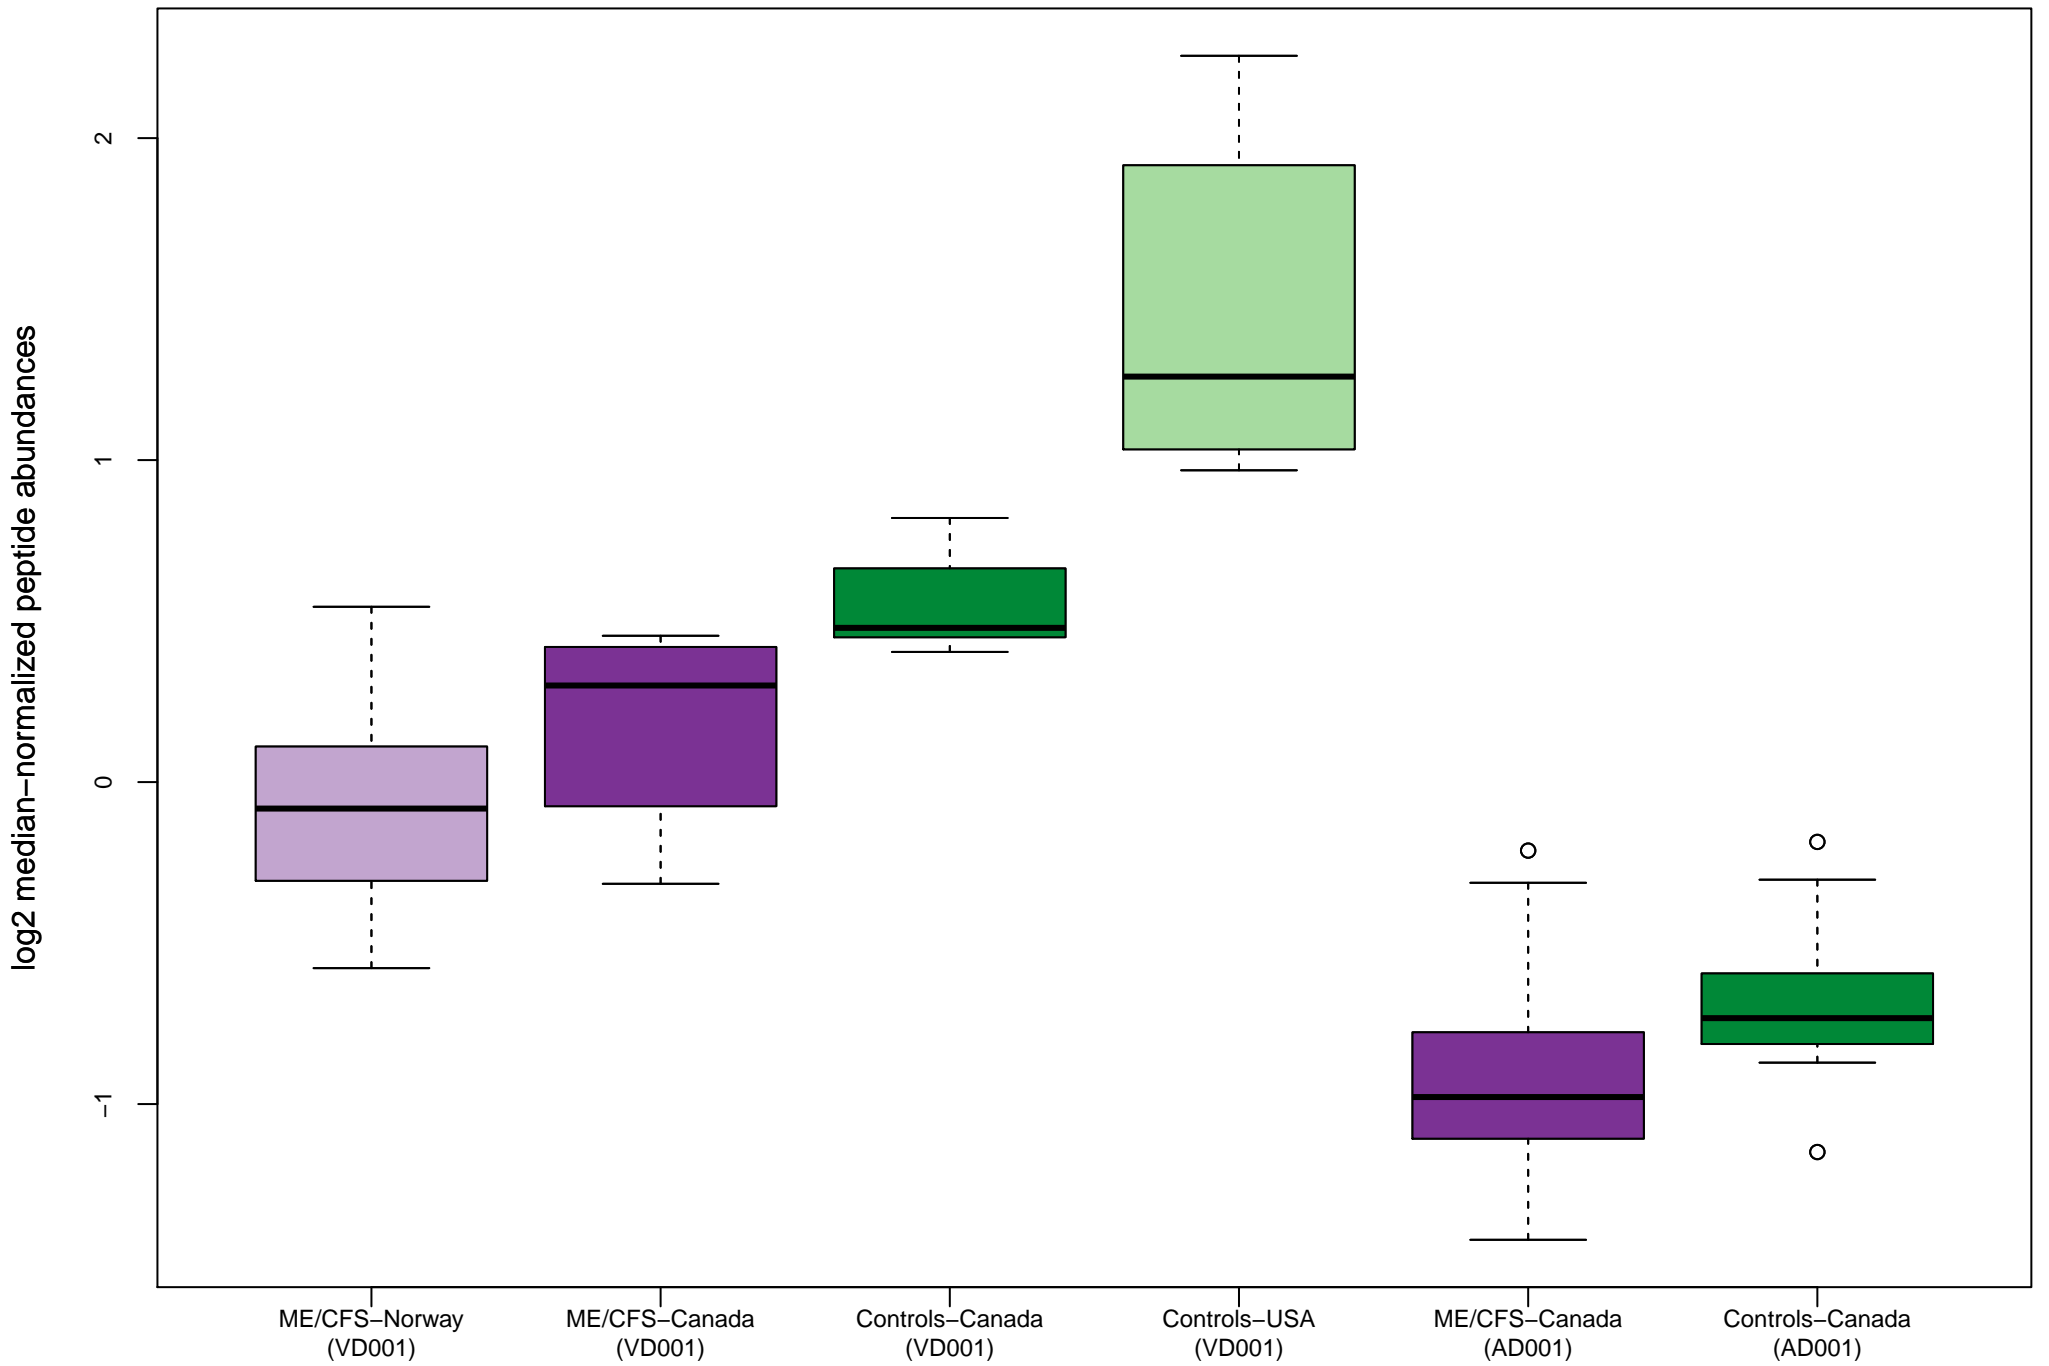

# KFARFYSGVLSG

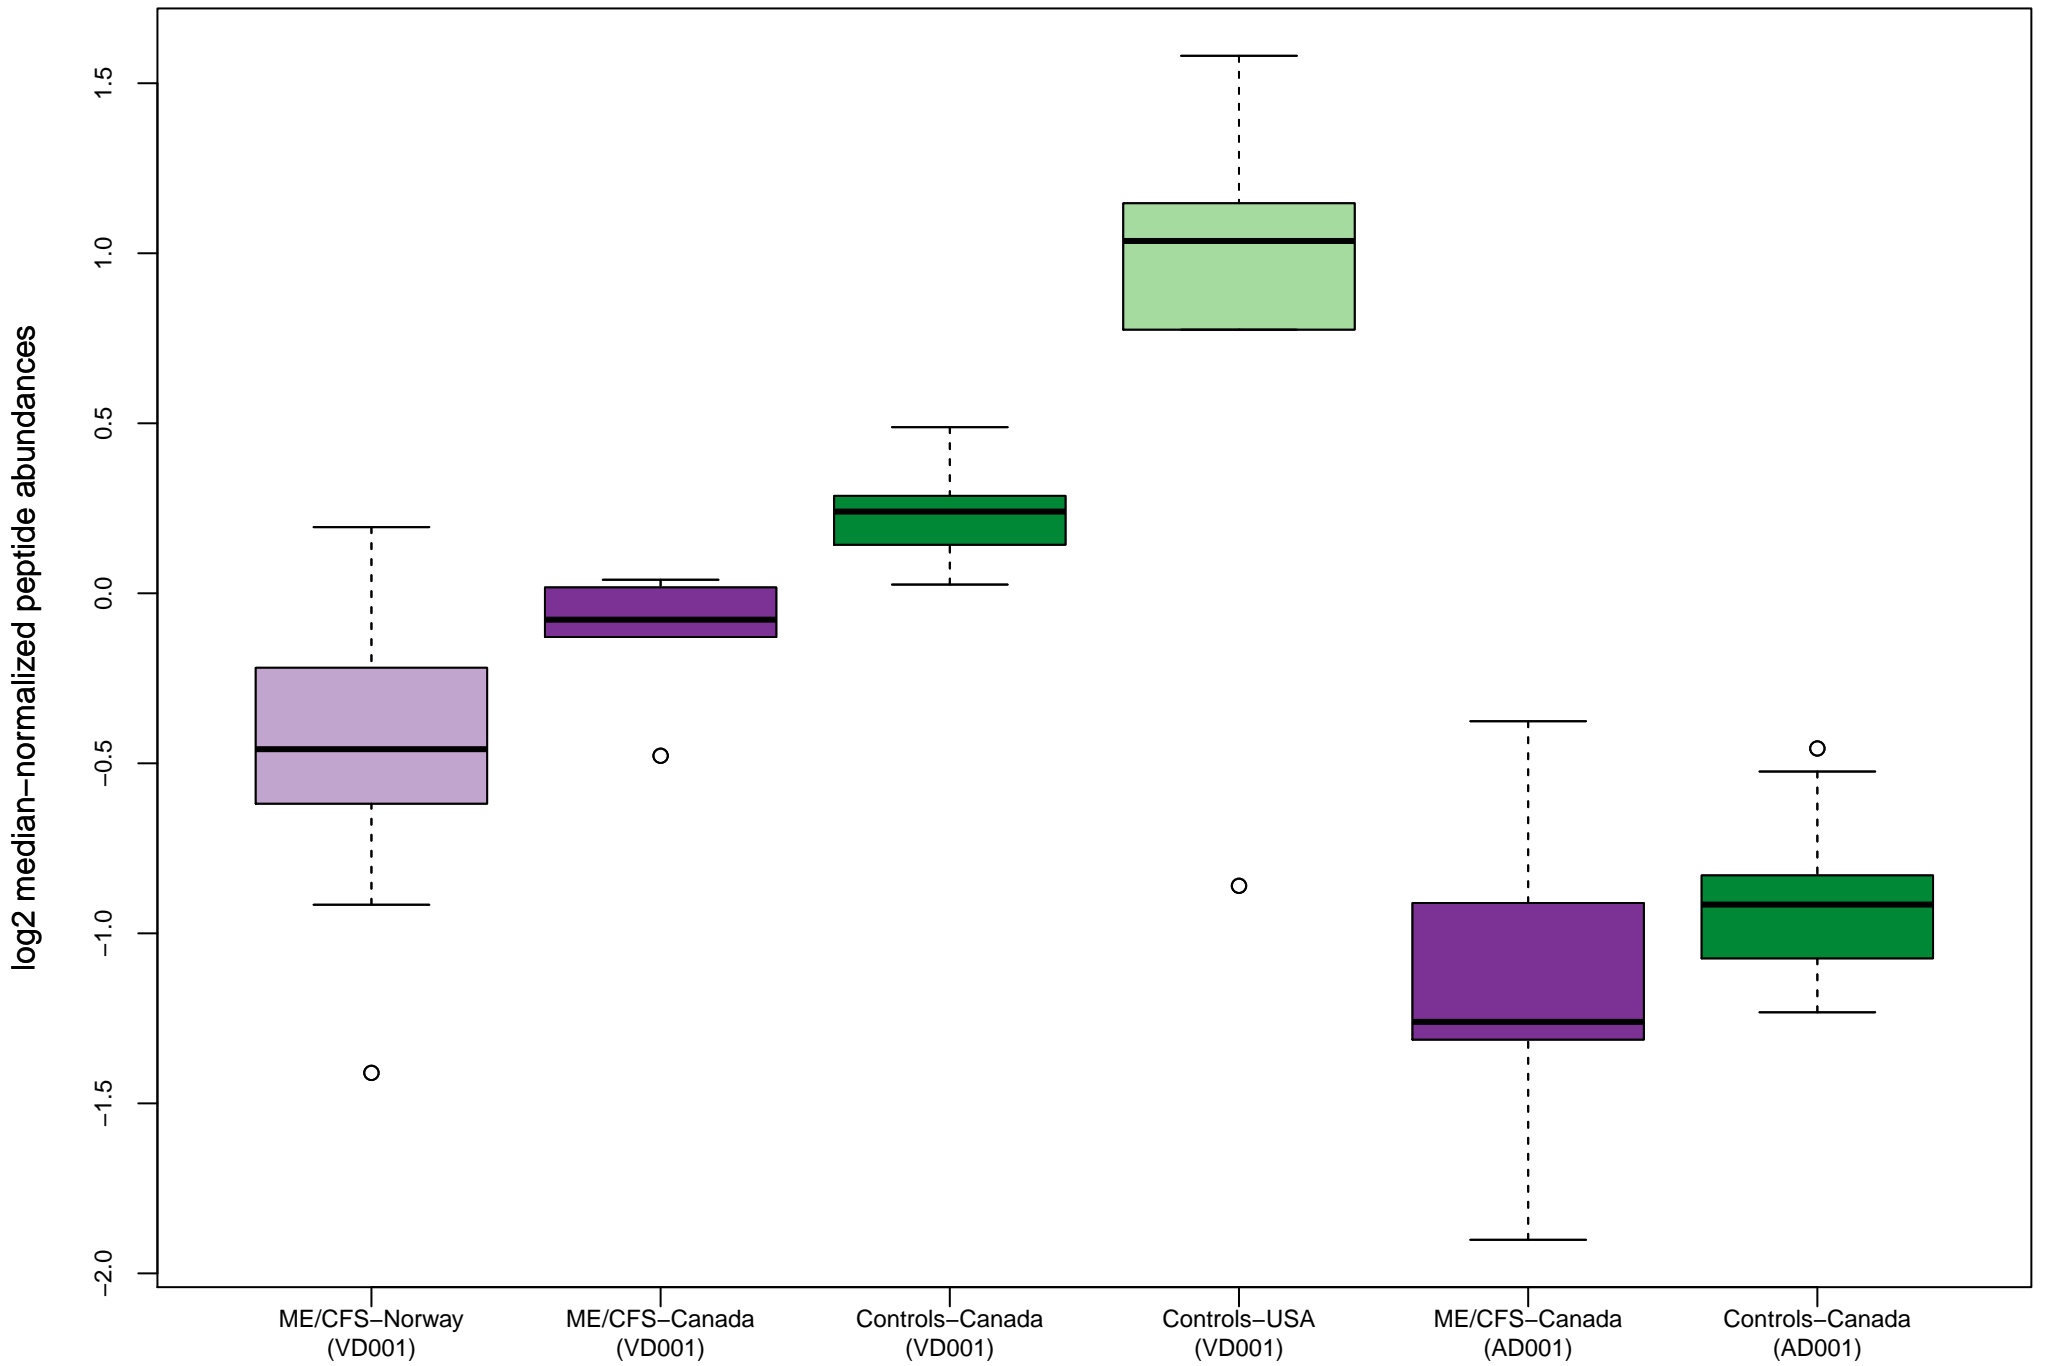

# KLWLPRYWASVL

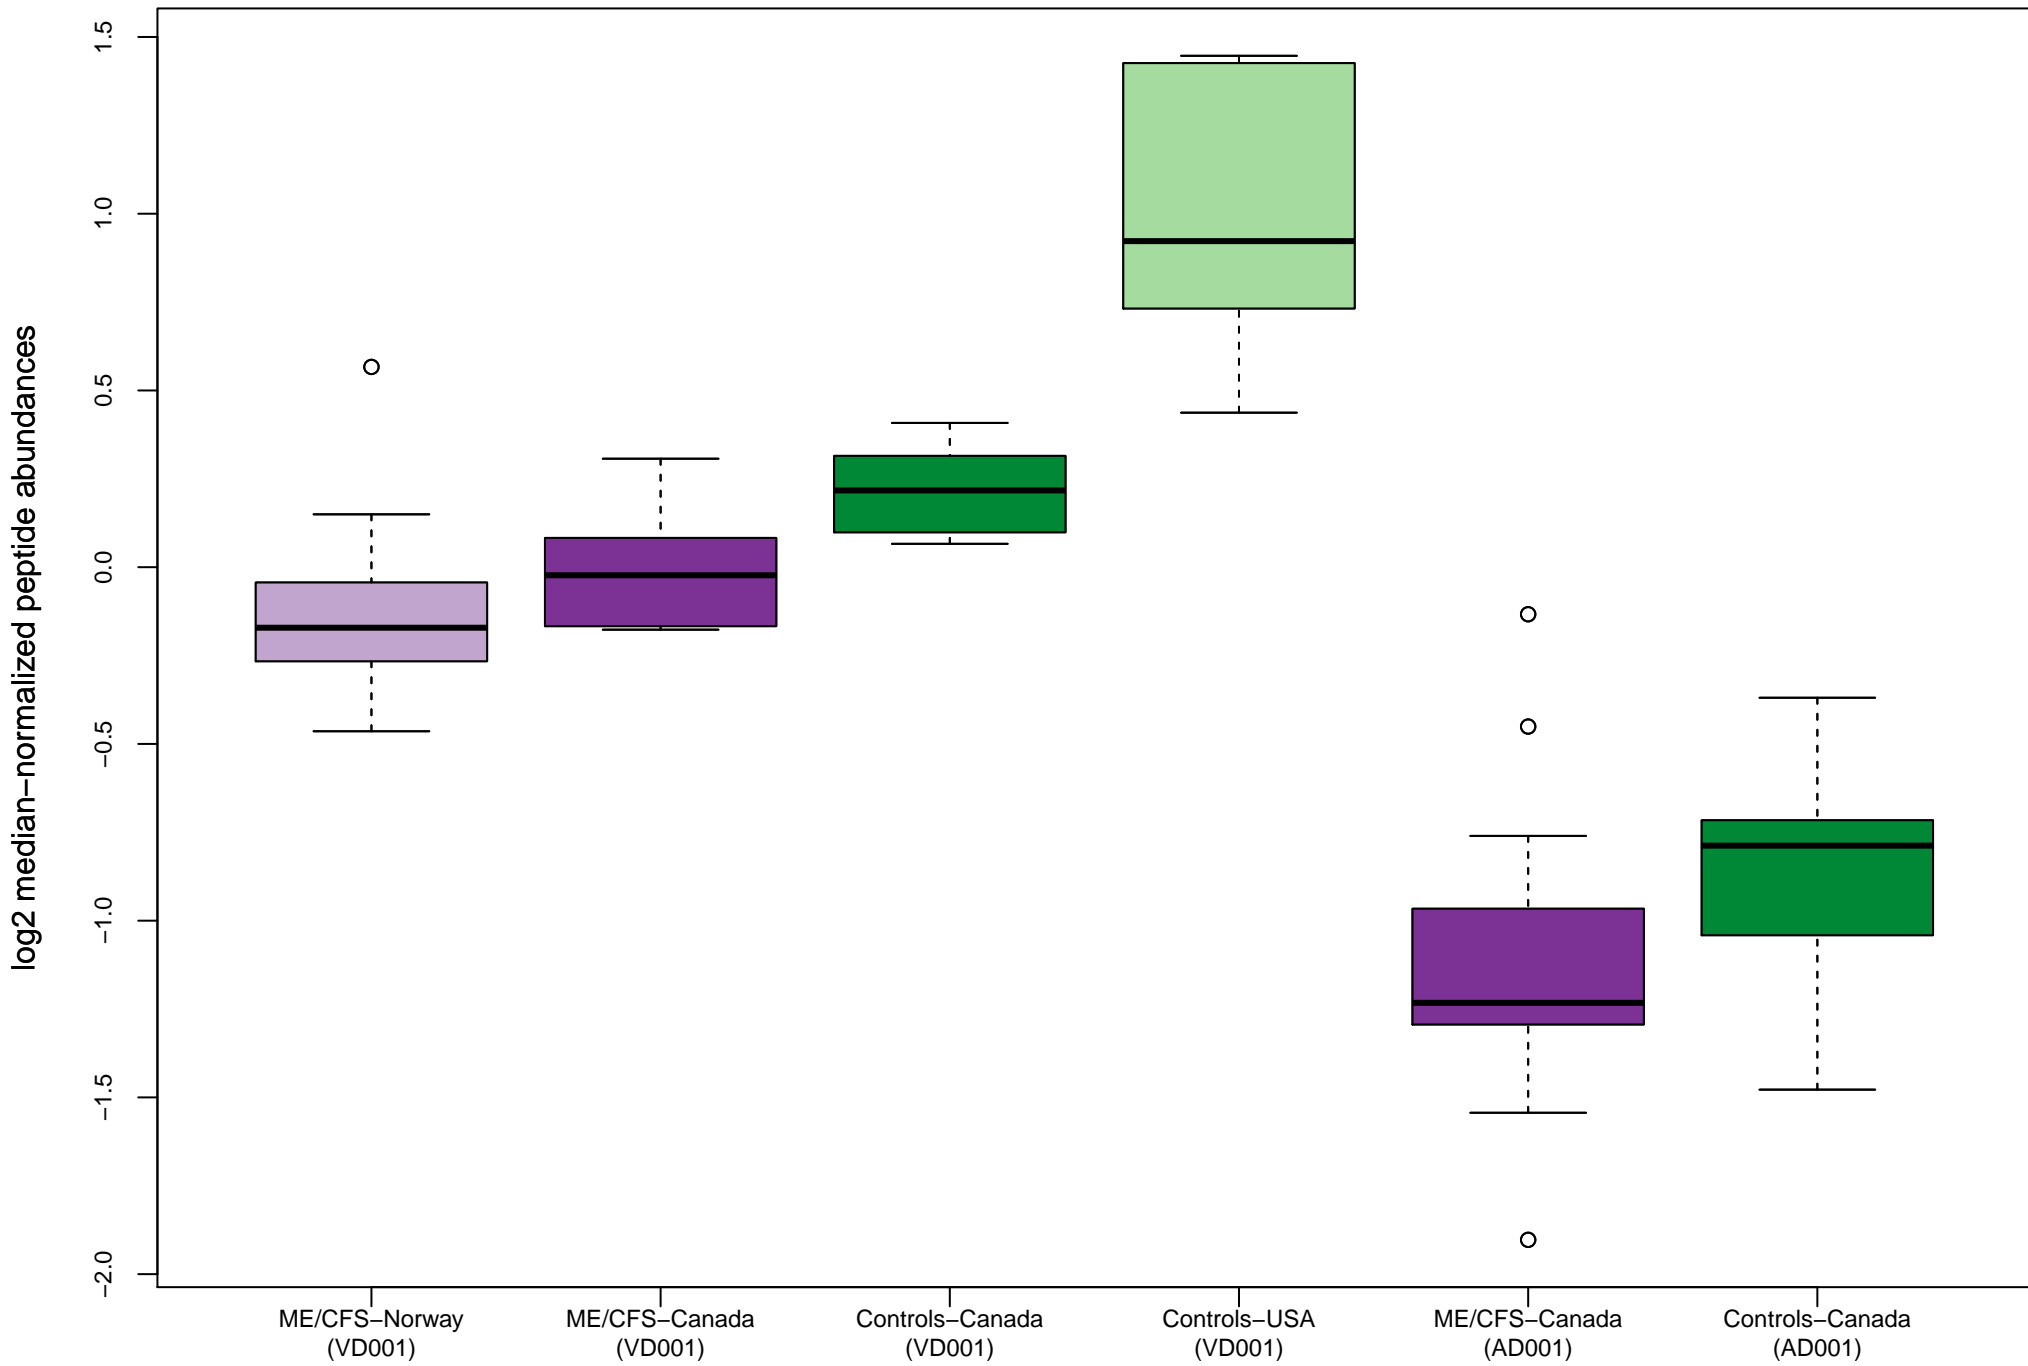

# LARLPLGVALSG

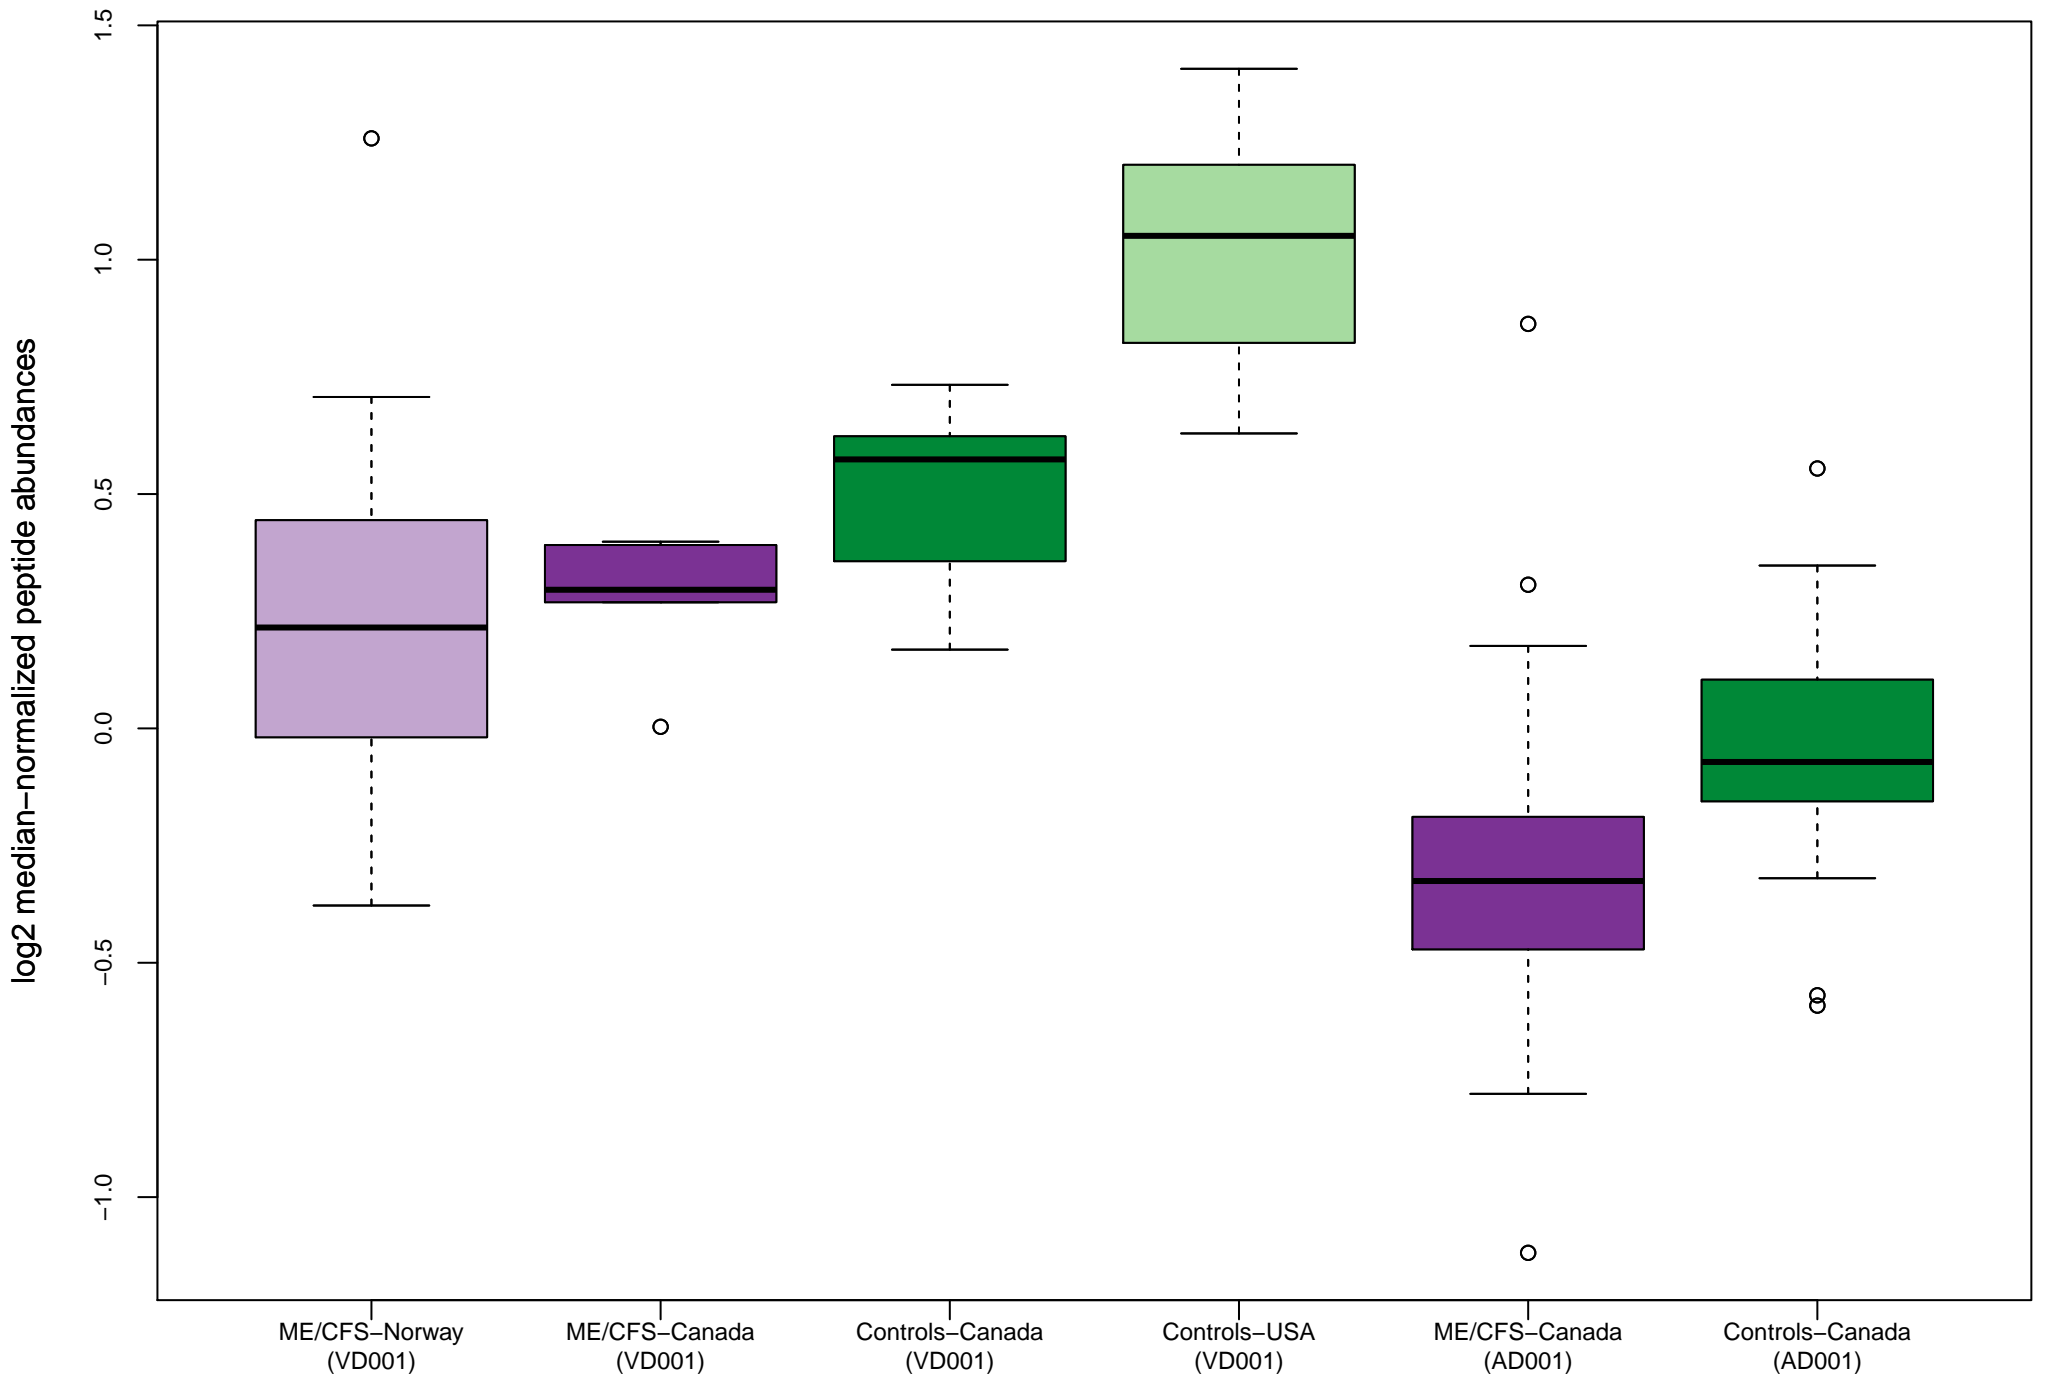

# LFLRRWALSVSG

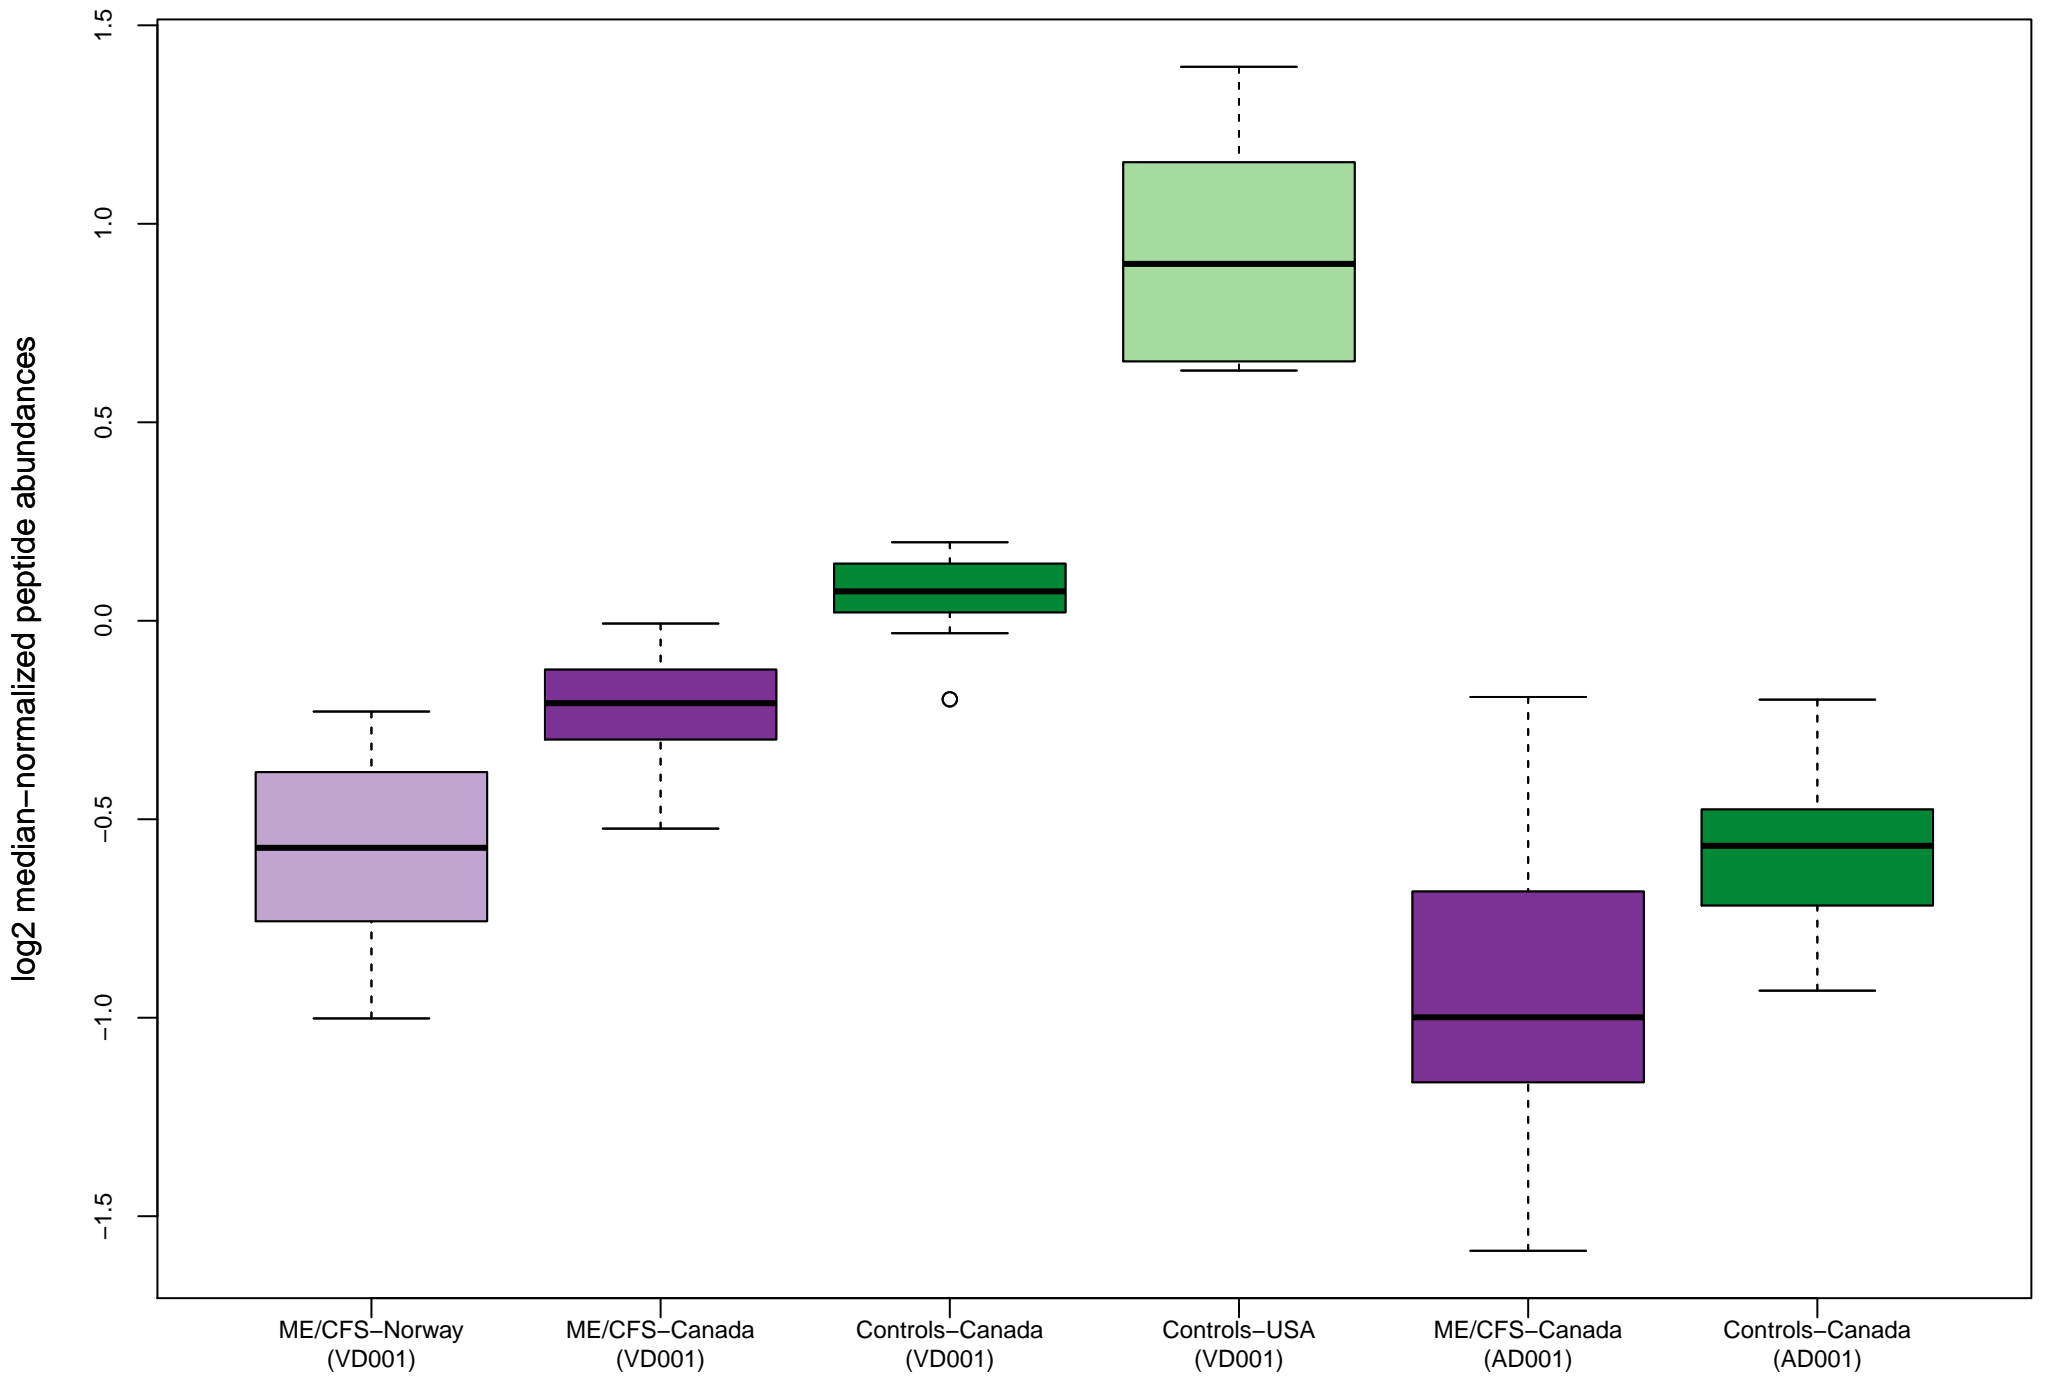

# LFWLFRQRNVAL

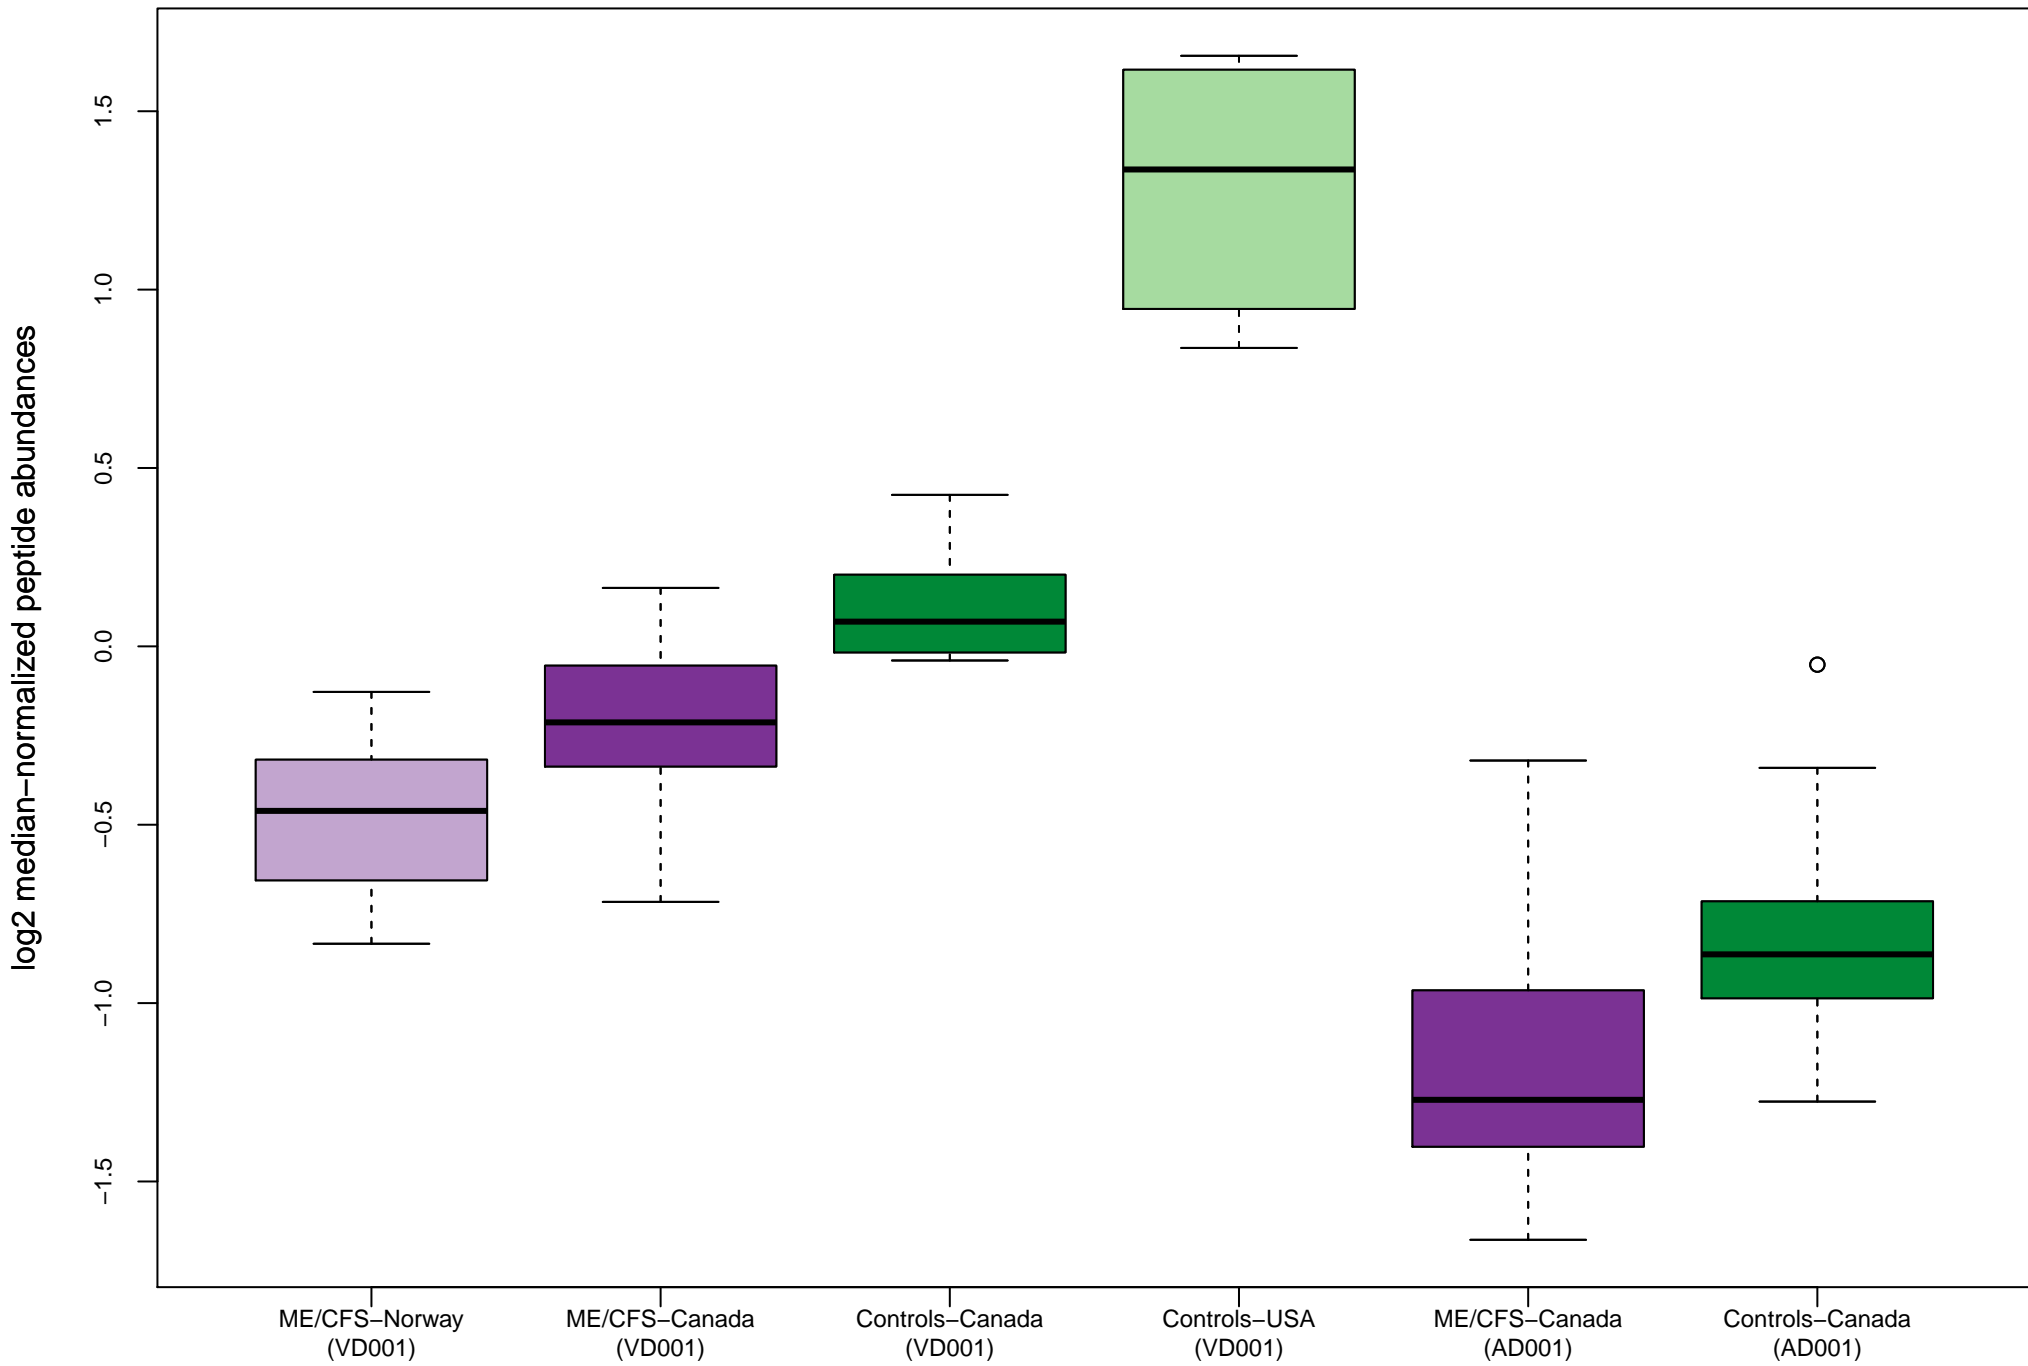

# LLRWNWAGVALS

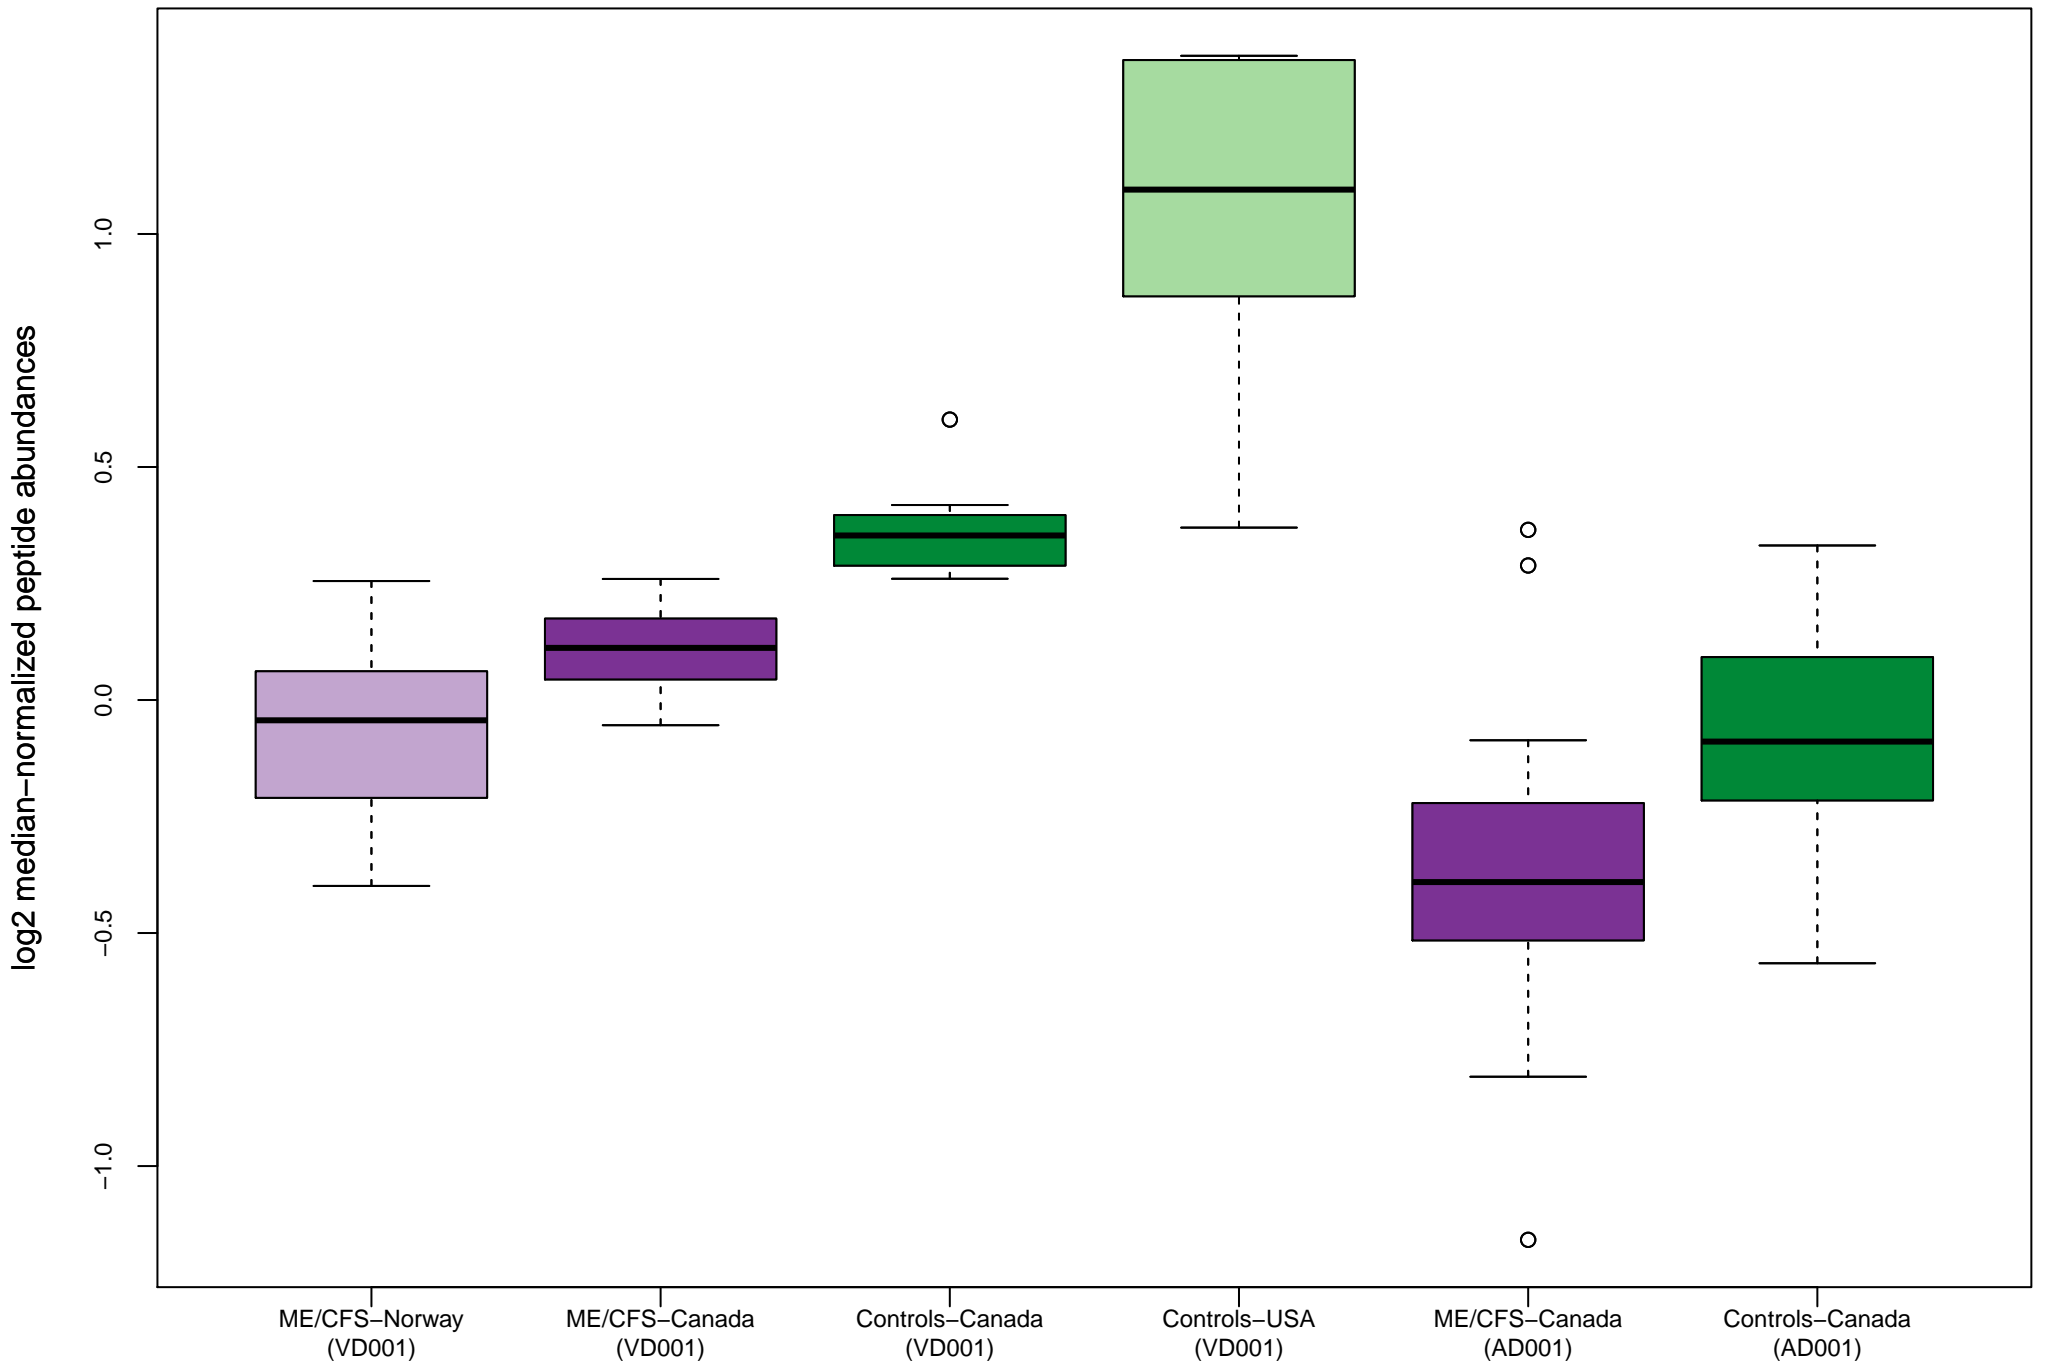

# LNKFQYALGLSG

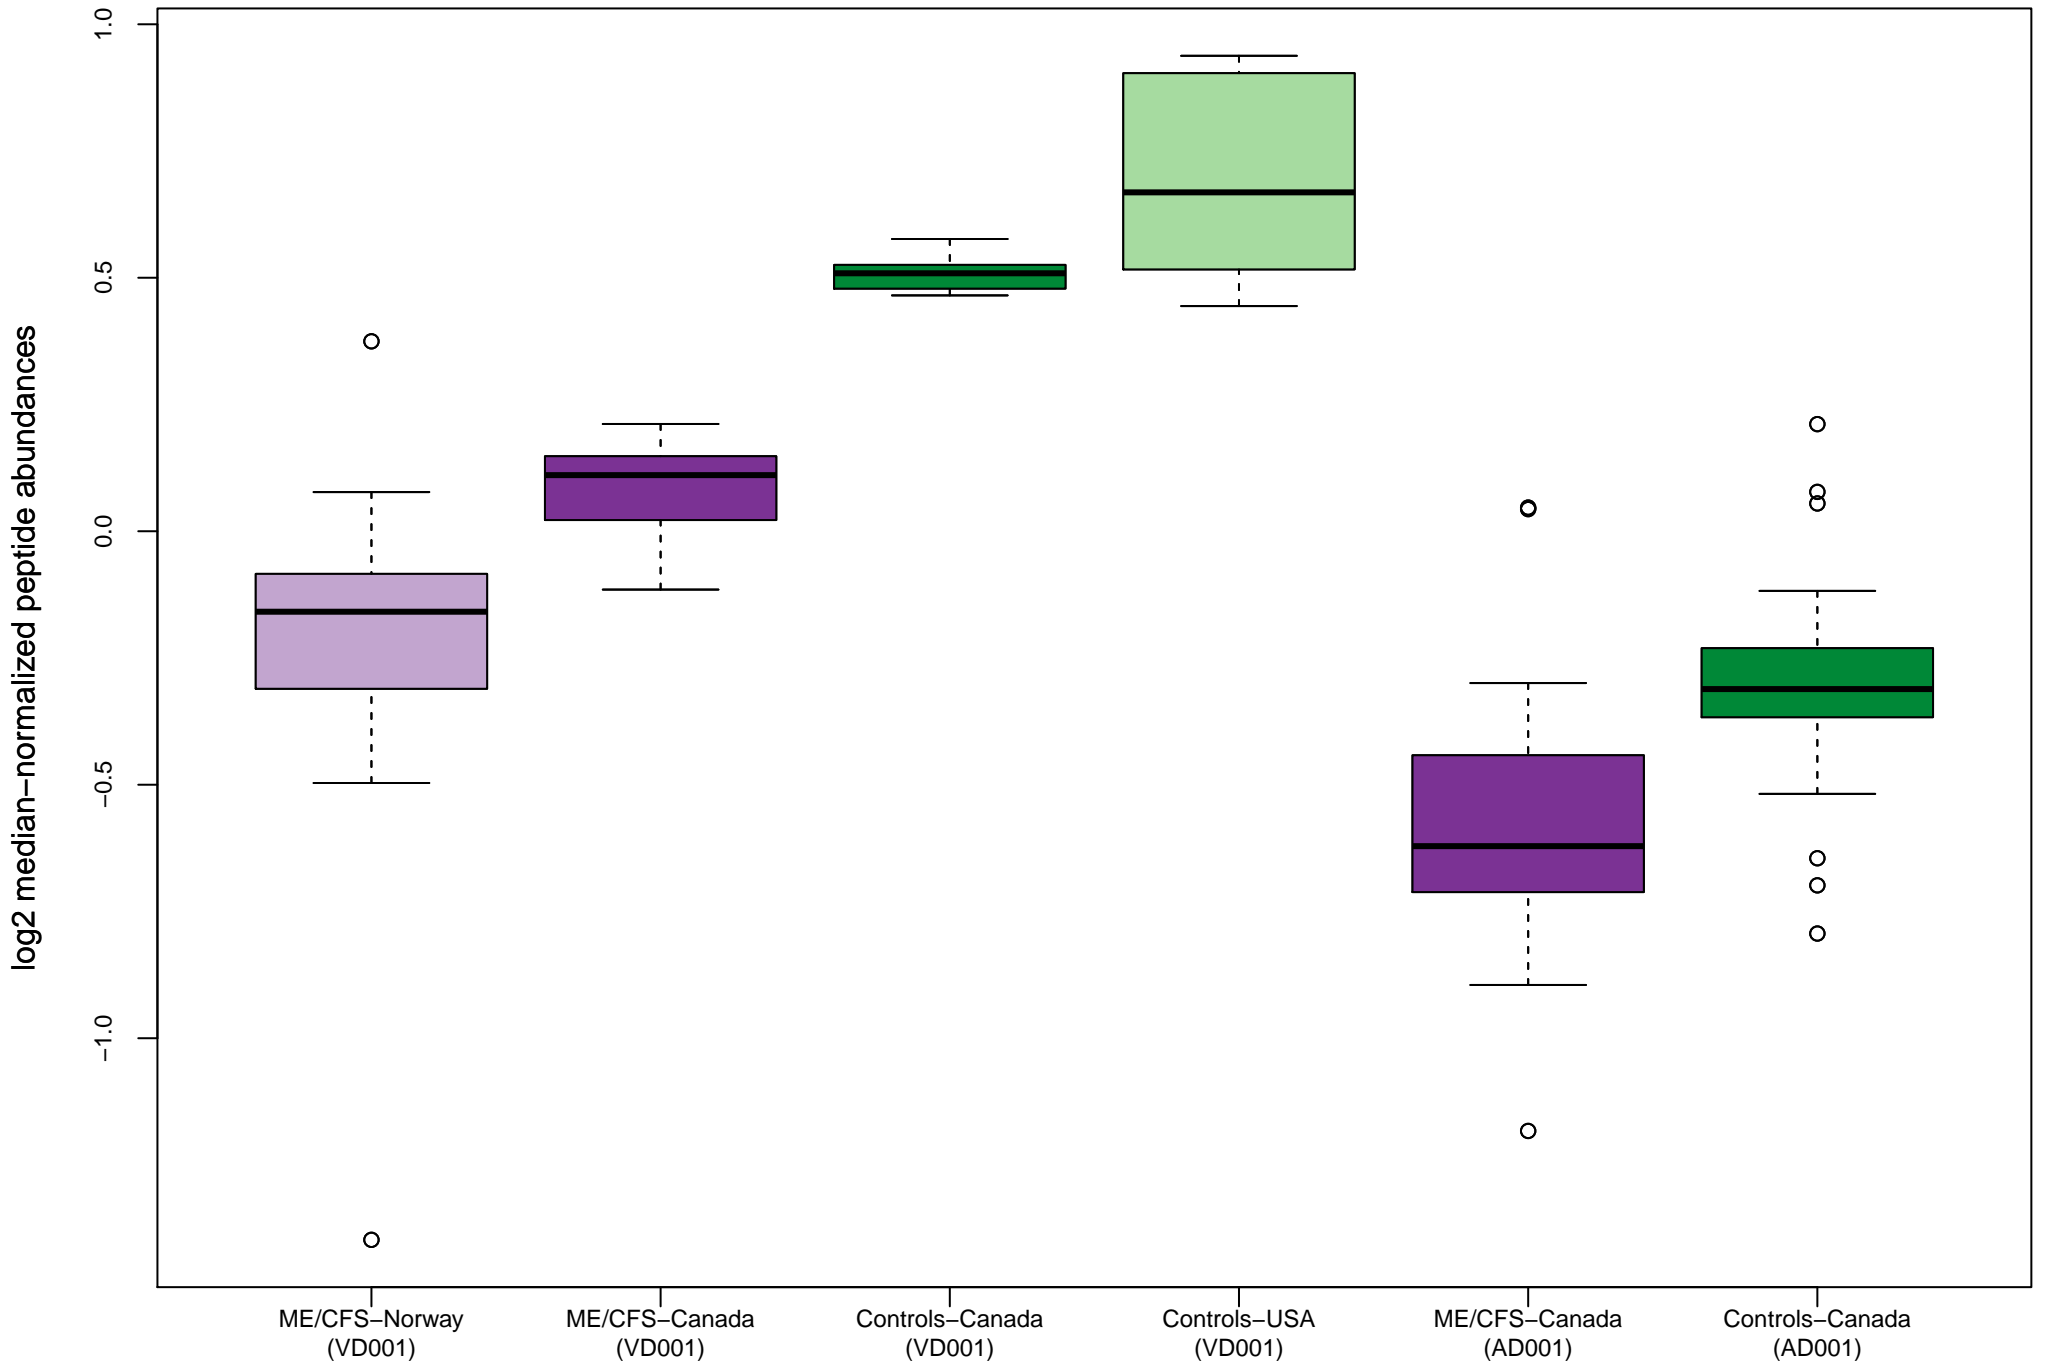



# LNRLYHALGVLS

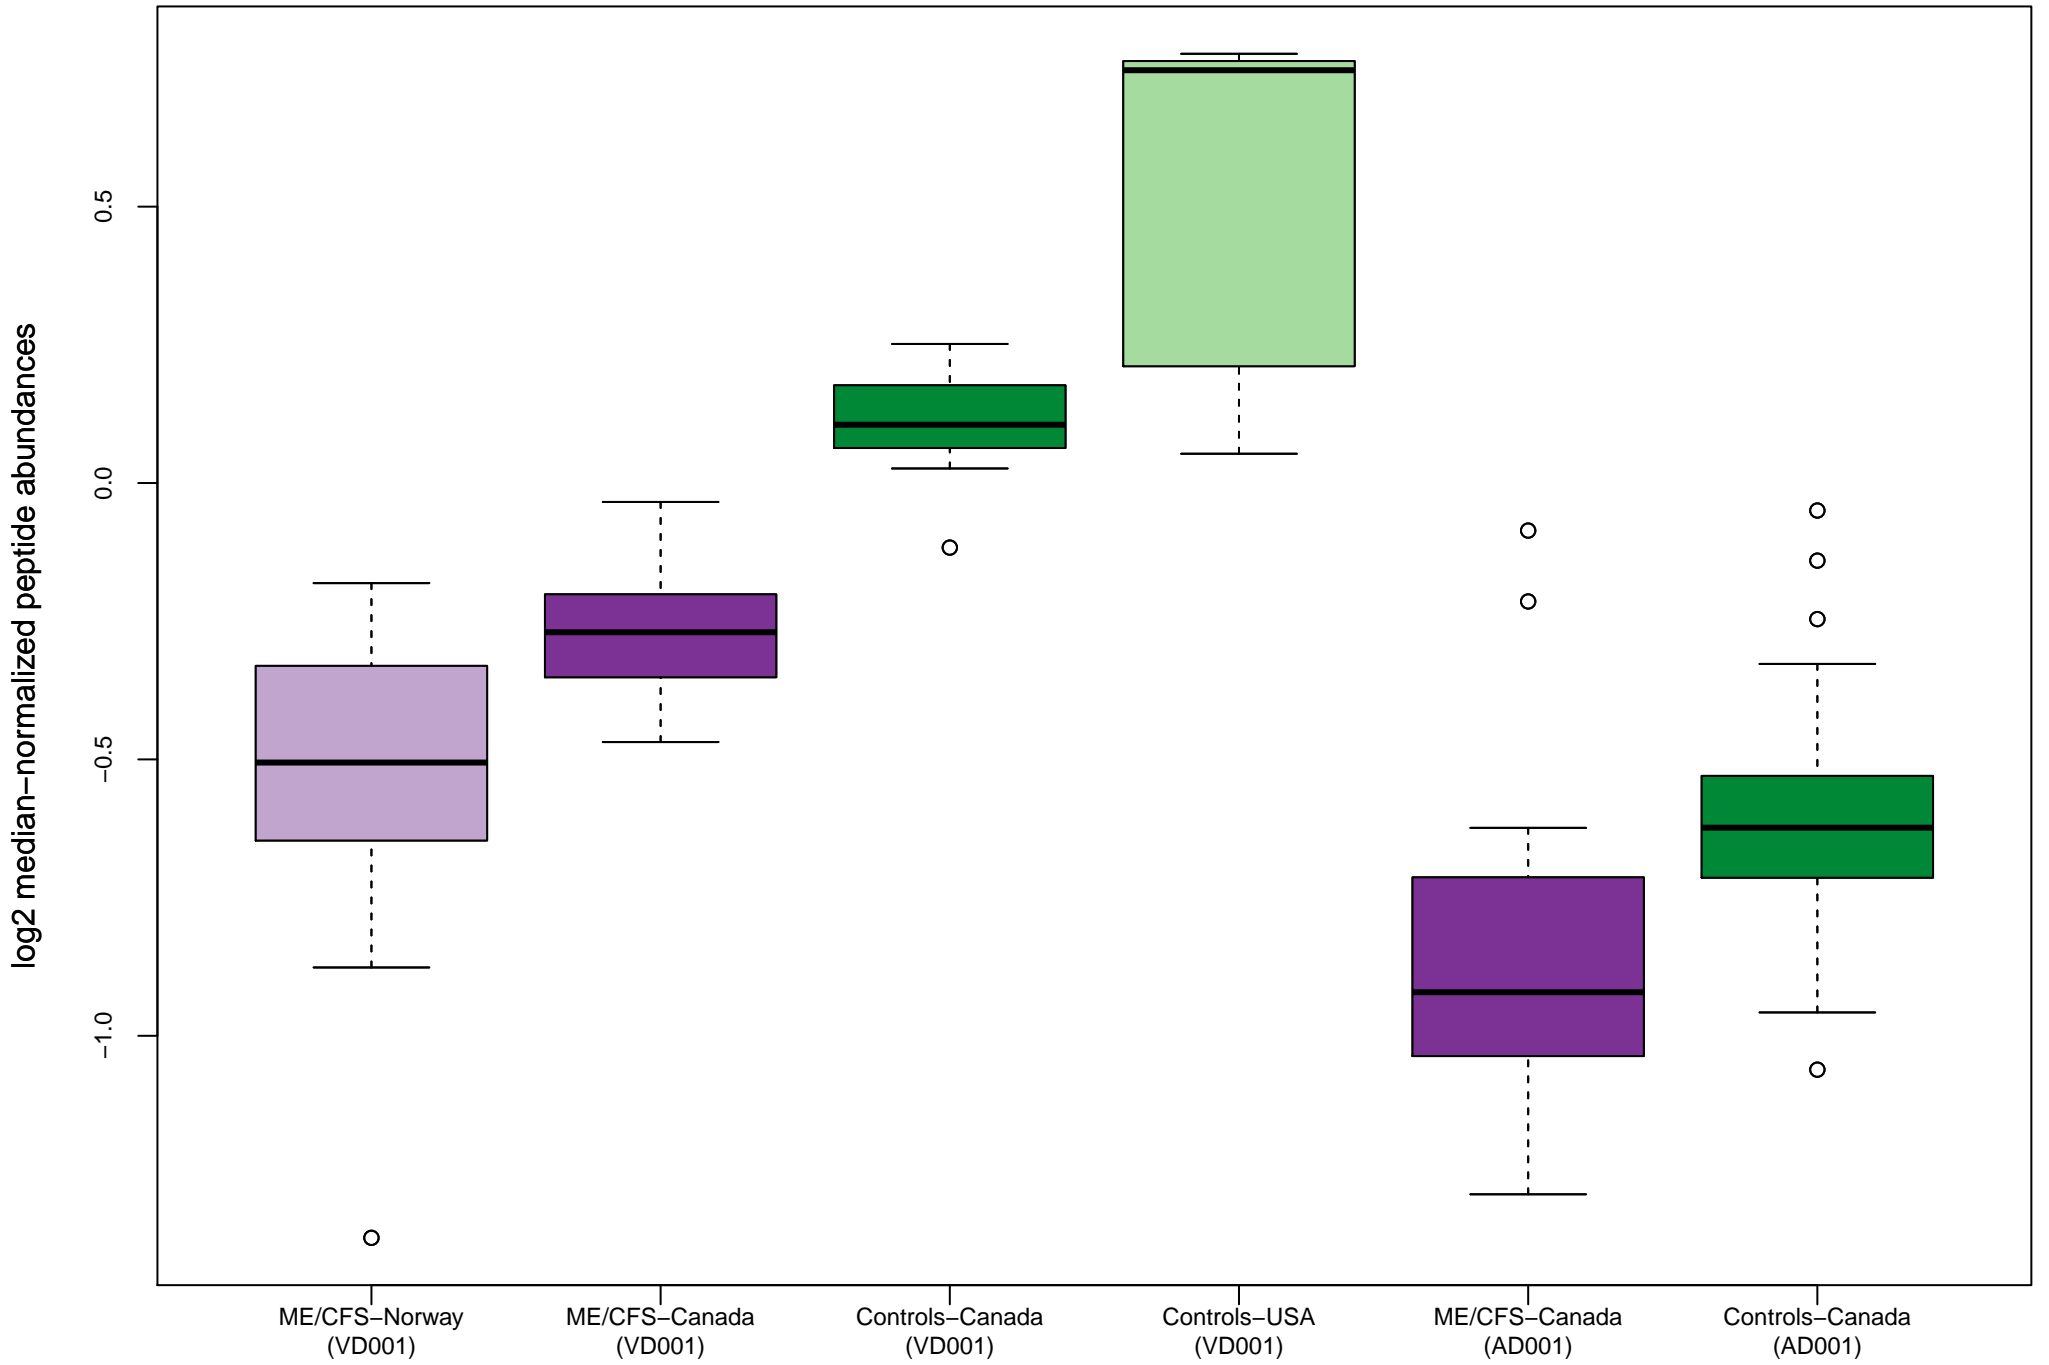

# LQLRLQFAGVLG

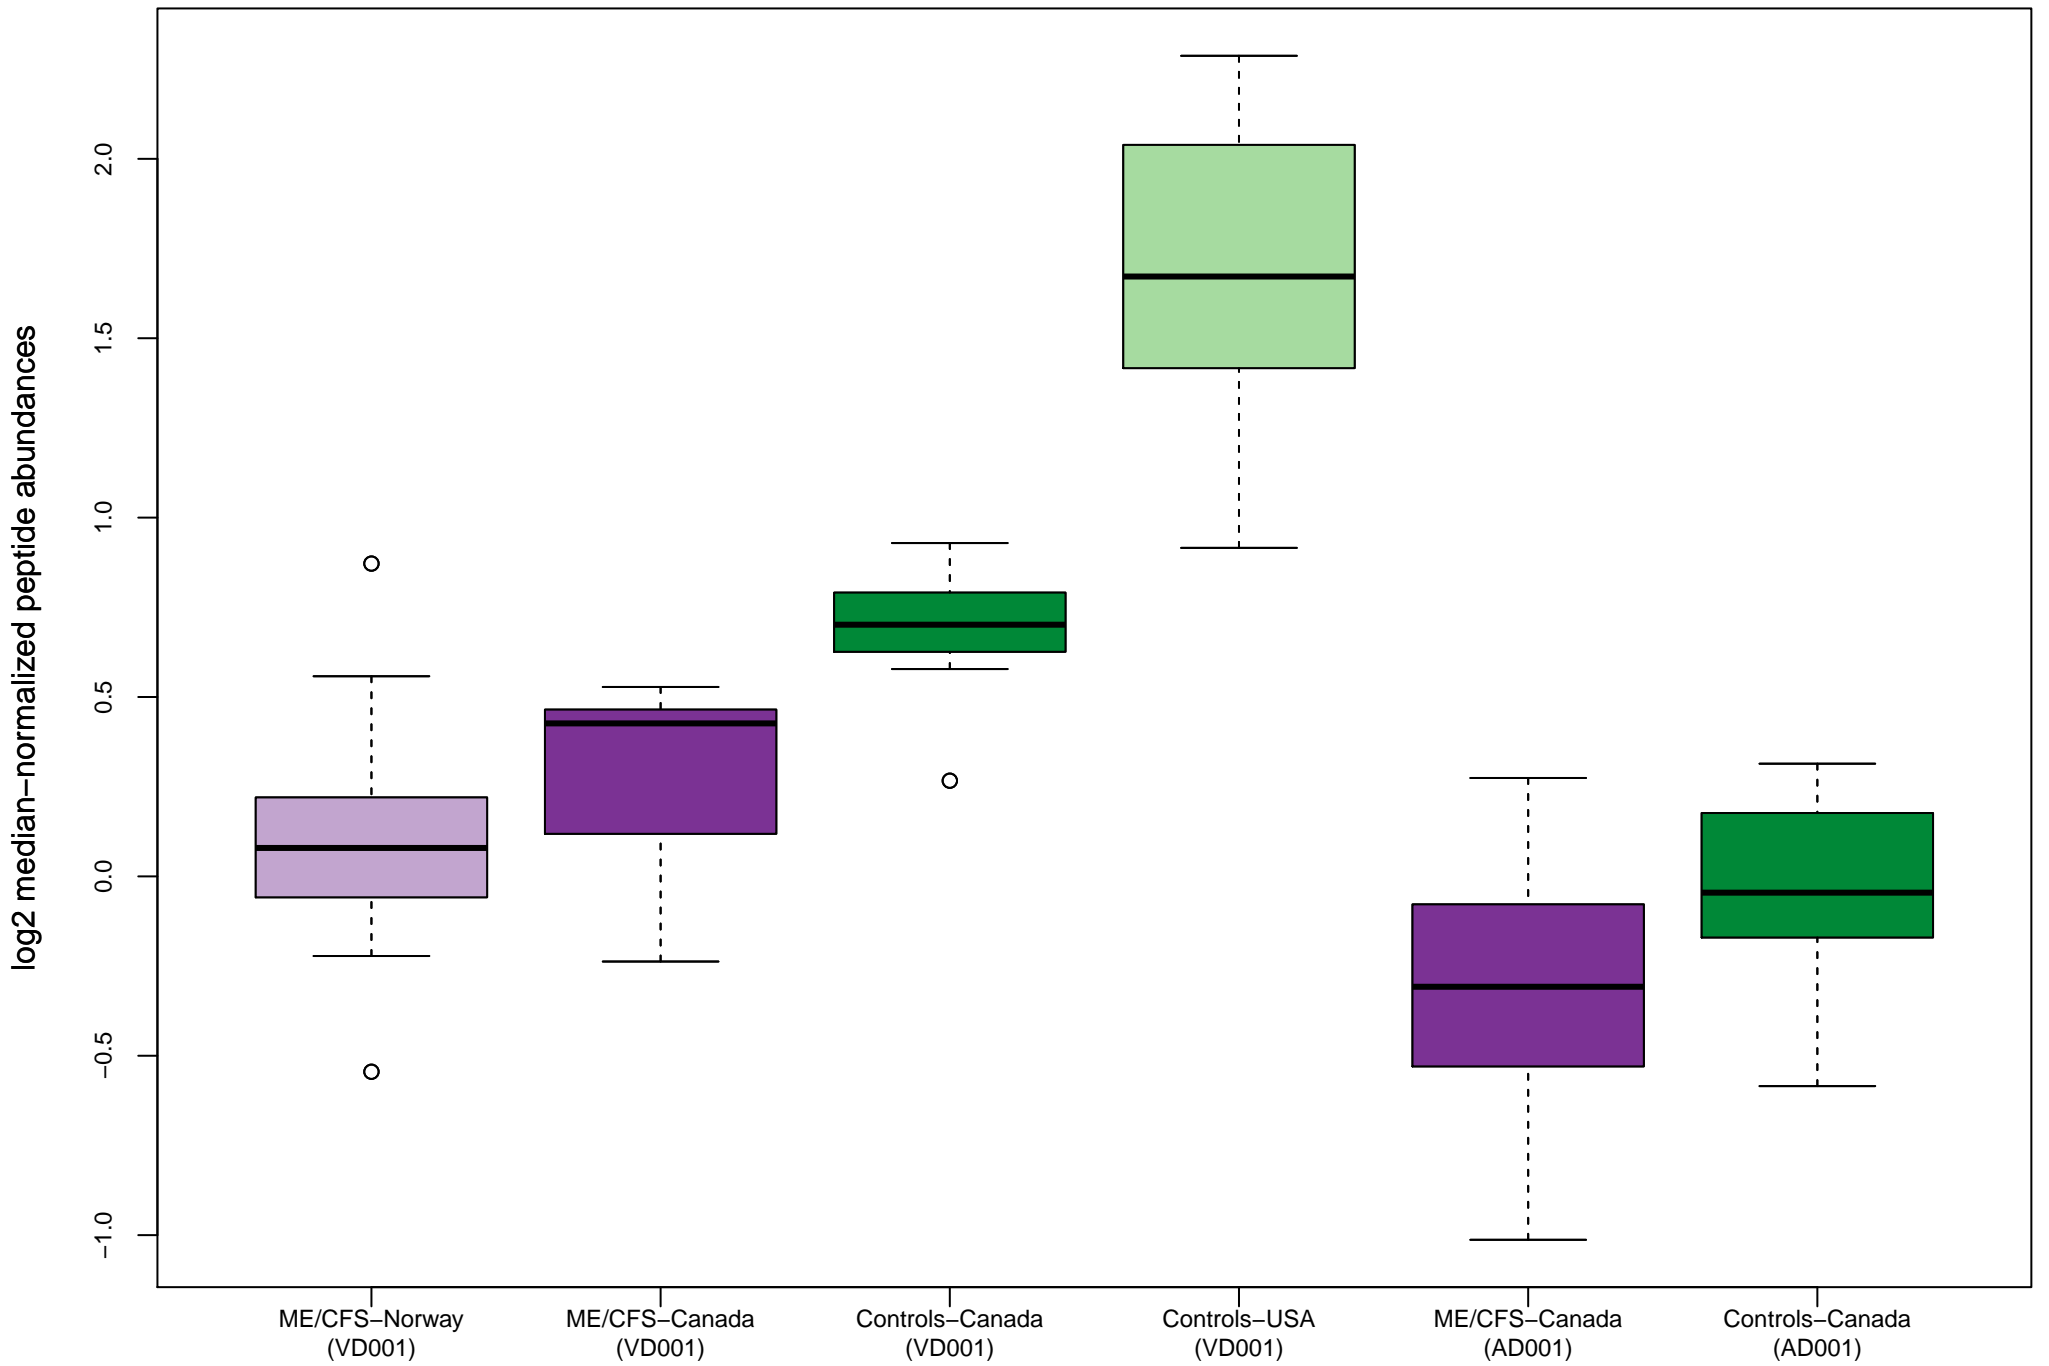

# LRAFYQRYWVLS

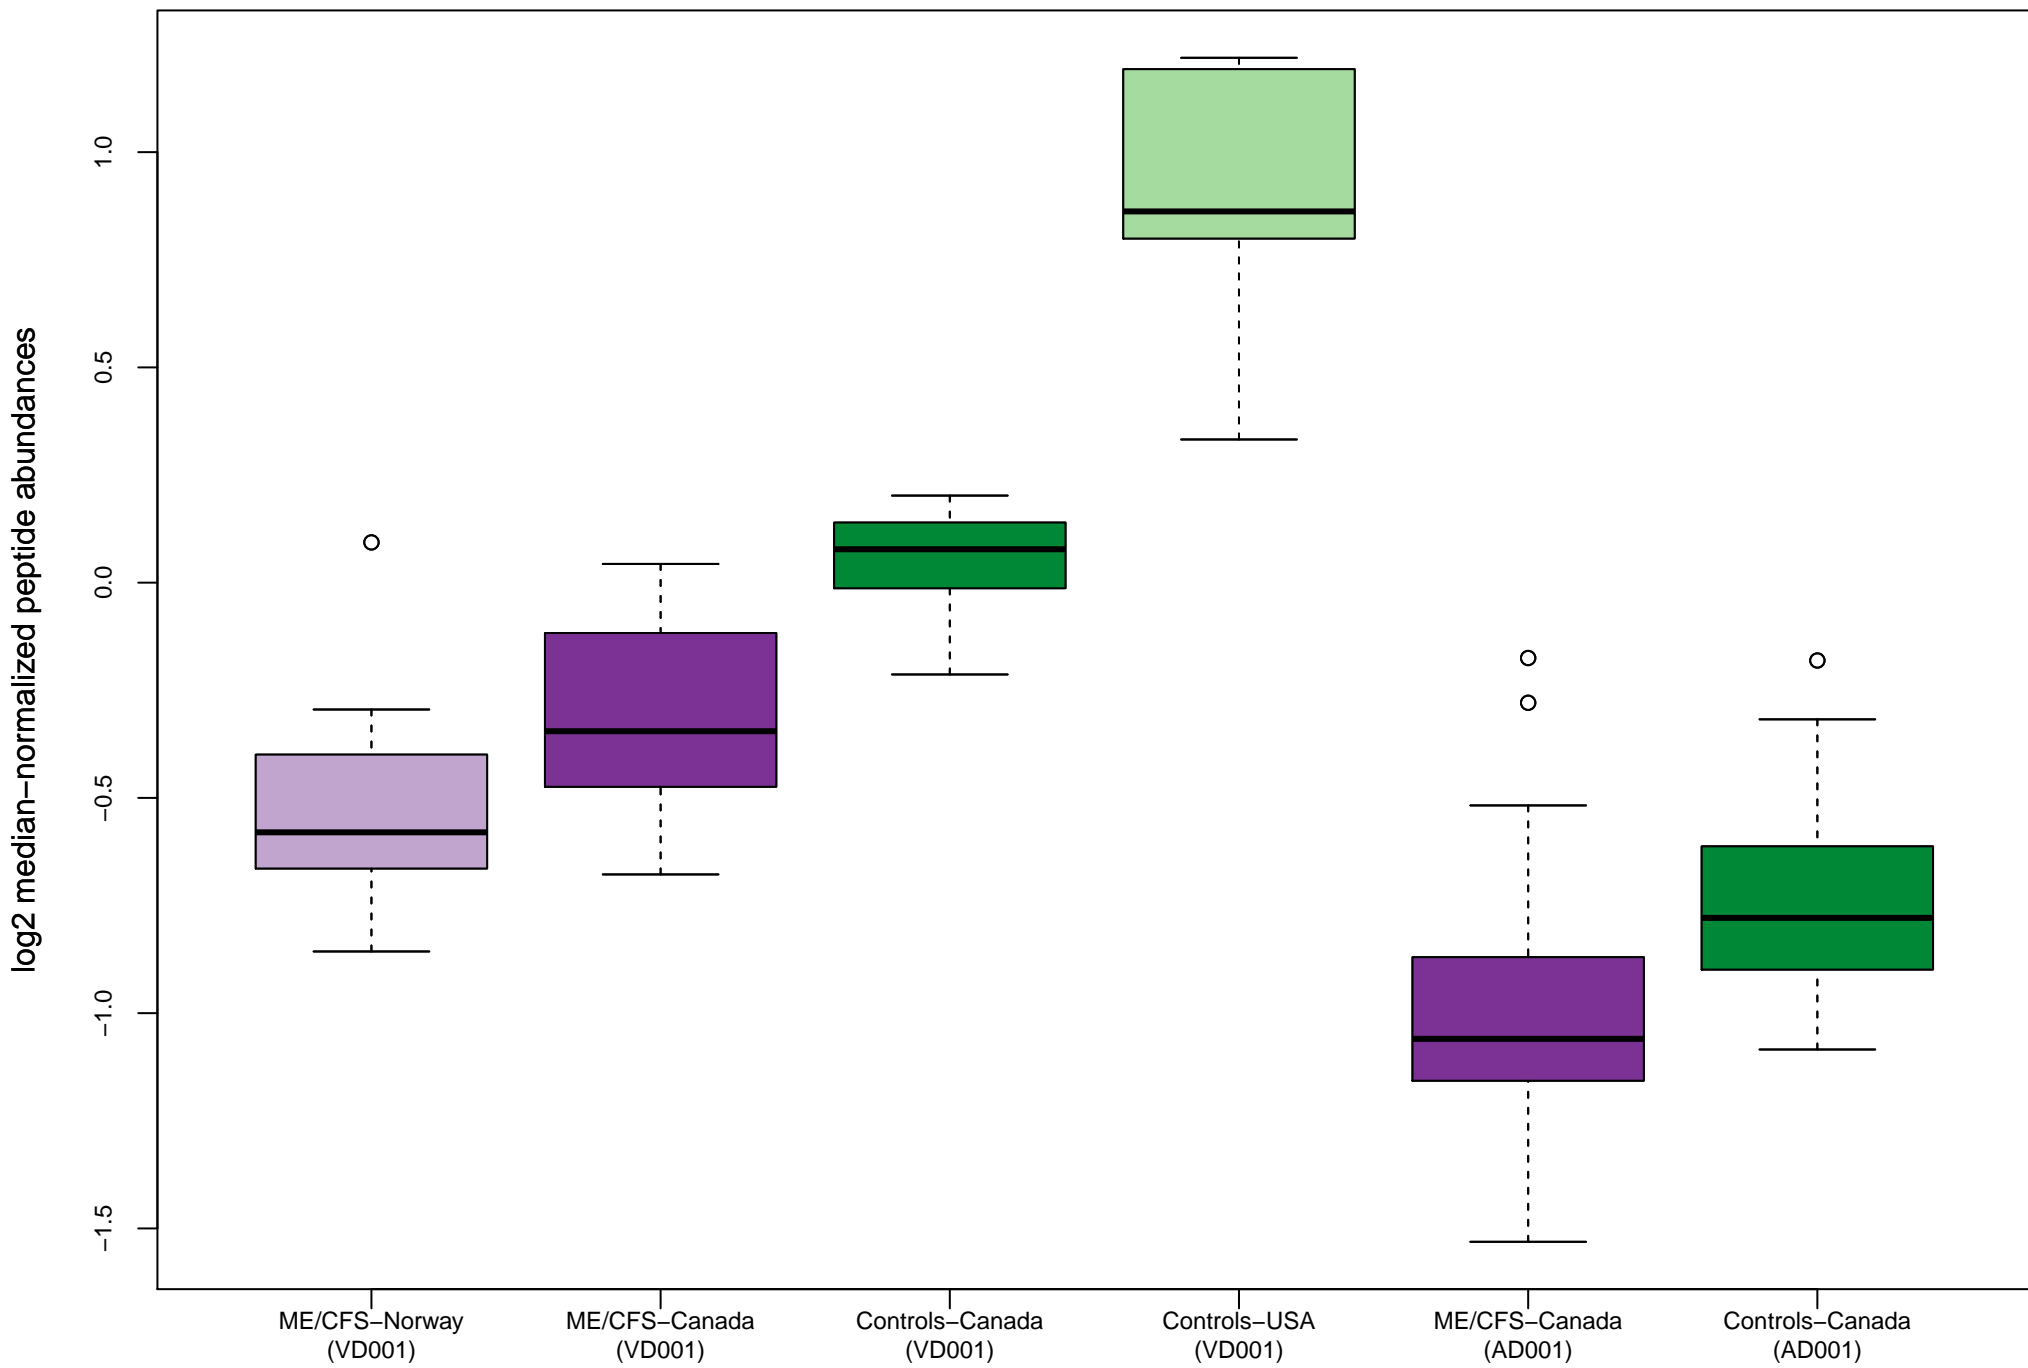

# LRFKYVALSGSG

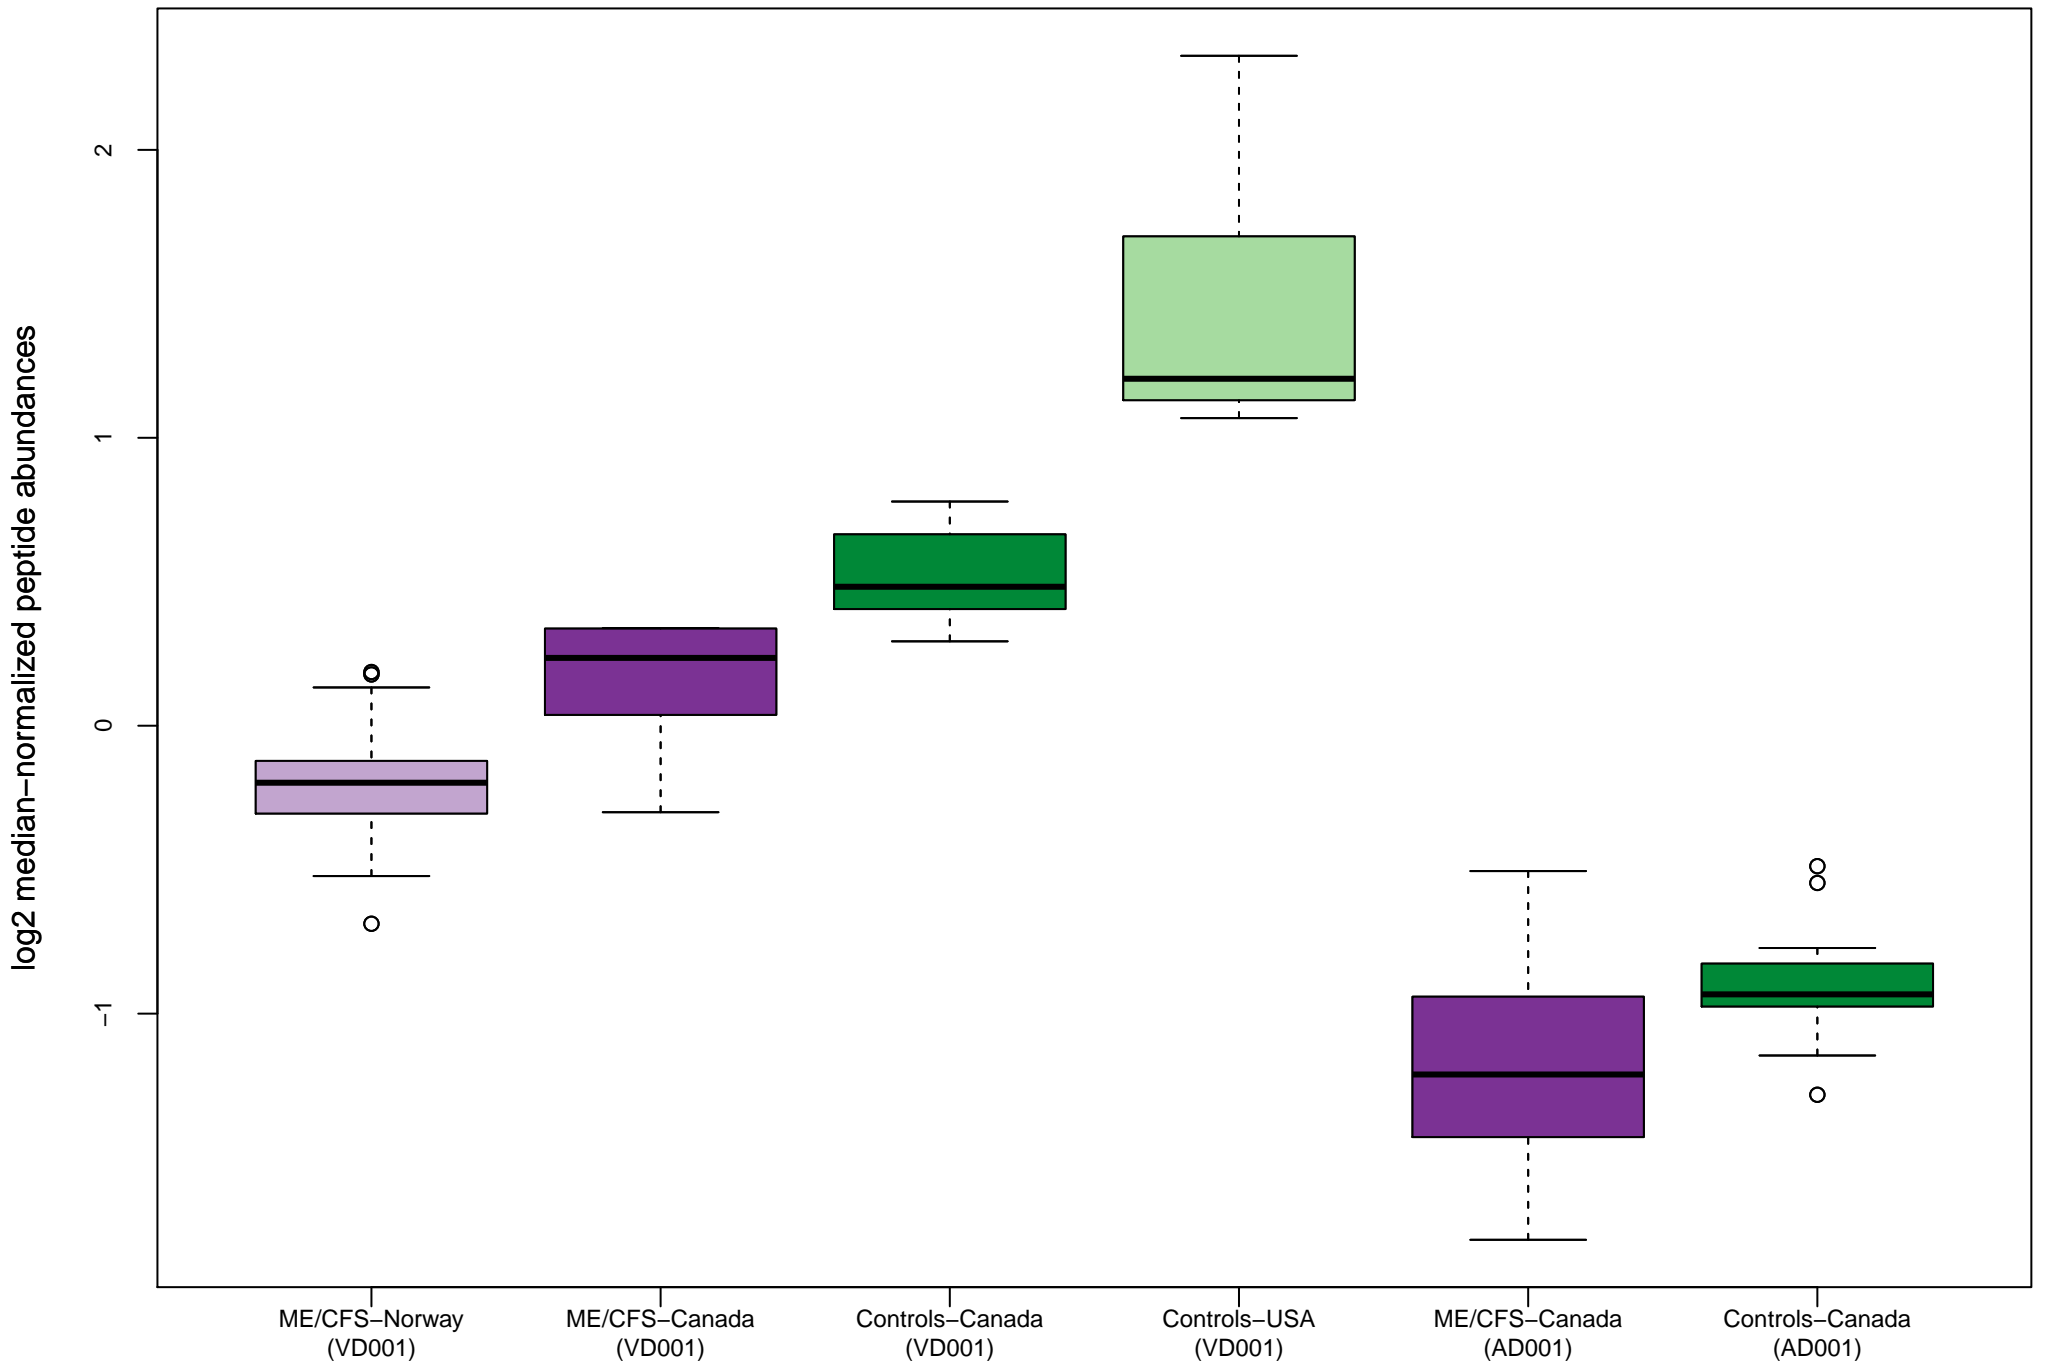

# LRFPFPLGALSG

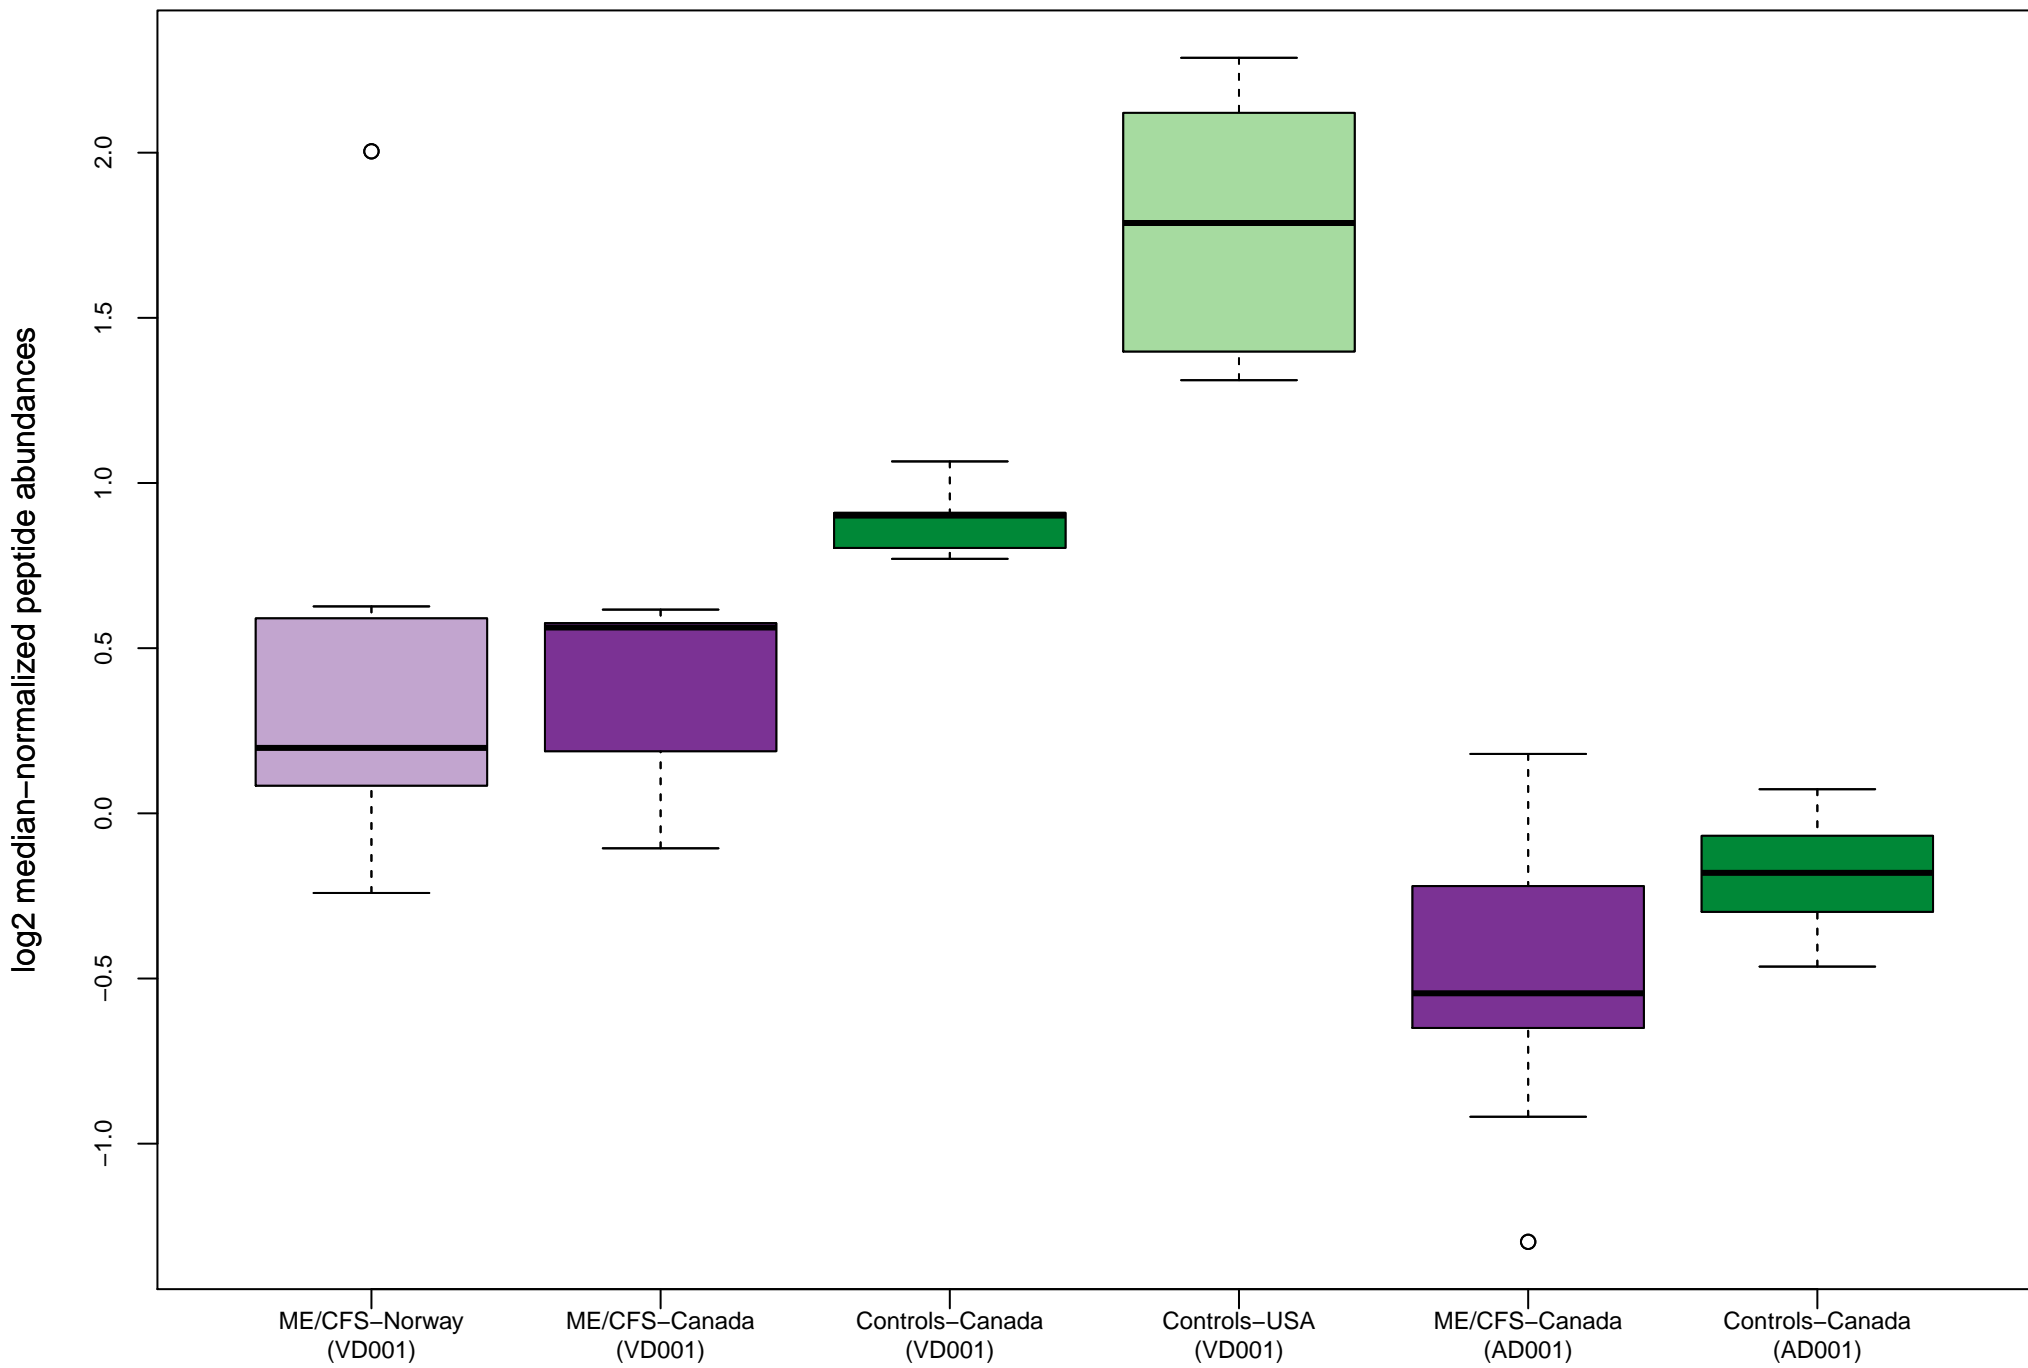

# LRLFAPWVASAG

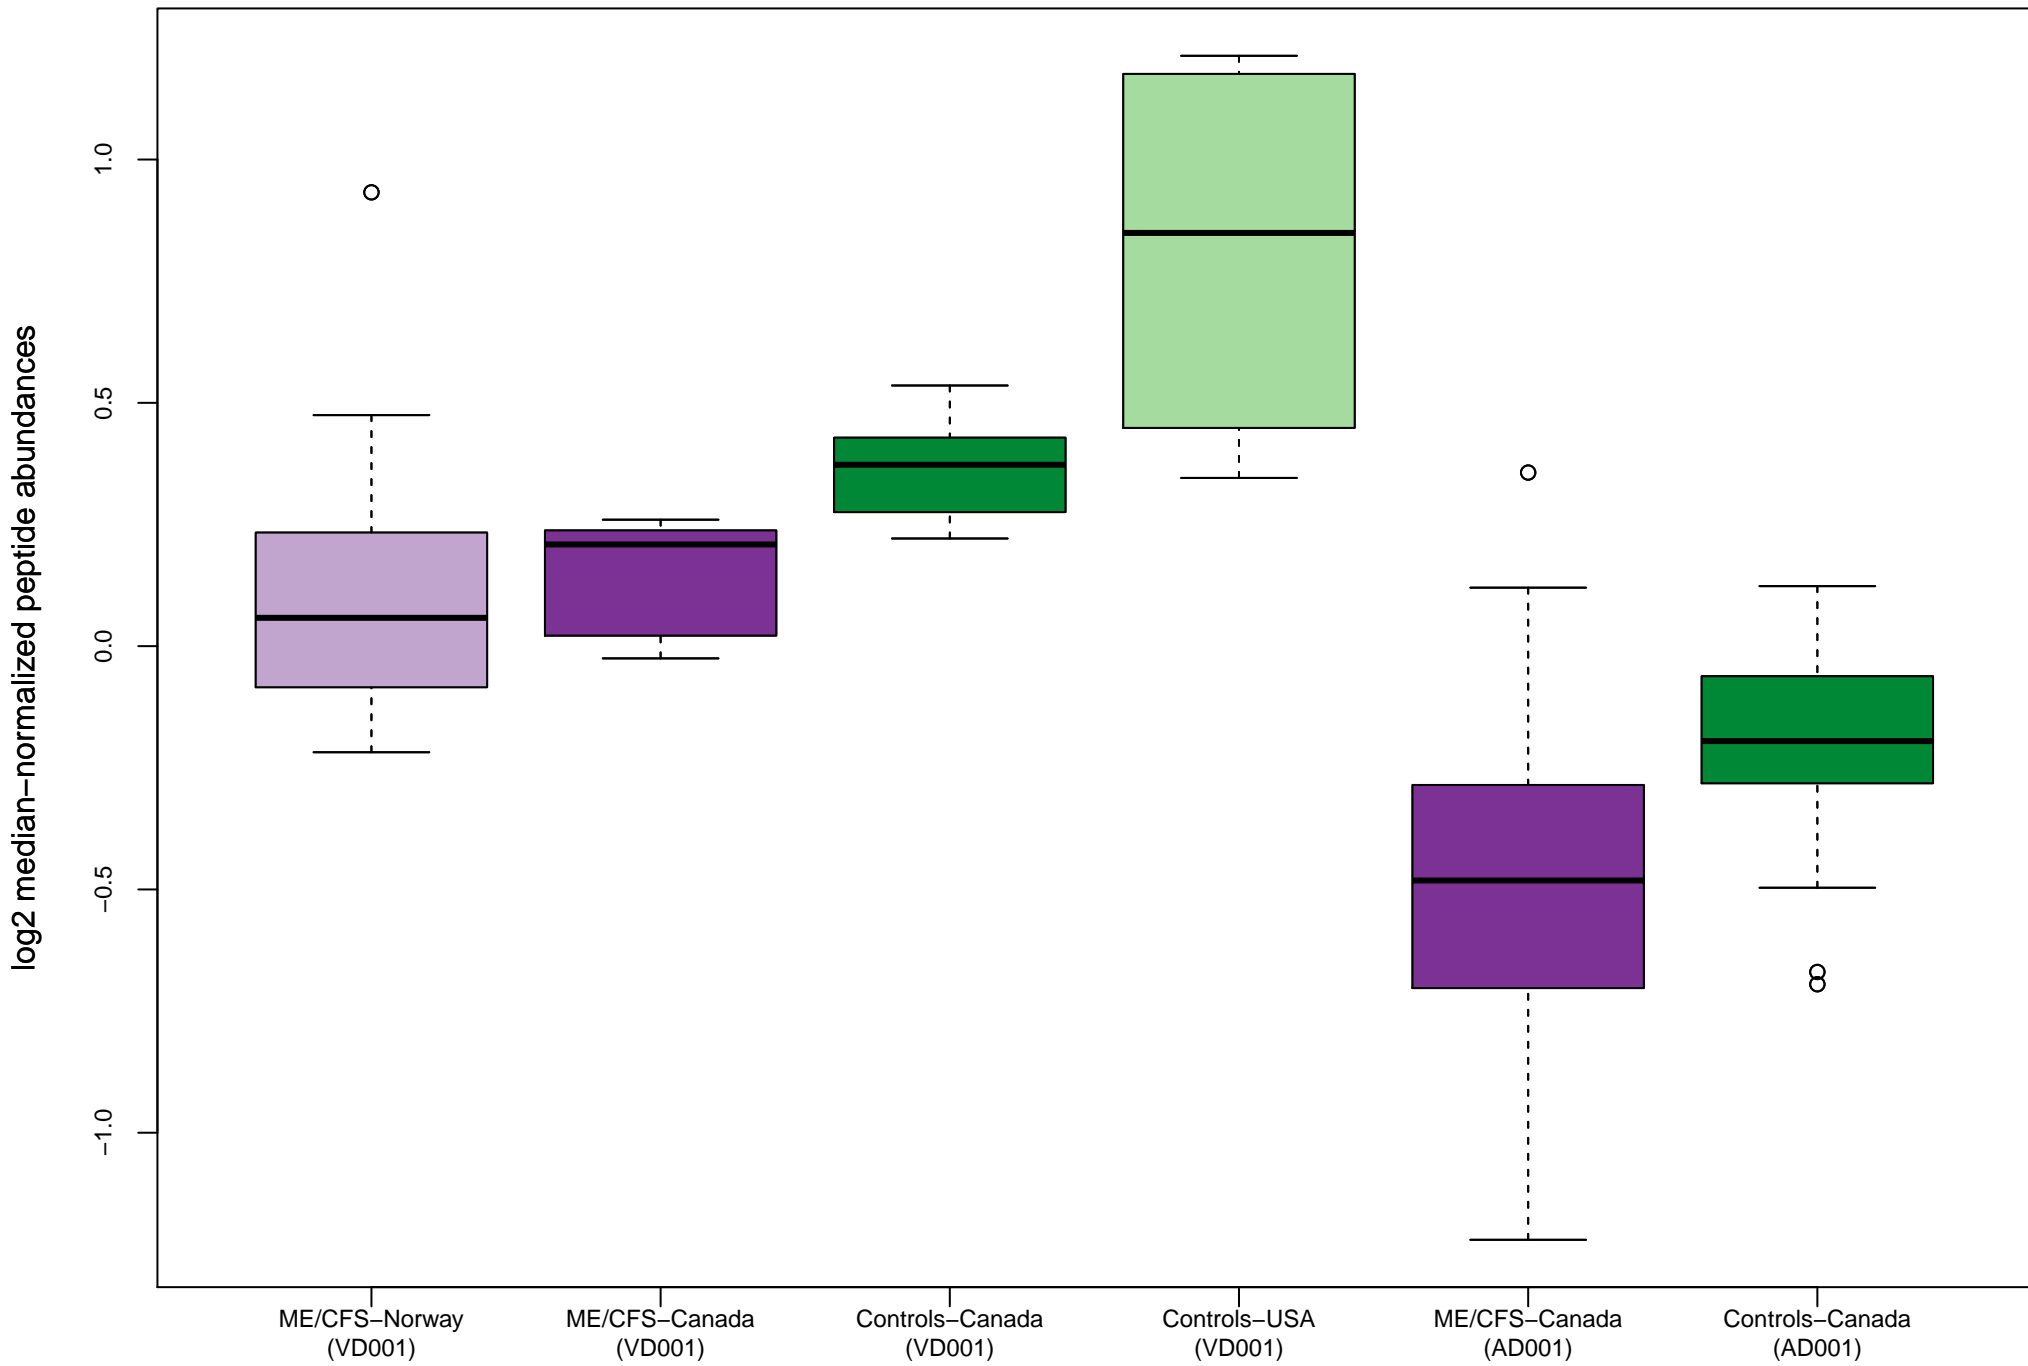

# LRLGLRYLSVLG

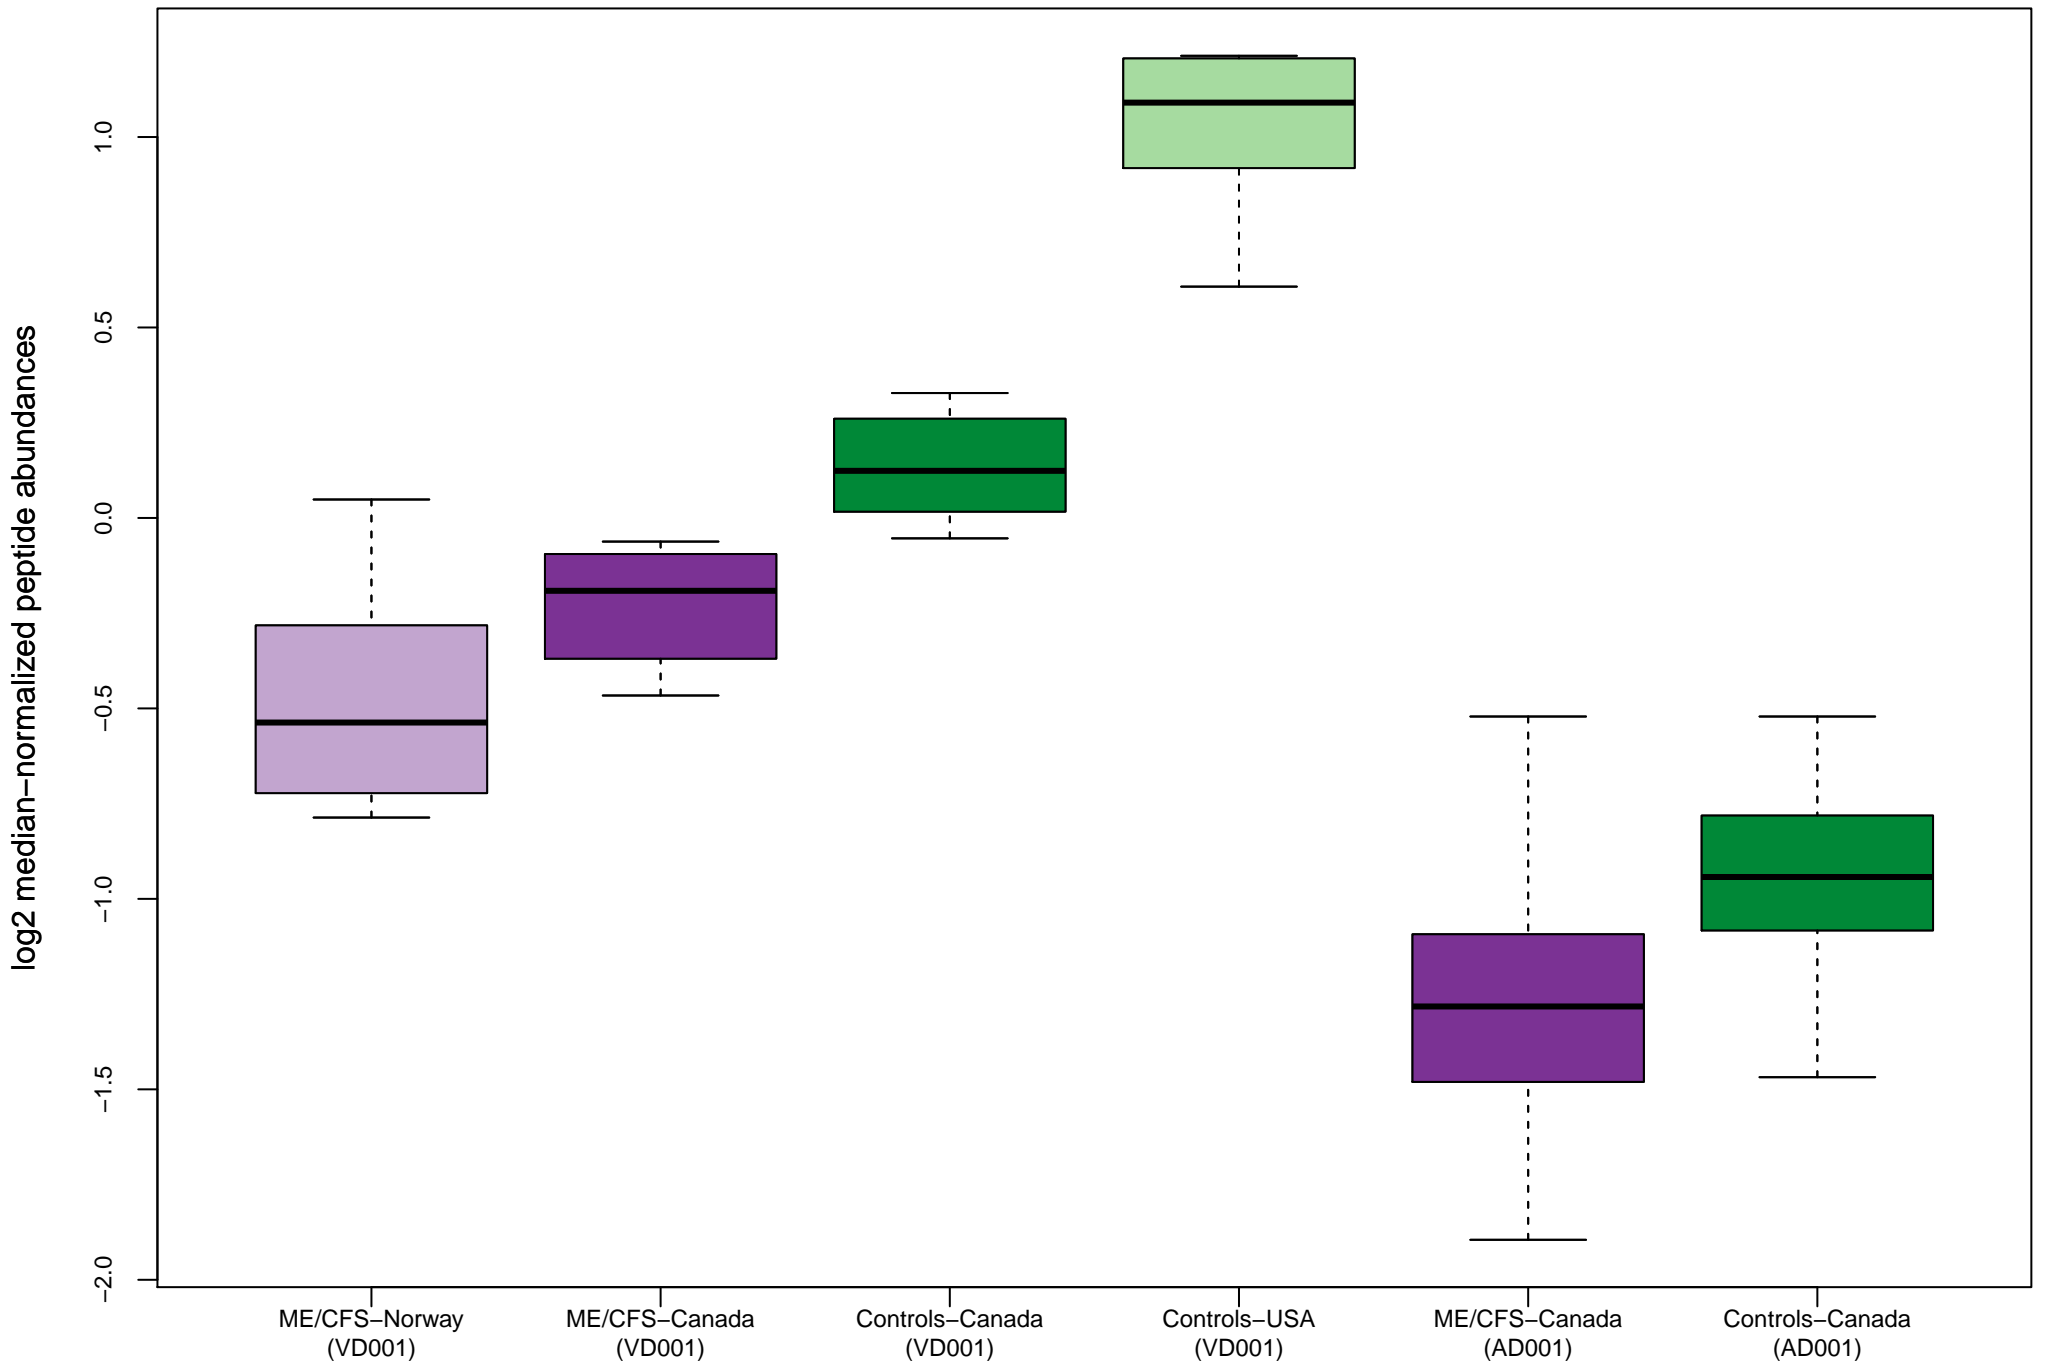

# LRNFAQRPYWL

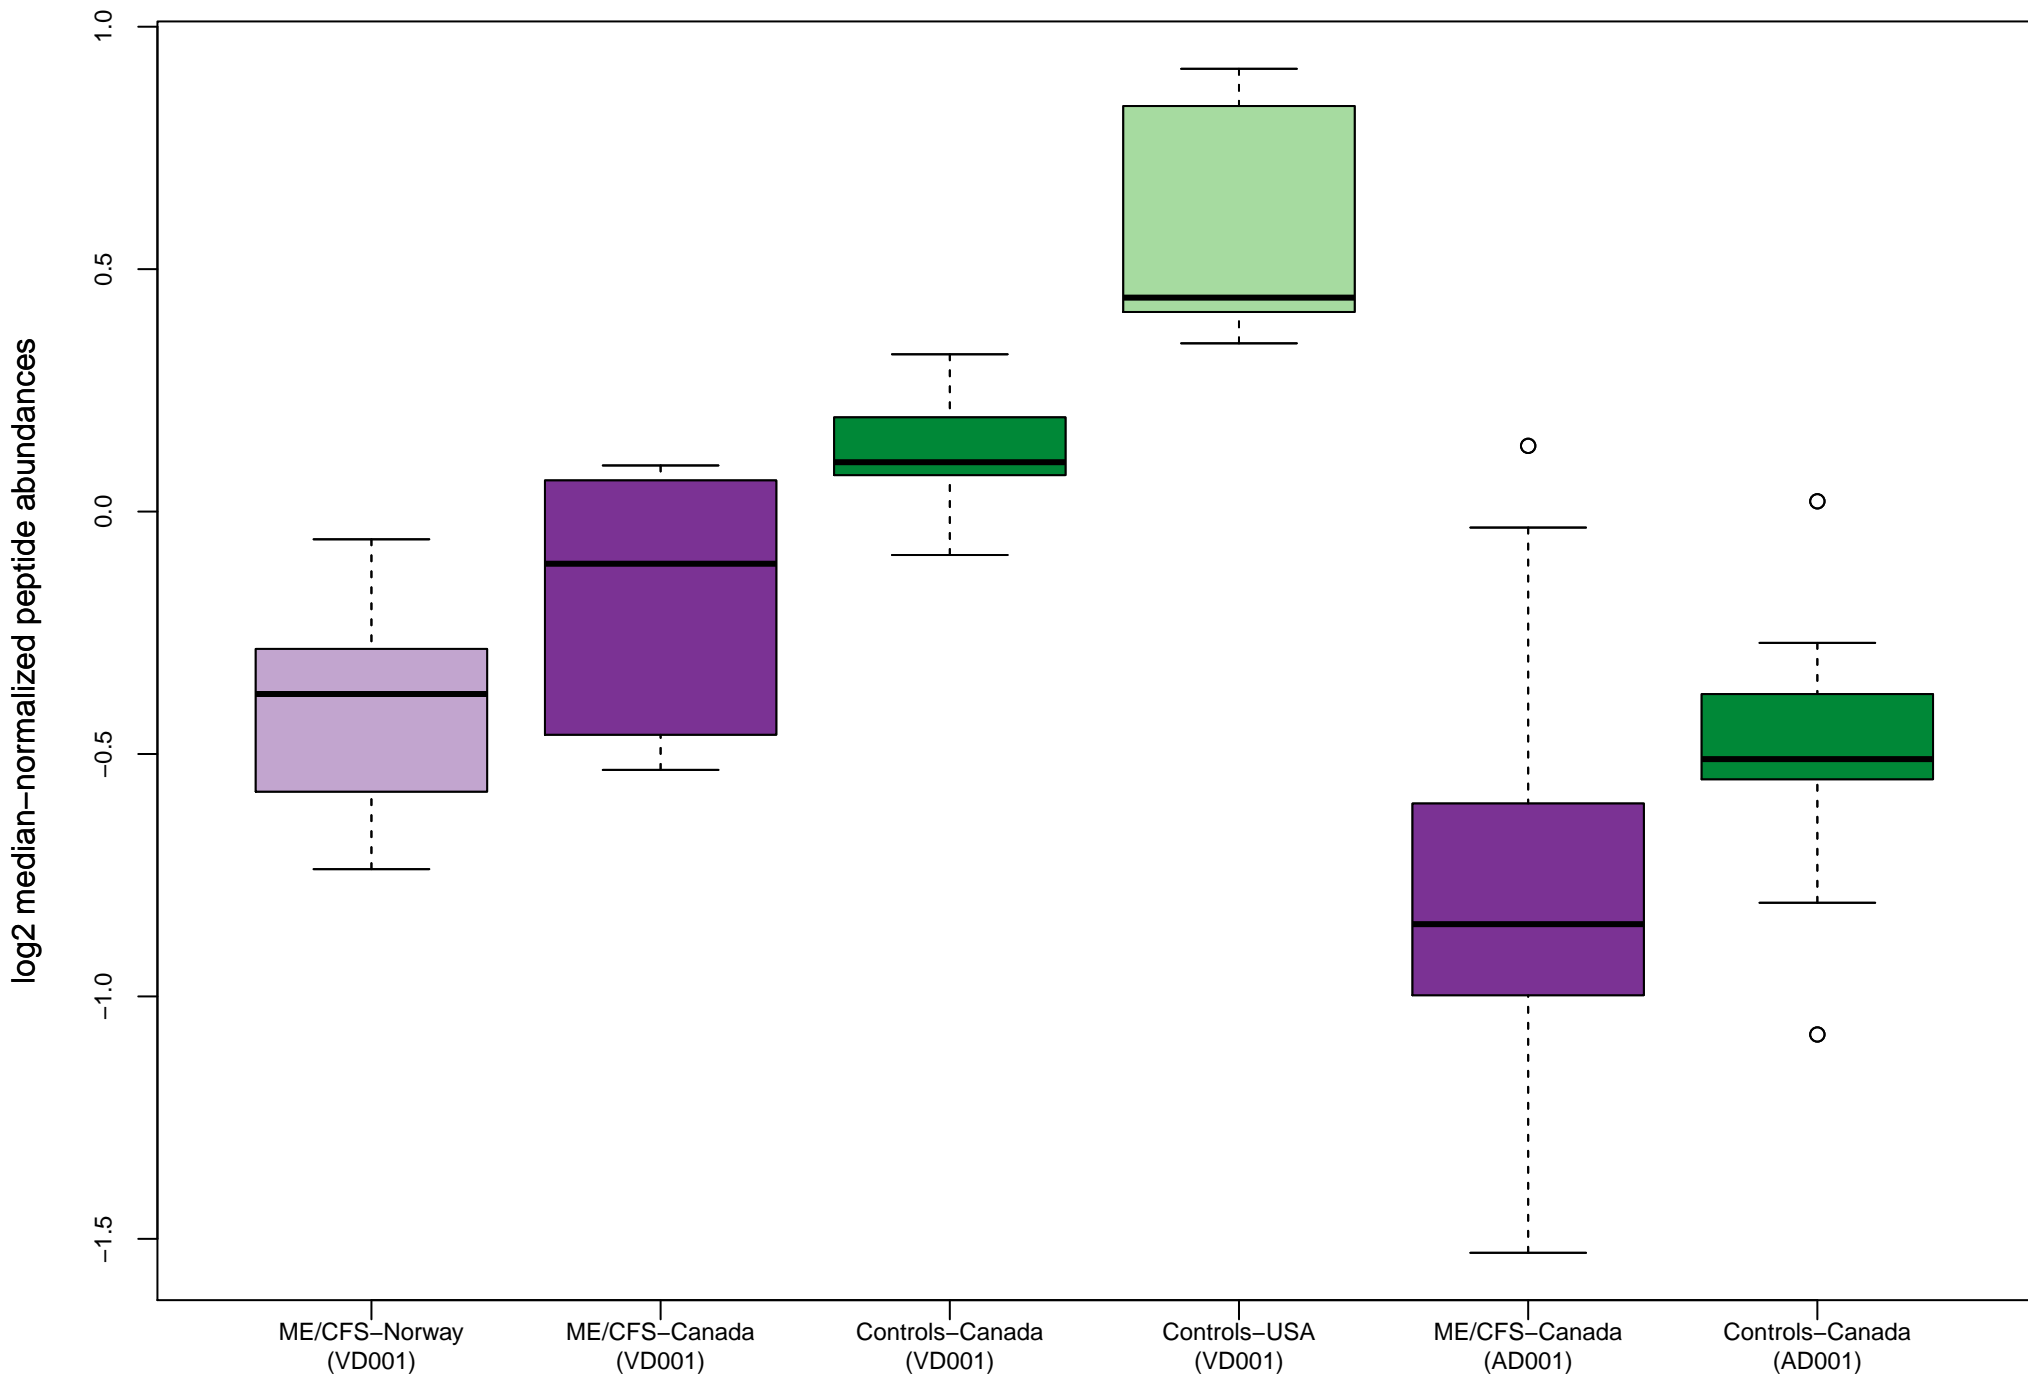



# LRQNLFHVSVLG

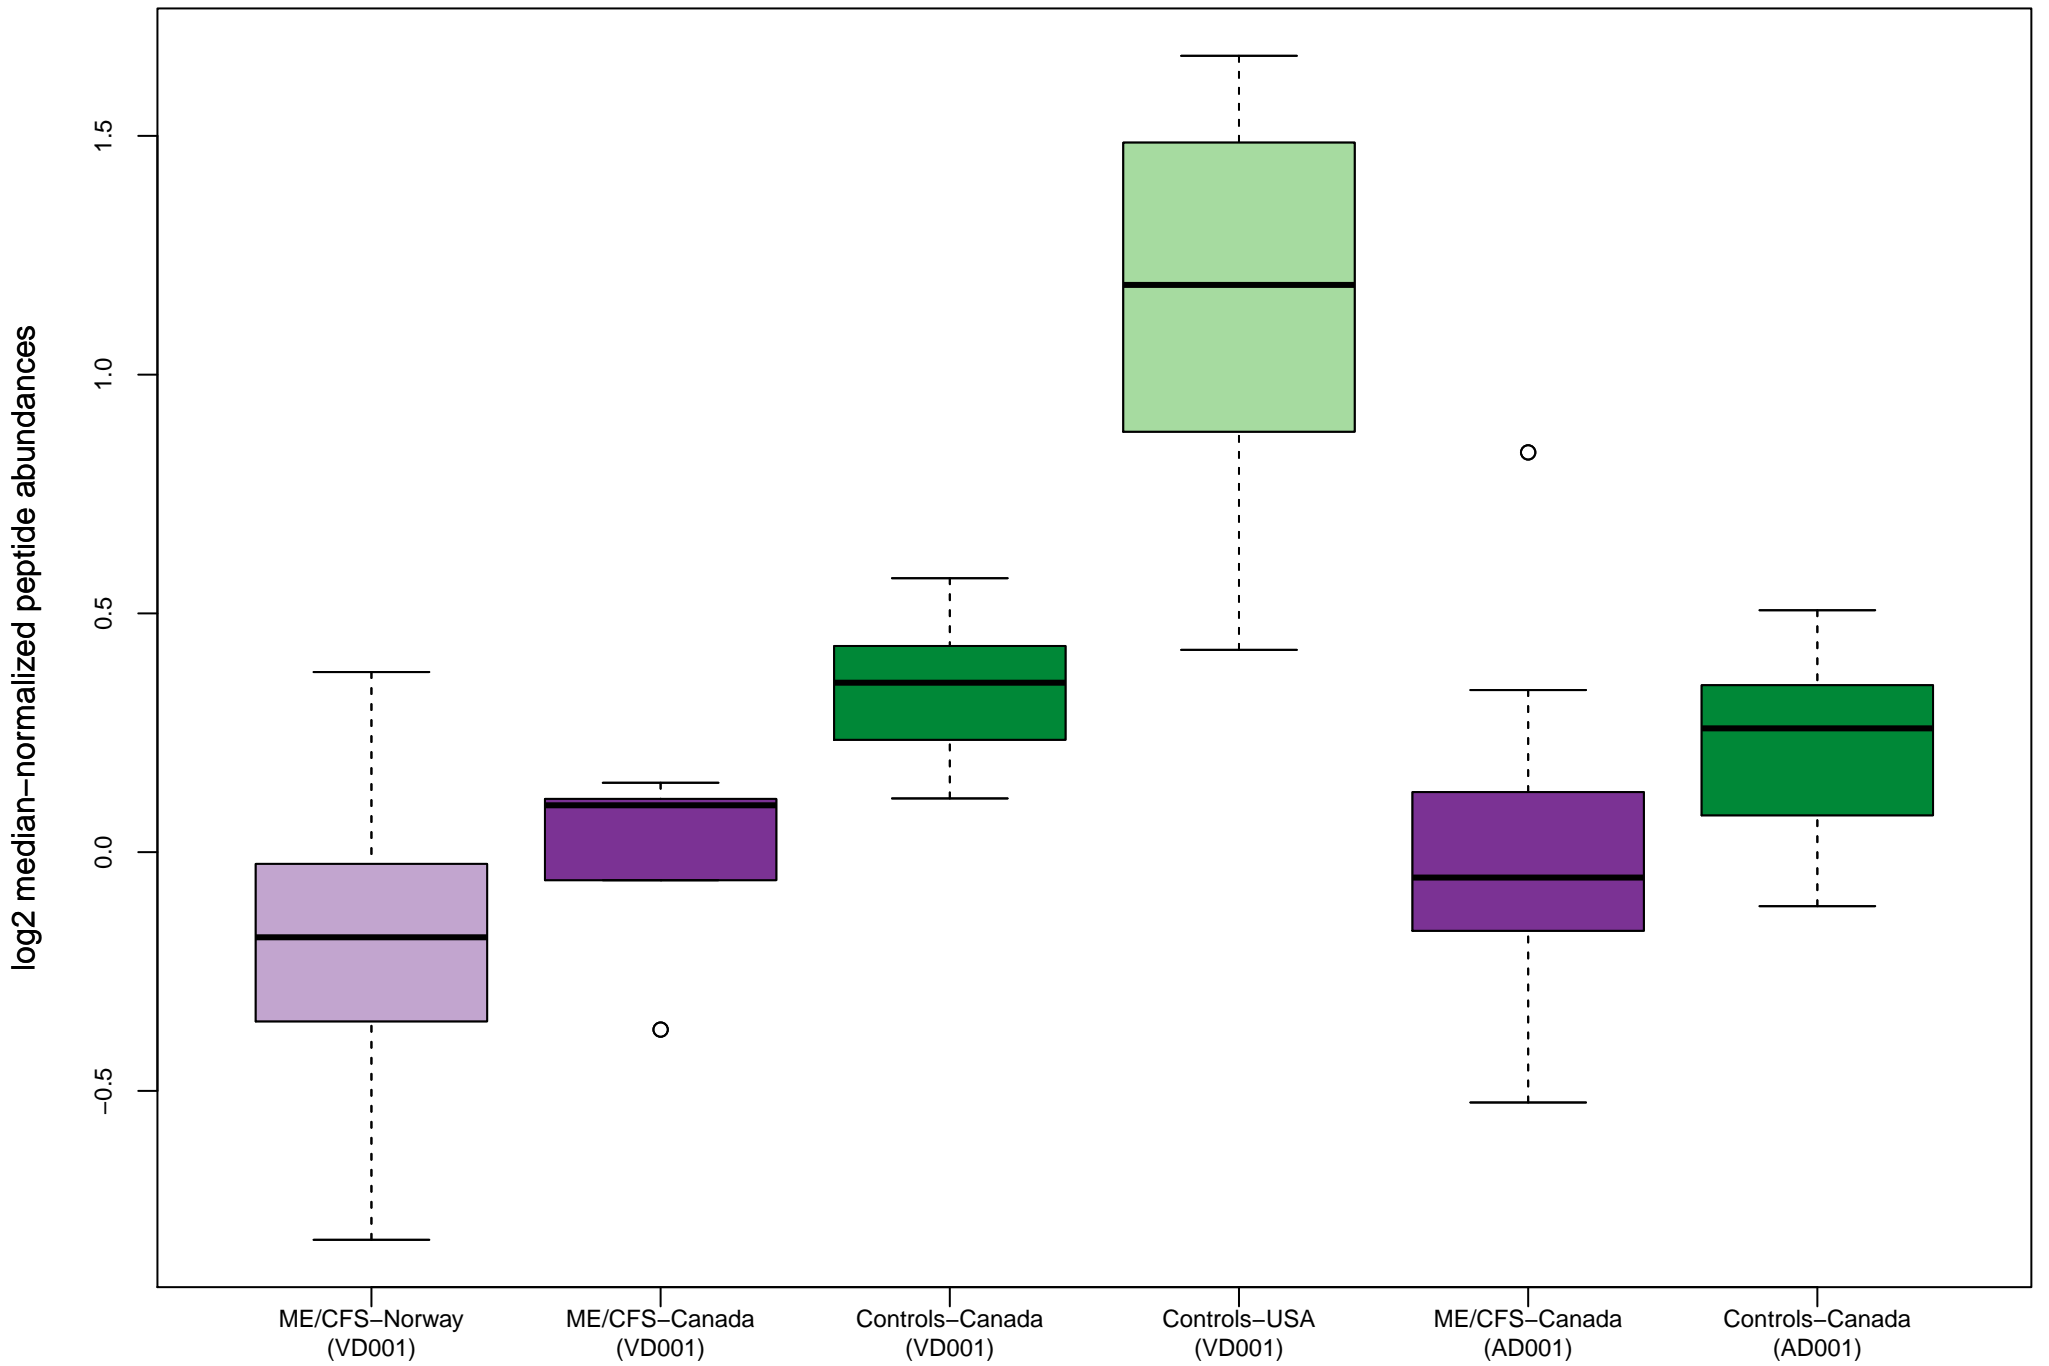

# LRYFYQFKAGVG

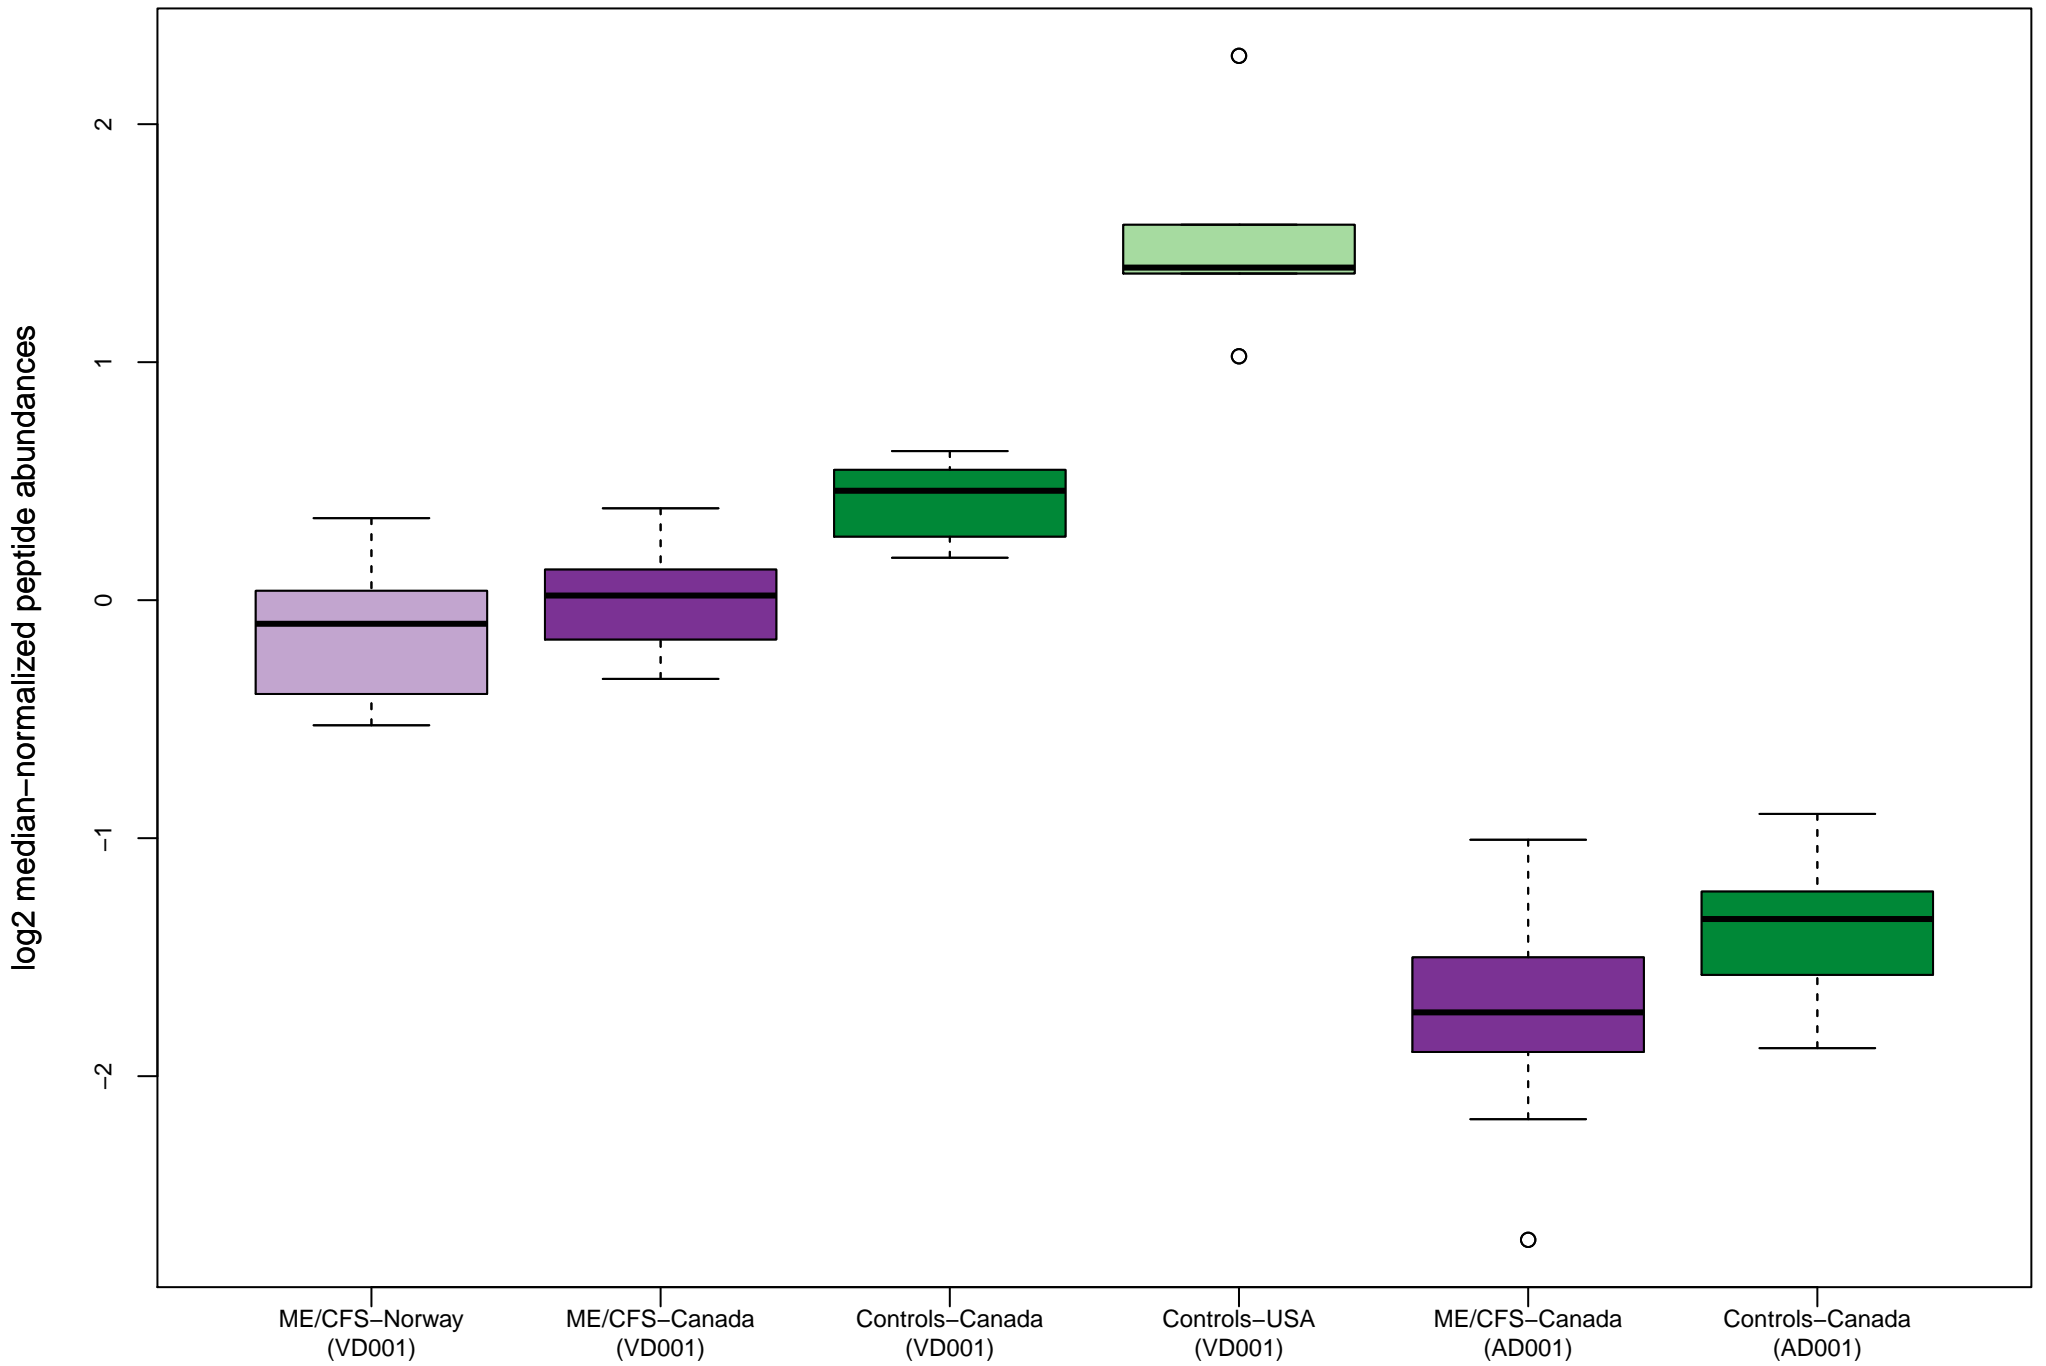

# LVRNYKALVALS

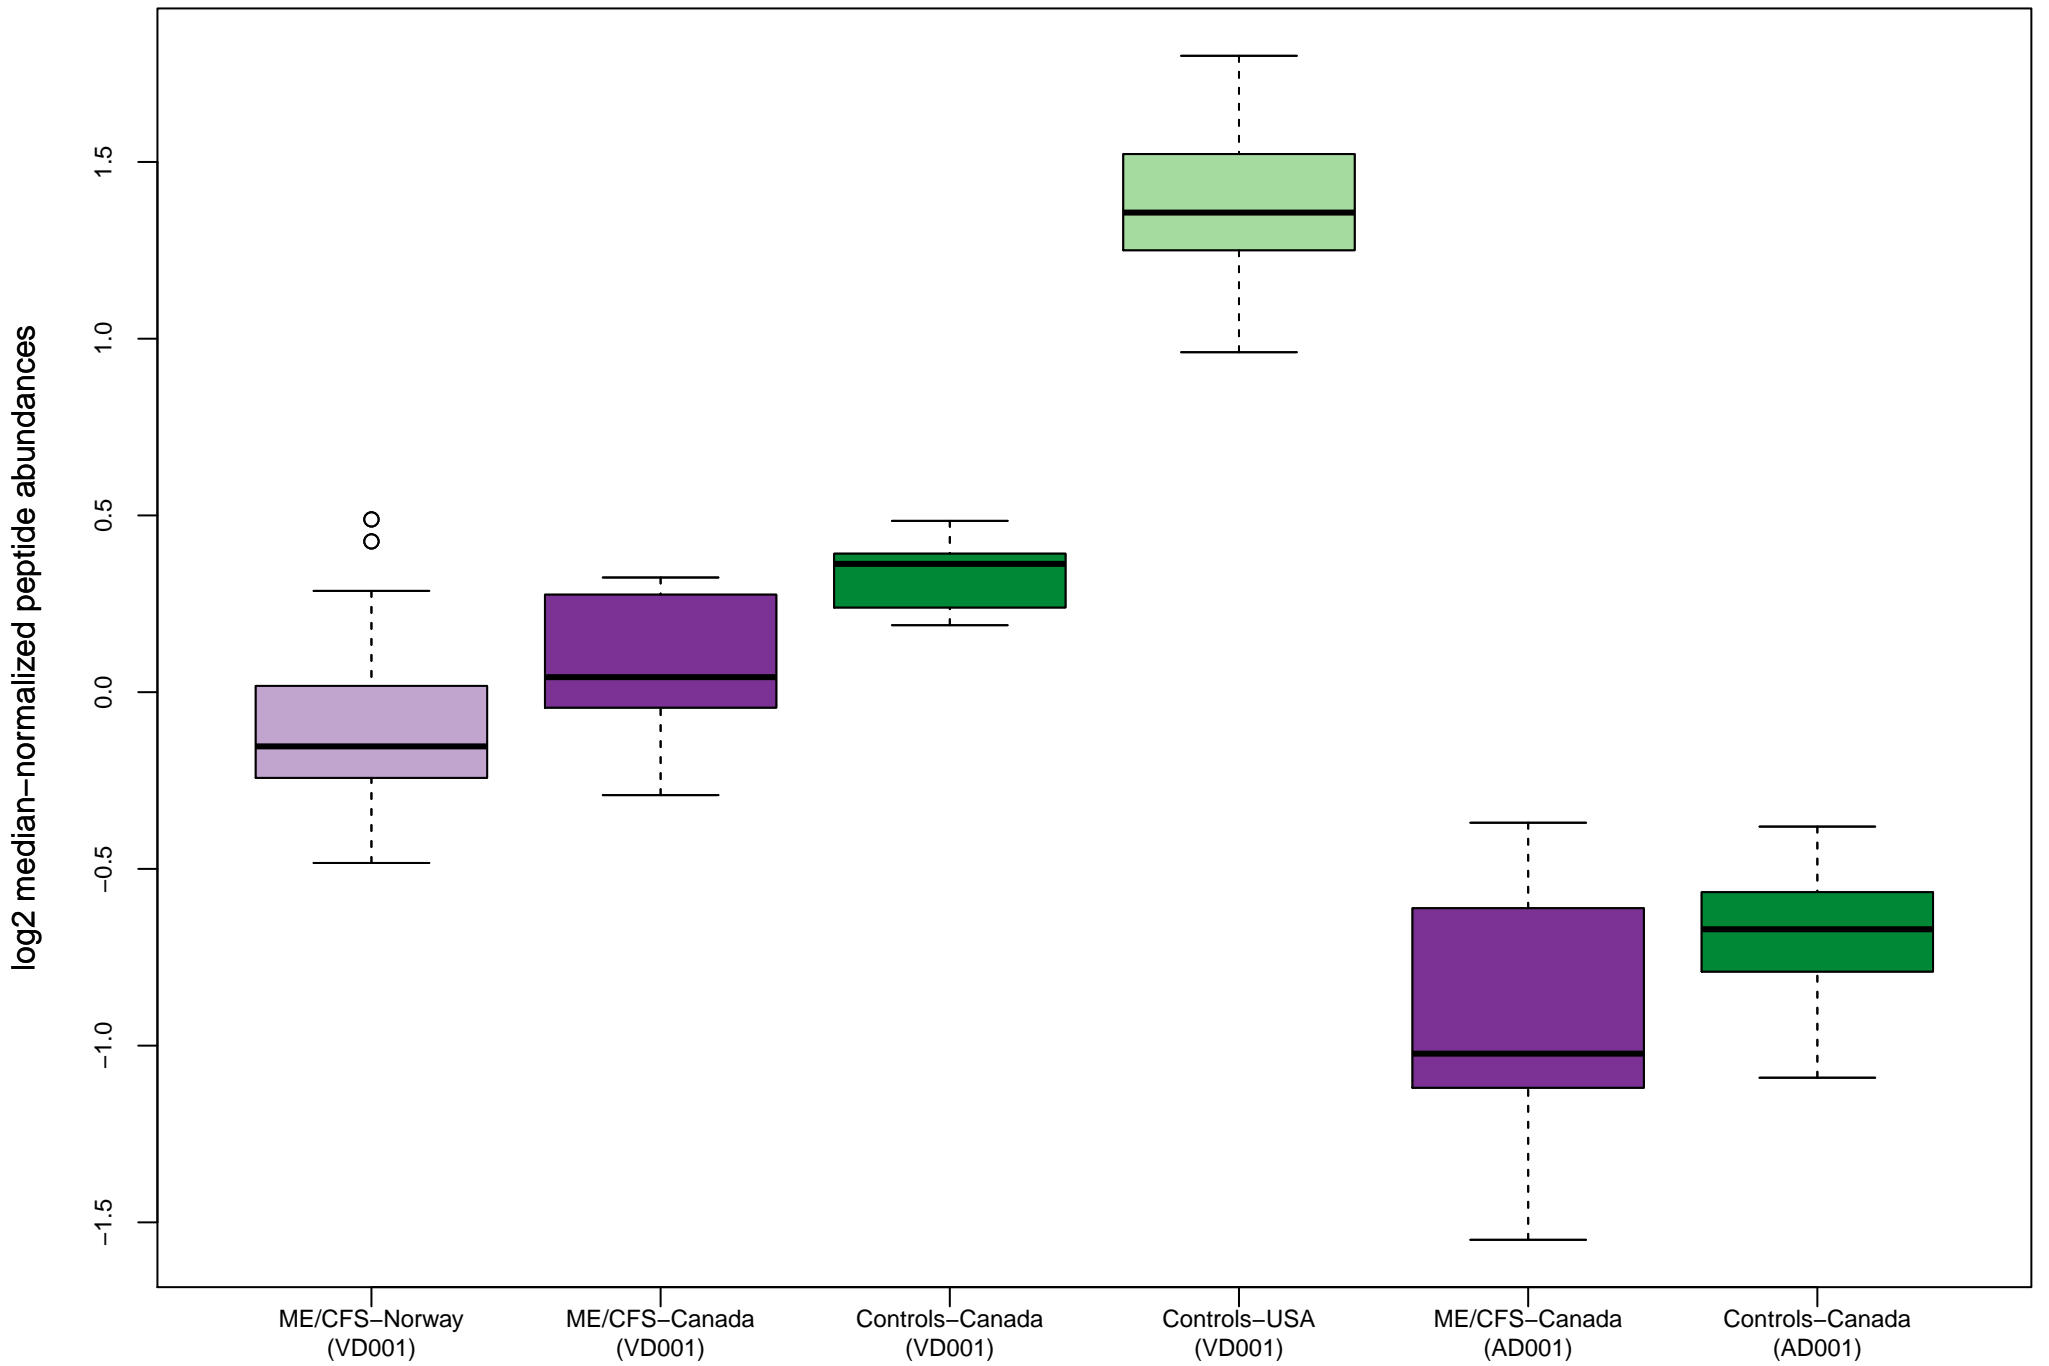

# LVRWGNLGVALG

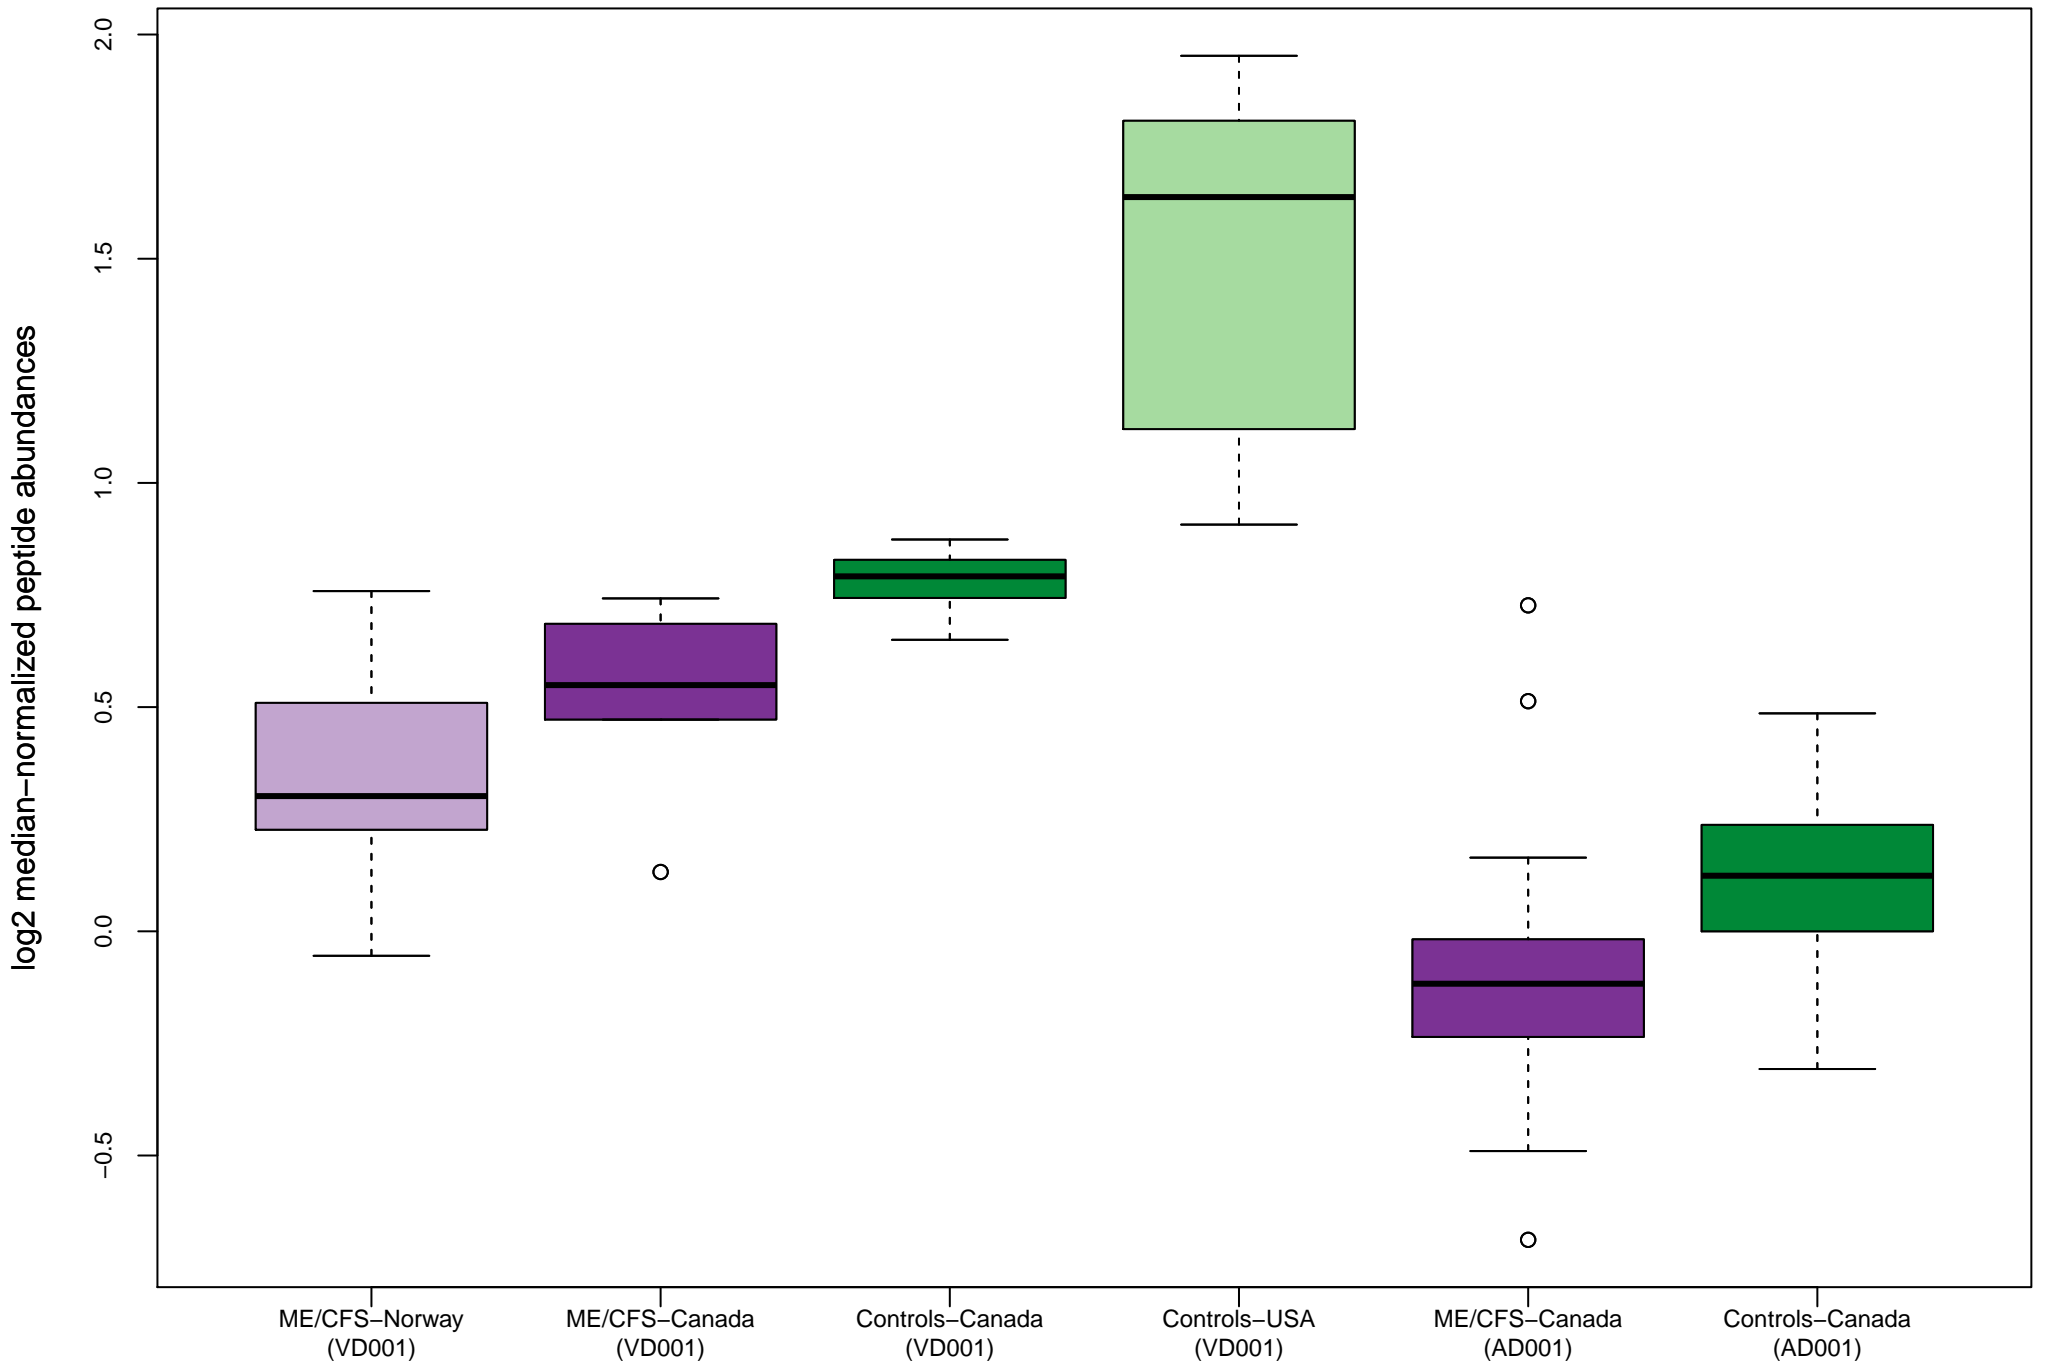

# LWRNYALSVLSG

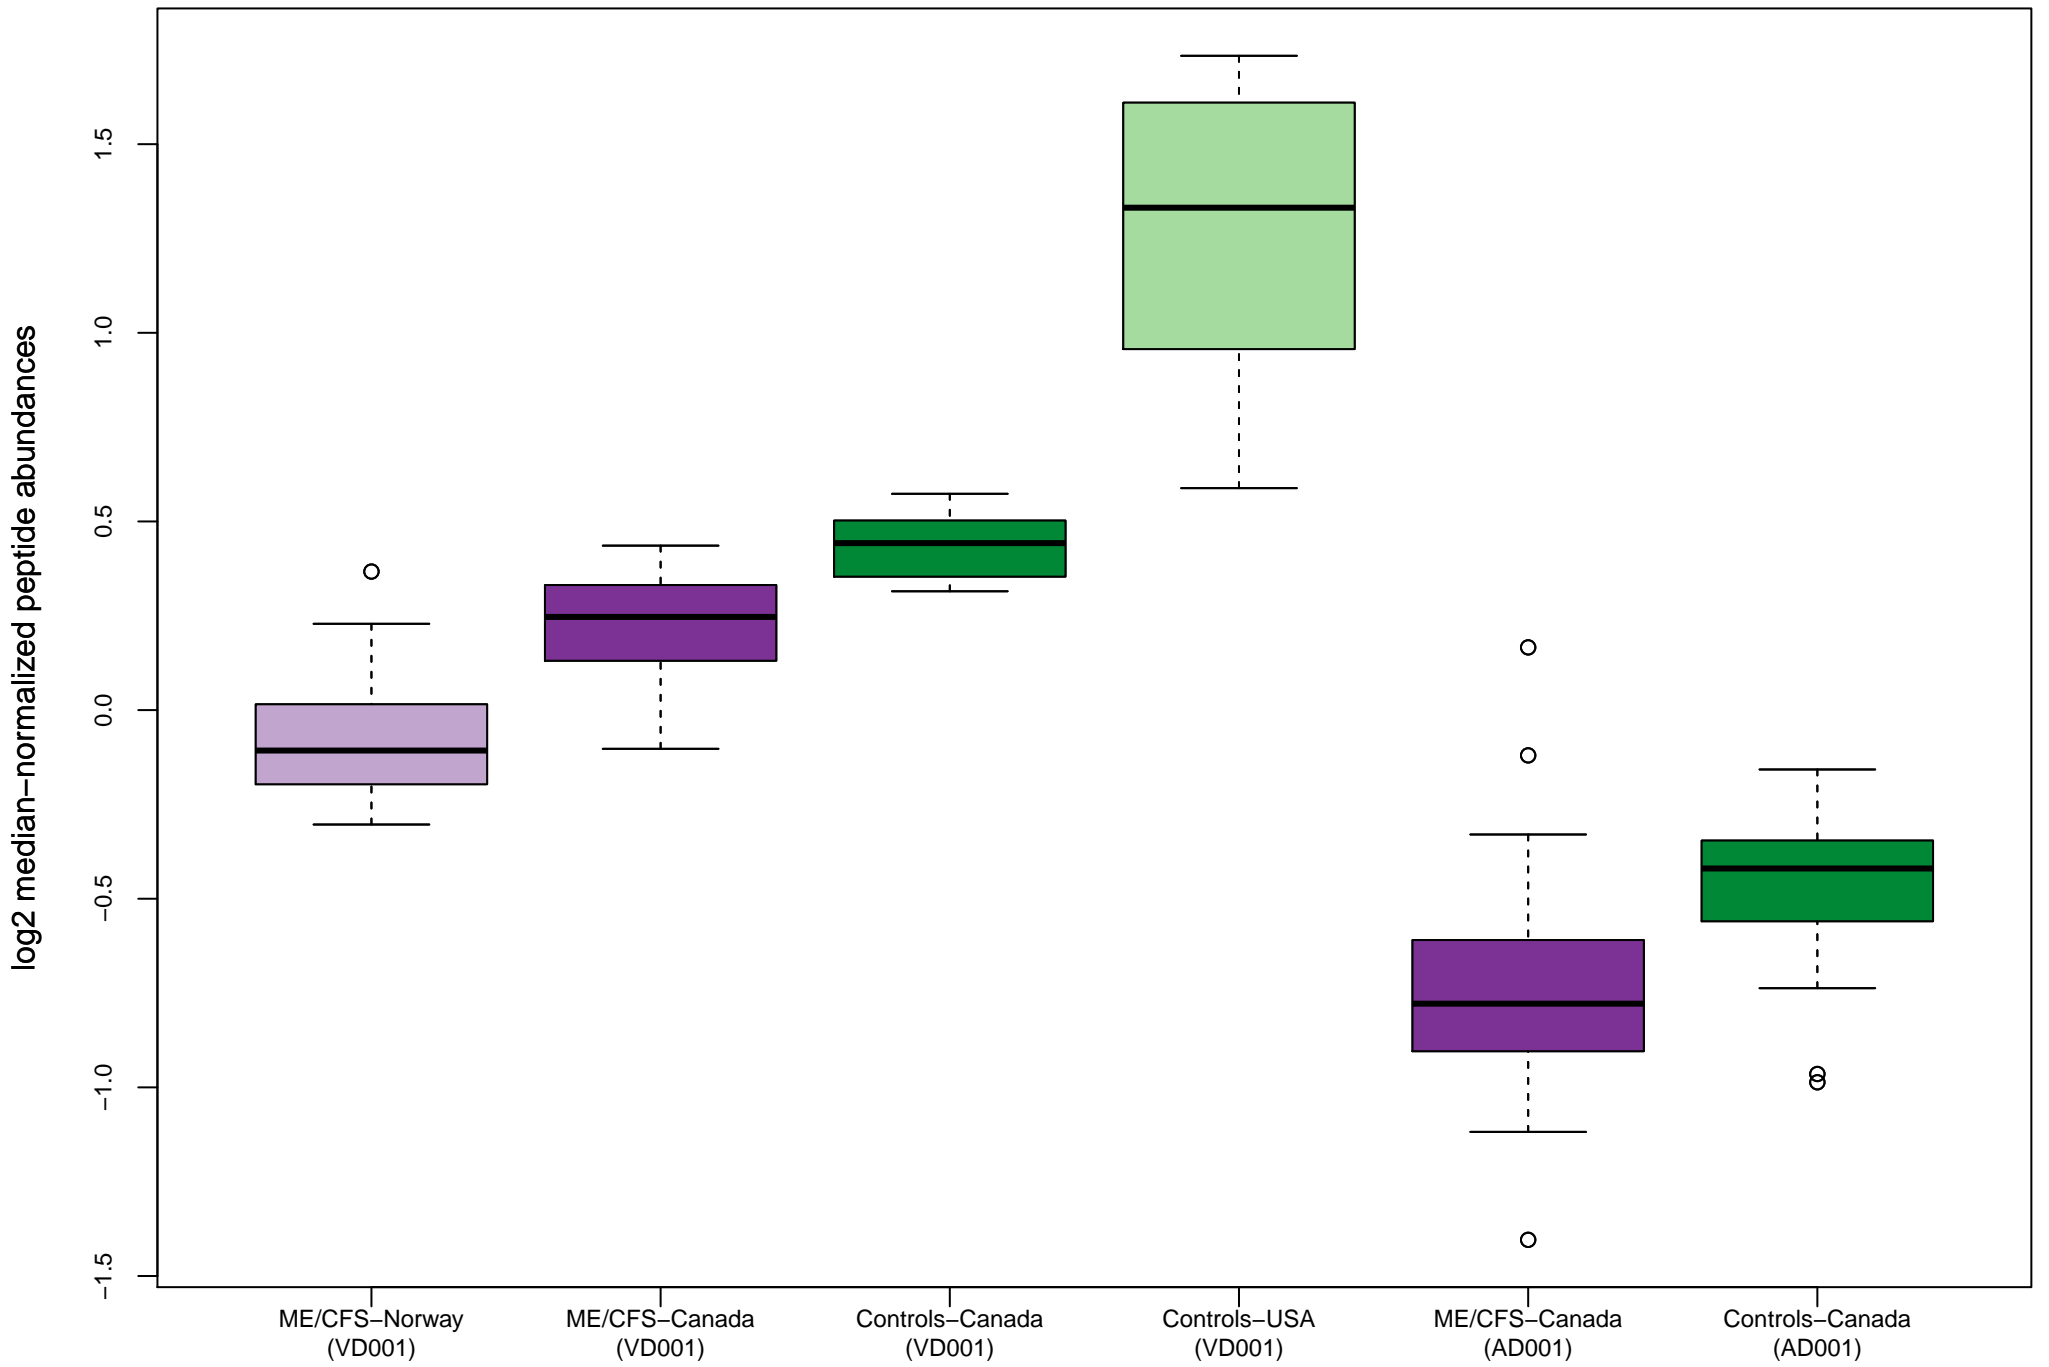

# LWSNRALGVALG

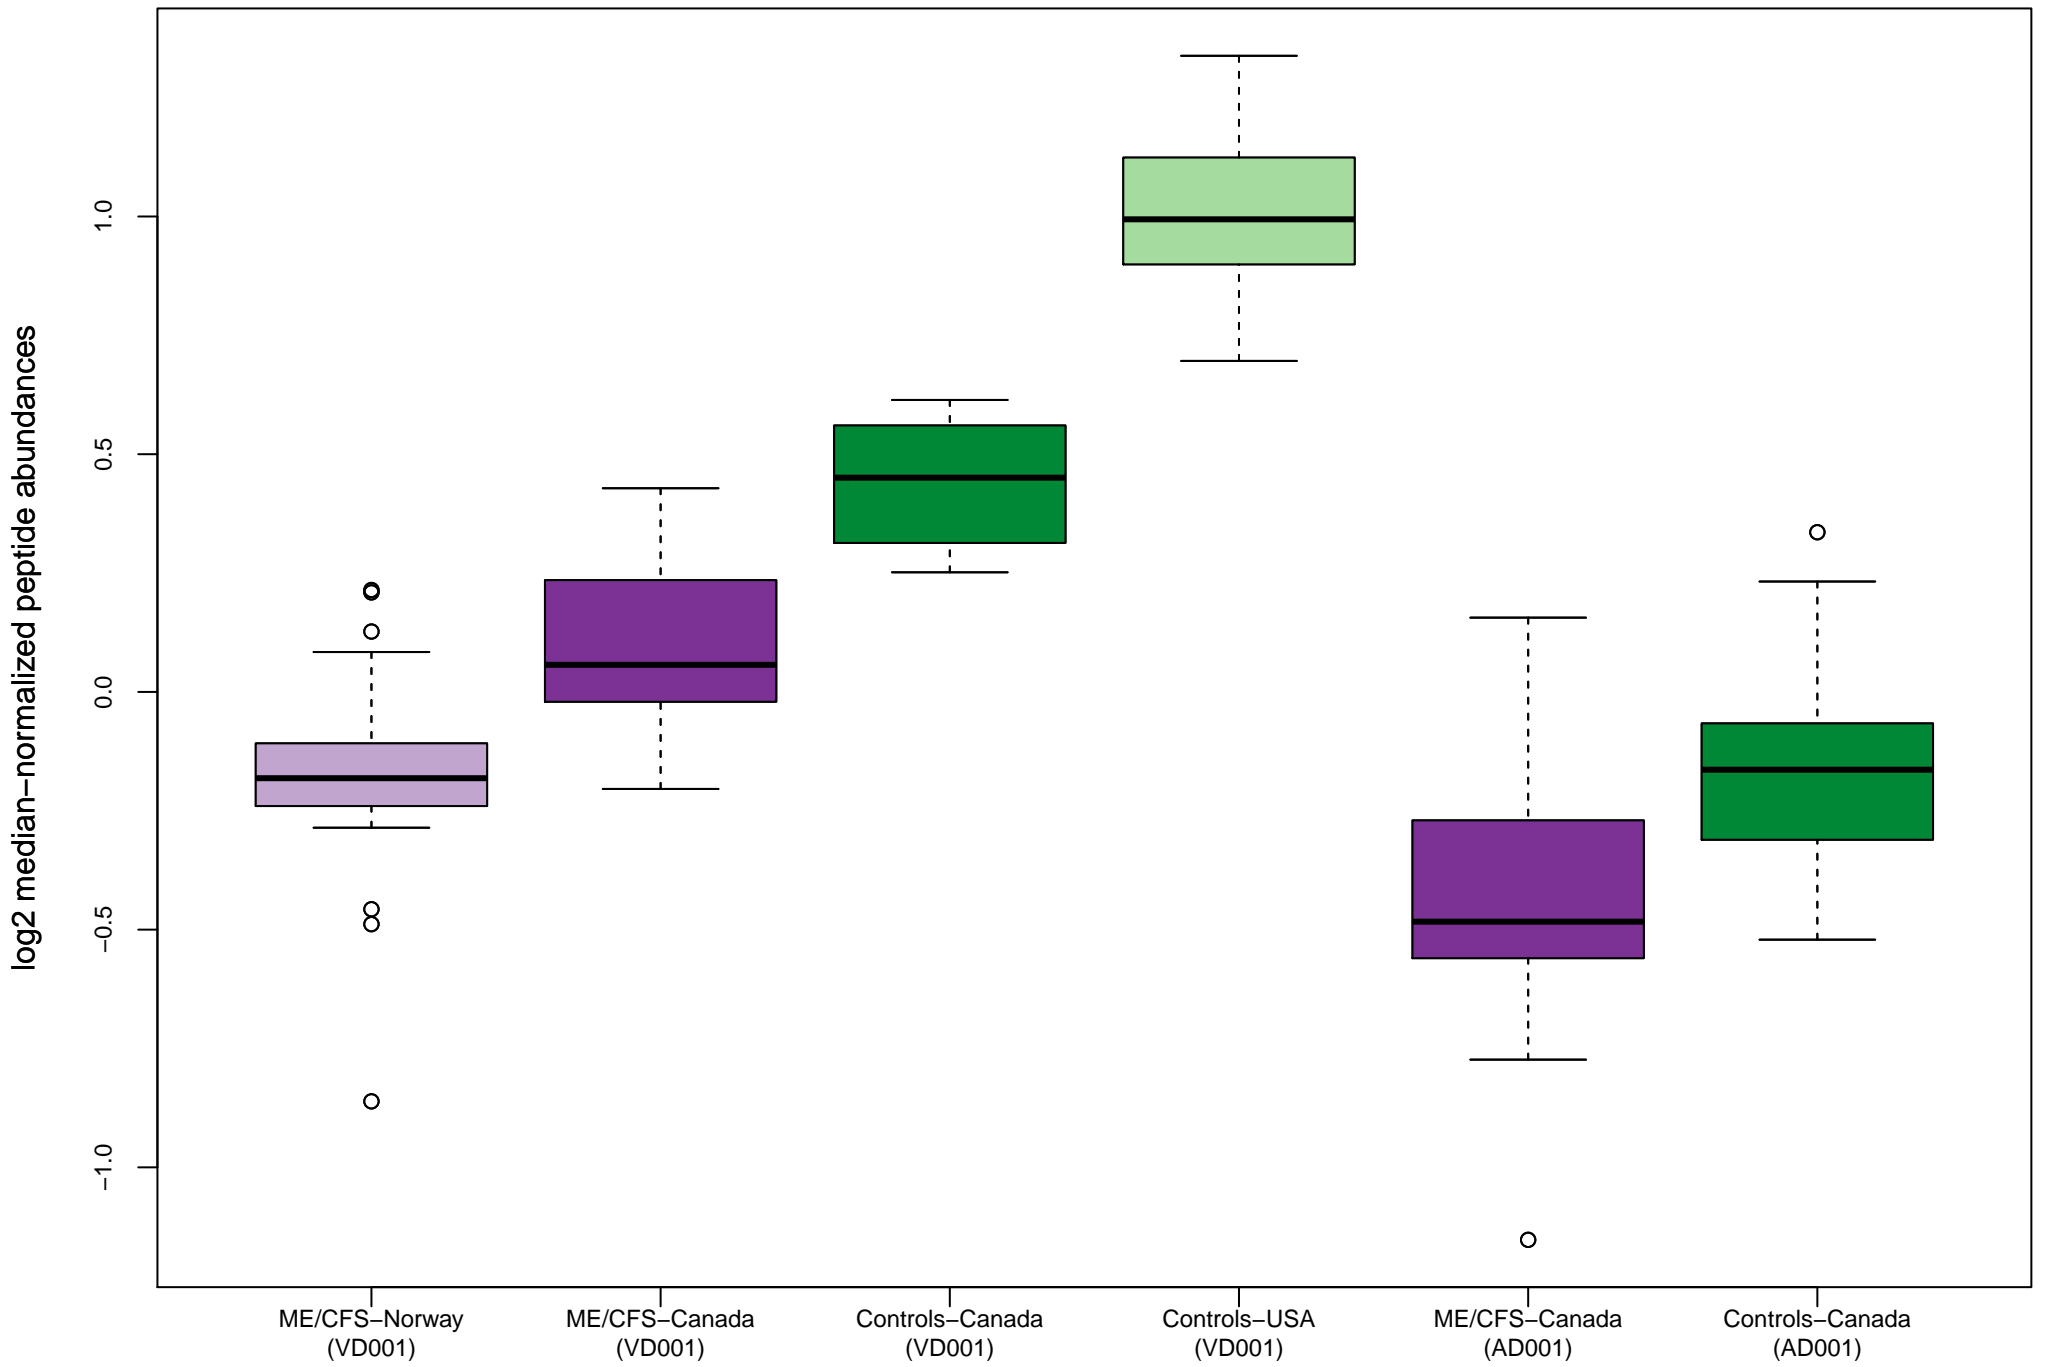

# LYFRSWLSVASG

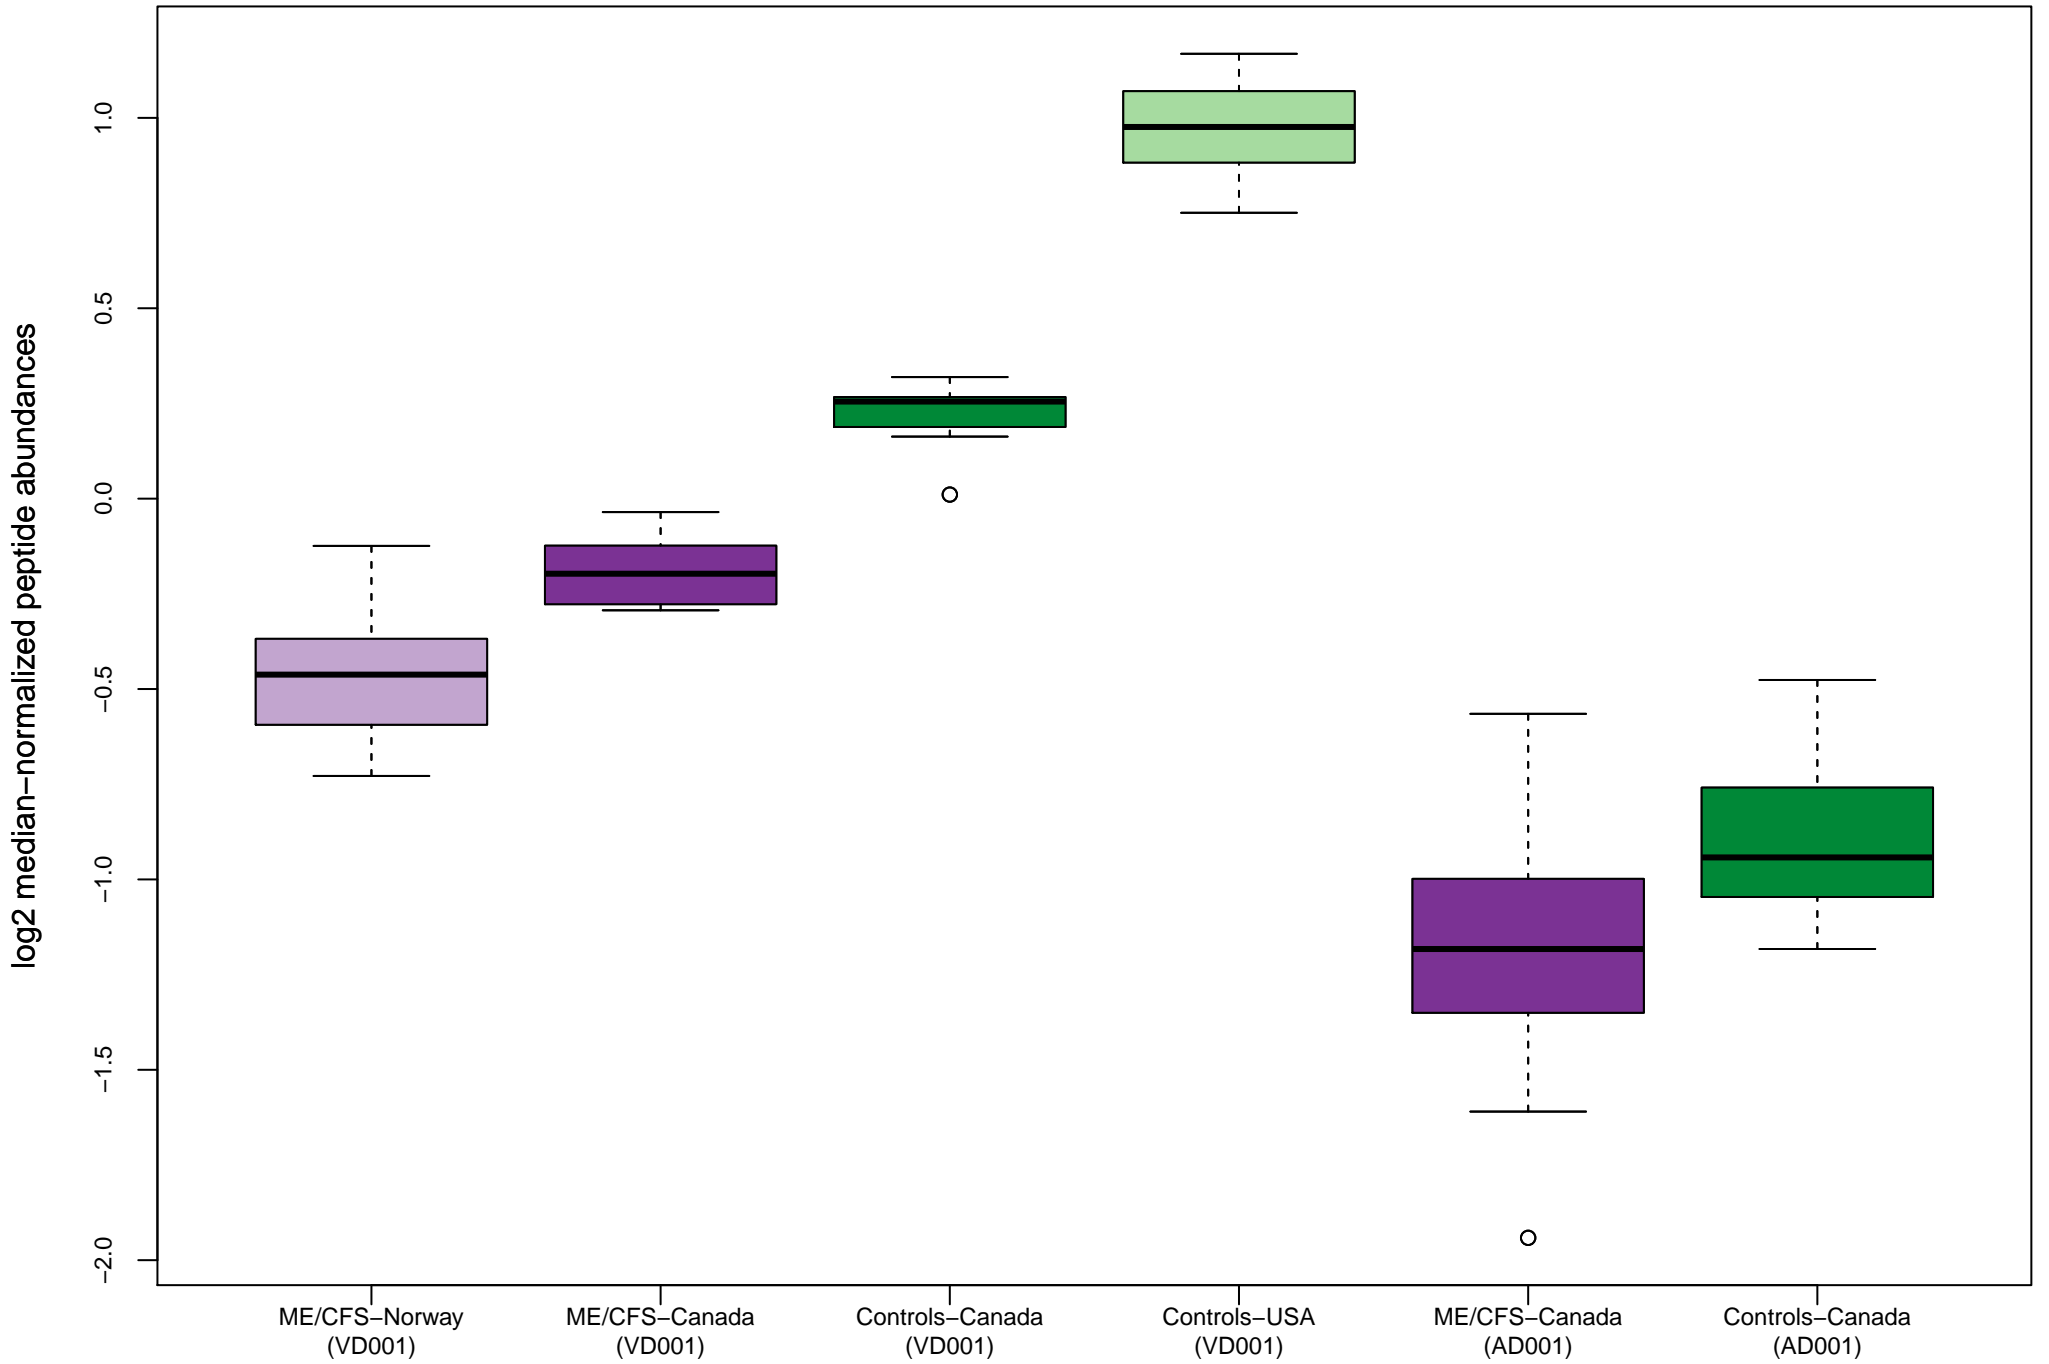

# LYLGHRVGVALS

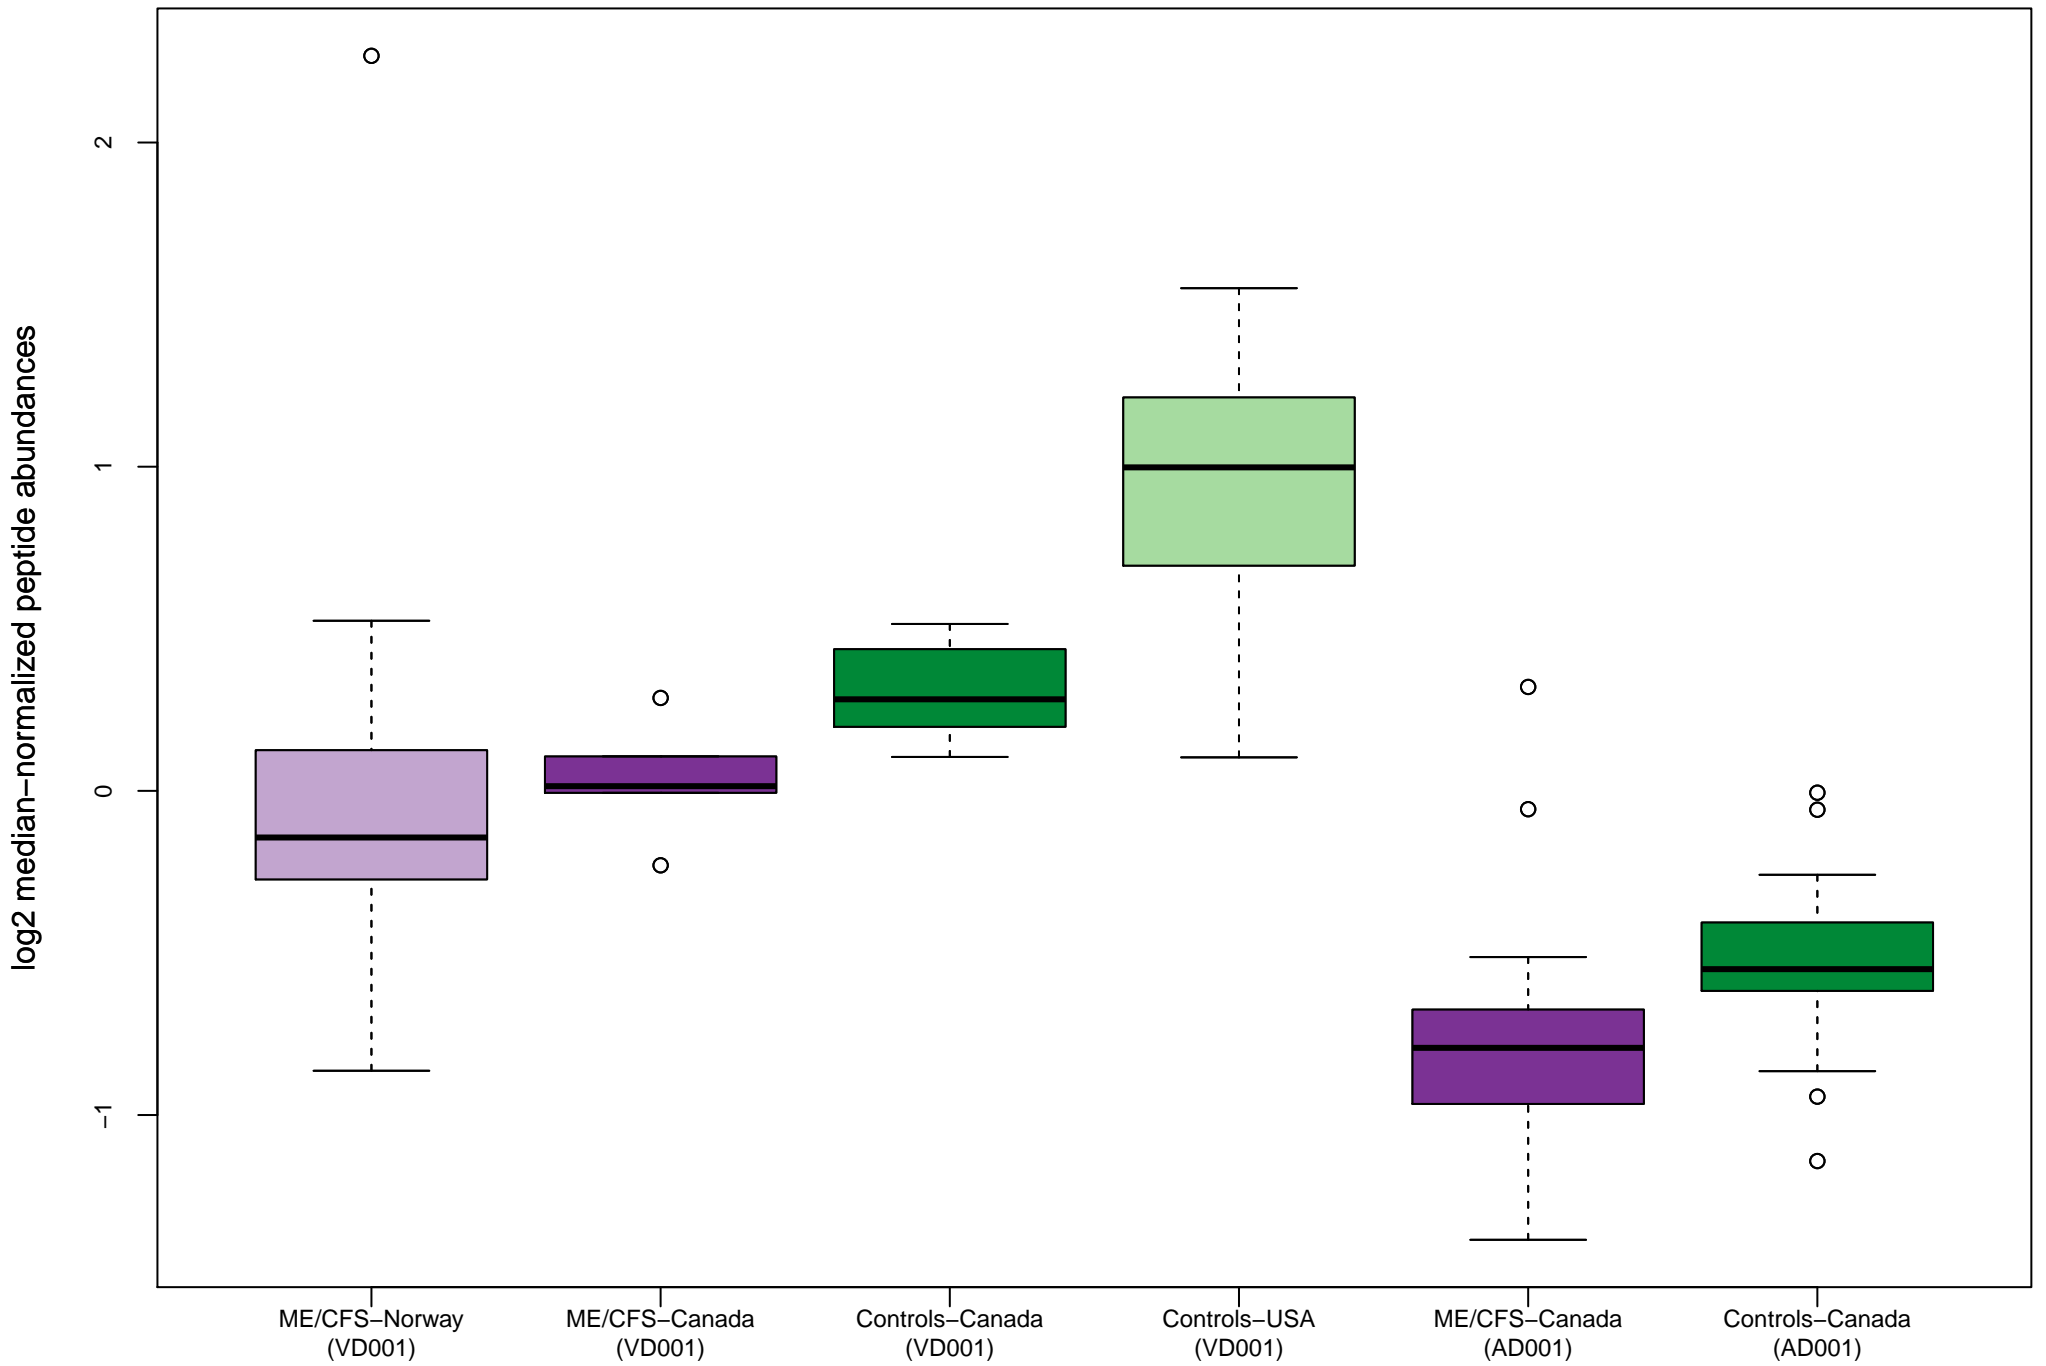



# LYLGWRWAGVLG

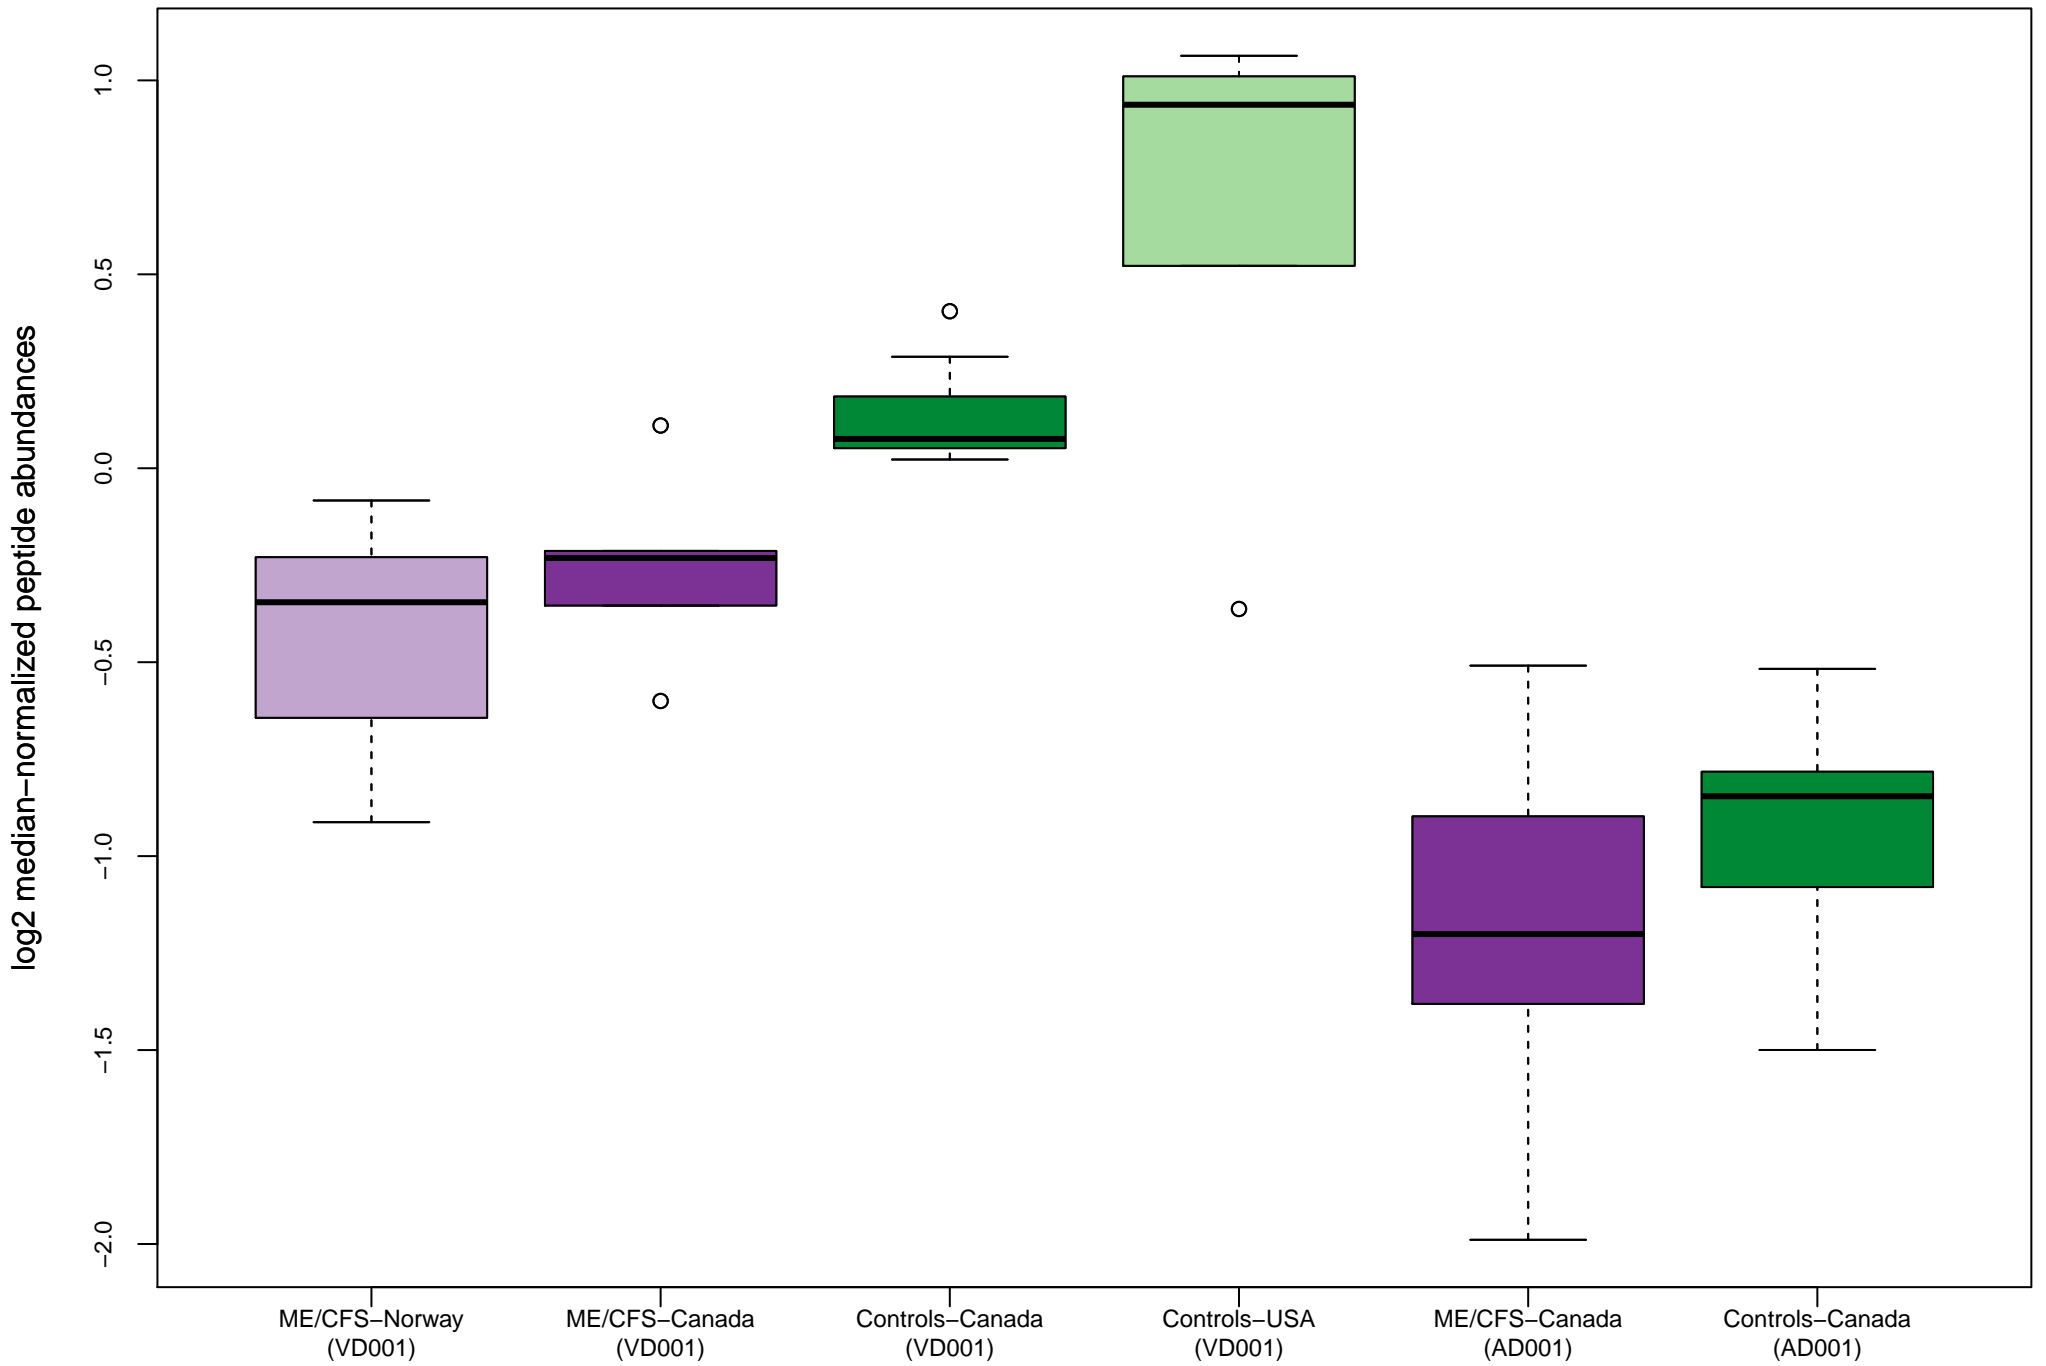

# NAWFRYRHLVAS

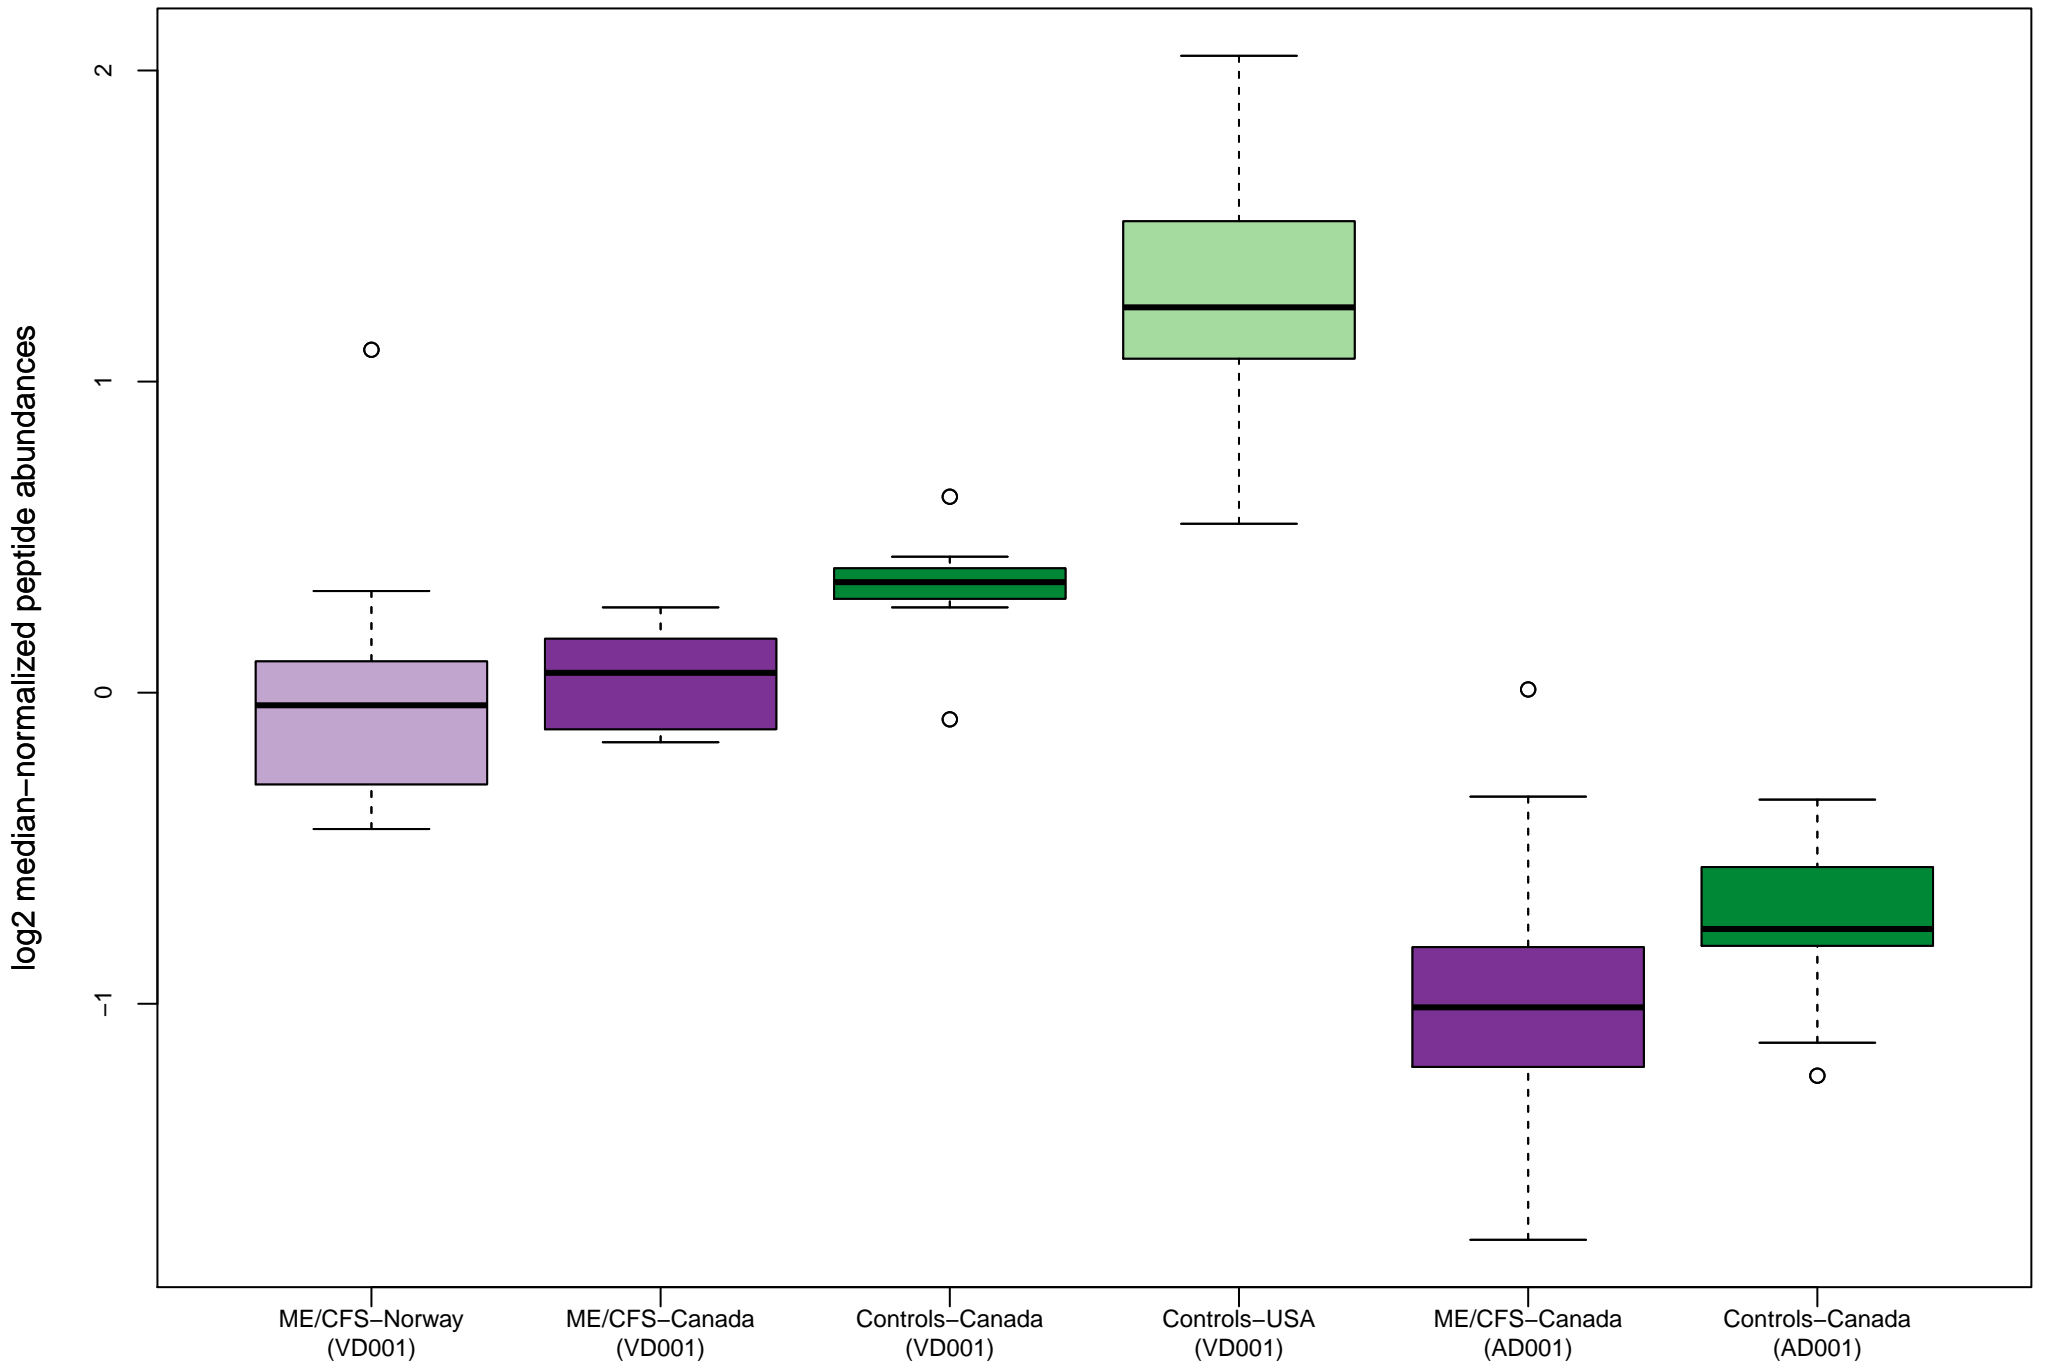

# NFQFRSVASLSG

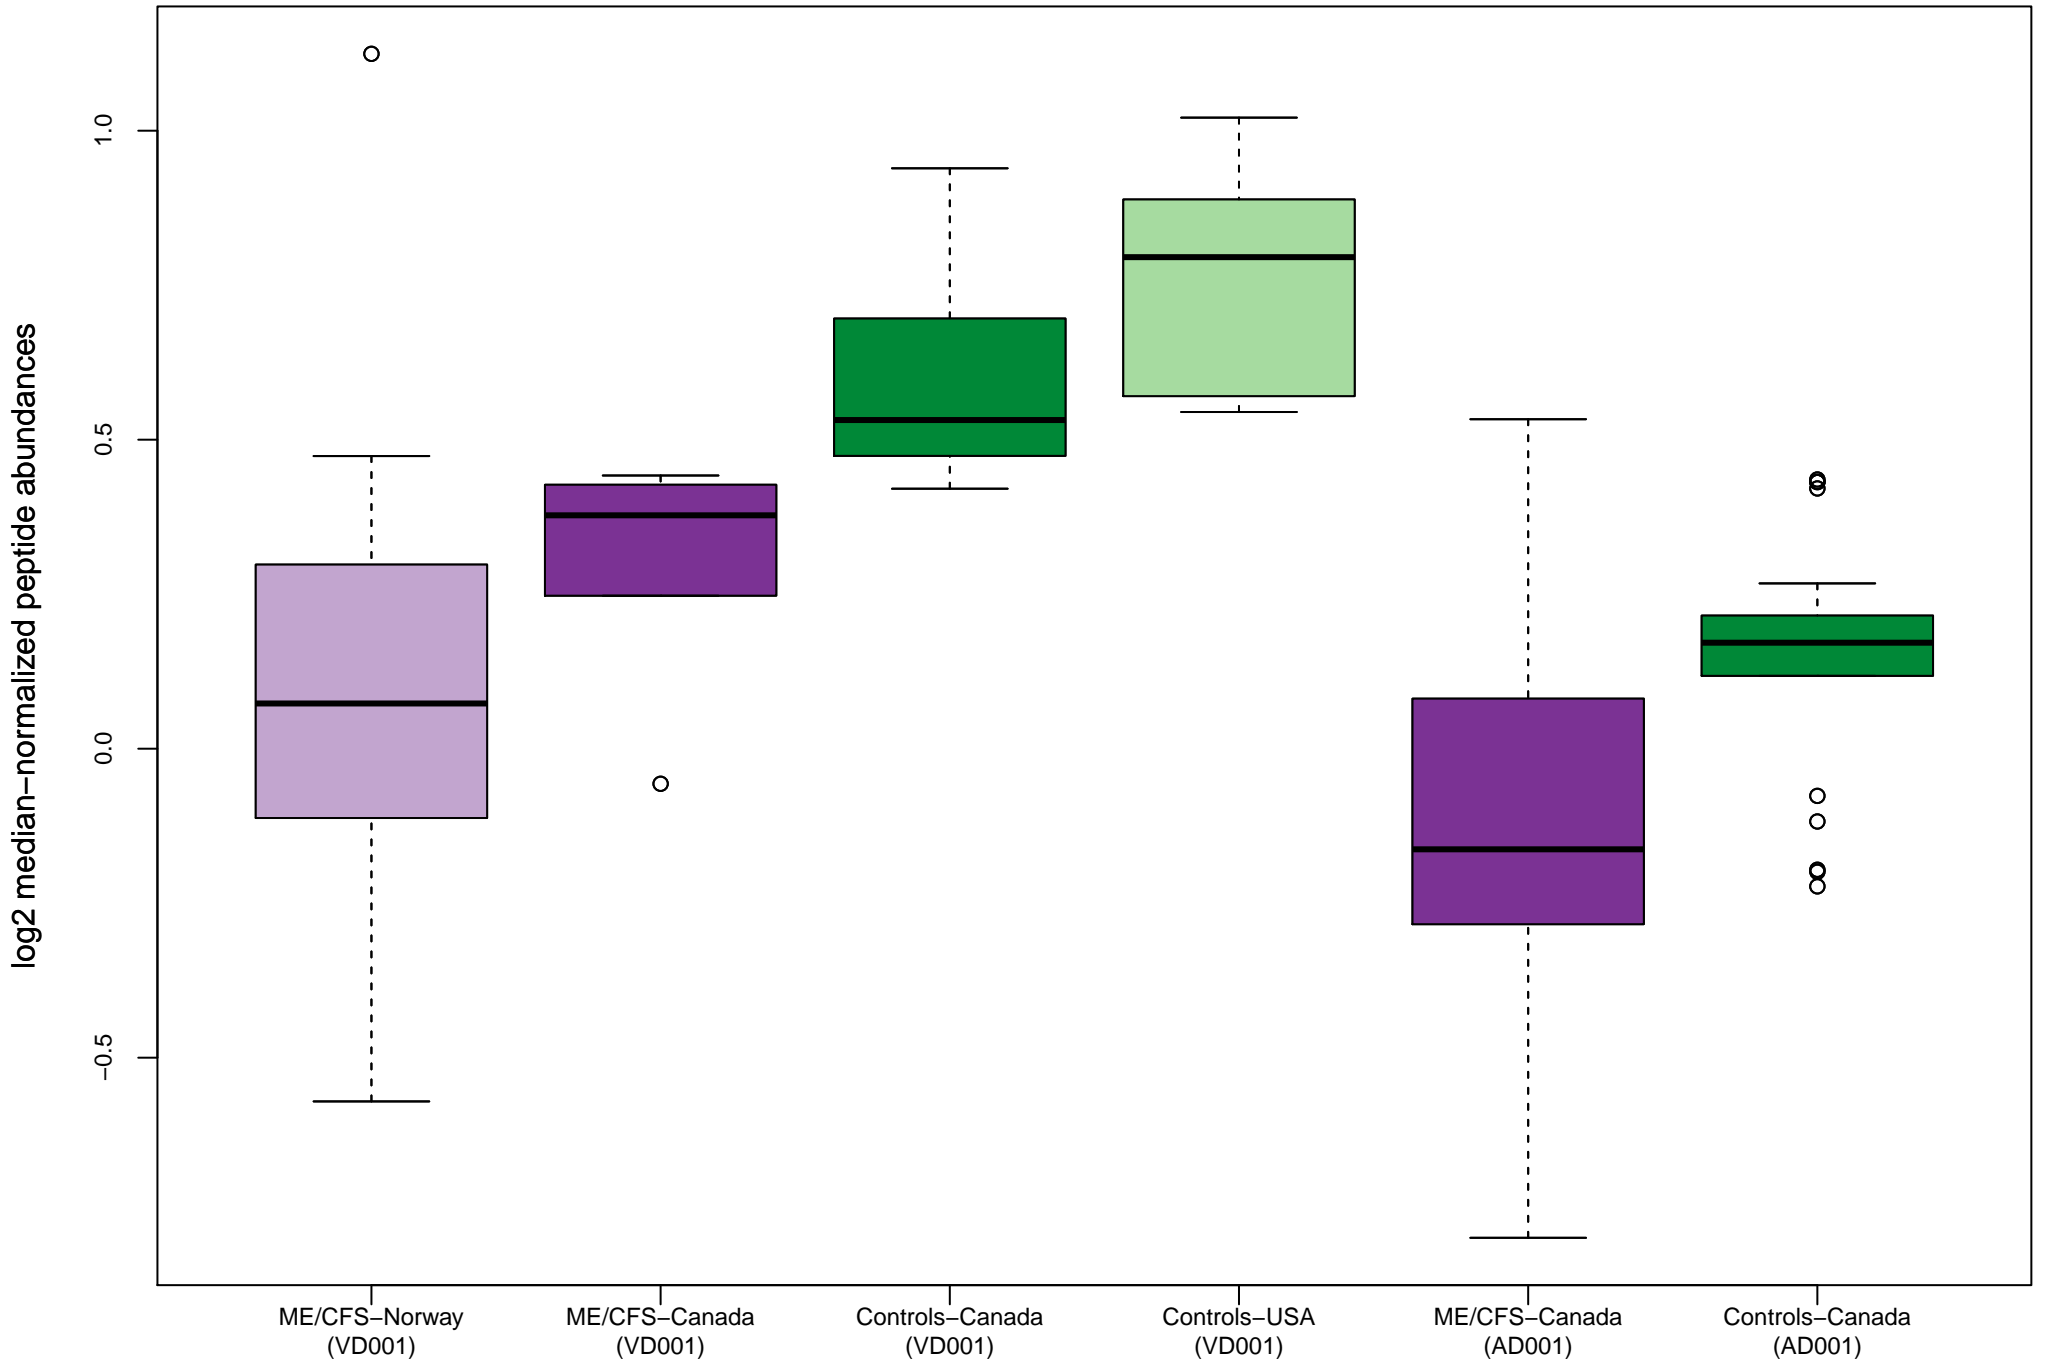

# NPNRRAPYVLSS

log2 median-normalized peptide abundances

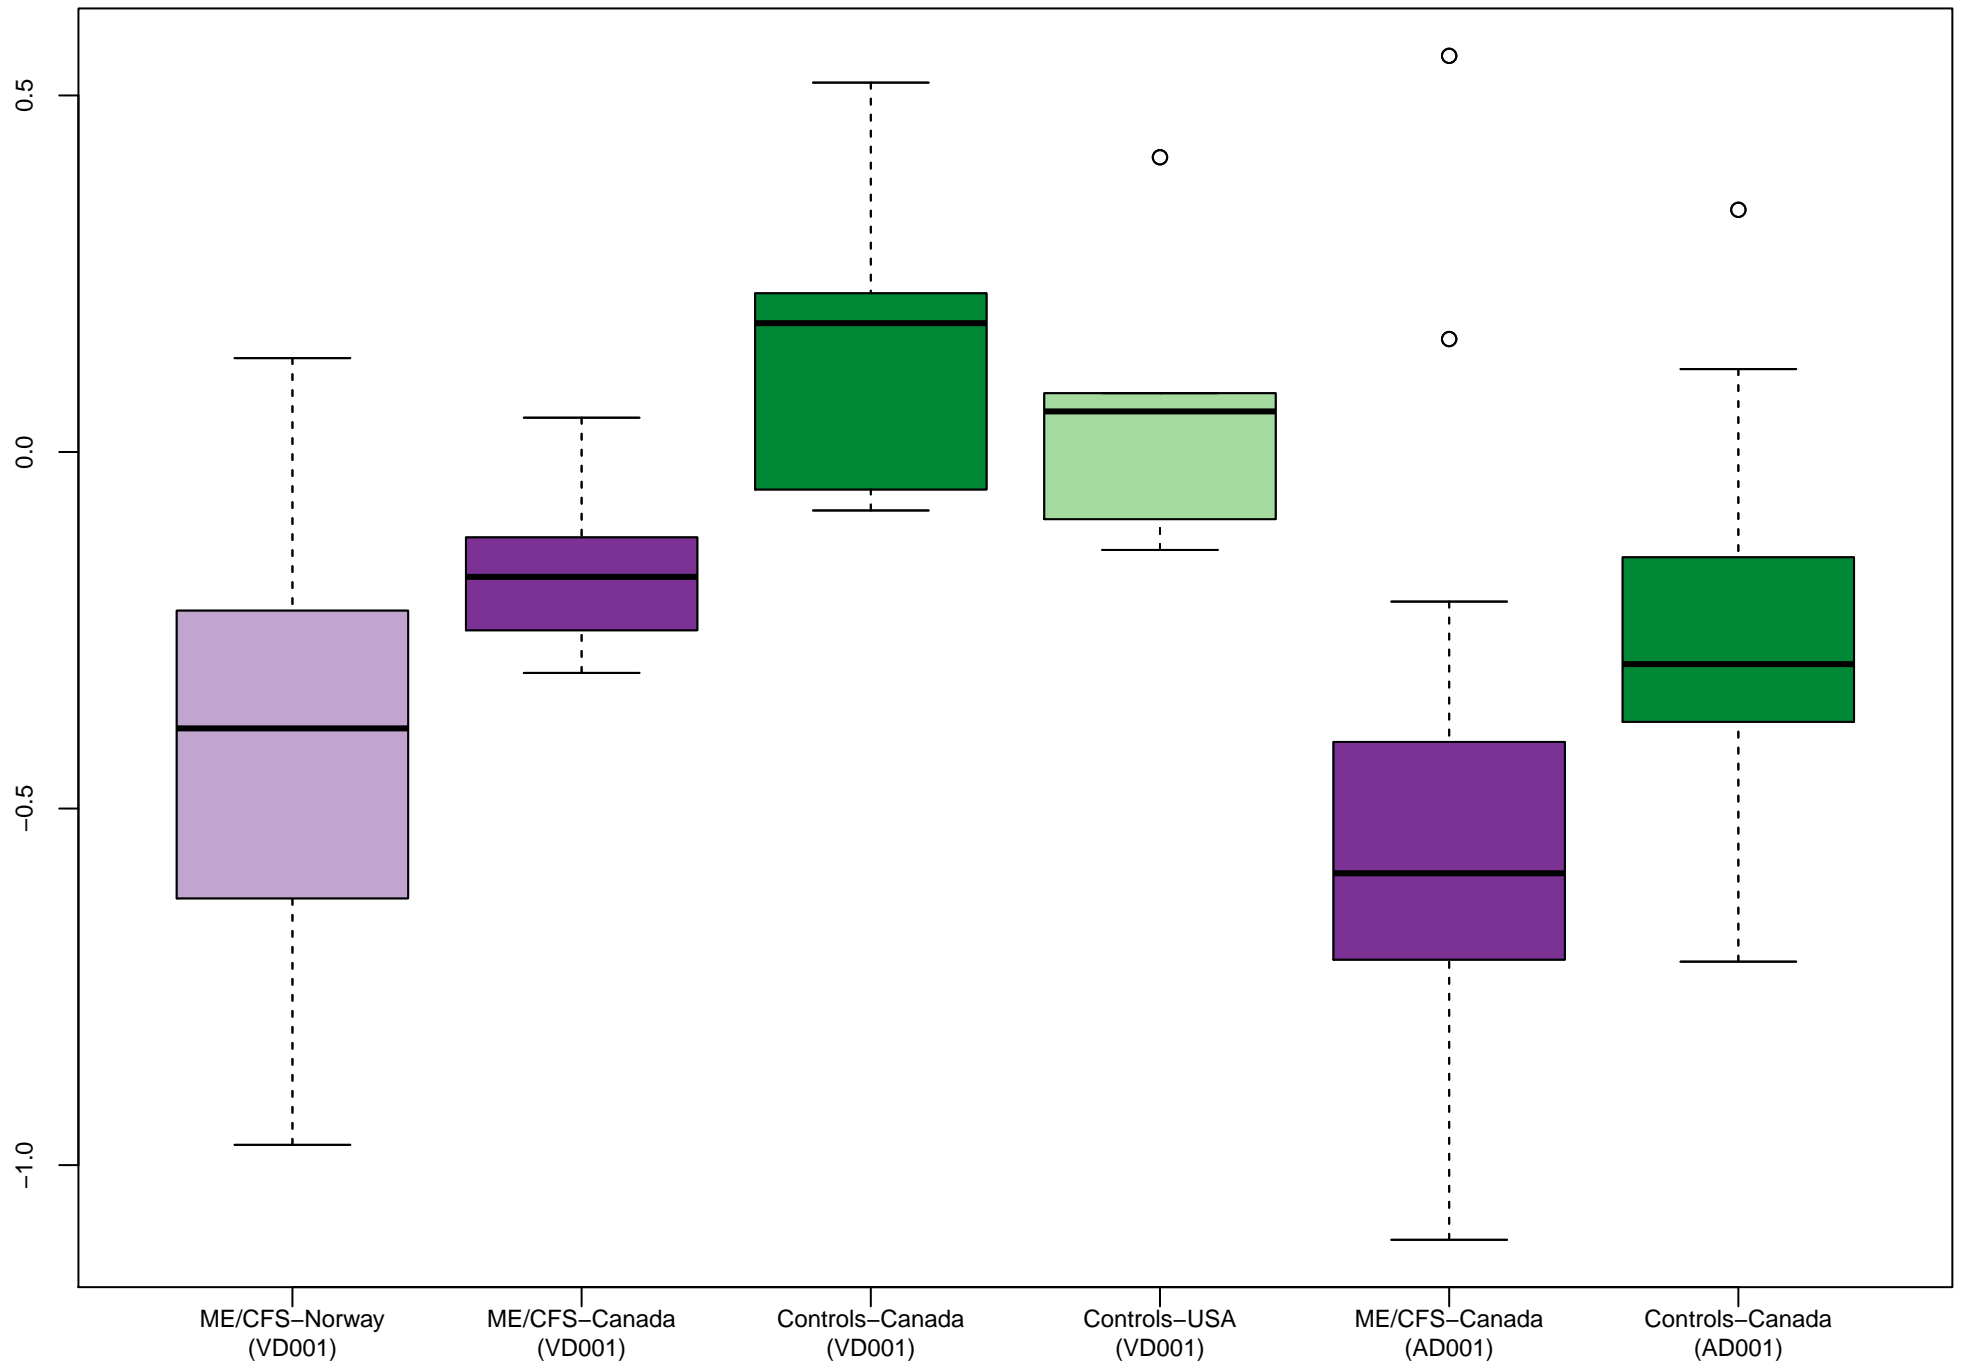

# NQLNLRWLGVLG

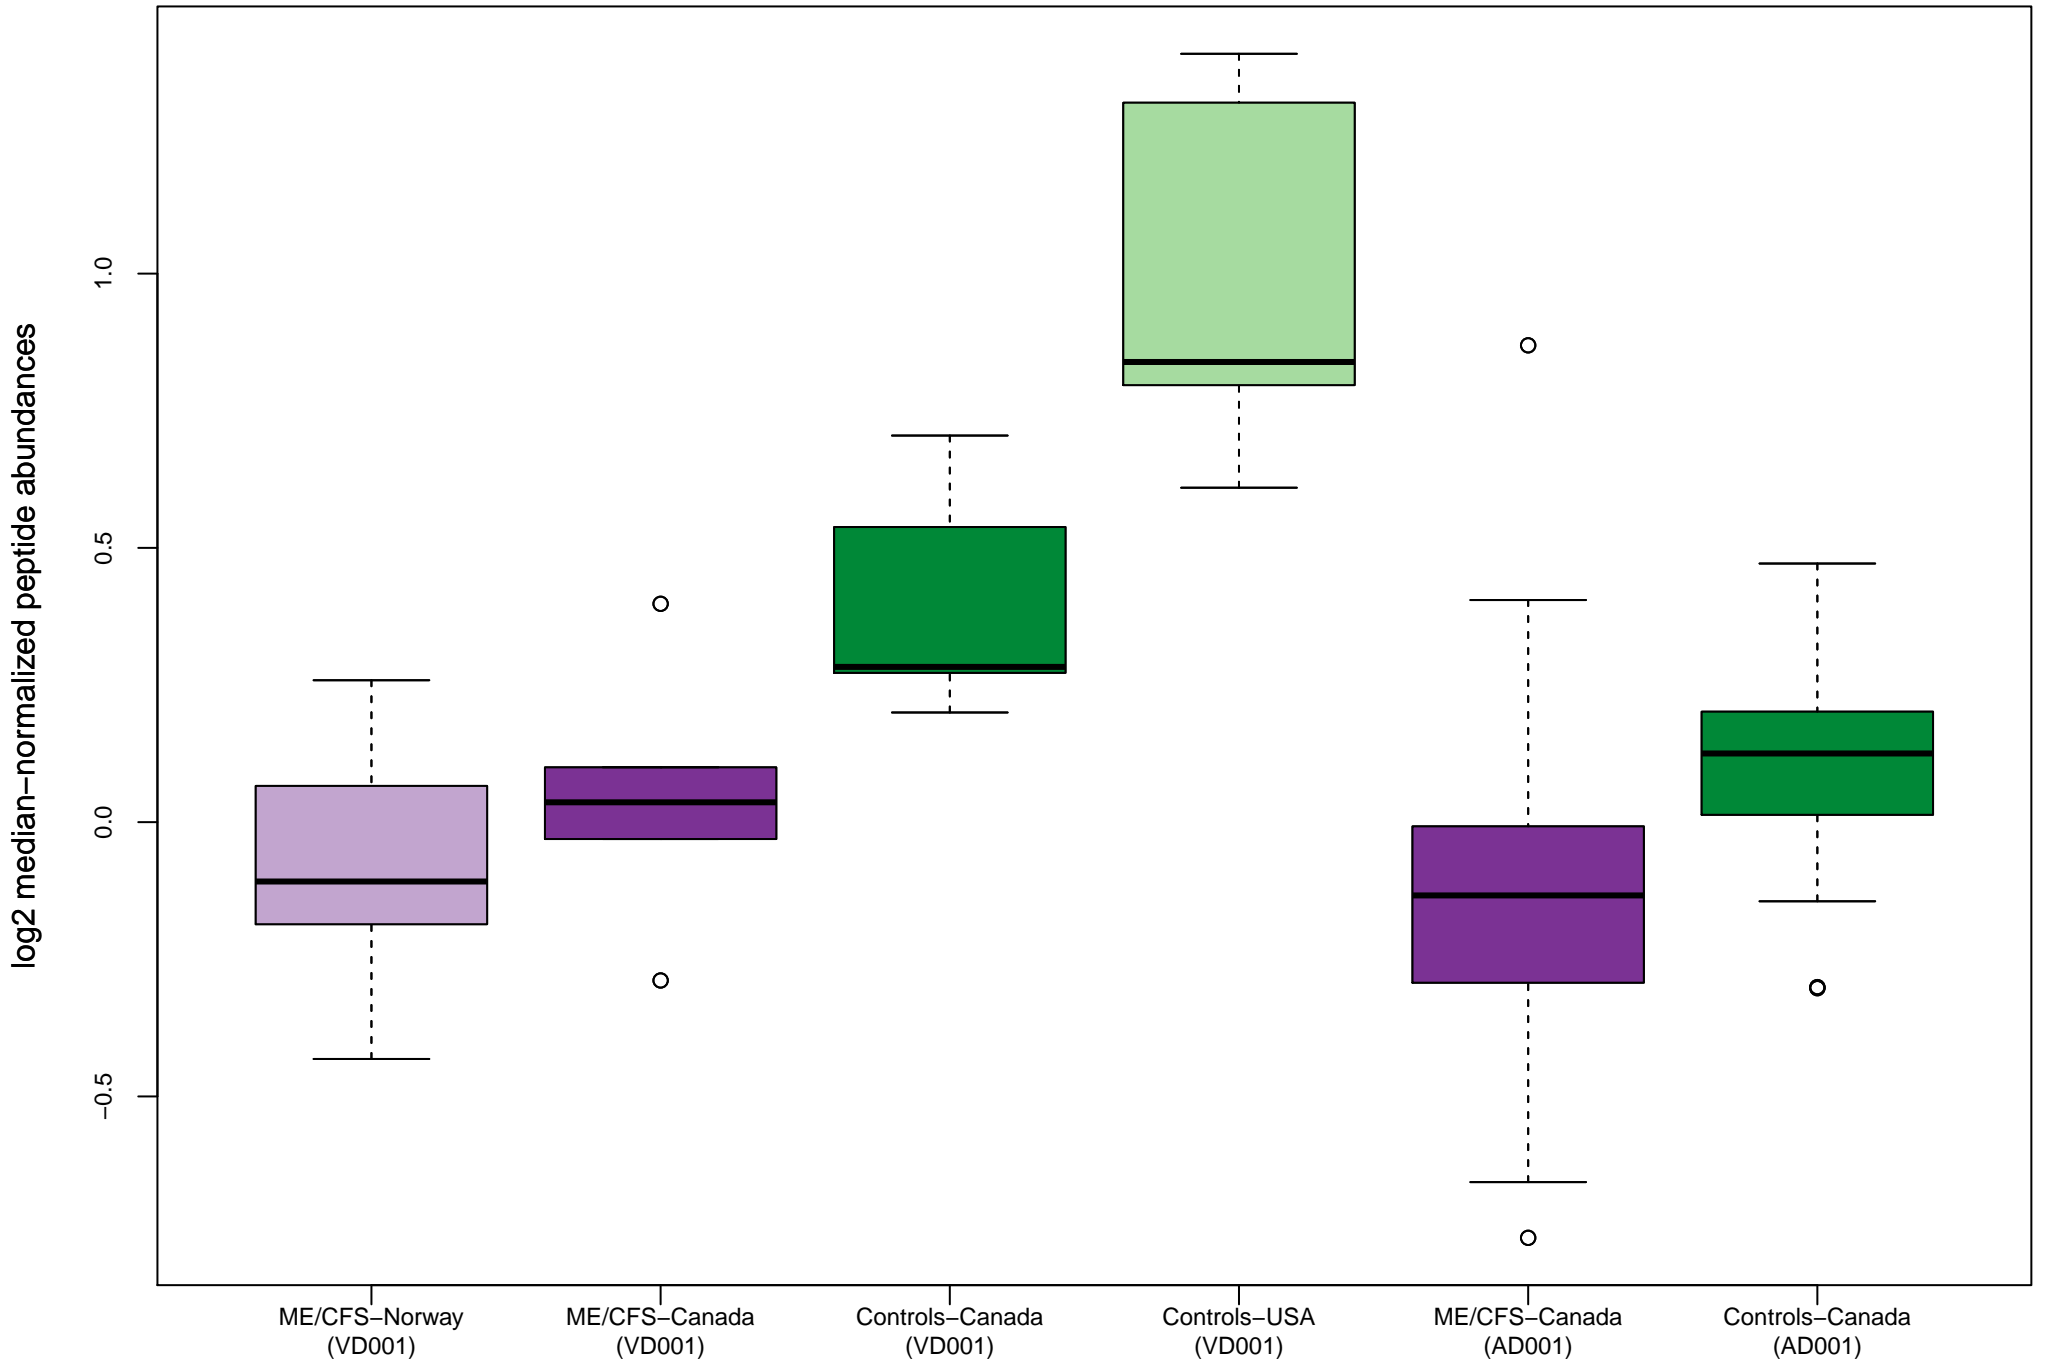

# NRDGPVFRWVSA

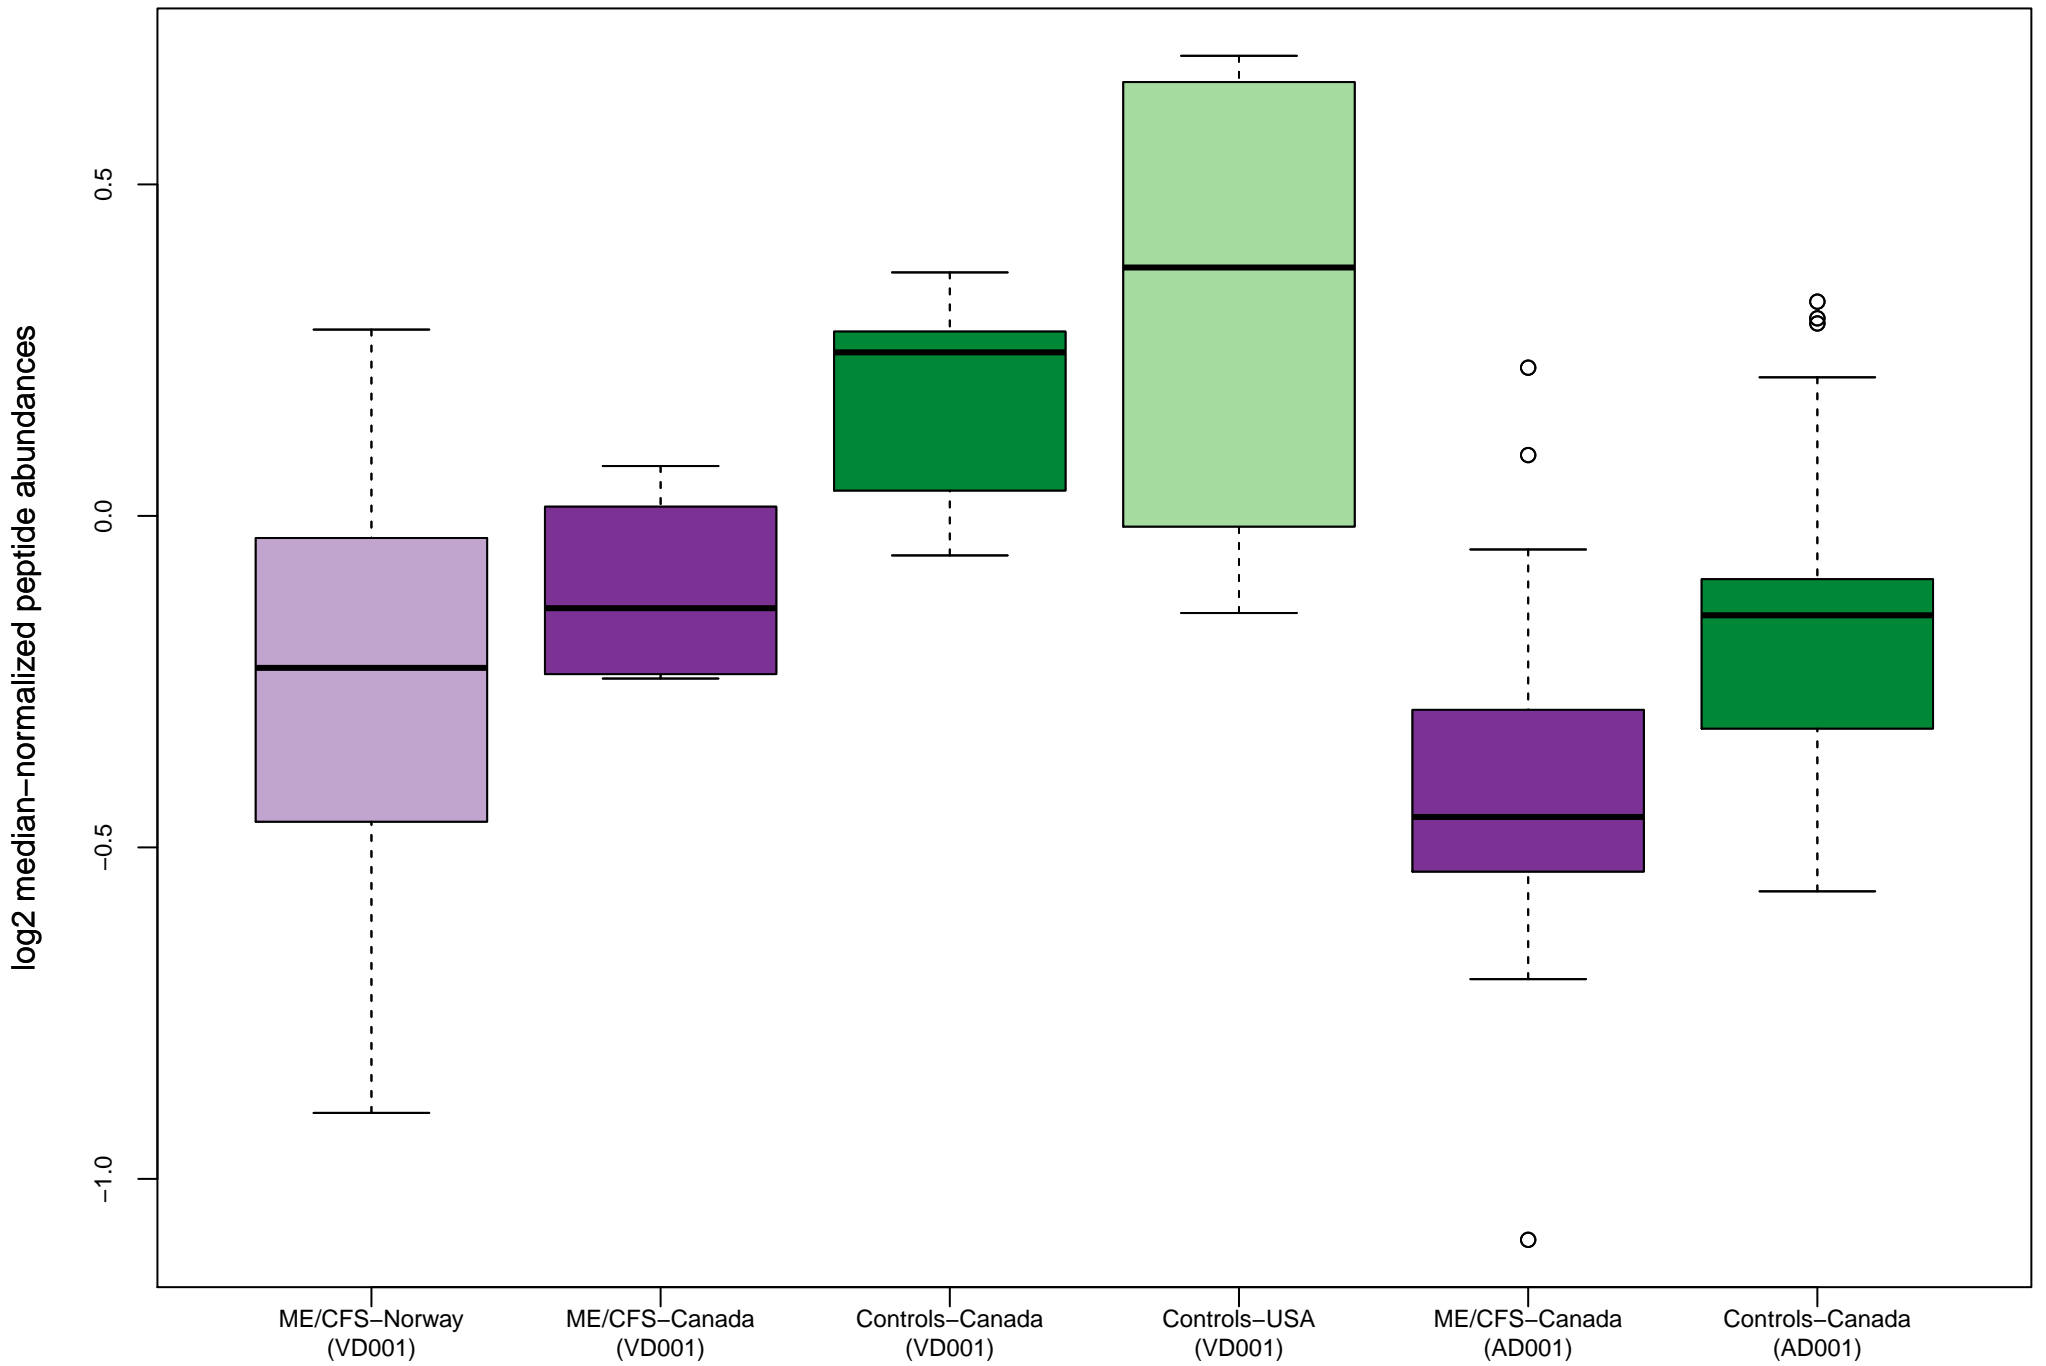

# NSKQRLFLSVSG

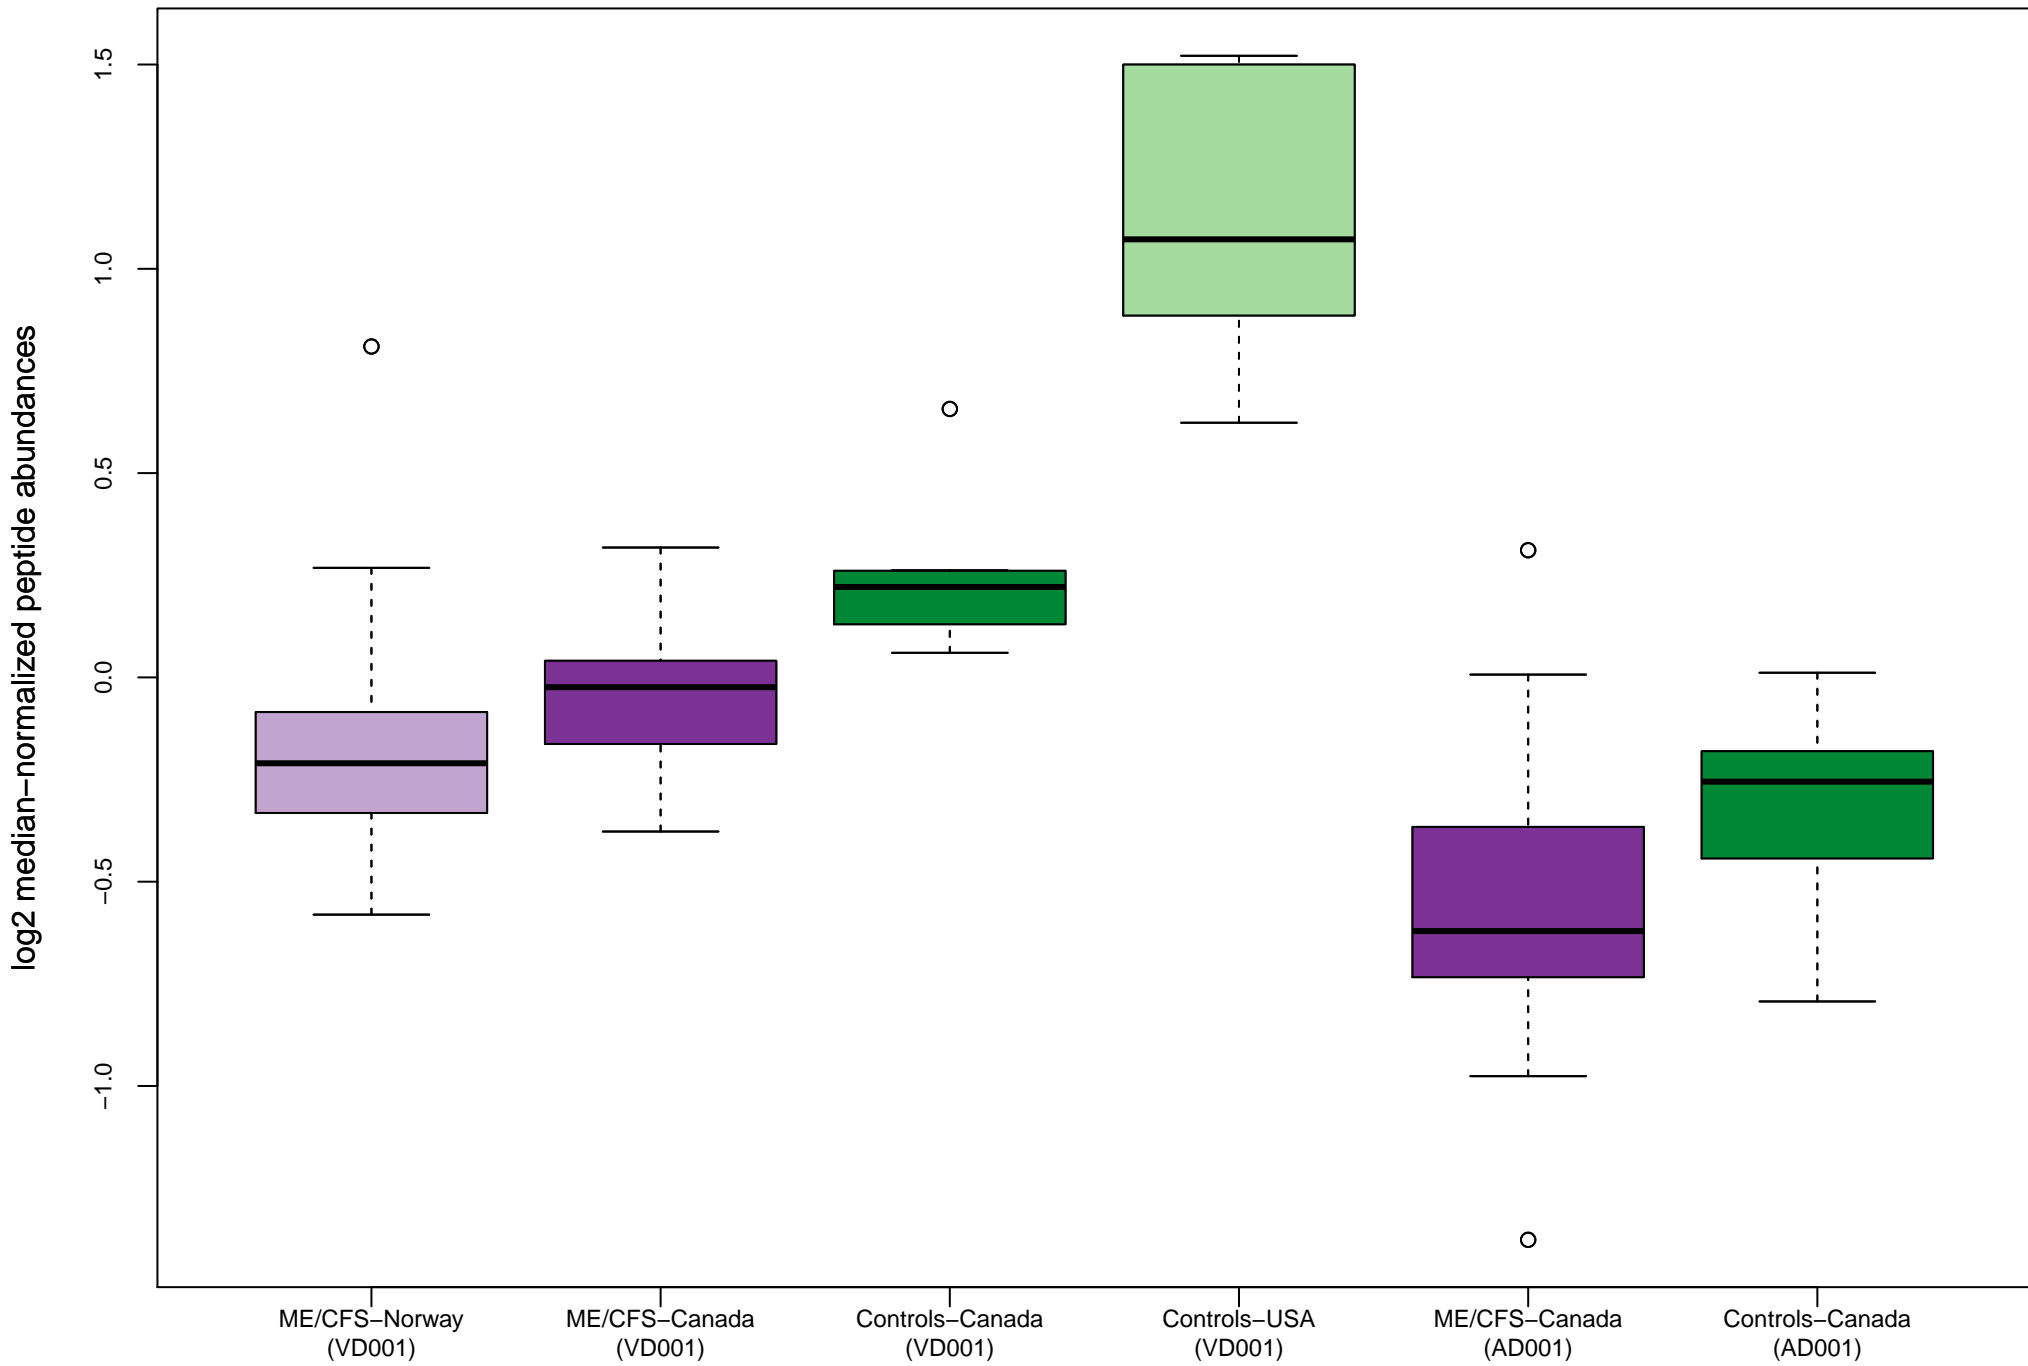

# NSWALNSRYWVL

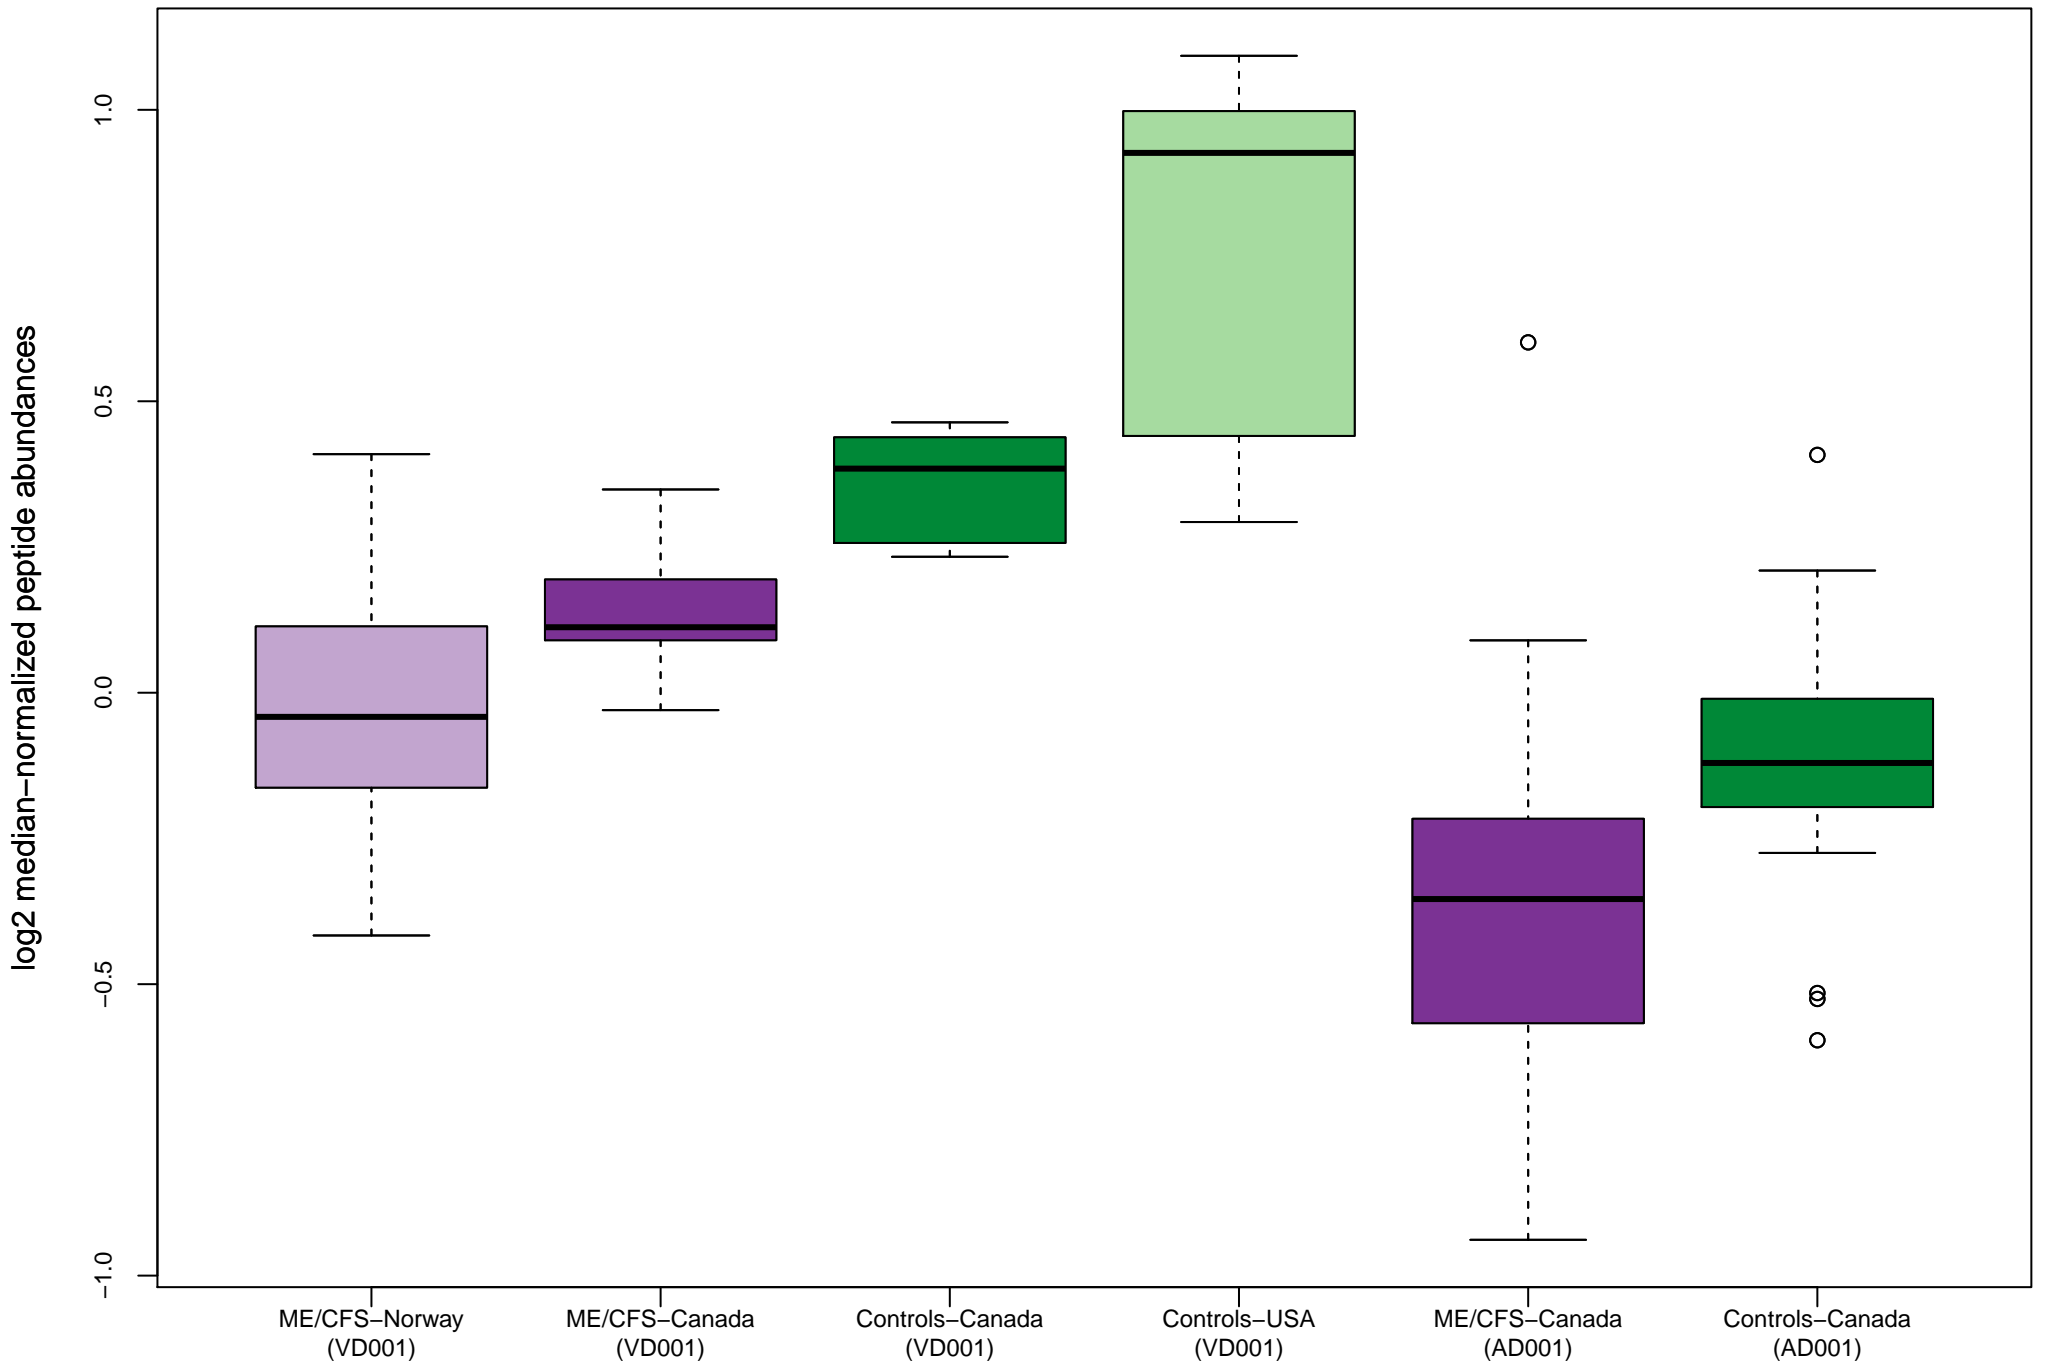



# NVLLGVRNAVLS

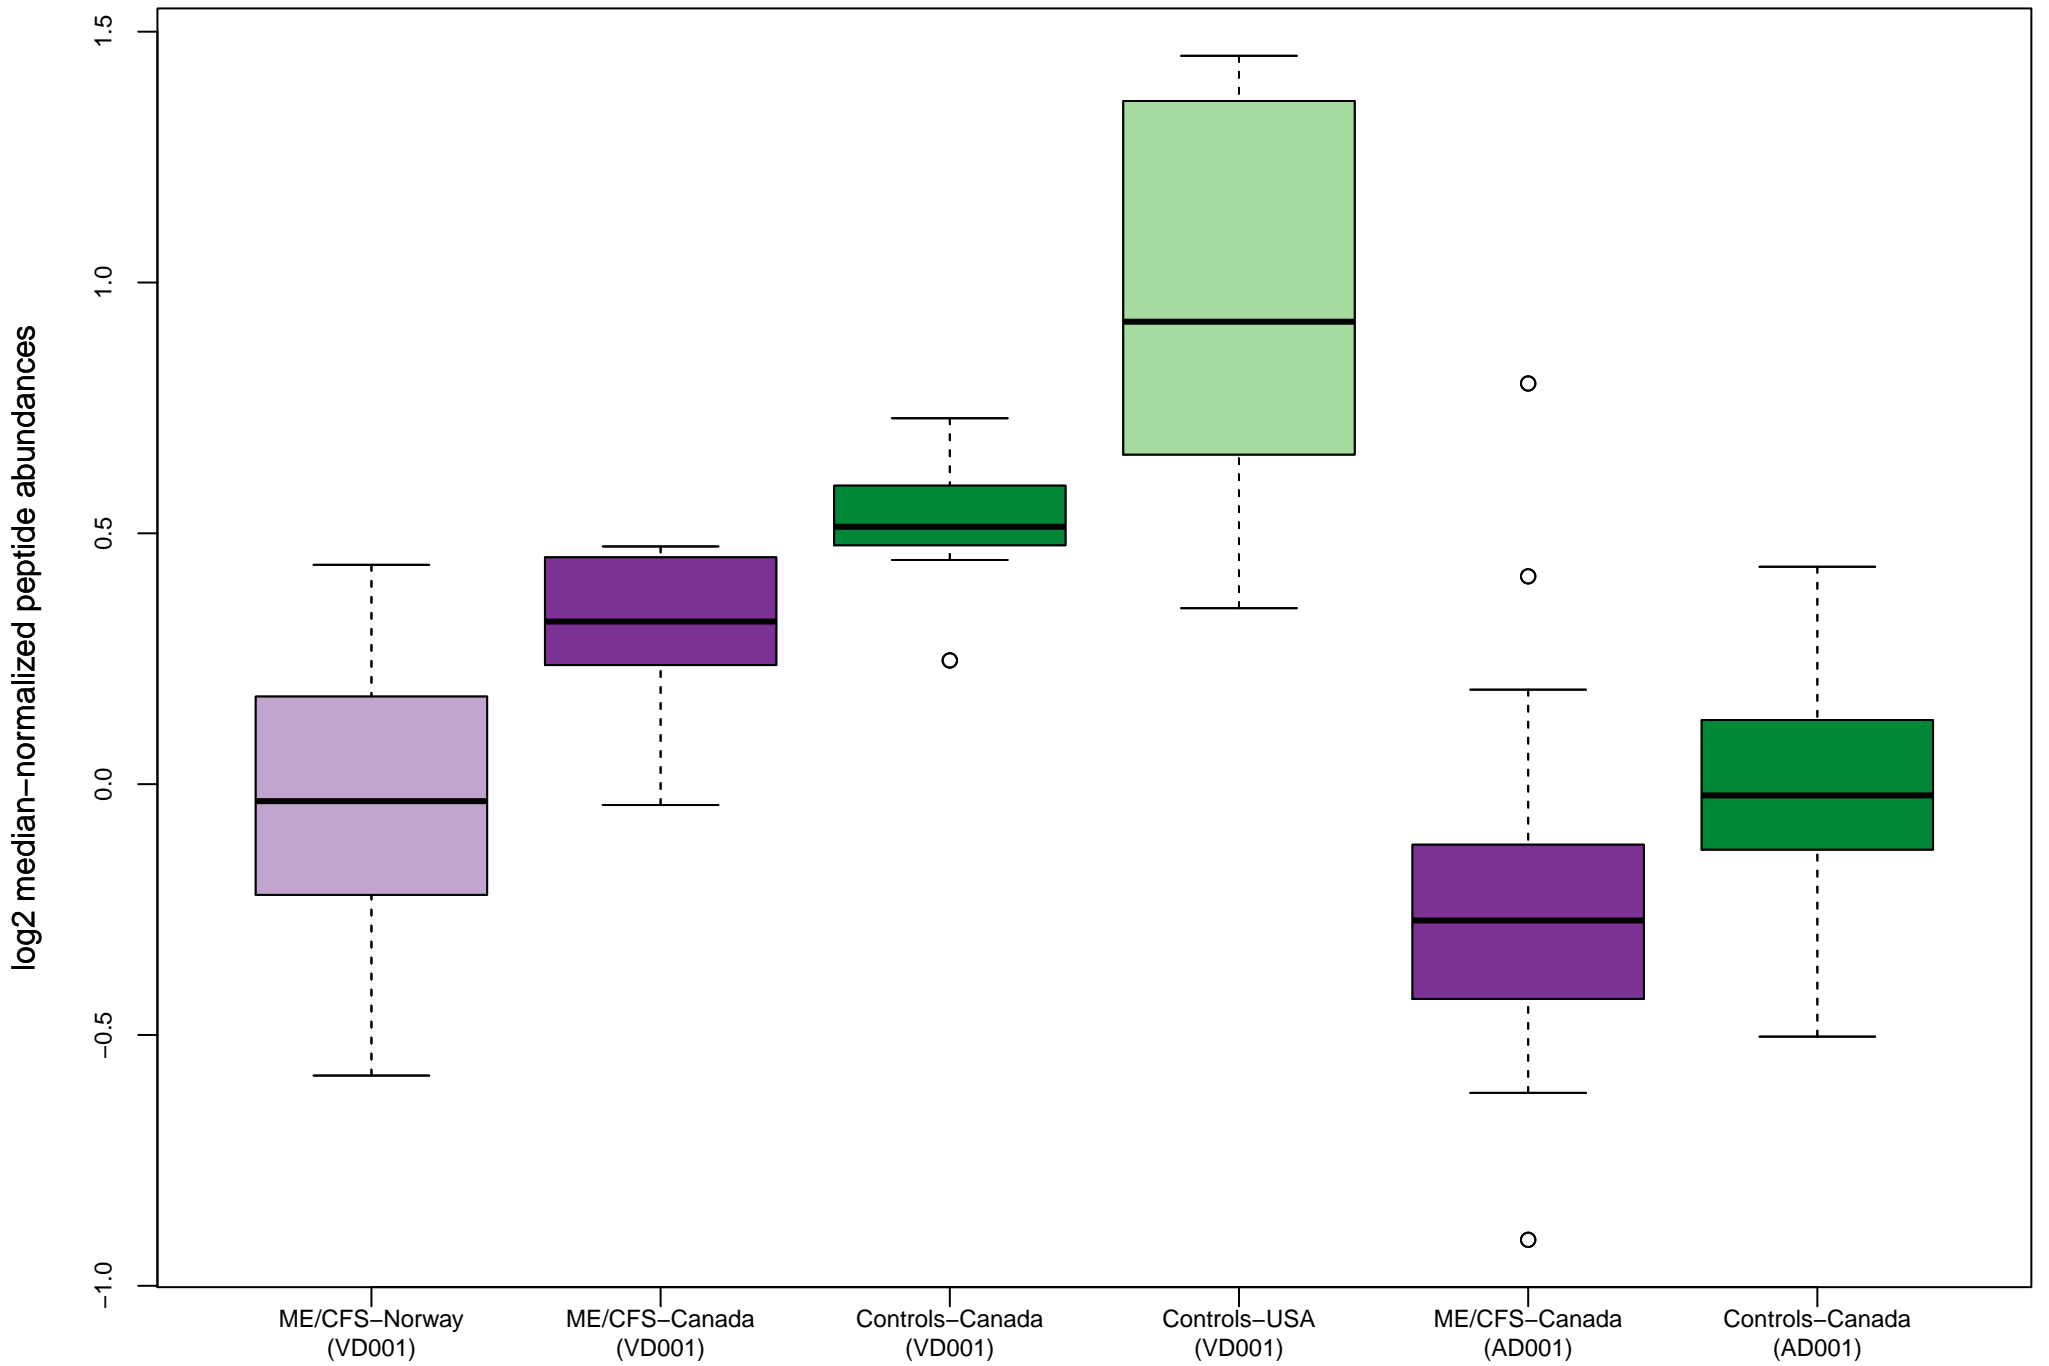

# NWSLRYLGVLSG

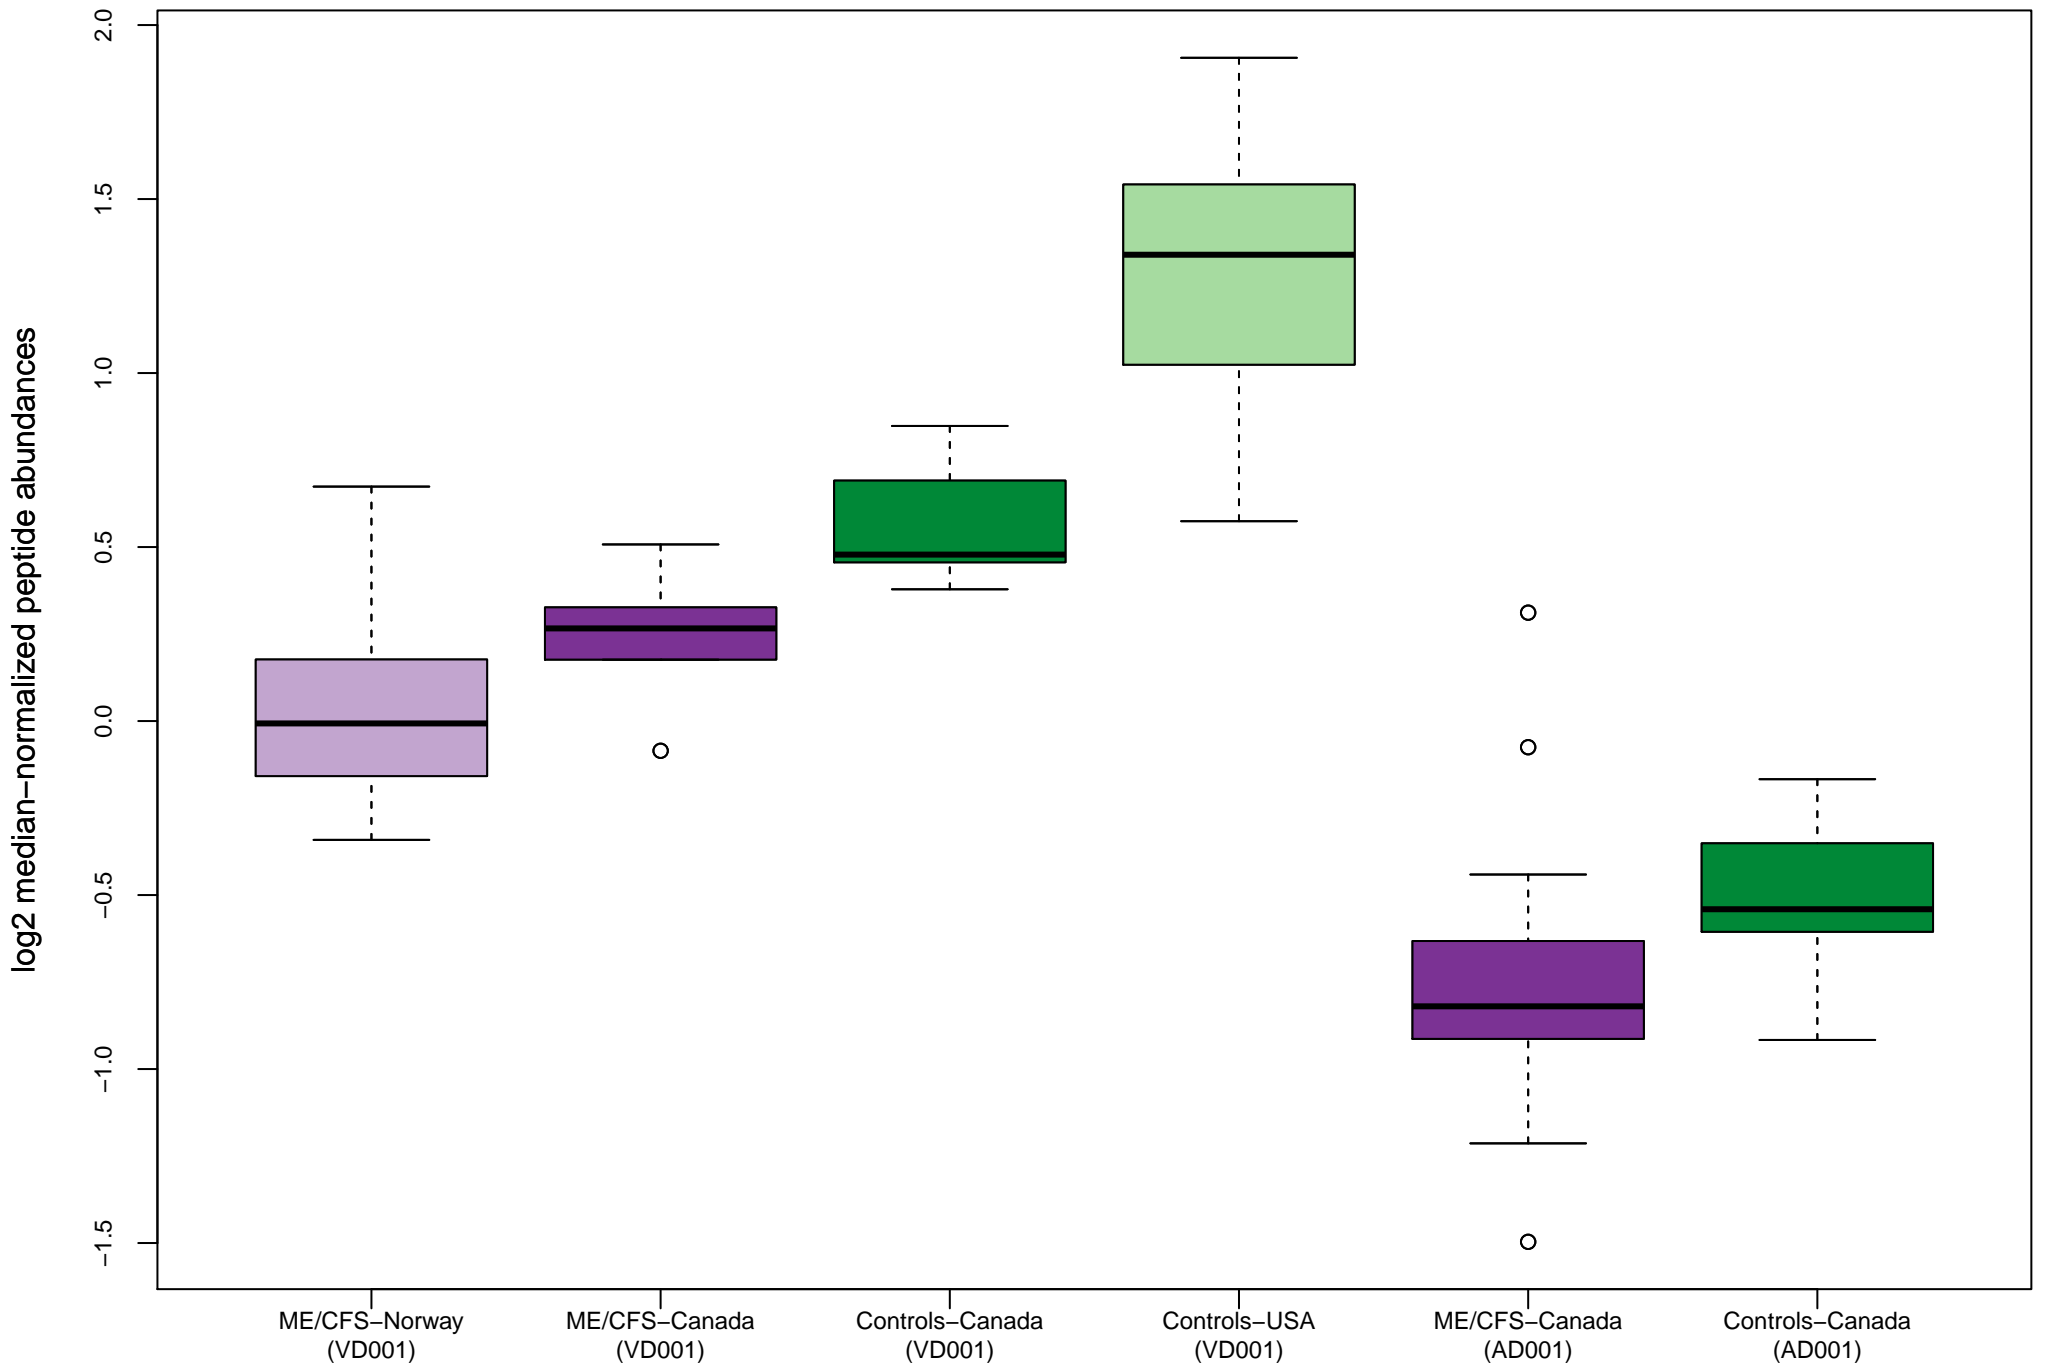

# PARFFRVALSGG

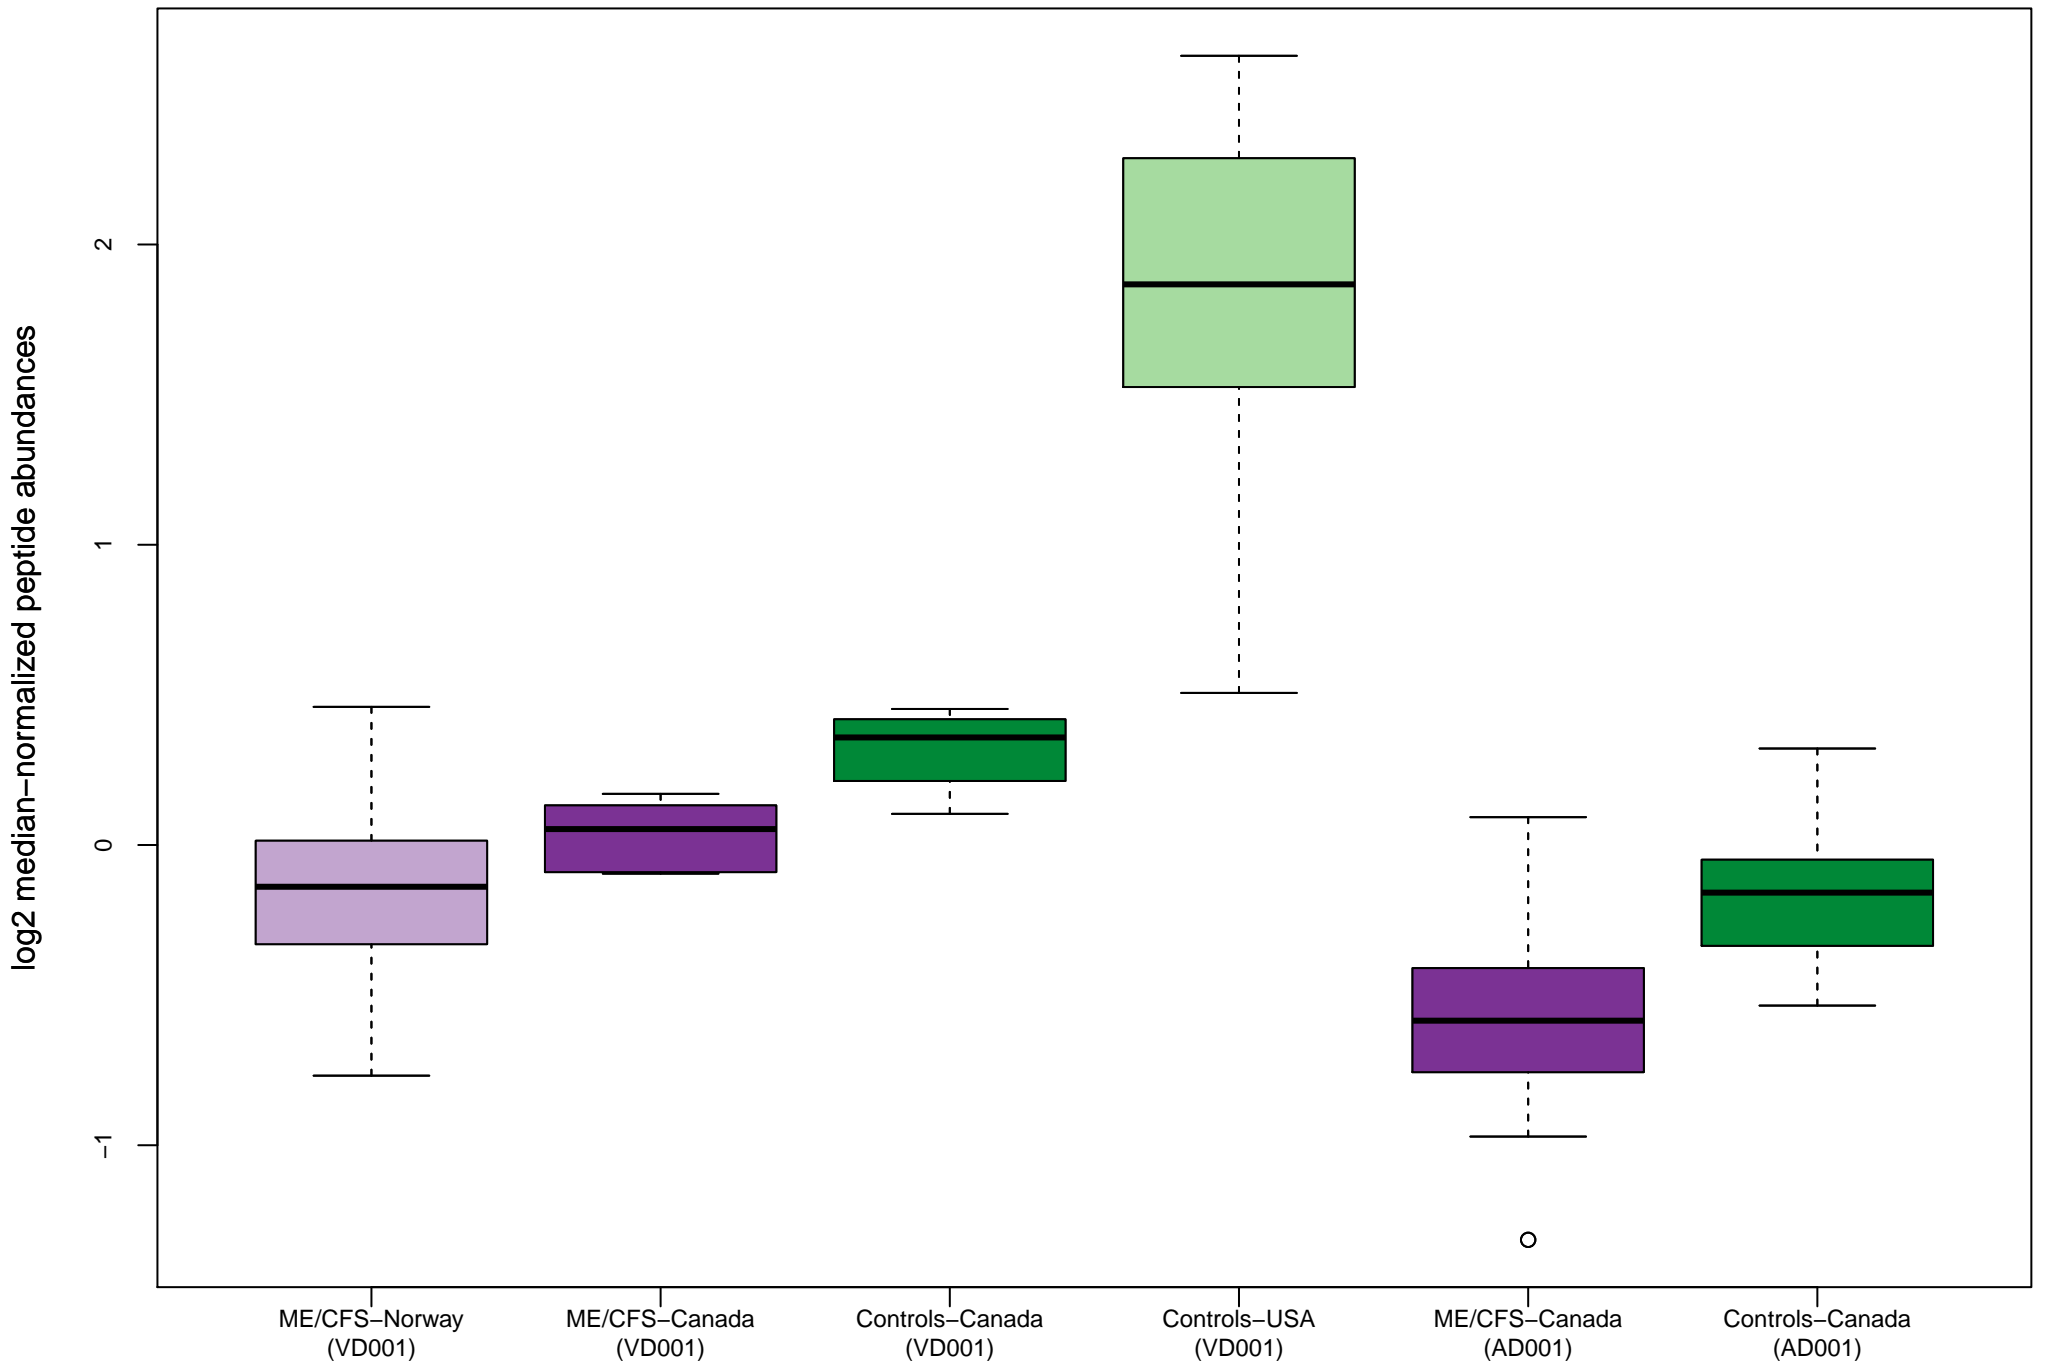

# PARLYLQYKVLS

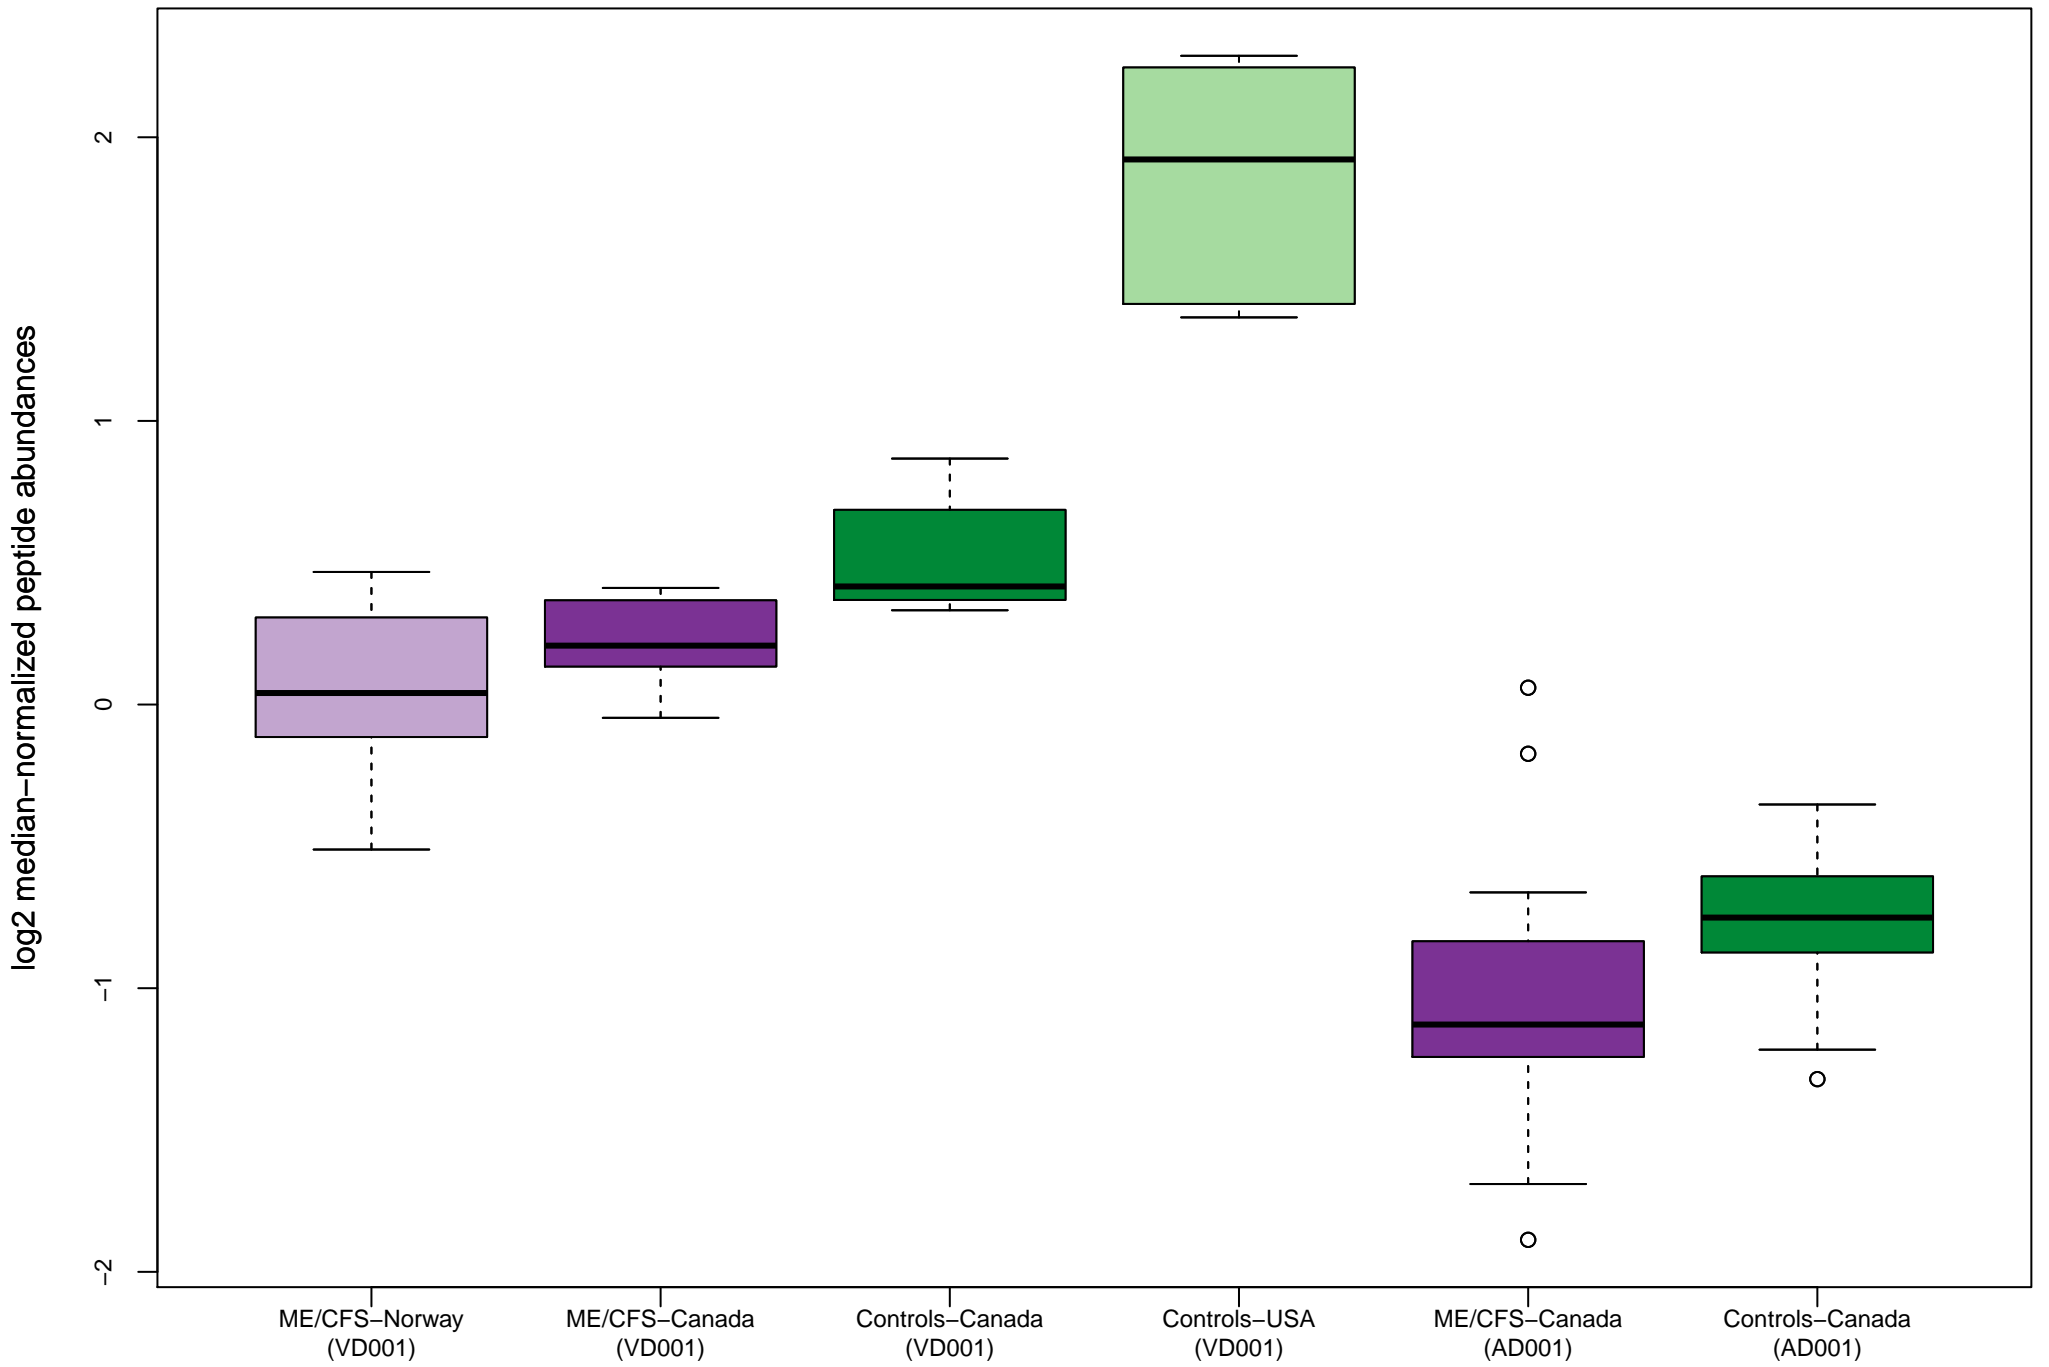

# PFYYLRPYKLGV

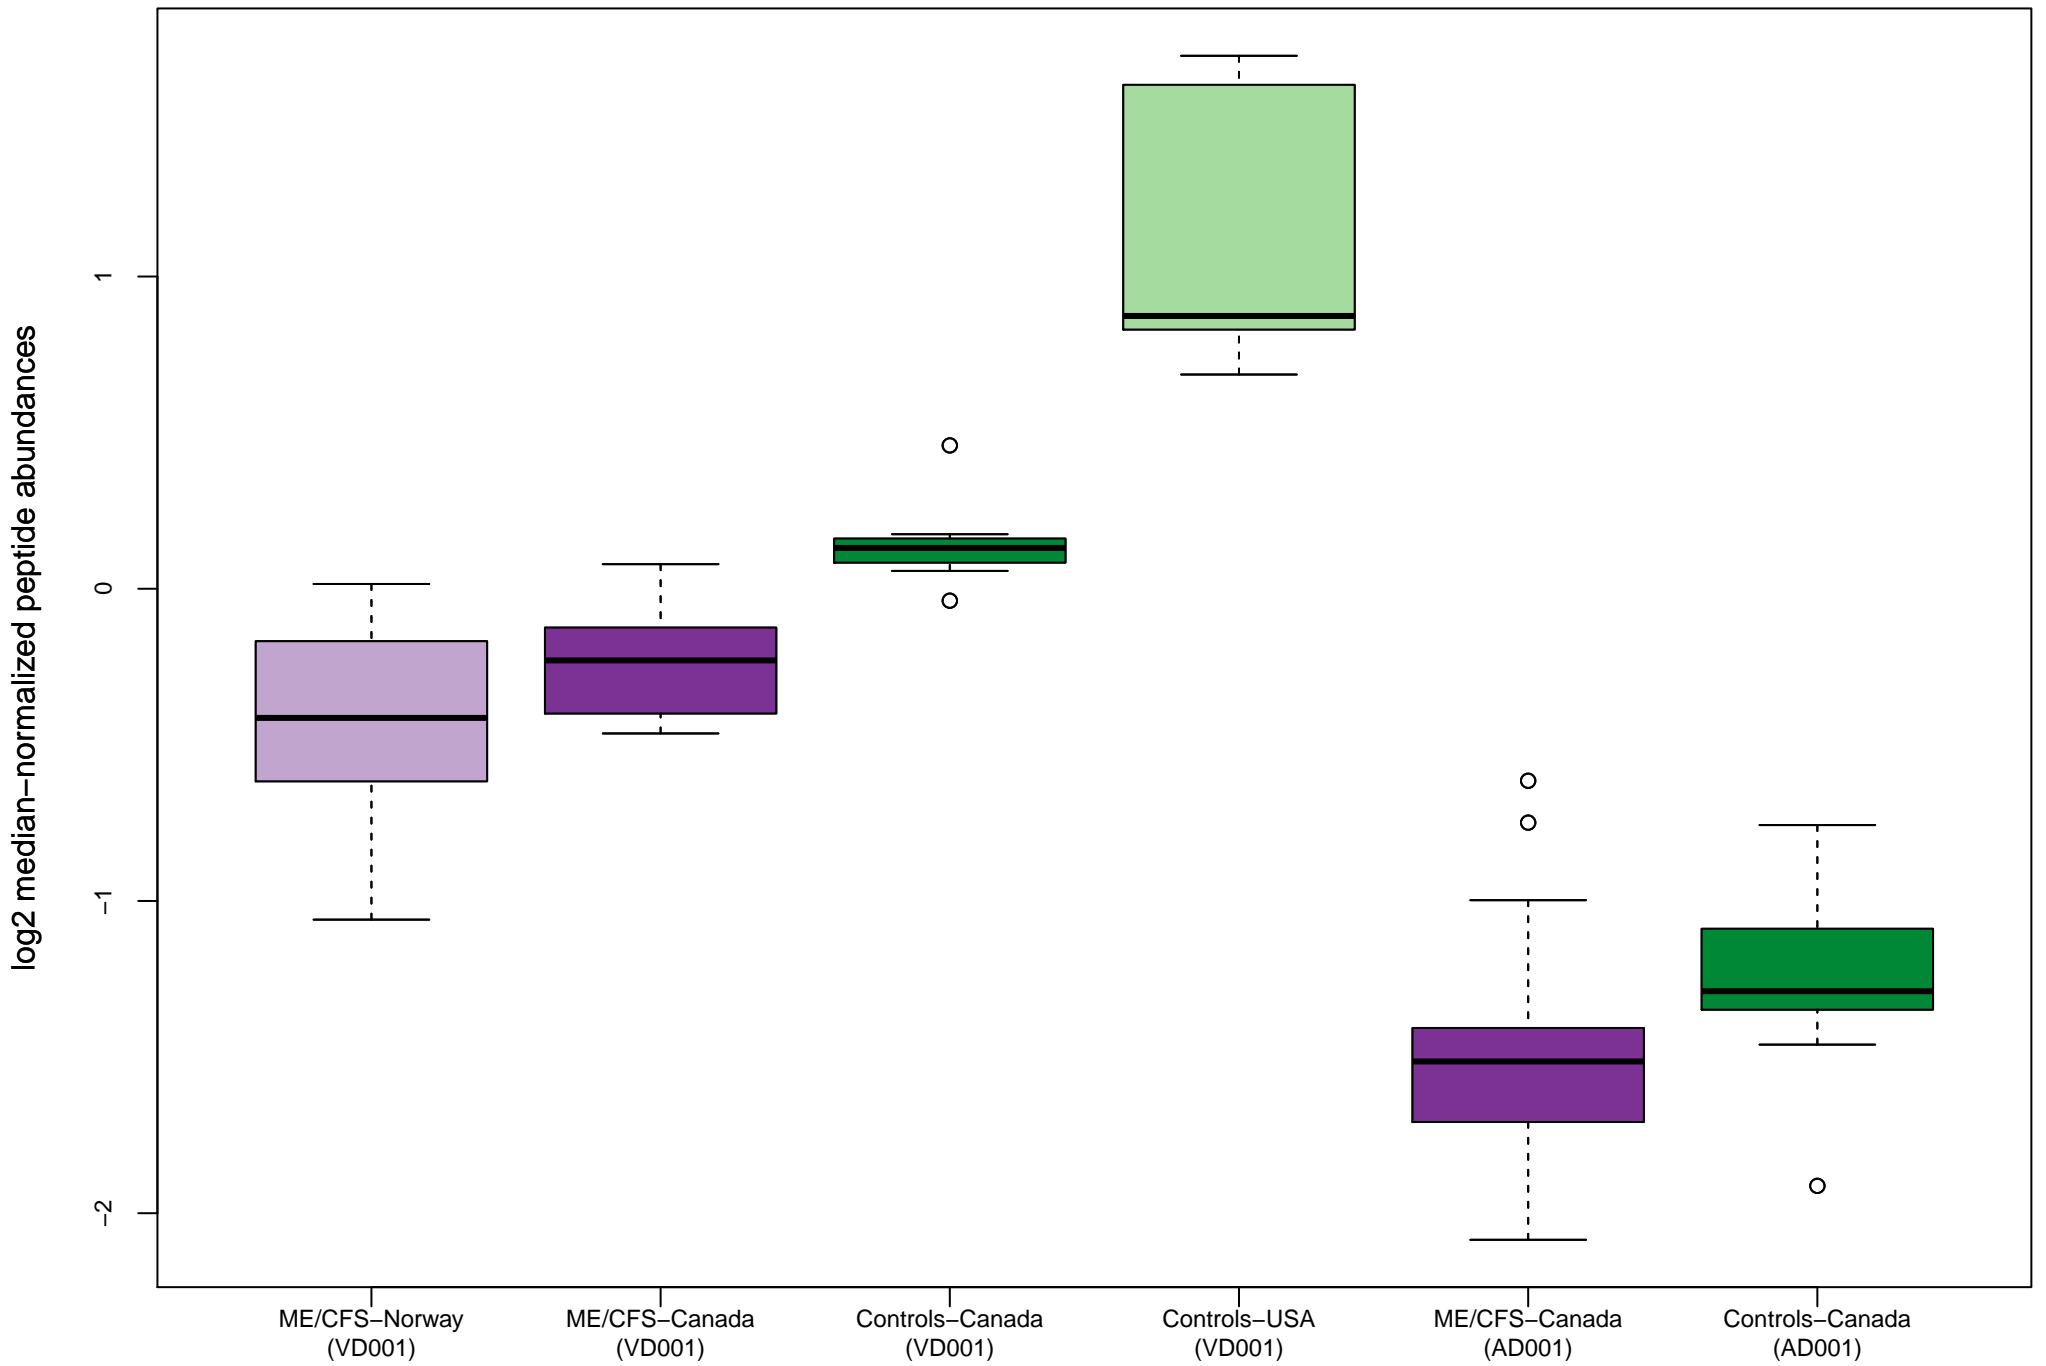

# PKFFFRYKVLGG

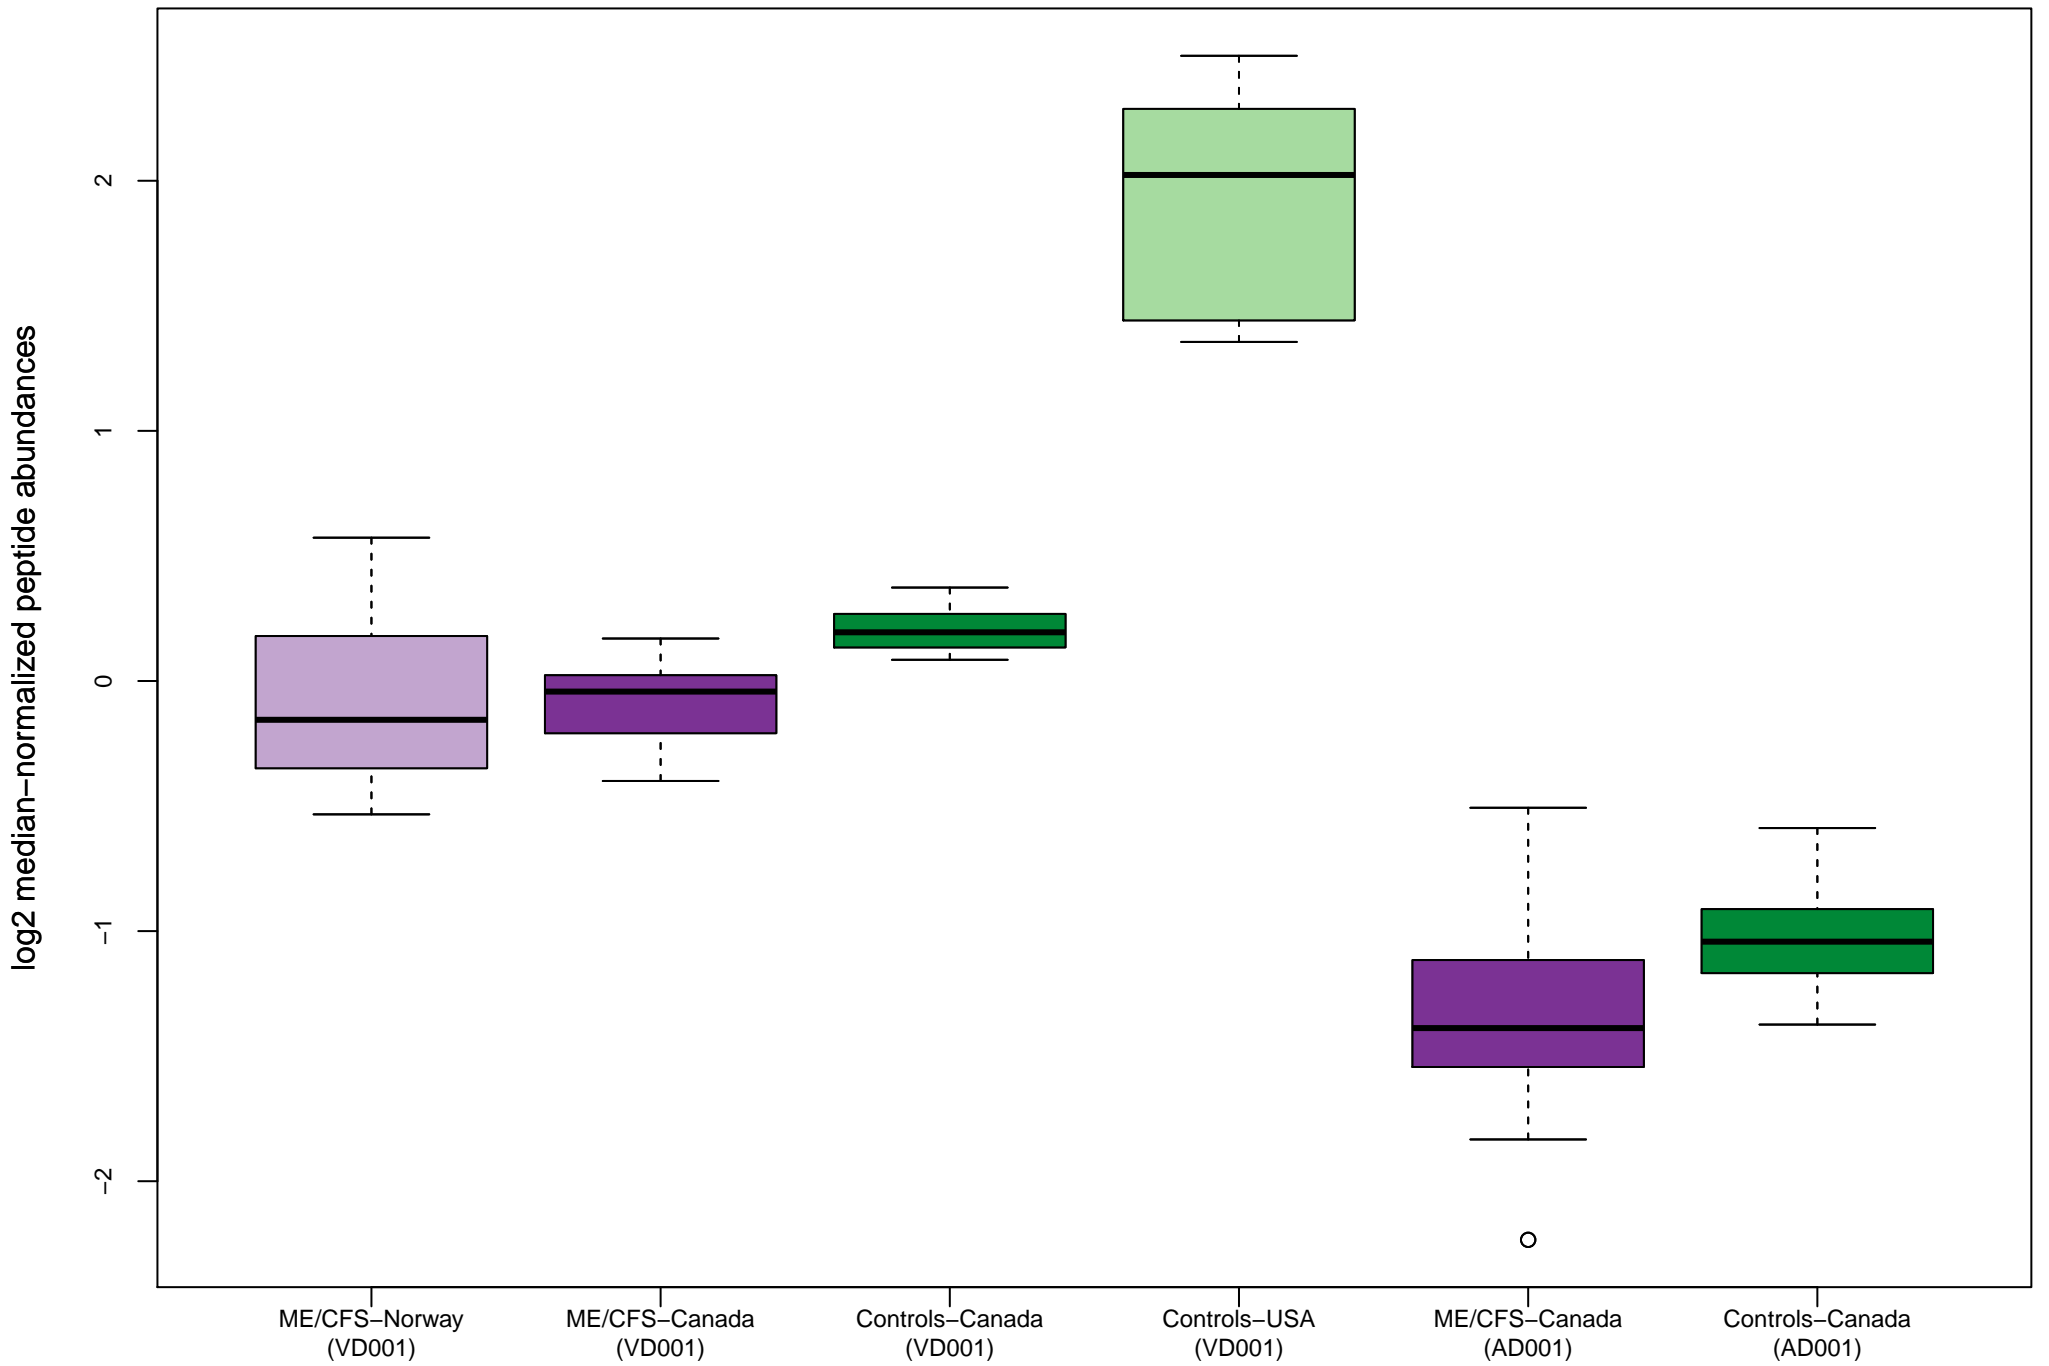

# PLLLRKVALSGS

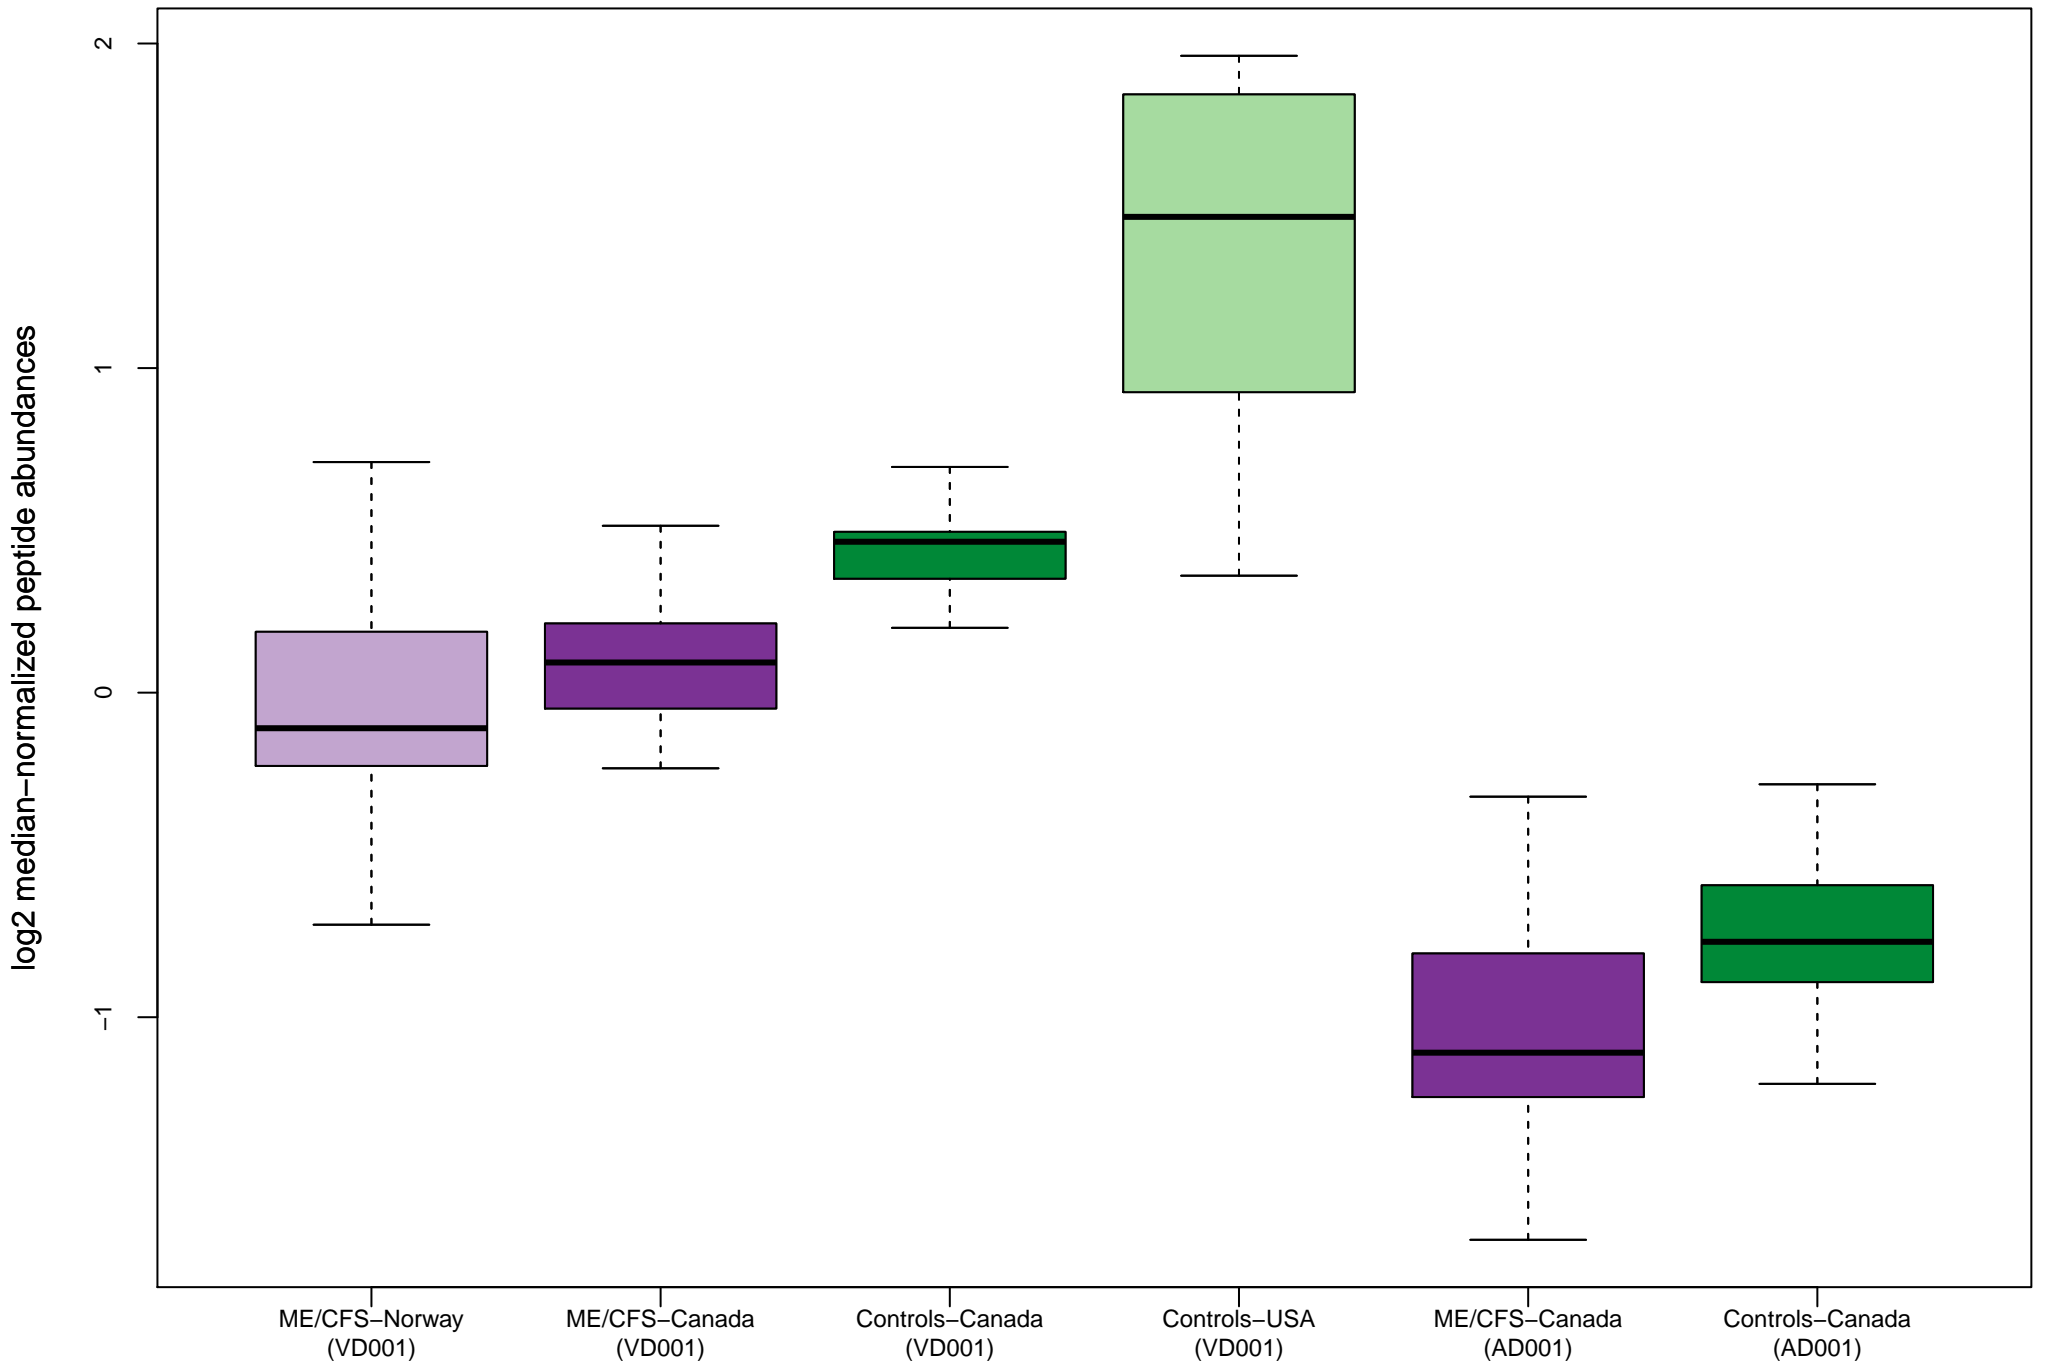

# PVYKRVFRVLS

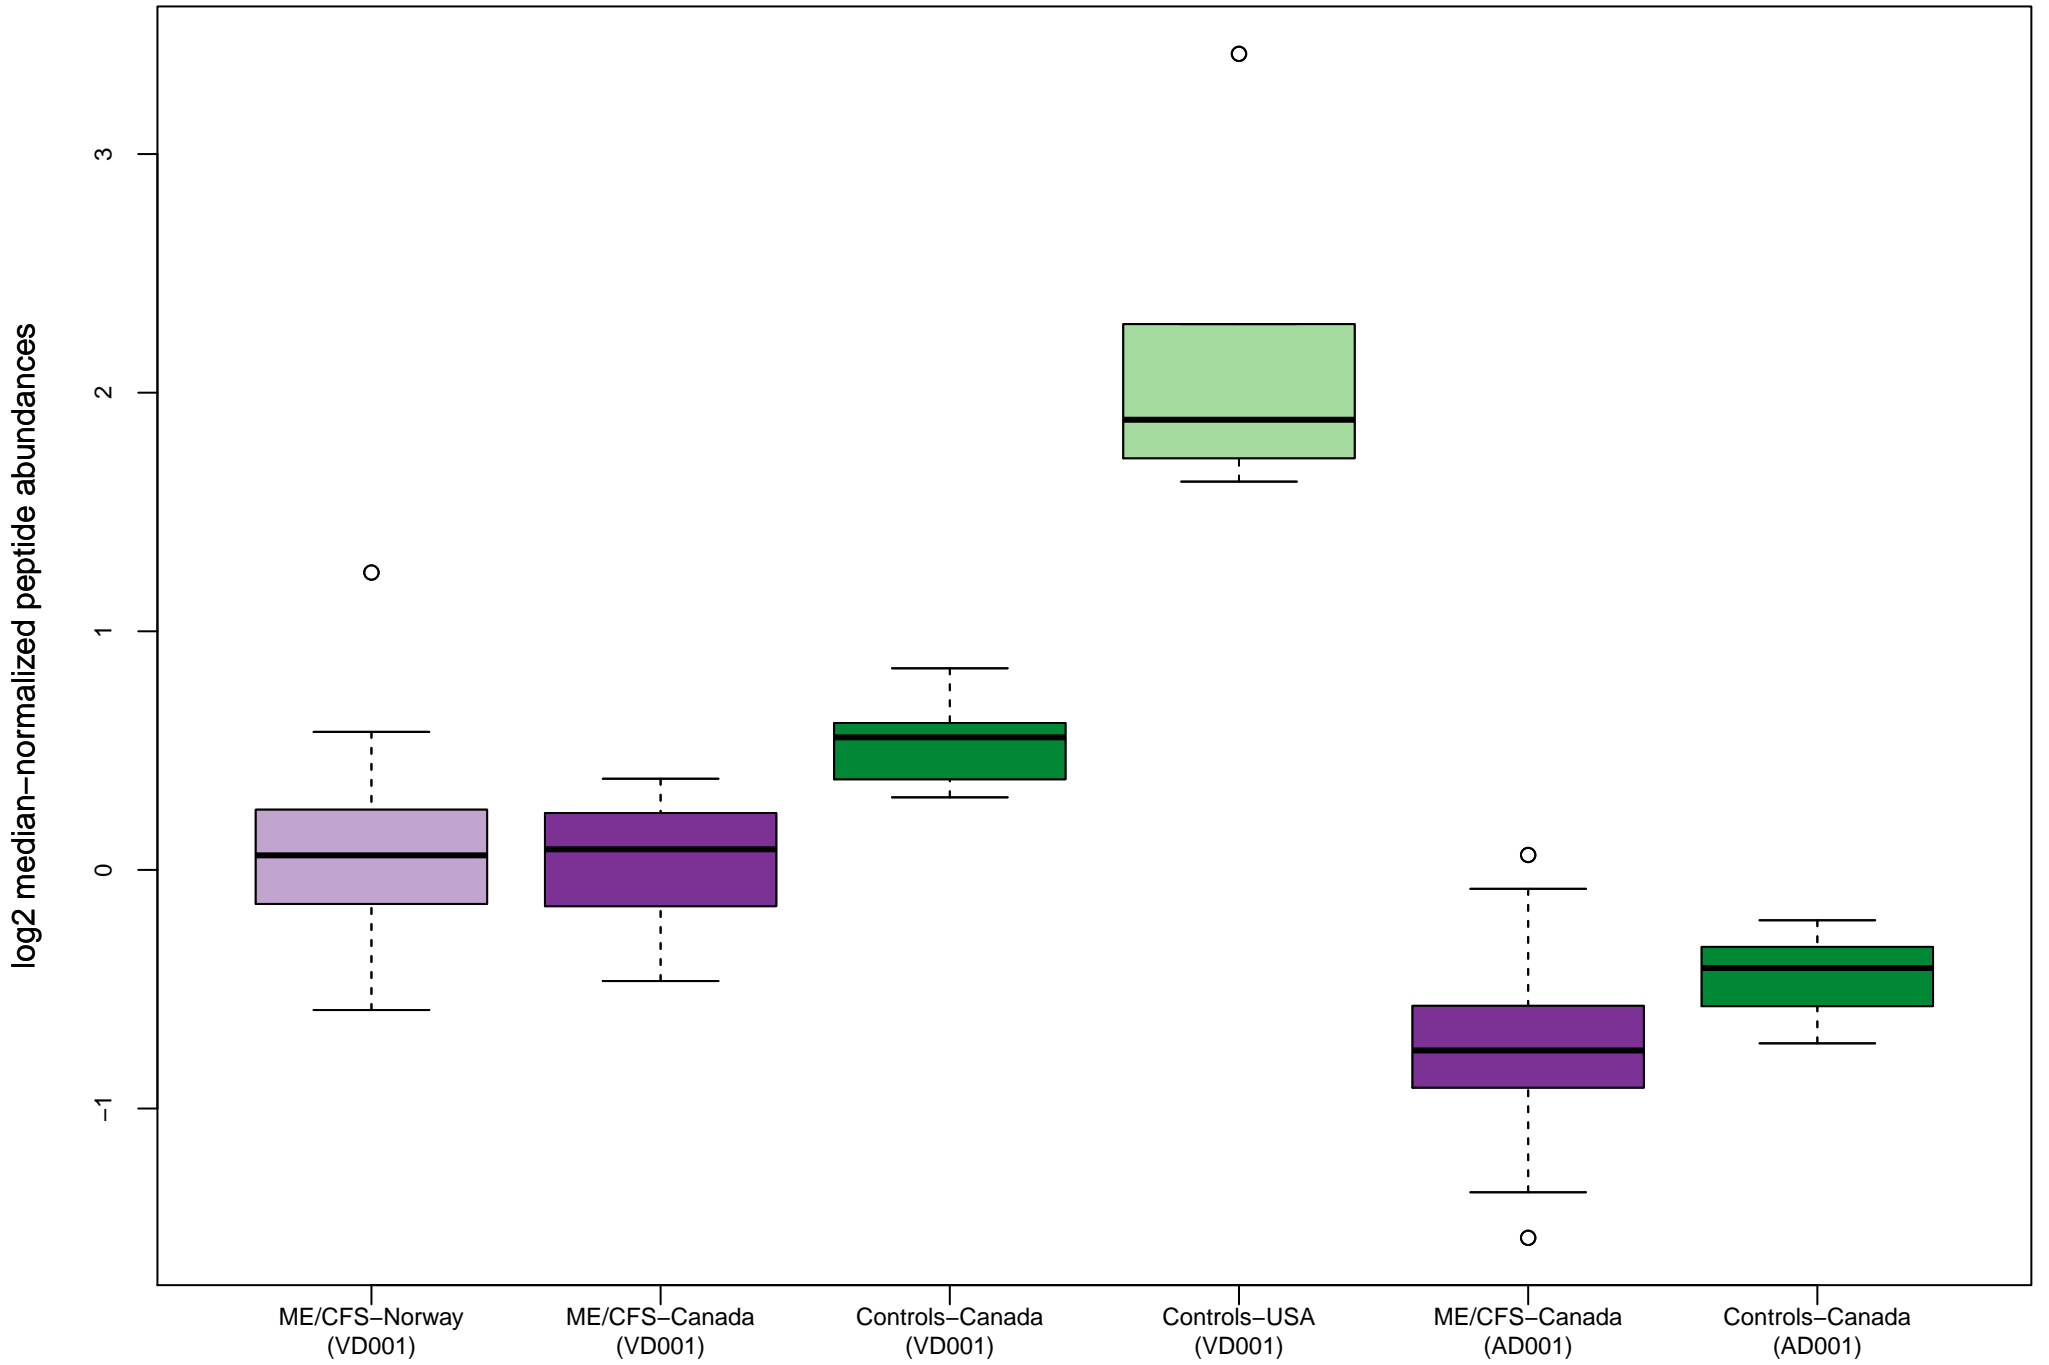



PWGFLSFQRYVL

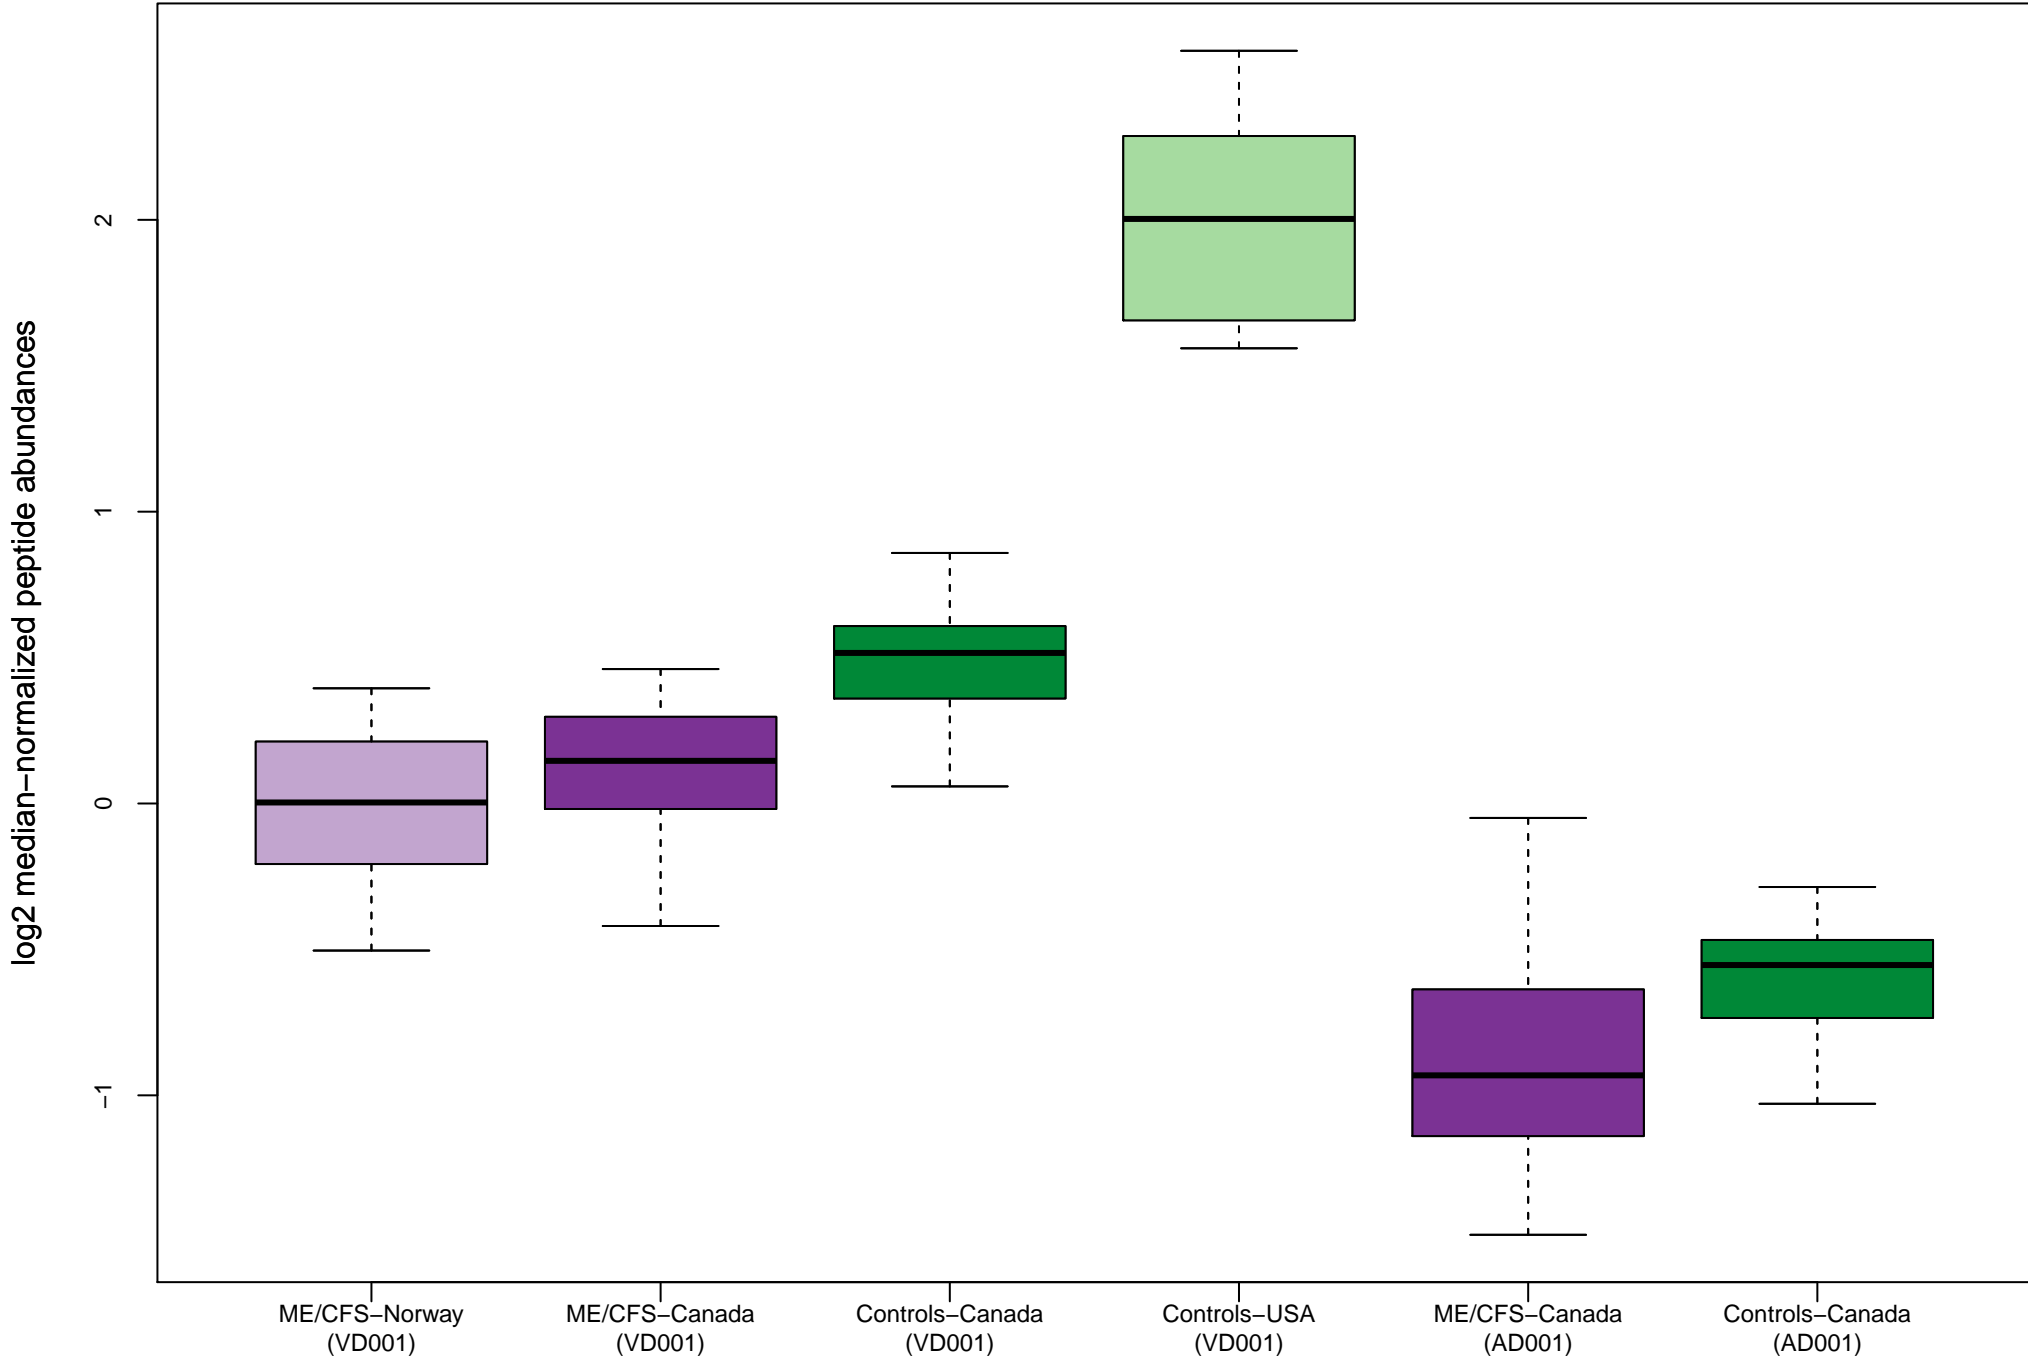

# PWYRSFHLSGLG

log2 median-normalized peptide abundances

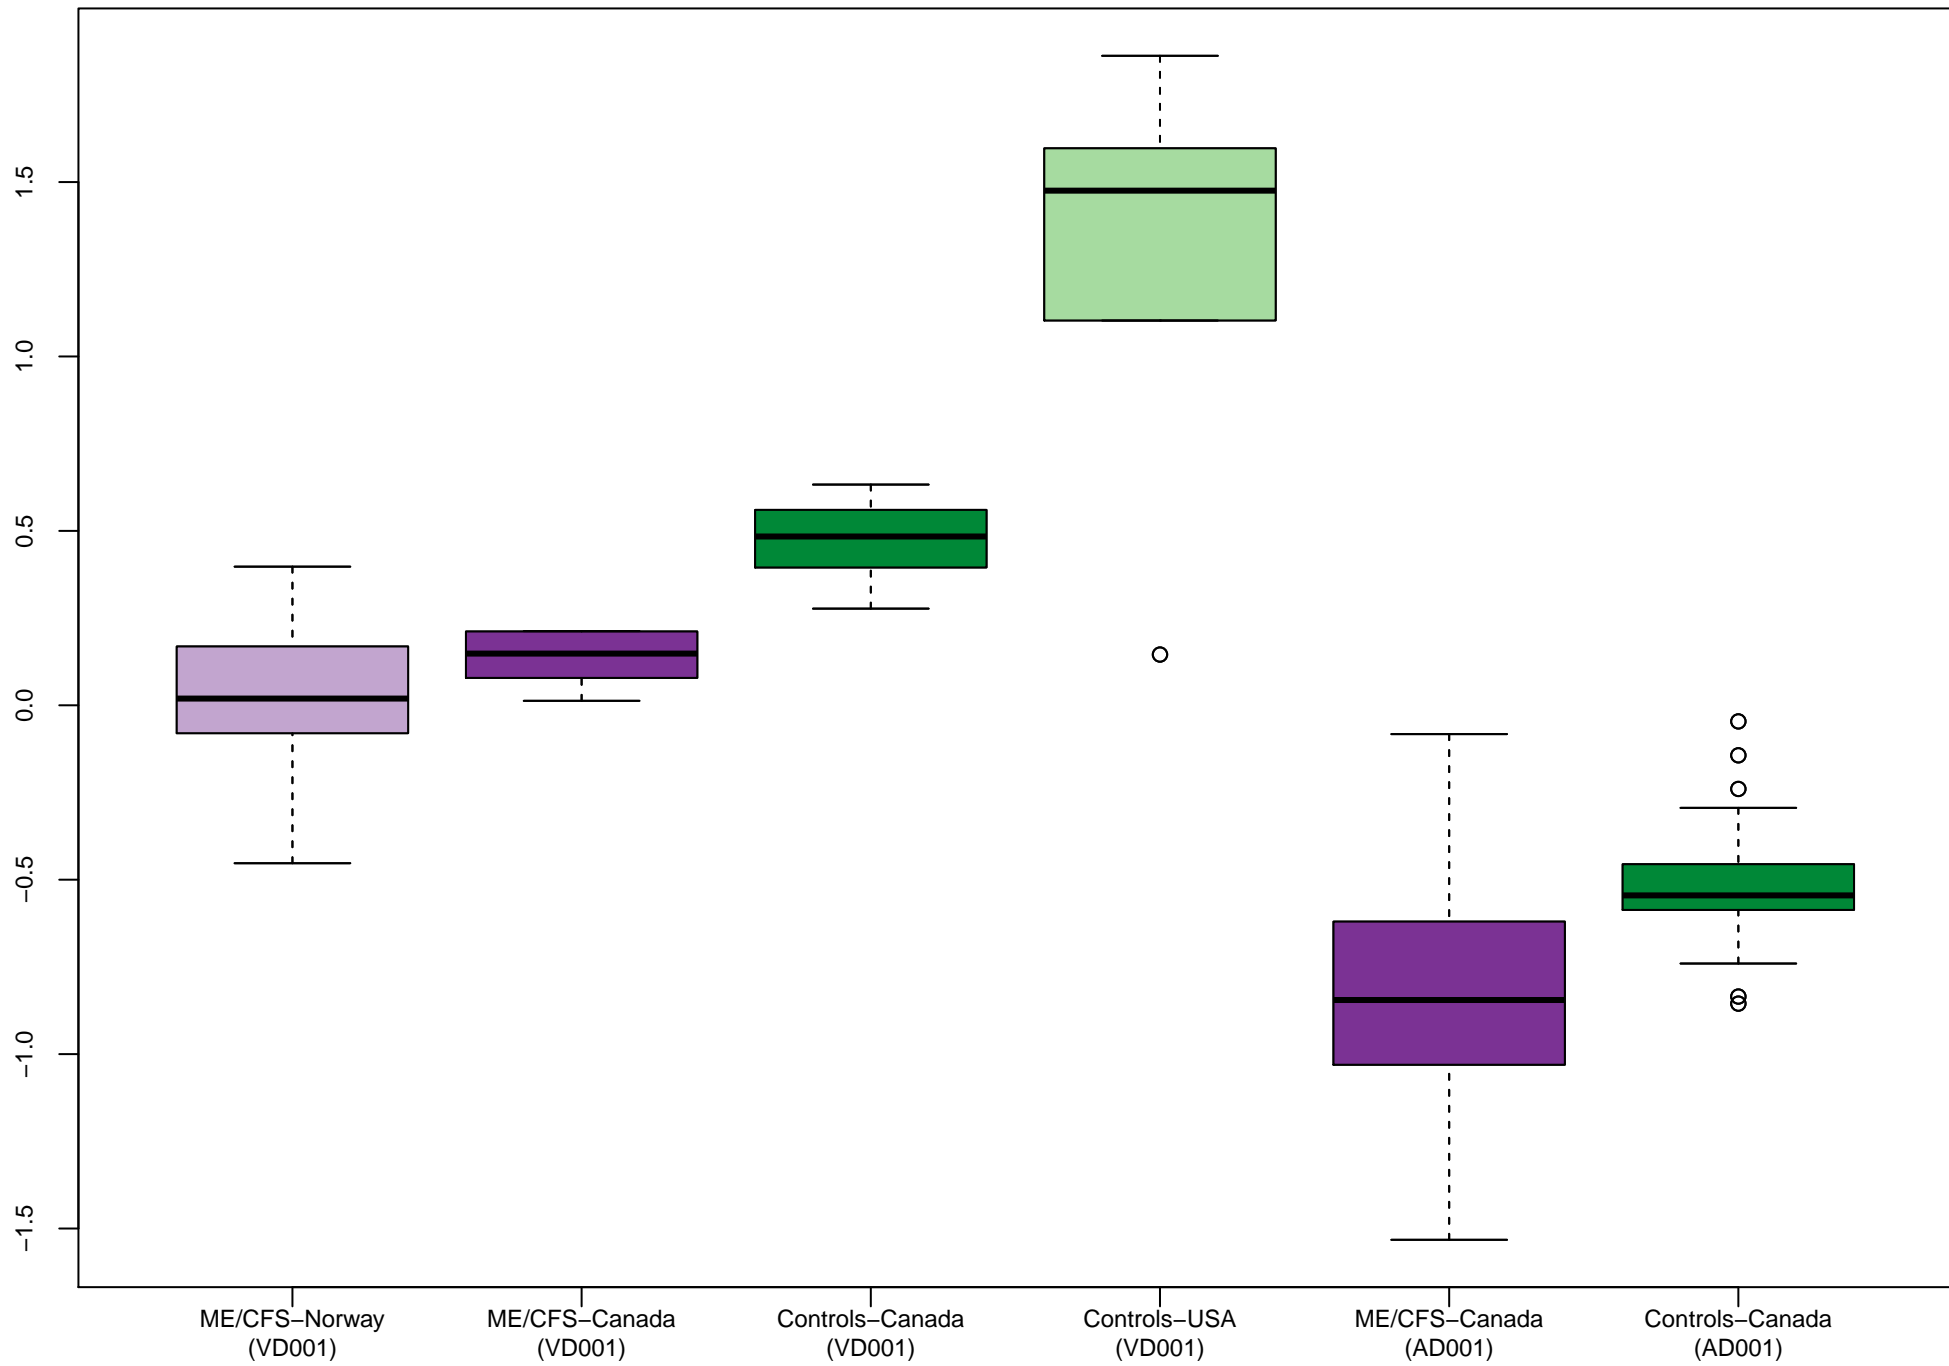

# PYAVVLGRPLSS

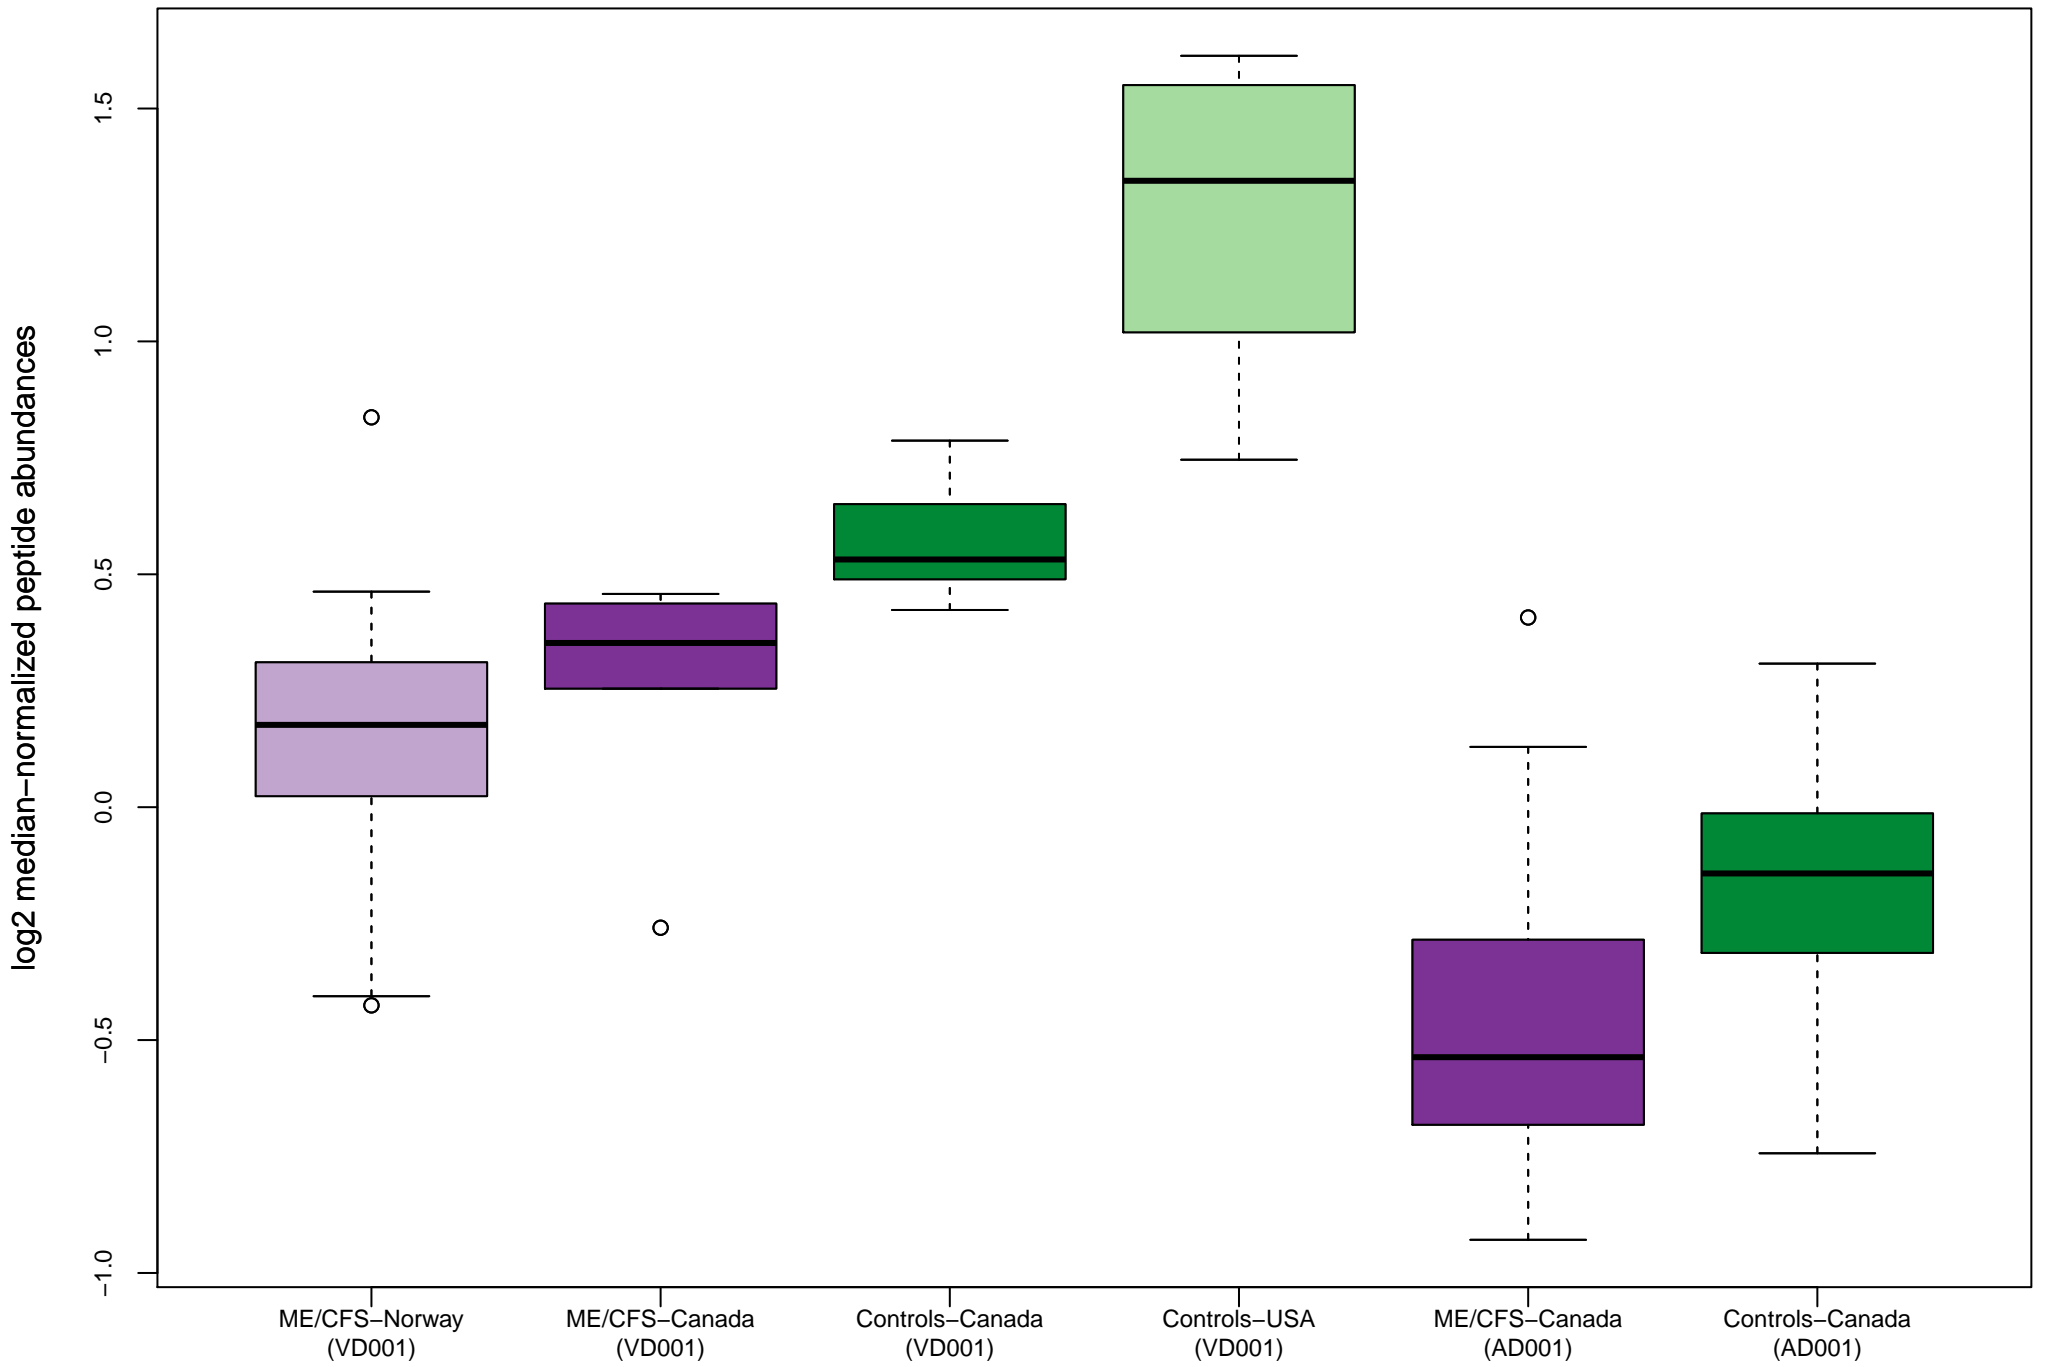

# PYLNFYKFRKVA

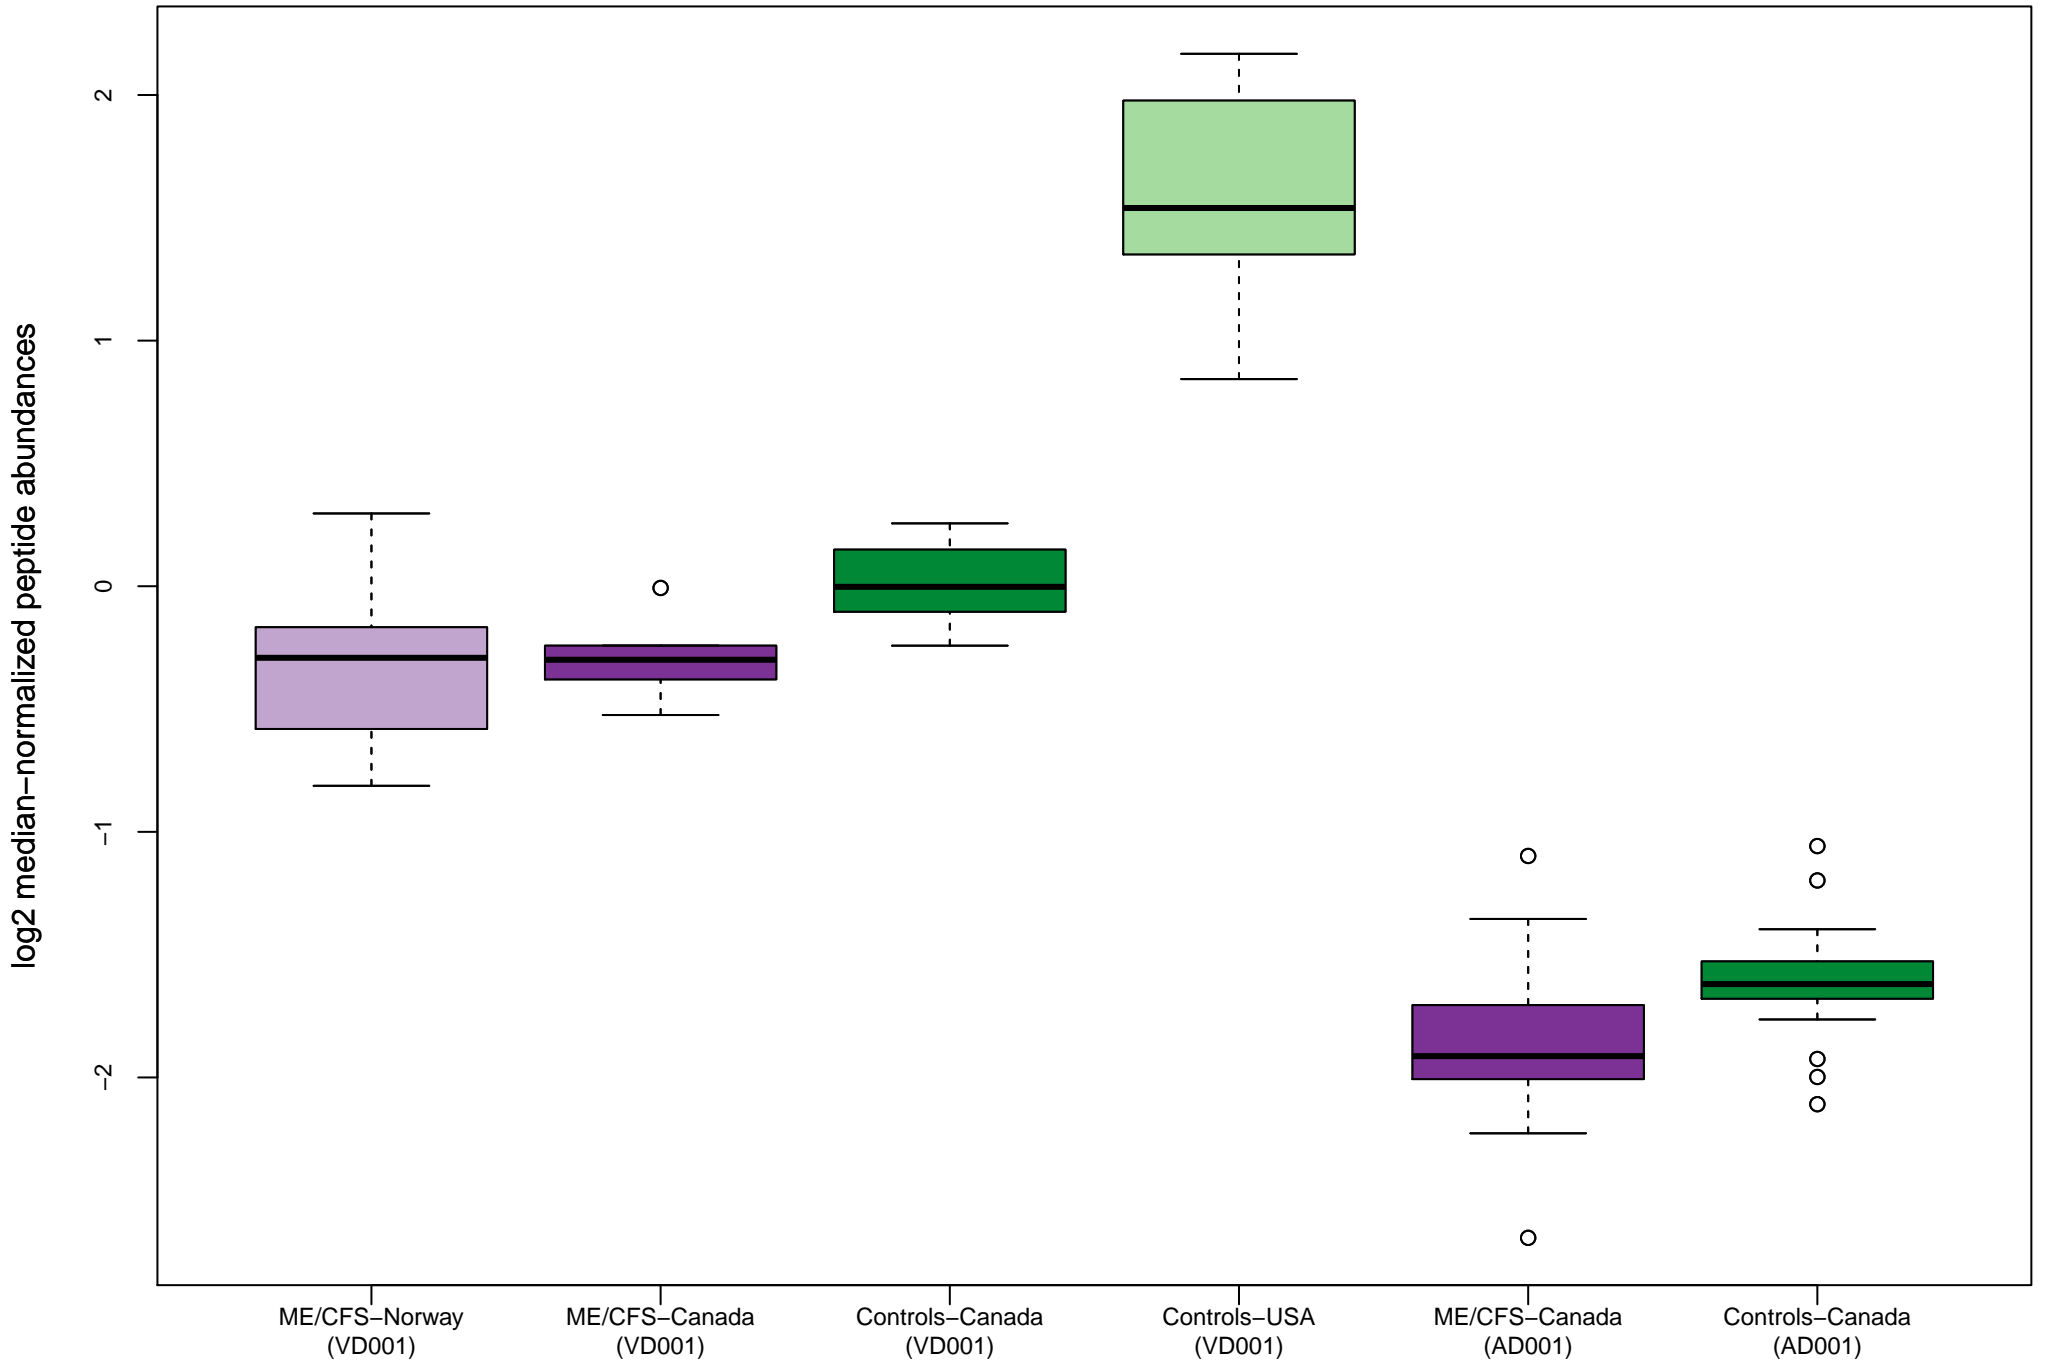

# PYRSRGWHALLG

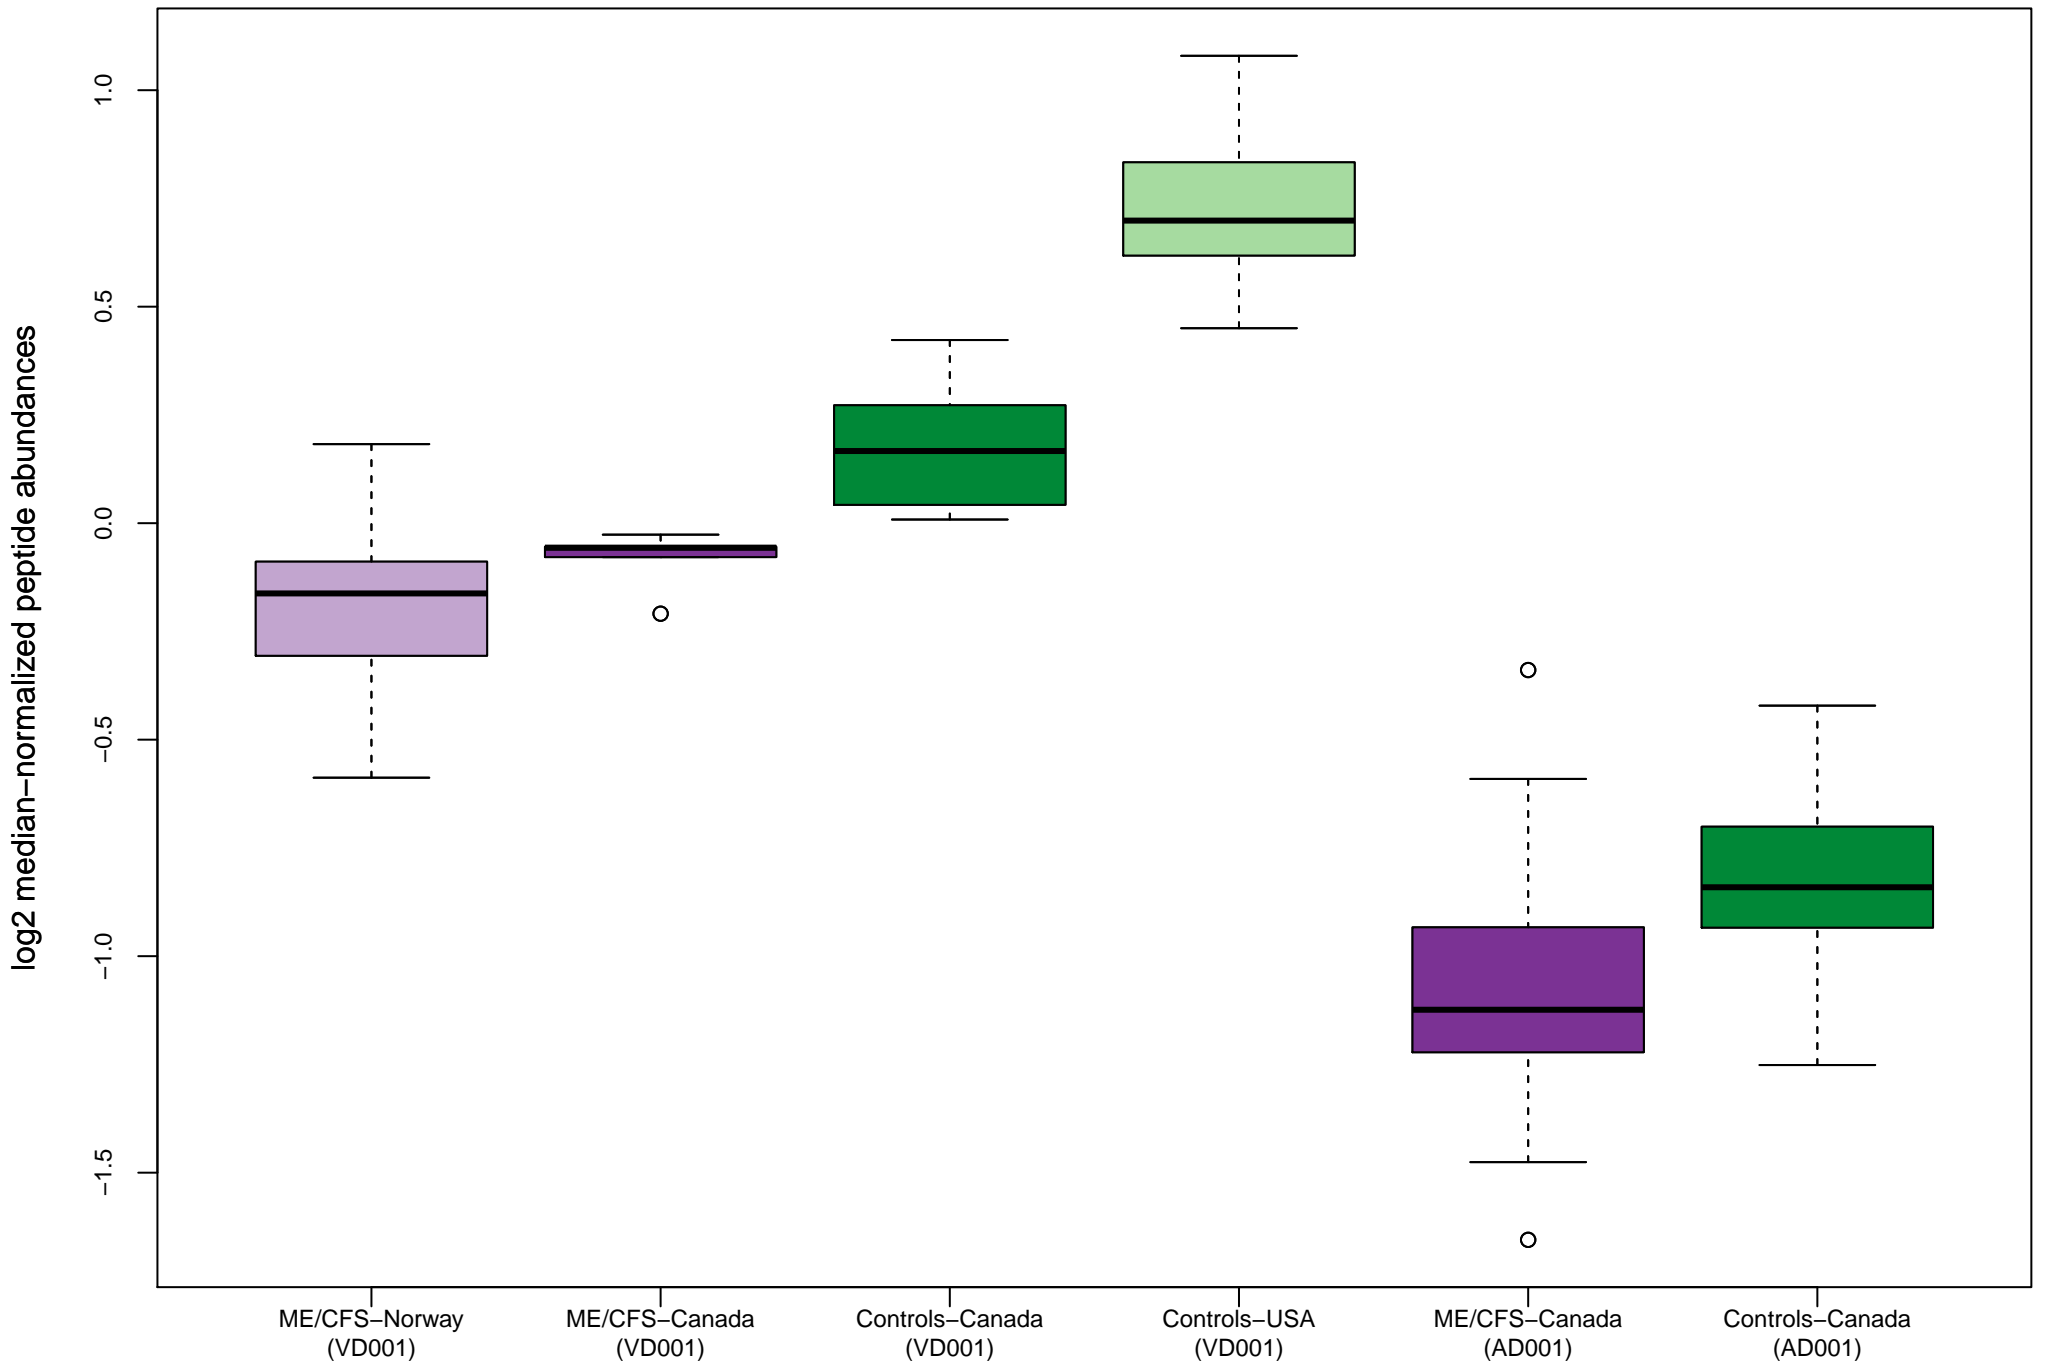

# PYVLVRYNQWLL

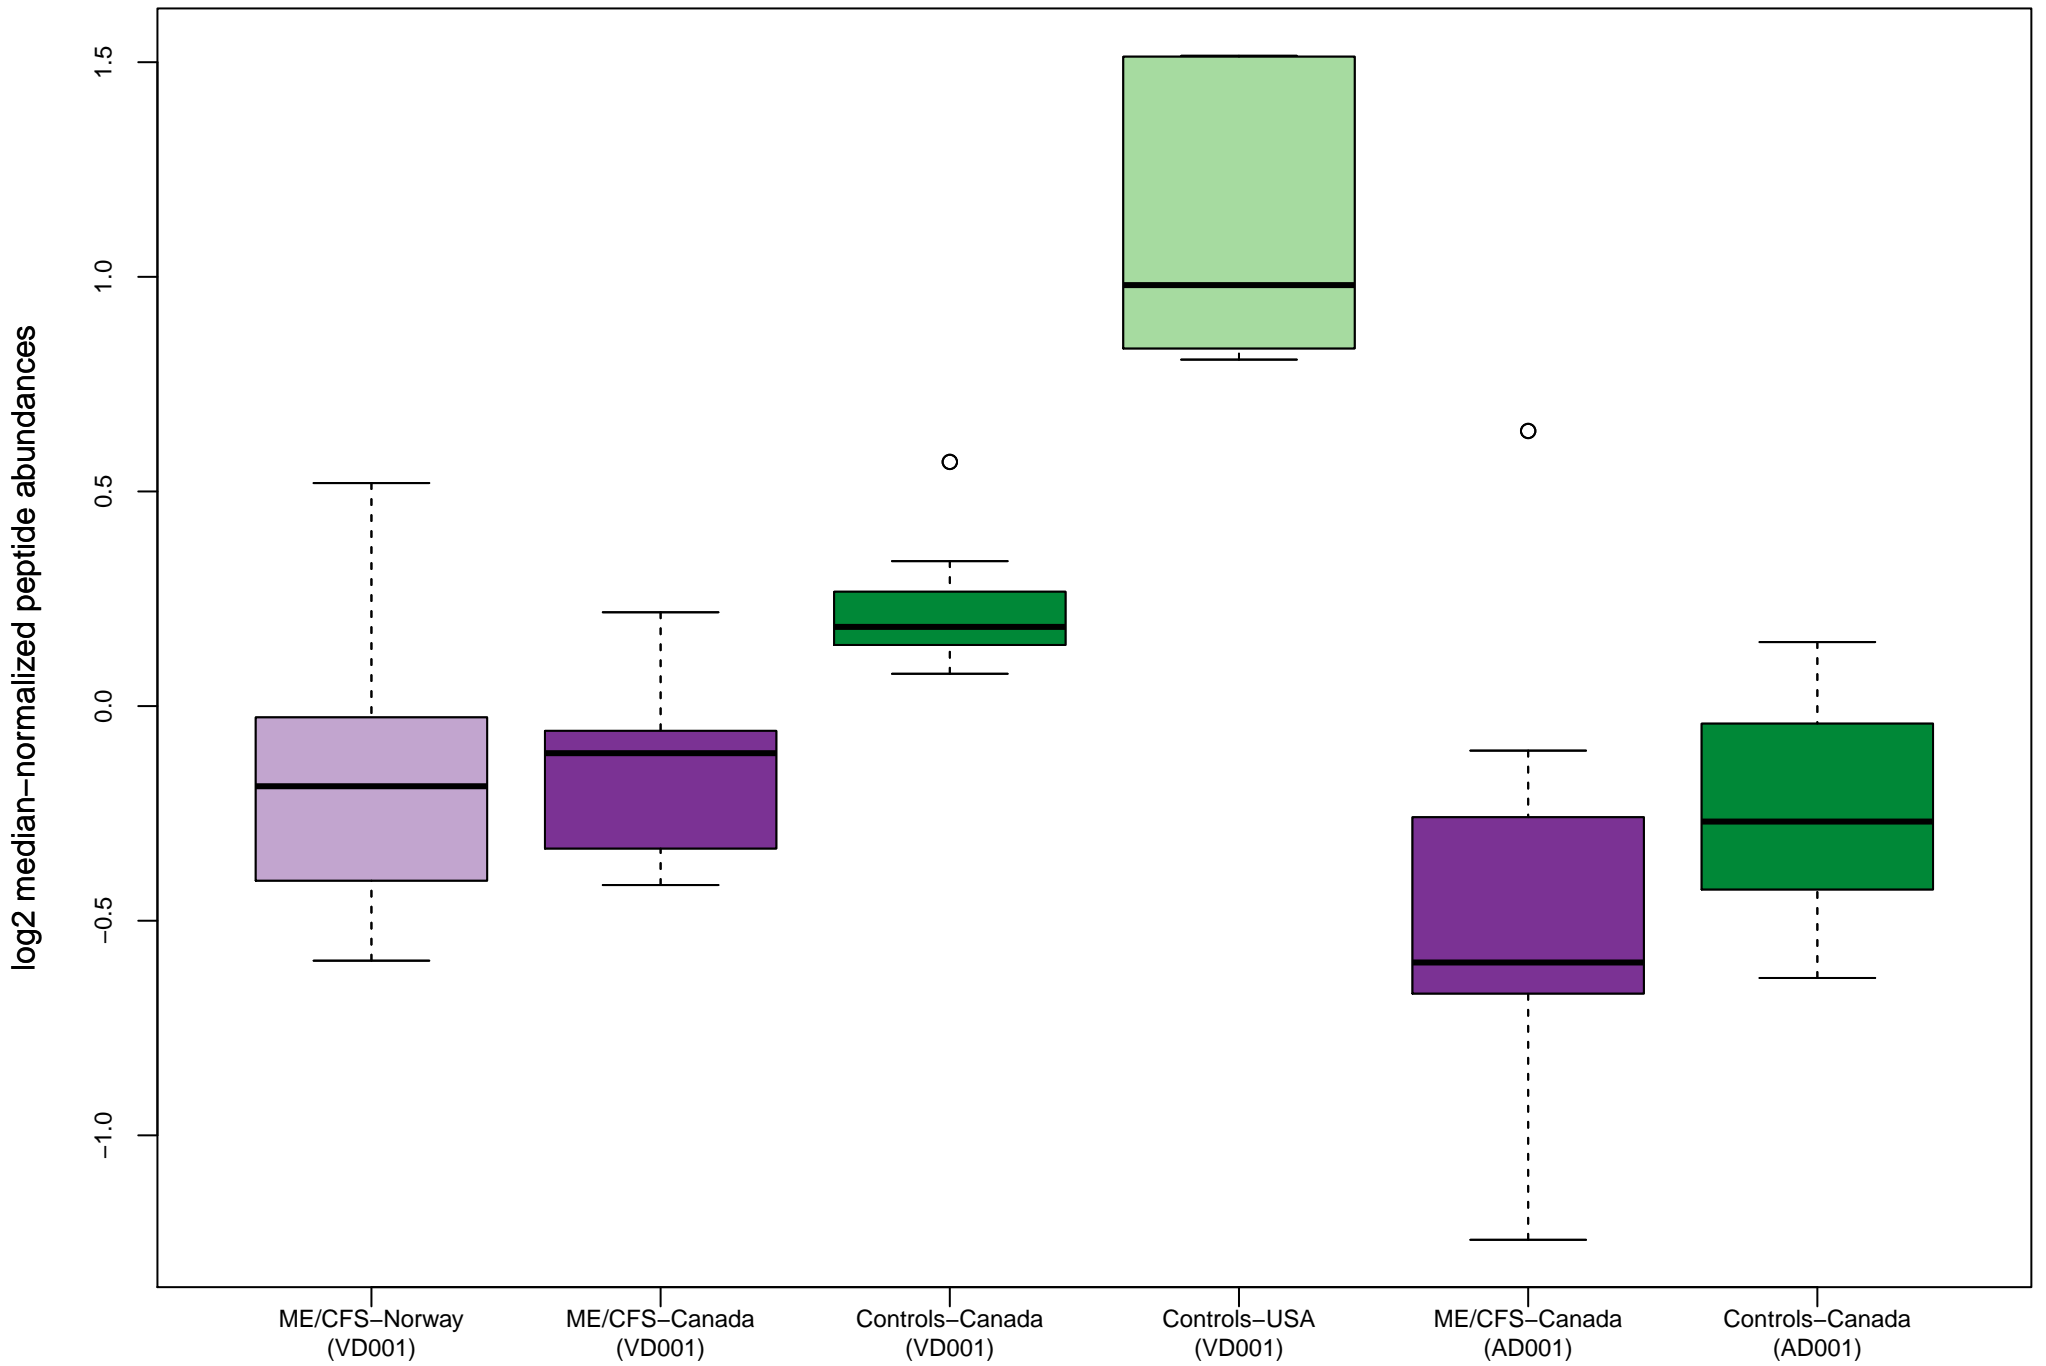

# QALRFVARYNVG

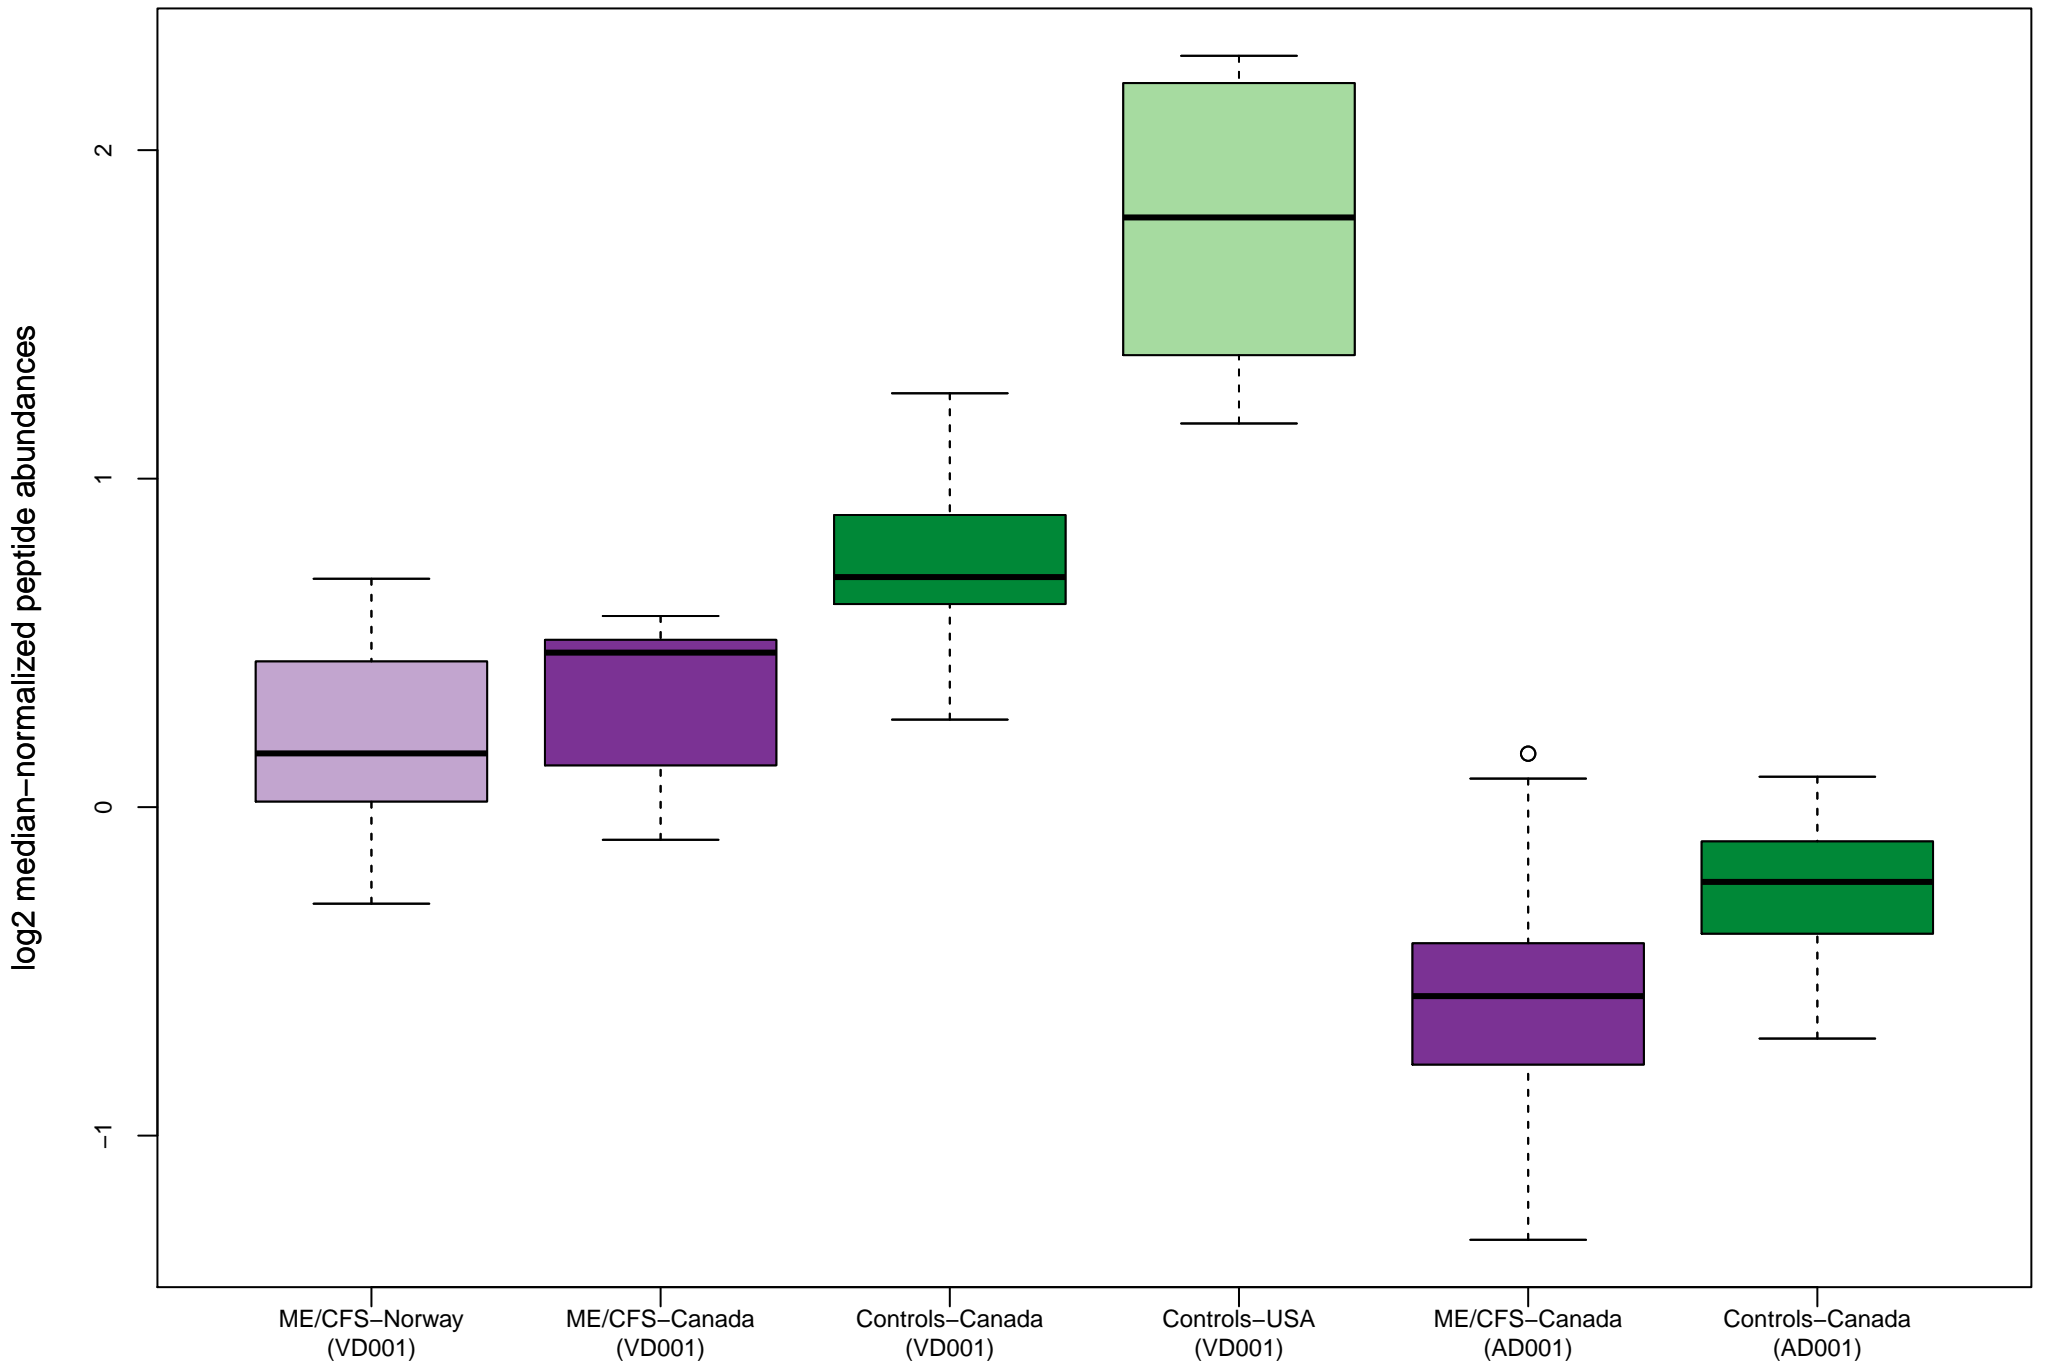

# QFLWHQPWGFRL

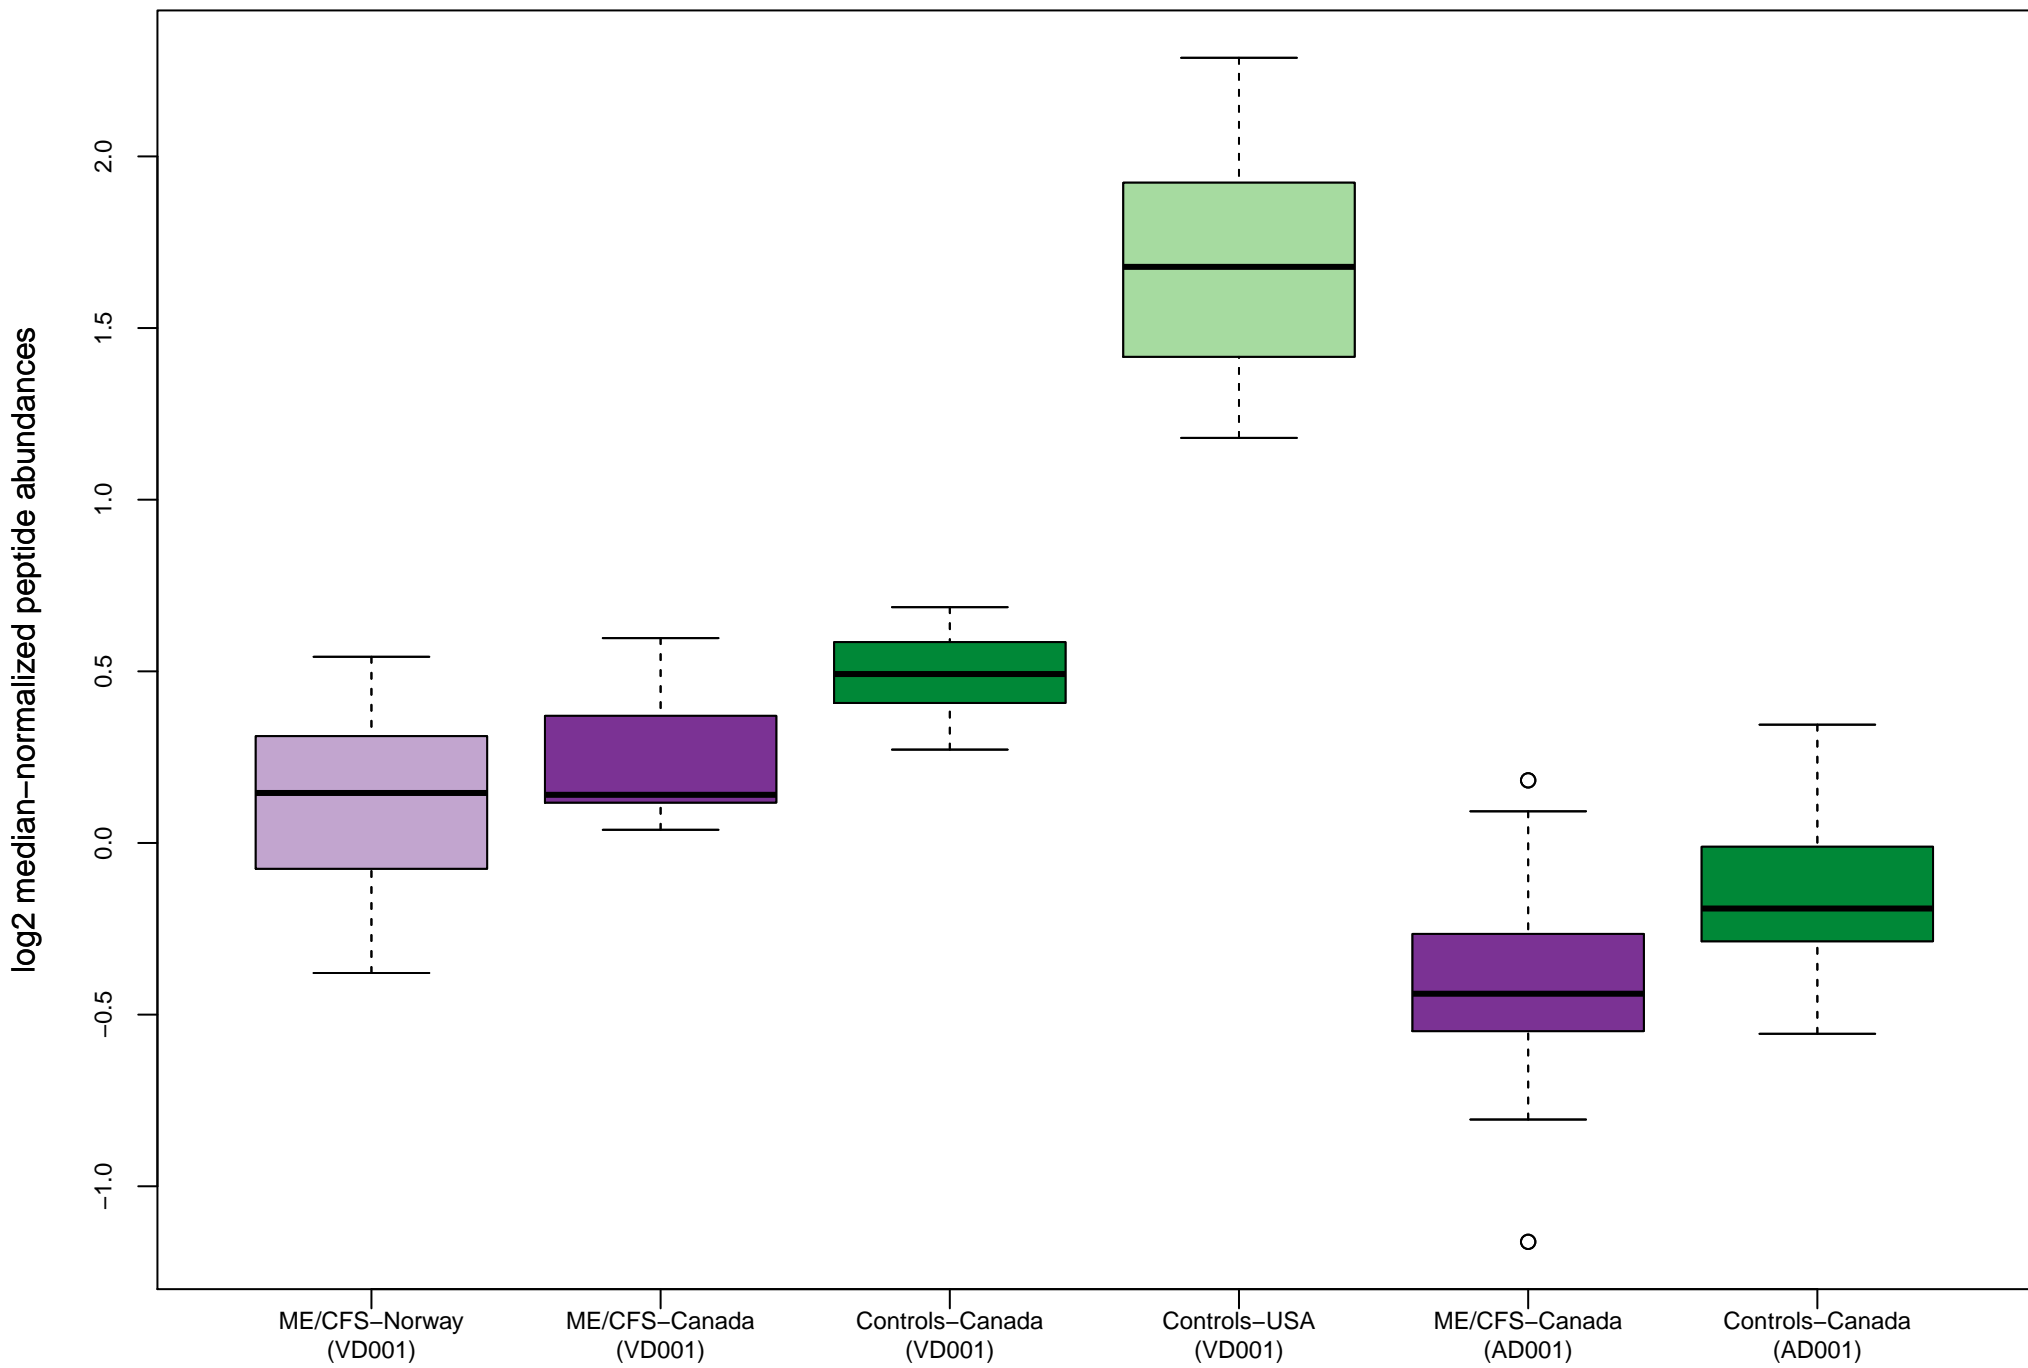



# QGQFRLWNAFPL

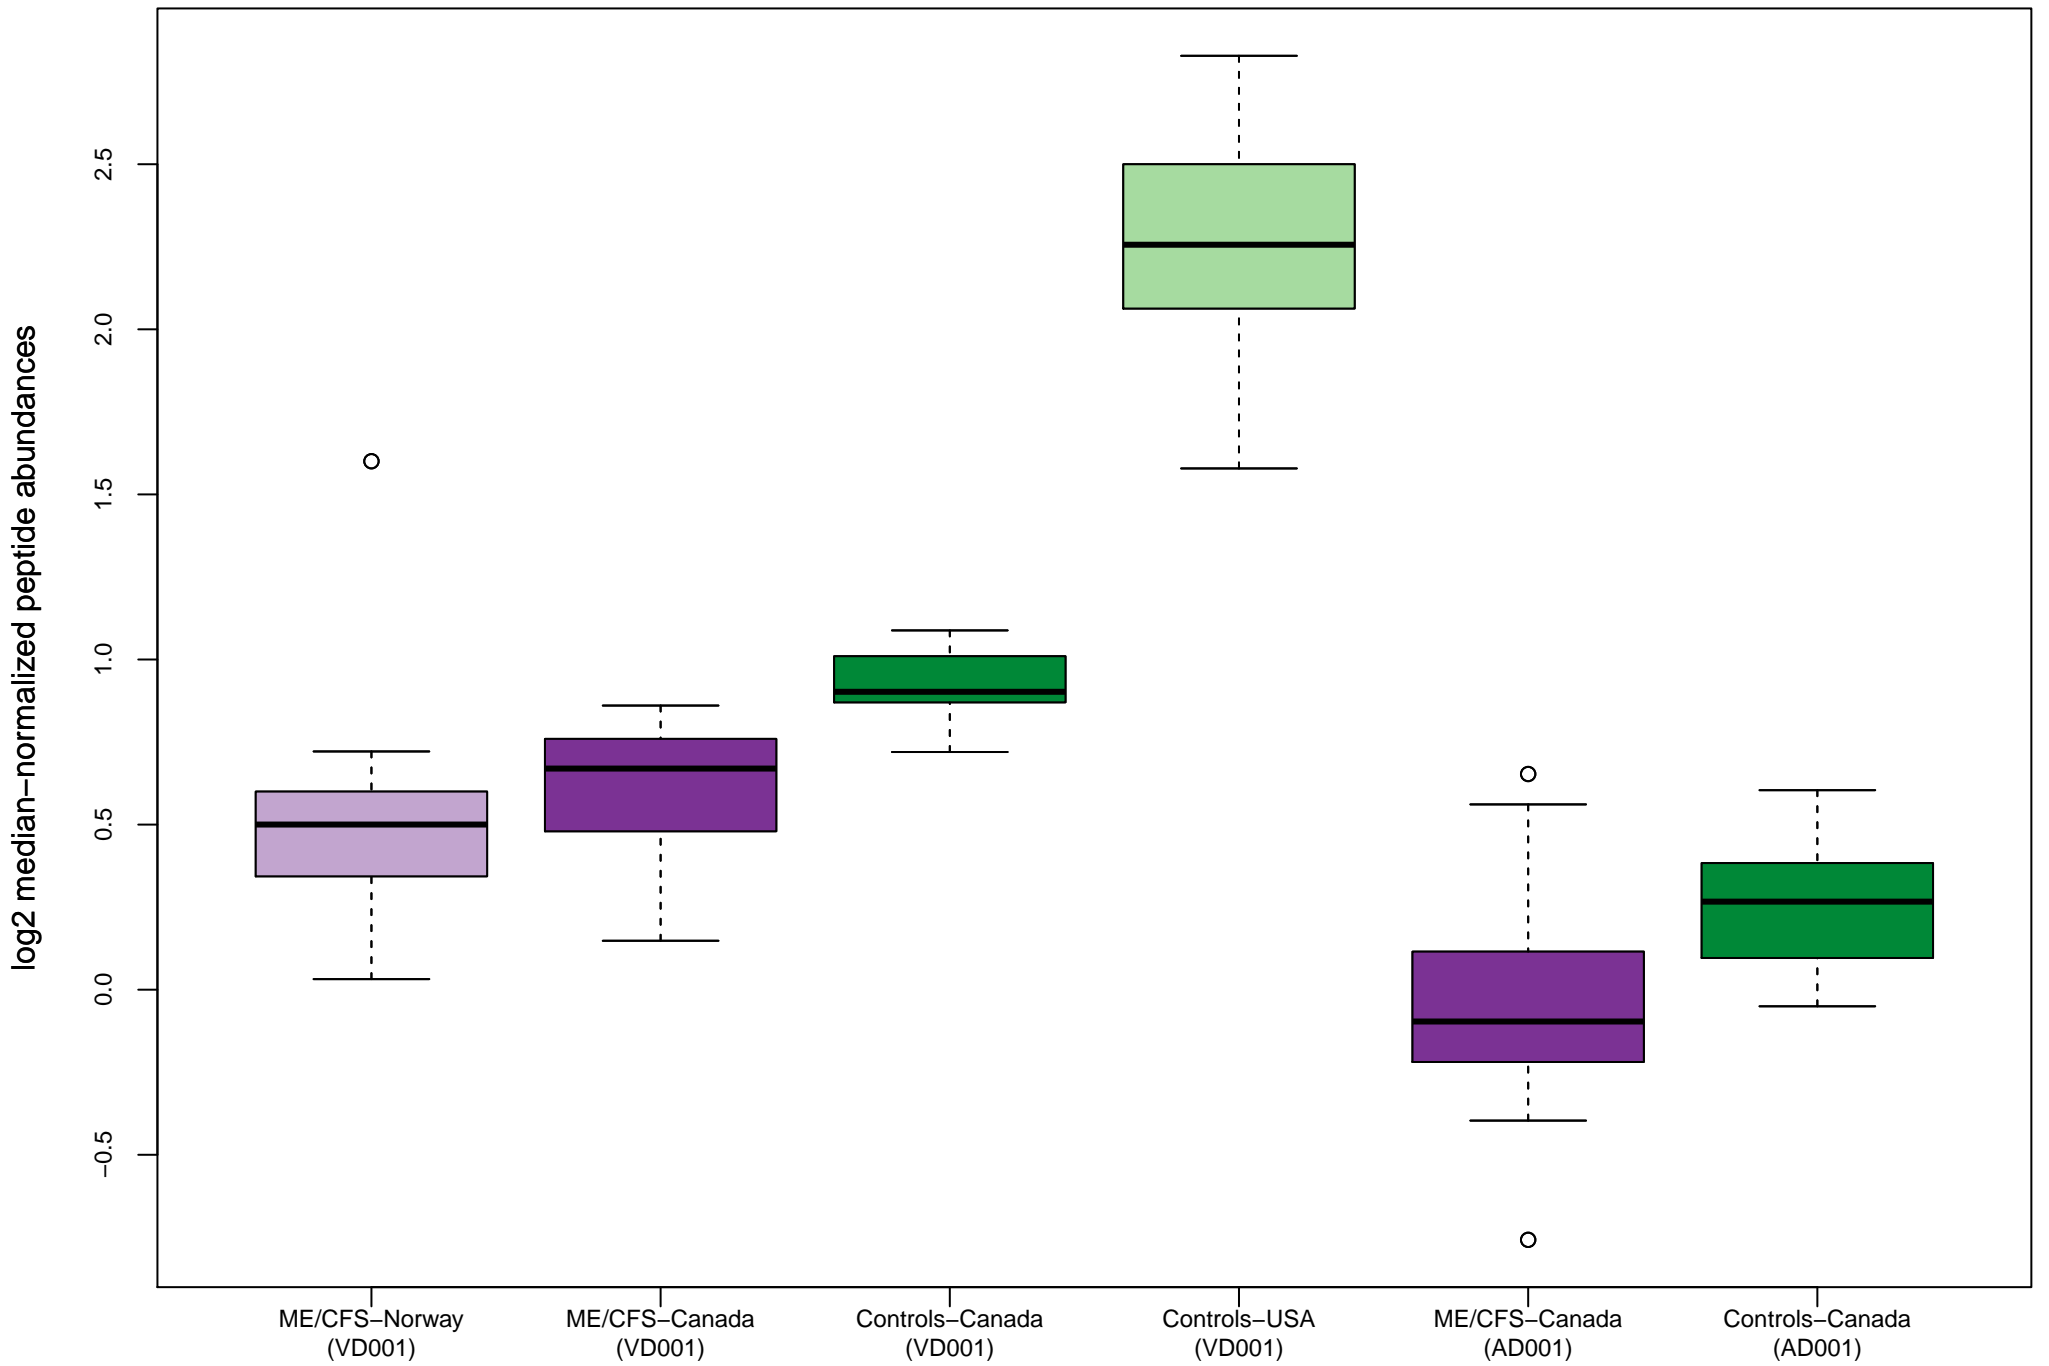

# QGWRLFALSGAL

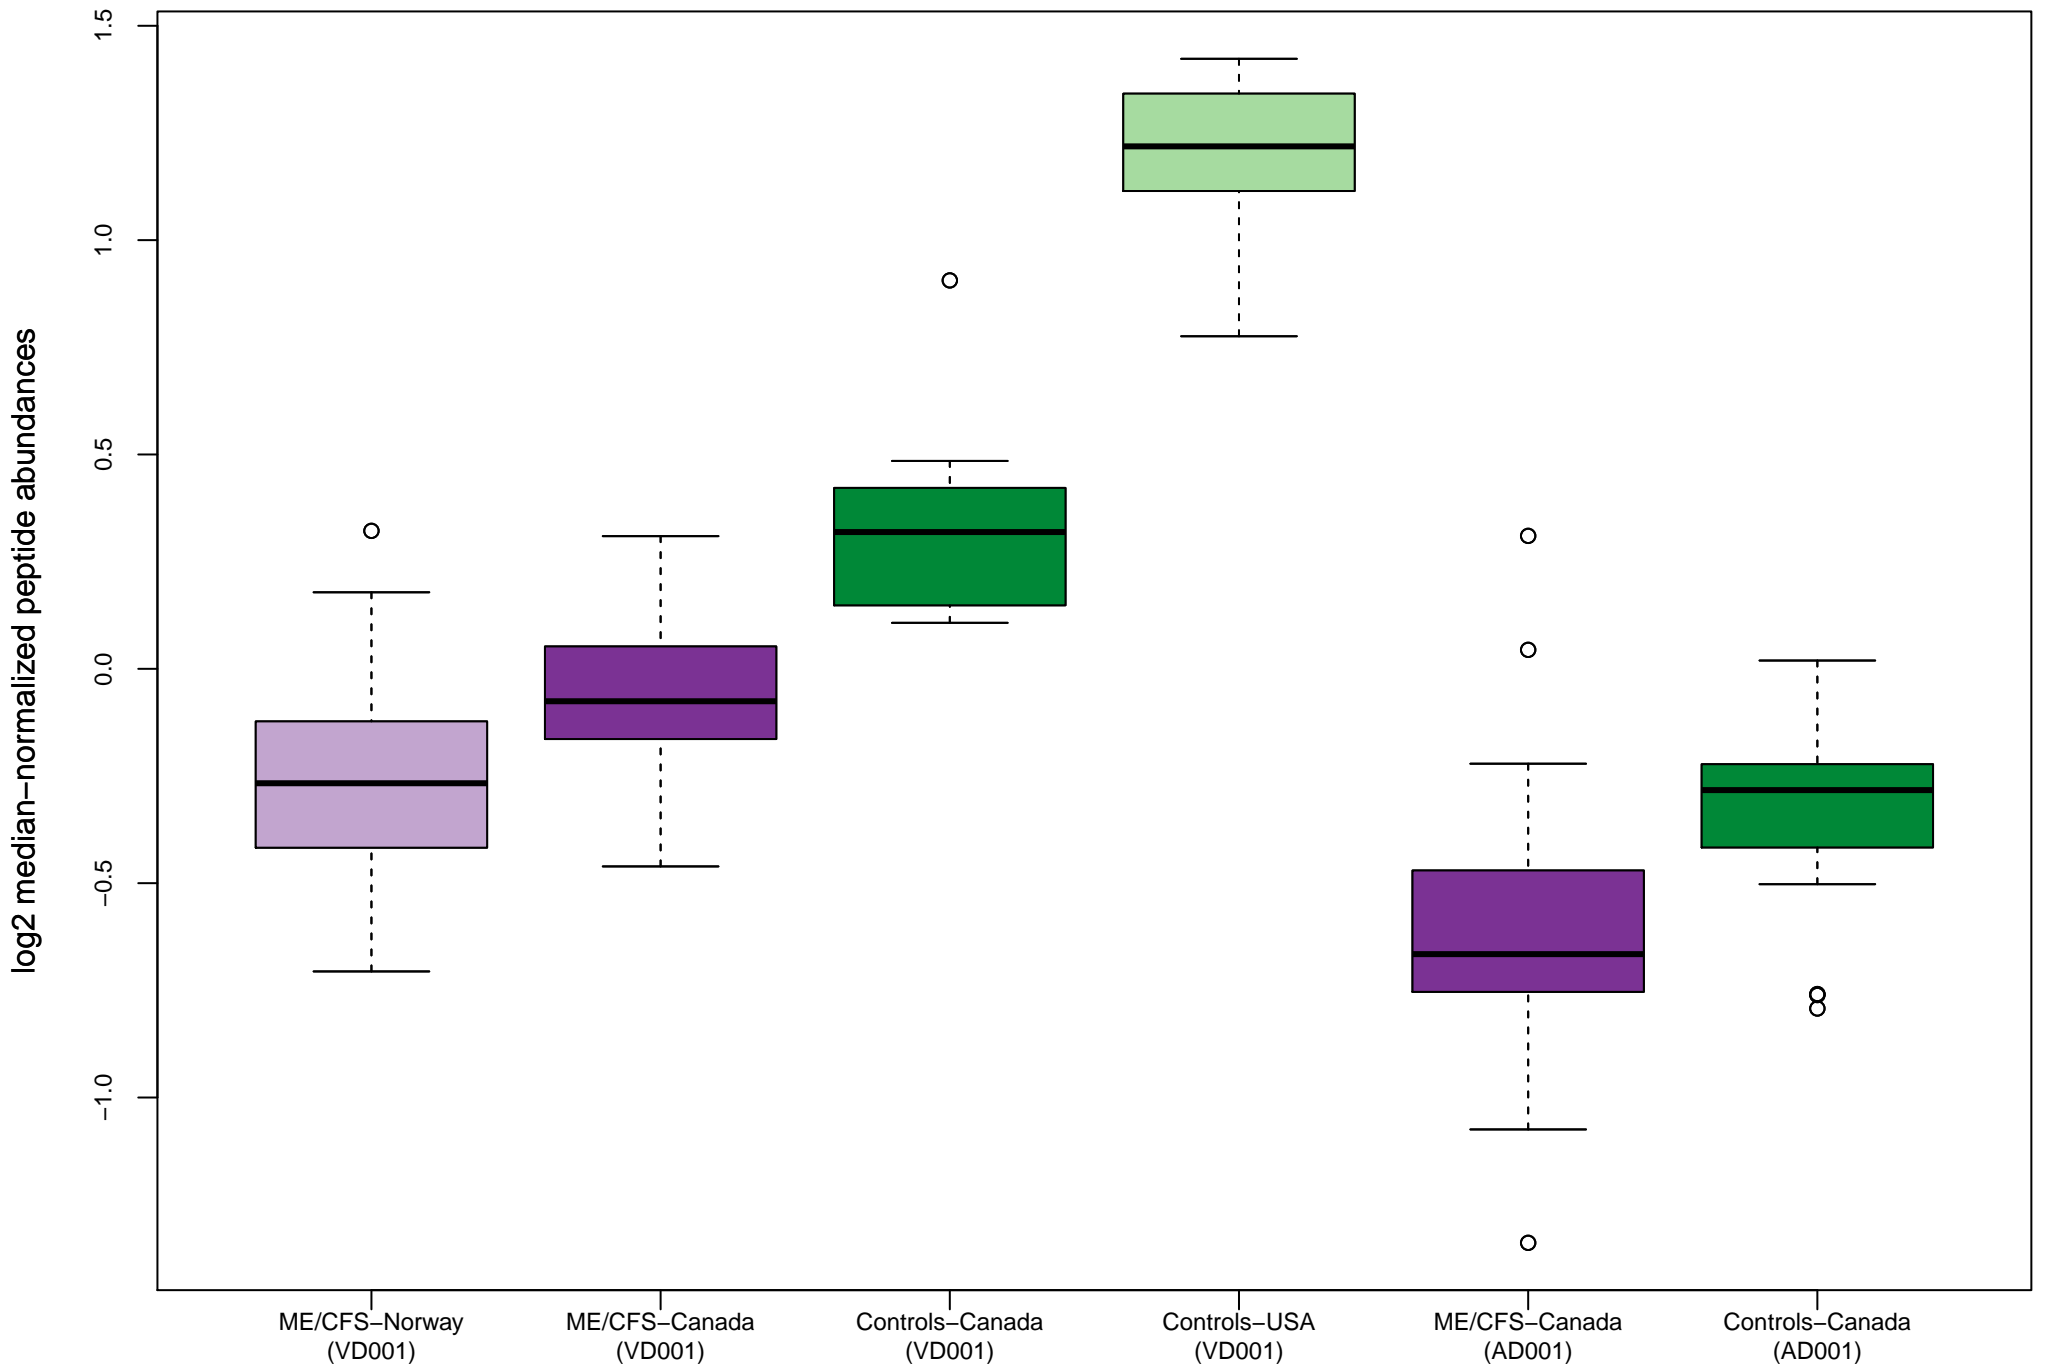

# QLKYHVQFRLLS

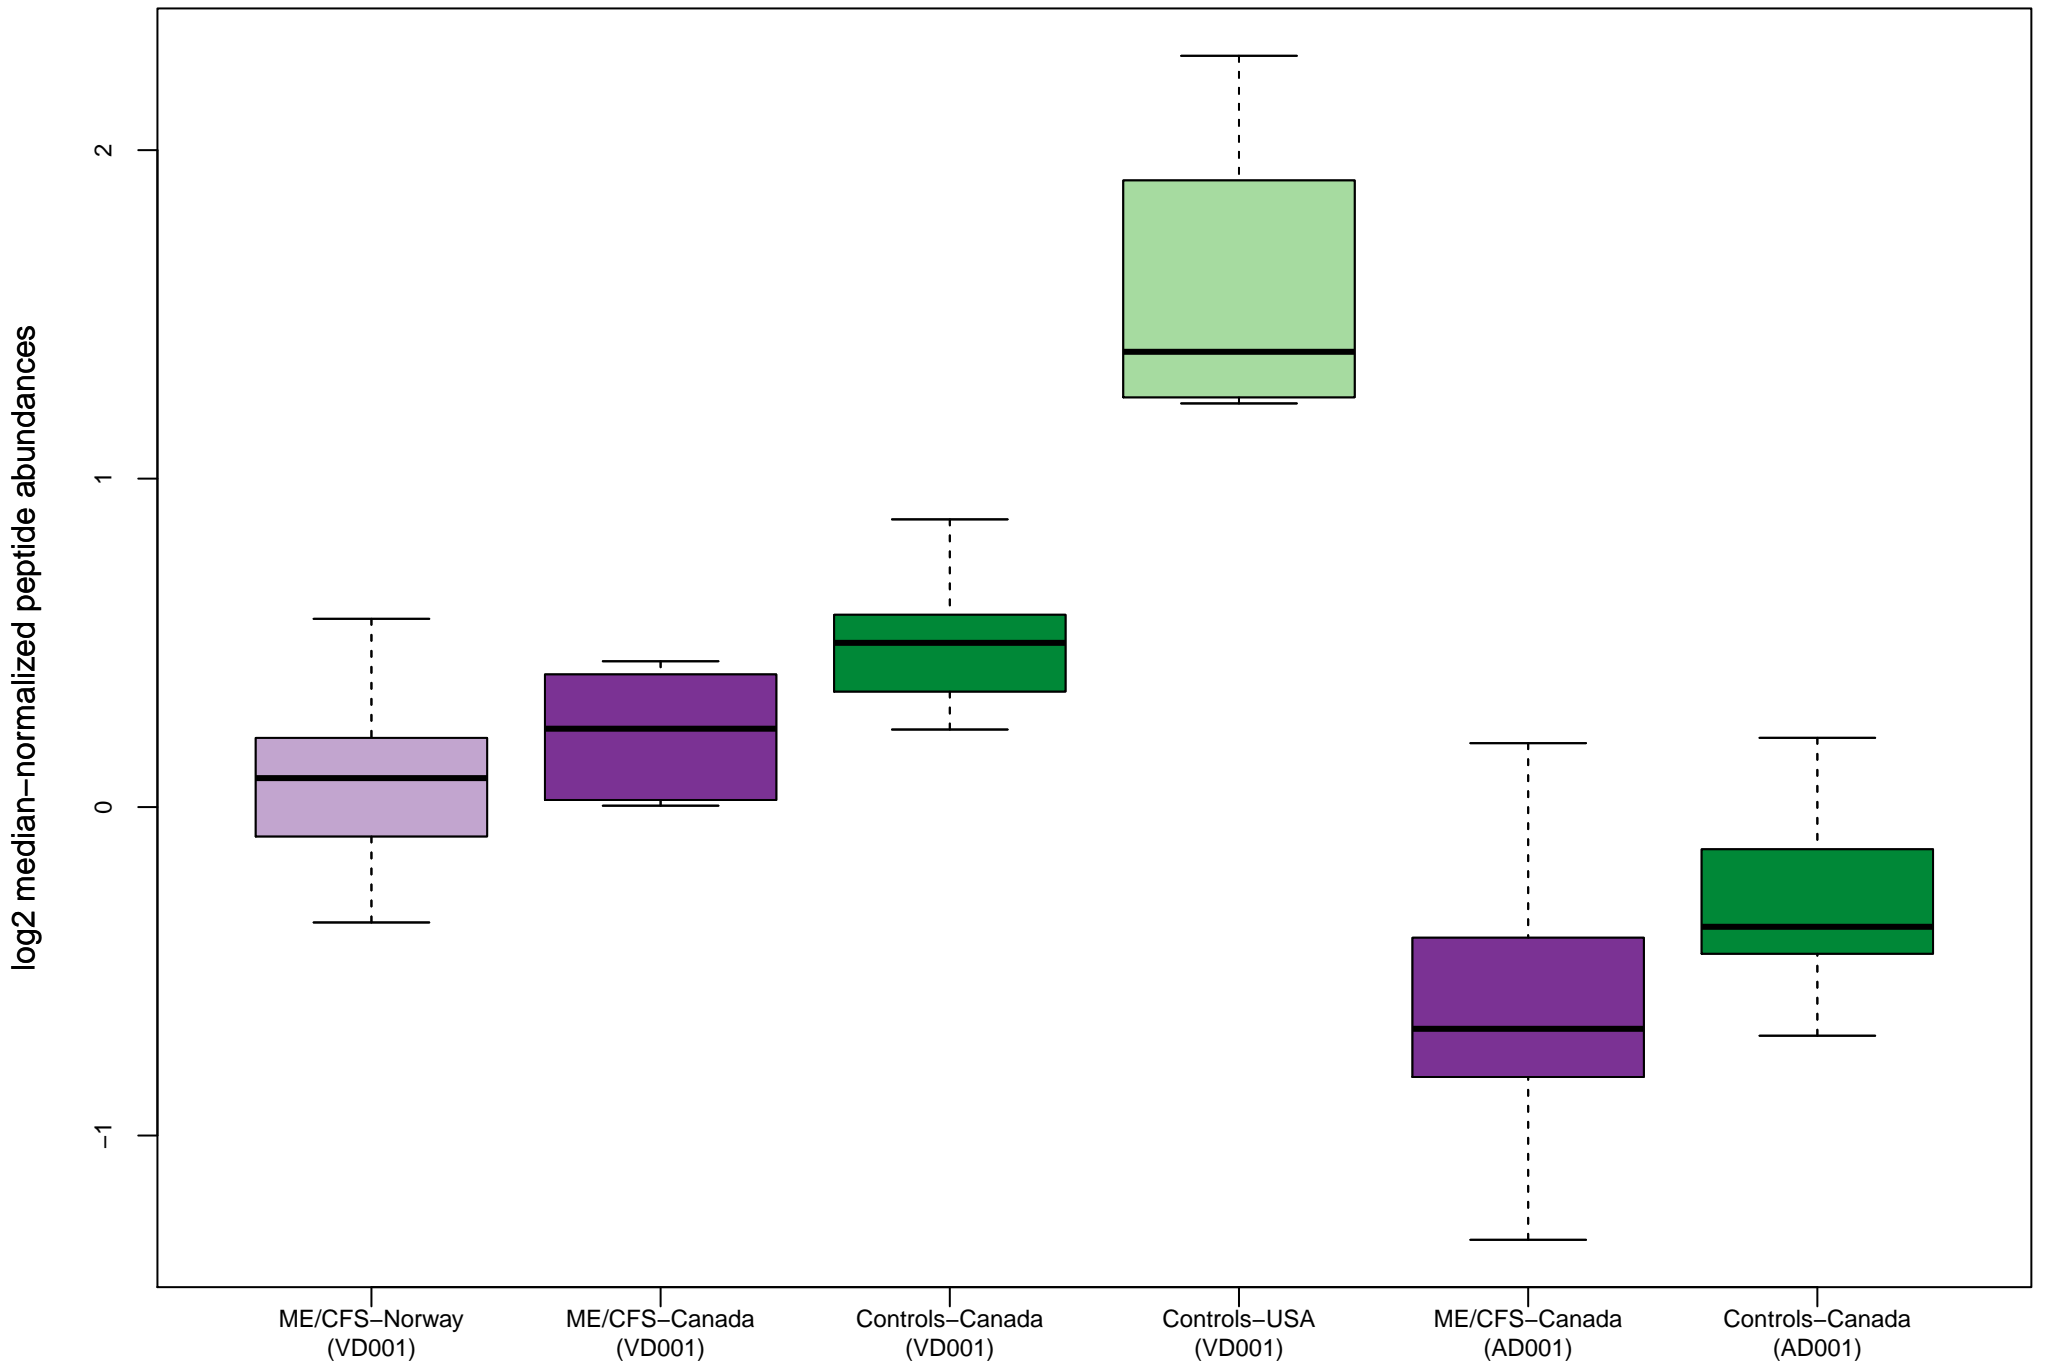

# QRFGLQFPYNAL

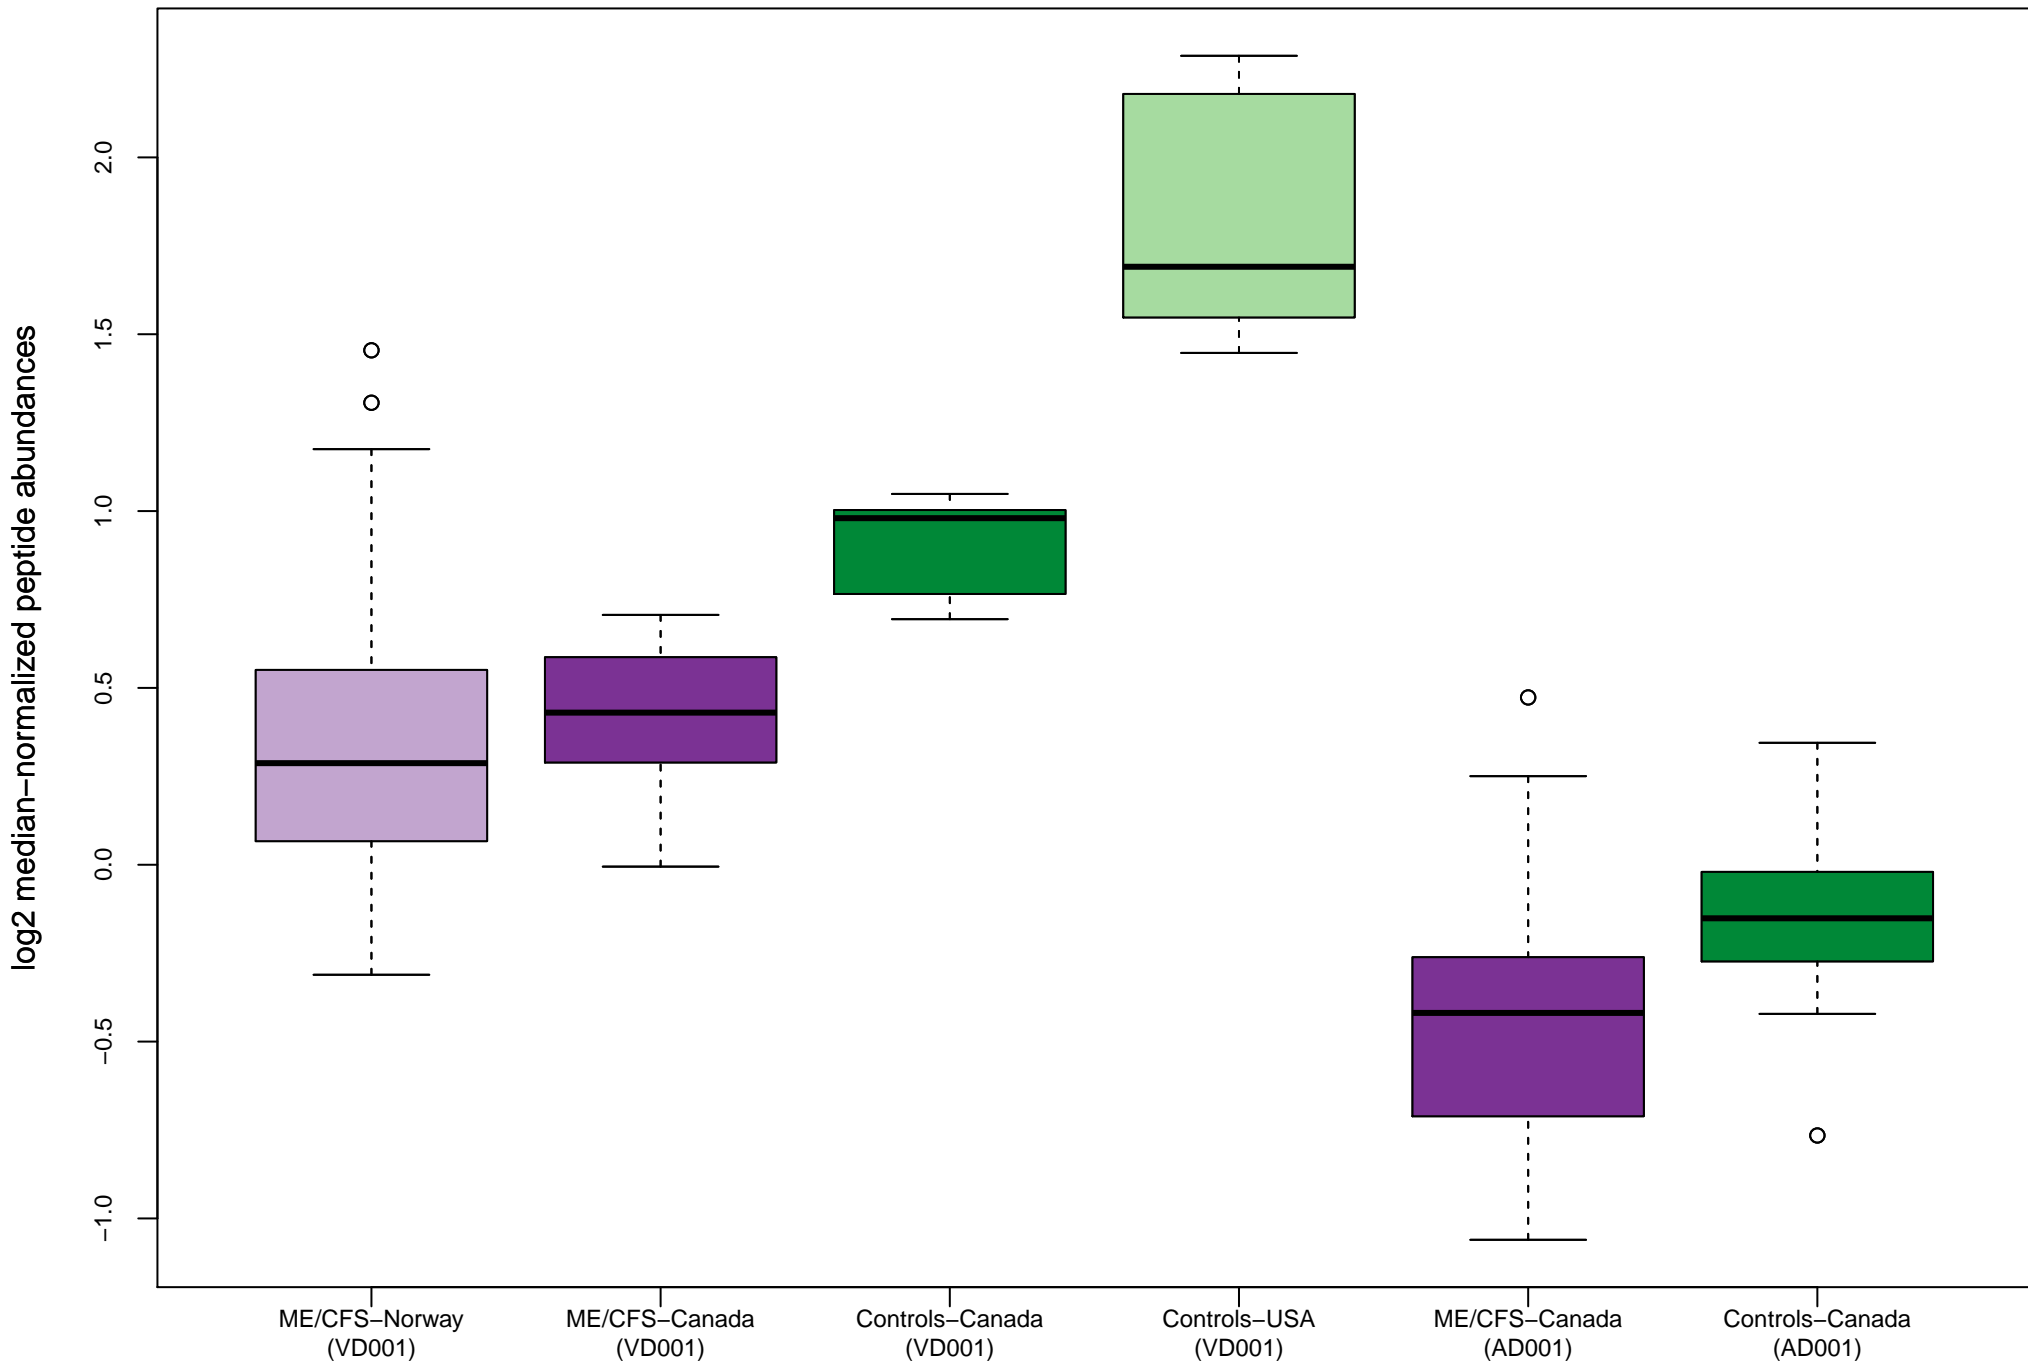

# QRVQFHWVYKSG

log2 median-normalized peptide abundances

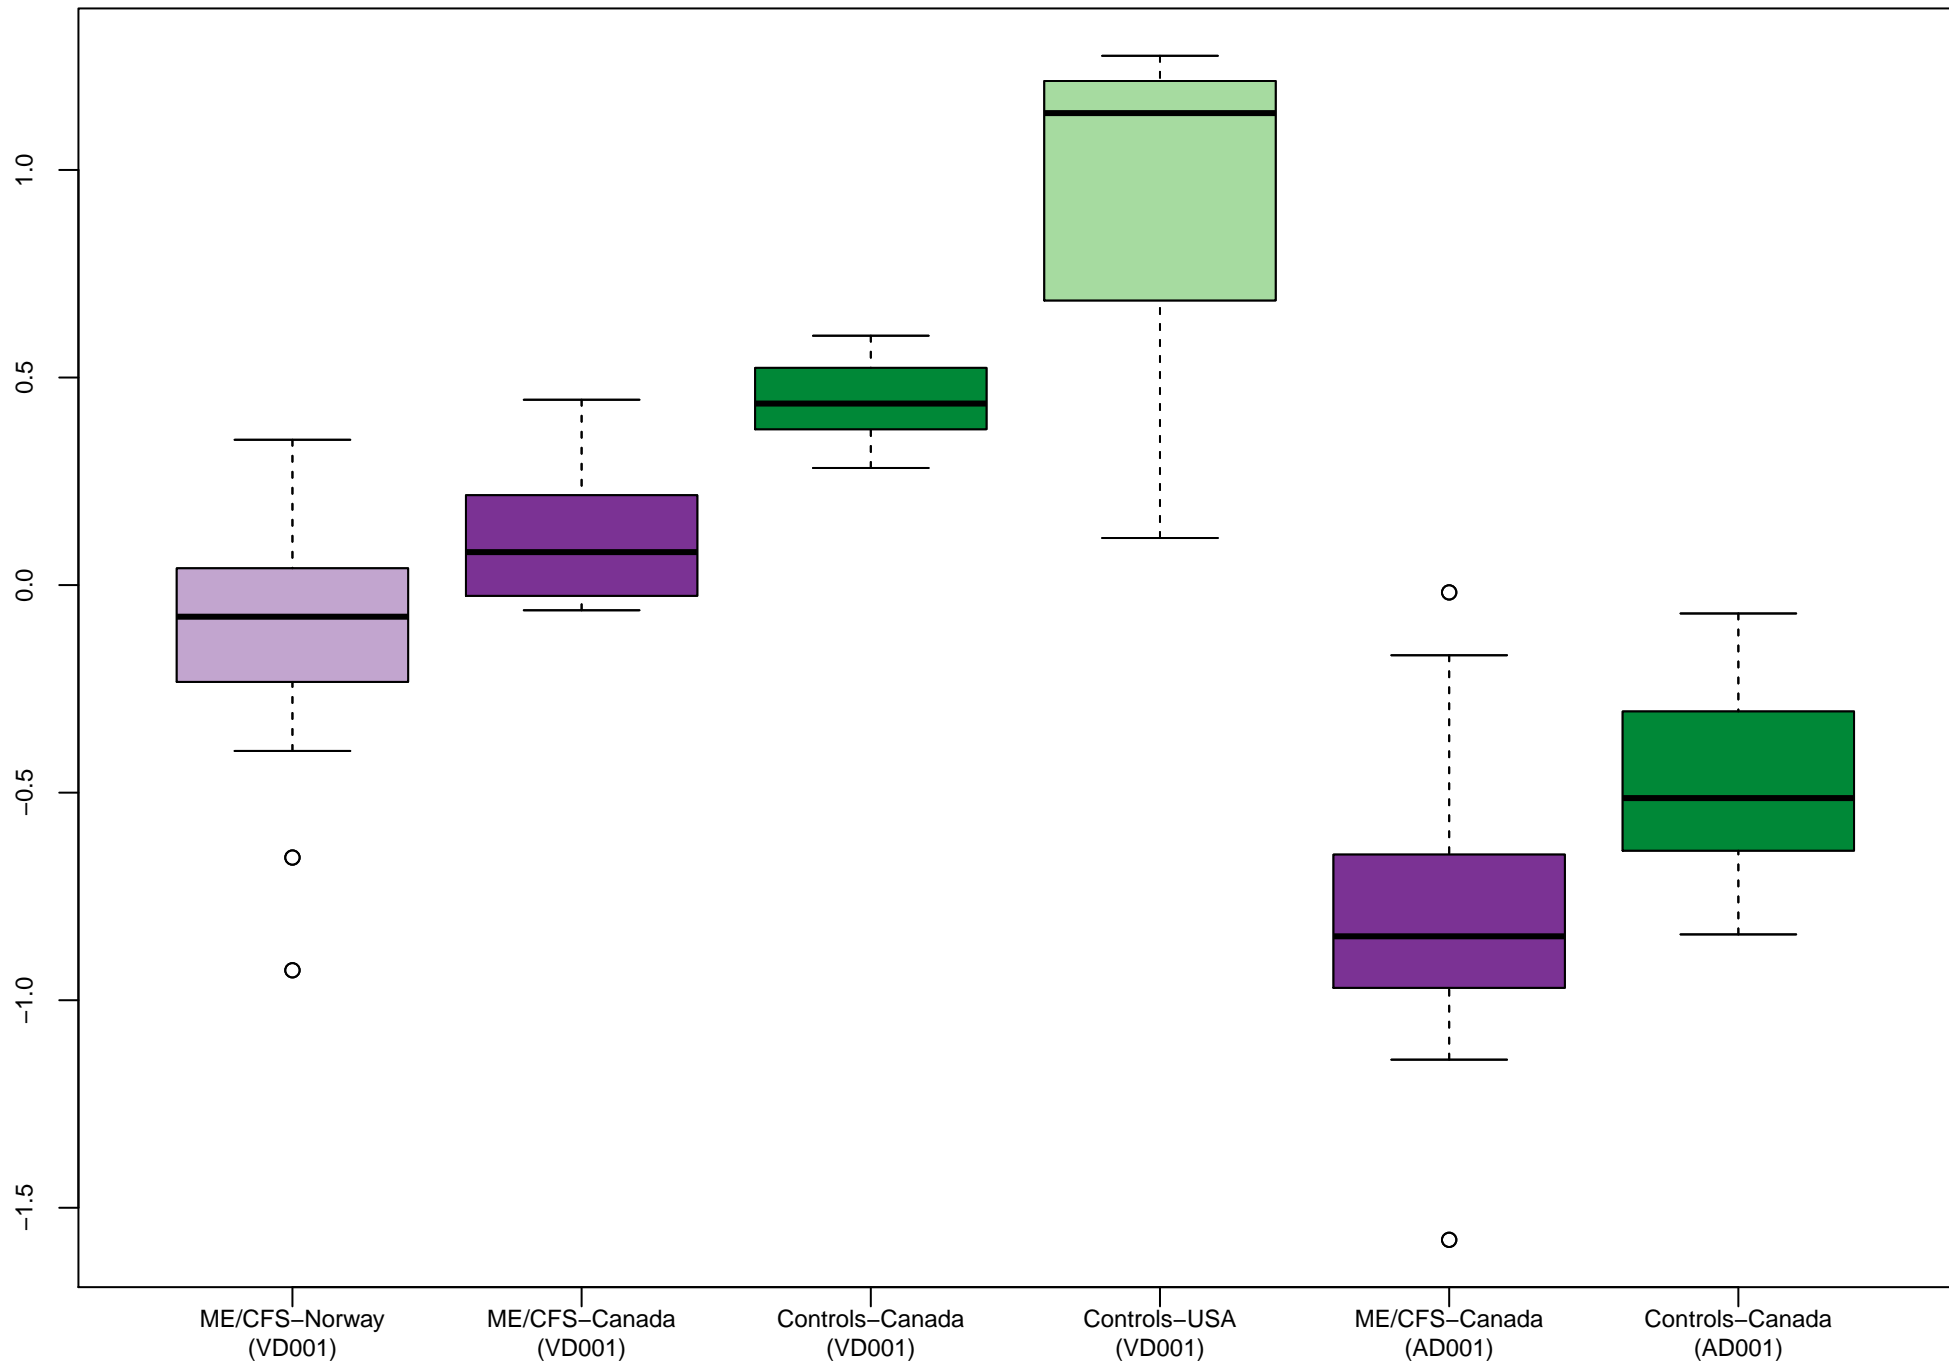

# QRWVGYGFLPN

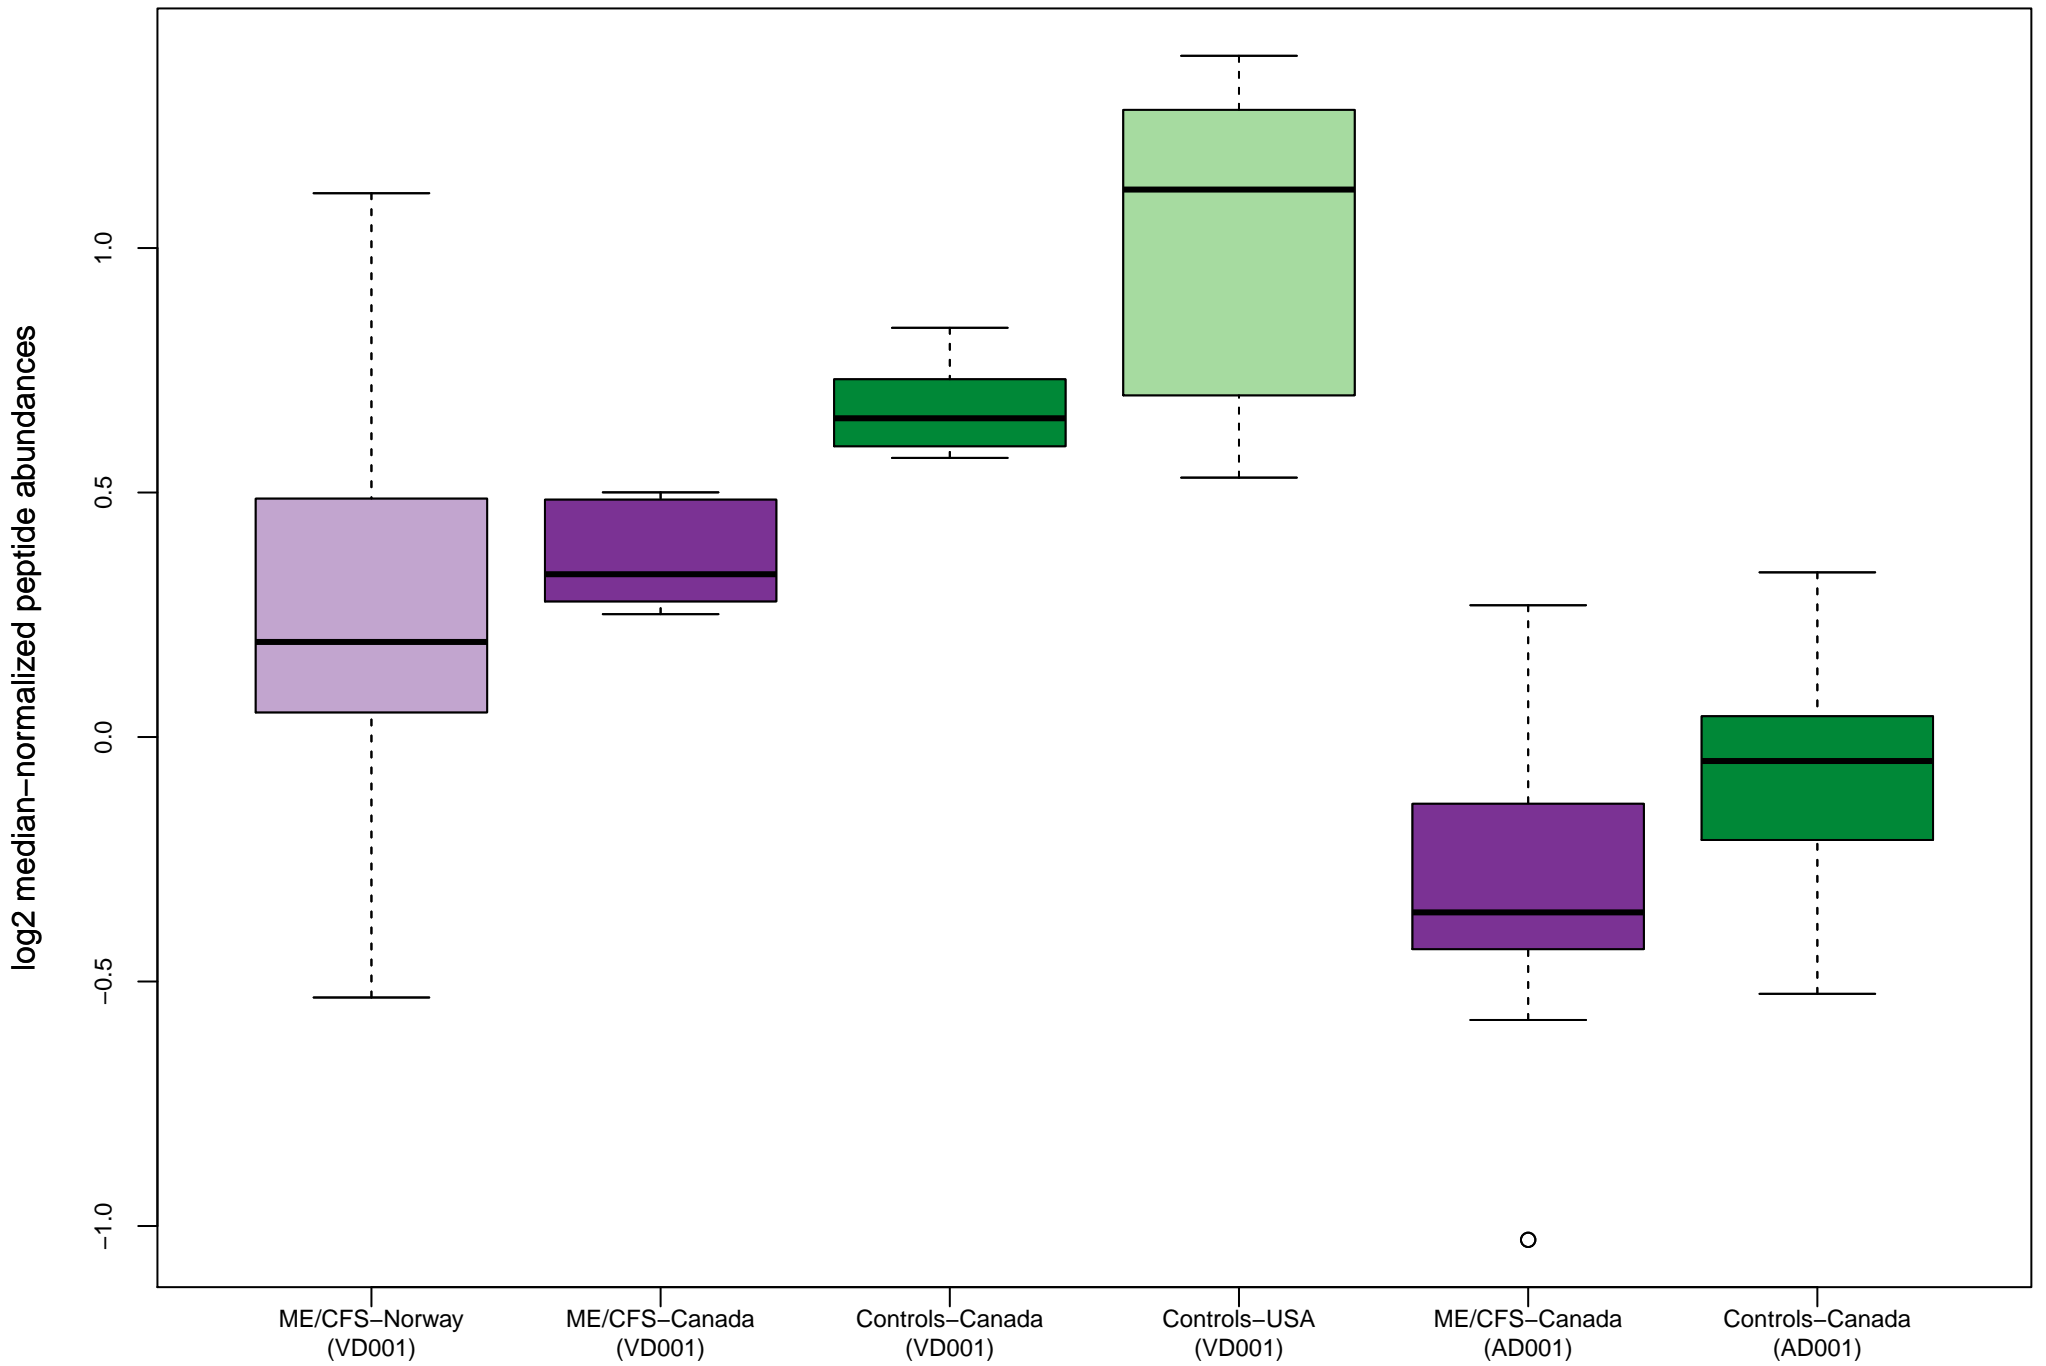

# QVFSRAFASLSG

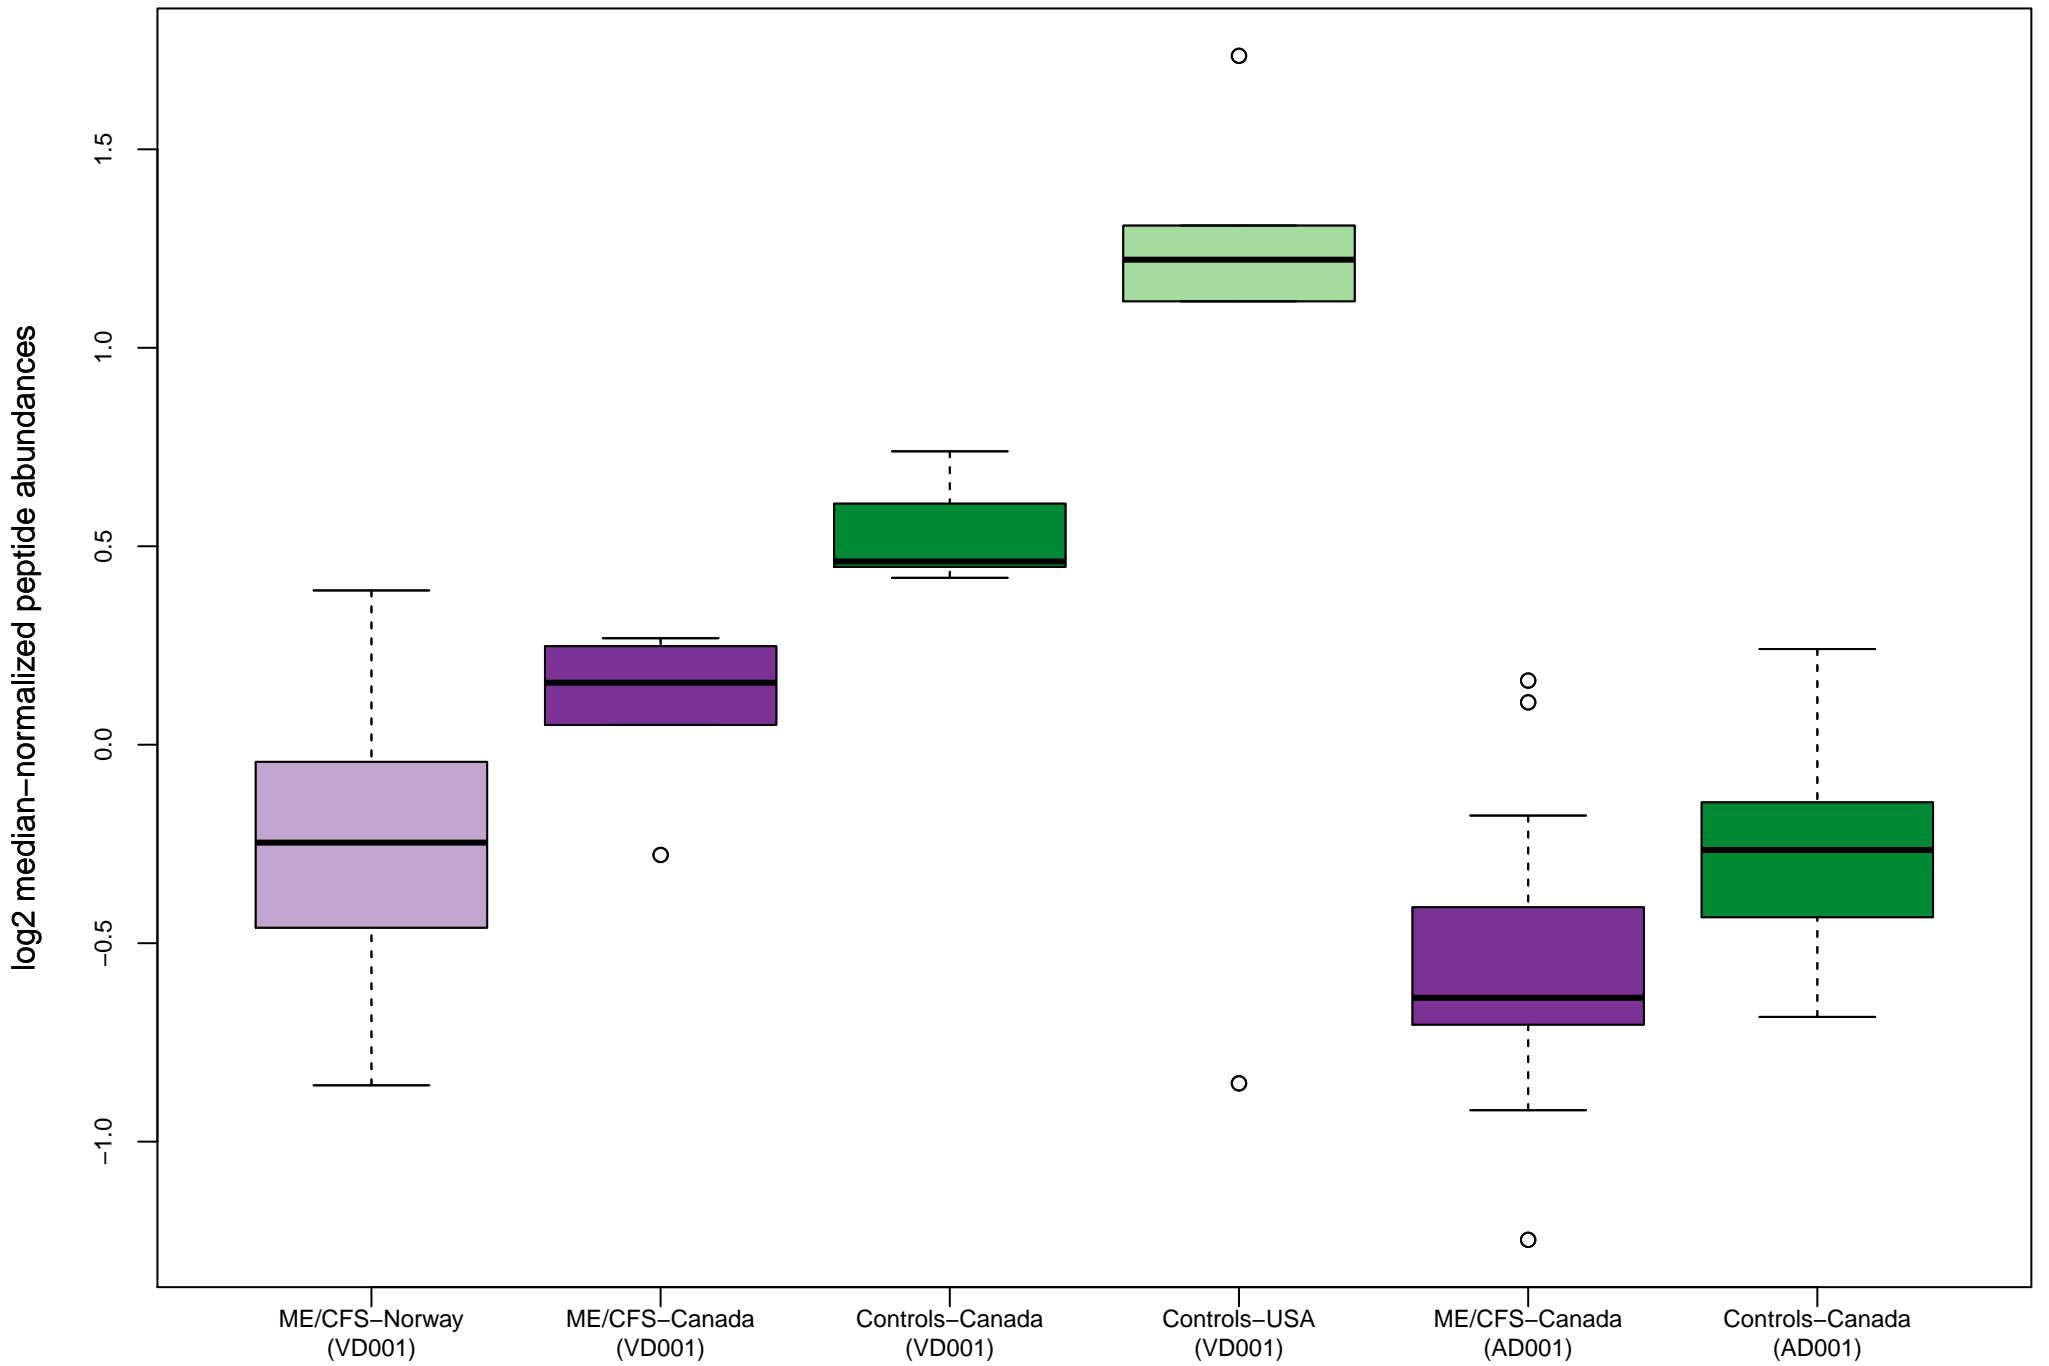

# QVGPPWLRYVSV

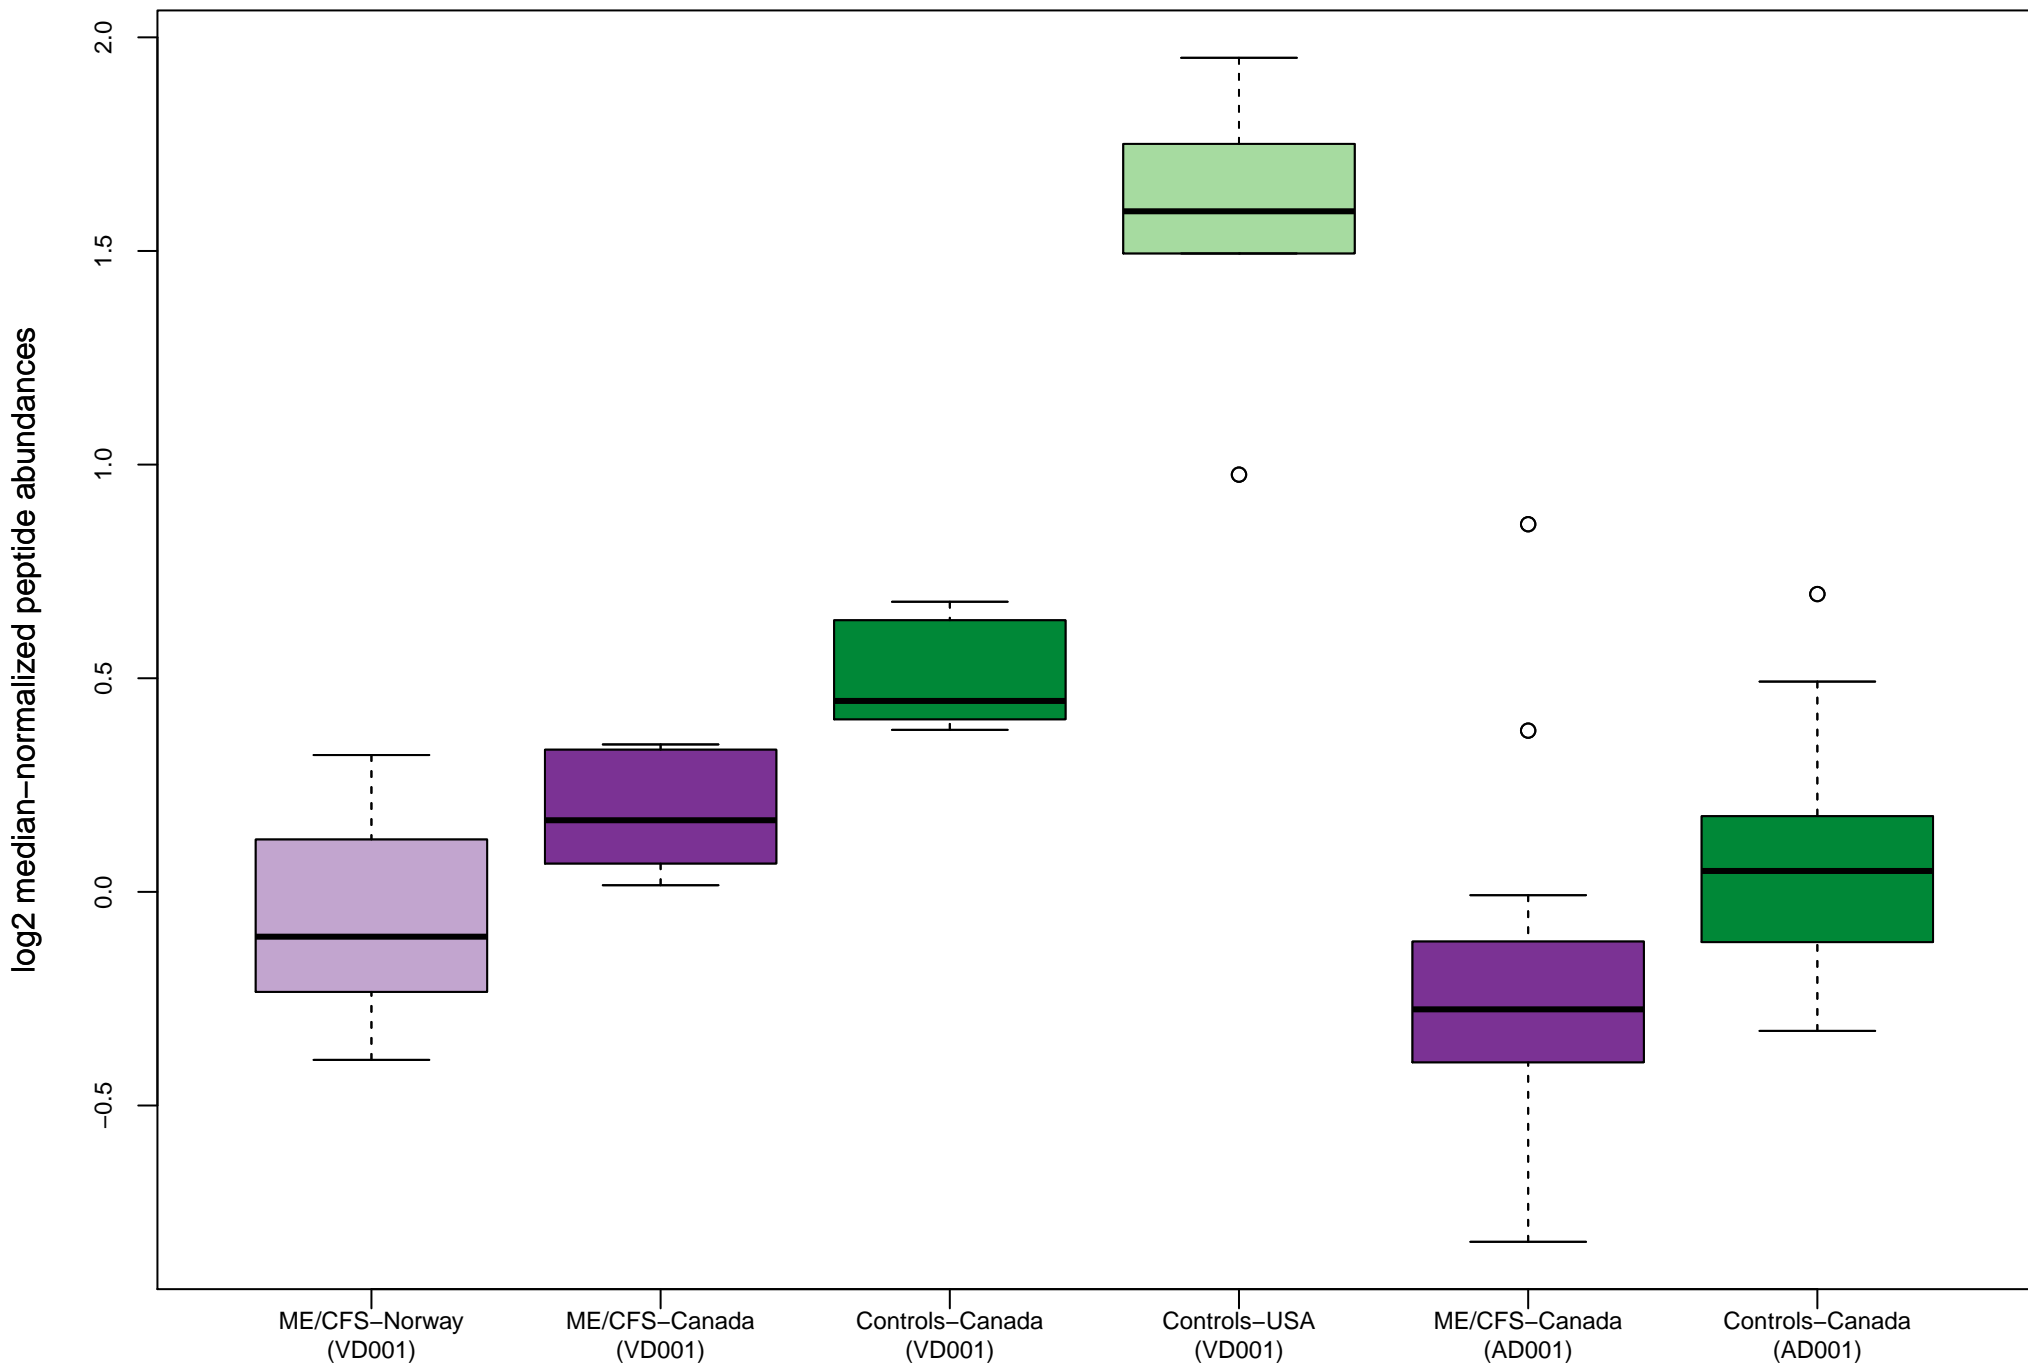



# QWWFLGRYKLSG

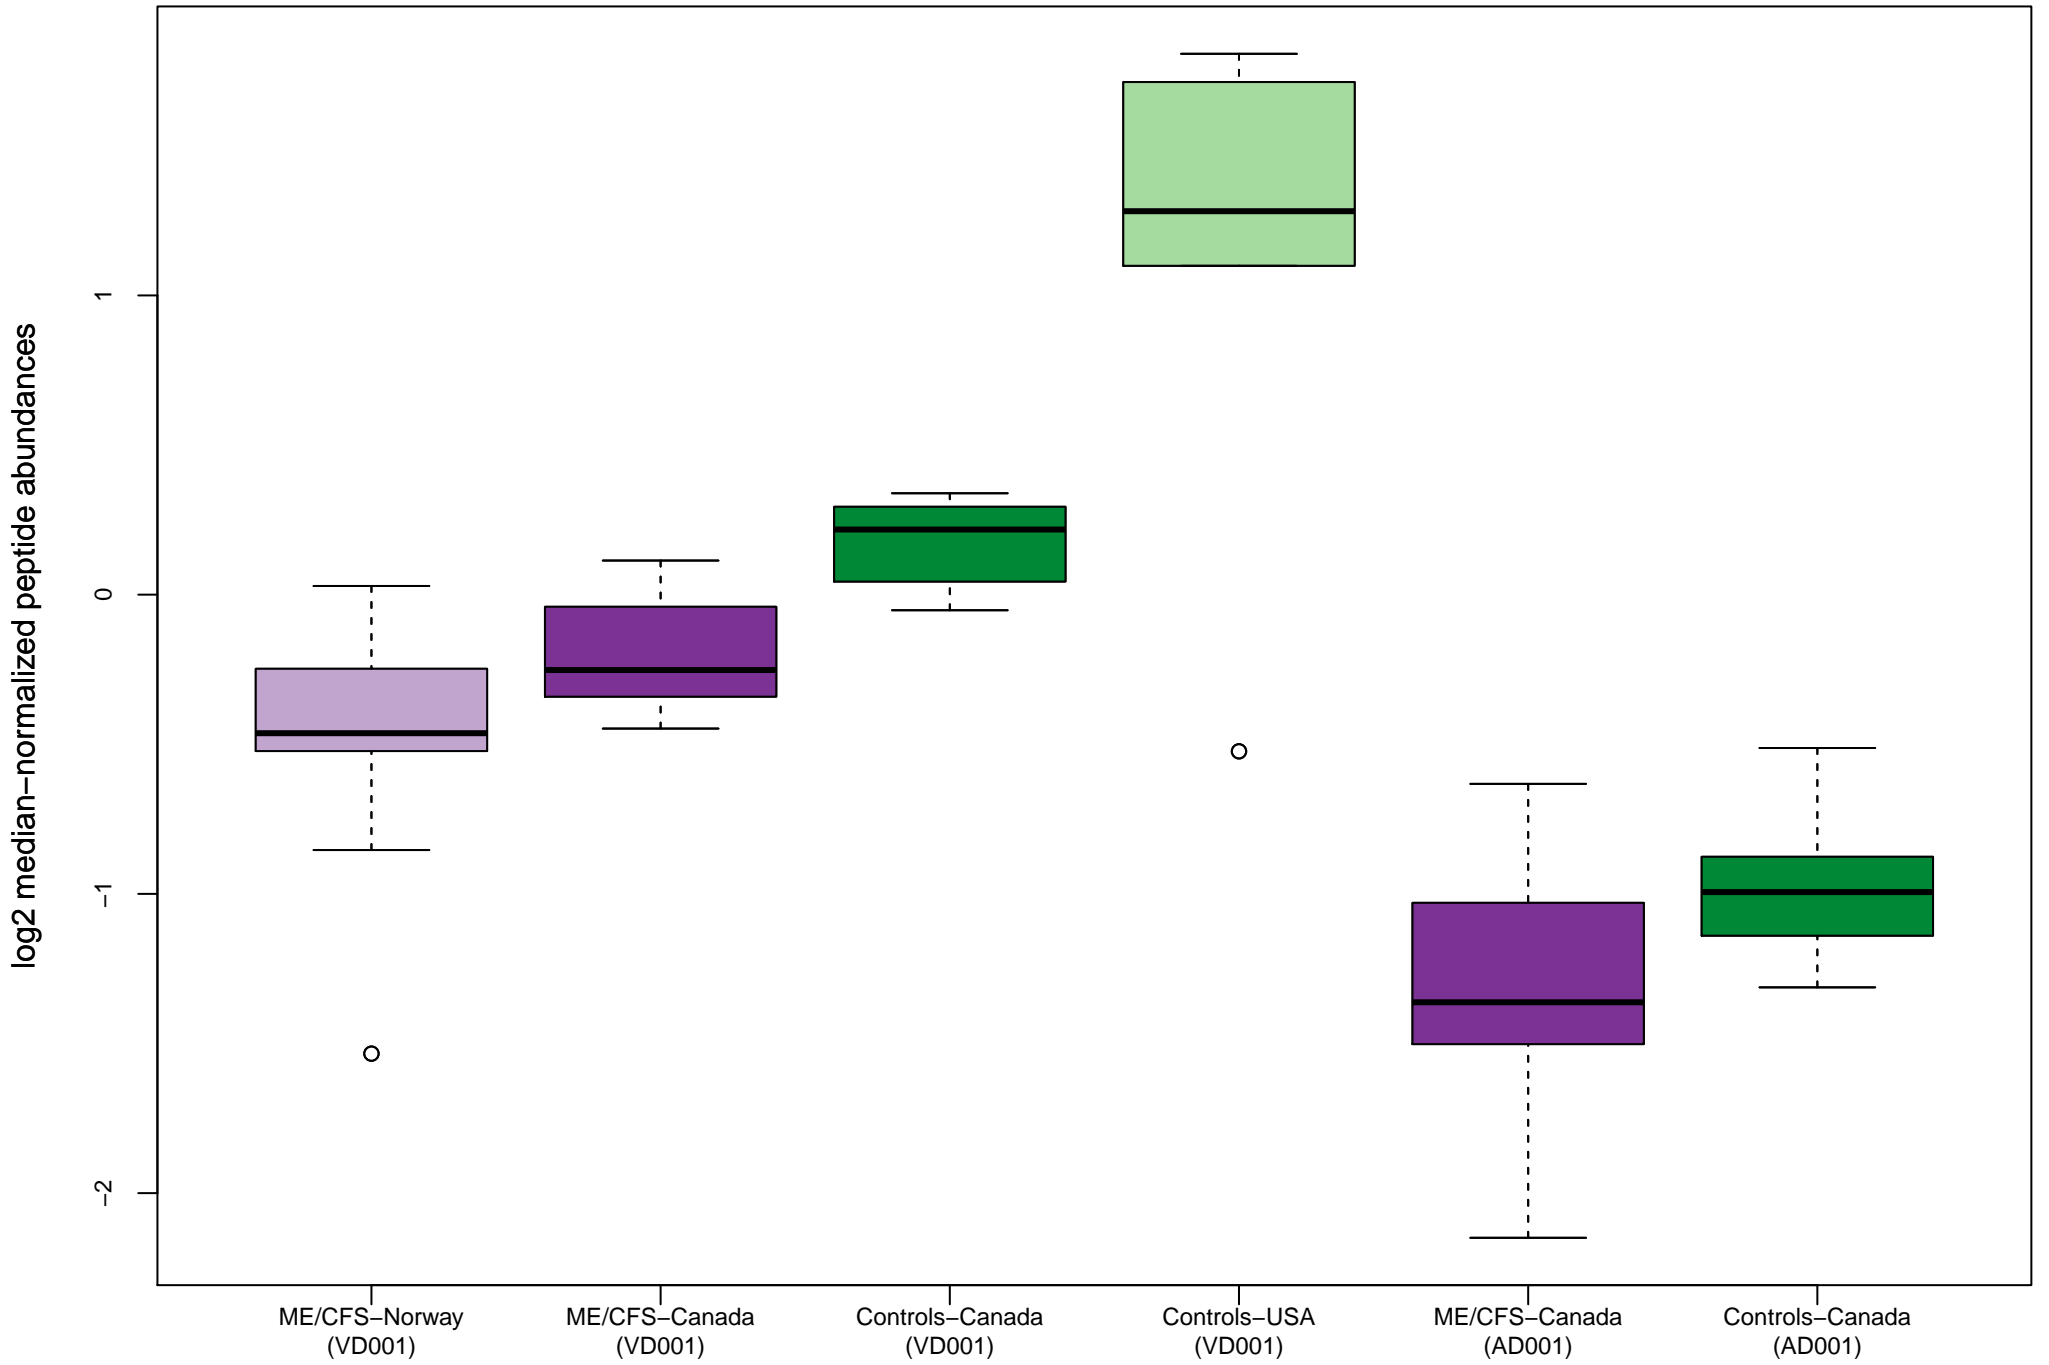

# QYWRGFWFKVAV

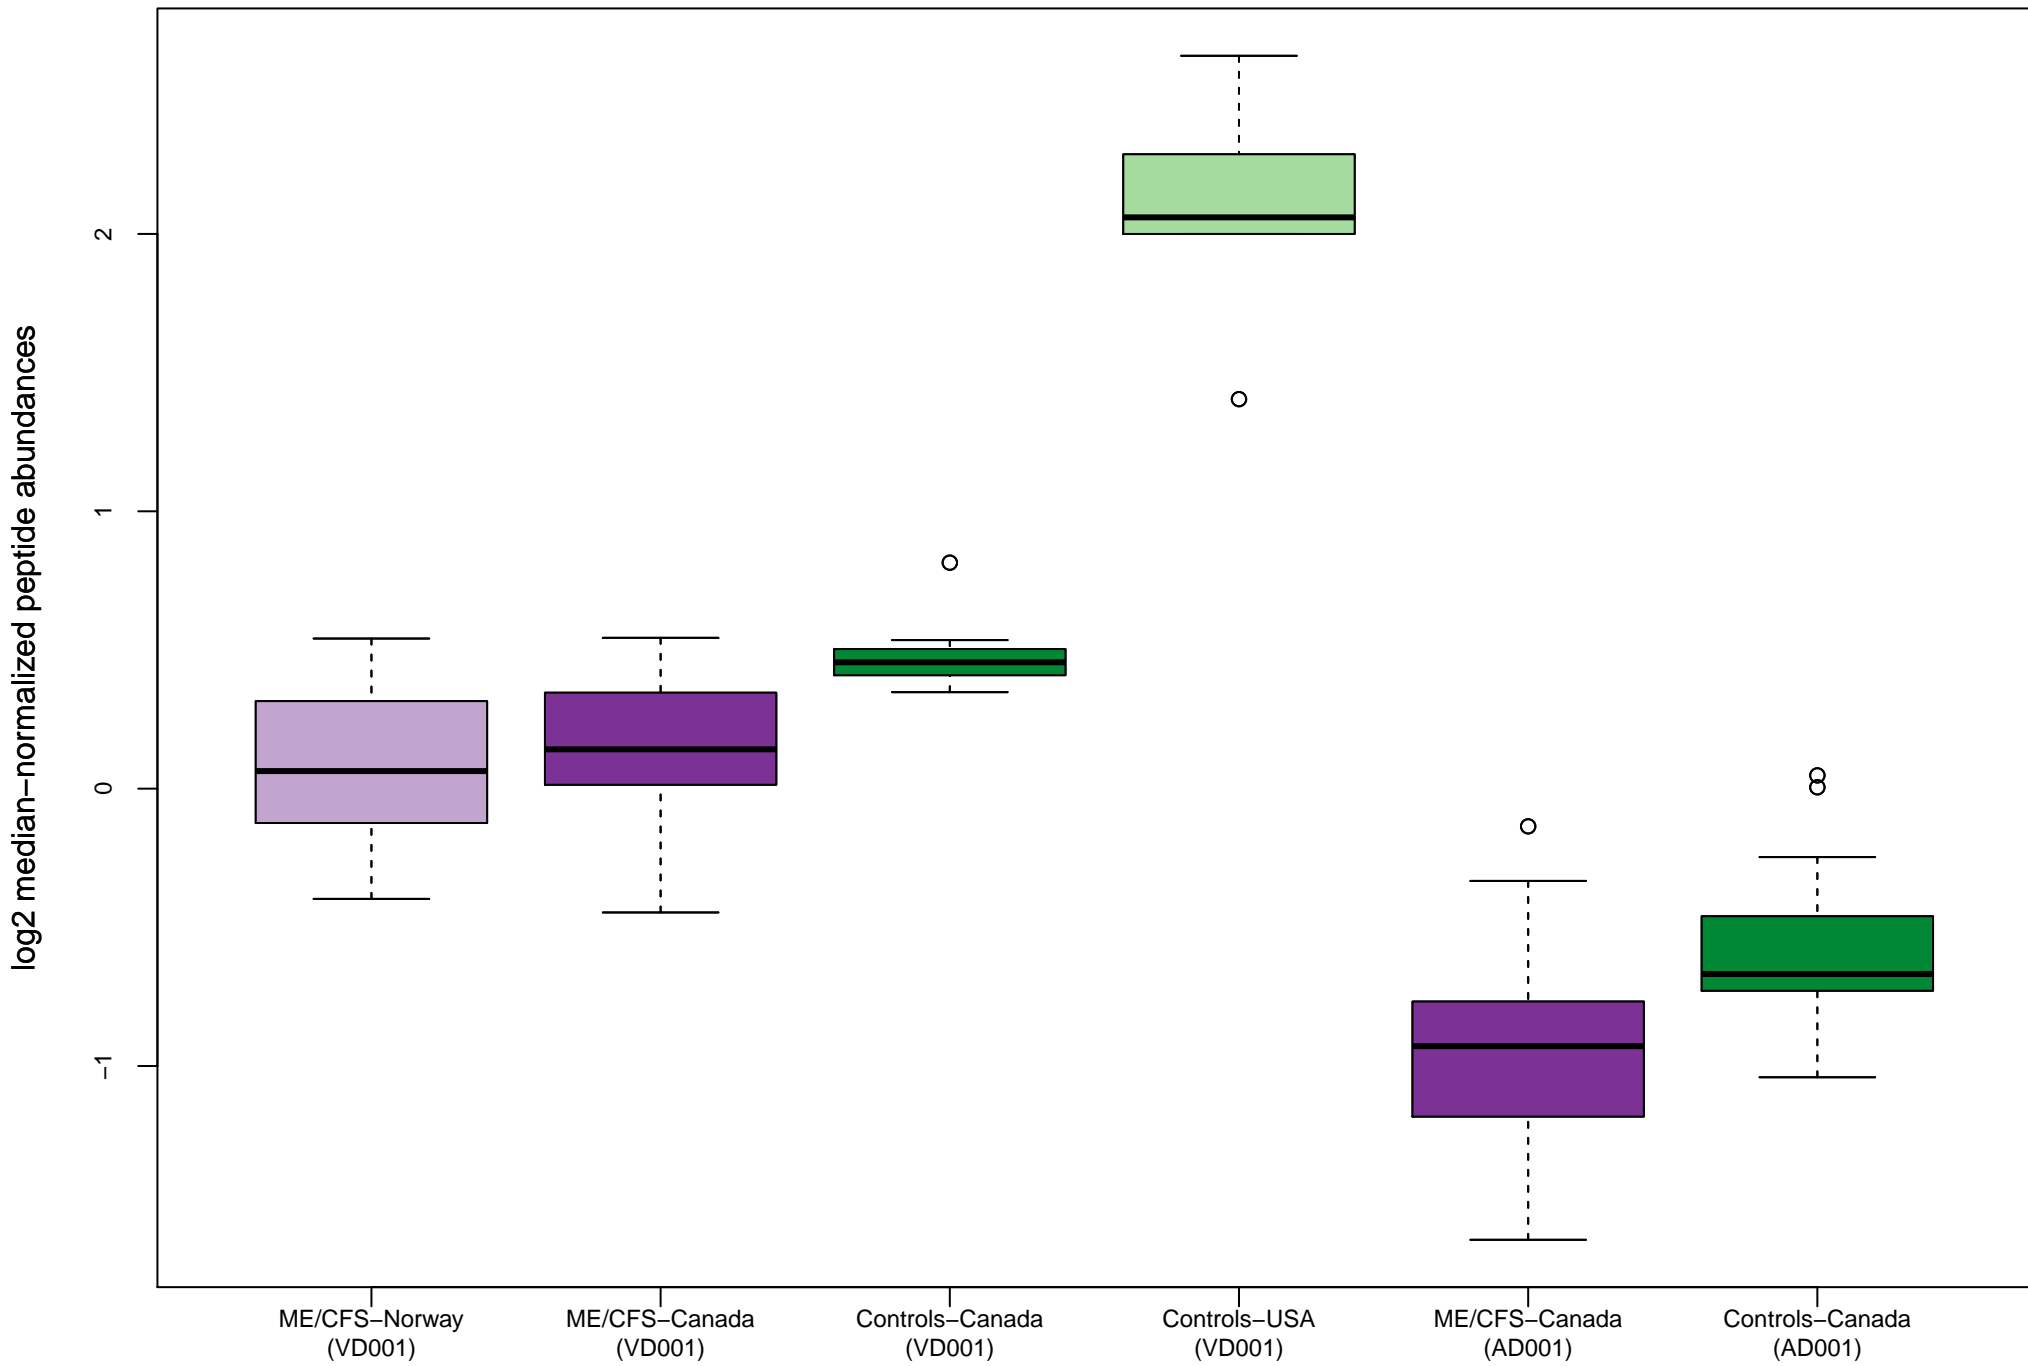

# RAFLFKFYHGVL

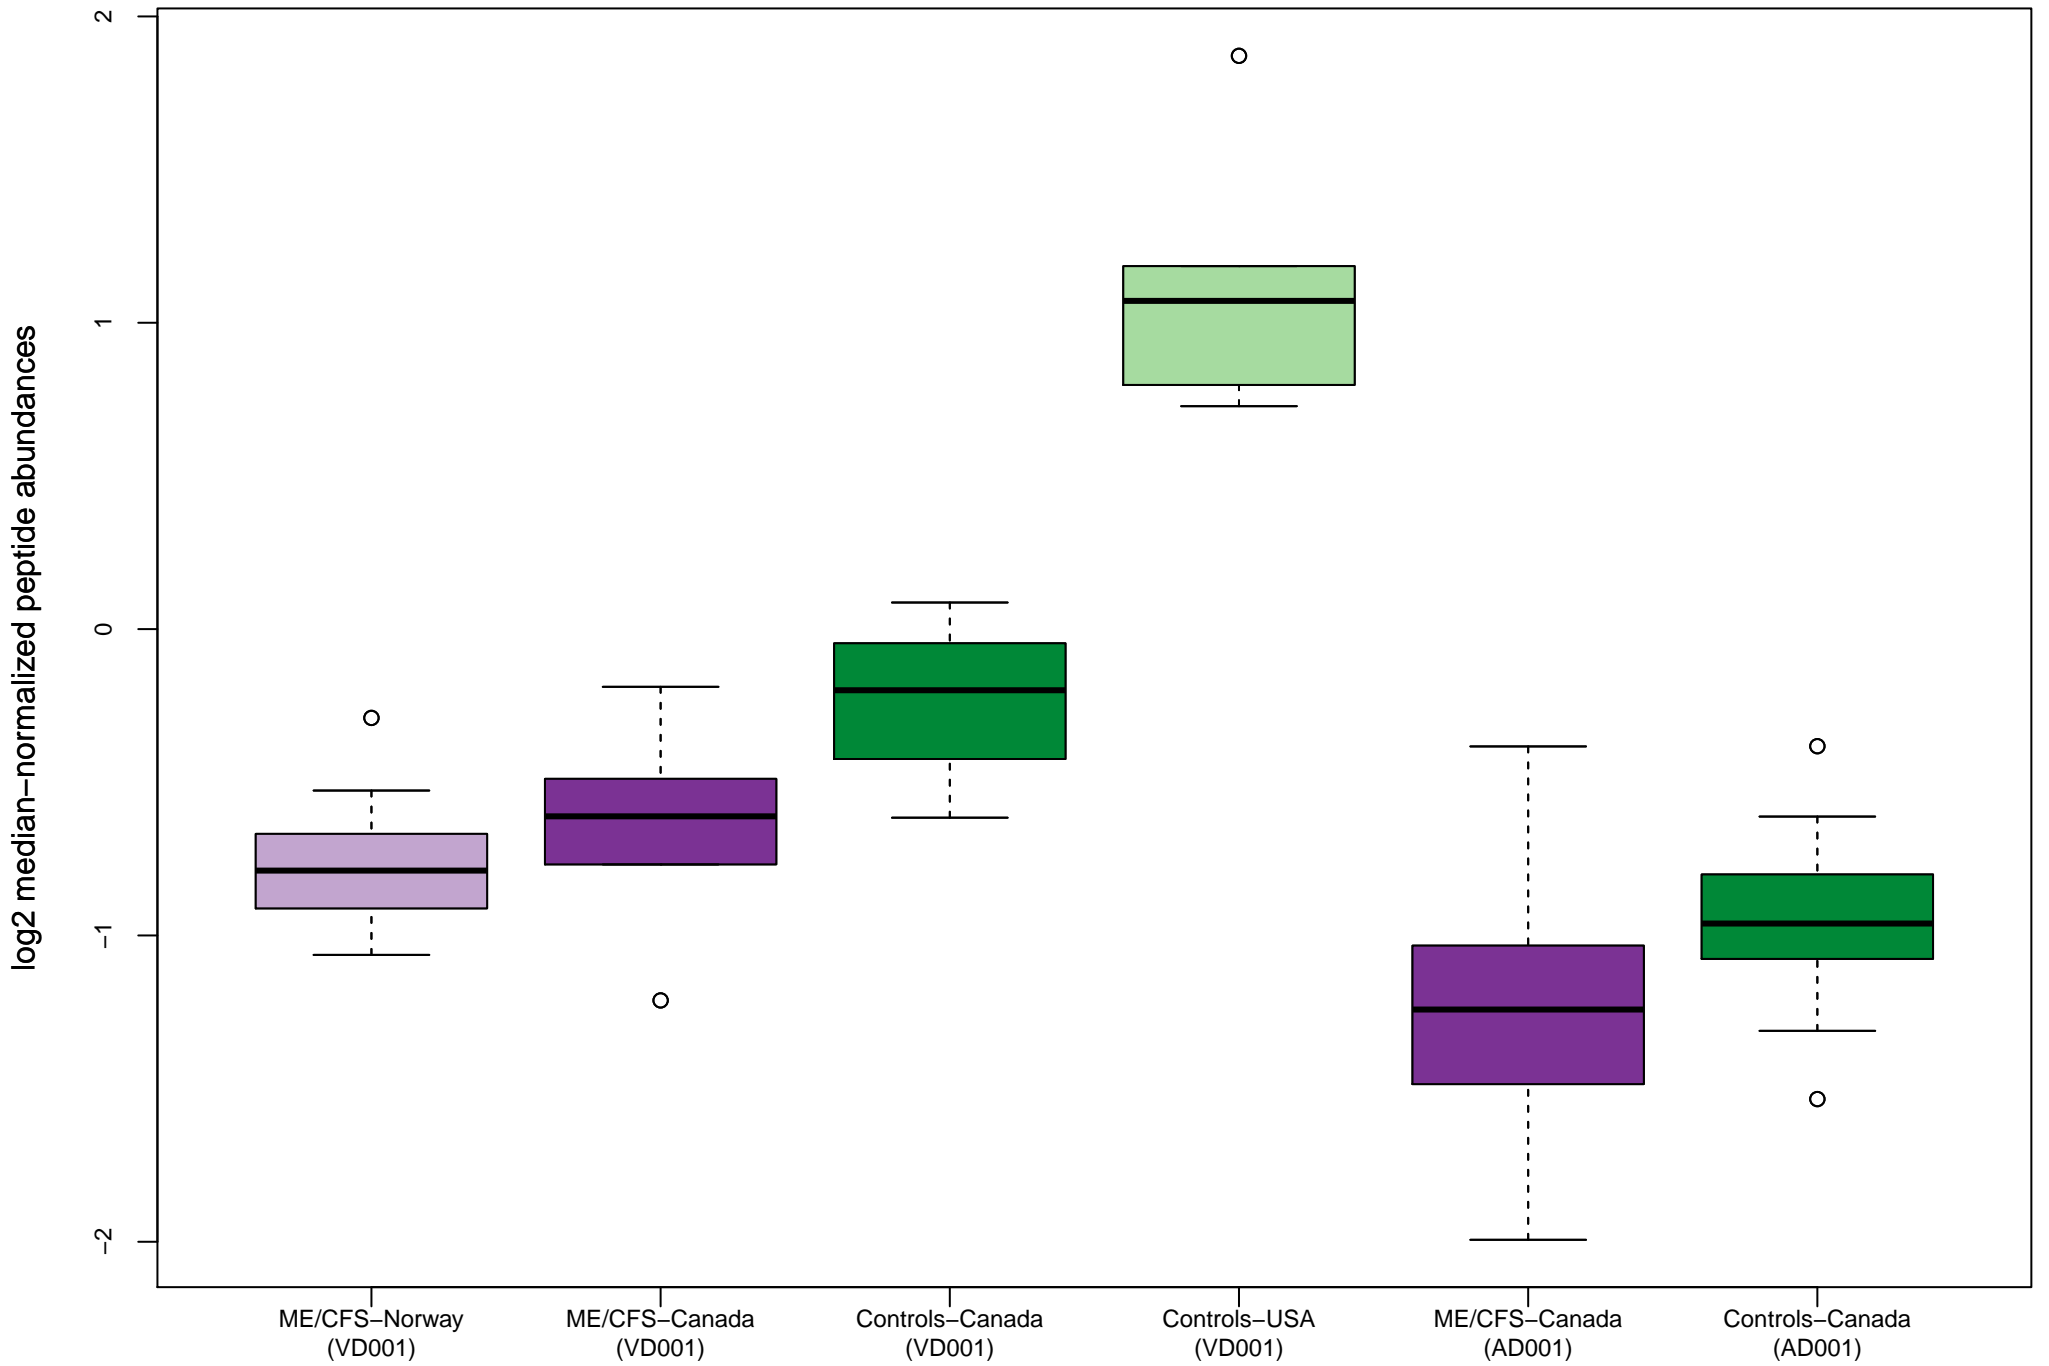

# RAYYKGPYVSLG

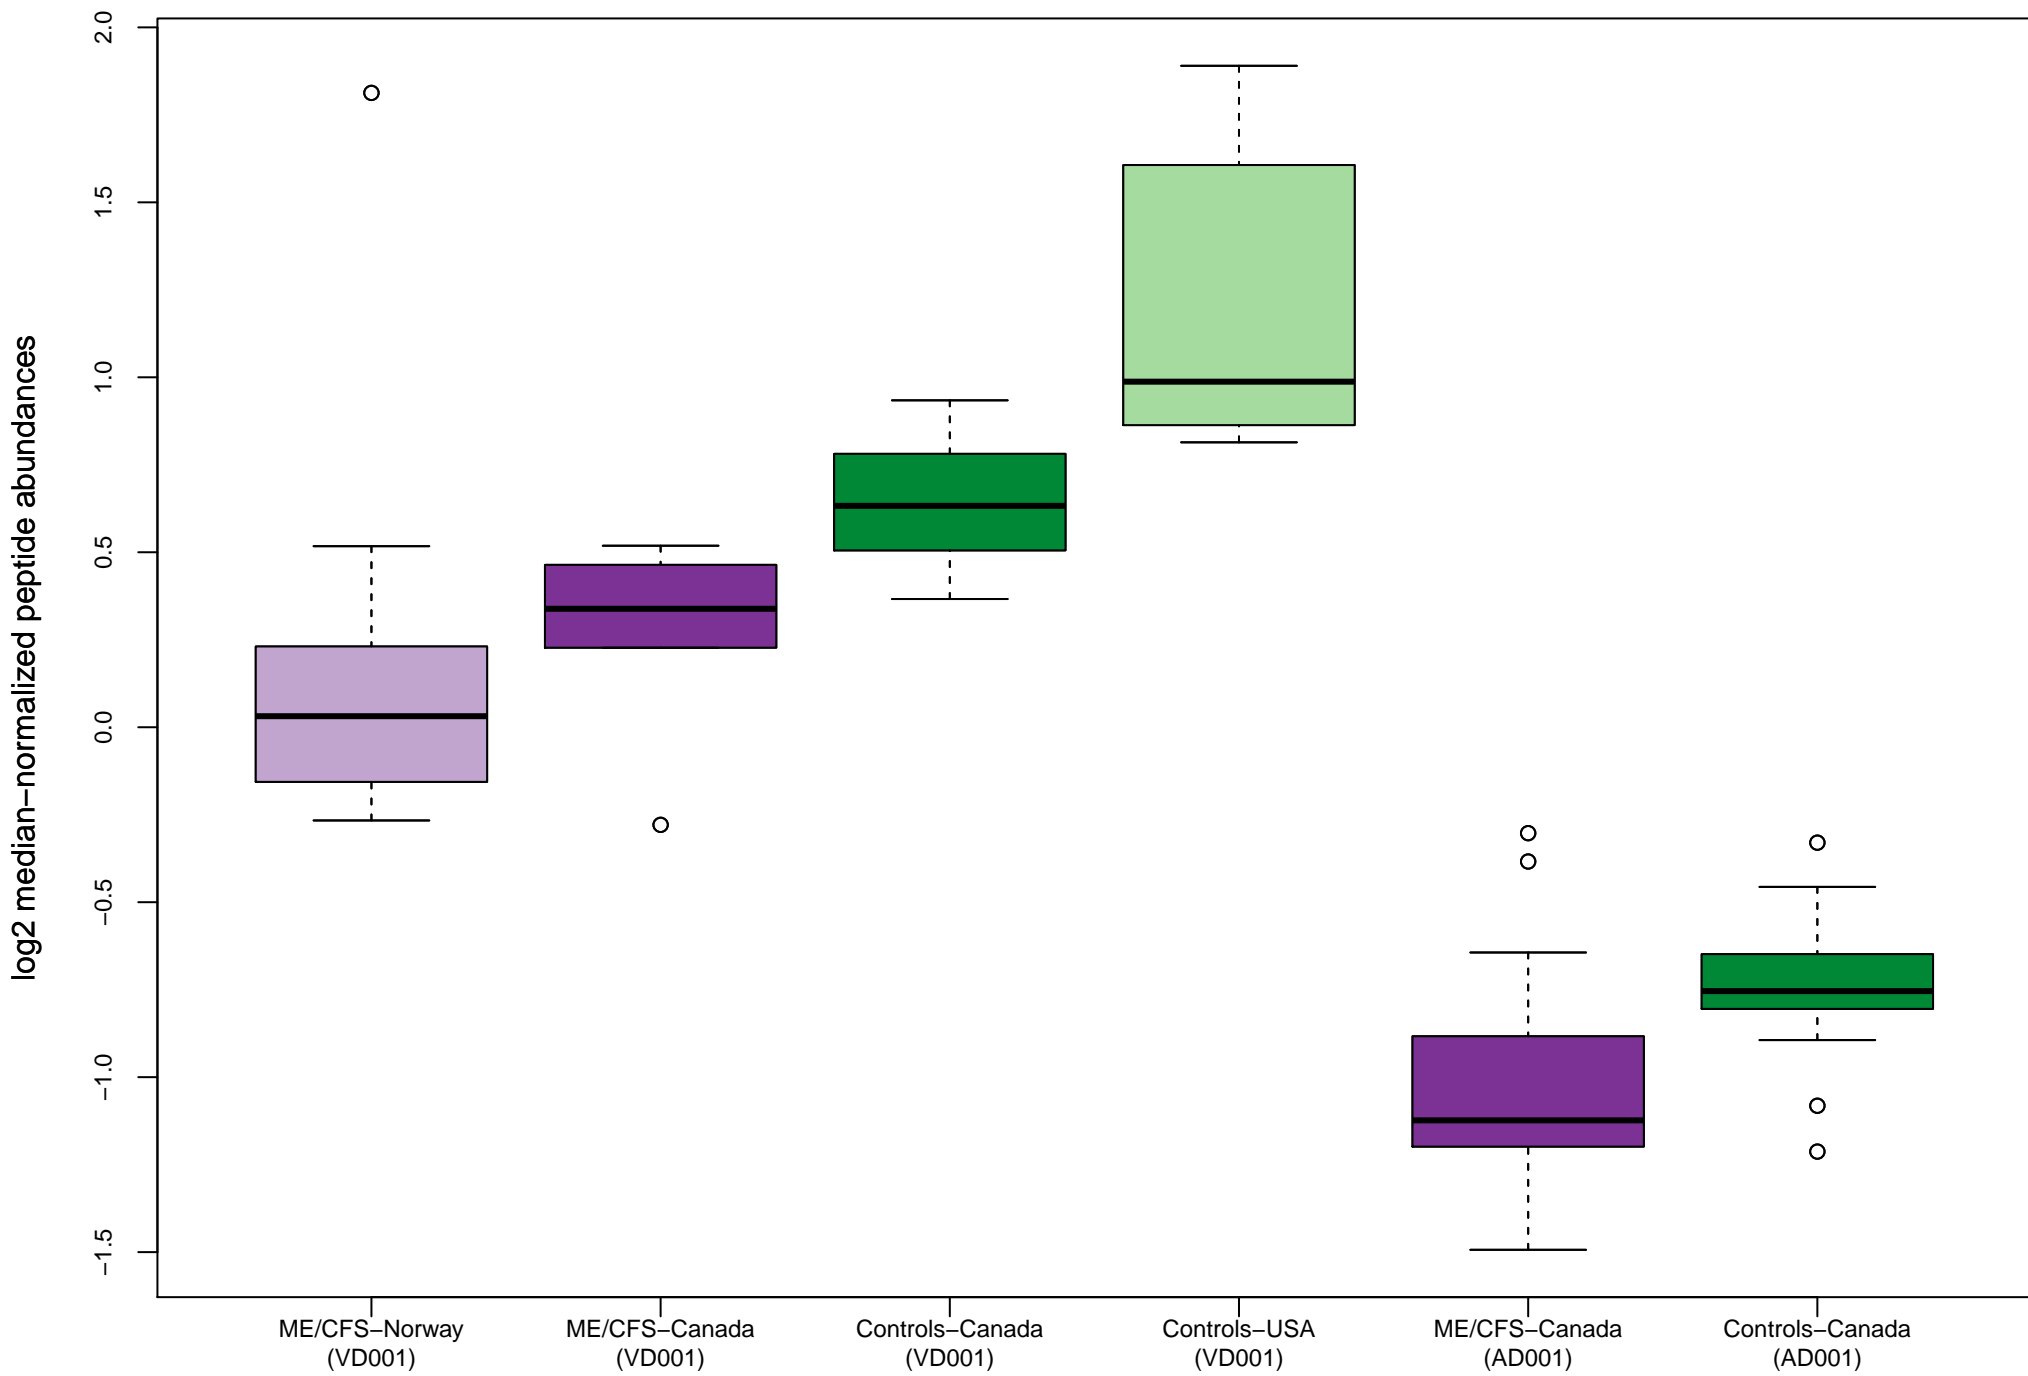

# RFFVWRSGVASG

log2 median-normalized peptide abundances

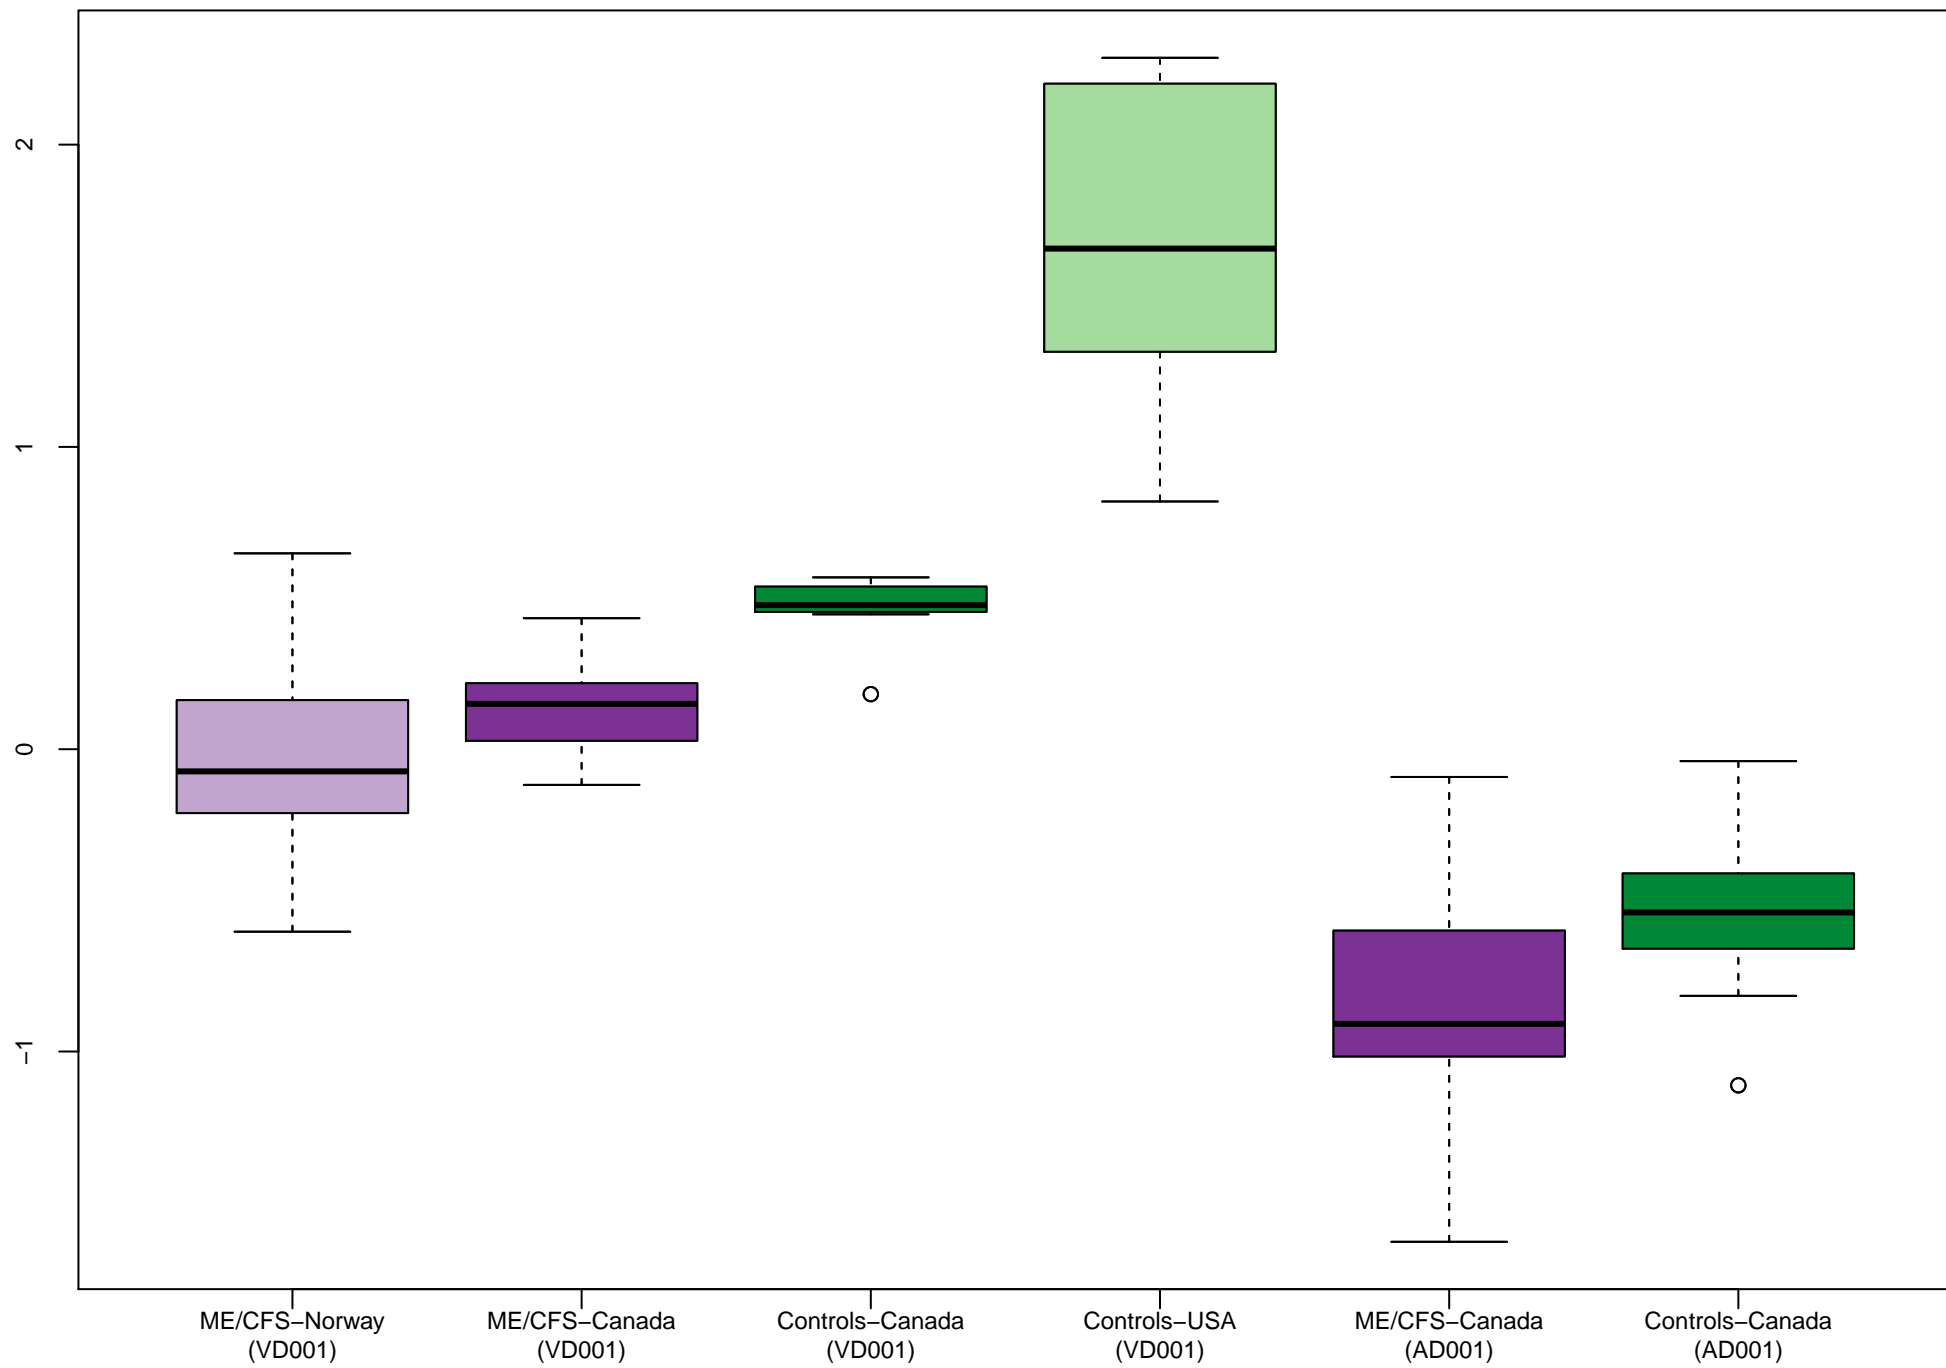

# RFGYQFLSGVAL

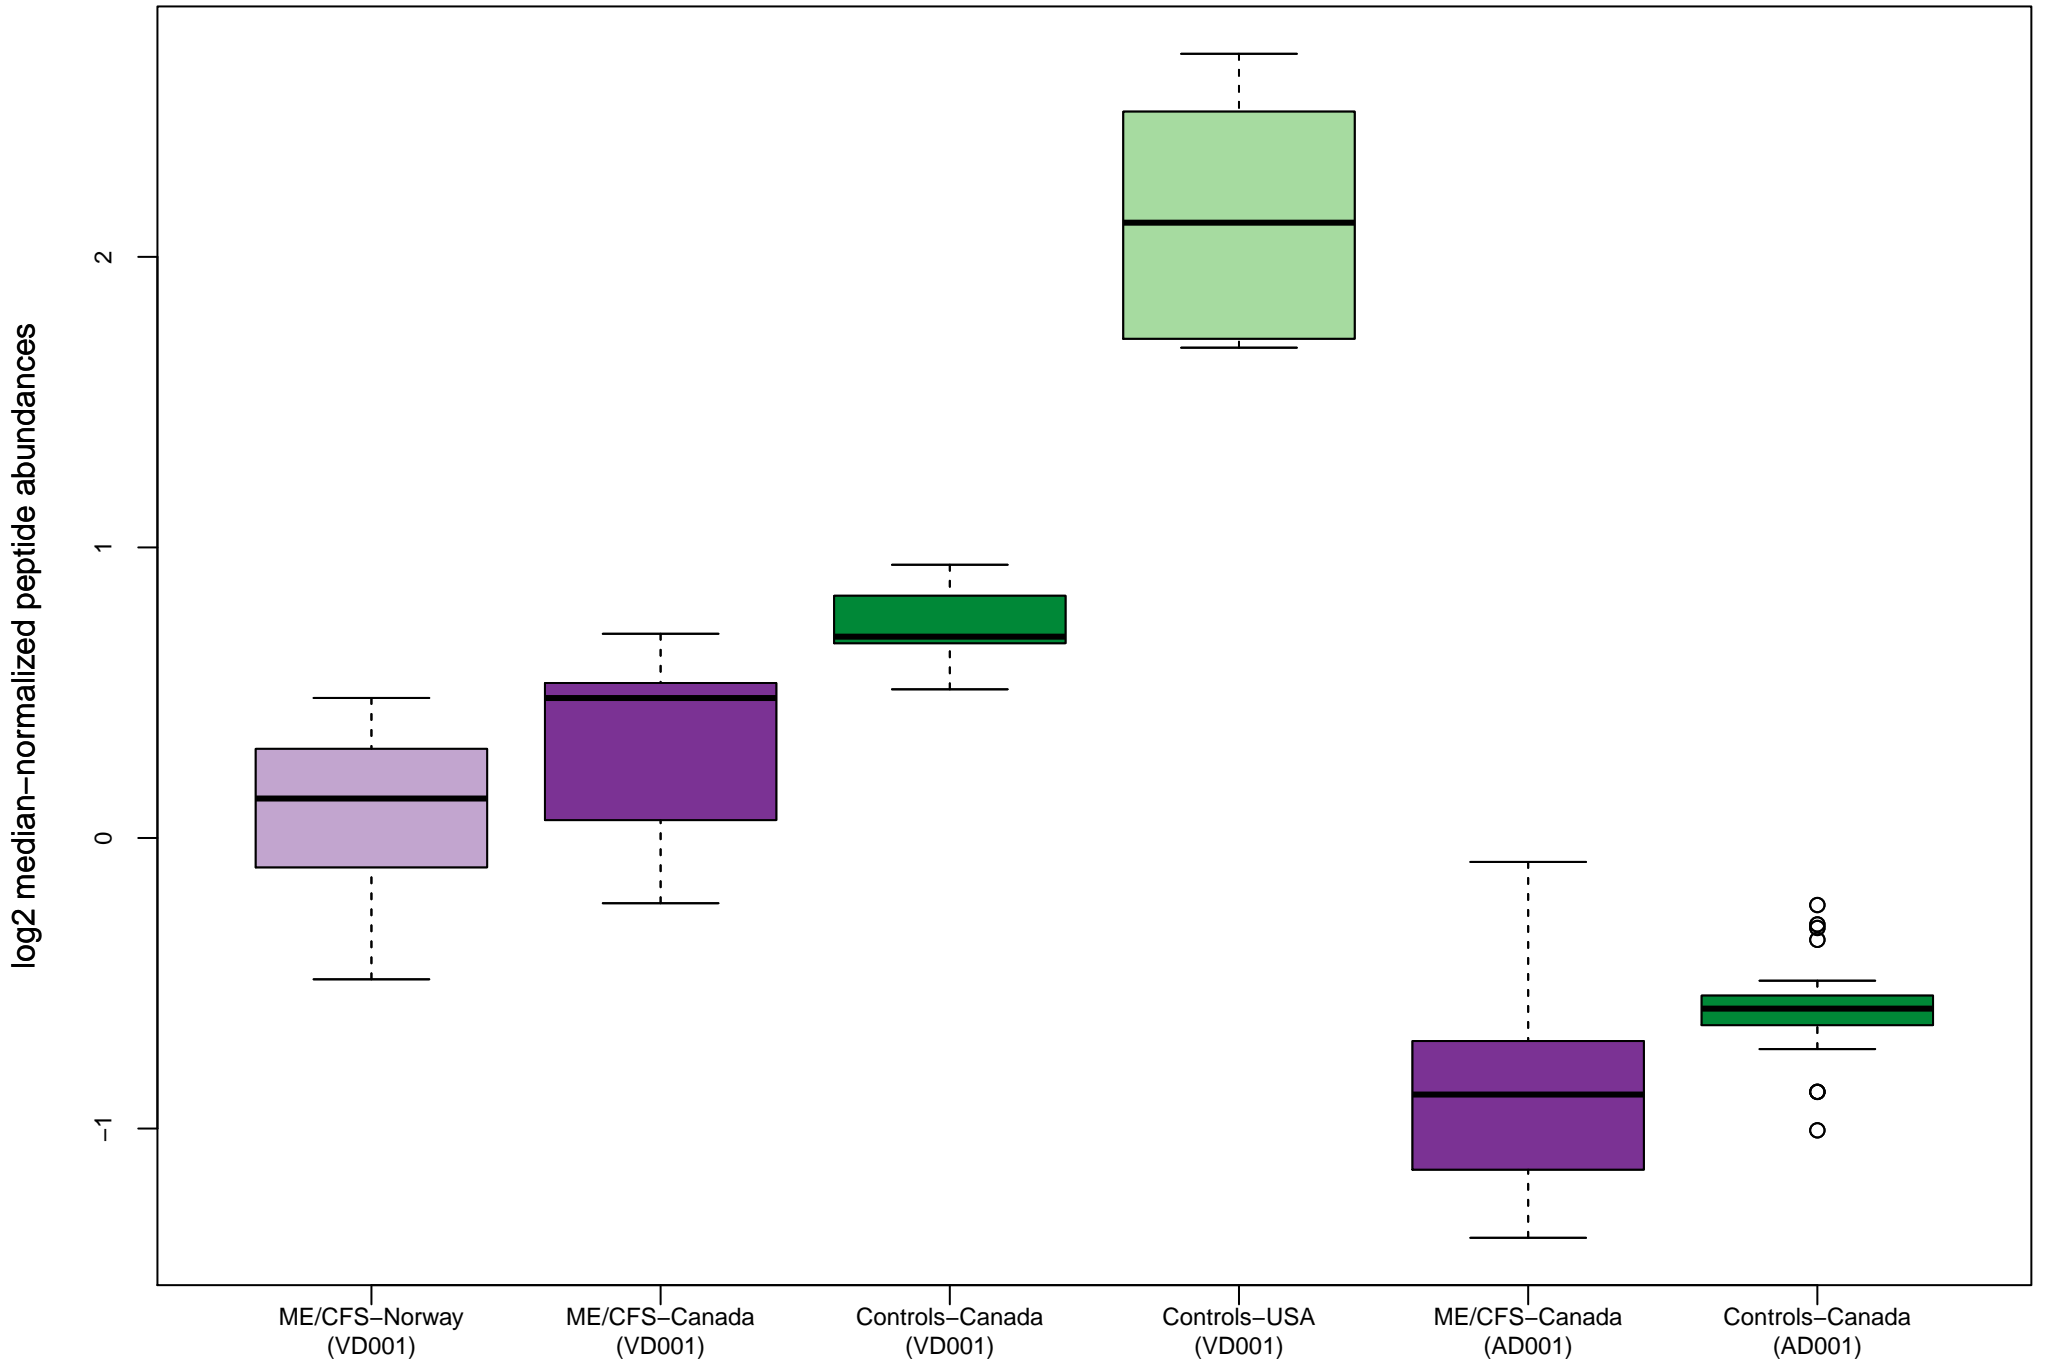

# RFLASRLSVALS

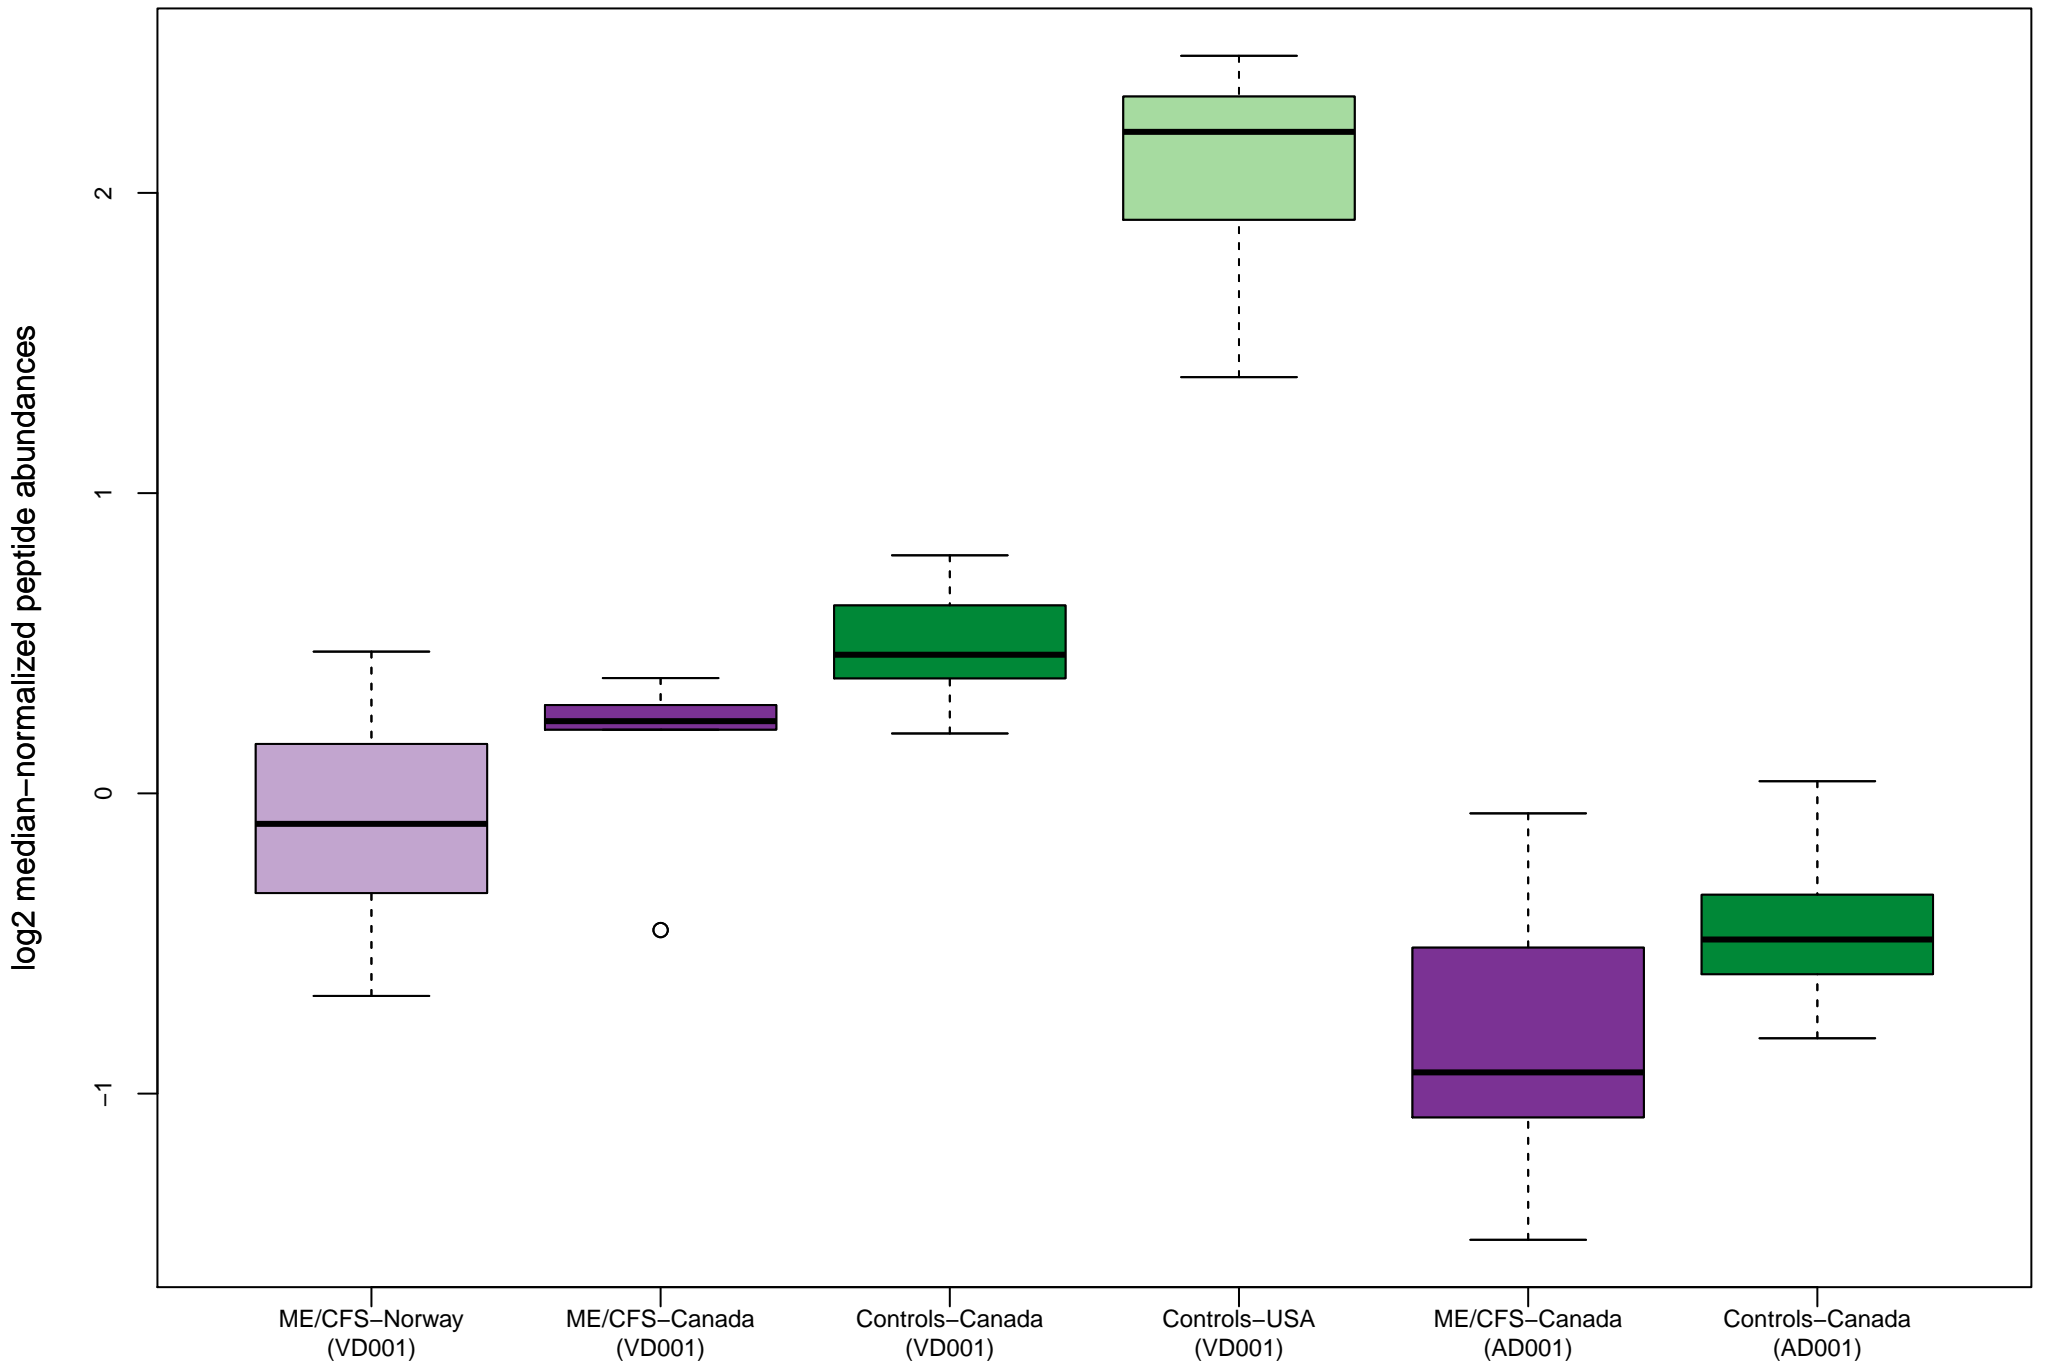

# RFPNKLHWLLS

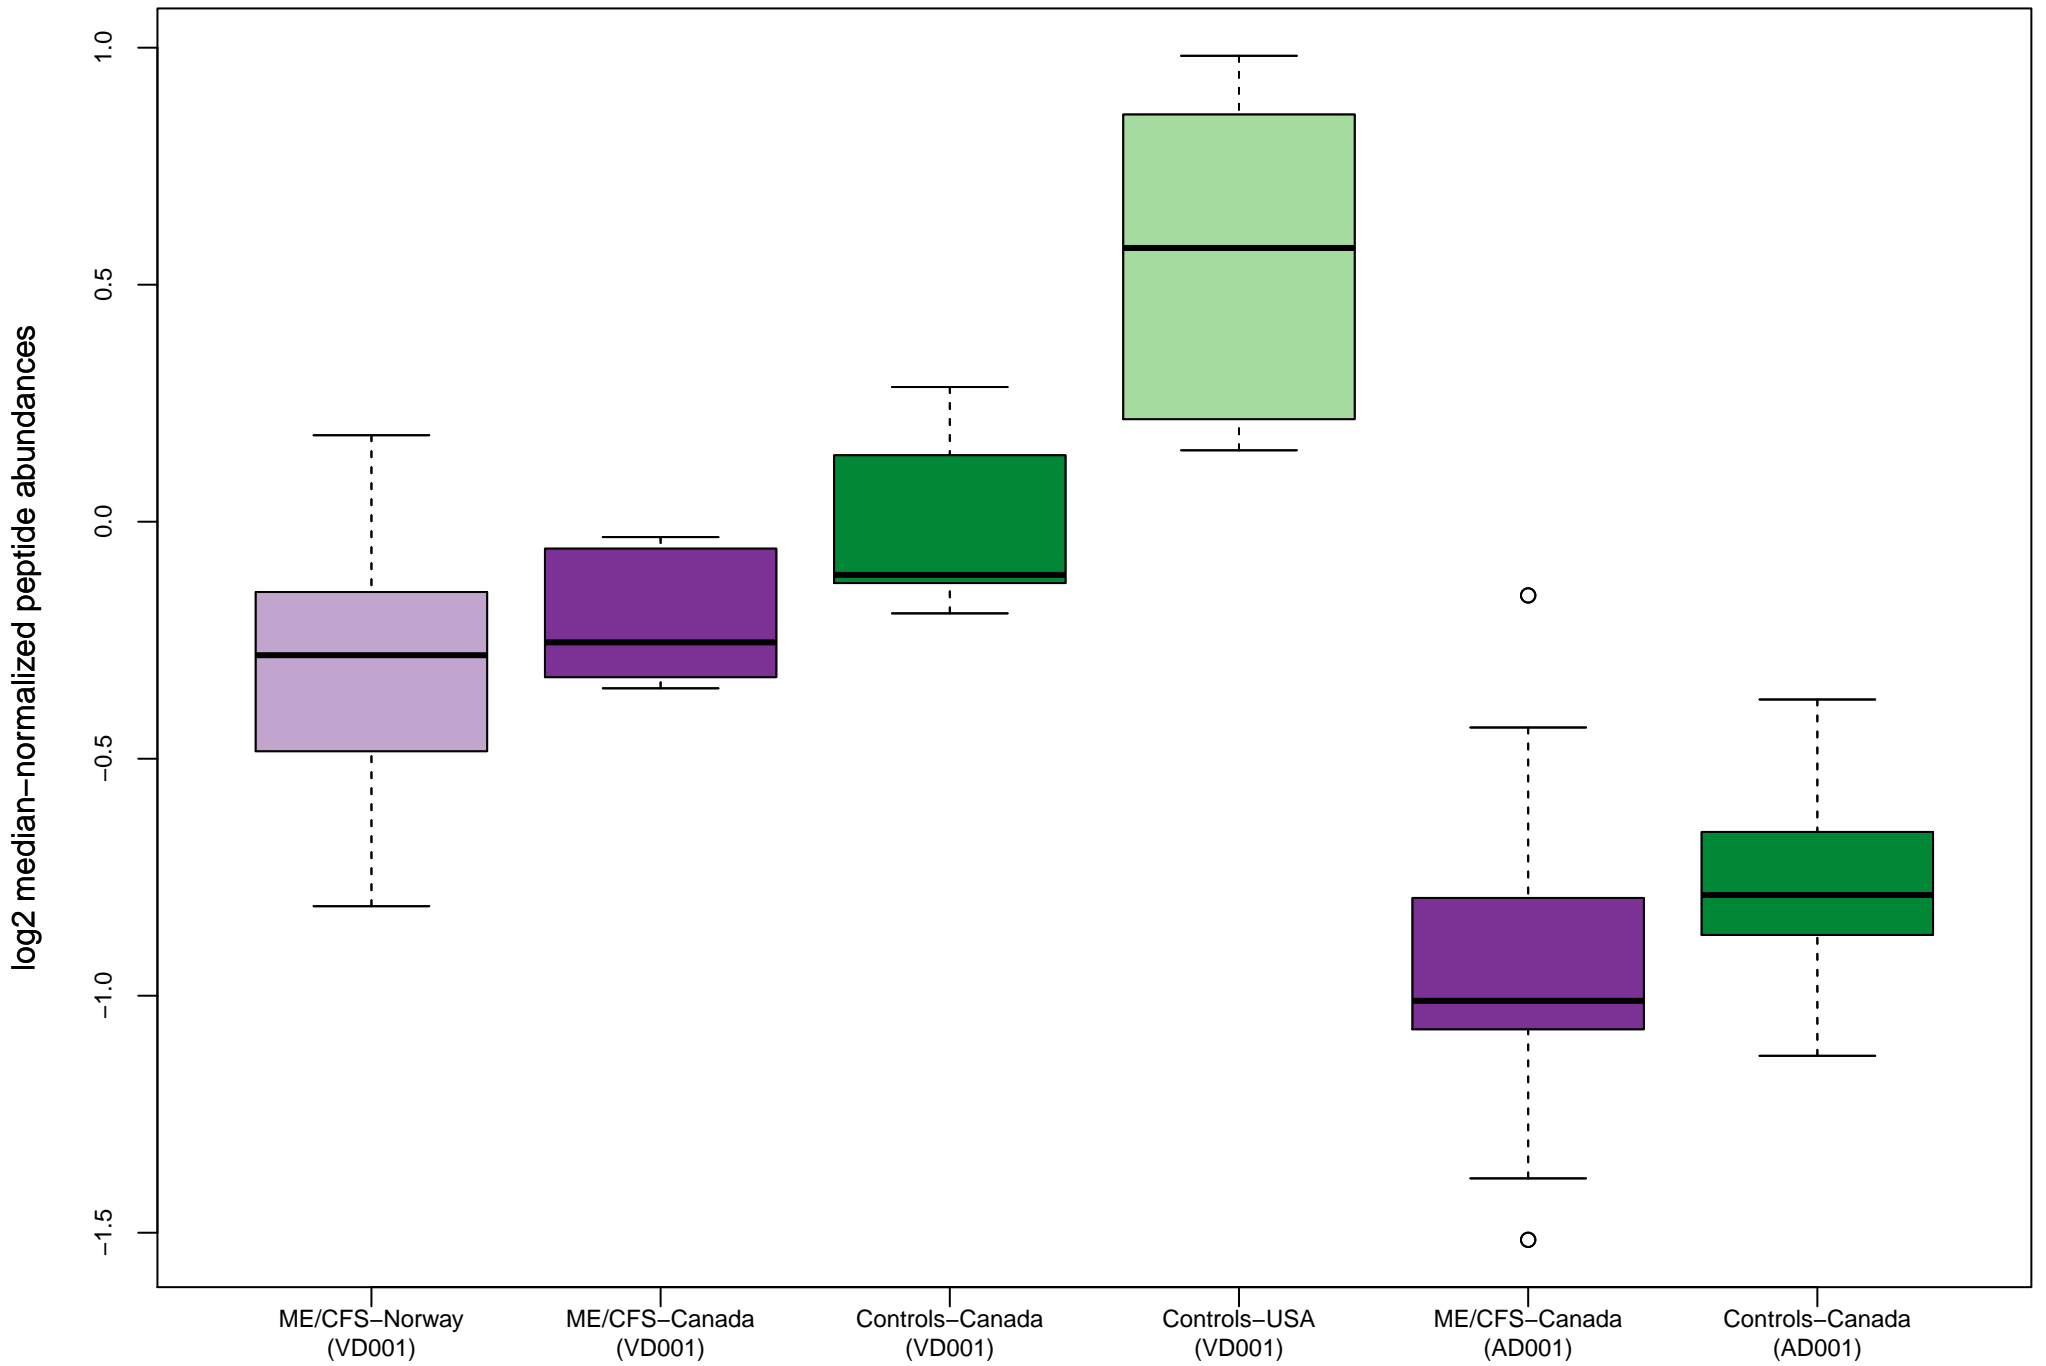



# RFPVAVYHGLSG

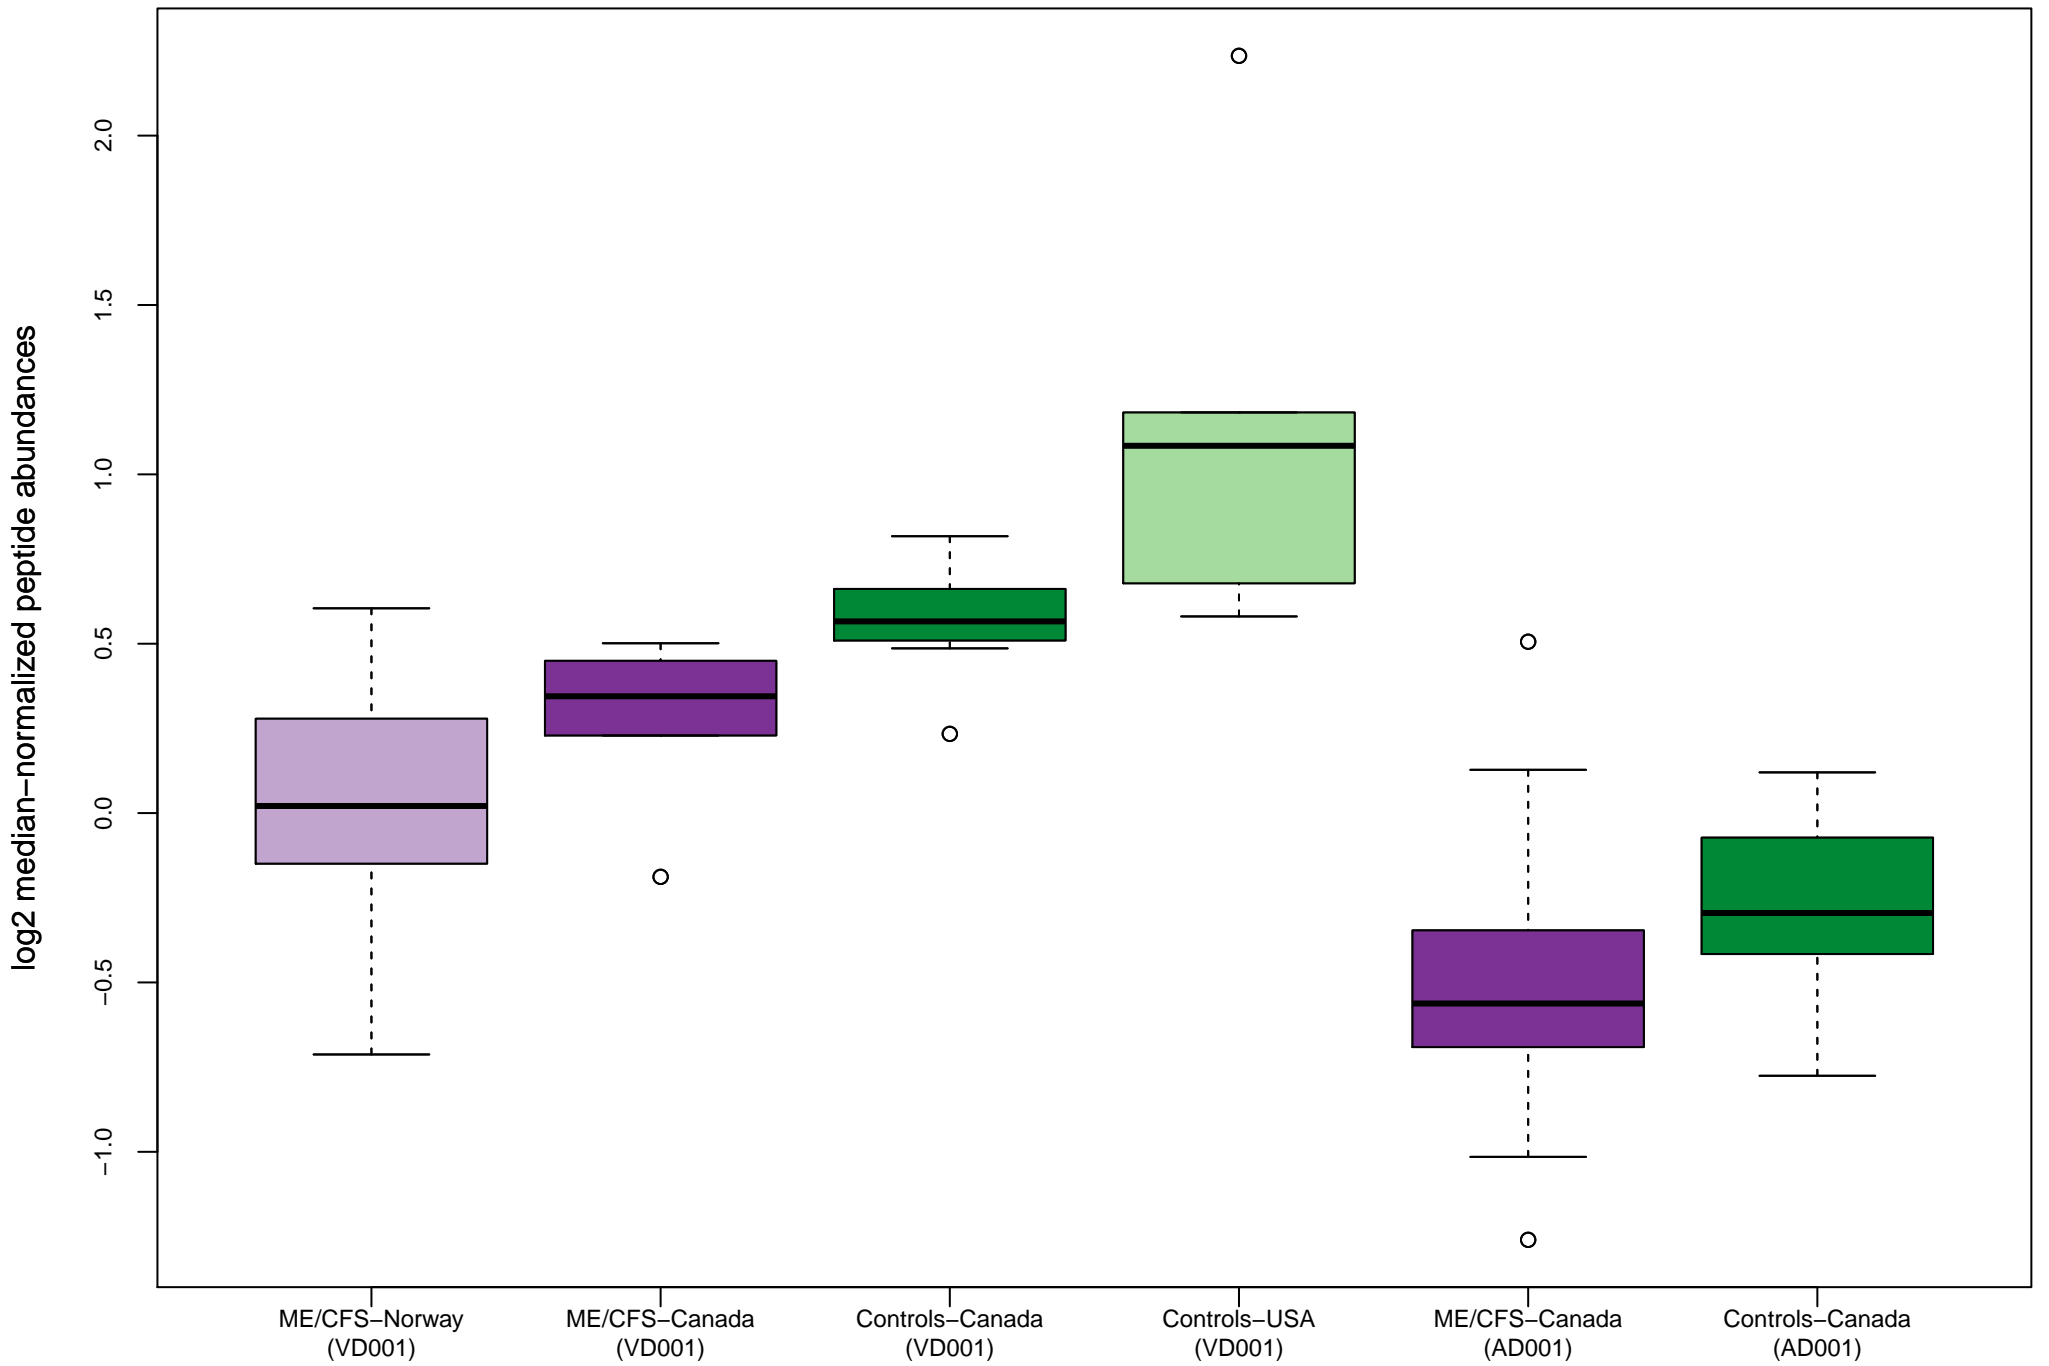

RFRWLFYVGKHL

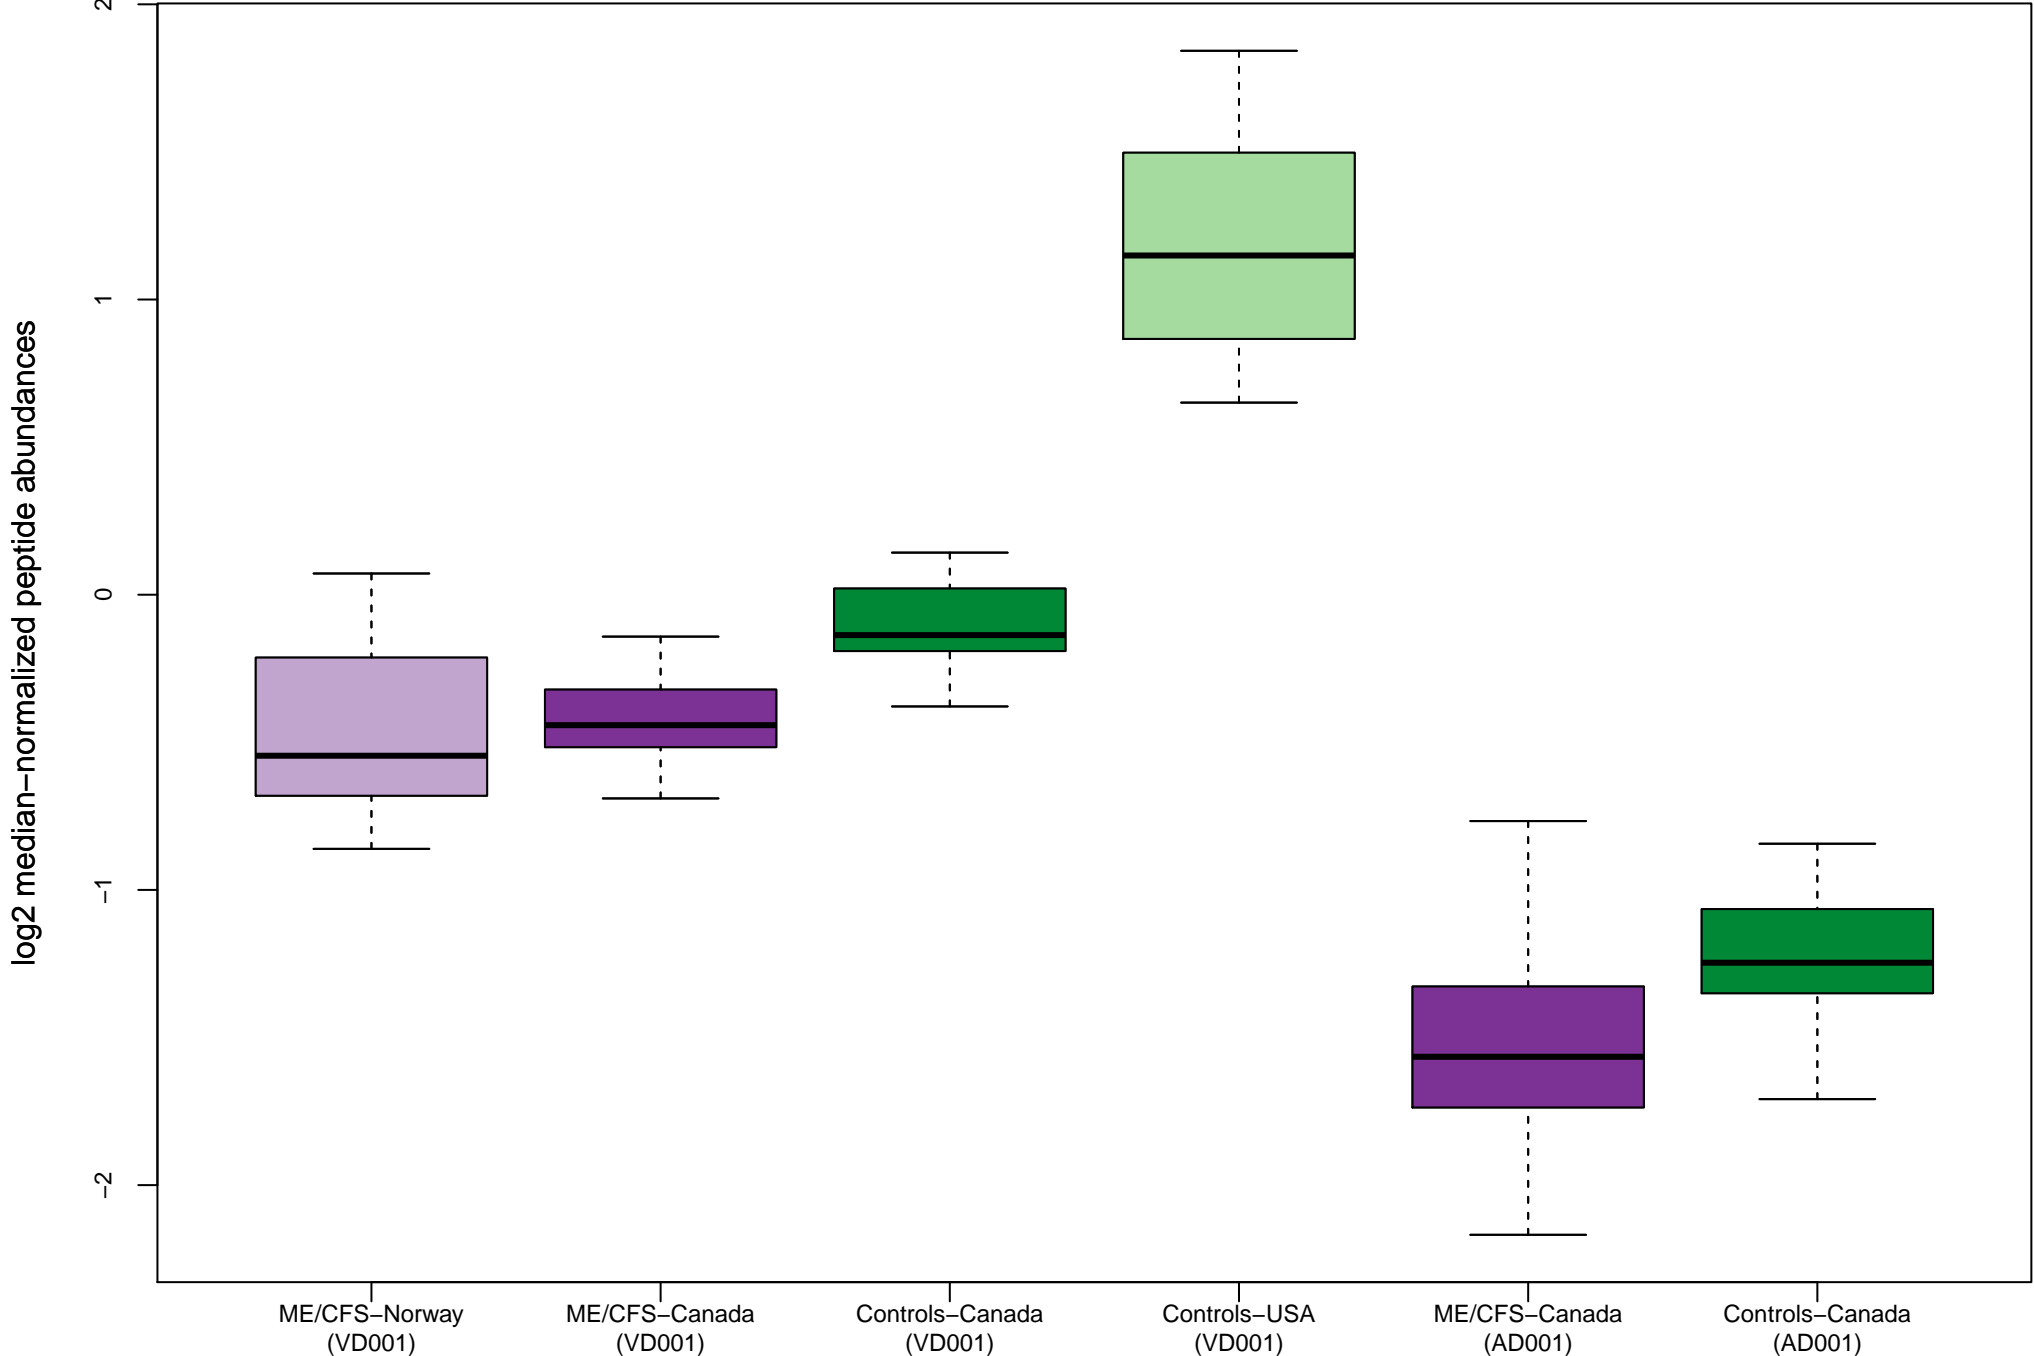

# RFSALWALSALG

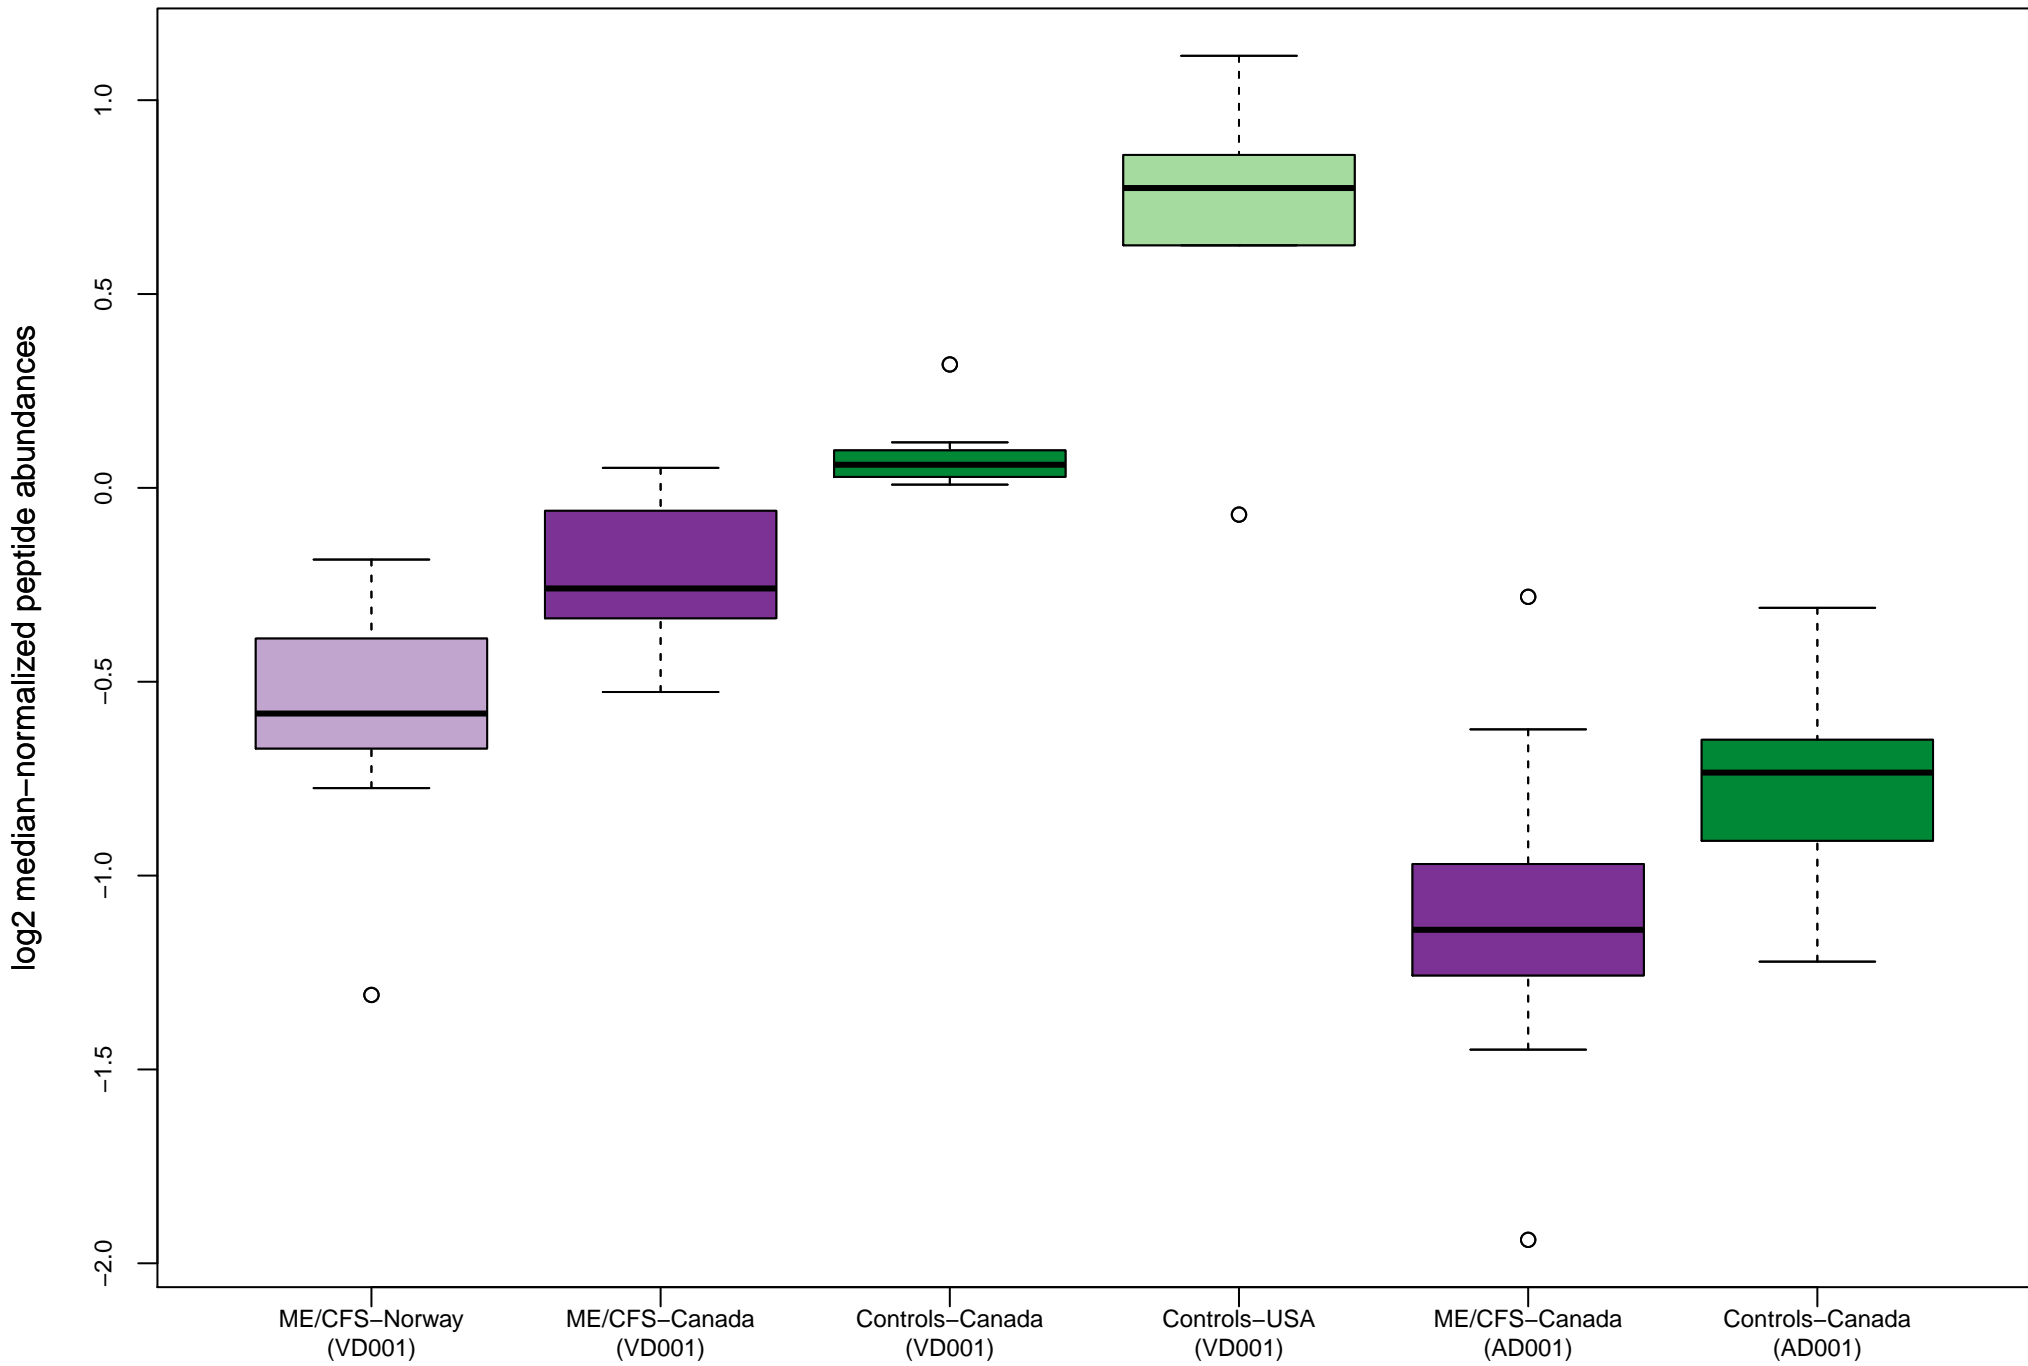

# RFVALYRPLGAL

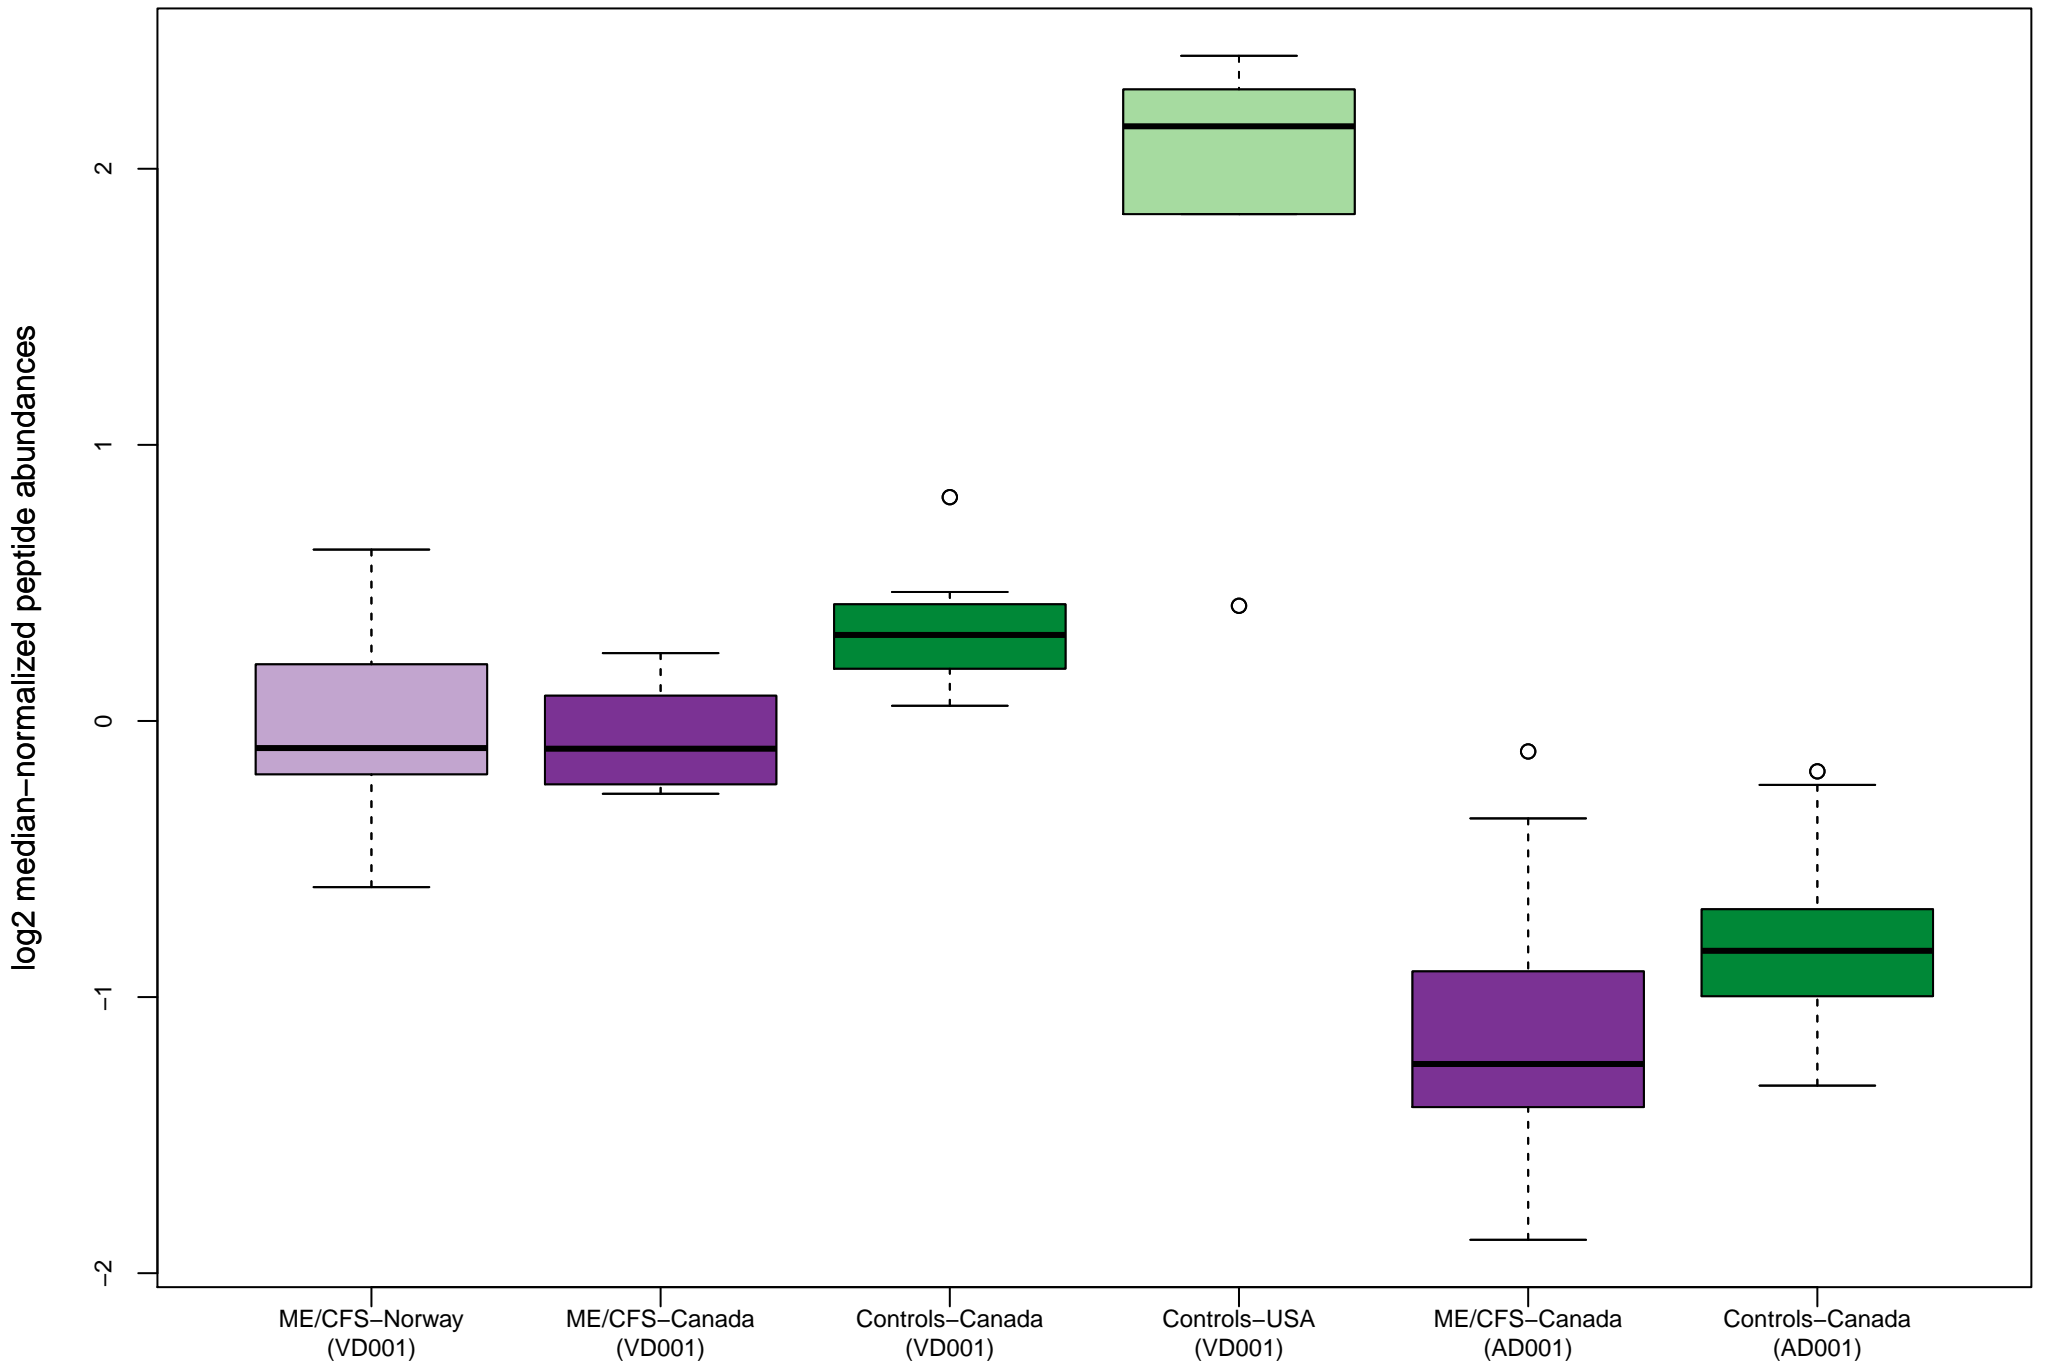

# RFWRHVFRHLVL

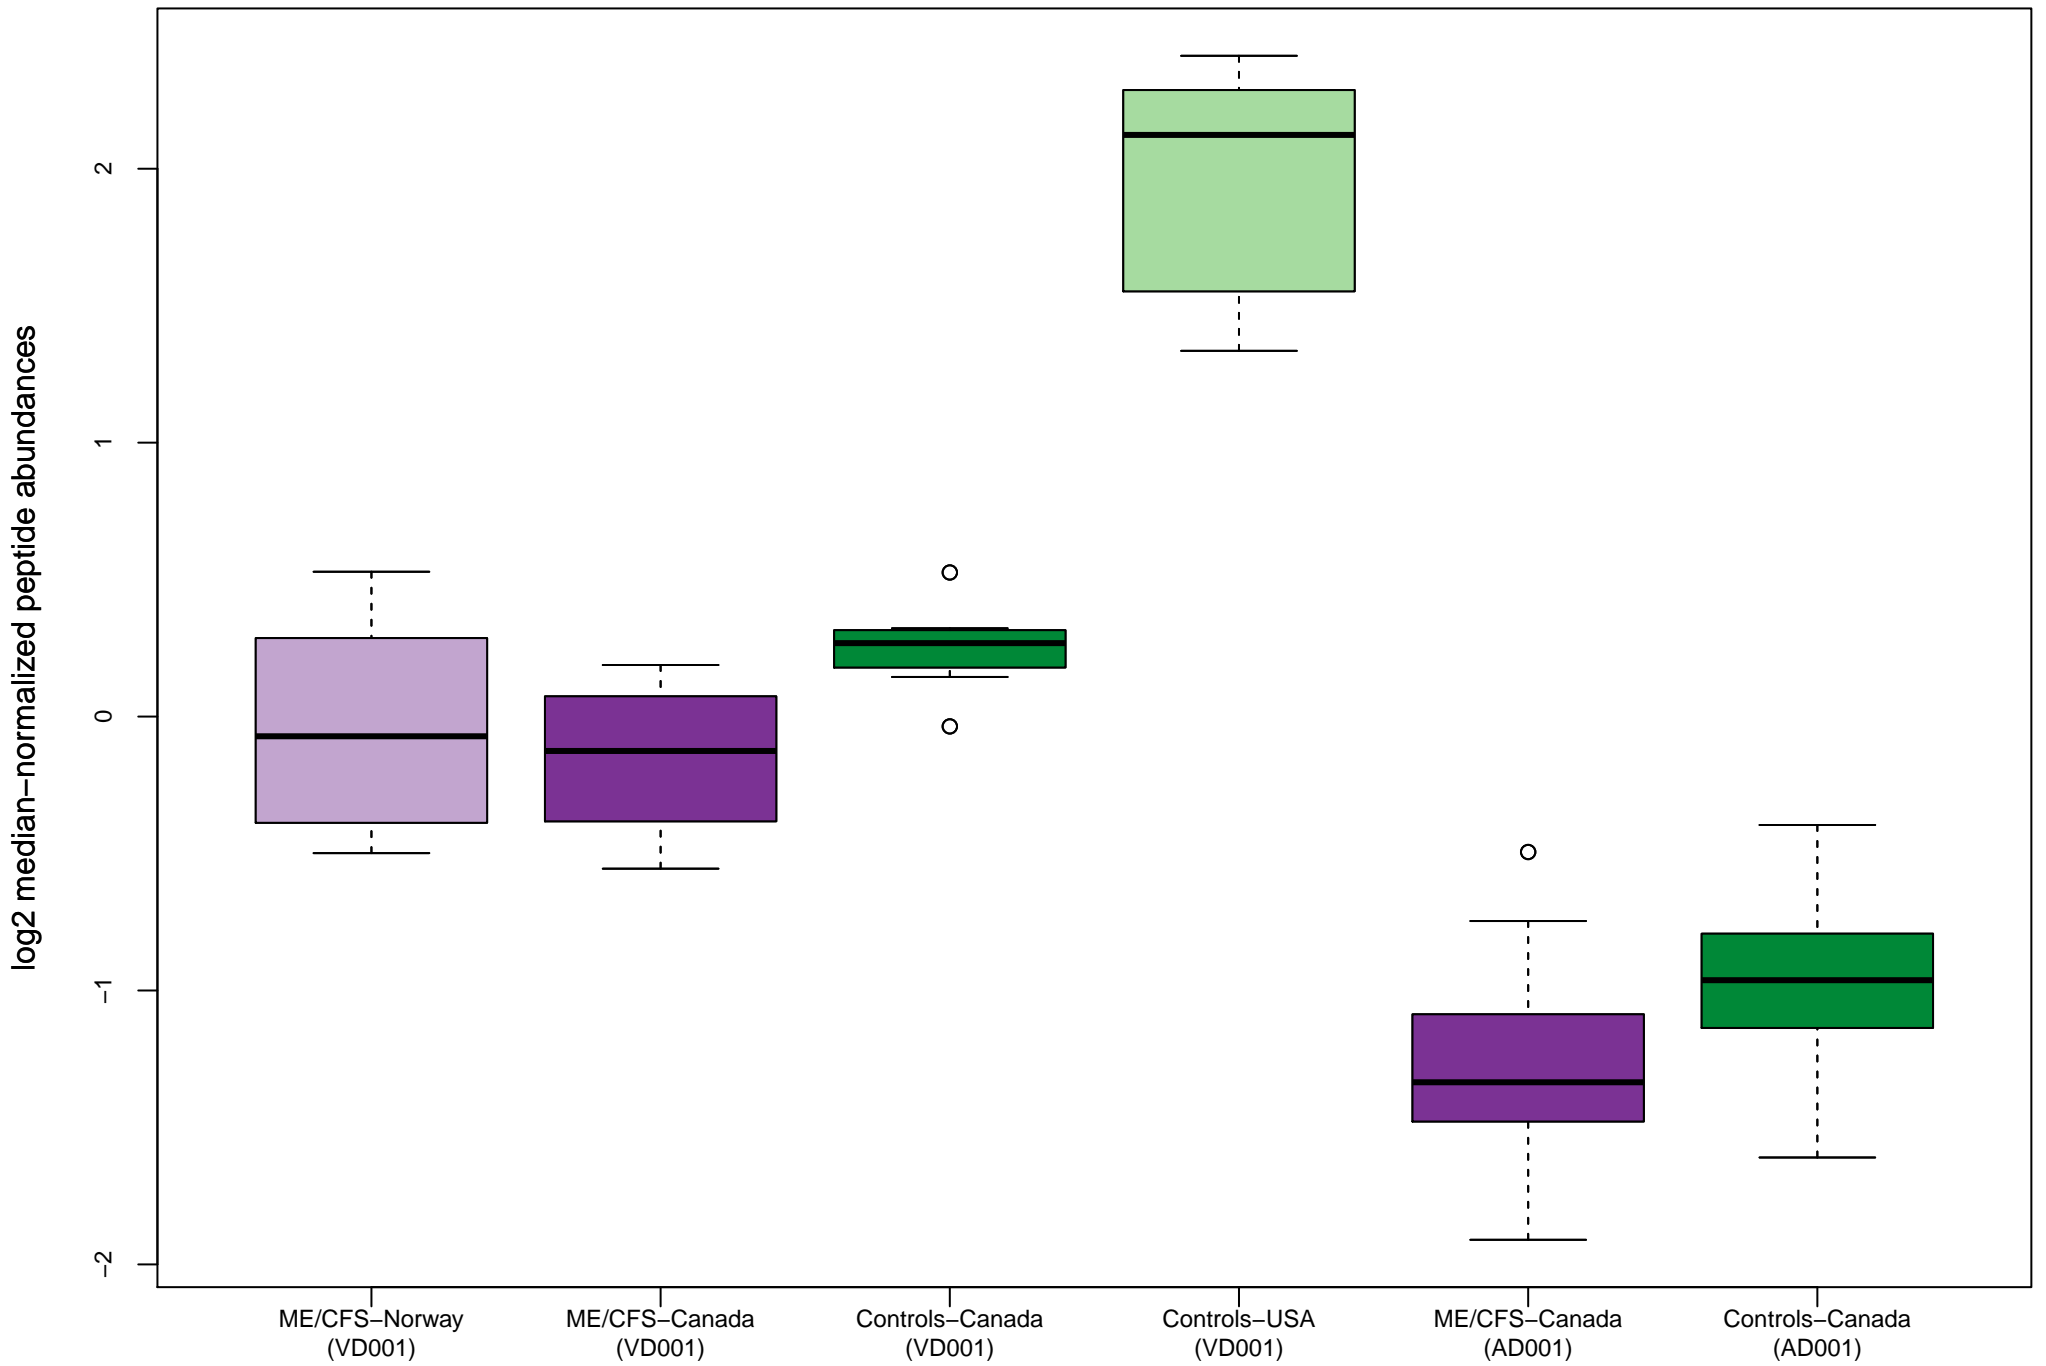

# RGQFSFPFWNL

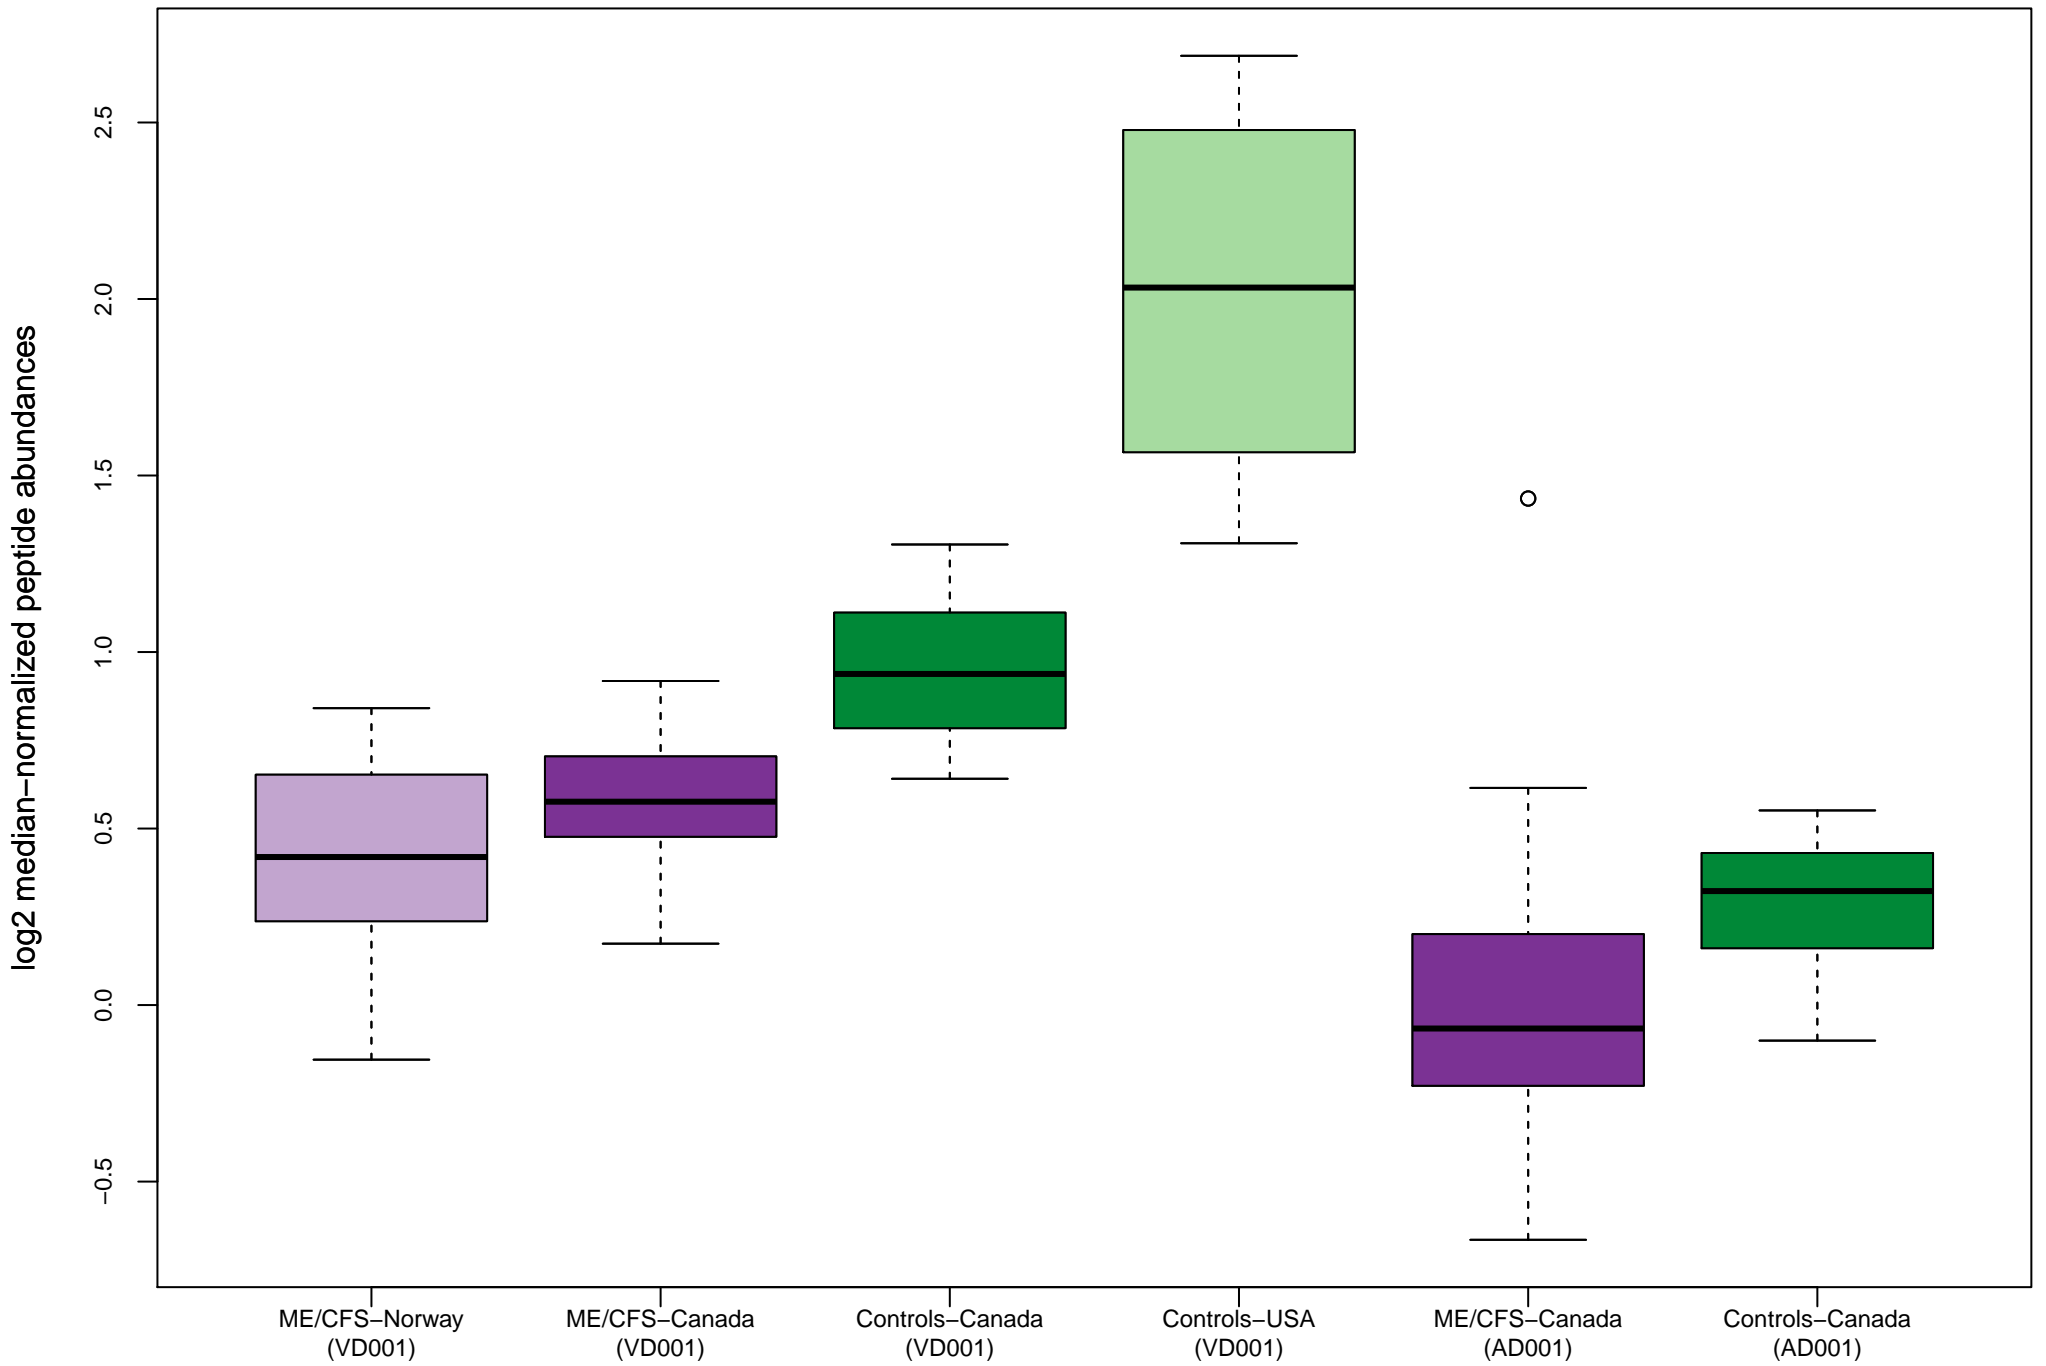

# RGRQYFEHVVAL

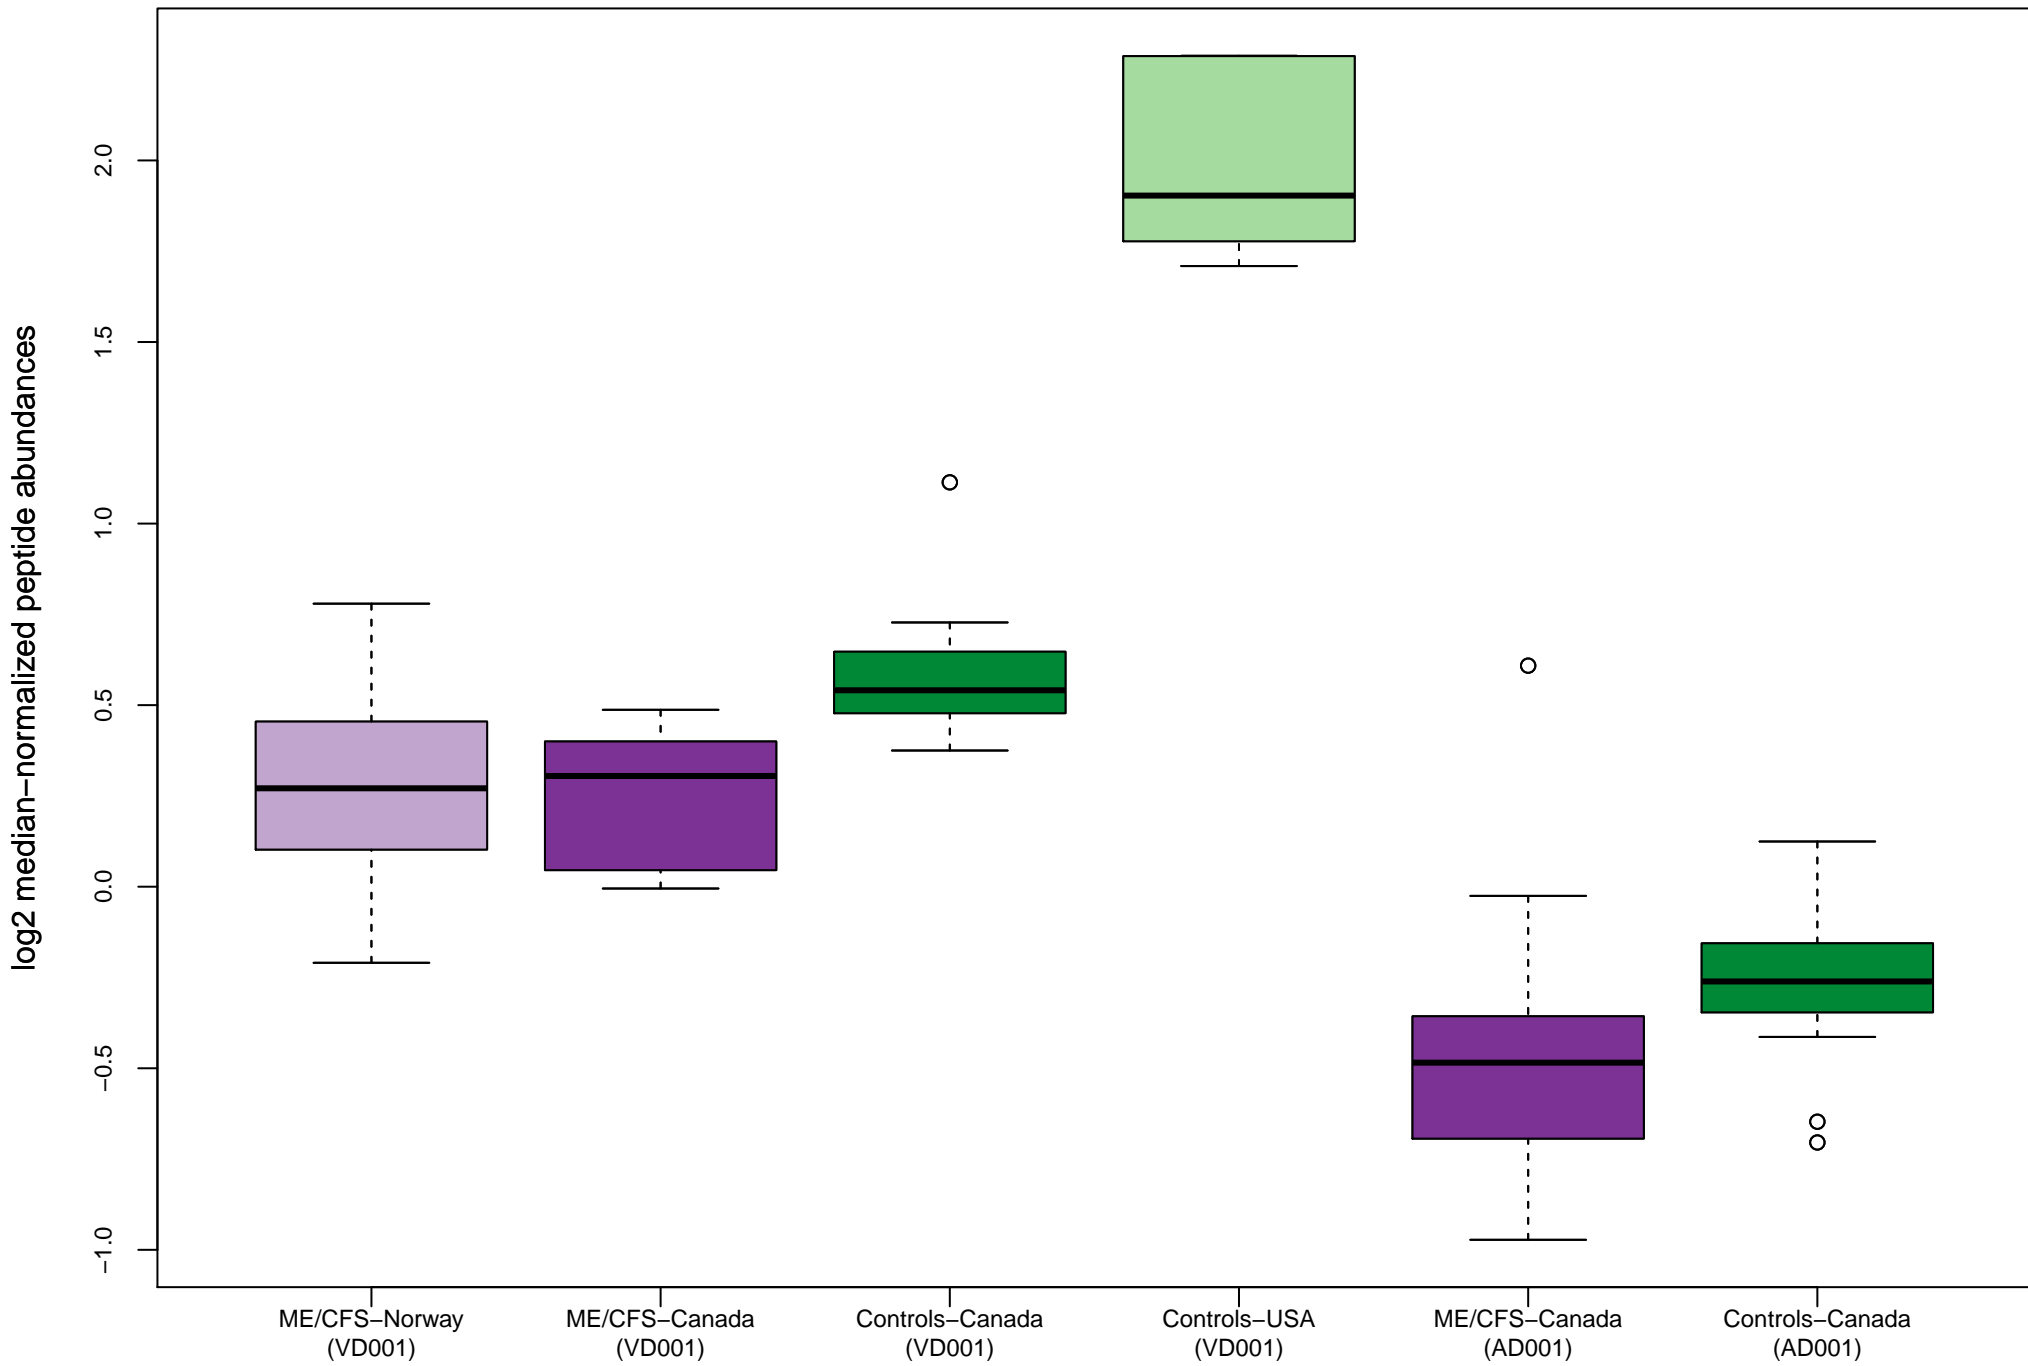

# RLALGRLYALVA

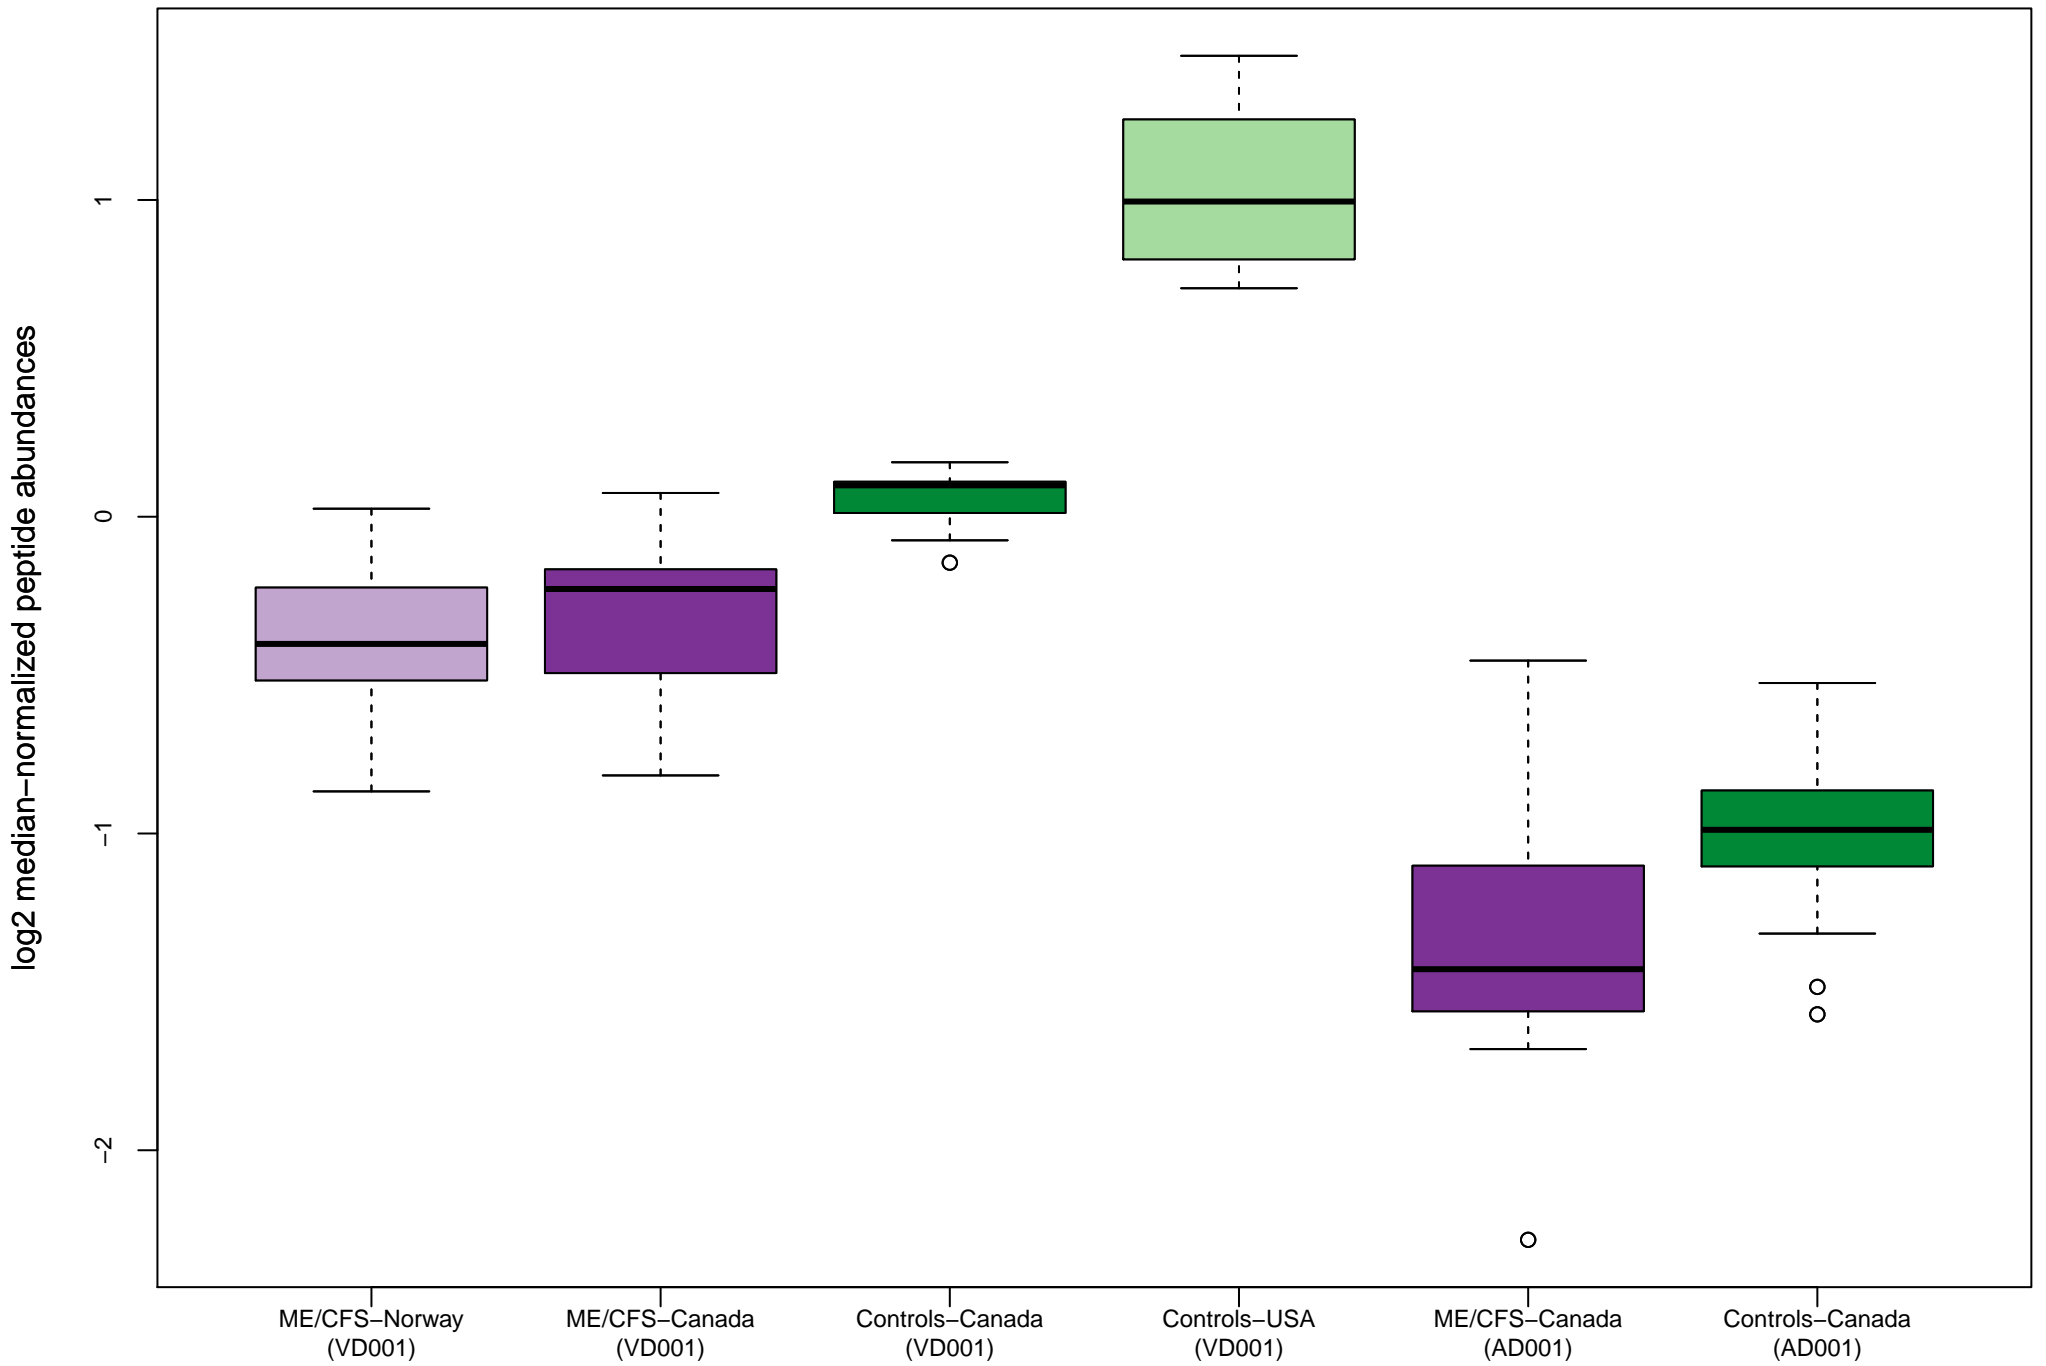



# RLEFPLRPYWLV

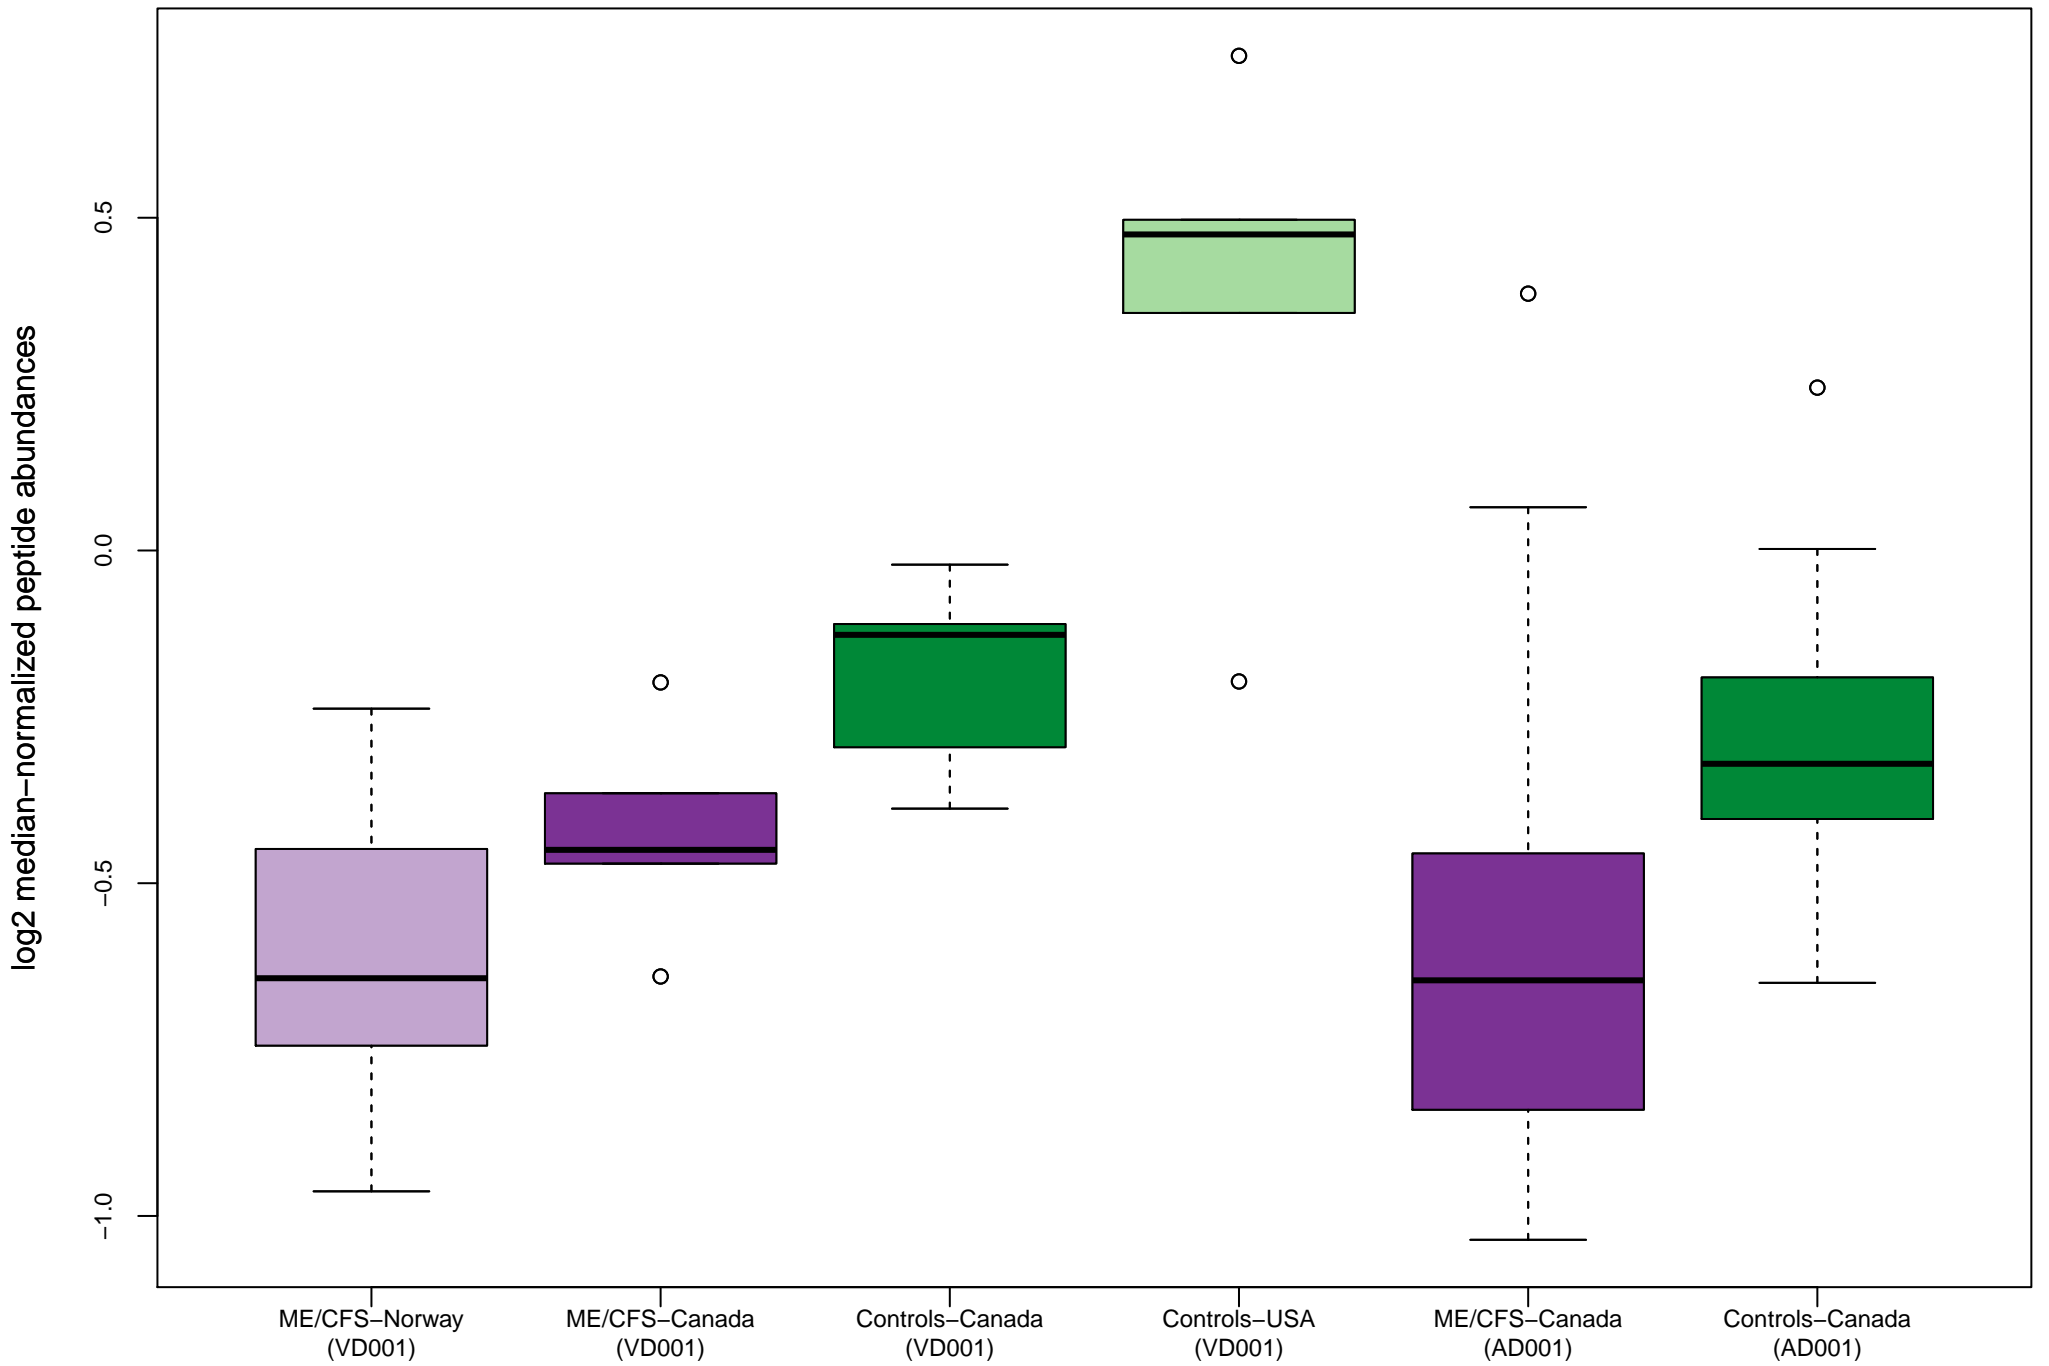

# RLFSGAFVASGA

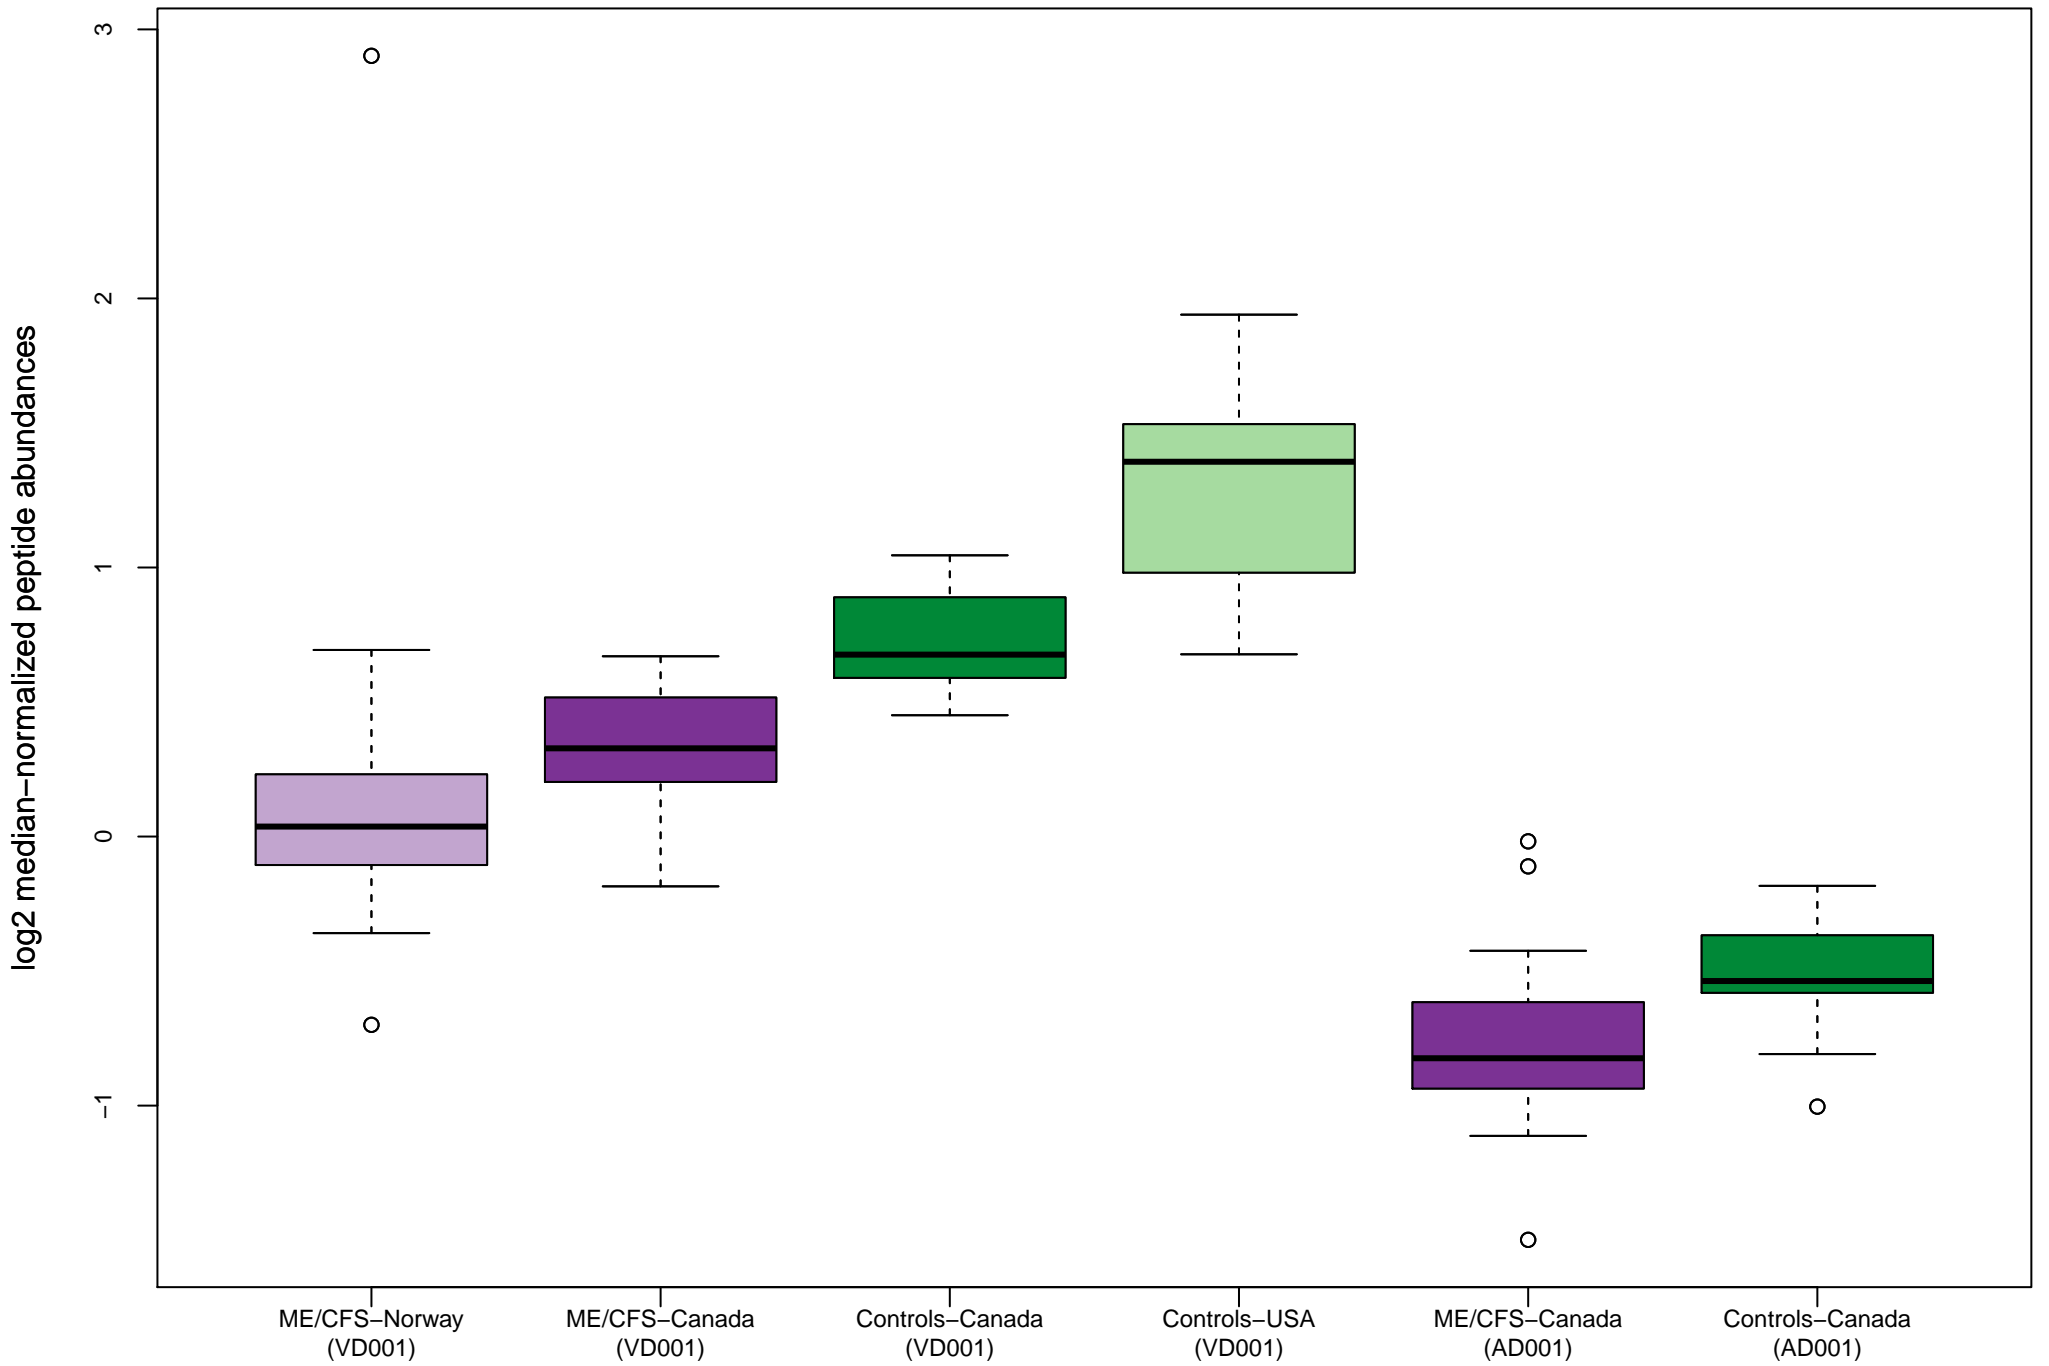

# RLGYYNKLVLSG

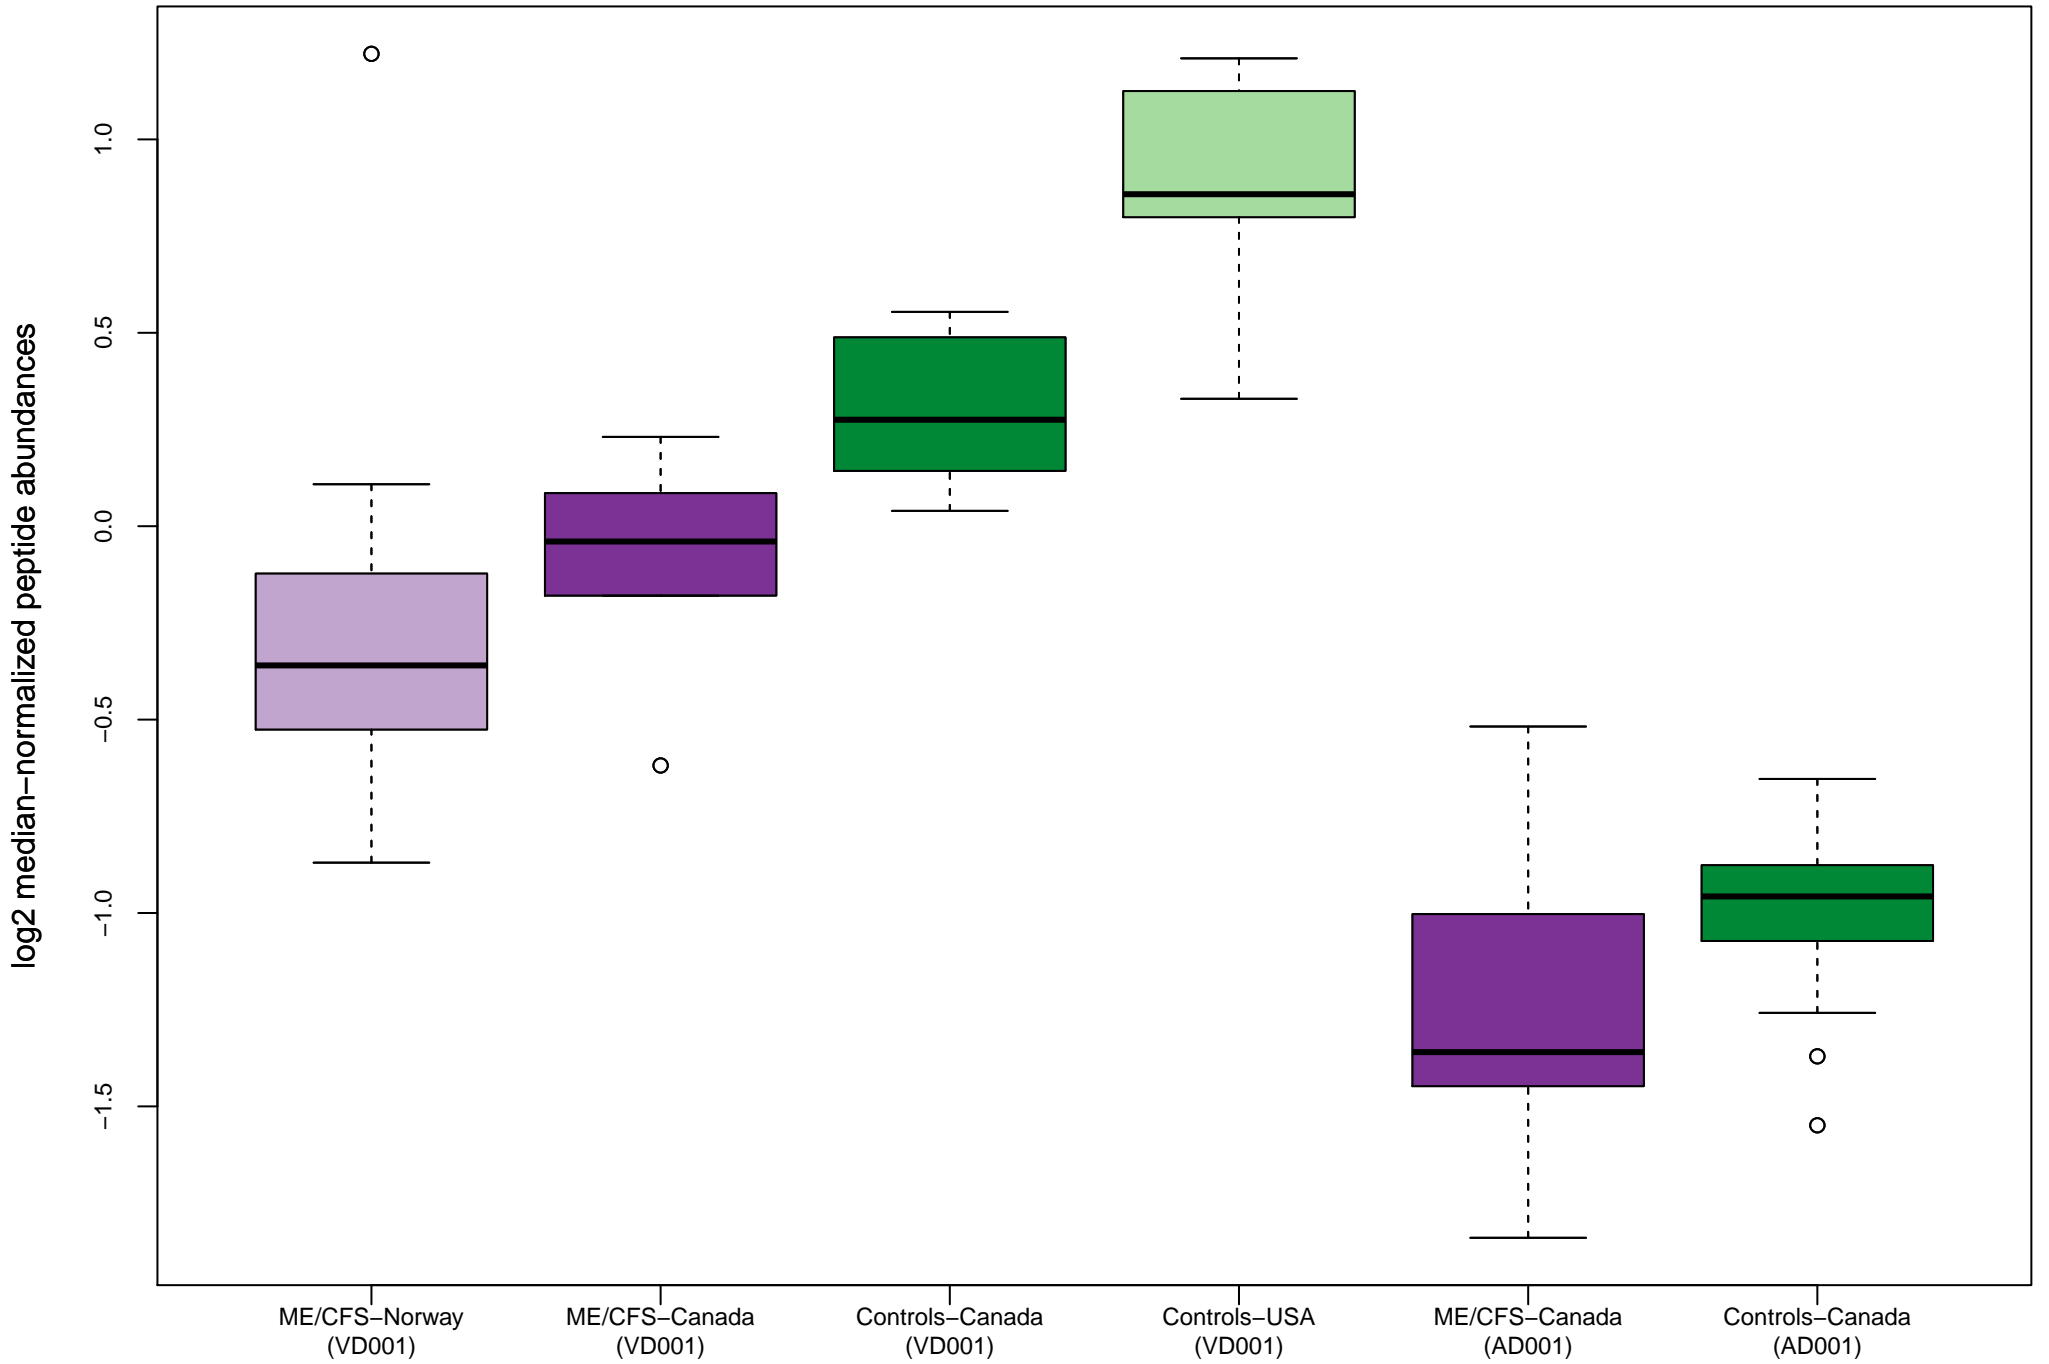

# RNFWAFSFPNVS

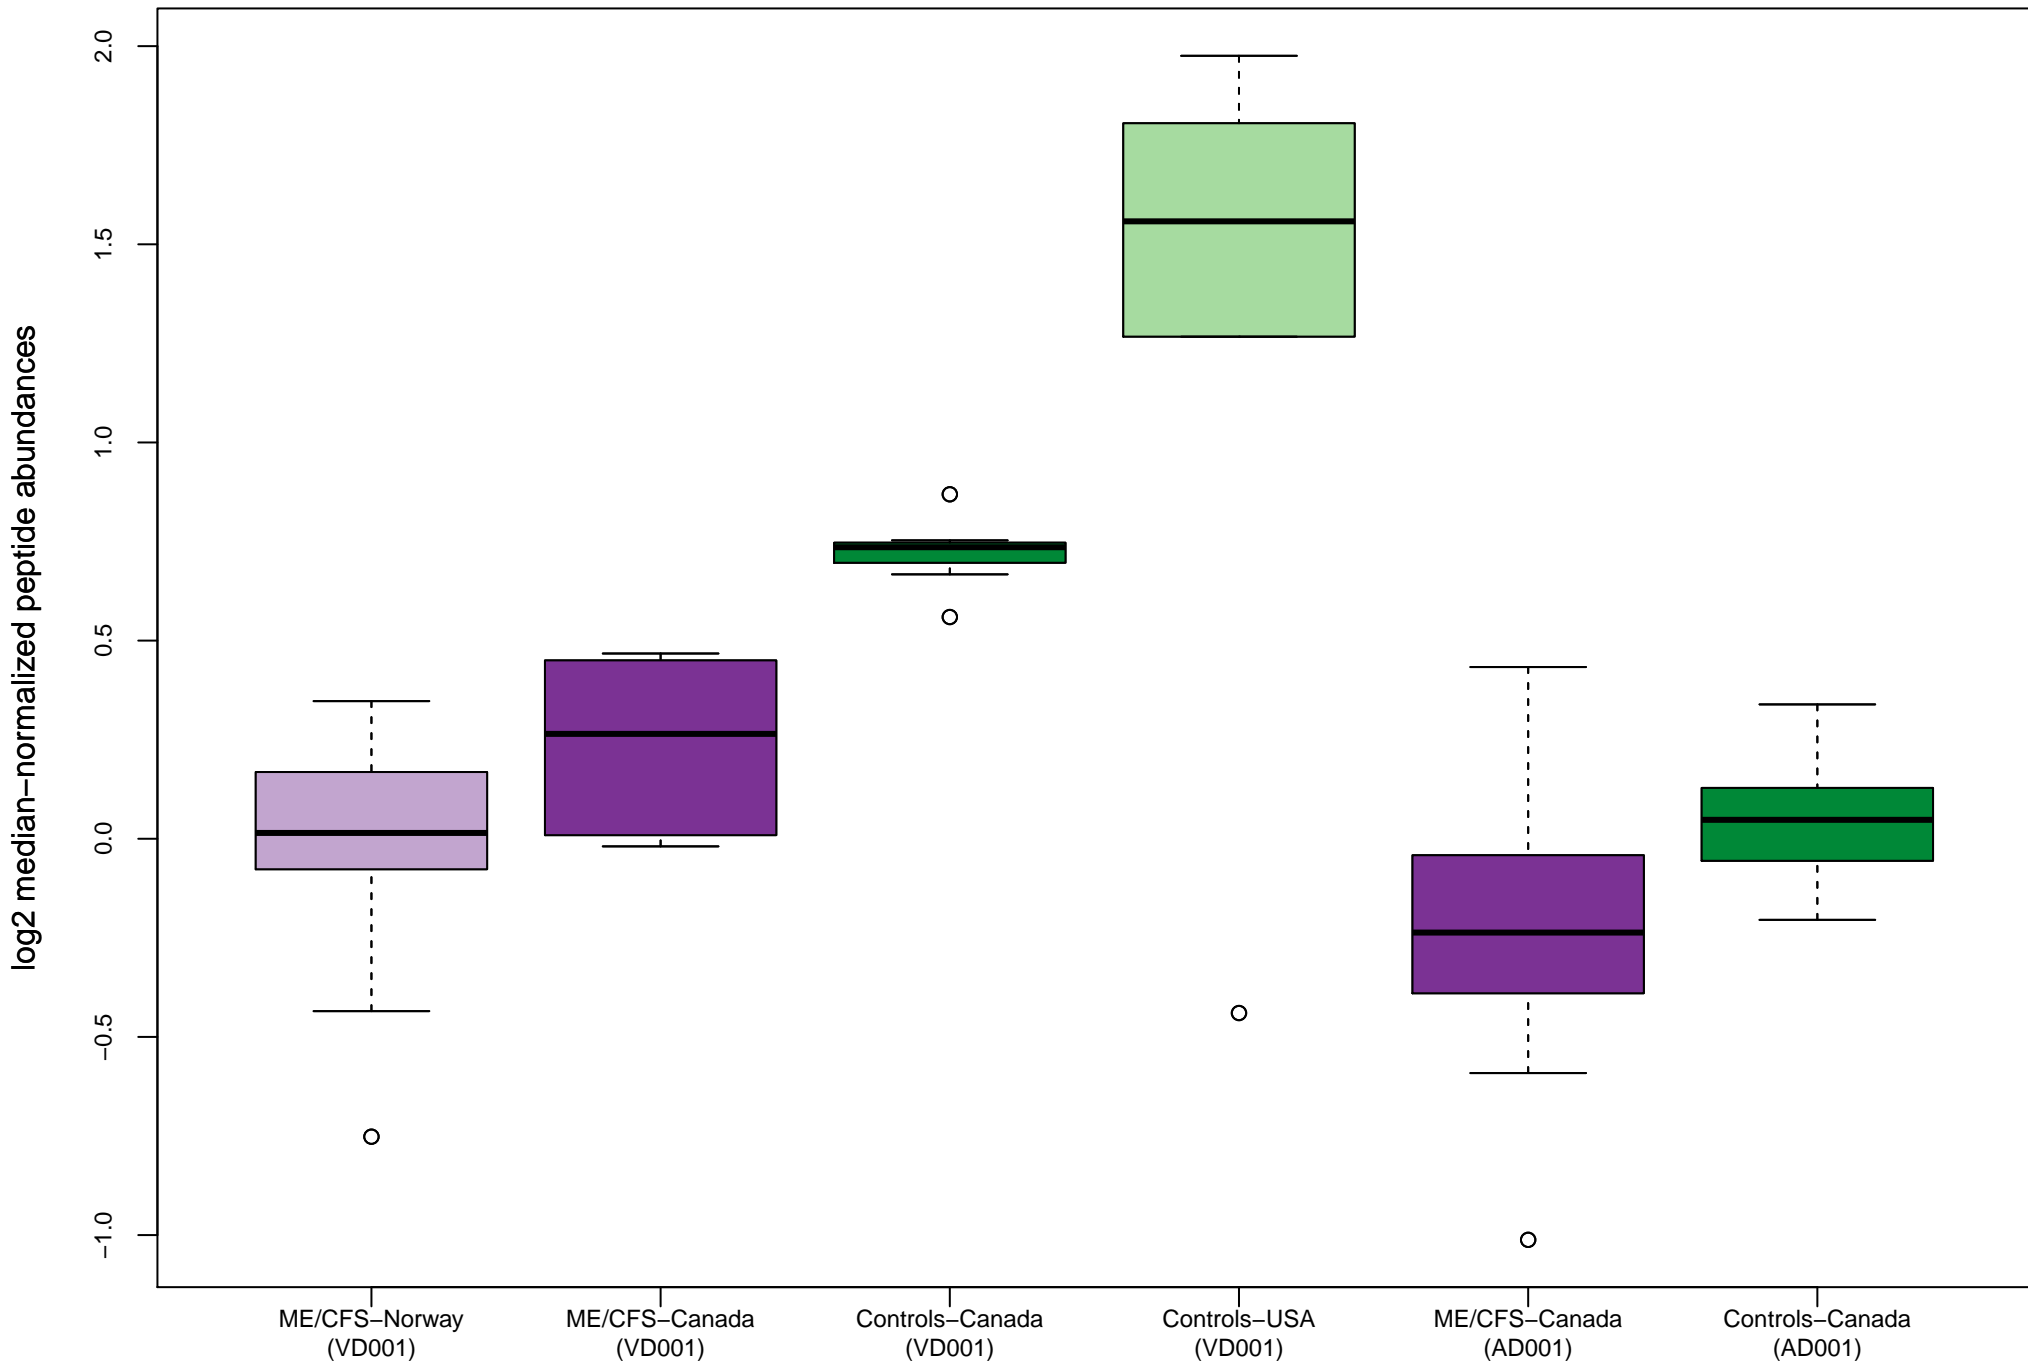

# RPLAVGYKLGSG

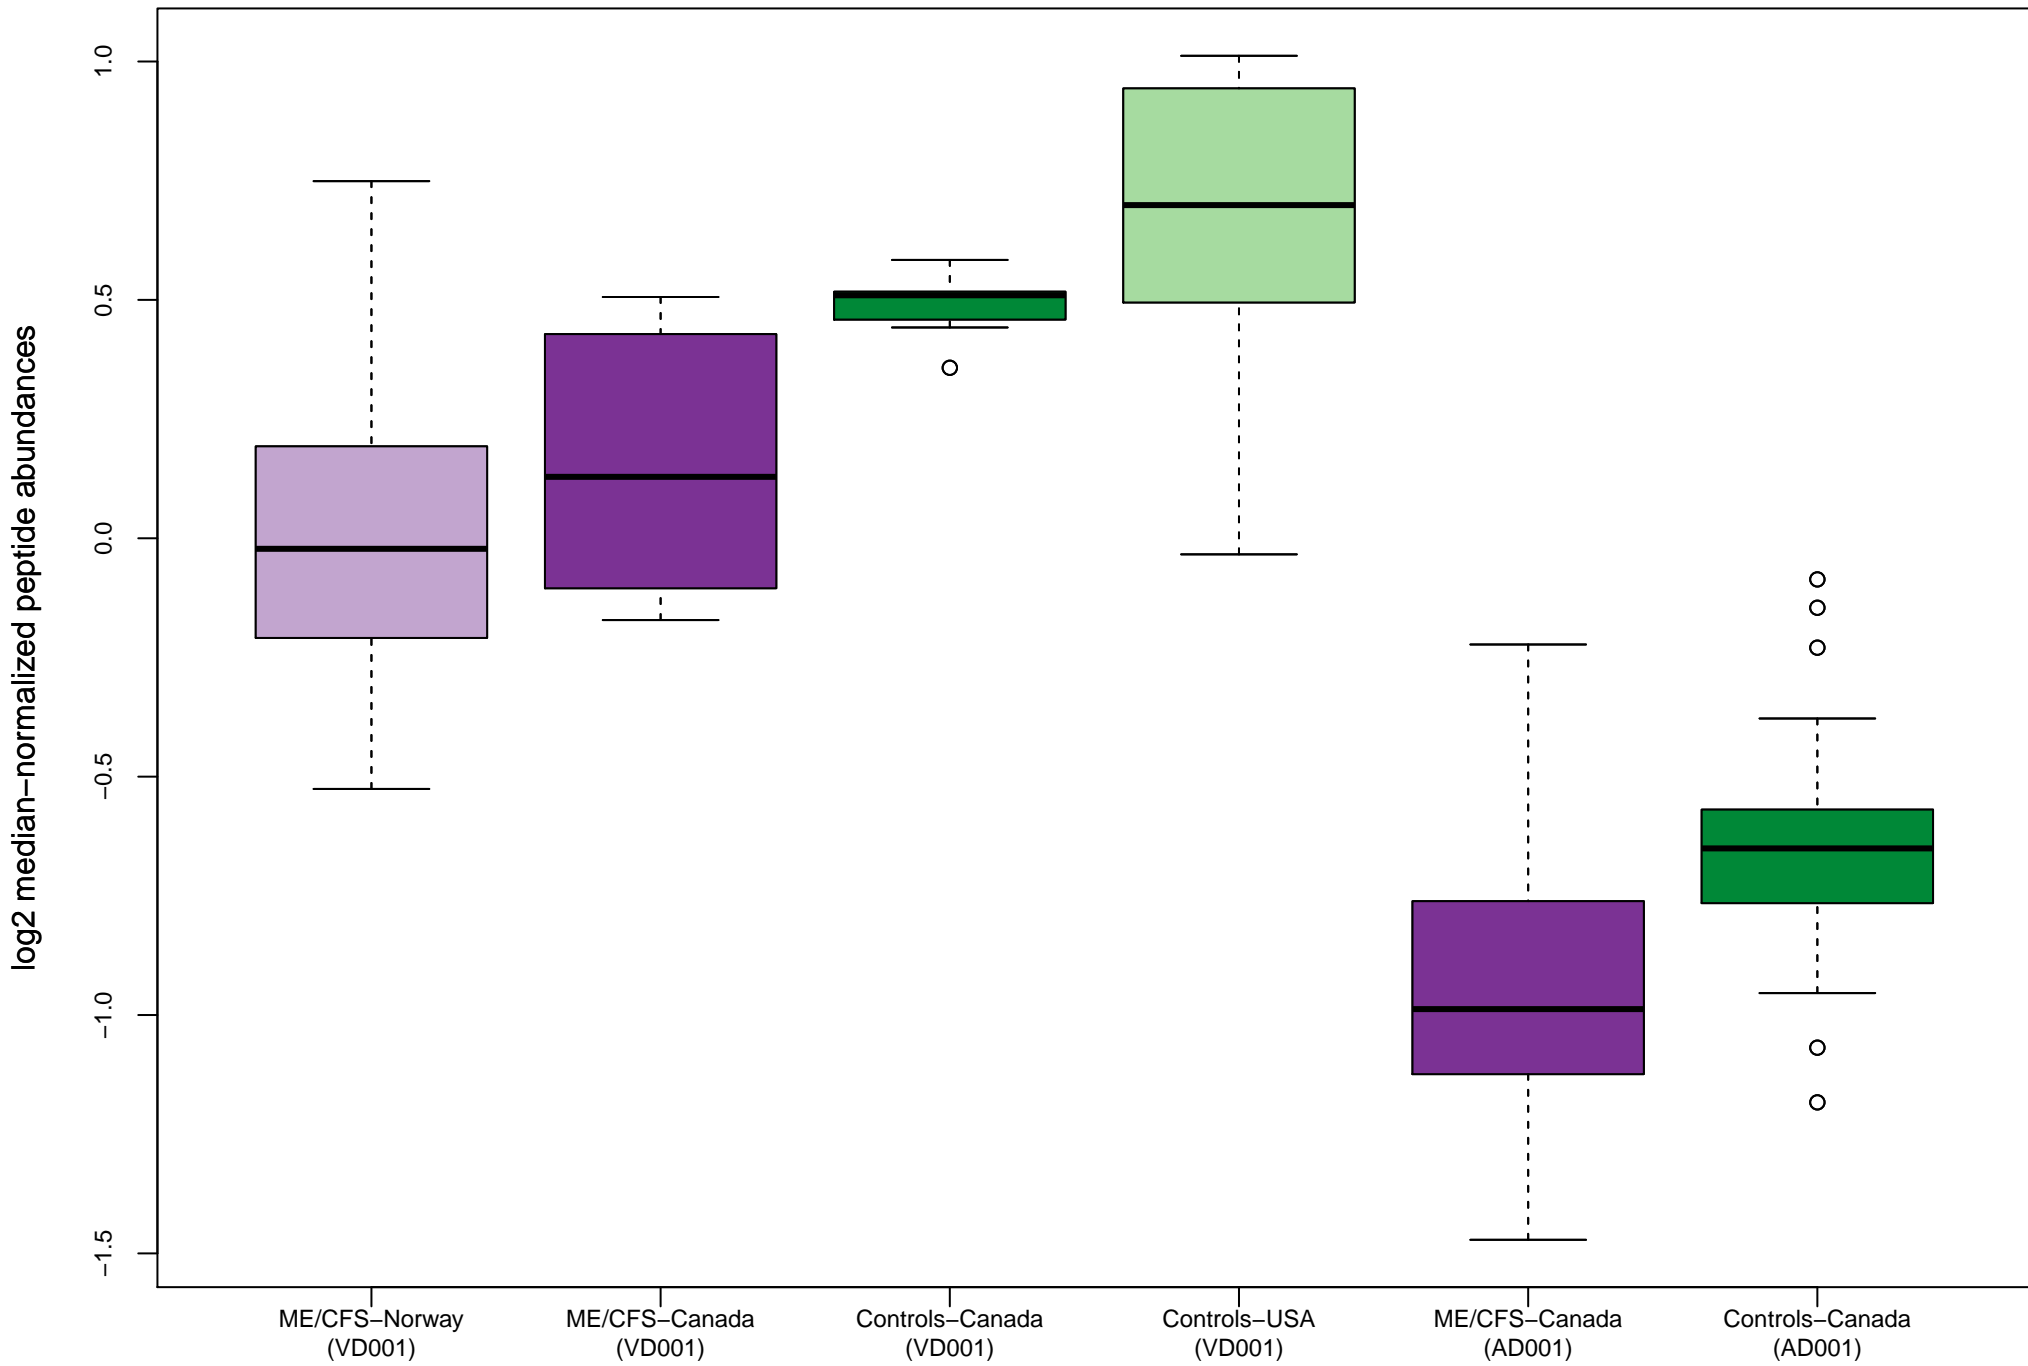

RPLRQELFRWLS

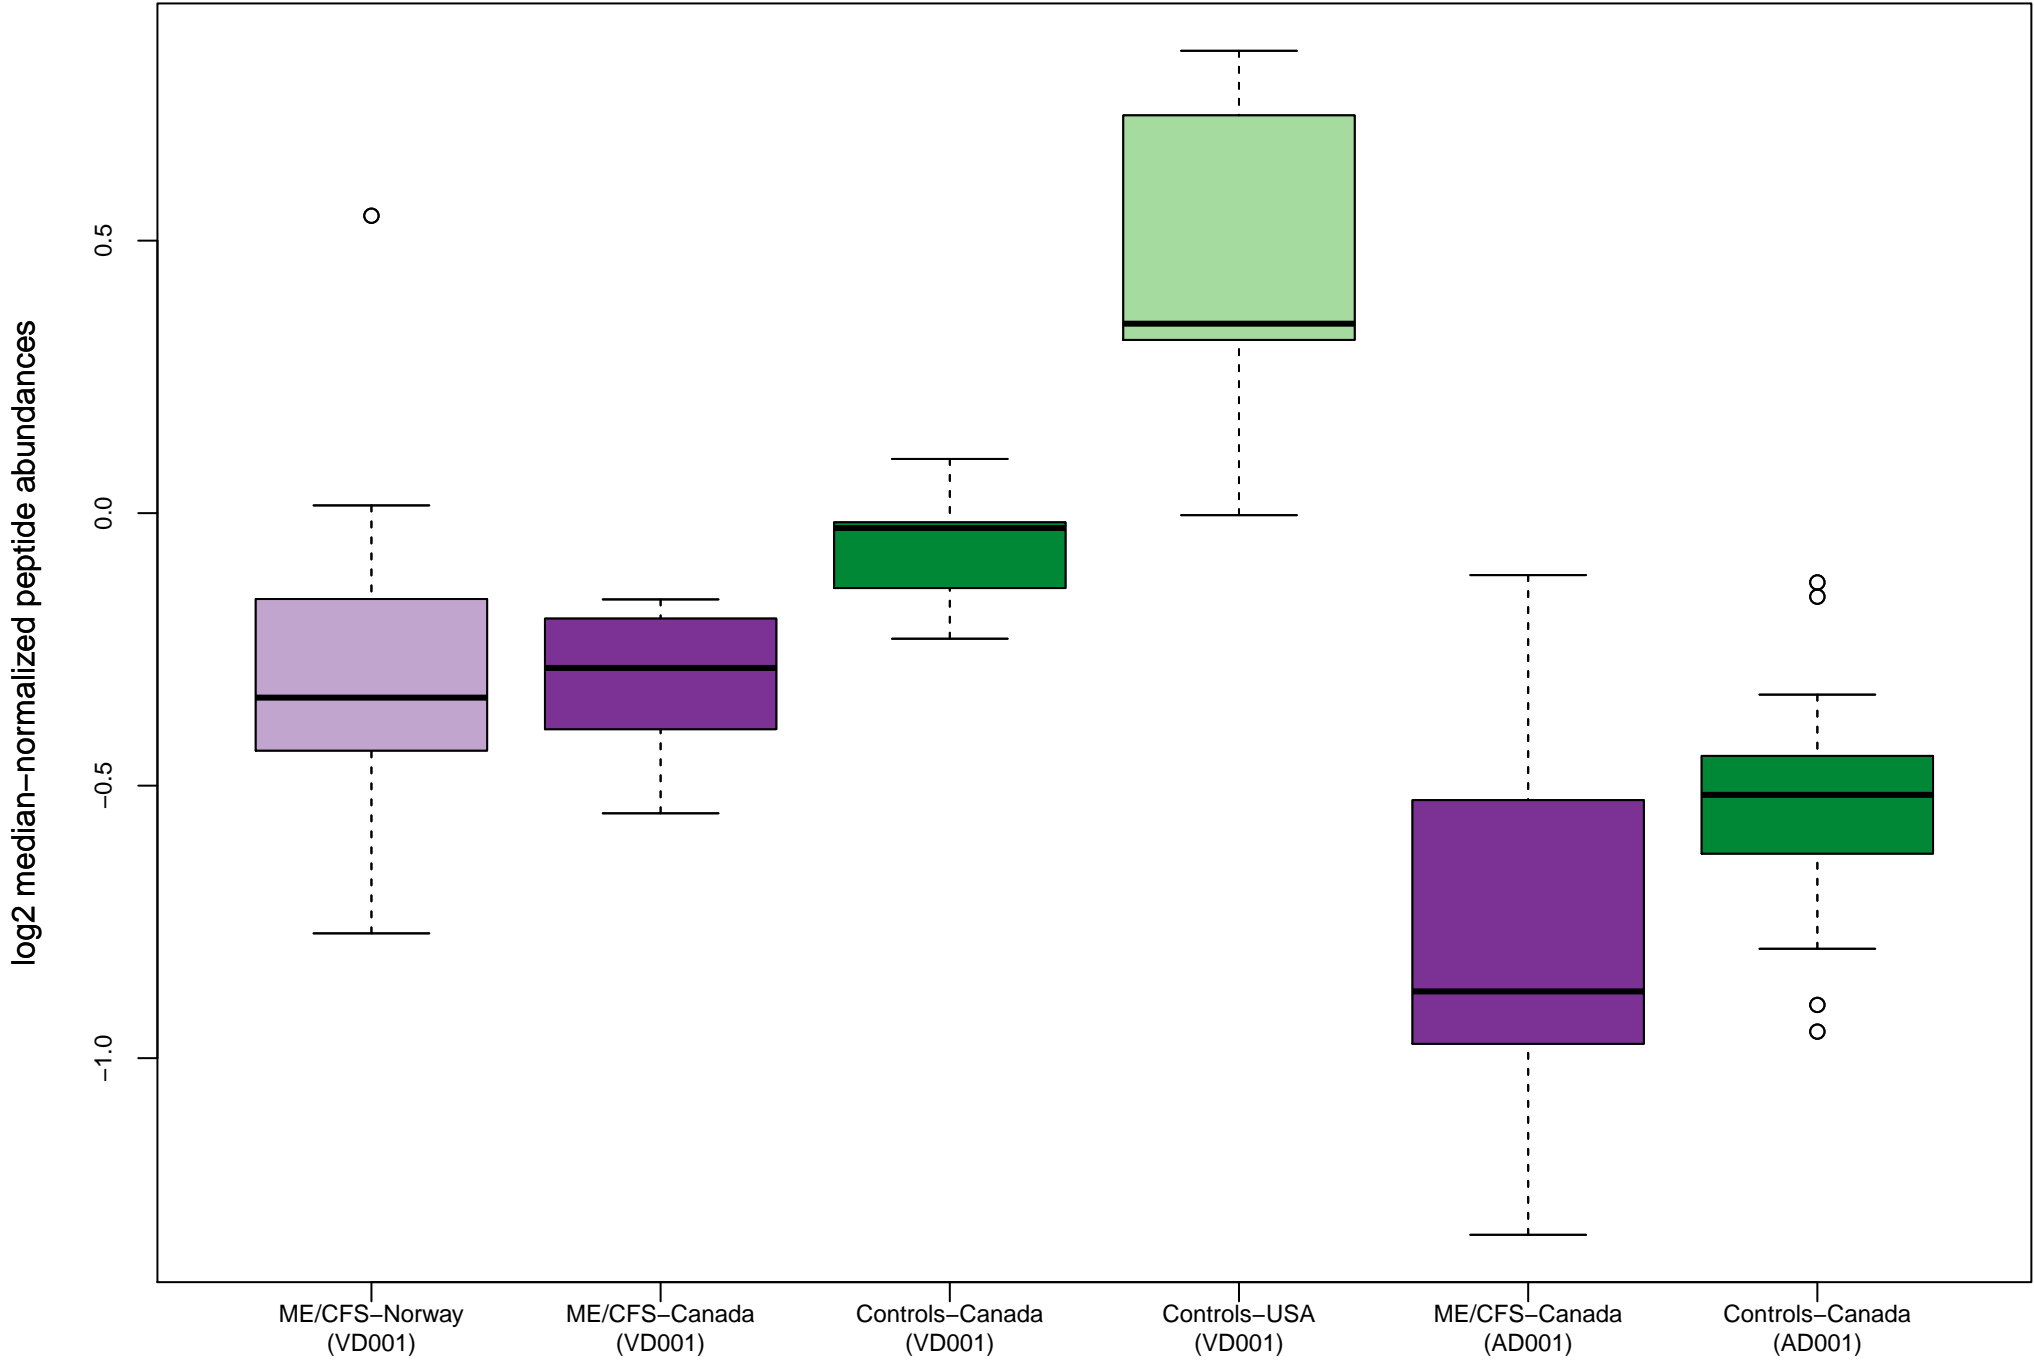

# RQYAGQRPLSFY

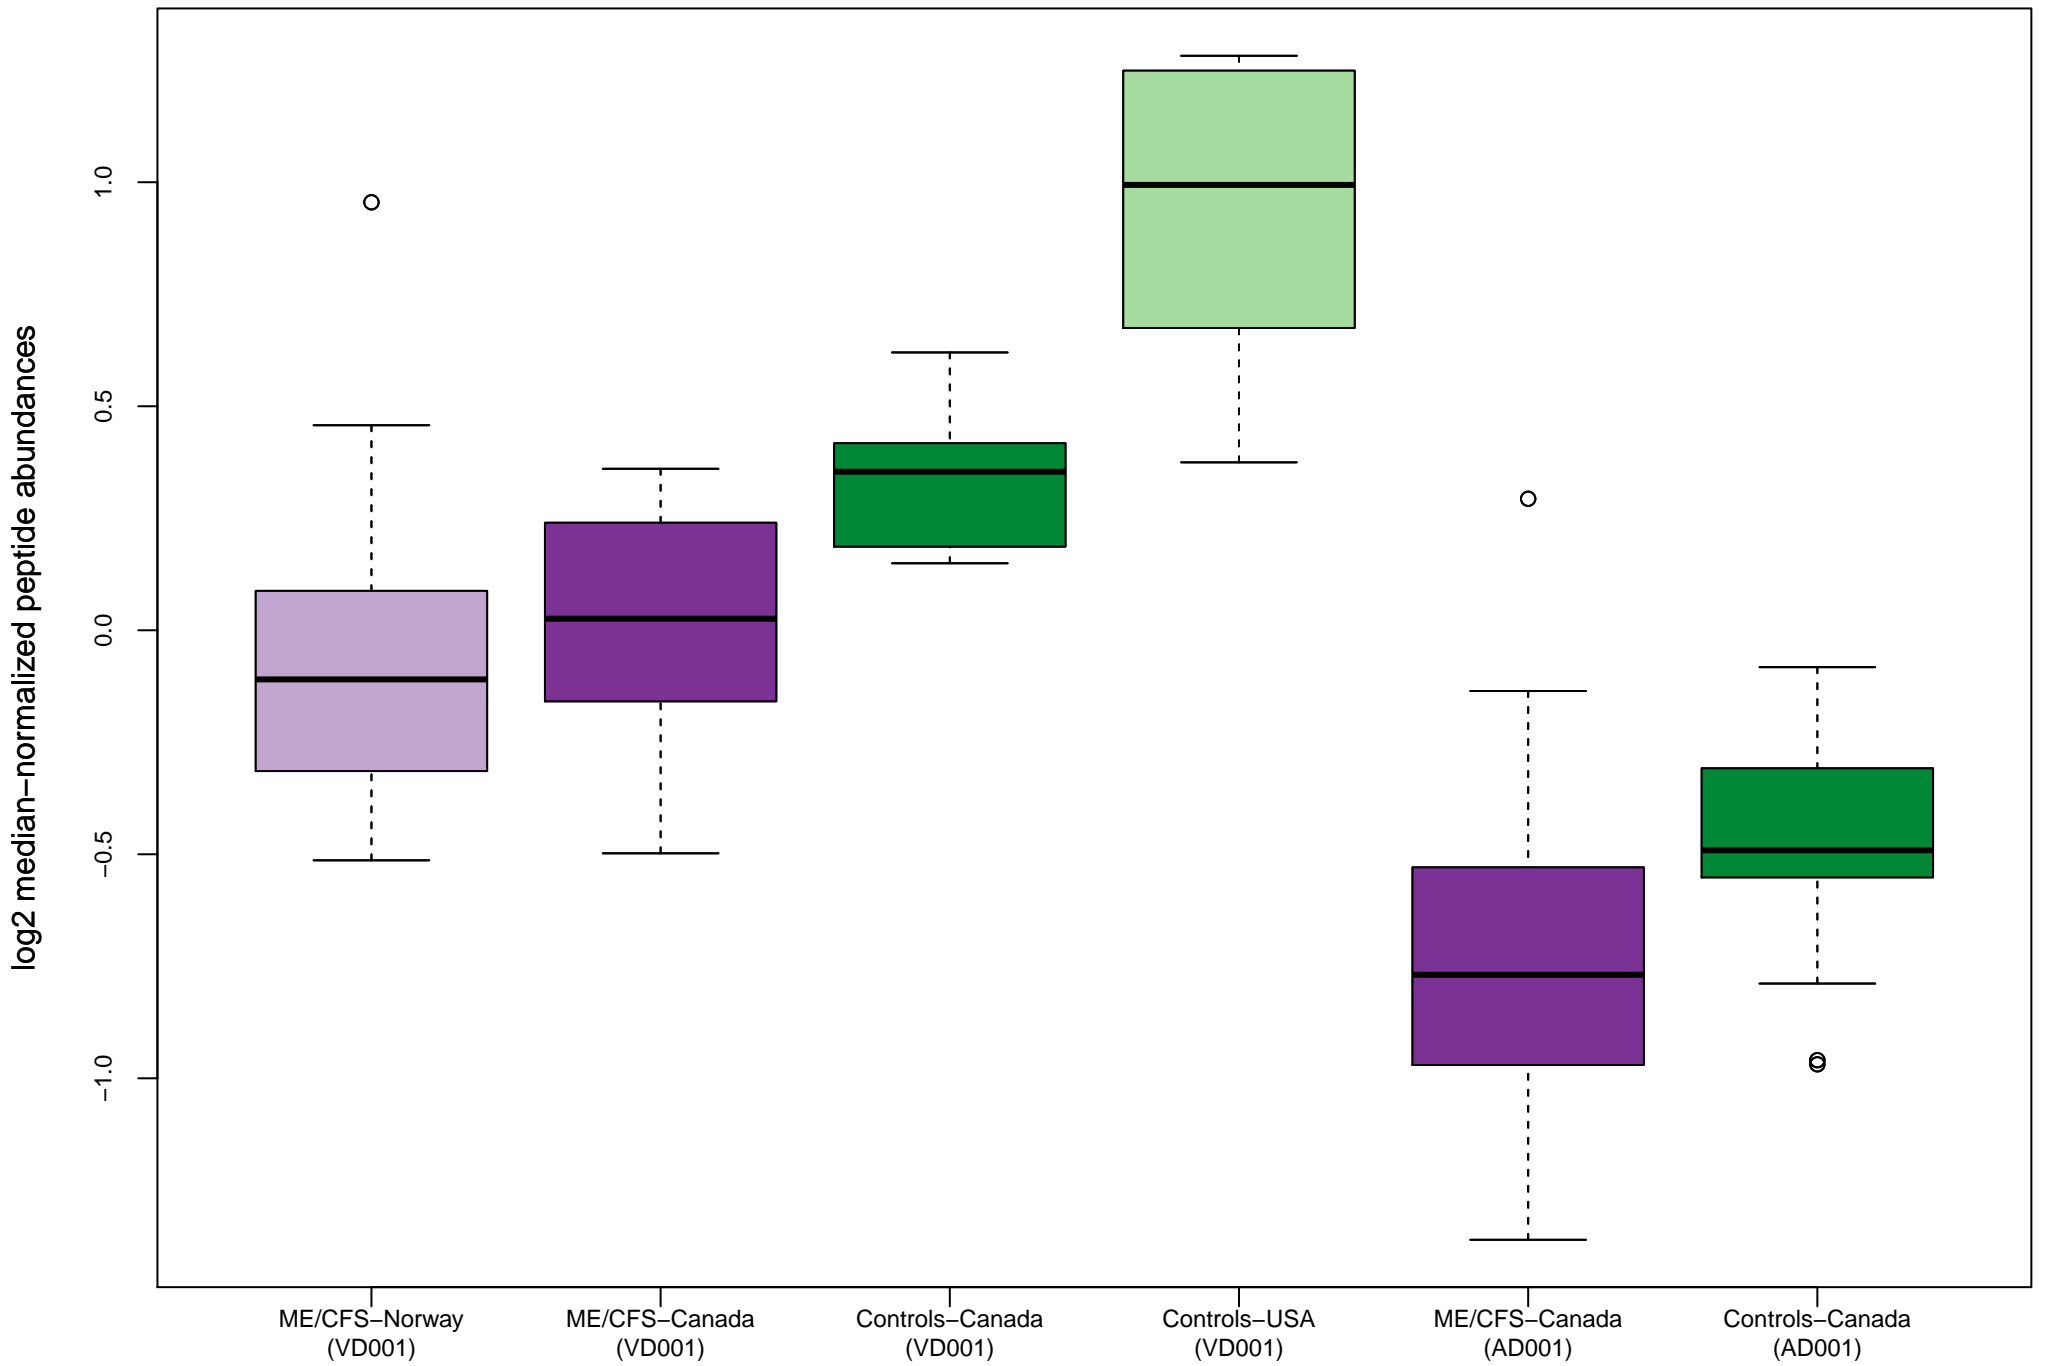

# RRAVLSGVALS

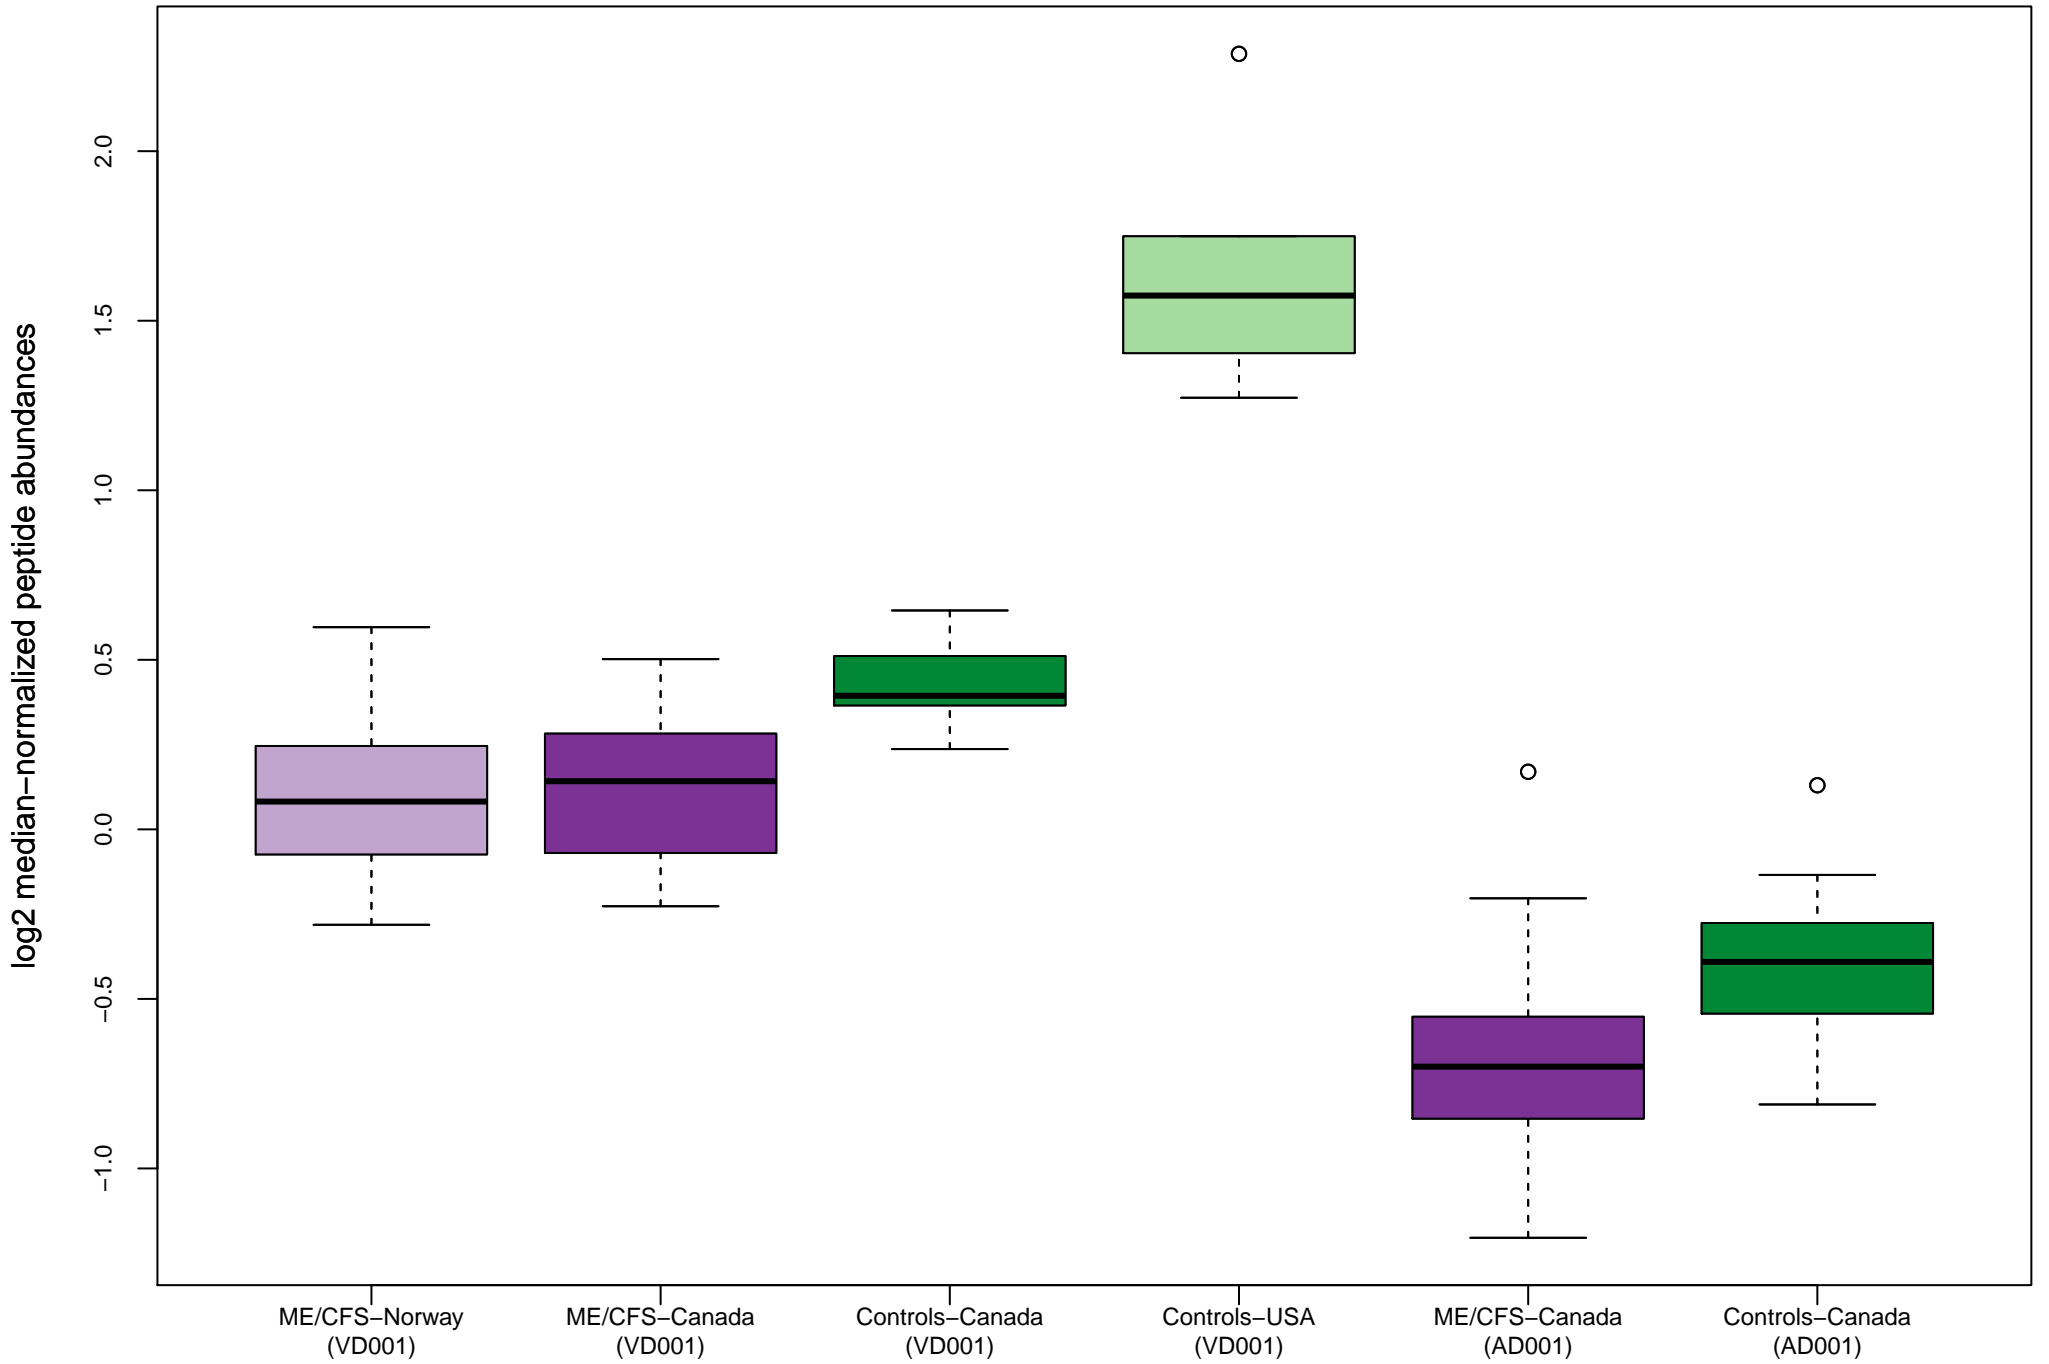



# RRFAYWGVALSG

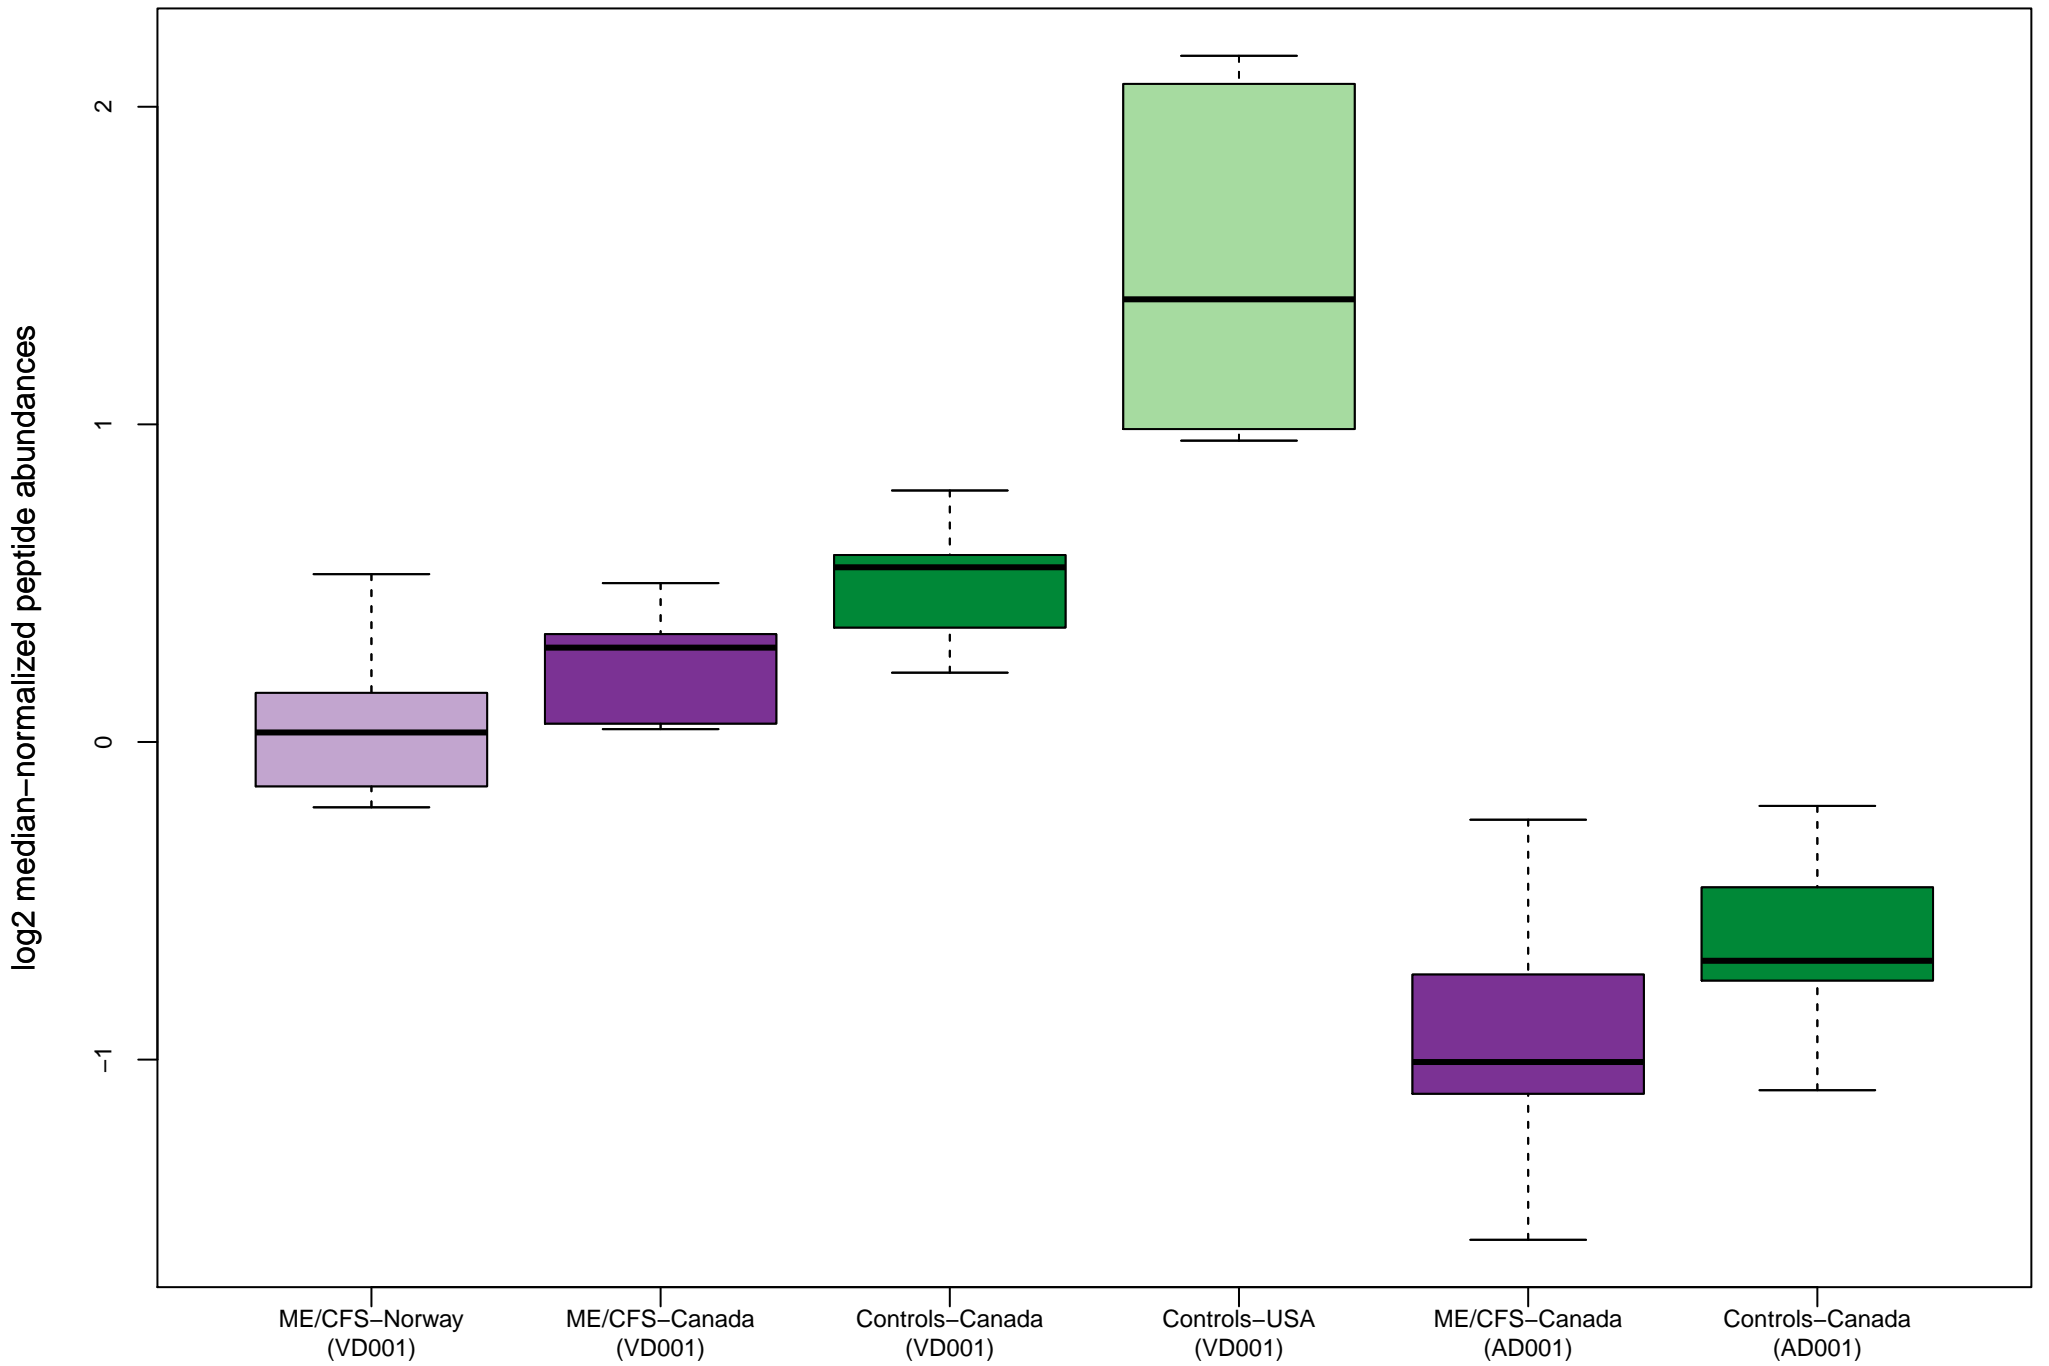

# RRFFASGVALSG

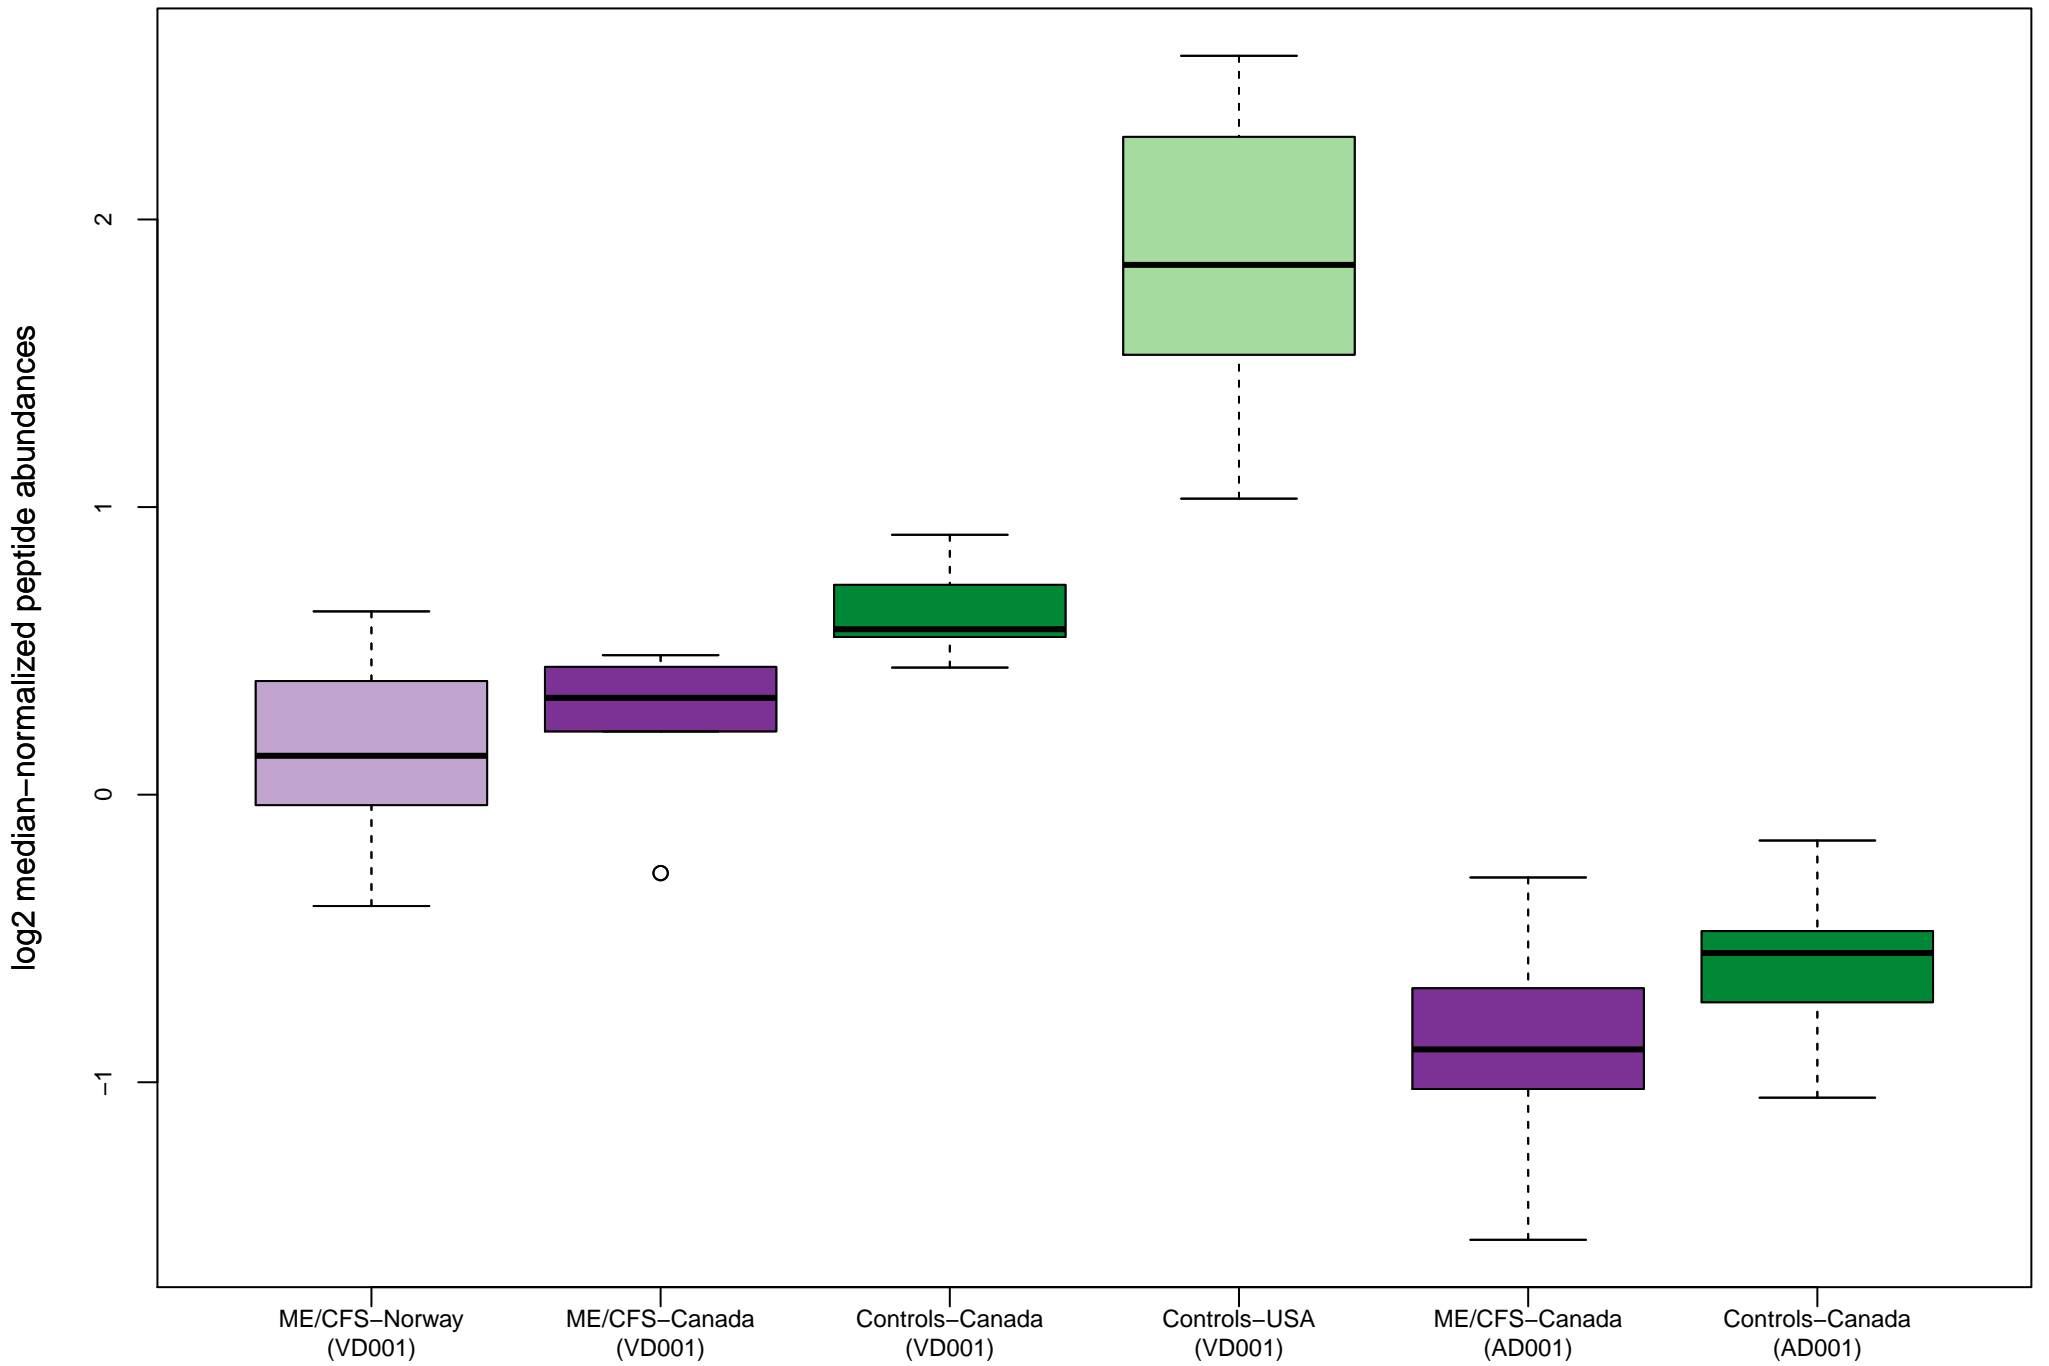

# RRSVLFLSGVLG

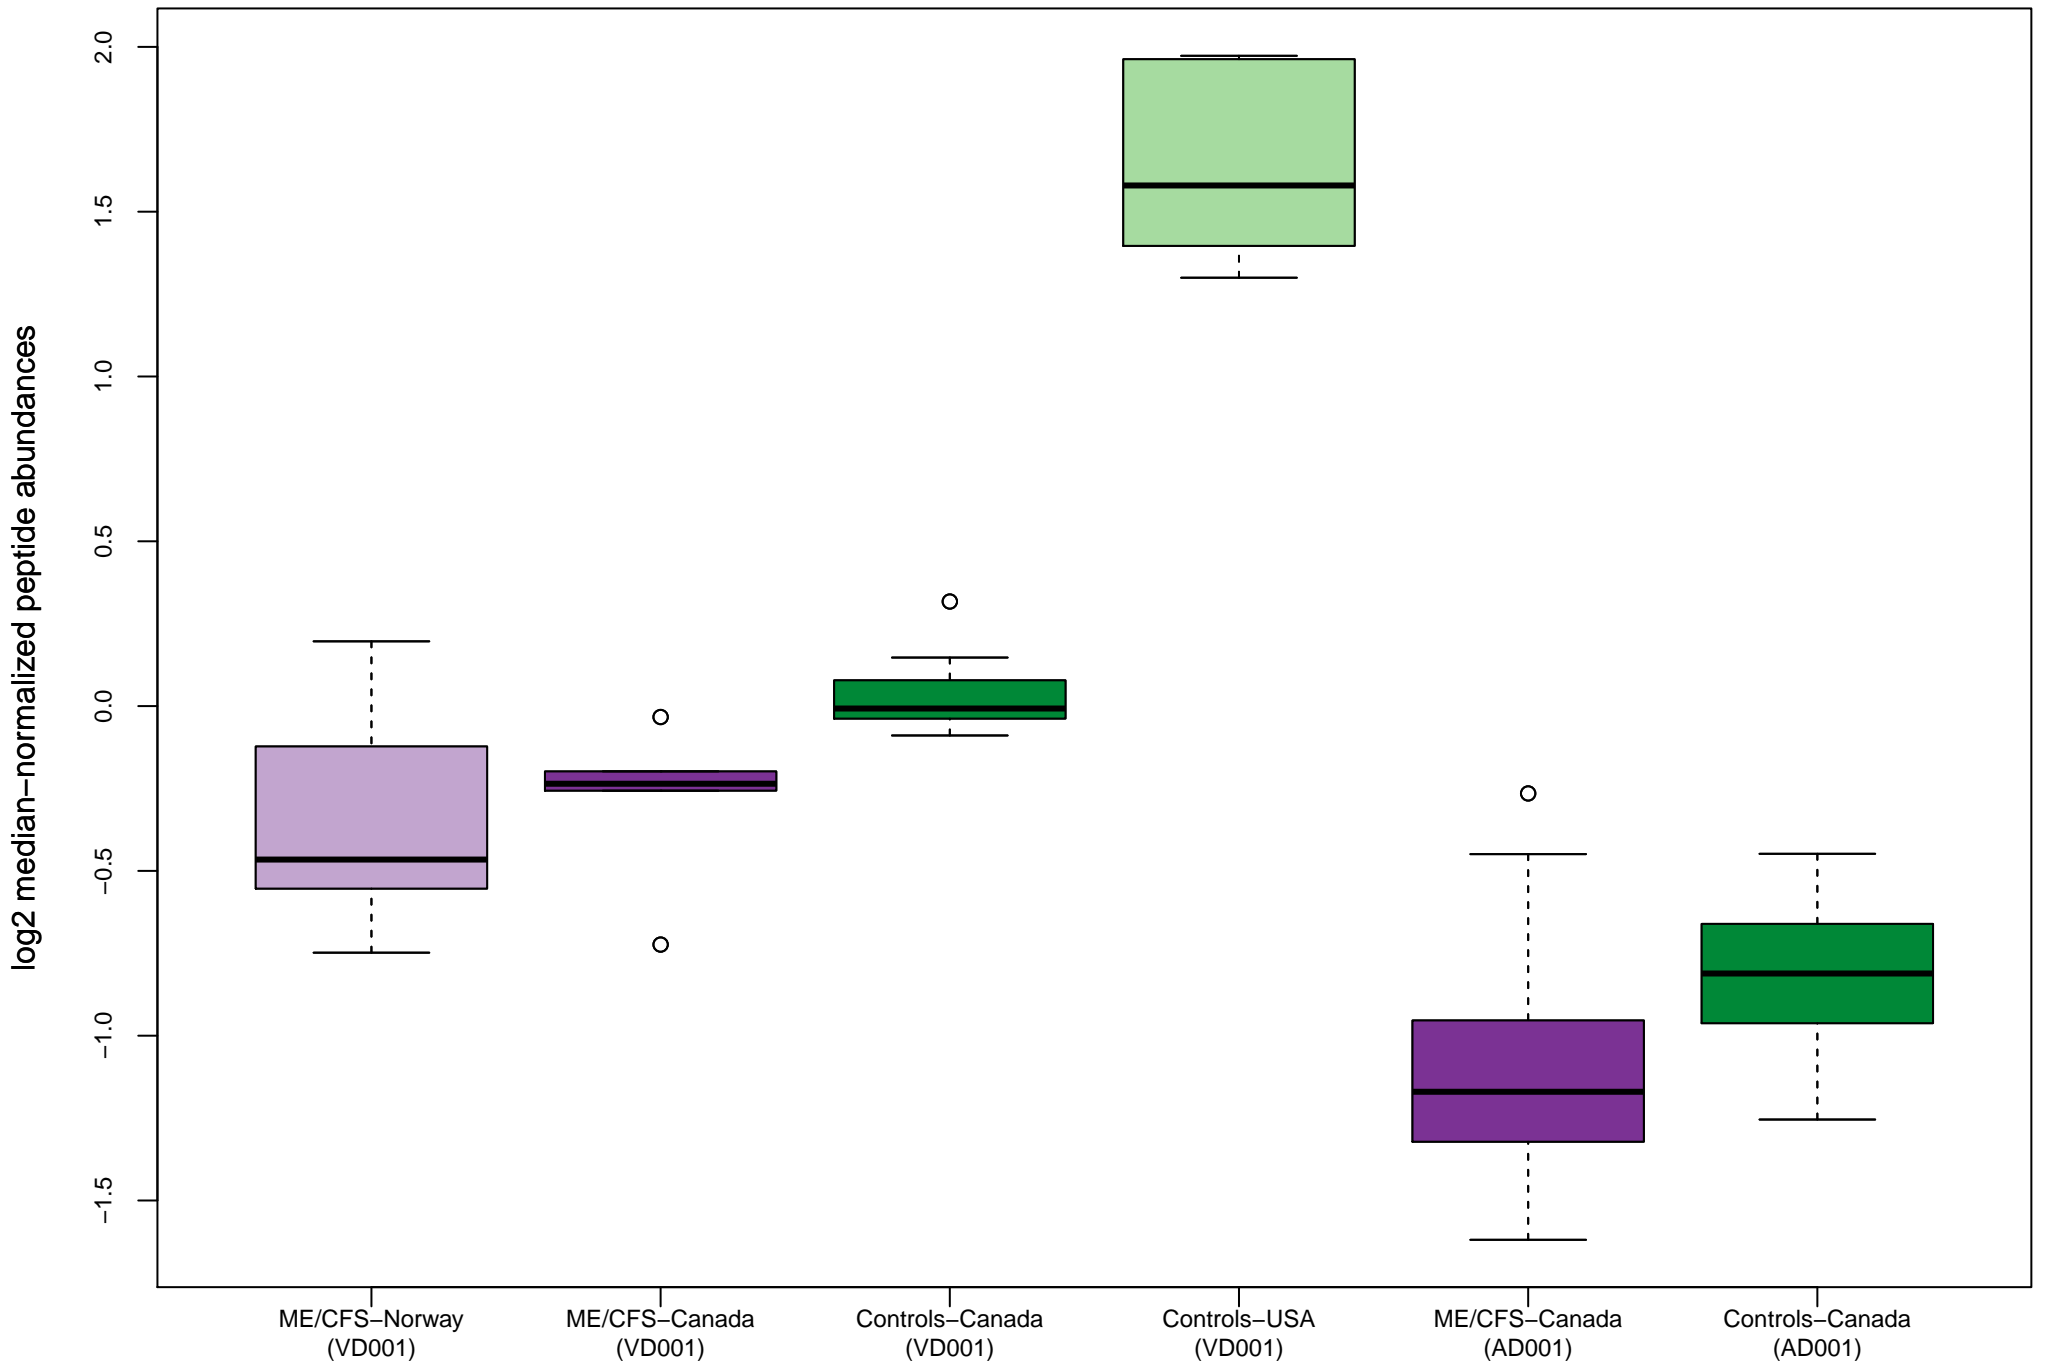

# RRVVLYLGALSG

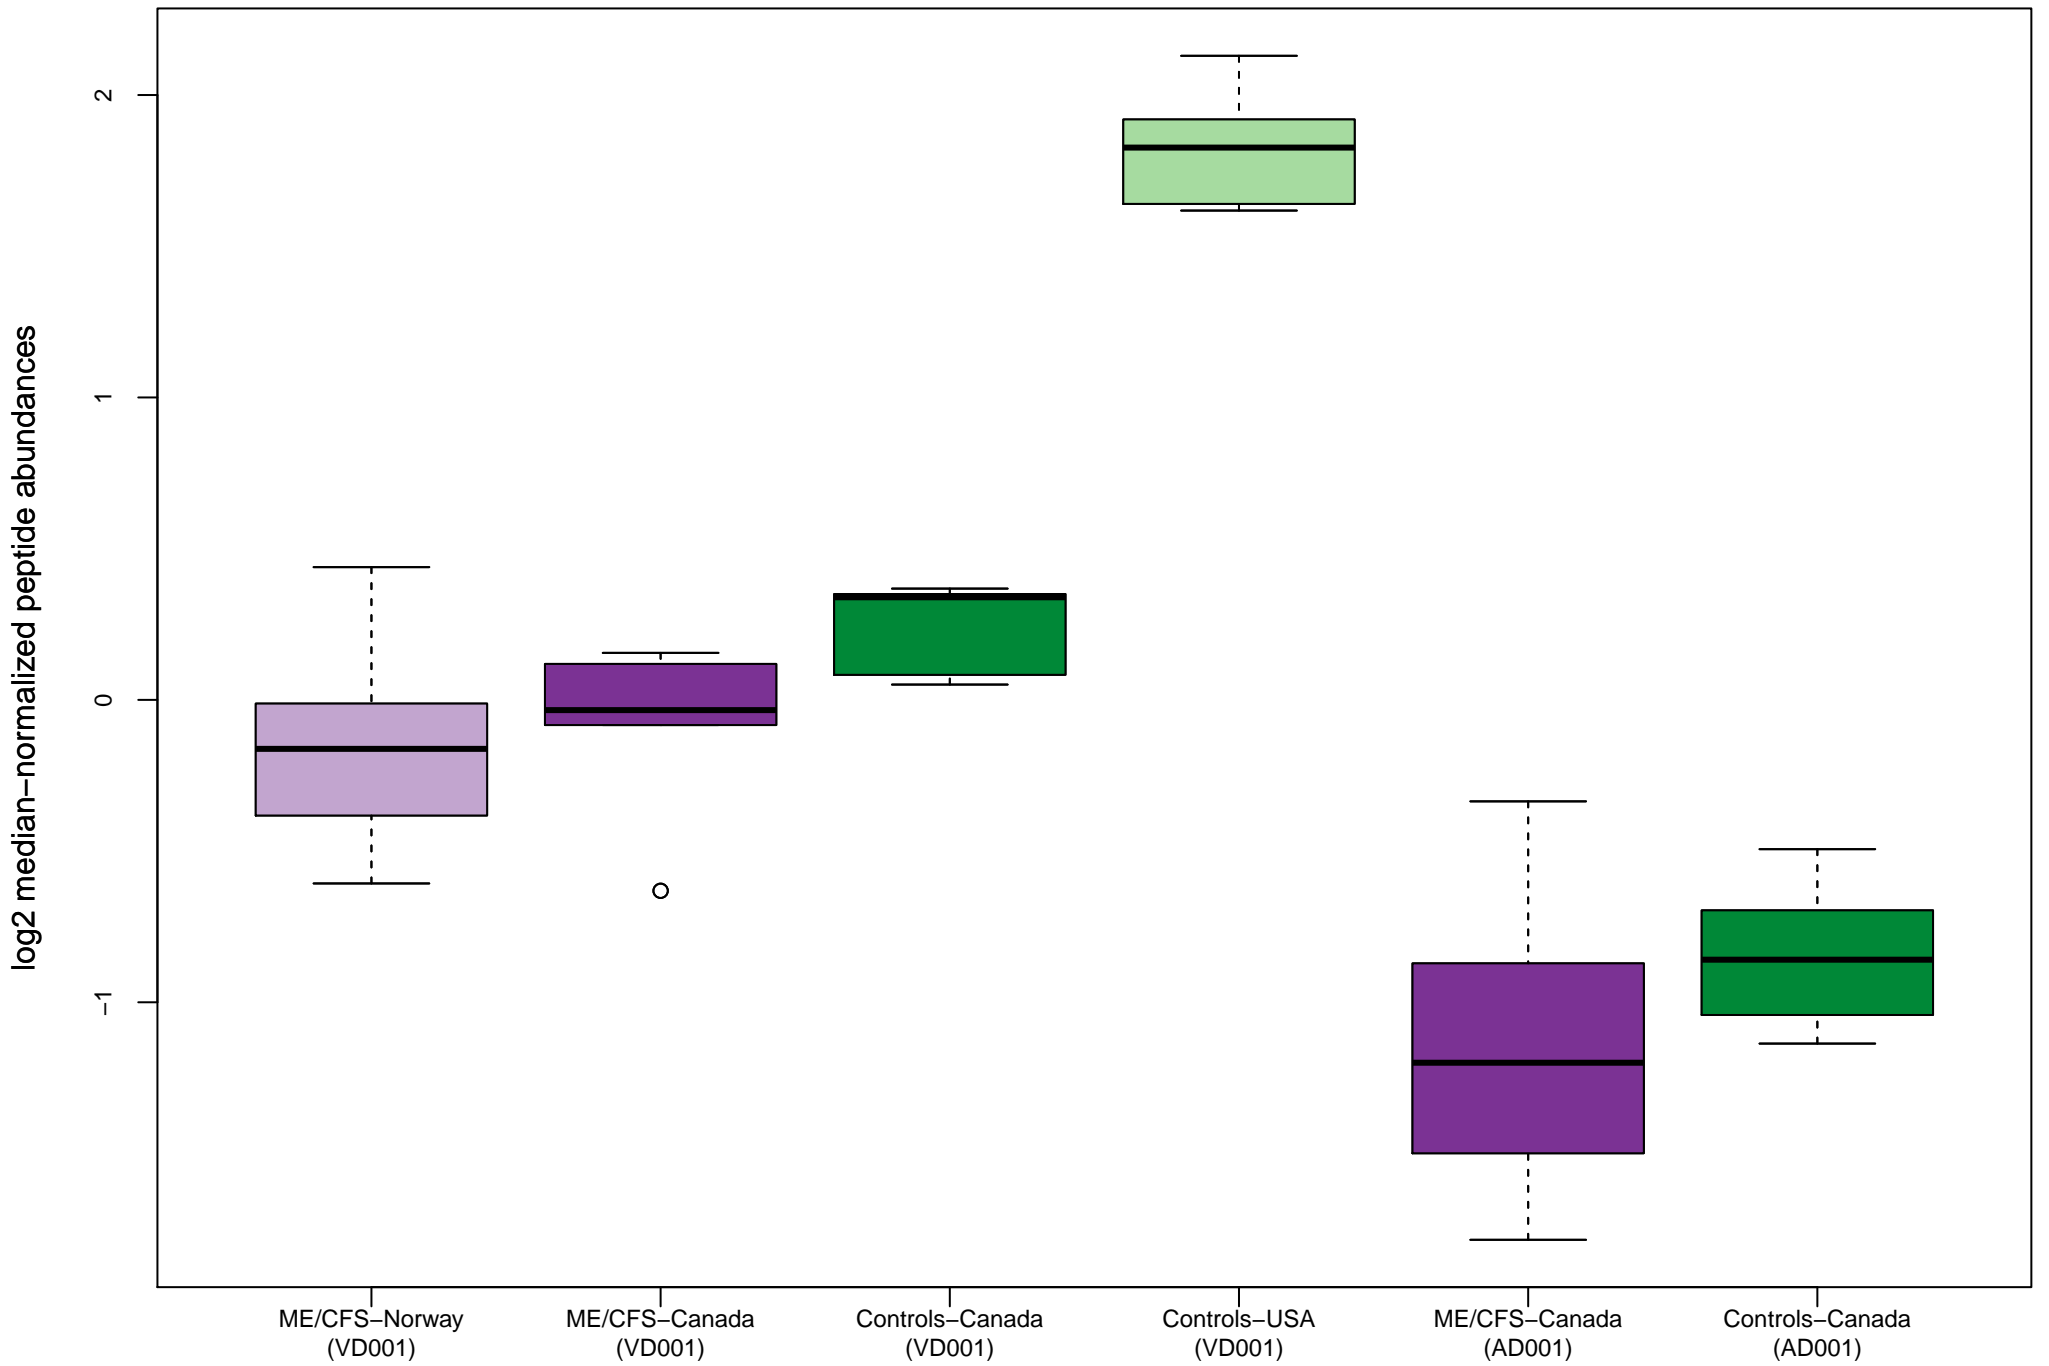

# RRWNFVSVSALS

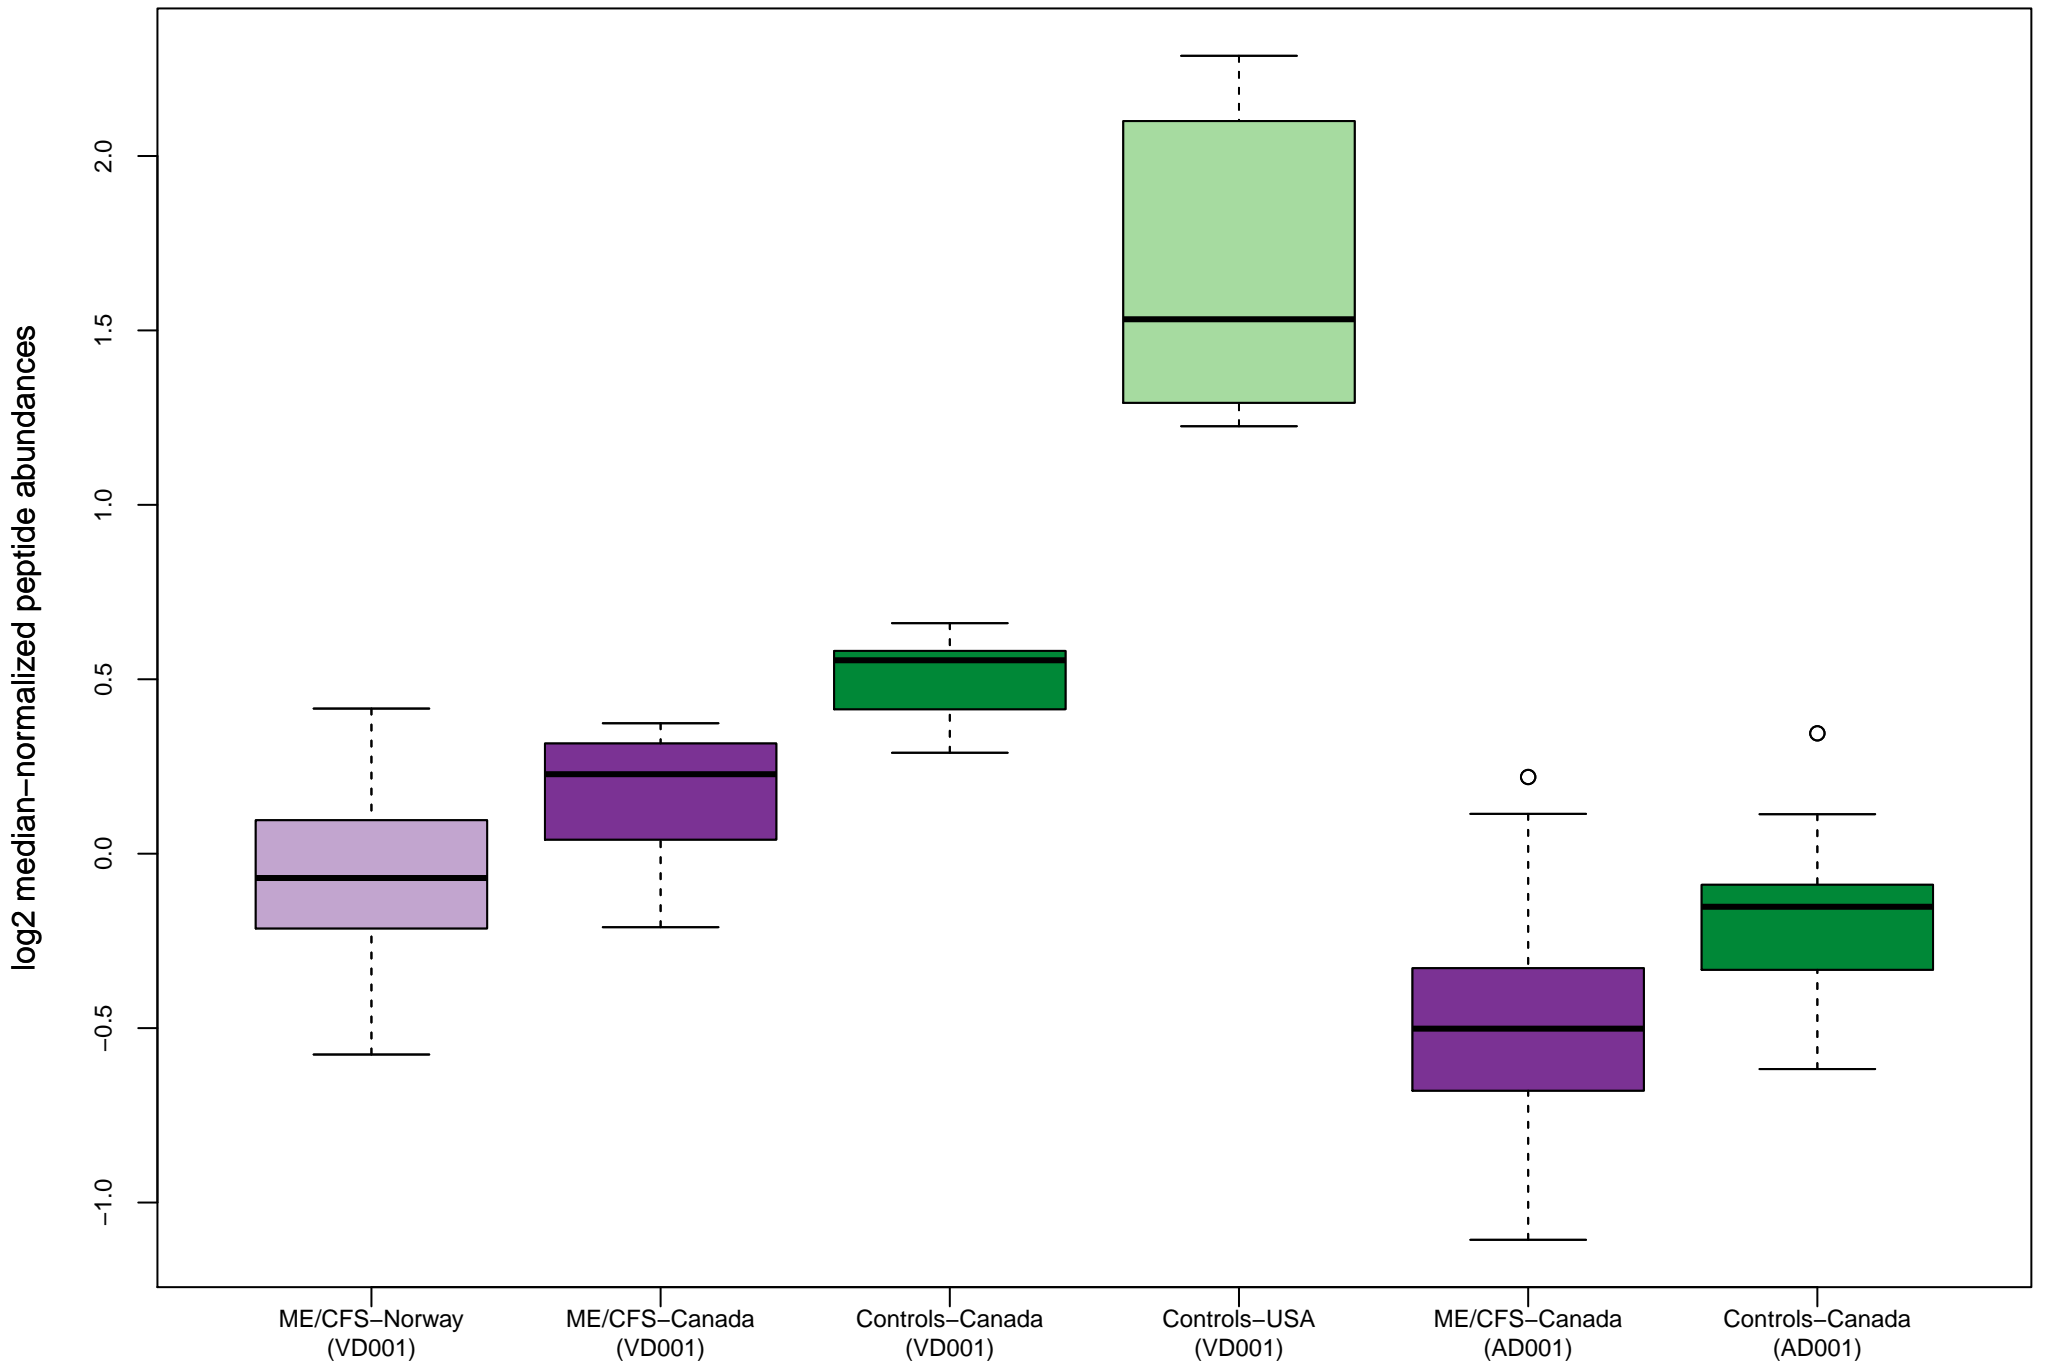

# RSGYYHLFRNLS

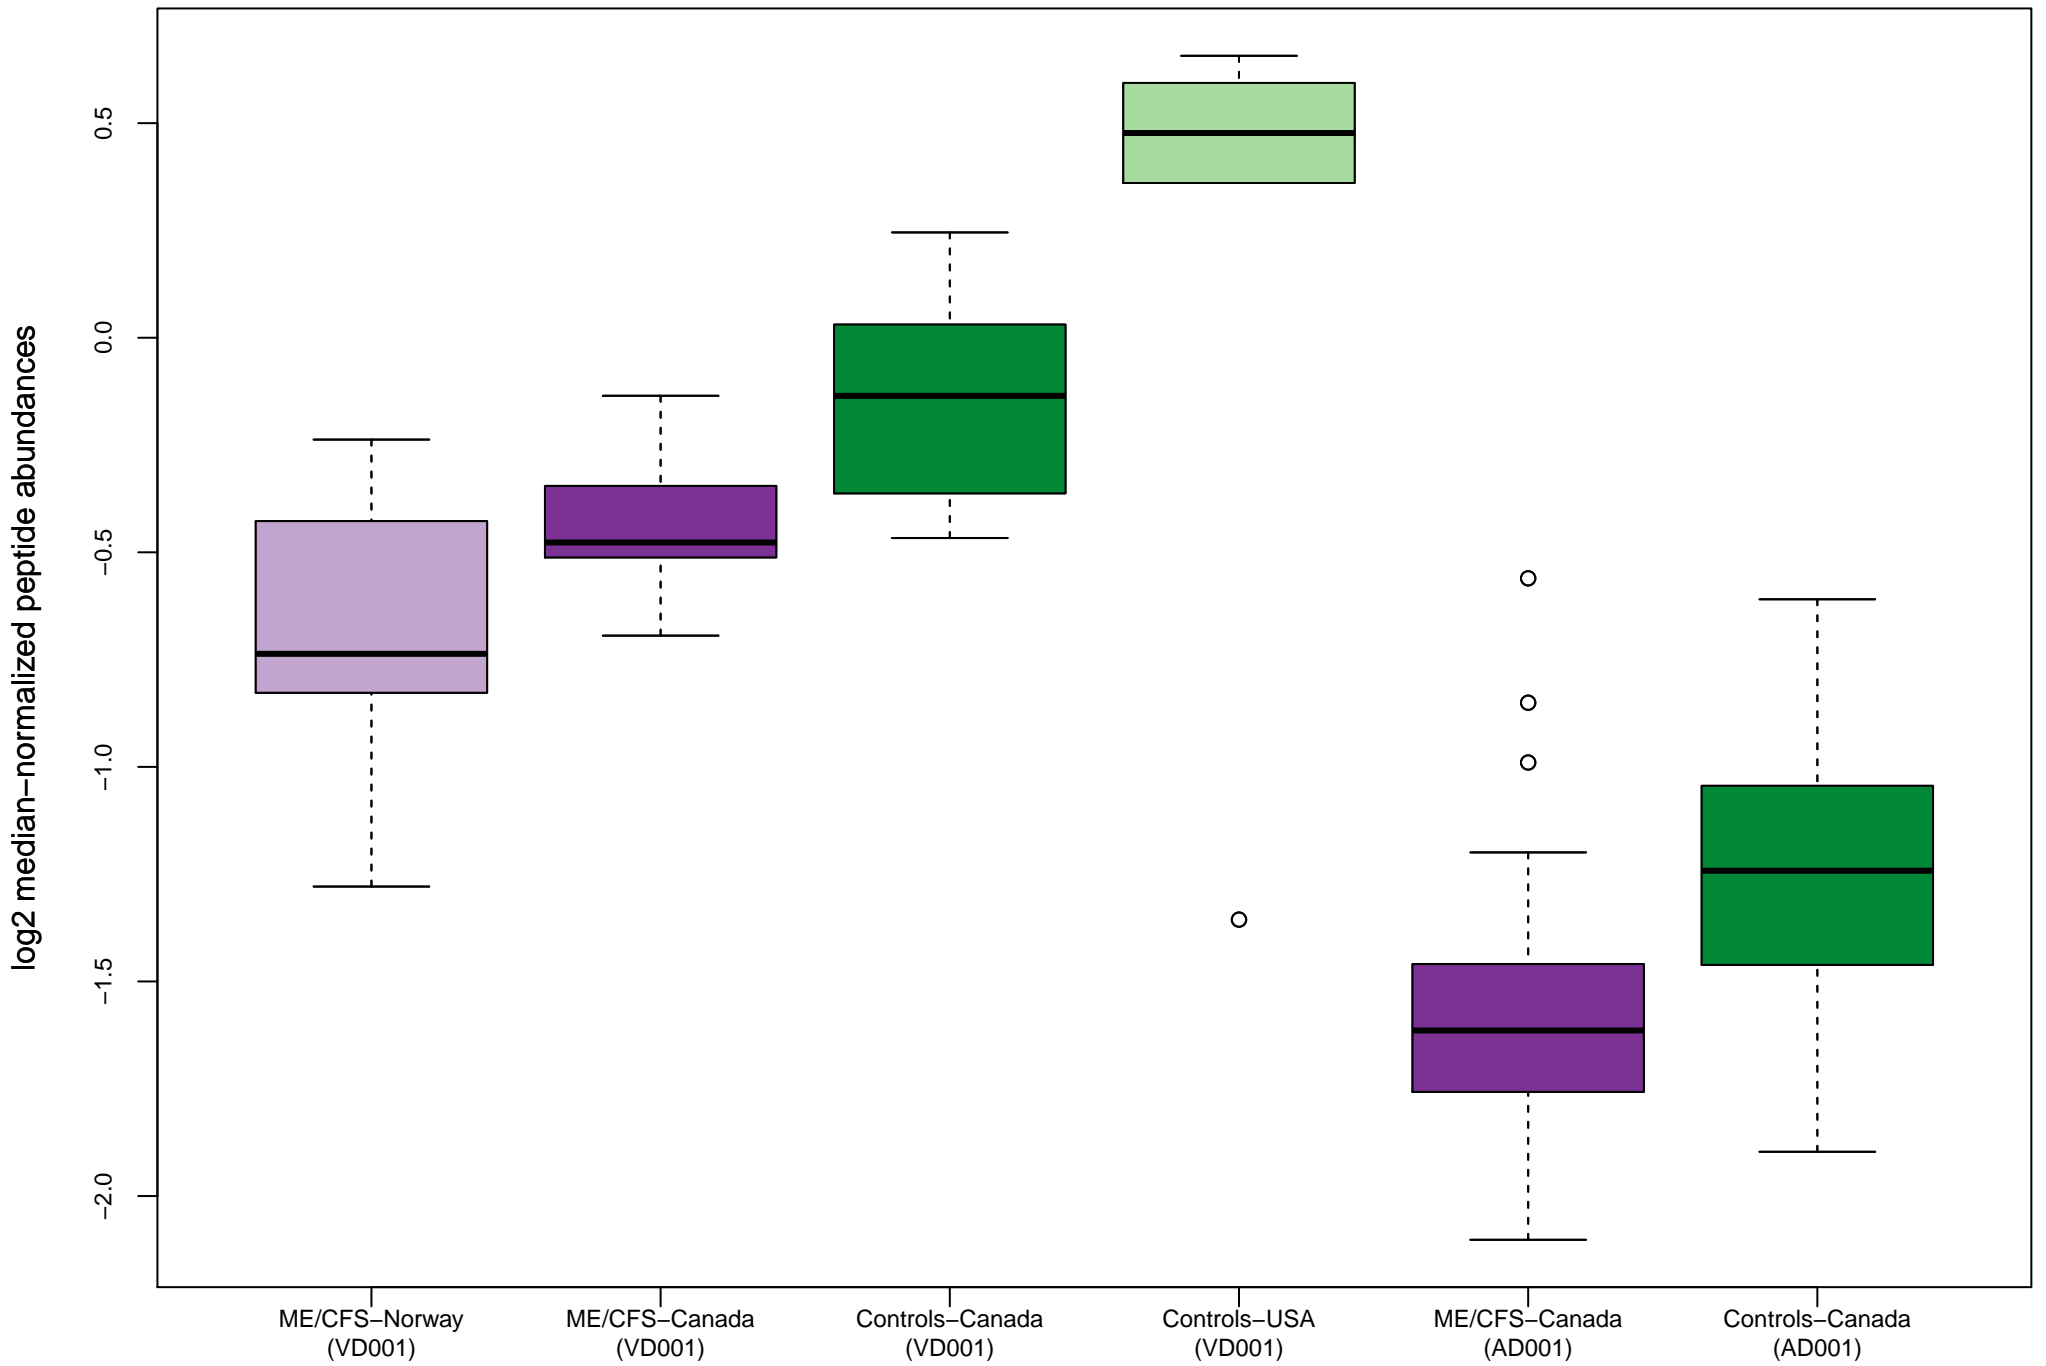

# RVFNRYARPLSL

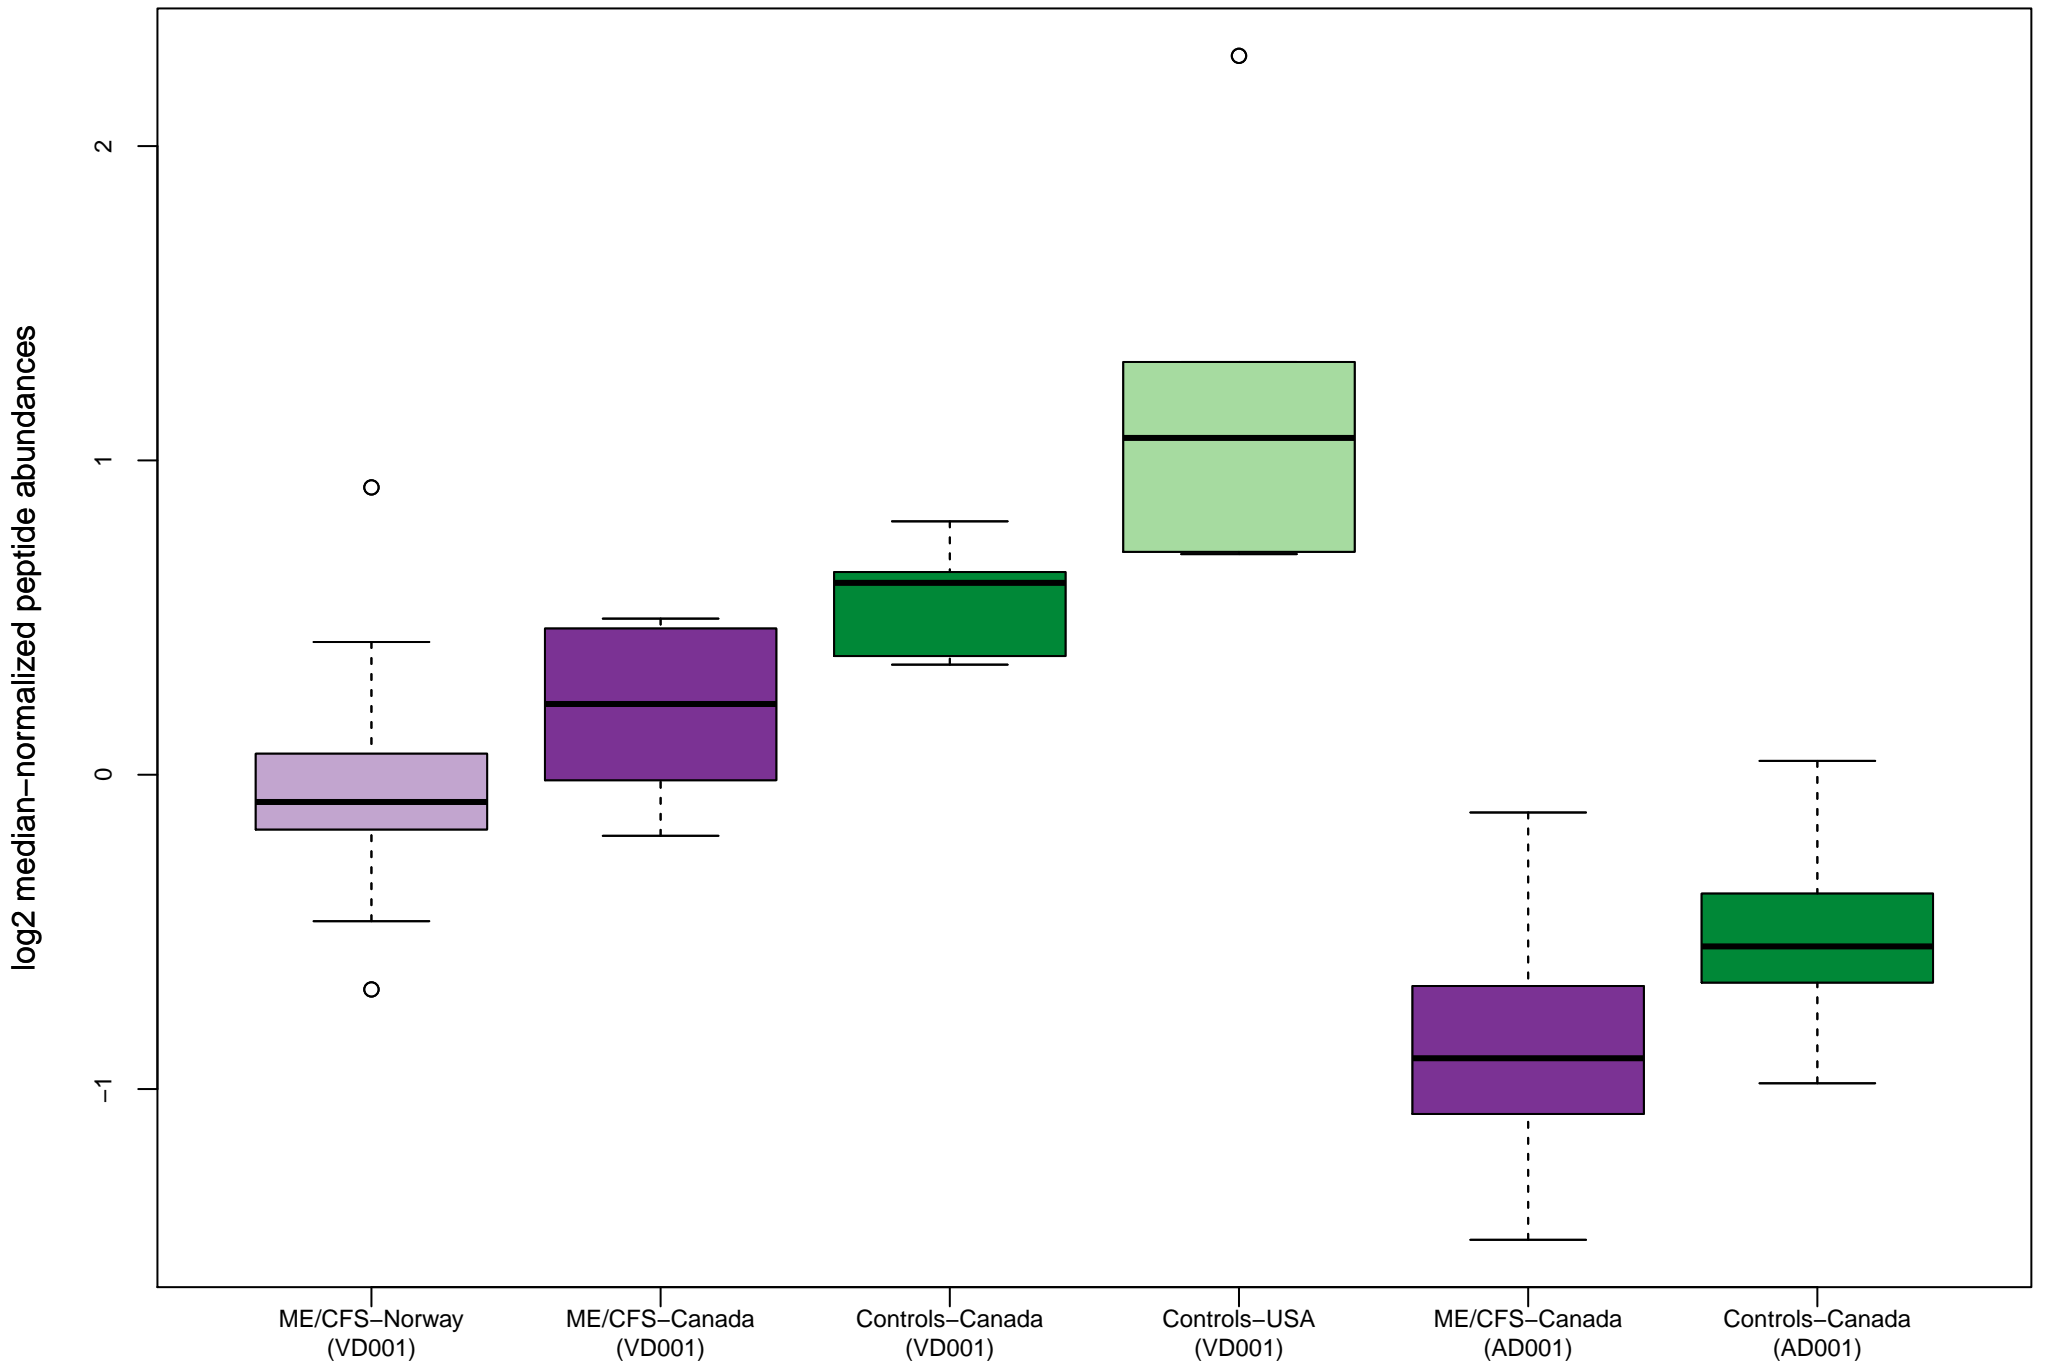

# RVRWWQPYGVLG

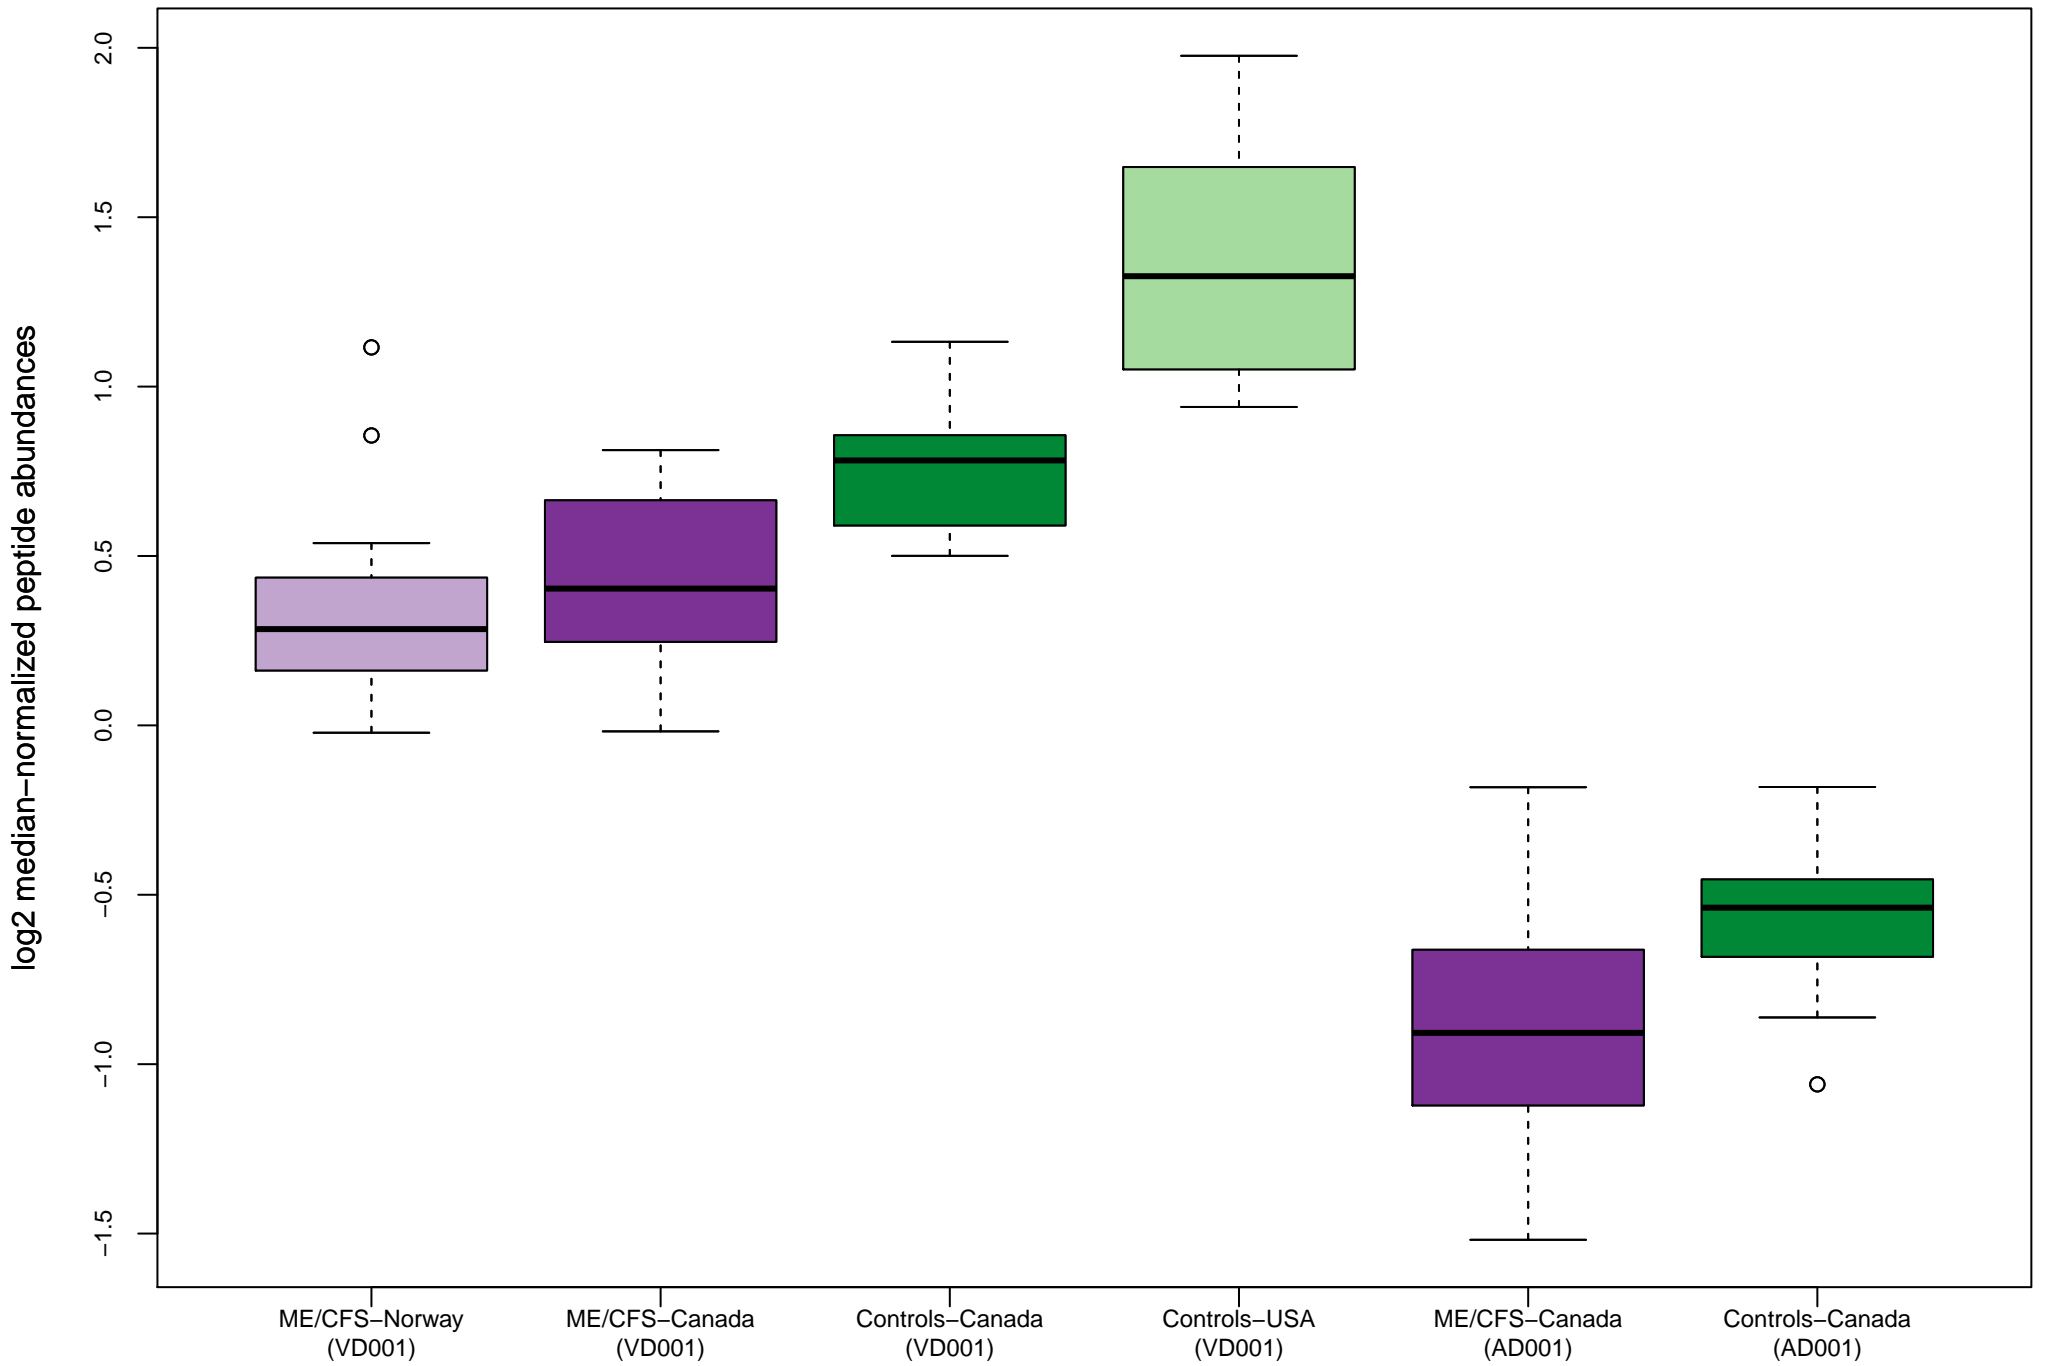



# RWKWPYNVFPVL

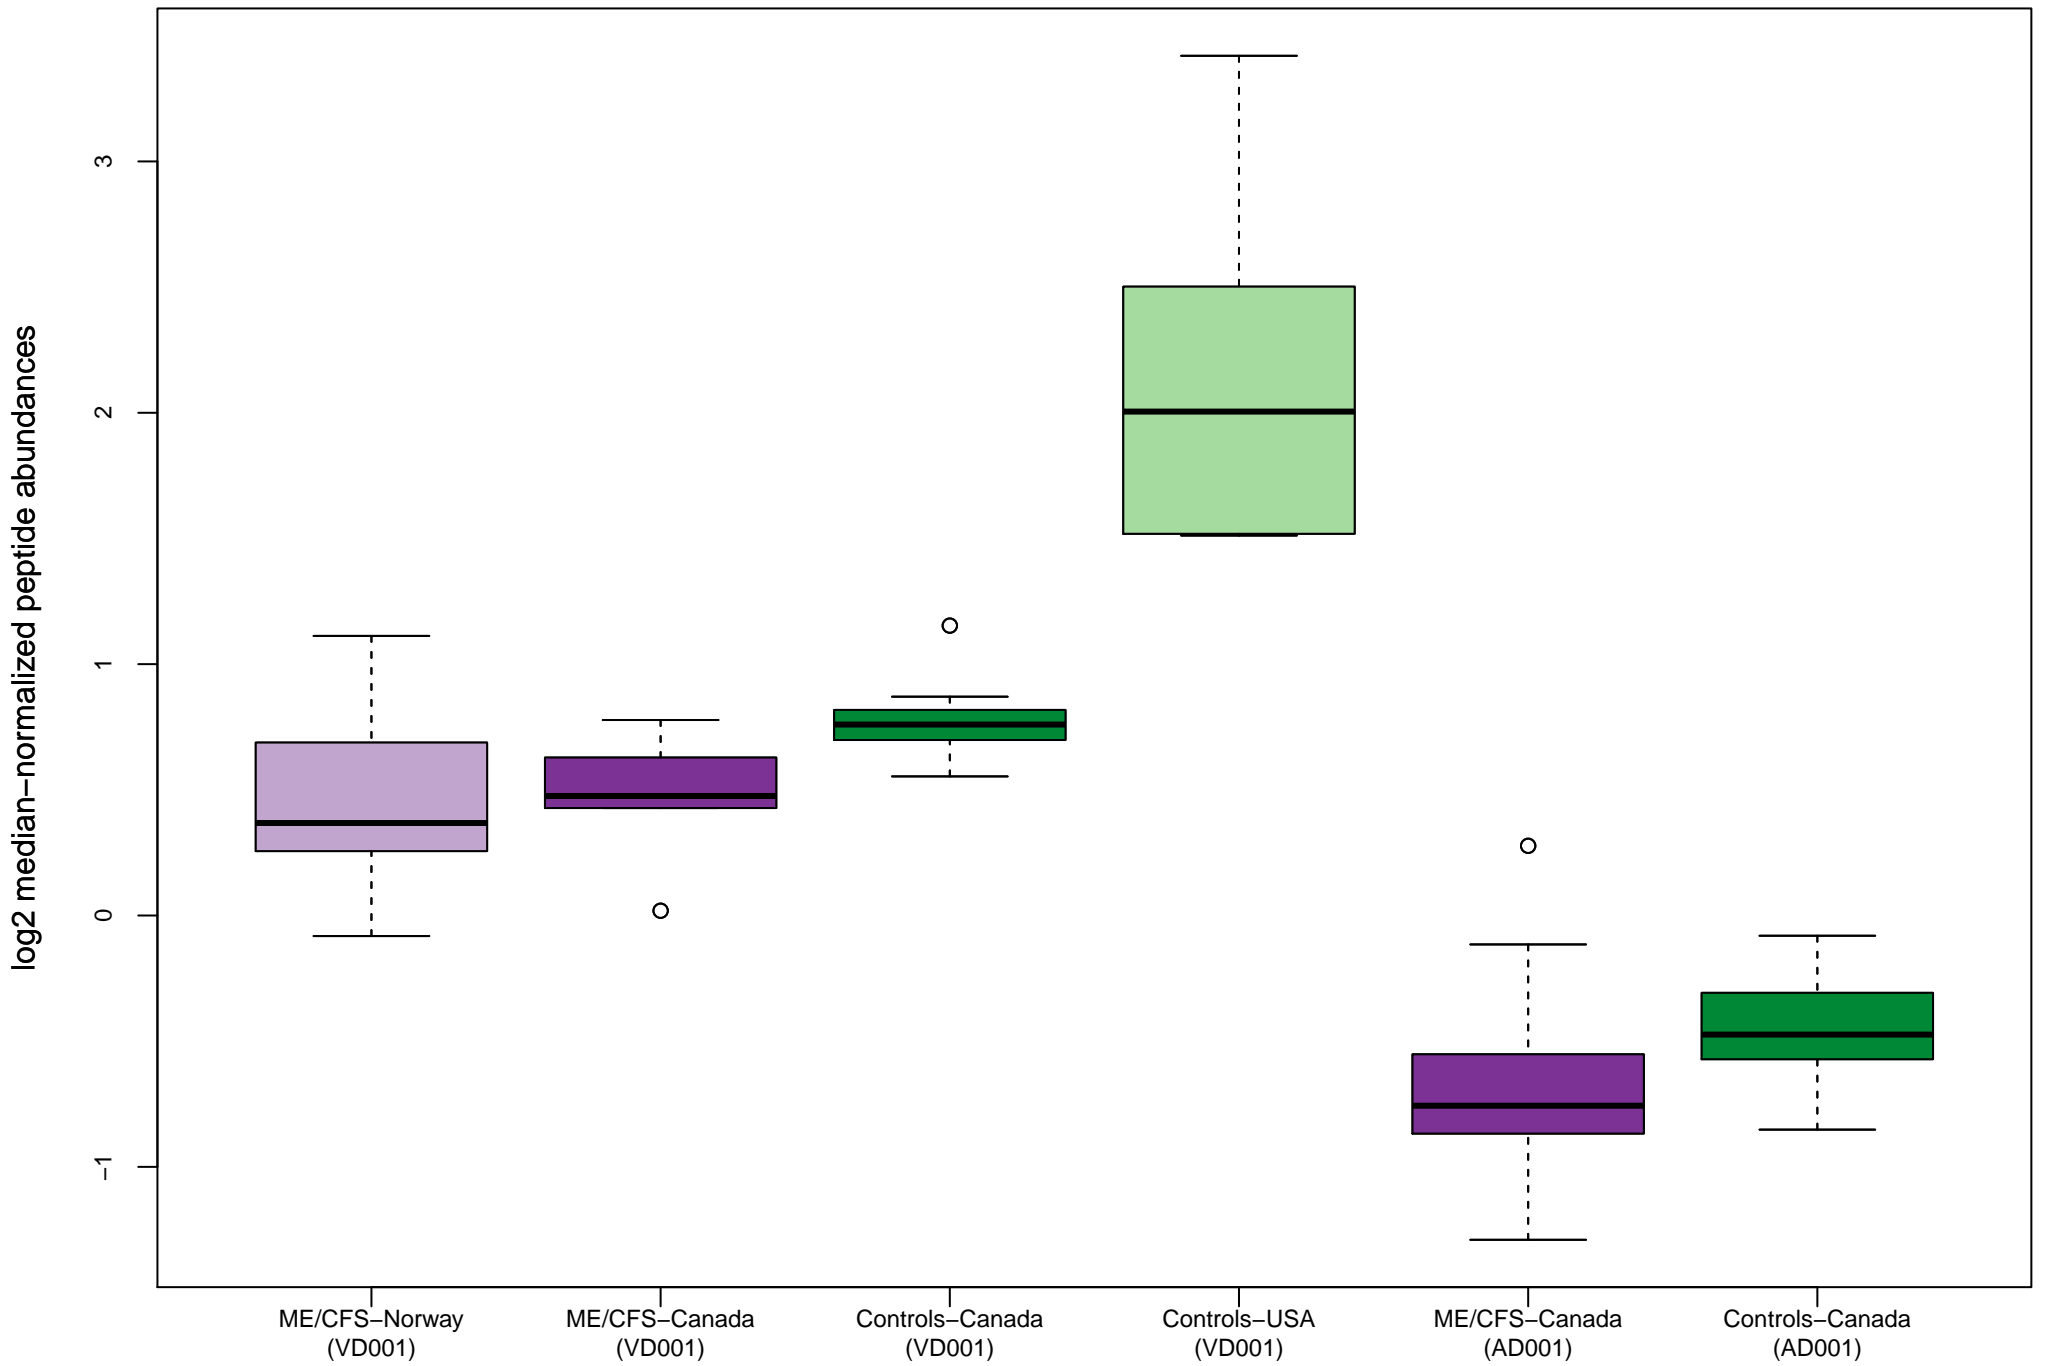

# RWWQFPGYKLLS

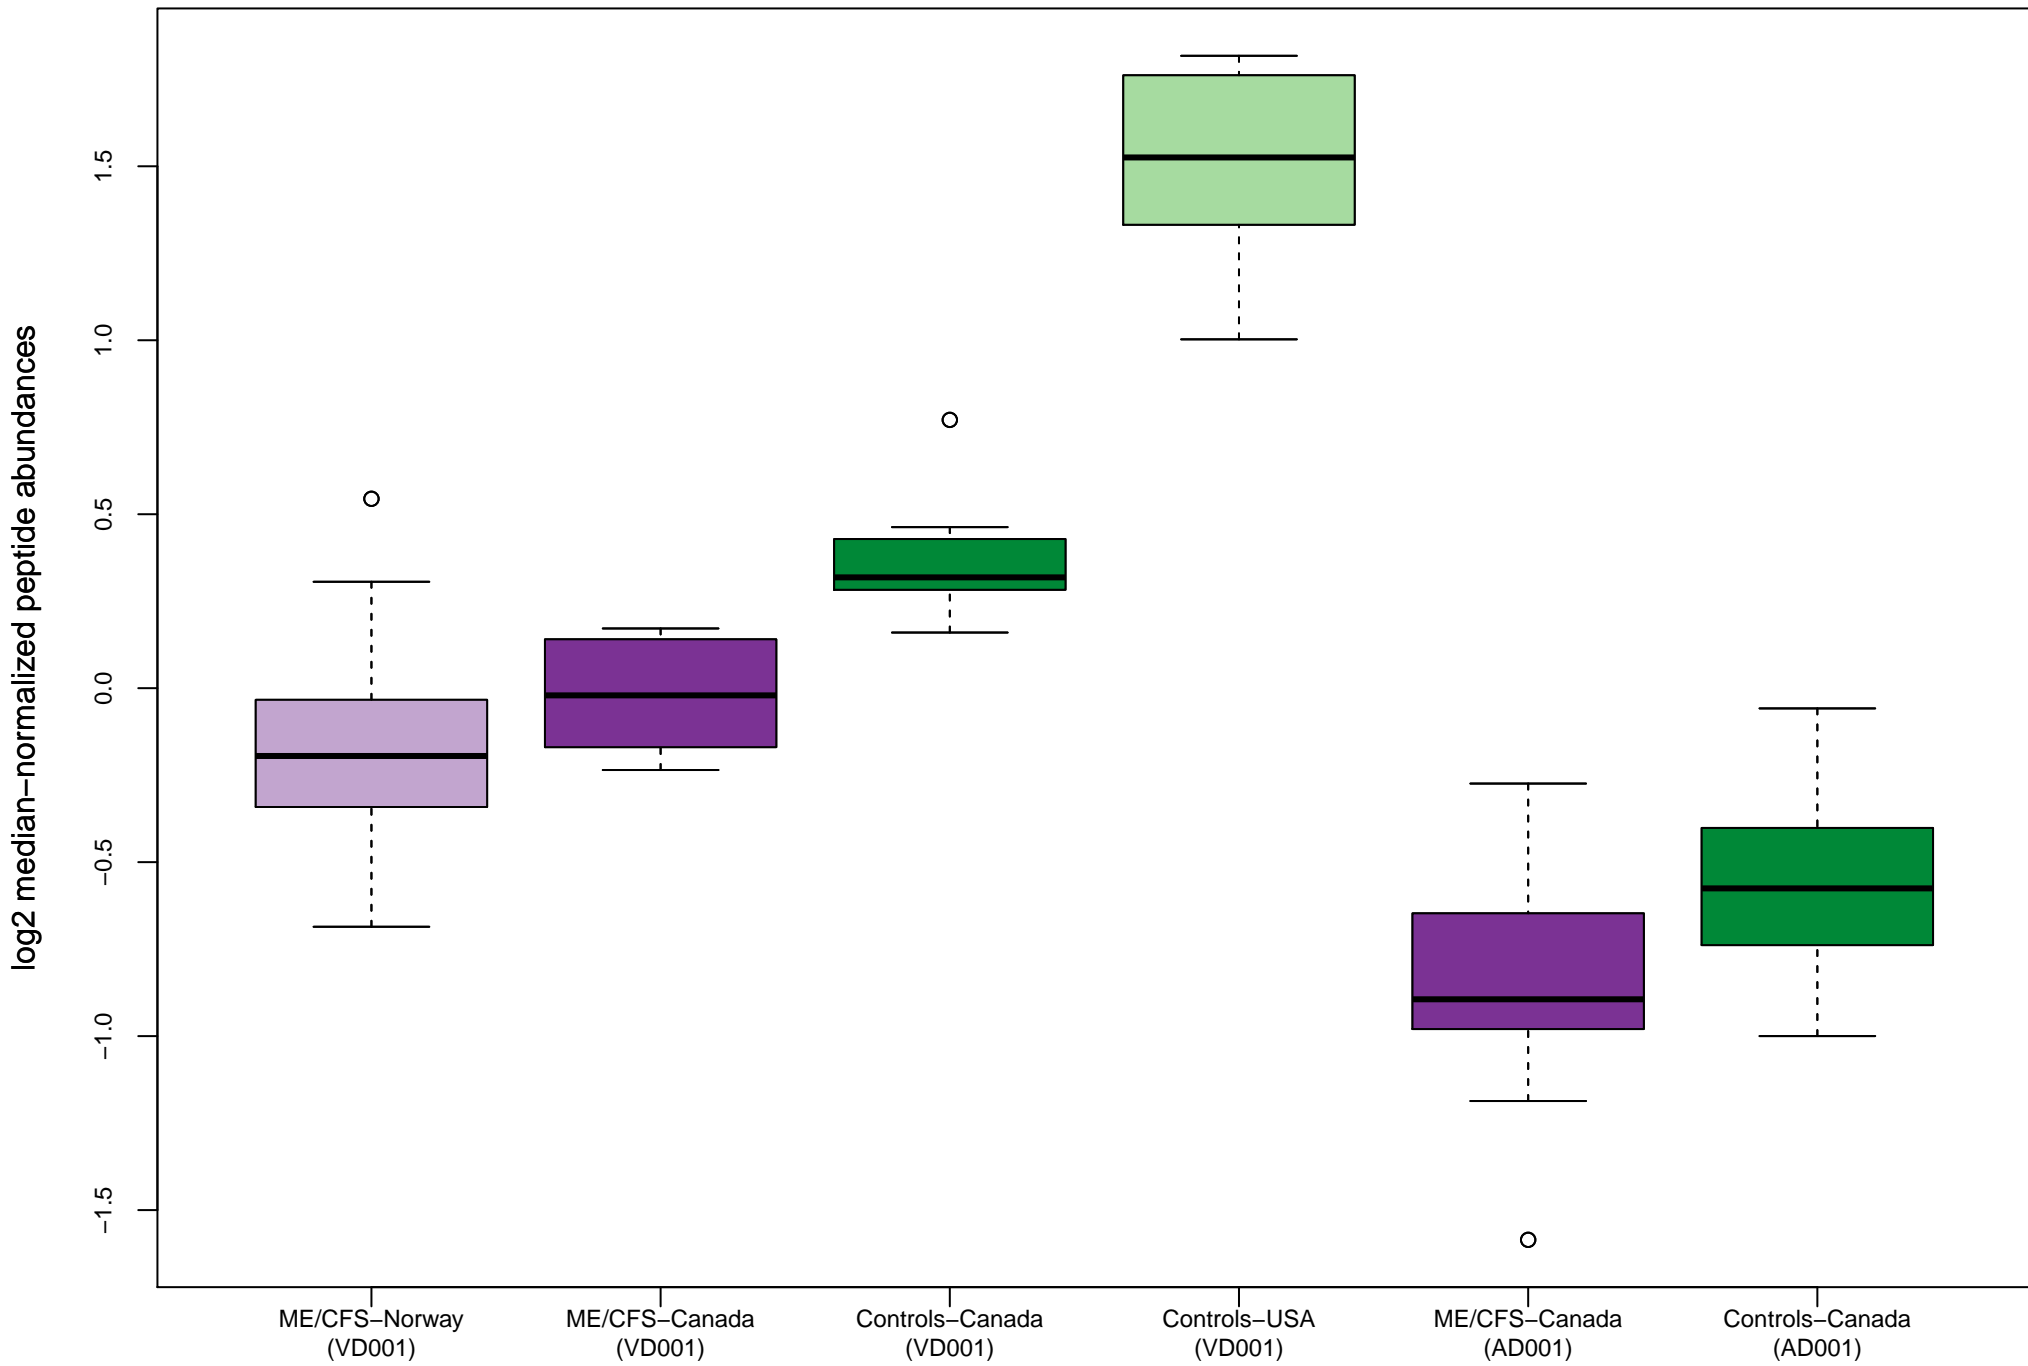

# RYAFSGRLQVLL

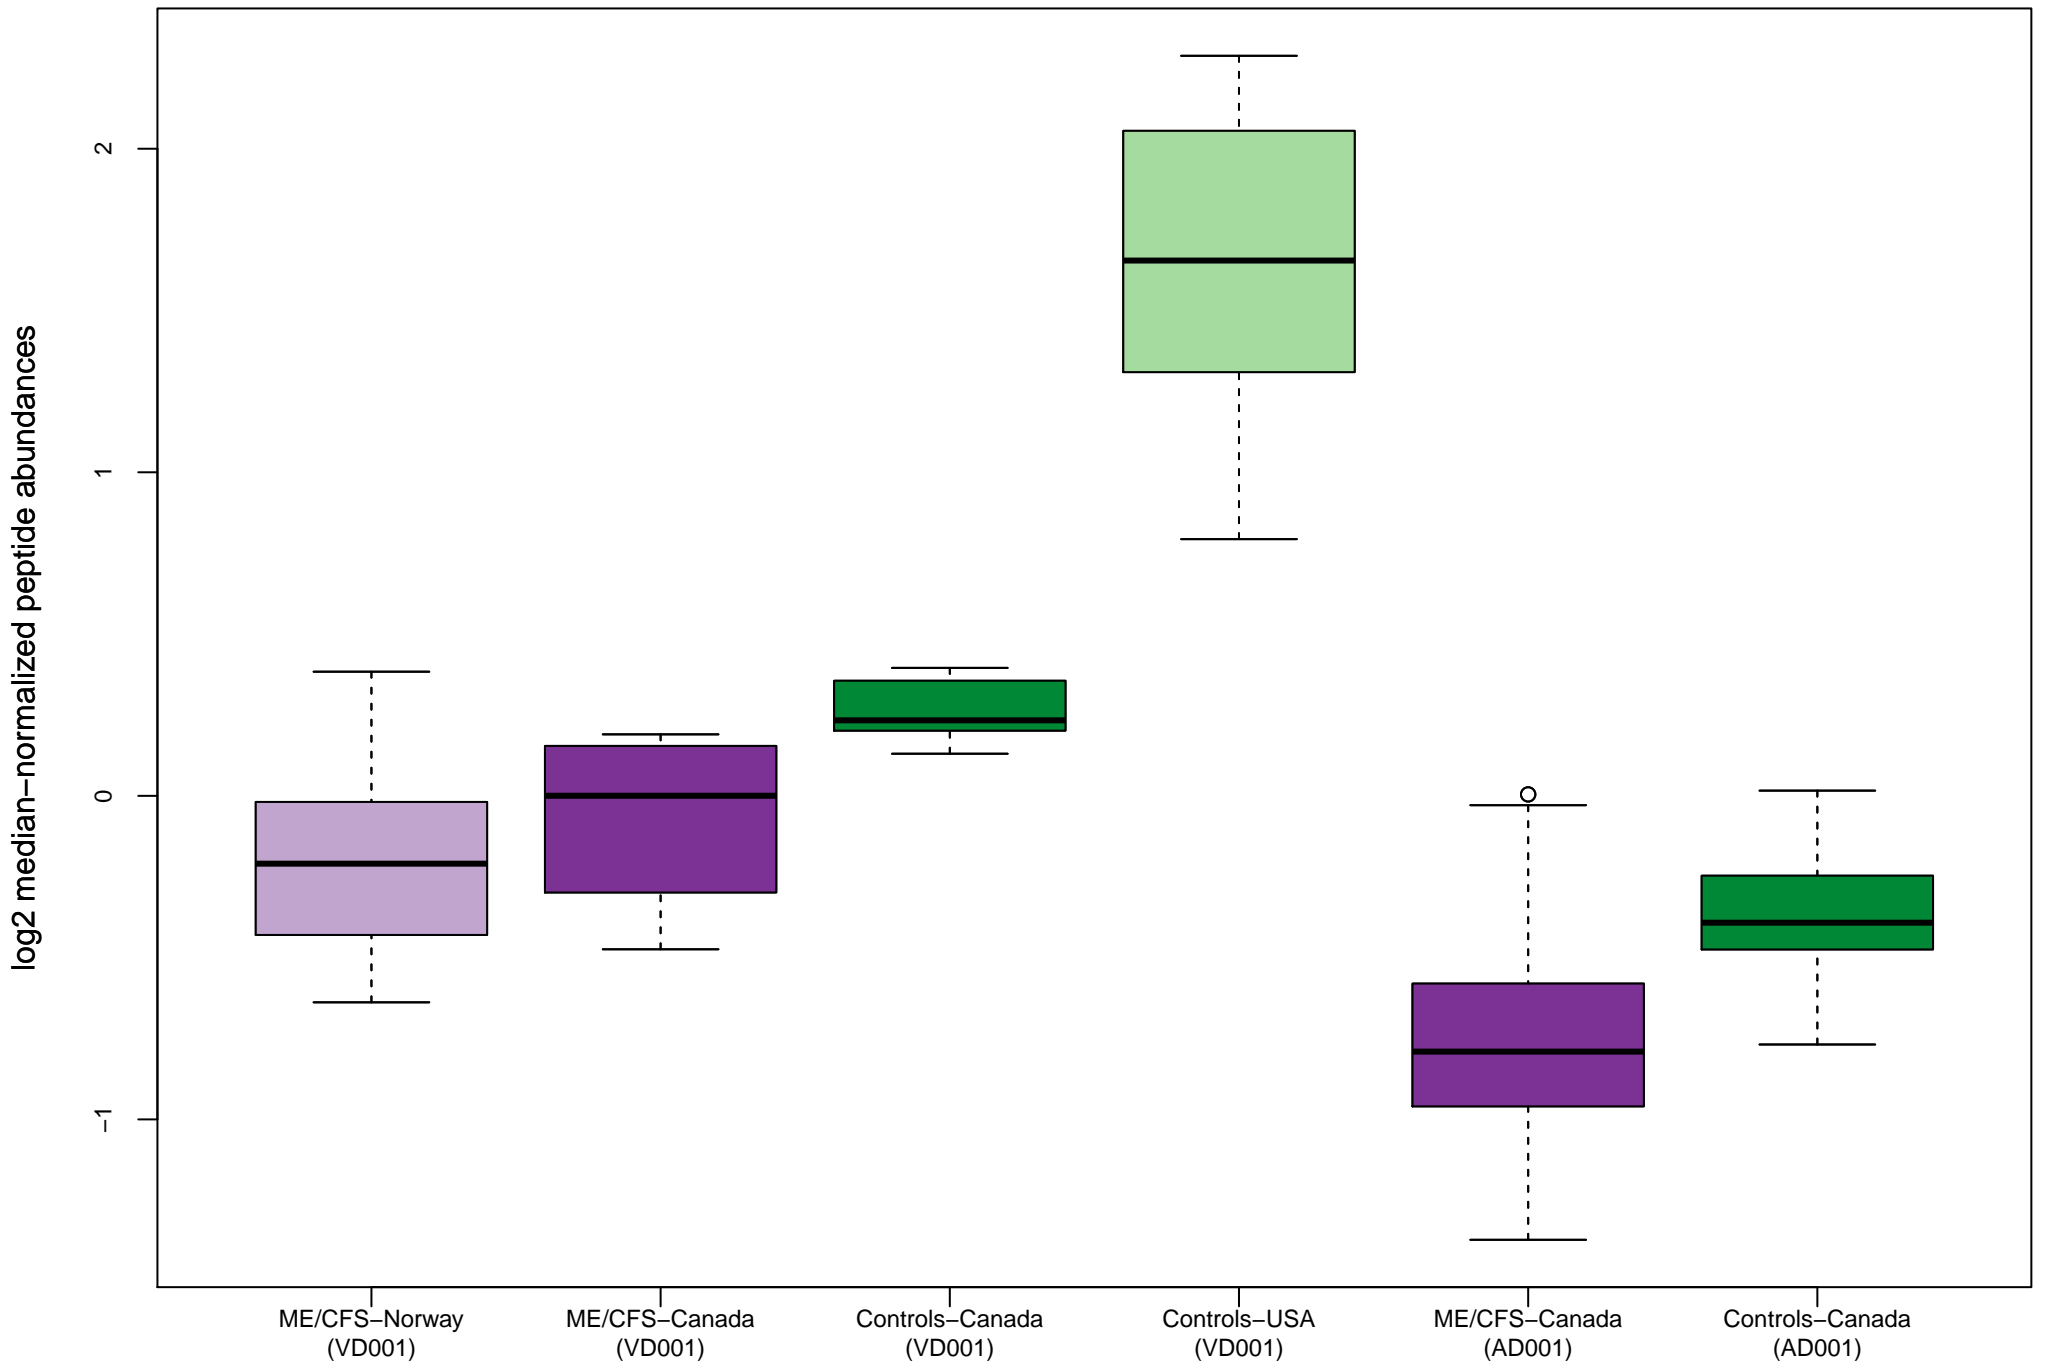

# RYFQRWVNL<sup>S</sup>AL

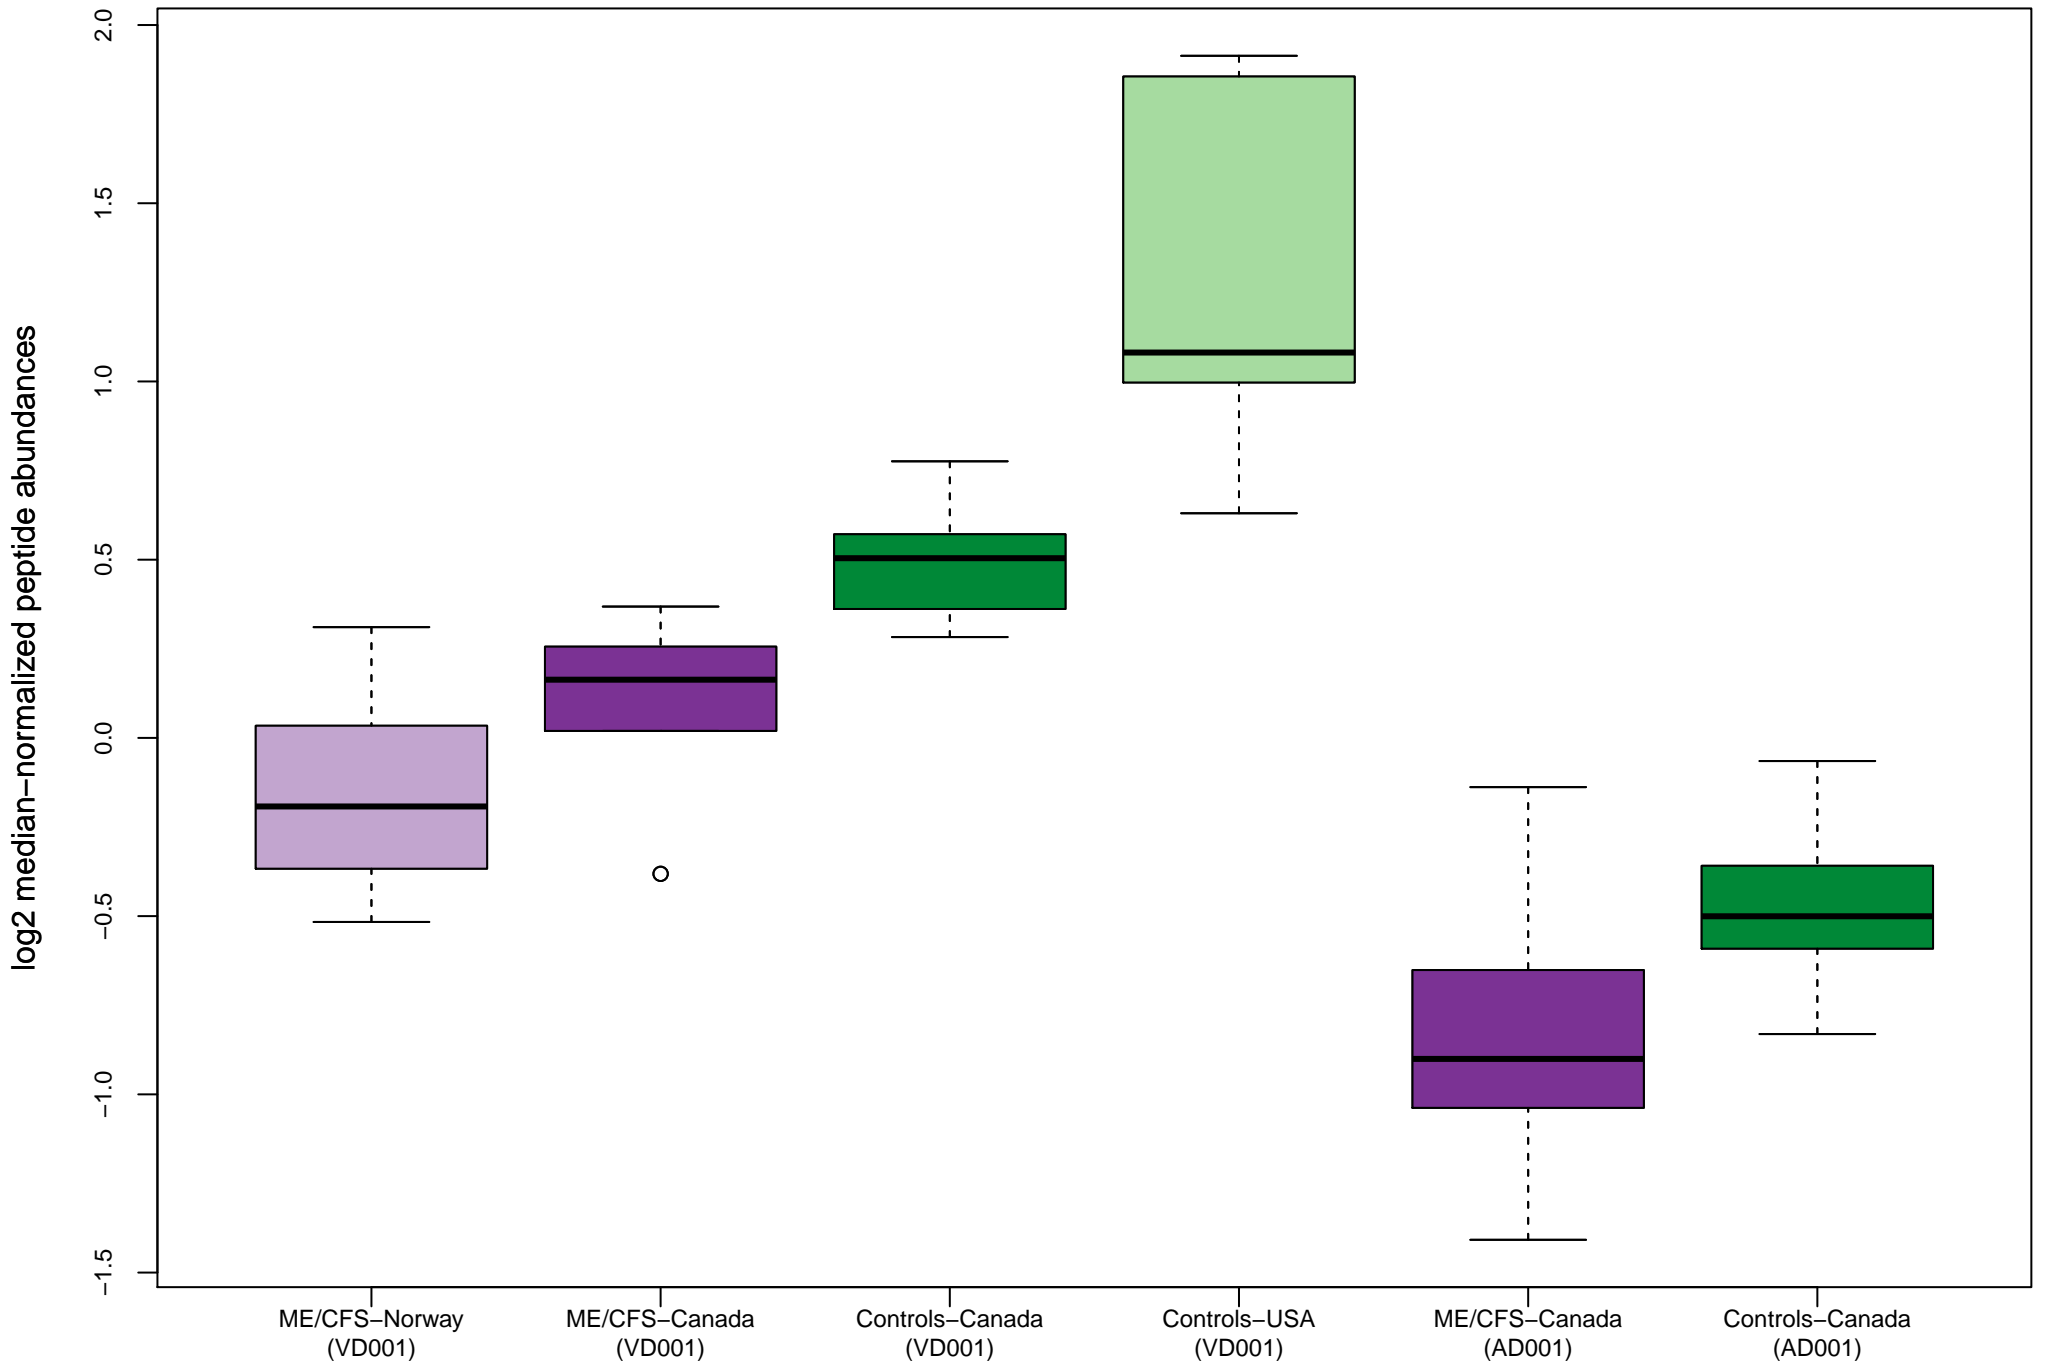

# RYFSVSRHVVAL

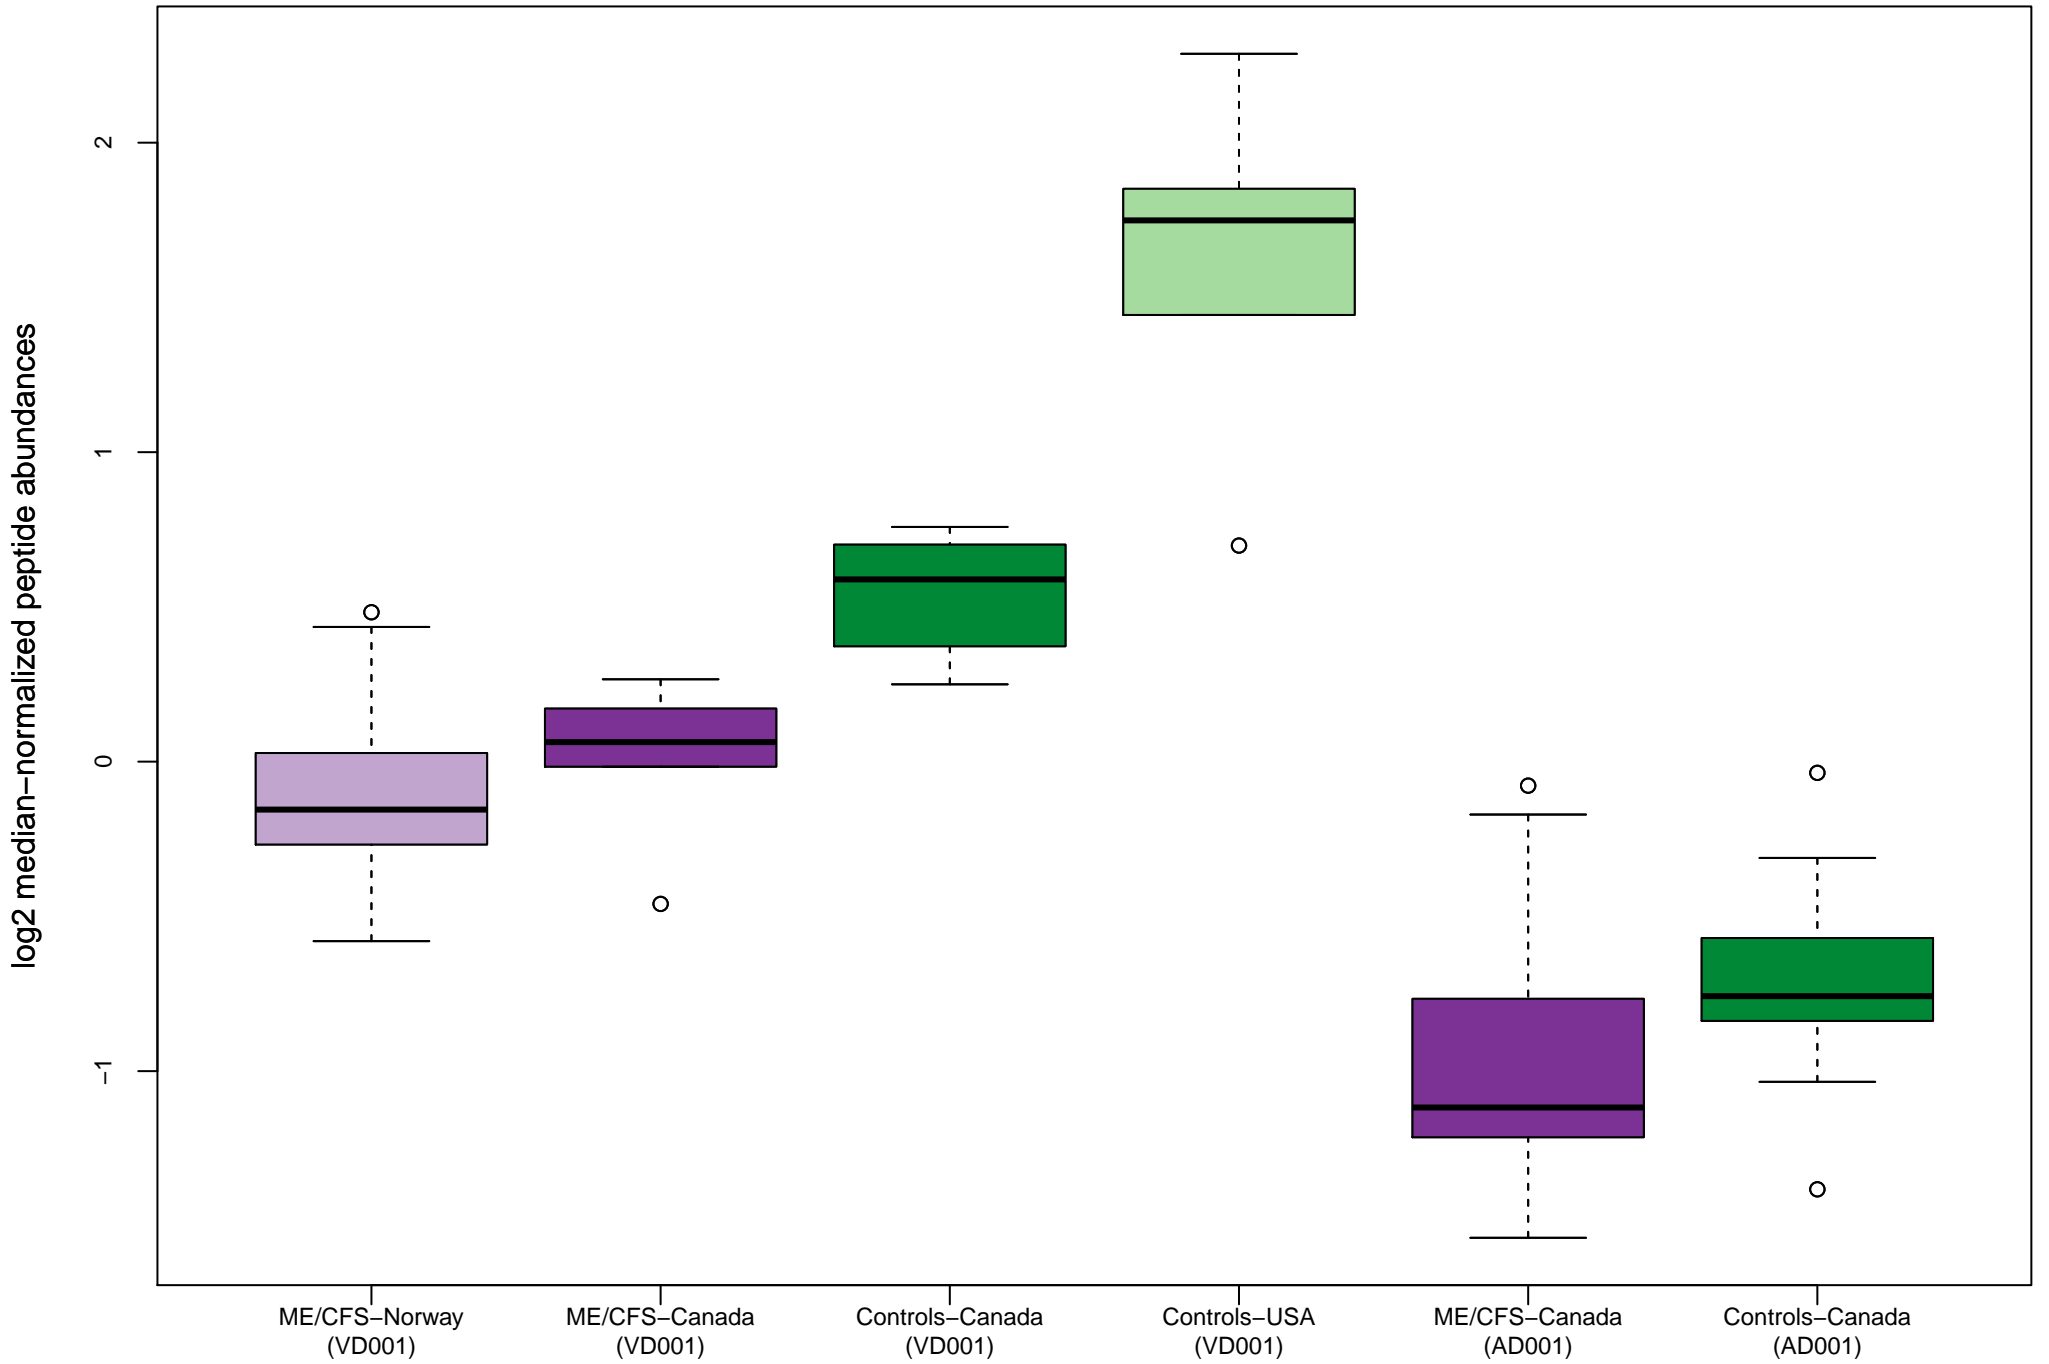

# RYLLVLNKHALS

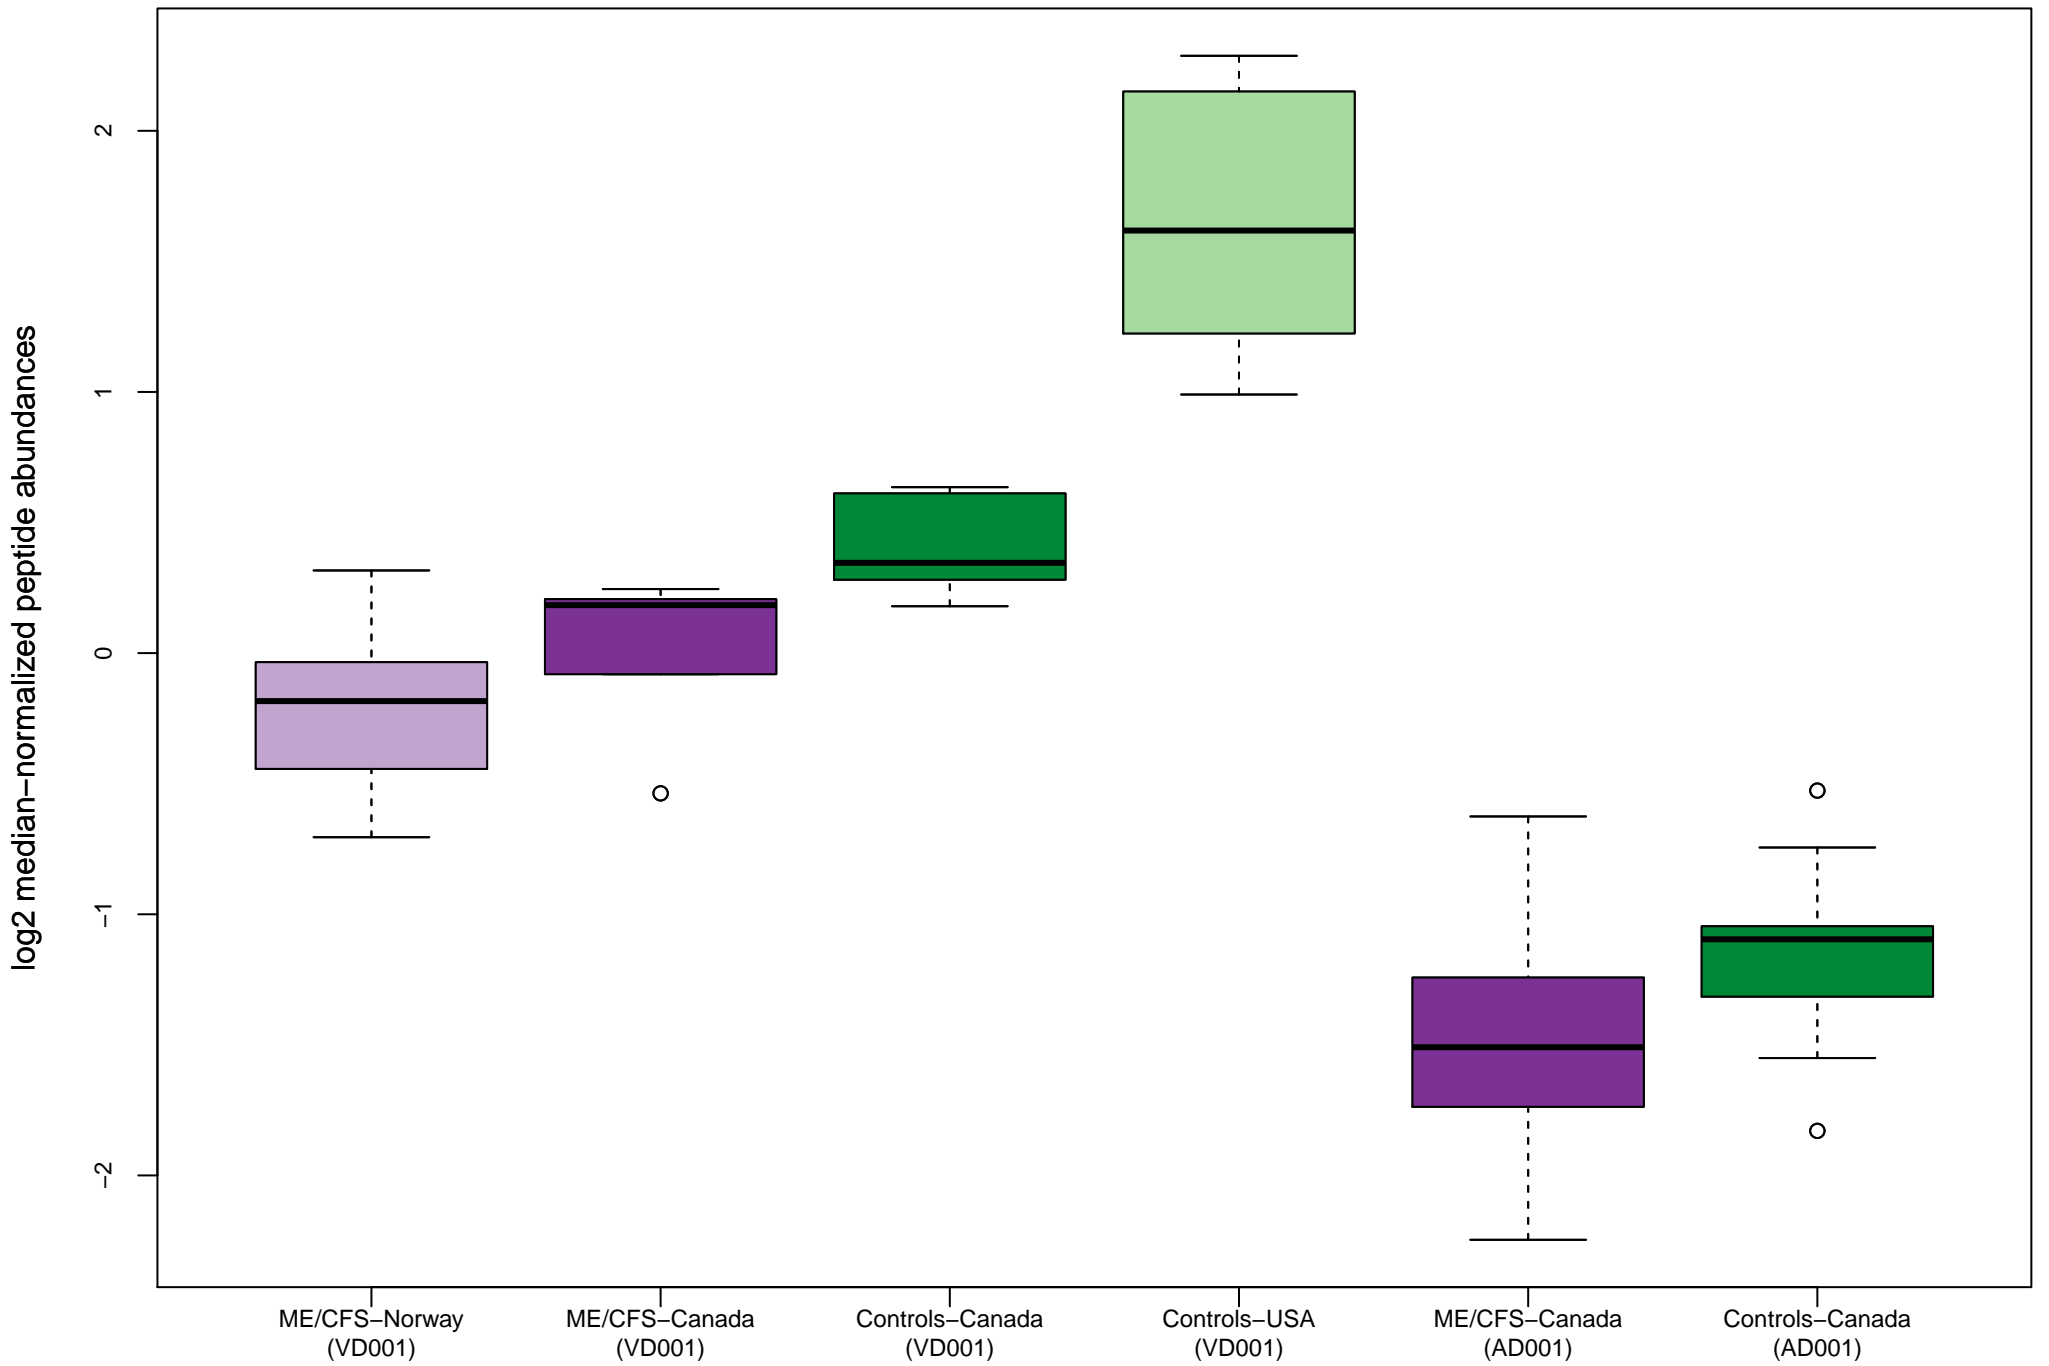

# RYPRLQFWKVV

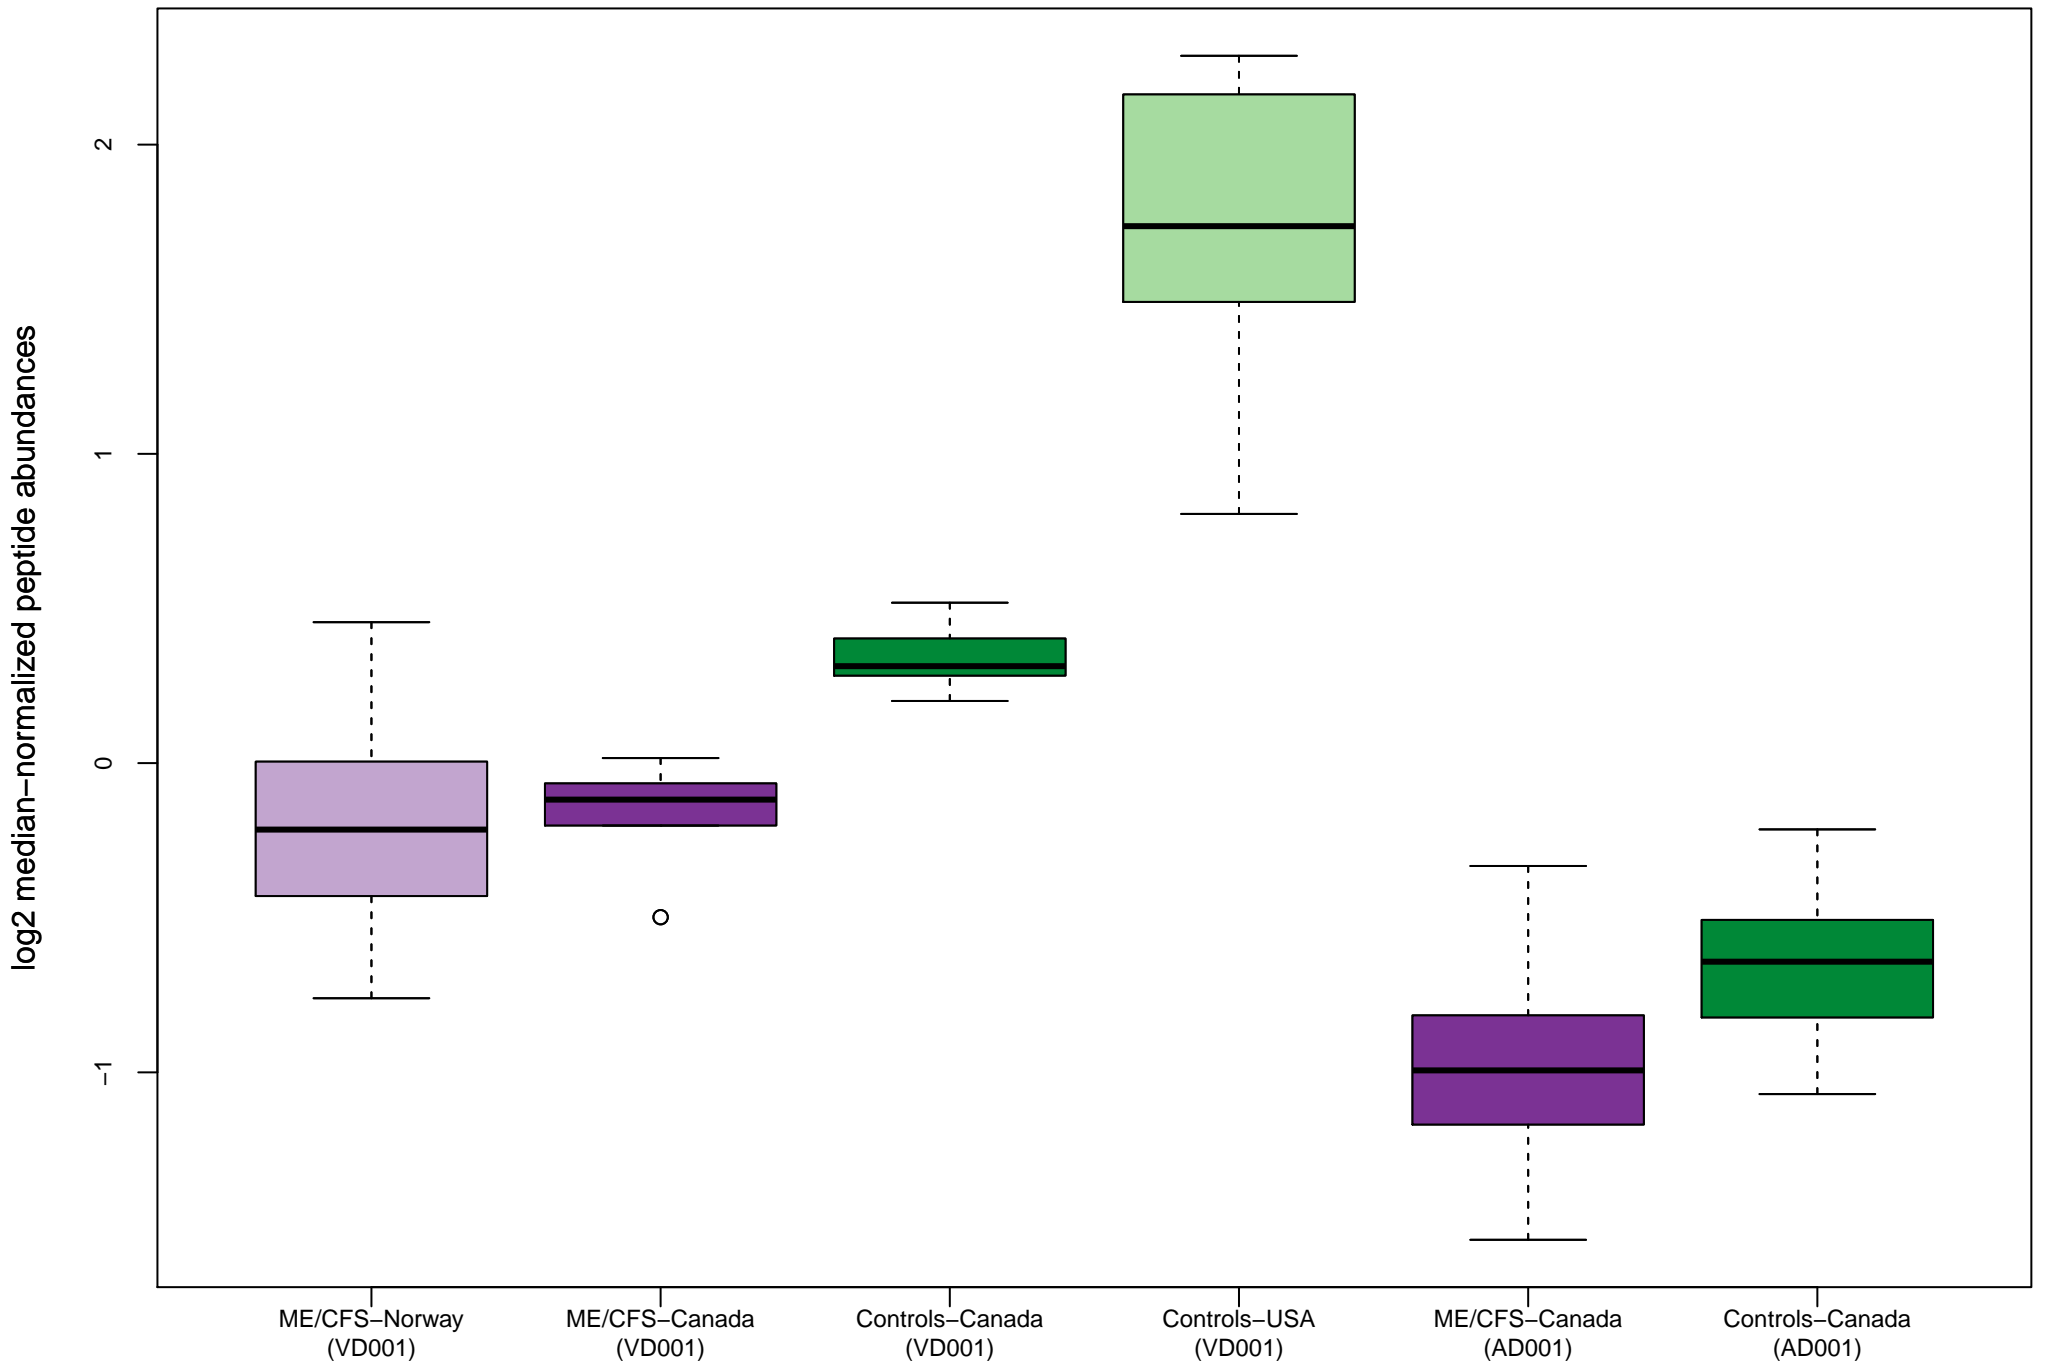

# SFFRLRSGVLSG

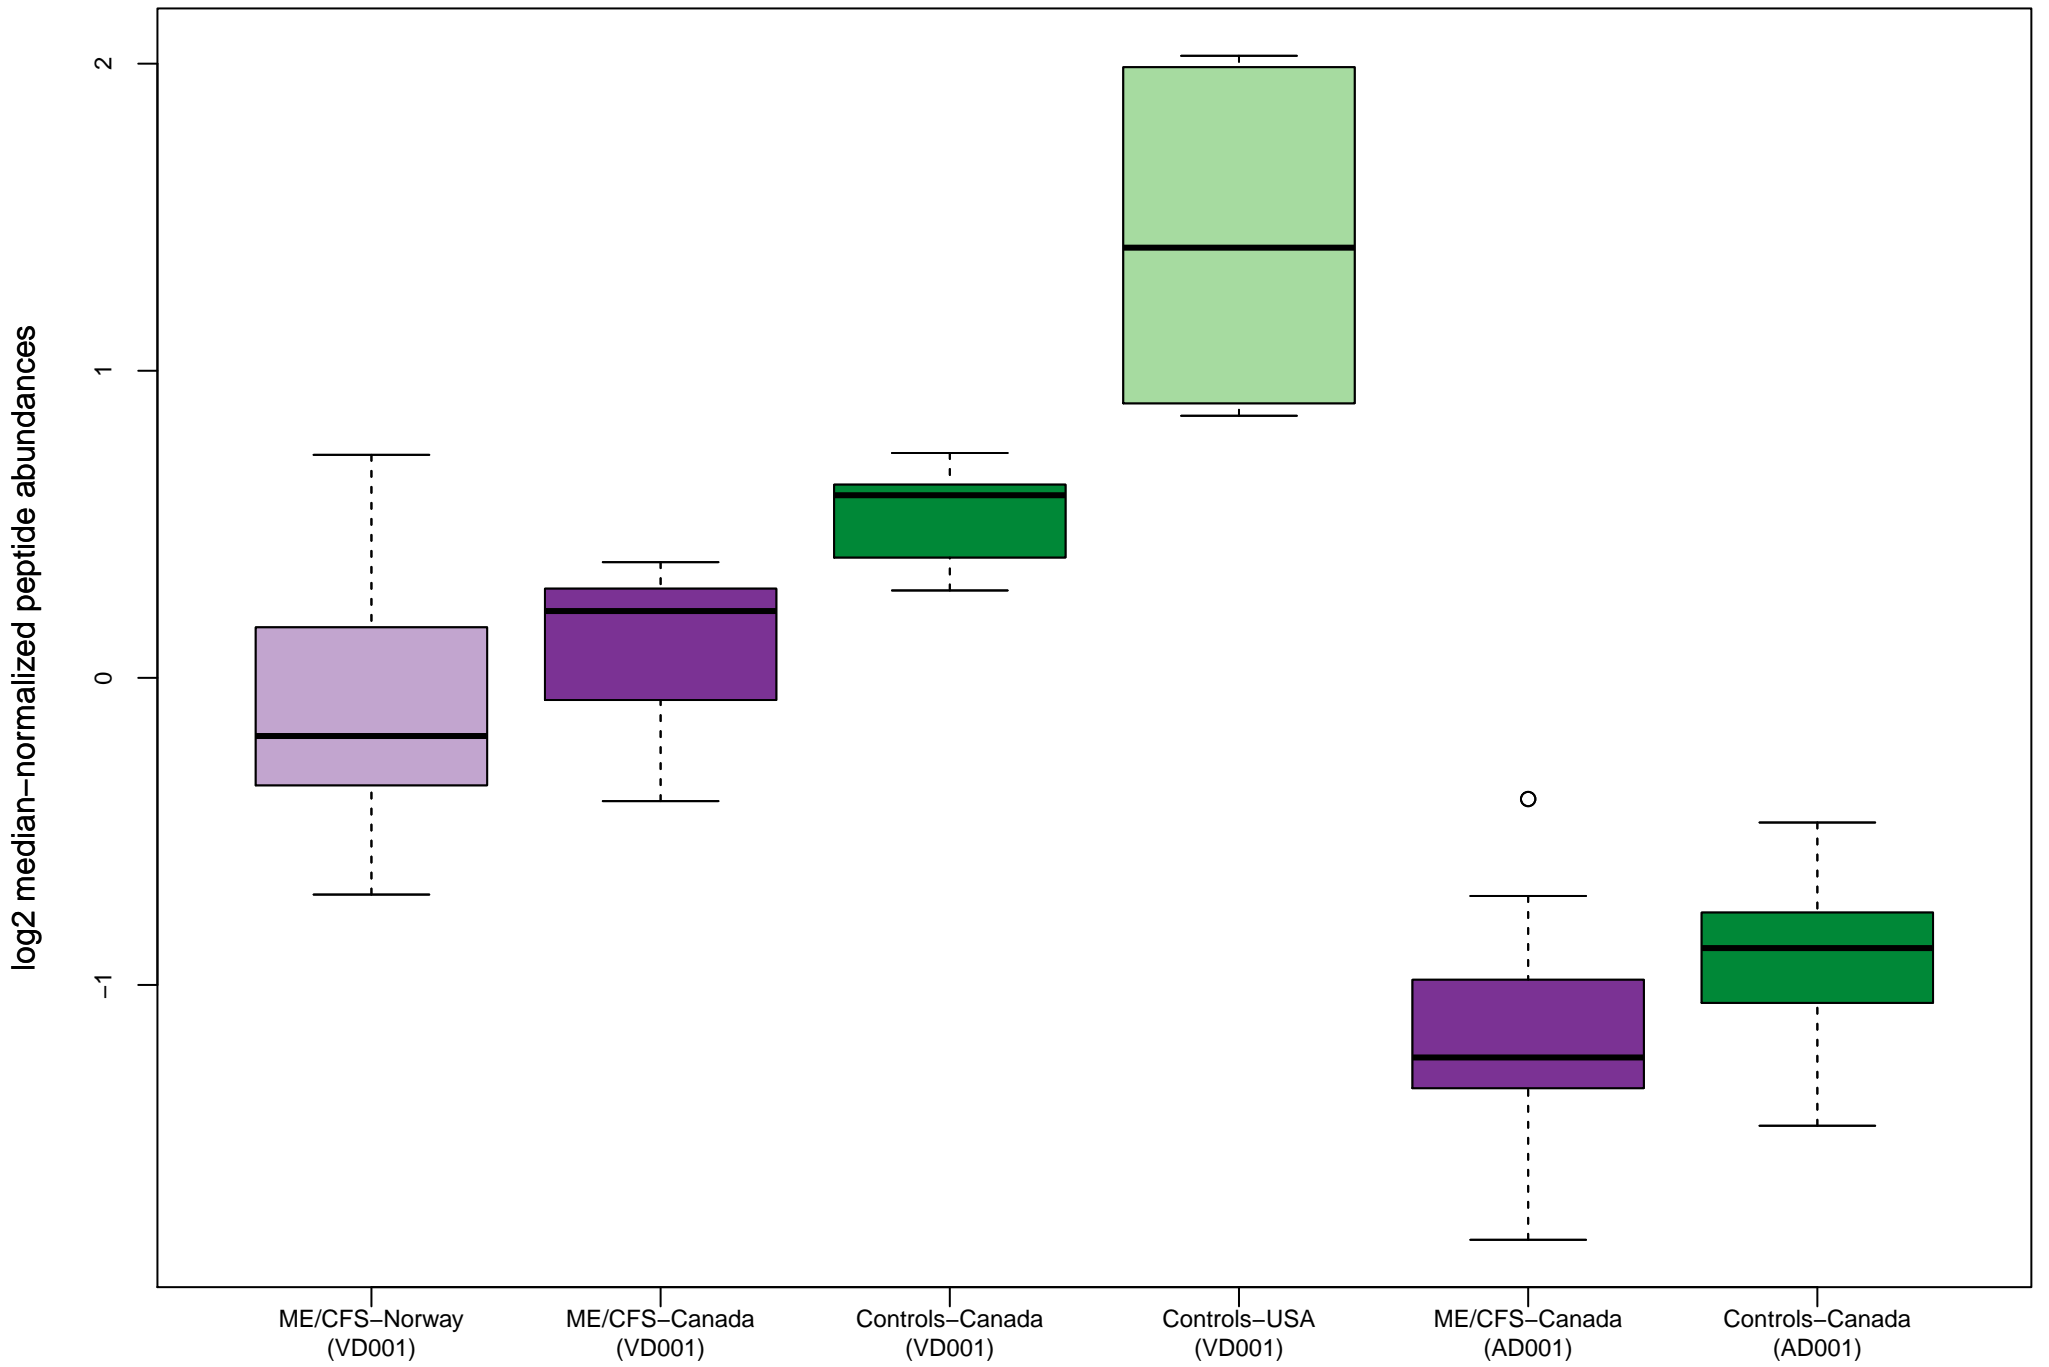



# SNQWKFGVAGS

log2 median-normalized peptide abundances

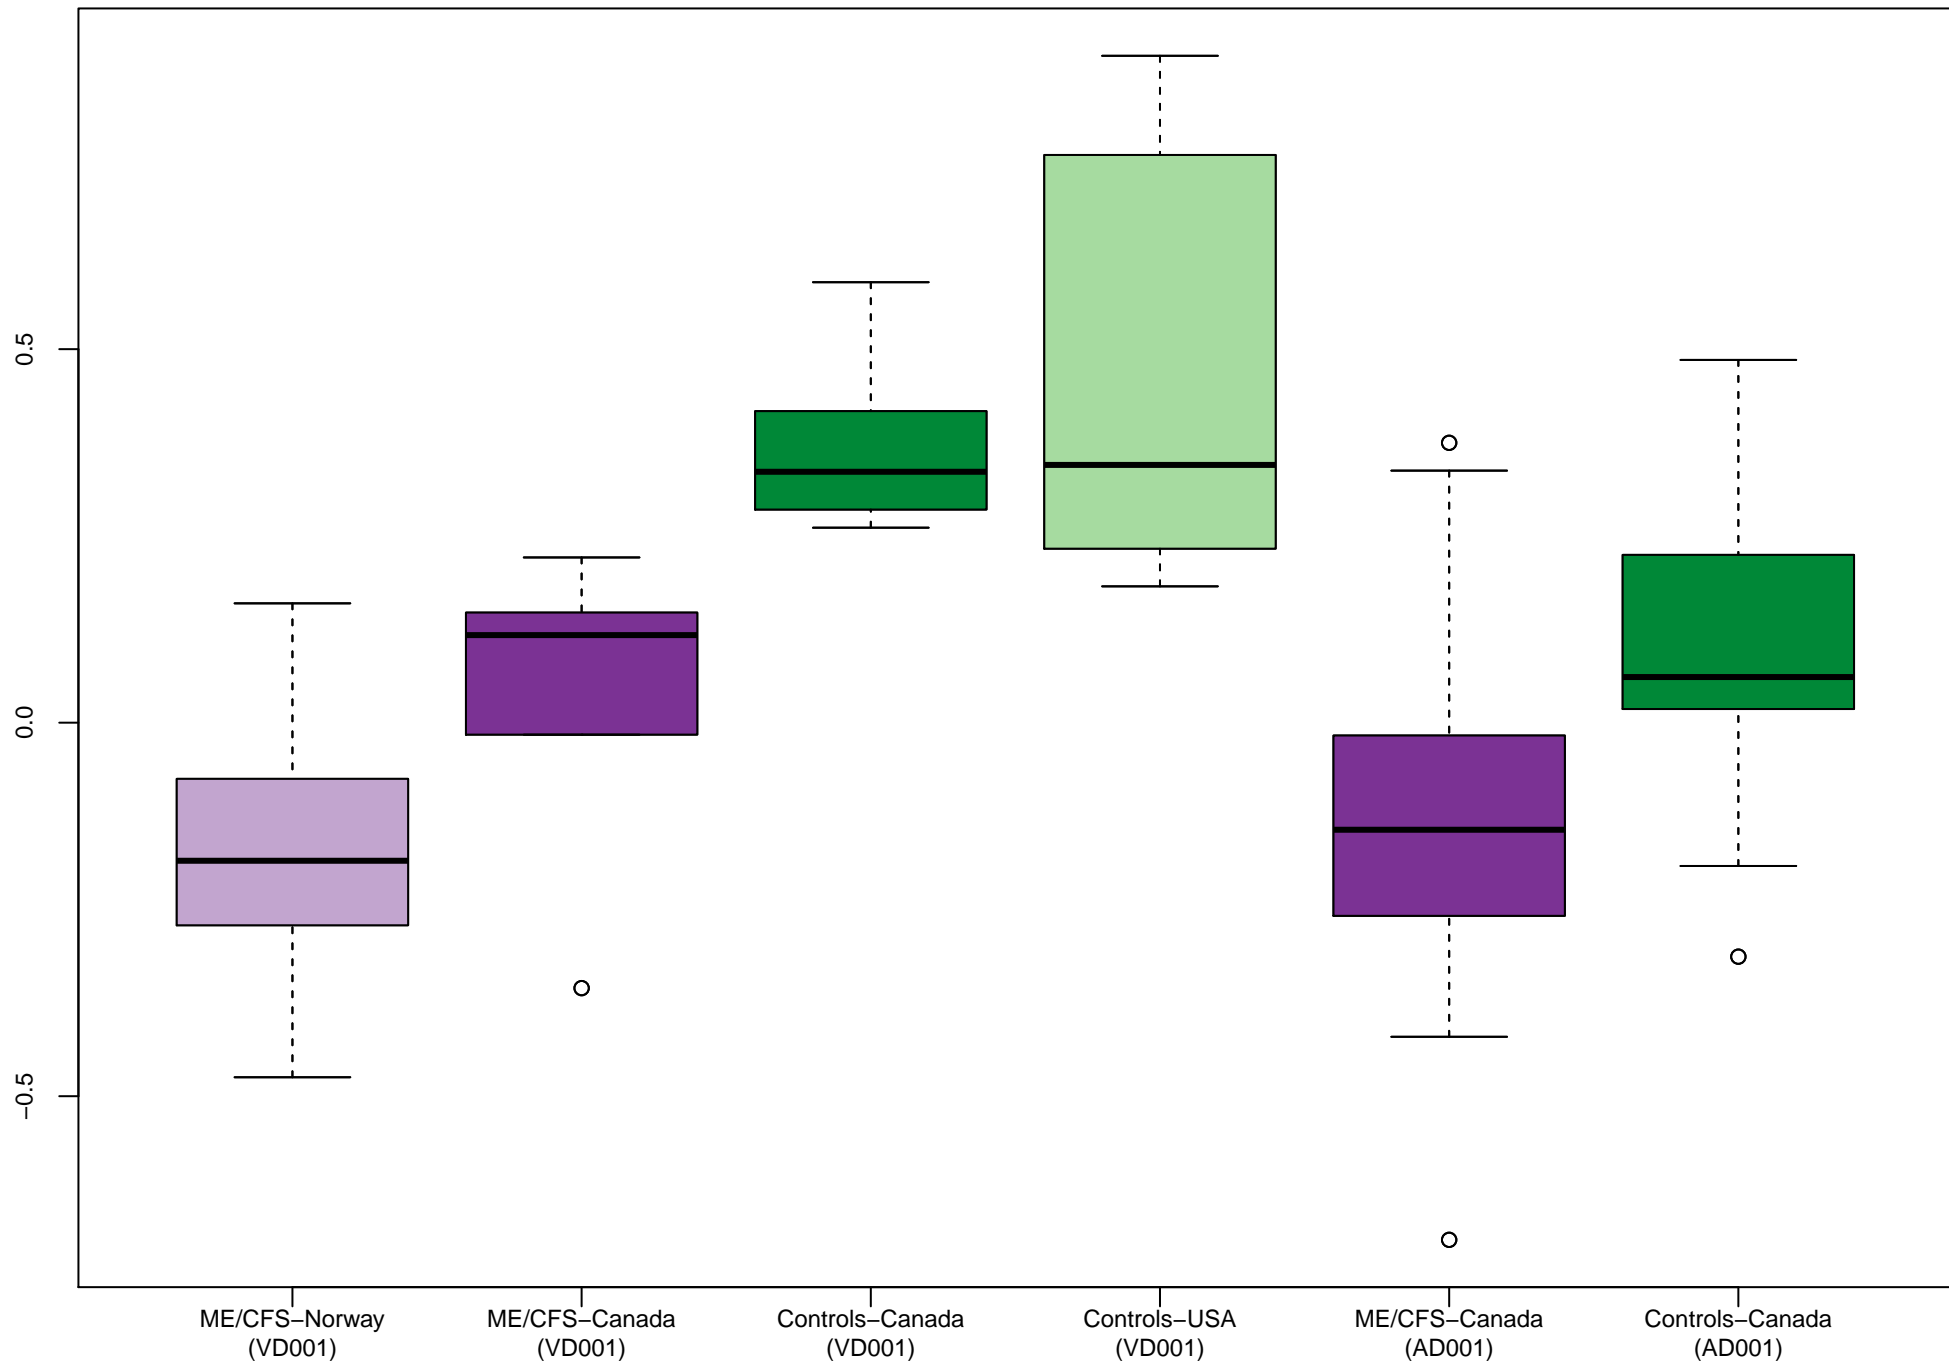

# SNVYRWLSGALG

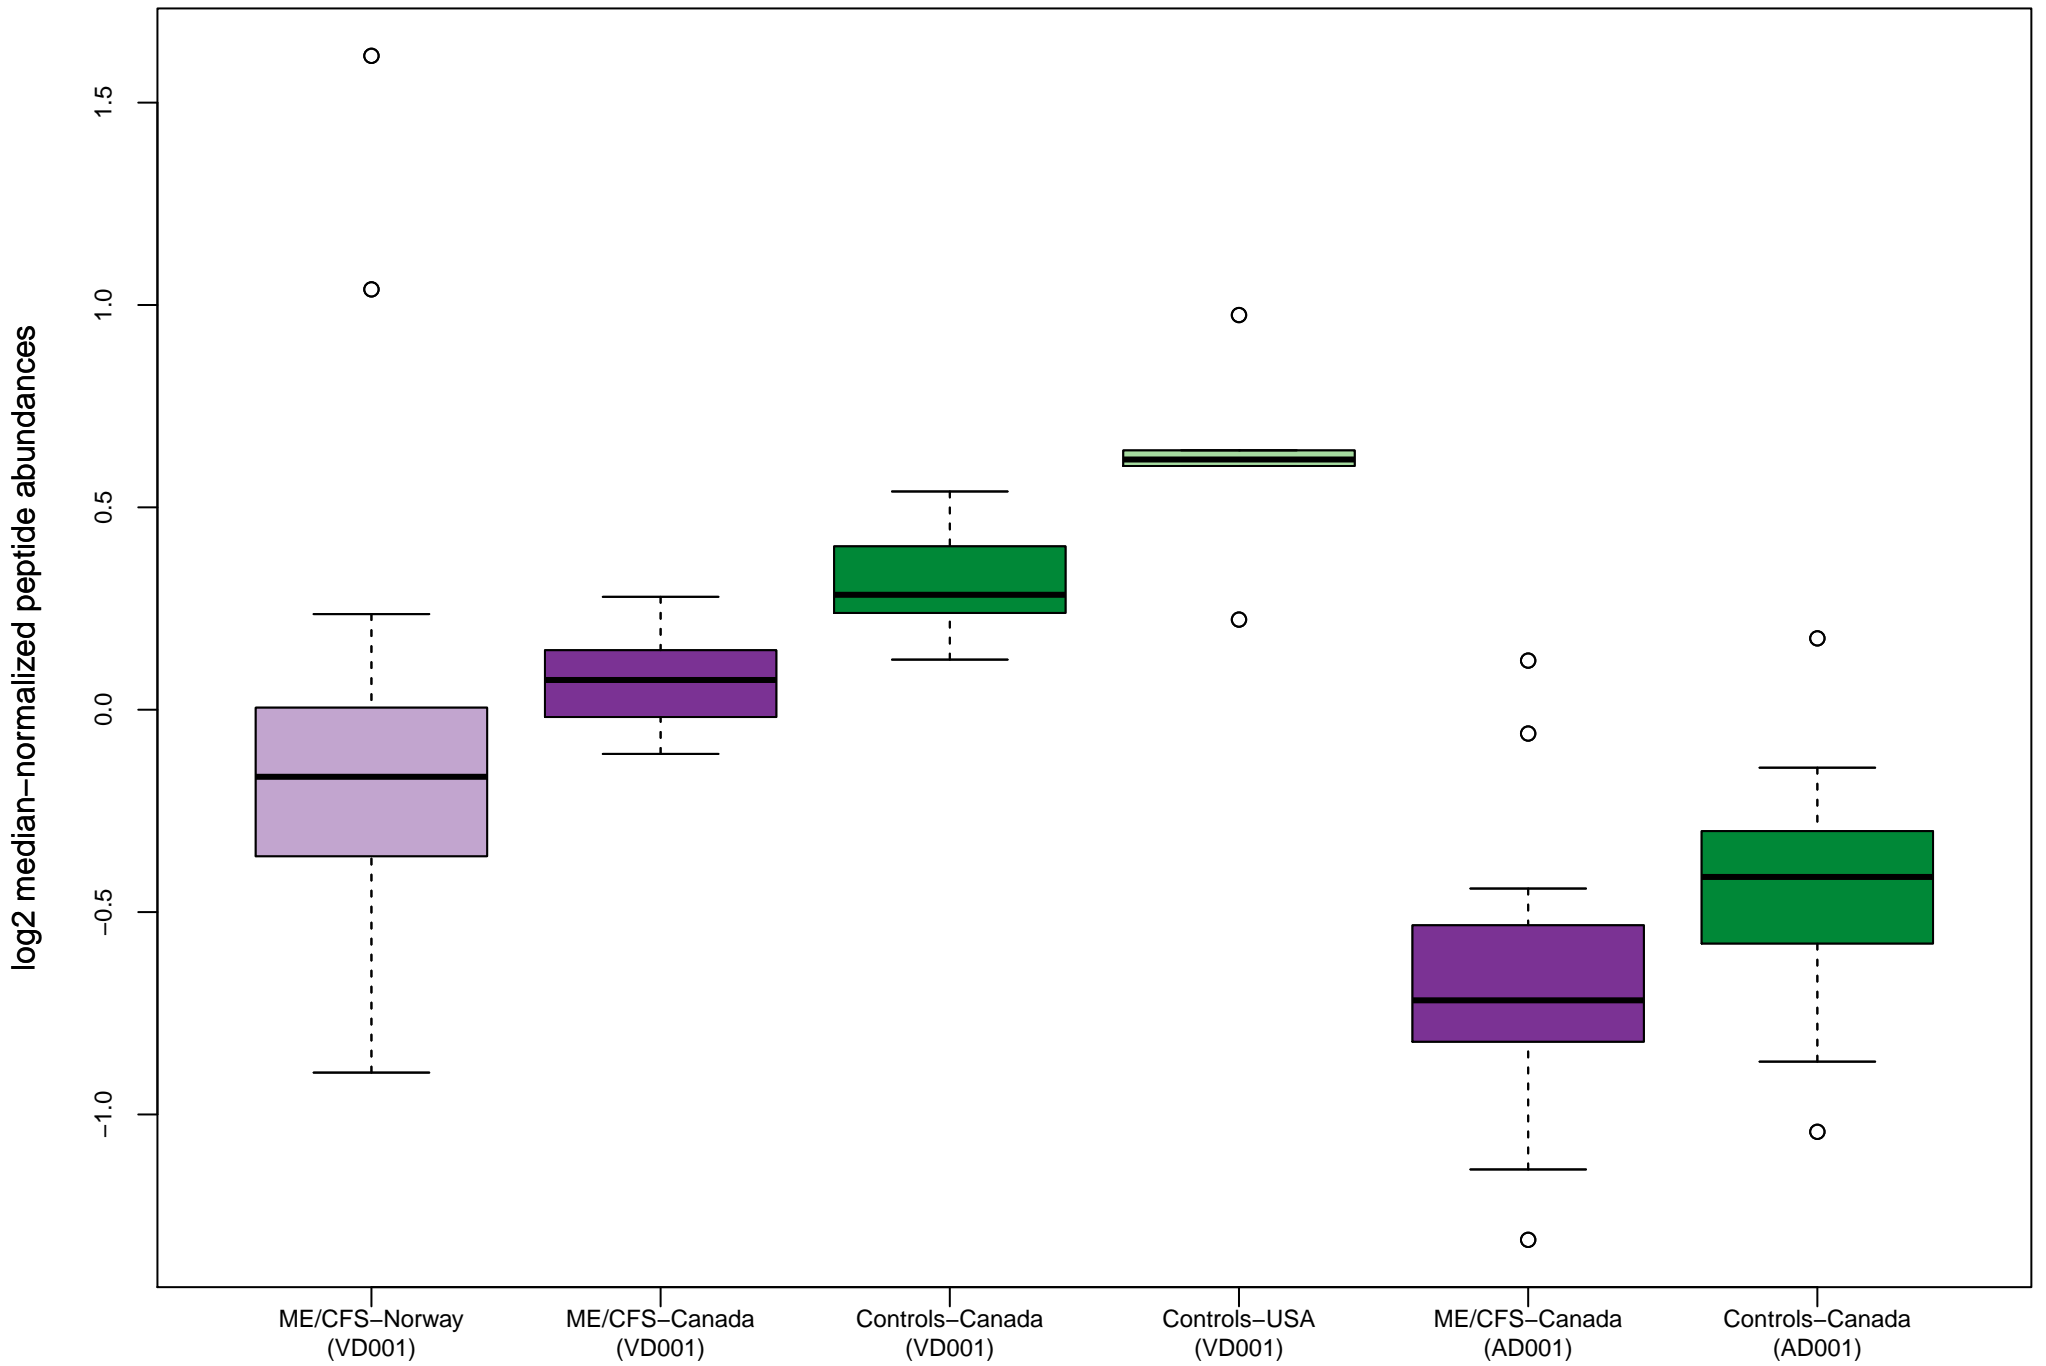

# SPFVSKLSGVLS

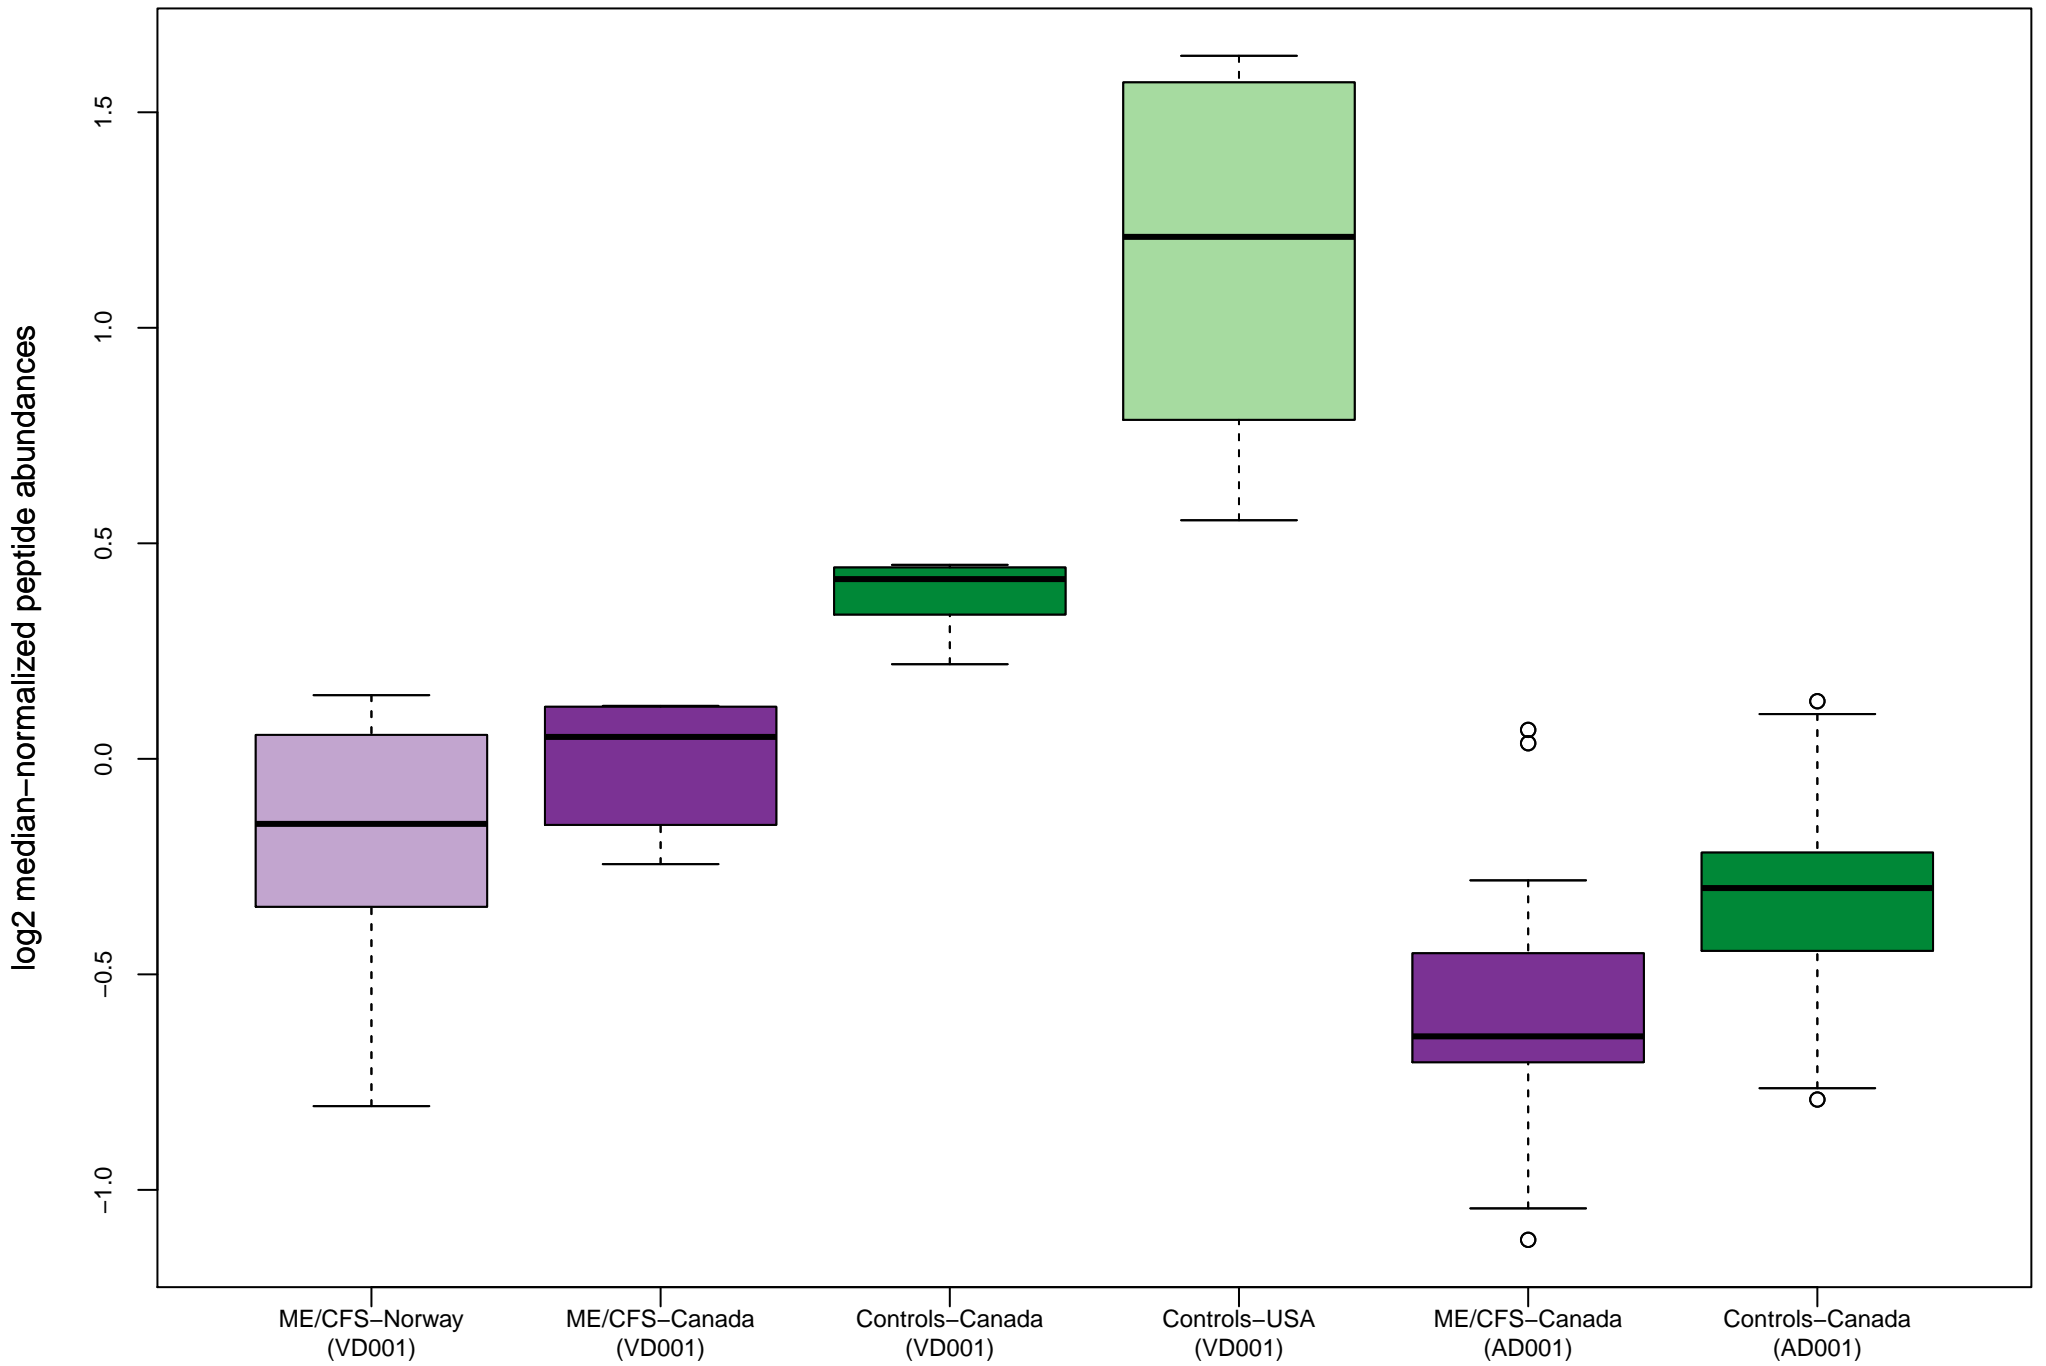

# SPQFRFWNVSGL

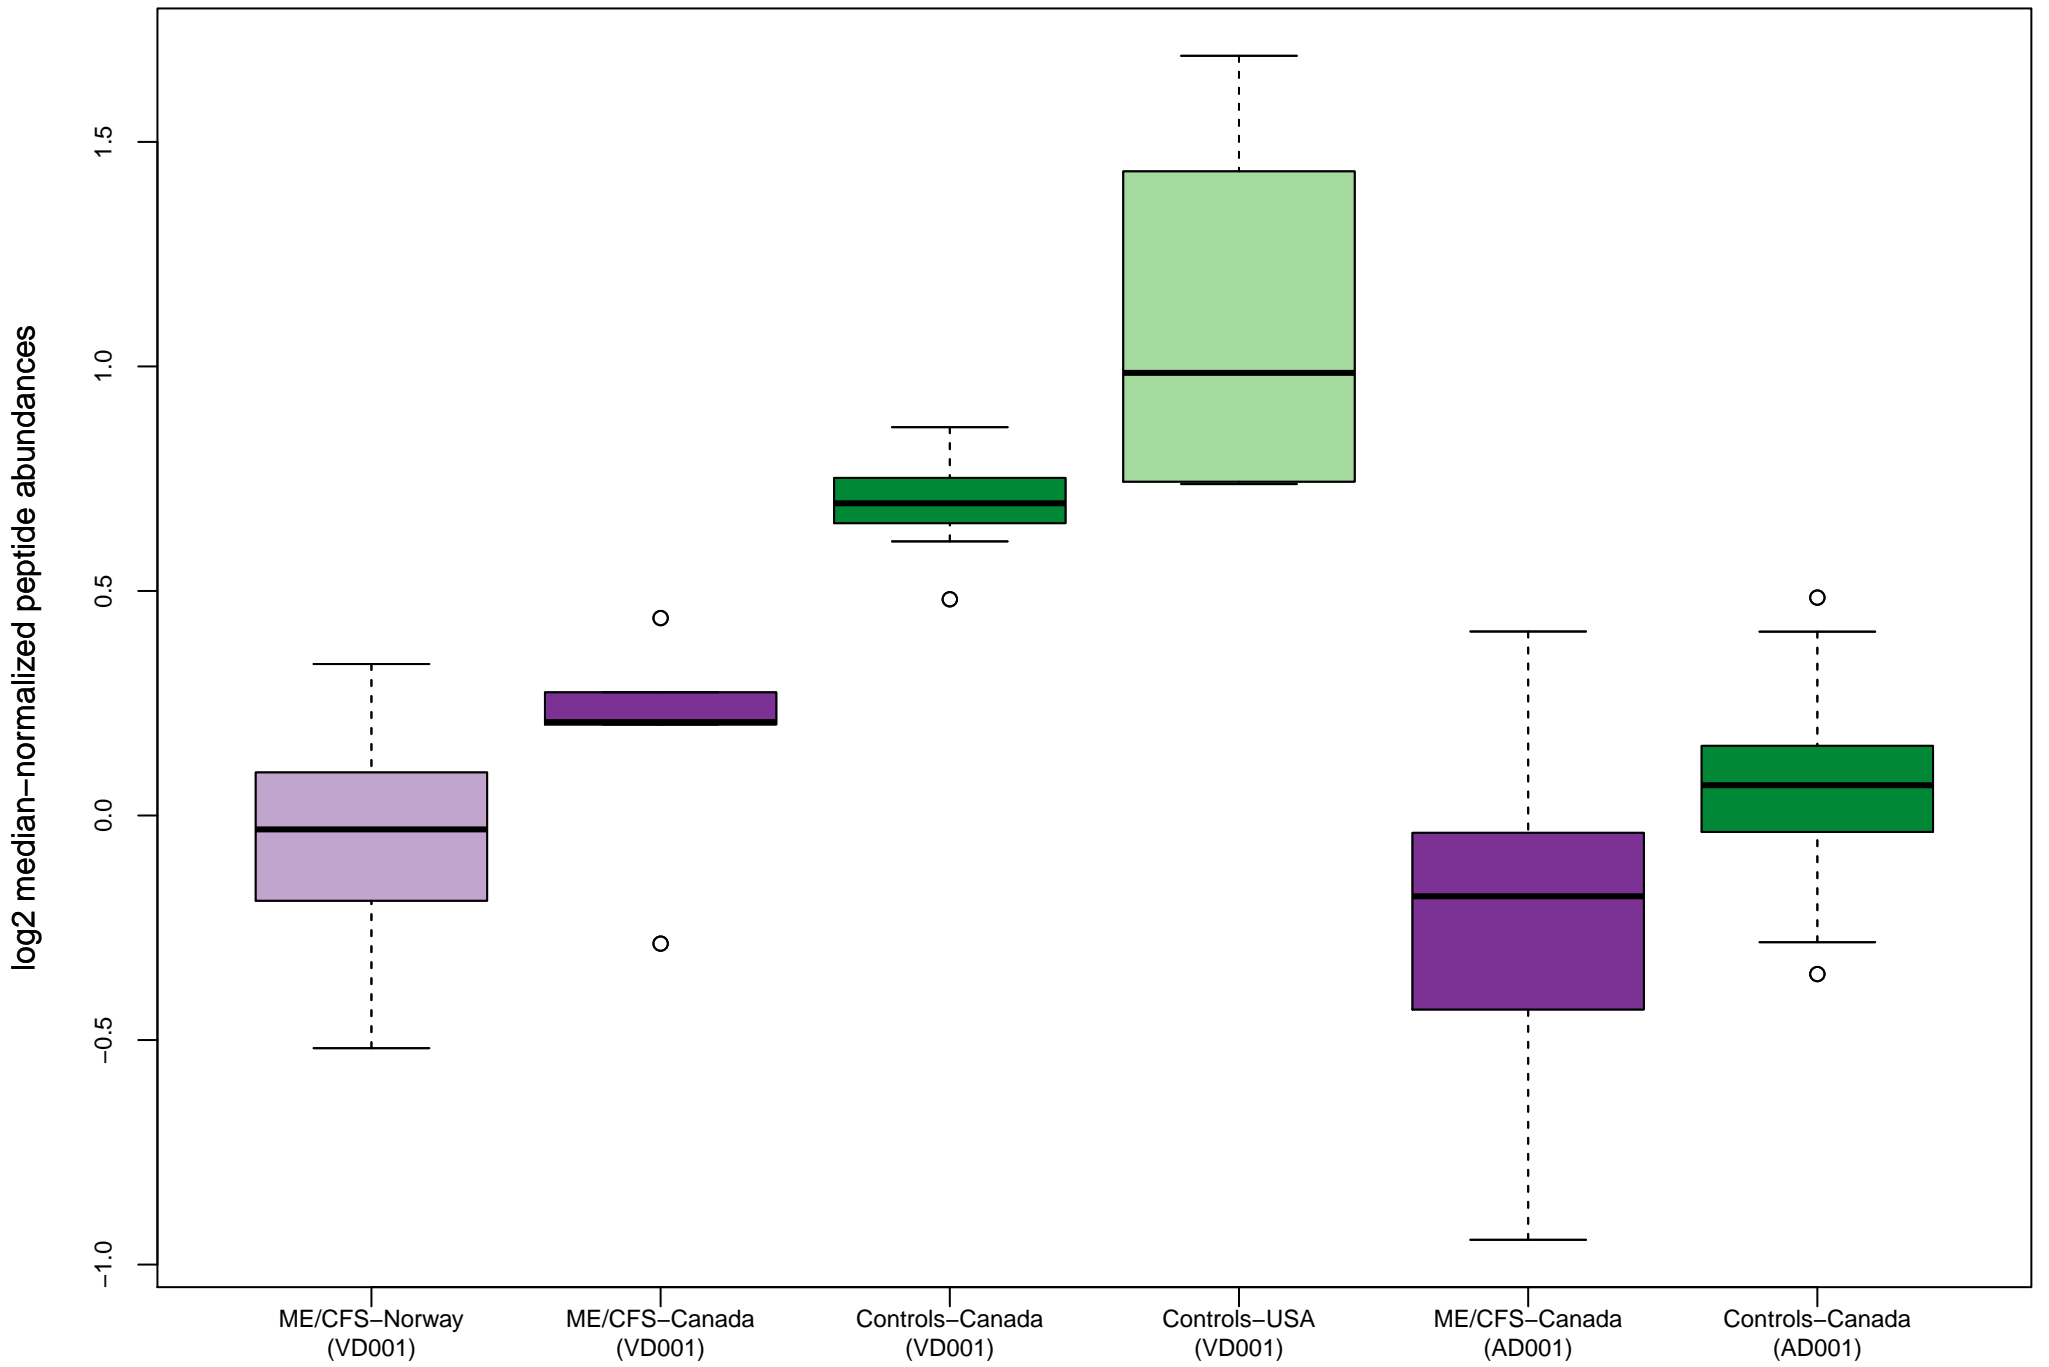

# SPYRPNFRLSLS

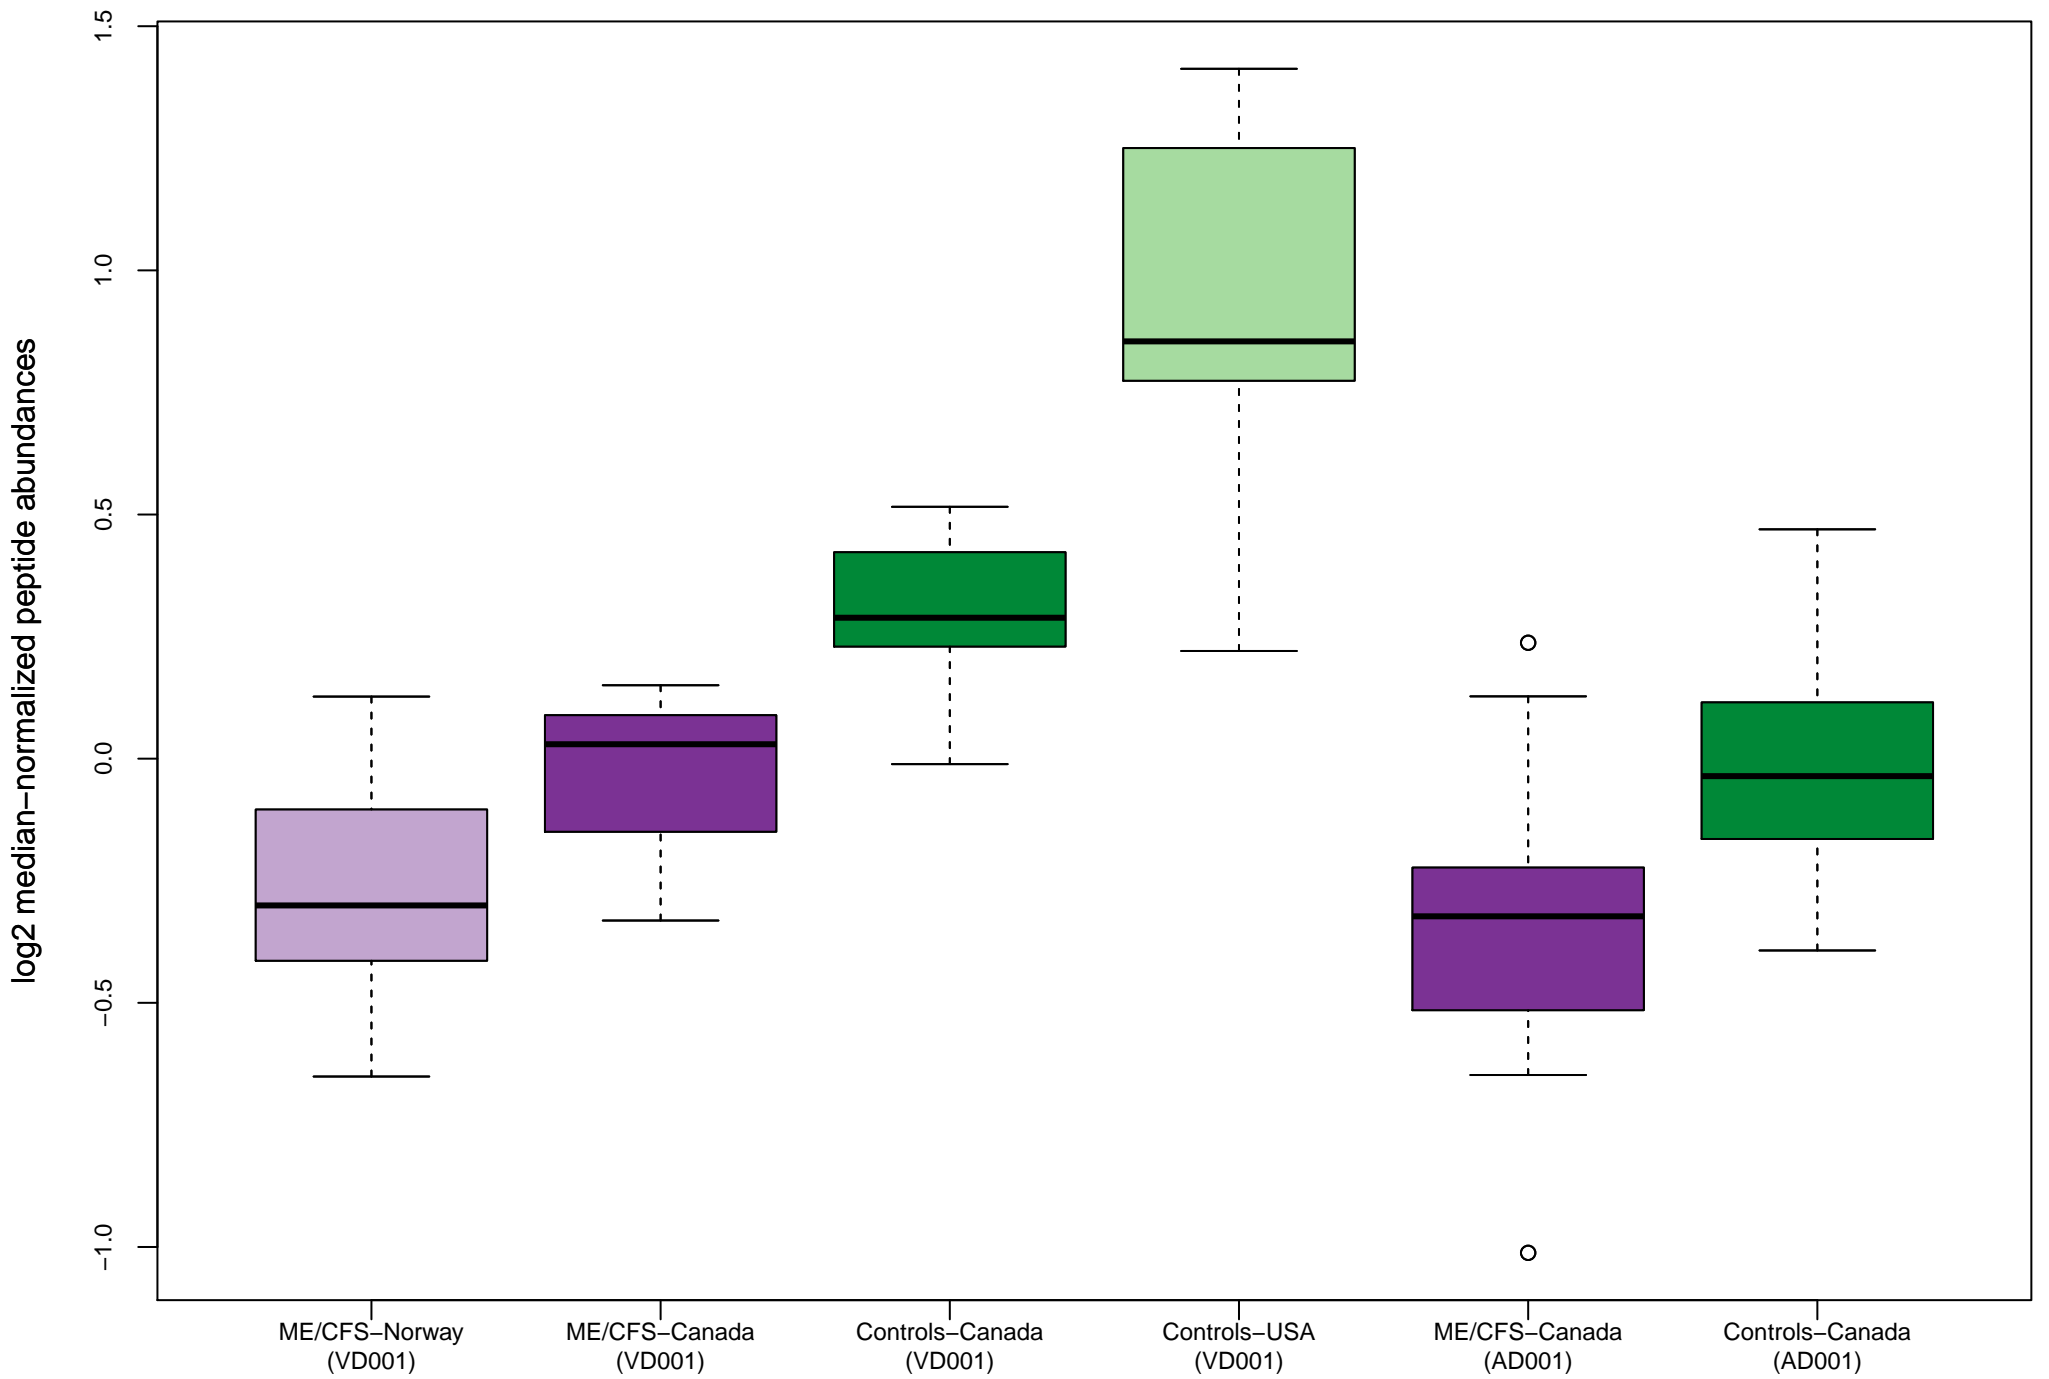

# SRFLRYLGVALG

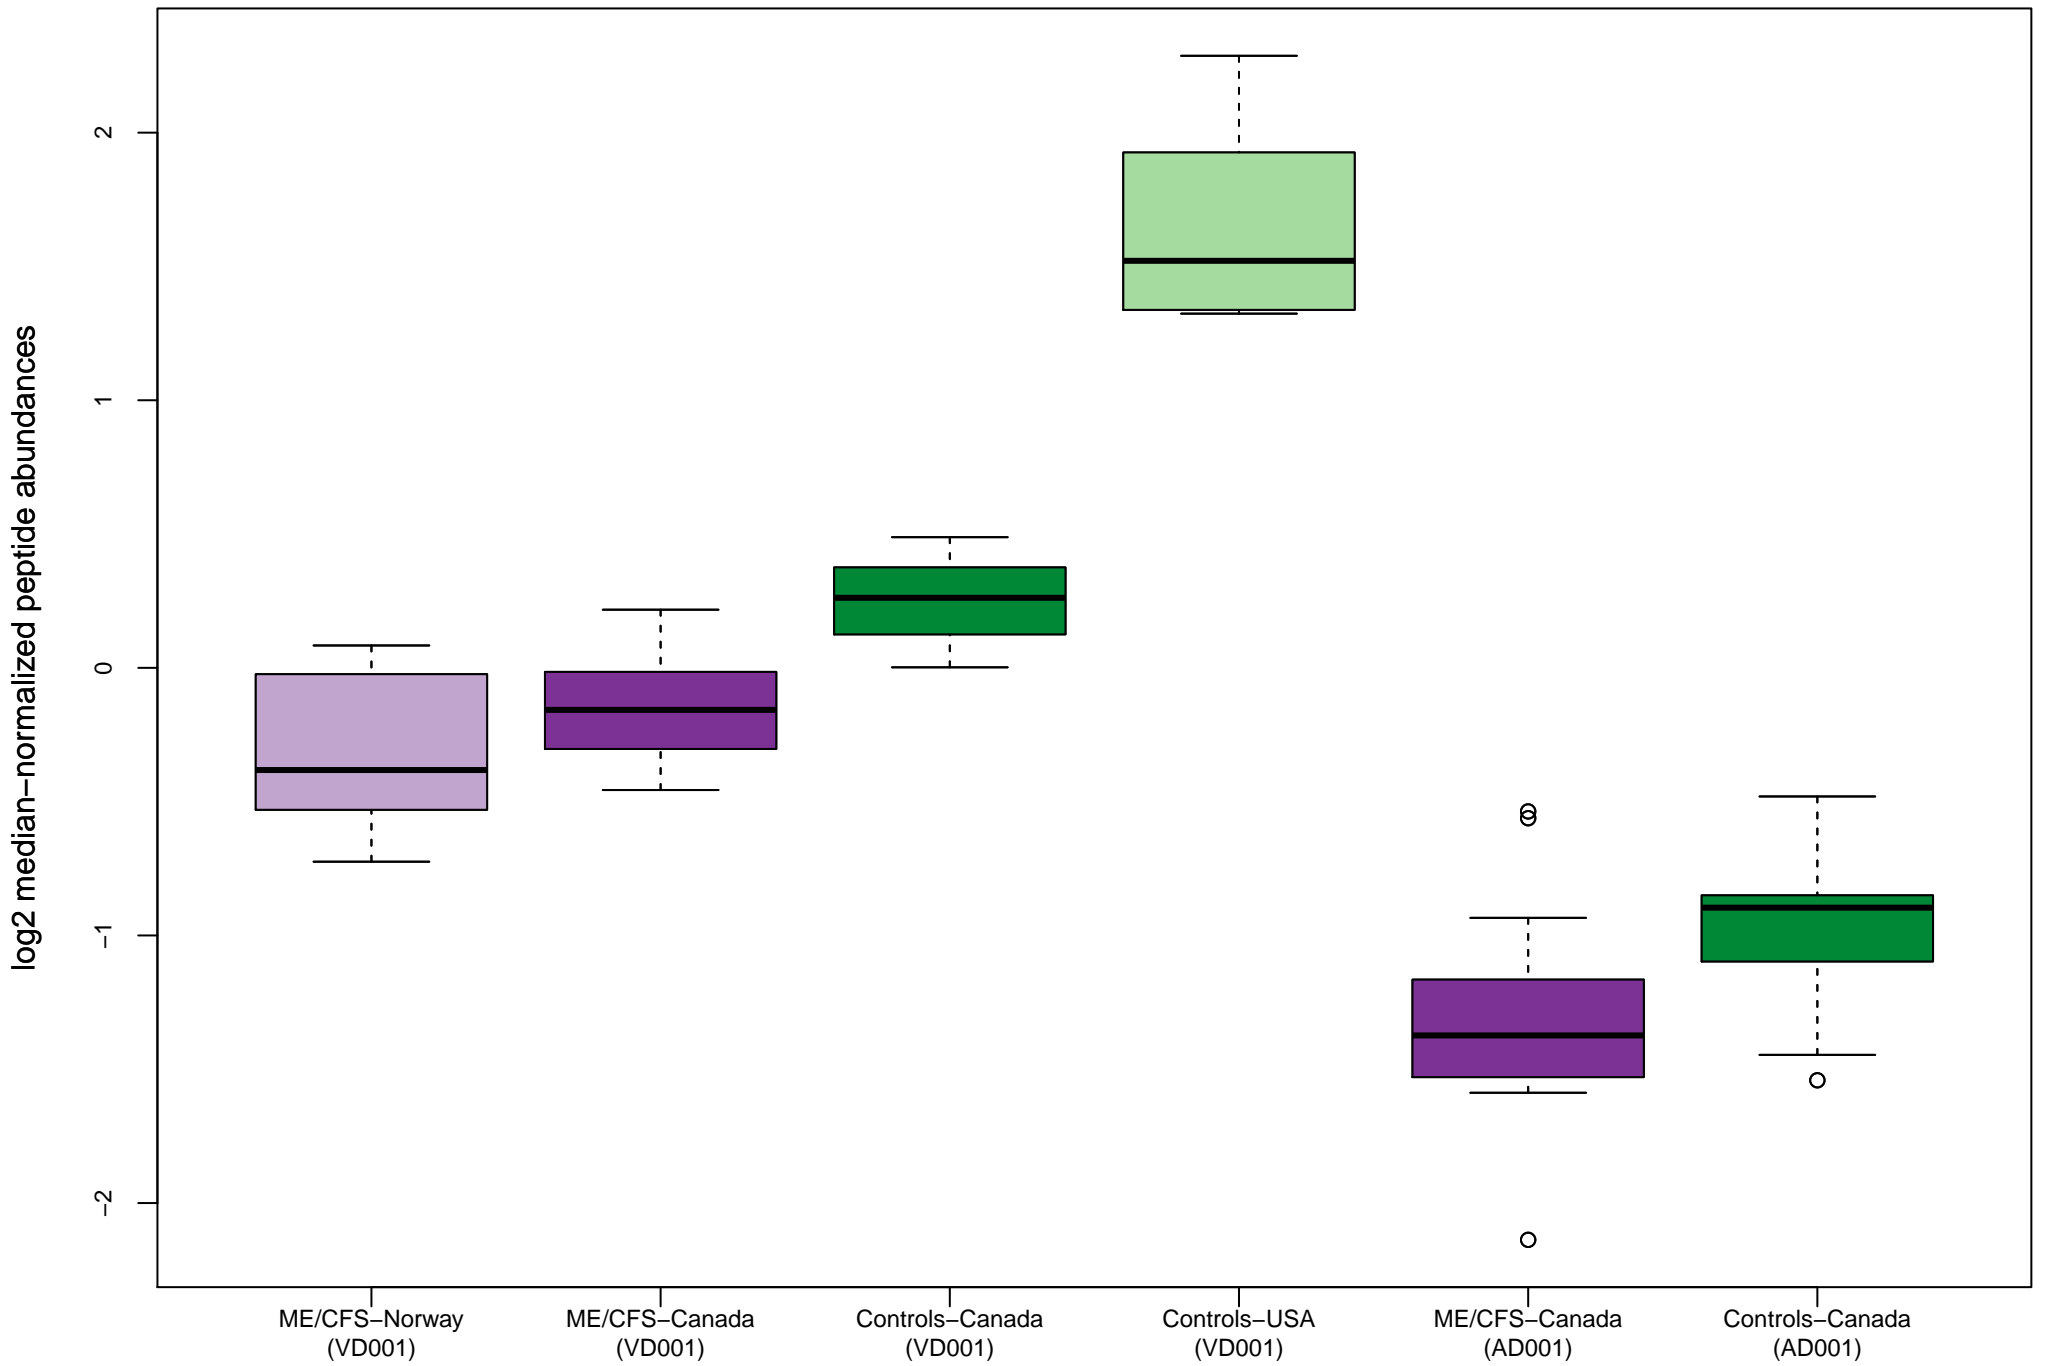

# SRLVFALGALSG

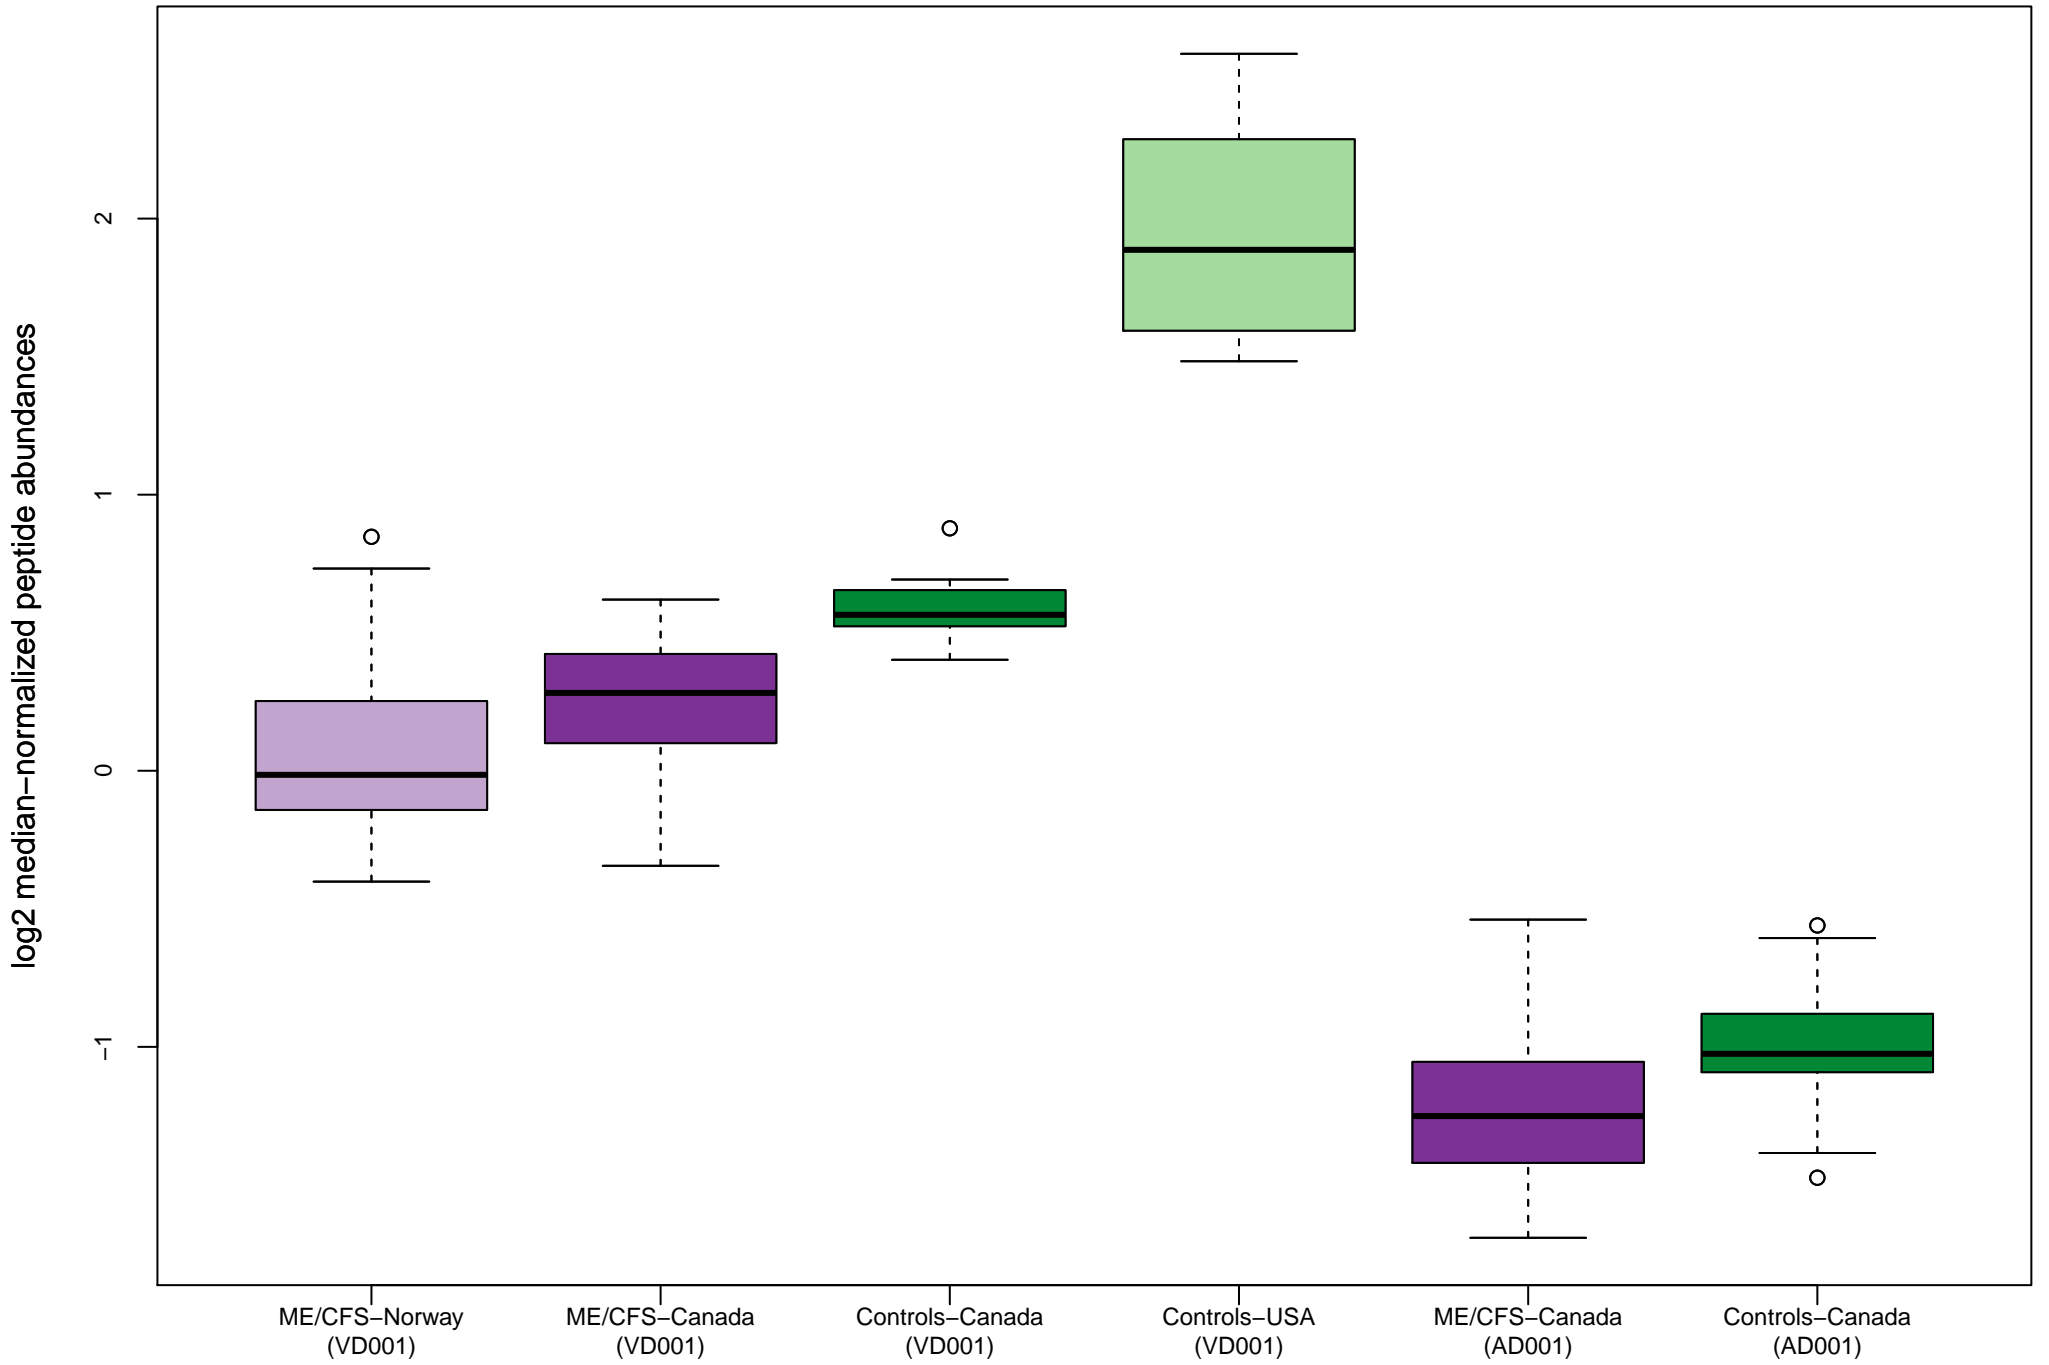

# VFAPRYLSVASG

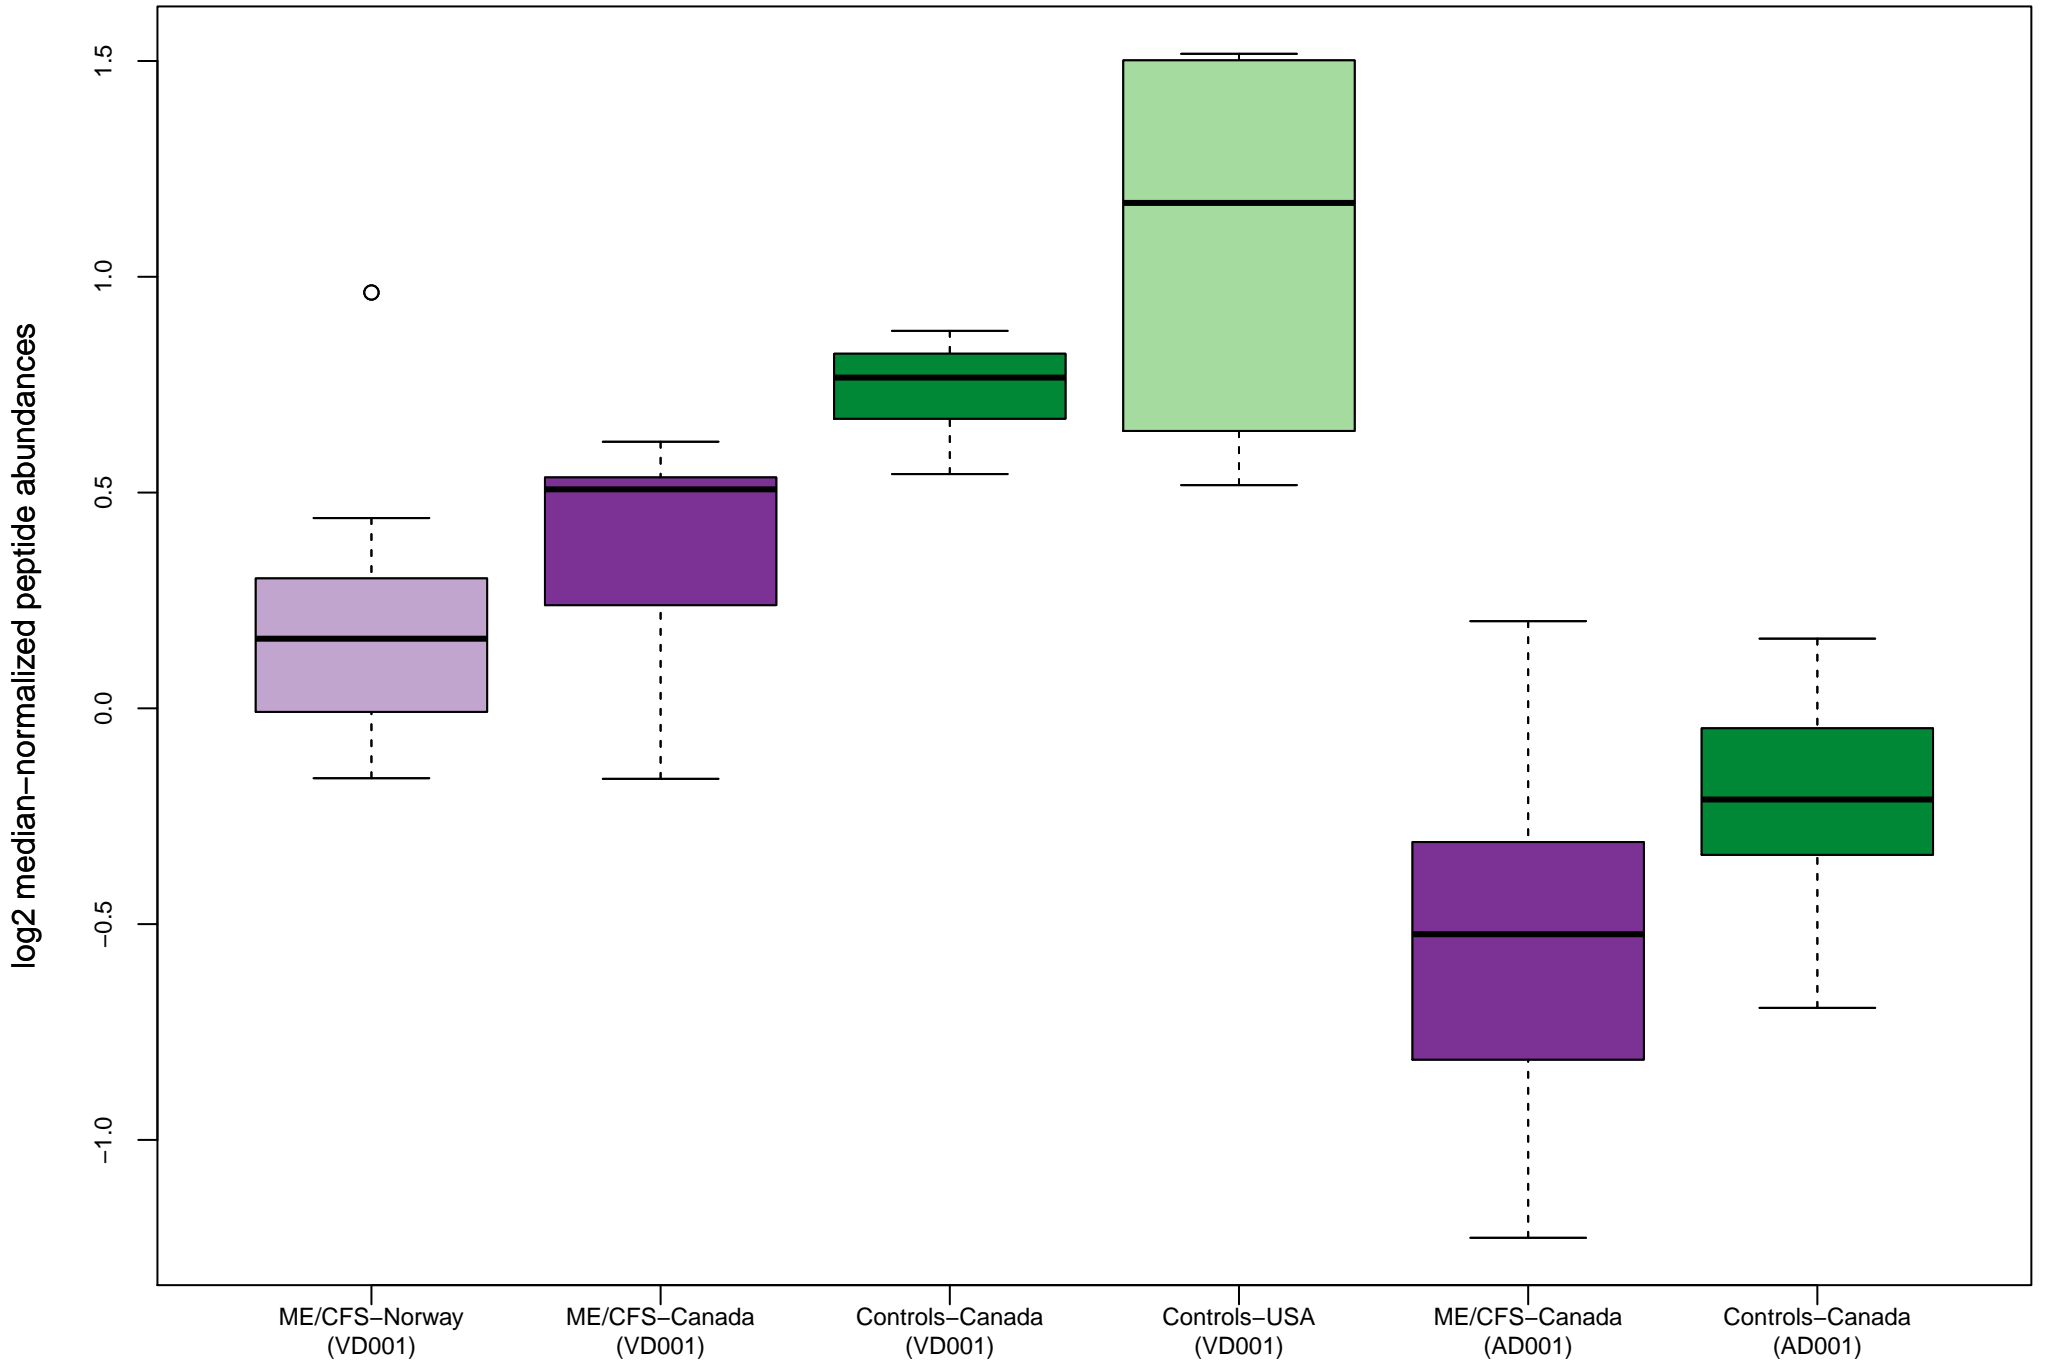



# VFNRWVFRYKVA

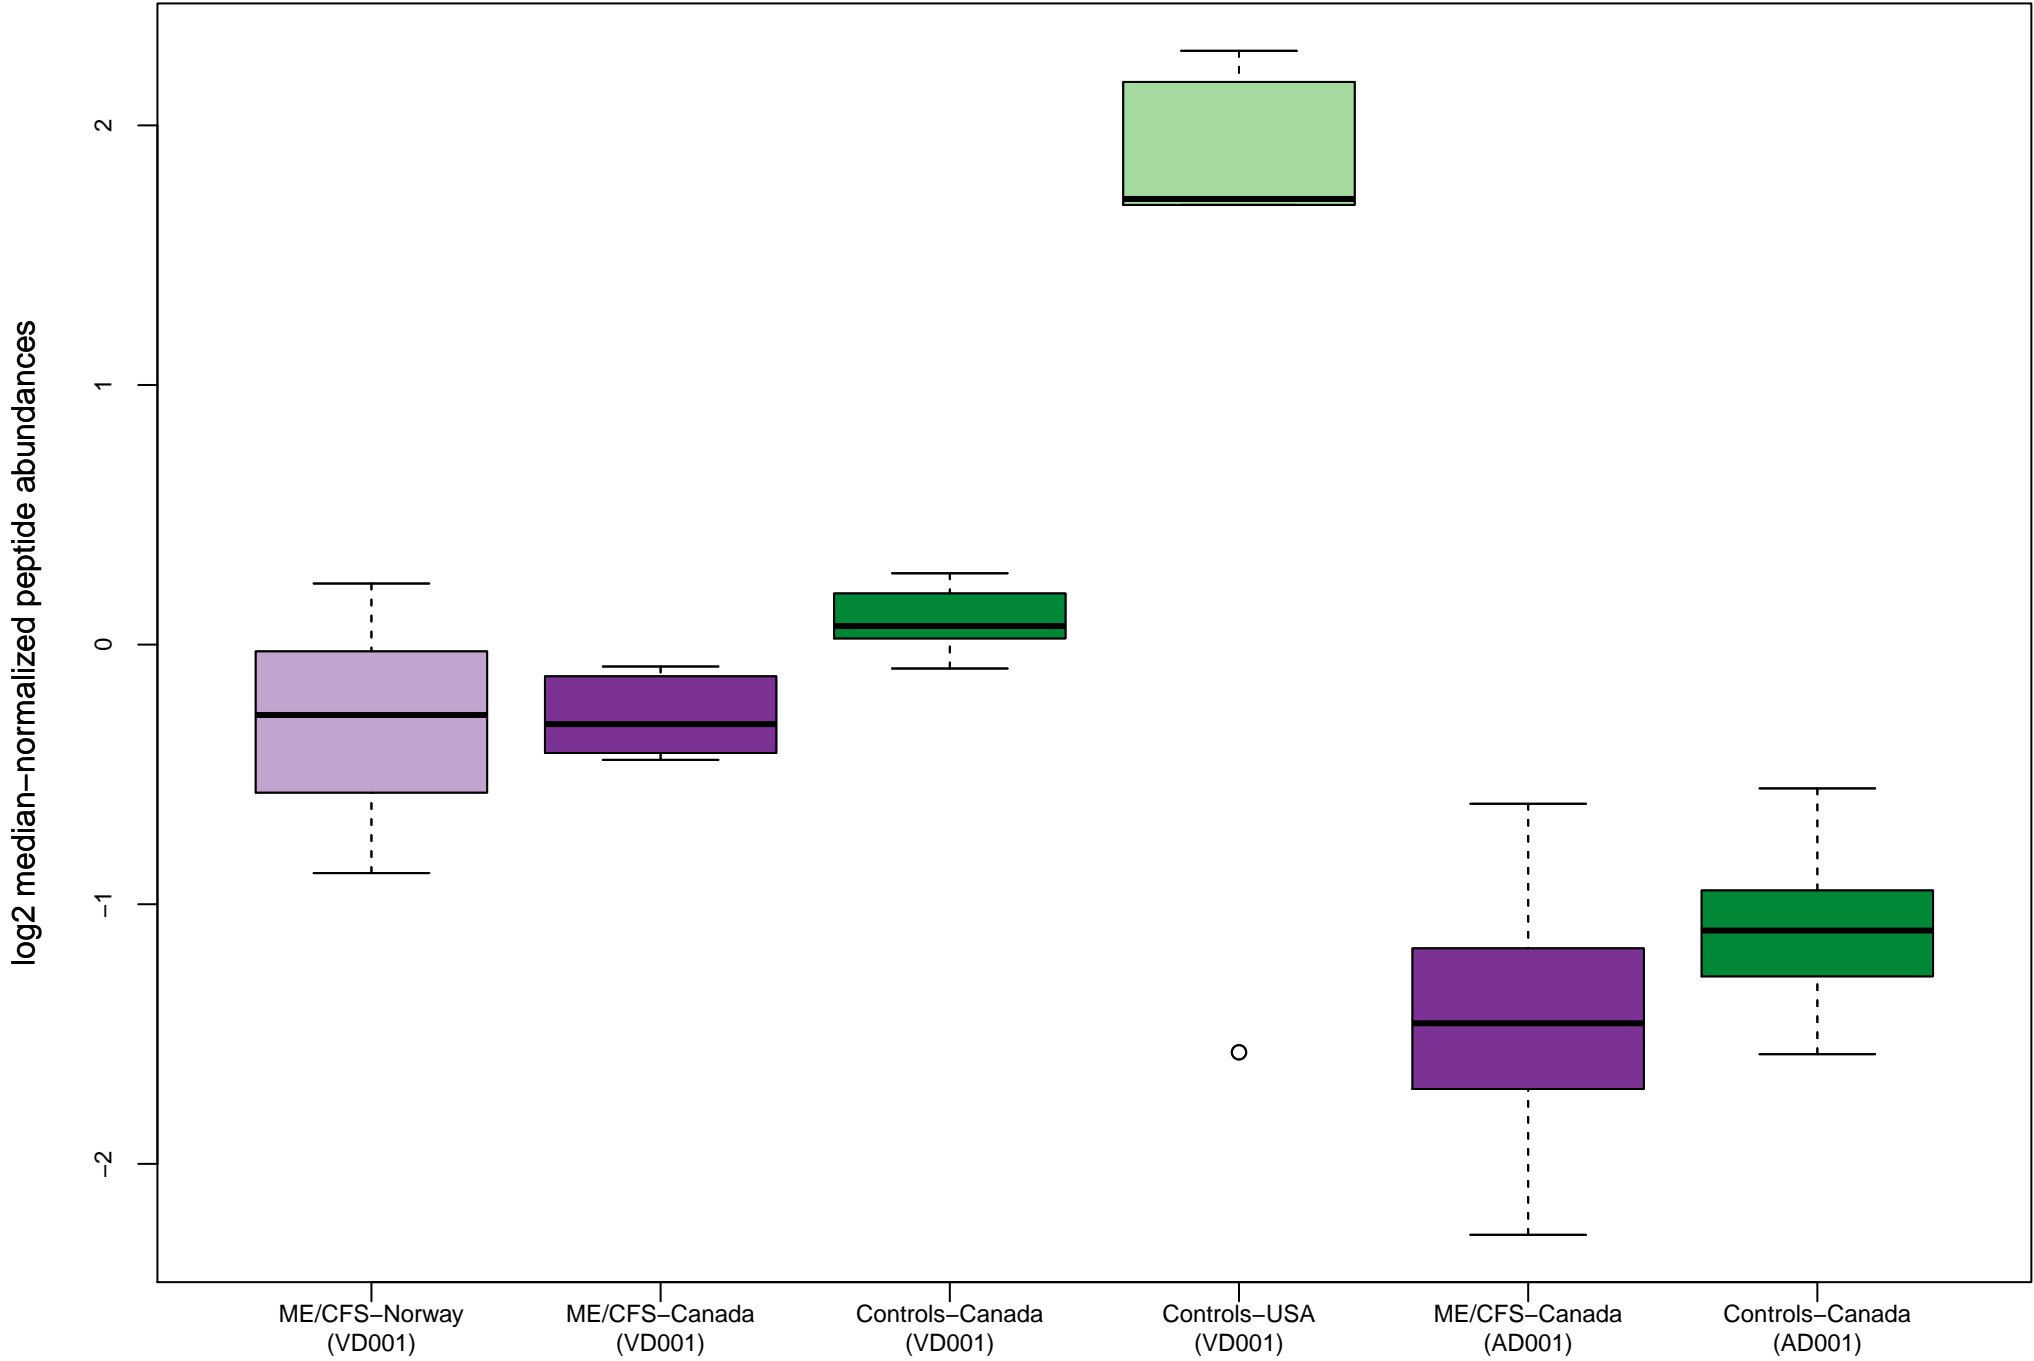

# VFYRKFREWVS

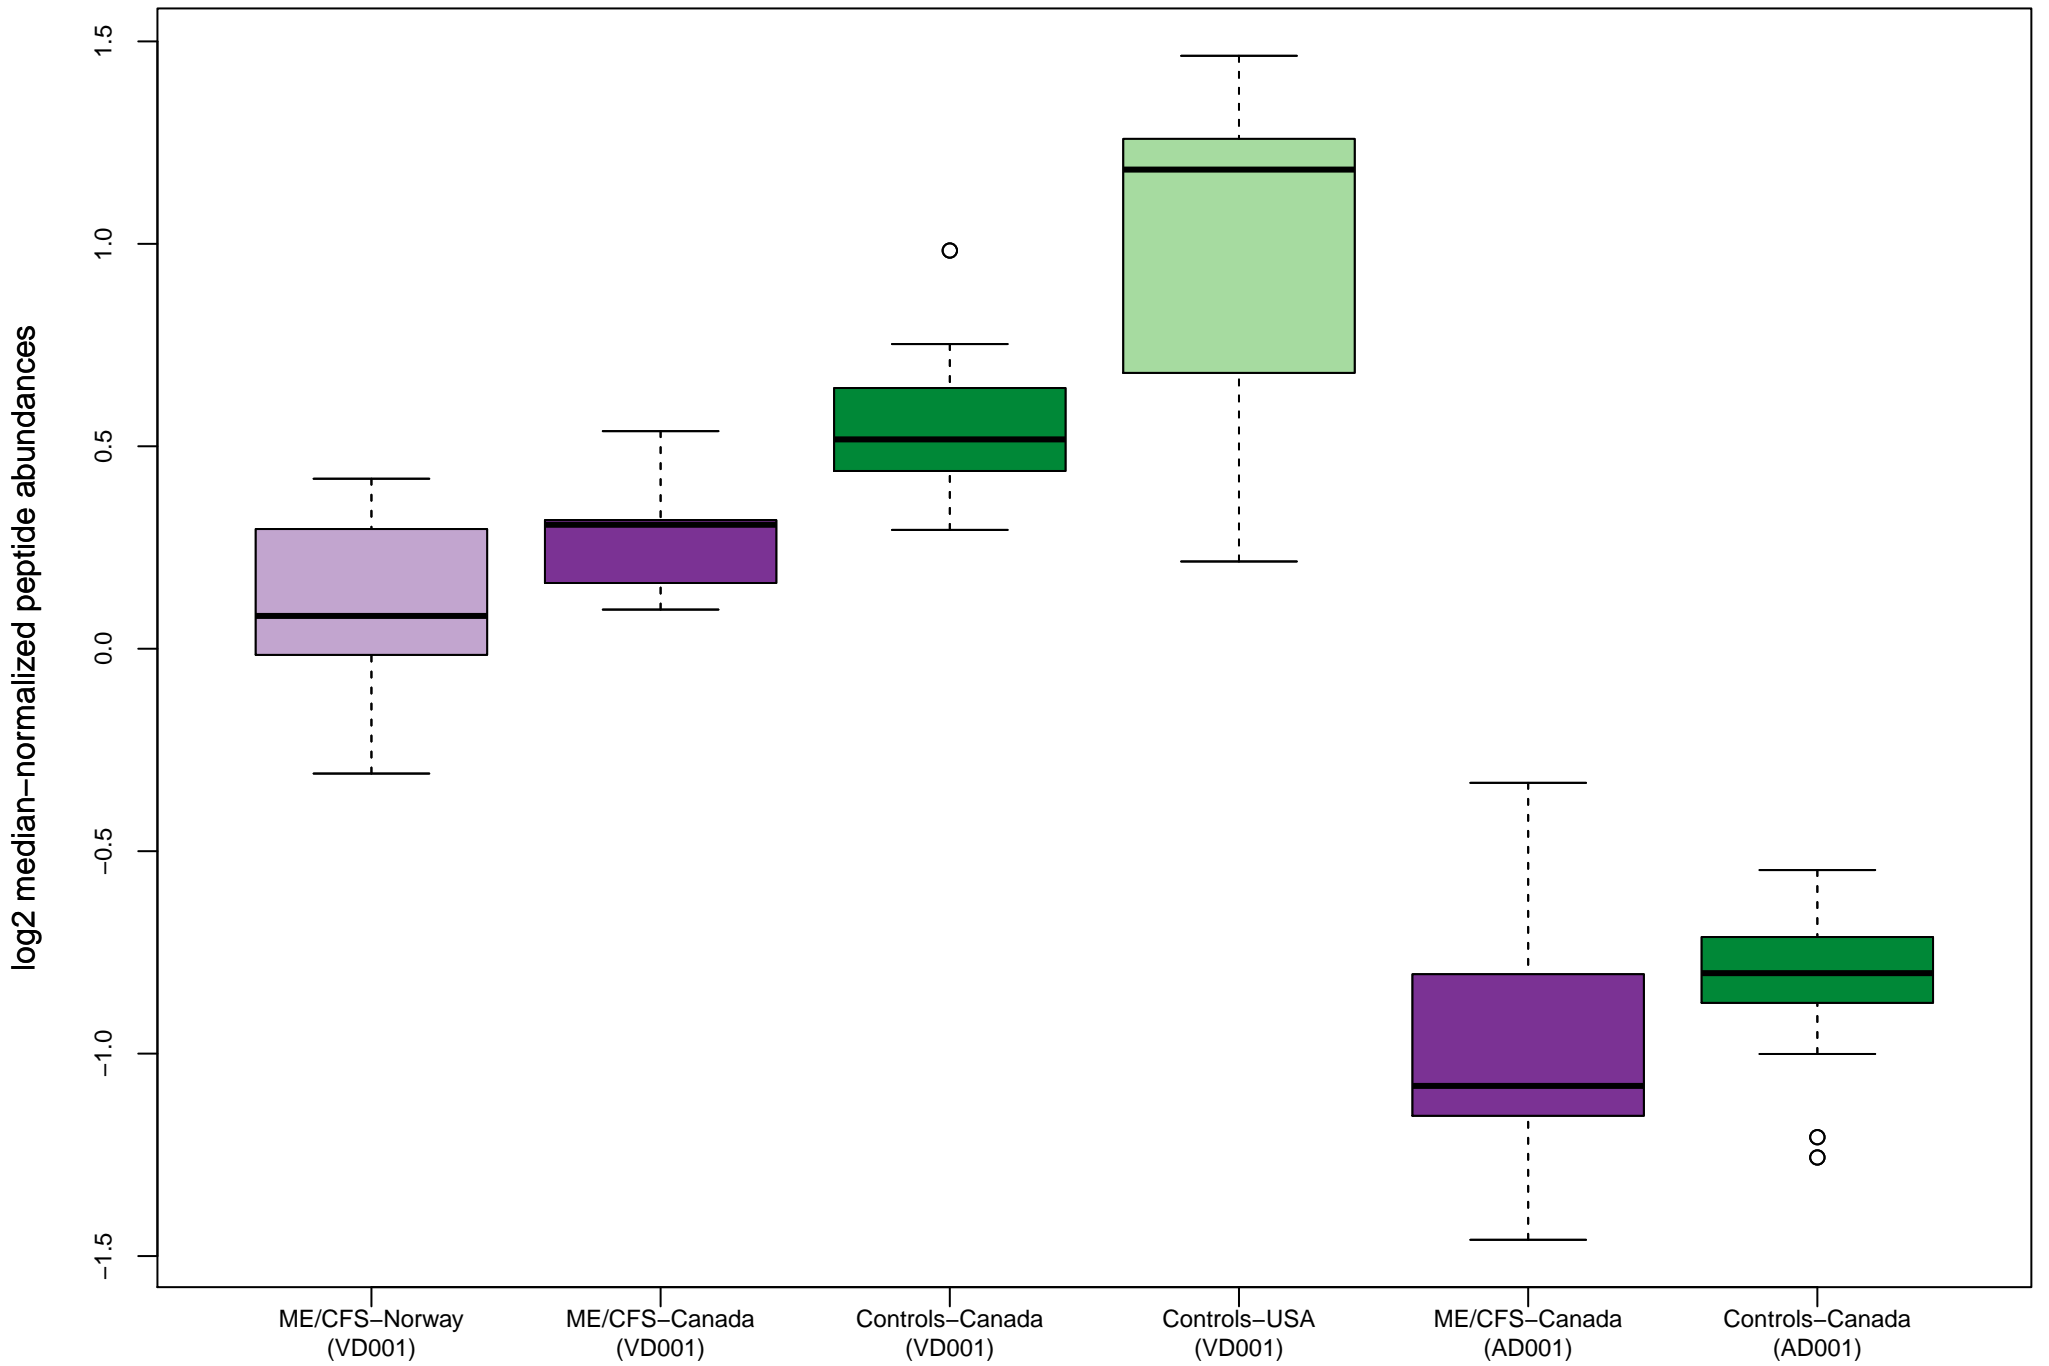

# VNAFRRPVLGVL

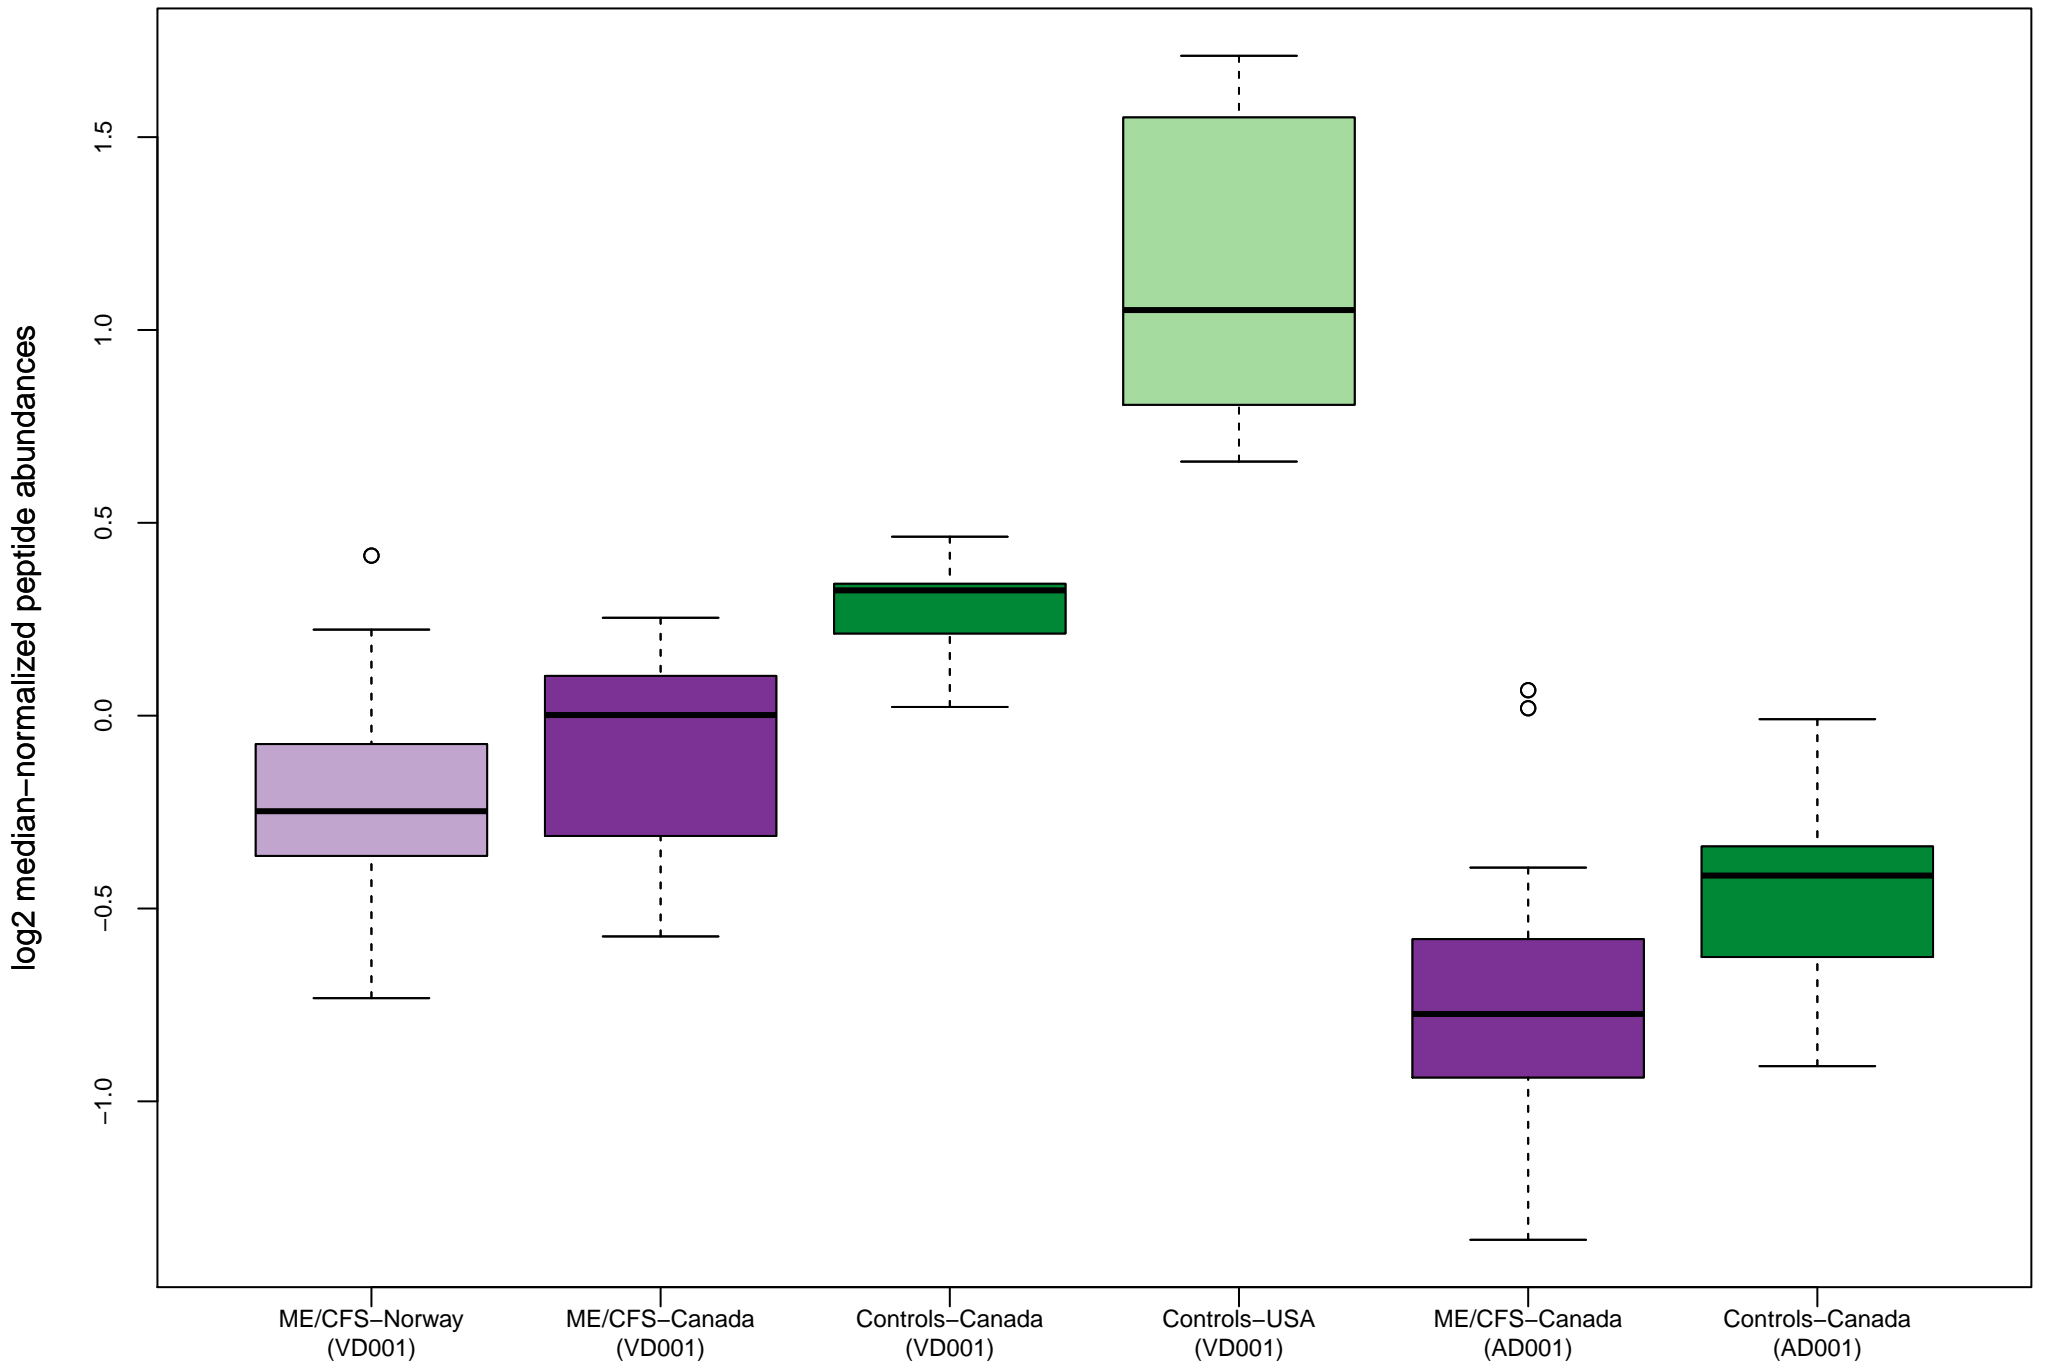

# VQYNFLGPWKVS

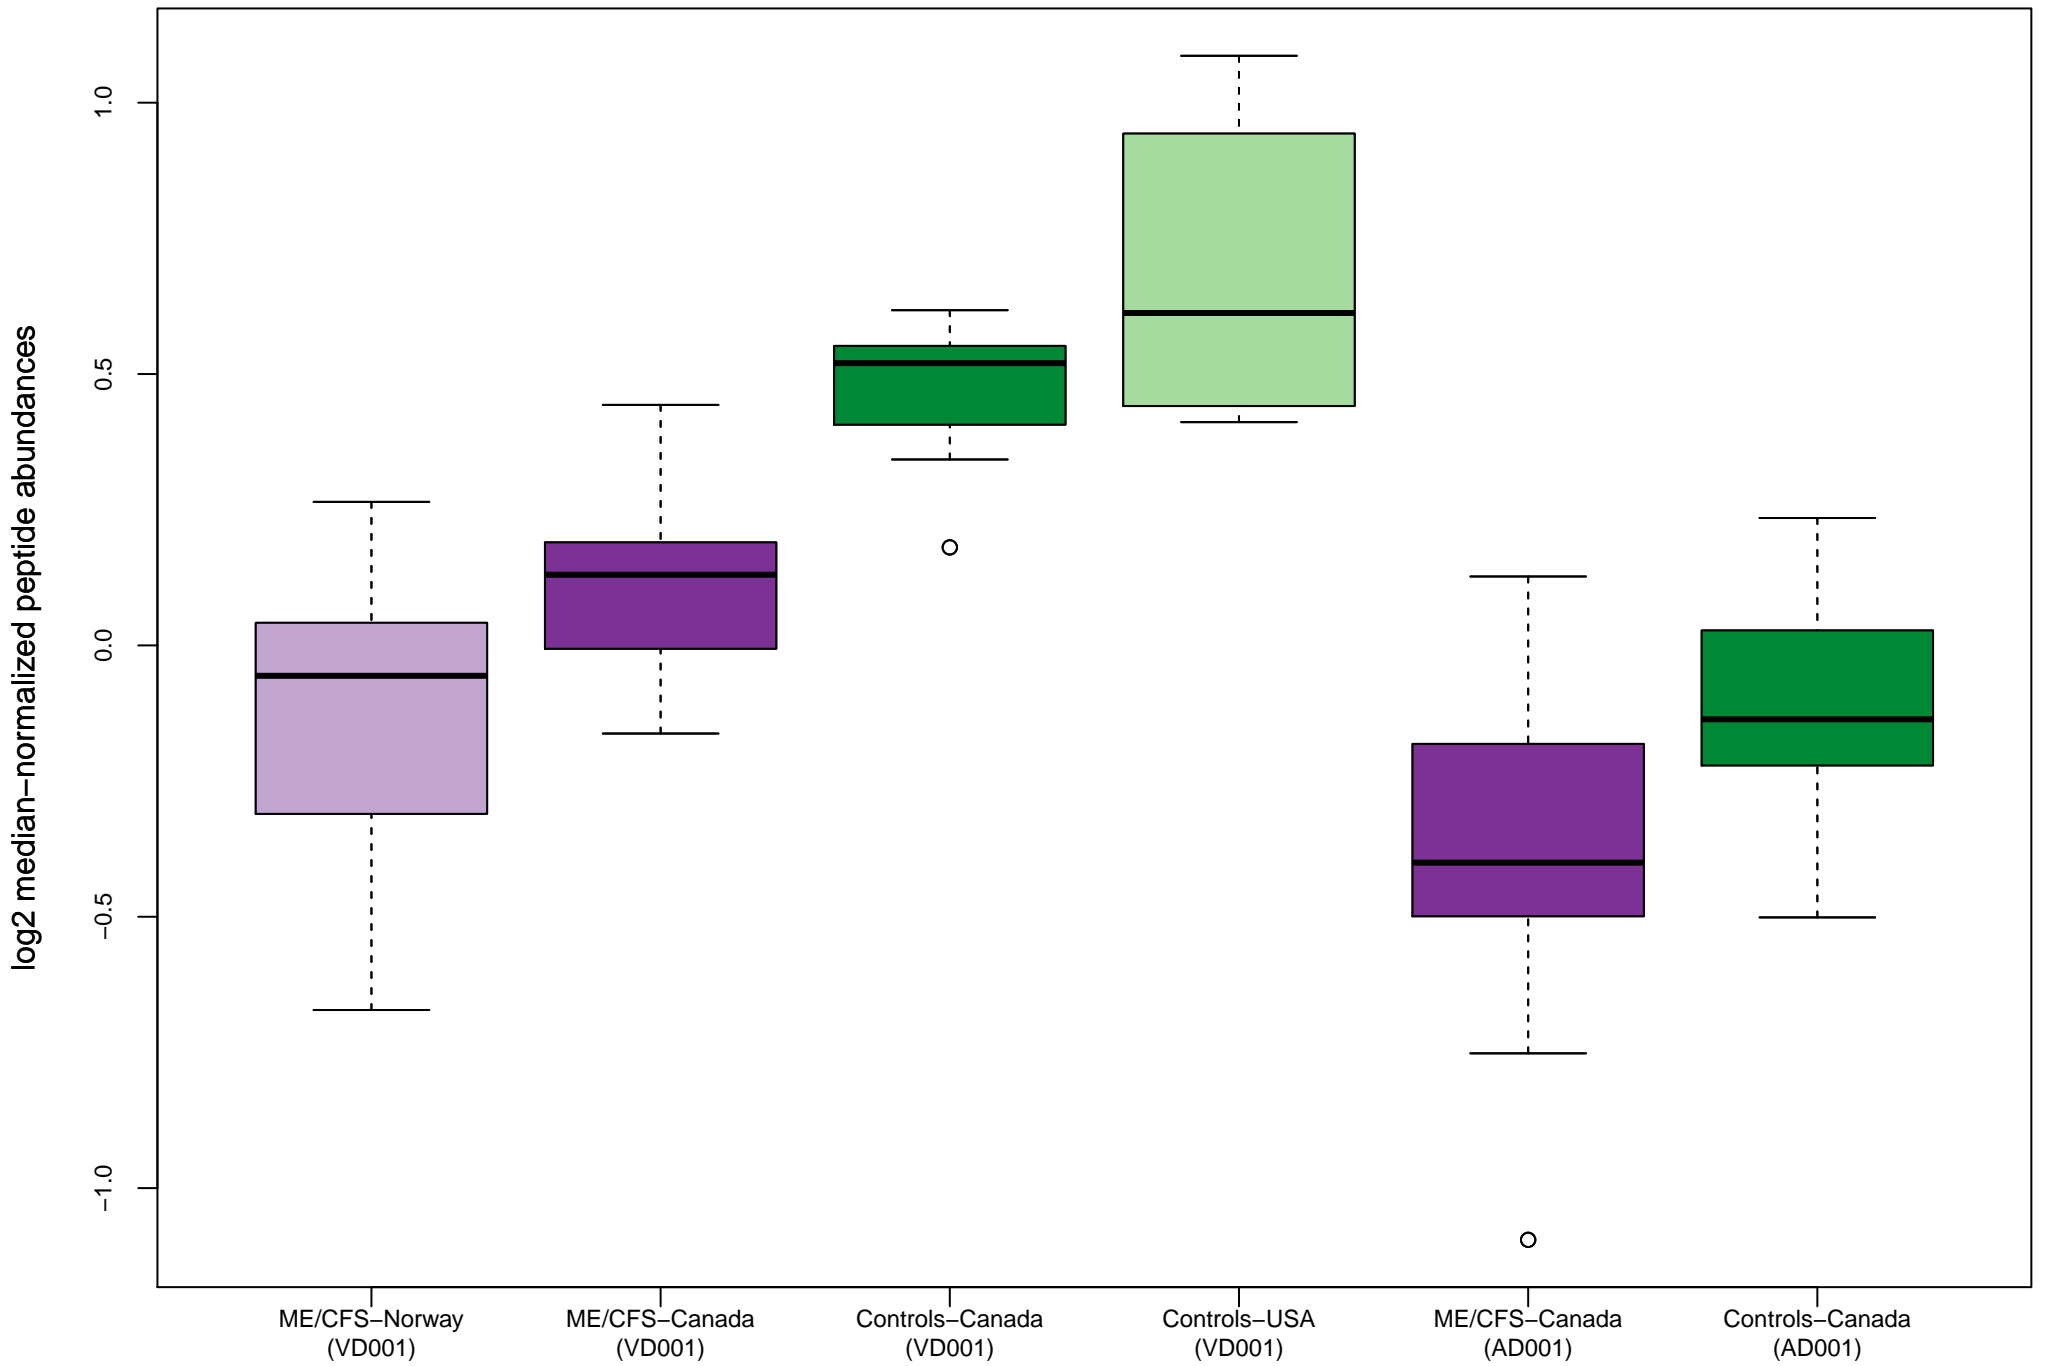

# VRPGLRWALGVA

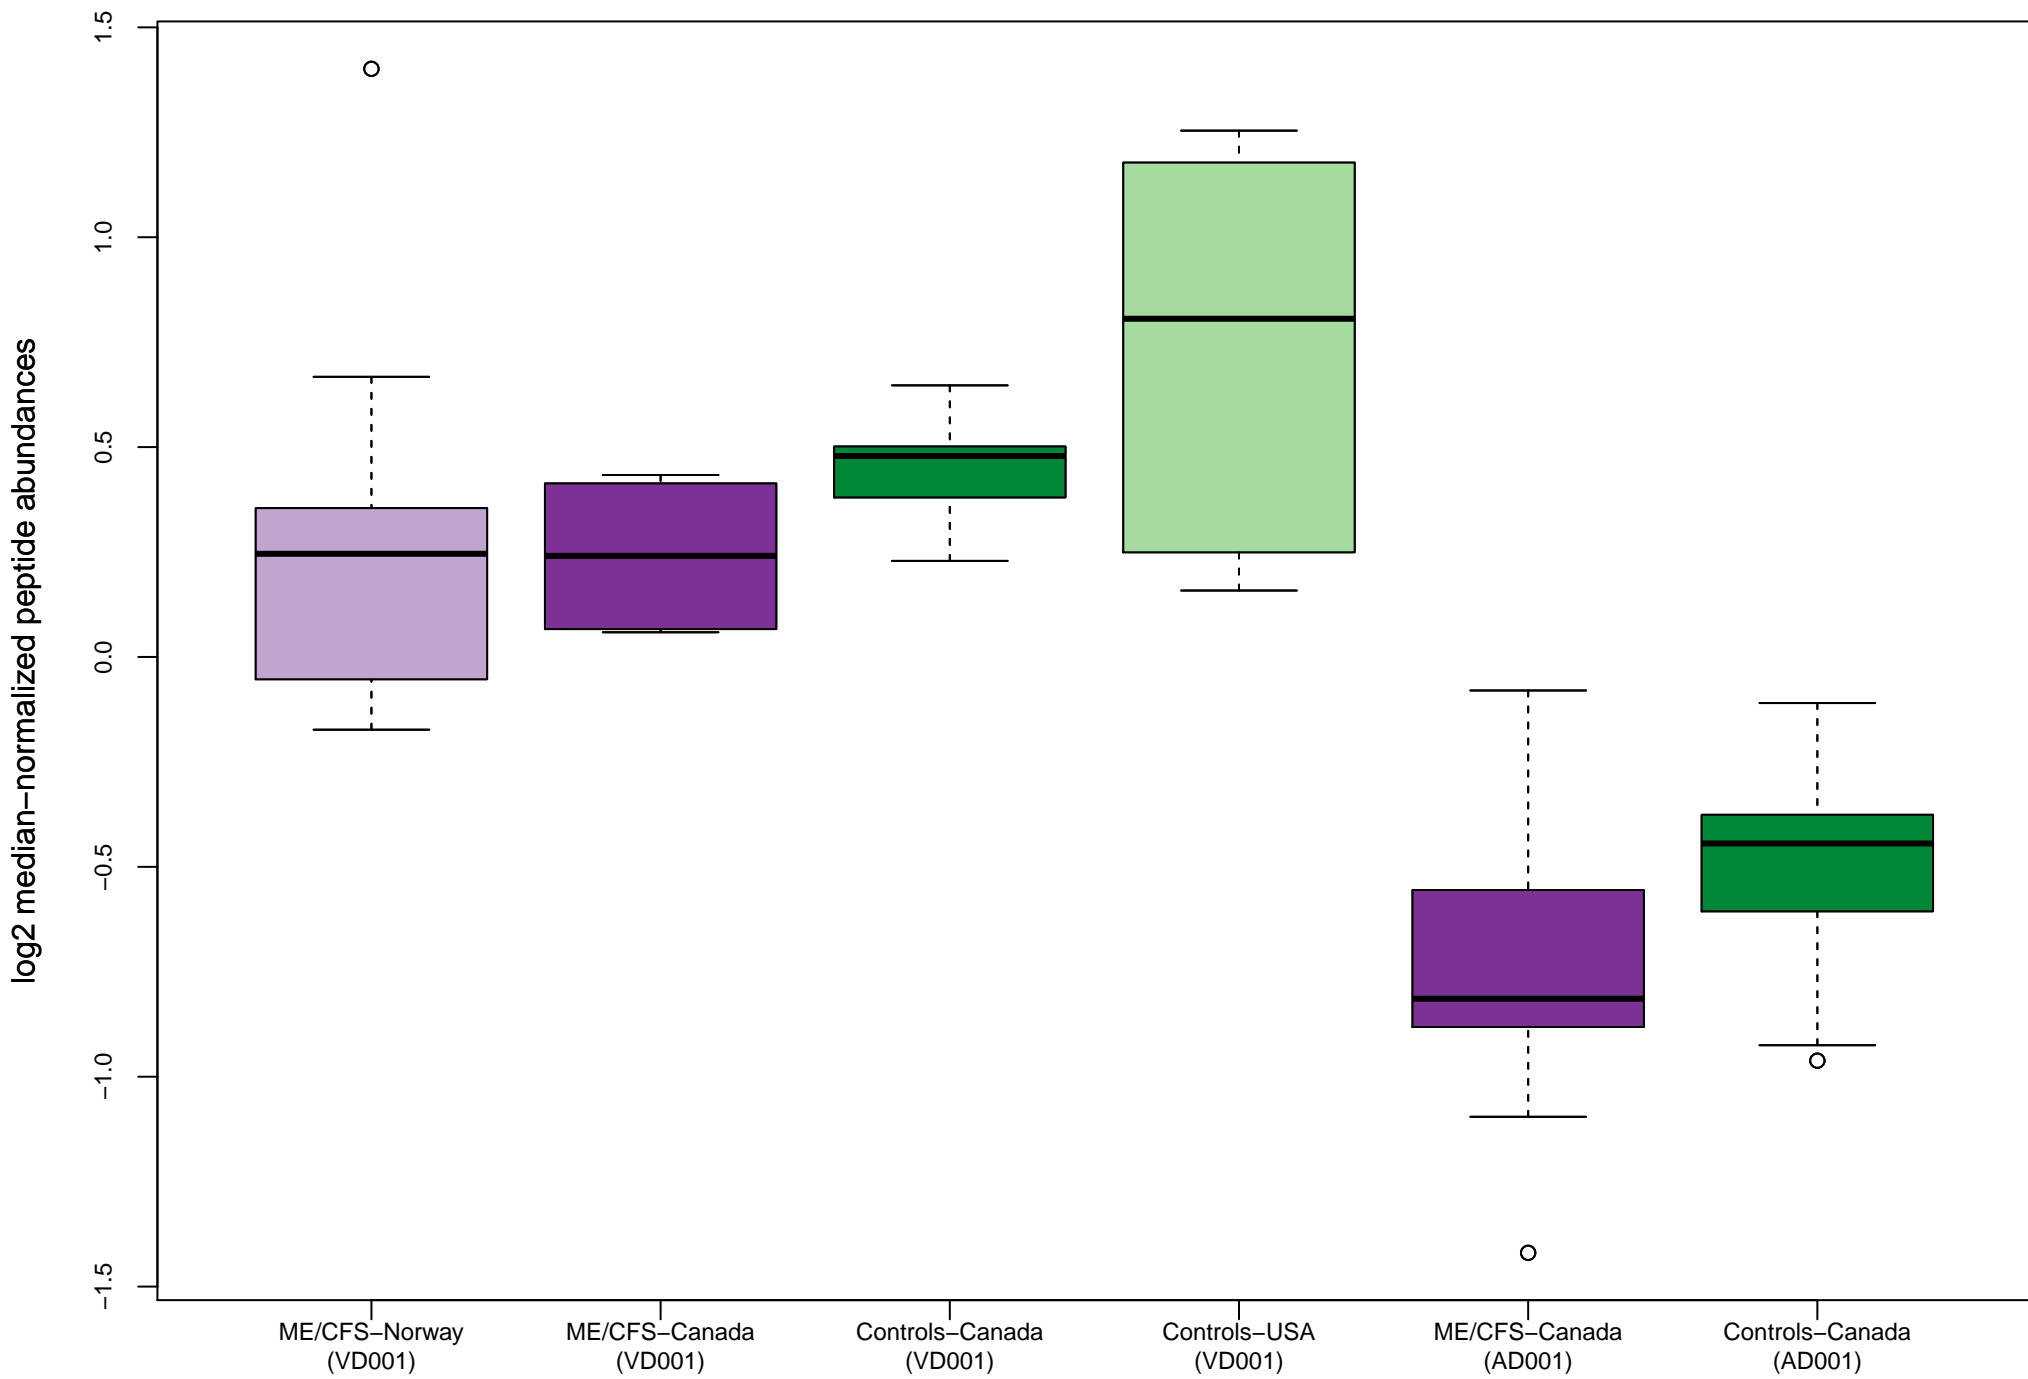

# VSSFSTRSGALS

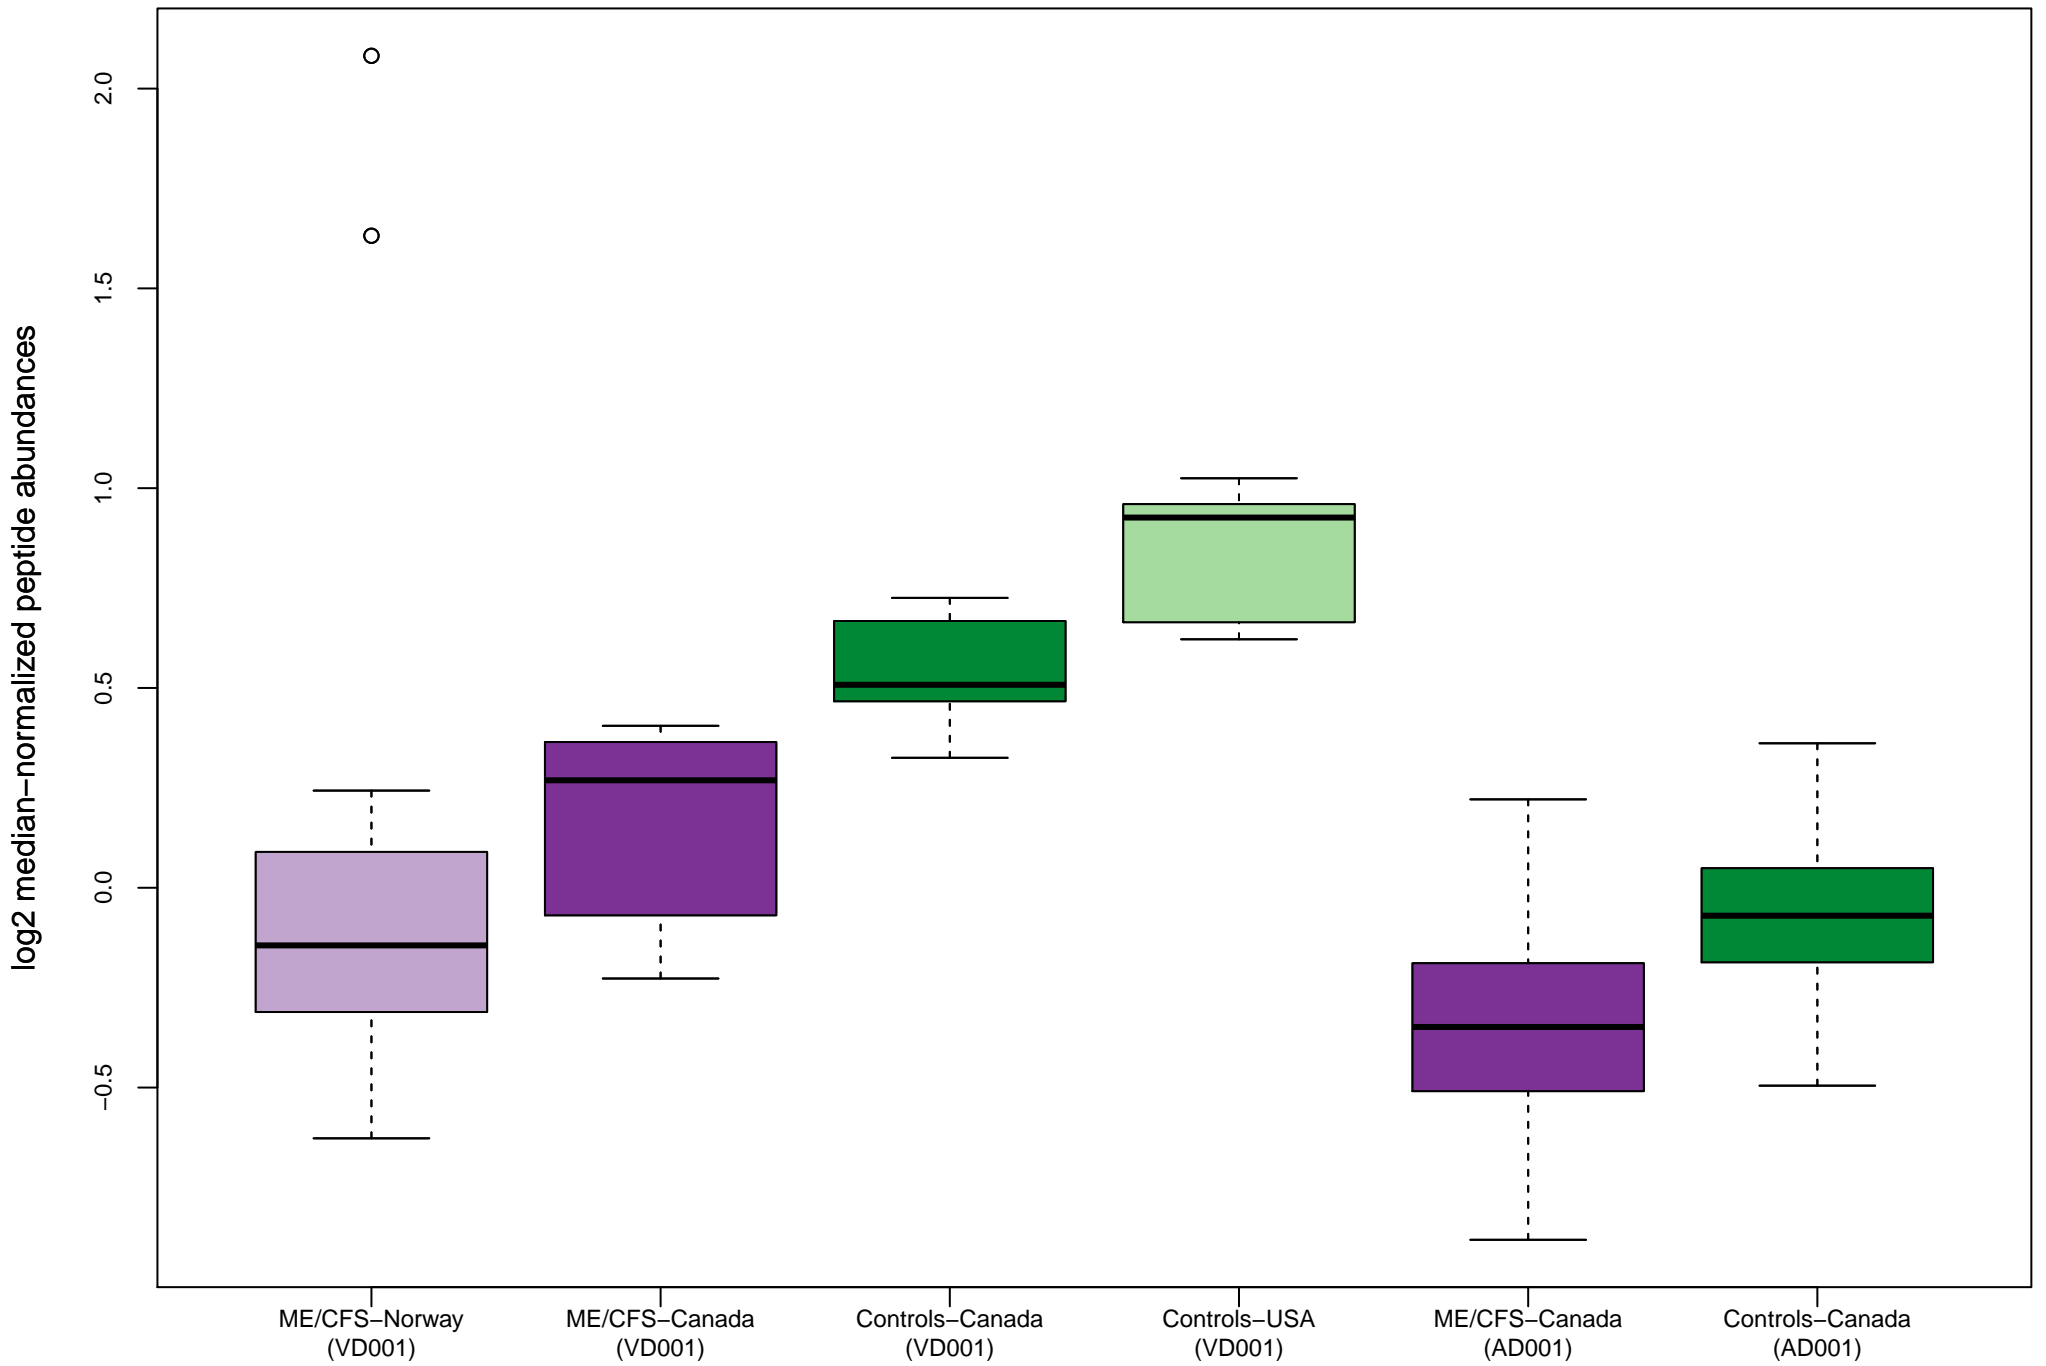

# VWRNRWALALSG

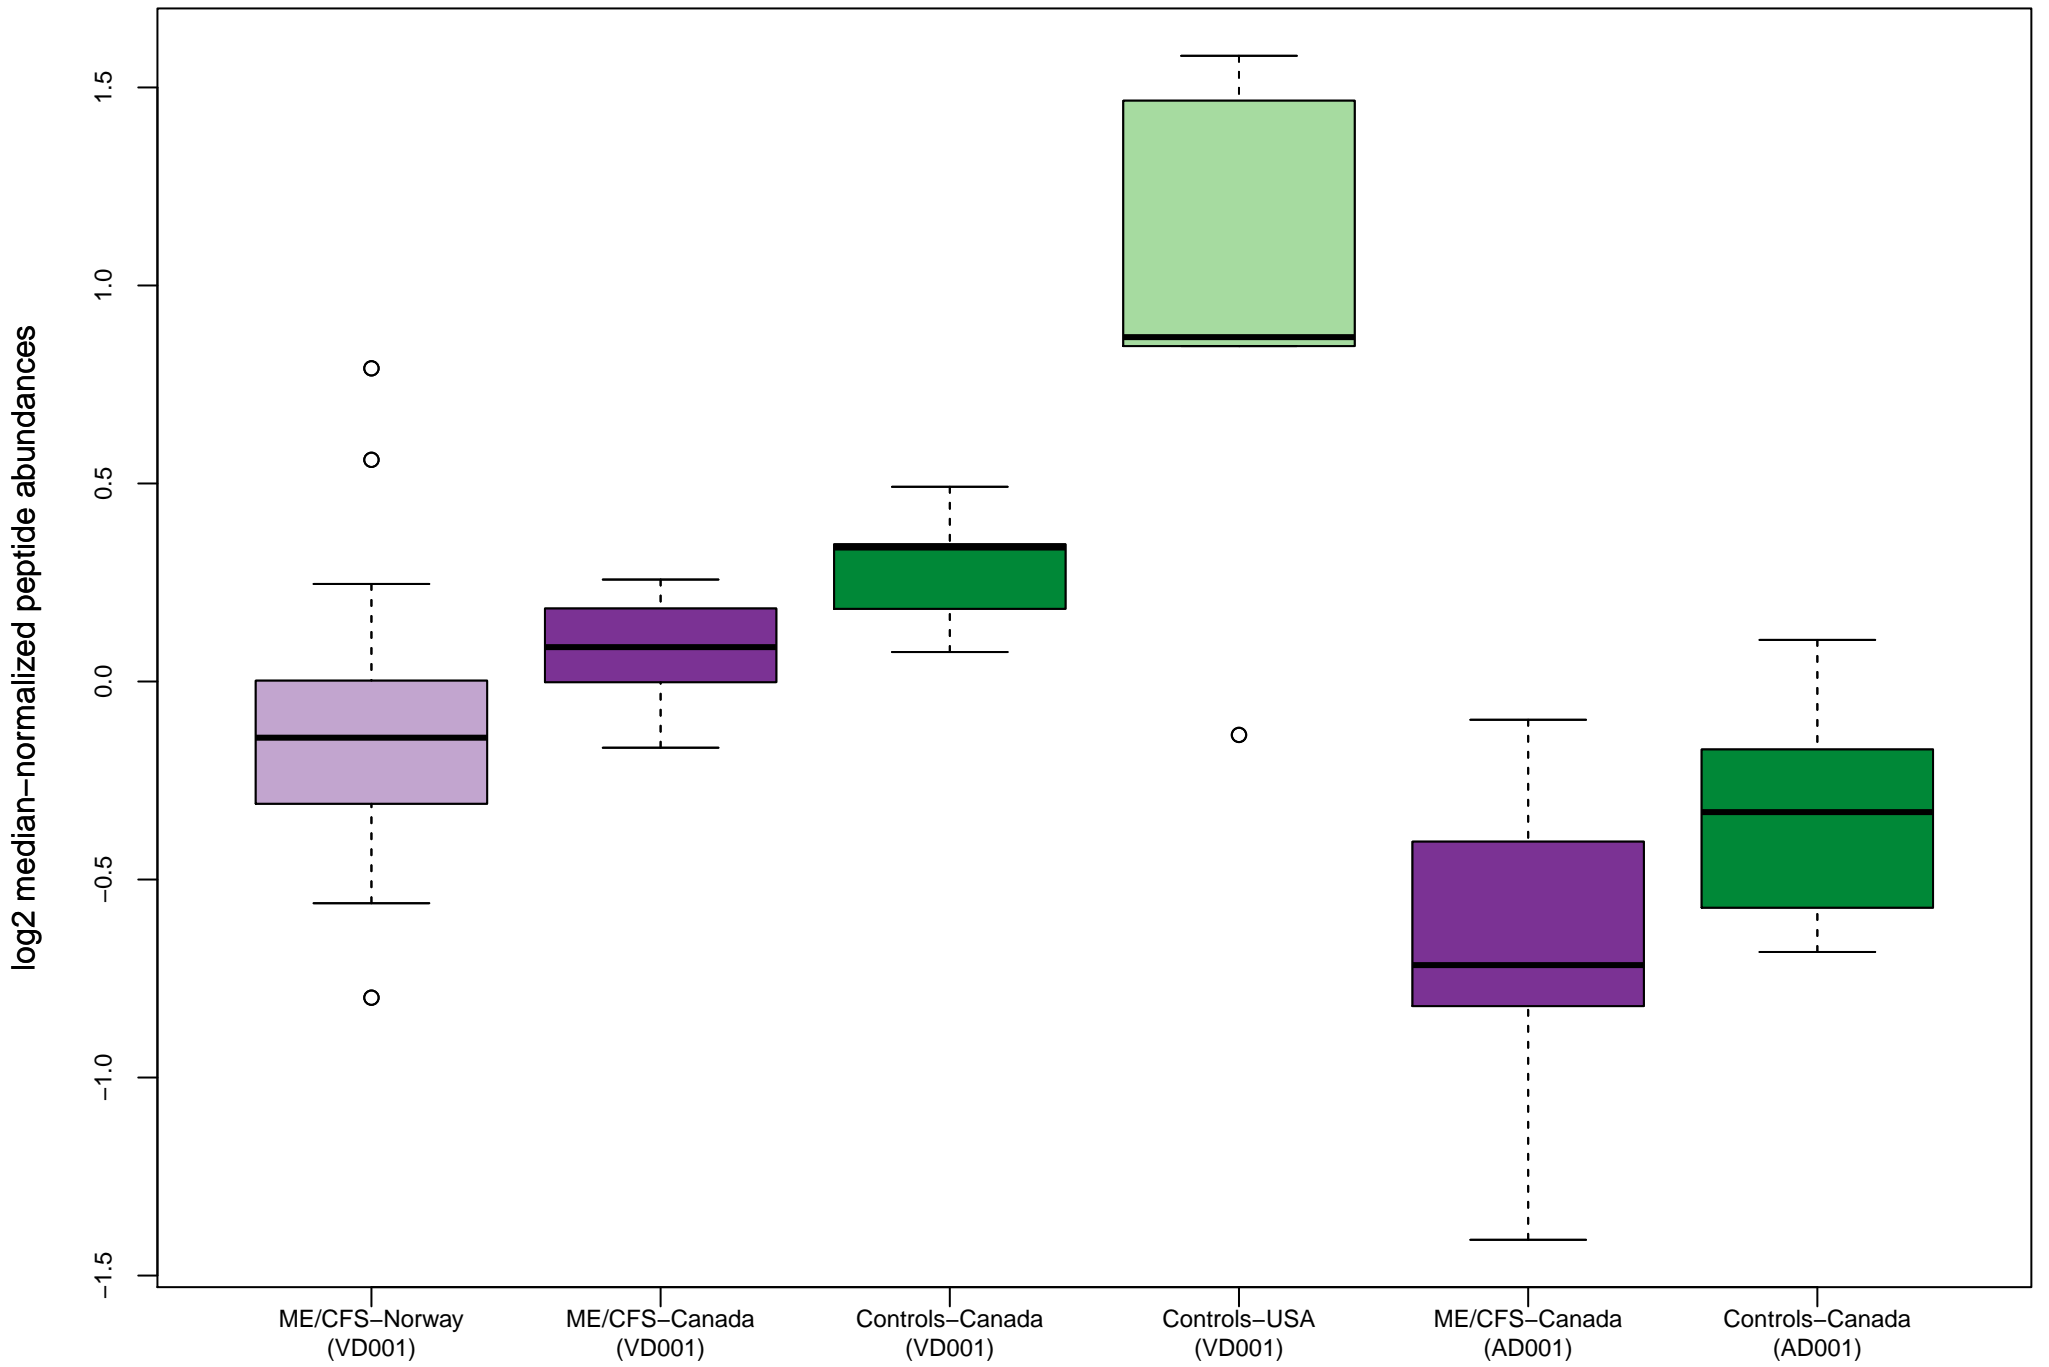

# VYFNKFASVLSG

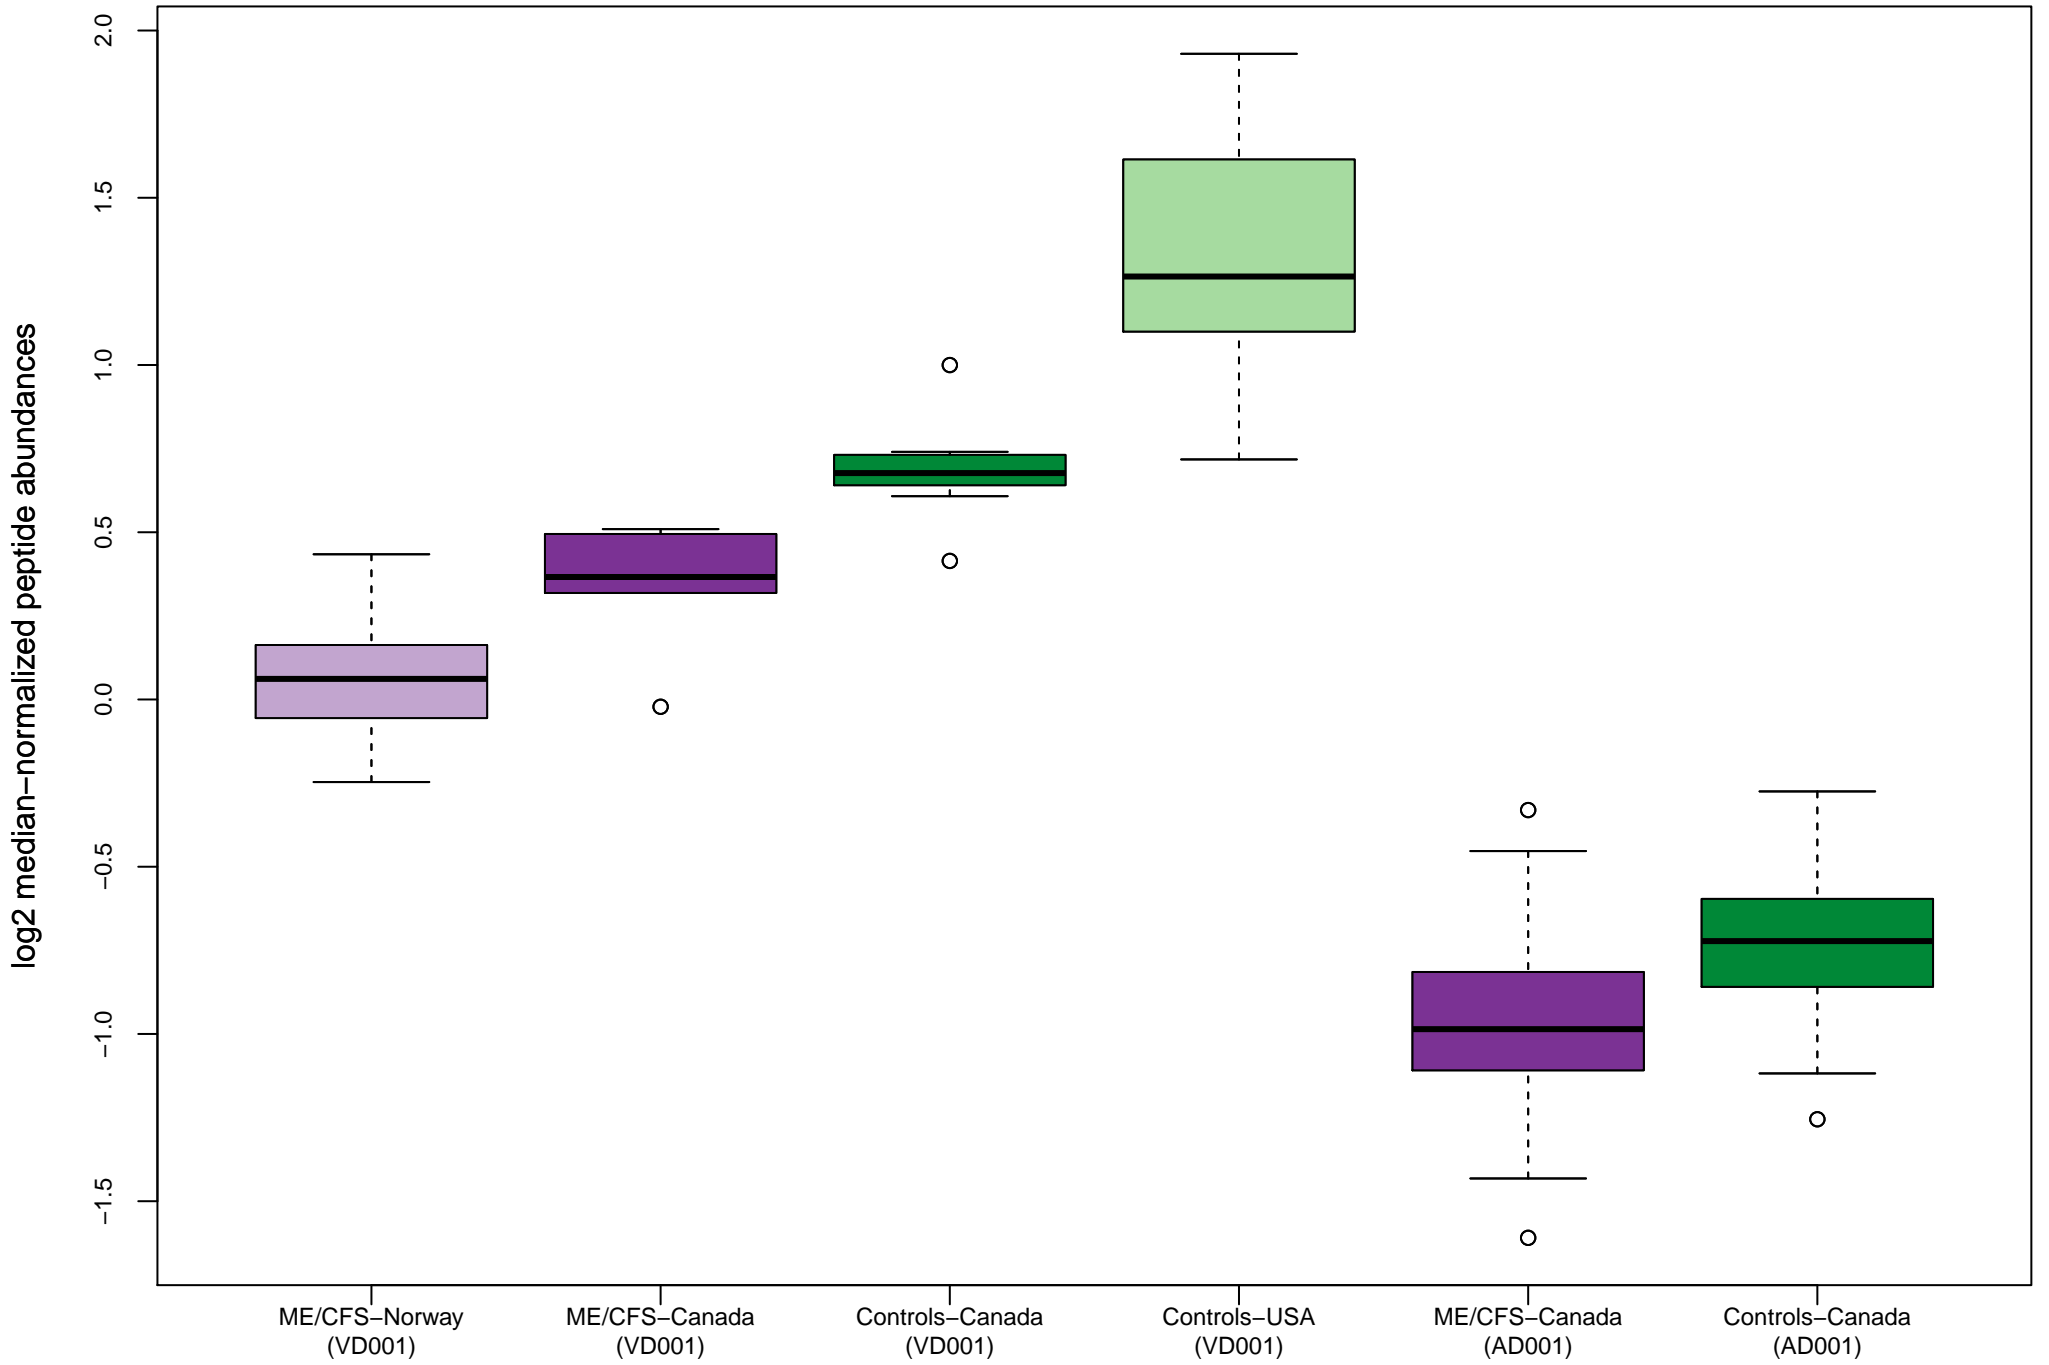



# WAARALVASGLS

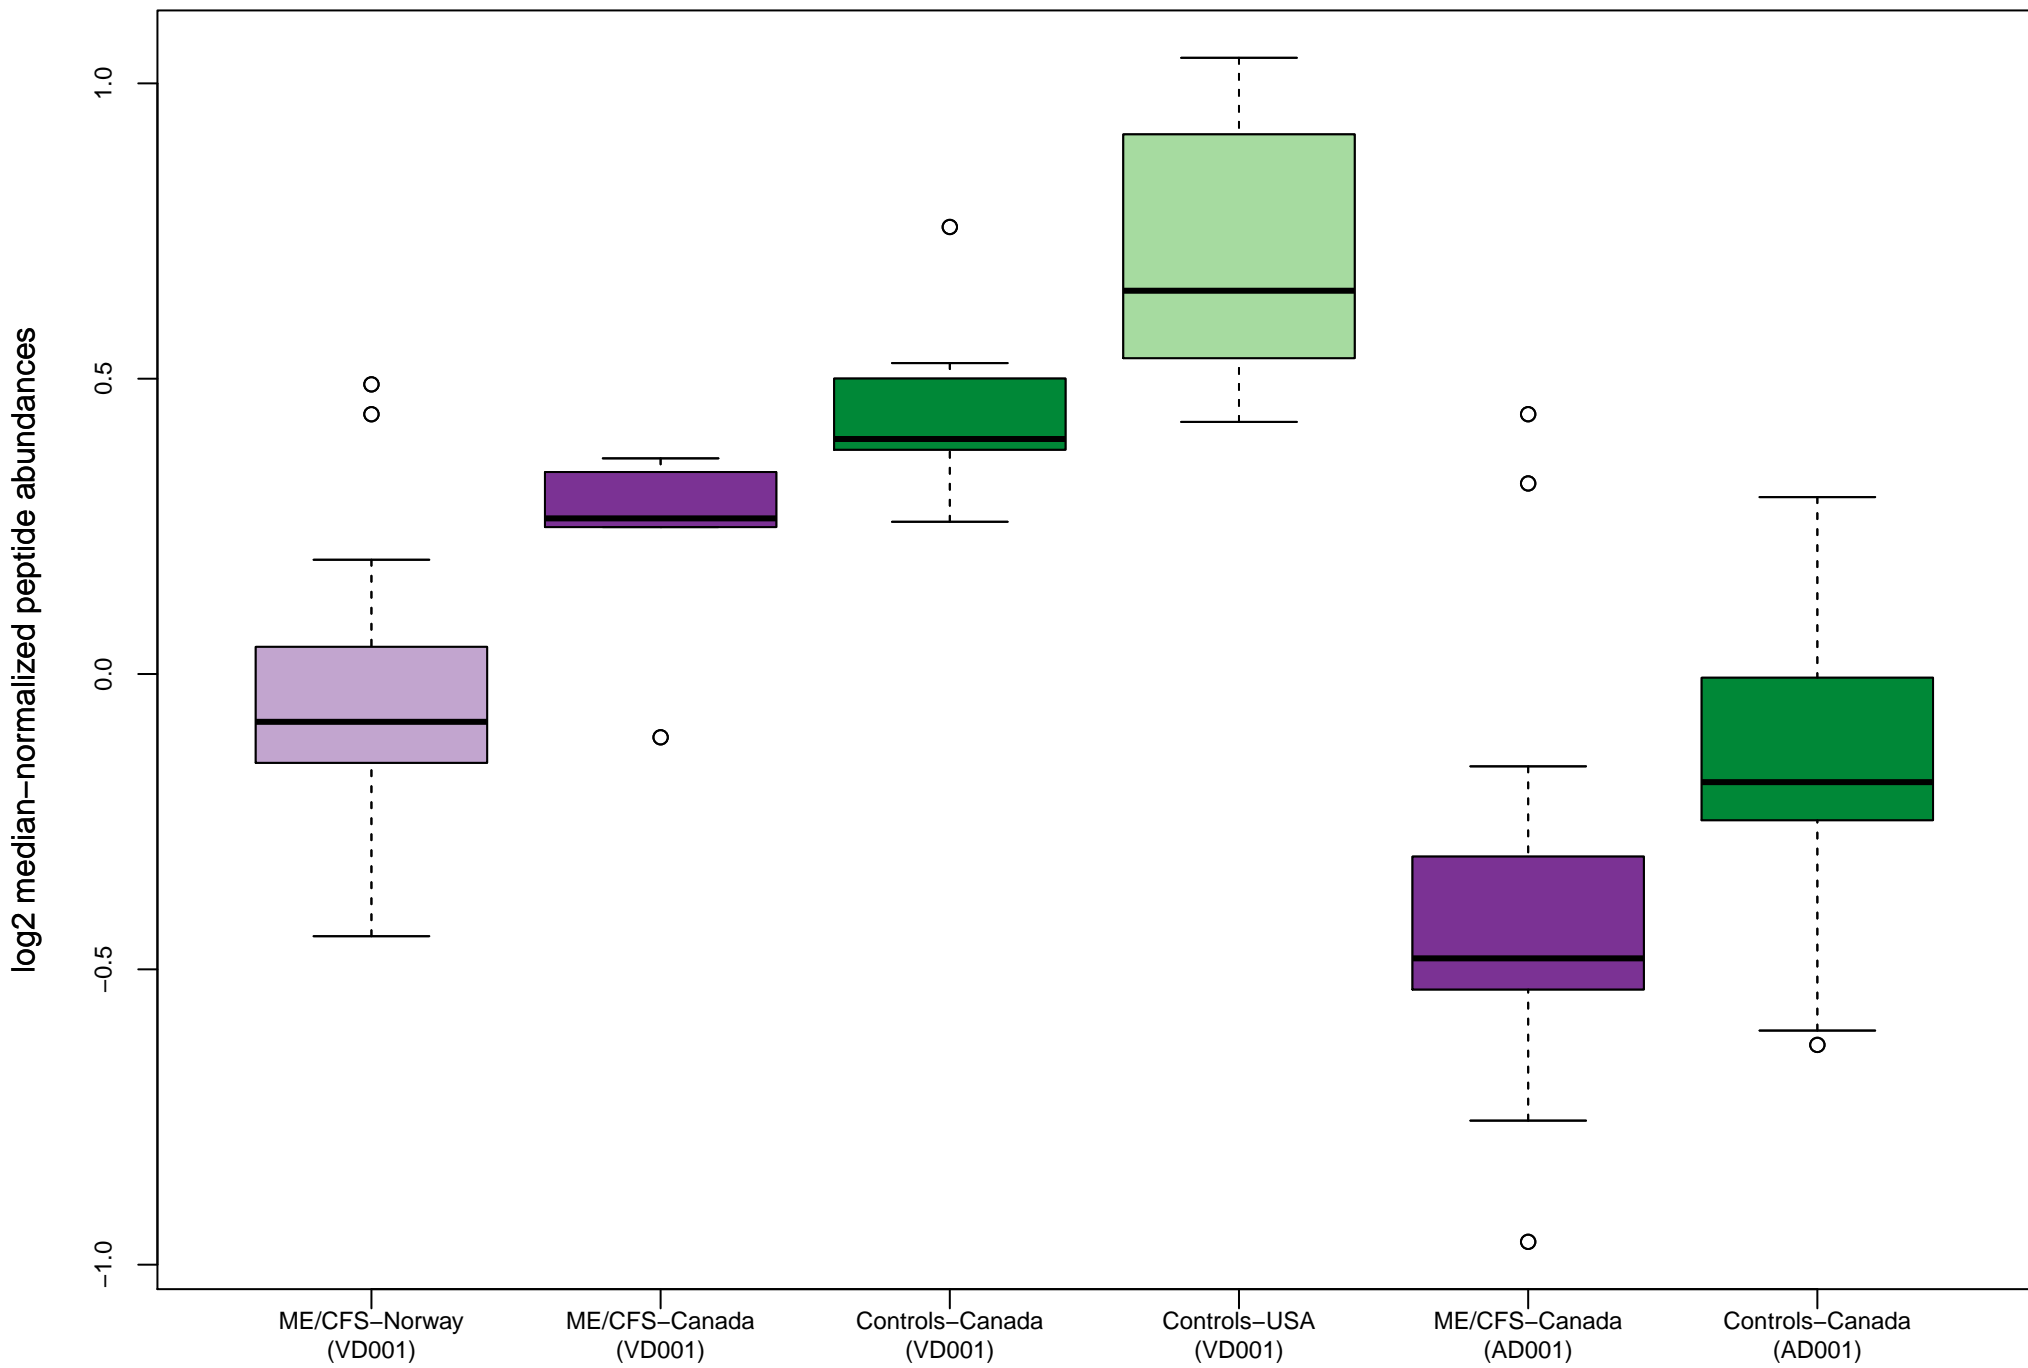

# WAFPGRYRVSGV

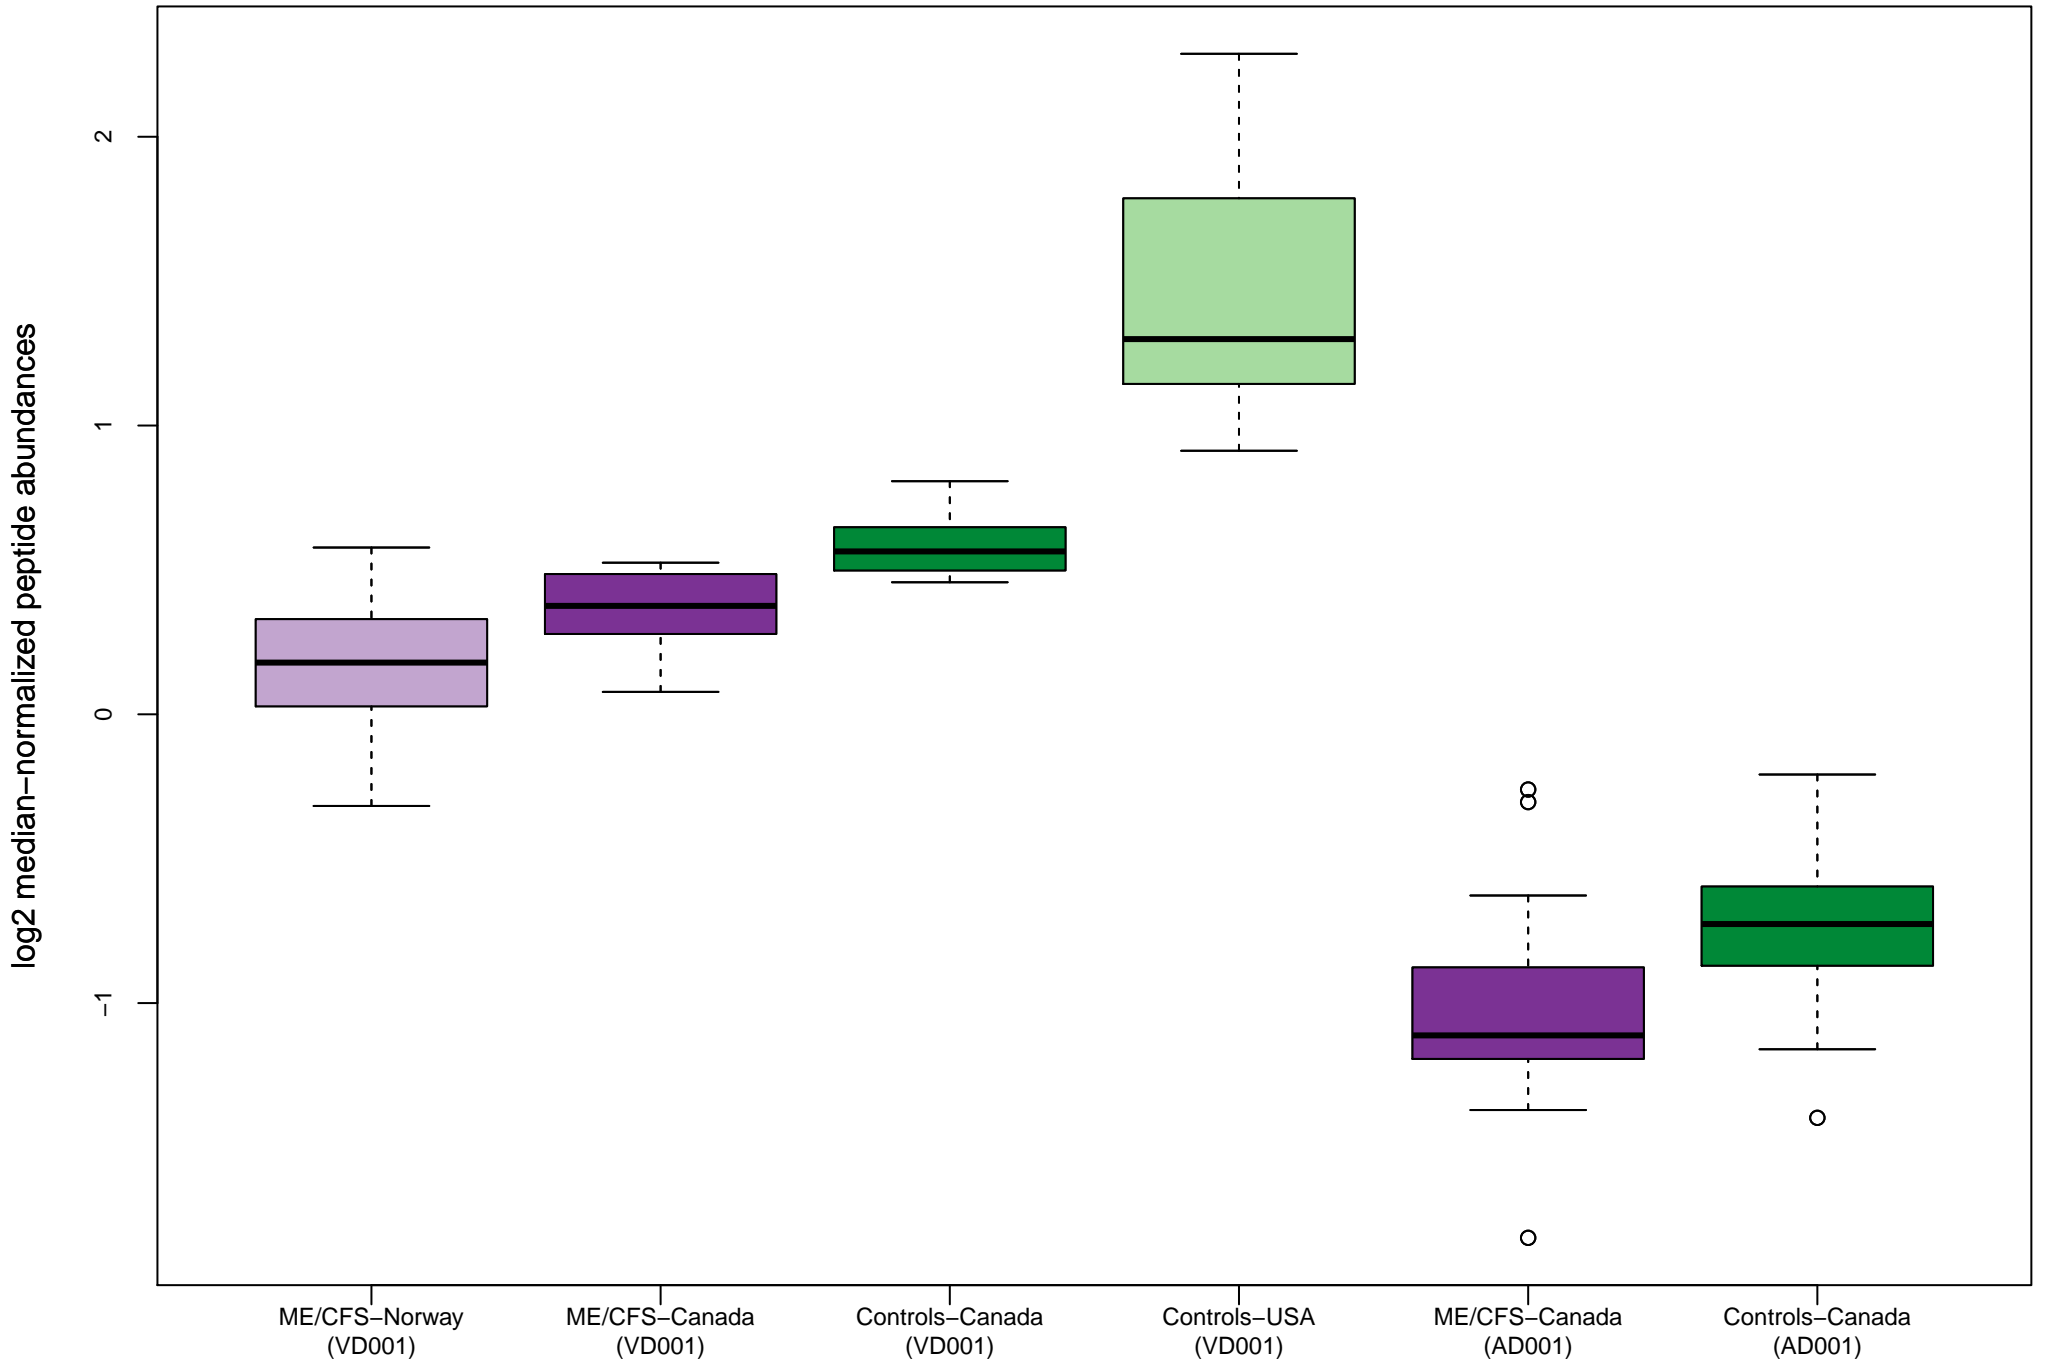

# WFFKFRGVALSG

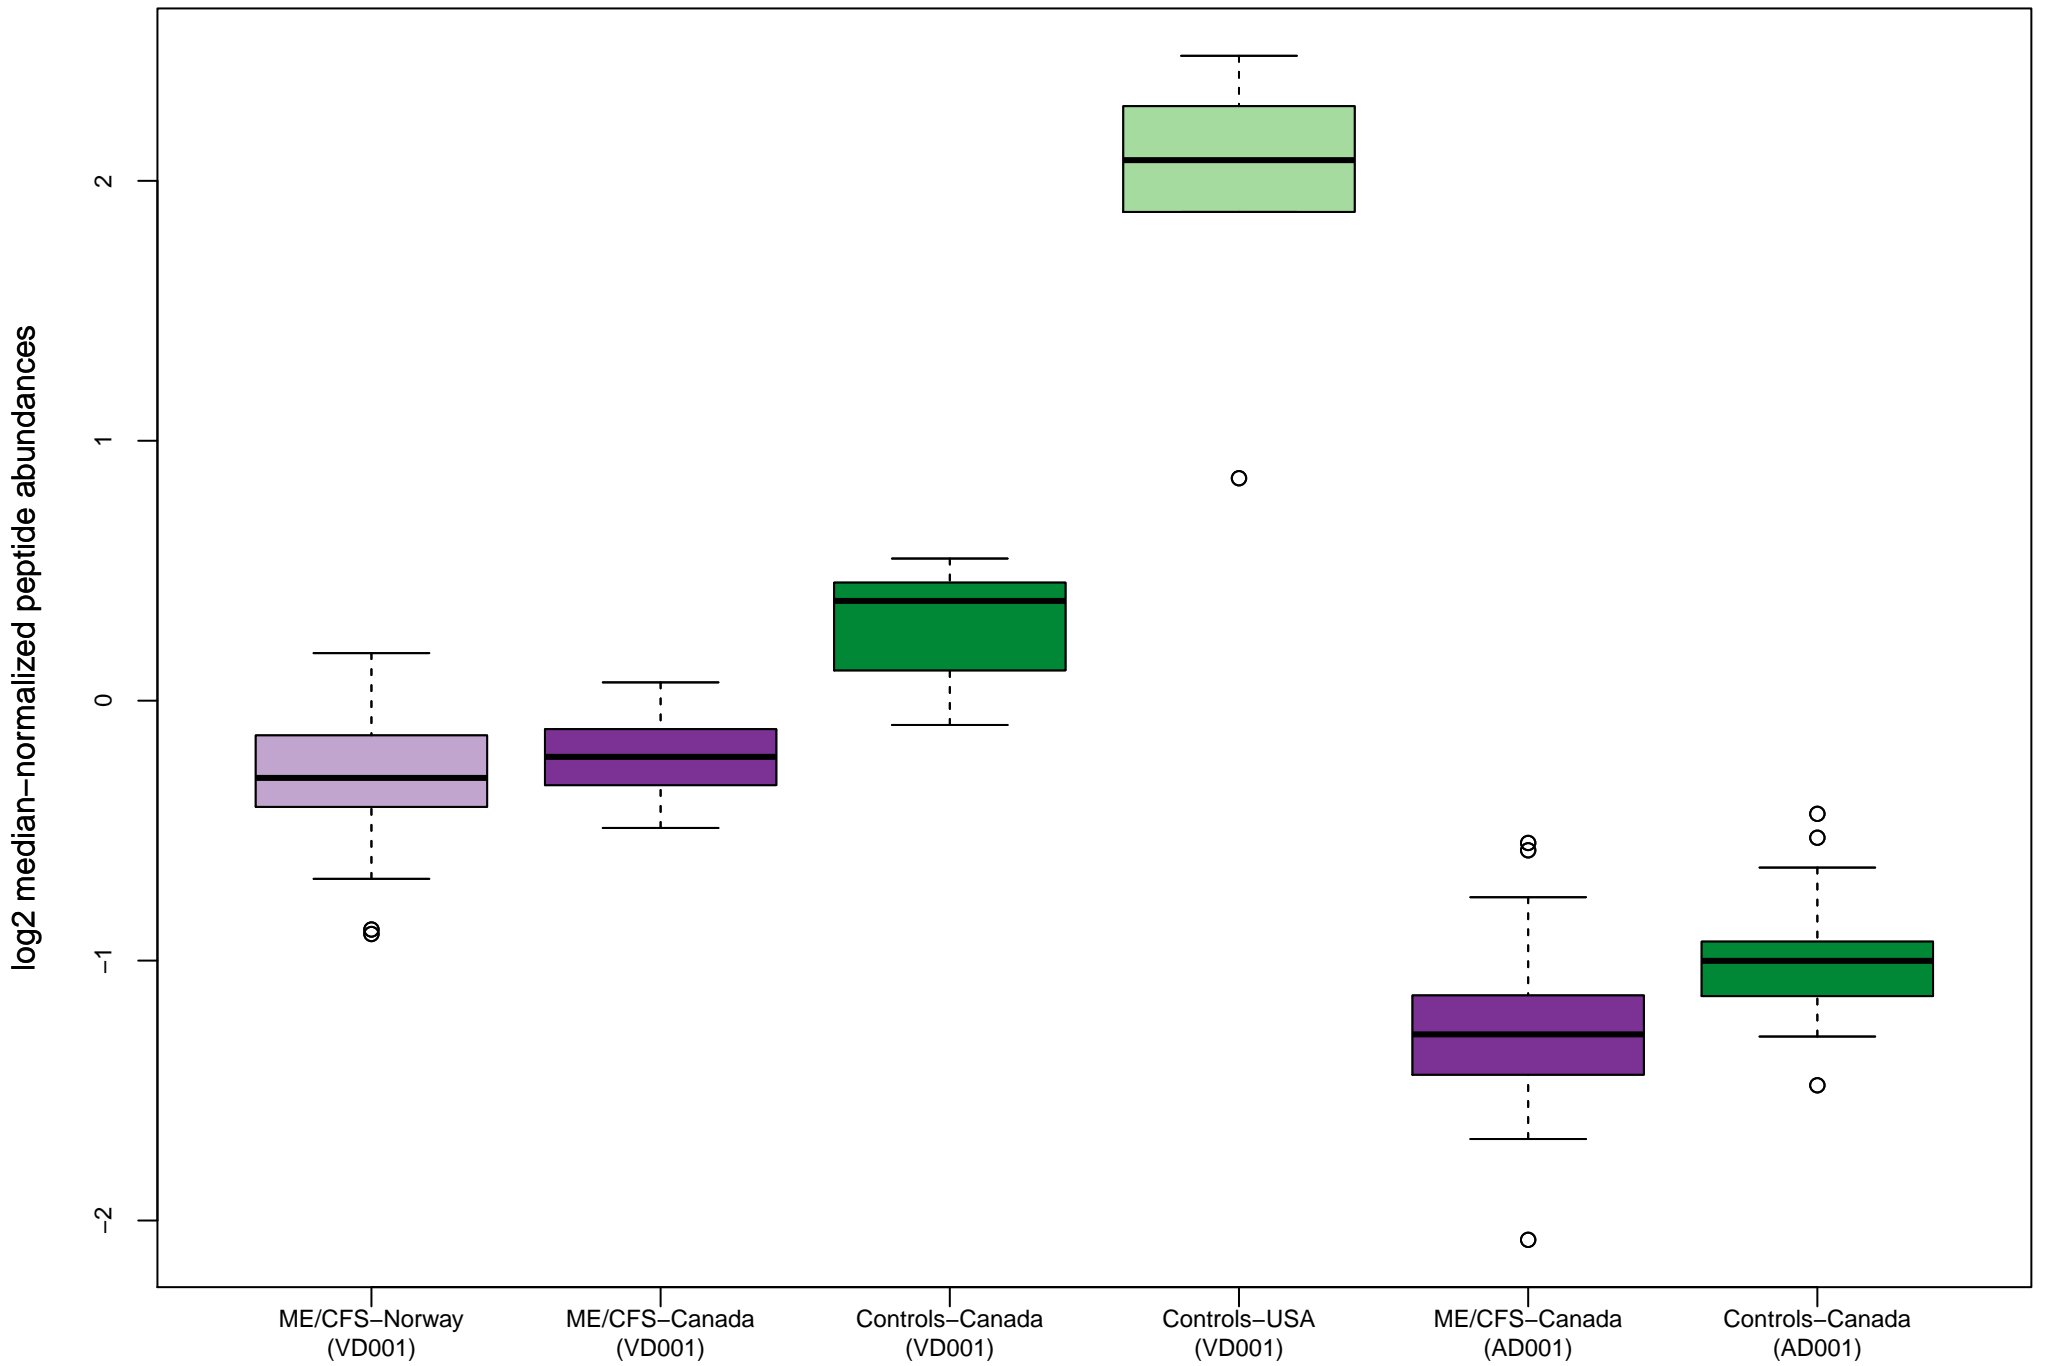

# WFGRLRYALVAG

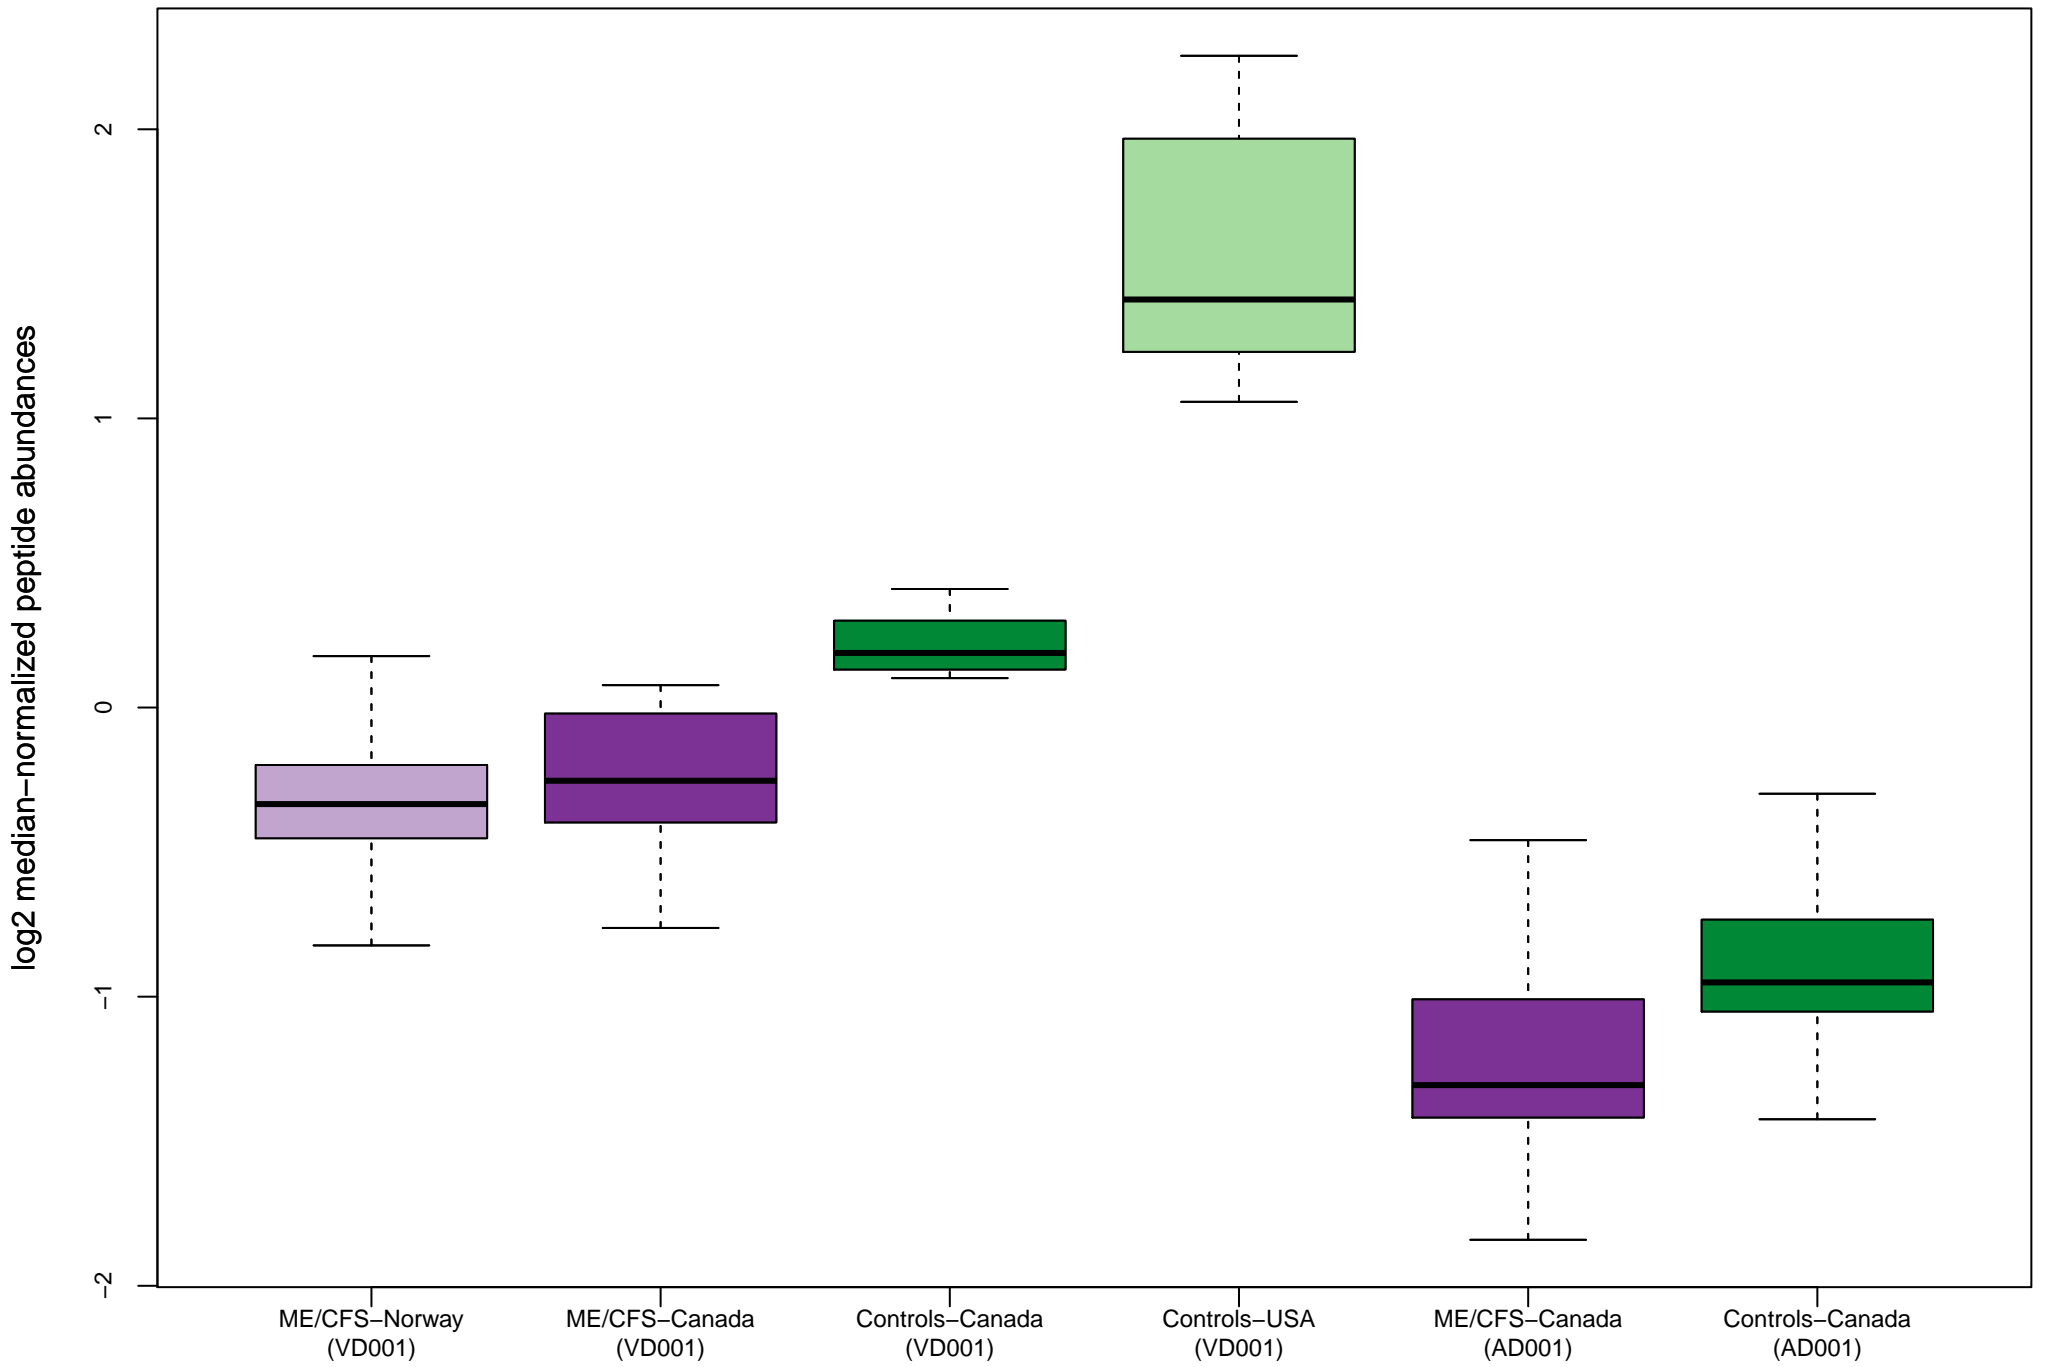

# WGQAVLFRKLSG

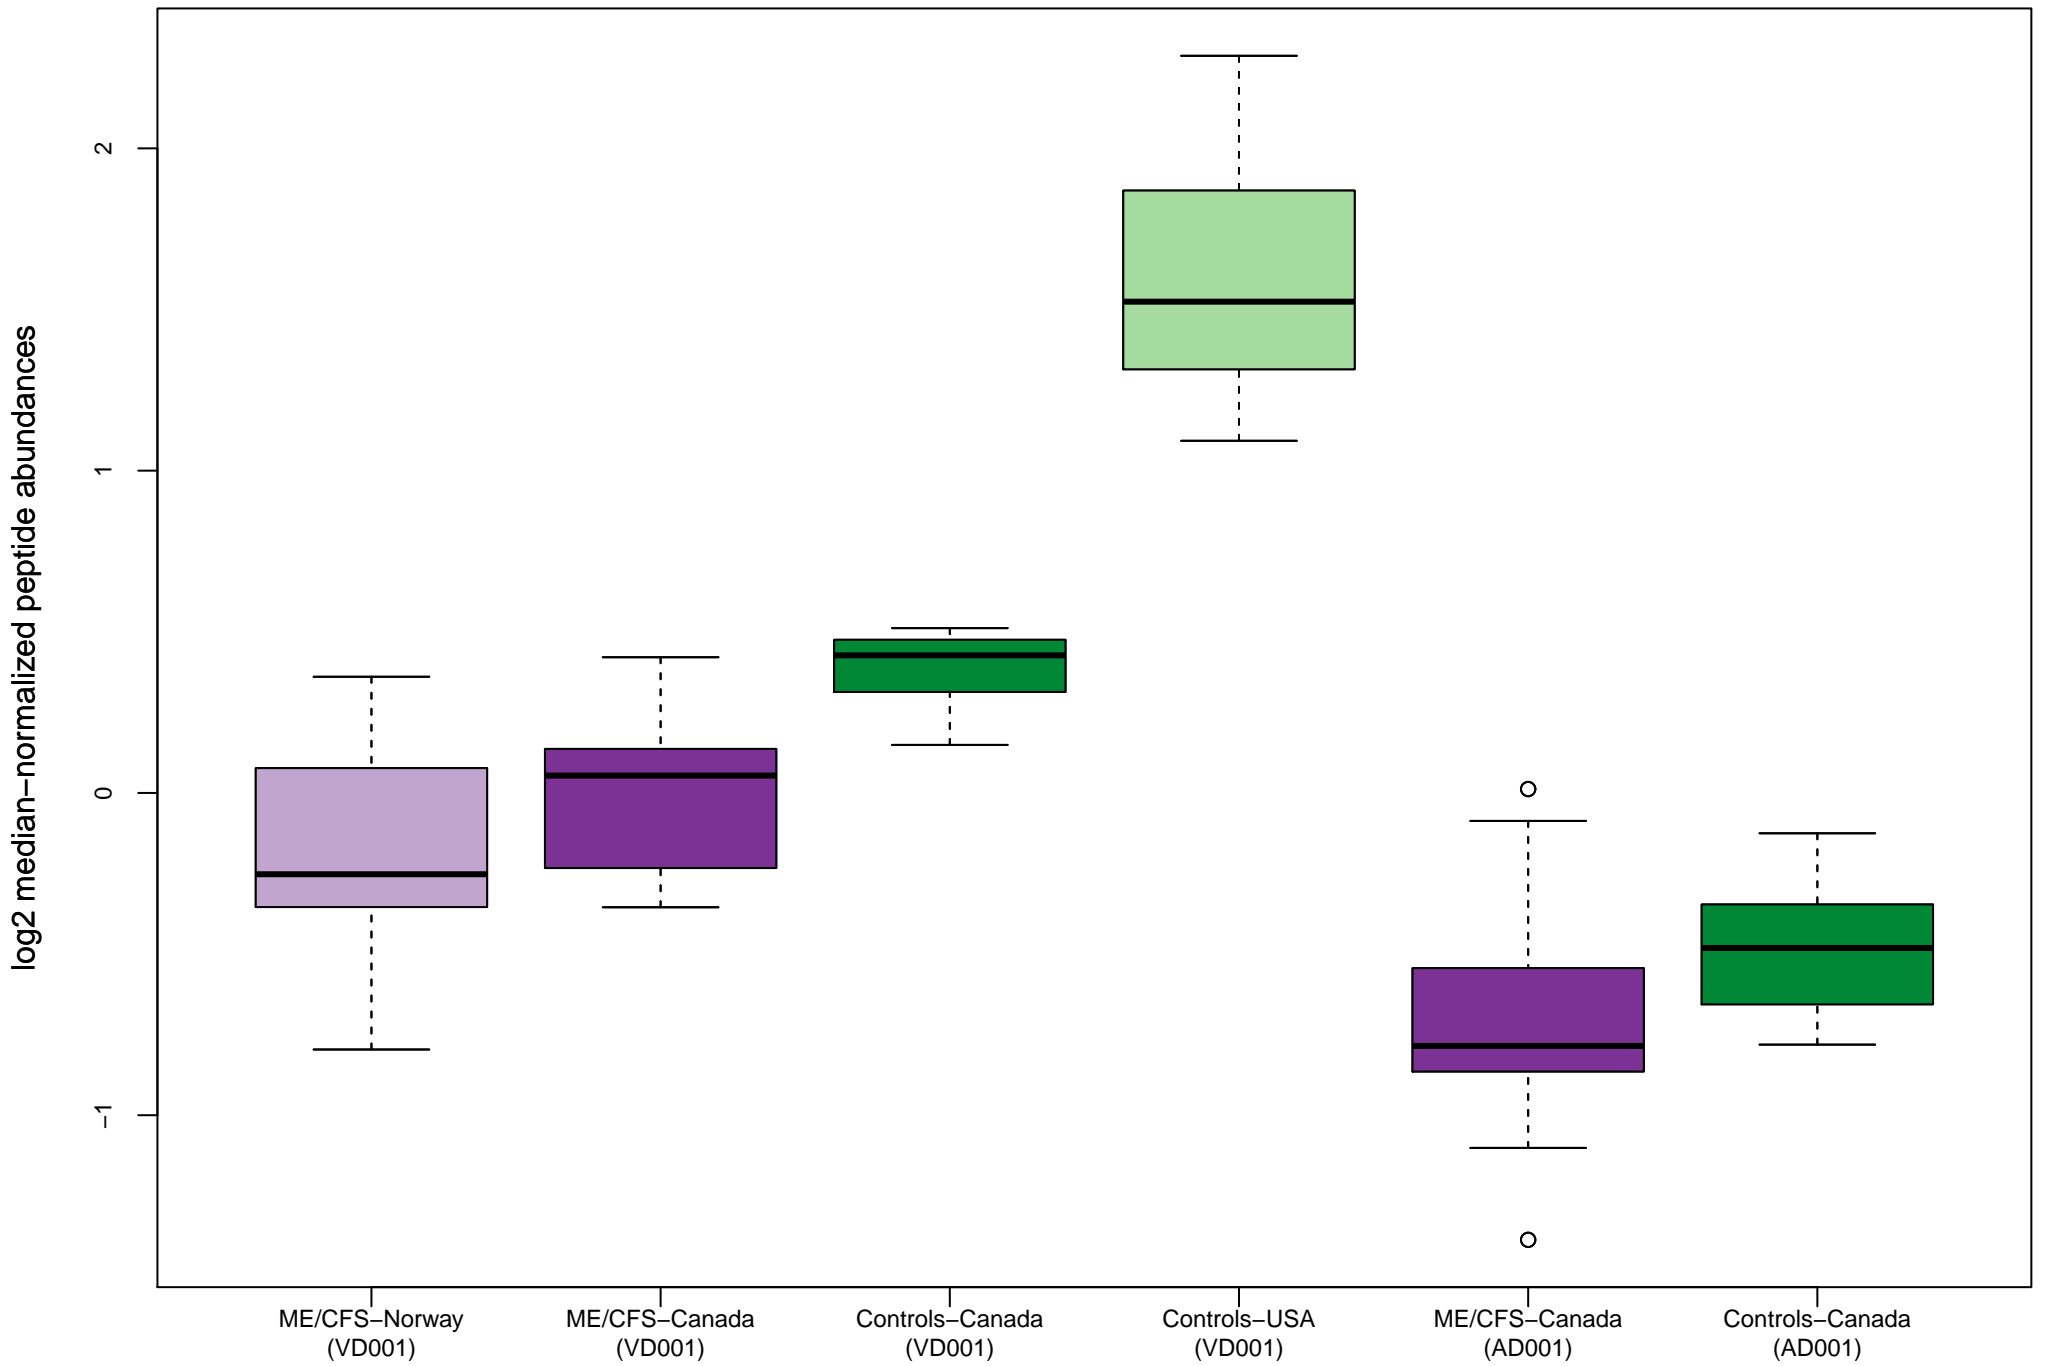

# WGRKPLQPYWLL

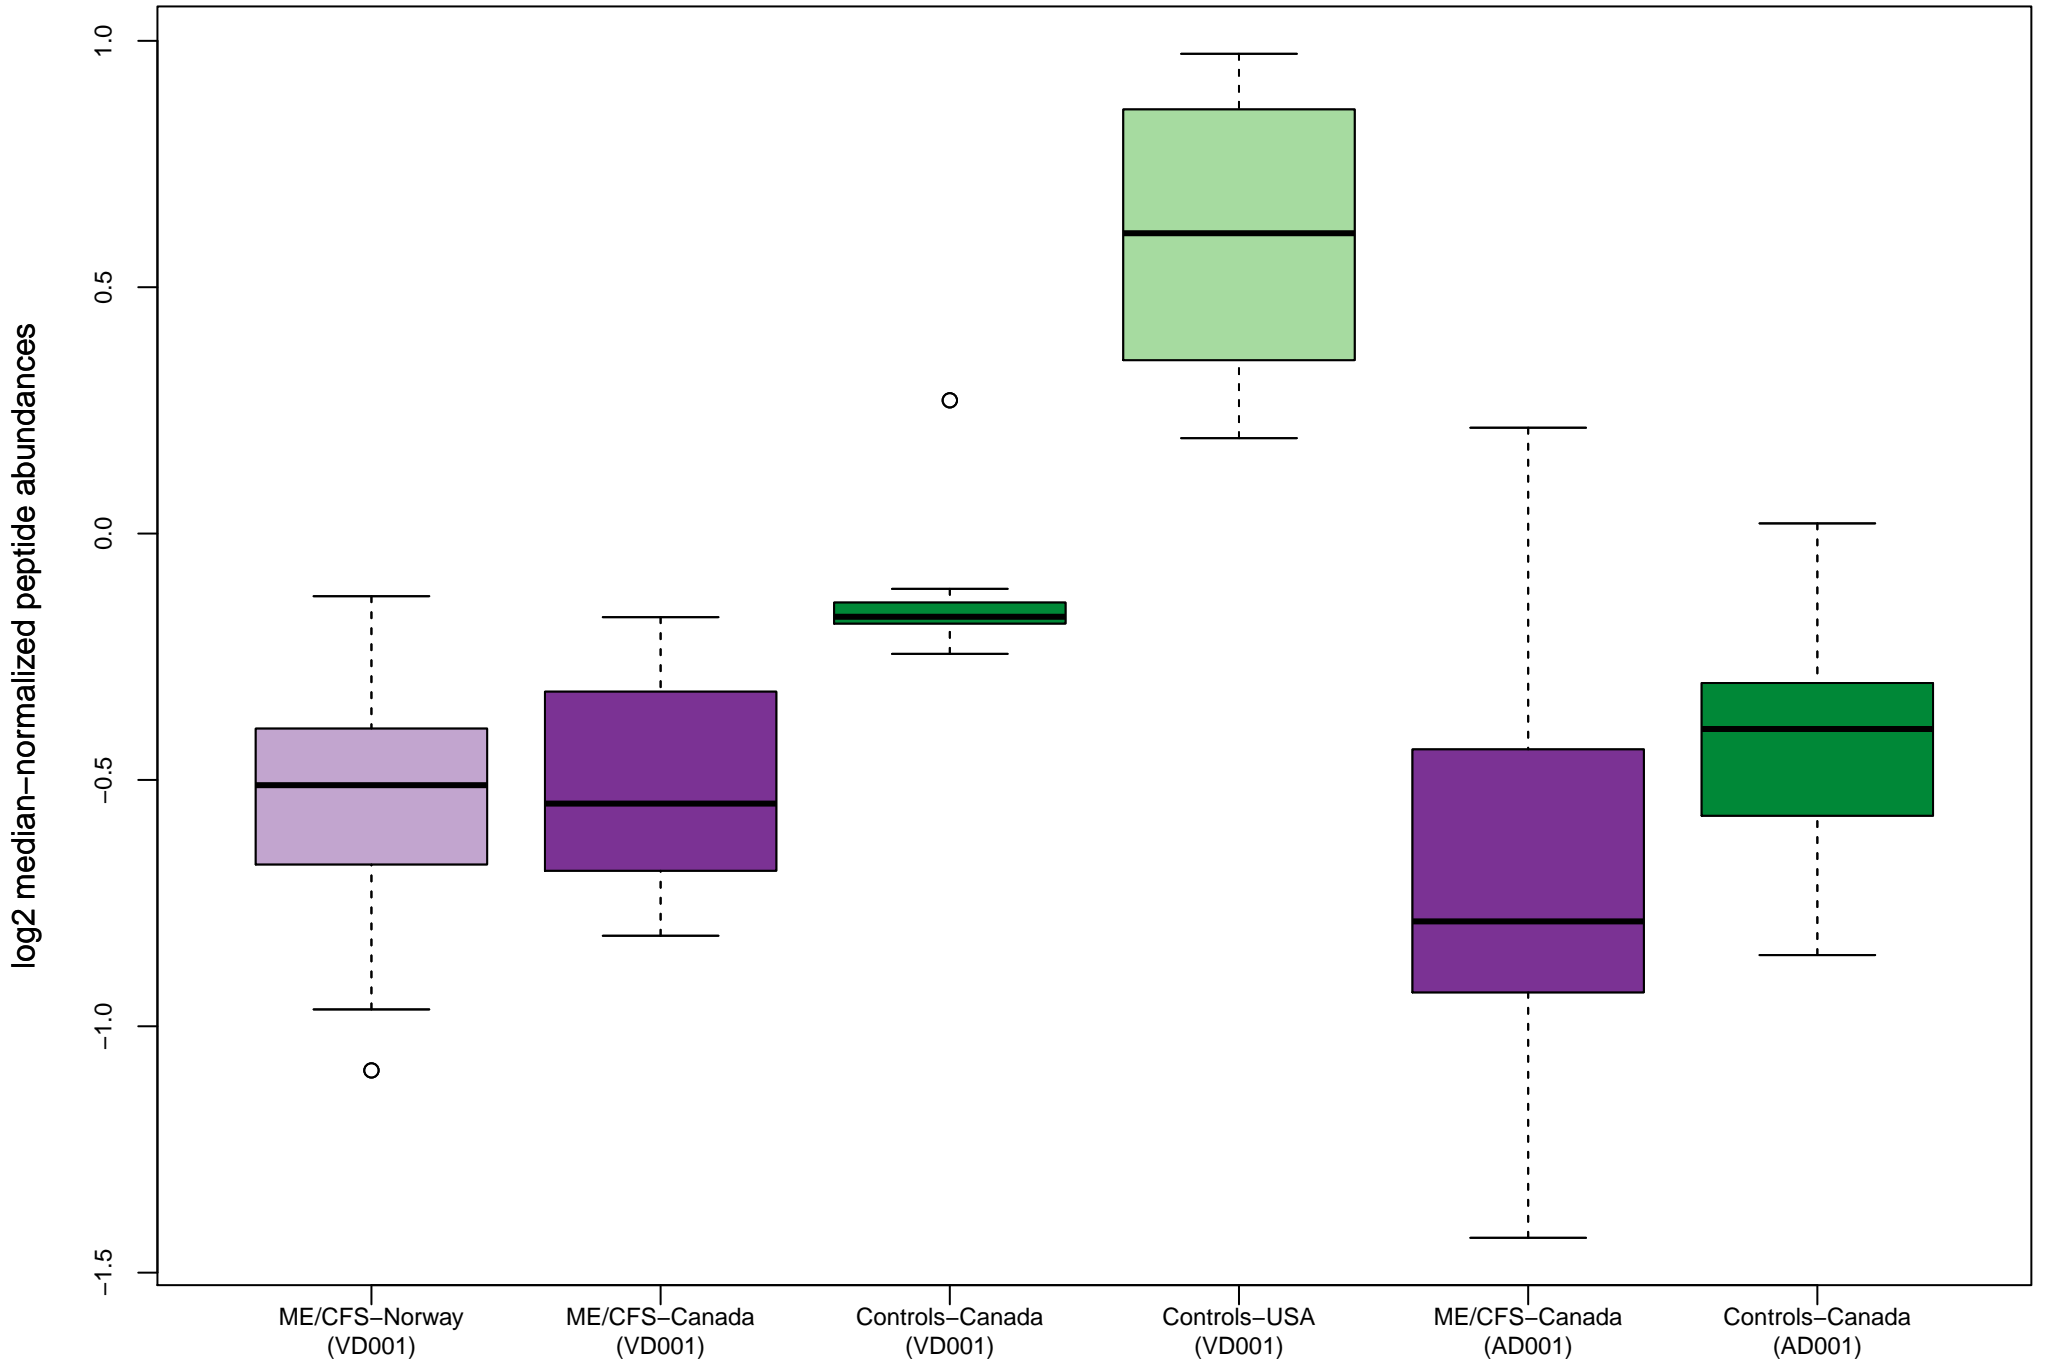

# WKFWRYLQFVGG

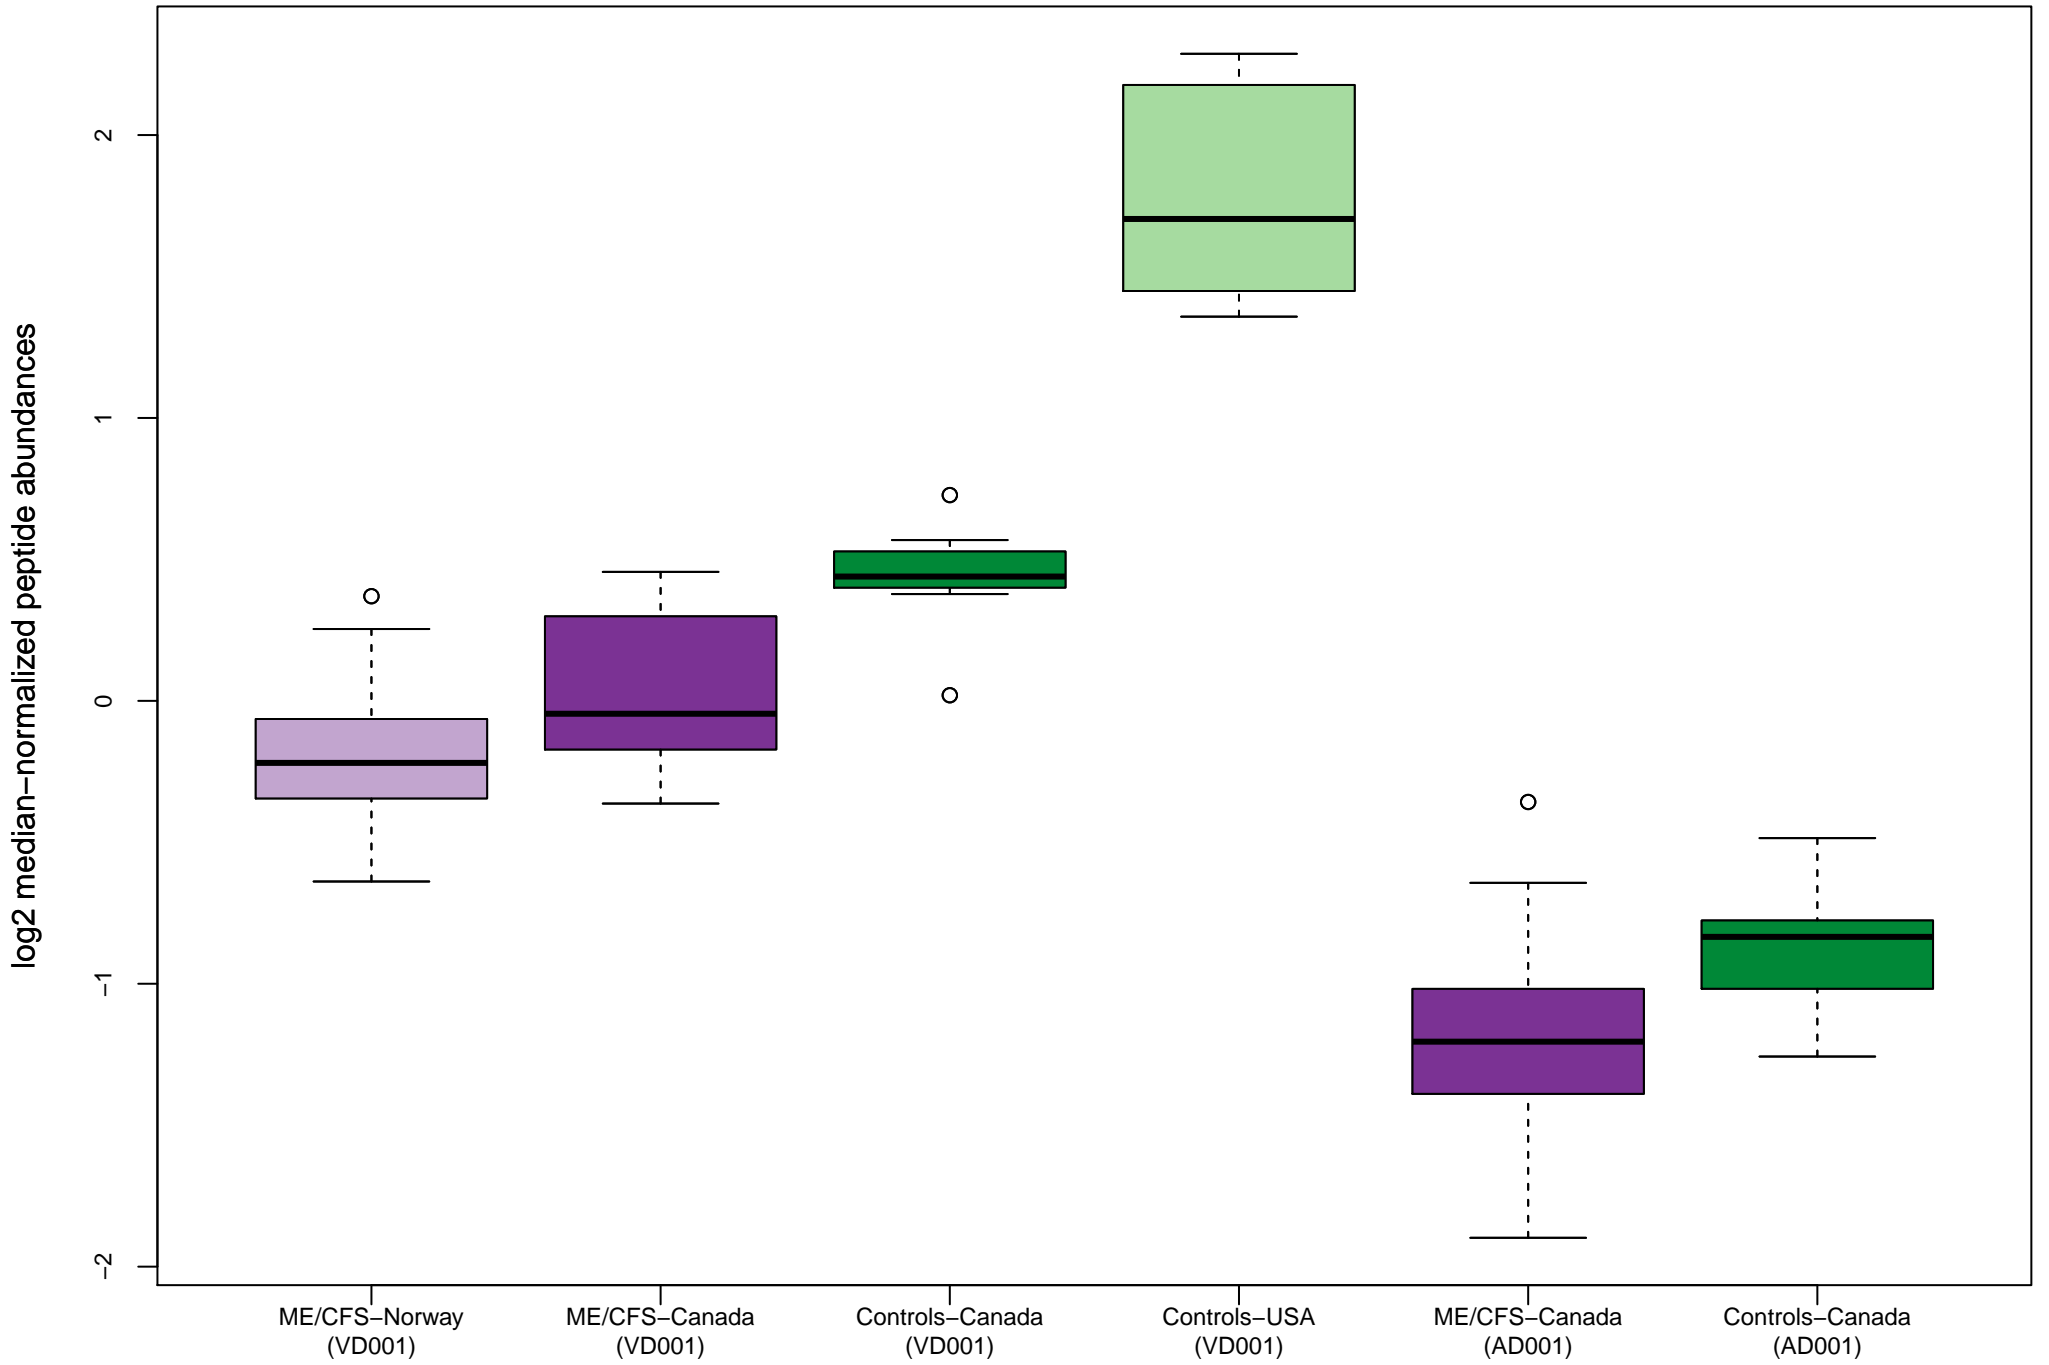

WLYSGRSFKVVS

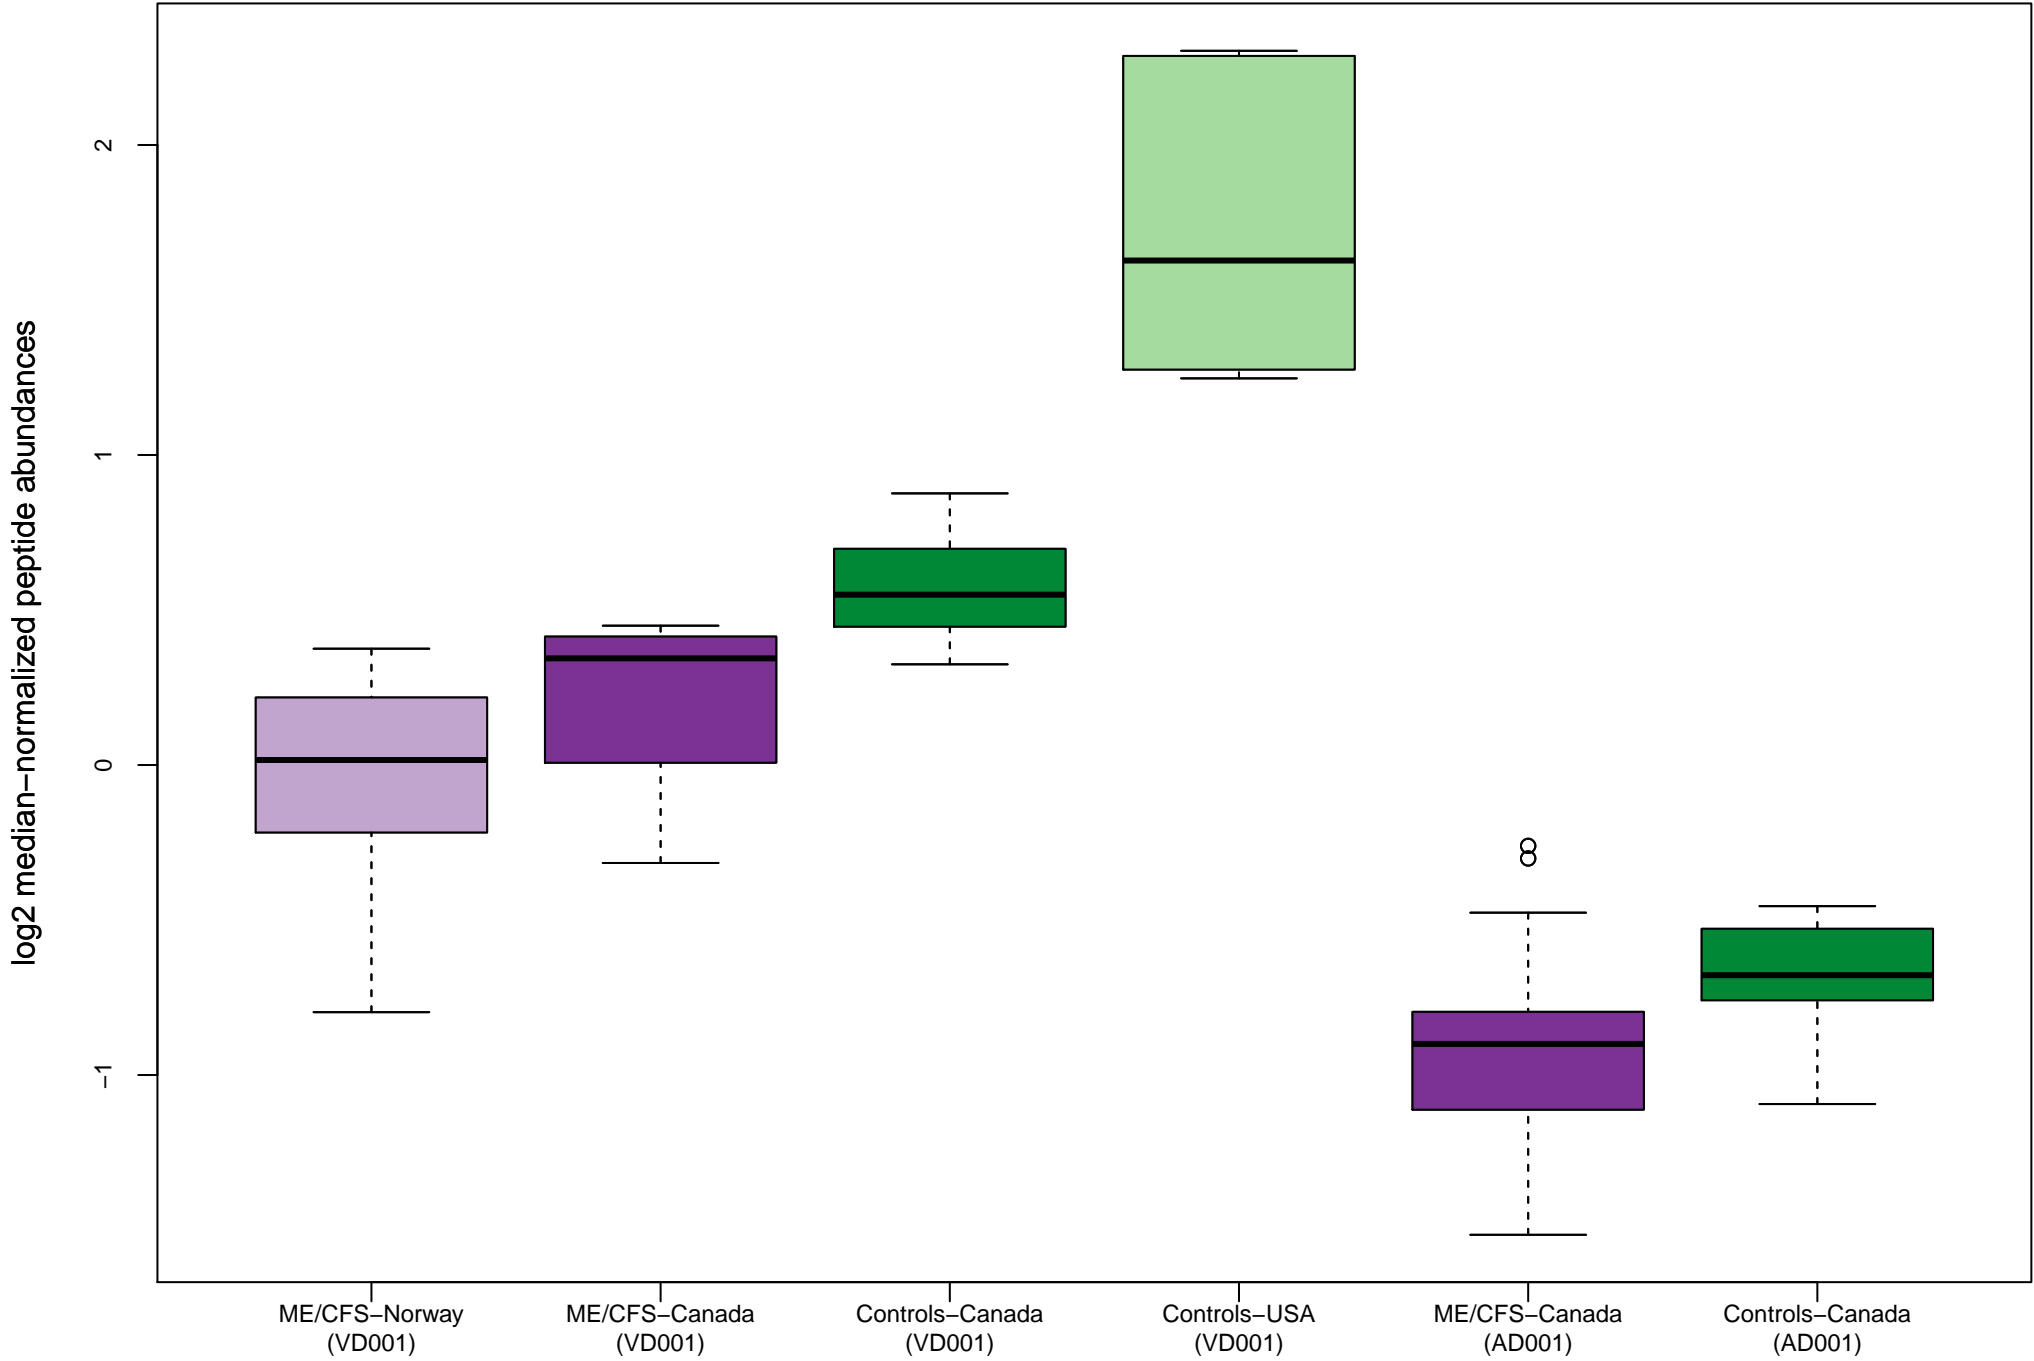



# WPLQLRSGVALS

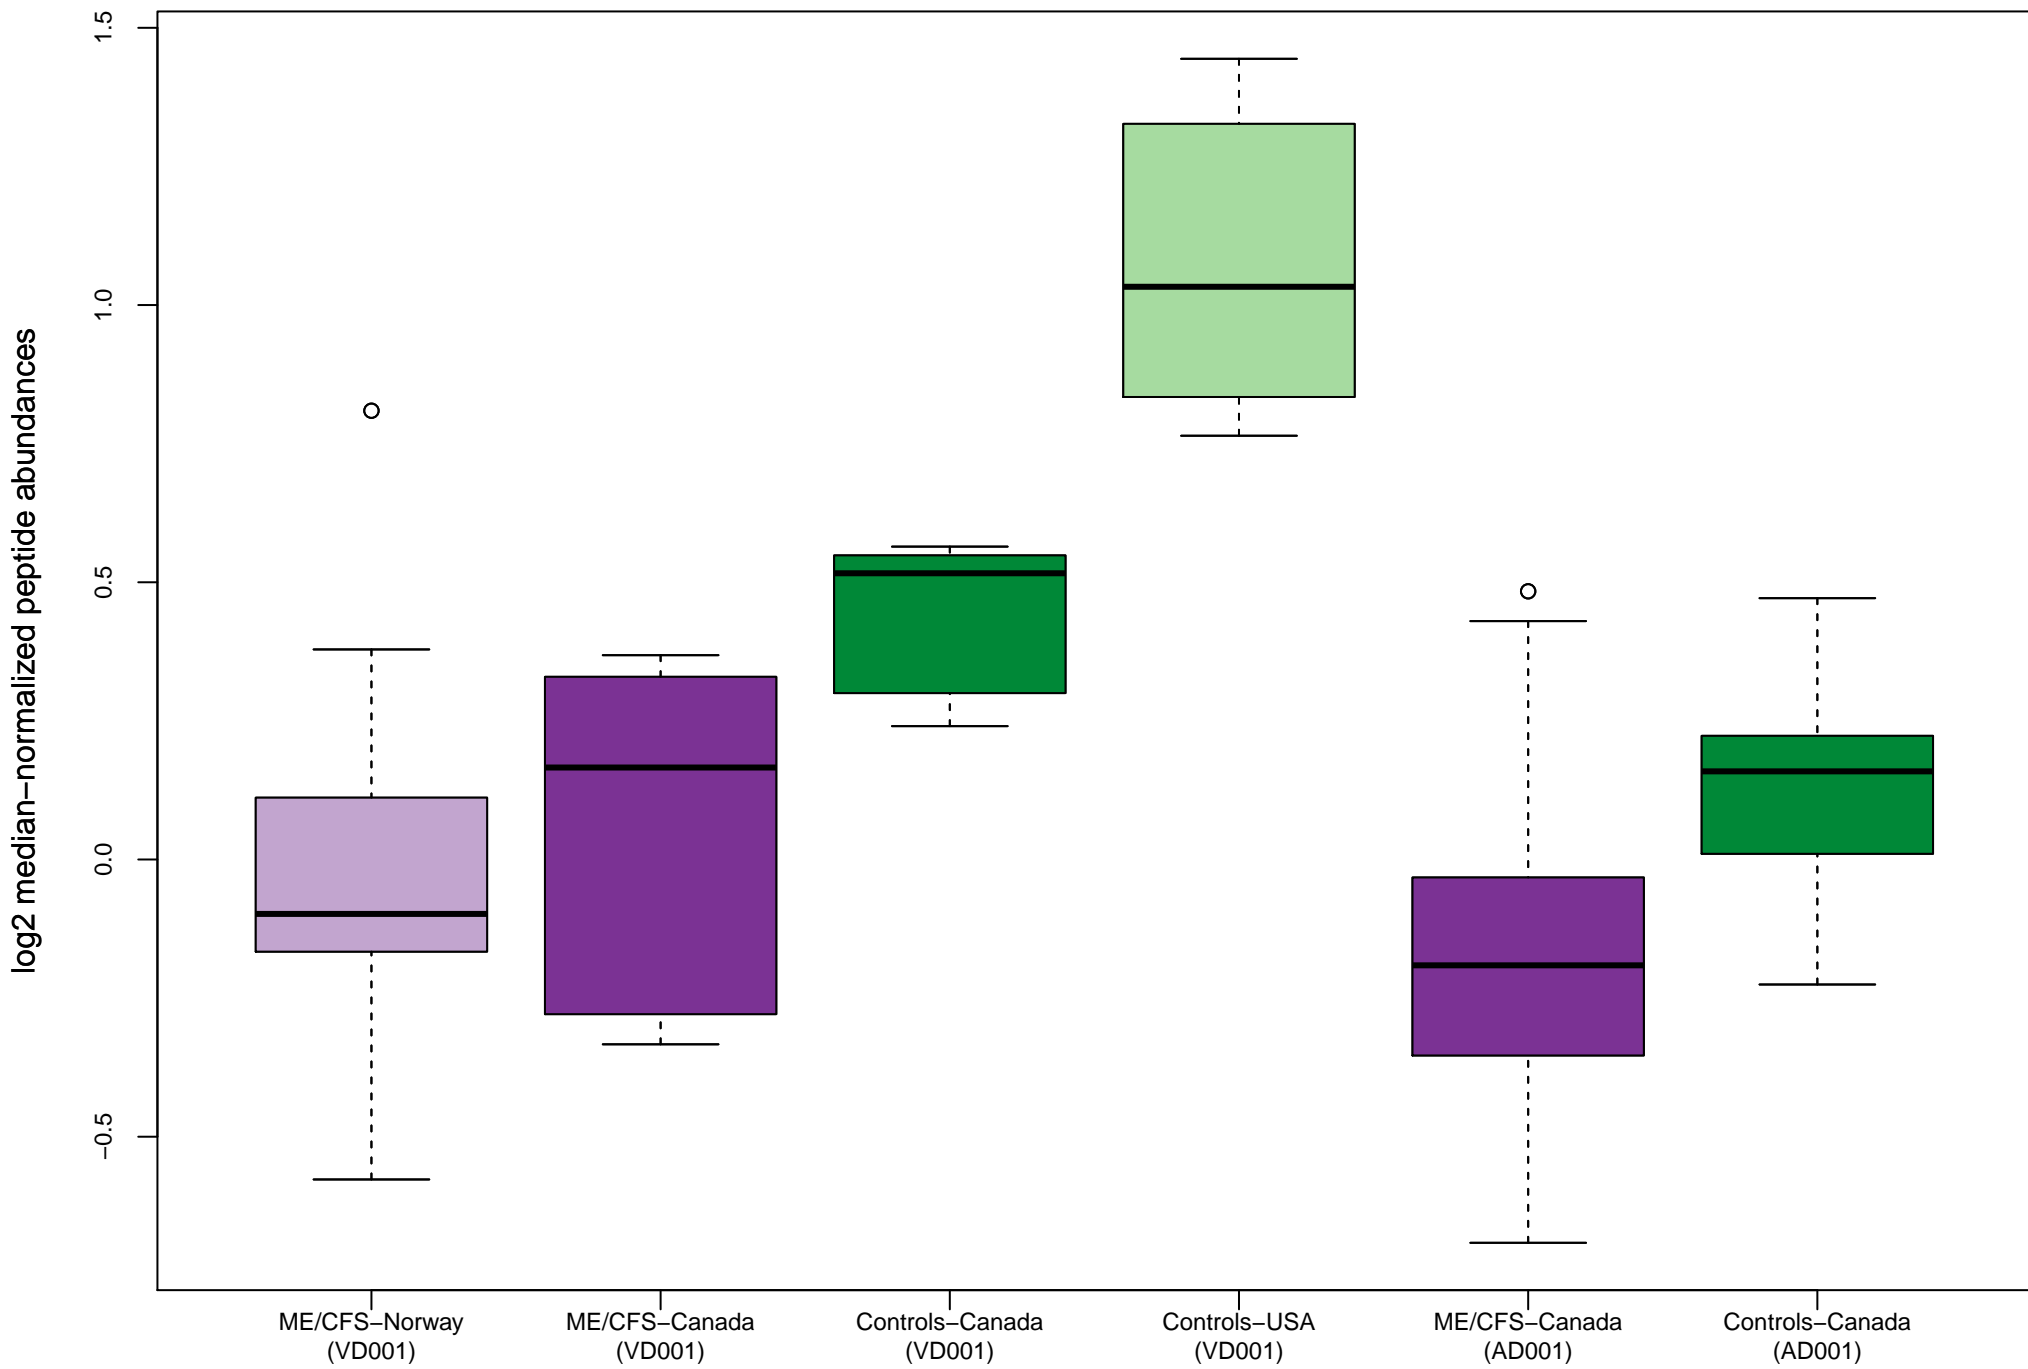

# WRFHRYSGVLSG

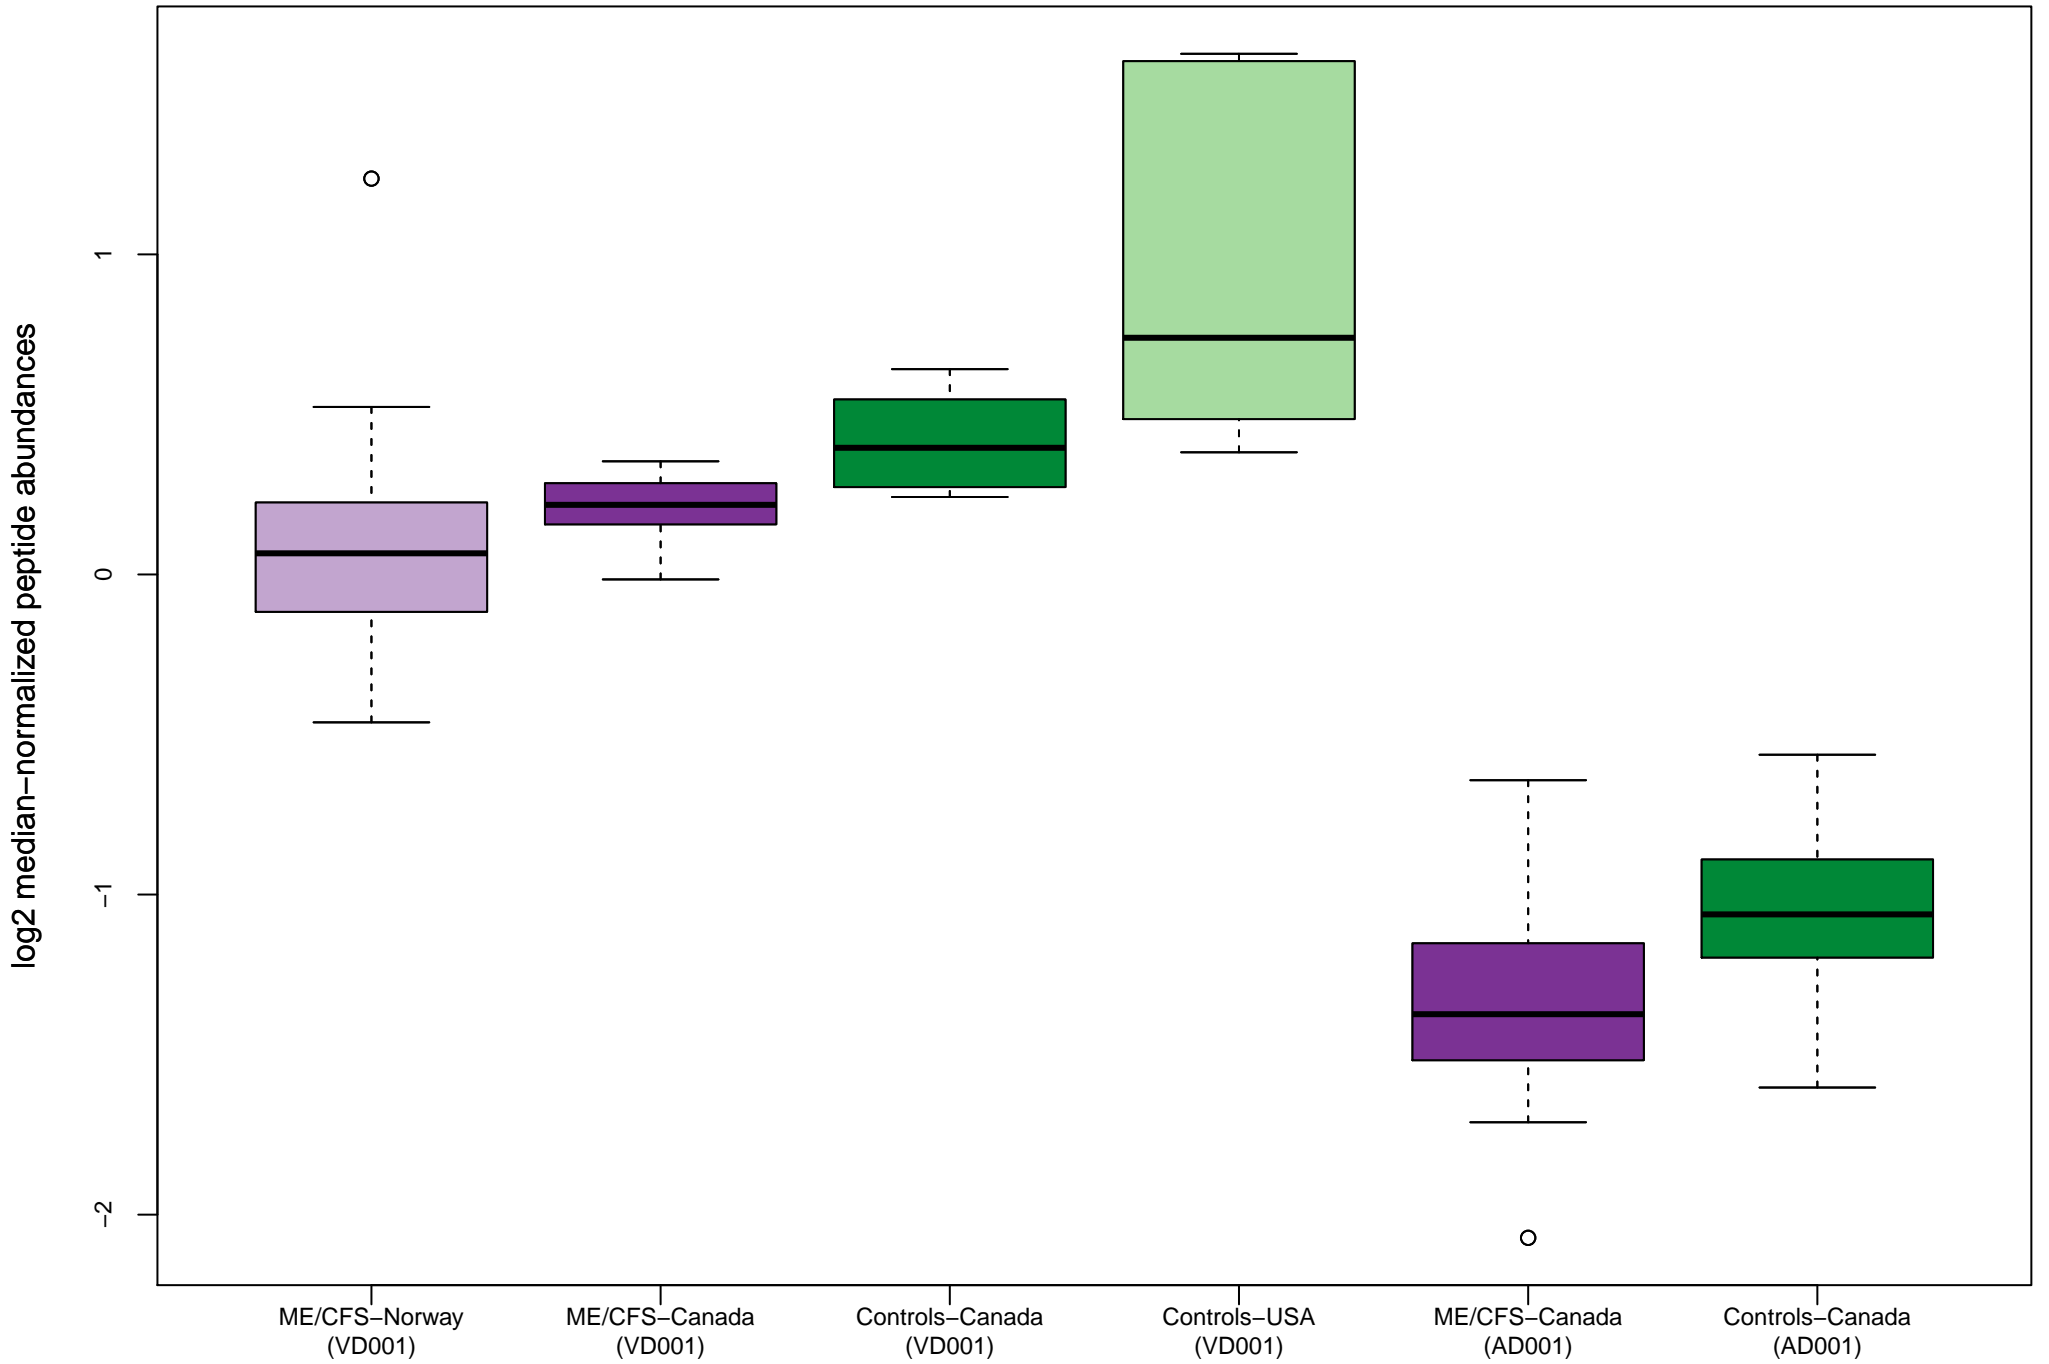

# WRGGQFRYHVAL

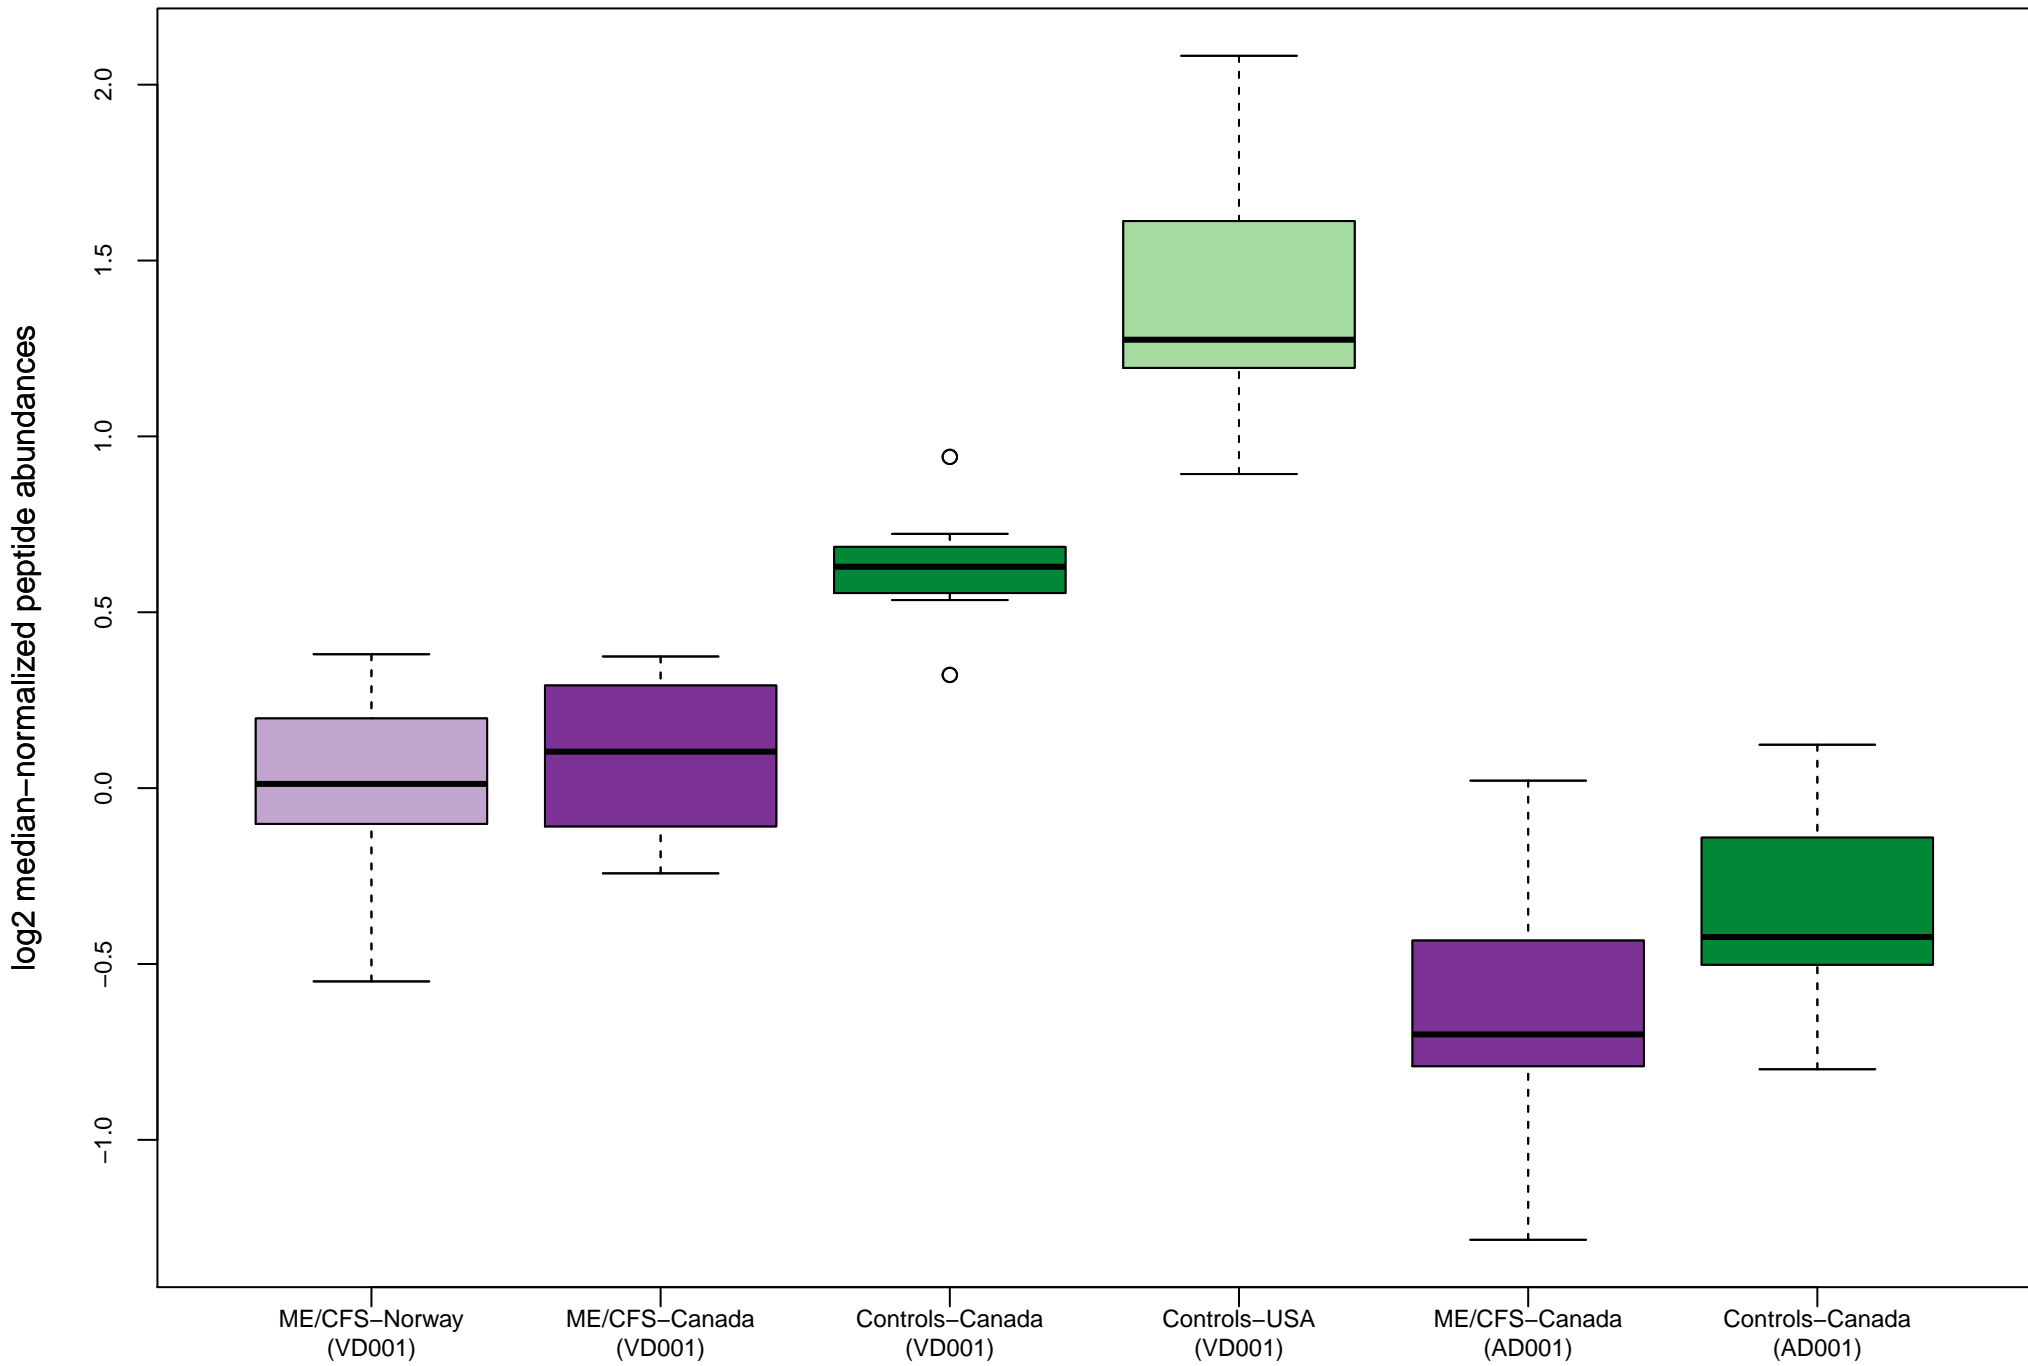

# WRSVFALSGLSG

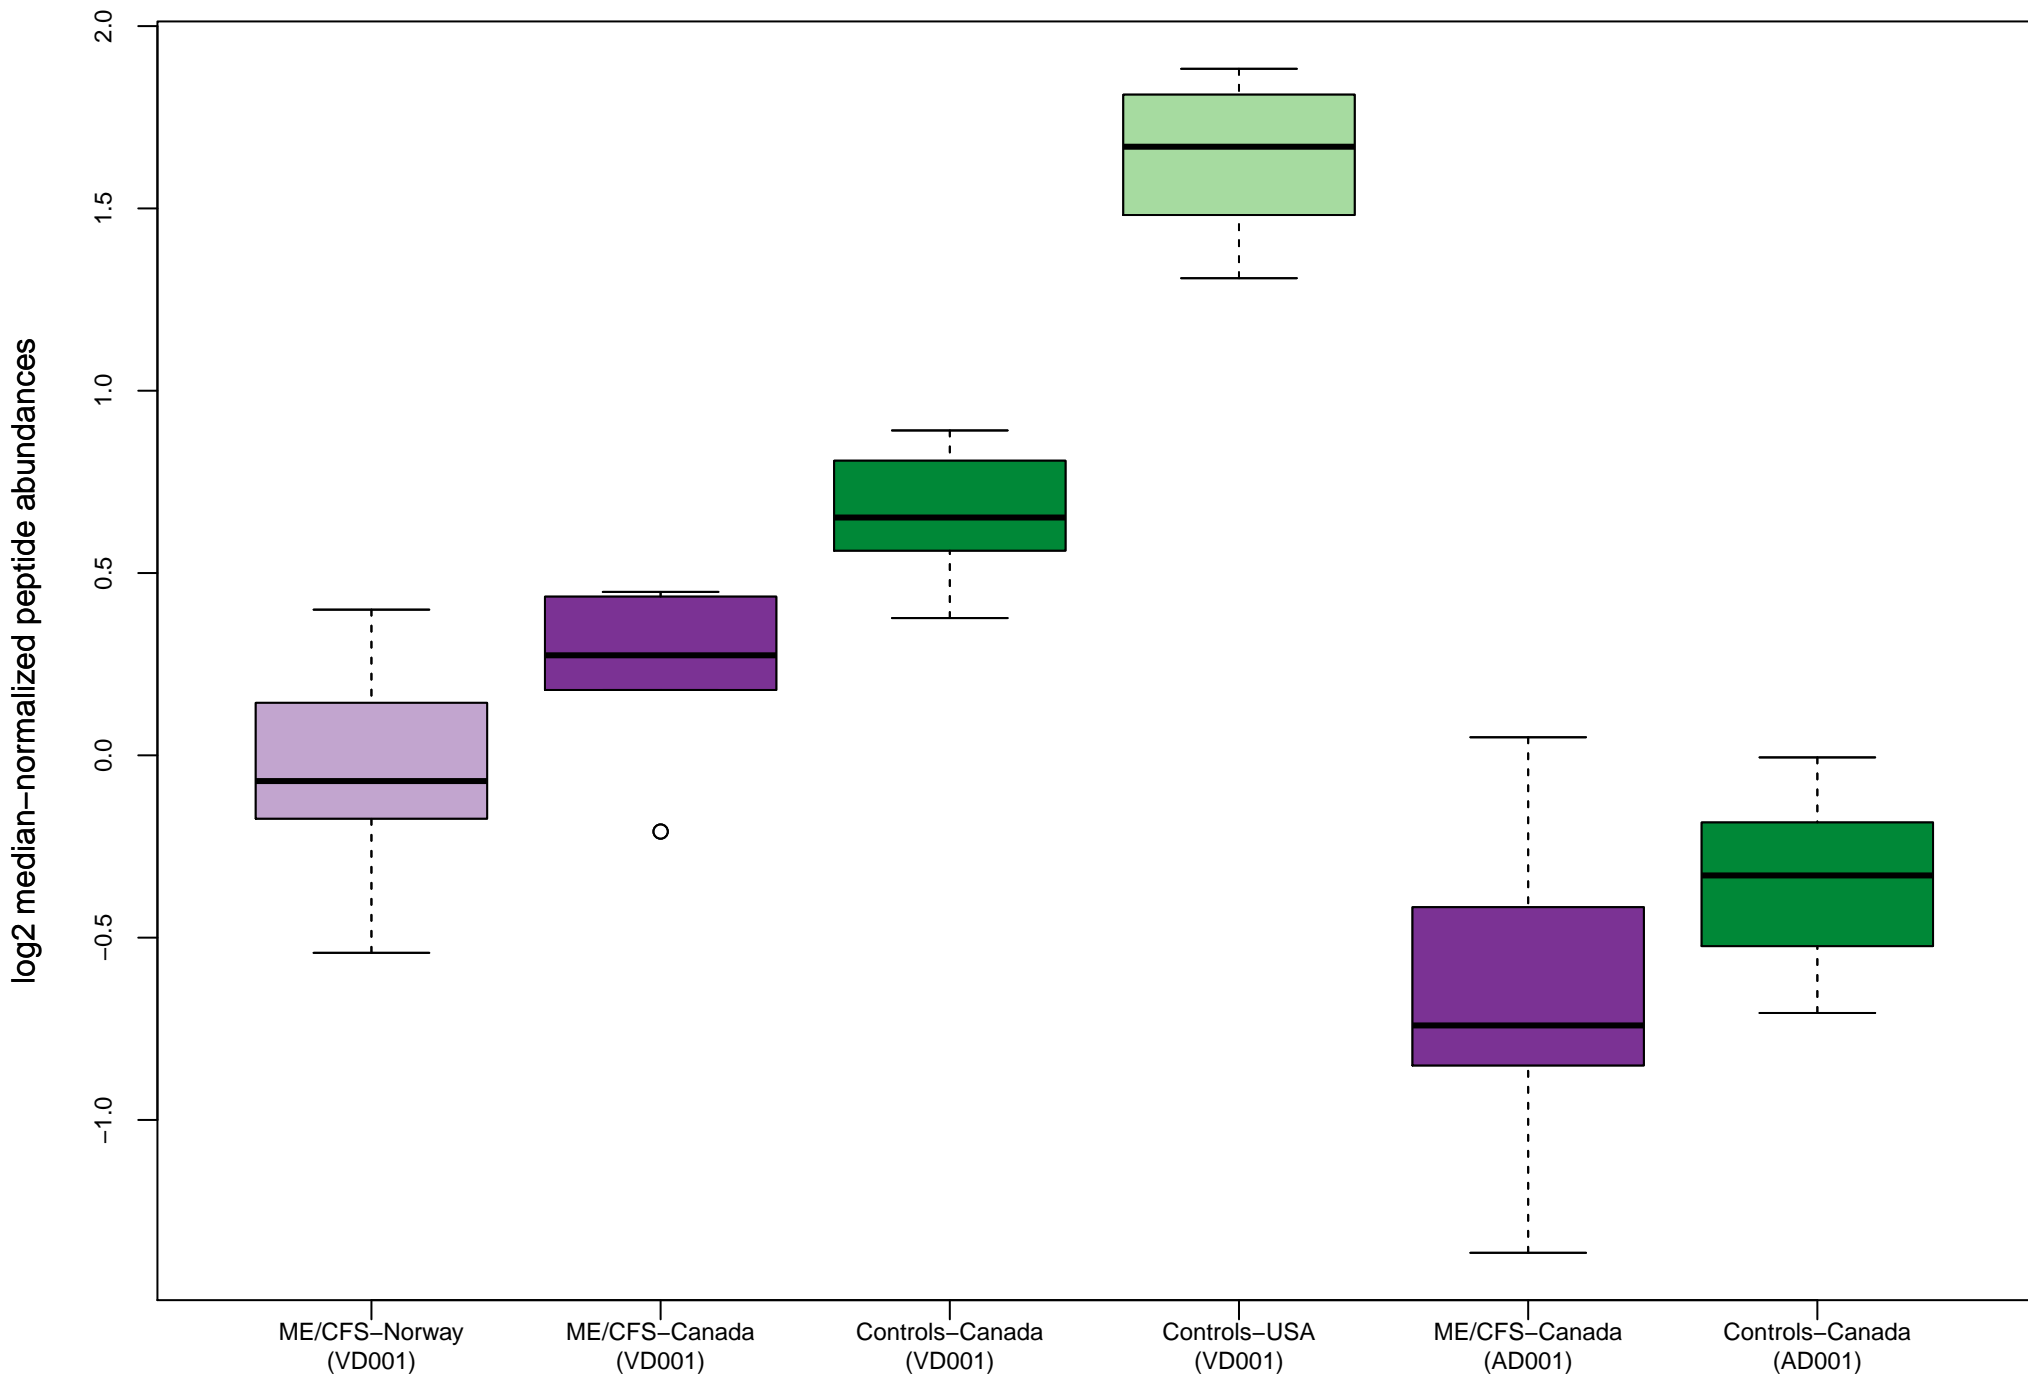

# WRVFLGPVGVAS

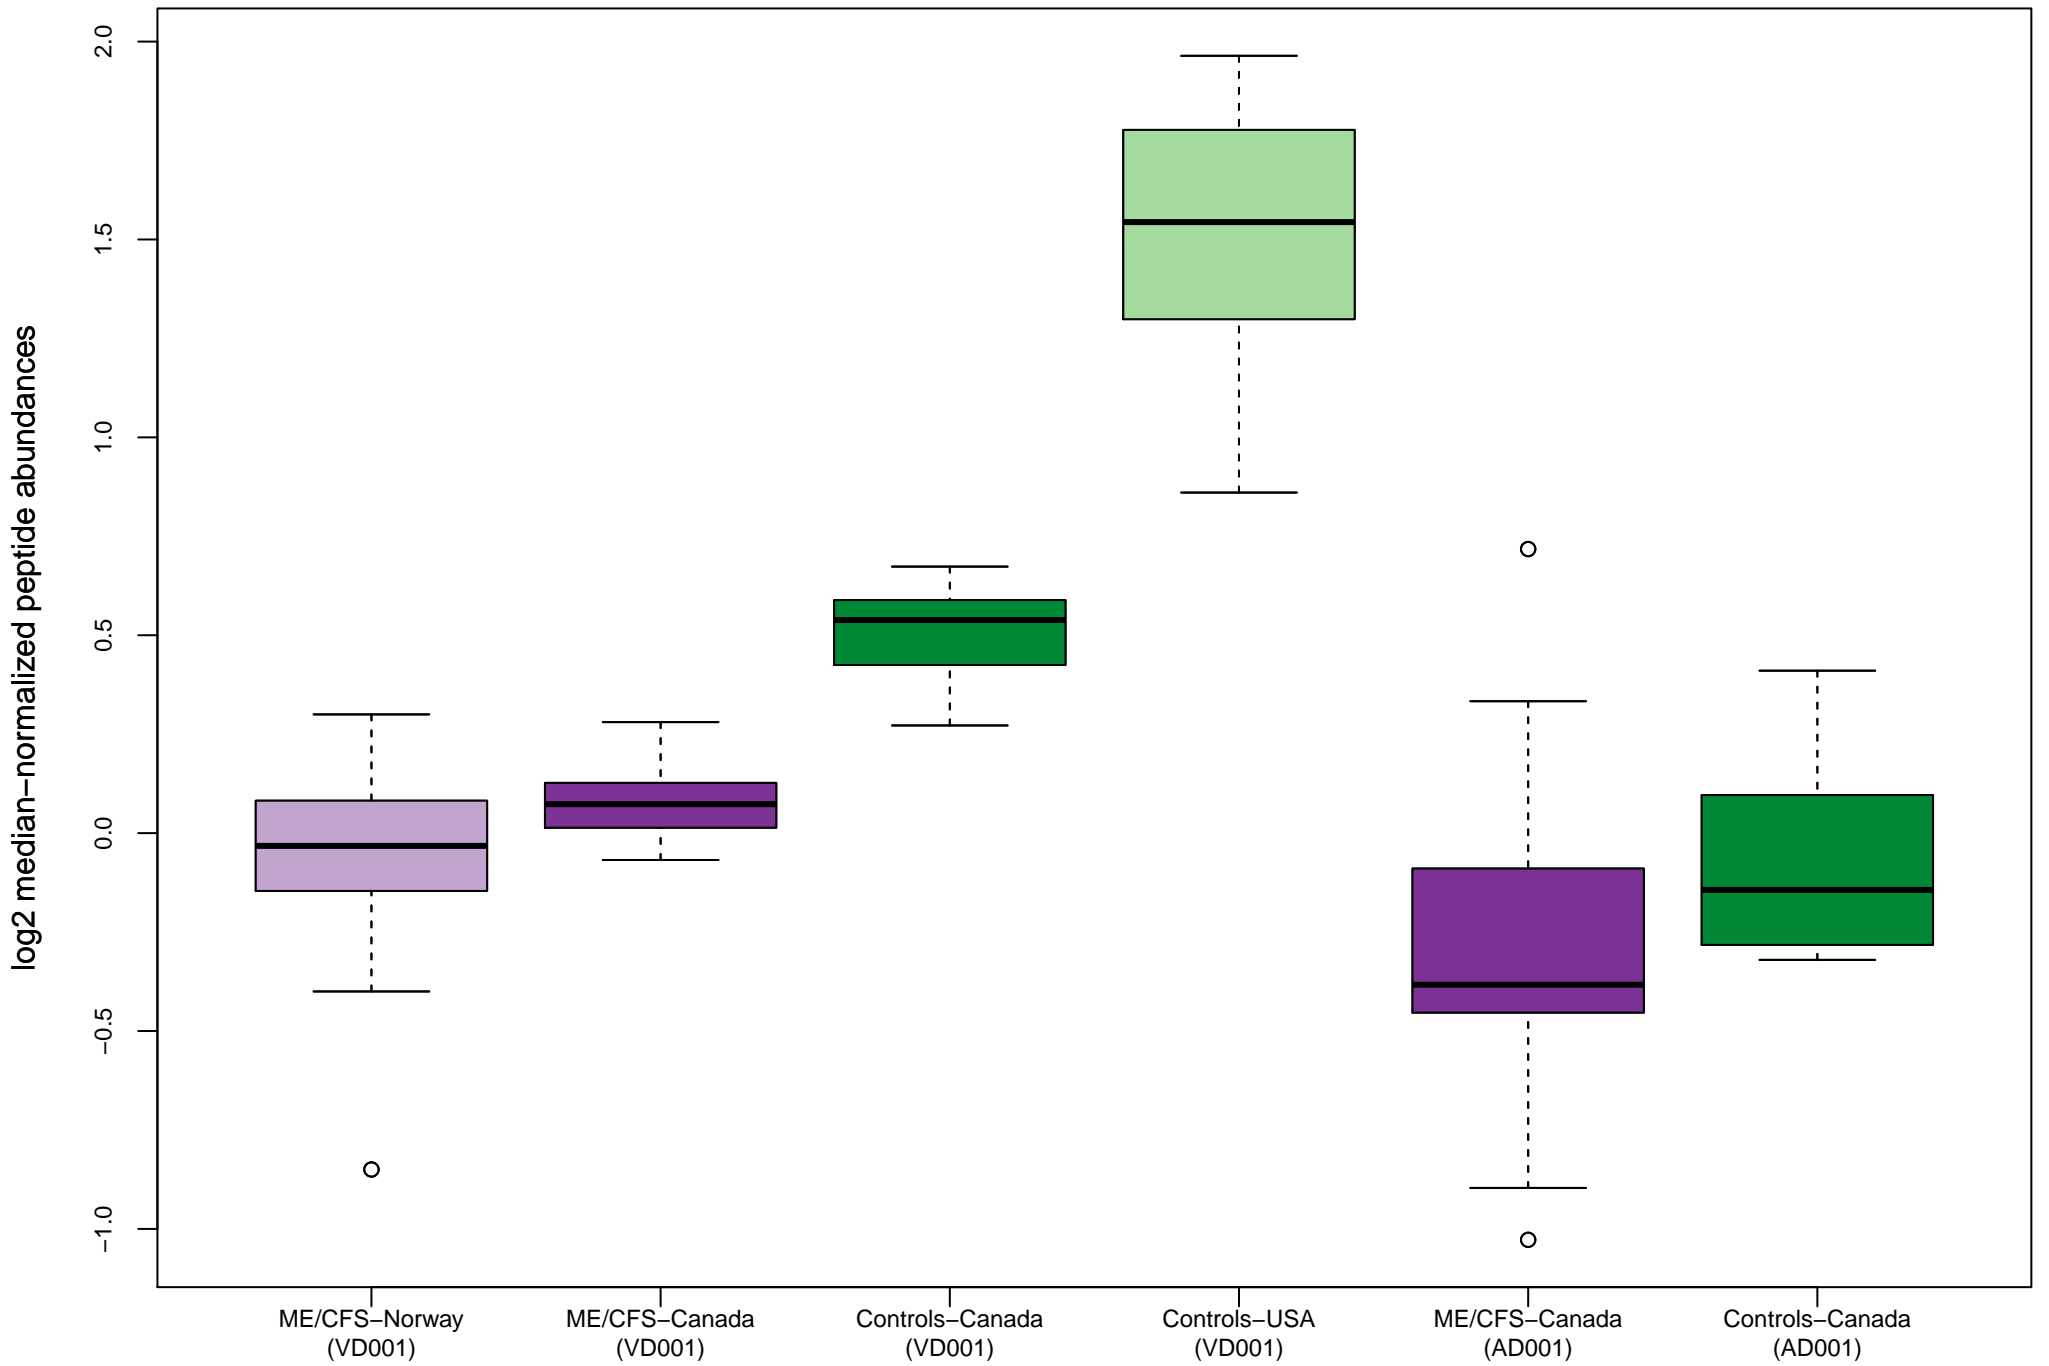

# WRYRPGYWKVAL

log2 median-normalized peptide abundances

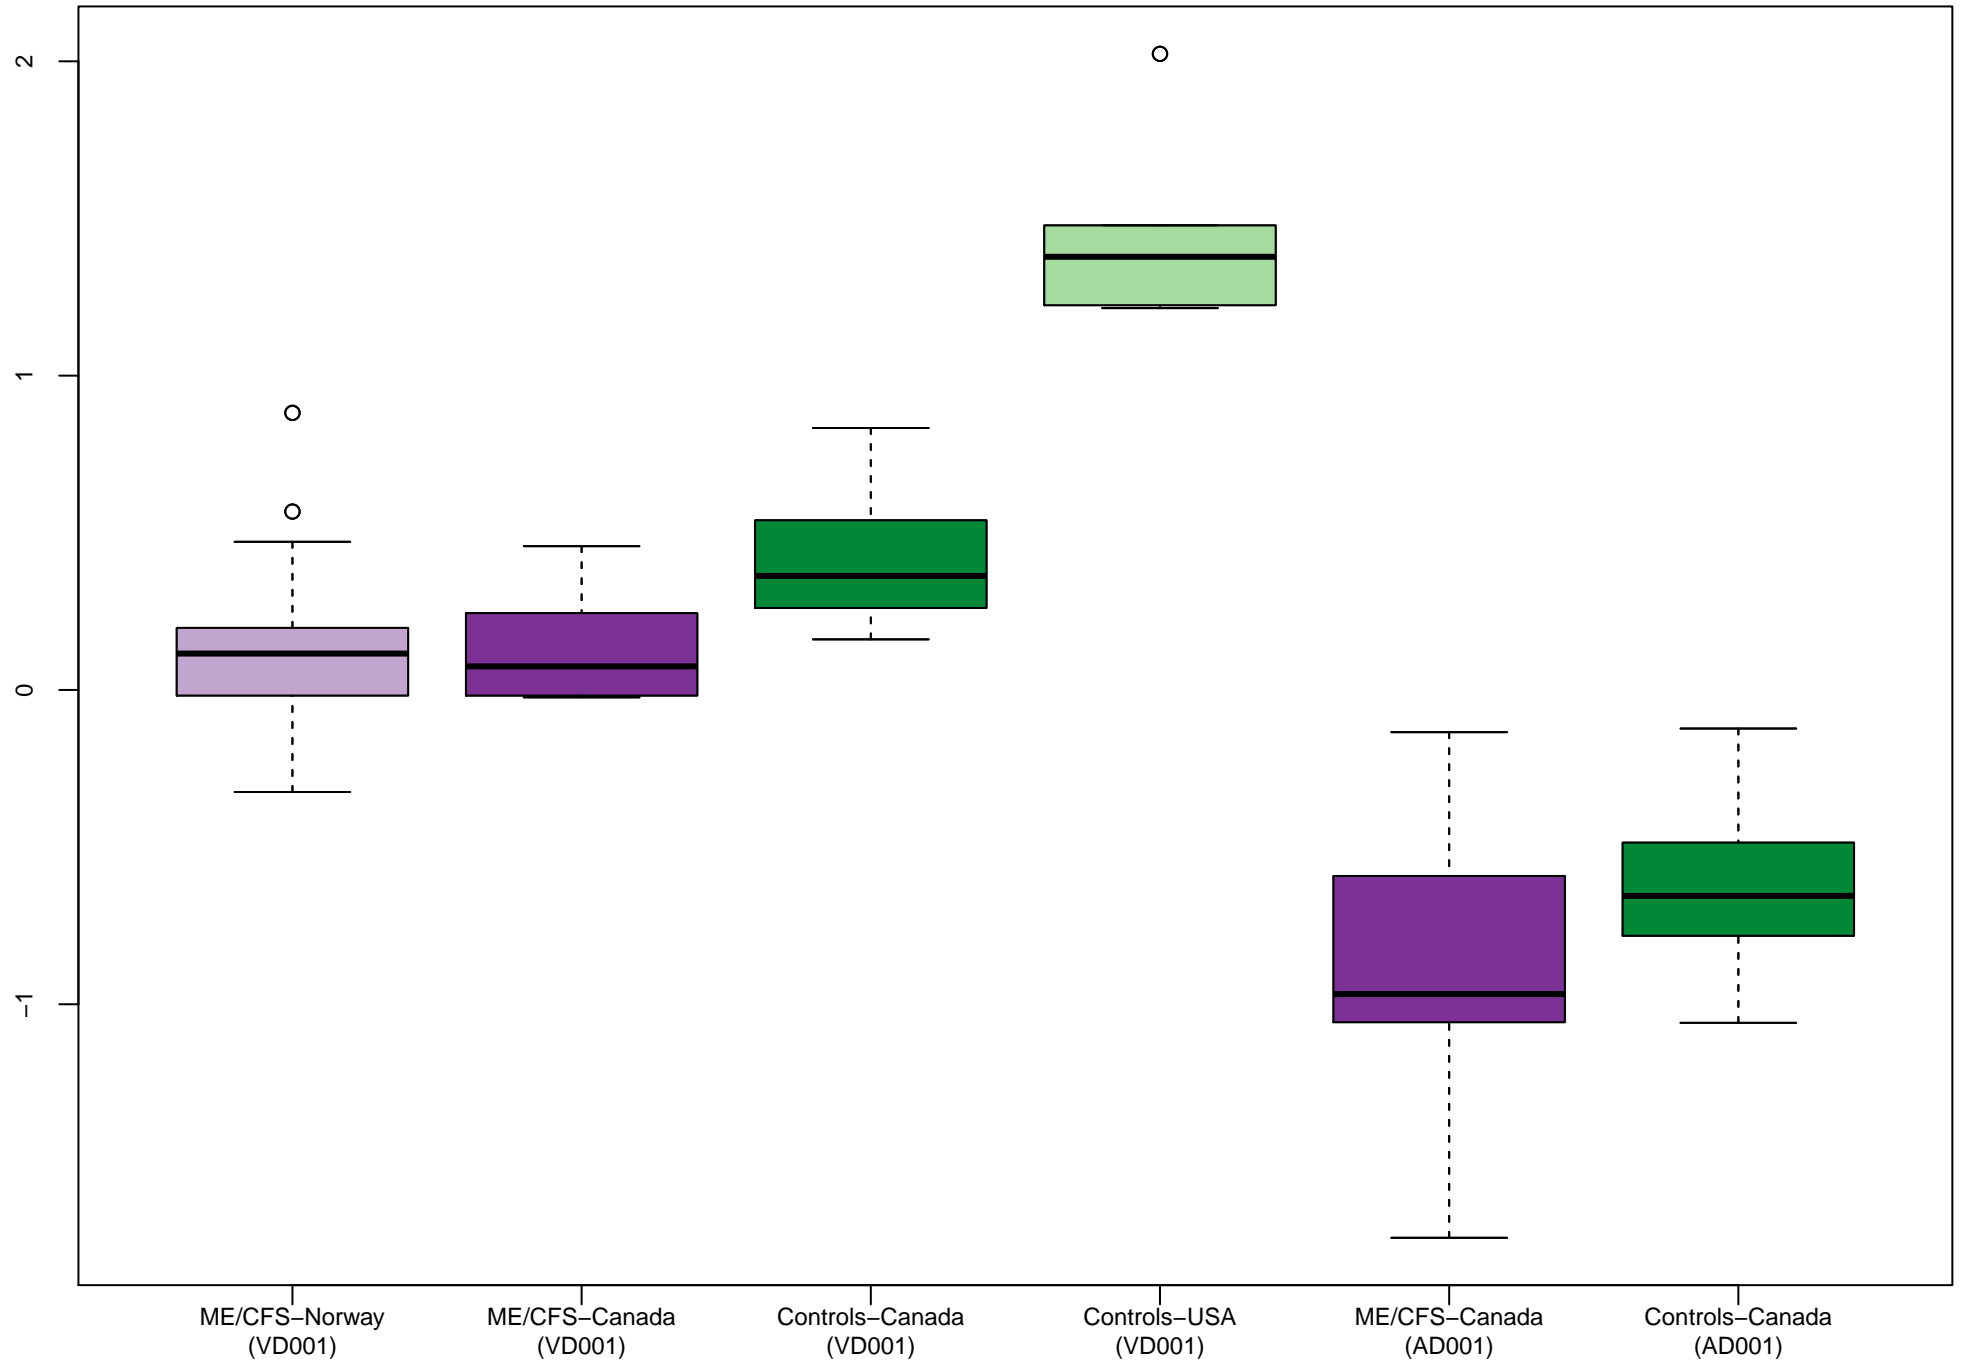

# WSAQYVQRVLGV

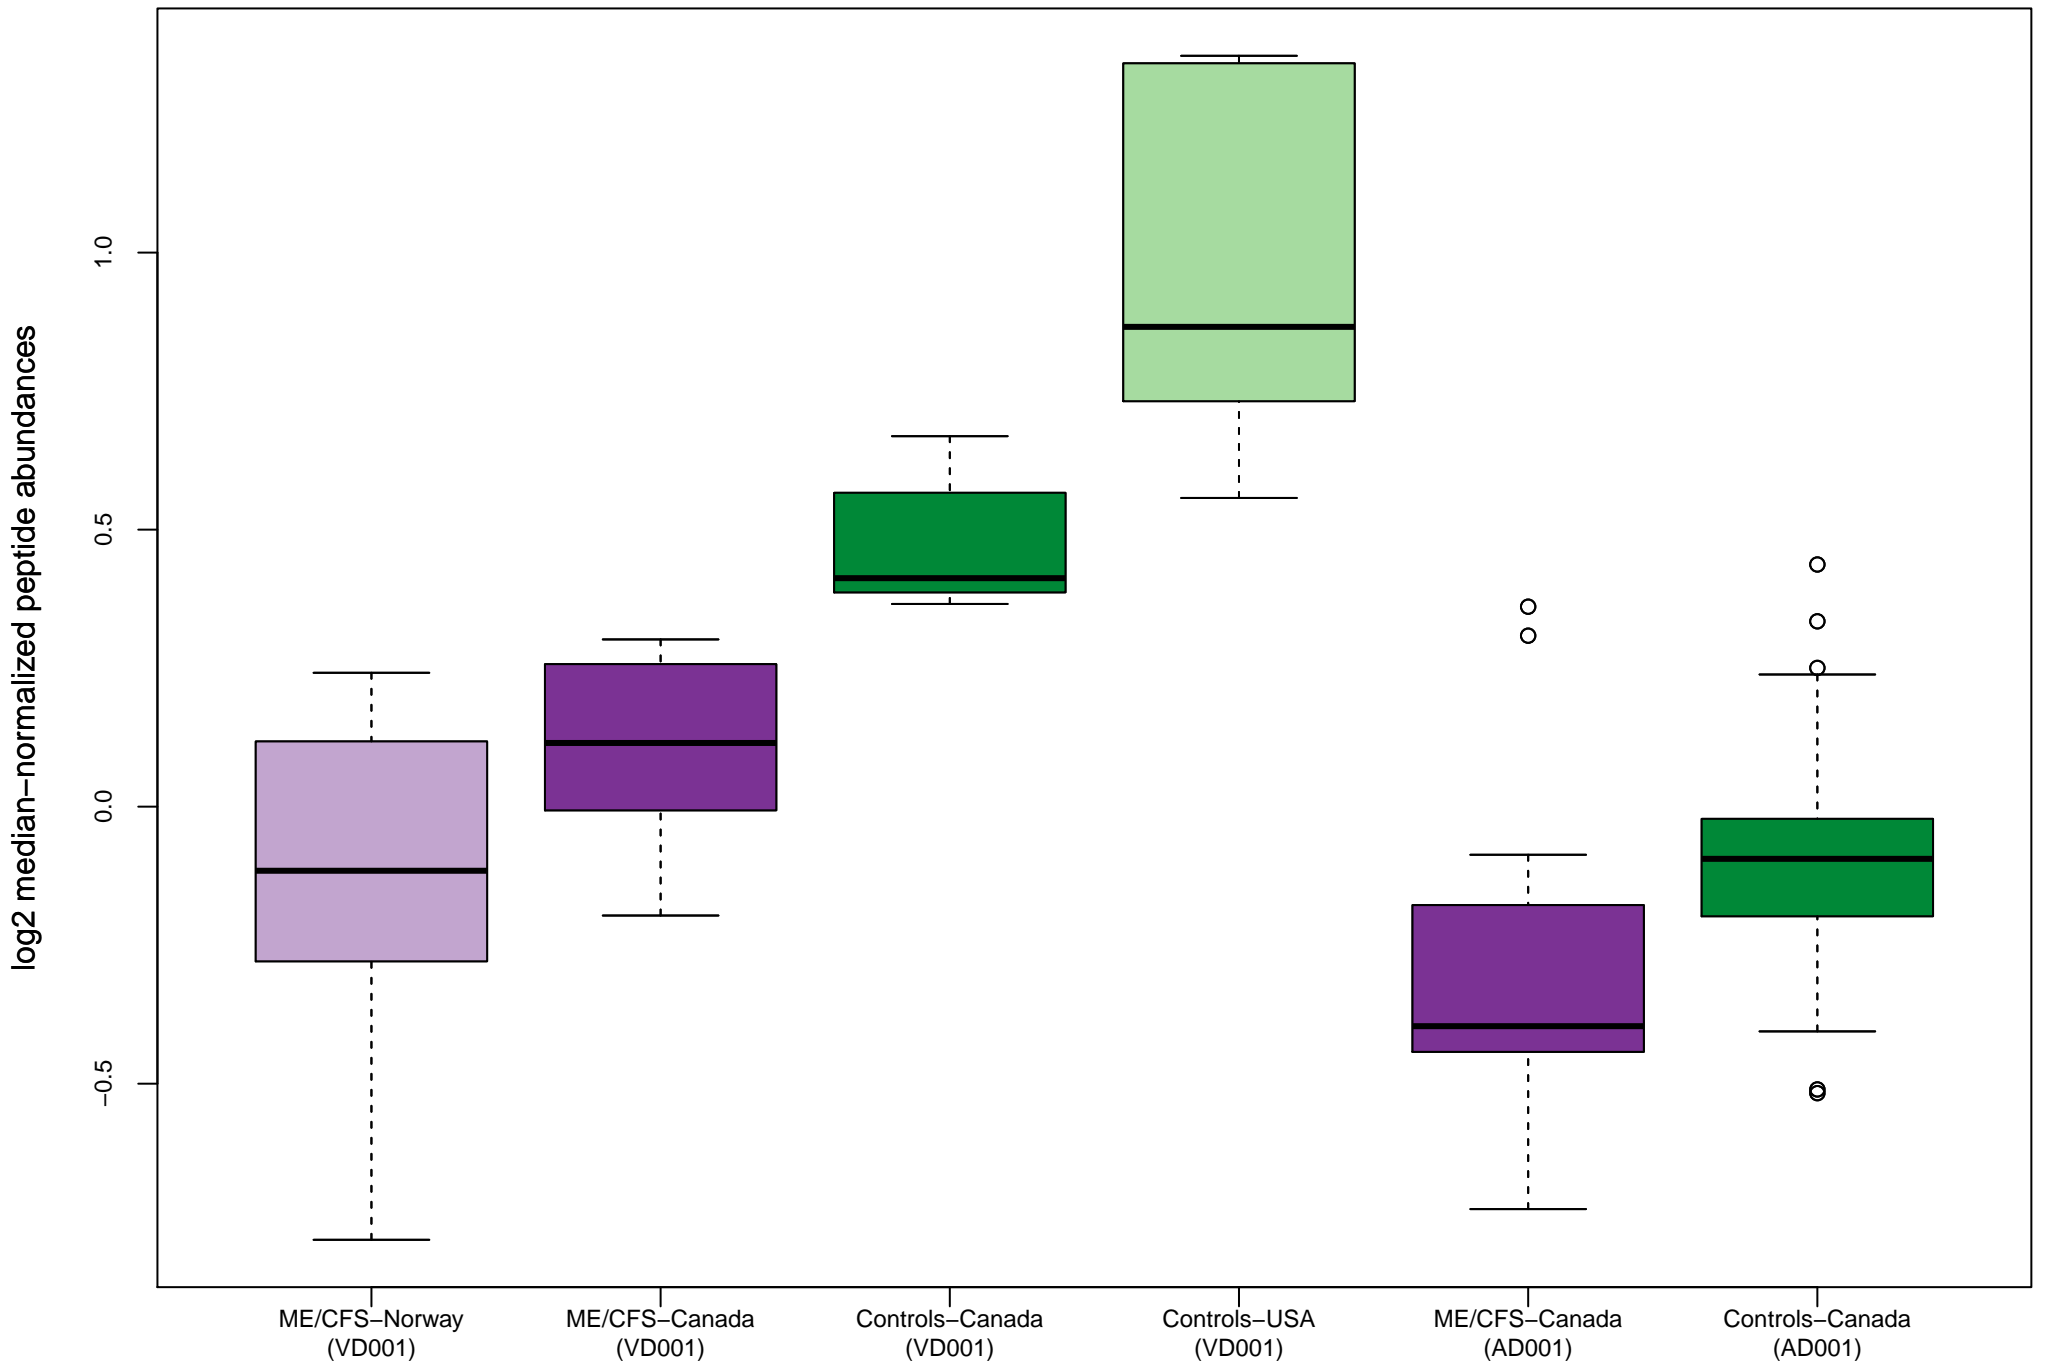

# WSWARQFALSLG

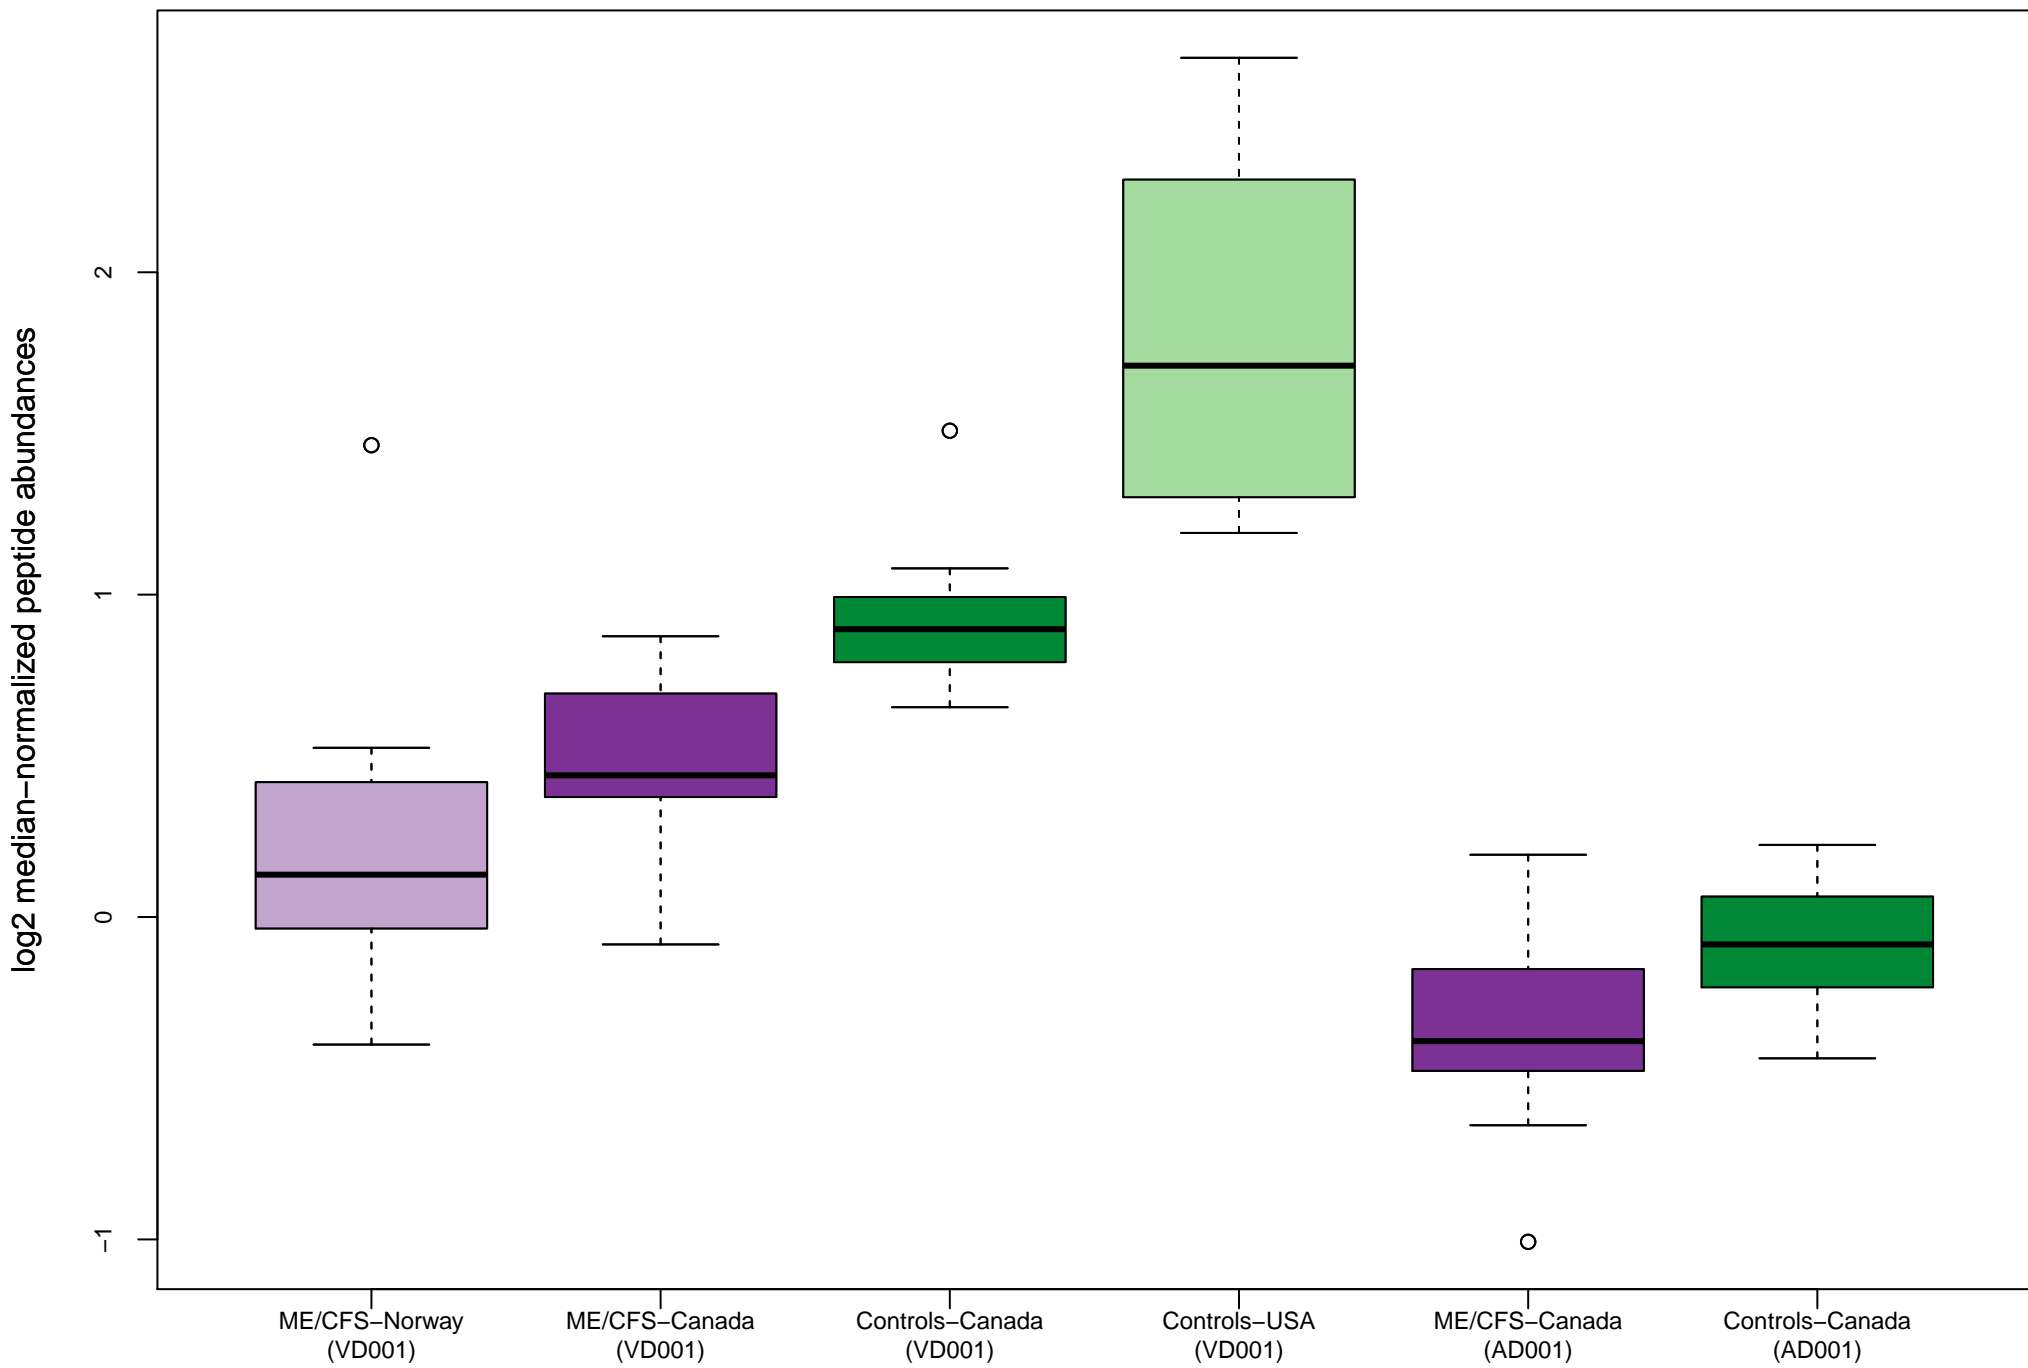



# WWRFKLSGVLSG

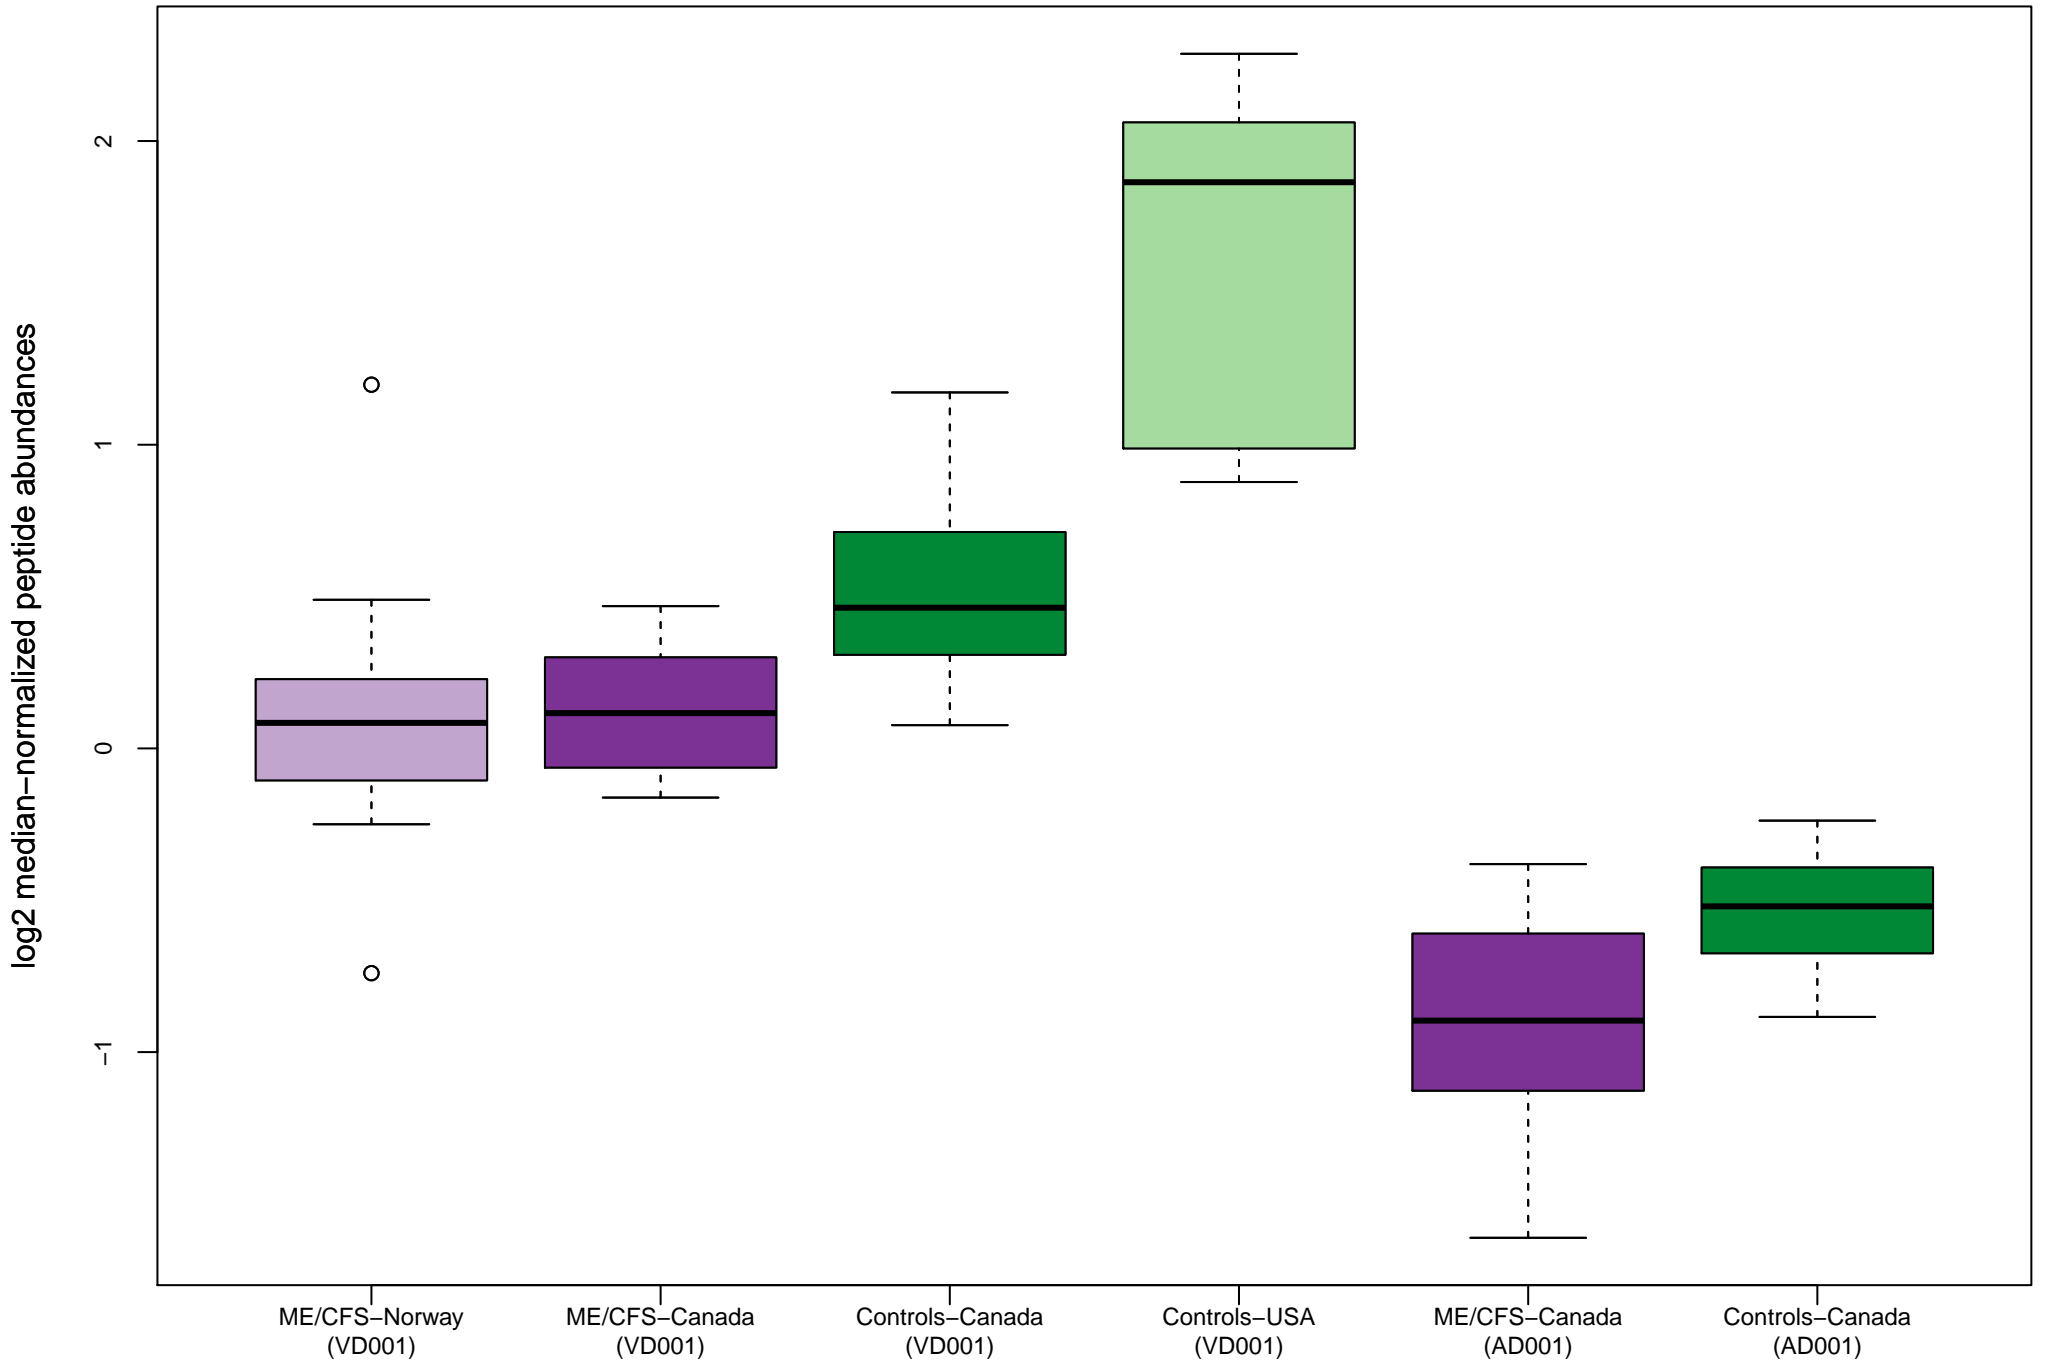

# WYFSRALSGVLS

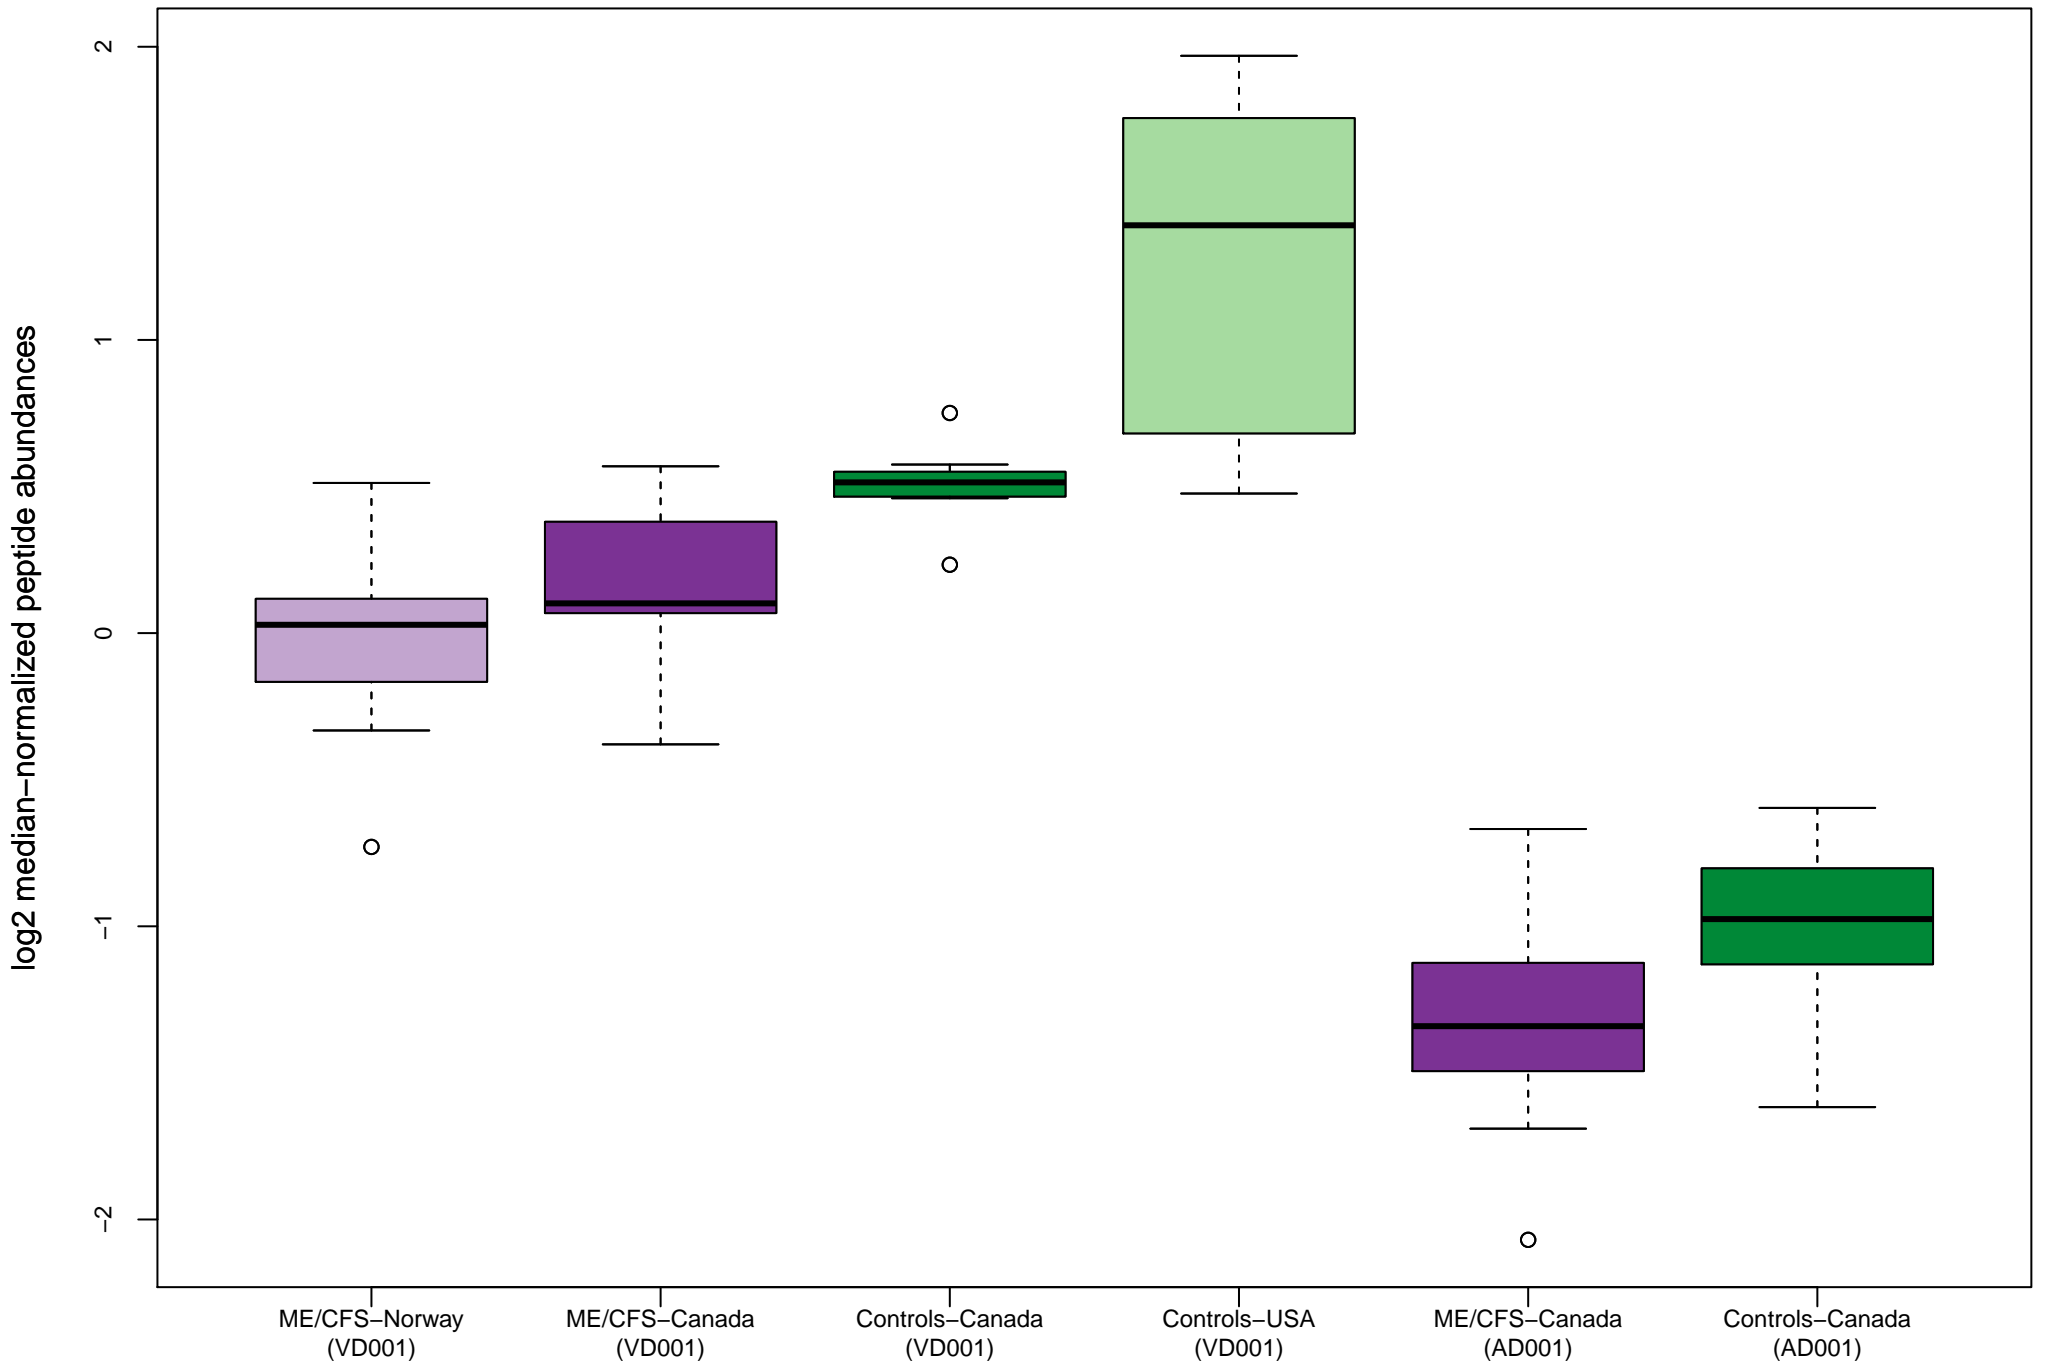

# WYRRVLSGVALS

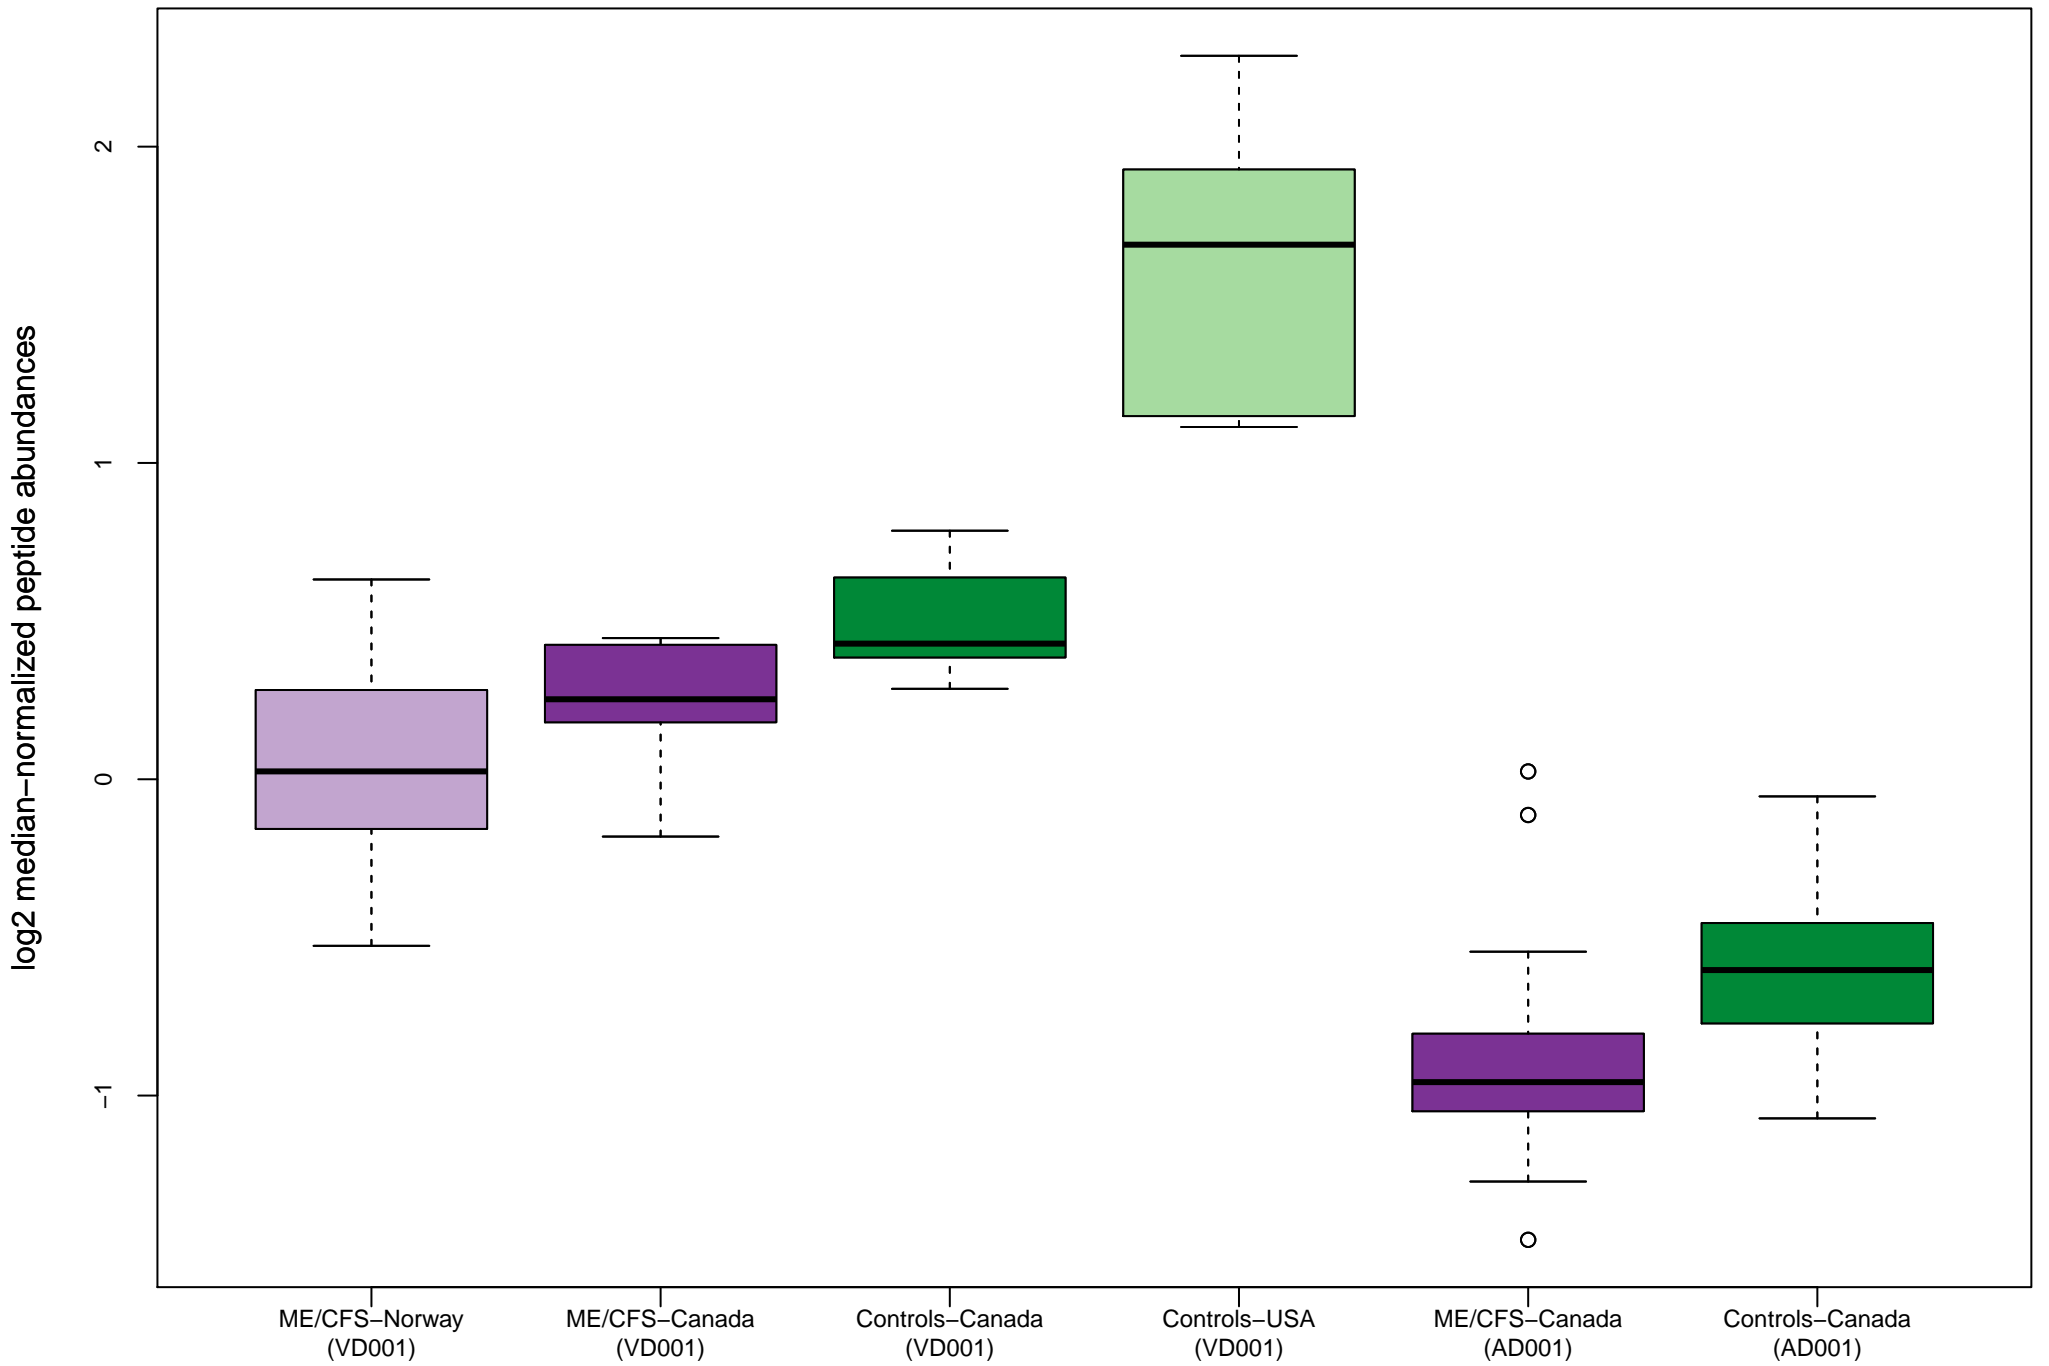

# YAPFVAFRYNKG

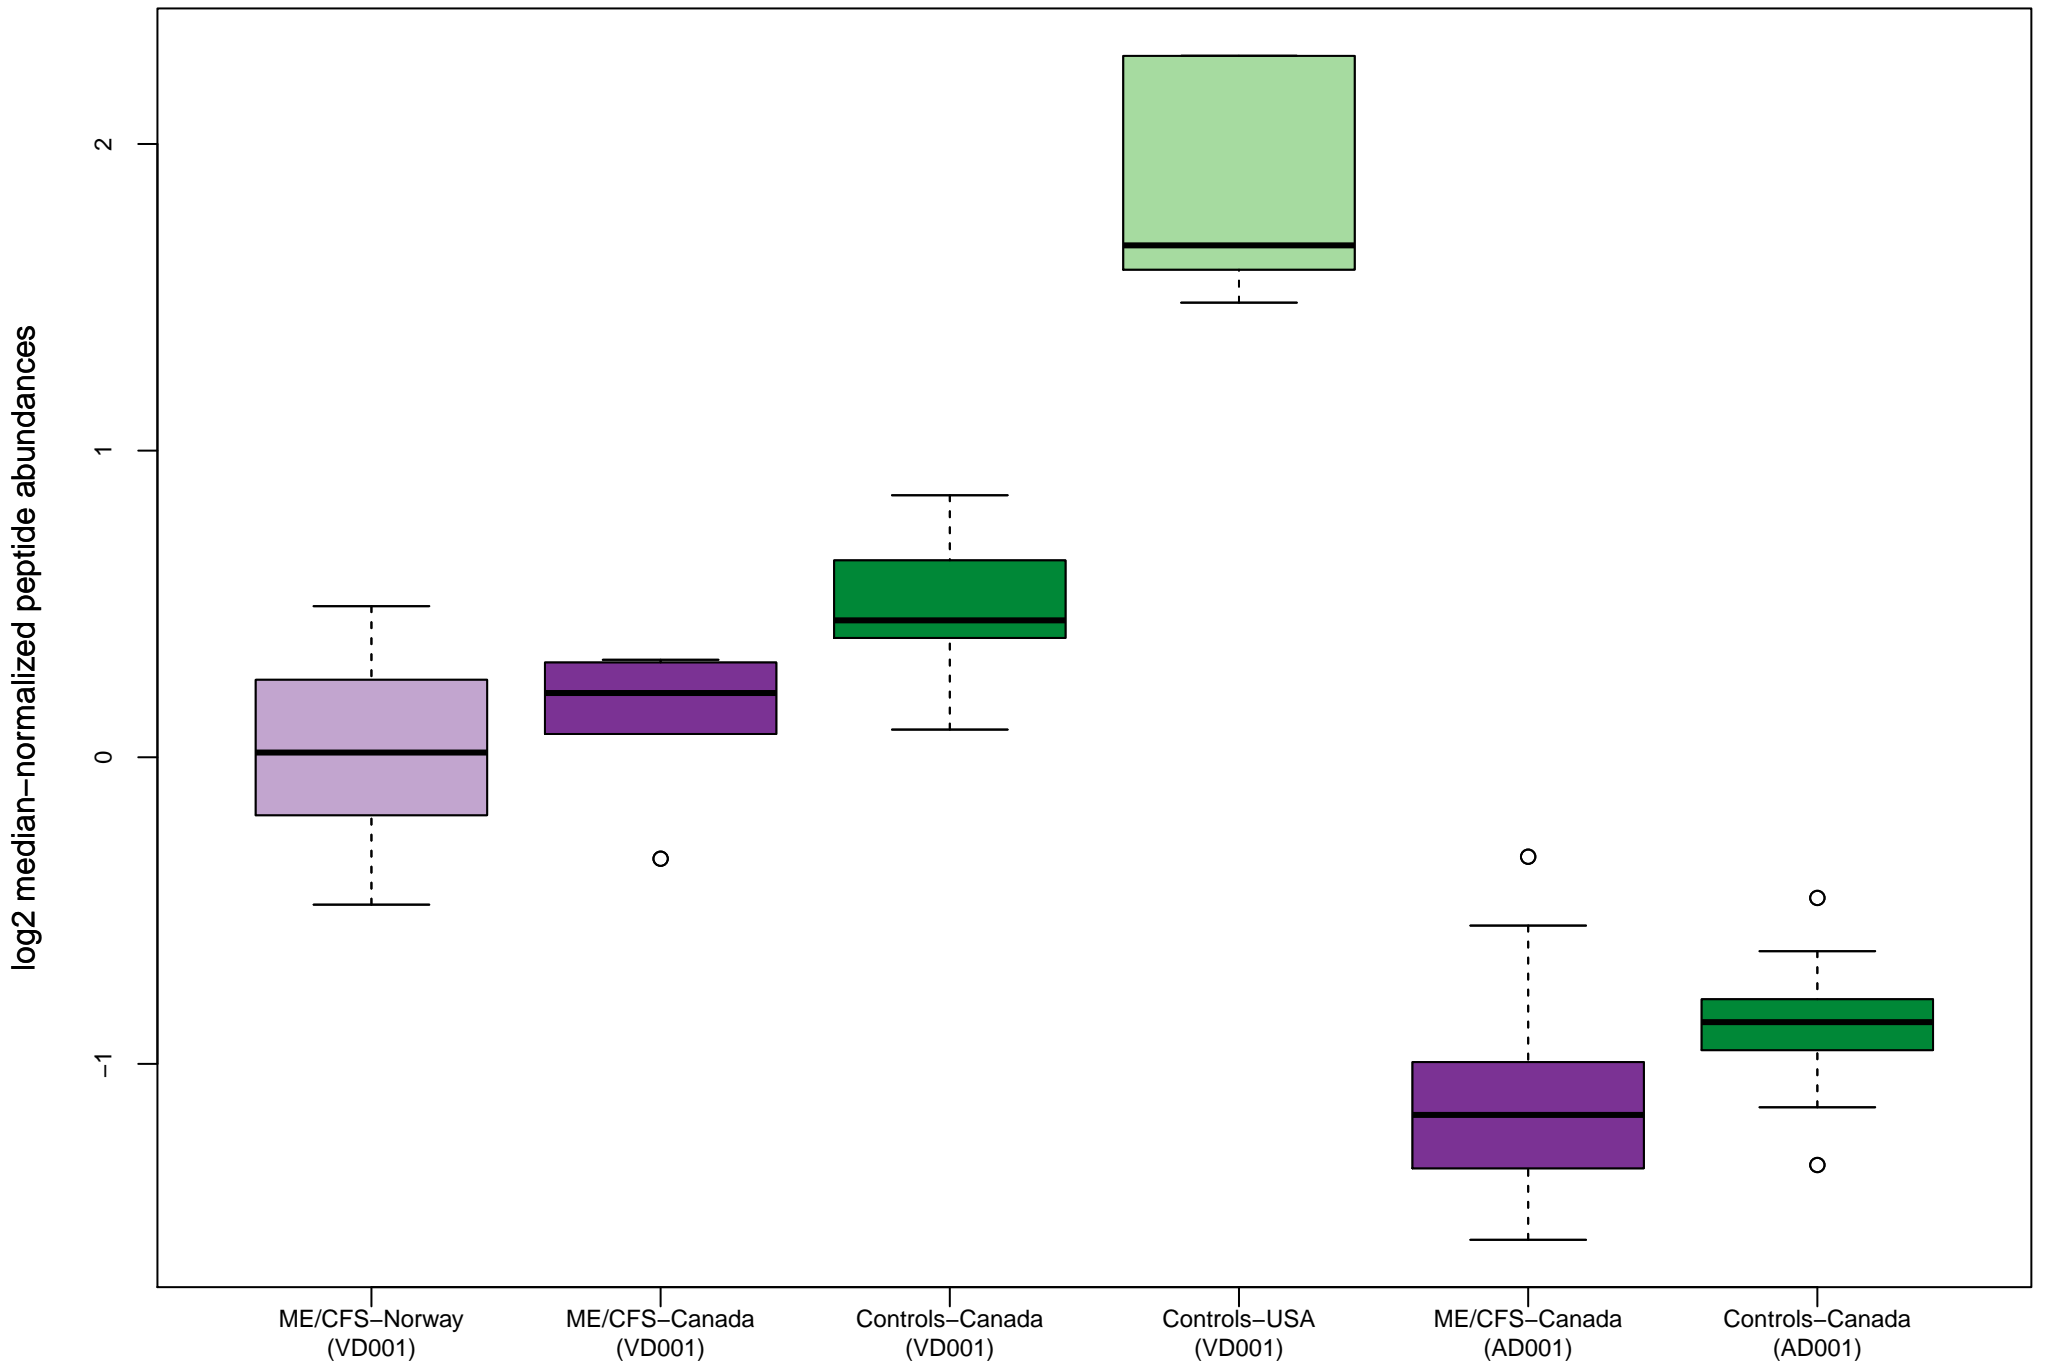

# YFRAPYLFKVLG

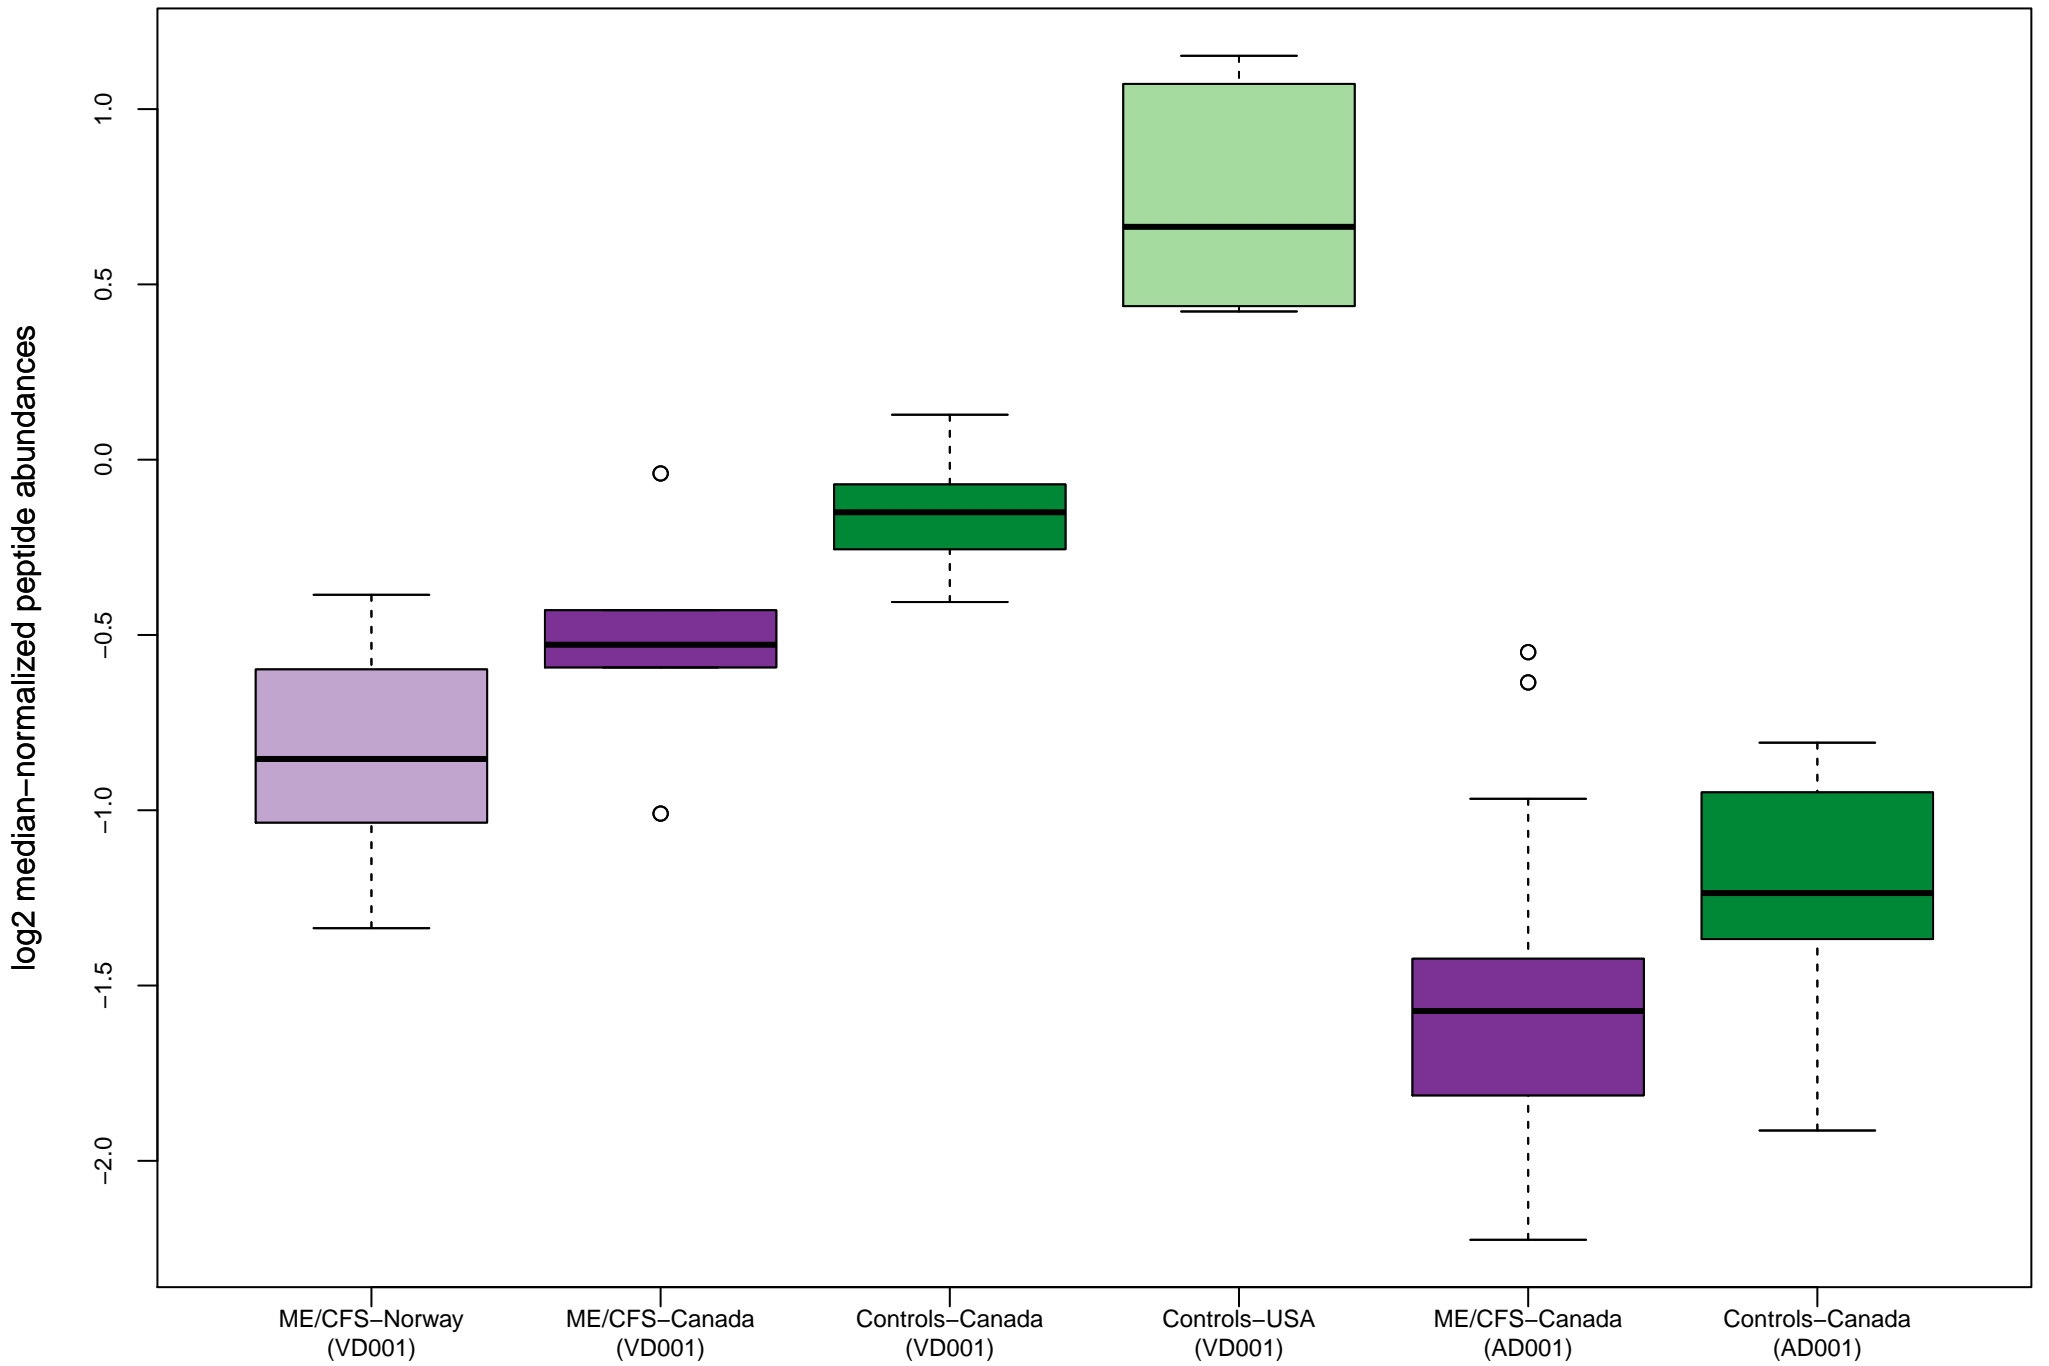

# YFYHRVRYALLS

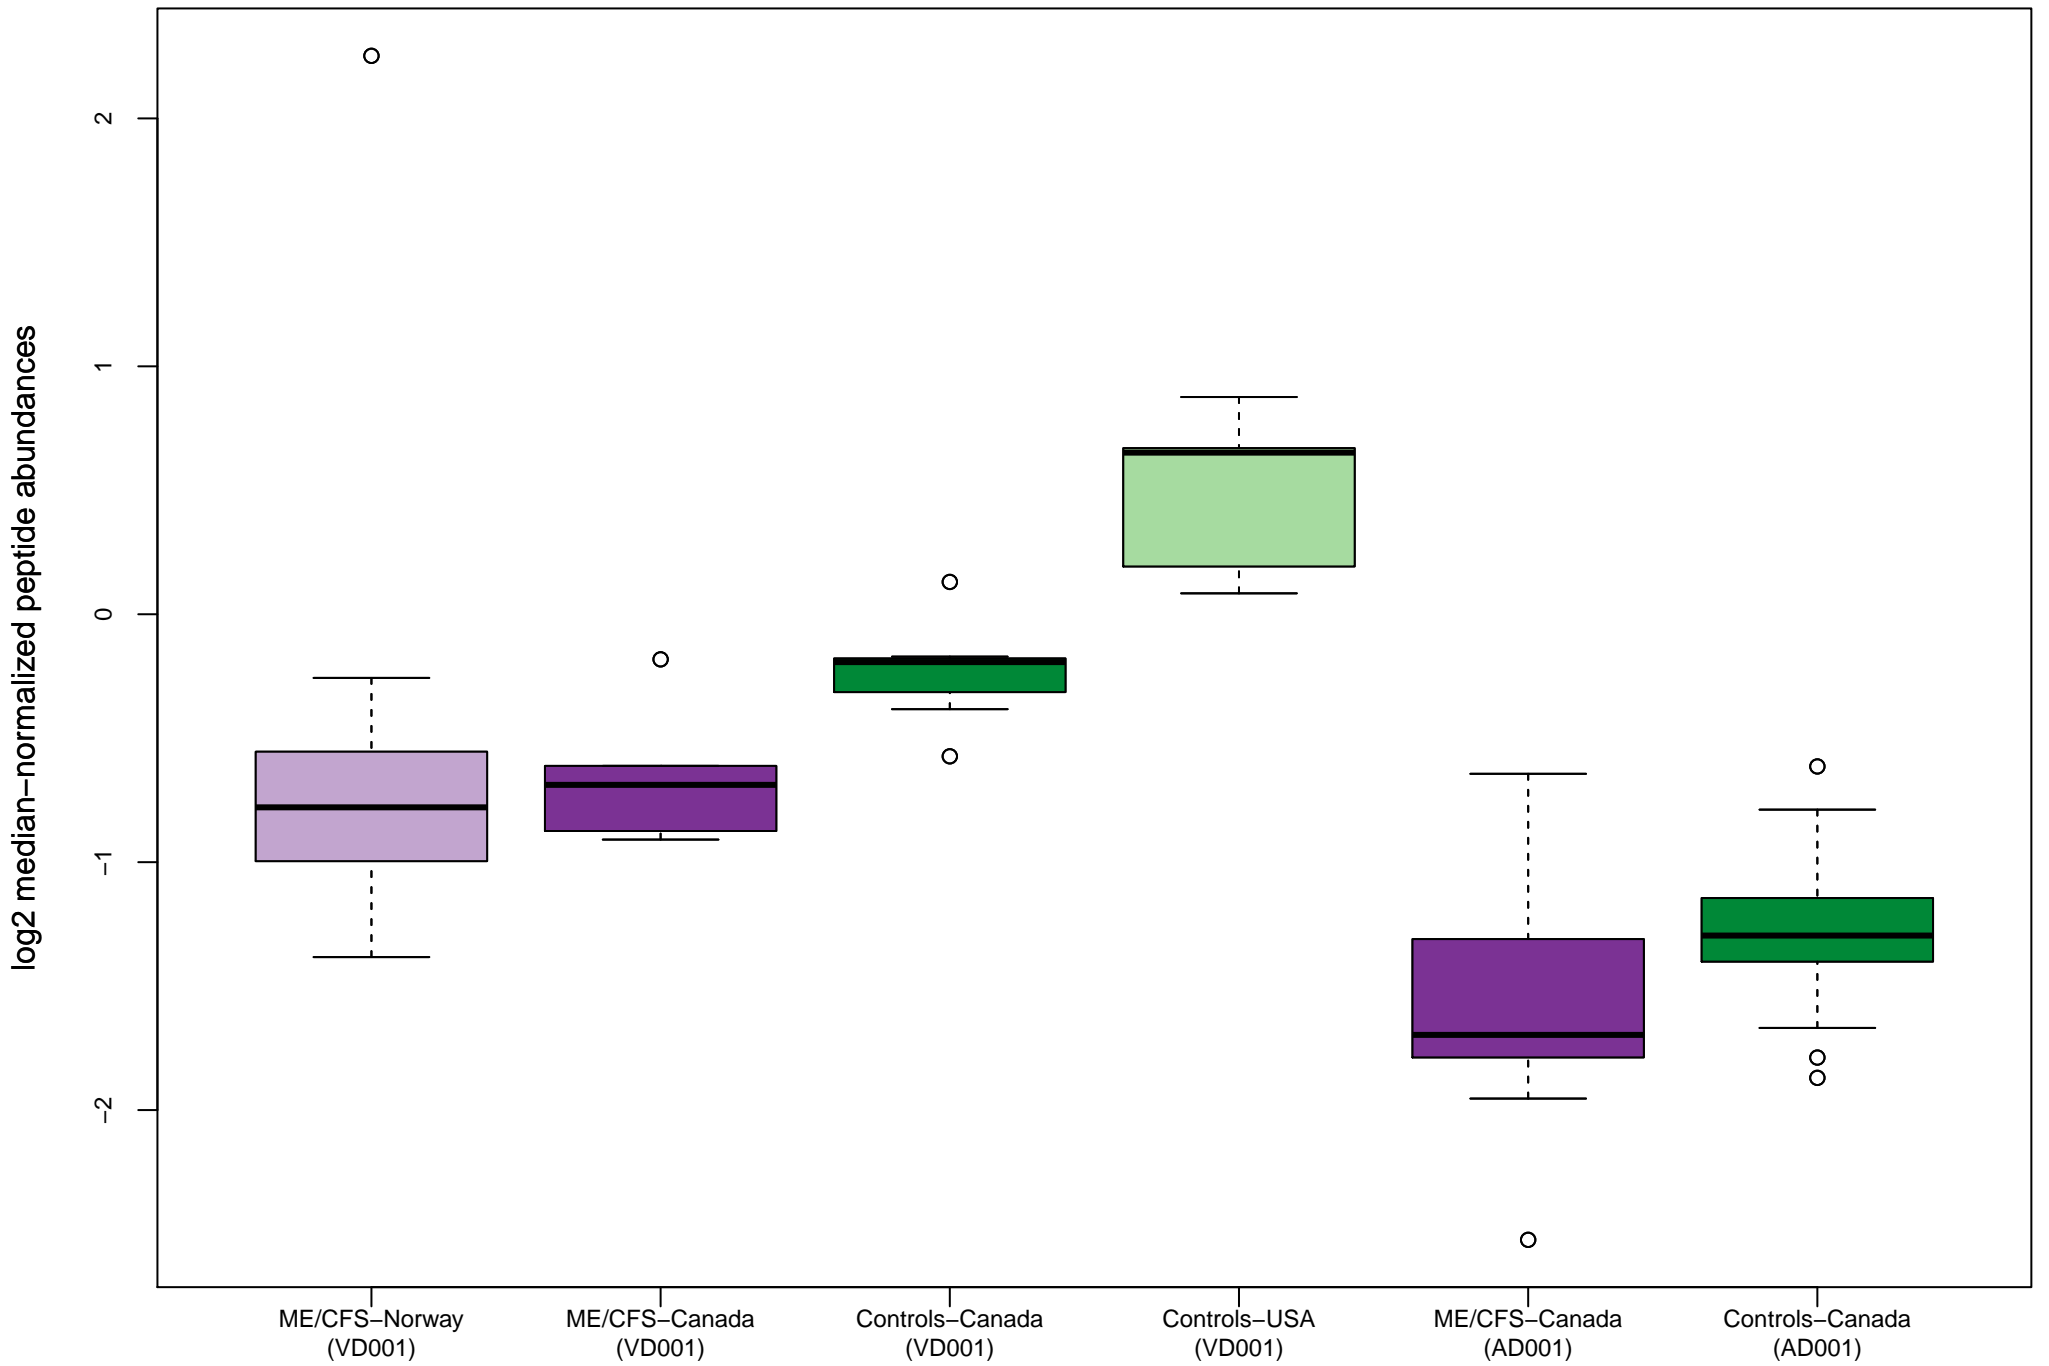

# YKQSQRLRPYWL

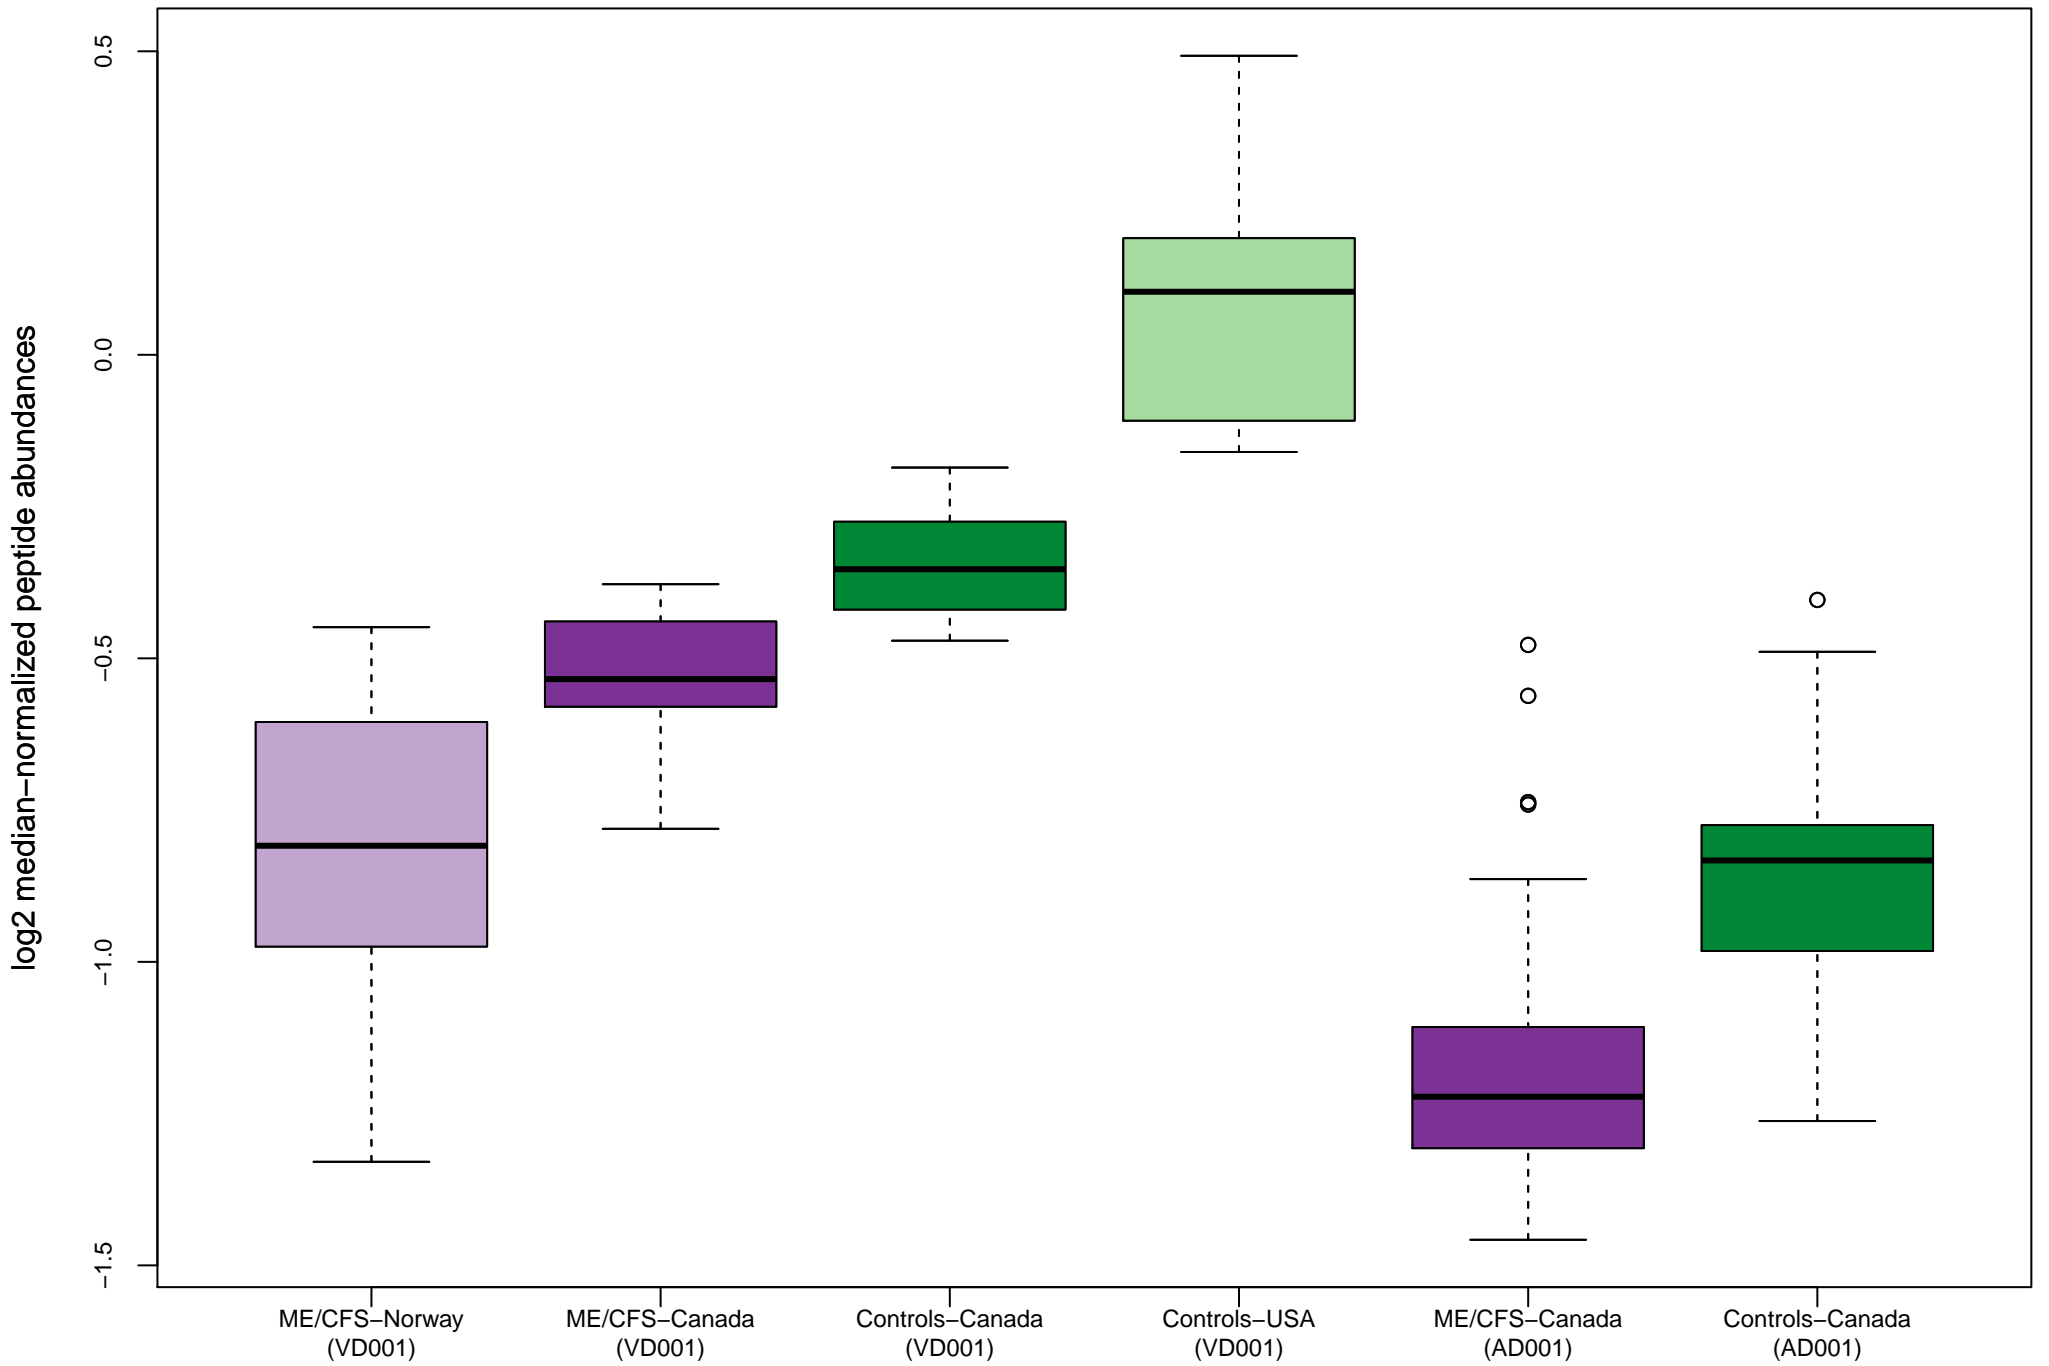

# YKVGRLFYRYH

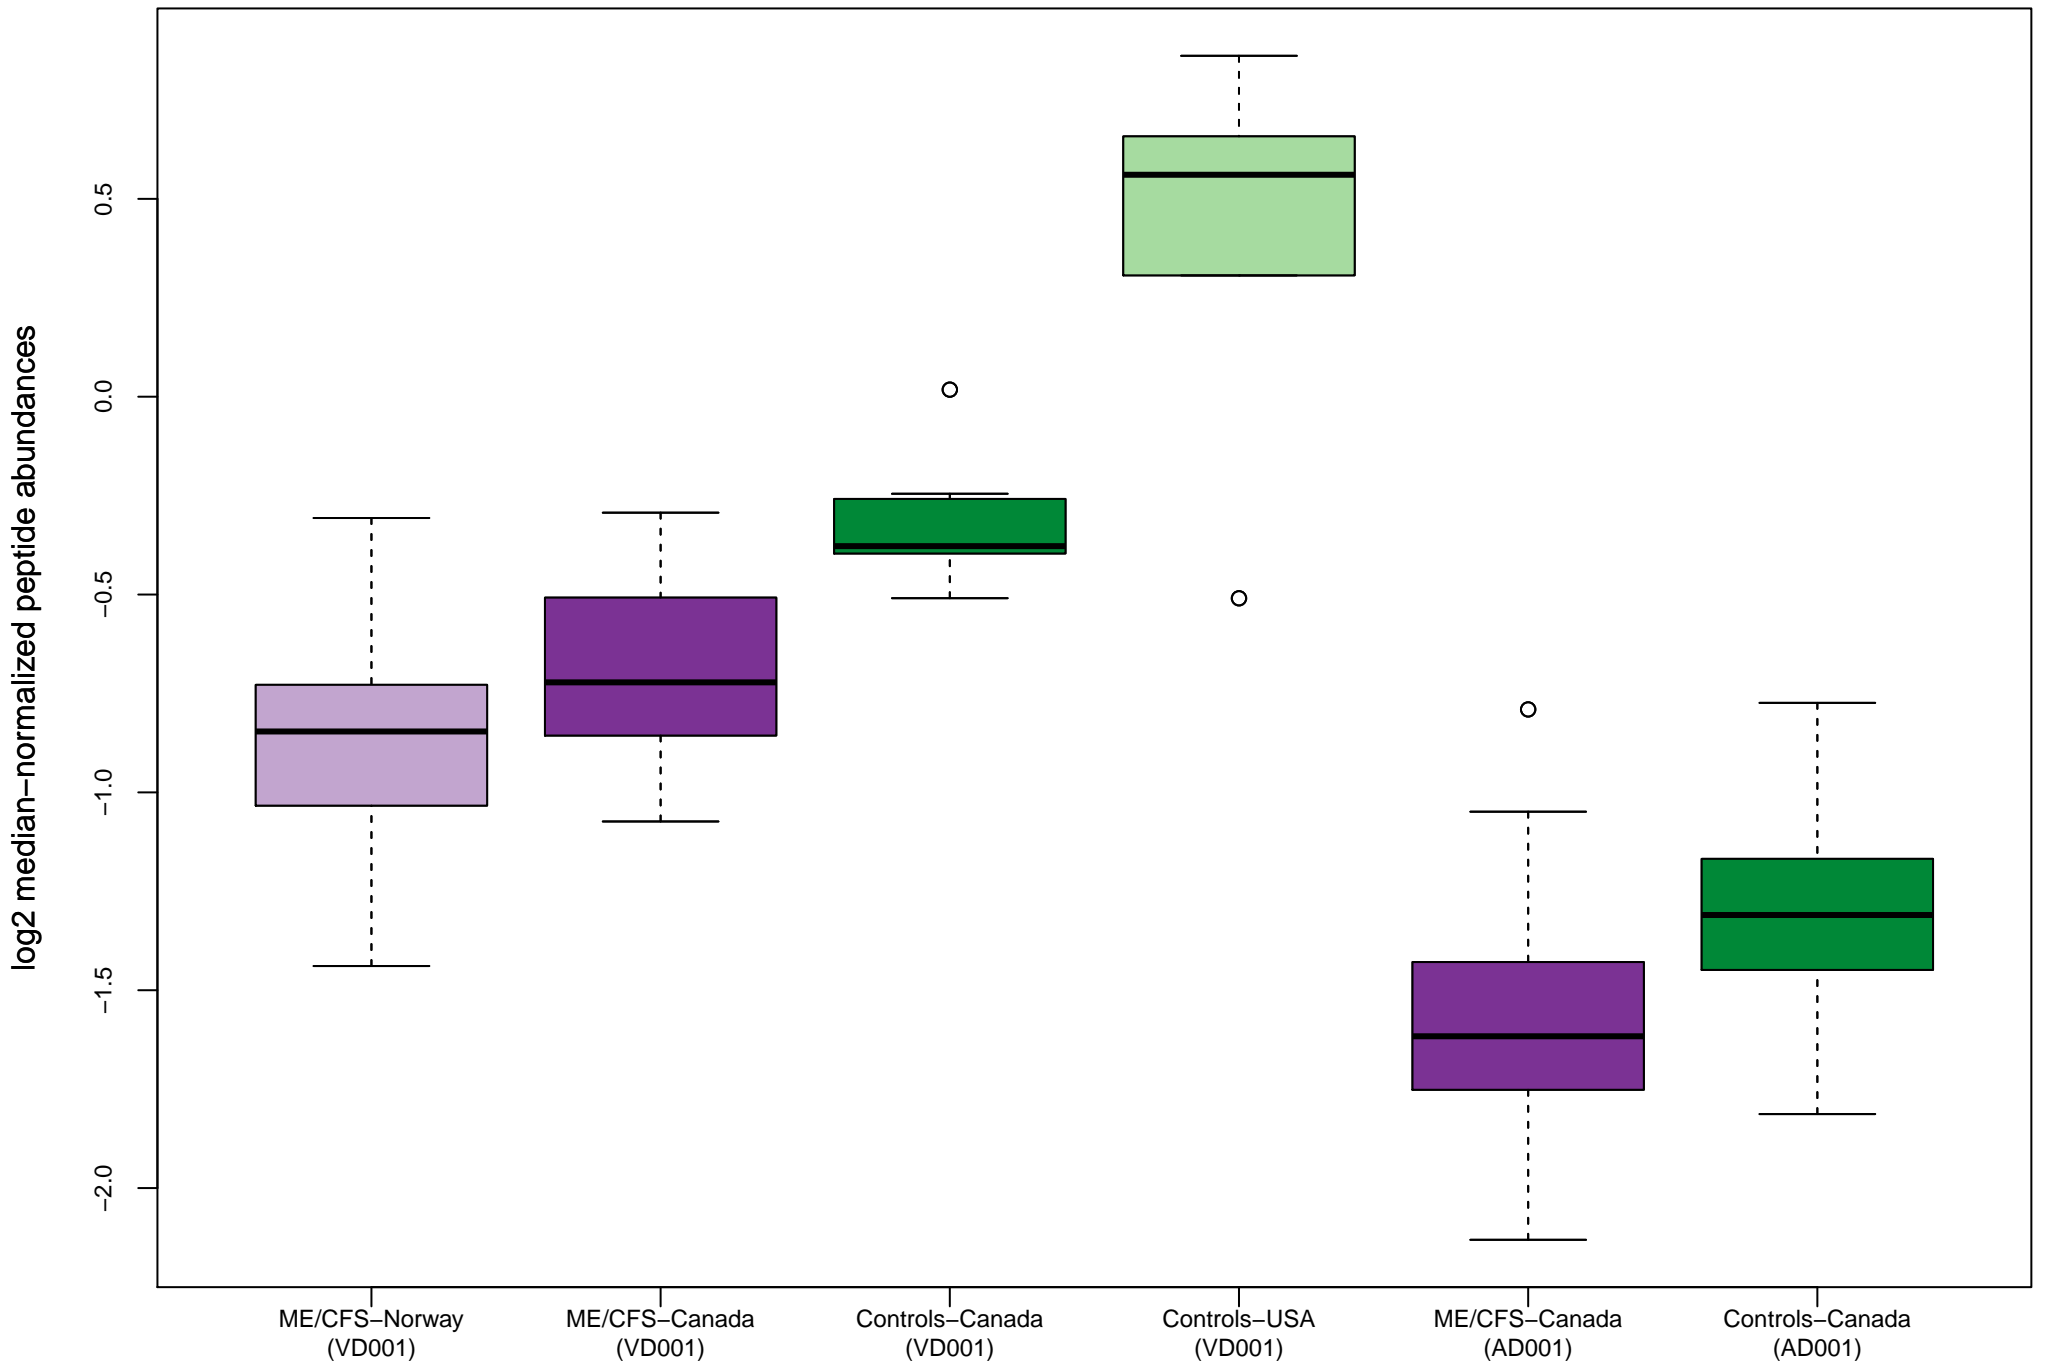



# YLKKFWVLGVLG

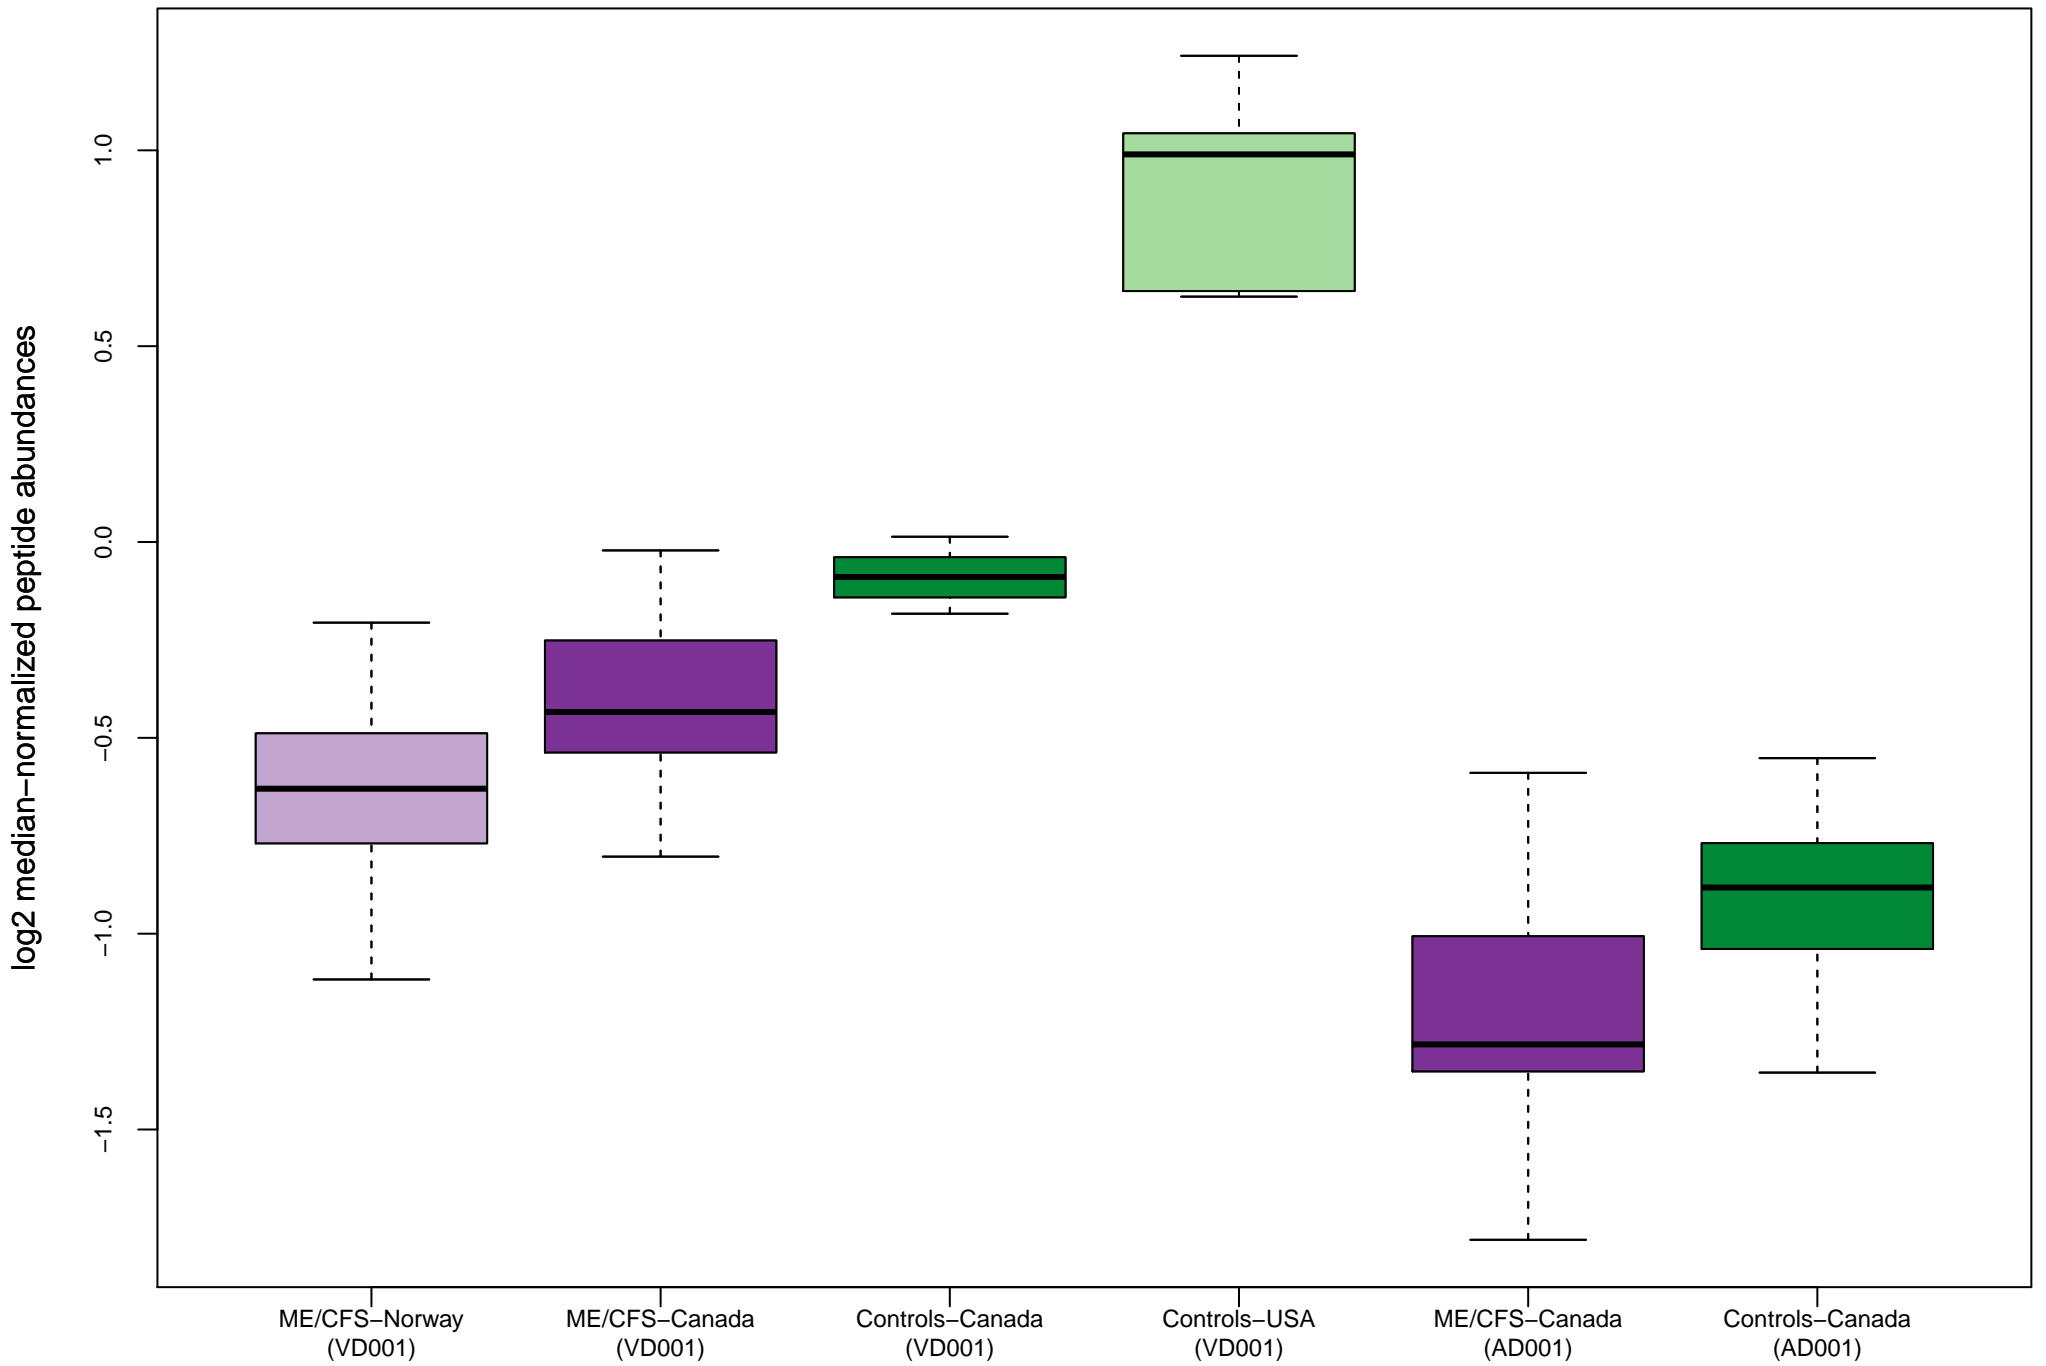

# YLRKYAQWHVLS

log2 median-normalized peptide abundances

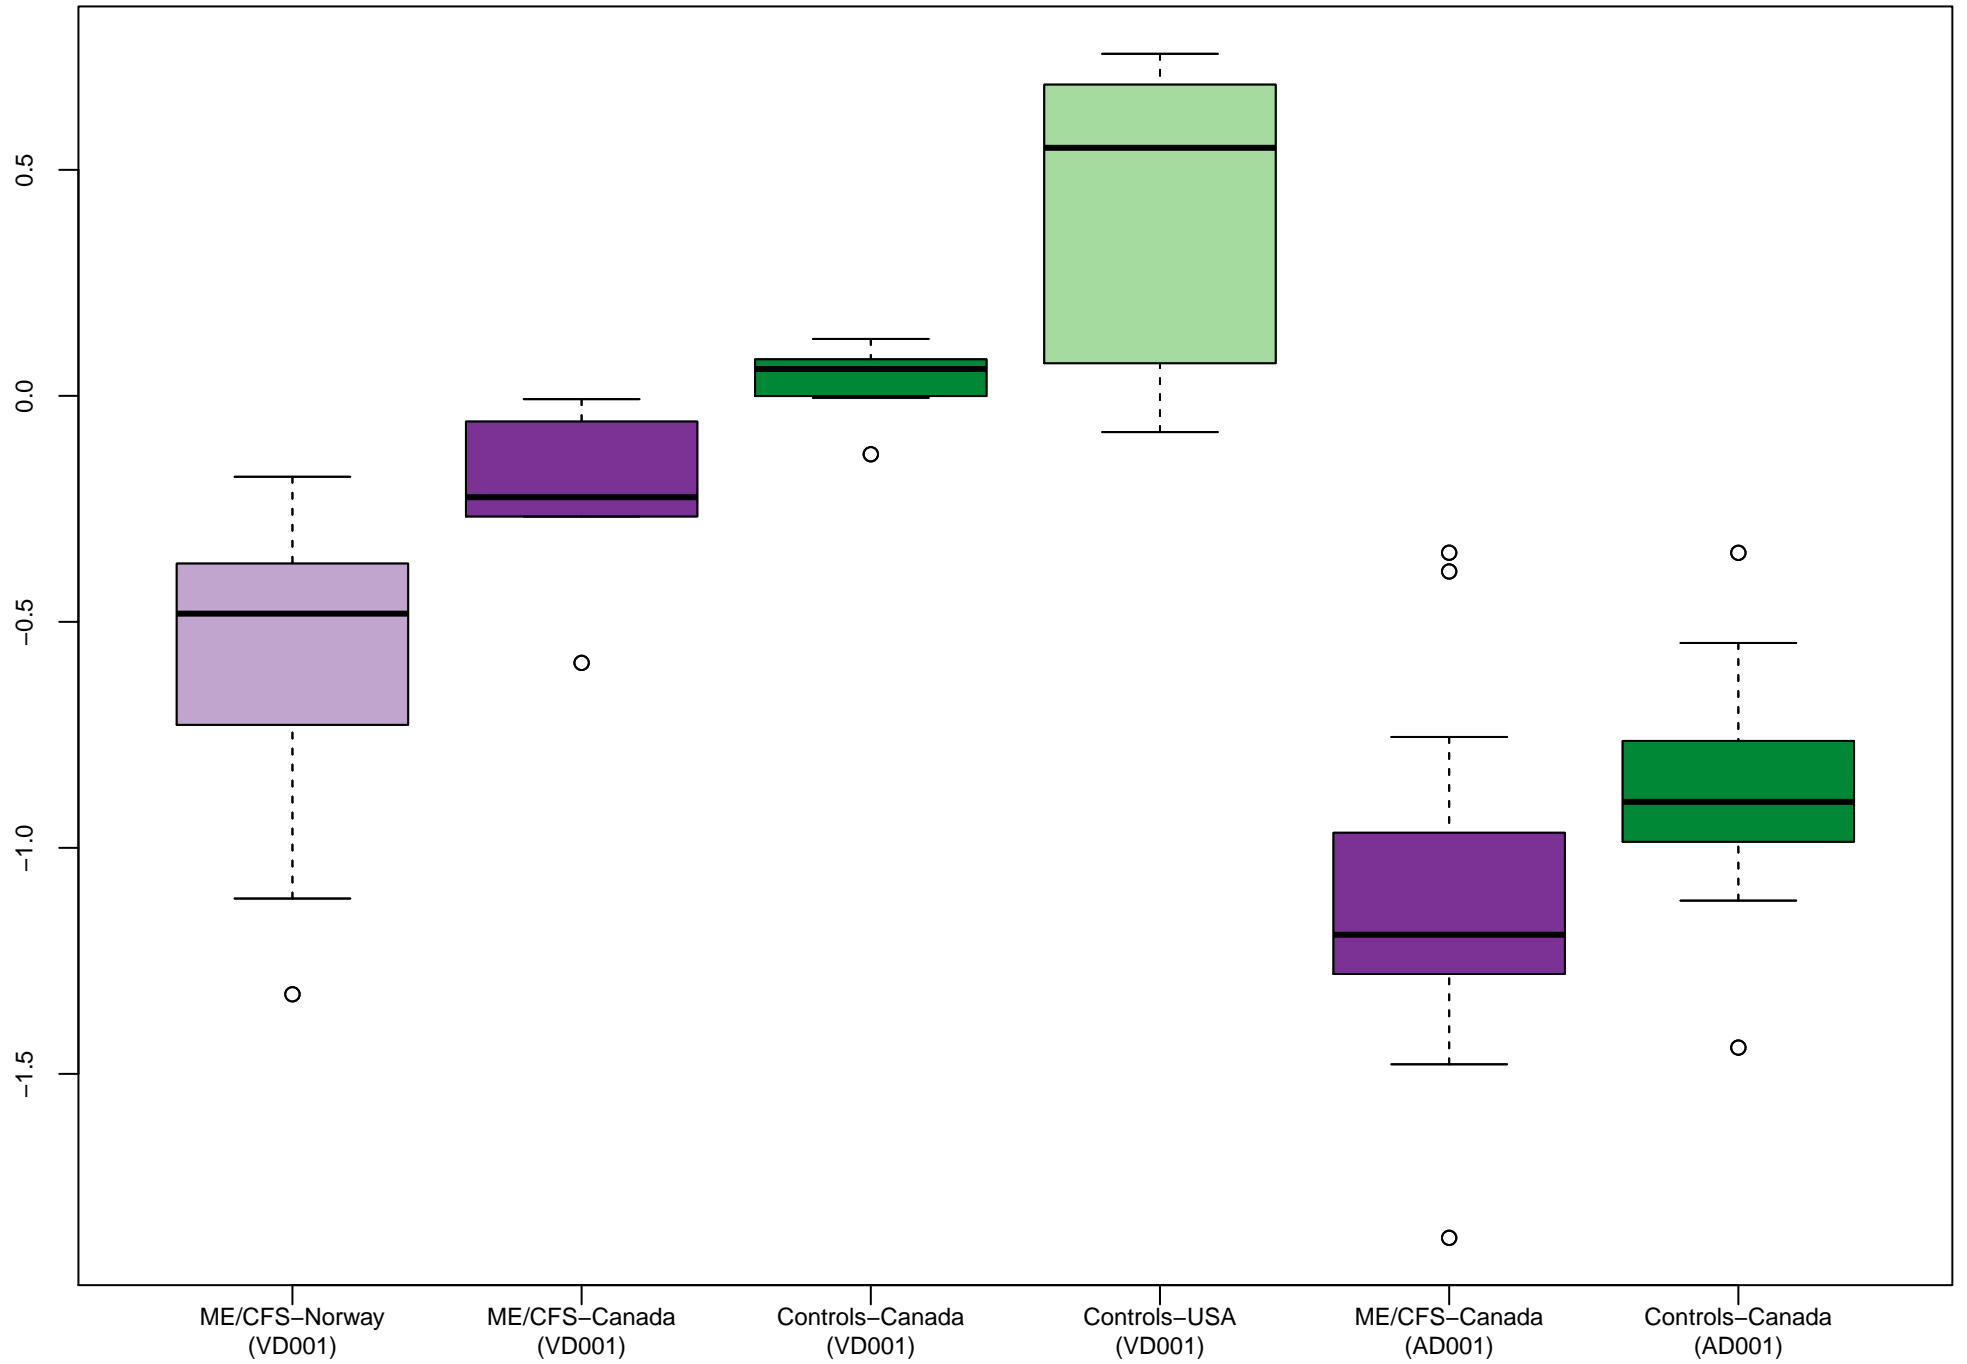

# YLVNKLRLHVLVA

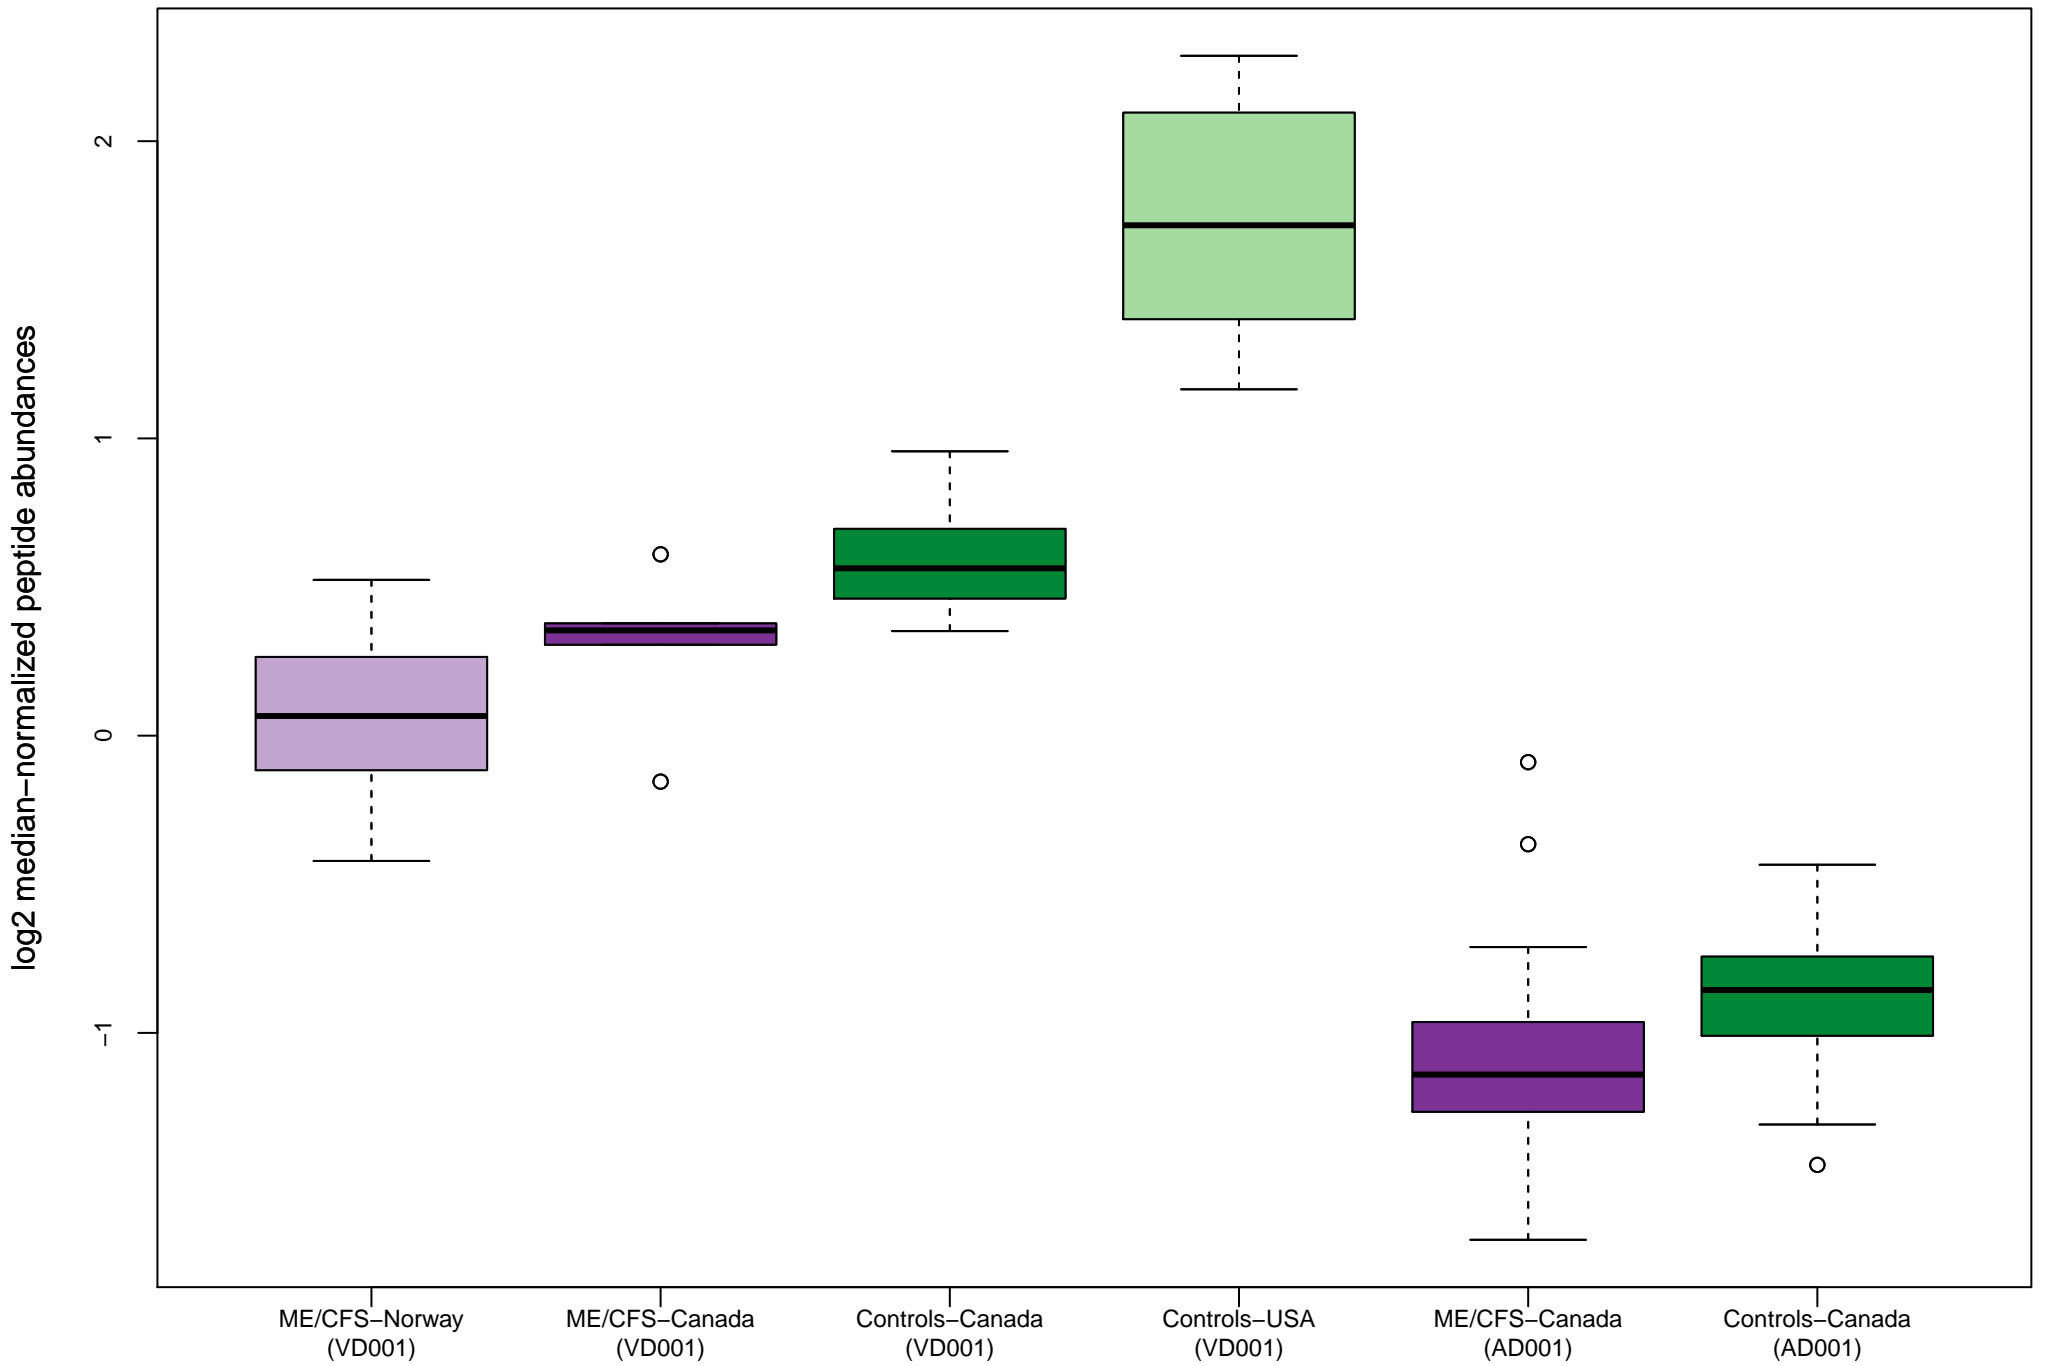

# YNAPLSFRAKVL

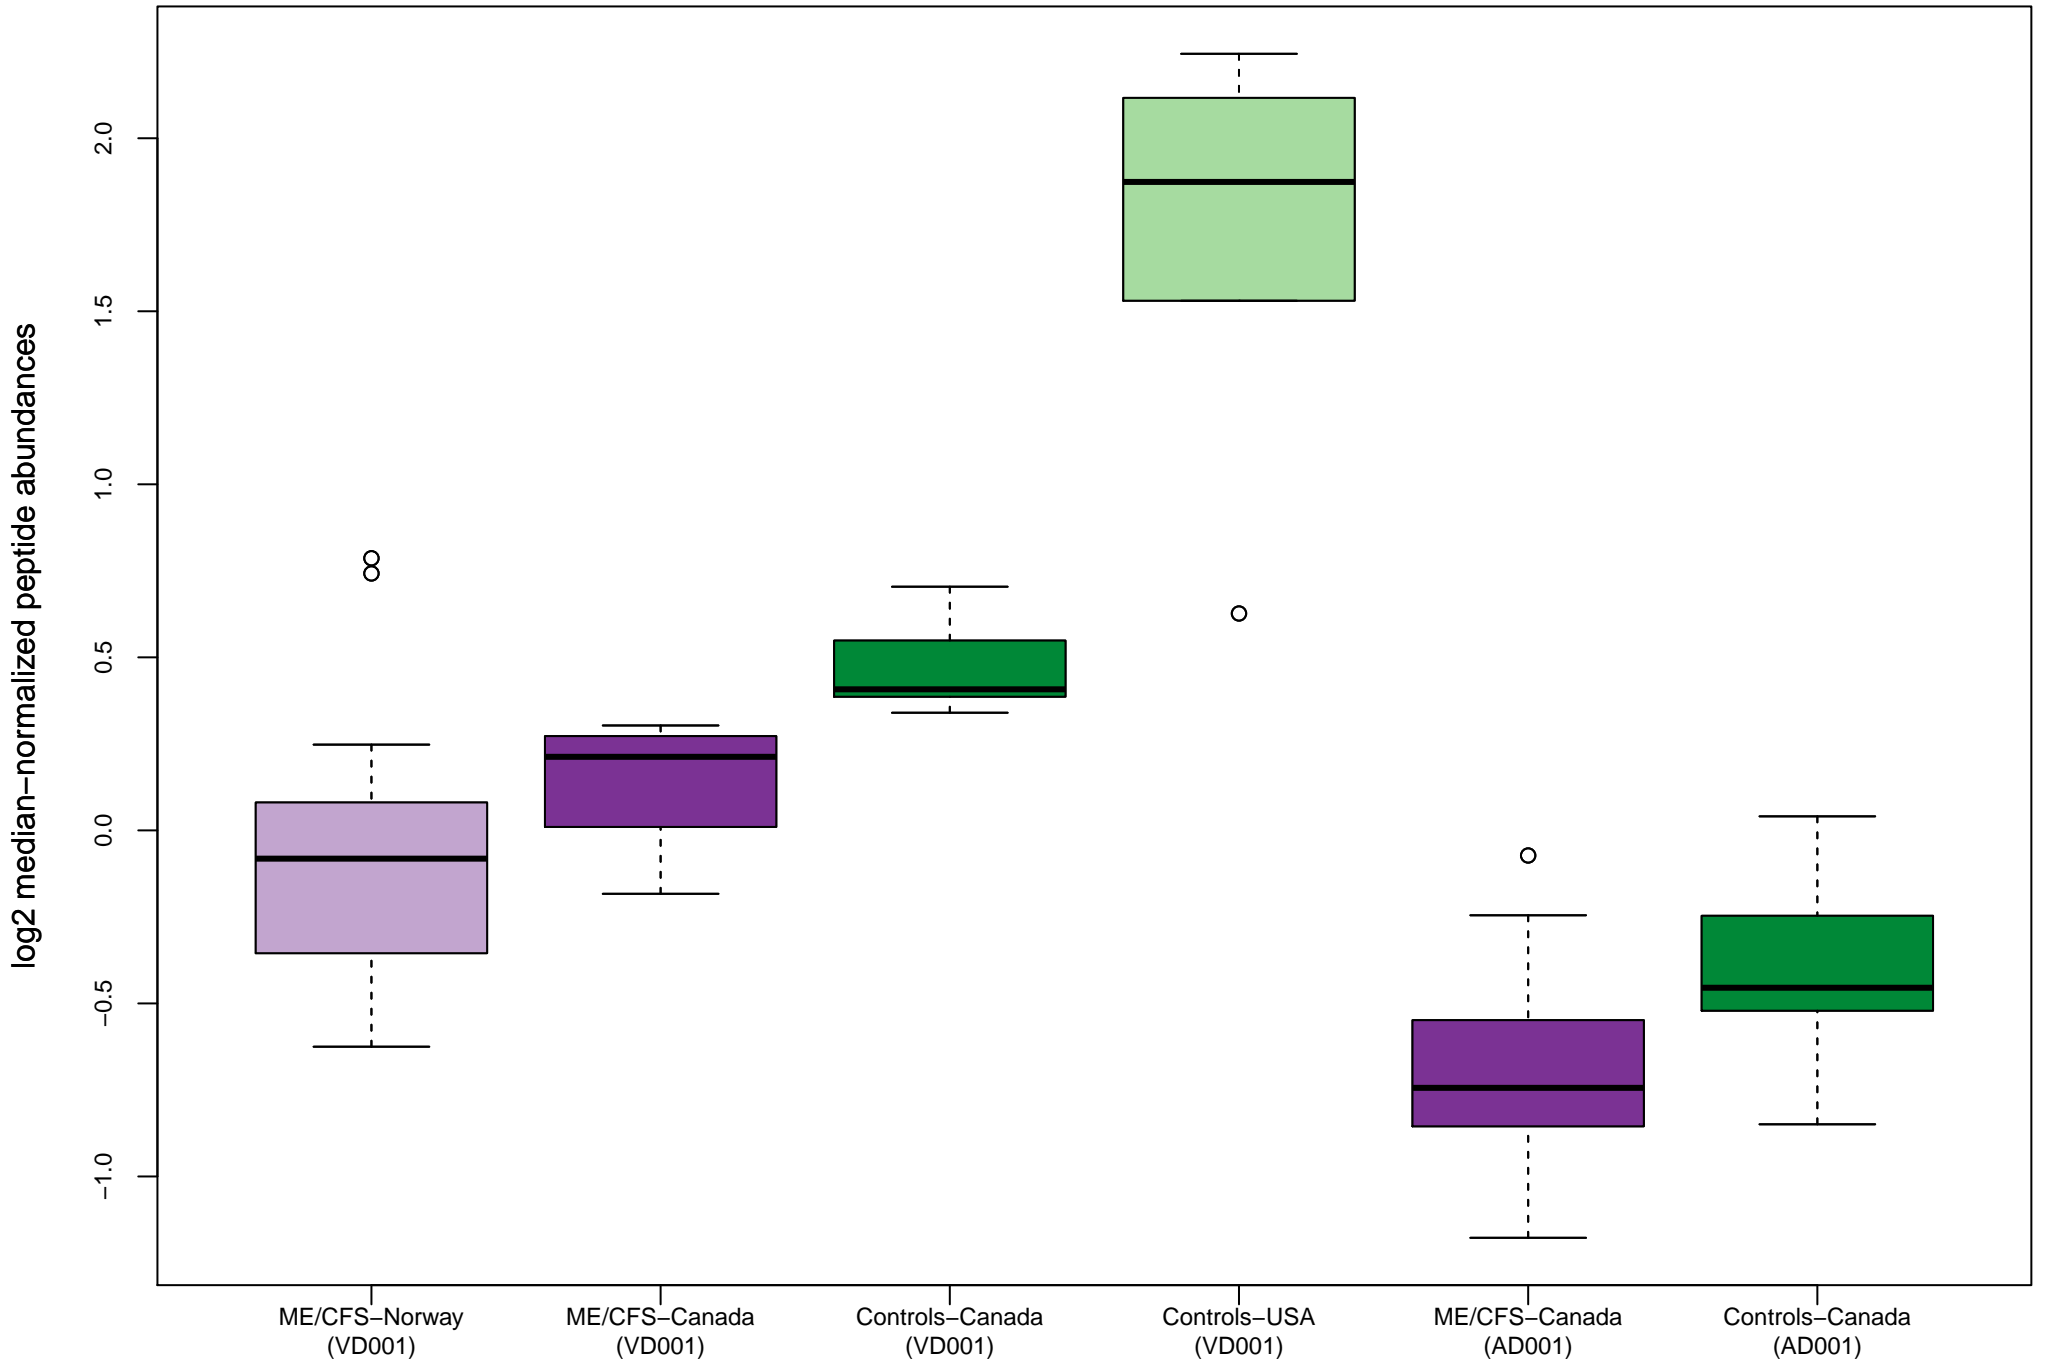

# YRGAYVSGVALG

log2 median-normalized peptide abundances

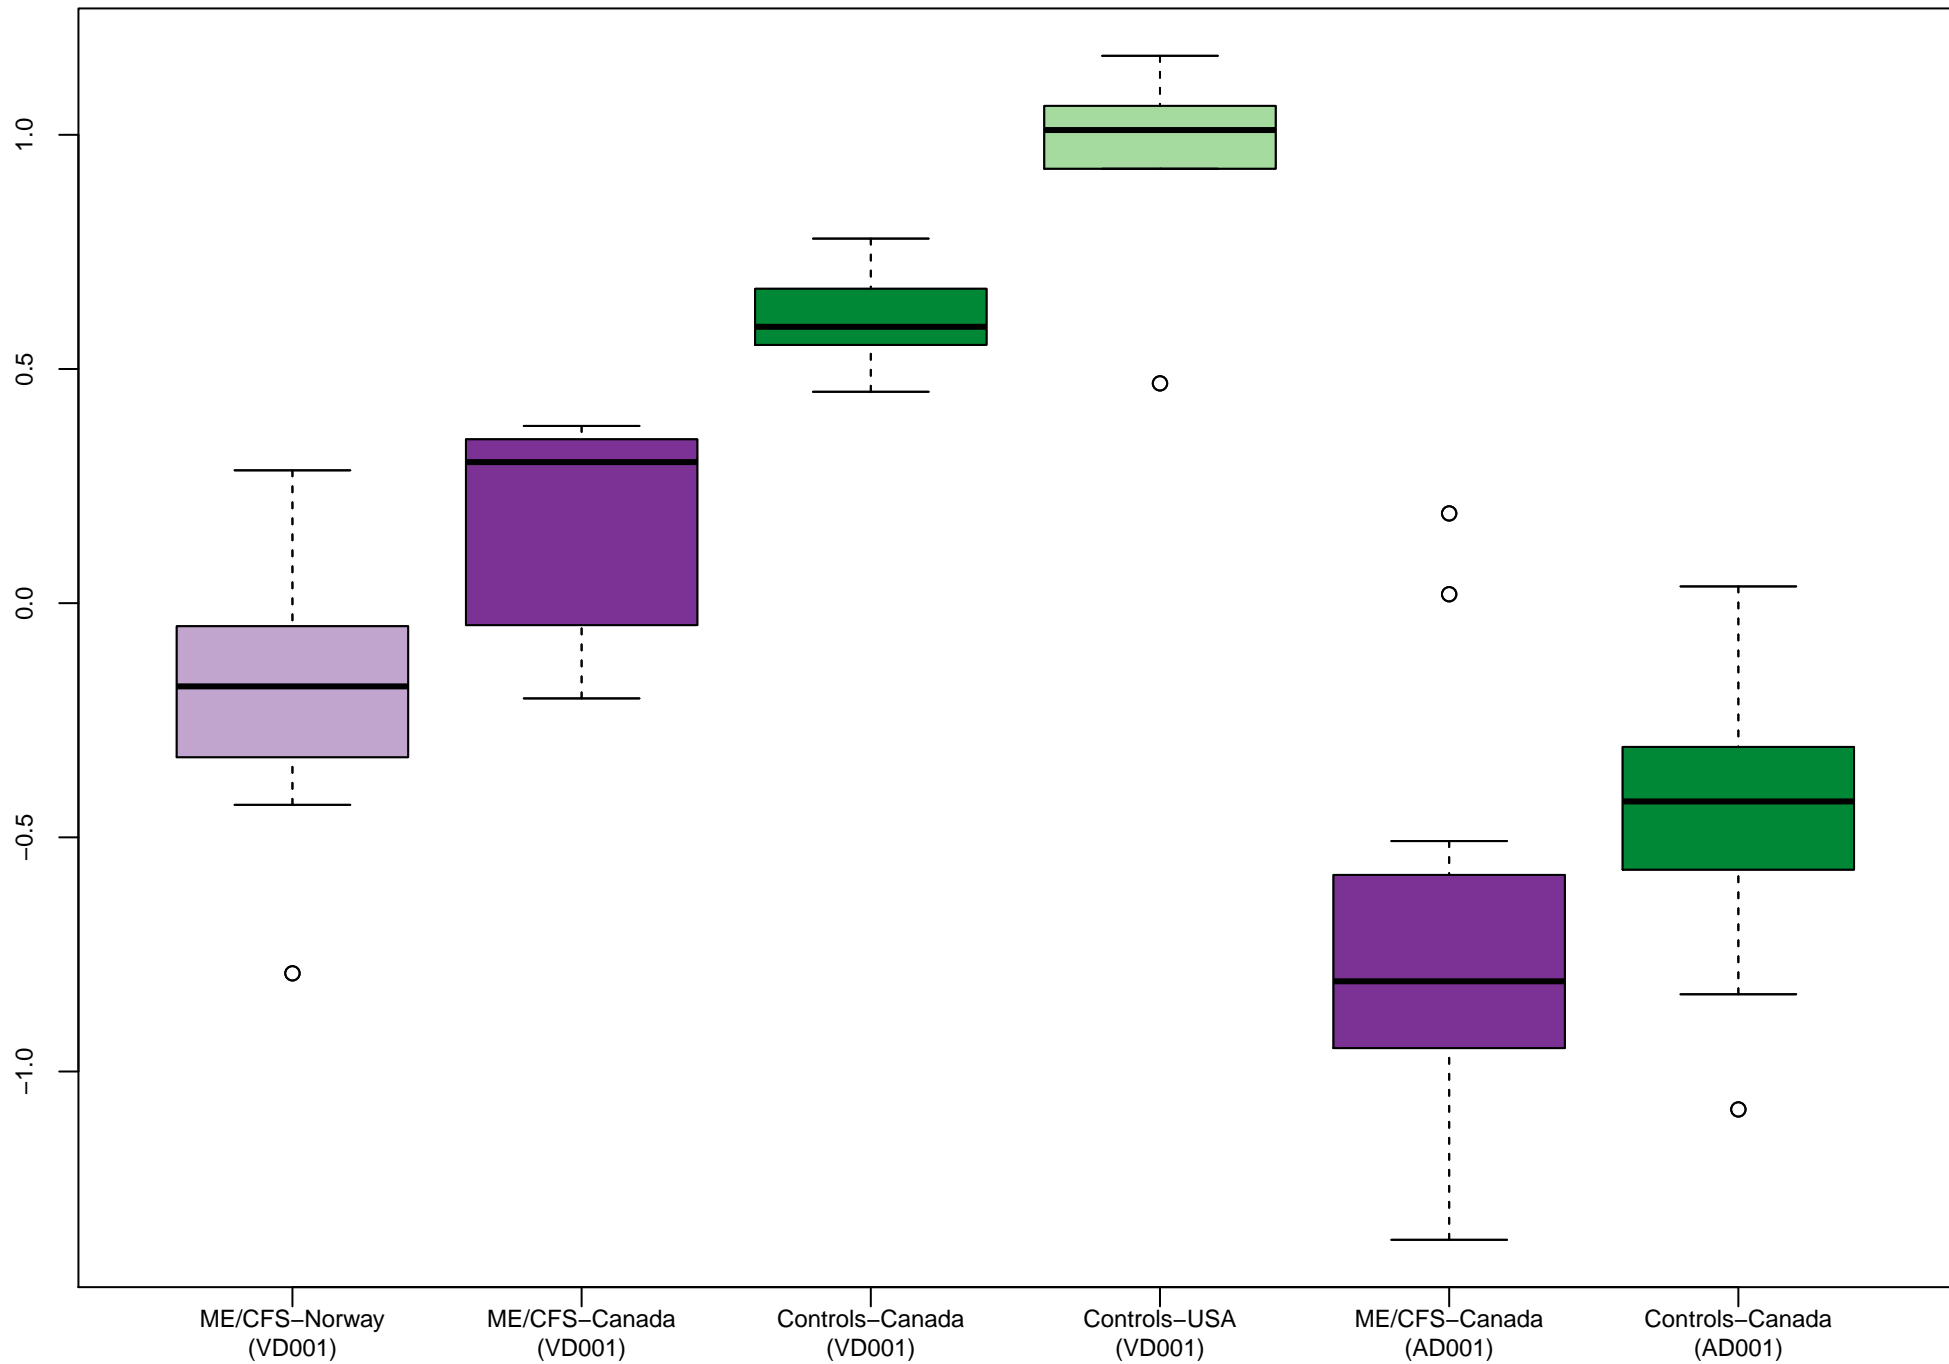

# YRLNLFVSGALG

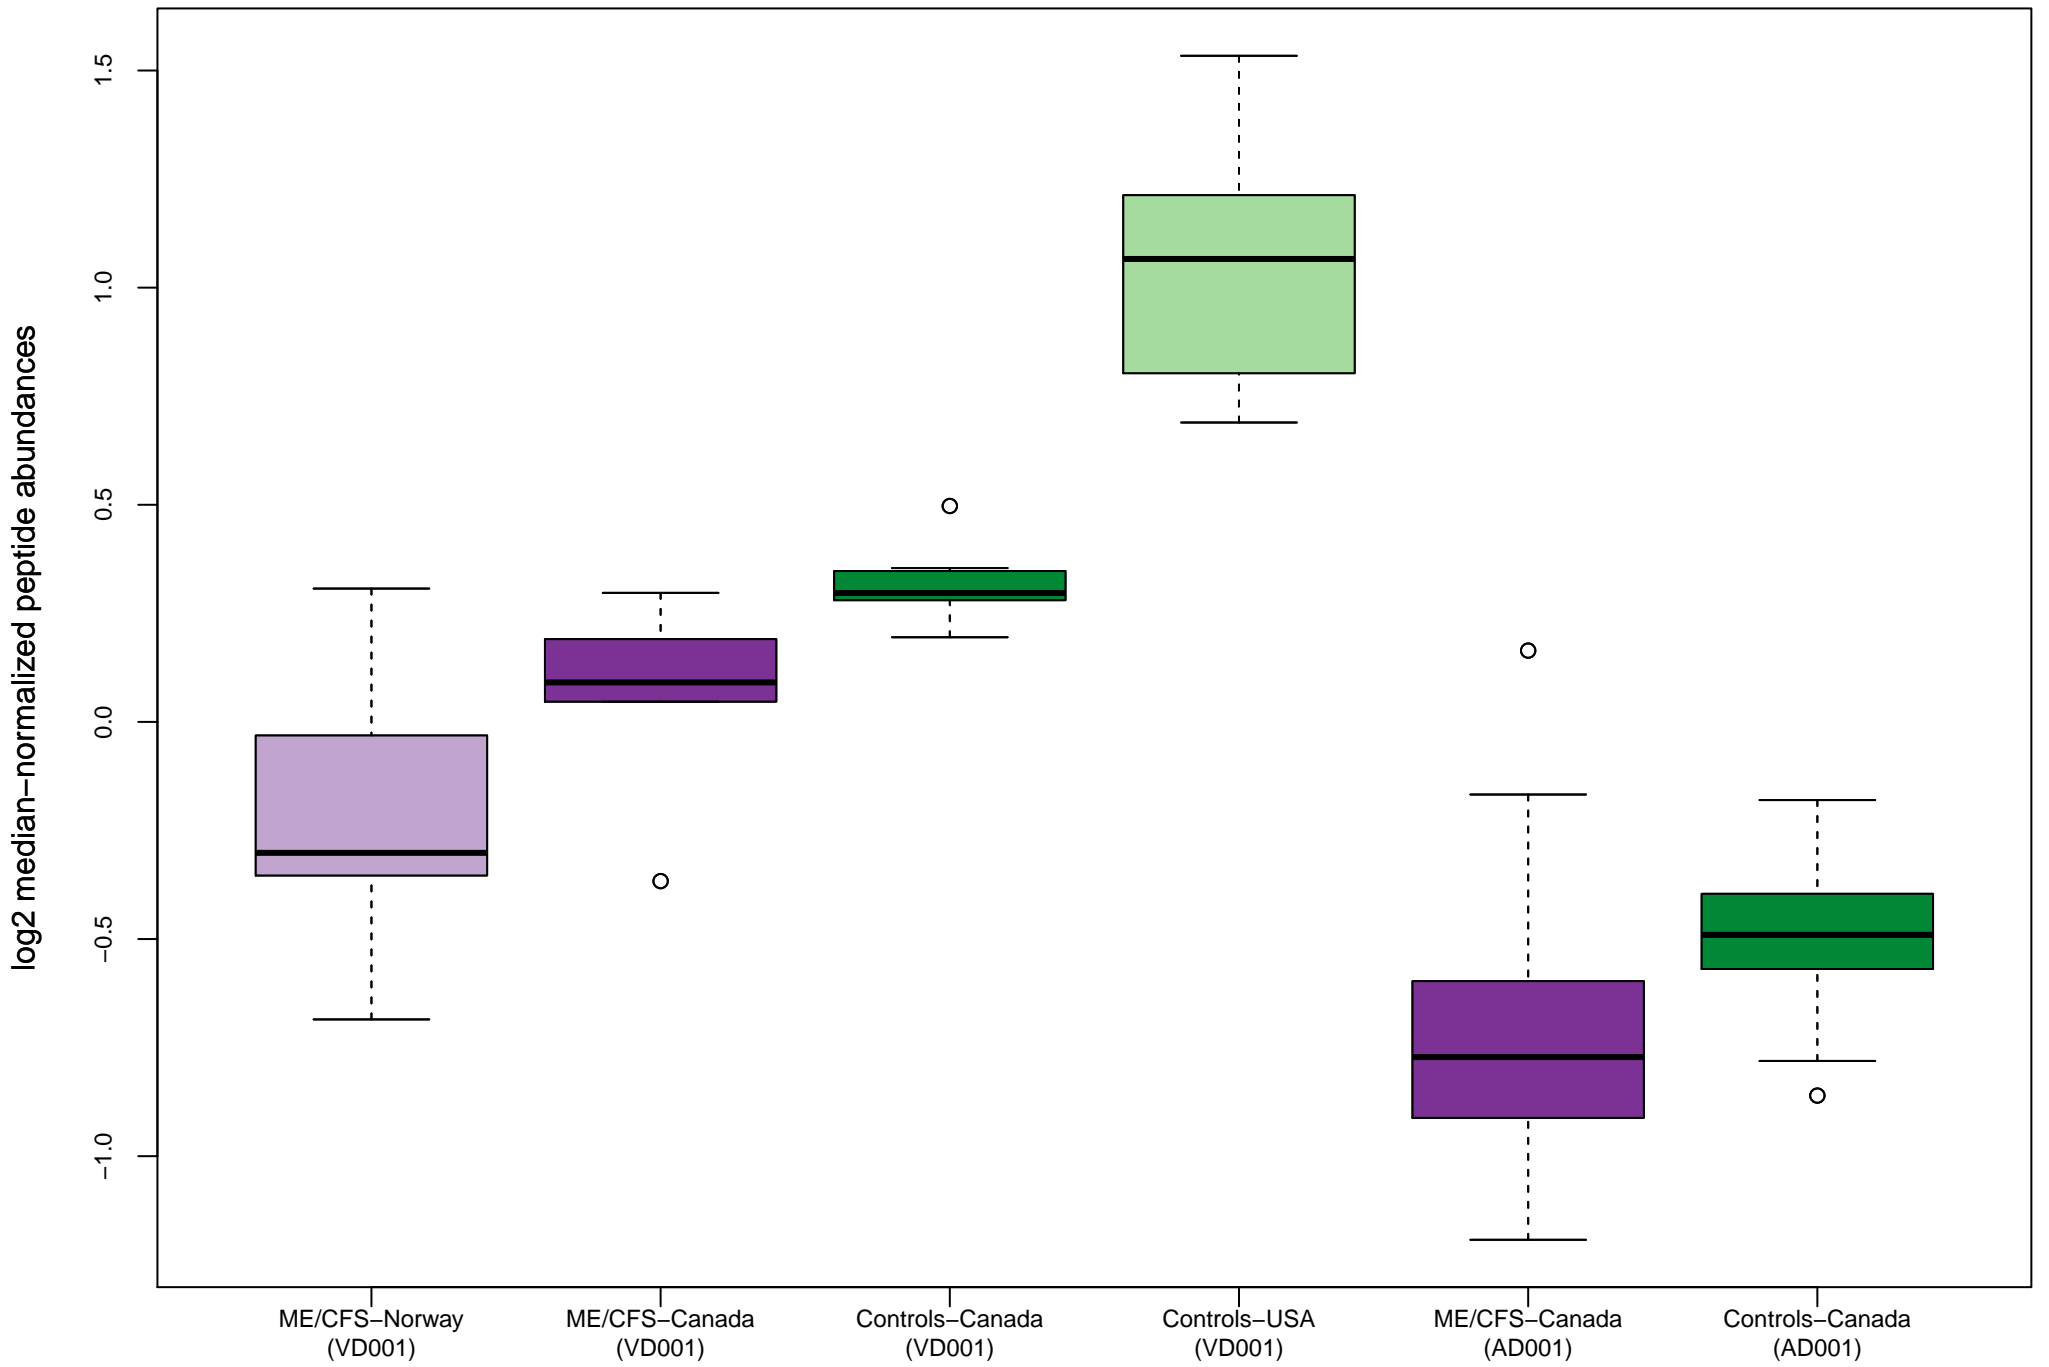

# YRLWFRVSGVLS

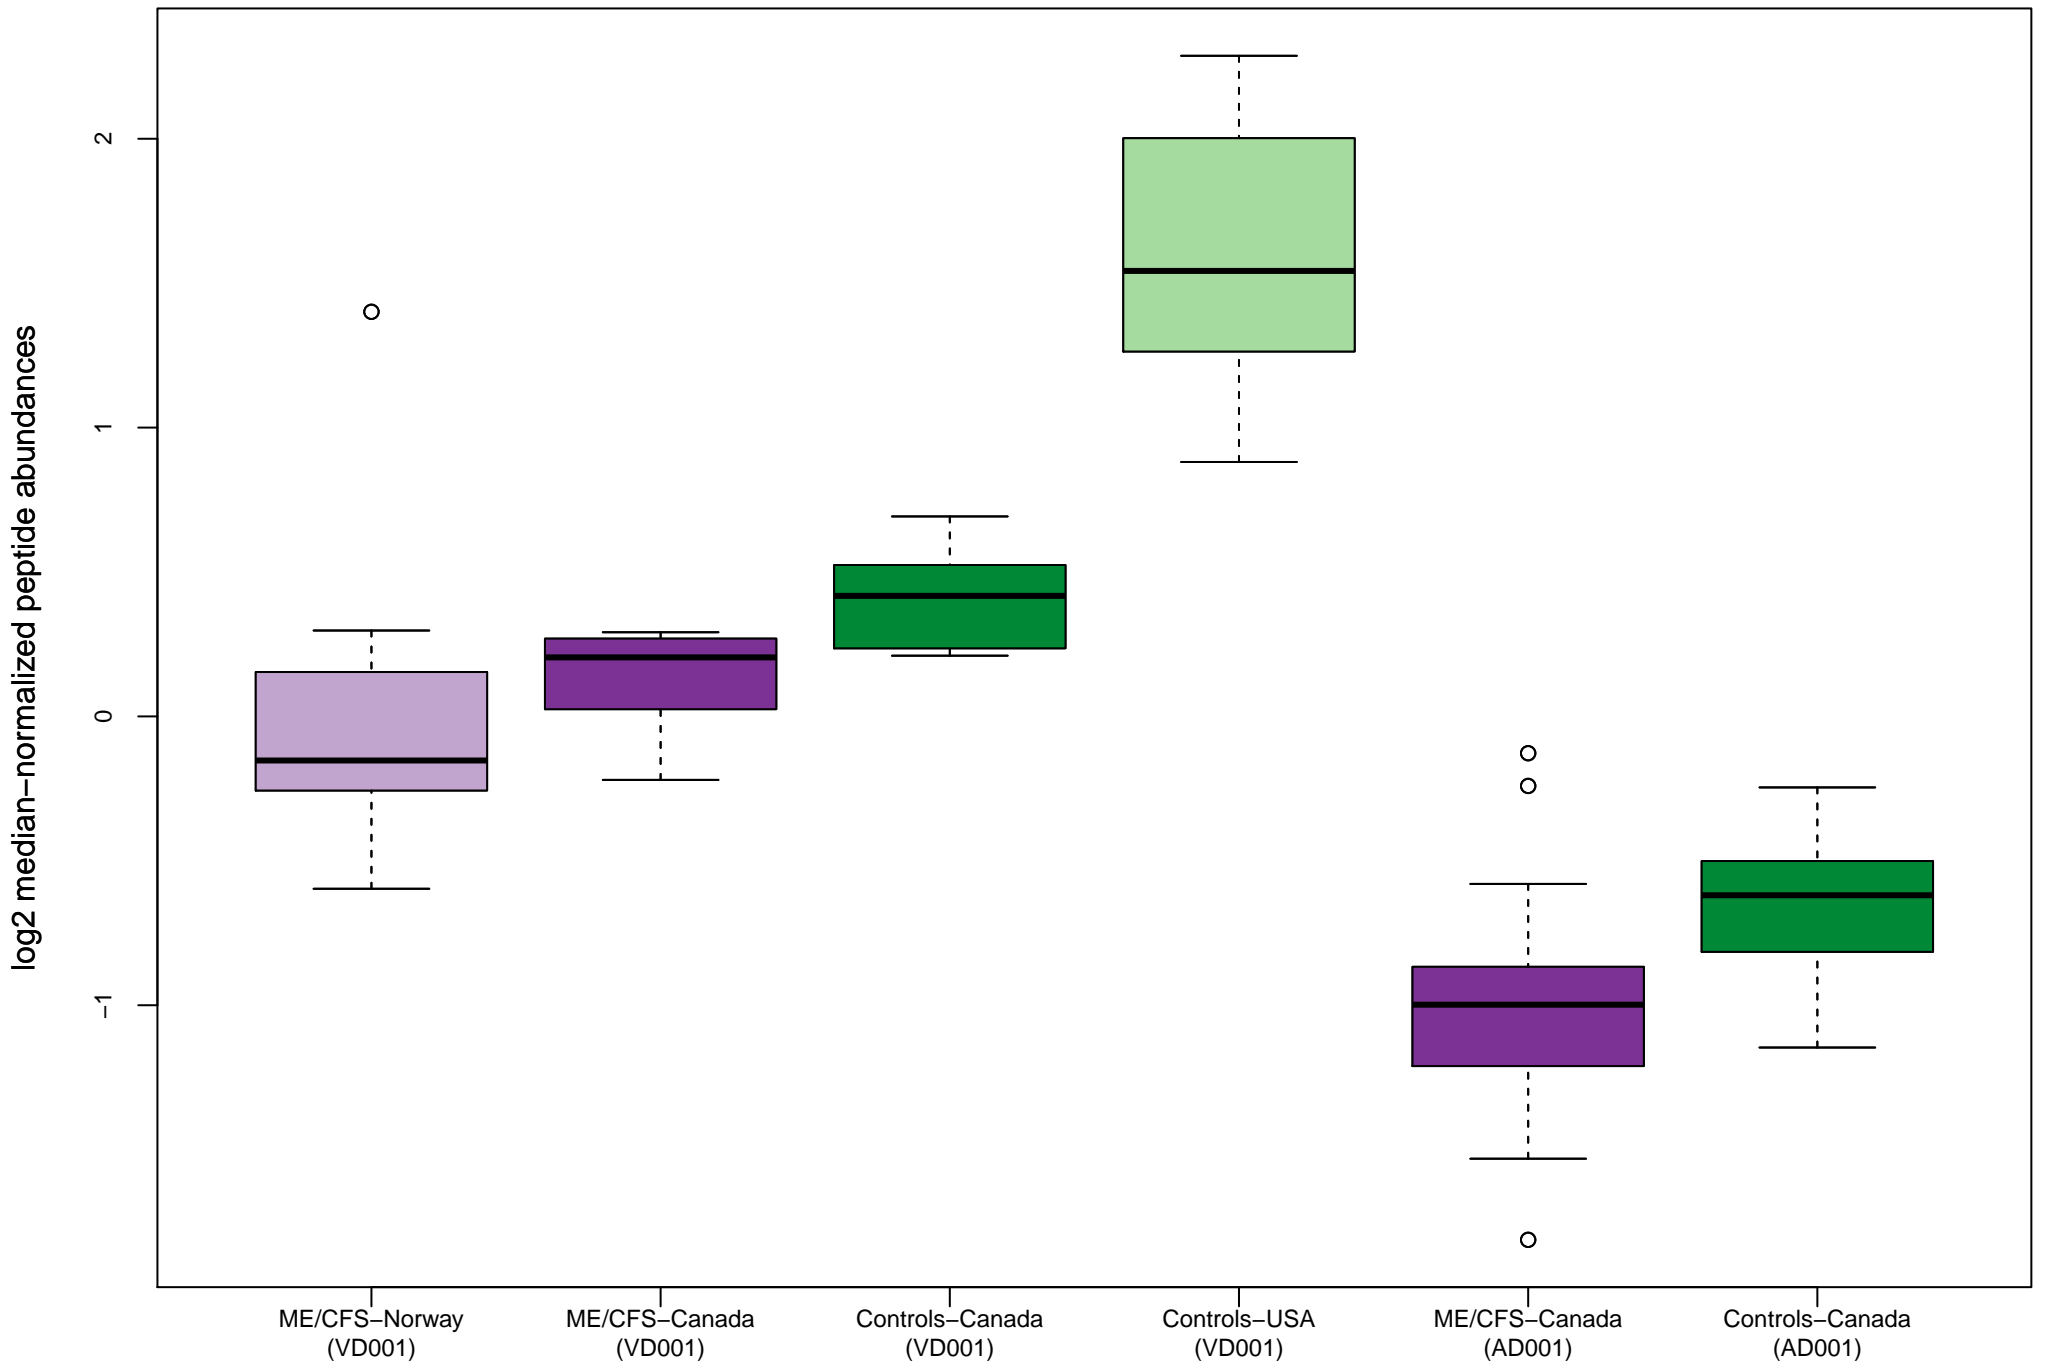

# YRYQYVARWNAS

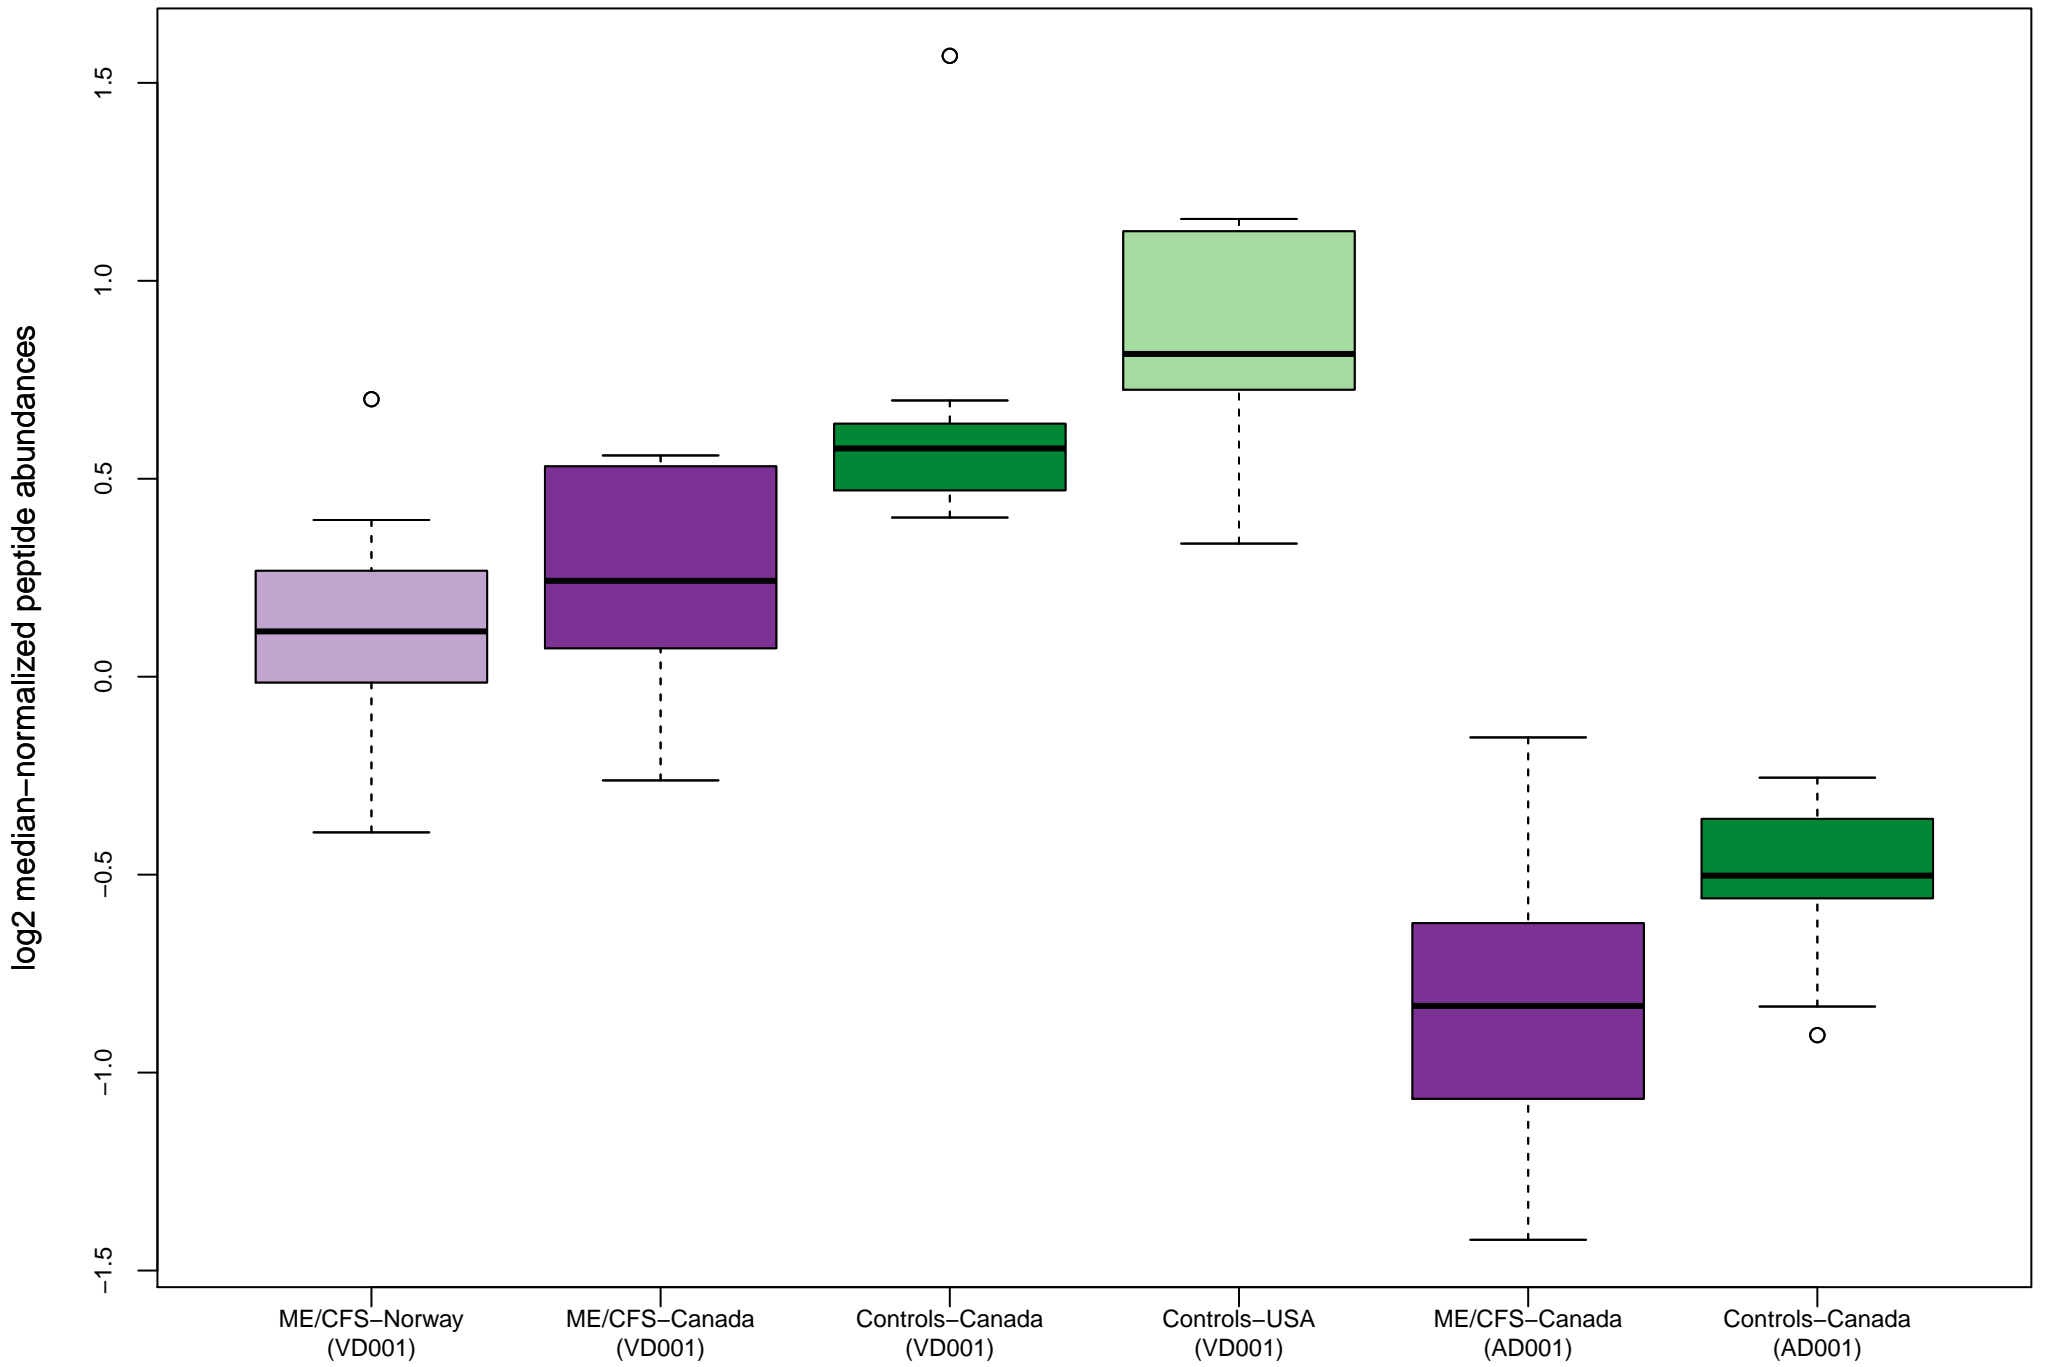



# YVRPYHVGQFLR

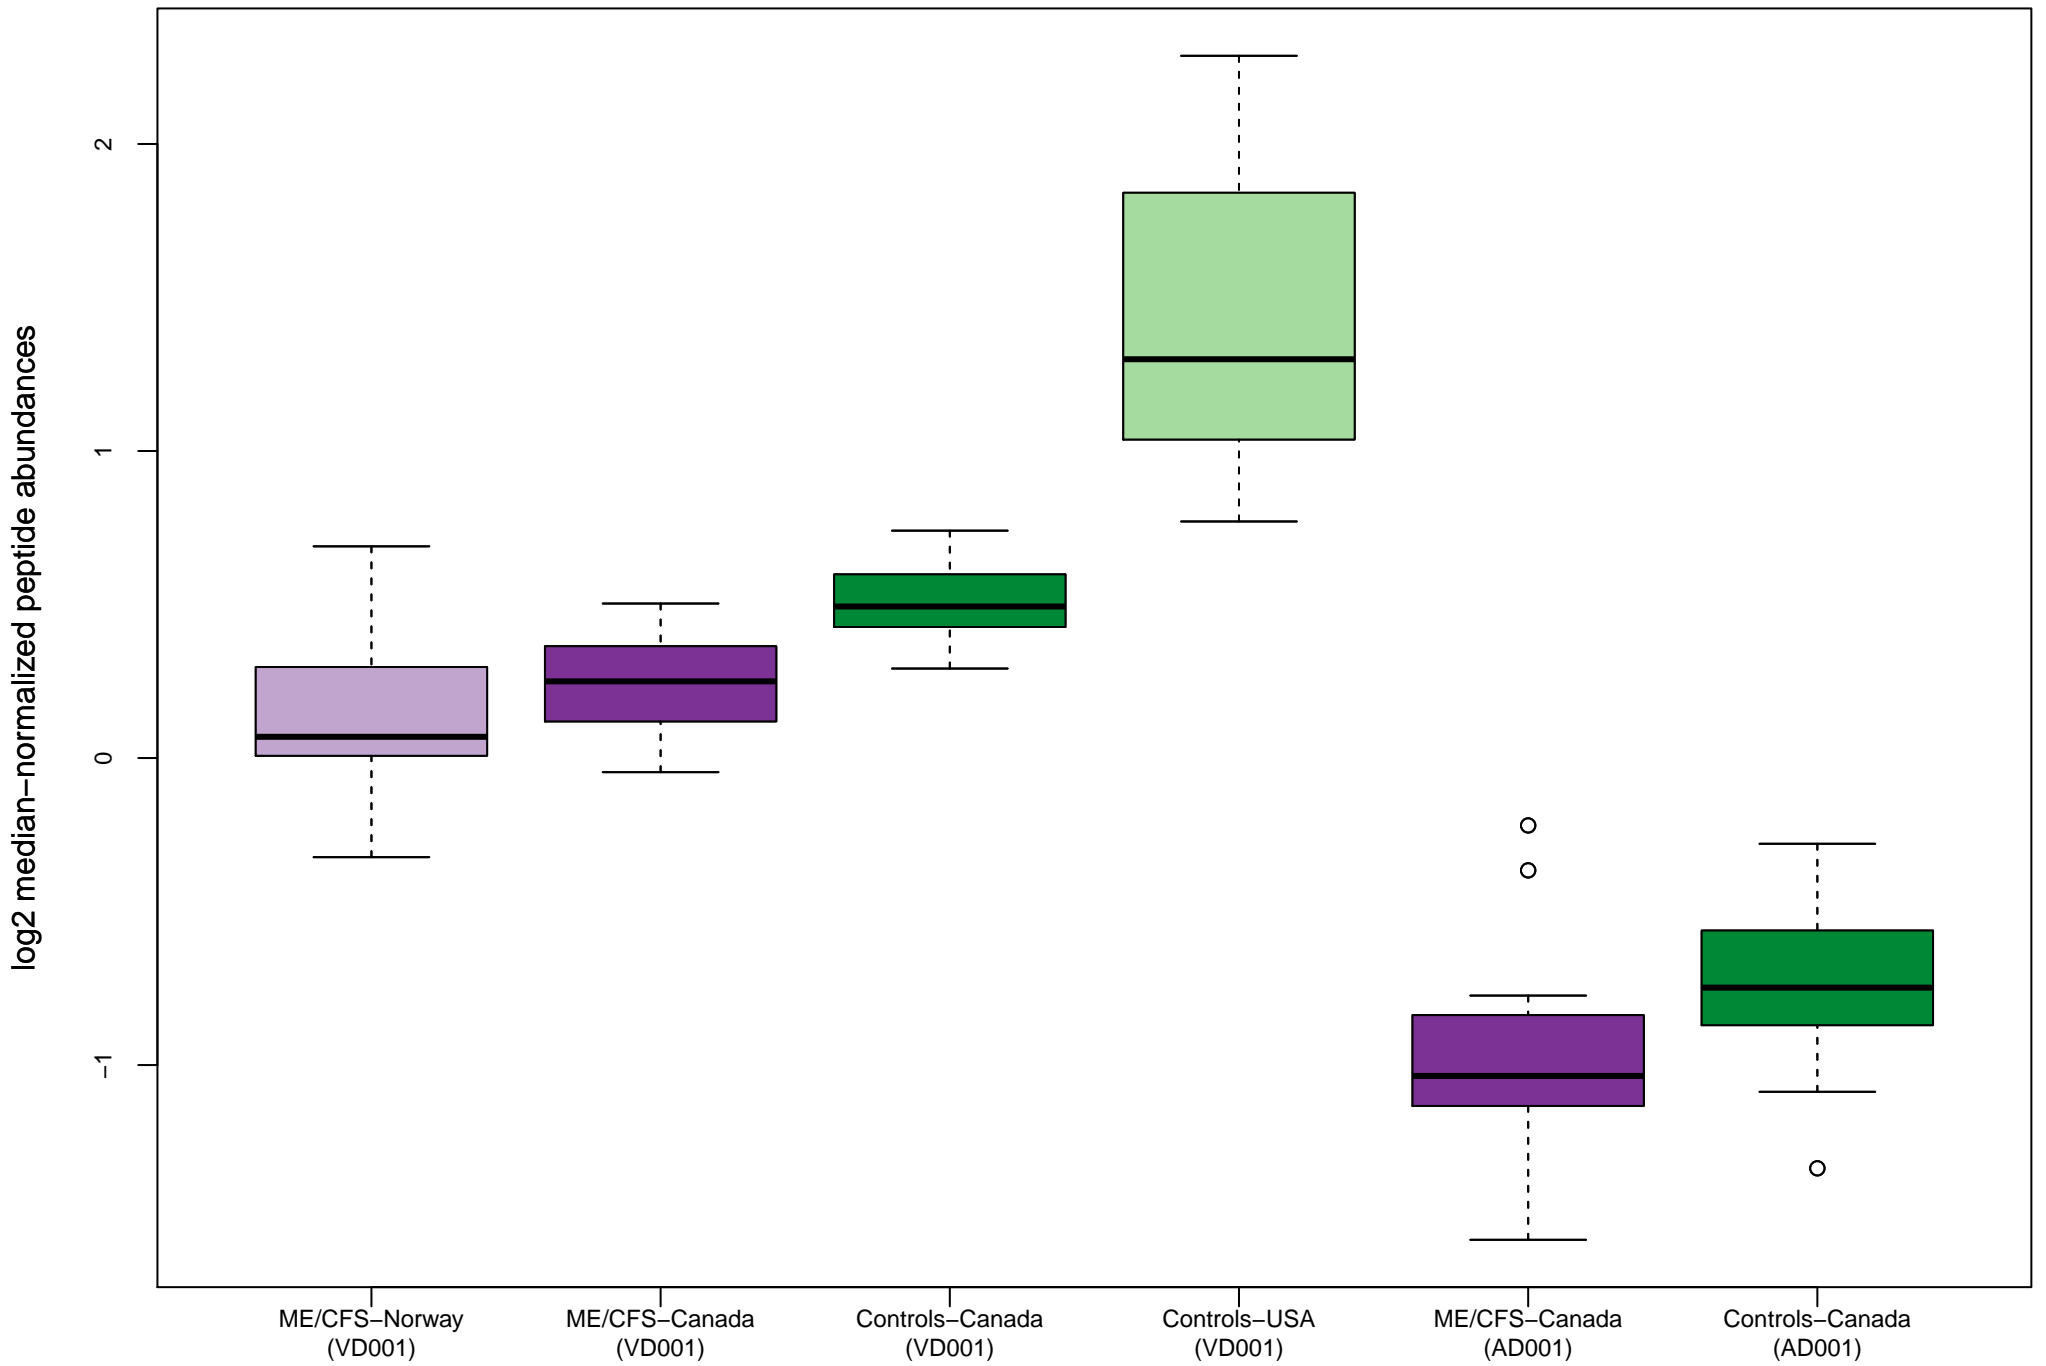

# YWRRRPYWVVLG

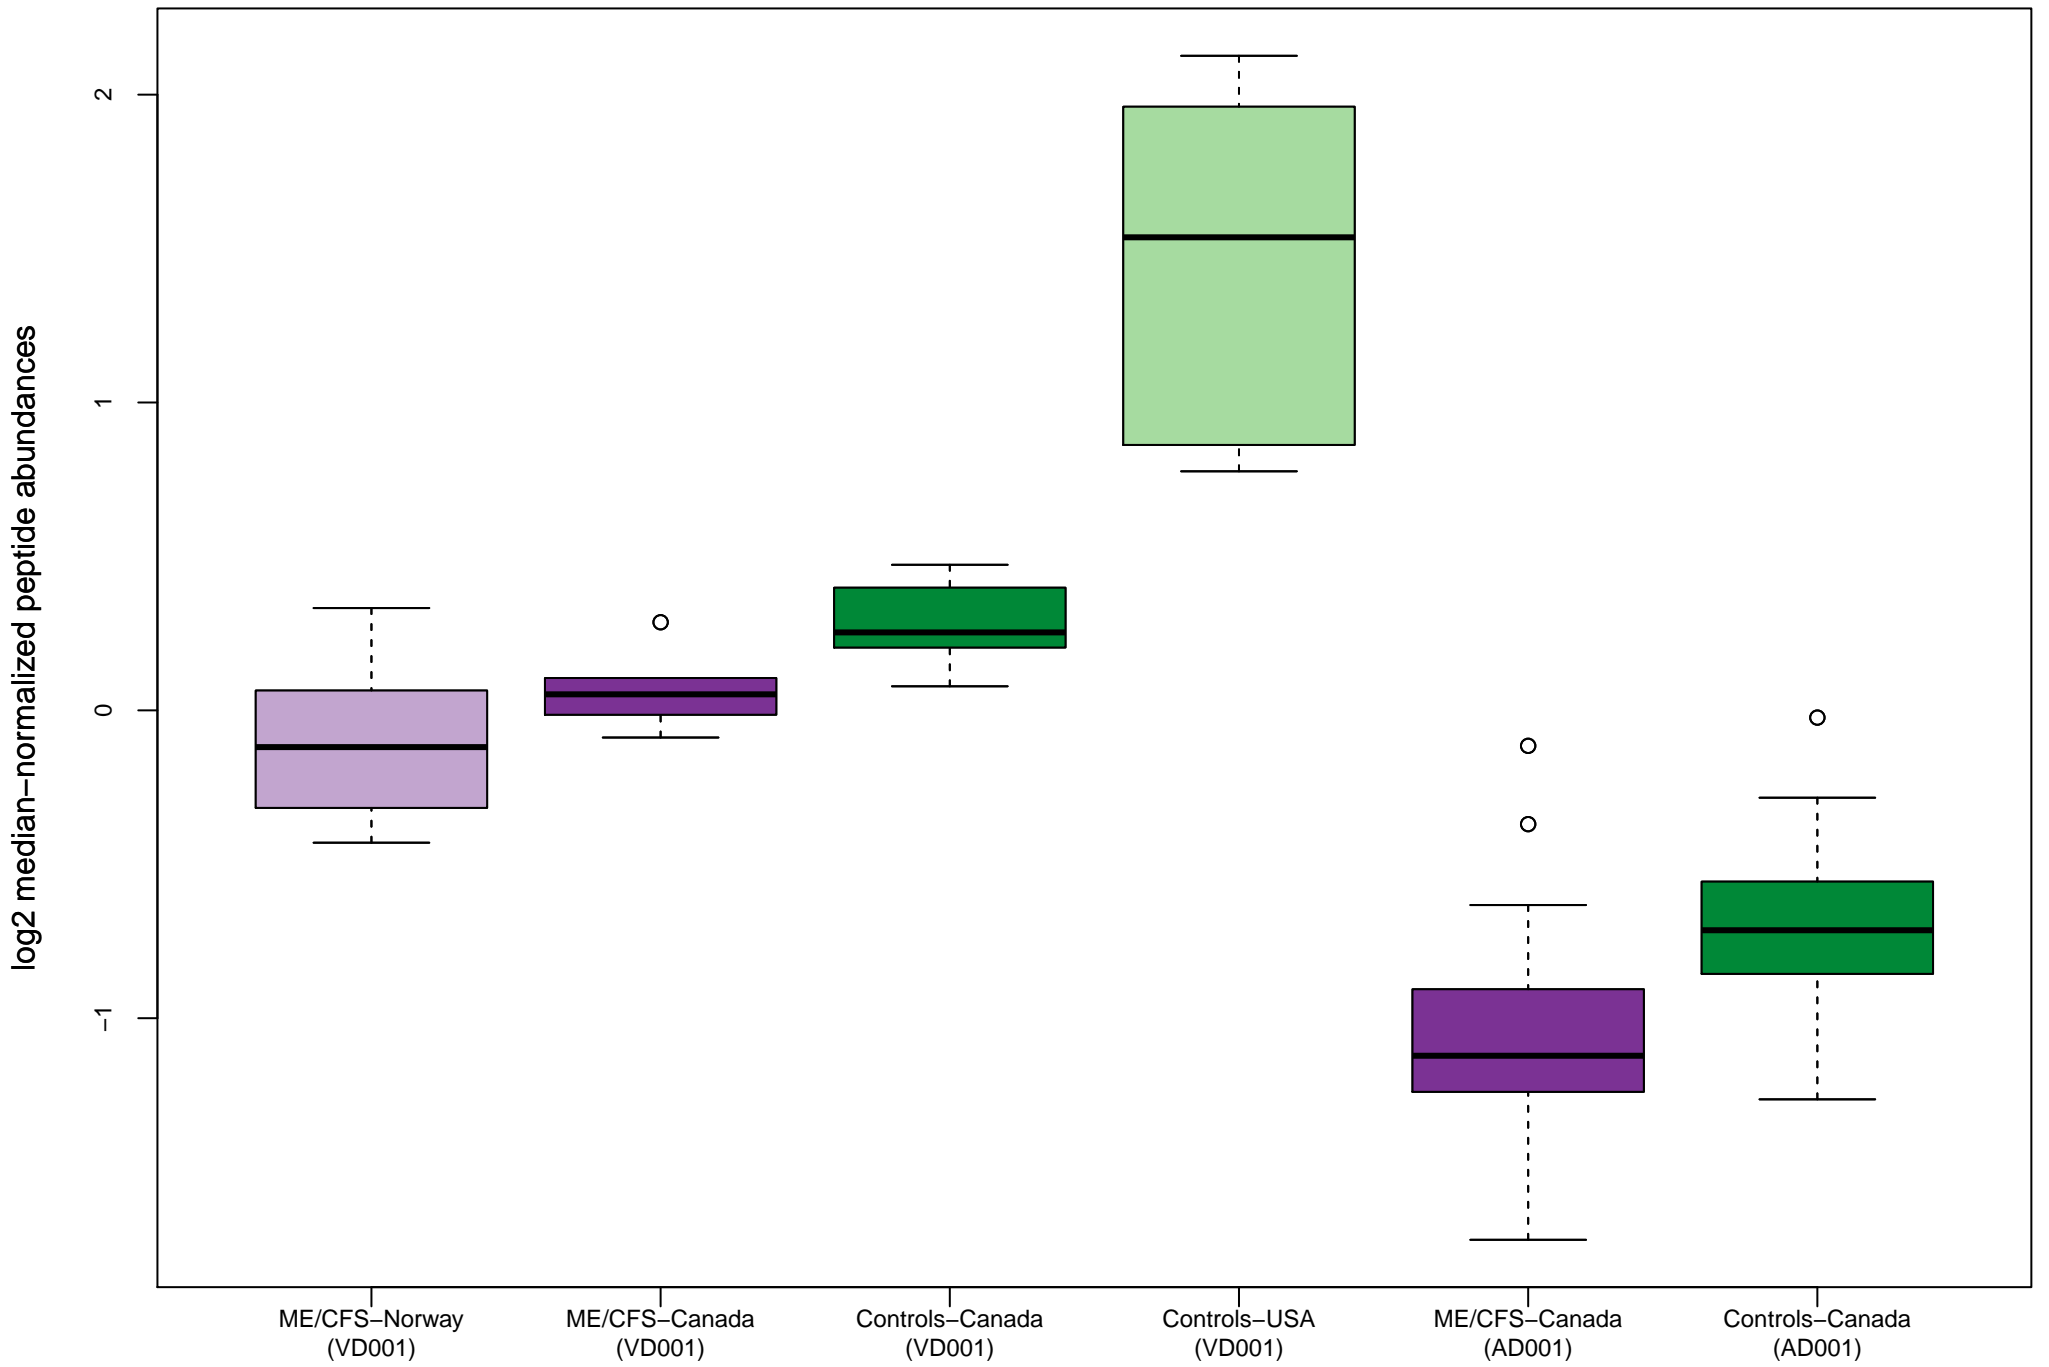

# YYKNFWKLGVLS

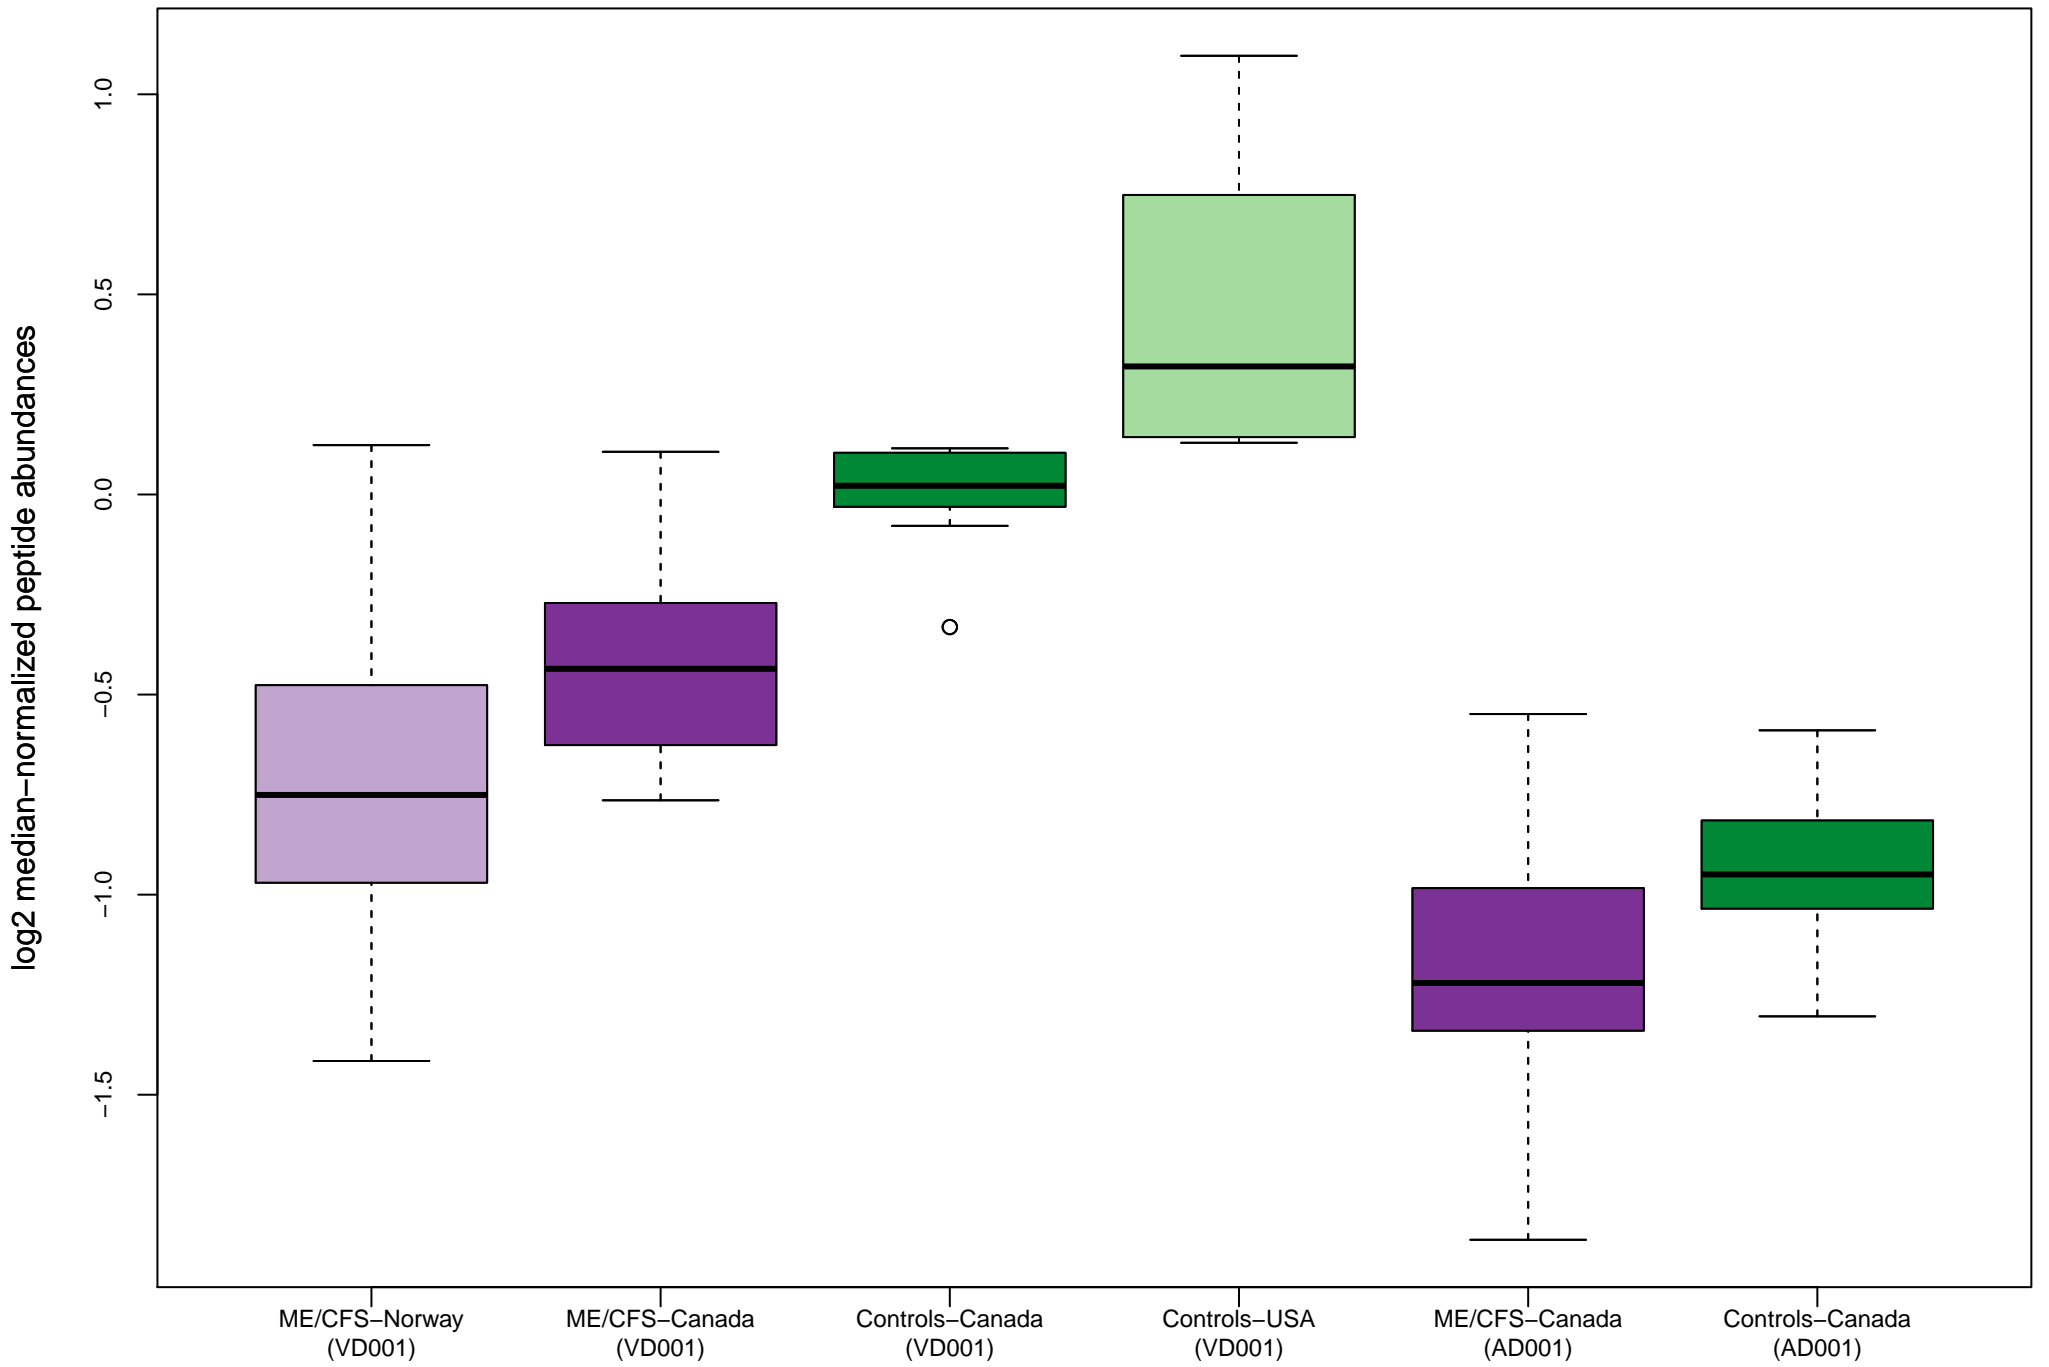

# ARFVSRALSASG

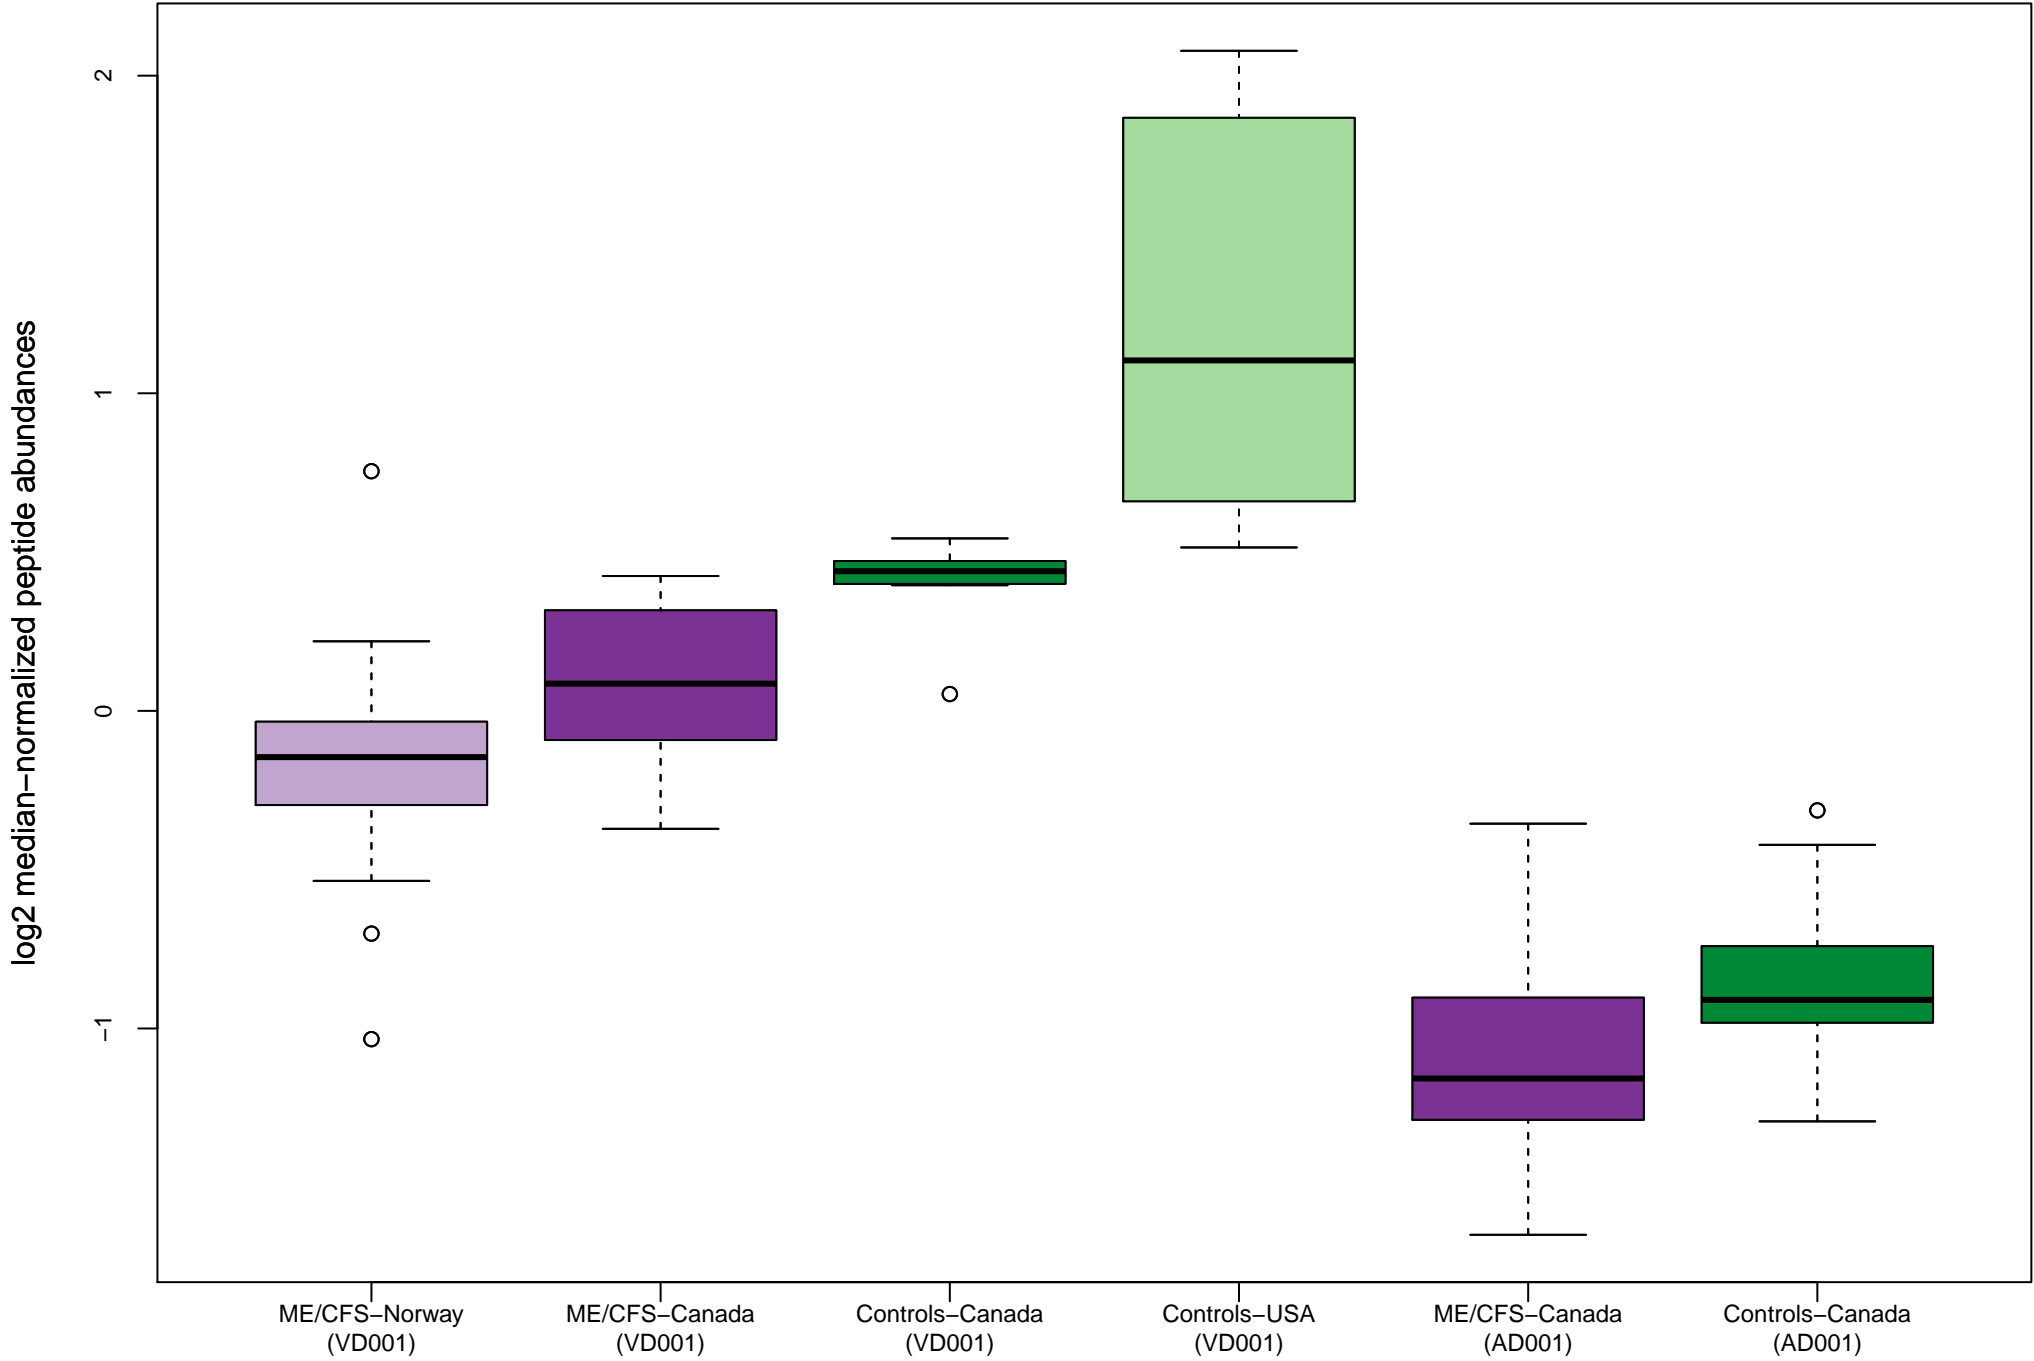

# FARWRLSFWASG

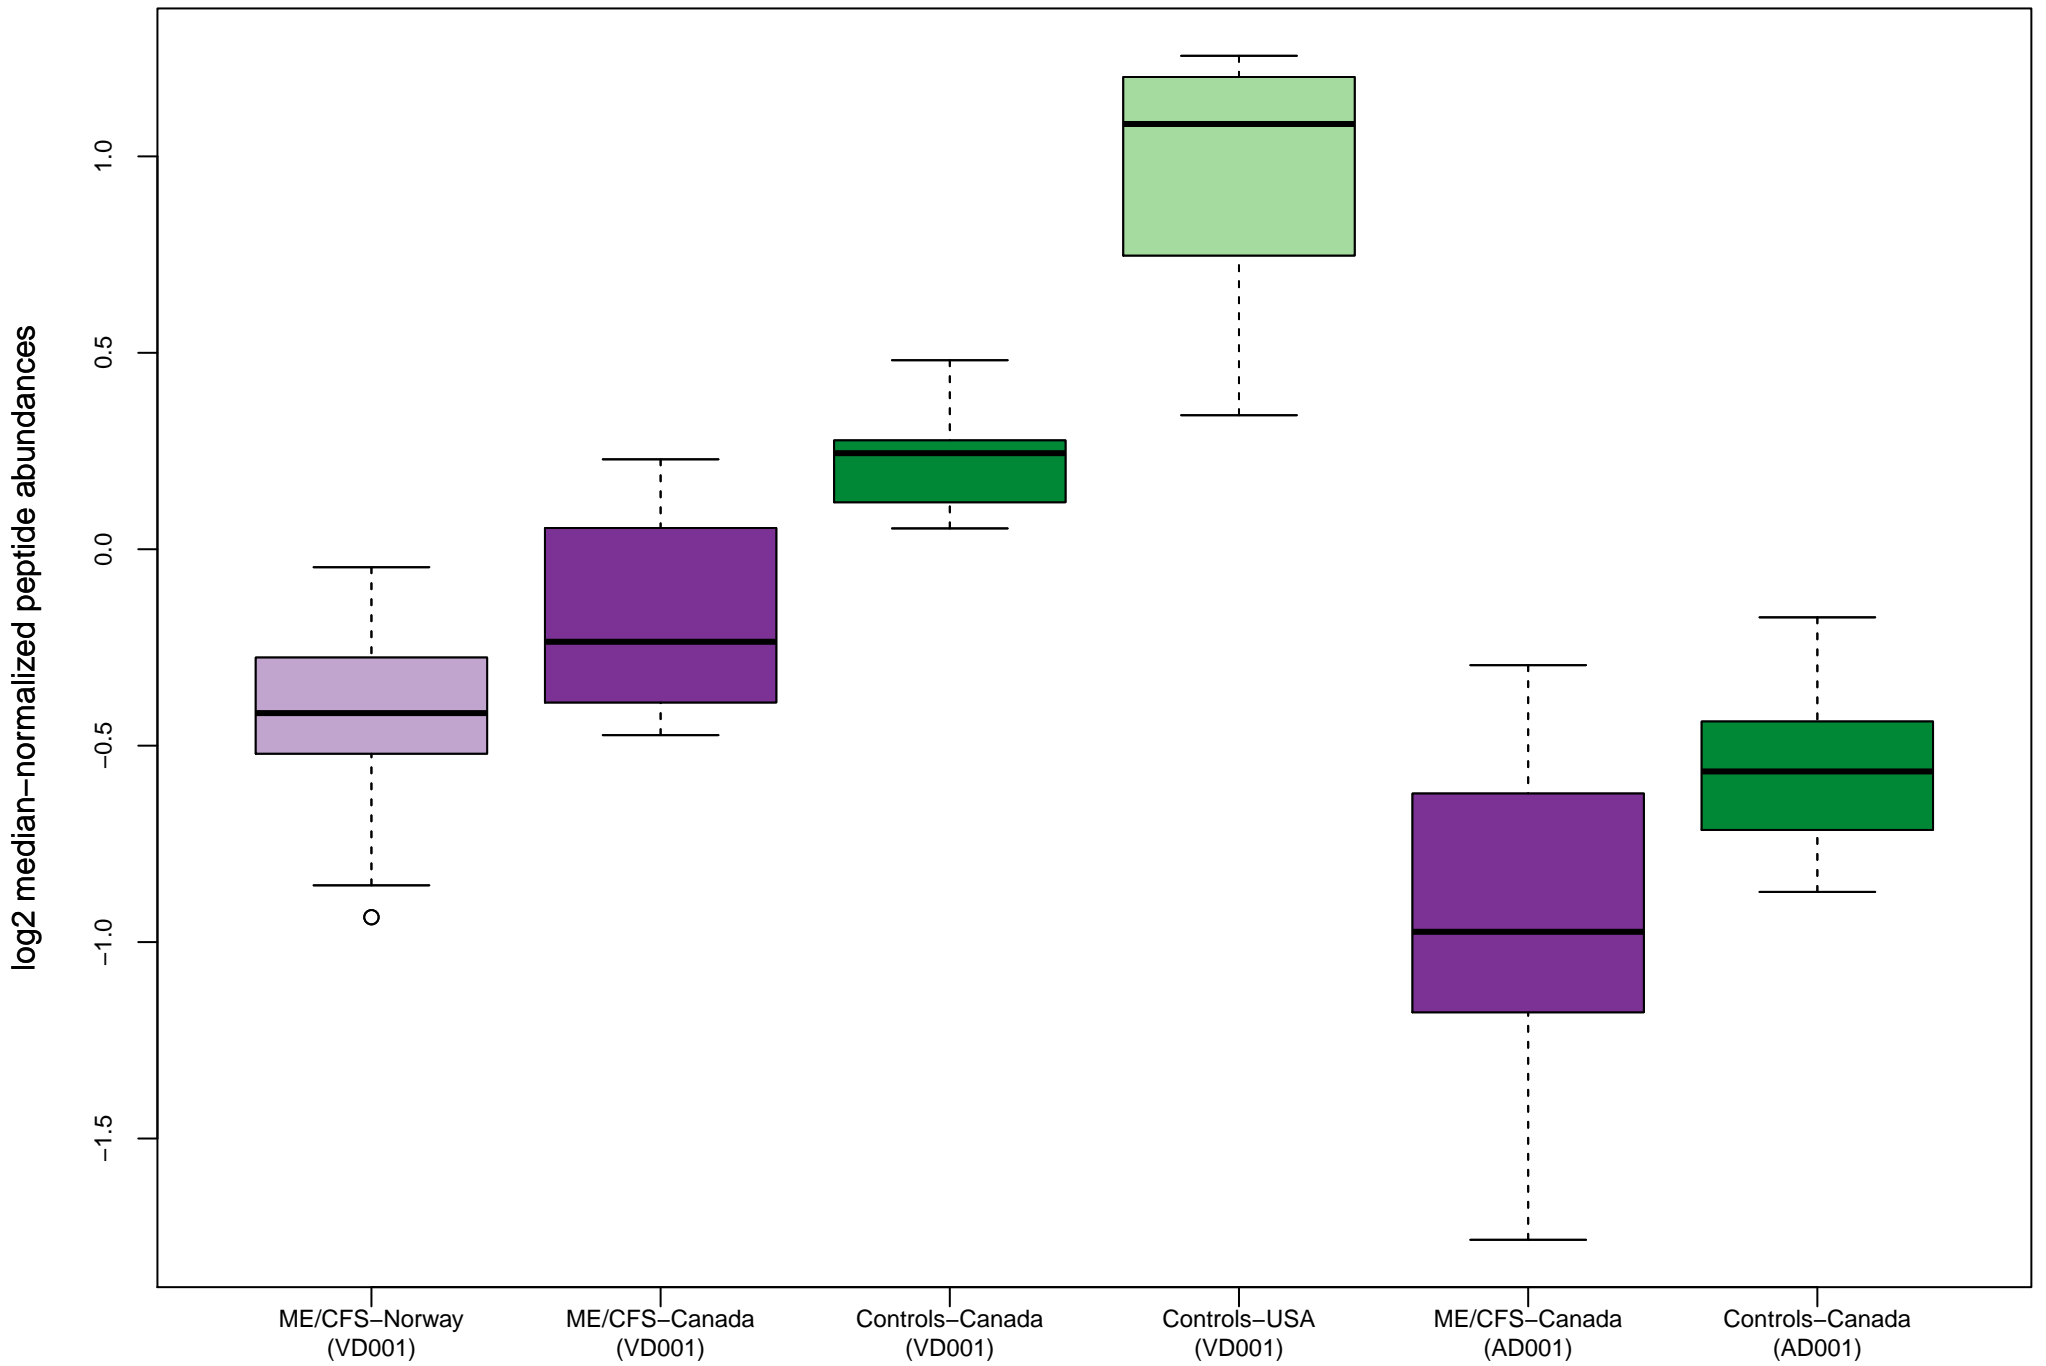

# FKSFHVLSKPNV

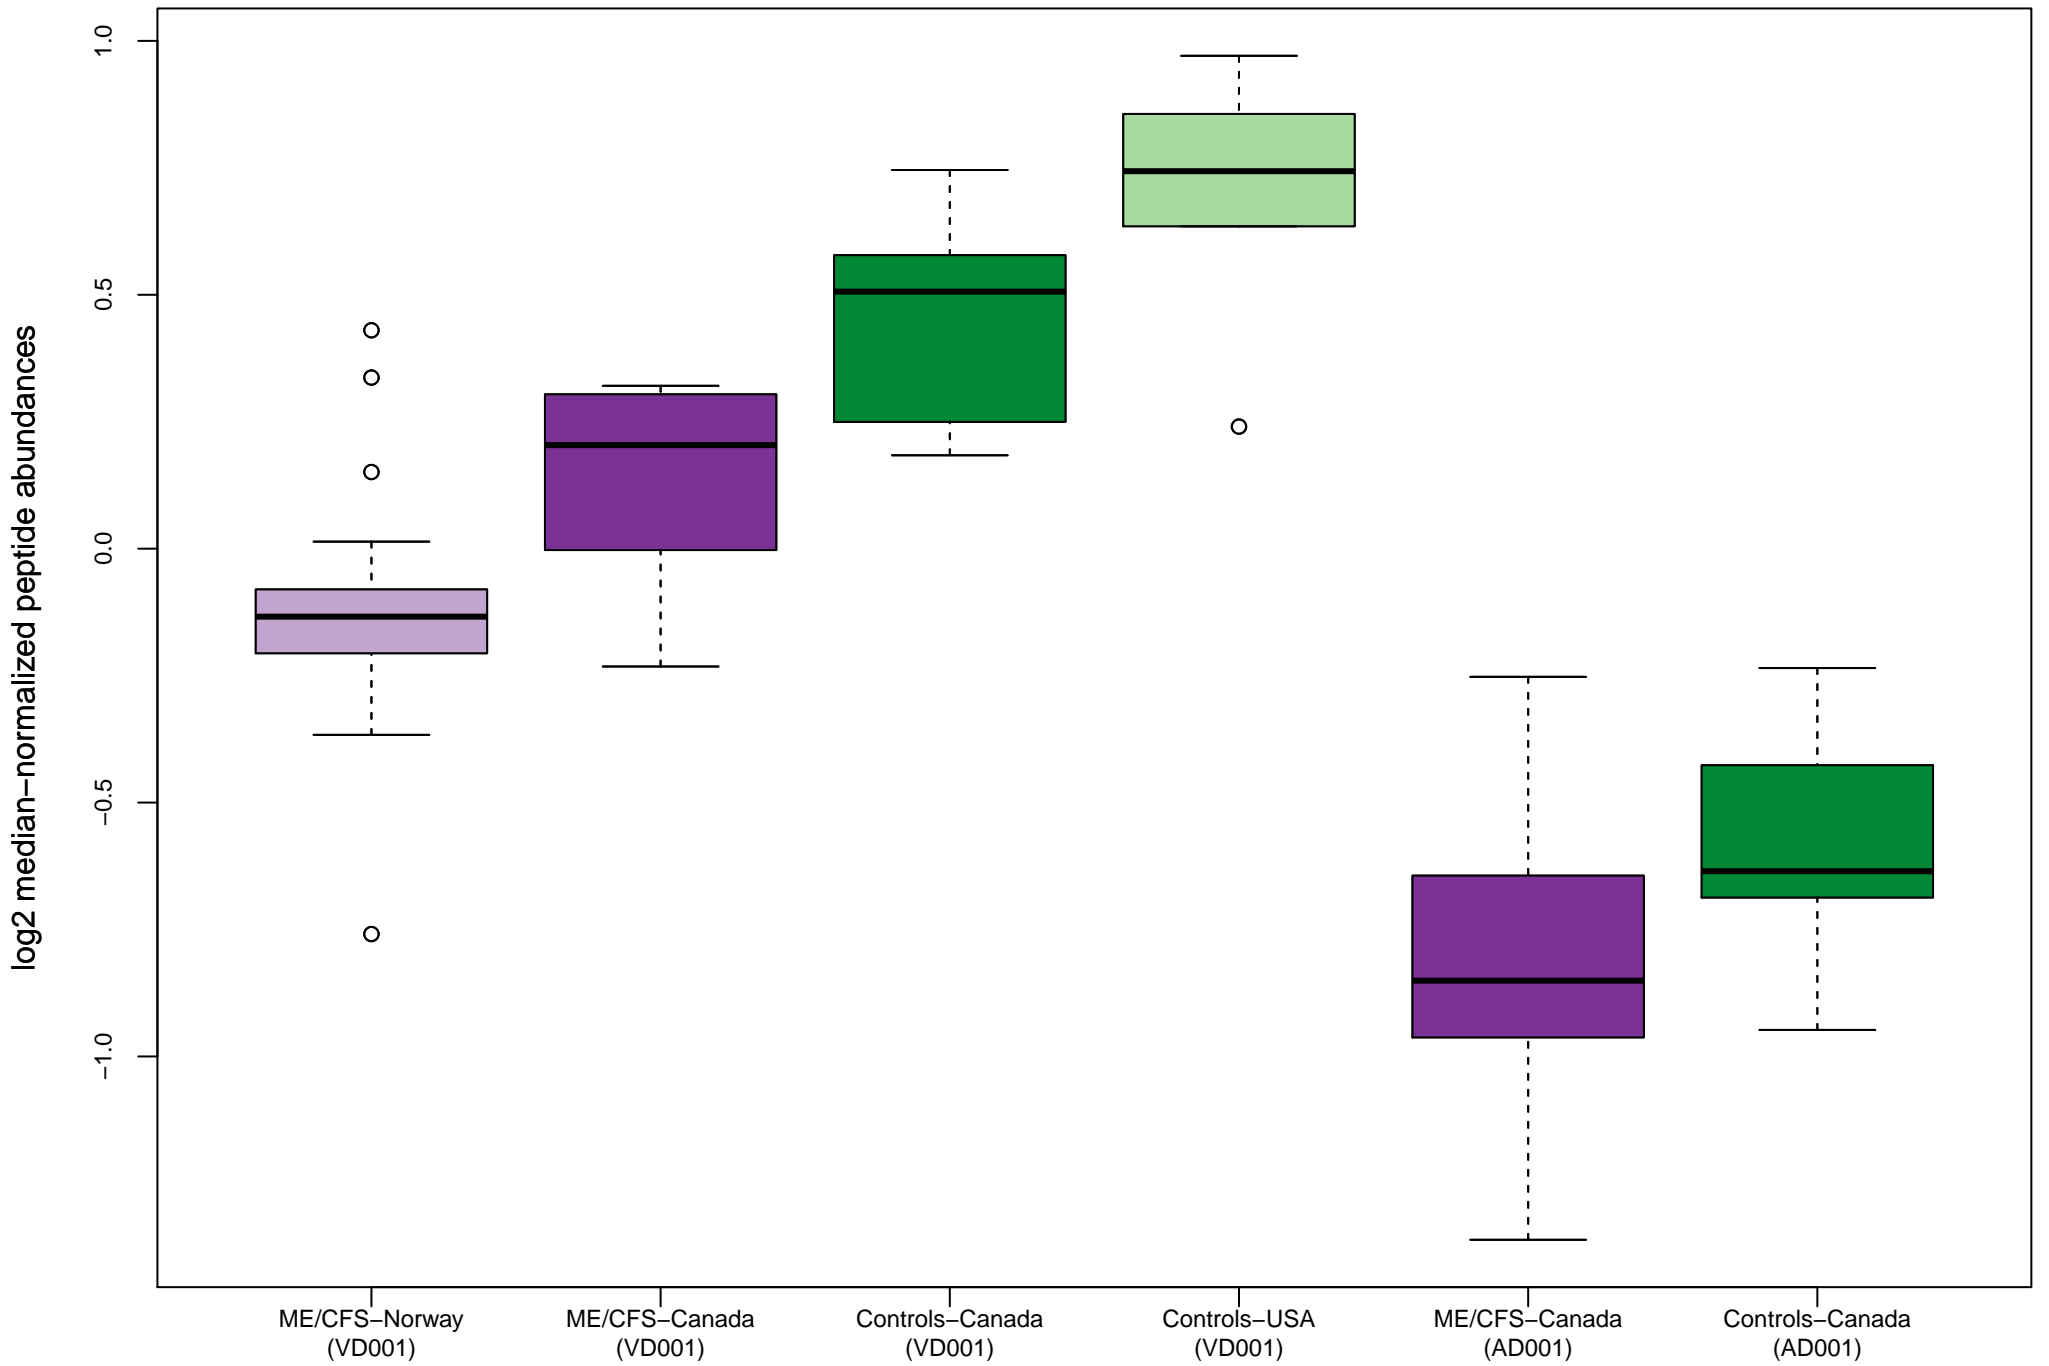

# FRAFLGNLRPLG

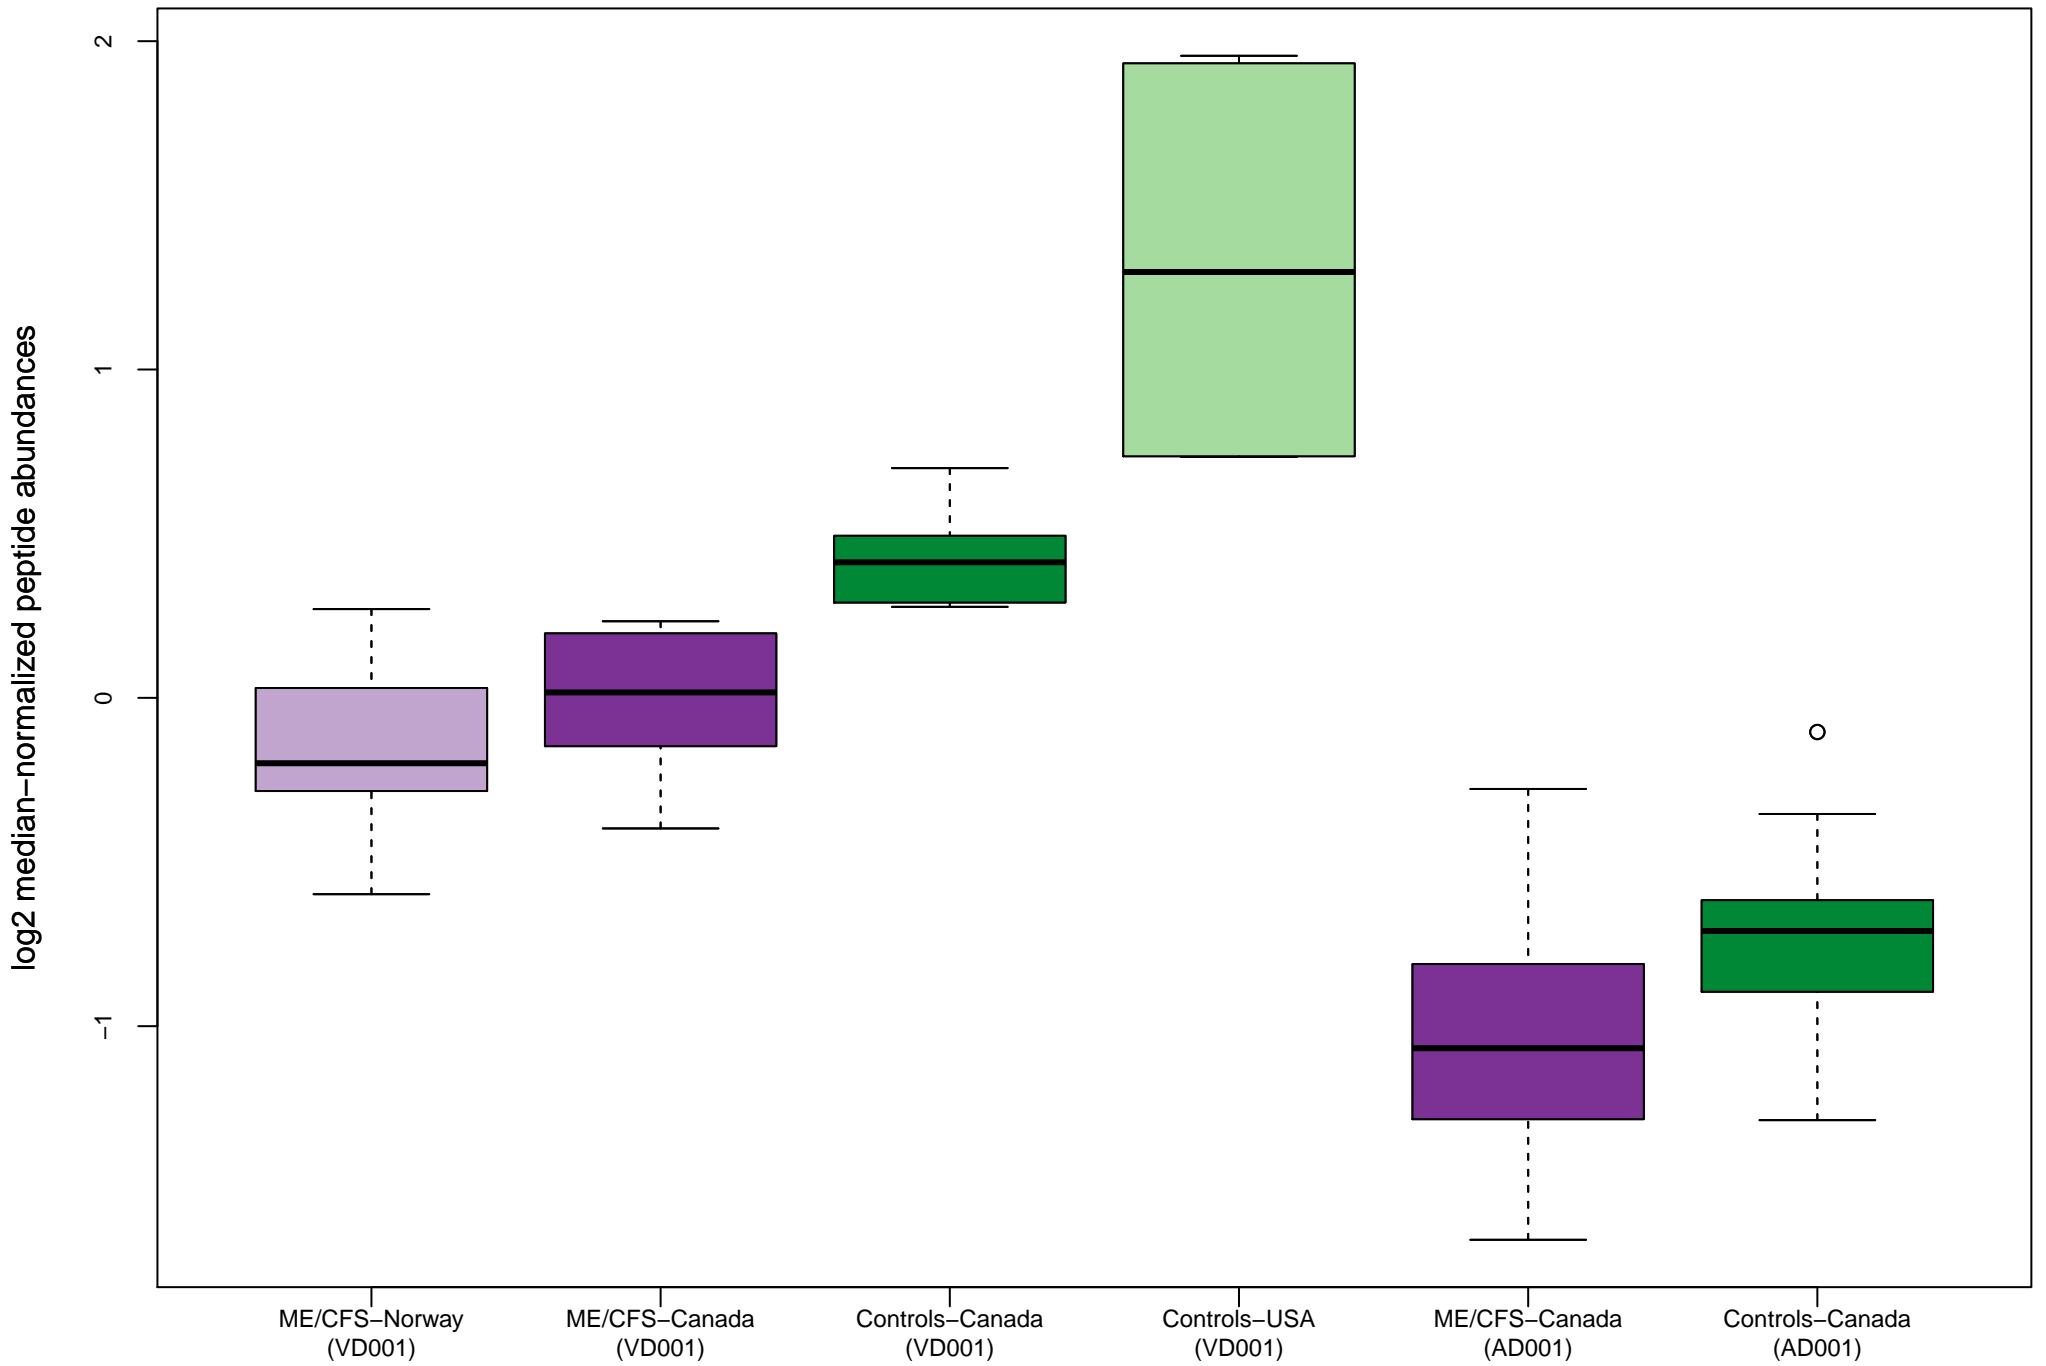

# FRGWPHLNKAS

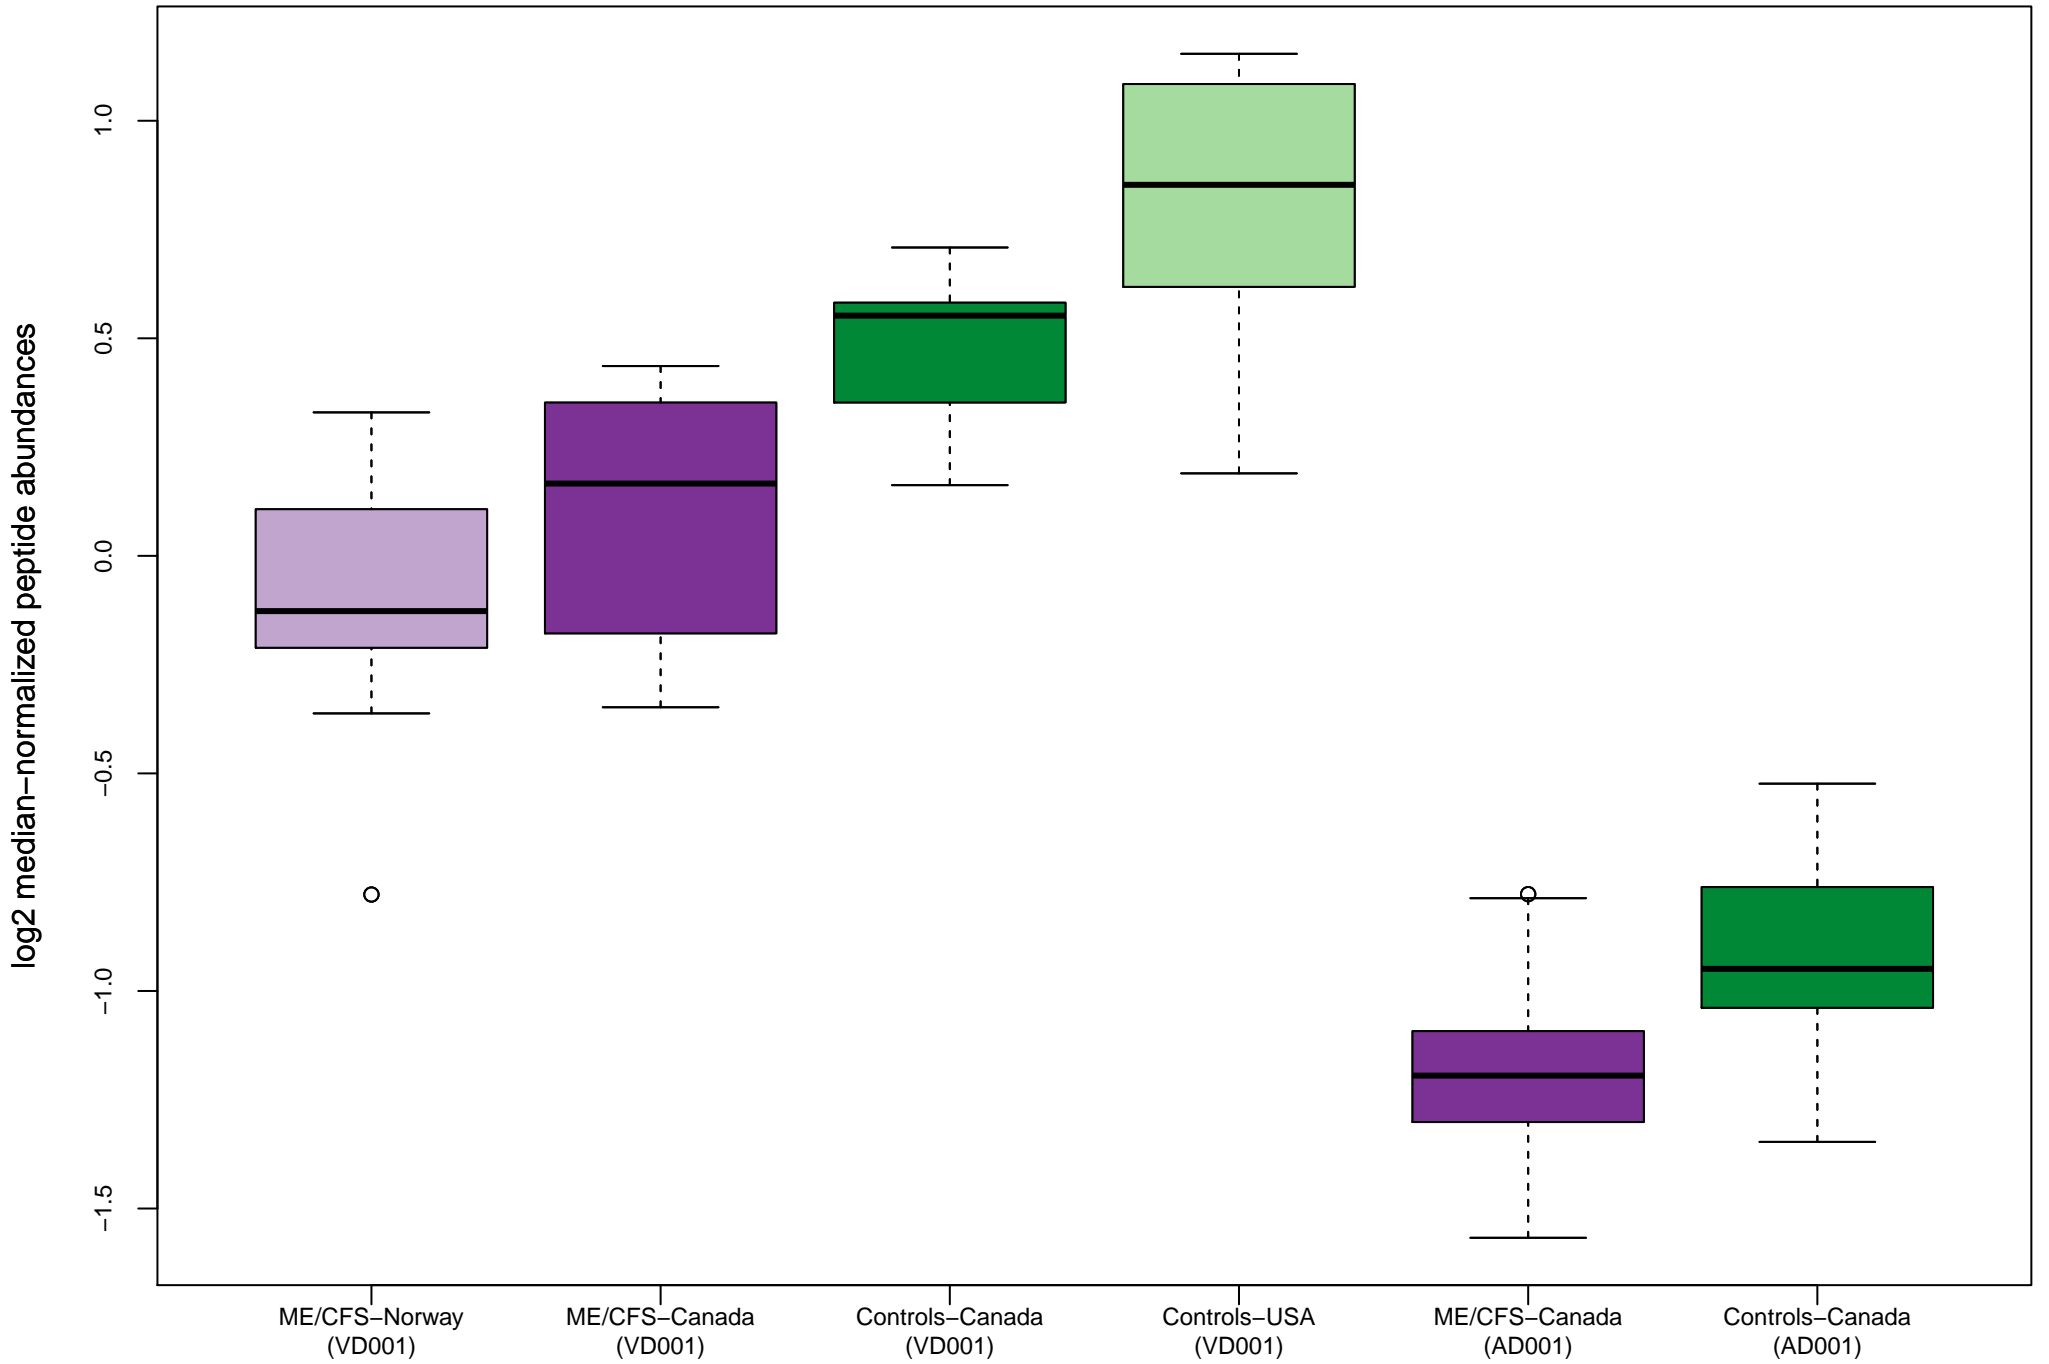



# FRVFRARPLSG

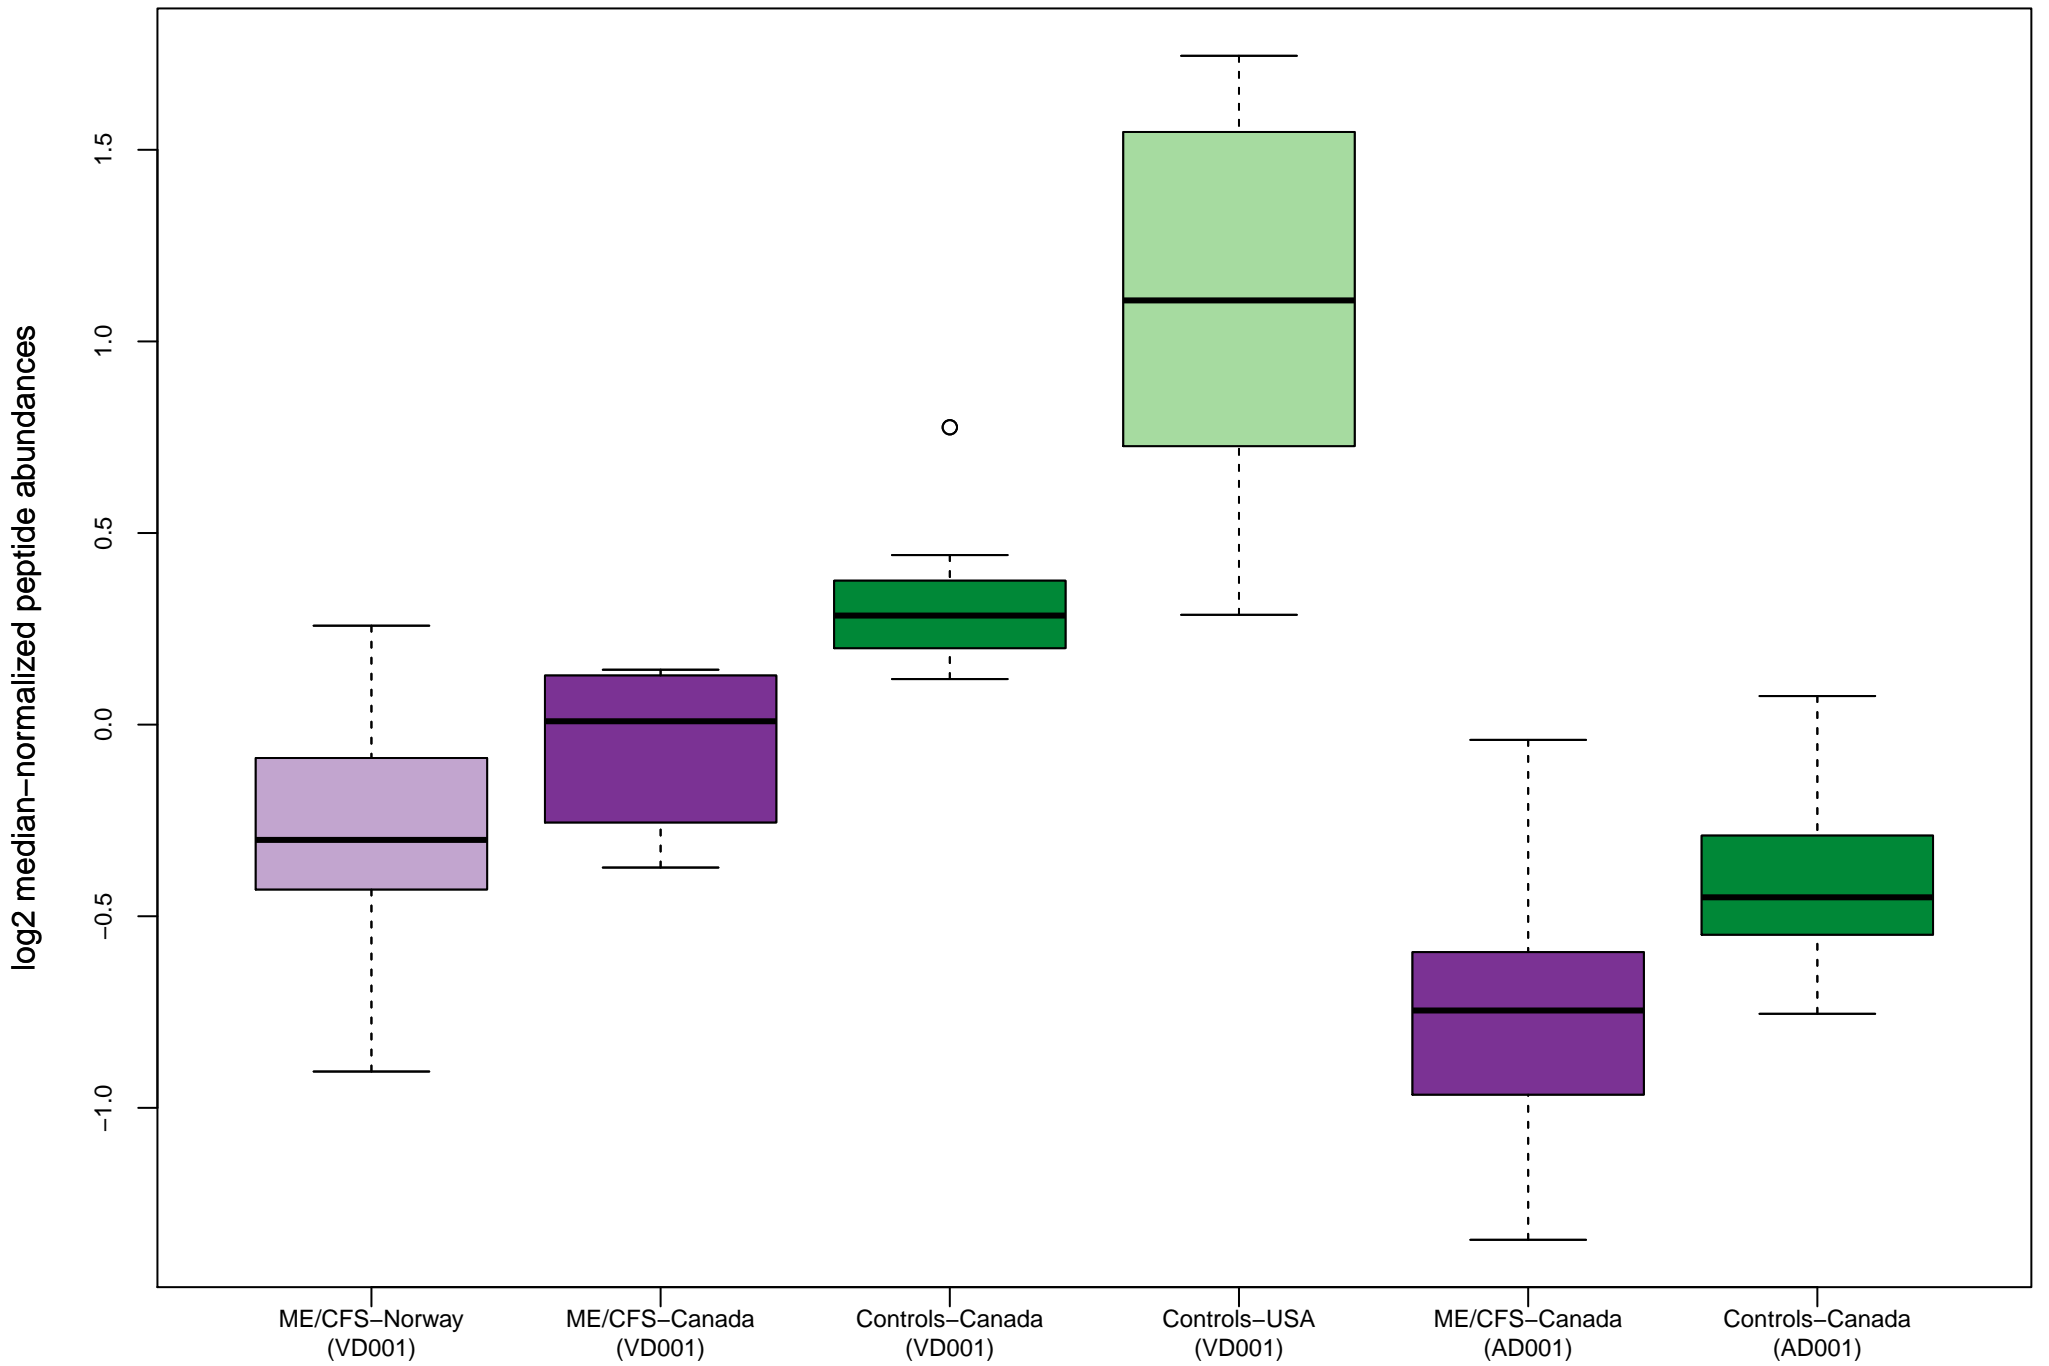

# FWRRVLSNKASV

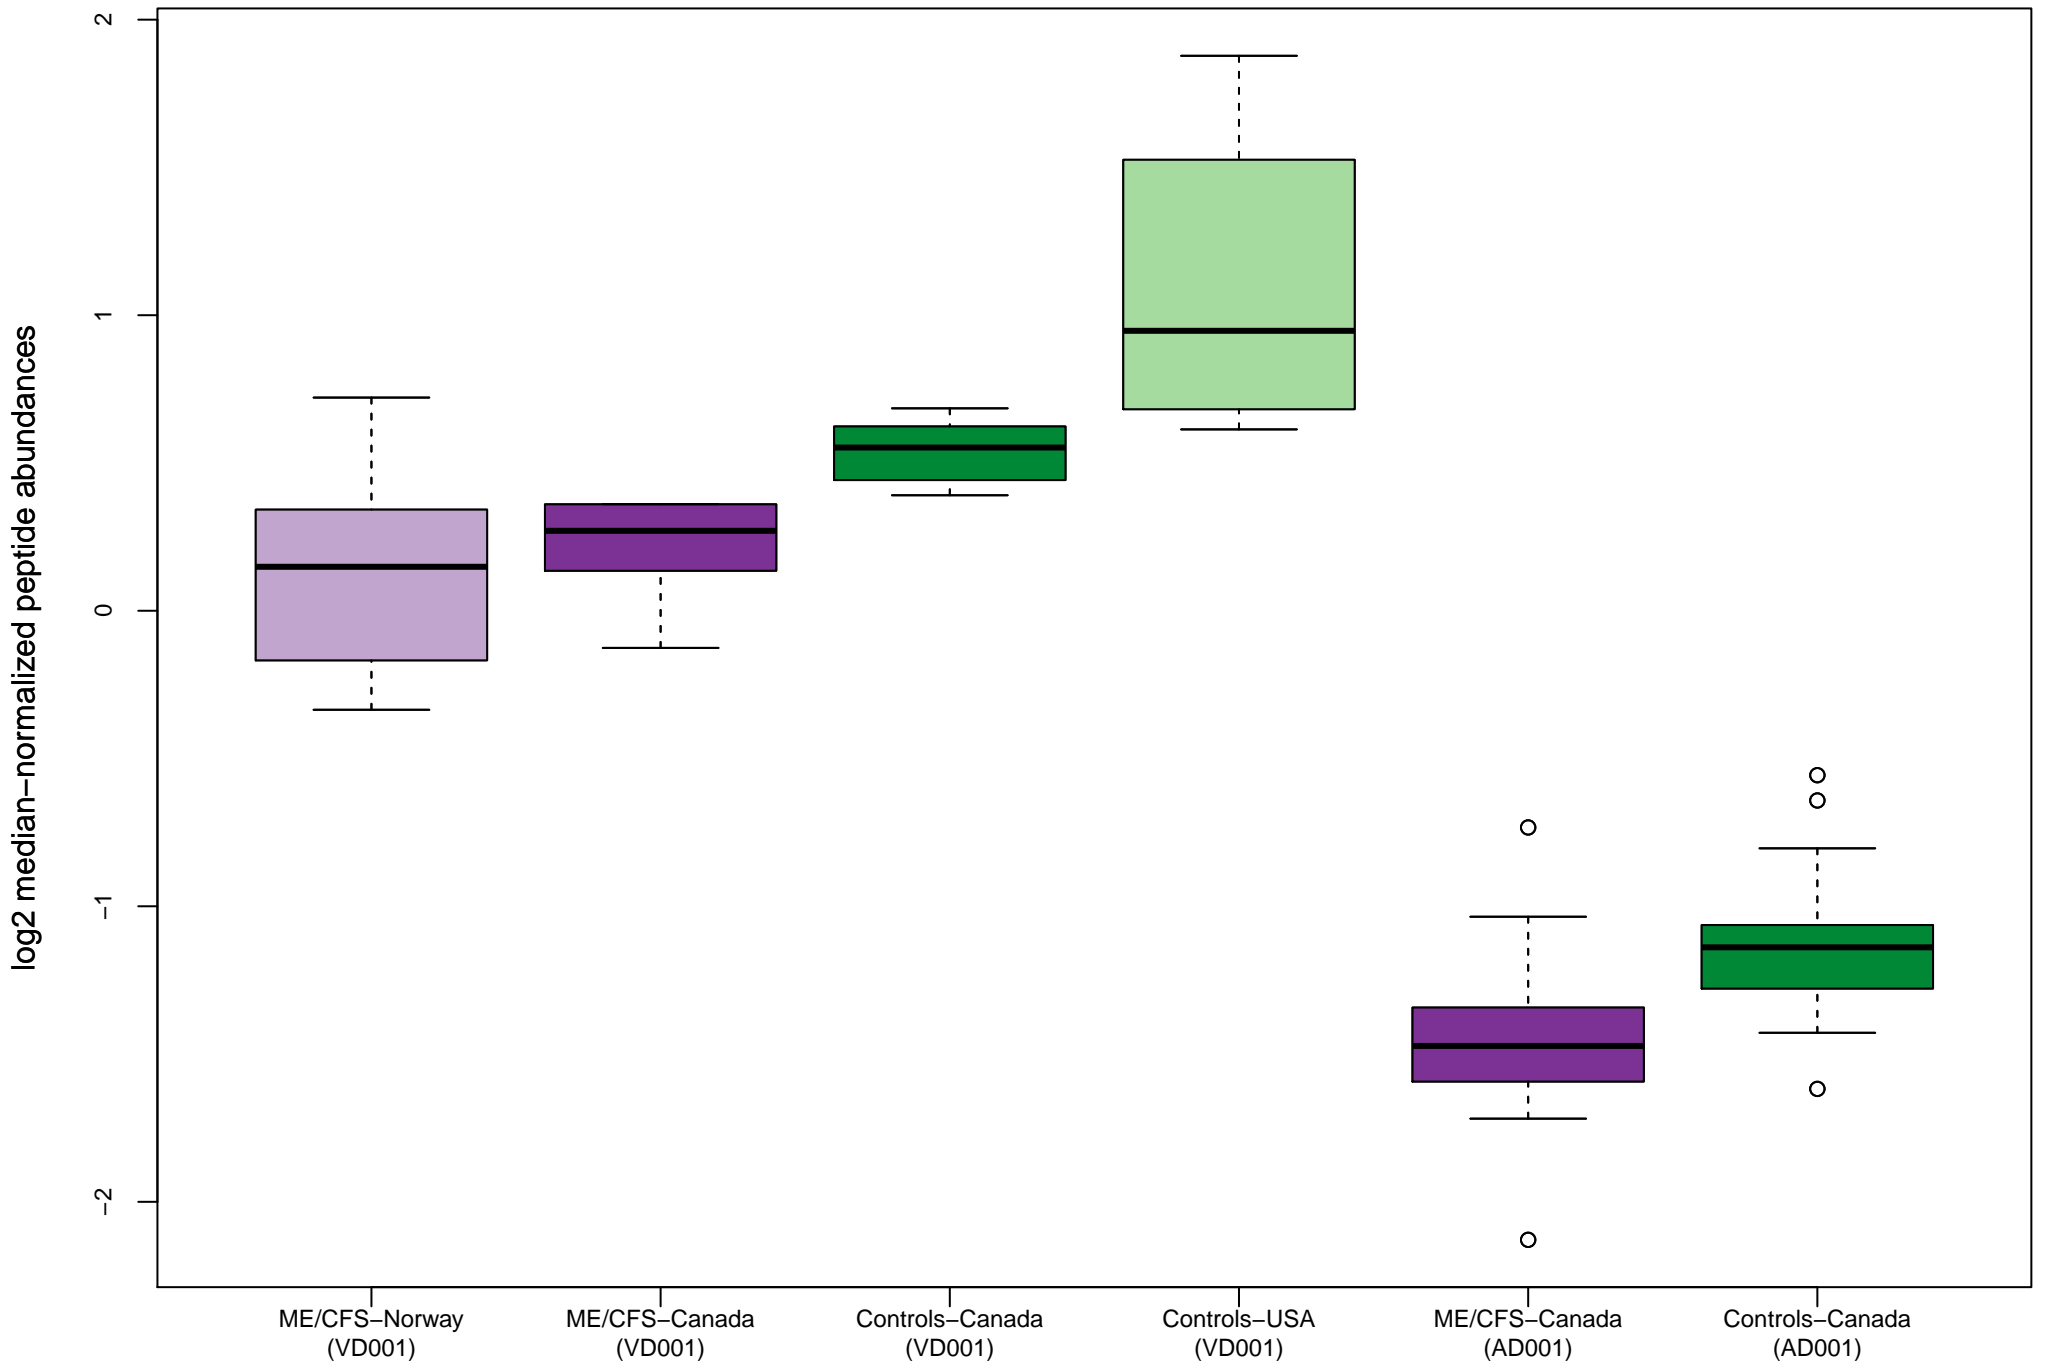

# GFSFRKVRVLAG

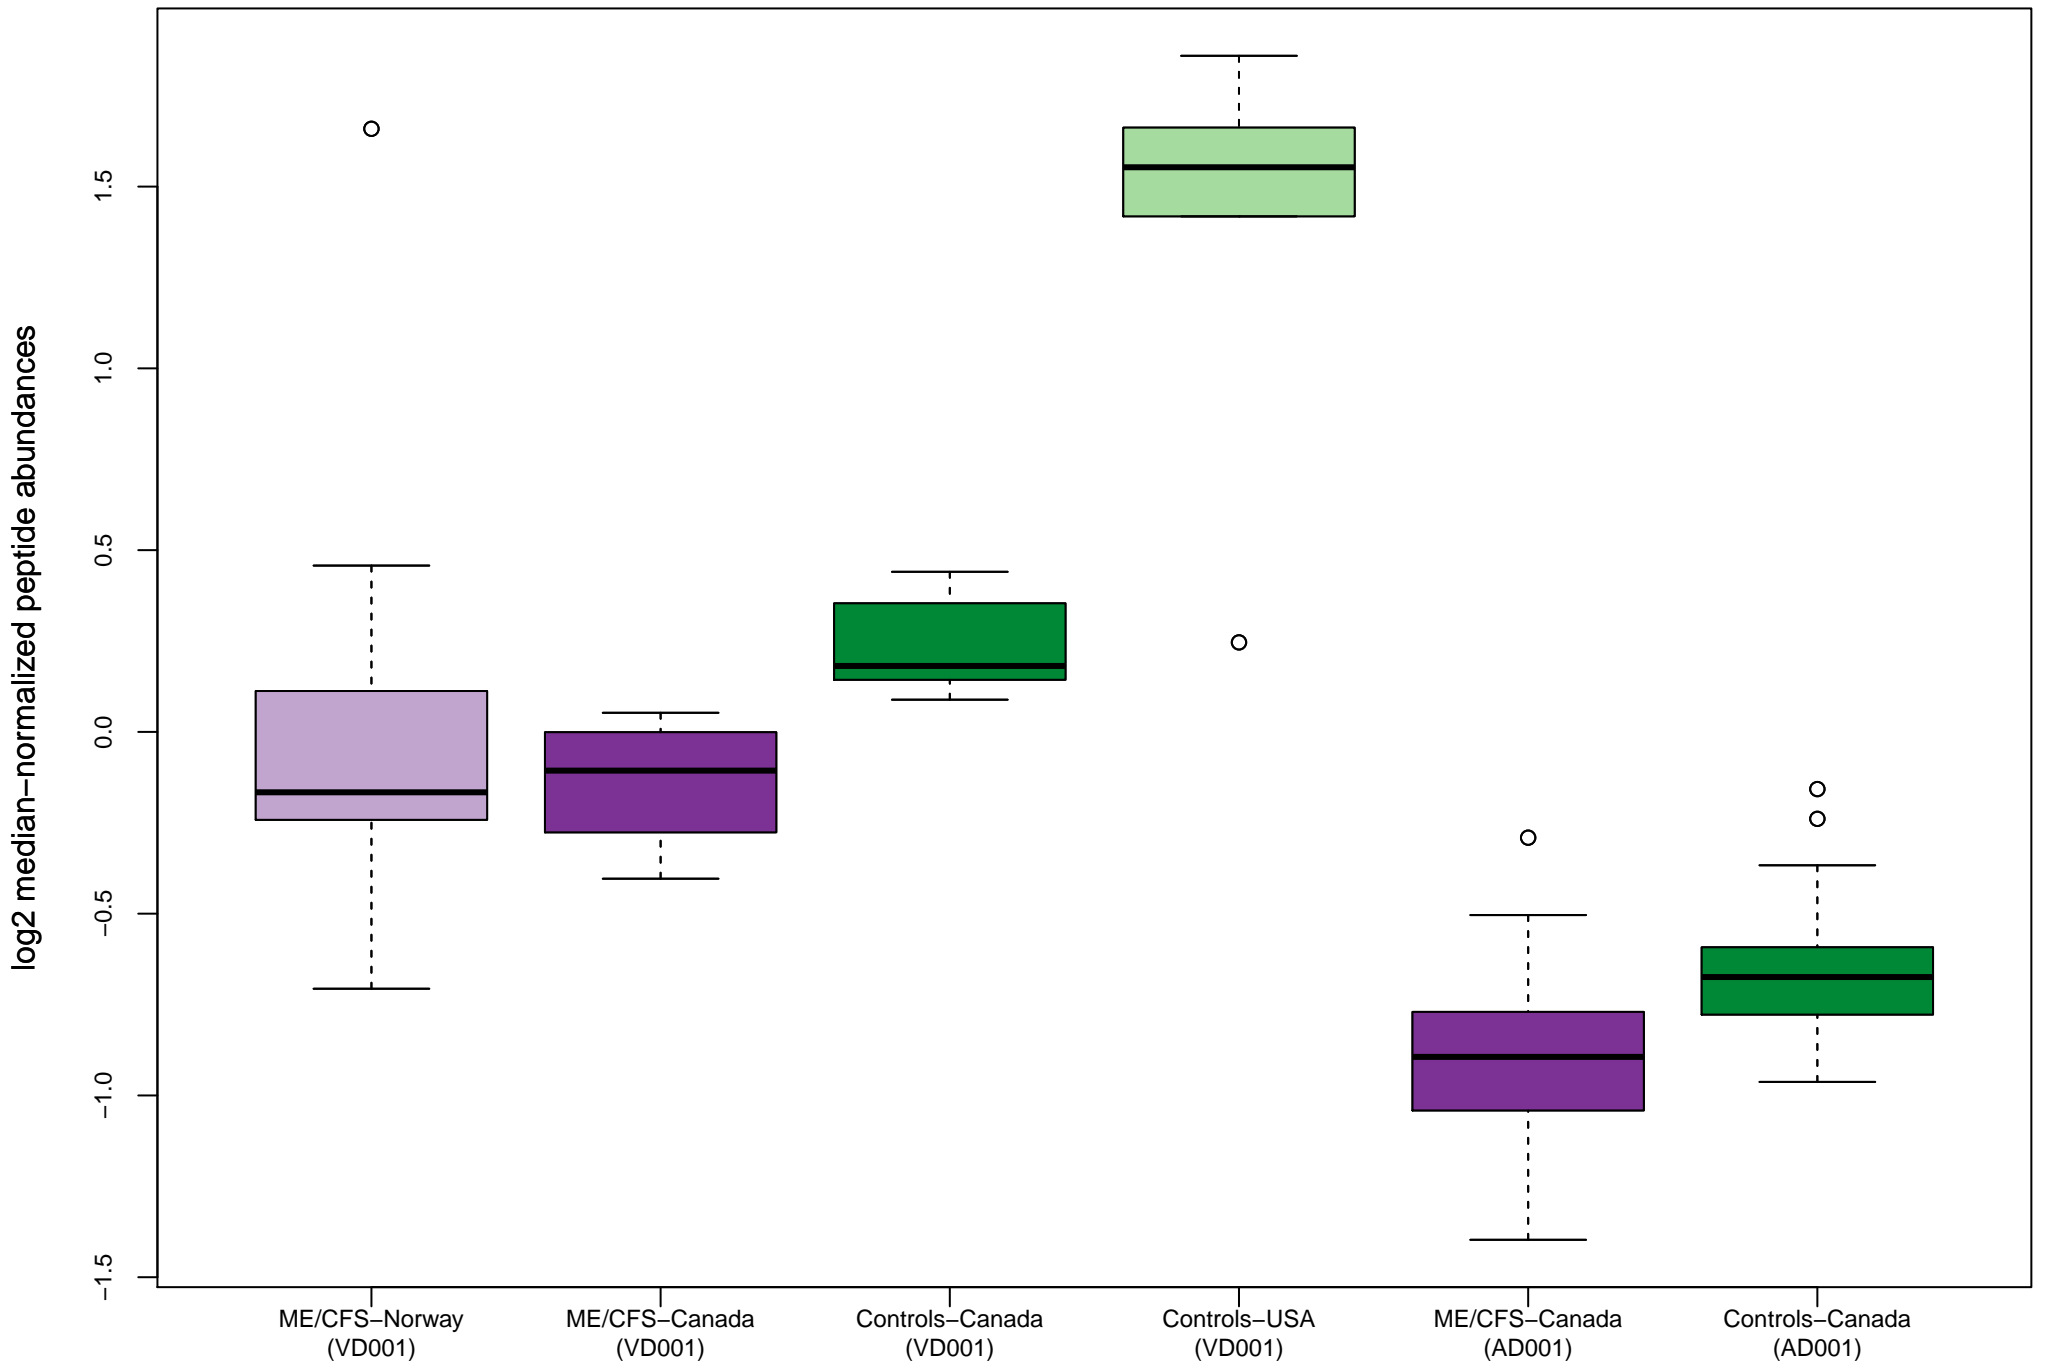

# GRLSRYFRAGVS

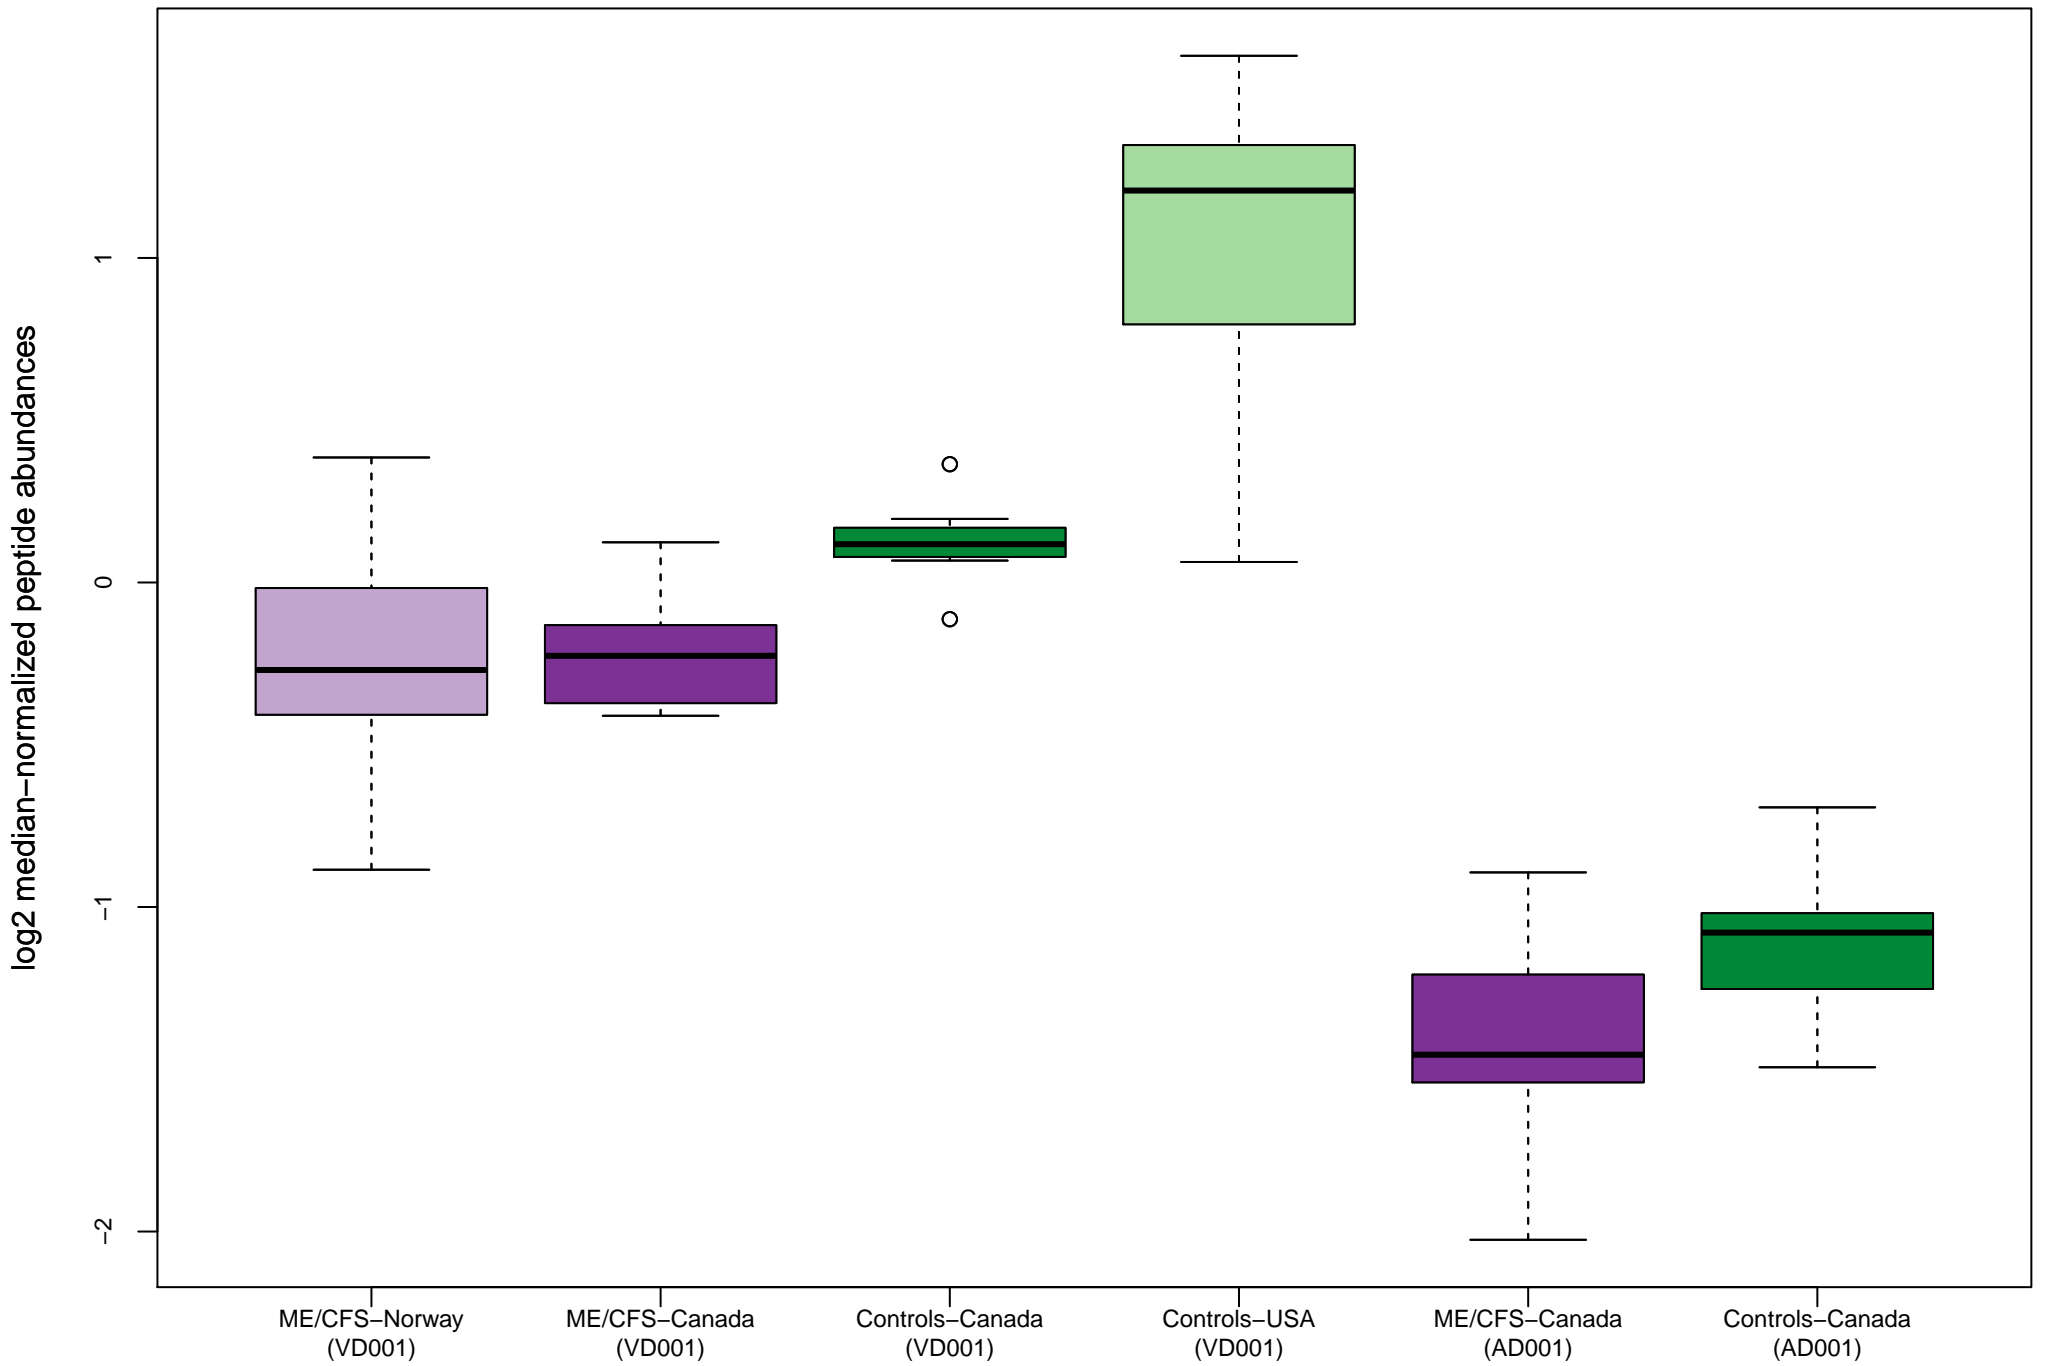

# GRWRGYKLSVLS

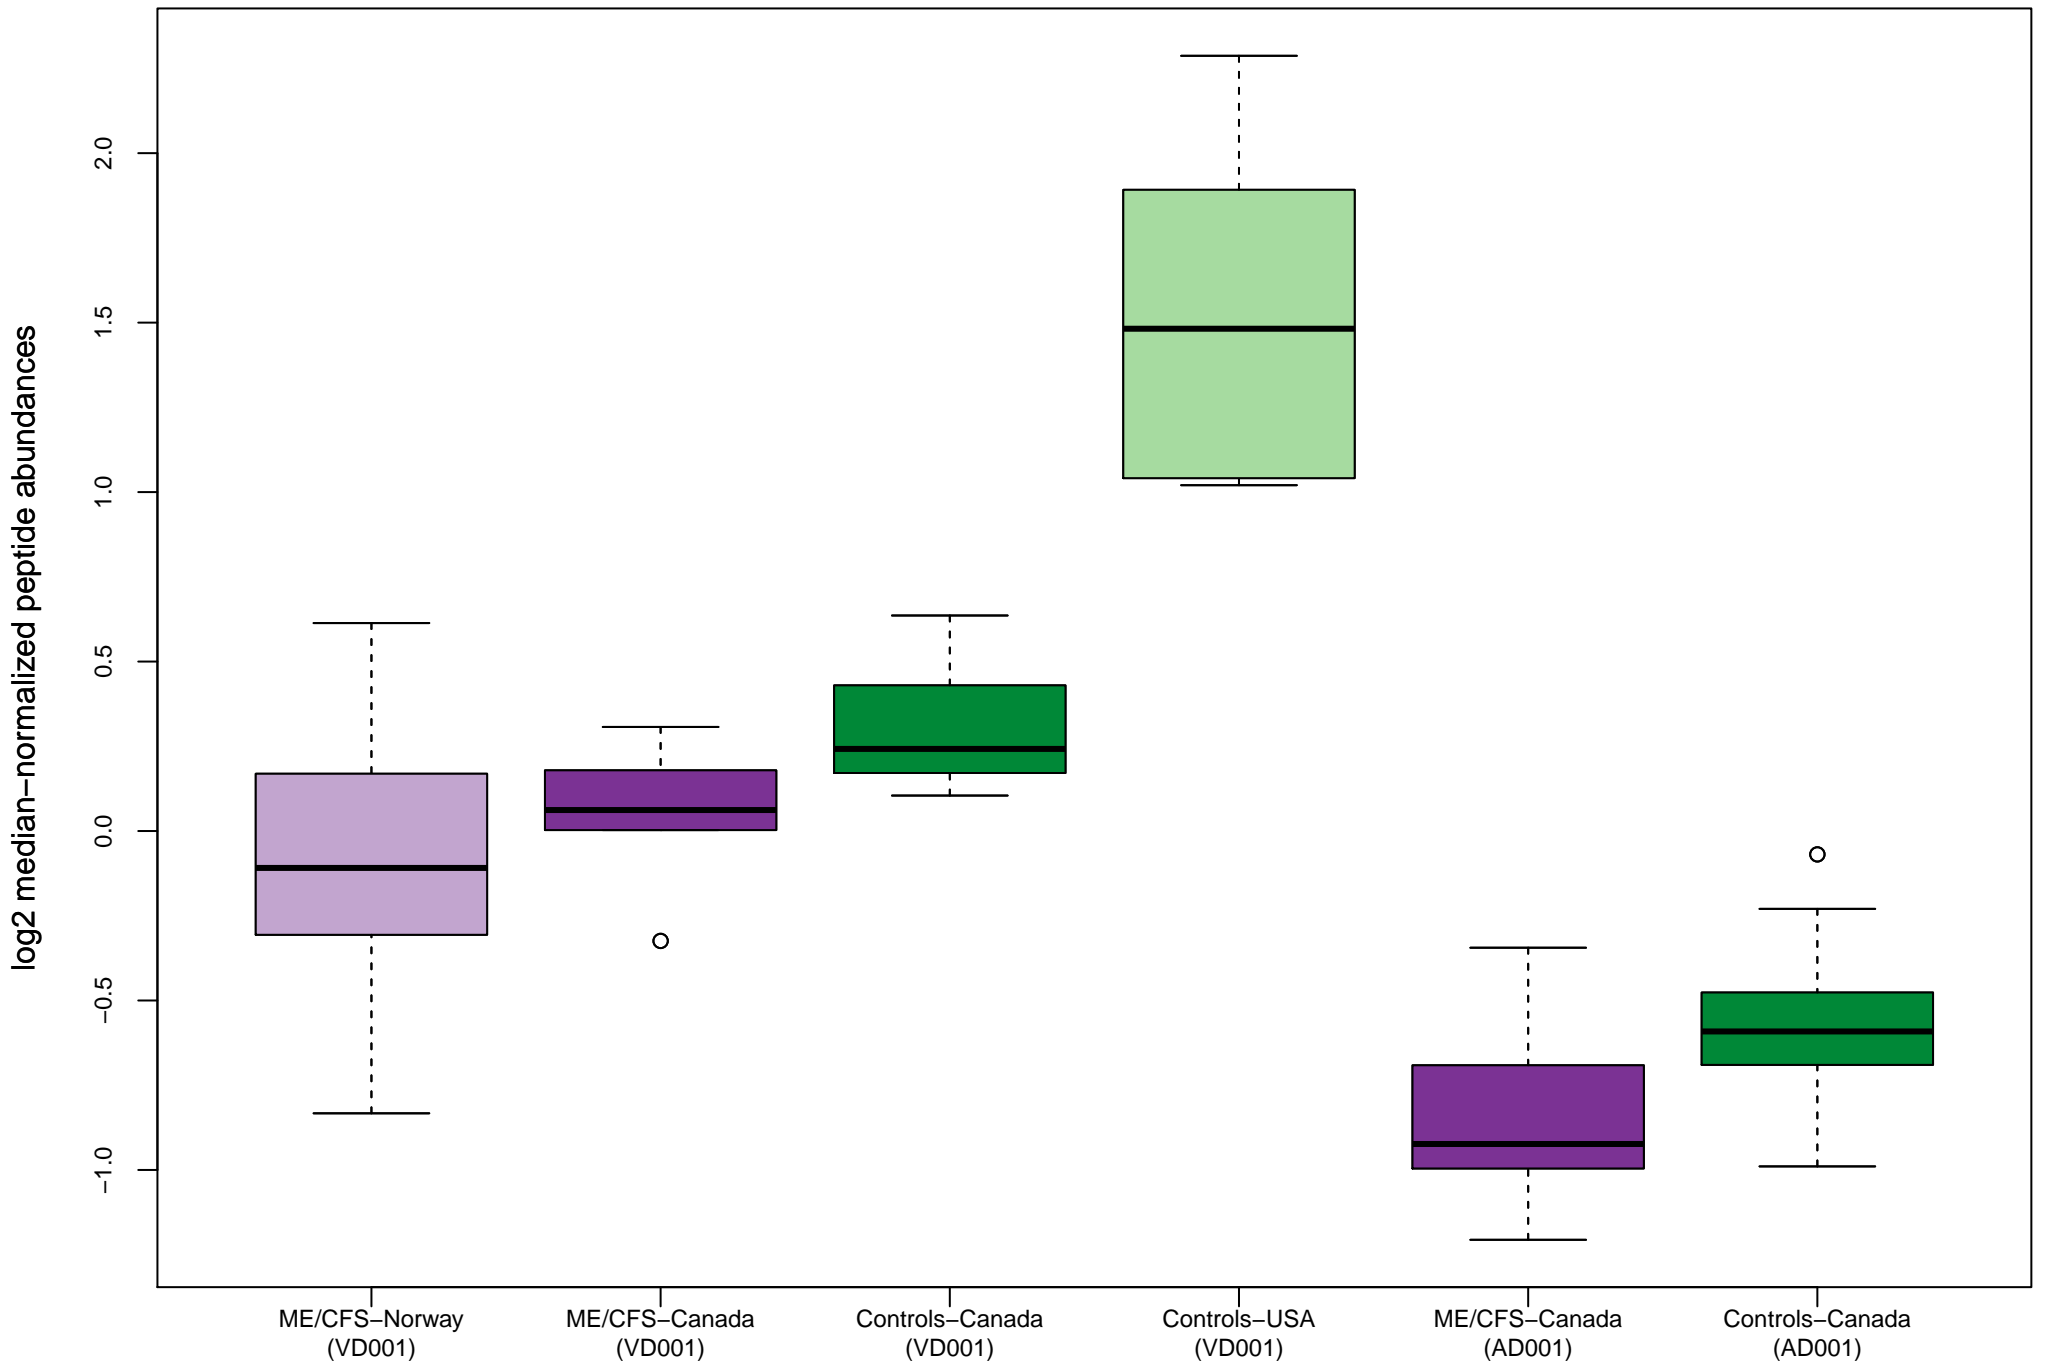

# KLLAYKALSGAG

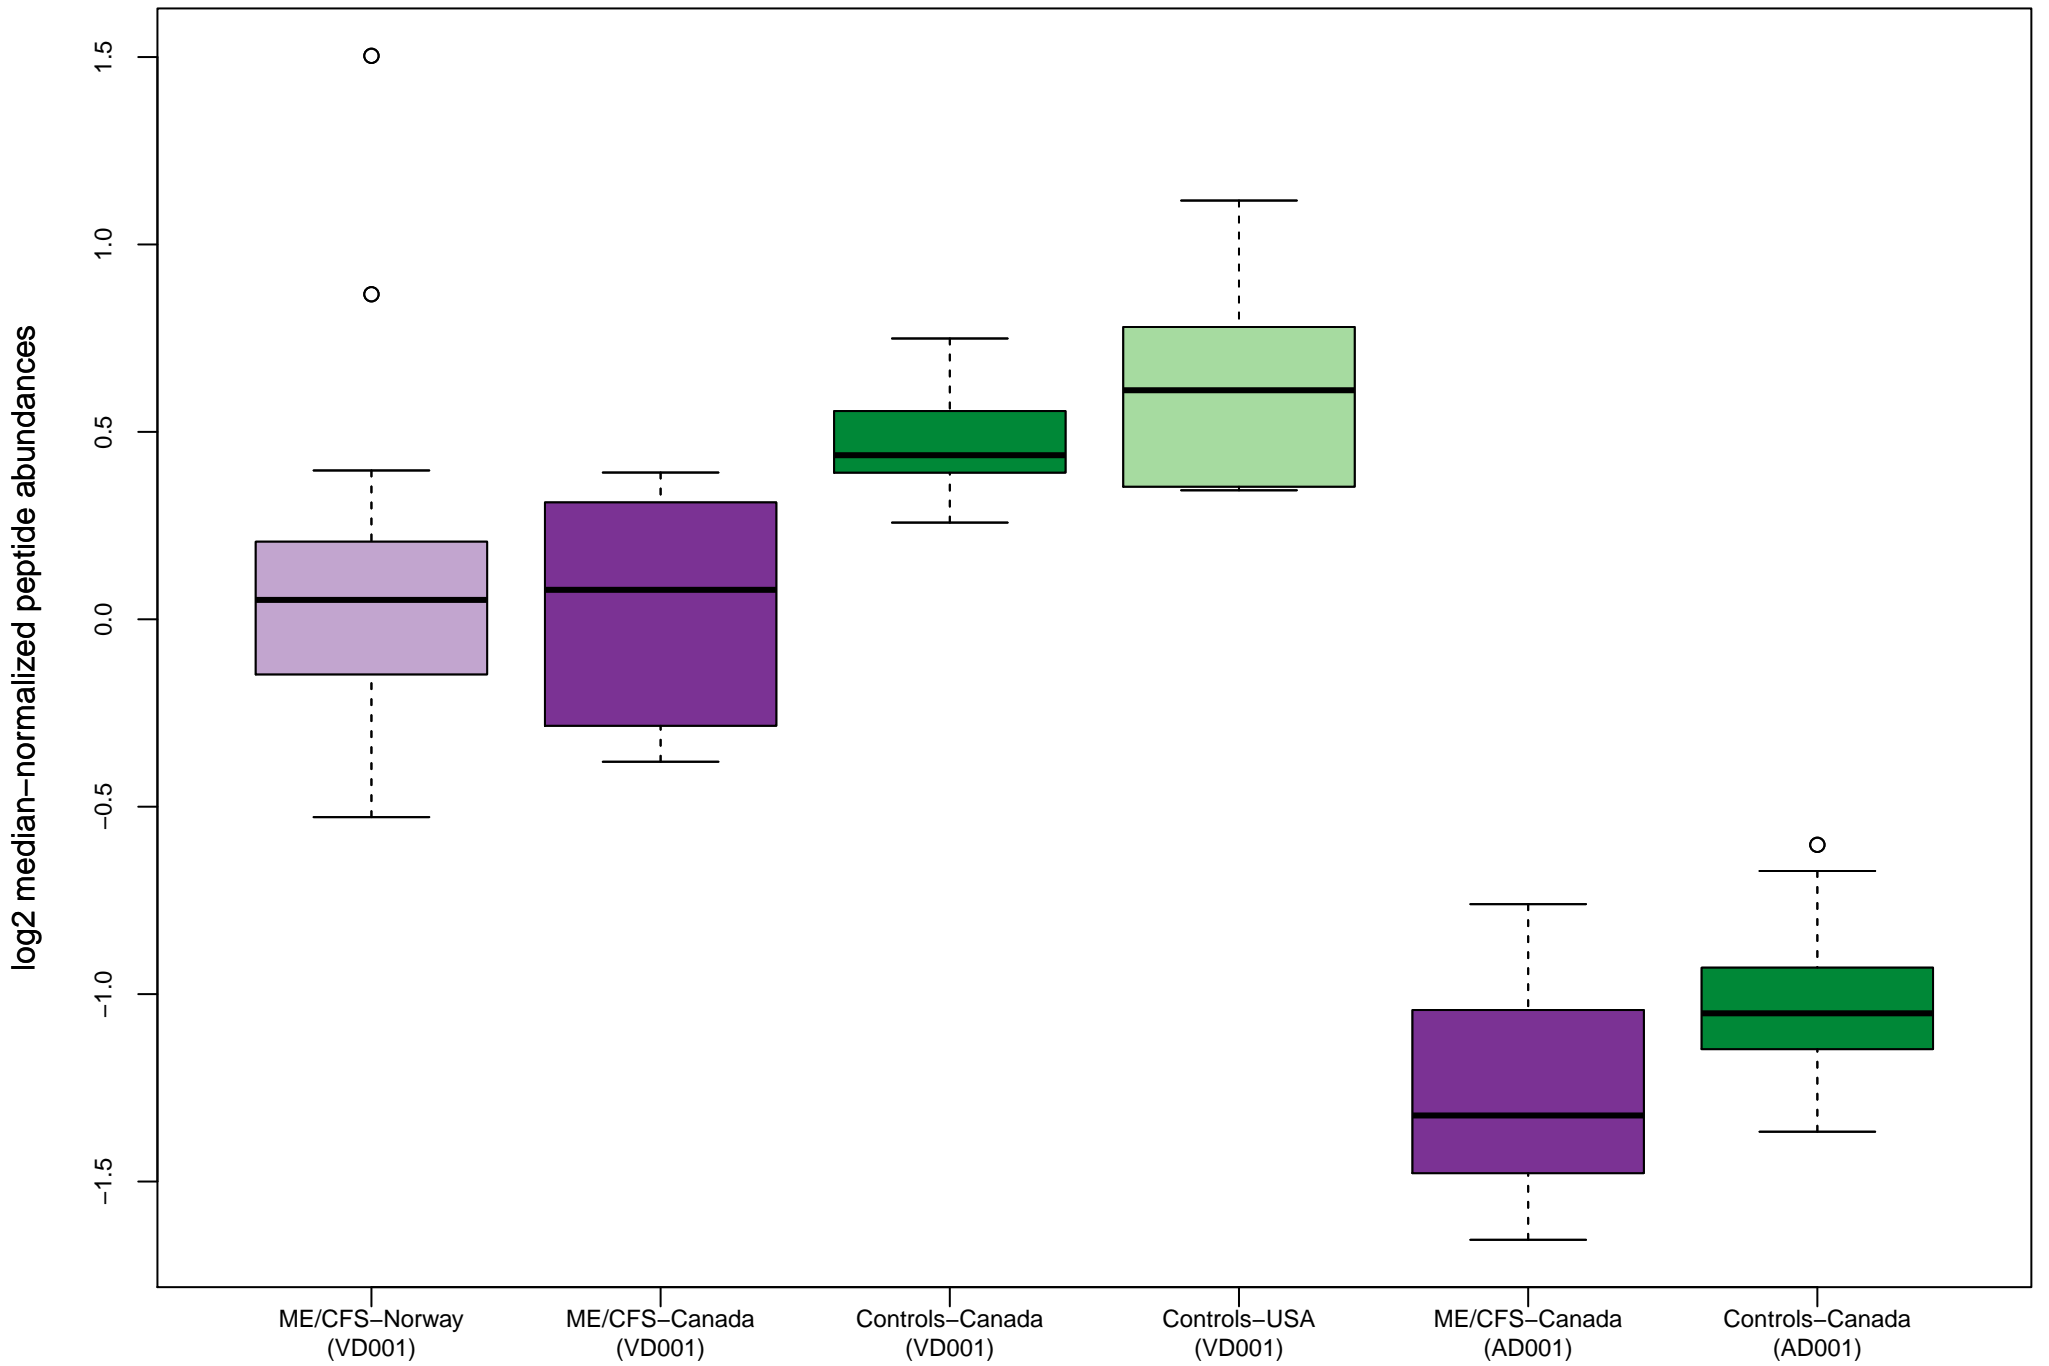

# KVAPLFRLRPLS

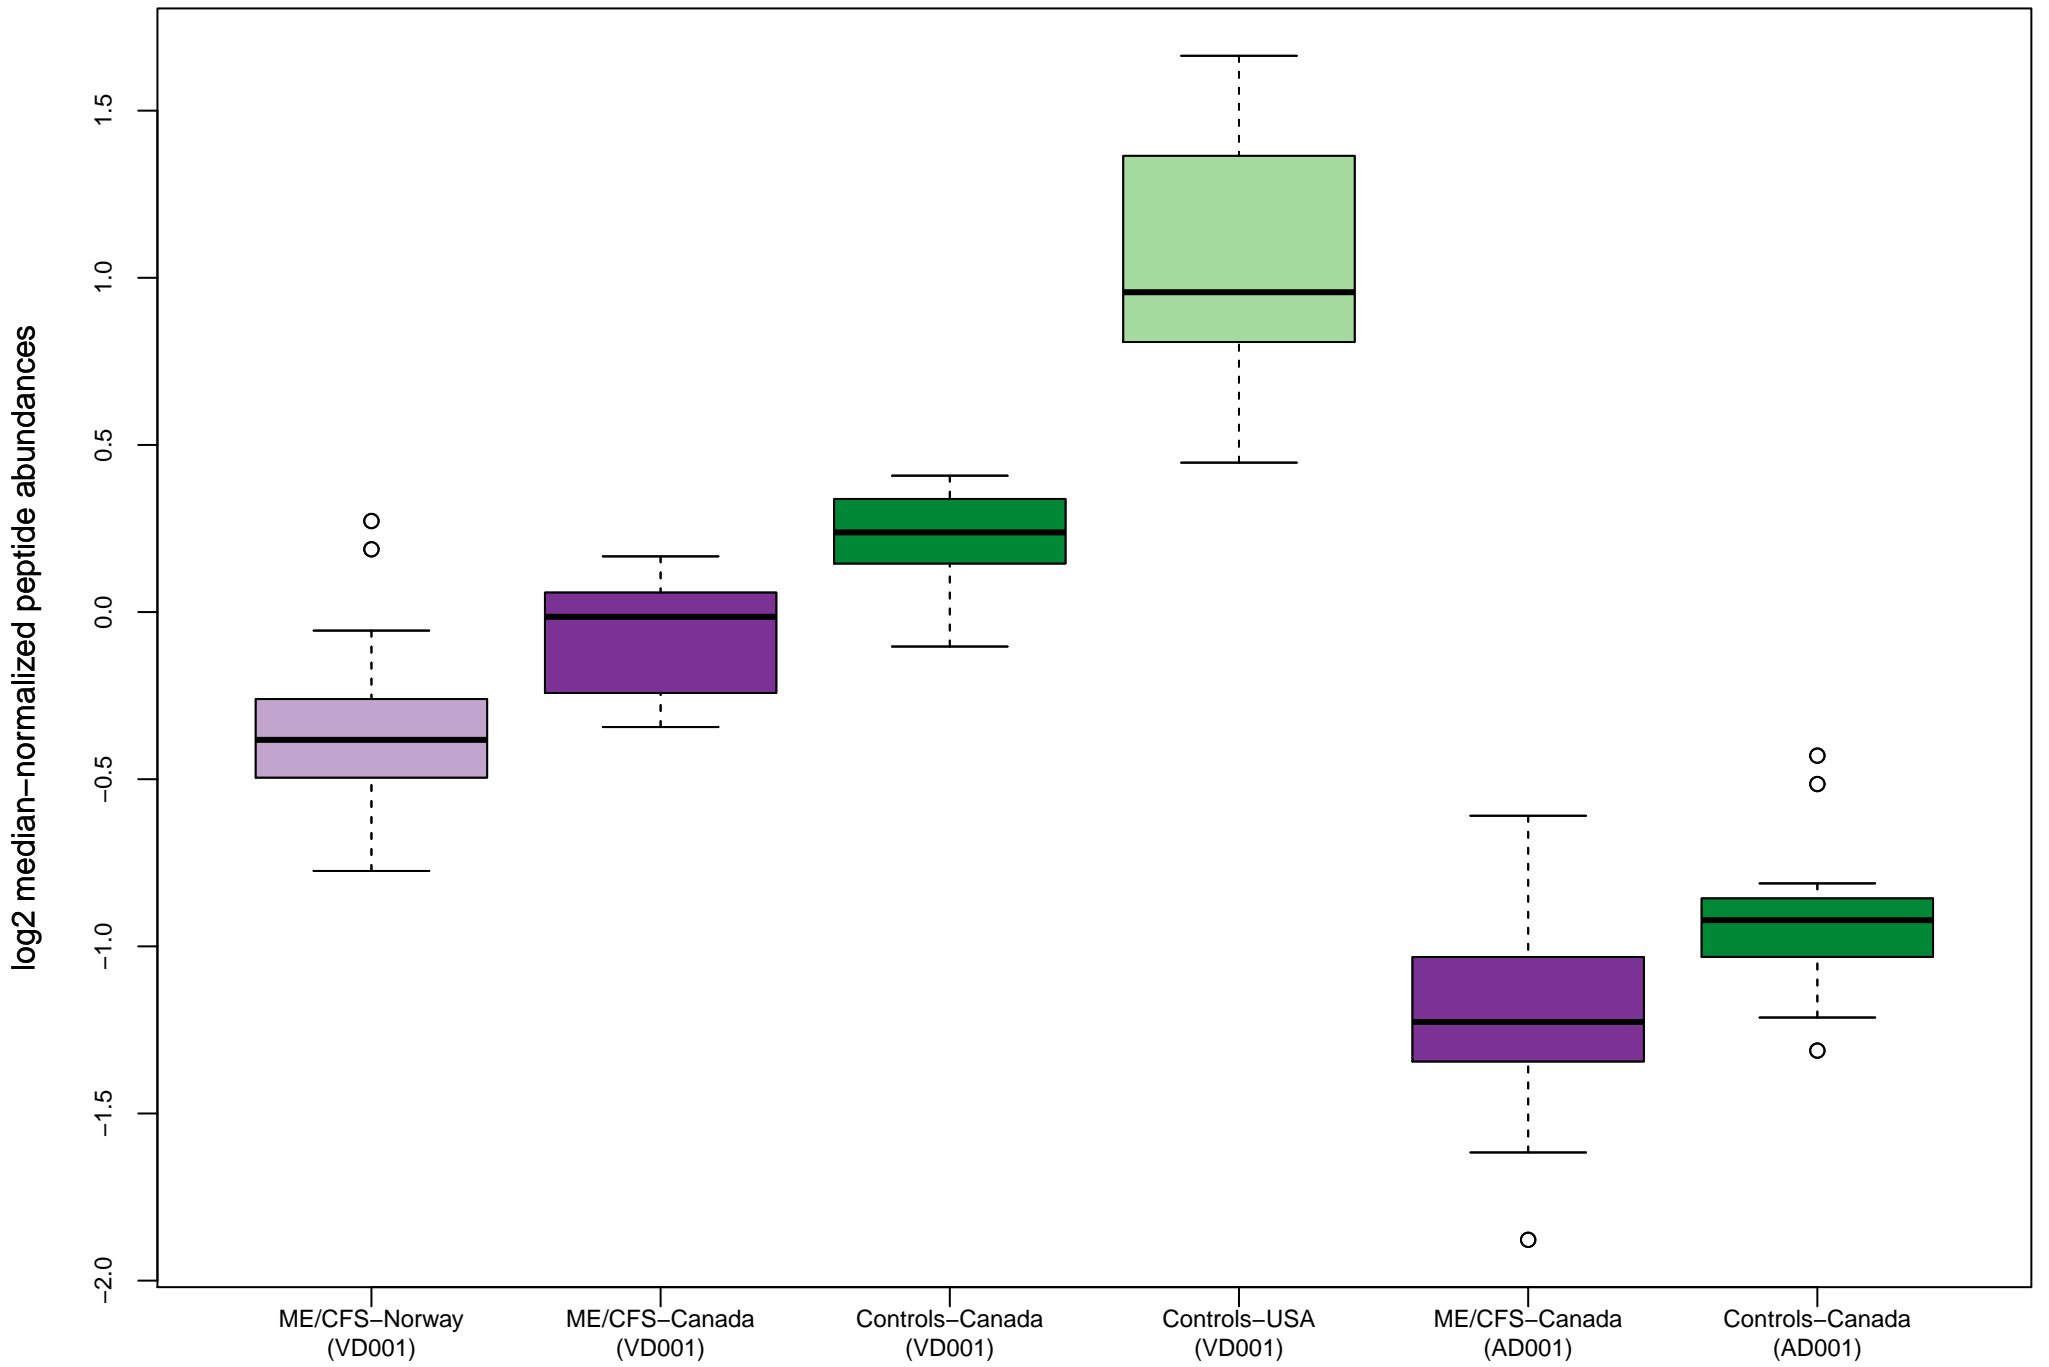

# LFLQFRNRLGAS

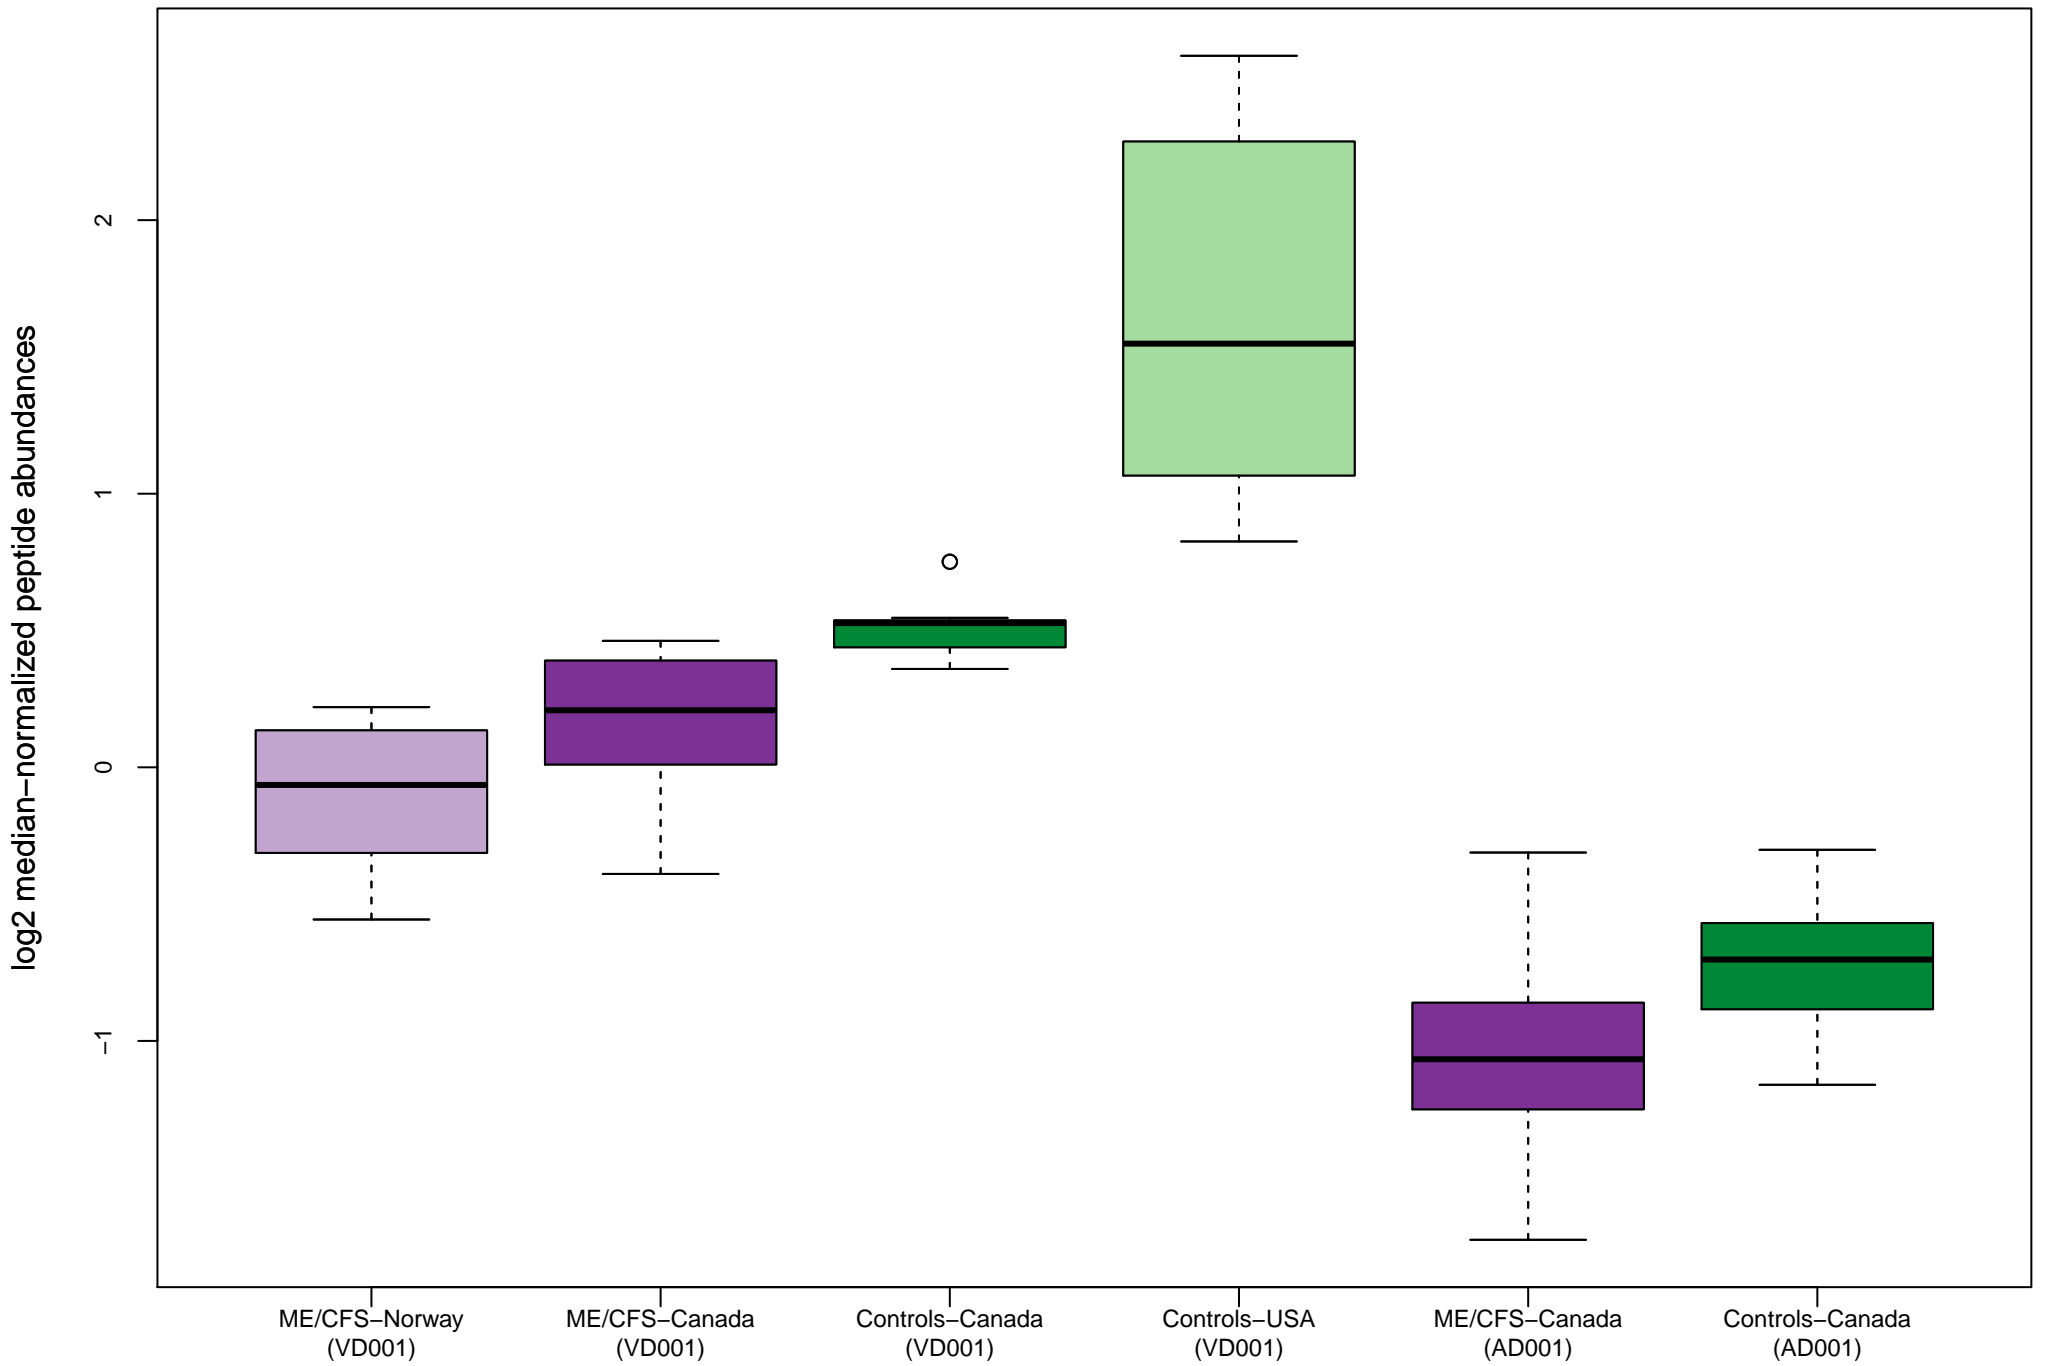



# LGVFRYSRPWKA

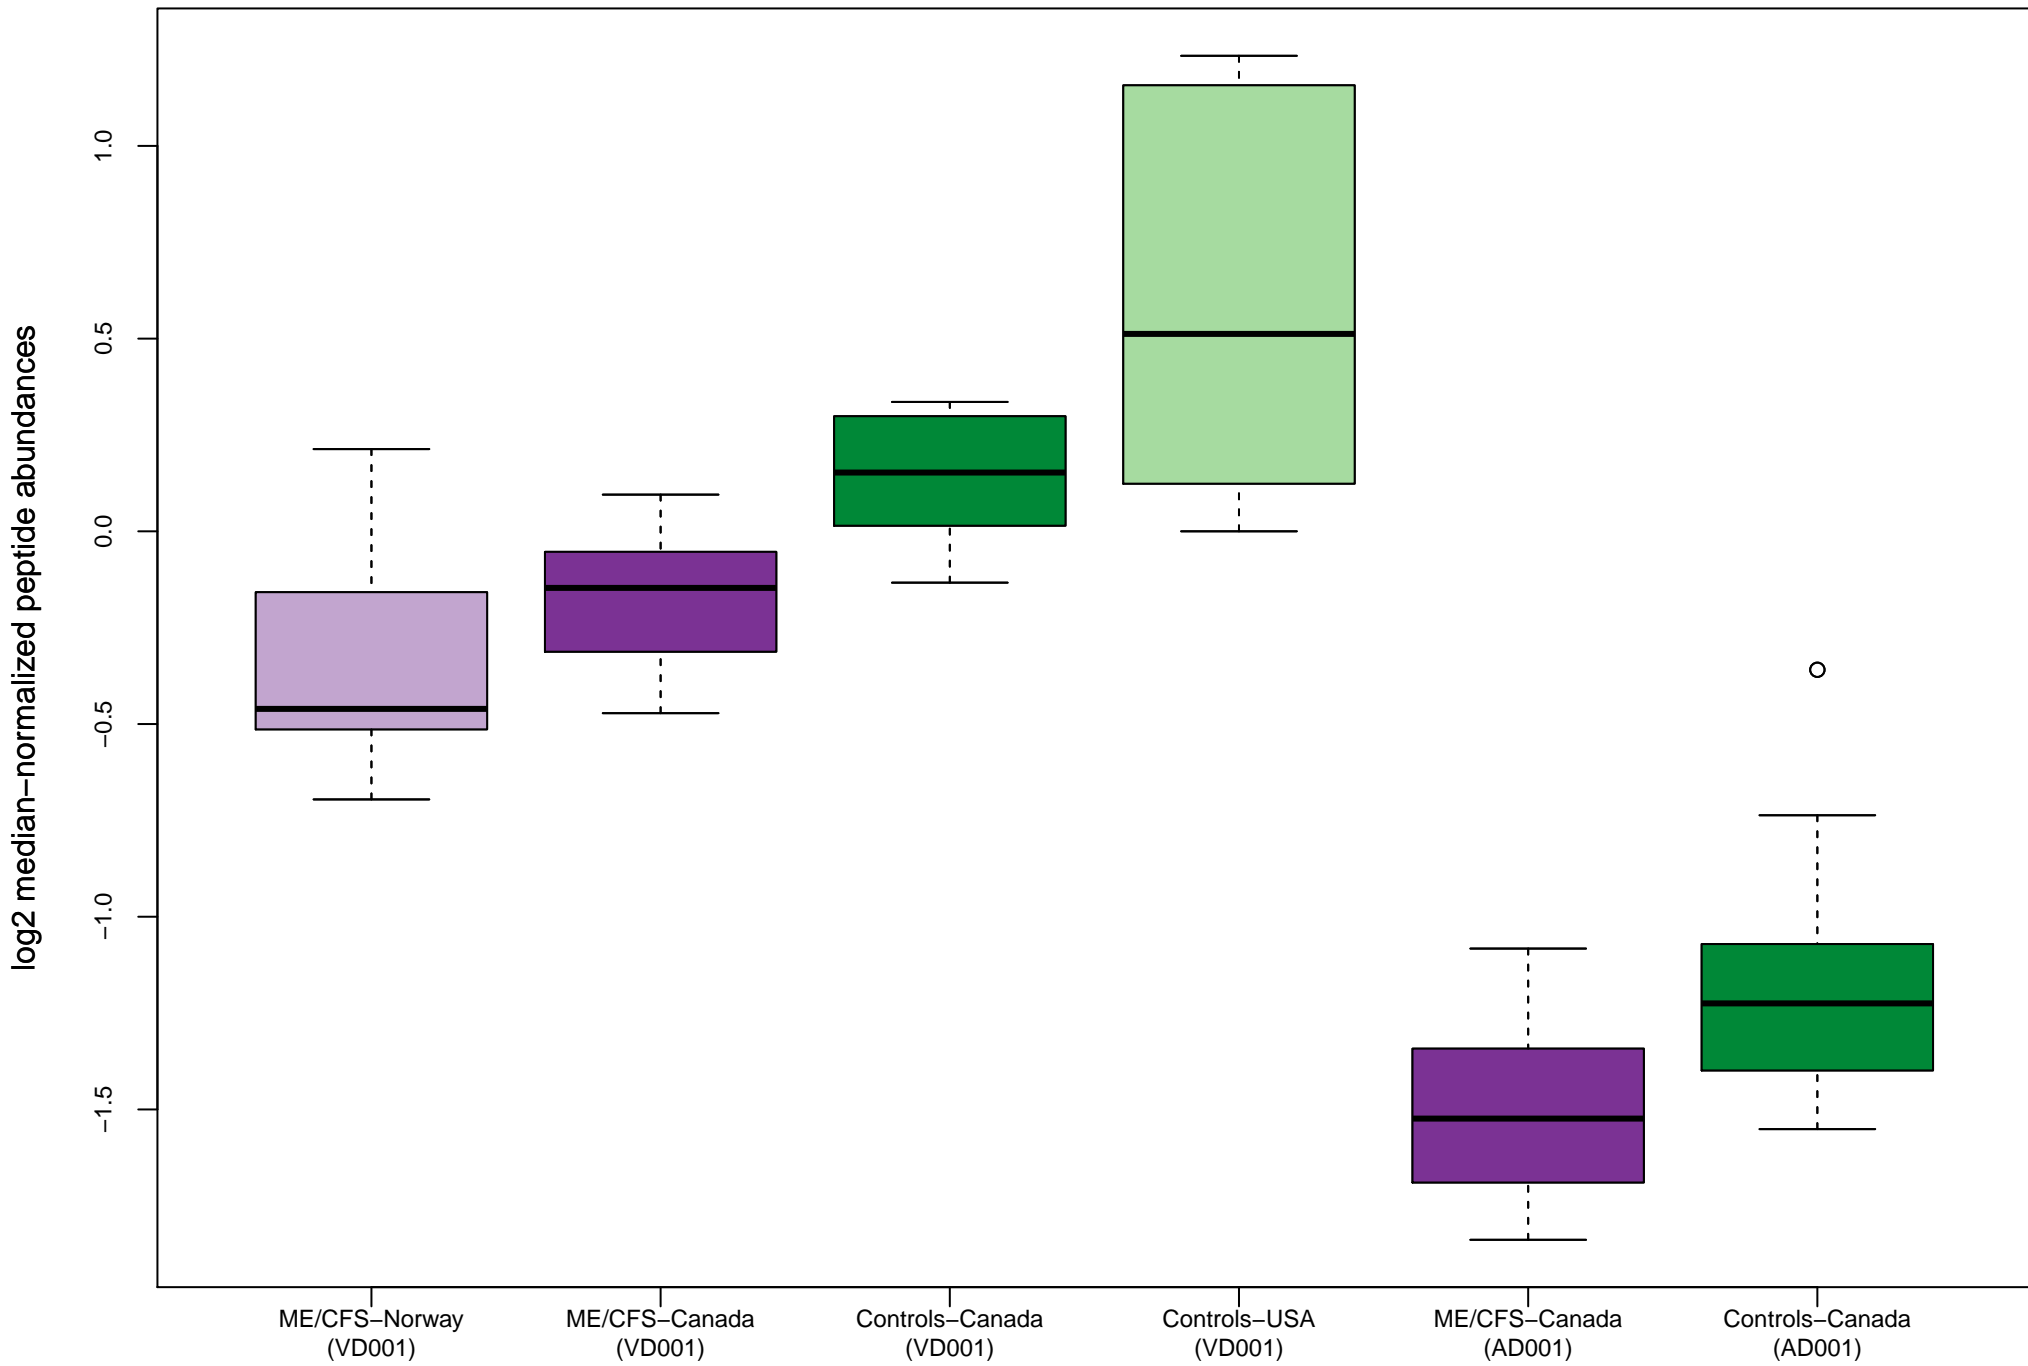

# LRSWFKLSGLSG

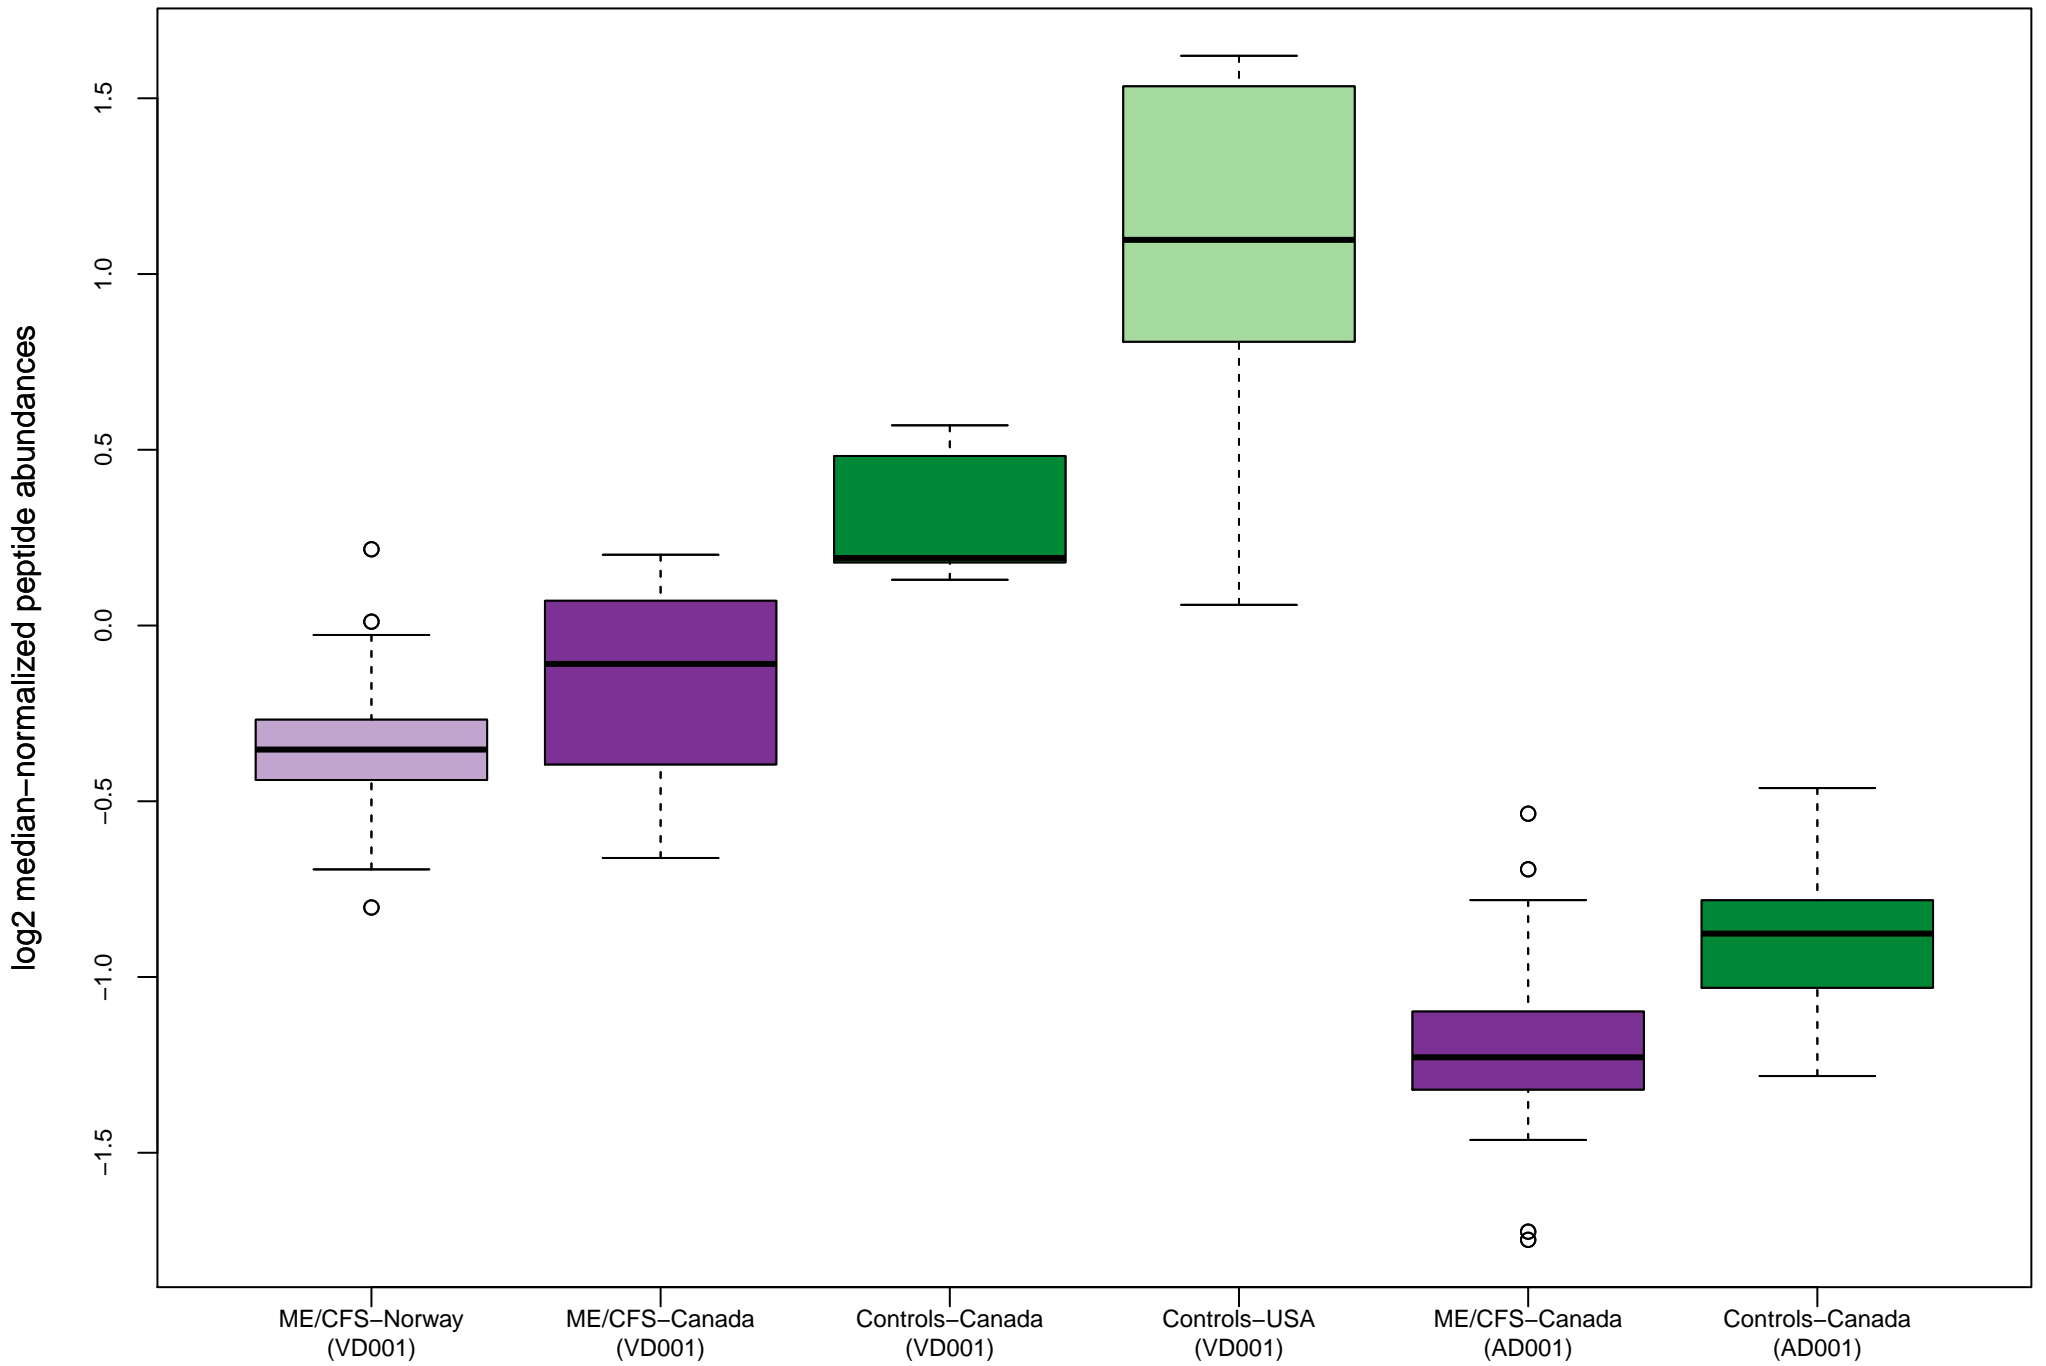

# LRWVARNFLSAG

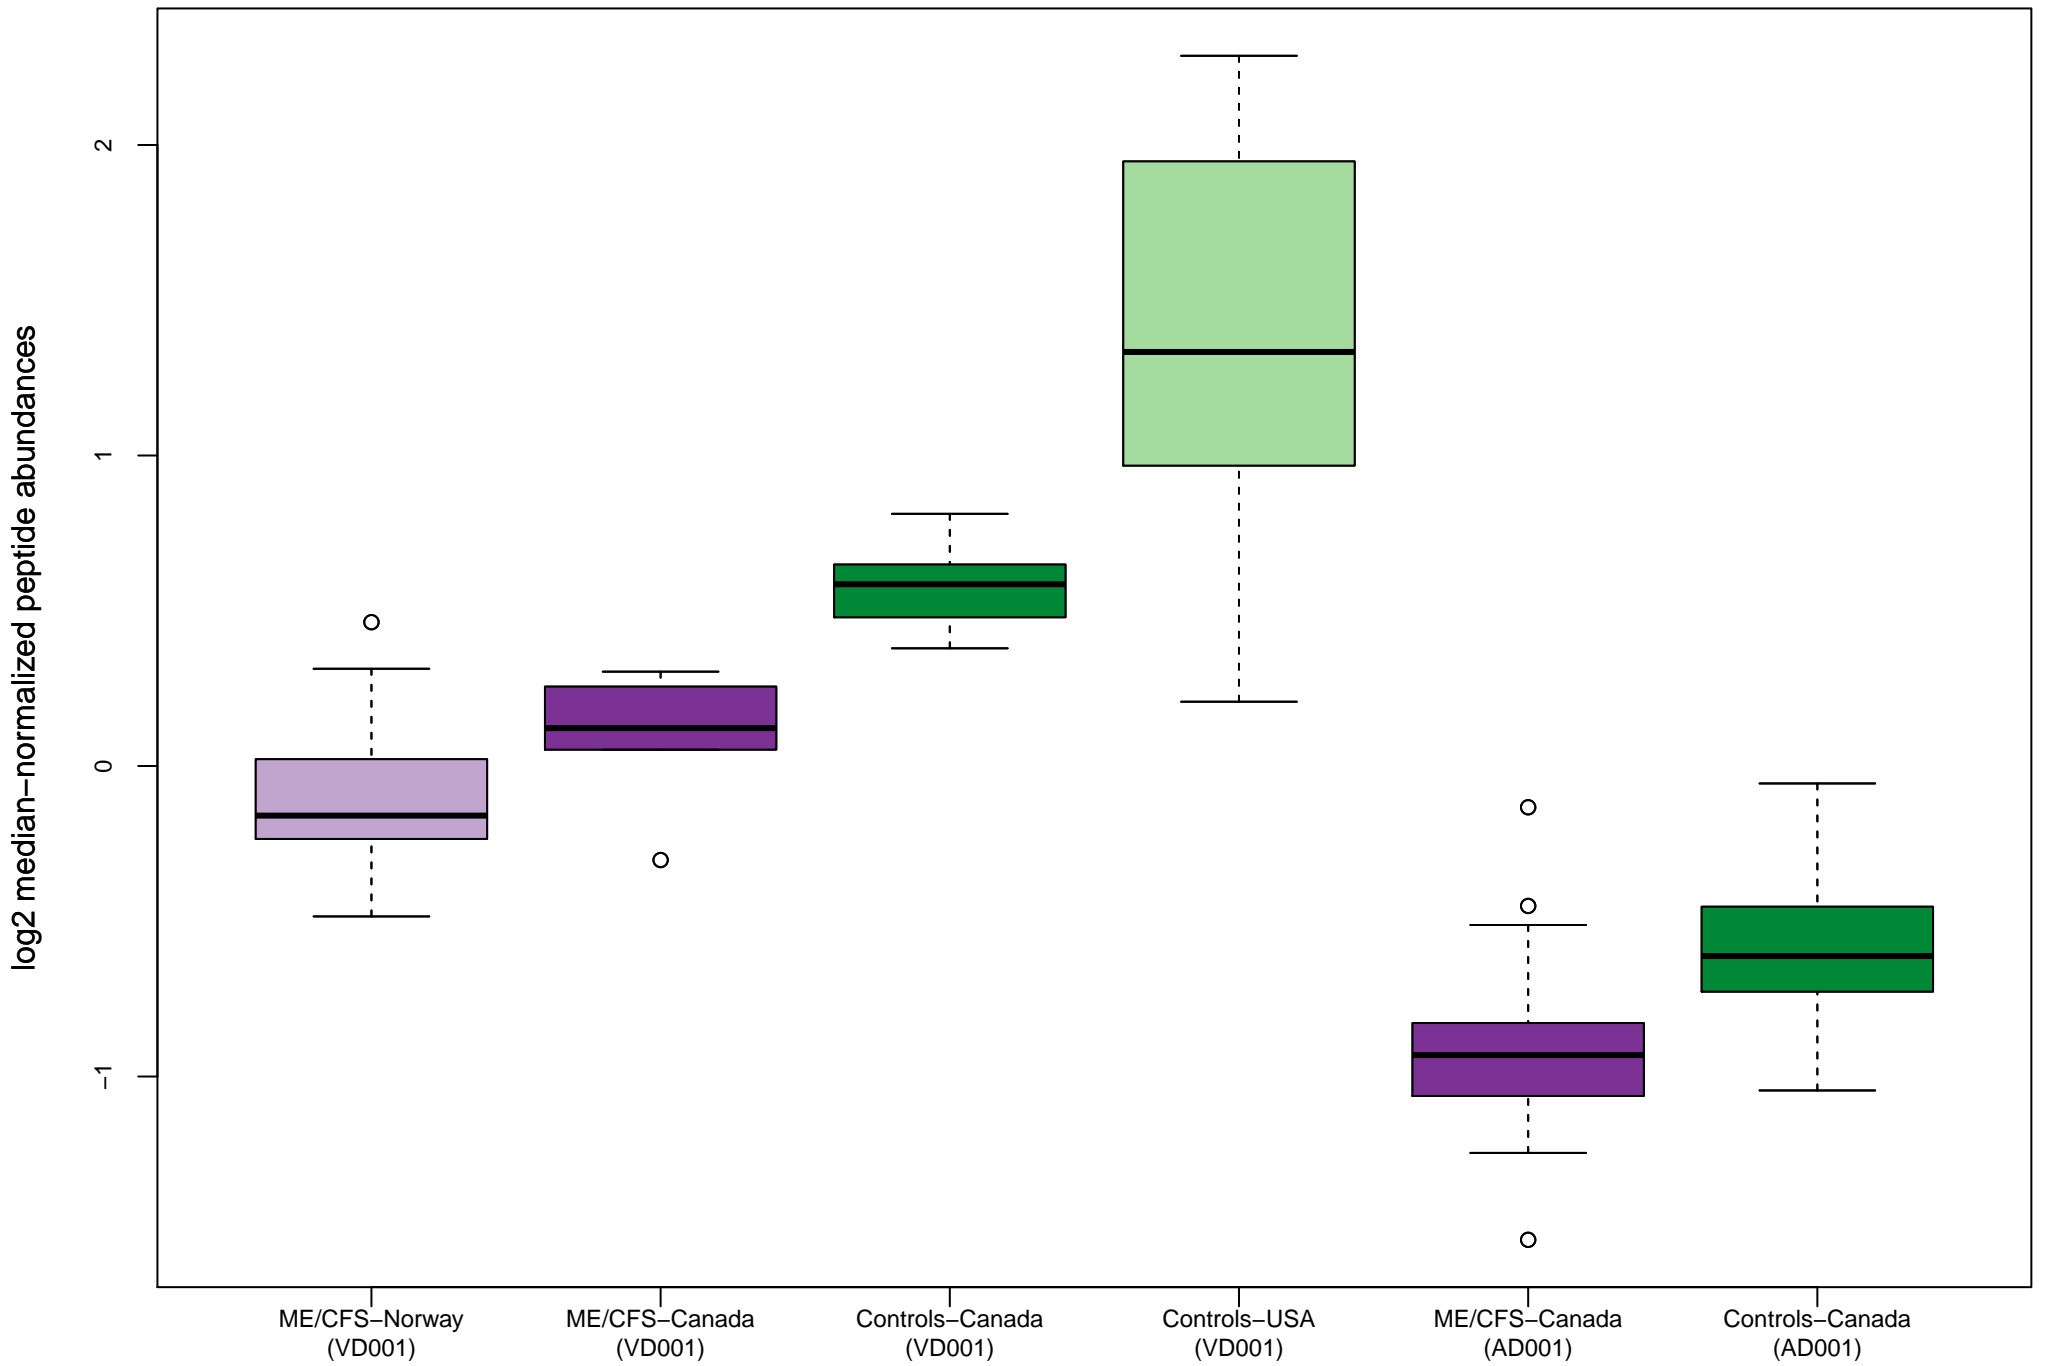

# LRYVGQFKLQRY

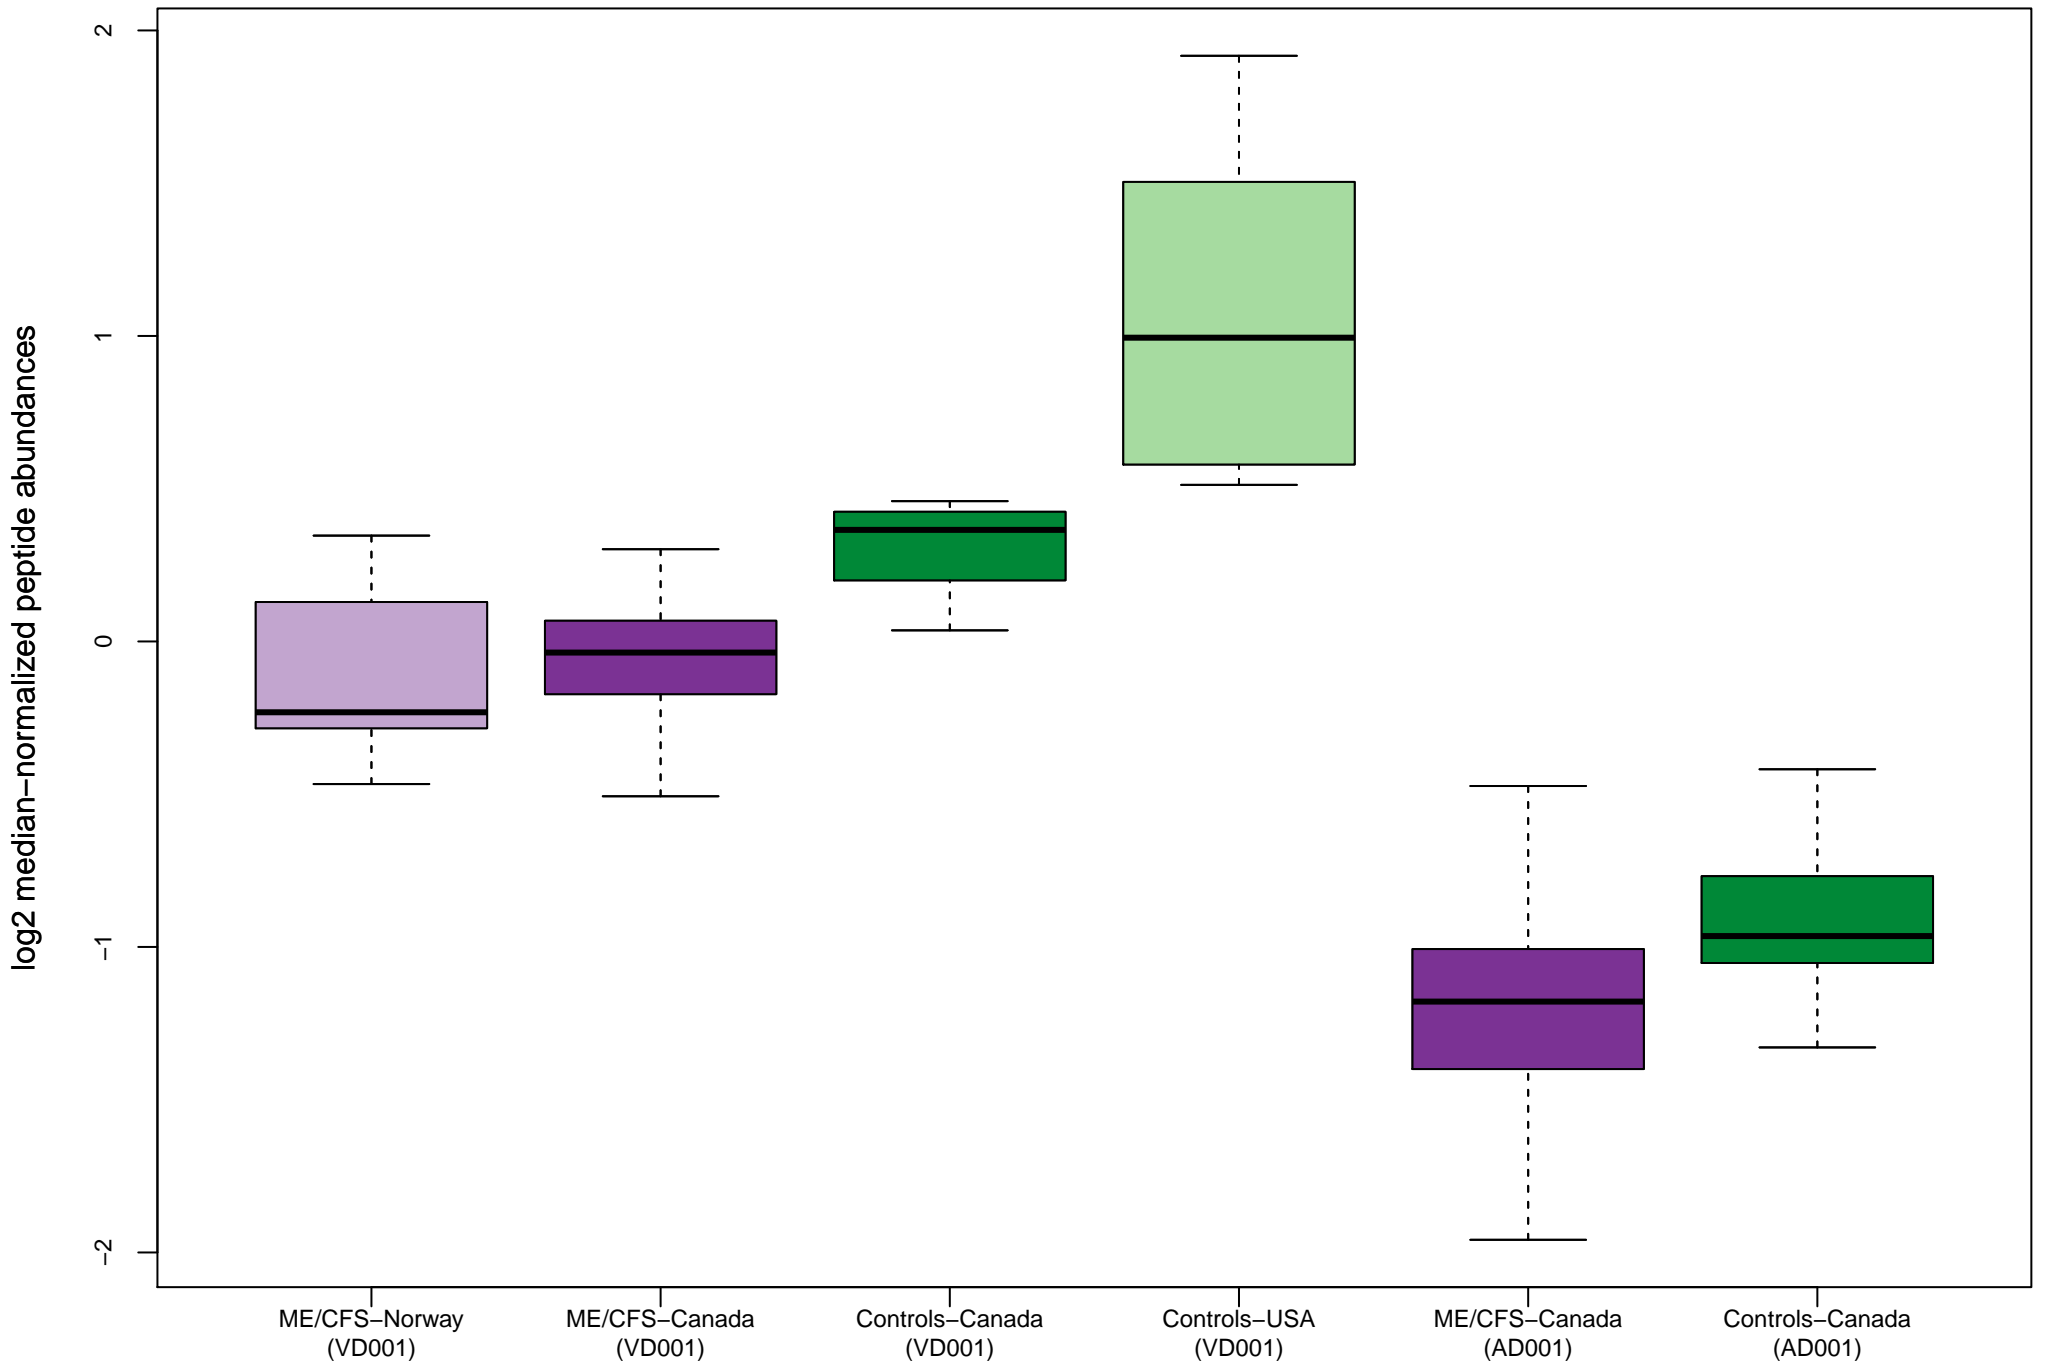

# LWRHFKLSGALG

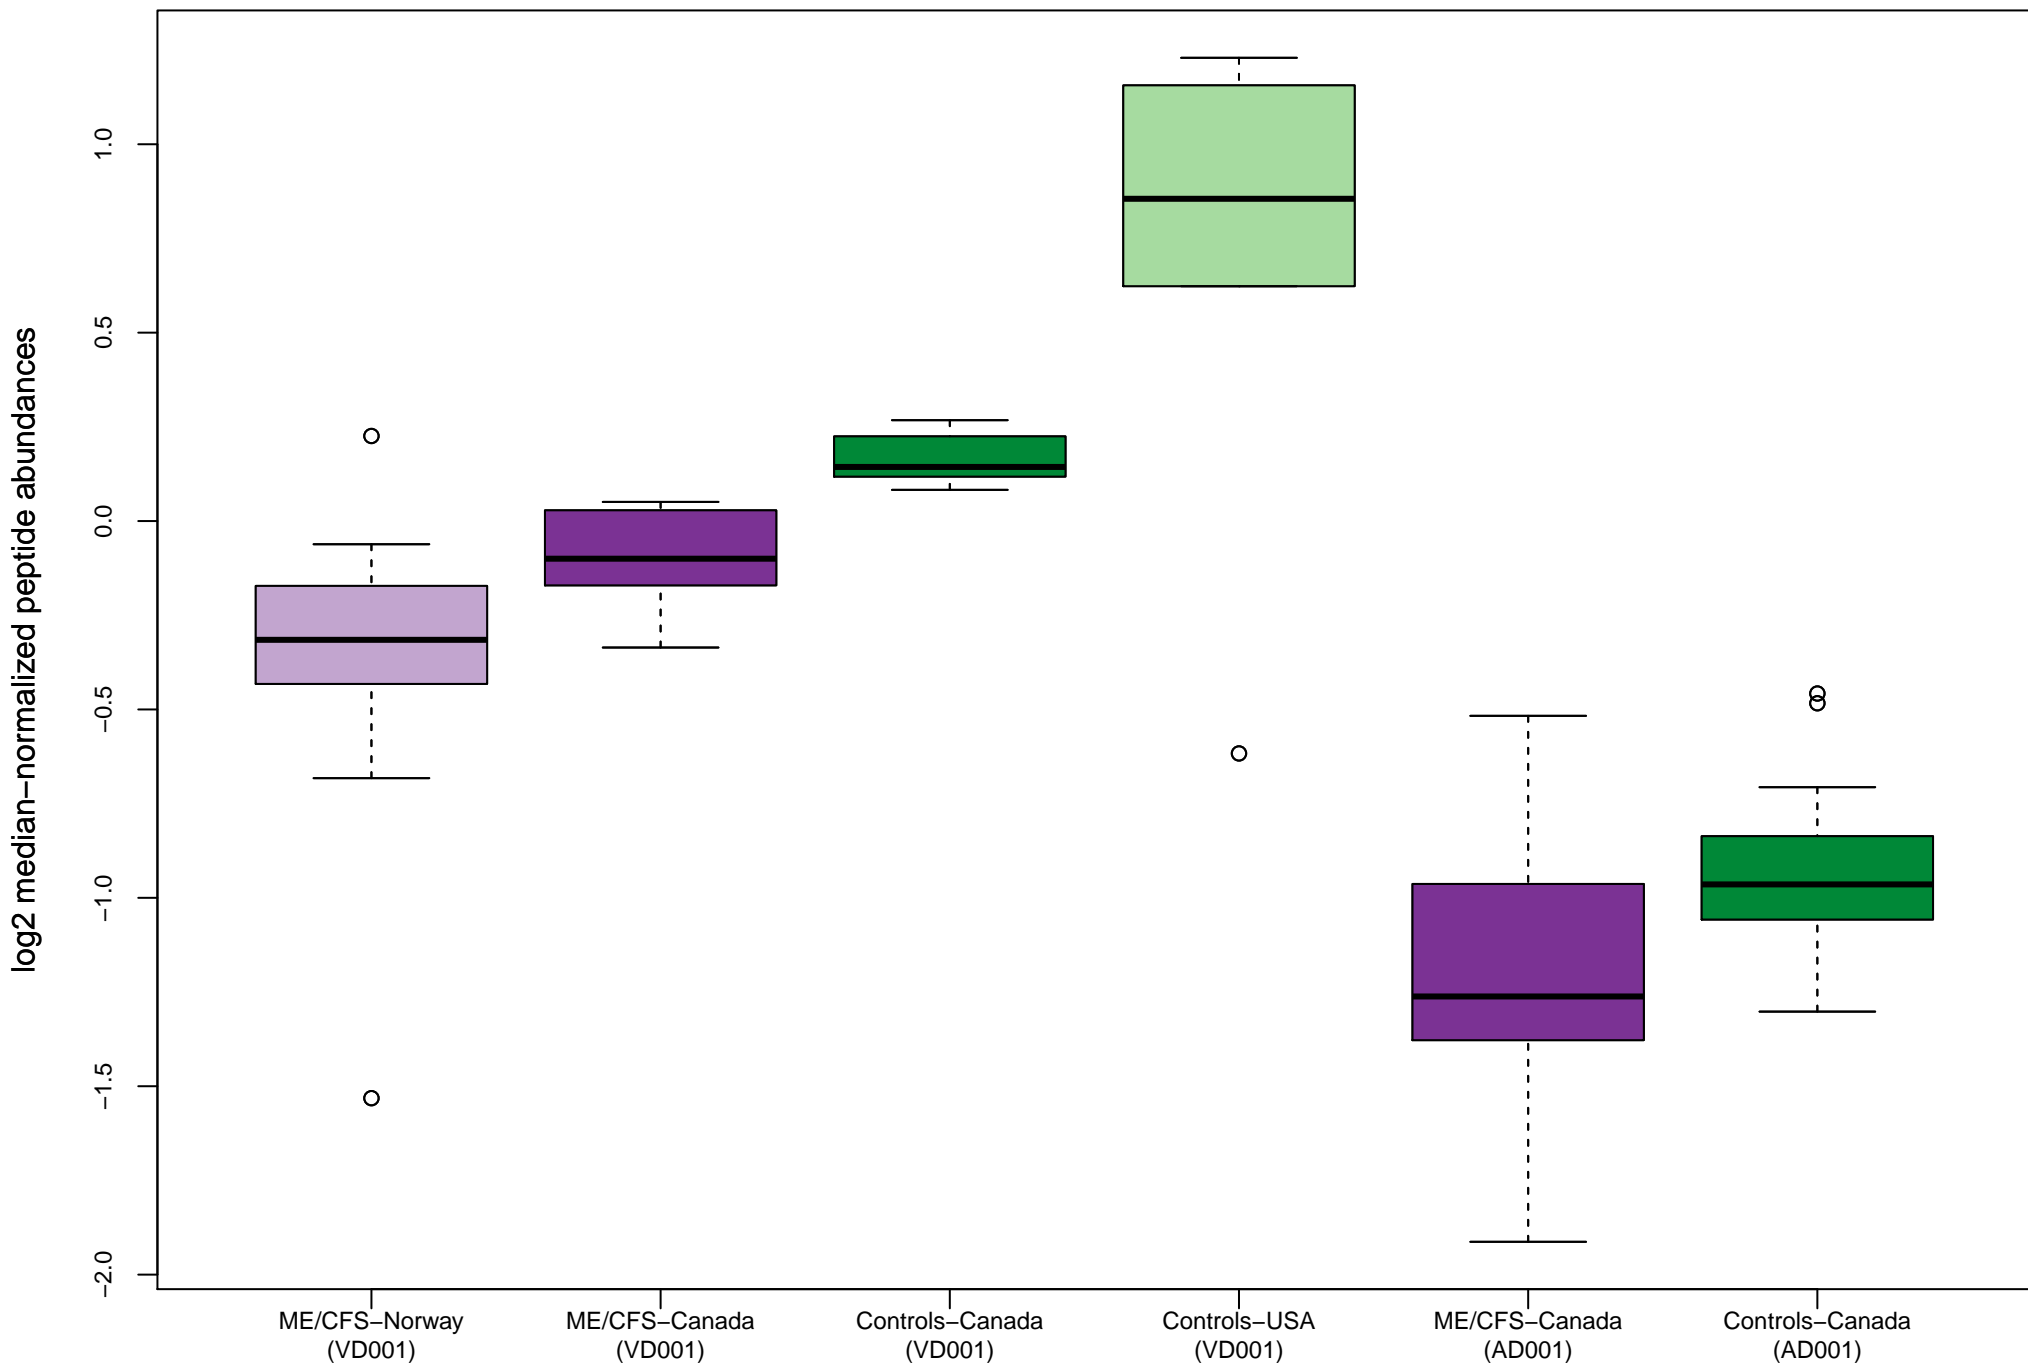

# NRLKFWLSVAG

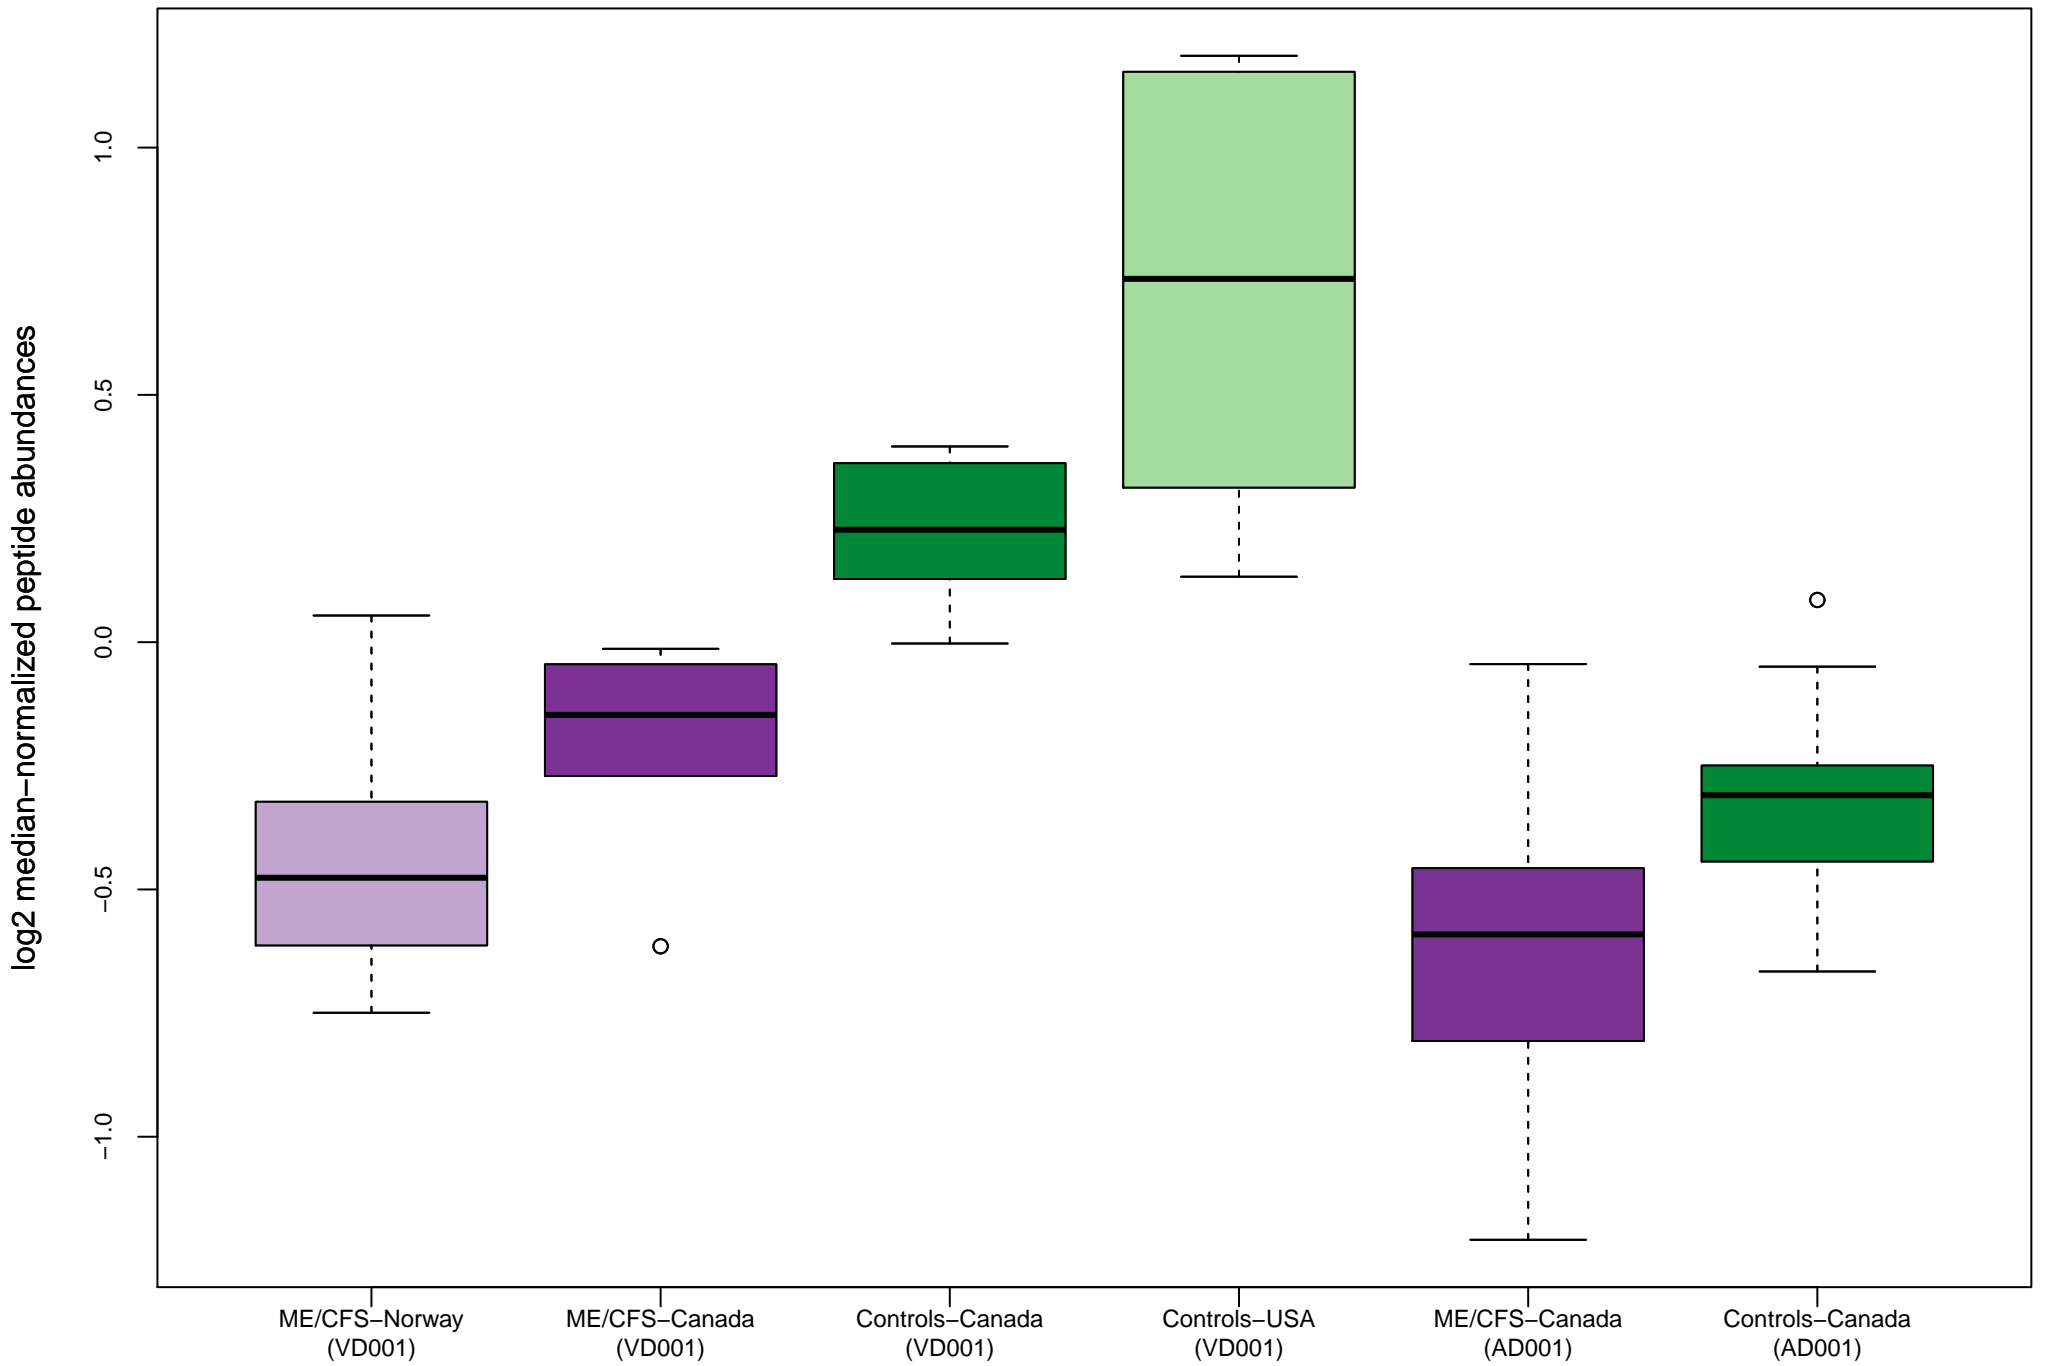

# PRYFFRWNKASG

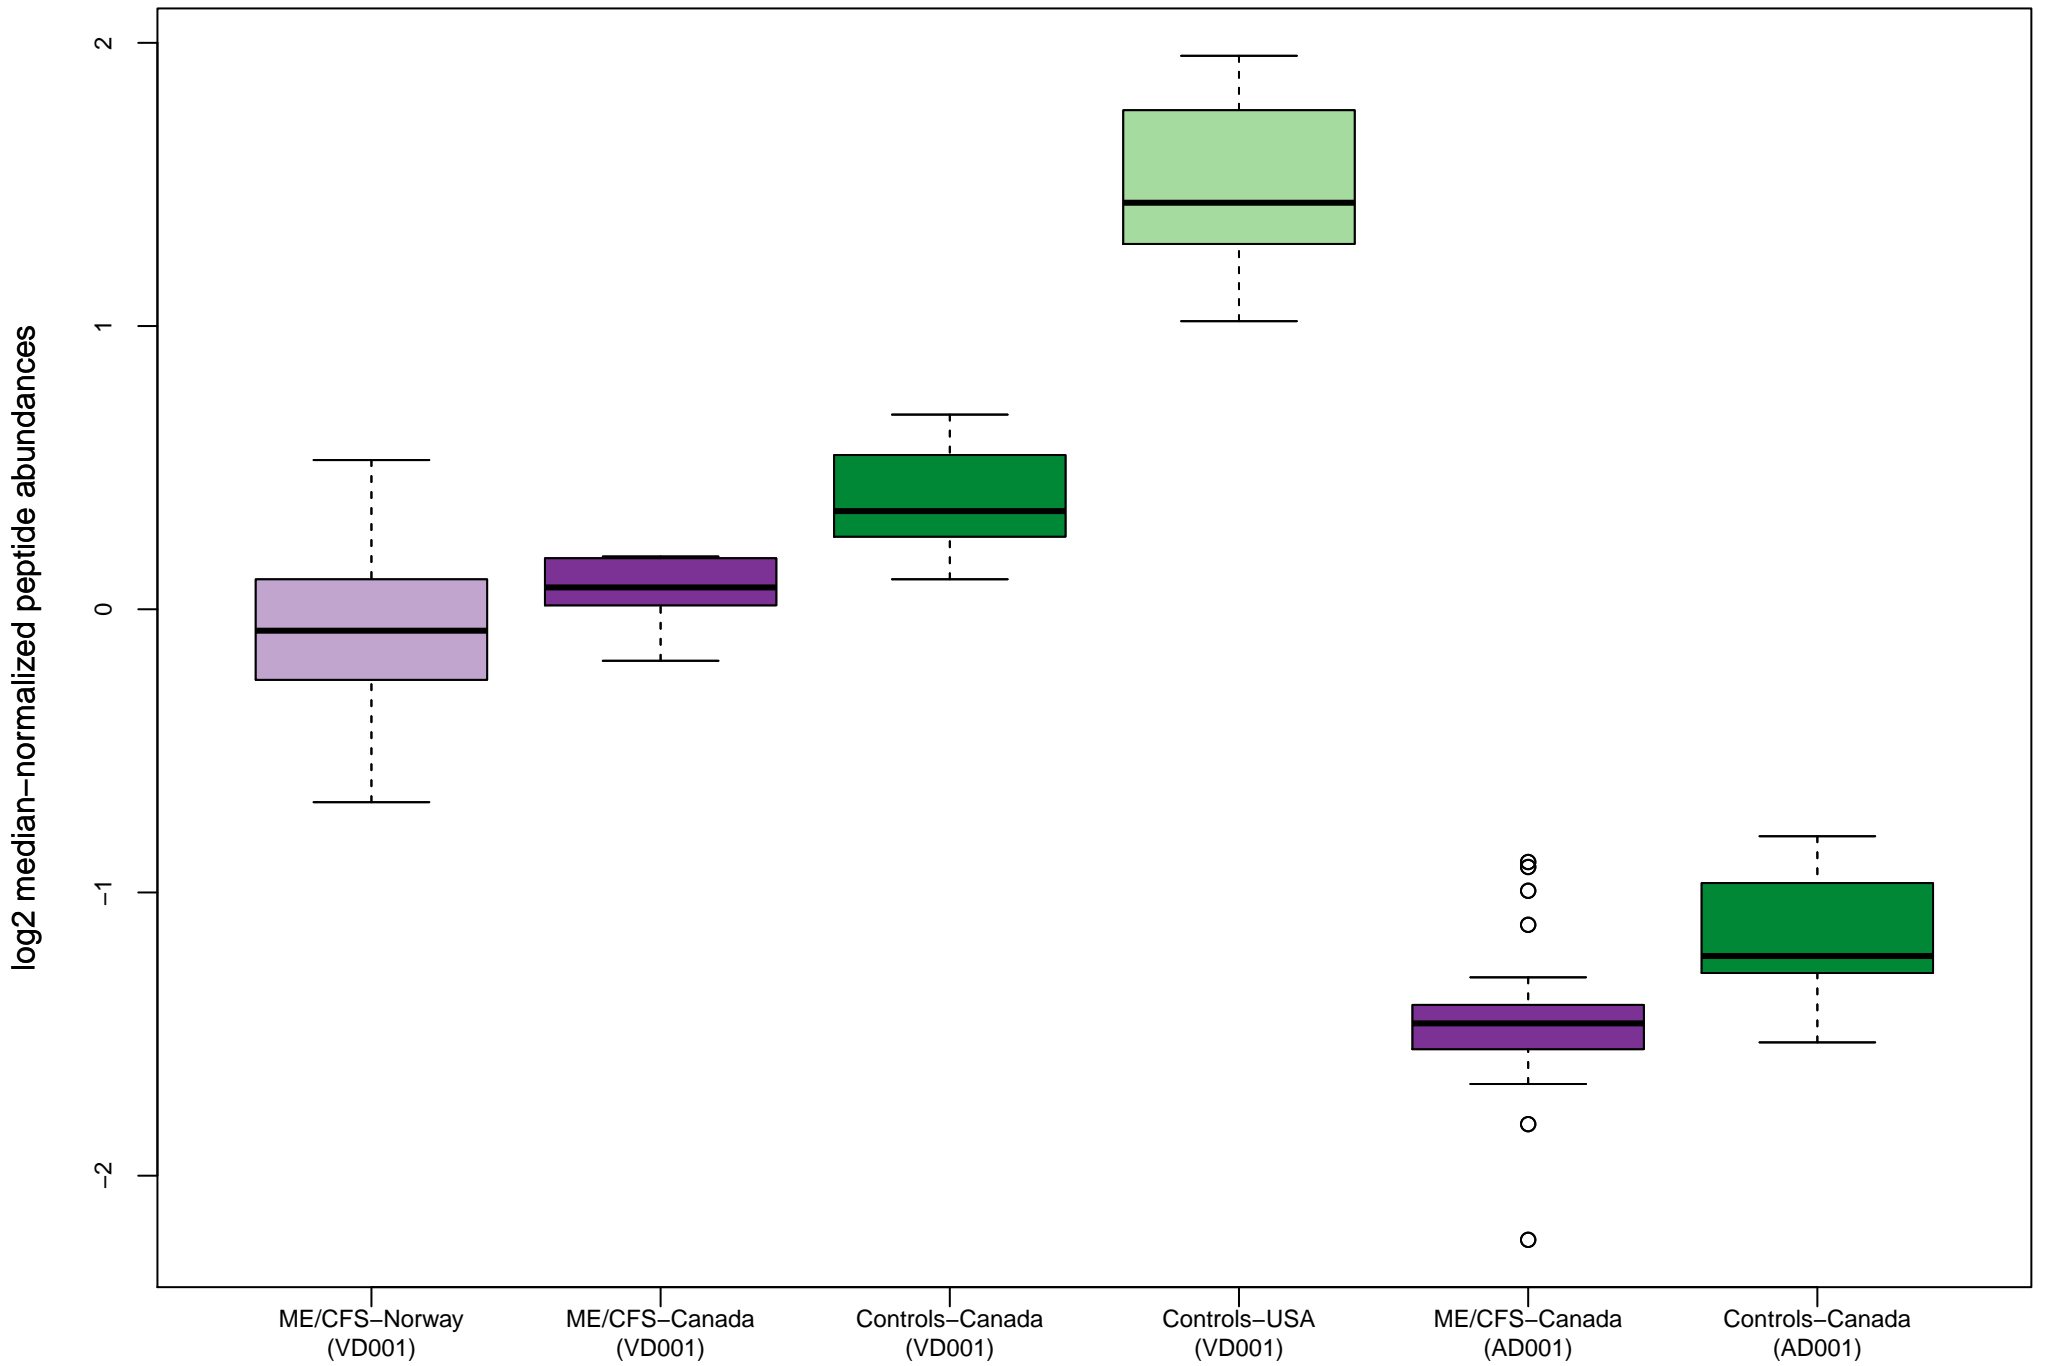

# PSEHEDFEWDVA

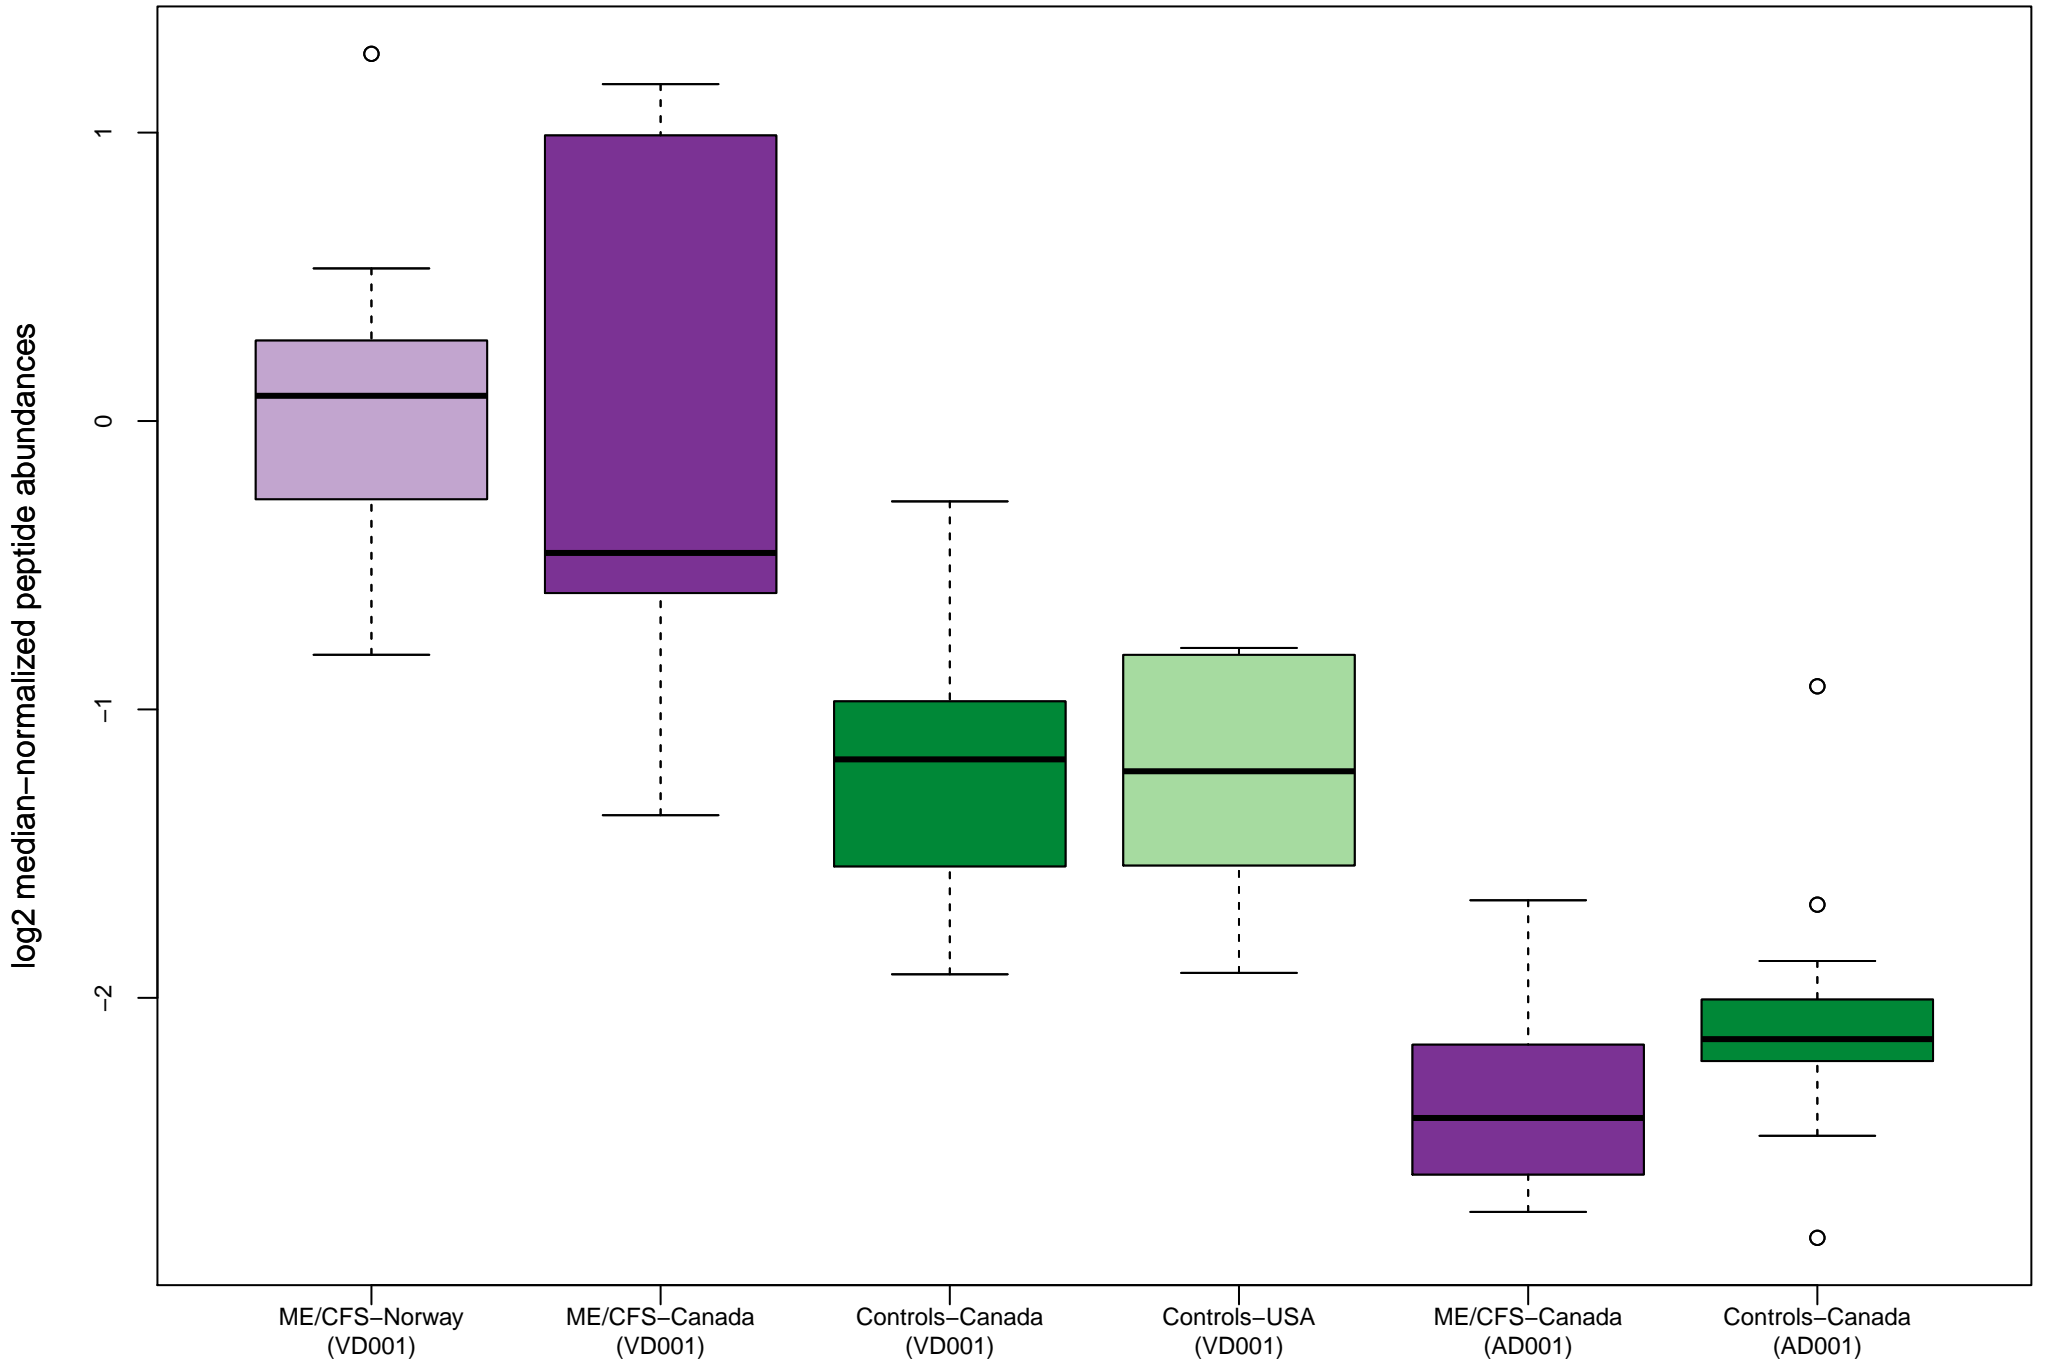



# QFYPSQRLYNKV

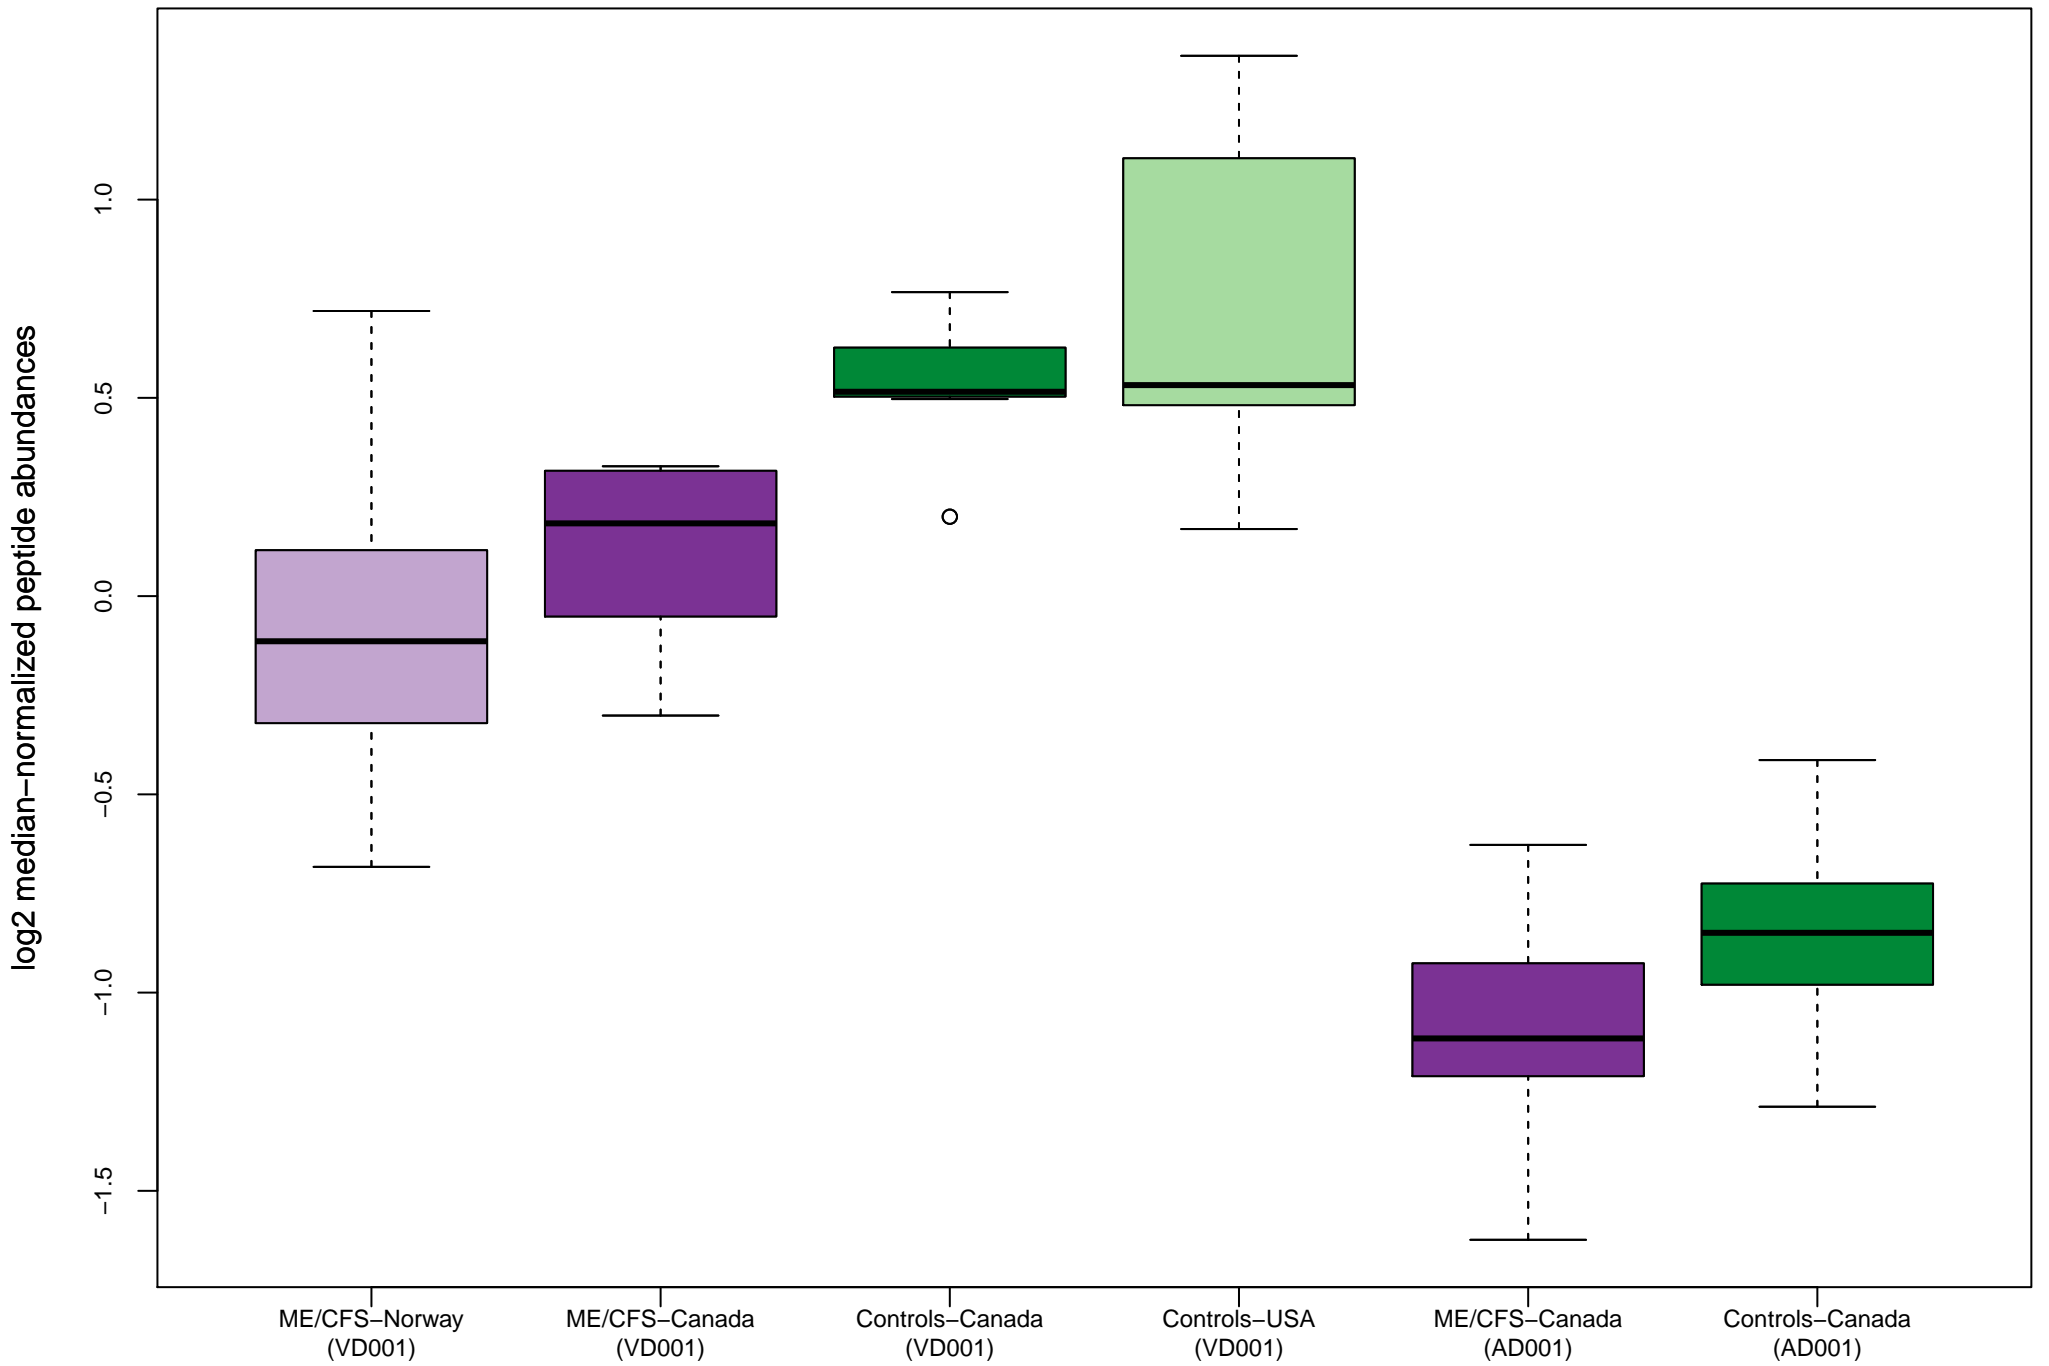

# QYFQGRPYWNKV

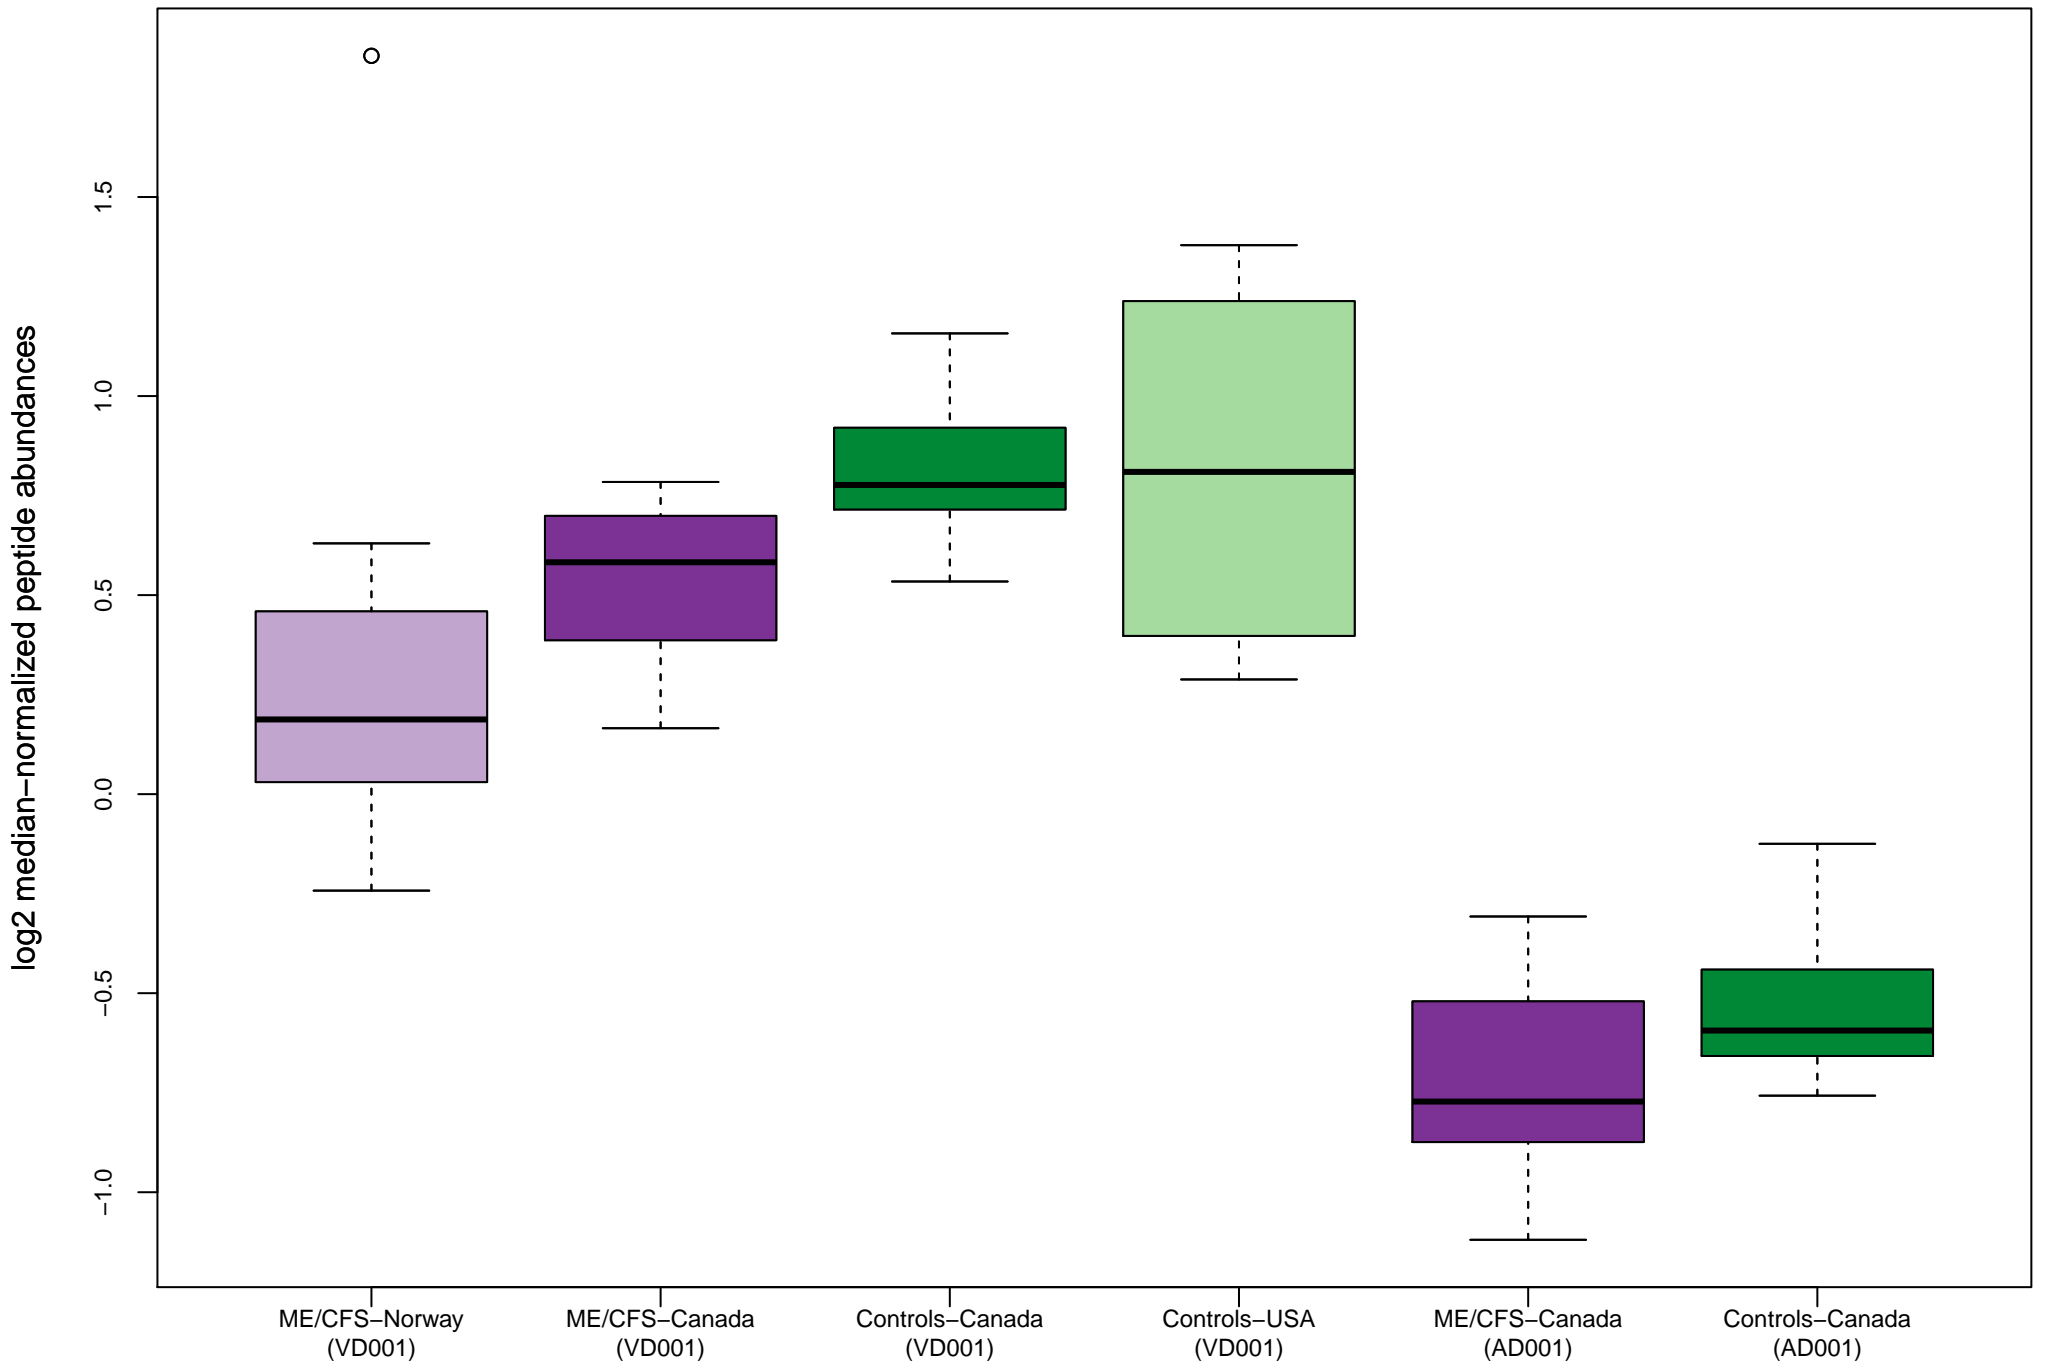

# RALEWKFFRHAV

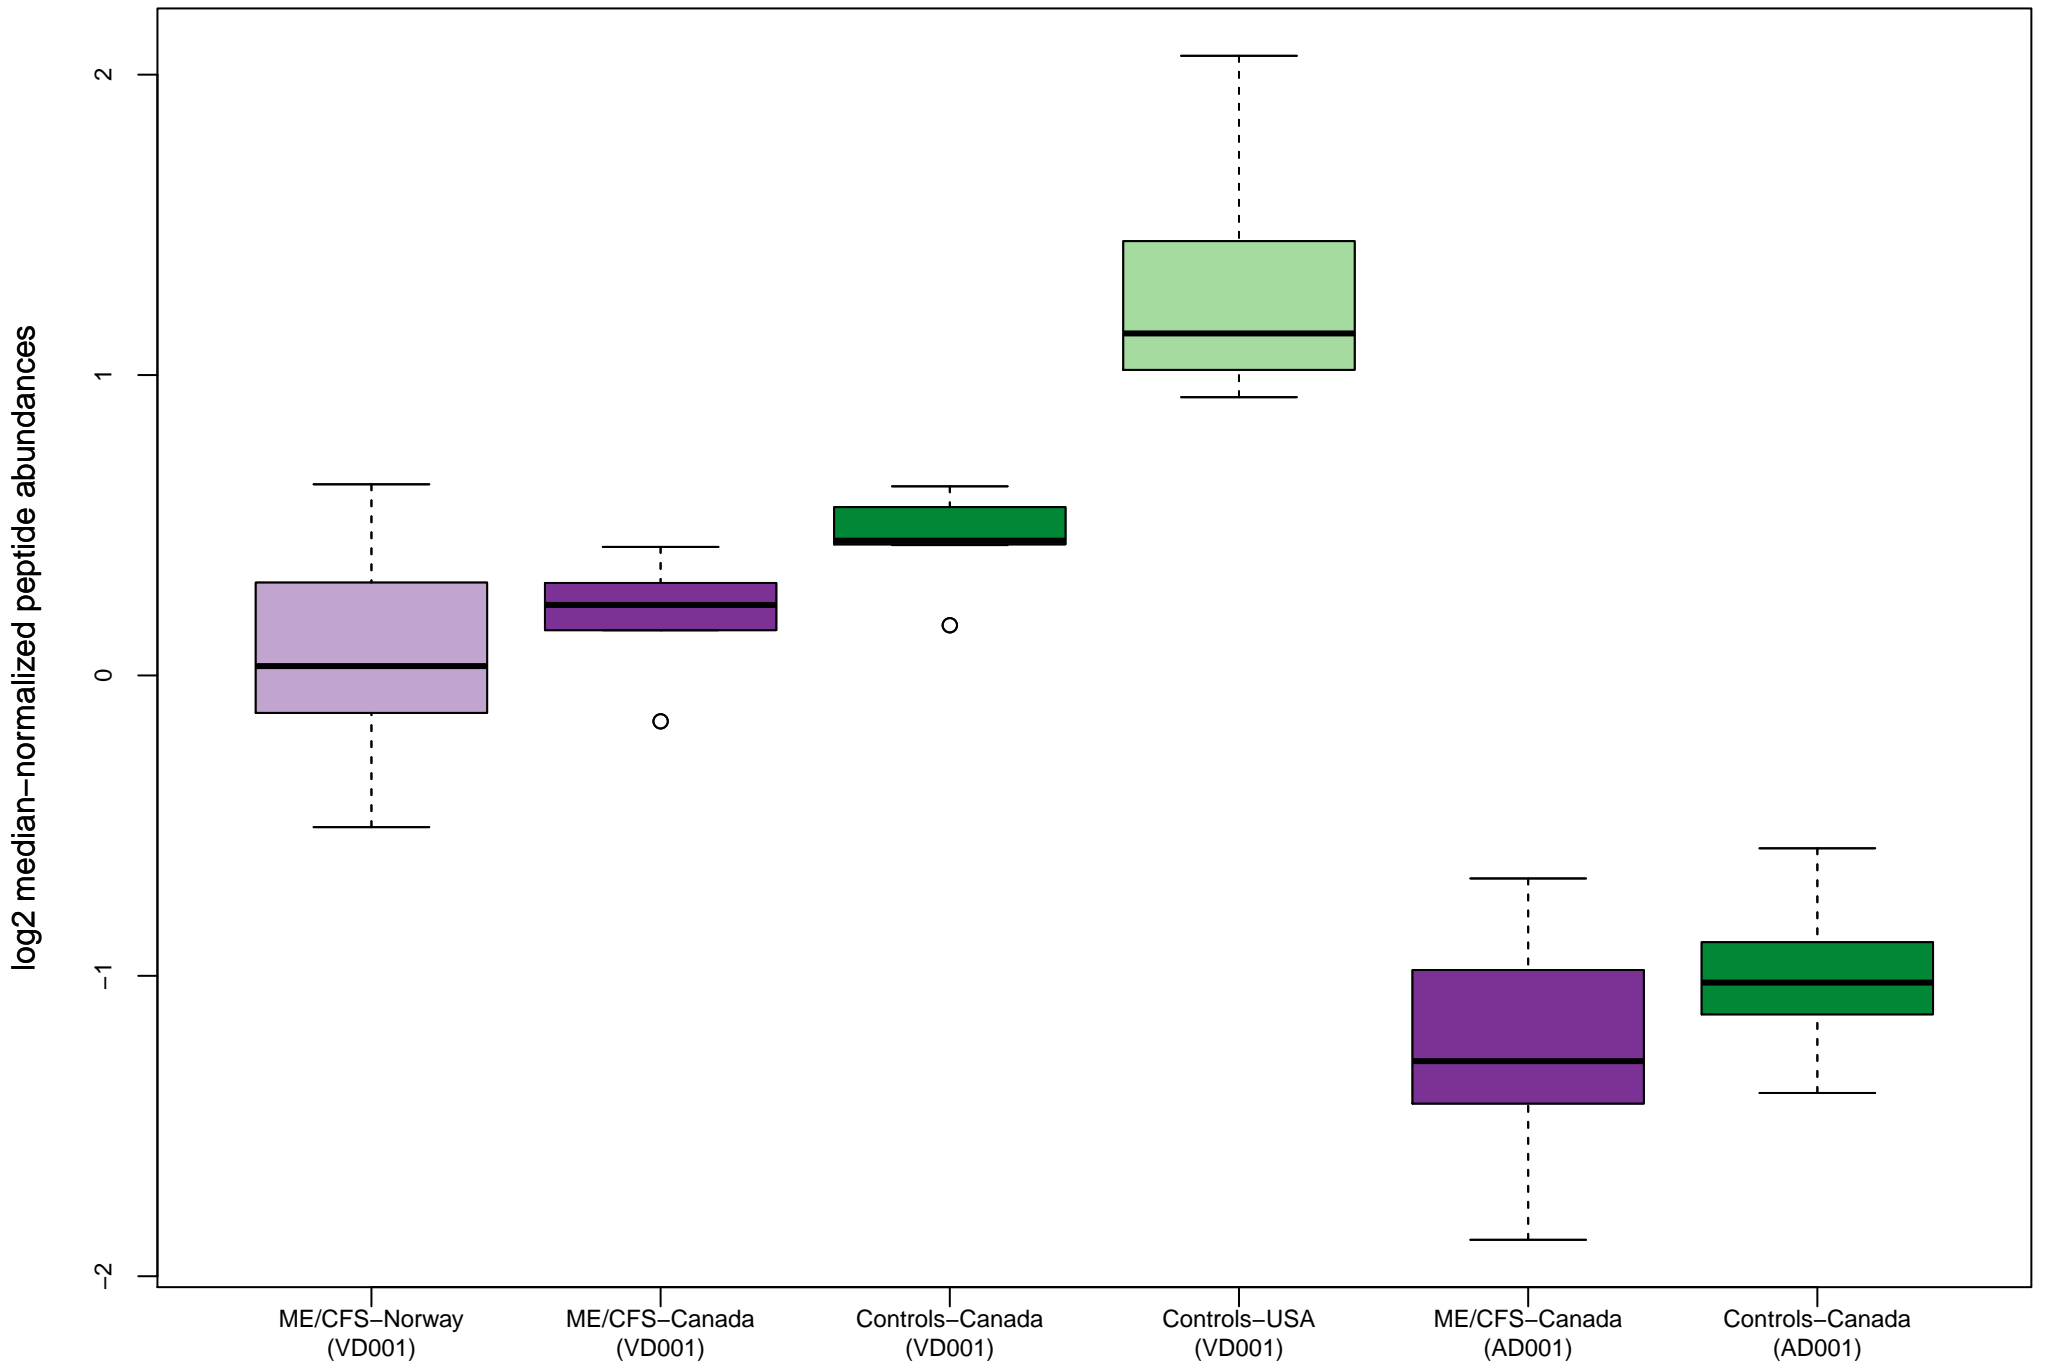

# RAWNFVFRKHVV

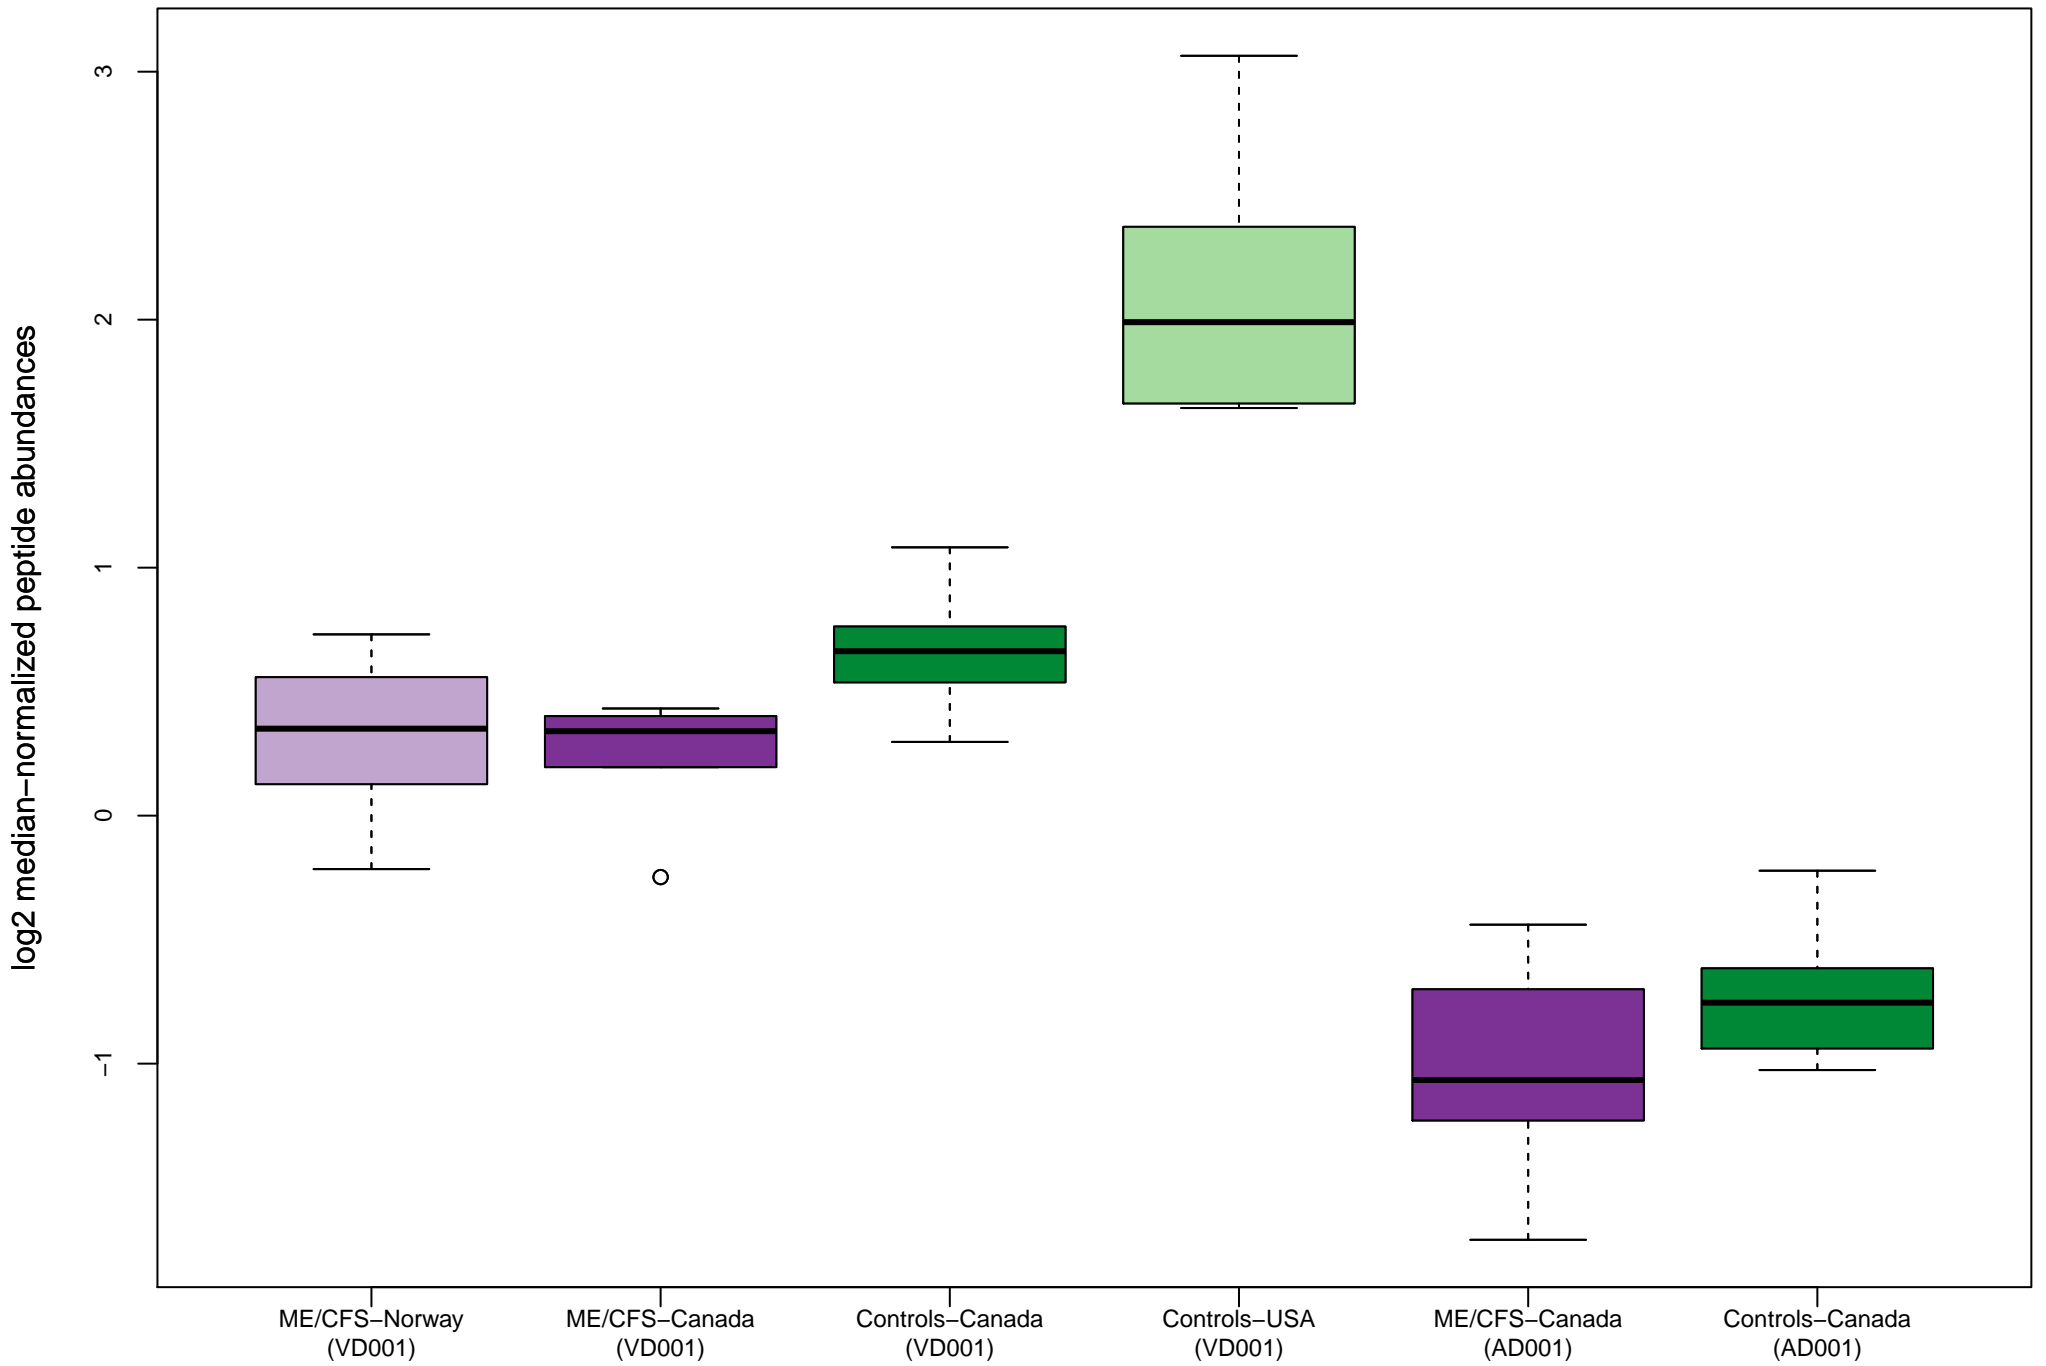

# RFFFKALSGLSG

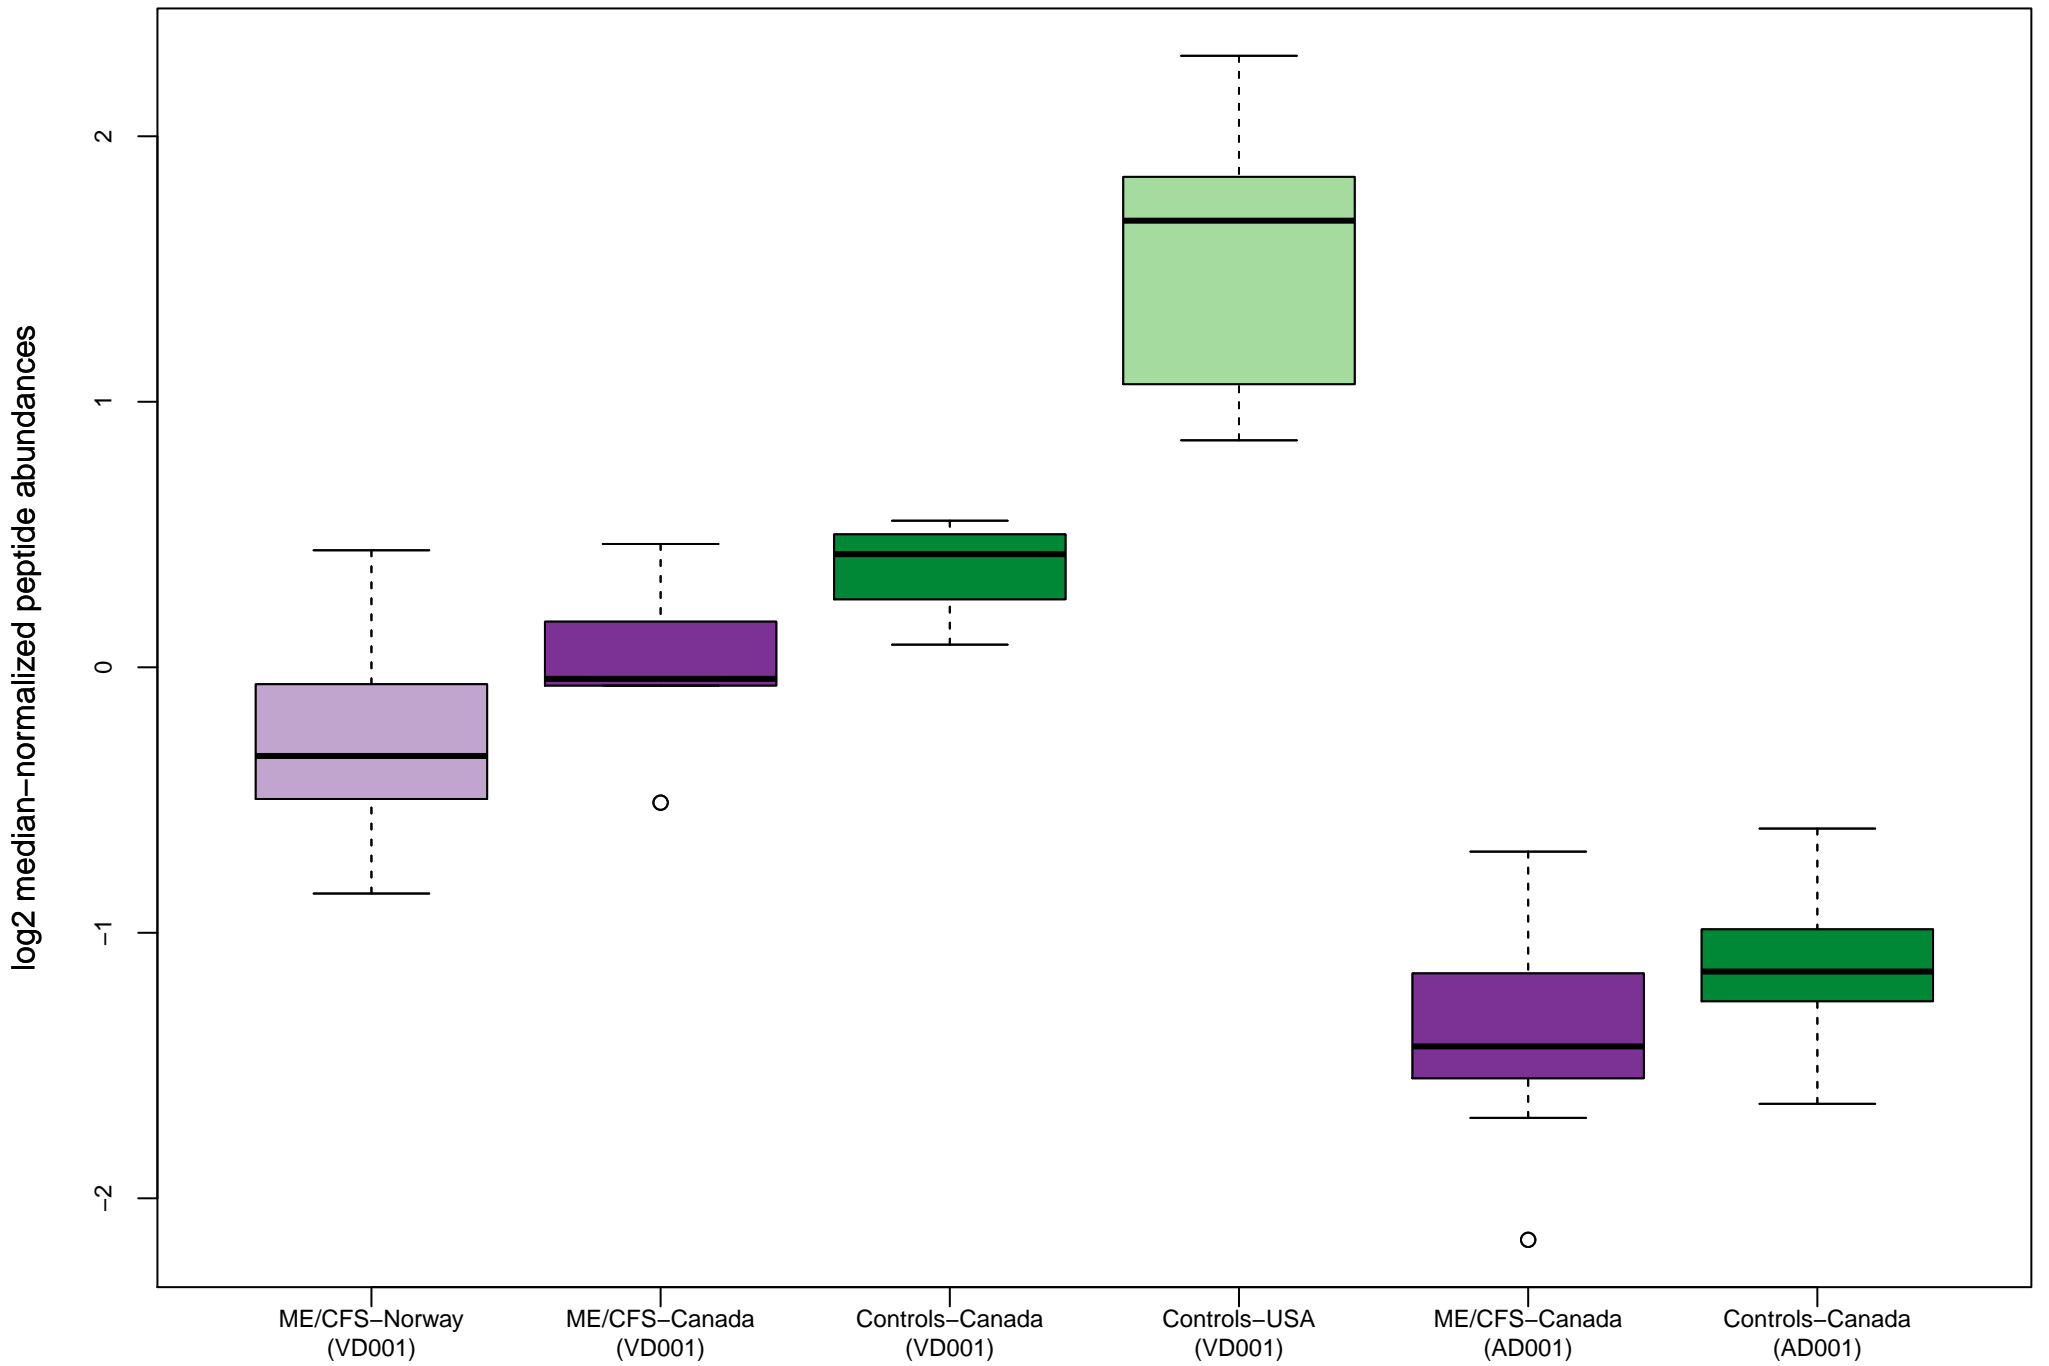

# RFGNVFRGVALG

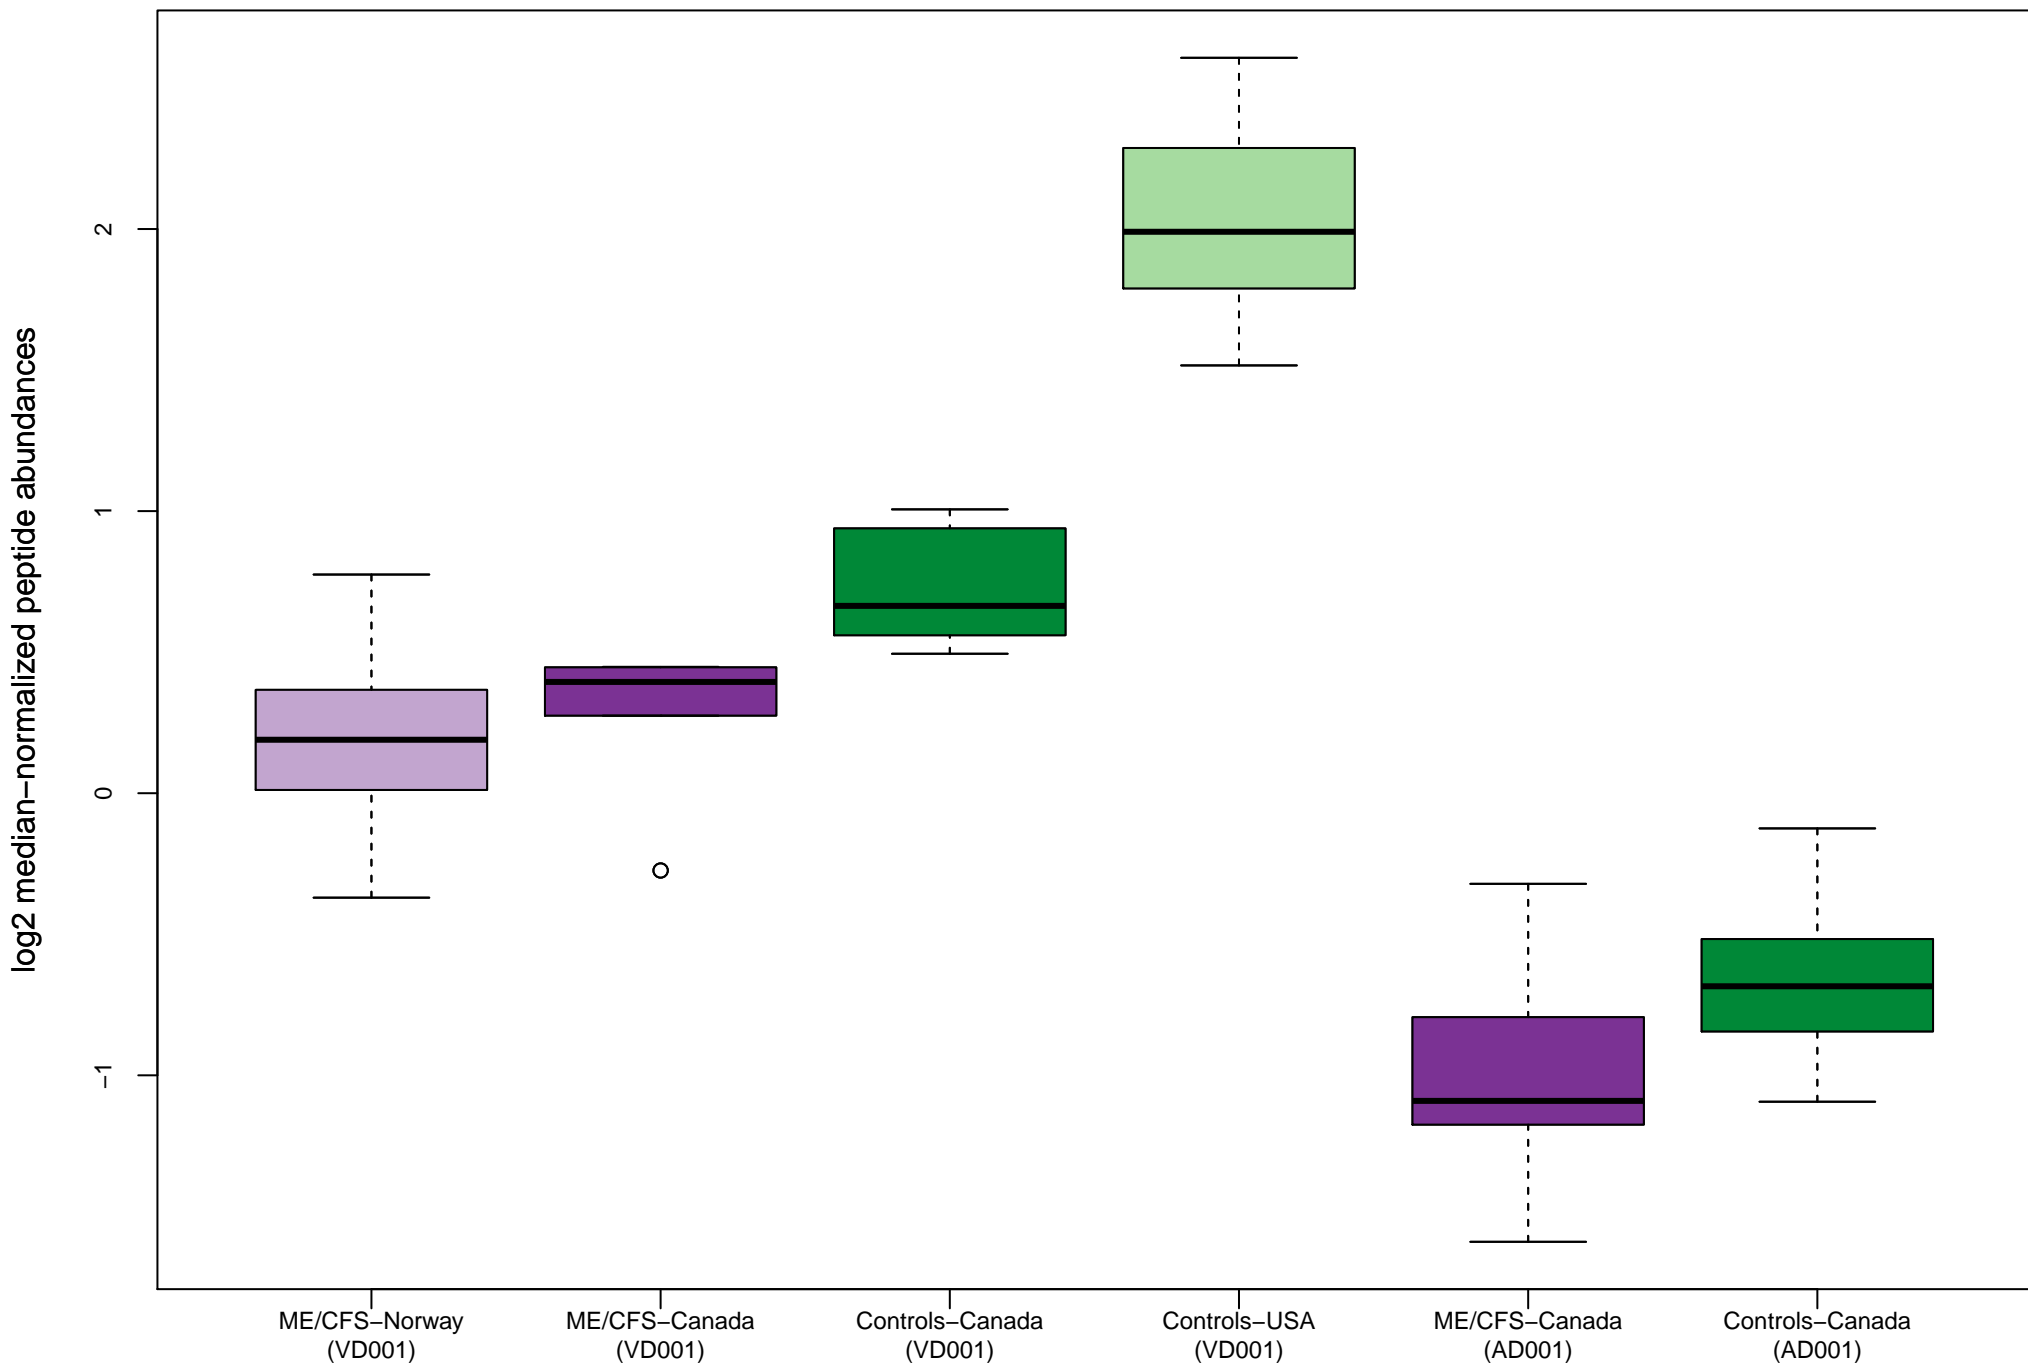

# RFLKYLSGVLSG

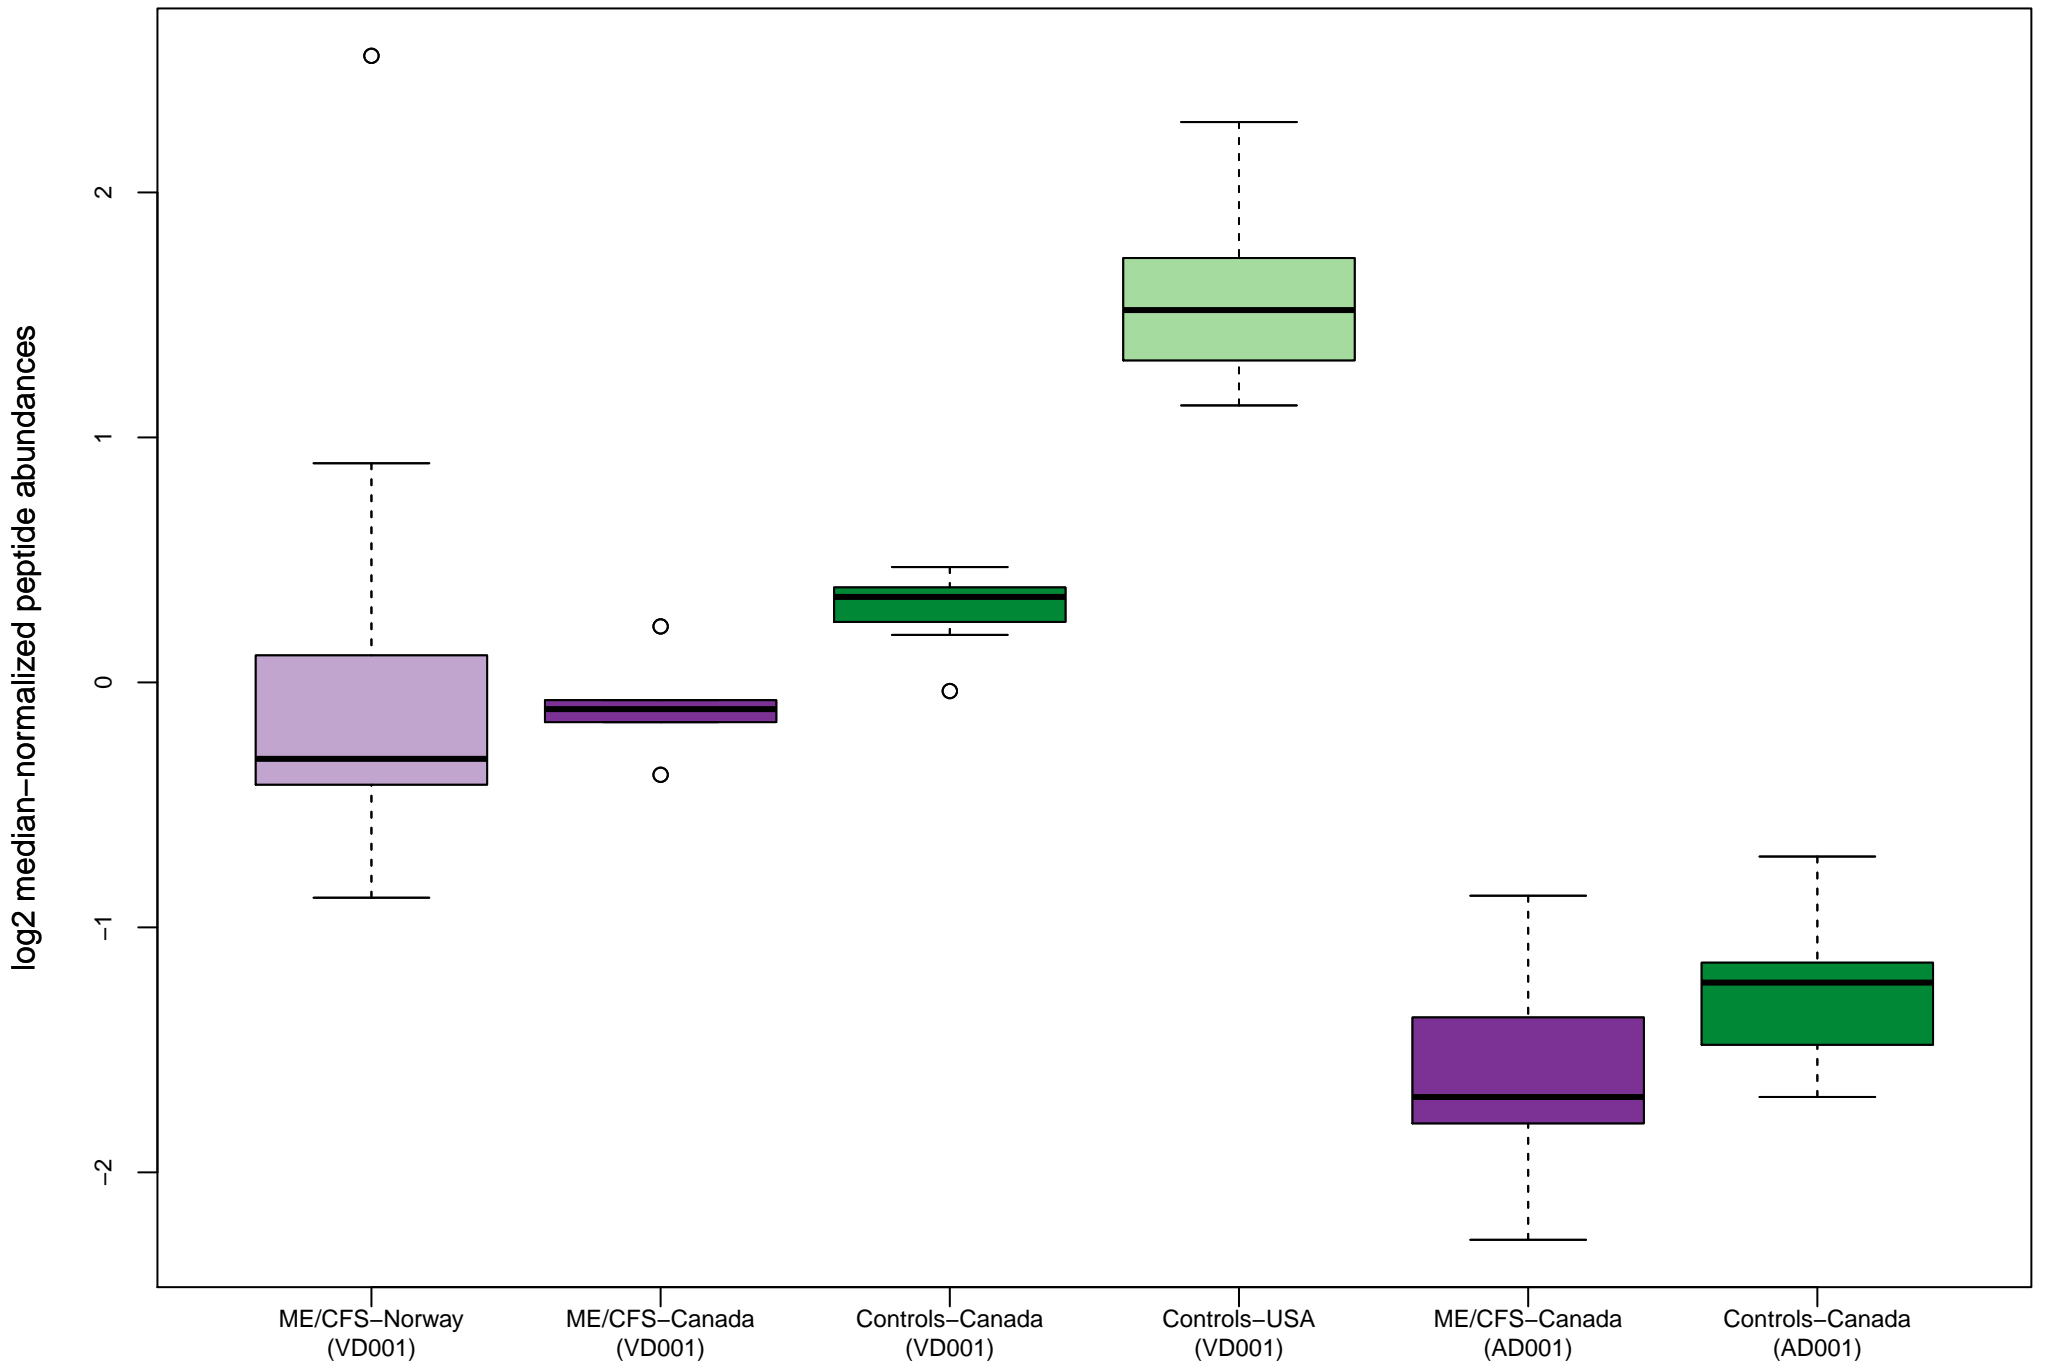

# RFLSYNRVAGLS

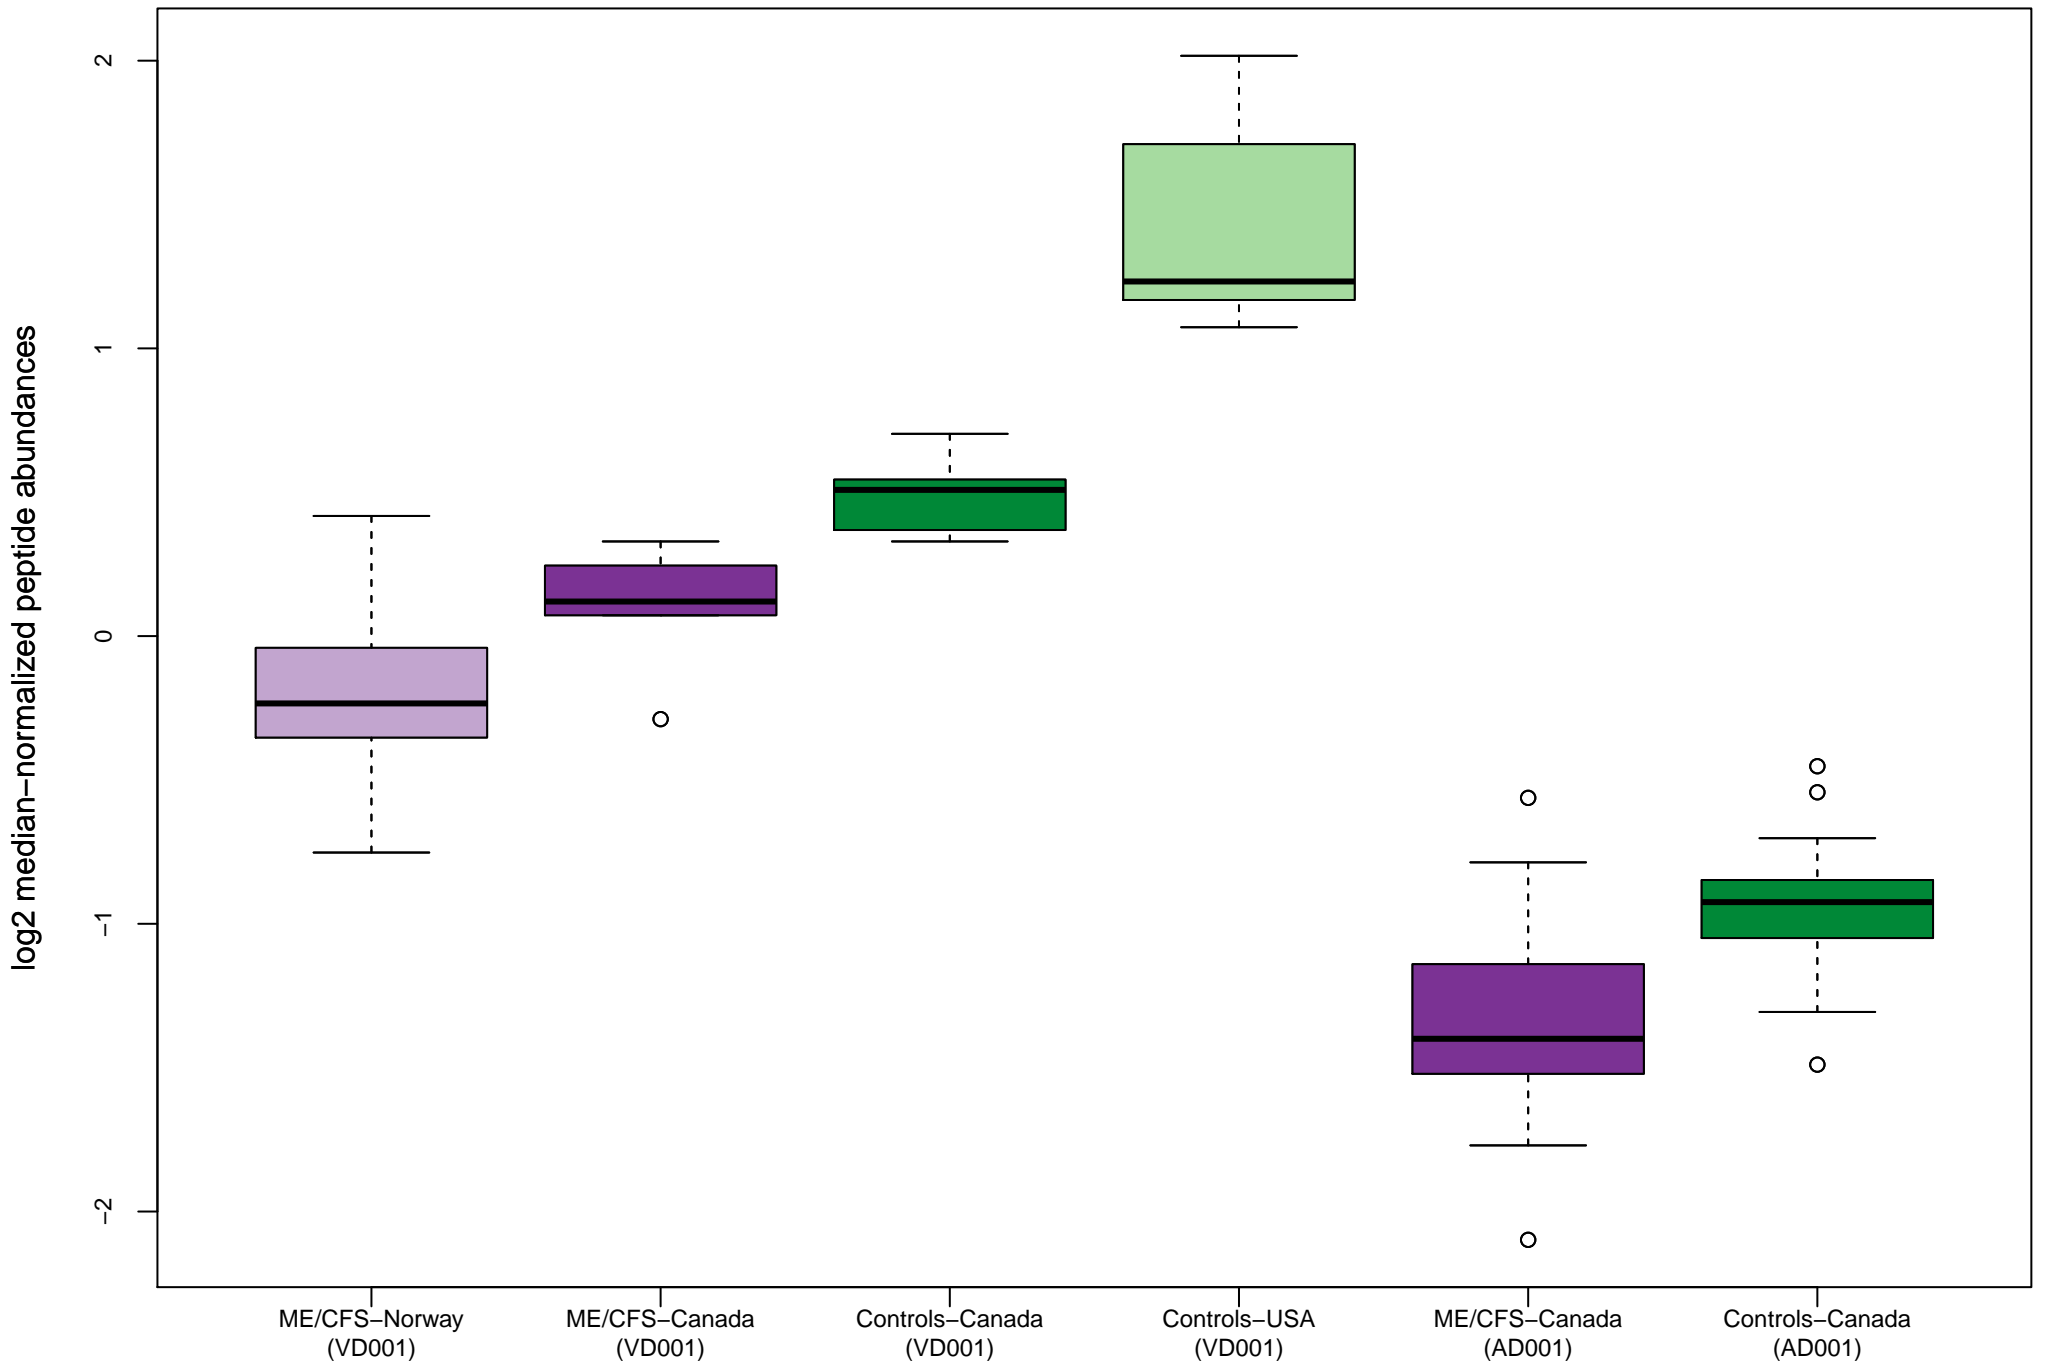



# RFWARQVLSLSG

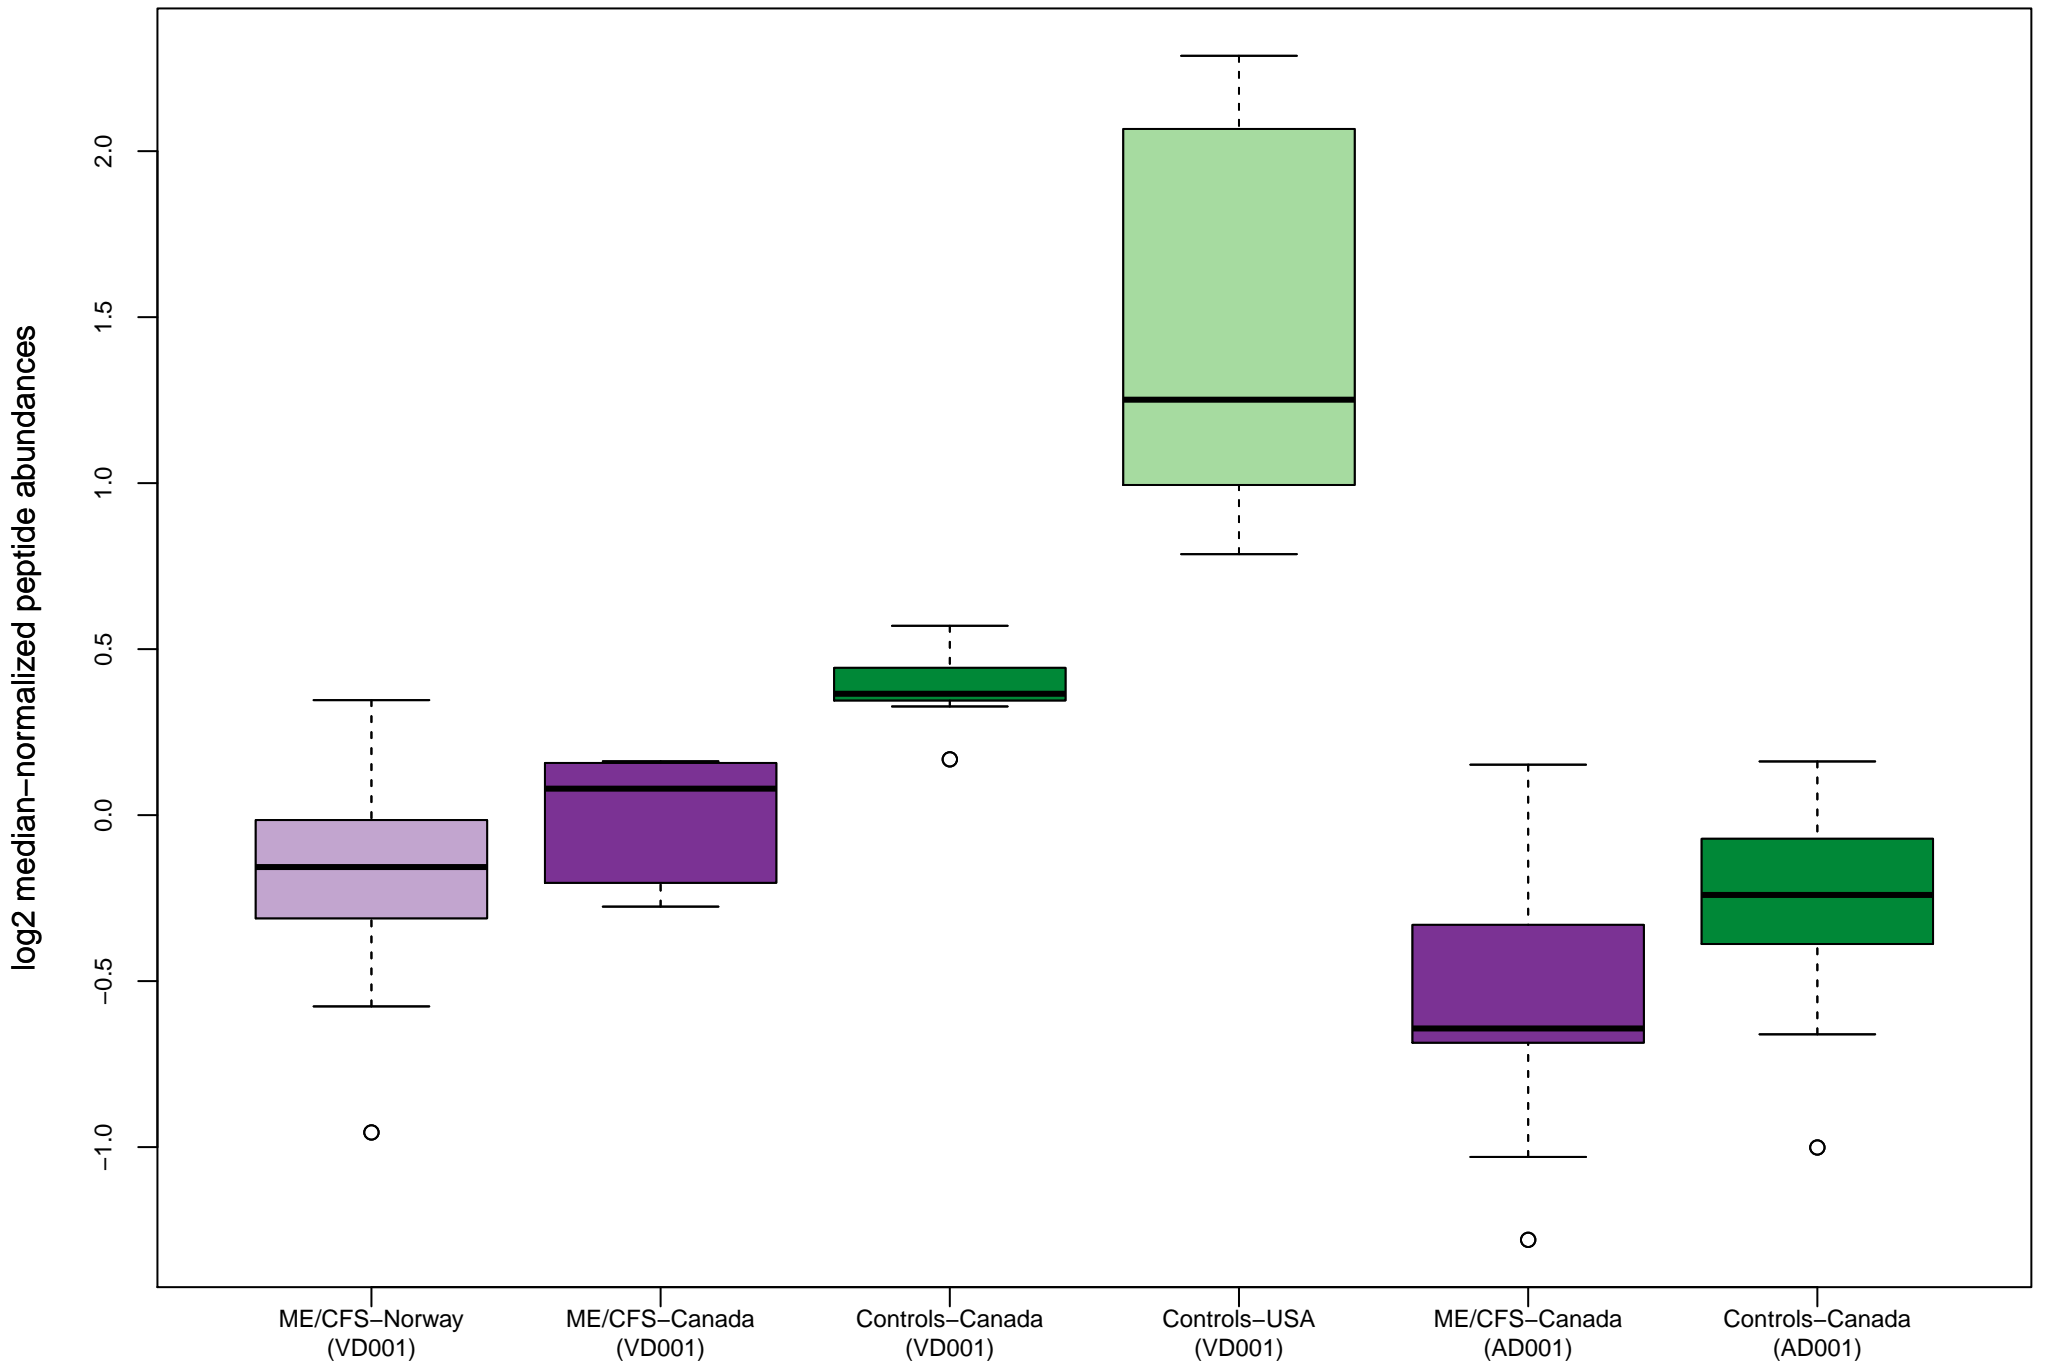

# RFWFAQPWNKSG

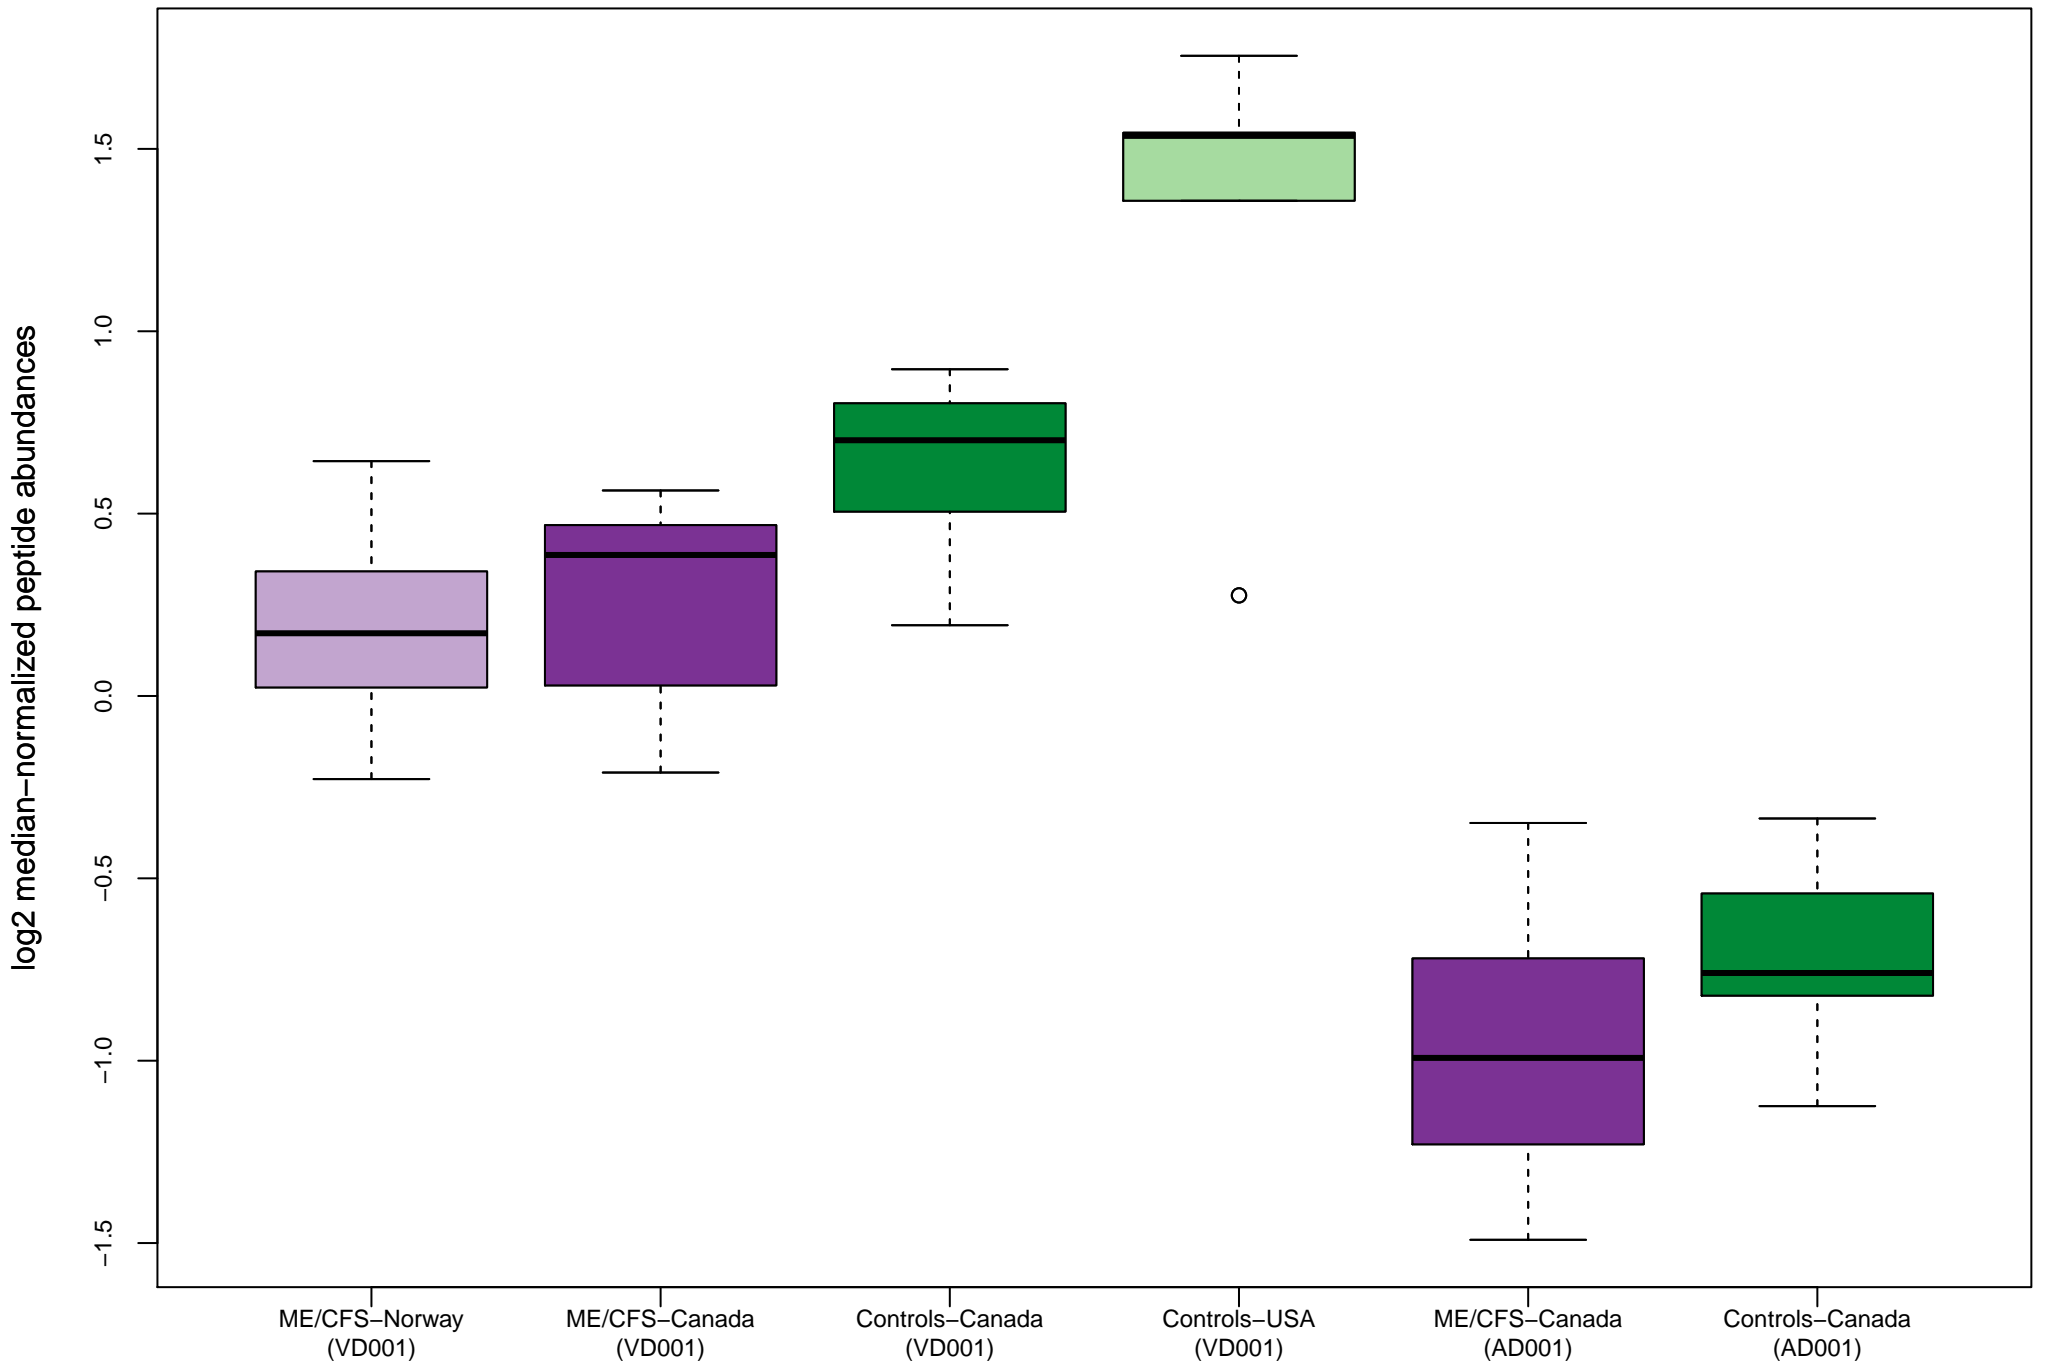

# RFWRANVLGALS

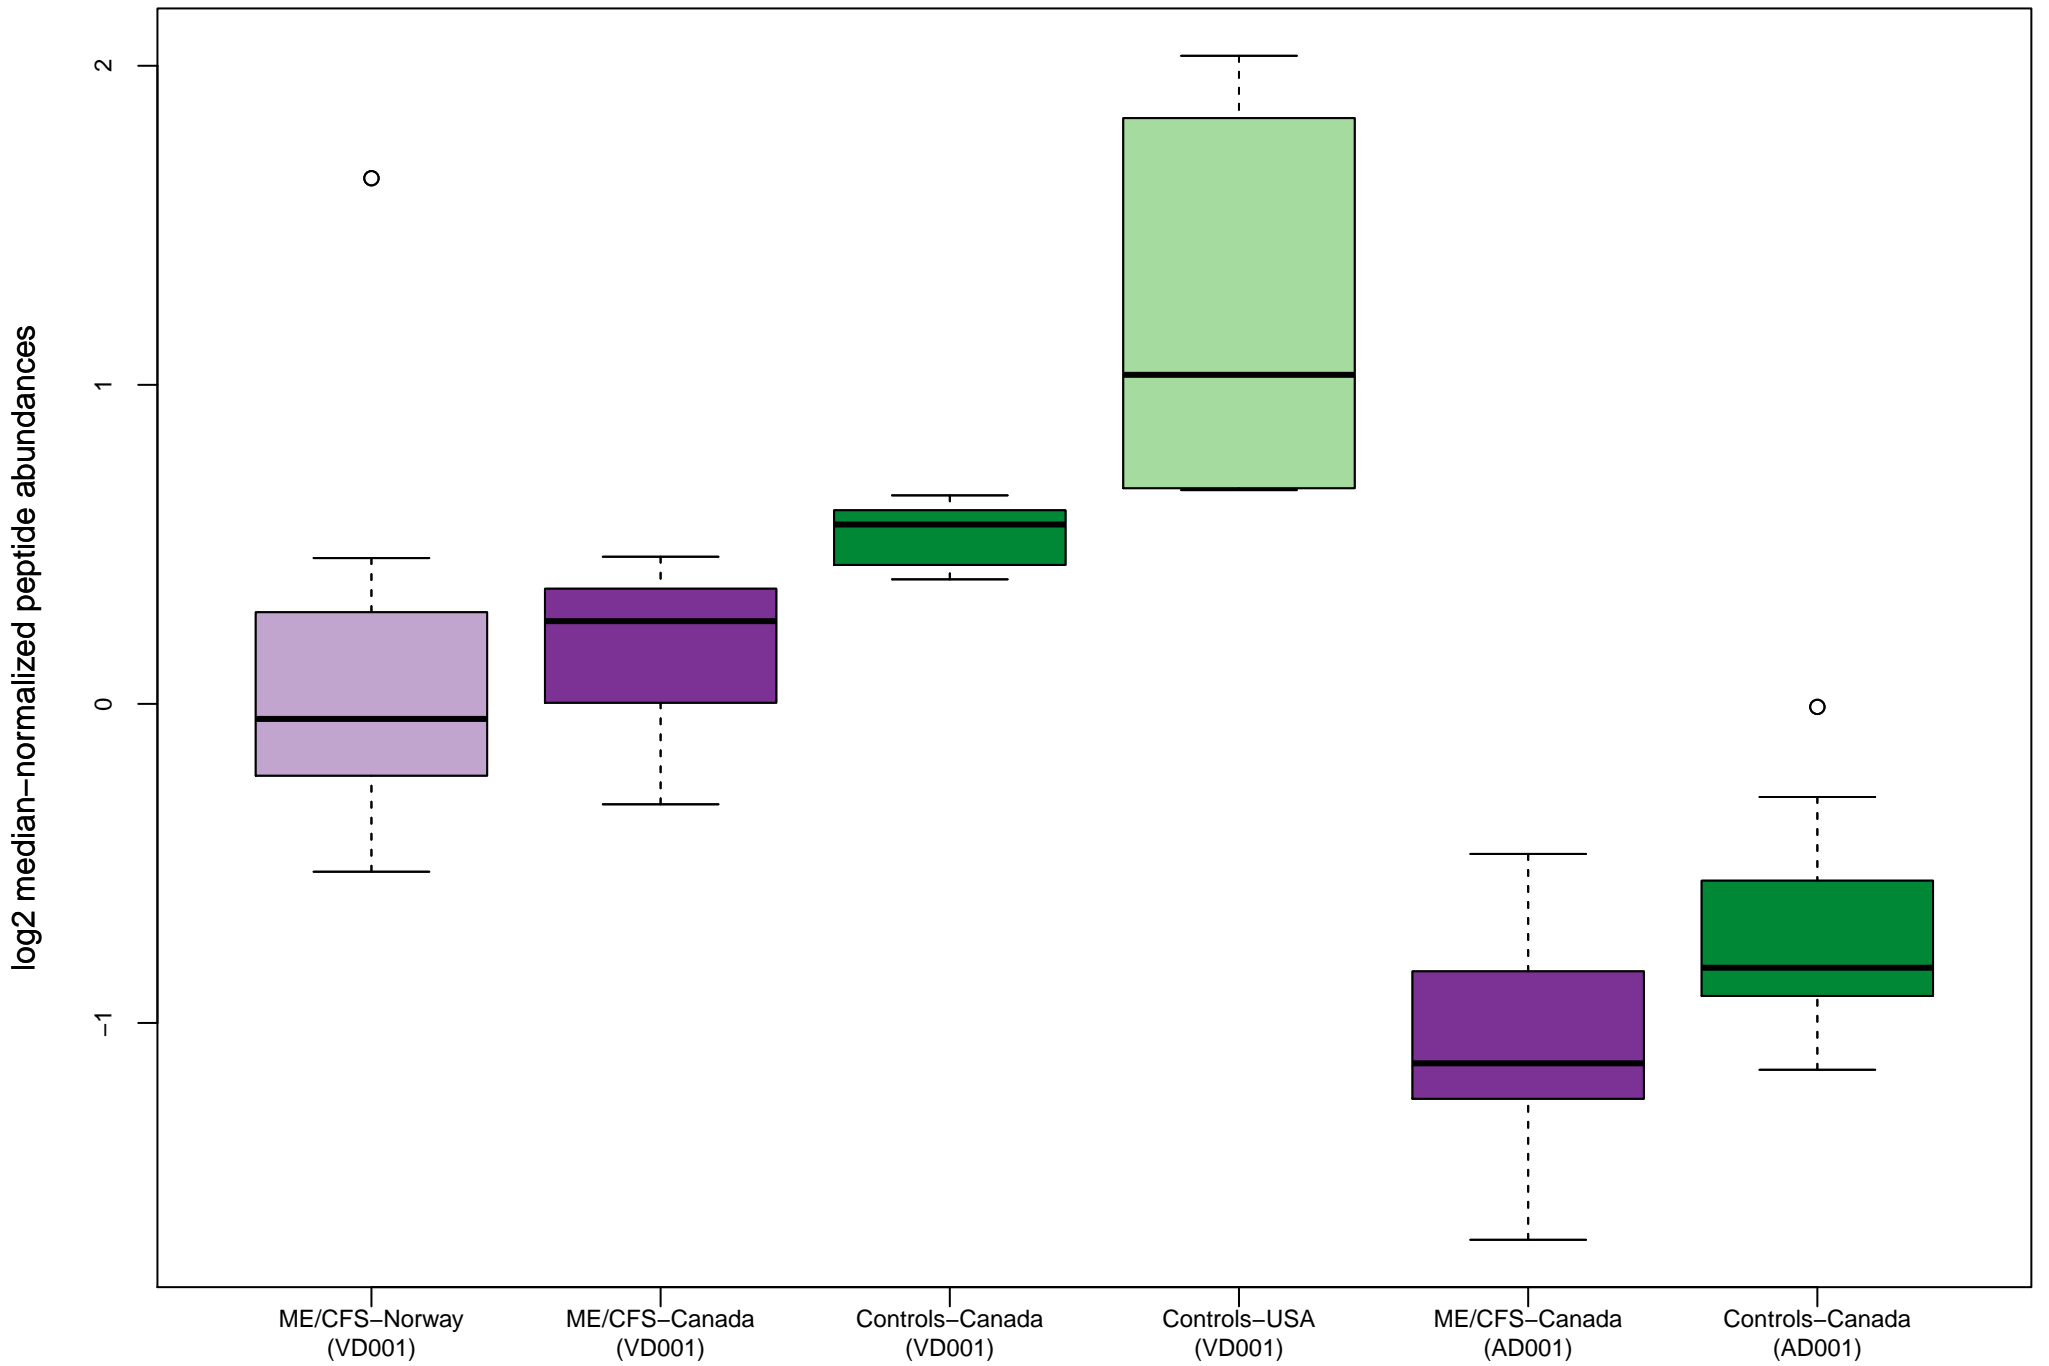

# RLGRFSFKGASG

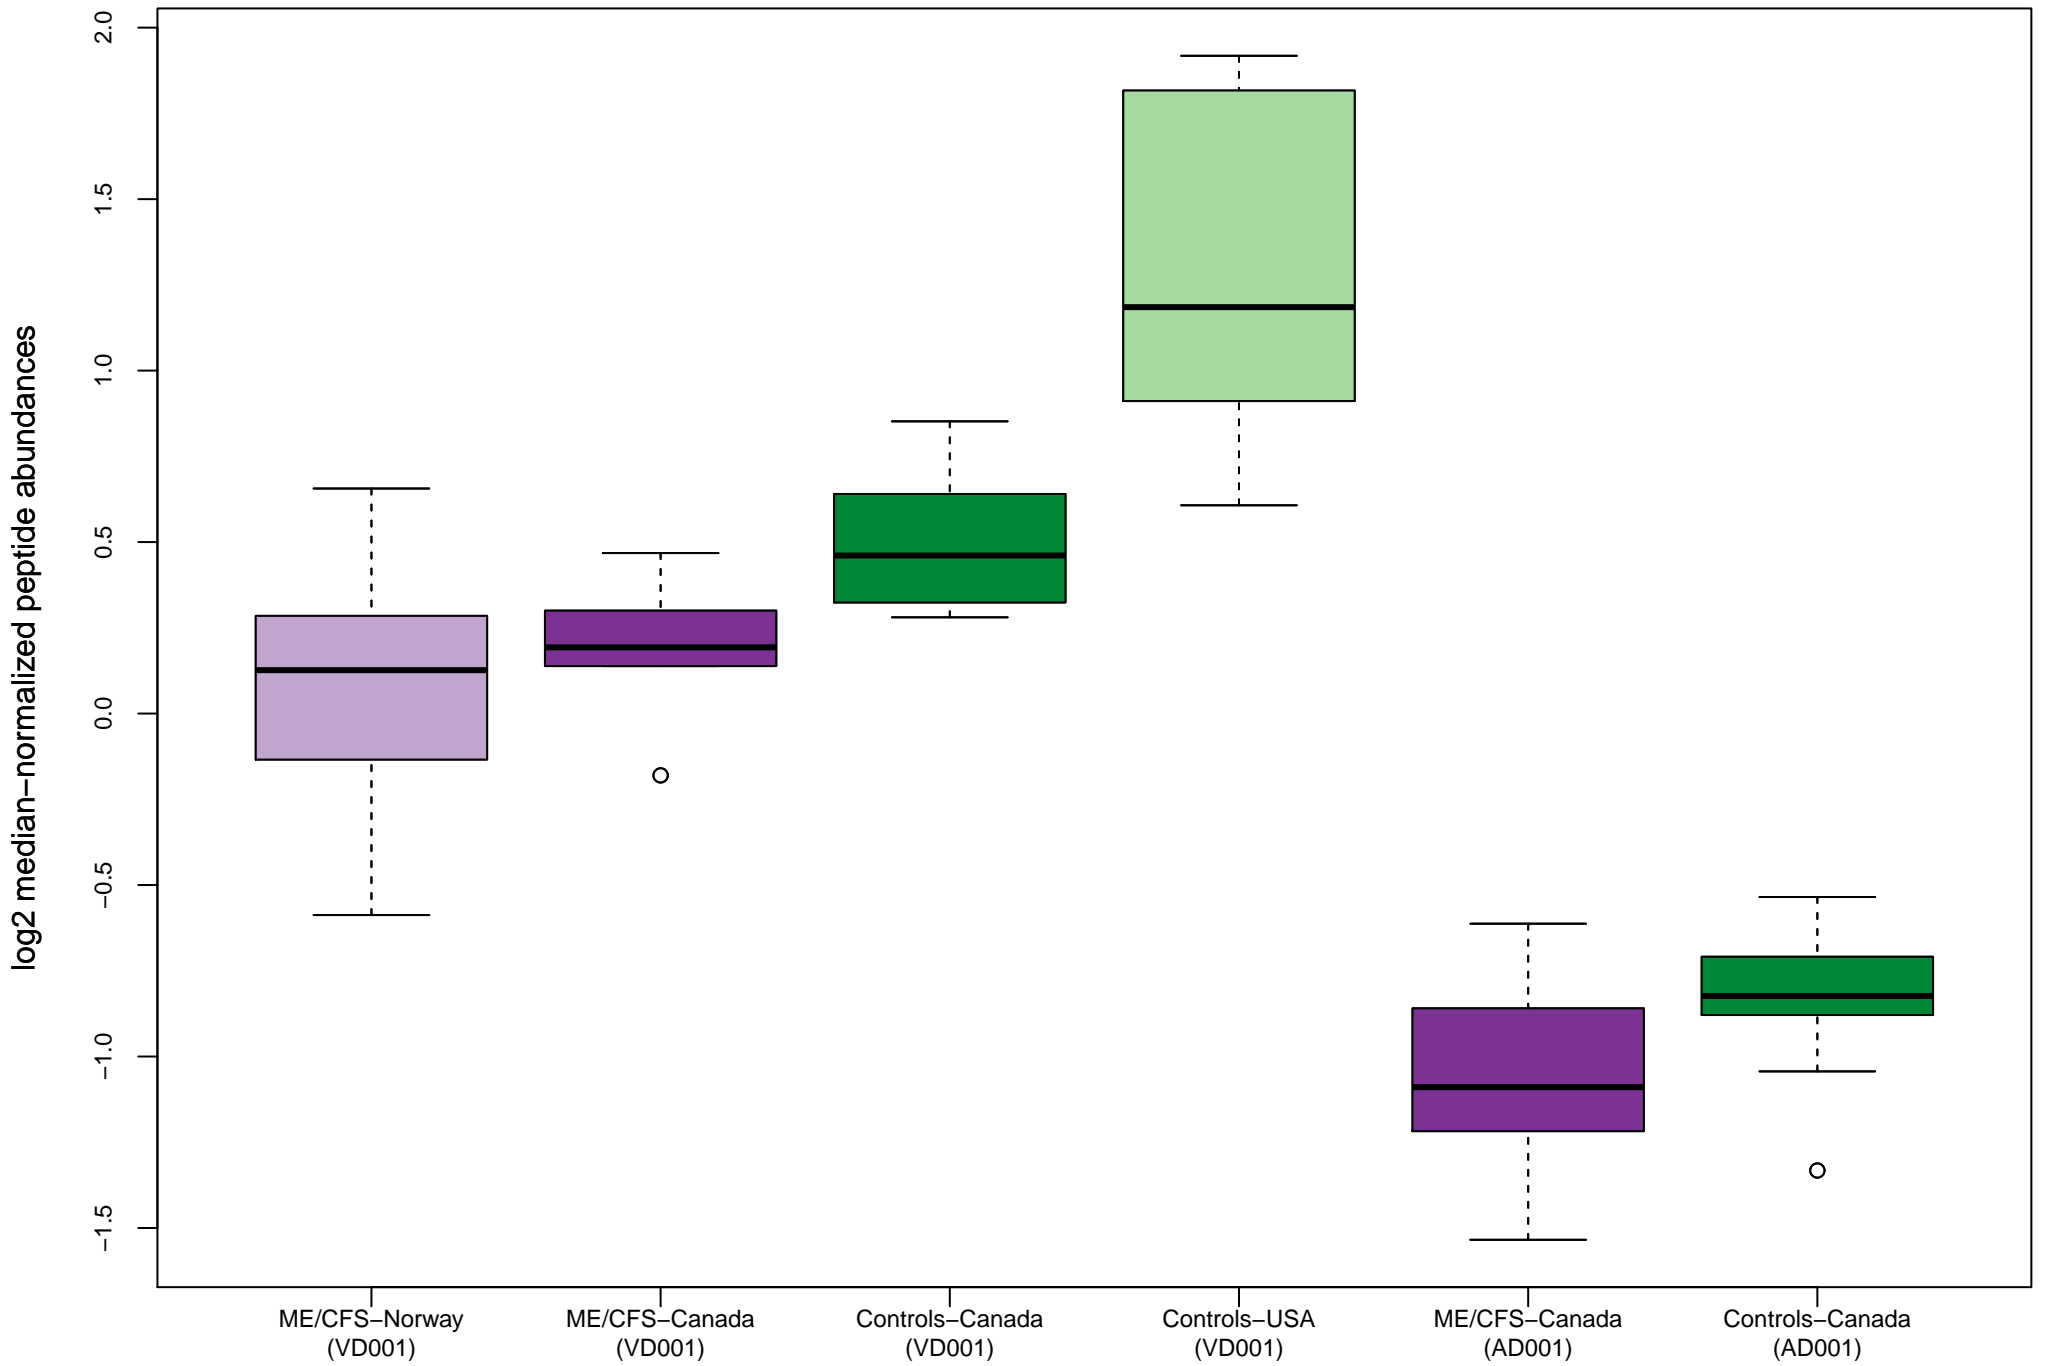

# RLLFWVRKALAS

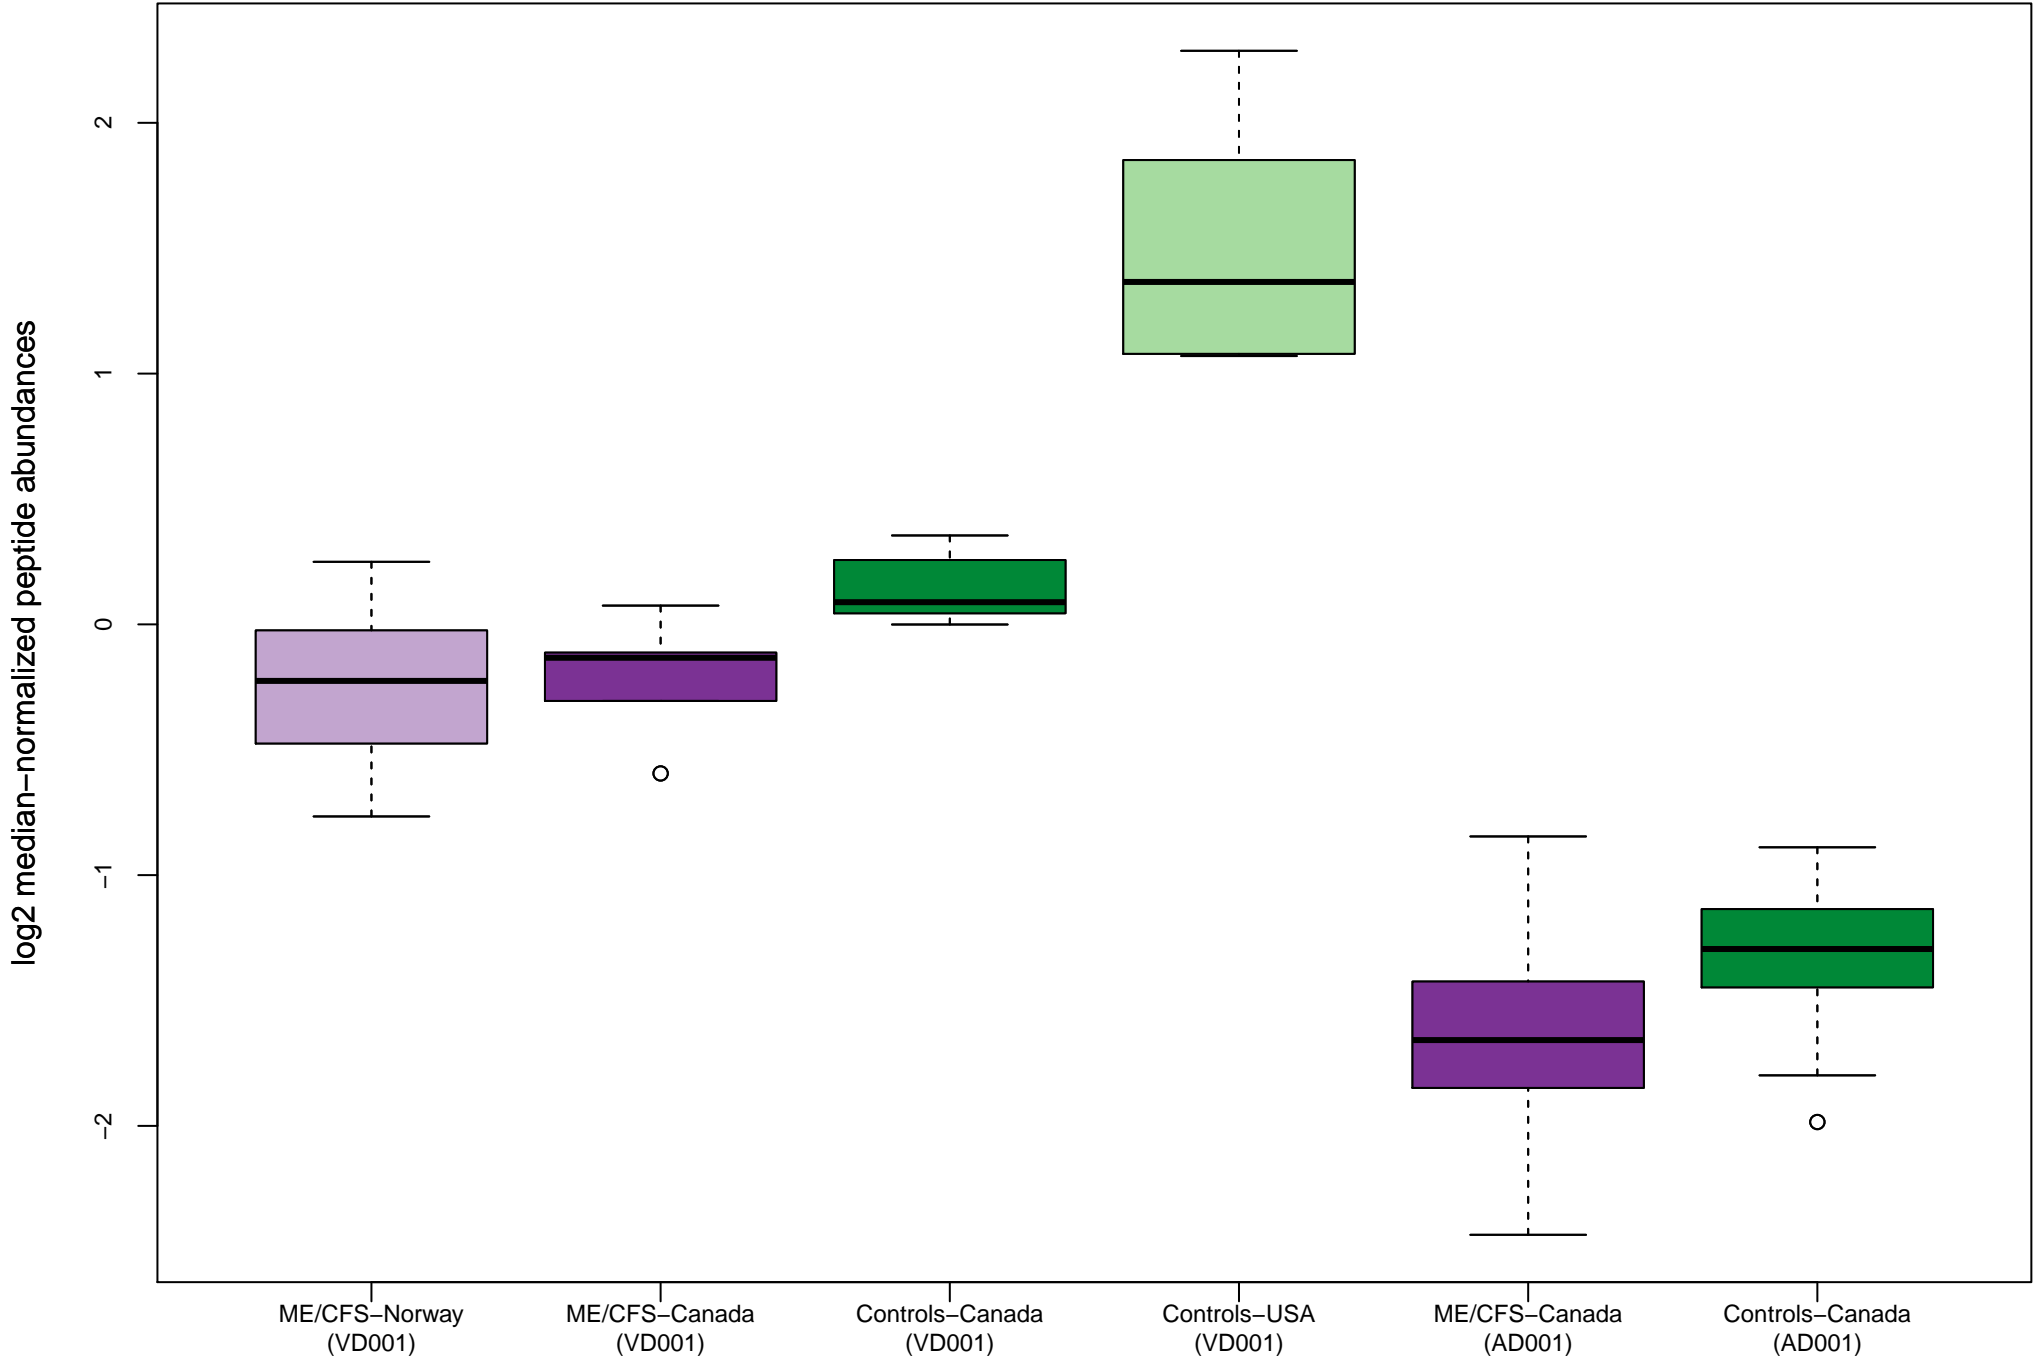

# RLVAYSNKVLGV

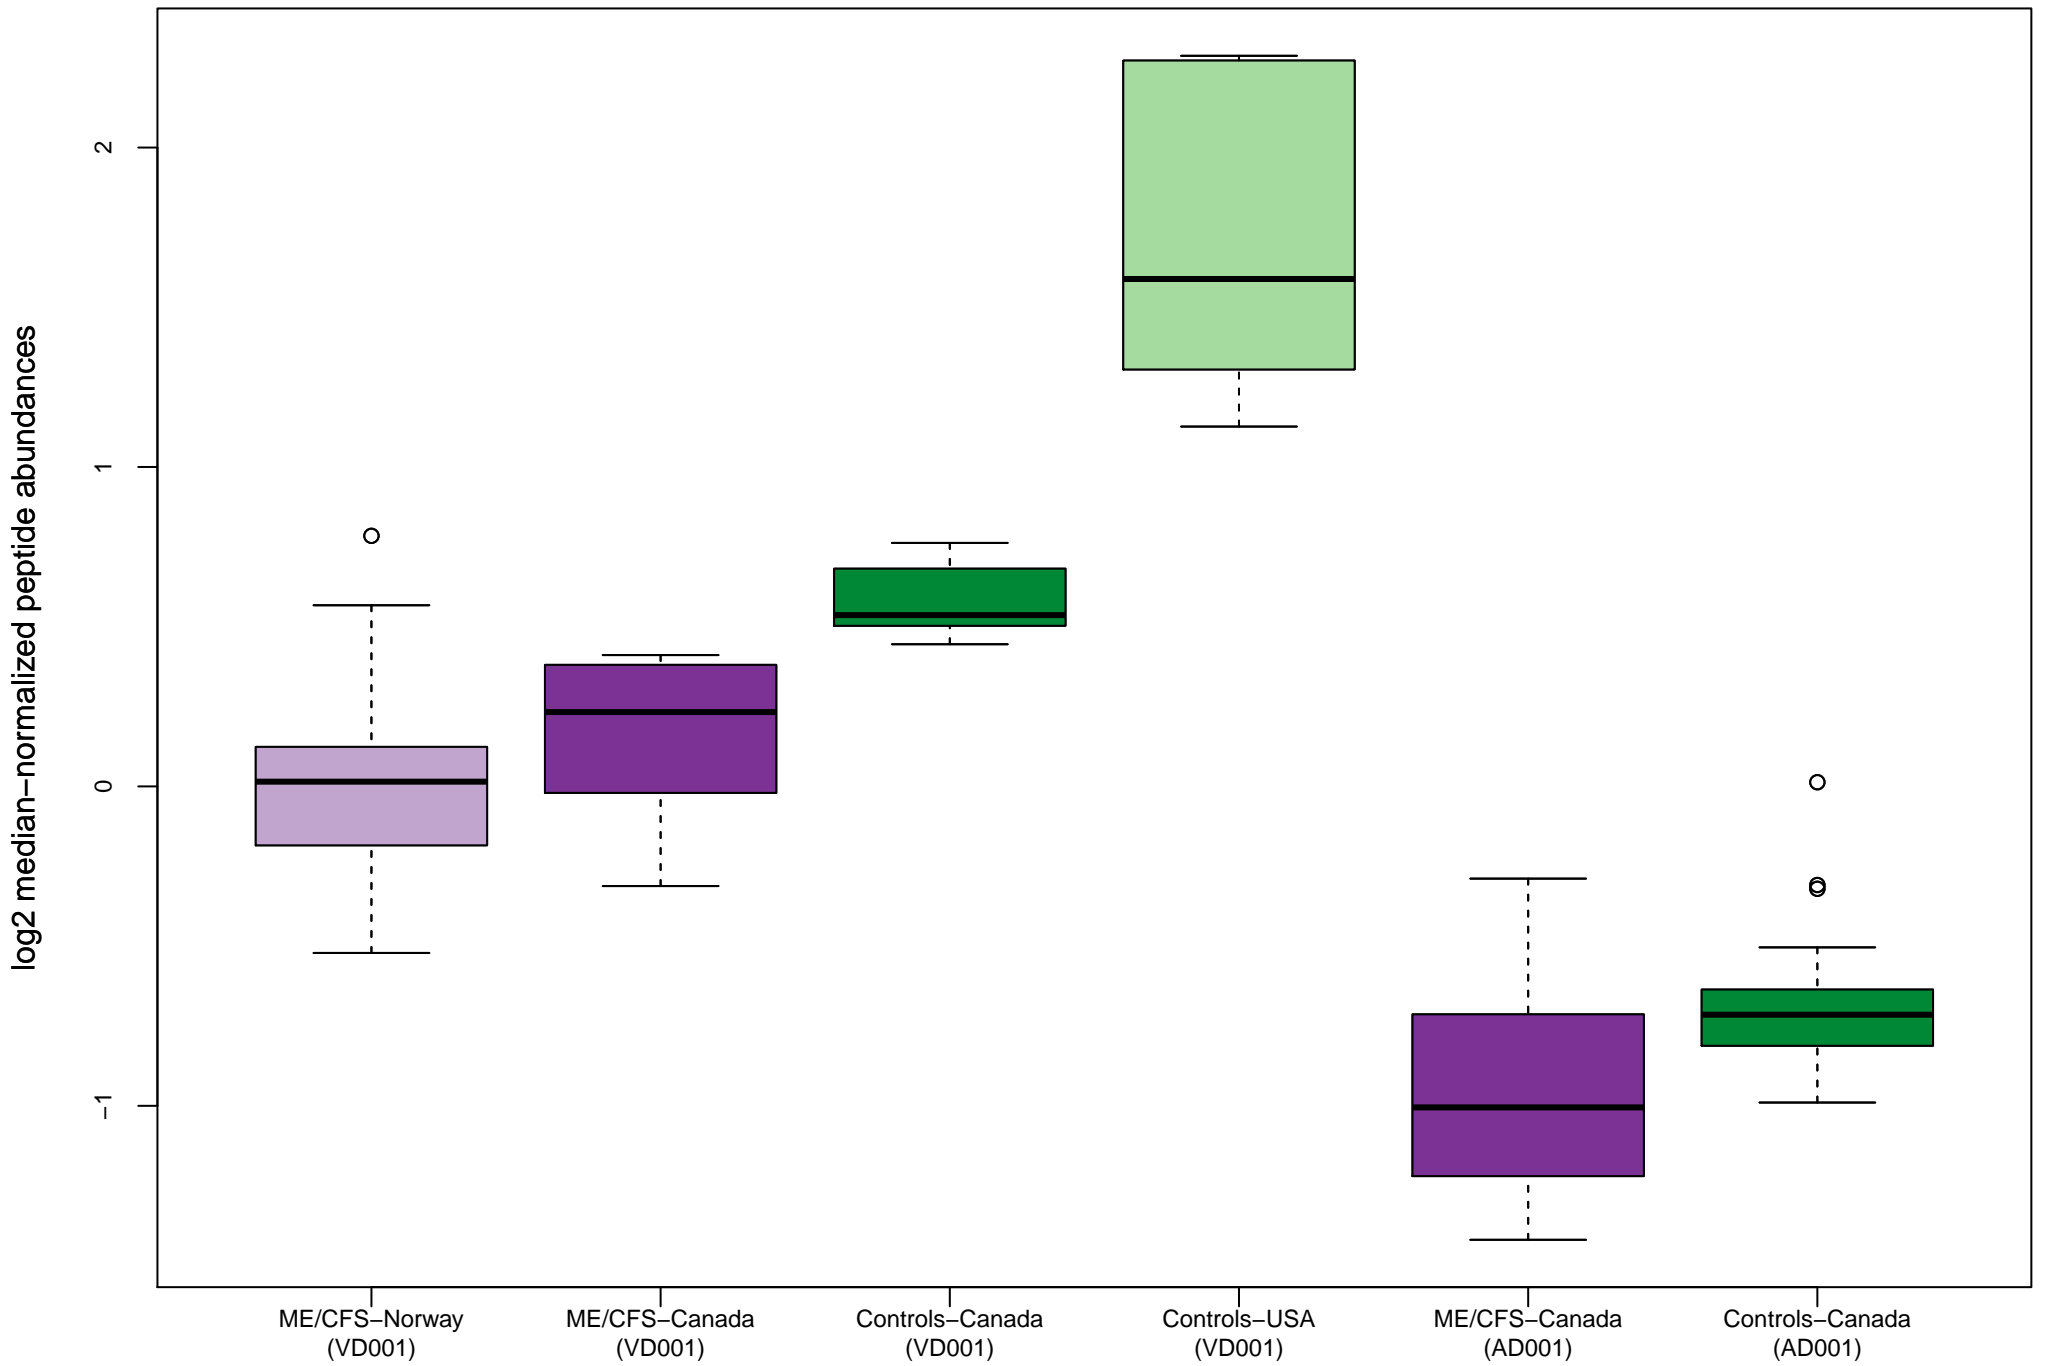

# RPLHNHLFRYKL

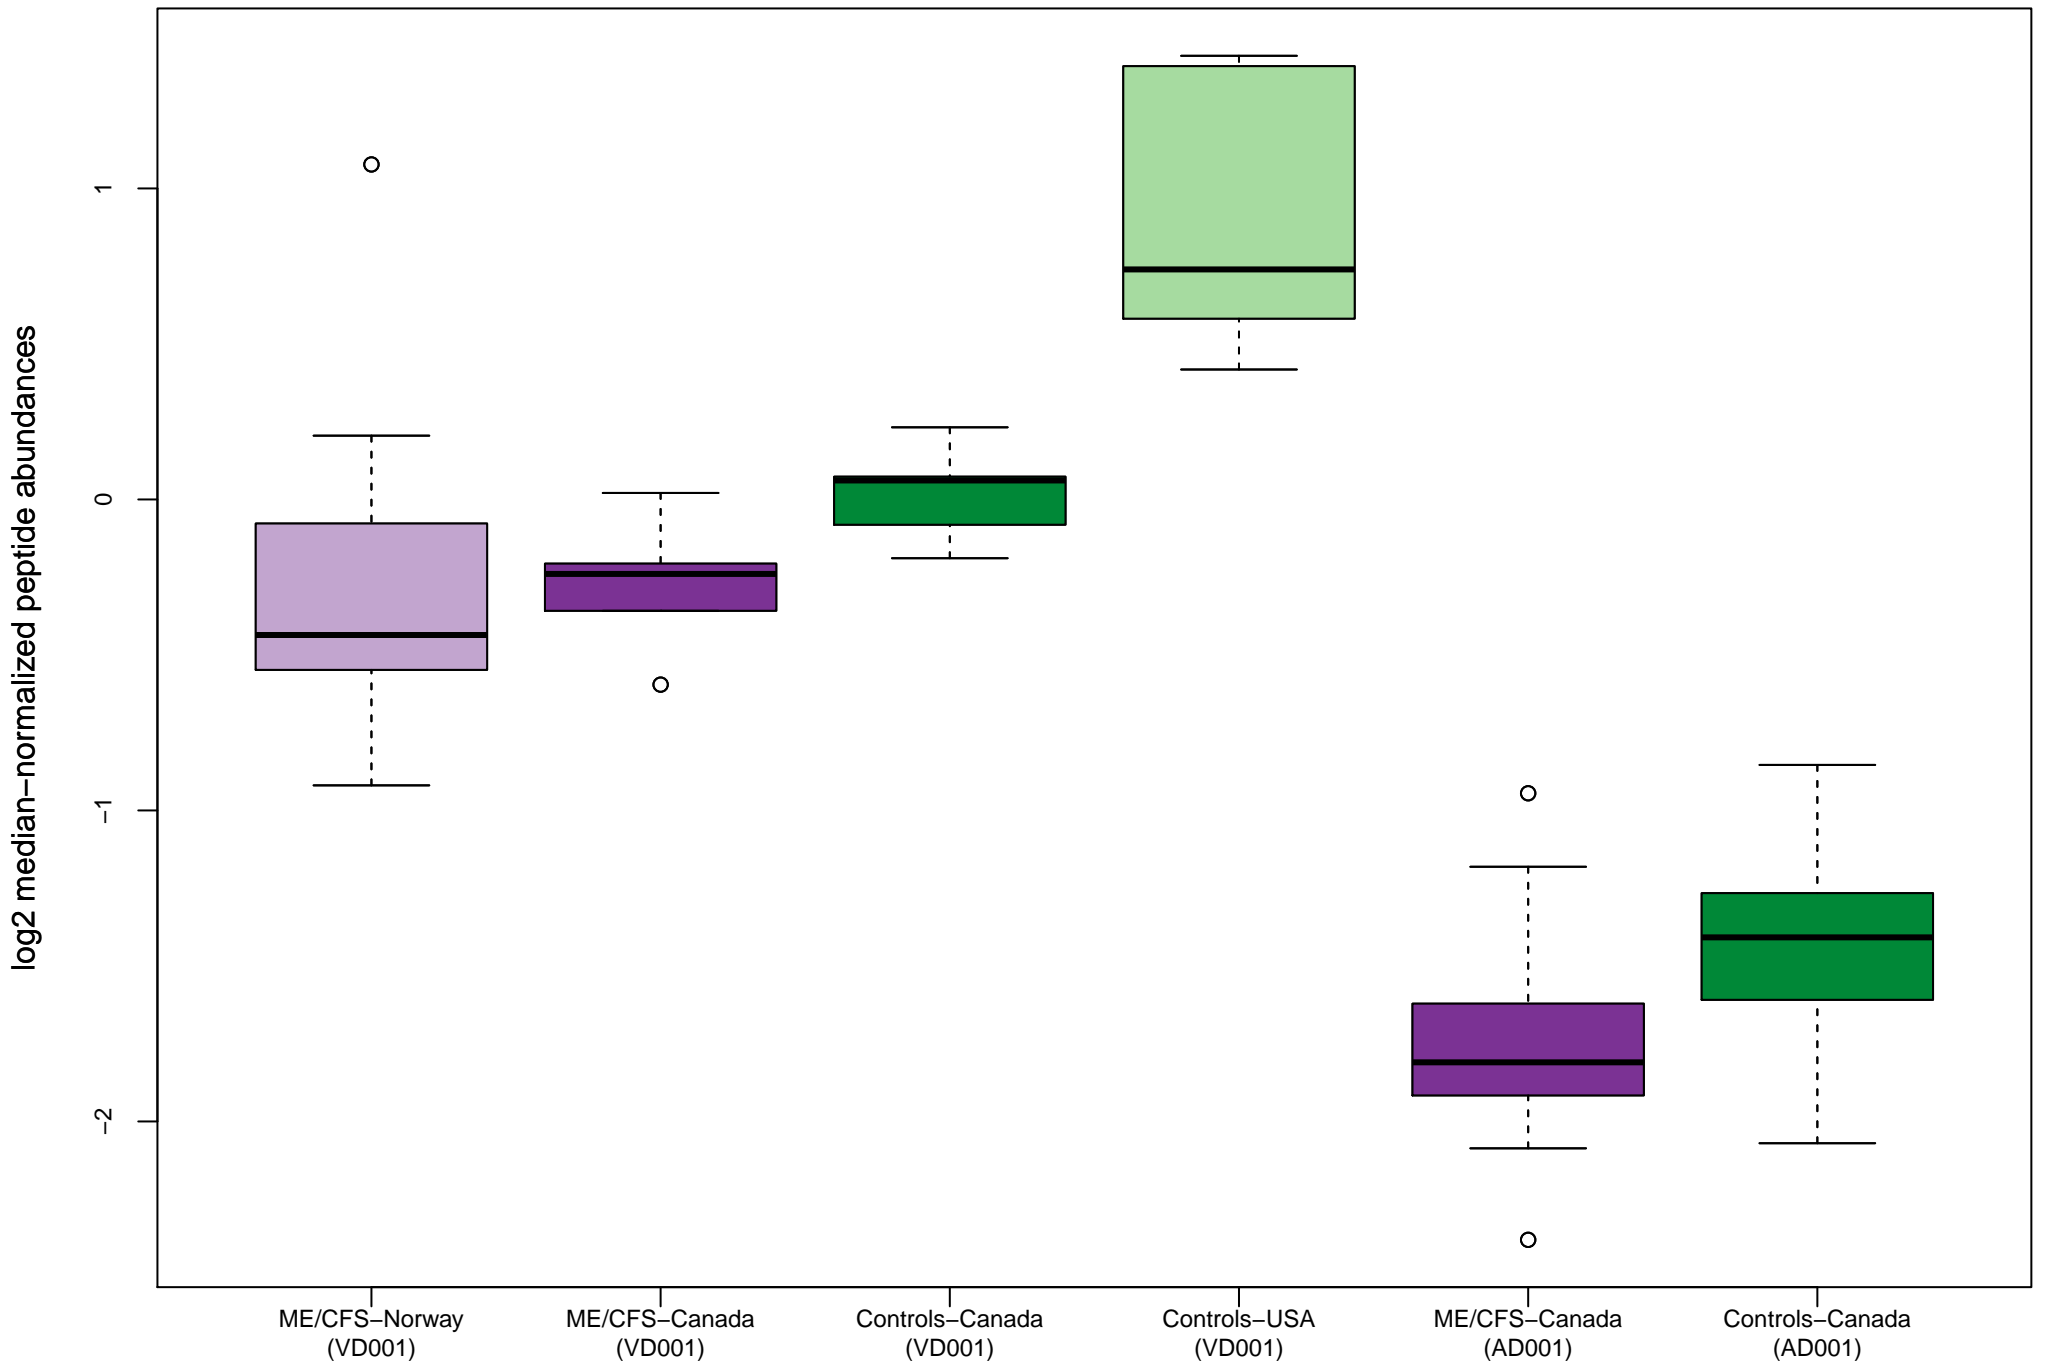

# RRAAFWLSGALS

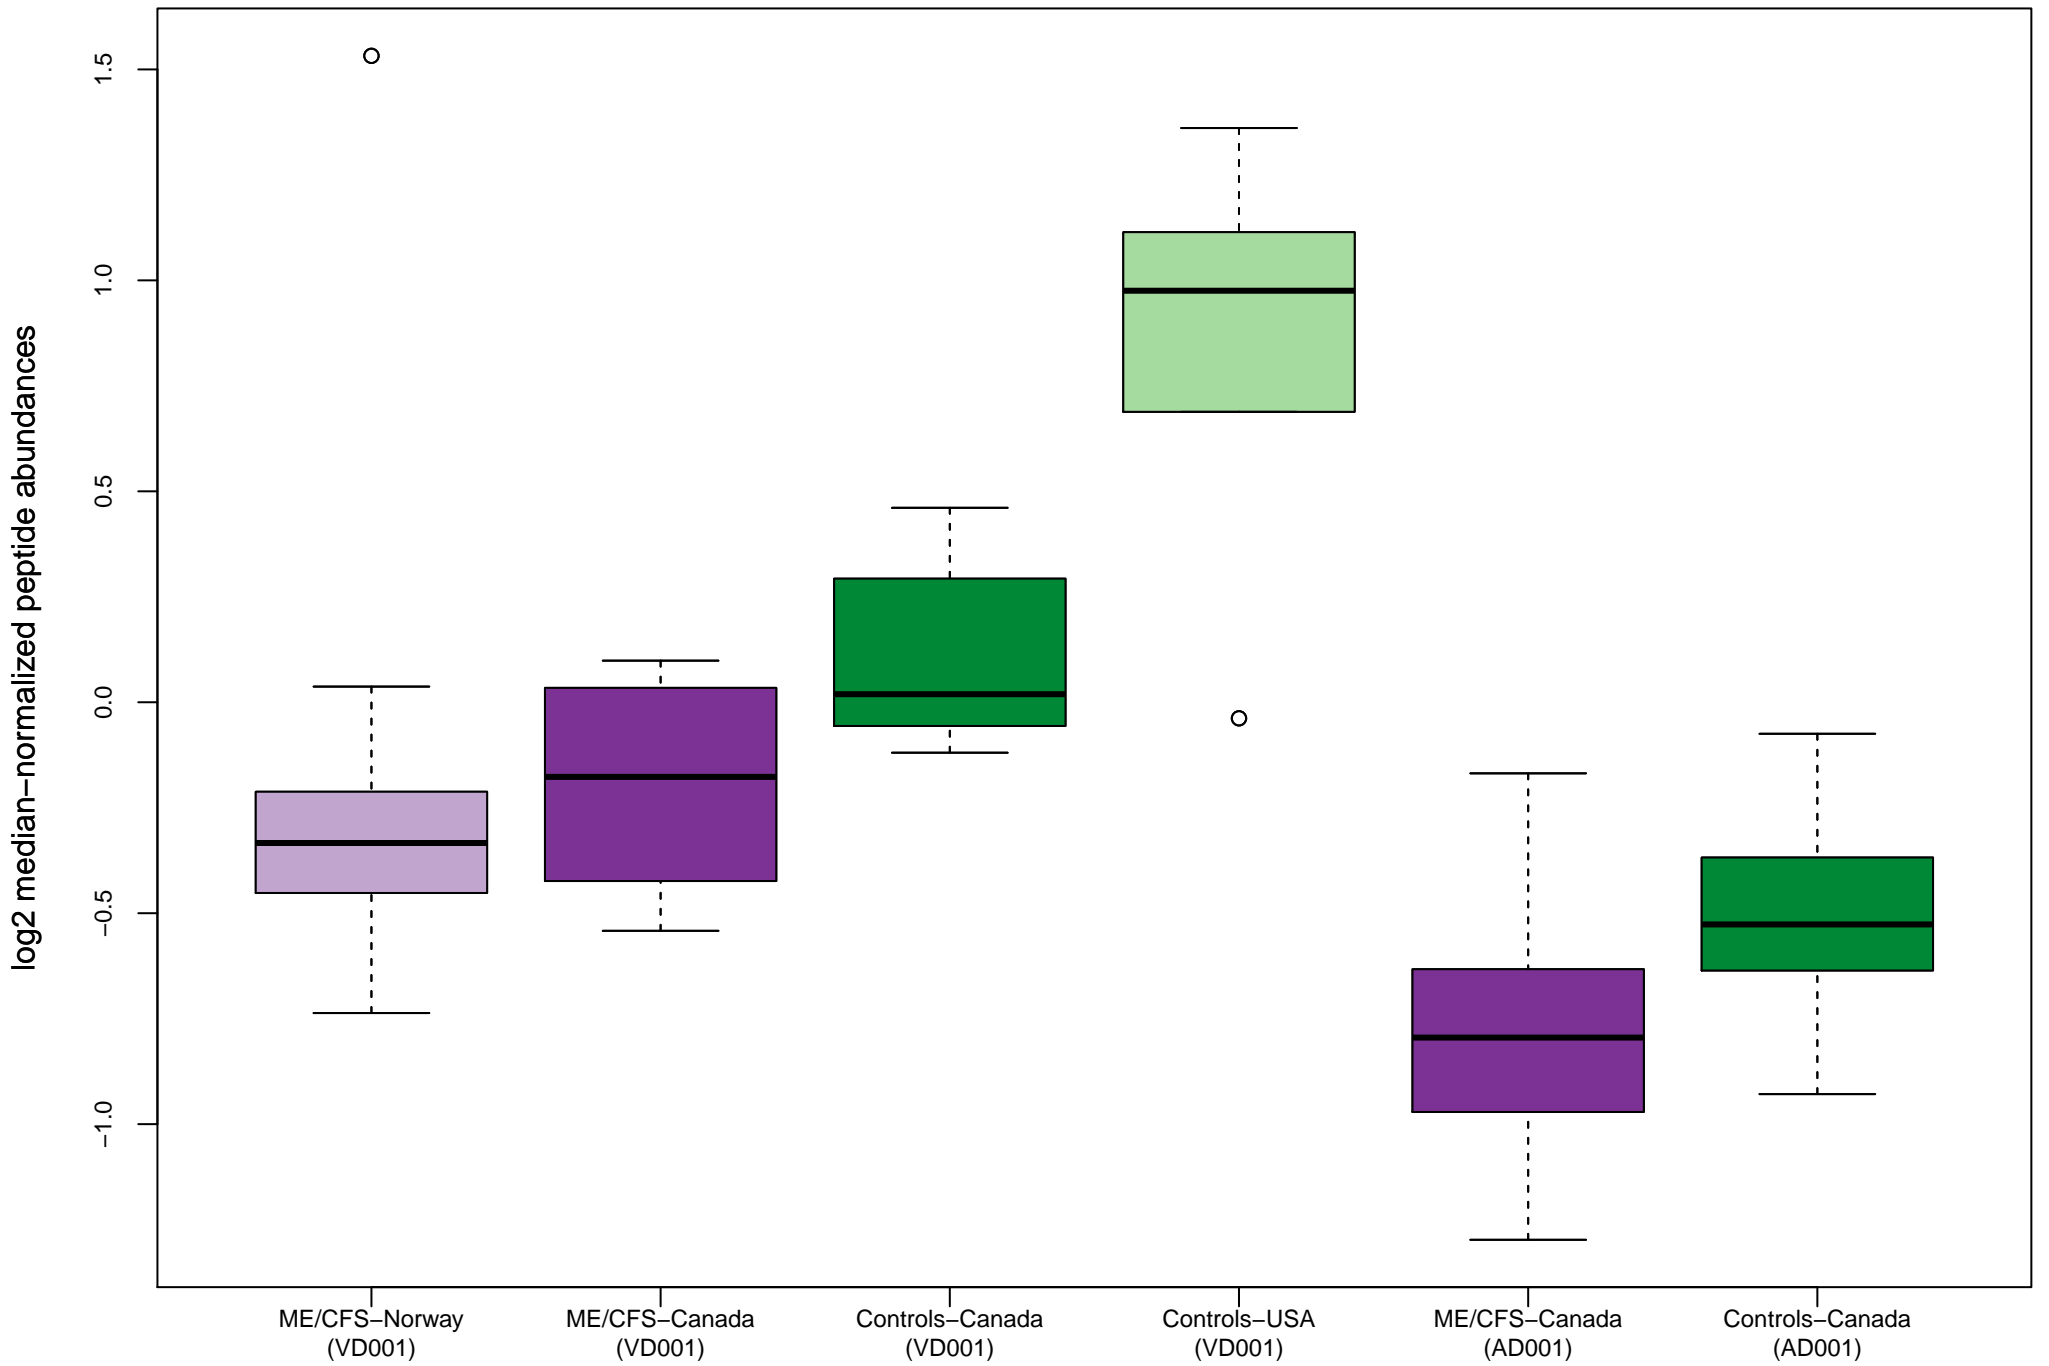



# RRFYQFPGVALG

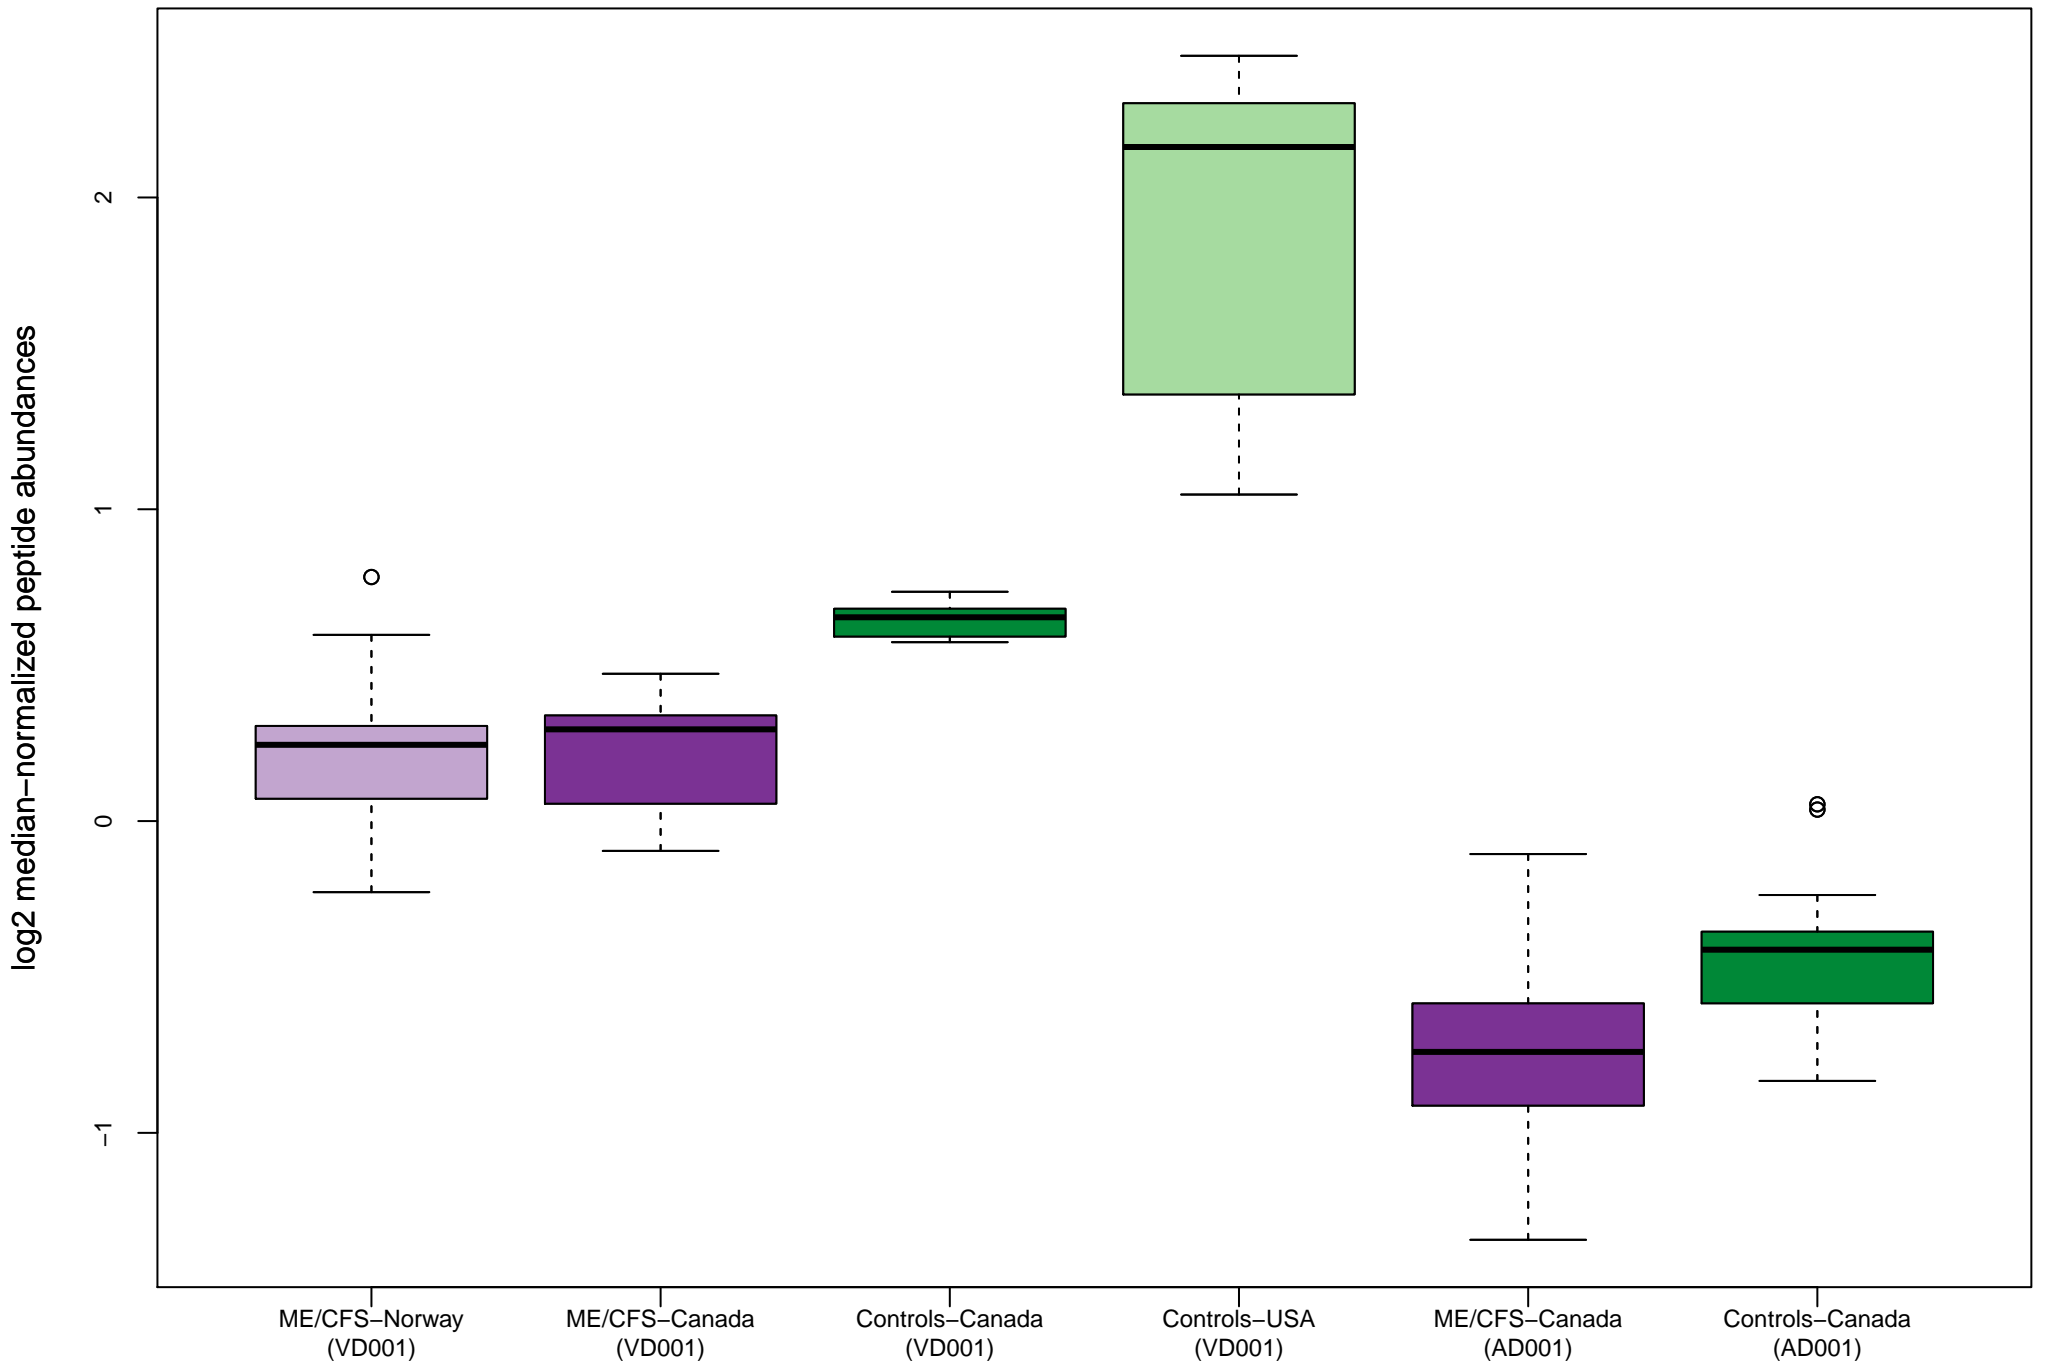

# RRYVLVSFRPNG

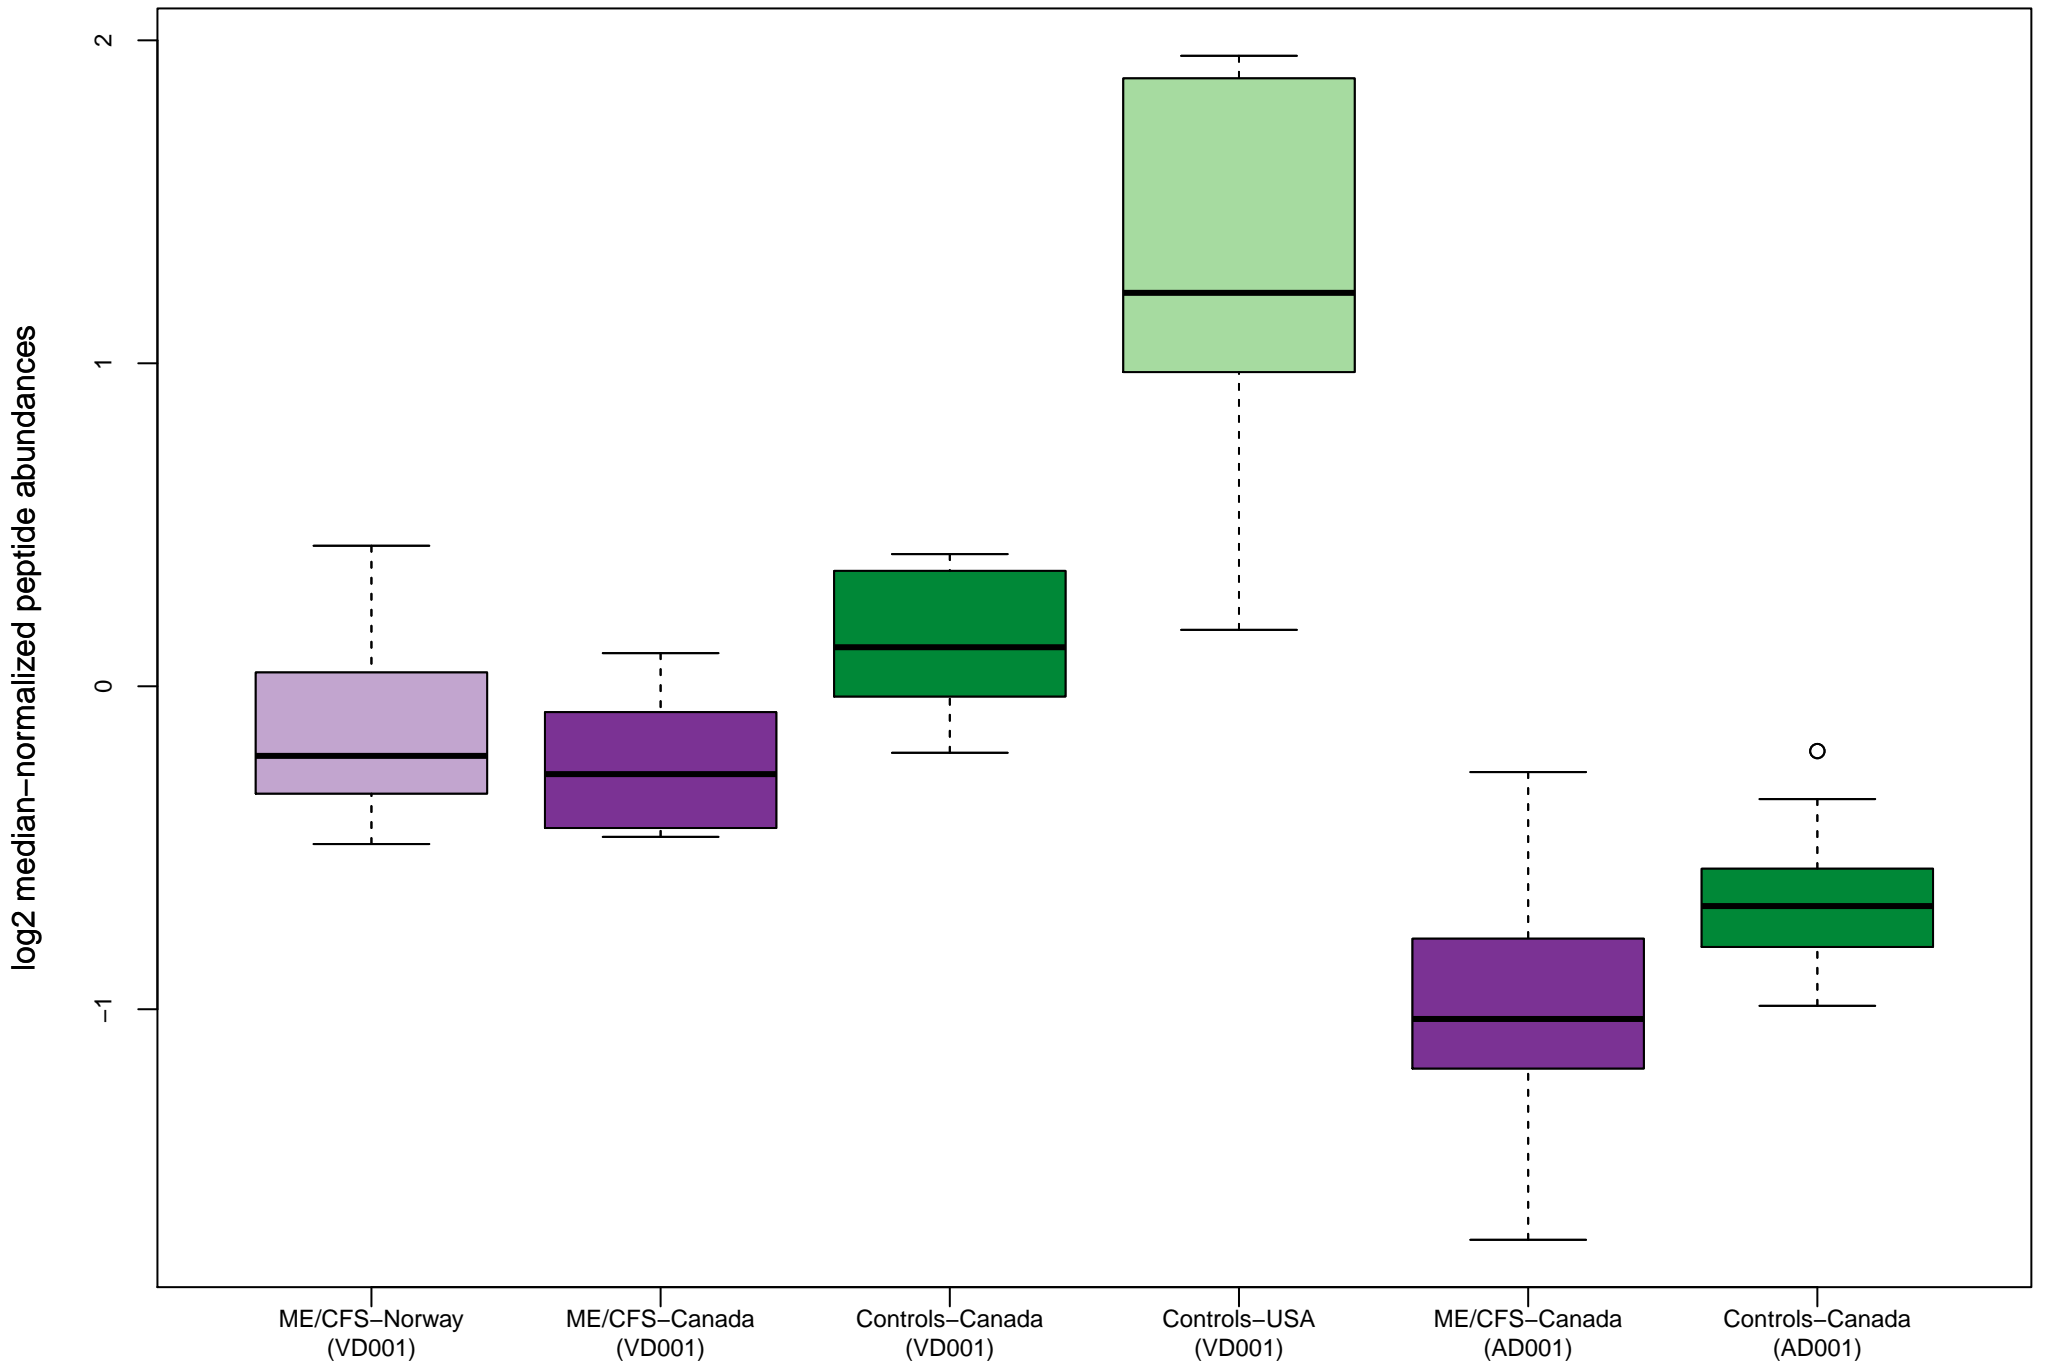

# RSLWSRYLSALG

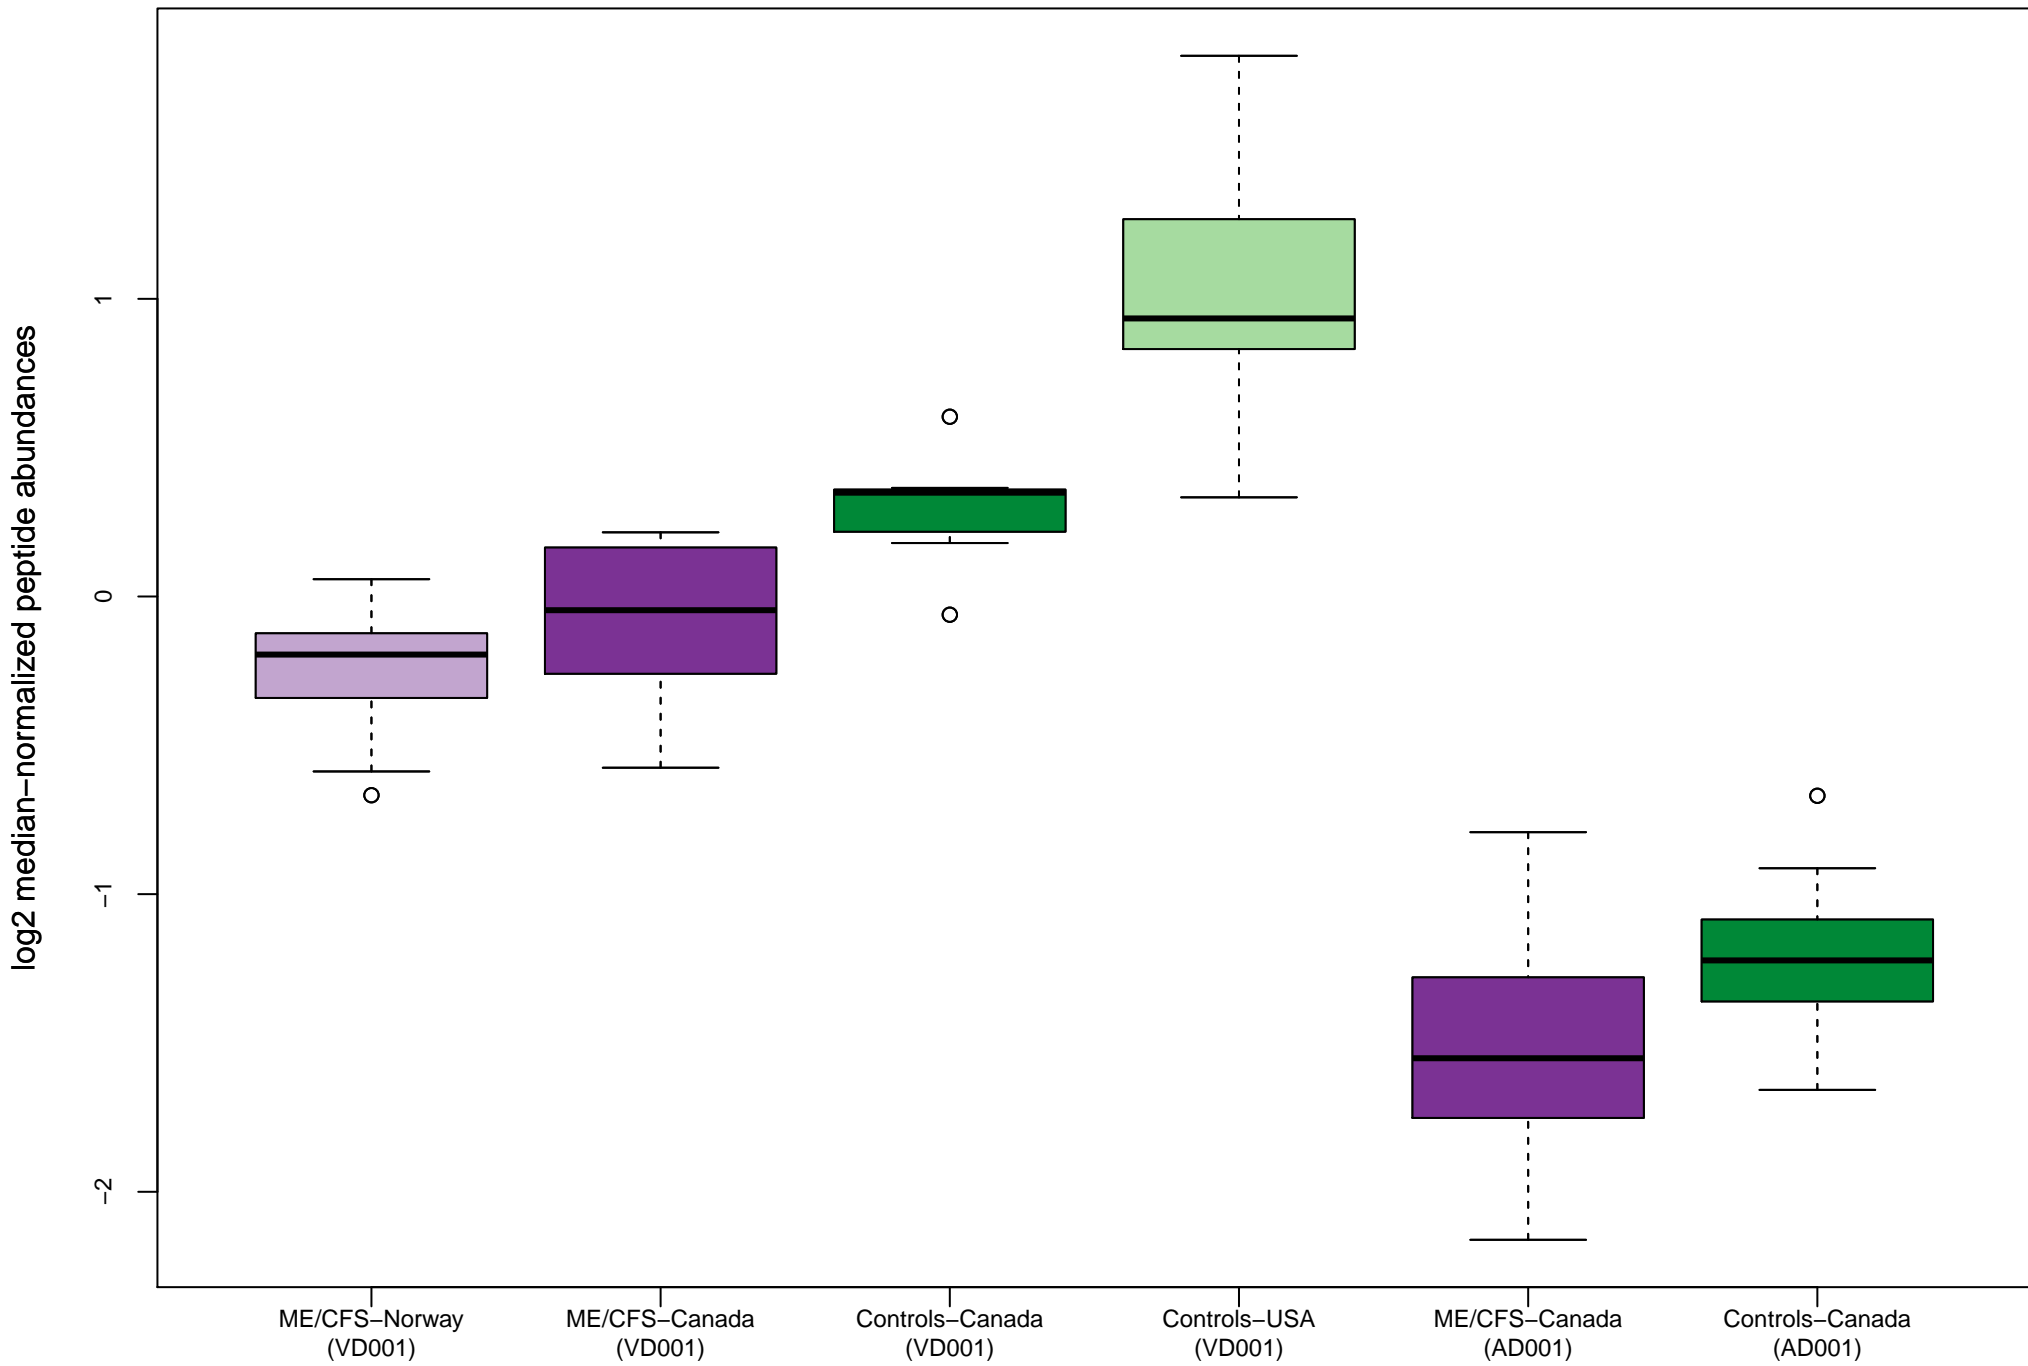

# RVLYLSAQPKGV

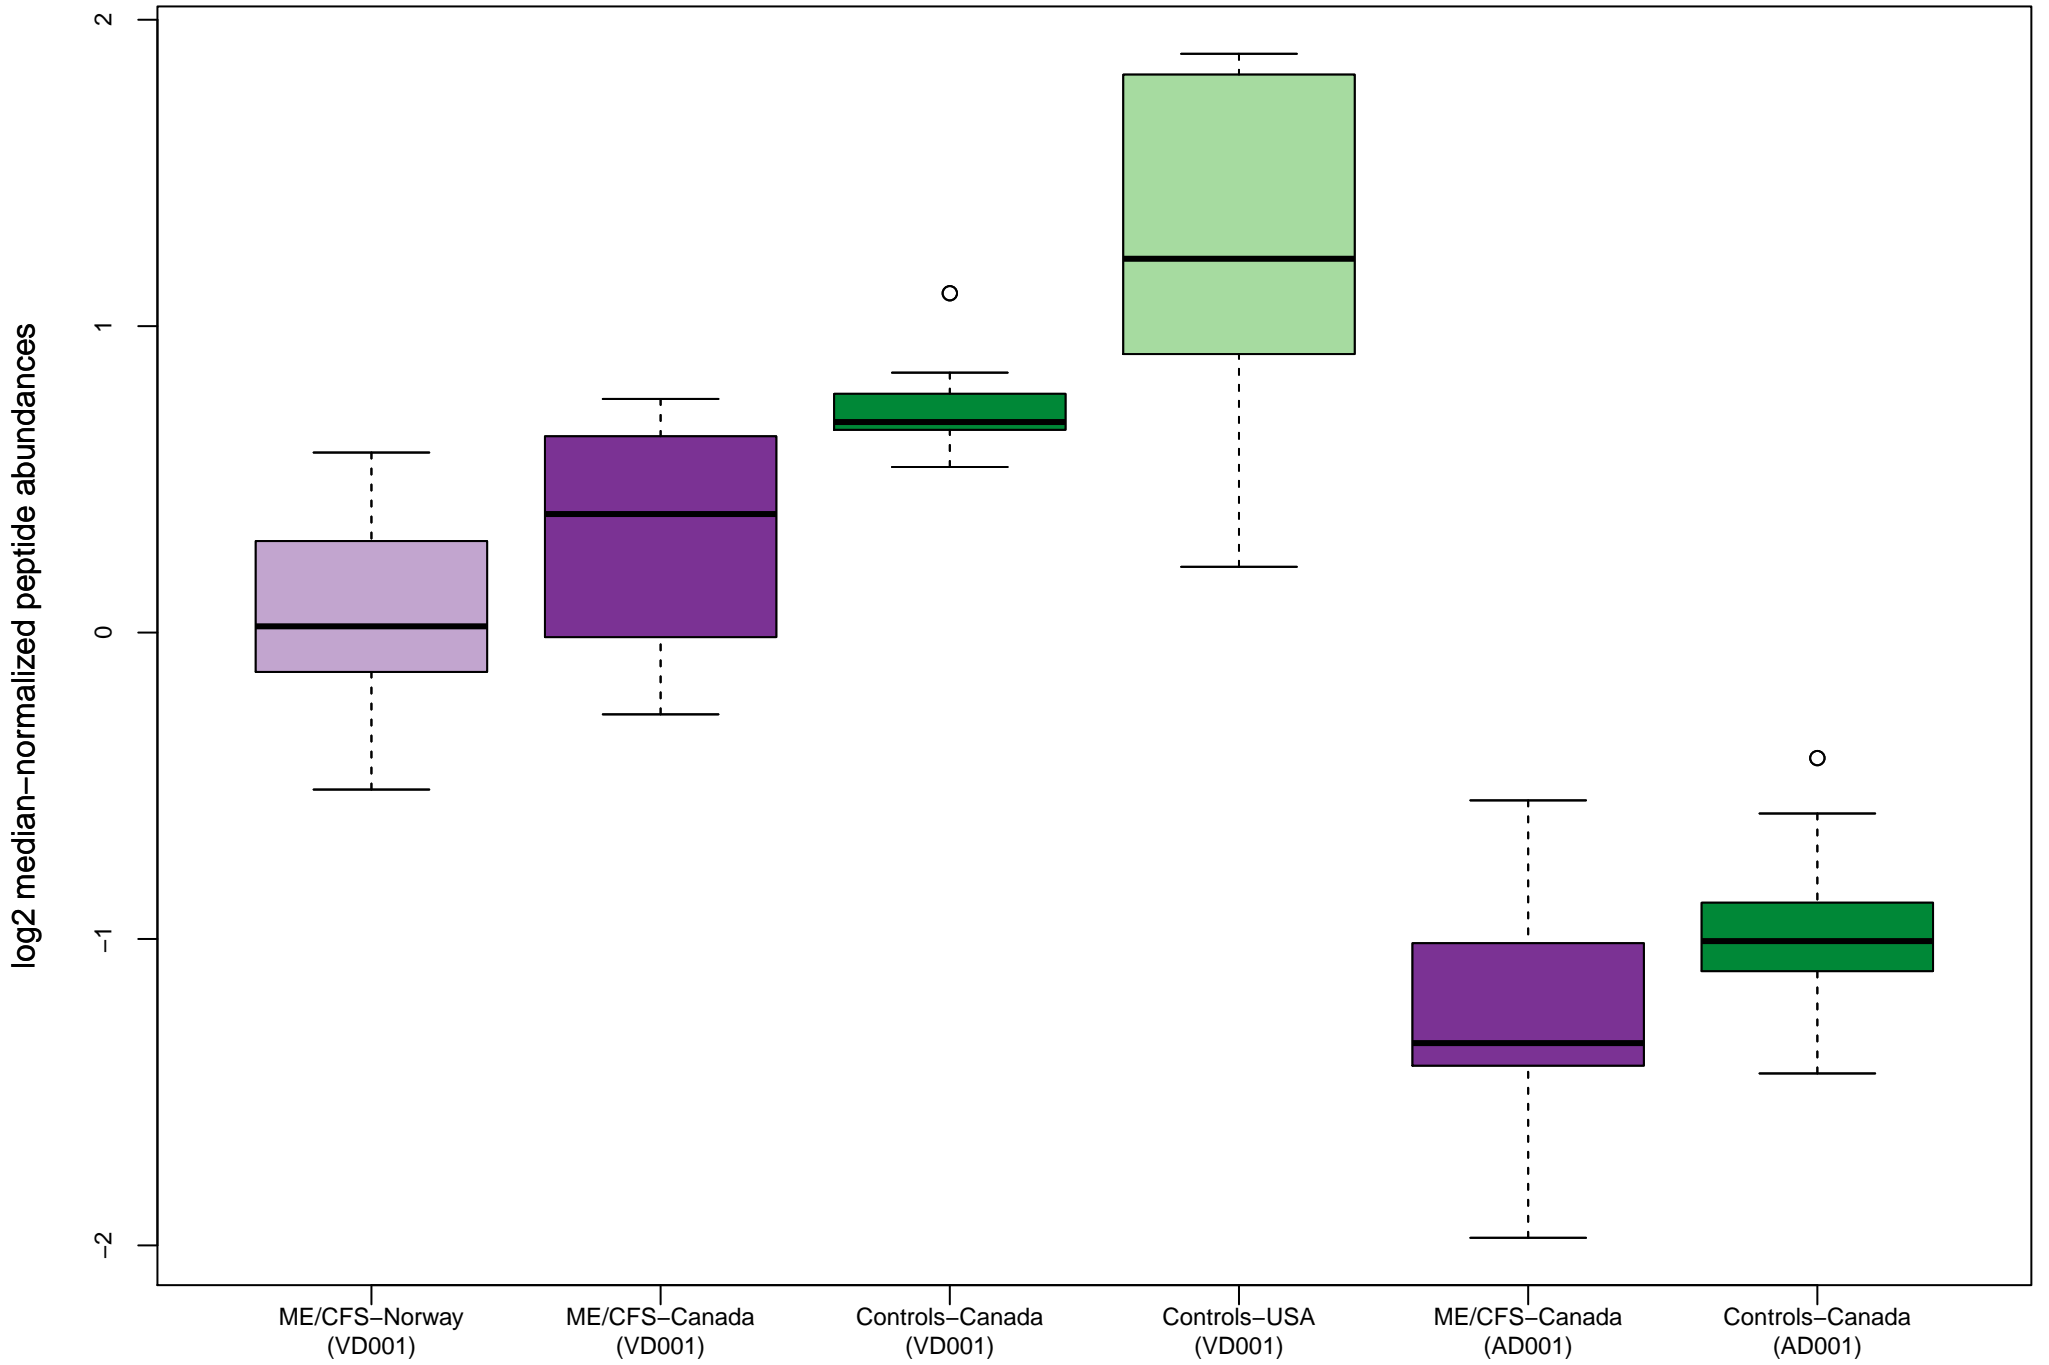

# SLFRSFRSGVAS

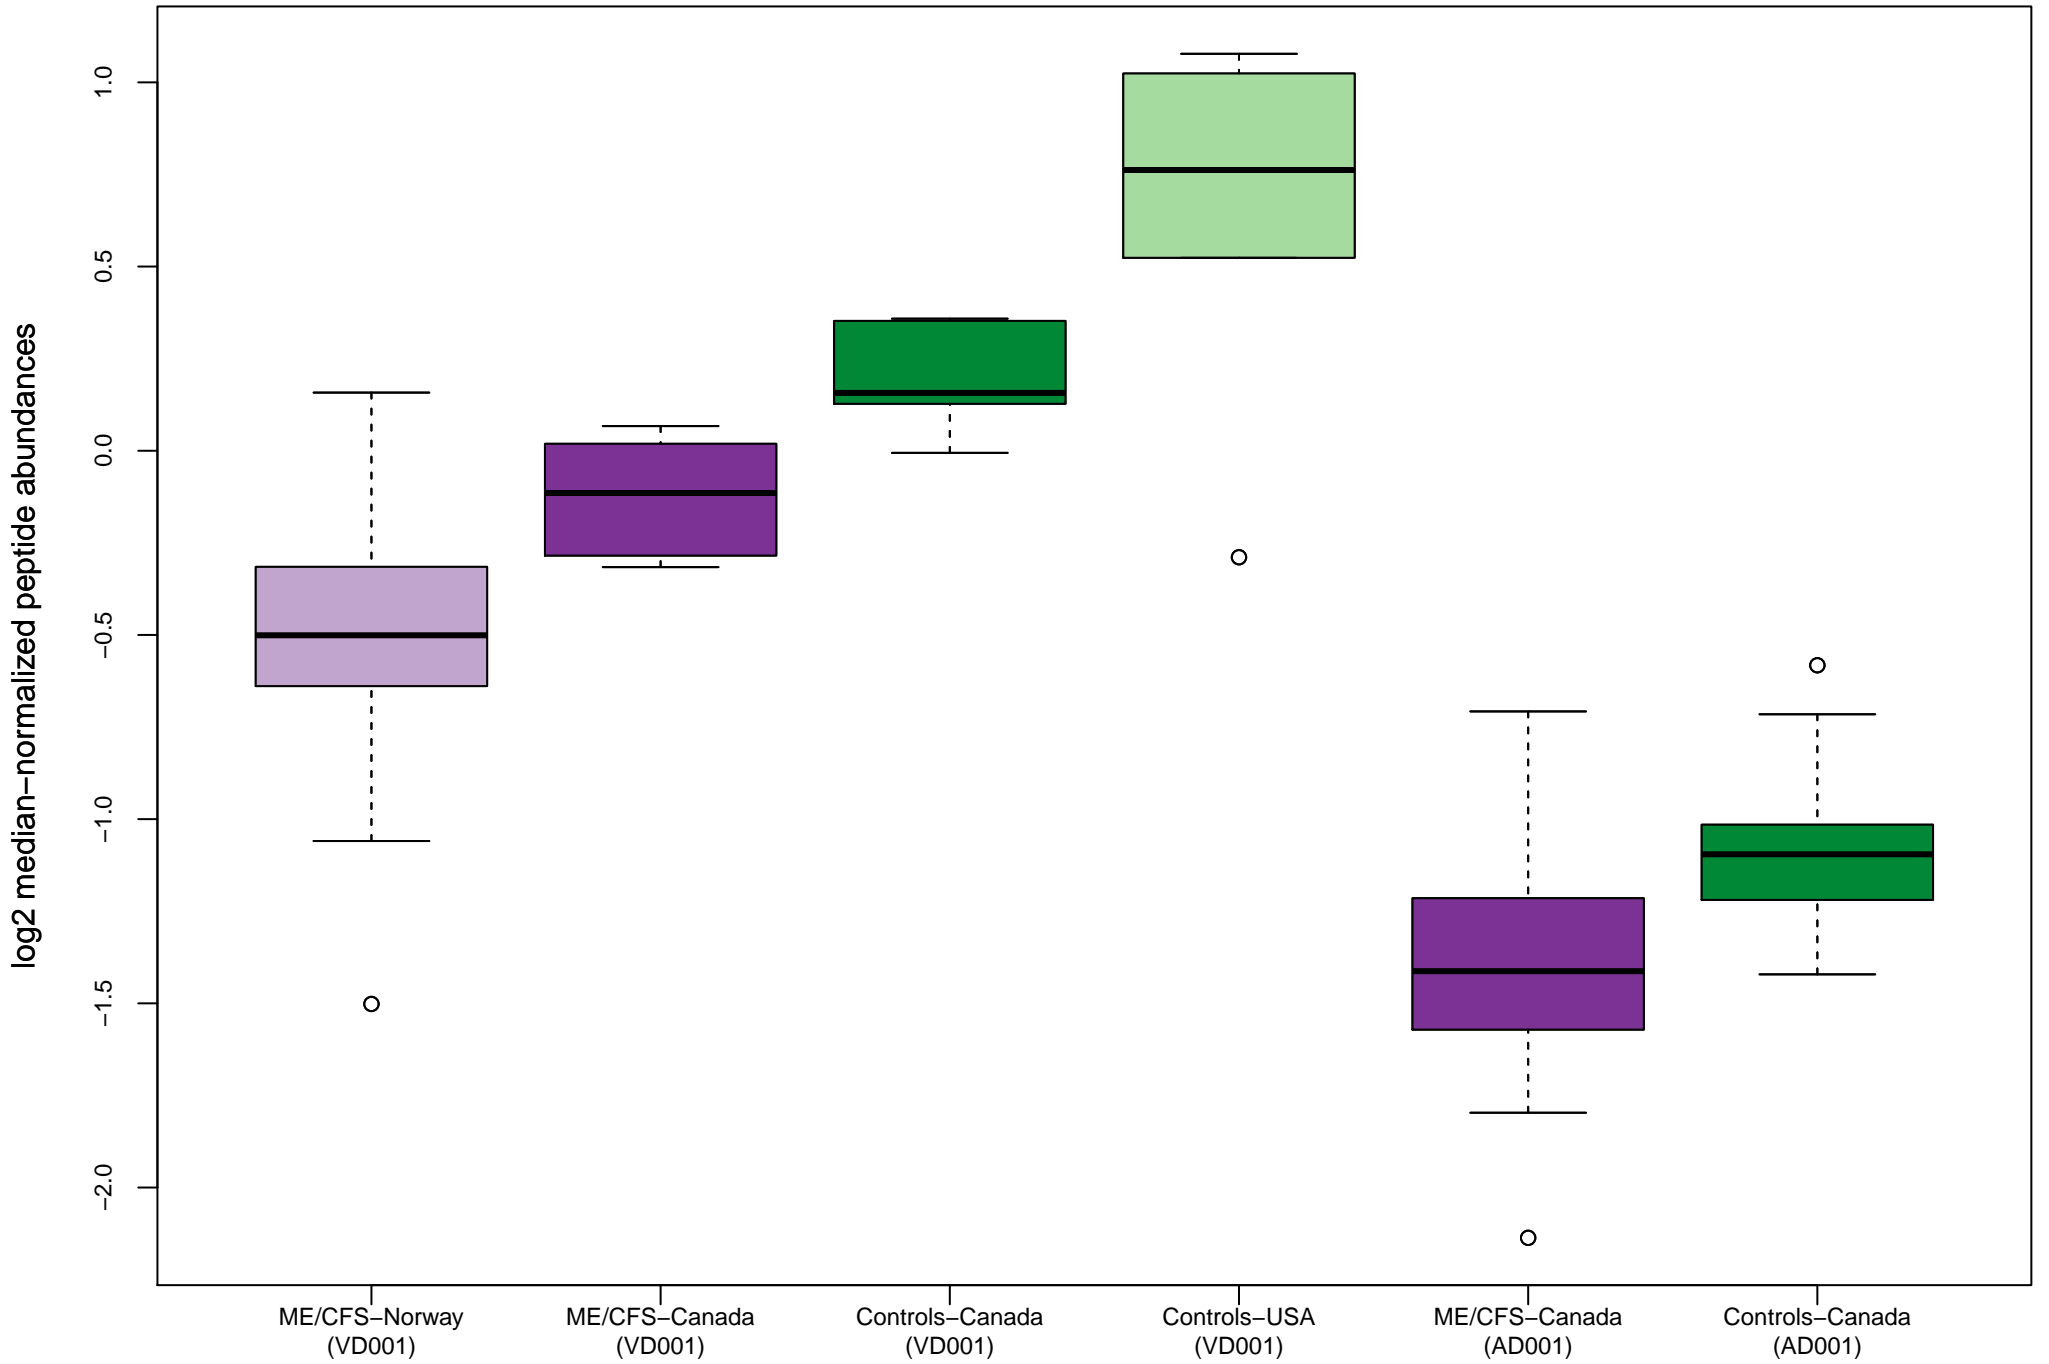

# VFGQPLFRWKGV

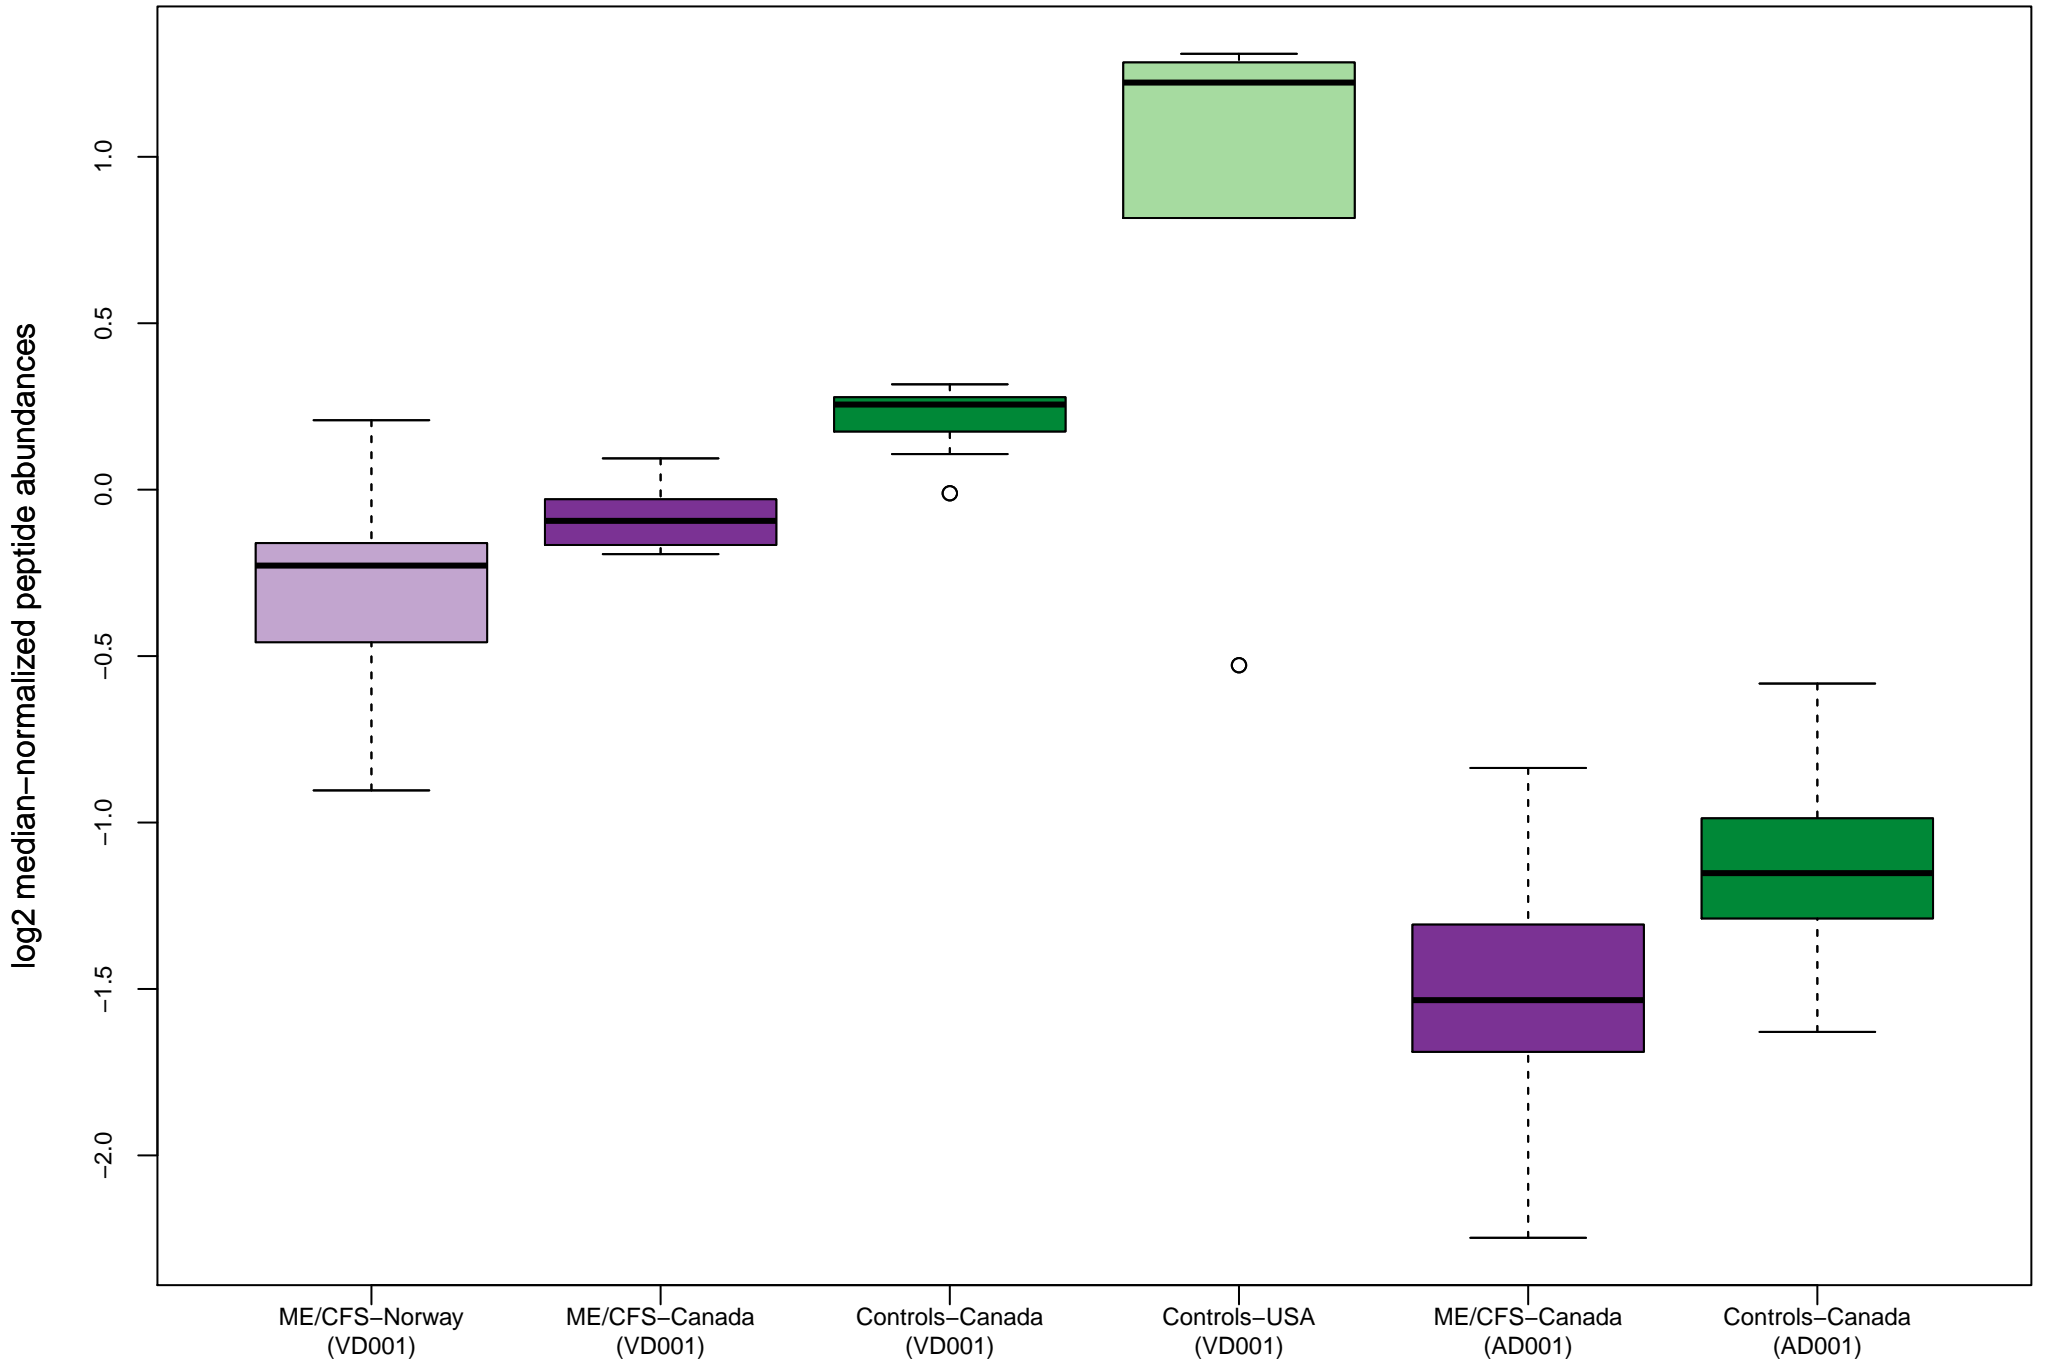

# VNLRNYKSVLSG

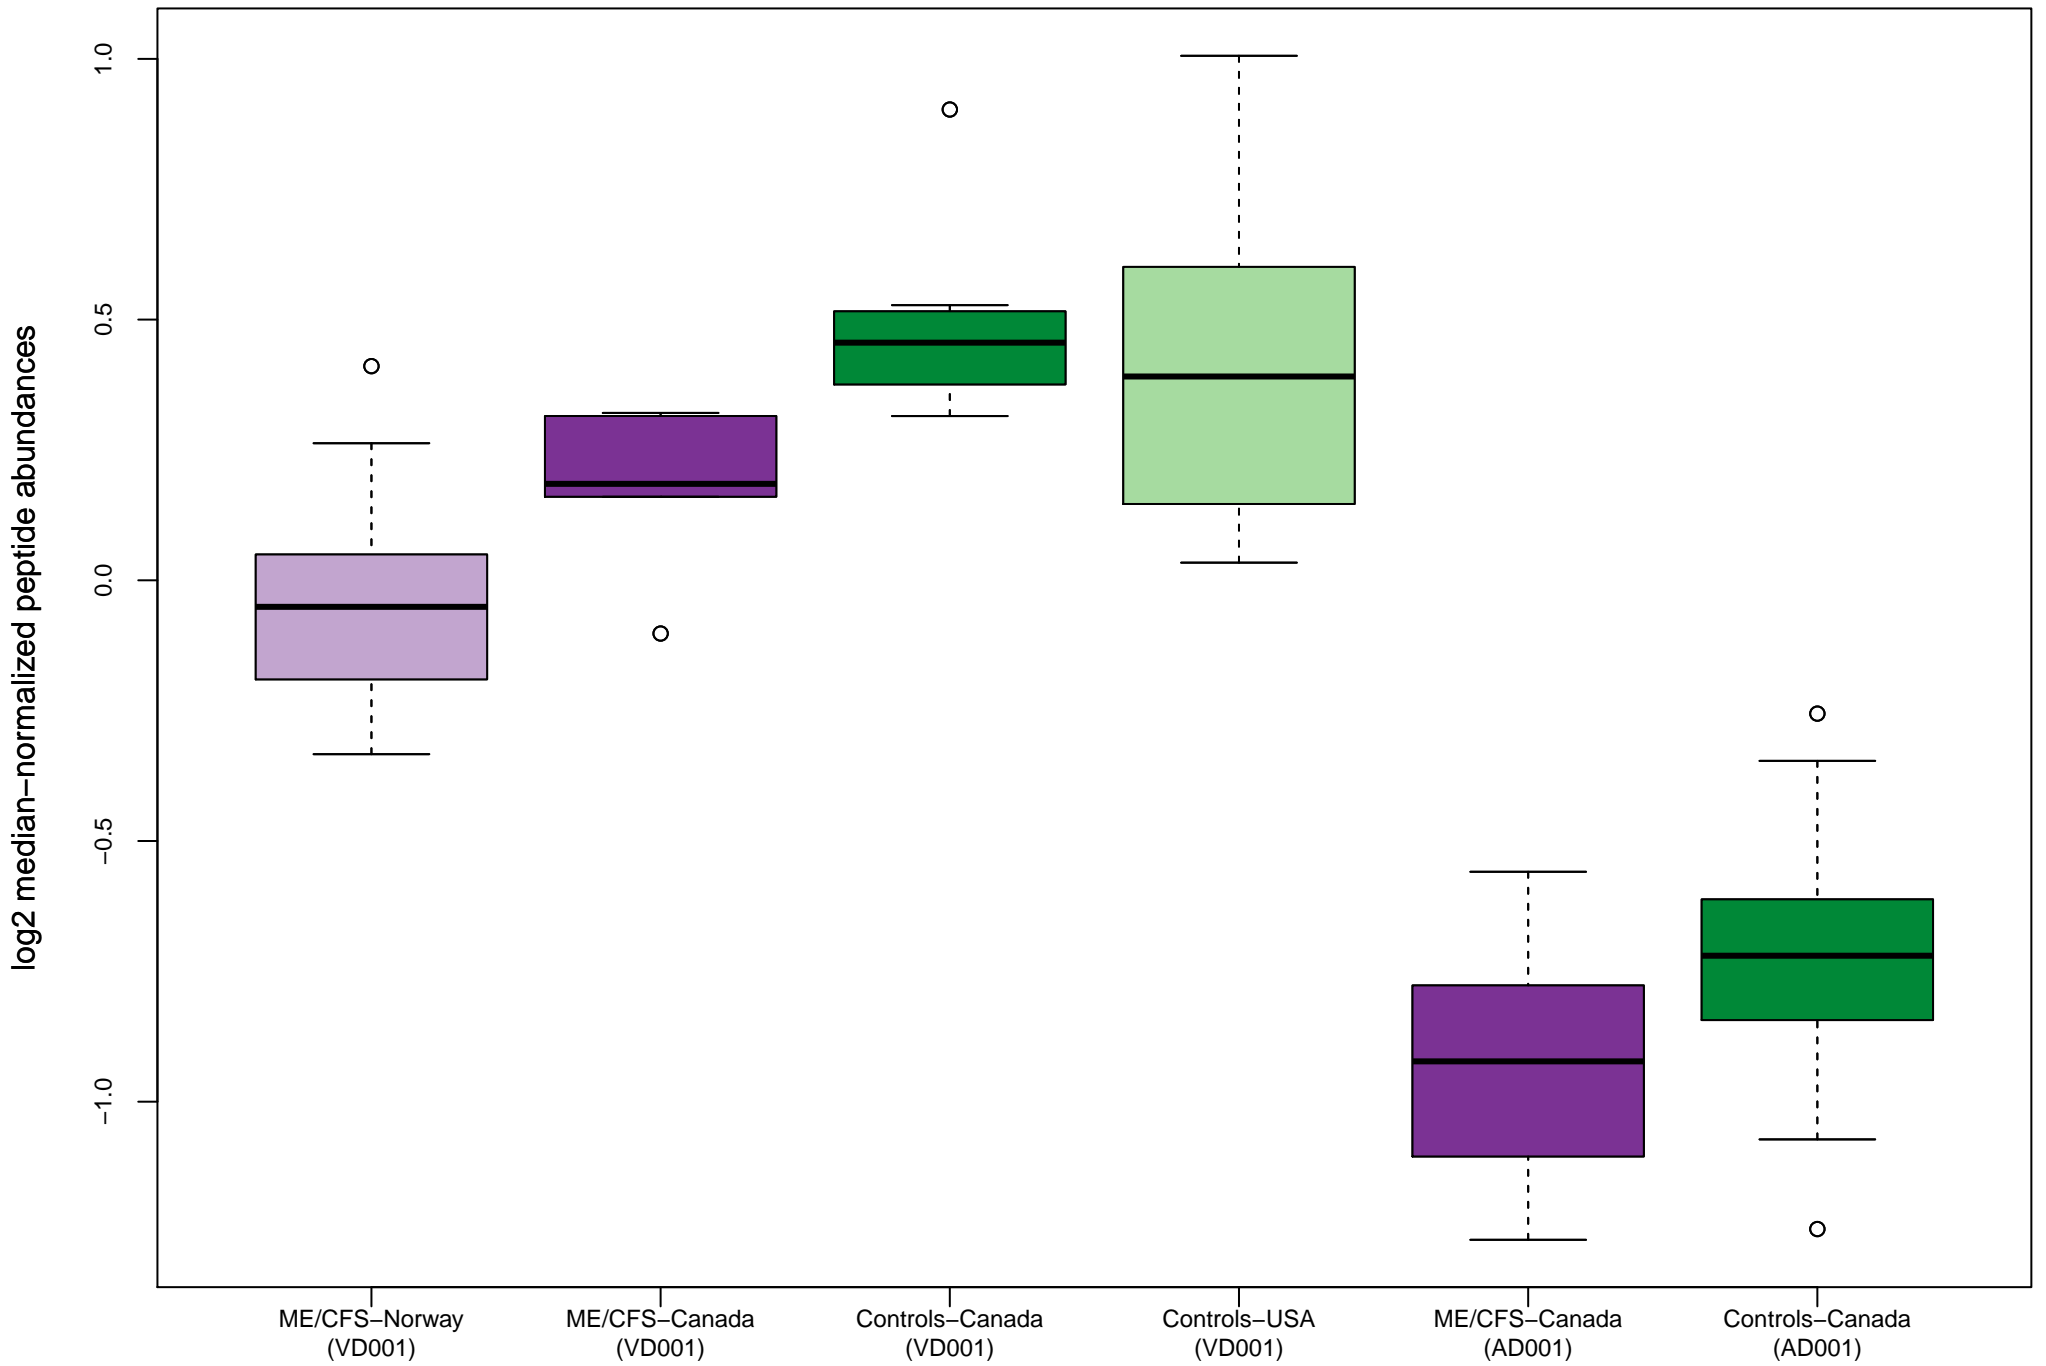

# VRAFRAPYWSGG

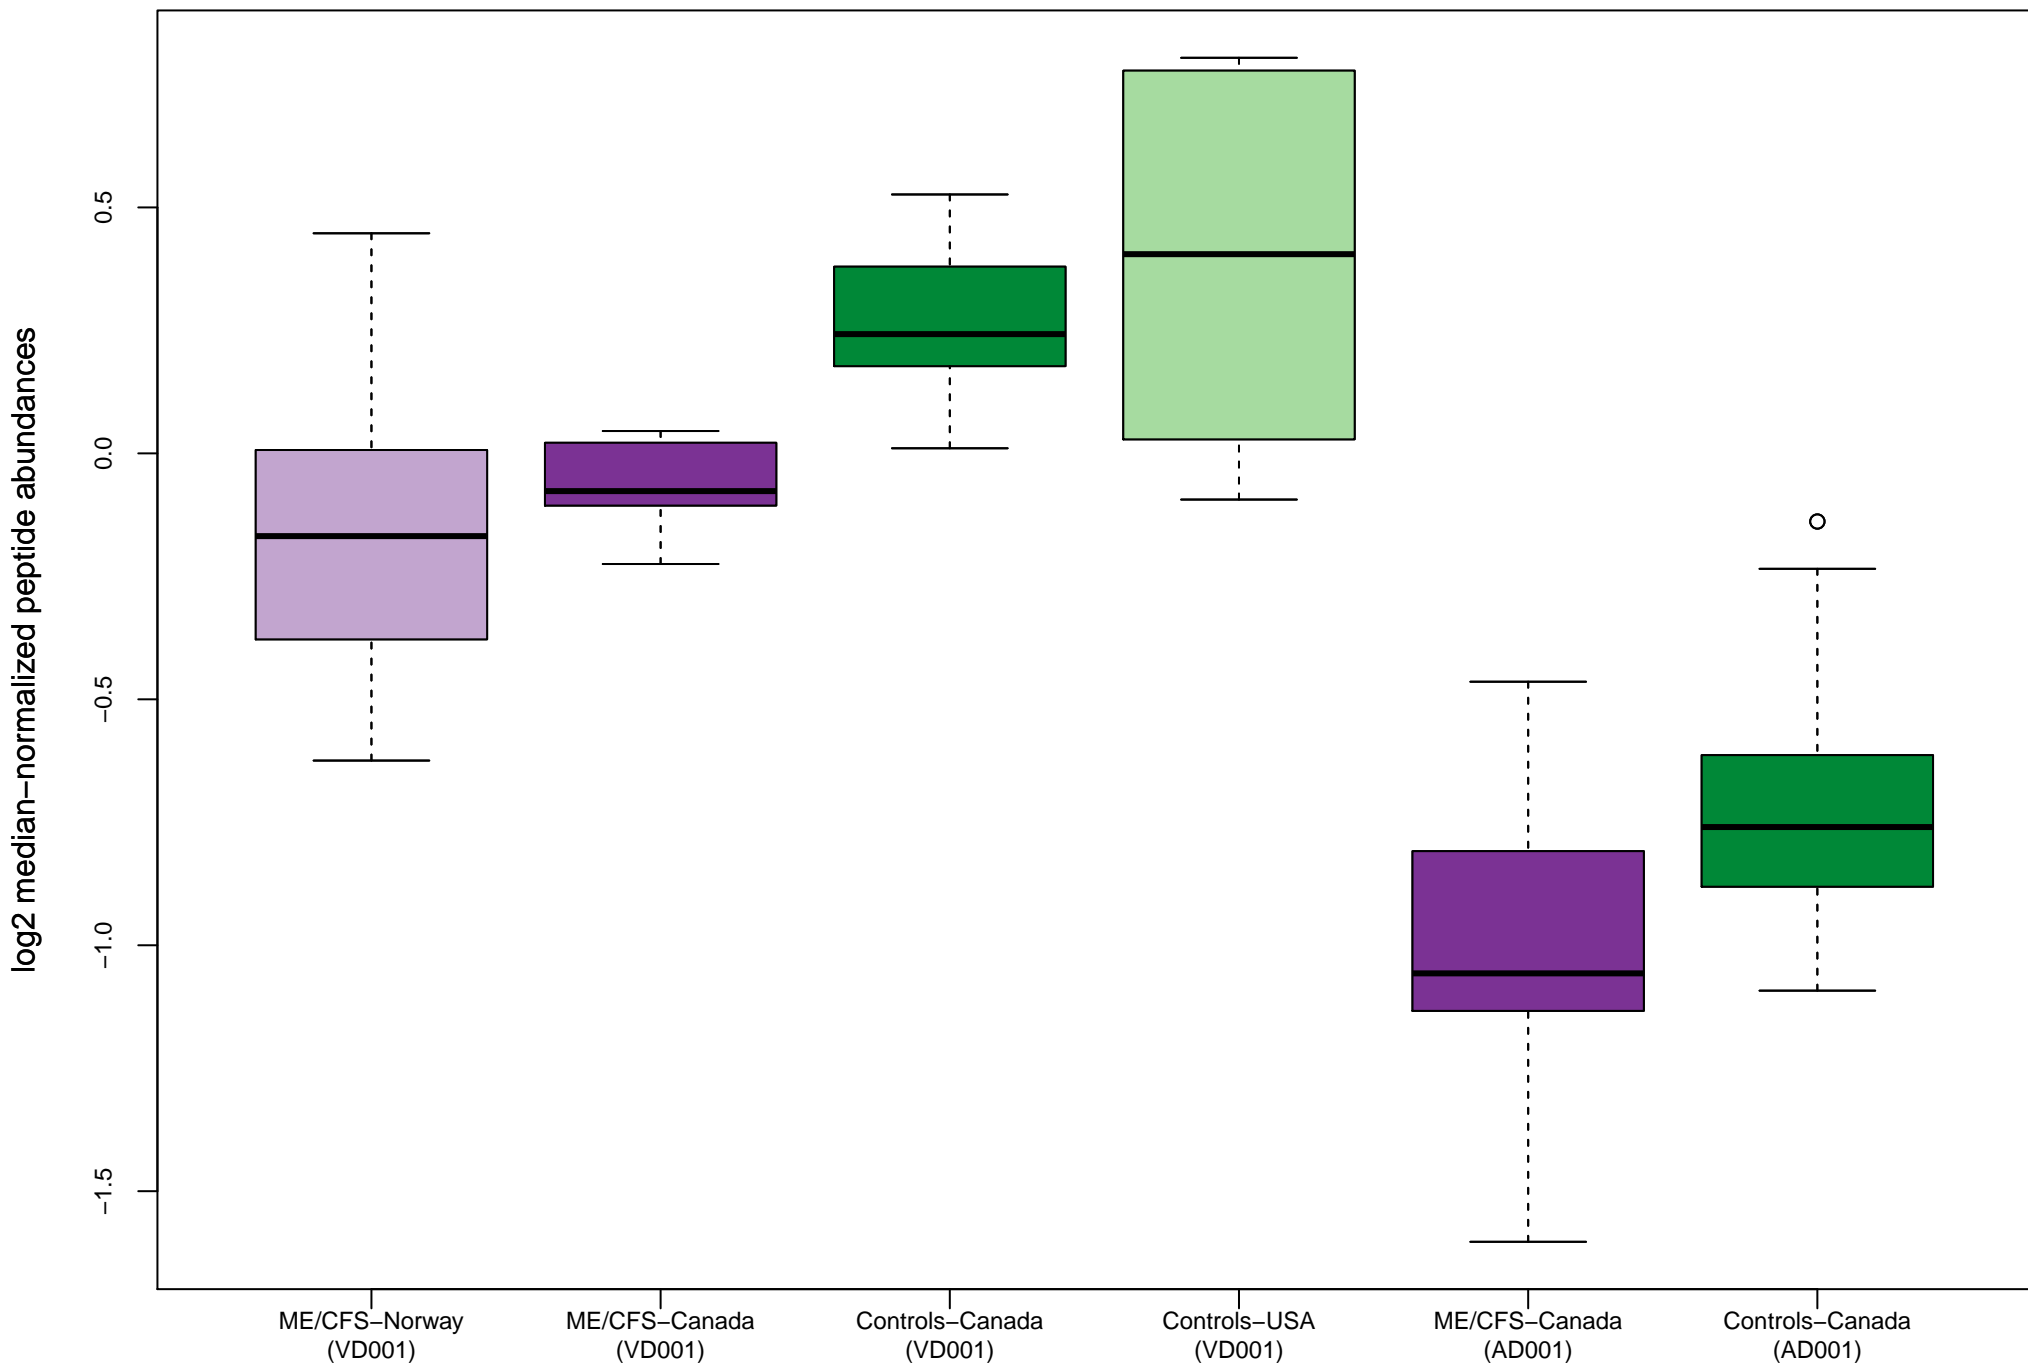



# WFPRSRWGVALS

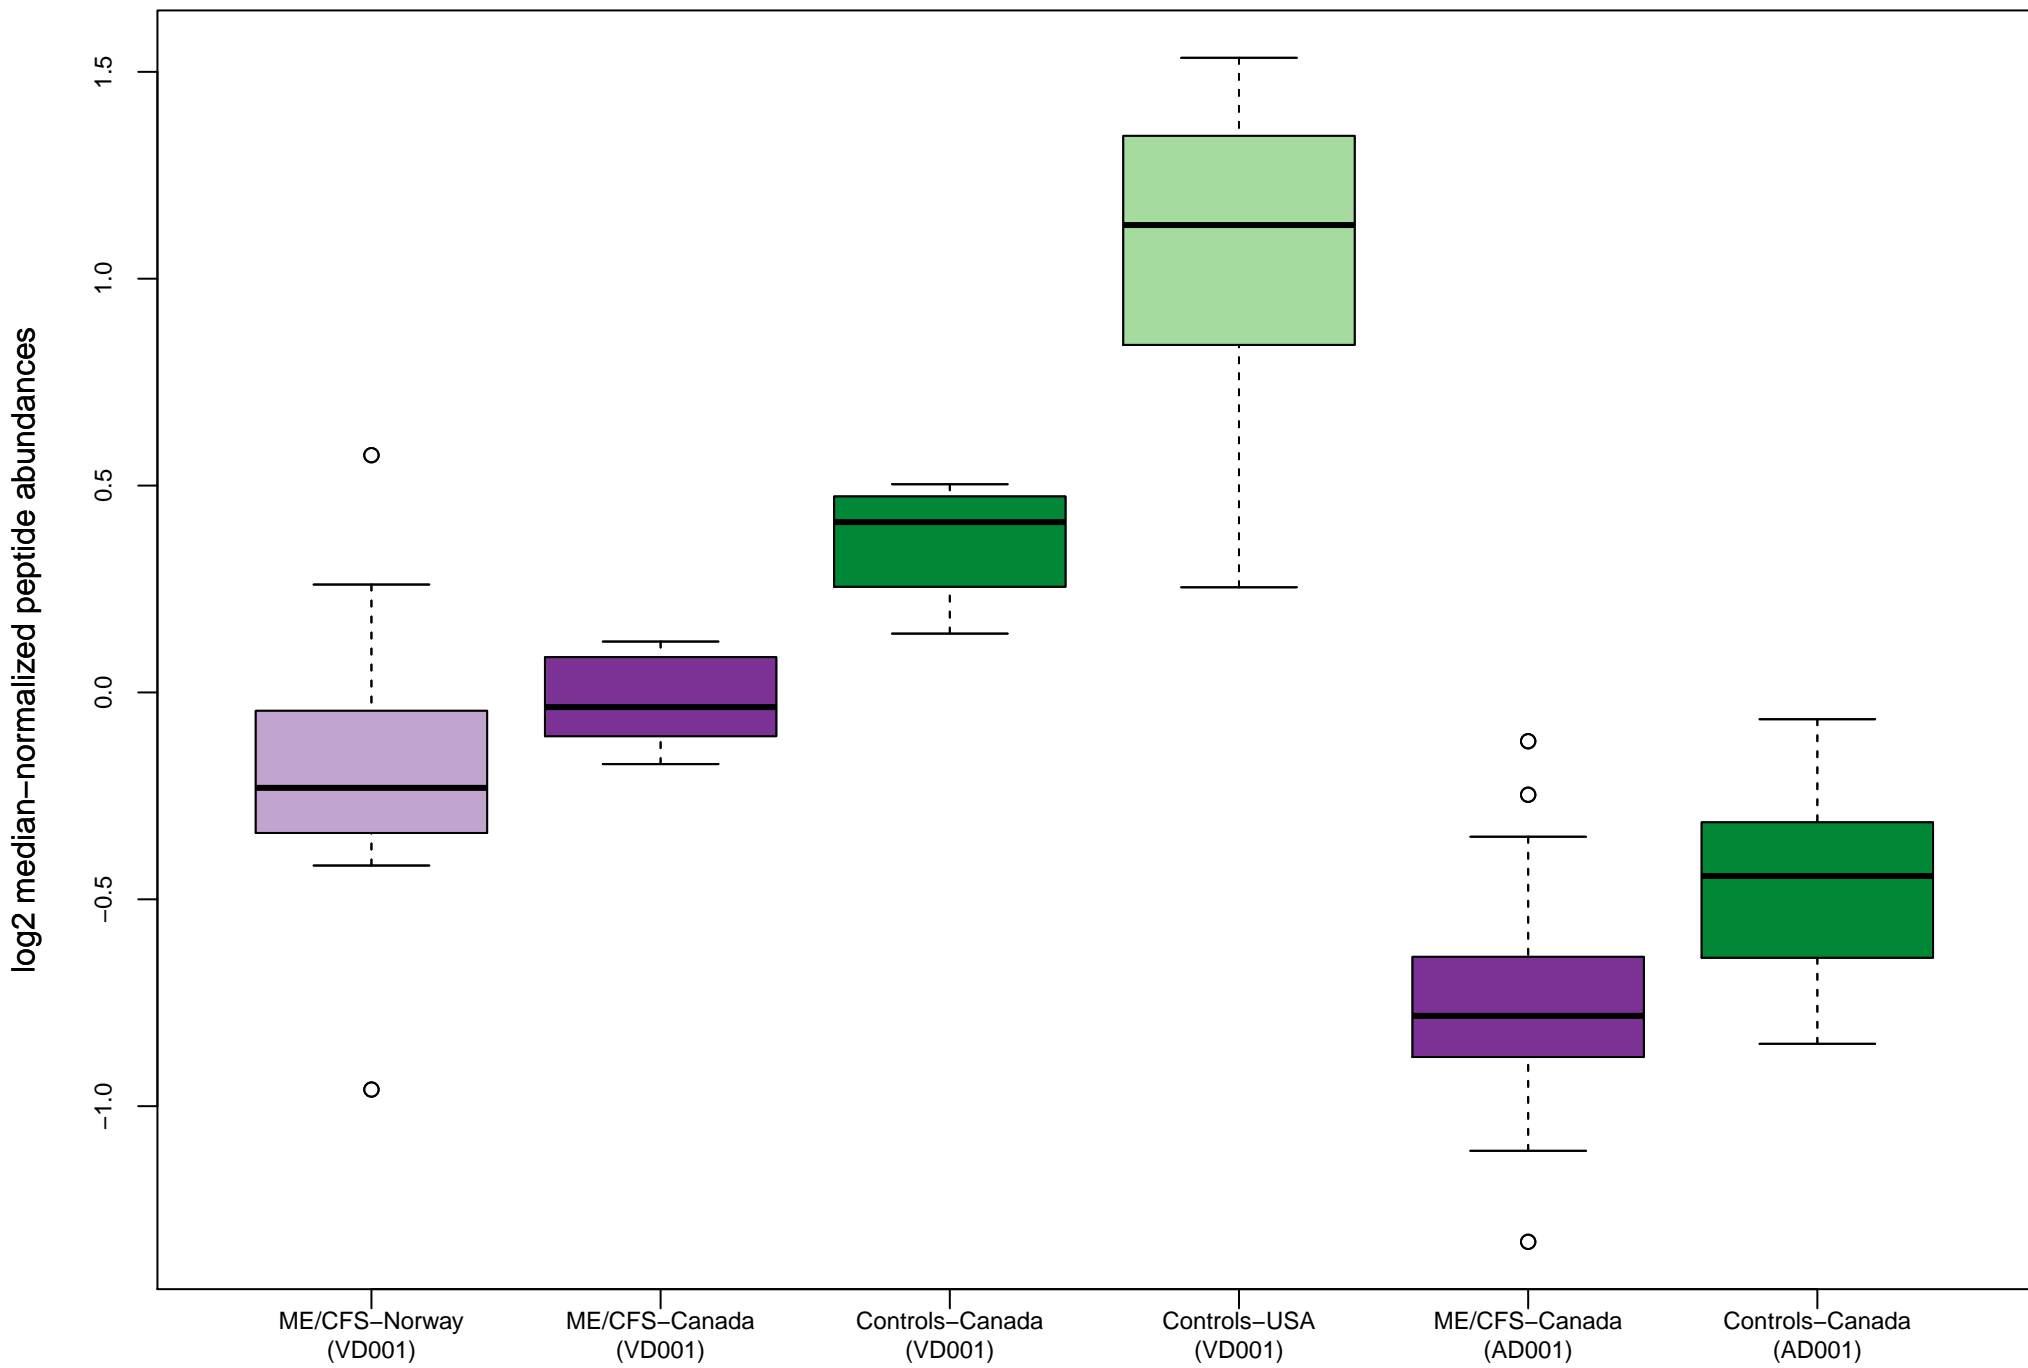

# WKRAQFYGRWLG

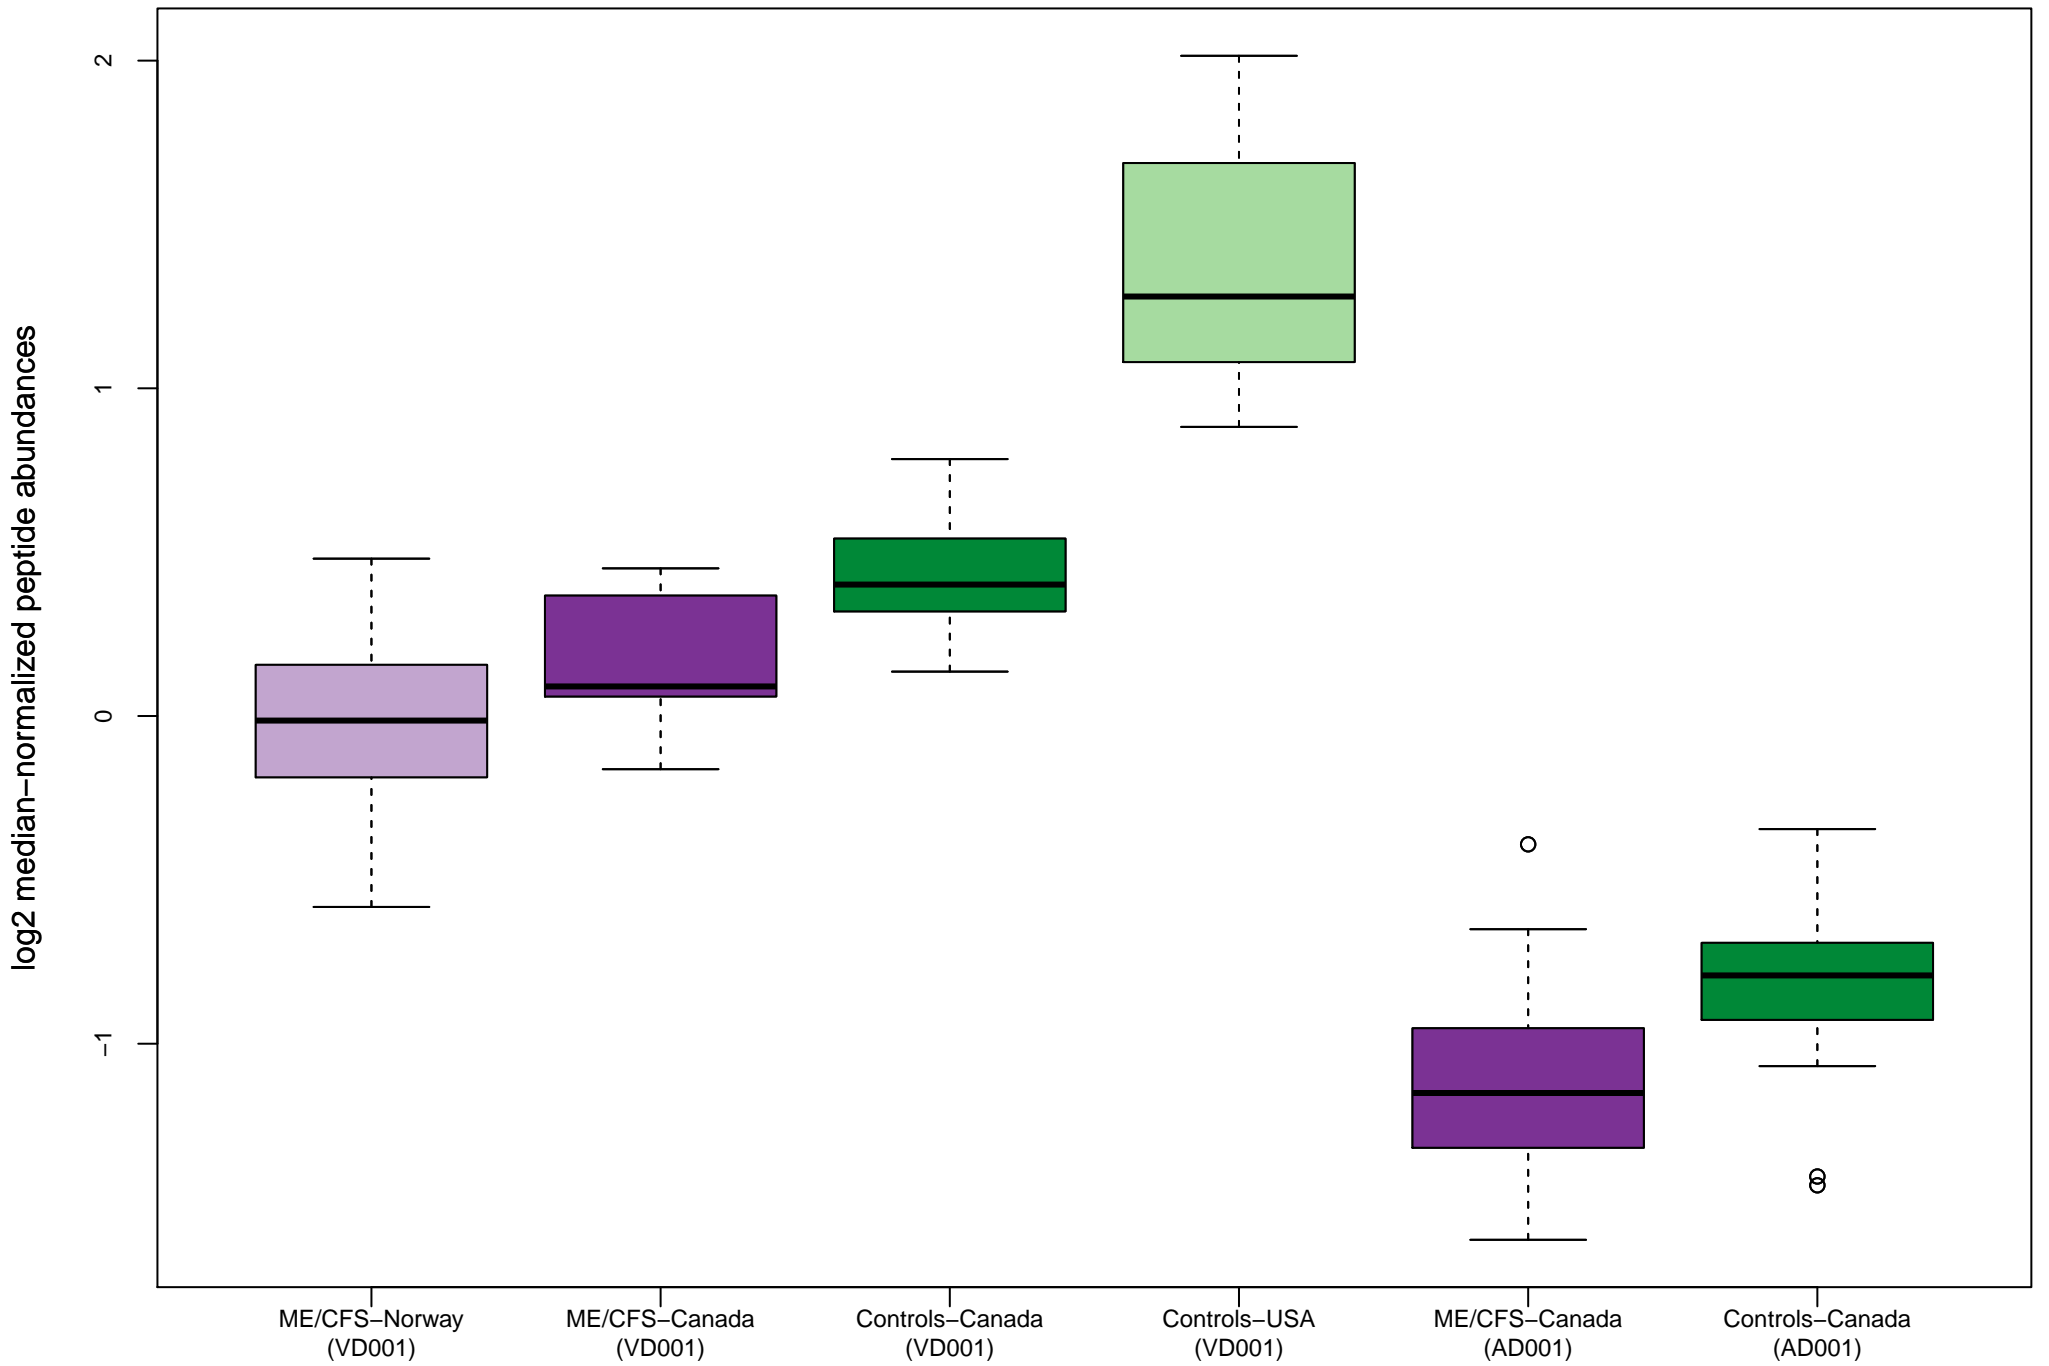

# WLKLGRPWLSGR

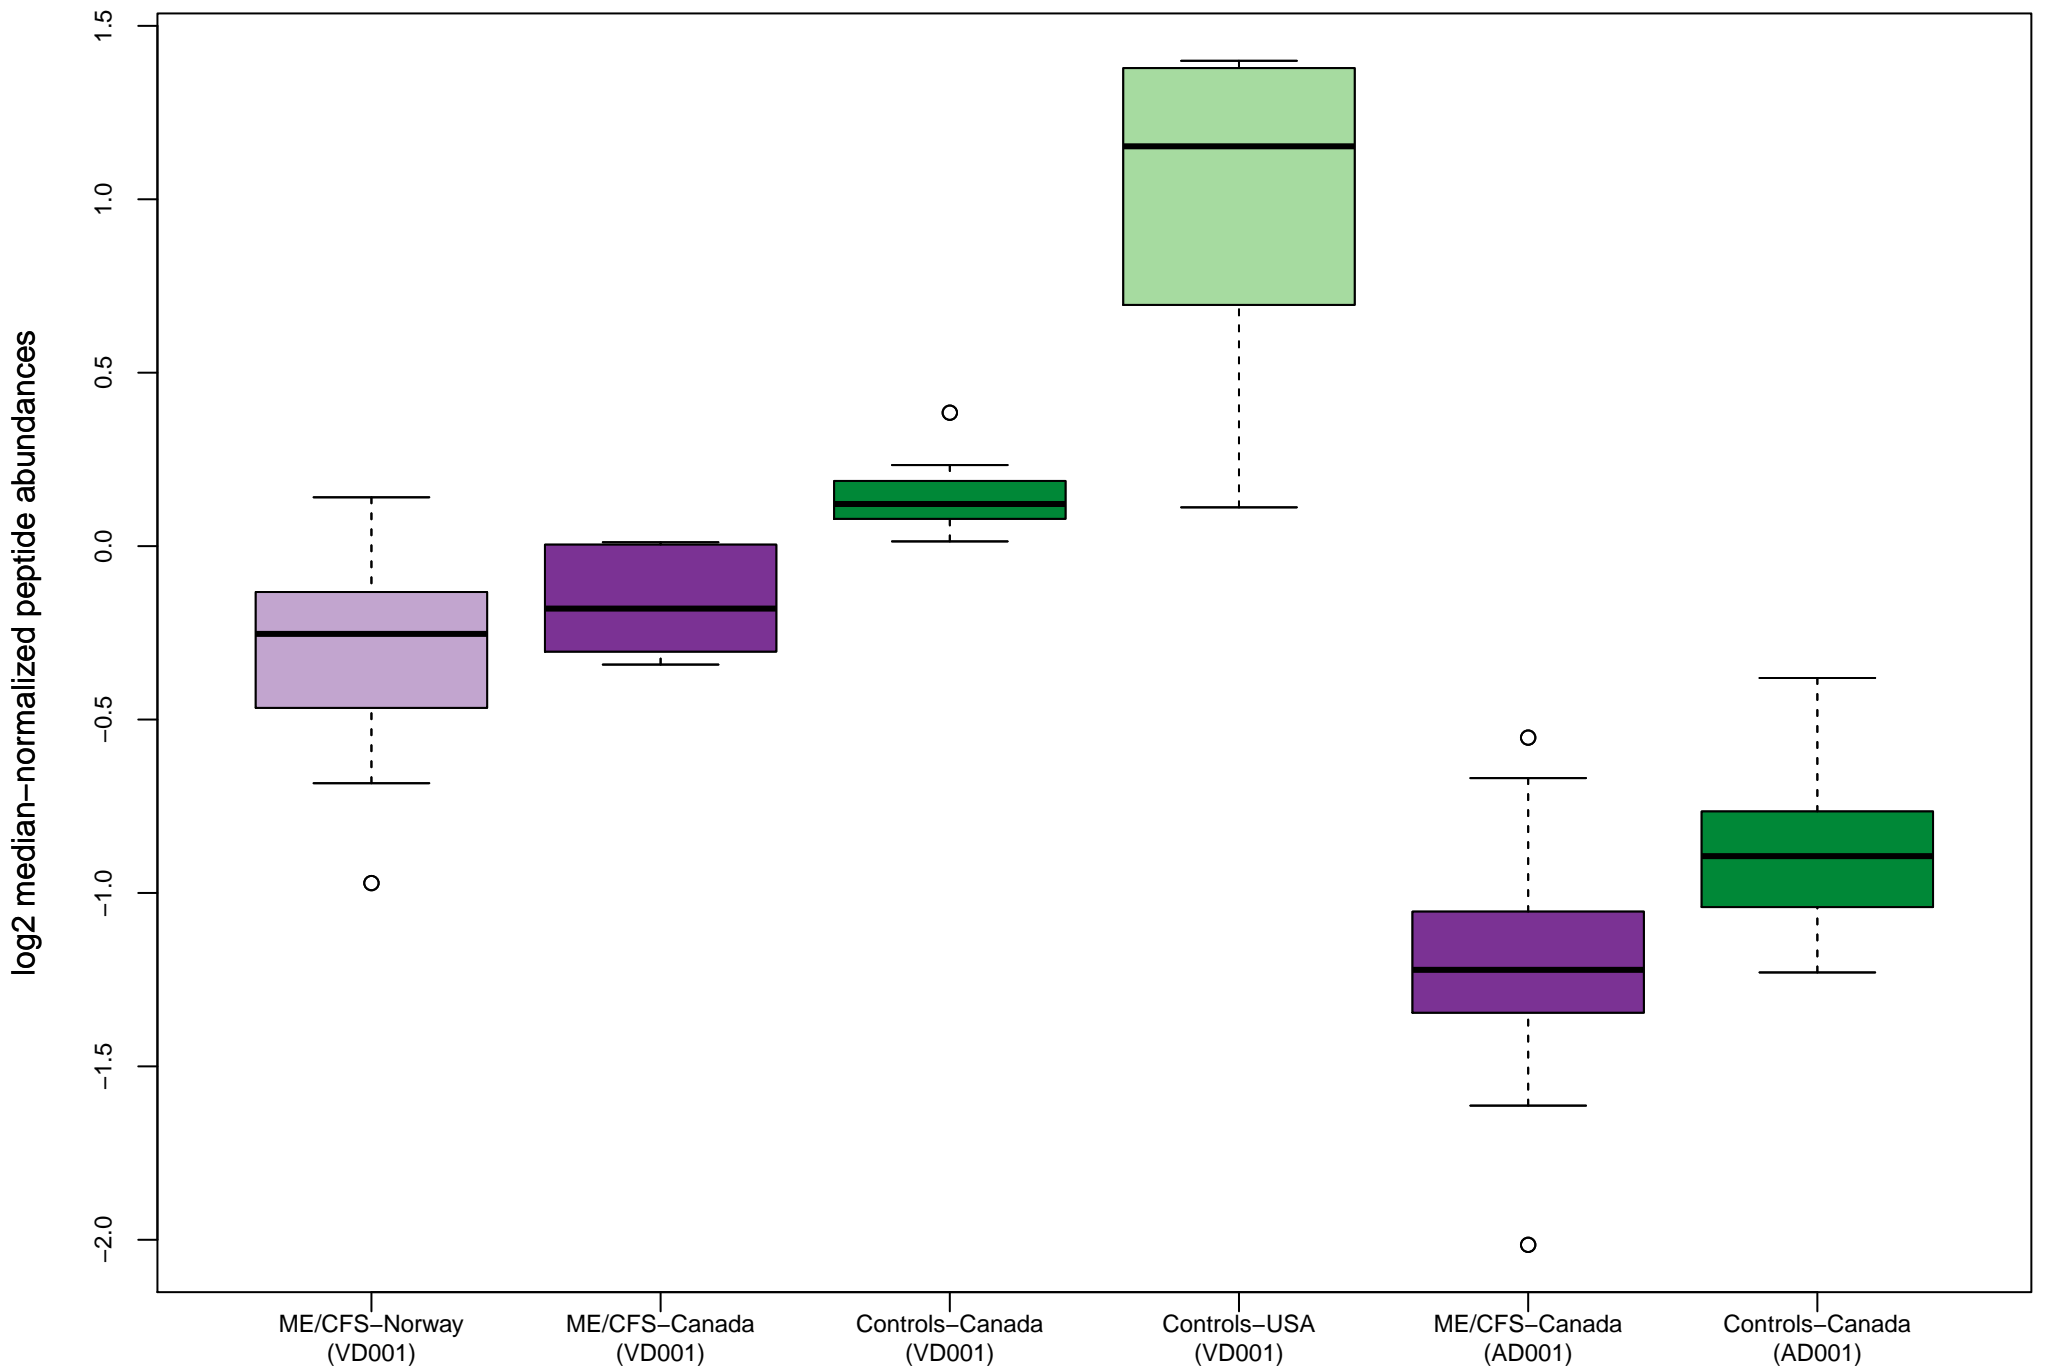

# WQRSGRLYKLSV

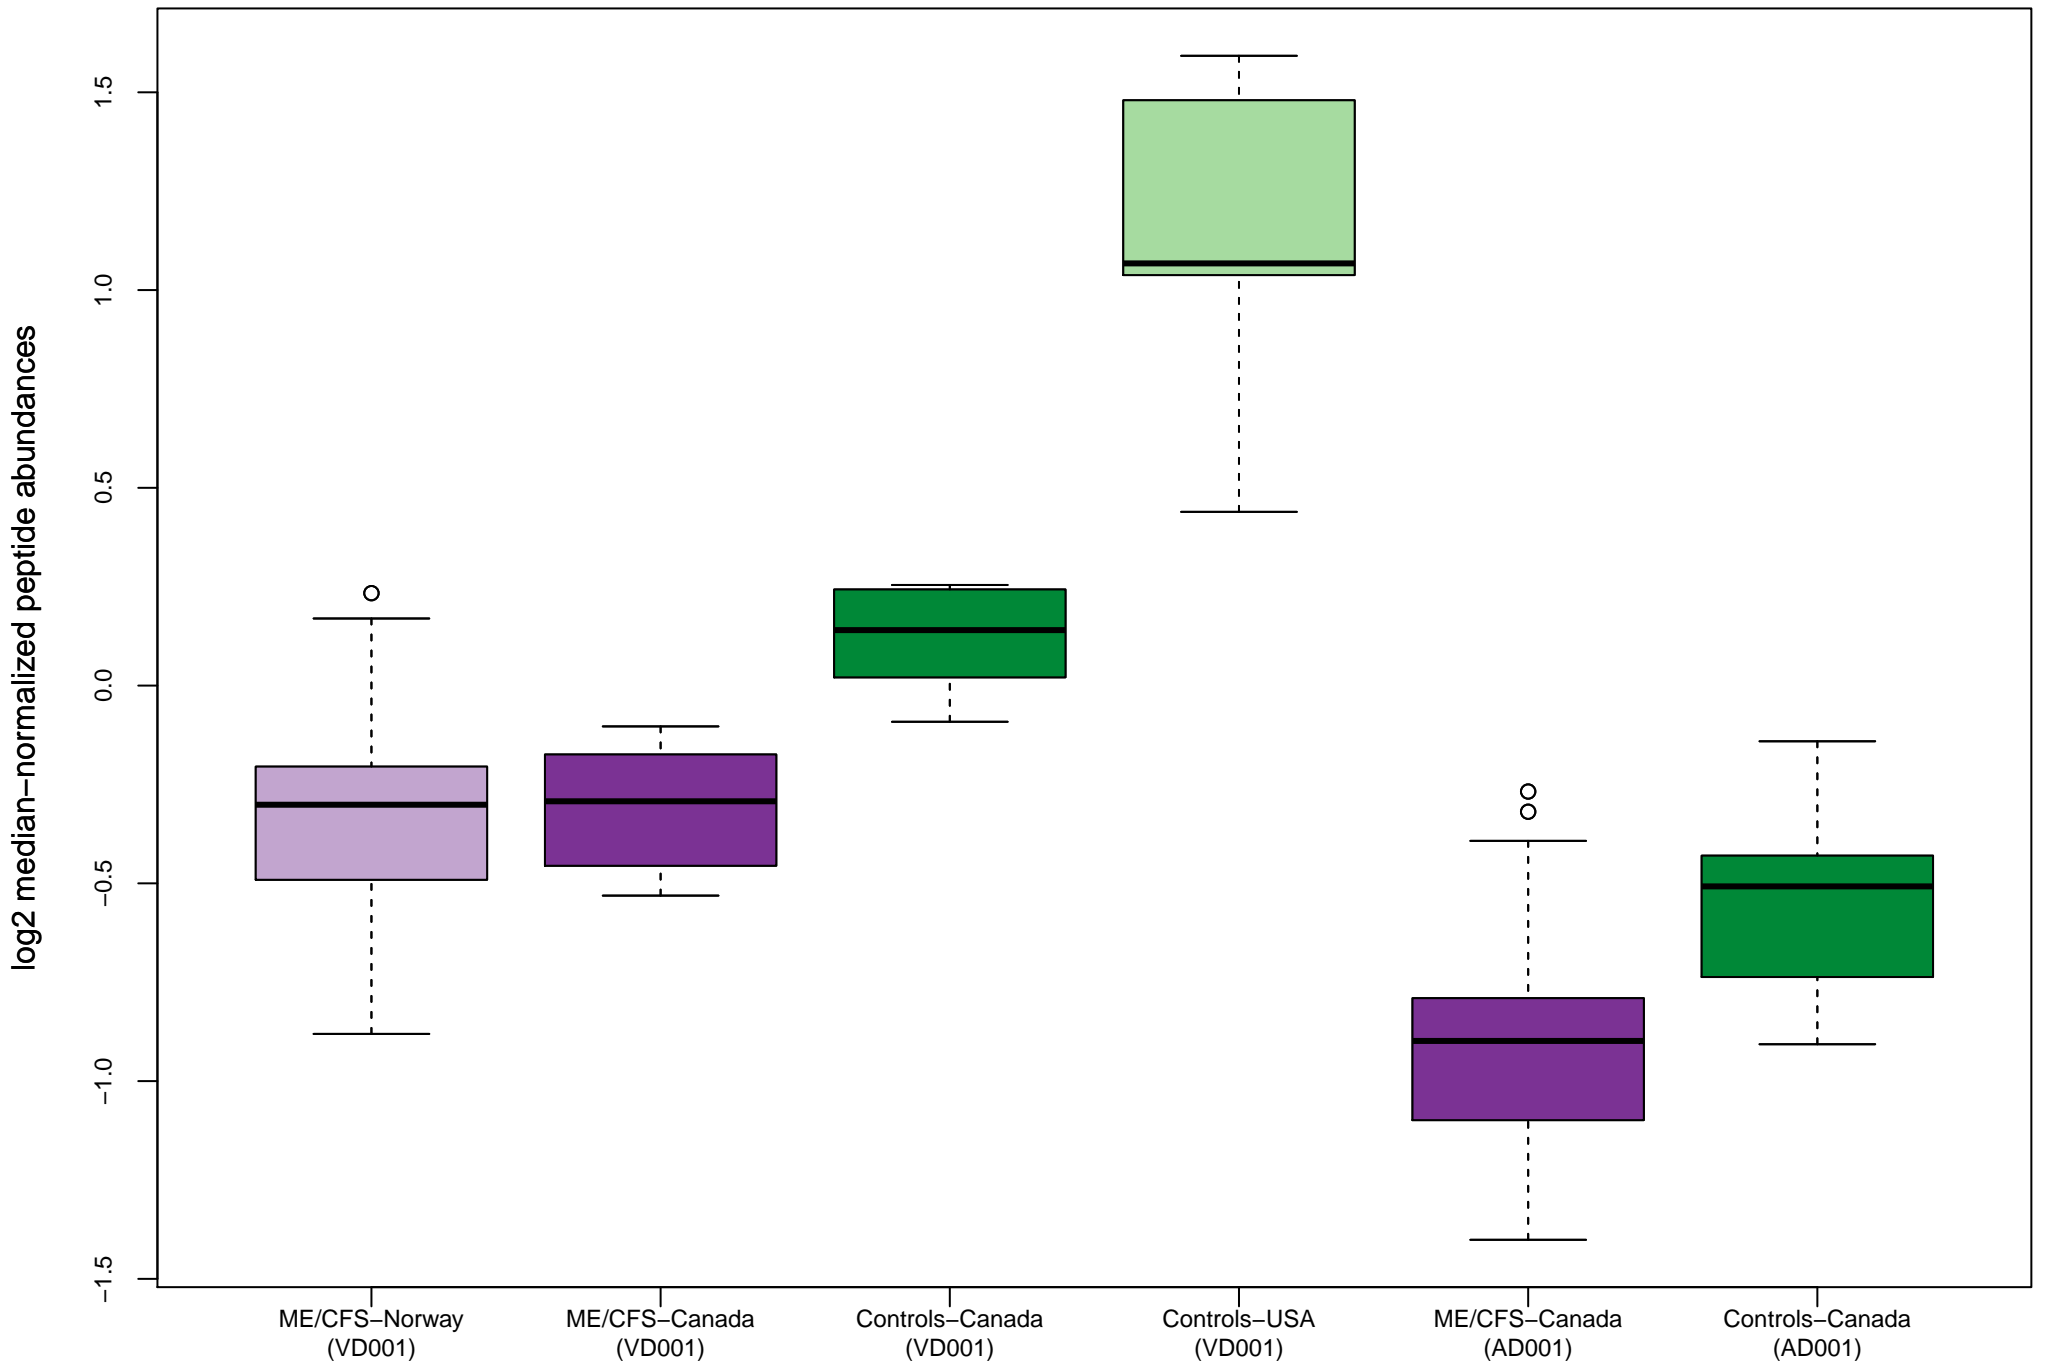

# YAALRGFKAGAS

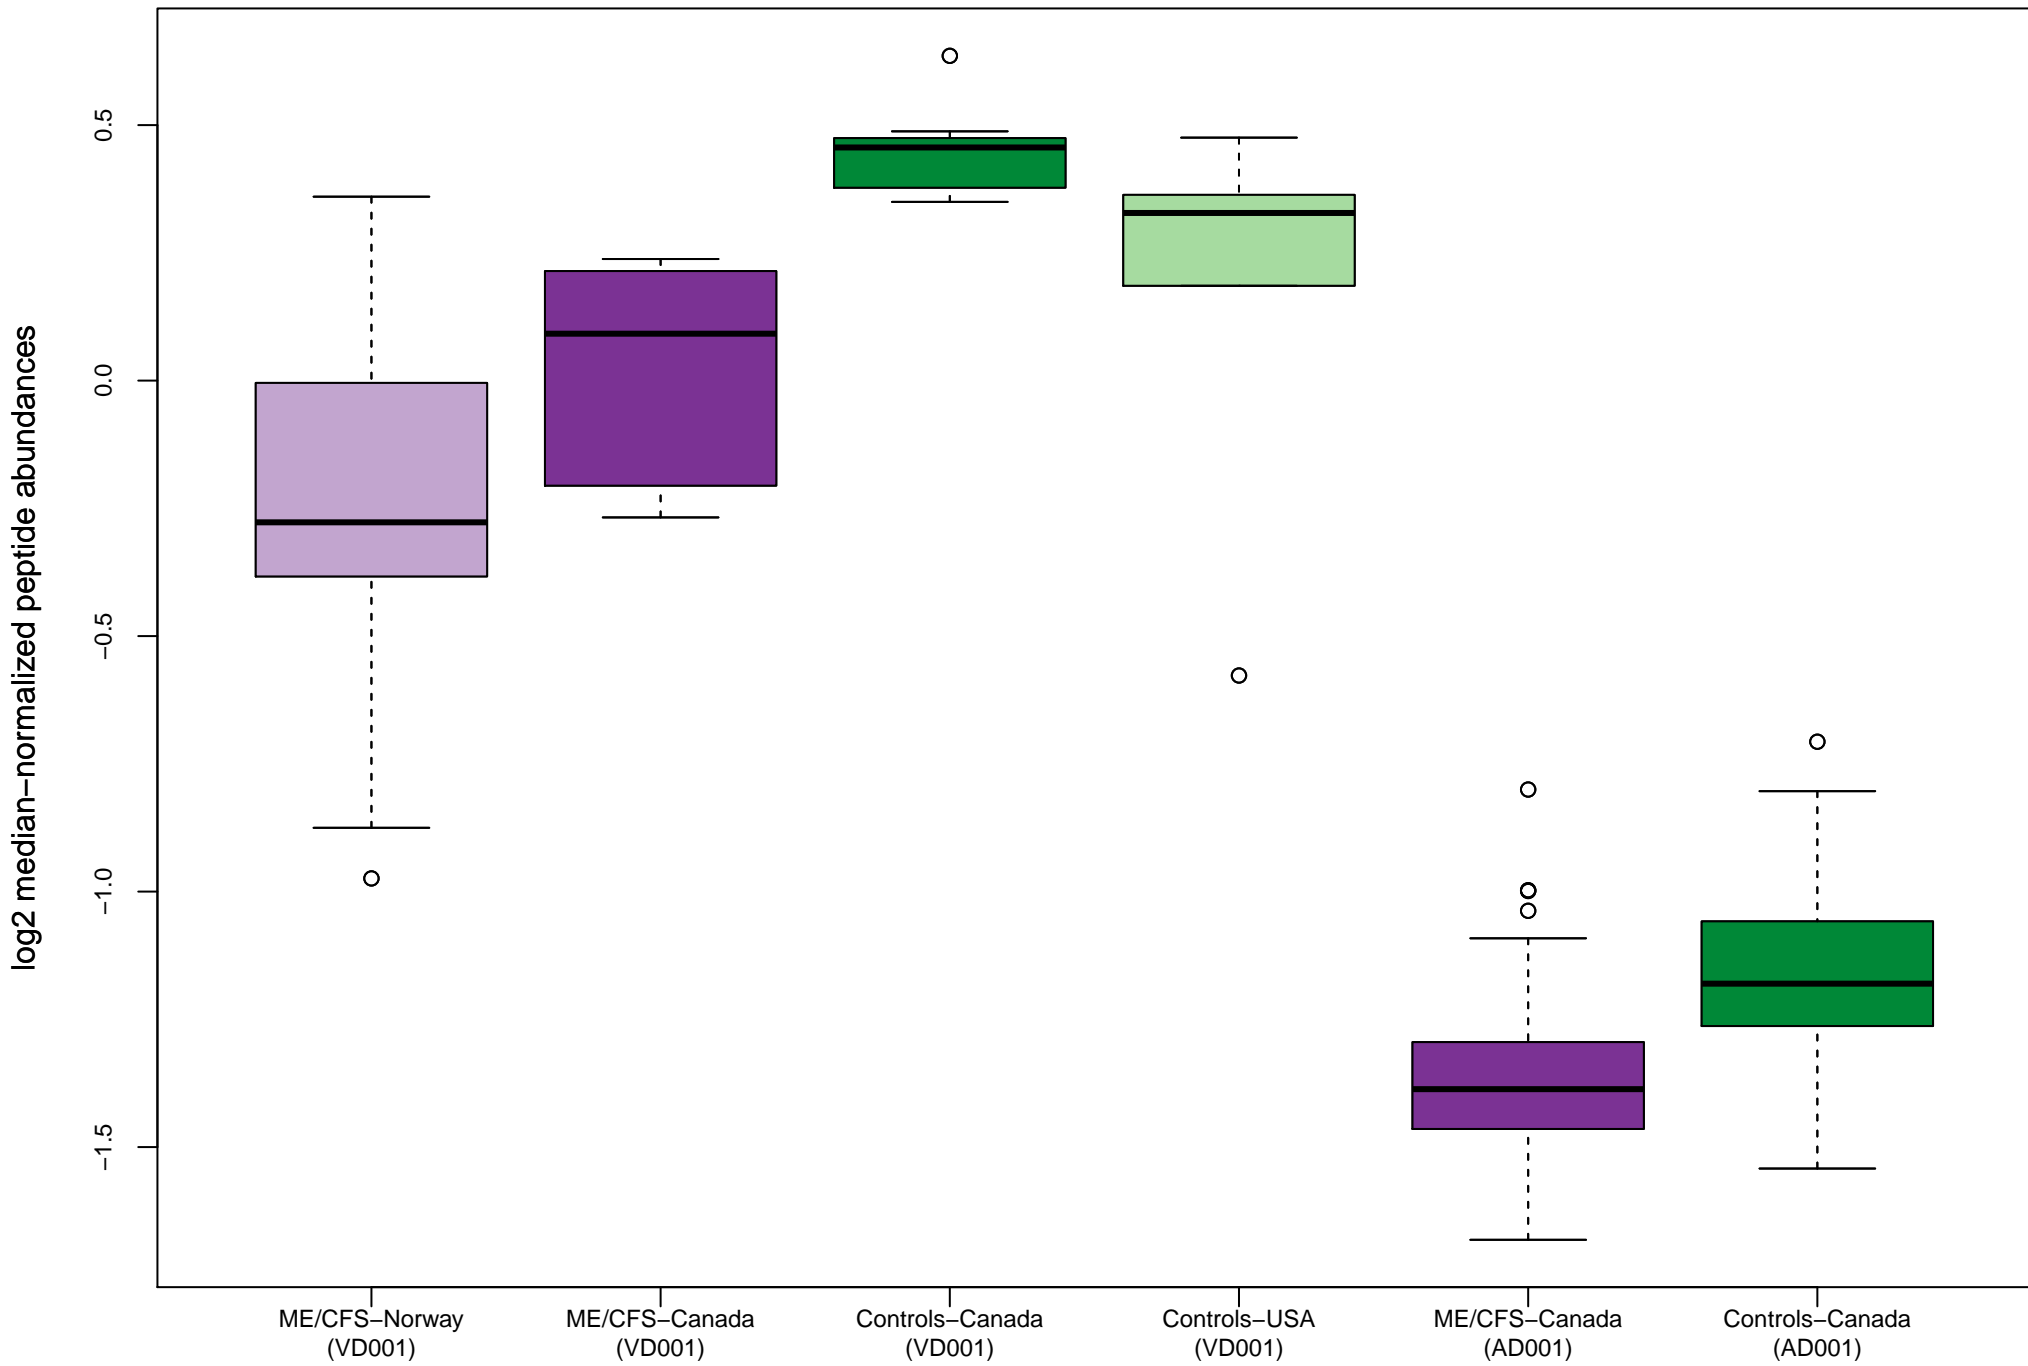

# YKQLSRLFWNA

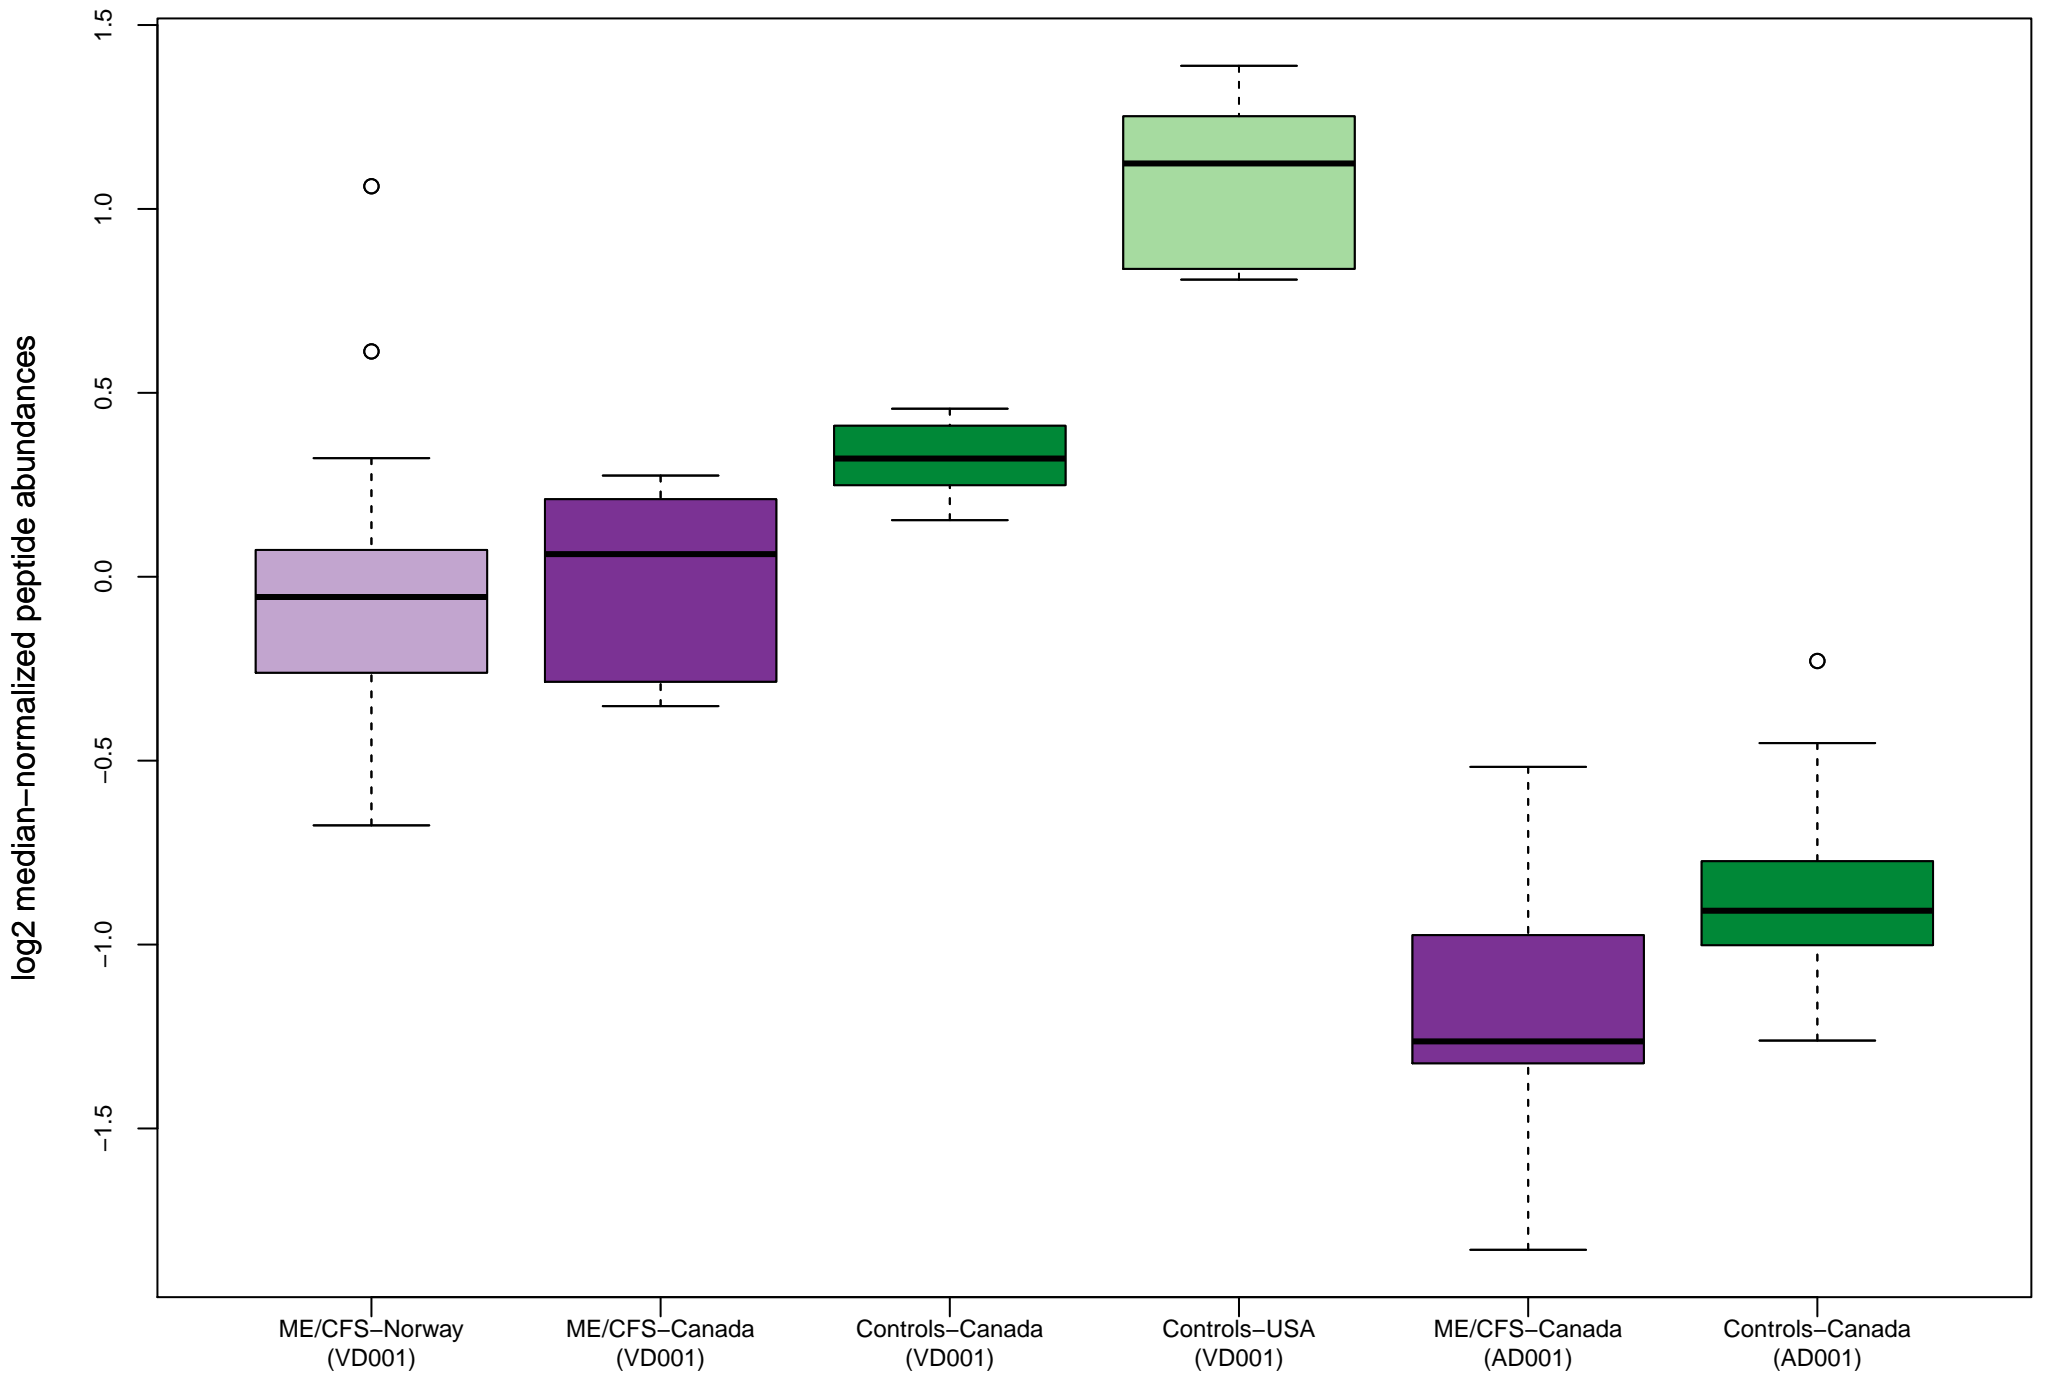

# YRFGPKLSVLSG

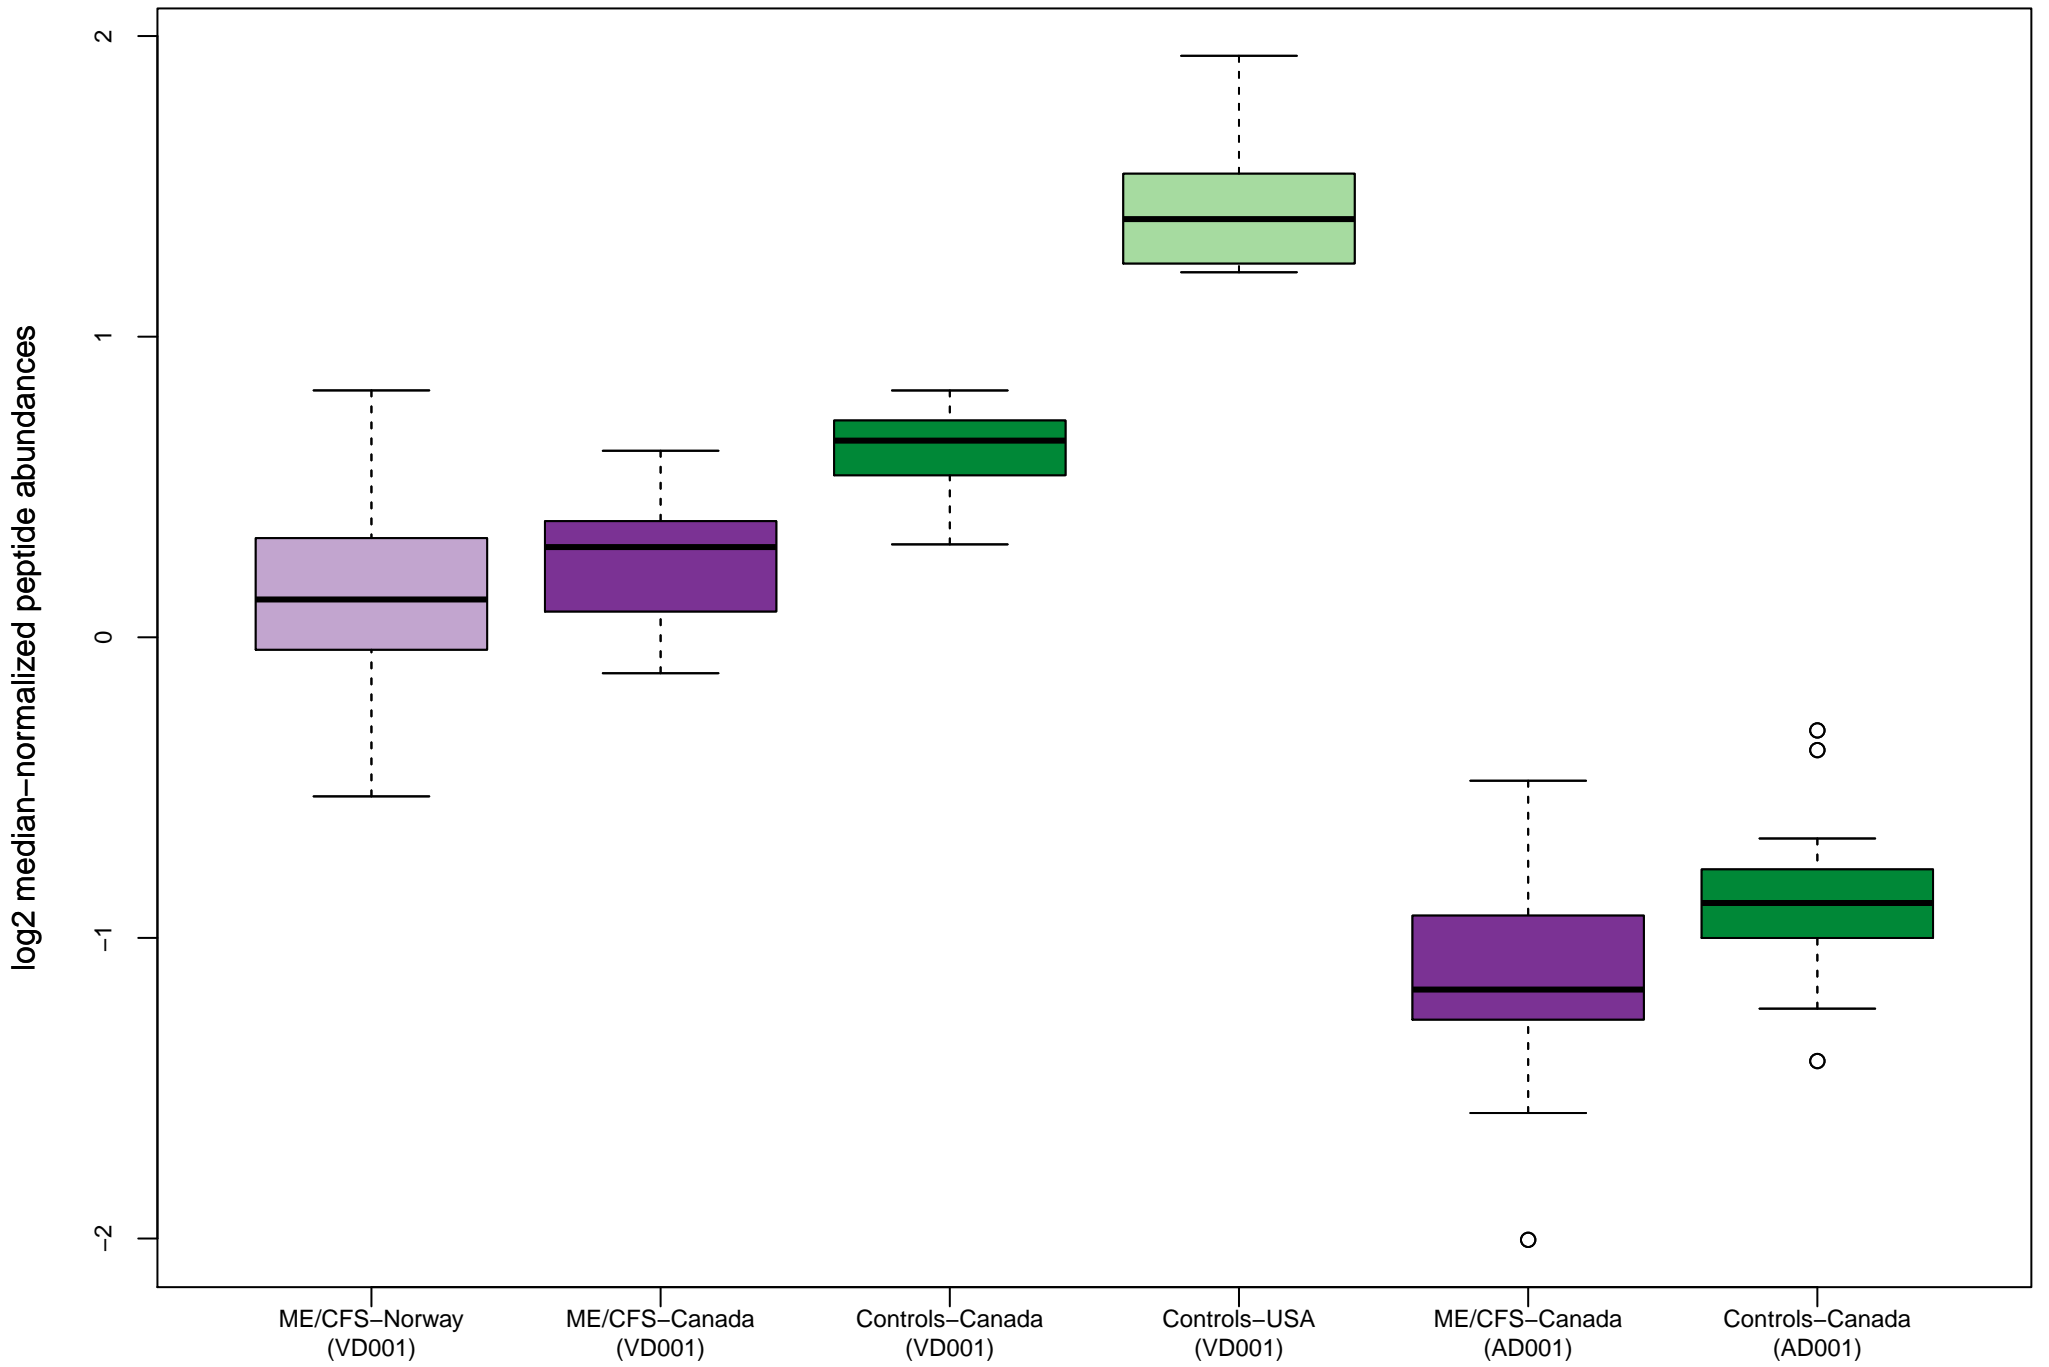

# YSYLLRKGVALS

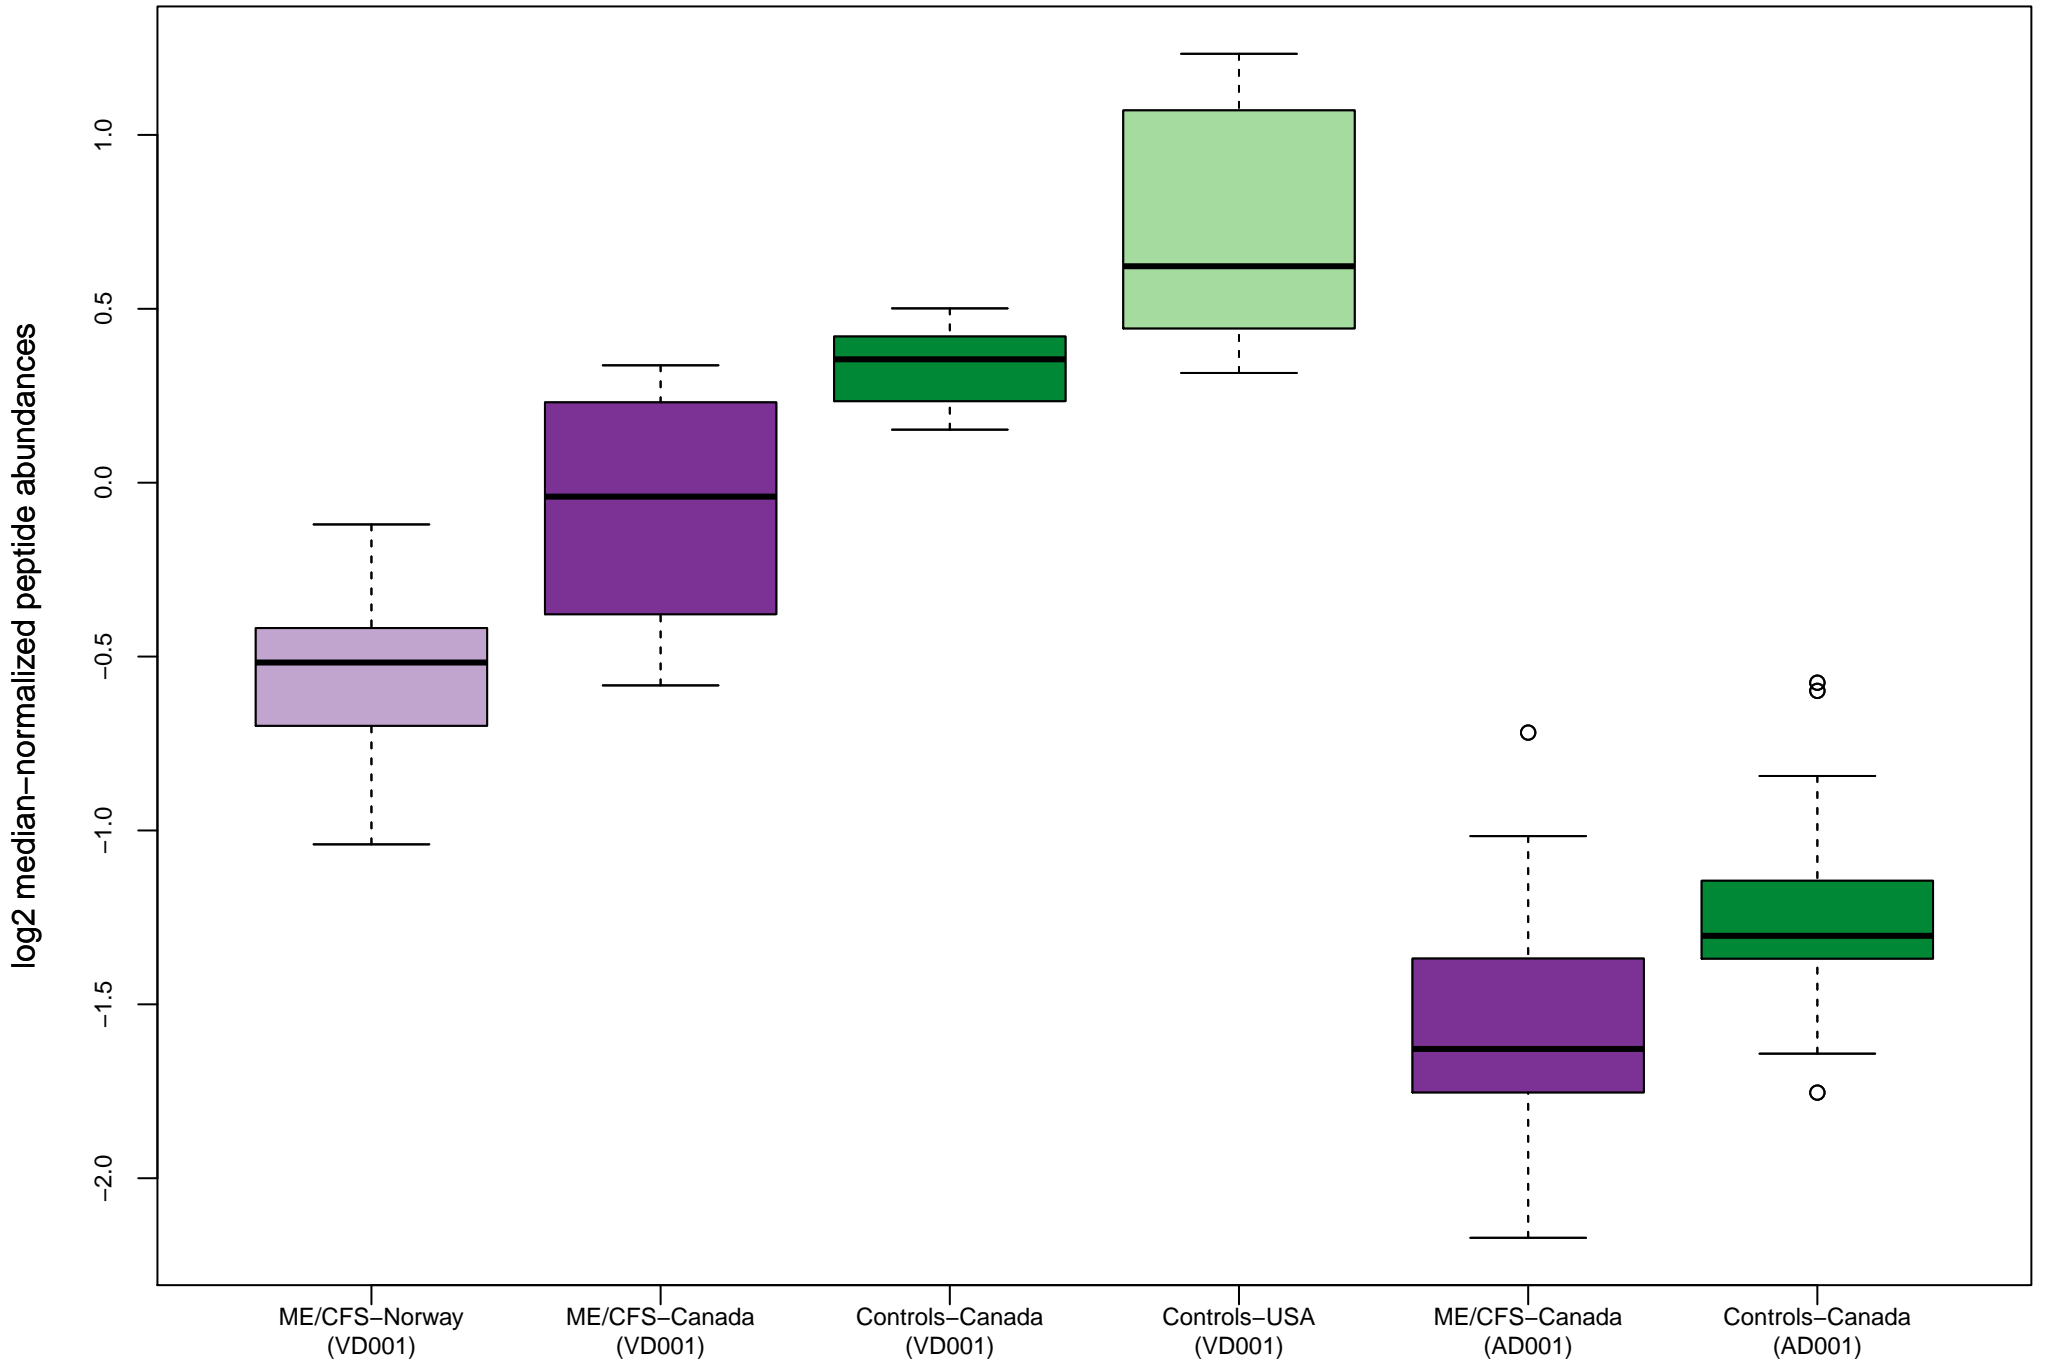

Supplement: 12035_2018_1354_MOESM6_ESM.pdf [file 12035_2018_1354_MOESM6_ESM.pdf]
