# Supplementary material for: Immunosignature Analysis of Myalgic Encephalomyelitis/Chronic Fatigue Syndrome (ME/CFS)
Source: PubMed Central journal article supplement (PMC6505503; doi:10.1007/s12035-018-1354-8), 2018-10-08

Replicate densities (raw) for sample: L-10002 (CFS)

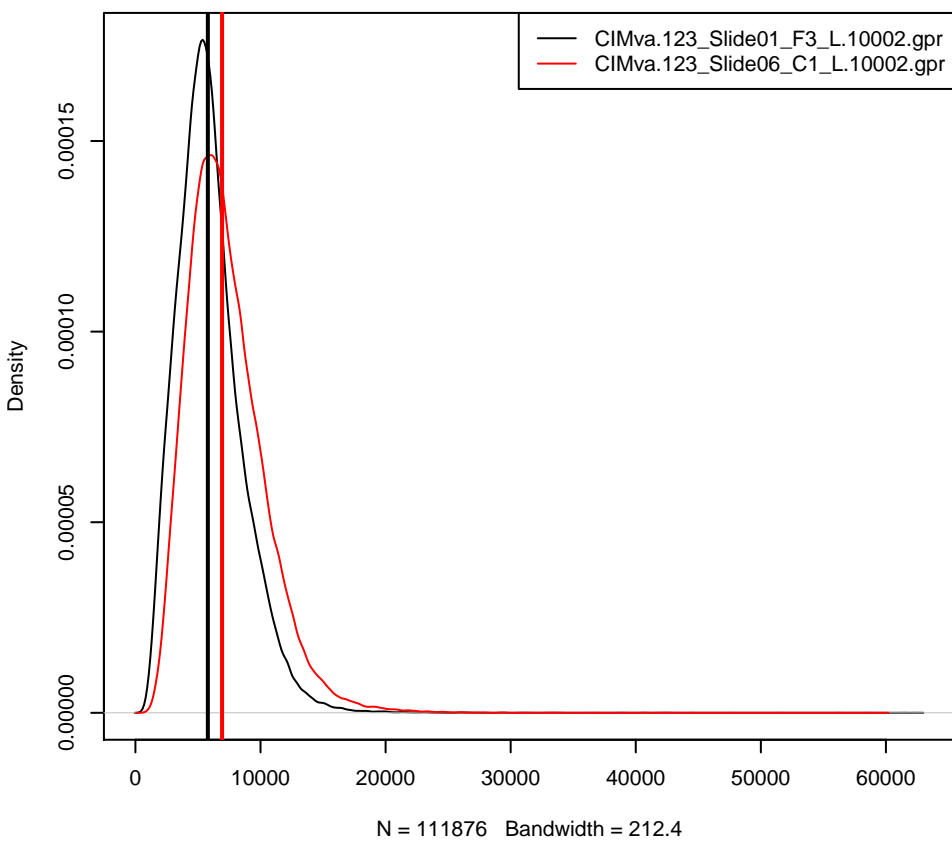

Replicate densities (raw; log2) for sample: L-10002 (CFS)

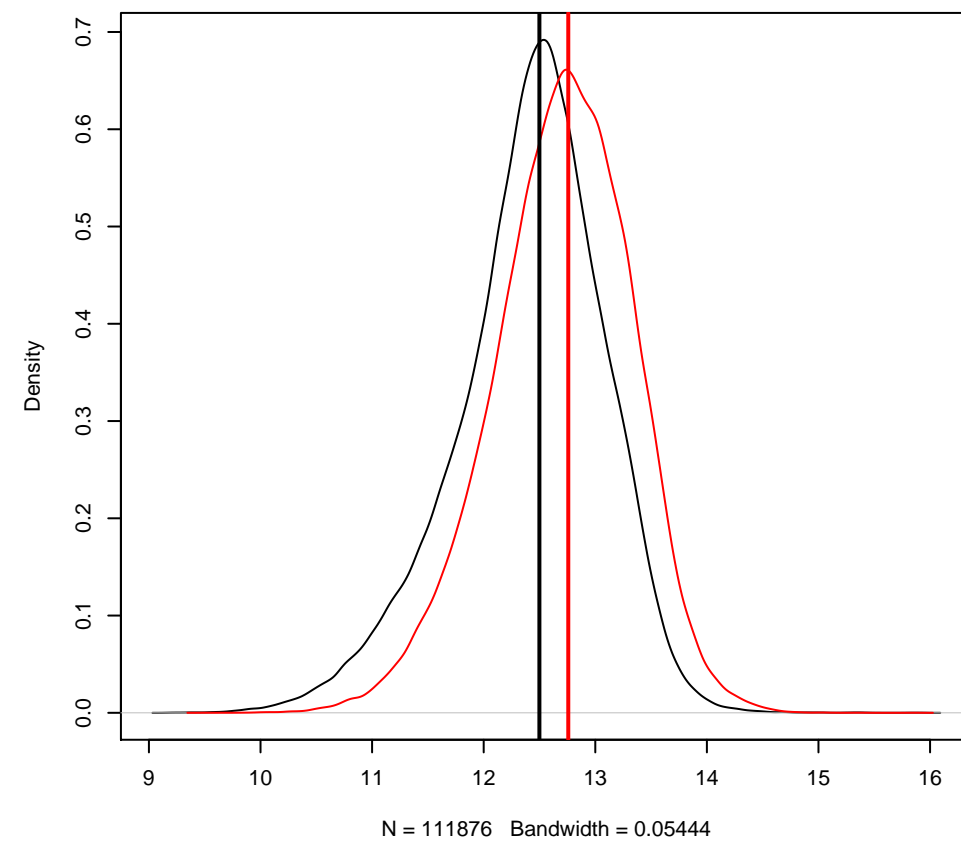

Replicate densities (normalized) for sample: L-10002 (CFS)

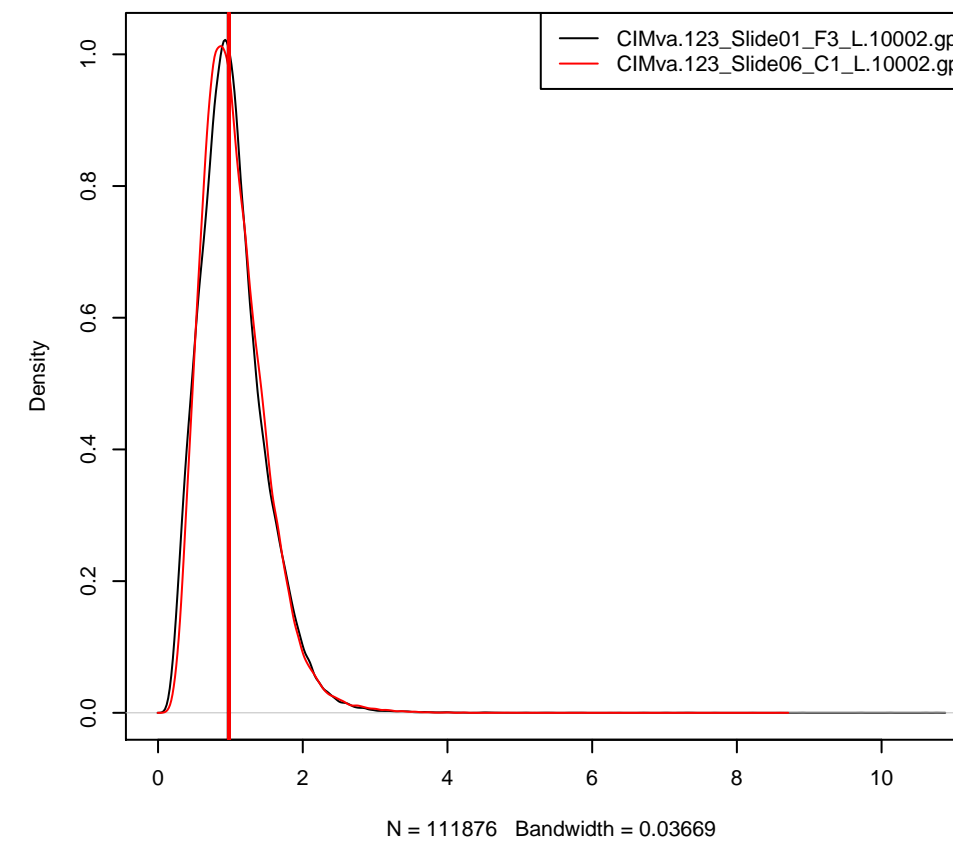

Replicate densities (normalized; log2) for sample: L-10002 (CFS)

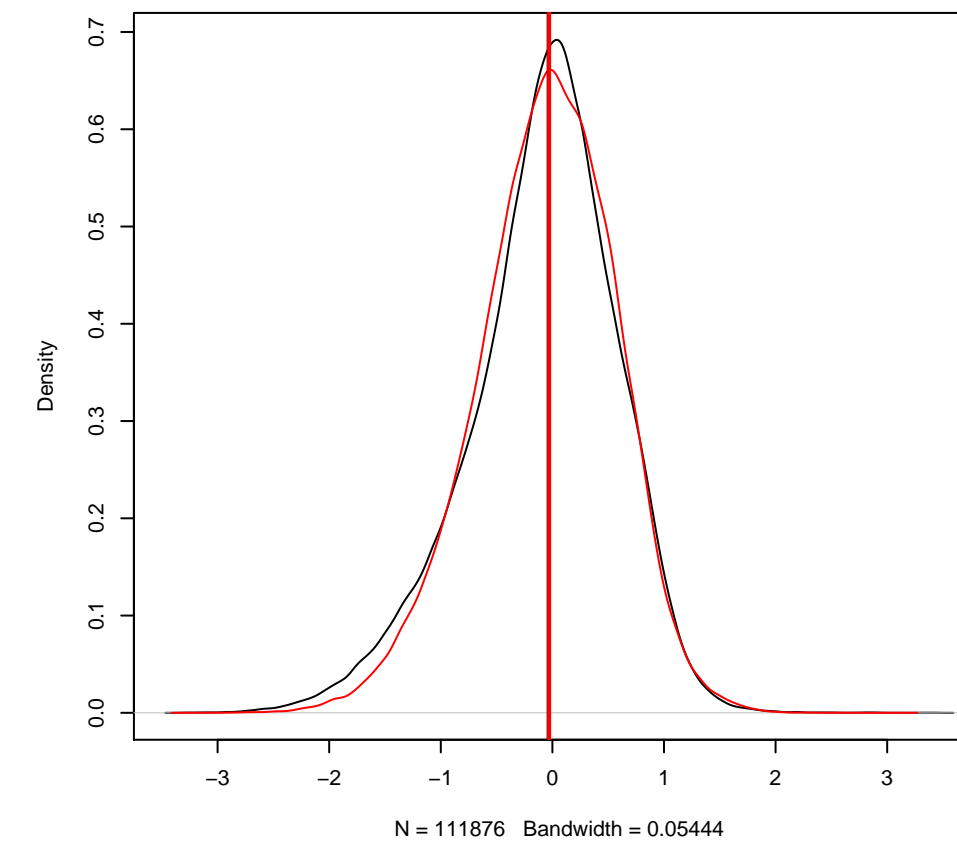

Replicate scatter (raw) for sample: L-10002 (CFS)  
Correlation coefficient: 0.57 (Pearson); 0.62 (Spearman)

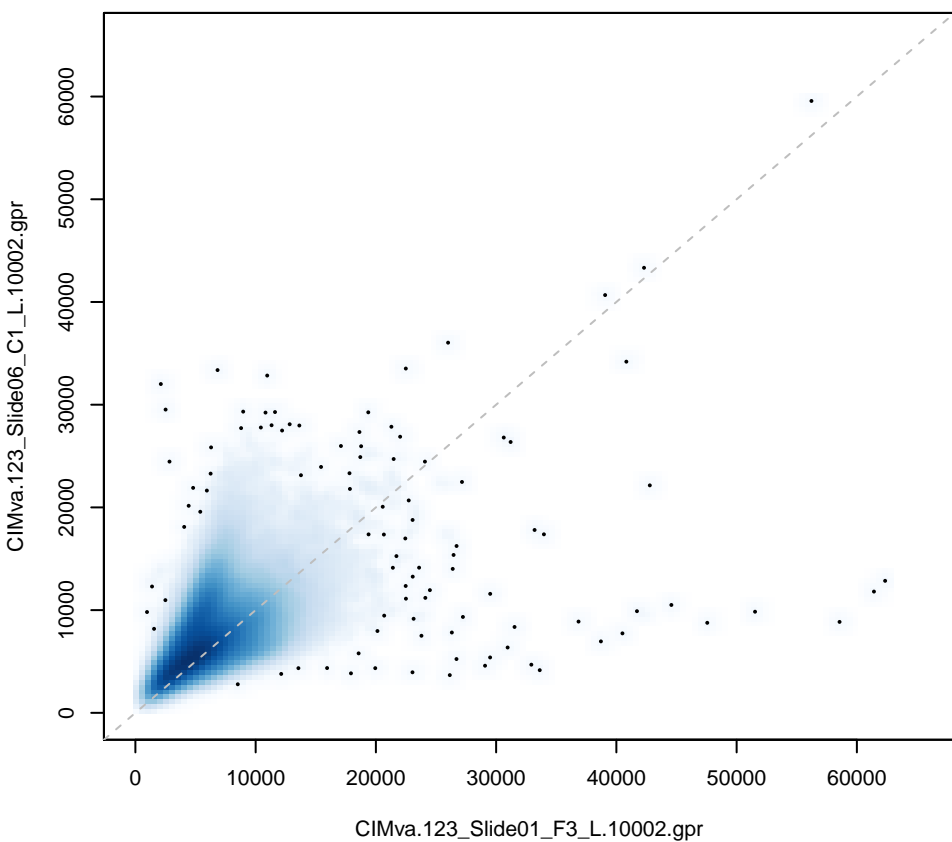

Replicate scatter (raw; log2) for sample: L-10002 (CFS)  
Correlation coefficient: 0.68 (Pearson); 0.62 (Spearman)

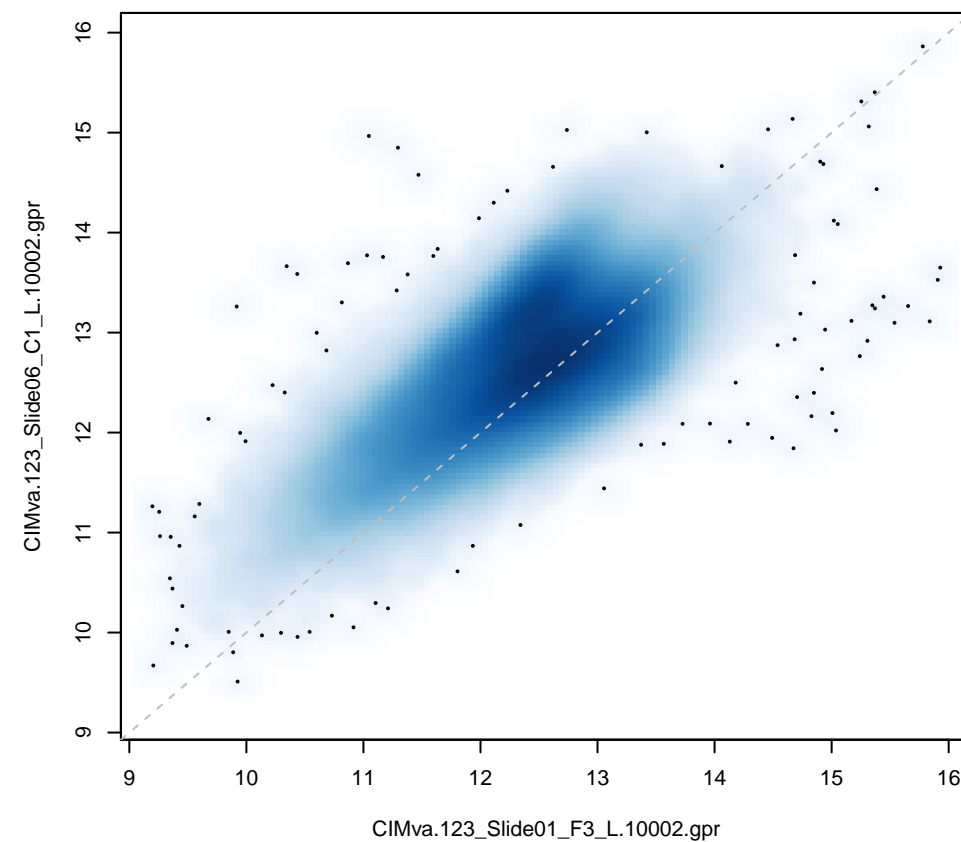

Replicate scatter (normalized) for sample: L-10002 (CFS)  
Correlation coefficient: 0.57 (Pearson); 0.62 (Spearman)

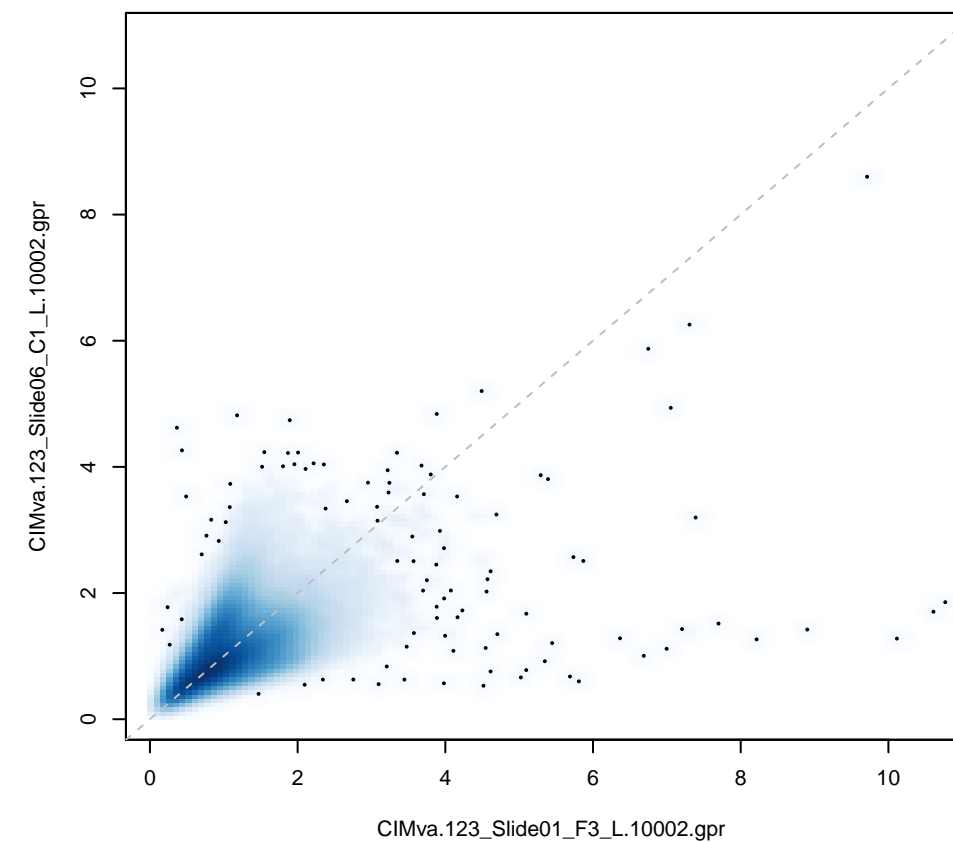

Replicate scatter (normalized; log2) for sample: L-10002 (CFS)  
Correlation coefficient: 0.63 (Pearson); 0.62 (Spearman)

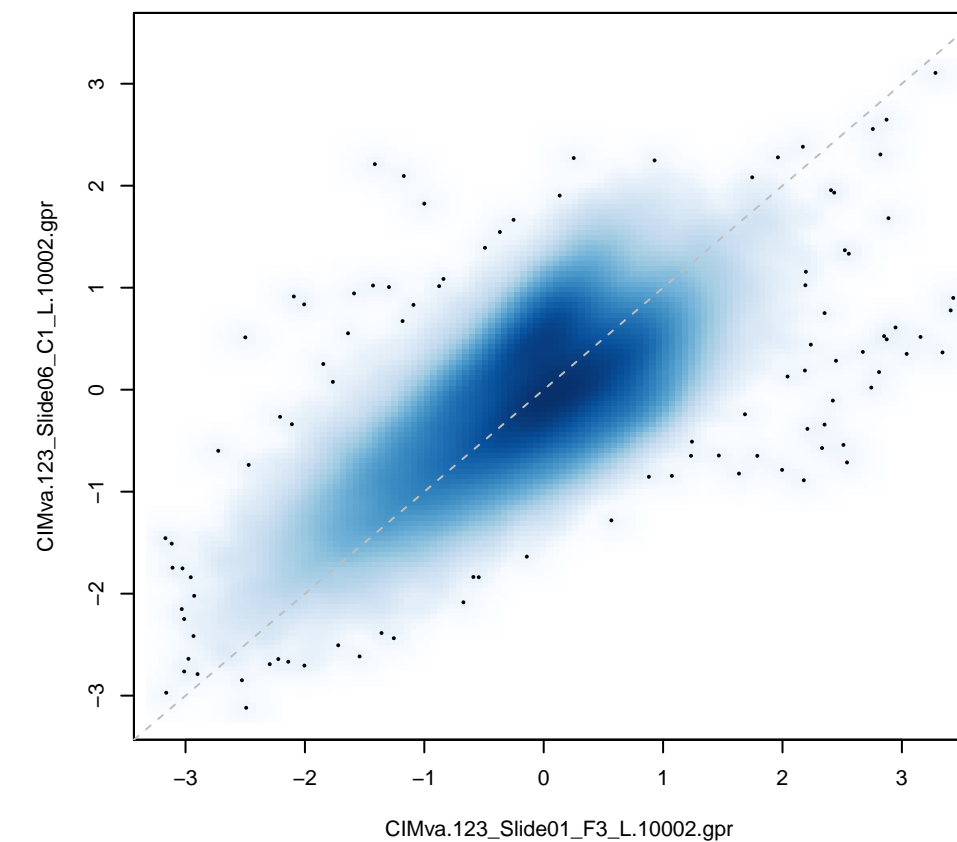

Replicate densities (raw) for sample: L-10848 (CFS)

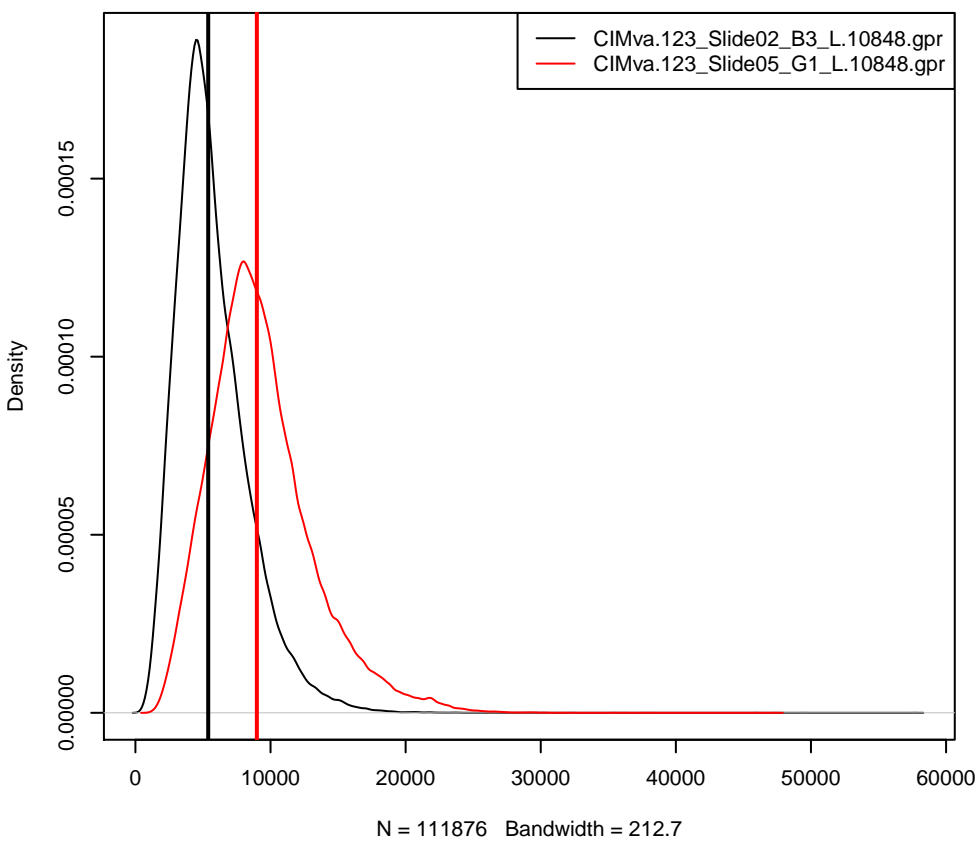

Replicate densities (raw; log2) for sample: L-10848 (CFS)

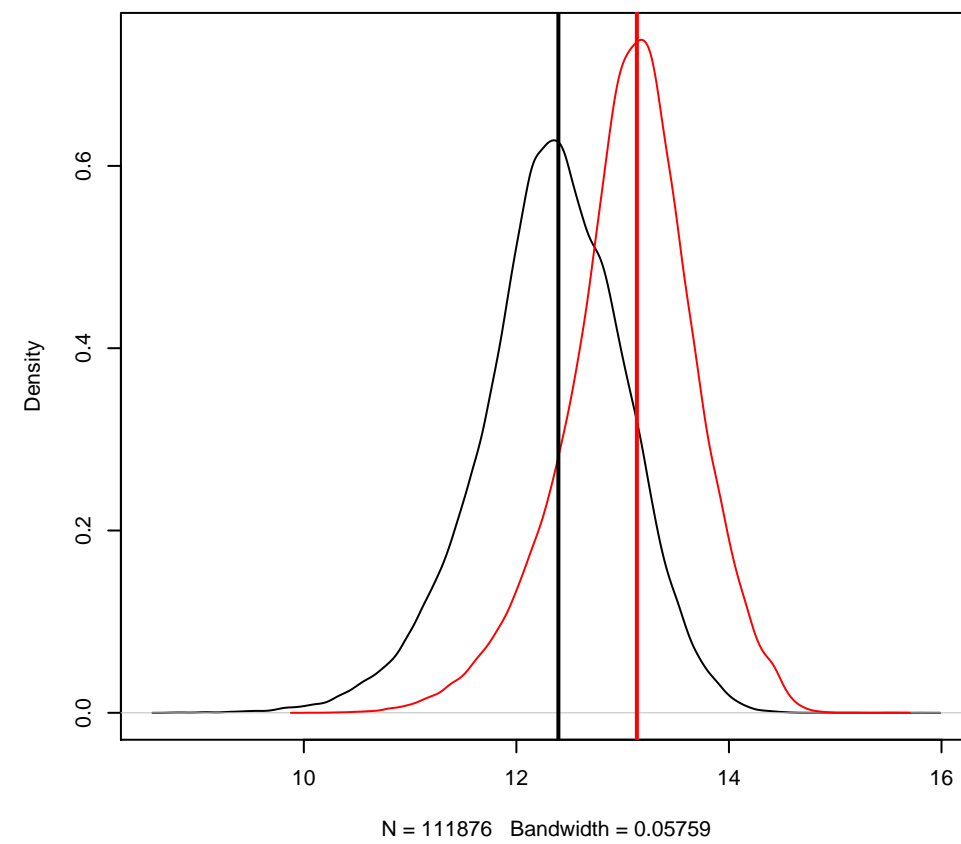

Replicate densities (normalized) for sample: L-10848 (CFS)

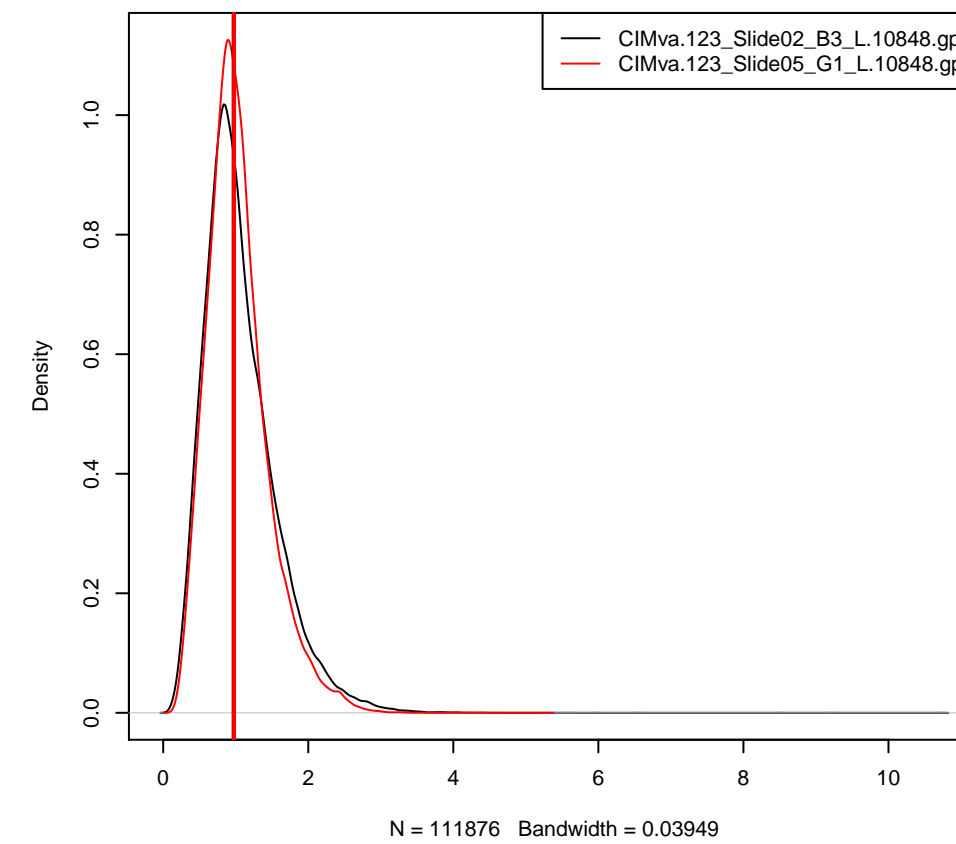

Replicate densities (normalized; log2) for sample: L-10848 (CFS)

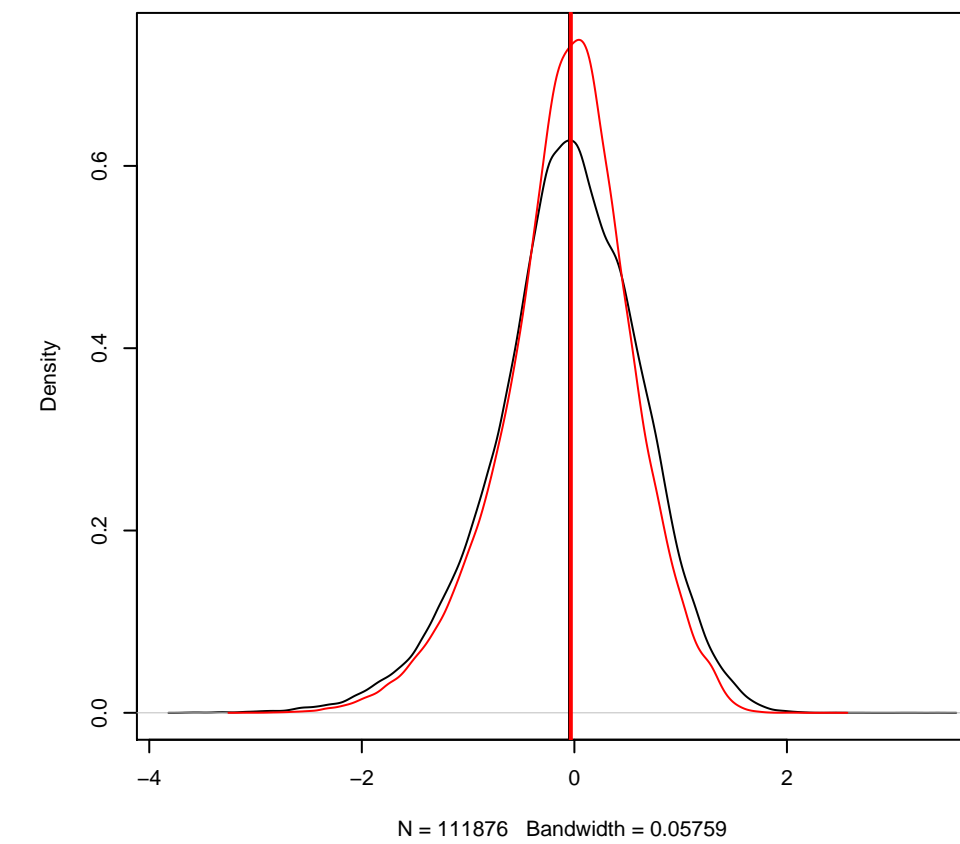

Replicate scatter (raw) for sample: L-10848 (CFS)  
Correlation coefficient: 0.72 (Pearson); 0.72 (Spearman)

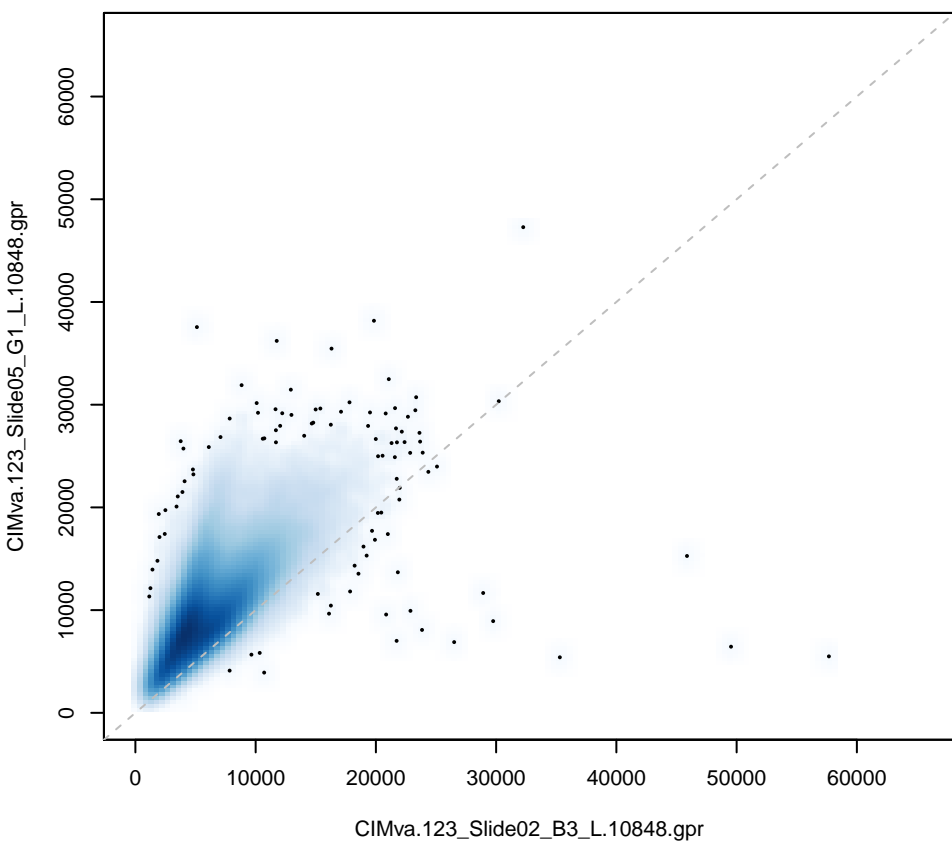

Replicate scatter (raw; log2) for sample: L-10848 (CFS)  
Correlation coefficient: 0.76 (Pearson); 0.72 (Spearman)

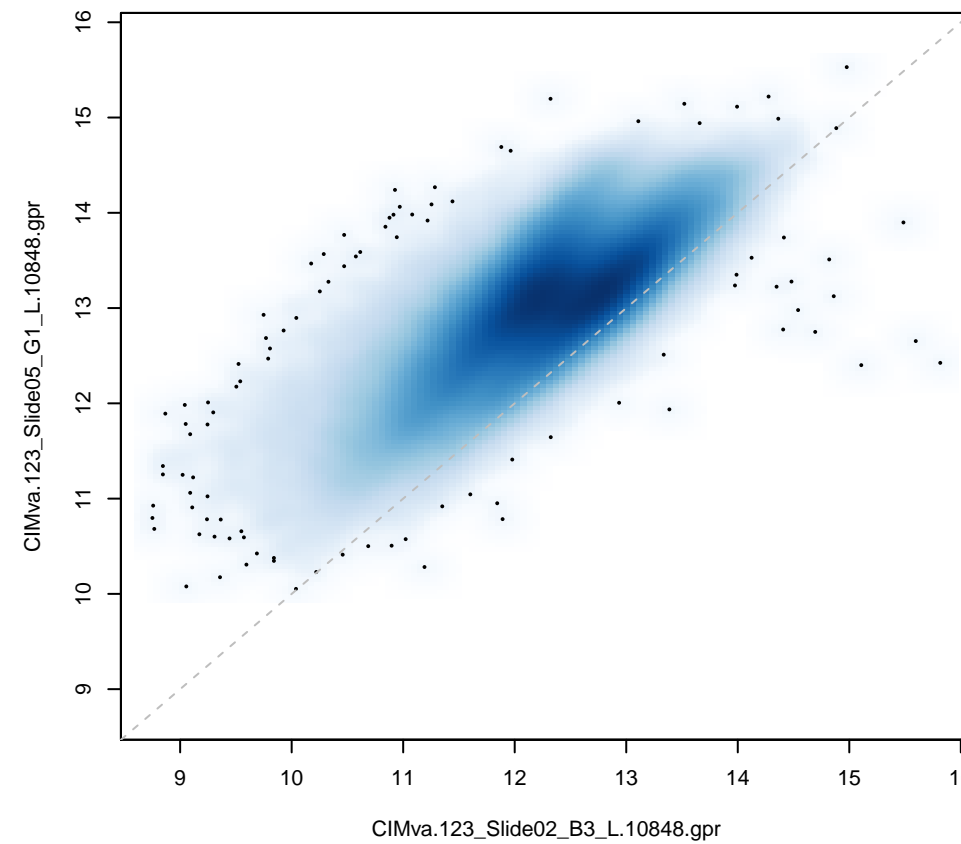

Replicate scatter (normalized) for sample: L-10848 (CFS)  
Correlation coefficient: 0.72 (Pearson); 0.72 (Spearman)

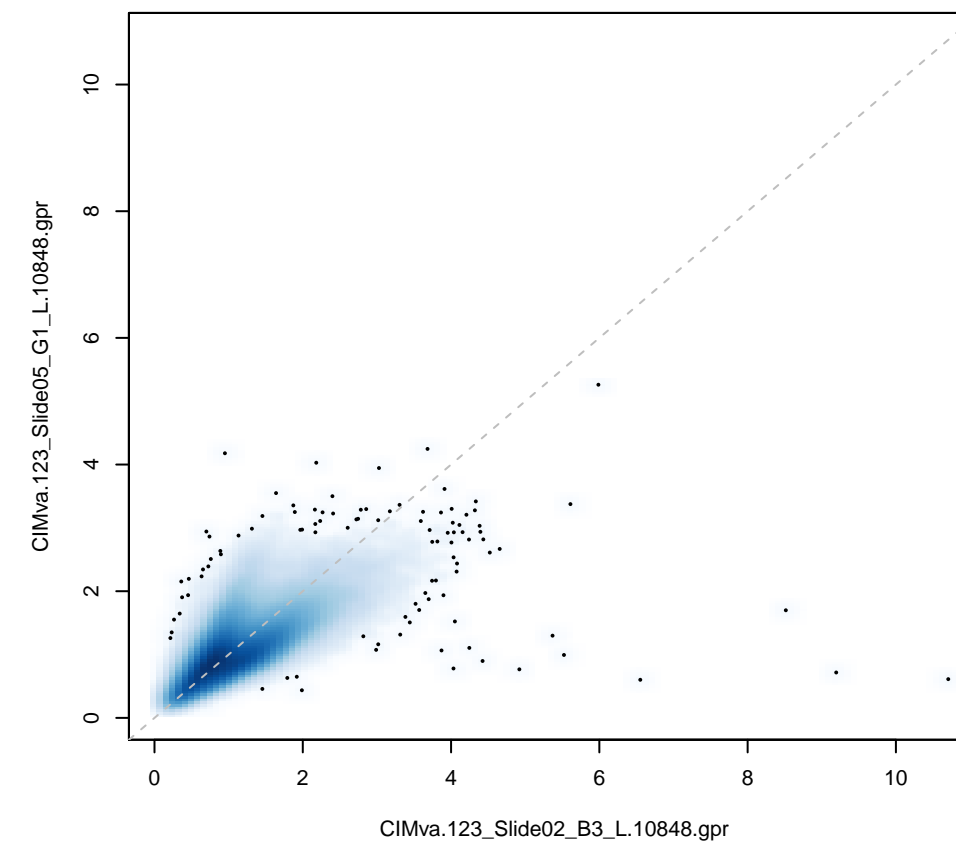

Replicate scatter (normalized; log2) for sample: L-10848 (CFS)  
Correlation coefficient: 0.74 (Pearson); 0.72 (Spearman)

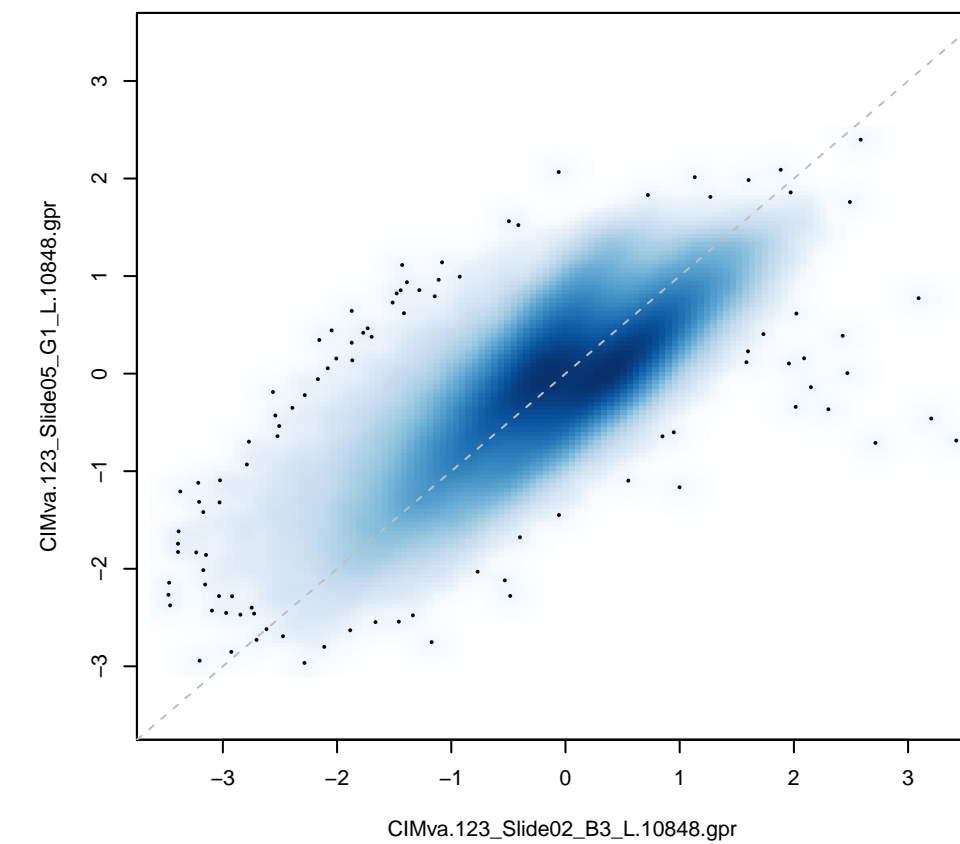

Replicate densities (raw) for sample: L-4049 (CFS)

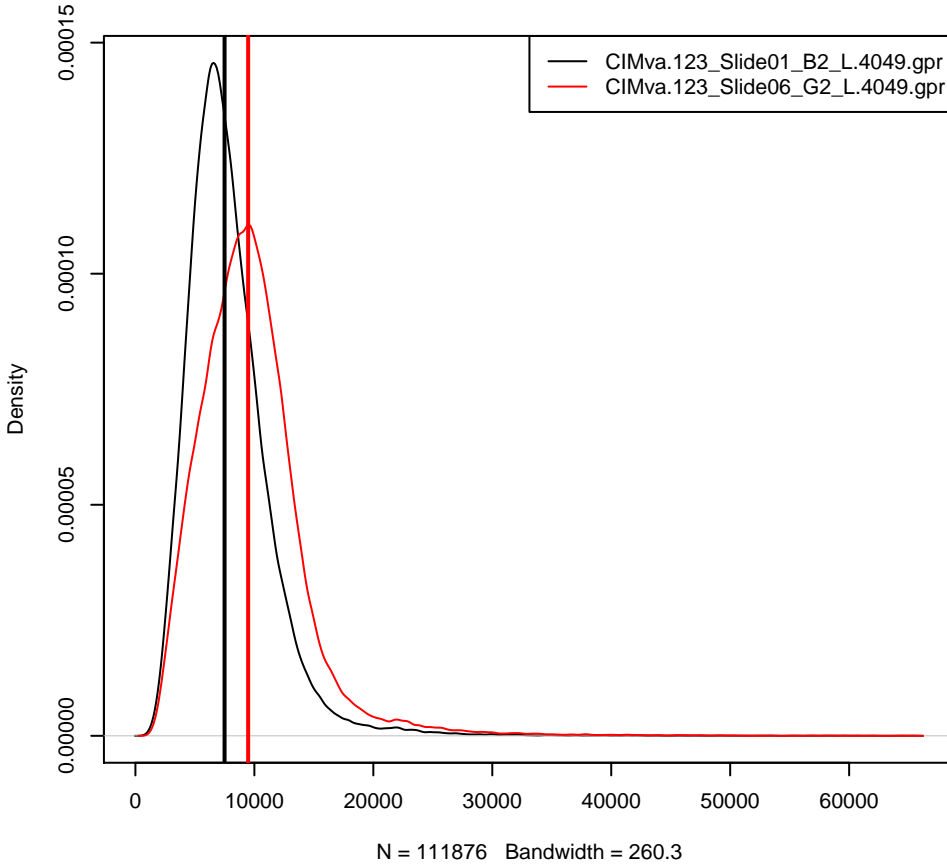

Replicate densities (raw; log2) for sample: L-4049 (CFS)

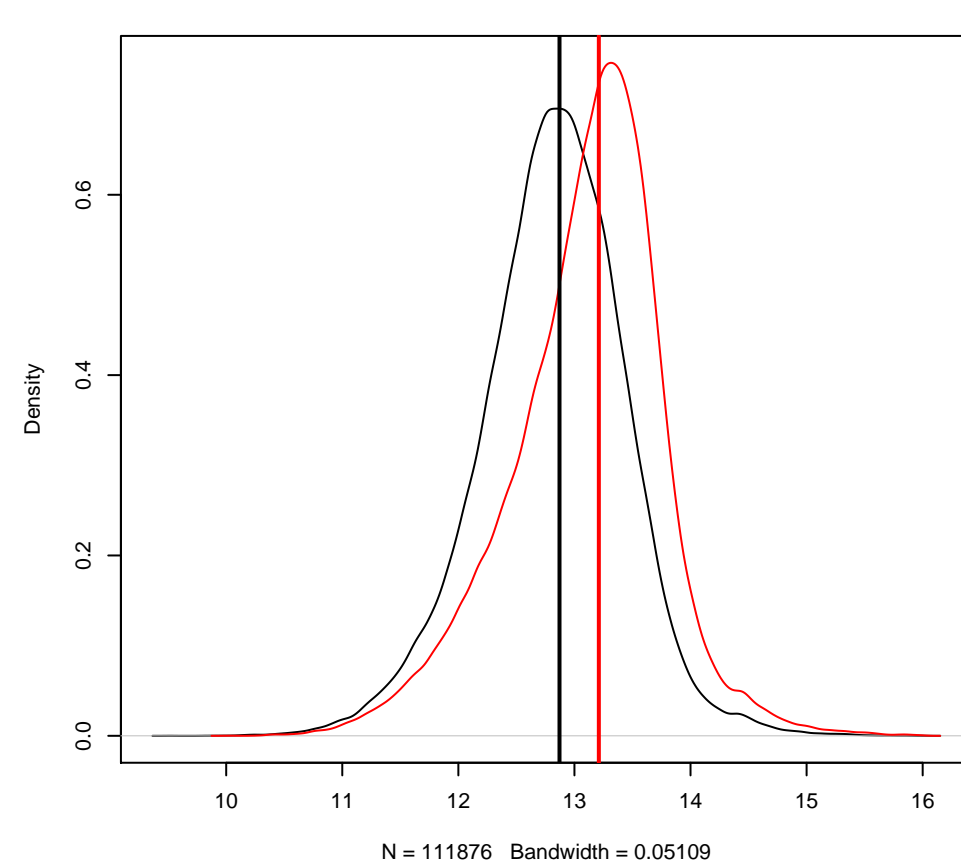

Replicate densities (normalized) for sample: L-4049 (CFS)

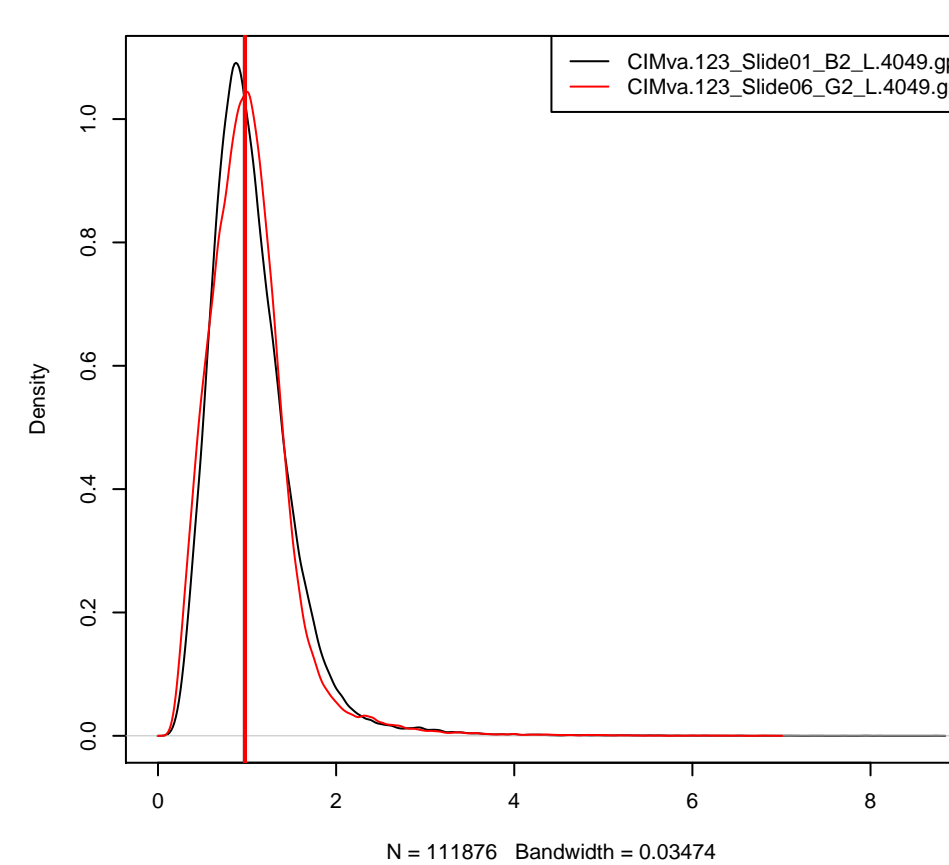

Replicate densities (normalized; log2) for sample: L-4049 (CFS)

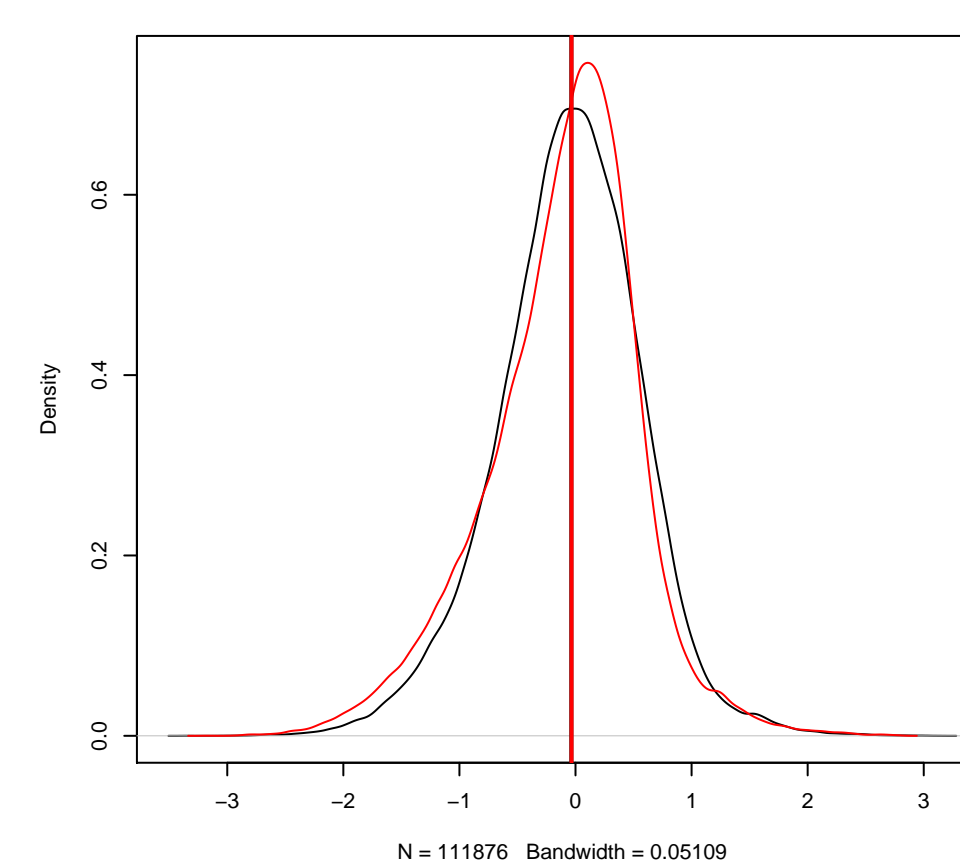

Replicate scatter (raw) for sample: L-4049 (CFS)  
Correlation coefficient: 0.76 (Pearson); 0.74 (Spearman)

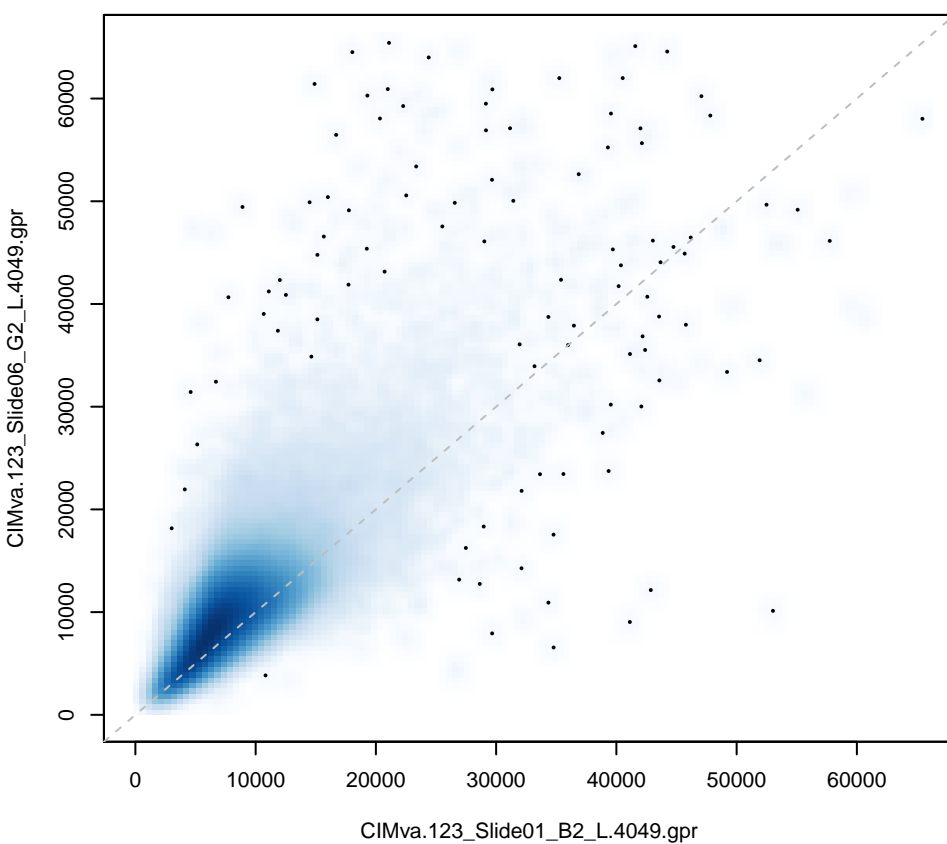

Replicate scatter (raw; log2) for sample: L-4049 (CFS)  
Correlation coefficient: 0.79 (Pearson); 0.74 (Spearman)

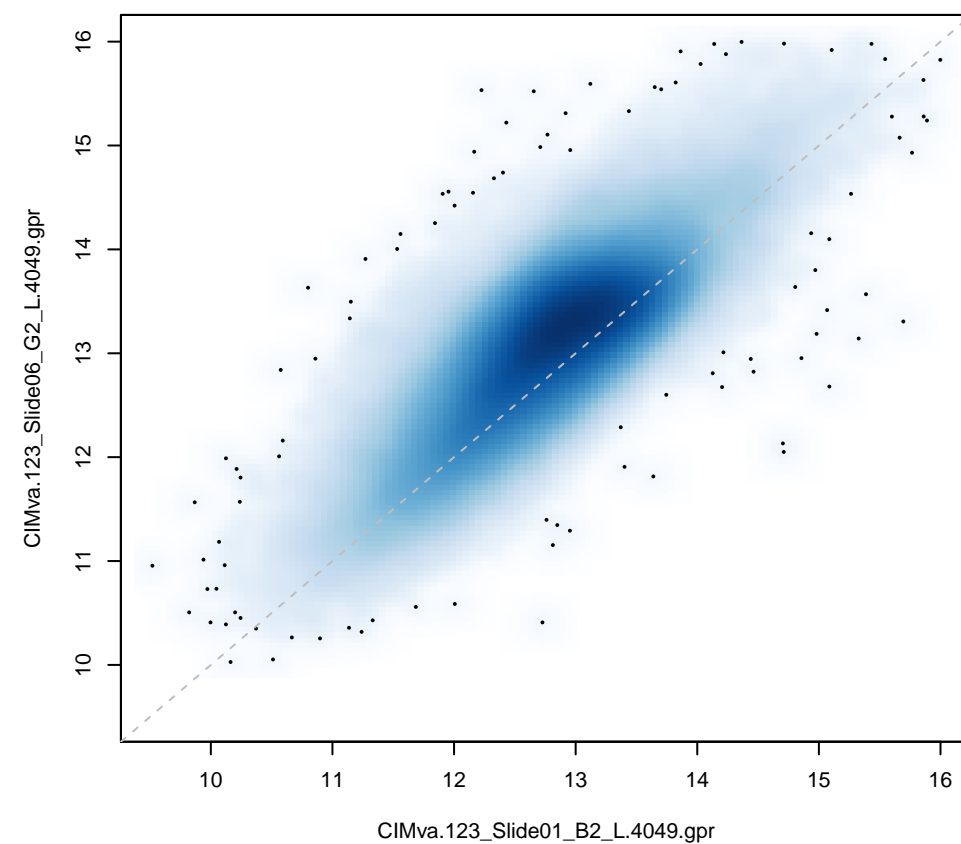

Replicate scatter (normalized) for sample: L-4049 (CFS)  
Correlation coefficient: 0.76 (Pearson); 0.74 (Spearman)

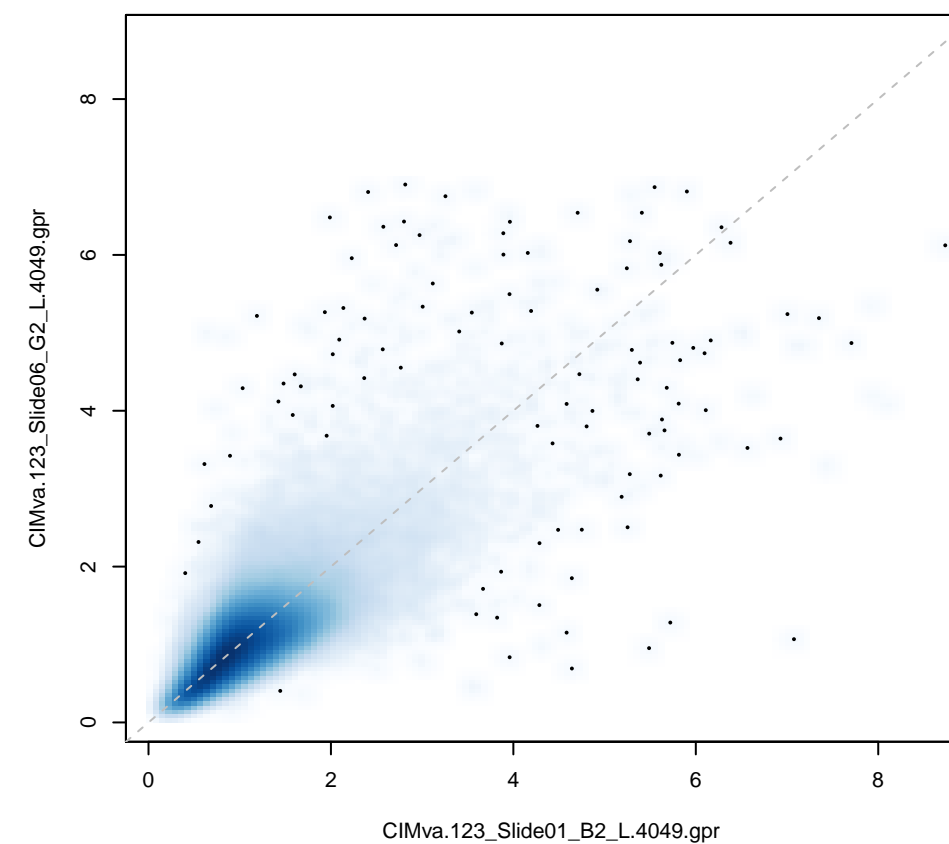

Replicate scatter (normalized; log2) for sample: L-4049 (CFS)  
Correlation coefficient: 0.77 (Pearson); 0.74 (Spearman)

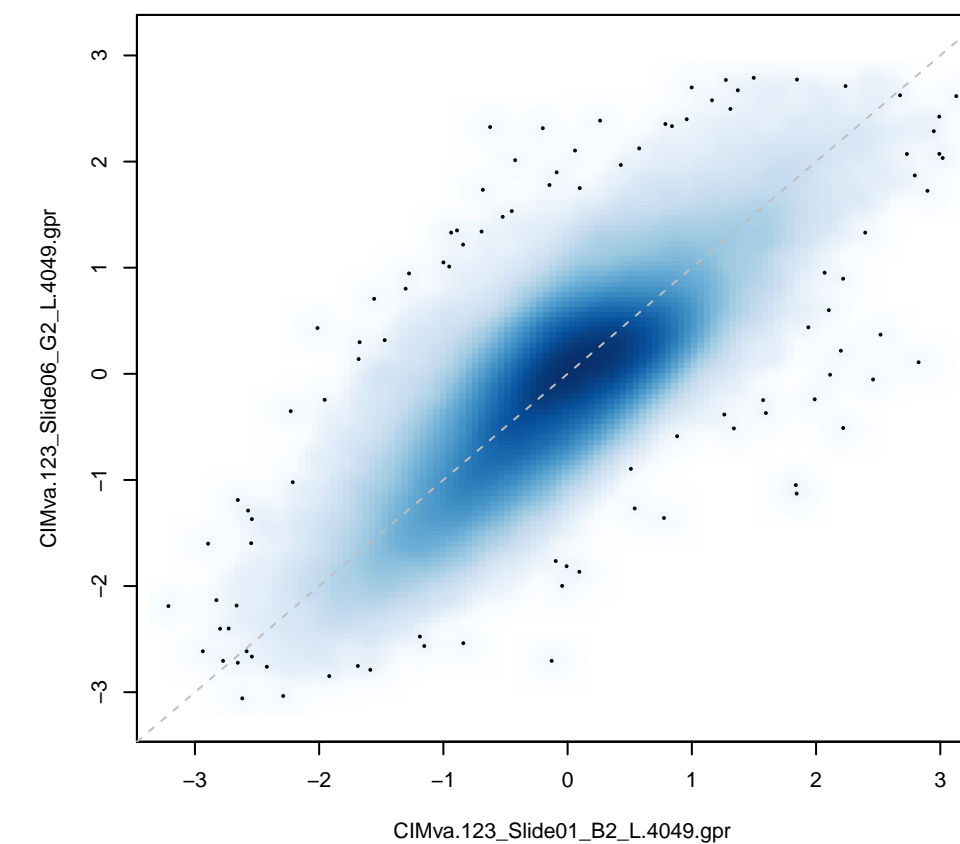

Replicate densities (raw) for sample: L-532181 (Controls)

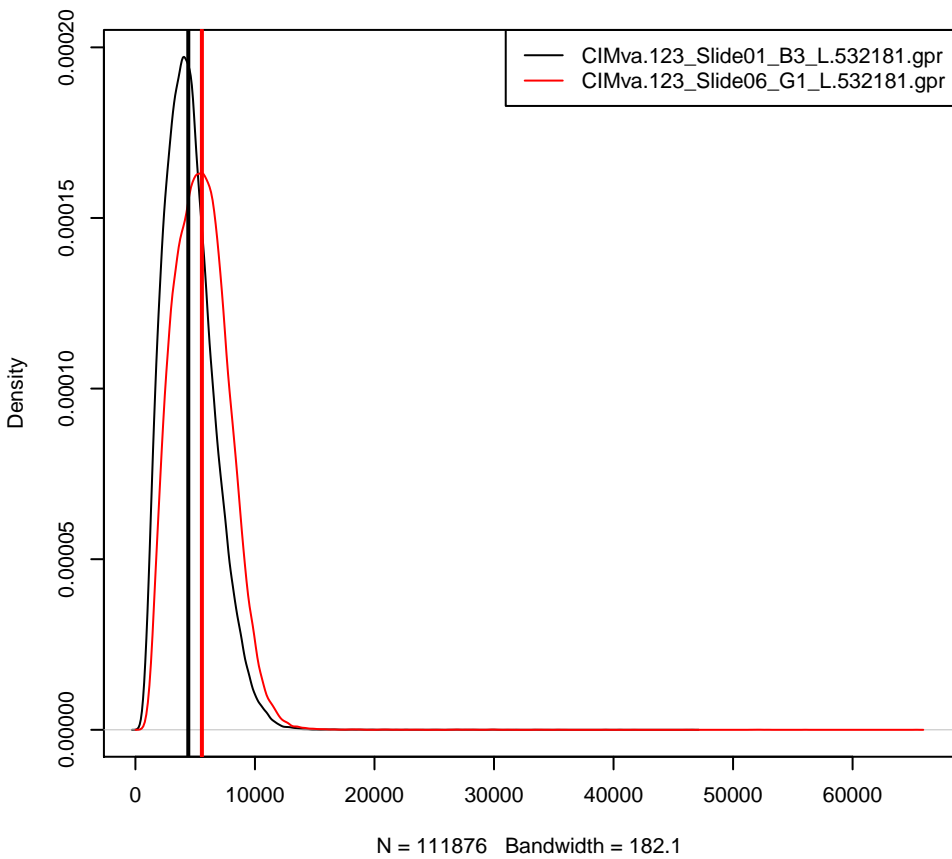

Replicate densities (raw; log2) for sample: L-532181 (Controls)

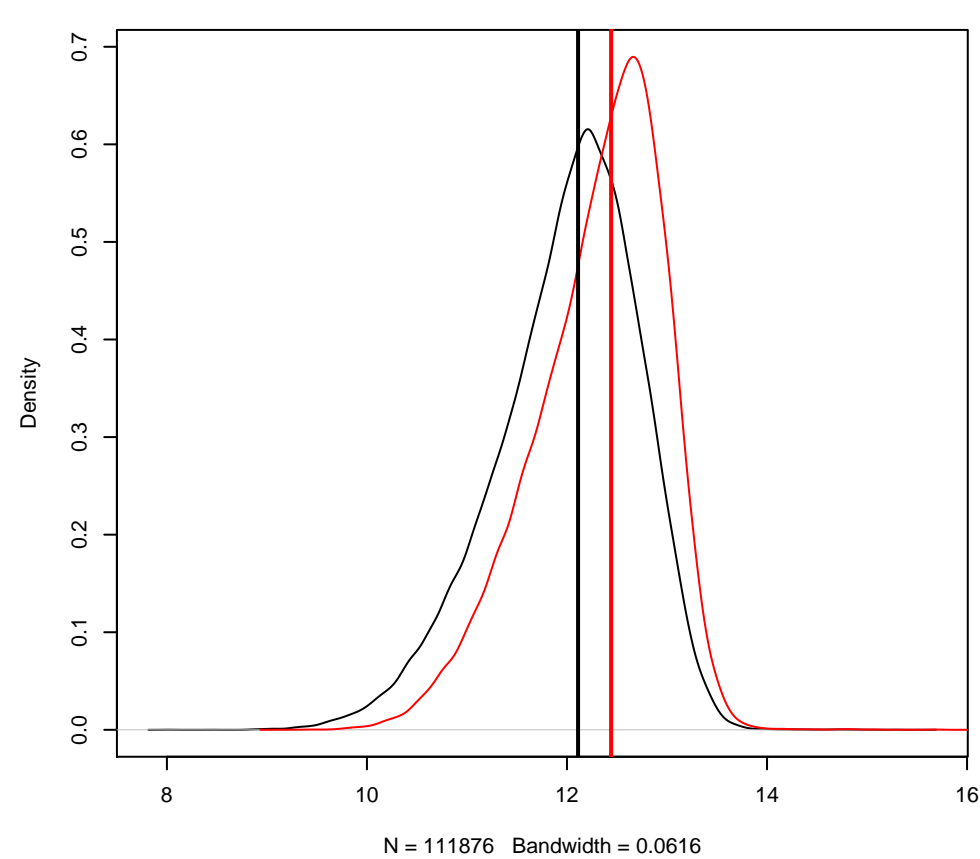

Replicate densities (normalized) for sample: L-532181 (Controls)

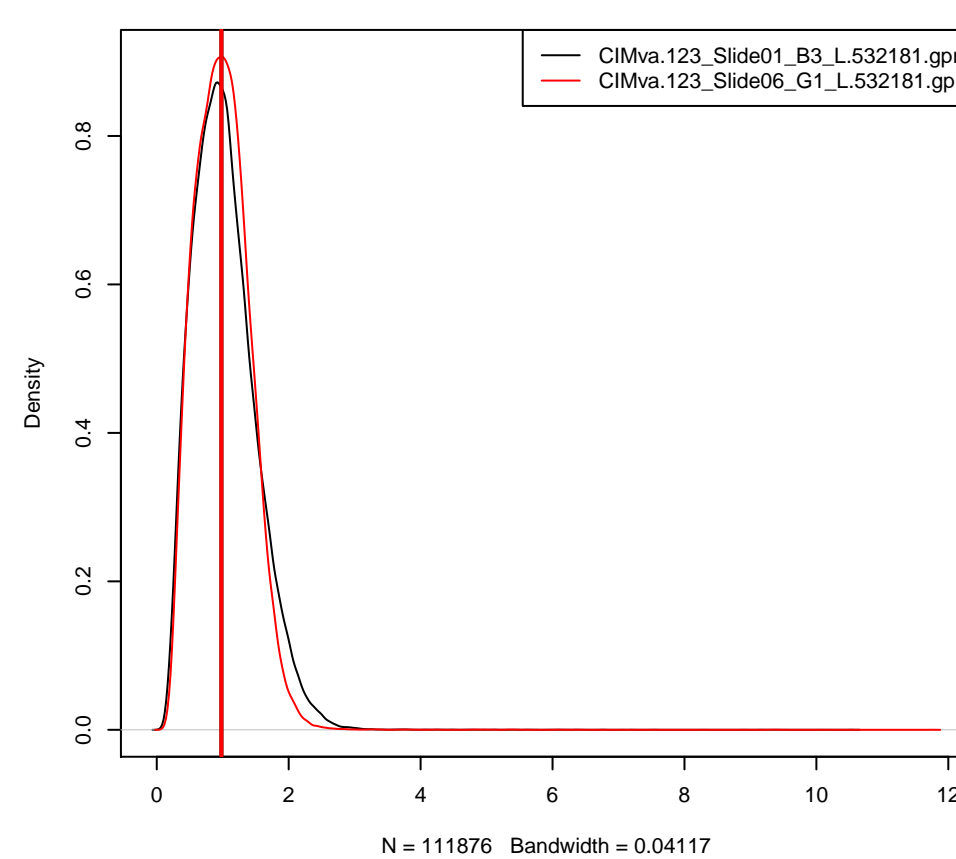

Replicate densities (normalized; log2) for sample: L-532181 (Controls)

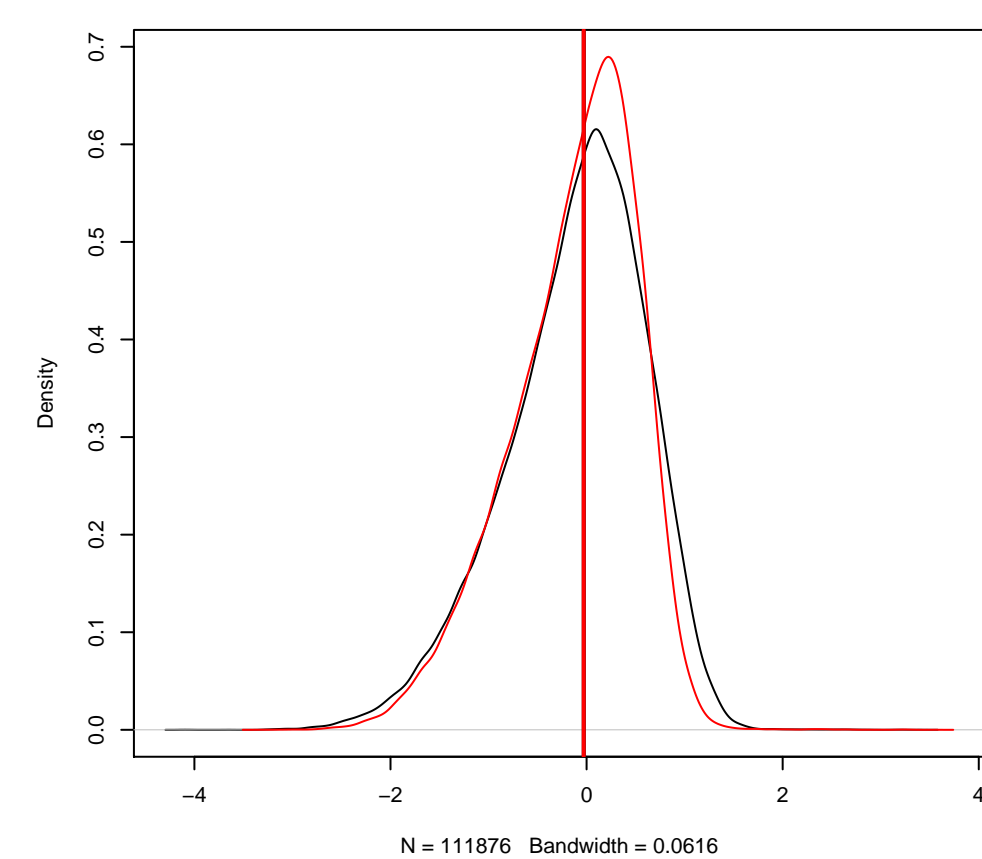

Replicate scatter (raw) for sample: L-532181 (Controls)  
Correlation coefficient: 0.67 (Pearson); 0.74 (Spearman)

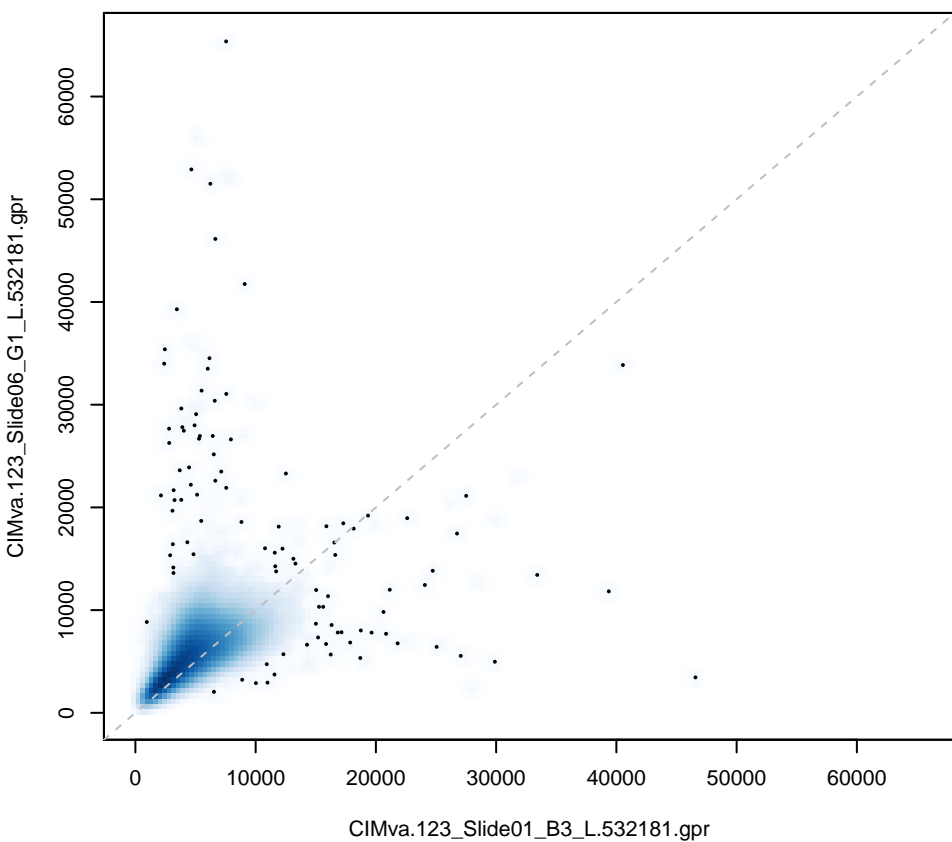

Replicate scatter (raw; log2) for sample: L-532181 (Controls)  
Correlation coefficient: 0.79 (Pearson); 0.74 (Spearman)

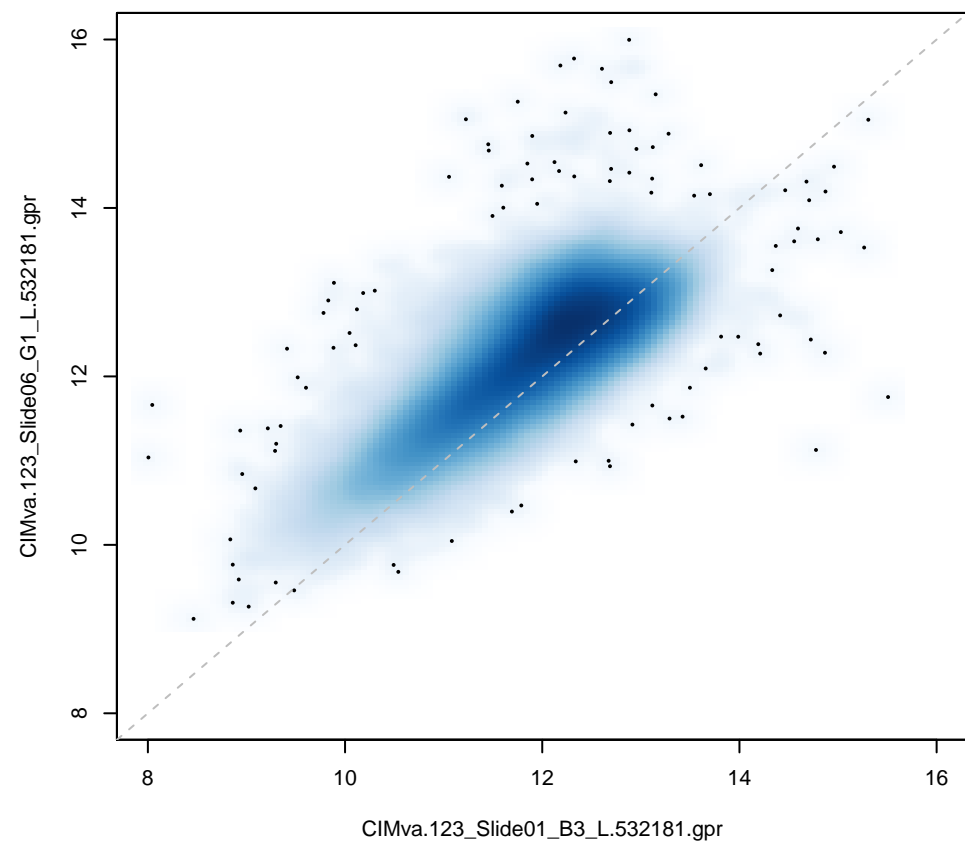

Replicate scatter (normalized) for sample: L-532181 (Controls)  
Correlation coefficient: 0.67 (Pearson); 0.74 (Spearman)

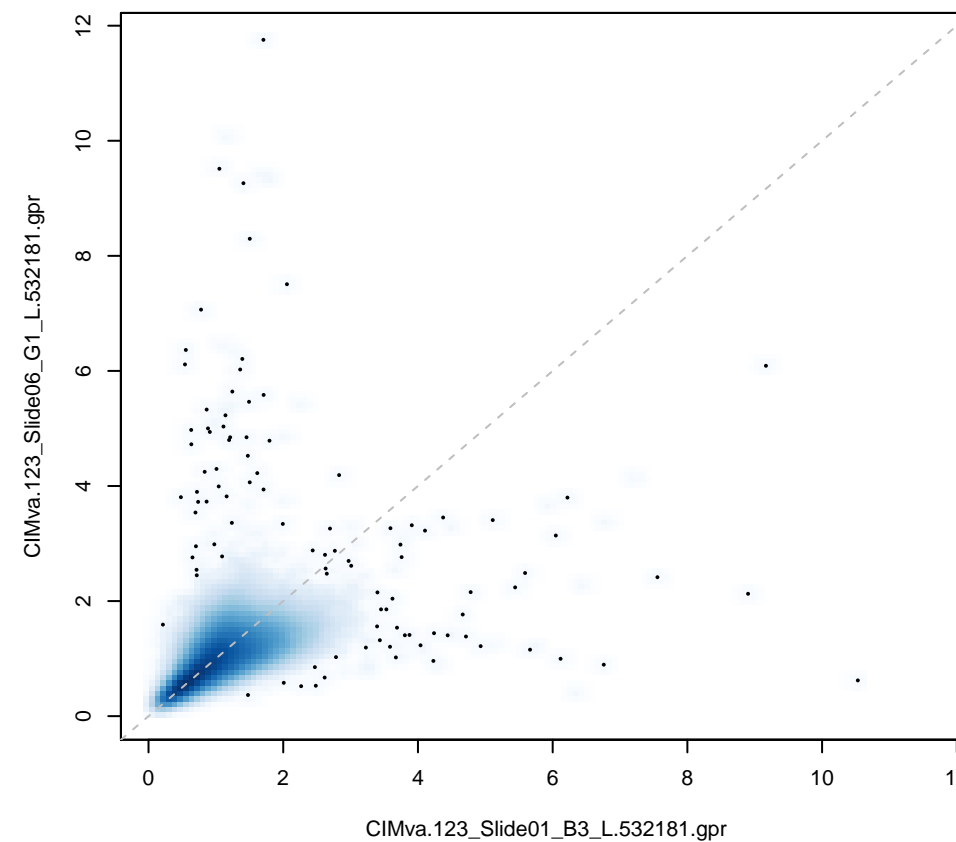

Replicate scatter (normalized; log2) for sample: L-532181 (Controls)  
Correlation coefficient: 0.74 (Pearson); 0.74 (Spearman)

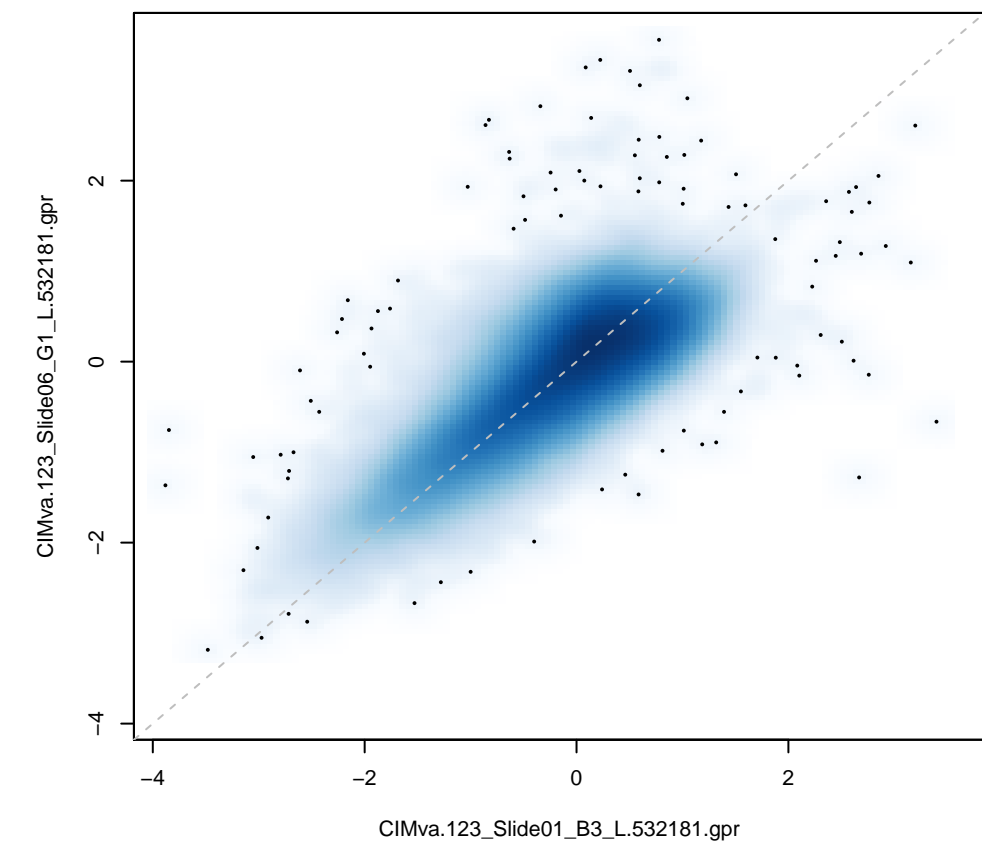

Replicate densities (raw) for sample: L-546336 (CFS)

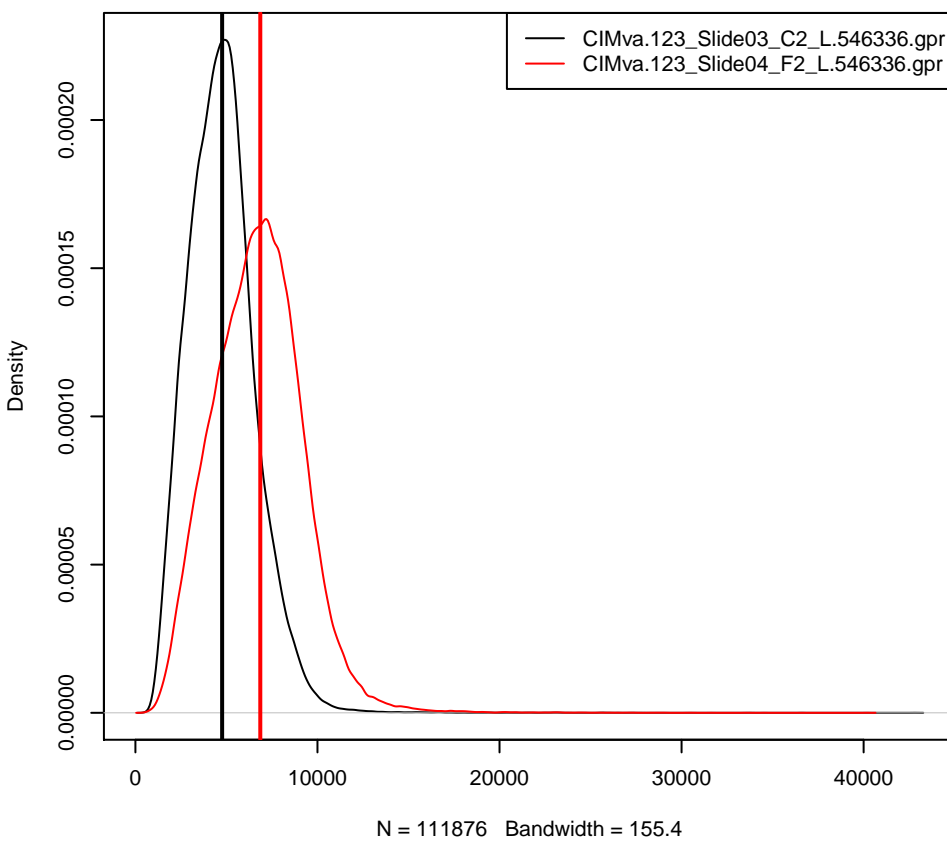

Replicate densities (raw; log2) for sample: L-546336 (CFS)

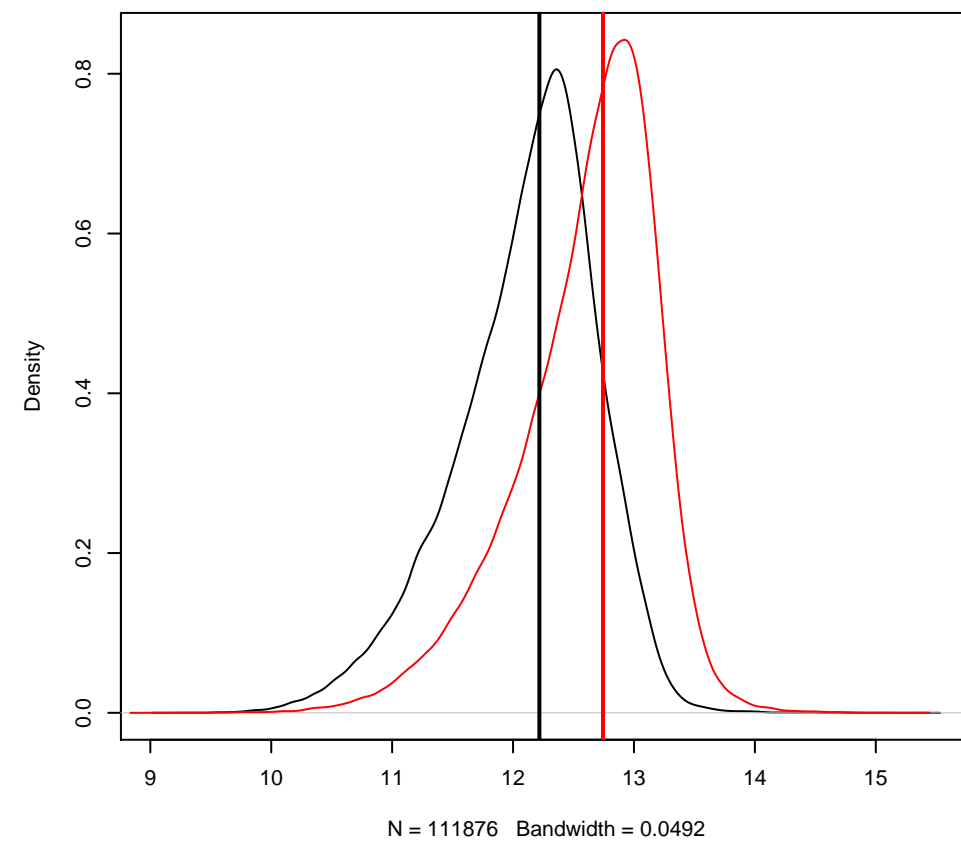

Replicate densities (normalized) for sample: L-546336 (CFS)

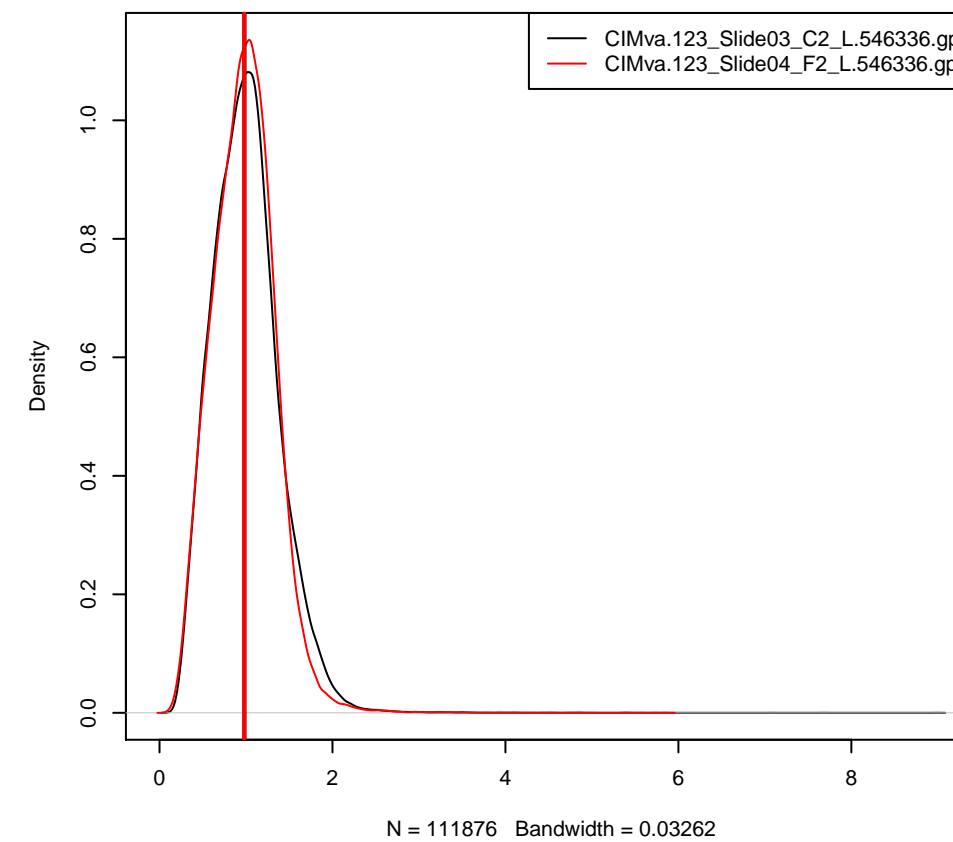

Replicate densities (normalized; log2) for sample: L-546336 (CFS)

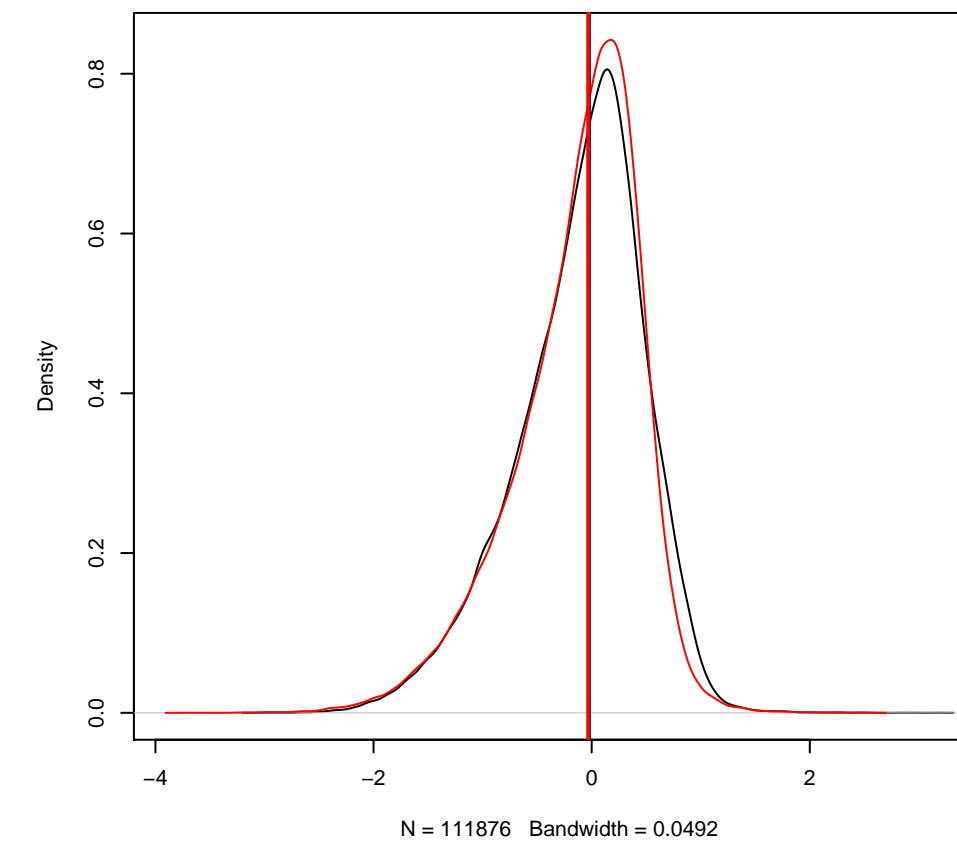

Replicate scatter (raw) for sample: L-546336 (CFS)  
Correlation coefficient: 0.79 (Pearson); 0.81 (Spearman)

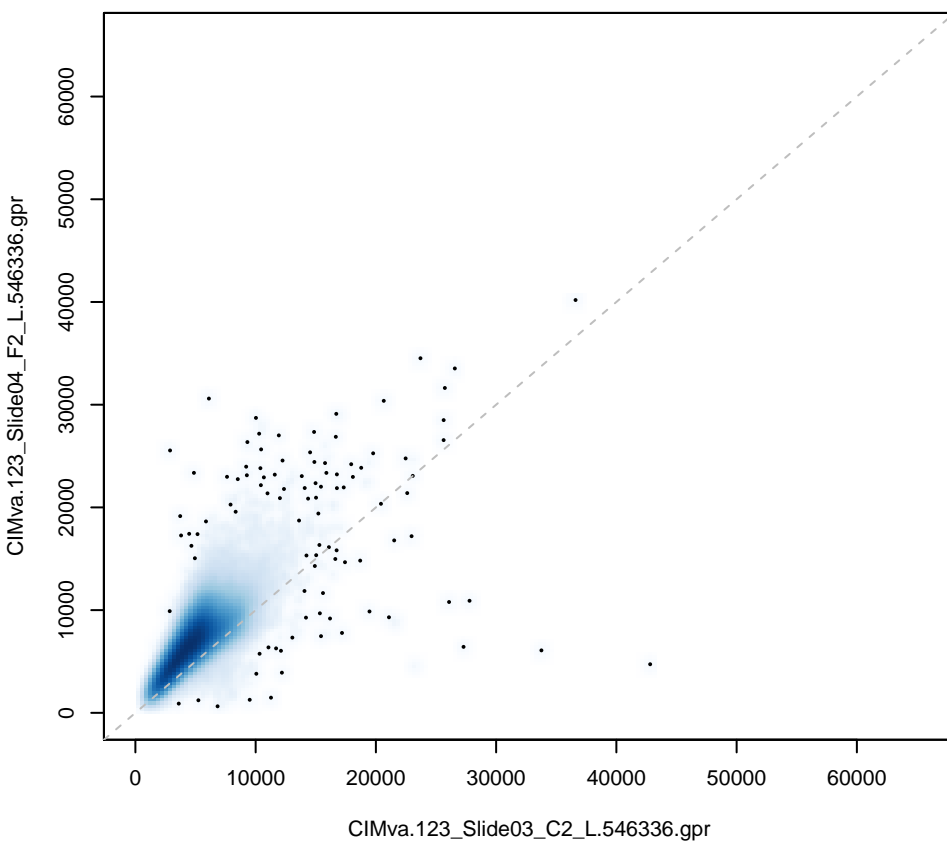

Replicate scatter (raw; log2) for sample: L-546336 (CFS)  
Correlation coefficient: 0.84 (Pearson); 0.81 (Spearman)

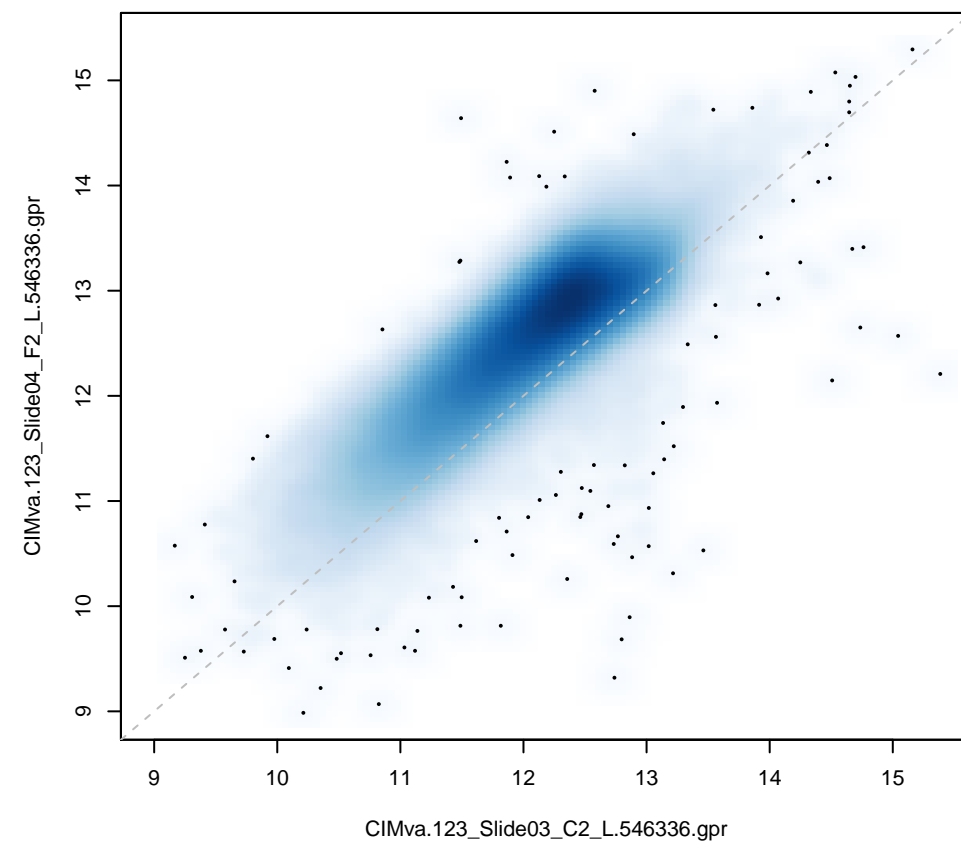

Replicate scatter (normalized) for sample: L-546336 (CFS)  
Correlation coefficient: 0.79 (Pearson); 0.81 (Spearman)

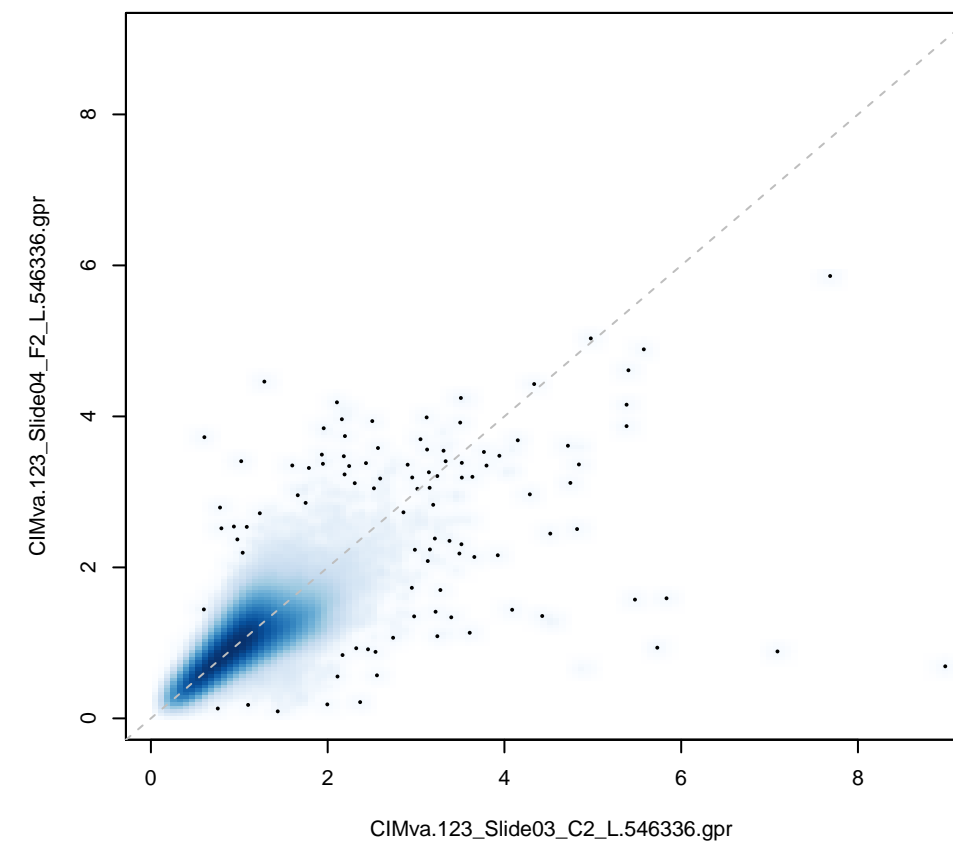

Replicate scatter (normalized; log2) for sample: L-546336 (CFS)  
Correlation coefficient: 0.82 (Pearson); 0.81 (Spearman)

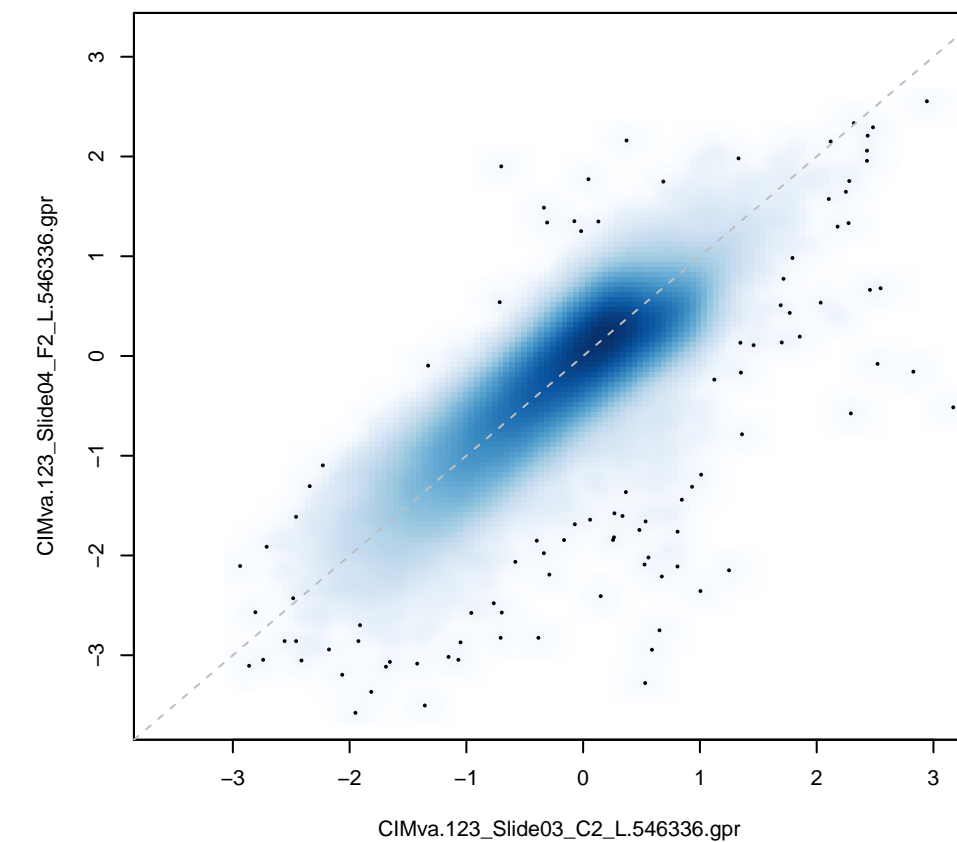

Replicate densities (raw) for sample: L-546431 (CFS)

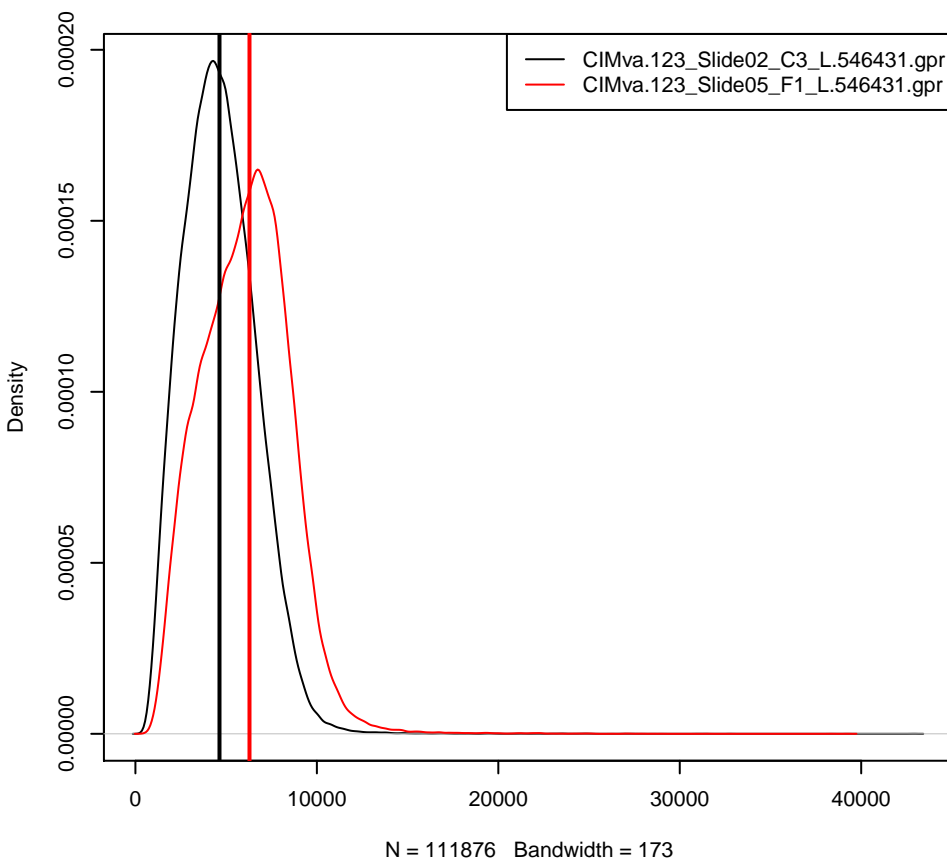

Replicate densities (raw; log2) for sample: L-546431 (CFS)

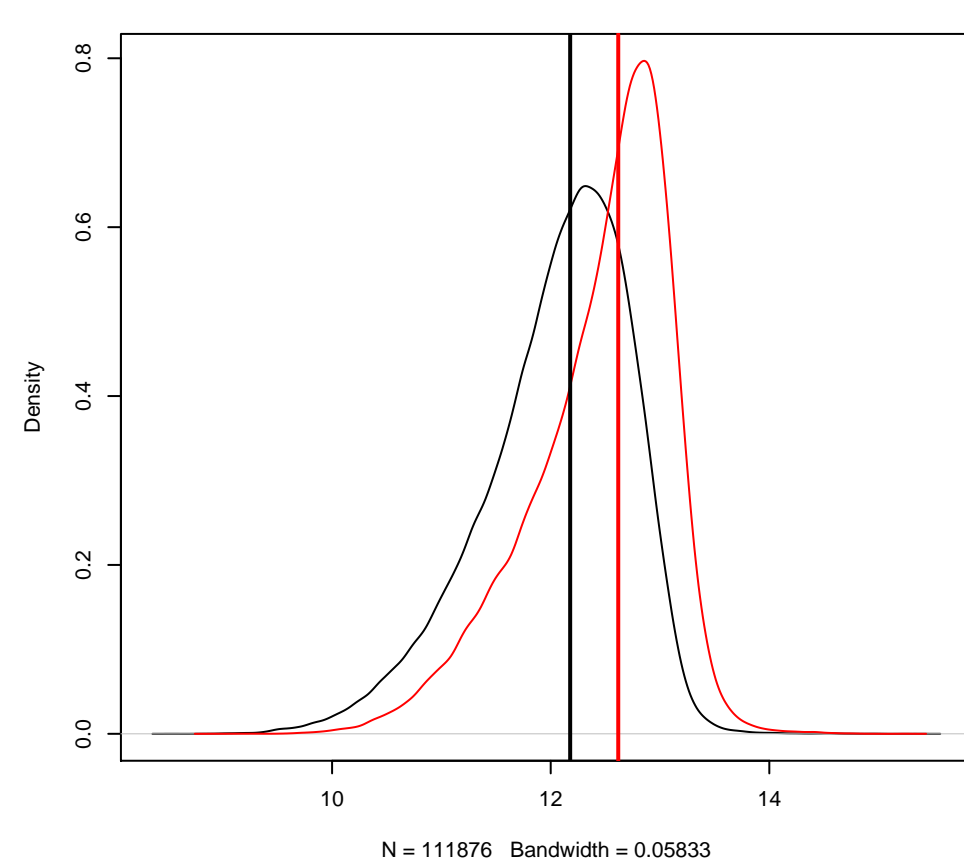

Replicate densities (normalized) for sample: L-546431 (CFS)

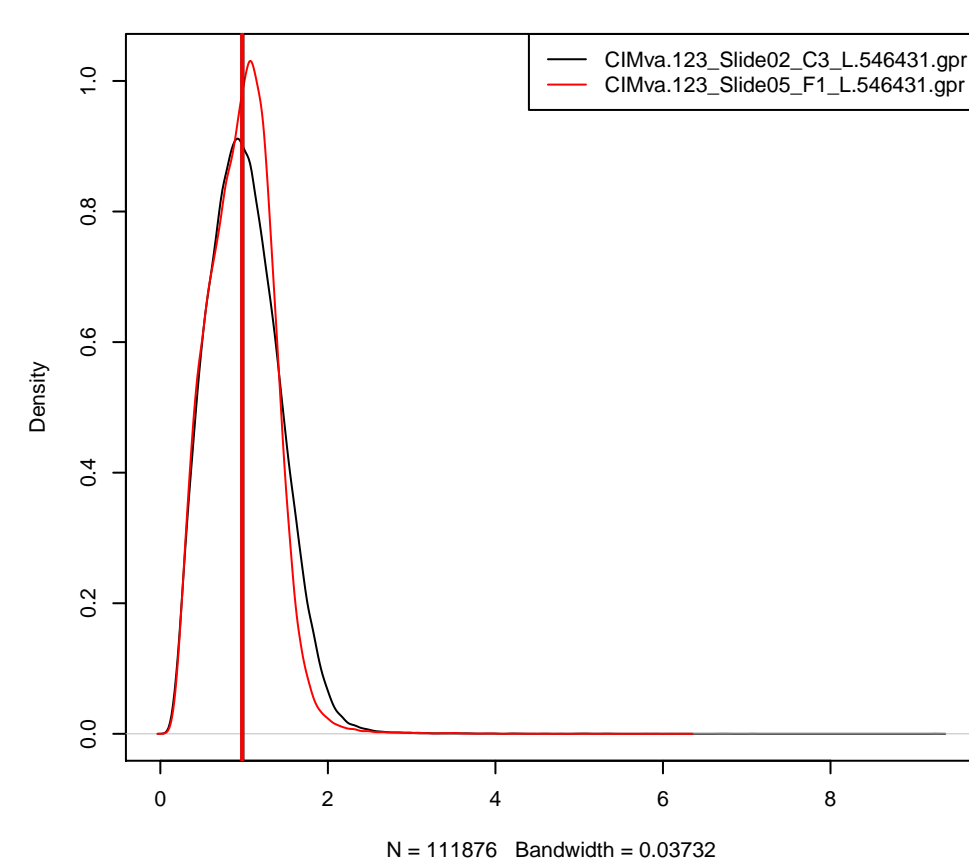

Replicate densities (normalized; log2) for sample: L-546431 (CFS)

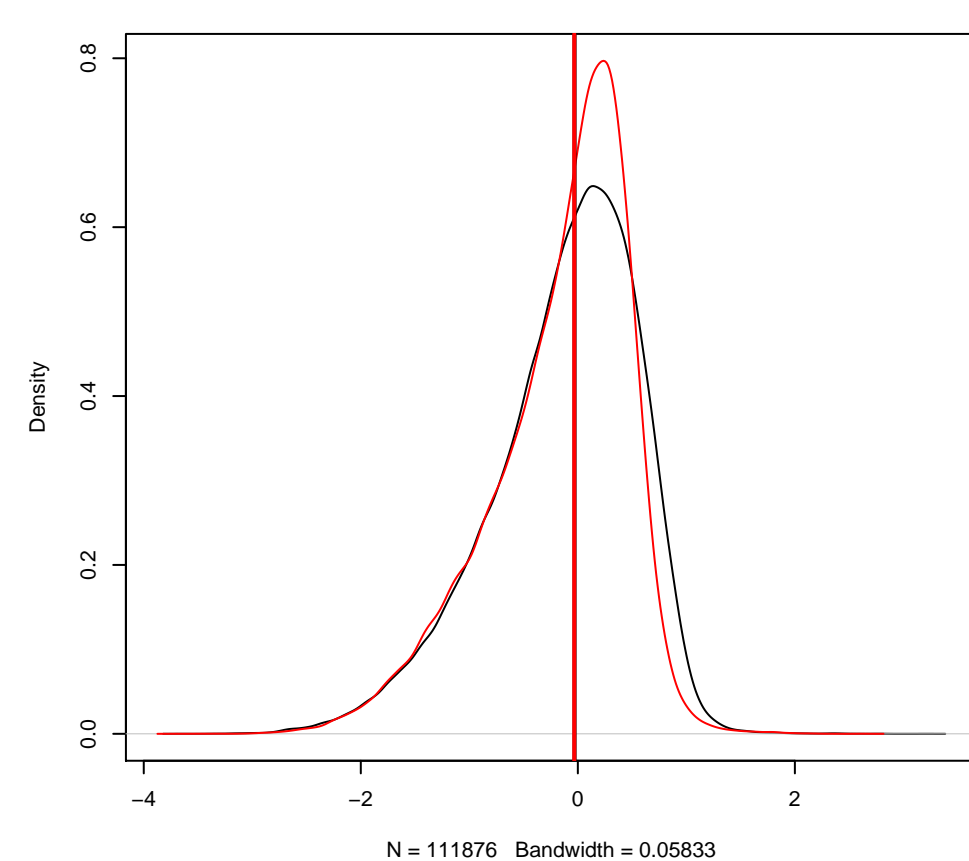

Replicate scatter (raw) for sample: L-546431 (CFS)  
Correlation coefficient: 0.83 (Pearson); 0.84 (Spearman)

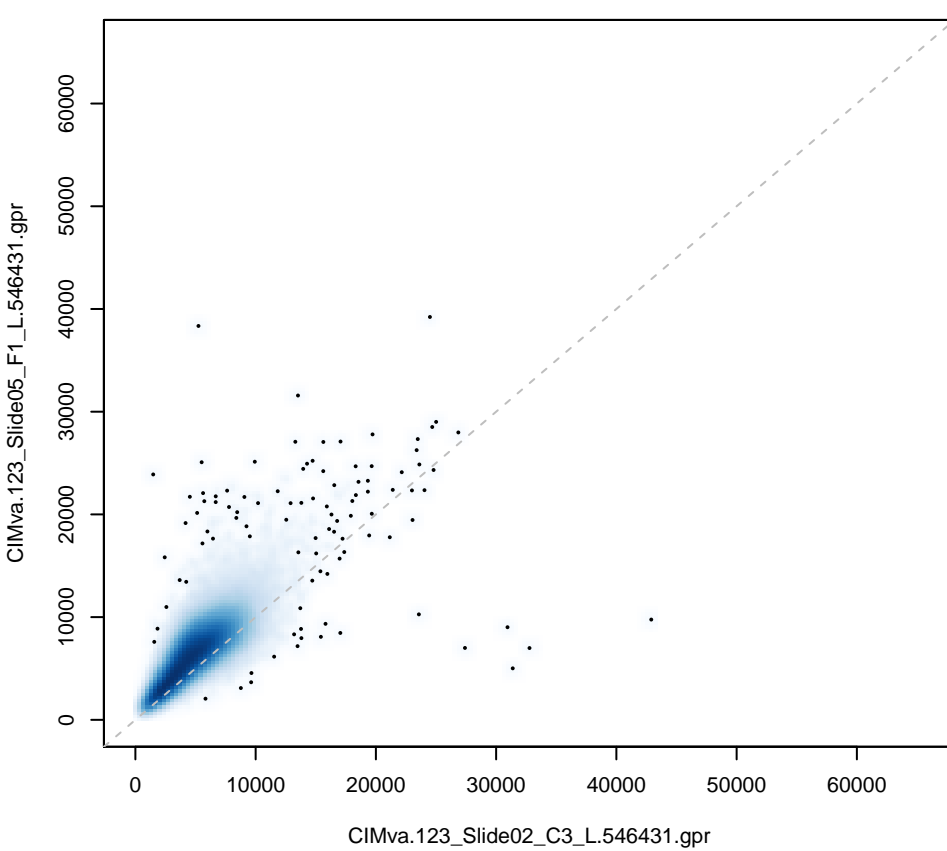

Replicate scatter (raw; log2) for sample: L-546431 (CFS)  
Correlation coefficient: 0.87 (Pearson); 0.84 (Spearman)

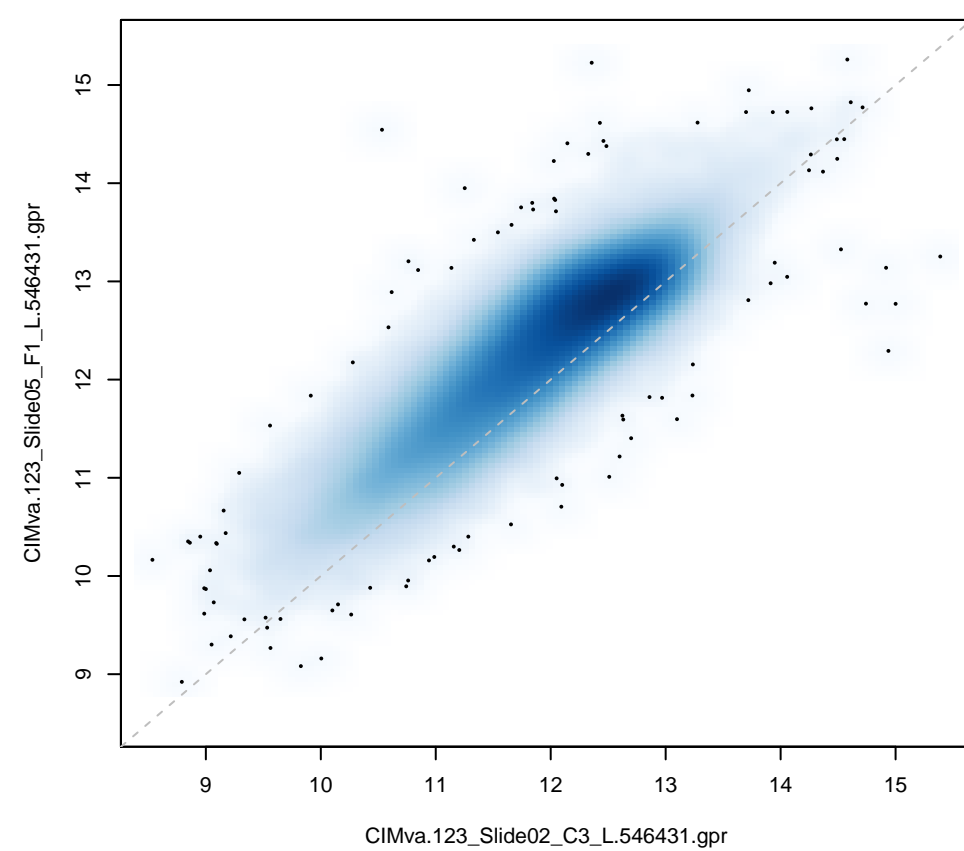

Replicate scatter (normalized) for sample: L-546431 (CFS)  
Correlation coefficient: 0.83 (Pearson); 0.84 (Spearman)

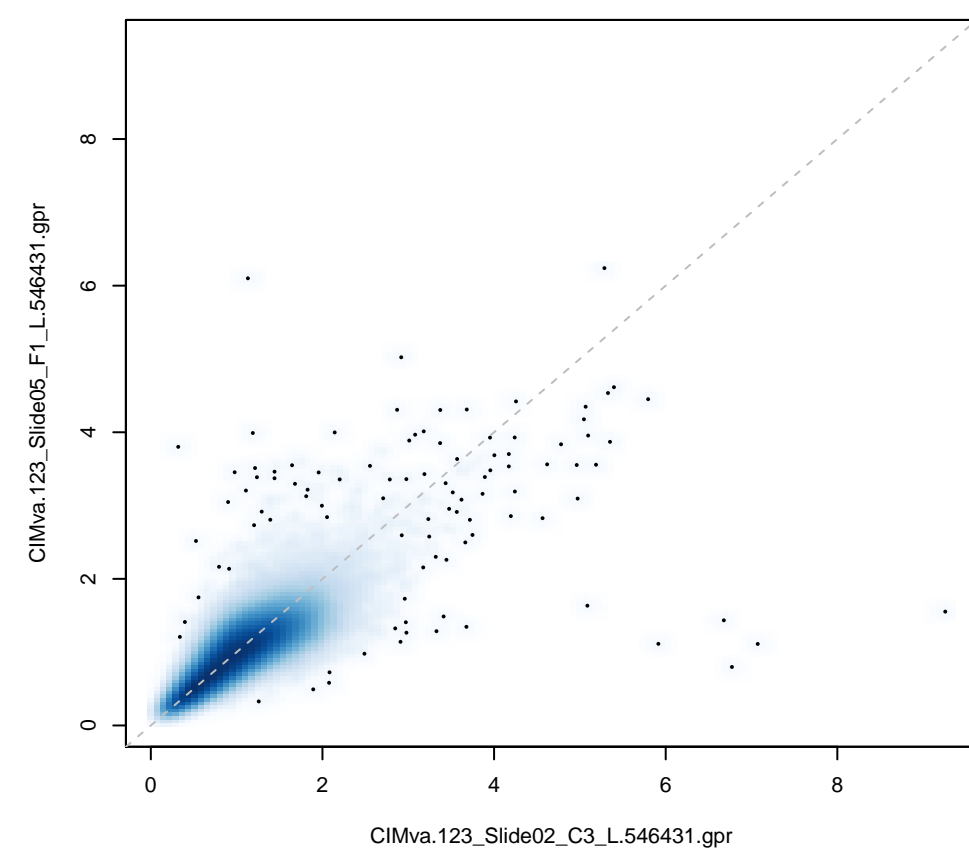

Replicate scatter (normalized; log2) for sample: L-546431 (CFS)  
Correlation coefficient: 0.85 (Pearson); 0.84 (Spearman)

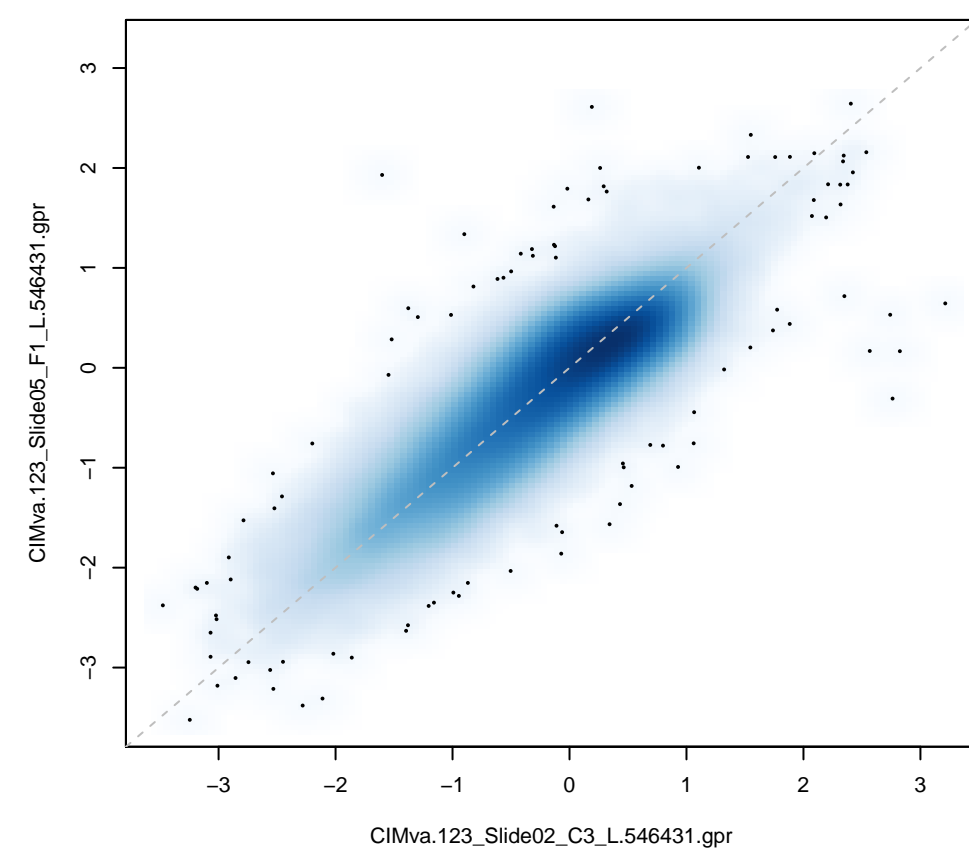

Replicate densities (raw) for sample: L-549734 (CFS)

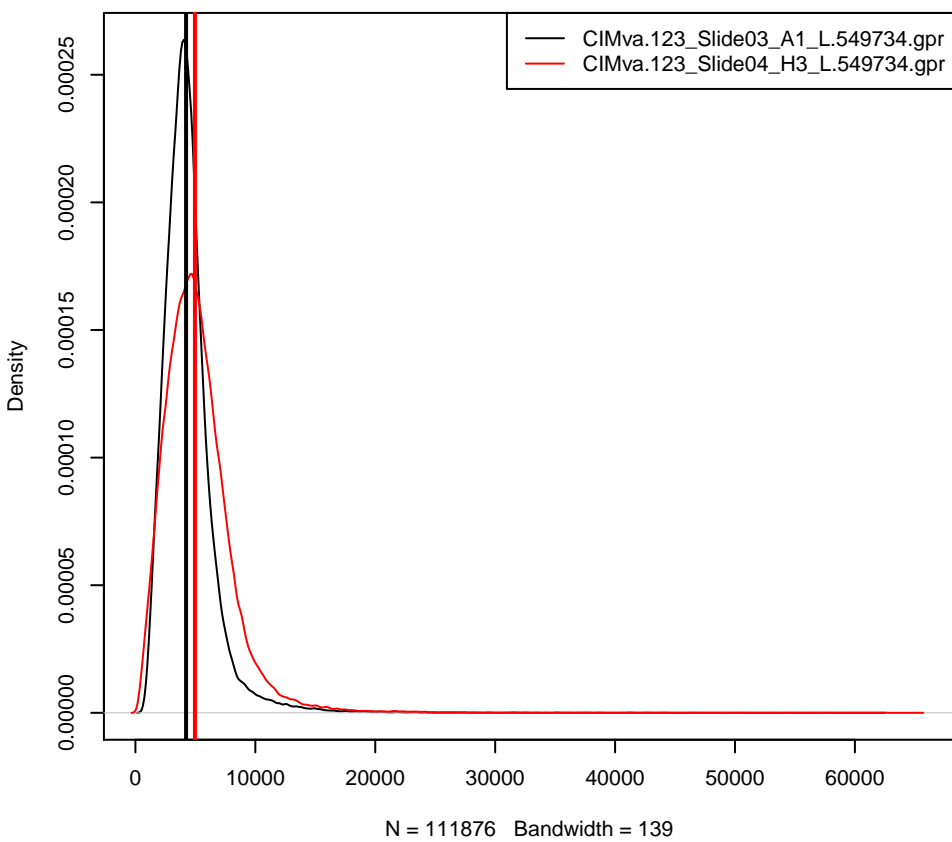

Replicate densities (raw; log2) for sample: L-549734 (CFS)

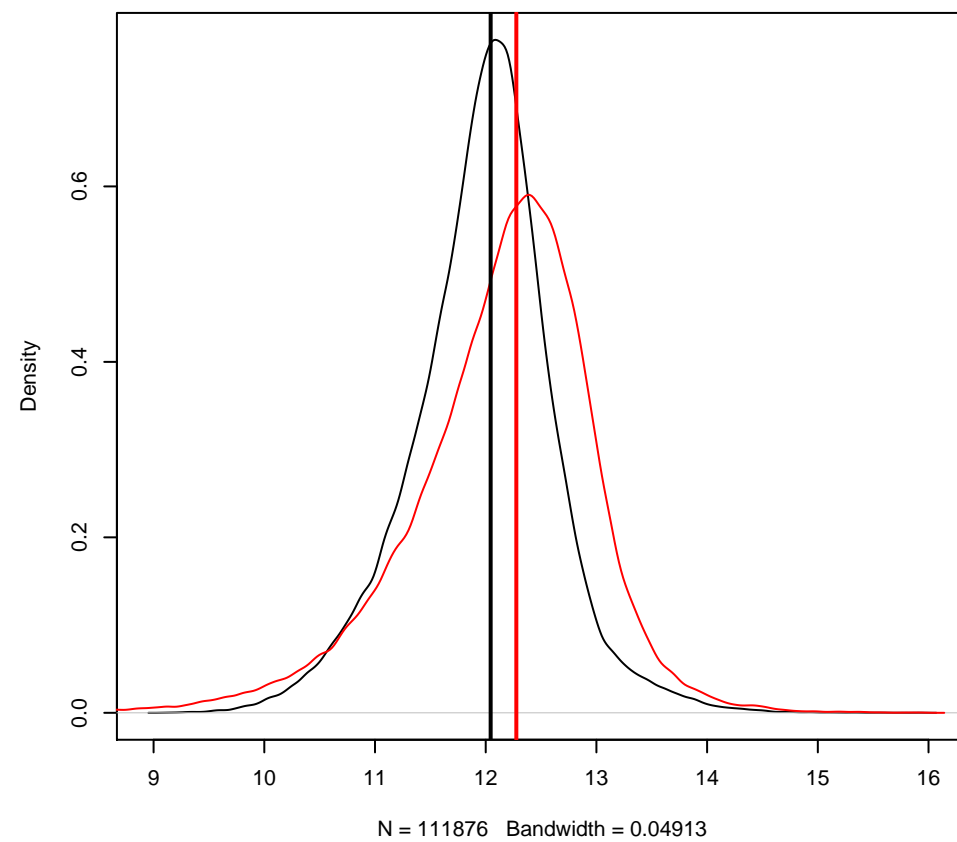

Replicate densities (normalized) for sample: L-549734 (CFS)

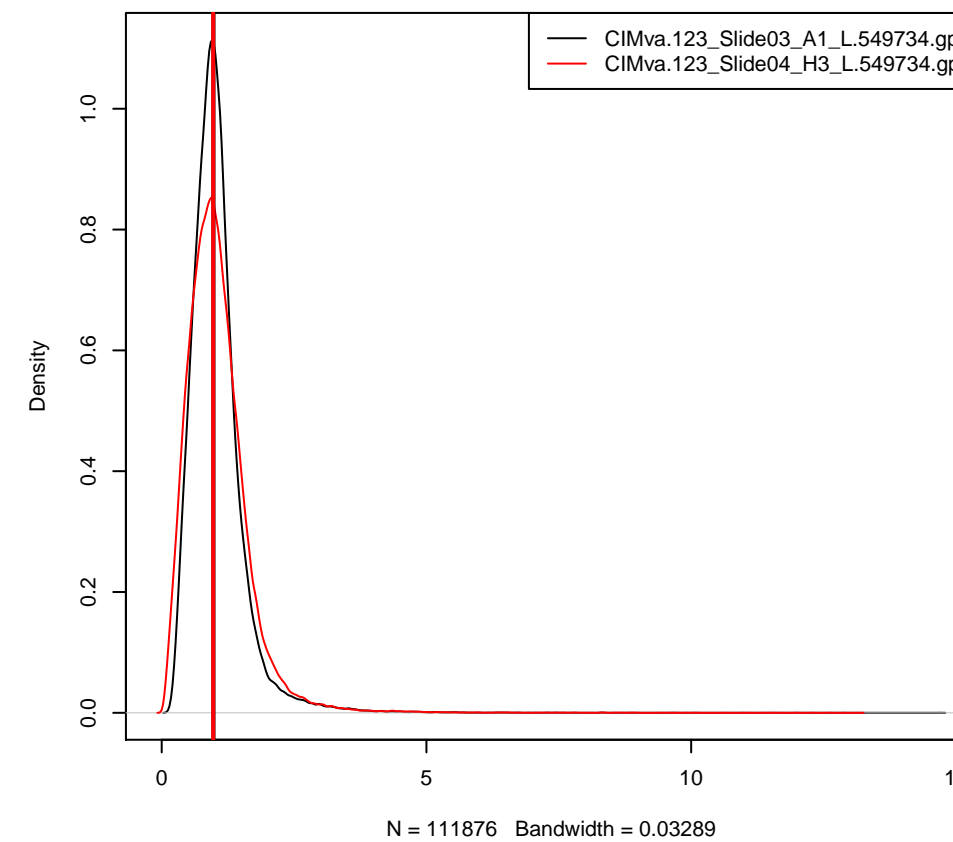

Replicate densities (normalized; log2) for sample: L-549734 (CFS)

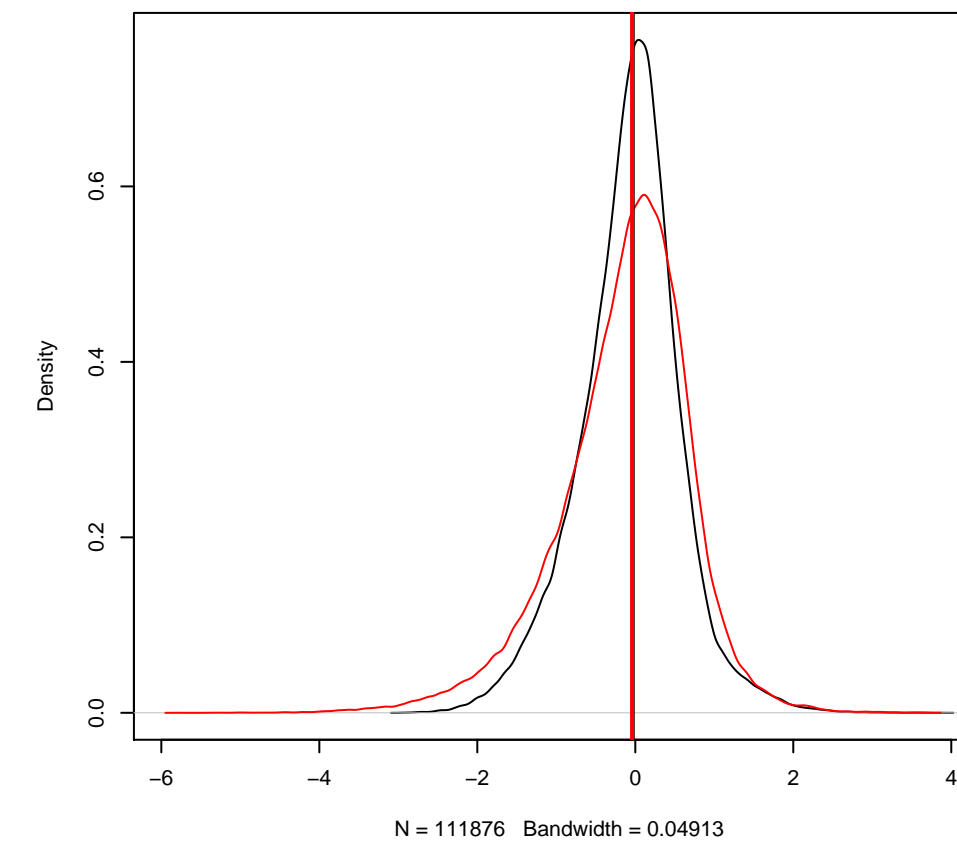

Replicate scatter (raw) for sample: L-549734 (CFS)  
Correlation coefficient: 0.64 (Pearson); 0.69 (Spearman)

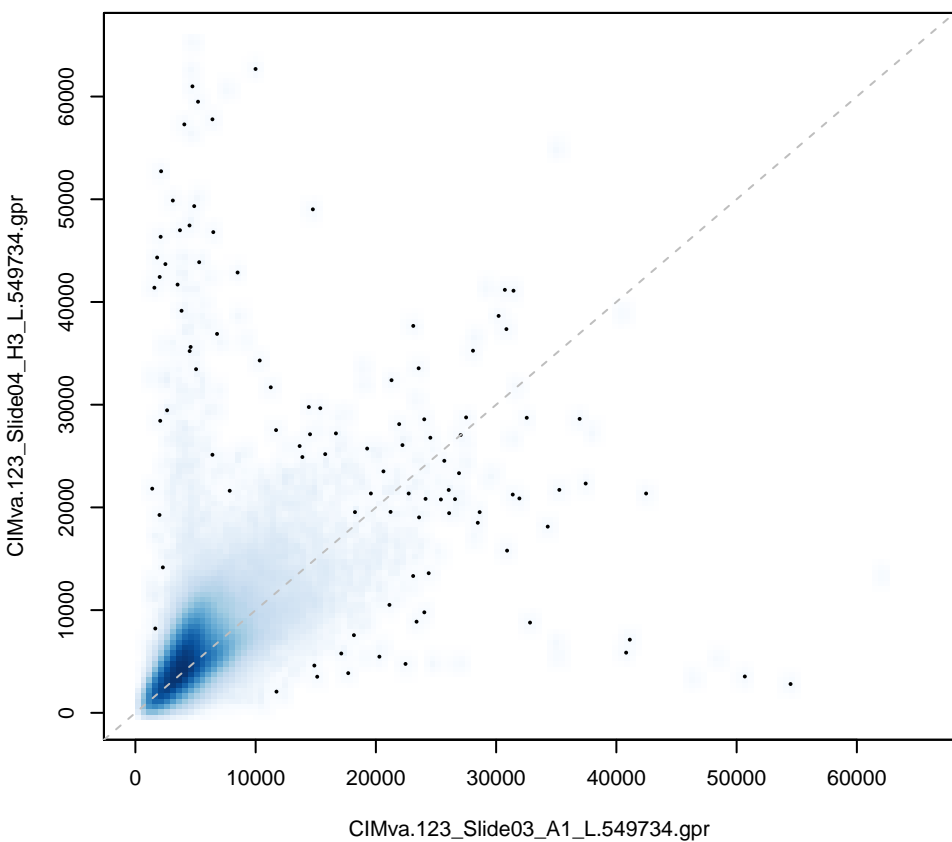

Replicate scatter (raw; log2) for sample: L-549734 (CFS)  
Correlation coefficient: 0.72 (Pearson); 0.69 (Spearman)

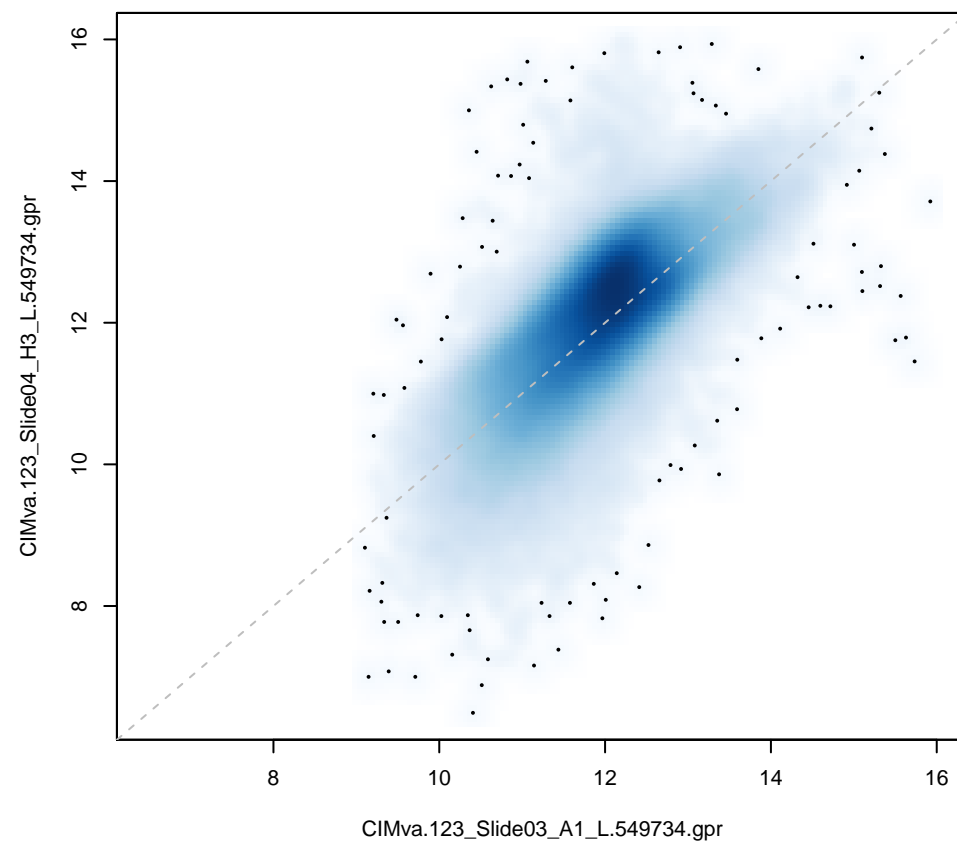

Replicate scatter (normalized) for sample: L-549734 (CFS)  
Correlation coefficient: 0.64 (Pearson); 0.69 (Spearman)

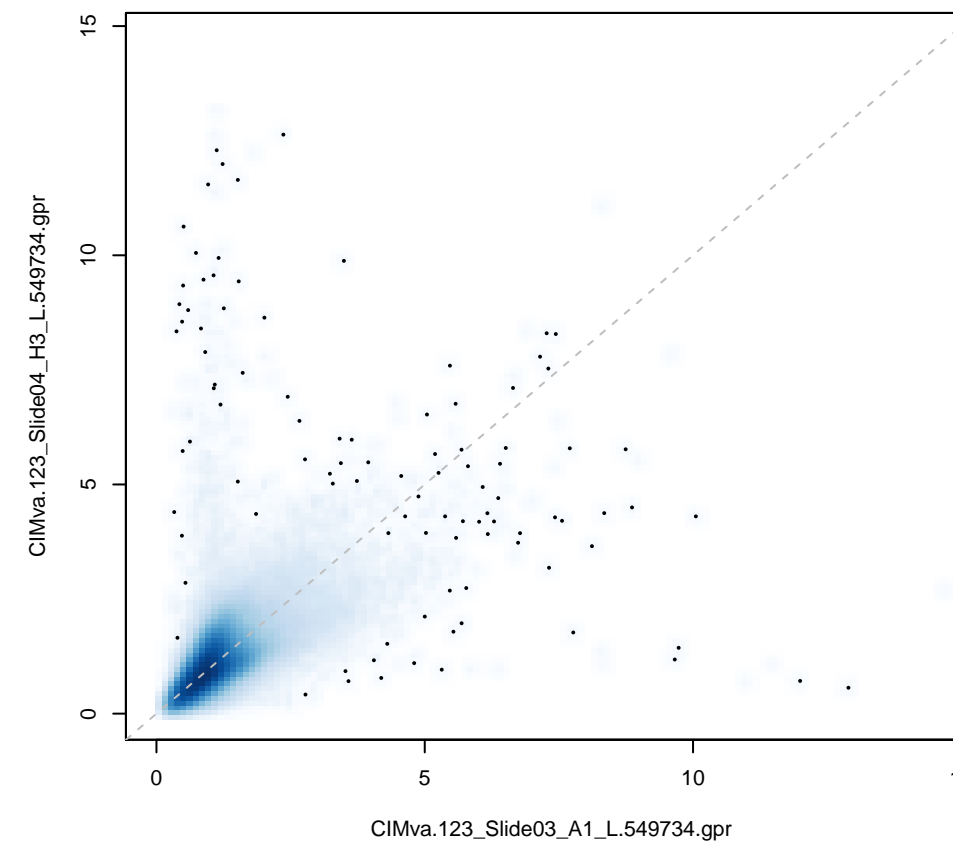

Replicate scatter (normalized; log2) for sample: L-549734 (CFS)  
Correlation coefficient: 0.7 (Pearson); 0.69 (Spearman)

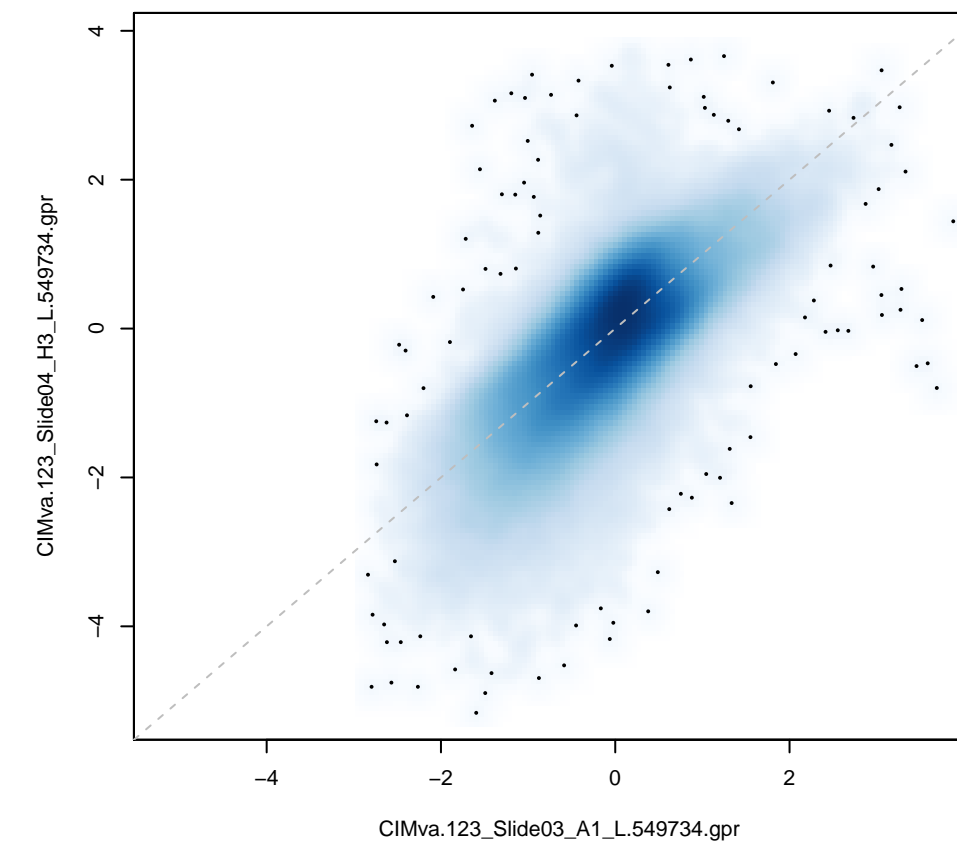

Replicate densities (raw) for sample: L-557625 (Controls)

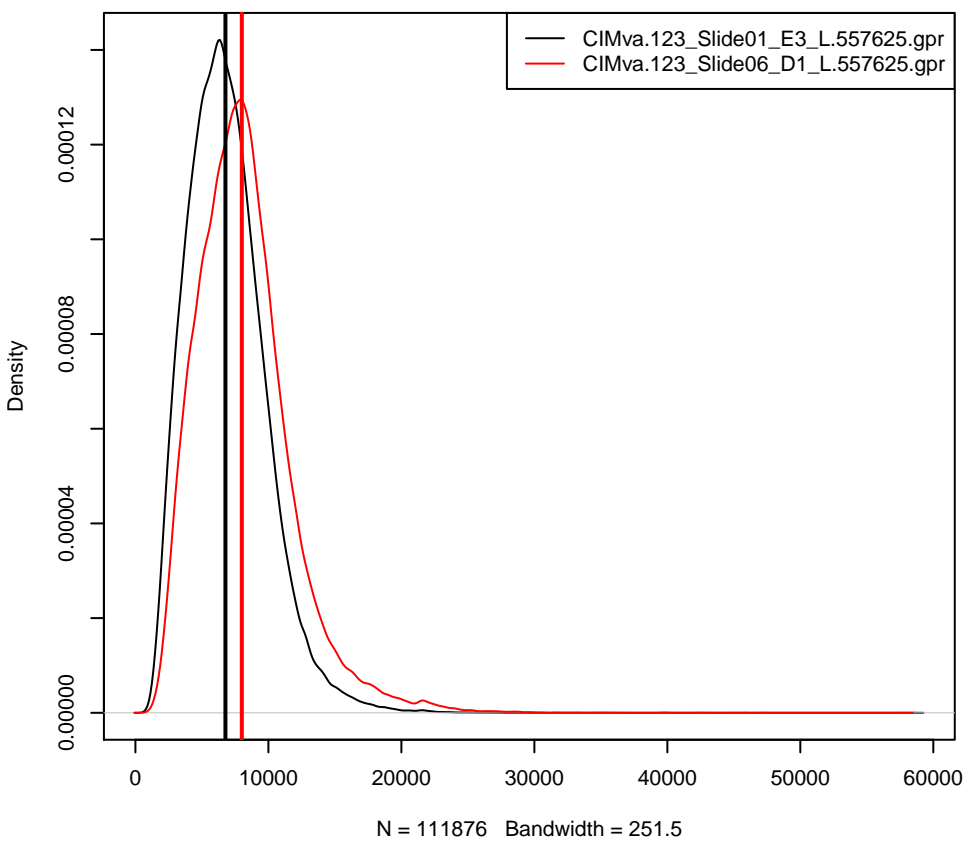

Replicate densities (raw; log2) for sample: L-557625 (Controls)

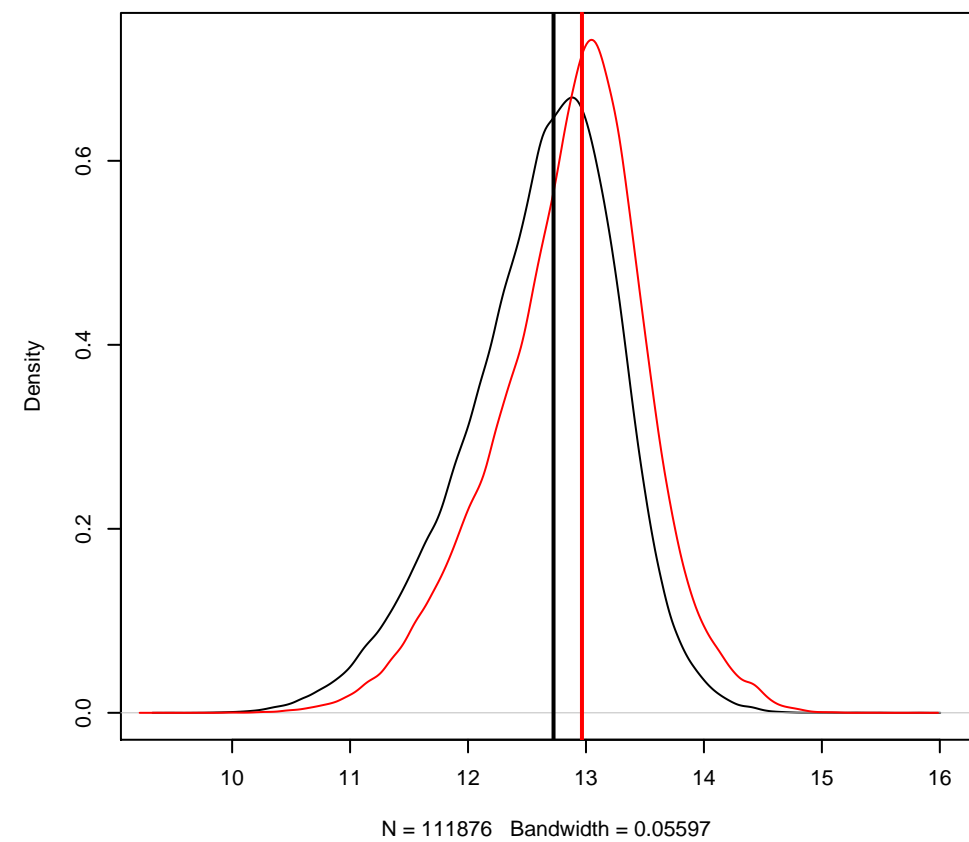

Replicate densities (normalized) for sample: L-557625 (Controls)

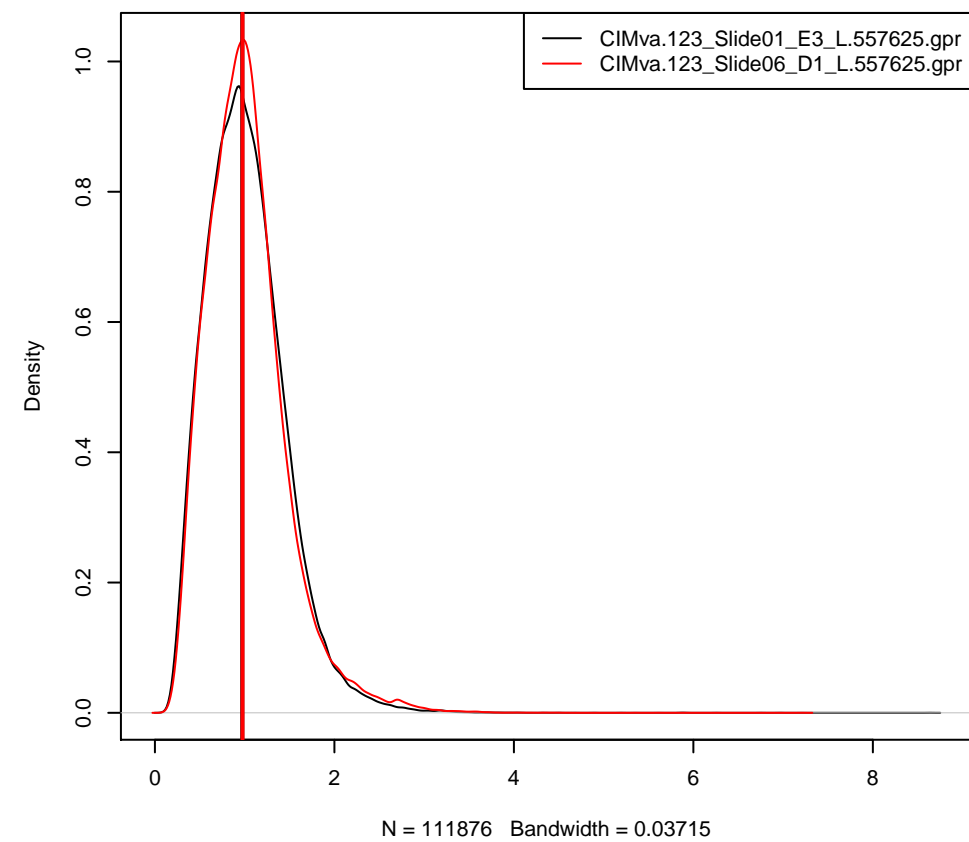

Replicate densities (normalized; log2) for sample: L-557625 (Controls)

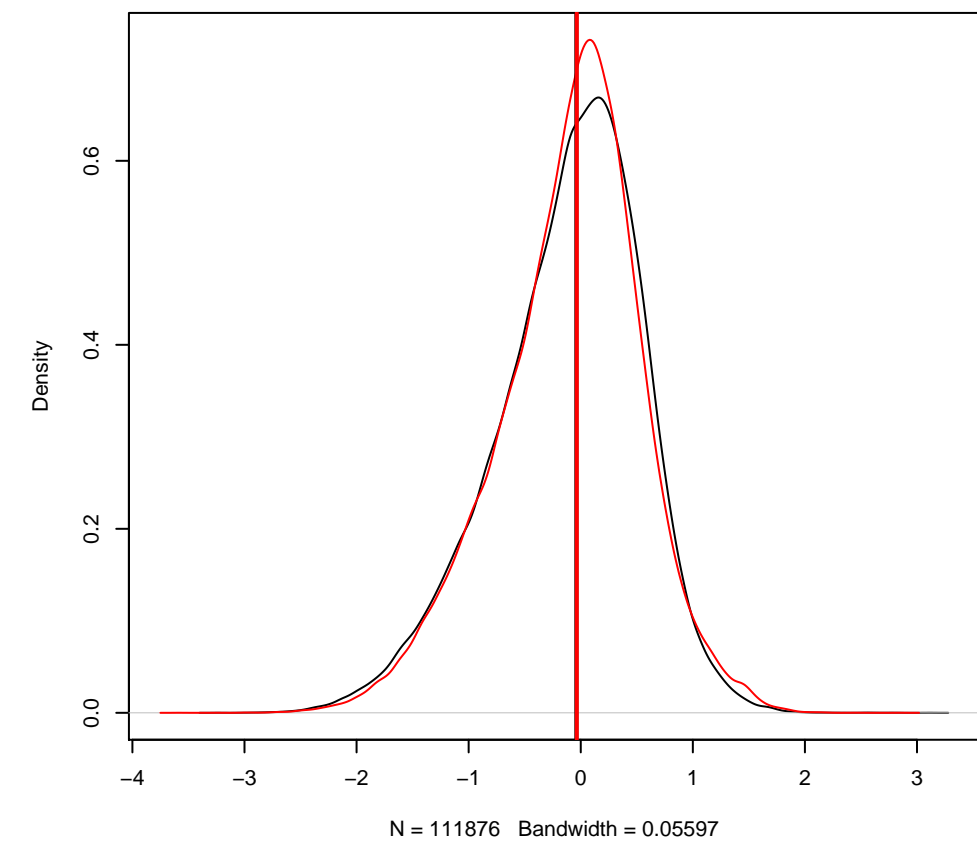

Replicate scatter (raw) for sample: L-557625 (Controls)  
Correlation coefficient: 0.72 (Pearson); 0.74 (Spearman)

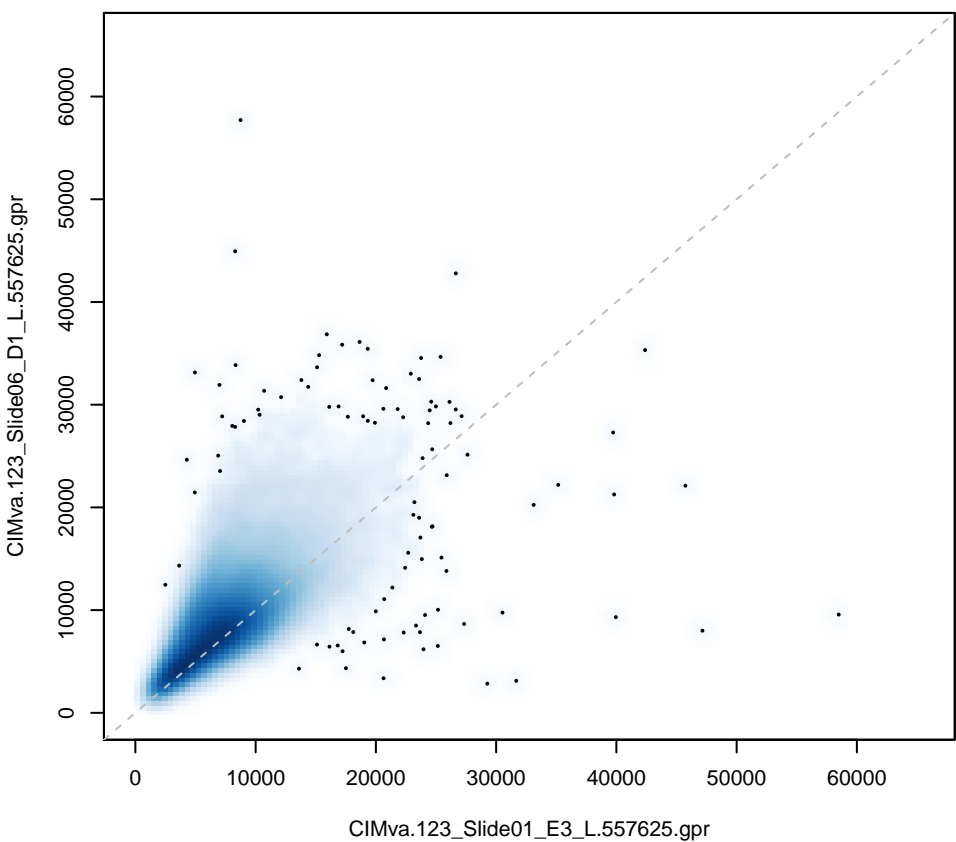

Replicate scatter (raw; log2) for sample: L-557625 (Controls)  
Correlation coefficient: 0.79 (Pearson); 0.74 (Spearman)

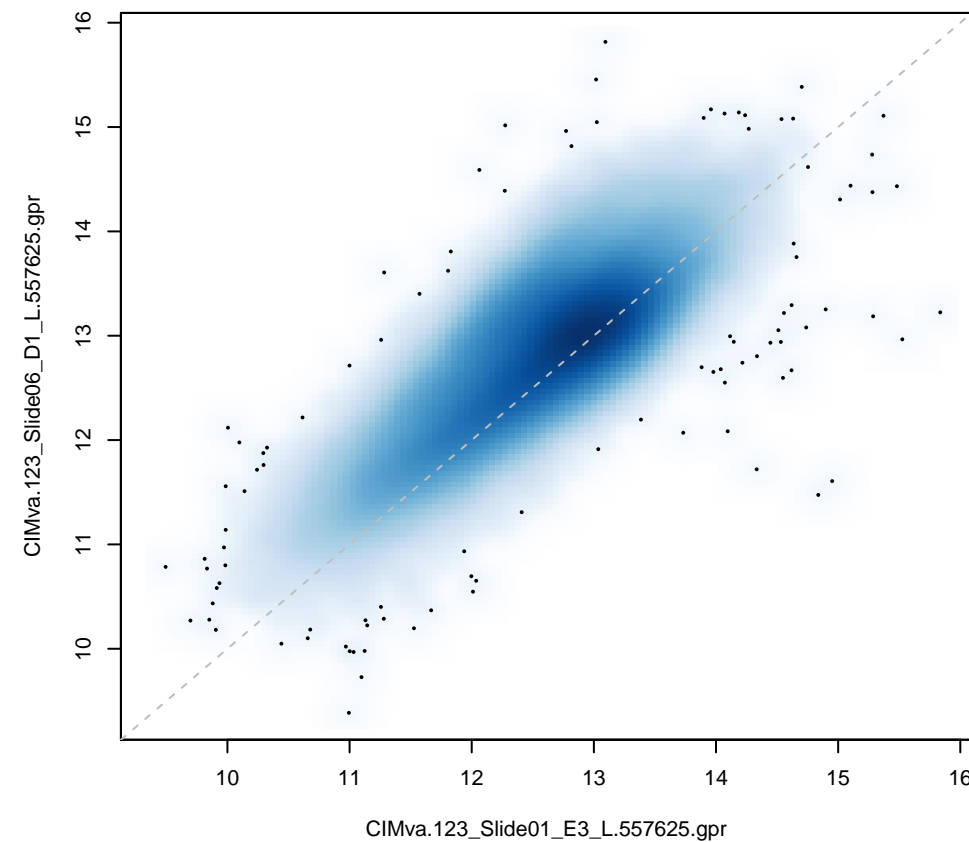

Replicate scatter (normalized) for sample: L-557625 (Controls)  
Correlation coefficient: 0.72 (Pearson); 0.74 (Spearman)

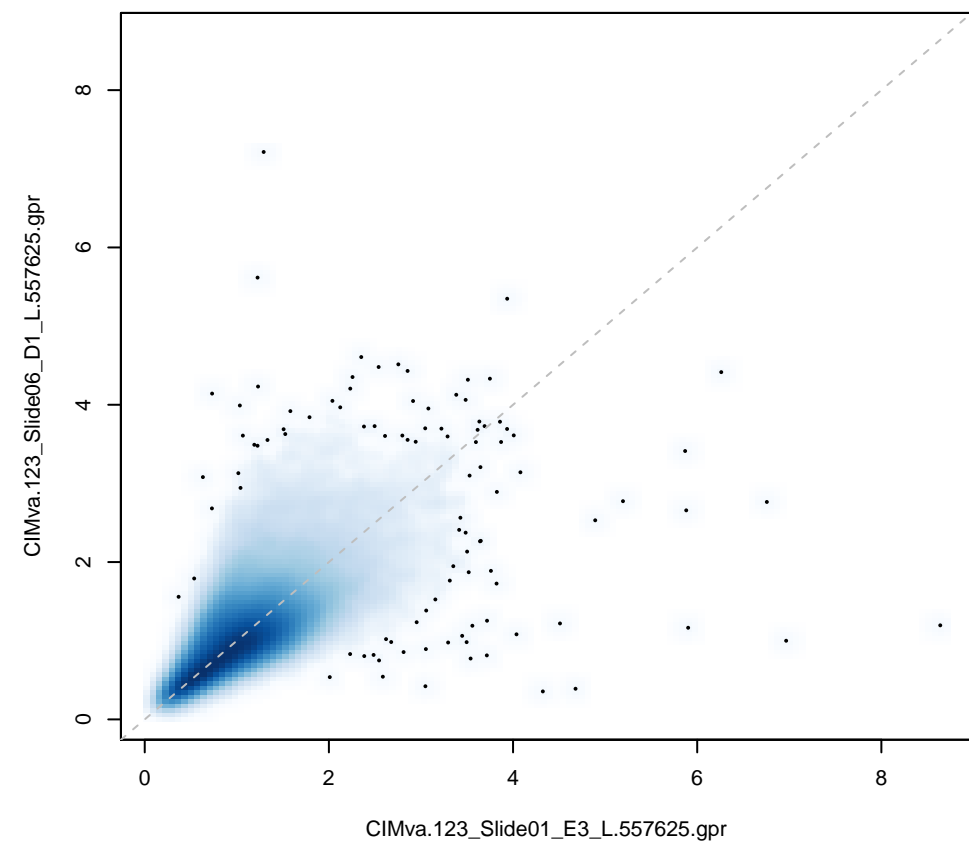

Replicate scatter (normalized; log2) for sample: L-557625 (Controls)  
Correlation coefficient: 0.76 (Pearson); 0.74 (Spearman)

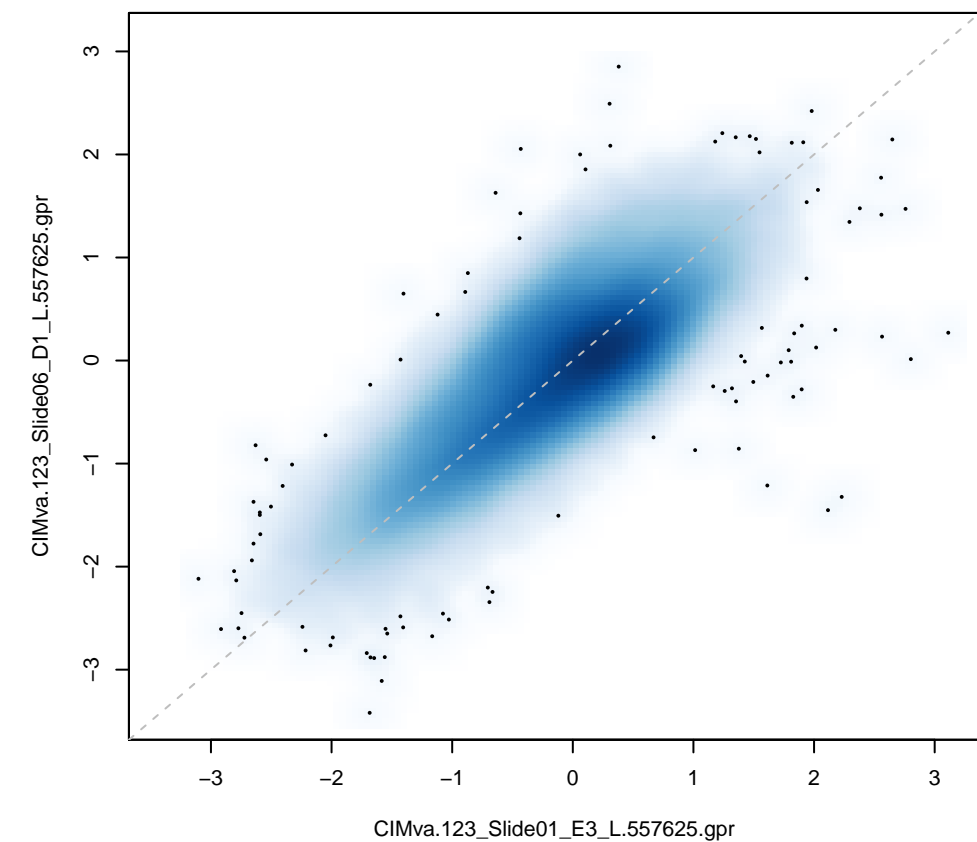



Replicate densities (raw) for sample: L-560677 (CFS)

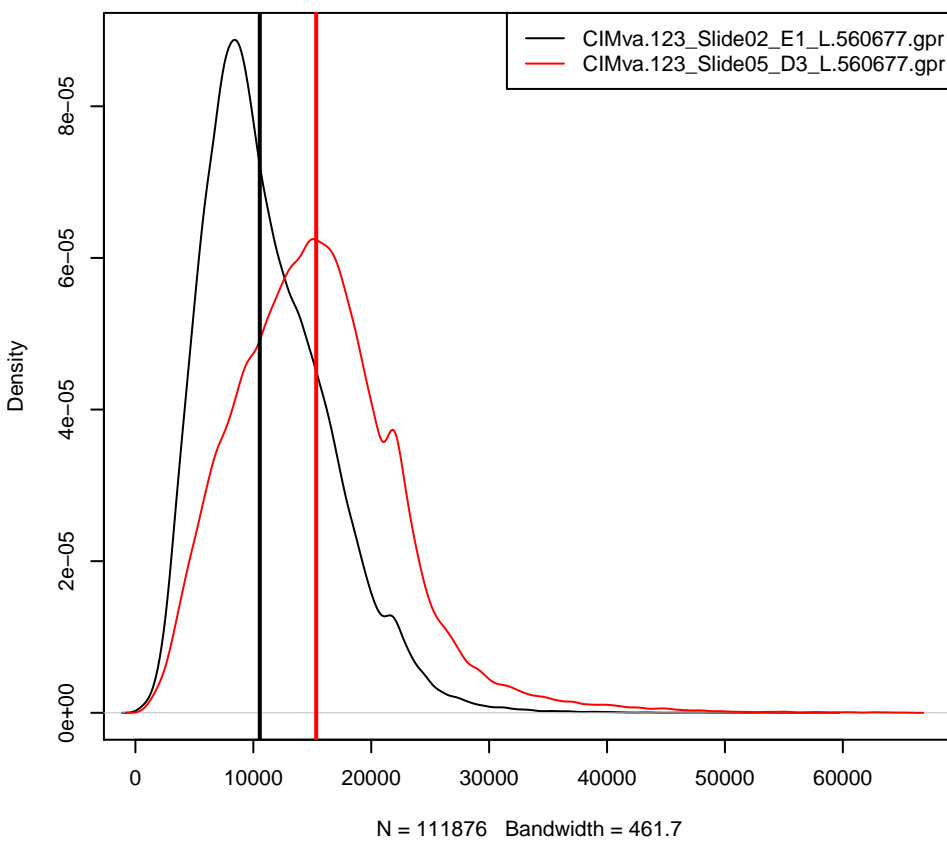

Replicate densities (raw; log2) for sample: L-560677 (CFS)

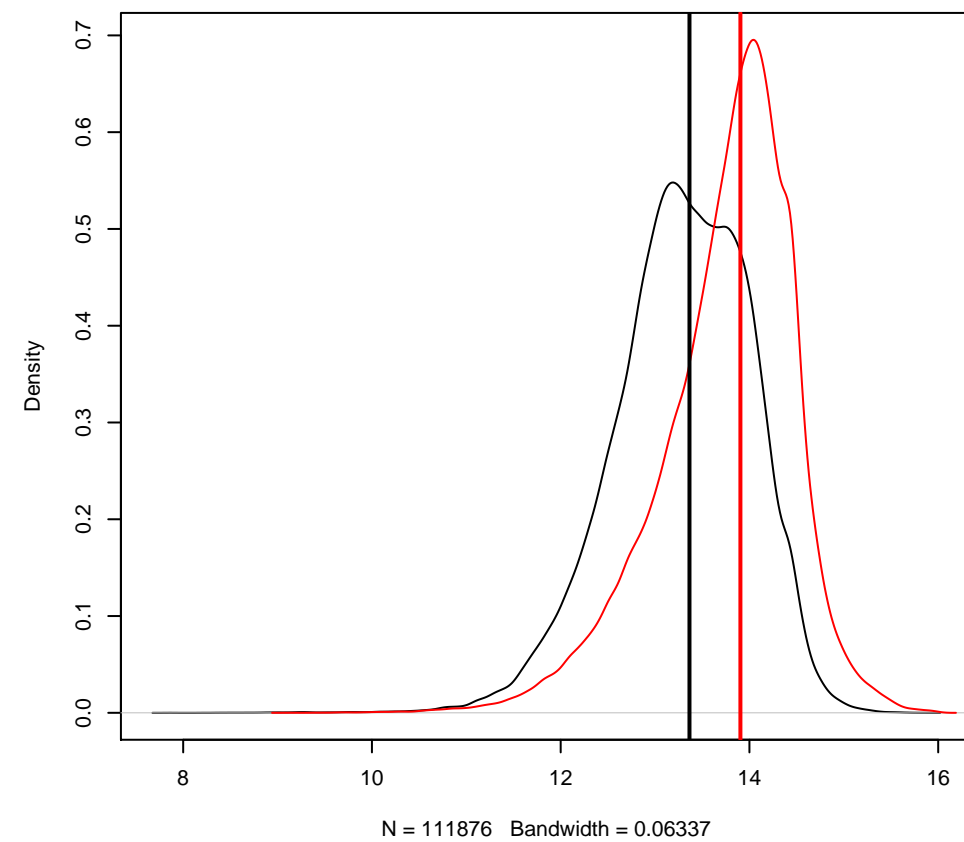

Replicate densities (normalized) for sample: L-560677 (CFS)

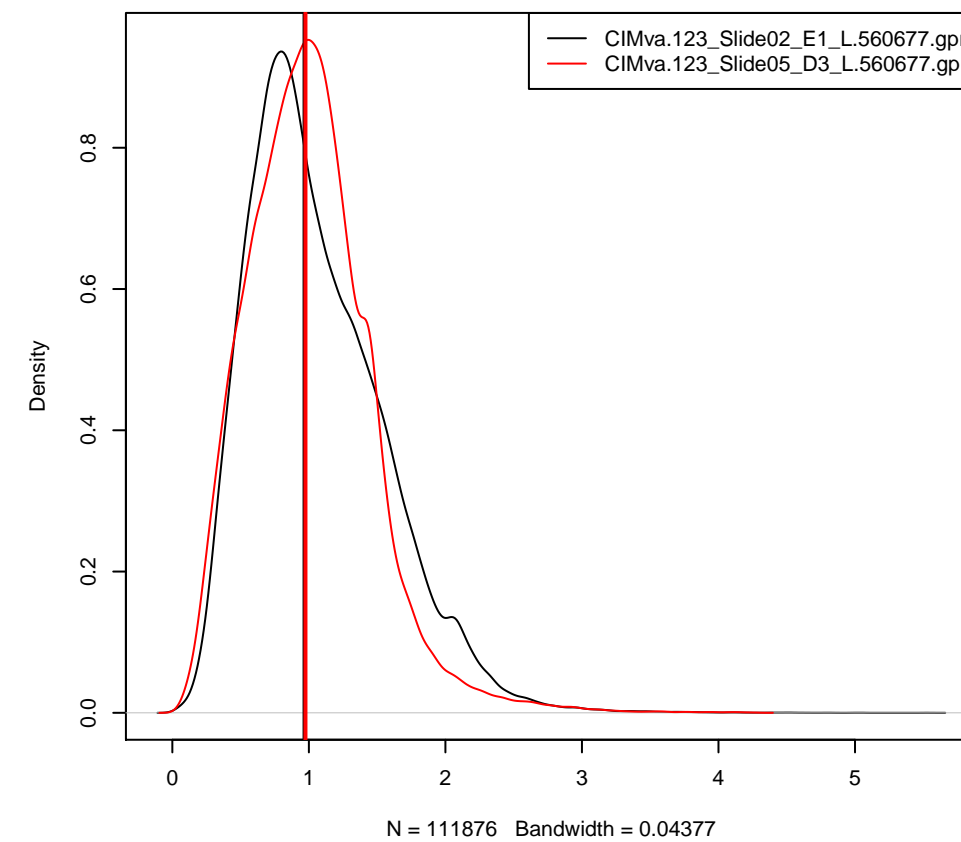

Replicate densities (normalized; log2) for sample: L-560677 (CFS)

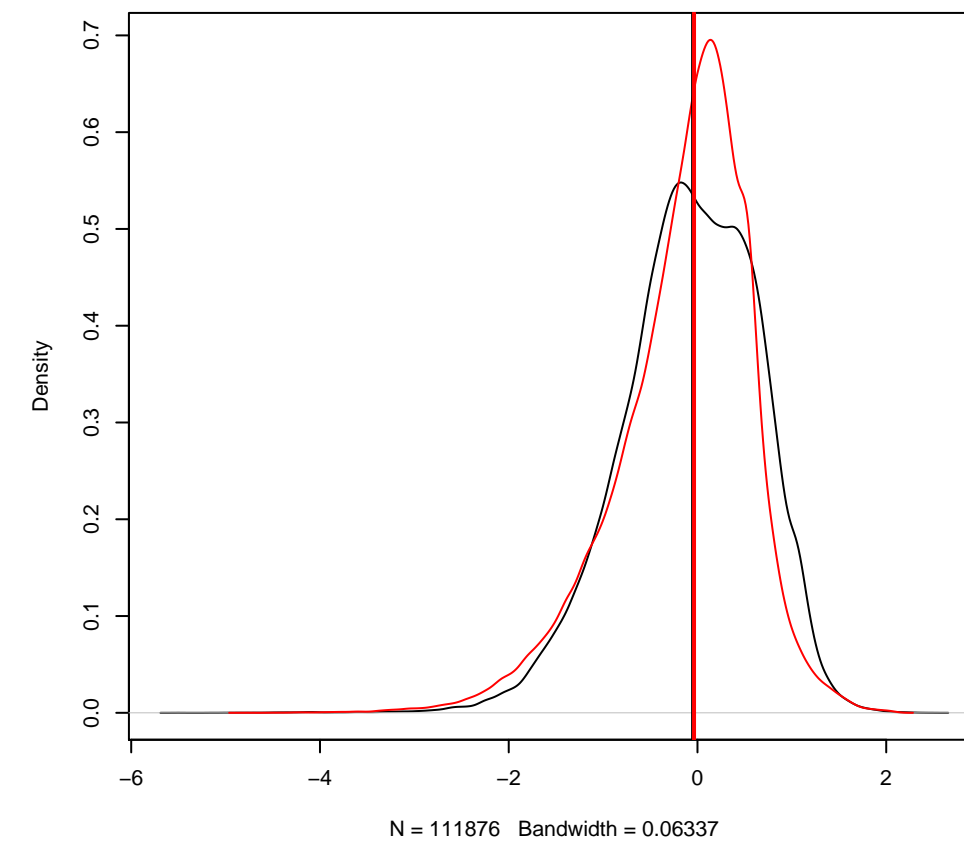

Replicate scatter (raw) for sample: L-560677 (CFS)  
Correlation coefficient: 0.68 (Pearson); 0.66 (Spearman)

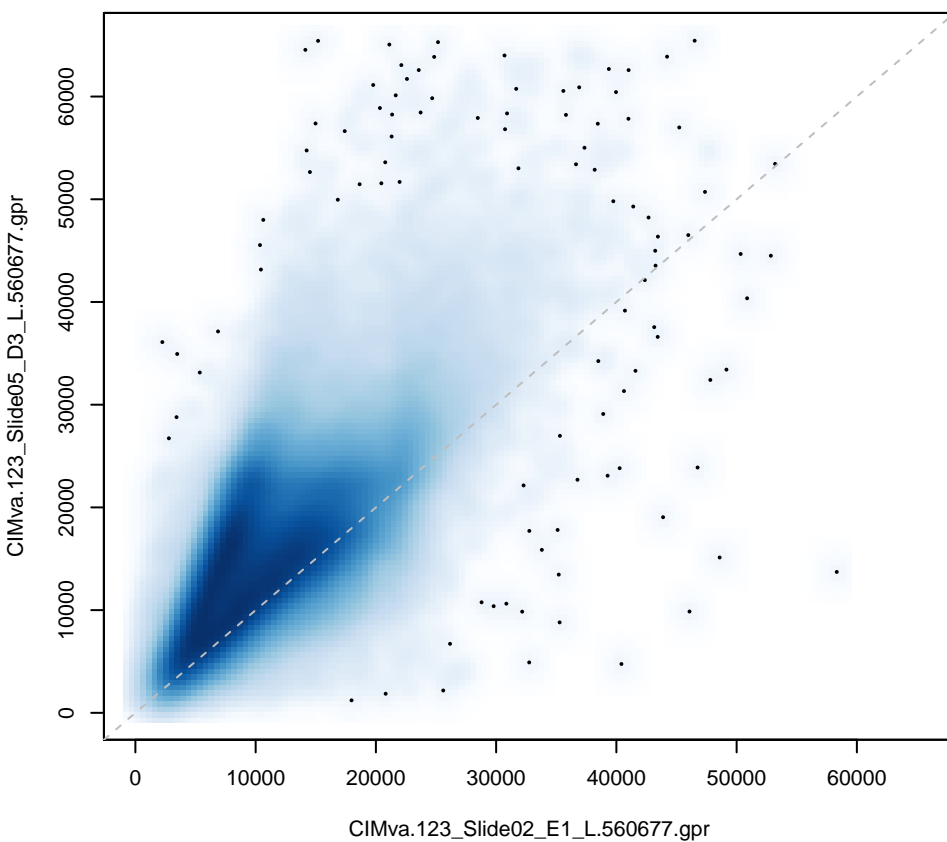

Replicate scatter (raw; log2) for sample: L-560677 (CFS)  
Correlation coefficient: 0.72 (Pearson); 0.66 (Spearman)

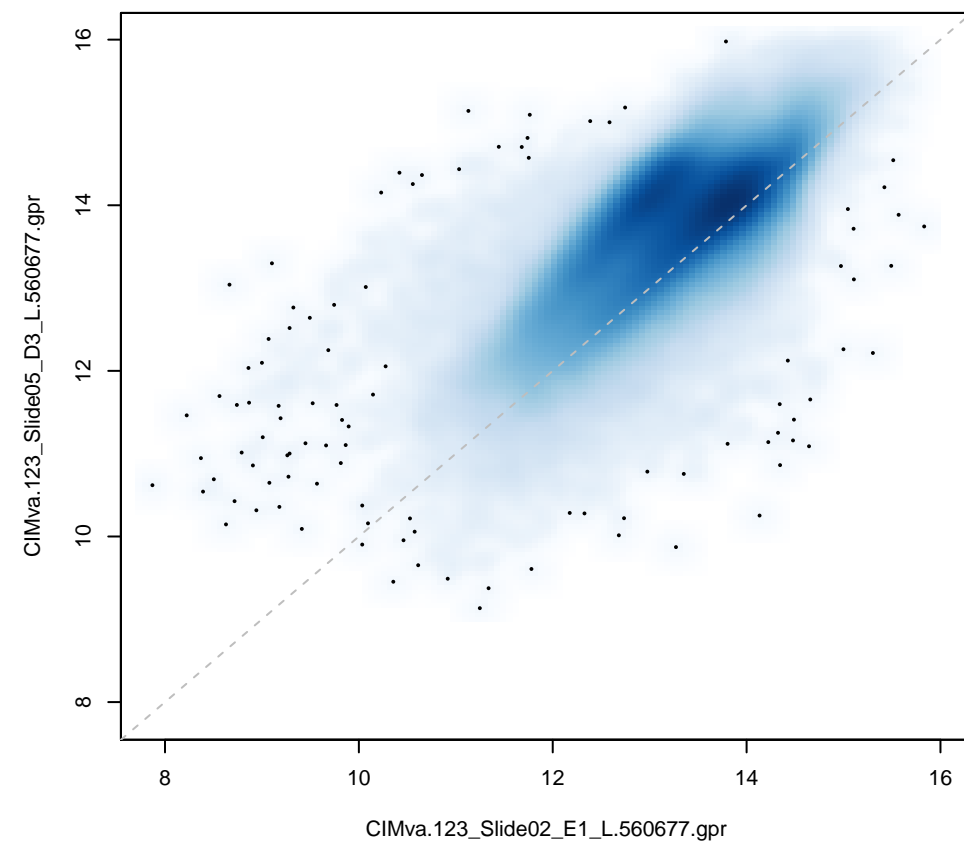

Replicate scatter (normalized) for sample: L-560677 (CFS)  
Correlation coefficient: 0.68 (Pearson); 0.66 (Spearman)

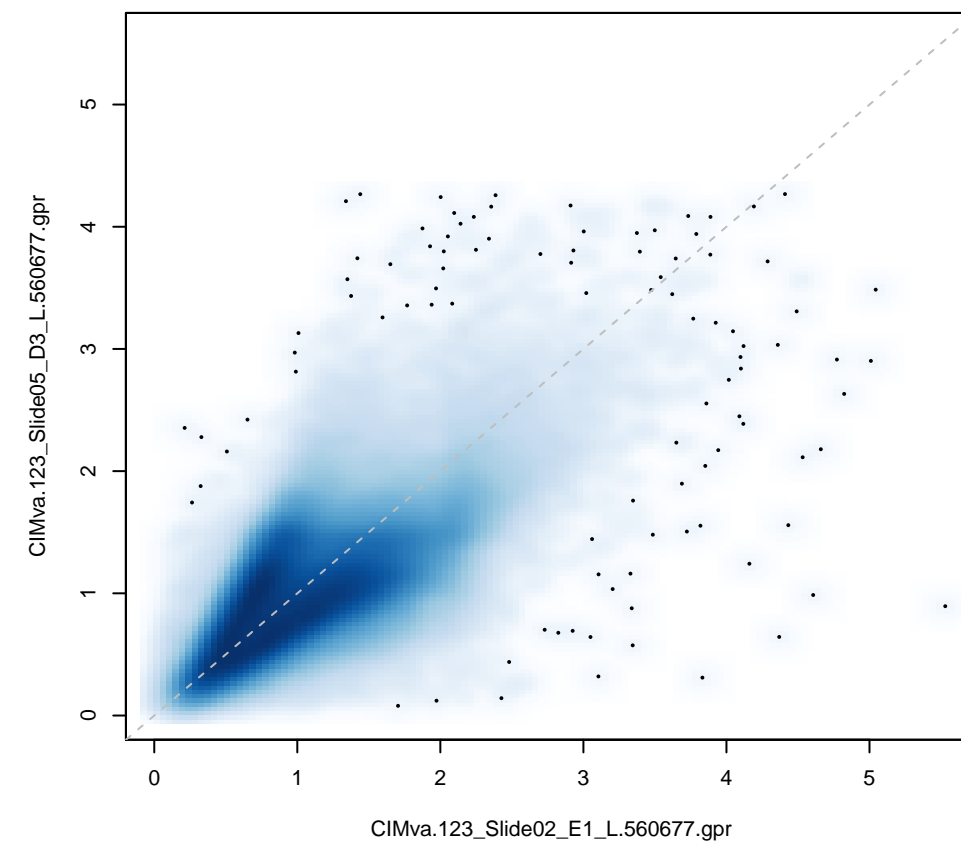

Replicate scatter (normalized; log2) for sample: L-560677 (CFS)  
Correlation coefficient: 0.7 (Pearson); 0.66 (Spearman)

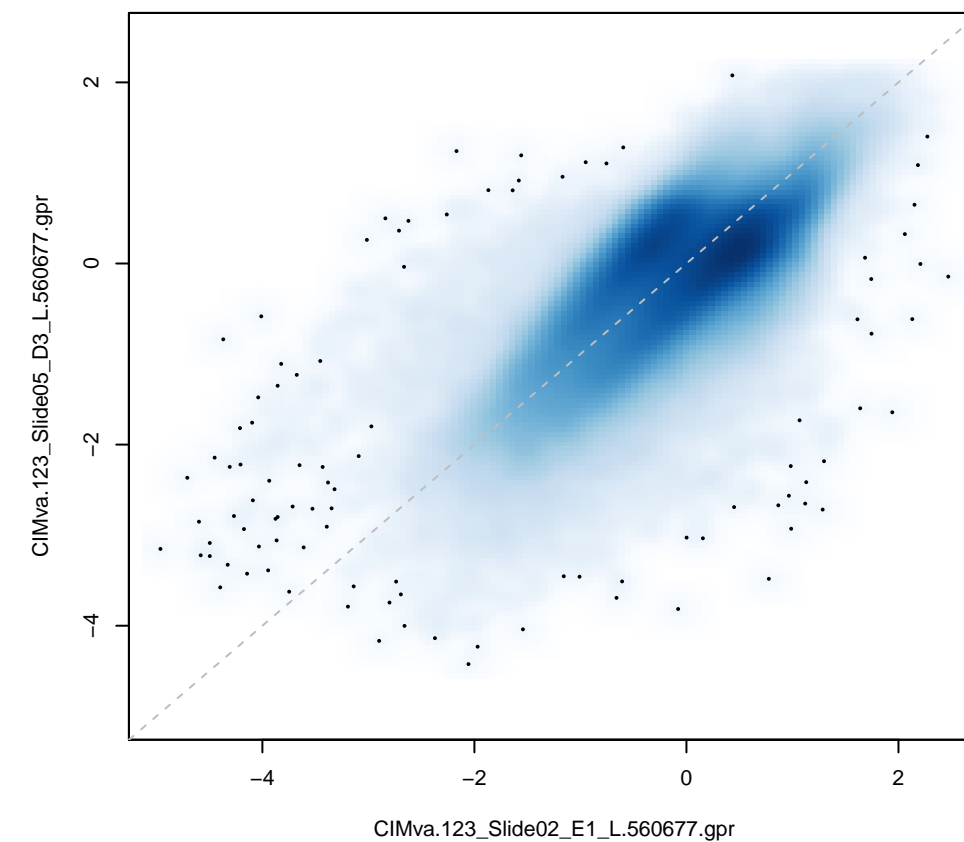

Replicate densities (raw) for sample: L-561979 (Controls)

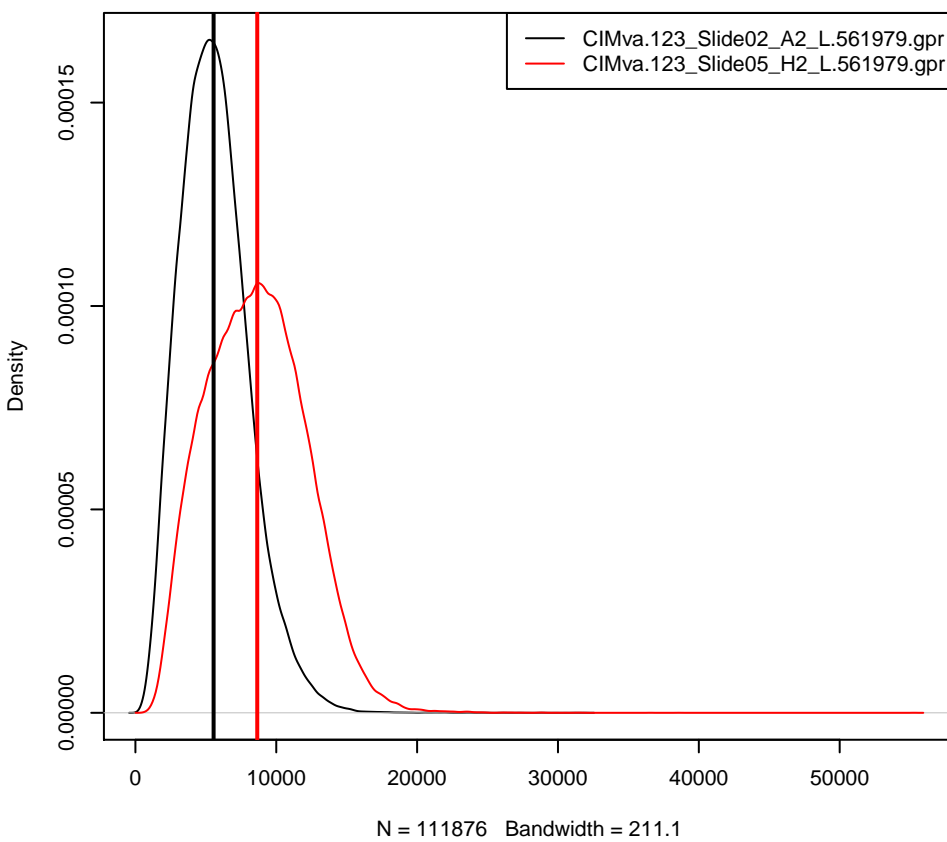

Replicate densities (raw; log2) for sample: L-561979 (Controls)

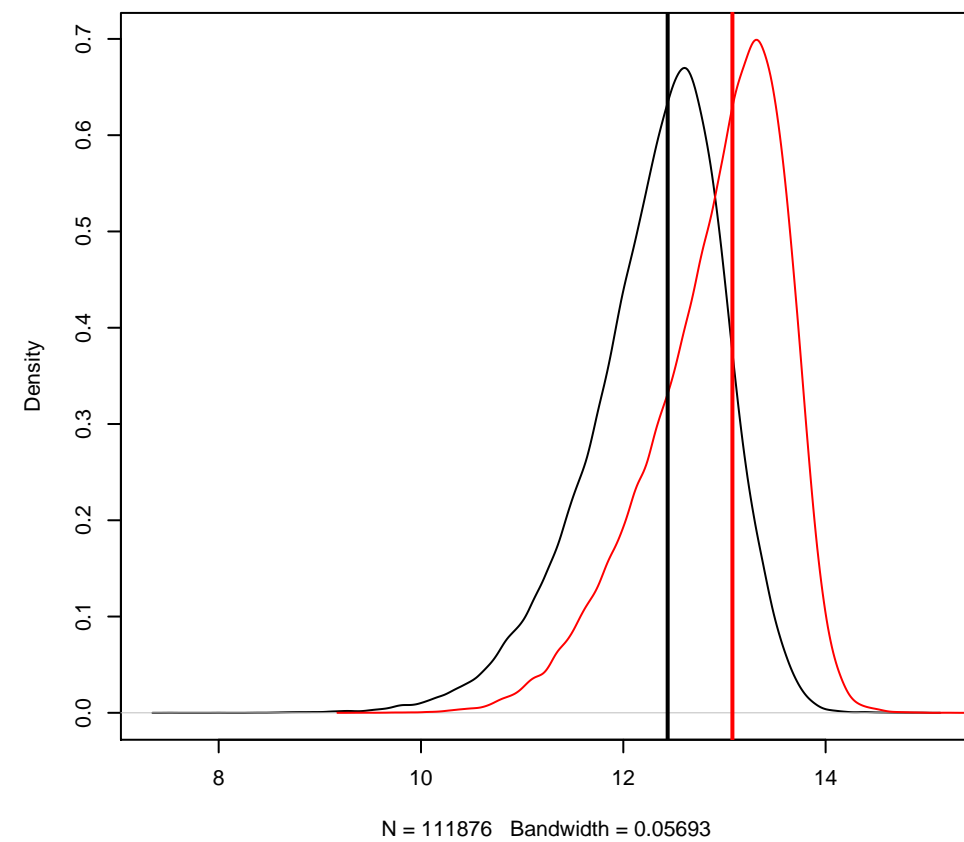

Replicate densities (normalized) for sample: L-561979 (Controls)

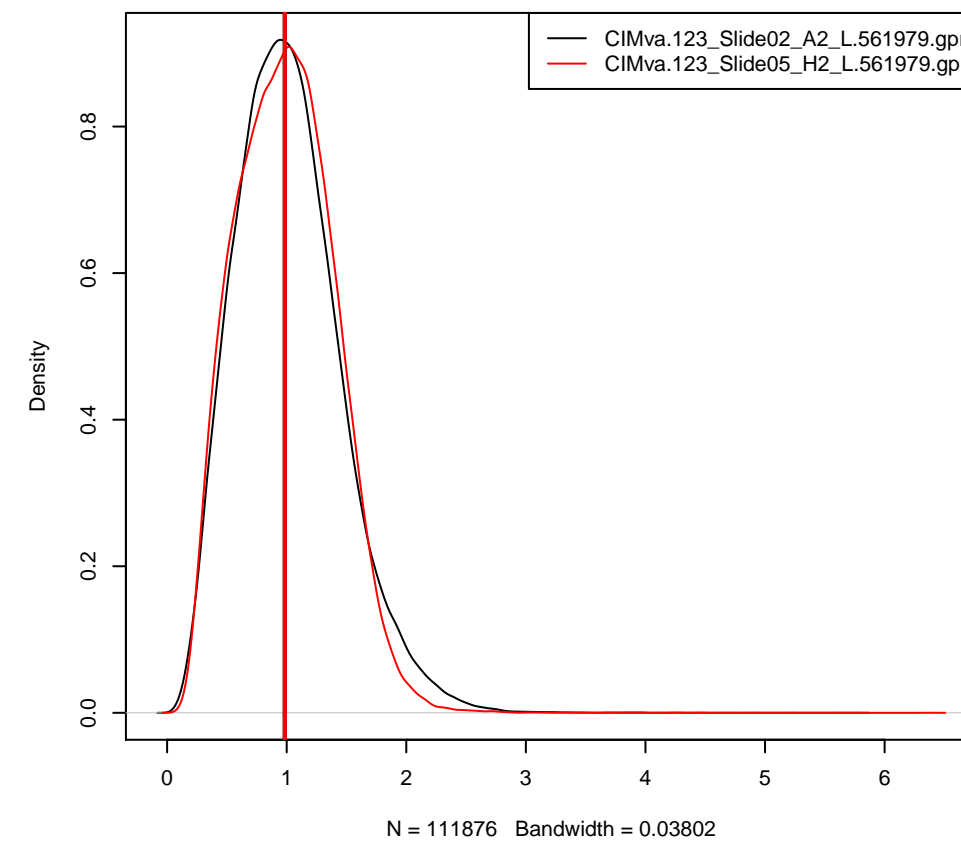

Replicate densities (normalized; log2) for sample: L-561979 (Controls)

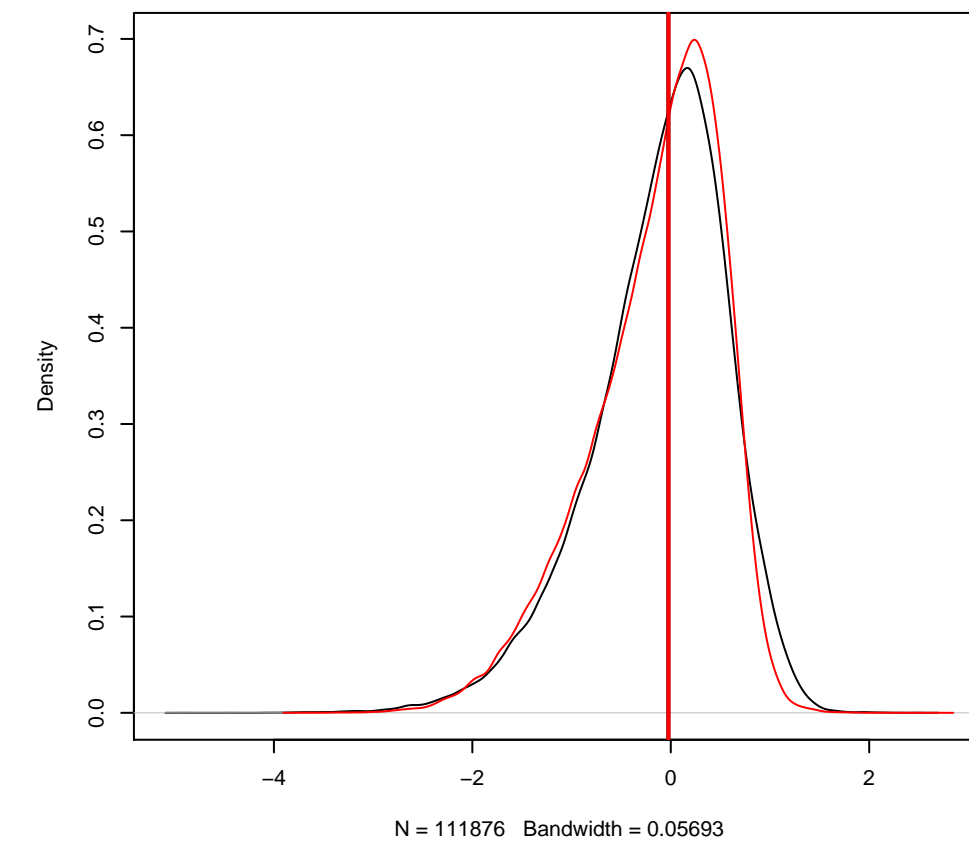

Replicate scatter (raw) for sample: L-561979 (Controls)  
Correlation coefficient: 0.77 (Pearson); 0.79 (Spearman)

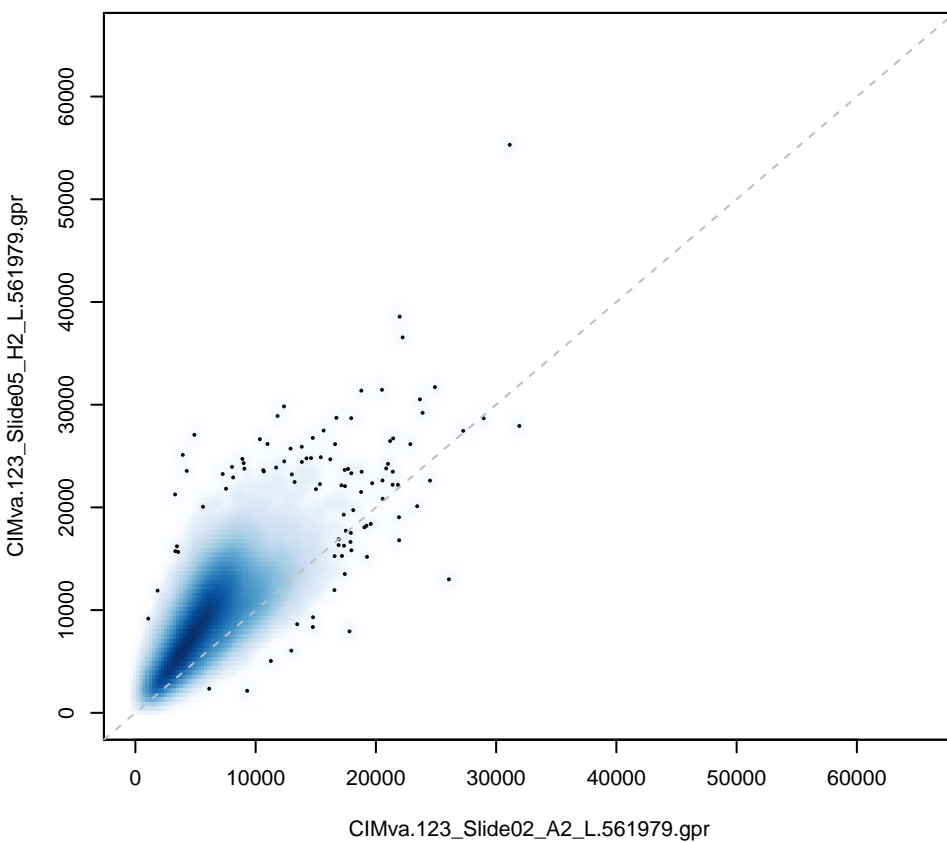

Replicate scatter (raw; log2) for sample: L-561979 (Controls)  
Correlation coefficient: 0.82 (Pearson); 0.79 (Spearman)

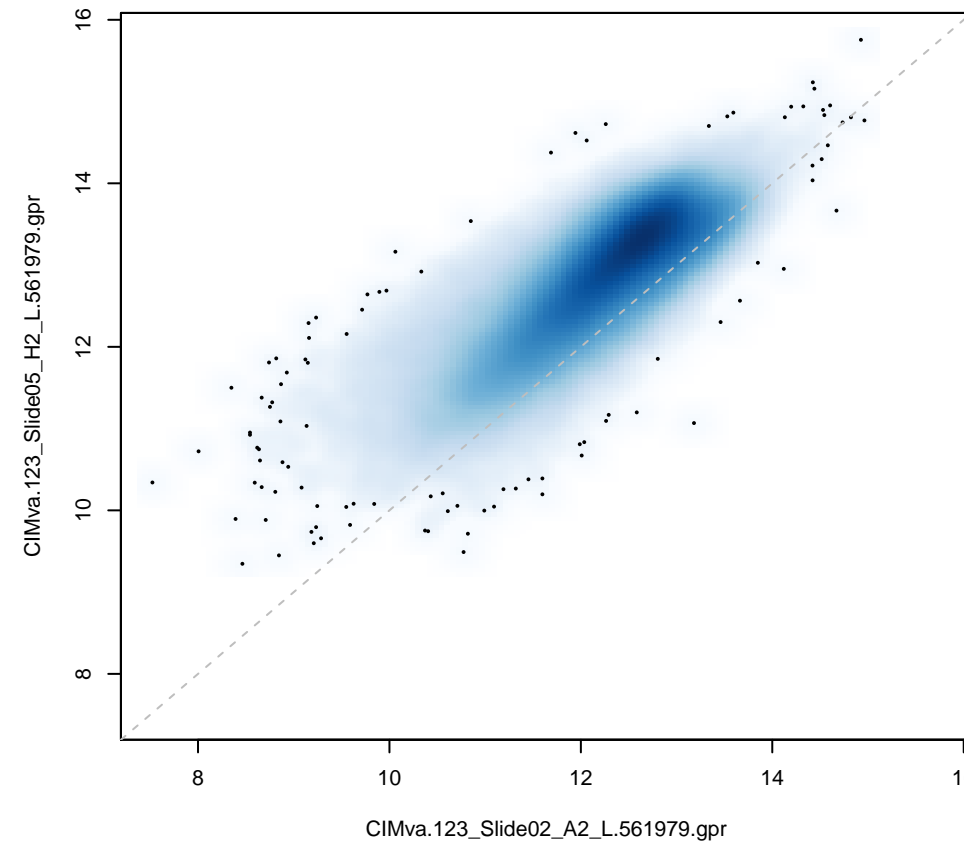

Replicate scatter (normalized) for sample: L-561979 (Controls)  
Correlation coefficient: 0.77 (Pearson); 0.79 (Spearman)

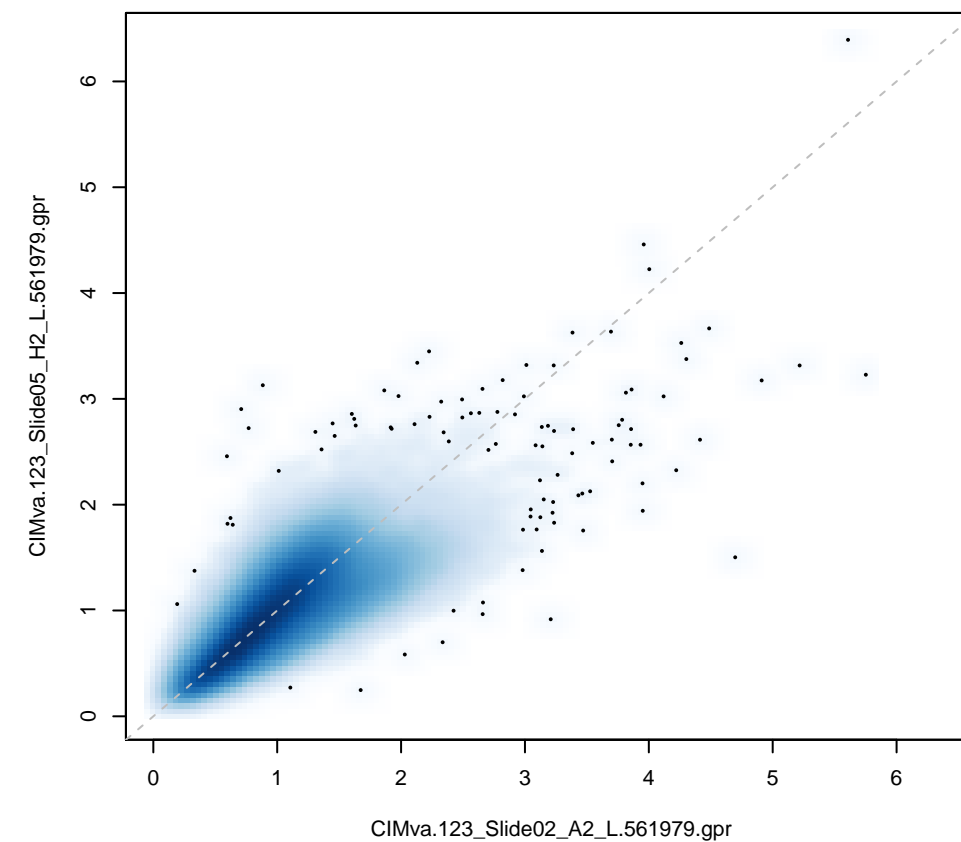

Replicate scatter (normalized; log2) for sample: L-561979 (Controls)  
Correlation coefficient: 0.8 (Pearson); 0.79 (Spearman)

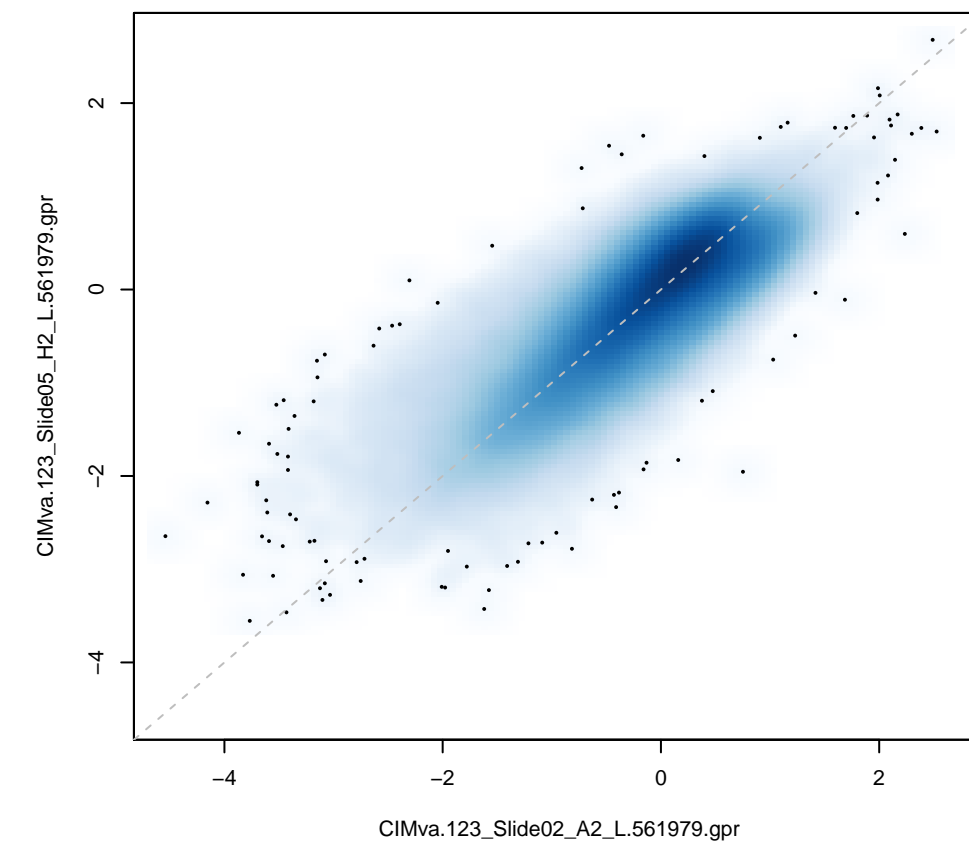

Replicate densities (raw) for sample: L-570811 (Controls)

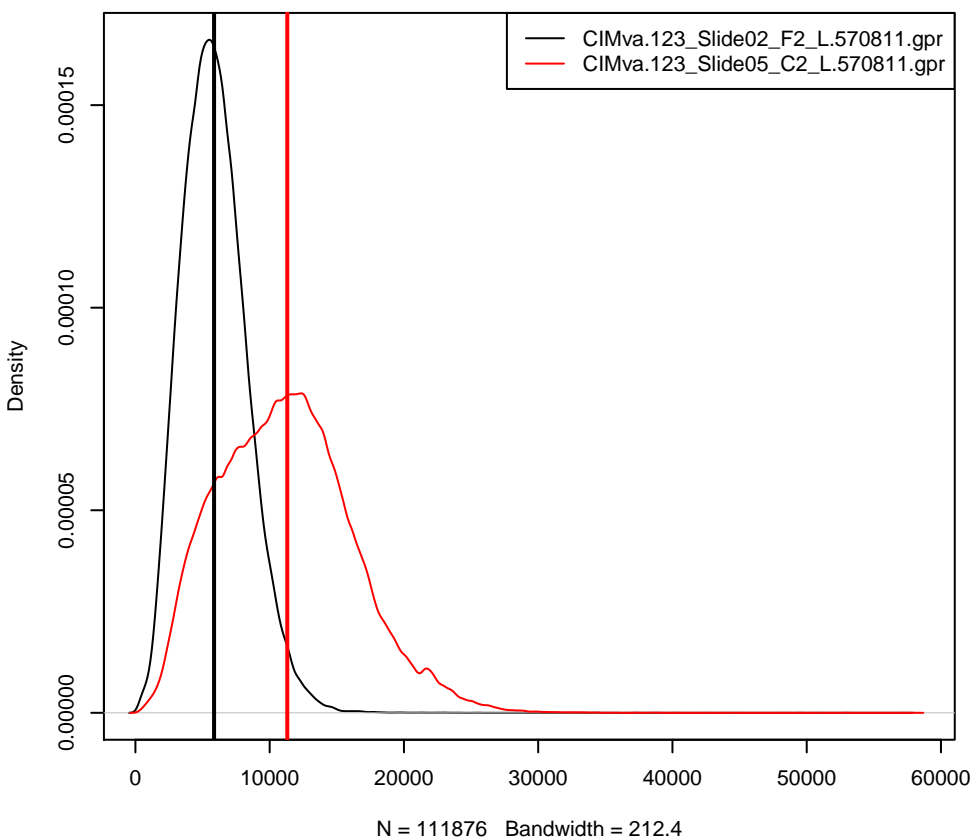

Replicate densities (raw; log2) for sample: L-570811 (Controls)

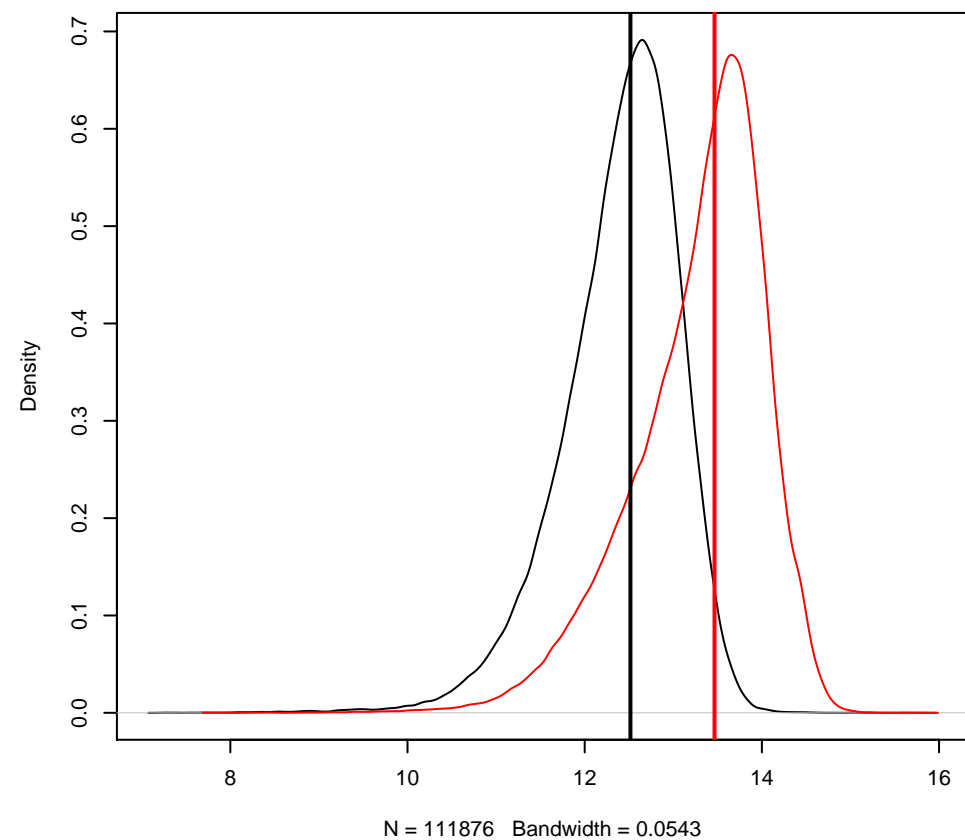

Replicate densities (normalized) for sample: L-570811 (Controls)

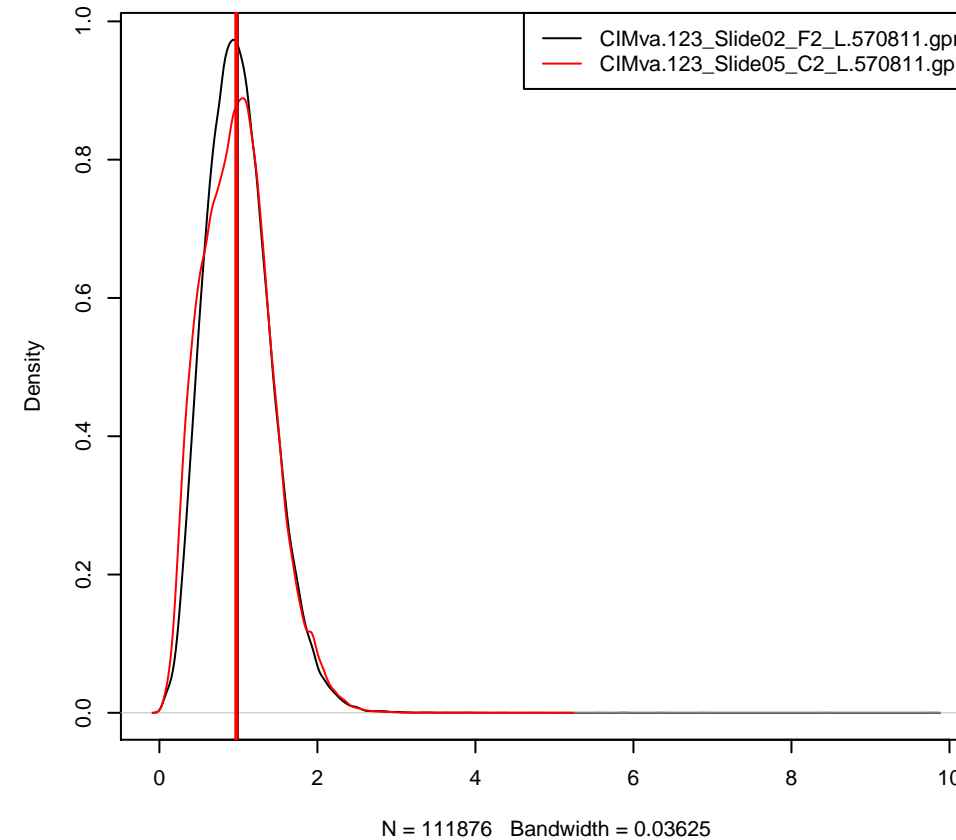

Replicate densities (normalized; log2) for sample: L-570811 (Controls)

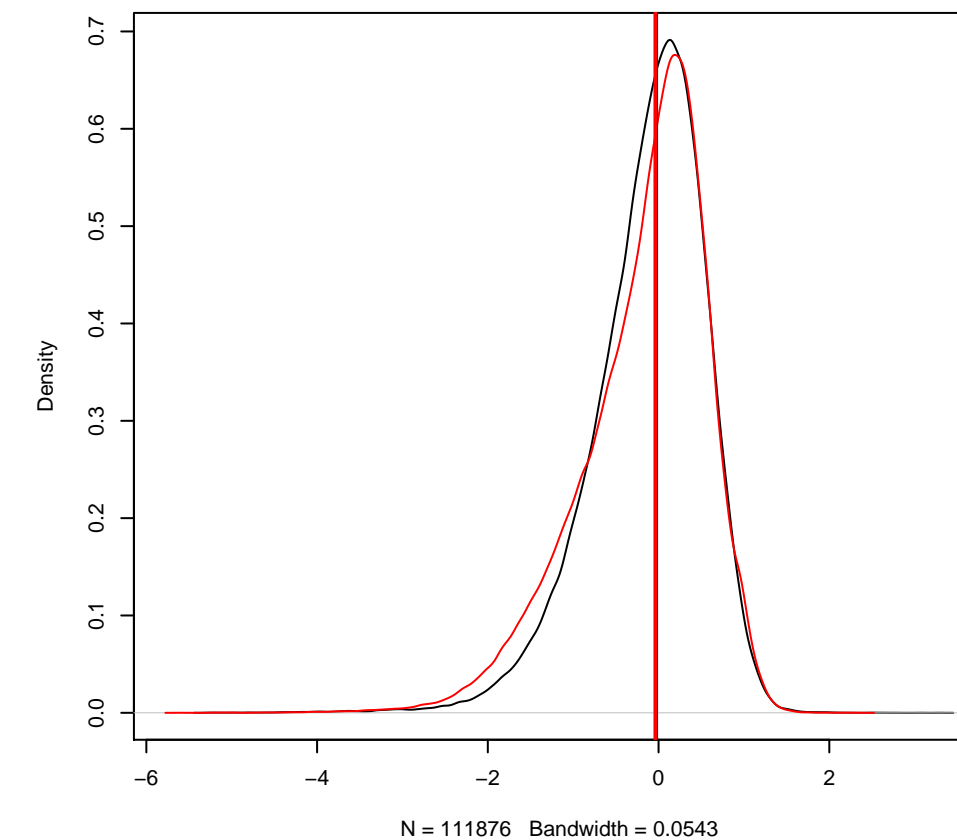

Replicate scatter (raw) for sample: L-570811 (Controls)  
Correlation coefficient: 0.74 (Pearson); 0.78 (Spearman)

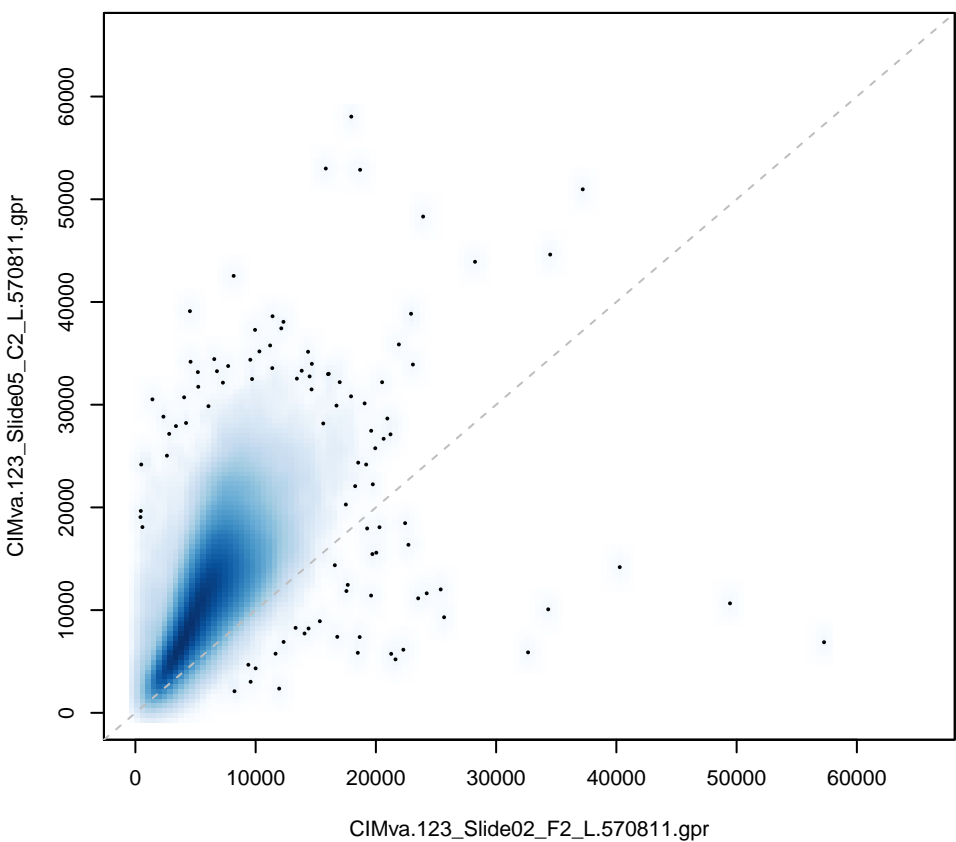

Replicate scatter (raw; log2) for sample: L-570811 (Controls)  
Correlation coefficient: 0.79 (Pearson); 0.78 (Spearman)

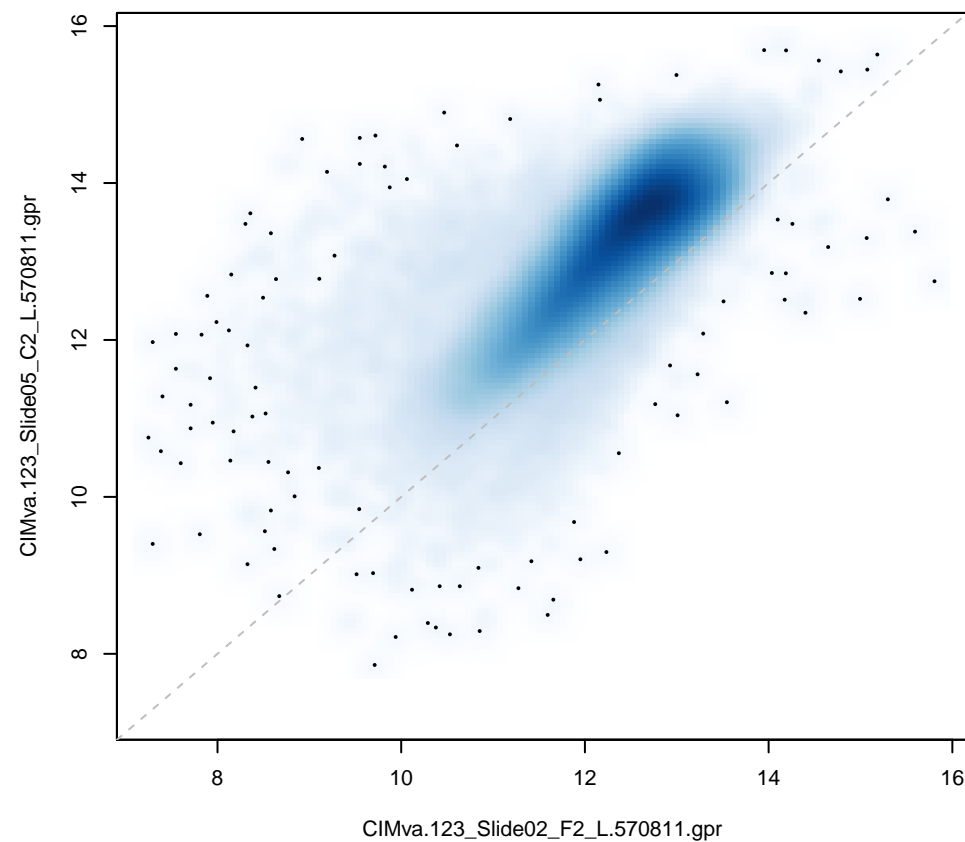

Replicate scatter (normalized) for sample: L-570811 (Controls)  
Correlation coefficient: 0.74 (Pearson); 0.78 (Spearman)

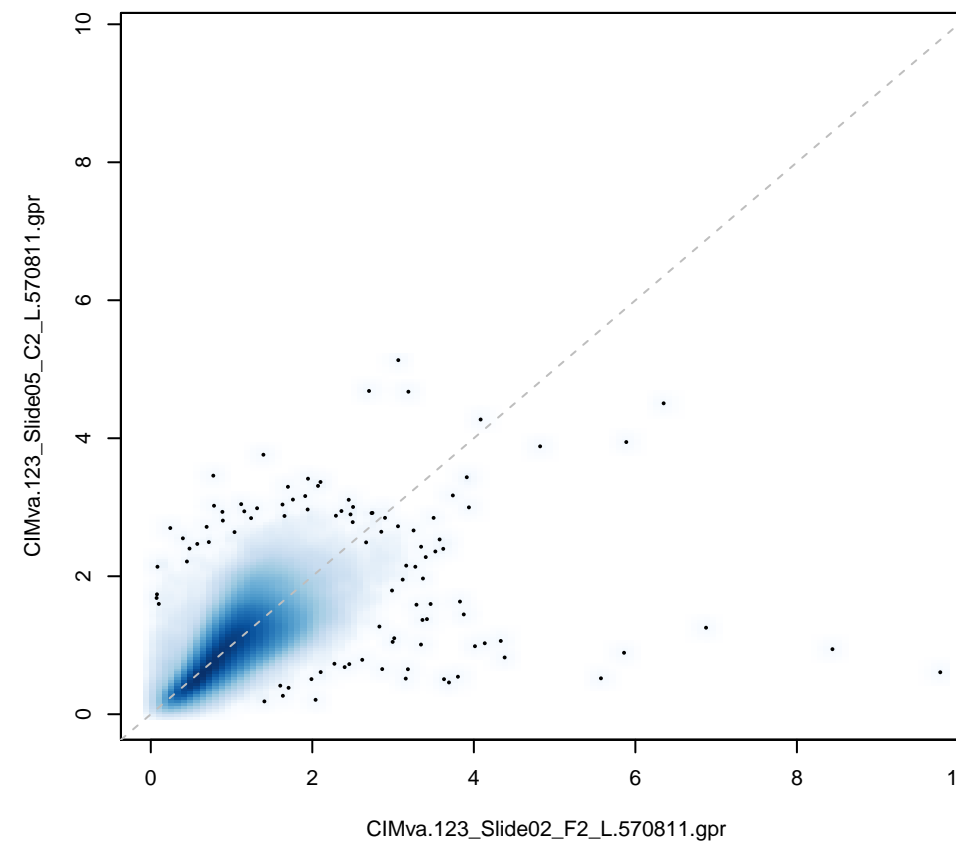

Replicate scatter (normalized; log2) for sample: L-570811 (Controls)  
Correlation coefficient: 0.78 (Pearson); 0.78 (Spearman)

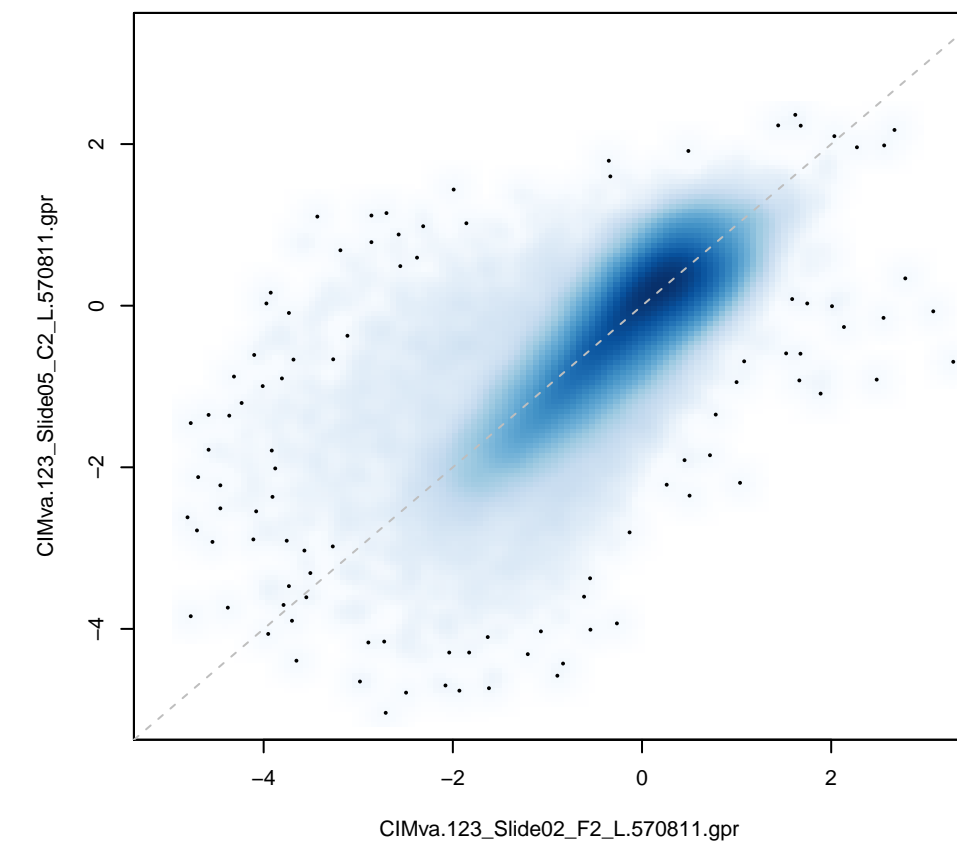

Replicate densities (raw) for sample: L-571239 (CFS)

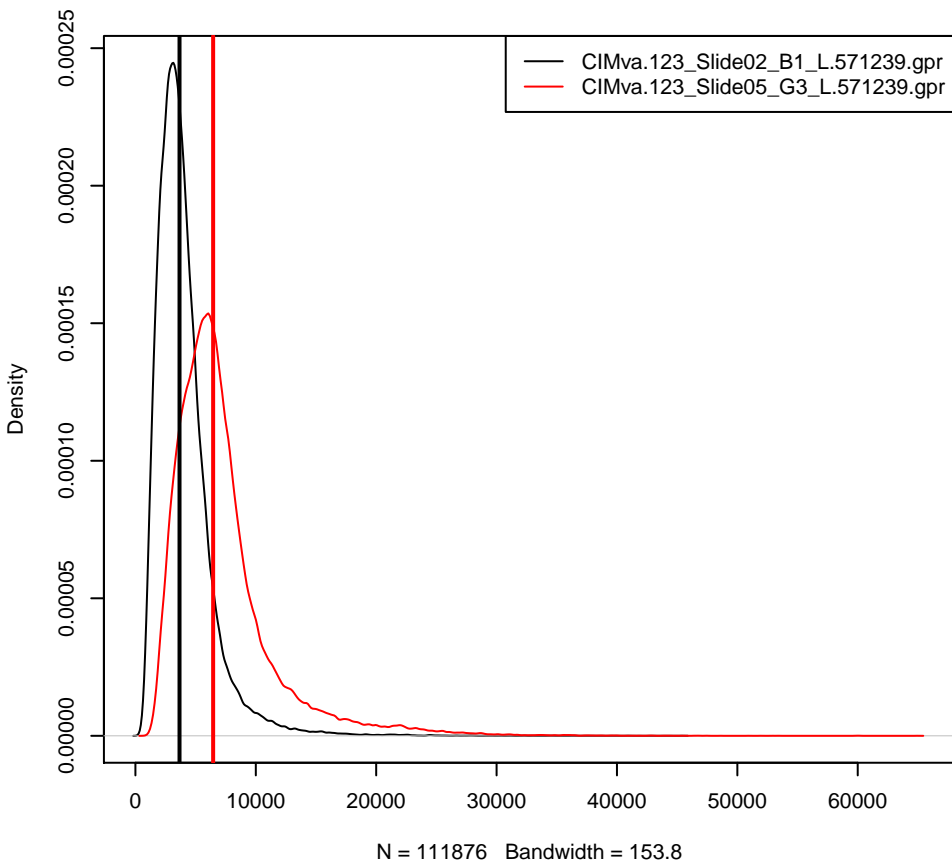

Replicate densities (raw; log2) for sample: L-571239 (CFS)

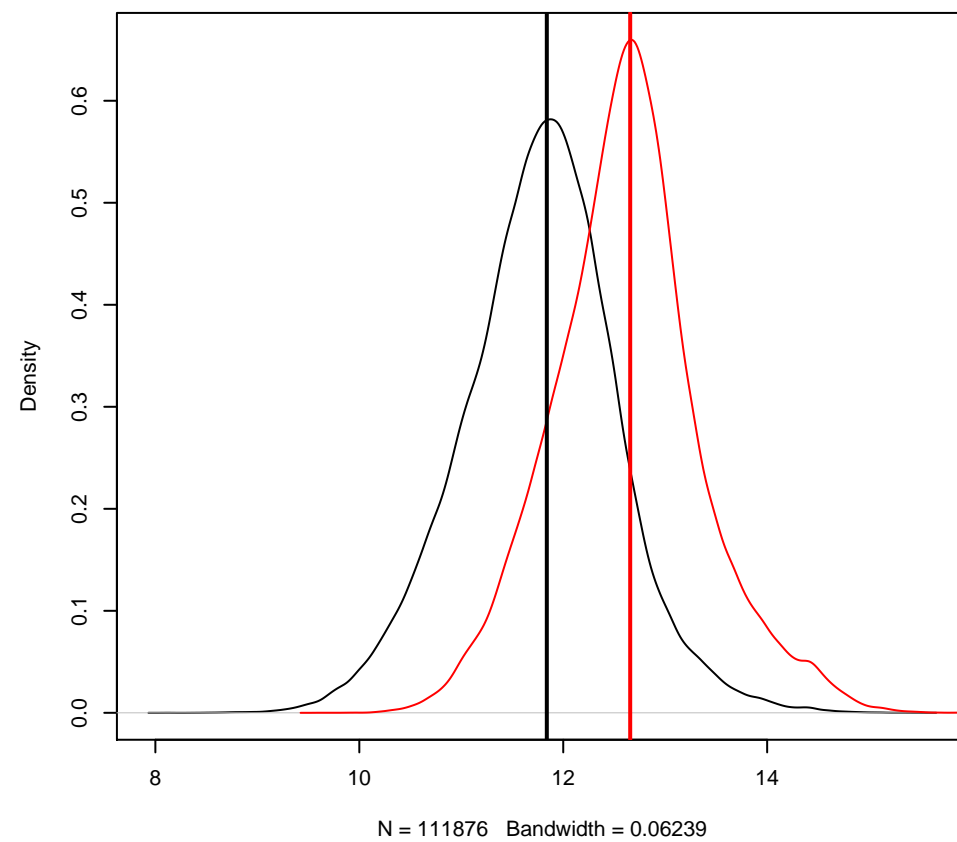

Replicate densities (normalized) for sample: L-571239 (CFS)

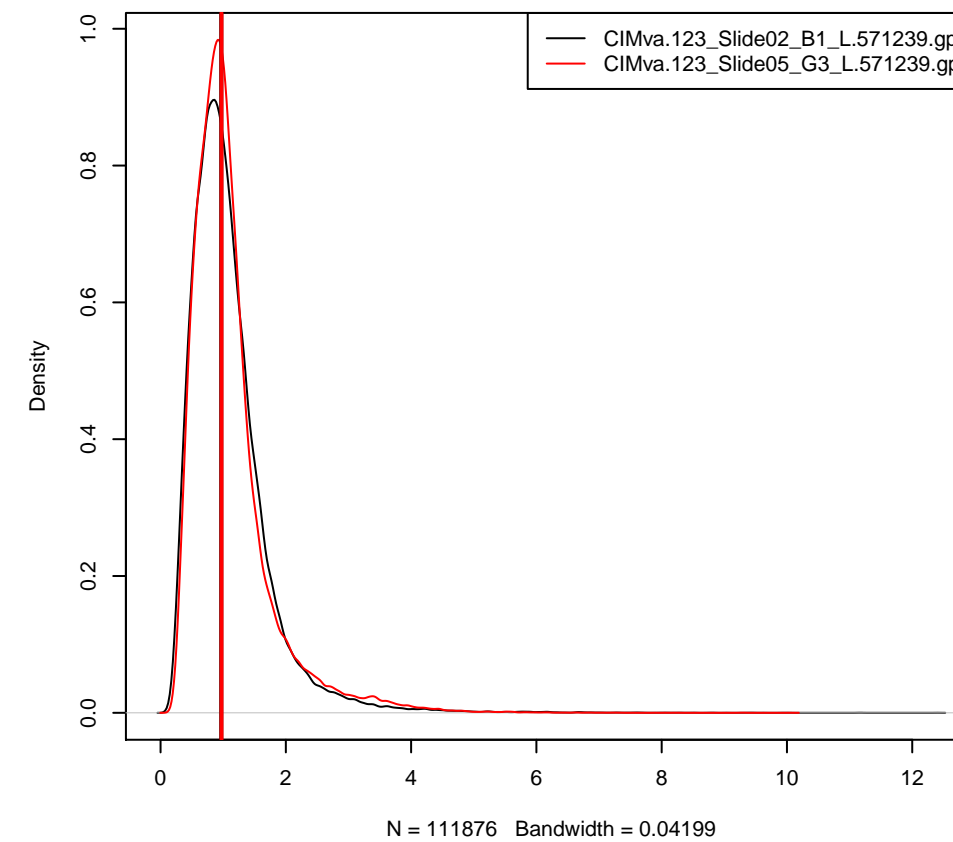

Replicate densities (normalized; log2) for sample: L-571239 (CFS)

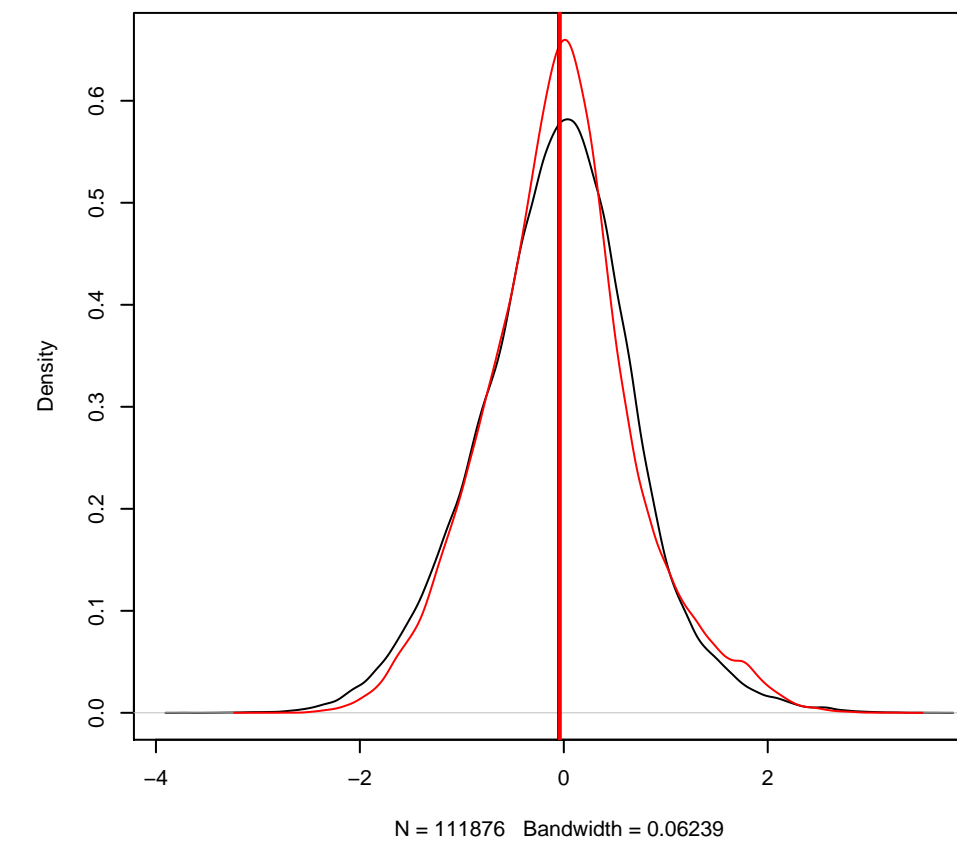

Replicate scatter (raw) for sample: L-571239 (CFS)  
Correlation coefficient: 0.81 (Pearson); 0.8 (Spearman)

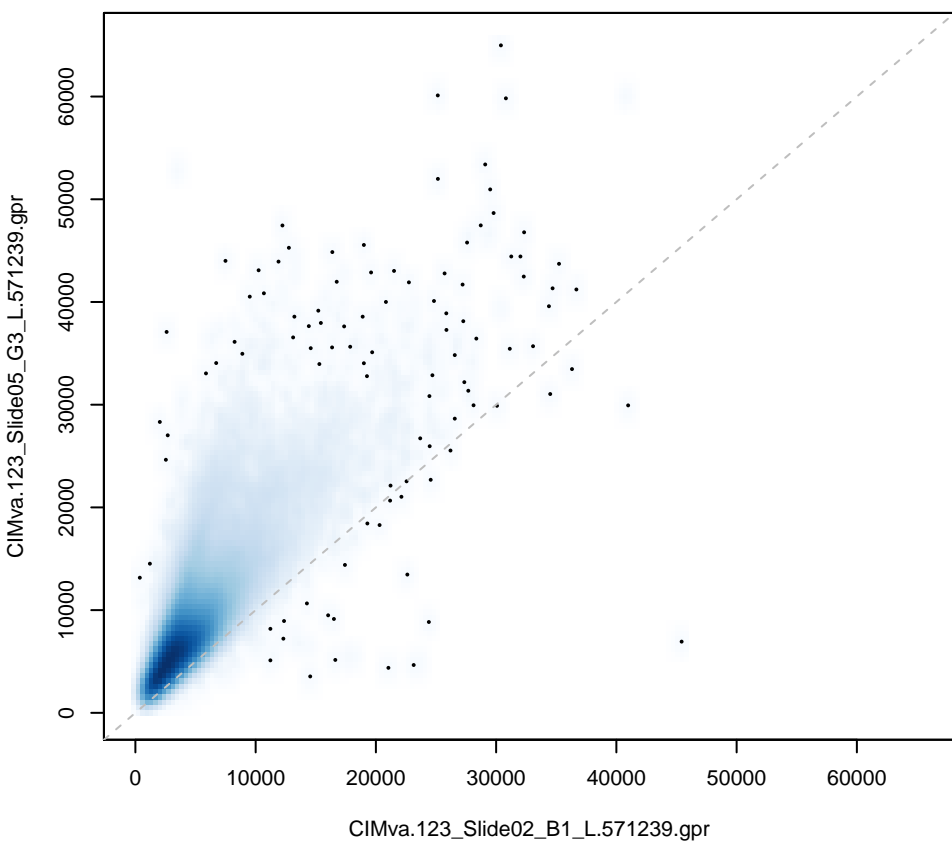

Replicate scatter (raw; log2) for sample: L-571239 (CFS)  
Correlation coefficient: 0.82 (Pearson); 0.8 (Spearman)

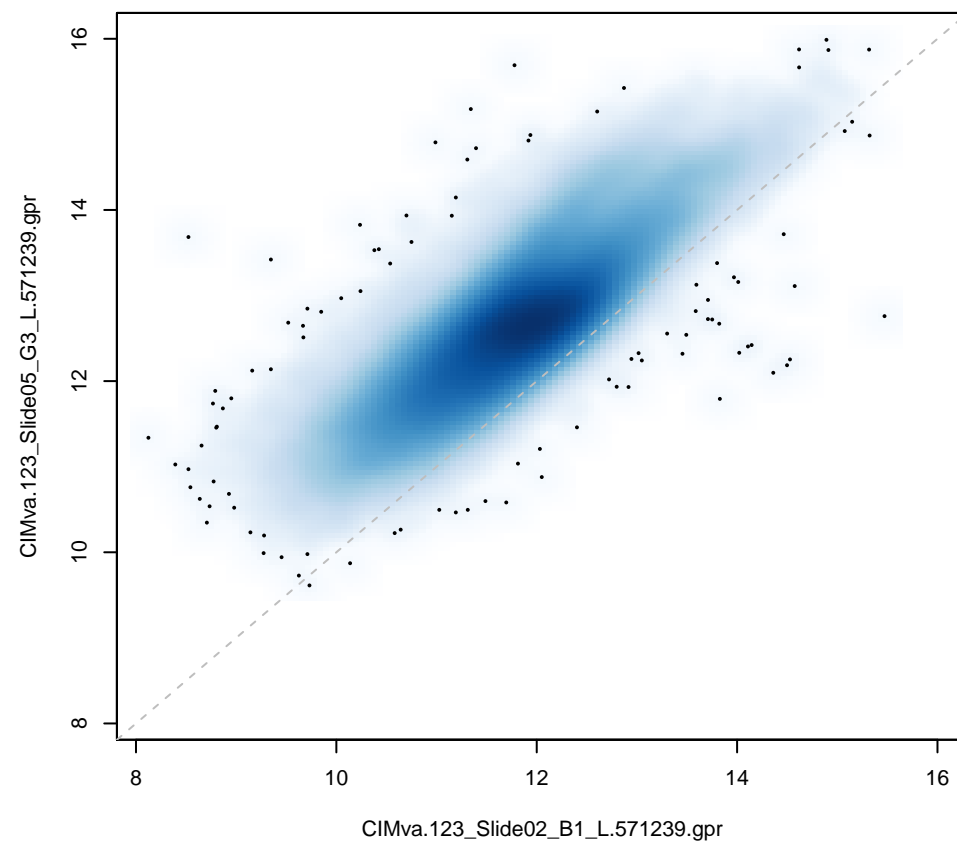

Replicate scatter (normalized) for sample: L-571239 (CFS)  
Correlation coefficient: 0.81 (Pearson); 0.8 (Spearman)

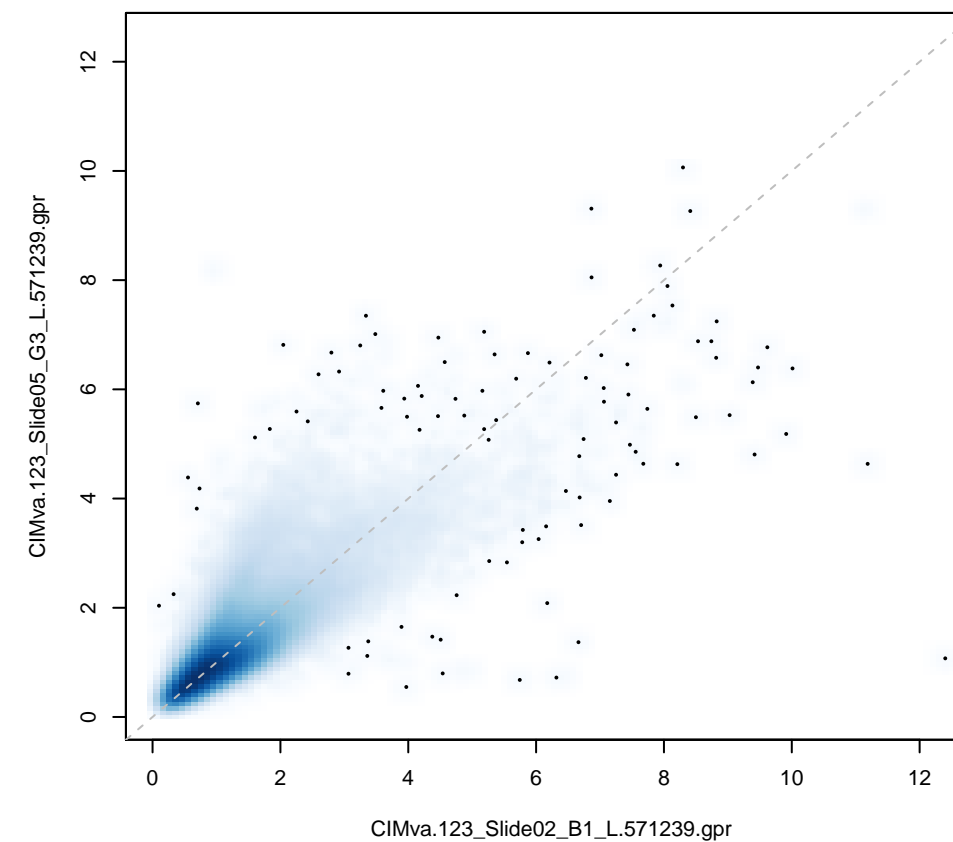

Replicate scatter (normalized; log2) for sample: L-571239 (CFS)  
Correlation coefficient: 0.82 (Pearson); 0.8 (Spearman)

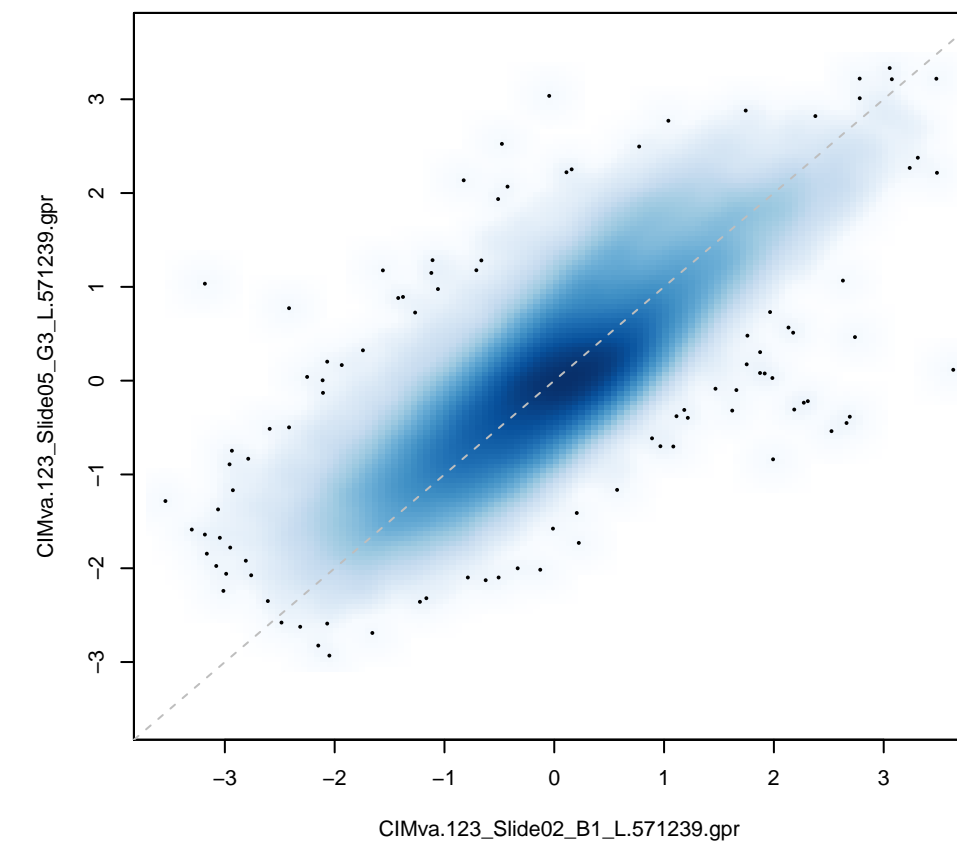

Replicate densities (raw) for sample: L-572527 (CFS)

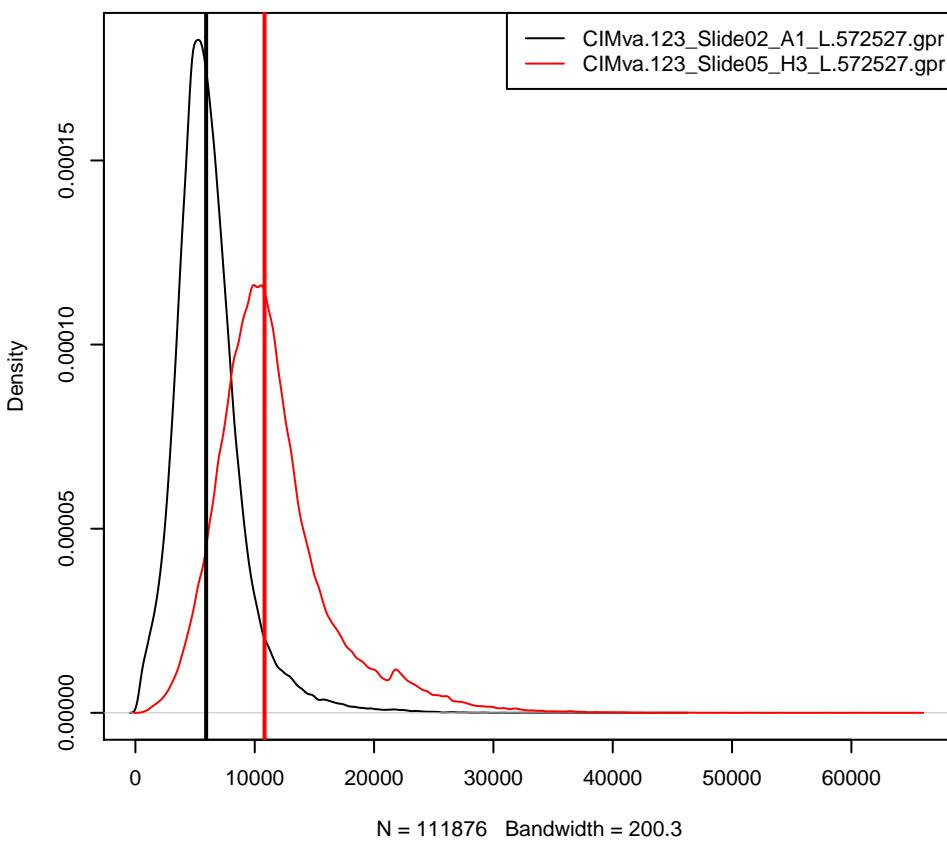

Replicate densities (raw; log2) for sample: L-572527 (CFS)

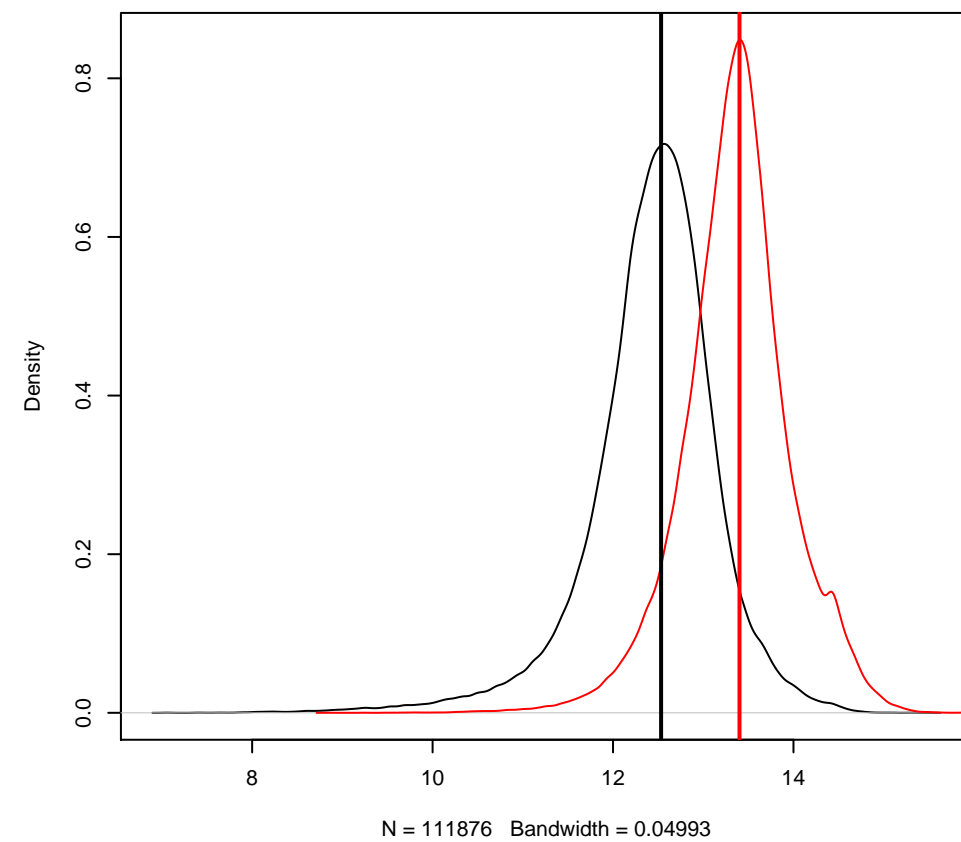

Replicate densities (normalized) for sample: L-572527 (CFS)

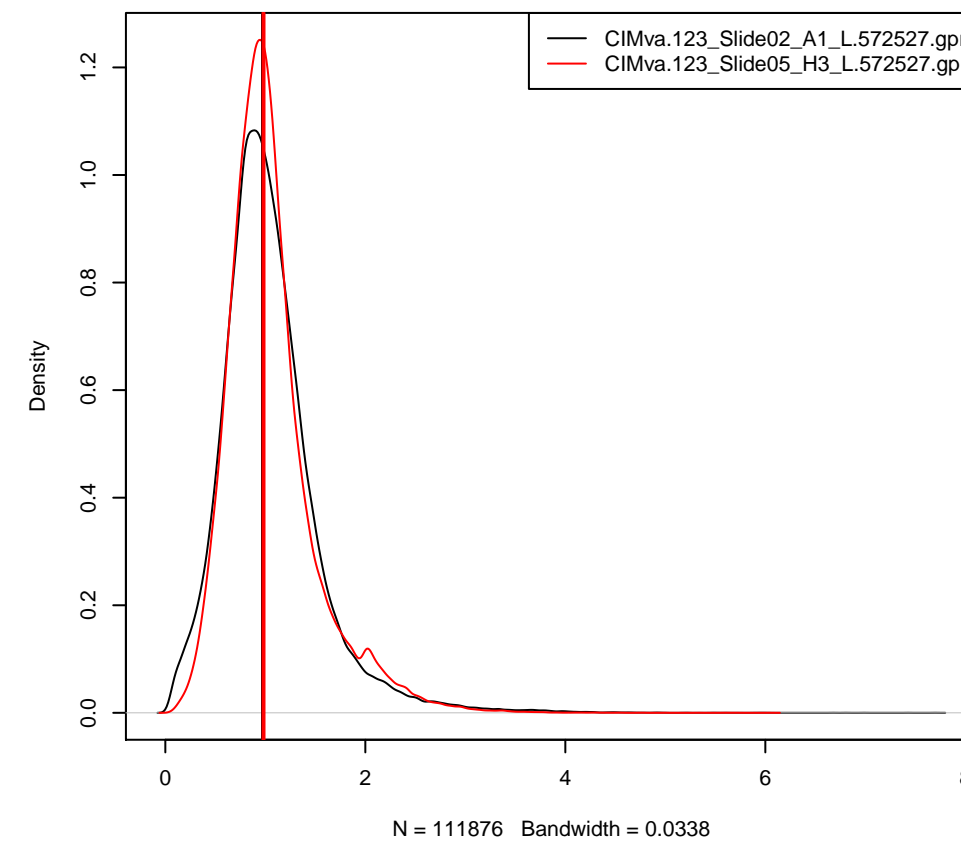

Replicate densities (normalized; log2) for sample: L-572527 (CFS)

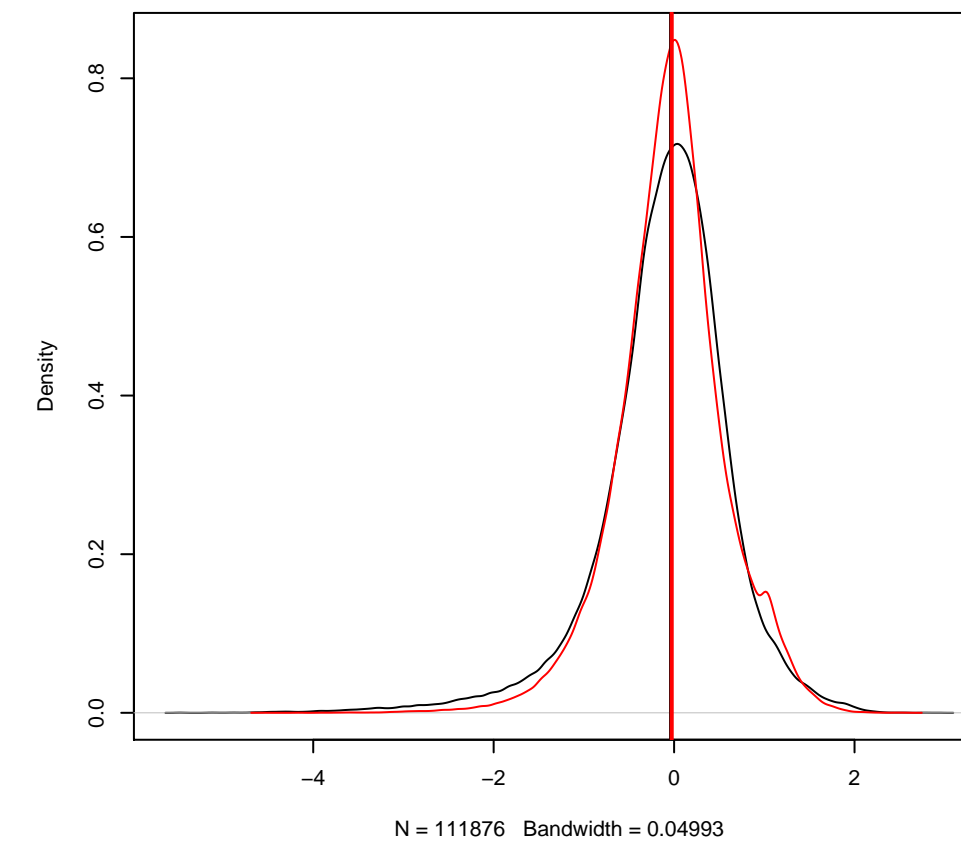

Replicate scatter (raw) for sample: L-572527 (CFS)  
Correlation coefficient: 0.7 (Pearson); 0.62 (Spearman)

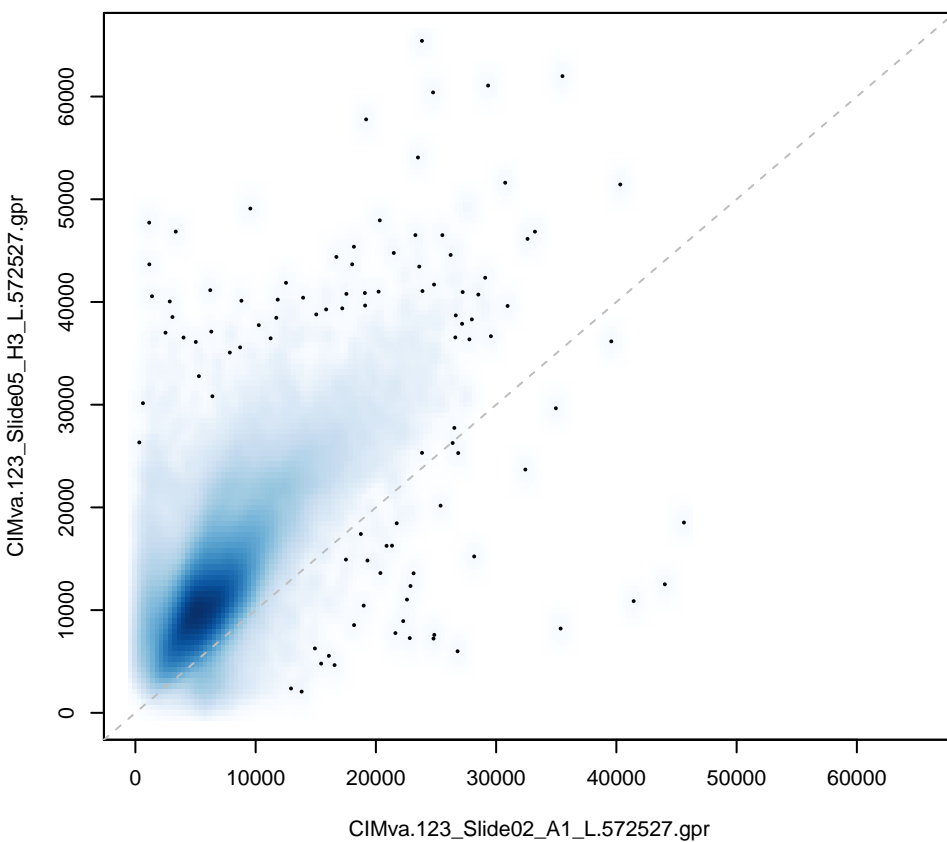

Replicate scatter (raw; log2) for sample: L-572527 (CFS)  
Correlation coefficient: 0.56 (Pearson); 0.62 (Spearman)

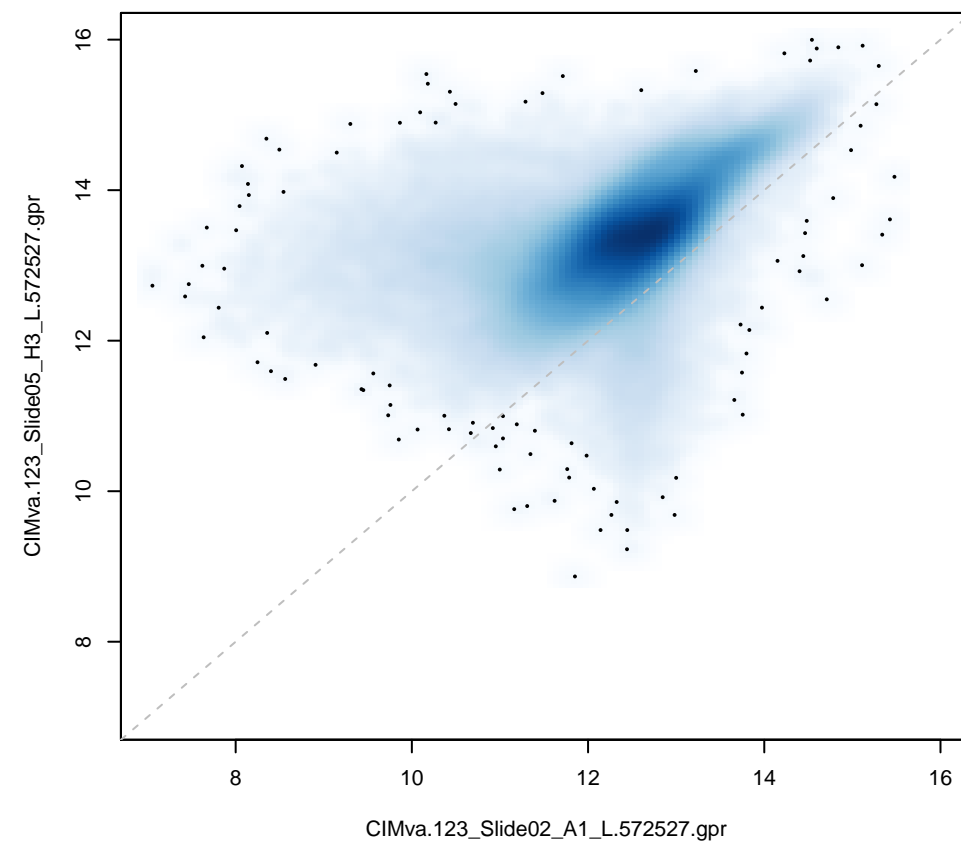

Replicate scatter (normalized) for sample: L-572527 (CFS)  
Correlation coefficient: 0.7 (Pearson); 0.62 (Spearman)

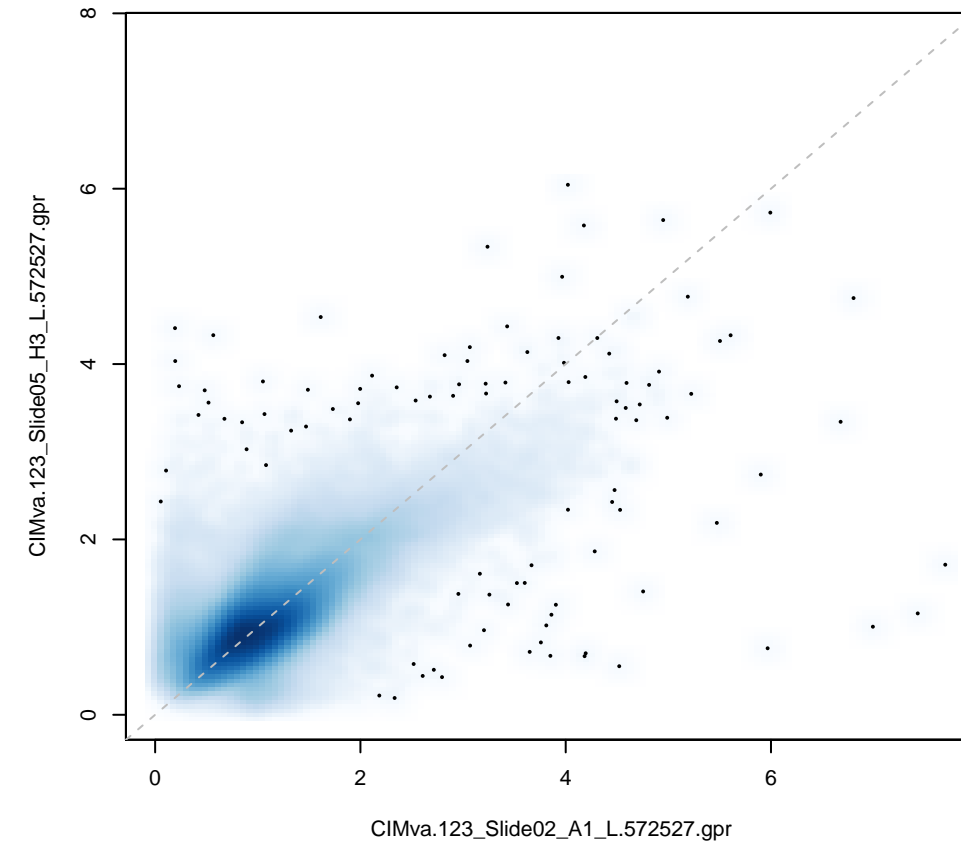

Replicate scatter (normalized; log2) for sample: L-572527 (CFS)  
Correlation coefficient: 0.65 (Pearson); 0.62 (Spearman)

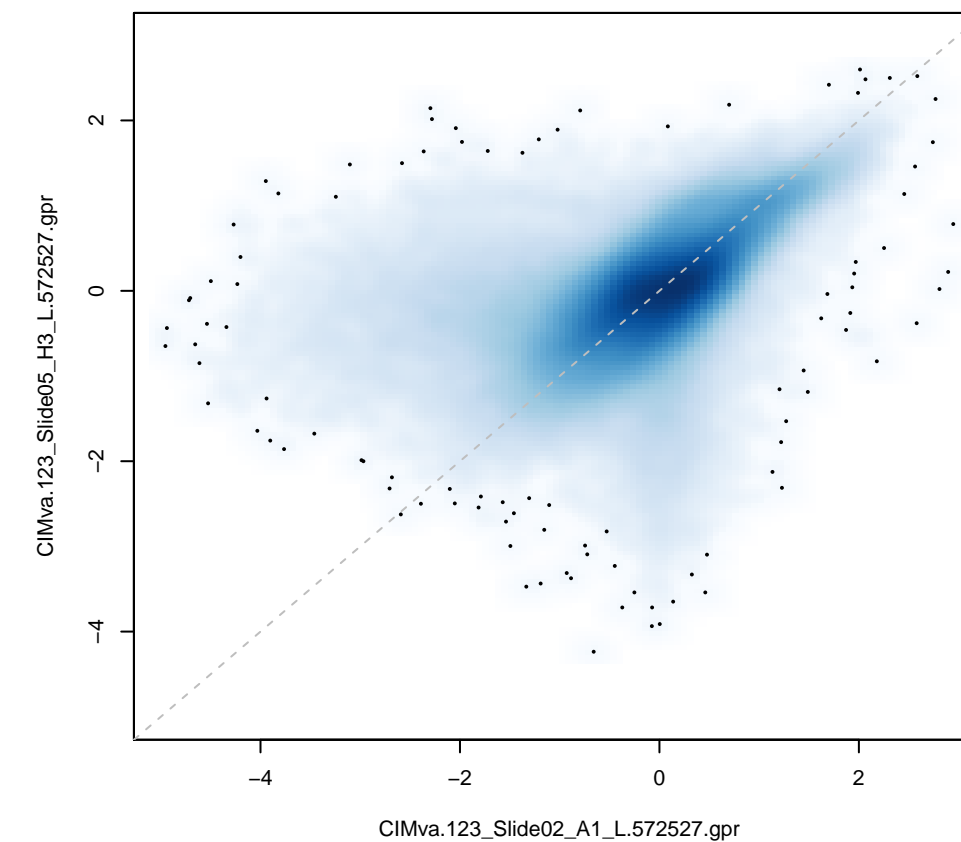

Replicate densities (raw) for sample: L-572529 (Controls)

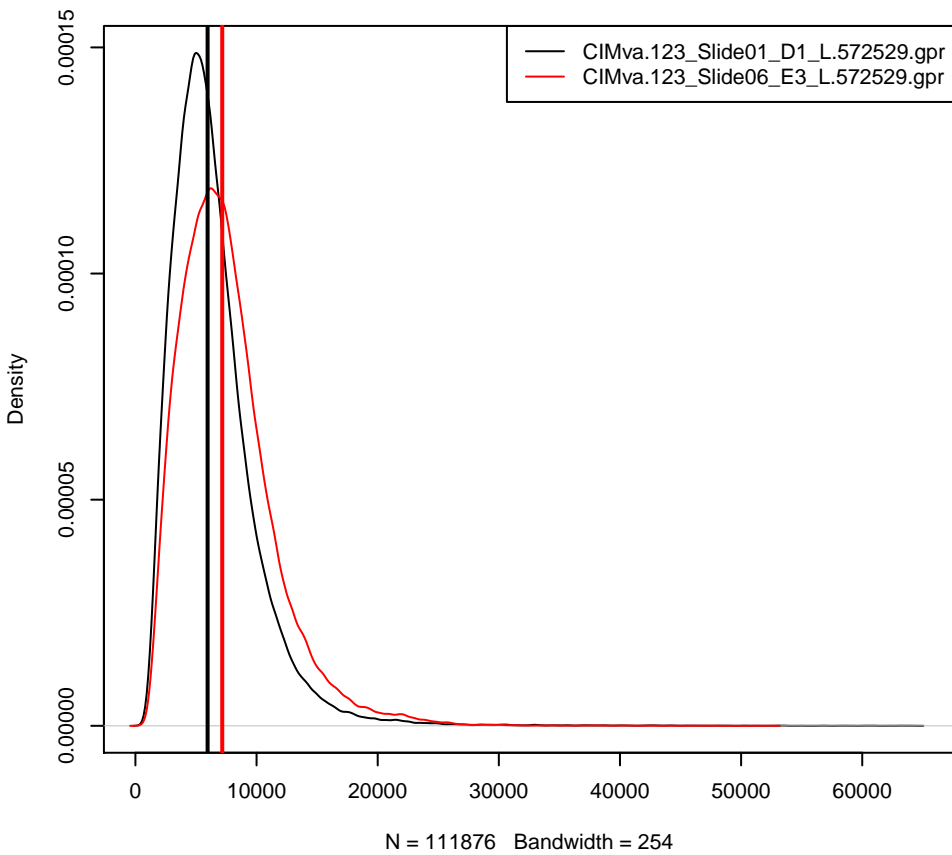

Replicate densities (raw; log2) for sample: L-572529 (Controls)

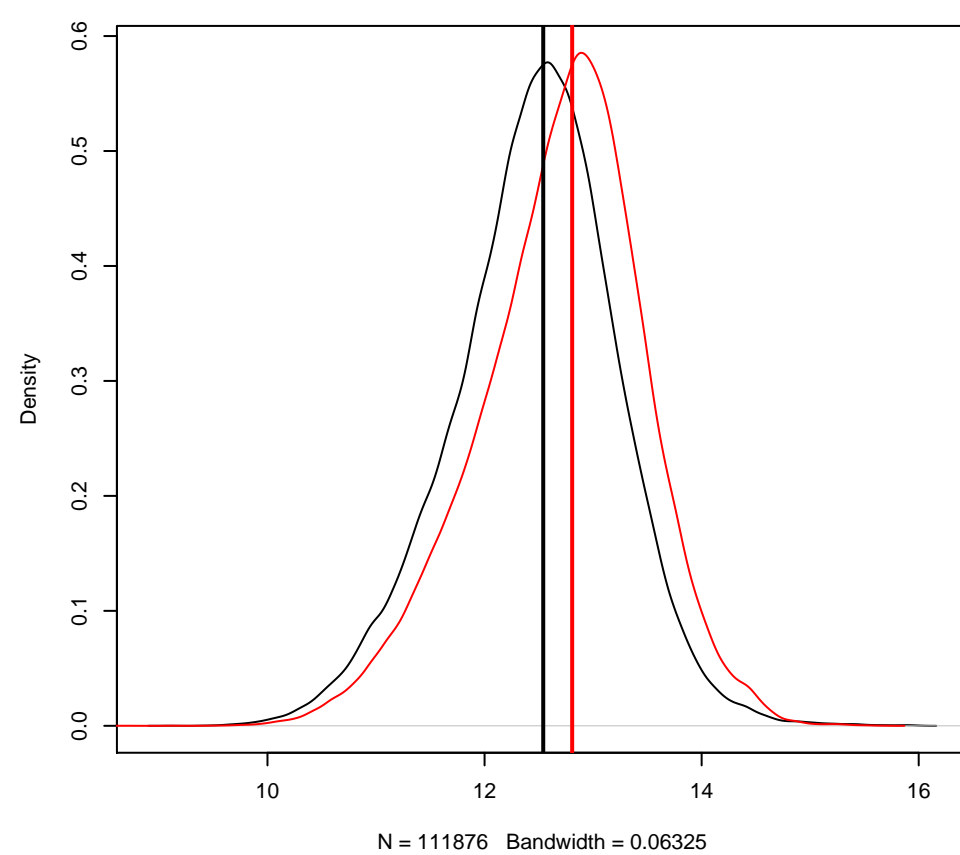

Replicate densities (normalized) for sample: L-572529 (Controls)

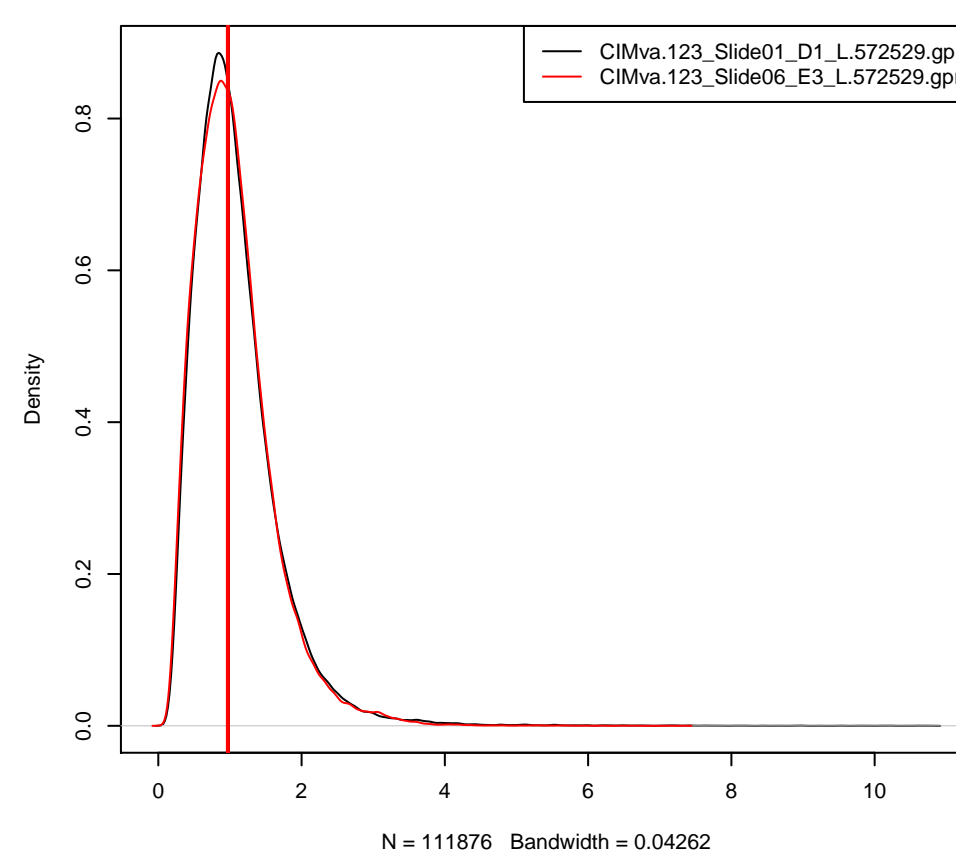

Replicate densities (normalized; log2) for sample: L-572529 (Controls)

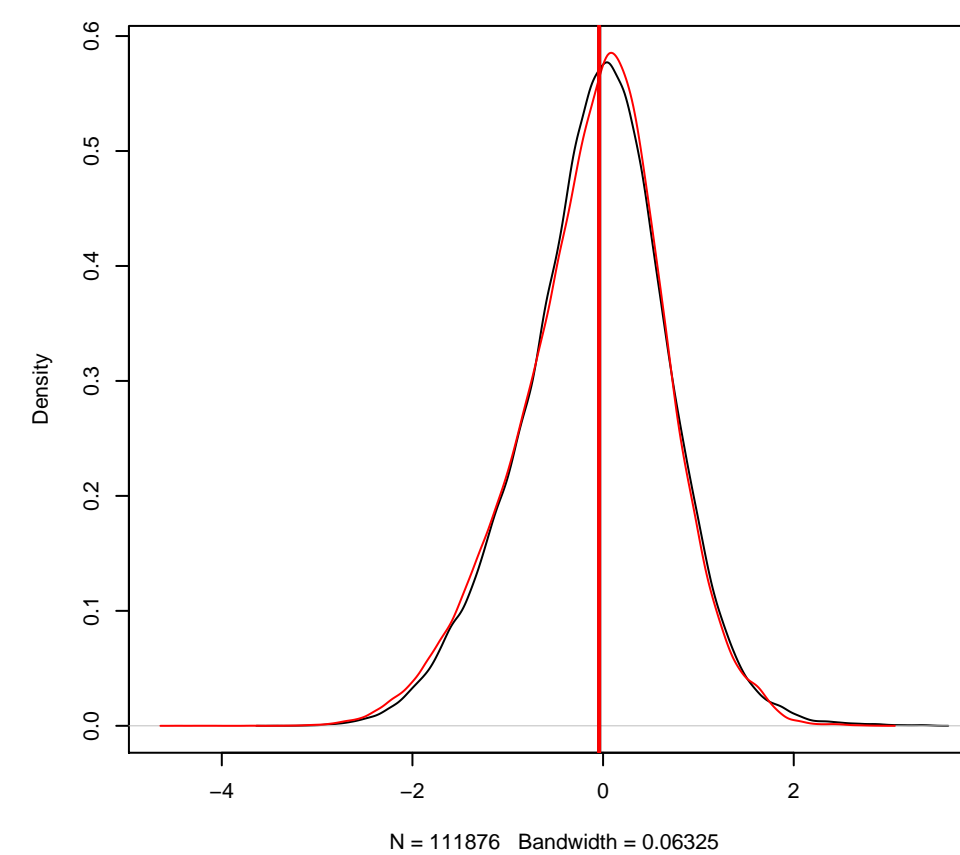

Replicate scatter (raw) for sample: L-572529 (Controls)  
Correlation coefficient: 0.82 (Pearson); 0.84 (Spearman)

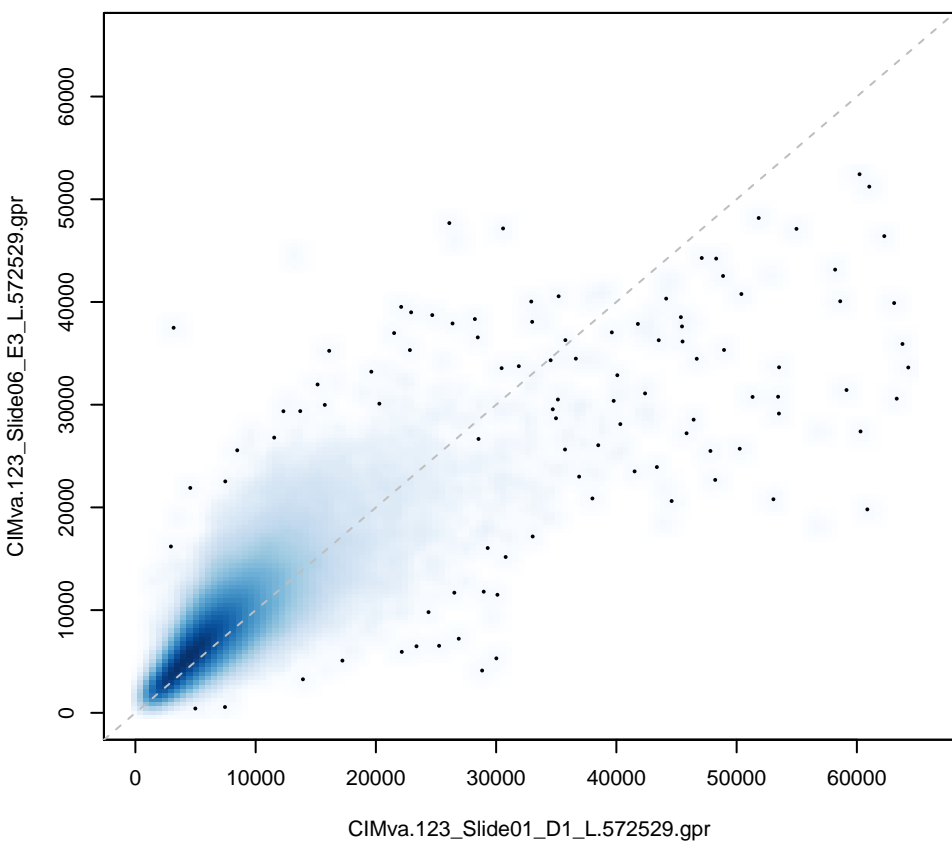

Replicate scatter (raw; log2) for sample: L-572529 (Controls)  
Correlation coefficient: 0.86 (Pearson); 0.84 (Spearman)

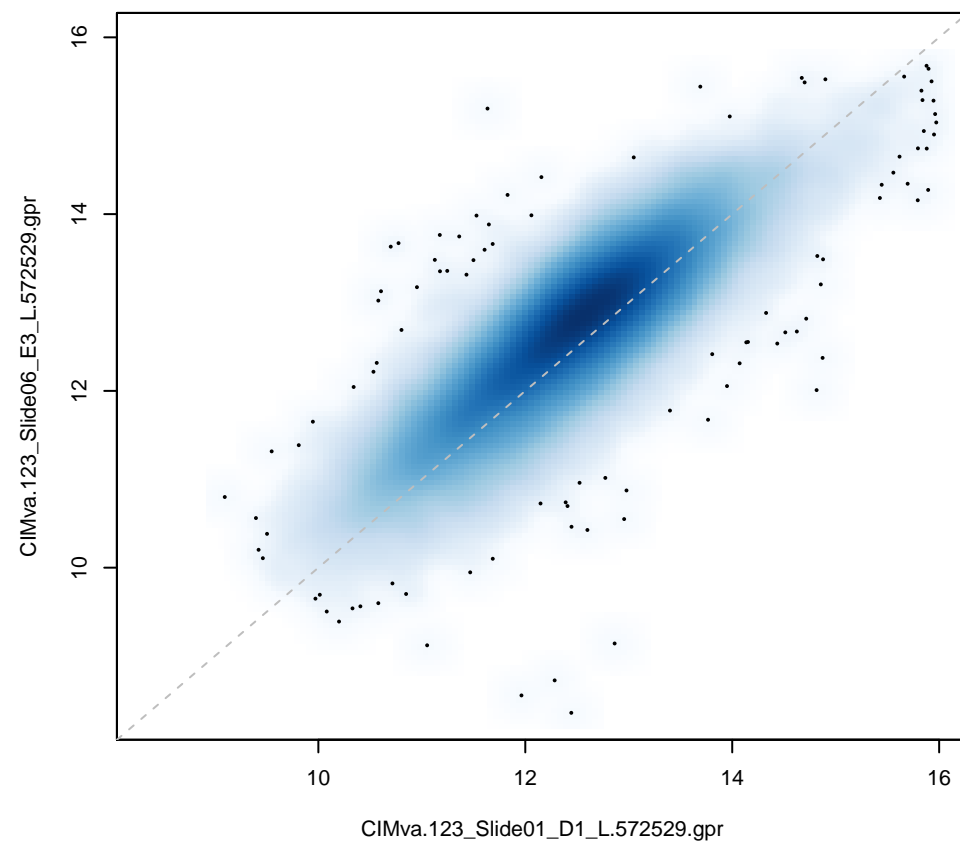

Replicate scatter (normalized) for sample: L-572529 (Controls)  
Correlation coefficient: 0.82 (Pearson); 0.84 (Spearman)

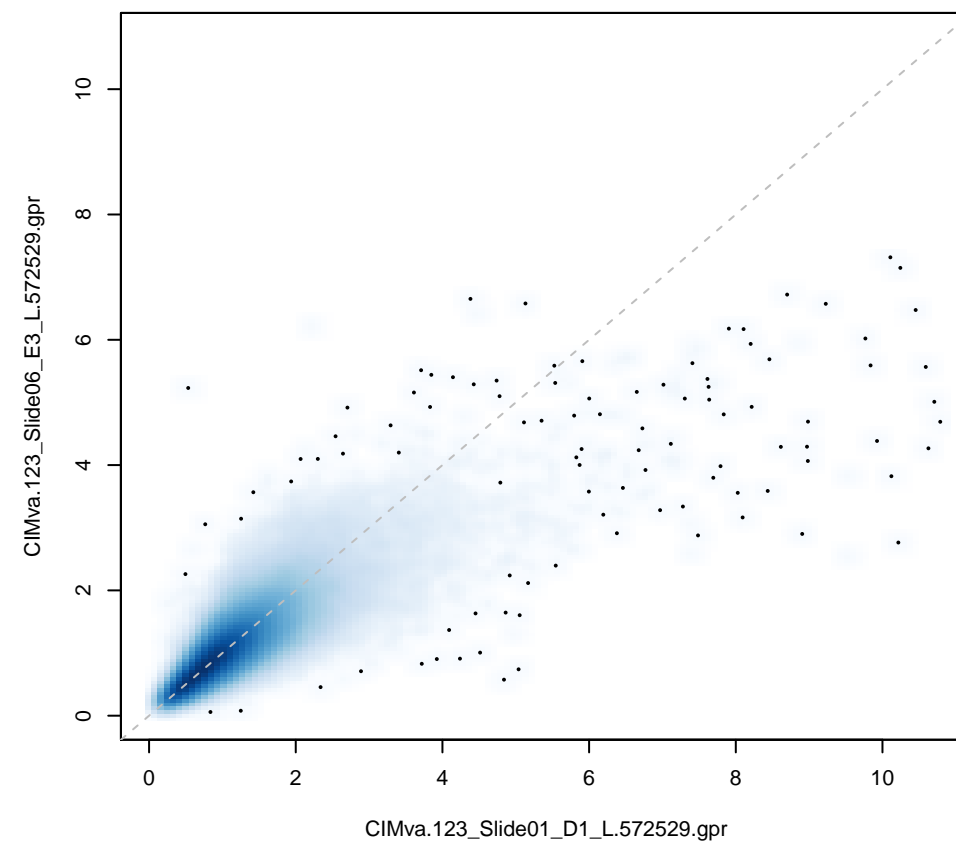

Replicate scatter (normalized; log2) for sample: L-572529 (Controls)  
Correlation coefficient: 0.85 (Pearson); 0.84 (Spearman)

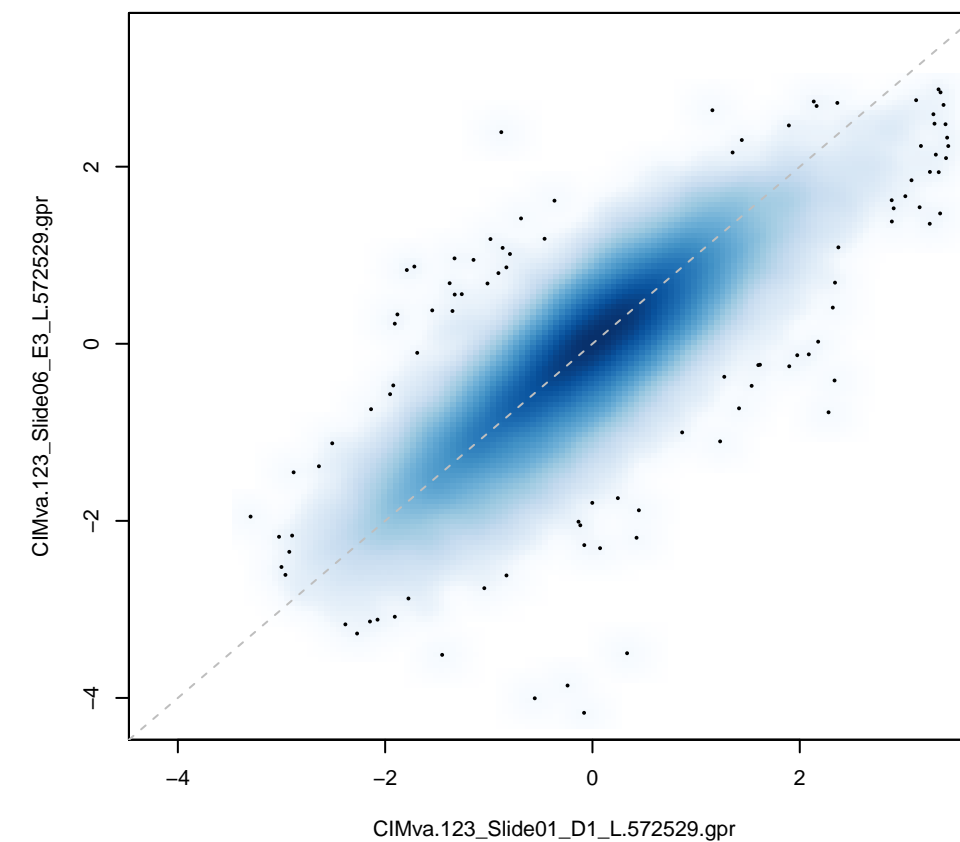

Replicate densities (raw) for sample: L-575788 (CFS)

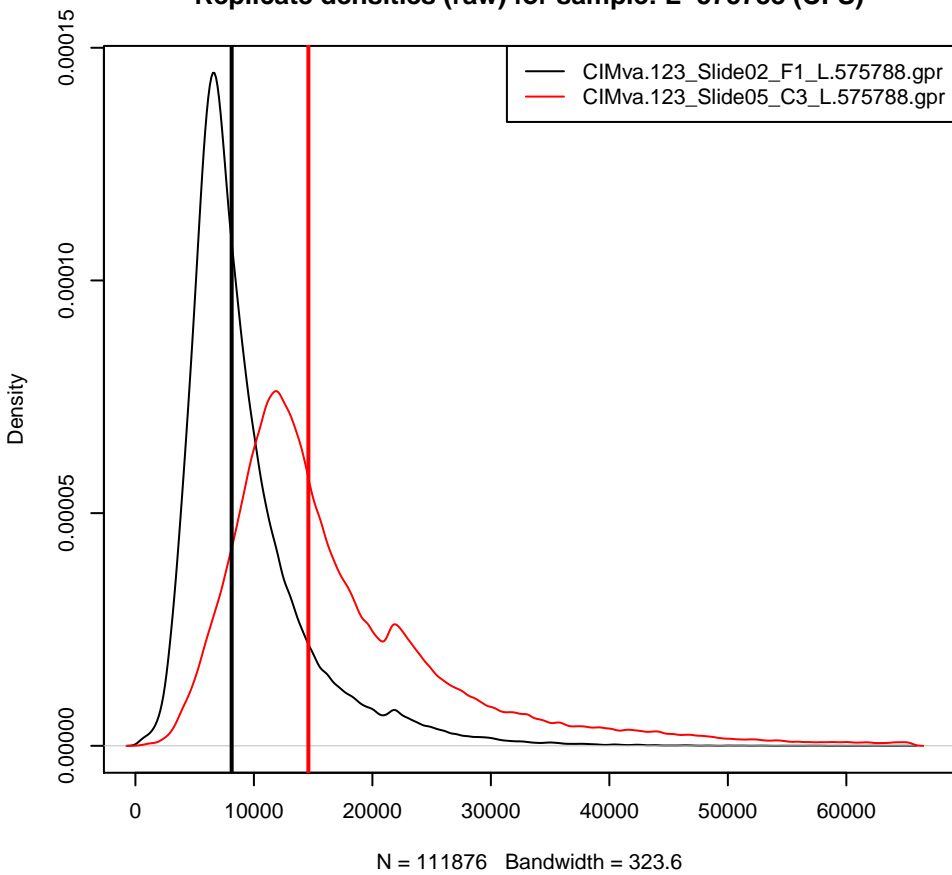

Replicate densities (raw; log2) for sample: L-575788 (CFS)

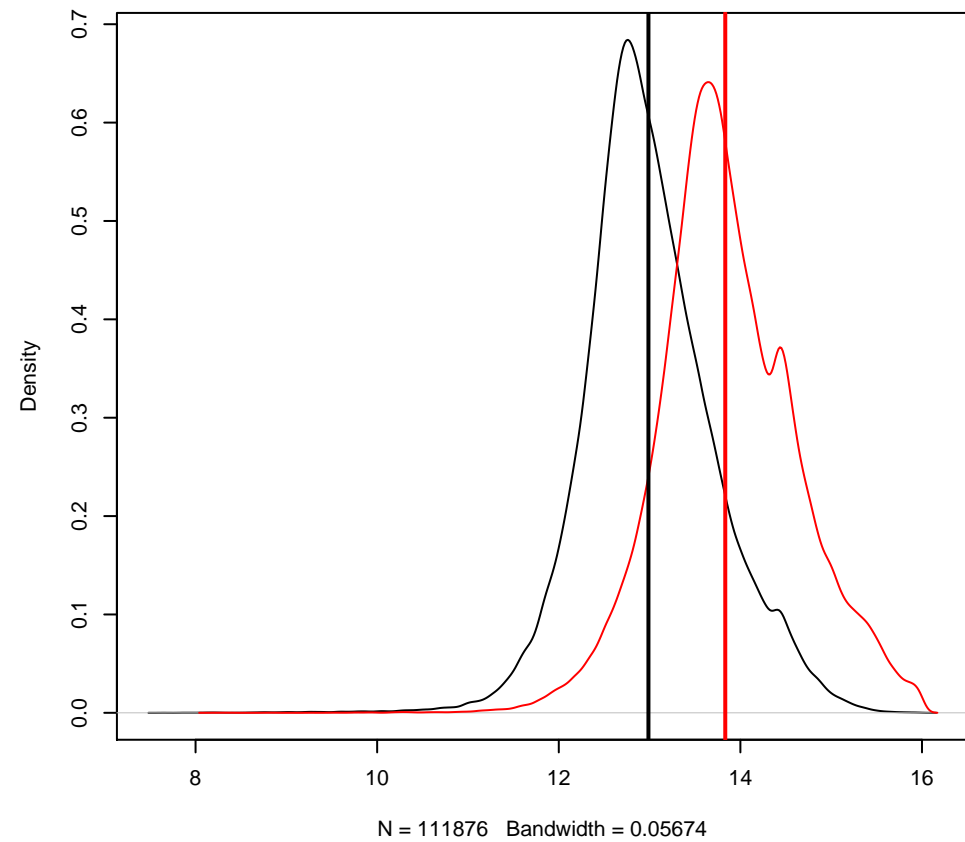

Replicate densities (normalized) for sample: L-575788 (CFS)

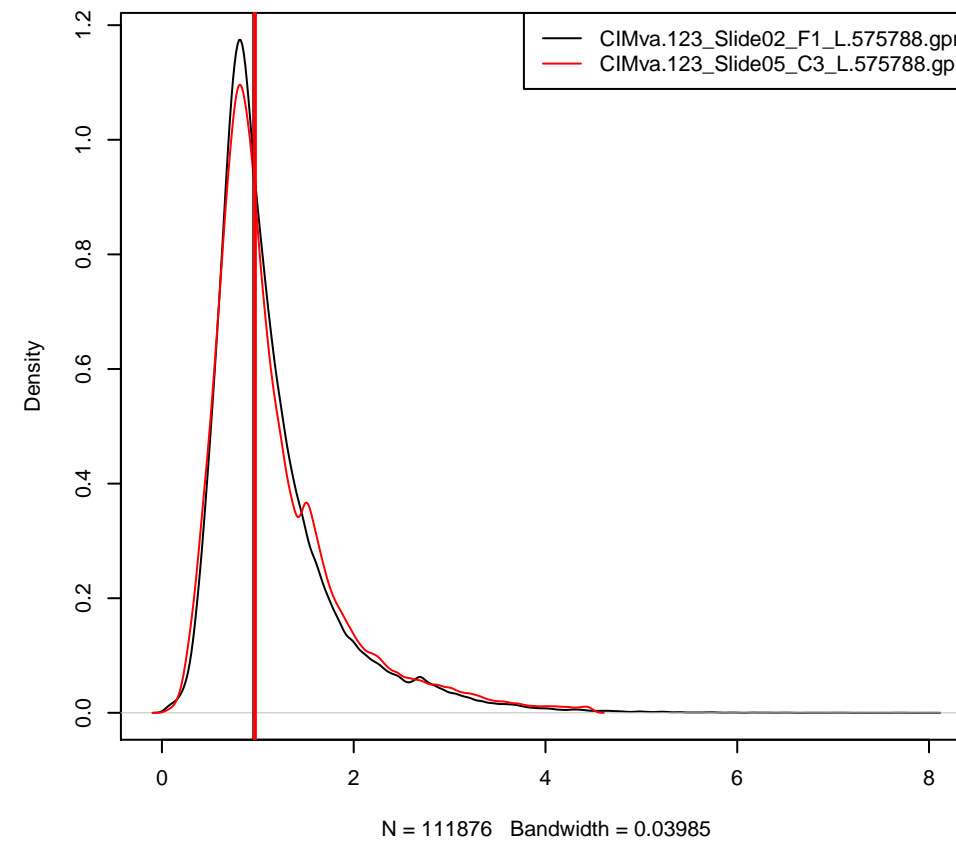

Replicate densities (normalized; log2) for sample: L-575788 (CFS)

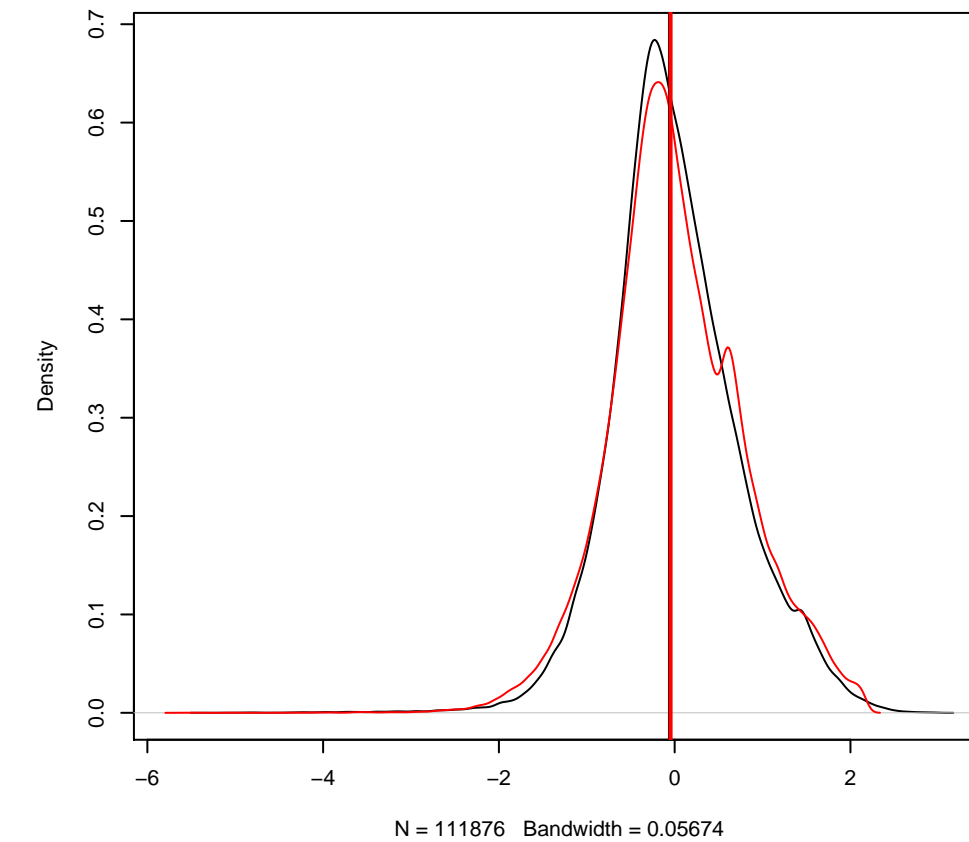

Replicate scatter (raw) for sample: L-575788 (CFS)  
Correlation coefficient: 0.8 (Pearson); 0.8 (Spearman)

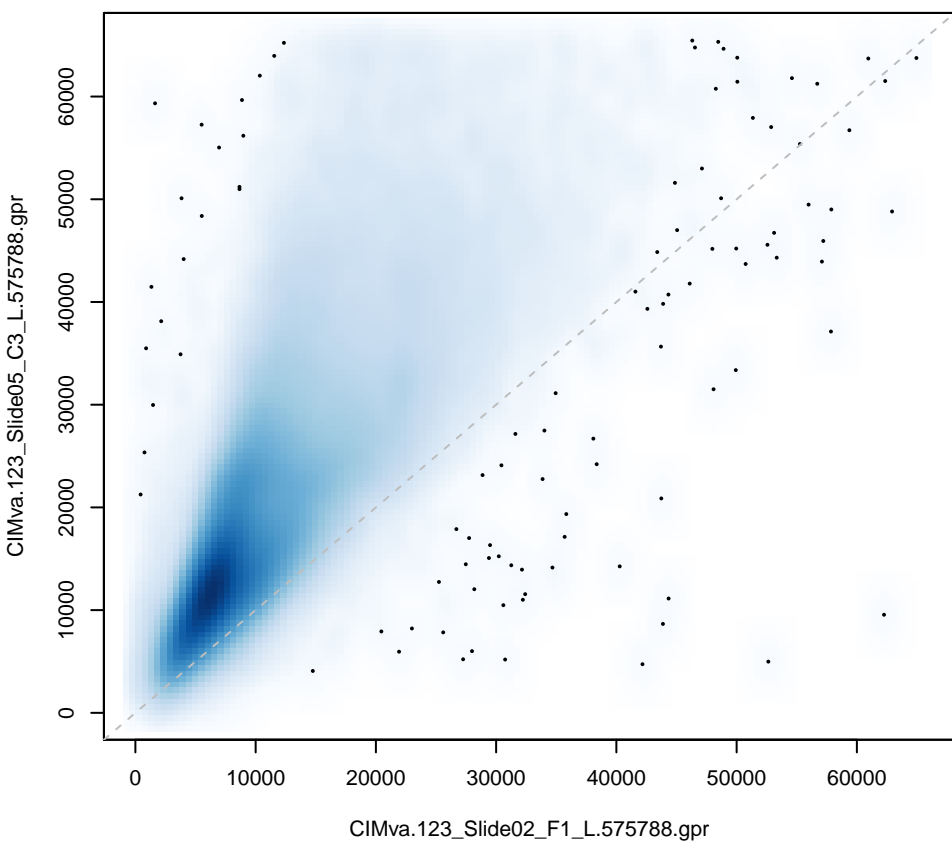

Replicate scatter (raw; log2) for sample: L-575788 (CFS)  
Correlation coefficient: 0.81 (Pearson); 0.8 (Spearman)

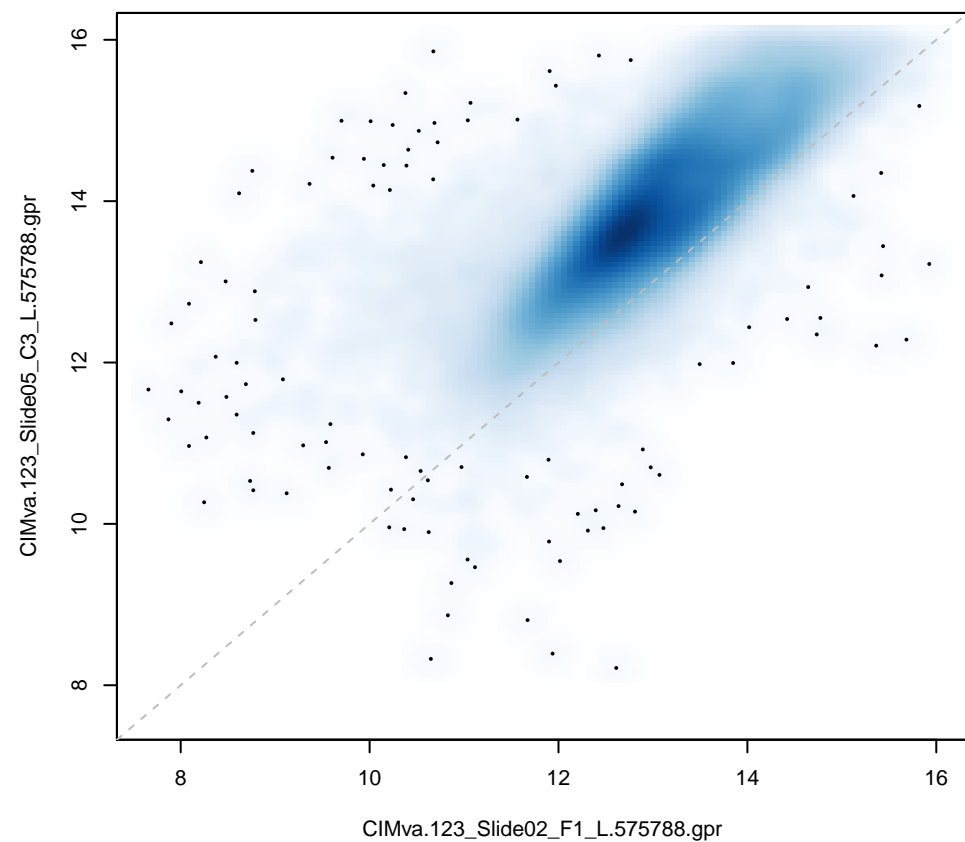

Replicate scatter (normalized) for sample: L-575788 (CFS)  
Correlation coefficient: 0.8 (Pearson); 0.8 (Spearman)

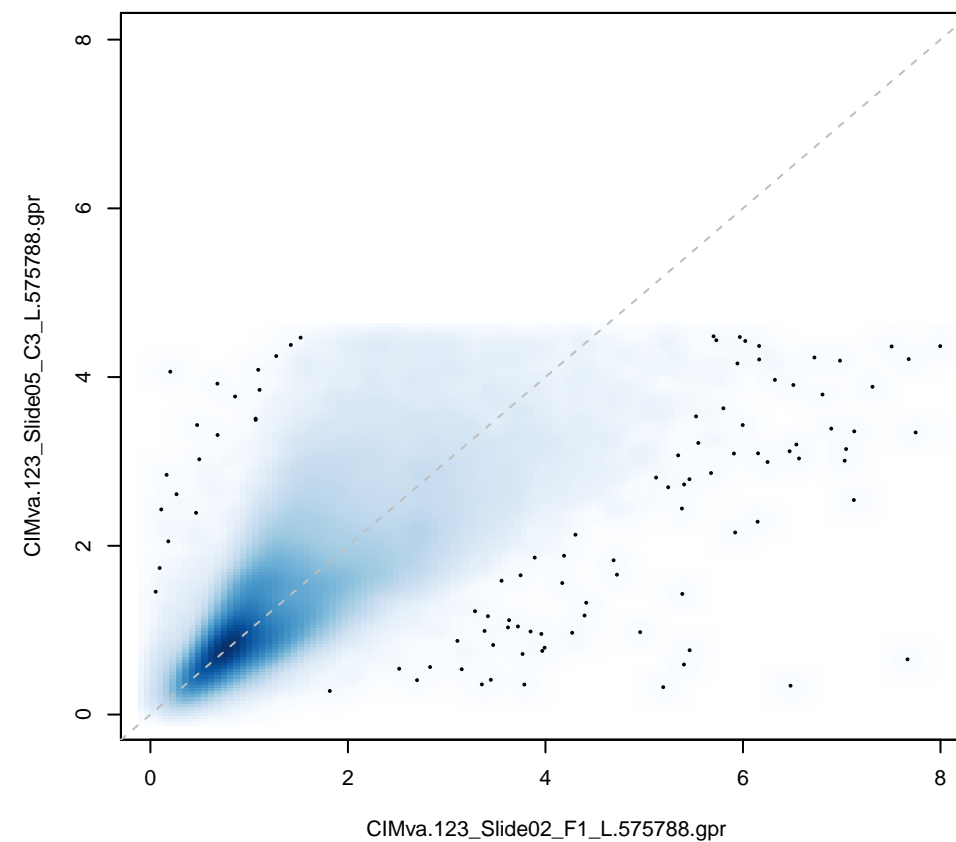

Replicate scatter (normalized; log2) for sample: L-575788 (CFS)  
Correlation coefficient: 0.82 (Pearson); 0.8 (Spearman)

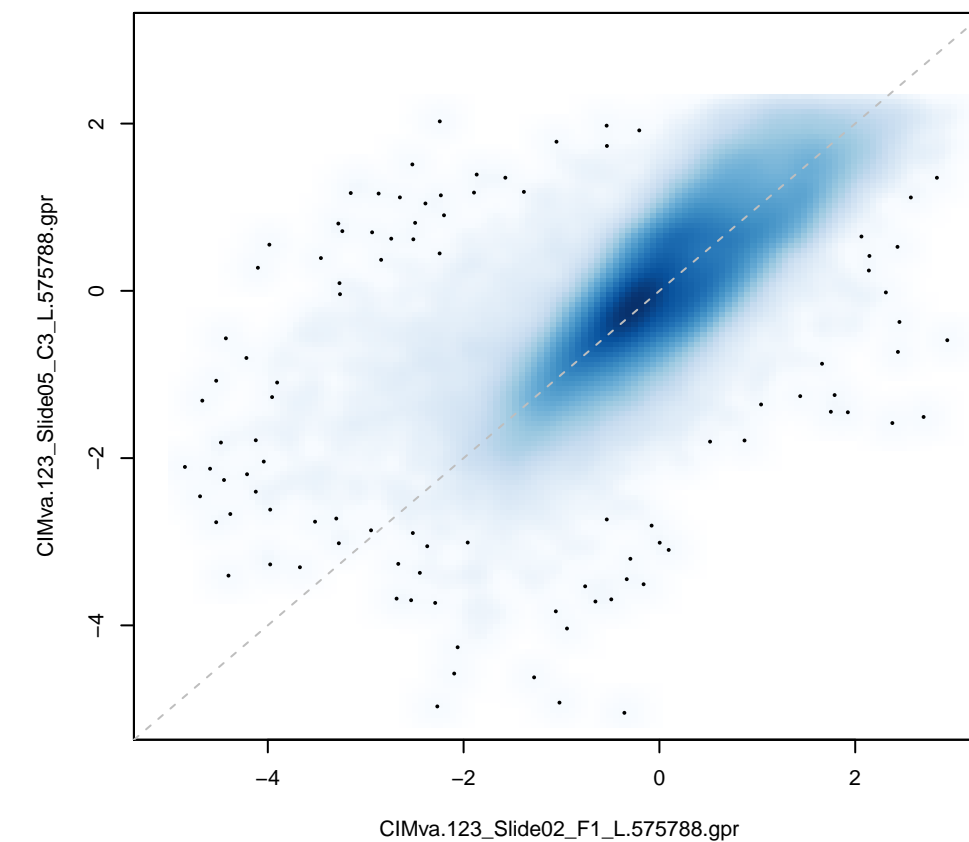

Replicate densities (raw) for sample: L-5940 (Controls)

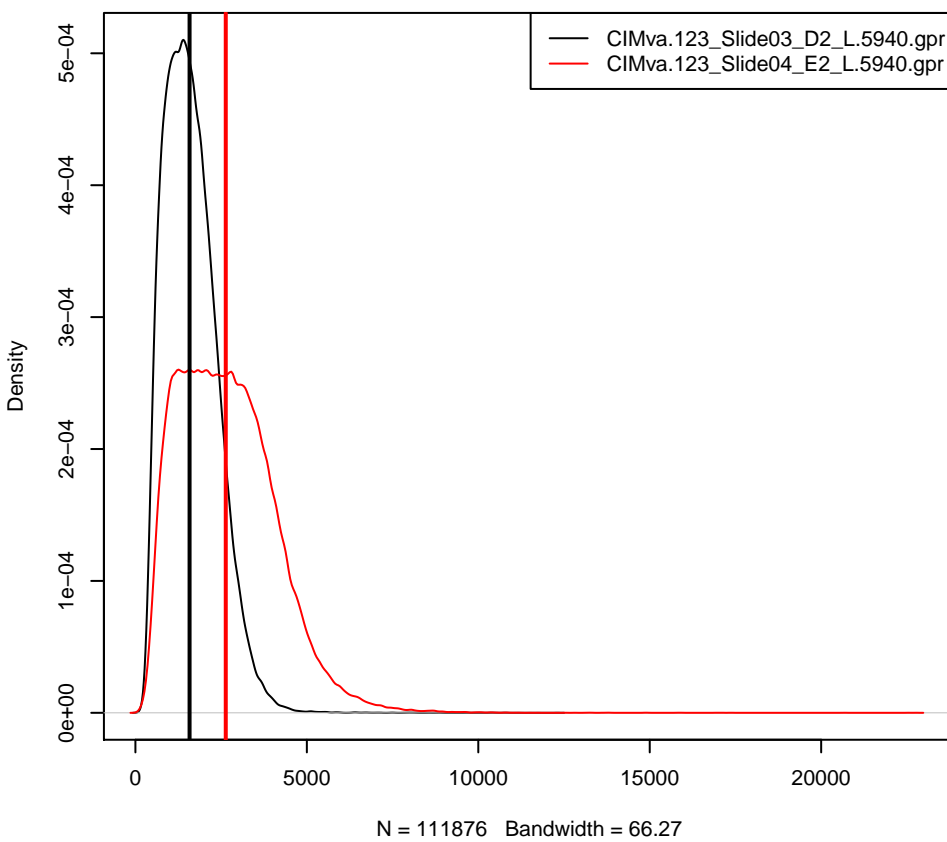

Replicate densities (raw; log2) for sample: L-5940 (Controls)

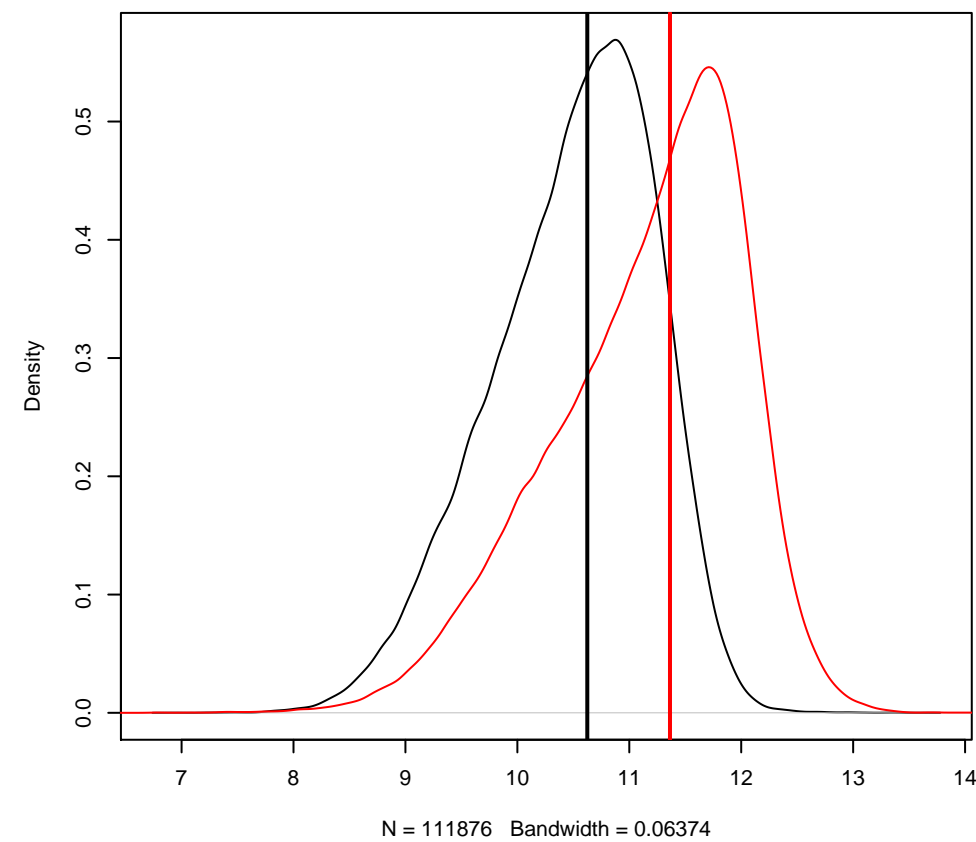

Replicate densities (normalized) for sample: L-5940 (Controls)

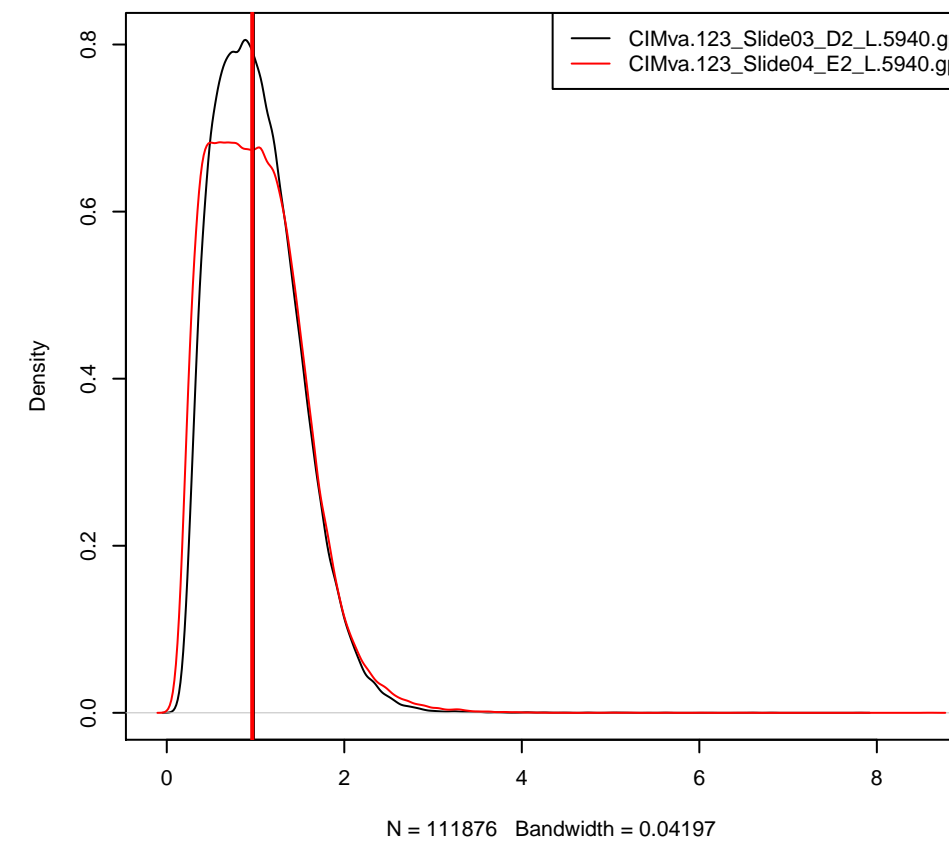

Replicate densities (normalized; log2) for sample: L-5940 (Controls)

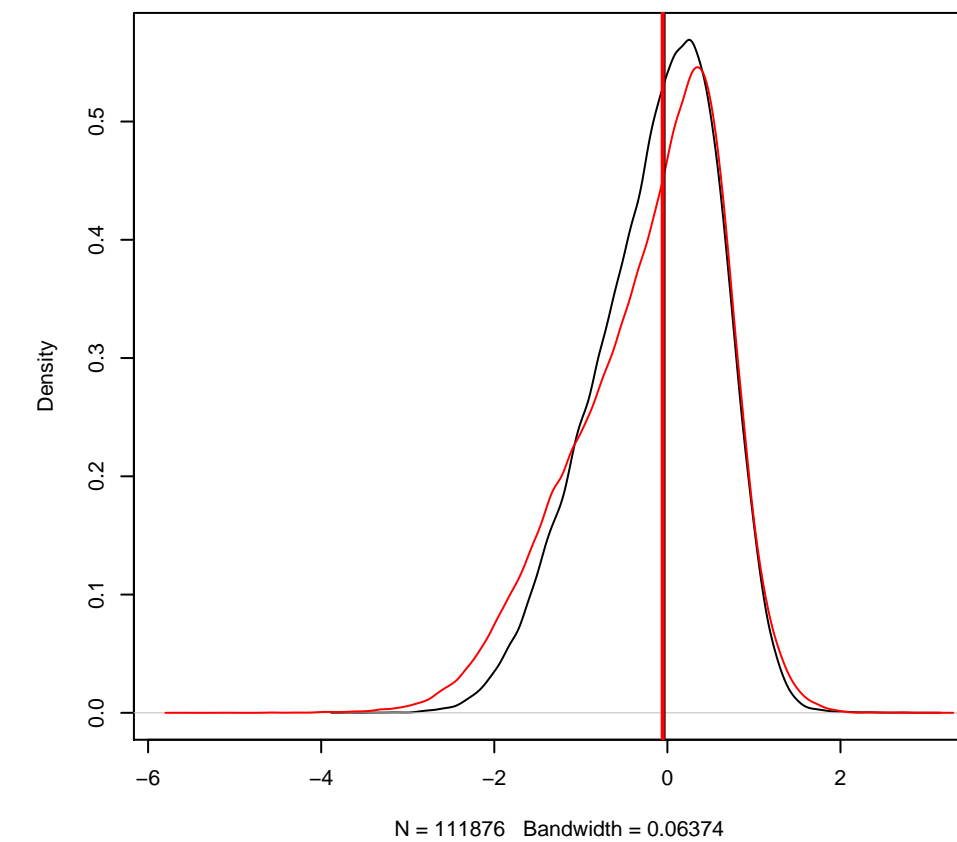

Replicate scatter (raw) for sample: L-5940 (Controls)  
Correlation coefficient: 0.82 (Pearson); 0.86 (Spearman)

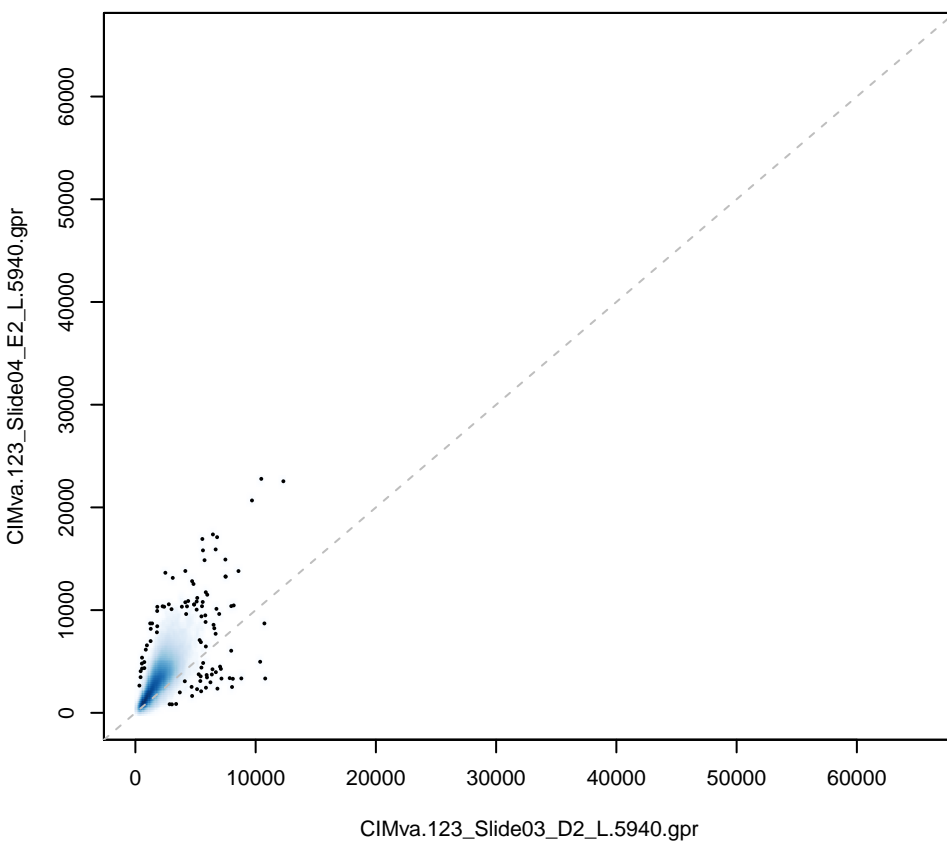

Replicate scatter (raw; log2) for sample: L-5940 (Controls)  
Correlation coefficient: 0.87 (Pearson); 0.86 (Spearman)

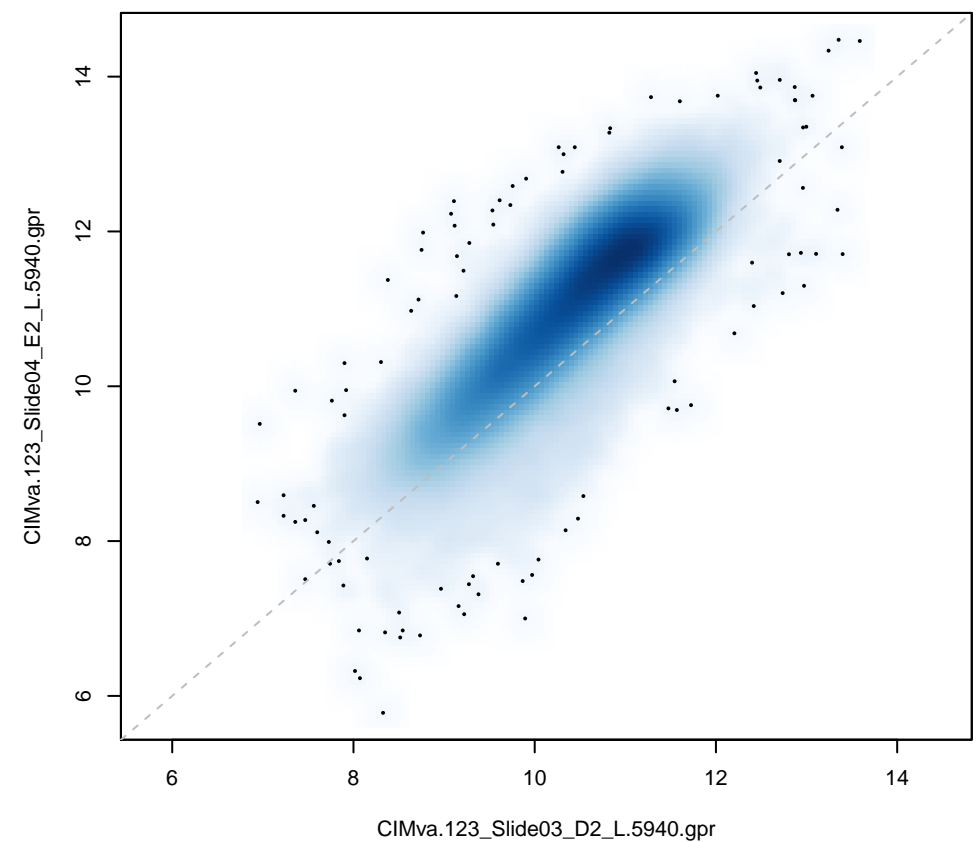

Replicate scatter (normalized) for sample: L-5940 (Controls)  
Correlation coefficient: 0.82 (Pearson); 0.86 (Spearman)

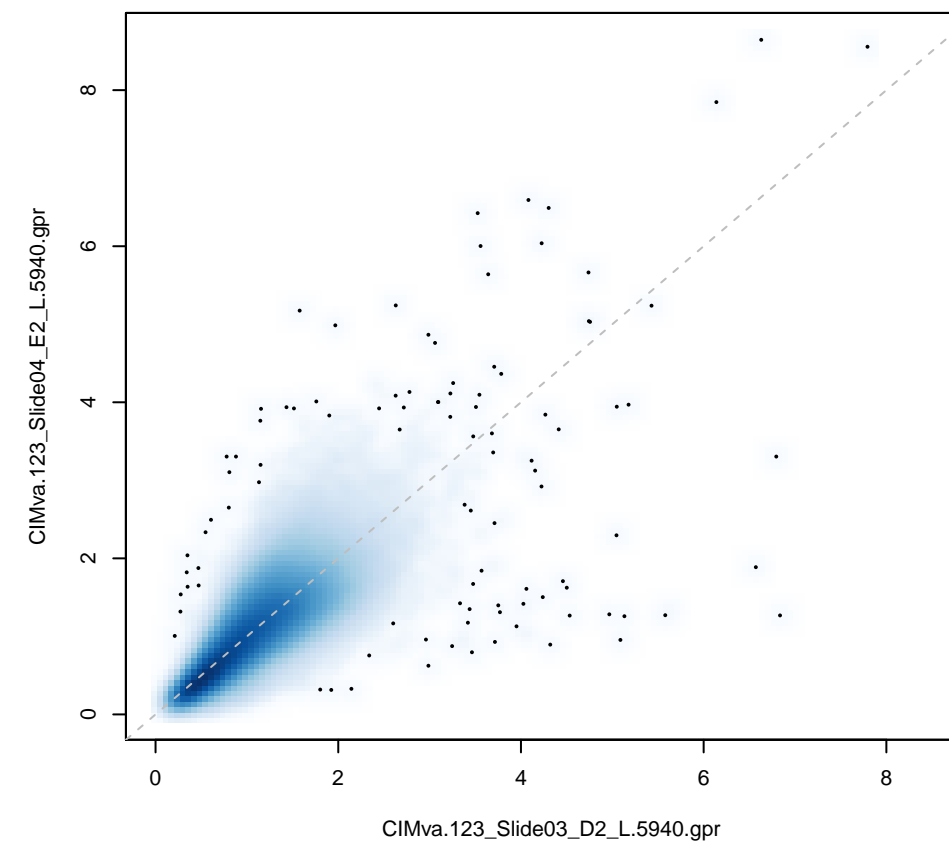

Replicate scatter (normalized; log2) for sample: L-5940 (Controls)  
Correlation coefficient: 0.85 (Pearson); 0.86 (Spearman)

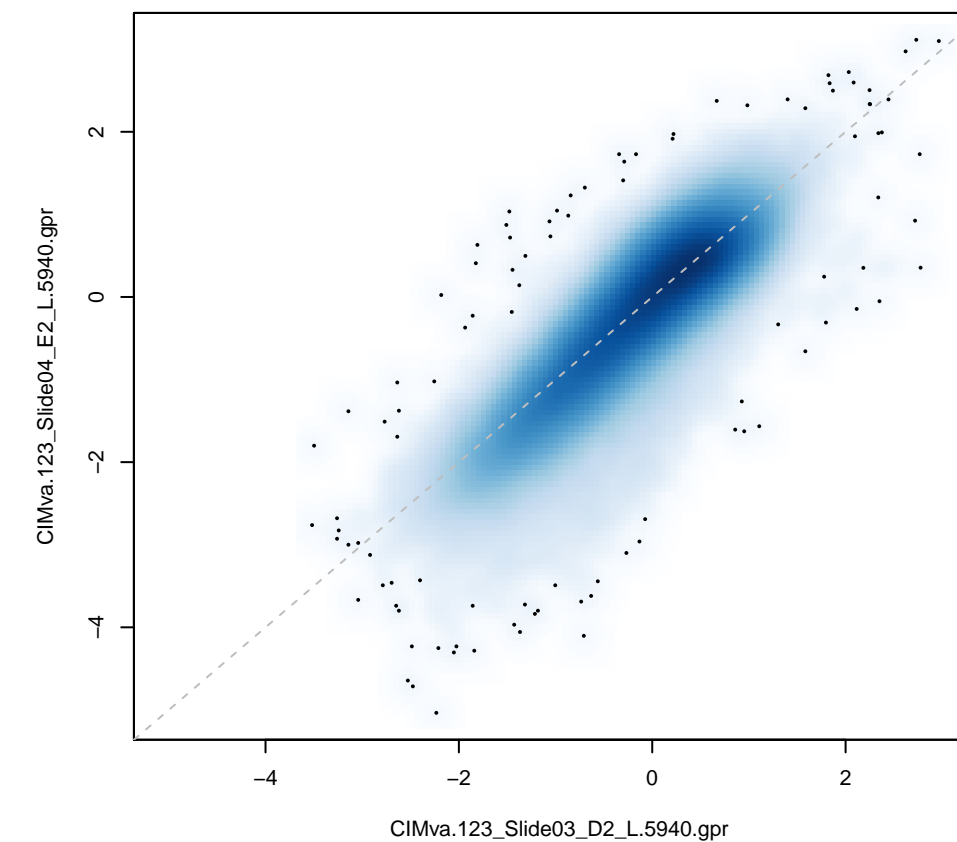



Replicate densities (raw) for sample: L-7505 (Controls)

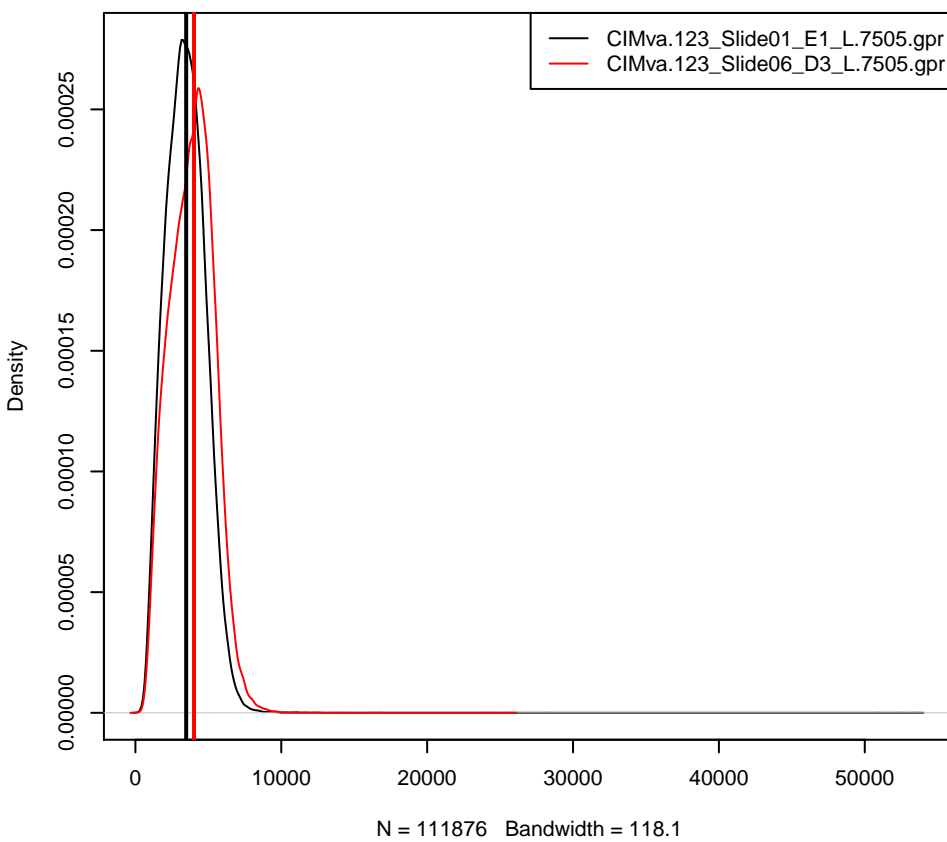

Replicate densities (raw; log2) for sample: L-7505 (Controls)

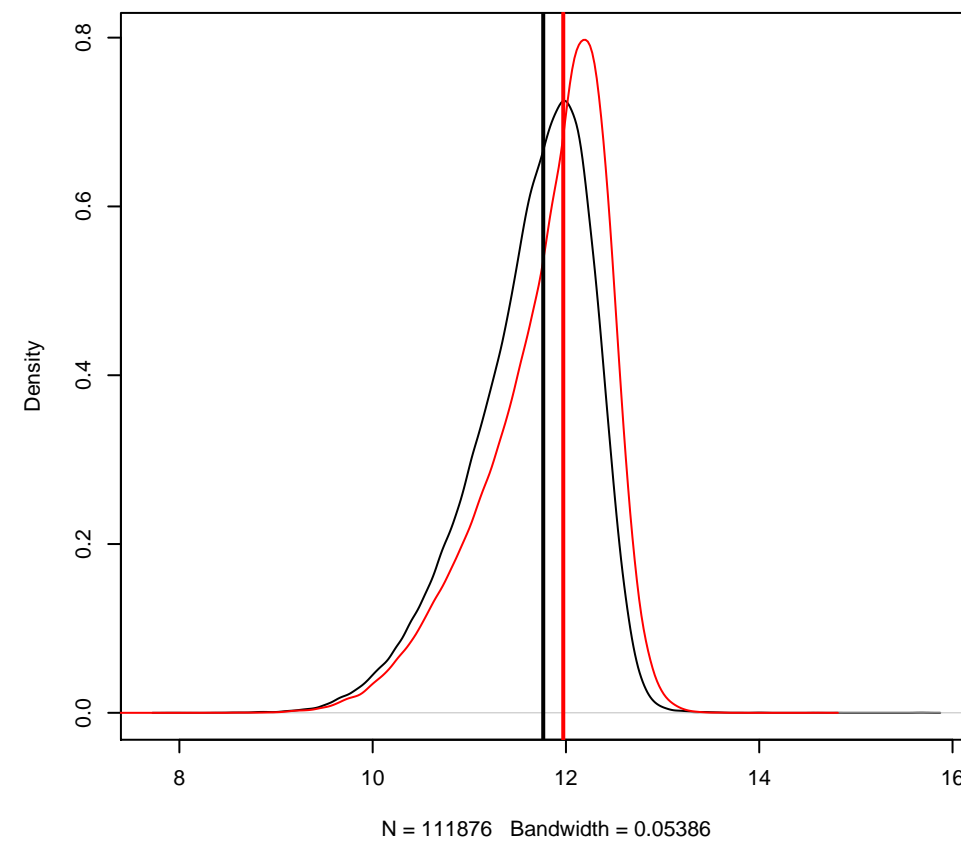

Replicate densities (normalized) for sample: L-7505 (Controls)

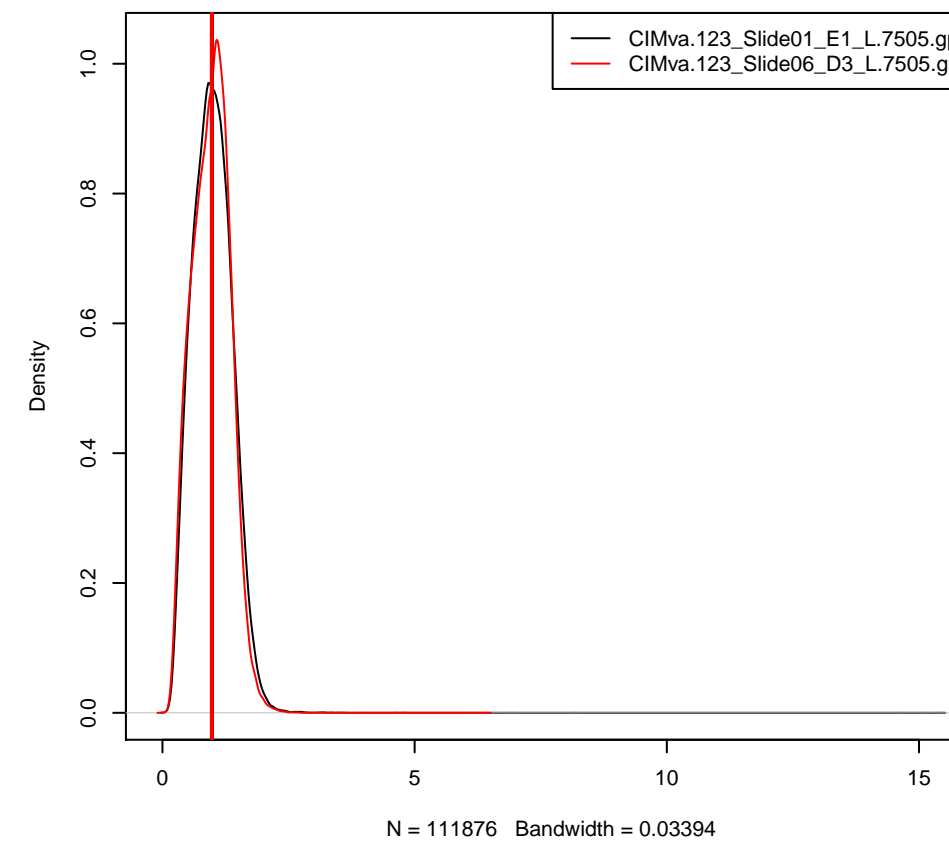

Replicate densities (normalized; log2) for sample: L-7505 (Controls)

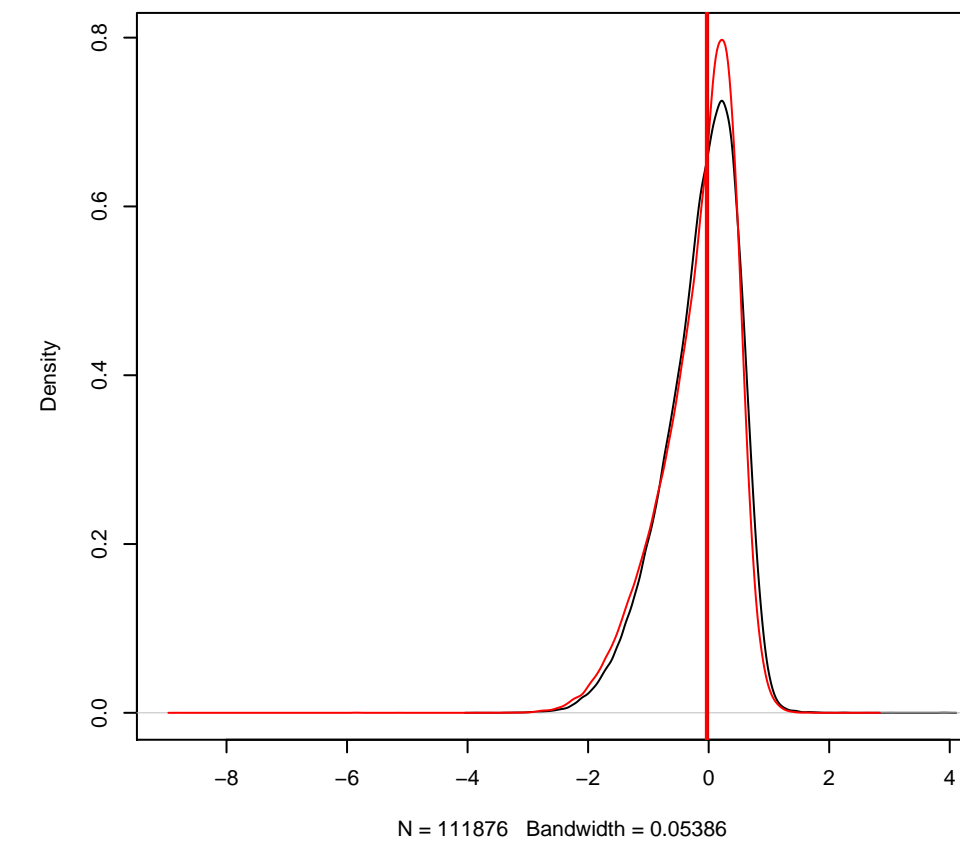

Replicate scatter (raw) for sample: L-7505 (Controls)  
Correlation coefficient: 0.8 (Pearson); 0.83 (Spearman)

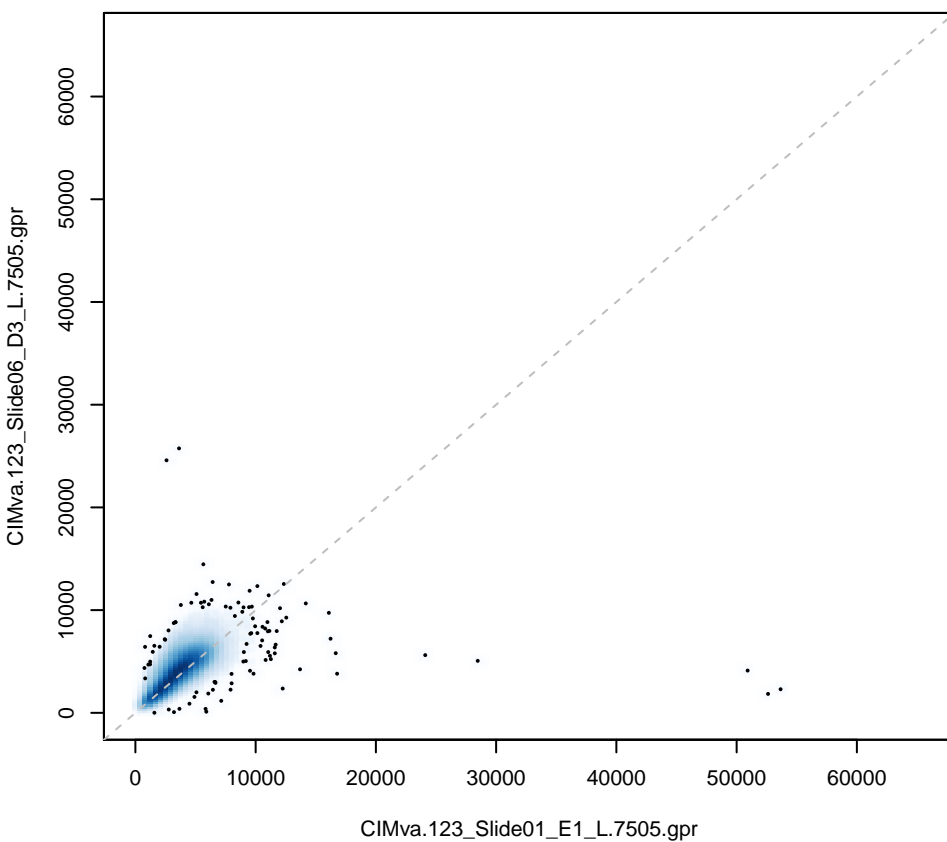

Replicate scatter (raw; log2) for sample: L-7505 (Controls)  
Correlation coefficient: 0.86 (Pearson); 0.83 (Spearman)

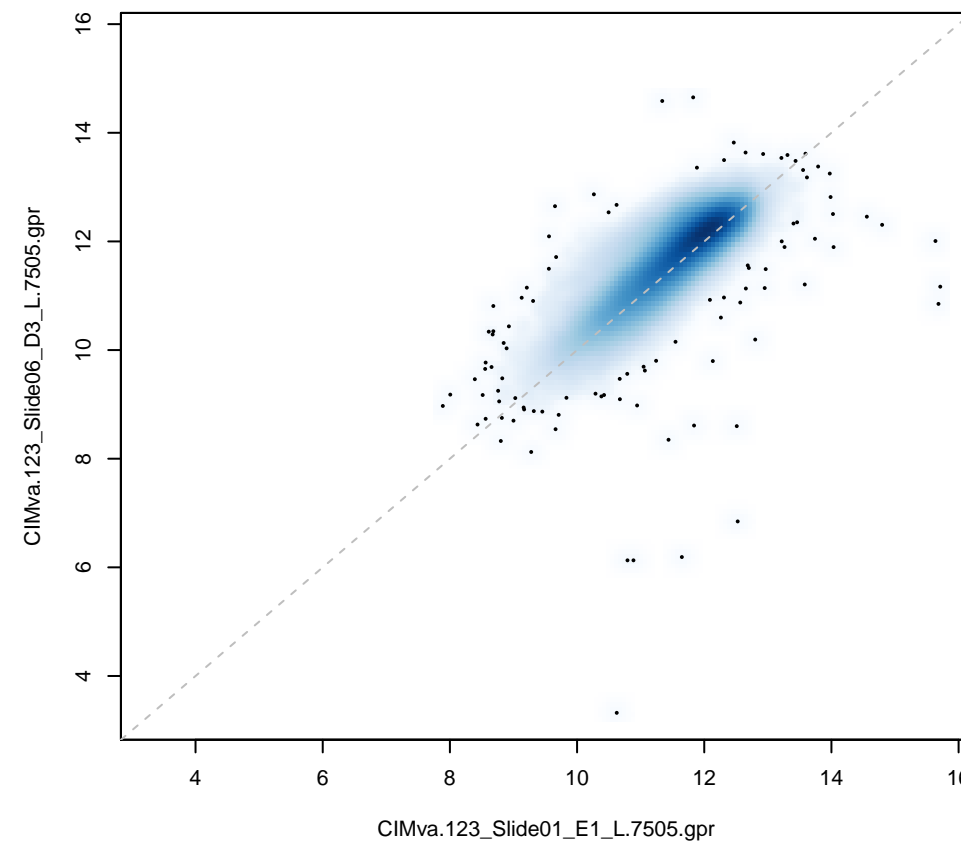

Replicate scatter (normalized) for sample: L-7505 (Controls)  
Correlation coefficient: 0.8 (Pearson); 0.83 (Spearman)

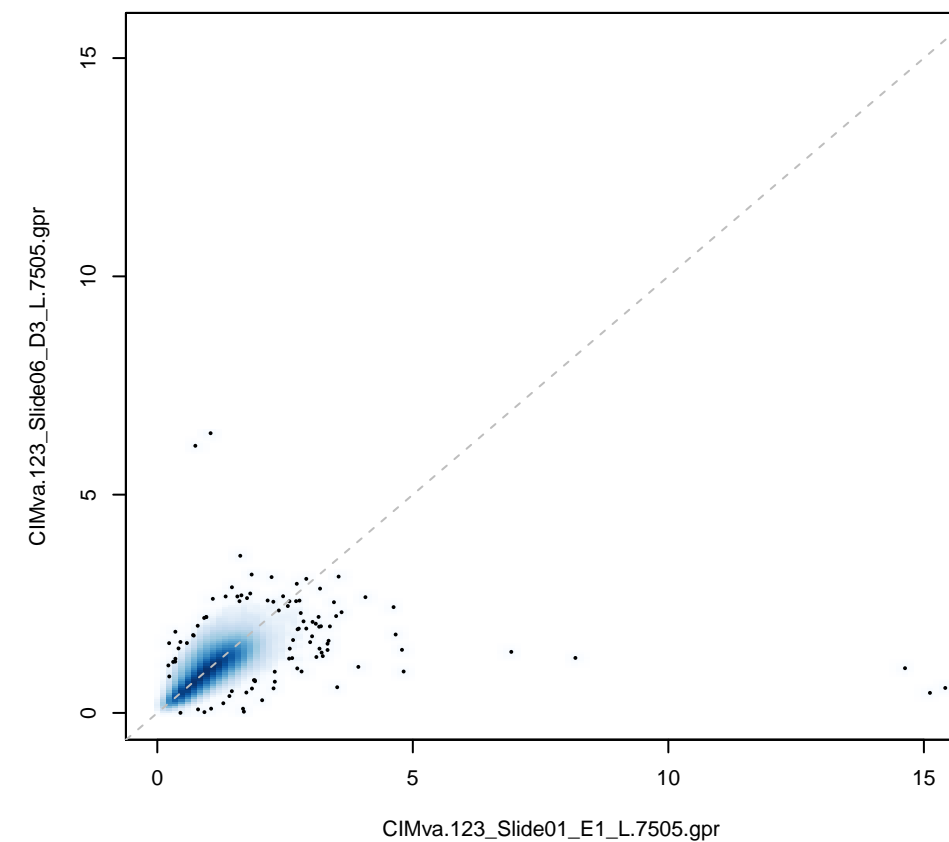

Replicate scatter (normalized; log2) for sample: L-7505 (Controls)  
Correlation coefficient: 0.84 (Pearson); 0.83 (Spearman)

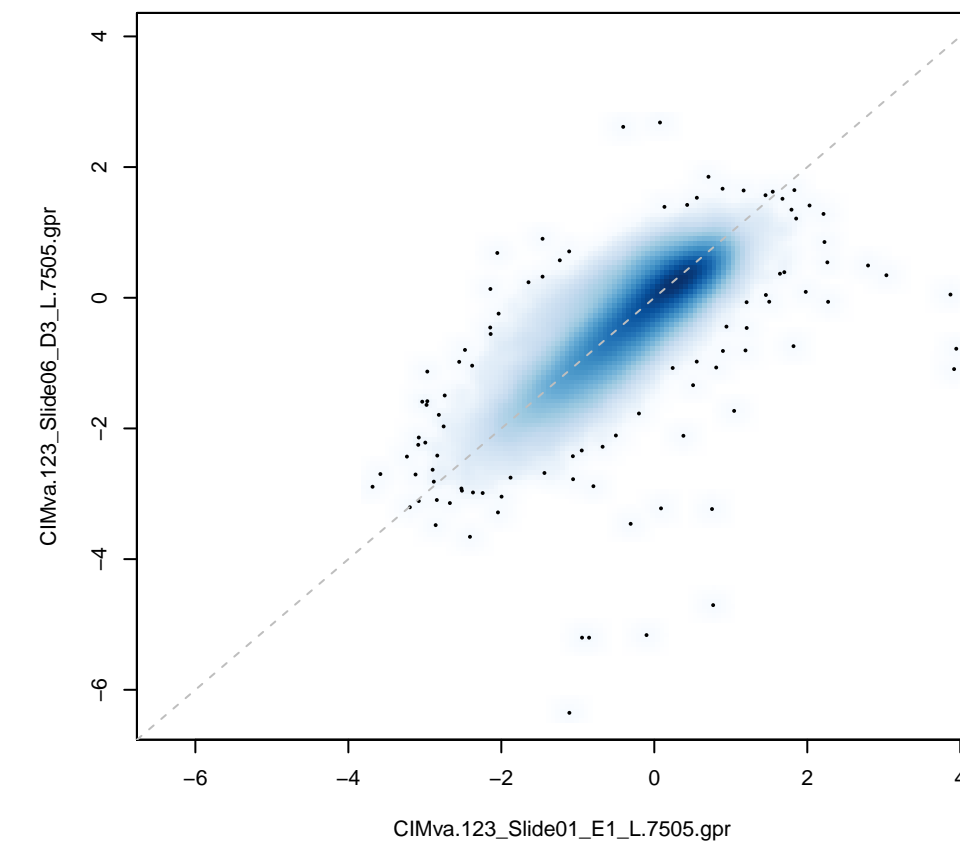

Replicate densities (raw) for sample: L-8793 (Controls)

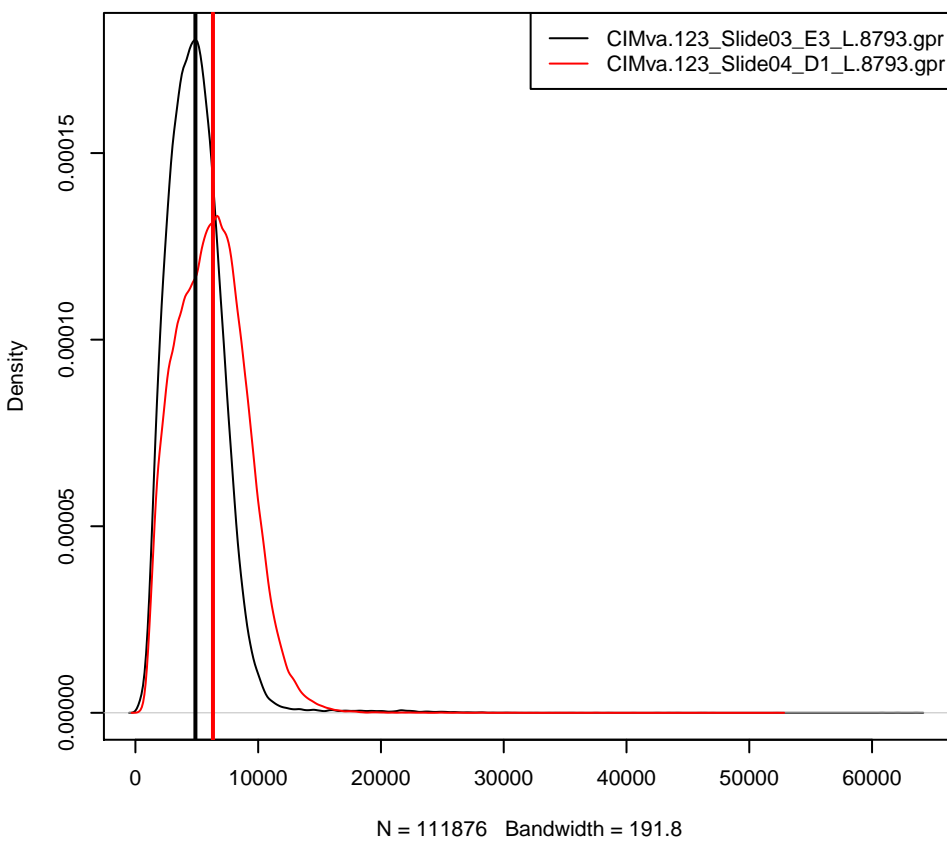

Replicate densities (raw; log2) for sample: L-8793 (Controls)

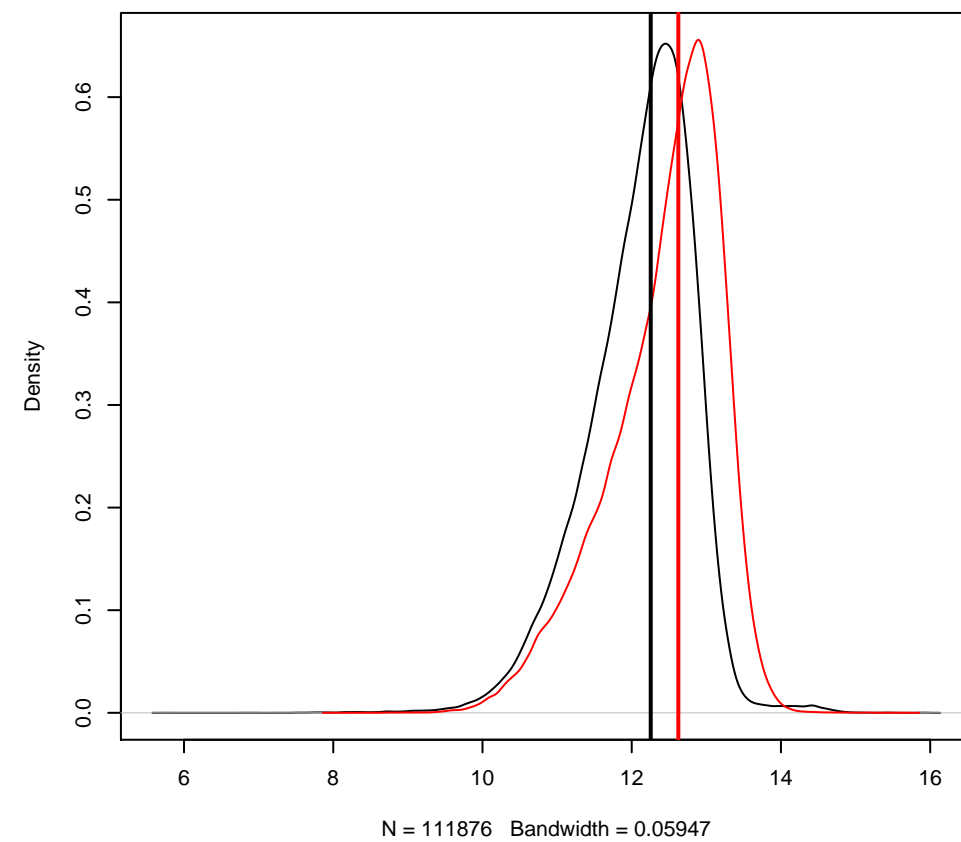

Replicate densities (normalized) for sample: L-8793 (Controls)

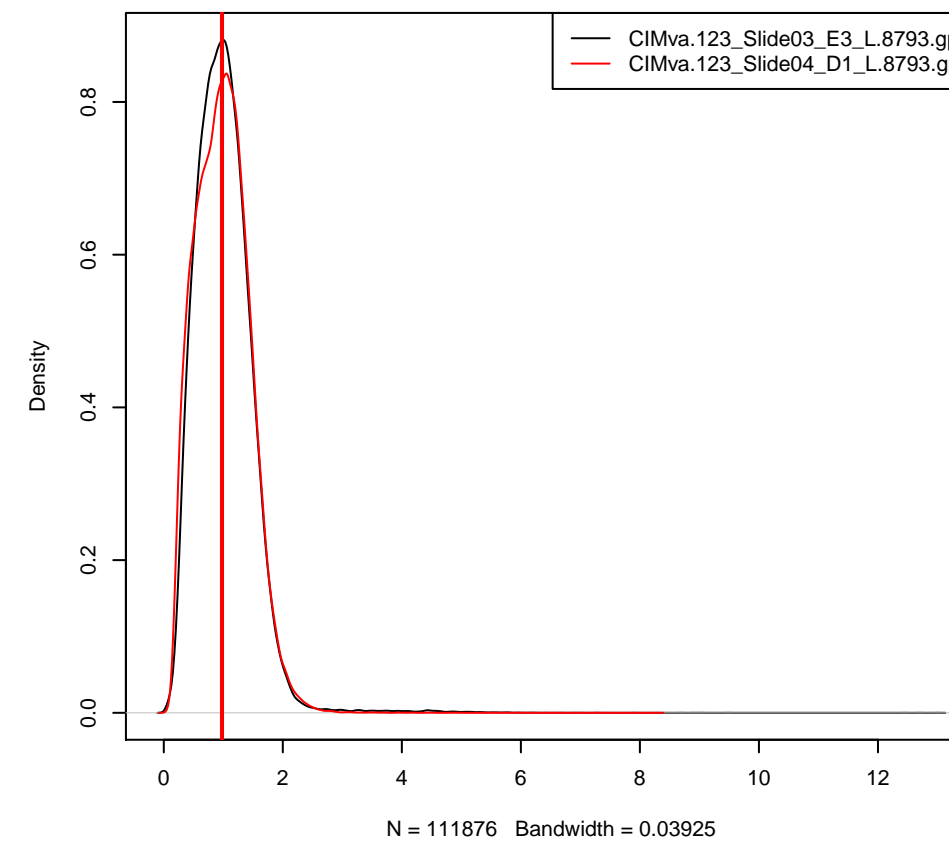

Replicate densities (normalized; log2) for sample: L-8793 (Controls)

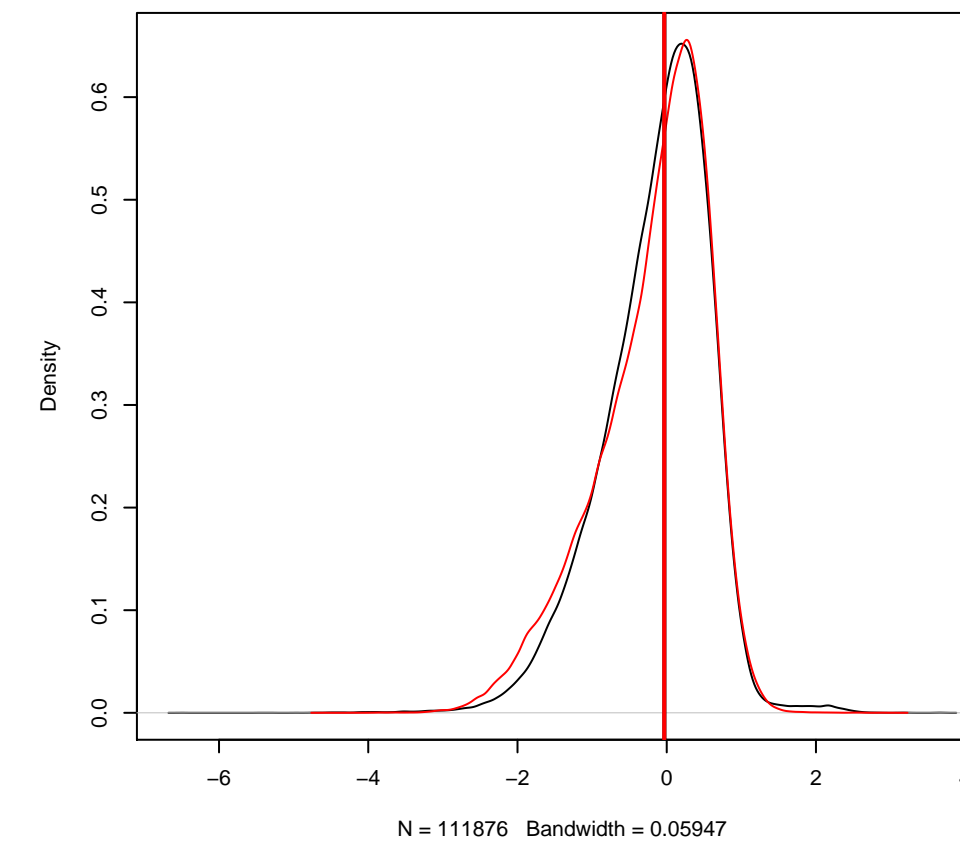

Replicate scatter (raw) for sample: L-8793 (Controls)  
Correlation coefficient: 0.67 (Pearson); 0.79 (Spearman)

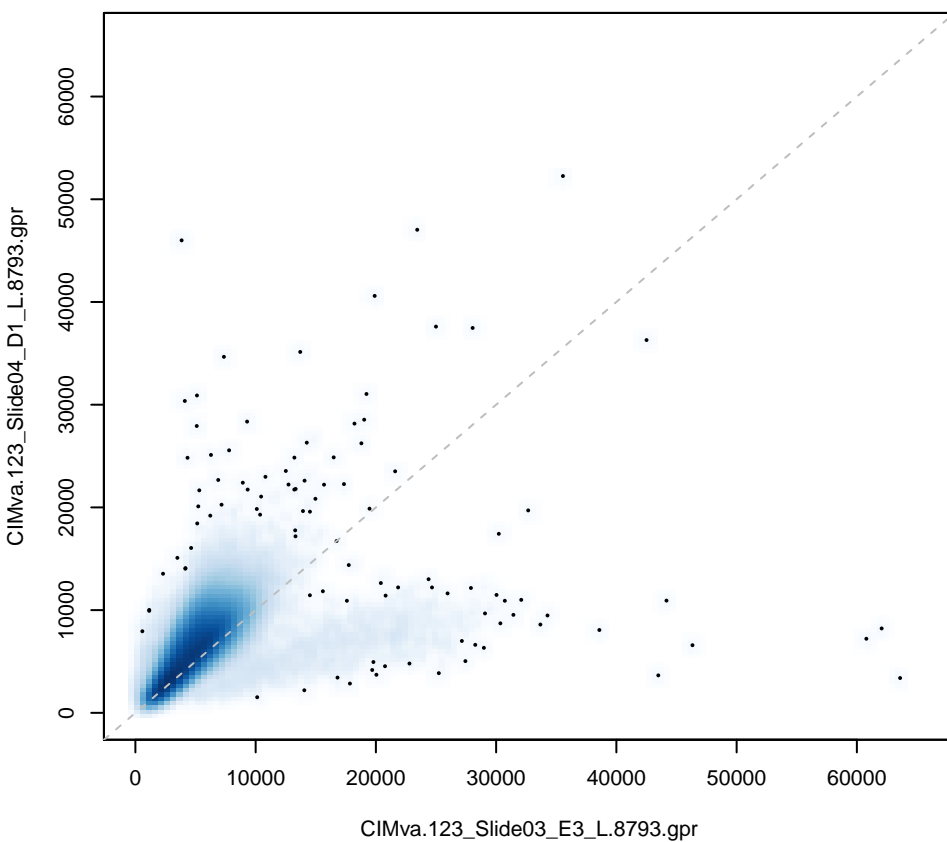

Replicate scatter (raw; log2) for sample: L-8793 (Controls)  
Correlation coefficient: 0.8 (Pearson); 0.79 (Spearman)

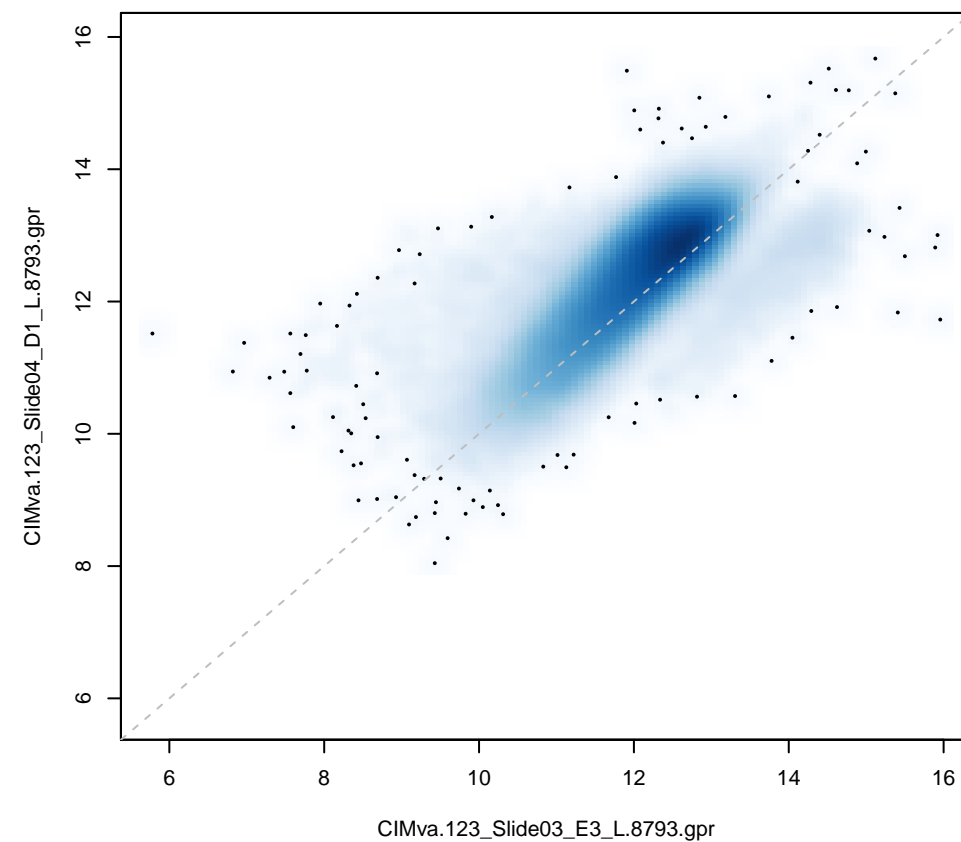

Replicate scatter (normalized) for sample: L-8793 (Controls)  
Correlation coefficient: 0.67 (Pearson); 0.79 (Spearman)

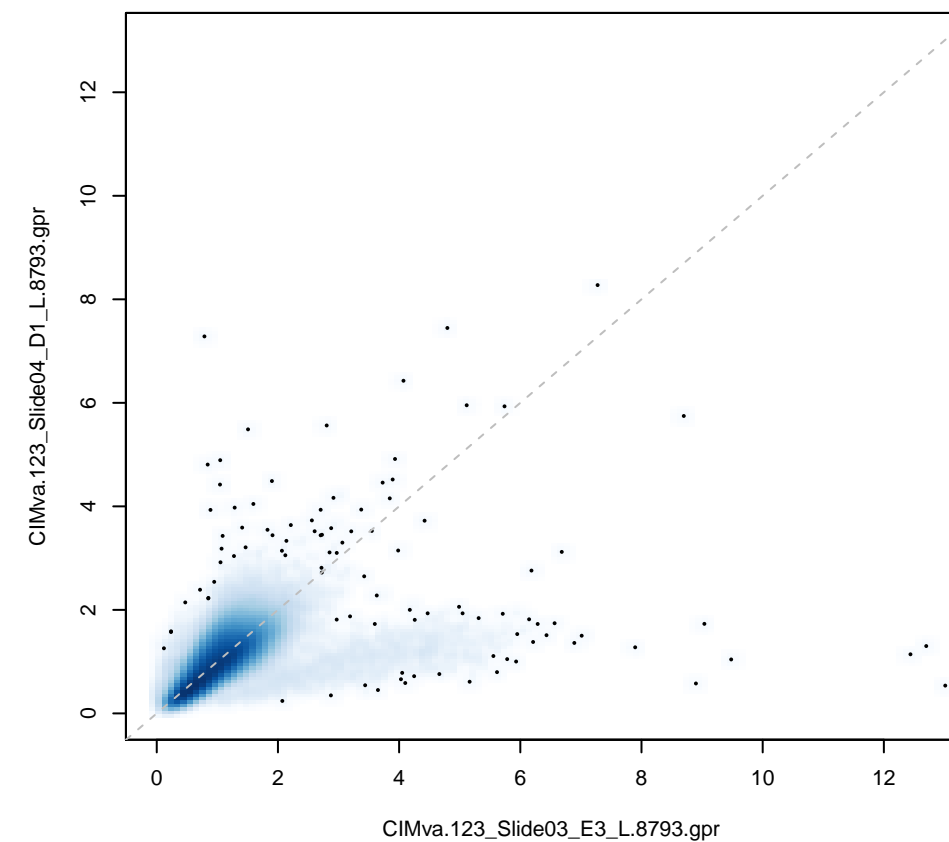

Replicate scatter (normalized; log2) for sample: L-8793 (Controls)  
Correlation coefficient: 0.76 (Pearson); 0.79 (Spearman)

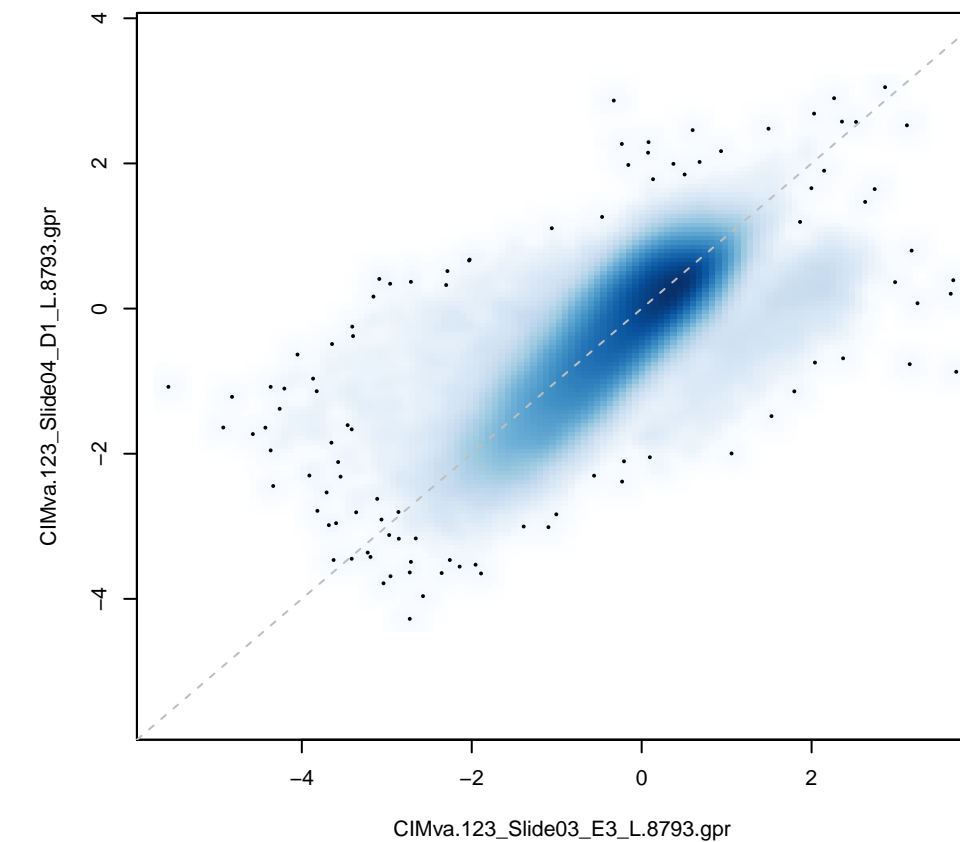

Replicate densities (raw) for sample: L-8795 (Controls)

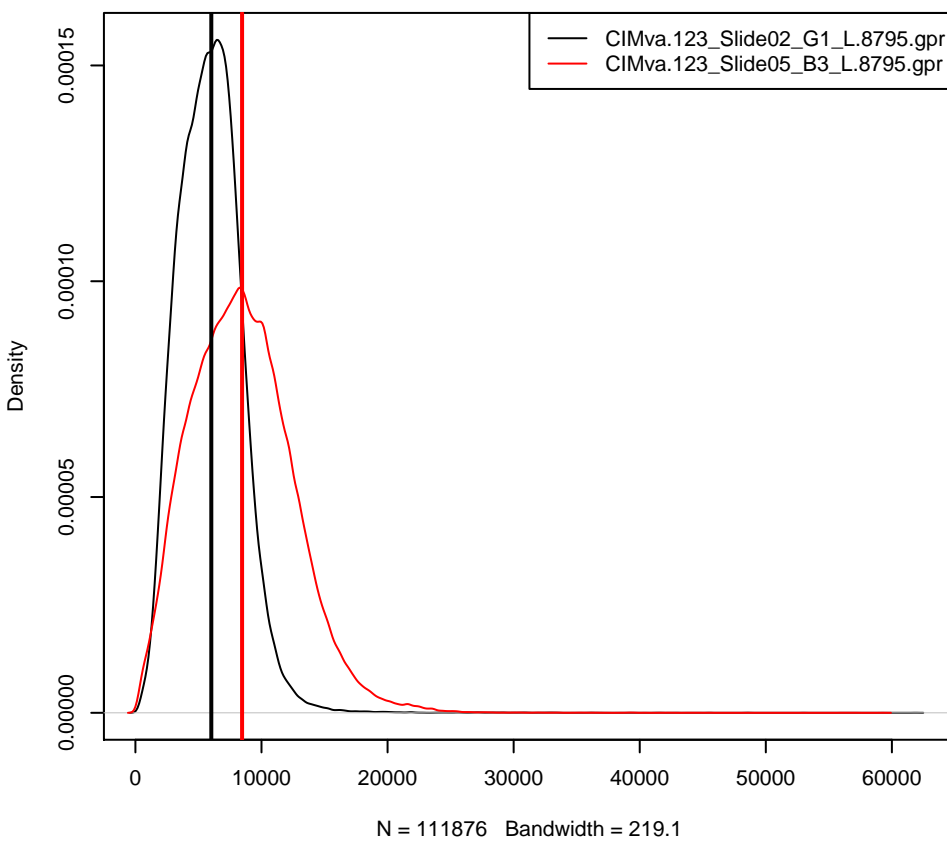

Replicate densities (raw; log2) for sample: L-8795 (Controls)

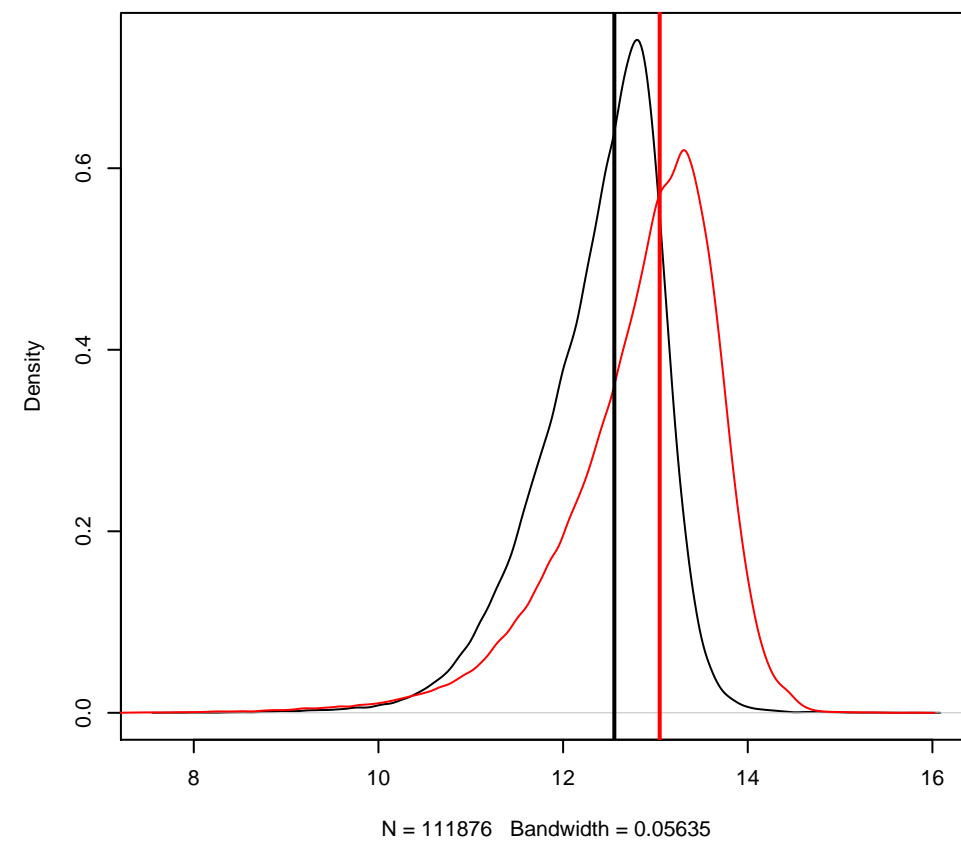

Replicate densities (normalized) for sample: L-8795 (Controls)

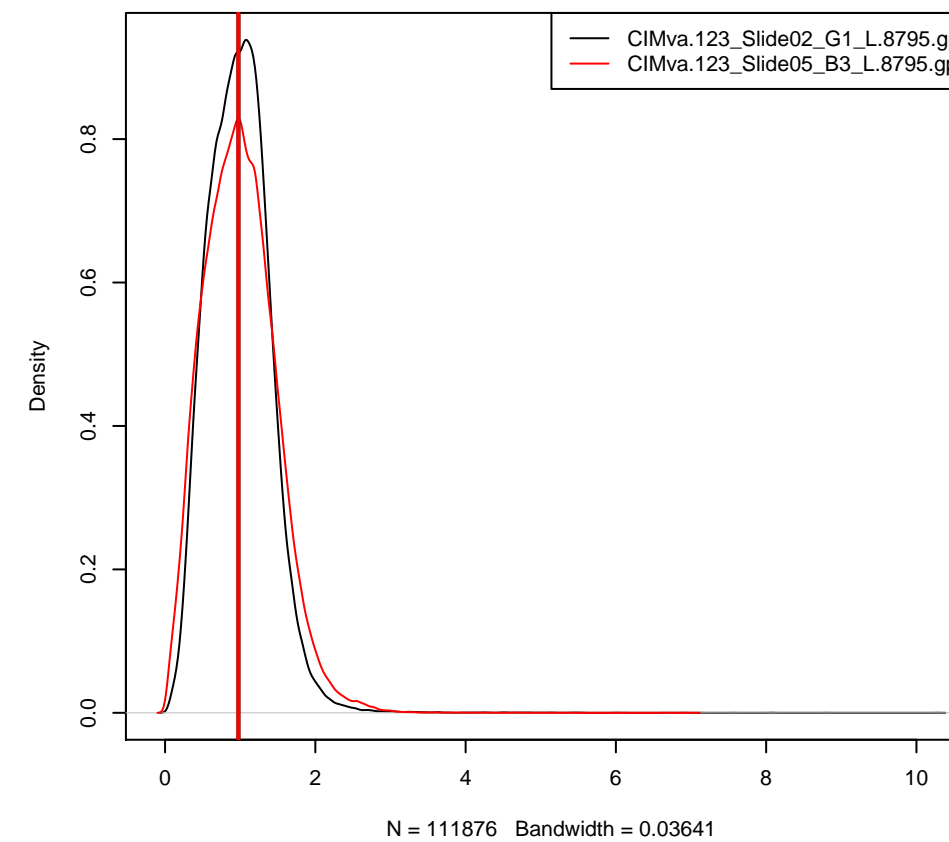

Replicate densities (normalized; log2) for sample: L-8795 (Controls)

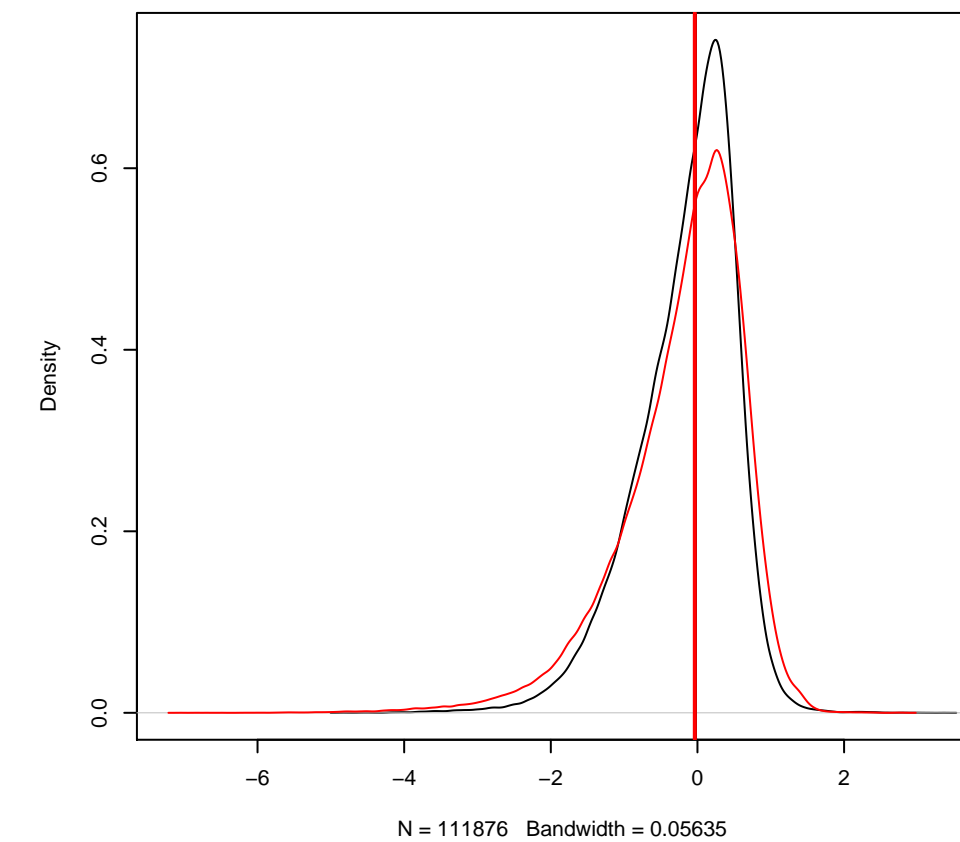

Replicate scatter (raw) for sample: L-8795 (Controls)  
Correlation coefficient: 0.82 (Pearson); 0.84 (Spearman)

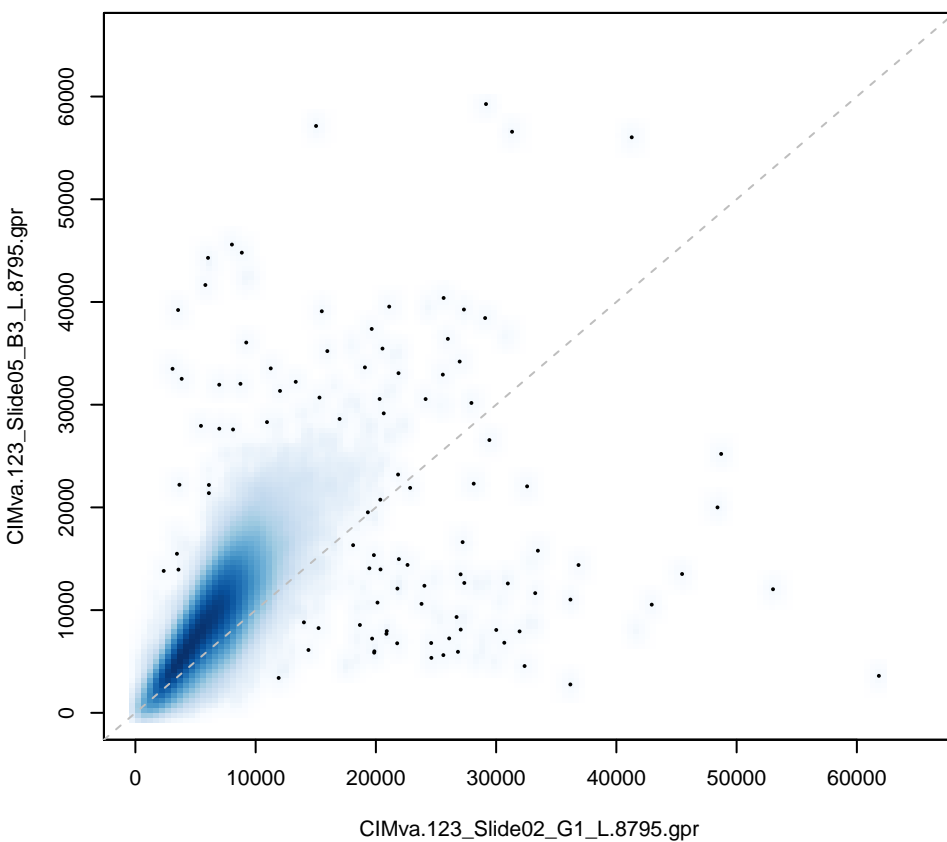

Replicate scatter (raw; log2) for sample: L-8795 (Controls)  
Correlation coefficient: 0.86 (Pearson); 0.84 (Spearman)

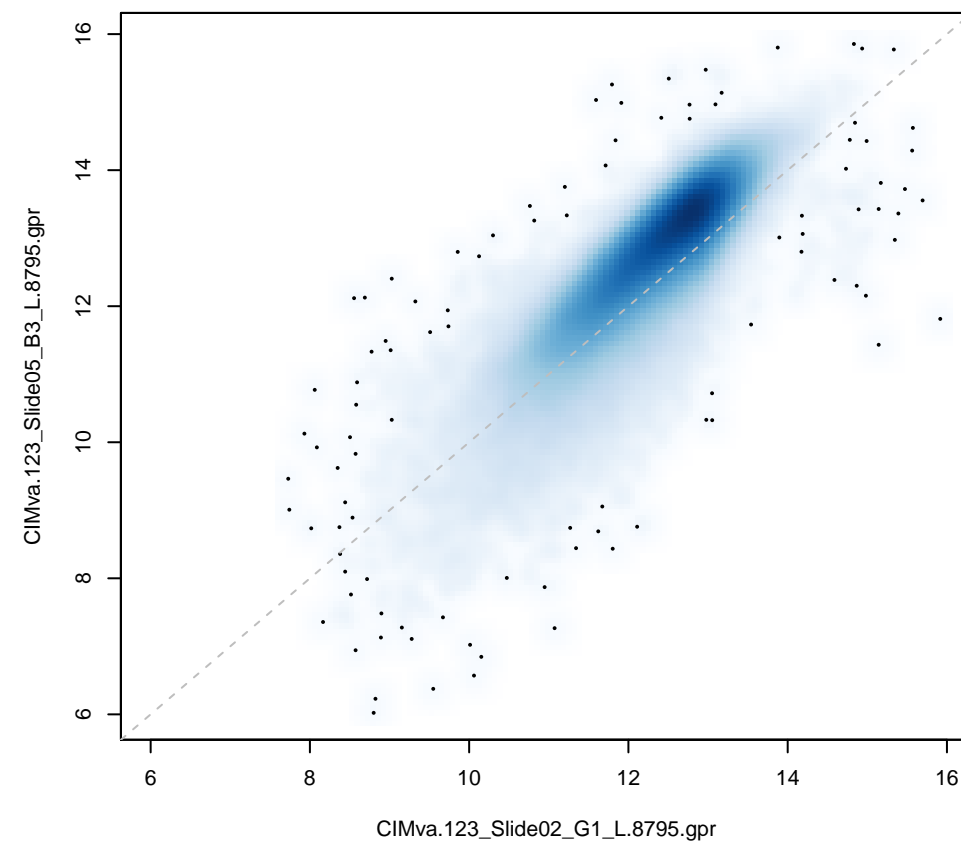

Replicate scatter (normalized) for sample: L-8795 (Controls)  
Correlation coefficient: 0.82 (Pearson); 0.84 (Spearman)

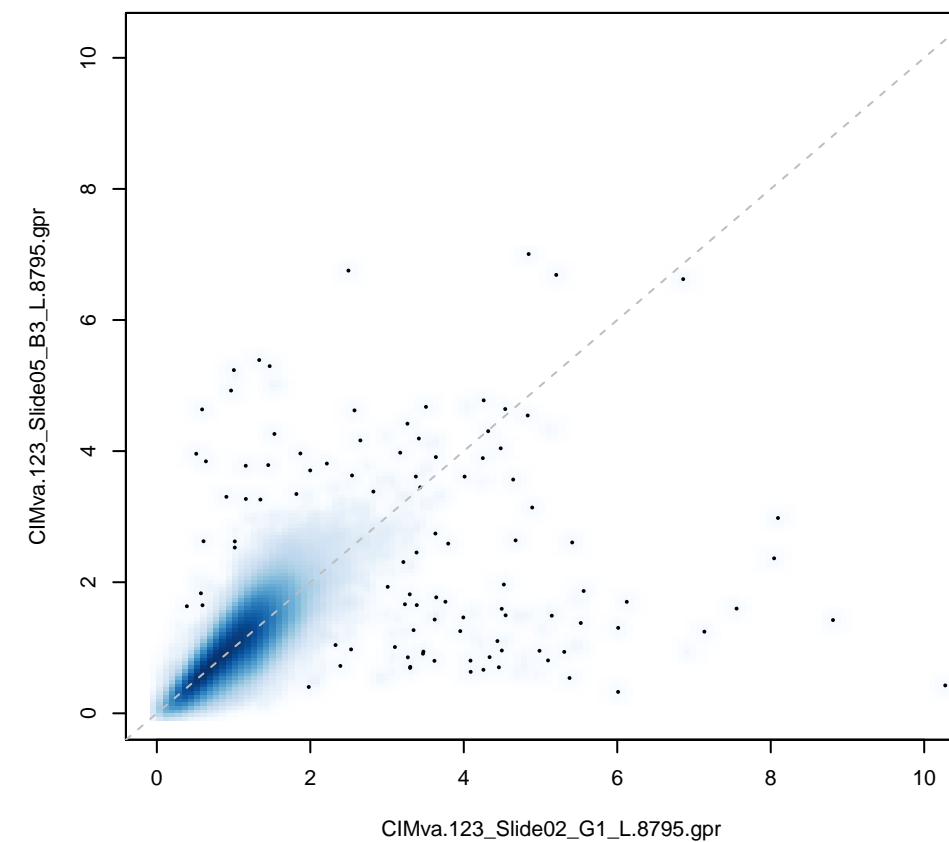

Replicate scatter (normalized; log2) for sample: L-8795 (Controls)  
Correlation coefficient: 0.85 (Pearson); 0.84 (Spearman)

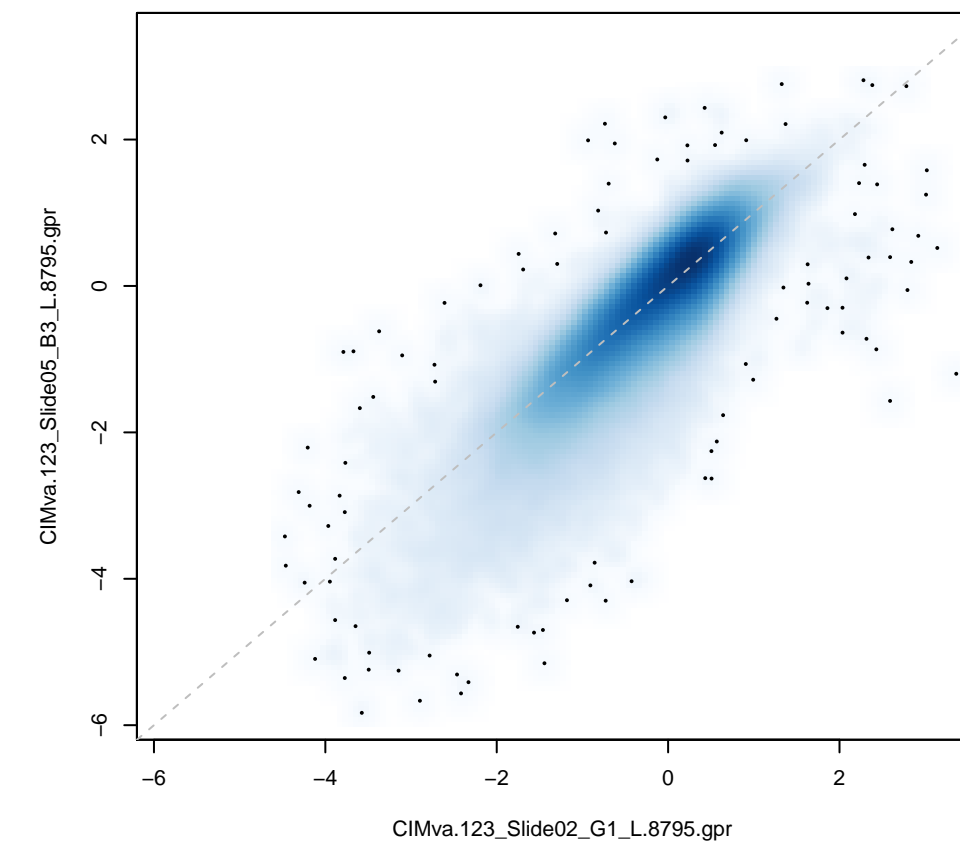

Replicate densities (raw) for sample: U-1 (R)

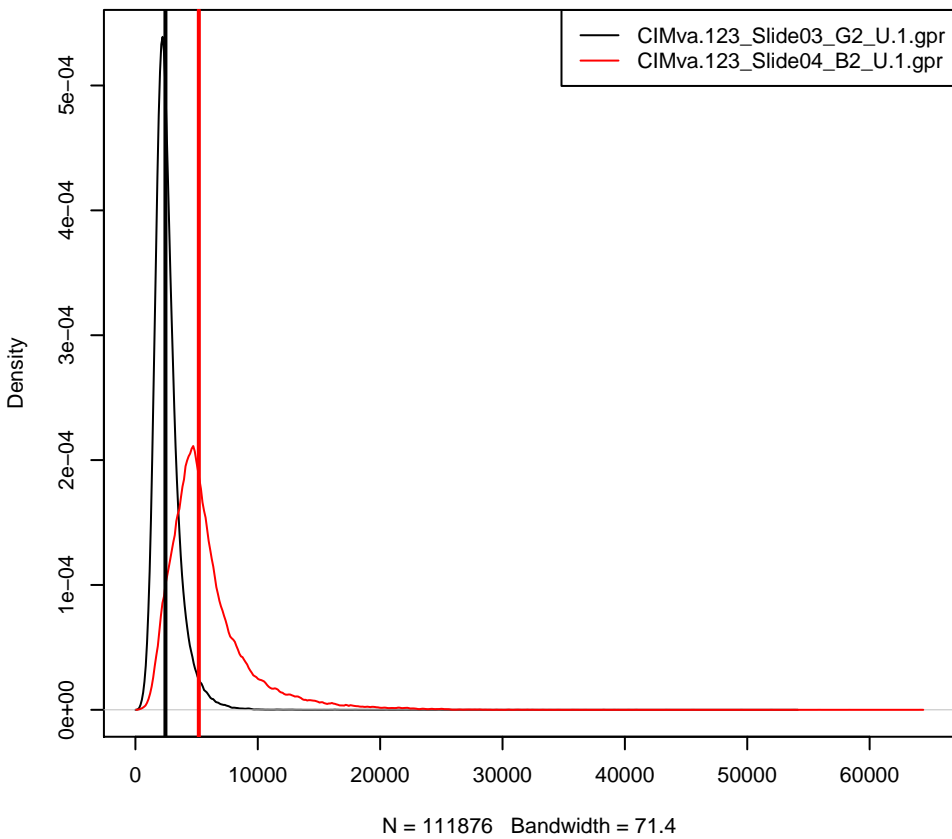

Replicate densities (raw; log2) for sample: U-1 (R)

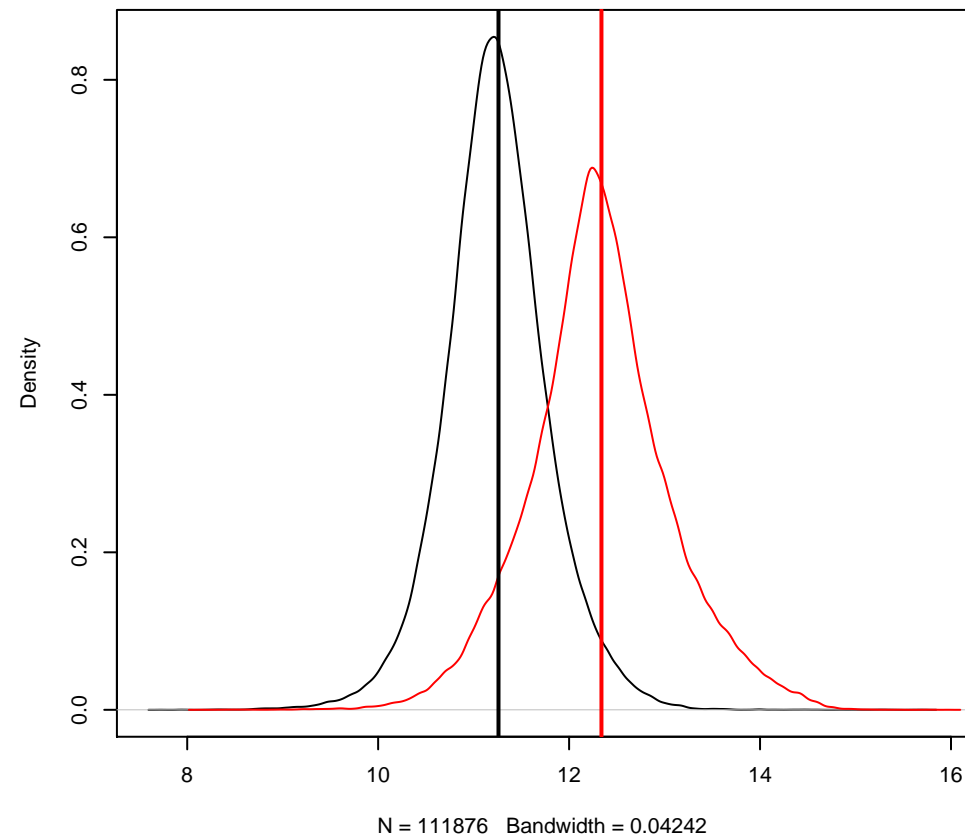

Replicate densities (normalized) for sample: U-1 (R)

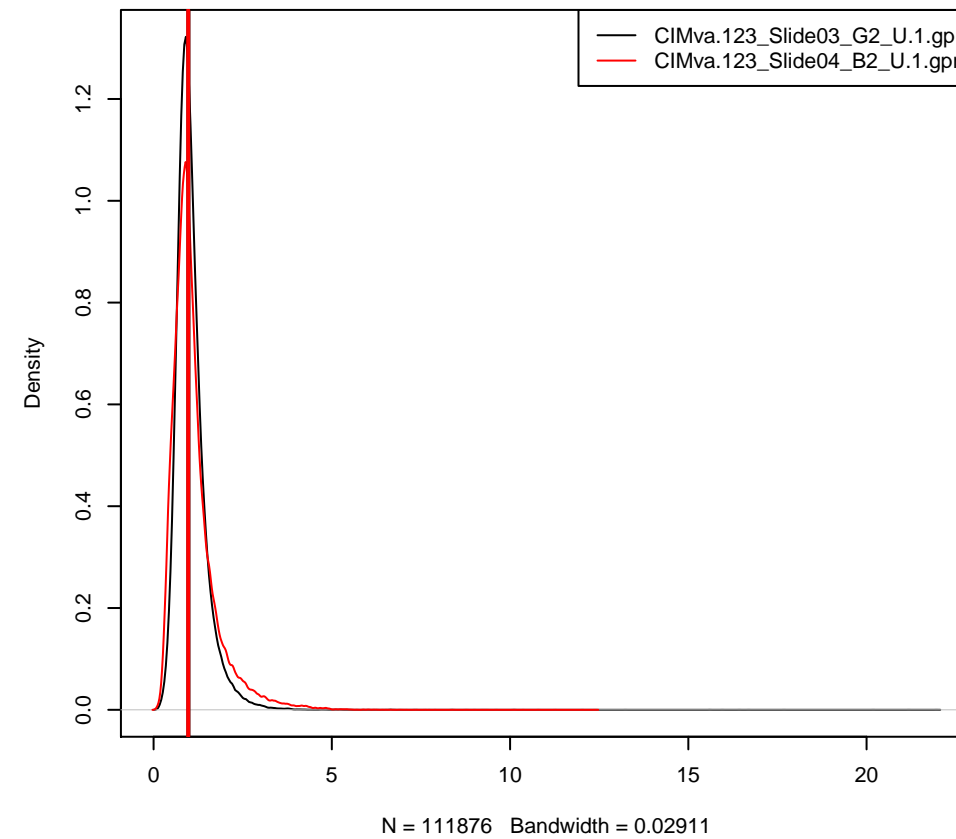

Replicate densities (normalized; log2) for sample: U-1 (R)

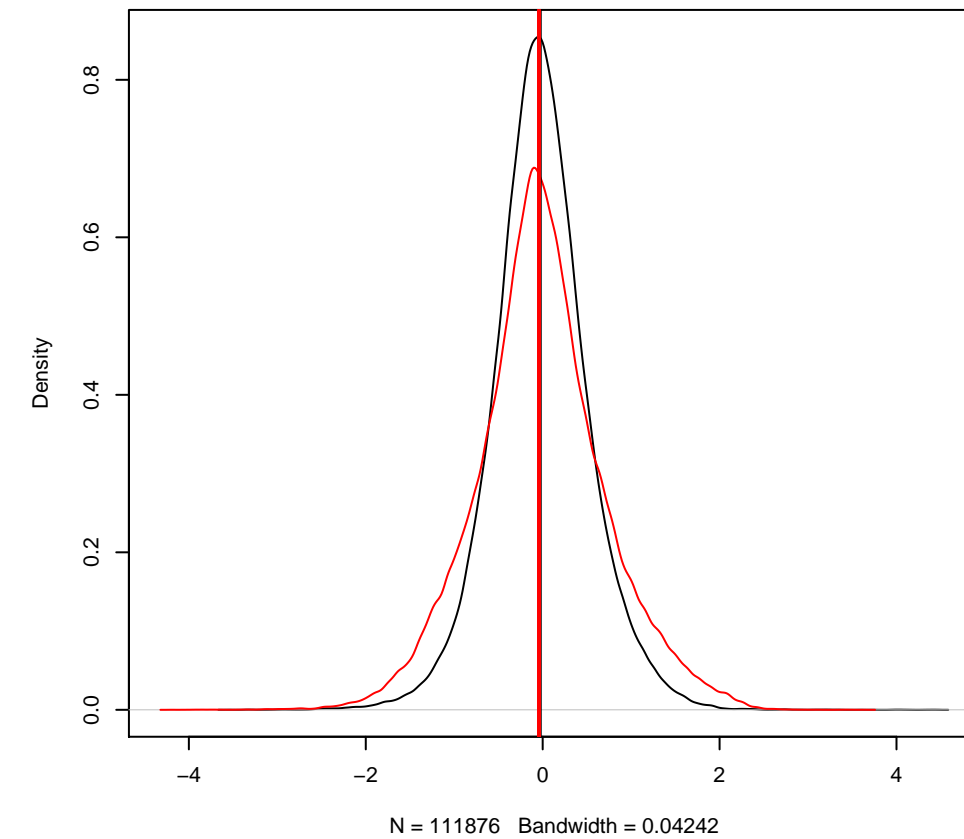

Replicate scatter (raw) for sample: U-1 (R)  
Correlation coefficient: 0.75 (Pearson); 0.78 (Spearman)

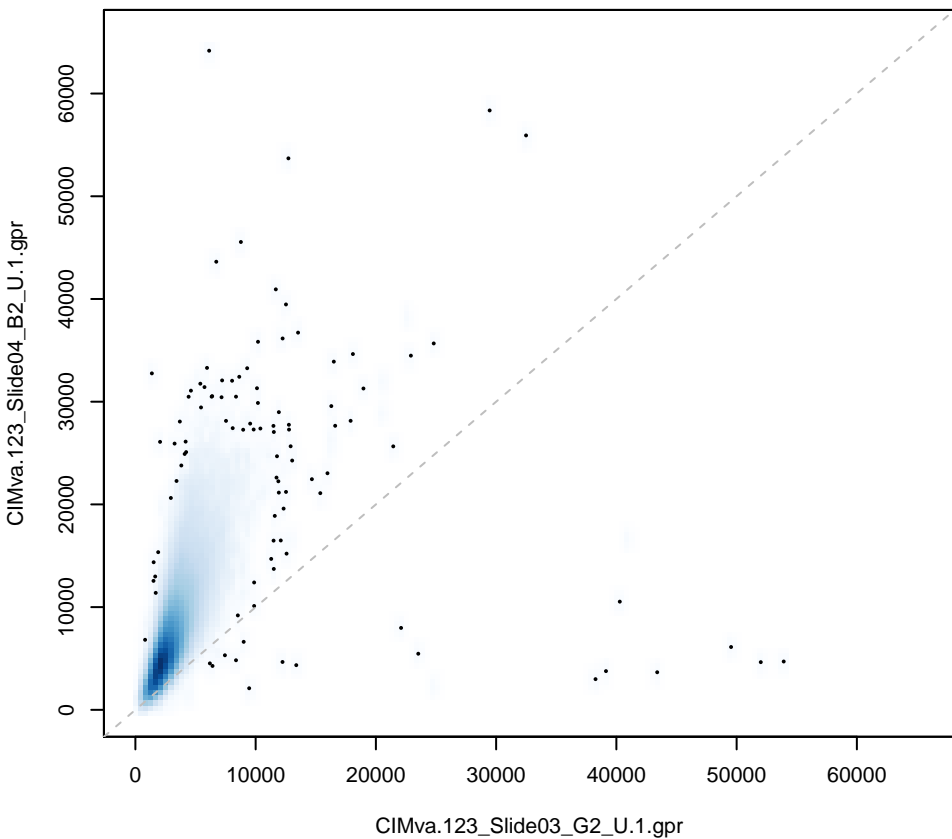

Replicate scatter (raw; log2) for sample: U-1 (R)  
Correlation coefficient: 0.81 (Pearson); 0.78 (Spearman)

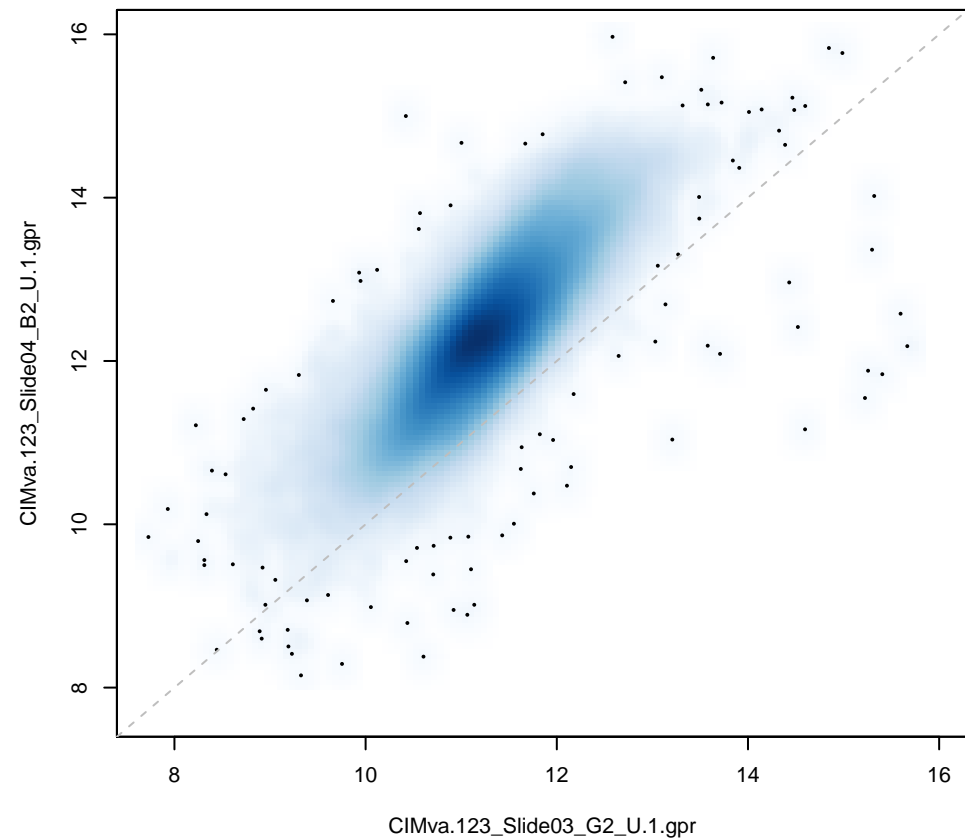

Replicate scatter (normalized) for sample: U-1 (R)  
Correlation coefficient: 0.75 (Pearson); 0.78 (Spearman)

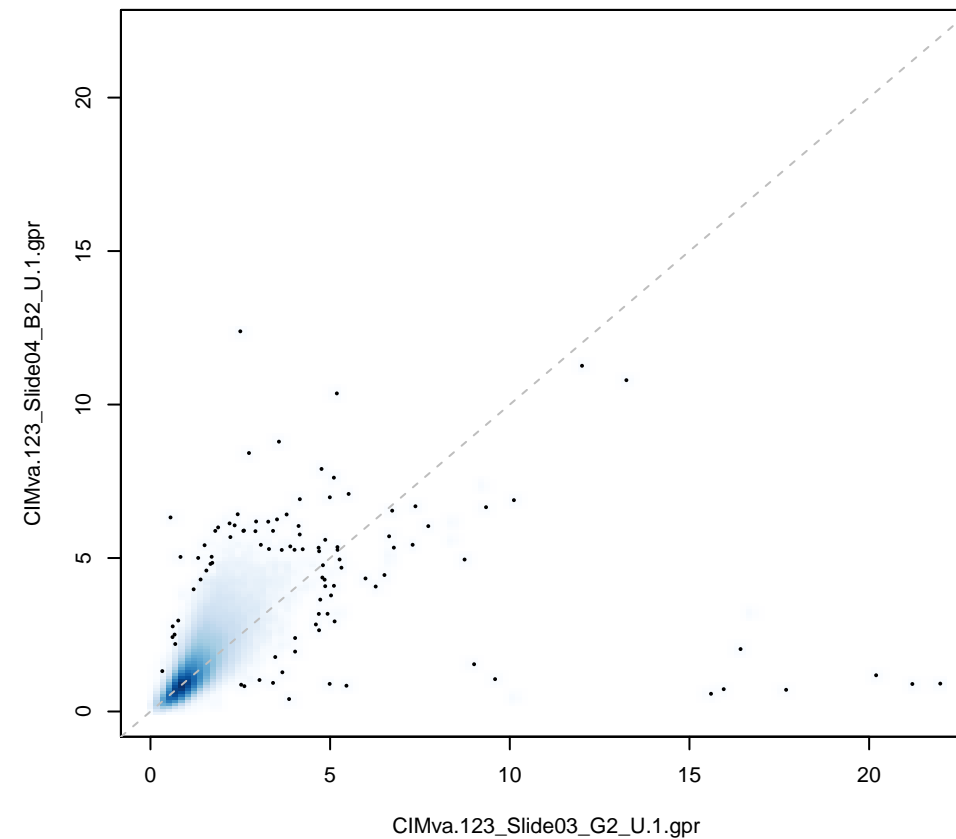

Replicate scatter (normalized; log2) for sample: U-1 (R)  
Correlation coefficient: 0.8 (Pearson); 0.78 (Spearman)

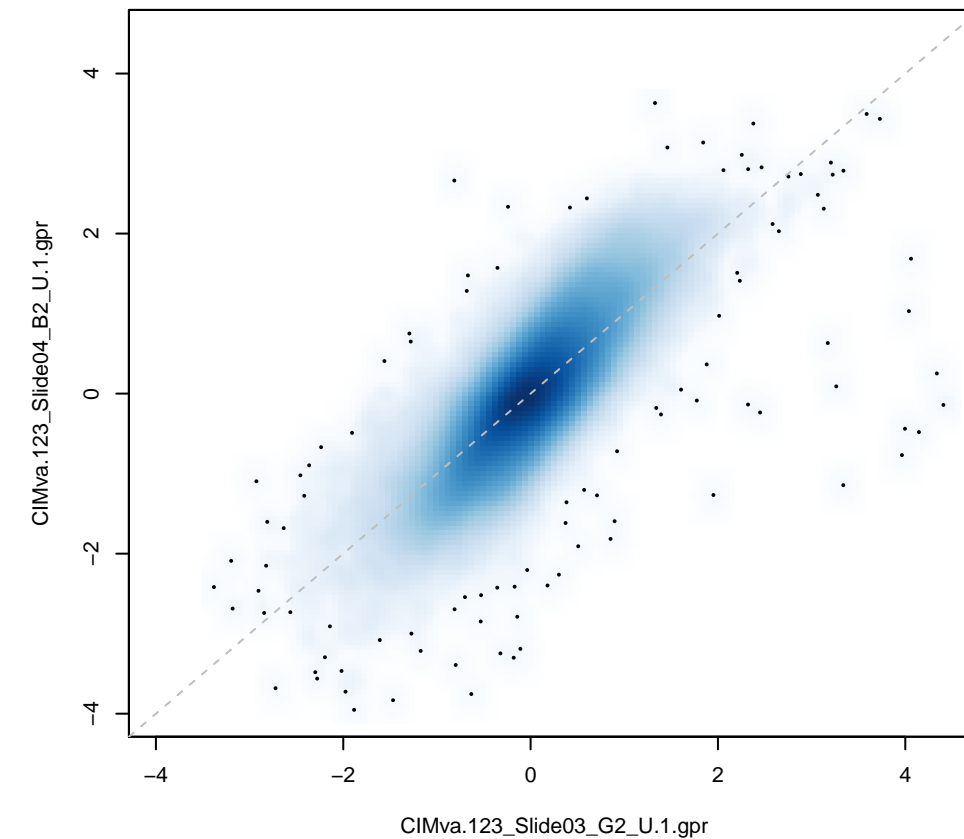

Replicate densities (raw) for sample: U-10 (NR)

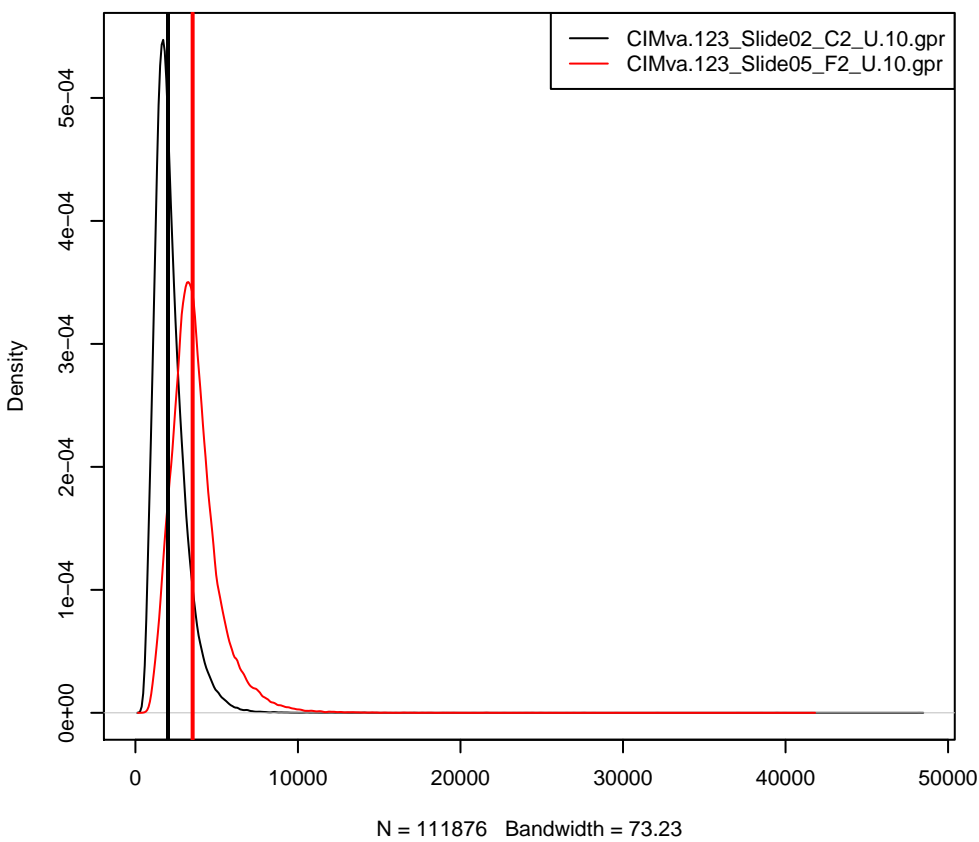

Replicate densities (raw; log2) for sample: U-10 (NR)

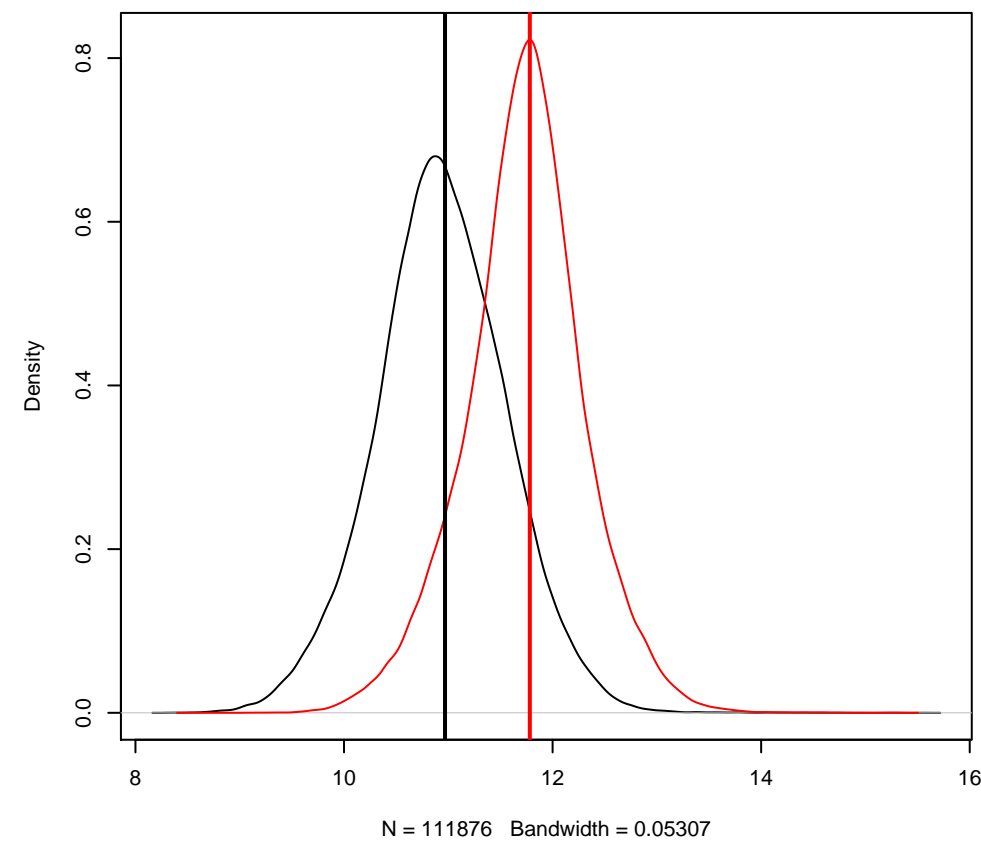

Replicate densities (normalized) for sample: U-10 (NR)

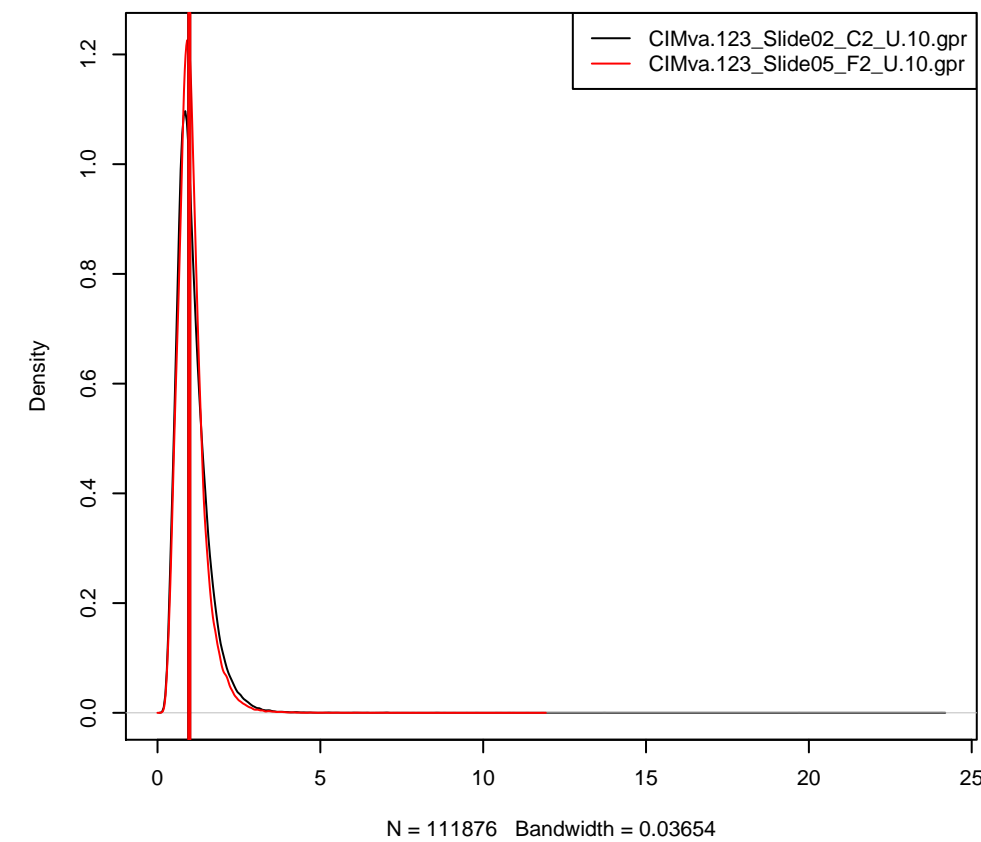

Replicate densities (normalized; log2) for sample: U-10 (NR)

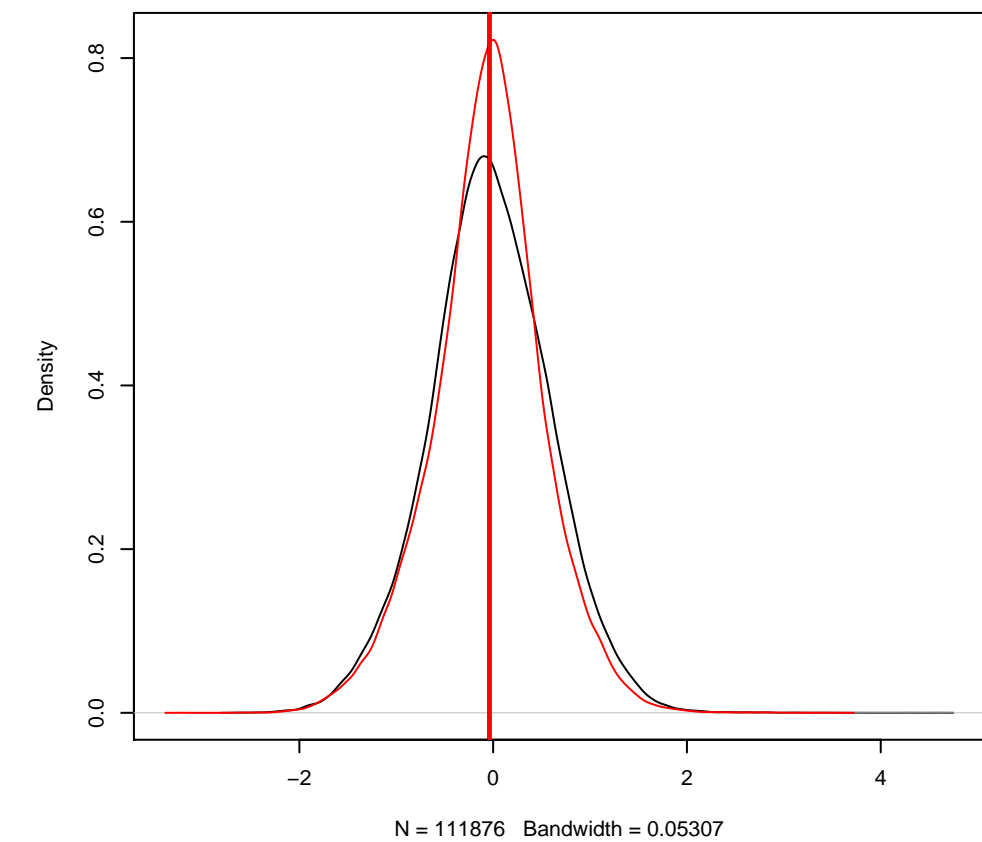

Replicate scatter (raw) for sample: U-10 (NR)  
Correlation coefficient: 0.73 (Pearson); 0.74 (Spearman)

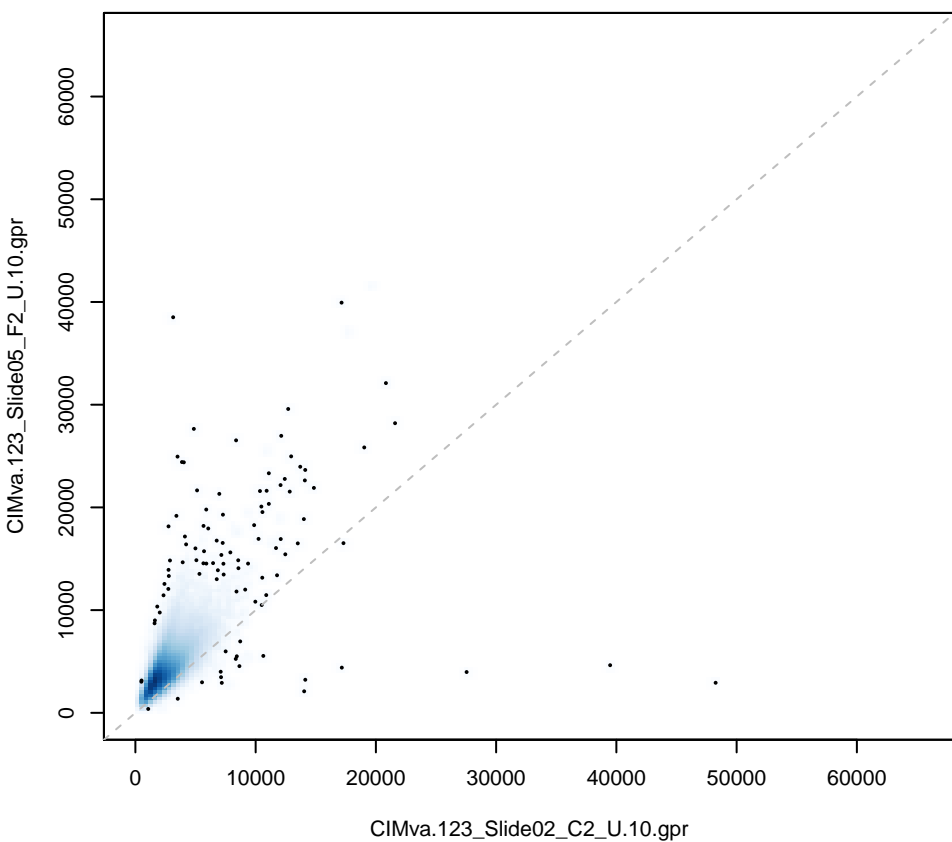

Replicate scatter (raw; log2) for sample: U-10 (NR)  
Correlation coefficient: 0.77 (Pearson); 0.74 (Spearman)

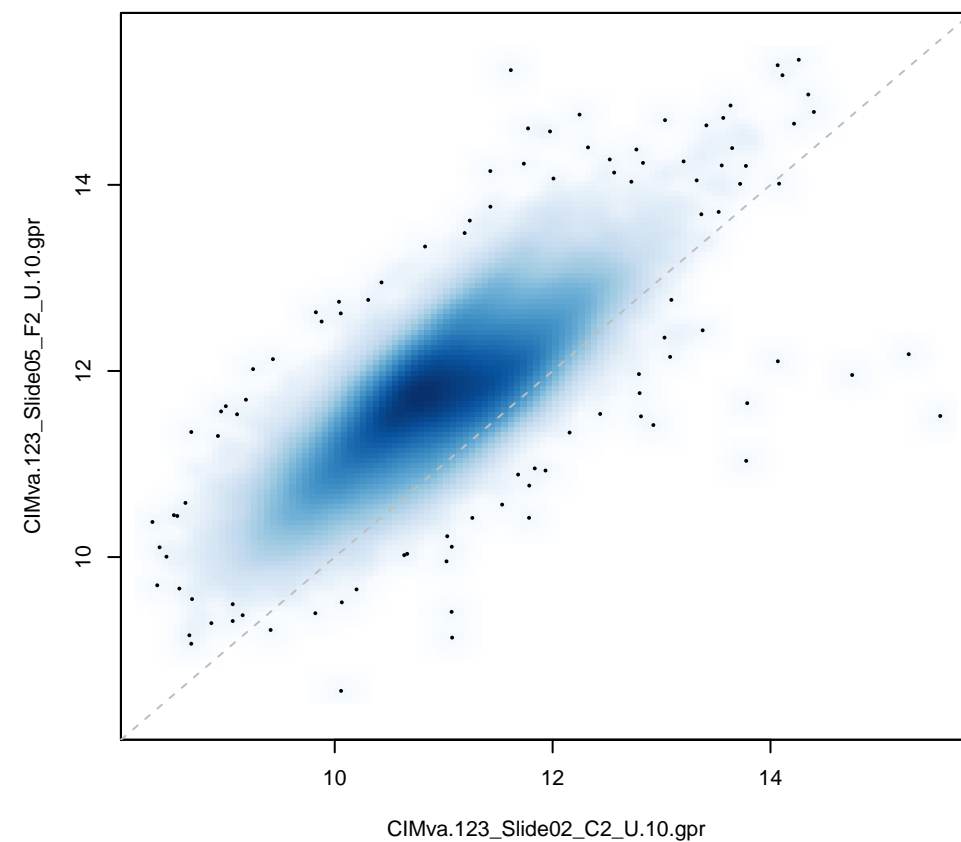

Replicate scatter (normalized) for sample: U-10 (NR)  
Correlation coefficient: 0.73 (Pearson); 0.74 (Spearman)

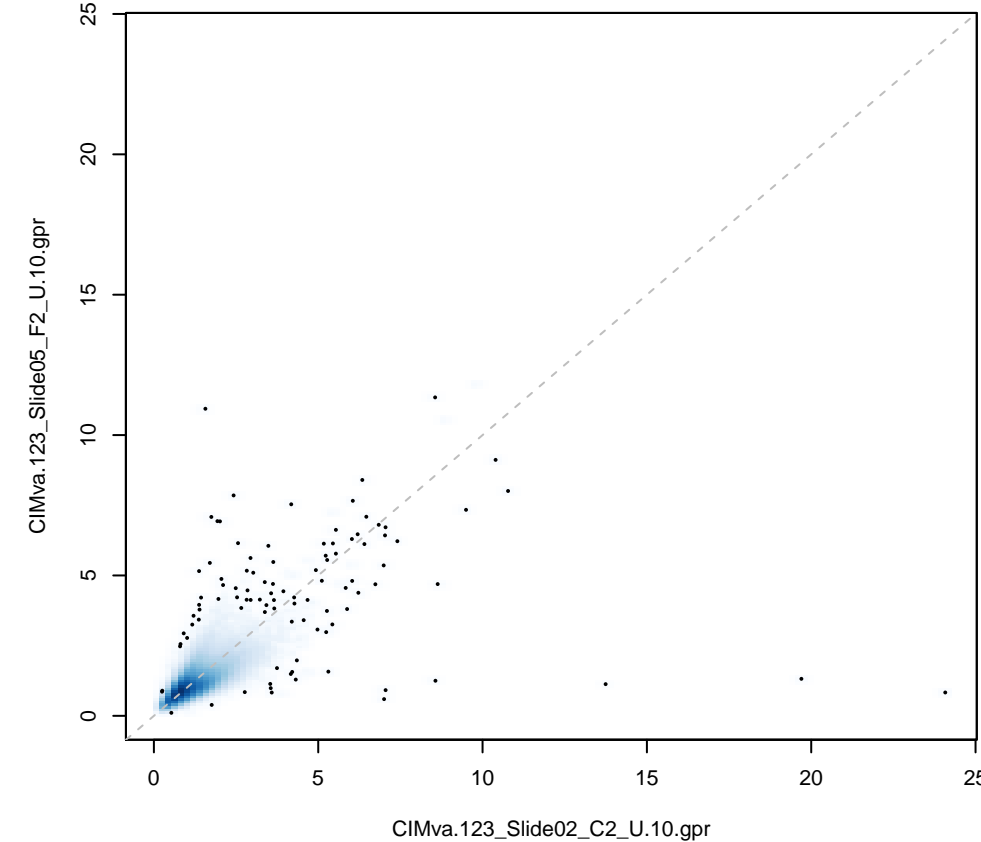

Replicate scatter (normalized; log2) for sample: U-10 (NR)  
Correlation coefficient: 0.76 (Pearson); 0.74 (Spearman)

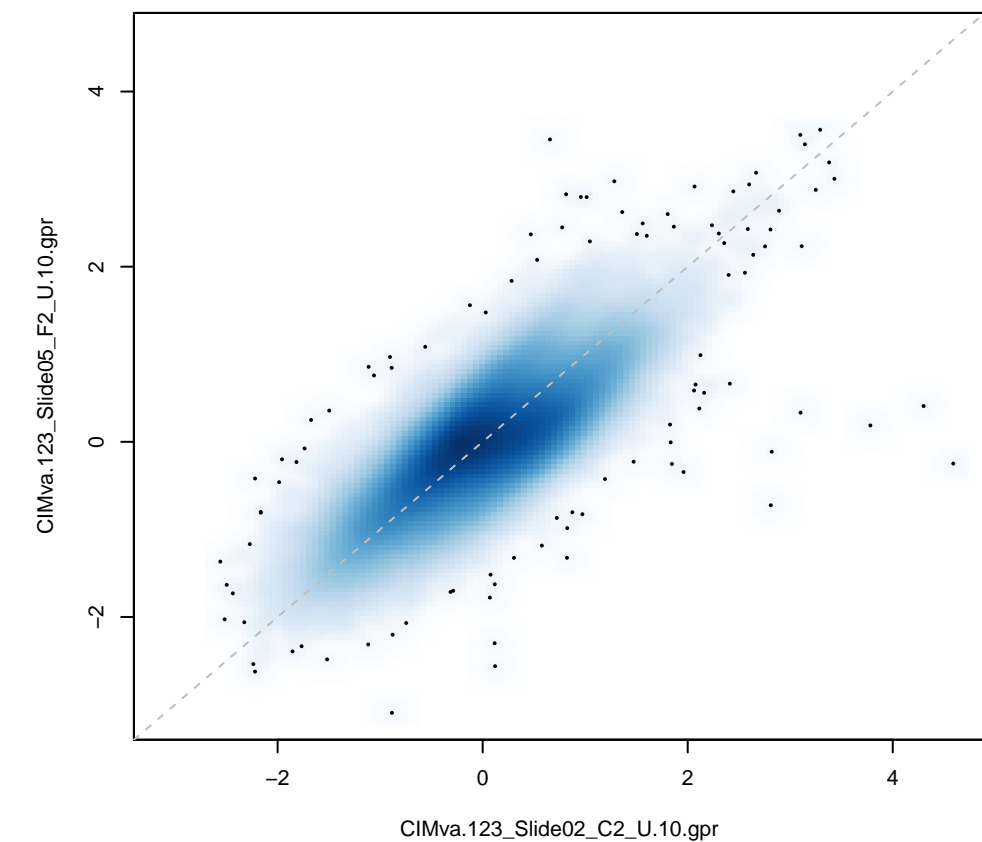

Replicate densities (raw) for sample: U-11 (R)

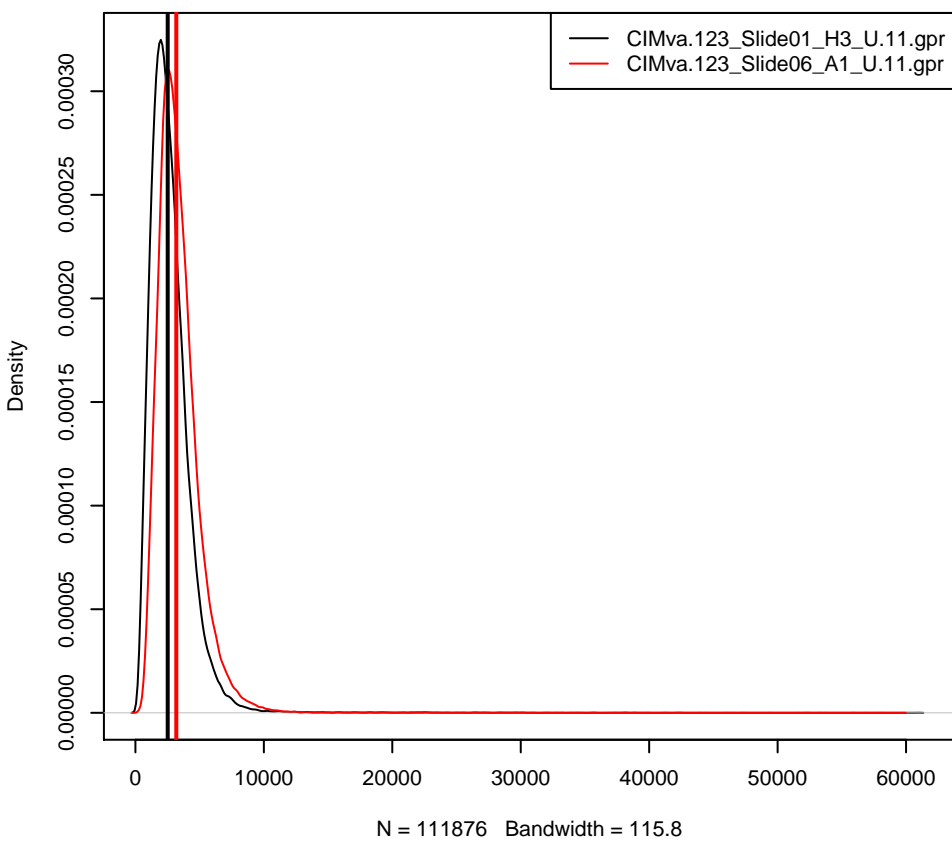

Replicate densities (raw; log2) for sample: U-11 (R)

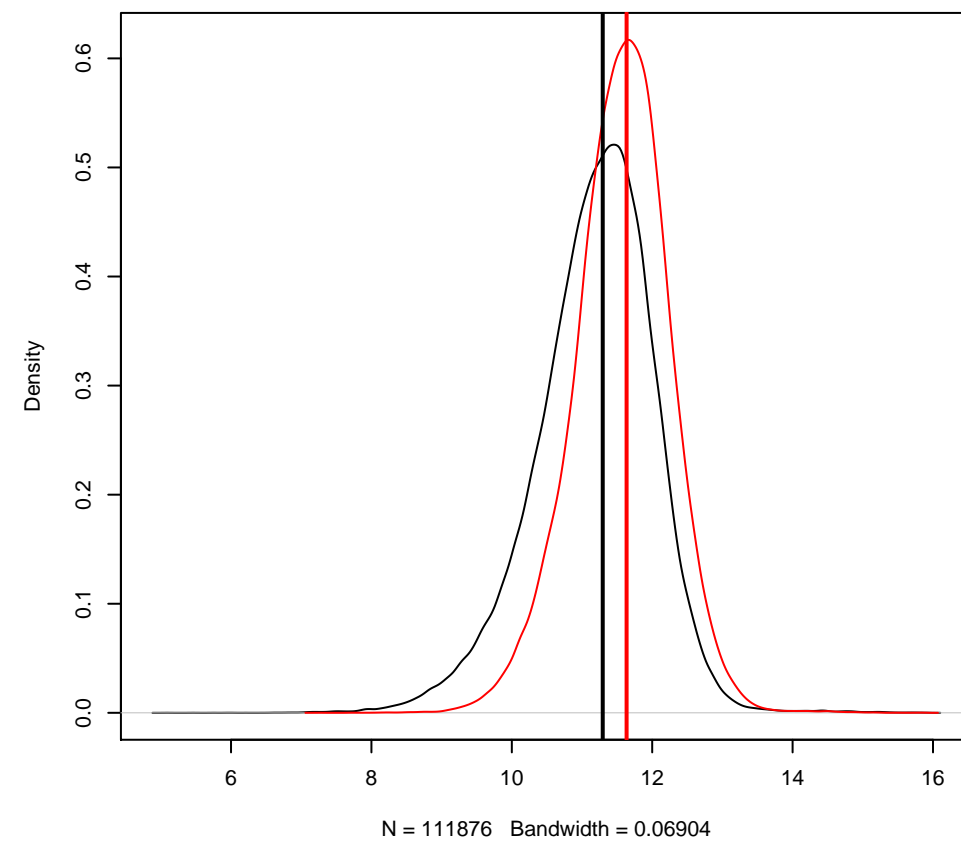

Replicate densities (normalized) for sample: U-11 (R)

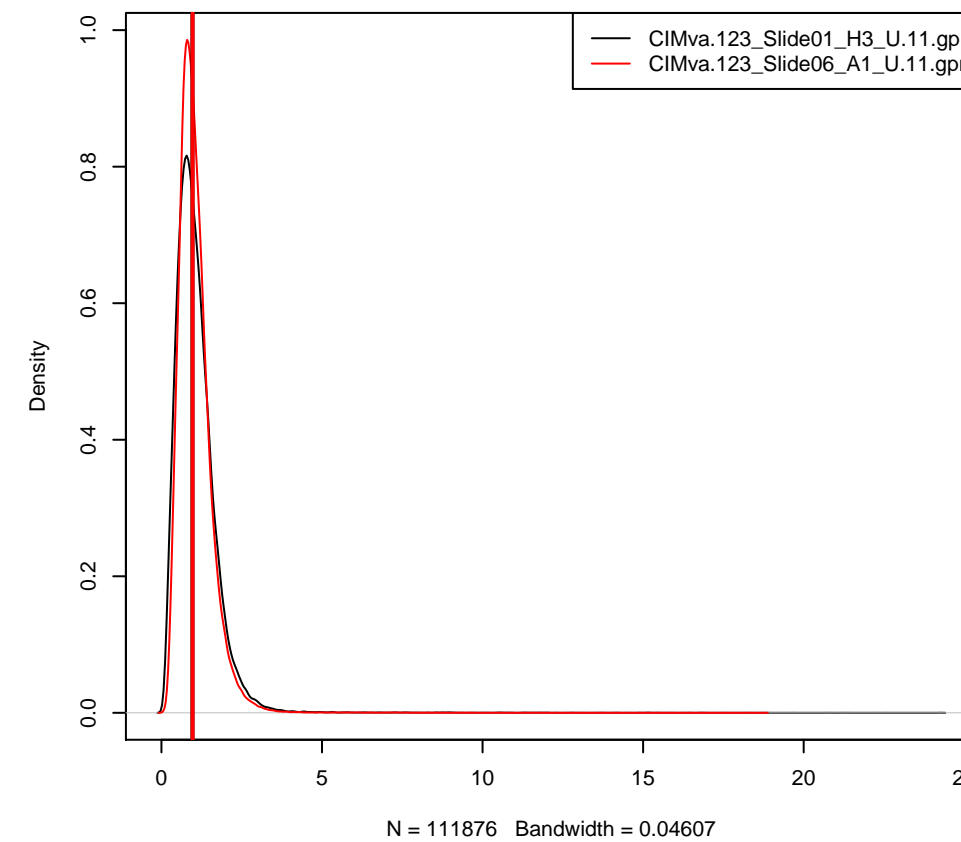

Replicate densities (normalized; log2) for sample: U-11 (R)

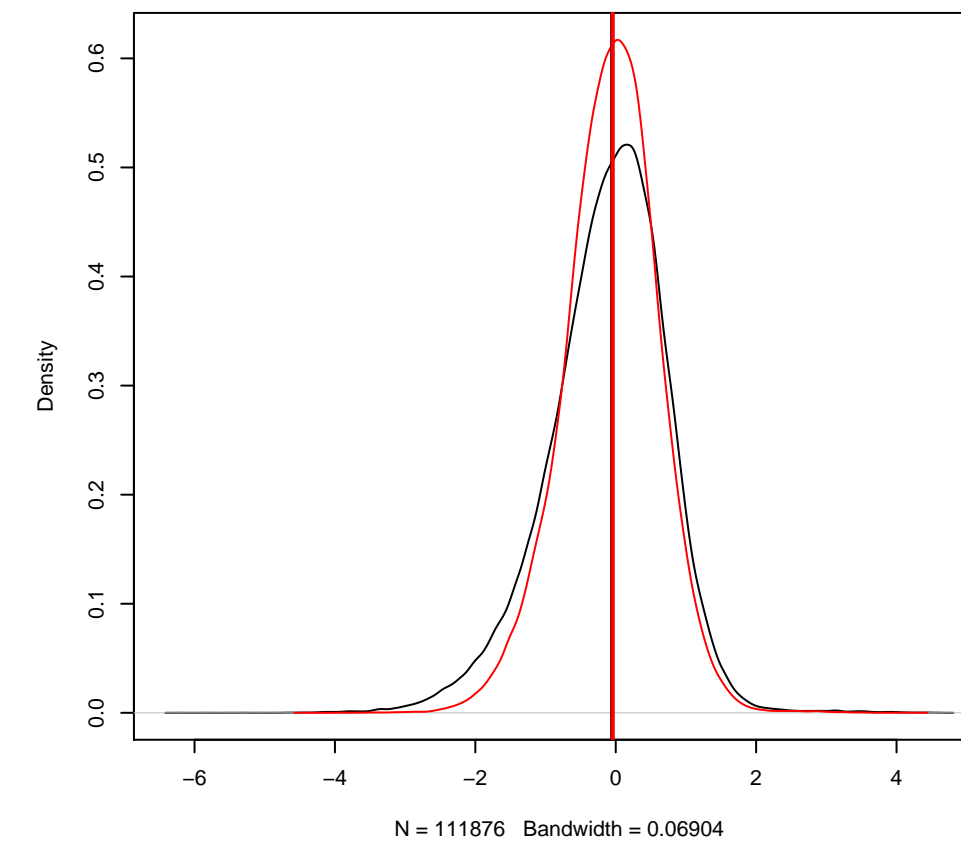

Replicate scatter (raw) for sample: U-11 (R)  
Correlation coefficient: 0.73 (Pearson); 0.74 (Spearman)

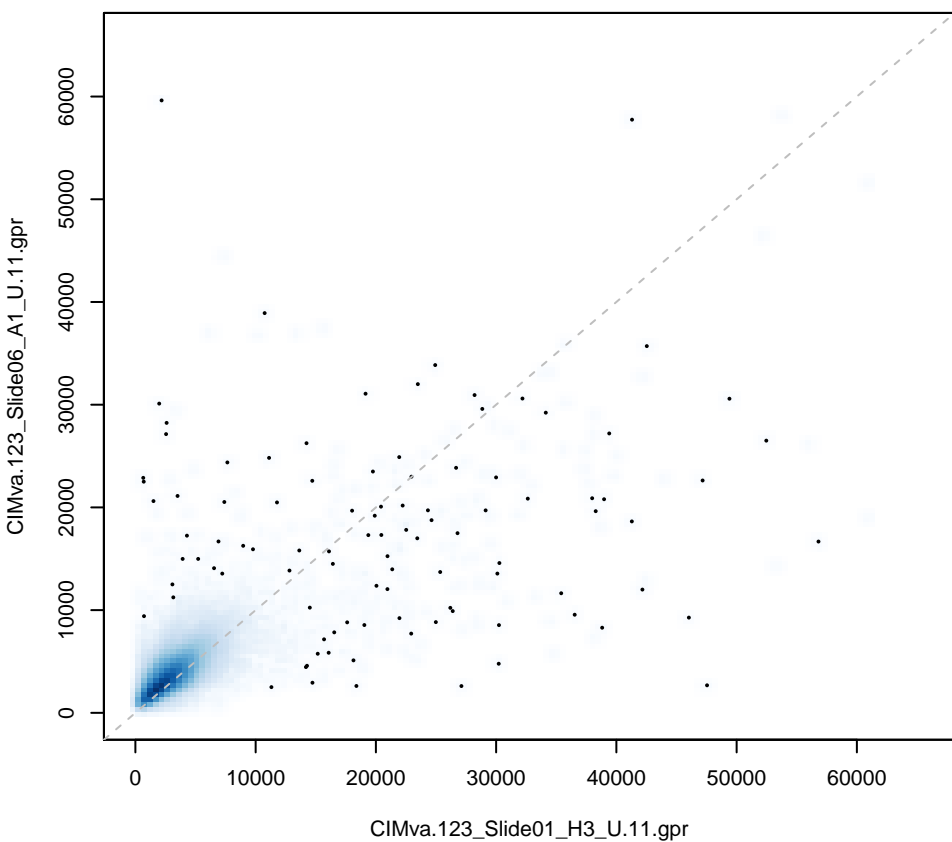

Replicate scatter (raw; log2) for sample: U-11 (R)  
Correlation coefficient: 0.74 (Pearson); 0.74 (Spearman)

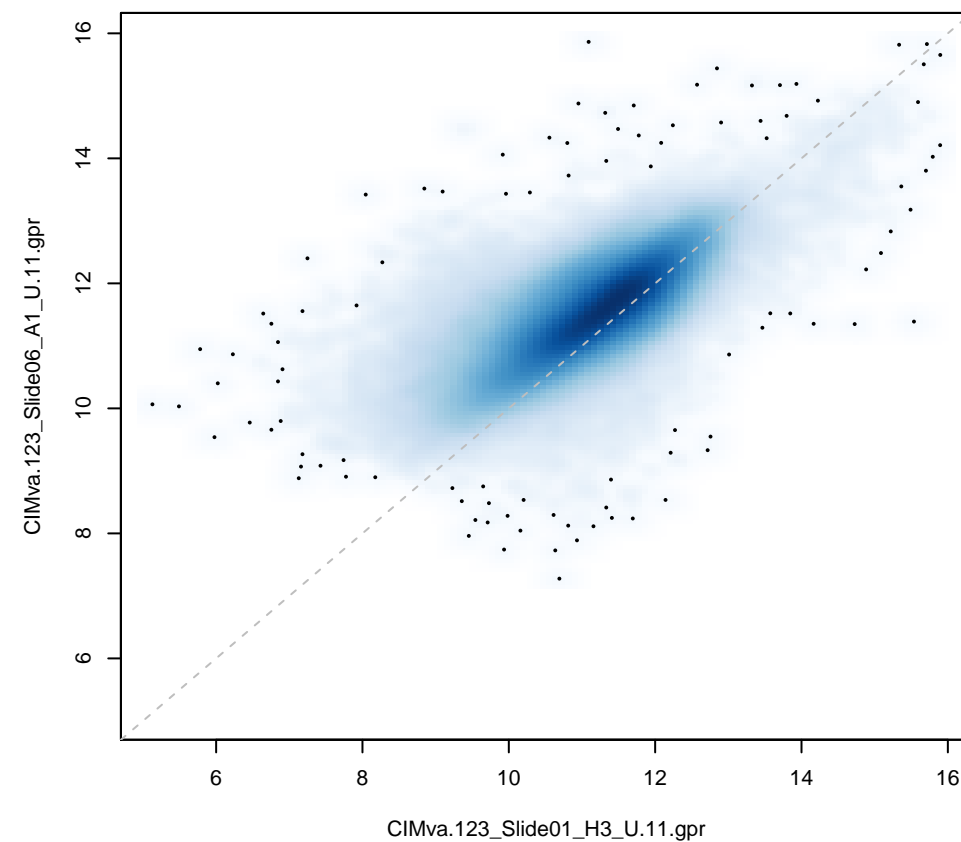

Replicate scatter (normalized) for sample: U-11 (R)  
Correlation coefficient: 0.73 (Pearson); 0.74 (Spearman)

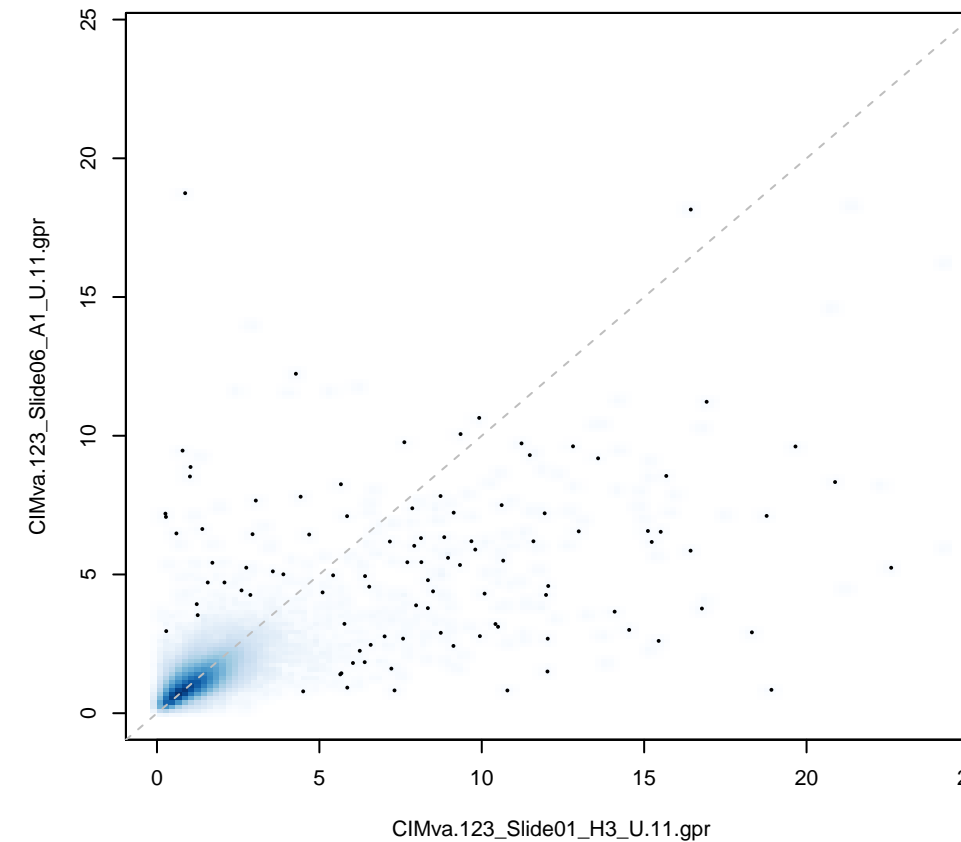

Replicate scatter (normalized; log2) for sample: U-11 (R)  
Correlation coefficient: 0.75 (Pearson); 0.74 (Spearman)

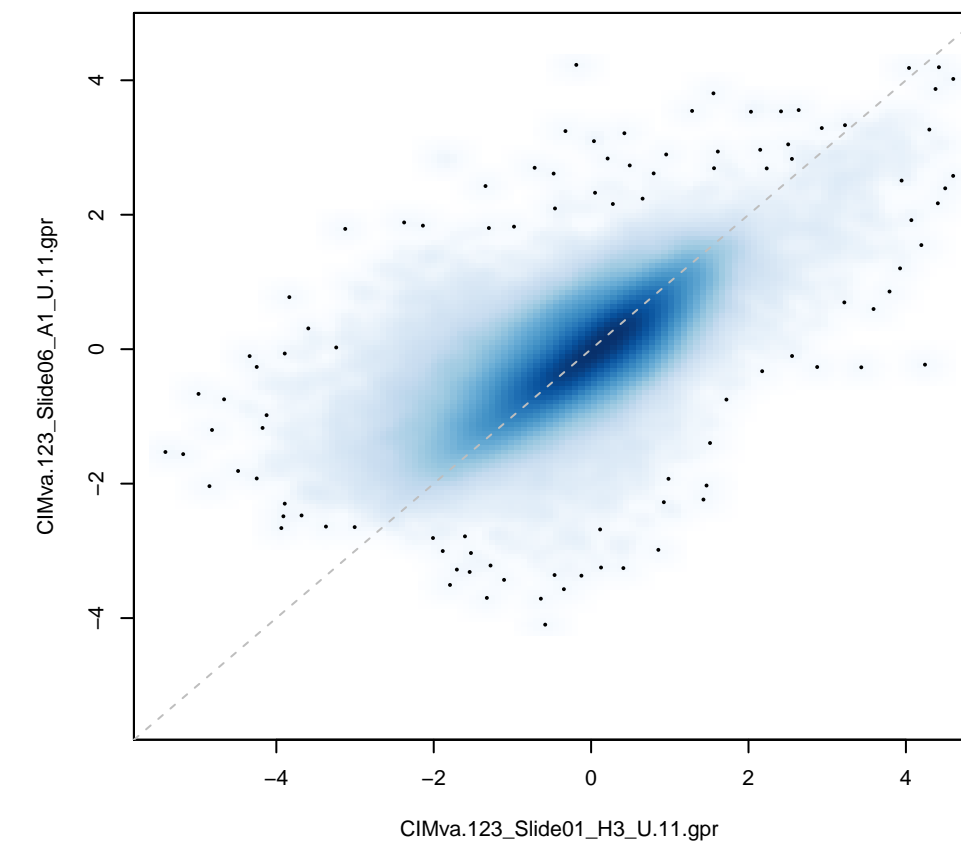

Replicate densities (raw) for sample: U-12 (R)

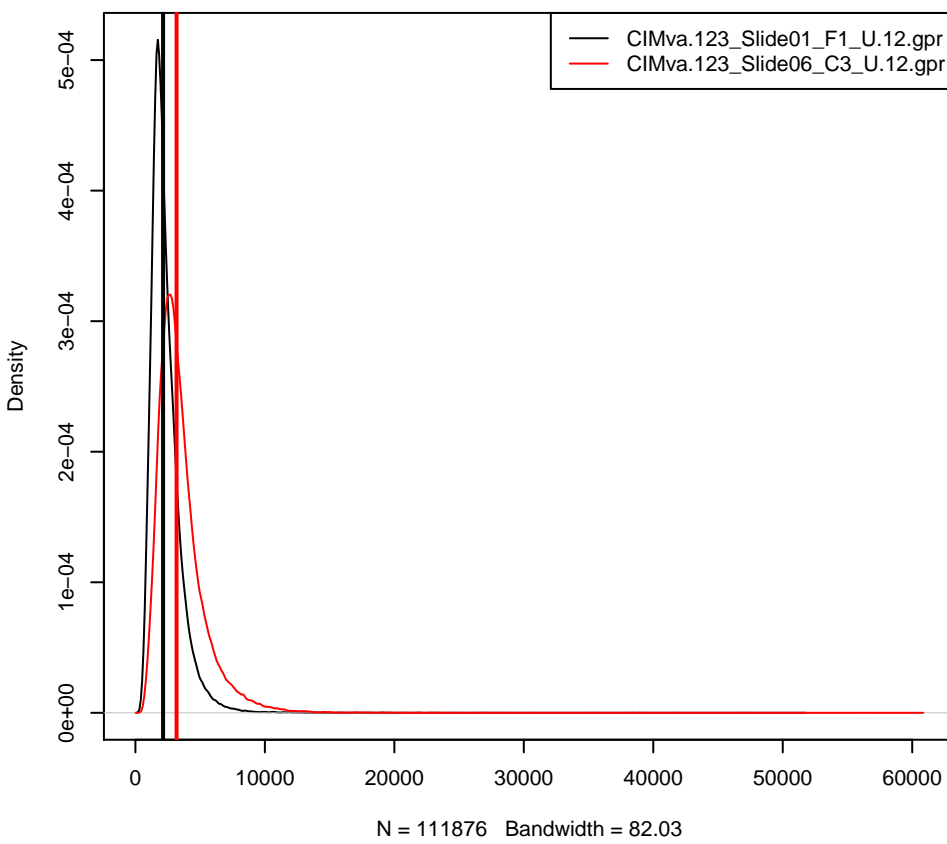

Replicate densities (raw; log2) for sample: U-12 (R)

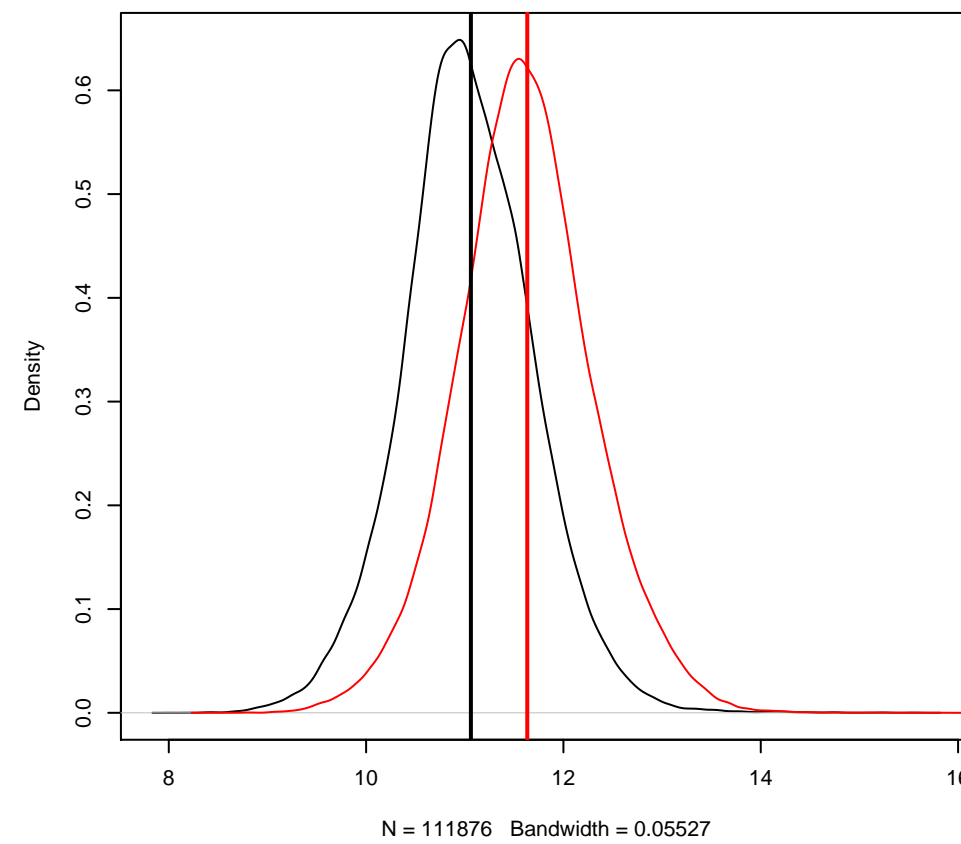

Replicate densities (normalized) for sample: U-12 (R)

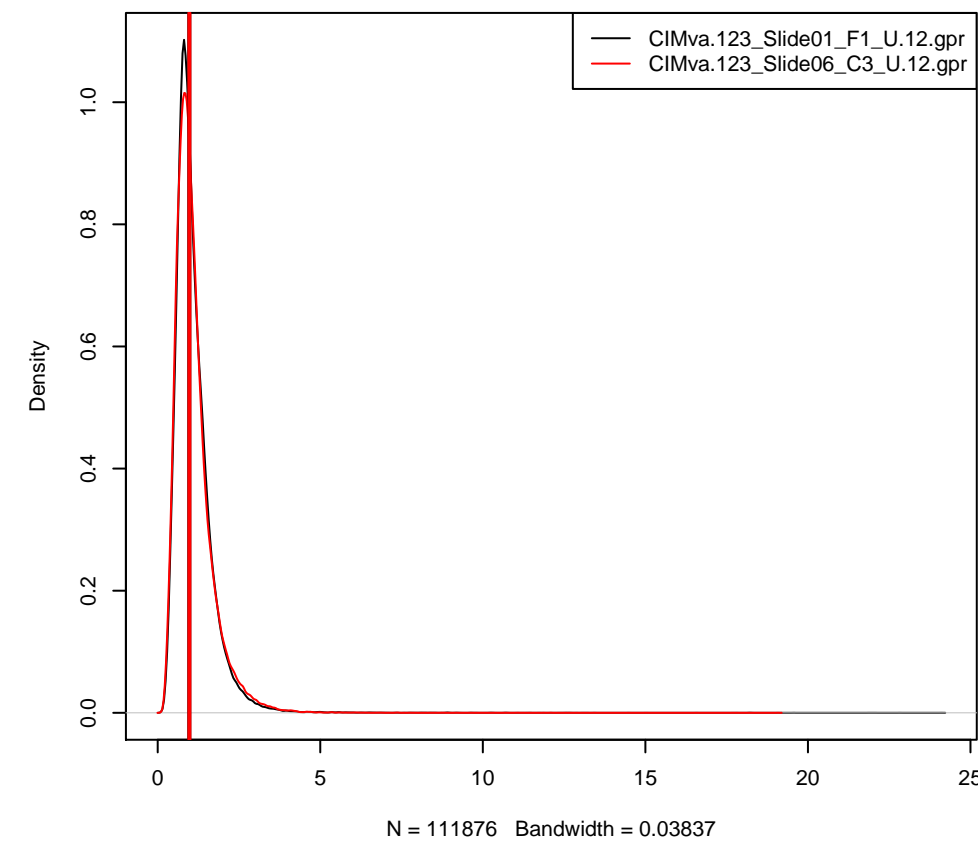

Replicate densities (normalized; log2) for sample: U-12 (R)

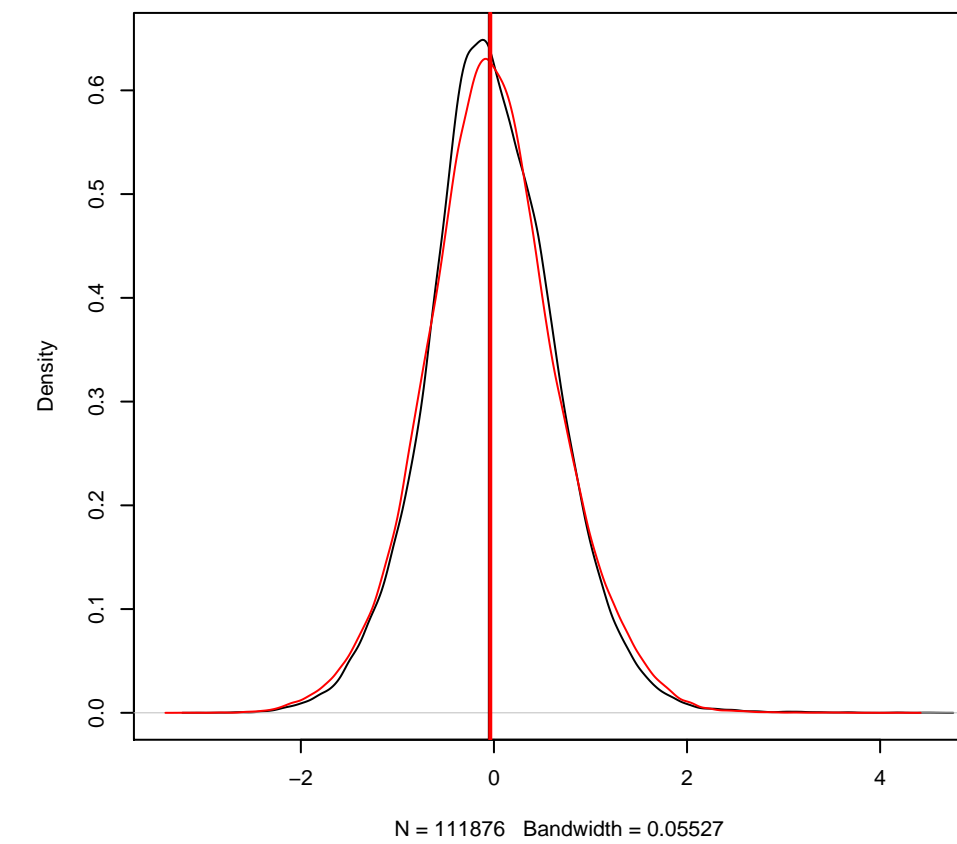

Replicate scatter (raw) for sample: U-12 (R)  
Correlation coefficient: 0.68 (Pearson); 0.62 (Spearman)

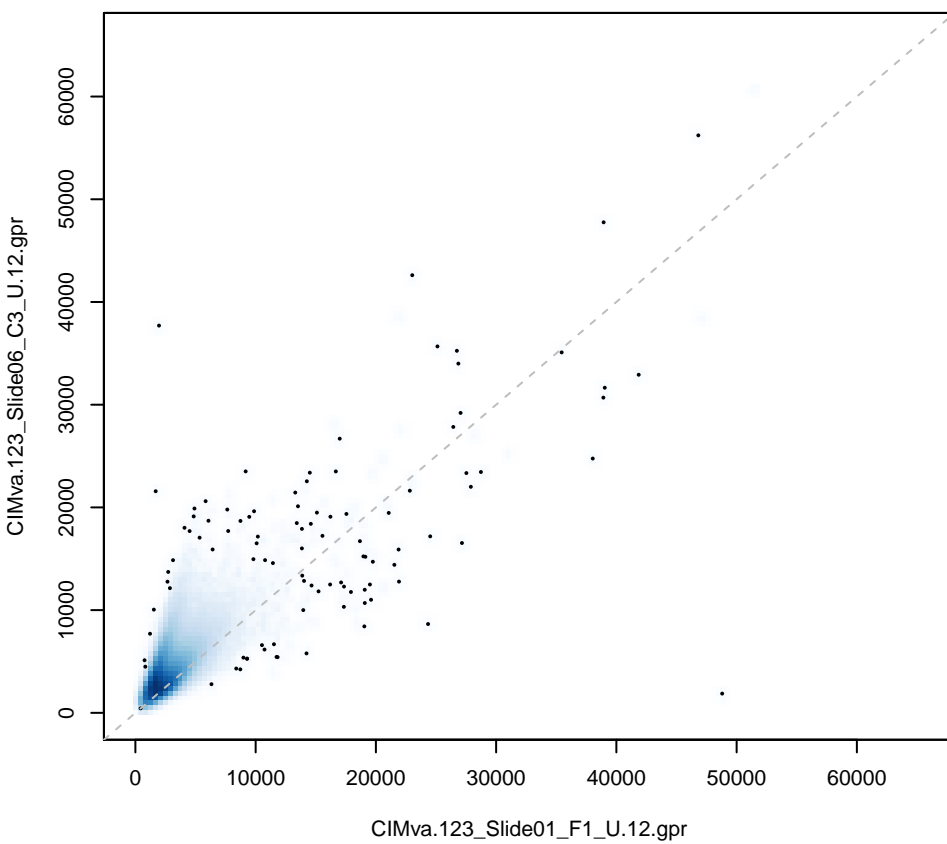

Replicate scatter (raw; log2) for sample: U-12 (R)  
Correlation coefficient: 0.67 (Pearson); 0.62 (Spearman)

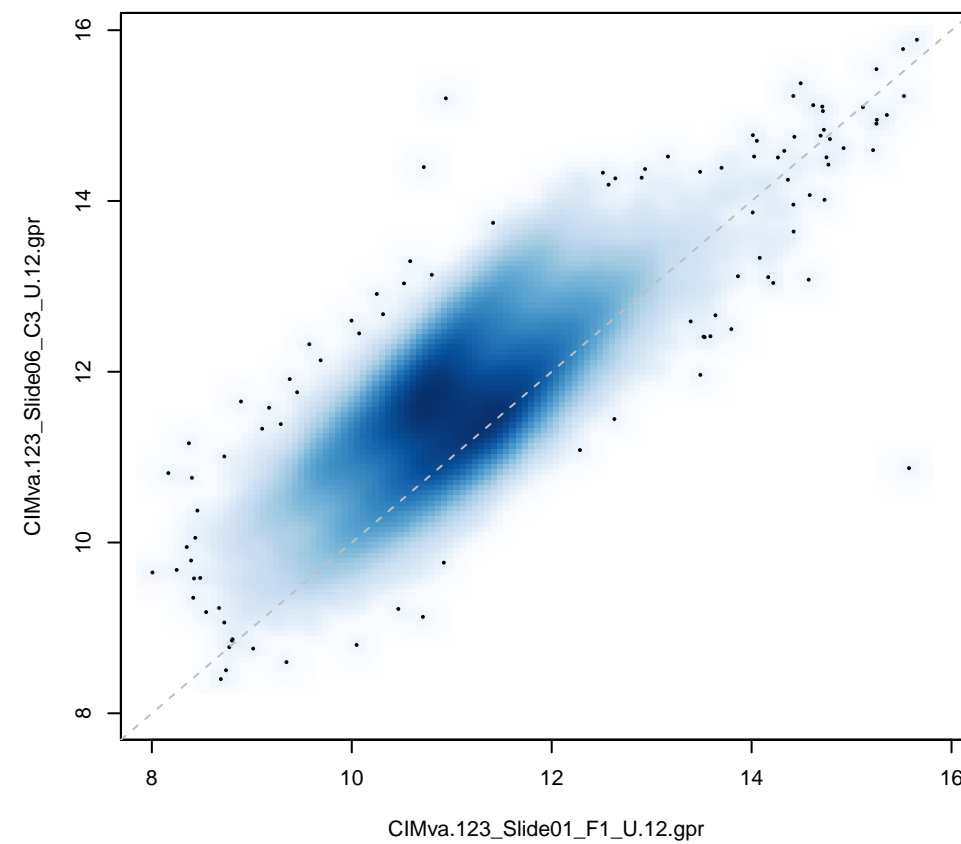

Replicate scatter (normalized) for sample: U-12 (R)  
Correlation coefficient: 0.68 (Pearson); 0.62 (Spearman)

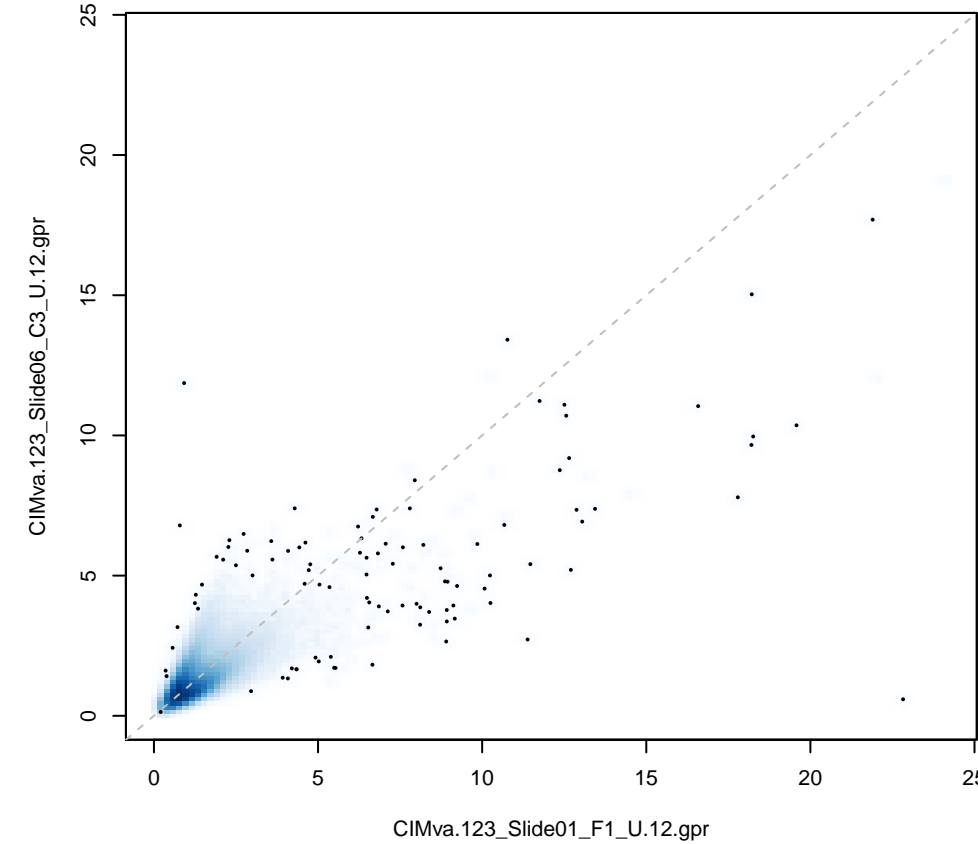

Replicate scatter (normalized; log2) for sample: U-12 (R)  
Correlation coefficient: 0.67 (Pearson); 0.62 (Spearman)

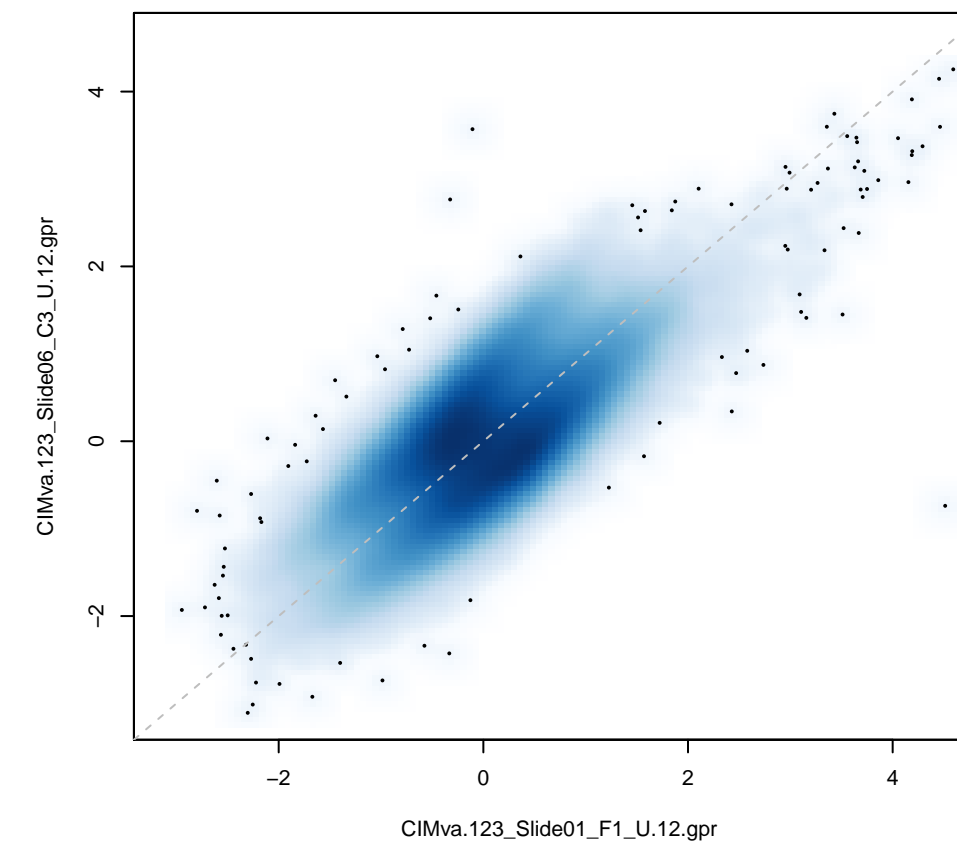

Replicate densities (raw) for sample: U-13 (R)

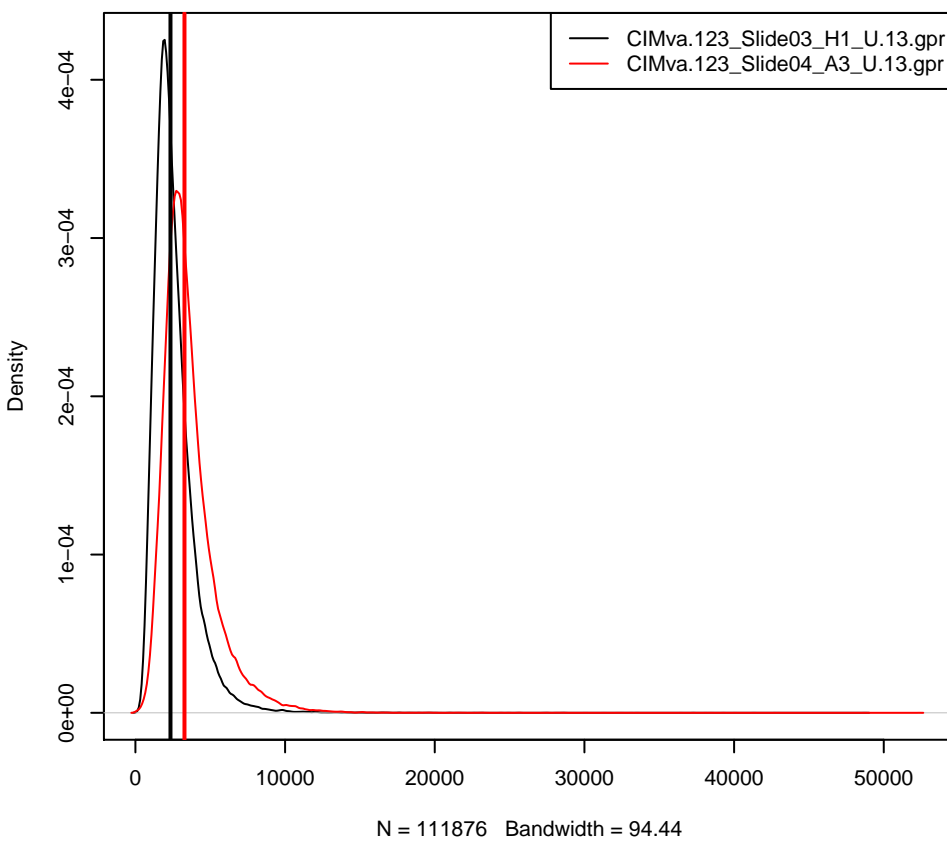

Replicate densities (raw; log2) for sample: U-13 (R)

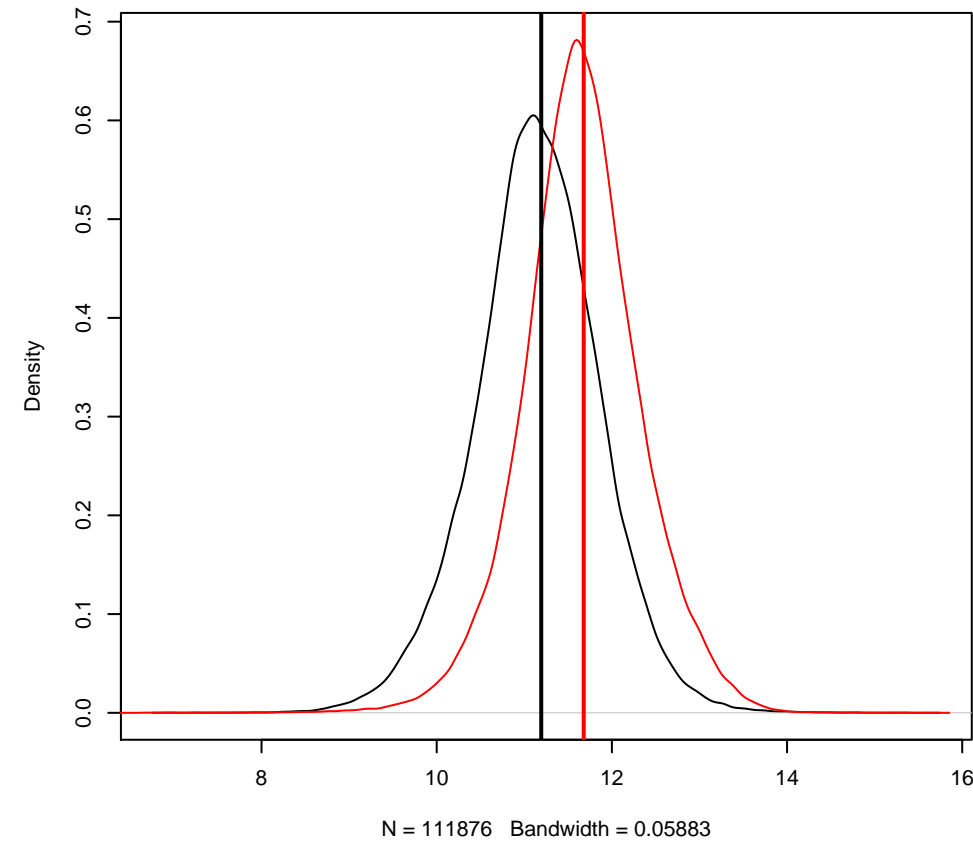

Replicate densities (normalized) for sample: U-13 (R)

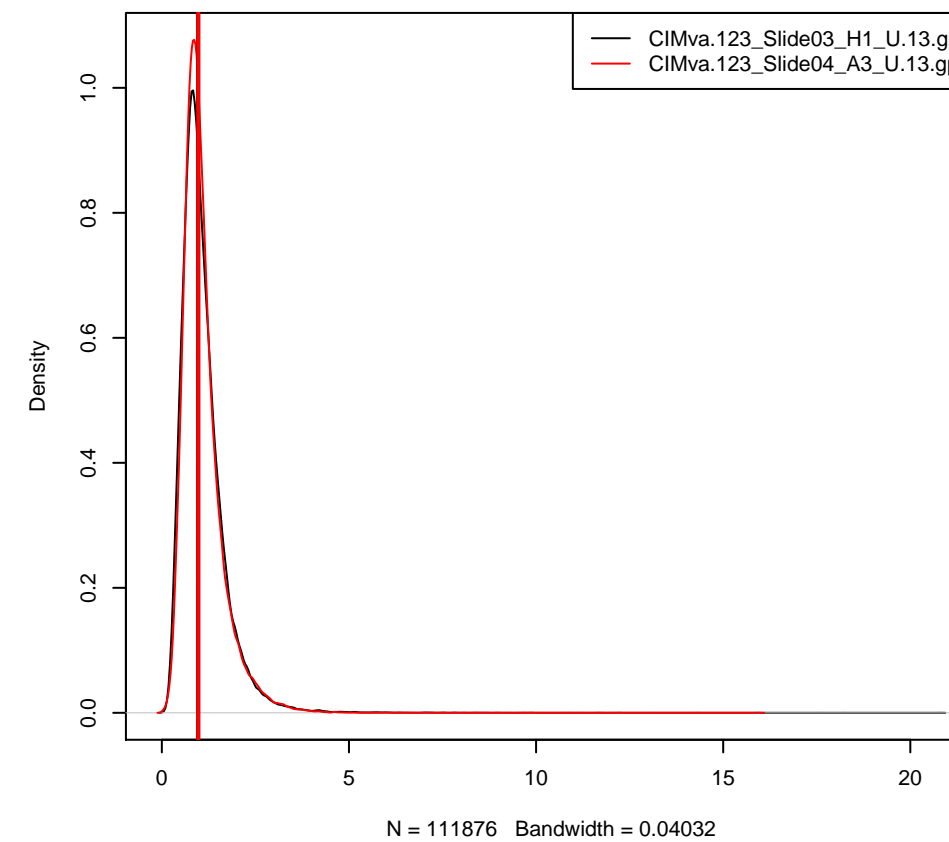

Replicate densities (normalized; log2) for sample: U-13 (R)

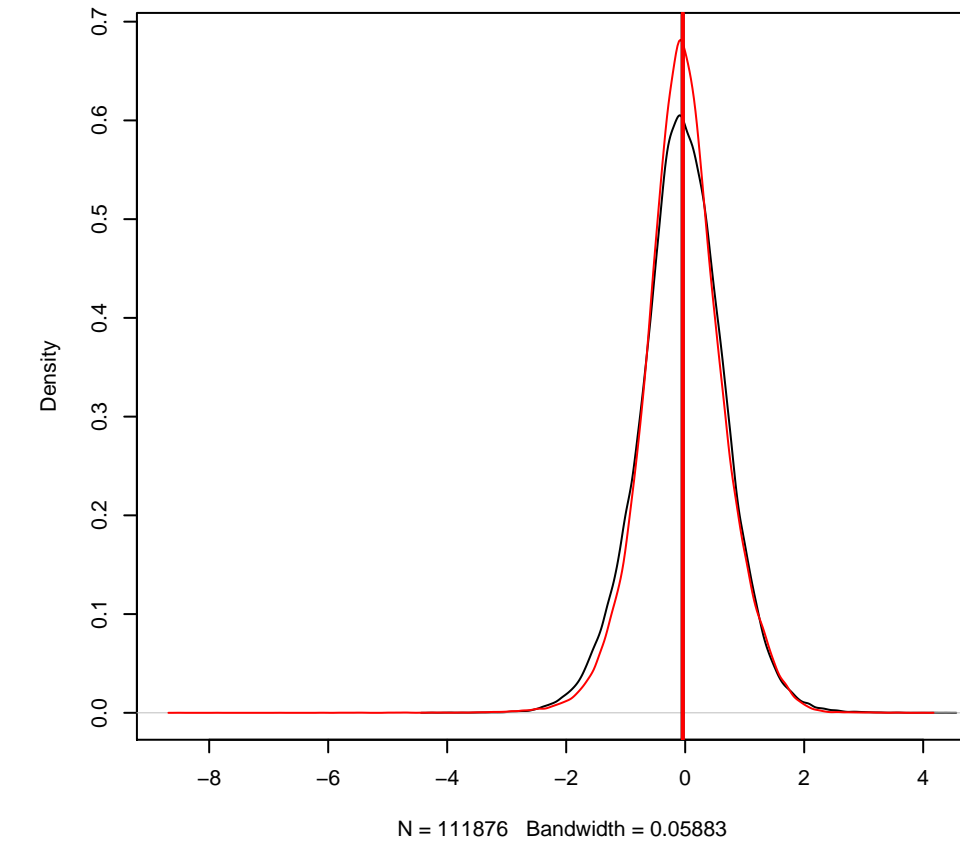

Replicate scatter (raw) for sample: U-13 (R)  
Correlation coefficient: 0.73 (Pearson); 0.7 (Spearman)

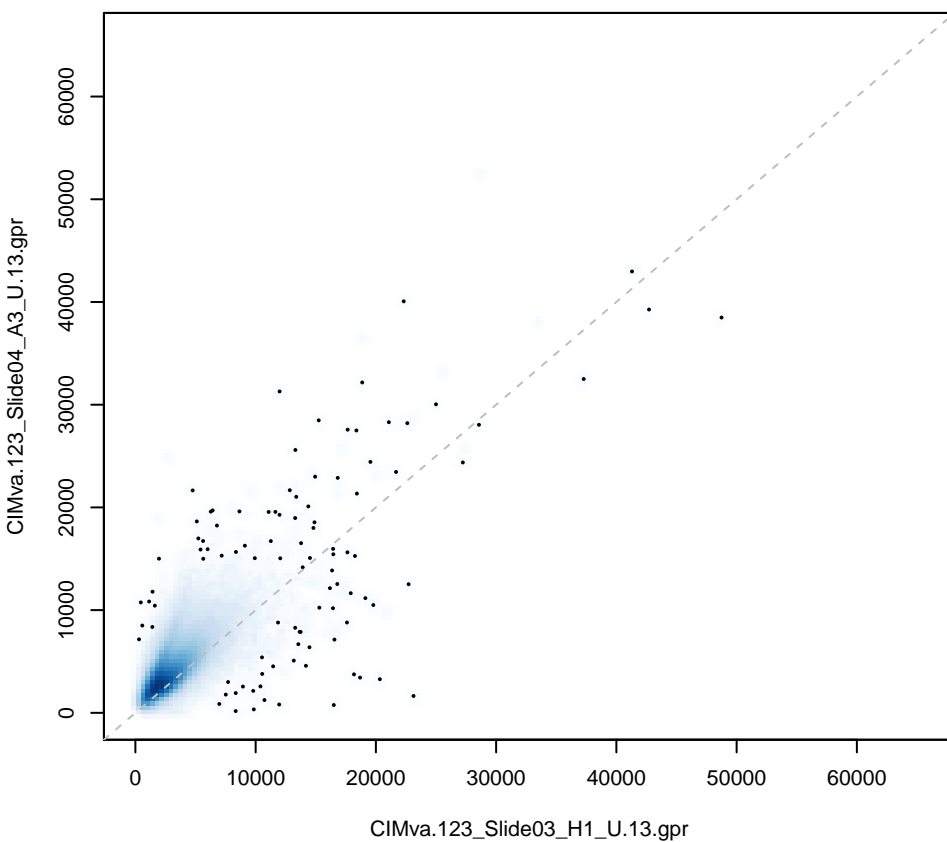

Replicate scatter (raw; log2) for sample: U-13 (R)  
Correlation coefficient: 0.72 (Pearson); 0.7 (Spearman)

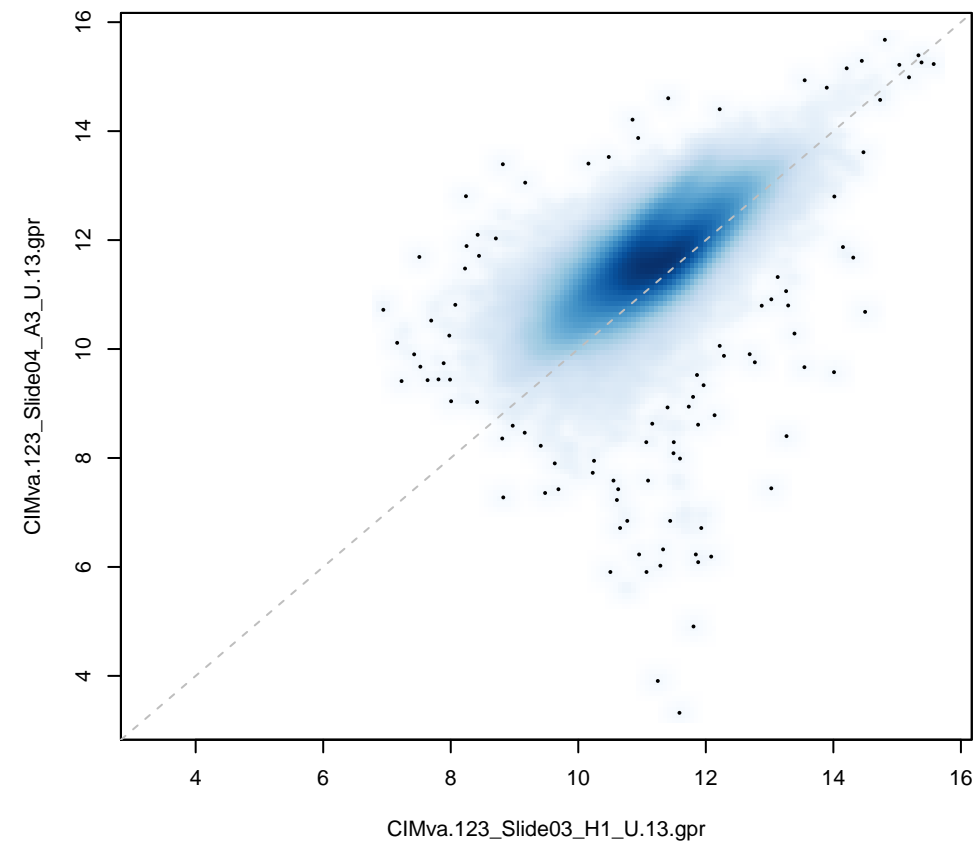

Replicate scatter (normalized) for sample: U-13 (R)  
Correlation coefficient: 0.73 (Pearson); 0.7 (Spearman)

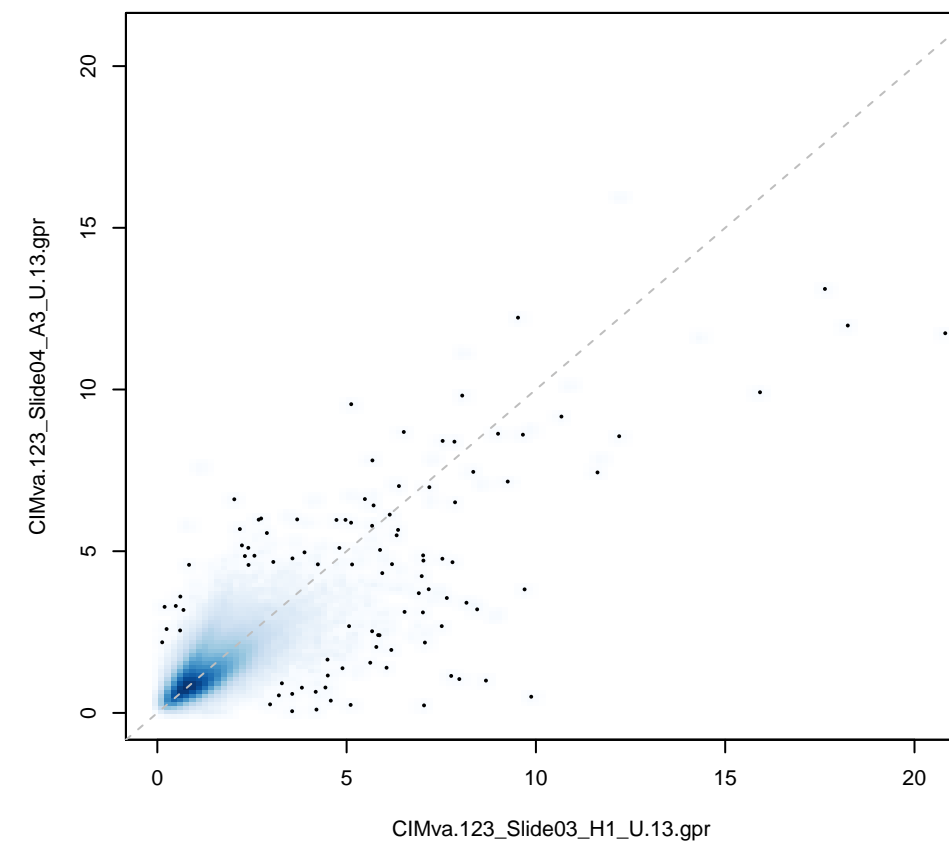

Replicate scatter (normalized; log2) for sample: U-13 (R)  
Correlation coefficient: 0.73 (Pearson); 0.7 (Spearman)

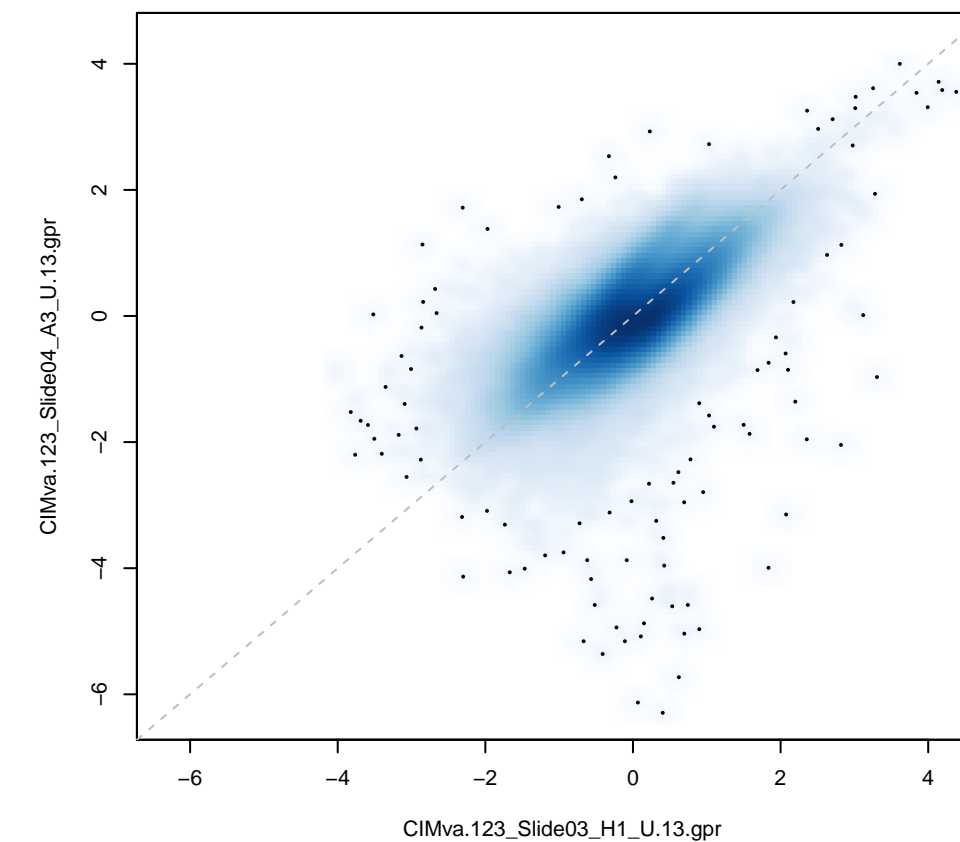



Replicate densities (raw) for sample: U-14 (R)

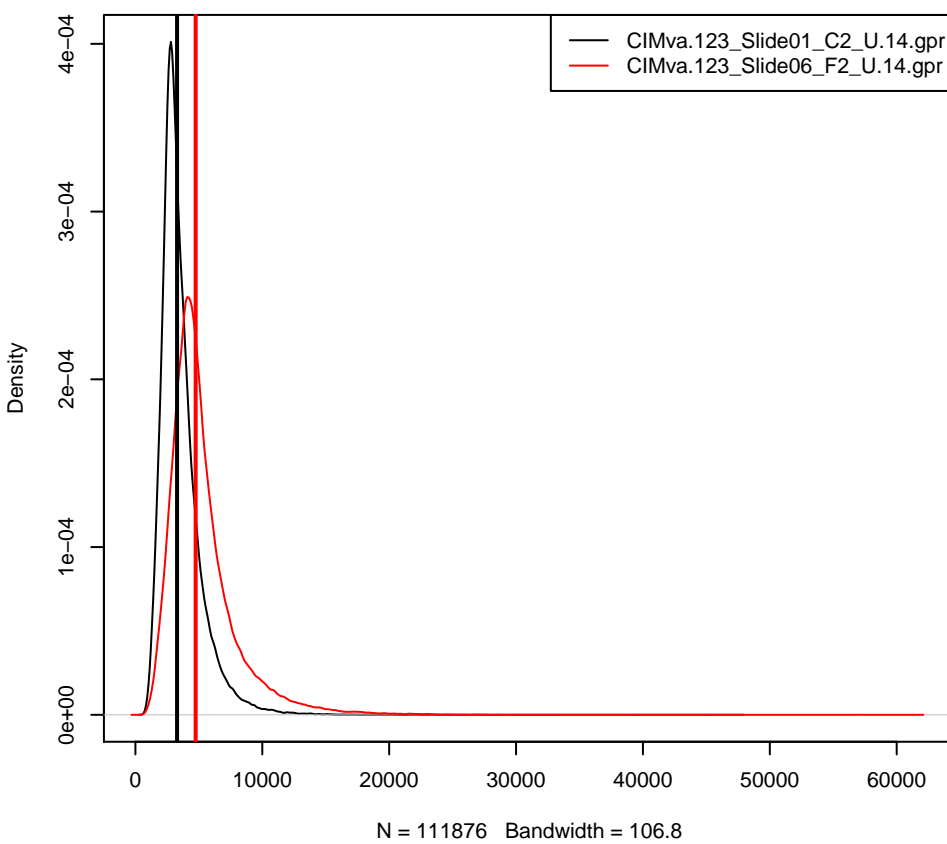

Replicate densities (raw; log2) for sample: U-14 (R)

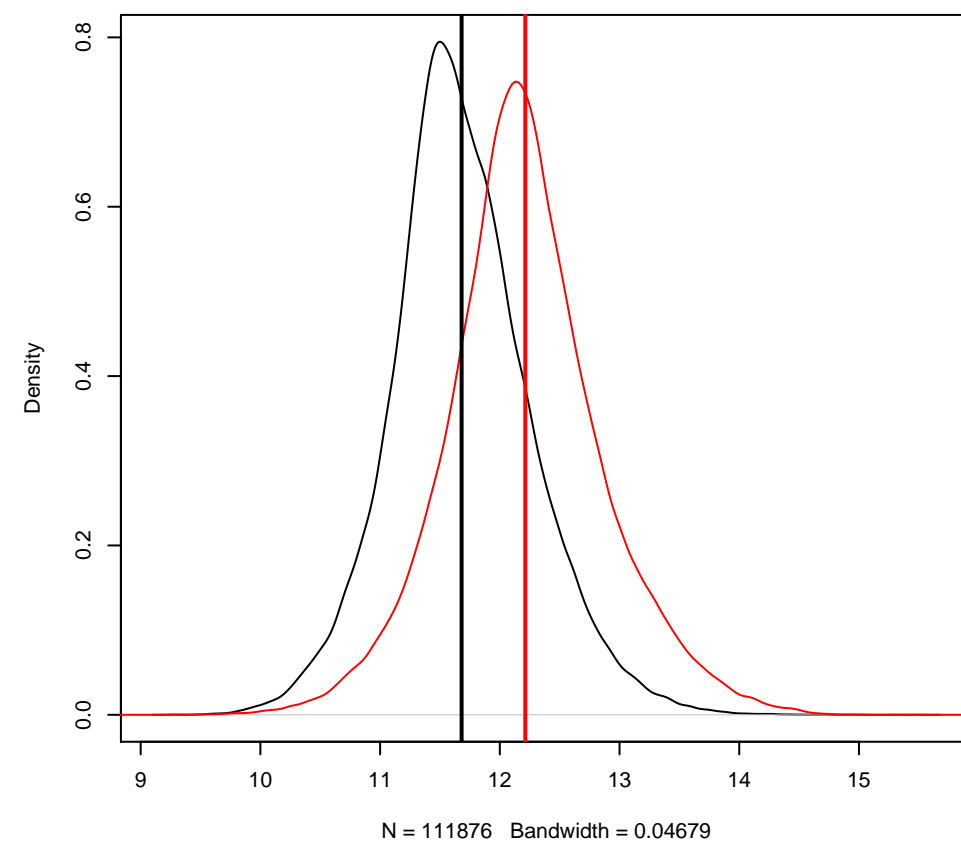

Replicate densities (normalized) for sample: U-14 (R)

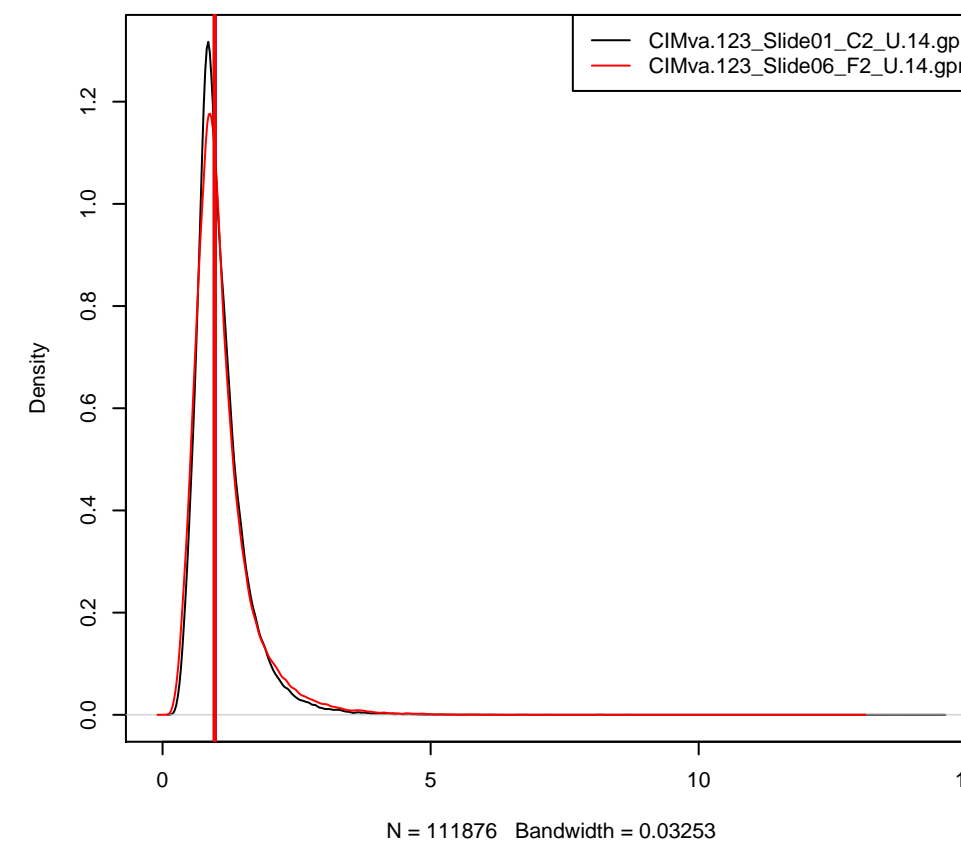

Replicate densities (normalized; log2) for sample: U-14 (R)

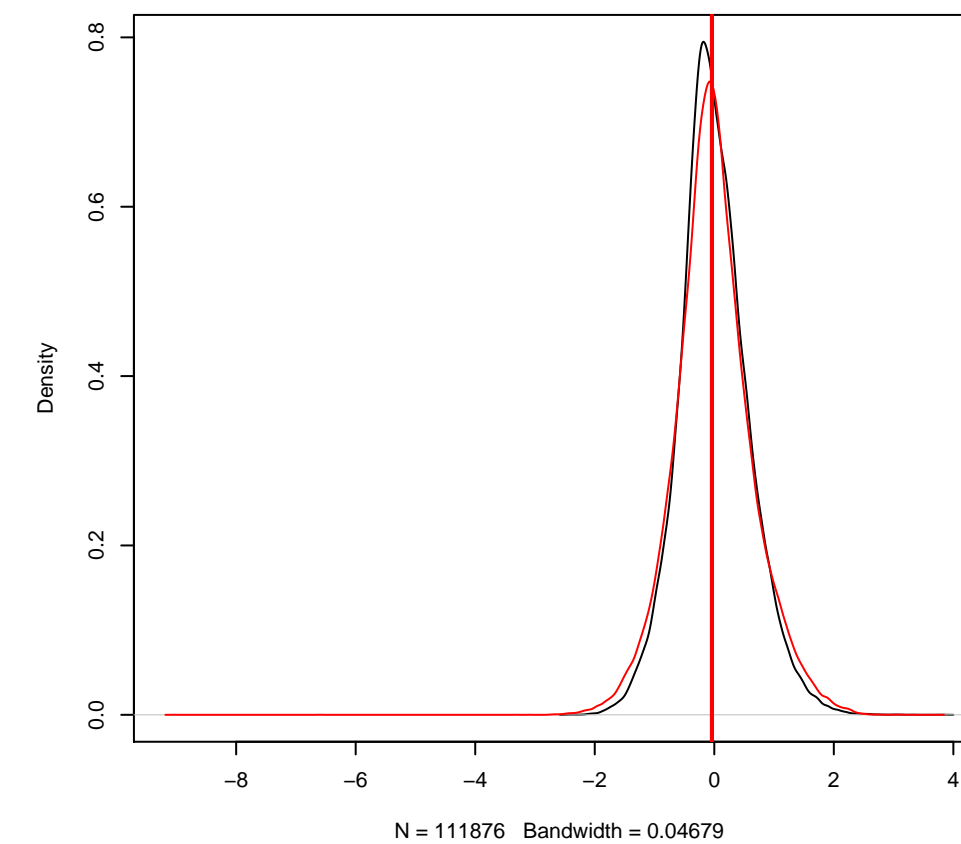

Replicate scatter (raw) for sample: U-14 (R)  
Correlation coefficient: 0.76 (Pearson); 0.75 (Spearman)

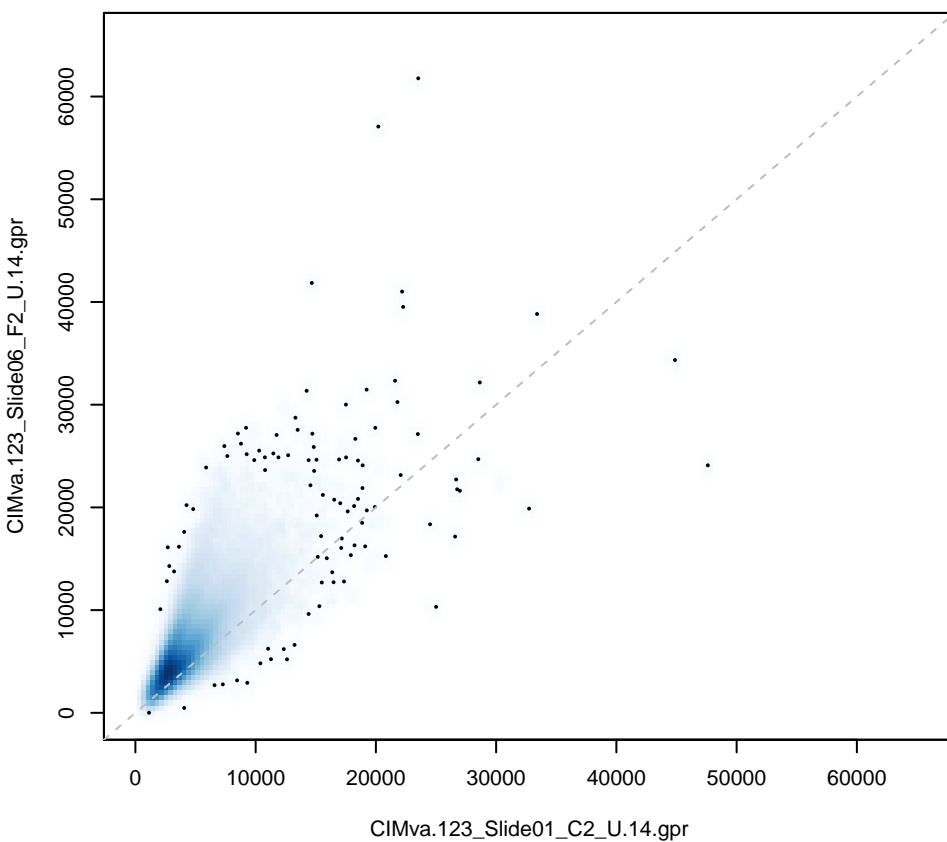

Replicate scatter (raw; log2) for sample: U-14 (R)  
Correlation coefficient: 0.78 (Pearson); 0.75 (Spearman)

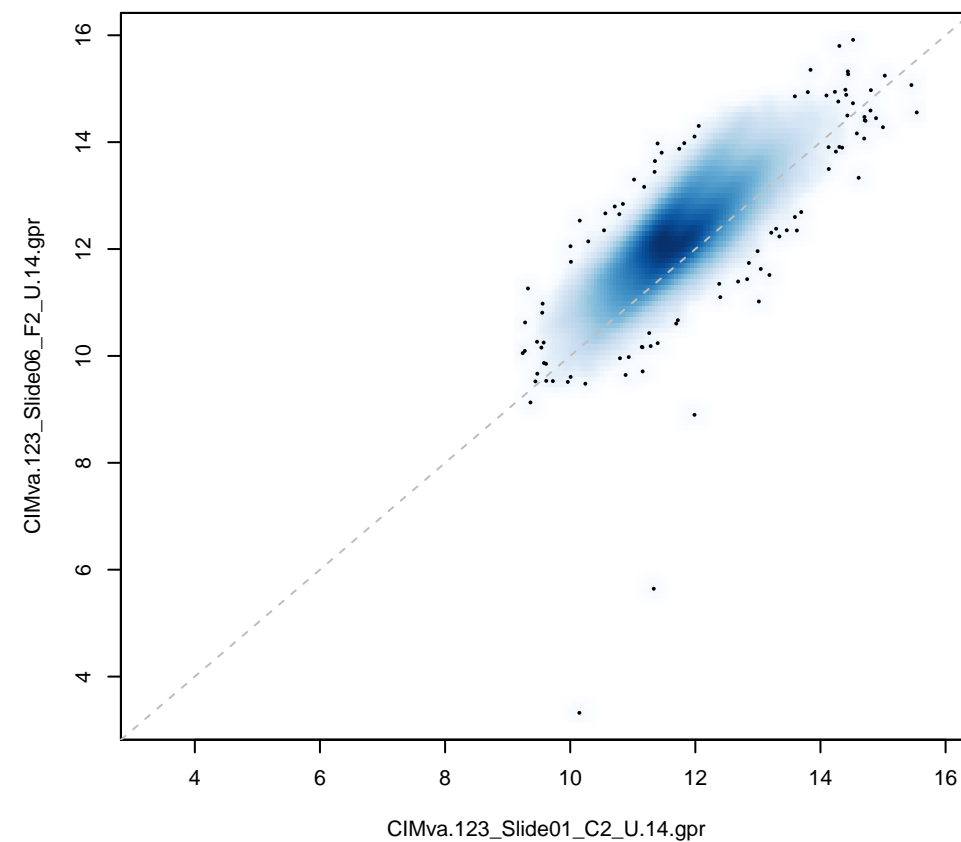

Replicate scatter (normalized) for sample: U-14 (R)  
Correlation coefficient: 0.76 (Pearson); 0.75 (Spearman)

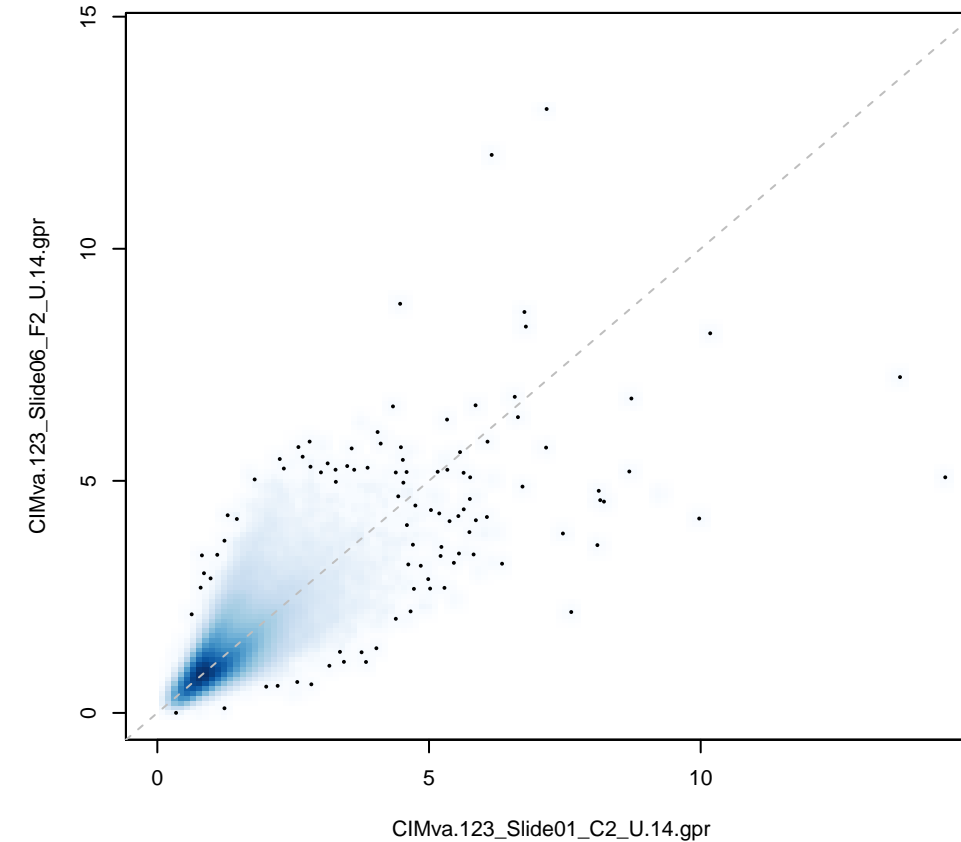

Replicate scatter (normalized; log2) for sample: U-14 (R)  
Correlation coefficient: 0.78 (Pearson); 0.75 (Spearman)

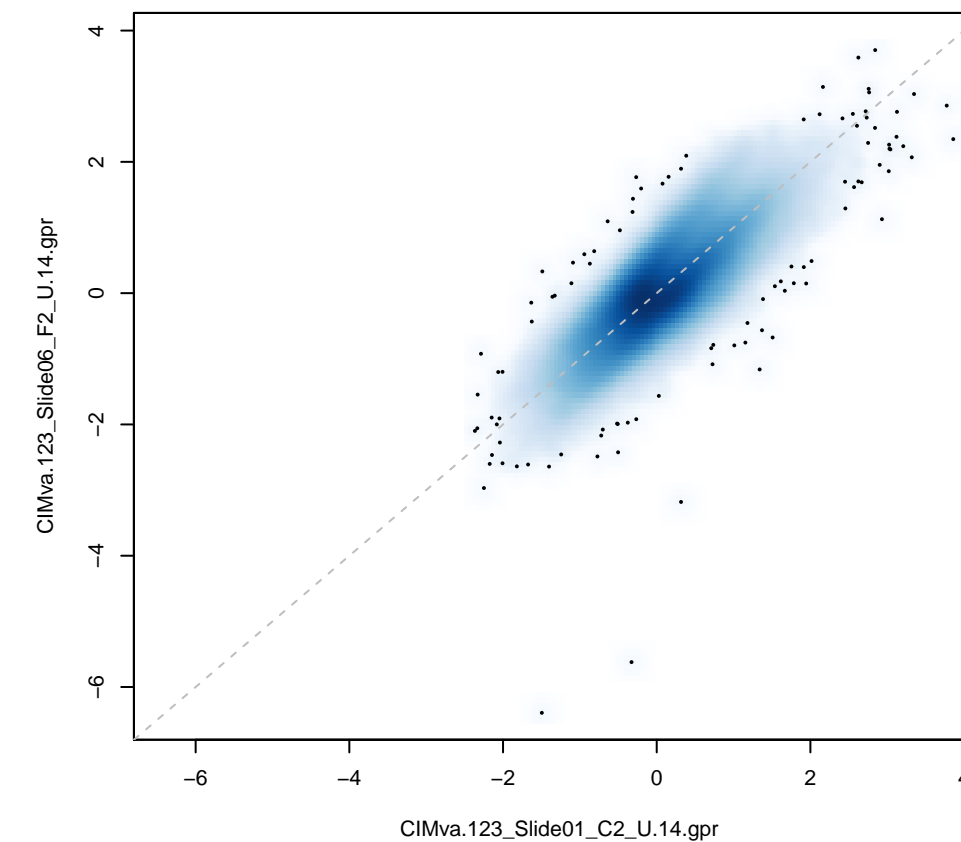

Replicate densities (raw) for sample: U-15 (NR)

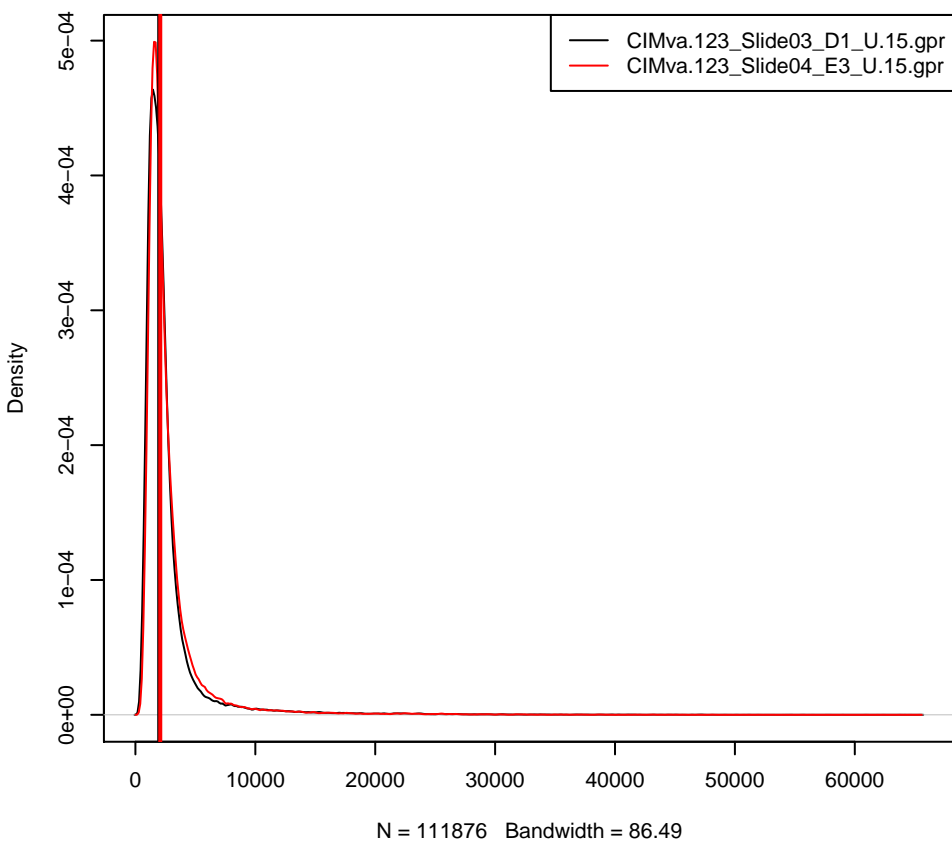

Replicate densities (raw; log2) for sample: U-15 (NR)

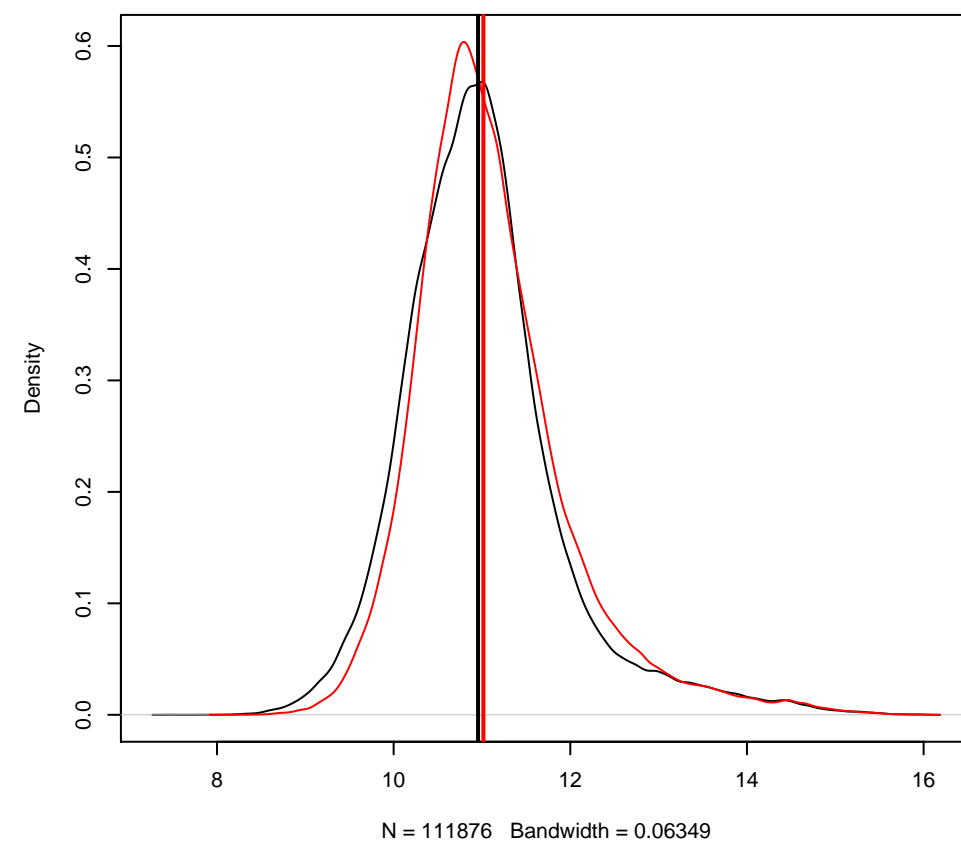

Replicate densities (normalized) for sample: U-15 (NR)

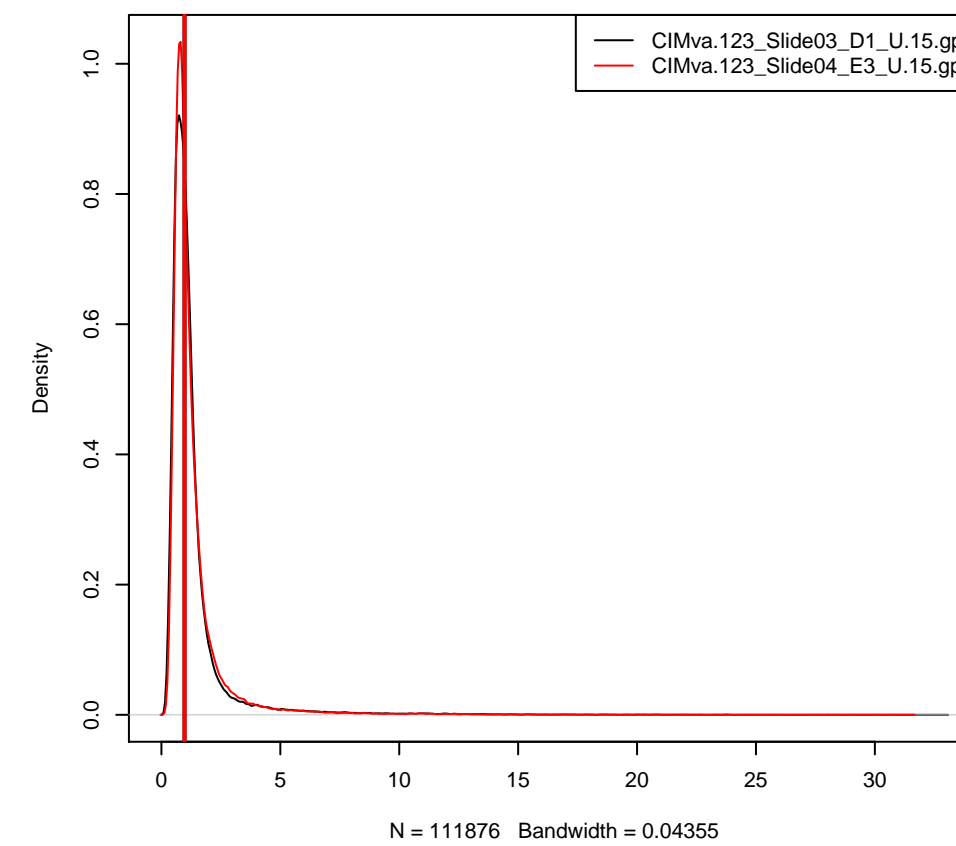

Replicate densities (normalized; log2) for sample: U-15 (NR)

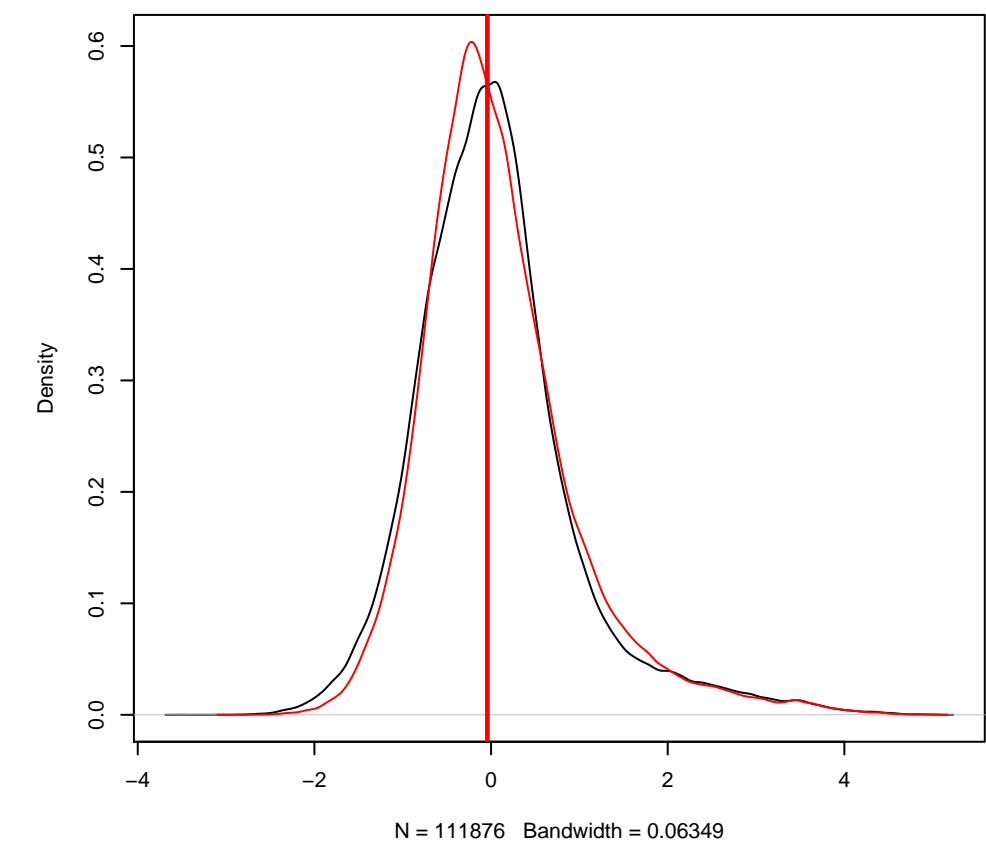

Replicate scatter (raw) for sample: U-15 (NR)  
Correlation coefficient: 0.9 (Pearson); 0.79 (Spearman)

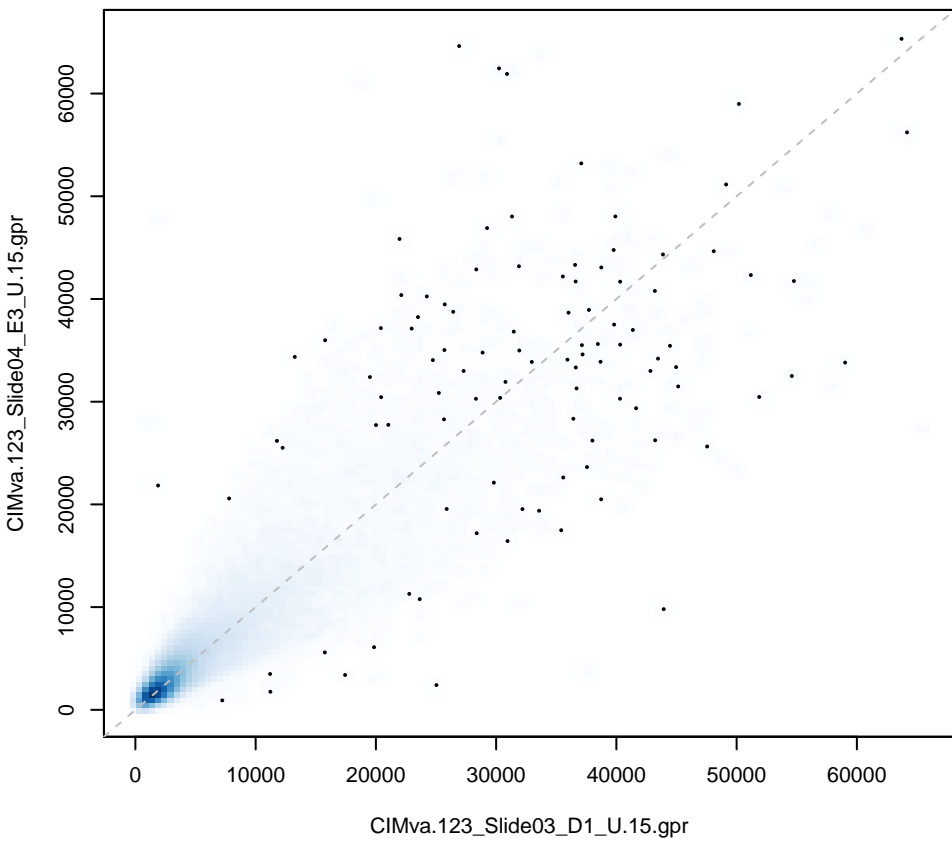

Replicate scatter (raw; log2) for sample: U-15 (NR)  
Correlation coefficient: 0.87 (Pearson); 0.79 (Spearman)

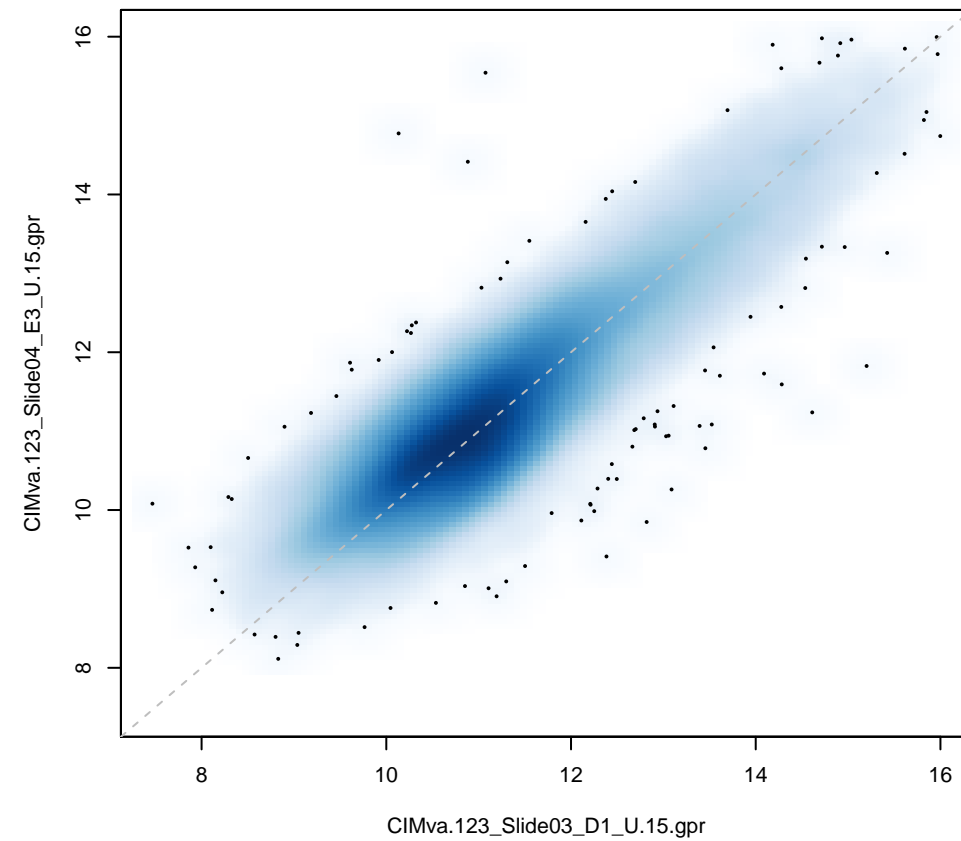

Replicate scatter (normalized) for sample: U-15 (NR)  
Correlation coefficient: 0.9 (Pearson); 0.79 (Spearman)

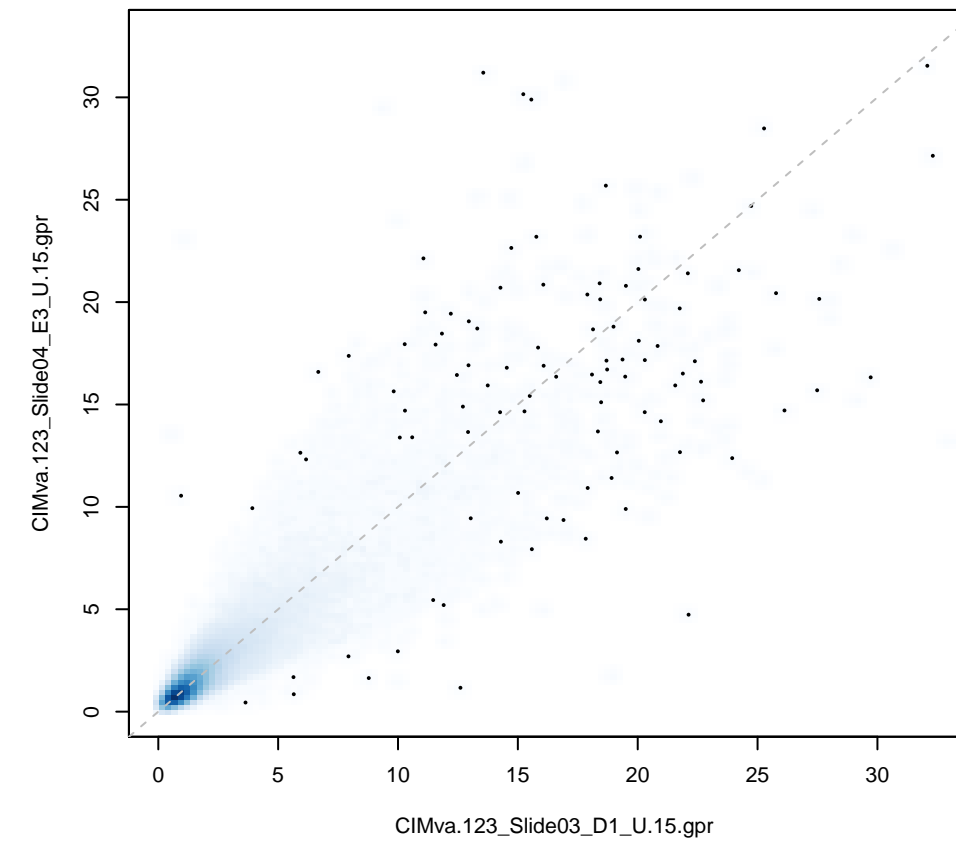

Replicate scatter (normalized; log2) for sample: U-15 (NR)  
Correlation coefficient: 0.9 (Pearson); 0.79 (Spearman)

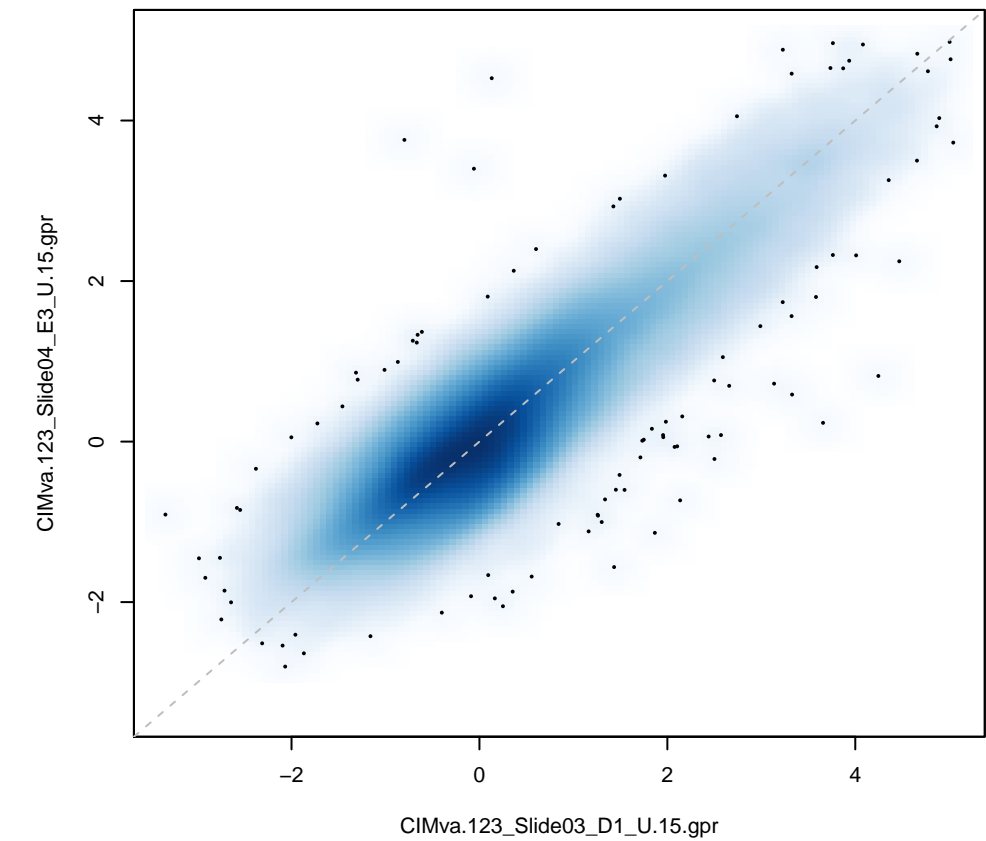

Replicate densities (raw) for sample: U-16 (NR)

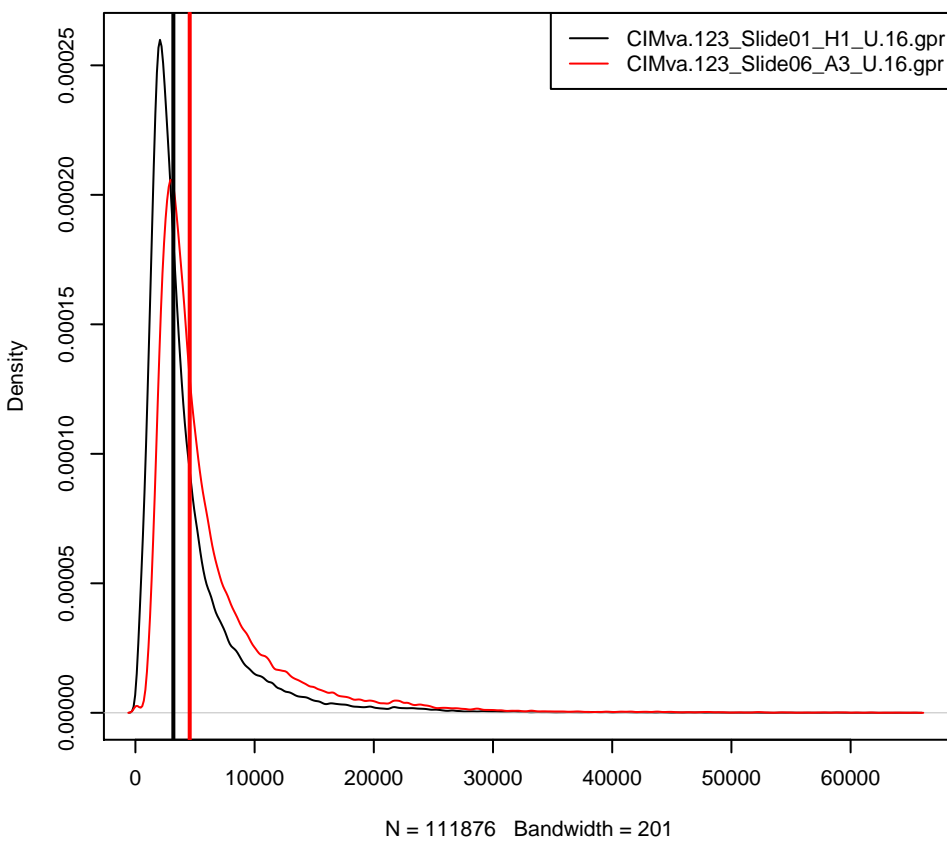

Replicate densities (raw; log2) for sample: U-16 (NR)

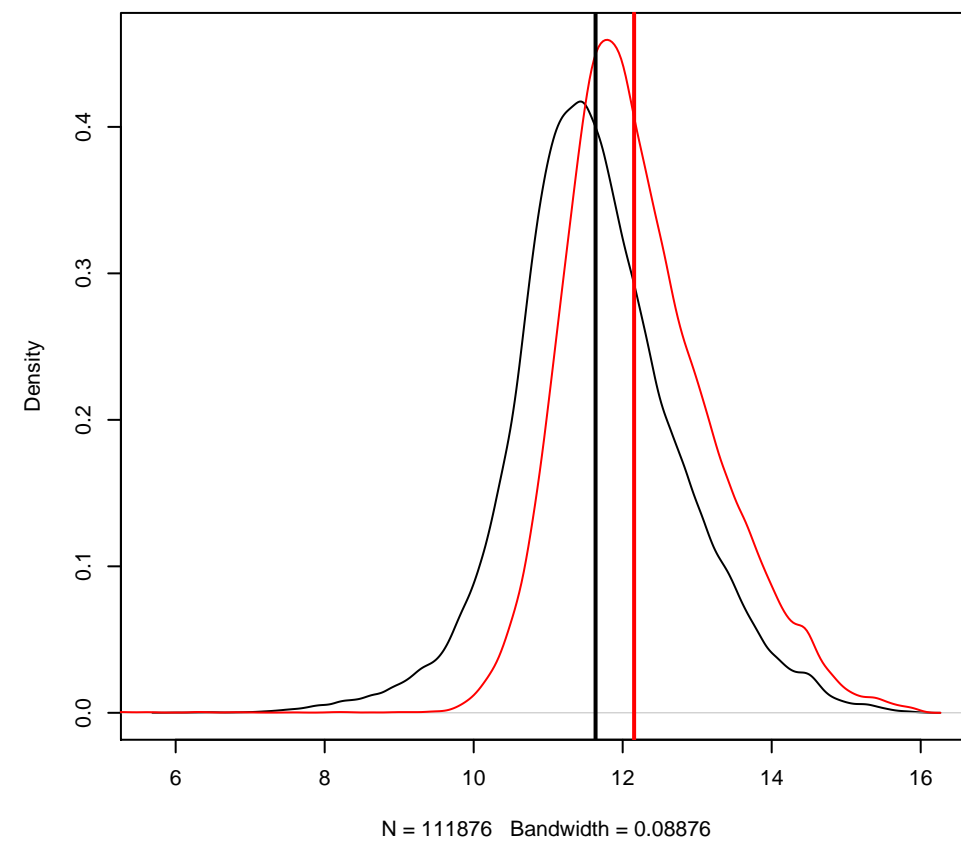

Replicate densities (normalized) for sample: U-16 (NR)

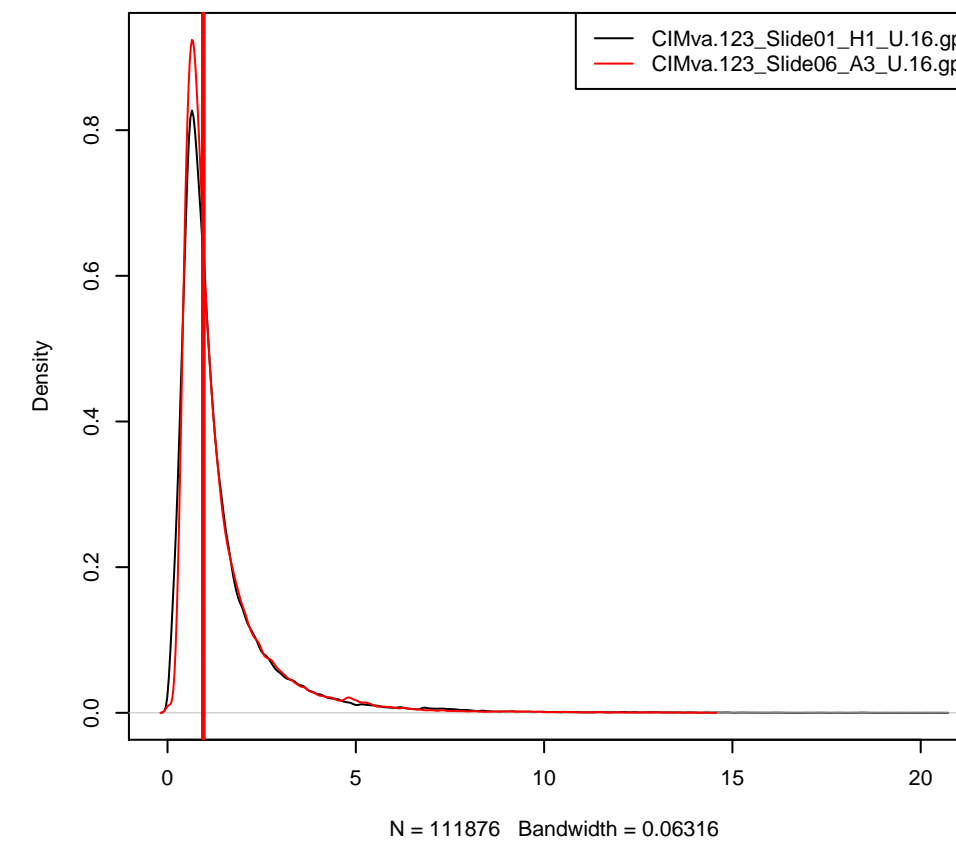

Replicate densities (normalized; log2) for sample: U-16 (NR)

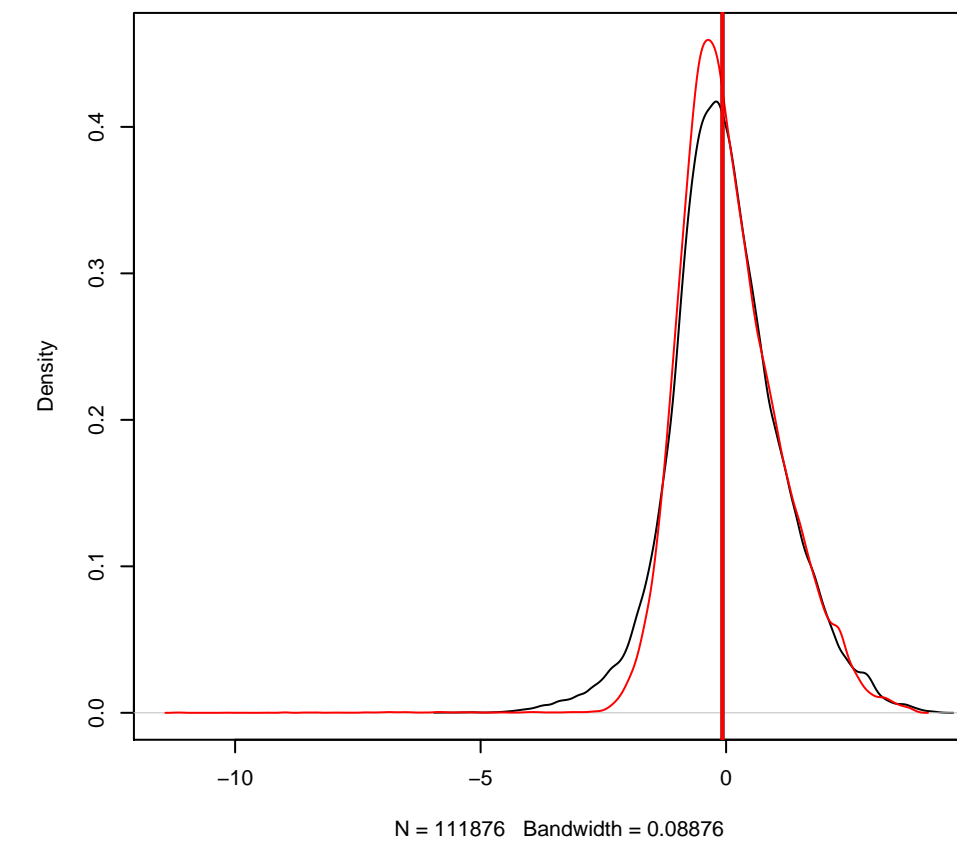

Replicate scatter (raw) for sample: U-16 (NR)  
Correlation coefficient: 0.8 (Pearson); 0.74 (Spearman)

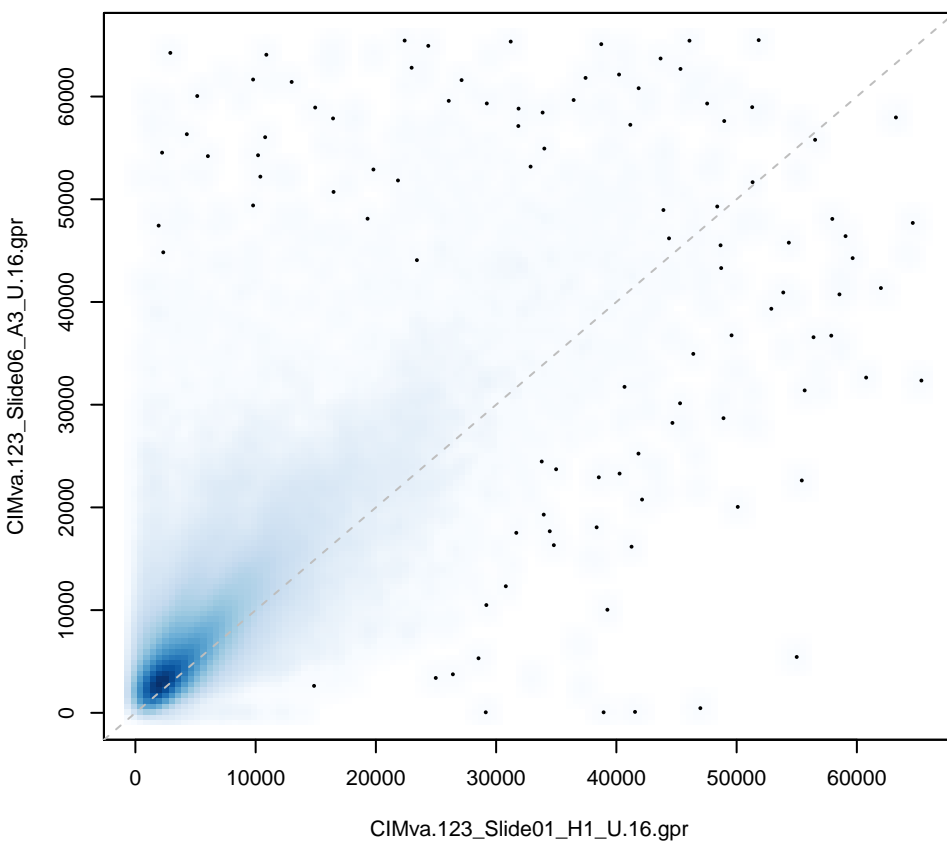

Replicate scatter (raw; log2) for sample: U-16 (NR)  
Correlation coefficient: 0.71 (Pearson); 0.74 (Spearman)

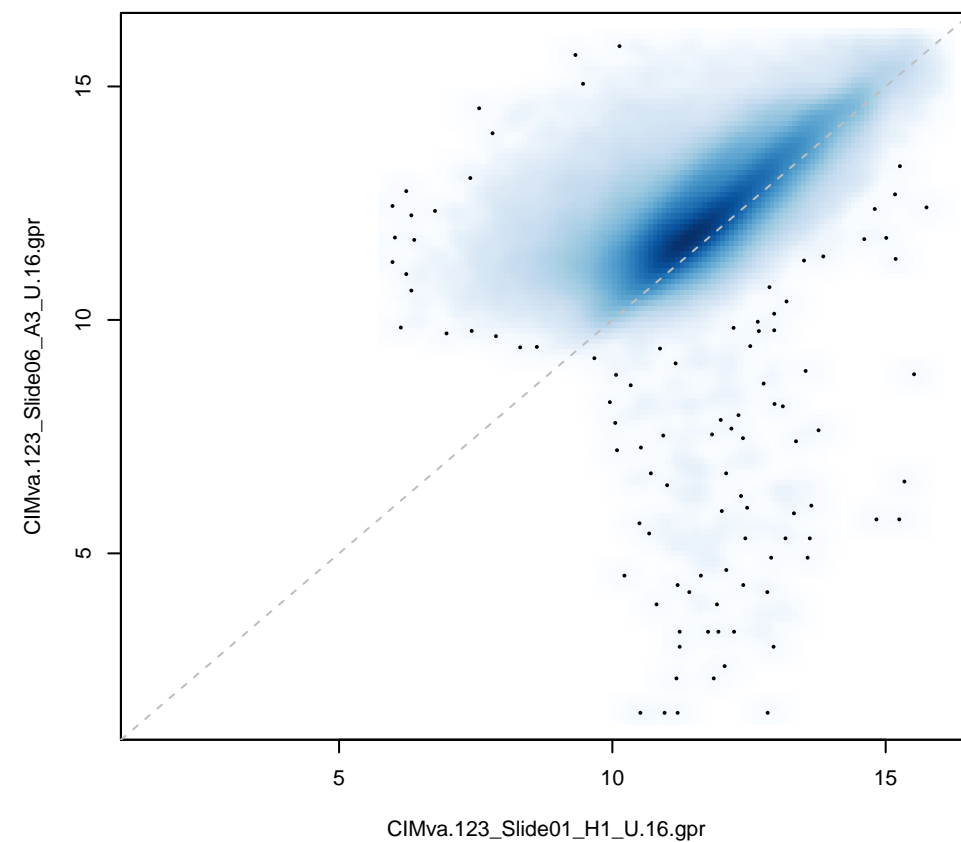

Replicate scatter (normalized) for sample: U-16 (NR)  
Correlation coefficient: 0.8 (Pearson); 0.74 (Spearman)

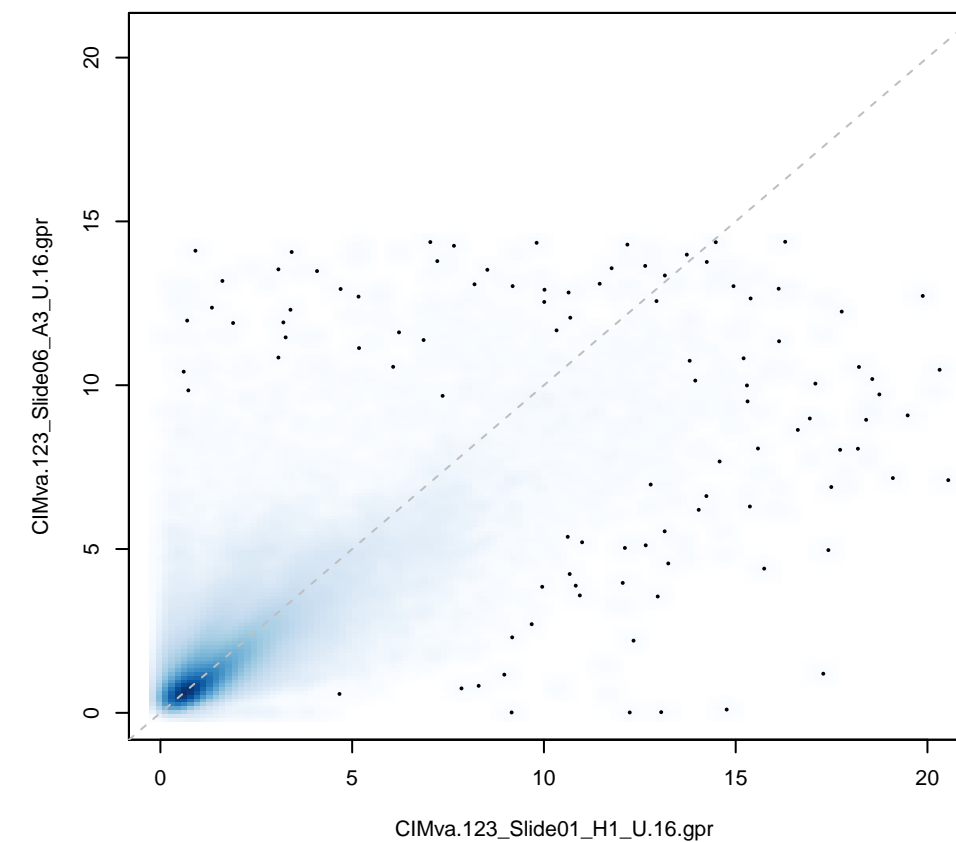

Replicate scatter (normalized; log2) for sample: U-16 (NR)  
Correlation coefficient: 0.79 (Pearson); 0.74 (Spearman)

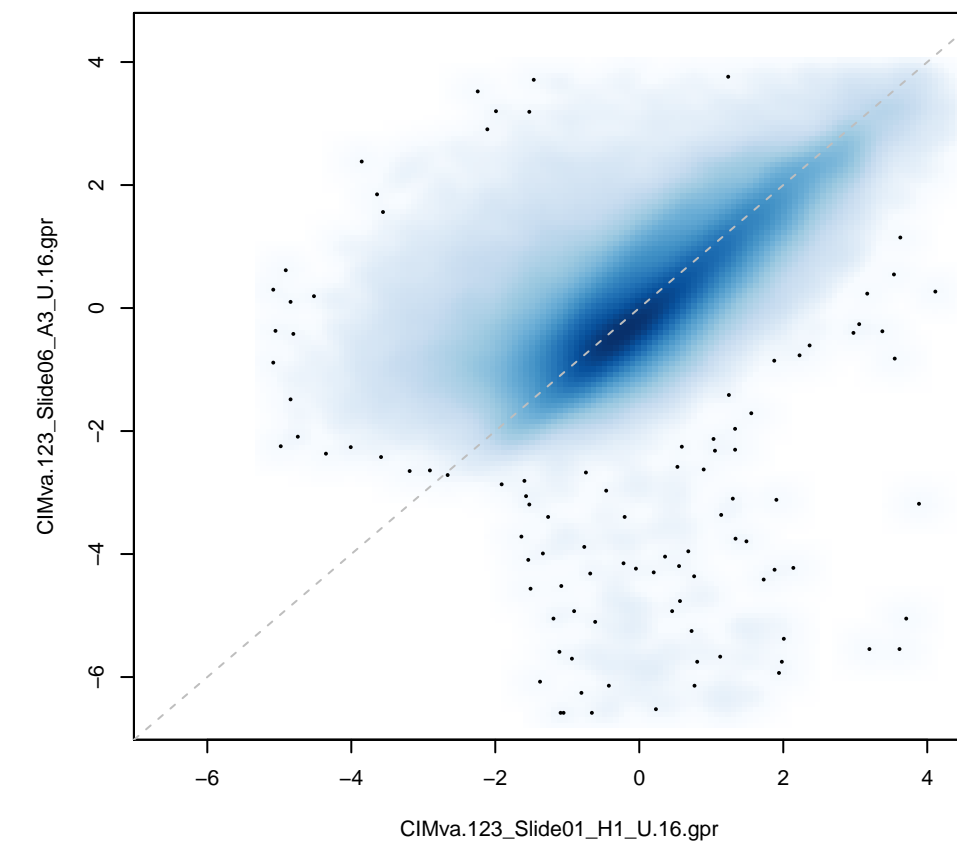

Replicate densities (raw) for sample: U-17 (R)

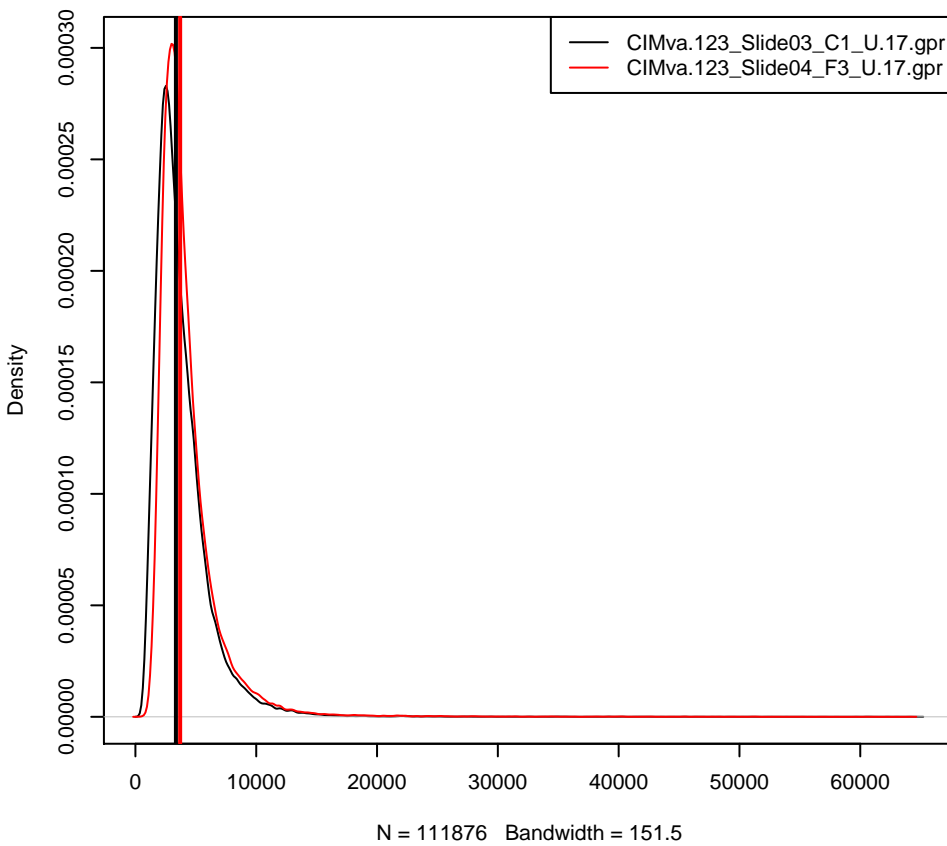

Replicate densities (raw; log2) for sample: U-17 (R)

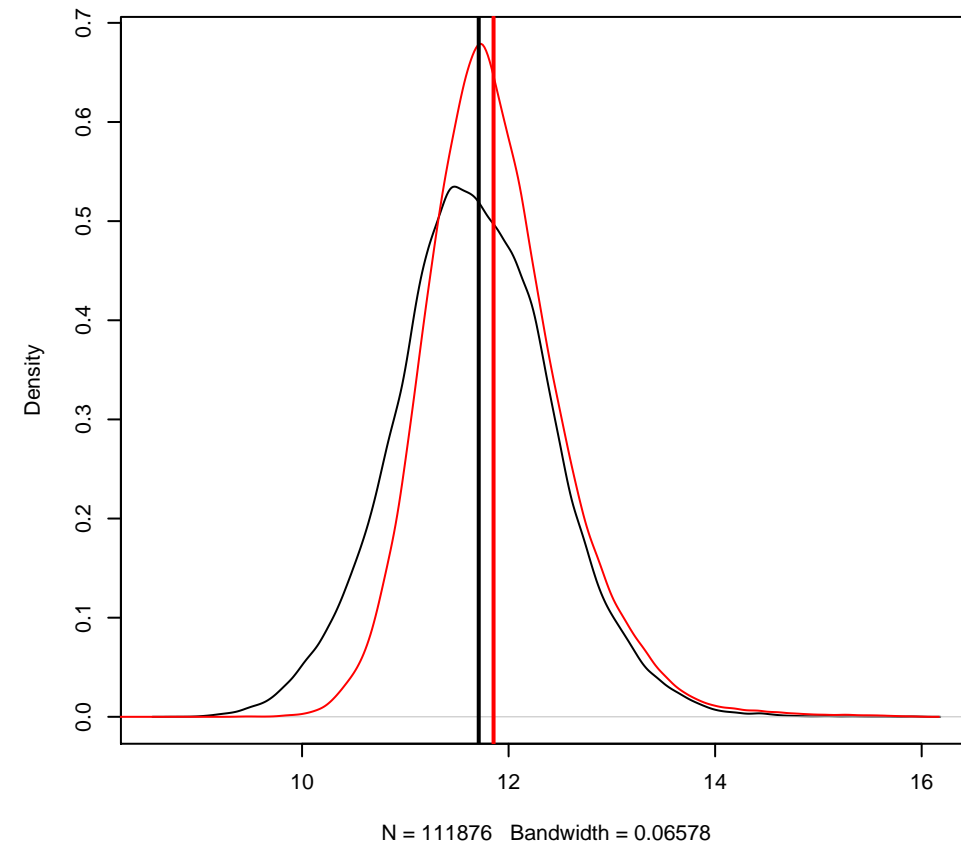

Replicate densities (normalized) for sample: U-17 (R)

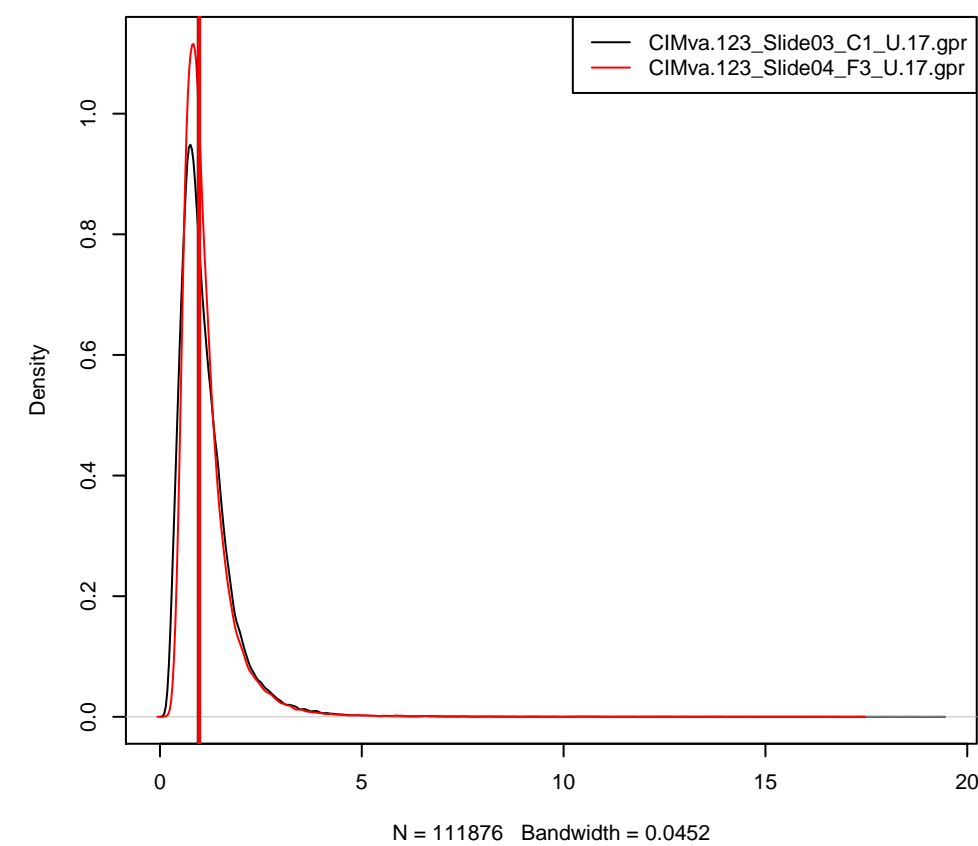

Replicate densities (normalized; log2) for sample: U-17 (R)

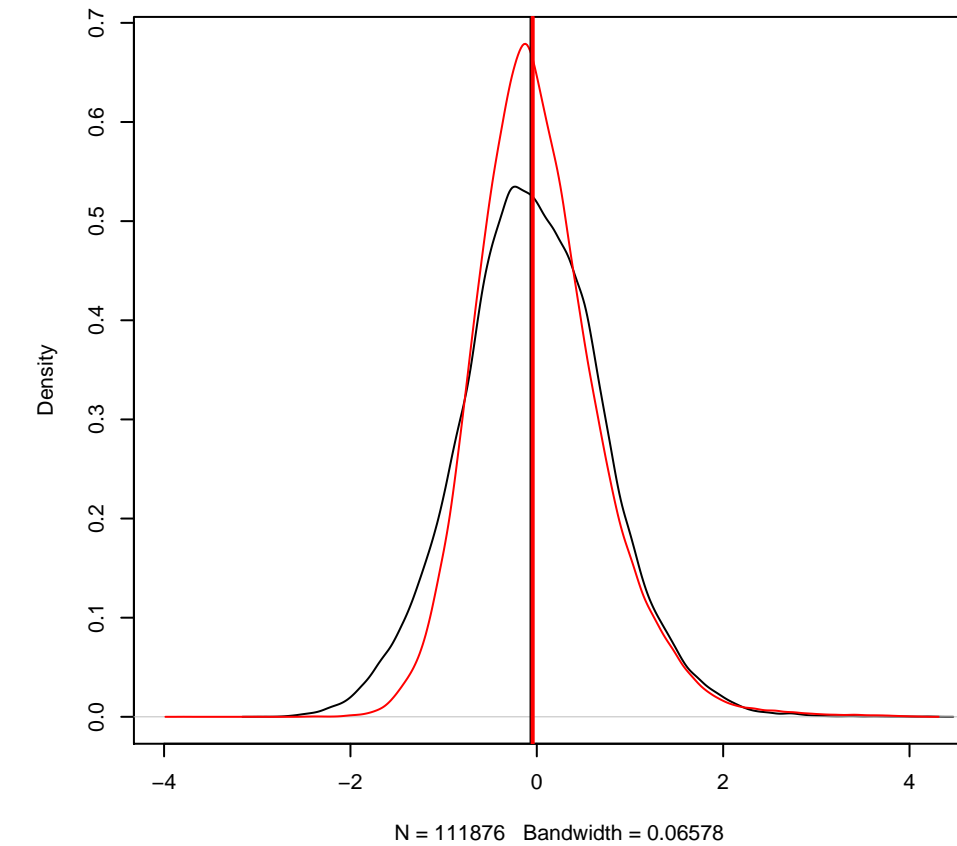

Replicate scatter (raw) for sample: U-17 (R)  
Correlation coefficient: 0.54 (Pearson); 0.71 (Spearman)

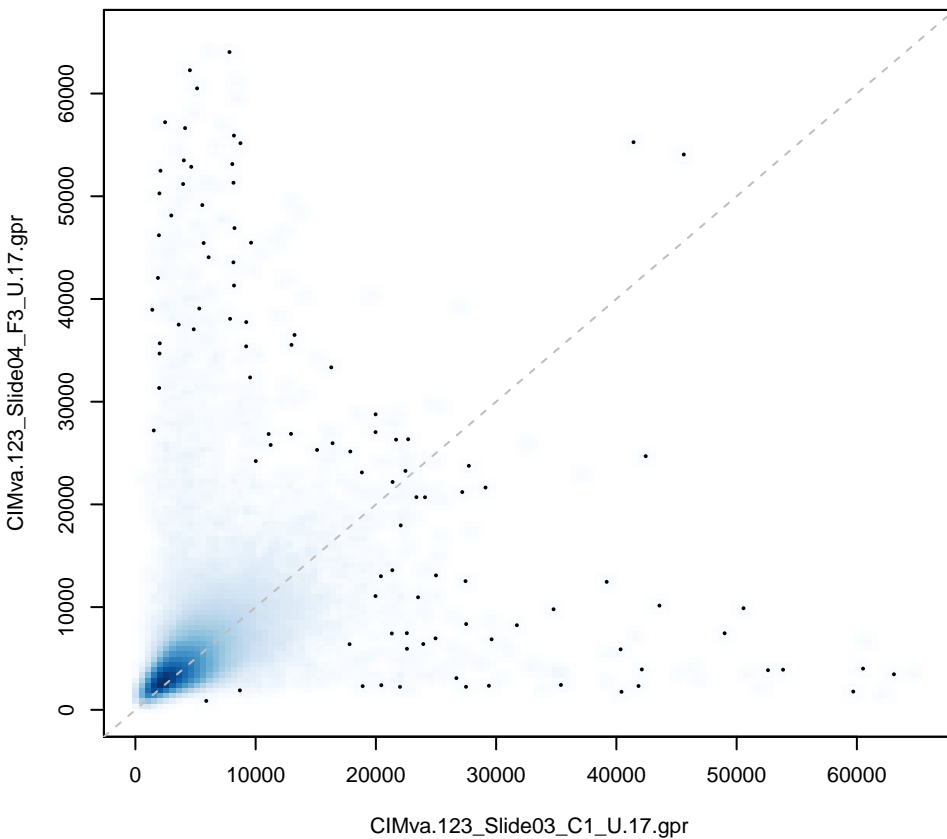

Replicate scatter (raw; log2) for sample: U-17 (R)  
Correlation coefficient: 0.71 (Pearson); 0.71 (Spearman)

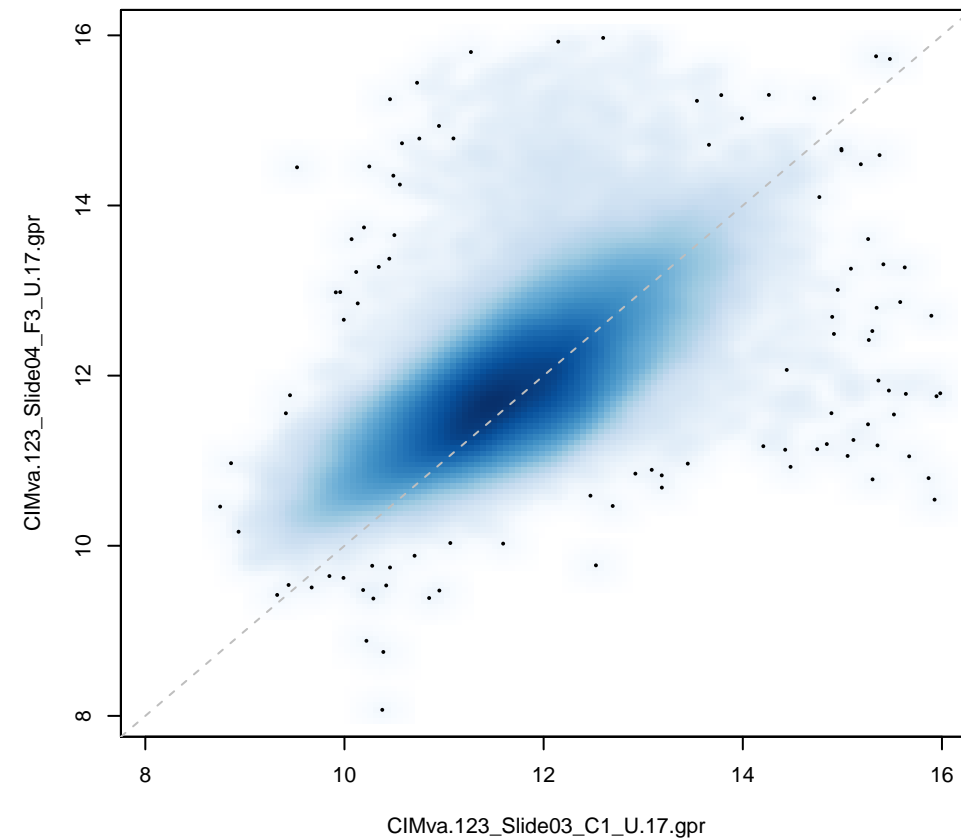

Replicate scatter (normalized) for sample: U-17 (R)  
Correlation coefficient: 0.54 (Pearson); 0.71 (Spearman)

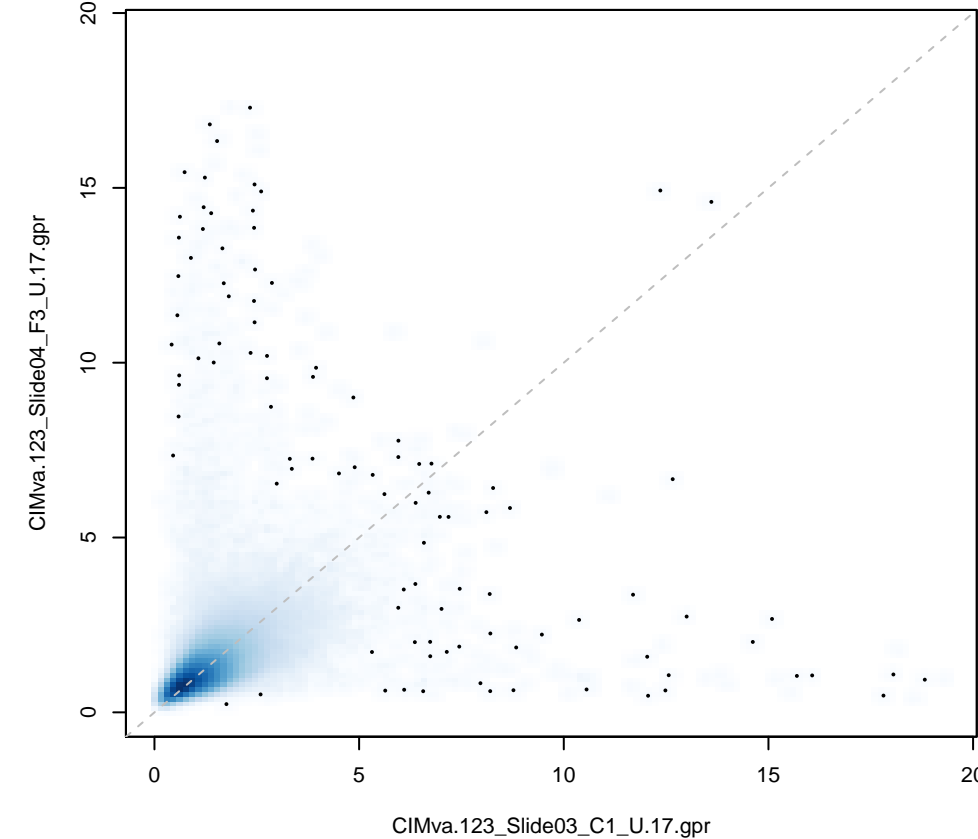

Replicate scatter (normalized; log2) for sample: U-17 (R)  
Correlation coefficient: 0.68 (Pearson); 0.71 (Spearman)

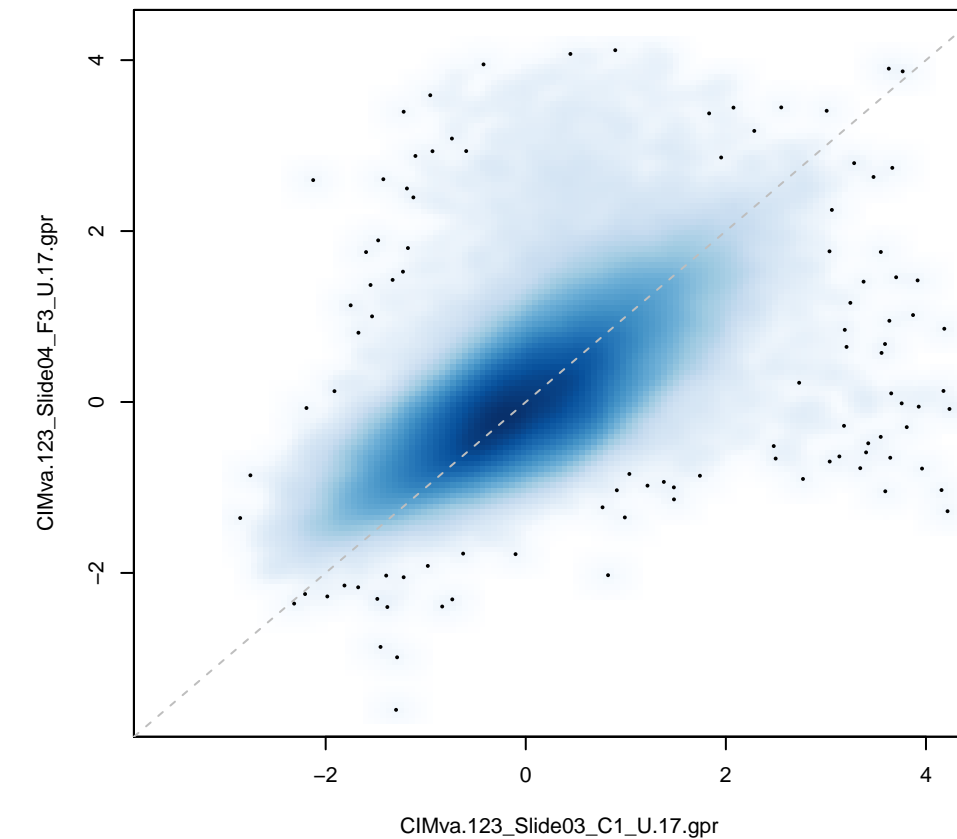

Replicate densities (raw) for sample: U-18 (R)

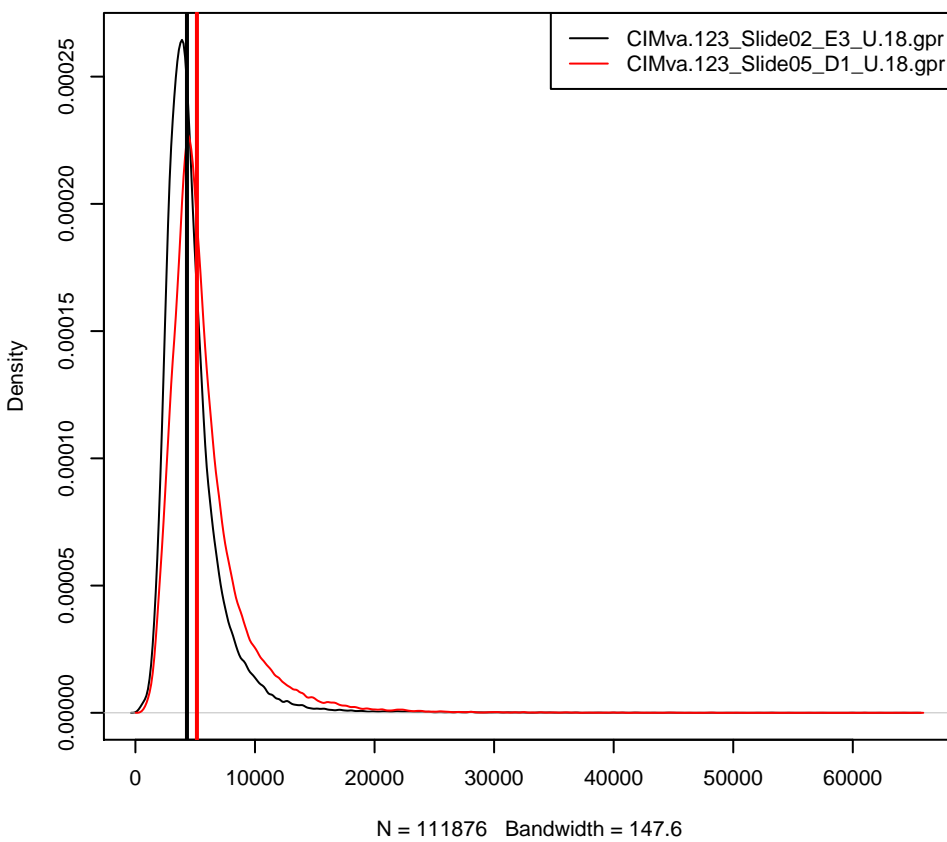

Replicate densities (raw; log2) for sample: U-18 (R)

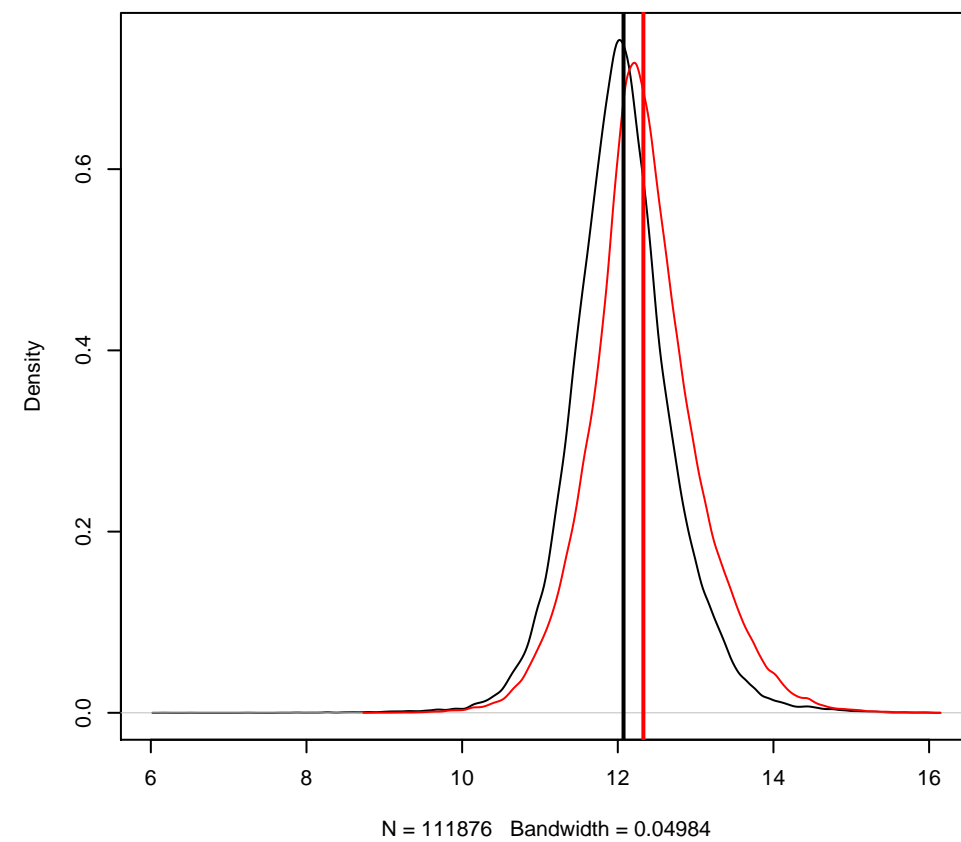

Replicate densities (normalized) for sample: U-18 (R)

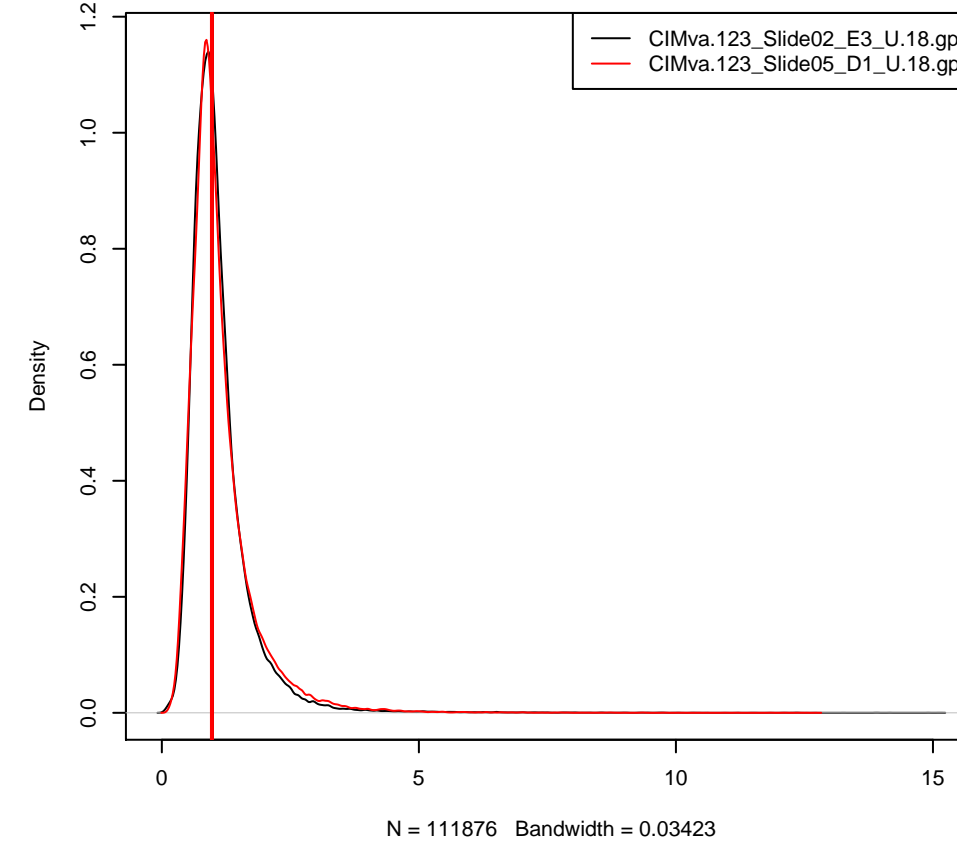

Replicate densities (normalized; log2) for sample: U-18 (R)

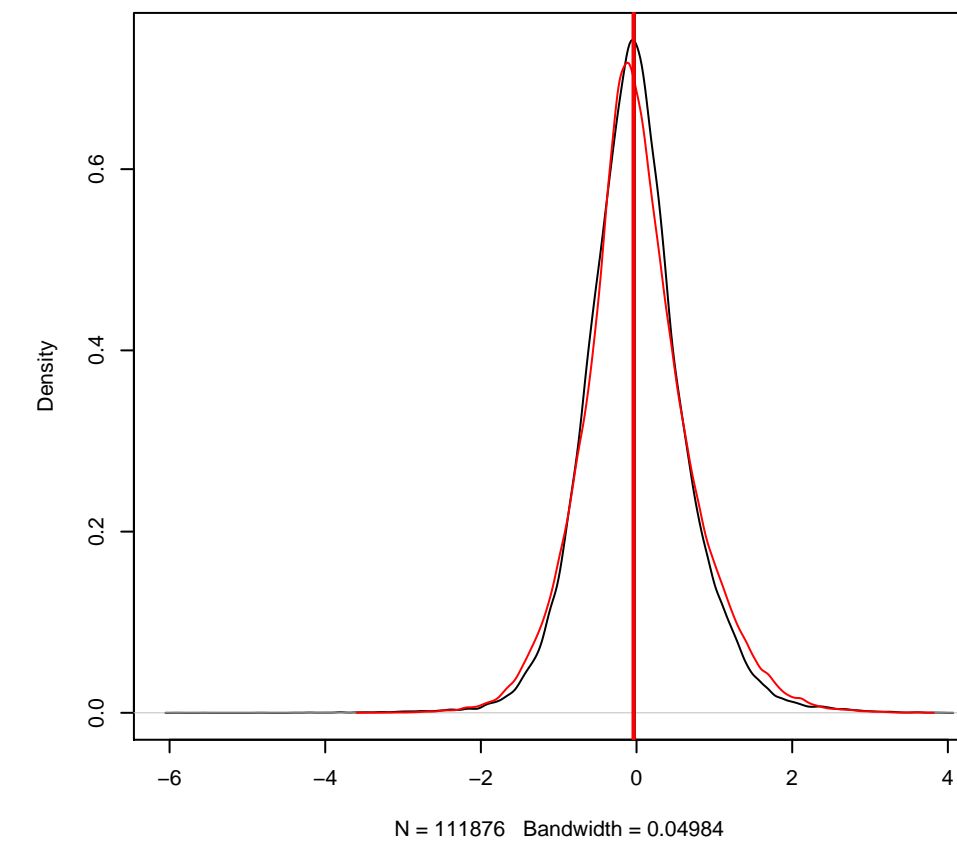

Replicate scatter (raw) for sample: U-18 (R)  
Correlation coefficient: 0.81 (Pearson); 0.77 (Spearman)

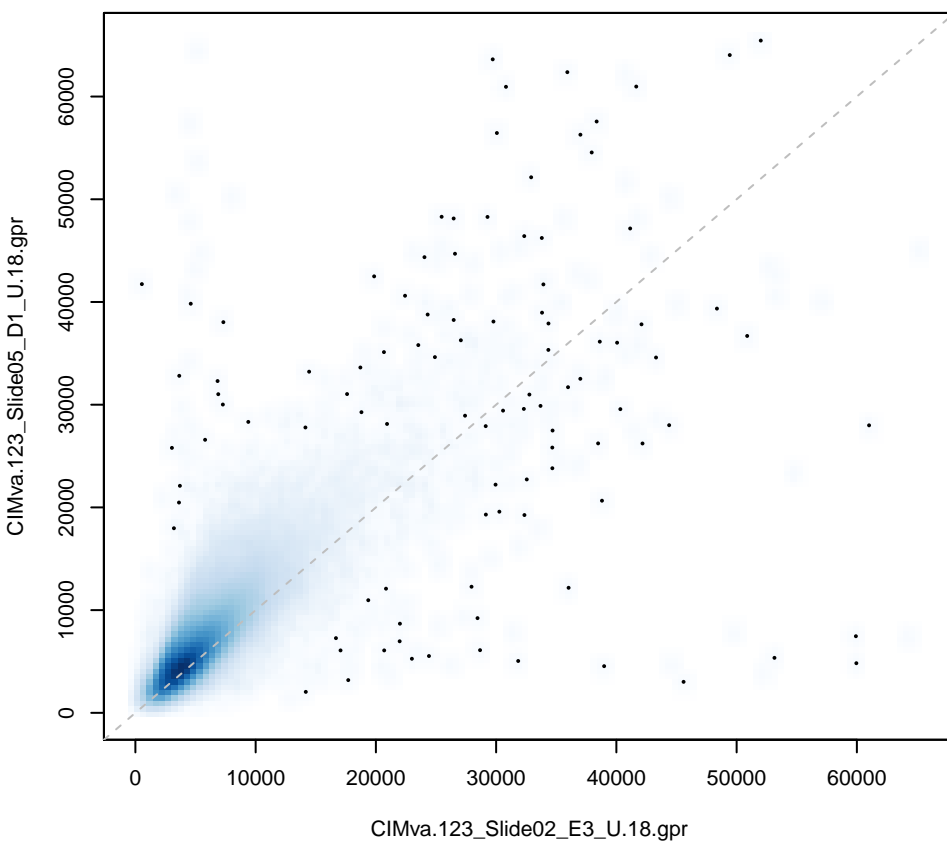

Replicate scatter (raw; log2) for sample: U-18 (R)  
Correlation coefficient: 0.8 (Pearson); 0.77 (Spearman)

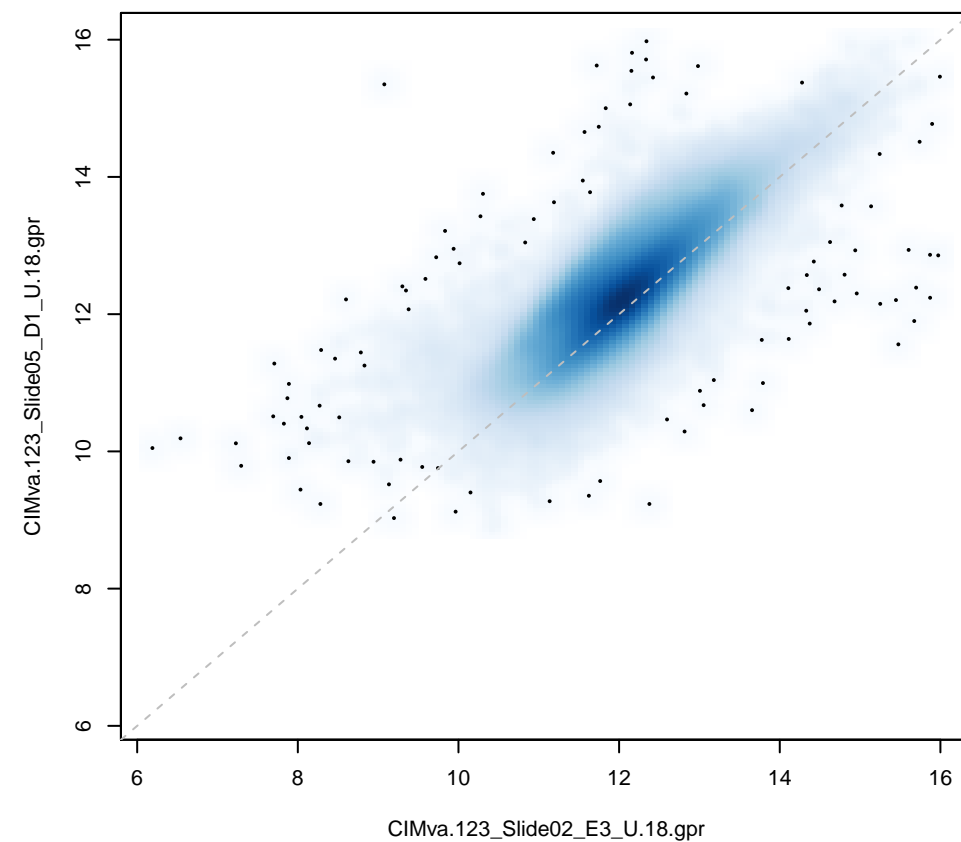

Replicate scatter (normalized) for sample: U-18 (R)  
Correlation coefficient: 0.81 (Pearson); 0.77 (Spearman)

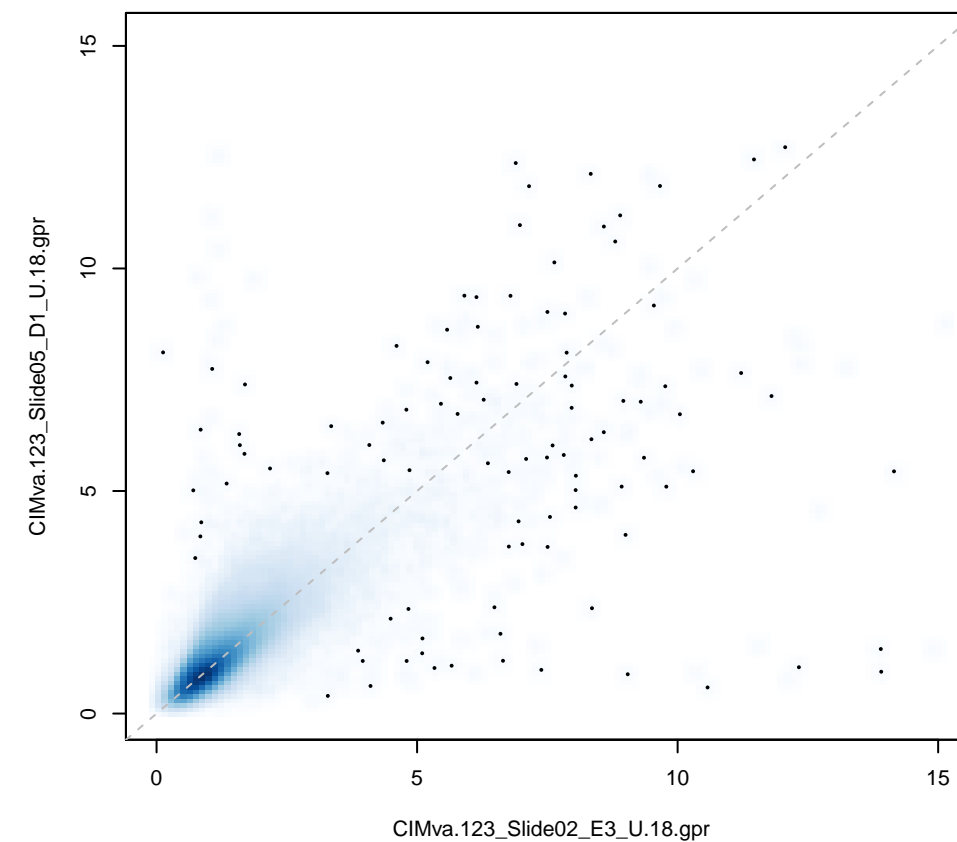

Replicate scatter (normalized; log2) for sample: U-18 (R)  
Correlation coefficient: 0.82 (Pearson); 0.77 (Spearman)

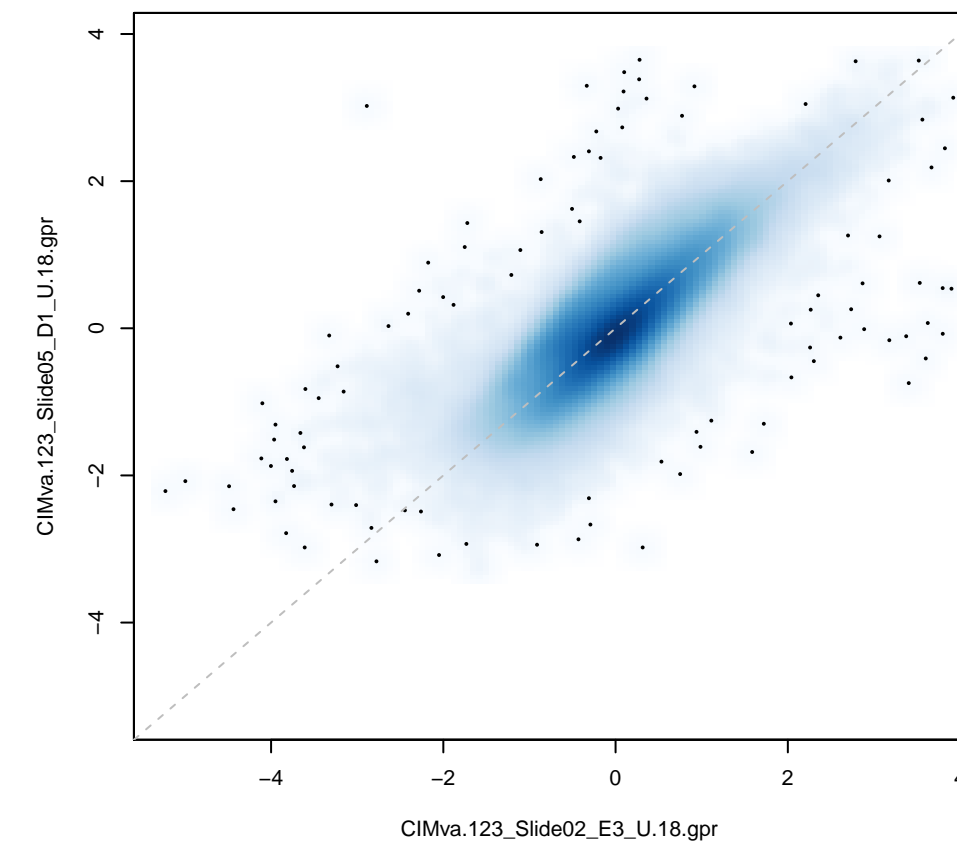

Replicate densities (raw) for sample: U-19 (NR)

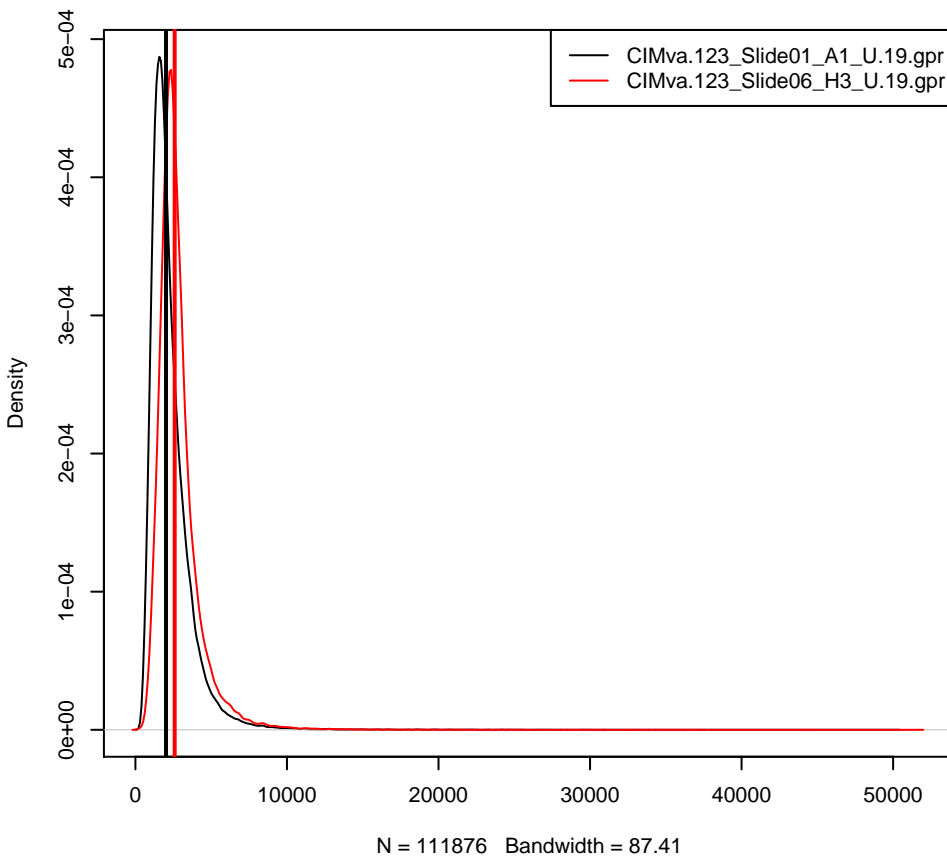

Replicate densities (raw; log2) for sample: U-19 (NR)

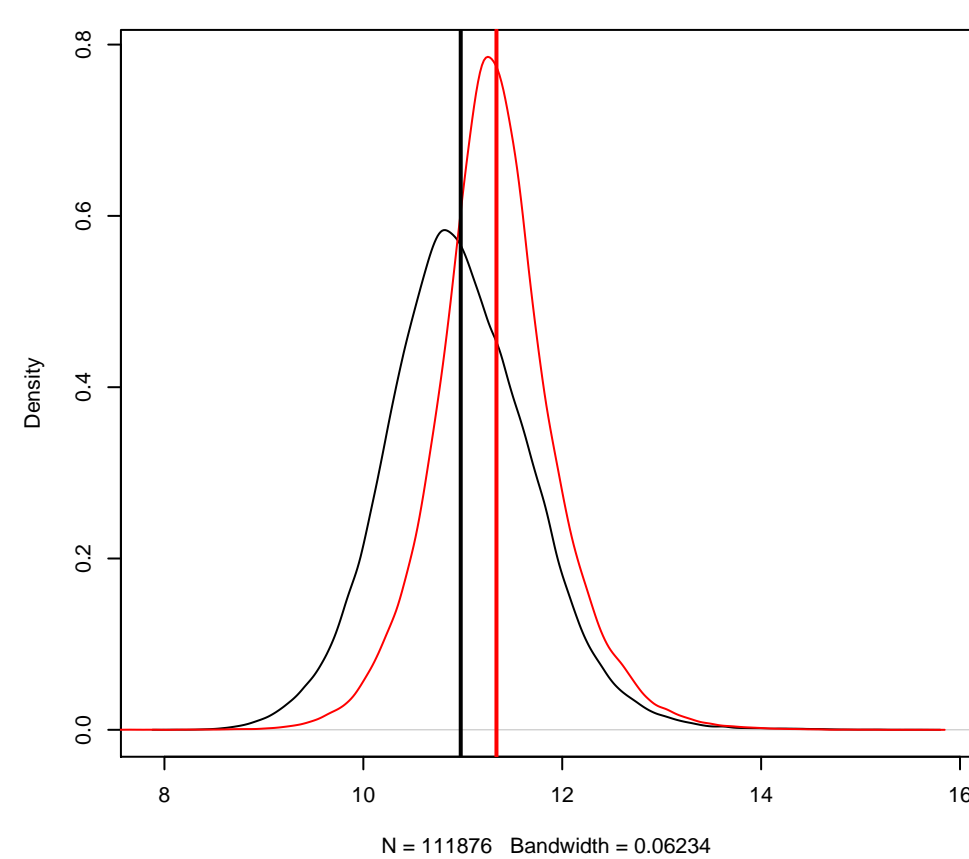

Replicate densities (normalized) for sample: U-19 (NR)

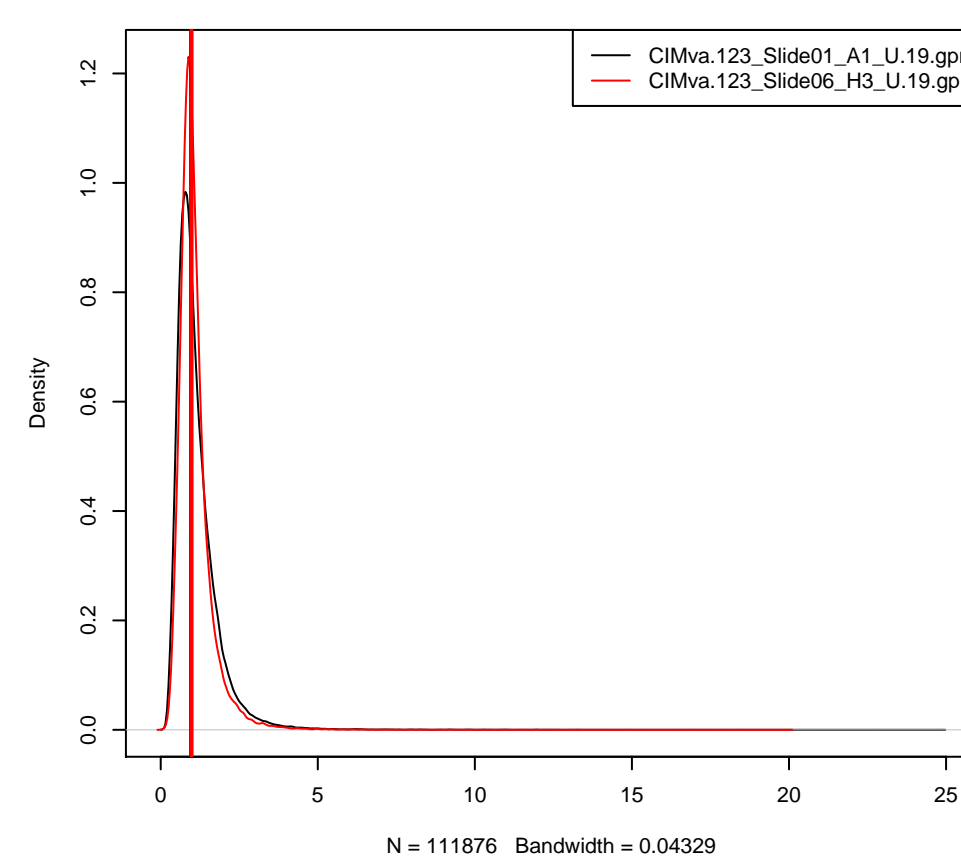

Replicate densities (normalized; log2) for sample: U-19 (NR)

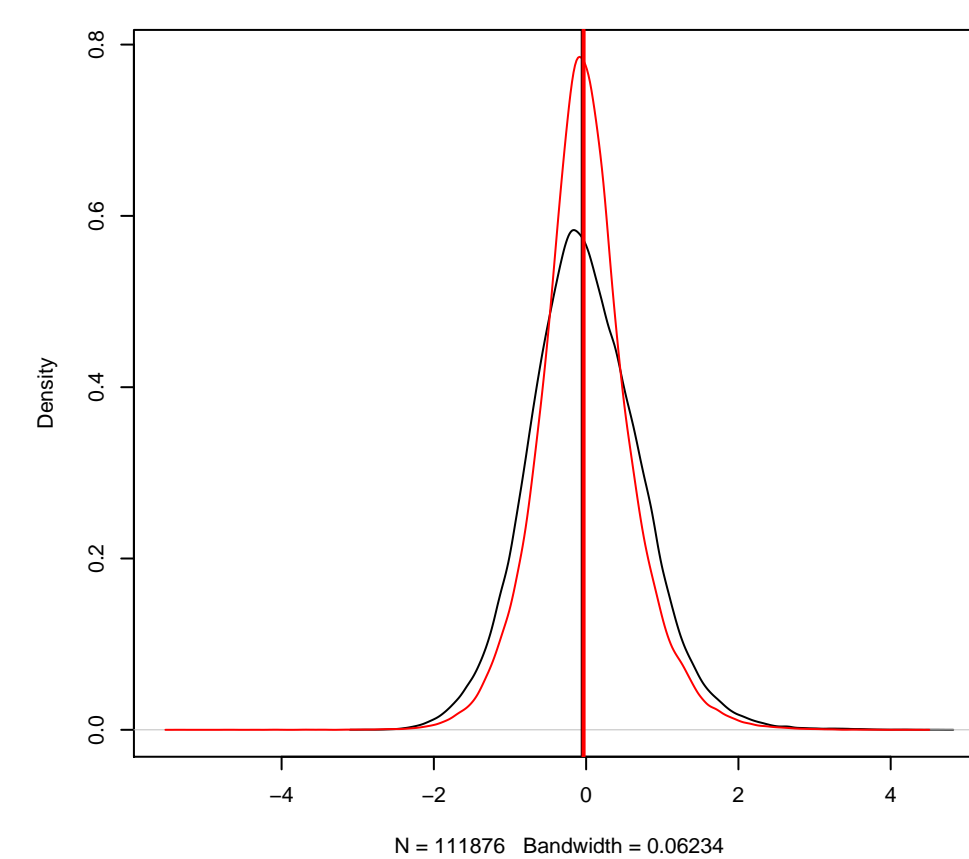

Replicate scatter (raw) for sample: U-19 (NR)  
Correlation coefficient: 0.64 (Pearson); 0.59 (Spearman)

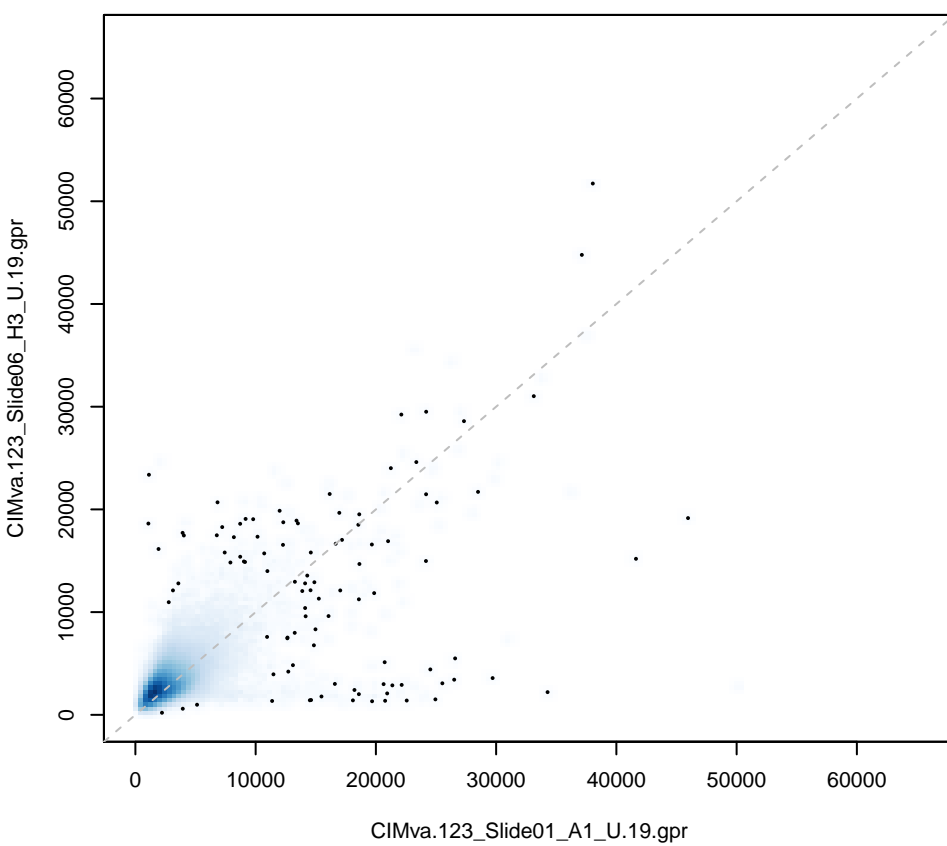

Replicate scatter (raw; log2) for sample: U-19 (NR)  
Correlation coefficient: 0.63 (Pearson); 0.59 (Spearman)

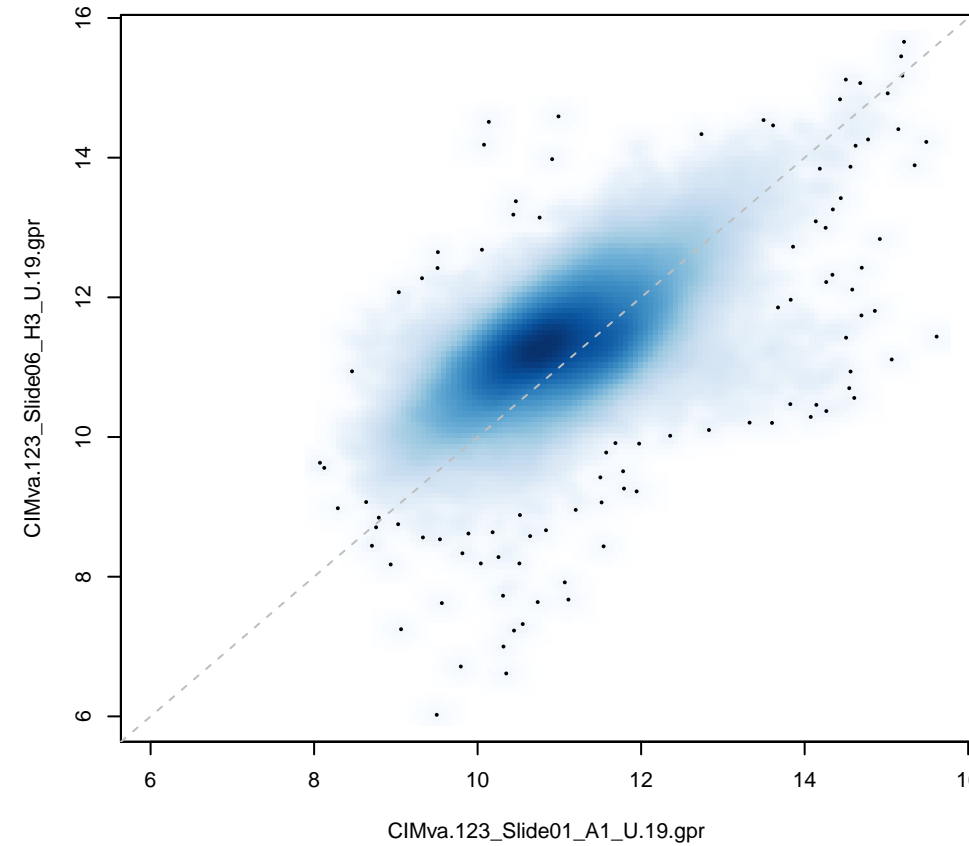

Replicate scatter (normalized) for sample: U-19 (NR)  
Correlation coefficient: 0.64 (Pearson); 0.59 (Spearman)

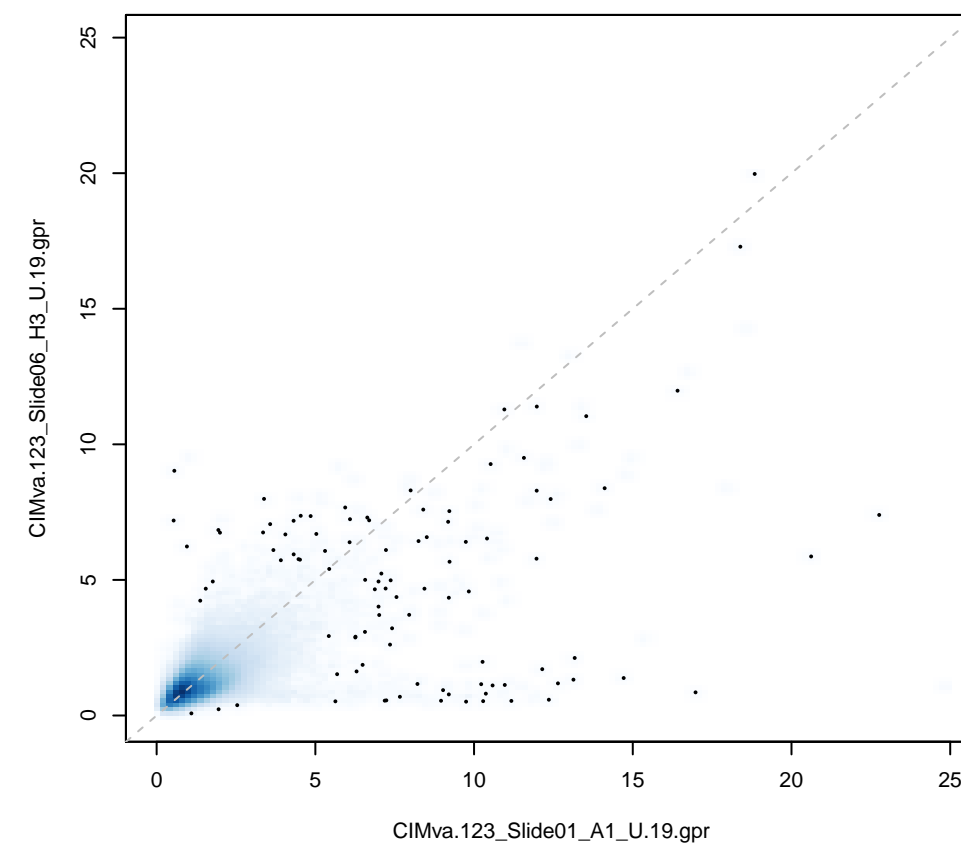

Replicate scatter (normalized; log2) for sample: U-19 (NR)  
Correlation coefficient: 0.64 (Pearson); 0.59 (Spearman)

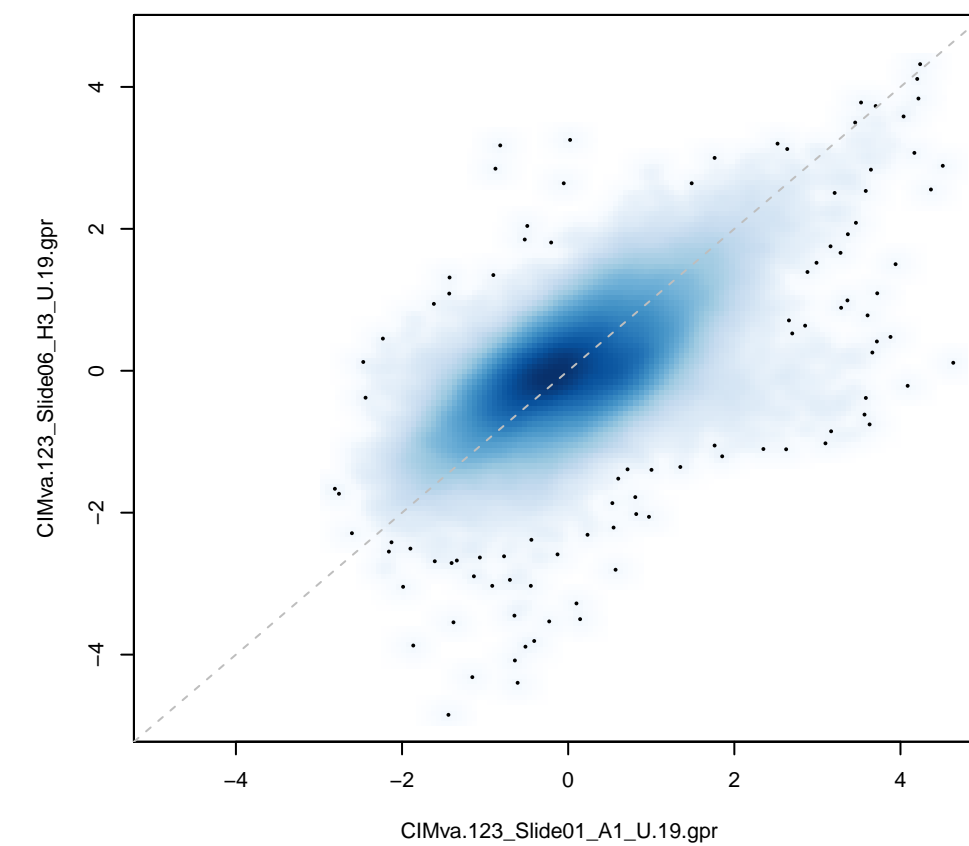

Replicate densities (raw) for sample: U-2 (NR)

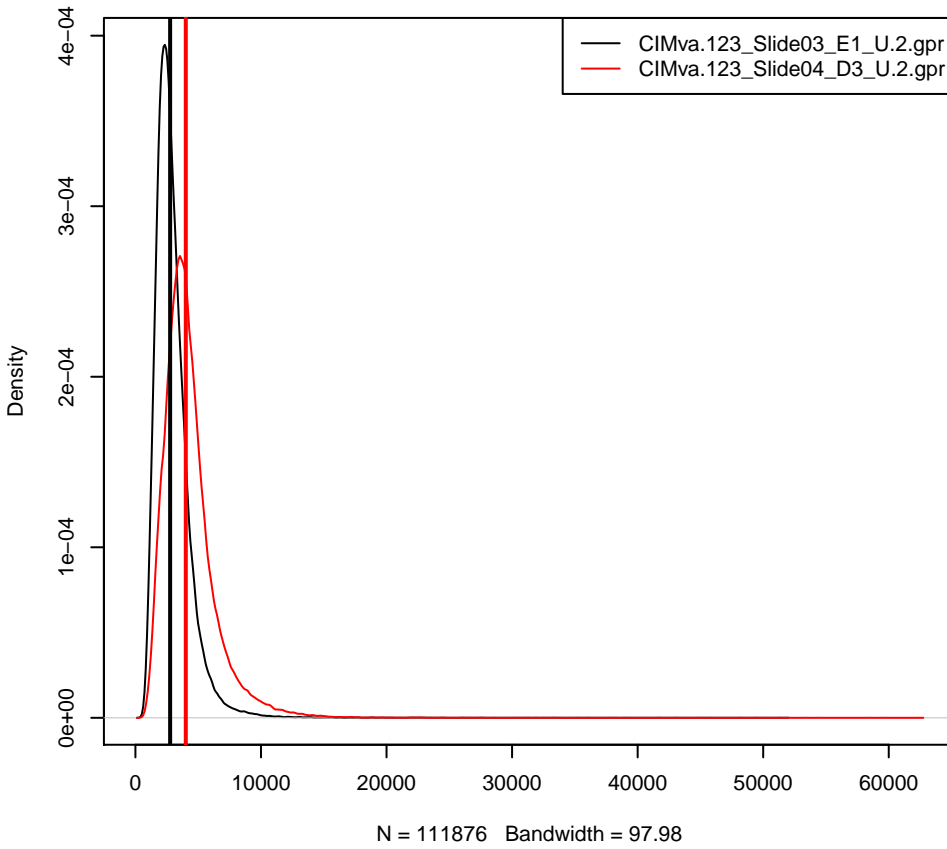

Replicate densities (raw; log2) for sample: U-2 (NR)

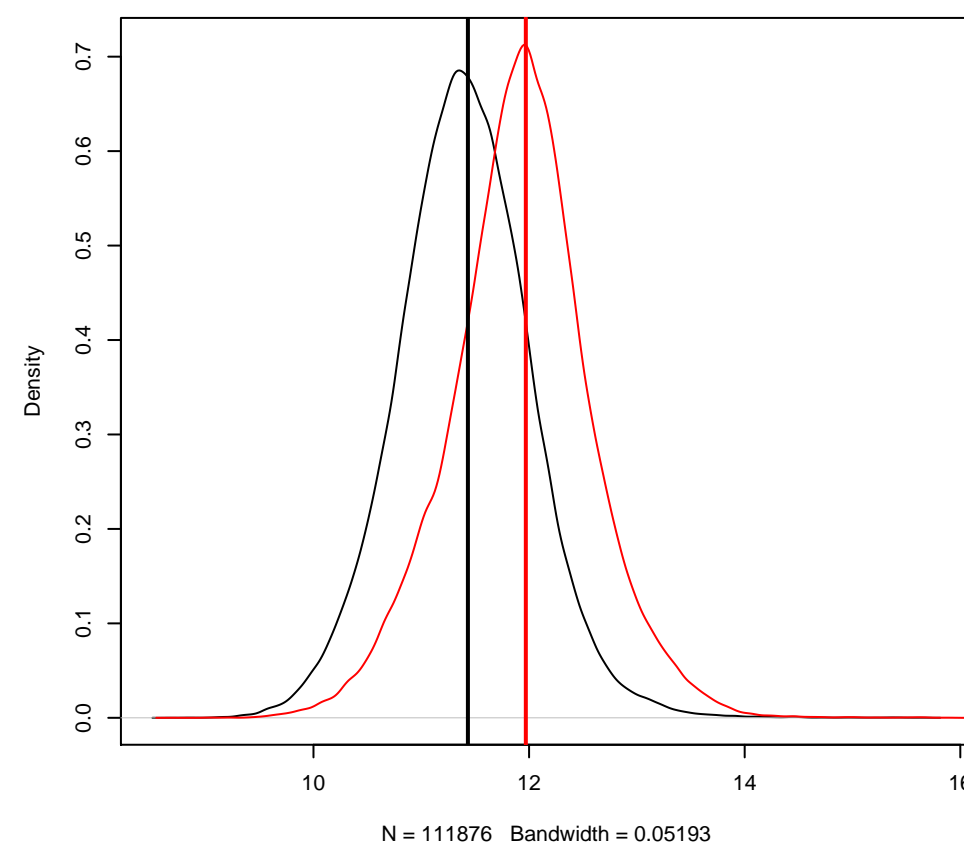

Replicate densities (normalized) for sample: U-2 (NR)

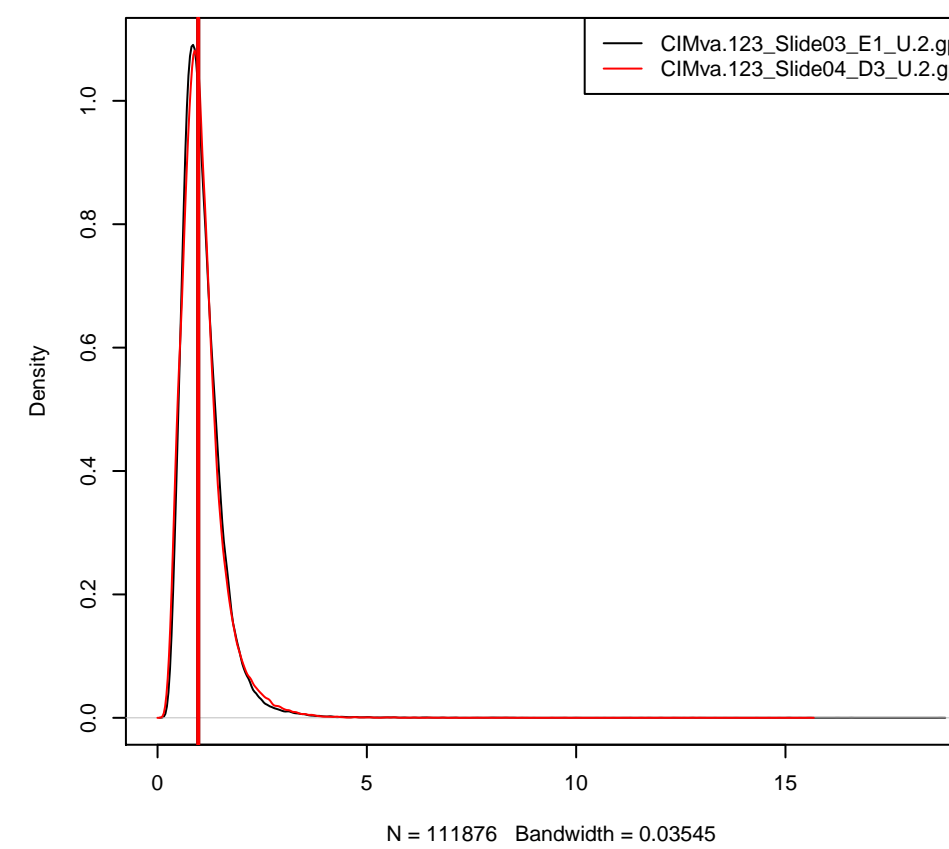

Replicate densities (normalized; log2) for sample: U-2 (NR)

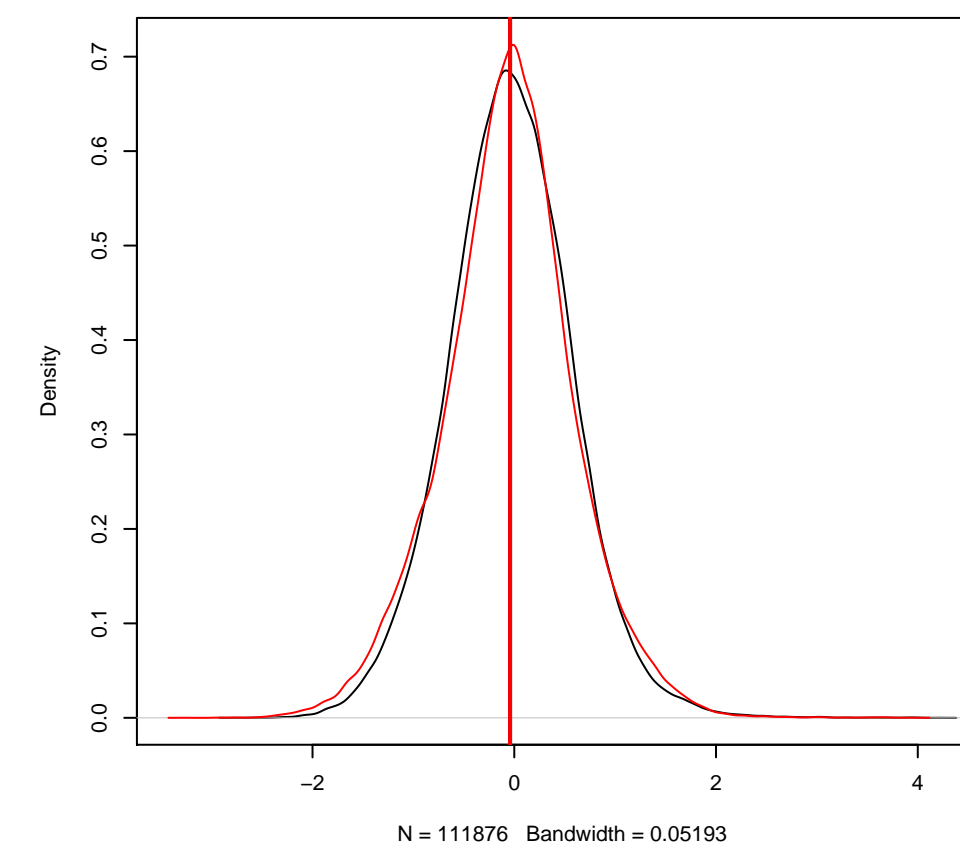

Replicate scatter (raw) for sample: U-2 (NR)  
Correlation coefficient: 0.64 (Pearson); 0.71 (Spearman)

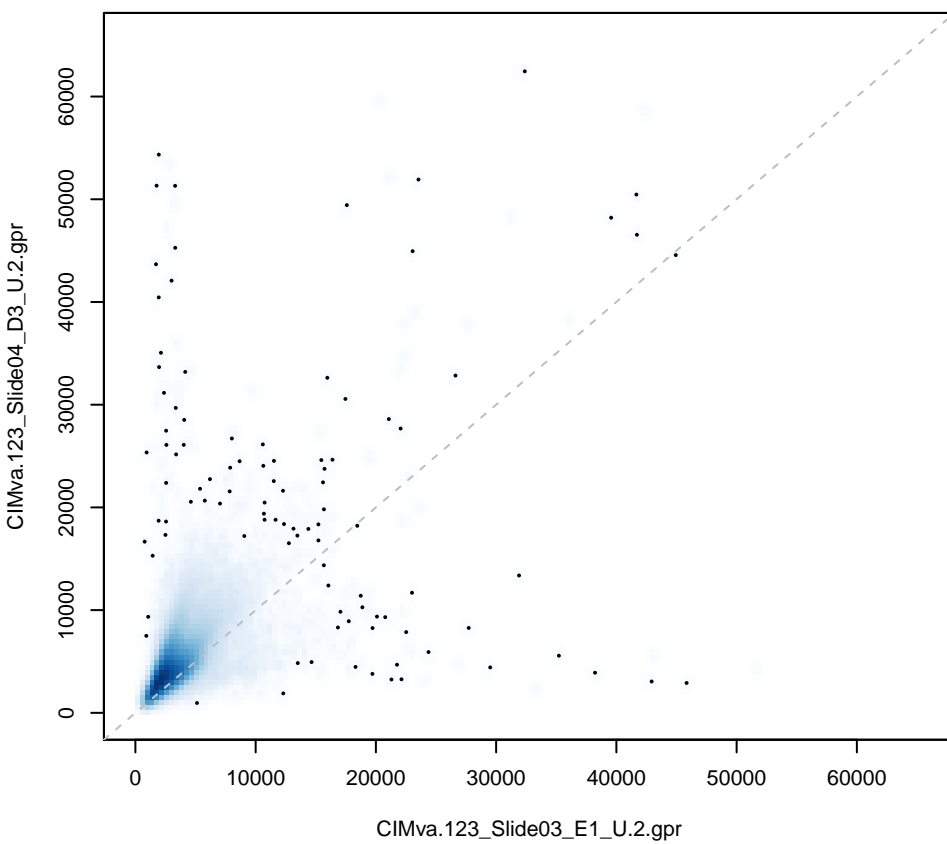

Replicate scatter (raw; log2) for sample: U-2 (NR)  
Correlation coefficient: 0.74 (Pearson); 0.71 (Spearman)

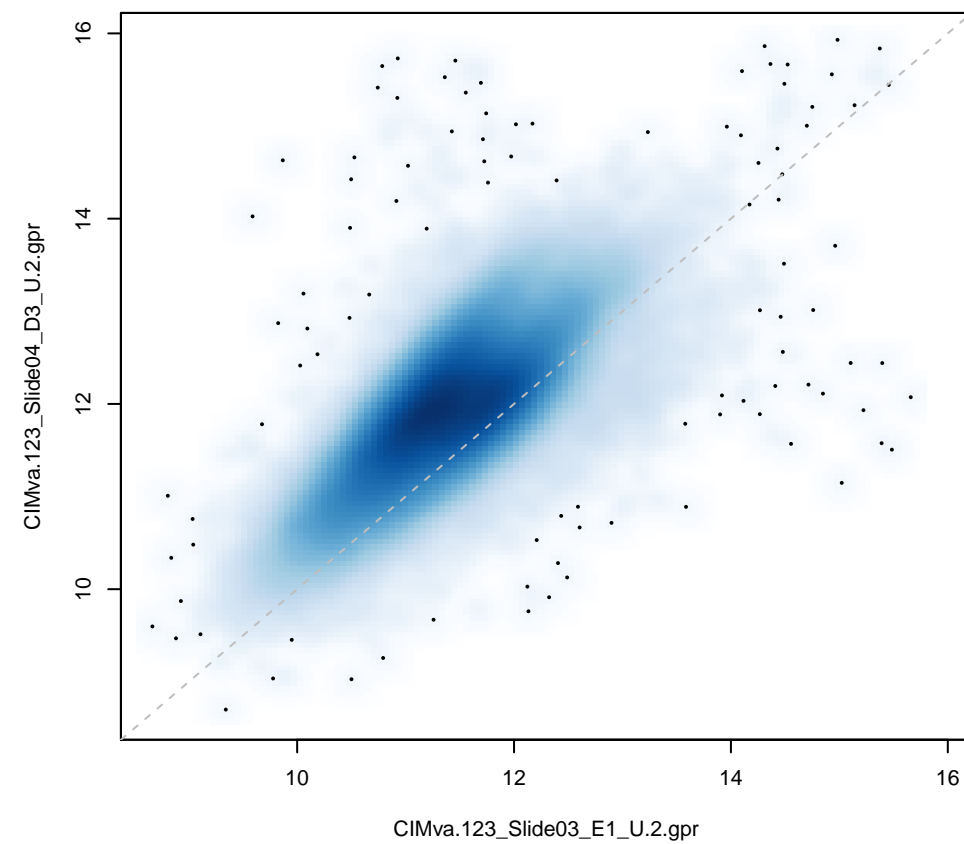

Replicate scatter (normalized) for sample: U-2 (NR)  
Correlation coefficient: 0.64 (Pearson); 0.71 (Spearman)

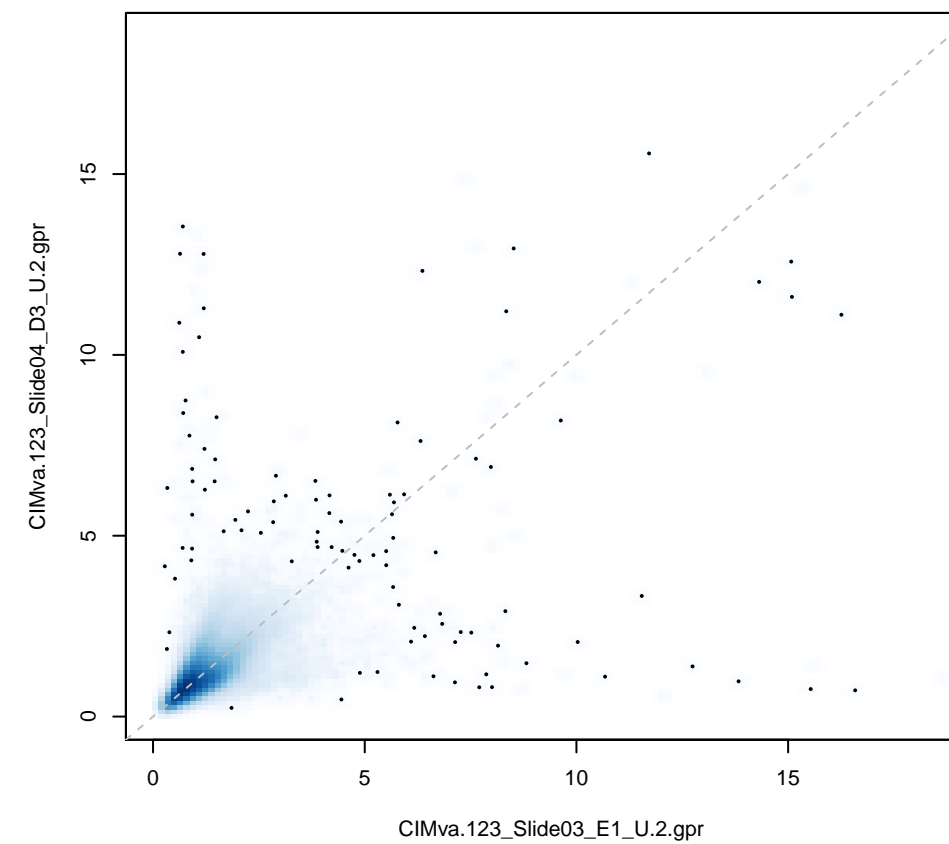

Replicate scatter (normalized; log2) for sample: U-2 (NR)  
Correlation coefficient: 0.71 (Pearson); 0.71 (Spearman)

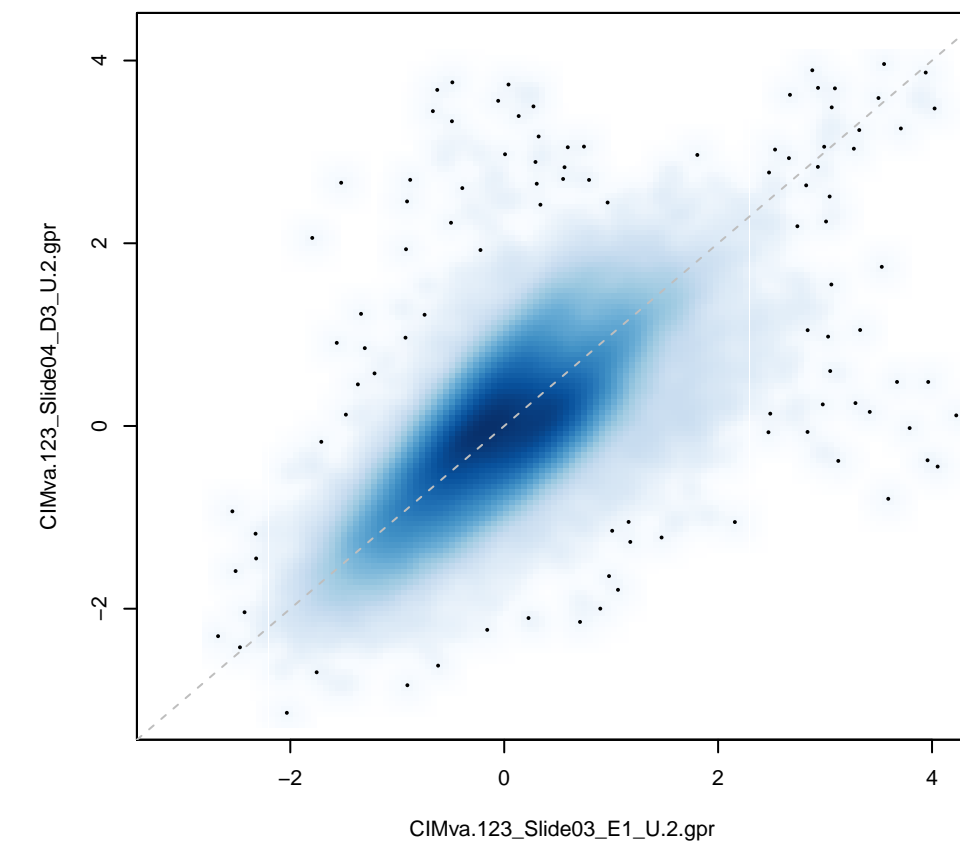

Replicate densities (raw) for sample: U-20 (NR)

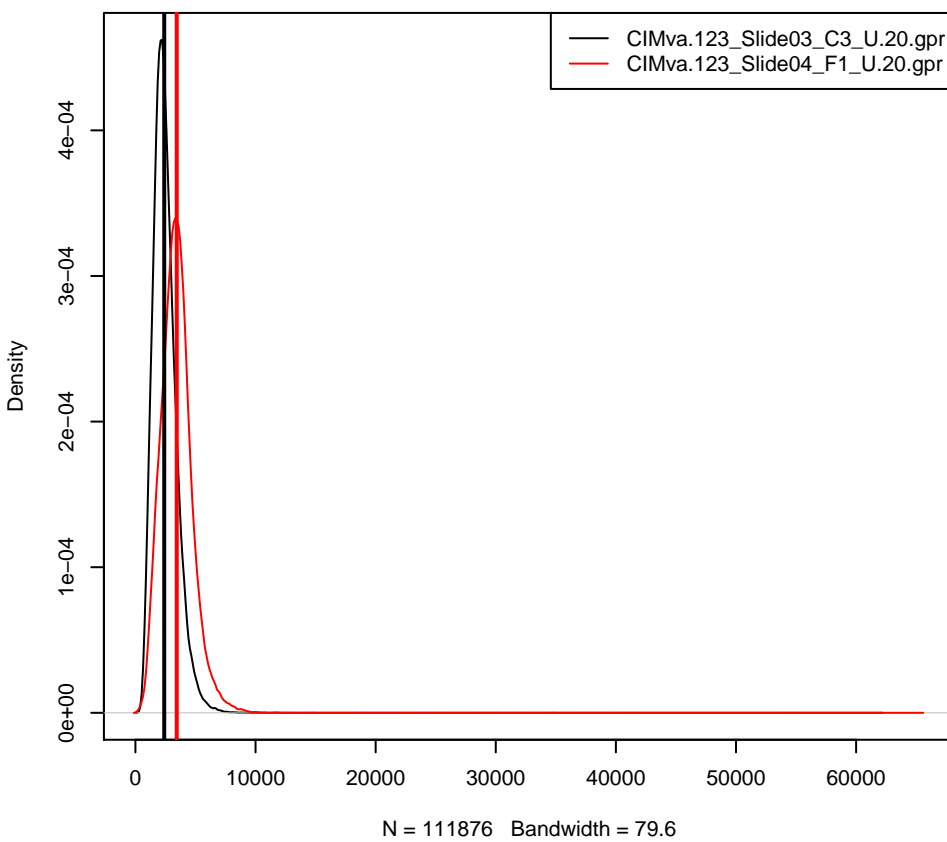

Replicate densities (raw; log2) for sample: U-20 (NR)

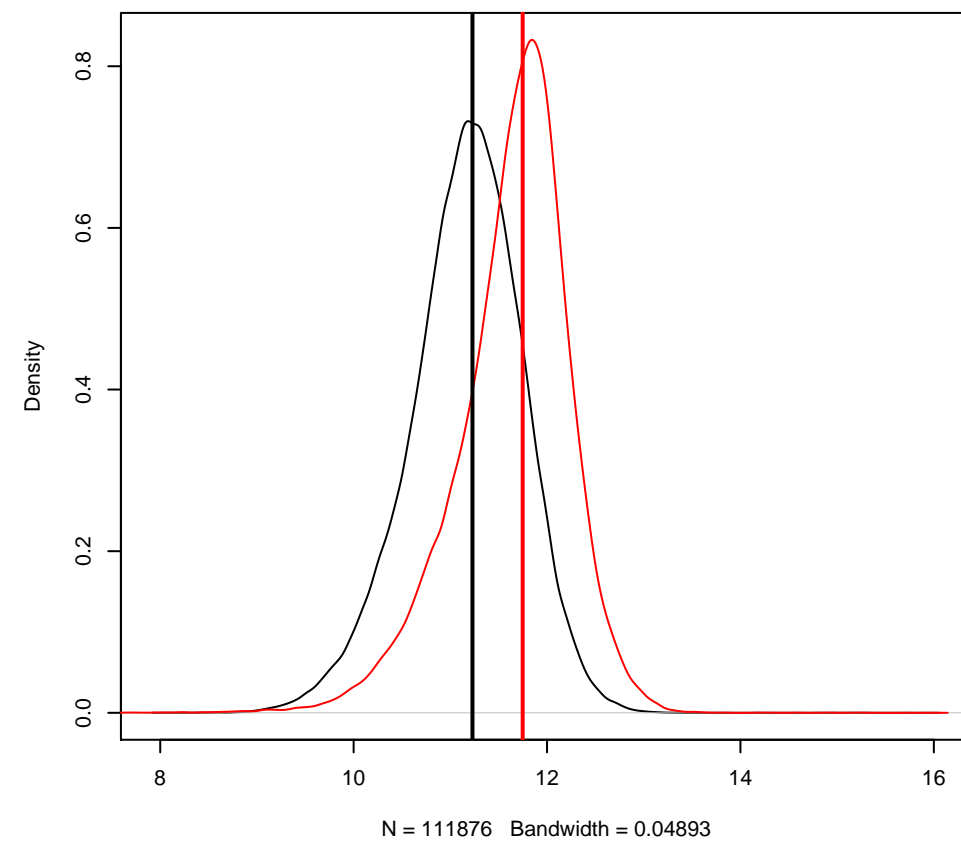

Replicate densities (normalized) for sample: U-20 (NR)

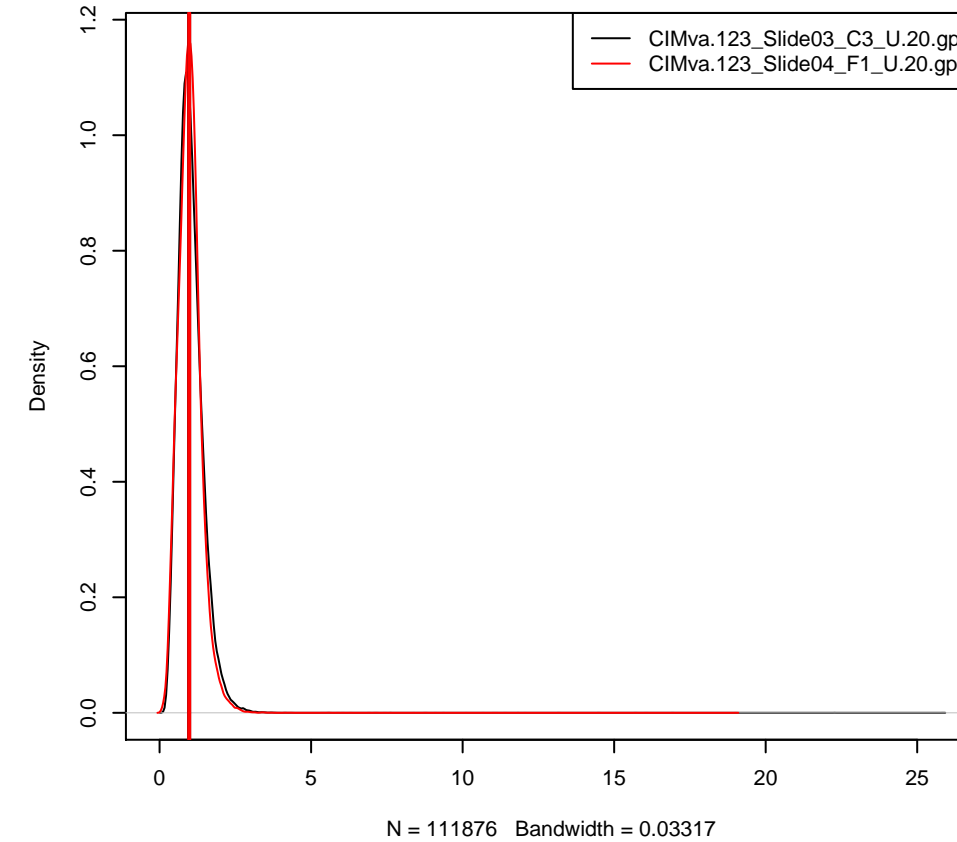

Replicate densities (normalized; log2) for sample: U-20 (NR)

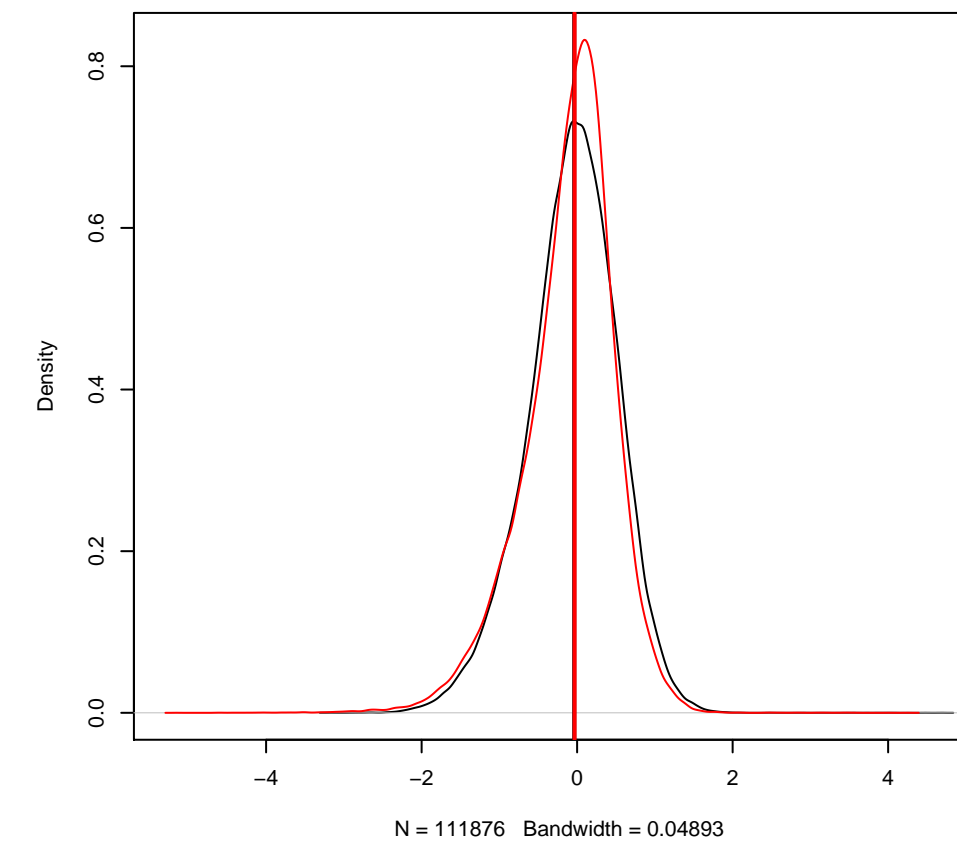

Replicate scatter (raw) for sample: U-20 (NR)  
Correlation coefficient: 0.64 (Pearson); 0.7 (Spearman)

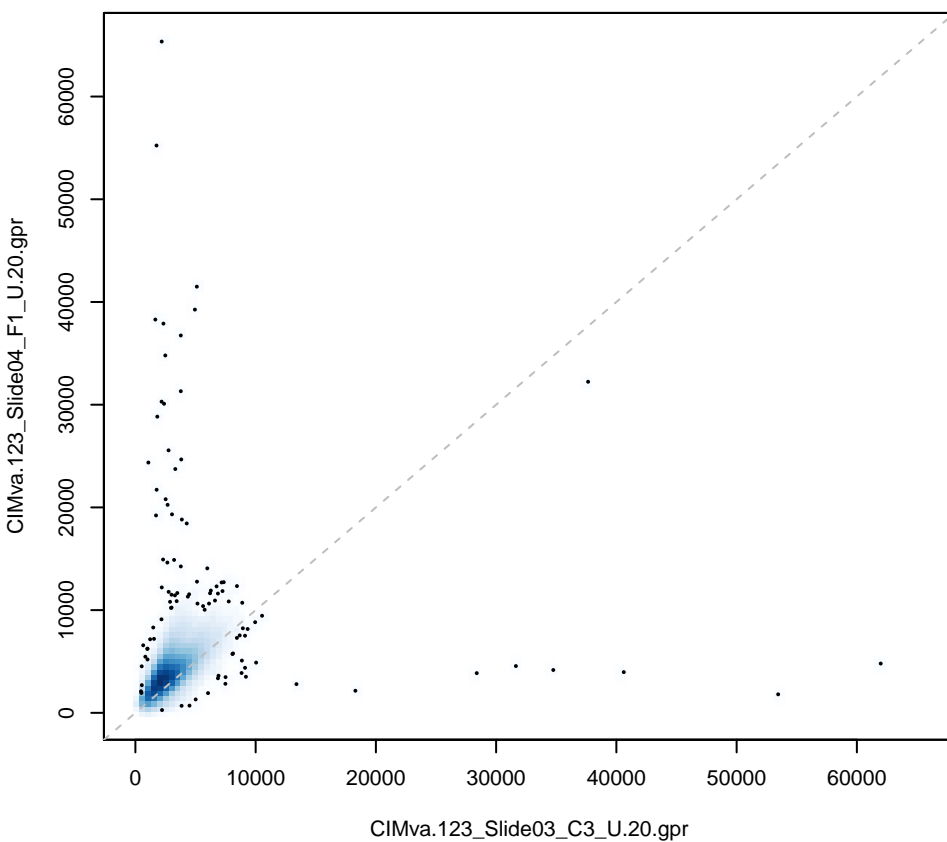

Replicate scatter (raw; log2) for sample: U-20 (NR)  
Correlation coefficient: 0.72 (Pearson); 0.7 (Spearman)

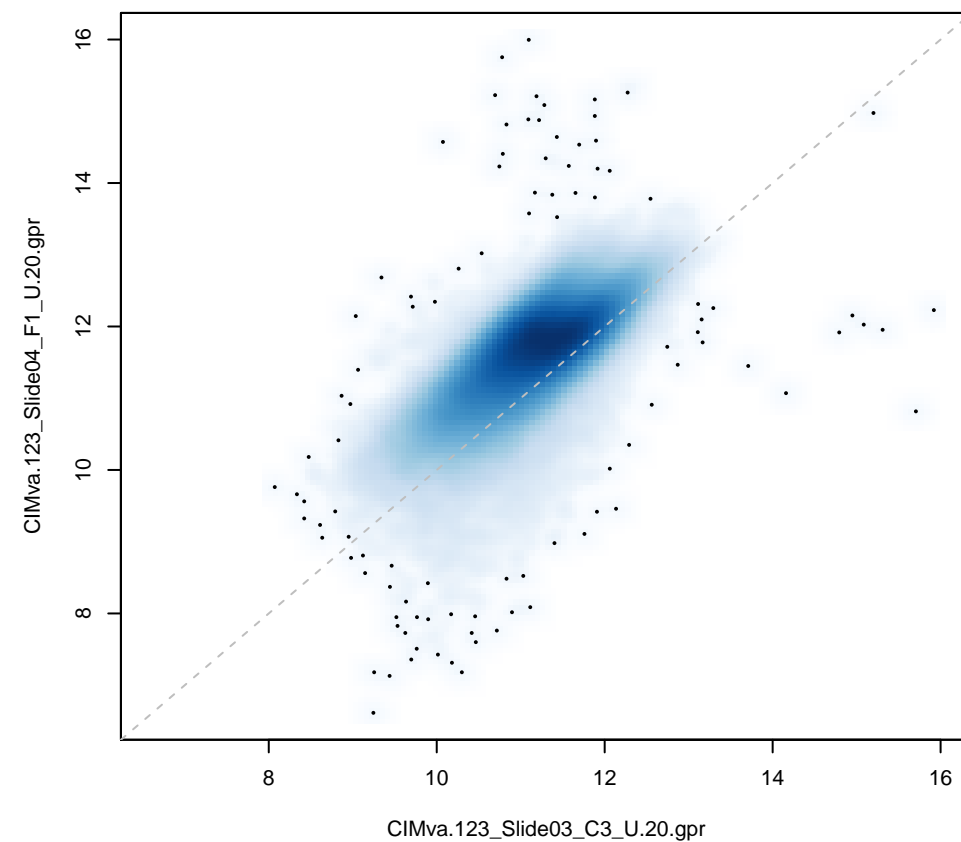

Replicate scatter (normalized) for sample: U-20 (NR)  
Correlation coefficient: 0.64 (Pearson); 0.7 (Spearman)

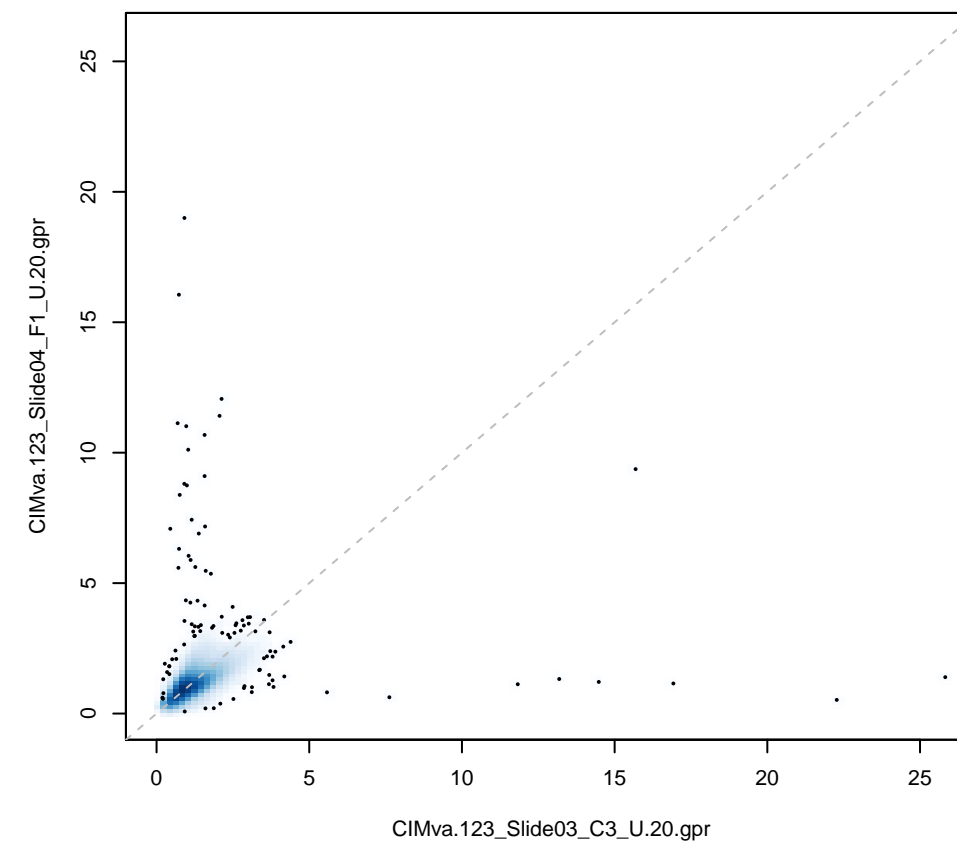

Replicate scatter (normalized; log2) for sample: U-20 (NR)  
Correlation coefficient: 0.71 (Pearson); 0.7 (Spearman)

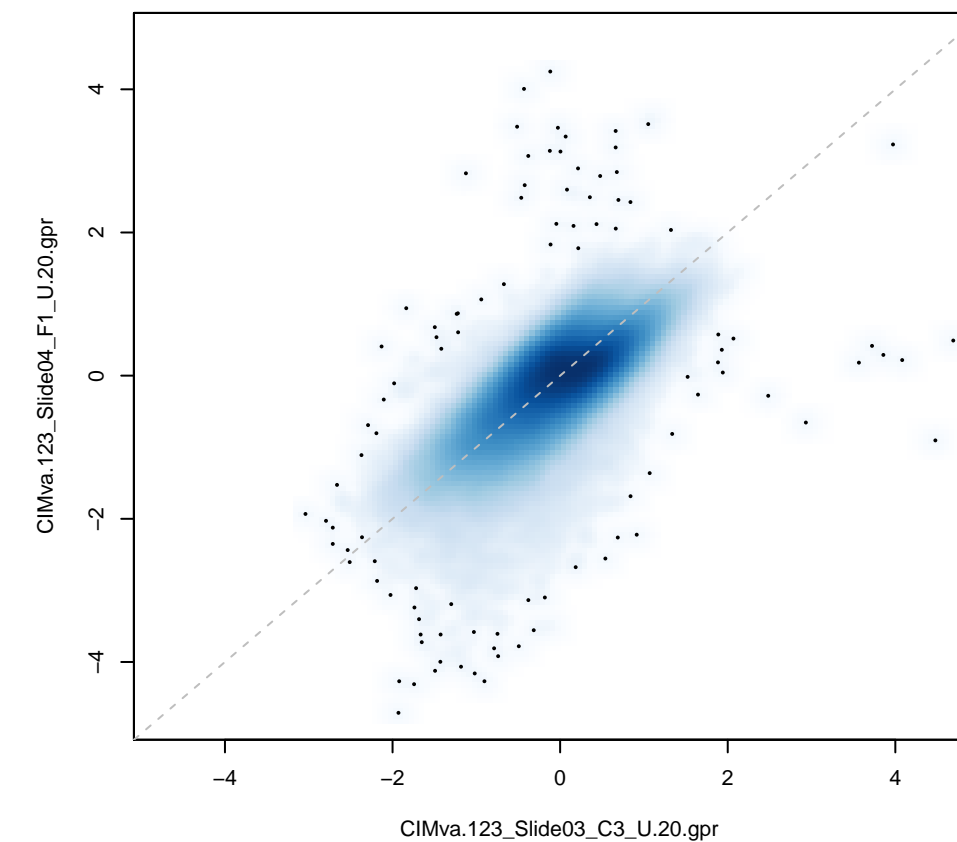



Replicate densities (raw) for sample: U-21 (R)

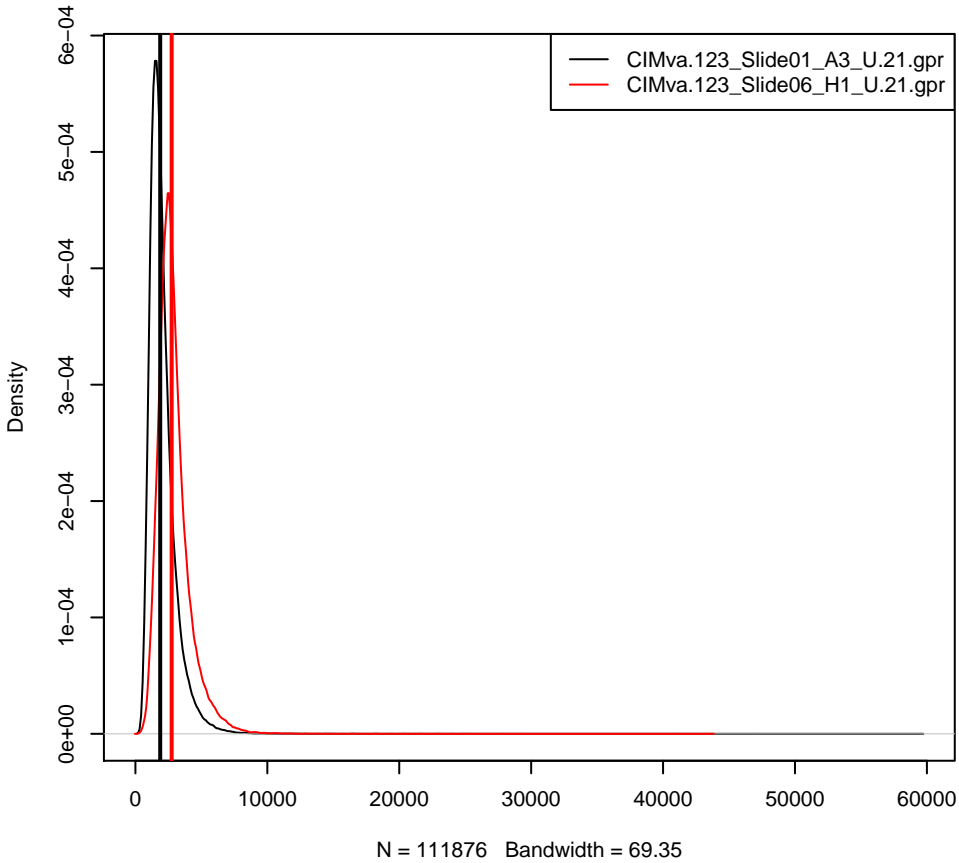

Replicate densities (raw; log2) for sample: U-21 (R)

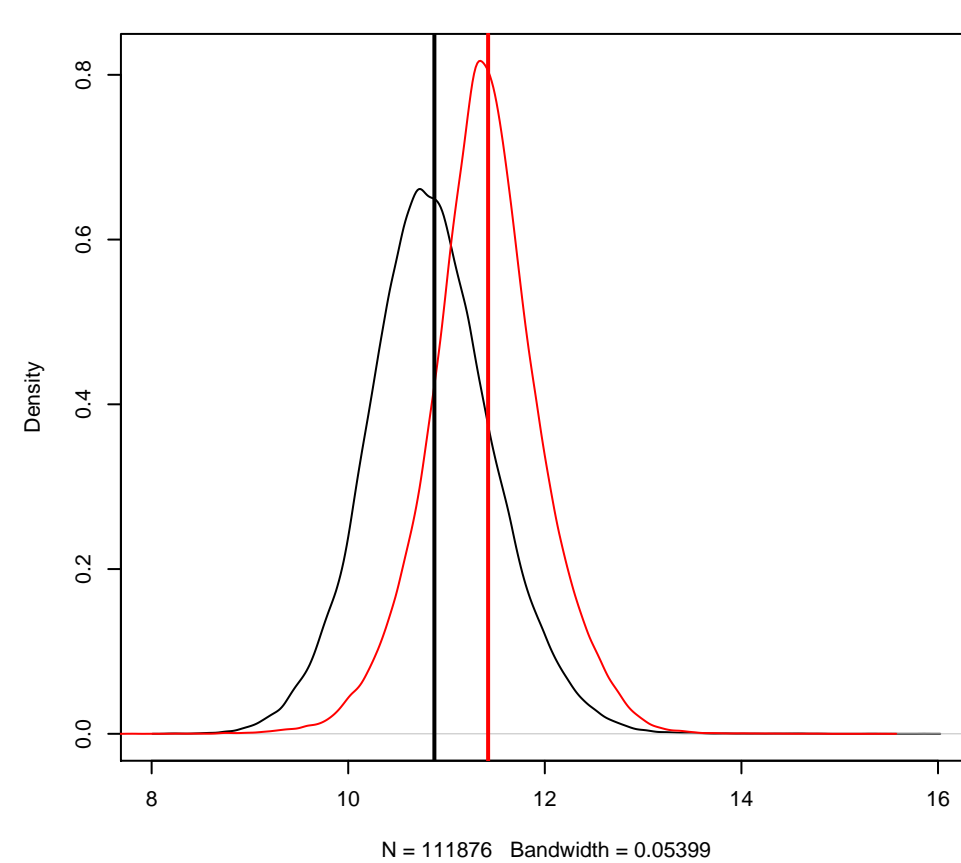

Replicate densities (normalized) for sample: U-21 (R)

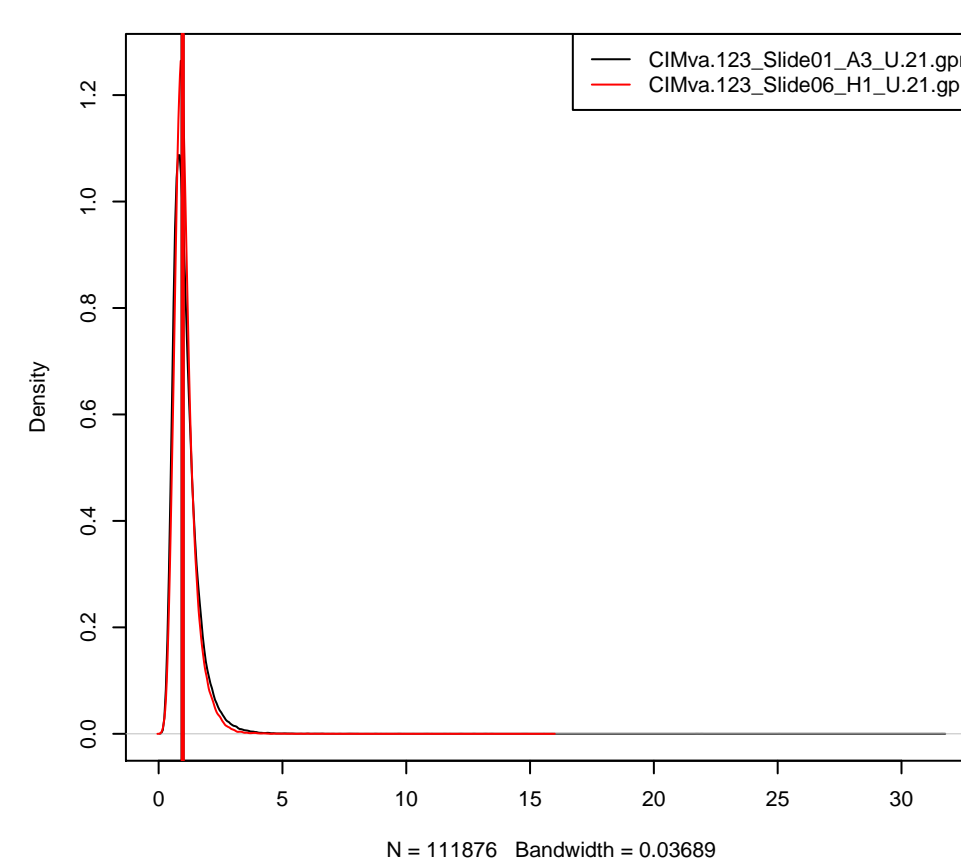

Replicate densities (normalized; log2) for sample: U-21 (R)

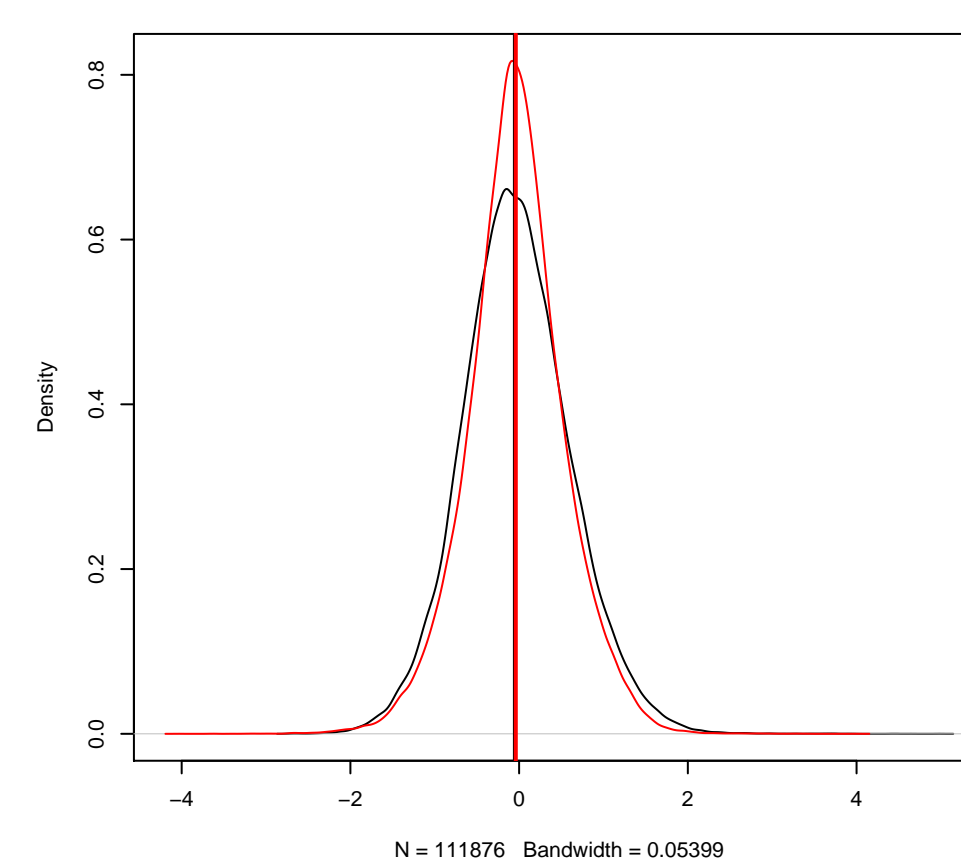

Replicate scatter (raw) for sample: U-21 (R)  
Correlation coefficient: 0.73 (Pearson); 0.7 (Spearman)

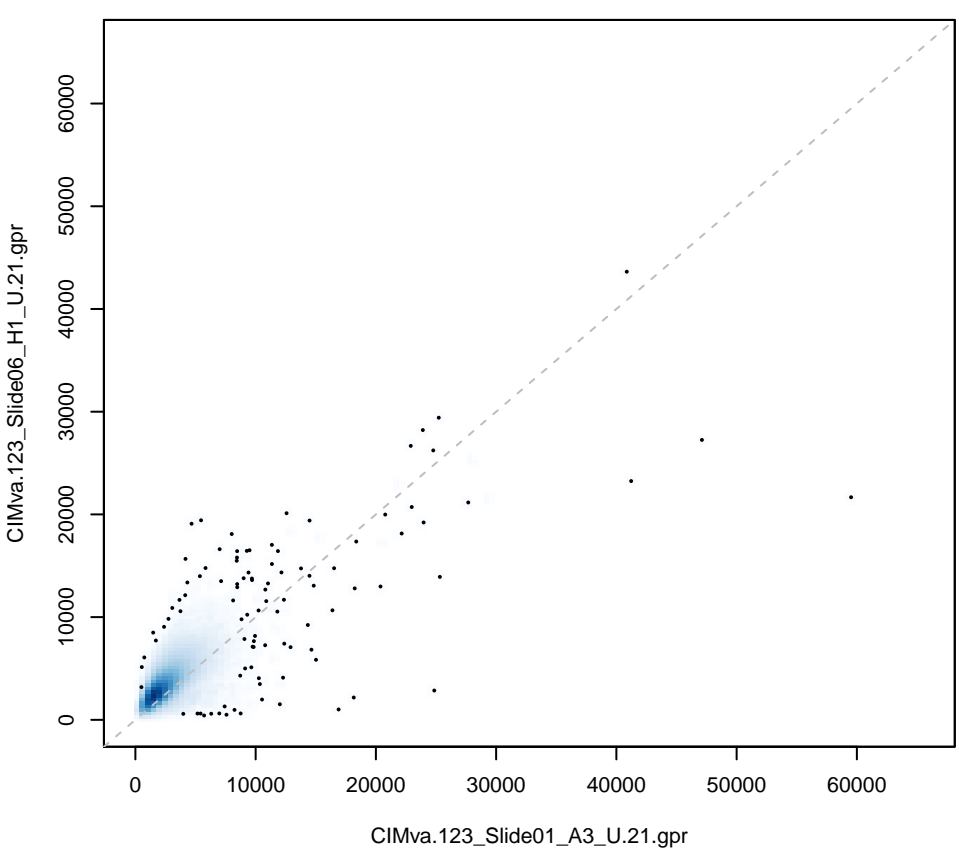

Replicate scatter (raw; log2) for sample: U-21 (R)  
Correlation coefficient: 0.72 (Pearson); 0.7 (Spearman)

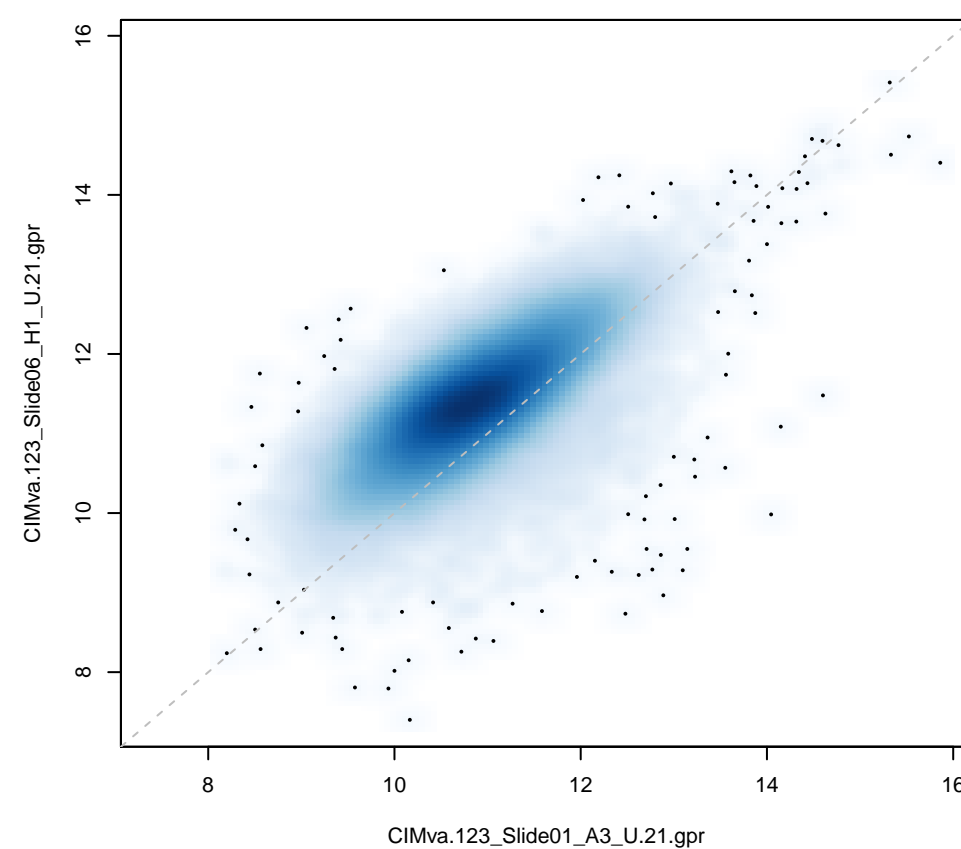

Replicate scatter (normalized) for sample: U-21 (R)  
Correlation coefficient: 0.73 (Pearson); 0.7 (Spearman)

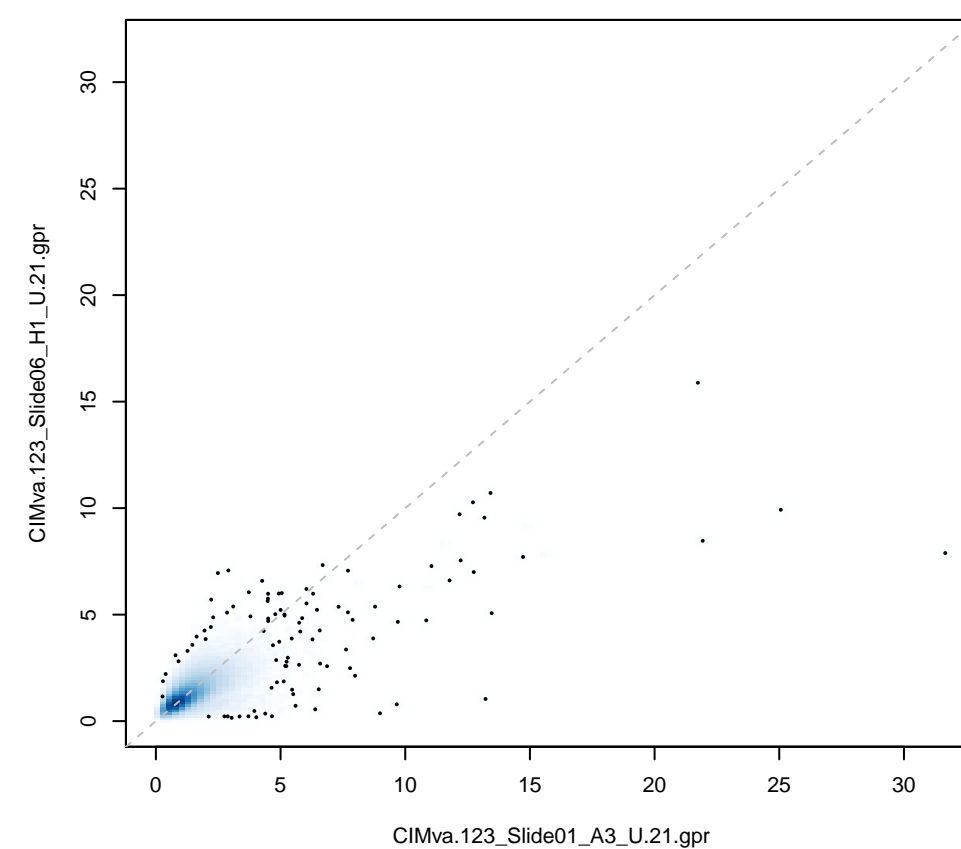

Replicate scatter (normalized; log2) for sample: U-21 (R)  
Correlation coefficient: 0.73 (Pearson); 0.7 (Spearman)

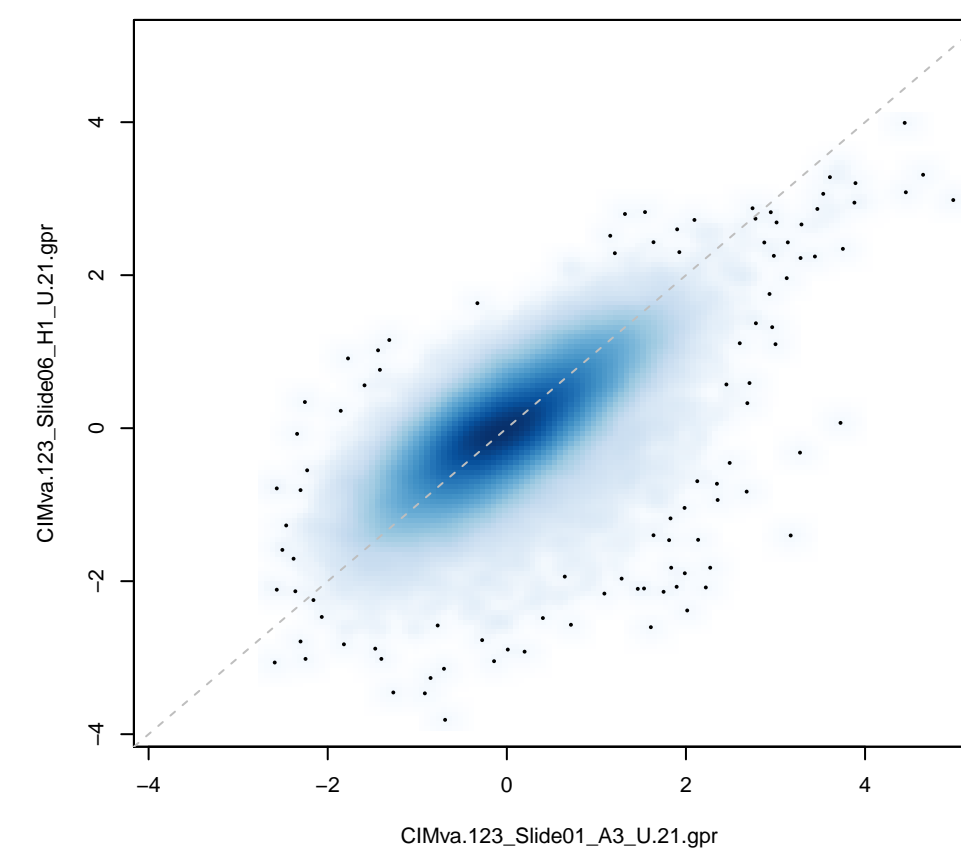

Replicate densities (raw) for sample: U-22 (R)

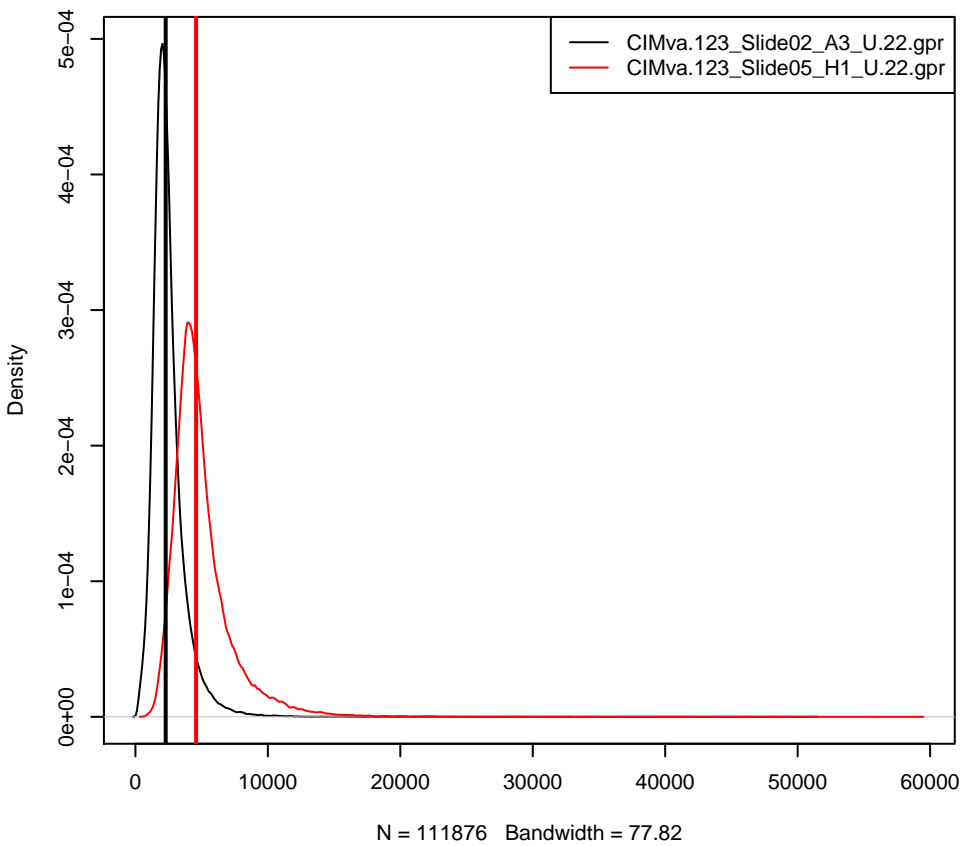

Replicate densities (raw; log2) for sample: U-22 (R)

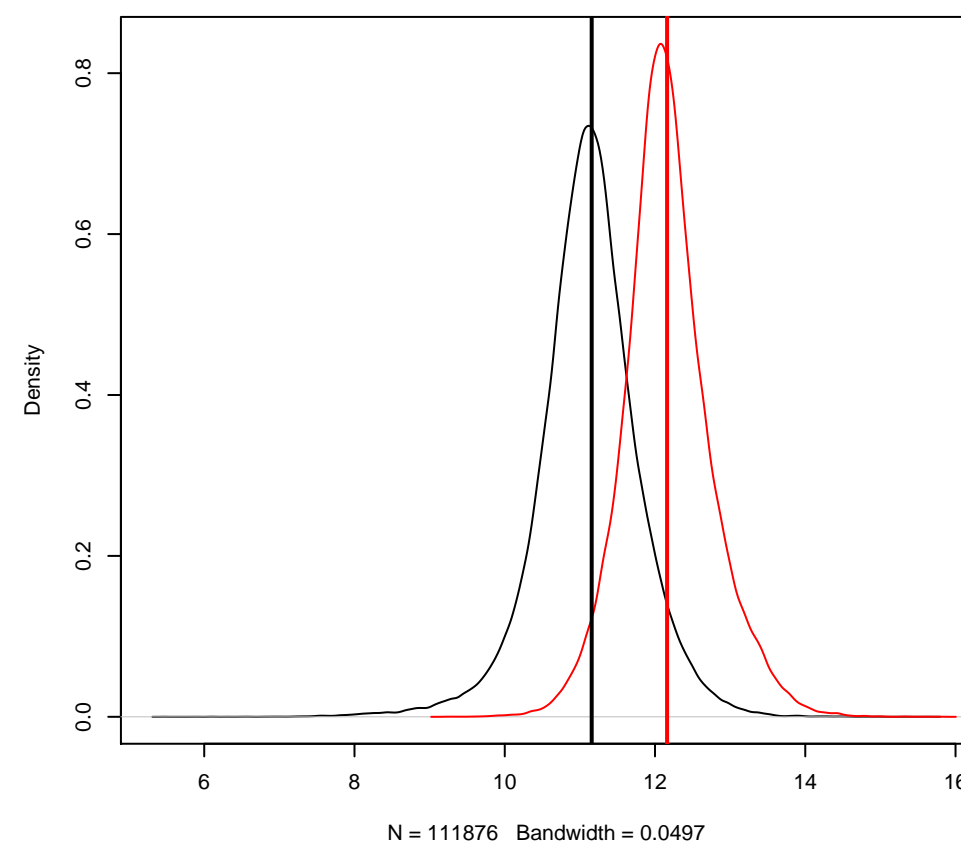

Replicate densities (normalized) for sample: U-22 (R)

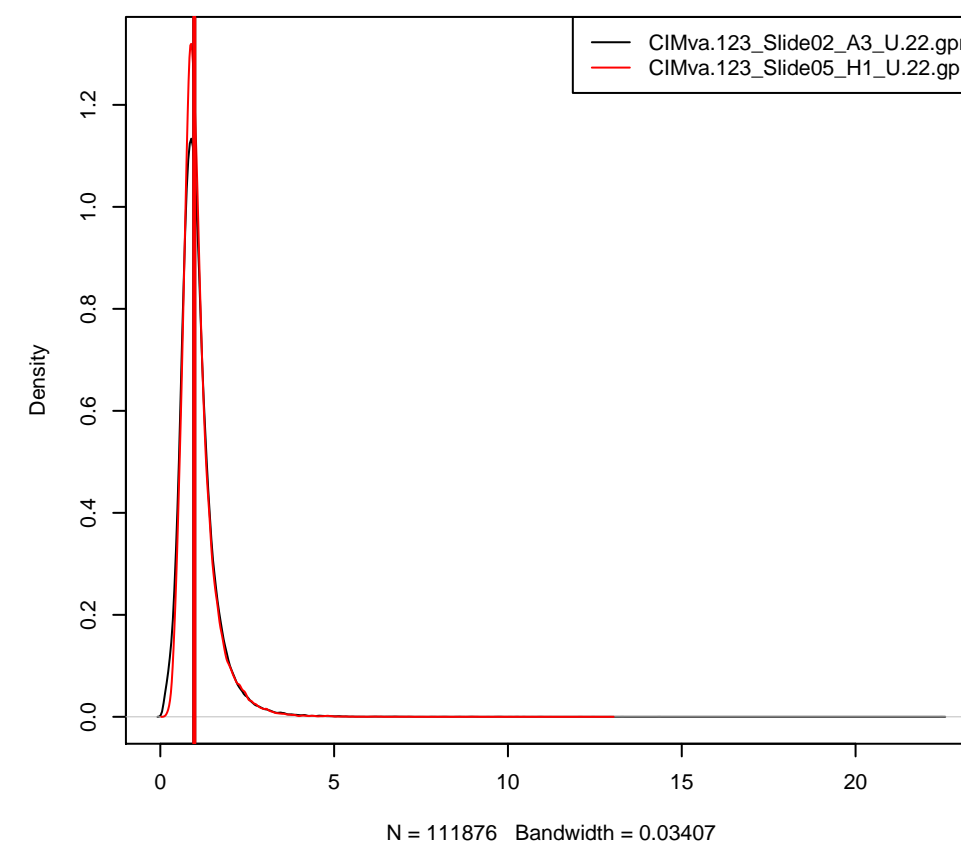

Replicate densities (normalized; log2) for sample: U-22 (R)

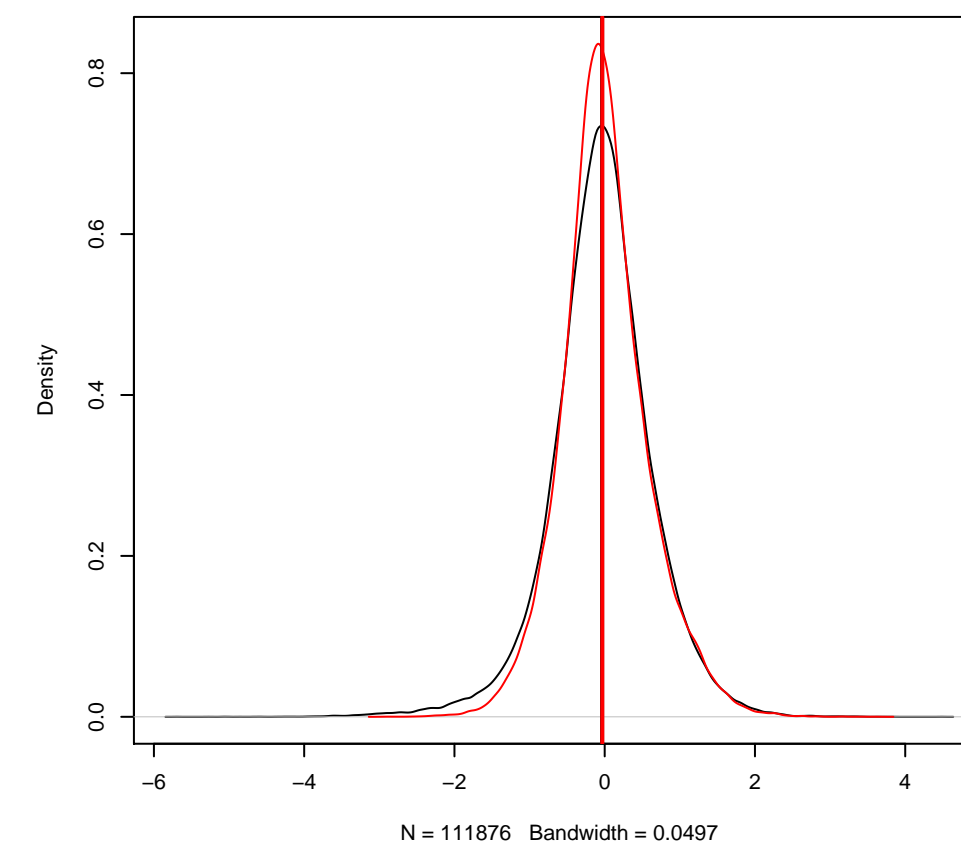

Replicate scatter (raw) for sample: U-22 (R)  
Correlation coefficient: 0.78 (Pearson); 0.73 (Spearman)

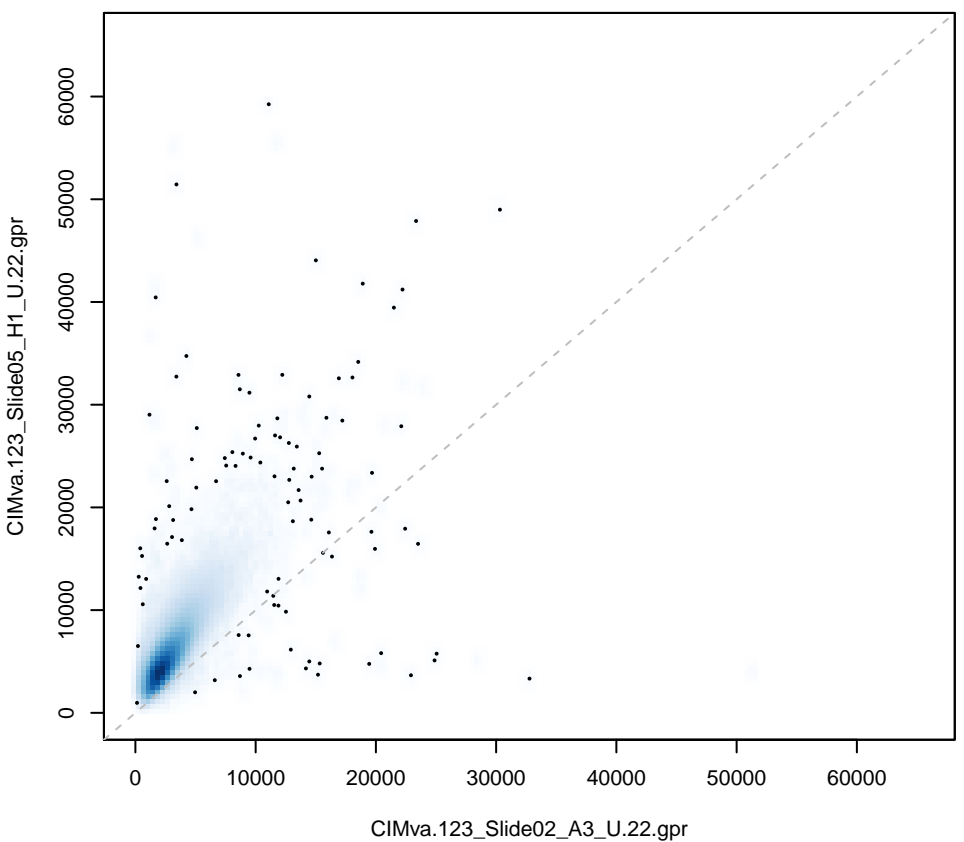

Replicate scatter (raw; log2) for sample: U-22 (R)  
Correlation coefficient: 0.73 (Pearson); 0.73 (Spearman)

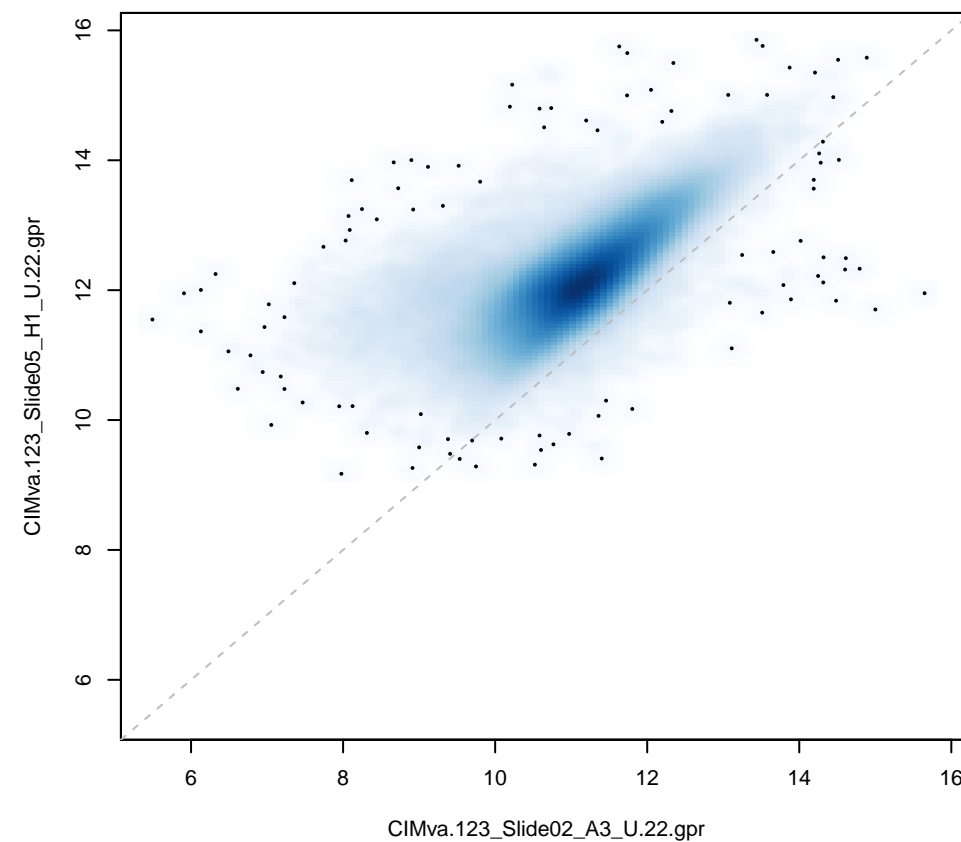

Replicate scatter (normalized) for sample: U-22 (R)  
Correlation coefficient: 0.78 (Pearson); 0.73 (Spearman)

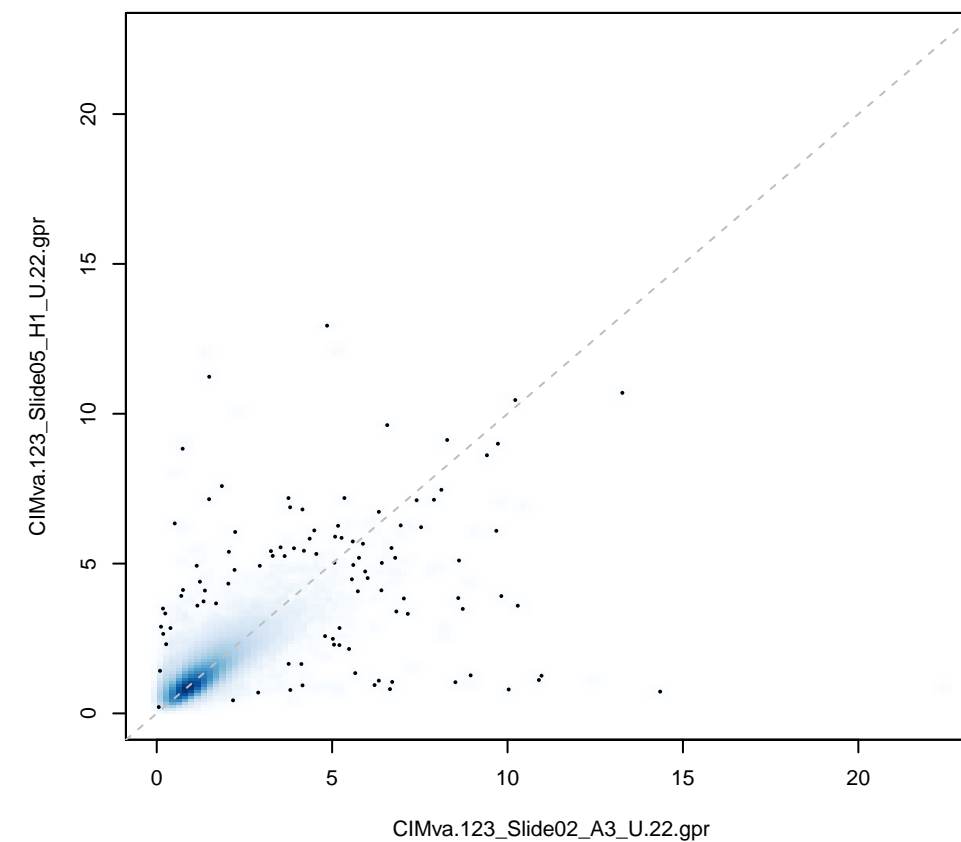

Replicate scatter (normalized; log2) for sample: U-22 (R)  
Correlation coefficient: 0.77 (Pearson); 0.73 (Spearman)

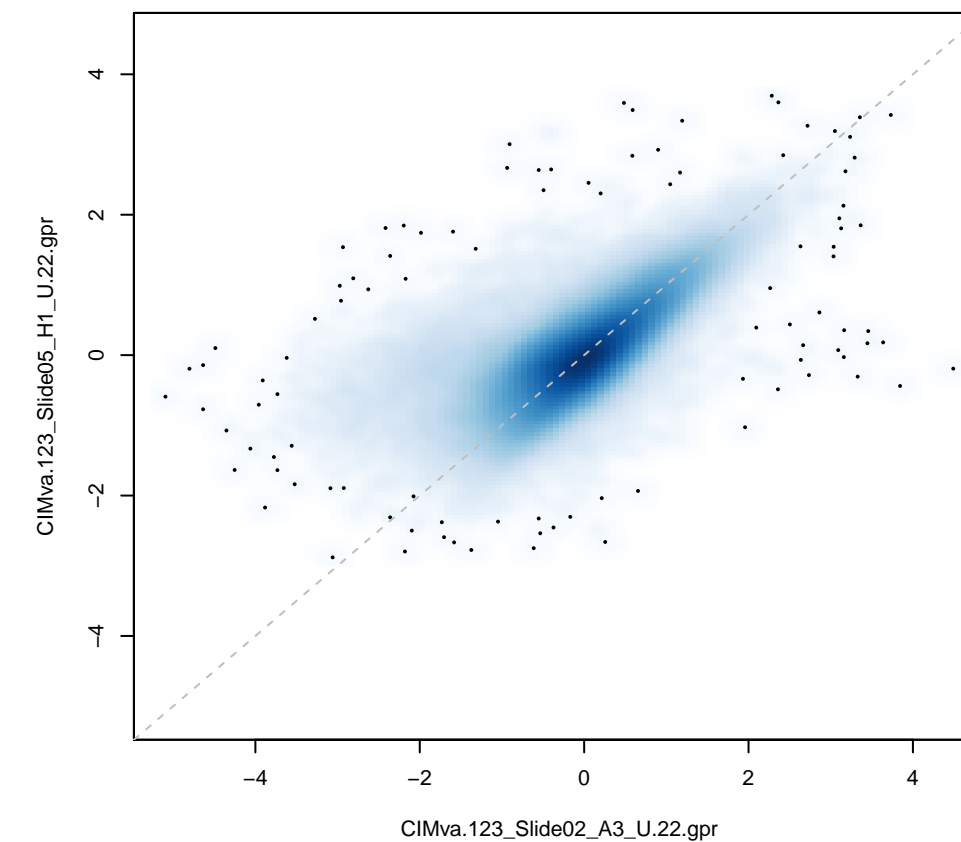

Replicate densities (raw) for sample: U-23 (R)

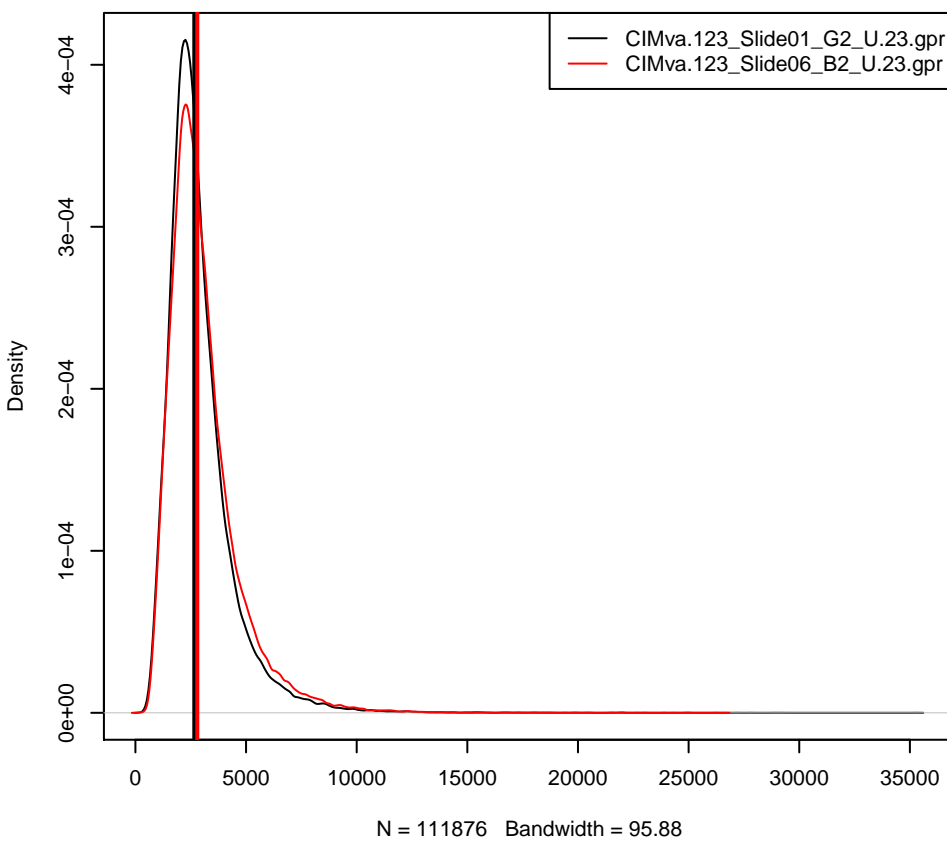

Replicate densities (raw; log2) for sample: U-23 (R)

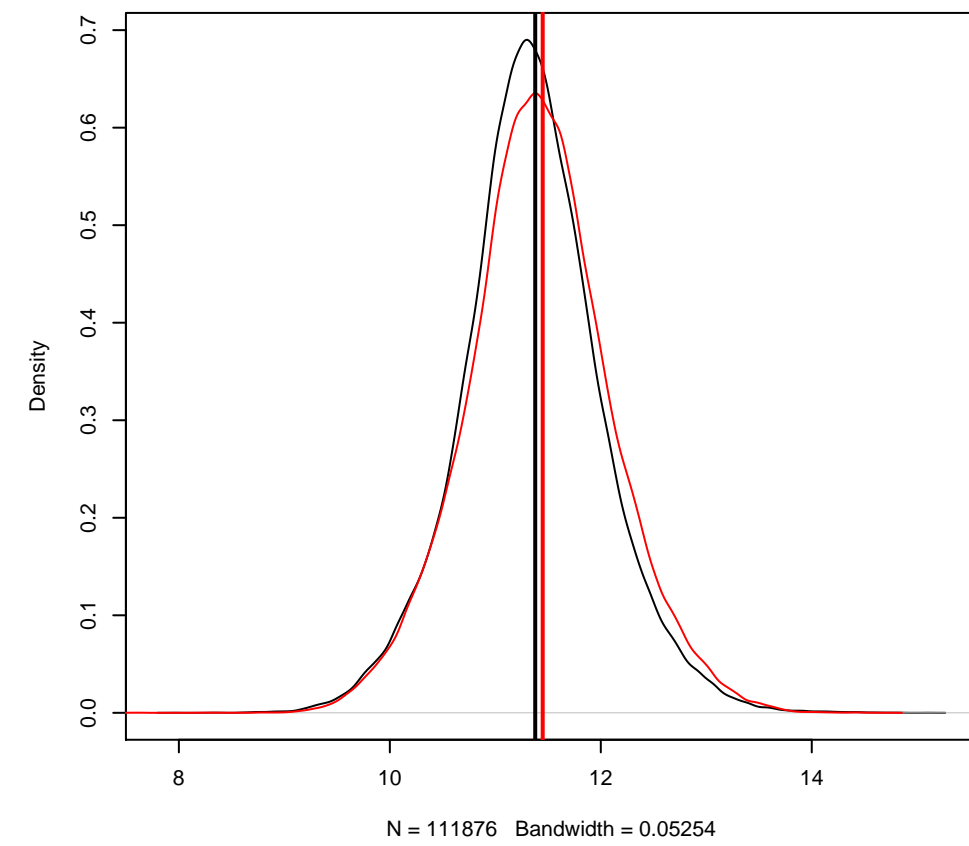

Replicate densities (normalized) for sample: U-23 (R)

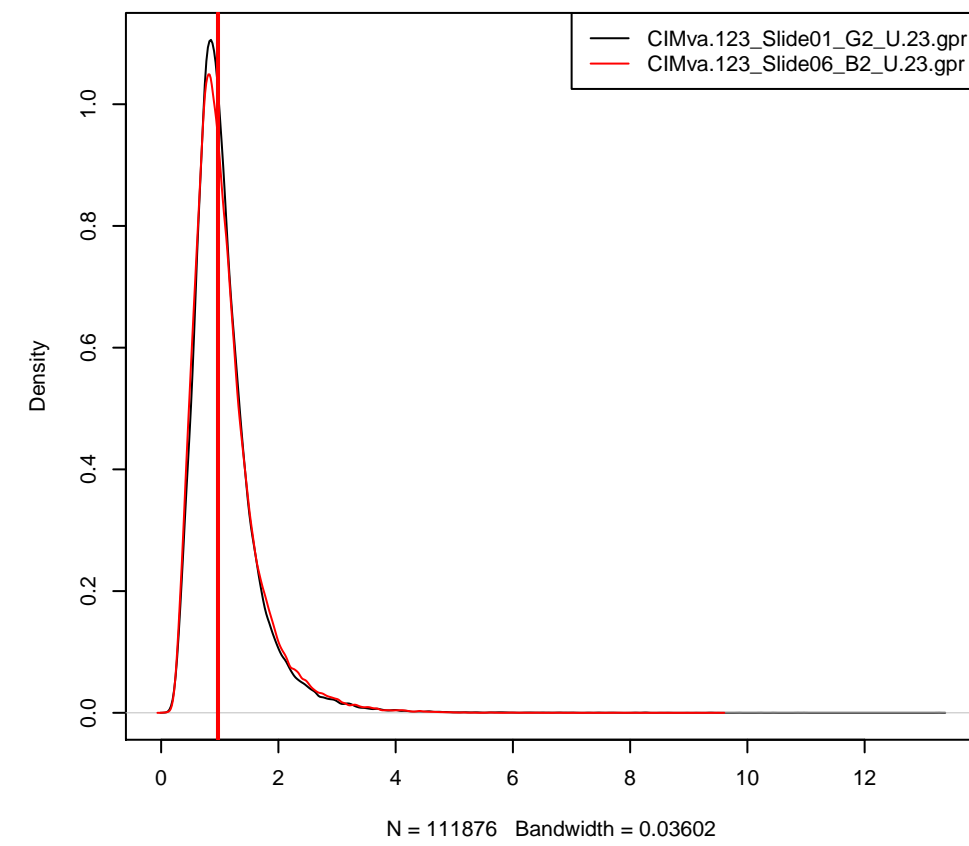

Replicate densities (normalized; log2) for sample: U-23 (R)

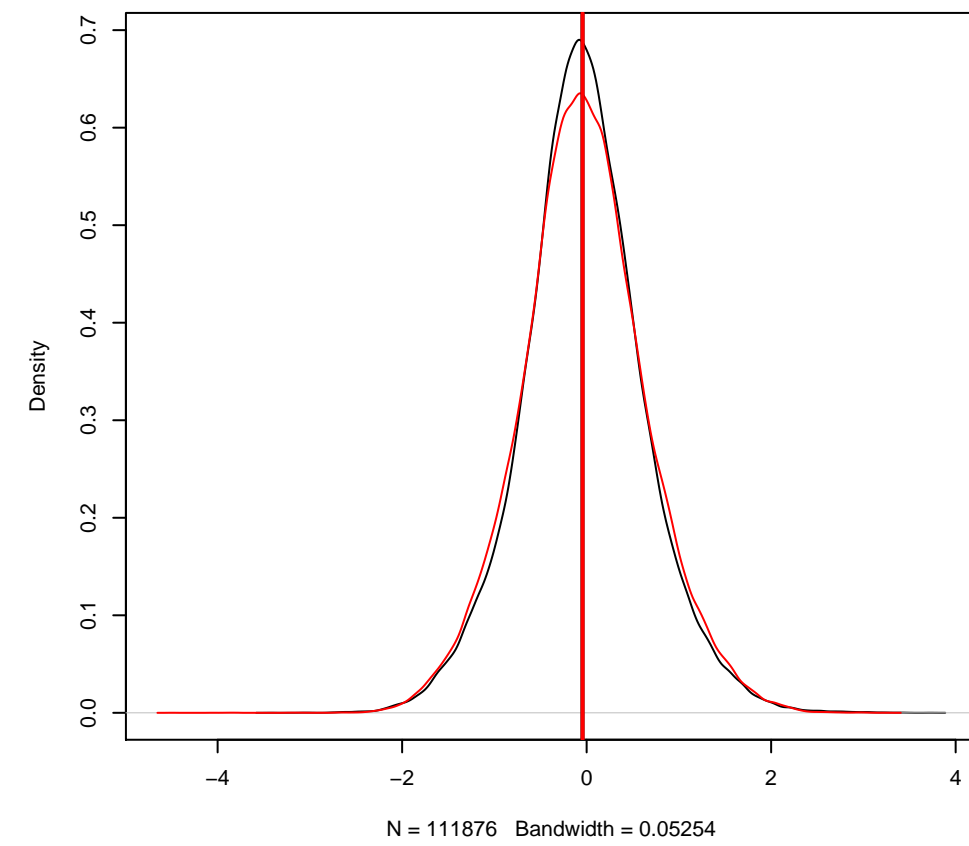

Replicate scatter (raw) for sample: U-23 (R)  
Correlation coefficient: 0.72 (Pearson); 0.73 (Spearman)

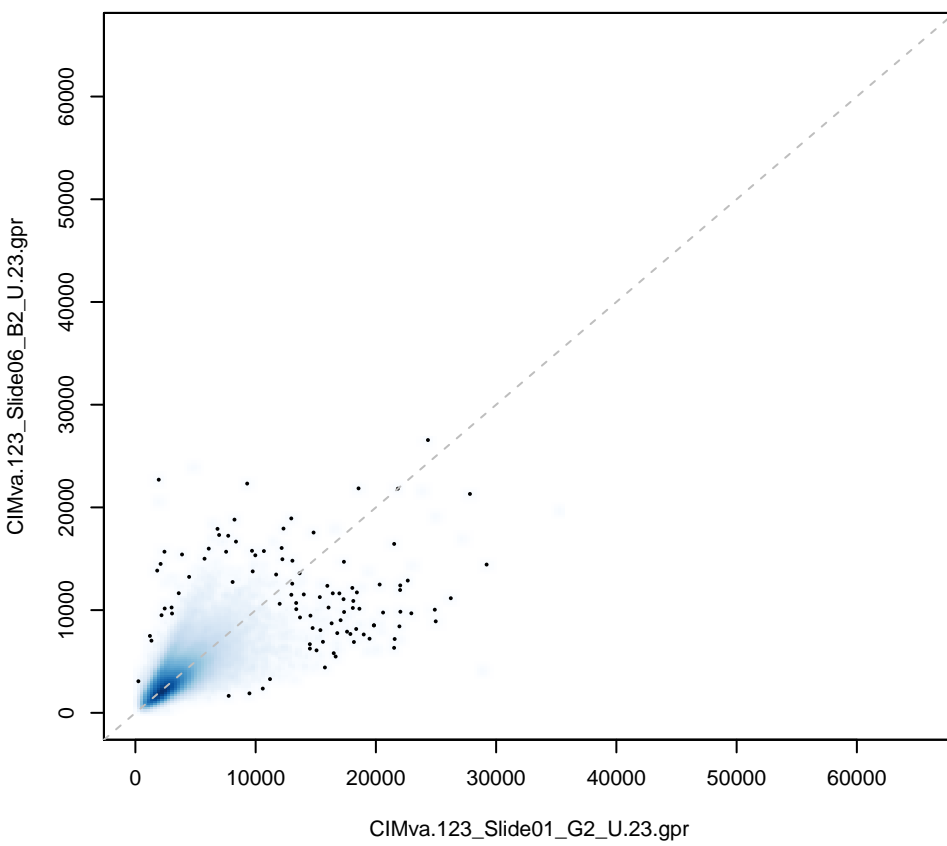

Replicate scatter (raw; log2) for sample: U-23 (R)  
Correlation coefficient: 0.76 (Pearson); 0.73 (Spearman)

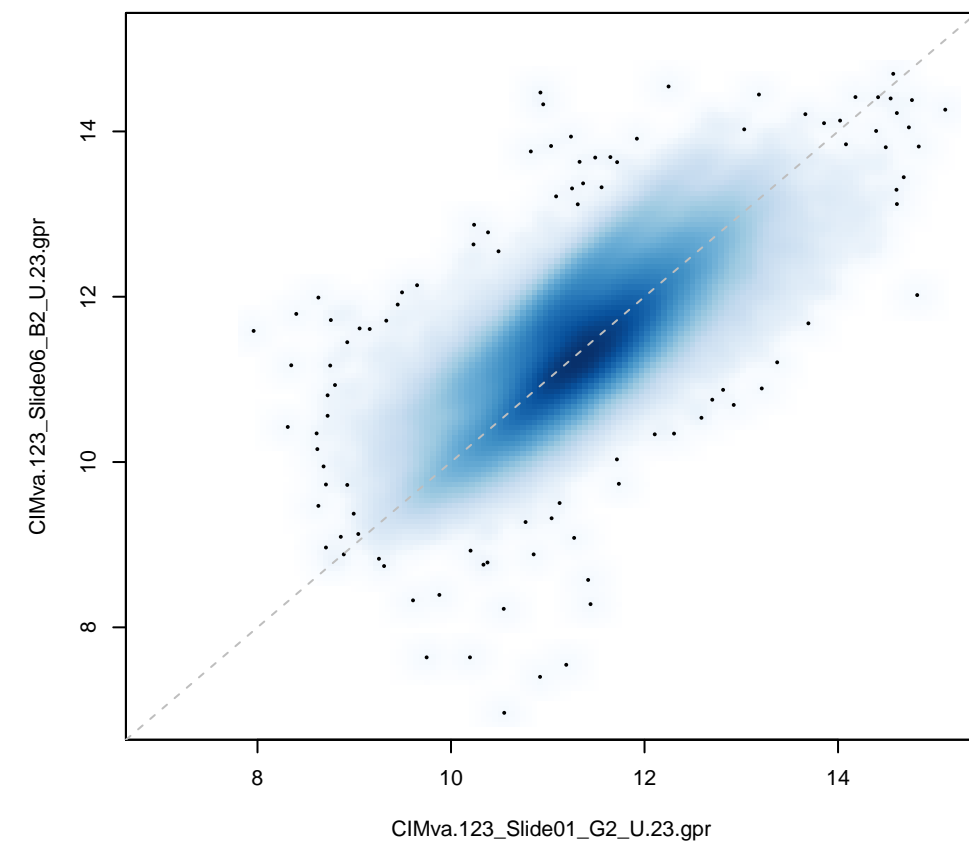

Replicate scatter (normalized) for sample: U-23 (R)  
Correlation coefficient: 0.72 (Pearson); 0.73 (Spearman)

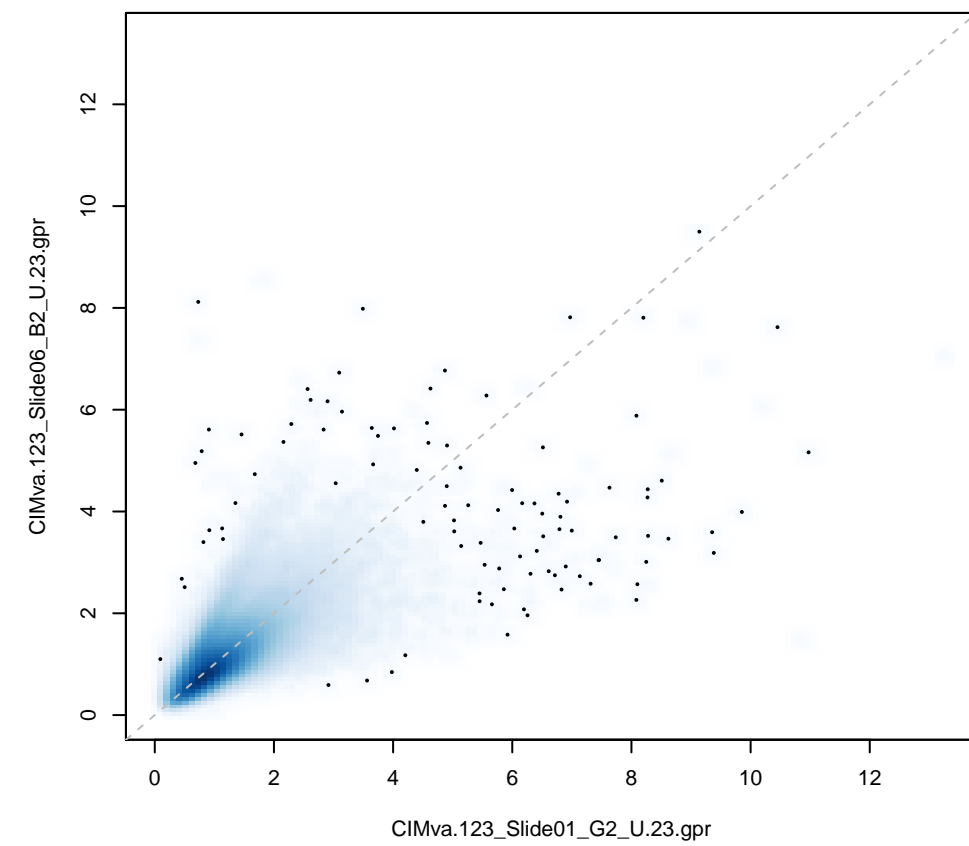

Replicate scatter (normalized; log2) for sample: U-23 (R)  
Correlation coefficient: 0.75 (Pearson); 0.73 (Spearman)

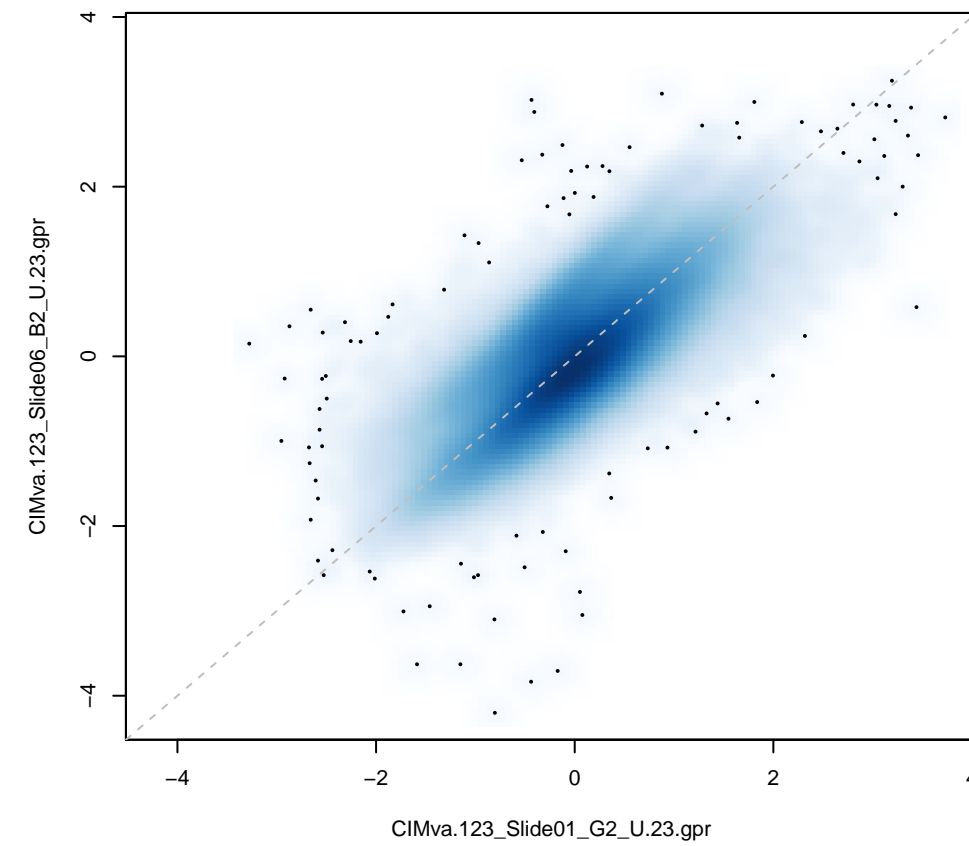

Replicate densities (raw) for sample: U-24 (NR)

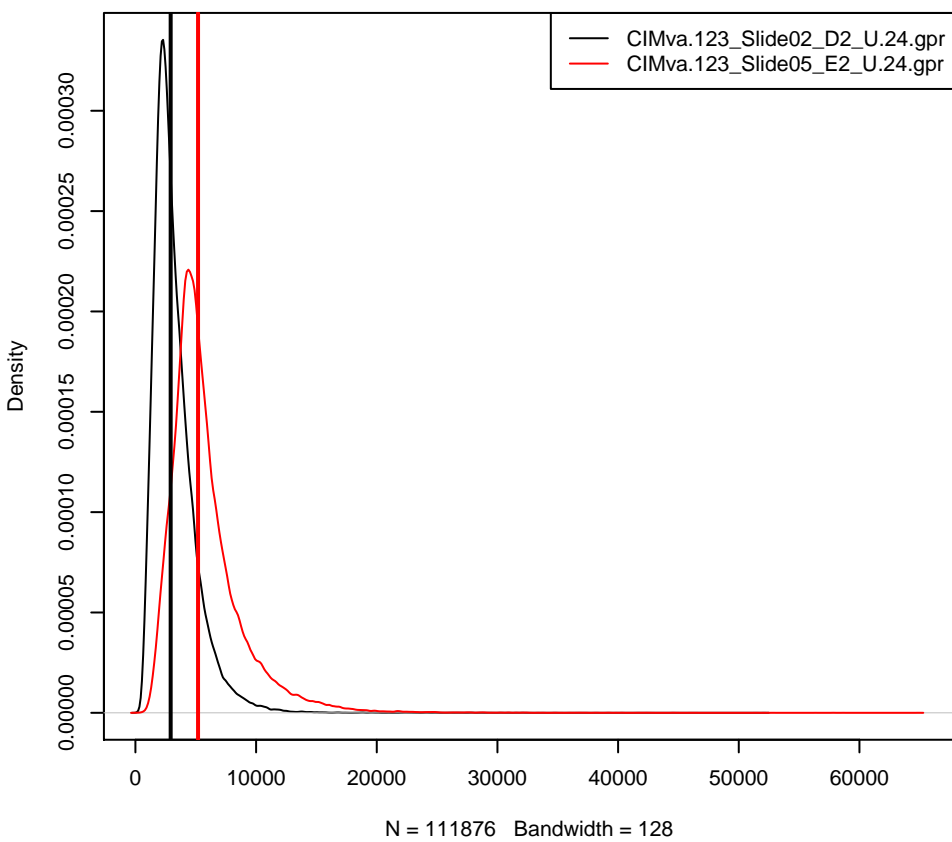

Replicate densities (raw; log2) for sample: U-24 (NR)

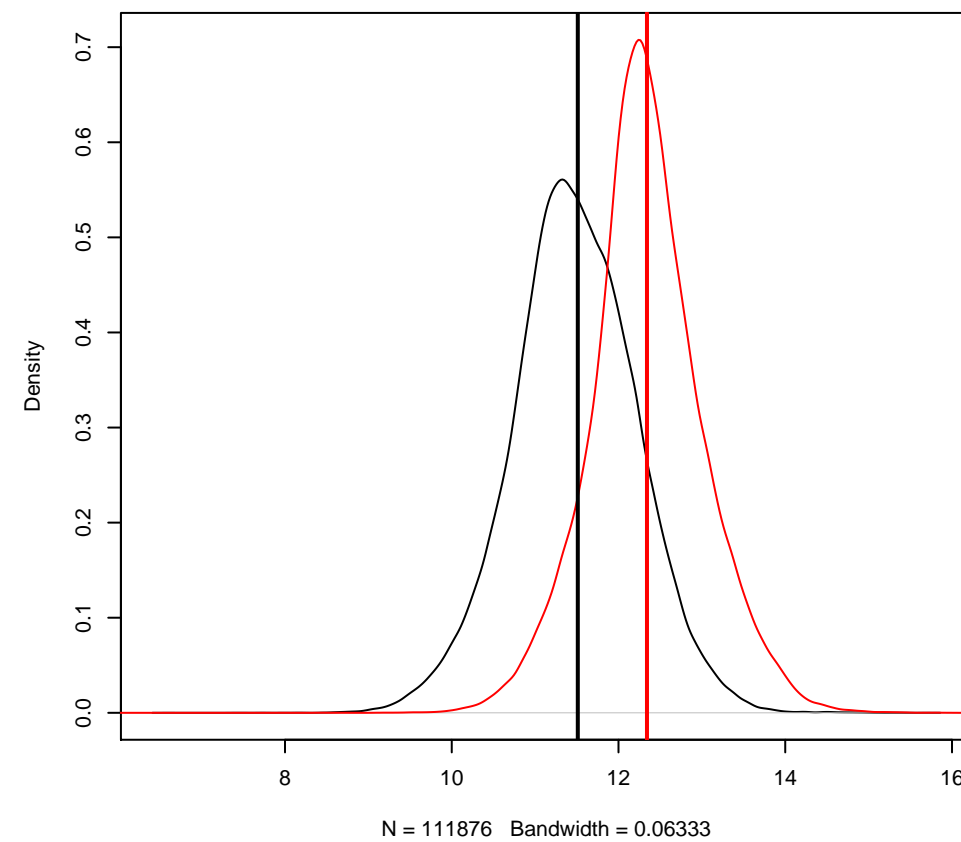

Replicate densities (normalized) for sample: U-24 (NR)

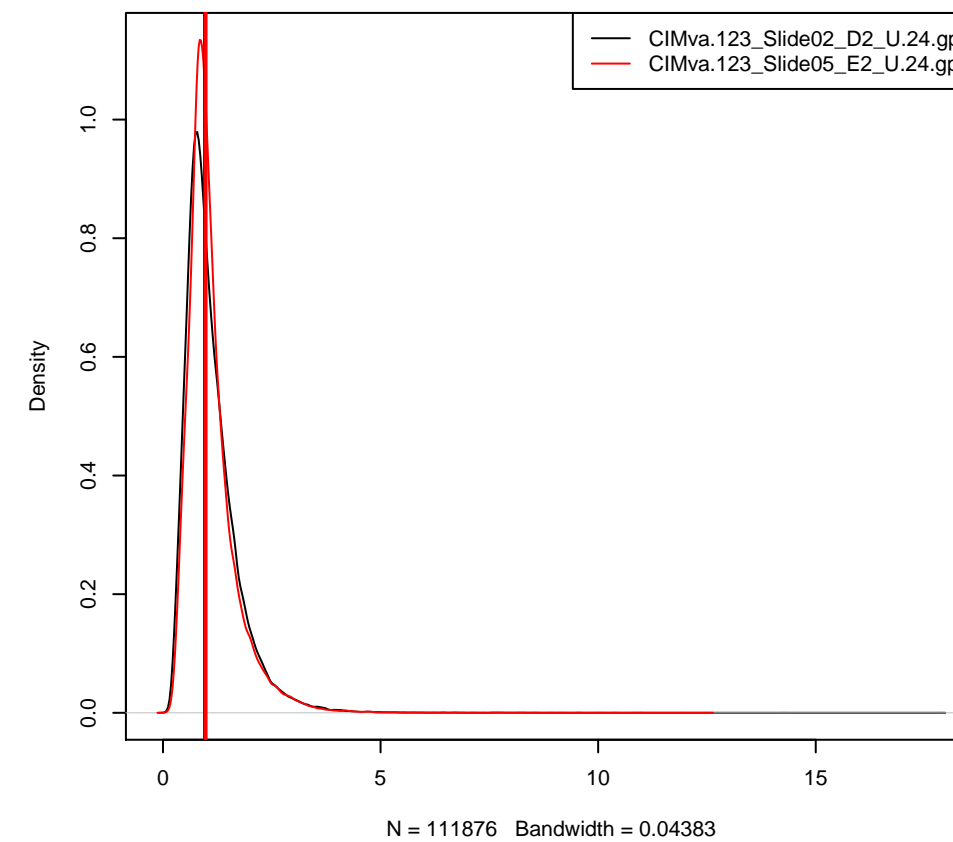

Replicate densities (normalized; log2) for sample: U-24 (NR)

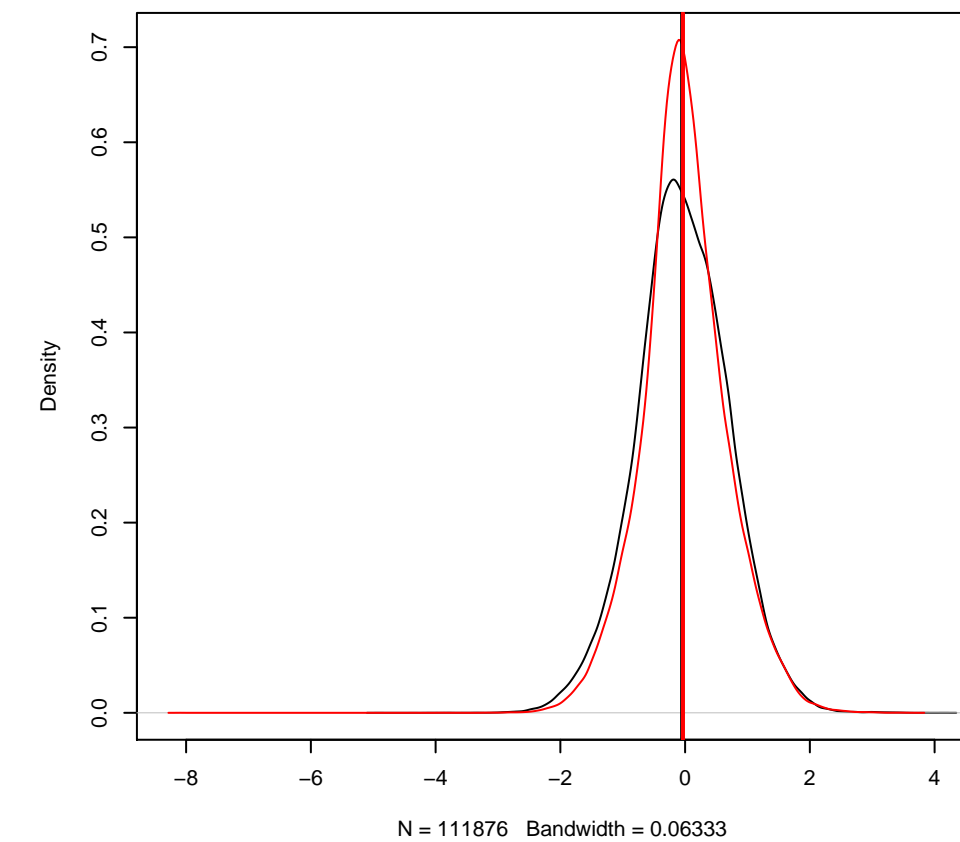

Replicate scatter (raw) for sample: U-24 (NR)  
Correlation coefficient: 0.77 (Pearson); 0.75 (Spearman)

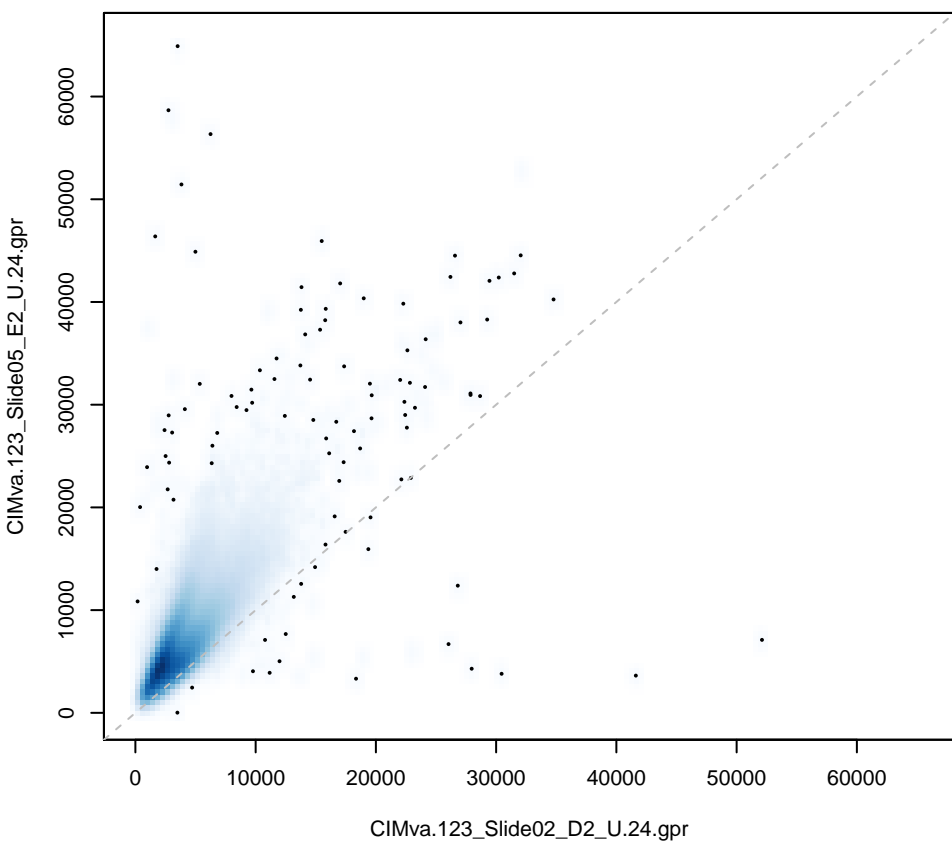

Replicate scatter (raw; log2) for sample: U-24 (NR)  
Correlation coefficient: 0.79 (Pearson); 0.75 (Spearman)

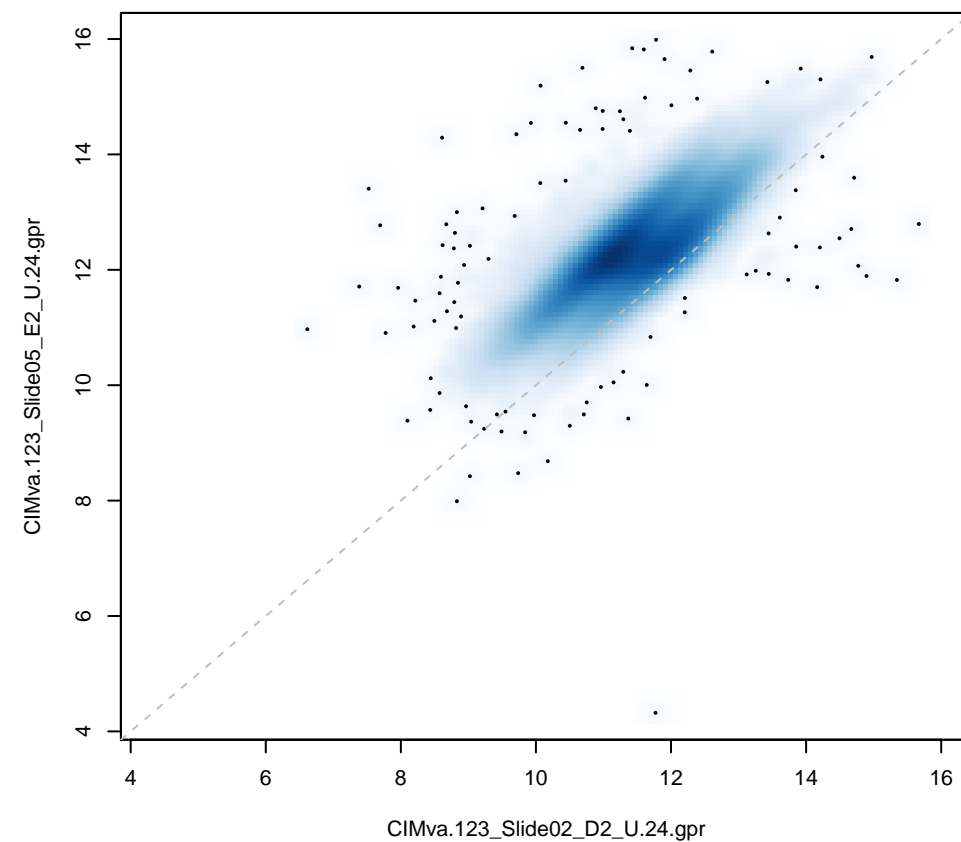

Replicate scatter (normalized) for sample: U-24 (NR)  
Correlation coefficient: 0.77 (Pearson); 0.75 (Spearman)

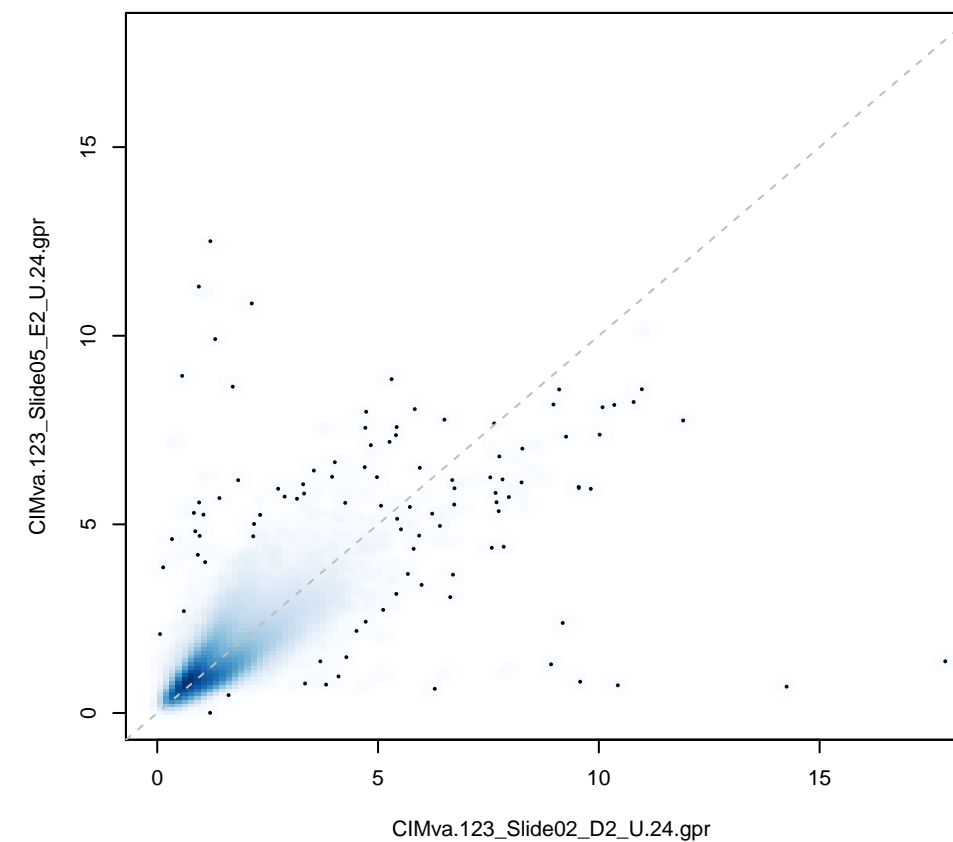

Replicate scatter (normalized; log2) for sample: U-24 (NR)  
Correlation coefficient: 0.78 (Pearson); 0.75 (Spearman)

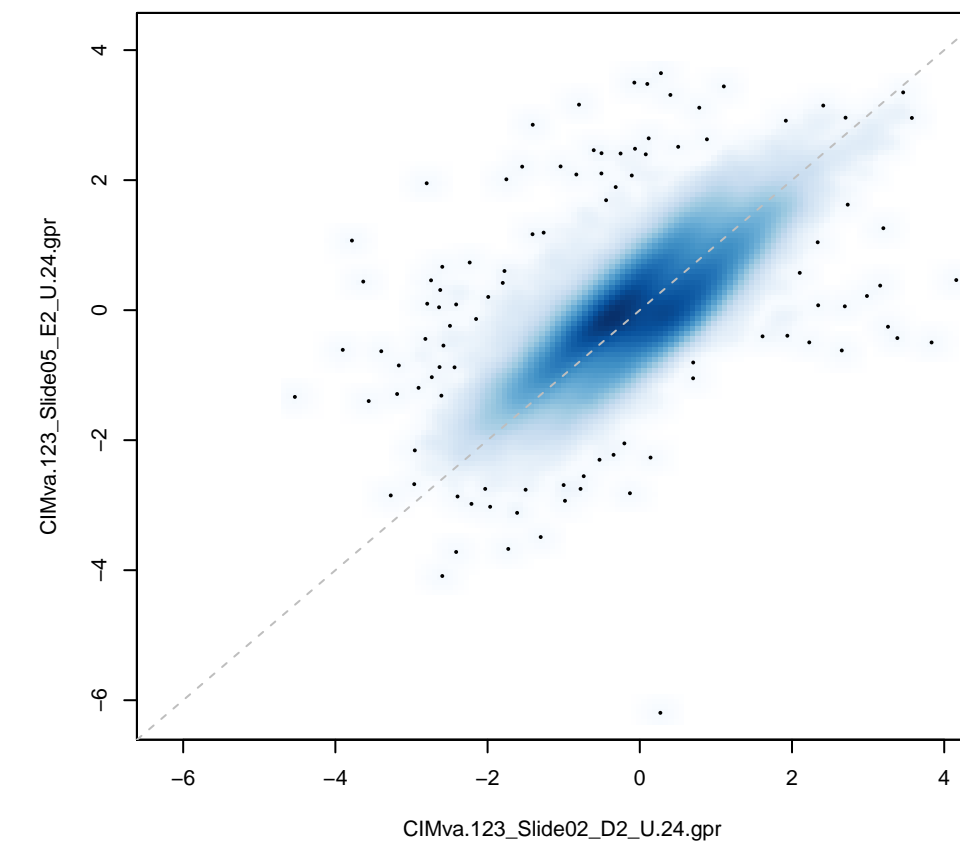

Replicate densities (raw) for sample: U-25 (R)

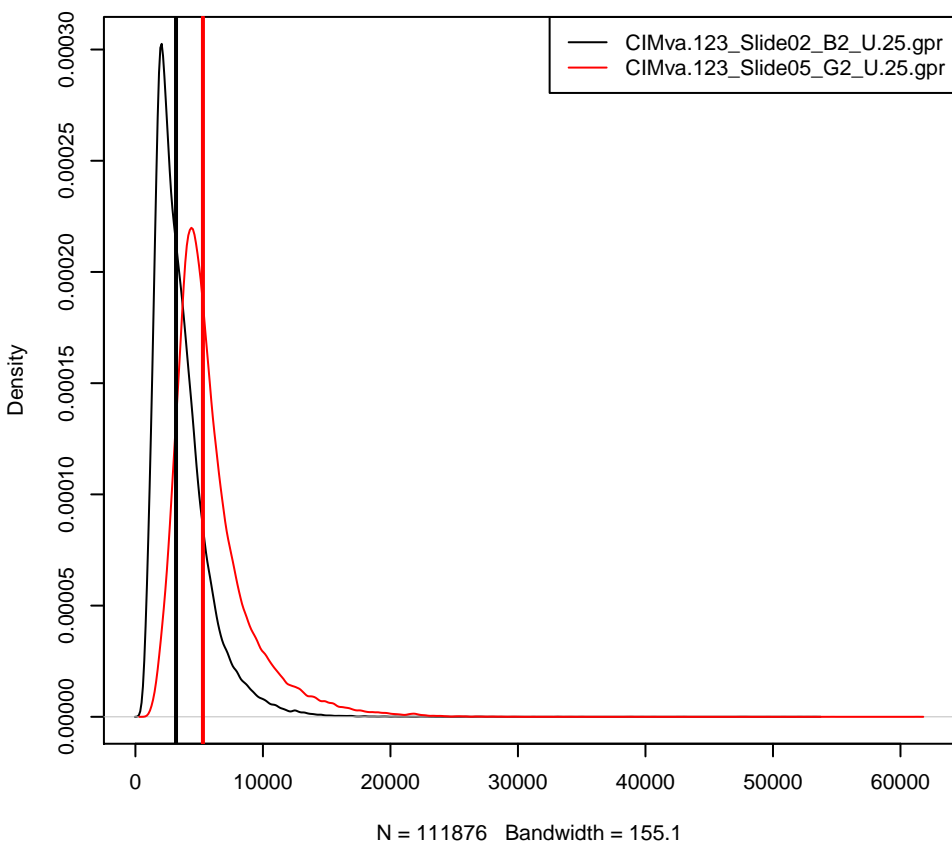

Replicate densities (raw; log2) for sample: U-25 (R)

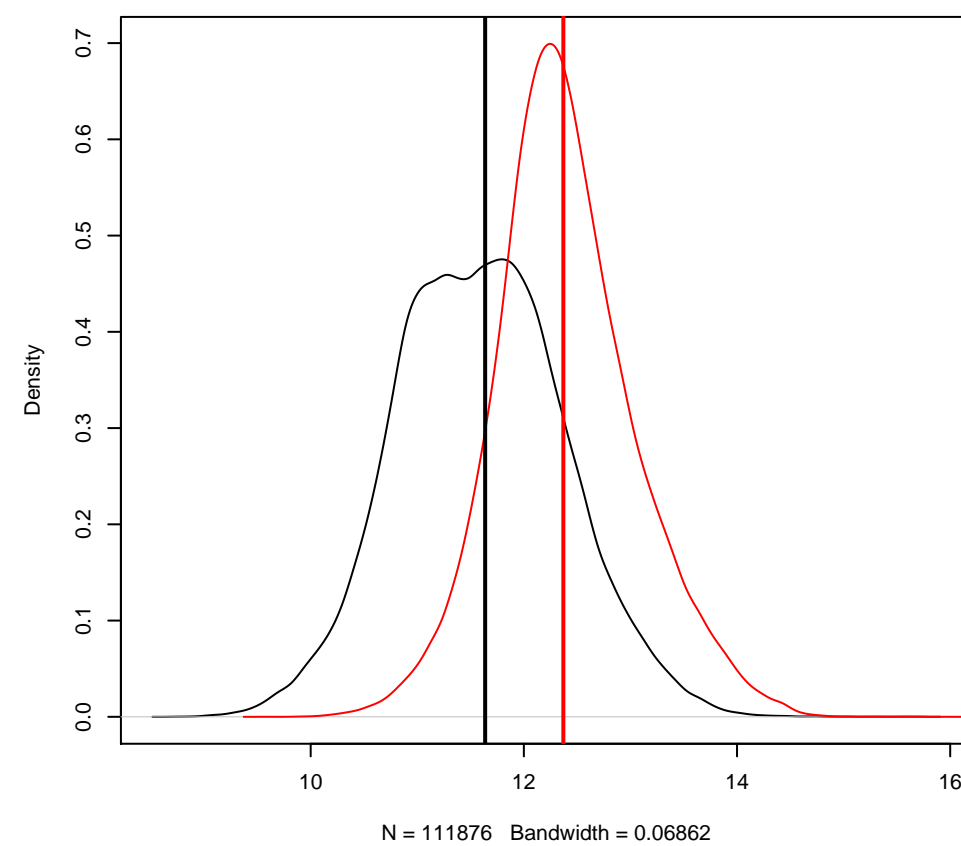

Replicate densities (normalized) for sample: U-25 (R)

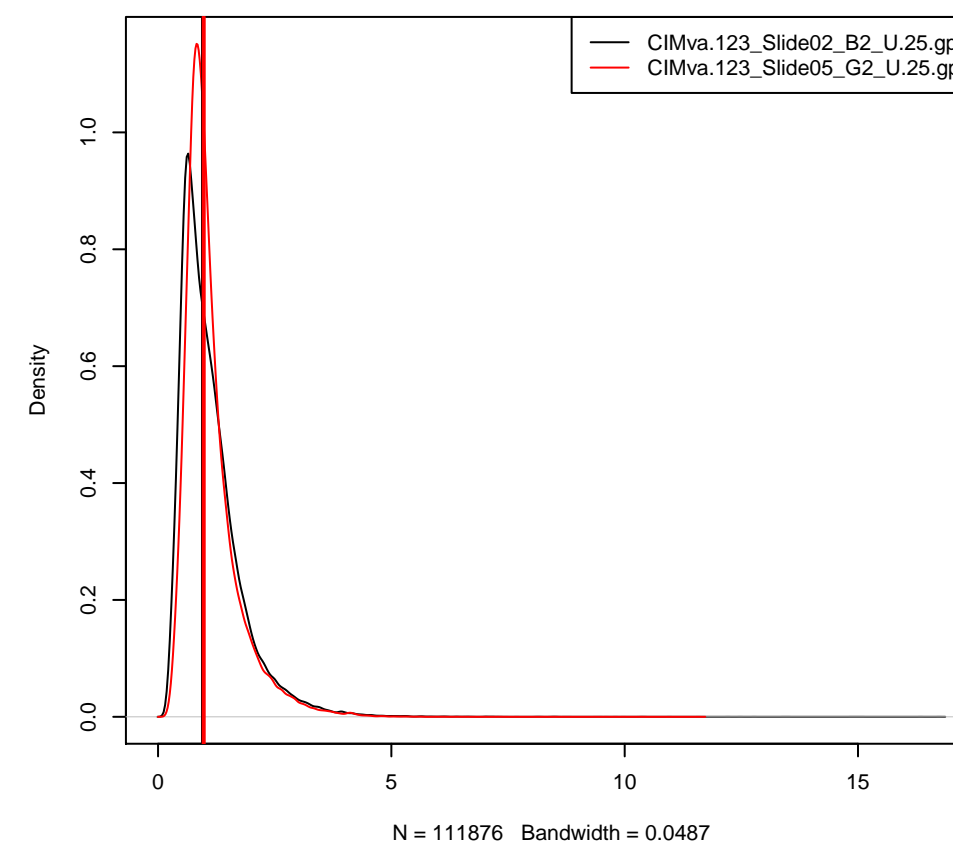

Replicate densities (normalized; log2) for sample: U-25 (R)

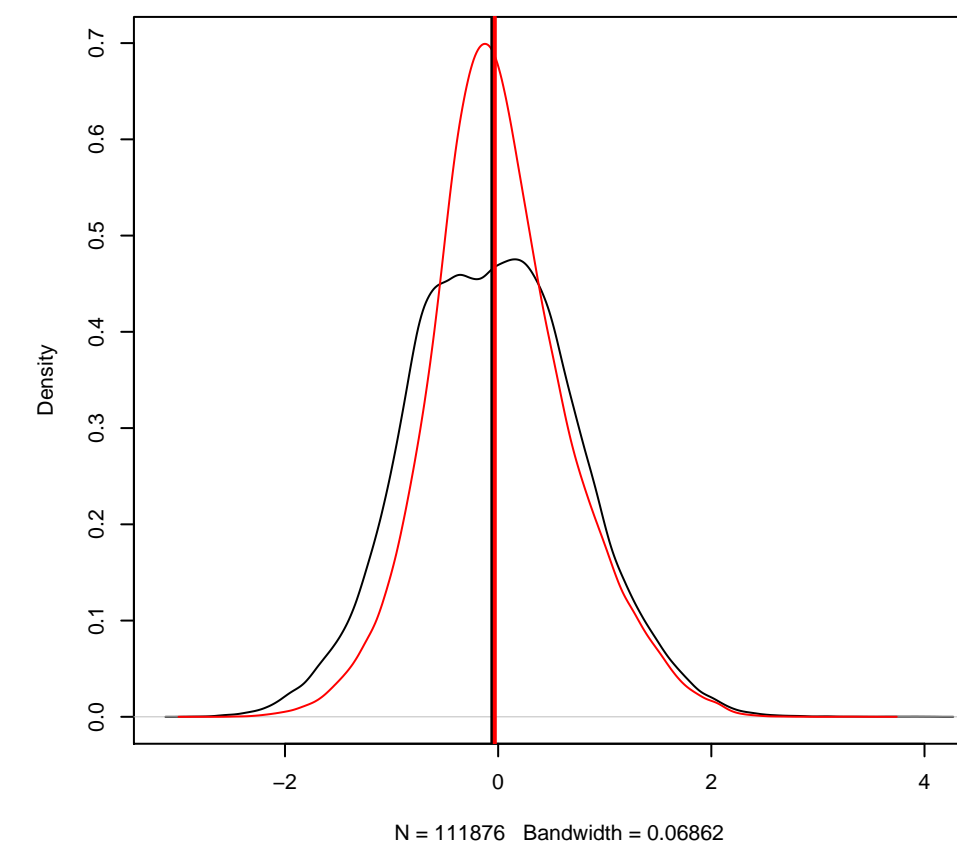

Replicate scatter (raw) for sample: U-25 (R)  
Correlation coefficient: 0.75 (Pearson); 0.73 (Spearman)

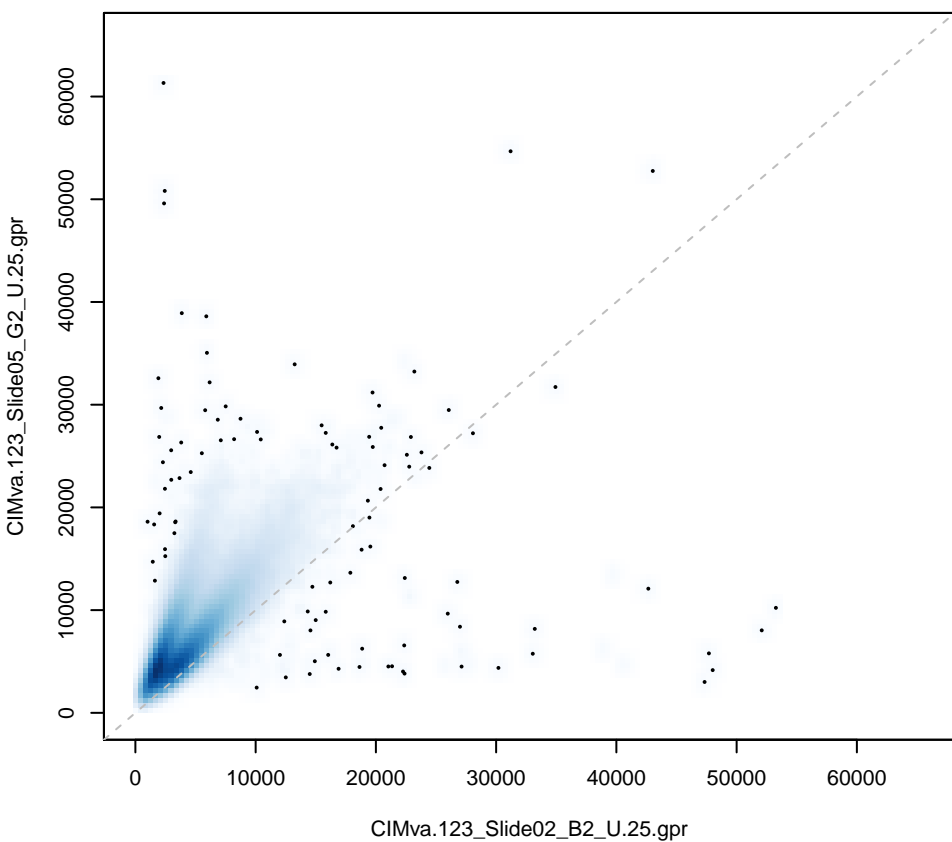

Replicate scatter (raw; log2) for sample: U-25 (R)  
Correlation coefficient: 0.77 (Pearson); 0.73 (Spearman)

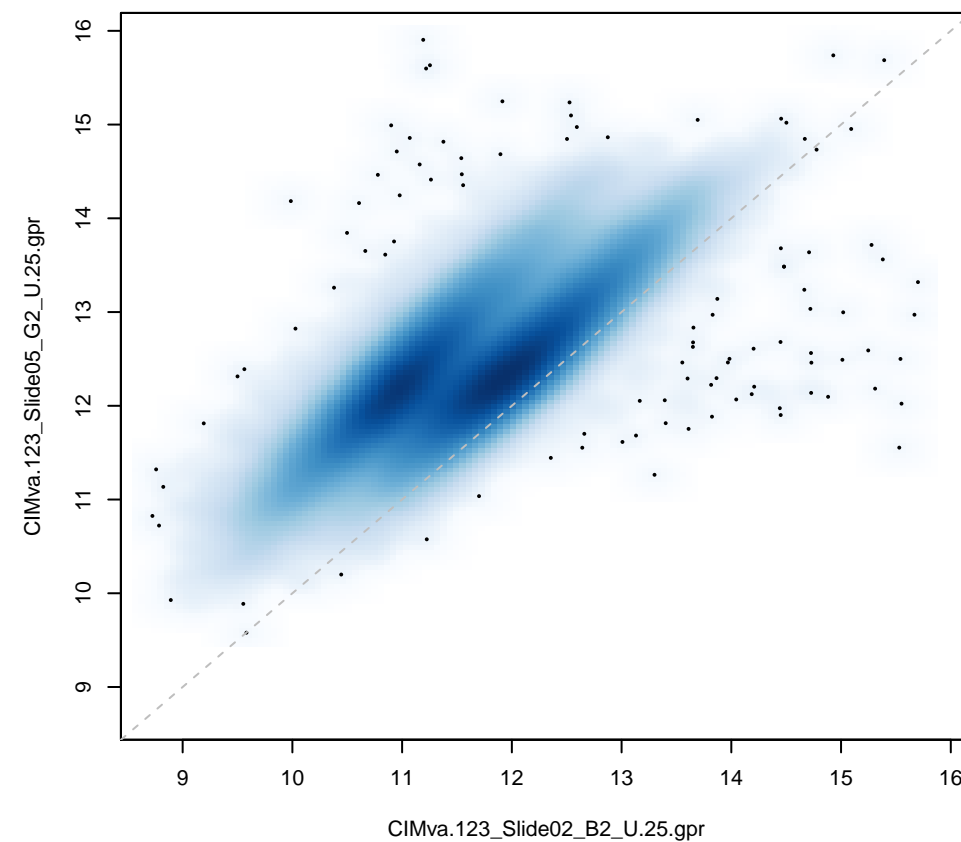

Replicate scatter (normalized) for sample: U-25 (R)  
Correlation coefficient: 0.75 (Pearson); 0.73 (Spearman)

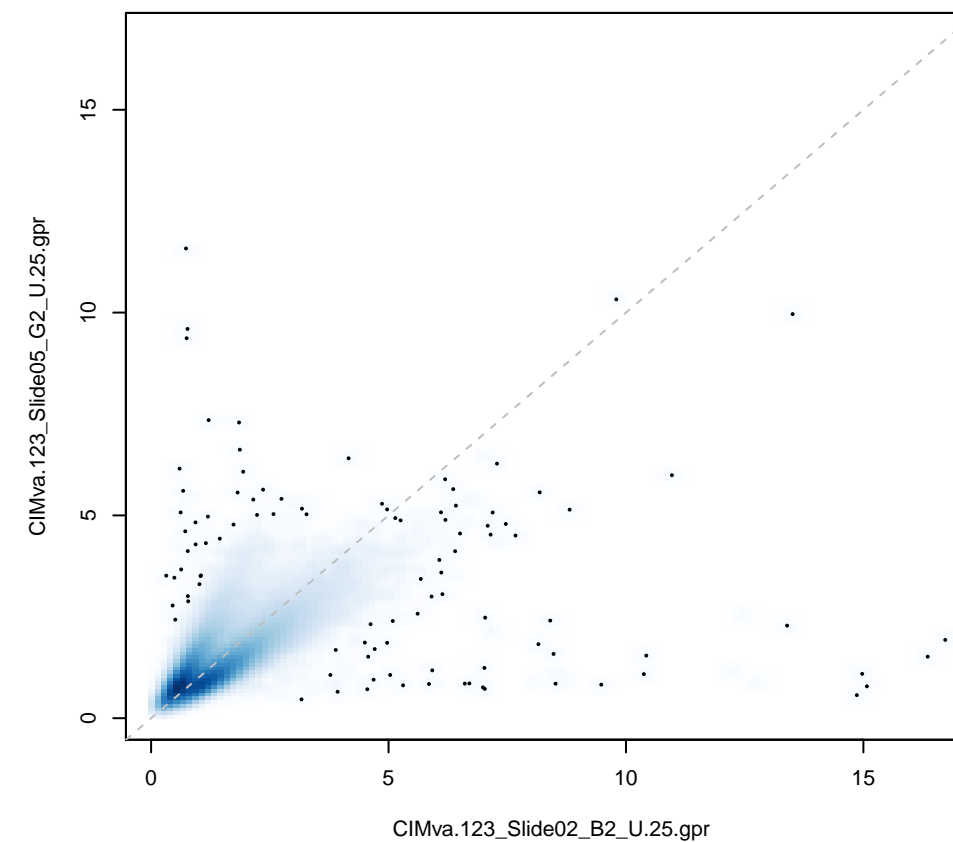

Replicate scatter (normalized; log2) for sample: U-25 (R)  
Correlation coefficient: 0.77 (Pearson); 0.73 (Spearman)

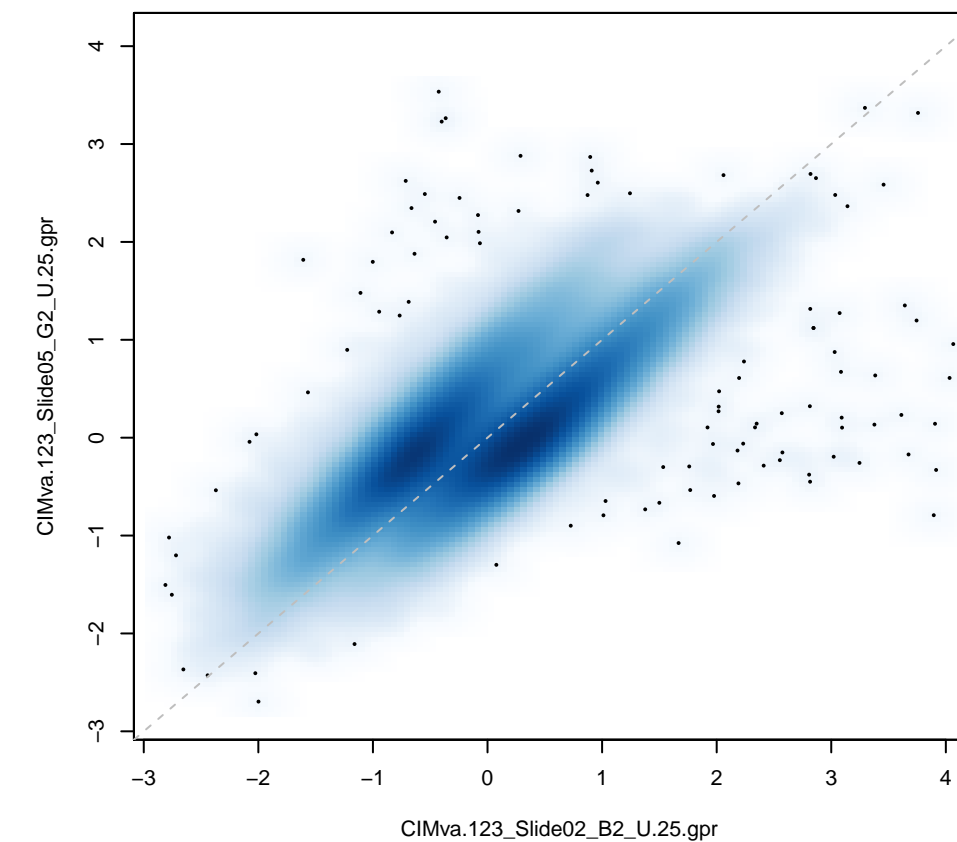

Replicate densities (raw) for sample: U-3 (R)

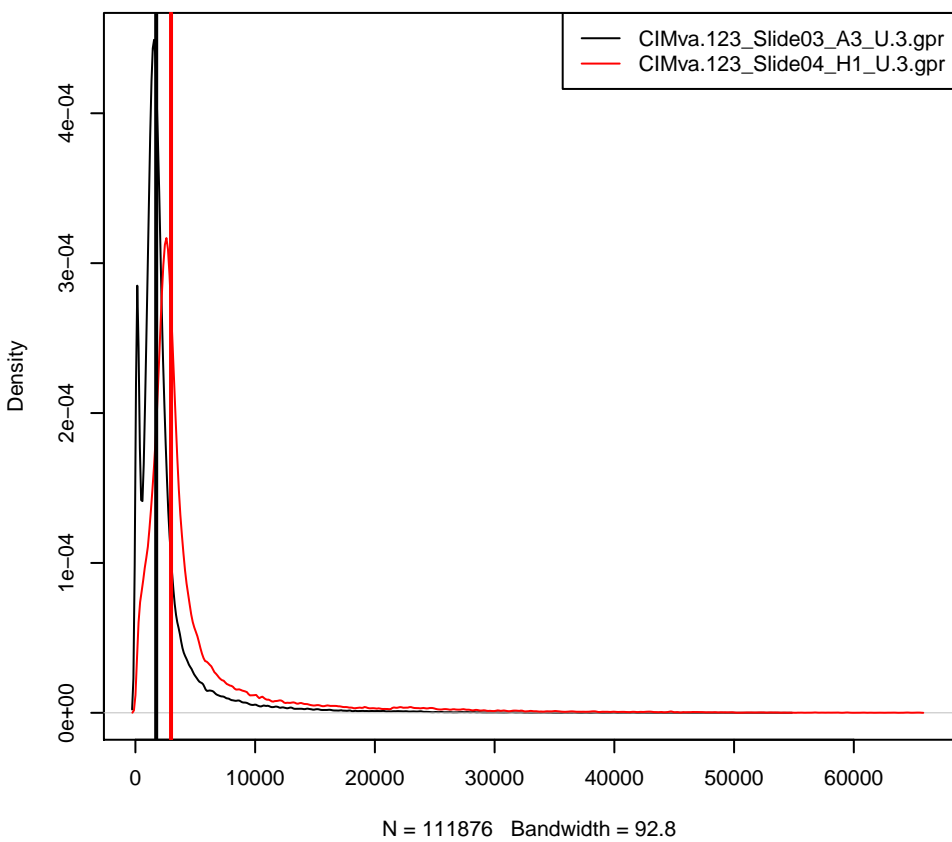

Replicate densities (raw; log2) for sample: U-3 (R)

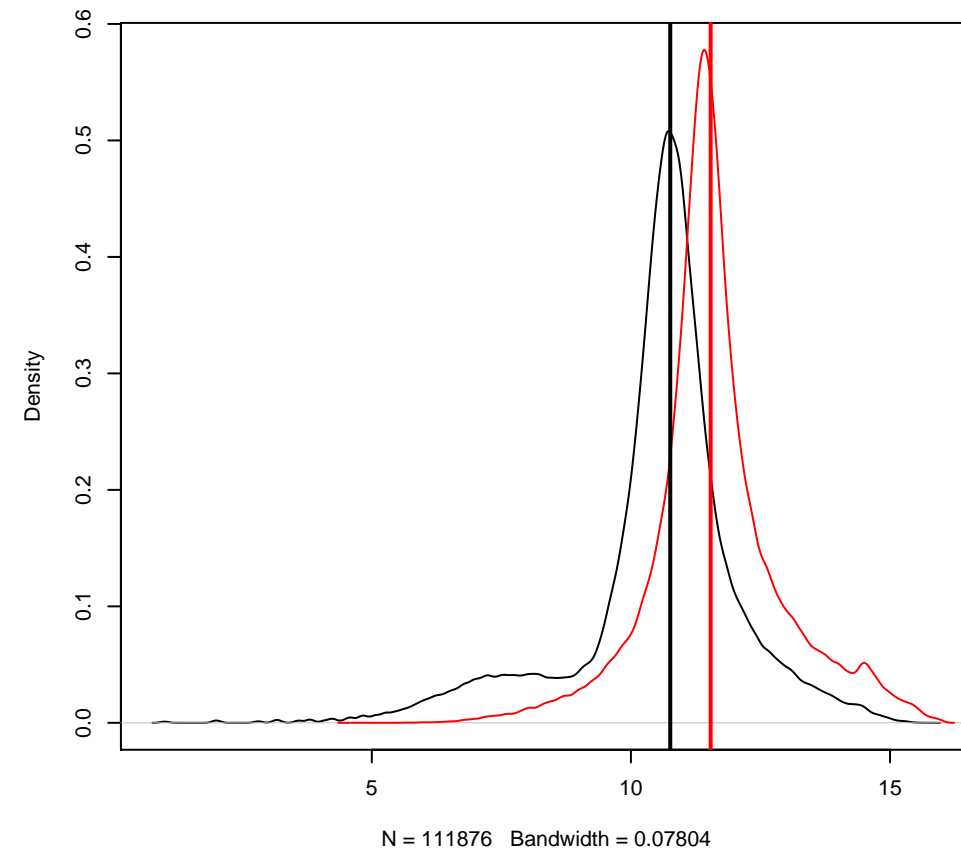

Replicate densities (normalized) for sample: U-3 (R)

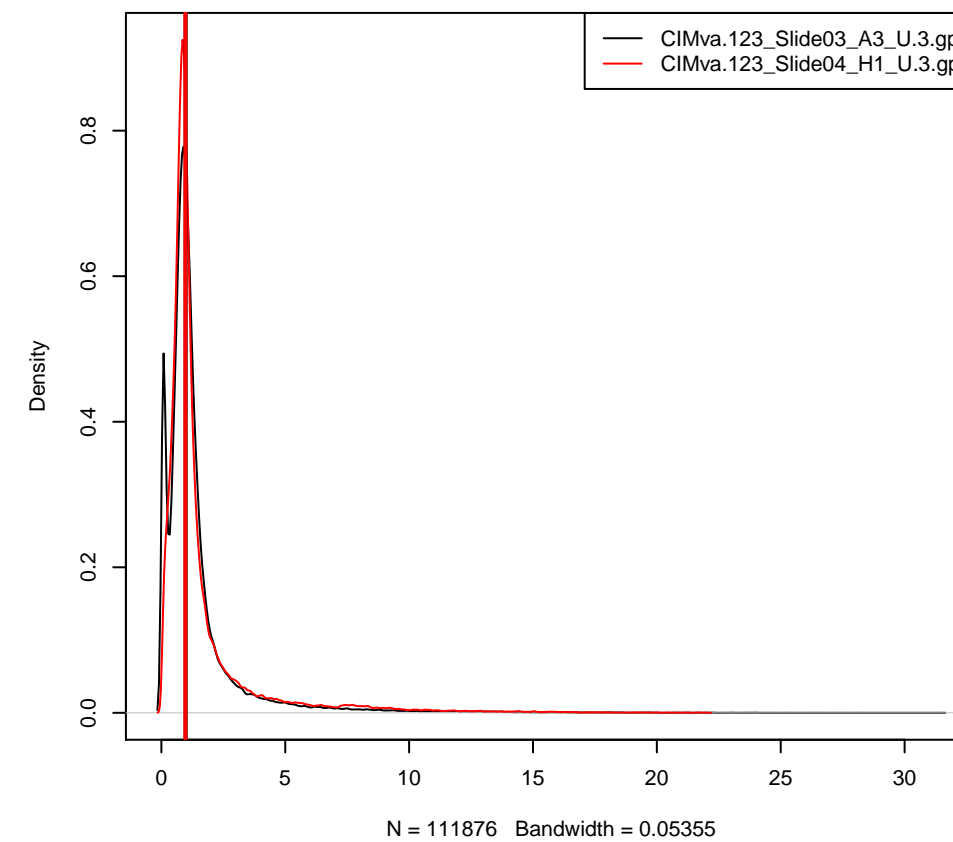

Replicate densities (normalized; log2) for sample: U-3 (R)

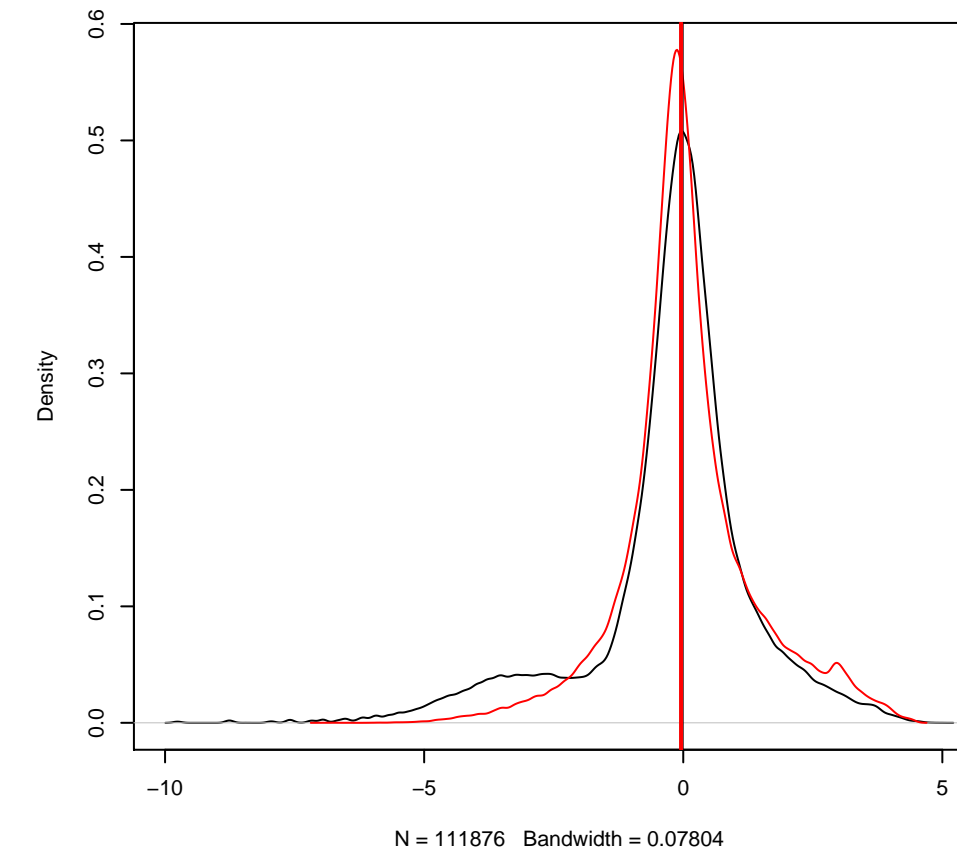

Replicate scatter (raw) for sample: U-3 (R)  
Correlation coefficient: 0.7 (Pearson); 0.42 (Spearman)

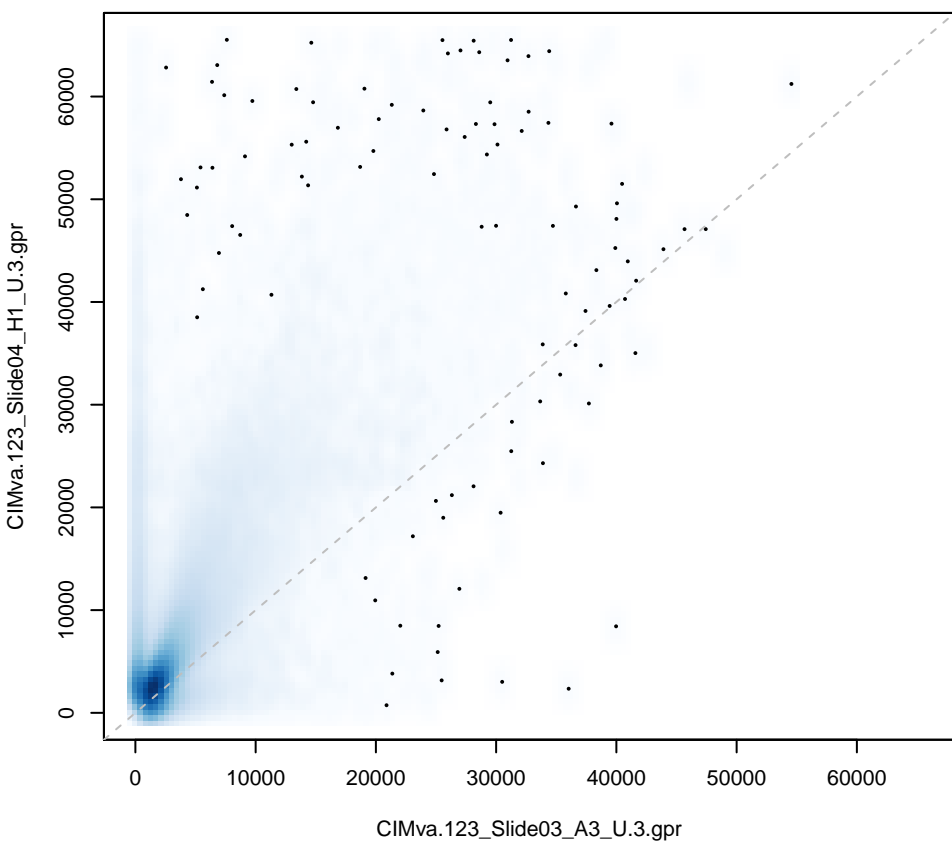

Replicate scatter (raw; log2) for sample: U-3 (R)  
Correlation coefficient: 0.29 (Pearson); 0.42 (Spearman)

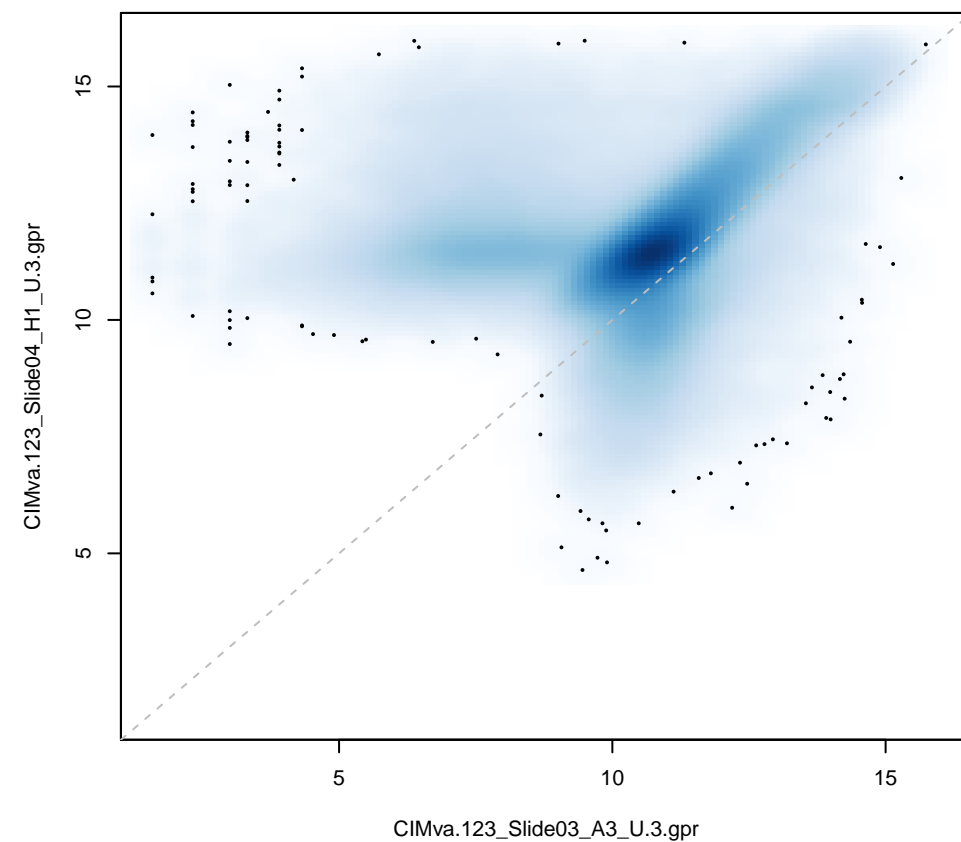

Replicate scatter (normalized) for sample: U-3 (R)  
Correlation coefficient: 0.7 (Pearson); 0.42 (Spearman)

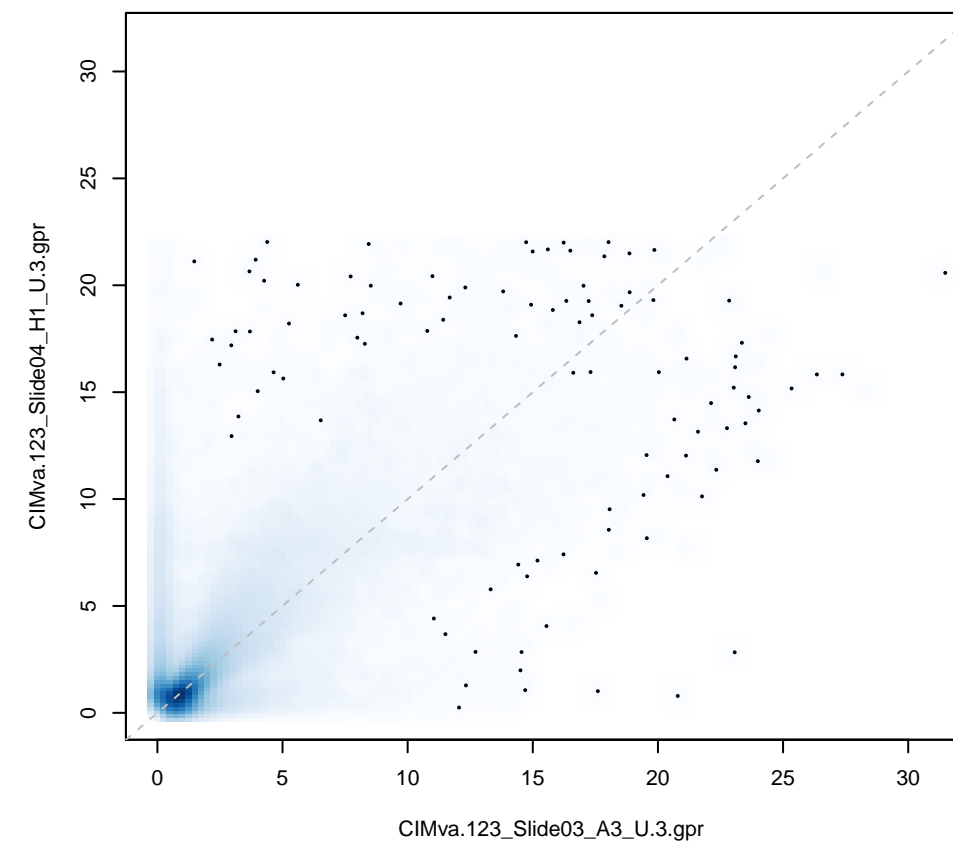

Replicate scatter (normalized; log2) for sample: U-3 (R)  
Correlation coefficient: 0.58 (Pearson); 0.42 (Spearman)

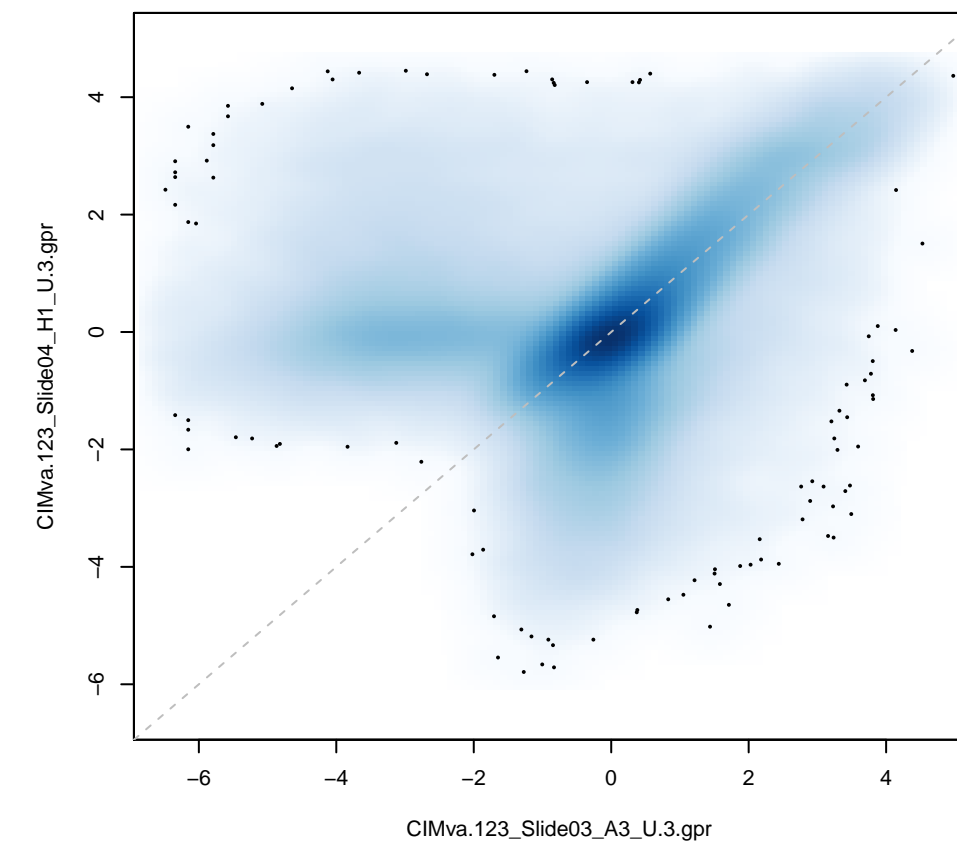

Replicate densities (raw) for sample: U-4 (R)

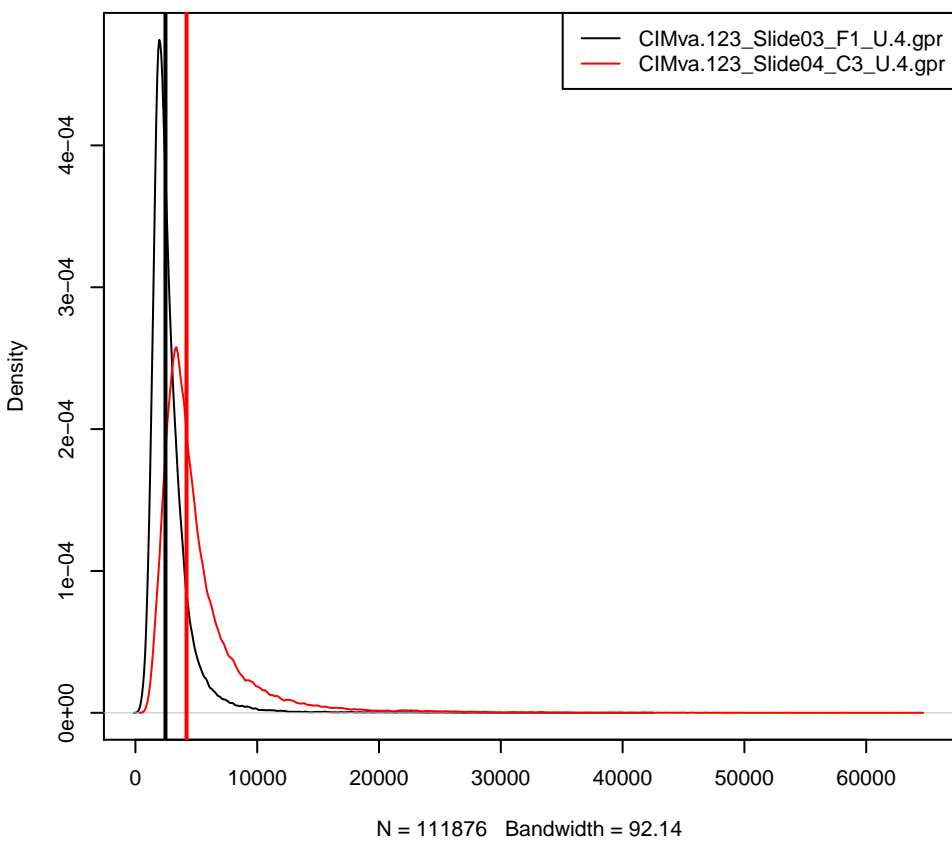

Replicate densities (raw; log2) for sample: U-4 (R)

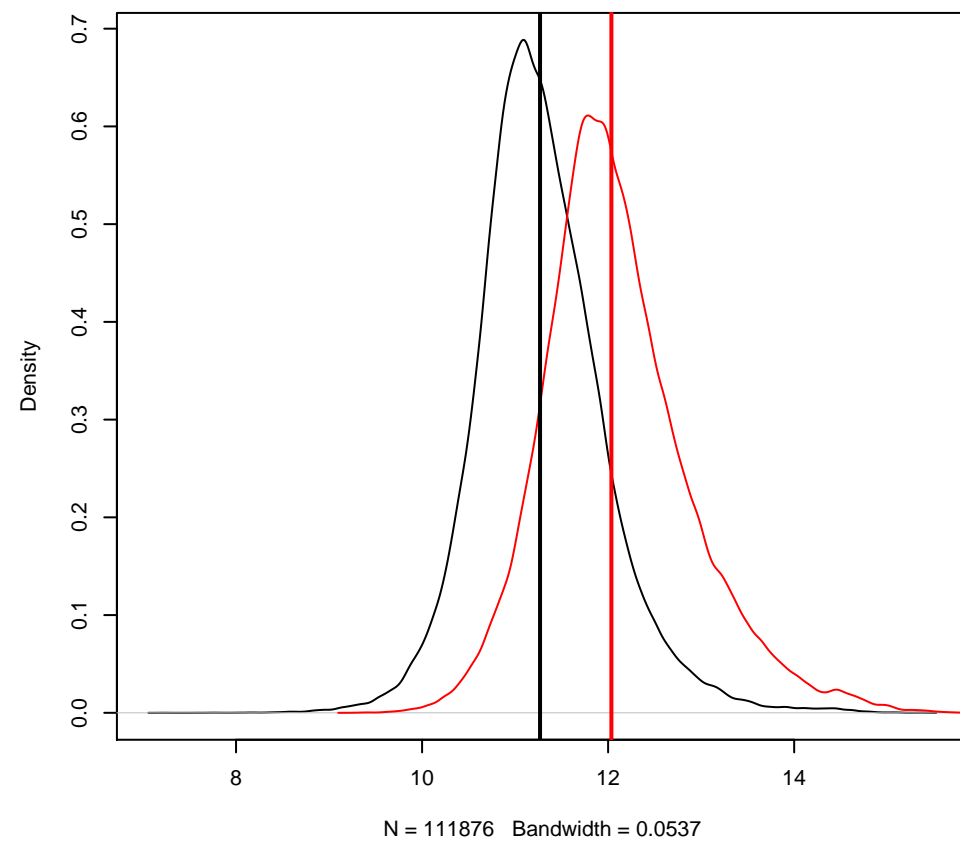

Replicate densities (normalized) for sample: U-4 (R)

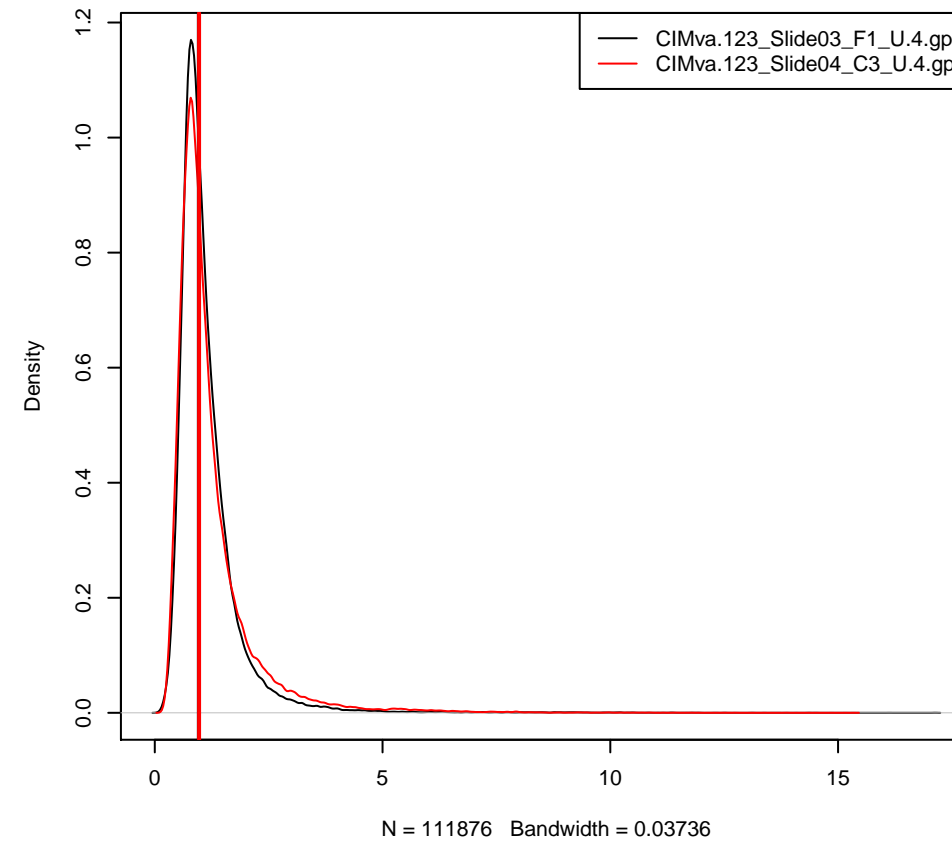

Replicate densities (normalized; log2) for sample: U-4 (R)

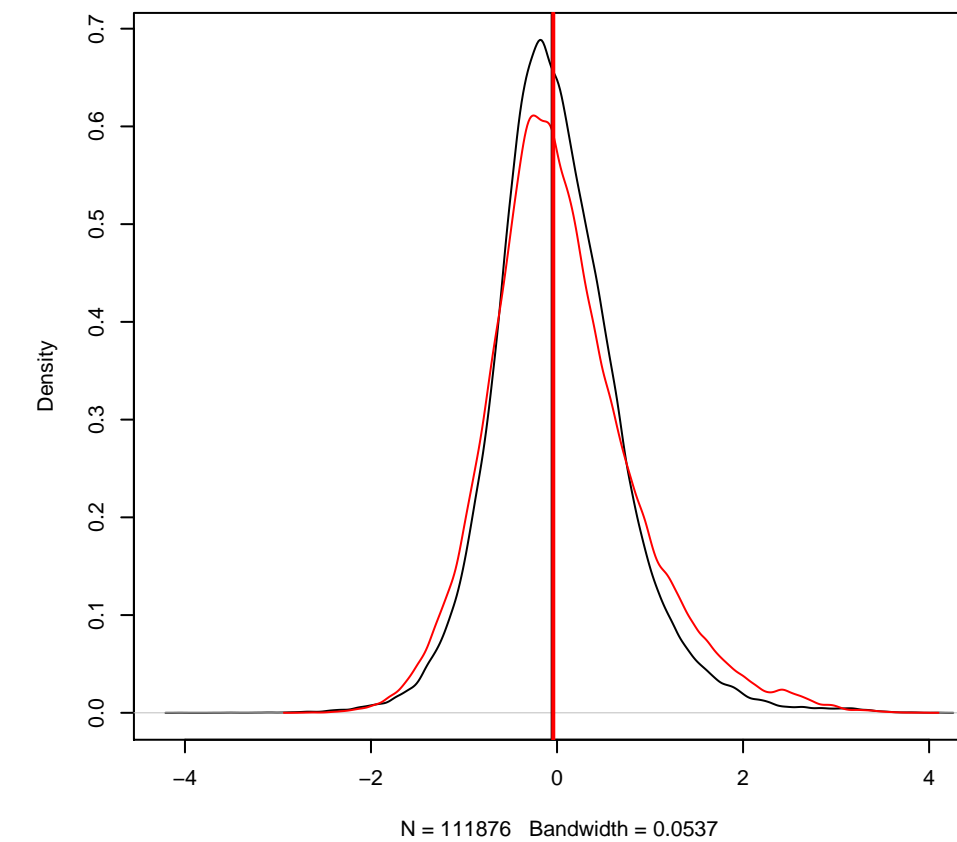

Replicate scatter (raw) for sample: U-4 (R)  
Correlation coefficient: 0.74 (Pearson); 0.68 (Spearman)

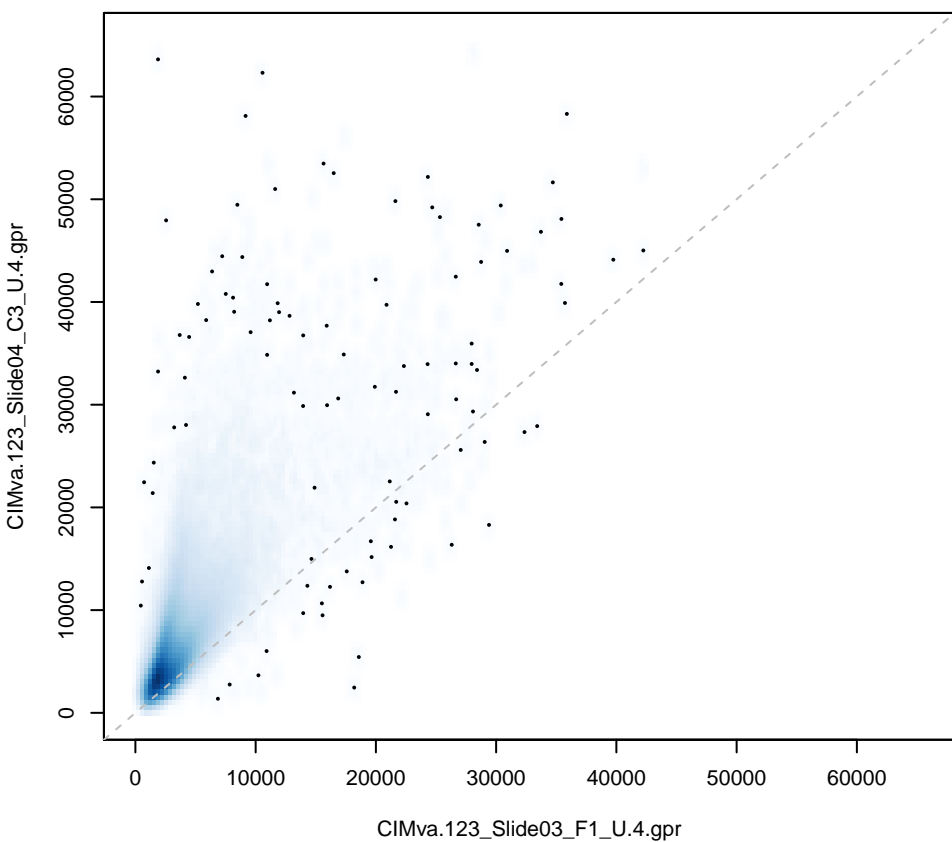

Replicate scatter (raw; log2) for sample: U-4 (R)  
Correlation coefficient: 0.73 (Pearson); 0.68 (Spearman)

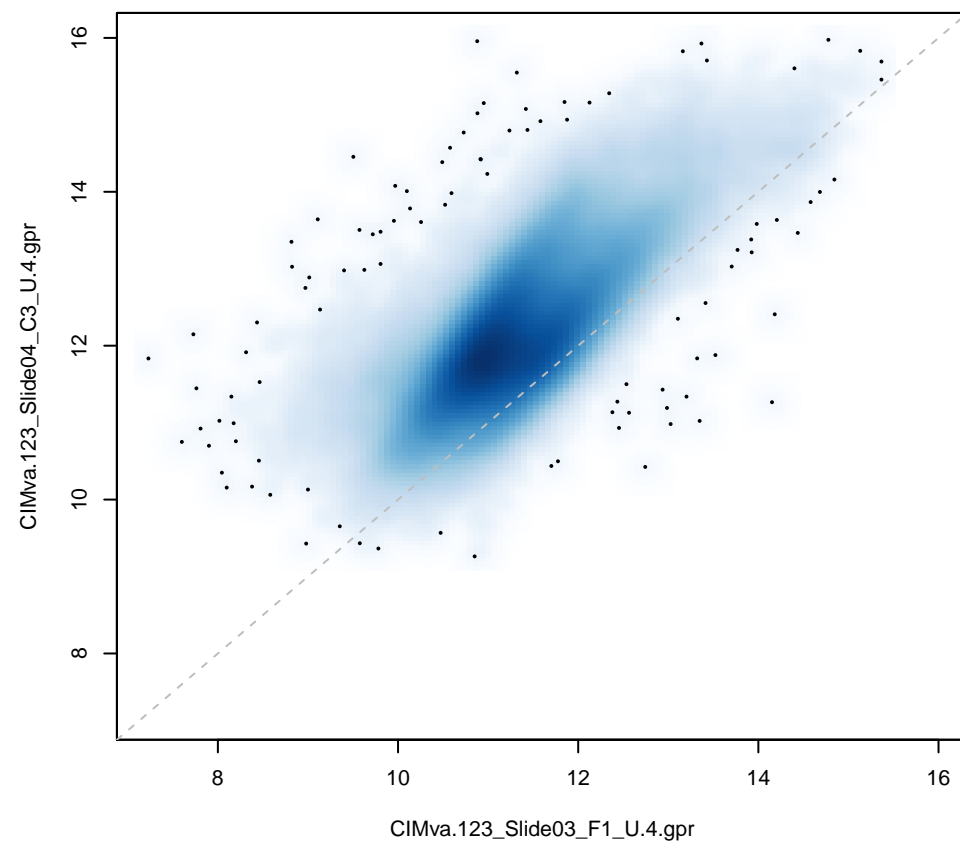

Replicate scatter (normalized) for sample: U-4 (R)  
Correlation coefficient: 0.74 (Pearson); 0.68 (Spearman)

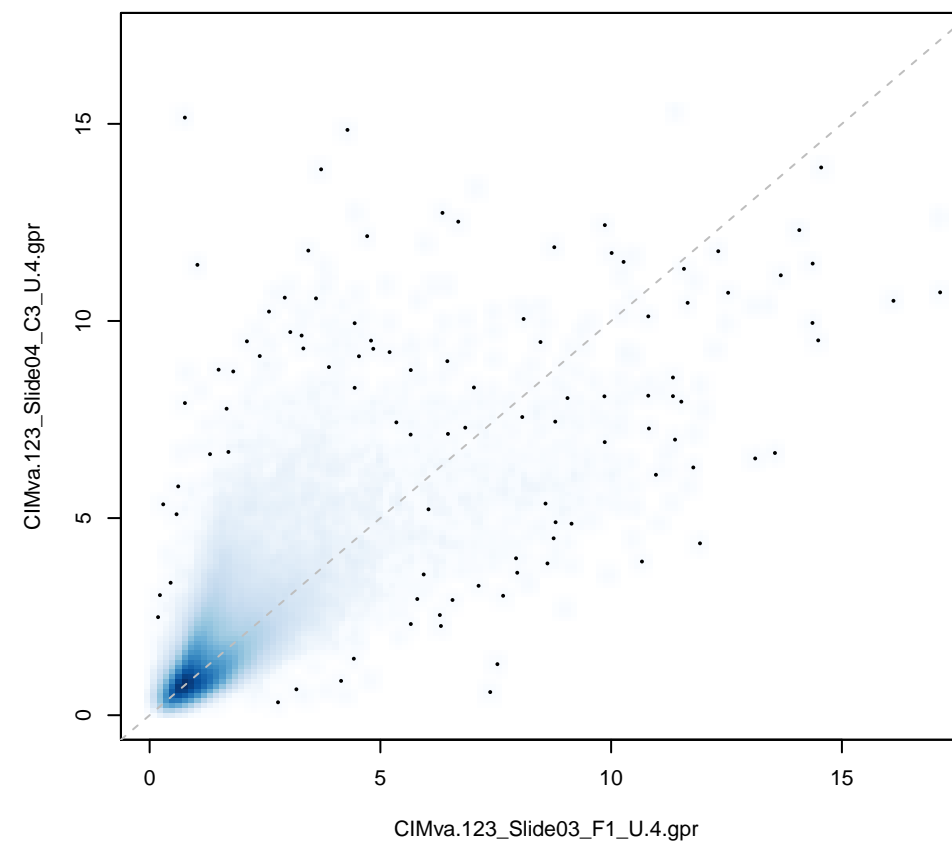

Replicate scatter (normalized; log2) for sample: U-4 (R)  
Correlation coefficient: 0.74 (Pearson); 0.68 (Spearman)

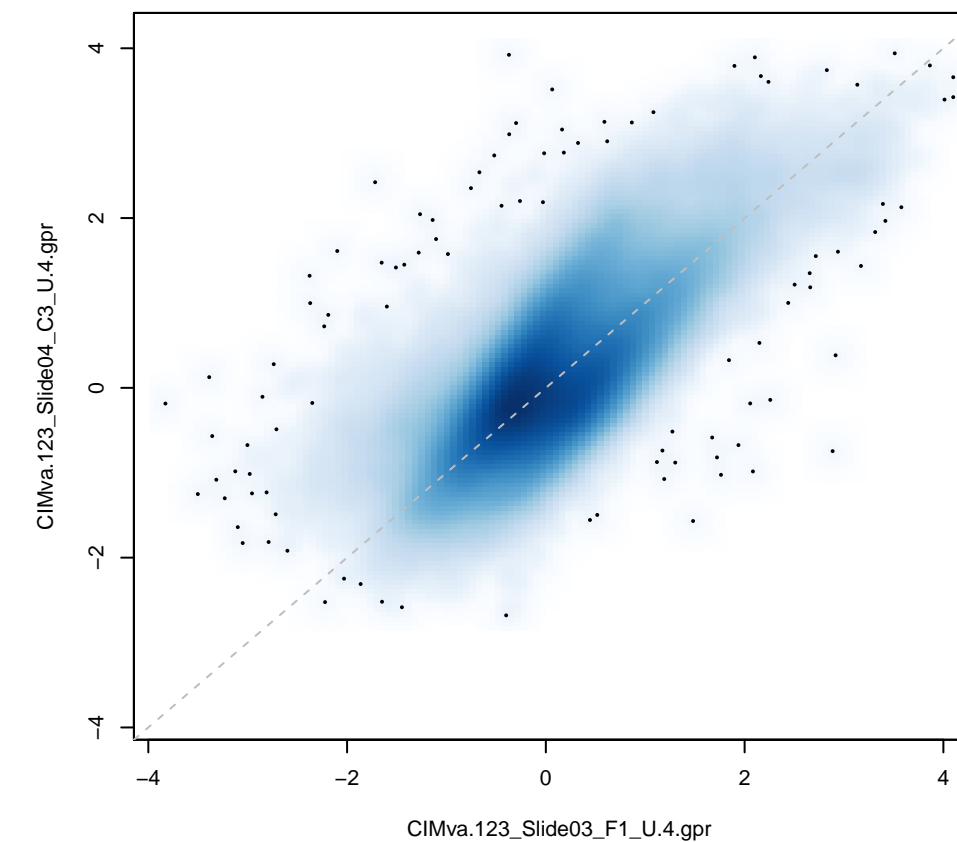

Replicate densities (raw) for sample: U-5 (R)

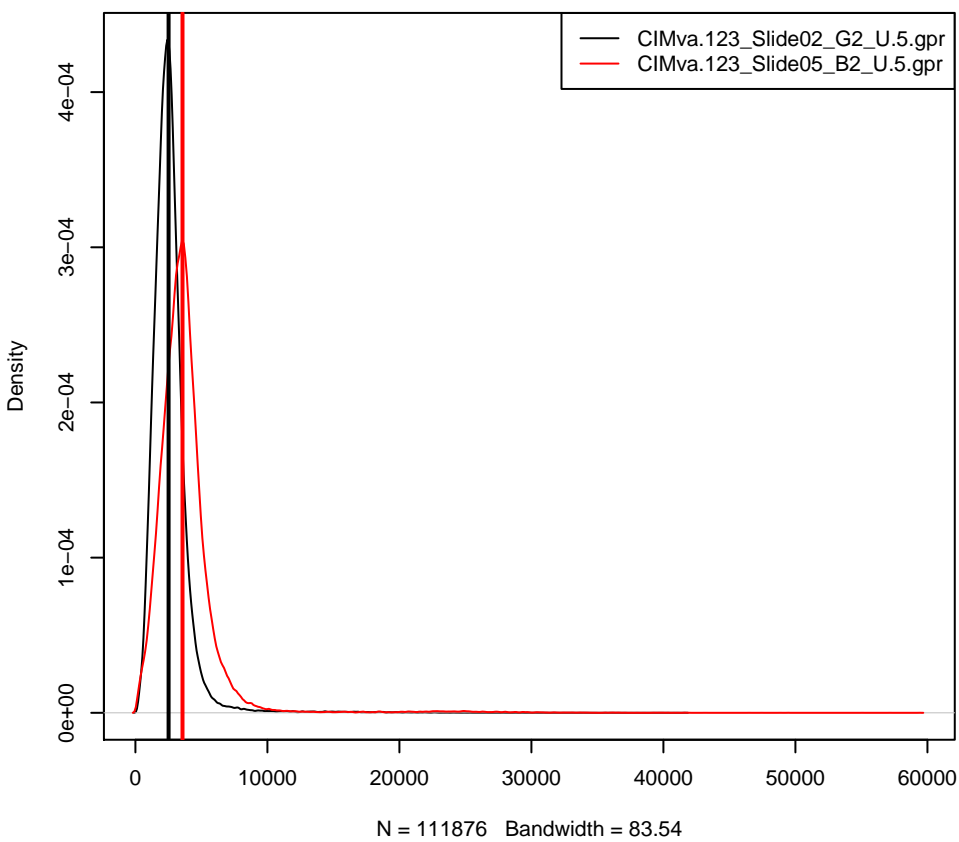

Replicate densities (raw; log2) for sample: U-5 (R)

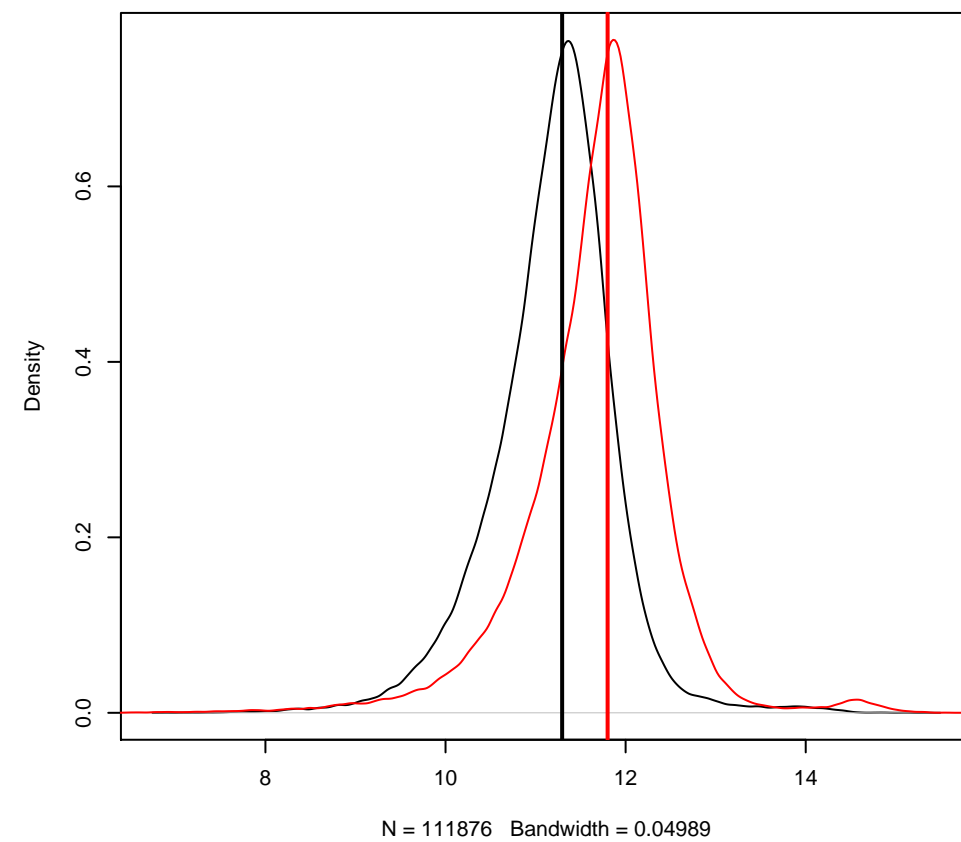

Replicate densities (normalized) for sample: U-5 (R)

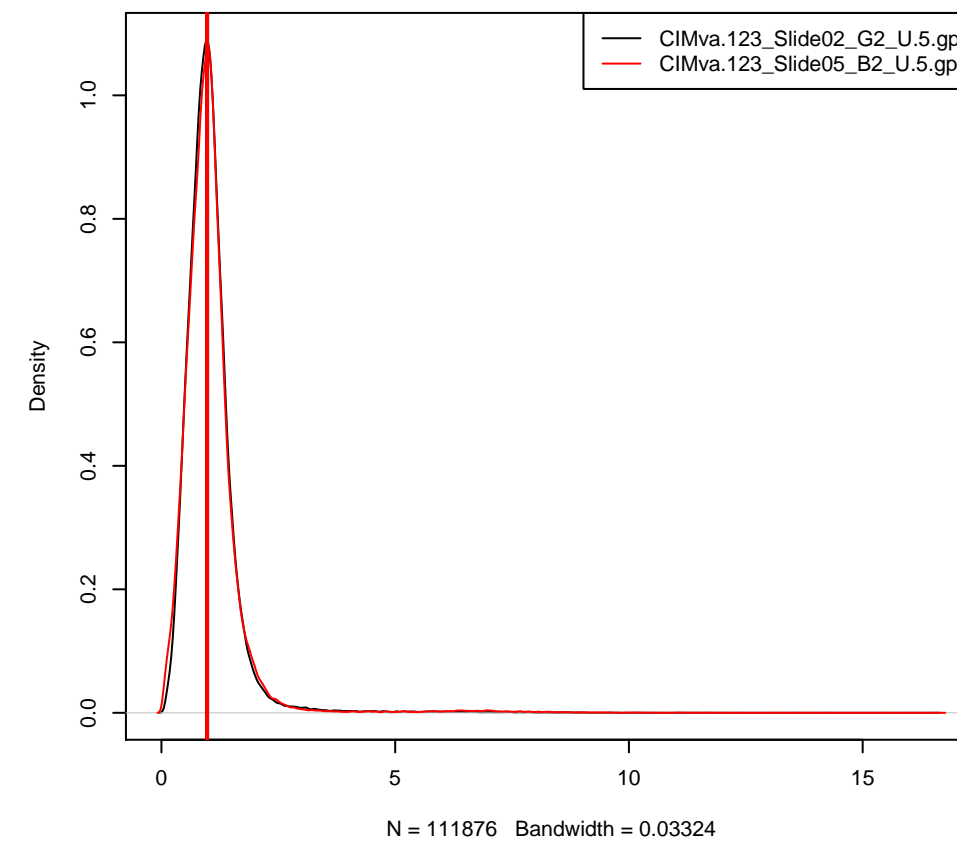

Replicate densities (normalized; log2) for sample: U-5 (R)

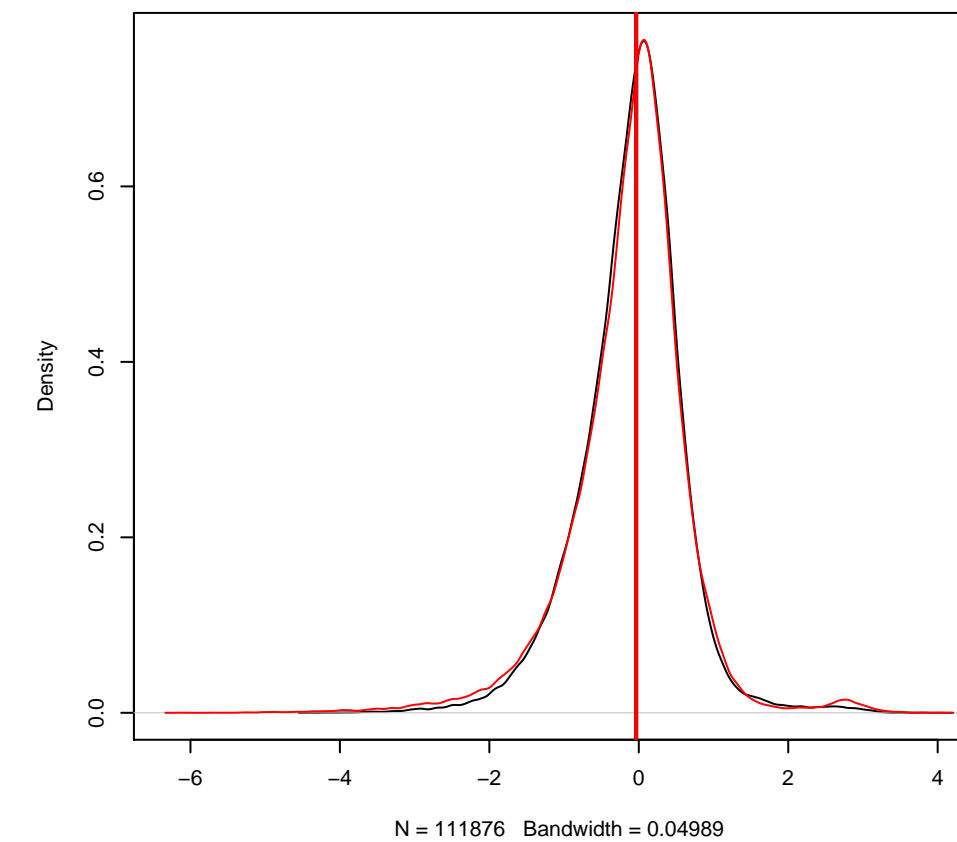

Replicate scatter (raw) for sample: U-5 (R)  
Correlation coefficient: 0.87 (Pearson); 0.84 (Spearman)

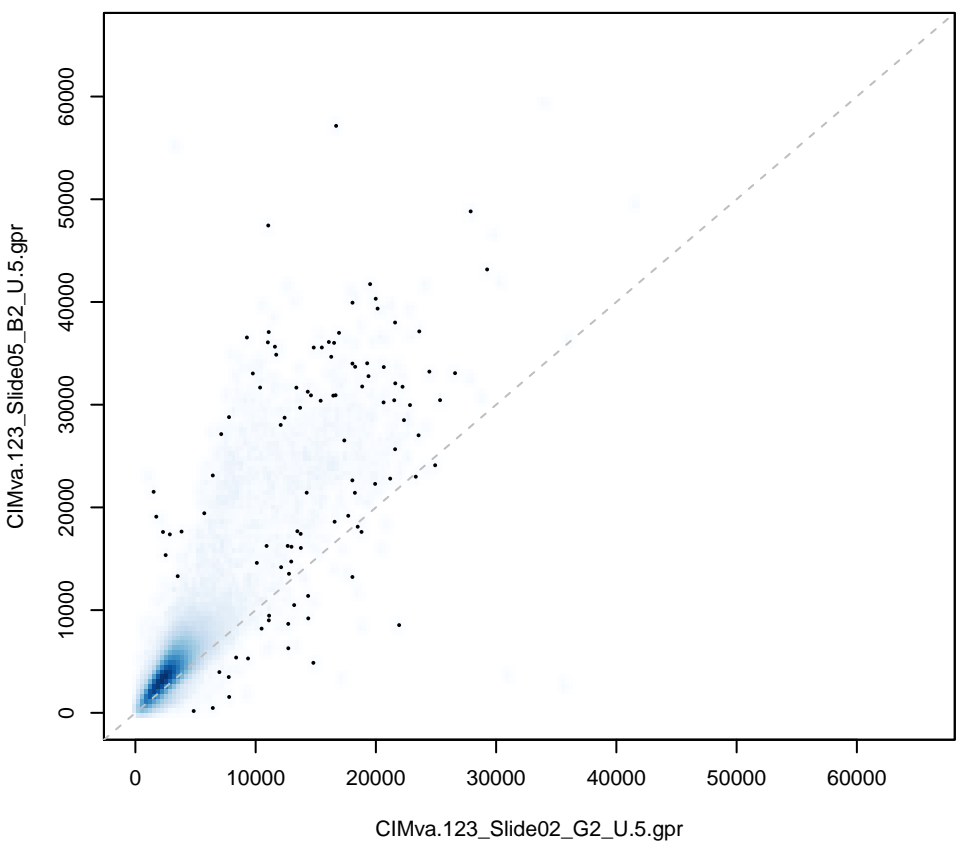

Replicate scatter (raw; log2) for sample: U-5 (R)  
Correlation coefficient: 0.85 (Pearson); 0.84 (Spearman)

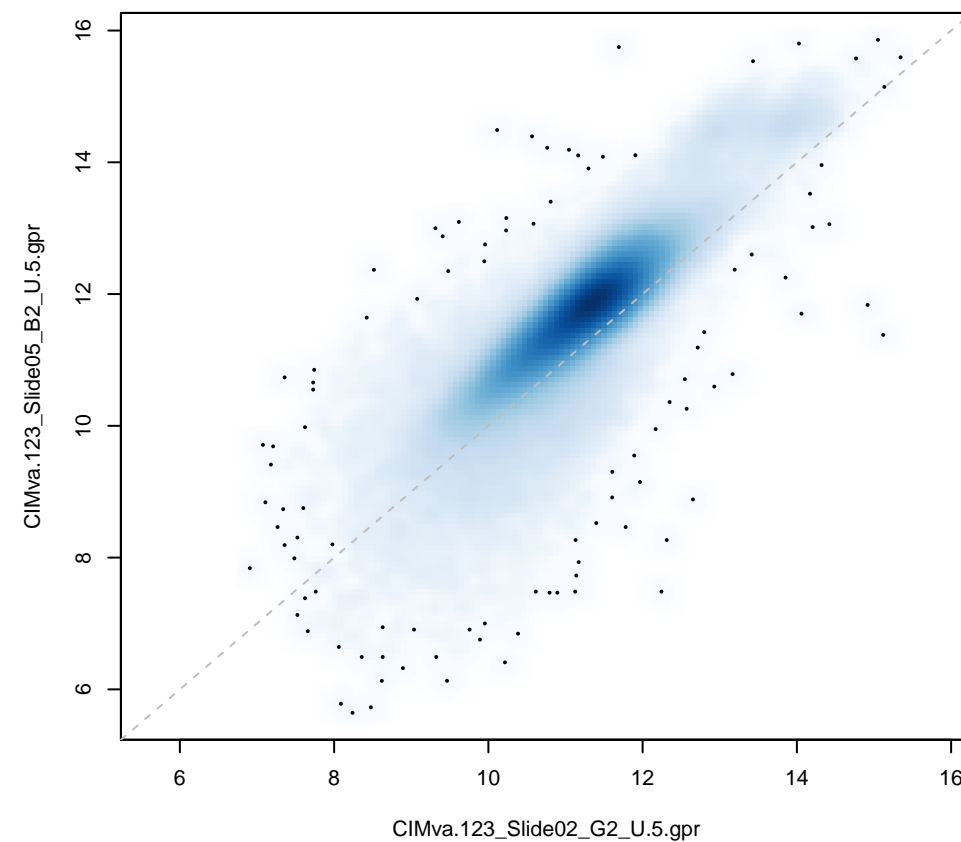

Replicate scatter (normalized) for sample: U-5 (R)  
Correlation coefficient: 0.87 (Pearson); 0.84 (Spearman)

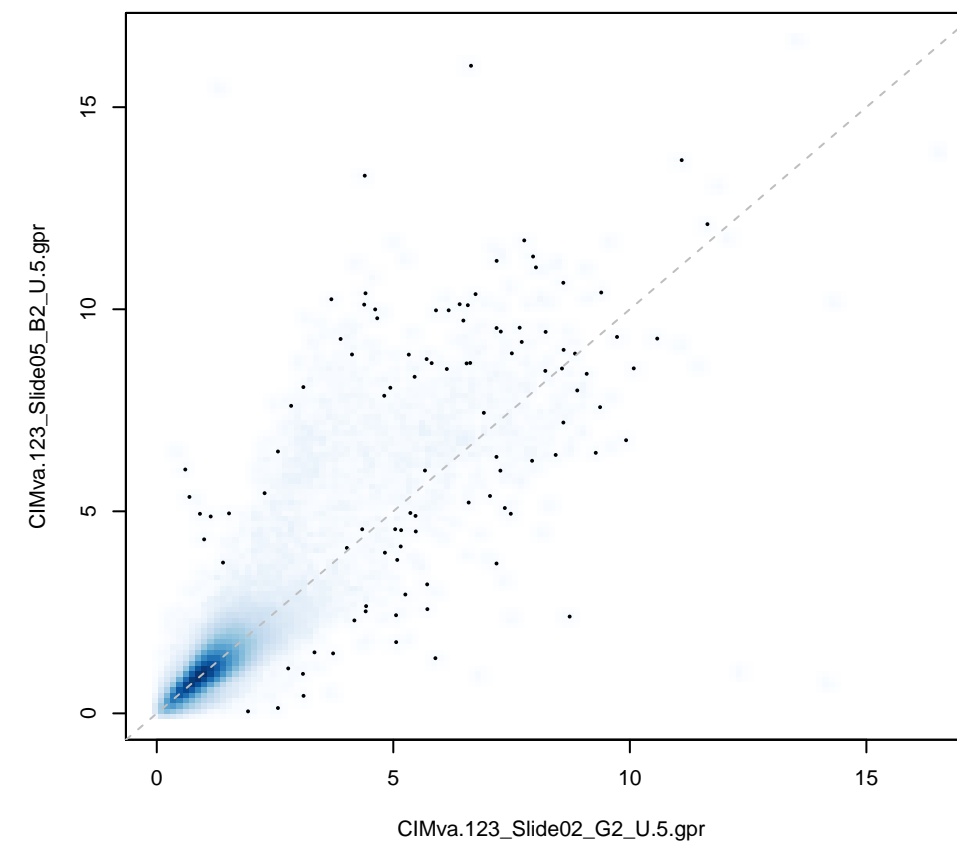

Replicate scatter (normalized; log2) for sample: U-5 (R)  
Correlation coefficient: 0.87 (Pearson); 0.84 (Spearman)

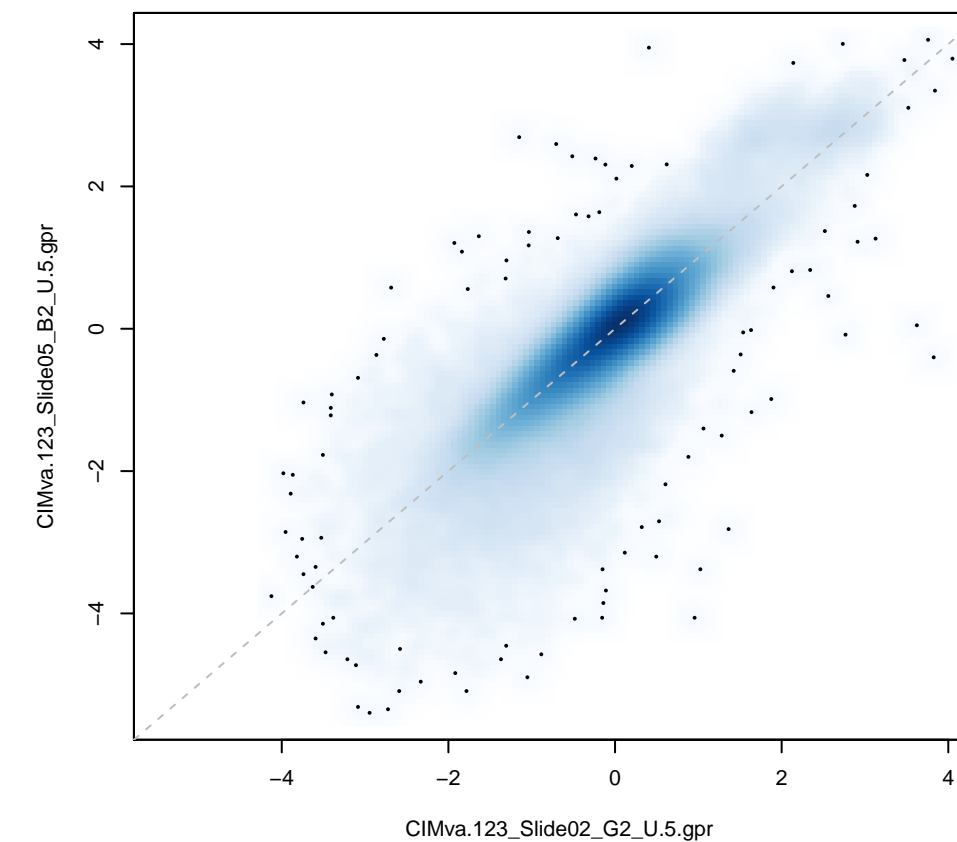



Replicate densities (raw) for sample: U-6 (R)

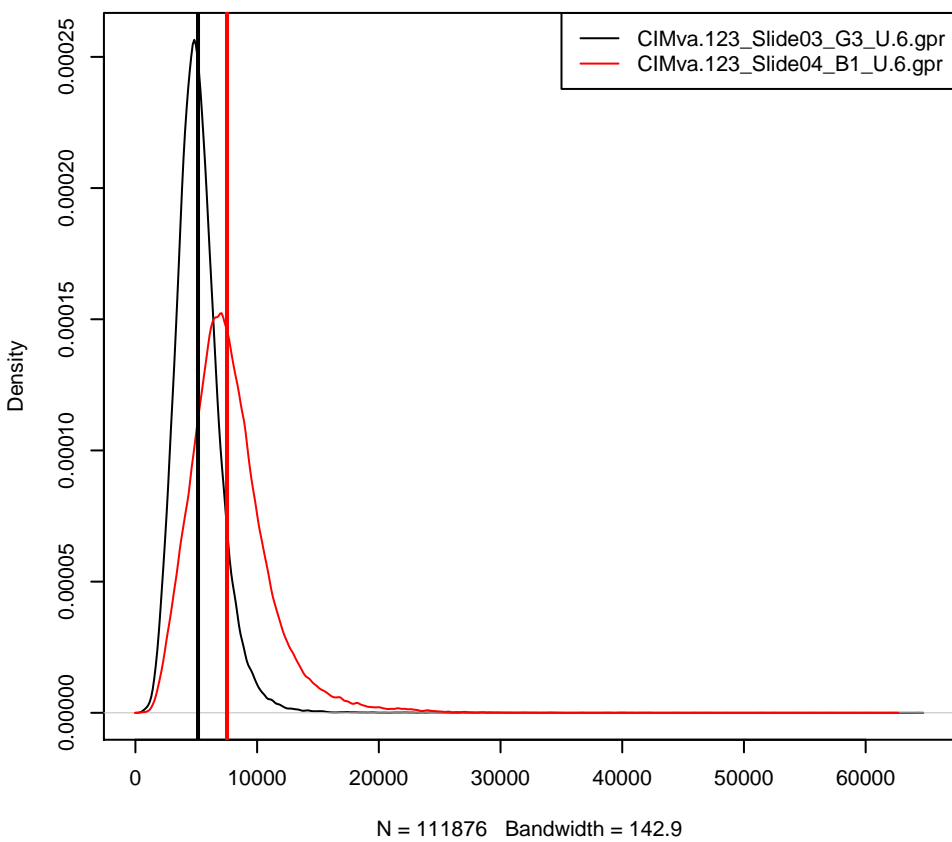

Replicate densities (raw; log2) for sample: U-6 (R)

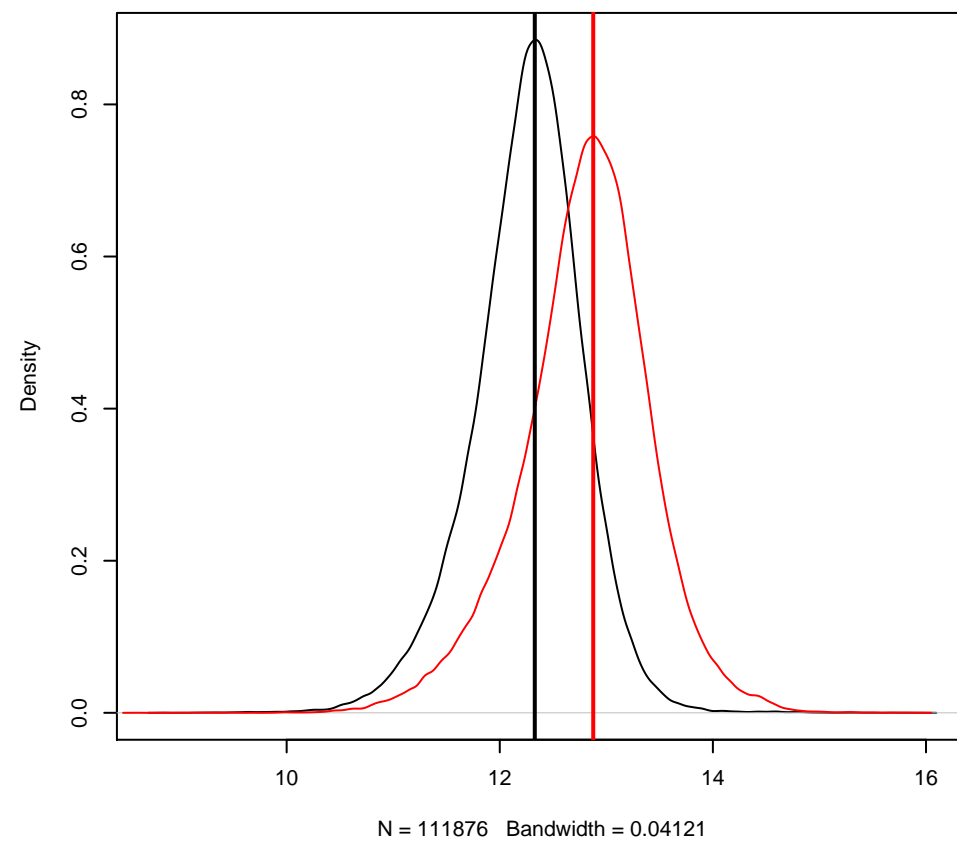

Replicate densities (normalized) for sample: U-6 (R)

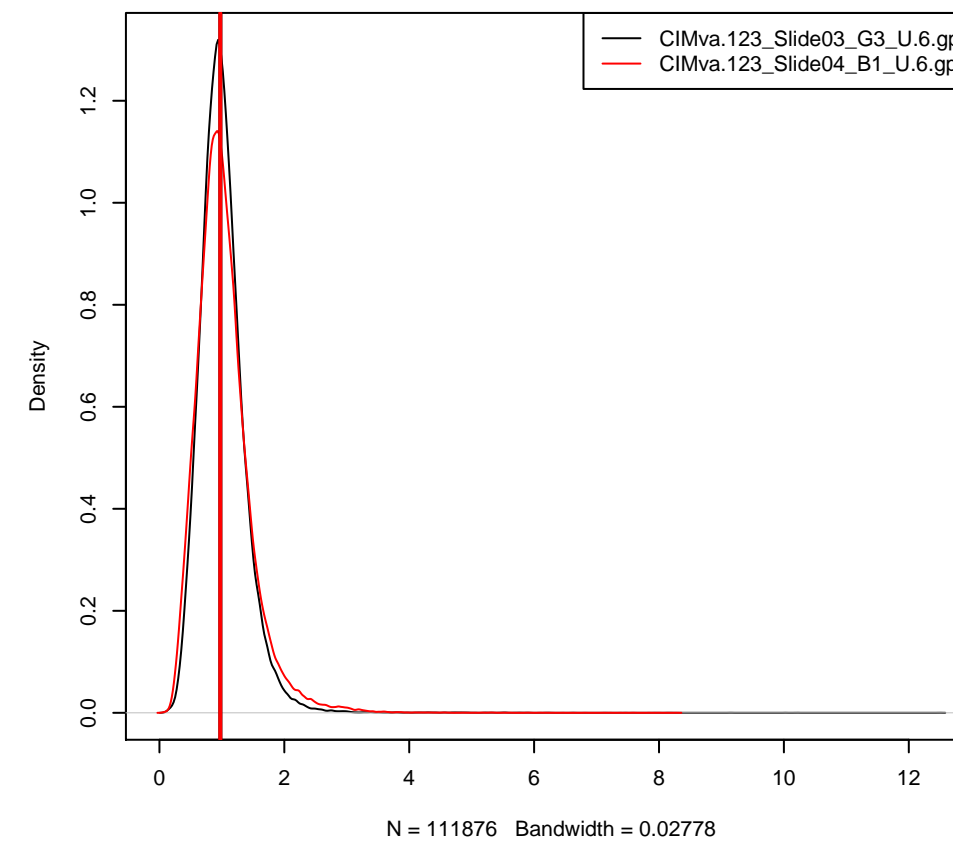

Replicate densities (normalized; log2) for sample: U-6 (R)

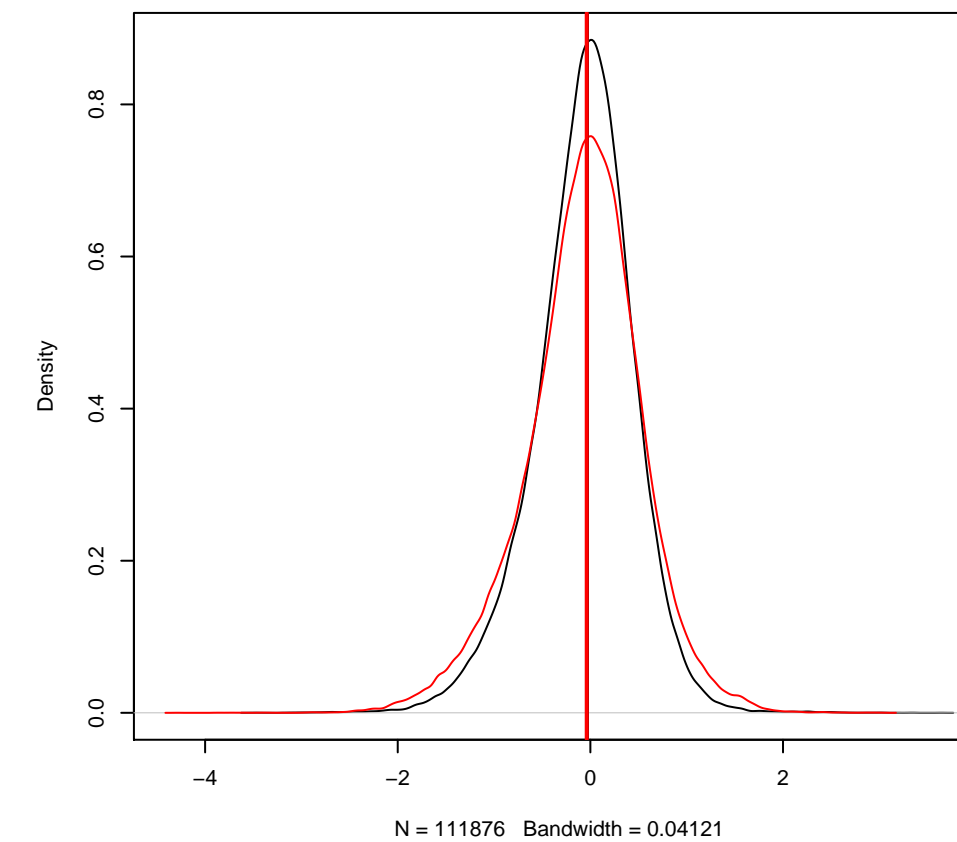

Replicate scatter (raw) for sample: U-6 (R)  
Correlation coefficient: 0.74 (Pearson); 0.73 (Spearman)

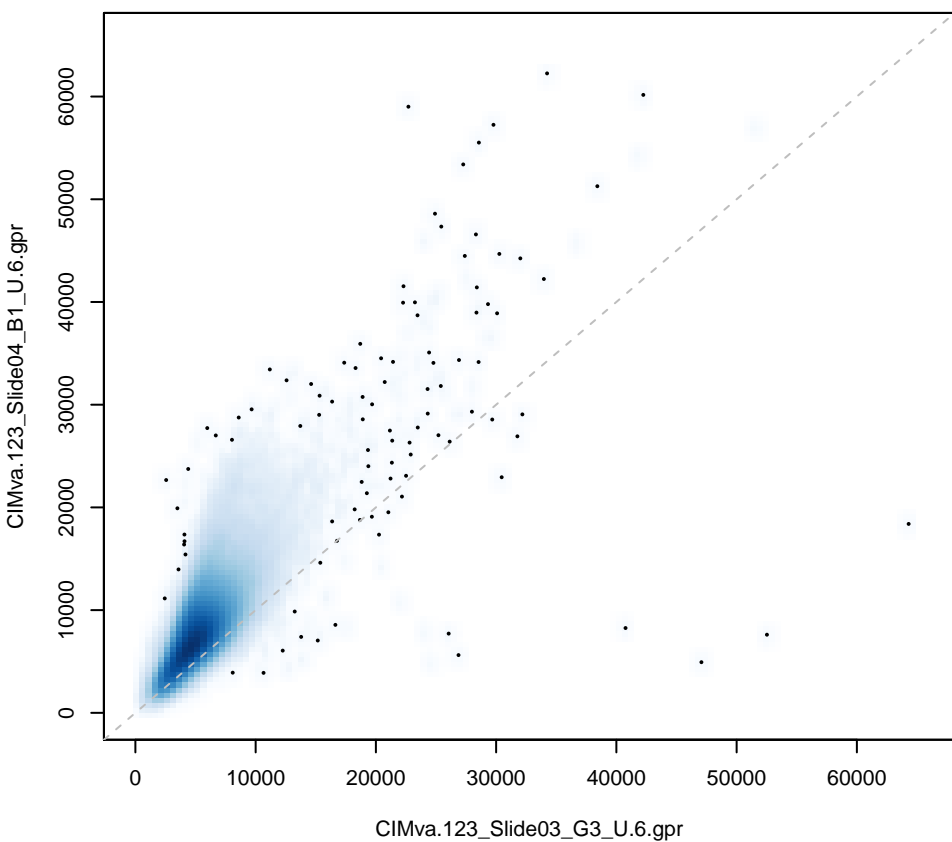

Replicate scatter (raw; log2) for sample: U-6 (R)  
Correlation coefficient: 0.78 (Pearson); 0.73 (Spearman)

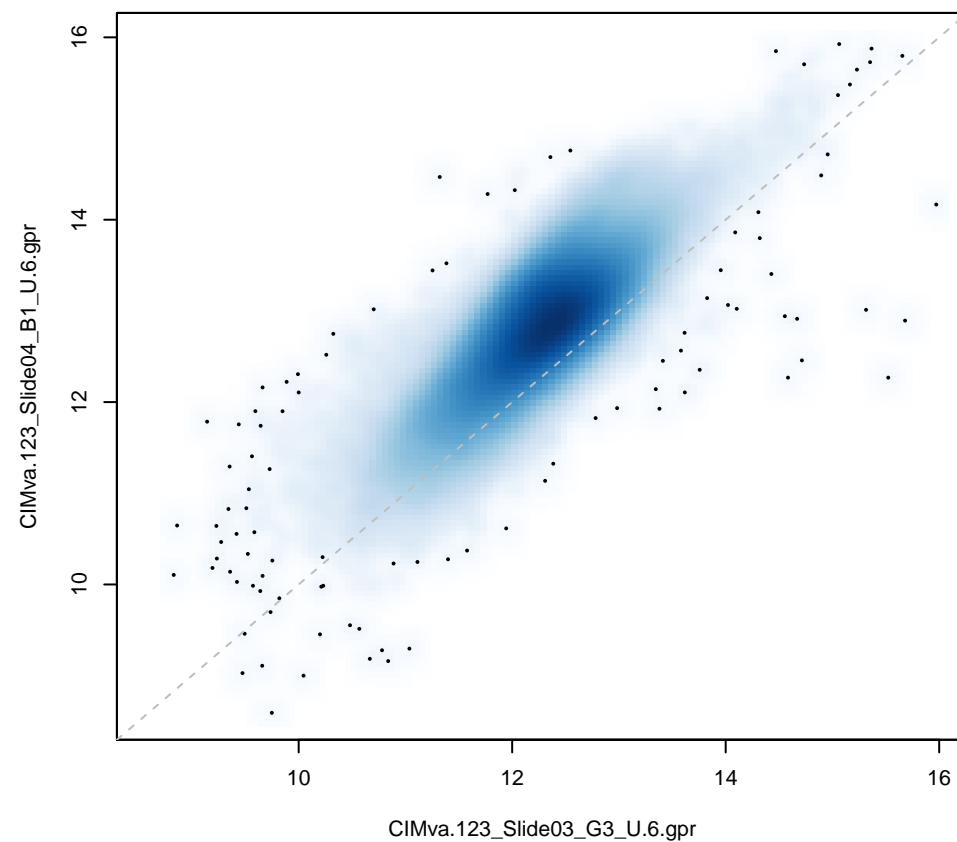

Replicate scatter (normalized) for sample: U-6 (R)  
Correlation coefficient: 0.74 (Pearson); 0.73 (Spearman)

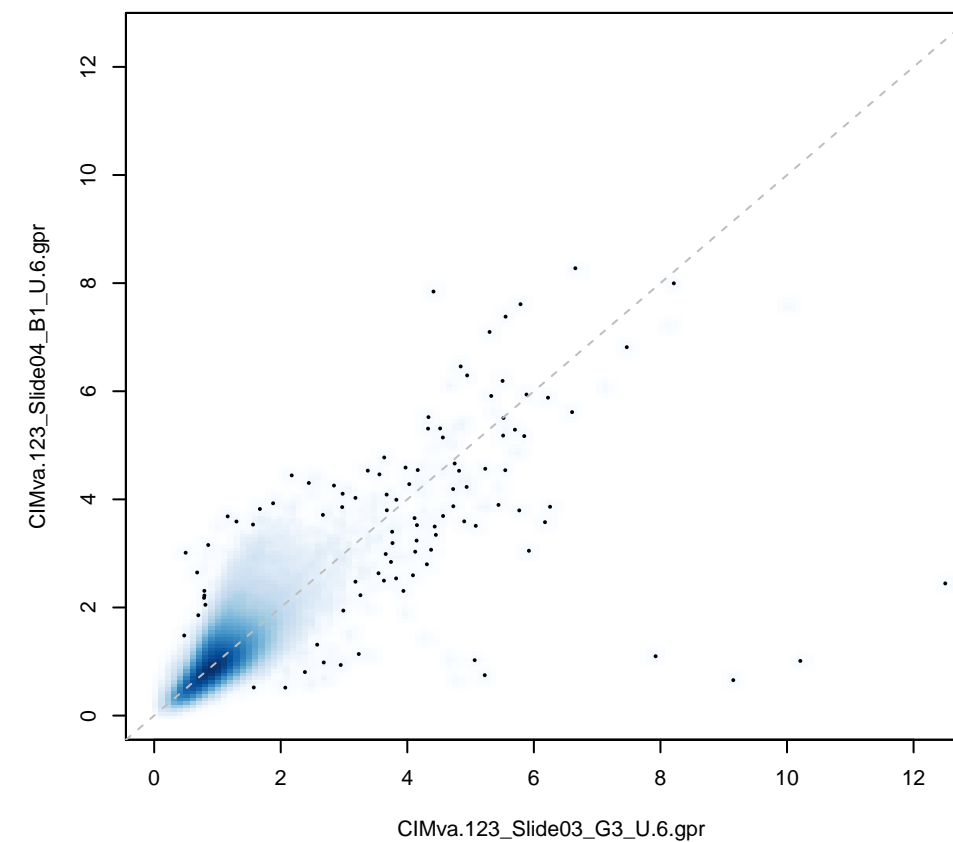

Replicate scatter (normalized; log2) for sample: U-6 (R)  
Correlation coefficient: 0.76 (Pearson); 0.73 (Spearman)

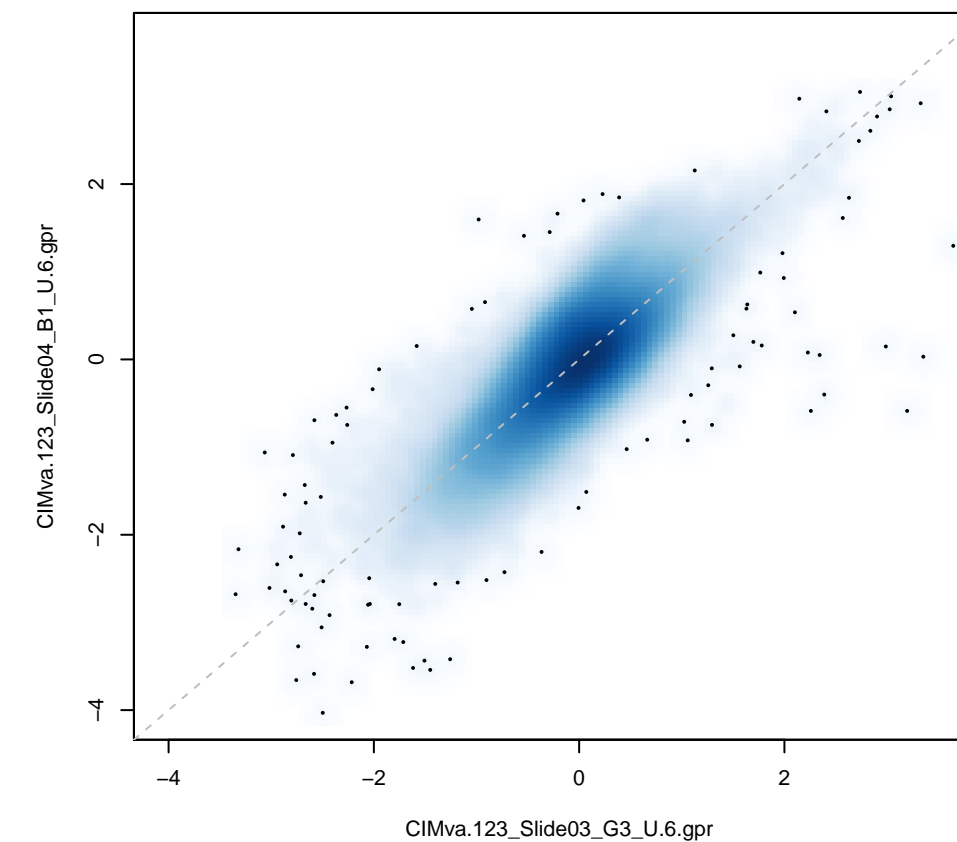

Replicate densities (raw) for sample: U-7 (R)

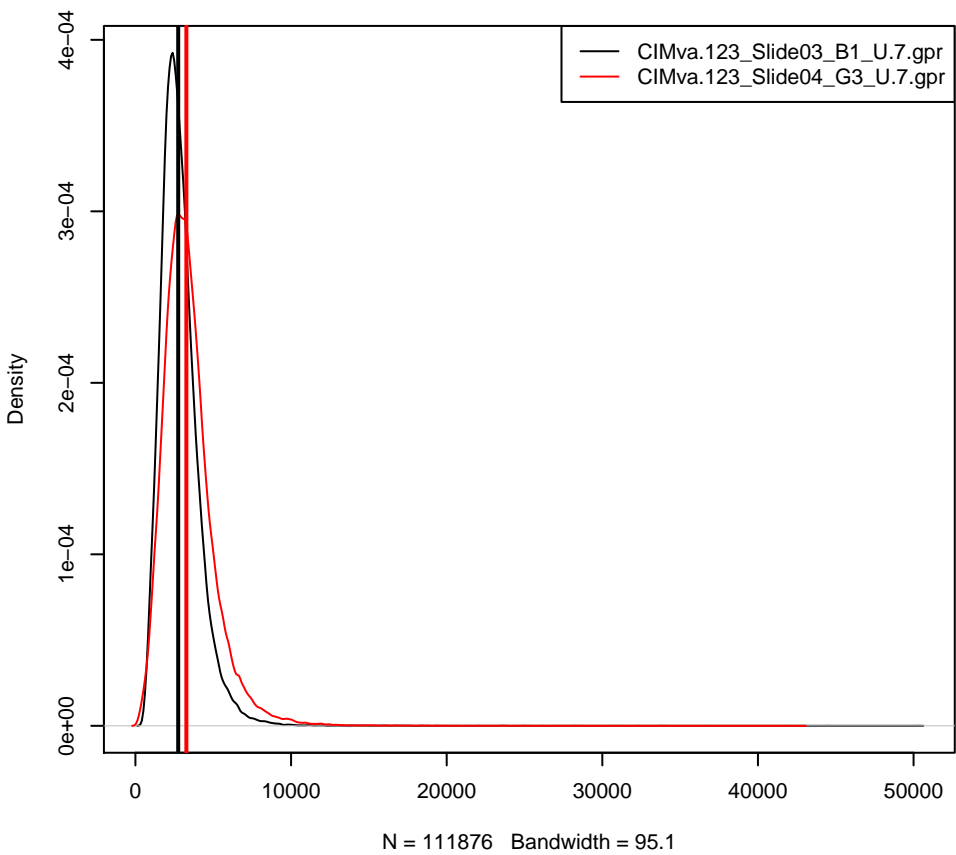

Replicate densities (raw; log2) for sample: U-7 (R)

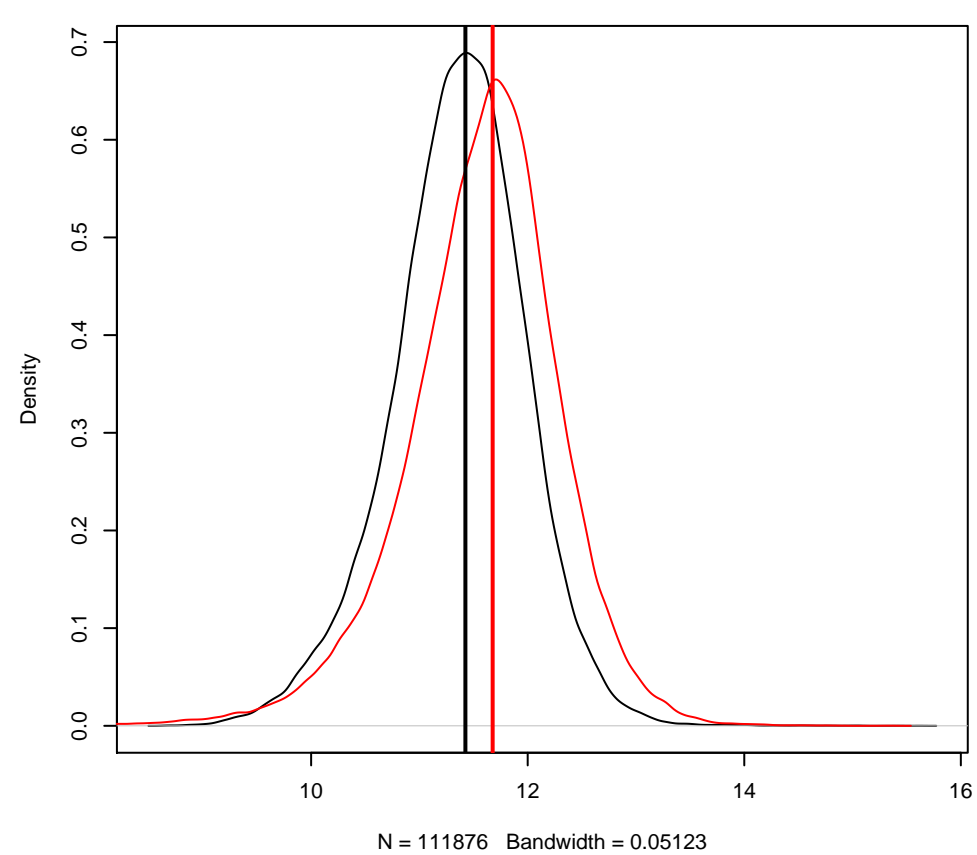

Replicate densities (normalized) for sample: U-7 (R)

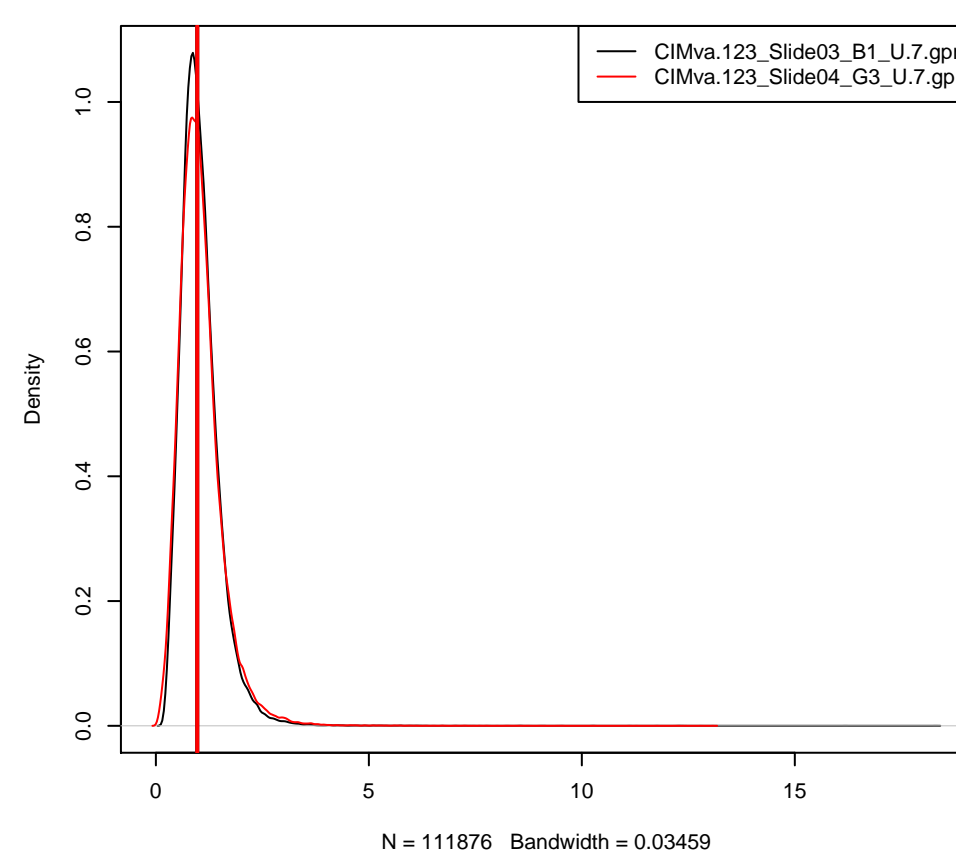

Replicate densities (normalized; log2) for sample: U-7 (R)

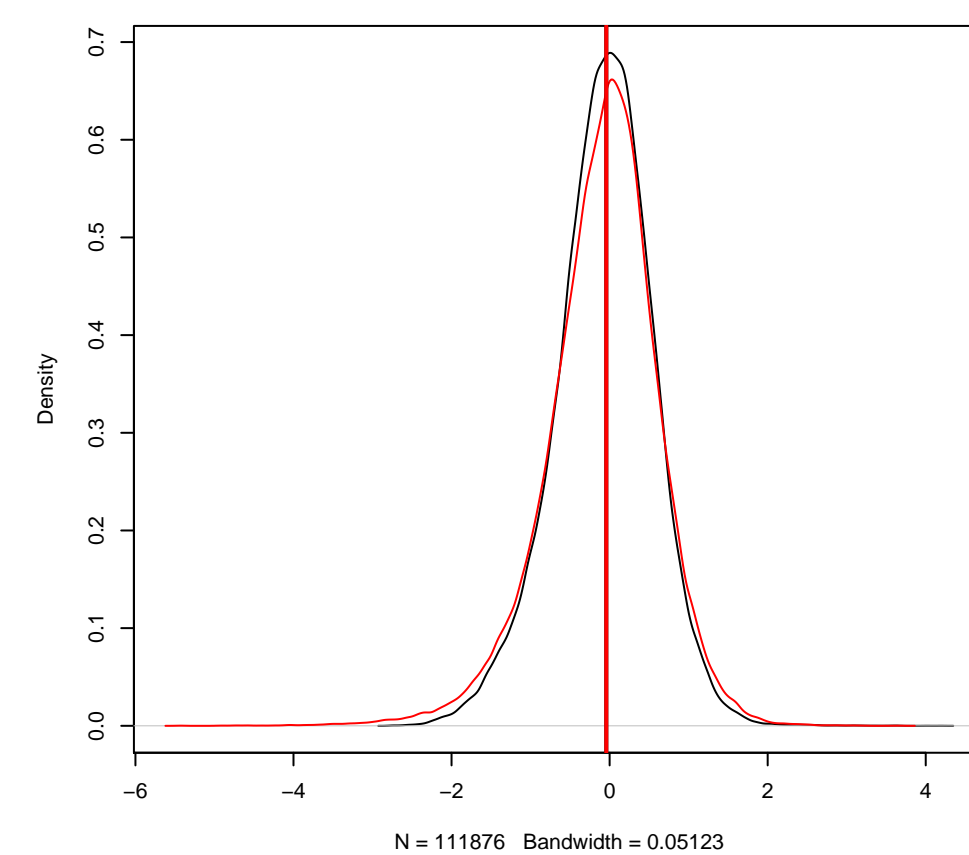

Replicate scatter (raw) for sample: U-7 (R)  
Correlation coefficient: 0.69 (Pearson); 0.73 (Spearman)

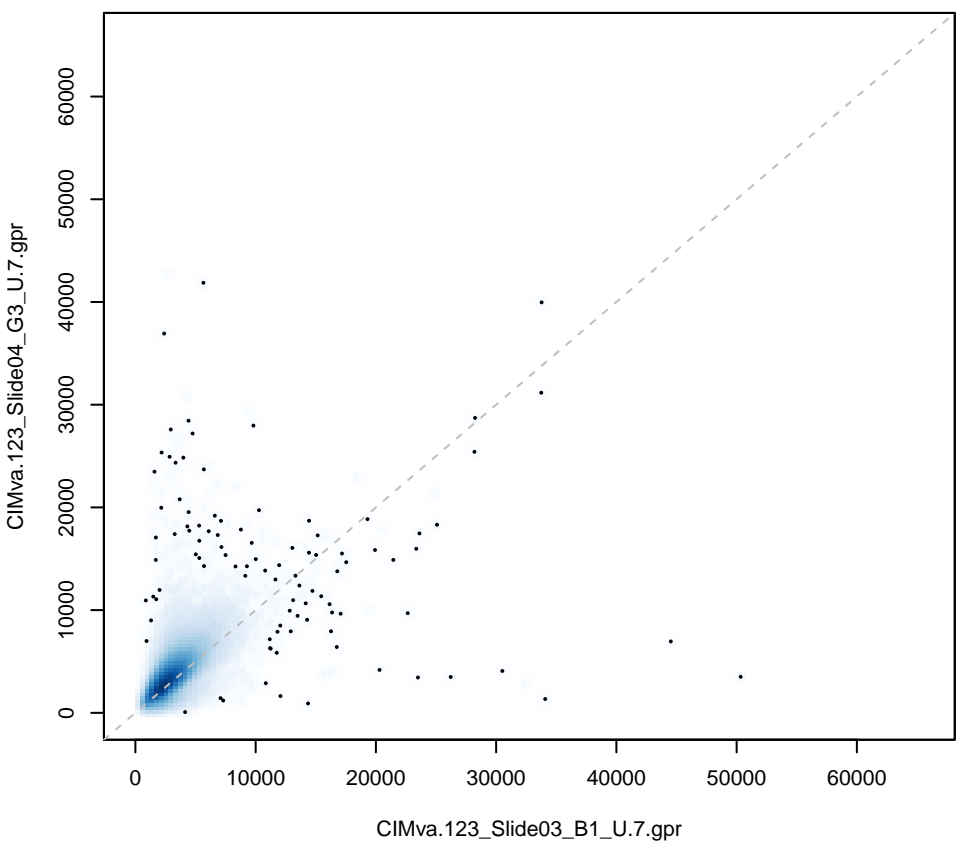

Replicate scatter (raw; log2) for sample: U-7 (R)  
Correlation coefficient: 0.71 (Pearson); 0.73 (Spearman)

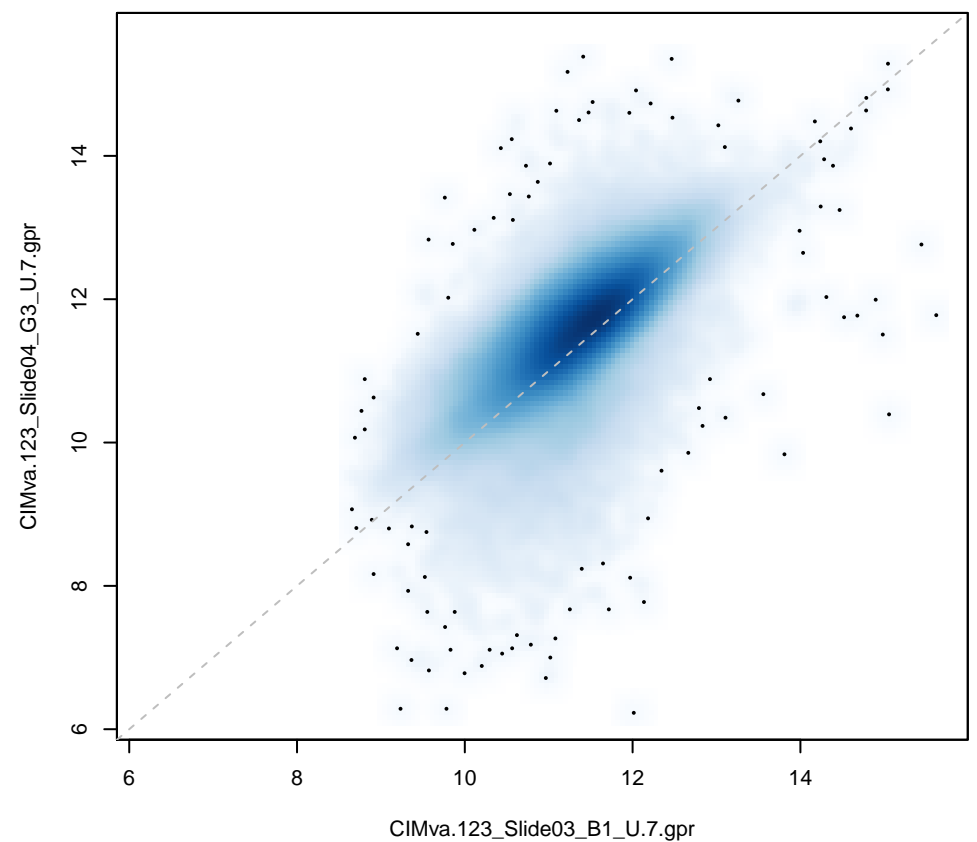

Replicate scatter (normalized) for sample: U-7 (R)  
Correlation coefficient: 0.69 (Pearson); 0.73 (Spearman)

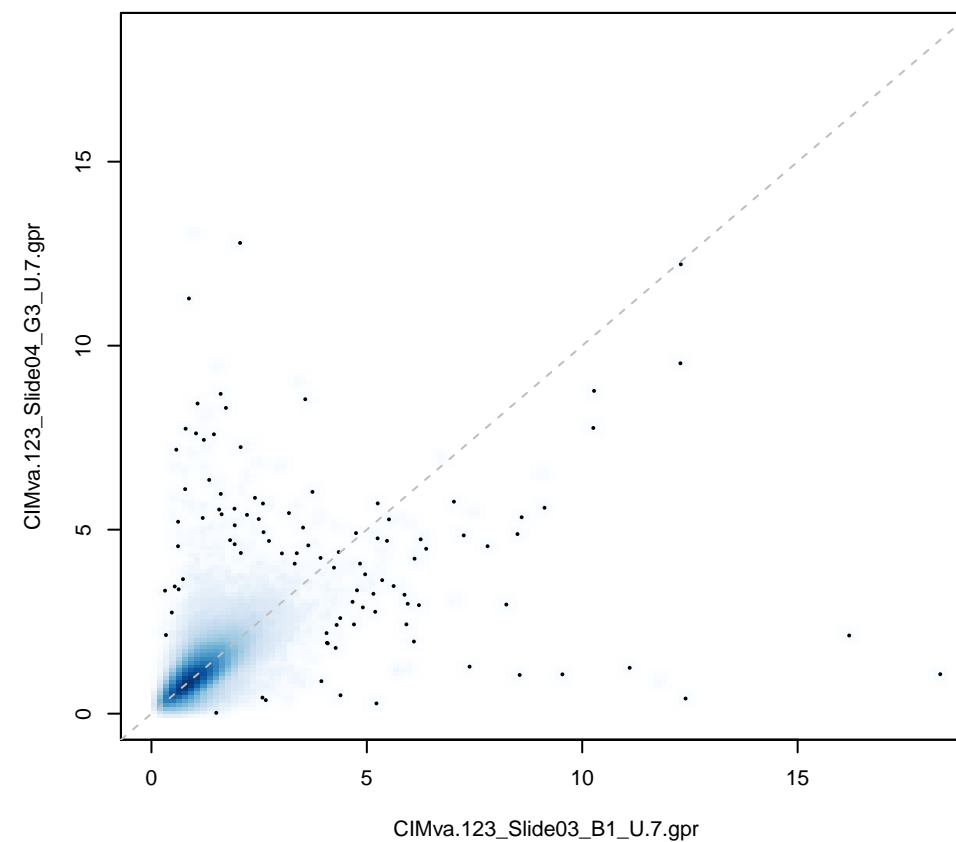

Replicate scatter (normalized; log2) for sample: U-7 (R)  
Correlation coefficient: 0.73 (Pearson); 0.73 (Spearman)

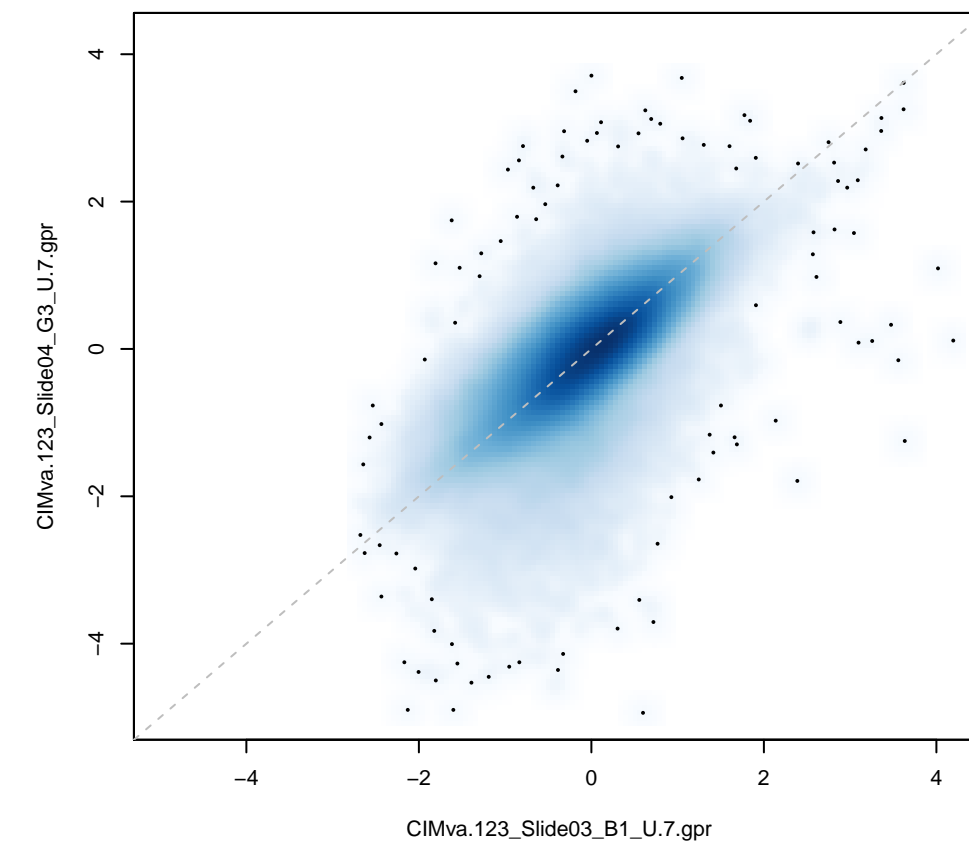

Replicate densities (raw) for sample: U-8 (R)

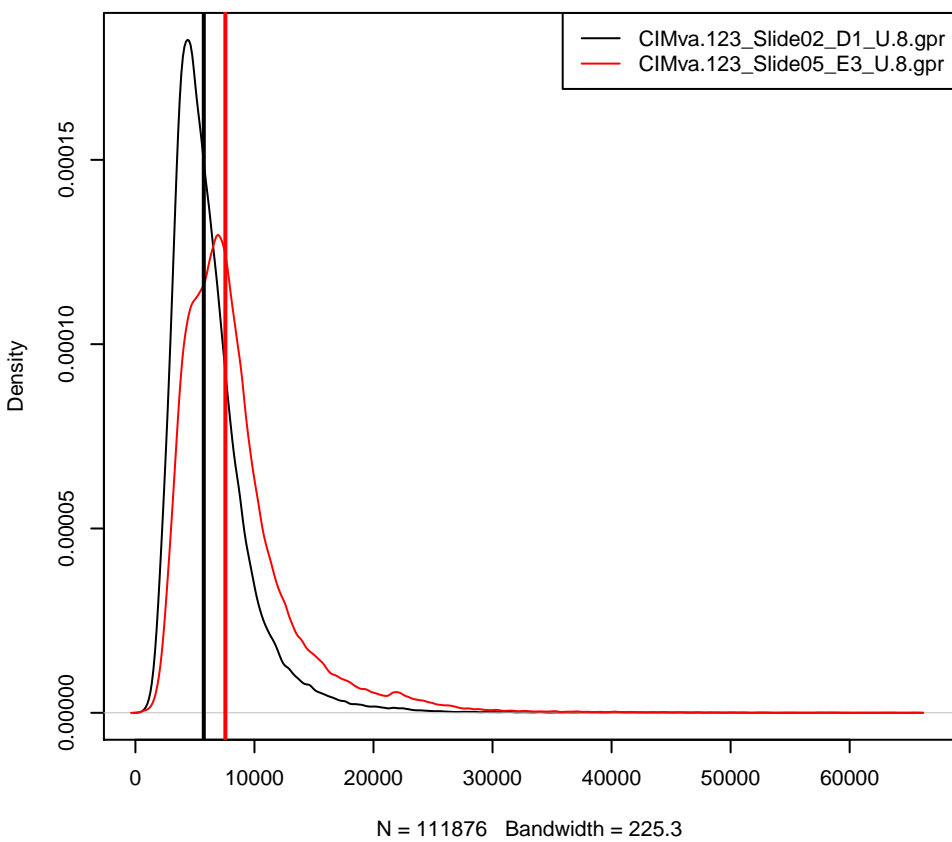

Replicate densities (raw; log2) for sample: U-8 (R)

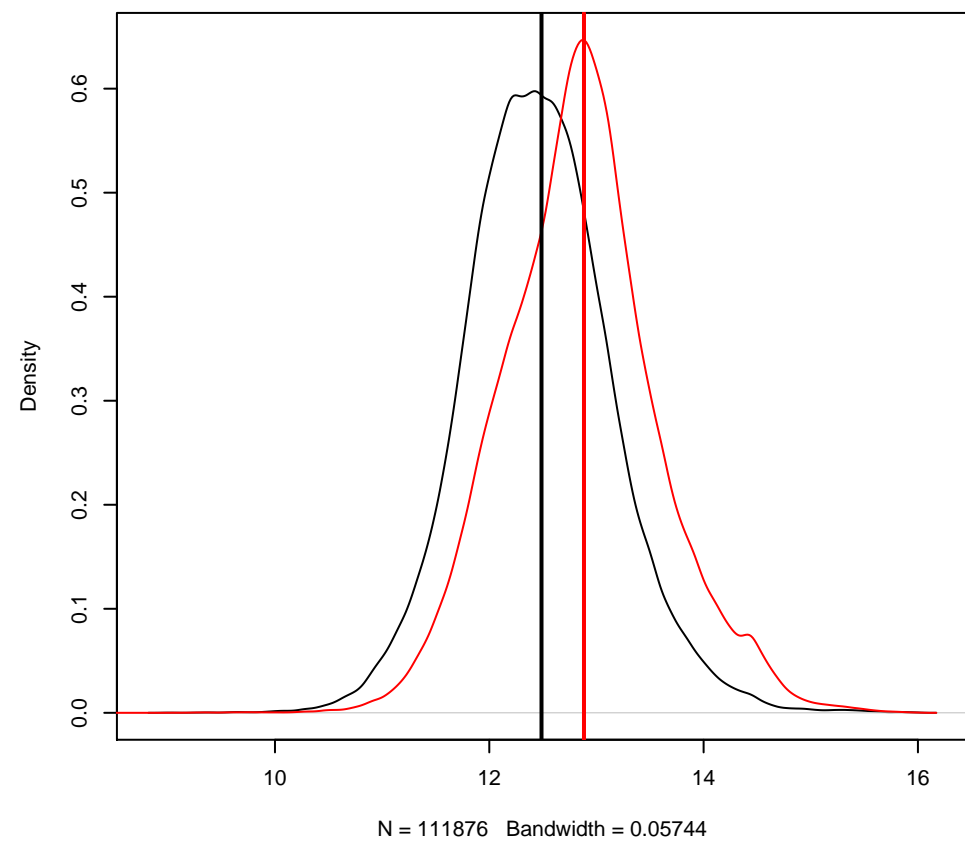

Replicate densities (normalized) for sample: U-8 (R)

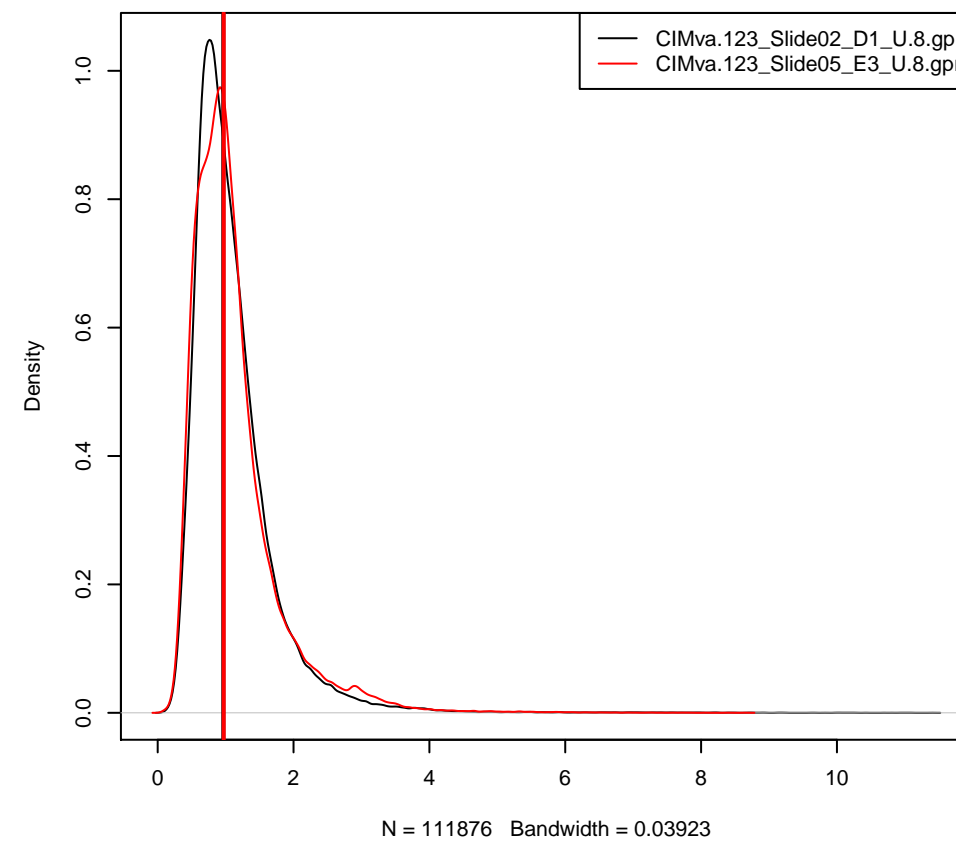

Replicate densities (normalized; log2) for sample: U-8 (R)

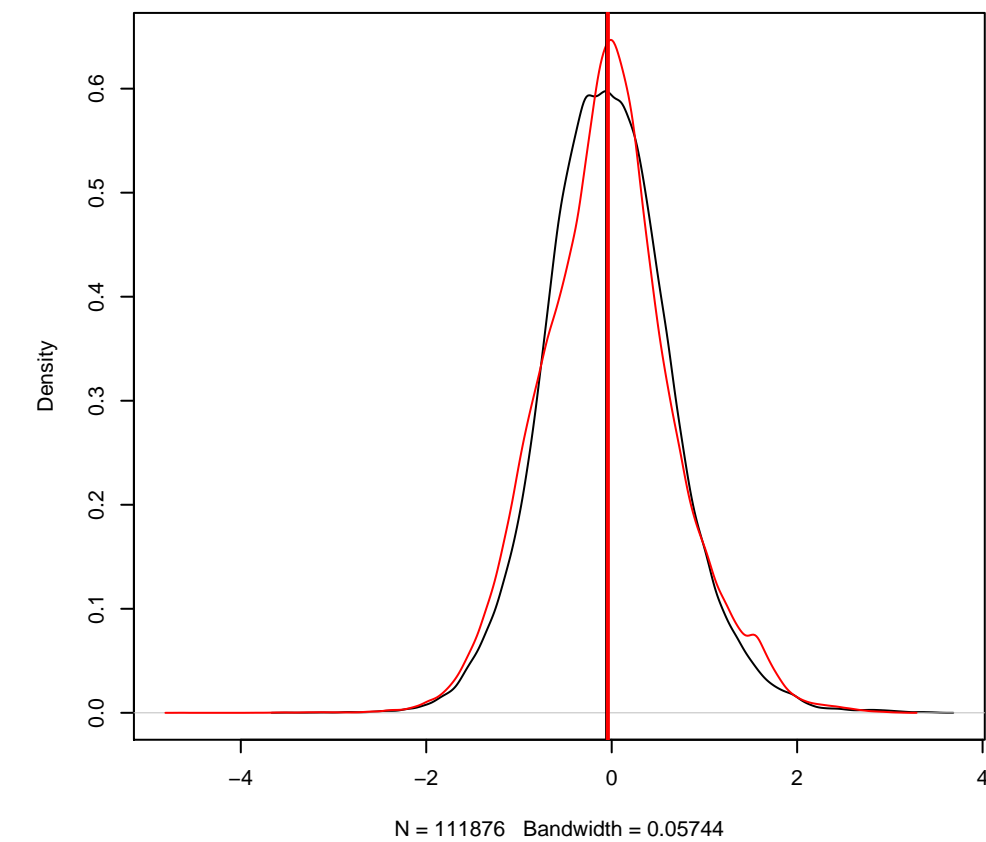

Replicate scatter (raw) for sample: U-8 (R)  
Correlation coefficient: 0.68 (Pearson); 0.59 (Spearman)

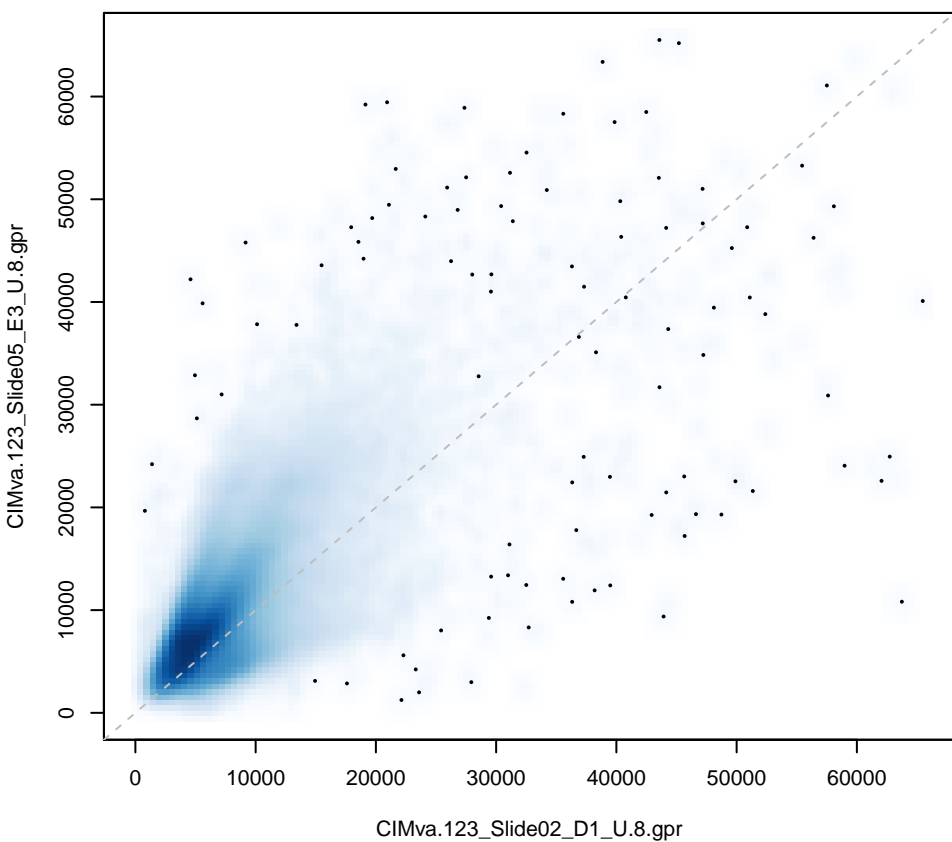

Replicate scatter (raw; log2) for sample: U-8 (R)  
Correlation coefficient: 0.63 (Pearson); 0.59 (Spearman)

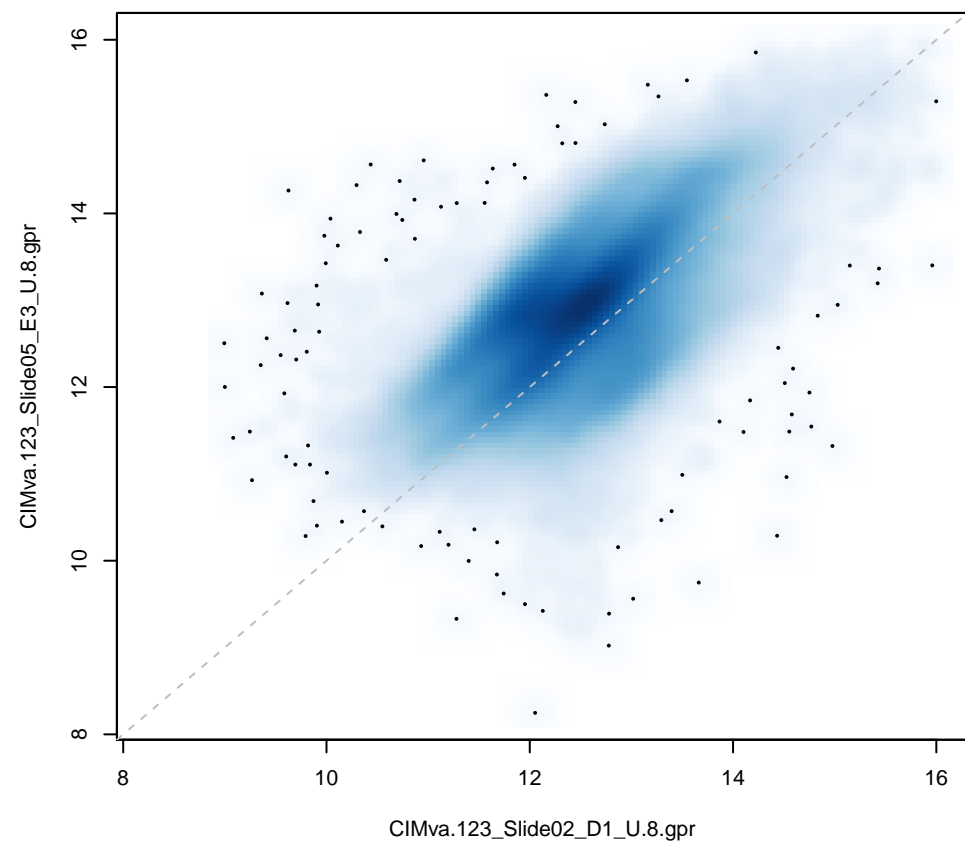

Replicate scatter (normalized) for sample: U-8 (R)  
Correlation coefficient: 0.68 (Pearson); 0.59 (Spearman)

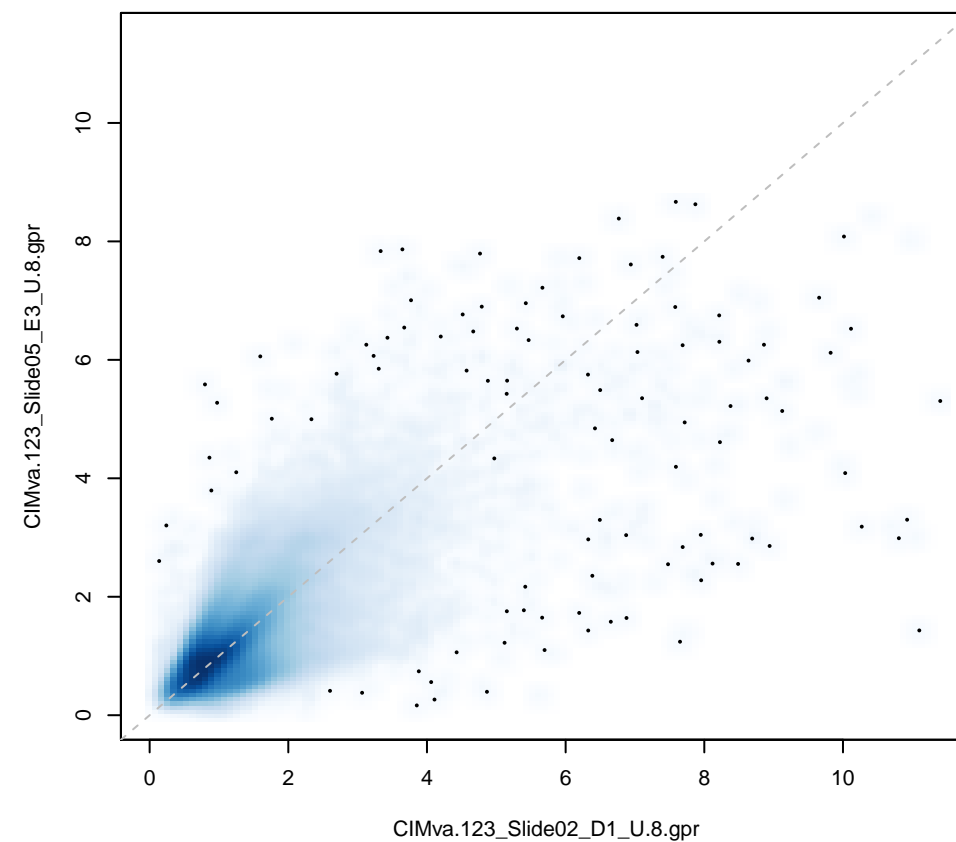

Replicate scatter (normalized; log2) for sample: U-8 (R)  
Correlation coefficient: 0.66 (Pearson); 0.59 (Spearman)

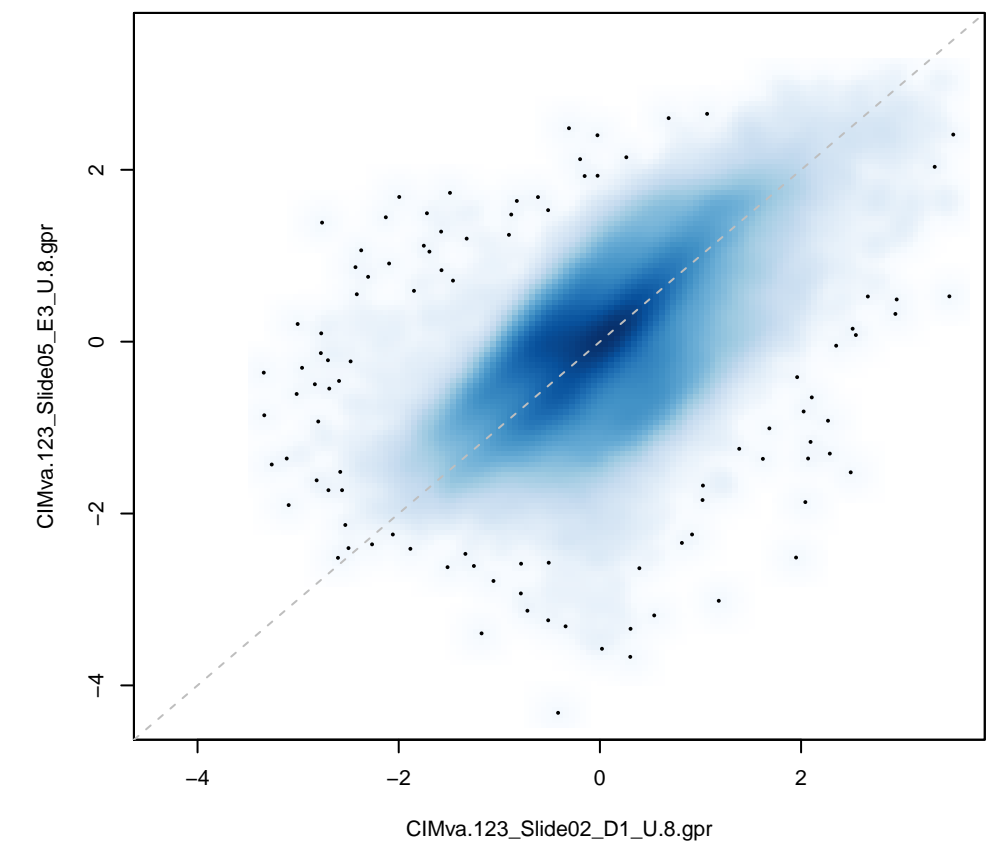

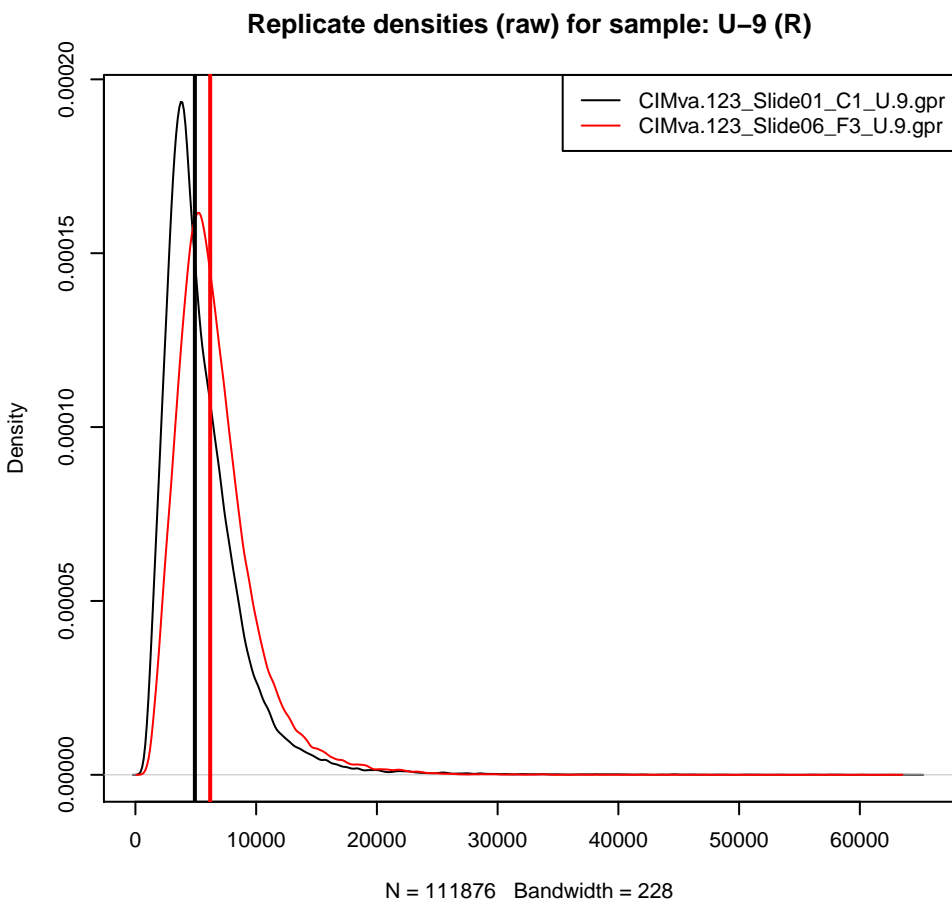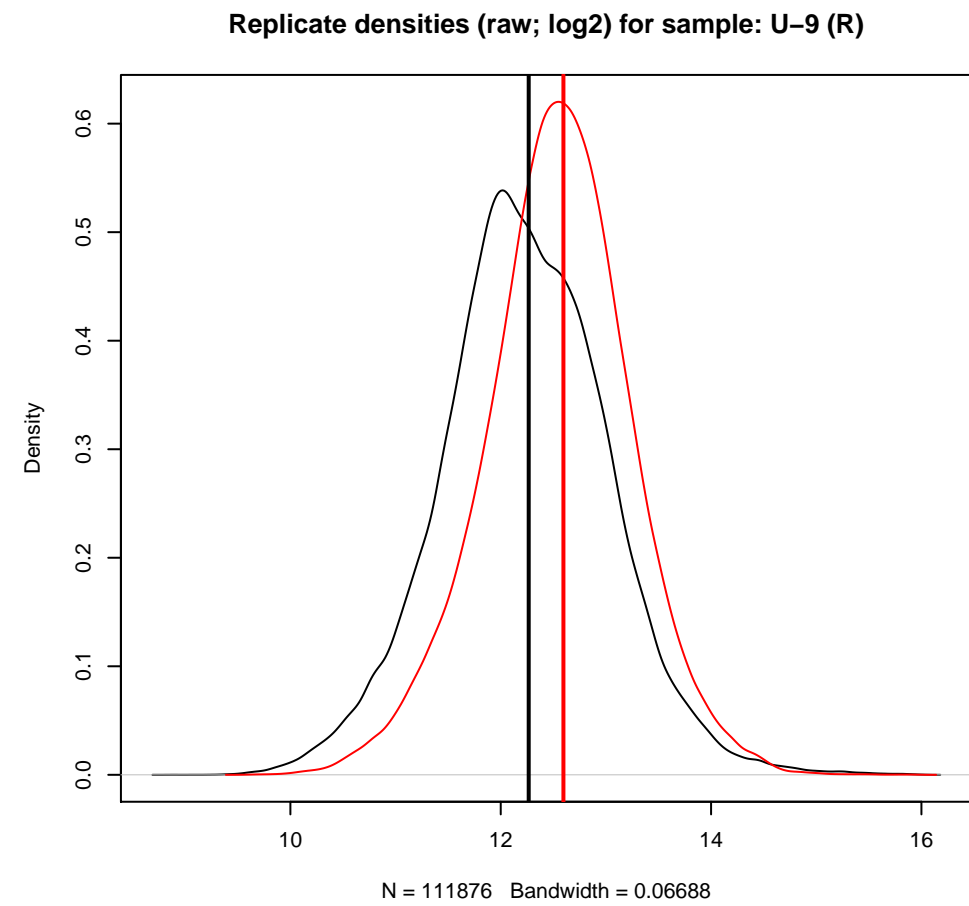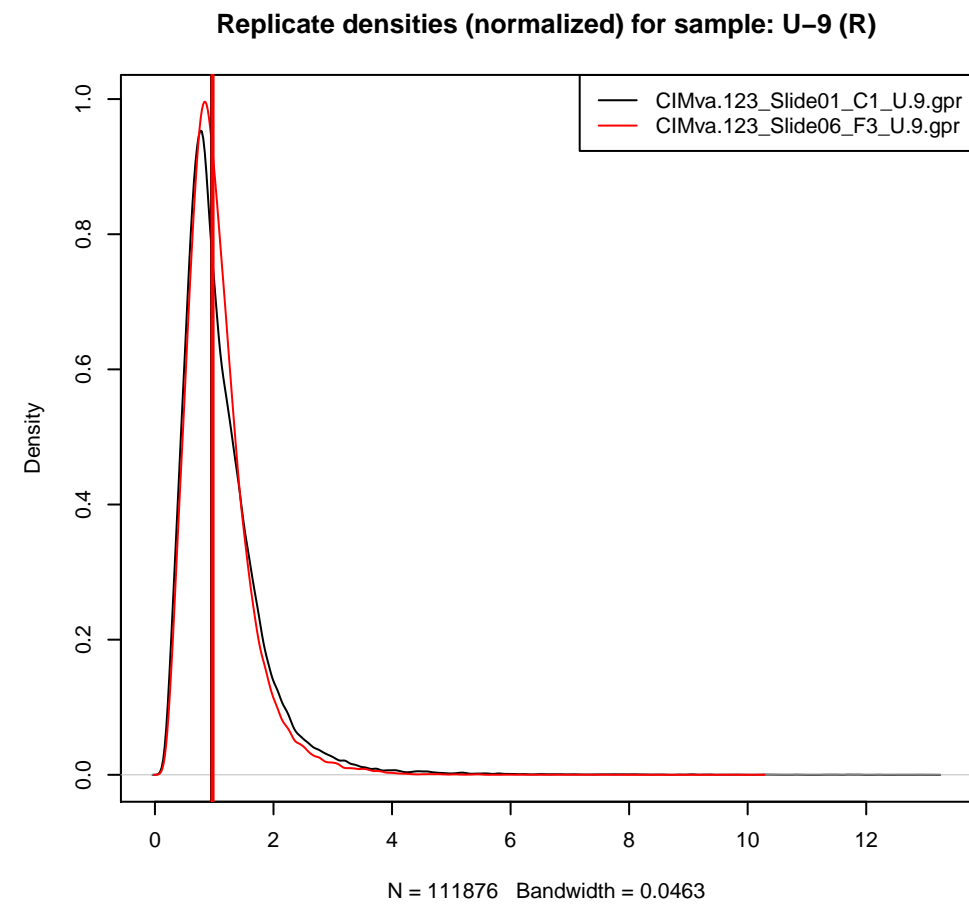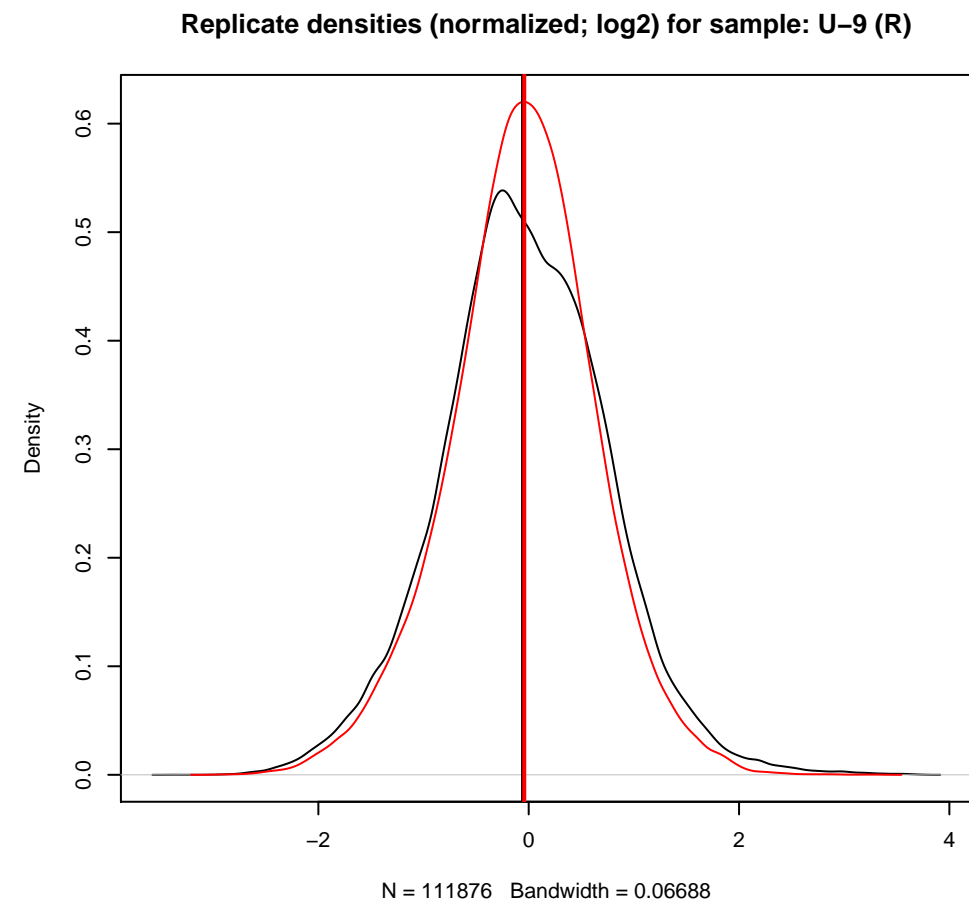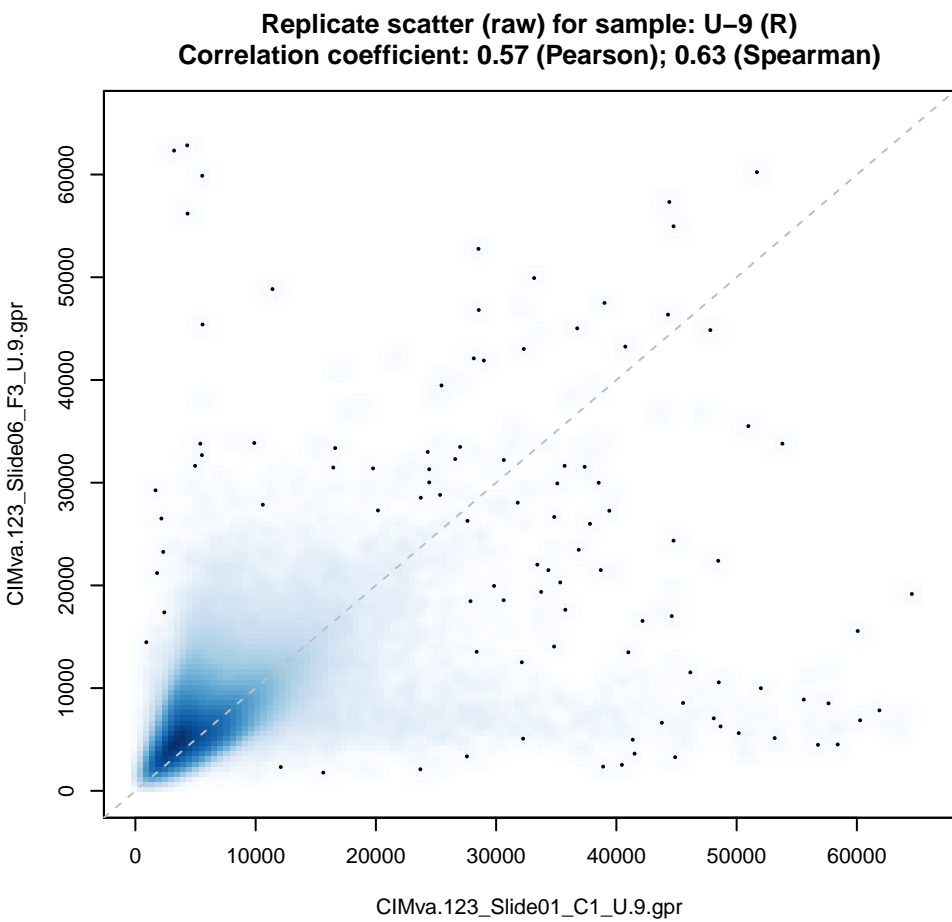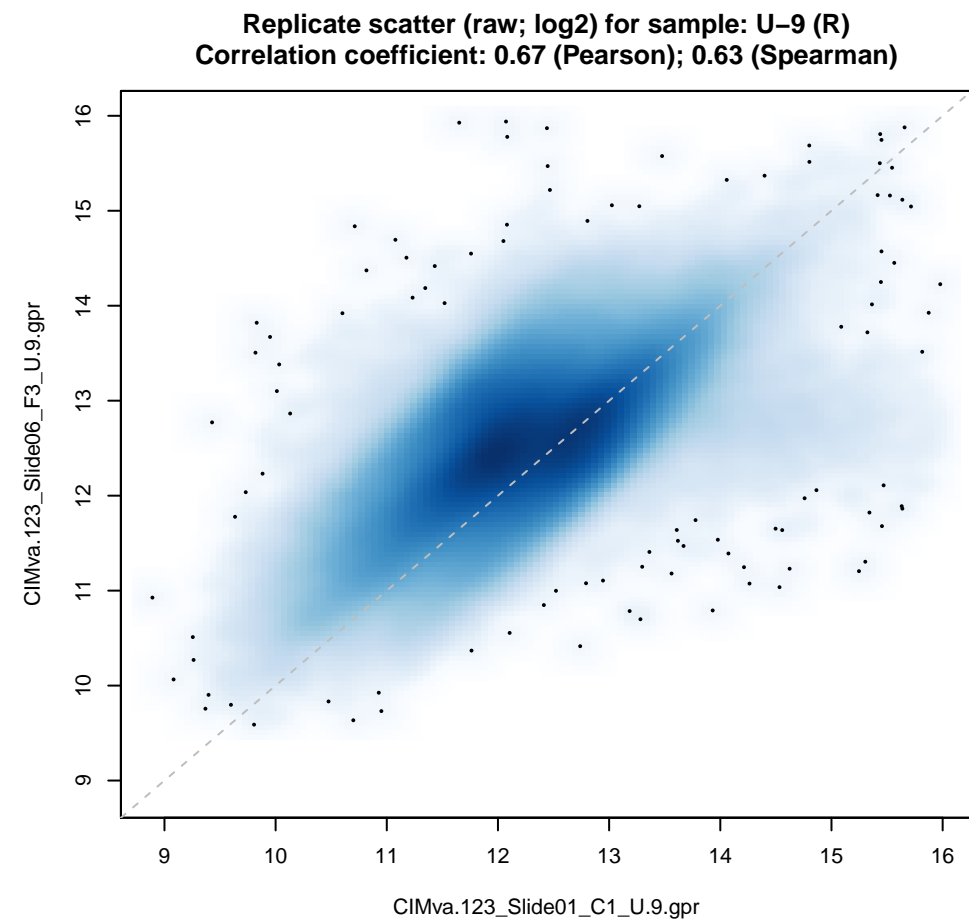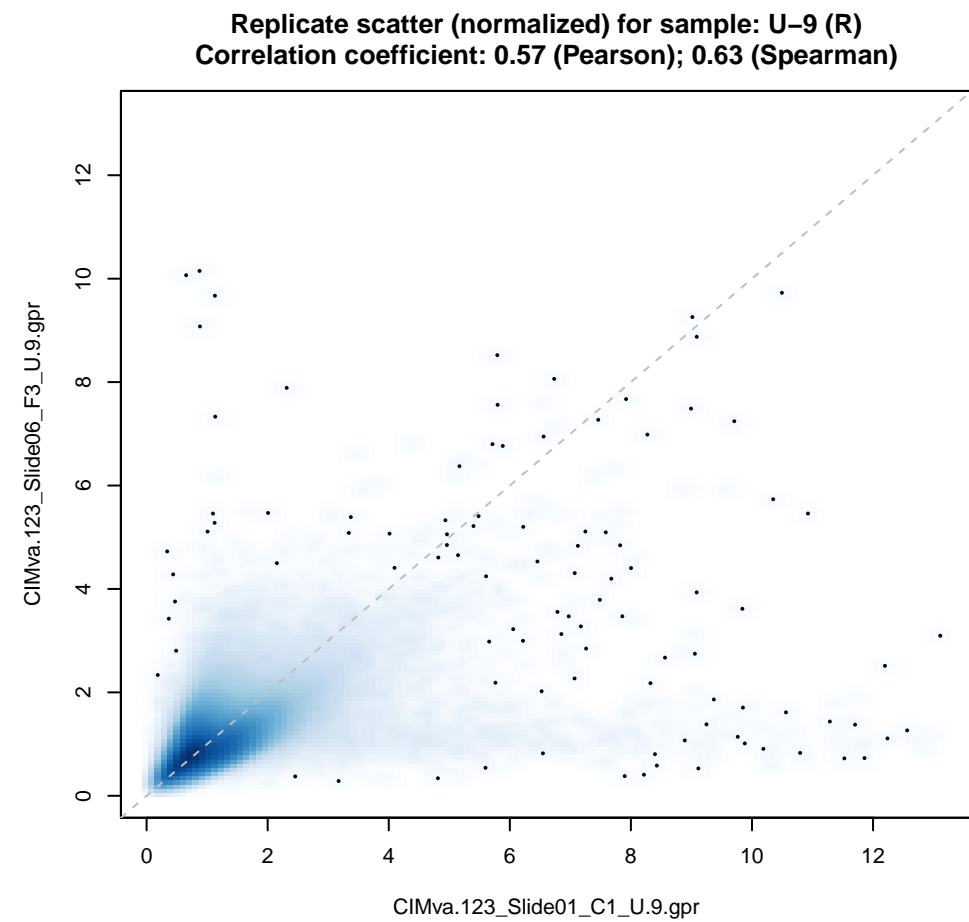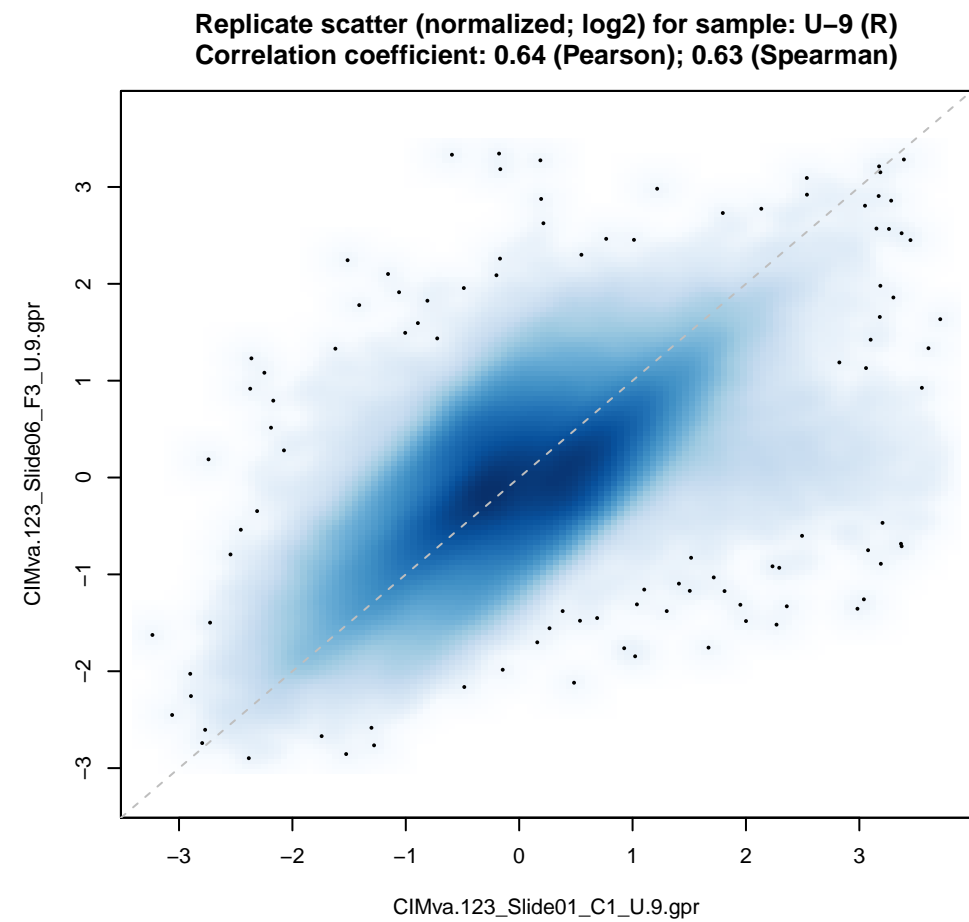

Supplement: 12035_2018_1354_MOESM12_ESM.pdf [file 12035_2018_1354_MOESM12_ESM.pdf]
