# Supplementary material for: Immunosignature Analysis of Myalgic Encephalomyelitis/Chronic Fatigue Syndrome (ME/CFS)
Source: PubMed Central journal article supplement (PMC6505503; doi:10.1007/s12035-018-1354-8), 2018-10-08

# Sample Correlation Boxplots (99 samples; 85987 features; pearson correlation)

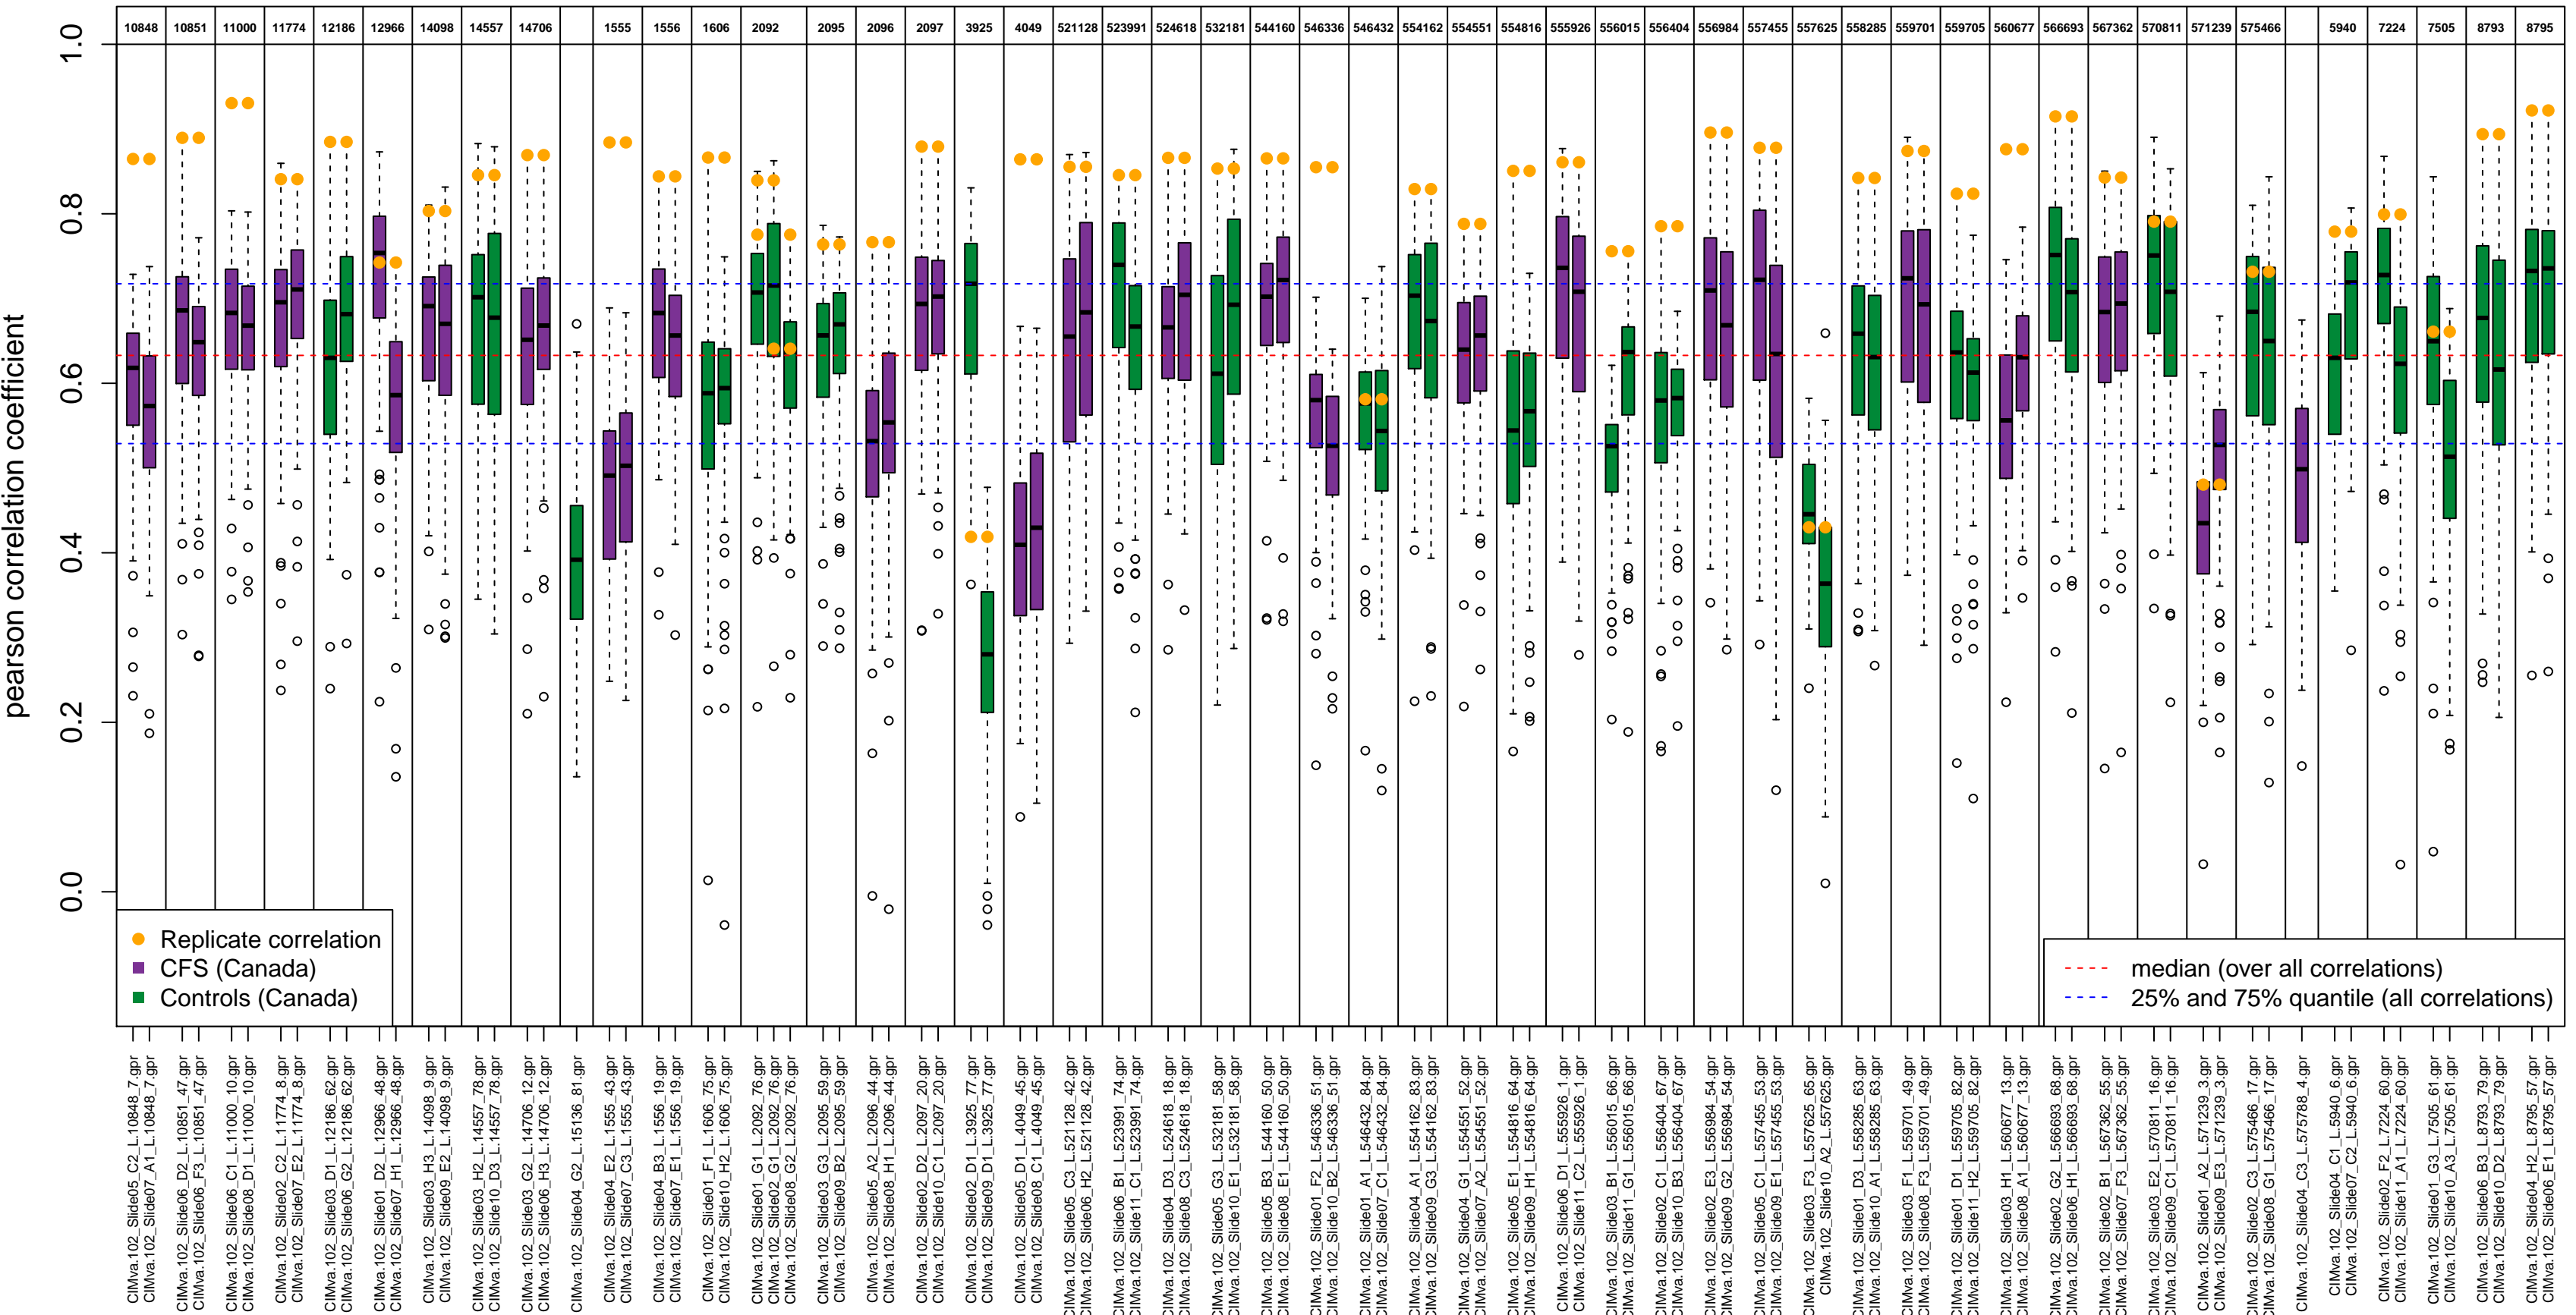

Supplement: 12035_2018_1354_MOESM7_ESM.pdf [file 12035_2018_1354_MOESM7_ESM.pdf]
